# Supplementary material
Source: PubMed Central journal article supplement (PMC2953924)
Supplement: supp_M110.001271_mcp.M110.001271-5.pdf [file supp_M110.001271_mcp.M110.001271-5.pdf]

**Supplementary Table 1. List of identified human caspase-3 cleavage sites.** Columns from left to right contain: Swissprot accession number, start and end position of the identified peptide in the protein sequence, the identified (neo-N-terminal) peptide sequence, the identified cleavage site from P4 to P4', number of fragmentation spectra by which the peptide was identified, all different light/heavy ratios by which the peptide was quantified, the MASCOT score and threshold (99% confidence) of the best scoring fragmentation spectrum, the protein name, possible protein isoforms in which the same peptide sequence can be found.

| accession | start | end  | neo-N-terminal peptide sequence      | cleavage site | # spectra | different light/heavy ratios                                    | score/threshold | protein name                                                | isoforms                                                                                                                                                         |
|-----------|-------|------|--------------------------------------|---------------|-----------|-----------------------------------------------------------------|-----------------|-------------------------------------------------------------|------------------------------------------------------------------------------------------------------------------------------------------------------------------|
| O00232    | 20    | 27   | AcD3-YSATVDQR-COOH                   | MEVD↓YSAT     | 1         | 1.01147                                                         | 48/47           | 26S proteasome non-ATPase regulatory subunit 12             |                                                                                                                                                                  |
| Q13442    | 25    | 35   | AcD3-AQLQAEKQKAR-COOH                | EIID↓AQLQ     | 2         | 0.98693                                                         | 84/47           | 28 kDa heat- and acid-stable phosphoprotein                 |                                                                                                                                                                  |
| P60709    | 245   | 254  | AcD3-GQVITIGNER-COOH                 | ELPD↓GQVI     | 62        | 0.97417/1.12689/0.95977/0.9809/1.09866                          | 92/48           | Actin, cytoplasmic 1                                        | ASA3E0 (945-954), P62736 (247-256), P63261 (245-254), P63267 (246-255), P68032 (247-256), P68133 (247-256), Q562R1 (246-255), Q658J3 (945-954), Q9BYX7 (245-254) |
| P63261    | 12    | 28   | AcD3-NGSGMCKAGFAGDDAPR-COOH          | LVID↓NGSG     | 16        | 1.03753/1.08073/1.07224/0.95333/1.06298/1.04297/1.05553/1.08642 | 92/42           | Actin, cytoplasmic 2                                        | ASA3E0 (712-728), P60709 (12-28), Q658J3 (712-728)                                                                                                               |
| P63261    | 52    | 62   | AcD3-SYVGDEAQSQR-COOH                | GQKD↓SYVG     | 2         | 0.95208                                                         | 69/48           | Actin, cytoplasmic 2                                        | P60709 (52-62), P62736 (54-64), P63267 (53-63), P68032 (54-64), P68133 (54-64)                                                                                   |
| O96019    | 58    | 76   | AcD3-GDKGKQGGPTYIDTALNR-COOH         | MEID↓GDKG     | 1         | 1.12421                                                         | 88/49           | Actin-like protein 6A                                       |                                                                                                                                                                  |
| O15511    | 30    | 47   | AcD3-GGDGQAGPDEGEVDSCLR-COOH         | DEED↓GGDG     | 1         | 1.13411                                                         | 66/41           | Actin-related protein 2/3 complex subunit 5                 |                                                                                                                                                                  |
| P25705    | 160   | 169  | AcD3-GKGPISGKTR-COOH                 | NAID↓GKGP     | 2         | 1.25226                                                         | 60/44           | ATP synthase subunit alpha, mitochondrial                   |                                                                                                                                                                  |
| Q92499    | 686   | 694  | AcD3-GKVTYQKQR-COOH                  | DEFD↓GKVT     | 6         | 0.86982/0.89644/0.93342                                         | 65/47           | ATP-dependent RNA helicase DDX1                             |                                                                                                                                                                  |
| Q99439    | 142   | 152  | AcD3-IGVYSEKQER-COOH                 | SGVD↓IGVK     | 1         | 0.93789                                                         | 49/48           | Calponin-2                                                  |                                                                                                                                                                  |
| Q9P2M7    | 174   | 188  | AcD3-SLINFQSLGGQAR-COOH              | SSVD↓SLIN     | 2         | 1.0573                                                          | 72/48           | Cingulin                                                    |                                                                                                                                                                  |
| P09496    | 77    | 102  | AcD3-GVMNGEYQESNGPTDYSAAISQVDR-COOH  | DAVD↓GVMN     | 1         | 1.16353                                                         | 126/41          | Clathrin light chain A                                      |                                                                                                                                                                  |
| Q9UEE9    | 41    | 53   | AcD3-GEEQTKQTGKKR-COOH               | DEVD↓GEEQ     | 5         | 0.91895/0.89471/0.91286                                         | 91/48           | Craniofacial development protein 1                          |                                                                                                                                                                  |
| Q9BQC3    | 254   | 263  | AcD3-TGKTQDEGAR-COOH                 | CCPD↓TGKT     | 1         | 0.9506                                                          | 50/48           | Diphthamide biosynthesis protein 2                          |                                                                                                                                                                  |
| Q9P265    | 61    | 68   | AcD3-SAVQKELR-COOH                   | QETD↓SAVQ     | 1         | 0.86515                                                         | 74/46           | Disco-interacting protein 2 homolog B                       |                                                                                                                                                                  |
| Q9Y2H0    | 721   | 731  | AcD3-ANDSCKSSER-COOH                 | DTQD↓ANDS     | 1         | 0.9755                                                          | 50/43           | Disks large-associated protein 4                            |                                                                                                                                                                  |
| P33992    | 14    | 27   | AcD3-SFGDQAQDEGQAR-COOH              | FYSYD↓SFGG    | 2         | 1.09287                                                         | 110/45          | DNA replication licensing factor MCM5                       |                                                                                                                                                                  |
| P78527    | 2714  | 2722 | AcD3-NKVKGAAGR-COOH                  | DEVD↓NKVK     | 2         | 0.96877                                                         | 74/45           | DNA-dependent protein kinase catalytic subunit              |                                                                                                                                                                  |
| O60216    | 129   | 139  | AcD3-VAQQFSLNQR-COOH                 | DDID↓VAQQ     | 2         | 0.90646                                                         | 65/48           | Double-strand-break repair protein rad21 homolog            |                                                                                                                                                                  |
| Q16643    | 168   | 174  | AcD3-AAVEMKR-COOH                    | QKTD↓AAVE     | 1         | 1.1434                                                          | 49/48           | Drebrin                                                     |                                                                                                                                                                  |
| P49792    | 2798  | 2822 | AcD3-SITKSISSPVSSSETMDKPVLDLSTR-COOH | EFPD↓SITK     | 1         | 1.34393                                                         | 65/48           | E3 SUMO-protein ligase RanBP2                               |                                                                                                                                                                  |
| Q00987    | 362   | 371  | AcD3-CKTIVNDSR-COOH                  | DVPD↓CKKT     | 1         | 0.81649                                                         | 69/48           | E3 ubiquitin-protein ligase Mdm2                            |                                                                                                                                                                  |
| P23588    | 532   | 545  | AcD3-GMNAPKQGTGNSSR-COOH             | NKVD↓GMNA     | 11        | 0.96943/0.97508/0.9448/0.87468                                  | 77/48           | Eukaryotic translation initiation factor 4B                 |                                                                                                                                                                  |
| Q15056    | 94    | 109  | AcD3-SLKEALTYDGLADR-COOH             | DEVD↓SLKE     | 6         | 0.93709/0.9915/0.94882                                          | 87/48           | Eukaryotic translation initiation factor 4H                 |                                                                                                                                                                  |
| Q96A65    | 935   | 948  | AcD3-SQTGVGELTTQNR-COOH              | LLHR↓SQTG     | 1         | 0.66733                                                         | 89/33           | Exocyst complex component 4                                 |                                                                                                                                                                  |
| Q9P107    | 843   | 862  | AcD3-GGGEVSSQGPEDSLGTQSR-COOH        | DTKD↓GGGE     | 1         | 1.29388                                                         | 107/47          | GEM-interacting protein                                     |                                                                                                                                                                  |
| P30419    | 73    | 88   | AcD3-SAQDQPVKMNLSLPAER-COOH          | SETD↓SAQD     | 3         | 0.99156/0.92431                                                 | 77/48           | Glycylpeptide N-tetradecanoyltransferase 1                  |                                                                                                                                                                  |
| Q9NX24    | 10    | 22   | AcD3-GPEAQAEACSGER-COOH              | ADPD↓GPEA     | 1         | 1.01371                                                         | 64/43           | H/ACA ribonucleoprotein complex subunit 2                   |                                                                                                                                                                  |
| P14317    | 116   | 128  | AcD3-AAKGFQKYGVER-COOH               | SQTD↓AAKG     | 3         | 1.01213/1.05769                                                 | 76/48           | Hematopoietic lineage cell-specific protein                 |                                                                                                                                                                  |
| P14317    | 190   | 204  | AcD3-YAKFGGQYGIQDR-COOH              | SQRD↓YAKG     | 3         | 0.99229/1.08177                                                 | 86/49           | Hematopoietic lineage cell-specific protein                 |                                                                                                                                                                  |
| Q9Y4L1    | 339   | 345  | AcD3-FKAVYTR-COOH                    | DDVD↓FKAV     | 1         | 0.88617                                                         | 45/43           | Hypoxia up-regulated protein 1                              |                                                                                                                                                                  |
| Q9BWW0    | 538   | 554  | AcD3-AFMSEMKSGSLDGVSR-COOH           | DSLQ↓AFMS     | 2         | 0.9324                                                          | 89/46           | Kanadaplin                                                  |                                                                                                                                                                  |
| P50851    | 1757  | 1771 | AcD3-SAQAQSDMGESPSGR-COOH            | SSVD↓SAQA     | 2         | 1.07911                                                         | 76/42           | Lipopolysaccharide-responsive and beige-like anchor protein |                                                                                                                                                                  |
| Q13136    | 837   | 856  | AcD3-NSSQDALGSLKGGQAEKNR-COOH        | SETD↓NSSQ     | 2         | 1.11652                                                         | 109/48          | Liprin-alpha-1                                              |                                                                                                                                                                  |
| Q15046    | 13    | 25   | AcD3-GSEPKLSKNEKLR-COOH              | VKVD↓GSEP     | 2         | 1.18481                                                         | 62/46           | Lysyl-tRNA synthetase                                       |                                                                                                                                                                  |
| Q9Y5V3    | 223   | 241  | AcD3-GATAQTADGSGQAQNLISR-COOH        | SEPD↓GATA     | 2         | 1.09483                                                         | 110/46          | Melanoma-associated antigen D1                              |                                                                                                                                                                  |
| Q9Y5V3    | 679   | 687  | AcD3-AAAAEAEAR-COOH                  | DALD↓AAAA     | 2         | 0.97795                                                         | 67/48           | Melanoma-associated antigen D1                              |                                                                                                                                                                  |
| Q9Y3A3    | 35    | 48   | AcD3-STLAVQQYIQQNR-COOH              | DEMD↓STLA     | 1         | 0.99352                                                         | 62/48           | Mps one binder kinase activator-like 3                      |                                                                                                                                                                  |
| P22234    | 27    | 46   | AcD3-SPGKVLQSKDQITAGNAAR-COOH        | ELLD↓SPGK     | 4         | 1.01387/1.03282/1.1137/1.29241                                  | 104/46          | Multifunctional protein ADE2                                |                                                                                                                                                                  |
| P35580    | 1161  | 1169 | AcD3-TTAAQQLR-COOH                   | DTLD↓TTAA     | 1         | 1.16291                                                         | 59/49           | Myosin-10                                                   |                                                                                                                                                                  |
| P35579    | 1154  | 1162 | AcD3-STAAQQLR-COOH                   | DTLD↓STAA     | 5         | 1.0046/1.14074/0.9207                                           | 80/48           | Myosin-9                                                    |                                                                                                                                                                  |
| P49321    | 524   | 531  | AcD3-LAKIIFKR-COOH                   | DMLD↓LAKI     | 2         | 0.93702                                                         | 52/32           | Nuclear autoantigenic sperm protein                         |                                                                                                                                                                  |
| Q12968    | 194   | 202  | AcD3-SELNEAAR-COOH                   | DDVD↓SELN     | 1         | 1.07658                                                         | 64/48           | Nuclear factor of activated T-cells, cytoplasmic 3          |                                                                                                                                                                  |
| Q9BRP8    | 144   | 162  | AcD3-SAATTEKAKKIKLNKKLR-COOH         | DQPD↓SAAT     | 1         | 1.18136                                                         | 62/29           | Partner of Y14 and mago                                     |                                                                                                                                                                  |
| Q9BRP8    | 163   | 170  | AcD3-QVEELQQR-COOH                   | KKLR↓QVEE     | 2         | 1.13764                                                         | 42/34           | Partner of Y14 and mago                                     |                                                                                                                                                                  |
| P26599    | 173   | 185  | AcD3-AGMAMAGQSPVLR-COOH              | AAVD↓AGMA     | 2         | 1.09887                                                         | 68/48           | Polypyrimidine tract-binding protein 1                      |                                                                                                                                                                  |
| O94913    | 414   | 423  | AcD3-GKDDVVEKCR-COOH                 | DKTD↓GKDD     | 1         | 1.04491                                                         | 52/48           | Pre-mRNA cleavage complex 2 protein Pcf11                   |                                                                                                                                                                  |
| Q96I20    | 132   | 145  | AcD3-GVPEKGSQSPAR-COOH               | EFPD↓GVPE     | 1         | 1.02426                                                         | 51/48           | PRK apoptosis WT1 regulator protein                         |                                                                                                                                                                  |
| Q9H875    | 98    | 112  | AcD3-AMAEKQLDAEFQKR-COOH             | DYMD↓AMAE     | 2         | 0.97457                                                         | 81/48           | PRKR-interacting protein 1                                  |                                                                                                                                                                  |
| Q7Z5W3    | 9     | 22   | AcD3-GGSKETAEEESR-COOH               | TELD↓GGSV     | 1         | 0.87022                                                         | 72/48           | Probable methyltransferase BCDIN3D                          |                                                                                                                                                                  |
| Q9CF4     | 274   | 295  | AcD3-AVAEPANAVKAGKEMKEKTQR-COOH      | MAVD↓AVAE     | 1         | 1.20788                                                         | 62/47           | Protein ALO17                                               |                                                                                                                                                                  |
| Q8N9T8    | 313   | 321  | AcD3-SASVITYPR-COOH                  | EFPD↓SASV     | 1         | 0.68631                                                         | 54/48           | Protein KRI1 homolog                                        |                                                                                                                                                                  |
| P06454    | 8     | 31   | AcD3-TSSEITTKDKLKEKVEVEEAENGR-COOH   | AAVD↓TSSE     | 3         | 1.02533/1.05131                                                 | 87/48           | Prothymosin alpha                                           |                                                                                                                                                                  |
| Q8N806    | 337   | 353  | AcD3-TVLAYENKGIQAQTR-COOH            | DEYD↓TVLA     | 3         | 0.97449/0.88033                                                 | 89/48           | Putative E3 ubiquitin-protein ligase UBR7                   |                                                                                                                                                                  |
| Q99575    | 775   | 785  | AcD3-AGCQESAGPER-COOH                | EVMD↓AGCQ     | 1         | 1.06151                                                         | 54/43           | Ribonucleases P/MRP protein subunit POP1                    |                                                                                                                                                                  |
| Q5W0B1    | 434   | 449  | AcD3-SSNVSNKDSSEDDISR-COOH           | DFCD↓SSNV     | 2         | 1.09381                                                         | 83/45           | RING finger protein 219                                     |                                                                                                                                                                  |
| P62877    | 9     | 21   | AcD3-TPSGTNSGAGKR-COOH               | MDVD↓TPSG     | 3         | 1.11363/1.07372                                                 | 60/48           | RING-box protein 1                                          |                                                                                                                                                                  |
| Q08AF3    | 18    | 28   | AcD3-AGKVTLTGQQR-COOH                | CVVD↓AGKV     | 5         | 1.00685/1.11198/1.06368                                         | 79/46           | Schlafen family member 5                                    |                                                                                                                                                                  |

|        |      |      |                                              |           |   |                                         |        |                                                               |                                                                        |
|--------|------|------|----------------------------------------------|-----------|---|-----------------------------------------|--------|---------------------------------------------------------------|------------------------------------------------------------------------|
| Q9UQ35 | 1561 | 1570 | AcD3-SSPDSKAKTR-COOH                         | SESD↓SSPD | 1 | 0.96906                                 | 50/48  | Serine/arginine repetitive matrix protein 2                   |                                                                        |
| Q13177 | 213  | 237  | AcD3-GAAKSLDKQKKTKMTDEEIMEKLR-COOH           | SHVD↓GAAK | 1 | 1.10105                                 | 53/45  | Serine/threonine-protein kinase PAK 2                         |                                                                        |
| P61011 | 392  | 402  | AcD3-GAKVFSKQPGR-COOH                        | DSTD↓GAKV | 1 | 1.18171                                 | 48/46  | Signal recognition particle 54 kDa protein                    |                                                                        |
| P42224 | 726  | 736  | AcD3-MSPEEFDEVSR-COOH                        | NLLP↓MSPE | 2 | 1.04296                                 | 55/42  | Signal transducer and activator of transcription 1-alpha/beta |                                                                        |
| O60232 | 56   | 66   | AcD3-CGTILLQDKQR-COOH                        | TCAD↓CGTI | 2 | 0.8631                                  | 78/48  | Sjogren syndrome/scleroderma autoantigen 1                    |                                                                        |
| P26368 | 129  | 146  | AcD3-GLAVTPTVPVVGSMQTR-COOH                  | MTPD↓GLAV | 4 | 1.11939/1.08754/0.93336                 | 86/47  | Splicing factor U2AF 65 kDa subunit                           |                                                                        |
| Q13148 | 90   | 98   | AcD3-ASSAVKVKR-COOH                          | DETD↓ASSA | 2 | 1.01304                                 | 46/42  | TAR DNA-binding protein 43                                    |                                                                        |
| P50991 | 262  | 274  | AcD3-NQIVVSDYAQMDR-COOH                      | TDMD↓NQIV | 2 | 0.91589                                 | 69/47  | T-complex protein 1 subunit delta                             |                                                                        |
| P52888 | 14   | 25   | AcD3-AASPCSVVNDLR-COOH                       | DMAD↓AASP | 1 | 1.07008                                 | 67/48  | Thimet oligopeptidase                                         |                                                                        |
| Q13263 | 689  | 702  | AcD3-STGVVAKLSPANQR-COOH                     | DGAD↓STGV | 2 | 1.10327/1.0394                          | 76/46  | Transcription intermediary factor 1-beta                      |                                                                        |
| Q13428 | 1243 | 1275 | AcD3-GKQEAQPQAAAGMLSPKTGGKEAASGTTTPQKSR-COOH | DDPD↓GKQE | 1 | 1.20964                                 | 54/47  | Treacle protein                                               |                                                                        |
| P07437 | 115  | 121  | AcD3-SVLDVVR-COOH                            | ELVD↓SVLD | 2 | 1.01557                                 | 62/47  | Tubulin beta chain                                            | P68371 (115-121), Q13509 (115-121), Q13885 (115-121), Q98VA1 (115-121) |
| P62310 | 7    | 22   | AcD3-QQQTNTVEEPLDUR-COOH                     | DDVD↓QQQT | 3 | 1.11267/1.09235                         | 86/49  | U6 snRNA-associated Sm-like protein LSm3                      |                                                                        |
| O94782 | 42   | 53   | AcD3-SQENEKASEYR-COOH                        | DFTD↓SQEN | 1 | 1.2651                                  | 69/45  | Ubiquitin carboxyl-terminal hydrolase 1                       |                                                                        |
| Q96N21 | 193  | 208  | AcD3-SGPSSQNSQNSDLR-COOH                     | DELD↓SGPS | 2 | 1.26504                                 | 87/45  | Uncharacterized protein C17orf56                              |                                                                        |
| P08670 | 86   | 100  | AcD3-FSLADAINTEFKNTR-COOH                    | DSVD↓FSLA | 9 | 1.16871/1.26176/1.16277/1.26869/1.20036 | 106/49 | Vimentin                                                      |                                                                        |
| P08670 | 332  | 342  | AcD3-ALKGTNESLER-COOH                        | CEVD↓ALKG | 2 | 1.20027                                 | 75/48  | Vimentin                                                      |                                                                        |
| O60293 | 336  | 349  | AcD3-SSQGLQDKEQNLTR-COOH                     | DTTD↓SSQG | 2 | 0.9083                                  | 90/48  | Zinc finger C3H1 domain-containing protein                    |                                                                        |
