# Supplementary material
Source: PubMed Central journal article supplement (PMC2953924)
Supplement: supp_M110.001271_mcp.M110.001271-6.pdf [file supp_M110.001271_mcp.M110.001271-6.pdf]

**Supplemental Table 2. List of identified mouse cathepsin D cleavage sites.** Columns from left to right contain: Swissprot accession number, start and end position of the identified peptide in the protein sequence, the identified (neo-N-terminal) peptide sequence, the residues surrounding the cleavage site from P4 to P4', number of fragmentation spectra by which the peptide was identified, all different light/heavy ratios by which the peptide was quantified, the MASCOT score and threshold (99% confidence) of the best scoring fragmentation spectrum, the protein name, possible protein isoforms in which the same peptide sequence can be found.

| accession | start | end  | neo-N-terminal peptide sequence        | cleavage site | # spectra | different light/heavy ratios            | score/threshold | protein name                                                                      | isoforms                                                                                 |
|-----------|-------|------|----------------------------------------|---------------|-----------|-----------------------------------------|-----------------|-----------------------------------------------------------------------------------|------------------------------------------------------------------------------------------|
| O35522    | 98    | 111  | AcD3-AAANVVKNIYSKYR-COOH               | PLVL↓AAAN     | 1         | 0.52463                                 | 46/45           | Proteasome subunit beta type-9                                                    | P28076 (98-111)                                                                          |
| P63101    | 23    | 41   | AcD3-AACMKSVTEQGAELNEER-COOH           | YDDM↓AACM     | 3         | 0.49054/0.54394                         | 95/44           | 14-3-3 protein zeta/delta                                                         |                                                                                          |
| P05064    | 32    | 43   | AcD3-AADESTGSIKAKR-COOH                | KGIL↓AADE     | 2         | 0.57875                                 | 63/47           | Fructose-bisphosphate aldolase A                                                  |                                                                                          |
| P46471    | 81    | 97   | AcD3-AADKTLQSEPLQVAR-COOH              | LWDL↓AADK     | 2         | 0.49843                                 | 94/47           | 26S protease regulatory subunit 7                                                 |                                                                                          |
| P50543    | 43    | 57   | AcD3-AAFTKQKDPGVLDLR-COOH              | NTEL↓AAFT     | 13        | 0.56449/0.54624/0.55426/0.53145/0.57775 | 108/47          | Protein S100-A11                                                                  |                                                                                          |
| Q8CIN4    | 515   | 524  | AcD3-AAKEAMKSNR-COOH                   | PLIL↓AAKE     | 1         | 0.56424                                 | 49/47           | Serine/threonine-protein kinase PAK 2                                             |                                                                                          |
| P99027    | 10    | 38   | AcD3-AALGGNSSPSAKDIKKILDSVGEADDDR-COOH | SYLL↓AALG     | 1         | 0.45747                                 | 49/47           | 60S acidic ribosomal protein P2                                                   |                                                                                          |
| P26638    | 96    | 107  | AcD3-AALKVSIQKVKR-COOH                 | ADAL↓AALK     | 2         | 0.60445                                 | 77/31           | Seryl-tRNA synthetase, cytoplasmic                                                |                                                                                          |
| P62264    | 77    | 84   | AcD3-AAQDVAQR-COOH                     | AAML↓AAQD     | 1         | 0.7715                                  | 53/47           | 40S ribosomal protein S14                                                         |                                                                                          |
| Q6P069    | 40    | 56   | AcD3-AAVAGQDGDDELQQR-COOH              | YGYF↓AAVA     | 1         | 0.55683                                 | 61/47           | Sorcin                                                                            |                                                                                          |
| P62962    | 33    | 56   | AcD3-AAVPGKTFVSIPTAEVGLVKGDR-COOH      | PSVW↓AAVP     | 2         | 0.42076/0.46667                         | 44/42           | Profilin-1                                                                        |                                                                                          |
| Q9C0E5    | 73    | 83   | AcD3-ACEDFKTTEDR-COOH                  | LFWL↓ACED     | 1         | 0.53454                                 | 55/46           | Regulator of G-protein signaling 10                                               |                                                                                          |
| Q61233    | 617   | 626  | AcD3-ACLMGKMKR-COOH                    | MTVF↓ACLM     | 5         | 0.52559/0.42004                         | 62/47           | Plastin-2                                                                         |                                                                                          |
| P63101    | 24    | 41   | AcD3-ACMKSVTEQGAELNEER-COOH            | DDMA↓ACMK     | 3         | 0.52524/0.50534                         | 114/44          | 14-3-3 protein zeta/delta                                                         |                                                                                          |
| P20152    | 89    | 100  | AcD3-ADAINTEFKNTR-COOH                 | DFSL↓ADA1     | 2         | 0.52829                                 | 60/47           | Vimentin                                                                          |                                                                                          |
| P63038    | 48    | 60   | AcD3-ADAVAVTMTGPKGR-COOH               | VDLL↓ADAV     | 1         | 0.49223                                 | 50/47           | 60 kDa heat shock protein, mitochondrial                                          |                                                                                          |
| Q9JIM14   | 18    | 29   | AcD3-ADFEGLLQGFGR-COOH                 | DGVL↓ADFE     | 1         | 0.50759                                 | 63/47           | 5'(3')-deoxyribonucleotidase, cytosolic type                                      |                                                                                          |
| P17742    | 26    | 37   | AcD3-ADKVPKTAENFR-COOH                 | FELF↓ADKV     | 3         | 0.49696                                 | 68/47           | Peptidyl-prolyl cis-trans isomerase A                                             |                                                                                          |
| P97351    | 72    | 82   | AcD3-ADLQNDDEVAFR-COOH                 | EVSJ↓ADLQ     | 2         | 0.43867/0.41421                         | 62/47           | 40S ribosomal protein S3a                                                         |                                                                                          |
| Q61171    | 105   | 127  | AcD3-ADVTKLSLQNYGVLNDEGIAYR-COOH       | IPLL↓ADVT     | 1         | 0.64251                                 | 51/47           | Peroxiredoxin-2                                                                   |                                                                                          |
| Q810U5    | 211   | 223  | AcD3-AEKKKAYKAKER-COOH                 | RLLM↓AEKE     | 2         | 0.6781                                  | 76/44           | Coiled-coil domain-containing protein 50                                          |                                                                                          |
| O54879    | 39    | 48   | AcD3-AEFSKCCSER-COOH                   | PVNF↓AEFS     | 1         | 0.3951                                  | 55/47           | High mobility group protein B3                                                    | P30681 (39-48)                                                                           |
| Q99KH8    | 373   | 393  | AcD3-AELKESQACGNGLSIEELR-COOH          | SPLF↓AELK     | 1         | 0.60256                                 | 64/47           | Serine/threonine-protein kinase 24                                                |                                                                                          |
| Q61316    | 677   | 689  | AcD3-AELKSLQPIKTR-COOH                 | VDKL↓AELK     | 2         | 0.56276                                 | 46/43           | Heat shock 70 kDa protein 4                                                       |                                                                                          |
| P06151    | 260   | 268  | AcD3-AESIMKNLR-COOH                    | VADL↓AESI     | 1         | 0.45566                                 | 49/47           | L-lactate dehydrogenase A chain                                                   |                                                                                          |
| O88569    | 73    | 82   | AcD3-AEVDAAAMAR-COOH                   | FSSM↓AEVD     | 1         | 0.50491                                 | 61/46           | Heterogeneous nuclear ribonucleoproteins A2/B1                                    |                                                                                          |
| Q9DCG9    | 64    | 82   | AcD3-AEVPKPEEGYHDETFRLR-COOH           | TLNL↓AEVP     | 2         | 0.58243                                 | 69/46           | TRM112-like protein                                                               |                                                                                          |
| Q8K3X4    | 764   | 773  | AcD3-AGDVVKVKER-COOH                   | ATIL↓AGDV     | 1         | 0.7562                                  | 45/42           | Enhanced at puberty protein 1                                                     |                                                                                          |
| P62897    | 84    | 92   | AcD3-AGIKKIGER-COOH                    | KMIF↓AGIK     | 1         | 0.47794                                 | 41/40           | Cytochrome c, somatic                                                             |                                                                                          |
| P0C056    | 70    | 81   | AcD3-AGNASKDLKVKR-COOH                 | VLEL↓AGNA     | 5         | 0.55355/0.52385/0.57779                 | 68/42           | Histone H2A.Z                                                                     | Q3THW5 (70-81)                                                                           |
| P01887    | 86    | 101  | AcD3-AHTTEPTTETDTYACR-COOH             | FYIL↓AHTE     | 2         | 0.66215                                 | 109/43          | Beta-2-microglobulin                                                              |                                                                                          |
| Q923D4    | 54    | 63   | AcD3-AIAENESKAR-COOH                   | LNVF↓AIAE     | 2         | 0.48288                                 | 58/48           | Splicing factor 3B subunit 5                                                      |                                                                                          |
| P17751    | 170   | 190  | AcD3-AIGTGKTATPQQAEVHEKLR-COOH         | EPVW↓AIGT     | 1         | 0.51166                                 | 50/46           | Triosephosphate isomerase                                                         |                                                                                          |
| P62889    | 95    | 106  | AcD3-AIIDPDGSDIIR-COOH                 | VCTL↓AIID     | 1         | 0.38488                                 | 65/47           | 60S ribosomal protein L30                                                         |                                                                                          |
| O35593    | 271   | 282  | AcD3-AIKNVGKQDPKR-COOH                 | PEQL↓AIKN     | 2         | 0.50596                                 | 72/43           | 26S proteasome non-ATPase regulatory subunit 14                                   |                                                                                          |
| Q66J56    | 137   | 158  | AcD3-AKETFGVNTVYVIDAMNPSR-COOH         | DLEL↓AKET     | 1         | 0.4725                                  | 62/47           | Eukaryotic translation initiation factor 3 subunit J                              |                                                                                          |
| P60335    | 236   | 243  | AcD3-AKLDNQVAR-COOH                    | PLDL↓AKLN     | 2         | 0.5643                                  | 73/43           | Poly(rC)-binding protein 1                                                        |                                                                                          |
| P09103    | 82    | 99   | AcD3-AKVDATTEESDLAQYQVGR-COOH          | EIRL↓AKVD     | 2         | 0.53657                                 | 94/47           | Protein disulfide-isomerase                                                       |                                                                                          |
| P62774    | 9     | 30   | AcD3-ALKNGDLDEVKDYVAKGEDVNR-COOH       | EFMW↓ALKN     | 1         | 0.62918                                 | 50/47           | Myotrophin                                                                        |                                                                                          |
| P06745    | 170   | 180  | AcD3-ALPKYSGGPR-COOH                   | MVTE↓ALPK     | 1         | 0.47033                                 | 56/45           | Glucose-6-phosphate isomerase                                                     |                                                                                          |
| Q9Z2U1    | 120   | 135  | AcD3-ALQFGEEDDPGAMSR-COOH              | VSNL↓ALQF     | 1         | 0.52752                                 | 59/44           | Proteasome subunit alpha type-5                                                   |                                                                                          |
| Q8VDM4    | 728   | 740  | AcD3-AMGMVSGTNNAR-COOH                 | NSIF↓AMGM     | 2         | 0.40173                                 | 73/44           | 26S proteasome non-ATPase regulatory subunit 2                                    |                                                                                          |
| P10107    | 110   | 124  | AcD3-AMLKTPAQFDAELR-COOH               | EVVL↓AMLK     | 3         | 0.51697                                 | 76/47           | Annexin A1                                                                        |                                                                                          |
| Q9JKV1    | 302   | 309  | AcD3-ANADVQER-COOH                     | APIL↓ANAD     | 1         | 0.51551                                 | 56/47           | Proteasomal ubiquitin receptor ADRM1                                              |                                                                                          |
| Q61753    | 223   | 230  | AcD3-AQCKKQVGR-COOH                    | DSTF↓AQCK     | 1         | 0.57156                                 | 53/46           | D-3-phosphoglycerate dehydrogenase                                                |                                                                                          |
| P13020    | 509   | 523  | AcD3-AQLDEELGGTPVQSR-COOH              | AILT↓AQLD     | 1         | 0.52121                                 | 58/48           | Gelsolin                                                                          |                                                                                          |
| P06745    | 431   | 446  | AcD3-AQTEALMKGLPEEAR-COOH              | ANFL↓AQTE     | 2         | 0.54214                                 | 82/47           | Glucose-6-phosphate isomerase                                                     |                                                                                          |
| P05063    | 175   | 201  | AcD3-ASIQQQNGIVPVEIPLDGDHDLKR-COOH     | LARY↓ASIC     | 1         | 0.43091                                 | 70/47           | Fructose-bisphosphate aldolase C                                                  | P05064 (175-201)                                                                         |
| Q9QRU7    | 109   | 121  | AcD3-ASQFSDCSSAKAR-COOH                | FESL↓ASQF     | 5         | 0.53902/0.53925                         | 70/45           | Peptidyl-prolyl cis-trans isomerase NIMA-interacting 1                            |                                                                                          |
| Q9DCW4    | 150   | 164  | AcD3-ASQVTLEGDKVKVER-COOH              | QGTF↓ASQV     | 2         | 0.59546                                 | 69/46           | Electron transfer flavoprotein subunit beta                                       |                                                                                          |
| P60710    | 228   | 254  | AcD3-ATAASSLSLEKSYELPDGQVITIGNER-COOH  | EQEM↓ATAA     | 1         | 0.52236                                 | 48/47           | Actin, cytoplasmic 1                                                              | P62737 (230-256), P63260 (228-254), P63268 (229-255), P68033 (230-256), P68134 (230-256) |
| Q6PGL7    | 1234  | 1245 | AcD3-ATEAIKFPFKKR-COOH                 | DDIF↓ATEA     | 3         | 0.59906/0.54758                         | 50/40           | Protein FAM21                                                                     |                                                                                          |
| P49722    | 47    | 60   | AcD3-ATEKQKSLYDER-COOH                 | GVVL↓ATEK     | 1         | 0.40938                                 | 57/46           | Proteasome subunit alpha type-2                                                   |                                                                                          |
| O89017    | 208   | 227  | AcD3-ATTAANPKESYACYDEER-COOH           | INVV↓ATTA     | 1         | 0.56962                                 | 97/41           | Legumain                                                                          |                                                                                          |
| Q76MZ3    | 97    | 105  | AcD3-ATVETVVR-COOH                     | LESL↓ATVE     | 1         | 0.5488                                  | 63/46           | Serine/threonine-protein phosphatase 2A 65 kDa regulatory subunit A alpha isoform | Q7TNP2 (109-117)                                                                         |
| P62830    | 63    | 73   | AcD3-ATVKKGKPELR-COOH                  | DMVM↓ATVK     | 4         | 0.42798/0.43139                         | 51/40           | 60S ribosomal protein L23                                                         |                                                                                          |

|        |      |      |                                           |           |    |                         |        |                                                                |                                        |
|--------|------|------|-------------------------------------------|-----------|----|-------------------------|--------|----------------------------------------------------------------|----------------------------------------|
| P17182 | 117  | 132  | AcD3-AVCKAGAVEKGVPLVLR-COOH               | GVSL↓AVCK | 12 | 0.50778/0.50043/0.50734 | 82/45  | Alpha-enolase                                                  |                                        |
| Q9D172 | 145  | 159  | AcD3-AVDGKDCVKVNEVER-COOH                 | LSTF↓AVDG | 2  | 0.52728                 | 73/48  | E51 protein homolog, mitochondrial                             |                                        |
| Q9EQK5 | 715  | 729  | AcD3-AVESTGNAKAEAESR-COOH                 | AMSM↓AVES | 4  | 0.57433/0.59349         | 84/47  | Major vault protein                                            |                                        |
| P63017 | 142  | 155  | AcD3-AVTVTPAYFNDSQR-COOH                  | TVTN↓AVTV | 1  | 0.49606                 | 68/48  | Heat shock cognate 71 kDa protein                              |                                        |
| P61979 | 360  | 377  | AcD3-AYEPQGGSGVDYSAGGR-COOH               | EWQM↓AYEP | 1  | 0.5588                  | 48/40  | Heterogeneous nuclear ribonucleoprotein K                      |                                        |
| P10630 | 50   | 62   | AcD3-AYGFEKPSAIQQR-COOH                   | RGYI↓AYGF | 1  | 0.49595                 | 51/47  | Eukaryotic initiation factor 4A-II                             | P60843 (49-61), Q91VC3 (55-67)         |
| O08585 | 205  | 220  | AcD3-CDFNPKSSQAKDVSR-COOH                 | VAPL↓CDFN | 1  | 0.6159                  | 68/47  | Clathrin light chain A                                         |                                        |
| P62827 | 120  | 129  | AcD3-CGNKVDIKDR-COOH                      | PIVL↓CGNK | 4  | 0.4615/0.4079           | 78/48  | GTP-binding nuclear protein Ran                                |                                        |
| P52480 | 358  | 376  | AcD3-CIMLSGETAKGDYPLEAVR-COOH             | DGAD↓CIML | 1  | 0.68376                 | 72/47  | Pyruvate kinase isozymes M1/M2                                 |                                        |
| Q61233 | 164  | 178  | AcD3-CKMINLVPDITIDER-COOH                 | GIVL↓CKMI | 1  | 0.44954                 | 72/47  | Plastin-2                                                      | Q99K51 (167-181)                       |
| Q9D358 | 91   | 98   | AcD3-CMDESMLR-COOH                        | DYIL↓CMDE | 1  | 0.72948                 | 52/41  | Low molecular weight phosphotyrosine protein phosphatase       |                                        |
| P63101 | 25   | 41   | AcD3-CMKSVTEQGAELSNEER-COOH               | DMAA↓CMKS | 1  | 0.52798                 | 115/44 | 14-3-3 protein zeta/delta                                      |                                        |
| P17182 | 389  | 400  | AcD3-CTGQIKTGAPCR-COOH                    | VVGL↓CTGQ | 3  | 0.48196/0.47512         | 77/47  | Alpha-enolase                                                  | P17183 (389-400), P21550 (389-400)     |
| Q99020 | 104  | 114  | AcD3-CTIKMDPNTGR-COOH                     | EVVD↓CTIK | 2  | 0.54799/0.55403         | 71/46  | Heterogeneous nuclear ribonucleoprotein A/B                    |                                        |
| Q60668 | 126  | 136  | AcD3-CTLKLDPIGR-COOH                      | EVVD↓CTLK | 1  | 0.41973                 | 67/46  | Heterogeneous nuclear ribonucleoprotein D0                     |                                        |
| Q9QUM9 | 78   | 88   | AcD3-CVMTGMTADSR-COOH                     | ESIG↓CVMT | 2  | 0.48644                 | 81/41  | Proteasome subunit alpha type-6                                |                                        |
| P50580 | 351  | 364  | AcD3-DAELKALLQSSASR-COOH                  | MEVQ↓DAEL | 1  | 0.37514                 | 83/47  | Proliferation-associated protein 2G4                           |                                        |
| Q9EPB4 | 132  | 148  | AcD3-DALHSGVLTEGQYQAVR-COOH               | DGVL↓DALH | 2  | 0.5207                  | 89/48  | Apoptosis-associated speck-like protein containing a CARD      |                                        |
| Q8CGC7 | 522  | 532  | AcD3-DAQEEMKEVAR-COOH                     | VNVL↓DAQE | 1  | 0.56231                 | 54/46  | Bifunctional aminoacyl-tRNA synthetase                         |                                        |
| P09411 | 315  | 330  | AcD3-DCGTESKKYAEAVGR-COOH                 | WMGL↓DCGT | 1  | 0.53104                 | 60/47  | Phosphoglycerate kinase 1                                      |                                        |
| Q61233 | 575  | 591  | AcD3-DDEEKLNNAKAIYSMAR-COOH               | TENL↓DDEE | 1  | 0.51461                 | 84/47  | Plastin-2                                                      |                                        |
| Q62523 | 157  | 168  | AcD3-DDMTKNDPDKAR-COOH                    | SLLJ↓DDMT | 1  | 0.52613                 | 52/47  | Zyxin                                                          |                                        |
| P63073 | 143  | 157  | AcD3-DDYSDDVCGAVNVNR-COOH                 | GESF↓DDYS | 1  | 0.45599                 | 50/44  | Eukaryotic translation initiation factor 4E                    |                                        |
| O08788 | 63   | 76   | AcD3-DEAKKNDGTVQGR-COOH                   | GVIL↓DEAK | 2  | 0.53412                 | 94/47  | Dynactin subunit 1                                             |                                        |
| Q61937 | 181  | 196  | AcD3-DEEETEEKVPPKVSRR-COOH                | DDDF↓DEEE | 3  | 0.43878/0.39189         | 69/47  | Nucleophosmin                                                  |                                        |
| P35979 | 107  | 114  | AcD3-DEIVNIAR-COOH                        | NITF↓DEIV | 1  | 0.32687                 | 48/47  | 60S ribosomal protein L12                                      |                                        |
| P05064 | 34   | 43   | AcD3-DESTGSIAR-COOH                       | ILAA↓DEST | 2  | 0.565                   | 63/47  | Fructose-bisphosphate aldolase A                               |                                        |
| Q9WUK2 | 90   | 109  | AcD3-DESLKEALTYDGLGDR-COOH                | YVEF↓DEVD | 1  | 0.56153                 | 70/47  | Eukaryotic translation initiation factor 4H                    |                                        |
| P63242 | 6    | 26   | AcD3-DFETGDAGASATFPMQCSALR-COOH           | ADDL↓DFET | 2  | 0.52335                 | 112/41 | Eukaryotic translation initiation factor 5A-1                  |                                        |
| O08585 | 206  | 220  | AcD3-DFNPKSSQAKDVSR-COOH                  | APLC↓DFNP | 1  | 0.6425                  | 49/47  | Clathrin light chain A                                         |                                        |
| Q61RUS | 200  | 214  | AcD3-DFNPKSSQCKDVSR-COOH                  | AQLC↓DFNP | 1  | 0.58641                 | 48/48  | Clathrin light chain B                                         |                                        |
| P52480 | 34   | 43   | AcD3-DIDSAPIAR-COOH                       | MCRL↓DIDS | 3  | 0.53102/0.44468         | 68/47  | Pyruvate kinase isozymes M1/M2                                 |                                        |
| P17742 | 9    | 19   | AcD3-DITADDEPLGR-COOH                     | TVFF↓DITA | 5  | 0.43328/0.49408/0.47016 | 70/47  | Peptidyl-prolyl cis-trans isomerase A                          |                                        |
| P62204 | 21   | 38   | AcD3-DKDGDDGTTIKELGTVMR-COOH              | FSLF↓DKDG | 4  | 0.52391/0.55806         | 98/47  | Calmodulin                                                     |                                        |
| P62204 | 94   | 107  | AcD3-DKDGNGIYSAELR-COOH                   | FRVF↓DKDG | 2  | 0.49958                 | 91/47  | Calmodulin                                                     |                                        |
| P09411 | 10   | 18   | AcD3-DKLDVKGKR-COOH                       | KLTL↓DKLD | 2  | 0.4574                  | 68/43  | Phosphoglycerate kinase 1                                      |                                        |
| Q9DBJ1 | 221  | 240  | AcD3-DKNLKPMPQFLGDEETVR-COOH              | YVEL↓DKNL | 4  | 0.47506/0.48381/0.50804 | 64/47  | Phosphoglycerate mutase 1                                      |                                        |
| P17742 | 27   | 37   | AcD3-DKVPKTAENFR-COOH                     | ELFA↓DKVP | 2  | 0.54002                 | 60/47  | Peptidyl-prolyl cis-trans isomerase A                          |                                        |
| O88844 | 38   | 49   | AcD3-DLHSDYLGIENR-COOH                    | YVEL↓DLHS | 2  | 0.71086                 | 71/47  | Isocitrate dehydrogenase [NADP] cytoplasmic                    |                                        |
| Q921W0 | 163  | 181  | AcD3-DQLSLPEGASAVGESSVR-COOH              | LEVJ↓DQLS | 2  | 0.58022                 | 122/47 | Charged multivesicular body protein 1a                         |                                        |
| P57759 | 63   | 77   | AcD3-DTQPPYGEKQDEFKR-COOH                 | LVKF↓DTQY | 1  | 0.53271                 | 58/47  | Endoplasmic reticulum protein ERp29                            |                                        |
| P17182 | 245  | 253  | AcD3-DVAASEFYR-COOH                       | VIGM↓DVAA | 2  | 0.57832                 | 74/47  | Alpha-enolase                                                  | P17183 (245-253), P21550 (245-253)     |
| P14152 | 82   | 92   | AcD3-DVAVLVGSMMPR-COOH                    | FKDL↓DVAV | 2  | 0.50486                 | 62/47  | Malate dehydrogenase, cytoplasmic                              |                                        |
| Q8R1F1 | 422  | 432  | AcD3-DVSSSTVFKQR-COOH                     | QRRF↓DVSS | 3  | 0.5928/0.70062          | 57/48  | Niban-like protein 1                                           |                                        |
| Q9Z0N1 | 24   | 38   | AcD3-DVTKLPLSHEVISR-COOH                  | LATL↓DVTK | 1  | 0.44942                 | 75/45  | Eukaryotic translation initiation factor 2 subunit 3, X-linked |                                        |
| P62960 | 110  | 140  | AcD3-DVVEGEGKAEAAVNTGPGGVPVQGSKYAADR-COOH | TVEF↓DVVE | 1  | 0.50348                 | 83/47  | Nuclease-sensitive element-binding protein 1                   |                                        |
| Q8VDD5 | 219  | 234  | AcD3-EAFGNAKTVKNDSSR-COOH                 | NPIL↓EAFG | 2  | 0.57478                 | 104/48 | Myosin-9                                                       | O08638 (226-241), Q6URW6 (250-265)     |
| Q9WUB4 | 135  | 150  | AcD3-EAIPENTVIYADCLR-COOH                 | LNTF↓EAIP | 1  | 0.48083                 | 93/47  | Dynactin subunit 6                                             |                                        |
| P06745 | 169  | 180  | AcD3-EALKPYSGGPR-COOH                     | LMVT↓EALK | 1  | 0.45636                 | 59/46  | Glucose-6-phosphate isomerase                                  |                                        |
| P06745 | 434  | 446  | AcD3-EALMKGKLPPEAR-COOH                   | LAQT↓EALM | 2  | 0.46017                 | 49/47  | Glucose-6-phosphate isomerase                                  |                                        |
| O08808 | 1187 | 1196 | AcD3-EALQSGAAFR-COOH                      | DSLJ↓EALQ | 2  | 0.56685                 | 63/47  | Protein diaphanous homolog 1                                   | O70566 (1058-1067), Q9Z207 (1046-1055) |
| P52480 | 285  | 294  | AcD3-EASDGIMVAR-COOH                      | DEIL↓EASD | 3  | 0.53273                 | 93/46  | Pyruvate kinase isozymes M1/M2                                 |                                        |
| Q00P19 | 43   | 62   | AcD3-EDEAGVGGAGPGGACKAEPK-COOH            | AEMJ↓EDEA | 2  | 0.49781                 | 76/45  | Heterogeneous nuclear ribonucleoprotein U-like protein 2       |                                        |
| P14148 | 210  | 222  | AcD3-EDLHEIYTVGKR-COOH                    | IICM↓EDLI | 2  | 0.44471                 | 69/47  | 60S ribosomal protein L7                                       |                                        |
| P48428 | 89   | 98   | AcD3-EEAEYKEAR-COOH                       | EKDL↓EEAE | 2  | 0.5514                  | 56/46  | Tubulin-specific chaperone A                                   |                                        |
| P17182 | 415  | 426  | AcD3-EELGSKAKFAGR-COOH                    | LRIE↓EELG | 3  | 0.52099/0.47997         | 89/46  | Alpha-enolase                                                  |                                        |
| Q3U239 | 147  | 155  | AcD3-EEQLAESQR-COOH                       | LLEL↓EEQL | 1  | 0.4844                  | 70/47  | Leucine-rich repeat flightless-interacting protein 1           |                                        |
| Q8K448 | 471  | 479  | AcD3-EFIGKEAIR-COOH                       | PVSS↓EFIG | 1  | 0.06876                 | 50/46  | ATP-binding cassette sub-family A member 5                     |                                        |
| Q61599 | 153  | 168  | AcD3-EFLTPVEEAPKGMALAR-COOH               | PEEY↓EFLT | 2  | 0.50496                 | 64/48  | Rho GDP-dissociation inhibitor 2                               |                                        |
| P15532 | 79   | 88   | AcD3-EGLNVVKTGR-COOH                      | AMVW↓EGLN | 1  | 0.4826                  | 67/45  | Nucleoside diphosphate kinase A                                | Q01768 (79-88)                         |

|        |      |      |                                          |           |    |                                                      |        |                                                             |                                                                                                                                                                                |
|--------|------|------|------------------------------------------|-----------|----|------------------------------------------------------|--------|-------------------------------------------------------------|--------------------------------------------------------------------------------------------------------------------------------------------------------------------------------|
| O70492 | 148  | 160  | AcD3-EIIDKSYTPSKIR-COOH                  | FLQD↓EIID | 3  | 0.62728/0.72237                                      | 94/46  | Sorting nexin-3                                             |                                                                                                                                                                                |
| P22752 | 62   | 72   | AcD3-EILELAGNAAR-COOH                    | YLTA↓EILE | 1  | 0.49684                                              | 93/47  | Histone H2A type 1                                          | P27661 (62-72), Q64522 (62-72), Q64523 (62-72), Q6GS57 (62-72), Q8BFU2 (62-72), Q8CCK0 (59-69), Q8CGP5 (62-72), Q8CGP6 (62-72), Q8CGP7 (62-72), Q8R1M2 (62-72), Q9QZ08 (59-69) |
| Q9DBJ1 | 170  | 180  | AcD3-EIVPQIKGKR-COOH                     | FWNE↓EIVP | 1  | 0.5451                                               | 57/44  | Phosphoglycerate mutase 1                                   |                                                                                                                                                                                |
| O35326 | 17   | 22   | AcD3-EKDVER-COOH                         | PAAR↓EKDV | 1  | 0.52909                                              | 35/33  | Splicing factor, arginine/serine-rich 5                     |                                                                                                                                                                                |
| P22752 | 65   | 72   | AcD3-ELAGNAAR-COOH                       | AEIL↓ELAG | 2  | 0.47927/0.44197                                      | 56/47  | Histone H2A type 1                                          | P27661 (65-72), Q64522 (65-72), Q64523 (65-72), Q6GS57 (65-72), Q8BFU2 (65-72), Q8CCK0 (62-69), Q8CGP5 (65-72), Q8CGP6 (65-72), Q8CGP7 (65-72), Q8R1M2 (65-72), Q9QZ08 (62-69) |
| P0C056 | 68   | 81   | AcD3-ELAGNASKDLKVKR-COOH                 | AEVL↓ELAG | 3  | 0.52728/0.5302                                       | 78/42  | Histone H2A.Z                                               | Q3THW5 (68-81)                                                                                                                                                                 |
| Q9QZK7 | 406  | 415  | AcD3-ELDEAGSAGR-COOH                     | LLEL↓ELDE | 1  | 0.67319                                              | 54/46  | Docking protein 3                                           |                                                                                                                                                                                |
| P17742 | 23   | 37   | AcD3-ELFADKVPKTAENFR-COOH                | RVSF↓ELFA | 2  | 0.47118                                              | 93/47  | Peptidyl-prolyl cis-trans isomerase A                       |                                                                                                                                                                                |
| O55131 | 361  | 380  | AcD3-EMKVKEKQKLDSEALQR-COOH              | EQVF↓EMKV | 2  | 0.41591/0.58448                                      | 55/44  | Septin-7                                                    |                                                                                                                                                                                |
| P62082 | 31   | 41   | AcD3-EMNSDLKAQLR-COOH                    | LLEL↓EMNS | 1  | 0.38836                                              | 80/47  | 40S ribosomal protein S7                                    |                                                                                                                                                                                |
| Q9CSU0 | 188  | 198  | AcD3-ENAASGDATVR-COOH                    | LQDL↓ENAA | 1  | 0.56729                                              | 63/46  | Regulation of nuclear pre-mRNA domain-containing protein 1B |                                                                                                                                                                                |
| P59999 | 23   | 32   | AcD3-ENFSSQVVER-COOH                     | ALCL↓ENFS | 3  | 0.49669                                              | 73/47  | Actin-related protein 2/3 complex subunit 4                 |                                                                                                                                                                                |
| O35226 | 339  | 352  | AcD3-ENLPGVDPNNAAIR-COOH                 | QSVL↓ENLP | 1  | 0.58608                                              | 49/48  | 26S proteasome non-ATPase regulatory subunit 4              |                                                                                                                                                                                |
| P27546 | 623  | 641  | AcD3-EQKETPGSQSPSEPCSGVSR-COOH           | LENL↓EQKE | 3  | 0.47027/0.55422                                      | 91/45  | Microtubule-associated protein 4                            |                                                                                                                                                                                |
| Q9CXW4 | 41   | 54   | AcD3-EQLTGTQTPVFSKAR-COOH                | AKVL↓EQLT | 2  | 0.40805                                              | 76/47  | 60S ribosomal protein L11                                   |                                                                                                                                                                                |
| P26039 | 1608 | 1618 | AcD3-ESAGGLQIAR-COOH                     | KTML↓ESAG | 1  | 0.50504                                              | 97/47  | Talin-1                                                     |                                                                                                                                                                                |
| Q99JY9 | 222  | 230  | AcD3-ETAKAVKER-COOH                      | EQSL↓ETAK | 2  | 0.50078                                              | 58/45  | Actin-related protein 3                                     |                                                                                                                                                                                |
| Q9CVD2 | 343  | 353  | AcD3-ETAKDNLKAER-COOH                    | TMSL↓ETAK | 2  | 0.61046                                              | 63/47  | Ataxin-3                                                    |                                                                                                                                                                                |
| P63242 | 8    | 26   | AcD3-ETGDAGASATFPMQCSALR-COOH            | DLDL↓ETGD | 2  | 0.51741                                              | 70/43  | Eukaryotic translation initiation factor 5A-1               |                                                                                                                                                                                |
| P60335 | 168  | 177  | AcD3-ETLSQSPQGR-COOH                     | LVML↓ETLS | 1  | 0.49479                                              | 66/47  | Poly(rC)-binding protein 1                                  |                                                                                                                                                                                |
| P63028 | 30   | 38   | AcD3-EVEGKVMVSR-COOH                     | GLCL↓EVEG | 4  | 0.40967/0.39528                                      | 67/47  | Translationally-controlled tumor protein                    |                                                                                                                                                                                |
| Q99JY9 | 302  | 312  | AcD3-EVIQNCIPDIVR-COOH                   | EVVD↓EVIQ | 1  | 0.5119                                               | 57/48  | Actin-related protein 3                                     |                                                                                                                                                                                |
| P50580 | 348  | 364  | AcD3-EVQDAELKALLQSSASR-COOH              | KSEM↓EVQD | 1  | 0.39957                                              | 96/47  | Proliferation-associated protein 2G4                        |                                                                                                                                                                                |
| Q9CR16 | 37   | 49   | AcD3-FADIVPKTAENFR-COOH                  | VLEL↓FADI | 1  | 0.39085                                              | 72/47  | 40 kDa peptidyl-prolyl cis-trans isomerase                  |                                                                                                                                                                                |
| P17742 | 25   | 37   | AcD3-FADKVPKTAENFR-COOH                  | SFEL↓FADK | 56 | 0.49893/0.498/0.47962/0.44913/0.45339/0.42096/0.4974 | 81/47  | Peptidyl-prolyl cis-trans isomerase A                       |                                                                                                                                                                                |
| P10107 | 278  | 292  | AcD3-FAEKLYEAMKGAETR-COOH                | TPAF↓FAEK | 3  | 0.55328/0.62108                                      | 77/48  | Annexin A1                                                  |                                                                                                                                                                                |
| Q6PGL7 | 858  | 865  | AcD3-FAGTKKIR-COOH                       | DVDL↓FAGT | 1  | 0.66502                                              | 45/42  | Protein FAM21                                               |                                                                                                                                                                                |
| Q923D4 | 53   | 63   | AcD3-FAIAENESKAR-COOH                    | LLNY↓FAIA | 1  | 0.54198                                              | 73/47  | Splicing factor 3B subunit 5                                |                                                                                                                                                                                |
| Q6PGL7 | 670  | 682  | AcD3-FAIAKDSQKKTQR-COOH                  | EVDL↓FAIA | 2  | 0.68301                                              | 93/45  | Protein FAM21                                               |                                                                                                                                                                                |
| P32067 | 189  | 196  | AcD3-FAKKNNEER-COOH                      | KEDY↓FAKK | 2  | 0.55605                                              | 51/47  | Lupus La protein homolog                                    |                                                                                                                                                                                |
| Q9D554 | 301  | 312  | AcD3-FAKNPKSKGTR-COOH                    | DTSL↓FAKN | 1  | 0.45303                                              | 48/42  | Splicing factor 3A subunit 3                                |                                                                                                                                                                                |
| Q91V76 | 161  | 177  | AcD3-FASEGQPKVIEVQAKR-COOH               | LAML↓FASE | 2  | 0.60984                                              | 101/45 | Ester hydrolase C11orf54 homolog                            |                                                                                                                                                                                |
| P26039 | 1998 | 2006 | AcD3-FATAGTLNR-COOH                      | TTIM↓FATA | 2  | 0.54871                                              | 67/47  | Talin-1                                                     |                                                                                                                                                                                |
| P97351 | 138  | 146  | AcD3-FCVGFTRKR-COOH                      | LLRL↓FCVG | 3  | 0.39991/0.40929                                      | 74/47  | 40S ribosomal protein S3a                                   |                                                                                                                                                                                |
| Q9D898 | 18   | 49   | AcD3-FDENKVFDEHEEAAAAGEPGDPCEVDGLLR-COOH | DIDE↓FDEN | 1  | 0.42586                                              | 63/43  | Actin-related protein 2/3 complex subunit 5-like protein    |                                                                                                                                                                                |
| Q60631 | 165  | 178  | AcD3-FDFPQEDGELGFR-COOH                  | VQAL↓FDFD | 1  | 0.74184                                              | 67/43  | Growth factor receptor-bound protein 2                      |                                                                                                                                                                                |
| P17742 | 8    | 19   | AcD3-FDITADDEPLGR-COOH                   | PTVF↓FDIT | 3  | 0.50987                                              | 88/46  | Peptidyl-prolyl cis-trans isomerase A                       |                                                                                                                                                                                |
| P62204 | 20   | 38   | AcD3-FDKDGDGTITTKELGTVMR-COOH            | AFSL↓FDKD | 5  | 0.56425/0.60319/0.64339                              | 100/47 | Calmodulin                                                  |                                                                                                                                                                                |
| Q922M7 | 7    | 17   | AcD3-FDMDGLTAPR-COOH                     | TLCL↓FDMD | 1  | 0.48382                                              | 47/45  | Phosphomannomutase 2                                        |                                                                                                                                                                                |
| P50580 | 283  | 290  | AcD3-FEDEKAR-COOH                        | TLRA↓FEDE | 3  | 0.42871/0.41068                                      | 72/47  | Proliferation-associated protein 2G4                        |                                                                                                                                                                                |
| P68433 | 105  | 117  | AcD3-FEDTNLCAHAKR-COOH                   | LVGL↓FEDT | 1  | 0.38258                                              | 76/48  | Histone H3.1                                                | P84228 (105-117), P84244 (105-117)                                                                                                                                             |
| Q9JLJ8 | 34   | 46   | AcD3-FEEKDIAAENEER-COOH                  | NKIG↓FEEK | 2  | 0.62248                                              | 68/46  | SH3 domain-binding glutamic acid-rich-like protein          |                                                                                                                                                                                |
| P63242 | 7    | 26   | AcD3-FETGDAGASATFPMQCSALR-COOH           | DDLD↓FETG | 3  | 0.52044/0.56818                                      | 113/44 | Eukaryotic translation initiation factor 5A-1               |                                                                                                                                                                                |
| Q9R0P5 | 89   | 95   | AcD3-FETKESR-COOH                        | YDAS↓FETK | 1  | 0.62446                                              | 52/48  | Destrin                                                     |                                                                                                                                                                                |
| Q9CQM9 | 92   | 101  | AcD3-FFKNKQVDR-COOH                      | PTFL↓FFKN | 2  | 0.543                                                | 61/47  | Glutaredoxin-3                                              |                                                                                                                                                                                |
| O35737 | 308  | 316  | AcD3-FFSPLNPNR-COOH                      | DIYN↓FFSP | 2  | 0.53553                                              | 59/46  | Heterogeneous nuclear ribonucleoprotein H                   | Q922X1 (308-316)                                                                                                                                                               |
| Q9D8B3 | 8    | 28   | AcD3-FGAGGGKAGKGGPTQEAQR-COOH            | FGKL↓FGAG | 1  | 0.63181                                              | 91/47  | Charged multivesicular body protein 4b                      |                                                                                                                                                                                |
| P13020 | 537  | 551  | AcD3-FGGKPMIHKGGTSR-COOH                 | LMSL↓FGGK | 2  | 0.44286                                              | 57/47  | Gelsolin                                                    |                                                                                                                                                                                |
| Q62465 | 69   | 80   | AcD3-FGGYDKVKLQSR-COOH                   | VLTG↓FGGY | 2  | 0.7465                                               | 58/46  | Synaptic vesicle membrane protein VAT-1 homolog             |                                                                                                                                                                                |
| O08638 | 228  | 241  | AcD3-FGNAYKVNDSR-COOH                    | ILEA↓FGNA | 1  | 0.50556                                              | 78/48  | Myosin-11                                                   | Q61879 (228-241), Q6URW6 (252-265), Q8VDD5 (221-234)                                                                                                                           |
| P17225 | 356  | 364  | AcD3-FGVYGDVQR-COOH                      | LFIL↓FGVY | 2  | 0.44354                                              | 79/47  | Polypyrimidine tract-binding protein 1                      | Q91Z31 (359-367)                                                                                                                                                               |

|        |      |      |                                 |            |    |                                         |        |                                                                |                                                      |
|--------|------|------|---------------------------------|------------|----|-----------------------------------------|--------|----------------------------------------------------------------|------------------------------------------------------|
| Q99PL6 | 123  | 133  | AcD3-FICPLTGVTLR-COOH           | PGVF-↓FICP | 1  | 0.58866                                 | 47/46  | UBX domain-containing protein 6                                |                                                      |
| P62748 | 169  | 181  | AcD3-FIKGAKSDPSIVR-COOH         | SLEE-↓FIKG | 1  | 0.66698                                 | 57/43  | Hippocalcin-like protein 1                                     |                                                      |
| P34884 | 4    | 12   | AcD3-FIVNTVPR-COOH              | MPM-↓FIVN  | 2  | 0.70238                                 | 68/46  | Macrophage migration inhibitory factor                         |                                                      |
| Q61233 | 38   | 49   | AcD3-FKAACLPLPGYR-COOH          | LNLD-↓FKAA | 1  | 0.48139                                 | 54/47  | Plastin-2                                                      |                                                      |
| Q9QUM9 | 29   | 43   | AcD3-FKAINQGLTSSAVR-COOH        | VEVA-↓FKAI | 2  | 0.46972                                 | 80/44  | Proteasome subunit alpha type-6                                |                                                      |
| Q99020 | 123  | 139  | AcD3-FKDSVVKEVLDQKEHR-COOH      | GFIL-↓FKDS | 2  | 0.50809/0.56352                         | 89/47  | Heterogeneous nuclear ribonucleoprotein A/B                    |                                                      |
| Q3THE2 | 34   | 45   | AcD3-FKFAFNMDQNR-COOH           | QIQE-↓FKFA | 1  | 0.48959                                 | 48/46  | Myosin regulatory light chain 12B                              | Q9CQ19 (34-45)                                       |
| P09103 | 208  | 215  | AcD3-FKKFDEGR-COOH              | GVVL-↓FKKF | 1  | 0.4921                                  | 52/47  | Protein disulfide-isomerase                                    |                                                      |
| O54988 | 1202 | 1218 | AcD3-FKMTGSECLNPSAQSR-COOH      | QEVF-↓FKMT | 2  | 0.53709                                 | 67/45  | STE20-like serine/threonine-protein kinase                     |                                                      |
| P09103 | 107  | 122  | AcD3-FKNGDTASPKYTAGR-COOH       | TIKF-↓FKNG | 1  | 0.5229                                  | 106/47 | Protein disulfide-isomerase                                    |                                                      |
| Q9CQM9 | 93   | 101  | AcD3-FKNSQKVDNR-COOH            | TLFL-↓FKNS | 1  | 0.52784                                 | 56/47  | Glutaredoxin-3                                                 |                                                      |
| P39749 | 342  | 353  | AcD3-FKVTGSLSSAKR-COOH          | LDDF-↓FKVT | 2  | 0.45229                                 | 68/44  | Flap endonuclease 1                                            |                                                      |
| Q9D7A6 | 61   | 70   | AcD3-FLEKNKMYSR-COOH            | GLNA-↓FLEK | 1  | 0.52223                                 | 52/48  | Signal recognition particle 19 kDa protein                     |                                                      |
| P10107 | 7    | 12   | AcD3-FLKQAR-COOH                | MVSE-↓FLKQ | 1  | 0.51562                                 | 58/44  | Annexin A1                                                     |                                                      |
| P80314 | 218  | 231  | AcD3-FLLDKIGVNPQKR-COOH         | LDEG-↓FLLD | 2  | 0.51765                                 | 86/38  | T-complex protein 1 subunit beta                               |                                                      |
| P23198 | 76   | 91   | AcD3-FLNSQKAGKEKDGTKR-COOH      | LIED-↓FLNS | 3  | 0.51144/0.50108                         | 118/46 | Chromobox protein homolog 3                                    |                                                      |
| Q61599 | 154  | 168  | AcD3-FLTPVEEAPKGLMAR-COOH       | EVEY-↓FLTP | 1  | 0.48704                                 | 62/47  | Rho GDP-dissociation inhibitor 2                               |                                                      |
| P31725 | 49   | 55   | AcD3-FMKKEKR-COOH               | QLAT-↓FMKK | 4  | 0.27968                                 | 52/46  | Protein S100-A9                                                |                                                      |
| O08585 | 207  | 220  | AcD3-FNPKSSQAKVSR-COOH          | PLCD-↓FNPK | 1  | 0.60224                                 | 49/47  | Clathrin light chain A                                         |                                                      |
| P09041 | 25   | 39   | AcD3-FNVPKMNQITNQR-COOH         | MRVD-↓FNVP | 1  | 0.49689                                 | 77/48  | Phosphoglycerate kinase 2                                      | P09411 (25-39)                                       |
| P06745 | 352  | 370  | AcD3-FQQGDMESNGKYITKSGAR-COOH   | FAAY-↓FQQG | 2  | 0.47464                                 | 87/47  | Glucose-6-phosphate isomerase                                  |                                                      |
| Q9CX34 | 284  | 297  | AcD3-FQQIYSDGSEVKKR-COOH        | LNKL-↓FQQI | 1  | 0.58623                                 | 56/47  | Suppressor of G2 allele of SKP1 homolog                        |                                                      |
| P63028 | 14   | 21   | AcD3-FSDIVKIR-COOH              | HDEL-↓FSDI | 1  | 0.38553                                 | 55/46  | Translationaly-controlled tumor protein                        |                                                      |
| P10126 | 415  | 423  | AcD3-FSDYPPILGR-COOH            | CVES-↓FSDY | 1  | 0.38777                                 | 55/47  | Elongation factor 1-alpha 1                                    |                                                      |
| Q5SV42 | 294  | 308  | AcD3-FSSSKADLSGMSGSR-COOH       | VQDL-↓FSSS | 4  | 0.41055/0.48615/0.468                   | 63/46  | Leukocyte elastase inhibitor C                                 | Q9D154 (297-311)                                     |
| Q9CX56 | 200  | 213  | AcD3-FSTPKKMTDYAKR-COOH         | RILF-↓FSTP | 2  | 0.50565/0.56883                         | 50/47  | 26S proteasome non-ATPase regulatory subunit 8                 |                                                      |
| O70310 | 99   | 115  | AcD3-FSVGGQAKTMEEAASKR-COOH     | AIEL-↓FSVG | 2  | 0.53997                                 | 89/47  | Glycylpeptide N-tetradecanoyltransferase 1                     |                                                      |
| P50543 | 45   | 57   | AcD3-FTKNQKDPGLDR-COOH          | ELAA-↓FTKN | 4  | 0.53532                                 | 92/47  | Protein S100-A11                                               |                                                      |
| Q8BZW8 | 427  | 437  | AcD3-FVADSESTVR-COOH            | WSCL-↓FVAD | 1  | 0.53485                                 | 55/46  | NHL repeat-containing protein 2                                |                                                      |
| P16675 | 405  | 417  | AcD3-FVDSLNLQKMEVQR-COOH        | GDEW-↓FVDS | 3  | 0.71142                                 | 61/48  | Lysosomal protective protein                                   |                                                      |
| Q61176 | 55   | 71   | AcD3-FVDVDPNDSSFIQVKNPR-COOH    | GDLA-↓FVDV | 1  | 0.59649                                 | 58/47  | Arginase-1                                                     |                                                      |
| P07901 | 221  | 226  | AcD3-FVEKER-COOH                | PITL-↓FVEK | 1  | 0.45005                                 | 49/47  | Heat shock protein HSP 90-alpha                                | Q9WU62 (509-514)                                     |
| Q92105 | 11   | 29   | AcD3-FVKAGSDGAKIGNCPFSQR-COOH   | QVEL-↓FVKA | 5  | 0.59854/0.62531/0.64168/0.7016          | 117/47 | Chloride intracellular channel protein 1                       |                                                      |
| Q9QYB1 | 22   | 40   | AcD3-FVKAGSDGSEIGNCPFSQR-COOH   | LIEL-↓FVKA | 1  | 0.51158                                 | 84/46  | Chloride intracellular channel protein 4                       |                                                      |
| P18760 | 71   | 81   | AcD3-FVKMLPKDKCR-COOH           | PYTT-↓FVKM | 1  | 0.49364                                 | 53/48  | Cofilin-1                                                      |                                                      |
| Q9DBP5 | 7    | 22   | AcD3-FVLGGPGAGKGTQCAR-COOH      | PLVV-↓FVLG | 2  | 0.59195                                 | 105/48 | UMP-CMP kinase                                                 |                                                      |
| P62962 | 60   | 75   | AcD3-FVNLTLGGQKCSVIR-COOH       | RSSF-↓FVNG | 3  | 0.49882                                 | 119/46 | Profilin-1                                                     |                                                      |
| P27546 | 154  | 168  | AcD3-FVSSGPTNASAFTR-COOH        | ADLL-↓FVSS | 2  | 0.55269                                 | 101/47 | Microtubule-associated protein 4                               |                                                      |
| P42932 | 64   | 74   | AcD3-FVTNDAATILR-COOH           | LEKL-↓FVTN | 1  | 0.45105                                 | 53/47  | T-complex protein 1 subunit theta                              |                                                      |
| Q99KJ8 | 90   | 105  | AcD3-GEGLGVKKEPQQKYQR-COOH      | YEML-↓GEGL | 3  | 0.55907                                 | 107/47 | Dynactin subunit 2                                             |                                                      |
| P15532 | 92   | 105  | AcD3-GETNPADSKPGTIR-COOH        | RVML-↓GETN | 2  | 0.4353                                  | 77/48  | Nucleoside diphosphate kinase A                                | Q01768 (92-105)                                      |
| Q9ROP3 | 240  | 253  | AcD3-IAACTEKIPVVR-COOH          | PDNF-↓IAAC | 2  | 0.57336                                 | 70/44  | S-formylglutathione hydrolase                                  |                                                      |
| Q9D8N0 | 20   | 30   | AcD3-IAAQYSGAQVR-COOH           | FKAL-↓IAAQ | 3  | 0.34487                                 | 96/48  | Elongation factor 1-gamma                                      |                                                      |
| Q61233 | 478  | 488  | AcD3-IAGQDLNENGR-COOH           | SLVG-↓IAGQ | 2  | 0.5212                                  | 67/47  | Plastin-2                                                      |                                                      |
| P63276 | 38   | 47   | AcD3-IAIIPSKLLR-COOH            | VCEE-↓IAII | 1  | 0.3713                                  | 50/29  | 40S ribosomal protein S17                                      |                                                      |
| Q99JY9 | 35   | 49   | AcD3-IAIKESAKVGDQAQR-COOH       | IPSC-↓IAIK | 13 | 0.51213/0.51635/0.50809/0.48507/0.54155 | 113/46 | Actin-related protein 3                                        |                                                      |
| P15532 | 9    | 18   | AcD3-IAIKPDGVQR-COOH            | ERTF-↓IAIK | 3  | 0.49492/0.46143                         | 76/42  | Nucleoside diphosphate kinase A                                | Q01768 (9-18)                                        |
| P07091 | 82   | 99   | AcD3-IAIMCMNEFFEGCPDKPR-COOH    | FLSC-↓IAMM | 1  | 0.58697                                 | 48/40  | Protein S100-A4                                                |                                                      |
| P50518 | 203  | 212  | AcD3-IAQQMMPEVR-COOH            | RIDL-↓IAQQ | 1  | 0.58788                                 | 48/47  | V-type proton ATPase subunit E 1                               |                                                      |
| Q9DBG5 | 218  | 234  | AcD3-IATPPEDSDMASLQQQR-COOH     | ELAL-↓IATP | 2  | 0.56988                                 | 82/46  | Mannose-6-phosphate receptor-binding protein 1                 |                                                      |
| P62075 | 30   | 41   | AcD3-IAVANAQELLQR-COOH          | VKVQ-↓IAVA | 5  | 0.56347/0.56644/0.65197                 | 95/45  | Mitochondrial import inner membrane translocase subunit Tim13  |                                                      |
| O88844 | 296  | 314  | AcD3-ICPDGKTVEAAHGTVTR-COOH     | TSVL-↓ICPD | 2  | 0.66955                                 | 101/47 | Isocitrate dehydrogenase [NADP] cytoplasmic                    |                                                      |
| Q9CX00 | 196  | 211  | AcD3-IDVGTDDVKKGGPGR-COOH       | ETDL-↓IDVG | 2  | 0.65988                                 | 60/47  | IST1 homolog                                                   |                                                      |
| P42208 | 246  | 254  | AcD3-IEAKGKVR-COOH              | SNQL-↓IEAK | 2  | 0.62481                                 | 43/37  | Septin-2                                                       |                                                      |
| P97429 | 110  | 116  | AcD3-IEILASR-COOH               | EGCL-↓IEIL | 1  | 0.55705                                 | 63/42  | Annexin A4                                                     | O35640 (117-123), P14824 (116-122), Q9QZ10 (113-119) |
| Q8BJF9 | 172  | 186  | AcD3-IEISGKMAKAPSAAR-COOH       | DEIG-↓IEIS | 1  | 0.68167                                 | 84/46  | Charged multivesicular body protein 2b                         |                                                      |
| Q921Y0 | 208  | 216  | AcD3-IEKLGSKDR-COOH             | LOEL-↓IEKL | 1  | 0.63701                                 | 56/45  | Mps one binder kinase activator-like 1B                        |                                                      |
| Q99020 | 188  | 199  | AcD3-IELPIDPKLNKR-COOH          | EIEA-↓IELP | 1  | 0.54154                                 | 58/39  | Heterogeneous nuclear ribonucleoprotein A/B                    |                                                      |
| Q8K2Q9 | 240  | 247  | AcD3-IEQNKLKR-COOH              | QEMF-↓IEQN | 1  | 0.5428                                  | 59/43  | Shootin-1                                                      |                                                      |
| Q9WVA2 | 23   | 31   | AcD3-IEVETQQR-COOH              | LQHF-↓IEVE | 1  | 0.48897                                 | 47/46  | Mitochondrial import inner membrane translocase subunit Tim8 A |                                                      |
| P63017 | 51   | 72   | AcD3-IGDAAKNQVAMNPTNTVDAKR-COOH | TERL-↓IGDA | 4  | 0.45507/0.48736/0.46913                 | 63/47  | Heat shock cognate 71 kDa protein                              |                                                      |

|        |     |     |                                |            |    |                                         |        |                                                   |                                                                                                                                                                                |
|--------|-----|-----|--------------------------------|------------|----|-----------------------------------------|--------|---------------------------------------------------|--------------------------------------------------------------------------------------------------------------------------------------------------------------------------------|
| Q9DCD0 | 281 | 288 | AcD3-IGEAVFAR-COOH             | PVTL-↓IGEA | 1  | 0.43845                                 | 68/46  | 6-phosphogluconate dehydrogenase, decarboxylating |                                                                                                                                                                                |
| P17751 | 128 | 135 | AcD3-IGEKLEDER-COOH            | VIAC-↓IGEK | 2  | 0.53211                                 | 52/47  | Triosephosphate isomerase                         |                                                                                                                                                                                |
| P97352 | 80  | 88  | AcD3-IGELAKEVR-COOH            | YWRL-↓IGEL | 1  | 0.4288                                  | 49/44  | Protein S100-A13                                  |                                                                                                                                                                                |
| Q99L53 | 194 | 202 | AcD3-IGFGNVIR-COOH             | ADAF-↓IGFG | 1  | 0.677                                   | 48/46  | Phosphoserine phosphatase                         |                                                                                                                                                                                |
| P63242 | 92  | 109 | AcD3-IGIQDGYLSLLQDSGEVR-COOH   | DFQL-↓IGIQ | 2  | 0.46734/0.5113                          | 96/47  | Eukaryotic translation initiation factor 5A-1     |                                                                                                                                                                                |
| P80316 | 511 | 525 | AcD3-IGKKQISLATQMVR-COOH       | IETL-↓IGKK | 2  | 0.45026                                 | 55/43  | T-complex protein 1 subunit epsilon               |                                                                                                                                                                                |
| Q8CDN6 | 266 | 280 | AcD3-IGTPVQATNMNDFKR-COOH      | YFTF-↓IGTP | 2  | 0.57939                                 | 55/47  | Thioredoxin-like protein 1                        |                                                                                                                                                                                |
| Q61171 | 131 | 139 | AcD3-IDAKGVLR-COOH             | RGLF-↓IIDA | 1  | 0.5435                                  | 59/39  | Peroxiredoxin-2                                   |                                                                                                                                                                                |
| P35700 | 132 | 140 | AcD3-IIDDKGILR-COOH            | RGLF-↓IIDD | 1  | 0.46457                                 | 68/42  | Peroxiredoxin-1                                   |                                                                                                                                                                                |
| P62889 | 96  | 106 | AcD3-IIDPQDSIIR-COOH           | CTLA-↓IIDP | 1  | 0.40892                                 | 70/47  | 60S ribosomal protein L30                         |                                                                                                                                                                                |
| Q9DCD0 | 97  | 107 | AcD3-IIIDGNSSEYR-COOH          | DTGD-↓IID  | 1  | 0.57044                                 | 62/47  | 6-phosphogluconate dehydrogenase, decarboxylating |                                                                                                                                                                                |
| P57759 | 171 | 179 | AcD3-IKASSIAR-COOH             | AGEF-↓IKAS | 3  | 0.50832/0.46111                         | 69/44  | Endoplasmic reticulum protein ERp29               |                                                                                                                                                                                |
| Q9JK48 | 119 | 127 | AcD3-IKCGETQKR-COOH            | GNAL-↓IKCG | 1  | 0.74489                                 | 48/47  | Endophilin-B1                                     |                                                                                                                                                                                |
| Q922D8 | 156 | 166 | AcD3-IKEAGVQIAGR-COOH          | CLEL-↓IKEA | 1  | 0.43252                                 | 47/43  | C-1-tetrahydrofolate synthase, cytoplasmic        |                                                                                                                                                                                |
| Q99JY9 | 37  | 49  | AcD3-IKESAKVGDQAQR-COOH        | SCIA-↓IKES | 2  | 0.48536                                 | 110/47 | Actin-related protein 3                           |                                                                                                                                                                                |
| P62748 | 170 | 181 | AcD3-IKGAKSDPSIVR-COOH         | LEEF-↓IKGA | 2  | 0.59466                                 | 63/43  | Hippocalcin-like protein 1                        |                                                                                                                                                                                |
| P97429 | 299 | 308 | AcD3-IKGDTSGDYR-COOH           | LYSF-↓IKGD | 2  | 0.65919                                 | 58/47  | Annexin A4                                        |                                                                                                                                                                                |
| Q9QWR8 | 303 | 315 | AcD3-IKINODPLGIQGR-COOH        | NPLM-↓IKIN | 1  | 0.61565                                 | 66/44  | Alpha-N-acetylgalactosaminidase                   |                                                                                                                                                                                |
| P52480 | 65  | 73  | AcD3-IKSGMNVAR-COOH            | LKEM-↓IKSG | 2  | 0.50723                                 | 60/47  | Pyruvate kinase isozymes M1/M2                    |                                                                                                                                                                                |
| Q8K3X4 | 762 | 773 | AcD3-ILAGDVKVKER-COOH          | EIAT-↓ILAG | 2  | 0.7111                                  | 72/39  | Enhanced at puberty protein 1                     |                                                                                                                                                                                |
| P22752 | 63  | 72  | AcD3-ILELAGNAR-COOH            | LTAE-↓ILEL | 12 | 0.45925/0.47487                         | 97/46  | Histone H2A type 1                                | P27661 (63-72), Q64522 (63-72), Q64523 (63-72), Q6GS57 (63-72), Q8BFU2 (63-72), Q8CCK0 (60-69), Q8CGP5 (63-72), Q8CGP6 (63-72), Q8CGP7 (63-72), Q8R1M2 (63-72), Q9OZQ8 (60-69) |
| P80316 | 527 | 534 | AcD3-ILKIDDIR-COOH             | MVRM-↓ILKI | 3  | 0.4706/0.46552/0.46936                  | 59/40  | T-complex protein 1 subunit epsilon               |                                                                                                                                                                                |
| P97461 | 178 | 198 | AcD3-INAAKGSNSYAIAKKDELER-COOH | ADEL-↓INAA | 1  | 0.37804                                 | 65/45  | 40S ribosomal protein S5                          |                                                                                                                                                                                |
| Q9C244 | 289 | 301 | AcD3-INEAEPNTIQR-COOH          | SSIL-↓INEA | 1  | 0.50447                                 | 52/47  | NSFL1 cofactor p47                                |                                                                                                                                                                                |
| Q61233 | 130 | 141 | AcD3-INKALENDPDCR-COOH         | FVNW-↓INKA | 1  | 0.4727                                  | 66/47  | Plastin-2                                         | Q99K51 (133-144)                                                                                                                                                               |
| Q3U0V1 | 271 | 285 | AcD3-IQDGSQNTNVDKPLR-COOH      | KMIL-↓IQDG | 2  | 0.58864                                 | 67/47  | Far upstream element-binding protein 2            |                                                                                                                                                                                |
| P97372 | 142 | 149 | AcD3-IQEKVLER-COOH             | FGVA-↓IQEK | 1  | 0.53796                                 | 48/43  | Proteasome activator complex subunit 2            |                                                                                                                                                                                |
| O70456 | 7   | 18  | AcD3-IQKAKLAEQAER-COOH         | RASL-↓IQKA | 4  | 0.51852/0.52414                         | 88/45  | 14-3-3 protein sigma                              | P68254 (7-18)                                                                                                                                                                  |
| Q9CY64 | 258 | 276 | AcD3-IQKLLGGVSAEDLAAEKKR-COOH  | QDIF-↓IQKL | 2  | 0.57768/0.56026                         | 86/41  | Biliverdin reductase A                            |                                                                                                                                                                                |
| Q60864 | 421 | 433 | AcD3-IQLEPTFKGYR-COOH          | CEEC-↓IQLE | 2  | 0.44346                                 | 71/45  | Stress-induced-phosphoprotein 1                   |                                                                                                                                                                                |
| Q9WU78 | 25  | 41  | AcD3-IQQTYPSSGEEQAQYCR-COOH    | LVKF-↓IQQT | 2  | 0.77209                                 | 59/44  | Programmed cell death 6-interacting protein       |                                                                                                                                                                                |
| P54726 | 314 | 326 | AcD3-IQVTPQEKAEIR-COOH         | QMNY-↓IQVT | 2  | 0.57944                                 | 53/47  | UV excision repair protein RAD23 homolog A        | P54728 (367-379)                                                                                                                                                               |
| P17182 | 313 | 327 | AcD3-IQVVGDDTLVTNPKR-COOH      | ASAG-↓IQVV | 2  | 0.51294                                 | 73/45  | Alpha-enolase                                     |                                                                                                                                                                                |
| P63017 | 440 | 447 | AcD3-IQVYEGER-COOH             | PGVL-↓IQVY | 1  | 0.52354                                 | 53/47  | Heat shock cognate 71 kDa protein                 | P16627 (442-449), P17879 (440-447), Q61696 (440-447)                                                                                                                           |
| Q61753 | 11  | 20  | AcD3-ISDSLDPCCR-COOH           | RKVL-↓ISDS | 2  | 0.52876                                 | 66/42  | D-3-phosphoglycerate dehydrogenase                |                                                                                                                                                                                |
| O88456 | 70  | 85  | AcD3-ISEAAQYNEPPPPR-COOH       | VISA-↓ISEA | 2  | 0.44888                                 | 86/47  | Calpain small subunit 1                           |                                                                                                                                                                                |
| Q91XC8 | 59  | 65  | AcD3-ISGVIAR-COOH              | PTVF-↓ISGV | 1  | 0.60133                                 | 61/43  | Death-associated protein 1                        |                                                                                                                                                                                |
| P58252 | 398 | 409 | AcD3-ISKMVPTSDKGR-COOH         | LMMY-↓ISKM | 1  | 0.46291                                 | 52/47  | Elongation factor 2                               |                                                                                                                                                                                |
| P60710 | 357 | 372 | AcD3-ISKQYDESGPSIVHR-COOH      | QQMW-↓ISKQ | 1  | 0.59417                                 | 75/48  | Actin, cytoplasmic 1                              | P63260 (357-372)                                                                                                                                                               |
| Q9DCL9 | 411 | 421 | AcD3-ISLKQADKKVR-COOH          | LNTW-↓ISLK | 1  | 0.58778                                 | 43/38  | Multifunctional protein ADE2                      |                                                                                                                                                                                |
| Q9D1E6 | 15  | 23  | AcD3-ISSSLNSFR-COOH            | VMVF-↓ISSS | 1  | 0.61058                                 | 52/48  | Tubulin folding cofactor B                        |                                                                                                                                                                                |
| P05213 | 93  | 105 | AcD3-ITGKEDAAANNYAR-COOH       | PEQL-↓ITGK | 1  | 0.48519                                 | 52/47  | Tubulin alpha-1B chain                            | P05214 (93-105), P68368 (93-105), P68369 (93-105), P68373 (93-105), Q9JJ22 (93-105)                                                                                            |
| P16110 | 146 | 158 | AcD3-ITIMGTVPKNANR-COOH        | PRML-↓ITIM | 3  | 0.53972                                 | 58/46  | Galectin-3                                        |                                                                                                                                                                                |
| P15864 | 44  | 54  | AcD3-ITKAVAASKER-COOH          | VSEL-↓ITKA | 2  | 0.52728                                 | 63/42  | Histone H1.2                                      | P43274 (44-54), P43277 (45-55)                                                                                                                                                 |
| P43276 | 44  | 54  | AcD3-ITKAVAASKER-COOH          | VSEL-↓ITKA | 2  | 0.48326                                 | 73/44  | Histone H1.5                                      |                                                                                                                                                                                |
| P14152 | 224 | 230 | AcD3-ITTVQQR-COOH              | KGEF-↓ITTV | 1  | 0.50527                                 | 51/45  | Malate dehydrogenase, cytoplasmic                 |                                                                                                                                                                                |
| Q9QV59 | 155 | 163 | AcD3-ITVEDAQNR-COOH            | LHVL-↓ITVE | 2  | 0.64035                                 | 59/47  | Protein quaking                                   |                                                                                                                                                                                |
| P10126 | 115 | 134 | AcD3-IVAAGVGEFEAGISKNGQTR-COOH | CAVL-↓IVAA | 2  | 0.4723                                  | 108/47 | Elongation factor 1-alpha 1                       | P62631 (115-134)                                                                                                                                                               |
| P05064 | 186 | 201 | AcD3-IVEPELIPDGDHLKR-COOH      | GIVP-↓IVEP | 2  | 0.50822                                 | 82/47  | Fructose-bisphosphate aldolase A                  | P05063 (186-201)                                                                                                                                                               |
| P14869 | 29  | 44  | AcD3-IVGADNVGSKMQQQR-COOH      | PKCF-↓IVGA | 2  | 0.4271                                  | 103/47 | 60S acidic ribosomal protein P0                   |                                                                                                                                                                                |
| P10126 | 149 | 166 | AcD3-IVGVNKMDSPEPPYSQKR-COOH   | VKQL-↓IVGV | 8  | 0.42375/0.38057/0.42294/0.39477/0.44158 | 78/47  | Elongation factor 1-alpha 1                       |                                                                                                                                                                                |
| P34884 | 5   | 12  | AcD3-IVNTNVR-COOH              | MPMF-↓IVNT | 3  | 0.65642/0.71679                         | 67/45  | Macrophage migration inhibitory factor            |                                                                                                                                                                                |
| P43275 | 46  | 56  | AcD3-IVQAVSSKER-COOH           | VSEL-↓IVQA | 2  | 0.55892                                 | 66/47  | Histone H1.1                                      |                                                                                                                                                                                |
| P32921 | 108 | 123 | AcD3-IVQFGSSKIDKELINR-COOH     | YDKL-↓IVQF | 1  | 0.6424                                  | 60/44  | Tryptophanyl-tRNA synthetase, cytoplasmic         |                                                                                                                                                                                |
| P80313 | 513 | 524 | AcD3-IVSVDETIKNPR-COOH         | AACL-↓IVSV | 1  | 0.50334                                 | 49/45  | T-complex protein 1 subunit eta                   |                                                                                                                                                                                |
| Q62426 | 39  | 45  | AcD3-KAISFKR-COOH              | FDVF-↓KAIS | 1  | 0.59383                                 | 46/41  | Cystatin-B                                        |                                                                                                                                                                                |

|        |      |      |                                 |           |   |                                 |        |                                                              |                                        |
|--------|------|------|---------------------------------|-----------|---|---------------------------------|--------|--------------------------------------------------------------|----------------------------------------|
| P68254 | 27   | 41   | AcD3-KAVTEQGAELSNEER-COOH       | ATCM↓KAVT | 3 | 0.49957/0.53309                 | 113/47 | 14-3-3 protein theta                                         |                                        |
| O89053 | 393  | 402  | AcD3-KDGYVPPKSR-COOH            | LISL↓KDG  | 1 | 0.44522                         | 55/46  | Coronin-1A                                                   |                                        |
| Q99020 | 124  | 139  | AcD3-KDSSSEVLELDQKEHR-COOH      | FILF↓KDSS | 2 | 0.68434                         | 108/47 | Heterogeneous nuclear ribonucleoprotein A/B                  |                                        |
| Q61599 | 101  | 107  | AcD3-KEGIEYR-COOH               | TFVL↓KEGI | 1 | 0.49717                         | 59/48  | Rho GDP-dissociation inhibitor 2                             |                                        |
| Q9JLQ0 | 221  | 228  | AcD3-KEGSVKLR-COOH              | GDIF↓KEGS | 1 | 0.70702                         | 46/42  | CD2-associated protein                                       |                                        |
| Q88H43 | 161  | 176  | AcD3-KEKMLQDTKDIMKEKR-COOH      | FDLW↓KEKM | 1 | 0.55322                         | 49/46  | Wiskott-Aldrich syndrome protein family member 2             |                                        |
| P52480 | 62   | 73   | AcD3-KEMIKSGMNVAR-COOH          | VEML↓KEMI | 4 | 0.43824/0.47417/0.5242          | 98/47  | Pyruvate kinase isozymes M1/M2                               |                                        |
| Q61176 | 41   | 48   | AcD3-KETEYDVR-COOH              | LEKL↓KETE | 1 | 0.67268                         | 49/47  | Arginase-1                                                   |                                        |
| P27659 | 334  | 343  | AcD3-KGCVGVTKKR-COOH            | FIML↓KGCV | 2 | 0.549                           | 58/42  | 60S ribosomal protein L3                                     |                                        |
| P80315 | 531  | 539  | AcD3-KIDDVNVNTR-COOH            | RSIL↓KIDD | 1 | 0.44962                         | 56/46  | T-complex protein 1 subunit delta                            |                                        |
| P10126 | 255  | 266  | AcD3-KIGGIGTVPVGR-COOH          | QDVY↓KIGG | 4 | 0.45272/0.48907                 | 65/42  | Elongation factor 1-alpha 1                                  | P62631 (255-266)                       |
| P70349 | 82   | 92   | AcD3-KKCAADLGLKR-COOH           | MIWG↓KKCA | 1 | 0.73536                         | 57/43  | Histidine triad nucleotide-binding protein 1                 |                                        |
| P21981 | 671  | 679  | AcD3-KLKSVKGYR-COOH             | FQCD↓KLKS | 2 | 0.47419                         | 69/38  | Protein-glutamine gamma-glutamyltransferase 2                |                                        |
| Q9CZ8  | 111  | 121  | AcD3-KMVEKQDQDGR-COOH           | LEGL↓KMVE | 5 | 0.43715/0.45917                 | 86/47  | 40S ribosomal protein S19                                    |                                        |
| Q9ET01 | 804  | 816  | AcD3-KNIAASGKFSDDR-COOH         | TMVL↓KNIA | 2 | 0.5401                          | 83/47  | Glycogen phosphorylase, liver form                           |                                        |
| Q9D898 | 89   | 102  | AcD3-KSSEIEQAVQSLDR-COOH        | LTNF↓KSSE | 2 | 0.60395                         | 107/48 | Actin-related protein 2/3 complex subunit 5-like protein     |                                        |
| P63101 | 27   | 41   | AcD3-KSVTEQGAELSNEER-COOH       | AACM↓KSVT | 2 | 0.51119                         | 104/47 | 14-3-3 protein zeta/delta                                    |                                        |
| P62806 | 60   | 68   | AcD3-KVFLFNVR-COOH              | RGVL↓KVFL | 2 | 0.43486                         | 78/43  | Histone H4                                                   |                                        |
| P63038 | 405  | 420  | AcD3-KVGGTSDVEVNEKKDR-COOH      | VAVL↓KVGG | 2 | 0.35288                         | 109/47 | 60 kDa heat shock protein, mitochondrial                     |                                        |
| O55131 | 363  | 380  | AcD3-KVKEKQKLDKSEAEQLR-COOH     | VFEM↓KVEK | 1 | 0.59289                         | 54/40  | Septin-7                                                     |                                        |
| O70622 | 326  | 333  | AcD3-KVLAQAVHR-COOH             | RVVR↓KVLQ | 1 | 0.40574                         | 31/29  | Reticulon-2                                                  |                                        |
| Q88FW7 | 100  | 114  | AcD3-KVQGNPQGGKTLLEER-COOH      | EGAF↓KVQ  | 1 | 0.79998                         | 76/47  | Lipoma-preferred partner homolog                             |                                        |
| P26638 | 99   | 107  | AcD3-KVSQIKKVR-COOH             | LAAL↓KVSQ | 1 | 0.47595                         | 60/33  | Seryl-tRNA synthetase, cytoplasmic                           |                                        |
| P97429 | 237  | 244  | AcD3-LAIVKCMR-COOH              | EDAL↓LAIV | 2 | 0.54081                         | 63/46  | Annexin A4                                                   |                                        |
| P10107 | 181  | 188  | AcD3-LALAKGDR-COOH              | RKAL↓LALA | 5 | 0.52255/0.53716                 | 76/43  | Annexin A1                                                   |                                        |
| Q99U8  | 267  | 279  | AcD3-LALSQSEAEKER-COOH          | LQLA↓LALS | 1 | 0.70166                         | 72/48  | Hepatocyte growth factor-regulated tyrosine kinase substrate |                                        |
| P52480 | 308  | 316  | AcD3-LAQKMMIMGR-COOH            | EKVF↓LAQK | 5 | 0.497/0.51098/0.51258           | 54/47  | Pyruvate kinase isozymes M1/M2                               | P53657 (351-359)                       |
| P06745 | 430  | 446  | AcD3-LAQTEALMGKLPPEAR-COOH      | LANF↓LAQT | 5 | 0.4894/0.4953/0.48738           | 55/47  | Glucose-6-phosphate isomerase                                |                                        |
| P53026 | 111  | 122  | AcD3-LASESLIQIPR-COOH           | YDAF↓LASE | 1 | 0.40779                         | 64/41  | 60S ribosomal protein L10a                                   |                                        |
| P17182 | 116  | 132  | AcD3-LAVCKAGAVEKGVPLYR-COOH     | LGVV↓LAVC | 1 | 0.48623                         | 49/44  | Alpha-enolase                                                |                                        |
| P59999 | 20   | 32   | AcD3-LCLENFSSQVVER-COOH         | LQAA↓LCLE | 1 | 0.49746                         | 92/47  | Actin-related protein 2/3 complex subunit 4                  |                                        |
| P17182 | 388  | 400  | AcD3-LCTGQIKTGAPCR-COOH         | LVVG↓LCTG | 2 | 0.51321                         | 76/47  | Alpha-enolase                                                | P17183 (388-400), P21550 (388-400)     |
| Q62523 | 156  | 168  | AcD3-LDDMTKNDPFAKR-COOH         | LSSL↓LDDM | 2 | 0.60659/0.46524                 | 68/47  | Zyxin                                                        |                                        |
| Q7TQI3 | 105  | 113  | AcD3-LDDSEKLEQR-COOH            | LEAL↓LDDS | 1 | 0.5746                          | 48/47  | Ubiquitin thioesterase OTUB1                                 |                                        |
| Q3U125 | 65   | 74   | AcD3-LDLVAEAQSR-COOH            | TELL↓LDLV | 1 | 0.54899                         | 52/47  | G-protein-signaling modulator 3                              |                                        |
| Q62084 | 101  | 109  | AcD3-LDMESDTR-COOH              | VDEL↓LDME | 1 | 0.49063                         | 41/40  | Protein phosphatase 1 regulatory subunit 14B                 |                                        |
| O08808 | 1186 | 1196 | AcD3-LEALQSGAAFR-COOH           | MDSL↓LEAL | 2 | 0.60511                         | 56/47  | Protein diaphanous homolog 1                                 | O70566 (1057-1067), Q92207 (1045-1055) |
| Q9JLJ8 | 27   | 46   | AcD3-LEANKGFEEKDIAANEENR-COOH   | VLFC↓LEAN | 5 | 0.66544/0.65144/0.63213/0.66017 | 119/47 | SH3 domain-binding glutamic acid-rich-like protein           |                                        |
| Q9CQE5 | 46   | 54   | AcD3-LEDPGQVR-COOH              | LENL↓LEDP | 1 | 0.61859                         | 48/47  | Regulator of G-protein signaling 10                          |                                        |
| Q9JH6  | 229  | 243  | AcD3-LEEPVVLALAEKHGR-COOH       | EPVL↓LEEP | 1 | 0.52538                         | 90/44  | Alcohol dehydrogenase [NADP+]                                |                                        |
| Q99K10 | 48   | 56   | AcD3-LEKNINIVR-COOH             | RYDL↓LEKN | 1 | 0.51816                         | 66/41  | Aconitate hydratase, mitochondrial                           |                                        |
| P60335 | 167  | 177  | AcD3-LETLSQSPQGR-COOH           | CLVM↓LETL | 2 | 0.56063                         | 64/47  | Poly(rC)-binding protein 1                                   |                                        |
| Q61598 | 386  | 402  | AcD3-LFVPKDLGTSQIFISR-COOH      | SISD↓LFVP | 2 | 0.48528                         | 70/46  | Rab GDP dissociation inhibitor beta                          |                                        |
| Q923D2 | 75   | 92   | AcD3-LGTGNDLSPPTVMSEGR-COOH     | VIVL↓LGTG | 5 | 0.48144/0.55417                 | 65/46  | Flavin reductase                                             |                                        |
| P80316 | 17   | 24   | AcD3-LIHKDQDR-COOH              | GRPF↓LIHK | 3 | 0.47923                         | 61/44  | T-complex protein 1 subunit epsilon                          |                                        |
| P52480 | 61   | 73   | AcD3-LKEMIKSGMNVAR-COOH         | SVEM↓LKEM | 3 | 0.50595/0.48029                 | 96/47  | Pyruvate kinase isozymes M1/M2                               |                                        |
| P26041 | 59   | 71   | AcD3-LKLNKVTYQDVR-COOH          | FSTW↓LKLN | 2 | 0.54613                         | 104/37 | Moesin                                                       |                                        |
| Q61233 | 569  | 591  | AcD3-LKTENLDEEKLNNAKYAIMAR-COOH | NYDL↓LKTE | 5 | 0.46224/0.48958/0.49297         | 90/47  | Plastin-2                                                    |                                        |
| P10107 | 112  | 124  | AcD3-LKTPAQFDAELR-COOH          | VLAM↓LKTP | 4 | 0.51828                         | 88/48  | Annexin A1                                                   |                                        |
| P26039 | 2129 | 2144 | AcD3-LKTVKAVEDEATKGR-COOH       | VTSL↓LKTV | 2 | 0.59975                         | 106/44 | Talin-1                                                      |                                        |
| P84099 | 125  | 136  | AcD3-LKVKGNVFNKR-COOH           | HSVL↓LKVK | 2 | 0.4975                          | 84/34  | 60S ribosomal protein L19                                    |                                        |
| Q62422 | 159  | 165  | AcD3-LLAKGAR-COOH               | IVOL↓LLAK | 1 | 0.57887                         | 65/39  | Osteoclast-stimulating factor 1                              |                                        |
| Q3U125 | 64   | 74   | AcD3-LLDLVAEAQSR-COOH           | QTEL↓LLDL | 1 | 0.77158                         | 76/46  | G-protein-signaling modulator 3                              |                                        |
| P08249 | 43   | 52   | AcD3-LLKNSPLVSR-COOH            | PLSL↓LLKN | 1 | 0.44049                         | 51/42  | Malate dehydrogenase, mitochondrial                          |                                        |
| P50518 | 94   | 101  | AcD3-LLNEAKQR-COOH              | LITD↓LLNE | 2 | 0.5949                          | 54/44  | V-type proton ATPase subunit E 1                             |                                        |
| P47753 | 39   | 47   | AcD3-LLNNDNLLR-COOH             | DVRL↓LLNN | 1 | 0.49389                         | 58/46  | F-actin-capping protein subunit alpha-1                      | P47754 (39-47)                         |
| P47911 | 181  | 191  | AcD3-LLVTGPIVNR-COOH            | DSGL↓LLVT | 3 | 0.36467/0.41005                 | 67/37  | 60S ribosomal protein L6                                     |                                        |
| P70429 | 109  | 123  | AcD3-LNIMNSQEGGSPQR-COOH        | MLFA↓LNIM | 1 | 0.5873                          | 75/47  | Ena/VASP-like protein                                        |                                        |
| P63242 | 102  | 109  | AcD3-LQDSSEVR-COOH              | YLSL↓LQDS | 3 | 0.51365                         | 62/47  | Eukaryotic translation initiation factor 5A-1                |                                        |
| P97372 | 47   | 61   | AcD3-LQEDSLNVDLSLR-COOH         | LSQL↓LQED | 2 | 0.51161                         | 61/47  | Proteasome activator complex subunit 2                       |                                        |
| O09159 | 952  | 965  | AcD3-LQETTLAANPLSR-COOH         | TINY↓LQET | 4 | 0.61084/0.62084                 | 105/47 | Lysosomal alpha-mannosidase                                  |                                        |

|        |      |      |                                  |           |    |                                                 |        |                                                                            |                                                                                          |
|--------|------|------|----------------------------------|-----------|----|-------------------------------------------------|--------|----------------------------------------------------------------------------|------------------------------------------------------------------------------------------|
| P24369 | 50   | 59   | AcD3-LQIGDESIVGR-COOH            | VYFD↓LQIG | 3  | 0.48029/0.42492                                 | 70/47  | Peptidyl-prolyl cis-trans isomerase B                                      |                                                                                          |
| Q8C788 | 853  | 860  | AcD3-LQLDITAGR-COOH              | TLLR↓LQLD | 1  | 0.53753                                         | 38/32  | Zinc finger SWIM domain-containing protein 4                               |                                                                                          |
| Q9ERD8 | 10   | 26   | AcD3-LQLPKVEAQTPEELPR-COOH       | LYDL↓LQLP | 3  | 0.53744/0.55749                                 | 58/47  | Gamma-parvin                                                               |                                                                                          |
| P97371 | 135  | 141  | AcD3-LQLQIPR-COOH                | VTTW↓LQLQ | 1  | 0.55163                                         | 49/41  | Proteasome activator complex subunit 1                                     |                                                                                          |
| Q9Z0E6 | 474  | 491  | AcD3-LQTDQSLTEAAAEVEEER-COOH     | VETL↓LQTD | 1  | 0.56186                                         | 99/47  | Interferon-induced guanylate-binding protein 2                             |                                                                                          |
| P07091 | 79   | 99   | AcD3-LSCIAMMNEFFEGCPDKEPR-COOH   | YCVF↓LSCI | 1  | 0.4928                                          | 60/39  | Protein S100-A4                                                            |                                                                                          |
| P63242 | 99   | 109  | AcD3-LSLQD5GEVIR-COOH            | QDGY↓LSSL | 2  | 0.4779                                          | 102/47 | Eukaryotic translation initiation factor 5A-1                              |                                                                                          |
| P47757 | 40   | 51   | AcD3-LSSVDQPLKIAR-COOH           | CEDL↓LSSV | 2  | 0.53649                                         | 65/43  | F-actin-capping protein subunit beta                                       |                                                                                          |
| Q921F2 | 28   | 42   | AcD3-LSTVTAQFPAGCLR-COOH         | GTVL↓LSTV | 1  | 0.45412                                         | 54/48  | TAR DNA-binding protein 43                                                 |                                                                                          |
| P61982 | 45   | 56   | AcD3-LSVAYKNVVGAR-COOH           | ERNL↓LSVA | 1  | 0.48939                                         | 57/45  | 14-3-3 protein gamma                                                       | P63101 (44-55), P68510 (45-56), Q9CQV8 (46-57)                                           |
| Q9ESP1 | 171  | 183  | AcD3-LSVTGEQYGNPIR-COOH          | TSVF↓LSVT | 1  | 0.54038                                         | 66/48  | Stromal cell-derived factor 2-like protein 1                               |                                                                                          |
| P63260 | 105  | 116  | AcD3-LTEALPNKANR-COOH            | HPVL↓LTEA | 6  | 0.49366/0.49311                                 | 66/45  | Actin, cytoplasmic 2                                                       | P60710 (105-116), P62737 (107-118), P63268 (106-117), P68033 (107-118), P68134 (107-118) |
| Q60854 | 78   | 91   | AcD3-LTEVNGTKTYLLR-COOH          | FQSL↓LTEV | 3  | 0.62765/0.65626                                 | 82/46  | Serpin B6                                                                  |                                                                                          |
| P14069 | 42   | 55   | AcD3-LTIGSKLDIAEIR-COOH          | IQKE↓LTIG | 2  | 0.45453                                         | 68/45  | Protein S100-A6                                                            |                                                                                          |
| P62962 | 64   | 75   | AcD3-LTLGGQKCSVIR-COOH           | FVNG↓LTLG | 6  | 0.53501/0.51182/0.46271                         | 88/45  | Profilin-1                                                                 |                                                                                          |
| Q62446 | 180  | 189  | AcD3-LTMSKGEKAR-COOH             | DEAL↓LTMS | 2  | 0.49565                                         | 60/47  | FK506-binding protein 3                                                    |                                                                                          |
| Q99J99 | 217  | 231  | AcD3-LTNEGLEKSPKIR-COOH          | FTEF↓LTNE | 2  | 0.50638                                         | 86/46  | 3-mercaptopyruvate sulfurtransferase                                       |                                                                                          |
| Q61599 | 155  | 168  | AcD3-LTPVEEAPKGMALAR-COOH        | EYEF↓LTPV | 4  | 0.48646                                         | 62/47  | Rho GDP-dissociation inhibitor 2                                           |                                                                                          |
| Q99KJ8 | 372  | 380  | AcD3-LTQVQTTMR-COOH              | NTAL↓LTQV | 1  | 0.51448                                         | 55/47  | Dynactin subunit 2                                                         |                                                                                          |
| O54824 | 938  | 956  | AcD3-LTTQSEDTQGPGLKMPQSQR-COOH   | LRLR↓LTTQ | 3  | 0.52016/0.52915/0.51197                         | 65/47  | Pro-interleukin-16                                                         |                                                                                          |
| P62315 | 80   | 92   | AcD3-LVDPEPKVSKKR-COOH           | LDTL↓LVDV | 2  | 0.43152                                         | 63/35  | Small nuclear ribonucleoprotein Sm D1                                      |                                                                                          |
| P62082 | 133  | 143  | AcD3-LVFPSEIVGKR-COOH            | ILED↓LVFP | 3  | 0.38913/0.37078                                 | 78/44  | 40S ribosomal protein S7                                                   |                                                                                          |
| P63260 | 8    | 28   | AcD3-LVIDNGSGMCKAGFAGDDAPR-COOH  | EIAA↓LVID | 9  | 0.48043/0.46464/0.49129/0.47642/0.52865/0.50428 | 141/45 | Actin, cytoplasmic 2                                                       |                                                                                          |
| P47791 | 46   | 59   | AcD3-LVIGGGSGGLASAR-COOH         | SFDY↓LVIG | 2  | 0.4772                                          | 89/45  | Glutathione reductase, mitochondrial                                       |                                                                                          |
| P18654 | 84   | 94   | AcD3-LVKKISGDAR-COOH             | GKVF↓LVKK | 2  | 0.60479                                         | 65/42  | Ribosomal protein S6 kinase alpha-3                                        |                                                                                          |
| O54962 | 50   | 60   | AcD3-LVLKDEDLFR-COOH             | LGQF↓LVLK | 1  | 0.51386                                         | 48/43  | Barrier-to-autointegration factor                                          |                                                                                          |
| O89053 | 60   | 69   | AcD3-LVPLGLKTR-COOH              | GGAF↓LVPL | 2  | 0.40984                                         | 54/36  | Coronin-1A                                                                 |                                                                                          |
| P70670 | 2155 | 2164 | AcD3-LVMSQANVSR-COOH             | KDIE↓LVMS | 1  | 0.55737                                         | 51/48  | Nascent polypeptide-associated complex subunit alpha, muscle-specific form | Q60817 (183-192)                                                                         |
| Q6P9Q4 | 1144 | 1154 | AcD3-LVQSVTKSGPR-COOH            | IMDL↓LVQS | 1  | 0.55558                                         | 56/44  | FH1/FH2 domain-containing protein 1                                        |                                                                                          |
| P17225 | 338  | 346  | AcD3-LVSNLNPER-COOH              | NSVL↓LVSN | 1  | 0.44062                                         | 50/46  | Poly(pyrimidine tract-binding protein 1                                    |                                                                                          |
| Q9D7M1 | 37   | 50   | AcD3-LVTEGFKEAEKFR-COOH          | IMNY↓LVTE | 2  | 0.60089                                         | 88/47  | Protein C20orf11 homolog                                                   |                                                                                          |
| P47911 | 182  | 191  | AcD3-LVTGPLYVIR-COOH             | SGLL↓LVTG | 3  | 0.41816/0.43596                                 | 59/41  | 60S ribosomal protein L6                                                   |                                                                                          |
| P60710 | 8    | 28   | AcD3-LVVDNGSGMCKAGFAGDDAPR-COOH  | DIAA↓LVVD | 12 | 0.49463/0.50327                                 | 121/45 | Actin, cytoplasmic 1                                                       |                                                                                          |
| P17182 | 384  | 400  | AcD3-LVVLCTGQIKTGAPCR-COOH       | FIAD↓LVVG | 2  | 0.49631                                         | 79/47  | Alpha-enolase                                                              | P17183 (384-400), P21550 (384-400)                                                       |
| P70296 | 123  | 146  | AcD3-LVYEQELSCDEPILNSKGDNR-COOH  | RYVW↓LVYE | 3  | 0.47396/0.50984/0.61887                         | 92/46  | Phosphatidylethanolamine-binding protein 1                                 |                                                                                          |
| P17182 | 24   | 32   | AcD3-LYTAQKGLFR-COOH             | VEVD↓LYTA | 7  | 0.52099/0.55103                                 | 81/45  | Alpha-enolase                                                              | P17183 (24-32)                                                                           |
| P05063 | 251  | 258  | AcD3-LMATVTALR-COOH              | EIIA↓MATV | 1  | 0.59562                                         | 55/47  | Fructose-bisphosphate aldolase C                                           | P05064 (251-258)                                                                         |
| P39749 | 308  | 318  | AcD3-MCGEKQFSEER-COOH            | LVKF↓MCGE | 1  | 0.47084                                         | 49/43  | Flap endonuclease 1                                                        |                                                                                          |
| P07091 | 85   | 99   | AcD3-MCNEFFEGCPDKEPR-COOH        | CIAM↓MCNE | 1  | 0.49695                                         | 41/39  | Protein S100-A4                                                            |                                                                                          |
| P17742 | 61   | 69   | AcD3-MCQGGDFTR-COOH              | IPGF↓MCQG | 2  | 0.46699                                         | 58/41  | Peptidyl-prolyl cis-trans isomerase A                                      |                                                                                          |
| P17182 | 244  | 253  | AcD3-MDVAASEFYR-COOH             | VVIG↓MDVA | 9  | 0.50327/0.51398/0.45284/0.41185                 | 93/45  | Alpha-enolase                                                              | P17183 (244-253), P21550 (244-253)                                                       |
| P26039 | 134  | 146  | AcD3-MEEKDEGTGLR-COOH            | VREL↓MEEK | 1  | 0.63264                                         | 58/47  | Talin-1                                                                    |                                                                                          |
| Q920E5 | 342  | 351  | AcD3-MELANKIYKR-COOH             | PSIF↓MELA | 1  | 0.3198                                          | 74/46  | Farnesyl pyrophosphate synthetase                                          |                                                                                          |
| P60710 | 269  | 290  | AcD3-MESCGIHETTFNSIMKCDVDIR-COOH | SFLG↓MESC | 1  | 0.54349                                         | 49/42  | Actin, cytoplasmic 1                                                       | P63260 (269-290)                                                                         |
| Q9DBG5 | 283  | 293  | AcD3-MESVQGVQDQR-COOH            | VLGL↓MESV | 2  | 0.62953                                         | 71/47  | Mannose-6-phosphate receptor-binding protein 1                             |                                                                                          |
| P70677 | 79   | 86   | AcD3-MGLKYQVR-COOH               | RETF↓MGLK | 2  | 0.51373                                         | 63/47  | Caspase-3                                                                  |                                                                                          |
| P52480 | 64   | 73   | AcD3-MIKSGMNVAR-COOH             | MLKE↓MIKS | 2  | 0.52935                                         | 72/47  | Pyruvate kinase isozymes M1/M2                                             |                                                                                          |
| Q3TX57 | 351  | 361  | AcD3-MILKNTKDAVR-COOH            | NTDL↓MILK | 1  | 0.43361                                         | 53/45  | 26S proteasome non-ATPase regulatory subunit 1                             |                                                                                          |
| P17182 | 169  | 179  | AcD3-MILPVGASSFR-COOH            | MQEF↓MILP | 3  | 0.52601/0.50981                                 | 66/47  | Alpha-enolase                                                              |                                                                                          |
| P24369 | 101  | 109  | AcD3-MIQGGDFTR-COOH              | IKDF↓MIQG | 1  | 0.49459                                         | 46/45  | Peptidyl-prolyl cis-trans isomerase B                                      |                                                                                          |
| P70349 | 78   | 92   | AcD3-MIVGKCAADLGLKR-COOH         | LGHL↓MIVG | 3  | 0.42055/0.51746                                 | 79/44  | Histidine triad nucleotide-binding protein 1                               |                                                                                          |
| P06745 | 437  | 446  | AcD3-MKGLPPEAR-COOH              | TEAL↓MKGL | 1  | 0.48783                                         | 60/47  | Glucose-6-phosphate isomerase                                              |                                                                                          |
| P97429 | 171  | 185  | AcD3-MKQDAQELYEAGEKR-COOH        | DDAL↓MKQD | 2  | 0.59301                                         | 72/47  | Annexin A4                                                                 |                                                                                          |
| Q6PDL0 | 364  | 379  | AcD3-MKQSLAKQAPTPTR-COOH         | QVFL↓MKQK | 1  | 0.63602                                         | 47/45  | Cytoplasmic dynein 1 light intermediate chain 2                            |                                                                                          |
| O08709 | 116  | 132  | AcD3-MLDPVFKDNNMPTVAR-COOH       | ILLG↓MLDP | 1  | 0.46277                                         | 53/46  | Peroxiredoxin-6                                                            |                                                                                          |
| Q00PI9 | 41   | 62   | AcD3-MLEDEAGVGGAGPGACKAEPR-COOH  | LDAE↓MLED | 3  | 0.49025/0.58369                                 | 105/45 | Heterogeneous nuclear ribonucleoprotein U-like protein 2                   |                                                                                          |
| P52480 | 60   | 73   | AcD3-MLKEMIKSGMNVAR-COOH         | RSVE↓MLKE | 2  | 0.55312                                         | 78/48  | Pyruvate kinase isozymes M1/M2                                             |                                                                                          |
| Q8BFR4 | 500  | 511  | AcD3-MMLQSCSGPTCR-COOH           | NYRL↓MMLQ | 4  | 0.76157/0.65761                                 | 77/40  | N-acetylglucosamine-6-sulfatase                                            |                                                                                          |

|        |      |      |                                    |           |   |                        |        |                                                                                                                 |                                                                                          |
|--------|------|------|------------------------------------|-----------|---|------------------------|--------|-----------------------------------------------------------------------------------------------------------------|------------------------------------------------------------------------------------------|
| Q9VWA4 | 130  | 139  | AcD3-MNLGLAVAR-COOH                | QRTL↓MNLG | 4 | 0.55874                | 82/46  | Transgelin-2                                                                                                    |                                                                                          |
| P50543 | 38   | 57   | AcD3-MNTELAFAFTKQKDPGLVDR-COOH     | FLSF↓MNTE | 3 | 0.53847/0.55461        | 119/47 | Protein S100-A11                                                                                                |                                                                                          |
| P62843 | 34   | 40   | AcD3-MQLYSAR-COOH                  | YEQL↓MQLY | 1 | 0.43269                | 55/47  | 40S ribosomal protein S15                                                                                       |                                                                                          |
| O08997 | 10   | 21   | AcD3-MTCEGCAEAVSR-COOH             | FVSD↓MTCE | 3 | 0.51158/0.47351        | 57/38  | Copper transport protein ATOX1                                                                                  |                                                                                          |
| P27048 | 80   | 94   | AcD3-MTVGEGPPPDKDTGIAR-COOH        | NLVS↓MTVE | 2 | 0.45369                | 81/48  | Small nuclear ribonucleoprotein-associated protein B                                                            | P63163 (80-94)                                                                           |
| Q9CZ8  | 112  | 121  | AcD3-MVEKDDQDGR-COOH               | EGLK↓MVEK | 1 | 0.54384                | 55/46  | 40S ribosomal protein S19                                                                                       |                                                                                          |
| P61161 | 56   | 65   | AcD3-MVGDASELR-COOH                | IKDL↓MVGD | 1 | 0.49566                | 49/46  | Actin-related protein 2                                                                                         |                                                                                          |
| O09131 | 40   | 48   | AcD3-MVLKAKGR-COOH                 | QRTL↓MVLK | 1 | 0.57733                | 53/40  | Glutathione S-transferase omega-1                                                                               |                                                                                          |
| Q920N1 | 405  | 416  | AcD3-MVNIIGSLSTGGR-COOH            | NEVL↓MVNI | 1 | 0.45723                | 50/47  | Eukaryotic translation initiation factor 2 subunit 3, X-linked                                                  | Q920N2 (405-416)                                                                         |
| P62702 | 182  | 191  | AcD3-MVTGGANLGR-COOH               | GNLC↓MVTG | 1 | 0.74091                | 48/47  | 40S ribosomal protein S4, X isoform                                                                             |                                                                                          |
| Q9ER80 | 67   | 83   | AcD3-MYSEKIGVASSEELVR-COOH         | SLSL↓MYES | 2 | 0.7369                 | 82/47  | Synaptosomal-associated protein 29                                                                              |                                                                                          |
| P17751 | 30   | 53   | AcD3-NAANVPAGTEVVCAPPTAYIDFAR-COOH | ICTL↓NAAN | 1 | 0.50595                | 55/47  | Triosephosphate isomerase                                                                                       |                                                                                          |
| P34022 | 144  | 159  | AcD3-NAENAQKFKTKFECCR-COOH         | IRFL↓NAEN | 3 | 0.43179/0.48409        | 98/47  | Ran-specific GTPase-activating protein                                                                          |                                                                                          |
| Q91V92 | 440  | 452  | AcD3-NASGSTSTPAPSR-COOH            | NFLI↓NASG | 1 | 0.63315                | 76/47  | ATP-citrate synthase                                                                                            |                                                                                          |
| Q9DBJ1 | 168  | 180  | AcD3-NEEIVPQIKGKR-COOH             | LPWF↓NEEI | 1 | 0.50087                | 62/45  | Phosphoglycerate mutase 1                                                                                       |                                                                                          |
| P68510 | 34   | 42   | AcD3-NEPLSNEDR-COOH                | VTEL↓NEPL | 2 | 0.54796                | 60/46  | 14-3-3 protein eta                                                                                              |                                                                                          |
| Q9D2G2 | 253  | 264  | AcD3-NEVDMSNIQEMR-COOH             | LTTF↓NEVD | 1 | 0.53394                | 79/41  | Dihydropolyllysine-residue succinyltransferase component of 2-oxoglutarate dehydrogenase complex, mitochondrial |                                                                                          |
| Q9CXW4 | 23   | 32   | AcD3-NICVGESGDR-COOH               | KLCL↓NICV | 1 | 0.44178                | 67/45  | 60S ribosomal protein L11                                                                                       |                                                                                          |
| P70441 | 321  | 330  | AcD3-NISLAVAKER-COOH               | ILDJ↓NISL | 2 | 0.60042                | 71/43  | Na(+)/H(+) exchange regulatory cofactor NHE-RF1                                                                 |                                                                                          |
| P12388 | 334  | 346  | AcD3-NKGGKAMFSGMSER-COOH           | EDAF↓NKGG | 1 | 0.65418                | 54/47  | Plasminogen activator inhibitor 2, macrophage                                                                   |                                                                                          |
| P61759 | 65   | 71   | AcD3-NLAQKRR-COOH                  | FMEL↓NLAQ | 1 | 0.4748                 | 43/40  | Prefoldin subunit 3                                                                                             |                                                                                          |
| P16675 | 410  | 417  | AcD3-NQKMEVQR-COOH                 | VDSL↓NQKM | 1 | 0.63114                | 48/47  | Lysosomal protective protein                                                                                    |                                                                                          |
| Q64152 | 150  | 161  | AcD3-NQLGADSLTSLR-COOH             | PSIL↓NQLG | 1 | 0.61303                | 71/47  | Transcription factor BTF3                                                                                       |                                                                                          |
| P60710 | 280  | 290  | AcD3-NSIMKCDVDIR-COOH              | ETTF↓NSIM | 1 | 0.48114                | 50/47  | Actin, cytoplasmic 1                                                                                            | P63260 (280-290), Q88FZ3 (281-291)                                                       |
| O88990 | 352  | 359  | AcD3-NTLQTKLR-COOH                 | EINF↓NTLQ | 1 | 0.45479                | 49/43  | Alpha-actinin-3                                                                                                 | P57780 (359-366), Q7TPR4 (339-346), Q9J91 (346-353)                                      |
| P97372 | 53   | 61   | AcD3-NVADLSLR-COOH                 | EDSL↓NVAD | 1 | 0.48718                | 88/46  | Proteasome activator complex subunit 2                                                                          |                                                                                          |
| P97379 | 403  | 410  | AcD3-NVEEKKTR-COOH                 | EVRL↓NVEE | 1 | 0.66301                | 55/46  | Ras GTPase-activating protein-binding protein 2                                                                 | P97855 (407-414)                                                                         |
| Q9JK48 | 7    | 21   | AcD3-NVKKLAADAGTFLSR-COOH          | IMDF↓NVKK | 1 | 0.62008                | 76/44  | Endophilin-B1                                                                                                   |                                                                                          |
| O70591 | 109  | 119  | AcD3-QAKGKLENEFR-COOH              | SQQL↓QAKG | 1 | 0.57461                | 53/47  | Prefoldin subunit 2                                                                                             |                                                                                          |
| P21981 | 668  | 679  | AcD3-QCDKLVKGYR-COOH               | VVNF↓QCCK | 2 | 0.50292                | 73/46  | Protein-glutamine gamma-glutamyltransferase 2                                                                   |                                                                                          |
| Q6N280 | 63   | 76   | AcD3-QIDPEVDEEIKKR-COOH            | FEVL↓QIDP | 2 | 0.6312                 | 77/47  | DnaJ homolog subfamily C member 8                                                                               |                                                                                          |
| P53026 | 35   | 48   | AcD3-QISLKNYDPQDKR-COOH            | TVEL↓QISL | 3 | 0.38459/0.44194        | 85/46  | 60S ribosomal protein L10a                                                                                      |                                                                                          |
| Q9CT10 | 20   | 27   | AcD3-QKDKGQKR-COOH                 | VVVF↓QKDK | 1 | 0.58864                | 46/44  | Ran-binding protein 3                                                                                           |                                                                                          |
| O08585 | 154  | 161  | AcD3-QKTKANNR-COOH                 | DEQL↓QKTK | 1 | 0.58817                | 53/45  | Clathrin light chain A                                                                                          |                                                                                          |
| P57784 | 148  | 155  | AcD3-QKVKLKER-COOH                 | VLDV↓QKVK | 1 | 0.45232                | 41/37  | U2 small nuclear ribonucleoprotein A'                                                                           |                                                                                          |
| P35235 | 211  | 220  | AcD3-QLKQPLNTR-COOH                | GTVL↓QLKQ | 1 | 0.50548                | 60/46  | Tyrosine-protein phosphatase non-receptor type 11                                                               |                                                                                          |
| P48428 | 79   | 98   | AcD3-QQILESEKLEEEAEEYKEAR-COOH     | YTDL↓QQIL | 4 | 0.55243/0.6185/0.64902 | 79/47  | Tubulin-specific chaperone A                                                                                    |                                                                                          |
| Q8K2Q0 | 13   | 25   | AcD3-QSLLKASSKDVVR-COOH            | FVAL↓QSLL | 1 | 0.58456                | 59/42  | COMM domain-containing protein 9                                                                                |                                                                                          |
| P63276 | 118  | 132  | AcD3-QVTOPTVGMNFKTPR-COOH          | LSNL↓QVTO | 1 | 0.41923                | 65/48  | 40S ribosomal protein S17                                                                                       |                                                                                          |
| Q9JHU4 | 3353 | 3362 | AcD3-SAEESDAIR-COOH                | IVNF↓SAEE | 1 | 0.56499                | 51/47  | Cytoplasmic dynein 1 heavy chain 1                                                                              |                                                                                          |
| P26039 | 1573 | 1593 | AcD3-SAFASNPEFSSVPAQISPEGR-COOH    | VDNL↓SAFA | 1 | 0.50417                | 92/47  | Talin-1                                                                                                         |                                                                                          |
| O35864 | 270  | 282  | AcD3-SEKLEQSEALGR-COOH             | VFDL↓SEKL | 1 | 0.51926                | 62/48  | COP9 signalosome complex subunit 5                                                                              |                                                                                          |
| P09528 | 140  | 157  | AcD3-SEVKSIIKELGDHVTNLR-COOH       | TYYL↓SEQV | 1 | 0.75712                | 56/46  | Ferritin heavy chain                                                                                            |                                                                                          |
| Q99LX0 | 83   | 98   | AcD3-SESPMVKEILKEQESR-COOH         | AQNL↓SESP | 1 | 0.50917                | 76/48  | Protein DJ-1                                                                                                    |                                                                                          |
| Q9R062 | 287  | 304  | AcD3-SFGEAAPQPSMSSEER-COOH         | LSDL↓SFGE | 2 | 0.51308                | 74/44  | Glycogenin-1                                                                                                    |                                                                                          |
| P52480 | 362  | 376  | AcD3-SGETAKGDYPLEAVR-COOH          | CIML↓SGET | 1 | 0.62401                | 65/48  | Pyruvate kinase isozymes M1/M2                                                                                  |                                                                                          |
| P60710 | 300  | 312  | AcD3-SGGTMYPIADR-COOH              | NTVL↓SGGT | 3 | 0.54598/0.54254        | 59/46  | Actin, cytoplasmic 1                                                                                            | P62737 (302-314), P63260 (300-312), P63268 (301-313), P68033 (302-314), P68134 (302-314) |
| P58252 | 418  | 428  | AcD3-SGVVSTGLKVR-COOH              | GRVF↓SGVV | 2 | 0.44342                | 61/42  | Elongation factor 2                                                                                             |                                                                                          |
| P20152 | 87   | 100  | AcD3-SLADAINTEFKNTR-COOH           | SVDV↓SLAD | 2 | 0.4814                 | 88/48  | Vimentin                                                                                                        |                                                                                          |
| P62204 | 18   | 38   | AcD3-SLFDKDDGGTITTKELGTVMR-COOH    | KEAF↓SLFD | 3 | 0.59696/0.59765        | 99/47  | Calmodulin                                                                                                      |                                                                                          |
| P51410 | 46   | 54   | AcD3-SLLGKKKR-COOH                 | NVEL↓SLLG | 2 | 0.45638                | 45/31  | 60S ribosomal protein L9                                                                                        |                                                                                          |
| P97372 | 51   | 61   | AcD3-SLNVALSSLR-COOH               | LQED↓SLNV | 1 | 0.56663                | 57/46  | Proteasome activator complex subunit 2                                                                          |                                                                                          |
| P99029 | 164  | 172  | AcD3-SLVSLFNGR-COOH                | LDD↓SLVS  | 1 | 0.59452                | 56/46  | Peroxisome protein 5, mitochondrial                                                                             |                                                                                          |
| Q921W0 | 166  | 181  | AcD3-SLPEGASAVGESSR-COOH           | LDQL↓SQLP | 2 | 0.60742                | 98/47  | Charged multivesicular body protein 1a                                                                          |                                                                                          |
| O88569 | 70   | 82   | AcD3-SSMAEYDAAMAAR-COOH            | FVTF↓SSMA | 1 | 0.71586                | 58/44  | Heterogeneous nuclear ribonucleoproteins A2/B1                                                                  |                                                                                          |
| P29341 | 341  | 356  | AcD3-SSPEATKAVTEMNGR-COOH          | FVCF↓SSPE | 1 | 0.39728                | 69/46  | Polyadenylate-binding protein 1                                                                                 |                                                                                          |
| Q99KJ8 | 39   | 61   | AcD3-SSTSVEHIVNPNAAVDKFKDR-COOH    | AEEL↓SSTS | 1 | 0.52778                | 64/47  | Dynactin subunit 2                                                                                              |                                                                                          |
| Q9R257 | 22   | 34   | AcD3-STGGKEDVSVEER-COOH            | WQVL↓STGG | 1 | 0.70805                | 59/45  | Heme-binding protein 1                                                                                          |                                                                                          |
| P06151 | 255  | 268  | AcD3-SVADLAESIMKLR-COOH            | AIGL↓SVAD | 1 | 0.74647                | 82/47  | L-lactate dehydrogenase A chain                                                                                 |                                                                                          |



|        |     |     |                                    |           |    |                         |        |                                                           |                                                                                                                                                                |
|--------|-----|-----|------------------------------------|-----------|----|-------------------------|--------|-----------------------------------------------------------|----------------------------------------------------------------------------------------------------------------------------------------------------------------|
| Q9JH2  | 28  | 38  | AcD3-SVASEEVMKNR-COOH              | MGTF↓SVAY | 1  | 0.70168                 | 60/47  | Nucleoporin 50 kDa                                        |                                                                                                                                                                |
| P63101 | 45  | 55  | AcD3-SVAYKVVGAR-COOH               | RNLL↓SVAY | 2  | 0.65112                 | 69/46  | 14-3-3 protein zeta/delta                                 | P61982 (46-56), P68510 (46-56), Q9CQV8 (47-57)                                                                                                                 |
| O70310 | 100 | 115 | AcD3-TSSGGPKMTMEEASKR-COOH         | IELF↓SVGG | 3  | 0.65205/0.65428         | 93/48  | Glycylpeptide N-tetradecanoyltransferase 1                |                                                                                                                                                                |
| P10107 | 193 | 204 | AcD3-SVQNQLADTDAR-COOH             | CQDL↓SVNQ | 2  | 0.56446                 | 86/47  | Annexin A1                                                |                                                                                                                                                                |
| P22752 | 60  | 72  | AcD3-TAEILELAGNAAR-COOH            | LEYL↓TAEI | 5  | 0.48832/0.4867          | 95/47  | Histone H2A type 1                                        | P27661 (60-72), Q64522 (60-72), Q64523 (60-72), Q6G557 (60-72), Q8BFU2 (60-72), Q8CGP5 (60-72), Q8CGP6 (60-72), Q8CGP7 (60-72), Q8R1M2 (60-72), Q9OZO8 (57-69) |
| P57746 | 75  | 95  | AcD3-TAGDFTTIVQNVNKAQVKIR-COOH     | EAKF↓TAGD | 1  | 0.60622                 | 49/45  | V-type proton ATPase subunit D                            |                                                                                                                                                                |
| P13020 | 508 | 523 | AcD3-TAQLDEELGGTPVQSR-COOH         | SAIL↓TAQL | 3  | 0.45151/0.5278          | 84/47  | Gelsolin                                                  |                                                                                                                                                                |
| P17182 | 308 | 327 | AcD3-TASAGIQVGGDLTVNPKR-COOH       | WQKF↓TASA | 2  | 0.52113/0.59238         | 71/46  | Alpha-enolase                                             |                                                                                                                                                                |
| P06745 | 433 | 446 | AcD3-TEALMKGKLPPEAR-COOH           | FLAQ↓TEAL | 1  | 0.61842                 | 51/47  | Glucose-6-phosphate isomerase                             |                                                                                                                                                                |
| Q9EPB4 | 140 | 148 | AcD3-TEGQYQAVR-COOH                | GSLV↓TEGQ | 1  | 0.54607                 | 59/47  | Apoptosis-associated speck-like protein containing a CARD |                                                                                                                                                                |
| Q62465 | 67  | 80  | AcD3-TGFGYDKVKLQSR-COOH            | CLVL↓TGFG | 10 | 0.60698/0.68874/0.69714 | 90/47  | Synaptic vesicle membrane protein VAT-1 homolog           |                                                                                                                                                                |
| Q9JH59 | 173 | 186 | AcD3-TGSPQPQANFKVKR-COOH           | LLNL↓TGPS | 1  | 0.69618                 | 78/46  | Protein CWC15 homolog                                     |                                                                                                                                                                |
| O09159 | 948 | 965 | AcD3-TINYLOETTAAANOPLSR-COOH       | FQTF↓TINY | 2  | 0.64169                 | 85/47  | Lysosomal alpha-mannosidase                               |                                                                                                                                                                |
| P50543 | 46  | 57  | AcD3-TKNQKDPGVLDLR-COOH            | LAAF↓TKNQ | 4  | 0.52218/0.57874         | 77/47  | Protein S100-A11                                          |                                                                                                                                                                |
| O89090 | 344 | 360 | AcD3-TSSGSSGTSQGGTTPQR-COOH        | IMNF↓TSSG | 2  | 0.6567                  | 74/46  | Transcription factor Sp1                                  |                                                                                                                                                                |
| P16858 | 101 | 116 | AcD3-TTMEKAGAHKGGAKR-COOH          | TGVF↓TTME | 3  | 0.51617/0.65406         | 84/46  | Glyceraldehyde-3-phosphate dehydrogenase                  |                                                                                                                                                                |
| P58252 | 5   | 10  | AcD3-TVDQIR-COOH                   | MVNF↓TVDQ | 1  | 0.64201                 | 49/47  | Elongation factor 2                                       |                                                                                                                                                                |
| Q6ZVV7 | 59  | 70  | AcD3-TVINOTQKENLR-COOH             | ARVL↓TVIN | 4  | 0.41858/0.49846         | 97/46  | 60S ribosomal protein L35                                 |                                                                                                                                                                |
| P26039 | 807 | 824 | AcD3-TVTENIFSSMGDAGEMVVR-COOH      | DTIL↓TVTE | 2  | 0.48531                 | 98/43  | Talin-1                                                   |                                                                                                                                                                |
| P13020 | 313 | 325 | AcD3-VADENPFAQGLR-COOH             | SVSL↓VAED | 3  | 0.52778/0.45905         | 107/48 | Gelsolin                                                  |                                                                                                                                                                |
| Q9CQI3 | 10  | 19  | AcD3-VAEDLVLEKLR-COOH              | VVCD↓VAED | 2  | 0.52267                 | 84/45  | Glia maturation factor beta                               |                                                                                                                                                                |
| P47738 | 70  | 86  | AcD3-VAEGNKEDVDKAVKAAAR-COOH       | VICQ↓VAEG | 1  | 0.75727                 | 47/46  | Aldehyde dehydrogenase, mitochondrial                     |                                                                                                                                                                |
| Q62422 | 66  | 83  | AcD3-VAEQAESIDNPLHEAAKR-COOH       | PSNY↓VAEQ | 2  | 0.52901                 | 99/47  | Osteoclast-stimulating factor 1                           |                                                                                                                                                                |
| P58252 | 233 | 249 | AcD3-VAKFAAQEGQLSAAER-COOH         | AMEY↓VAKF | 1  | 0.3996                  | 104/46 | Elongation factor 2                                       |                                                                                                                                                                |
| P52480 | 110 | 120 | AcD3-VALDITKGPDIR-COOH             | RPVA↓VALD | 4  | 0.48915/0.49558         | 79/46  | Pyruvate kinase isozymes M1/M2                            |                                                                                                                                                                |
| Q9CWJ9 | 319 | 335 | AcD3-VALSDICDVPTAKIISR-COOH        | FGDF↓VALS | 1  | 0.46172                 | 57/46  | Bifunctional purine biosynthesis protein PURH             |                                                                                                                                                                |
| Q9R190 | 525 | 536 | AcD3-VAQAPLKPPTPR-COOH             | VKDL↓VAQA | 1  | 0.55441                 | 69/39  | Metastasis-associated protein MTA2                        |                                                                                                                                                                |
| P50580 | 129 | 138 | AcD3-VAQGTQVTGR-COOH               | FVIG↓VAQG | 2  | 0.42764                 | 57/47  | Proliferation-associated protein 2G4                      |                                                                                                                                                                |
| Q9CWJ9 | 32  | 42  | AcD3-VASGGTAKAIR-COOH              | GLSL↓VASG | 4  | 0.49898/0.43551         | 76/44  | Bifunctional purine biosynthesis protein PURH             |                                                                                                                                                                |
| Q9CQ60 | 202 | 214 | AcD3-VATGEGKAIVLKR-COOH            | SIIF↓VATG | 4  | 0.53614/0.53802         | 83/43  | 6-phosphogluconolactonase                                 |                                                                                                                                                                |
| Q61425 | 56  | 76  | AcD3-VDQTEDILAKSKGIEESLKR-COOH     | TVVL↓VDQT | 1  | 0.63568                 | 49/43  | Hydroxyacyl-coenzyme A dehydrogenase, mitochondrial       |                                                                                                                                                                |
| P62315 | 81  | 92  | AcD3-VDVEPKVSKKR-COOH              | DTLL↓VDVE | 1  | 0.37475                 | 56/38  | Small nuclear ribonucleoprotein Sm D1                     |                                                                                                                                                                |
| Q61176 | 56  | 71  | AcD3-VDVPPNDSSFQIVKNR-COOH         | DIAF↓VDVP | 6  | 0.62813/0.62769         | 85/47  | Arginase-1                                                |                                                                                                                                                                |
| Q9R1T2 | 179 | 200 | AcD3-VEEKTAKVKSQVDEGPEAKR-COOH     | EHEF↓VEEK | 1  | 0.5191                  | 65/45  | SUMO-activating enzyme subunit 1                          |                                                                                                                                                                |
| Q9CQI7 | 192 | 204 | AcD3-VEFENDGQAGAAR-COOH            | DIAF↓VEFE | 1  | 0.59629                 | 47/46  | U2 small nuclear ribonucleoprotein B''                    |                                                                                                                                                                |
| P63038 | 514 | 526 | AcD3-VEKGIIDPTKVVVR-COOH           | FVNM↓VEKG | 1  | 0.41942                 | 56/40  | 60 kDa heat shock protein, mitochondrial                  |                                                                                                                                                                |
| Q8BIJ7 | 184 | 199 | AcD3-VEKLCPEASDIATSVR-COOH         | PLEL↓VEKL | 1  | 0.52279                 | 53/47  | RUN and FYVE domain-containing protein 1                  |                                                                                                                                                                |
| P06745 | 69  | 75  | AcD3-VELAKSR-COOH                  | MQML↓VELA | 1  | 0.4983                  | 61/44  | Glucose-6-phosphate isomerase                             | Q6GQX2 (768-774)                                                                                                                                               |
| Q99MD9 | 661 | 683 | AcD3-VESSGTFPSGASVSMIASR-COOH      | KATL↓VESS | 3  | 0.58121/0.65091         | 89/46  | Nuclear autoantigenic sperm protein                       |                                                                                                                                                                |
| P62082 | 134 | 143 | AcD3-VFPSEIVGKR-COOH               | LEDL↓VFPS | 1  | 0.42146                 | 60/44  | 40S ribosomal protein S7                                  |                                                                                                                                                                |
| P62827 | 16  | 29  | AcD3-VGDGGTGKTTFKR-COOH            | KLVL↓VGDG | 2  | 0.44188                 | 63/47  | GTP-binding nuclear protein Ran                           |                                                                                                                                                                |
| P18760 | 57  | 81  | AcD3-VGDVGGTVDPPYTFVKMLPKDKCR-COOH | KEIL↓VGDV | 1  | 0.49582                 | 55/46  | Cofilin-1                                                 |                                                                                                                                                                |
| Q02053 | 359 | 368 | AcD3-VGLAQAVNAR-COOH               | ATEL↓VGLA | 2  | 0.53171                 | 84/45  | Ubiquitin-like modifier-activating enzyme 1               |                                                                                                                                                                |
| Q4KML4 | 47  | 55  | AcD3-VGTLKAAKR-COOH                | FEAL↓VGTL | 4  | 0.52941/0.58585         | 59/38  | UPF0727 protein C6orf115 homolog                          |                                                                                                                                                                |
| P63260 | 9   | 28  | AcD3-VIDNNGSMCKAGFAGDDAPR-COOH     | IAAL↓VIDN | 5  | 0.47563/0.44782/0.40994 | 93/43  | Actin, cytoplasmic 2                                      |                                                                                                                                                                |
| P47791 | 47  | 59  | AcD3-VIGGSGGLASAR-COOH             | FDYL↓VIGG | 3  | 0.46579/0.43707         | 61/47  | Glutathione reductase, mitochondrial                      |                                                                                                                                                                |
| P62754 | 112 | 131 | AcD3-VIVKKGKDIPLGLDTPR-COOH        | VNLN↓VIVK | 1  | 0.44949                 | 44/40  | 40S ribosomal protein S6                                  |                                                                                                                                                                |
| Q921Q5 | 12  | 29  | AcD3-VKAGSDGAKIGNCPFSQR-COOH       | VELF↓VKAG | 2  | 0.56719/0.62926         | 70/48  | Chloride intracellular channel protein 1                  |                                                                                                                                                                |
| P62774 | 18  | 30  | AcD3-VKDYVAKGEDVNR-COOH            | DLDE↓VKDY | 1  | 0.48388                 | 83/47  | Myotrophin                                                |                                                                                                                                                                |
| P57759 | 60  | 77  | AcD3-VKFDYQYPYGEKQDEFKR-COOH       | KFVL↓VKFD | 1  | 0.53737                 | 50/47  | Endoplasmic reticulum protein ERp29                       |                                                                                                                                                                |
| Q61937 | 133 | 142 | AcD3-VKLLGMSGKR-COOH               | DEED↓VKLL | 2  | 0.44429                 | 56/43  | Nucleophosmin                                             |                                                                                                                                                                |
| Q99L47 | 158 | 168 | AcD3-VKQLKPNNAIR-COOH              | ASVF↓VKQL | 1  | 0.54148                 | 49/37  | Hsc70-interacting protein                                 |                                                                                                                                                                |
| P18760 | 72  | 81  | AcD3-VKMLPKDKCR-COOH               | YTF↓VKML  | 7  | 0.52919/0.54794/0.51787 | 62/47  | Cofilin-1                                                 |                                                                                                                                                                |
| Q03958 | 65  | 73  | AcD3-VKQELGAR-COOH                 | GPVL↓VKQE | 2  | 0.51017                 | 66/46  | Prefoldin subunit 6                                       |                                                                                                                                                                |
| P10126 | 59  | 67  | AcD3-VLDLKAER-COOH                 | KYAW↓VLDK | 2  | 0.5615                  | 57/41  | Elongation factor 1-alpha 1                               | P62631 (59-67)                                                                                                                                                 |
| Q3THW5 | 66  | 81  | AcD3-VLELAGNASKDLKVKR-COOH         | LTAE↓VLEL | 4  | 0.53324/0.61304/0.50597 | 106/41 | Histone H2A.V                                             | POC056 (66-81)                                                                                                                                                 |
| Q9DBP5 | 8   | 22  | AcD3-VLGGPAGKGTQCAR-COOH           | LVVF↓VLGG | 2  | 0.55311/0.42858         | 85/47  | UMP-CMP kinase                                            |                                                                                                                                                                |
| Q61599 | 99  | 107 | AcD3-VLKEGIEYR-COOH                | KDTF↓VLKE | 1  | 0.52206                 | 64/46  | Rho GDP-dissociation inhibitor 2                          |                                                                                                                                                                |
| P62827 | 14  | 29  | AcD3-VLVGDDGGTKTTFVKR-COOH         | QFKL↓VLVG | 4  | 0.42317/0.50384         | 103/45 | GTP-binding nuclear protein Ran                           |                                                                                                                                                                |

|        |      |      |                                    |            |    |                               |        |                                                                            |                                                      |
|--------|------|------|------------------------------------|------------|----|-------------------------------|--------|----------------------------------------------------------------------------|------------------------------------------------------|
| P70670 | 2156 | 2164 | AcD3-VMSQANVSR-COOH                | DIEL-VMSQ  | 2  | 0.49705/0.51462               | 70/47  | Nascent polypeptide-associated complex subunit alpha, muscle-specific form | Q60817 (184-192)                                     |
| P97461 | 113  | 122  | AcD3-VNAINSGPR-COOH                | LQVL-VNAI  | 1  | 0.39338                       | 62/46  | 40S ribosomal protein S5                                                   |                                                      |
| P07356 | 260  | 273  | AcD3-VQCIQKPLFYADR-COOH            | FLNL-VQCI  | 2  | 0.53457                       | 57/48  | Annexin A2                                                                 |                                                      |
| Q62433 | 309  | 322  | AcD3-VQGMGYMPSASMT-R-COOH          | FKYF-VQGM  | 2  | 0.64143                       | 75/41  | Protein NDRG1                                                              |                                                      |
| P26039 | 2034 | 2057 | AcD3-VQNAAGSQEKLAAQAQSSVATITR-COOH | TKVL-VQNA  | 3  | 0.53605/0.50909/0.59948       | 53/47  | Talin-1                                                                    |                                                      |
| Q9WU84 | 53   | 71   | AcD3-VQTTLPQSEVQALLESTGR-COOH      | QMVL-VQTT  | 1  | 0.58197                       | 47/47  | Copper chaperone for superoxide dismutase                                  |                                                      |
| O89053 | 229  | 241  | AcD3-VSEGIKLTGFSR-COOH             | HAVF-VSEGI | 1  | 0.54974                       | 66/46  | Coronin-1A                                                                 |                                                      |
| P62962 | 41   | 56   | AcD3-VSITPAEVLVGVKDR-COOH          | GKTF-VSIT  | 17 | 0.48359                       | 104/43 | Profilin-1                                                                 |                                                      |
| Q91V76 | 254  | 263  | AcD3-VSKDPLGLDR-COOH               | LPVF-VSKD  | 1  | 0.62014                       | 49/47  | Ester hydrolase C11orf54 homolog                                           |                                                      |
| Q9R1P4 | 109  | 122  | AcD3-VSLIGSKQIPTQR-COOH            | YSRL-VSLI  | 1  | 0.47113                       | 46/43  | Proteasome subunit alpha type-1                                            |                                                      |
| P27048 | 78   | 94   | AcD3-VSMTVEGPPPKDTGIAR-COOH        | GENL-VSMT  | 1  | 0.45506                       | 54/48  | Small nuclear ribonucleoprotein-associated protein B                       | P63163 (78-94)                                       |
| O70492 | 33   | 43   | AcD3-VSNPQTGVGGR-COOH              | LEID-VSNP  | 2  | 0.72298                       | 55/47  | Sorting nexin-3                                                            |                                                      |
| P51410 | 154  | 173  | AcD3-VSNSAALIQQATTVKKNDIR-COOH     | DIEL-VSNS  | 1  | 0.44631                       | 67/44  | 60S ribosomal protein L9                                                   |                                                      |
| P50580 | 230  | 243  | AcD3-VSSGEGKADAGQR-COOH            | VDVL-VSSG  | 3  | 0.38905/0.46456               | 61/48  | Proliferation-associated protein 2G4                                       |                                                      |
| Q8R317 | 291  | 304  | AcD3-VSSSSAEGTQPSR-COOH            | FASL-VSSS  | 2  | 0.59694                       | 89/46  | Ubiquitin-1                                                                |                                                      |
| Q9C092 | 9    | 19   | AcD3-VSVEDLKNFER-COOH              | LNEL-VSVE  | 1  | 0.50509                       | 64/47  | Mitochondrial fission 1 protein                                            |                                                      |
| P60710 | 9    | 28   | AcD3-VVDNNGSGMCKAGFAGDDAPR-COOH    | IAAL-VVDN  | 10 | 0.50473/0.47845/0.50214       | 114/43 | Actin, cytoplasmic 1                                                       |                                                      |
| P12970 | 167  | 175  | AcD3-VVFLPALCR-COOH                | PIEL-VVFL  | 2  | 0.41031                       | 59/46  | 60S ribosomal protein L7a                                                  |                                                      |
| Q9D0R2 | 674  | 688  | AcD3-VVGEKEKASGTVNIR-COOH          | NFIL-VVGE  | 1  | 0.51793                       | 55/45  | Threonyl-tRNA synthetase, cytoplasmic                                      |                                                      |
| P17182 | 385  | 400  | AcD3-VVGLCTGQITGAPCR-COOH          | IADL-VVGL  | 2  | 0.497                         | 58/48  | Alpha-enolase                                                              | P17183 (385-400), P21550 (385-400)                   |
| Q91V92 | 56   | 65   | AcD3-VVKPDKLIKR-COOH               | SQSL-VVKP  | 1  | 0.58099                       | 42/39  | ATP-citrate synthase                                                       |                                                      |
| Q9JLJ2 | 308  | 326  | AcD3-VVKQTQKIKLGDPLELDR-COOH       | FINE-VVKQ  | 1  | 0.51252                       | 50/40  | 4-trimethylaminobutyraldehyde dehydrogenase                                |                                                      |
| Q8BGS2 | 39   | 52   | AcD3-VVSAKFEKPLLR-COOH             | FRVL-VVSA  | 1  | 0.56602                       | 59/42  | BolA-like protein 2                                                        |                                                      |
| Q9JLJ2 | 7    | 15   | AcD3-VVSQPLNLR-COOH                | TGTF-VVSA  | 1  | 0.48715                       | 51/47  | 4-trimethylaminobutyraldehyde dehydrogenase                                |                                                      |
| P50580 | 17   | 30   | AcD3-VVTKYMGGDIANR-COOH            | AEDL-VVTK  | 1  | 0.42544                       | 62/47  | Proliferation-associated protein 2G4                                       |                                                      |
| P63017 | 143  | 155  | AcD3-VVTVPAFYFNSQR-COOH            | VTNA-VVTV  | 1  | 0.42124                       | 82/48  | Heat shock cognate 71 kDa protein                                          |                                                      |
| P08249 | 95   | 104  | AcD3-VVIPAQVPR-COOH                | KGCD-VVVI  | 2  | 0.45088                       | 77/38  | Malate dehydrogenase, mitochondrial                                        |                                                      |
| O89086 | 35   | 41   | AcD3-VVVVKDR-COOH                  | PISE-VVVV  | 2  | 0.58912/0.61498               | 53/40  | Putative RNA-binding protein 3                                             | P60824 (35-41)                                       |
| A2A8Z1 | 722  | 730  | AcD3-VYDEPLLR-COOH                 | VYDE       | 1  | 0.68066                       | 51/46  | Oxysterol-binding protein-related protein 9                                |                                                      |
| P70296 | 124  | 146  | AcD3-VYEQQLSCDEPILSNKSGDNR-COOH    | YVWLVEQ    | 1  | 0.41623                       | 49/45  | Phosphatidylethanolamine-binding protein 1                                 |                                                      |
| P60710 | 294  | 312  | AcD3-YANTVLSGGTMYPGIADR-COOH       | RKDLVANT   | 2  | 0.49075                       | 99/47  | Actin, cytoplasmic 1                                                       | P63260 (294-312)                                     |
| Q922U0 | 21   | 36   | AcD3-YAQEAVKKGSTAVGVR-COOH         | FQVEVAQE   | 8  | 0.49233/0.4759/0.51215/0.5181 | 92/45  | Proteasome subunit alpha type-7                                            |                                                      |
| Q9JKP7 | 47   | 61   | AcD3-YATSCANNFAMKGR-COOH           | VFVLVATS   | 1  | 0.76931                       | 49/47  | DNA polymerase epsilon subunit 3                                           |                                                      |
| Q9DB11 | 26   | 40   | AcD3-YDADLSPAGHEEAKR-COOH          | FSGWYDAD   | 2  | 0.49194                       | 93/47  | Phosphoglycerate mutase 1                                                  |                                                      |
| Q9R0P5 | 85   | 95   | AcD3-YDAFETKESR-COOH               | RYALYDAS   | 1  | 0.4686                        | 50/46  | Destrin                                                                    |                                                      |
| Q99L47 | 212  | 221  | AcD3-YEDASAMLR-COOH                | CKLDYDED   | 1  | 0.51937                       | 68/44  | Hsc70-interacting protein                                                  |                                                      |
| P07356 | 275  | 284  | AcD3-YDSMKGKGR-COOH                | ADRLYDSM   | 2  | 0.53447                       | 59/47  | Annexin A2                                                                 |                                                      |
| P97429 | 90   | 96   | AcD3-YDVQELR-COOH                  | PTVLYDQV   | 1  | 0.5549                        | 52/47  | Annexin A4                                                                 |                                                      |
| P10107 | 283  | 292  | AcD3-YEAMKAGTR-COOH                | AEKLYEAM   | 6  | 0.48807/0.56854               | 81/47  | Annexin A1                                                                 |                                                      |
| O88342 | 72   | 83   | AcD3-YIASGDISGKLR-COOH             | PSGFYIAS   | 1  | 0.47302                       | 54/46  | WD repeat-containing protein 1                                             |                                                      |
| Q9R1P1 | 50   | 66   | AcD3-YIAGLAGLATDQVTAQR-COOH        | GDRLYIGL   | 1  | 0.47408                       | 67/46  | Proteasome subunit beta type-3                                             |                                                      |
| Q93092 | 129  | 138  | AcD3-YKEAGVGKDR-COOH               | LIELYKEA   | 1  | 0.56174                       | 53/47  | Transaldolase                                                              |                                                      |
| P14824 | 609  | 624  | AcD3-YKSMKGLGTDKTLTR-COOH          | ADKLYKSM   | 2  | 0.67349/0.49933               | 60/48  | Annexin A6                                                                 |                                                      |
| P97429 | 255  | 270  | AcD3-YKSMKGLGTDNTLR-COOH           | AERLYKSM   | 3  | 0.63797/0.61015               | 106/47 | Annexin A4                                                                 |                                                      |
| Q61598 | 197  | 208  | AcD3-YLDQPCCTINR-COOH              | RTDDYLDQ   | 1  | 0.47431                       | 49/43  | Rab GDP dissociation inhibitor beta                                        |                                                      |
| P63101 | 118  | 127  | AcD3-YLKMKGYYR-COOH                | SKVFLKLM   | 2  | 0.55571                       | 55/47  | 14-3-3 protein zeta/delta                                                  | O70456 (120-129), P61982 (123-132), P68510 (123-132) |
| O09159 | 951  | 965  | AcD3-YLQETTLAANQPLSR-COOH          | FTINYLQE   | 2  | 0.57613                       | 89/48  | Lysosomal alpha-mannosidase                                                |                                                      |
| P09528 | 138  | 157  | AcD3-YLSEQVKSILGHDVHTNLR-COOH      | IETYLYSE   | 3  | 0.6622/0.70811                | 86/45  | Ferritin heavy chain                                                       |                                                      |
| P63242 | 98   | 109  | AcD3-YLSLLQDSGVR-COOH              | IQDGYLSL   | 2  | 0.47649/0.47671               | 82/47  | Eukaryotic translation initiation factor 5A-1                              |                                                      |
| P51150 | 183  | 197  | AcD3-YNEFPEPIKDKNDR-COOH           | EVELYNEF   | 1  | 0.56311                       | 50/48  | Ras-related protein Rab-7a                                                 |                                                      |
| O08585 | 83   | 101  | AcD3-YQESNGPTDSYAAISEVDR-COOH      | NGEYQYES   | 1  | 0.52036                       | 121/43 | Clathrin light chain A                                                     |                                                      |
| Q60864 | 134  | 142  | AcD3-YQKLENDPR-COOH                | LPNLQYKL   | 1  | 0.49235                       | 49/47  | Stress-induced-phosphoprotein 1                                            |                                                      |
| Q99JY9 | 391  | 409  | AcD3-YQVCHTKKDYEEIGPSICR-COOH      | TPEFYQVC   | 1  | 0.44402                       | 64/47  | Actin-related protein 3                                                    |                                                      |
| P24452 | 142  | 151  | AcD3-YQVKGKNIIR-COOH               | IRKLYQVK   | 2  | 0.58055                       | 62/42  | Macrophage-capping protein                                                 |                                                      |
| O35639 | 300  | 312  | AcD3-YSAIQSDTSGDYR-COOH            | GYSLYSAI   | 1  | 0.66114                       | 64/44  | Annexin A3                                                                 |                                                      |
| Q6N2B0 | 24   | 33   | AcD3-YSEVQIEKR-COOH                | FMTFYSEV   | 2  | 0.70264/0.62693               | 62/46  | DnaJ homolog subfamily C member 8                                          |                                                      |
| P17182 | 25   | 32   | AcD3-YTAKGLFR-COOH                 | EVDLYTAK   | 5  | 0.50255                       | 70/46  | Alpha-enolase                                                              | P17183 (25-32)                                       |
| P10649 | 23   | 32   | AcD3-YTDSYDEKR-COOH                | MLLLEYTDS  | 1  | 0.70183                       | 57/45  | Glutathione S-transferase Mu 1                                             |                                                      |
| P62876 | 29   | 42   | AcD3-YTEGDALDALGLKR-COOH           | LQAEYTEG   | 1  | 0.54334                       | 71/47  | DNA-directed RNA polymerases I, II, and III subunit RPABC5                 |                                                      |
| P62774 | 21   | 30   | AcD3-YVAKGEDVNR-COOH               | EVKDYVAK   | 1  | 0.64475                       | 60/48  | Myotrophin                                                                 |                                                      |
| Q9WU28 | 91   | 105  | AcD3-YVEKTAEDAKDFKR-COOH           | GTGYVVEK   | 2  | 0.47356                       | 74/48  | Prefoldin subunit 5                                                        |                                                      |

|        |     |     |                            |          |   |         |       |                                          |  |
|--------|-----|-----|----------------------------|----------|---|---------|-------|------------------------------------------|--|
| P26039 | 270 | 277 | AcD3-YVKQKGER-COOH         | LPKEYVKQ | 1 | 0.53177 | 48/46 | Talin-1                                  |  |
| Q9CQU0 | 139 | 155 | AcD3-YVSAEQVVQGMKEAQR-COOH | YKYFYVSA | 2 | 0.59149 | 97/47 | Thioredoxin domain-containing protein 12 |  |
