# Supplementary material
Source: PubMed Central journal article supplement (PMC2953924)
Supplement: supp_M110.001271_mcp.M110.001271-7.pdf [file supp_M110.001271_mcp.M110.001271-7.pdf]

**Supplementary Table 3. List of identified mouse cathepsin E cleavage sites.** Columns from left to right contain: Swissprot accession number, start and end position of the identified peptide in the protein sequence, the identified (neo-N-terminal) peptide sequence, the residues surrounding the cleavage site from P4 to P4', number of fragmentation spectra by which the peptide was identified, all different light/heavy ratios by which the peptide was quantified, the MASCOT score and threshold (99% confidence) of the best scoring fragmentation spectrum, the protein name, and possible protein isoforms in which the same peptide sequence can be found.

| accession | start | end | neo-N-terminal peptide sequence    | cleavage site | # spectra | different light/heavy ratios            | score/threshold | protein name                                                      | isoforms                                             |
|-----------|-------|-----|------------------------------------|---------------|-----------|-----------------------------------------|-----------------|-------------------------------------------------------------------|------------------------------------------------------|
| P62259    | 8     | 19  | AcD3-VYQAKLAEQAER-COOH             | REDL↓VYQA     | 4         | 0.48466/0.50846/0.47288                 | 75/47           | 14-3-3 protein epsilon                                            |                                                      |
| P62259    | 10    | 19  | AcD3-QAKLAEQAER-COOH               | DLVY↓QAKL     | 2         | 0.55671                                 | 82/47           | 14-3-3 protein epsilon                                            |                                                      |
| P62259    | 178   | 190 | AcD3-SVFYVEILNSPDR-COOH            | ALNF↓SVFY     | 1         | 0.65232                                 | 48/47           | 14-3-3 protein epsilon                                            |                                                      |
| P62259    | 181   | 190 | AcD3-YEILNSPDR-COOH                | FSVF↓YVEI     | 1         | 0.71381                                 | 56/47           | 14-3-3 protein epsilon                                            |                                                      |
| P68510    | 30    | 42  | AcD3-VTELNEPLSNEDR-COOH            | AMKA↓VTEL     | 3         | 0.5518/0.52405                          | 74/47           | 14-3-3 protein eta                                                |                                                      |
| P61982    | 24    | 42  | AcD3-AAAMKNVTELNEPLSNEER-COOH      | YDDM↓AAAM     | 1         | 0.52726                                 | 64/47           | 14-3-3 protein gamma                                              |                                                      |
| P61982    | 30    | 42  | AcD3-VTELNEPLSNEER-COOH            | AMKN↓VTEL     | 2         | 0.42895                                 | 68/48           | 14-3-3 protein gamma                                              |                                                      |
| P61982    | 33    | 42  | AcD3-LNEPLSNEER-COOH               | NVTE↓LNEP     | 1         | 0.49528                                 | 53/47           | 14-3-3 protein gamma                                              |                                                      |
| O70456    | 7     | 18  | AcD3-IQKAKLAEQAER-COOH             | RASL↓IQKA     | 5         | 0.54673/0.55126                         | 89/45           | 14-3-3 protein sigma                                              | P68254 (7-18)                                        |
| P68254    | 27    | 41  | AcD3-KAVTEQGAELNSNEER-COOH         | ATCM↓KAVT     | 3         | 0.55356/0.39311                         | 127/47          | 14-3-3 protein theta                                              |                                                      |
| P68254    | 45    | 55  | AcD3-SVAYKVVVGR-COOH               | RNLL↓SVAY     | 1         | 0.6112                                  | 75/47           | 14-3-3 protein theta                                              |                                                      |
| P63101    | 7     | 18  | AcD3-VQKAKLAEQAER-COOH             | KNEL↓VQKA     | 2         | 0.52129                                 | 97/45           | 14-3-3 protein zeta/delta                                         | Q9CQV8 (9-20)                                        |
| P63101    | 23    | 41  | AcD3-AACMSVTEQGAELNSNEER-COOH      | YDDM↓AACM     | 6         | 0.47197/0.46382/0.44103/0.45846/0.50997 | 100/44          | 14-3-3 protein zeta/delta                                         |                                                      |
| P63101    | 24    | 41  | AcD3-ACMKSVTEQGAELNSNEER-COOH      | DDMA↓ACMK     | 3         | 0.54575/0.47447                         | 137/44          | 14-3-3 protein zeta/delta                                         |                                                      |
| P63101    | 26    | 41  | AcD3-MKSVTEQGAELNSNEER-COOH        | MAAC↓MKS      | 2         | 0.67068                                 | 131/46          | 14-3-3 protein zeta/delta                                         |                                                      |
| P63101    | 27    | 41  | AcD3-KSVTEQGAELNSNEER-COOH         | AACM↓KSVT     | 2         | 0.56883                                 | 110/47          | 14-3-3 protein zeta/delta                                         |                                                      |
| P63101    | 29    | 41  | AcD3-VTEQGAELNSNEER-COOH           | CMKS↓VTEQ     | 7         | 0.51119/0.47254/0.47117/0.51045         | 79/46           | 14-3-3 protein zeta/delta                                         | P68254 (29-41)                                       |
| P63101    | 44    | 55  | AcD3-LSVAYKVVGR-COOH               | ERNL↓LSVA     | 10        | 0.42402/0.49222/0.47159                 | 87/45           | 14-3-3 protein zeta/delta                                         | P61982 (45-56), P68510 (45-56), Q9CQV8 (46-57)       |
| P63101    | 45    | 55  | AcD3-SVAYKVVGR-COOH                | RNLL↓SVAY     | 4         | 0.66067/0.6267                          | 64/46           | 14-3-3 protein zeta/delta                                         | P61982 (46-56), P68510 (46-56), Q9CQV8 (47-57)       |
| P63101    | 67    | 80  | AcD3-QKTEGAEKQMAR-COOH             | SSIE↓QKTE     | 2         | 0.55076                                 | 85/47           | 14-3-3 protein zeta/delta                                         |                                                      |
| P63101    | 118   | 127 | AcD3-YLKMKGDIYR-COOH               | SKVF↓YLKM     | 2         | 0.6497                                  | 54/48           | 14-3-3 protein zeta/delta                                         | O70456 (120-129), P61982 (123-132), P68510 (123-132) |
| Q8CIH5    | 959   | 968 | AcD3-VETKADSIYR-COOH               | IRSF↓VETK     | 4         | 0.5661/0.52026                          | 64/45           | 1-phosphatidylinositol-4,5-bisphosphate phosphodiesterase gamma-2 |                                                      |
| P62192    | 235   | 249 | AcD3-LAKAVANQTSATFLR-COOH          | GKTL↓LAKA     | 1         | 0.4751                                  | 81/44           | 26S protease regulatory subunit 4                                 |                                                      |
| P54775    | 30    | 43  | AcD3-LGPEPELDELISYR-COOH           | GLSF↓LGPE     | 1         | 0.50969                                 | 50/47           | 26S protease regulatory subunit 6B                                |                                                      |
| P54775    | 164   | 178 | AcD3-YADIGMGDIKQEVRR-COOH          | PDVM↓YADI     | 2         | 0.4417                                  | 96/47           | 26S protease regulatory subunit 6B                                |                                                      |
| P54775    | 191   | 200 | AcD3-YKIGIOPPR-COOH                | HFEL↓YKQI     | 1         | 0.60708                                 | 52/46           | 26S protease regulatory subunit 6B                                |                                                      |
| P46471    | 33    | 43  | AcD3-LKTYGGSTYSR-COOH              | DIAL↓LKTY     | 3         | 0.48321/0.4443                          | 60/47           | 26S protease regulatory subunit 7                                 |                                                      |
| P46471    | 81    | 97  | AcD3-AADKQTLQSEQPLQVAR-COOH        | LWDL↓AADK     | 2         | 0.4448                                  | 103/47          | 26S protease regulatory subunit 7                                 |                                                      |
| P46471    | 122   | 139 | AcD3-VVDLSQVAPTIEEGMR-COOH         | FAKF↓VVDL     | 1         | 0.49635                                 | 57/46           | 26S protease regulatory subunit 7                                 |                                                      |
| P46471    | 126   | 139 | AcD3-SDQVAPTIEEGMR-COOH            | VVDL↓SDQV     | 2         | 0.47037/0.45977                         | 75/45           | 26S protease regulatory subunit 7                                 |                                                      |
| P62196    | 12    | 21  | AcD3-EEGKAGSGLR-COOH               | QMEL↓EEGK     | 6         | 0.45553/0.42531/0.45894                 | 97/47           | 26S protease regulatory subunit 8                                 |                                                      |
| P62196    | 176   | 201 | AcD3-EALGIAQPKGVLLYGGPGTKLLAR-COOH | PELF↓EALG     | 1         | 0.44681                                 | 53/38           | 26S protease regulatory subunit 8                                 |                                                      |
| O35593    | 271   | 282 | AcD3-AIKNVGKQDPKPR-COOH            | PEQL↓AIKN     | 2         | 0.42566                                 | 61/41           | 26S proteasome non-ATPase regulatory subunit 14                   |                                                      |
| O35226    | 207   | 221 | AcD3-GVDPADPELALALR-COOH           | DFEF↓GVDP     | 1         | 0.52427                                 | 50/47           | 26S proteasome non-ATPase regulatory subunit 4                    |                                                      |
| O35226    | 337   | 352 | AcD3-VLENLPGVDPNNAAIR-COOH         | FLQS↓VLEN     | 1         | 0.58867                                 | 54/46           | 26S proteasome non-ATPase regulatory subunit 4                    |                                                      |
| Q3UHX2    | 81    | 88  | AcD3-IDIENPNR-COOH                 | VEGL↓IDIE     | 1         | 0.5767                                  | 53/47           | 28 kDa heat- and acid-stable phosphoprotein                       |                                                      |
| Q99J99    | 217   | 231 | AcD3-LTNEGLEKSPKIKR-COOH           | FTFE↓LTNE     | 3         | 0.45852/0.50891                         | 80/46           | 3-mercaptopyruvate sulfurtransferase                              |                                                      |
| Q9CR16    | 37    | 49  | AcD3-FADIVPKTAENFR-COOH            | VLEL↓FADI     | 1         | 0.3885                                  | 60/47           | 40 kDa peptidyl-prolyl cis-trans isomerase                        |                                                      |
| Q9CR16    | 301   | 312 | AcD3-EMDPSNPKALYR-COOH             | LEAL↓EMDP     | 1         | 0.56593                                 | 51/47           | 40 kDa peptidyl-prolyl cis-trans isomerase                        |                                                      |
| P63323    | 89    | 96  | AcD3-VGLCKIDR-COOH                 | LGEW↓VGLC     | 2         | 0.36101                                 | 53/47           | 40S ribosomal protein S12                                         |                                                      |
| P62843    | 26    | 40  | AcD3-LDMSYEQLMQLYSAR-COOH          | LDQL↓LDMS     | 2         | 0.37708                                 | 75/46           | 40S ribosomal protein S12                                         |                                                      |
| P63276    | 38    | 47  | AcD3-IAIIPSKLLR-COOH               | VCEE↓IAII     | 1         | 0.41523                                 | 42/29           | 40S ribosomal protein S17                                         |                                                      |
| P63276    | 109   | 132 | AcD3-LDFGLSNLQVTPVMNFKTPR-COOH     | MLKL↓LDFG     | 1         | 0.52745                                 | 69/47           | 40S ribosomal protein S17                                         |                                                      |
| P63276    | 118   | 132 | AcD3-QVTQPTVMNFKTPR-COOH           | LSNL↓QVTQ     | 2         | 0.47945                                 | 70/48           | 40S ribosomal protein S17                                         |                                                      |
| P62270    | 29    | 38  | AcD3-AITAIKGVGR-COOH               | KIAF↓AITA     | 3         | 0.33176/0.36954                         | 50/42           | 40S ribosomal protein S18                                         |                                                      |
| P62849    | 24    | 41  | AcD3-VIDVLPHGKATVPKTEIR-COOH       | RKQM↓VIDV     | 2         | 0.39715/0.43347                         | 86/39           | 40S ribosomal protein S24                                         |                                                      |
| P62852    | 68    | 76  | AcD3-ITPAVVSER-COOH                | NYKL↓ITPA     | 1         | 0.42625                                 | 68/45           | 40S ribosomal protein S25                                         |                                                      |
| P97351    | 69    | 82  | AcD3-VSLADLNDEVAFR-COOH            | RVFE↓VSLA     | 2         | 0.47261                                 | 107/48          | 40S ribosomal protein S3a                                         |                                                      |
| P97351    | 72    | 82  | AcD3-ADLNQDEVAFR-COOH              | EVSL↓ADLQ     | 4         | 0.40359/0.40646                         | 68/47           | 40S ribosomal protein S3a                                         |                                                      |
| P97351    | 138   | 146 | AcD3-FCVGFTRK-COOH                 | LLRL↓FCVG     | 1         | 0.40954                                 | 62/47           | 40S ribosomal protein S3a                                         |                                                      |
| P62702    | 21    | 30  | AcD3-DKLTGVFAPR-COOH               | HWML↓DKLT     | 2         | 0.38749                                 | 68/46           | 40S ribosomal protein S4, X isoform                               |                                                      |
| P97461    | 174   | 198 | AcD3-ADELINAAGSSNSYAIKKKDELER-COOH | AECL↓ADEL     | 1         | 0.448                                   | 68/46           | 40S ribosomal protein S5                                          |                                                      |
| P62082    | 31    | 41  | AcD3-EMNSDLKAQLR-COOH              | LLEL↓EMNS     | 2         | 0.34271                                 | 74/47           | 40S ribosomal protein S7                                          |                                                      |

|        |     |     |                                      |           |    |                                         |        |                                              |
|--------|-----|-----|--------------------------------------|-----------|----|-----------------------------------------|--------|----------------------------------------------|
| P62082 | 133 | 143 | AcD3-LVFPSEIVGKR-COOH                | ILED↓LVFP | 9  | 0.40254/0.37404/0.38437/0.33247         | 81/44  | 40S ribosomal protein S7                     |
| P14206 | 140 | 155 | AcD3-VNLPPTIALCNTDSPLR-COOH          | EASY↓VNLP | 1  | 0.3645                                  | 68/47  | 40S ribosomal protein SA                     |
| Q9JLJ2 | 7   | 15  | AcD3-VVQPLNLYR-COOH                  | TGTF↓VVQS | 3  | 0.45148/0.51236/0.55507                 | 64/47  | 4-trimethylaminobutyraldehyde dehydrogenase  |
| Q9JLJ2 | 91  | 107 | AcD3-IATVETINNGKSIFEAR-COOH          | RKDE↓IATV | 2  | 0.56204                                 | 98/47  | 4-trimethylaminobutyraldehyde dehydrogenase  |
| Q9JLJ2 | 94  | 107 | AcD3-VETINNGKSIFEAR-COOH             | EIAT↓VETI | 2  | 0.53835                                 | 68/47  | 4-trimethylaminobutyraldehyde dehydrogenase  |
| Q9JLJ2 | 308 | 326 | AcD3-VVKQTQKIKLGDPLEDTR-COOH         | FINE↓VVKQ | 2  | 0.45502/0.42882                         | 66/40  | 4-trimethylaminobutyraldehyde dehydrogenase  |
| Q9JLJ2 | 18  | 29  | AcD3-ADFEGLLQGRF-COOH                | DGVL↓ADFE | 2  | 0.42914                                 | 80/47  | 5'(3')-deoxyribonucleotidase, cytosolic type |
| Q9D110 | 132 | 145 | AcD3-IFLPGDFDKDGNR-COOH              | GLDL↓IFLP | 2  | 0.62212                                 | 98/47  | 5-formyltetrahydrofolate cyclo-ligase        |
| P63038 | 47  | 60  | AcD3-LADAVAVTMGPKGR-COOH             | GVLD↓LADA | 2  | 0.36736                                 | 69/47  | 60 kDa heat shock protein, mitochondrial     |
| P63038 | 405 | 420 | AcD3-KVGGTSDVEVNEKKDR-COOH           | VAVL↓KVGG | 1  | 0.77801                                 | 119/47 | 60 kDa heat shock protein, mitochondrial     |
| P63038 | 412 | 420 | AcD3-VEVNEKKDR-COOH                  | GTSD↓VEVN | 2  | 0.32888/0.36849                         | 89/47  | 60 kDa heat shock protein, mitochondrial     |
| P63038 | 436 | 446 | AcD3-IVLGGCCALLR-COOH                | VEEG↓IVLG | 1  | 0.37412                                 | 77/44  | 60 kDa heat shock protein, mitochondrial     |
| P63038 | 514 | 526 | AcD3-VEKGIIIDPTKVR-COOH              | FVNM↓VEKG | 1  | 0.43897                                 | 61/39  | 60 kDa heat shock protein, mitochondrial     |
| P14869 | 29  | 44  | AcD3-IVGADNVGSKMQMQR-COOH            | PKCF↓IVGA | 8  | 0.40229/0.37056/0.38675/0.37638/0.41811 | 111/48 | 60S acidic ribosomal protein P0              |
| P14869 | 52  | 62  | AcD3-VVLMGKNTMMR-COOH                | RGKA↓VVLM | 1  | 0.3376                                  | 57/47  | 60S acidic ribosomal protein P0              |
| P14869 | 89  | 99  | AcD3-VFTKEDLLEIR-COOH                | NVGF↓VFTK | 1  | 0.55737                                 | 56/47  | 60S acidic ribosomal protein P0              |
| P14869 | 103 | 112 | AcD3-LANKVPAAR-COOH                  | RDML↓LANK | 3  | 0.34311/0.38145                         | 70/44  | 60S acidic ribosomal protein P0              |
| P14869 | 138 | 149 | AcD3-FQALGITTKISR-COOH               | KTSF↓FQAL | 2  | 0.42897                                 | 88/44  | 60S acidic ribosomal protein P0              |
| P99027 | 10  | 38  | AcD3-AALGNSSPSAKIKKILDSVIEADDDR-COOH | SVLL↓AALG | 1  | 0.49405                                 | 52/47  | 60S acidic ribosomal protein P2              |
| P53026 | 34  | 48  | AcD3-LQISLKNYDPOKDKR-COOH            | ETVE↓LQIS | 5  | 0.39179/0.32975/0.37979                 | 99/45  | 60S ribosomal protein L10a                   |
| P53026 | 35  | 48  | AcD3-QISLKNYDPOKDKR-COOH             | TYEL↓QISL | 2  | 0.39176                                 | 80/46  | 60S ribosomal protein L10a                   |
| P53026 | 111 | 122 | AcD3-LASESLIKQIPR-COOH               | YDAF↓LASE | 5  | 0.41131/0.38137/0.40881                 | 70/43  | 60S ribosomal protein L10a                   |
| P53026 | 112 | 122 | AcD3-ASESLIKQIPR-COOH                | DAFL↓ASES | 1  | 0.59564                                 | 44/43  | 60S ribosomal protein L10a                   |
| Q9CXW4 | 23  | 32  | AcD3-NICVGESEDR-COOH                 | KLCL↓NICV | 2  | 0.42182                                 | 76/45  | 60S ribosomal protein L11                    |
| Q9CXW4 | 24  | 32  | AcD3-ICVGESEDR-COOH                  | LCLN↓ICVG | 1  | 0.44579                                 | 55/45  | 60S ribosomal protein L11                    |
| P35979 | 107 | 114 | AcD3-DEIVNIAR-COOH                   | NITF↓DEIV | 2  | 0.4387                                  | 67/47  | 60S ribosomal protein L12                    |
| P47963 | 147 | 158 | AcD3-ATQLTGPVMPPIR-COOH              | EKLK↓ATQL | 4  | 0.45798/0.39766/0.34938                 | 56/46  | 60S ribosomal protein L13                    |
| P19253 | 22  | 31  | AcD3-IVAKVQLLR-COOH                  | RLAA↓IVAK | 2  | 0.3737                                  | 59/33  | 60S ribosomal protein L13a                   |
| Q9CR57 | 25  | 35  | AcD3-VAIVDVIDQNR-COOH                | AGKL↓VAIV | 4  | 0.37868/0.39682                         | 73/47  | 60S ribosomal protein L14                    |
| Q9CR57 | 111 | 119 | AcD3-KVMKAKKMR-COOH                  | FDRF↓KVMK | 2  | 0.5883/0.51864                          | 49/42  | 60S ribosomal protein L14                    |
| P62717 | 128 | 138 | AcD3-KVEIAAGKCR-COOH                 | IQIM↓KVEE | 1  | 0.55275                                 | 60/47  | 60S ribosomal protein L18a                   |
| P84099 | 124 | 136 | AcD3-YLKVKNVFNKCR-COOH               | YHSL↓YLKV | 1  | 0.60987                                 | 52/37  | 60S ribosomal protein L19                    |
| P84099 | 125 | 136 | AcD3-LKVKGNVFNKCR-COOH               | HSLY↓LKVK | 2  | 0.51244                                 | 75/34  | 60S ribosomal protein L19                    |
| P67984 | 40  | 46  | AcD3-EQFLQER-COOH                    | AANF↓EQFL | 1  | 0.34094                                 | 53/47  | 60S ribosomal protein L22                    |
| P62830 | 63  | 73  | AcD3-ATVKGKPELR-COOH                 | DMVM↓ATVK | 2  | 0.39508/0.36369                         | 49/38  | 60S ribosomal protein L23                    |
| P27659 | 217 | 234 | AcD3-IDVIGVTKGKYGVTSR-COOH           | QDEM↓IDVI | 3  | 0.41303/0.34586                         | 114/43 | 60S ribosomal protein L3                     |
| P27659 | 331 | 343 | AcD3-IMLKGCVGTKKR-COOH               | TNDF↓IMLK | 4  | 0.38239/0.41945                         | 82/42  | 60S ribosomal protein L3                     |
| P27659 | 333 | 343 | AcD3-LKGCYVGTKKR-COOH                | DFIM↓LKGC | 1  | 0.41808                                 | 58/40  | 60S ribosomal protein L3                     |
| P27659 | 334 | 343 | AcD3-KGCYVGTKKR-COOH                 | FIML↓KGCV | 2  | 0.61236                                 | 69/44  | 60S ribosomal protein L3                     |
| P62889 | 46  | 56  | AcD3-VILANCPALR-COOH                 | KAKL↓VILA | 2  | 0.41119                                 | 55/47  | 60S ribosomal protein L30                    |
| P62889 | 49  | 56  | AcD3-ANNCPALR-COOH                   | LVIL↓ANNC | 1  | 0.40797                                 | 51/47  | 60S ribosomal protein L30                    |
| P62889 | 94  | 106 | AcD3-LAIDPGSDIIR-COOH                | RVCT↓LAII | 1  | 0.38945                                 | 51/46  | 60S ribosomal protein L30                    |
| P62889 | 95  | 106 | AcD3-AIDPGSDIIR-COOH                 | VCTL↓AID  | 2  | 0.4178/0.32232                          | 61/47  | 60S ribosomal protein L30                    |
| P62900 | 15  | 23  | AcD3-SAINEVVTR-COOH                  | KKGR↓SAIN | 1  | 0.75295                                 | 72/34  | 60S ribosomal protein L31                    |
| Q62VW7 | 59  | 70  | AcD3-TVINQTQKENLR-COOH               | ARVL↓TVIN | 4  | 0.45525/0.48178                         | 99/46  | 60S ribosomal protein L35                    |
| O55142 | 28  | 36  | AcD3-LKIEGVYAR-COOH                  | HTAL↓LKIE | 2  | 0.39539                                 | 59/45  | 60S ribosomal protein L35a                   |
| O55142 | 50  | 68  | AcD3-VYKANNVTPGGKPNKTR-COOH          | RCAY↓VYKA | 1  | 0.381                                   | 44/43  | 60S ribosomal protein L35a                   |
| Q9D8E6 | 326 | 336 | AcD3-LKLNPKYAKTMR-COOH               | LRIM↓LKLN | 2  | 0.39633                                 | 59/45  | 60S ribosomal protein L4                     |
| P47962 | 145 | 152 | AcD3-YLDAGLAR-COOH                   | AFTC↓YLDA | 1  | 0.48112                                 | 65/47  | 60S ribosomal protein L5                     |
| P47911 | 98  | 113 | AcD3-ATVTKTGGBDKNGTR-COOH            | EKVL↓ATVT | 2  | 0.43202                                 | 98/47  | 60S ribosomal protein L6                     |
| P47911 | 181 | 191 | AcD3-LLVTGPLVINR-COOH                | DSGL↓LLVT | 2  | 0.4263/0.6003                           | 55/37  | 60S ribosomal protein L6                     |
| P47911 | 182 | 191 | AcD3-LVTGPLVINR-COOH                 | SGLL↓LVTG | 1  | 0.39714                                 | 50/40  | 60S ribosomal protein L6                     |
| P47911 | 183 | 191 | AcD3-VTGPLVINR-COOH                  | GILL↓VTGP | 3  | 0.39214/0.40911                         | 53/42  | 60S ribosomal protein L6                     |
| P47911 | 242 | 254 | AcD3-DTEKEVYETEQR-COOH               | GEIF↓DTEK | 1  | 0.44709                                 | 63/48  | 60S ribosomal protein L6                     |
| P47911 | 264 | 280 | AcD3-QILPKIKAVPQLQGYLR-COOH          | AVDL↓QILP | 1  | 0.35779                                 | 71/35  | 60S ribosomal protein L6                     |
| P12970 | 205 | 223 | AcD3-TQVNSDEKAGALAKVEAIR-COOH        | TVAF↓TQVN | 2  | 0.48123/0.43016                         | 65/44  | 60S ribosomal protein L7a                    |
| P51410 | 45  | 54  | AcD3-LSLLGKKKR-COOH                  | INVE↓LSLL | 2  | 0.39642                                 | 47/27  | 60S ribosomal protein L9                     |
| P51410 | 46  | 54  | AcD3-SLLGKKKR-COOH                   | NVEL↓SLLG | 3  | 0.43333/0.34462                         | 54/30  | 60S ribosomal protein L9                     |
| P51410 | 151 | 173 | AcD3-IELVNSAALIQQATTVKNKDIR-COOH     | EGND↓IELV | 1  | 0.37656                                 | 65/42  | 60S ribosomal protein L9                     |
| P51410 | 154 | 173 | AcD3-VSNSAALIQQATTVKNKDIR-COOH       | DIEL↓VSNL | 6  | 0.39418/0.42996/0.41948/0.48589         | 102/44 | 60S ribosomal protein L9                     |
| P51410 | 161 | 173 | AcD3-IQQATTVKNKDIR-COOH              | SAAL↓IQQA | 3  | 0.41496/0.37651                         | 88/44  | 60S ribosomal protein L9                     |
| Q9WUA3 | 359 | 373 | AcD3-CVQMTQDVQKAMDER-COOH            | PLME↓CVQM | 2  | 0.56314                                 | 103/44 | 6-phosphofructokinase type C                 |
| Q9WUA3 | 360 | 373 | AcD3-VQMTQDVQKAMDER-COOH             | LMEC↓VQMT | 10 | 0.44792/0.4778/0.46847/0.37151          | 97/46  | 6-phosphofructokinase type C                 |

|        |     |     |                                      |           |    |                                                                                                                         |        |                                                               |                                                                                                            |
|--------|-----|-----|--------------------------------------|-----------|----|-------------------------------------------------------------------------------------------------------------------------|--------|---------------------------------------------------------------|------------------------------------------------------------------------------------------------------------|
| Q9WUA3 | 362 | 373 | AcD3-MTQDVQKAMDER-COOH               | ECVQ↓MTQD | 2  | 0.57075                                                                                                                 | 70/45  | 6-phosphofructokinase type C                                  |                                                                                                            |
| P12382 | 538 | 554 | AcD3-SLGSDTAVNAAMESCDR-COOH          | GTDF↓SLGS | 1  | 0.61543                                                                                                                 | 94/42  | 6-phosphofructokinase, liver type                             |                                                                                                            |
| P12382 | 701 | 713 | AcD3-ANAPDSACVIGLR-COOH              | GRVF↓ANAP | 2  | 0.52283                                                                                                                 | 65/48  | 6-phosphofructokinase, liver type                             |                                                                                                            |
| Q9DCD0 | 43  | 69  | AcD3-LANEAKGTVVGAQSLKDMVSKLKKPR-COOH | VDDF↓LANE | 1  | 0.42701                                                                                                                 | 41/37  | 6-phosphogluconate dehydrogenase, decarboxylating             |                                                                                                            |
| Q9DCD0 | 62  | 69  | AcD3-VSKLKKPR-COOH                   | LKDM↓VSKL | 2  | 0.47889                                                                                                                 | 49/34  | 6-phosphogluconate dehydrogenase, decarboxylating             |                                                                                                            |
| Q9DCD0 | 97  | 107 | AcD3-IIDGMSSEYR-COOH                 | DTGD↓IID  | 1  | 0.45764                                                                                                                 | 79/47  | 6-phosphogluconate dehydrogenase, decarboxylating             |                                                                                                            |
| Q9DCD0 | 123 | 136 | AcD3-FVGSVSGGEEGAR-COOH              | KGIL↓FVGS | 2  | 0.49645                                                                                                                 | 70/47  | 6-phosphogluconate dehydrogenase, decarboxylating             |                                                                                                            |
| Q9DCD0 | 281 | 288 | AcD3-IGEAVFAR-COOH                   | PVTL↓IGEA | 2  | 0.47906                                                                                                                 | 61/47  | 6-phosphogluconate dehydrogenase, decarboxylating             |                                                                                                            |
| Q9CQ60 | 202 | 214 | AcD3-VATGEGKAAVLKR-COOH              | SLIF↓VATG | 3  | 0.48252/0.54238                                                                                                         | 68/43  | 6-phosphogluconolactonase                                     |                                                                                                            |
| P20029 | 67  | 75  | AcD3-VAFTPEGER-COOH                  | TPSY↓VAFT | 1  | 0.48648                                                                                                                 | 69/47  | 78 kDa glucose-regulated protein                              |                                                                                                            |
| P20029 | 268 | 280 | AcD3-IKLYKKTKGDVVR-COOH              | MEHF↓IKLY | 4  | 0.56395/0.50371                                                                                                         | 93/33  | 78 kDa glucose-regulated protein                              |                                                                                                            |
| P20029 | 314 | 325 | AcD3-FEGEDFSETLVR-COOH               | IESF↓FEGE | 1  | 0.45405                                                                                                                 | 75/46  | 78 kDa glucose-regulated protein                              |                                                                                                            |
| P20029 | 550 | 559 | AcD3-AEEDKLLKER-COOH                 | AEKF↓AEED | 2  | 0.47208                                                                                                                 | 56/47  | 78 kDa glucose-regulated protein                              |                                                                                                            |
| Q8QZT1 | 146 | 162 | AcD3-VAGGMESMSNPVYVMSR-COOH          | QDVM↓VAGG | 1  | 0.7455                                                                                                                  | 60/43  | Acetyl-CoA acetyltransferase, mitochondrial                   |                                                                                                            |
| Q8QZT1 | 291 | 300 | AcD3-VLMTAEAAQR-COOH                 | AAAL↓VLMT | 4  | 0.67767/0.68604                                                                                                         | 66/47  | Acetyl-CoA acetyltransferase, mitochondrial                   |                                                                                                            |
| Q35381 | 121 | 132 | AcD3-FNCEVTNLINAYR-COOH              | SIDL↓FNCE | 2  | 0.53453                                                                                                                 | 65/45  | Acidic leucine-rich nuclear phosphoprotein 32 family member A |                                                                                                            |
| Q9E5T5 | 121 | 128 | AcD3-FGCEVTNR-COOH                   | SIDL↓FGCE | 1  | 0.51173                                                                                                                 | 50/46  | Acidic leucine-rich nuclear phosphoprotein 32 family member B |                                                                                                            |
| Q99KIO | 48  | 56  | AcD3-LEKNINIVR-COOH                  | RYDL↓LEKN | 3  | 0.52982                                                                                                                 | 52/43  | Aconitate hydratase, mitochondrial                            |                                                                                                            |
| Q99KIO | 49  | 56  | AcD3-EKNINIVR-COOH                   | YDLL↓EKNI | 1  | 0.59873                                                                                                                 | 51/44  | Aconitate hydratase, mitochondrial                            |                                                                                                            |
| Q99KIO | 66  | 84  | AcD3-SEKIVGHLLDPPANQEIQR-COOH        | PLTL↓SEKI | 3  | 0.49339/0.504                                                                                                           | 111/47 | Aconitate hydratase, mitochondrial                            |                                                                                                            |
| Q99KIO | 132 | 141 | AcD3-AQVGGKDLR-COOH                  | HLIE↓AQVG | 2  | 0.52051                                                                                                                 | 65/47  | Aconitate hydratase, mitochondrial                            |                                                                                                            |
| Q99KIO | 621 | 633 | AcD3-AINIENKANSVR-COOH               | LLIG↓AINI | 2  | 0.58962                                                                                                                 | 84/47  | Aconitate hydratase, mitochondrial                            |                                                                                                            |
| P60710 | 5   | 28  | AcD3-IAALVVDNGSGMCKAGFAGDDAPR-COOH   | MDDD↓IAAL | 1  | 0.69612                                                                                                                 | 51/47  | Actin, cytoplasmic 1                                          |                                                                                                            |
| P60710 | 7   | 28  | AcD3-ALVVDNGSGMCKAGFAGDDAPR-COOH     | DDIA↓ALVV | 1  | 0.46735                                                                                                                 | 79/45  | Actin, cytoplasmic 1                                          |                                                                                                            |
| P60710 | 8   | 28  | AcD3-LVVDNGSGMCKAGFAGDDAPR-COOH      | DIAA↓LVVD | 72 | 0.46616/0.49005/0.52394/0.51412/0.46655/0.49343/0.46777/0.49905/0.49937/0.50686/0.50403/0.56316/0.48132/0.56838/0.45552 | 124/45 | Actin, cytoplasmic 1                                          |                                                                                                            |
| P60710 | 9   | 28  | AcD3-VVDNGSGMCKAGFAGDDAPR-COOH       | IAAL↓VVDN | 25 | 0.54994/0.41808/0.51933/0.50011/0.50011/0.48178/0.52377/0.5259/0.50062/0.52097/0.46767/0.56942/0.48139/0.559            | 95/43  | Actin, cytoplasmic 1                                          |                                                                                                            |
| P60710 | 45  | 62  | AcD3-VGMGQKQSVYVDEAQSQR-COOH         | QGVM↓VGMG | 2  | 0.74207                                                                                                                 | 98/46  | Actin, cytoplasmic 1                                          | P62737 (47-64), P63260 (45-62), P63268 (46-63), P68033 (47-64), P68134 (47-64)                             |
| P60710 | 54  | 62  | AcD3-VGDEAQSQR-COOH                  | KDSY↓VGDE | 2  | 0.55011/0.50992                                                                                                         | 60/47  | Actin, cytoplasmic 1                                          | P62737 (56-64), P63260 (54-62), P63268 (55-63), P68033 (56-64), P68134 (56-64), Q8BF23 (55-63)             |
| P60710 | 140 | 147 | AcD3-LSLYASGR-COOH                   | IQAV↓LSLY | 4  | 0.71974/0.73503/0.71079                                                                                                 | 76/47  | Actin, cytoplasmic 1                                          | P62737 (142-149), P63260 (140-147), P63268 (141-148), P68033 (142-149), P68134 (142-149), Q8BF23 (141-148) |
| P60710 | 190 | 196 | AcD3-MKILTER-COOH                    | TDYL↓MKIL | 1  | 0.61154                                                                                                                 | 66/46  | Actin, cytoplasmic 1                                          | P62737 (192-198), P63260 (190-196), P63268 (191-197), P68033 (192-198), P68134 (192-198), Q8BF23 (191-197) |
| P60710 | 280 | 290 | AcD3-NSIMKCDVDIR-COOH                | ETTF↓NSIM | 5  | 0.54278/0.57677/0.57011                                                                                                 | 58/47  | Actin, cytoplasmic 1                                          | P63260 (280-290), Q8BF23 (281-291)                                                                         |
| P60710 | 294 | 312 | AcD3-YANTVLSGGTTMPYGIADR-COOH        | RKDL↓YANT | 23 | 0.41583/0.53374/0.46953/0.44477/0.48859/0.54949/0.47862/0.43169/0.48746/0.44507/0.48126                                 | 121/47 | Actin, cytoplasmic 1                                          | P63260 (294-312)                                                                                           |
| P60710 | 297 | 312 | AcD3-TVLSGGTTMPYGIADR-COOH           | LYAN↓TVLS | 2  | 0.69458                                                                                                                 | 119/47 | Actin, cytoplasmic 1                                          | P63260 (297-312)                                                                                           |
| P60710 | 298 | 312 | AcD3-VLSGGTTMPYGIADR-COOH            | YANT↓VLSG | 2  | 0.48684                                                                                                                 | 67/47  | Actin, cytoplasmic 1                                          | P62737 (300-314), P63260 (298-312), P63268 (299-313), P68033 (300-314)                                     |
| P60710 | 300 | 312 | AcD3-SGGTTMPYGIADR-COOH              | NTVL↓SGGT | 3  | 0.7736/0.79715                                                                                                          | 77/45  | Actin, cytoplasmic 1                                          | P62737 (302-314), P63260 (300-312), P63268 (301-313), P68033 (302-314), P68134 (302-314)                   |
| P60710 | 357 | 372 | AcD3-ISKQEYDESPSIVHR-COOH            | QQMW↓ISKQ | 1  | 0.72155                                                                                                                 | 90/47  | Actin, cytoplasmic 1                                          | P63260 (357-372)                                                                                           |
| P63260 | 5   | 28  | AcD3-IAALVIDNGSGMCKAGFAGDDAPR-COOH   | MEEE↓IAAL | 3  | 0.43713/0.47818                                                                                                         | 92/46  | Actin, cytoplasmic 2                                          |                                                                                                            |
| P63260 | 7   | 28  | AcD3-ALVIDNGSGMCKAGFAGDDAPR-COOH     | EElA↓ALVI | 4  | 0.483/0.46624/0.49607                                                                                                   | 110/45 | Actin, cytoplasmic 2                                          |                                                                                                            |
| P63260 | 8   | 28  | AcD3-LVIDNGSGMCKAGFAGDDAPR-COOH      | EIAA↓LVID | 9  | 0.46663/0.47533/0.4876                                                                                                  | 105/45 | Actin, cytoplasmic 2                                          |                                                                                                            |
| P63260 | 9   | 28  | AcD3-VIDNGSGMCKAGFAGDDAPR-COOH       | IAAL↓VIDN | 9  | 0.55943/0.4869/0.49886/0.47703/0.49243/0.51238                                                                          | 86/44  | Actin, cytoplasmic 2                                          |                                                                                                            |
| P63260 | 105 | 116 | AcD3-LTEAPLNPKANR-COOH               | HPVL↓LTEA | 57 | 0.49143/0.50235/0.50051/0.50992/0.48862/0.42975/0.46959/0.48899/0.46723                                                 | 94/46  | Actin, cytoplasmic 2                                          | P60710 (105-116), P62737 (107-118), P63268 (106-117), P68033 (107-118), P68134 (107-118)                   |

|        |     |     |                                    |           |    |                                                                               |  |        |                                               |                                                                                                            |
|--------|-----|-----|------------------------------------|-----------|----|-------------------------------------------------------------------------------|--|--------|-----------------------------------------------|------------------------------------------------------------------------------------------------------------|
| P63260 | 137 | 147 | AcD3-QAVLSLYASGR-COOH              | YVAI↓QAVL | 3  | 0.73398                                                                       |  | 75/47  | Actin, cytoplasmic 2                          | P60710 (137-147), P62737 (139-149), P63268 (138-148), P68033 (139-149), P68134 (139-149), Q8BF23 (138-148) |
| P61161 | 55  | 65  | AcD3-LMVGDEASELR-COOH              | EIKD↓LMVG | 3  | 0.43835/0.49659                                                               |  | 70/47  | Actin-related protein 2                       |                                                                                                            |
| P61161 | 56  | 65  | AcD3-MVGDSEASELR-COOH              | IKDL↓MVG  | 1  | 0.41417                                                                       |  | 63/46  | Actin-related protein 2                       |                                                                                                            |
| P61161 | 69  | 80  | AcD3-EVNYPMENGIVR-COOH             | RSML↓EVNY | 1  | 0.53753                                                                       |  | 54/47  | Actin-related protein 2                       |                                                                                                            |
| P61161 | 109 | 120 | AcD3-LTEPPMNPPTKNR-COOH            | CKIL↓LTEP | 1  | 0.49838                                                                       |  | 58/48  | Actin-related protein 2                       |                                                                                                            |
| Q9ROQ6 | 157 | 167 | AcD3-LAAGSCDFKCR-COOH              | NNVL↓LAAG | 2  | 0.53226                                                                       |  | 58/45  | Actin-related protein 2/3 complex subunit 1A  | Q9WV32 (157-167)                                                                                           |
| Q9JM76 | 55  | 66  | AcD3-FKNEYKNEADR-COOH              | ANVF↓FKNY | 2  | 0.63281                                                                       |  | 76/48  | Actin-related protein 2/3 complex subunit 3   |                                                                                                            |
| P59999 | 20  | 32  | AcD3-LCLENFSSQVVER-COOH            | LQAA↓LCLE | 1  | 0.55698                                                                       |  | 72/47  | Actin-related protein 2/3 complex subunit 4   |                                                                                                            |
| P59999 | 23  | 32  | AcD3-ENFSSQVVER-COOH               | ALCL↓ENFS | 4  | 0.50977/0.55488                                                               |  | 77/47  | Actin-related protein 2/3 complex subunit 4   |                                                                                                            |
| P59999 | 25  | 32  | AcD3-FSSQVVER-COOH                 | CLEN↓FSSQ | 1  | 0.68488                                                                       |  | 62/47  | Actin-related protein 2/3 complex subunit 4   |                                                                                                            |
| P59999 | 47  | 55  | AcD3-LLQPVITSR-COOH                | SKEL↓LLQP | 4  | 0.48666/0.46605/0.38962                                                       |  | 57/41  | Actin-related protein 2/3 complex subunit 4   |                                                                                                            |
| P59999 | 63  | 71  | AcD3-IEGSINSVR-COOH                | EKVL↓IEGS | 2  | 0.47378                                                                       |  | 76/46  | Actin-related protein 2/3 complex subunit 4   |                                                                                                            |
| Q9CPW4 | 25  | 47  | AcD3-VDEEDGGDQAGPDEGEVDSCLR-COOH   | ENKF↓VDEE | 1  | 0.50065                                                                       |  | 109/37 | Actin-related protein 2/3 complex subunit 5   |                                                                                                            |
| Q9CPW4 | 54  | 74  | AcD3-ALQAAALKNPINTKSQAVKDR-COOH    | NMTA↓ALQA | 1  | 0.43996                                                                       |  | 57/41  | Actin-related protein 2/3 complex subunit 5   |                                                                                                            |
| Q9CPW4 | 58  | 74  | AcD3-ALKNPINTKSQAVKDR-COOH         | ALQA↓ALKN | 4  | 0.48153/0.48394/0.48436                                                       |  | 87/42  | Actin-related protein 2/3 complex subunit 5   |                                                                                                            |
| Q9CPW4 | 60  | 74  | AcD3-KNPPINTKSQAVKDR-COOH          | QAAL↓KNPP | 2  | 0.47557                                                                       |  | 94/44  | Actin-related protein 2/3 complex subunit 5   |                                                                                                            |
| Q9CPW4 | 134 | 143 | AcD3-AAGGVGSIVR-COOH               | EKAL↓AAGG | 2  | 0.54598                                                                       |  | 82/45  | Actin-related protein 2/3 complex subunit 5   |                                                                                                            |
| Q99Y9  | 35  | 49  | AcD3-IAIKESAKVGDQAQR-COOH          | IPSC↓IAIK | 4  | 0.49919/0.49463                                                               |  | 86/45  | Actin-related protein 3                       |                                                                                                            |
| Q99Y9  | 37  | 49  | AcD3-IKESAKVGDQAQR-COOH            | SCIA↓IKES | 7  | 0.49523/0.51885/0.46845                                                       |  | 88/47  | Actin-related protein 3                       |                                                                                                            |
| Q99Y9  | 222 | 230 | AcD3-ETAKAVKER-COOH                | EQSL↓ETAK | 2  | 0.53183                                                                       |  | 77/46  | Actin-related protein 3                       |                                                                                                            |
| Q99Y9  | 299 | 312 | AcD3-VVDEVIQNCIPDIVR-COOH          | PISE↓VVDE | 1  | 0.46107                                                                       |  | 71/48  | Actin-related protein 3                       |                                                                                                            |
| Q99Y9  | 319 | 329 | AcD3-IVLSGGSTMFR-COOH              | LYKN↓IVLS | 4  | 0.53868/0.47055                                                               |  | 105/48 | Actin-related protein 3                       |                                                                                                            |
| Q99Y9  | 391 | 409 | AcD3-YQVCHTKKDYEEIGPSICR-COOH      | TFEF↓YQVC | 1  | 0.44651                                                                       |  | 54/47  | Actin-related protein 3                       |                                                                                                            |
| P31786 | 7   | 15  | AcD3-DKAAAEVKR-COOH                | QAEF↓DKAA | 1  | 0.51871                                                                       |  | 52/47  | Acyl-CoA-binding protein                      |                                                                                                            |
| Q9D1J1 | 68  | 89  | AcD3-FAQAPVDQPGTAVESVTDSSR-COOH    | SGEL↓FAQA | 1  | 0.53802                                                                       |  | 67/47  | Adaptin ear-binding coat-associated protein 2 |                                                                                                            |
| Q9WTP6 | 129 | 137 | AcD3-SIQDSLIR-COOH                 | VIEF↓SIQD | 4  | 0.45561/0.45062                                                               |  | 65/46  | Adenylate kinase 2, mitochondrial             |                                                                                                            |
| P54822 | 388 | 396 | AcD3-AMVKAAGSR-COOH                | NJIM↓AMVK | 4  | 0.39401/0.38869                                                               |  | 64/47  | Adenylosuccinate lyase                        |                                                                                                            |
| P28650 | 53  | 62  | AcD3-LATDADIVSR-COOH               | VVDL↓LATD | 4  | 0.55692/0.54726                                                               |  | 97/48  | Adenylosuccinate synthetase isozyme 1         |                                                                                                            |
| P46664 | 50  | 59  | AcD3-LAQDADIVCR-COOH               | VVDL↓LAQD | 1  | 0.53868                                                                       |  | 54/47  | Adenylosuccinate synthetase isozyme 2         |                                                                                                            |
| P40124 | 387 | 394 | AcD3-IVEIINSR-COOH                 | DVVG↓IVEI | 3  | 0.53978/0.50608                                                               |  | 57/45  | Adenylyl cyclase-associated protein 1         |                                                                                                            |
| Q9JKX6 | 35  | 43  | AcD3-YMDPTGKTR-COOH                | EKTT↓YMDP | 1  | 0.53036                                                                       |  | 53/46  | ADP-sugar pyrophosphatase                     |                                                                                                            |
| Q9JII6 | 47  | 72  | AcD3-ASVYGNTEIGEALKEVSGSKAVPR-COOH | HIDC↓ASVY | 3  | 0.56159/0.57455                                                               |  | 80/47  | Alcohol dehydrogenase [NADP+]                 |                                                                                                            |
| Q9JII6 | 229 | 243 | AcD3-LEPVLALAEKHKGR-COOH           | EPVL↓LEEP | 4  | 0.52222/0.60061                                                               |  | 85/44  | Alcohol dehydrogenase [NADP+]                 |                                                                                                            |
| Q9JII6 | 236 | 243 | AcD3-ALAEKHKGR-COOH                | PVVL↓ALAE | 1  | 0.59522                                                                       |  | 48/46  | Alcohol dehydrogenase [NADP+]                 |                                                                                                            |
| Q57119 | 558 | 567 | AcD3-VAEGGAKDIR-COOH               | VSSY↓VAEG | 2  | 0.49118                                                                       |  | 83/47  | Aldehyde dehydrogenase family 16 member A1    |                                                                                                            |
| P47738 | 69  | 86  | AcD3-QVAEKNKEDVDKAVKAAR-COOH       | EVIC↓QVAE | 1  | 0.64135                                                                       |  | 80/47  | Aldehyde dehydrogenase, mitochondrial         |                                                                                                            |
| P47738 | 70  | 86  | AcD3-VAEKNKEDVDKAVKAAR-COOH        | VICQ↓VAEG | 2  | 0.64644                                                                       |  | 69/46  | Aldehyde dehydrogenase, mitochondrial         |                                                                                                            |
| P47738 | 272 | 283 | AcD3-IQVAAGSSNLKR-COOH             | VGHL↓IQVA | 1  | 0.49519                                                                       |  | 46/46  | Aldehyde dehydrogenase, mitochondrial         |                                                                                                            |
| P45376 | 259 | 269 | AcD3-VVIPKSVTPVR-COOH              | QRNL↓VVIP | 2  | 0.43795/0.51674                                                               |  | 48/39  | Aldose reductase                              |                                                                                                            |
| P45376 | 280 | 294 | AcD3-EVSSEDMATLSYNR-COOH           | VFDF↓EVSS | 2  | 0.53594                                                                       |  | 95/45  | Aldose reductase                              |                                                                                                            |
| Q7TPR4 | 555 | 565 | AcD3-KATLPDADKER-COOH              | HEQF↓KATL | 1  | 0.43282                                                                       |  | 51/47  | Alpha-actinin-1                               |                                                                                                            |
| O88990 | 352 | 359 | AcD3-NLQTKLR-COOH                  | EINF↓NLQ  | 4  | 0.4835/0.43493                                                                |  | 68/44  | Alpha-actinin-3                               | P57780 (359-366), Q7TPR4 (339-346), Q9JII6 (346-353)                                                       |
| P57780 | 272 | 281 | AcD3-AQKAETAANR-COOH               | AFSG↓AQKA | 2  | 0.52821                                                                       |  | 70/48  | Alpha-actinin-4                               | Q7TPR4 (252-261)                                                                                           |
| P57780 | 355 | 366 | AcD3-EINFNTLQTKLR-COOH             | KCQL↓EINF | 1  | 0.44529                                                                       |  | 49/45  | Alpha-actinin-4                               | O88990 (348-359), Q7TPR4 (335-346), Q9JII6 (342-353)                                                       |
| P61164 | 212 | 220 | AcD3-EIVKAIKER-COOH                | SSEF↓EIVK | 1  | 0.35428                                                                       |  | 40/40  | Alpha-centractin                              |                                                                                                            |
| P61164 | 298 | 313 | AcD3-IVLSGGSTLKFQGGDR-COOH         | LFSN↓IVLS | 1  | 0.53777                                                                       |  | 48/46  | Alpha-centractin                              | Q8R5C5 (298-313)                                                                                           |
| P17182 | 22  | 32  | AcD3-VDLYTAGLFR-COOH               | PTVE↓VDLY | 10 | 0.49323/0.49369/0.48971/0.50009                                               |  | 89/45  | Alpha-enolase                                 | P17183 (22-32)                                                                                             |
| P17182 | 24  | 32  | AcD3-LYTAKGLFR-COOH                | VEVD↓LYTA | 1  | 0.52559                                                                       |  | 73/45  | Alpha-enolase                                 | P17183 (24-32)                                                                                             |
| P17182 | 25  | 32  | AcD3-YTAKGLFR-COOH                 | EVDL↓YTAK | 14 | 0.48559/0.4815/0.49854                                                        |  | 71/45  | Alpha-enolase                                 | P17183 (25-32)                                                                                             |
| P17182 | 43  | 50  | AcD3-IYEALER-COOH                  | ASTG↓IYEA | 1  | 0.42549                                                                       |  | 47/46  | Alpha-enolase                                 | P17183 (43-50), P21550 (43-50)                                                                             |
| P17182 | 114 | 132 | AcD3-VSLAVCKAGAVEKGVPLR-COOH       | AILG↓VSLA | 2  | 0.74253/0.6344                                                                |  | 64/44  | Alpha-enolase                                 |                                                                                                            |
| P17182 | 117 | 132 | AcD3-AVCKAGAVEKGVPLR-COOH          | GVSL↓AVCK | 40 | 0.46751/0.45224/0.49505/0.44347/0.43109/0.52483/0.4758/0.49689/0.4812/0.42481 |  | 101/45 | Alpha-enolase                                 |                                                                                                            |
| P17182 | 118 | 132 | AcD3-VCKAGAVEKGVPLR-COOH           | VSLA↓VCKA | 3  | 0.6054/0.55185                                                                |  | 82/46  | Alpha-enolase                                 |                                                                                                            |
| P17182 | 168 | 179 | AcD3-FMILPVGASSFR-COOH             | AMQE↓FMIL | 2  | 0.44158                                                                       |  | 74/47  | Alpha-enolase                                 |                                                                                                            |
| P17182 | 169 | 179 | AcD3-MILPVGASSFR-COOH              | MQEF↓MILP | 3  | 0.4625/0.45986                                                                |  | 62/47  | Alpha-enolase                                 |                                                                                                            |
| P17182 | 172 | 179 | AcD3-PVGASSFR-COOH                 | FMIL↓PVG  | 2  | 0.49543                                                                       |  | 65/47  | Alpha-enolase                                 |                                                                                                            |
| P17182 | 240 | 253 | AcD3-VVIGMDVAASEFYR-COOH           | YTDQ↓VVIG | 2  | 0.45235/0.43375                                                               |  | 102/48 | Alpha-enolase                                 | P21550 (240-253)                                                                                           |
| P17182 | 244 | 253 | AcD3-MDVAASEFYR-COOH               | VVIG↓MDVA | 2  | 0.74388                                                                       |  | 74/44  | Alpha-enolase                                 | P17183 (244-253), P21550 (244-253)                                                                         |
| P17182 | 313 | 327 | AcD3-IQVVGDITVTNPKR-COOH           | ASAG↓IQVV | 2  | 0.49719                                                                       |  | 92/46  | Alpha-enolase                                 |                                                                                                            |

|        |     |     |                                  |            |    |                                                        |        |                                                                         |                                                      |
|--------|-----|-----|----------------------------------|------------|----|--------------------------------------------------------|--------|-------------------------------------------------------------------------|------------------------------------------------------|
| P17182 | 320 | 327 | AcD3-LTVNPKR-COOH                | VGDD↓LTVT  | 2  | 0.50678/0.50259                                        | 54/43  | Alpha-enolase                                                           | P17183 (320-327), P21550 (320-327)                   |
| P17182 | 381 | 400 | AcD3-IADLVVGLCTGQIKTGAPCR-COOH   | EDTF↓IADL  | 2  | 0.43585/0.47727                                        | 64/47  | Alpha-enolase                                                           | P17183 (381-400), P21550 (381-400)                   |
| P17182 | 384 | 400 | AcD3-LVVLCTGQIKTGAPCR-COOH       | FIAD↓LVVG  | 3  | 0.47918/0.54778                                        | 66/47  | Alpha-enolase                                                           | P17183 (384-400), P21550 (384-400)                   |
| P17182 | 385 | 400 | AcD3-VVGLCTGQIKTGAPCR-COOH       | IADL↓VVGL  | 2  | 0.47194                                                | 59/47  | Alpha-enolase                                                           | P17183 (385-400), P21550 (385-400)                   |
| P17182 | 389 | 400 | AcD3-CTGQIKTGAPCR-COOH           | VVGL↓CTGQ  | 2  | 0.4952/0.48151                                         | 73/47  | Alpha-enolase                                                           | P17183 (389-400), P21550 (389-400)                   |
| P17182 | 415 | 426 | AcD3-EELGSKAKFAGR-COOH           | LRIE↓EELG  | 2  | 0.68565                                                | 69/46  | Alpha-enolase                                                           |                                                      |
| P17182 | 418 | 426 | AcD3-GSKAKFAGR-COOH              | EEEL↓GSKA  | 5  | 0.51144/0.47771                                        | 60/46  | Alpha-enolase                                                           |                                                      |
| Q9EPC1 | 30  | 39  | AcD3-LGKLGTLAR-COOH              | DDSF↓LGKL  | 2  | 0.66827                                                | 63/40  | Alpha-parvin                                                            | Q9E546 (23-32)                                       |
| P31230 | 177 | 185 | AcD3-VDVGEAAPR-COOH              | YVEE↓VDVG  | 2  | 0.41902                                                | 71/47  | Aminoacyl tRNA synthetase complex-interacting multifunctional protein 1 |                                                      |
| P59672 | 475 | 489 | AcD3-LLTAETKILGTTDGR-COOH        | PVEL↓LLTA  | 2  | 0.7072                                                 | 60/45  | Ankyrin repeat and SAM domain-containing protein 1A                     |                                                      |
| P10107 | 4   | 12  | AcD3-VSEFLKQAR-COOH              | MAM↓VSEF   | 1  | 0.63765                                                | 63/46  | Annexin A1                                                              |                                                      |
| P10107 | 63  | 72  | AcD3-ATIIDILTKR-COOH             | GVDE↓ATII  | 2  | 0.57649/0.52328                                        | 84/38  | Annexin A1                                                              |                                                      |
| P10107 | 110 | 124 | AcD3-AMLKTPAQFADDELRCOOH         | EVVL↓AMLK  | 1  | 0.65272                                                | 72/48  | Annexin A1                                                              |                                                      |
| P10107 | 112 | 124 | AcD3-LKTPAQFADDELRCOOH           | VLAM↓LKTP  | 3  | 0.64144/0.45643                                        | 77/48  | Annexin A1                                                              |                                                      |
| P10107 | 138 | 144 | AcD3-IEILTR-COOH                 | EDTL↓IEIL  | 3  | 0.64367/0.56449                                        | 66/42  | Annexin A1                                                              | O35639 (114-120)                                     |
| P10107 | 181 | 188 | AcD3-LALAKGR-COOH                | RKAL↓LALA  | 6  | 0.57929/0.54928                                        | 81/45  | Annexin A1                                                              |                                                      |
| P10107 | 193 | 204 | AcD3-SVNDQLADTDAR-COOH           | CODL↓SVNQ  | 6  | 0.72538/0.60815/0.58279                                | 92/47  | Annexin A1                                                              |                                                      |
| P10107 | 222 | 228 | AcD3-TTILTSR-COOH                | VNVF↓TTIL  | 2  | 0.54285                                                | 70/45  | Annexin A1                                                              |                                                      |
| P10107 | 278 | 292 | AcD3-FAEKLYEAMKAGTR-COOH         | TPAF↓FAEK  | 5  | 0.6426/0.62111                                         | 95/48  | Annexin A1                                                              |                                                      |
| P10107 | 283 | 292 | AcD3-YEAMKAGTR-COOH              | AEKL↓YEAM  | 4  | 0.44639/0.6636                                         | 67/47  | Annexin A1                                                              |                                                      |
| P07356 | 41  | 63  | AcD3-NIETAVTKGVDEVITVNLNRCOOH    | RDAL↓NIET  | 1  | 0.48159                                                | 63/42  | Annexin A2                                                              |                                                      |
| P07356 | 45  | 63  | AcD3-AVTKGVDEVITVNLNRCOOH        | NIET↓AVKT  | 1  | 0.57087                                                | 53/41  | Annexin A2                                                              |                                                      |
| P07356 | 54  | 63  | AcD3-VTIVNLNRCOOH                | GVDE↓VTIV  | 5  | 0.52785/0.55071/0.48752                                | 95/43  | Annexin A2                                                              |                                                      |
| P07356 | 56  | 63  | AcD3-IVNLTNR-COOH                | DEVT↓IVNI  | 3  | 0.51032/0.54268                                        | 72/42  | Annexin A2                                                              |                                                      |
| P07356 | 172 | 178 | AcD3-VALAKGR-COOH                | RKLM↓VALA  | 2  | 0.60681                                                | 50/41  | Annexin A2                                                              |                                                      |
| O35639 | 42  | 48  | AcD3-INILTR-COOH                 | EKTL↓INIL  | 3  | 0.59805/0.55984/0.5547                                 | 52/46  | Annexin A3                                                              |                                                      |
| O35639 | 300 | 312 | AcD3-YSAIQSDTSGDYR-COOH          | GYSL↓YSAI  | 1  | 0.68046                                                | 81/45  | Annexin A3                                                              |                                                      |
| P97429 | 110 | 116 | AcD3-IEILASR-COOH                | EGCL↓IEIL  | 2  | 0.64116                                                | 69/45  | Annexin A4                                                              | O35640 (117-123), P14824 (116-122), Q9QZ10 (113-119) |
| P97429 | 299 | 308 | AcD3-IKGDTSQDYR-COOH             | LYSF↓IKGD  | 1  | 0.7082                                                 | 53/47  | Annexin A4                                                              |                                                      |
| P48036 | 109 | 115 | AcD3-TEIASR-COOH                 | EKVL↓TEII  | 1  | 0.5678                                                 | 64/44  | Annexin A5                                                              |                                                      |
| P48036 | 136 | 149 | AcD3-EDDVVGGTSGYYQR-COOH         | GSNL↓EDDV  | 1  | 0.51155                                                | 59/43  | Annexin A5                                                              |                                                      |
| P14824 | 609 | 624 | AcD3-YKSMKAGTDEKTLTR-COOH        | ADKL↓YKSM  | 3  | 0.63613/0.70904                                        | 95/47  | Annexin A6                                                              |                                                      |
| Q07076 | 183 | 190 | AcD3-IVDVVSNR-COOH               | DEQA↓IVDV  | 2  | 0.54395                                                | 61/46  | Annexin A7                                                              |                                                      |
| Q9DBG3 | 18  | 30  | AcD3-LKAEILNEKKEKR-COOH          | EIFE↓LKAEL | 1  | 0.67898                                                | 89/43  | AP-2 complex subunit beta                                               |                                                      |
| Q9DBG3 | 19  | 30  | AcD3-KAEILNEKKEKR-COOH           | IFEL↓KAEI  | 2  | 0.54305                                                | 103/44 | AP-2 complex subunit beta                                               |                                                      |
| Q8VB16 | 895 | 913 | AcD3-EETPELSATKPEGTPVPPAR-COOH   | SLQL↓EETP  | 2  | 0.56509                                                | 105/48 | Apolipoprotein B-100 receptor                                           |                                                      |
| O35841 | 33  | 43  | AcD3-DGVKGGTKEKR-COOH            | QVIL↓DGVK  | 2  | 0.64026                                                | 61/46  | Apoptosis inhibitor 5                                                   |                                                      |
| Q9EPB4 | 132 | 148 | AcD3-DALHGSVLTGEGYQAVR-COOH      | DGVL↓DALH  | 1  | 0.57539                                                | 63/47  | Apoptosis-associated speck-like protein containing a CARD               |                                                      |
| Q9EPB4 | 140 | 148 | AcD3-TEGQYQAVR-COOH              | GSVL↓TEGQ  | 2  | 0.57134                                                | 62/47  | Apoptosis-associated speck-like protein containing a CARD               |                                                      |
| Q8K2K6 | 48  | 57  | AcD3-VCTCSGSLR-COOH              | VGSE↓VCTS  | 2  | 0.5761                                                 | 56/44  | Arf-GAP domain and FG repeats-containing protein 1                      |                                                      |
| Q8K2K6 | 174 | 186 | AcD3-NKGTSPSQPVVGR-COOH          | ALHL↓NKGT  | 1  | 0.7063                                                 | 65/47  | Arf-GAP domain and FG repeats-containing protein 1                      |                                                      |
| Q80WC7 | 135 | 143 | AcD3-LQEKYEKKR-COOH              | VKEF↓LQEK  | 2  | 0.63123                                                | 64/44  | Arf-GAP domain and FG repeats-containing protein 2                      | Q8K2K6 (117-125)                                     |
| Q8K2H4 | 722 | 732 | AcD3-MASDDPEKLSR-COOH            | DFSL↓MASD  | 1  | 0.6175                                                 | 58/47  | Arf-GAP with coiled-coil, ANK repeat and PH domain-containing protein 1 |                                                      |
| Q61176 | 9   | 21  | AcD3-EIIGAPFSKQPR-COOH           | PKSL↓EIIG  | 5  | 0.59262/0.60698/0.59052                                | 81/46  | Arginase-1                                                              |                                                      |
| Q61176 | 55  | 71  | AcD3-FVDVPNDSFQVKNPR-COOH        | GDLA↓FVDV  | 1  | 0.66857                                                | 59/47  | Arginase-1                                                              |                                                      |
| Q61176 | 56  | 71  | AcD3-VDVPNDSSFQVKNPR-COOH        | DIAF↓VDVP  | 25 | 0.5887/0.65322/0.64472/0.66937/0.61932/0.61432/0.64961 | 79/47  | Arginase-1                                                              |                                                      |
| Q61176 | 81  | 92  | AcD3-AGVVAEVQKNGR-COOH           | NEEL↓AGVV  | 2  | 0.73053                                                | 95/47  | Arginase-1                                                              |                                                      |
| Q61176 | 302 | 308 | AcD3-ACFGTQR-COOH                | ALTL↓ACFG  | 1  | 0.69483                                                | 48/45  | Arginase-1                                                              |                                                      |
| P16460 | 224 | 244 | AcD3-EIEFKKGPVVKVTNIKDGTTTR-COOH | PDVL↓EIEF  | 1  | 0.42759                                                | 55/41  | Argininosuccinate synthase                                              |                                                      |
| P16460 | 225 | 244 | AcD3-IEFKKGPVVKVTNIKDGTTTR-COOH  | DVLE↓IEFK  | 1  | 0.38941                                                | 48/39  | Argininosuccinate synthase                                              |                                                      |
| Q8BPA7 | 57  | 65  | AcD3-VOSQKENER-COOH              | PTIY↓VDSQ  | 2  | 0.59775                                                | 73/47  | Asparaginyl-tRNA synthetase, cytoplasmic                                |                                                      |
| Q922B2 | 34  | 43  | AcD3-MIQSQEKPPDR-COOH            | GISS↓MIQS  | 1  | 0.46369                                                | 56/47  | Aspartyl-tRNA synthetase, cytoplasmic                                   |                                                      |
| Q922B2 | 35  | 43  | AcD3-IQSQEKPPDR-COOH             | ISSM↓IQSQ  | 2  | 0.48177                                                | 50/47  | Aspartyl-tRNA synthetase, cytoplasmic                                   |                                                      |
| Q9CVD2 | 341 | 353 | AcD3-SLETAKDNLKAER-COOH          | AVTM↓SLET  | 1  | 0.71646                                                | 64/47  | Ataxin-3                                                                |                                                      |
| Q91V92 | 21  | 28  | AcD3-TTSAIQNR-COOH               | KYIC↓TTSA  | 1  | 0.50725                                                | 51/48  | ATP-citrate synthase                                                    |                                                      |
| Q91V92 | 52  | 65  | AcD3-SQSLVVKPDQLIKR-COOH         | PWLL↓SQSL  | 1  | 0.67029                                                | 48/41  | ATP-citrate synthase                                                    |                                                      |
| Q91V92 | 56  | 65  | AcD3-VVKPDQLIKR-COOH             | SQSL↓VVKP  | 4  | 0.60672                                                | 57/37  | ATP-citrate synthase                                                    |                                                      |
| Q91V92 | 438 | 452 | AcD3-LLNASGSTSTPAPSR-COOH        | TANF↓LLNA  | 1  | 0.47434                                                | 51/48  | ATP-citrate synthase                                                    |                                                      |
| Q91V92 | 439 | 452 | AcD3-LNASGSTSTPAPSR-COOH         | ANFL↓LNAS  | 2  | 0.60881                                                | 75/47  | ATP-citrate synthase                                                    |                                                      |
| Q91V92 | 584 | 597 | AcD3-IAIIAEGIPALTR-COOH          | QIRT↓IAII  | 1  | 0.62194                                                | 68/44  | ATP-citrate synthase                                                    |                                                      |

|        |     |     |                                  |           |   |                               |        |                                                                 |                                                |
|--------|-----|-----|----------------------------------|-----------|---|-------------------------------|--------|-----------------------------------------------------------------|------------------------------------------------|
| Q91V92 | 586 | 597 | AcD3-IAEIGPEALTR-COOH            | RTIA↓IAIE | 2 | 0.60643                       | 68/45  | ATP-citrate synthase                                            |                                                |
| Q61655 | 70  | 81  | AcD3-VDNTNQVEVLQR-COOH           | RSNL↓VDNT | 2 | 0.55617                       | 63/48  | ATP-dependent RNA helicase DDX19A                               |                                                |
| Q922H5 | 856 | 863 | AcD3-VTKAVYVR-COOH               | PDML↓VTKA | 1 | 0.56764                       | 46/42  | Band 4.1-like protein 1                                         |                                                |
| O70318 | 760 | 773 | AcD3-LEEPGQGAQVVER-COOH          | CDEE↓LEEE | 2 | 0.61603/0.63656               | 54/48  | Band 4.1-like protein 2                                         |                                                |
| O70318 | 761 | 773 | AcD3-EEEPGQGAQVVER-COOH          | DEEL↓EEEP | 4 | 0.63724/0.65185               | 107/48 | Band 4.1-like protein 2                                         |                                                |
| O70318 | 861 | 869 | AcD3-VTISDASQR-COOH              | KTEM↓VTIS | 2 | 0.6892                        | 56/48  | Band 4.1-like protein 2                                         |                                                |
| O54962 | 11  | 33  | AcD3-VAEPMGKPVGLAGIDVLSKR-COOH   | HRDF↓VAEP | 2 | 0.45682                       | 61/46  | Barrier-to-autointegration factor                               |                                                |
| O88597 | 98  | 112 | AcD3-IGEASDGGTMENLSR-COOH        | SFTL↓IGEA | 1 | 0.61531                       | 80/45  | Beclin-1                                                        |                                                |
| Q8BWG8 | 40  | 51  | AcD3-VLVDPPEYLKER-COOH           | PVDG↓VVLV | 1 | 0.5626                        | 49/45  | Beta-arrestin-1                                                 |                                                |
| Q99KR3 | 233 | 242 | AcD3-EKSFVTLR-COOH               | RDNF↓EKSF | 1 | 0.68434                       | 64/47  | Beta-lactamase-like protein 2                                   |                                                |
| Q8CGC7 | 154 | 161 | AcD3-LEAQAFR-COOH                | WFGF↓LEAQ | 1 | 0.38155                       | 65/47  | Bifunctional aminoacyl-tRNA synthetase                          |                                                |
| Q9DBL7 | 10  | 21  | AcD3-VLTPLATLAAR-COOH            | SGLL↓VLTT | 1 | 0.61061                       | 41/40  | Bifunctional coenzyme A synthase                                |                                                |
| Q9CWJ9 | 9   | 22  | AcD3-FSVSDKTGLVEFAR-COOH         | QLAL↓FSVS | 1 | 0.44746                       | 90/47  | Bifunctional purine biosynthesis protein PURH                   |                                                |
| Q9CWJ9 | 32  | 42  | AcD3-VASGGTAKAIR-COOH            | GLSL↓VASG | 4 | 0.38421/0.45183               | 100/45 | Bifunctional purine biosynthesis protein PURH                   |                                                |
| Q9CWJ9 | 319 | 335 | AcD3-VALSDICDVPTAKIISR-COOH      | GFDF↓VALS | 1 | 0.41575                       | 81/46  | Bifunctional purine biosynthesis protein PURH                   |                                                |
| Q9CWJ9 | 475 | 484 | AcD3-SMKFKAGYKR-COOH             | PRVL↓SMKF | 4 | 0.46281/0.46025               | 61/44  | Bifunctional purine biosynthesis protein PURH                   |                                                |
| Q9CY64 | 36  | 44  | AcD3-LNLIGYYSR-COOH              | SSAF↓LNL  | 2 | 0.52161                       | 56/46  | Biliverdin reductase A                                          |                                                |
| Q9CY64 | 258 | 276 | AcD3-IQKLLGQVSAEDLAAEKKR-COOH    | QDIF↓IQKL | 2 | 0.60349/0.52437               | 88/41  | Biliverdin reductase A                                          |                                                |
| Q8BGS2 | 23  | 30  | AcD3-VEDTLLNR-COOH               | EHVE↓VEDT | 1 | 0.51549                       | 53/47  | BoA-like protein 2                                              |                                                |
| Q8BGS2 | 39  | 52  | AcD3-VVASFKFEGKPLLQR-COOH        | FRVL↓VVSA | 5 | 0.60694/0.71103/0.66911       | 65/42  | BoA-like protein 2                                              |                                                |
| O35855 | 103 | 117 | AcD3-FEGLKAYKGGDQQRV-COOH        | SLQL↓FEGL | 2 | 0.44262                       | 86/47  | Branched-chain-amino-acid aminotransferase, mitochondrial       |                                                |
| Q6VWG3 | 38  | 48  | AcD3-LNVGGQVYTR-COOH             | DIVE↓LNVG | 1 | 0.76582                       | 51/46  | BTB/POZ domain-containing protein KCTD12                        |                                                |
| Q922D8 | 156 | 166 | AcD3-IKEAGVQIAGR-COOH            | CLEL↓IKEA | 1 | 0.38546                       | 51/45  | C-1-tetrahydrofolate synthase, cytoplasmic                      |                                                |
| Q922D8 | 731 | 739 | AcD3-VEKGF5NLR-COOH              | DLDL↓VEKG | 1 | 0.38544                       | 65/47  | C-1-tetrahydrofolate synthase, cytoplasmic                      |                                                |
| P11798 | 16  | 28  | AcD3-FEELGKGFVVR-COOH            | EYQL↓FEEL | 2 | 0.61786                       | 80/47  | Calcium/calmodulin-dependent protein kinase type II alpha chain | Q6PHZ2 (17-29), Q923T9 (17-29)                 |
| P11798 | 40  | 52  | AcD3-AAKIINTKLSAR-COOH           | GQEQ↓AAKI | 2 | 0.72834                       | 66/34  | Calcium/calmodulin-dependent protein kinase type II alpha chain | P28652 (41-53), Q6PHZ2 (41-53), Q923T9 (41-53) |
| P28652 | 253 | 260 | AcD3-LTINPAKR-COOH               | INQM↓LTIN | 1 | 0.53218                       | 42/41  | Calcium/calmodulin-dependent protein kinase type II beta chain  | Q6PHZ2 (253-260), Q923T9 (253-260)             |
| P62204 | 21  | 38  | AcD3-DKDGDTTITKELGTVMR-COOH      | FSLF↓DKDG | 1 | 0.67002                       | 62/48  | Calmodulin                                                      |                                                |
| P62204 | 94  | 107 | AcD3-DKDGNGYISAELR-COOH          | FRVF↓DKDG | 1 | 0.60501                       | 73/47  | Calmodulin                                                      |                                                |
| O35350 | 6   | 22  | AcD3-ITPVCTGVSQAQVQKR-COOH       | TEEL↓ITPV | 2 | 0.55097/0.54802               | 67/45  | Calpain-1 catalytic subunit                                     |                                                |
| P51125 | 365 | 381 | AcD3-VINDQALQALSDSLGTR-COOH      | VEEE↓VIND | 2 | 0.57026                       | 77/47  | Calpastatin                                                     |                                                |
| P51125 | 449 | 458 | AcD3-IGELSAQDFDR-COOH            | ESEL↓IGEL | 4 | 0.60272/0.60928               | 82/47  | Calpastatin                                                     |                                                |
| P51125 | 512 | 522 | AcD3-VETLAGSLGTR-COOH            | PEDA↓VETL | 3 | 0.59768/0.56481               | 83/46  | Calpastatin                                                     |                                                |
| P14211 | 50  | 73  | AcD3-VLSSGKFGDLEKDKLQTSQDAR-COOH | FGKF↓VLSS | 1 | 0.50161                       | 74/47  | Calreticulin                                                    |                                                |
| P14211 | 52  | 73  | AcD3-SSGKFGYKDGKDKLQTSQDAR-COOH  | KFVL↓SSGK | 6 | 0.57331/0.7315/0.7314/0.69501 | 121/47 | Calreticulin                                                    |                                                |
| O35887 | 53  | 72  | AcD3-LGAEFAKFDLTPPEESKER-COOH    | HDAF↓LGAE | 1 | 0.52286                       | 54/47  | Calumenin                                                       |                                                |
| O35887 | 297 | 311 | AcD3-FVGSQATDFGEALVR-COOH        | KYDL↓FVGS | 4 | 0.70941/0.79806               | 120/47 | Calumenin                                                       |                                                |
| O35887 | 298 | 311 | AcD3-VGSQATDFGEALVR-COOH         | YDLF↓VGSQ | 2 | 0.78543                       | 70/48  | Calumenin                                                       |                                                |
| Q9DBC7 | 106 | 115 | AcD3-TEEDAASVVR-COOH             | AEVY↓TEED | 1 | 0.59585                       | 50/46  | cAMP-dependent protein kinase type I-alpha regulatory subunit   |                                                |
| P67871 | 200 | 215 | AcD3-QLQAASNFSPVKTR-COOH         | AYQL↓QLQA | 2 | 0.56267                       | 109/43 | Casein kinase II subunit beta                                   |                                                |
| P24270 | 447 | 456 | AcD3-YTKVLENEER-COOH             | VRTF↓YTKV | 1 | 0.55041                       | 56/48  | Catalase                                                        |                                                |
| P26231 | 40  | 52  | AcD3-VNTNSKGPSNKKR-COOH          | VTTL↓VNTN | 2 | 0.64232                       | 63/46  | Catenin alpha-1                                                 |                                                |
| P06797 | 311 | 318 | AcD3-YIKIADR-COOH                | GMEG↓YIKI | 2 | 0.75623                       | 51/42  | Cathepsin L1                                                    |                                                |
| Q8C5L3 | 228 | 236 | AcD3-SDFFPALADR-COOH             | GLDL↓SDFF | 1 | 0.56299                       | 49/47  | CCR4-NOT transcription complex subunit 2                        |                                                |
| P60766 | 113 | 120 | AcD3-VGTQIDLRCOOH                | PFL↓VGTQ  | 2 | 0.57885                       | 71/47  | Cell division control protein 42 homolog                        |                                                |
| Q6A068 | 310 | 321 | AcD3-VVKYVQASEVAR-COOH           | ELQE↓VVKV | 2 | 0.63099                       | 62/45  | Cell division cycle 5-related protein                           |                                                |
| Q6A068 | 512 | 521 | AcD3-IEDAADVDAR-COOH             | DDTY↓IEDA | 3 | 0.59764/0.60715               | 73/46  | Cell division cycle 5-related protein                           |                                                |
| Q8CH18 | 167 | 182 | AcD3-FQLGAVKGTQVQVDR-COOH        | EDVF↓FQLG | 1 | 0.6581                        | 75/45  | Cell division cycle and apoptosis regulator protein 1           |                                                |
| Q921W0 | 163 | 181 | AcD3-DQLSQLPEGASAVGESSVR-COOH    | LEVL↓DQLS | 1 | 0.57917                       | 118/47 | Charged multivesicular body protein 1a                          |                                                |
| Q921Q5 | 10  | 29  | AcD3-LFKAGSDGAKIGNCPFSQR-COOH    | PQVE↓LFVK | 2 | 0.5445/0.495                  | 70/47  | Chloride intracellular channel protein 1                        |                                                |
| Q921Q5 | 11  | 29  | AcD3-FVKAGSDGAKIGNCPFSQR-COOH    | QVEL↓FVKA | 3 | 0.57187/0.58501               | 100/48 | Chloride intracellular channel protein 1                        |                                                |
| Q921Q5 | 12  | 29  | AcD3-VKAGSDGAKIGNCPFSQR-COOH     | VELF↓VKAG | 3 | 0.61352/0.65265               | 100/48 | Chloride intracellular channel protein 1                        |                                                |
| Q921Q5 | 220 | 238 | AcD3-ASTCPDDEIEELAYEQVAR-COOH    | REEF↓ASTC | 1 | 0.4841                        | 52/44  | Chloride intracellular channel protein 1                        |                                                |
| Q921Q5 | 229 | 238 | AcD3-IELAYEQVAR-COOH             | DDDE↓IELA | 2 | 0.51186                       | 77/47  | Chloride intracellular channel protein 1                        |                                                |
| Q921Q5 | 231 | 238 | AcD3-LAYEQVAR-COOH               | EEIE↓LAYE | 2 | 0.55256/0.53859               | 56/47  | Chloride intracellular channel protein 1                        |                                                |
| Q9QYB1 | 242 | 250 | AcD3-IAYSQVAKR-COOH              | KEVE↓IAYS | 2 | 0.5957                        | 67/47  | Chloride intracellular channel protein 4                        |                                                |
| P23198 | 76  | 91  | AcD3-FLNSQKAGKEDGTR-COOH         | LIED↓FLNS | 1 | 0.52028                       | 52/45  | Chromobox protein homolog 3                                     |                                                |
| Q9C2U6 | 26  | 47  | AcD3-ASASSTNLKDVLSNLPKEQAR-COOH  | AARH↓ASAS | 1 | 0.78891                       | 46/45  | Citrate synthase, mitochondrial                                 |                                                |
| Q9ESN9 | 300 | 310 | AcD3-VSVTKNNKQAR-COOH            | LDGY↓VSVT | 1 | 0.70041                       | 54/45  | C-jun-amino-terminal kinase-interacting protein 3               |                                                |
| Q58A65 | 610 | 621 | AcD3-LSEETASLASR-COOH            | AFDF↓LSEE | 1 | 0.65314                       | 66/47  | C-jun-amino-terminal kinase-interacting protein 4               |                                                |
| Q68FD5 | 167 | 176 | AcD3-LTGISAQQR-COOH              | KWLL↓LTGI | 2 | 0.54684                       | 73/47  | Clathrin heavy chain 1                                          |                                                |

|        |      |      |                                      |           |   |                                 |        |                                                            |
|--------|------|------|--------------------------------------|-----------|---|---------------------------------|--------|------------------------------------------------------------|
| Q68FD5 | 378  | 393  | AcD3-SEAAKVAANAPKGLR-COOH            | QGNV↓SEAA | 2 | 0.50709                         | 82/42  | Clathrin heavy chain 1                                     |
| Q68FD5 | 1472 | 1481 | AcD3-ITEEDYQALR-COOH                 | NNLF↓ITEE | 2 | 0.60963                         | 56/47  | Clathrin heavy chain 1                                     |
| O08585 | 83   | 101  | AcD3-QYESNPDTSYAAISEVDR-COOH         | NGEY↓YQES | 1 | 0.65267                         | 61/43  | Clathrin light chain A                                     |
| O08585 | 94   | 101  | AcD3-AAISEVDR-COOH                   | TDVY↓AAIS | 1 | 0.61694                         | 82/49  | Clathrin light chain A                                     |
| O08585 | 153  | 161  | AcD3-LQKTKANNR-COOH                  | QDEQ↓LQKT | 2 | 0.68501/0.64216                 | 53/45  | Clathrin light chain A                                     |
| Q6IRU5 | 78   | 95   | AcD3-QEANGPADGYAAIAQADR-COOH         | GDVF↓QEAN | 2 | 0.56052                         | 107/46 | Clathrin light chain B                                     |
| Q6IRU5 | 88   | 95   | AcD3-AAIAQADR-COOH                   | ADGY↓AAIA | 1 | 0.4993                          | 59/47  | Clathrin light chain B                                     |
| Q6IRU5 | 147  | 155  | AcD3-VEKNKINNR-COOH                  | QSEQ↓VEKN | 1 | 0.49379                         | 63/44  | Clathrin light chain B                                     |
| Q6IRU5 | 220  | 229  | AcD3-MSLKQTPLSR-COOH                 | RSLV↓MSLK | 2 | 0.51179                         | 75/47  | Clathrin light chain B                                     |
| Q9JIF7 | 692  | 702  | AcD3-SLLAAMGNTQR-COOH                | RFQL↓SLLA | 1 | 0.65379                         | 55/48  | Coatomer subunit beta                                      |
| Q9JIF7 | 694  | 702  | AcD3-LAAMGNTQR-COOH                  | QLSL↓LAAM | 5 | 0.50696/0.7455/0.46966          | 60/47  | Coatomer subunit beta                                      |
| P18760 | 57   | 81   | AcD3-VGDVGQTVDDPYTTFVKMLPKDKCR-COOH  | KEIL↓VGDV | 4 | 0.48048/0.49397/0.49128         | 68/46  | Cofilin-1                                                  |
| P18760 | 72   | 81   | AcD3-VKMLPKDKCR-COOH                 | YTTF↓VKML | 4 | 0.51483/0.46611/0.5253          | 59/47  | Cofilin-1                                                  |
| O35638 | 1058 | 1066 | AcD3-SVISGMSSR-COOH                  | DDTM↓SVIS | 1 | 0.65917                         | 56/47  | Cohesin subunit SA-2                                       |
| Q692T1 | 747  | 752  | AcD3-LSLYQR-COOH                     | TGHR↓LSLY | 1 | 0.4932                          | 40/32  | Coiled-coil domain-containing protein MTMR15               |
| Q8K2Q0 | 10   | 25   | AcD3-VALQSLKASSKDVVR-COOH            | AEHF↓VALQ | 2 | 0.51104                         | 102/40 | COMM domain-containing protein 9                           |
| Q99LD4 | 421  | 428  | AcD3-LMGKFEQR-COOH                   | EKSL↓LMGK | 1 | 0.46293                         | 60/48  | COP9 signalosome complex subunit 1                         |
| P61202 | 259  | 272  | AcD3-FEAFKNYDESGSPR-COOH             | HTDF↓FEAF | 2 | 0.38321                         | 79/45  | COP9 signalosome complex subunit 2                         |
| O35864 | 270  | 282  | AcD3-SEKLEQSEQLGR-COOH               | VFDL↓SEKL | 2 | 0.53824                         | 74/48  | COP9 signalosome complex subunit 5                         |
| O08997 | 10   | 21   | AcD3-MTEGCAEAVSR-COOH                | FVSD↓MTEG | 4 | 0.64805/0.6865                  | 83/38  | Copper transport protein ATOX1                             |
| O08997 | 11   | 21   | AcD3-TCEGCAEAVSR-COOH                | SVDM↓TCEG | 1 | 0.49008                         | 47/42  | Copper transport protein ATOX1                             |
| P36552 | 120  | 128  | AcD3-MSSPTEL-COOH                    | CSTF↓MSSP | 1 | 0.49724                         | 53/47  | Coproporphyrinogen-III oxidase, mitochondrial              |
| O89053 | 60   | 69   | AcD3-LVPLGKTGR-COOH                  | GGAF↓LVPL | 4 | 0.44892/0.43816                 | 55/36  | Coronin-1A                                                 |
| O89053 | 229  | 241  | AcD3-VSEKILTTGFSR-COOH               | HAVF↓VSEG | 6 | 0.45302/0.46028                 | 100/47 | Coronin-1A                                                 |
| O89053 | 310  | 317  | AcD3-FSSKESQR-COOH                   | YLSM↓FSSK | 3 | 0.43657/0.42372/0.4809          | 57/47  | Coronin-1A                                                 |
| O89053 | 390  | 402  | AcD3-ISLKDGVVPPKSR-COOH              | GPLL↓ISLK | 1 | 0.43202                         | 54/45  | Coronin-1A                                                 |
| O89053 | 441  | 450  | AcD3-NAIVKQLQR-COOH                  | VRNL↓NAIV | 1 | 0.41296                         | 56/44  | Coronin-1A                                                 |
| Q9WUM3 | 192  | 201  | AcD3-CSACKDKSVR-COOH                 | GSLF↓CSAC | 2 | 0.58304                         | 58/47  | Coronin-1B                                                 |
| Q9WUM3 | 229  | 241  | AcD3-LADGKVTTFGFSR-COOH              | RAIF↓LADG | 2 | 0.59652                         | 71/47  | Coronin-1B                                                 |
| Q9WUM4 | 227  | 239  | AcD3-LADGNVFTTFGFSR-COOH             | RAIF↓LADG | 2 | 0.51099                         | 81/48  | Coronin-1C                                                 |
| Q9D2V7 | 228  | 236  | AcD3-VSTGFNQMR-COOH                  | QEHL↓VSTG | 2 | 0.50118                         | 61/47  | Coronin-7                                                  |
| Q9D2V7 | 898  | 904  | AcD3-VAKLGNR-COOH                    | LNAM↓VAKL | 6 | 0.54539/0.48713/0.52629/0.49335 | 64/42  | Coronin-7                                                  |
| Q04447 | 328  | 341  | AcD3-AAVGGVFDVSNADR-COOH             | GVDT↓AAVG | 2 | 0.39958                         | 116/47 | Creatine kinase B-type                                     |
| P47941 | 257  | 268  | AcD3-ALEVGDIVKVR-COOH                | KTAL↓ALEV | 2 | 0.62205                         | 59/43  | Crk-like protein                                           |
| P47941 | 259  | 268  | AcD3-EVGGDIVKVR-COOH                 | ALAL↓EVGD | 2 | 0.57798                         | 73/45  | Crk-like protein                                           |
| Q920H4 | 136  | 149  | AcD3-IGMVSKCNENDIR-COOH              | RKLF↓IGMV | 2 | 0.53909                         | 67/48  | CUG-BP- and ETR-3-like factor 2                            |
| Q9JLV5 | 723  | 733  | AcD3-VAEVTQQLKAR-COOH                | HNVL↓VAEV | 1 | 0.64914                         | 50/45  | Cullin-3                                                   |
| Q61458 | 286  | 294  | AcD3-ALNAVTKKR-COOH                  | SSDL↓ALNA | 1 | 0.64705                         | 44/41  | Cyclin-H                                                   |
| Q62426 | 39   | 45   | AcD3-KAIFKR-COOH                     | FDVF↓KAIS | 1 | 0.56571                         | 43/41  | Cystatin-B                                                 |
| Q62426 | 83   | 91   | AcD3-SSVQTNKER-COOH                  | PLTL↓SSVQ | 2 | 0.65704/0.6206                  | 49/47  | Cystatin-B                                                 |
| Q9D1P4 | 54   | 63   | AcD3-LSIVGCTKGR-COOH                 | FSDF↓LSIV | 3 | 0.56889/0.53861                 | 76/46  | Cysteine and histidine-rich domain-containing protein 1    |
| Q9CQX2 | 25   | 31   | AcD3-LEEVAKR-COOH                    | TYR↓LEEV  | 1 | 0.5002                          | 36/31  | Cytochrome b5 type B                                       |
| Q9JHU4 | 2096 | 2103 | AcD3-VSAGNVKR-COOH                   | KSVL↓VSAG | 2 | 0.47269                         | 58/45  | Cytoplasmic dynein 1 heavy chain 1                         |
| Q9JHU4 | 3353 | 3362 | AcD3-SAEISDAIR-COOH                  | IVNF↓SAEE | 2 | 0.40283                         | 61/47  | Cytoplasmic dynein 1 heavy chain 1                         |
| O88487 | 422  | 435  | AcD3-VVGSEEGSVYTACR-COOH             | VNMF↓VVG  | 1 | 0.48711                         | 58/45  | Cytoplasmic dynein 1 intermediate chain 2                  |
| Q6PDLO | 340  | 346  | AcD3-IVKPPVR-COOH                    | YEDF↓IVKP | 1 | 0.63605                         | 43/38  | Cytoplasmic dynein 1 light intermediate chain 2            |
| Q6PDLO | 363  | 379  | AcD3-LMKQSLAKQPATPTR-COOH            | EQVF↓LMKQ | 1 | 0.53175                         | 54/44  | Cytoplasmic dynein 1 light intermediate chain 2            |
| Q9CPY7 | 71   | 84   | AcD3-LNISGPKLAKGKTR-COOH             | LREM↓LNIS | 2 | 0.41429/0.45412                 | 48/40  | Cytosol aminopeptidase                                     |
| Q9CPY7 | 72   | 84   | AcD3-NISGPKLAKGKTR-COOH              | REML↓NISG | 2 | 0.45151/0.49233                 | 71/44  | Cytosol aminopeptidase                                     |
| Q91V12 | 81   | 91   | AcD3-IEEAGAIISTR-COOH                | ILKM↓IEEA | 2 | 0.37323                         | 82/46  | Cytosolic acyl coenzyme A thioester hydrolase              |
| Q91V12 | 255  | 265  | AcD3-MDEVAGIVAAR-COOH                | TMKL↓MDEV | 2 | 0.30943                         | 79/47  | Cytosolic acyl coenzyme A thioester hydrolase              |
| Q91V12 | 367  | 373  | AcD3-LQMKAKR-COOH                    | KGRY↓LQMK | 1 | 0.41488                         | 53/44  | Cytosolic acyl coenzyme A thioester hydrolase              |
| Q61753 | 11   | 20   | AcD3-ISDSLDPCCR-COOH                 | RKVL↓ISDS | 1 | 0.43145                         | 48/43  | D-3-phosphoglycerate dehydrogenase                         |
| Q9JII5 | 40   | 51   | AcD3-VIMKDKTTNQSR-COOH               | VVDC↓VIMK | 3 | 0.45683/0.58994                 | 76/47  | DAZ-associated protein 1                                   |
| Q9DCP9 | 106  | 115  | AcD3-VEGGYDAGAR-COOH                 | SAVL↓VEGG | 2 | 0.77825                         | 66/45  | DAZ-associated protein 2                                   |
| Q3U0B3 | 16   | 29   | AcD3-VTGASGGIGAAVAR-COOH             | RLLA↓VTGA | 2 | 0.47649                         | 100/47 | Dehydrogenase/reductase SDR family member 11               |
| Q8BV14 | 175  | 188  | AcD3-IAVPLVTLDTPMNR-COOH             | GAAL↓IAVL | 1 | 0.59989                         | 59/46  | Dihydropteridine reductase                                 |
| O08553 | 381  | 397  | AcD3-VAVTSTNAAKVFNLYPR-COOH          | ENQF↓VAVT | 2 | 0.49969                         | 80/45  | Dihydropyrimidinase-related protein 2                      |
| O08553 | 506  | 532  | AcD3-VSVTPKVTTPASSAKTSPAKQAPPVR-COOH | PVCE↓VSVT | 1 | 0.41016                         | 70/43  | Dihydropyrimidinase-related protein 2                      |
| Q99K77 | 629  | 638  | AcD3-KSTGDVAVGR-COOH                 | LQVL↓KSTG | 2 | 0.46907                         | 77/47  | Dipeptidyl-peptidase 3                                     |
| P98078 | 74   | 84   | AcD3-MKLGMAAAGR-COOH                 | QDSM↓MKLK | 2 | 0.66638                         | 65/47  | Disabled homolog 2                                         |
| P98078 | 236  | 251  | AcD3-LVDLNSEIDTQNLSR-COOH            | KDIL↓LVDL | 2 | 0.69211                         | 100/48 | Disabled homolog 2                                         |
| P98078 | 240  | 251  | AcD3-NSEIDTQNLSR-COOH                | LVDL↓NSEI | 1 | 0.72455                         | 69/47  | Disabled homolog 2                                         |
| P62876 | 29   | 42   | AcD3-YTEGDALDGLKR-COOH               | LQAE↓YTEG | 2 | 0.61195                         | 65/47  | DNA-directed RNA polymerases I, II, and III subunit RPABC5 |

|        |      |      |                                 |            |   |                                 |        |                                                                   |                  |
|--------|------|------|---------------------------------|------------|---|---------------------------------|--------|-------------------------------------------------------------------|------------------|
| Q9QY10 | 143  | 163  | AcD3-CSACSGQGGKSGAVQKCSACR-COOH | KNVL↓CSAC  | 2 | 0.63562/0.74442                 | 63/43  | Dnaj homolog subfamily A member 2                                 |                  |
| Q99KV1 | 75   | 83   | AcD3-EVLSDESEKR-COOH            | GRAAY↓EVLS | 1 | 0.48066                         | 62/47  | Dnaj homolog subfamily B member 11                                |                  |
| Q9QY13 | 436  | 446  | AcD3-TILSDPKKTR-COOH            | GEAF↓TILS  | 2 | 0.56595                         | 63/41  | Dnaj homolog subfamily C member 7                                 |                  |
| Q6NZB0 | 24   | 33   | AcD3-YSEVQIEKR-COOH             | FMTF↓YSEV  | 2 | 0.70588                         | 56/47  | Dnaj homolog subfamily C member 8                                 |                  |
| Q6NZB0 | 63   | 76   | AcD3-QIDPEVTDEEIKR-COOH         | FVFL↓QIDP  | 2 | 0.64833                         | 69/47  | Dnaj homolog subfamily C member 8                                 |                  |
| O70469 | 88   | 94   | AcD3-ILETKEK-COOH               | TSAF↓ILET  | 2 | 0.60133                         | 61/44  | Docking protein 2                                                 |                  |
| Q61550 | 305  | 320  | AcD3-ALEPIDITVKETKAKR-COOH      | EEAF↓ALEP  | 1 | 0.7307                          | 69/42  | Double-strand-break repair protein rad21 homolog                  |                  |
| Q62418 | 31   | 41   | AcD3-FTYEGNSNDIR-COOH           | DWAL↓FTYE  | 1 | 0.53765                         | 52/46  | Drebrin-like protein                                              |                  |
| Q62418 | 370  | 383  | AcD3-MQSQGFSGQGLCAR-COOH        | IDNY↓MQSQ  | 2 | 0.59162                         | 119/45 | Drebrin-like protein                                              |                  |
| Q99KJ8 | 89   | 105  | AcD3-LGEGLVKVKETPQQYQR-COOH     | DYEM↓LGEG  | 2 | 0.48121                         | 77/47  | Dynactin subunit 2                                                |                  |
| Q99KJ8 | 90   | 105  | AcD3-GEGLVKVKETPQQYQR-COOH      | YEML↓GEGL  | 2 | 0.61134                         | 91/47  | Dynactin subunit 2                                                |                  |
| Q99KJ8 | 372  | 380  | AcD3-LTQVQTTMR-COOH             | NTAL↓LTQV  | 2 | 0.56425                         | 54/48  | Dynactin subunit 2                                                |                  |
| Q8CBY8 | 12   | 21   | AcD3-YLVQGEKKVR-COOH            | ERVL↓YLVQ  | 1 | 0.53417                         | 58/43  | Dynactin subunit 4                                                |                  |
| Q8CBY8 | 247  | 255  | AcD3-TEVTTLQQR-COOH             | PVNL↓TEVT  | 1 | 0.51172                         | 57/47  | Dynactin subunit 4                                                |                  |
| Q9ERU9 | 1785 | 1793 | AcD3-ADLAKGMSR-COOH             | TFTF↓ADLA  | 1 | 0.61799                         | 62/47  | E3 SUMO-protein ligase RanBP2                                     |                  |
| Q9ERU9 | 3021 | 3029 | AcD3-VKDGMDTVR-COOH             | VFGF↓VKDG  | 1 | 0.61617                         | 55/47  | E3 SUMO-protein ligase RanBP2                                     |                  |
| Q99PP7 | 143  | 151  | AcD3-VCCQSLQSR-COOH             | DTCA↓VCCQ  | 1 | 0.60451                         | 55/47  | E3 ubiquitin-protein ligase TRIM33                                |                  |
| Q8BL66 | 1382 | 1400 | AcD3-CAECSTKNALTPSSKKPVR-COOH   | GNIF↓CAEC  | 1 | 0.60658                         | 51/47  | Early endosome antigen 1                                          |                  |
| Q9WVK4 | 18   | 26   | AcD3-FQTVAEGLR-COOH             | EPEL↓FQTV  | 1 | 0.58844                         | 55/47  | EH domain-containing protein 1                                    |                  |
| Q9WVK4 | 279  | 287  | AcD3-FKDIQSLPR-COOH             | EQDL↓FKDI  | 1 | 0.50425                         | 49/46  | EH domain-containing protein 1                                    |                  |
| Q9EQP2 | 21   | 29   | AcD3-VQTVGGGLR-COOH             | GMDA↓VQTV  | 2 | 0.5093                          | 60/46  | EH domain-containing protein 4                                    |                  |
| Q9DCW4 | 44   | 51   | AcD3-IAVEEAVR-COOH              | PFCE↓IAVE  | 2 | 0.51072                         | 51/46  | Electron transfer flavoprotein subunit beta                       |                  |
| Q9DCW4 | 64   | 76   | AcD3-VSCGSPQCQETIR-COOH         | EIIA↓VSCG  | 1 | 0.46021                         | 51/45  | Electron transfer flavoprotein subunit beta                       |                  |
| Q9DCW4 | 150  | 164  | AcD3-ASQVTLLEGDKVQVER-COOH      | QGTF↓ASQV  | 2 | 0.55051                         | 104/45 | Electron transfer flavoprotein subunit beta                       |                  |
| Q9DCW4 | 246  | 255  | AcD3-VAKLKEVGR-COOH             | TEDL↓VAKL  | 1 | 0.41608                         | 41/35  | Electron transfer flavoprotein subunit beta                       |                  |
| P10126 | 59   | 67   | AcD3-VLDKLKAER-COOH             | KYAW↓VLDK  | 1 | 0.40454                         | 46/41  | Elongation factor 1-alpha 1                                       | P62631 (59-67)   |
| P10126 | 115  | 134  | AcD3-IVAAGVGEFEAGISKNGQTR-COOH  | CAVL↓IVAA  | 1 | 0.53414                         | 89/47  | Elongation factor 1-alpha 1                                       | P62631 (115-134) |
| P10126 | 255  | 266  | AcD3-KIGGIGTVPVGR-COOH          | QDVY↓KIGG  | 2 | 0.74719                         | 78/40  | Elongation factor 1-alpha 1                                       | P62631 (255-266) |
| P57776 | 26   | 38   | AcD3-YEQMNGPVTSGSR-COOH         | ERRF↓YEQM  | 4 | 0.39666/0.39779/0.39836         | 61/45  | Elongation factor 1-delta                                         |                  |
| Q9D8N0 | 20   | 30   | AcD3-IAAQYSGAQVR-COOH           | FKAL↓IAAQ  | 4 | 0.36658/0.36111                 | 103/47 | Elongation factor 1-gamma                                         |                  |
| P58252 | 40   | 50   | AcD3-VCKAGIIASAR-COOH           | TDLS↓VCKA  | 6 | 0.4111/0.39502/0.36209          | 88/45  | Elongation factor 2                                               |                  |
| P58252 | 42   | 50   | AcD3-KAGIIASAR-COOH             | SLVC↓KAGI  | 2 | 0.55542                         | 68/41  | Elongation factor 2                                               |                  |
| P58252 | 112  | 120  | AcD3-SSEVTAALR-COOH             | HVDF↓SSEV  | 1 | 0.49597                         | 54/46  | Elongation factor 2                                               |                  |
| P58252 | 614  | 625  | AcD3-AEDIDKGEVSAR-COOH          | PDGL↓AEDI  | 4 | 0.4083/0.3792                   | 96/47  | Elongation factor 2                                               |                  |
| P58252 | 616  | 625  | AcD3-DIDKGEVSAR-COOH            | GLAE↓DIDK  | 1 | 0.38929                         | 79/47  | Elongation factor 2                                               |                  |
| P58252 | 617  | 625  | AcD3-IDKGEVSAR-COOH             | LAED↓IDKG  | 2 | 0.39841                         | 73/47  | Elongation factor 2                                               |                  |
| P58252 | 731  | 739  | AcD3-ASVLTAAQPR-COOH            | RCLY↓ASVL  | 5 | 0.49893/0.53435                 | 78/46  | Elongation factor 2                                               |                  |
| P70429 | 110  | 123  | AcD3-NIMMSQEGGPSTQR-COOH        | LFAL↓NIMN  | 2 | 0.65431                         | 89/44  | Ena/VASP-like protein                                             |                  |
| Q9JK48 | 78   | 85   | AcD3-FVYEKLDK-COOH              | RIEE↓FVYE  | 1 | 0.77892                         | 49/47  | Endophilin-B1                                                     |                  |
| Q9EQH2 | 559  | 568  | AcD3-ITSKSDSVQR-COOH            | PLTF↓ITSK  | 1 | 0.47563                         | 59/47  | Endoplasmic reticulum aminopeptidase 1                            |                  |
| P57759 | 171  | 179  | AcD3-KASSIAR-COOH               | AGEF↓IKAS  | 2 | 0.58292                         | 70/44  | Endoplasmic reticulum protein Erp29                               |                  |
| P08113 | 56   | 67   | AcD3-IQLDGLNASQIR-COOH          | EEEA↓IQLD  | 5 | 0.47417/0.51462/0.47102/0.50308 | 60/47  | Endoplasmic                                                       |                  |
| P08113 | 433  | 448  | AcD3-VKGVVDSDDLPLNVSR-COOH      | YLNK↓VKGV  | 4 | 0.46361/0.52468                 | 79/46  | Endoplasmic                                                       |                  |
| P08113 | 539  | 546  | AcD3-YFMAGSSR-COOH              | QDKI↓YFMA  | 1 | 0.38489                         | 49/45  | Endoplasmic                                                       |                  |
| P08113 | 575  | 587  | AcD3-YCIIALPEFDGKR-COOH         | PVDE↓YCIQ  | 2 | 0.48569                         | 57/48  | Endoplasmic                                                       |                  |
| P08113 | 678  | 690  | AcD3-YASQKKTFEINPR-COOH         | STNY↓YASQ  | 1 | 0.52434                         | 68/47  | Endoplasmic                                                       |                  |
| Q8K3X4 | 762  | 773  | AcD3-ILAGDVVKKKR-COOH           | EIAT↓ILAG  | 2 | 0.7383                          | 61/37  | Enhanced at puberty protein 1                                     |                  |
| Q8K3X4 | 764  | 773  | AcD3-AGDVVKKKR-COOH             | ATIL↓AGDV  | 2 | 0.76762                         | 53/43  | Enhanced at puberty protein 1                                     |                  |
| Q9JX0  | 68   | 76   | AcD3-VAEITPKGR-COOH             | VDDL↓VAEI  | 3 | 0.48902/0.56293                 | 57/45  | Enhancer of yellow 2 transcription factor homolog                 |                  |
| Q8R180 | 50   | 60   | AcD3-VETIDKFNYYR-COOH           | CTCD↓VETI  | 1 | 0.70624                         | 81/48  | ERO1-like protein alpha                                           |                  |
| Q9D172 | 145  | 159  | AcD3-AVDGKCKVKNKEVER-COOH       | LSTF↓AVDG  | 4 | 0.54051/0.55517                 | 80/48  | ES1 protein homolog, mitochondrial                                |                  |
| Q91V76 | 162  | 177  | AcD3-ASEGQPGKVIEWQAKR-COOH      | ANLF↓ASEG  | 3 | 0.51427/0.59472                 | 82/46  | Ester hydrolase C11orf54 homolog                                  |                  |
| Q91V76 | 251  | 263  | AcD3-PVVFVKDPLGLDLR-COOH        | LVCL↓PVVF  | 2 | 0.61029                         | 62/45  | Ester hydrolase C11orf54 homolog                                  |                  |
| Q91V76 | 254  | 263  | AcD3-VSKDPGLDLR-COOH            | LPVF↓VSKD  | 2 | 0.59399                         | 59/46  | Ester hydrolase C11orf54 homolog                                  |                  |
| Q149F3 | 598  | 609  | AcD3-LETFKDPQMGR-COOH           | GTIC↓LETF  | 1 | 0.35762                         | 60/47  | Eukaryotic peptide chain release factor GTP-binding subunit ERF3B | Q8R050 (465-476) |
| Q8BWW3 | 35   | 47   | AcD3-ISLIIPKDKQIR-COOH          | GTSM↓ISLI  | 1 | 0.49633                         | 46/40  | Eukaryotic peptide chain release factor subunit 1                 |                  |
| Q6ZWX6 | 256  | 266  | AcD3-AVIKEIEEKR-COOH            | NQAM↓AVIK  | 3 | 0.46314/0.50347                 | 60/41  | Eukaryotic translation initiation factor 2 subunit 1              |                  |
| Q9Z0N1 | 405  | 416  | AcD3-MVNIIGSLSTGGR-COOH         | NEVL↓MVNI  | 2 | 0.4296                          | 107/47 | Eukaryotic translation initiation factor 2 subunit 3, X-linked    | Q9Z0N2 (405-416) |
| Q9DCH4 | 104  | 112  | AcD3-ASIVDSYER-COOH             | PVIL↓ASIV  | 1 | 0.5533                          | 48/46  | Eukaryotic translation initiation factor 3 subunit F              |                  |
| Q6NZ16 | 643  | 654  | AcD3-VVLDKANKTPLR-COOH          | HITD↓VVLD  | 1 | 0.62643                         | 43/41  | Eukaryotic translation initiation factor 4 gamma 1                |                  |
| Q62448 | 375  | 392  | AcD3-GQMPGSGIGTGGVVIQDR-COOH    | ADMF↓GQMP  | 1 | 0.67007                         | 63/47  | Eukaryotic translation initiation factor 4 gamma 2                |                  |
| Q9EST3 | 895  | 903  | AcD3-AVMQQLQR-COOH              | PLHL↓AVMQ  | 2 | 0.51843                         | 63/47  | Eukaryotic translation initiation factor 4E transporter           |                  |
| Q9WUK2 | 90   | 109  | AcD3-DEVDSLKEALTYDGLGDR-COOH    | YVEF↓DEVQ  | 1 | 0.60717                         | 61/47  | Eukaryotic translation initiation factor 4H                       |                  |



|        |      |      |                                       |           |    |                                                        |        |                                               |                                                      |
|--------|------|------|---------------------------------------|-----------|----|--------------------------------------------------------|--------|-----------------------------------------------|------------------------------------------------------|
| P63242 | 6    | 26   | AcD3-DFETGDAGASATFPMQCSALR-COOH       | ADDL↓DFET | 11 | 0.48379/0.49817/0.49201/0.4638/0.47564/0.50019/0.44817 | 109/43 | Eukaryotic translation initiation factor 5A-1 |                                                      |
| P63242 | 8    | 26   | AcD3-ETGDAGASATFPMQCSALR-COOH         | DLDF↓ETGD | 3  | 0.47674/0.47793                                        | 63/43  | Eukaryotic translation initiation factor 5A-1 |                                                      |
| P63242 | 92   | 109  | AcD3-IGIQDGYLSLLQDQSGEVR-COOH         | DFQL↓IGIQ | 4  | 0.51423/0.47816                                        | 127/47 | Eukaryotic translation initiation factor 5A-1 |                                                      |
| Q6KAR6 | 17   | 25   | AcD3-EAVATAVQR-COOH                   | ETDL↓EAVA | 1  | 0.55061                                                | 50/47  | Exocyst complex component 3                   |                                                      |
| Q8R313 | 227  | 237  | AcD3-SVALQKQNNMR-COOH                 | QKSF↓SVAL | 1  | 0.65256                                                | 57/47  | Exocyst complex component 6                   |                                                      |
| Q8VBV3 | 53   | 62   | AcD3-IASVAGSVER-COOH                  | EELK↓IASV | 1  | 0.29762                                                | 52/46  | Exosome complex exonuclease RRP4              |                                                      |
| P26040 | 302  | 310  | AcD3-VQQMKAQAR-COOH                   | DTIE↓VQQM | 3  | 0.50837/0.48449                                        | 78/48  | Ezrin                                         | P26041 (302-310), P26043 (302-310), P46662 (318-326) |
| P26040 | 532  | 542  | AcD3-LTSLNELSQAR-COOH                 | QRQL↓LTLS | 4  | 0.47483/0.42521                                        | 83/47  | Ezrin                                         |                                                      |
| P26040 | 533  | 542  | AcD3-TLSNELSQAR-COOH                  | RQLL↓TLNS | 1  | 0.60071                                                | 57/47  | Ezrin                                         |                                                      |
| P47754 | 30   | 37   | AcD3-NEVFNDVR-COOH                    | PGEF↓NEVF | 1  | 0.5342                                                 | 51/46  | F-actin-capping protein subunit alpha-2       | P47753 (30-37)                                       |
| P47757 | 40   | 51   | AcD3-LSSVDQLPKIAR-COOH                | CEDL↓LSSV | 3  | 0.53763/0.55761                                        | 87/44  | F-actin-capping protein subunit beta          |                                                      |
| P47757 | 231  | 244  | AcD3-IFGKTKDIVNGLR-COOH               | TLNE↓IFYG | 1  | 0.52965                                                | 70/44  | F-actin-capping protein subunit beta          |                                                      |
| Q91WJ8 | 186  | 210  | AcD3-IMIPASKAGLVIGKGGTIKQLQER-COOH    | AVQE↓IMIP | 1  | 0.42663                                                | 59/40  | Far upstream element-binding protein 1        |                                                      |
| Q3U0V1 | 239  | 263  | AcD3-IMIPAGKAGLVIGKGGTIKQLQER-COOH    | TVQE↓IMIP | 1  | 0.48272                                                | 83/40  | Far upstream element-binding protein 2        |                                                      |
| Q920E5 | 342  | 351  | AcD3-MELANKIKR-COOH                   | PSIF↓MELA | 2  | 0.32052                                                | 53/47  | Farnesyl pyrophosphate synthetase             |                                                      |
| Q61553 | 177  | 185  | AcD3-ITLAFQDQR-COOH                   | VDSL↓ITLA | 1  | 0.48101                                                | 54/47  | Fascin                                        |                                                      |
| Q61553 | 263  | 271  | AcD3-VVLQAANER-COOH                   | SCAQ↓VVLQ | 1  | 0.51709                                                | 88/46  | Fascin                                        |                                                      |
| P19096 | 696  | 703  | AcD3-QALKKVR-COOH                     | PTLL↓QALK | 1  | 0.44834                                                | 41/34  | Fatty acid synthase                           |                                                      |
| P19096 | 1934 | 1946 | AcD3-VSTNSVSSLEGAR-COOH               | IQVL↓VSTS | 1  | 0.35425                                                | 79/47  | Fatty acid synthase                           |                                                      |
| Q3UFK8 | 423  | 432  | AcD3-YVEDGKGIKR-COOH                  | STID↓YVED | 1  | 0.71128                                                | 47/46  | FERM domain-containing protein 8              |                                                      |
| Q8K1B8 | 170  | 179  | AcD3-AGGVAPTIFR-COOH                  | KVVL↓AGGV | 1  | 0.4989                                                 | 50/46  | Fermitin family homolog 3                     |                                                      |
| P09528 | 138  | 157  | AcD3-YLSEQVKSKELGHDVHNLNR-COOH        | IETY↓YLSE | 1  | 0.73343                                                | 55/46  | Ferritin heavy chain                          |                                                      |
| Q6P9Q4 | 1144 | 1154 | AcD3-LVQSVTKSGPR-COOH                 | IMDL↓LVQS | 2  | 0.57169                                                | 70/45  | FH1/FH2 domain-containing protein 1           |                                                      |
| Q8BTM8 | 162  | 171  | AcD3-EAKKQTPKQR-COOH                  | EEDE↓EAKK | 1  | 0.4899                                                 | 51/43  | Filamin-A                                     |                                                      |
| Q8BTM8 | 418  | 437  | AcD3-VVIQDPTGQKGTVEPQLEAR-COOH        | GEVE↓VVIQ | 1  | 0.49495                                                | 52/46  | Filamin-A                                     |                                                      |
| Q8BTM8 | 912  | 921  | AcD3-SGLAKGDAVR-COOH                  | DVQF↓SGLA | 1  | 0.61908                                                | 49/46  | Filamin-A                                     |                                                      |
| Q8BTM8 | 914  | 921  | AcD3-LAKGDAVR-COOH                    | QFSG↓LAKG | 2  | 0.55904                                                | 58/45  | Filamin-A                                     |                                                      |
| Q8BTM8 | 1159 | 1172 | AcD3-DASKVKCSGGPLER-COOH              | EPSh↓DASK | 2  | 0.54392                                                | 85/48  | Filamin-A                                     |                                                      |
| Q8BTM8 | 1525 | 1532 | AcD3-YGEEVPR-COOH                     | ISVL↓YGEE | 2  | 0.53068                                                | 57/47  | Filamin-A                                     |                                                      |
| Q8BTM8 | 1794 | 1809 | AcD3-VIPFTIKGEITGEVR-COOH             | PFDL↓VIPF | 2  | 0.69841/0.53706                                        | 75/42  | Filamin-A                                     |                                                      |
| Q8VHX6 | 1789 | 1804 | AcD3-VIPFTVQKQELTGEVR-COOH            | PFNL↓VIPF | 2  | 0.37229                                                | 65/45  | Filamin-C                                     |                                                      |
| Q8VHX6 | 1854 | 1861 | AcD3-YVDAINSR-COOH                    | PLQF↓YVDA | 1  | 0.35843                                                | 62/47  | Filamin-C                                     |                                                      |
| Q62446 | 180  | 189  | AcD3-LTMSKGEKAR-COOH                  | DEAL↓LTMS | 2  | 0.51154                                                | 75/47  | FK506-binding protein 3                       |                                                      |
| P30416 | 23   | 39   | AcD3-VDISPKQDEVLKVIKR-COOH            | PLEG↓VDIS | 1  | 0.5435                                                 | 44/39  | FK506-binding protein 4                       |                                                      |
| P39749 | 342  | 353  | AcD3-FKVTGSLSSAKR-COOH                | LDDF↓FKVT | 3  | 0.54675/0.53726                                        | 67/44  | Flap endonuclease 1                           |                                                      |
| Q923D2 | 75   | 92   | AcD3-LGTGNLSPPTVMSEGR-COOH            | VIVL↓LGTG | 2  | 0.51633                                                | 74/46  | Flavin reductase                              |                                                      |
| Q9R059 | 6    | 17   | AcD3-DCARKNESLYGR-COOH                | SEAF↓DCAK | 2  | 0.59966                                                | 49/44  | Four and a half LIM domains protein 3         |                                                      |
| P05064 | 32   | 43   | AcD3-AADESTGSIKR-COOH                 | KGIL↓AADE | 25 | 0.53808/0.56129/0.54425/0.4599                         | 79/48  | Fructose-bisphosphate aldolase A              |                                                      |
| P05064 | 34   | 43   | AcD3-DESTGSIKR-COOH                   | ILAA↓DEST | 3  | 0.57196/0.56599                                        | 73/47  | Fructose-bisphosphate aldolase A              |                                                      |
| P05064 | 35   | 43   | AcD3-ESTGSIKR-COOH                    | LAAD↓ESTG | 2  | 0.72483                                                | 60/47  | Fructose-bisphosphate aldolase A              |                                                      |
| P05064 | 153  | 173  | AcD3-KIGHEPTPSALAIMENANVLAR-COOH      | RCVL↓KIGE | 1  | 0.50081                                                | 58/46  | Fructose-bisphosphate aldolase A              |                                                      |
| P05064 | 163  | 173  | AcD3-AIMENANVLAR-COOH                 | PSAL↓AIME | 13 | 0.54289/0.51745/0.53008                                | 75/48  | Fructose-bisphosphate aldolase A              |                                                      |
| P05064 | 175  | 201  | AcD3-ASICQNGVPIVEPEILPDGDHDLKR-COOH   | LARY↓ASIC | 1  | 0.50608                                                | 60/47  | Fructose-bisphosphate aldolase A              | P05063 (175-201)                                     |
| P05064 | 322  | 331  | AcD3-KAAQEEYIKR-COOH                  | KENL↓KAAQ | 6  | 0.53126/0.53166                                        | 73/46  | Fructose-bisphosphate aldolase A              |                                                      |
| P05063 | 32   | 43   | AcD3-AADESIVGSMMAKR-COOH              | KGIL↓AADE | 5  | 0.55418/0.57293                                        | 68/47  | Fructose-bisphosphate aldolase C              |                                                      |
| P05063 | 107  | 134  | AcD3-KVYDGGVPLAGTDGETTTQGLDGLLER-COOH | ILVG↓KVYD | 1  | 0.51171                                                | 53/45  | Fructose-bisphosphate aldolase C              |                                                      |
| P05063 | 163  | 173  | AcD3-AILENANVLAR-COOH                 | PSAL↓AILE | 2  | 0.56583                                                | 66/46  | Fructose-bisphosphate aldolase C              |                                                      |
| P05063 | 177  | 201  | AcD3-ICQQNGVPIVEPEILPDGDHDLKR-COOH    | RYAS↓ICQQ | 2  | 0.48581/0.52019                                        | 72/47  | Fructose-bisphosphate aldolase C              | P05064 (177-201)                                     |
| P05063 | 249  | 258  | AcD3-IAMATVTLAR-COOH                  | SPEE↓IAMA | 30 | 0.53938/0.57227/0.54689/0.54007/0.5457/0.50294         | 85/45  | Fructose-bisphosphate aldolase C              | P05064 (249-258)                                     |
| P05063 | 251  | 258  | AcD3-MATVTLAR-COOH                    | EElA↓MATV | 1  | 0.4883                                                 | 65/47  | Fructose-bisphosphate aldolase C              | P05064 (251-258)                                     |
| P05063 | 252  | 258  | AcD3-ATVTLAR-COOH                     | ElAM↓ATVT | 2  | 0.52221                                                | 61/46  | Fructose-bisphosphate aldolase C              | P05064 (252-258)                                     |
| P05063 | 271  | 289  | AcD3-LSGGQSEFEASLNLNAINR-COOH         | GVTF↓LSGG | 2  | 0.48362                                                | 82/47  | Fructose-bisphosphate aldolase C              |                                                      |
| P97807 | 149  | 157  | AcD3-NVNEVISNR-COOH                   | QTNM↓NVNE | 1  | 0.41736                                                | 62/47  | Fumarate hydratase, mitochondrial             |                                                      |
| P97807 | 223  | 230  | AcD3-AQVIKIGR-COOH                    | SKEF↓AQVI | 1  | 0.53486                                                | 62/39  | Fumarate hydratase, mitochondrial             |                                                      |
| P97807 | 270  | 283  | AcD3-AAGGTAVGTGLNTR-COOH              | lYEL↓AAGG | 2  | 0.47692                                                | 92/47  | Fumarate hydratase, mitochondrial             |                                                      |
| Q35601 | 772  | 785  | AcD3-EVIQSTDDTKVLCR-COOH              | GESL↓EVIQ | 1  | 0.60479                                                | 53/48  | FYN-binding protein                           |                                                      |
| P16110 | 146  | 158  | AcD3-ITIMGTVKPNANR-COOH               | PRML↓ITIM | 9  | 0.5547/0.53693/0.58972/0.60379/0.57224                 | 84/46  | Galectin-3                                    |                                                      |
| Q9ERD8 | 10   | 26   | AcD3-LQLPKVAQPTTEELPR-COOH            | LYDL↓LQLP | 1  | 0.68771                                                | 63/46  | Gamma-parvin                                  |                                                      |
| P13020 | 313  | 325  | AcD3-VADENPFAQGALR-COOH               | SVSL↓VADE | 5  | 0.49892/0.52792                                        | 84/47  | Gelsolin                                      |                                                      |
| P13020 | 512  | 523  | AcD3-DEELGGTPVQSR-COOH                | TAQL↓DEEL | 2  | 0.55566/0.62905                                        | 67/47  | Gelsolin                                      |                                                      |
| Q3THK3 | 363  | 372  | AcD3-MAKKKTPPKR-COOH                  | SALF↓MAKK | 1  | 0.60604                                                | 44/41  | General transcription factor IIF subunit 1    |                                                      |

|        |     |     |                                   |            |    |                                         |        |                                                          |                                                                                |
|--------|-----|-----|-----------------------------------|------------|----|-----------------------------------------|--------|----------------------------------------------------------|--------------------------------------------------------------------------------|
| Q9E5Z8 | 686 | 702 | AcD3-VTVEGPNSSPQTSAVR-COOH        | PEIE↓VTVE  | 1  | 0.69115                                 | 78/48  | General transcription factor II-I                        |                                                                                |
| Q9CQI3 | 10  | 19  | AcD3-VAEDLVEKLR-COOH              | VVCD↓VAED  | 1  | 0.54448                                 | 49/45  | Glia maturation factor beta                              |                                                                                |
| Q9ERL7 | 6   | 19  | AcD3-VVCEVDPELKETLR-COOH          | SDSL↓VVCE  | 2  | 0.56646                                 | 65/47  | Glia maturation factor gamma                             |                                                                                |
| Q9ERL7 | 9   | 19  | AcD3-EVDPELKETLR-COOH             | LVVC↓EVDPE | 1  | 0.50397                                 | 84/47  | Glia maturation factor gamma                             |                                                                                |
| Q00612 | 413 | 427 | AcD3-FNPFESELDLTYGNR-COOH         | PGMF↓FNPE  | 1  | 0.40975                                 | 58/46  | Glucose-6-phosphate 1-dehydrogenase X                    |                                                                                |
| P06745 | 67  | 75  | AcD3-MLVELAKSR-COOH               | EVMQ↓MLVE  | 1  | 0.67597                                 | 55/46  | Glucose-6-phosphate isomerase                            |                                                                                |
| P06745 | 68  | 75  | AcD3-LVELAKSR-COOH                | VMQM↓LVEL  | 5  | 0.52339/0.5024                          | 56/43  | Glucose-6-phosphate isomerase                            |                                                                                |
| P06745 | 69  | 75  | AcD3-VELAKSR-COOH                 | MQML↓VELA  | 4  | 0.5303/0.50633/0.5581                   | 66/44  | Glucose-6-phosphate isomerase                            | Q6GQX2 (768-774)                                                               |
| P06745 | 352 | 370 | AcD3-FQQGDMESNGKYITKSGAR-COOH     | FAAY↓FQQG  | 7  | 0.46709/0.55639/0.48511/0.49764/0.50474 | 90/47  | Glucose-6-phosphate isomerase                            |                                                                                |
| P06745 | 407 | 417 | AcD3-LIPVQTOHPIR-COOH             | PCDF↓LIPV  | 1  | 0.49394                                 | 44/43  | Glucose-6-phosphate isomerase                            |                                                                                |
| P06745 | 430 | 446 | AcD3-LAQTEALMKGKLPPEAR-COOH       | LANF↓LAQT  | 5  | 0.48194/0.49476                         | 76/47  | Glucose-6-phosphate isomerase                            |                                                                                |
| P06745 | 431 | 446 | AcD3-AQTEALMKGKLPPEAR-COOH        | ANFL↓AQTE  | 5  | 0.52221/0.49594                         | 98/47  | Glucose-6-phosphate isomerase                            |                                                                                |
| P06745 | 436 | 446 | AcD3-LMKGKLPPEAR-COOH             | QTEA↓LMKG  | 4  | 0.49665/0.52854                         | 62/46  | Glucose-6-phosphate isomerase                            |                                                                                |
| P06745 | 437 | 446 | AcD3-MKGKLPPEAR-COOH              | TEAL↓MKGK  | 1  | 0.50586                                 | 66/47  | Glucose-6-phosphate isomerase                            |                                                                                |
| P06745 | 546 | 553 | AcD3-ISFIKQQR-COOH                | TNGL↓ISFI  | 2  | 0.53338                                 | 71/44  | Glucose-6-phosphate isomerase                            |                                                                                |
| O08795 | 160 | 177 | AcD3-LELOAGKKSLEDQVETLR-COOH      | QSKL↓LELQ  | 2  | 0.52399/0.56551                         | 93/45  | Glucosidase 2 subunit beta                               |                                                                                |
| O08795 | 163 | 177 | AcD3-QAGKKSLEDQVETLR-COOH         | LLEL↓QAGK  | 2  | 0.61987                                 | 103/46 | Glucosidase 2 subunit beta                               |                                                                                |
| O08795 | 359 | 367 | AcD3-HIDAAQEAR-COOH               | ETQA↓HIDA  | 2  | 0.54086                                 | 82/47  | Glucosidase 2 subunit beta                               |                                                                                |
| P26443 | 378 | 395 | AcD3-LIPAAASEKQLTKSNAPR-COOH      | ADCD↓LIP   | 3  | 0.4432/0.46322                          | 99/42  | Glutamate dehydrogenase 1, mitochondrial                 |                                                                                |
| P15105 | 270 | 280 | AcD3-IEAIDKLSKR-COOH              | GLKC↓IEEA  | 2  | 0.69882                                 | 59/44  | Glutamine synthetase                                     |                                                                                |
| Q9CQM9 | 93  | 101 | AcD3-FKNSQVDR-COOH                | TFLF↓FKNS  | 2  | 0.51347                                 | 54/47  | Glutaredoxin-3                                           |                                                                                |
| P47791 | 46  | 59  | AcD3-LVIGGSGGLASAR-COOH           | SFDY↓LVIG  | 10 | 0.4614/0.43044/0.4177                   | 108/46 | Glutathione reductase, mitochondrial                     |                                                                                |
| P47791 | 47  | 59  | AcD3-VIGGSGGLASAR-COOH            | FQYL↓VIGG  | 2  | 0.55212                                 | 88/47  | Glutathione reductase, mitochondrial                     |                                                                                |
| P47791 | 350 | 369 | AcD3-AVGDVCGKALLTPVIAAGR-COOH     | KGYY↓AVGD  | 3  | 0.35868/0.45221                         | 92/45  | Glutathione reductase, mitochondrial                     |                                                                                |
| P10649 | 20  | 32  | AcD3-LLEYTSSYDEKR-COOH            | PIRM↓LLEY  | 1  | 0.71737                                 | 69/47  | Glutathione S-transferase Mu 1                           |                                                                                |
| P10649 | 22  | 32  | AcD3-EYTDSSYDEKR-COOH             | RMLL↓EYTD  | 2  | 0.67558                                 | 73/43  | Glutathione S-transferase Mu 1                           |                                                                                |
| O09131 | 40  | 48  | AcD3-MVLKAKGIR-COOH               | QRTL↓MVLK  | 2  | 0.61583/0.61914                         | 48/40  | Glutathione S-transferase omega-1                        |                                                                                |
| O09131 | 41  | 48  | AcD3-VLKAKGIR-COOH                | RTLM↓VLKA  | 8  | 0.56287/0.57618/0.56031/0.63948         | 57/33  | Glutathione S-transferase omega-1                        | Q8K2Q2 (41-48)                                                                 |
| P16858 | 93  | 116 | AcD3-VVESTGVFTTMEKAGAHKGGAKR-COOH | GAEY↓VVES  | 1  | 0.48539                                 | 72/46  | Glyceraldehyde-3-phosphate dehydrogenase                 |                                                                                |
| P16858 | 101 | 116 | AcD3-TTMEKAGAHKGGAKR-COOH         | TGVF↓TTME  | 4  | 0.50111/0.51221/0.50895                 | 71/47  | Glyceraldehyde-3-phosphate dehydrogenase                 |                                                                                |
| P16858 | 241 | 246 | AcD3-VDLTLCR-COOH                 | NVSV↓VDLT  | 1  | 0.45459                                 | 48/47  | Glyceraldehyde-3-phosphate dehydrogenase                 | Q64467 (347-352)                                                               |
| Q9ET01 | 22  | 34  | AcD3-VENVAELKGFNR-COOH            | GIVG↓VENV  | 2  | 0.66787                                 | 77/45  | Glycogen phosphorylase, liver form                       |                                                                                |
| Q9ET01 | 25  | 34  | AcD3-VAELKGFNR-COOH               | GVEN↓VAEL  | 3  | 0.56789/0.5878                          | 55/43  | Glycogen phosphorylase, liver form                       |                                                                                |
| Q2NL51 | 145 | 155 | AcD3-VAIKKVLQDKR-COOH             | TREL↓VAIK  | 2  | 0.70409                                 | 53/33  | Glycogen synthase kinase-3 alpha                         | Q9WV60 (82-92)                                                                 |
| O70310 | 99  | 115 | AcD3-FSVGGQPAKTMEEASKR-COOH       | AIEL↓FSVG  | 5  | 0.56464/0.57112/0.56583                 | 113/47 | Glycopeptide N-tetradecanoyltransferase 1                |                                                                                |
| O70310 | 100 | 115 | AcD3-SVGGQPAKTMEEASKR-COOH        | IELF↓SVGQ  | 1  | 0.7164                                  | 80/48  | Glycopeptide N-tetradecanoyltransferase 1                |                                                                                |
| Q9CZD3 | 192 | 203 | AcD3-MVKDVKNGEFCFR-COOH           | FADF↓MVKD  | 2  | 0.51268                                 | 73/47  | Glycyl-tRNA synthetase                                   |                                                                                |
| Q9CPV4 | 89  | 101 | AcD3-ITLASSQAVSNAR-COOH           | DFMG↓ITLA  | 3  | 0.56436/0.46851                         | 93/47  | Glyoxalase domain-containing protein 4                   |                                                                                |
| Q9CPV4 | 90  | 101 | AcD3-TLASSQAVSNAR-COOH            | FMGI↓TLAS  | 2  | 0.75                                    | 63/48  | Glyoxalase domain-containing protein 4                   |                                                                                |
| Q91253 | 308 | 318 | AcD3-LAANNLLAGLR-COOH             | TMSL↓LAAN  | 3  | 0.54022/0.55825                         | 93/42  | Glyoxylate reductase/hydroxypyruvate reductase           |                                                                                |
| Q60780 | 381 | 394 | AcD3-FNQSTVEPVQDLRL-COOH          | ETDM↓FNQS  | 1  | 0.47181                                 | 55/47  | Growth arrest-specific protein 7                         |                                                                                |
| Q9WTP7 | 111 | 124 | AcD3-VINLNVPEVVIKQR-COOH          | QIDT↓VINL  | 2  | 0.5468                                  | 76/42  | GTP-AMP phosphotransferase mitochondrial                 |                                                                                |
| P62827 | 14  | 29  | AcD3-VLVDGGGTGKTFVVKR-COOH        | QFKL↓VLVD  | 8  | 0.54298/0.41307/0.40721/0.42947         | 77/44  | GTP-binding nuclear protein Ran                          |                                                                                |
| P62827 | 16  | 29  | AcD3-VGDGGGTGKTFVVKR-COOH         | KLVL↓VGDG  | 2  | 0.41308                                 | 64/47  | GTP-binding nuclear protein Ran                          |                                                                                |
| Q9R111 | 119 | 126 | AcD3-VAEEVYTR-COOH                | RSTD↓VAEE  | 1  | 0.76986                                 | 49/48  | Guanine deaminase                                        |                                                                                |
| Q9R111 | 154 | 163 | AcD3-AEITDKFGQR-COOH              | SULI↓AEIT  | 2  | 0.68259                                 | 71/48  | Guanine deaminase                                        |                                                                                |
| P68040 | 110 | 118 | AcD3-SVAFSDNR-COOH                | KDVL↓SVAF  | 2  | 0.62111                                 | 78/46  | Guanine nucleotide-binding protein subunit beta-2-like 1 |                                                                                |
| P52785 | 203 | 209 | AcD3-ALSTALR-COOH                 | EAGR↓ALST  | 1  | 0.52704                                 | 34/32  | Guanylyl cyclase GC-E                                    |                                                                                |
| Q3SXD3 | 179 | 186 | AcD3-VSELETER-COOH                | IVQL↓VSEL  | 1  | 0.43185                                 | 56/47  | HD domain-containing protein 2                           |                                                                                |
| P16627 | 30  | 38  | AcD3-IIANDQGNR-COOH               | GKVE↓IIAN  | 1  | 0.48837                                 | 57/47  | Heat shock 70 kDa protein 1L                             | P17156 (29-37), P17879 (28-36), P20029 (53-61), P63017 (28-36), Q61696 (28-36) |
| P16627 | 44  | 51  | AcD3-VAFTDTER-COOH                | TPSY↓VAFT  | 1  | 0.50794                                 | 55/47  | Heat shock 70 kDa protein 1L                             | P17156 (43-50), P17879 (42-49), P63017 (42-49), Q61696 (42-49)                 |
| Q61316 | 338 | 346 | AcD3-VEIVGGATR-COOH               | DIYA↓VEIV  | 4  | 0.50819/0.49757                         | 81/46  | Heat shock 70 kDa protein 4                              |                                                                                |
| Q61316 | 598 | 615 | AcD3-YTENEGKMIMQDKLEKER-COOH      | MLAL↓YTEN  | 1  | 0.60238                                 | 78/47  | Heat shock 70 kDa protein 4                              |                                                                                |
| Q61316 | 677 | 689 | AcD3-AELKSLGQPIKTR-COOH           | VDKL↓AELK  | 1  | 0.45593                                 | 59/41  | Heat shock 70 kDa protein 4                              |                                                                                |
| P48722 | 26  | 33  | AcD3-IANEYSDR-COOH                | GIET↓IANE  | 1  | 0.53611                                 | 48/45  | Heat shock 70 kDa protein 4L                             | Q61316 (26-33)                                                                 |
| P48722 | 338 | 346 | AcD3-IEIVGGATR-COOH               | DINS↓IEIV  | 2  | 0.51517/0.54178                         | 67/45  | Heat shock 70 kDa protein 4L                             | Q61699 (338-346)                                                               |
| P48722 | 381 | 390 | AcD3-AILSPAFAKVR-COOH             | ALQC↓AAIL  | 6  | 0.52308/0.48946/0.51767                 | 58/41  | Heat shock 70 kDa protein 4L                             | Q61316 (381-390), Q61699 (381-390)                                             |
| P63017 | 51  | 72  | AcD3-IGDAAKNQVAMNPTNTVFDKAR-COOH  | TERL↓IGDA  | 5  | 0.45224/0.55428/0.66979/0.59471         | 106/47 | Heat shock cognate 71 kDa protein                        |                                                                                |
| P63017 | 59  | 72  | AcD3-VAMNPTNTVFDKAR-COOH          | AKNQ↓VAMN  | 2  | 0.49834                                 | 78/48  | Heat shock cognate 71 kDa protein                        |                                                                                |
| P63017 | 133 | 155 | AcD3-AYLGKTVTNAVVTVPAYFNDSQR-COOH | EIAE↓AYLG  | 1  | 0.53207                                 | 48/47  | Heat shock cognate 71 kDa protein                        |                                                                                |

|        |     |     |                                   |            |    |                         |        |                                                              |                                                                                                                                                                               |
|--------|-----|-----|-----------------------------------|------------|----|-------------------------|--------|--------------------------------------------------------------|-------------------------------------------------------------------------------------------------------------------------------------------------------------------------------|
| P63017 | 142 | 155 | AcD3-AVTVVPAYFNDSSQR-COOH         | VTVN↓AVVT  | 1  | 0.75275                 | 54/48  | Heat shock cognate 71 kDa protein                            |                                                                                                                                                                               |
| P63017 | 143 | 155 | AcD3-VVTVPAYFNDSSQR-COOH          | VTNA↓VVTV  | 2  | 0.44358/0.45722         | 73/47  | Heat shock cognate 71 kDa protein                            |                                                                                                                                                                               |
| Q61699 | 463 | 477 | AcD3-VVQVNSAQKDGKSR-COOH          | IGRF↓VVQN  | 2  | 0.50853/0.54508         | 89/47  | Heat shock protein 105 kDa                                   |                                                                                                                                                                               |
| P07901 | 581 | 592 | AcD3-EKKVKKVVSNSR-COOH            | KDIL↓EKKV  | 2  | 0.44736                 | 71/42  | Heat shock protein HSP 90-alpha                              |                                                                                                                                                                               |
| P11499 | 344 | 358 | AcD3-FENKKNKNIKLVYR-COOH          | PFDL↓FENK  | 3  | 0.35915/0.42658         | 74/39  | Heat shock protein HSP 90-beta                               |                                                                                                                                                                               |
| P49710 | 28  | 37  | AcD3-VNDISEKEQR-COOH              | DPDF↓VNDI  | 1  | 0.556                   | 70/47  | Hematopoietic lineage cell-specific protein                  |                                                                                                                                                                               |
| P49710 | 213 | 236 | AcD3-NEMEAPTTAYKKTPIEAASSGAR-COOH | AVGF↓NEME  | 3  | 0.54081/0.55183/0.51139 | 81/47  | Hematopoietic lineage cell-specific protein                  |                                                                                                                                                                               |
| P49710 | 215 | 236 | AcD3-MEAPTTAYKKTPIEAASSGAR-COOH   | GFNE↓MEAP  | 2  | 0.54321                 | 109/47 | Hematopoietic lineage cell-specific protein                  |                                                                                                                                                                               |
| Q9R257 | 22  | 34  | AcD3-STGGKEEDVSYEER-COOH          | WQVL↓STGG  | 2  | 0.80024                 | 50/45  | Heme-binding protein 1                                       |                                                                                                                                                                               |
| Q9918  | 266 | 279 | AcD3-ALALSOSEAEKEER-COOH          | ELQL↓ALAL  | 1  | 0.46439                 | 73/48  | Hepatocyte growth factor-regulated tyrosine kinase substrate |                                                                                                                                                                               |
| Q9918  | 268 | 279 | AcD3-ALSOSEAEKEER-COOH            | QLAL↓ALSQ  | 4  | 0.62083/0.65084         | 71/47  | Hepatocyte growth factor-regulated tyrosine kinase substrate |                                                                                                                                                                               |
| Q99020 | 106 | 114 | AcD3-IKMDPNTGR-COOH               | VDCT↓IKMD  | 1  | 0.50186                 | 49/47  | Heterogeneous nuclear ribonucleoprotein A/B                  |                                                                                                                                                                               |
| Q99020 | 121 | 139 | AcD3-ILFKOSSSEKVLQDQKEHR-COOH     | GFGF↓ILFK  | 2  | 0.6203/0.56527          | 84/45  | Heterogeneous nuclear ribonucleoprotein A/B                  |                                                                                                                                                                               |
| Q99020 | 123 | 139 | AcD3-FKSSSSEKVLQDQKEHR-COOH       | GFIL↓FKDS  | 2  | 0.47377                 | 116/47 | Heterogeneous nuclear ribonucleoprotein A/B                  |                                                                                                                                                                               |
| Q99020 | 187 | 199 | AcD3-AIELPIDPKLNKR-COOH           | GEIE↓AIEL  | 1  | 0.52112                 | 50/40  | Heterogeneous nuclear ribonucleoprotein A/B                  |                                                                                                                                                                               |
| Q99020 | 188 | 199 | AcD3-IELPIDPKLNKR-COOH            | EIEA↓IELP  | 2  | 0.46811/0.49201         | 60/39  | Heterogeneous nuclear ribonucleoprotein A/B                  |                                                                                                                                                                               |
| Q99020 | 191 | 199 | AcD3-PIDPKLNKR-COOH               | AIEL↓PIDP  | 2  | 0.5528                  | 58/41  | Heterogeneous nuclear ribonucleoprotein A/B                  |                                                                                                                                                                               |
| Q99020 | 231 | 250 | AcD3-IVKVAQKEVYQQQYSGGR-COOH      | SKCE↓IKVA  | 1  | 0.46712                 | 51/47  | Heterogeneous nuclear ribonucleoprotein A/B                  |                                                                                                                                                                               |
| P49312 | 60  | 75  | AcD3-VTYATVEEVDAAAMNAR-COOH       | GFGF↓VTYA  | 1  | 0.37751                 | 89/46  | Heterogeneous nuclear ribonucleoprotein A1                   |                                                                                                                                                                               |
| P49312 | 63  | 75  | AcD3-ATVEEVDAAAMNAR-COOH          | FVTY↓ATVE  | 1  | 0.59408                 | 98/46  | Heterogeneous nuclear ribonucleoprotein A1                   |                                                                                                                                                                               |
| P49312 | 65  | 75  | AcD3-VEEVDAAAMNAR-COOH            | TYAT↓VEEV  | 2  | 0.47296                 | 53/45  | Heterogeneous nuclear ribonucleoprotein A1                   |                                                                                                                                                                               |
| Q88G05 | 86  | 96  | AcD3-VEEVDAAAMNAR-COOH            | TYSC↓VEEV  | 4  | 0.51716/0.48456         | 52/43  | Heterogeneous nuclear ribonucleoprotein A3                   |                                                                                                                                                                               |
| Q60668 | 211 | 222 | AcD3-IELPMDNKTKR-COOH             | EVEF↓IELP  | 2  | 0.36099/0.4647          | 51/47  | Heterogeneous nuclear ribonucleoprotein D0                   |                                                                                                                                                                               |
| Q922X1 | 222 | 230 | AcD3-IVKQAGLDR-COOH               | RYIG↓IVKQ  | 4  | 0.57557/0.67036         | 70/43  | Heterogeneous nuclear ribonucleoprotein F                    |                                                                                                                                                                               |
| Q35737 | 309 | 316 | AcD3-FSPLNVR-COOH                 | IYNF↓FSPL  | 1  | 0.59155                 | 52/46  | Heterogeneous nuclear ribonucleoprotein H                    | Q922X1 (309-316)                                                                                                                                                              |
| P61979 | 360 | 377 | AcD3-AYEPQGGSGYDYSYAGGR-COOH      | EWQM↓AYEP  | 1  | 0.63332                 | 45/42  | Heterogeneous nuclear ribonucleoprotein K                    |                                                                                                                                                                               |
| Q921F4 | 426 | 436 | AcD3-VEMEDGEYAVR-COOH             | GTAL↓VEMG  | 1  | 0.54783                 | 45/44  | Heterogeneous nuclear ribonucleoprotein L-like               |                                                                                                                                                                               |
| Q9D0E1 | 374 | 381 | AcD3-ILSNALKR-COOH                | RINE↓ILSN  | 1  | 0.46377                 | 52/40  | Heterogeneous nuclear ribonucleoprotein M                    |                                                                                                                                                                               |
| Q8VDM6 | 111 | 126 | AcD3-YETPVIKQENESSYDR-COOH        | QNQF↓YETP  | 1  | 0.68872                 | 63/47  | Heterogeneous nuclear ribonucleoprotein U-like protein 1     |                                                                                                                                                                               |
| O88569 | 67  | 82  | AcD3-VTFSSMAEVDAAAMNAR-COOH       | GFGF↓VTFS  | 1  | 0.67591                 | 61/45  | Heterogeneous nuclear ribonucleoproteins A2/B1               |                                                                                                                                                                               |
| O88569 | 73  | 82  | AcD3-AEVDAAAMNAR-COOH             | FSSM↓AEVD  | 3  | 0.58839/0.66917         | 62/46  | Heterogeneous nuclear ribonucleoproteins A2/B1               |                                                                                                                                                                               |
| O88569 | 318 | 325 | AcD3-SGNFSGSR-COOH                | GPMK↓SGNF  | 1  | 0.80277                 | 52/46  | Heterogeneous nuclear ribonucleoproteins A2/B1               |                                                                                                                                                                               |
| P17710 | 444 | 452 | AcD3-ATLGAILNR-COOH               | NLVA↓ATLG  | 2  | 0.54601                 | 81/44  | Hexokinase-1                                                 |                                                                                                                                                                               |
| P17710 | 585 | 595 | AcD3-LALDLGGTNFR-COOH             | HGDF↓LALD  | 2  | 0.49463                 | 87/47  | Hexokinase-1                                                 | O08528 (81-91), Q3TRM8 (537-547), Q91W97 (529-539)                                                                                                                            |
| P17710 | 947 | 966 | AcD3-LLEDGSGKGAALITAVGVR-COOH     | TVSF↓LLESE | 1  | 0.54267                 | 69/44  | Hexokinase-1                                                 |                                                                                                                                                                               |
| O08528 | 891 | 910 | AcD3-LESEDSGKGAALITAVACR-COOH     | DVSF↓LESE  | 1  | 0.46777                 | 84/47  | Hexokinase-2                                                 |                                                                                                                                                                               |
| P62748 | 169 | 181 | AcD3-FIKGAKSDPSIVR-COOH           | SLEE↓FIKG  | 2  | 0.6617                  | 49/43  | Hippocalcin-like protein 1                                   |                                                                                                                                                                               |
| P62748 | 170 | 181 | AcD3-IKGAKSDPSIVR-COOH            | LEEF↓IKGA  | 4  | 0.61266/0.588           | 77/42  | Hippocalcin-like protein 1                                   |                                                                                                                                                                               |
| P70349 | 10  | 24  | AcD3-VAQPGGDTIFGKIIR-COOH         | AKAQ↓VAQP  | 1  | 0.4613                  | 61/44  | Histidine triad nucleotide-binding protein 1                 |                                                                                                                                                                               |
| P43275 | 62  | 81  | AcD3-AALKKSLAAGYDVEKNNSR-COOH     | GVSL↓AALK  | 1  | 0.50939                 | 60/45  | Histone H1.1                                                 |                                                                                                                                                                               |
| P43275 | 69  | 81  | AcD3-AAAGYDVEKNNSR-COOH           | KKSL↓AAAG  | 2  | 0.54273                 | 87/47  | Histone H1.1                                                 | P15864 (67-79), P43274 (67-79), P43277 (68-80), Q07133 (69-81)                                                                                                                |
| P15864 | 44  | 54  | AcD3-ITKAAVASKER-COOH             | VSEL↓ITKA  | 2  | 0.47221                 | 66/43  | Histone H1.2                                                 | P43274 (44-54), P43277 (45-55)                                                                                                                                                |
| P15864 | 60  | 79  | AcD3-AALKKALAAAGYDVEKNNSR-COOH    | GVSL↓AALK  | 3  | 0.47622/0.5285          | 110/45 | Histone H1.2                                                 | P43274 (60-79), P43277 (61-80), Q07133 (62-81)                                                                                                                                |
| P43276 | 44  | 54  | AcD3-ITKAVASKER-COOH              | VSEL↓ITKA  | 2  | 0.45539                 | 56/44  | Histone H1.5                                                 |                                                                                                                                                                               |
| P22752 | 60  | 72  | AcD3-TAEILELAGNAAR-COOH           | LEYL↓TAEI  | 4  | 0.51399/0.50168         | 102/47 | Histone H2A type 1                                           | P27661 (60-72), Q64522 (60-72), Q64523 (60-72), Q6GSS7 (60-72), Q8BFU2 (60-72), Q8CGP5 (60-72), Q8CGP6 (60-72), Q8CGP7 (60-72), Q8R1M2 (60-72), Q9QZQ8 (57-69)                |
| P22752 | 63  | 72  | AcD3-ILELAGNAAR-COOH              | LTAE↓ILEL  | 11 | 0.42721/0.53715/0.4281  | 96/46  | Histone H2A type 1                                           | P27661 (63-72), Q64522 (63-72), Q64523 (63-72), Q6GSS7 (63-72), Q8BFU2 (63-72), Q8CKO (60-69), Q8CGP5 (63-72), Q8CGP6 (63-72), Q8CGP7 (63-72), Q8R1M2 (63-72), Q9QZQ8 (60-69) |
| Q64523 | 58  | 72  | AcD3-YLTAIEILELAGNAAR-COOH        | AVLE↓YLTA  | 2  | 0.64593                 | 96/46  | Histone H2A type 2-C                                         | P22752 (58-72), P27661 (58-72), Q64522 (58-72), Q6GSS7 (58-72), Q8BFU2 (58-72), Q8CGP5 (58-72), Q8CGP6 (58-72), Q8CGP7 (58-72), Q8R1M2 (58-72), Q9QZQ8 (55-69)                |

|        |      |      |                               |            |    |                                         |        |                                                                 |                                                                                                                                                                                                                                                                                                                  |
|--------|------|------|-------------------------------|------------|----|-----------------------------------------|--------|-----------------------------------------------------------------|------------------------------------------------------------------------------------------------------------------------------------------------------------------------------------------------------------------------------------------------------------------------------------------------------------------|
| Q3THW5 | 66   | 81   | AcD3-VLELAGNASKDLKVKR-COOH    | LTAE↓VLEL  | 8  | 0.51502/0.55256/0.64474/0.78221/0.57621 | 117/41 | Histone H2A.V                                                   | POC056 (66-81)                                                                                                                                                                                                                                                                                                   |
| POC056 | 63   | 81   | AcD3-TAEVLELAGNASKDLKVKR-COOH | LEYL↓TAEV  | 1  | 0.75634                                 | 120/42 | Histone H2A.Z                                                   | Q3THW5 (63-81)                                                                                                                                                                                                                                                                                                   |
| POC056 | 68   | 81   | AcD3-ELAGNASKDLKVKR-COOH      | AEVL↓ELAG  | 1  | 0.61371                                 | 64/43  | Histone H2A.Z                                                   | Q3THW5 (68-81)                                                                                                                                                                                                                                                                                                   |
| POC056 | 70   | 81   | AcD3-AGNASKDLKVKR-COOH        | VLEL↓AGNA  | 3  | 0.46068/0.55544                         | 61/42  | Histone H2A.Z                                                   | Q3THW5 (70-81)                                                                                                                                                                                                                                                                                                   |
| Q64475 | 66   | 73   | AcD3-FVNDIFER-COOH            | IMNS↓FVND  | 2  | 0.75516                                 | 70/47  | Histone H2B type 1-8                                            | P10853 (66-73), P10854 (66-73), Q64478 (66-73), Q64524 (66-73), Q64525 (66-73), Q6ZWY9 (66-73), Q8CGP0 (66-73), Q8CGP1 (66-73), Q8CGP2 (66-73), Q9D2U9 (66-73)                                                                                                                                                   |
| Q99L47 | 158  | 168  | AcD3-VKLQKPNAAIR-COOH         | ASVF↓VKLQ  | 1  | 0.55395                                 | 59/37  | Hsc70-interacting protein                                       |                                                                                                                                                                                                                                                                                                                  |
| Q99L47 | 205  | 221  | AcD3-ALACKLDYDEASAMLR-COOH    | AHDL↓ALAC  | 1  | 0.6549                                  | 65/46  | Hsc70-interacting protein                                       |                                                                                                                                                                                                                                                                                                                  |
| Q99L47 | 207  | 221  | AcD3-ACKLDYDEASAMLR-COOH      | DLAL↓ACKL  | 2  | 0.5684                                  | 98/45  | Hsc70-interacting protein                                       |                                                                                                                                                                                                                                                                                                                  |
| Q99L47 | 211  | 221  | AcD3-DYDEASAMLR-COOH          | ACKL↓DYDE  | 1  | 0.60526                                 | 49/41  | Hsc70-interacting protein                                       |                                                                                                                                                                                                                                                                                                                  |
| Q61081 | 130  | 145  | AcD3-VNTKPEKAEEDSEEAR-COOH    | SKMS↓VNTK  | 1  | 0.63047                                 | 72/47  | Hsp90 co-chaperone Cdc37                                        |                                                                                                                                                                                                                                                                                                                  |
| Q8VD75 | 925  | 932  | AcD3-TQLQOASR-COOH            | SINL↓TQLQ  | 1  | 0.40289                                 | 48/47  | Huntingtin-interacting protein 1                                |                                                                                                                                                                                                                                                                                                                  |
| Q35343 | 76   | 96   | AcD3-IVQNASSDNQIGLQVQAAR-COOH | SLEA↓IVQN  | 1  | 0.57199                                 | 65/47  | Importin subunit alpha-4                                        |                                                                                                                                                                                                                                                                                                                  |
| Q9EPL8 | 772  | 779  | AcD3-EVKTSELR-COOH            | RLTR↓EVKT  | 1  | 0.42397                                 | 35/33  | Importin-7                                                      |                                                                                                                                                                                                                                                                                                                  |
| O88351 | 413  | 419  | AcD3-ILQEPKR-COOH             | SVSC↓ILQE  | 1  | 0.55629                                 | 46/42  | Inhibitor of nuclear factor kappa-B kinase subunit beta         |                                                                                                                                                                                                                                                                                                                  |
| Q9D819 | 60   | 79   | AcD3-IATKDPNPIKQDVKGGKLR-COOH | AKME↓IATK  | 1  | 0.315                                   | 44/33  | Inorganic pyrophosphatase                                       |                                                                                                                                                                                                                                                                                                                  |
| P24547 | 186  | 203  | AcD3-VVAPAGVTLKEANEILQR-COOH  | REDL↓VVAP  | 2  | 0.53847                                 | 105/44 | Inosine 5'-monophosphate dehydrogenase 2                        | P50096 (186-203)                                                                                                                                                                                                                                                                                                 |
| O88844 | 210  | 222  | AcD3-STKNTILKLYDGR-COOH       | PLYL↓STKN  | 1  | 0.77511                                 | 56/45  | Iso citrate dehydrogenase [NADP] cytoplasmic                    |                                                                                                                                                                                                                                                                                                                  |
| Q9CX00 | 196  | 211  | AcD3-IDVGTDDYKKGPGGR-COOH     | ETDL↓IDVG  | 2  | 0.59513                                 | 79/47  | IST1 homolog                                                    |                                                                                                                                                                                                                                                                                                                  |
| Q9DB55 | 346  | 358  | AcD3-LCQNGQKYEAVER-COOH       | NLAL↓LCQN  | 2  | 0.53155/0.44695                         | 71/47  | Kinesin light chain 4                                           |                                                                                                                                                                                                                                                                                                                  |
| Q61768 | 947  | 956  | AcD3-VQNNQPVGLR-COOH          | GGSF↓VQNN  | 1  | 0.63042                                 | 68/47  | Kinesin-1 heavy chain                                           |                                                                                                                                                                                                                                                                                                                  |
| O08672 | 628  | 635  | AcD3-VDLAGSER-COOH            | TLHL↓VDLA  | 1  | 0.65614                                 | 62/47  | Kinesin-like protein KIFC2                                      | O35066 (245-252), O35071 (247-254), O35231 (671-678), P28741 (249-256), P33173 (247-254), P33174 (240-247), Q60575 (247-254), Q61771 (244-251), Q6P9L6 (264-271), Q6RT24 (234-241), Q7M6Z4 (243-250), Q99PW8 (239-246), Q9EQW7 (251-258), Q9QWT9 (565-572), Q9QXL1 (273-280), Q9QXL2 (273-280), Q9WV04 (244-251) |
| Q99KP3 | 176  | 185  | AcD3-MKIGQSPVR-COOH           | TYAL↓MKKI  | 1  | 0.52014                                 | 45/44  | Lambda-crystallin homolog                                       |                                                                                                                                                                                                                                                                                                                  |
| Q9Z1R2 | 18   | 29   | AcD3-EVLVKTLDQTR-COOH         | PDSL↓EVLV  | 1  | 0.7935                                  | 71/45  | Large proline-rich protein BAT3                                 |                                                                                                                                                                                                                                                                                                                  |
| Q9Z1R2 | 1065 | 1072 | AcD3-LSGMPAKR-COOH            | SDAY↓LSGM  | 1  | 0.69746                                 | 54/46  | Large proline-rich protein BAT3                                 |                                                                                                                                                                                                                                                                                                                  |
| P70202 | 33   | 48   | AcD3-LVQTVQQASKEIPGR-COOH     | HKLF↓LVQT  | 2  | 0.47464/0.54844                         | 59/46  | Latexin                                                         |                                                                                                                                                                                                                                                                                                                  |
| P70202 | 34   | 48   | AcD3-VQTVQQASKEIPGR-COOH      | KLFL↓VQTV  | 2  | 0.5442/0.55276                          | 64/47  | Latexin                                                         |                                                                                                                                                                                                                                                                                                                  |
| Q3UZ39 | 77   | 85   | AcD3-ASLGGTSSR-COOH           | AATL↓ASLG  | 1  | 0.55932                                 | 60/47  | Leucine-rich repeat flightless-interacting protein 1            |                                                                                                                                                                                                                                                                                                                  |
| Q3UZ39 | 179  | 186  | AcD3-AEVKEALR-COOH            | QFQF↓AEVK  | 2  | 0.56854                                 | 70/45  | Leucine-rich repeat flightless-interacting protein 1            |                                                                                                                                                                                                                                                                                                                  |
| Q3UZ39 | 387  | 401  | AcD3-GQTAEDIKVTCTDSR-COOH     | DYIL↓GQTA  | 2  | 0.71241                                 | 75/46  | Leucine-rich repeat flightless-interacting protein 1            |                                                                                                                                                                                                                                                                                                                  |
| Q505F5 | 28   | 36   | AcD3-LTGPGLER-COOH            | RELL↓LTGP  | 2  | 0.48514                                 | 62/47  | Leucine-rich repeat-containing protein 47                       |                                                                                                                                                                                                                                                                                                                  |
| Q88MJ2 | 727  | 742  | AcD3-LTLSQAVDKFSADGMR-COOH    | TGNF↓LTLS  | 2  | 0.54909                                 | 107/48 | Leucyl-tRNA synthetase, cytoplasmic                             |                                                                                                                                                                                                                                                                                                                  |
| Q88MJ2 | 997  | 1008 | AcD3-MIKENMEKKGPR-COOH        | PFVA↓MIKE  | 2  | 0.52555                                 | 76/48  | Leucyl-tRNA synthetase, cytoplasmic                             |                                                                                                                                                                                                                                                                                                                  |
| Q55V42 | 294  | 308  | AcD3-FSSSKADLSGMSGSR-COOH     | VQDL↓FSSS  | 2  | 0.35997                                 | 96/46  | Leukocyte elastase inhibitor C                                  | Q9D154 (297-311)                                                                                                                                                                                                                                                                                                 |
| P24527 | 41   | 51   | AcD3-LTVGSQEENLR-COOH         | GTAAL↓LTVQ | 1  | 0.46056                                 | 70/48  | Leukotriene A-4 hydrolase                                       |                                                                                                                                                                                                                                                                                                                  |
| Q99JW4 | 160  | 173  | AcD3-NCANCGKELTADAR-COOH      | PDHF↓NCAN  | 2  | 0.58122                                 | 82/44  | LIM and senescent cell antigen-like-containing domain protein 1 |                                                                                                                                                                                                                                                                                                                  |
| Q61792 | 65   | 73   | AcD3-VADTPENLR-COOH           | SFTM↓VADT  | 6  | 0.5166/0.48411                          | 67/48  | LIM and SH3 domain protein 1                                    |                                                                                                                                                                                                                                                                                                                  |
| Q61792 | 99   | 109  | AcD3-SVADTPELQR-COOH          | KGKF↓SVVA  | 1  | 0.64191                                 | 51/47  | LIM and SH3 domain protein 1                                    |                                                                                                                                                                                                                                                                                                                  |
| Q88GB5 | 97   | 109  | AcD3-FKSKGNVDEGFR-COOH        | FQQL↓FKSK  | 1  | 0.66946                                 | 74/47  | LIM domain-containing protein 2                                 |                                                                                                                                                                                                                                                                                                                  |
| O88951 | 106  | 121  | AcD3-NIMGGKEQNPYISR-COOH      | GLGF↓NIMG  | 1  | 0.70369                                 | 50/48  | Lin-7 homolog B                                                 | O88952 (106-121)                                                                                                                                                                                                                                                                                                 |
| Q88FW7 | 100  | 114  | AcD3-KVQQGNPGGKTLER-COOH      | EGAF↓KVQQ  | 3  | 0.65857/0.60088                         | 111/47 | Lipoma-preferred partner homolog                                |                                                                                                                                                                                                                                                                                                                  |
| P06151 | 253  | 268  | AcD3-GLSVADLAESIMKNLR-COOH    | SWAI↓GLSV  | 1  | 0.68678                                 | 86/47  | L-lactate dehydrogenase A chain                                 |                                                                                                                                                                                                                                                                                                                  |
| P06151 | 303  | 315  | AcD3-VVKVTLTPEEAR-COOH        | GISD↓VVKV  | 2  | 0.48575                                 | 83/46  | L-lactate dehydrogenase A chain                                 |                                                                                                                                                                                                                                                                                                                  |
| P00342 | 92   | 99   | AcD3-VIITAGAR-COOH            | NSKL↓VIIT  | 4  | 0.4689/0.42585                          | 76/44  | L-lactate dehydrogenase C chain                                 | P06151 (92-99)                                                                                                                                                                                                                                                                                                   |
| P19973 | 223  | 234  | AcD3-QQYQATSSGR-COOH          | DERL↓QQYT  | 2  | 0.60717                                 | 63/46  | Lymphocyte-specific protein 1                                   |                                                                                                                                                                                                                                                                                                                  |
| P19973 | 225  | 234  | AcD3-YTQATSSGR-COOH           | RLQQ↓YTQA  | 2  | 0.57662                                 | 81/45  | Lymphocyte-specific protein 1                                   |                                                                                                                                                                                                                                                                                                                  |
| O09159 | 847  | 856  | AcD3-LSSVDAAR-COOH            | HLVL↓LSSV  | 9  | 0.68094/0.65611/0.54178                 | 90/47  | Lysosomal alpha-mannosidase                                     |                                                                                                                                                                                                                                                                                                                  |
| O09159 | 952  | 965  | AcD3-LQETTLAANQPISR-COOH      | TINY↓LQET  | 2  | 0.72871/0.70246                         | 97/47  | Lysosomal alpha-mannosidase                                     |                                                                                                                                                                                                                                                                                                                  |
| P16675 | 405  | 417  | AcD3-FVDSLNQKMEVQR-COOH       | GDEW↓FVDS  | 2  | 0.71058                                 | 58/47  | Lysosomal protective protein                                    |                                                                                                                                                                                                                                                                                                                  |
| P34884 | 5    | 12   | AcD3-IVNTNPR-COOH             | MPMF↓IVNT  | 16 | 0.62033/0.57897/0.56283/0.61095         | 71/45  | Macrophage migration inhibitory factor                          |                                                                                                                                                                                                                                                                                                                  |
| P34884 | 65   | 74   | AcD3-IGKIGGAQNR-COOH          | SLHS↓IGKI  | 1  | 0.68249                                 | 47/46  | Macrophage migration inhibitory factor                          |                                                                                                                                                                                                                                                                                                                  |

|        |      |      |                                   |           |   |                         |        |                                                                            |                                    |
|--------|------|------|-----------------------------------|-----------|---|-------------------------|--------|----------------------------------------------------------------------------|------------------------------------|
| P34884 | 80   | 87   | AcD3-LCGLLSDR-COOH                | YSKL↓LCGL | 1 | 0.46267                 | 62/47  | Macrophage migration inhibitory factor                                     |                                    |
| P34884 | 81   | 87   | AcD3-CGLLSDR-COOH                 | SKLL↓CGLL | 1 | 0.47399                 | 53/47  | Macrophage migration inhibitory factor                                     |                                    |
| P24452 | 142  | 151  | AcD3-YQVKGKKNR-COOH               | IRKL↓YQVK | 2 | 0.51575                 | 73/42  | Macrophage-capping protein                                                 |                                    |
| P24452 | 332  | 339  | AcD3-VELPQGR-COOH                 | PNTQ↓VEIL | 1 | 0.42739                 | 48/45  | Macrophage-capping protein                                                 |                                    |
| Q9EQK5 | 75   | 82   | AcD3-FDVTGQVR-COOH                | SSVL↓FDVT | 2 | 0.50617                 | 71/48  | Major vault protein                                                        |                                    |
| Q9EQK5 | 390  | 399  | AcD3-VQDVKTGKVR-COOH              | EGY↓VQDV  | 3 | 0.51209/0.52949         | 66/43  | Major vault protein                                                        |                                    |
| Q9EQK5 | 715  | 729  | AcD3-AVESTGNAKAEASR-COOH          | AMSM↓AVES | 3 | 0.54163                 | 105/47 | Major vault protein                                                        |                                    |
| P14152 | 82   | 92   | AcD3-DVAVLVGSMPR-COOH             | FKDL↓DVAV | 1 | 0.37493                 | 78/47  | Malate dehydrogenase, cytoplasmic                                          |                                    |
| P14152 | 224  | 230  | AcD3-ITVQQR-COOH                  | KGEF↓ITTV | 1 | 0.51015                 | 51/45  | Malate dehydrogenase, cytoplasmic                                          |                                    |
| Q64327 | 70   | 88   | AcD3-VELAPVGEDEGAADIQDR-COOH      | EQEE↓VELA | 1 | 0.58715                 | 55/47  | Male-enhanced antigen 1                                                    |                                    |
| Q8BTZ7 | 5    | 13   | AcD3-ILVGYGTR-COOH                | MKAL↓ILVG | 2 | 0.59284                 | 70/46  | Mannose-1-phosphate guanyltransferase beta                                 |                                    |
| Q9DBG5 | 136  | 150  | AcD3-VSSSVSAKETVATR-COOH          | AQEM↓VSSS | 1 | 0.56719                 | 72/47  | Mannose-6-phosphate receptor-binding protein 1                             |                                    |
| Q9DBG5 | 218  | 234  | AcD3-IATPPEDSDMASLQQQR-COOH       | ELAL↓IATP | 4 | 0.64397/0.58624         | 85/46  | Mannose-6-phosphate receptor-binding protein 1                             |                                    |
| Q9DBG5 | 281  | 293  | AcD3-GLMESVKQGVDQR-COOH           | TSVL↓GLME | 1 | 0.58035                 | 56/48  | Mannose-6-phosphate receptor-binding protein 1                             |                                    |
| Q3UMW7 | 351  | 362  | AcD3-VKIKDLKTSNNR-COOH            | DYDQ↓VKIK | 1 | 0.6939                  | 65/41  | MAP kinase-activated protein kinase 3                                      |                                    |
| P45952 | 40   | 53   | AcD3-ELTEQKEFQATAR-COOH           | GFSE↓ELTE | 1 | 0.54835                 | 83/48  | Medium-chain specific acyl-CoA dehydrogenase, mitochondrial                |                                    |
| P45952 | 42   | 53   | AcD3-TEQKEFQATAR-COOH             | SFEL↓TEQQ | 2 | 0.58117                 | 76/47  | Medium-chain specific acyl-CoA dehydrogenase, mitochondrial                |                                    |
| Q9R190 | 608  | 614  | AcD3-VATKTR-COOH                  | PVVF↓VATK | 1 | 0.60681                 | 59/46  | Metastasis-associated protein MTA2                                         |                                    |
| Q99LB6 | 159  | 181  | AcD3-YGKTKLDGKAVLENNLGAAVLR-COOH  | PLNL↓YGKT | 1 | 0.57377                 | 54/43  | Methionine adenosyltransferase 2 subunit beta                              |                                    |
| Q9QXZ0 | 5277 | 5299 | AcD3-LETQSCASDTSSESSAAGGQSSR-COOH | DFDL↓LETQ | 1 | 0.77746                 | 49/41  | Microtubule-actin cross-linking factor 1                                   |                                    |
| P27546 | 7    | 23   | AcD3-VDALTEPPPEIEGKIKR-COOH       | DLSL↓VDAL | 1 | 0.5416                  | 61/47  | Microtubule-associated protein 4                                           |                                    |
| P27546 | 154  | 168  | AcD3-FVSSGPTNASAFTR-COOH          | ADLL↓FVSS | 2 | 0.53294                 | 94/47  | Microtubule-associated protein 4                                           |                                    |
| P27546 | 623  | 641  | AcD3-EQKETPGSQSPSEPCGVSRR-COOH    | LENL↓EQKE | 1 | 0.63299                 | 51/45  | Microtubule-associated protein 4                                           |                                    |
| Q8VCF0 | 161  | 170  | AcD3-LQTN5GAVAR-COOH              | SEQL↓LQTN | 4 | 0.59194/0.59369         | 65/47  | Mitochondrial antiviral-signaling protein                                  |                                    |
| Q9WWA2 | 23   | 31   | AcD3-IEVETQKQR-COOH               | LQHF↓IEVE | 2 | 0.43847                 | 51/46  | Mitochondrial import inner membrane translocase subunit Tim8 A             |                                    |
| Q99K90 | 409  | 420  | AcD3-ISTNSGSPAASR-COOH            | PTLF↓ISTN | 2 | 0.62614                 | 98/47  | Mitogen-activated protein kinase kinase kinase 7-interacting protein 2     |                                    |
| P26041 | 226  | 233  | AcD3-NIYEQNDR-COOH                | ALGL↓NIYE | 1 | 0.56121                 | 55/45  | Moesin                                                                     |                                    |
| P26041 | 323  | 330  | AcD3-LENEKKR-COOH                 | ERAL↓LENE | 3 | 0.53734/0.53353         | 52/43  | Moesin                                                                     | P26043 (323-330)                   |
| P26041 | 418  | 427  | AcD3-ASEMAELTAR-COOH              | QEQL↓ASEM | 1 | 0.5122                  | 63/46  | Moesin                                                                     |                                    |
| P26041 | 526  | 533  | AcD3-TSELANAR-COOH                | LKAL↓TSEL | 1 | 0.61659                 | 50/47  | Moesin                                                                     |                                    |
| Q9CWP6 | 24   | 35   | AcD3-VYTEKSEKYSR-COOH             | FEAE↓VYTE | 1 | 0.48126                 | 51/47  | Motile sperm domain-containing protein 2                                   |                                    |
| Q921Y0 | 208  | 216  | AcD3-IEKLGSKDR-COOH               | LOEL↓IEKL | 1 | 0.65306                 | 55/45  | Mps one binder kinase activator-like 1B                                    |                                    |
| Q9D0L8 | 54   | 69   | AcD3-VEQNSSYYQDPSPKKR-COOH        | GEDL↓VEQN | 2 | 0.54346                 | 89/48  | mRNA cap guanine-N7 methyltransferase                                      |                                    |
| Q08539 | 45   | 60   | AcD3-EQCQVQFNKQLTGTGR-COOH        | DEQF↓EQCV | 2 | 0.62467                 | 88/47  | Myc box-dependent-interacting protein 1                                    |                                    |
| Q60605 | 29   | 37   | AcD3-YSQCGDVMR-COOH               | GKIL↓YSQC | 4 | 0.58097/0.53862         | 57/42  | Myosin light polypeptide 6                                                 |                                    |
| Q3THE2 | 24   | 45   | AcD3-AMFQDSIQEFKEAFNMIDQNR-COOH   | SNVF↓AMFD | 1 | 0.5625                  | 62/44  | Myosin regulatory light chain 12B                                          | Q9CQ19 (24-45)                     |
| Q3THE2 | 34   | 45   | AcD3-FKEAFNMIDQNR-COOH            | QIQE↓FKEA | 3 | 0.63502/0.50718         | 83/47  | Myosin regulatory light chain 12B                                          | Q9CQ19 (34-45)                     |
| Q08638 | 226  | 241  | AcD3-EAFGNAKTVMNDSSR-COOH         | NPIL↓EAFG | 2 | 0.49528                 | 83/48  | Myosin-11                                                                  | Q6URW6 (250-265), Q8VDD5 (219-234) |
| Q8VDD5 | 152  | 159  | AcD3-AITDAYER-COOH                | PHY↓AITD  | 1 | 0.50011                 | 53/47  | Myosin-9                                                                   |                                    |
| Q8VDD5 | 831  | 842  | AcD3-FTKVKPLLSNIR-COOH            | WWRL↓FTKV | 2 | 0.50042                 | 59/37  | Myosin-9                                                                   |                                    |
| Q8VDD5 | 1201 | 1210 | AcD3-LADQLEQTKR-COOH              | AVEE↓LADQ | 1 | 0.60729                 | 50/46  | Myosin-9                                                                   |                                    |
| P70248 | 1010 | 1022 | AcD3-LNVPDQGVAGMQR-COOH           | STEF↓LNVP | 2 | 0.58561/0.60911         | 57/47  | Myosin-If                                                                  |                                    |
| P62774 | 16   | 30   | AcD3-DEVKDYVAKGEDVNR-COOH         | NGDL↓DEVK | 2 | 0.56683/0.50779         | 81/47  | Myotrophin                                                                 |                                    |
| P62774 | 18   | 30   | AcD3-VKDYVAKGEDVNR-COOH           | DLDE↓VKDY | 6 | 0.57769/0.54596/0.49965 | 111/48 | Myotrophin                                                                 |                                    |
| P62774 | 21   | 30   | AcD3-YVAKGEDVNR-COOH              | EVKD↓YVAK | 2 | 0.3945                  | 73/48  | Myotrophin                                                                 |                                    |
| P62774 | 22   | 30   | AcD3-VAKGEDVNR-COOH               | VKDY↓VAKG | 5 | 0.51499/0.55181/0.57229 | 55/47  | Myotrophin                                                                 |                                    |
| Q8K296 | 651  | 667  | AcD3-SSFASAGEEVPAMDLSR-COOH       | SLEL↓SSFA | 1 | 0.51819                 | 51/45  | Myotubularin-related protein 3                                             |                                    |
| Q9Z2D0 | 4    | 11   | AcD3-AELIKTPR-COOH                | MEF↓AELI  | 1 | 0.57194                 | 60/42  | Myotubularin-related protein 9                                             |                                    |
| Q64191 | 88   | 106  | AcD3-DAMIMDGTAMDVGAVGLLR-COOH     | ETTL↓DAMI | 1 | 0.47863                 | 57/45  | N(4)-(beta-N-acetylglucosaminy)-L-asparaginase                             |                                    |
| Q64191 | 90   | 106  | AcD3-MIMDGTAMDVGAVGLLR-COOH       | TLDA↓MIMD | 1 | 0.63102                 | 55/45  | N(4)-(beta-N-acetylglucosaminy)-L-asparaginase                             |                                    |
| P70441 | 321  | 330  | AcD3-NISLAVAKER-COOH              | ILDL↓NISL | 1 | 0.65288                 | 57/43  | Na(+)/H(+) exchange regulatory cofactor NHE-RF1                            |                                    |
| Q9QZ08 | 124  | 132  | AcD3-ISGTGNSCR-COOH               | GIVL↓ISGT | 2 | 0.57949                 | 69/46  | N-acetyl-D-glucosamine kinase                                              |                                    |
| Q8BFR4 | 500  | 511  | AcD3-MMLQSCSGPTCR-COOH            | NYRL↓MMLQ | 3 | 0.72557/0.76479         | 77/38  | N-acetylglucosamine-6-sulfatase                                            |                                    |
| P70670 | 2028 | 2043 | AcD3-AAEIDPEPVSKAQSR-COOH         | QLAA↓AAEI | 2 | 0.50905                 | 114/47 | Nascent polypeptide-associated complex subunit alpha, muscle-specific form | Q60817 (56-71)                     |
| Q8C878 | 102  | 111  | AcD3-DTIDVSNLNR-COOH              | VIDM↓DTID | 1 | 0.46328                 | 61/47  | NEDD8-activating enzyme E1 catalytic subunit                               | Q9Z1F9 (50-59)                     |
| Q8VBW6 | 340  | 347  | AcD3-IKLQNVYR-COOH                | SNKY↓IKLQ | 1 | 0.5725                  | 45/43  | NEDD8-activating enzyme E1 regulatory subunit                              |                                    |
| Q9CQ45 | 73   | 83   | AcD3-DVTSKGFEYGR-COOH             | GVVF↓DVTS | 1 | 0.64683                 | 56/47  | Neudisin                                                                   |                                    |
| Q6ZQA0 | 2700 | 2711 | AcD3-IVVAGAGQPSEVR-COOH           | DGKL↓IVVG | 3 | 0.52402/0.5283          | 69/46  | Neurobechin-like protein 2                                                 |                                    |
| Q09014 | 280  | 292  | AcD3-LQKAGEEITQQR-COOH            | PSMY↓LQKA | 1 | 0.7705                  | 48/47  | Neutrophil cytosol factor 1                                                |                                    |
| Q09014 | 281  | 292  | AcD3-QKAGEEITQQR-COOH             | SMYL↓QKAG | 2 | 0.80227                 | 59/47  | Neutrophil cytosol factor 1                                                |                                    |
| O70145 | 145  | 155  | AcD3-ALATNMKSEPR-COOH             | EEQL↓ALAT | 1 | 0.56926                 | 60/47  | Neutrophil cytosol factor 2                                                |                                    |

|        |     |     |                                         |            |    |                                                                        |        |                                                        |                 |
|--------|-----|-----|-----------------------------------------|------------|----|------------------------------------------------------------------------|--------|--------------------------------------------------------|-----------------|
| P97369 | 306 | 311 | AcD3-MVKQAR-COOH                        | DVGL↓MVKQ  | 1  | 0.6385                                                                 | 47/46  | Neutrophil cytosol factor 4                            |                 |
| Q88ZW8 | 427 | 437 | AcD3-FVADSESVTVR-COOH                   | WSCL↓FVAD  | 2  | 0.74479                                                                | 69/47  | NHL repeat-containing protein 2                        |                 |
| Q9D0T1 | 26  | 36  | AcD3-VQQSCNRYQLR-COOH                   | LLDL↓VQQS  | 1  | 0.40877                                                                | 51/47  | NHP2-like protein 1                                    |                 |
| Q80UM3 | 786 | 796 | AcD3-ATLDGSLTNR-COOH                    | AIEL↓ATTL  | 2  | 0.50714                                                                | 77/47  | NMDA receptor-regulated protein 1                      |                 |
| Q9C244 | 289 | 301 | AcD3-INEAPEPTTIQIR-COOH                 | SSIL↓INEA  | 2  | 0.44637/0.46073                                                        | 52/47  | NSFL1 cofactor p47                                     |                 |
| Q9WTK5 | 149 | 156 | AcD3-IMIQLQR-COOH                       | NMME↓IMIQ  | 1  | 0.61241                                                                | 46/43  | Nuclear factor NF-kappa-B p100 subunit                 |                 |
| O35685 | 288 | 296 | AcD3-VEKMMYDQR-COOH                     | TRSM↓VEKM  | 1  | 0.52571                                                                | 47/45  | Nuclear migration protein nudC                         |                 |
| P62960 | 110 | 140 | AcD3-DVVEGEKGAEEANVTGPGGVQGSKYAADR-COOH | TVFE↓DVVE  | 1  | 0.44658                                                                | 65/47  | Nuclease-sensitive element-binding protein 1           |                 |
| Q8R5K4 | 556 | 563 | AcD3-LTLGLFLFR-COOH                     | DAGT↓LTLG  | 1  | 0.70362                                                                | 43/42  | Nucleolar protein 6                                    |                 |
| Q61937 | 133 | 142 | AcD3-VKLLGMSGKR-COOH                    | DEED↓VKLL  | 1  | 0.40592                                                                | 54/43  | Nucleophosmin                                          |                 |
| Q61937 | 181 | 196 | AcD3-DEEETEKEVPVKKSVR-COOH              | DDDF↓DEEE  | 4  | 0.41642/0.43095                                                        | 74/47  | Nucleophosmin                                          |                 |
| Q61937 | 183 | 196 | AcD3-EETEKEVPVKKSVR-COOH                | DFDE↓EETE  | 1  | 0.45916                                                                | 55/46  | Nucleophosmin                                          |                 |
| Q61937 | 184 | 196 | AcD3-EETEKEVPVKKSVR-COOH                | FDEE↓EETE  | 1  | 0.79041                                                                | 52/44  | Nucleophosmin                                          |                 |
| Q9JIH2 | 28  | 38  | AcD3-SVASEEVMKNR-COOH                   | MGTG↓SVAS  | 2  | 0.80375                                                                | 60/48  | Nucleoporin 50 kDa                                     |                 |
| P15532 | 9   | 18  | AcD3-IAIKPDGVQR-COOH                    | ERTF↓IAIK  | 3  | 0.4492                                                                 | 54/45  | Nucleoside diphosphate kinase A                        | Q01768 (9-18)   |
| P15532 | 82  | 88  | AcD3-NVVKTR-COOH                        | WEGE↓NVVK  | 2  | 0.41464/0.42926                                                        | 50/44  | Nucleoside diphosphate kinase A                        | Q01768 (82-88)  |
| P15532 | 92  | 105 | AcD3-GETNPADSPKPTIR-COOH                | RVML↓GETN  | 2  | 0.48803                                                                | 60/48  | Nucleoside diphosphate kinase A                        | Q01768 (92-105) |
| Q62422 | 176 | 200 | AcD3-ALDMATNAACASLKKKQQTGDGAR-COOH      | EKML↓ALDM  | 1  | 0.66407                                                                | 49/47  | Osteoclast-stimulating factor 1                        |                 |
| Q62422 | 180 | 200 | AcD3-ATNAACASLKKKQQTGDGAR-COOH          | ALDM↓ATNA  | 4  | 0.58912/0.56487/0.62181                                                | 93/47  | Osteoclast-stimulating factor 1                        |                 |
| Q62422 | 182 | 200 | AcD3-NAACASLKKKQQTGDGAR-COOH            | DMAT↓NAAC  | 1  | 0.62281                                                                | 57/46  | Osteoclast-stimulating factor 1                        |                 |
| Q8CI95 | 181 | 191 | AcD3-ASSGNSPISQR-COOH                   | SFSL↓ASSG  | 2  | 0.57826                                                                | 80/47  | Oxysterol-binding protein-related protein 11           |                 |
| Q88531 | 202 | 209 | AcD3-LADINQER-COOH                      | YISF↓LADI  | 2  | 0.63845                                                                | 57/47  | Palmitoyl-protein thioesterase 1                       |                 |
| Q8V136 | 225 | 247 | AcD3-ESSVPSVPVPAITVNOGEMSSPQR-COOH      | LDEL↓ESSV  | 1  | 0.63236                                                                | 54/47  | Paxillin                                               |                 |
| Q8R1G6 | 263 | 272 | AcD3-SSQASLPTSR-COOH                    | PSSL↓SSQA  | 1  | 0.61139                                                                | 53/47  | PDZ and LIM domain protein 2                           |                 |
| P17742 | 8   | 19  | AcD3-FDITADEPLGR-COOH                   | PTVF↓FDIT  | 37 | 0.48707/0.40127/0.38691/0.4857/0.38766/0.48432                         | 99/46  | Peptidyl-prolyl cis-trans isomerase A                  |                 |
| P17742 | 9   | 19  | AcD3-DITADEPLGR-COOH                    | TVFF↓DITA  | 4  | 0.52446/0.47978                                                        | 83/47  | Peptidyl-prolyl cis-trans isomerase A                  |                 |
| P17742 | 23  | 37  | AcD3-ELFADKVPKTAENFR-COOH               | RVSF↓ELFA  | 4  | 0.46967/0.33762                                                        | 110/47 | Peptidyl-prolyl cis-trans isomerase A                  |                 |
| P17742 | 25  | 37  | AcD3-FADKVPKTAENFR-COOH                 | SFEL↓FADK  | 65 | 0.45713/0.45159/0.45021/0.47376/0.48308/0.48481/0.48149/0.4519/0.48578 | 98/47  | Peptidyl-prolyl cis-trans isomerase A                  |                 |
| P17742 | 61  | 69  | AcD3-MCQGGDFTR-COOH                     | IPGF↓MCQG  | 28 | 0.45434/0.48227/0.46413/0.45229/0.45004                                | 79/38  | Peptidyl-prolyl cis-trans isomerase A                  |                 |
| P17742 | 130 | 144 | AcD3-GKVKGMNIVEAMER-COOH                | HVVV↓GKVK  | 3  | 0.60001/0.62476                                                        | 96/48  | Peptidyl-prolyl cis-trans isomerase A                  |                 |
| P24369 | 50  | 59  | AcD3-LQIGDESVGR-COOH                    | VYFD↓LQIG  | 1  | 0.5077                                                                 | 58/47  | Peptidyl-prolyl cis-trans isomerase B                  |                 |
| P24369 | 51  | 59  | AcD3-QIGDESVGR-COOH                     | YFDL↓QIGD  | 3  | 0.50662/0.46023                                                        | 64/47  | Peptidyl-prolyl cis-trans isomerase B                  |                 |
| P24369 | 101 | 109 | AcD3-MIQGGDFTR-COOH                     | IKDF↓MIQG  | 6  | 0.52216/0.51234/0.47141/0.50696                                        | 59/47  | Peptidyl-prolyl cis-trans isomerase B                  |                 |
| P26883 | 63  | 72  | AcD3-GVAQMSVGR-COOH                     | GWEE↓GVAQ  | 2  | 0.50753                                                                | 69/47  | Peptidyl-prolyl cis-trans isomerase FKBP1A             |                 |
| Q9QUR7 | 106 | 121 | AcD3-ESLASQFSCSSAKAR-COOH               | EEDF↓ESLA  | 1  | 0.57875                                                                | 86/45  | Peptidyl-prolyl cis-trans isomerase NIMA-interacting 1 |                 |
| Q9QUR7 | 109 | 121 | AcD3-ASQFSCSSAKAR-COOH                  | FESL↓ASQF  | 2  | 0.61316                                                                | 81/45  | Peptidyl-prolyl cis-trans isomerase NIMA-interacting 1 |                 |
| Q99KR7 | 49  | 60  | AcD3-LDVGADGQPLGR-COOH                  | PLVV↓LDVG  | 1  | 0.42799                                                                | 63/47  | Peptidyl-prolyl cis-trans isomerase, mitochondrial     |                 |
| Q99KR7 | 64  | 78  | AcD3-ELKADVVPKTAENFR-COOH               | RVVL↓ELKA  | 2  | 0.46262                                                                | 67/46  | Peptidyl-prolyl cis-trans isomerase, mitochondrial     |                 |
| Q9D0W5 | 61  | 72  | AcD3-MIQGGDPTGTGR-COOH                  | IKDF↓MIQG  | 4  | 0.40127/0.42363                                                        | 98/46  | Peptidyl-prolyl cis-trans isomerase-like 1             |                 |
| P99029 | 160 | 172 | AcD3-LLDLSVLSFGNR-COOH                  | ATDL↓LLDD  | 1  | 0.63238                                                                | 74/47  | Peroxiredoxin-5, mitochondrial                         |                 |
| P99029 | 166 | 172 | AcD3-VSLFGNR-COOH                       | DDSL↓VSLF  | 1  | 0.56186                                                                | 58/47  | Peroxiredoxin-5, mitochondrial                         |                 |
| Q8C0C7 | 143 | 156 | AcD3-VQAGQAEKAEKER-COOH                 | RLQL↓VQAG  | 2  | 0.4779                                                                 | 108/46 | Phenylalanyl-tRNA synthetase alpha chain               |                 |
| P70296 | 67  | 76  | AcD3-VLTPDPAFPR-COOH                    | LYTL↓VLTD  | 1  | 0.45526                                                                | 51/47  | Phosphatidylethanolamine-binding protein 1             |                 |
| Q7M6Y3 | 251 | 261 | AcD3-LKVAEQVGIDR-COOH                   | ISEF↓LKVA  | 2  | 0.61306                                                                | 75/44  | Phosphatidylinositol-binding clathrin assembly protein |                 |
| Q7M6Y3 | 283 | 298 | AcD3-ASLEGGIKKIDSTAASR-COOH             | EOHL↓ASLE  | 1  | 0.67964                                                                | 81/46  | Phosphatidylinositol-binding clathrin assembly protein |                 |
| Q8CYR6 | 20  | 29  | AcD3-ILQYGTAGFR-COOH                    | PGGL↓ILQY  | 2  | 0.36453                                                                | 72/47  | Phosphoacetylglucosamine mutase                        |                 |
| Q9D0F9 | 40  | 52  | AcD3-IQSIIVTEPALR-COOH                  | AENF↓IQSI  | 2  | 0.45258                                                                | 57/45  | Phosphoglucomutase-1                                   |                 |
| Q9D0F9 | 542 | 552 | AcD3-IALKVSQLOER-COOH                   | PLIS↓IALK  | 5  | 0.5886/0.57025/0.53066                                                 | 61/42  | Phosphoglucomutase-1                                   |                 |
| Q9D0F9 | 543 | 552 | AcD3-ALKVSQLOER-COOH                    | LISI↓ALKV  | 2  | 0.7828                                                                 | 64/45  | Phosphoglucomutase-1                                   |                 |
| Q7TSV4 | 47  | 56  | AcD3-IAGGNKEELR-COOH                    | VKQL↓IAGG  | 1  | 0.49617                                                                | 70/47  | Phosphoglucomutase-2                                   |                 |
| P09411 | 10  | 18  | AcD3-DKLDVKGR-COOH                      | KITL↓DKLD  | 6  | 0.5241/0.49098/0.52184                                                 | 74/42  | Phosphoglycerate kinase 1                              |                 |
| P09411 | 96  | 123 | AcD3-LKDCVGFVENACANPAAGTVILLENLR-COOH   | DVLF↓LKDC  | 1  | 0.45208                                                                | 59/47  | Phosphoglycerate kinase 1                              |                 |
| P09411 | 315 | 330 | AcD3-DCGTSSSKYAEAVGR-COOH               | WMGL↓DCGT  | 1  | 0.49189                                                                | 77/47  | Phosphoglycerate kinase 1                              |                 |
| P09411 | 356 | 365 | AcD3-MDEVVKATSR-COOH                    | TKSL↓MDEV  | 5  | 0.48022/0.48168/0.46835                                                | 74/47  | Phosphoglycerate kinase 1                              |                 |
| P09411 | 359 | 365 | AcD3-VVKATSR-COOH                       | LMDE↓VVKAT | 2  | 0.47091                                                                | 55/42  | Phosphoglycerate kinase 1                              |                 |
| P09041 | 26  | 39  | AcD3-NVPMKNNQNTNQR-COOH                 | RVDF↓NVPM  | 7  | 0.47696/0.47874/0.47102/0.48729                                        | 90/47  | Phosphoglycerate kinase 2                              | P09411 (26-39)  |
| Q9DBJ1 | 145 | 162 | AcD3-LTEDQLPSCESLKDITAR-COOH            | RYAD↓LTED  | 2  | 0.45386                                                                | 64/47  | Phosphoglycerate mutase 1                              |                 |
| Q9DBJ1 | 146 | 162 | AcD3-TEDQLPSCESLKDITAR-COOH             | YADL↓TEDQ  | 4  | 0.49497/0.48008                                                        | 89/47  | Phosphoglycerate mutase 1                              |                 |
| Q9DBJ1 | 148 | 162 | AcD3-DQLPSCESLKDITAR-COOH               | DLTE↓DQLP  | 1  | 0.50099                                                                | 63/48  | Phosphoglycerate mutase 1                              |                 |
| Q9DBJ1 | 151 | 162 | AcD3-PSCESLKDITAR-COOH                  | EDQL↓PSC   | 4  | 0.46838/0.58806                                                        | 85/48  | Phosphoglycerate mutase 1                              |                 |
| Q9DBJ1 | 170 | 180 | AcD3-EIVPQIKEGR-COOH                    | FWNE↓EIVP  | 6  | 0.50555/0.5037                                                         | 84/44  | Phosphoglycerate mutase 1                              |                 |

|        |      |      |                                     |            |    |                                                                        |        |                                                            |                  |
|--------|------|------|-------------------------------------|------------|----|------------------------------------------------------------------------|--------|------------------------------------------------------------|------------------|
| Q9DBJ1 | 221  | 240  | AcD3-DKNLKPMPQFLGDEETVR-COOH        | VYEL↓DKNL  | 2  | 0.5082/0.52502                                                         | 47/46  | Phosphoglycerate mutase 1                                  |                  |
| O70250 | 183  | 191  | AcD3-IAAHGNLSR-COOH                 | QRVL↓IAAH  | 2  | 0.48769/0.4242                                                         | 59/47  | Phosphoglycerate mutase 2                                  | Q9DBJ1 (183-191) |
| Q8CHP8 | 195  | 203  | AcD3-LVGTNMDNR-COOH                 | PDCL↓LVGT  | 1  | 0.61836                                                                | 51/46  | Phosphoglycolate phosphatase                               |                  |
| Q8BG07 | 457  | 464  | AcD3-IVSQTKPR-COOH                  | GVGL↓IVSQ  | 1  | 0.62967                                                                | 54/43  | Phospholipase D4                                           |                  |
| Q8BQ30 | 571  | 582  | AcD3-LLQPGLOGGLR-COOH               | EEEE↓LLLQ  | 2  | 0.5479                                                                 | 53/41  | Phostensin                                                 |                  |
| Q8BQ30 | 572  | 582  | AcD3-LLQPGLOGGLR-COOH               | EELL↓LLQP  | 2  | 0.50734                                                                | 63/42  | Phostensin                                                 |                  |
| P12388 | 123  | 136  | AcD3-LESANKLFGKSAR-COOH             | GDYL↓LESA  | 1  | 0.56743                                                                | 72/47  | Plasminogen activator inhibitor 2, macrophage              |                  |
| Q61233 | 349  | 357  | AcD3-FVTATDVVR-COOH                 | GCRQ↓FVTA  | 2  | 0.47682                                                                | 55/47  | Plastin-2                                                  |                  |
| Q61233 | 350  | 357  | AcD3-VTATDVVR-COOH                  | CRQF↓VTAT  | 2  | 0.45242                                                                | 60/46  | Plastin-2                                                  |                  |
| Q61233 | 463  | 488  | AcD3-AVDLGNQAKFSLVGIAGQDLNEGMR-COOH | NCNY↓AVDL  | 1  | 0.45974                                                                | 73/46  | Plastin-2                                                  |                  |
| Q61233 | 476  | 488  | AcD3-VGIAGQDLNEGMR-COOH             | KFSL↓VGIA  | 9  | 0.47493/0.46997/0.43475                                                | 85/47  | Plastin-2                                                  |                  |
| Q61233 | 478  | 488  | AcD3-IAGQDLNEGMR-COOH               | SLVG↓IAGQ  | 2  | 0.7399                                                                 | 78/47  | Plastin-2                                                  |                  |
| Q61233 | 569  | 591  | AcD3-LKTENLDEEKLNNAKYAISMAR-COOH    | NYDL↓LKTE  | 7  | 0.52024/0.50733/0.56322/0.45072/0.42997/0.48322                        | 85/47  | Plastin-2                                                  |                  |
| Q61233 | 614  | 626  | AcD3-TVFACLMGKMKR-COOH              | KMVM↓TVFA  | 2  | 0.64783                                                                | 70/48  | Plastin-2                                                  |                  |
| Q61233 | 617  | 626  | AcD3-ACLMGKMKR-COOH                 | MTVF↓ACLM  | 8  | 0.57836/0.51101/0.58363                                                | 55/47  | Plastin-2                                                  |                  |
| Q61233 | 618  | 626  | AcD3-CLMGKMKR-COOH                  | TVFA↓CLMG  | 1  | 0.70491                                                                | 56/47  | Plastin-2                                                  |                  |
| Q9QXS1 | 1553 | 1561 | AcD3-AVDAQQQR-COOH                  | REEA↓AVDA  | 1  | 0.49501                                                                | 71/47  | Plectin-1                                                  |                  |
| Q9QXS1 | 1578 | 1590 | AcD3-IQAKAQVEAAER-COOH              | SEAE↓IQAK  | 1  | 0.51203                                                                | 72/47  | Plectin-1                                                  |                  |
| Q9QXS1 | 3352 | 3362 | AcD3-SLLPSEKAVR-COOH                | LTGL↓SLLP  | 1  | 0.57159                                                                | 54/41  | Plectin-1                                                  |                  |
| Q8CG72 | 169  | 181  | AcD3-AYSSVQDVQKQFAR-COOH            | GISL↓AYSS  | 1  | 0.59639                                                                | 70/48  | Poly(ADP-ribose) glycohydrolase ARH3                       |                  |
| P60335 | 222  | 243  | AcD3-YSIQGHTISPLDLAKNQVAR-COOH      | PLDA↓YSIQ  | 1  | 0.54495                                                                | 73/45  | Poly(rC)-binding protein 1                                 |                  |
| P60335 | 236  | 243  | AcD3-AKLNQVAR-COOH                  | PLDL↓AKLN  | 3  | 0.57361/0.61455                                                        | 55/44  | Poly(rC)-binding protein 1                                 |                  |
| P29341 | 338  | 356  | AcD3-VCFSPPEATKAVTEMNGR-COOH        | GFGF↓VCFSP | 2  | 0.36256                                                                | 78/46  | Polyadenylate-binding protein 1                            |                  |
| P29341 | 340  | 356  | AcD3-FSSPEATKAVTEMNGR-COOH          | GFVC↓FSSP  | 1  | 0.40893                                                                | 61/46  | Polyadenylate-binding protein 1                            |                  |
| P29341 | 341  | 356  | AcD3-SSPEATKAVTEMNGR-COOH           | FVCF↓SSPE  | 1  | 0.66517                                                                | 81/46  | Polyadenylate-binding protein 1                            |                  |
| P17225 | 98   | 121  | AcD3-IEMNTEEAANTMVNYTSPVLR-COOH     | NQAF↓IEMN  | 3  | 0.52644/0.49301                                                        | 99/45  | Poly(pyrimidine tract-binding protein 1                    |                  |
| P17225 | 164  | 184  | AcD3-AASAAVAADAGMAMAGQSPVLR-COOH    | NLAL↓AASA  | 3  | 0.46677/0.5032                                                         | 143/47 | Poly(pyrimidine tract-binding protein 1                    |                  |
| P17225 | 338  | 346  | AcD3-LVSNLPER-COOH                  | NSVL↓LVSN  | 2  | 0.49743                                                                | 62/47  | Poly(pyrimidine tract-binding protein 1                    |                  |
| P17225 | 339  | 346  | AcD3-VSNLPER-COOH                   | SVLL↓VSNL  | 1  | 0.50346                                                                | 51/47  | Poly(pyrimidine tract-binding protein 1                    |                  |
| P17225 | 356  | 364  | AcD3-FGVYGDVQR-COOH                 | LFIL↓FGVY  | 4  | 0.49502/0.47008                                                        | 62/47  | Poly(pyrimidine tract-binding protein 1                    | Q91231 (359-367) |
| P17225 | 357  | 364  | AcD3-GVYGDVQR-COOH                  | FILF↓GVYQ  | 1  | 0.63459                                                                | 48/47  | Poly(pyrimidine tract-binding protein 1                    | Q91231 (360-367) |
| P22907 | 339  | 355  | AcD3-ASLLLNKAKNILDVAR-COOH          | GISL↓ASLL  | 2  | 0.48584                                                                | 86/38  | Porphobilinogen deaminase                                  |                  |
| O70591 | 57   | 68   | AcD3-VIDTLKEVDETR-COOH              | EHSL↓VIDT  | 5  | 0.61458/0.57798/0.58619                                                | 58/47  | Prefoldin subunit 2                                        |                  |
| P62962 | 41   | 56   | AcD3-VSITPAEVLGVLDKDR-COOH          | GKTF↓VSIT  | 20 | 0.47866/0.43071/0.44914/0.46445/0.52251/0.47872/0.4185/0.39119/0.48653 | 104/44 | Profilin-1                                                 |                  |
| P62962 | 60   | 75   | AcD3-FVNLTLGGQKCSVIR-COOH           | RSSF↓FVNG  | 7  | 0.49436/0.4871/0.55688                                                 | 88/46  | Profilin-1                                                 |                  |
| P62962 | 64   | 75   | AcD3-LTLGGQKCSVIR-COOH              | FVNG↓LTLG  | 2  | 0.48413                                                                | 72/45  | Profilin-1                                                 |                  |
| P62962 | 79   | 89   | AcD3-LQDGEFTMDLR-COOH               | RDSL↓LQDG  | 1  | 0.49374                                                                | 64/46  | Profilin-1                                                 |                  |
| Q9WU78 | 25   | 41   | AcD3-IQQTYPSPGEGEQAQYCR-COOH        | LVKF↓IQQT  | 2  | 0.56452                                                                | 91/43  | Programmed cell death 6-interacting protein                |                  |
| Q9WU78 | 355  | 373  | AcD3-FEKMPVSPVQSLAVFSQR-COOH        | FTDL↓FEKM  | 3  | 0.55621/0.55447                                                        | 94/47  | Programmed cell death 6-interacting protein                |                  |
| Q9WU78 | 706  | 715  | AcD3-LKDLQQSAR-COOH                 | RDEL↓FKDL  | 4  | 0.60856/0.59399                                                        | 85/44  | Programmed cell death 6-interacting protein                |                  |
| P56812 | 45   | 53   | AcD3-AQVLQDSAR-COOH                 | NSIL↓AQVL  | 2  | 0.50379                                                                | 70/48  | Programmed cell death protein 5                            |                  |
| P50580 | 17   | 30   | AcD3-VVTKYKMGDIANR-COOH             | AEDL↓VVTK  | 1  | 0.36585                                                                | 63/47  | Proliferation-associated protein 2G4                       |                  |
| P50580 | 225  | 243  | AcD3-AVDVLVSSGEGKADAGQR-COOH        | HEVY↓AVDV  | 2  | 0.39725                                                                | 115/47 | Proliferation-associated protein 2G4                       |                  |
| P50580 | 226  | 243  | AcD3-VDVLVSSGEGKADAGQR-COOH         | EYVA↓VDVL  | 3  | 0.34779/0.3577                                                         | 94/47  | Proliferation-associated protein 2G4                       |                  |
| P50580 | 228  | 243  | AcD3-VLVSSGEGKADAGQR-COOH           | YAVD↓VLVS  | 1  | 0.40024                                                                | 69/47  | Proliferation-associated protein 2G4                       |                  |
| P50580 | 230  | 243  | AcD3-VSSGEGKADAGQR-COOH             | VDVL↓VSSG  | 3  | 0.40759/0.39877                                                        | 81/48  | Proliferation-associated protein 2G4                       |                  |
| P50580 | 283  | 290  | AcD3-FEDEKKAR-COOH                  | TLRA↓FEDE  | 2  | 0.47644                                                                | 72/47  | Proliferation-associated protein 2G4                       |                  |
| P50580 | 348  | 364  | AcD3-EVQDAELKALQSSASR-COOH          | KSEM↓EVQD  | 1  | 0.4727                                                                 | 73/47  | Proliferation-associated protein 2G4                       |                  |
| Q99M15 | 243  | 253  | AcD3-VANDEMYEQVR-COOH               | SQCC↓VAND  | 1  | 0.70069                                                                | 48/45  | Proline-serine-threonine phosphatase-interacting protein 2 |                  |
| P97372 | 51   | 61   | AcD3-SLNVADLSSLR-COOH               | LOED↓SLNV  | 1  | 0.55121                                                                | 50/46  | Proteasome activator complex subunit 2                     |                  |
| P97372 | 53   | 61   | AcD3-NVADLSSLR-COOH                 | EDSL↓NVAD  | 1  | 0.6192                                                                 | 52/48  | Proteasome activator complex subunit 2                     |                  |
| Q9R1P4 | 109  | 122  | AcD3-VSLIGSKTQIPTQR-COOH            | VSRL↓VSLI  | 2  | 0.43244/0.46869                                                        | 61/43  | Proteasome subunit alpha type-1                            |                  |
| P49722 | 47   | 60   | AcD3-ATEKKQKSILYDER-COOH            | GVVL↓ATEK  | 3  | 0.44574/0.40452                                                        | 76/46  | Proteasome subunit alpha type-2                            |                  |
| P49722 | 98   | 113  | AcD3-YLVYQEPIPTAQLVQR-COOH          | AQQY↓YLVI  | 1  | 0.51846                                                                | 77/46  | Proteasome subunit alpha type-2                            |                  |
| O70435 | 11   | 20   | AcD3-SASTFSPDGR-COOH                | GYDL↓SAST  | 1  | 0.39248                                                                | 57/46  | Proteasome subunit alpha type-3                            |                  |
| Q9R1P0 | 36   | 49   | AcD3-GILANDGVLLAER-COOH             | GTCL↓GILA  | 1  | 0.4081                                                                 | 84/46  | Proteasome subunit alpha type-4                            |                  |
| Q9R1P0 | 73   | 91   | AcD3-ACSVAGITSDANVLTNLR-COOH        | NEDM↓ACSV  | 1  | 0.4953                                                                 | 120/48 | Proteasome subunit alpha type-4                            |                  |
| Q922U1 | 120  | 135  | AcD3-ALQFGEEDADPAGMSR-COOH          | VSNL↓ALQF  | 1  | 0.42108                                                                | 100/44 | Proteasome subunit alpha type-5                            |                  |
| Q9QUM9 | 30   | 43   | AcD3-KAINQGGITSAVAVR-COOH           | EYAF↓KAIN  | 1  | 0.50777                                                                | 75/43  | Proteasome subunit alpha type-6                            |                  |
| Q922U0 | 17   | 36   | AcD3-FQVEYAEAVKKGSTAVGVR-COOH       | DGHL↓FQVE  | 2  | 0.43573/0.33896                                                        | 73/46  | Proteasome subunit alpha type-7                            |                  |
| Q922U0 | 21   | 36   | AcD3-YAQEAVKKGSTAVGVR-COOH          | FQVE↓YQEA  | 2  | 0.53685                                                                | 82/46  | Proteasome subunit alpha type-7                            |                  |
| Q922U0 | 22   | 36   | AcD3-AQEAVKKGSTAVGVR-COOH           | QVEY↓AQEA  | 1  | 0.25465                                                                | 80/44  | Proteasome subunit alpha type-7                            |                  |

|        |      |      |                              |            |   |                                 |        |                                               |                                        |
|--------|------|------|------------------------------|------------|---|---------------------------------|--------|-----------------------------------------------|----------------------------------------|
| Q922U0 | 133  | 143  | AcD3-IVGFDFDGTGR-COOH        | ISAL↓IVGF  | 1 | 0.5494                          | 52/48  | Proteasome subunit alpha type-7               |                                        |
| Q9CWH6 | 46   | 59   | AcD3-GVEKSVAKLQDER-COOH      | IVVL↓GVEK  | 2 | 0.47863                         | 75/45  | Proteasome subunit alpha type-7-like          | Q922U0 (44-57)                         |
| Q9CWH6 | 74   | 83   | AcD3-AFAGLTADAR-COOH         | HVCM↓AFAG  | 3 | 0.44837/0.43491                 | 76/47  | Proteasome subunit alpha type-7-like          | Q922U0 (72-81)                         |
| Q9CWH6 | 76   | 83   | AcD3-AGLTADAR-COOH           | CMAF↓AGLT  | 1 | 0.46278                         | 49/48  | Proteasome subunit alpha type-7-like          | Q9R1P4 (75-82), Q922U0 (74-81)         |
| O09061 | 41   | 55   | AcD3-AIAGEDFSIVASDTR-COOH    | GTVL↓AIAG  | 2 | 0.49057                         | 61/47  | Proteasome subunit beta type-1                |                                        |
| O09061 | 47   | 55   | AcD3-FSIVASDTR-COOH          | AGED↓FSIV  | 1 | 0.44711                         | 55/48  | Proteasome subunit beta type-1                |                                        |
| O09061 | 48   | 55   | AcD3-SIVASDTR-COOH           | GEDF↓SIVA  | 3 | 0.46577/0.47681                 | 51/47  | Proteasome subunit beta type-1                |                                        |
| O09061 | 92   | 98   | AcD3-TKIIEAR-COOH            | CLTL↓TKII  | 1 | 0.48005                         | 43/41  | Proteasome subunit beta type-1                |                                        |
| O35955 | 82   | 96   | AcD3-CCGAGVAADTEMTR-COOH     | PKIY↓CCGA  | 2 | 0.55439                         | 89/39  | Proteasome subunit beta type-10               |                                        |
| O35955 | 216  | 226  | AcD3-VITAGGAKLQR-COOH        | VDAC↓VITA  | 2 | 0.60881                         | 77/43  | Proteasome subunit beta type-10               |                                        |
| Q9R1P1 | 50   | 66   | AcD3-YIGLAGLATDVQTVQAQR-COOH | GDRL↓YIGL  | 2 | 0.5218                          | 90/47  | Proteasome subunit beta type-3                |                                        |
| O35522 | 98   | 111  | AcD3-AAANVVKNISYKYR-COOH     | PLVL↓AAAN  | 2 | 0.54813                         | 71/45  | Proteasome subunit beta type-9                | P28076 (98-111)                        |
| Q6PDI5 | 39   | 49   | AcD3-LKLSSTQEGVR-COOH        | PPVL↓LKLS  | 1 | 0.59096                         | 51/46  | Proteasome-associated protein ECM29 homolog   |                                        |
| Q8CJG0 | 548  | 555  | AcD3-VQMKNNVQR-COOH          | ATQC↓VQMK  | 1 | 0.49524                         | 53/48  | Protein argonaute-2                           |                                        |
| Q6PGH1 | 18   | 30   | AcD3-IEPTLDELQKMR-COOH       | GWEL↓IEPT  | 2 | 0.61778                         | 62/48  | Protein BUD31 homolog                         |                                        |
| A2ADY9 | 97   | 110  | AcD3-SIAVPGTSPNQQR-COOH      | RIDF↓SSIA  | 2 | 0.55552/0.55679                 | 66/47  | Protein DDI1 homolog 2                        |                                        |
| A2ADY9 | 99   | 110  | AcD3-IAVPGTSPNQQR-COOH       | DFSS↓IAVP  | 1 | 0.65651                         | 58/47  | Protein DDI1 homolog 2                        |                                        |
| A2ADY9 | 162  | 173  | AcD3-ALLSGDLEKFSR-COOH       | PLAE↓ALLS  | 1 | 0.64516                         | 61/46  | Protein DDI1 homolog 2                        |                                        |
| A2ADY9 | 201  | 211  | AcD3-EAQAKIEEDIR-COOH        | PFDL↓EAQA  | 1 | 0.64272                         | 56/47  | Protein DDI1 homolog 2                        |                                        |
| A2ADY9 | 383  | 396  | AcD3-LAEAIQKSAEDAER-COOH     | ADQE↓LAEA  | 2 | 0.58768                         | 52/48  | Protein DDI1 homolog 2                        |                                        |
| O08808 | 1187 | 1196 | AcD3-EALQSGAAFR-COOH         | DSLL↓EALQ  | 2 | 0.59713                         | 90/48  | Protein diaphanous homolog 1                  | O70566 (1058-1067), Q9Z207 (1046-1055) |
| O08808 | 1245 | 1253 | AcD3-EFAKELVGR-COOH          | PTIL↓FEAK  | 2 | 0.60195                         | 78/47  | Protein diaphanous homolog 1                  |                                        |
| P09103 | 82   | 99   | AcD3-AKVDATEESDLAQYGVV-COOH  | EIRL↓AKVD  | 5 | 0.47061/0.5997/0.48313          | 132/47 | Protein disulfide-isomerase                   |                                        |
| P09103 | 93   | 99   | AcD3-AQQYGVV-COOH            | ESDL↓AQQY  | 3 | 0.48062/0.42348                 | 54/48  | Protein disulfide-isomerase                   |                                        |
| P09103 | 107  | 122  | AcD3-FKNGDTASPKYTAGR-COOH    | TIKF↓FKNG  | 3 | 0.48429/0.49971                 | 107/47 | Protein disulfide-isomerase                   |                                        |
| P09103 | 208  | 215  | AcD3-FKFDEGR-COOH            | GVVL↓FKKF  | 2 | 0.51797                         | 49/47  | Protein disulfide-isomerase                   |                                        |
| P27773 | 31   | 38   | AcD3-TDENFESR-COOH           | VLEL↓TDEN  | 1 | 0.47129                         | 47/44  | Protein disulfide-isomerase A3                |                                        |
| P27773 | 171  | 179  | AcD3-FLKAASNLR-COOH          | GHSE↓FLKA  | 2 | 0.47312                         | 69/45  | Protein disulfide-isomerase A3                |                                        |
| P27773 | 172  | 179  | AcD3-LKAASNL-COOH            | HSEF↓LKAA  | 5 | 0.46994/0.43359                 | 64/42  | Protein disulfide-isomerase A3                |                                        |
| P27773 | 317  | 329  | AcD3-ESTTGEVPPVAIR-COOH      | DFGL↓ESTT  | 2 | 0.56495                         | 54/47  | Protein disulfide-isomerase A3                |                                        |
| P27773 | 353  | 363  | AcD3-LQEFYDGNLKR-COOH        | LEQF↓LQEF  | 1 | 0.74137                         | 65/48  | Protein disulfide-isomerase A3                |                                        |
| P08003 | 241  | 252  | AcD3-DVSGYPTLKIIFR-COOH      | ASKF↓DVSG  | 1 | 0.73104                         | 47/46  | Protein disulfide-isomerase A4                |                                        |
| Q922R8 | 218  | 231  | AcD3-AAVDATVNVQLASR-COOH     | KVKL↓AAVD  | 1 | 0.49159                         | 75/46  | Protein disulfide-isomerase A6                |                                        |
| Q99LX0 | 83   | 98   | AcD3-SESPMVKELKEQESR-COOH    | AQNL↓SESP  | 1 | 0.47263                         | 53/48  | Protein DJ-1                                  |                                        |
| Q8C1F7 | 1746 | 1762 | AcD3-NVTSEGEPSAVATPKKR-COOH  | ALSL↓NVT   | 1 | 0.49157                         | 74/47  | Protein ELYS                                  |                                        |
| Q3TFG2 | 112  | 119  | AcD3-VKVKGNLR-COOH           | APEF↓VKVK  | 2 | 0.47887                         | 47/37  | Protein FAM107B                               |                                        |
| Q9DB52 | 119  | 133  | AcD3-SLSDNDVEKASPKR-COOH     | EESF↓SLSD  | 1 | 0.54405                         | 55/48  | Protein FAM122A                               |                                        |
| Q6PGL7 | 670  | 682  | AcD3-FAIAKDSQKTKQR-COOH      | EVDL↓FAIA  | 3 | 0.68812                         | 87/44  | Protein FAM21                                 |                                        |
| Q6PGL7 | 858  | 865  | AcD3-FAGTKKIR-COOH           | DVDL↓FAGT  | 2 | 0.7315                          | 64/41  | Protein FAM21                                 |                                        |
| Q9J128 | 395  | 401  | AcD3-SLQNQLR-COOH            | NIDF↓SLQN  | 1 | 0.50141                         | 48/46  | Protein flightless-1 homolog                  |                                        |
| P28867 | 30   | 40   | AcD3-VKMKKALSTER-COOH        | PFCA↓VKMK  | 1 | 0.57616                         | 55/47  | Protein kinase C delta type                   |                                        |
| Q9D0R8 | 9    | 18   | AcD3-FSVGSGVSCR-COOH         | PGEY↓FSVG  | 1 | 0.58278                         | 87/47  | Protein LSM12 homolog                         |                                        |
| Q62433 | 227  | 234  | AcD3-FISAYNSR-COOH           | NLHL↓FISA  | 1 | 0.60336                         | 54/48  | Protein NDRG1                                 |                                        |
| Q62433 | 309  | 322  | AcD3-VQGMGMPSASMT-COOH       | FKYF↓VQGM  | 3 | 0.59945/0.55646                 | 81/41  | Protein NDRG1                                 |                                        |
| Q3UW53 | 98   | 110  | AcD3-AVESYESKAYQR-COOH       | KNDF↓AVES  | 2 | 0.55382                         | 83/47  | Protein Niban                                 |                                        |
| Q9DBR7 | 803  | 811  | AcD3-VGITSAYS-R-COOH         | PNSL↓VGIT  | 1 | 0.637                           | 51/47  | Protein phosphatase 1 regulatory subunit 12A  |                                        |
| Q3UMT1 | 458  | 466  | AcD3-LEKASTQAR-COOH          | SSSL↓LEKA  | 1 | 0.77765                         | 61/46  | Protein phosphatase 1 regulatory subunit 12C  |                                        |
| Q62084 | 128  | 136  | AcD3-ISGLLDKIR-COOH          | TEAF↓ISGL  | 1 | 0.50323                         | 53/42  | Protein phosphatase 1 regulatory subunit 14B  |                                        |
| Q9QY59 | 155  | 163  | AcD3-ITVEDAQNR-COOH          | LHLV↓ITVE  | 2 | 0.73183                         | 64/47  | Protein quaking                               |                                        |
| Q9QY59 | 217  | 227  | AcD3-SLAATAQAAPR-COOH        | ALAF↓SLAA  | 2 | 0.73154                         | 60/47  | Protein quaking                               |                                        |
| P50543 | 43   | 57   | AcD3-AAFTKNQKDPGLDR-COOH     | NTEL↓AAFT  | 3 | 0.54846/0.51601                 | 83/47  | Protein S100-A11                              |                                        |
| P50543 | 45   | 57   | AcD3-FTKNQKDPGLDR-COOH       | EELAA↓FTKN | 3 | 0.59538/0.56757                 | 66/47  | Protein S100-A11                              |                                        |
| P07091 | 85   | 99   | AcD3-MCNEFFEGCPDKPR-COOH     | CIAM↓MCNE  | 1 | 0.57901                         | 42/39  | Protein S100-A4                               |                                        |
| P27005 | 46   | 56   | AcD3-VQNIINIENLFR-COOH       | CPQF↓VQNI  | 3 | 0.2976/0.28543                  | 82/47  | Protein S100-A8                               |                                        |
| P31725 | 49   | 55   | AcD3-FMKKEKR-COOH            | QLAT↓FMKK  | 2 | 0.3938/0.27452                  | 51/45  | Protein S100-A9                               |                                        |
| Q3UPL0 | 428  | 440  | AcD3-ISQVTEKDFLNR-COOH       | QPVF↓ISQV  | 2 | 0.51058                         | 87/46  | Protein transport protein Sec31A              |                                        |
| Q9CX30 | 38   | 47   | AcD3-FDSTTSPASR-COOH         | PHQF↓FDDT  | 1 | 0.72857                         | 69/44  | Protein YIF1B                                 |                                        |
| P21981 | 421  | 433  | AcD3-VVGQKIKSVGR-COOH        | NRSL↓VVGQ  | 1 | 0.52781                         | 45/42  | Protein-glutamine gamma-glutamyltransferase 2 |                                        |
| P21981 | 582  | 591  | AcD3-YLENPEIKIR-COOH         | ERDL↓YLEN  | 1 | 0.55159                         | 46/46  | Protein-glutamine gamma-glutamyltransferase 2 |                                        |
| P21981 | 583  | 591  | AcD3-LENPEIKIR-COOH          | RDLY↓LENP  | 2 | 0.57019                         | 51/45  | Protein-glutamine gamma-glutamyltransferase 2 |                                        |
| P21981 | 668  | 679  | AcD3-QCDKLSVKGYR-COOH        | VVNF↓QCDK  | 5 | 0.49858/0.50049/0.51148/0.49538 | 87/46  | Protein-glutamine gamma-glutamyltransferase 2 |                                        |
| Q64010 | 24   | 31   | AcD3-VALLQGR-COOH            | RQEA↓VALL  | 2 | 0.57958                         | 76/45  | Proto-oncogene C-crk                          |                                        |
| P23492 | 195  | 207  | AcD3-LAGPNFETVAESR-COOH      | TYVM↓LAGP  | 2 | 0.65355                         | 78/47  | Purine nucleoside phosphorylase               |                                        |



|         |      |      |                                |           |    |                                                         |        |                                                                    |                  |
|---------|------|------|--------------------------------|-----------|----|---------------------------------------------------------|--------|--------------------------------------------------------------------|------------------|
| Q80SW1  | 51   | 60   | AcD3-FTKFPTKGR-COOH            | DMQE↓FTKF | 2  | 0.60468/0.65791                                         | 57/46  | Putative adenosylhomocysteine 2                                    |                  |
| O35286  | 457  | 469  | AcD3-LVTAISKASAQQR-COOH        | VESL↓LVTA | 1  | 0.53207                                                 | 49/45  | Putative pre-mRNA-splicing factor ATP-dependent RNA helicase DHX15 |                  |
| O89086  | 35   | 41   | AcD3-VVVKDR-COOH               | PISE↓VVVV | 2  | 0.7343/0.69583                                          | 50/40  | Putative RNA-binding protein 3                                     | P60824 (35-41)   |
| P52480  | 34   | 43   | AcD3-DIDSPITAR-COOH            | MCRL↓DIDS | 22 | 0.55179/0.50235/0.47146/0.46703/0.49499/0.4301/0.43444  | 89/47  | Pyruvate kinase isozymes M1/M2                                     |                  |
| P52480  | 60   | 73   | AcD3-MLKEMIKSGMNVAR-COOH       | RSVE↓MLKE | 1  | 0.48265                                                 | 77/48  | Pyruvate kinase isozymes M1/M2                                     |                  |
| P52480  | 61   | 73   | AcD3-LKEMIKSGMNVAR-COOH        | SVEM↓LKEM | 8  | 0.49707/0.52248/0.50968                                 | 100/47 | Pyruvate kinase isozymes M1/M2                                     |                  |
| P52480  | 64   | 73   | AcD3-MIKSGMNVAR-COOH           | MLKE↓MIKS | 3  | 0.4958/0.5396                                           | 83/47  | Pyruvate kinase isozymes M1/M2                                     |                  |
| P52480  | 65   | 73   | AcD3-IKSGMNVAR-COOH            | LKEM↓IKSG | 6  | 0.51288/0.50549/0.50782/0.42477                         | 89/46  | Pyruvate kinase isozymes M1/M2                                     |                  |
| P52480  | 99   | 106  | AcD3-ASDPILYR-COOH             | TESF↓ASDP | 3  | 0.47999/0.42761                                         | 65/47  | Pyruvate kinase isozymes M1/M2                                     |                  |
| P52480  | 110  | 120  | AcD3-VALDTKGPPIR-COOH          | RPVA↓VALD | 3  | 0.52048/0.48503                                         | 57/46  | Pyruvate kinase isozymes M1/M2                                     |                  |
| P52480  | 111  | 120  | AcD3-ALDTKGPPIR-COOH           | PVAV↓ALDT | 2  | 0.58455                                                 | 52/47  | Pyruvate kinase isozymes M1/M2                                     | P53657 (154-163) |
| P52480  | 283  | 294  | AcD3-ILEASDGMVAR-COOH          | RFDE↓ILEA | 6  | 0.60916/0.50685                                         | 75/47  | Pyruvate kinase isozymes M1/M2                                     |                  |
| P52480  | 285  | 294  | AcD3-EASDGMVAR-COOH            | DEIL↓EASD | 21 | 0.51463/0.47853/0.2699/0.52459/0.55654/0.53751/0.48022  | 86/47  | Pyruvate kinase isozymes M1/M2                                     |                  |
| P52480  | 308  | 316  | AcD3-LAQKMMIGR-COOH            | EKVF↓LAQM | 2  | 0.5109                                                  | 66/47  | Pyruvate kinase isozymes M1/M2                                     | P53657 (351-359) |
| P52480  | 309  | 316  | AcD3-AQKMMIGR-COOH             | KVFL↓AQKM | 4  | 0.55759/0.54411                                         | 56/47  | Pyruvate kinase isozymes M1/M2                                     | P53657 (352-359) |
| P52480  | 332  | 339  | AcD3-ESMIKPR-COOH              | TQML↓ESMI | 4  | 0.51565/0.52878                                         | 61/46  | Pyruvate kinase isozymes M1/M2                                     |                  |
| P52480  | 359  | 376  | AcD3-IMLSGATAGDYPLEAVR-COOH    | GADC↓IMLS | 11 | 0.50657/0.48264/0.45379                                 | 118/48 | Pyruvate kinase isozymes M1/M2                                     |                  |
| P52480  | 361  | 376  | AcD3-LSGATAGDYPLEAVR-COOH      | DCIM↓LSGE | 2  | 0.5027                                                  | 78/48  | Pyruvate kinase isozymes M1/M2                                     |                  |
| P52480  | 428  | 436  | AcD3-IIVLTKSGR-COOH            | CSGA↓IIVL | 4  | 0.51259/0.52743                                         | 88/36  | Pyruvate kinase isozymes M1/M2                                     |                  |
| Q921W4  | 333  | 341  | AcD3-EVVKQNER-COOH             | KVSM↓EVVQ | 1  | 0.66707                                                 | 63/47  | Quinone oxidoreductase-like protein 1                              |                  |
| Q61598  | 430  | 436  | AcD3-DFEEMKR-COOH              | GSEF↓DFEE | 1  | 0.50923                                                 | 50/45  | Rab GDP dissociation inhibitor beta                                |                  |
| P31750  | 167  | 174  | AcD3-VKEATGR-COOH              | KVIL↓VKEK | 2  | 0.66509                                                 | 59/43  | RAC-alpha serine/threonine-protein kinase                          |                  |
| Q9CT10  | 18   | 27   | AcD3-VFQKDRKQGR-COOH           | PSVF↓VFQK | 1  | 0.61028                                                 | 46/45  | Ran-binding protein 3                                              |                  |
| Q9JKF1  | 630  | 641  | AcD3-INEAVDSDVGR-COOH          | GISA↓INEA | 2  | 0.56314                                                 | 93/47  | Ras GTPase-activating-like protein IQGAP1                          |                  |
| Q9JKF1  | 950  | 966  | AcD3-MINKQAGGLKALSKEKR-COOH    | SDMM↓MINK | 1  | 0.5141                                                  | 65/39  | Ras GTPase-activating-like protein IQGAP1                          |                  |
| Q9JKF1  | 951  | 966  | AcD3-INKQAGGLKALSKEKR-COOH     | DMMM↓INKQ | 10 | 0.54353/0.56103/0.57058/0.47849/0.60842/0.68151/0.61422 | 100/36 | Ras GTPase-activating-like protein IQGAP1                          |                  |
| Q9JKF1  | 1212 | 1222 | AcD3-SAGGLTDDR-COOH            | IIDL↓SAGG | 2  | 0.60356/0.51836                                         | 78/47  | Ras GTPase-activating-like protein IQGAP1                          |                  |
| Q9JKF1  | 1481 | 1490 | AcD3-LINDIAKDIR-COOH           | RYQE↓LIND | 2  | 0.44655                                                 | 76/45  | Ras GTPase-activating-like protein IQGAP1                          |                  |
| Q9JKF1  | 1482 | 1490 | AcD3-INDIAKDIR-COOH            | YQEL↓INDI | 2  | 0.5331                                                  | 61/46  | Ras GTPase-activating-like protein IQGAP1                          |                  |
| Q9JKF1  | 1531 | 1549 | AcD3-IKTCLDNLASKGVKSKPR-COOH   | YKSY↓IKTC | 2  | 0.5501/0.5204                                           | 48/39  | Ras GTPase-activating-like protein IQGAP1                          |                  |
| Q9JKF1  | 1535 | 1549 | AcD3-LDNLASKGVKSKPR-COOH       | IKTC↓LDNL | 2  | 0.61377                                                 | 78/39  | Ras GTPase-activating-like protein IQGAP1                          |                  |
| Q9JKF1  | 1539 | 1549 | AcD3-ASKGVKSKPR-COOH           | LDNL↓ASKG | 6  | 0.54593/0.53925/0.46921/0.53326                         | 56/38  | Ras GTPase-activating-like protein IQGAP1                          |                  |
| Q05144  | 146  | 163  | AcD3-AKDISVYKLECSALTQR-COOH    | GLAL↓AKDI | 1  | 0.47589                                                 | 95/47  | Ras-related C3 botulinum toxin substrate 2                         |                  |
| P62821  | 166  | 175  | AcD3-MTMAAEIKKR-COOH           | EQSF↓MTMA | 1  | 0.57854                                                 | 58/47  | Ras-related protein Rab-1A                                         | Q9D1G1 (163-172) |
| P51150  | 107  | 113  | AcD3-LIQASPR-COOH              | RDEF↓LIQA | 1  | 0.73158                                                 | 47/45  | Ras-related protein Rab-7a                                         |                  |
| Q60855  | 390  | 399  | AcD3-AEKQTKPQPR-COOH           | FGIF↓AEKQ | 1  | 0.71411                                                 | 52/46  | Receptor-interacting serine/threonine-protein kinase 1             |                  |
| Q9OZL0  | 28   | 38   | AcD3-VGKGFGVFR-COOH            | KLEF↓VGKG | 1  | 0.71328                                                 | 56/46  | Receptor-interacting serine/threonine-protein kinase 3             |                  |
| Q8VDS4  | 60   | 72   | AcD3-LYLANDVIQNSKR-COOH        | KLTF↓LYLA | 2  | 0.5917                                                  | 114/46 | Regulation of nuclear pre-mRNA domain-containing protein 1A        | Q9CSU0 (60-72)   |
| Q8VDS4  | 61   | 72   | AcD3-YLANDVIQNSKR-COOH         | LTLF↓YLAN | 2  | 0.5719                                                  | 96/47  | Regulation of nuclear pre-mRNA domain-containing protein 1A        | Q9CSU0 (61-72)   |
| Q8VE37  | 39   | 57   | AcD3-TLQGDVQQLGLGESVLER-COOH   | GLVL↓TLGQ | 1  | 0.44082                                                 | 81/47  | Regulator of chromosome condensation                               |                  |
| Q8VE37  | 310  | 320  | AcD3-DSEGAAYSIGR-COOH          | TVCM↓DSEG | 1  | 0.42977                                                 | 55/48  | Regulator of chromosome condensation                               |                  |
| P97492  | 18   | 37   | AcD3-AVSDGELTSTAGSQAQEGGR-COOH | RMVL↓AVSD | 2  | 0.57374                                                 | 122/45 | Regulator of G-protein signaling 14                                |                  |
| P97492  | 484  | 495  | AcD3-LVEDASSTGNR-COOH          | SSSL↓LVED | 2  | 0.64672                                                 | 63/46  | Regulator of G-protein signaling 14                                |                  |
| Q9WLUK4 | 43   | 54   | AcD3-NEIVGNEDTVSR-COOH         | PLKL↓NEIV | 1  | 0.5481                                                  | 69/47  | Replication factor C subunit 2                                     |                  |
| O70622  | 326  | 333  | AcD3-KVLOQVHR-COOH             | RVYR↓KVLO | 1  | 0.51866                                                 | 31/29  | Reticulon-2                                                        |                  |
| Q99P72  | 80   | 89   | AcD3-SSDSVPPAPR-COOH           | LLDF↓SSDS | 1  | 0.5871                                                  | 51/47  | Reticulon-4                                                        |                  |
| Q99P71  | 38   | 49   | AcD3-IQELDKDESRLR-COOH         | SIQE↓IQEL | 2  | 0.52266                                                 | 72/47  | Rho GDP-dissociation inhibitor 1                                   |                  |
| Q61599  | 52   | 70   | AcD3-LGDPVPVADPTVNPVTVTR-COOH  | KKTL↓LGDV | 5  | 0.45087/0.46858                                         | 94/45  | Rho GDP-dissociation inhibitor 2                                   |                  |
| Q61599  | 99   | 107  | AcD3-VLKEGIEYR-COOH            | KDTF↓VLKE | 3  | 0.49023/0.48079                                         | 78/46  | Rho GDP-dissociation inhibitor 2                                   |                  |
| Q61599  | 101  | 107  | AcD3-KEGIEYR-COOH              | TFVL↓KEGI | 1  | 0.46586                                                 | 49/47  | Rho GDP-dissociation inhibitor 2                                   |                  |
| Q61599  | 153  | 168  | AcD3-EFLTPEEAPKGMGLAR-COOH     | PEEY↓EFLT | 3  | 0.4383/0.45796                                          | 85/47  | Rho GDP-dissociation inhibitor 2                                   |                  |
| Q61599  | 154  | 168  | AcD3-FLTPVEEAPKGMGLAR-COOH     | EYEE↓FLTP | 1  | 0.44374                                                 | 49/47  | Rho GDP-dissociation inhibitor 2                                   |                  |
| Q61599  | 155  | 168  | AcD3-LTPVEEAPKGMGLAR-COOH      | EYEF↓LTPV | 26 | 0.47533/0.45085/0.45598/0.42915/0.46945/0.47517/0.4294  | 74/46  | Rho GDP-dissociation inhibitor 2                                   |                  |
| Q8KQ05  | 238  | 251  | AcD3-AEQAVNQEKFSKER-COOH       | EVSF↓AEQA | 2  | 0.73235                                                 | 88/47  | Rho GTPase-activating protein 18                                   |                  |
| Q8BYW1  | 12   | 22   | AcD3-NLKAEASKIAR-COOH          | NWDF↓NLKA | 2  | 0.6456                                                  | 70/44  | Rho GTPase-activating protein 25                                   |                  |
| Q8BYW1  | 14   | 22   | AcD3-KAEASKIAR-COOH            | DFNL↓KAEA | 1  | 0.55845                                                 | 46/43  | Rho GTPase-activating protein 25                                   |                  |
| Q8BYW1  | 314  | 323  | AcD3-ATVIGVNLIR-COOH           | VDNL↓ATVI | 2  | 0.61583                                                 | 63/42  | Rho GTPase-activating protein 25                                   |                  |
| O54834  | 388  | 399  | AcD3-PAEASQSKKAR-COOH          | QLSL↓PAEA | 4  | 0.64161/0.71842                                         | 69/45  | Rho GTPase-activating protein 6                                    |                  |
| Q61210  | 140  | 150  | AcD3-VVQSQAAVSR-COOH           | FIQE↓VVQS | 1  | 0.56102                                                 | 50/46  | Rho guanine nucleotide exchange factor 1                           |                  |

|        |      |      |                                    |            |   |                                |        |                                                                                   |                                                      |
|--------|------|------|------------------------------------|------------|---|--------------------------------|--------|-----------------------------------------------------------------------------------|------------------------------------------------------|
| Q61210 | 407  | 416  | AcD3-LSLPKQVQR-COOH                | PDTL↓LSLP  | 1 | 0.70401                        | 44/38  | Rho guanine nucleotide exchange factor 1                                          |                                                      |
| Q62159 | 115  | 122  | AcD3-VGNKKDLR-COOH                 | PIL↓VGNK   | 3 | 0.63558/0.64767                | 53/43  | Rho-related GTP-binding protein RhoC                                              | Q9QUI0 (115-122)                                     |
| Q91V17 | 287  | 297  | AcD3-ASNELKDEGAR-COOH              | ELSL↓ASNE  | 2 | 0.59042                        | 79/47  | Ribonuclease inhibitor                                                            |                                                      |
| P18654 | 84   | 94   | AcD3-LVKKISGSDAR-COOH              | GKVF↓LVKK  | 2 | 0.62707                        | 79/42  | Ribosomal protein S6 kinase alpha-3                                               |                                                      |
| Q9Z2B9 | 718  | 730  | AcD3-FLKSVENAPLAKR-COOH            | REGF↓FLKS  | 2 | 0.57071                        | 51/42  | Ribosomal protein S6 kinase alpha-4                                               |                                                      |
| Q8VEE0 | 96   | 109  | AcD3-EATENPGALIKDIR-COOH           | FTHL↓EATE  | 3 | 0.41903                        | 68/47  | Ribulose-phosphate 3-epimerase                                                    |                                                      |
| Q9ET26 | 118  | 134  | AcD3-IMEGVKATTKDASLQPR-COOH        | YQNY↓IMEG  | 5 | 0.66063/0.6193/0.64448/0.64843 | 94/47  | RING finger protein 114                                                           |                                                      |
| Q9ET26 | 211  | 224  | AcD3-DVDEDDMINQVLQR-COOH           | FVDY↓DVDE  | 1 | 0.63788                        | 54/44  | RING finger protein 114                                                           |                                                      |
| P62878 | 6    | 21   | AcD3-DVDTPSGTNSGAGKKR-COOH         | AAAM↓DVDT  | 2 | 0.67295                        | 99/48  | RING-box protein 1                                                                |                                                      |
| Q9D706 | 345  | 357  | AcD3-IVLDGYSYKAFAR-COOH            | CTQA↓IVLD  | 1 | 0.57782                        | 60/46  | RNA polymerase II-associated protein 3                                            |                                                      |
| P60122 | 55   | 64   | AcD3-LIKSKMAGR-COOH                | VIVE↓LIKS  | 2 | 0.40257                        | 57/41  | RuvB-like 1                                                                       |                                                      |
| Q3TH56 | 67   | 74   | AcD3-LAGEITSR-COOH                 | GMIL↓LAGE  | 1 | 0.59884                        | 67/46  | S-adenosylmethionine synthetase isoform type-2                                    |                                                      |
| Q60710 | 33   | 44   | AcD3-SADDFQNTDLR-COOH              | TANL↓SADD  | 2 | 0.6626                         | 71/44  | SAM domain and HD domain-containing protein 1                                     |                                                      |
| Q60710 | 91   | 98   | AcD3-GVSLLEER-COOH                 | LEDL↓GVSS  | 1 | 0.59692                        | 49/47  | SAM domain and HD domain-containing protein 1                                     |                                                      |
| Q60710 | 105  | 112  | AcD3-IQQLSQSR-COOH                 | MIEC↓IQQL  | 1 | 0.56995                        | 51/46  | SAM domain and HD domain-containing protein 1                                     |                                                      |
| Q60710 | 298  | 306  | AcD3-LYEIVSNKR-COOH                | TKSF↓LYEI  | 1 | 0.63395                        | 61/46  | SAM domain and HD domain-containing protein 1                                     |                                                      |
| Q60710 | 532  | 542  | AcD3-YCKSNSQAVR-COOH               | RVHF↓YCKS  | 2 | 0.58957                        | 54/48  | SAM domain and HD domain-containing protein 1                                     |                                                      |
| P17563 | 106  | 114  | AcD3-VVDVGVSEPR-COOH               | SRIY↓VVDV  | 2 | 0.57377                        | 67/47  | Selenium-binding protein 1                                                        | Q63836 (106-114)                                     |
| Q8C650 | 409  | 416  | AcD3-LASGSSIR-COOH                 | NQSF↓LASG  | 2 | 0.54382                        | 54/45  | Septin-10                                                                         |                                                      |
| Q8C1B7 | 243  | 253  | AcD3-VKIGNKMAKAR-COOH              | STEE↓VKIG  | 2 | 0.54228                        | 56/41  | Septin-11                                                                         |                                                      |
| Q8C1B7 | 320  | 327  | AcD3-QETYEAKR-COOH                 | PFSL↓QETY  | 2 | 0.49873/0.52219                | 57/47  | Septin-11                                                                         | Q8C650 (318-325), Q8CHH9 (323-330), Q9R1T4 (321-328) |
| P42208 | 246  | 254  | AcD3-IEAKGKVR-COOH                 | SNQL↓IEAK  | 2 | 0.64399                        | 67/38  | Septin-2                                                                          |                                                      |
| Q9R1T4 | 406  | 421  | AcD3-LQSGSQAGGSQTLKR-COOH          | AAEL↓LQSQ  | 5 | 0.45528/0.38092/0.46422        | 131/47 | Septin-6                                                                          |                                                      |
| Q9R1T4 | 407  | 421  | AcD3-QSQGQAGGSQTLKR-COOH           | AELL↓QSQG  | 2 | 0.46449                        | 117/48 | Septin-6                                                                          |                                                      |
| O55131 | 33   | 41   | AcD3-ANLNPQVYR-COOH                | YVGF↓ANLP  | 1 | 0.55721                        | 56/48  | Septin-7                                                                          |                                                      |
| O55131 | 361  | 380  | AcD3-EMKVKVKQLKDESEALQR-COOH       | EQVF↓EMKV  | 1 | 0.58893                        | 53/44  | Septin-7                                                                          |                                                      |
| O55131 | 363  | 380  | AcD3-KVKEKVKQLKDESEALQR-COOH       | VFEM↓KVKE  | 1 | 0.51561                        | 48/40  | Septin-7                                                                          |                                                      |
| Q80UG5 | 259  | 266  | AcD3-LKQAPASR-COOH                 | RDAM↓LKQA  | 1 | 0.77844                        | 44/43  | Septin-9                                                                          |                                                      |
| Q91V14 | 90   | 97   | AcD3-ESLKVIGR-COOH                 | LEDF↓ESLK  | 3 | 0.70112/0.56751                | 53/42  | Serine/threonine-protein kinase 38                                                |                                                      |
| Q99JT2 | 161  | 176  | AcD3-ADFGVAGQLTDTQIKR-COOH         | DVKLL↓ADFG | 1 | 0.54503                        | 81/47  | Serine/threonine-protein kinase MST4                                              | Q99KH8 (161-176), Q9Z2W1 (157-172)                   |
| P70268 | 16   | 39   | AcD3-LEQLGLAGADLAPGVQQQLLELER-COOH | SWSL↓LEQL  | 1 | 0.65142                        | 71/46  | Serine/threonine-protein kinase N1                                                |                                                      |
| Q6P456 | 808  | 821  | AcD3-LSNMAAGTAAGSAGR-COOH          | PVDM↓LSNM  | 2 | 0.69003                        | 81/47  | Serine/threonine-protein kinase QSK                                               |                                                      |
| Q80X41 | 24   | 34   | AcD3-AAGEVLTDMSR-COOH              | AEQF↓AAGE  | 2 | 0.47899                        | 79/47  | Serine/threonine-protein kinase VRK1                                              |                                                      |
| Q80X41 | 374  | 387  | AcD3-ECSDTQVQEAQTR-COOH            | VEDM↓ECSD  | 1 | 0.49193                        | 83/44  | Serine/threonine-protein kinase VRK1                                              |                                                      |
| Q6P9R2 | 20   | 42   | AcD3-QEIVGSGATAVVQAAQCAPKKEK-COOH  | DVEL↓QEVI  | 1 | 0.41306                        | 105/47 | Serine/threonine-protein kinaseR1                                                 |                                                      |
| Q6P9R2 | 484  | 497  | AcD3-ANLQKIVEPQSNR-COOH            | VIVA↓ANLQ  | 1 | 0.5258                         | 48/47  | Serine/threonine-protein kinaseR1                                                 |                                                      |
| Q76MZ3 | 97   | 105  | AcD3-ATVEETVYR-COOH                | LESL↓ATVE  | 2 | 0.60007                        | 74/46  | Serine/threonine-protein phosphatase 2A 65 kDa regulatory subunit A alpha isoform | Q7TNP2 (109-117)                                     |
| P58389 | 137  | 148  | AcD3-VYLKEAVGNSTR-COOH             | PEVA↓VYLK  | 1 | 0.41776                        | 51/47  | Serine/threonine-protein phosphatase 2A regulatory subunit B'                     |                                                      |
| Q60854 | 78   | 91   | AcD3-LTEVNTKTGYLLR-COOH            | FQSL↓LTEV  | 2 | 0.73021                        | 49/46  | Serpin B6                                                                         |                                                      |
| Q60854 | 325  | 343  | AcD3-VNEEGTEAAAAATAGMMTVR-COOH     | AFVE↓VNEE  | 1 | 0.61765                        | 96/45  | Serpin B6                                                                         |                                                      |
| P26638 | 96   | 107  | AcD3-AALKVSIKQKVR-COOH             | ADAL↓AALK  | 2 | 0.56897                        | 61/31  | Seryl-tRNA synthetase, cytoplasmic                                                |                                                      |
| Q9R0P3 | 77   | 86   | AcD3-VVIAPDTSR-COOH                | EHGL↓VVIAP | 1 | 0.45908                        | 56/47  | S-formylglutathione hydrolase                                                     |                                                      |
| Q9R0P3 | 132  | 142  | AcD3-INANFPVDPQR-COOH              | LPQL↓INAN  | 2 | 0.58883                        | 63/48  | S-formylglutathione hydrolase                                                     |                                                      |
| Q9R0P3 | 157  | 167  | AcD3-ICALNPKGYR-COOH               | HGAL↓ICAL  | 2 | 0.43433                        | 72/47  | S-formylglutathione hydrolase                                                     |                                                      |
| Q9R0P3 | 159  | 167  | AcD3-ALKNPKGYR-COOH                | ALIC↓ALKN  | 1 | 0.45859                        | 47/43  | S-formylglutathione hydrolase                                                     |                                                      |
| Q9R0P3 | 240  | 253  | AcD3-IACTEKKIPVIVFR-COOH           | PDNF↓IAAC  | 2 | 0.46926/0.44044                | 70/44  | S-formylglutathione hydrolase                                                     |                                                      |
| Q9J1U8 | 27   | 46   | AcD3-LEANKIGFEEKDIAANEENR-COOH     | VLCF↓LEAN  | 1 | 0.791                          | 63/47  | SH3 domain-binding glutamic acid-rich-like protein                                |                                                      |
| P16254 | 28   | 36   | AcD3-ITLKKYDGR-COOH                | GSVF↓ITLK  | 1 | 0.65428                        | 70/43  | Signal recognition particle 14 kDa protein                                        |                                                      |
| Q9D7A6 | 108  | 118  | AcD3-VAEMIPKIKTR-COOH              | VMLY↓VAEM  | 1 | 0.51632                        | 50/43  | Signal recognition particle 19 kDa protein                                        |                                                      |
| P46062 | 539  | 549  | AcD3-VTTTSLDSASR-COOH              | ATNE↓VTTT  | 2 | 0.69495                        | 98/47  | Signal-induced proliferation-associated protein 1                                 |                                                      |
| P46062 | 1012 | 1021 | AcD3-LAESESAATR-COOH               | NORL↓LAES  | 1 | 0.78312                        | 93/47  | Signal-induced proliferation-associated protein 1                                 |                                                      |
| Q8BJU0 | 63   | 77   | AcD3-EAATSSKQEMPPDPR-COOH          | PEIF↓EAAT  | 1 | 0.54825                        | 69/45  | Small glutamine-rich tetrapeptide repeat-containing protein alpha                 |                                                      |
| P62315 | 81   | 92   | AcD3-VDVEPKVSKKR-COOH              | DTLL↓VDVE  | 3 | 0.37554/0.41889                | 61/38  | Small nuclear ribonucleoprotein Sm D1                                             |                                                      |
| P27048 | 78   | 94   | AcD3-VSMTVEGPPPKDTGIAR-COOH        | GENL↓VSMT  | 2 | 0.45122                        | 81/47  | Small nuclear ribonucleoprotein-associated protein B                              | P63163 (78-94)                                       |
| Q9CQ65 | 48   | 60   | AcD3-GKIKNVDCVLLR-COOH             | ALIL↓GKIK  | 1 | 0.50019                        | 85/43  | S-methyl-5'-thioadenosine phosphorylase                                           |                                                      |
| Q9CQ65 | 108  | 116  | AcD3-VIIDQFDR-COOH                 | PGDM↓VIID  | 2 | 0.5069                         | 71/46  | S-methyl-5'-thioadenosine phosphorylase                                           |                                                      |
| Q9CQ65 | 153  | 162  | AcD3-IETAKKILGLR-COOH              | REVL↓IETA  | 1 | 0.45818                        | 52/37  | S-methyl-5'-thioadenosine phosphorylase                                           |                                                      |
| Q6P069 | 40   | 56   | AcD3-AAVAGQDQIDDELQR-COOH          | YGYF↓AAVA  | 1 | 0.64101                        | 61/47  | Sorcin                                                                            |                                                      |
| Q9WV80 | 265  | 272  | AcD3-LEKEELPR-COOH                 | VREF↓LEKE  | 3 | 0.69872/0.56019                | 60/46  | Sorting nexin-1                                                                   |                                                      |
| O70493 | 145  | 152  | AcD3-LQEEAIDR-COOH                 | LHMF↓LQEE  | 1 | 0.64941                        | 61/47  | Sorting nexin-12                                                                  |                                                      |
| Q9CWK8 | 262  | 269  | AcD3-LESSELPK-COOH                 | LROF↓LESS  | 2 | 0.62662                        | 57/47  | Sorting nexin-2                                                                   |                                                      |

|        |      |      |                                      |            |    |                                |        |                                                                                            |                    |
|--------|------|------|--------------------------------------|------------|----|--------------------------------|--------|--------------------------------------------------------------------------------------------|--------------------|
| O70492 | 29   | 43   | AcD3-LEIDVSNPQTVGVGR-COOH            | PSNF↓LEID  | 1  | 0.65522                        | 64/47  | Sorting nexin-3                                                                            |                    |
| O70492 | 145  | 160  | AcD3-LQDEIIDKSYTPSKIR-COOH           | LHMF↓LQDE  | 1  | 0.67696                        | 57/46  | Sorting nexin-3                                                                            |                    |
| Q9D8U8 | 26   | 42   | AcD3-NVDPSLIQDIPDALSER-COOH          | SVDL↓NVDP  | 2  | 0.57234                        | 93/48  | Sorting nexin-5                                                                            |                    |
| Q9D8U8 | 33   | 42   | AcD3-IDIPDALSER-COOH                 | PSLQ↓IDIP  | 1  | 0.56265                        | 50/48  | Sorting nexin-5                                                                            |                    |
| Q9D8U8 | 168  | 175  | AcD3-YQQDL5VR-COOH                   | VFLE↓VDQD  | 1  | 0.59423                        | 65/47  | Sorting nexin-5                                                                            |                    |
| Q9D8U8 | 319  | 330  | AcD3-YENSNKALDKAR-COOH               | ALID↓YENS  | 1  | 0.64636                        | 55/48  | Sorting nexin-5                                                                            |                    |
| P16546 | 940  | 950  | AcD3-SAYGSSIQALR-COOH                | MSDL↓SAYG  | 1  | 0.57822                        | 49/48  | Spectrin alpha chain, brain                                                                |                    |
| P16546 | 1266 | 1273 | AcD3-ASVQALQR-COOH                   | GRDL↓ASVQ  | 1  | 0.59593                        | 47/46  | Spectrin alpha chain, brain                                                                |                    |
| P16546 | 1283 | 1298 | AcD3-AALGDKVNSLGETAQR-COOH           | ERDL↓AALG  | 4  | 0.63138/0.6164                 | 87/47  | Spectrin alpha chain, brain                                                                |                    |
| P16546 | 1725 | 1739 | AcD3-MTSSAFDTSQVKEKR-COOH            | ADSL↓MTSS  | 2  | 0.66044                        | 129/47 | Spectrin alpha chain, brain                                                                |                    |
| P16546 | 1731 | 1739 | AcD3-DTSSQVKEKR-COOH                 | SSAF↓DTSQ  | 1  | 0.59227                        | 66/47  | Spectrin alpha chain, brain                                                                |                    |
| Q64213 | 153  | 160  | AcD3-VGLLIGPR-COOH                   | EINF↓VGLL  | 4  | 0.59172/0.64197                | 62/40  | Splicing factor 1                                                                          |                    |
| Q9D554 | 23   | 34   | AcD3-AKEMLTKKSTLR-COOH               | MDVM↓AKEM  | 1  | 0.41734                        | 45/43  | Splicing factor 3A subunit 3                                                               |                    |
| Q9D554 | 27   | 34   | AcD3-LTKKSTLR-COOH                   | AKEM↓LTKK  | 1  | 0.58408                        | 40/36  | Splicing factor 3A subunit 3                                                               |                    |
| Q9D554 | 301  | 312  | AcD3-FAKNPKSKGTR-COOH                | DTSL↓FAKN  | 3  | 0.44637/0.48646                | 51/41  | Splicing factor 3A subunit 3                                                               |                    |
| Q923D4 | 54   | 63   | AcD3-AIAENESKAR-COOH                 | LNPF↓AIAE  | 4  | 0.61682/0.61264                | 68/47  | Splicing factor 3B subunit 5                                                               |                    |
| Q8VI6  | 660  | 673  | AcD3-GQGGAGPVGGQPR-COOH              | TERF↓GQGG  | 2  | 0.73525                        | 87/47  | Splicing factor, proline- and glutamine-rich                                               |                    |
| Q78PY7 | 98   | 107  | AcD3-TIENKTPQGR-COOH                 | EVCF↓TIEN  | 2  | 0.49701/0.50141                | 67/47  | Staphylococcal nuclease domain-containing protein 1                                        |                    |
| Q78PY7 | 128  | 135  | AcD3-VAEGLATR-COOH                   | AESL↓VAEG  | 3  | 0.51642                        | 66/47  | Staphylococcal nuclease domain-containing protein 1                                        |                    |
| Q78PY7 | 223  | 232  | AcD3-LSGIGKPTFR-COOH                 | VTVM↓LSGI  | 1  | 0.46487                        | 55/47  | Staphylococcal nuclease domain-containing protein 1                                        |                    |
| Q78PY7 | 455  | 464  | AcD3-VSKGLATVIR-COOH                 | AEAL↓VSKG  | 2  | 0.52986                        | 73/41  | Staphylococcal nuclease domain-containing protein 1                                        |                    |
| Q78PY7 | 669  | 678  | AcD3-VMPVLEEKER-COOH                 | PVEE↓VMPV  | 1  | 0.55399                        | 71/47  | Staphylococcal nuclease domain-containing protein 1                                        |                    |
| O54988 | 655  | 662  | AcD3-VTGAEAR-COOH                    | LERL↓VVTG  | 2  | 0.59593                        | 60/47  | STE20-like serine/threonine-protein kinase                                                 |                    |
| O54988 | 764  | 784  | AcD3-SISSFLSKAKDSSGSLQETR-COOH       | DLNL↓SISS  | 1  | 0.62587                        | 63/47  | STE20-like serine/threonine-protein kinase                                                 |                    |
| O54988 | 1202 | 1218 | AcD3-FKMTGESECLNPSAQR-COOH           | QEVF↓FKMT  | 3  | 0.55977/0.52525                | 97/45  | STE20-like serine/threonine-protein kinase                                                 |                    |
| Q60864 | 27   | 44   | AcD3-YSEAIKLDPNQNHVLYSNR-COOH        | ALQC↓YSEA  | 1  | 0.44552                        | 91/47  | Stress-induced-phosphoprotein 1                                                            |                    |
| Q60864 | 107  | 118  | AcD3-QLKEQLQNMEAR-COOH               | ANNL↓QLKE  | 3  | 0.44267/0.37842                | 93/47  | Stress-induced-phosphoprotein 1                                                            |                    |
| Q60864 | 421  | 433  | AcD3-QLLEPTFIKGYTR-COOH              | CEEC↓QLE   | 2  | 0.4309                         | 61/45  | Stress-induced-phosphoprotein 1                                                            |                    |
| Q60864 | 458  | 470  | AcD3-DSSCKEAAADGYQR-COOH             | ALDL↓DSSC  | 2  | 0.45074                        | 60/42  | Stress-induced-phosphoprotein 1                                                            |                    |
| Q9ESP1 | 171  | 183  | AcD3-LSVTGEQYGNIPIR-COOH             | TSVF↓LSVT  | 1  | 0.40943                        | 75/48  | Stromal cell-derived factor 2-like protein 1                                               |                    |
| Q9ESP1 | 172  | 183  | AcD3-SVTGEQYGNPIR-COOH               | SVFL↓SVTG  | 2  | 0.6518                         | 58/48  | Stromal cell-derived factor 2-like protein 1                                               |                    |
| Q7TN29 | 159  | 174  | AcD3-EKVKMPQKEDAQLPK-COOH            | PVVF↓EKVK  | 1  | 0.74479                        | 82/44  | Stromal membrane-associated protein 2                                                      |                    |
| Q922I8 | 61   | 75   | AcD3-FVANTAKEALEAAKR-COOH            | VQRF↓FVAN  | 1  | 0.46618                        | 47/45  | Succinyl-CoA ligase [GDP-forming] subunit beta, mitochondrial                              |                    |
| Q9R1T2 | 85   | 93   | AcD3-LIQTGSVGR-COOH                  | GAQF↓LIQT  | 2  | 0.54648                        | 84/45  | SUMO-activating enzyme subunit 1                                                           |                    |
| Q9R1T2 | 179  | 200  | AcD3-VEEKTAKVAKVQGVDPGPEAKR-COOH     | EHEF↓VEEK  | 1  | 0.50405                        | 69/45  | SUMO-activating enzyme subunit 1                                                           |                    |
| Q9Z1F9 | 353  | 360  | AcD3-VTSAANLR-COOH                   | AMDF↓V TSA | 1  | 0.63798                        | 48/46  | SUMO-activating enzyme subunit 2                                                           |                    |
| Q8K4L3 | 1075 | 1087 | AcD3-LDPSKMTSIKER-COOH               | GDSF↓LDSP  | 2  | 0.66101                        | 65/47  | Supervillin                                                                                |                    |
| Q6PDG5 | 582  | 599  | AcD3-YTKKNVPSKSKAAASATR-COOH         | RTDM↓YTKK  | 1  | 0.54226                        | 51/43  | SWI/SNF complex subunit SMARCC2                                                            |                    |
| O54941 | 208  | 216  | AcD3-SESVPDVR-COOH                   | SEIL↓SESV  | 1  | 0.55238                        | 72/47  | SWI/SNF-related matrix-associated actin-dependent regulator chromatin subfamily E member 1 |                    |
| Q9D5V6 | 295  | 305  | AcD3-DTCSLNQEDLR-COOH                | SDAF↓DTCS  | 1  | 0.67346                        | 52/45  | Synapse-associated protein 1                                                               |                    |
| Q62465 | 64   | 80   | AcD3-LVLTGFGYDKVKLQSR-COOH           | PIRC↓LVLT  | 2  | 0.682                          | 96/44  | Synaptic vesicle membrane protein VAT-1 homolog                                            |                    |
| Q62465 | 65   | 80   | AcD3-VLTGFGYDKVKLQSR-COOH            | LRCL↓VLTG  | 2  | 0.59681                        | 80/45  | Synaptic vesicle membrane protein VAT-1 homolog                                            |                    |
| Q62465 | 67   | 80   | AcD3-TGFGGYDKVKLQSR-COOH             | CLVL↓TGFG  | 12 | 0.64485/0.73218/0.6873/0.62057 | 86/47  | Synaptic vesicle membrane protein VAT-1 homolog                                            |                    |
| Q62465 | 351  | 357  | AcD3-VNSVVTNR-COOH                   | EVEL↓VNSV  | 1  | 0.60618                        | 55/44  | Synaptic vesicle membrane protein VAT-1 homolog                                            |                    |
| P26039 | 271  | 277  | AcD3-VKQKGER-COOH                    | PKEY↓VKQK  | 2  | 0.53312                        | 52/44  | Talin-1                                                                                    |                    |
| P26039 | 423  | 438  | AcD3-SVSPKSTVLQQYQNR-COOH            | MLED↓SVSP  | 2  | 0.73153                        | 65/46  | Talin-1                                                                                    |                    |
| P26039 | 807  | 824  | AcD3-TVTEFNIFSSMGDAGEMVR-COOH        | DTIL↓TVTE  | 5  | 0.56227/0.54614/0.58467        | 148/43 | Talin-1                                                                                    |                    |
| P26039 | 830  | 854  | AcD3-AQATSOLDVNAIKADAEGESDLENSR-COOH | ARIL↓AQAT  | 1  | 0.64165                        | 78/47  | Talin-1                                                                                    |                    |
| P26039 | 1607 | 1618 | AcD3-LESAGGLIQTR-COOH                | AKTM↓LESA  | 1  | 0.47895                        | 59/46  | Talin-1                                                                                    |                    |
| P26039 | 1851 | 1859 | AcD3-VDYQTTMVR-COOH                  | EGSF↓VDYQ  | 1  | 0.53906                        | 58/47  | Talin-1                                                                                    |                    |
| P26039 | 1966 | 1973 | AcD3-AALQAQNR-COOH                   | SHVL↓AALQ  | 1  | 0.49814                        | 55/47  | Talin-1                                                                                    |                    |
| P26039 | 1998 | 2006 | AcD3-FATAGTLNR-COOH                  | TTIM↓FATA  | 2  | 0.50879/0.55689                | 74/47  | Talin-1                                                                                    |                    |
| P26039 | 2034 | 2057 | AcD3-VQNAAGSQELQAAQSSVATITR-COOH     | TKVL↓VQNA  | 1  | 0.57387                        | 71/47  | Talin-1                                                                                    |                    |
| P26039 | 2185 | 2197 | AcD3-ATAKAVAGNSCR-COOH               | GITM↓ATAK  | 2  | 0.56552                        | 92/48  | Talin-1                                                                                    | Q71LX4 (2097-2109) |
| P26039 | 2201 | 2209 | AcD3-VIATANLSR-COOH                  | ROED↓VIAT  | 1  | 0.52928                        | 48/44  | Talin-1                                                                                    | Q71LX4 (2113-2121) |
| Q3U0I8 | 190  | 202  | AcD3-AVEAAPGELVGR-COOH               | RTVL↓AVEA  | 2  | 0.58896                        | 74/48  | TBC1 domain family member 2B                                                               |                    |
| P11983 | 217  | 228  | AcD3-NCVVSQGMKPR-COOH                | GYAL↓NCVV  | 3  | 0.45288/0.51776                | 75/47  | T-complex protein 1 subunit alpha B                                                        | P11984 (217-228)   |
| P11983 | 219  | 228  | AcD3-VVGSQGMKPR-COOH                 | ALNC↓VVGS  | 4  | 0.53588/0.53087                | 66/47  | T-complex protein 1 subunit alpha B                                                        | P11984 (219-228)   |
| P11983 | 453  | 468  | AcD3-AVNAAQDSTDLVAKLR-COOH           | PNTL↓AVNA  | 2  | 0.52446                        | 95/46  | T-complex protein 1 subunit alpha B                                                        | P11984 (453-468)   |
| P80314 | 219  | 231  | AcD3-LLDKIGVNPQPKR-COOH              | DEGF↓LLDK  | 2  | 0.41739                        | 59/37  | T-complex protein 1 subunit beta                                                           |                    |
| P80315 | 517  | 527  | AcD3-SALTATETVR-COOH                 | LVSF↓SALT  | 2  | 0.68476                        | 53/45  | T-complex protein 1 subunit delta                                                          |                    |
| P80316 | 17   | 24   | AcD3-LHKDQDR-COOH                    | GRPF↓LHK   | 3  | 0.50571/0.43714                | 60/44  | T-complex protein 1 subunit epsilon                                                        |                    |
| P80316 | 40   | 49   | AcD3-AAKAVANTMR-COOH                 | SHIM↓AAKA  | 2  | 0.39043                        | 69/48  | T-complex protein 1 subunit epsilon                                                        |                    |

|        |      |      |                                        |           |   |                                 |        |                                                       |                                |
|--------|------|------|----------------------------------------|-----------|---|---------------------------------|--------|-------------------------------------------------------|--------------------------------|
| P80316 | 133  | 142  | AcD3-IADGYEQAAR-COOH                   | HPIR↓IADG | 2 | 0.52274                         | 47/33  | T-complex protein 1 subunit epsilon                   |                                |
| P80316 | 193  | 201  | AcD3-VLTVADMER-COOH                    | AVNA↓VLTV | 2 | 0.45906/0.41102                 | 66/47  | T-complex protein 1 subunit epsilon                   |                                |
| P80316 | 207  | 218  | AcD3-ELUKVEGKVGGR-COOH                 | DVDF↓ELUK | 2 | 0.40556                         | 91/41  | T-complex protein 1 subunit epsilon                   |                                |
| P80316 | 209  | 218  | AcD3-IKVEGKVGGR-COOH                   | DFEL↓IKVE | 4 | 0.43112/0.46388                 | 71/42  | T-complex protein 1 subunit epsilon                   |                                |
| P80316 | 511  | 525  | AcD3-IGKKQIQSLATQMVR-COOH              | IETL↓IGKK | 2 | 0.48442                         | 79/44  | T-complex protein 1 subunit epsilon                   |                                |
| P80316 | 527  | 534  | AcD3-ILKIDDIR-COOH                     | MVRM↓ILKI | 2 | 0.45614                         | 60/41  | T-complex protein 1 subunit epsilon                   |                                |
| P80313 | 132  | 152  | AcD3-AVNKKEIAVTVKKQDKVEQR-COOH         | ATQL↓AVNK | 1 | 0.43143                         | 60/36  | T-complex protein 1 subunit eta                       |                                |
| P80313 | 141  | 152  | AcD3-VTVKKQDKVEQR-COOH                 | KEIA↓VTVK | 2 | 0.4693                          | 53/42  | T-complex protein 1 subunit eta                       |                                |
| P80313 | 513  | 524  | AcD3-IVSVDETIKNPR-COOH                 | AACL↓IVSV | 2 | 0.49393                         | 63/46  | T-complex protein 1 subunit eta                       |                                |
| P80318 | 9    | 16   | AcD3-VLSQNTKR-COOH                     | RPVL↓VLSQ | 2 | 0.47171/0.45615                 | 55/45  | T-complex protein 1 subunit gamma                     |                                |
| P80318 | 50   | 68   | AcD3-LLDPMPGGIVMITNDGNAILR-COOH        | MMKM↓LLDP | 1 | 0.57888                         | 87/48  | T-complex protein 1 subunit gamma                     |                                |
| P80318 | 178  | 190  | AcD3-DAVKTQVFEENGR-COOH                | NIAL↓DAVK | 2 | 0.53967                         | 69/48  | T-complex protein 1 subunit gamma                     |                                |
| P42932 | 64   | 74   | AcD3-FVTNDAATILR-COOH                  | LEKL↓FVTN | 2 | 0.55173                         | 67/47  | T-complex protein 1 subunit theta                     |                                |
| P42932 | 511  | 520  | AcD3-ATNAAVTVLR-COOH                   | AIKL↓ATNA | 1 | 0.44819                         | 64/44  | T-complex protein 1 subunit theta                     |                                |
| P80317 | 21   | 28   | AcD3-AVNISAAR-COOH                     | QAAL↓AVNI | 3 | 0.35941/0.39697                 | 57/46  | T-complex protein 1 subunit zeta                      |                                |
| P80317 | 303  | 314  | AcD3-DALAKEGIVALR-COOH                 | PFSL↓DALA | 3 | 0.48472/0.29993                 | 68/44  | T-complex protein 1 subunit zeta                      |                                |
| P47226 | 132  | 151  | AcD3-MQMLPKPEKQPVAGSEGAQYR-COOH        | ARYQ↓MQML | 1 | 0.45072                         | 76/47  | Testin                                                |                                |
| Q9C0U0 | 139  | 155  | AcD3-YVSAEQVQGMKEAQR-COOH              | YKVF↓YVSA | 5 | 0.64688/0.61935/0.58041         | 113/47 | Thioredoxin domain-containing protein 12              |                                |
| Q8CDN6 | 25   | 32   | AcD3-AVVKFTMR-COOH                     | GSRL↓AVVK | 1 | 0.55361                         | 60/46  | Thioredoxin-like protein 1                            |                                |
| O08583 | 180  | 188  | AcD3-VTSQIDTQR-COOH                    | NILQ↓VTSQ | 1 | 0.43296                         | 63/47  | THO complex subunit 4                                 |                                |
| Q93092 | 129  | 138  | AcD3-YKEAGVGKDR-COOH                   | LIEL↓YKEA | 2 | 0.52539                         | 55/47  | Transaldolase                                         |                                |
| Q93092 | 232  | 239  | AcD3-IVMGASFR-COOH                     | GYKT↓IVMG | 2 | 0.54978                         | 67/48  | Transaldolase                                         |                                |
| Q93092 | 304  | 313  | AcD3-AVEKLSDGIR-COOH                   | EDQM↓AVEK | 2 | 0.59567                         | 82/45  | Transaldolase                                         |                                |
| Q93092 | 305  | 313  | AcD3-VEKLSDGIR-COOH                    | DQMA↓VEKL | 2 | 0.57228/0.61295                 | 51/45  | Transaldolase                                         |                                |
| P10711 | 229  | 237  | AcD3-ASDELKEMR-COOH                    | AEEM↓ASDE | 1 | 0.57971                         | 58/47  | Transcription elongation factor A protein 1           |                                |
| P10711 | 261  | 279  | AcD3-FTCGCKKKNCTYTVQVQTR-COOH          | QTDL↓FTCG | 1 | 0.63016                         | 53/47  | Transcription elongation factor A protein 1           |                                |
| Q9QVW7 | 287  | 295  | AcD3-VVNCNCGNR-COOH                    | MTTY↓VVCN | 2 | 0.58573                         | 59/43  | Transcription elongation factor A protein 2           | P10711 (289-297)               |
| P83940 | 53   | 63   | AcD3-AENETNEVNFRR-COOH                 | PGQF↓AENE | 1 | 0.51948                         | 48/45  | Transcription elongation factor B polypeptide 1       |                                |
| Q64152 | 150  | 161  | AcD3-NQLGADSLTSLR-COOH                 | PSIL↓NQLG | 2 | 0.68479                         | 83/48  | Transcription factor BTF3                             |                                |
| Q62318 | 221  | 231  | AcD3-FECESDTLTCR-COOH                  | PLVL↓FCES | 3 | 0.55877/0.52469                 | 51/38  | Transcription intermediary factor 1-beta              |                                |
| P42669 | 85   | 98   | AcD3-LKIAEVGAGGNKSR-COOH               | KGRF↓LKIA | 3 | 0.40624/0.49388                 | 98/45  | Transcriptional activator protein Pur-alpha           |                                |
| Q35295 | 71   | 84   | AcD3-LKIAEVGAGGSKSR-COOH               | KGRF↓LKIA | 1 | 0.40739                         | 93/43  | Transcriptional activator protein Pur-beta            |                                |
| O9WVA4 | 130  | 139  | AcD3-MNLGGLAVAR-COOH                   | QRTL↓MNLG | 3 | 0.50485/0.57433                 | 68/47  | Transgelin-2                                          |                                |
| O9WVA4 | 163  | 182  | AcD3-SDNQLQEGKNNVIGLQMGTRN-COOH        | PRNF↓SDNQ | 2 | 0.77112/0.77407                 | 60/47  | Transgelin-2                                          |                                |
| Q01853 | 31   | 53   | AcD3-AINEDNSVSVLSQPKMDELQLR-COOH       | IVDE↓AINE | 1 | 0.53717                         | 75/47  | Transitional endoplasmic reticulum ATPase             |                                |
| Q01853 | 70   | 83   | AcD3-IVLSDDTCSDEKIR-COOH               | EAVC↓IVLS | 1 | 0.39398                         | 80/47  | Transitional endoplasmic reticulum ATPase             |                                |
| Q01853 | 199  | 210  | AcD3-NEVGYDDIGGCR-COOH                 | EESL↓NEVG | 2 | 0.48006                         | 96/43  | Transitional endoplasmic reticulum ATPase             |                                |
| Q01853 | 329  | 338  | AcD3-LTLMGKQR-COOH                     | VSQL↓LTLM | 1 | 0.50668                         | 47/46  | Transitional endoplasmic reticulum ATPase             |                                |
| Q01853 | 675  | 693  | AcD3-LAKMTNGFSGADLTEICQR-COOH          | DLEF↓LAKM | 2 | 0.5135/0.47327                  | 74/47  | Transitional endoplasmic reticulum ATPase             |                                |
| Q01853 | 758  | 766  | AcD3-FAQTLQQR-COOH                     | KYEM↓FAQT | 8 | 0.51381/0.46199/0.48763/0.47257 | 82/48  | Transitional endoplasmic reticulum ATPase             |                                |
| Q01853 | 759  | 766  | AcD3-AQTLQQR-COOH                      | YEMF↓AQTL | 1 | 0.45798                         | 53/47  | Transitional endoplasmic reticulum ATPase             |                                |
| P40142 | 286  | 302  | AcD3-ATPPQEDAPSVDIANIR-COOH            | KKIL↓ATPP | 2 | 0.44804                         | 65/48  | Transketolase                                         |                                |
| P40142 | 326  | 334  | AcD3-AKLGHASDR-COOH                    | GLAL↓AKLG | 1 | 0.41082                         | 48/47  | Transketolase                                         |                                |
| P40142 | 461  | 471  | AcD3-AAANTGICFIR-COOH                  | AVEL↓AANT | 2 | 0.44323/0.39556                 | 62/47  | Transketolase                                         |                                |
| P40142 | 588  | 594  | AcD3-AVSQVPR-COOH                      | VTRL↓AVSQ | 1 | 0.40796                         | 49/46  | Transketolase                                         |                                |
| P63028 | 14   | 21   | AcD3-FSDIYKIR-COOH                     | HDEL↓FSDI | 2 | 0.42988                         | 68/46  | Translationally-controlled tumor protein              |                                |
| P63028 | 30   | 38   | AcD3-EVEGKMVSR-COOH                    | GLCL↓EVEG | 5 | 0.44765/0.47697/0.51437         | 71/47  | Translationally-controlled tumor protein              |                                |
| Q99KF1 | 87   | 100  | AcD3-VEVKDPEDKIVLAR-COOH               | LGMF↓VEVK | 1 | 0.60865                         | 65/44  | Transmembrane emp24 domain-containing protein 9       |                                |
| O08784 | 1178 | 1188 | AcD3-IKESGKKSQKR-COOH                  | ATEA↓IKES | 1 | 0.40679                         | 69/40  | Treacle protein                                       |                                |
| Q64737 | 70   | 92   | AcD3-VVVGPEAPLAAGIVGLTASAGVR-COOH      | KIEL↓VVVG | 3 | 0.47698/0.41712                 | 89/45  | Trifunctional purine biosynthetic protein adenosine-3 |                                |
| Q64737 | 991  | 999  | AcD3-VASGAVQLR-COOH                    | ALQL↓VASG | 8 | 0.48253/0.41297/0.6247/0.40436  | 71/45  | Trifunctional purine biosynthetic protein adenosine-3 |                                |
| P17751 | 26   | 53   | AcD3-ICTLNAANVPAGTEVVCPAPTAYIDFAR-COOH | LGEL↓ICTL | 1 | 0.43278                         | 60/47  | Triosephosphate isomerase                             |                                |
| P17751 | 30   | 53   | AcD3-NAANVPAGTEVVCPAPTAYIDFAR-COOH     | ICTL↓NAAN | 1 | 0.46257                         | 52/47  | Triosephosphate isomerase                             |                                |
| P17751 | 92   | 99   | AcD3-VVLGHSER-COOH                     | GATW↓VVLG | 2 | 0.51884                         | 54/47  | Triosephosphate isomerase                             |                                |
| P17751 | 128  | 135  | AcD3-IGEKDLER-COOH                     | VIAC↓IGEK | 3 | 0.53831                         | 60/47  | Triosephosphate isomerase                             |                                |
| P17751 | 197  | 206  | AcD3-VNDGVAQSTR-COOH                   | LKSN↓VNDG | 2 | 0.77389                         | 82/47  | Triosephosphate isomerase                             |                                |
| Q9DCG9 | 95   | 105  | AcD3-EGTLQCPESGR-COOH                  | VDVL↓EGTL | 1 | 0.71385                         | 49/46  | TRM112-like protein                                   |                                |
| Q1HF20 | 149  | 160  | AcD3-LVSETSGNISR-COOH                  | FHQF↓LVSE | 1 | 0.51126                         | 63/47  | tRNA (cytosine-5)-methyltransferase NSUN2             |                                |
| Q1HF20 | 150  | 160  | AcD3-VSETSGNISR-COOH                   | HQFL↓VSET | 1 | 0.52916                         | 60/47  | tRNA (cytosine-5)-methyltransferase NSUN2             |                                |
| Q1HF20 | 211  | 220  | AcD3-VIANDVNDKRR-COOH                  | PEGF↓VIAN | 1 | 0.63971                         | 69/47  | tRNA (cytosine-5)-methyltransferase NSUN2             |                                |
| Q91X11 | 181  | 188  | AcD3-VQEEVVAR-COOH                     | GQNL↓VQEE | 1 | 0.55166                         | 49/47  | tRNA-dihydrouridine synthase 3-like                   |                                |
| P32921 | 108  | 123  | AcD3-IVQFGSSKIDKELNR-COOH              | YDKL↓IVQF | 2 | 0.5636                          | 102/45 | Tryptophanyl-tRNA synthetase, cytoplasmic             |                                |
| P05213 | 68   | 79   | AcD3-VDLEPTVIDEVR-COOH                 | RAVF↓VDLE | 1 | 0.49782                         | 50/47  | Tubulin alpha-1B chain                                | P68369 (68-79), P68373 (68-79) |

|        |      |      |                                     |            |   |                               |        |                                                          |                                                                                                            |
|--------|------|------|-------------------------------------|------------|---|-------------------------------|--------|----------------------------------------------------------|------------------------------------------------------------------------------------------------------------|
| P05213 | 92   | 105  | AcD3-LITGKEDAANNYAR-COOH            | HPEQL↓LITG | 1 | 0.52233                       | 91/48  | Tubulin alpha-1B chain                                   | P05214 (92-105), P68368 (92-105), P68369 (92-105), P68373 (92-105), Q9JJZ2 (92-105)                        |
| P05213 | 93   | 105  | AcD3-ITGKEDAANNYAR-COOH             | PEQL↓ITGK  | 6 | 0.46023/0.44587/0.45853       | 88/47  | Tubulin alpha-1B chain                                   | P05214 (93-105), P68368 (93-105), P68369 (93-105), P68373 (93-105), Q9JJZ2 (93-105)                        |
| P68372 | 113  | 121  | AcD3-VDSVLDDVR-COOH                 | GAEL↓VDSV  | 2 | 0.5407                        | 88/47  | Tubulin beta-2C chain                                    | P99024 (113-121), Q7TMM9 (113-121), Q922F4 (113-121), Q9CWF2 (113-121), Q9ERD7 (113-121)                   |
| P68372 | 295  | 306  | AcD3-DAKNMMMAACDPR-COOH             | QQMF↓DAKN  | 2 | 0.64696                       | 75/42  | Tubulin beta-2C chain                                    | P99024 (295-306), Q922F4 (295-306), Q9D6F9 (295-306), Q9ERD7 (295-306)                                     |
| P68372 | 366  | 380  | AcD3-TFIGNSTAIQELFKR-COOH           | KMSA↓TFIG  | 2 | 0.73366                       | 103/47 | Tubulin beta-2C chain                                    | P99024 (366-380), Q7TMM9 (366-380), Q922F4 (366-380), Q9CWF2 (366-380), Q9D6F9 (366-380), Q9ERD7 (366-380) |
| P48428 | 89   | 98   | AcD3-EAAEYKEAR-COOH                 | EKDL↓EAAE  | 2 | 0.54616                       | 63/45  | Tubulin-specific chaperone A                             |                                                                                                            |
| Q8VCN9 | 9    | 19   | AcD3-ALADAAAGSPR-COOH               | DCSM↓ALAD  | 1 | 0.45132                       | 51/47  | Tubulin-specific chaperone C                             |                                                                                                            |
| Q8CIV8 | 82   | 88   | AcD3-LTALKKR-COOH                   | GDDF↓LTAL  | 1 | 0.45982                       | 51/33  | Tubulin-specific chaperone E                             |                                                                                                            |
| Q80U87 | 364  | 373  | AcD3-LVTDQDEKLR-COOH                | EKAL↓LVTD  | 2 | 0.64563                       | 71/47  | Ubiquitin carboxyl-terminal hydrolase 8                  |                                                                                                            |
| Q7TQI3 | 41   | 51   | AcD3-IAVQNPVLSER-COOH               | IQQE↓IAVQ  | 2 | 0.59827                       | 69/45  | Ubiquitin thioesterase OTUB1                             |                                                                                                            |
| Q7TQI3 | 105  | 113  | AcD3-LDSSKELQR-COOH                 | LEAL↓LDSS  | 2 | 0.53964                       | 72/47  | Ubiquitin thioesterase OTUB1                             |                                                                                                            |
| Q88GG7 | 8    | 14   | AcD3-YSKVTPR-COOH                   | REEL↓YSKV  | 1 | 0.60496                       | 51/46  | Ubiquitin-associated and SH3 domain-containing protein B |                                                                                                            |
| P68037 | 38   | 52   | AcD3-LVPPNPYDYGAFR-COOH             | TWQG↓LVPP  | 1 | 0.52447                       | 69/47  | Ubiquitin-conjugating enzyme E2 L3                       |                                                                                                            |
| P61089 | 16   | 33   | AcD3-LAEPVPGIKAPDESNAAR-COOH        | TORL↓LAEP  | 1 | 0.40984                       | 85/47  | Ubiquitin-conjugating enzyme E2 N                        |                                                                                                            |
| Q02053 | 316  | 325  | AcD3-VMTDFAKYSR-COOH                | EPDF↓VMTD  | 2 | 0.4703                        | 54/47  | Ubiquitin-like modifier-activating enzyme 1              |                                                                                                            |
| Q02053 | 318  | 325  | AcD3-TDFAKYSR-COOH                  | DFVM↓TDF   | 4 | 0.53567/0.48206               | 70/47  | Ubiquitin-like modifier-activating enzyme 1              |                                                                                                            |
| Q02053 | 359  | 368  | AcD3-VGLAQAVNAR-COOH                | ATEL↓VGLA  | 6 | 0.51303                       | 90/46  | Ubiquitin-like modifier-activating enzyme 1              |                                                                                                            |
| Q02053 | 772  | 784  | AcD3-FAQTYGLTSQDR-COOH              | AANL↓FAQT  | 2 | 0.44881                       | 85/46  | Ubiquitin-like modifier-activating enzyme 1              |                                                                                                            |
| Q8C7R4 | 567  | 574  | AcD3-ALDNVEAR-COOH                  | IIT↓ALDN   | 1 | 0.48503                       | 52/47  | Ubiquitin-like modifier-activating enzyme 6              |                                                                                                            |
| Q70475 | 163  | 177  | AcD3-LAEGTAKDLKNPDR-COOH            | NPEF↓LAEG  | 1 | 0.56432                       | 83/46  | UDP-glucose 6-dehydrogenase                              |                                                                                                            |
| Q3TW96 | 111  | 118  | AcD3-LAGGGQTR-COOH                  | AVLL↓LAGG  | 2 | 0.59104                       | 73/48  | UDP-N-acetylhexosamine pyrophosphorylase-like protein 1  | Q91YN5 (108-115)                                                                                           |
| Q9DBP5 | 7    | 22   | AcD3-FVLGGPGAGKGTQCAR-COOH          | PLVV↓FVLG  | 1 | 0.5991                        | 73/48  | UMP-CMP kinase                                           |                                                                                                            |
| Q4KM4  | 44   | 55   | AcD3-EALVGLTKAAR-COOH               | ANLF↓EALV  | 1 | 0.50257                       | 82/39  | UPF0727 protein C6orf115 homolog                         |                                                                                                            |
| Q4KM4  | 47   | 55   | AcD3-VGLTKAAR-COOH                  | FEAL↓VGLT  | 1 | 0.45281                       | 57/38  | UPF0727 protein C6orf115 homolog                         |                                                                                                            |
| P54726 | 314  | 326  | AcD3-IQVTPQKEAER-COOH               | QMNY↓IQVT  | 1 | 0.46226                       | 54/46  | UV excision repair protein RAD23 homolog A               | P54728 (367-379)                                                                                           |
| Q8BX70 | 3487 | 3497 | AcD3-ITMDKEYQQR-COOH                | GLAA↓ITMD  | 1 | 0.56757                       | 50/48  | Vacuolar protein sorting-associated protein 13C          |                                                                                                            |
| Q8BX70 | 3719 | 3728 | AcD3-DAIESAQSR-COOH                 | KRAF↓DAIE  | 1 | 0.57092                       | 51/47  | Vacuolar protein sorting-associated protein 13C          |                                                                                                            |
| P40336 | 14   | 24   | AcD3-IDVALNDGTR-COOH                | PICE↓IDVA  | 1 | 0.61132                       | 56/47  | Vacuolar protein sorting-associated protein 26A          |                                                                                                            |
| Q9EQH3 | 656  | 668  | AcD3-AASKLLKPPDQGR-COOH             | QCAL↓AASK  | 1 | 0.54196                       | 41/40  | Vacuolar protein sorting-associated protein 35           |                                                                                                            |
| Q8R0J7 | 139  | 146  | AcD3-IDVYQSKR-COOH                  | LDSF↓IDVY  | 2 | 0.79515                       | 72/47  | Vacuolar protein sorting-associated protein 37B          |                                                                                                            |
| P46460 | 196  | 205  | AcD3-IGKAKTKENR-COOH                | SLNL↓IGKA  | 1 | 0.50411                       | 49/42  | Vesicle-fusing ATPase                                    |                                                                                                            |
| Q8VDJ3 | 214  | 222  | AcD3-LISAEQDKR-COOH                 | HEVL↓LISA  | 3 | 0.64204/0.76968               | 79/46  | Vigilin                                                  |                                                                                                            |
| Q8VDJ3 | 215  | 222  | AcD3-ISAEDQKR-COOH                  | EVL↓ISAE   | 2 | 0.62343                       | 66/47  | Vigilin                                                  |                                                                                                            |
| Q8VDJ3 | 245  | 255  | AcD3-VGEIMQETGTR-COOH               | YNRL↓VGEI  | 2 | 0.59105                       | 51/47  | Vigilin                                                  |                                                                                                            |
| P20152 | 87   | 100  | AcD3-SLADAINTEFKNTR-COOH            | SVDF↓SLAD  | 6 | 0.53186/0.49011               | 91/47  | Vimentin                                                 |                                                                                                            |
| P20152 | 89   | 100  | AcD3-ADAINTEFKNTR-COOH              | DFSL↓ADAI  | 2 | 0.68139                       | 100/47 | Vimentin                                                 |                                                                                                            |
| P20152 | 107  | 113  | AcD3-LQELNDR-COOH                   | EKVE↓LQEL  | 1 | 0.50414                       | 49/47  | Vimentin                                                 | P15331 (105-111), P31001 (111-117), P48678 (35-41)                                                         |
| P62814 | 170  | 185  | AcD3-IQTGISAIDGMNSIAR-COOH          | PEFM↓IQTG  | 3 | 0.65169                       | 94/48  | V-type proton ATPase subunit B, brain isoform            |                                                                                                            |
| P57746 | 80   | 95   | AcD3-STTVIQNVNKAQVKIR-COOH          | AGDF↓STTV  | 1 | 0.45547                       | 60/40  | V-type proton ATPase subunit D                           |                                                                                                            |
| P57746 | 82   | 95   | AcD3-TVIQNVNKAQVKIR-COOH            | DFST↓TVIQ  | 7 | 0.5805/0.63282/0.5706/0.67156 | 95/38  | V-type proton ATPase subunit D                           |                                                                                                            |
| P50518 | 19   | 44   | AcD3-HEQAEANEAEIDAKAEFEENIEKGR-COOH | MMAF↓IEQE  | 1 | 0.58565                       | 62/47  | V-type proton ATPase subunit E 1                         | Q9D593 (19-44)                                                                                             |
| P50518 | 91   | 101  | AcD3-ITDLLNEAKR-COOH                | RDDL↓ITDL  | 2 | 0.65302/0.44988               | 58/45  | V-type proton ATPase subunit E 1                         |                                                                                                            |
| Q88VE3 | 12   | 27   | AcD3-AAVPTNIIAAKAEVR-COOH           | GAVD↓AAVP  | 1 | 0.75364                       | 45/42  | V-type proton ATPase subunit H                           |                                                                                                            |
| Q88342 | 33   | 43   | AcD3-LYTNKCVILR-COOH                | GDHF↓LYTN  | 1 | 0.41441                       | 69/46  | WD repeat-containing protein 1                           |                                                                                                            |
| Q88342 | 72   | 83   | AcD3-YIASGDISGKLR-COOH              | PSGF↓YIAS  | 5 | 0.48526/0.50224               | 86/46  | WD repeat-containing protein 1                           |                                                                                                            |
| Q88342 | 73   | 83   | AcD3-IASGDISGKLR-COOH               | SGFY↓IASG  | 3 | 0.56083                       | 88/46  | WD repeat-containing protein 1                           |                                                                                                            |
| Q88342 | 380  | 389  | AcD3-VSCSMDDTVR-COOH                | SEQL↓VSCS  | 1 | 0.37507                       | 42/40  | WD repeat-containing protein 1                           |                                                                                                            |
| Q88H43 | 89   | 97   | AcD3-VSLQGINTR-COOH                 | KEEE↓VSLQ  | 1 | 0.54868                       | 51/45  | Wiskott-Aldrich syndrome protein family member 2         |                                                                                                            |
| Q6P1B1 | 413  | 429  | AcD3-LIDSGAQYKDGTTDVTNR-COOH        | DEVY↓LIDS  | 2 | 0.47393                       | 68/47  | Xaa-Pro aminopeptidase 1                                 |                                                                                                            |
| Q11136 | 46   | 56   | AcD3-VVLQGGEMQR-COOH                | ASAV↓VVLQ  | 3 | 0.52084                       | 79/47  | Xaa-Pro dipeptidase                                      |                                                                                                            |
| Q11136 | 47   | 56   | AcD3-VLQGGEMQR-COOH                 | ASAV↓VLQG  | 1 | 0.63662                       | 58/47  | Xaa-Pro dipeptidase                                      |                                                                                                            |
| Q88J05 | 589  | 600  | AcD3-SVAQKPEKLLER-COOH              | MTDL↓SVAQ  | 1 | 0.60633                       | 43/43  | Zinc finger CCCH domain-containing protein 14            |                                                                                                            |
| Q9CYA6 | 678  | 689  | AcD3-ENMAESTGMVLR-COOH              | PFEF↓ENMA  | 2 | 0.58508                       | 57/43  | Zinc finger CCH domain-containing protein 8              |                                                                                                            |
| Q80U44 | 337  | 346  | AcD3-MKQTVKEDSR-COOH                | TSVF↓MKQT  | 1 | 0.75613                       | 53/47  | Zinc finger FYVE domain-containing protein 16            |                                                                                                            |

|        |     |     |                               |           |   |         |       |                         |
|--------|-----|-----|-------------------------------|-----------|---|---------|-------|-------------------------|
| Q8R1N0 | 242 | 252 | AcD3-FDDPEVDAKVR-COOH         | PEGF↓FDDP | 1 | 0.59564 | 70/48 | zinc finger protein 830 |
| Q62523 | 148 | 168 | AcD3-EIDSLSLDDMTKNDPFKAR-COOH | SIDL↓EIDS | 1 | 0.51928 | 59/47 | Zyxin                   |
|        |     |     |                               |           |   |         |       |                         |
