# Supplementary material
Source: PubMed Central journal article supplement (PMC2953924)
Supplement: supp_M110.001271_mcp.M110.001271-8.pdf [file supp_M110.001271_mcp.M110.001271-8.pdf]

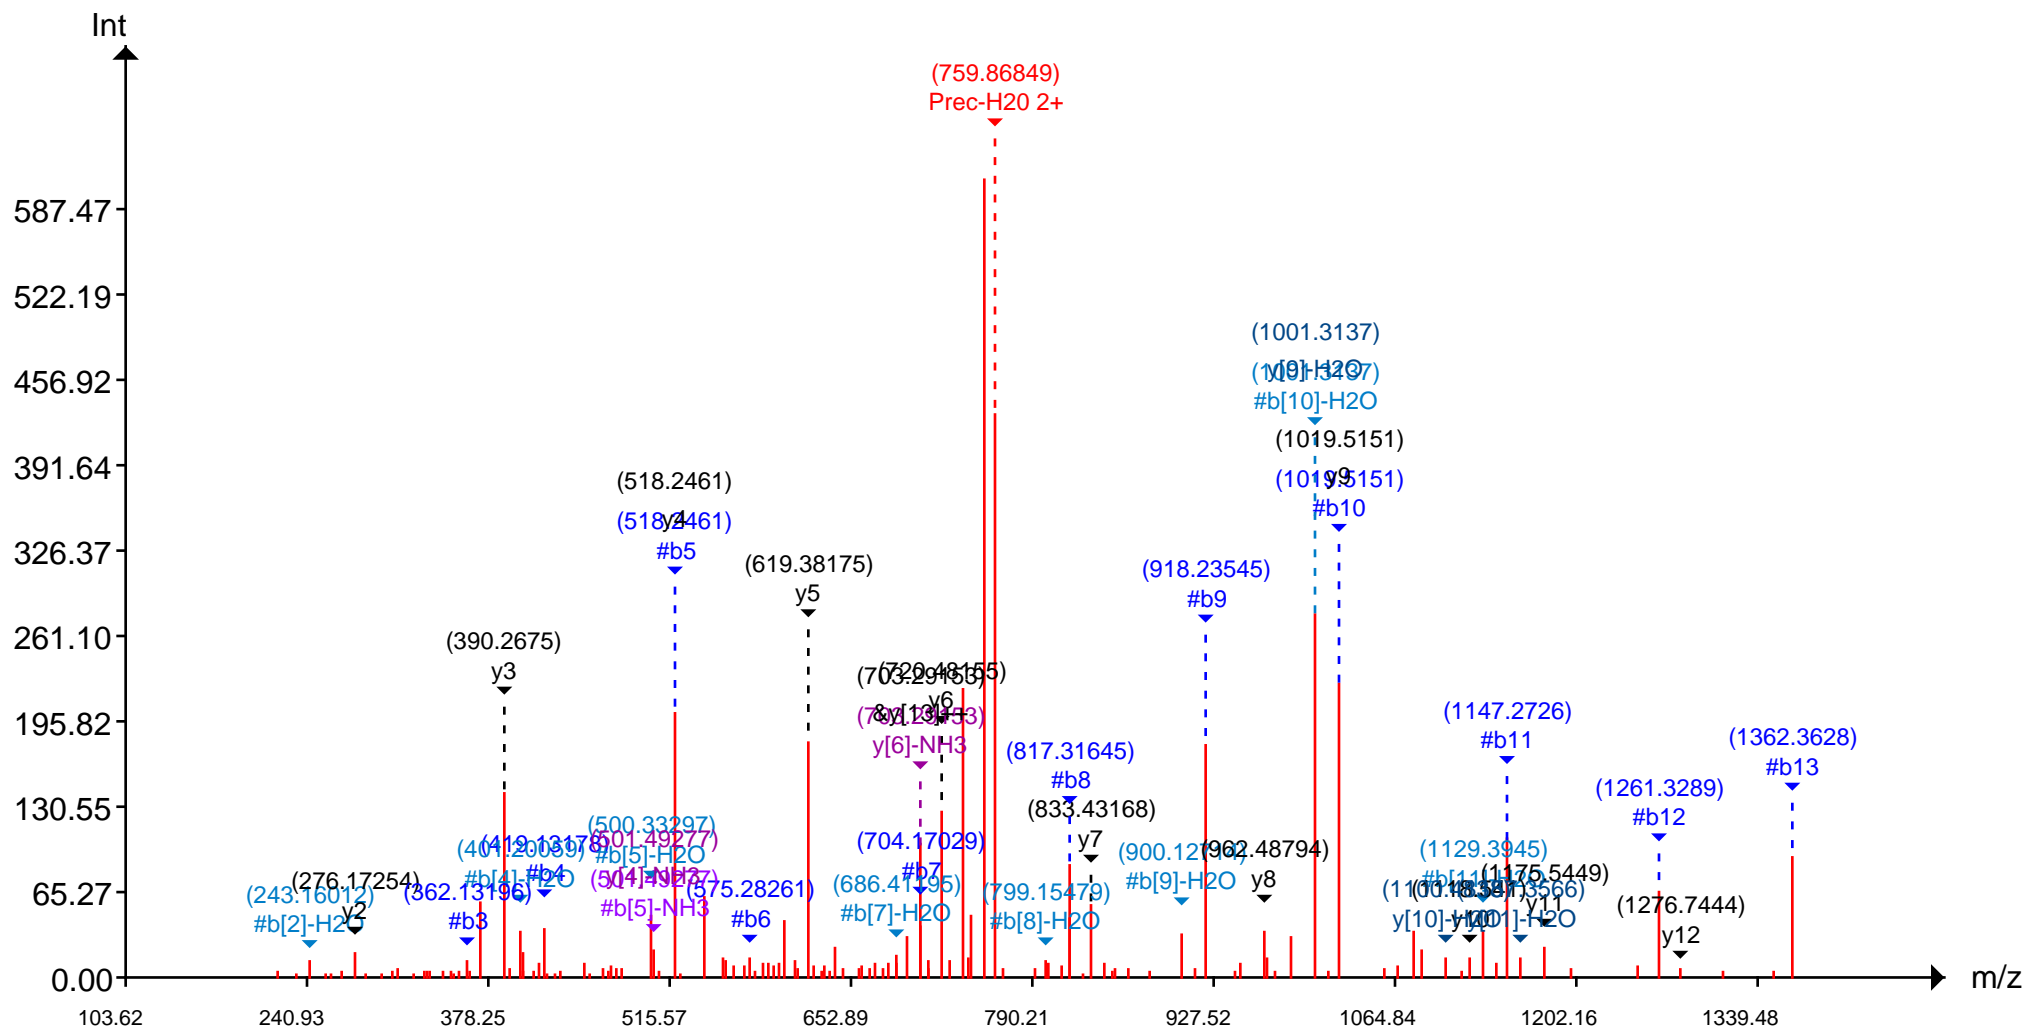

## Info

|                          |                          |                           |          |
|--------------------------|--------------------------|---------------------------|----------|
| <b>Modified Sequence</b> | AcD3-SQTGVGELTTQNTR-COOH | <b>Ion score</b>          | 88.57    |
| <b>Protein</b>           | Q96A65                   | <b>Confidence level</b>   | 99.00%   |
| <b>Precursor m/z</b>     | 768.88928                | <b>Identity Threshold</b> | 33.72    |
| <b>Charge</b>            | 2+                       | <b>Mass error</b>         | 0.002106 |

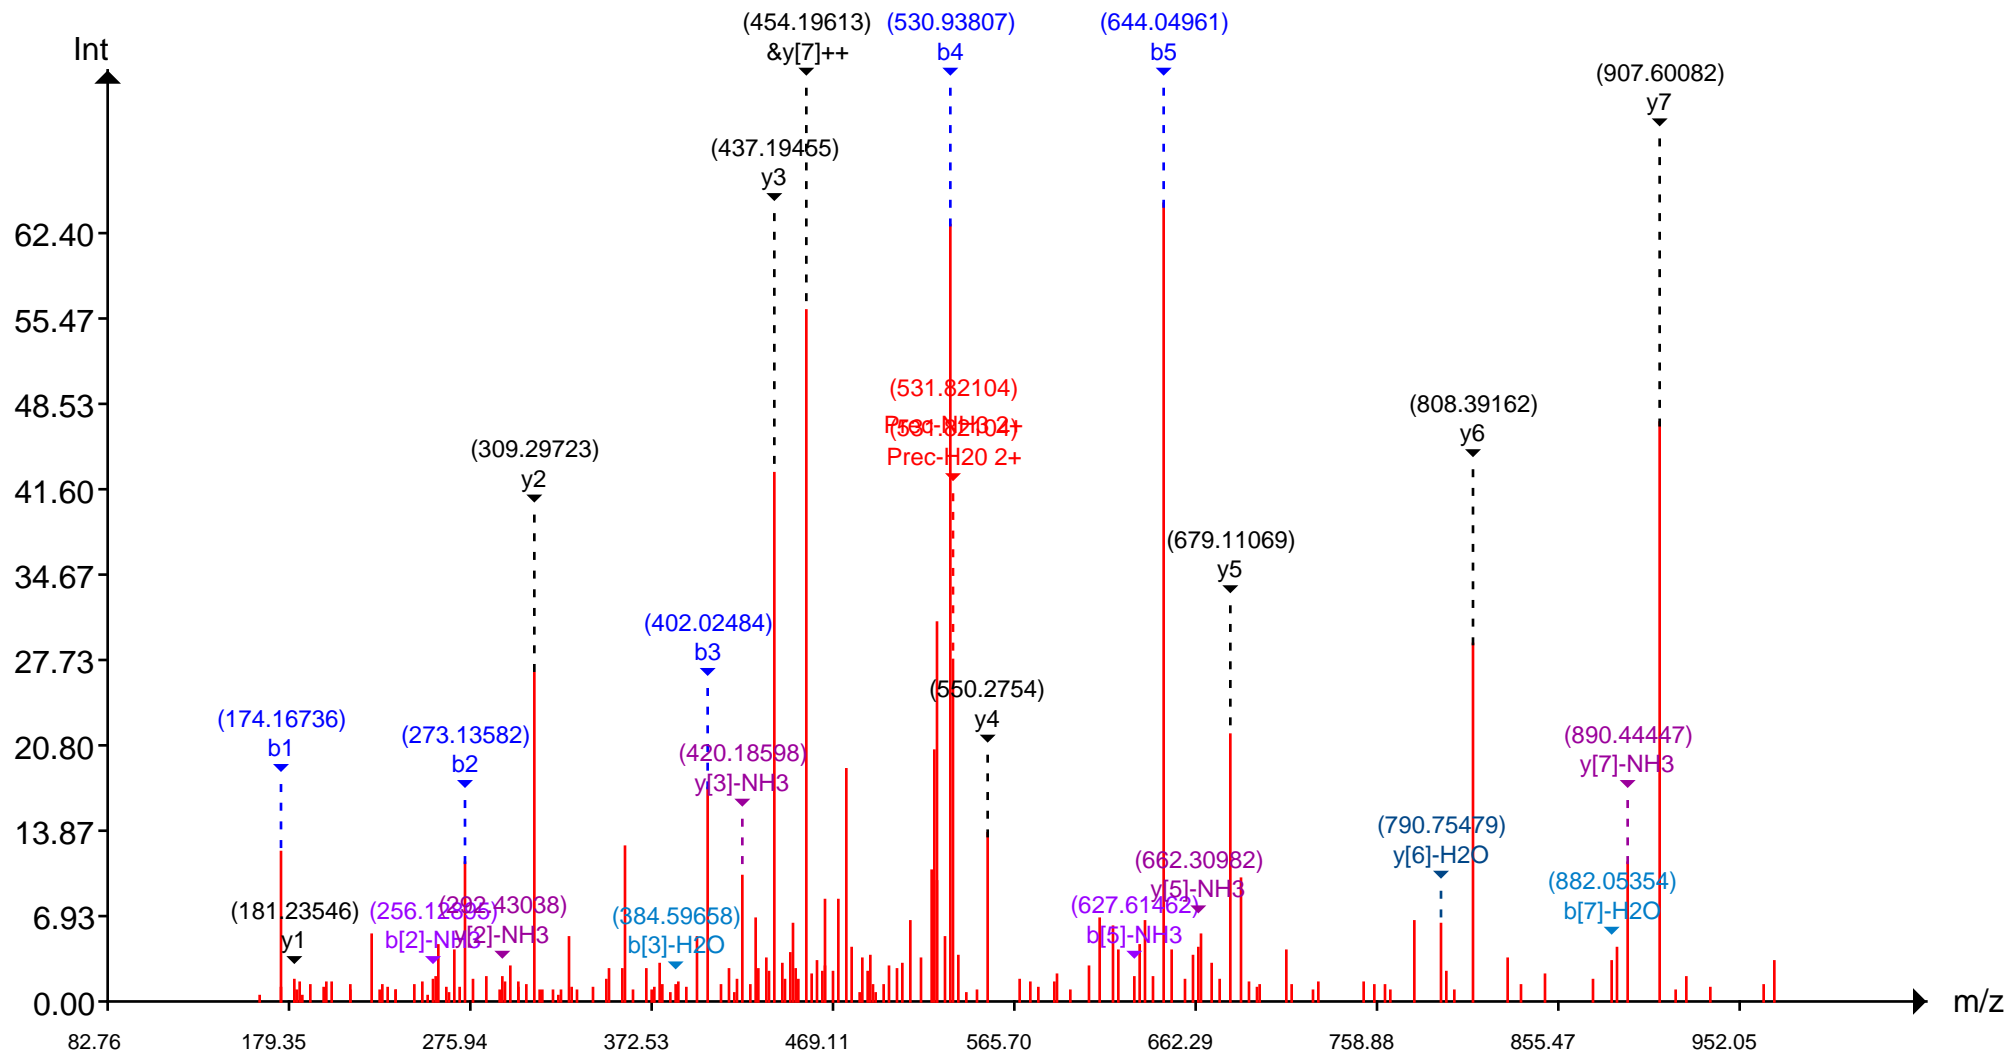

## Info

|                          |                         |                           |          |
|--------------------------|-------------------------|---------------------------|----------|
| <b>Modified Sequence</b> | AcD3-QVEELQQR<C13>-COOH | <b>Ion score</b>          | 35.84    |
| <b>Protein</b>           | Q9BRP8                  | <b>Confidence level</b>   | 99.00%   |
| <b>Precursor m/z</b>     | 540.79439               | <b>Identity Threshold</b> | 34.45    |
| <b>Charge</b>            | 2+                      | <b>Mass error</b>         | -3.57E-4 |

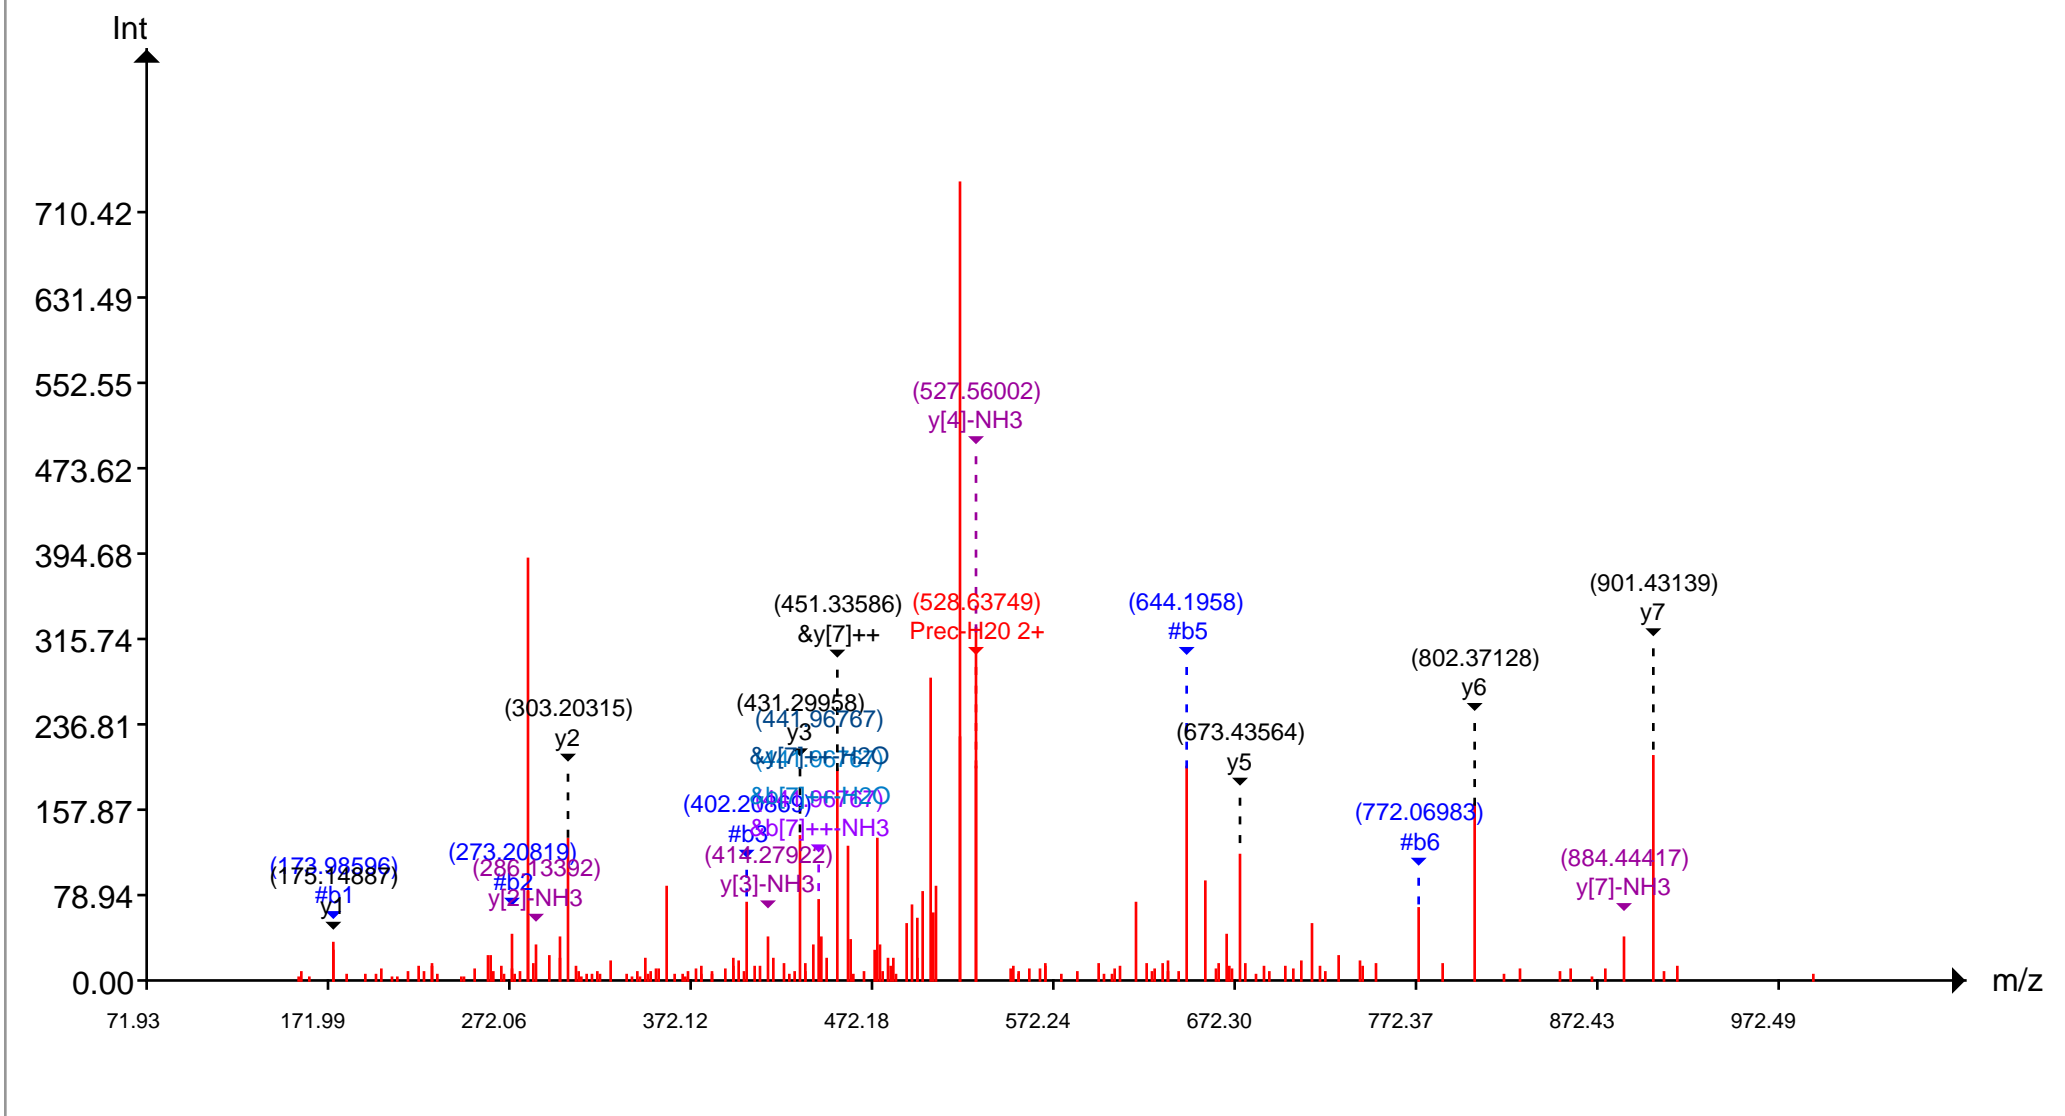

## Info

**Modified Sequence** AcD3-QVEELQQR-COOH

**Protein** Q9BRP8

**Precursor m/z** 537.78474

**Charge** 2+

**Ion score** 41.86

**Confidence level** 99.00%

**Identity Threshold** 34.75

**Mass error** 4.85E-4

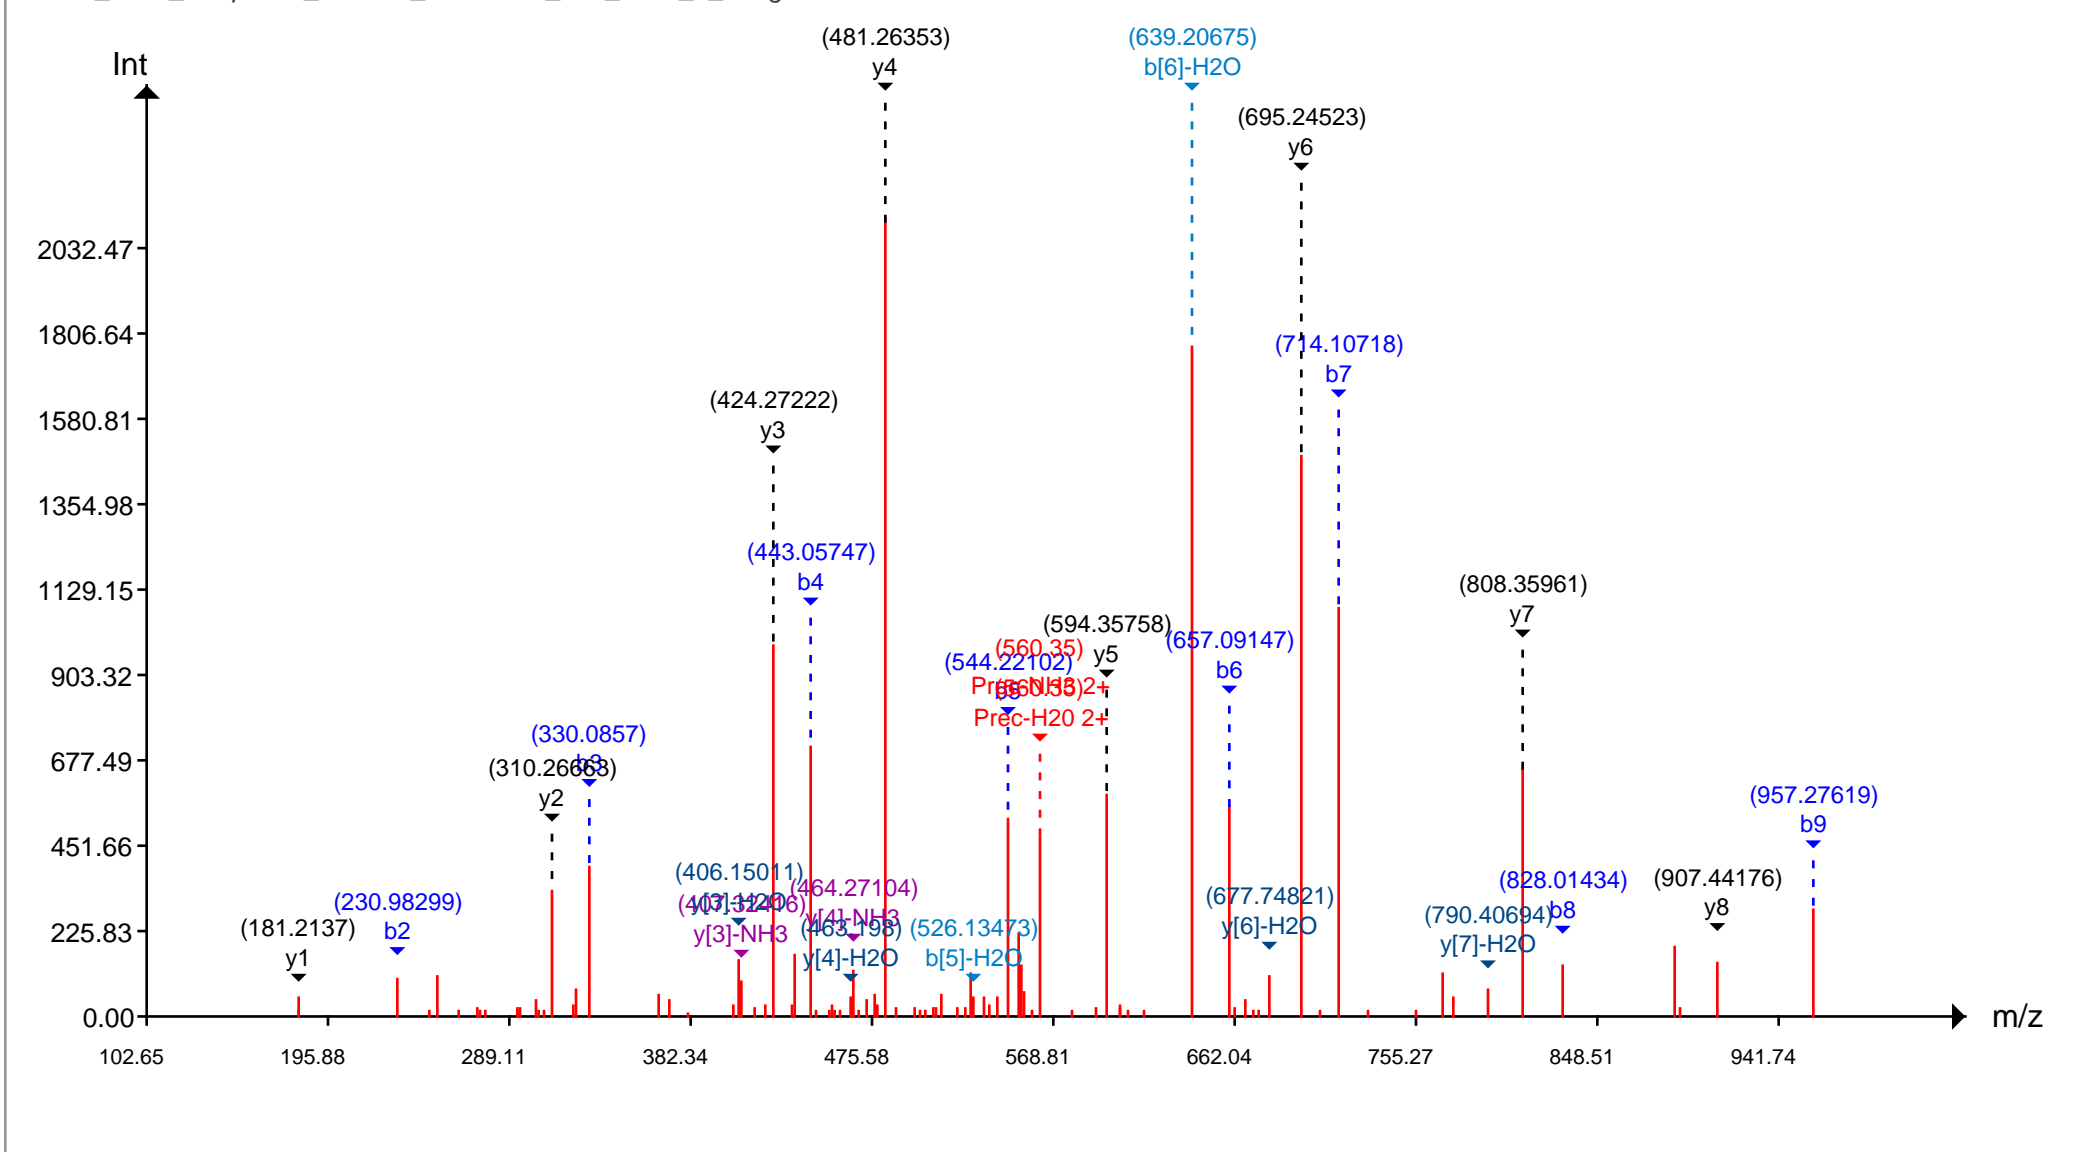

## Info

|                          |                                                                                |                           |          |
|--------------------------|--------------------------------------------------------------------------------|---------------------------|----------|
| <b>Modified Sequence</b> | AcD3-GQVITIGNER<C13>-COOH                                                      | <b>Ion score</b>          | 70.92    |
| <b>Protein</b>           | P62736, Q562R1, Q9BYX7, P60709, P68032, P63261, P63267, P68133, Q6S8J3, A5A3E0 | <b>Confidence level</b>   | 99.00%   |
| <b>Precursor m/z</b>     | 569.32312                                                                      | <b>Identity Threshold</b> | 48.32    |
| <b>Charge</b>            | 2+                                                                             | <b>Mass error</b>         | -7.58E-4 |

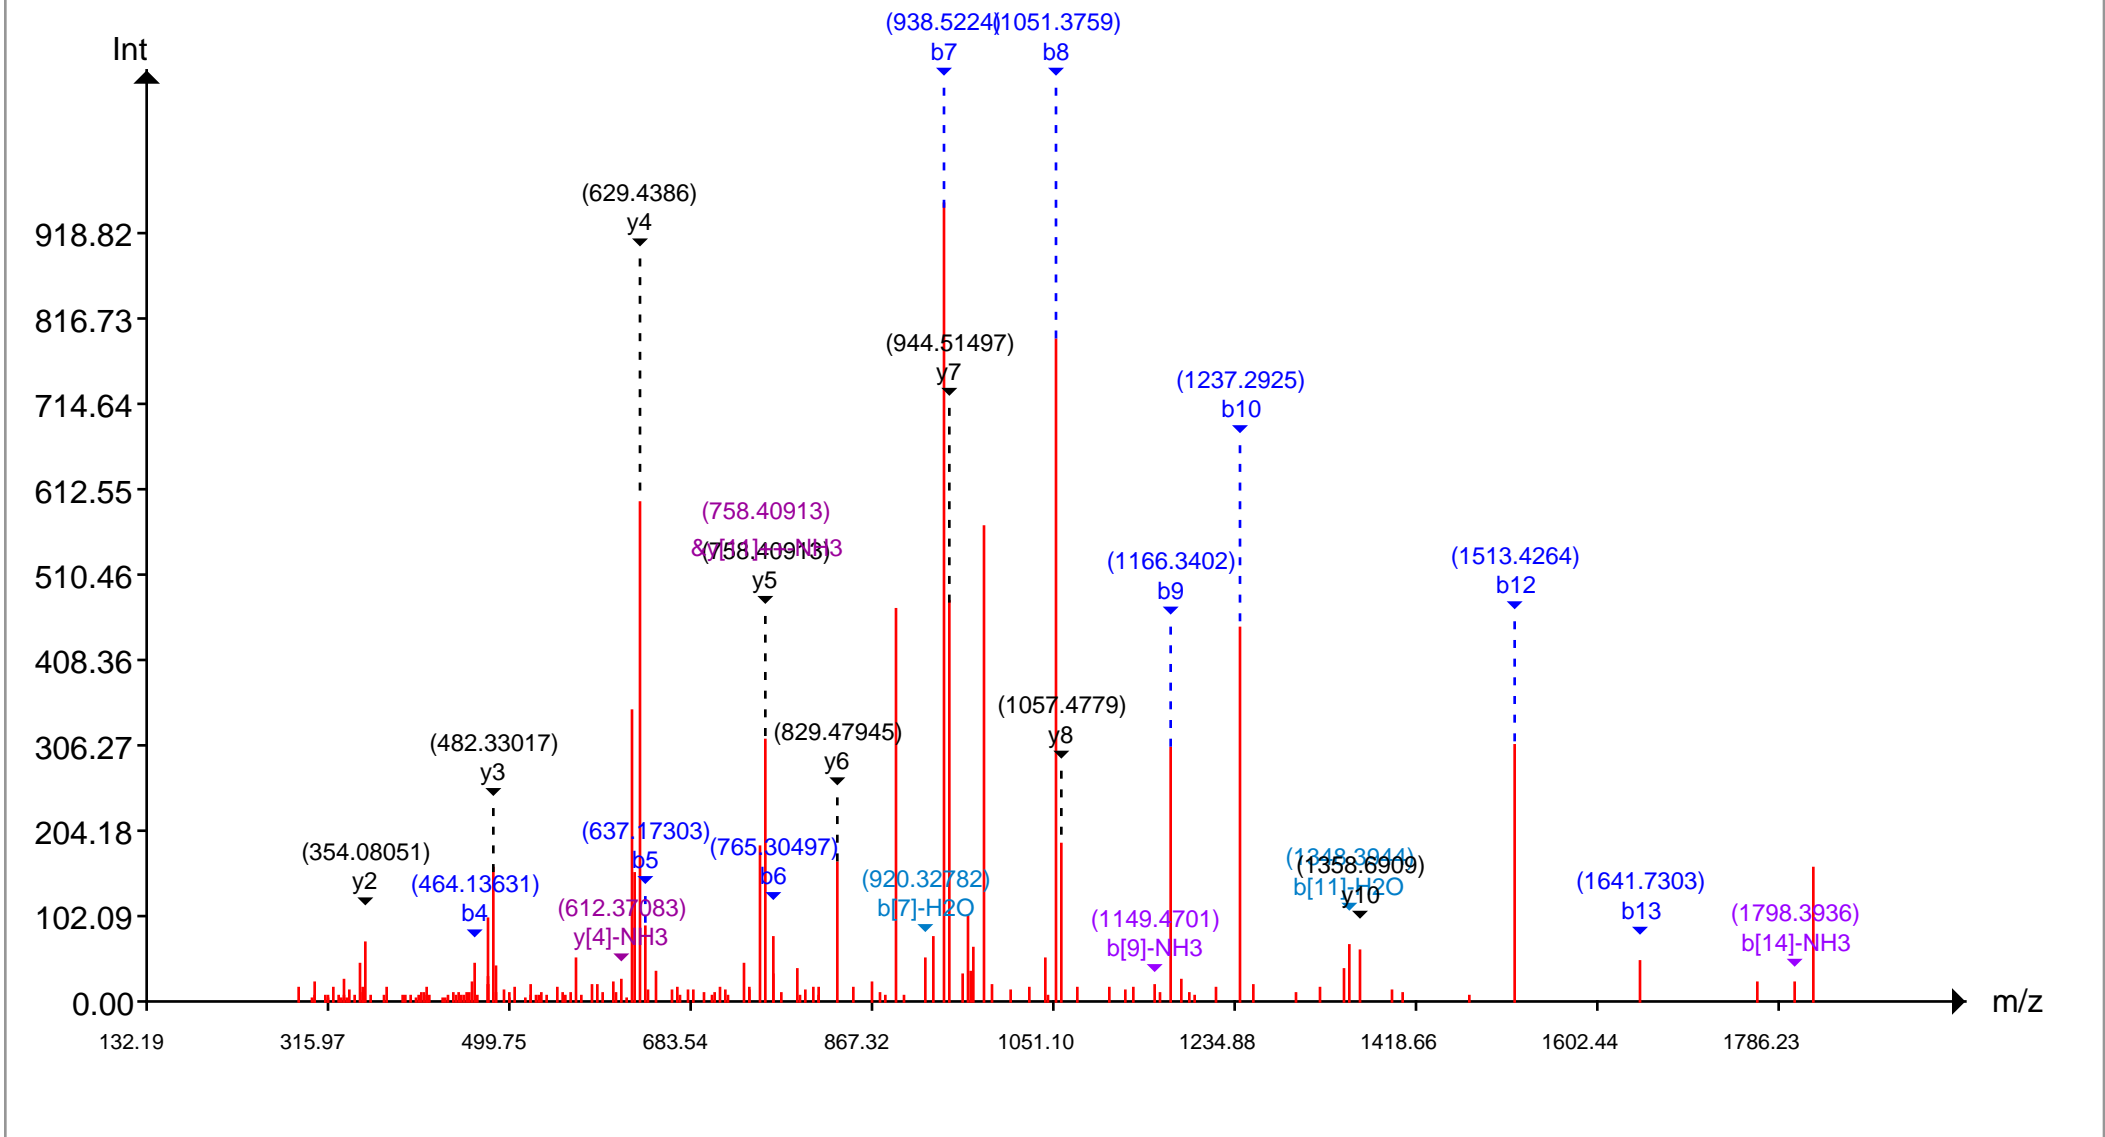

## Info

|                          |                                                              |                           |          |
|--------------------------|--------------------------------------------------------------|---------------------------|----------|
| <b>Modified Sequence</b> | AcD3-AM<Mox*>AEK<AcD3K*>QK<AcD3K*>LDAEFQK<AcD3K*>R<C13>-COOH | <b>Ion score</b>          | 49.0     |
| <b>Protein</b>           | Q9H875                                                       | <b>Confidence level</b>   | 99.00%   |
| <b>Precursor m/z</b>     | 998.03925                                                    | <b>Identity Threshold</b> | 48.55    |
| <b>Charge</b>            | 2+                                                           | <b>Mass error</b>         | 0.001189 |

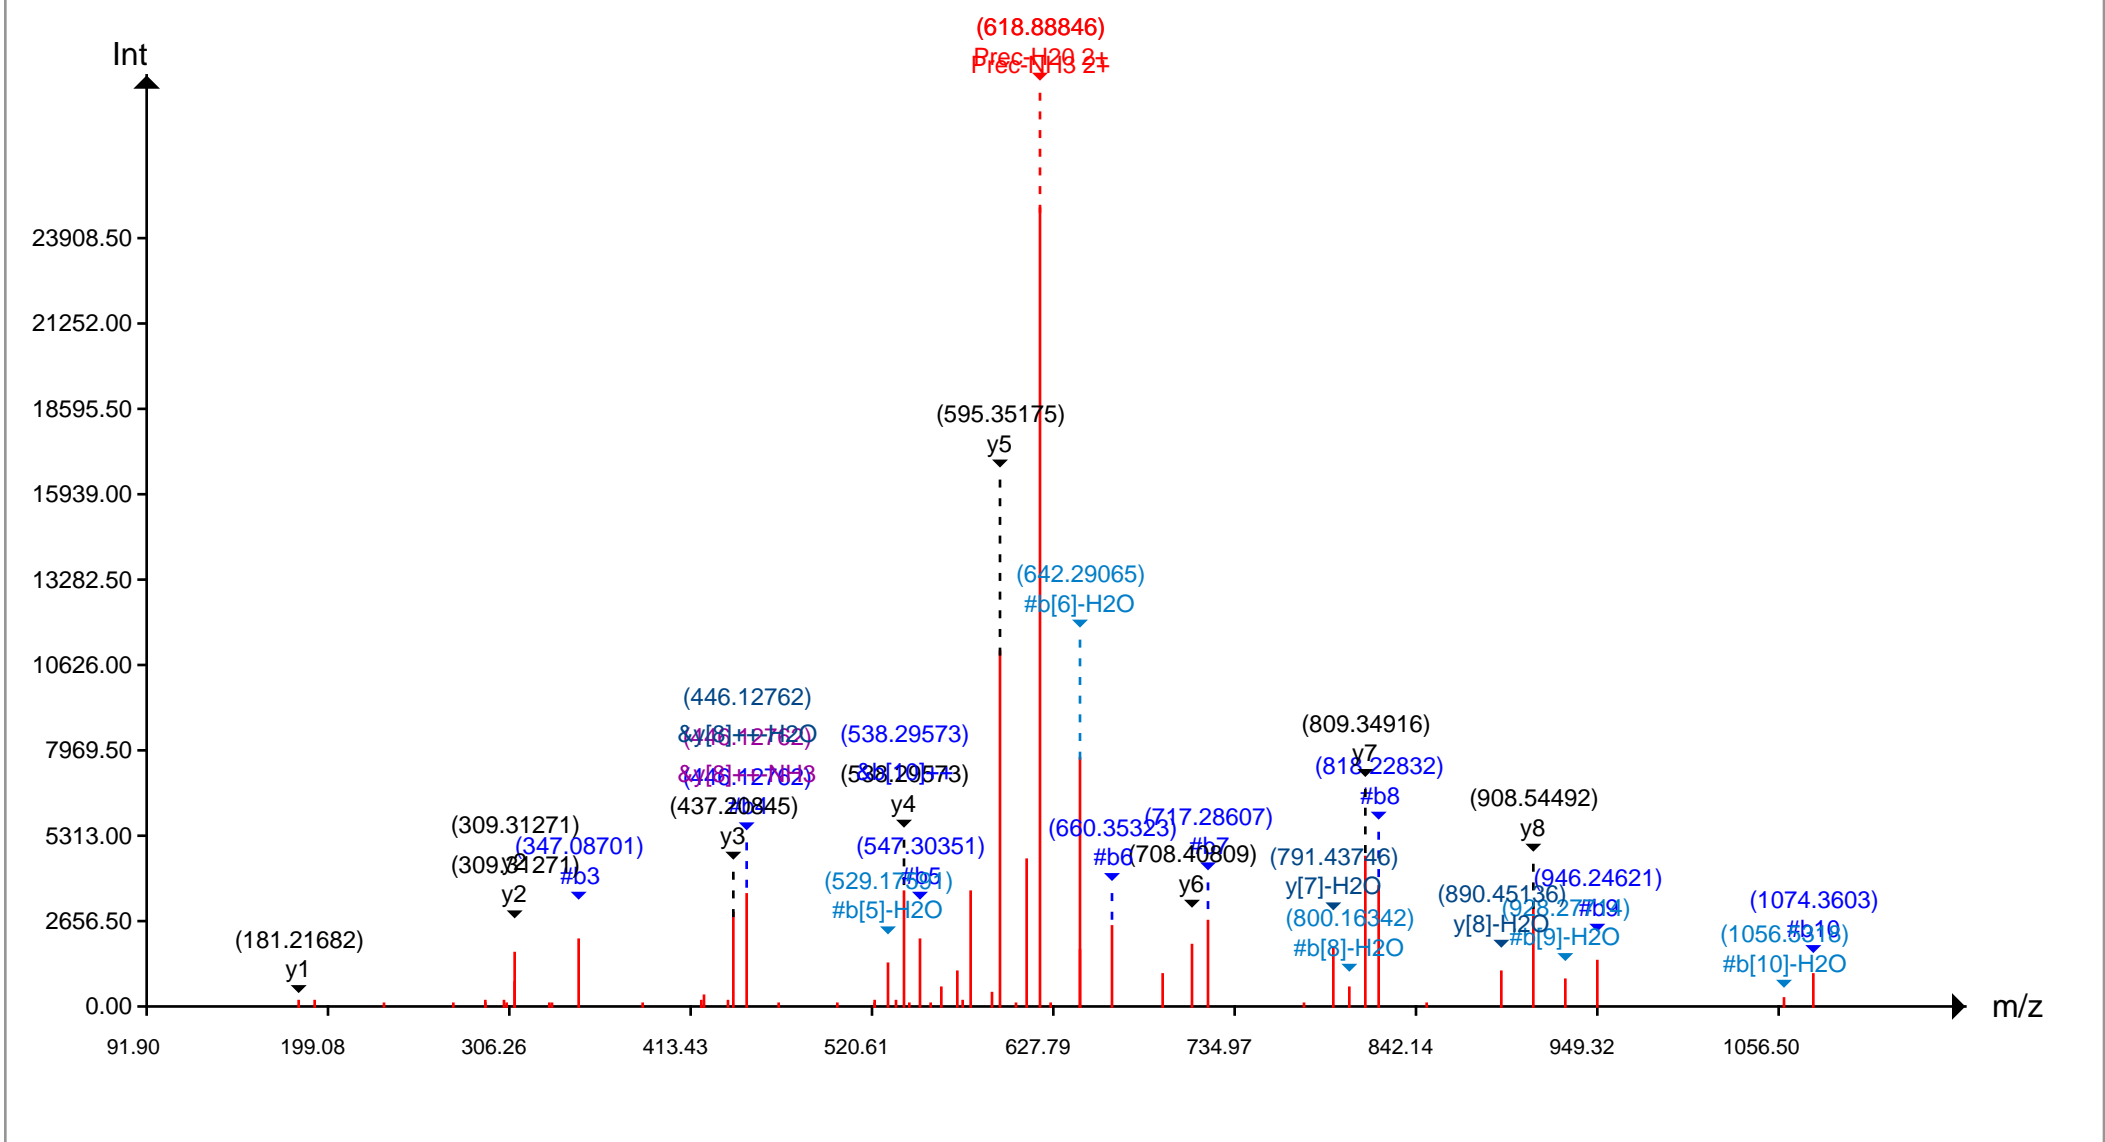

## Info

|                          |                                    |                           |           |
|--------------------------|------------------------------------|---------------------------|-----------|
| <b>Modified Sequence</b> | AcD3-AGK<AcD3K*>VTLGTQQR<C13>-COOH | <b>Ion score</b>          | 78.94     |
| <b>Protein</b>           | Q08AF3                             | <b>Confidence level</b>   | 99.00%    |
| <b>Precursor m/z</b>     | 627.87179                          | <b>Identity Threshold</b> | 46.57     |
| <b>Charge</b>            | 2+                                 | <b>Mass error</b>         | -0.001578 |

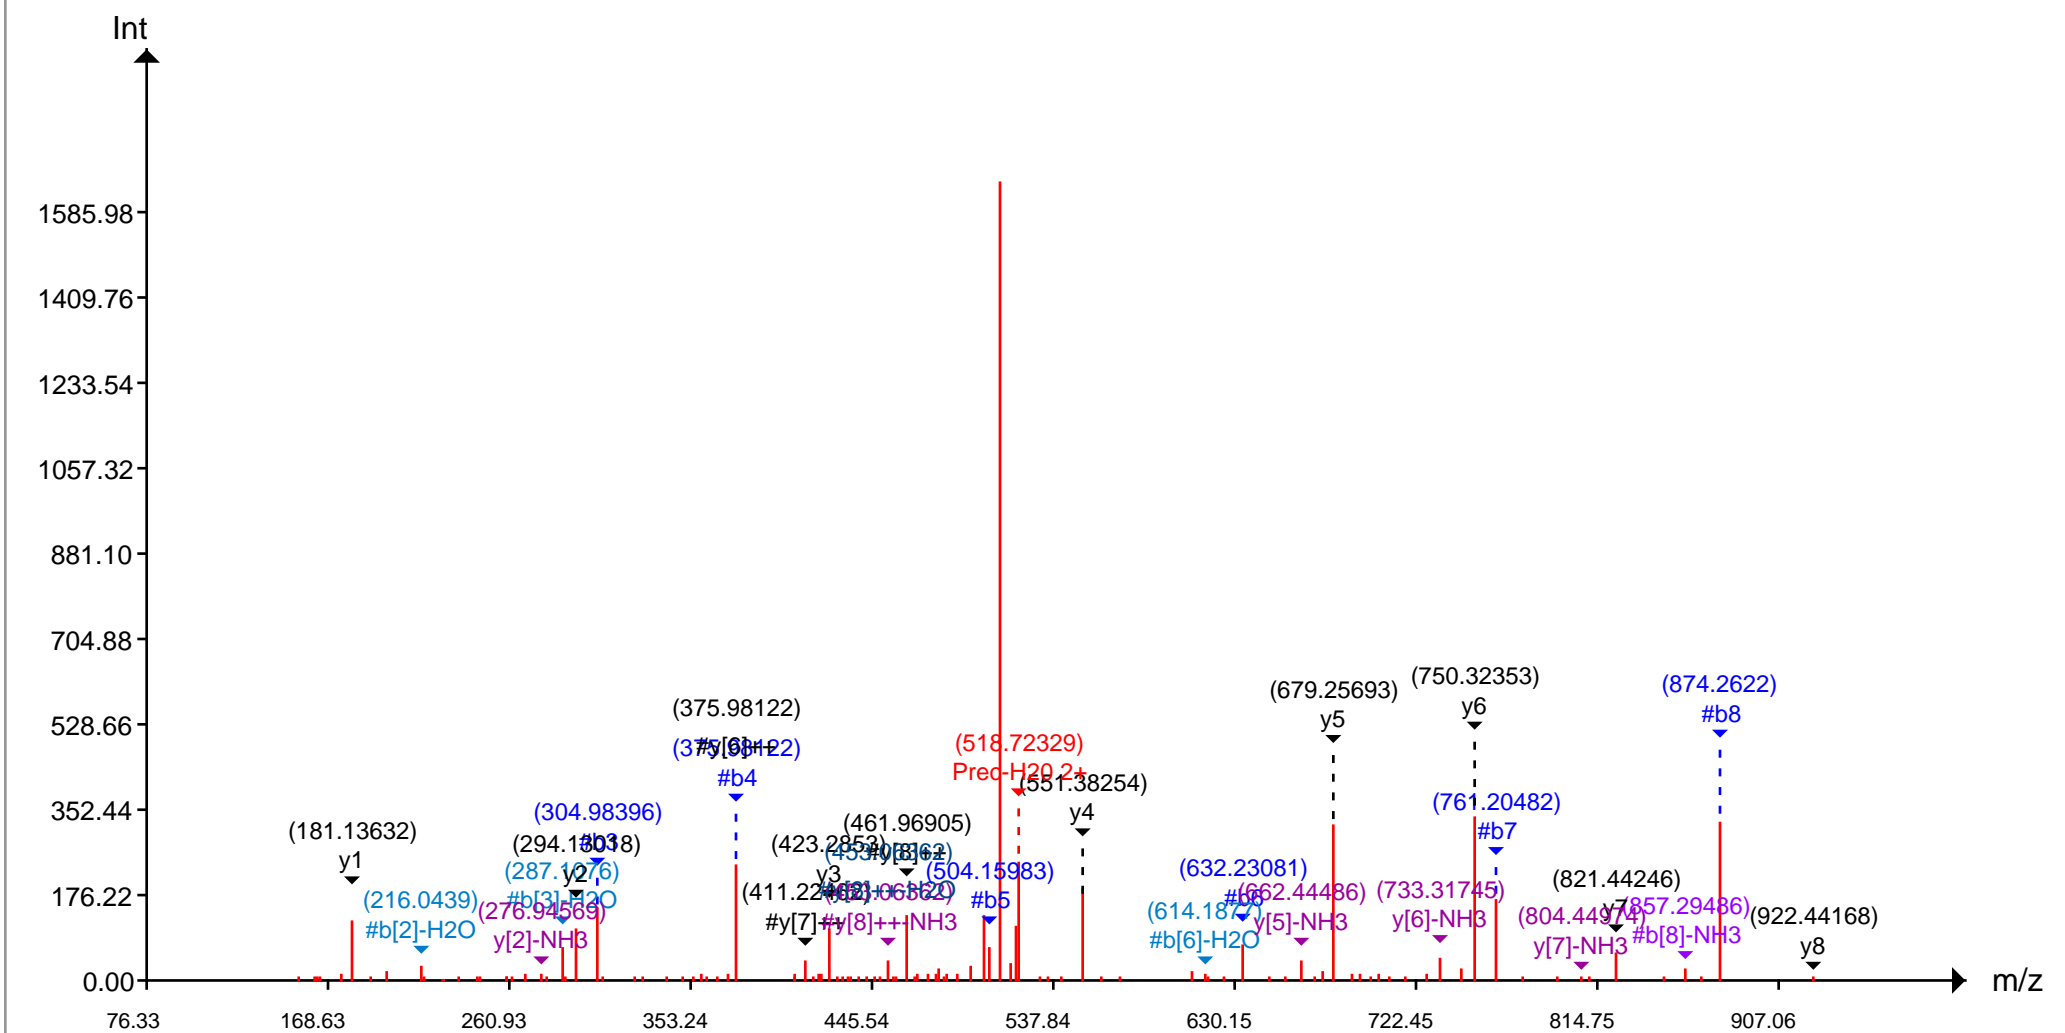

## Info

**Modified Sequence** AcD3-STAAQQELR<C13>-COOH

**Ion score** 72.4

**Protein** P35579

**Confidence level** 99.00%

**Precursor m/z** 527.78688

**Identity Threshold** 48.71

**Charge** 2+

**Mass error** 2.79E-4

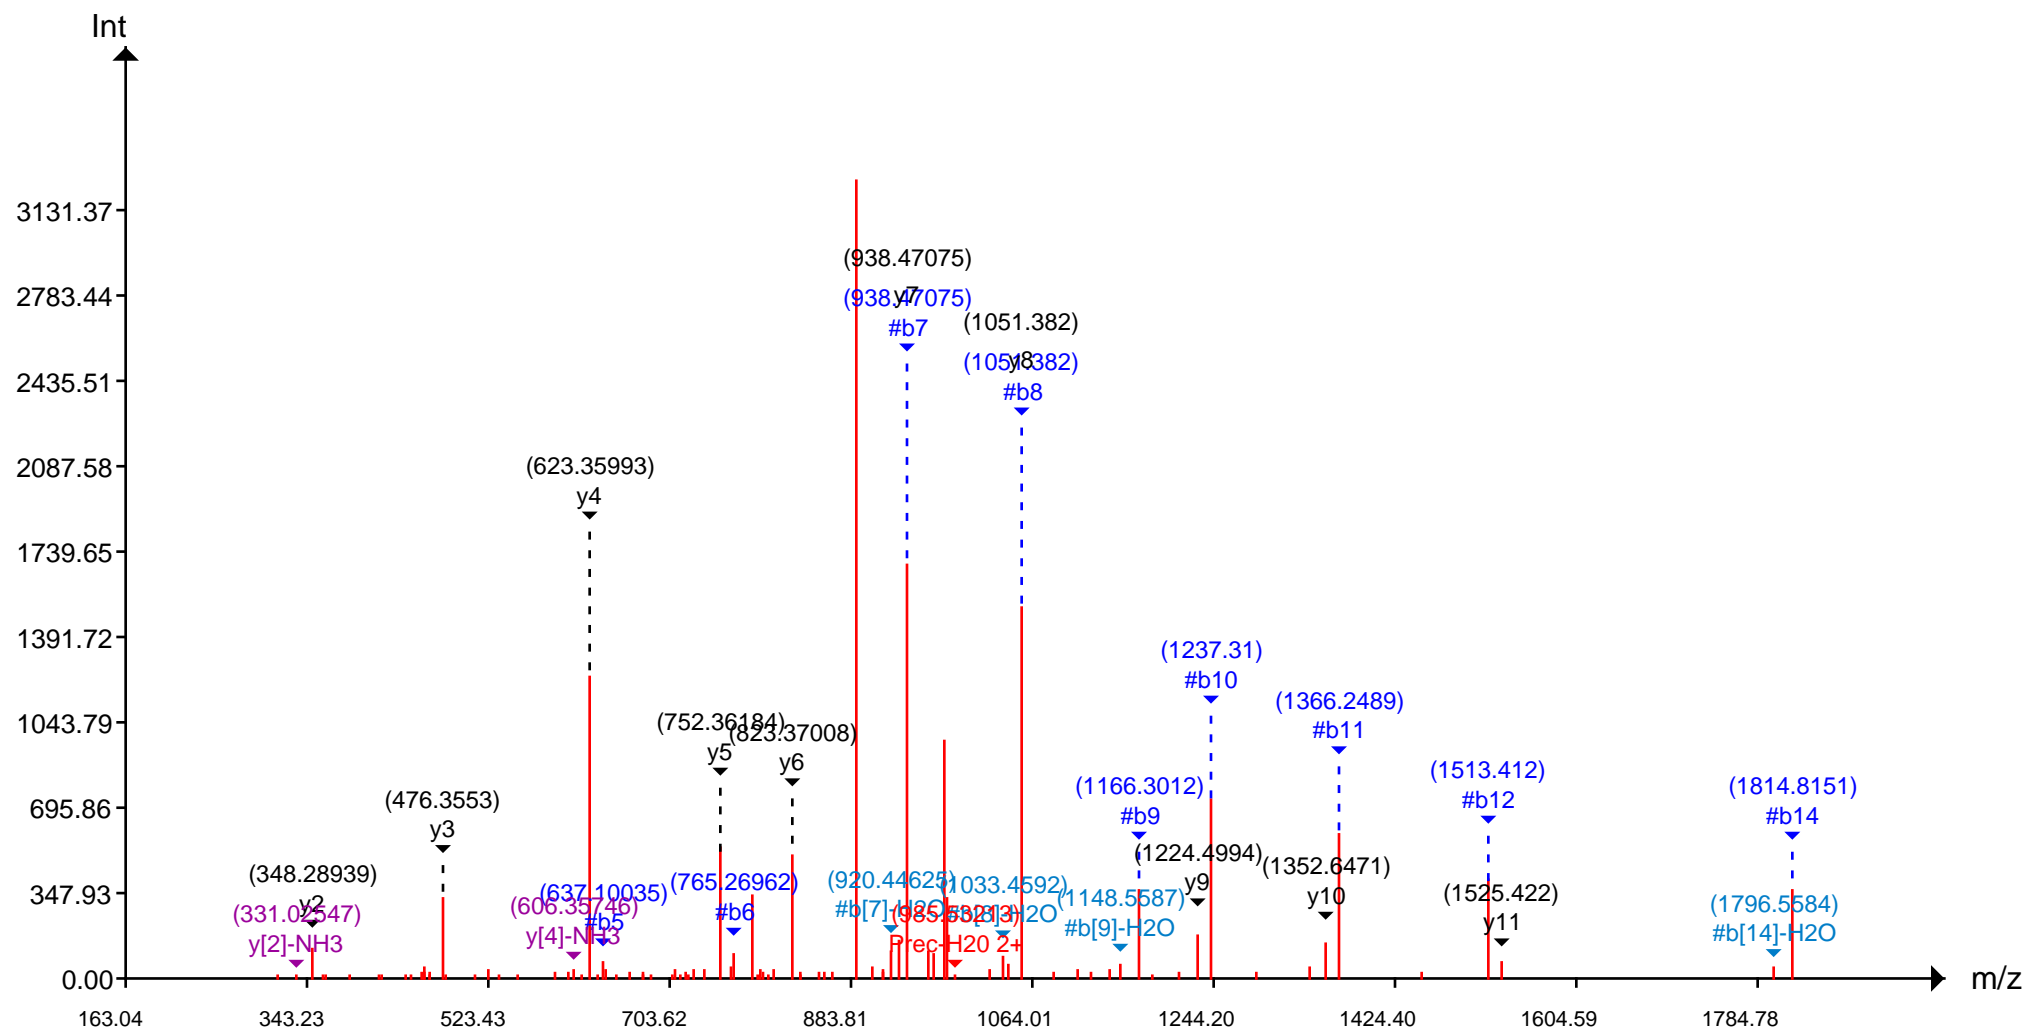

## Info

|                          |                                                         |                           |         |
|--------------------------|---------------------------------------------------------|---------------------------|---------|
| <b>Modified Sequence</b> | AcD3-AM<Mox*>AEK<AcD3K*>QK<AcD3K*>LDAEFQK<AcD3K*>R-COOH | <b>Ion score</b>          | 80.69   |
| <b>Protein</b>           | Q9H875                                                  | <b>Confidence level</b>   | 99.00%  |
| <b>Precursor m/z</b>     | 995.02923                                               | <b>Identity Threshold</b> | 48.88   |
| <b>Charge</b>            | 2+                                                      | <b>Mass error</b>         | 0.00129 |



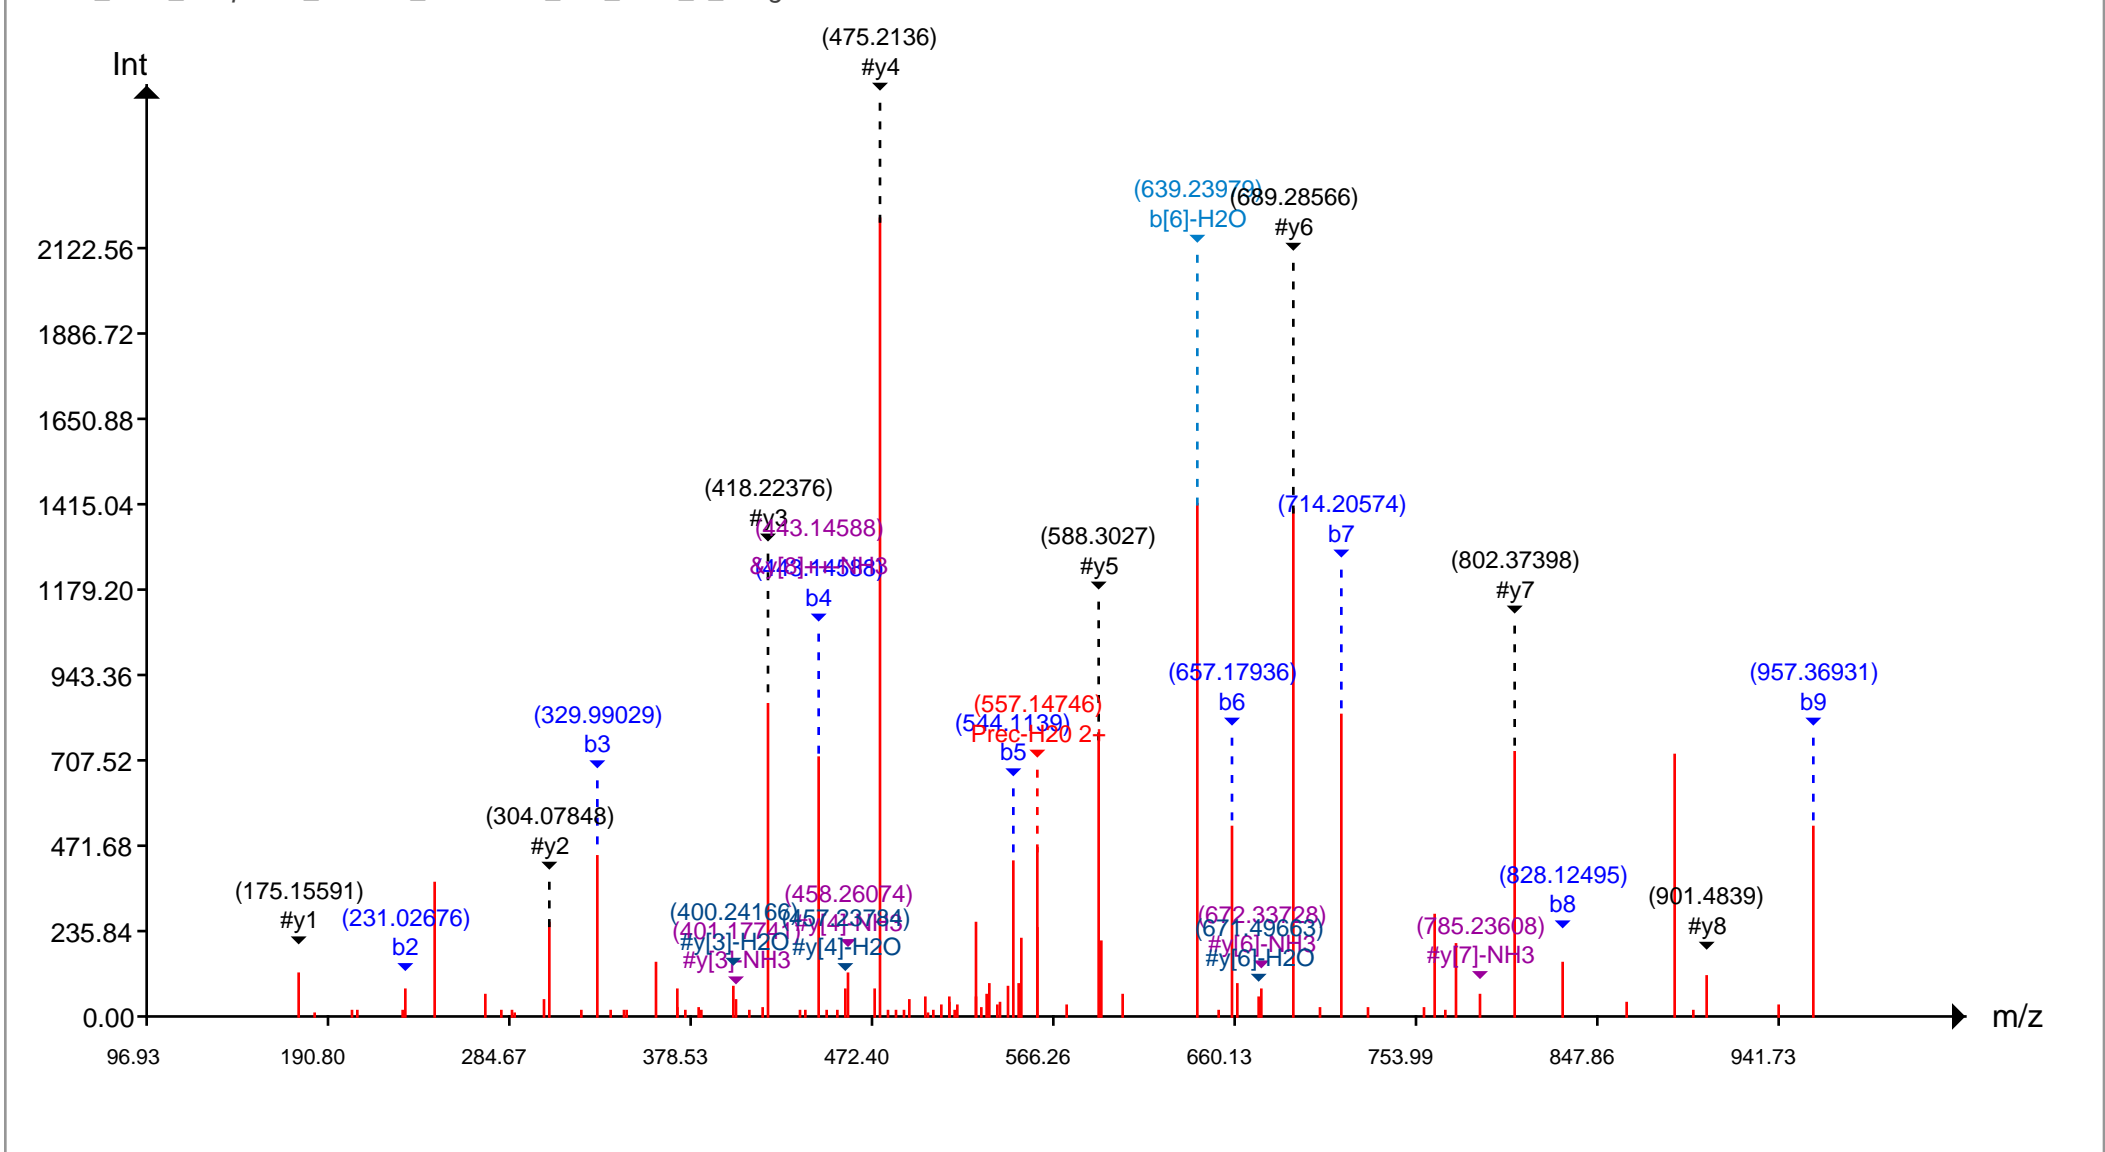

## Info

|                          |                                                                                |                           |          |
|--------------------------|--------------------------------------------------------------------------------|---------------------------|----------|
| <b>Modified Sequence</b> | AcD3-GQVITIGNER-COOH                                                           | <b>Ion score</b>          | 72.59    |
| <b>Protein</b>           | P62736, Q562R1, Q9BYX7, P60709, P68032, P63261, P63267, P68133, Q6S8J3, A5A3E0 | <b>Confidence level</b>   | 99.00%   |
| <b>Precursor m/z</b>     | 566.31739                                                                      | <b>Identity Threshold</b> | 48.79    |
| <b>Charge</b>            | 2+                                                                             | <b>Mass error</b>         | 0.007923 |

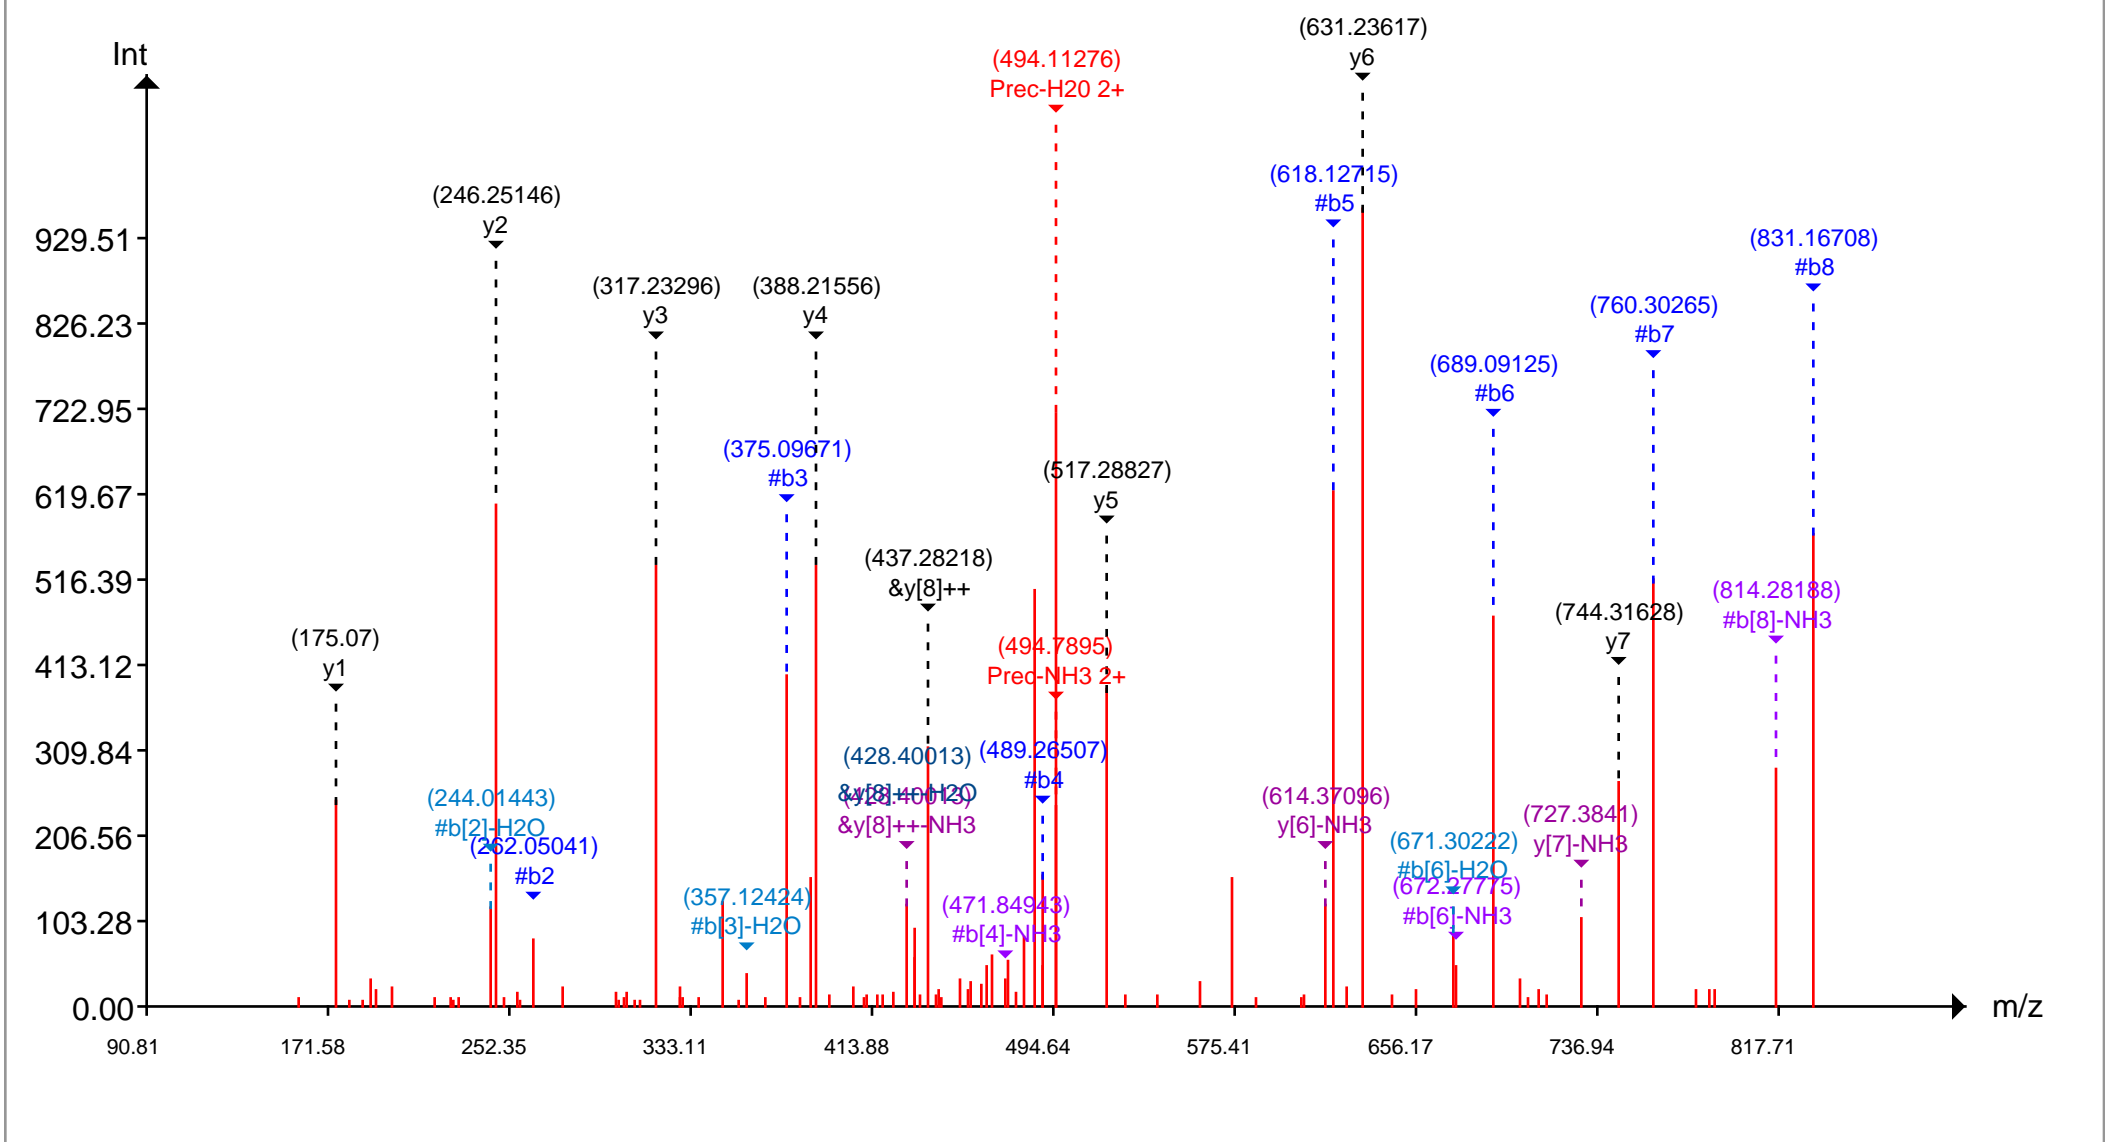

## Info

**Modified Sequence** AcD3-SELNEAAAR-COOH

**Protein** Q12968

**Precursor m/z** 503.25541

**Charge** 2+

**Ion score** 64.23

**Confidence level** 99.00%

**Identity Threshold** 48.50

**Mass error** -2.99E-4

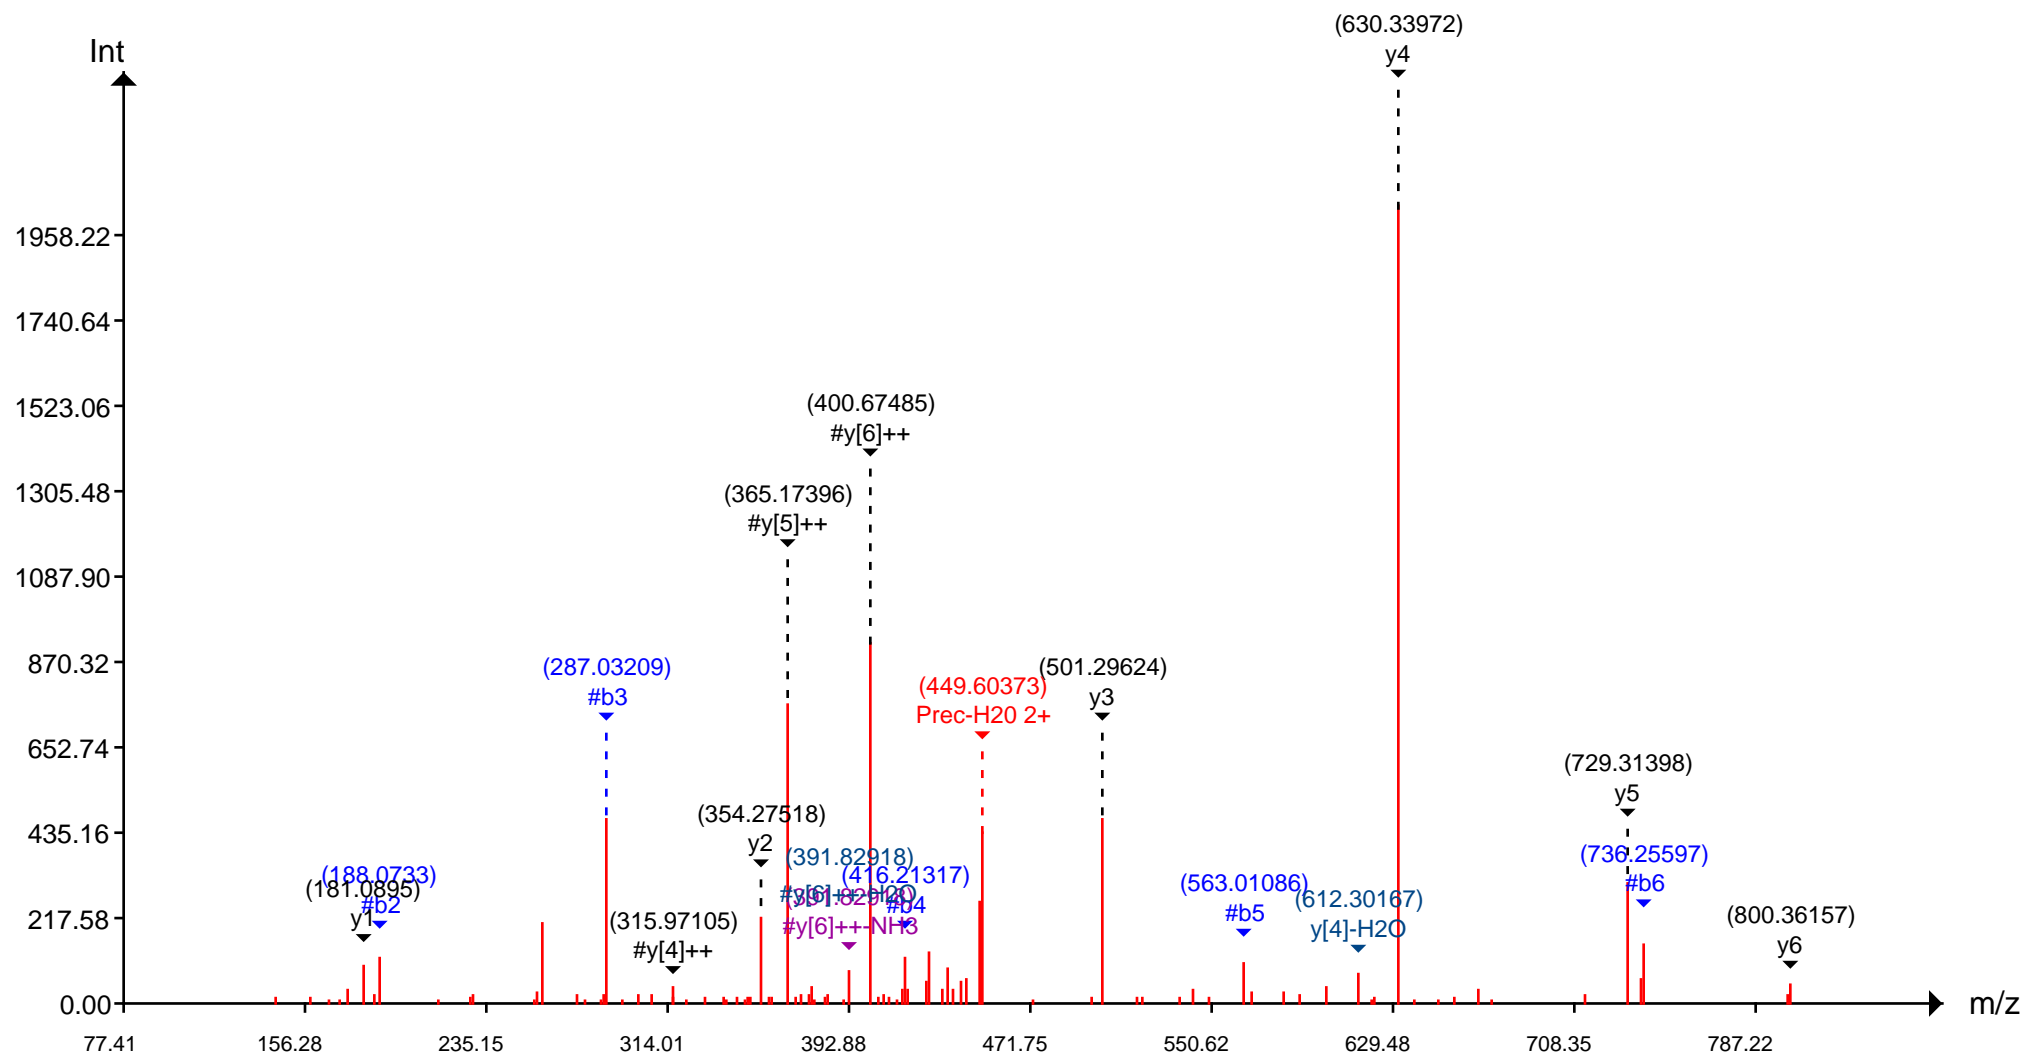

## Info

|                          |                                      |                           |        |
|--------------------------|--------------------------------------|---------------------------|--------|
| <b>Modified Sequence</b> | AcD3-AAVEM<Mox*>K<AcD3K*>R<C13>-COOH | <b>Ion score</b>          | 48.67  |
| <b>Protein</b>           | Q16643                               | <b>Confidence level</b>   | 99.00% |
| <b>Precursor m/z</b>     | 458.76041                            | <b>Identity Threshold</b> | 48.18  |
| <b>Charge</b>            | 2+                                   | <b>Mass error</b>         | 8.8E-5 |

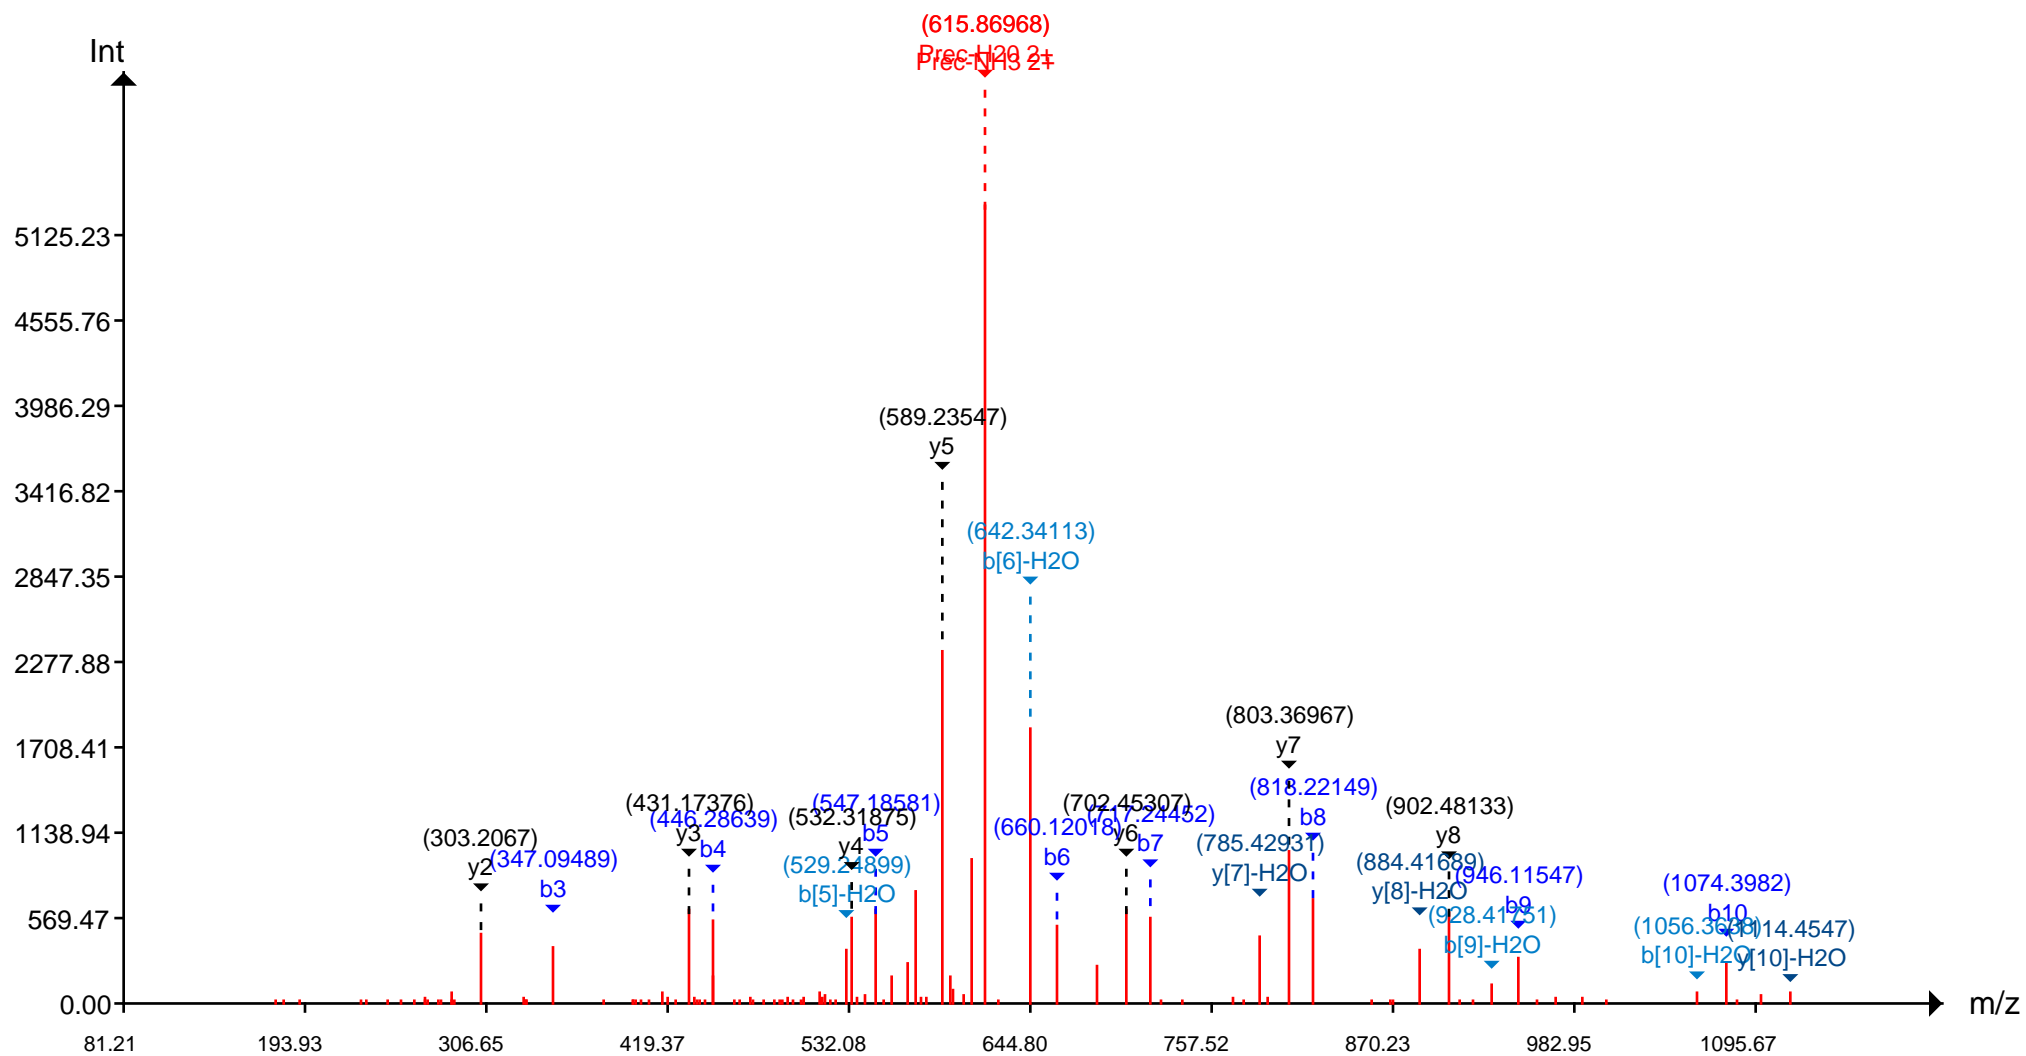

## Info

**Modified Sequence** AcD3-AGK<AcD3K\*>VTLGTQQR-COOH

**Ion score** 58.47

**Protein** Q08AF3

**Confidence level** 99.00%

**Precursor m/z** 624.86194

**Identity Threshold** 47.61

**Charge** 2+

**Mass error** -0.001136

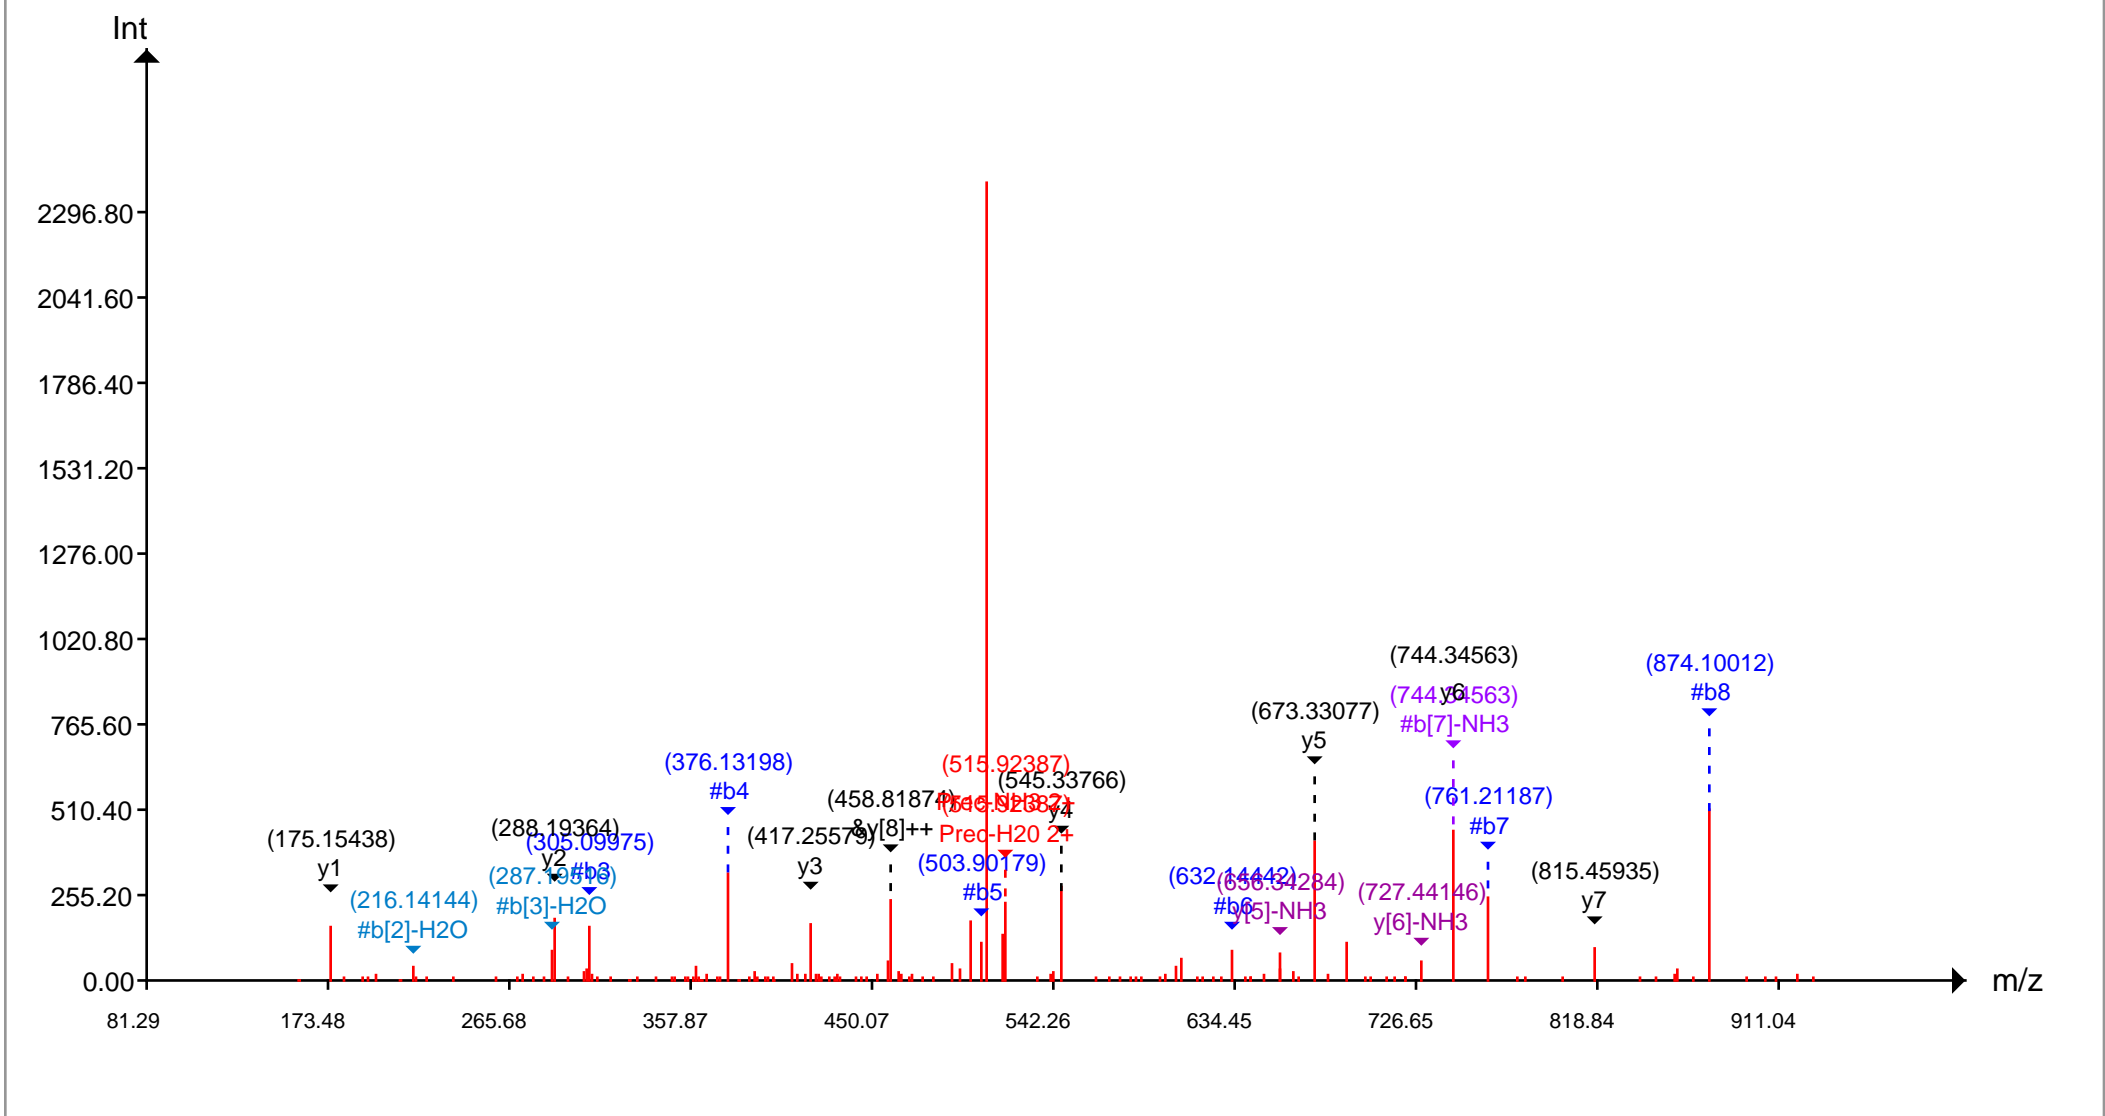

## Info

**Modified Sequence** AcD3-STAAQQELR-COOH

**Protein** P35579

**Precursor m/z** 524.77666

**Charge** 2+

**Ion score** 73.8

**Confidence level** 99.00%

**Identity Threshold** 49.07

**Mass error** -2.0E-5

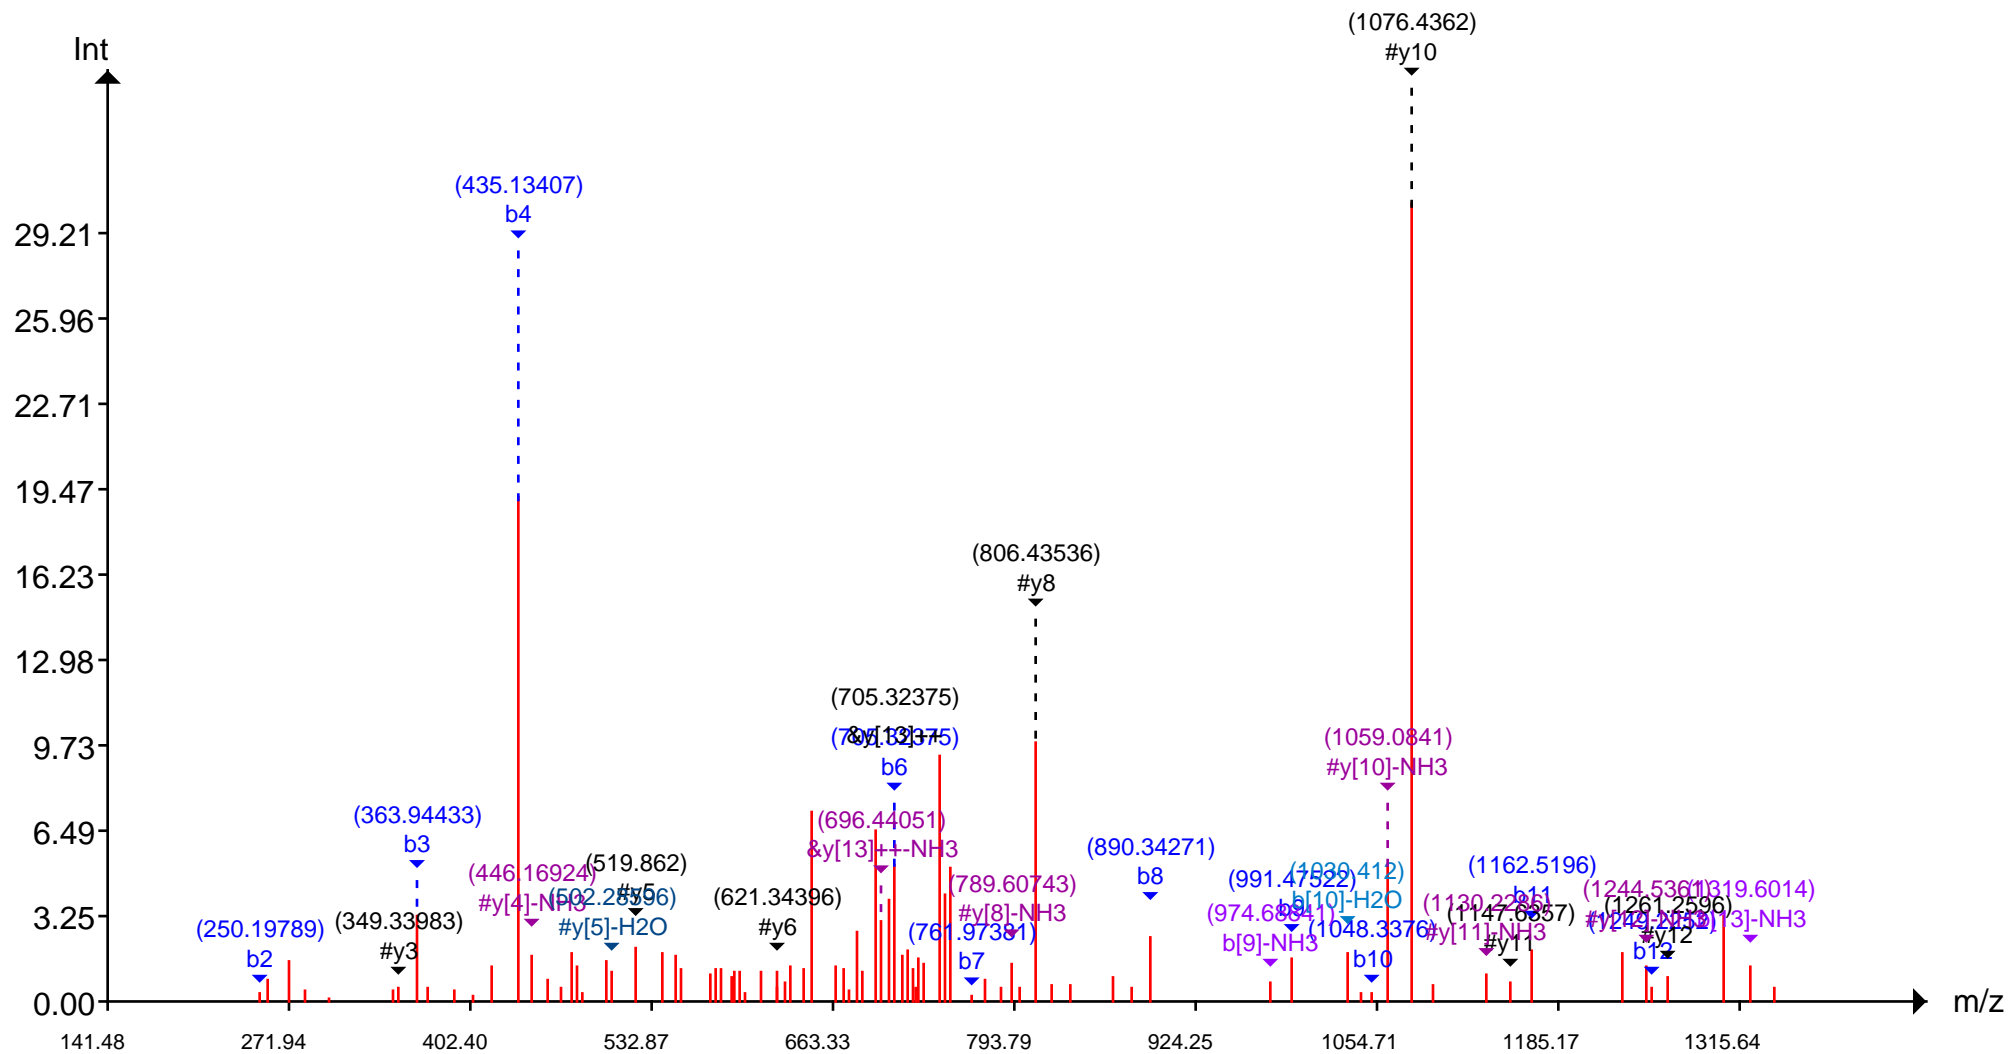

## Info

|                          |                                        |                           |        |
|--------------------------|----------------------------------------|---------------------------|--------|
| <b>Modified Sequence</b> | AcD3-GM<Mox*>NAPK<AcD3K*>GQTGNSSR-COOH | <b>Ion score</b>          | 49.41  |
| <b>Protein</b>           | P23588                                 | <b>Confidence level</b>   | 99.00% |
| <b>Precursor m/z</b>     | 755.86322                              | <b>Identity Threshold</b> | 47.76  |
| <b>Charge</b>            | 2+                                     | <b>Mass error</b>         | 6.3E-4 |

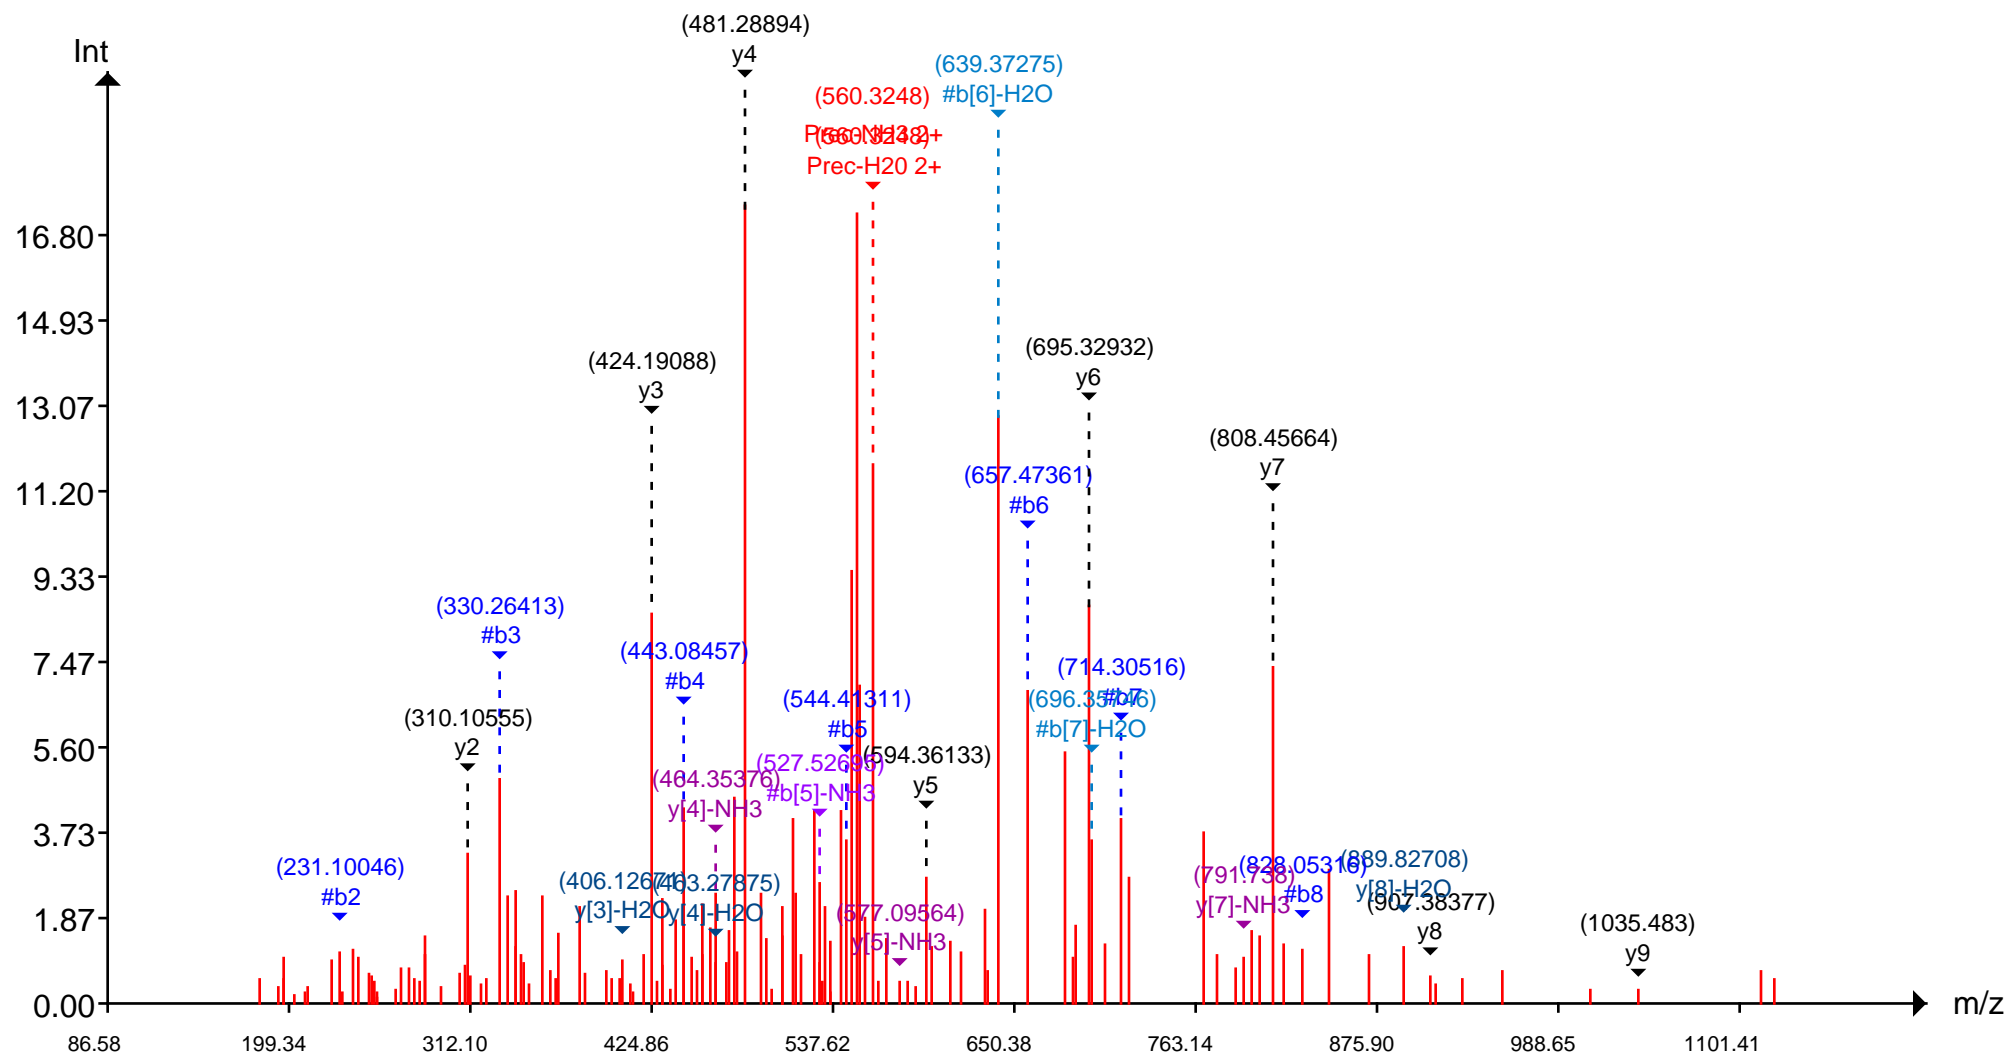

## Info

|                          |                                                                                |                           |         |
|--------------------------|--------------------------------------------------------------------------------|---------------------------|---------|
| <b>Modified Sequence</b> | AcD3-GQVITIGNER<C13>-COOH                                                      | <b>Ion score</b>          | 58.2    |
| <b>Protein</b>           | P62736, Q562R1, Q9BYX7, P60709, P68032, P63261, P63267, P68133, Q6S8J3, A5A3E0 | <b>Confidence level</b>   | 99.00%  |
| <b>Precursor m/z</b>     | 569.32391                                                                      | <b>Identity Threshold</b> | 47.94   |
| <b>Charge</b>            | 2+                                                                             | <b>Mass error</b>         | 8.22E-4 |

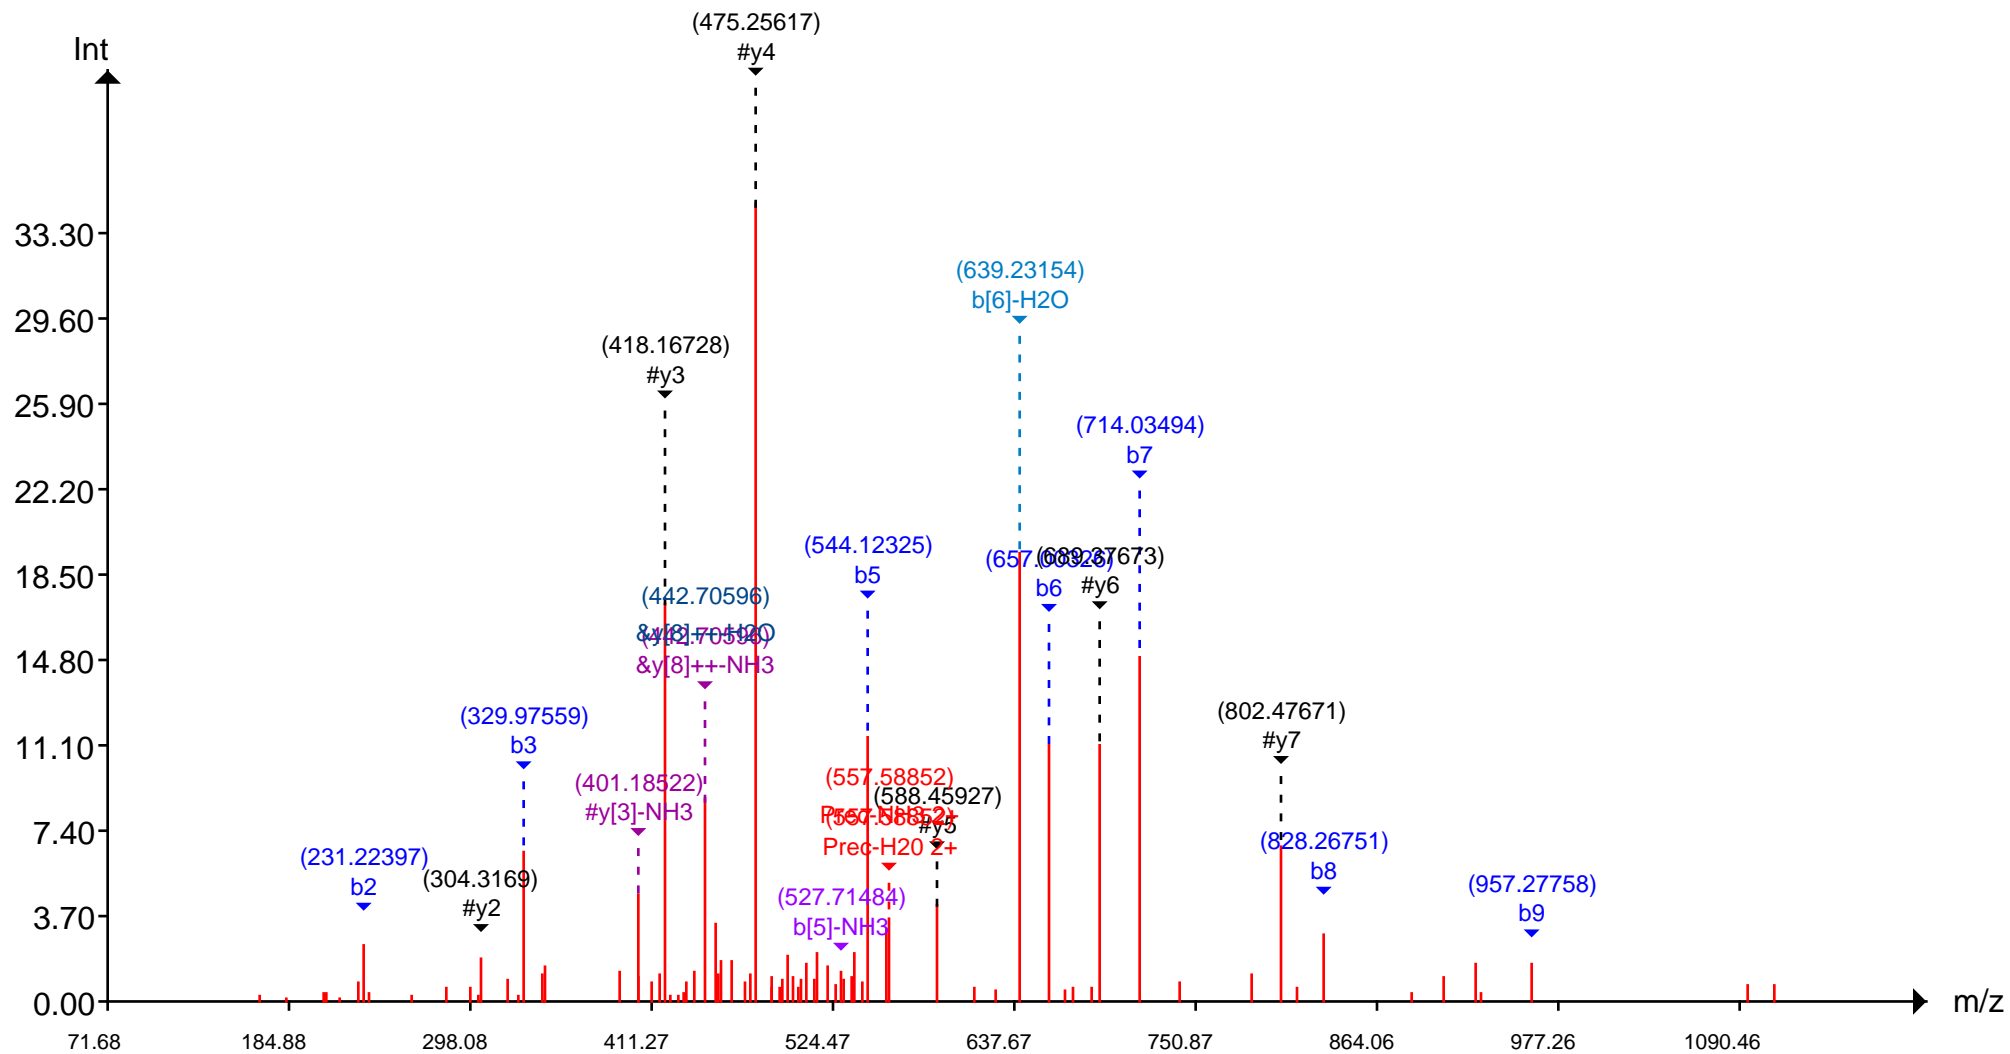

## Info

|                          |                                                                                |                           |         |
|--------------------------|--------------------------------------------------------------------------------|---------------------------|---------|
| <b>Modified Sequence</b> | AcD3-GQVITIGNER-COOH                                                           | <b>Ion score</b>          | 61.26   |
| <b>Protein</b>           | P62736, Q562R1, Q9BYX7, P60709, P68032, P63261, P63267, P68133, Q6S8J3, A5A3E0 | <b>Confidence level</b>   | 99.00%  |
| <b>Precursor m/z</b>     | 566.31338                                                                      | <b>Identity Threshold</b> | 48.99   |
| <b>Charge</b>            | 2+                                                                             | <b>Mass error</b>         | -9.7E-5 |



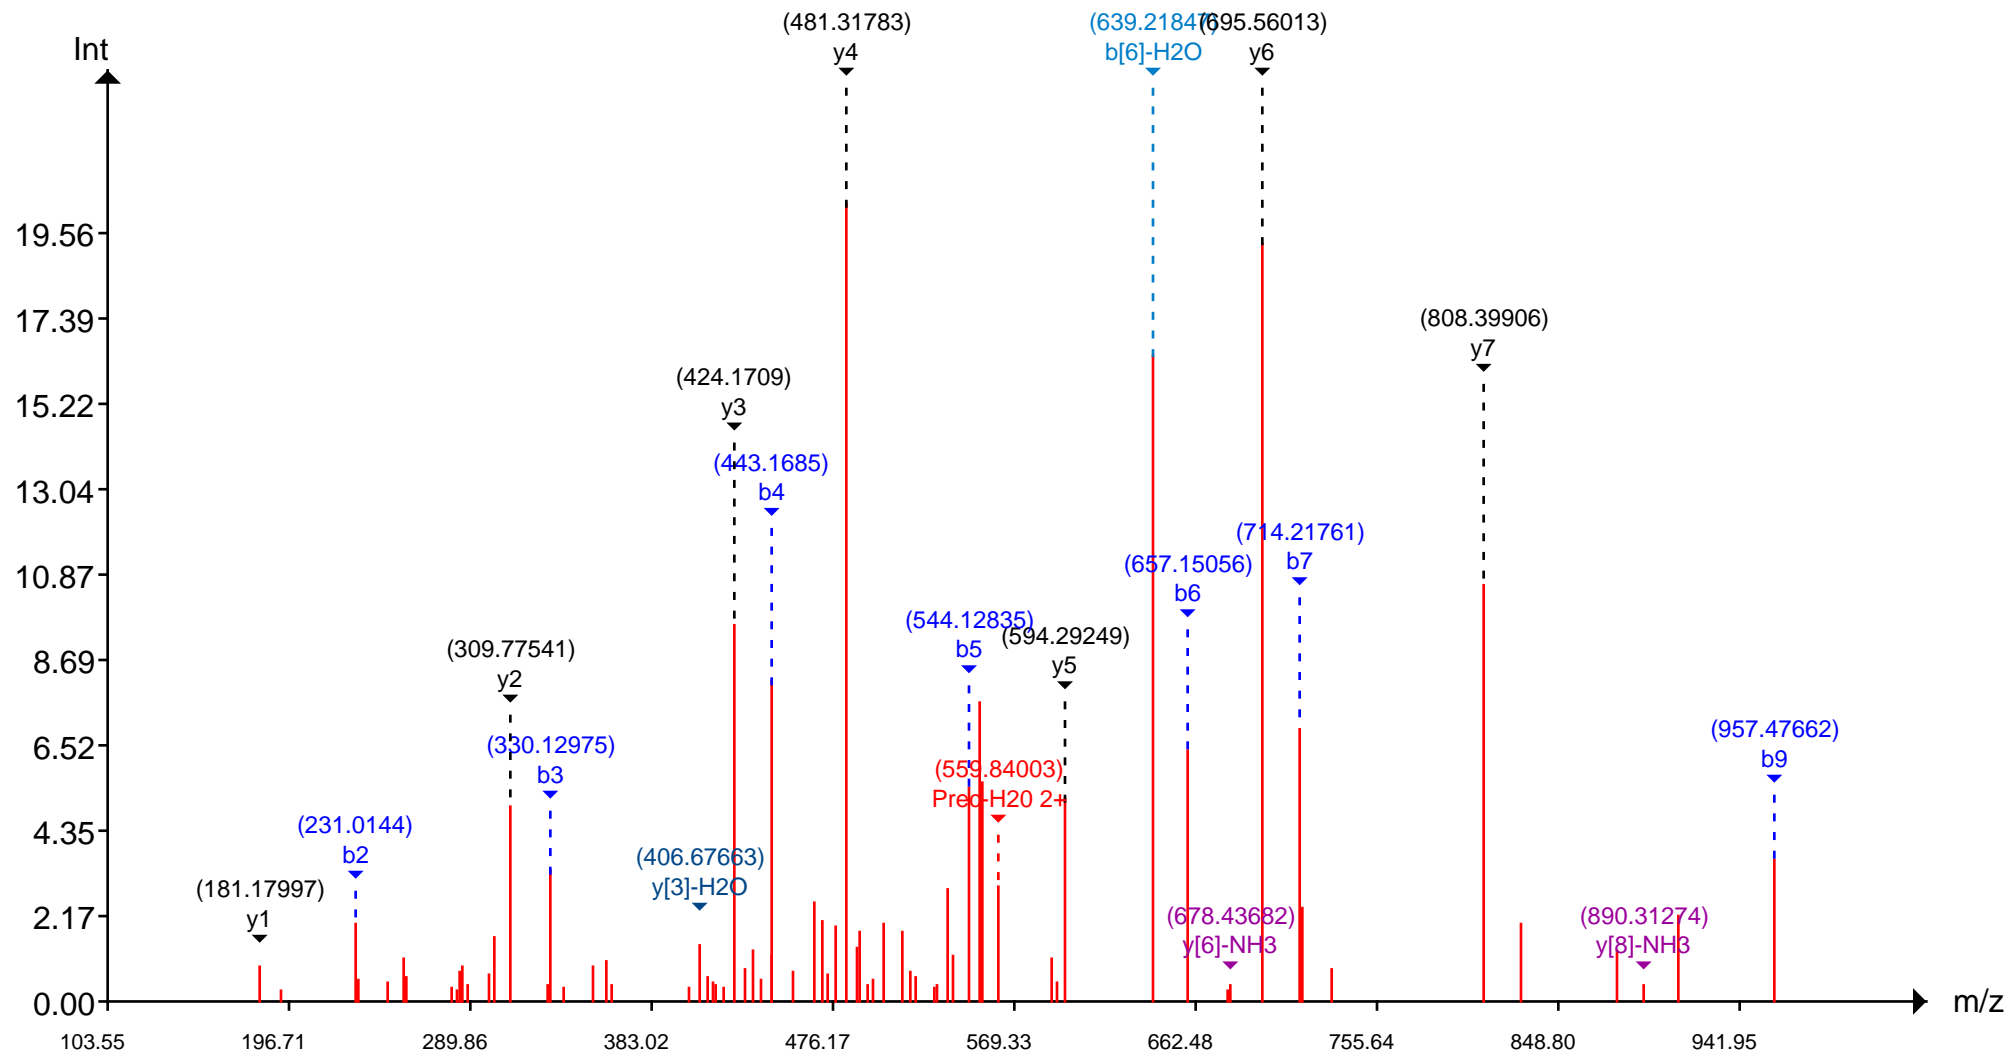

## Info

|                          |                                                                                |                           |         |
|--------------------------|--------------------------------------------------------------------------------|---------------------------|---------|
| <b>Modified Sequence</b> | AcD3-GQVITIGNER<C13>-COOH                                                      | <b>Ion score</b>          | 54.08   |
| <b>Protein</b>           | P62736, Q562R1, Q9BYX7, P60709, P68032, P63261, P63267, P68133, Q6S8J3, A5A3E0 | <b>Confidence level</b>   | 99.00%  |
| <b>Precursor m/z</b>     | 569.32361                                                                      | <b>Identity Threshold</b> | 47.96   |
| <b>Charge</b>            | 2+                                                                             | <b>Mass error</b>         | 2.22E-4 |

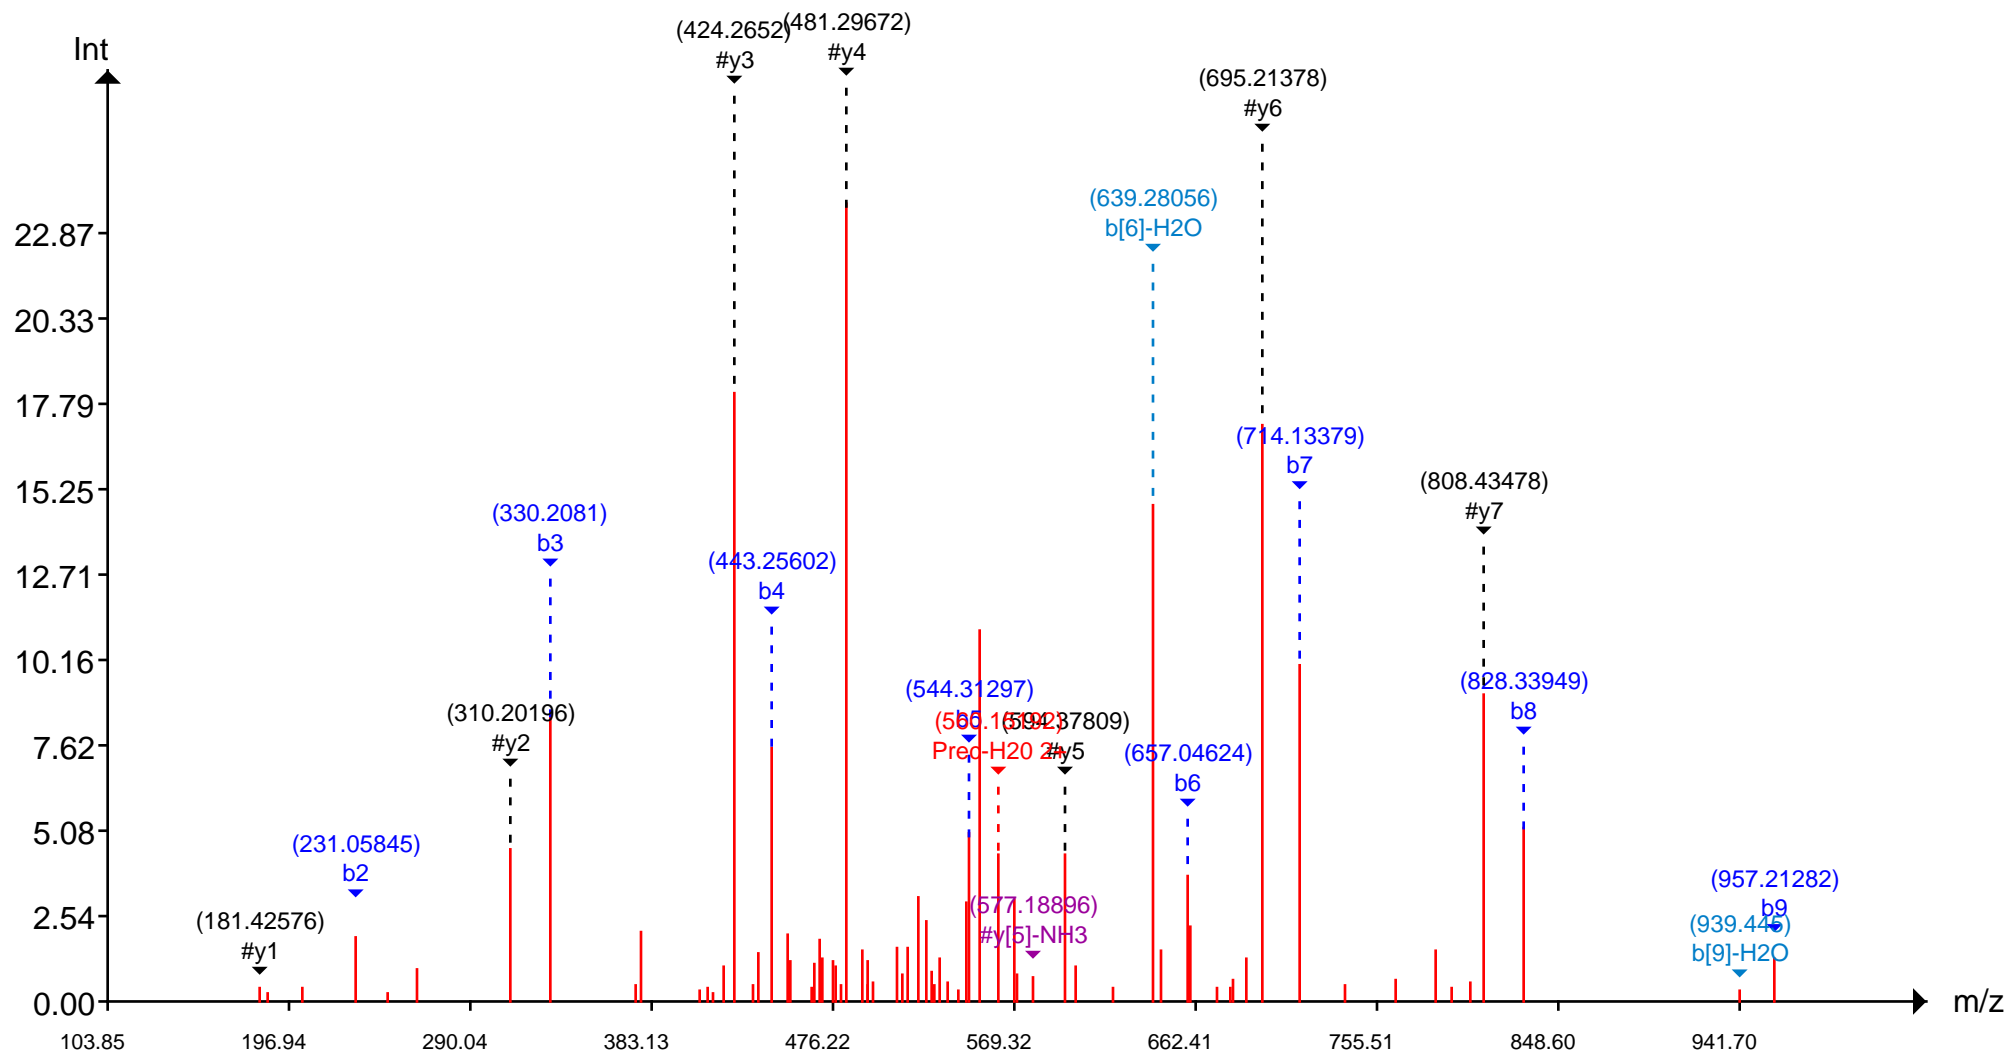

## Info

|                          |                                                                                |                           |         |
|--------------------------|--------------------------------------------------------------------------------|---------------------------|---------|
| <b>Modified Sequence</b> | AcD3-GQVITIGNER<C13>-COOH                                                      | <b>Ion score</b>          | 69.55   |
| <b>Protein</b>           | P62736, Q562R1, Q9BYX7, P60709, P68032, P63261, P63267, P68133, Q6S8J3, A5A3E0 | <b>Confidence level</b>   | 99.00%  |
| <b>Precursor m/z</b>     | 569.3236                                                                       | <b>Identity Threshold</b> | 47.96   |
| <b>Charge</b>            | 2+                                                                             | <b>Mass error</b>         | 2.02E-4 |

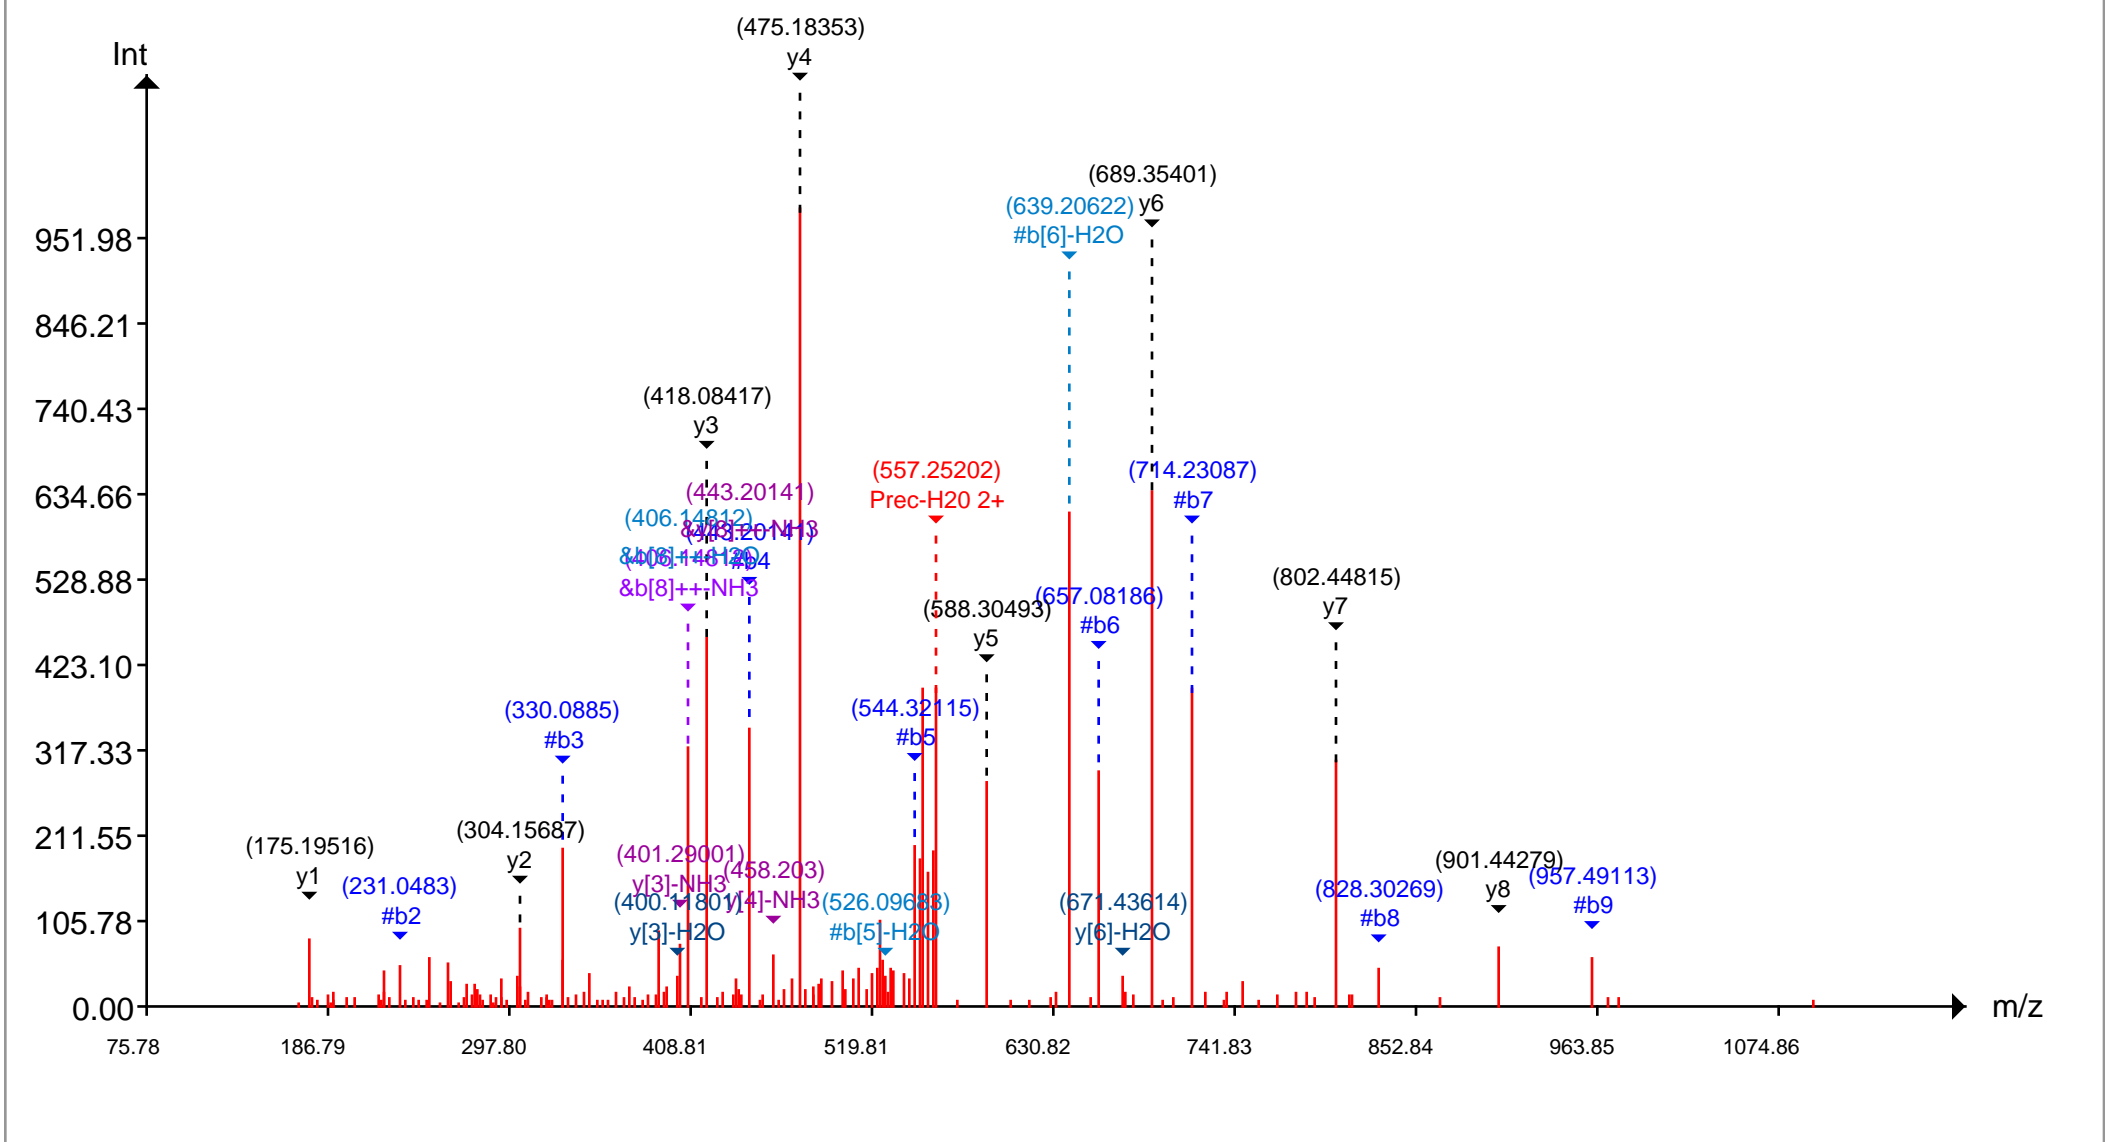

## Info

|                          |                                                                                |                           |          |
|--------------------------|--------------------------------------------------------------------------------|---------------------------|----------|
| <b>Modified Sequence</b> | AcD3-GQVITIGNER-COOH                                                           | <b>Ion score</b>          | 63.11    |
| <b>Protein</b>           | P62736, Q562R1, Q9BYX7, P60709, P68032, P63261, P63267, P68133, Q6S8J3, A5A3E0 | <b>Confidence level</b>   | 99.00%   |
| <b>Precursor m/z</b>     | 566.31316                                                                      | <b>Identity Threshold</b> | 48.90    |
| <b>Charge</b>            | 2+                                                                             | <b>Mass error</b>         | -5.37E-4 |

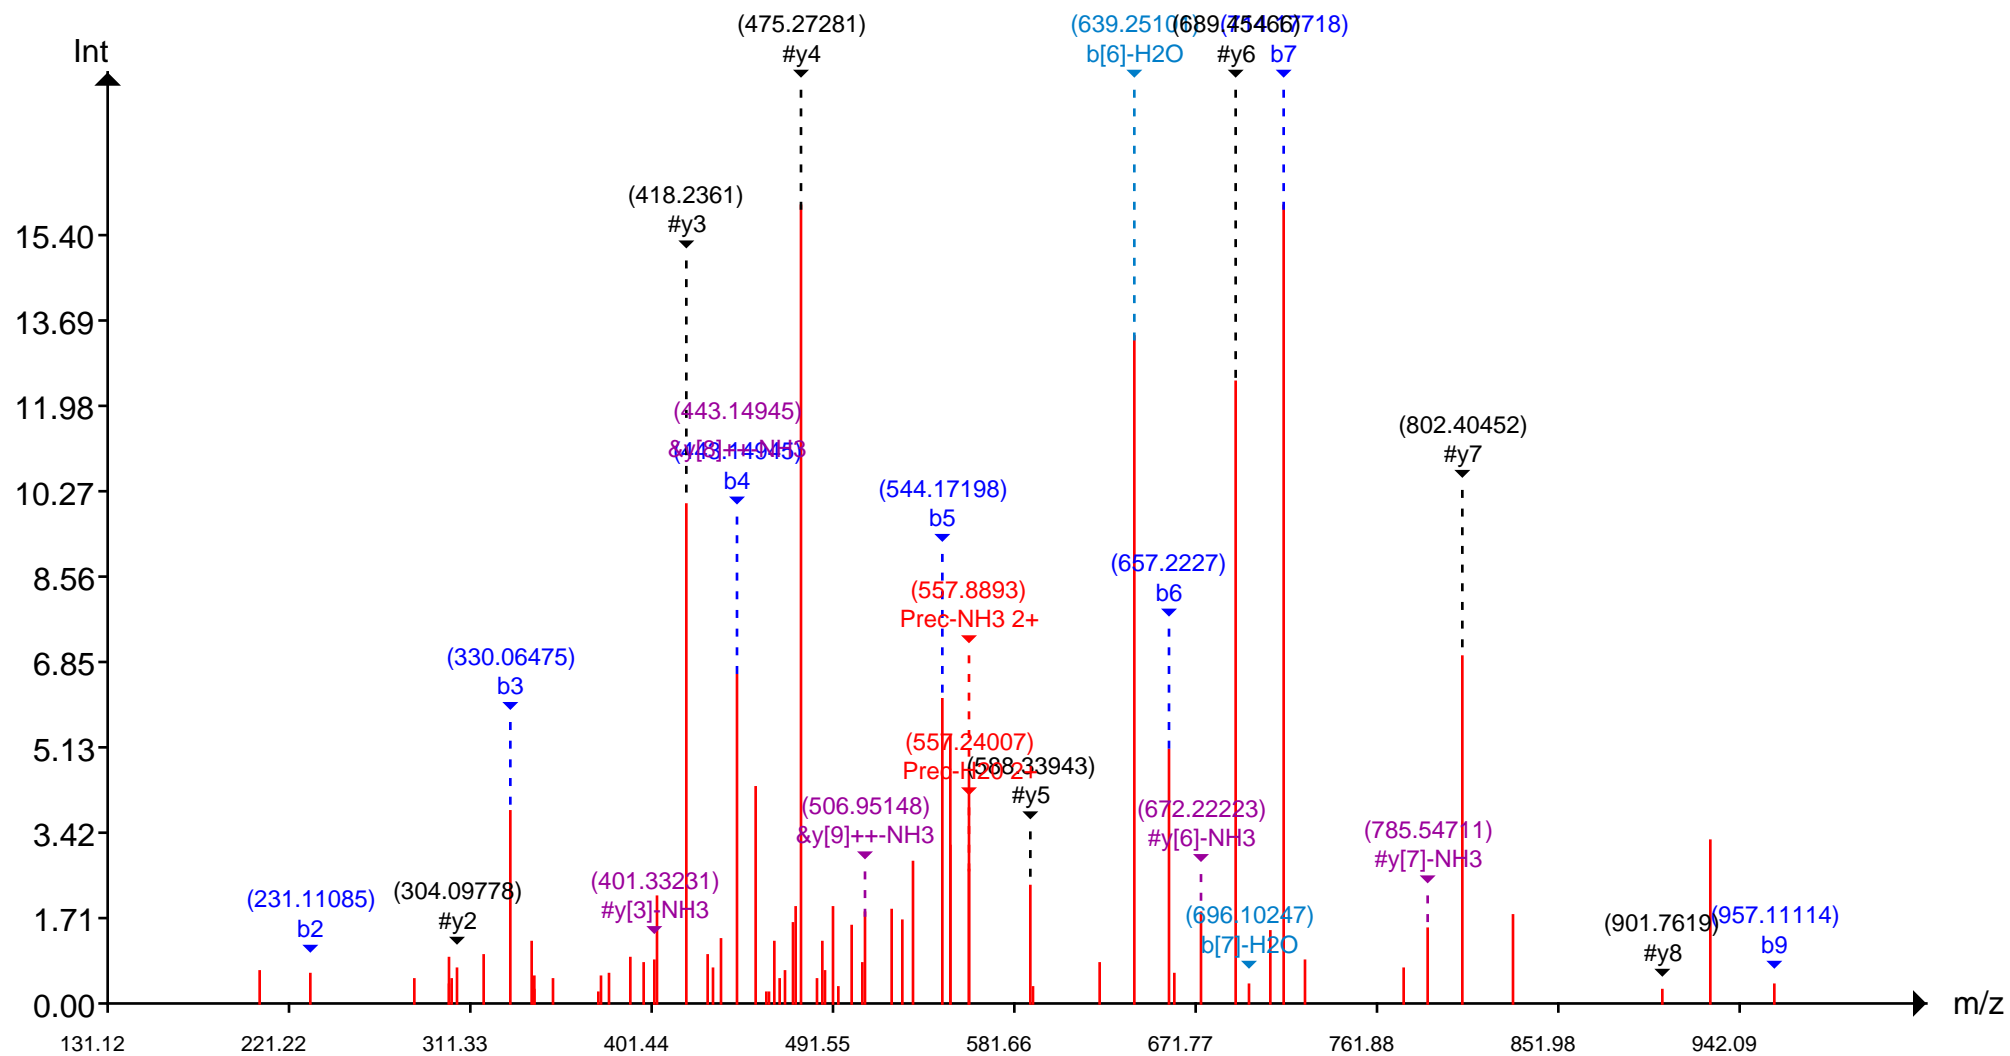

## Info

|                          |                                                                                |                           |          |
|--------------------------|--------------------------------------------------------------------------------|---------------------------|----------|
| <b>Modified Sequence</b> | AcD3-GQVITIGNER-COOH                                                           | <b>Ion score</b>          | 49.98    |
| <b>Protein</b>           | P62736, Q562R1, Q9BYX7, P60709, P68032, P63261, P63267, P68133, Q6S8J3, A5A3E0 | <b>Confidence level</b>   | 99.00%   |
| <b>Precursor m/z</b>     | 566.31324                                                                      | <b>Identity Threshold</b> | 48.87    |
| <b>Charge</b>            | 2+                                                                             | <b>Mass error</b>         | -3.77E-4 |

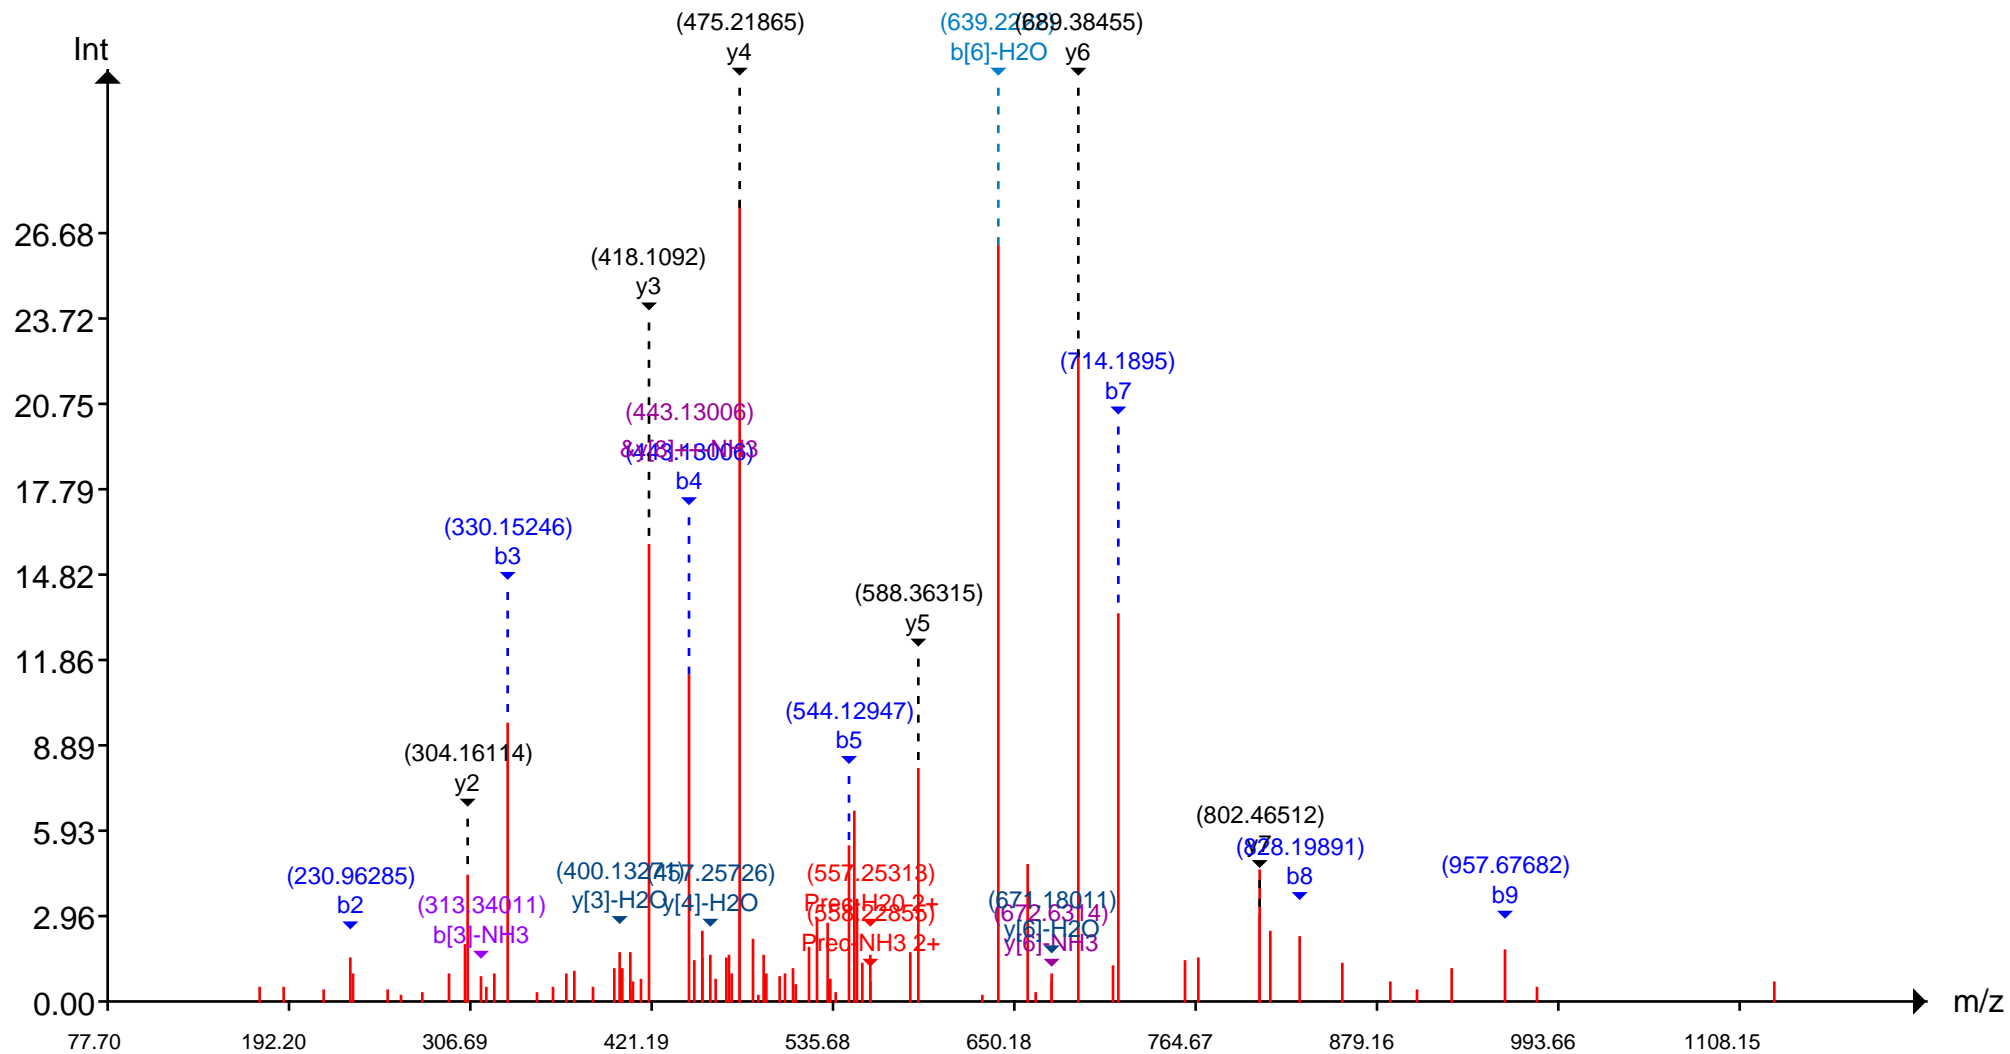

## Info

|                          |                                                                                |                           |        |
|--------------------------|--------------------------------------------------------------------------------|---------------------------|--------|
| <b>Modified Sequence</b> | AcD3-GQVITIGNER-COOH                                                           | <b>Ion score</b>          | 50.46  |
| <b>Protein</b>           | P62736, Q562R1, Q9BYX7, P60709, P68032, P63261, P63267, P68133, Q6S8J3, A5A3E0 | <b>Confidence level</b>   | 99.00% |
| <b>Precursor m/z</b>     | 566.31346                                                                      | <b>Identity Threshold</b> | 48.97  |
| <b>Charge</b>            | 2+                                                                             | <b>Mass error</b>         | 6.3E-5 |

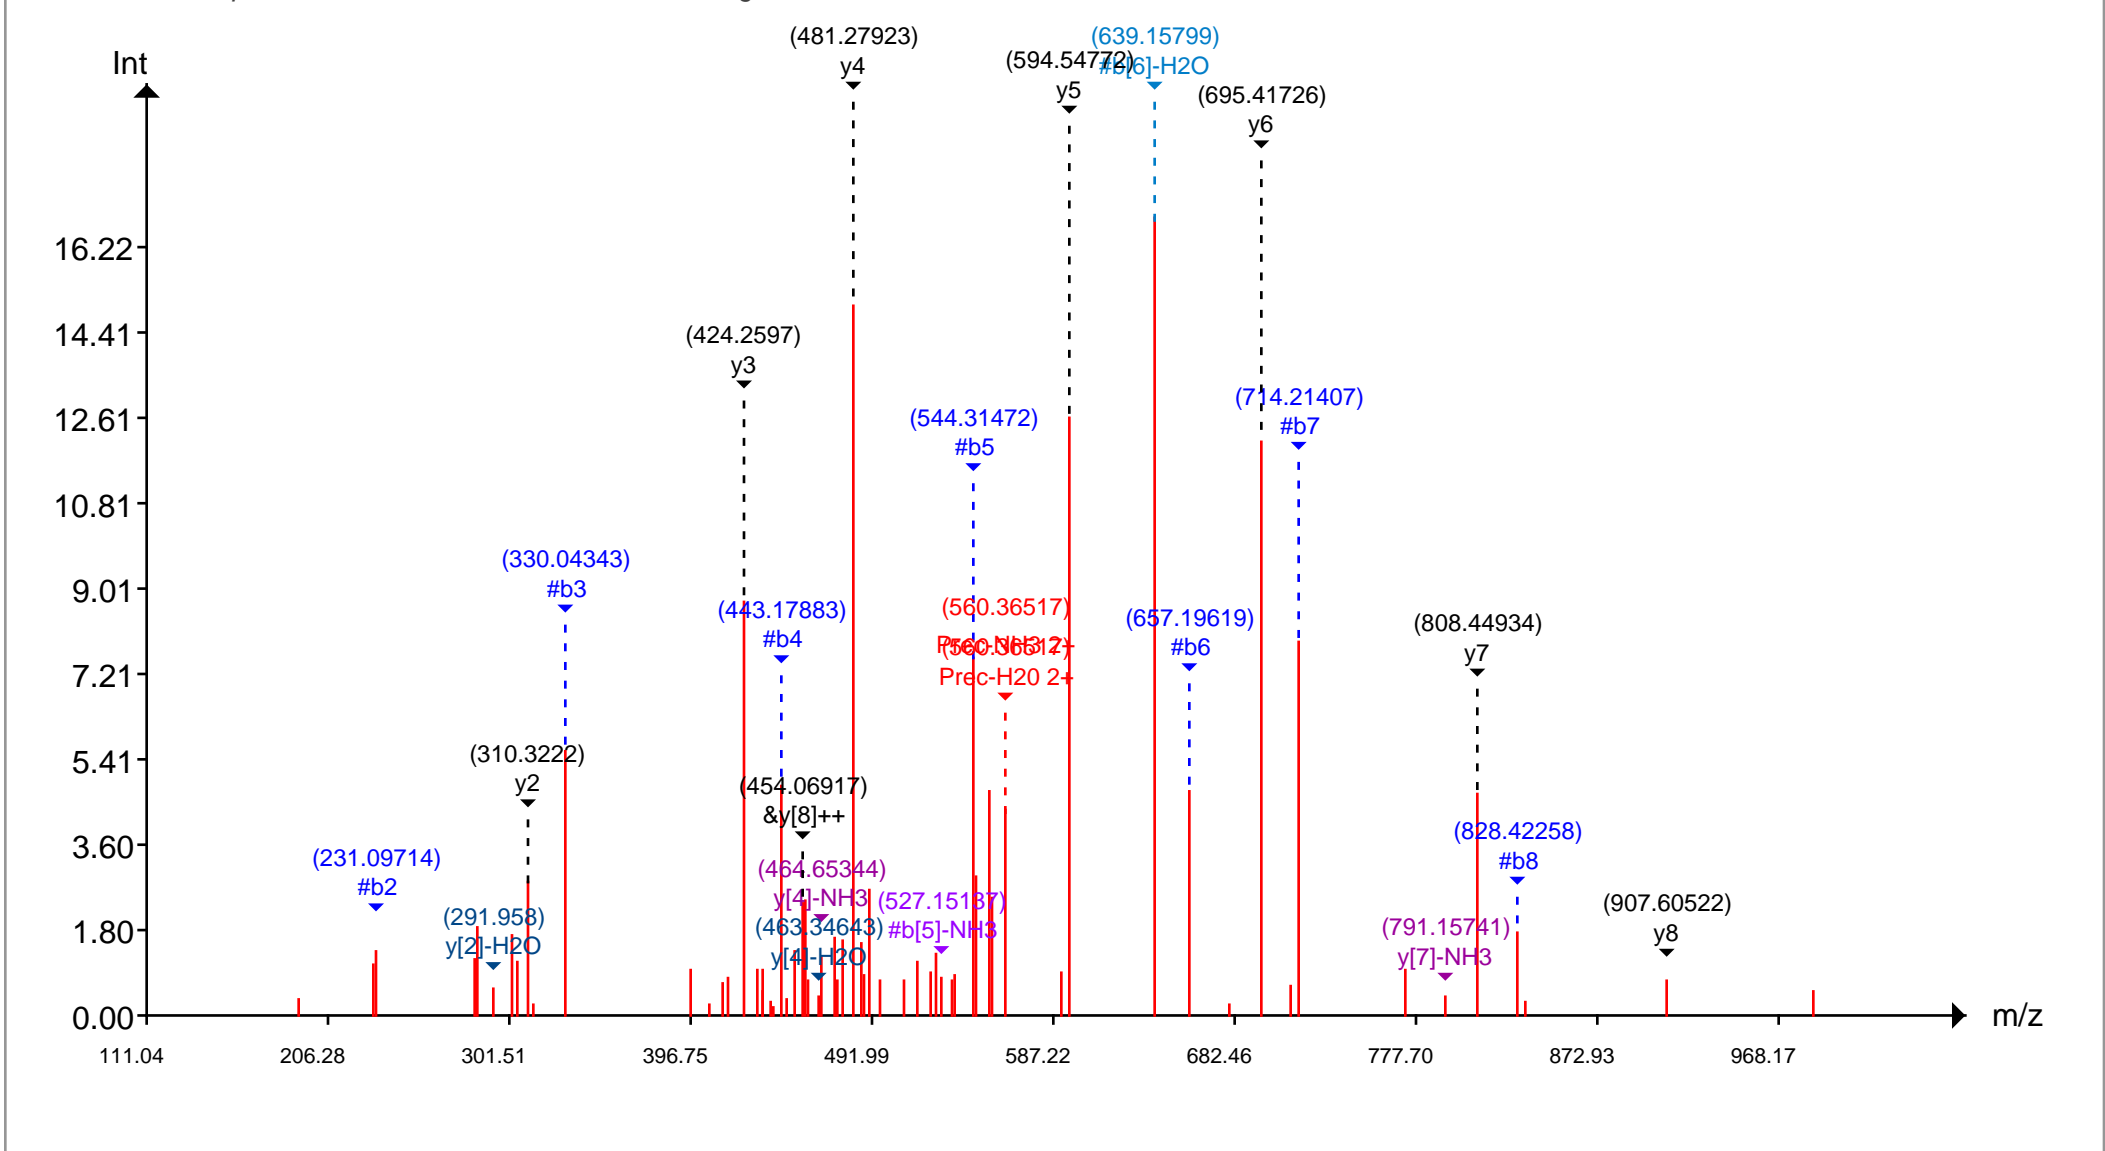

## Info

|                          |                                                                                |                           |         |
|--------------------------|--------------------------------------------------------------------------------|---------------------------|---------|
| <b>Modified Sequence</b> | AcD3-GQVITIGNER<C13>-COOH                                                      | <b>Ion score</b>          | 67.23   |
| <b>Protein</b>           | P62736, Q562R1, Q9BYX7, P60709, P68032, P63261, P63267, P68133, Q6S8J3, A5A3E0 | <b>Confidence level</b>   | 99.00%  |
| <b>Precursor m/z</b>     | 569.32348                                                                      | <b>Identity Threshold</b> | 48.30   |
| <b>Charge</b>            | 2+                                                                             | <b>Mass error</b>         | -3.8E-5 |

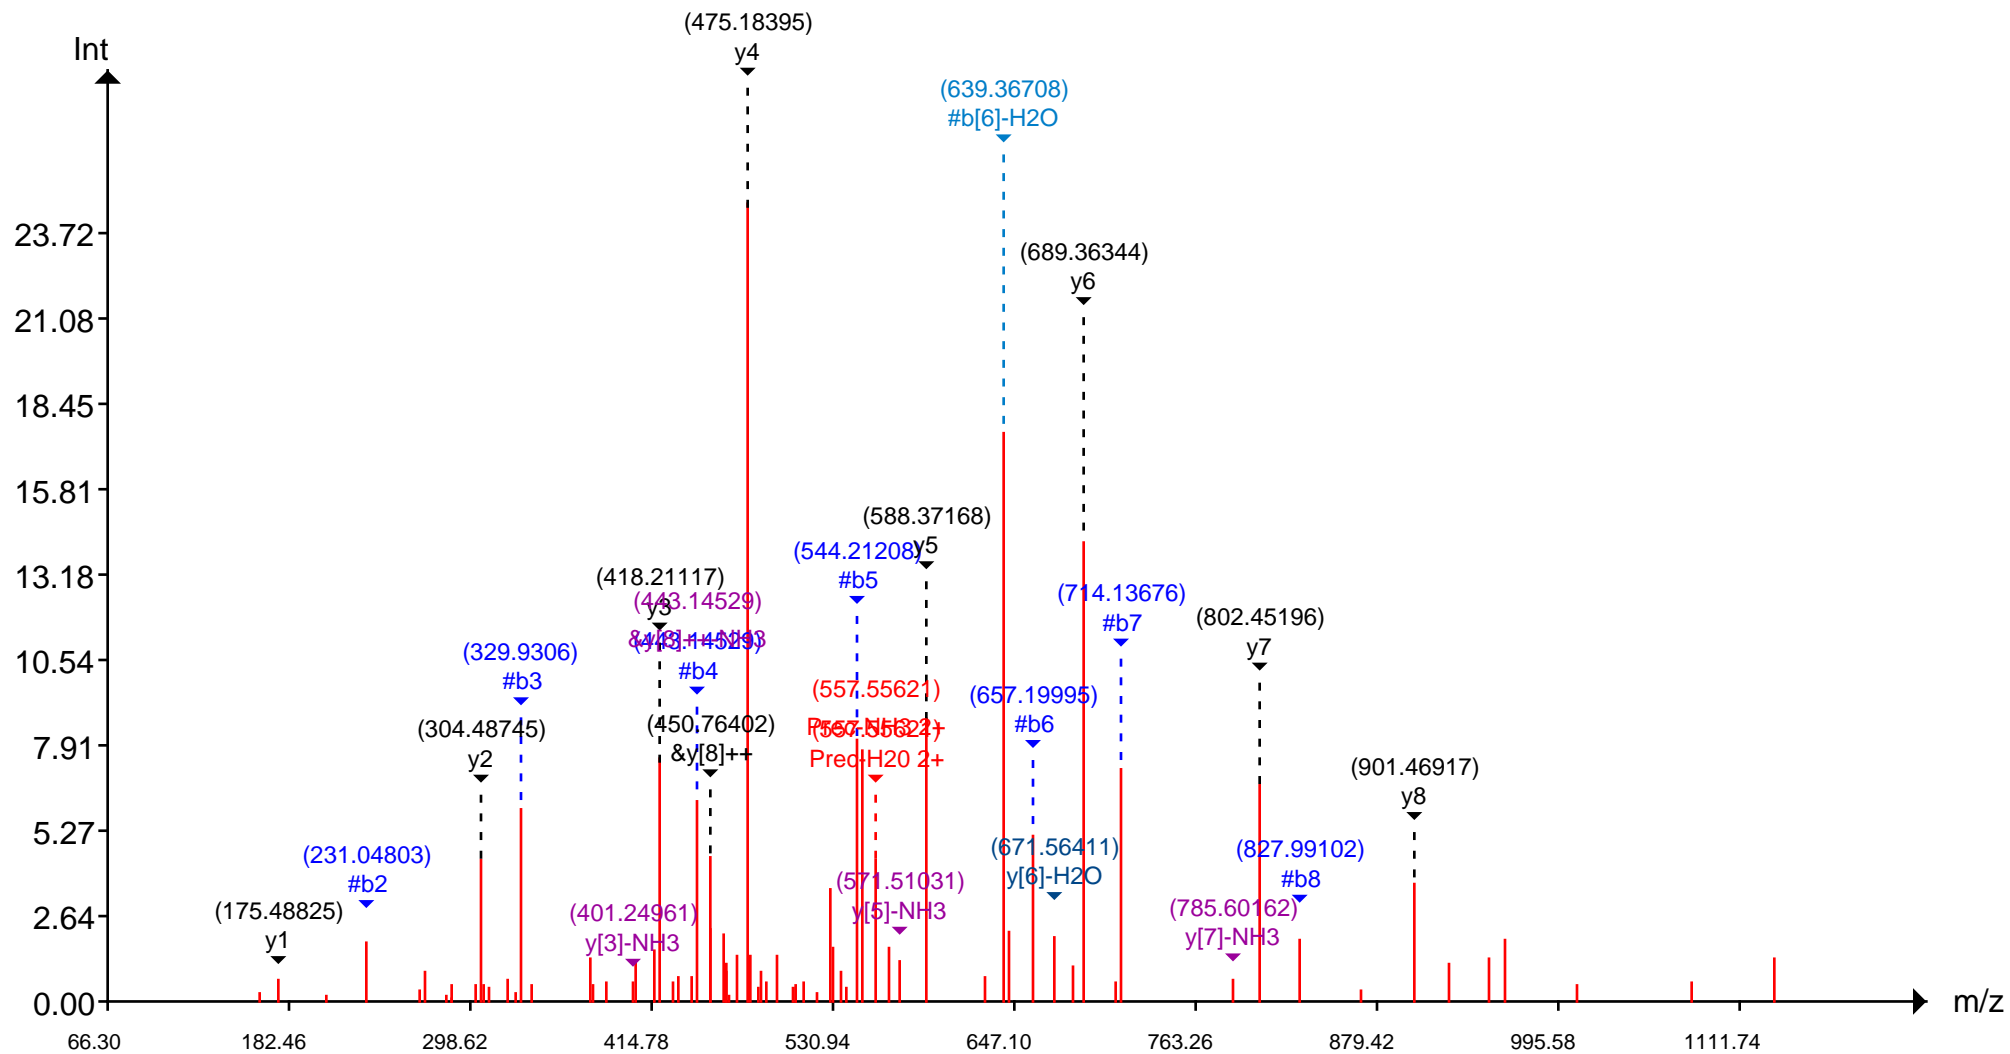

## Info

|                          |                                                                                |                           |        |
|--------------------------|--------------------------------------------------------------------------------|---------------------------|--------|
| <b>Modified Sequence</b> | AcD3-GQVITIGNER-COOH                                                           | <b>Ion score</b>          | 77.09  |
| <b>Protein</b>           | P62736, Q562R1, Q9BYX7, P60709, P68032, P63261, P63267, P68133, Q6S8J3, A5A3E0 | <b>Confidence level</b>   | 99.00% |
| <b>Precursor m/z</b>     | 566.31345                                                                      | <b>Identity Threshold</b> | 49.03  |
| <b>Charge</b>            | 2+                                                                             | <b>Mass error</b>         | 4.3E-5 |

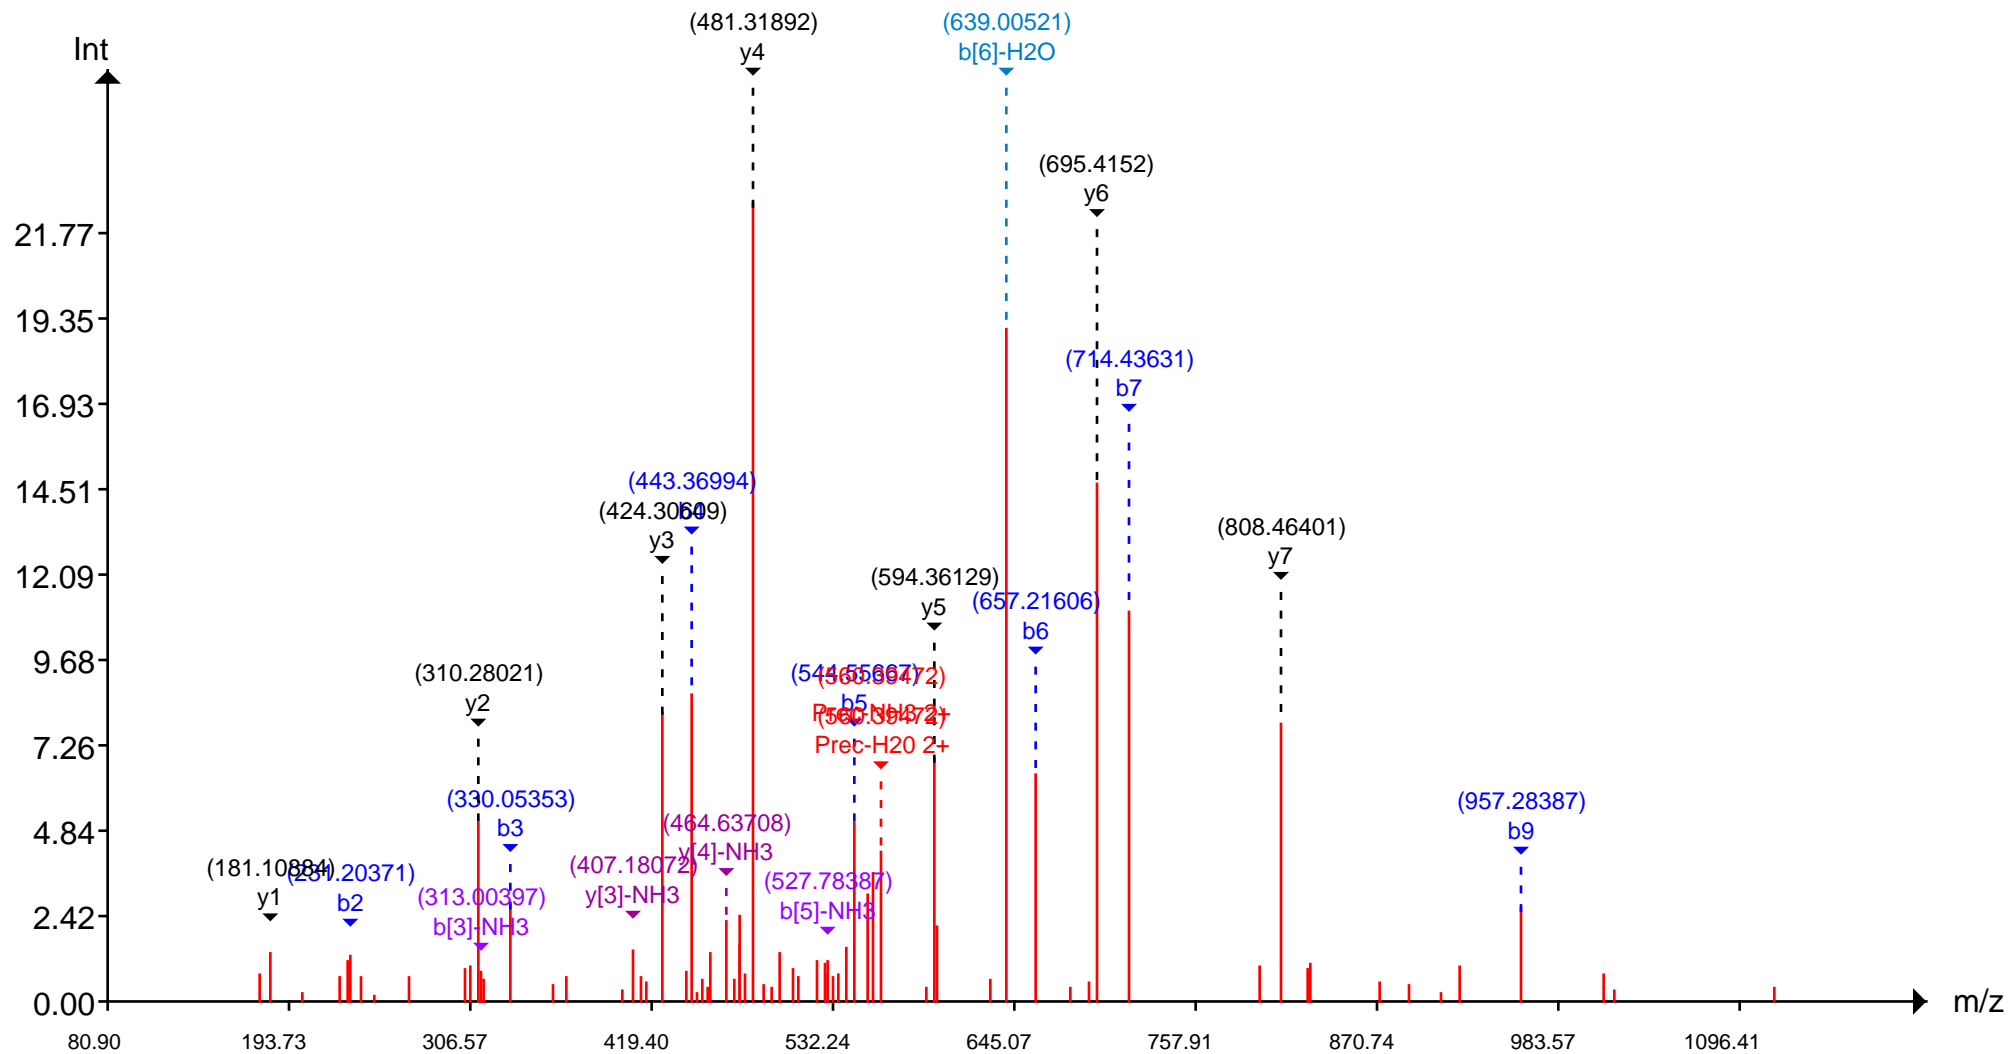

## Info

|                          |                                                                                |                           |          |
|--------------------------|--------------------------------------------------------------------------------|---------------------------|----------|
| <b>Modified Sequence</b> | AcD3-GQVITIGNER<C13>-COOH                                                      | <b>Ion score</b>          | 60.53    |
| <b>Protein</b>           | P62736, Q562R1, Q9BYX7, P60709, P68032, P63261, P63267, P68133, Q6S8J3, A5A3E0 | <b>Confidence level</b>   | 99.00%   |
| <b>Precursor m/z</b>     | 569.32322                                                                      | <b>Identity Threshold</b> | 48.30    |
| <b>Charge</b>            | 2+                                                                             | <b>Mass error</b>         | -5.58E-4 |



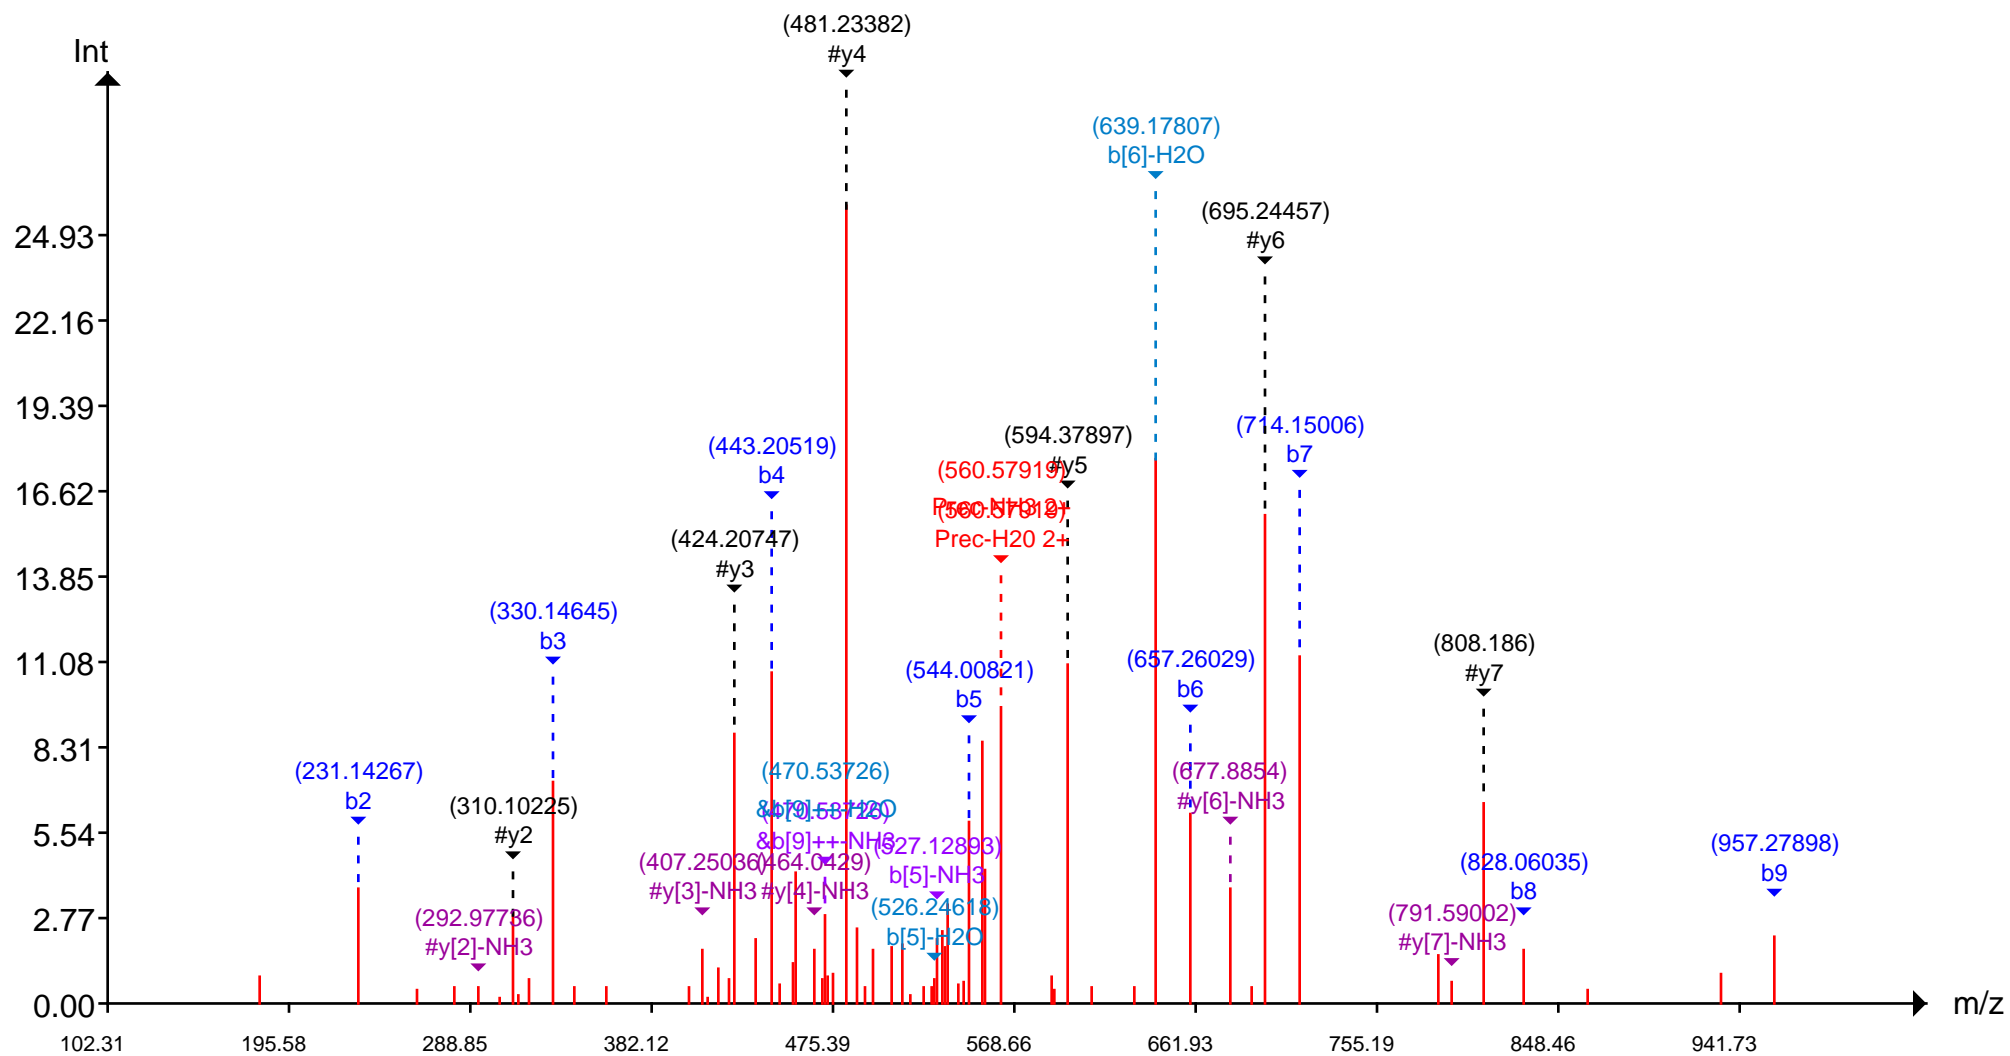

## Info

|                          |                                                                                |                           |          |
|--------------------------|--------------------------------------------------------------------------------|---------------------------|----------|
| <b>Modified Sequence</b> | AcD3-GQVITIGNER<C13>-COOH                                                      | <b>Ion score</b>          | 64.64    |
| <b>Protein</b>           | P62736, Q562R1, Q9BYX7, P60709, P68032, P63261, P63267, P68133, Q6S8J3, A5A3E0 | <b>Confidence level</b>   | 99.00%   |
| <b>Precursor m/z</b>     | 569.32315                                                                      | <b>Identity Threshold</b> | 48.30    |
| <b>Charge</b>            | 2+                                                                             | <b>Mass error</b>         | -6.98E-4 |

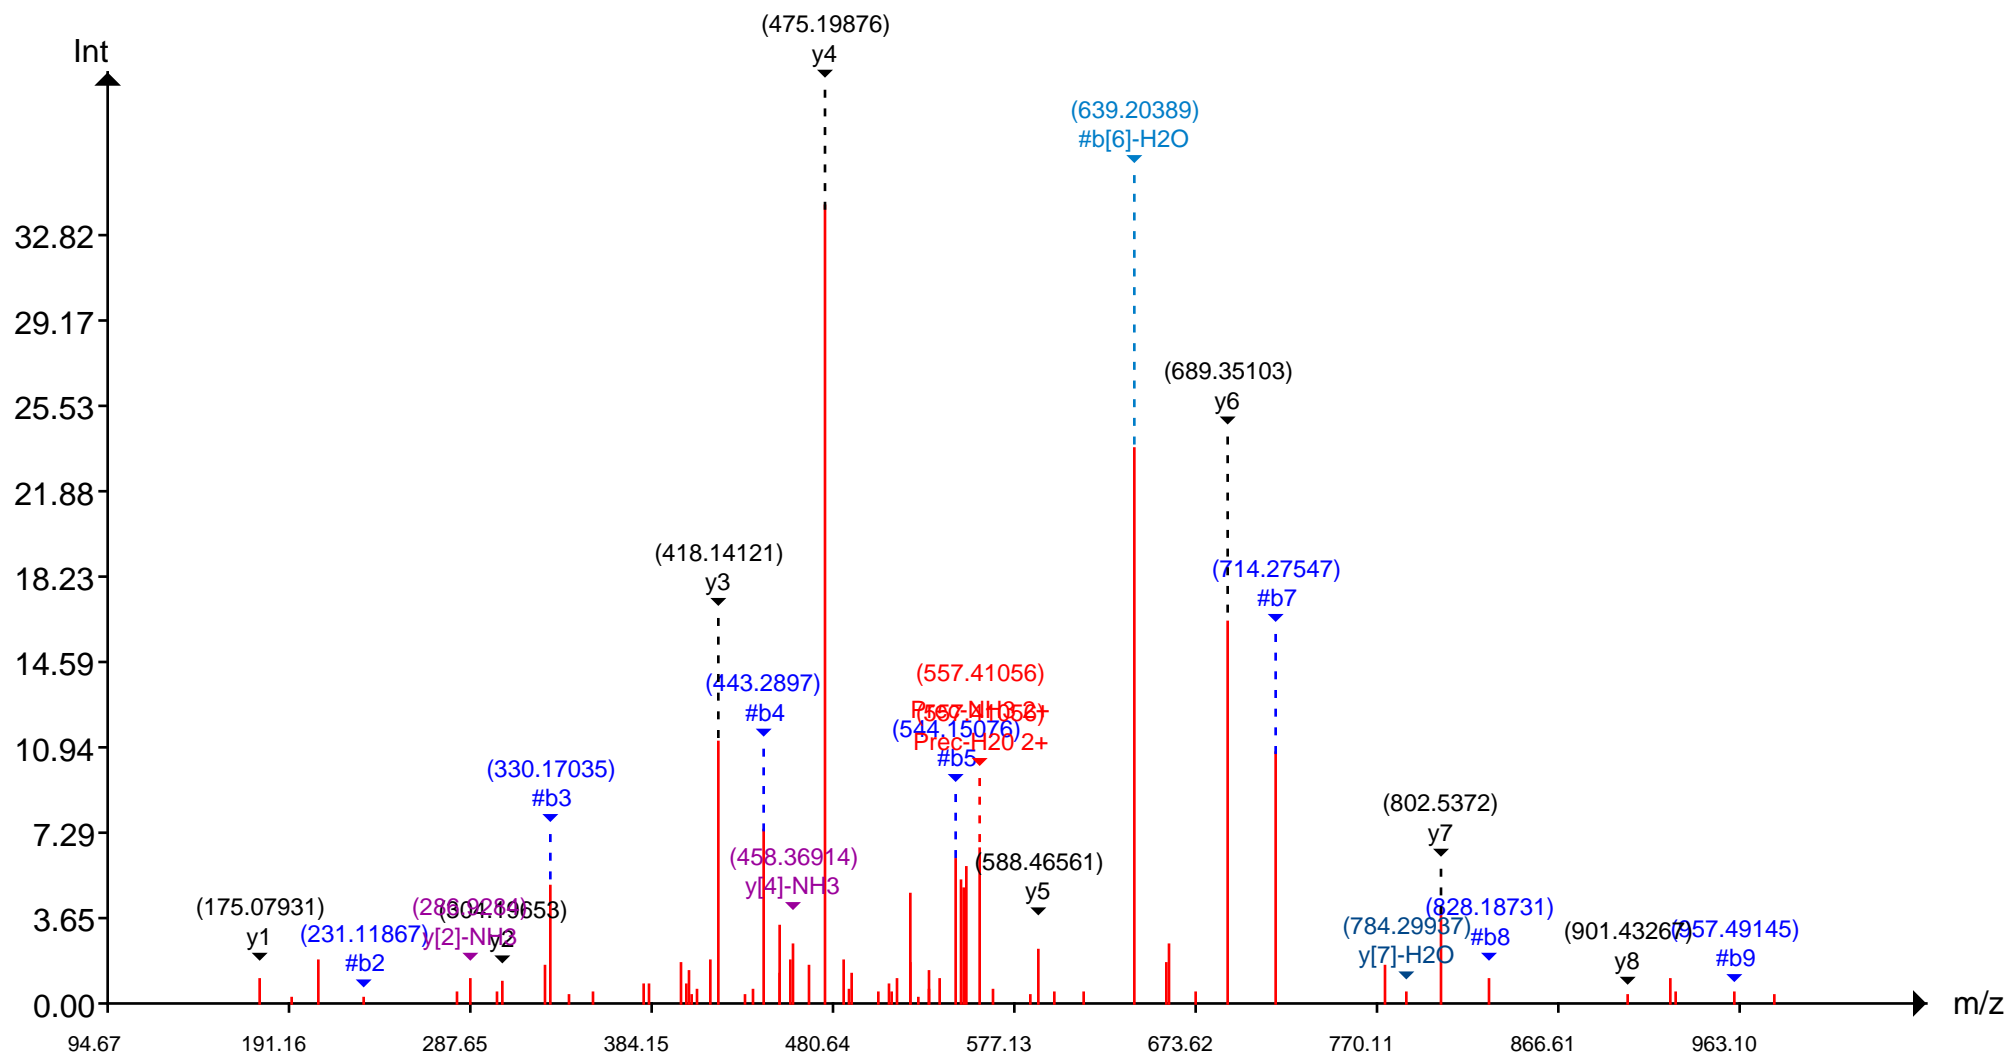

## Info

|                          |                                                                                |                           |         |
|--------------------------|--------------------------------------------------------------------------------|---------------------------|---------|
| <b>Modified Sequence</b> | AcD3-GQVITIGNER-COOH                                                           | <b>Ion score</b>          | 58.91   |
| <b>Protein</b>           | P62736, Q562R1, Q9BYX7, P60709, P68032, P63261, P63267, P68133, Q6S8J3, A5A3E0 | <b>Confidence level</b>   | 99.00%  |
| <b>Precursor m/z</b>     | 566.31356                                                                      | <b>Identity Threshold</b> | 48.80   |
| <b>Charge</b>            | 2+                                                                             | <b>Mass error</b>         | 2.63E-4 |

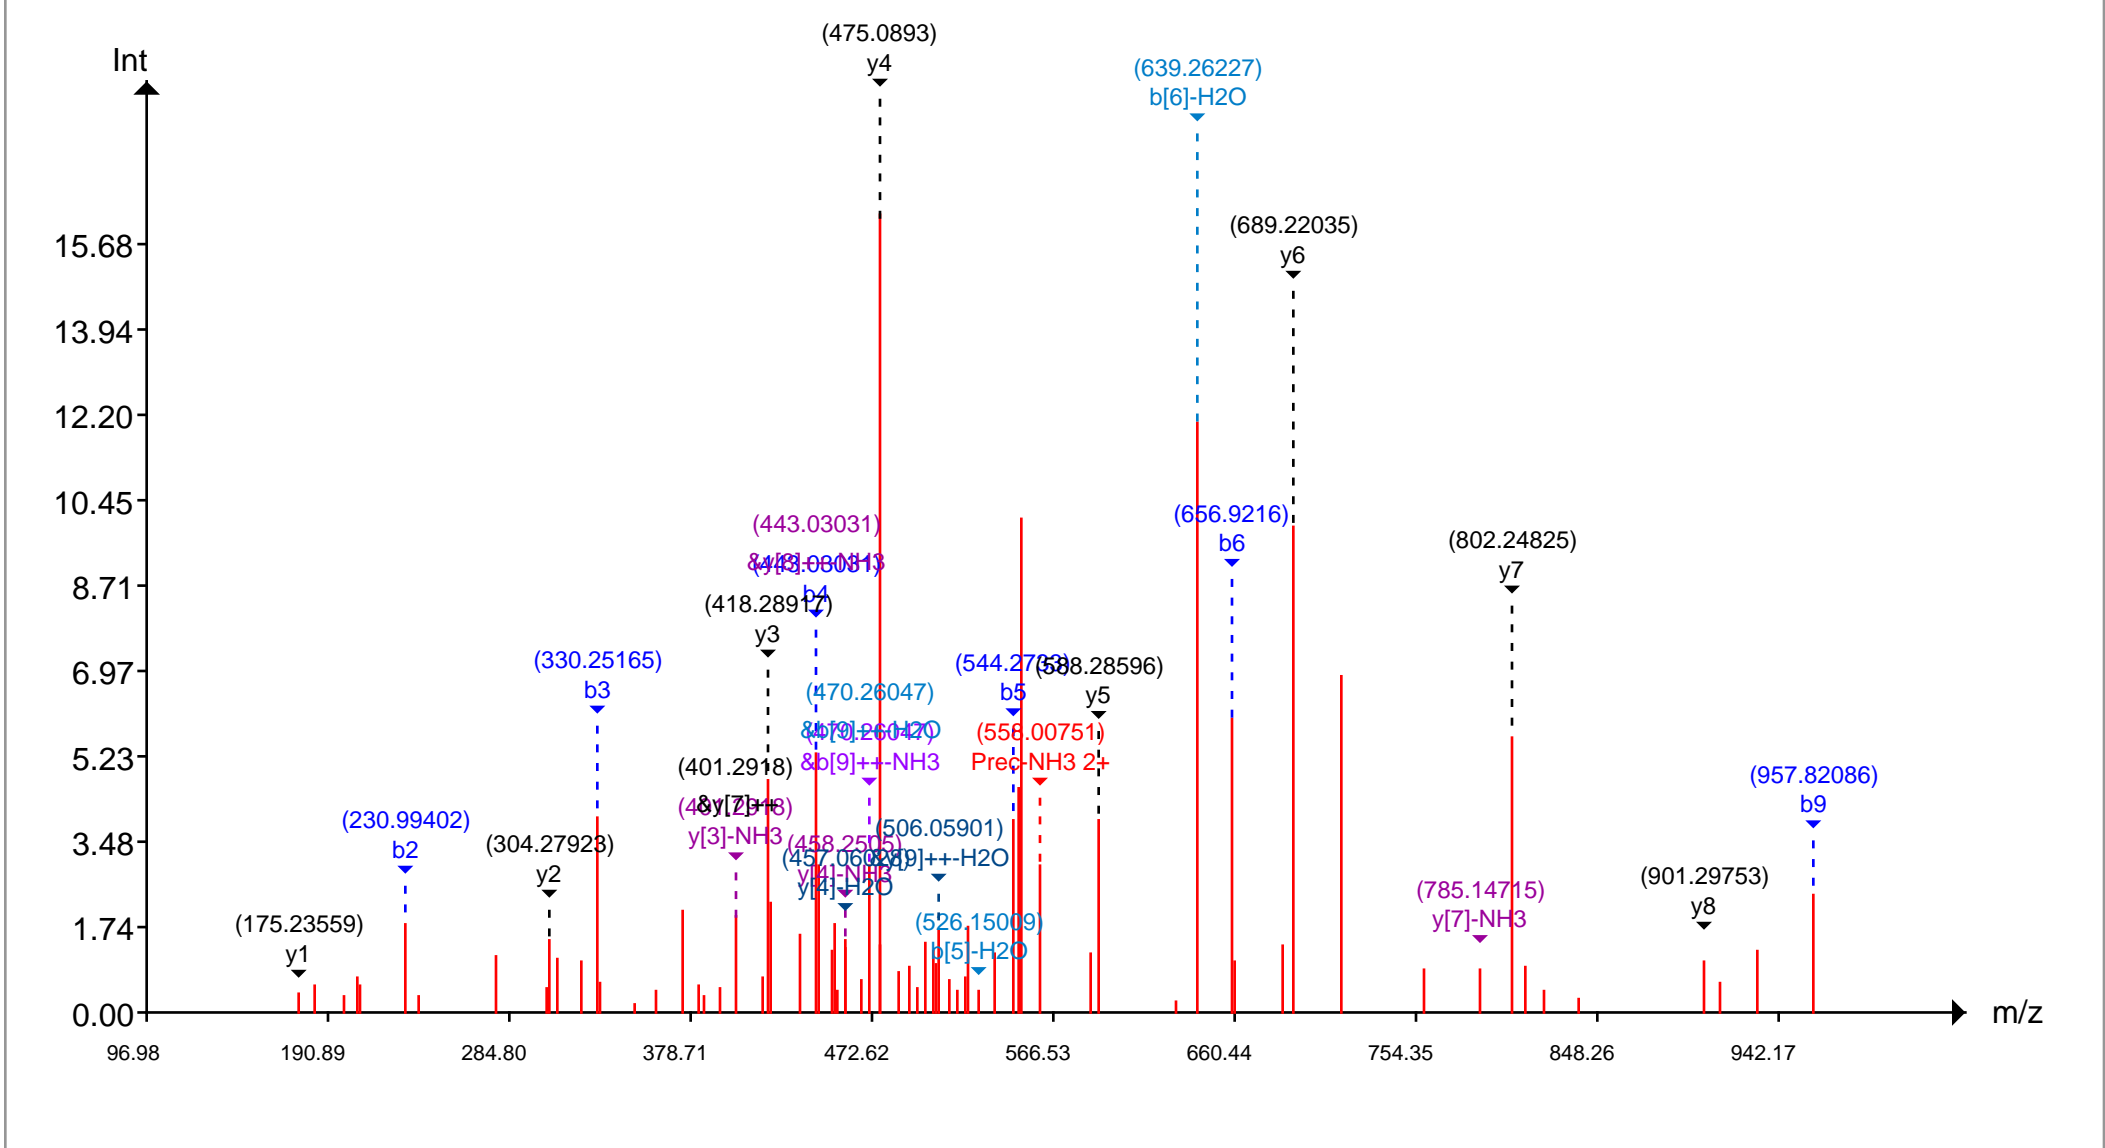

## Info

|                          |                                                                                |                           |         |
|--------------------------|--------------------------------------------------------------------------------|---------------------------|---------|
| <b>Modified Sequence</b> | AcD3-GQVITIGNER-COOH                                                           | <b>Ion score</b>          | 53.65   |
| <b>Protein</b>           | P62736, Q562R1, Q9BYX7, P60709, P68032, P63261, P63267, P68133, Q6S8J3, A5A3E0 | <b>Confidence level</b>   | 99.00%  |
| <b>Precursor m/z</b>     | 566.3135                                                                       | <b>Identity Threshold</b> | 48.87   |
| <b>Charge</b>            | 2+                                                                             | <b>Mass error</b>         | 1.43E-4 |

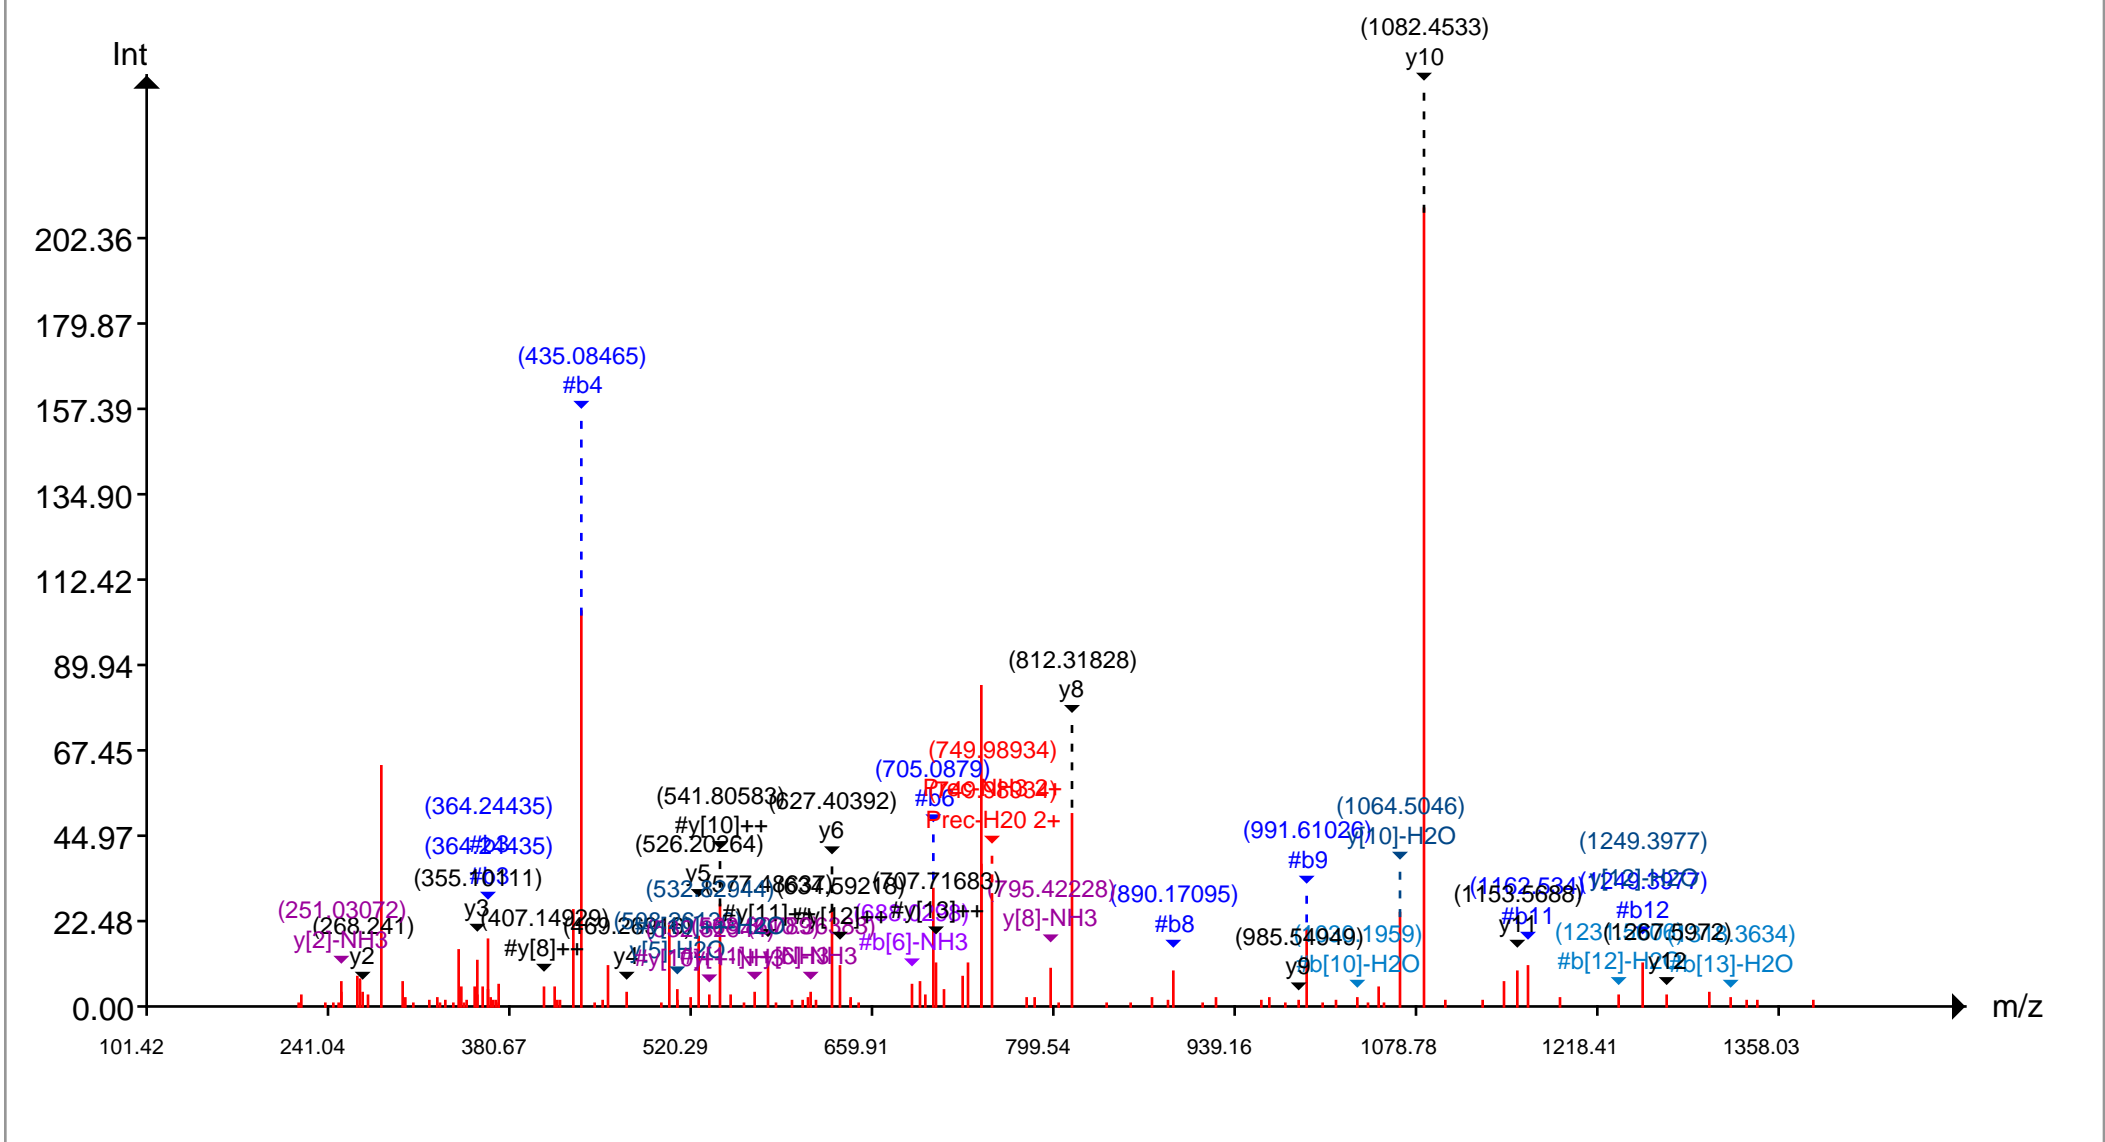

## Info

|                          |                                             |                           |         |
|--------------------------|---------------------------------------------|---------------------------|---------|
| <b>Modified Sequence</b> | AcD3-GM<Mox*>NAPK<AcD3K*>GQTGNSSR<C13>-COOH | <b>Ion score</b>          | 56.41   |
| <b>Protein</b>           | P23588                                      | <b>Confidence level</b>   | 99.00%  |
| <b>Precursor m/z</b>     | 758.87325                                   | <b>Identity Threshold</b> | 48.20   |
| <b>Charge</b>            | 2+                                          | <b>Mass error</b>         | 5.48E-4 |

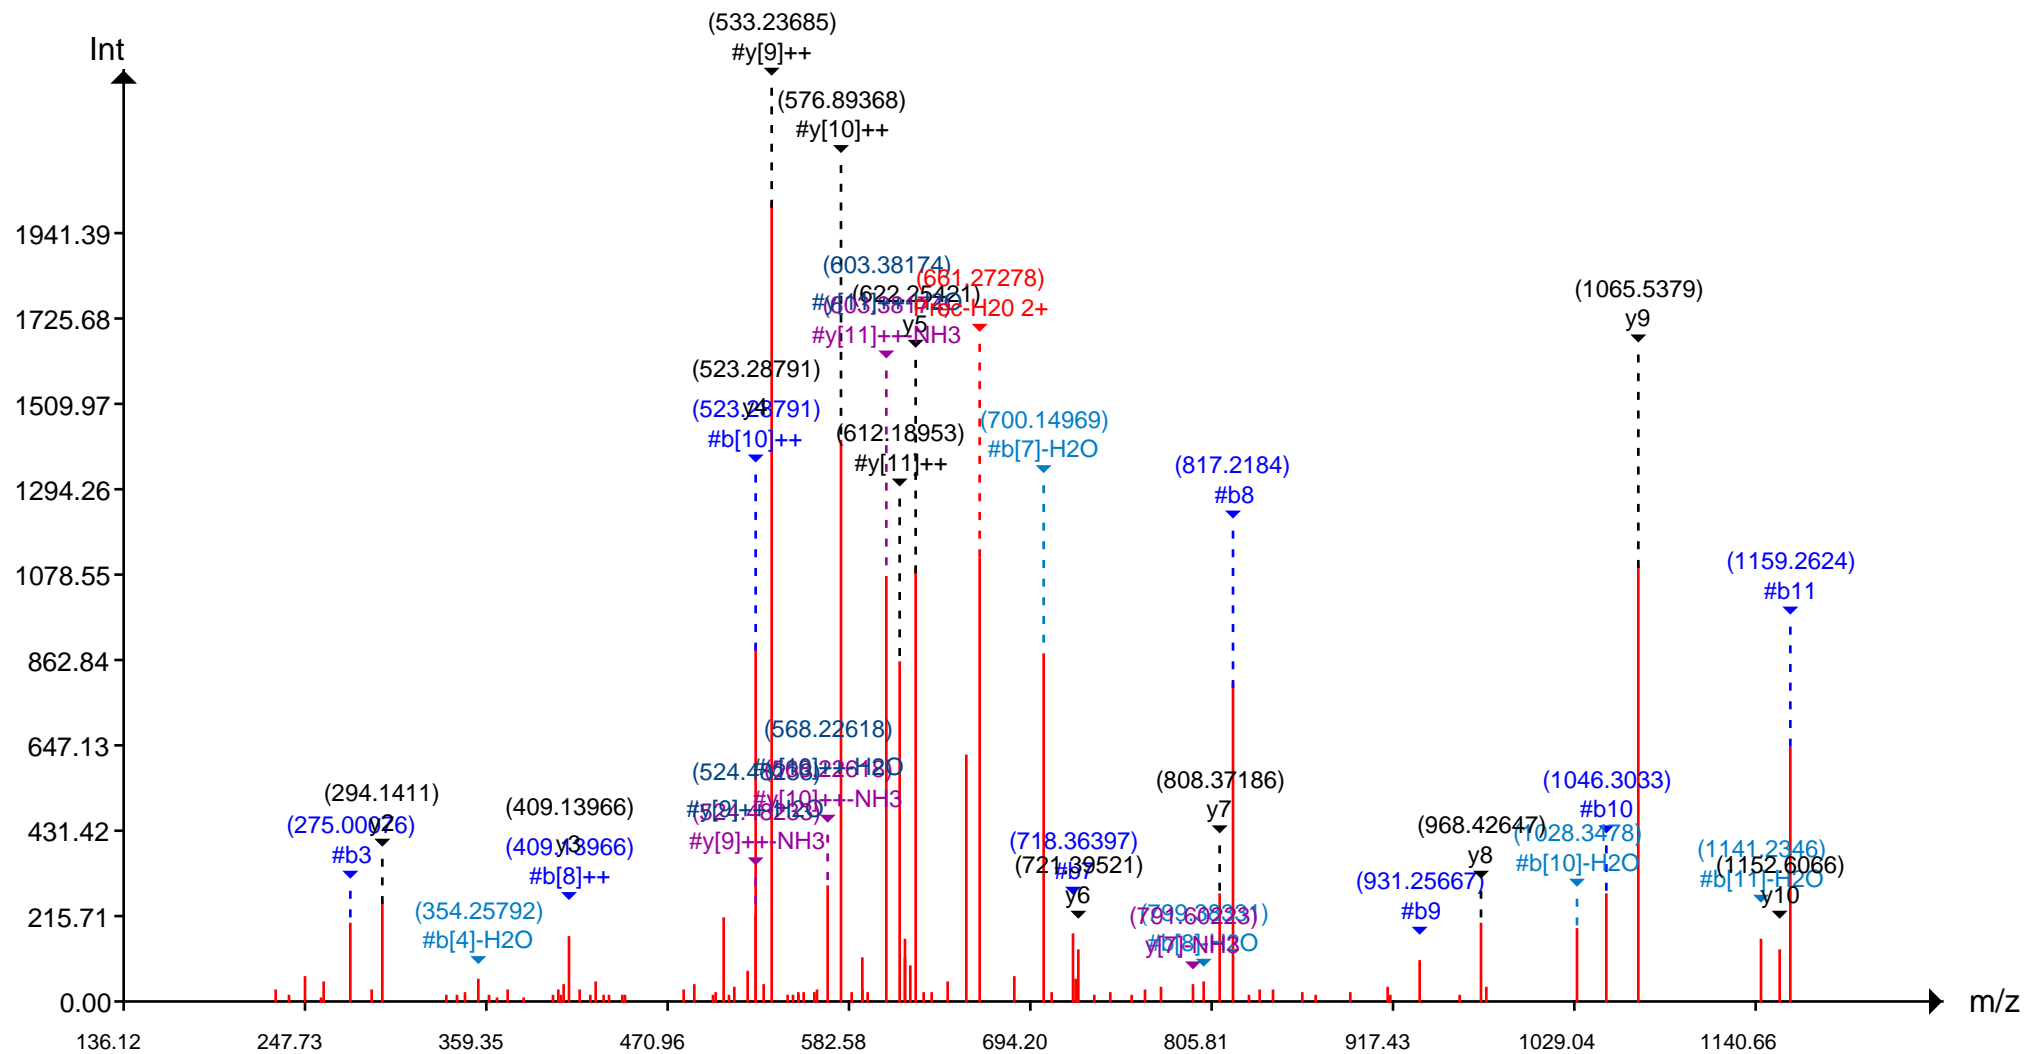

## Info

|                          |                                   |                           |         |
|--------------------------|-----------------------------------|---------------------------|---------|
| <b>Modified Sequence</b> | AcD3-AASPC<Cmm*>SVVNDLR<C13>-COOH | <b>Ion score</b>          | 66.68   |
| <b>Protein</b>           | P52888                            | <b>Confidence level</b>   | 99.00%  |
| <b>Precursor m/z</b>     | 670.34422                         | <b>Identity Threshold</b> | 48.88   |
| <b>Charge</b>            | 2+                                | <b>Mass error</b>         | 2.28E-4 |

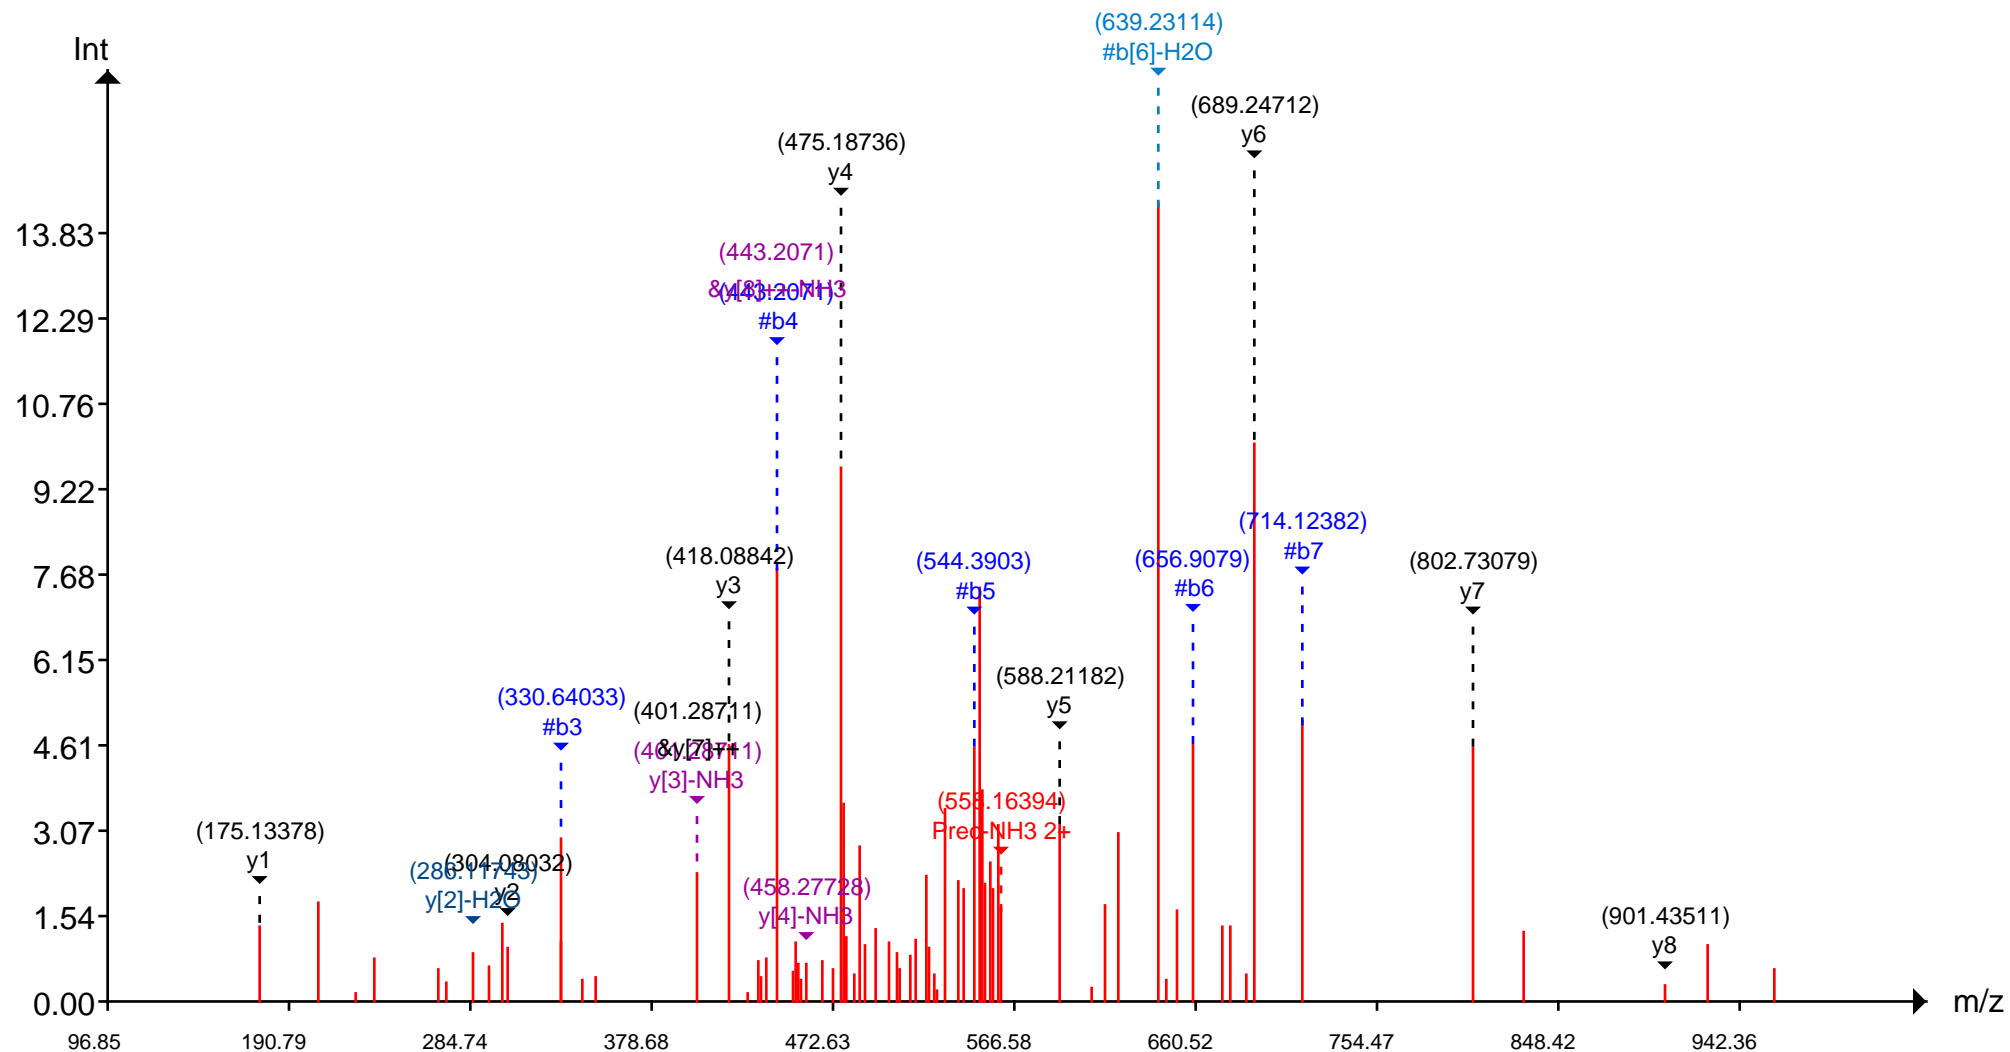

## Info

|                          |                                                                                |                           |         |
|--------------------------|--------------------------------------------------------------------------------|---------------------------|---------|
| <b>Modified Sequence</b> | AcD3-GQVITIGNER-COOH                                                           | <b>Ion score</b>          | 55.5    |
| <b>Protein</b>           | P62736, Q562R1, Q9BYX7, P60709, P68032, P63261, P63267, P68133, Q6S8J3, A5A3E0 | <b>Confidence level</b>   | 99.00%  |
| <b>Precursor m/z</b>     | 566.31366                                                                      | <b>Identity Threshold</b> | 48.78   |
| <b>Charge</b>            | 2+                                                                             | <b>Mass error</b>         | 4.63E-4 |

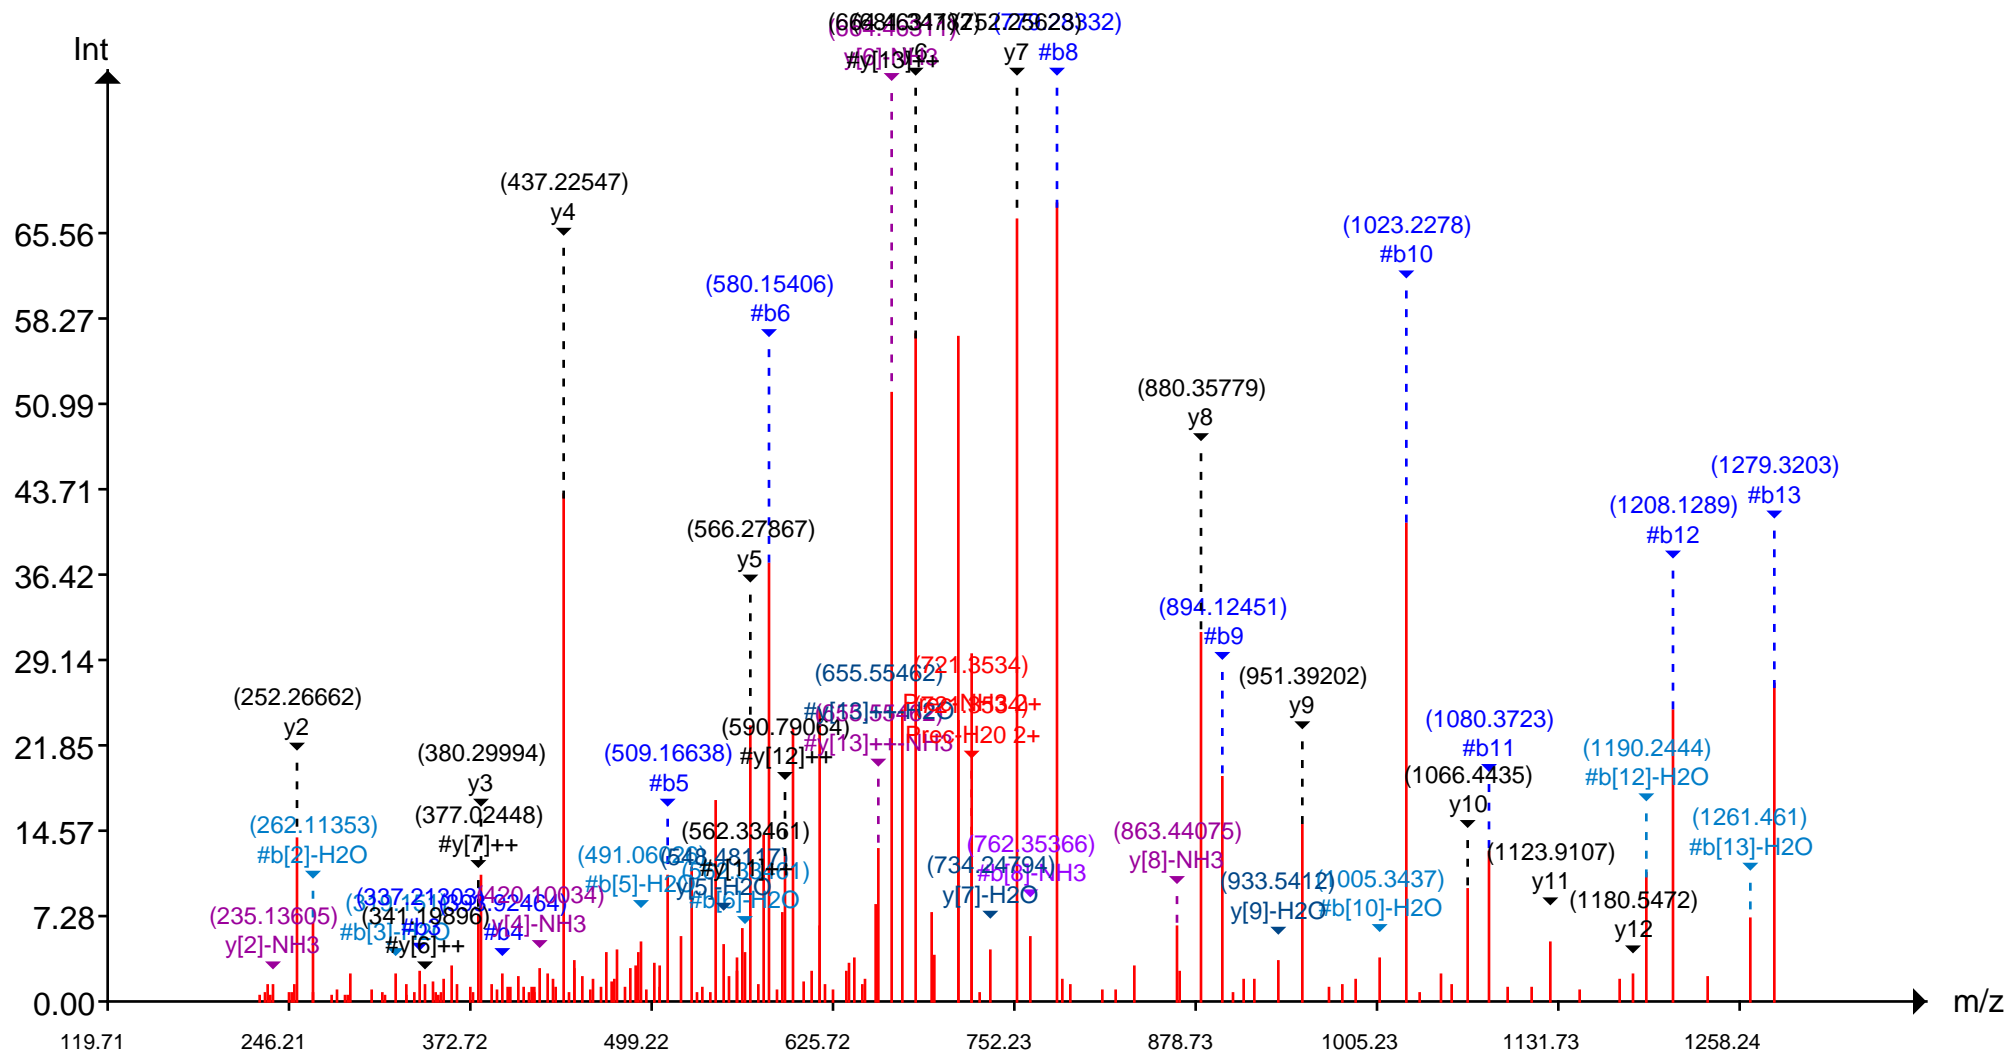

| Info                     |                               |                           |         |
|--------------------------|-------------------------------|---------------------------|---------|
| <b>Modified Sequence</b> | AcD3-SFGGDAQADEGQAR<C13>-COOH | <b>Ion score</b>          | 109.88  |
| <b>Protein</b>           | P33992                        | <b>Confidence level</b>   | 99.00%  |
| <b>Precursor m/z</b>     | 730.33284                     | <b>Identity Threshold</b> | 45.42   |
| <b>Charge</b>            | 2+                            | <b>Mass error</b>         | 1.12E-4 |

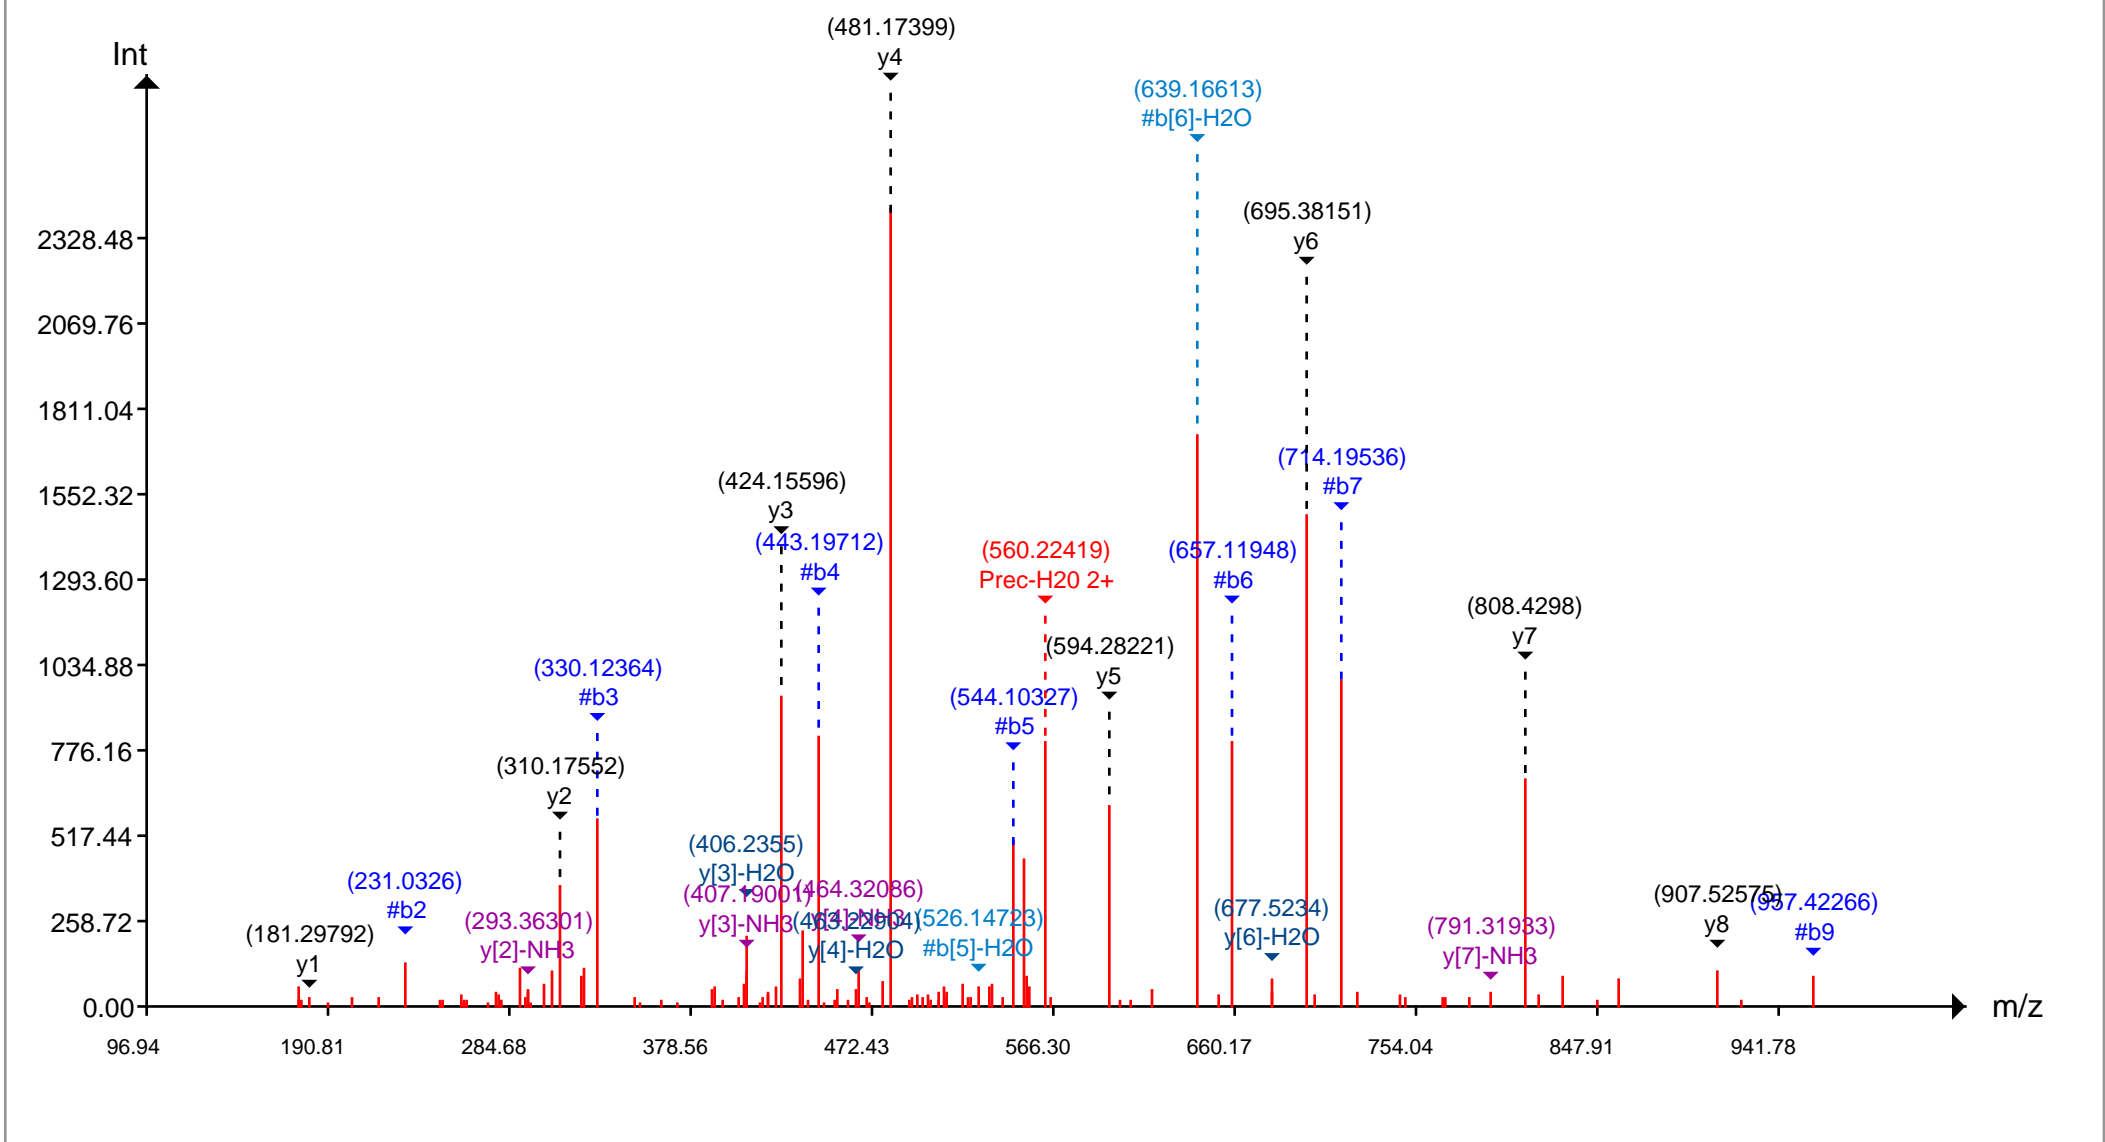

## Info

|                          |                                                                                |                           |          |
|--------------------------|--------------------------------------------------------------------------------|---------------------------|----------|
| <b>Modified Sequence</b> | AcD3-GQVITIGNER<C13>-COOH                                                      | <b>Ion score</b>          | 59.49    |
| <b>Protein</b>           | P62736, Q562R1, Q9BYX7, P60709, P68032, P63261, P63267, P68133, Q6S8J3, A5A3E0 | <b>Confidence level</b>   | 99.00%   |
| <b>Precursor m/z</b>     | 569.32306                                                                      | <b>Identity Threshold</b> | 48.31    |
| <b>Charge</b>            | 2+                                                                             | <b>Mass error</b>         | -8.78E-4 |



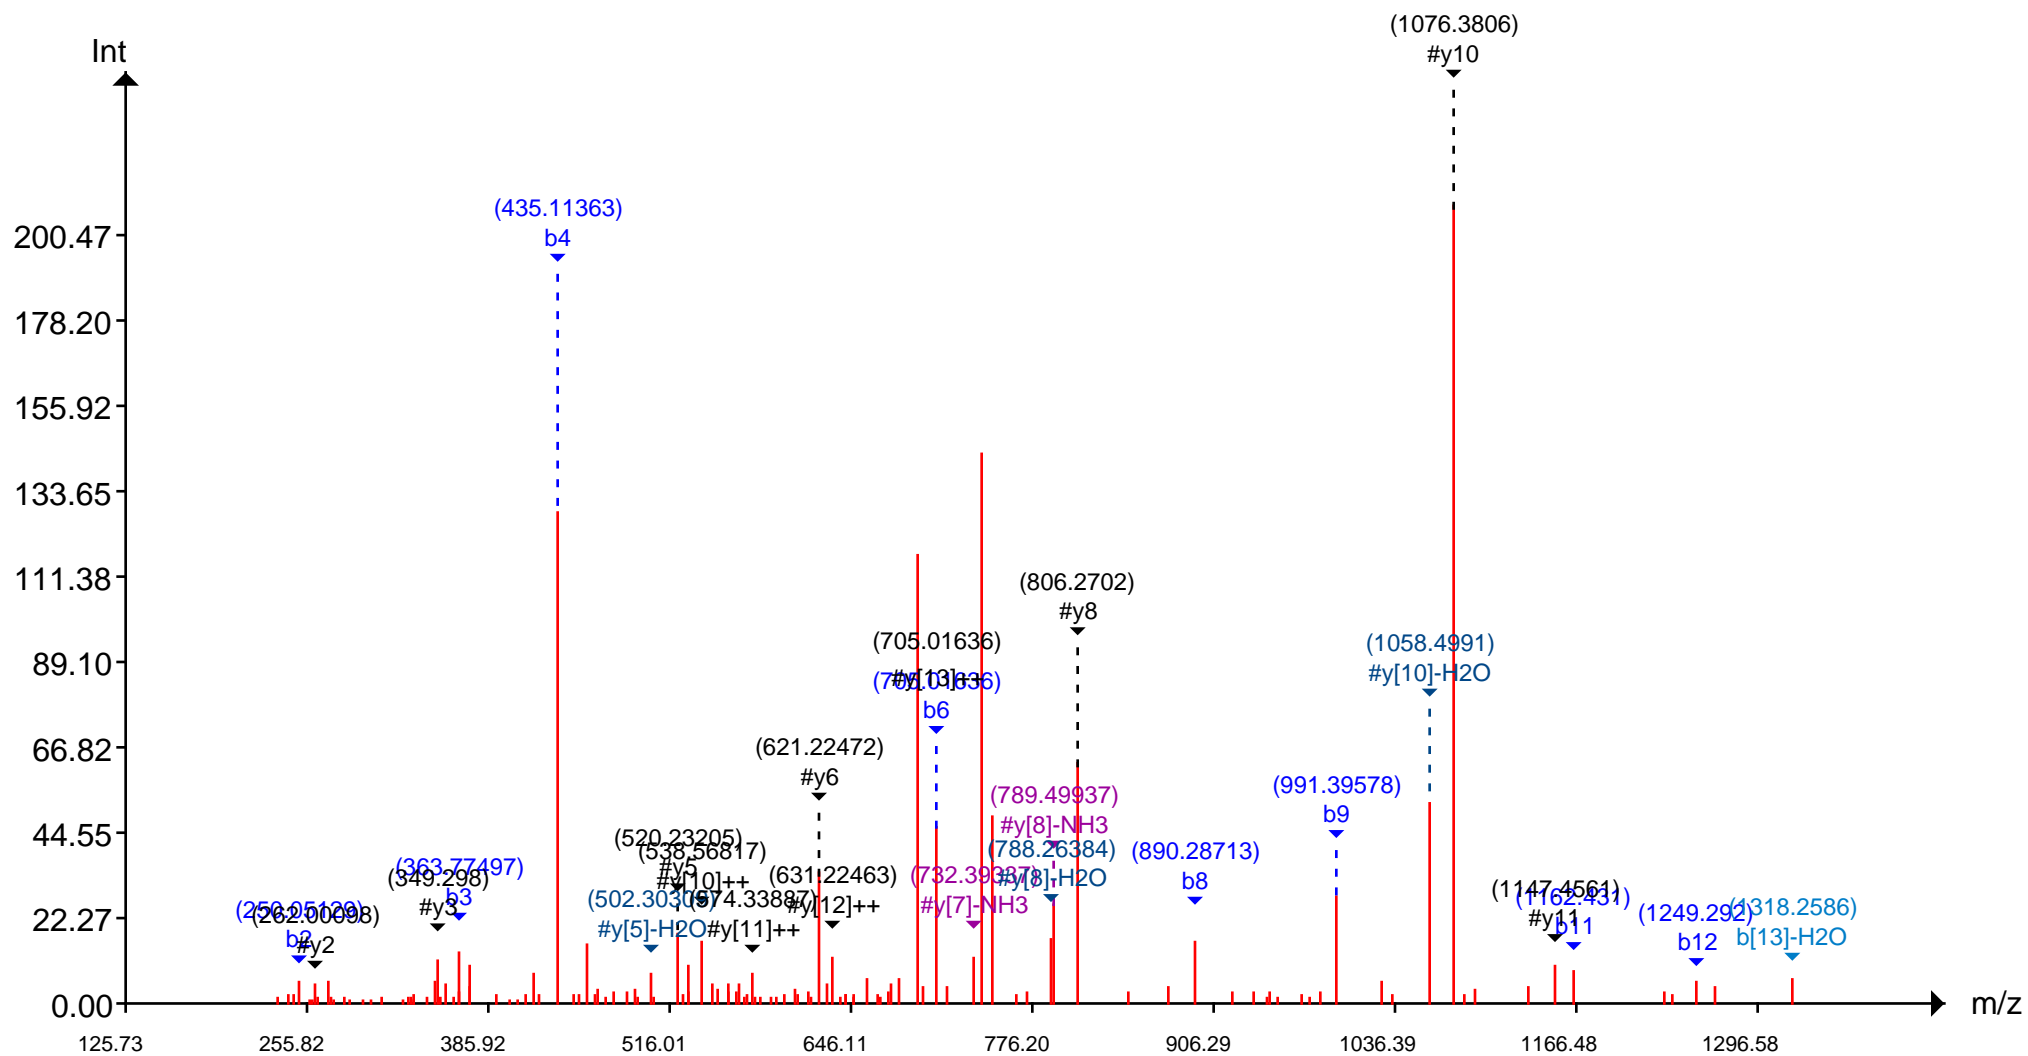

## Info

**Modified Sequence** AcD3-GM<Mox\*>NAPK<AcD3K\*>GQTGNSSR-COOH

**Ion score** 68.51

**Protein** P23588

**Confidence level** 99.00%

**Precursor m/z** 755.86311

**Identity Threshold** 47.73

**Charge** 2+

**Mass error** 4.1E-4

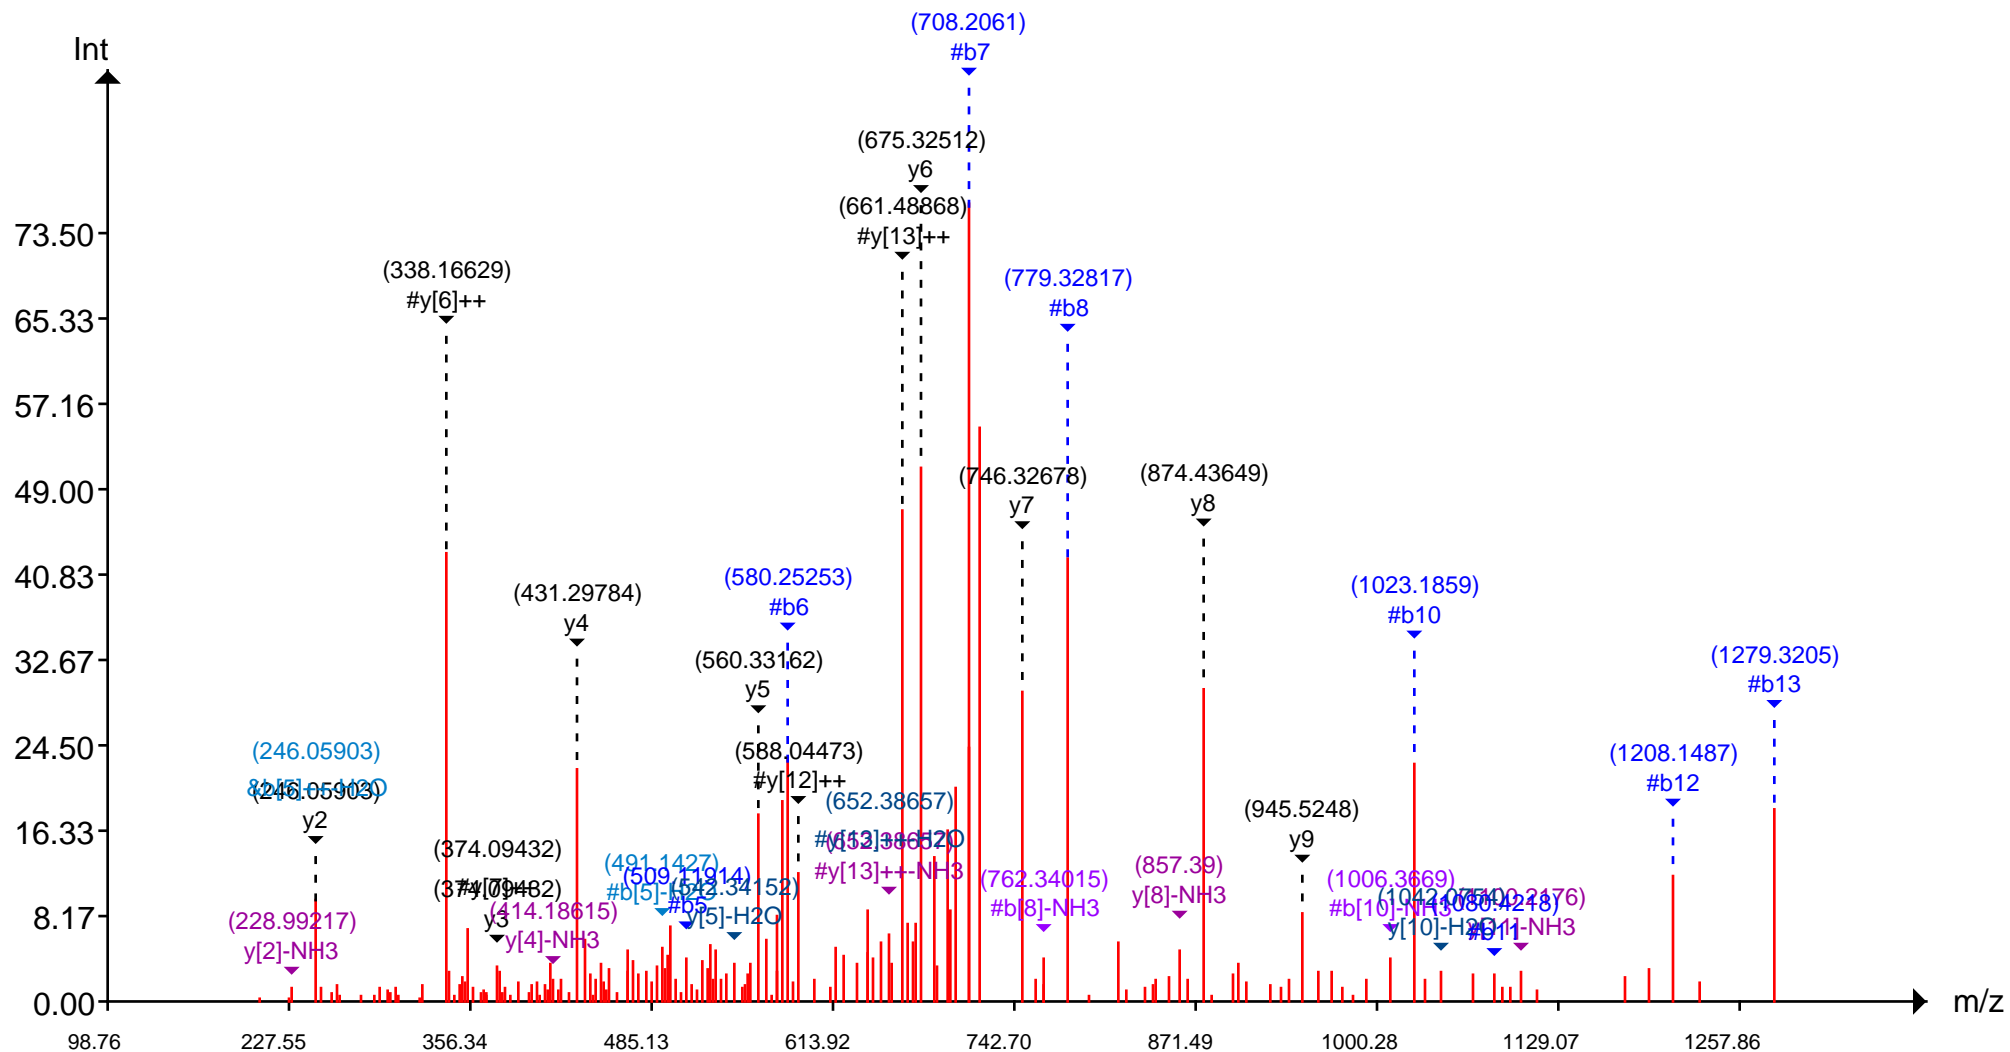

## Info

**Modified Sequence** AcD3-SFGGDAQADEGQAR-COOH

**Protein** P33992

**Precursor m/z** 727.32307

**Charge** 2+

**Ion score** 45.09

**Confidence level** 99.00%

**Identity Threshold** 44.30

**Mass error** 7.13E-4

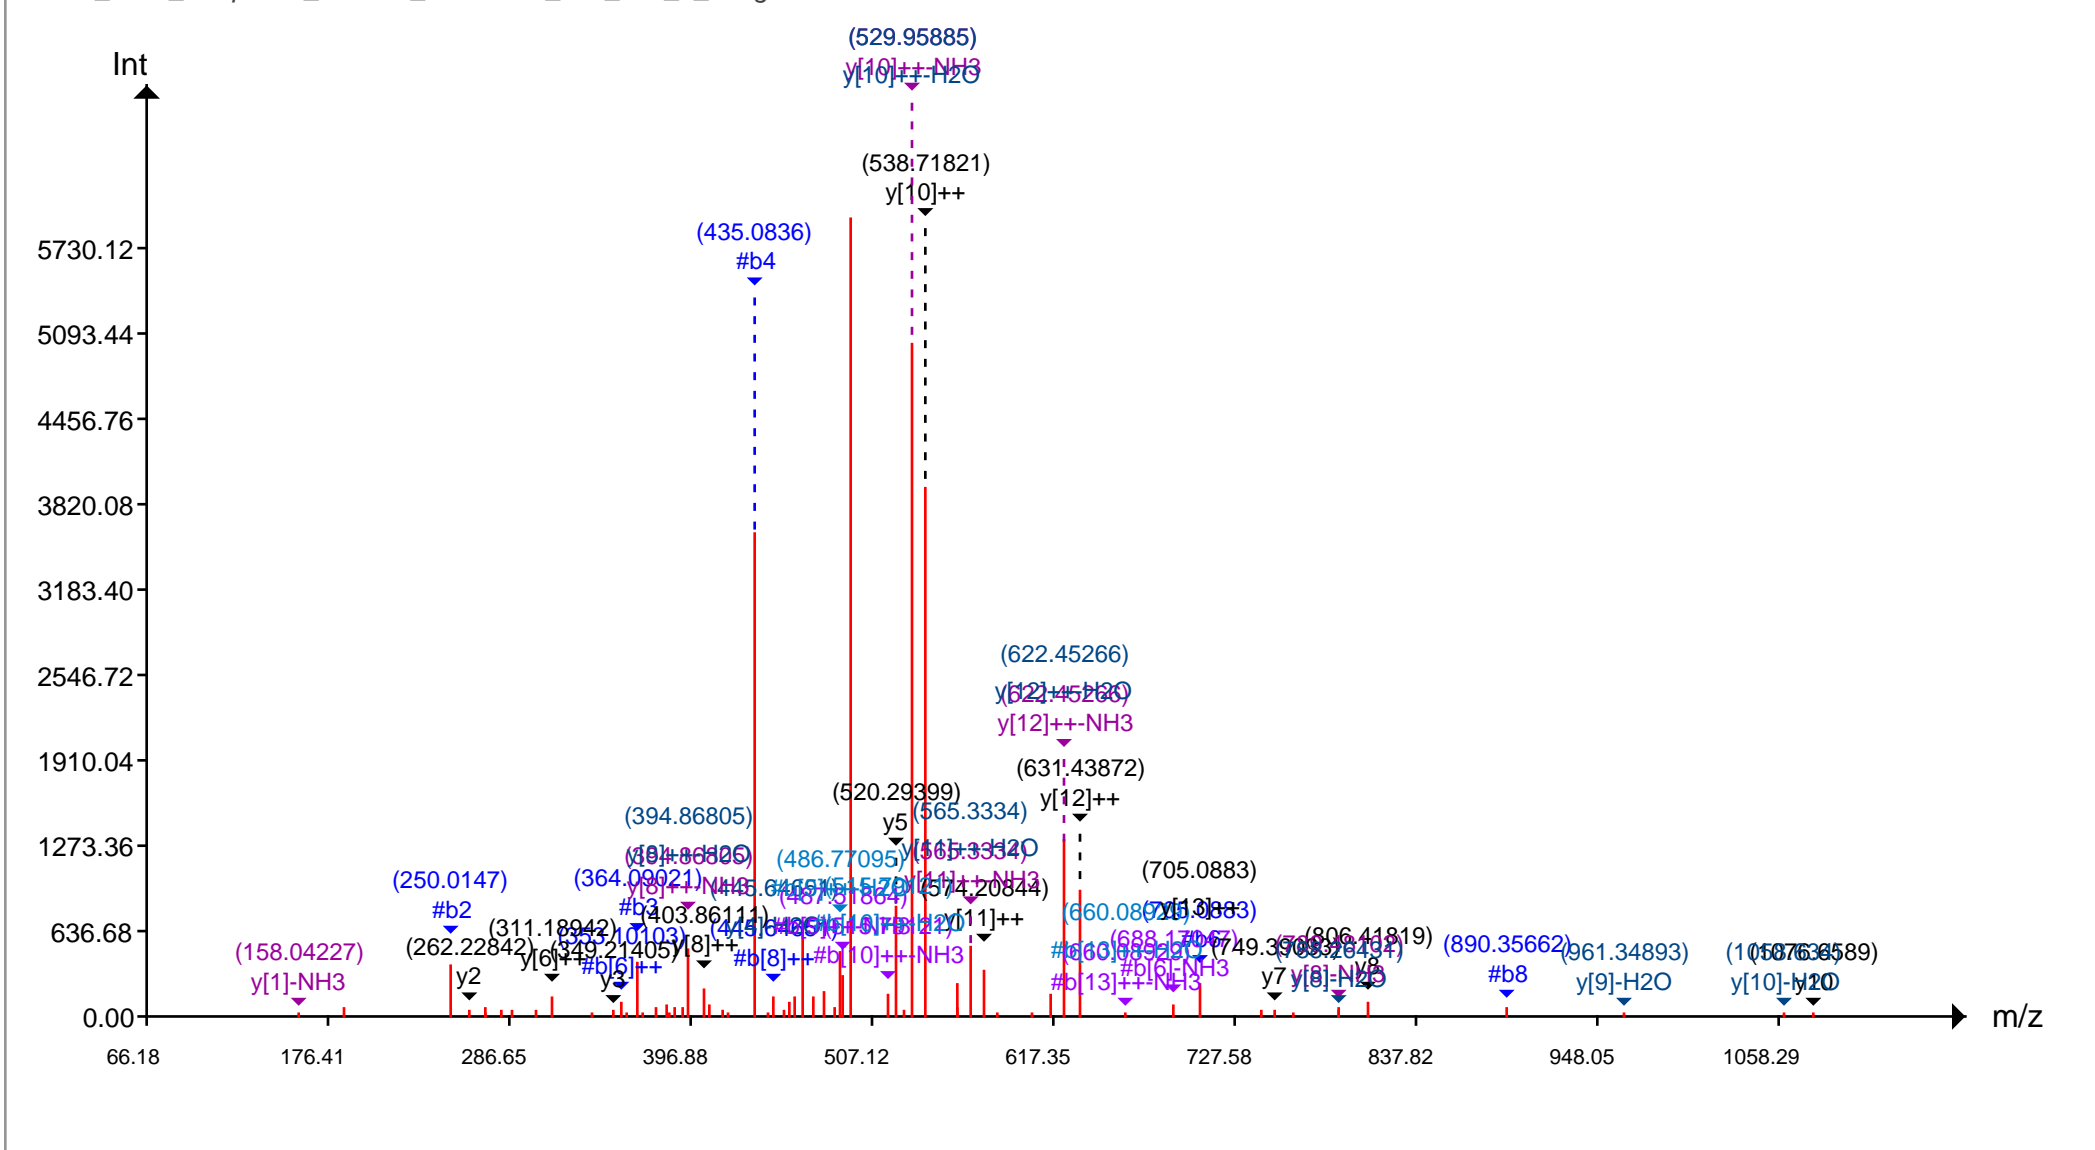

## Info

**Modified Sequence** AcD3-GM<Mox\*>NAPK<AcD3K\*>GQTGNSSR-COOH

**Ion score** 59.98

**Protein** P23588

**Confidence level** 99.00%

**Precursor m/z** 504.24422

**Identity Threshold** 47.76

**Charge** 3+

**Mass error** -4.26E-4

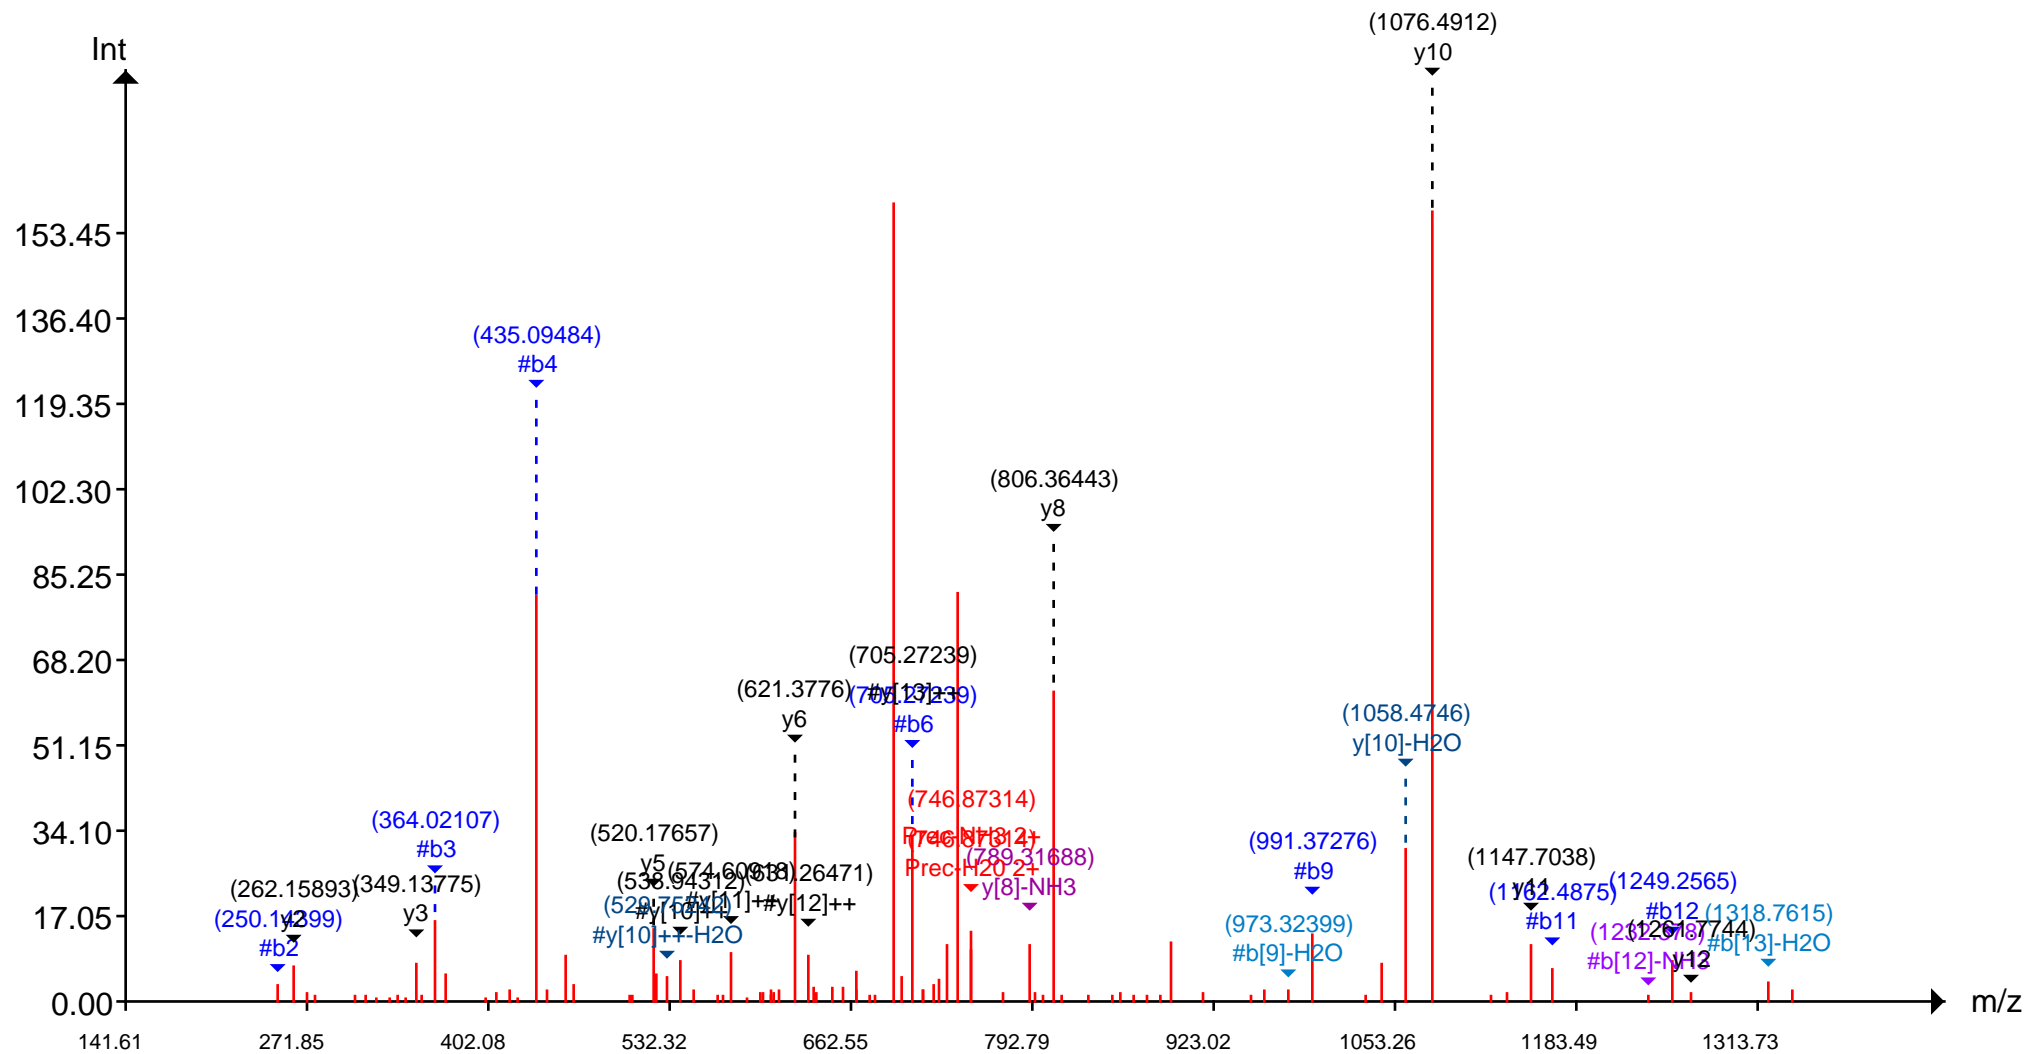

## Info

**Modified Sequence** AcD3-GM<Mox\*>NAPK<AcD3K\*>GQTGNSSR-COOH

**Ion score** 58.83

**Protein** P23588

**Confidence level** 99.00%

**Precursor m/z** 755.86321

**Identity Threshold** 47.75

**Charge** 2+

**Mass error** 6.1E-4

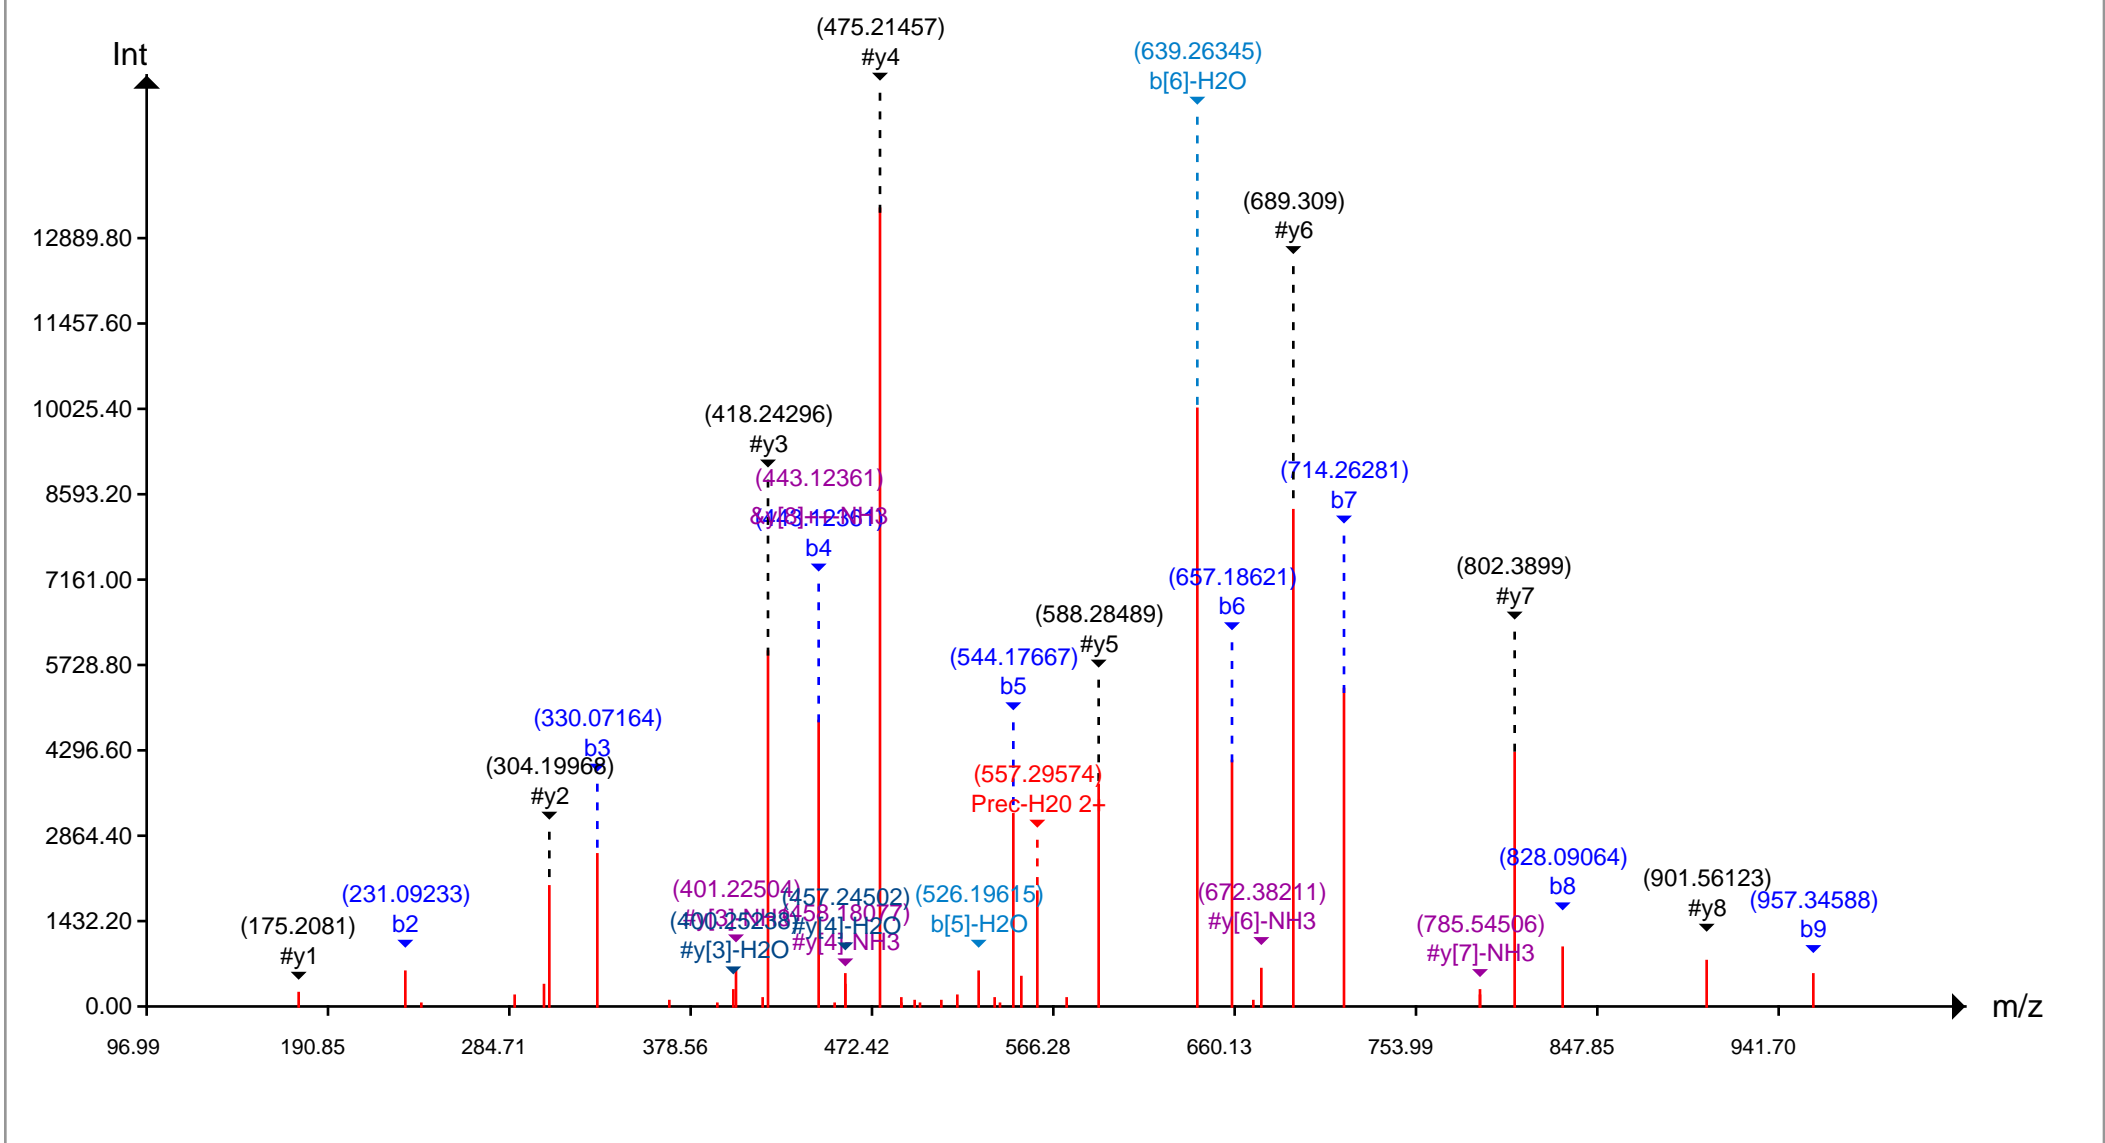

## Info

|                          |                                                                                |                           |        |
|--------------------------|--------------------------------------------------------------------------------|---------------------------|--------|
| <b>Modified Sequence</b> | AcD3-GQVITIGNER-COOH                                                           | <b>Ion score</b>          | 92.1   |
| <b>Protein</b>           | P62736, Q562R1, Q9BYX7, P60709, P68032, P63261, P63267, P68133, Q6S8J3, A5A3E0 | <b>Confidence level</b>   | 99.00% |
| <b>Precursor m/z</b>     | 566.31347                                                                      | <b>Identity Threshold</b> | 48.85  |
| <b>Charge</b>            | 2+                                                                             | <b>Mass error</b>         | 8.3E-5 |

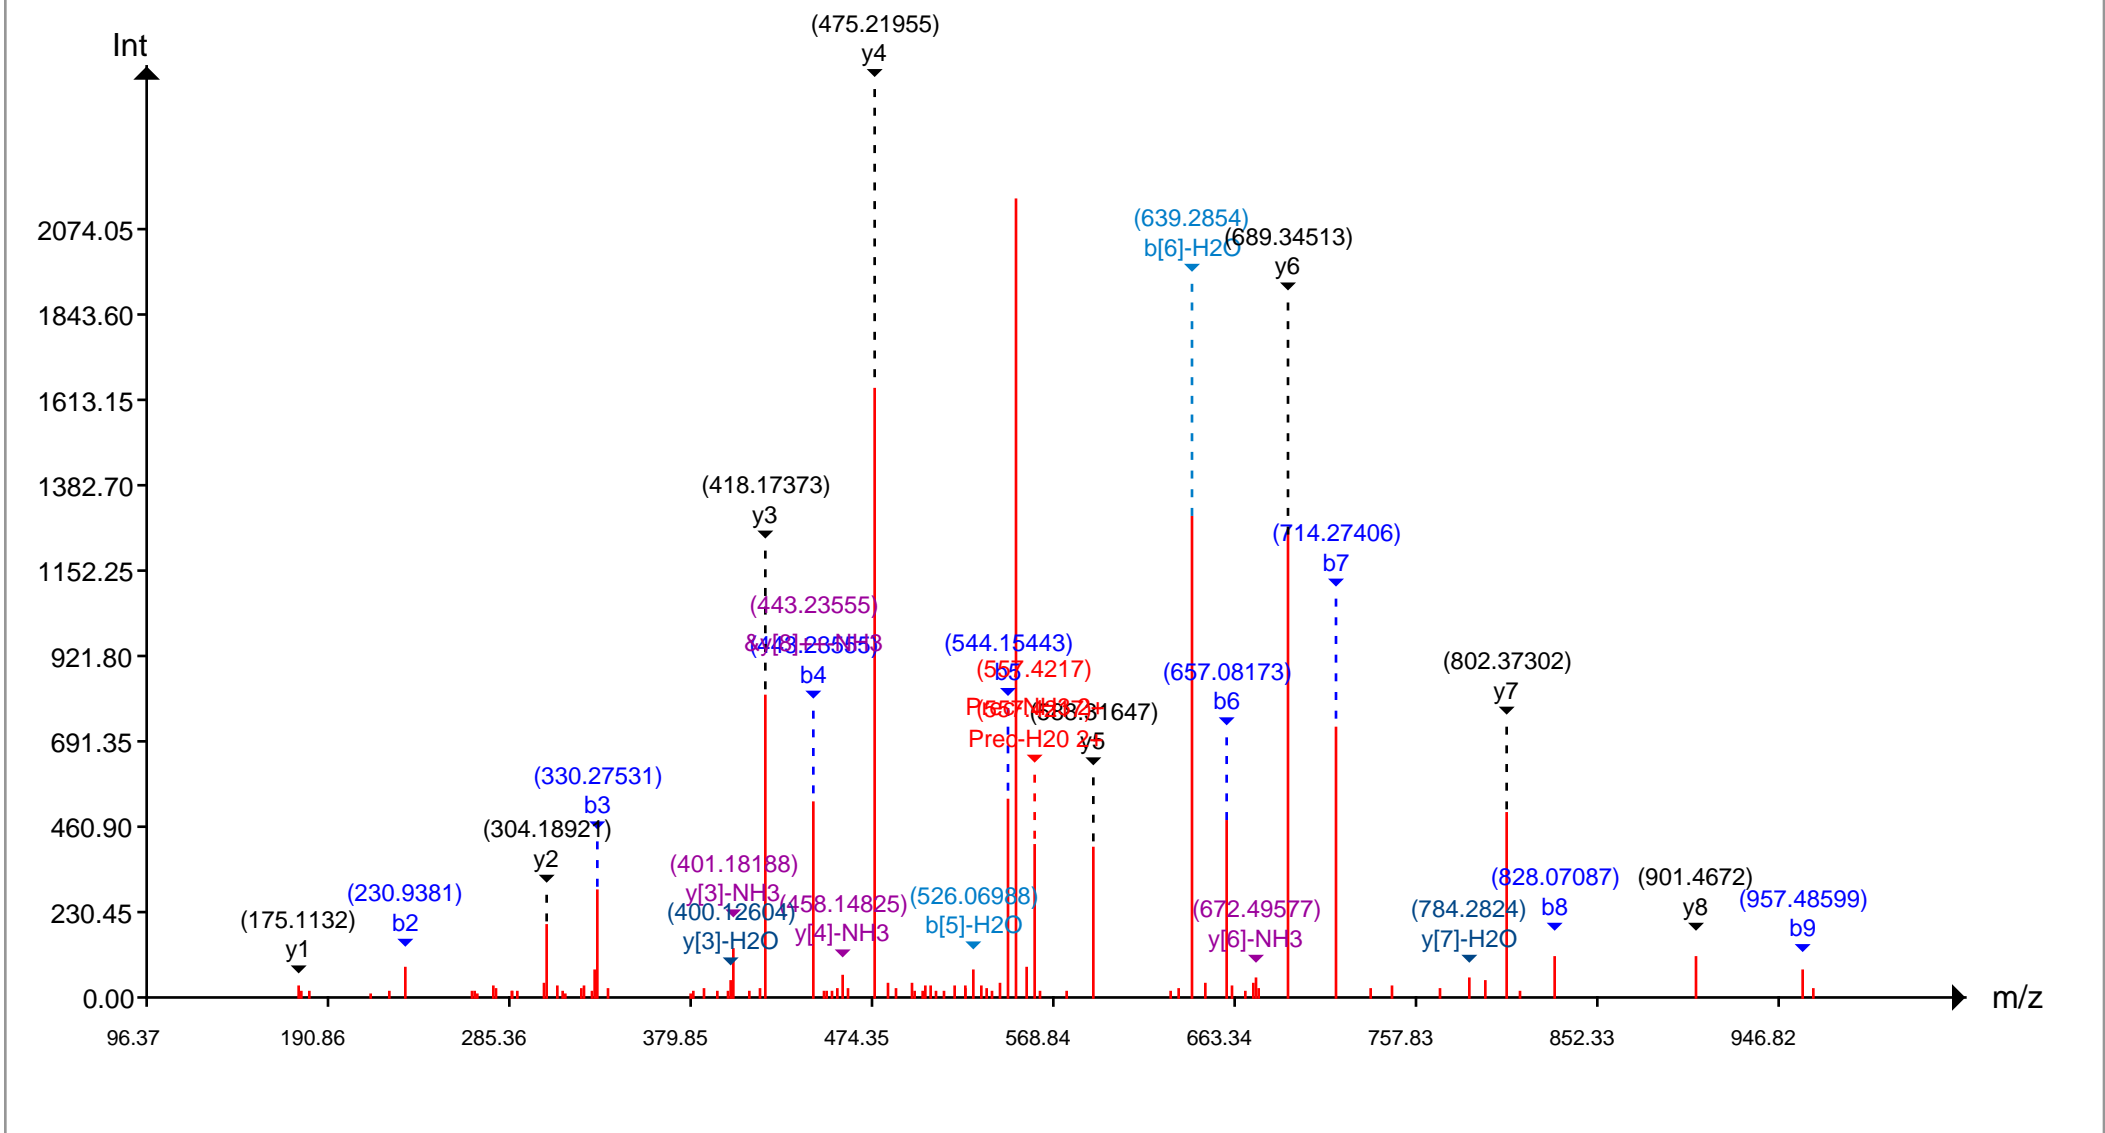

## Info

|                          |                                                                                |                           |        |
|--------------------------|--------------------------------------------------------------------------------|---------------------------|--------|
| <b>Modified Sequence</b> | AcD3-GQVITIGNER-COOH                                                           | <b>Ion score</b>          | 81.46  |
| <b>Protein</b>           | P62736, Q562R1, Q9BYX7, P60709, P68032, P63261, P63267, P68133, Q6S8J3, A5A3E0 | <b>Confidence level</b>   | 99.00% |
| <b>Precursor m/z</b>     | 566.31347                                                                      | <b>Identity Threshold</b> | 48.85  |
| <b>Charge</b>            | 2+                                                                             | <b>Mass error</b>         | 8.3E-5 |

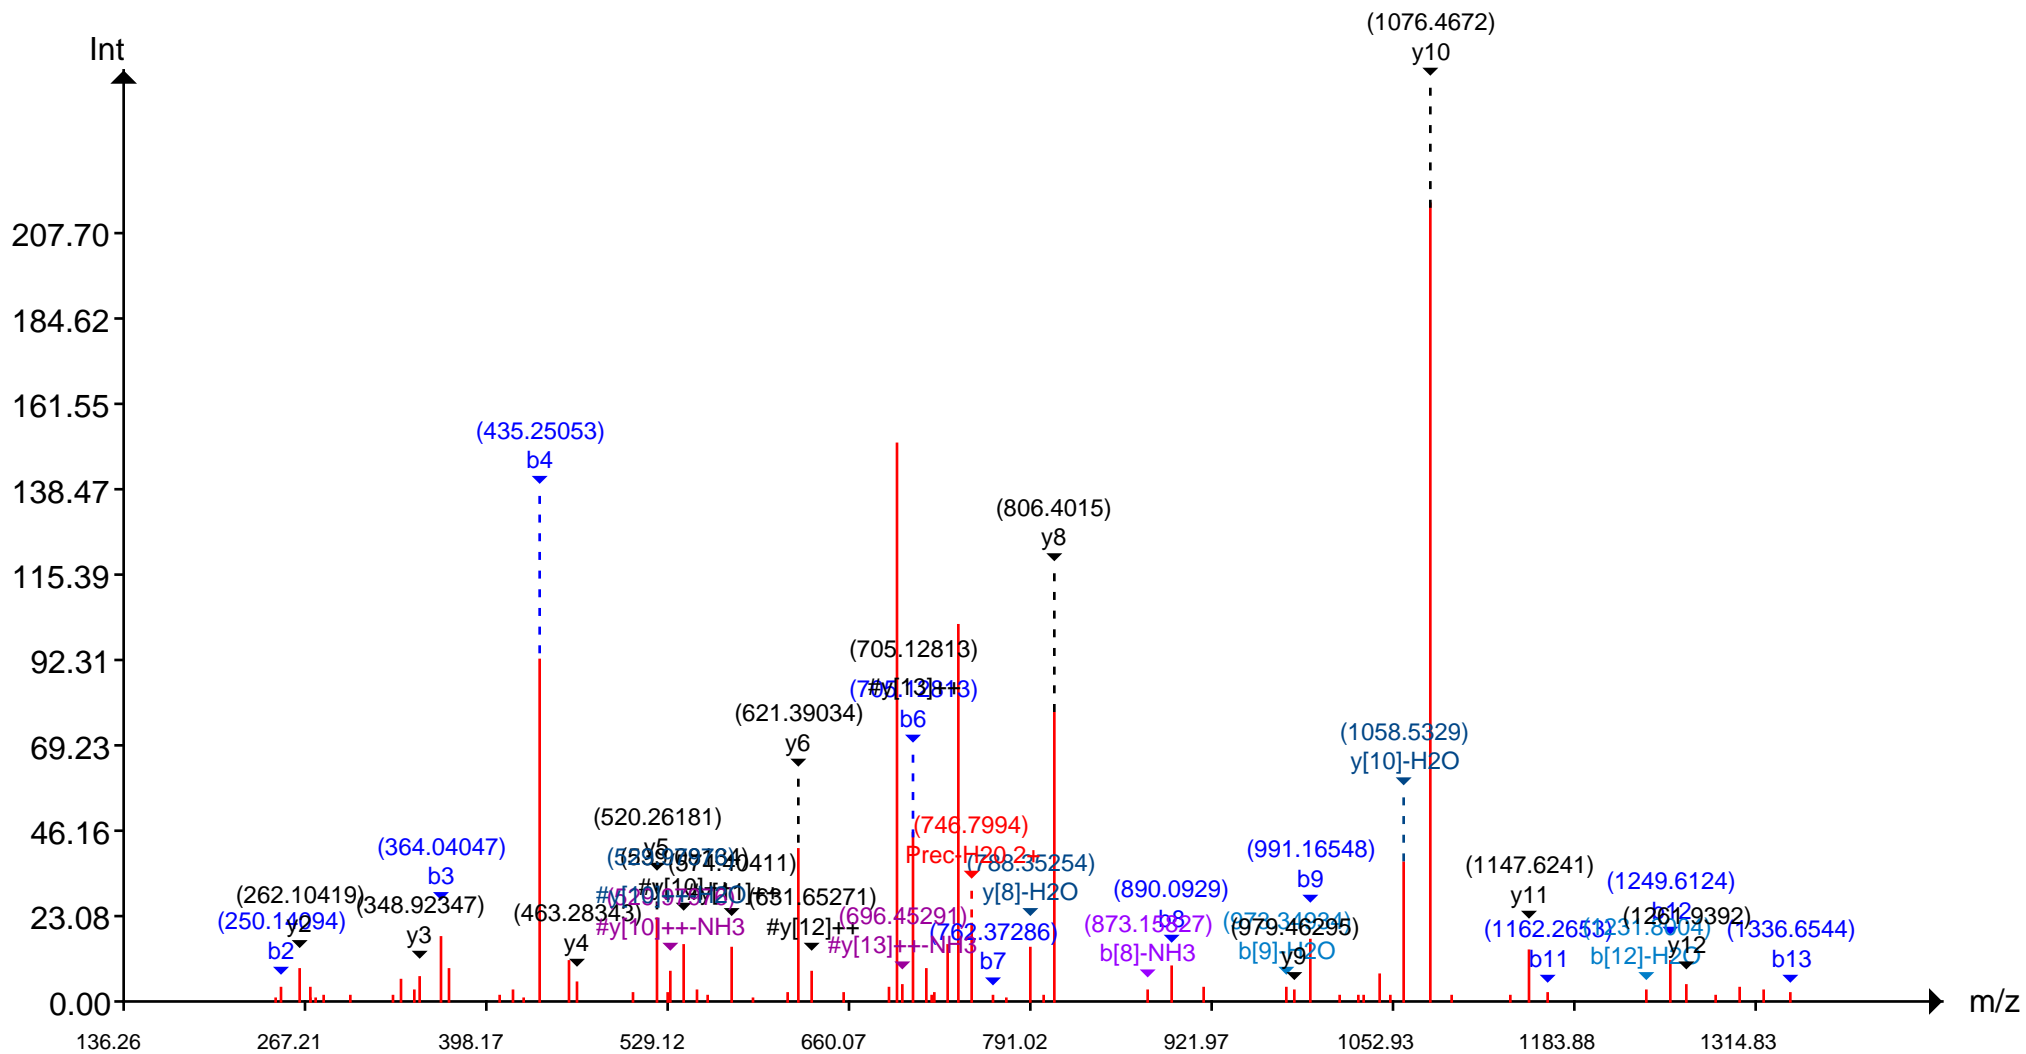

## Info

**Modified Sequence** AcD3-GM<Mox\*>NAPK<AcD3K\*>GQTGNSSR-COOH

**Ion score** 73.51

**Protein** P23588

**Confidence level** 99.00%

**Precursor m/z** 755.86326

**Identity Threshold** 47.74

**Charge** 2+

**Mass error** 7.1E-4

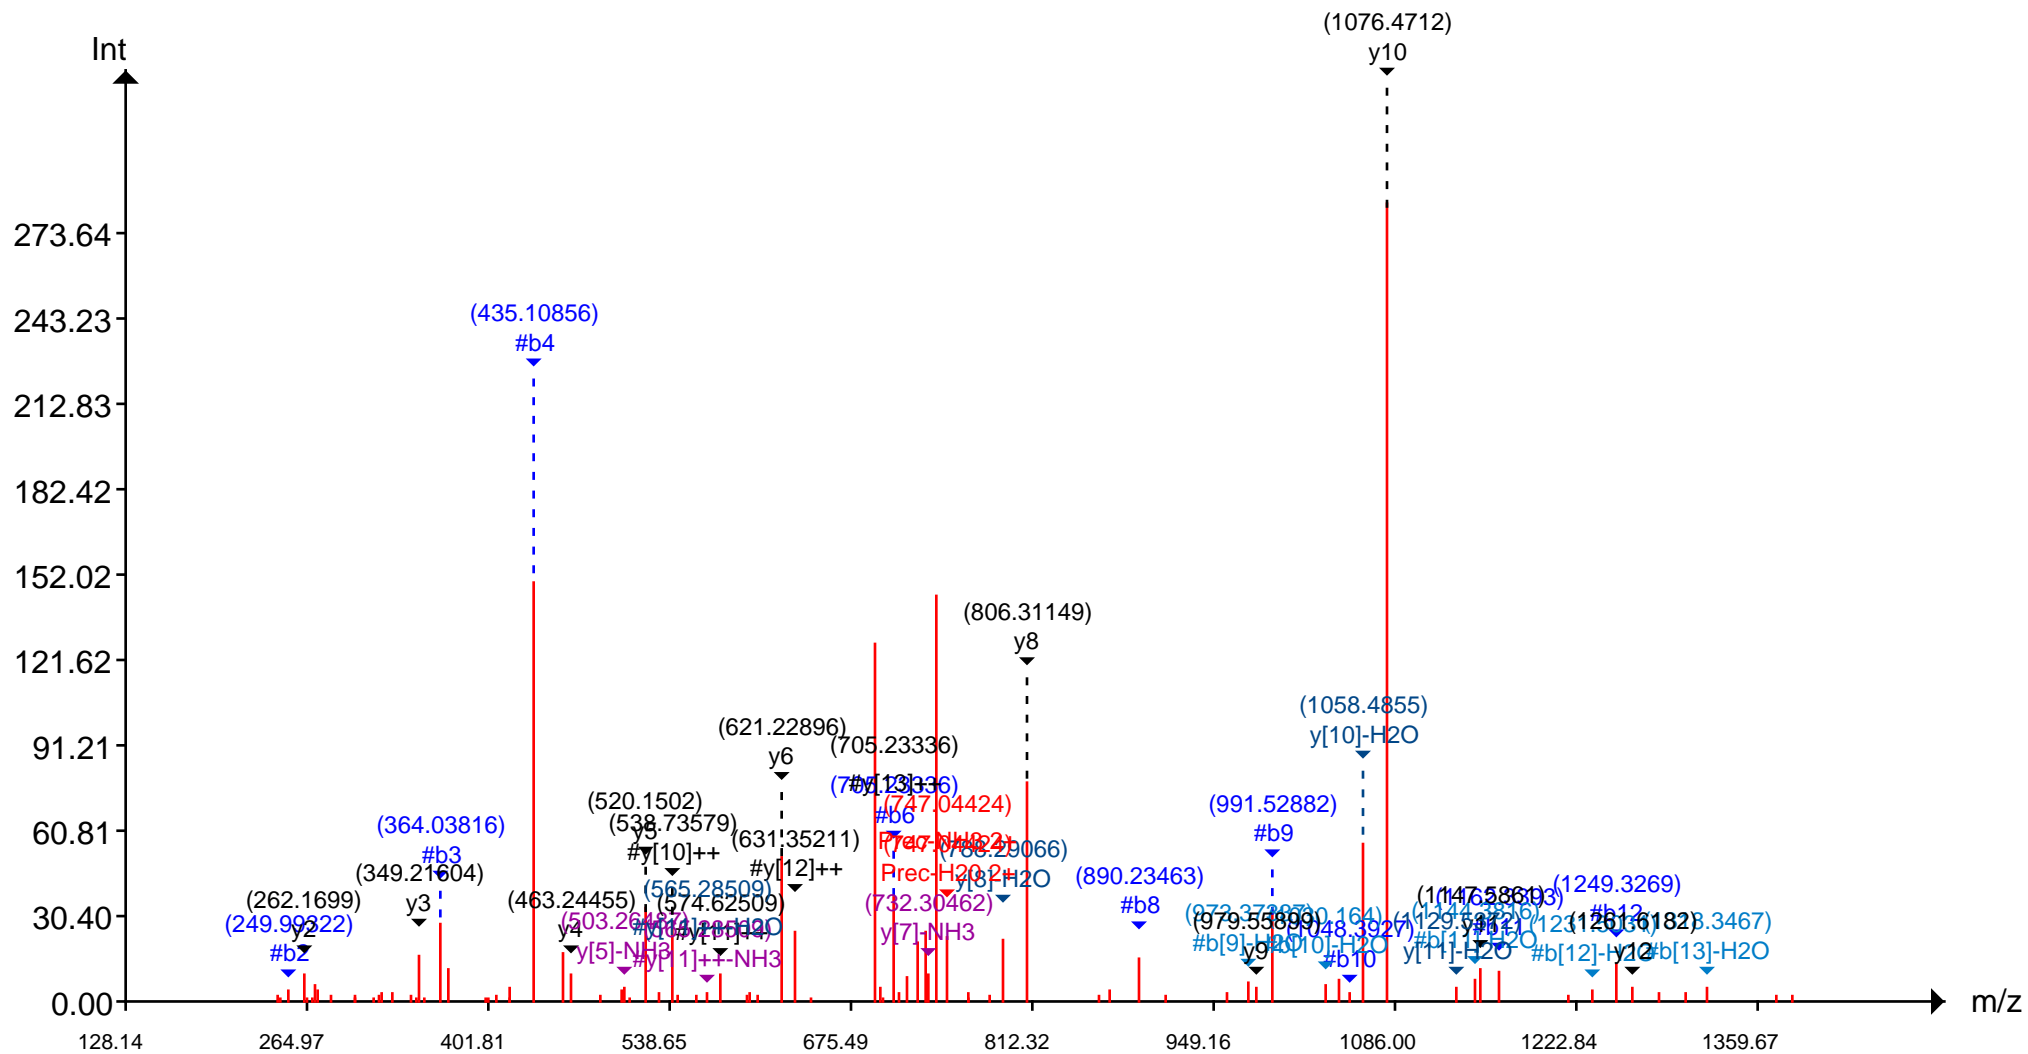

## Info

|                          |                                        |                           |        |
|--------------------------|----------------------------------------|---------------------------|--------|
| <b>Modified Sequence</b> | AcD3-GM<Mox*>NAPK<AcD3K*>GQTGNSSR-COOH | <b>Ion score</b>          | 67.87  |
| <b>Protein</b>           | P23588                                 | <b>Confidence level</b>   | 99.00% |
| <b>Precursor m/z</b>     | 755.86299                              | <b>Identity Threshold</b> | 47.69  |
| <b>Charge</b>            | 2+                                     | <b>Mass error</b>         | 1.7E-4 |



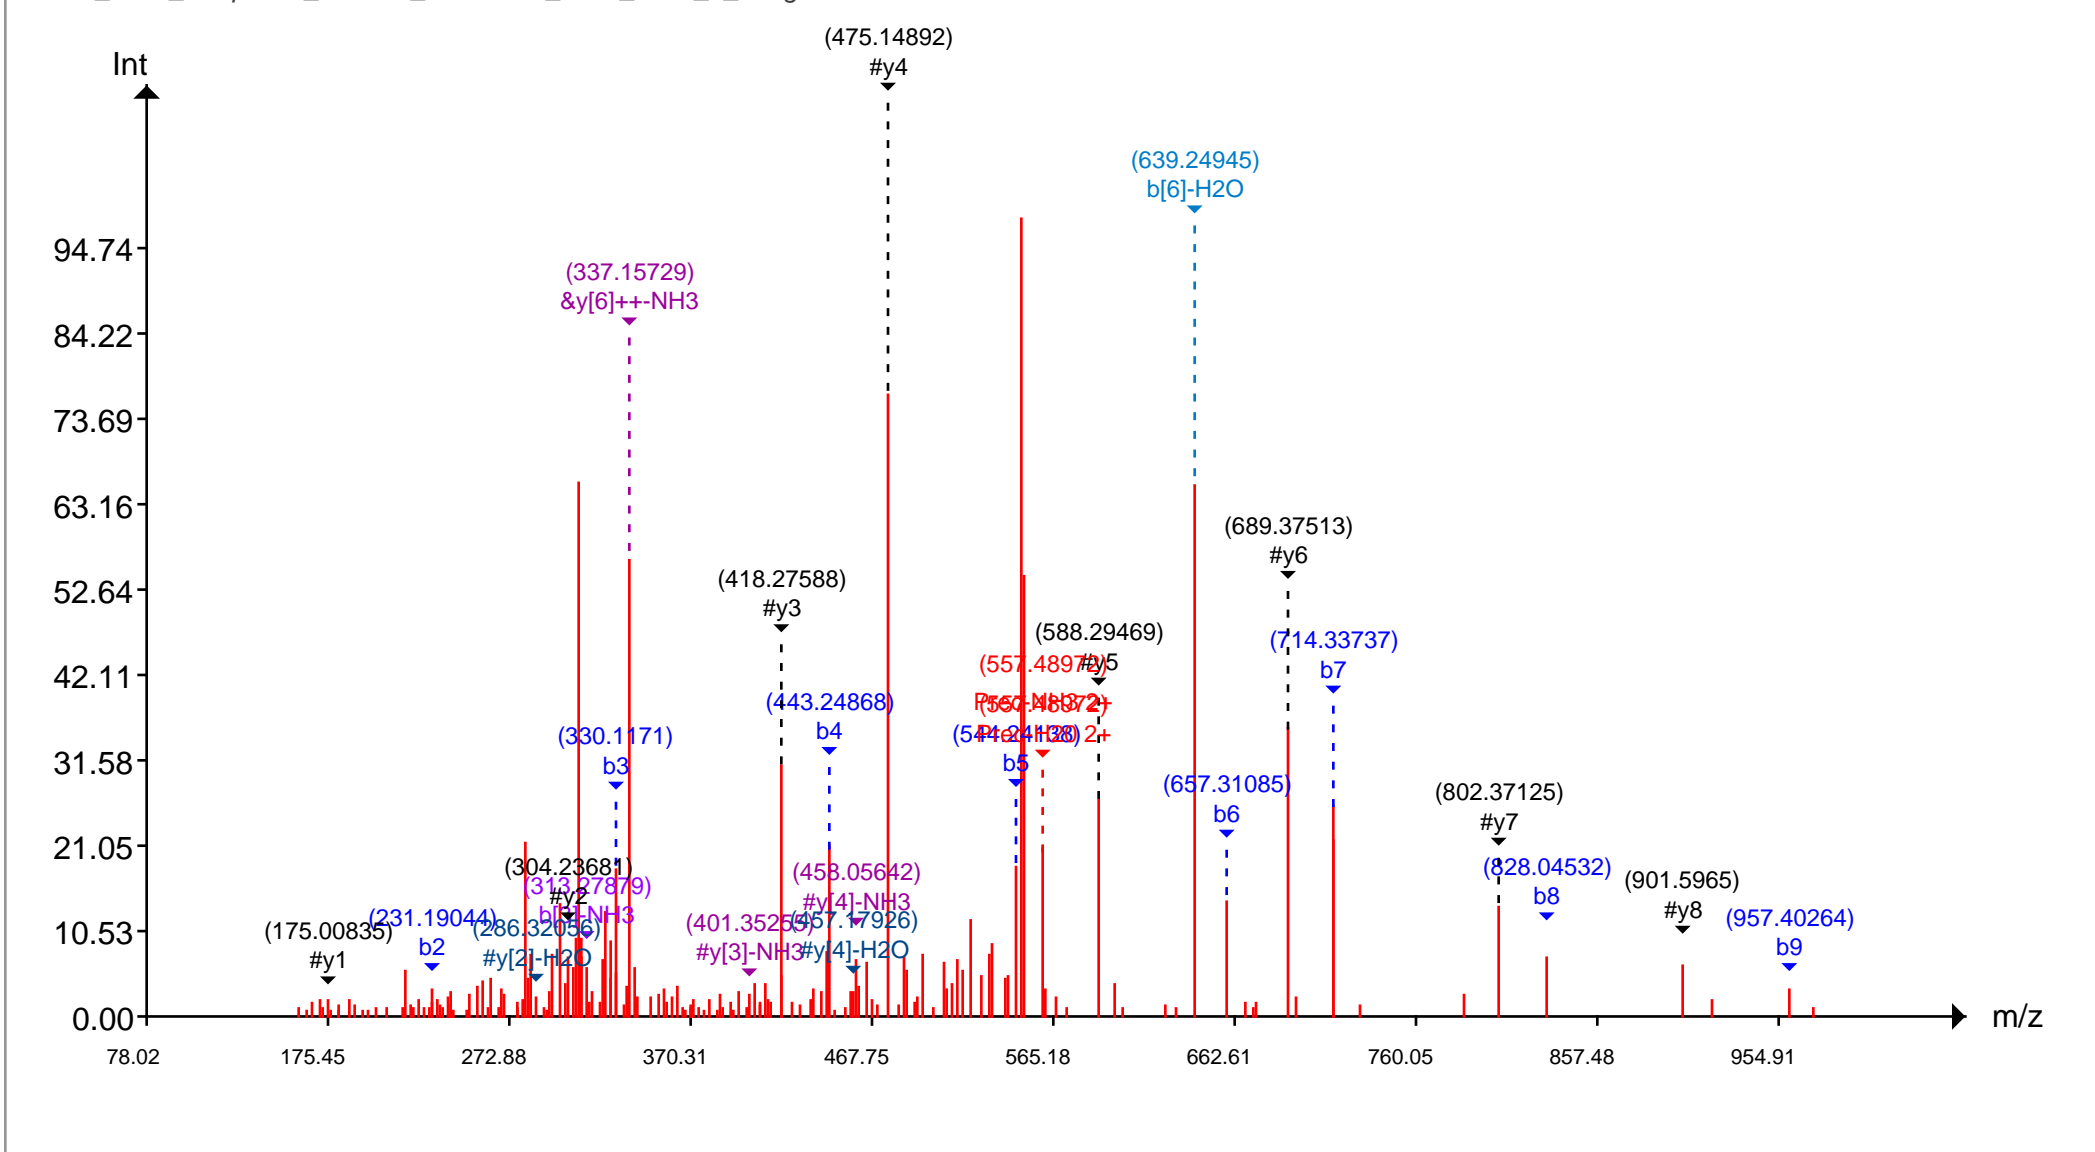

## Info

|                          |                                                                                |                           |        |
|--------------------------|--------------------------------------------------------------------------------|---------------------------|--------|
| <b>Modified Sequence</b> | AcD3-GQVITIGNER-COOH                                                           | <b>Ion score</b>          | 50.15  |
| <b>Protein</b>           | P62736, Q562R1, Q9BYX7, P60709, P68032, P63261, P63267, P68133, Q6S8J3, A5A3E0 | <b>Confidence level</b>   | 99.00% |
| <b>Precursor m/z</b>     | 566.31347                                                                      | <b>Identity Threshold</b> | 48.85  |
| <b>Charge</b>            | 2+                                                                             | <b>Mass error</b>         | 8.3E-5 |

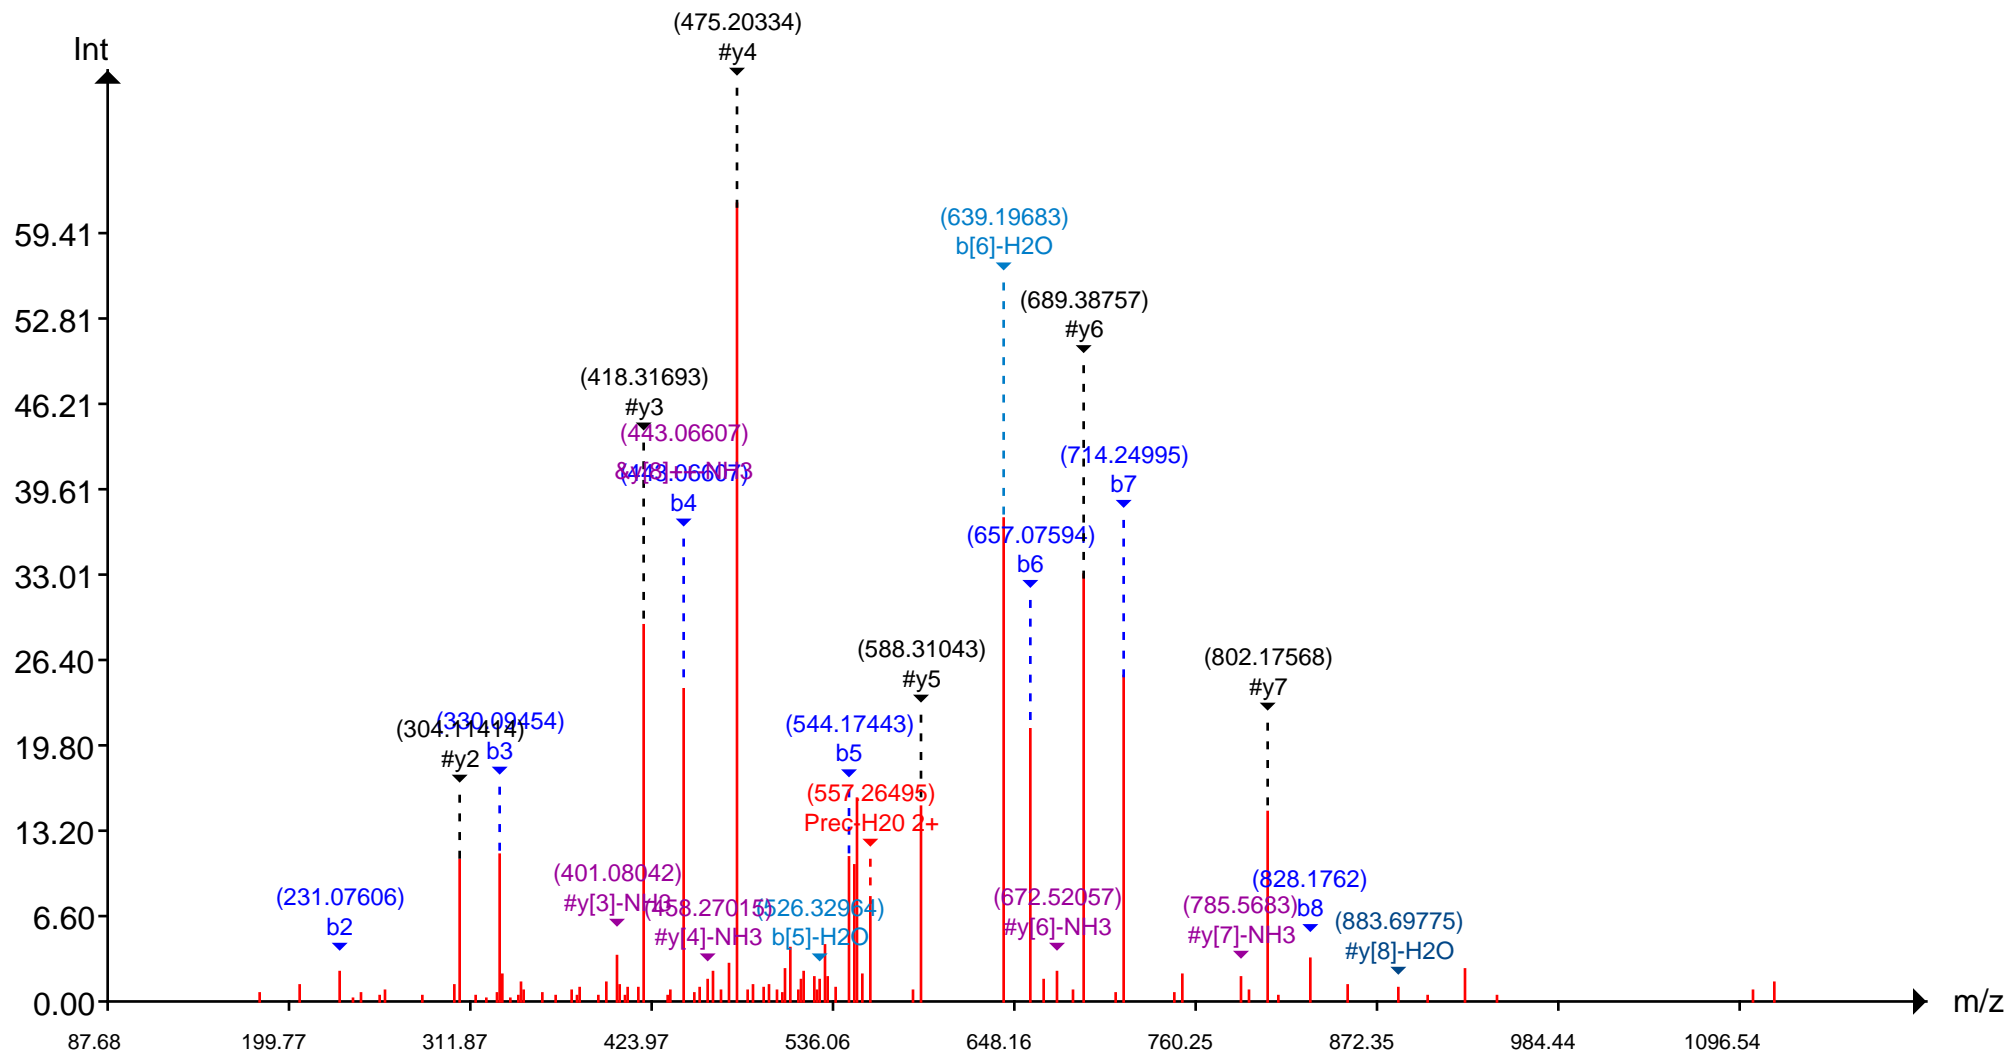

## Info

|                          |                                                                                |                           |        |
|--------------------------|--------------------------------------------------------------------------------|---------------------------|--------|
| <b>Modified Sequence</b> | AcD3-GQVITIGNER-COOH                                                           | <b>Ion score</b>          | 52.01  |
| <b>Protein</b>           | P62736, Q562R1, Q9BYX7, P60709, P68032, P63261, P63267, P68133, Q6S8J3, A5A3E0 | <b>Confidence level</b>   | 99.00% |
| <b>Precursor m/z</b>     | 566.31346                                                                      | <b>Identity Threshold</b> | 48.97  |
| <b>Charge</b>            | 2+                                                                             | <b>Mass error</b>         | 6.3E-5 |

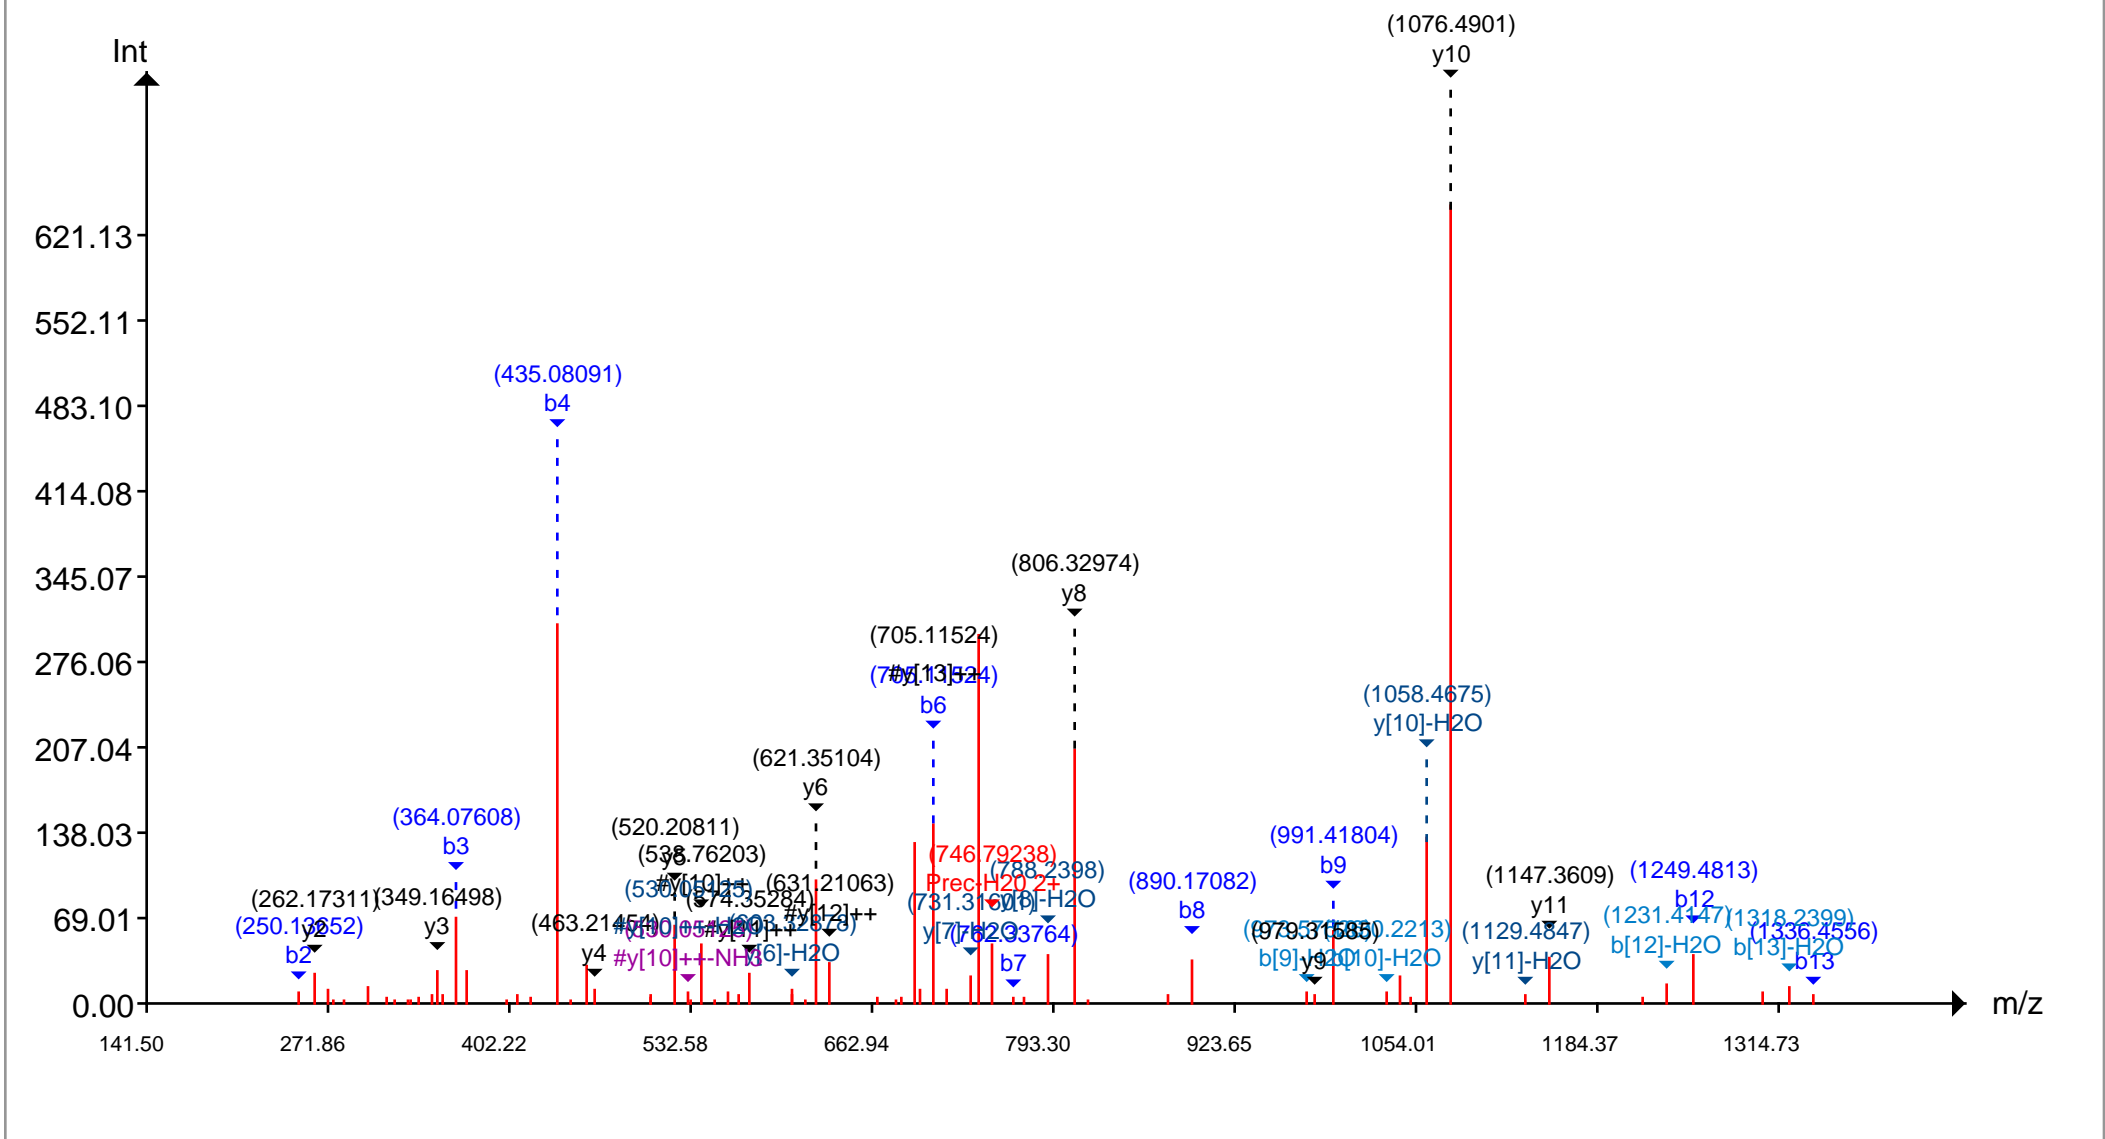

## Info

**Modified Sequence** AcD3-GM<Mox\*>NAPK<AcD3K\*>GQTGNSSR-COOH

**Ion score** 77.32

**Protein** P23588

**Confidence level** 99.00%

**Precursor m/z** 755.86313

**Identity Threshold** 47.74

**Charge** 2+

**Mass error** 4.5E-4

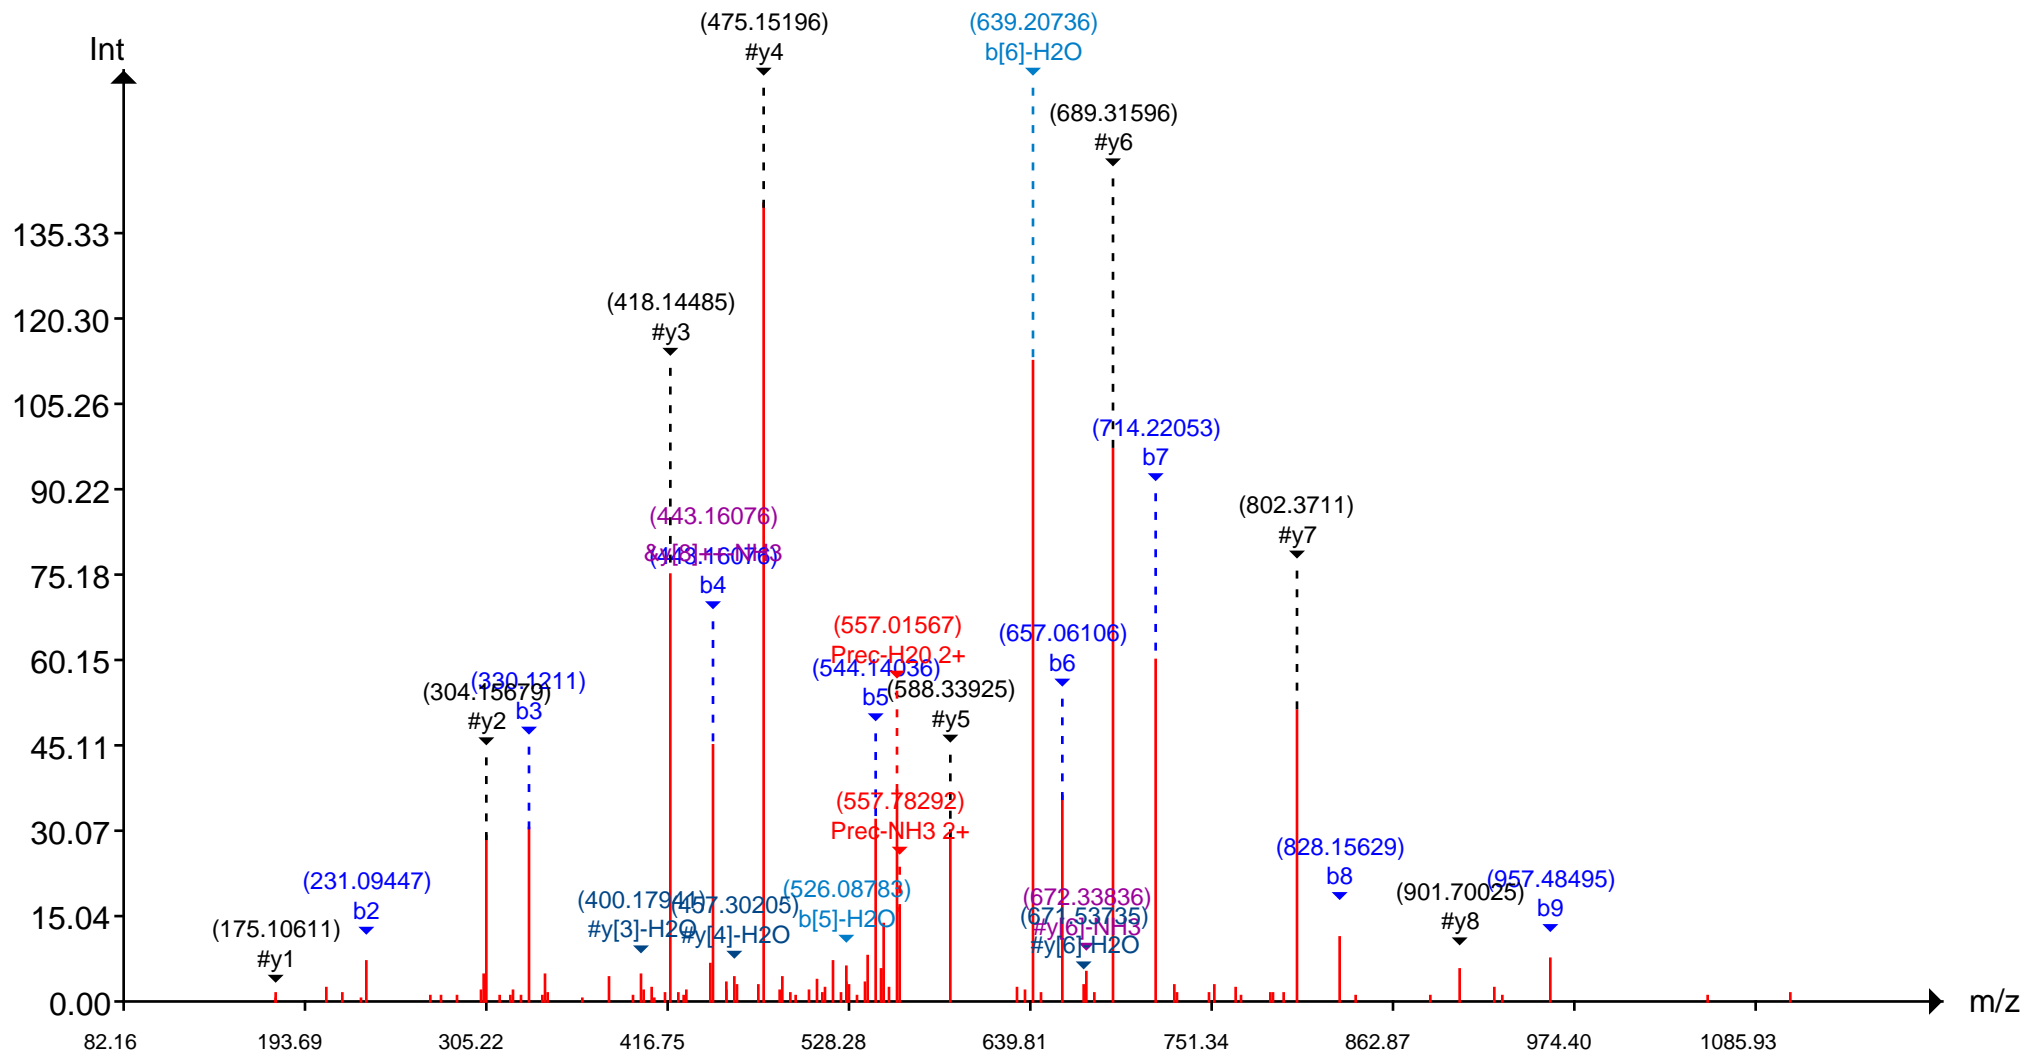

## Info

|                          |                                                                                |                           |        |
|--------------------------|--------------------------------------------------------------------------------|---------------------------|--------|
| <b>Modified Sequence</b> | AcD3-GQVITIGNER-COOH                                                           | <b>Ion score</b>          | 66.17  |
| <b>Protein</b>           | P62736, Q562R1, Q9BYX7, P60709, P68032, P63261, P63267, P68133, Q6S8J3, A5A3E0 | <b>Confidence level</b>   | 99.00% |
| <b>Precursor m/z</b>     | 566.31346                                                                      | <b>Identity Threshold</b> | 48.97  |
| <b>Charge</b>            | 2+                                                                             | <b>Mass error</b>         | 6.3E-5 |

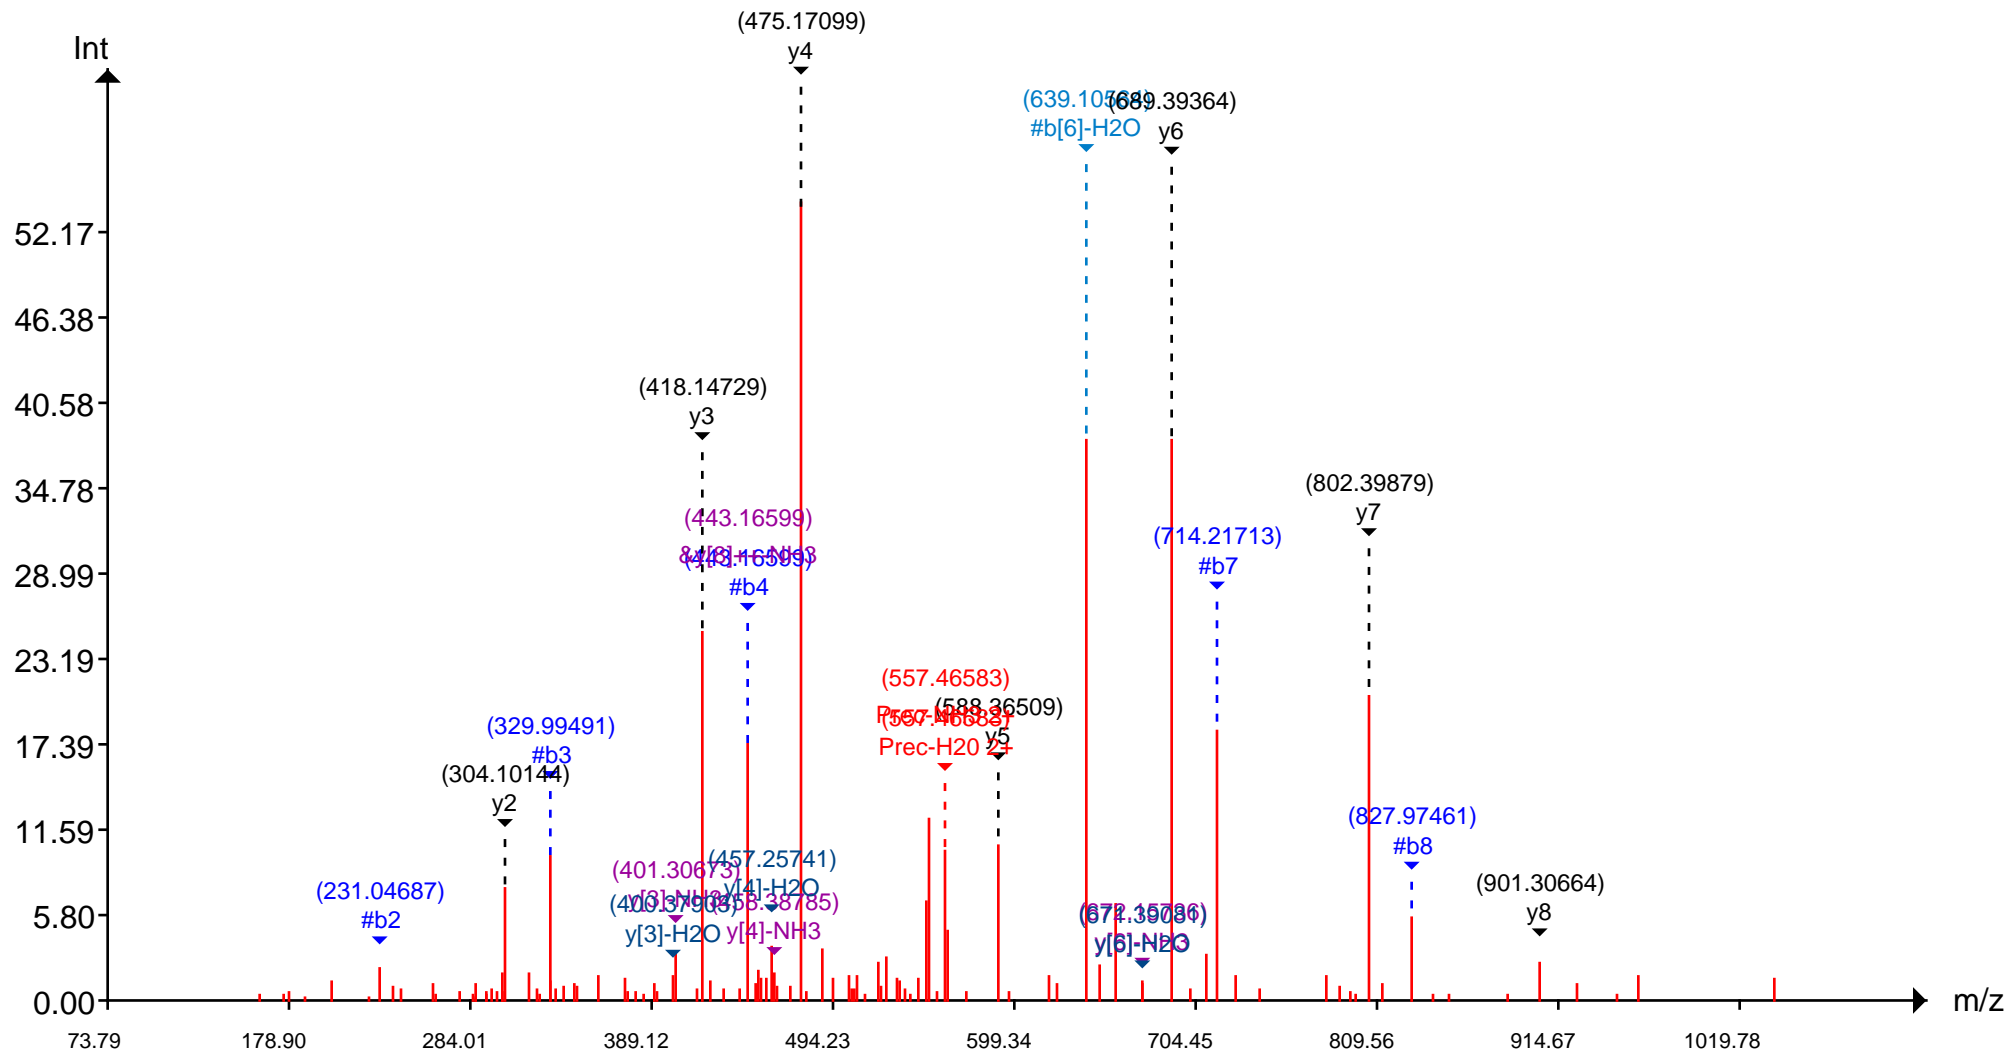

## Info

|                          |                                                                                |                           |        |
|--------------------------|--------------------------------------------------------------------------------|---------------------------|--------|
| <b>Modified Sequence</b> | AcD3-GQVITIGNER-COOH                                                           | <b>Ion score</b>          | 64.18  |
| <b>Protein</b>           | P62736, Q562R1, Q9BYX7, P60709, P68032, P63261, P63267, P68133, Q6S8J3, A5A3E0 | <b>Confidence level</b>   | 99.00% |
| <b>Precursor m/z</b>     | 566.31346                                                                      | <b>Identity Threshold</b> | 48.97  |
| <b>Charge</b>            | 2+                                                                             | <b>Mass error</b>         | 6.3E-5 |

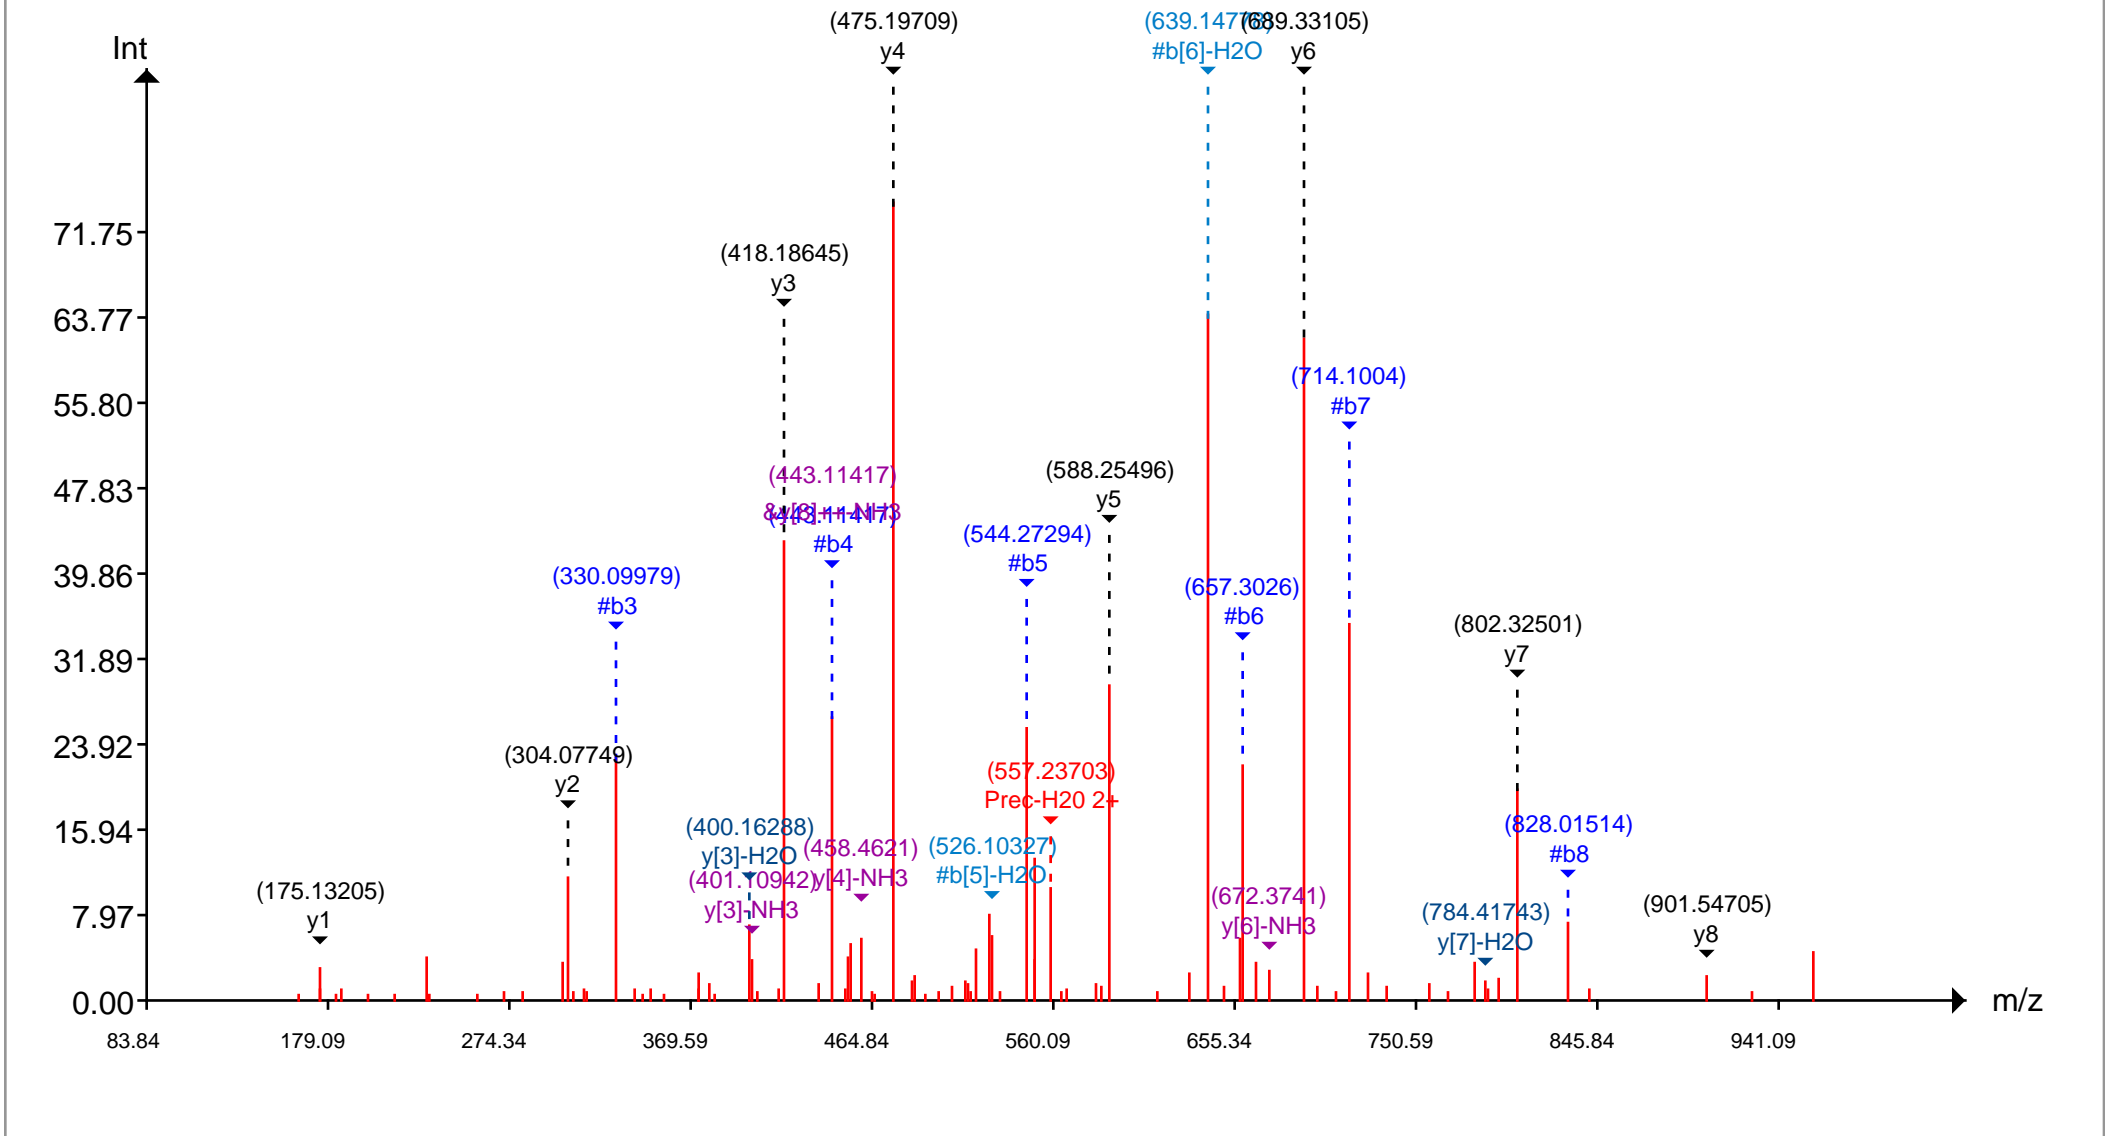

## Info

|                          |                                                                                |                           |        |
|--------------------------|--------------------------------------------------------------------------------|---------------------------|--------|
| <b>Modified Sequence</b> | AcD3-GQVITIGNER-COOH                                                           | <b>Ion score</b>          | 81.05  |
| <b>Protein</b>           | P62736, Q562R1, Q9BYX7, P60709, P68032, P63261, P63267, P68133, Q6S8J3, A5A3E0 | <b>Confidence level</b>   | 99.00% |
| <b>Precursor m/z</b>     | 566.31345                                                                      | <b>Identity Threshold</b> | 49.03  |
| <b>Charge</b>            | 2+                                                                             | <b>Mass error</b>         | 4.3E-5 |



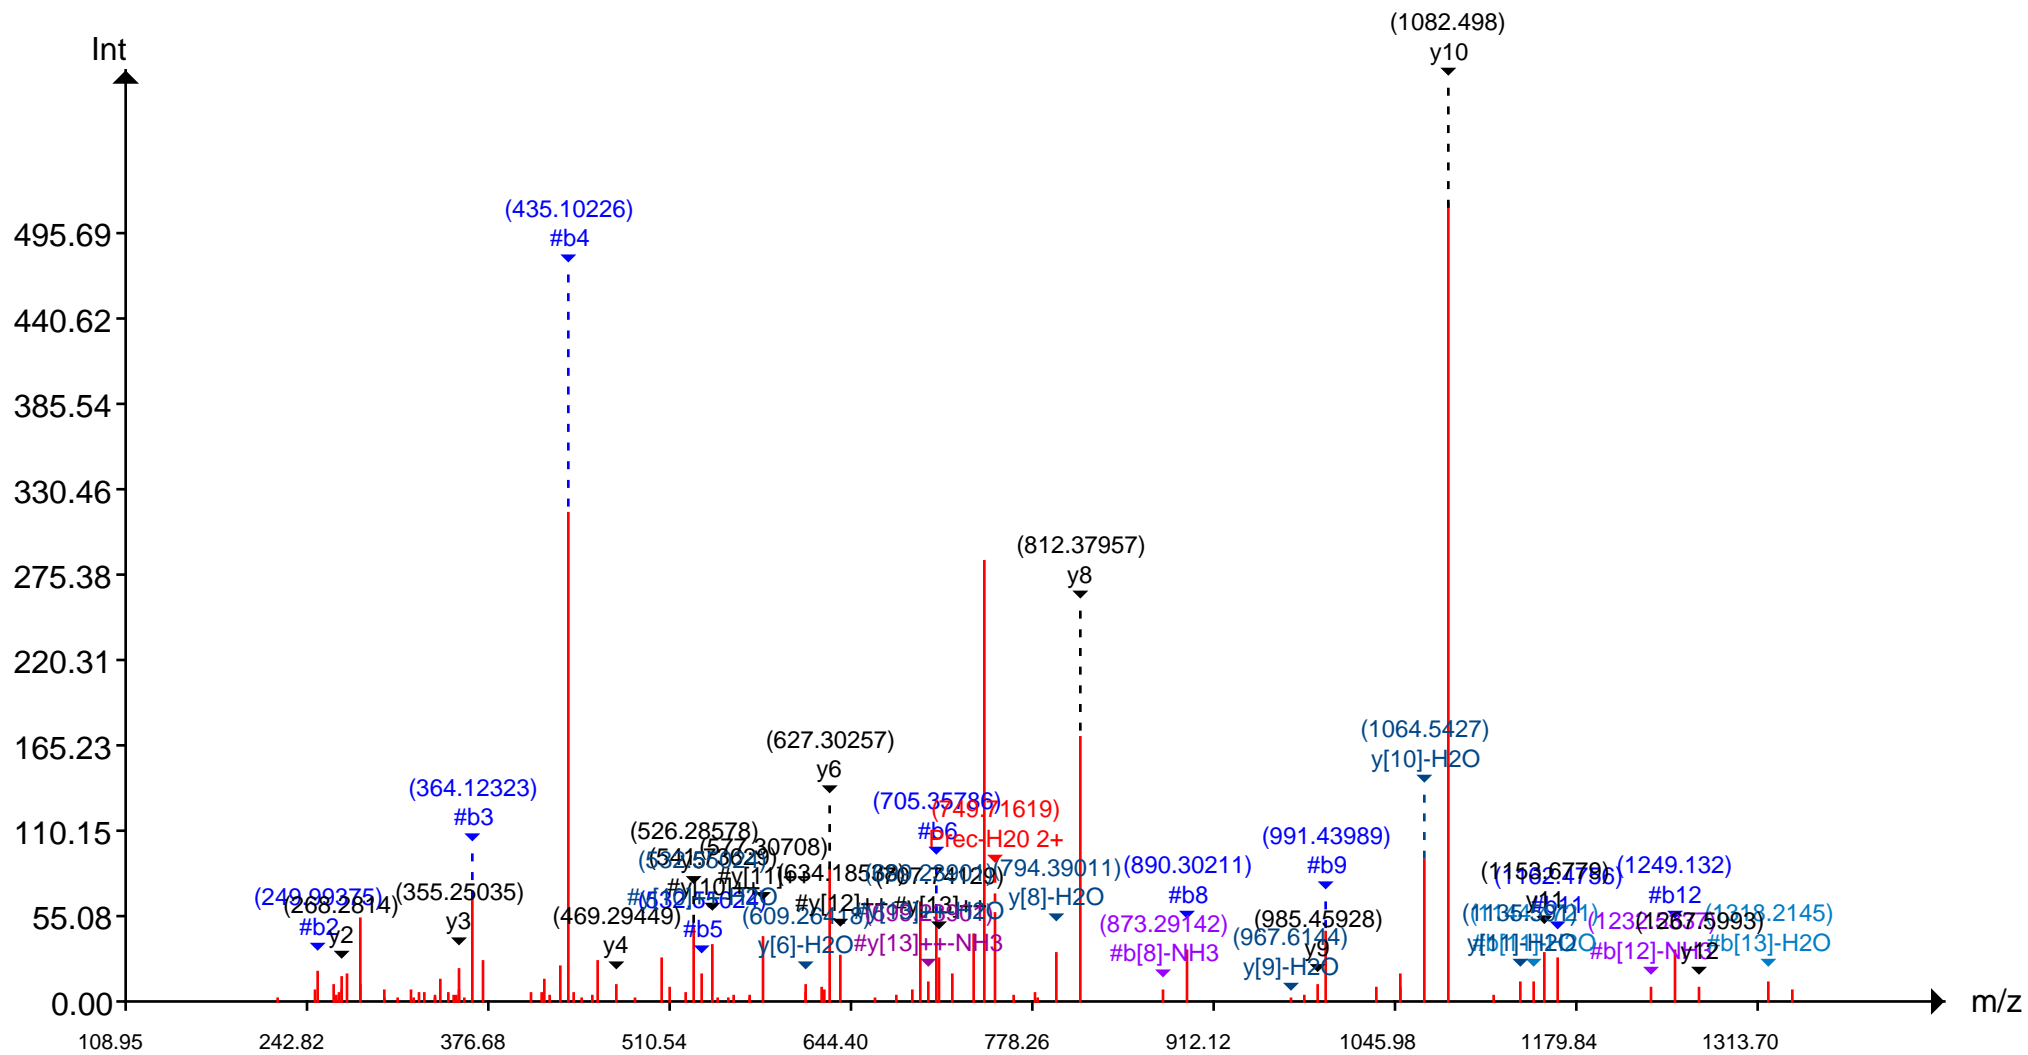

| Info                     |                                             | Ion score                 | 72.43   |
|--------------------------|---------------------------------------------|---------------------------|---------|
| <b>Modified Sequence</b> | AcD3-GM<Mox*>NAPK<AcD3K*>GQTGNSSR<C13>-COOH | <b>Confidence level</b>   | 99.00%  |
| <b>Protein</b>           | P23588                                      | <b>Identity Threshold</b> | 48.10   |
| <b>Precursor m/z</b>     | 758.87308                                   | <b>Mass error</b>         | 2.08E-4 |
| <b>Charge</b>            | 2+                                          |                           |         |



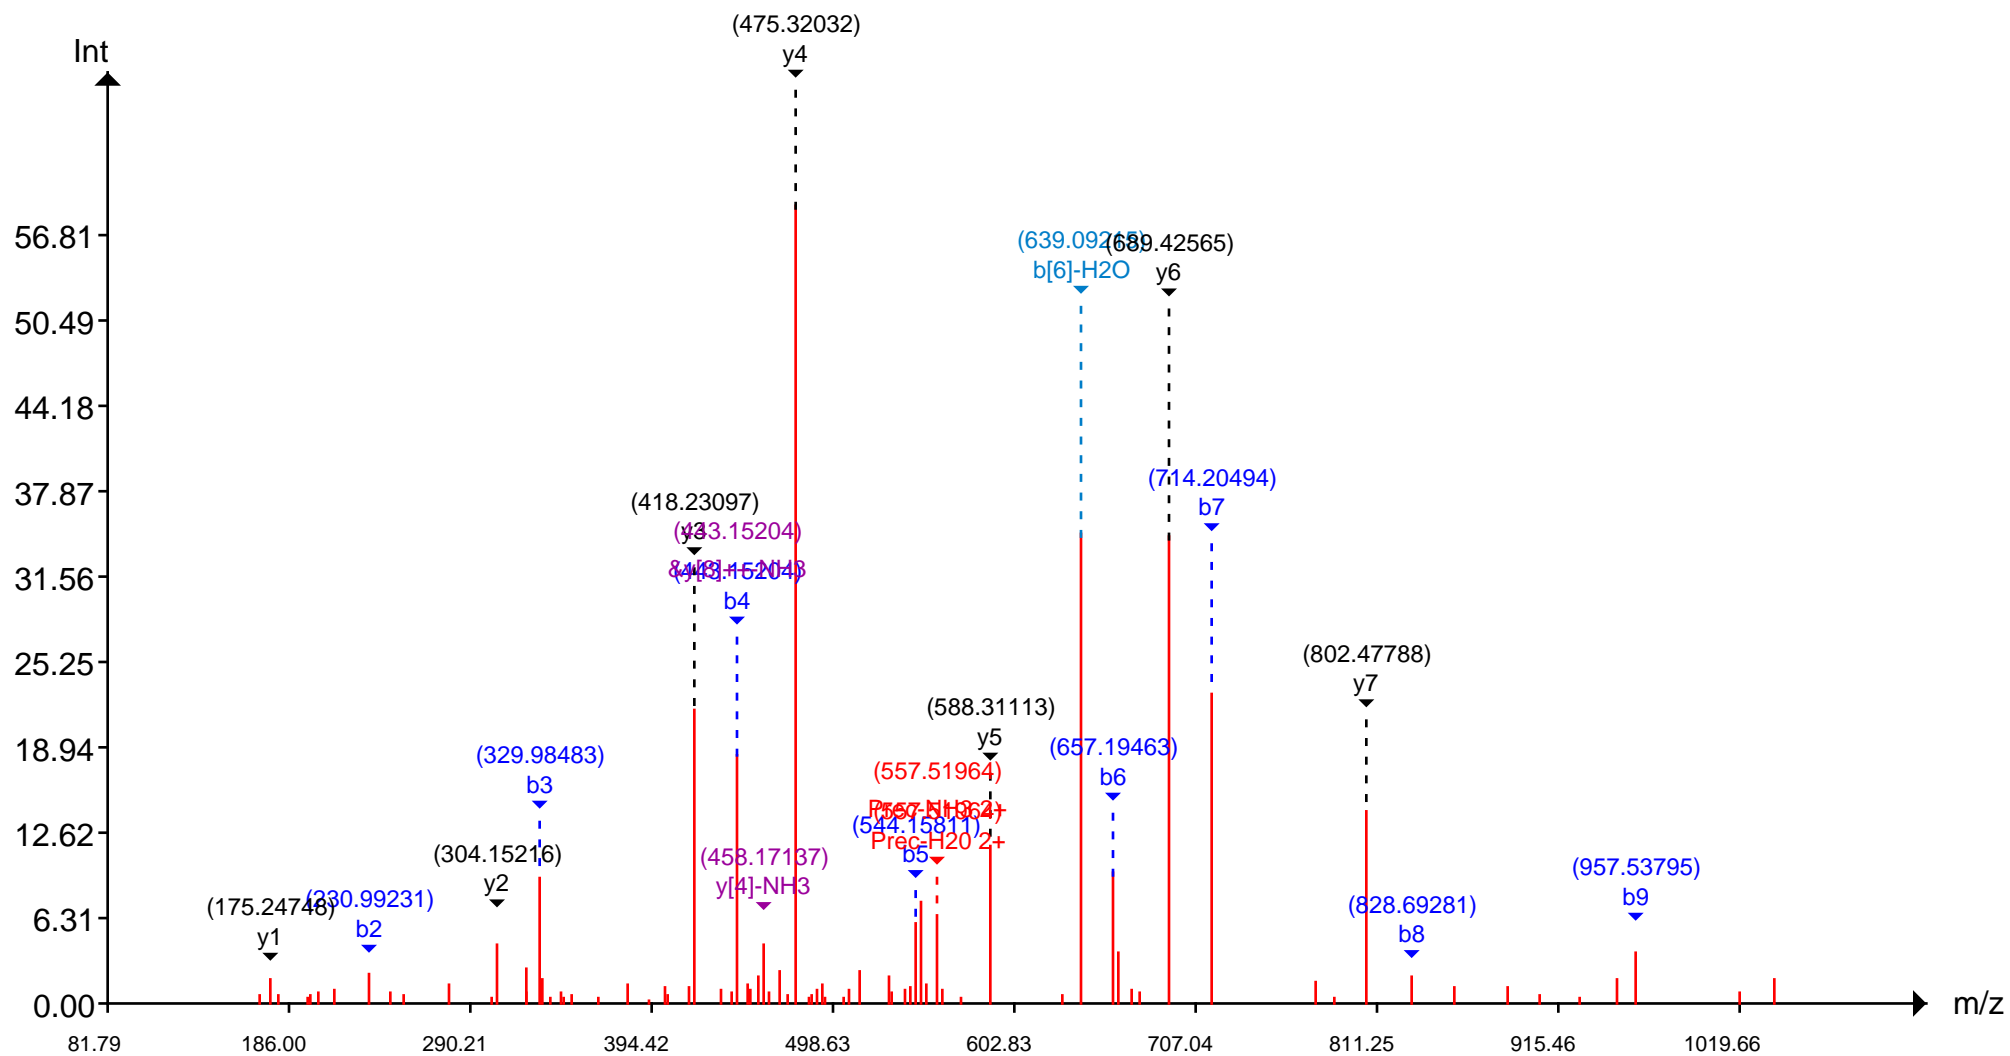

## Info

|                          |                                                                                |                           |         |
|--------------------------|--------------------------------------------------------------------------------|---------------------------|---------|
| <b>Modified Sequence</b> | AcD3-GQVITIGNER-COOH                                                           | <b>Ion score</b>          | 67.29   |
| <b>Protein</b>           | P62736, Q562R1, Q9BYX7, P60709, P68032, P63261, P63267, P68133, Q6S8J3, A5A3E0 | <b>Confidence level</b>   | 99.00%  |
| <b>Precursor m/z</b>     | 566.31342                                                                      | <b>Identity Threshold</b> | 49.03   |
| <b>Charge</b>            | 2+                                                                             | <b>Mass error</b>         | -1.7E-5 |

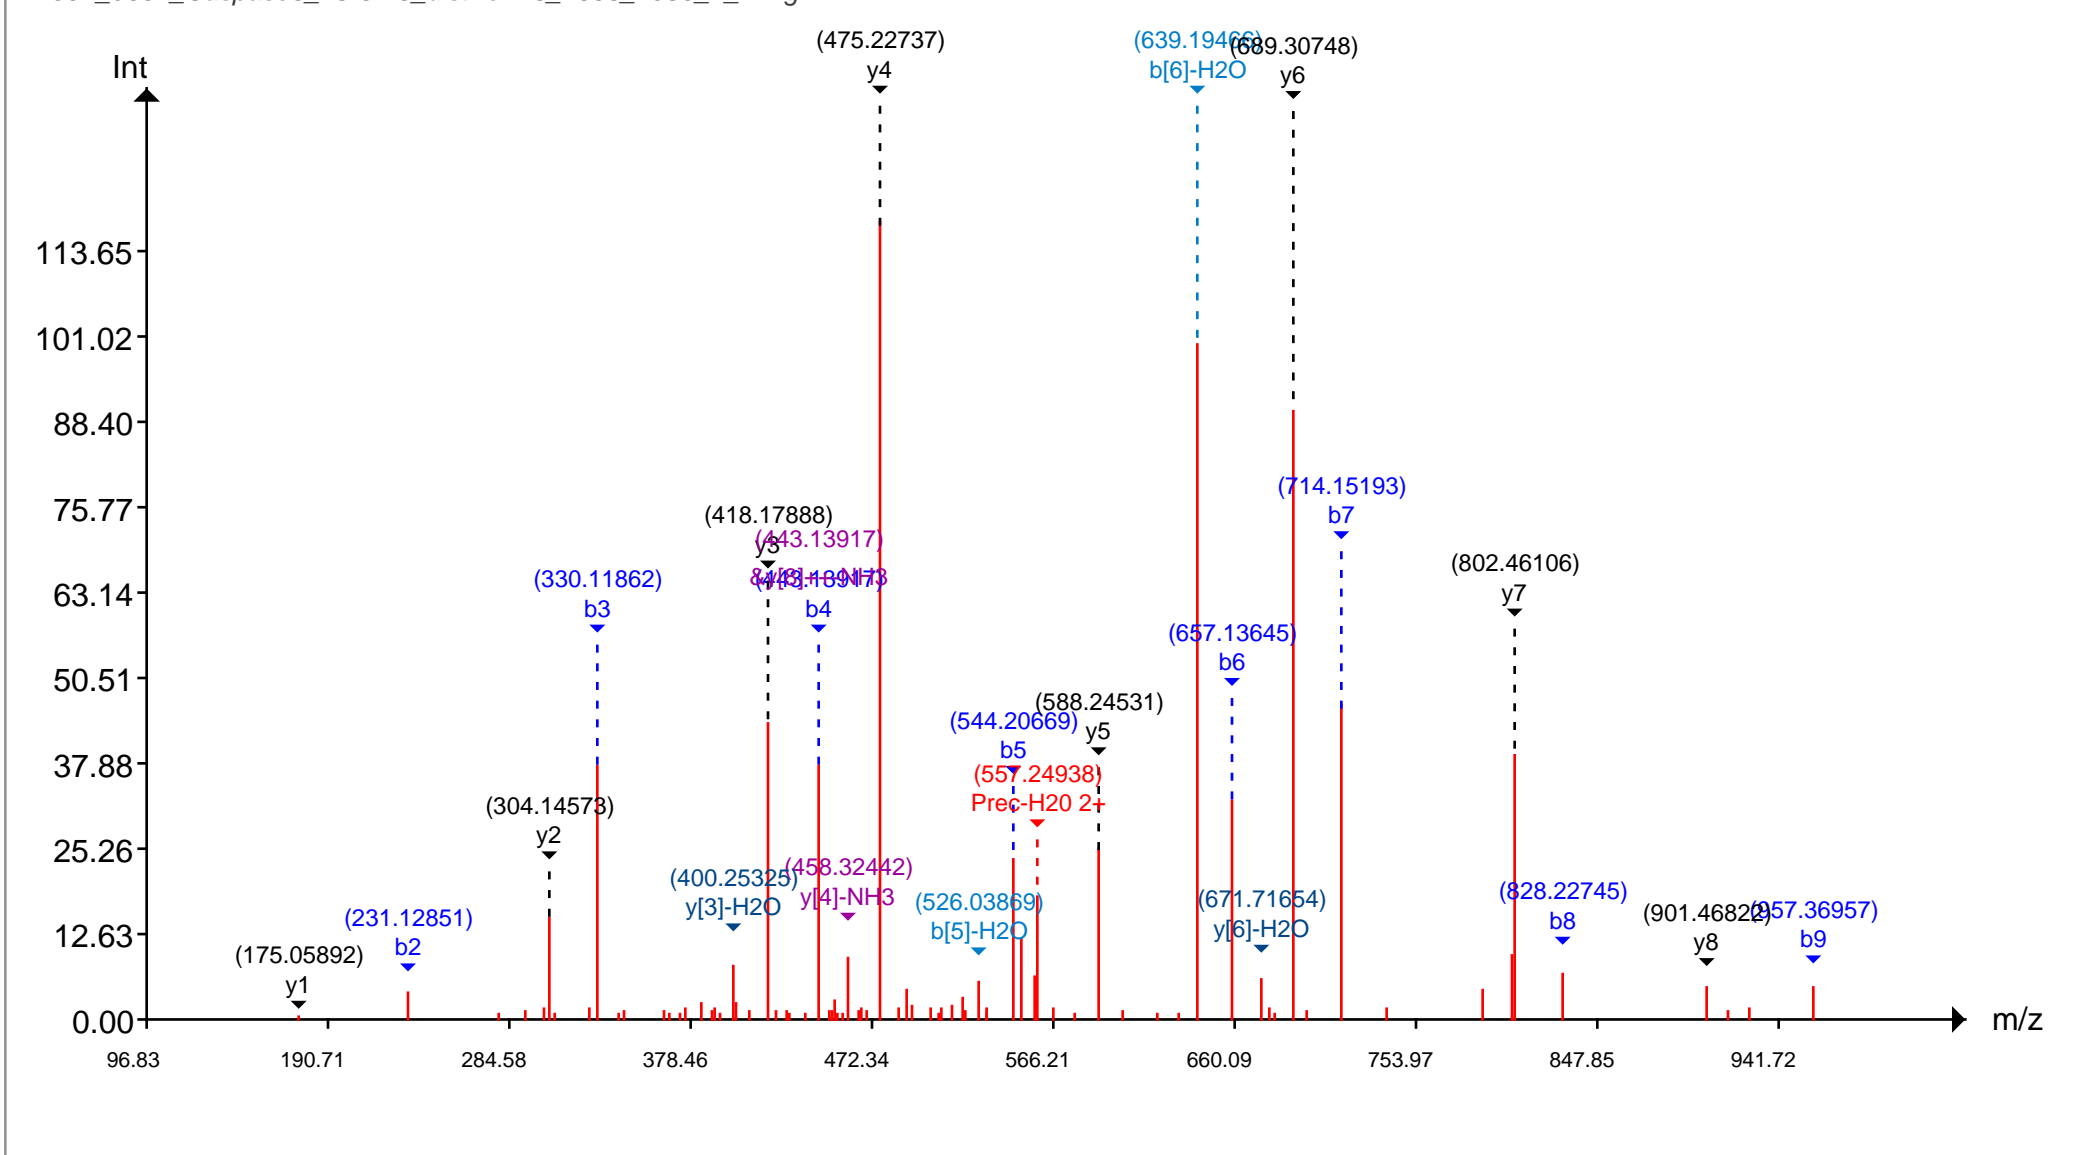

## Info

|                          |                                                                                |                           |          |
|--------------------------|--------------------------------------------------------------------------------|---------------------------|----------|
| <b>Modified Sequence</b> | AcD3-GQVITIGNER-COOH                                                           | <b>Ion score</b>          | 74.99    |
| <b>Protein</b>           | P62736, Q562R1, Q9BYX7, P60709, P68032, P63261, P63267, P68133, Q6S8J3, A5A3E0 | <b>Confidence level</b>   | 99.00%   |
| <b>Precursor m/z</b>     | 566.31336                                                                      | <b>Identity Threshold</b> | 48.86    |
| <b>Charge</b>            | 2+                                                                             | <b>Mass error</b>         | -1.37E-4 |

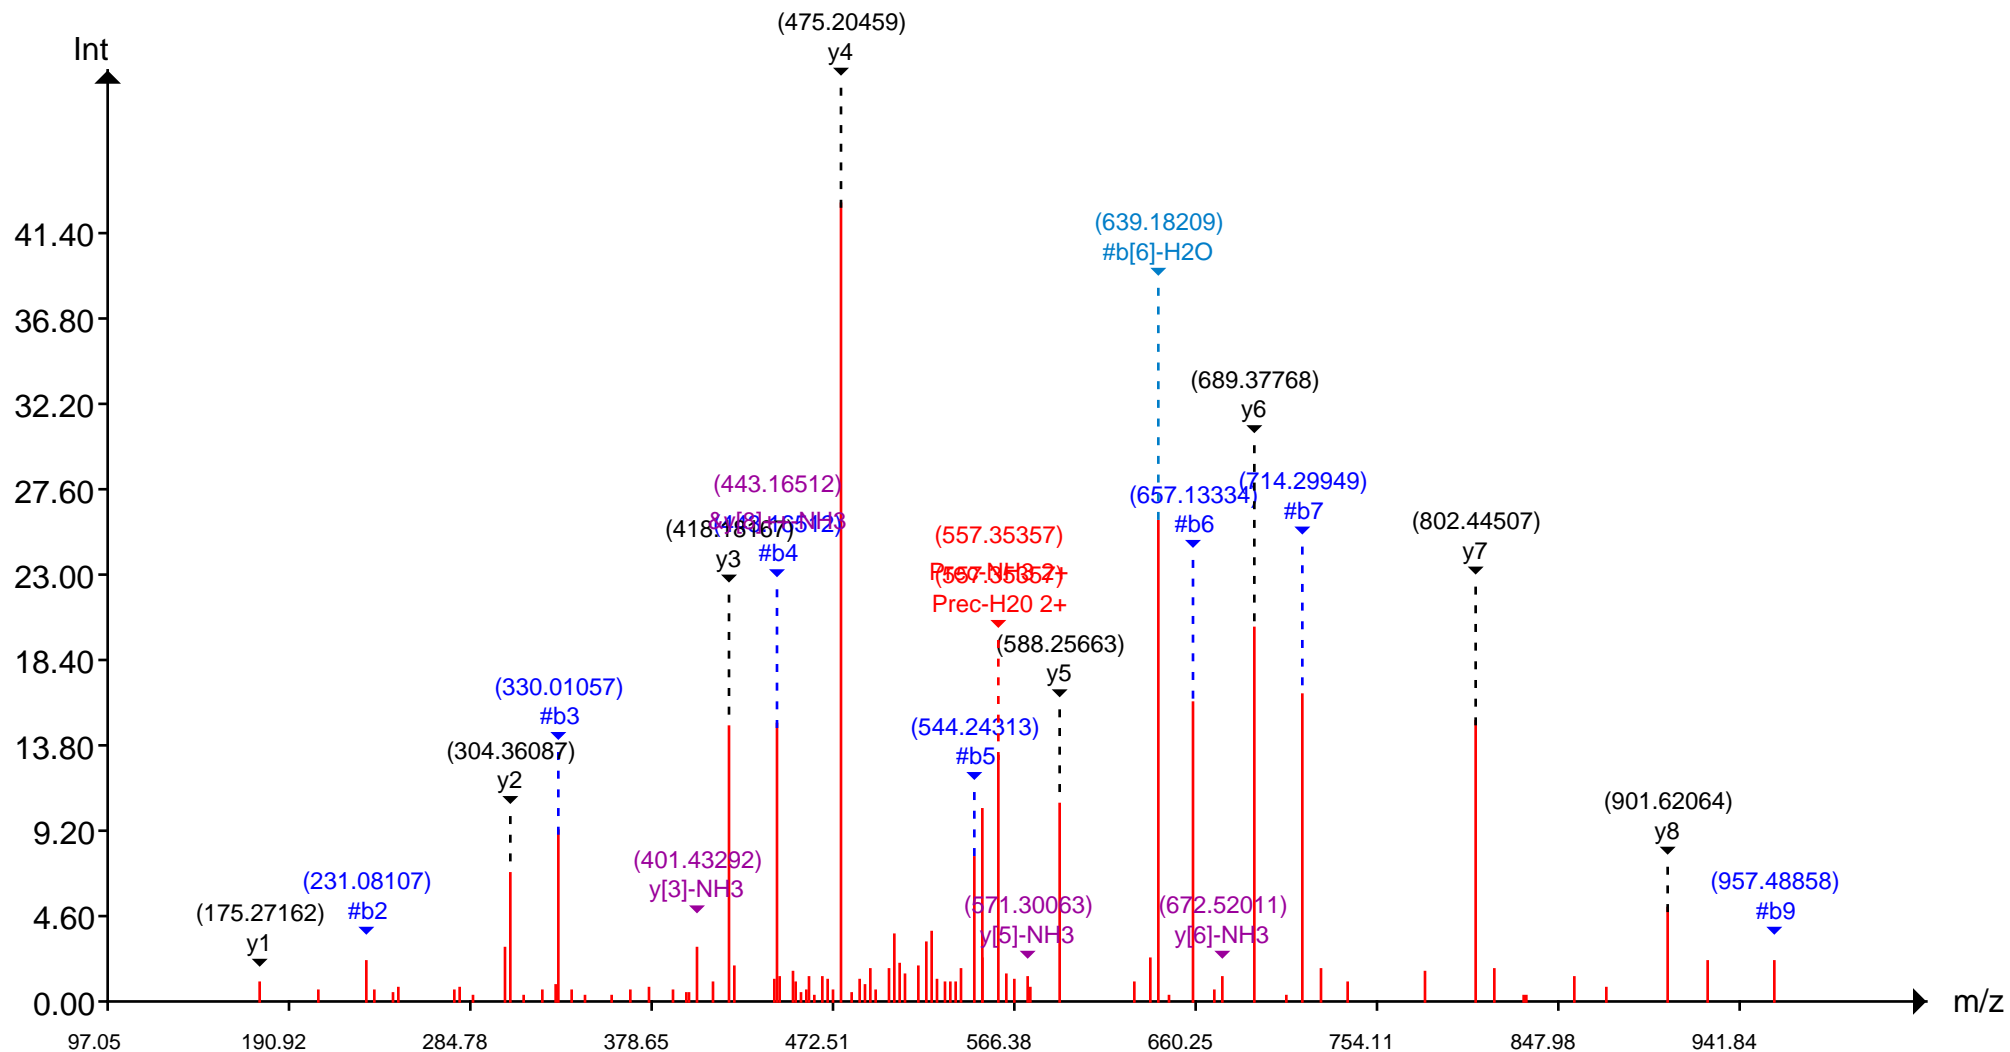

## Info

|                          |                                                                                |                           |          |
|--------------------------|--------------------------------------------------------------------------------|---------------------------|----------|
| <b>Modified Sequence</b> | AcD3-GQVITIGNER-COOH                                                           | <b>Ion score</b>          | 67.76    |
| <b>Protein</b>           | P62736, Q562R1, Q9BYX7, P60709, P68032, P63261, P63267, P68133, Q6S8J3, A5A3E0 | <b>Confidence level</b>   | 99.00%   |
| <b>Precursor m/z</b>     | 566.31335                                                                      | <b>Identity Threshold</b> | 48.86    |
| <b>Charge</b>            | 2+                                                                             | <b>Mass error</b>         | -1.57E-4 |

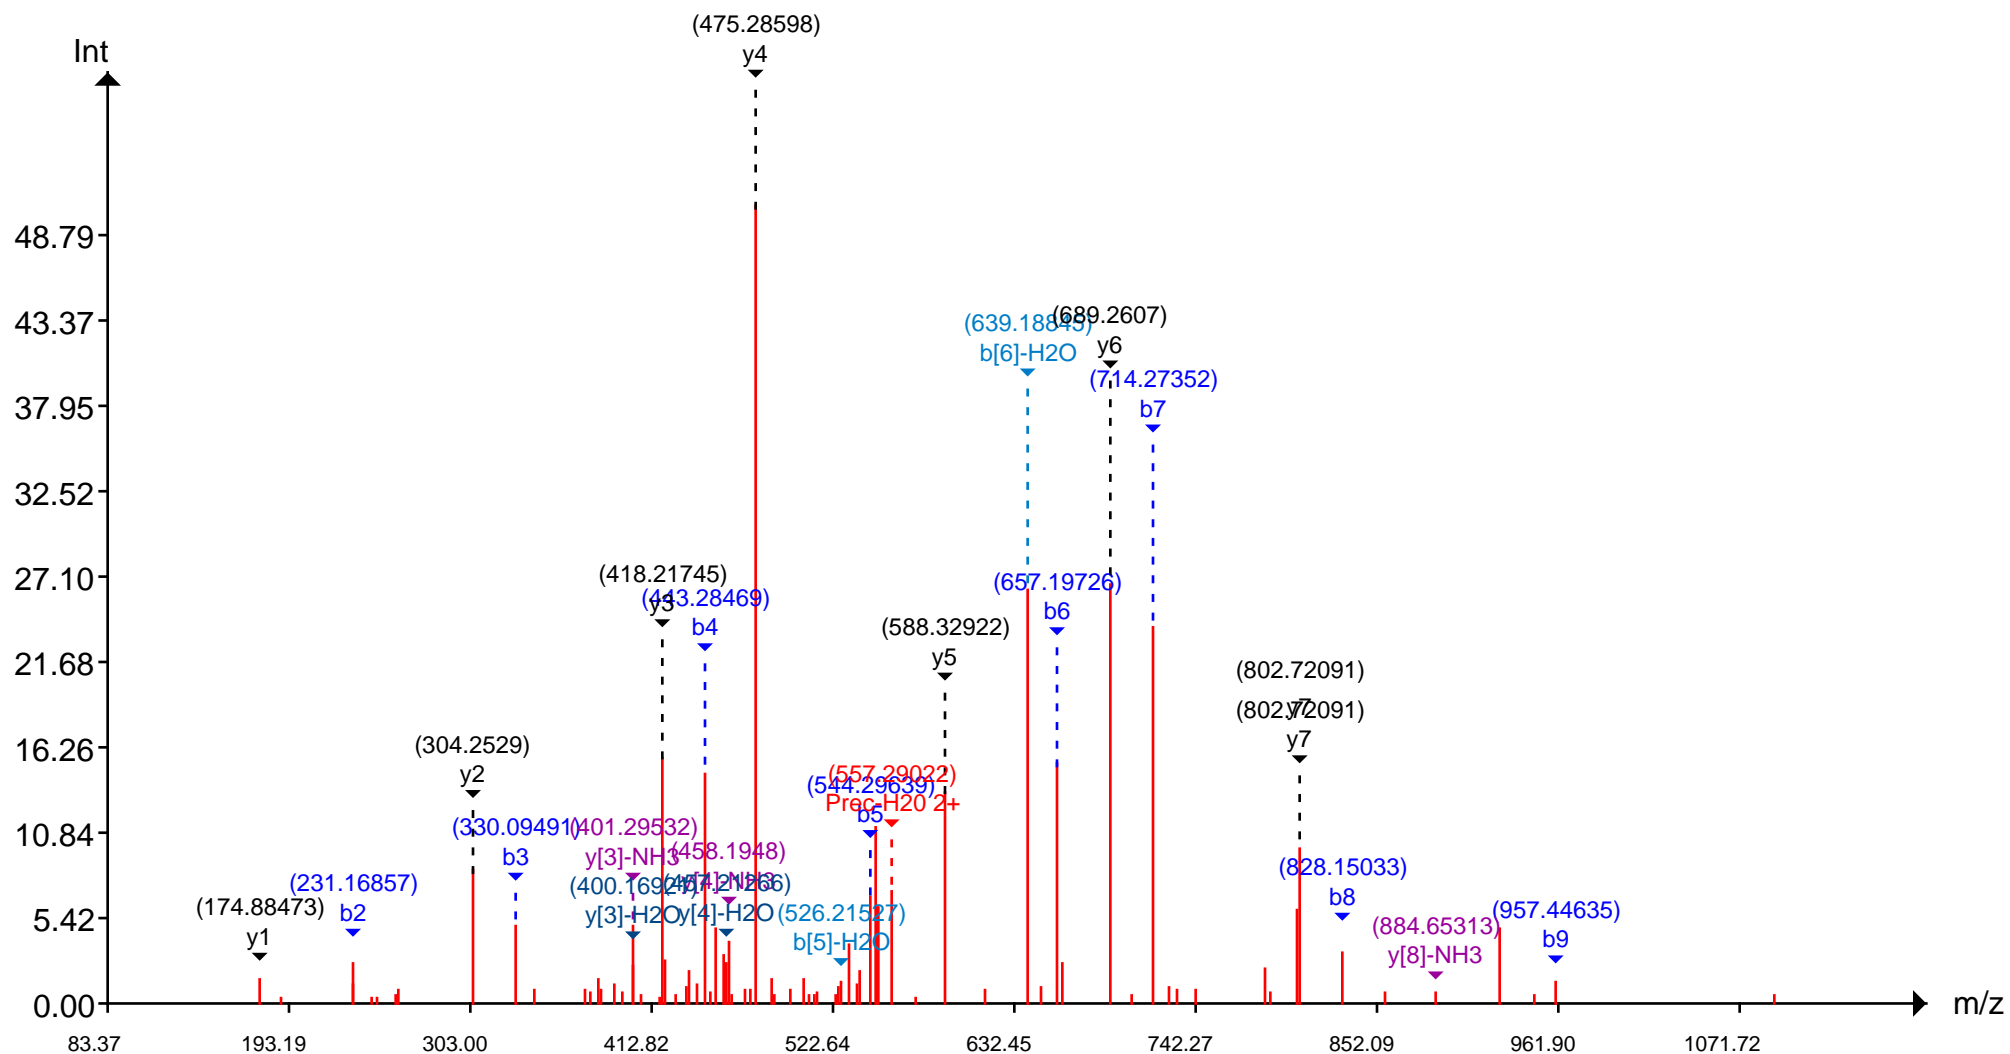

## Info

|                          |                                                                                |                           |         |
|--------------------------|--------------------------------------------------------------------------------|---------------------------|---------|
| <b>Modified Sequence</b> | AcD3-GQVITIGNER-COOH                                                           | <b>Ion score</b>          | 62.94   |
| <b>Protein</b>           | P62736, Q562R1, Q9BYX7, P60709, P68032, P63261, P63267, P68133, Q6S8J3, A5A3E0 | <b>Confidence level</b>   | 99.00%  |
| <b>Precursor m/z</b>     | 566.3136                                                                       | <b>Identity Threshold</b> | 48.77   |
| <b>Charge</b>            | 2+                                                                             | <b>Mass error</b>         | 3.43E-4 |

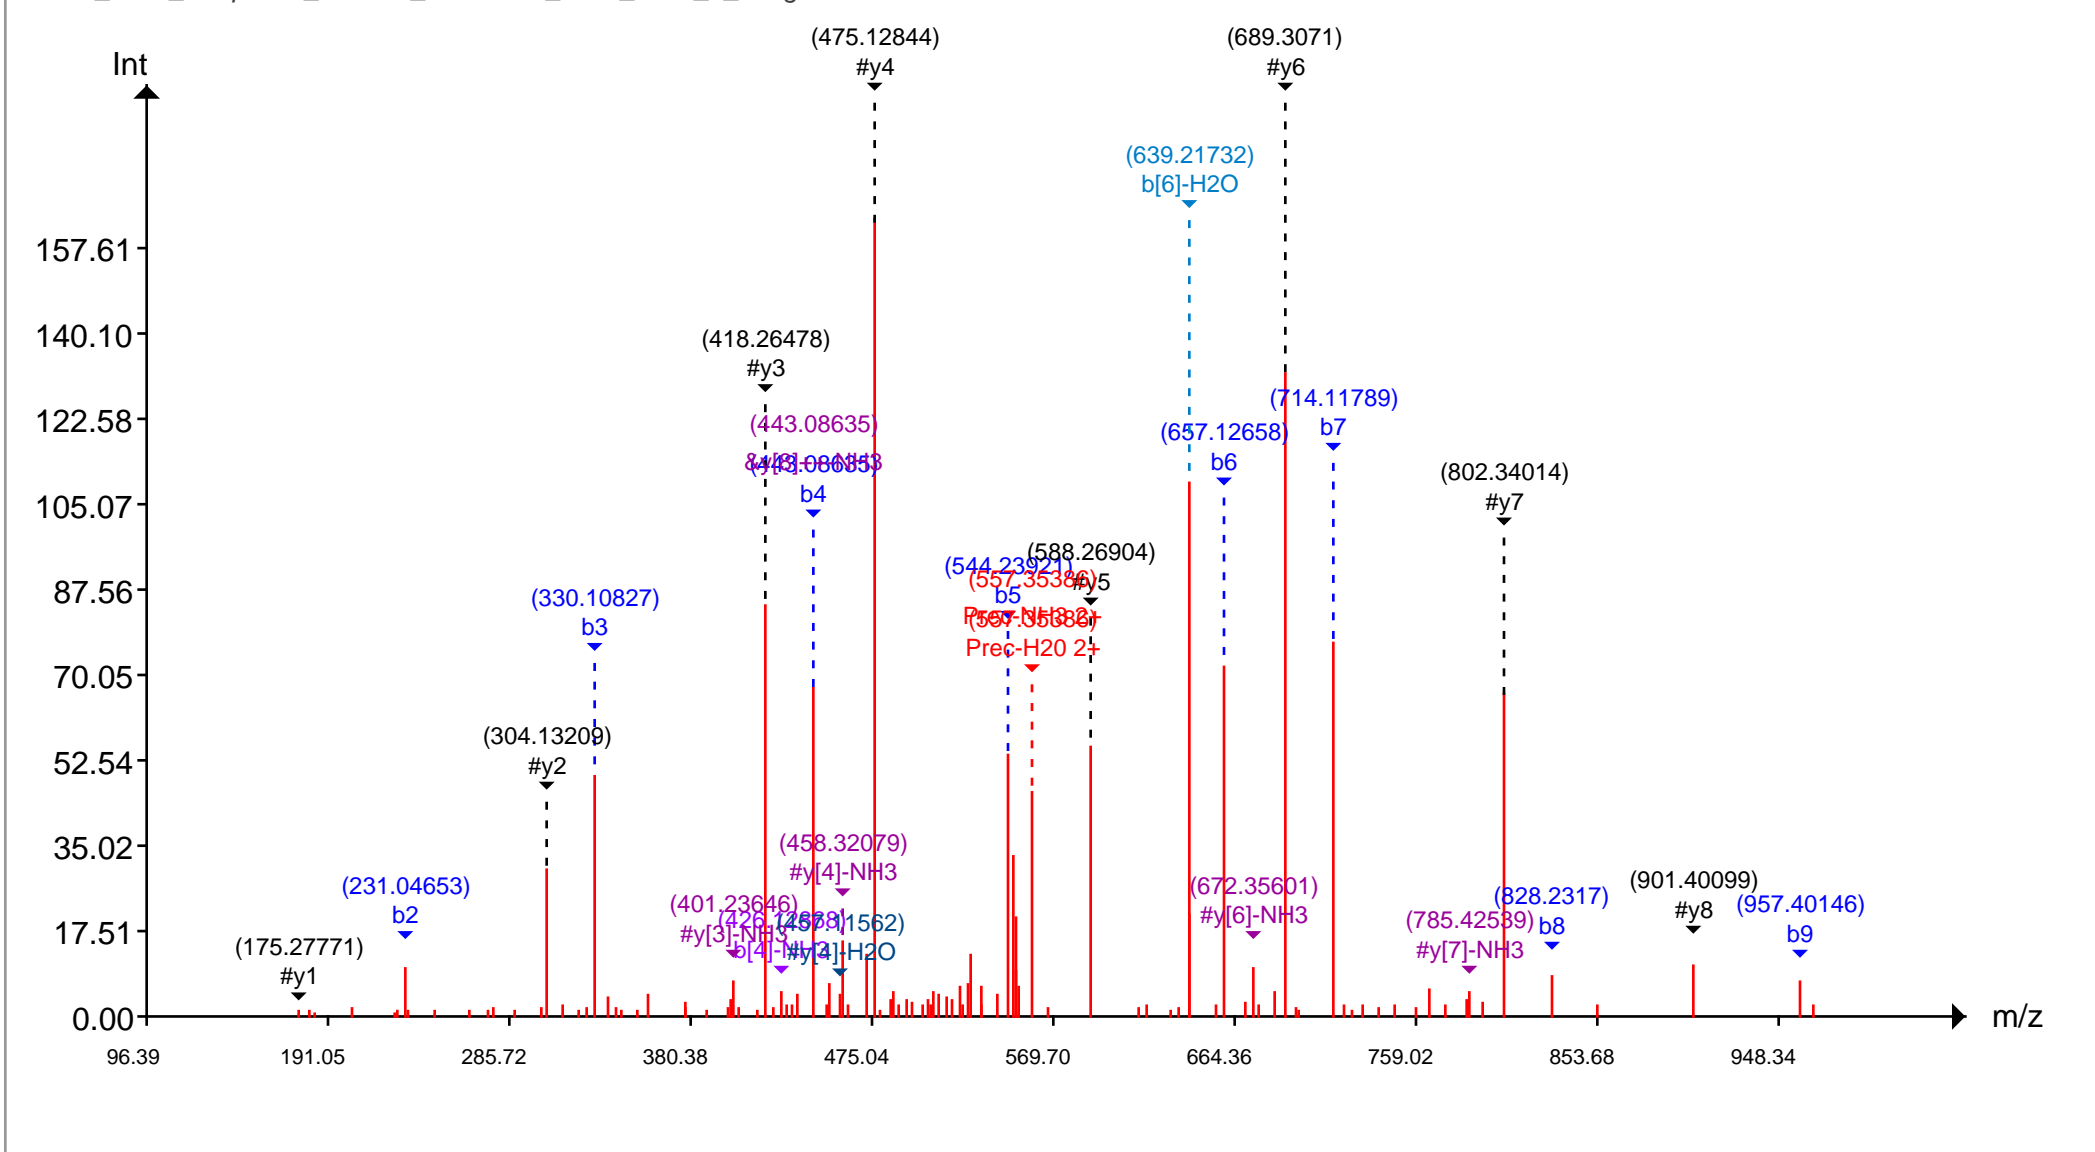

## Info

|                          |                                                                                |                           |         |
|--------------------------|--------------------------------------------------------------------------------|---------------------------|---------|
| <b>Modified Sequence</b> | AcD3-GQVITIGNER-COOH                                                           | <b>Ion score</b>          | 70.25   |
| <b>Protein</b>           | P62736, Q562R1, Q9BYX7, P60709, P68032, P63261, P63267, P68133, Q6S8J3, A5A3E0 | <b>Confidence level</b>   | 99.00%  |
| <b>Precursor m/z</b>     | 566.31353                                                                      | <b>Identity Threshold</b> | 48.87   |
| <b>Charge</b>            | 2+                                                                             | <b>Mass error</b>         | 2.03E-4 |

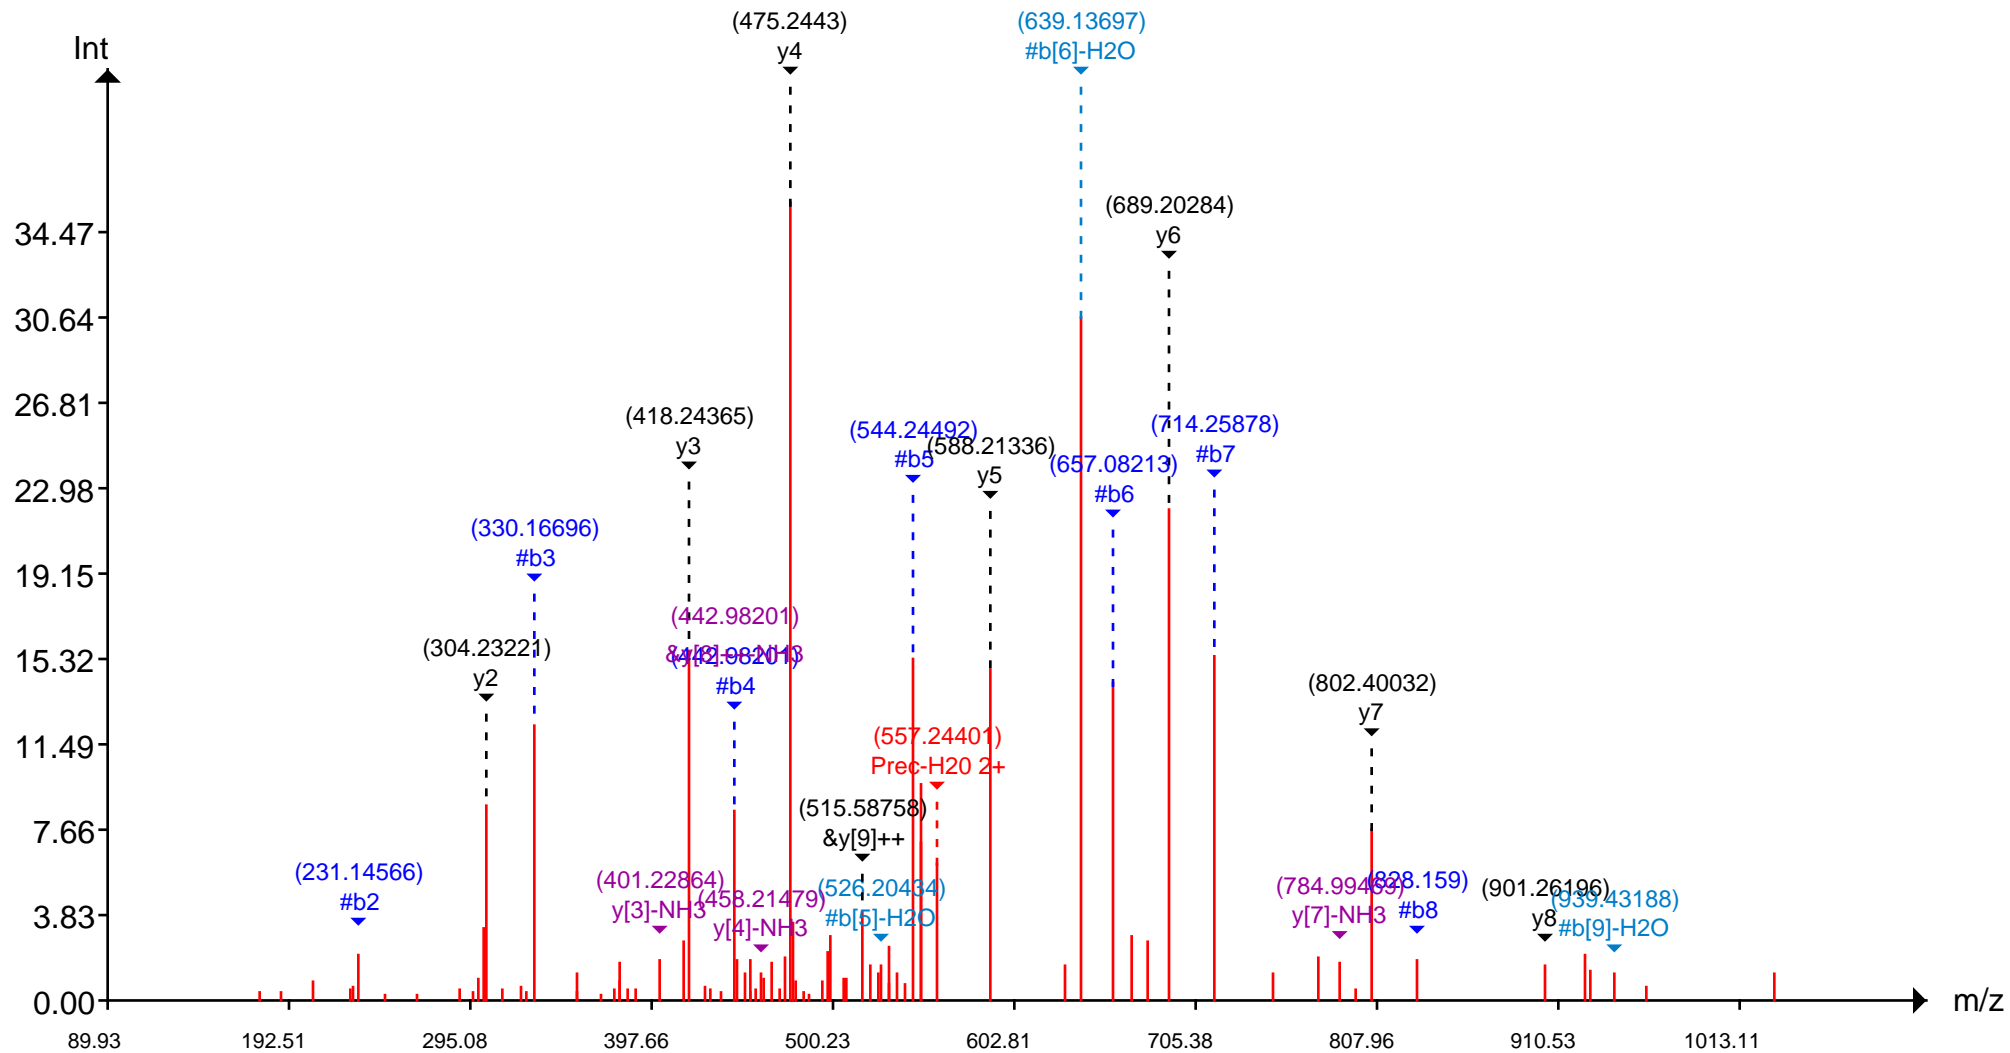

## Info

|                          |                                                                                |                           |         |
|--------------------------|--------------------------------------------------------------------------------|---------------------------|---------|
| <b>Modified Sequence</b> | AcD3-GQVITIGNER-COOH                                                           | <b>Ion score</b>          | 63.8    |
| <b>Protein</b>           | P62736, Q562R1, Q9BYX7, P60709, P68032, P63261, P63267, P68133, Q6S8J3, A5A3E0 | <b>Confidence level</b>   | 99.00%  |
| <b>Precursor m/z</b>     | 566.31352                                                                      | <b>Identity Threshold</b> | 48.87   |
| <b>Charge</b>            | 2+                                                                             | <b>Mass error</b>         | 1.83E-4 |

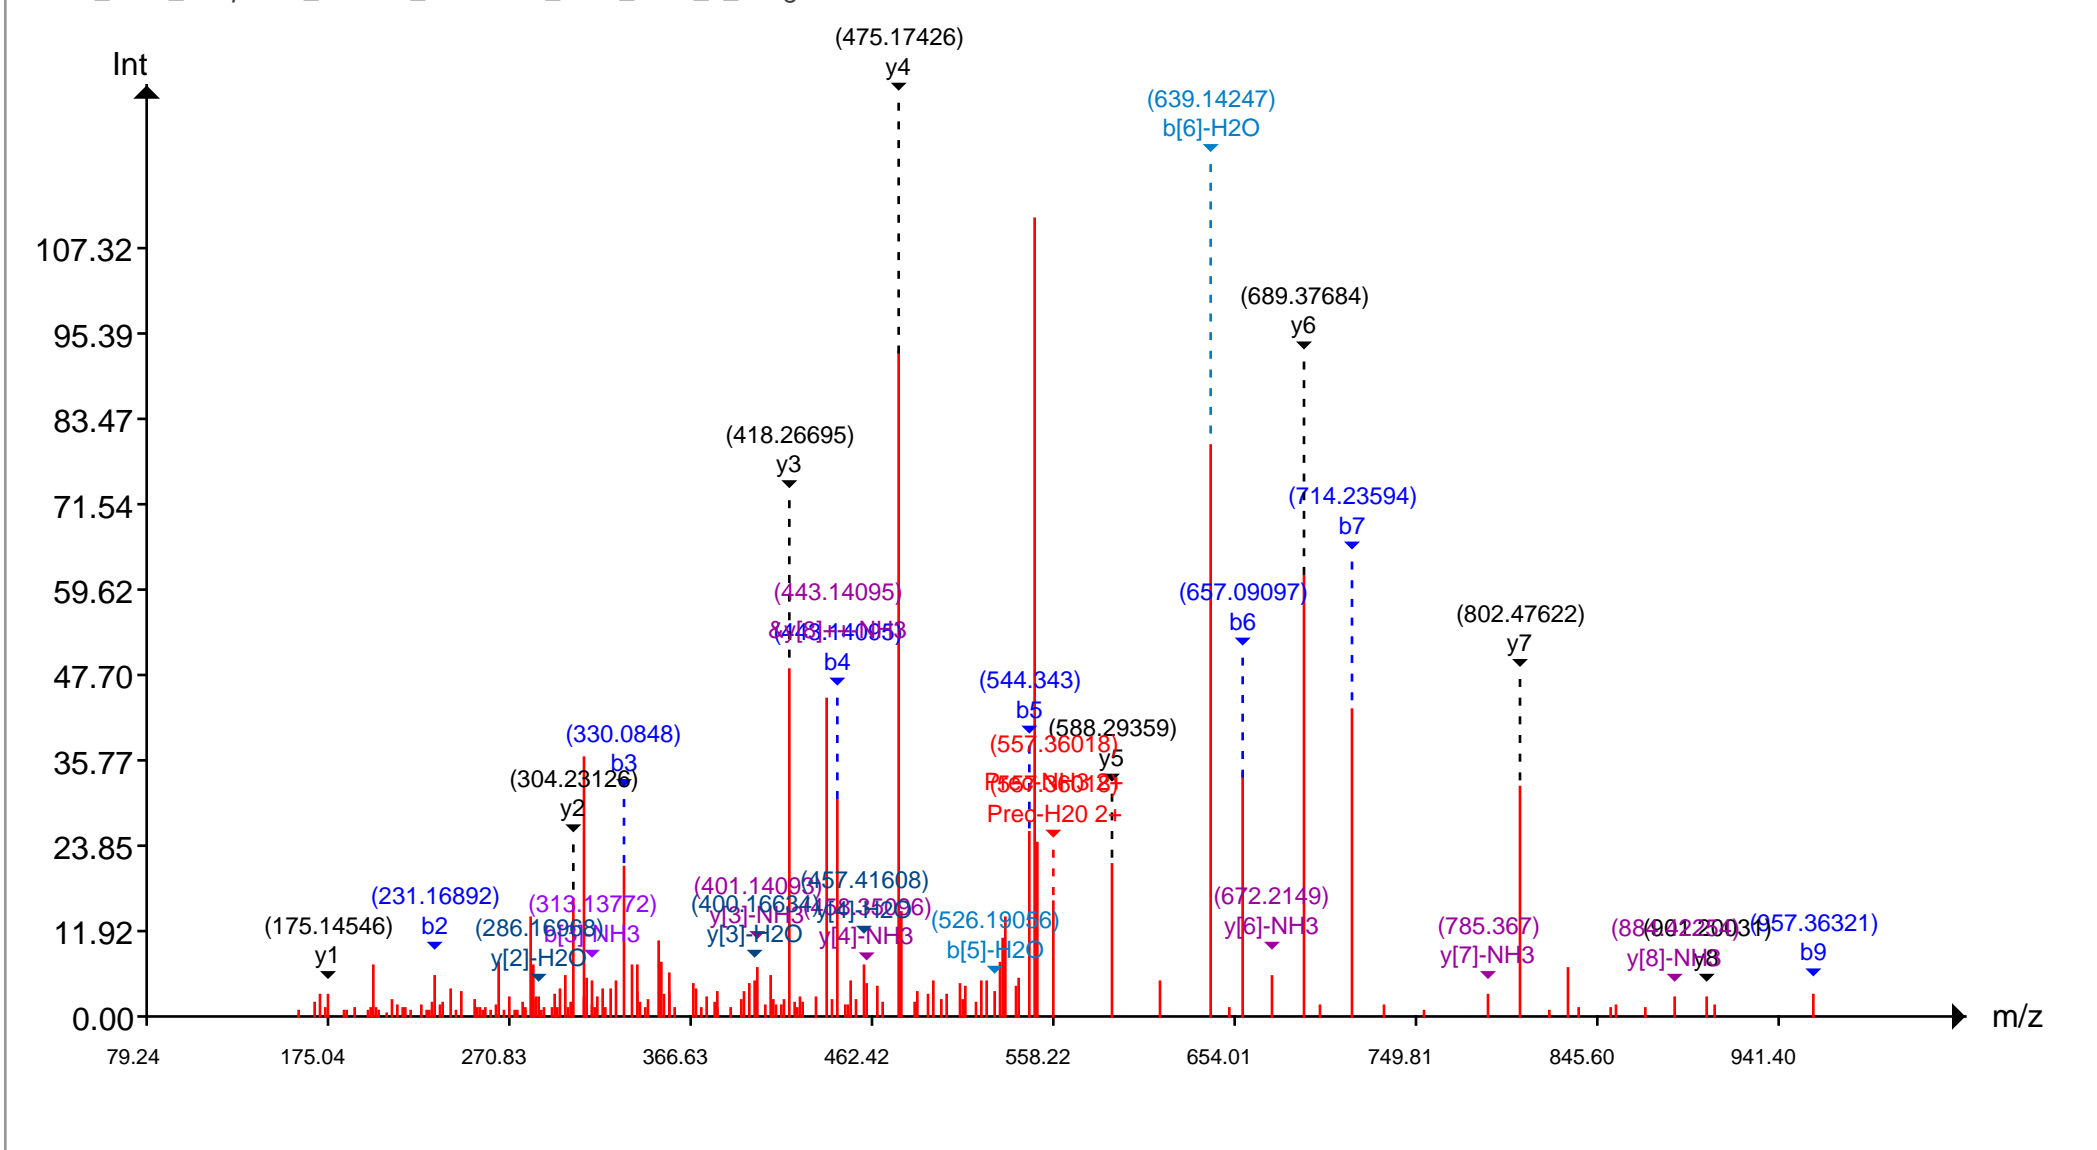

## Info

|                          |                                                                                |                           |         |
|--------------------------|--------------------------------------------------------------------------------|---------------------------|---------|
| <b>Modified Sequence</b> | AcD3-GQVITIGNER-COOH                                                           | <b>Ion score</b>          | 61.22   |
| <b>Protein</b>           | P62736, Q562R1, Q9BYX7, P60709, P68032, P63261, P63267, P68133, Q6S8J3, A5A3E0 | <b>Confidence level</b>   | 99.00%  |
| <b>Precursor m/z</b>     | 566.31353                                                                      | <b>Identity Threshold</b> | 48.87   |
| <b>Charge</b>            | 2+                                                                             | <b>Mass error</b>         | 2.03E-4 |

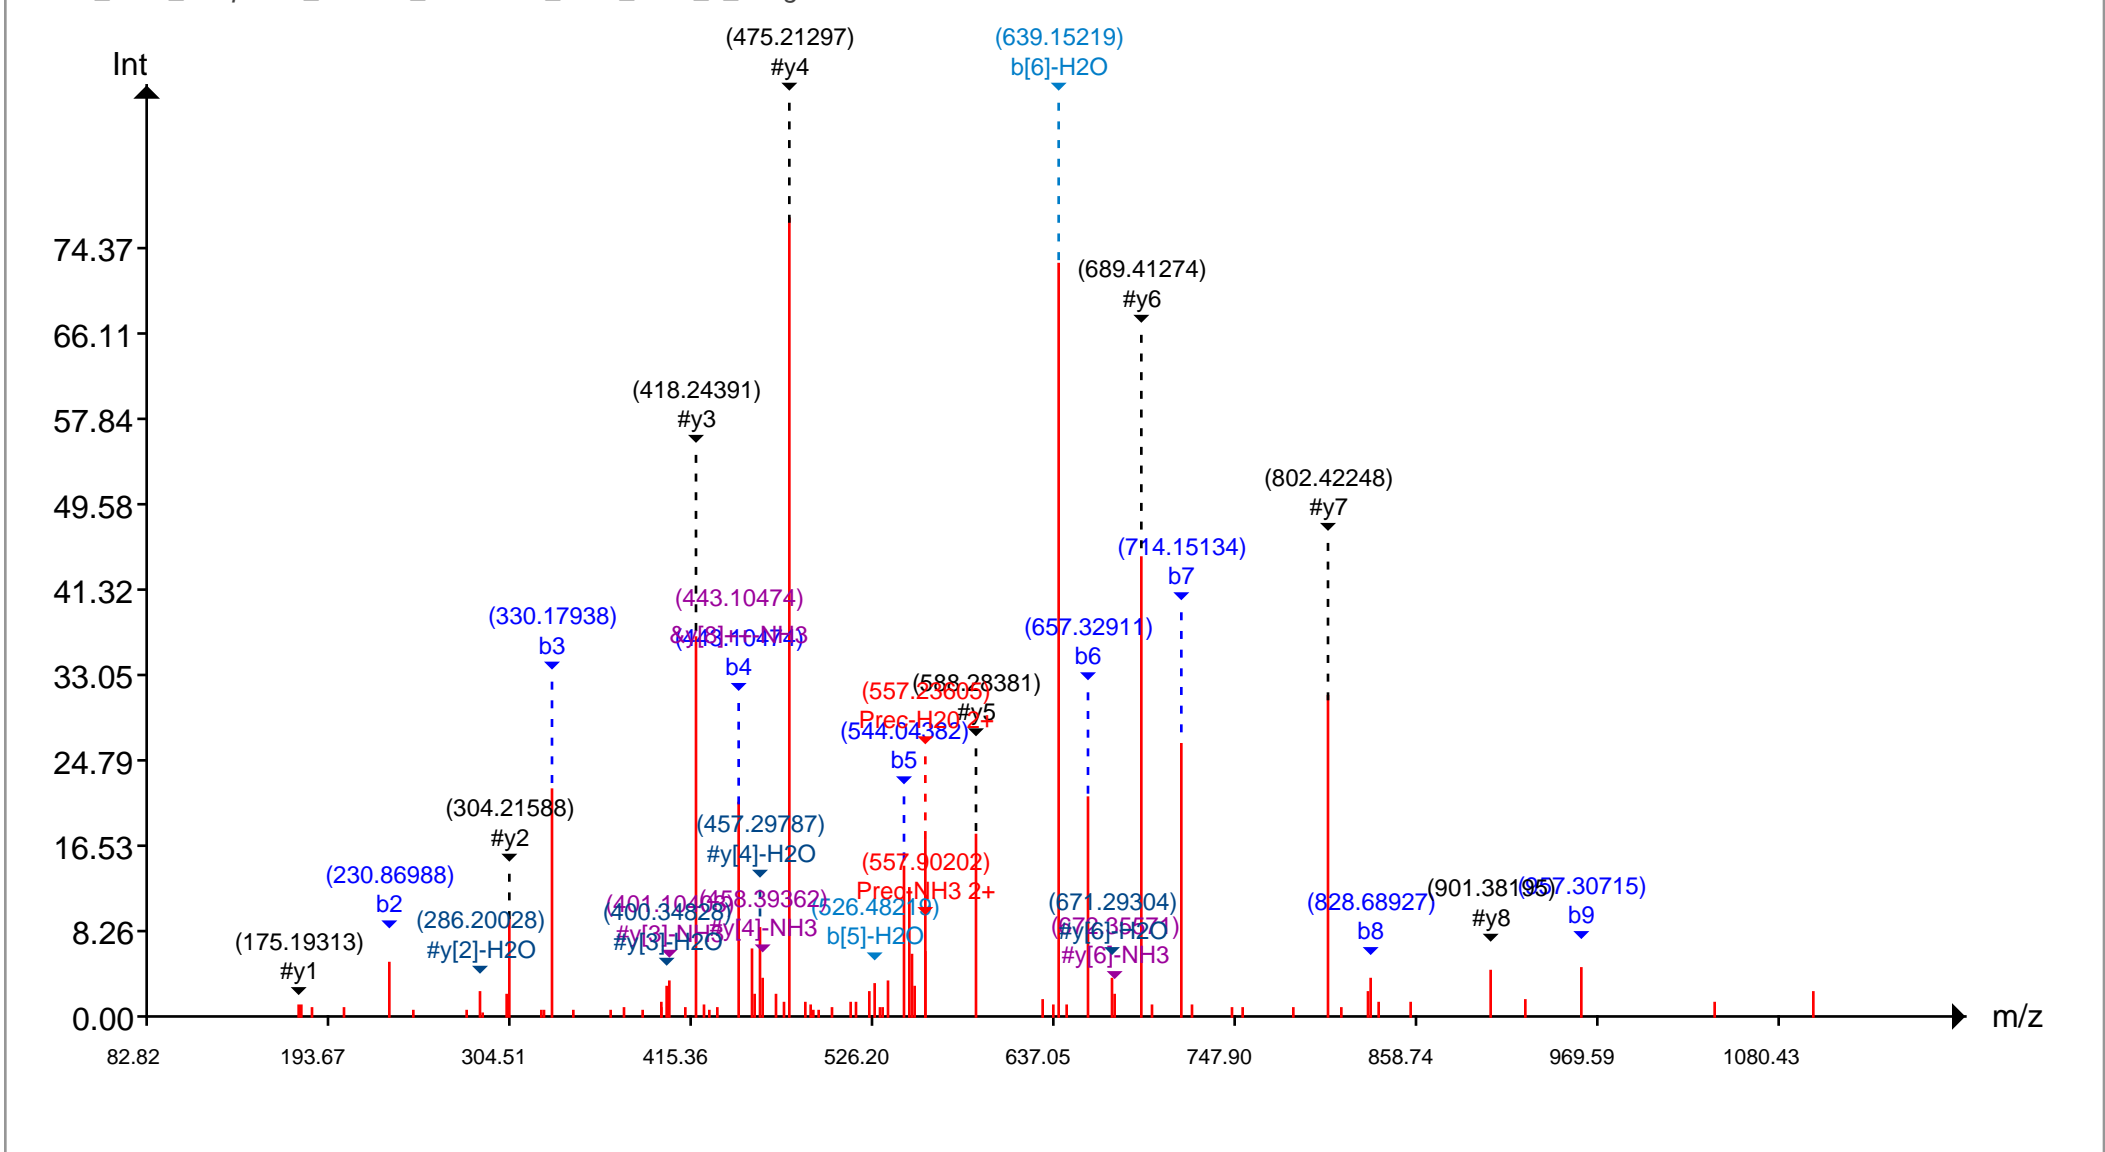

## Info

|                          |                                                                                |                           |         |
|--------------------------|--------------------------------------------------------------------------------|---------------------------|---------|
| <b>Modified Sequence</b> | AcD3-GQVITIGNER-COOH                                                           | <b>Ion score</b>          | 68.39   |
| <b>Protein</b>           | P62736, Q562R1, Q9BYX7, P60709, P68032, P63261, P63267, P68133, Q6S8J3, A5A3E0 | <b>Confidence level</b>   | 99.00%  |
| <b>Precursor m/z</b>     | 566.3135                                                                       | <b>Identity Threshold</b> | 48.87   |
| <b>Charge</b>            | 2+                                                                             | <b>Mass error</b>         | 1.43E-4 |



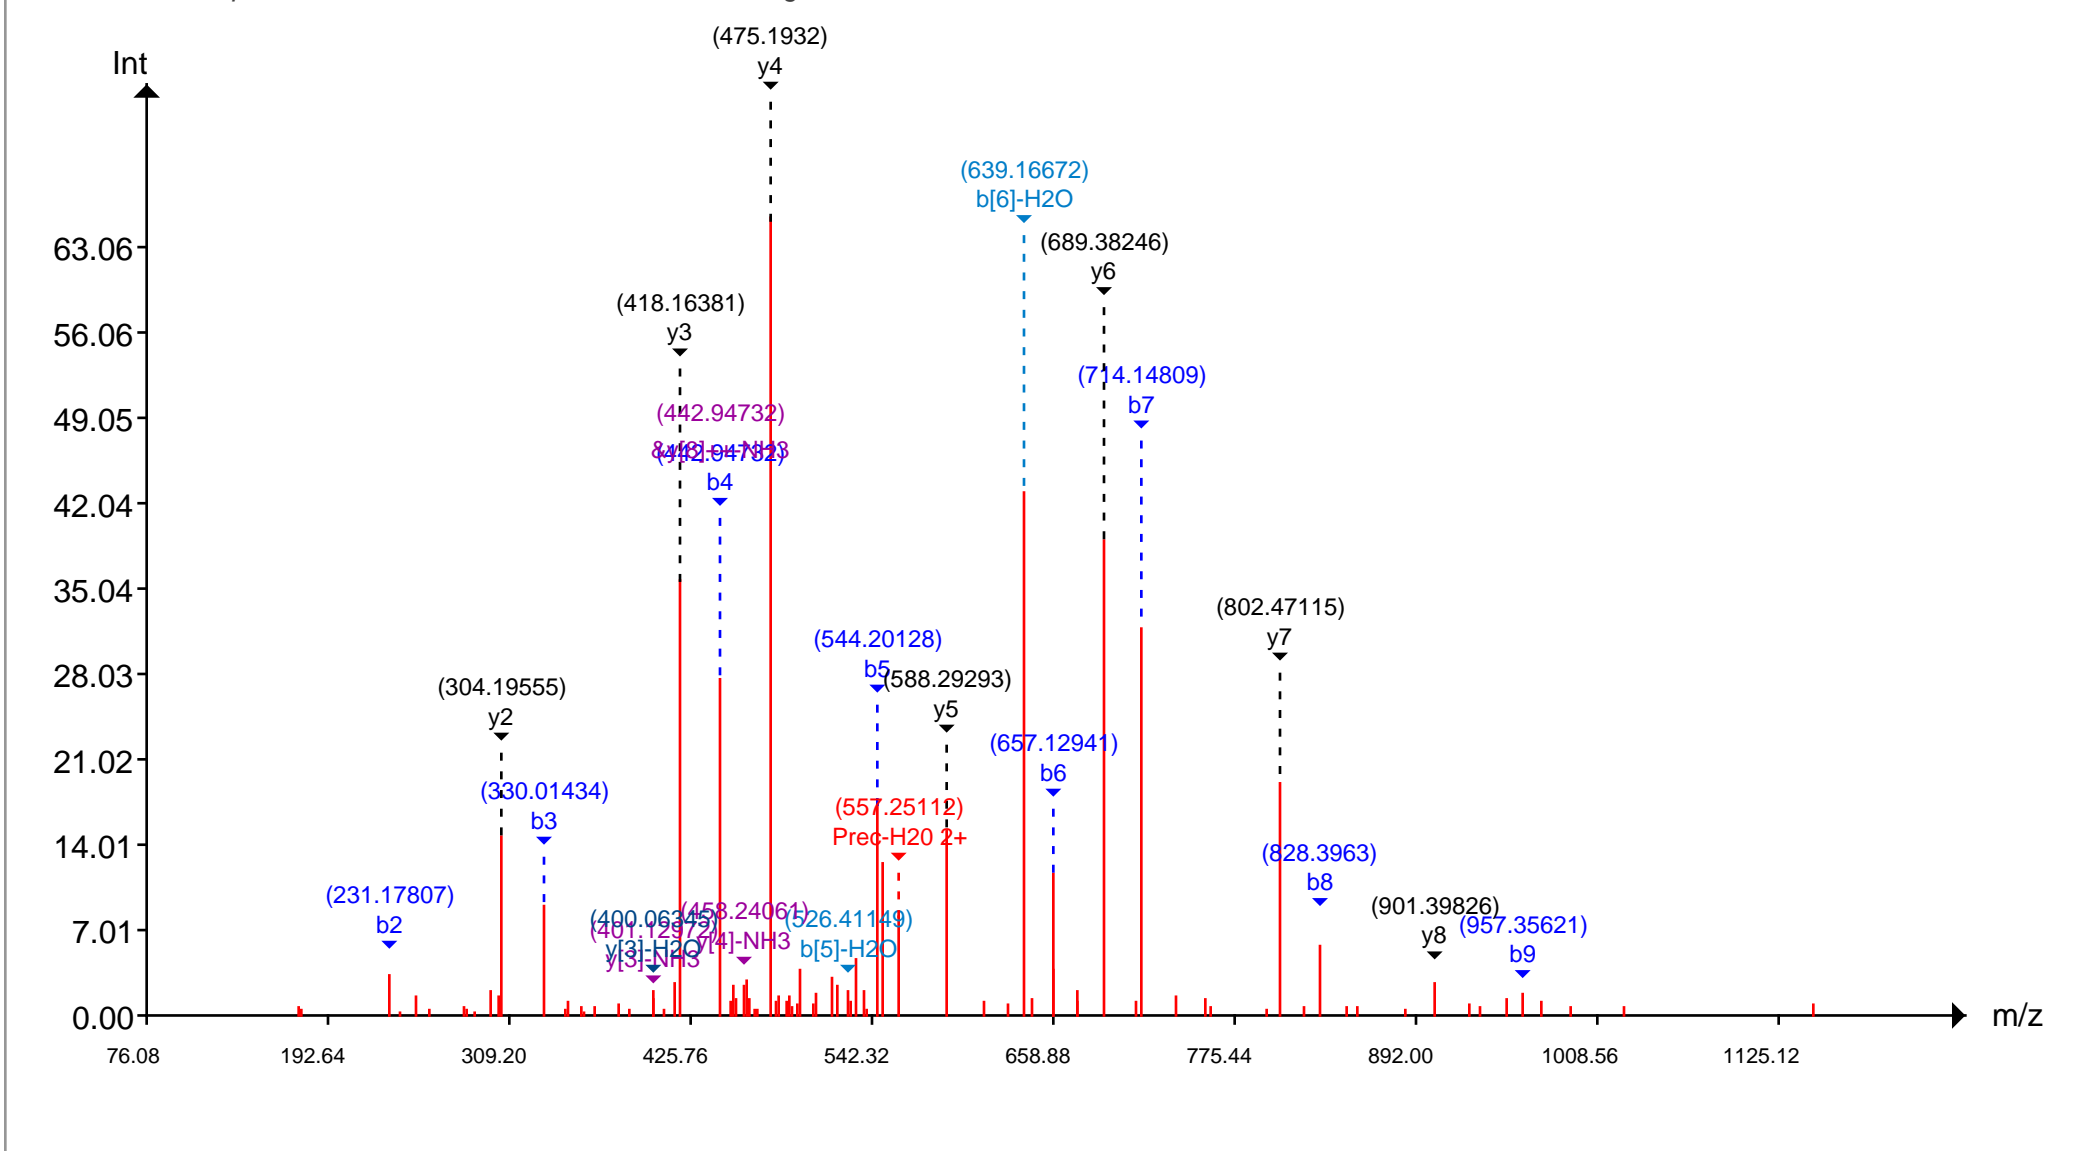

## Info

|                          |                                                                                |                           |         |
|--------------------------|--------------------------------------------------------------------------------|---------------------------|---------|
| <b>Modified Sequence</b> | AcD3-GQVITIGNER-COOH                                                           | <b>Ion score</b>          | 71.12   |
| <b>Protein</b>           | P62736, Q562R1, Q9BYX7, P60709, P68032, P63261, P63267, P68133, Q6S8J3, A5A3E0 | <b>Confidence level</b>   | 99.00%  |
| <b>Precursor m/z</b>     | 566.31352                                                                      | <b>Identity Threshold</b> | 48.87   |
| <b>Charge</b>            | 2+                                                                             | <b>Mass error</b>         | 1.83E-4 |

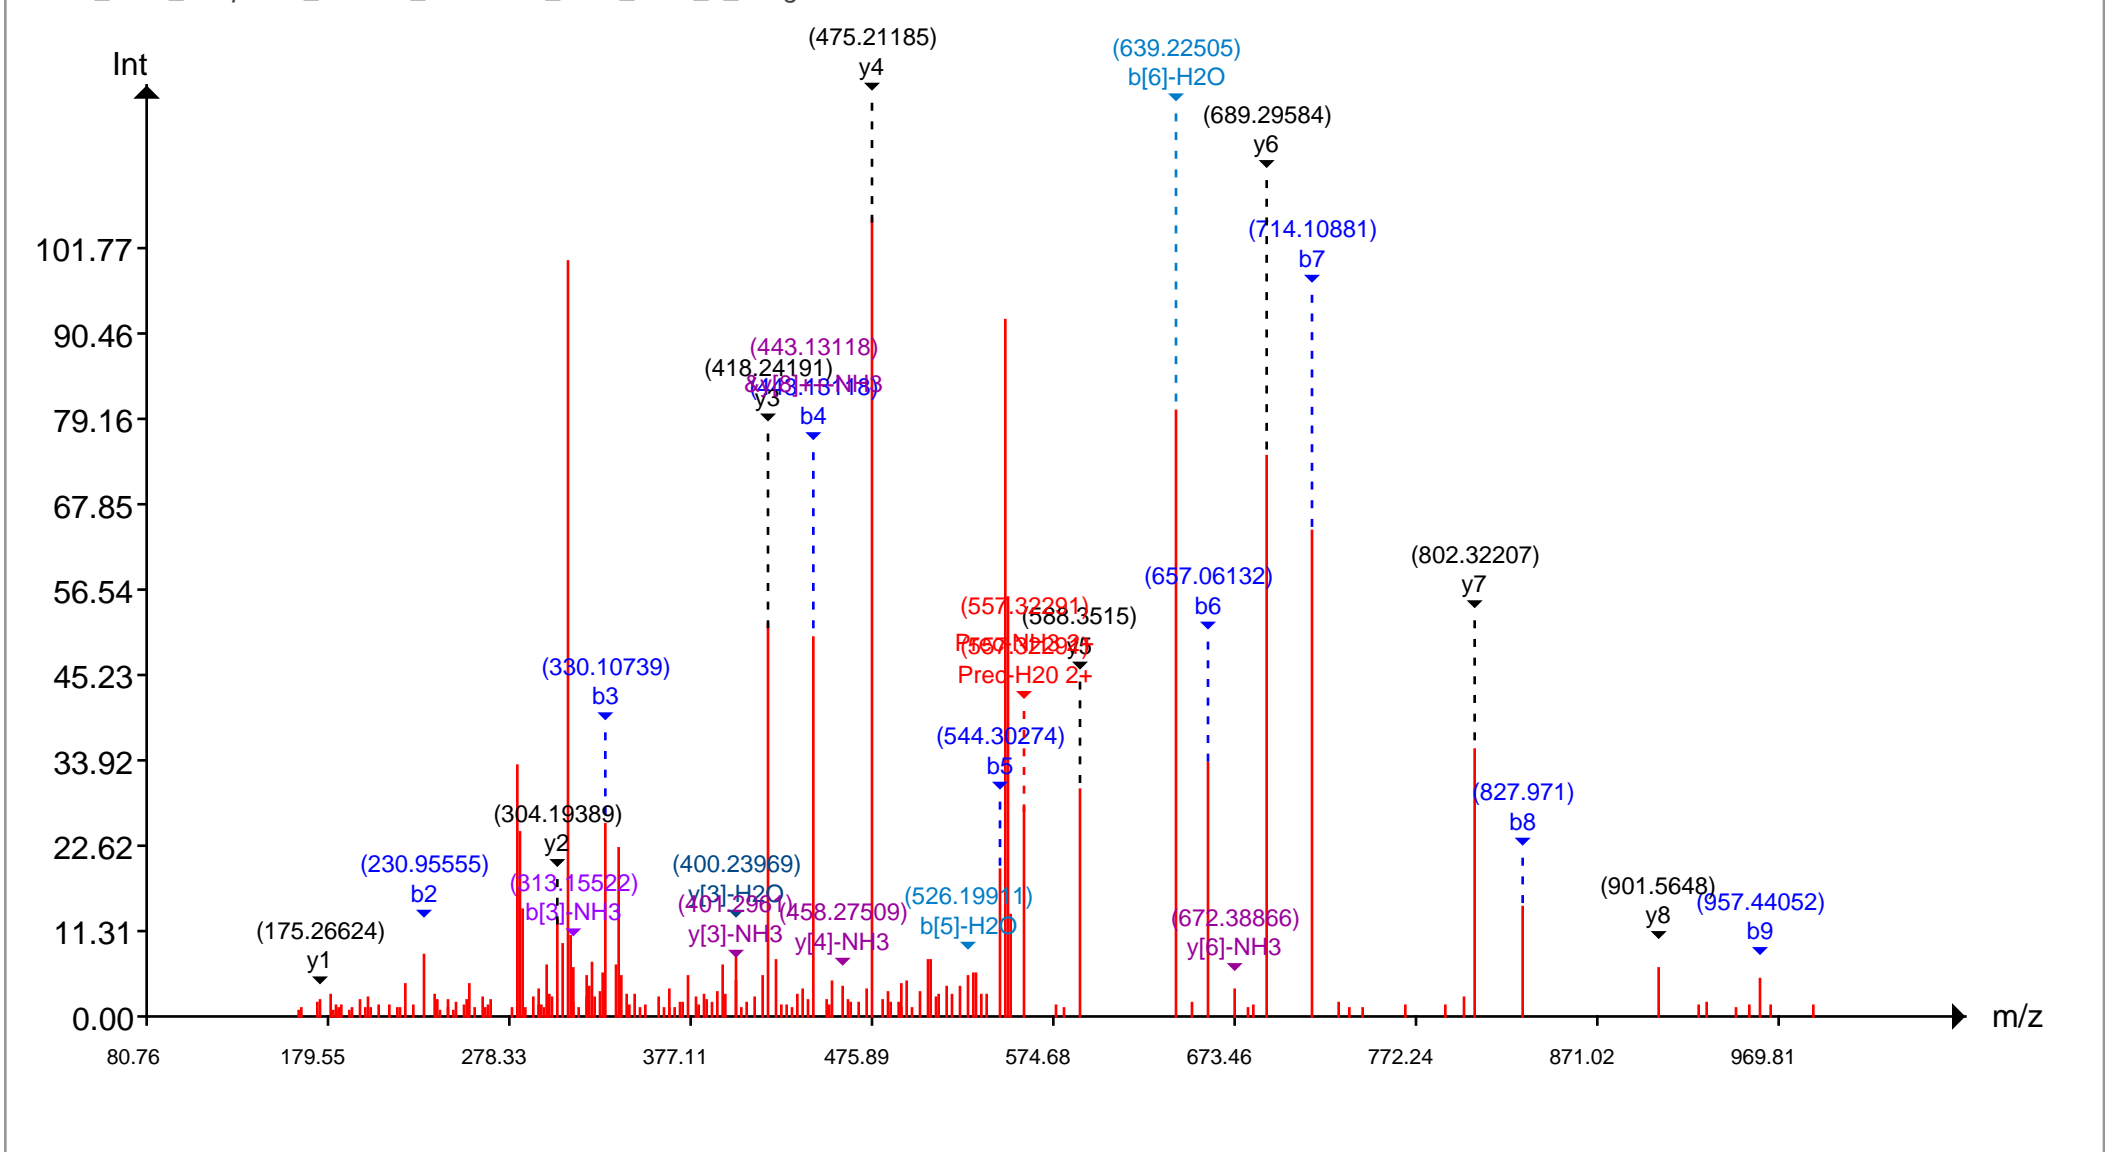

## Info

|                          |                                                                                |                           |         |
|--------------------------|--------------------------------------------------------------------------------|---------------------------|---------|
| <b>Modified Sequence</b> | AcD3-GQVITIGNER-COOH                                                           | <b>Ion score</b>          | 51.61   |
| <b>Protein</b>           | P62736, Q562R1, Q9BYX7, P60709, P68032, P63261, P63267, P68133, Q6S8J3, A5A3E0 | <b>Confidence level</b>   | 99.00%  |
| <b>Precursor m/z</b>     | 566.31348                                                                      | <b>Identity Threshold</b> | 48.87   |
| <b>Charge</b>            | 2+                                                                             | <b>Mass error</b>         | 1.03E-4 |

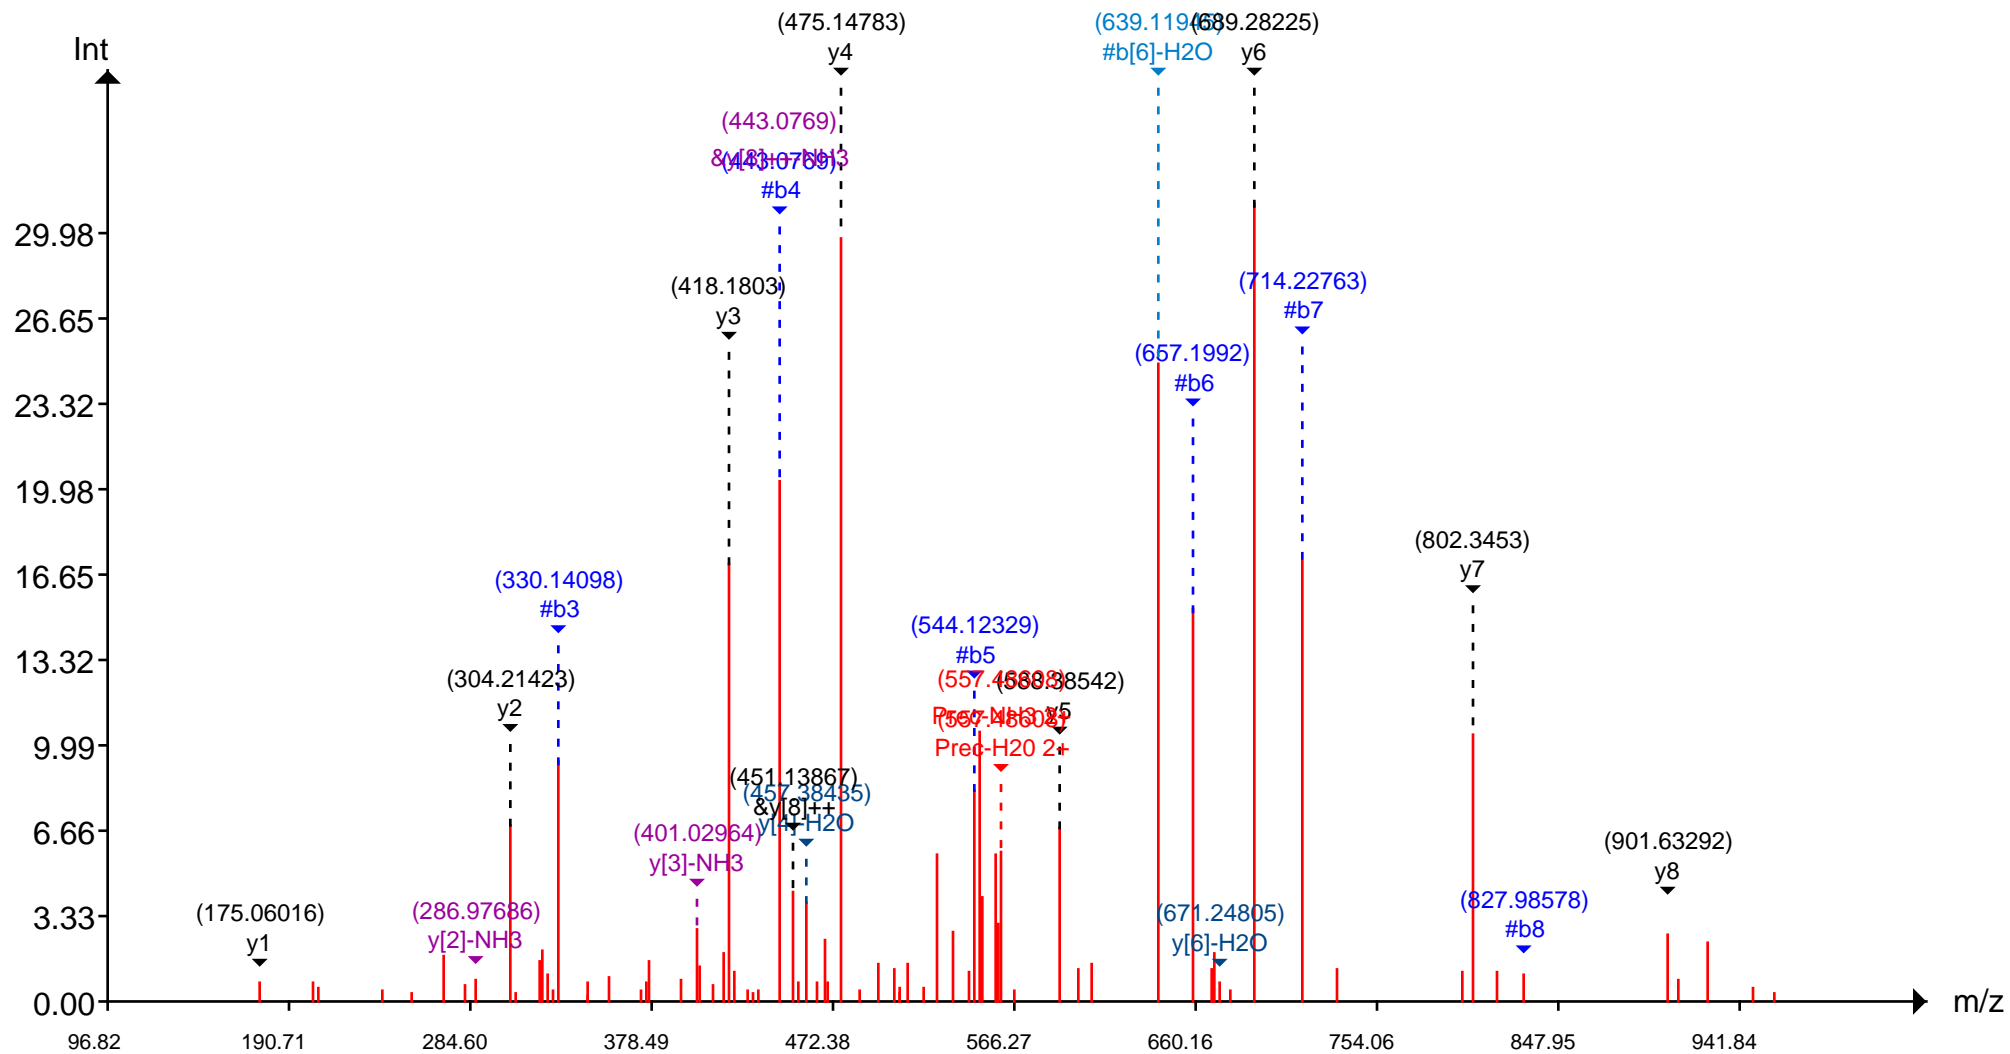

## Info

|                          |                                                                                |                           |         |
|--------------------------|--------------------------------------------------------------------------------|---------------------------|---------|
| <b>Modified Sequence</b> | AcD3-GQVITIGNER-COOH                                                           | <b>Ion score</b>          | 60.15   |
| <b>Protein</b>           | P62736, Q562R1, Q9BYX7, P60709, P68032, P63261, P63267, P68133, Q6S8J3, A5A3E0 | <b>Confidence level</b>   | 99.00%  |
| <b>Precursor m/z</b>     | 566.31348                                                                      | <b>Identity Threshold</b> | 48.87   |
| <b>Charge</b>            | 2+                                                                             | <b>Mass error</b>         | 1.03E-4 |

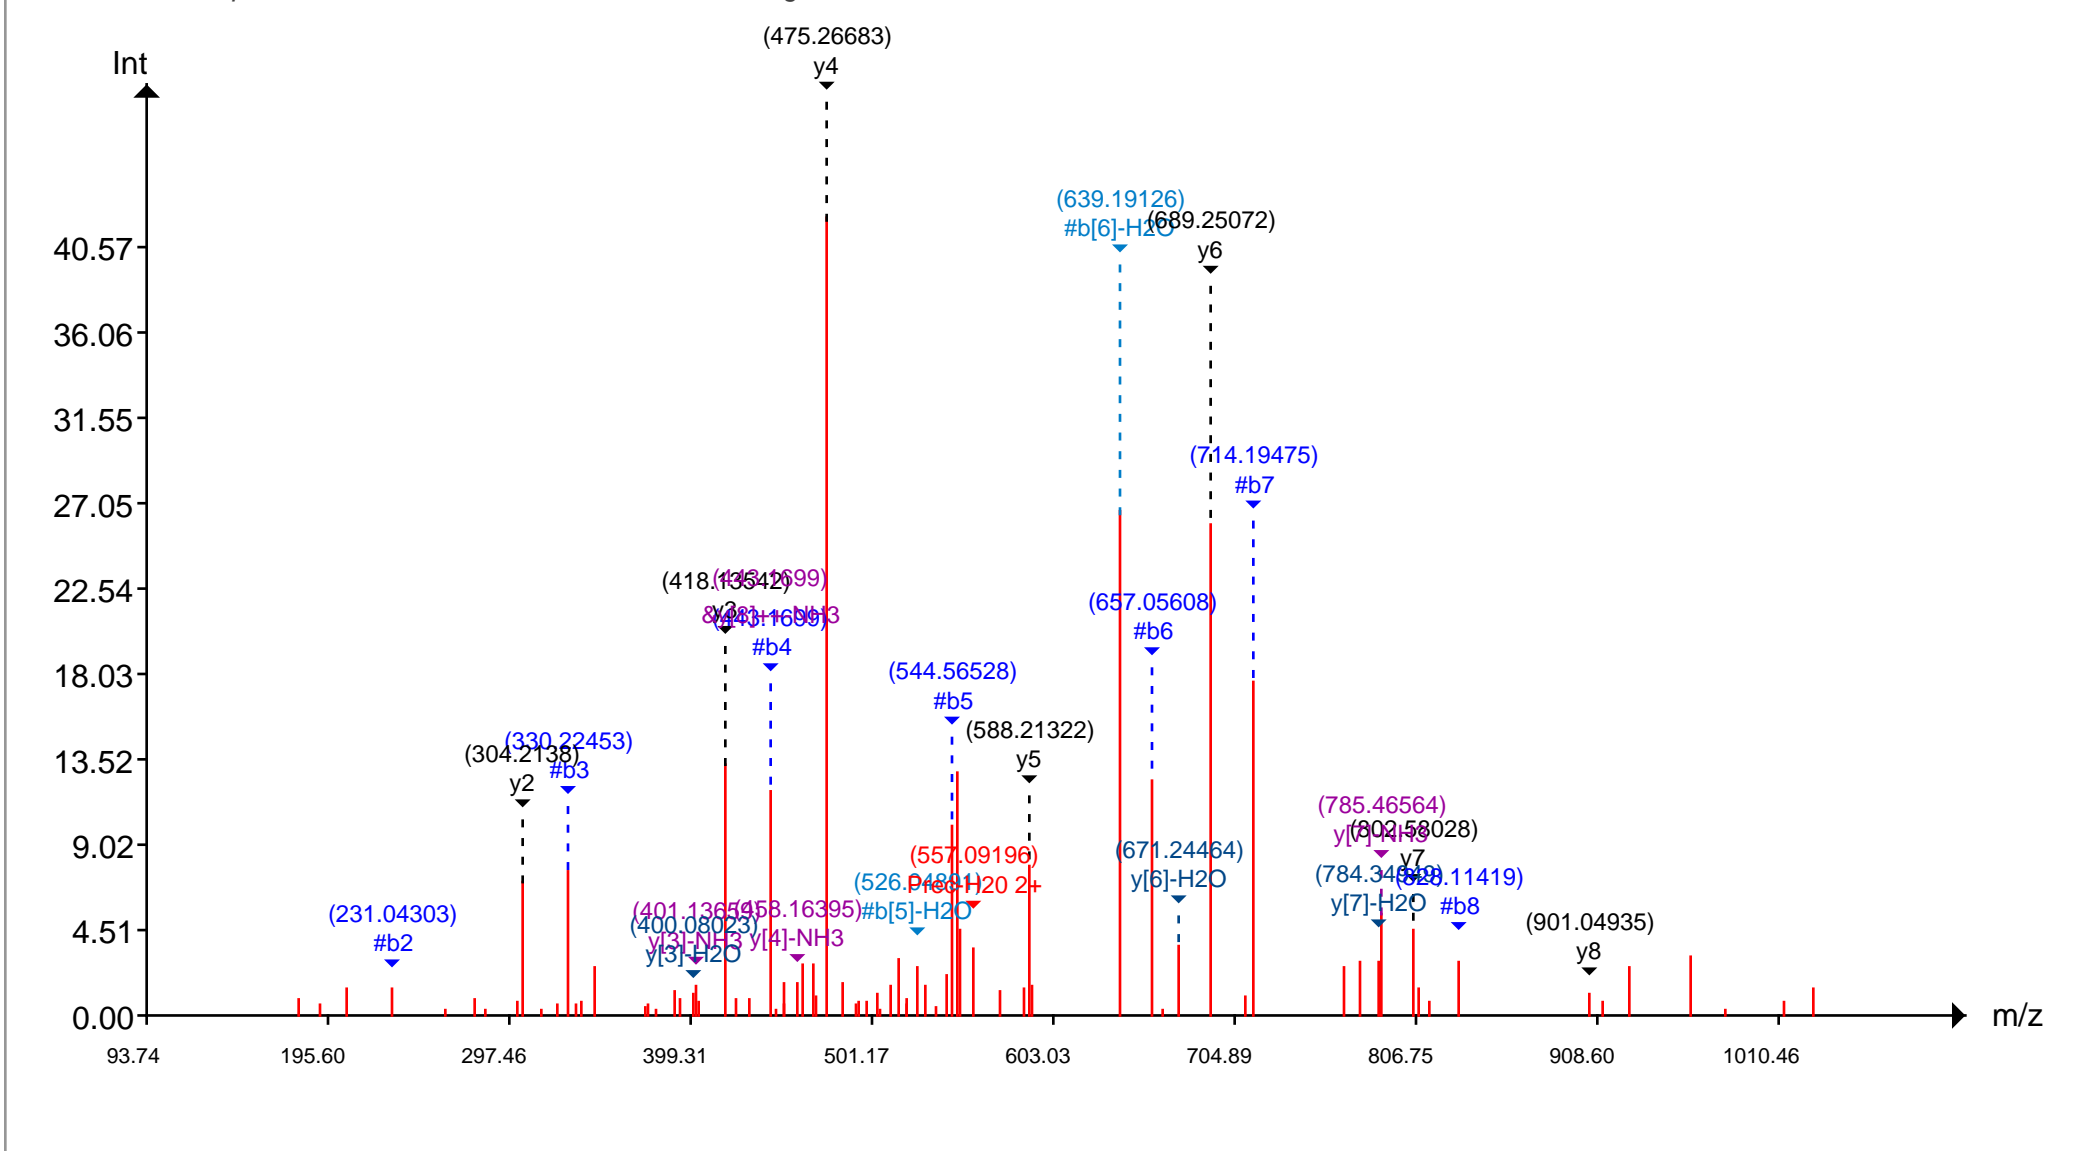

## Info

|                          |                                                                                |                           |          |
|--------------------------|--------------------------------------------------------------------------------|---------------------------|----------|
| <b>Modified Sequence</b> | AcD3-GQVITIGNER-COOH                                                           | <b>Ion score</b>          | 53.76    |
| <b>Protein</b>           | P62736, Q562R1, Q9BYX7, P60709, P68032, P63261, P63267, P68133, Q6S8J3, A5A3E0 | <b>Confidence level</b>   | 99.00%   |
| <b>Precursor m/z</b>     | 566.31325                                                                      | <b>Identity Threshold</b> | 48.87    |
| <b>Charge</b>            | 2+                                                                             | <b>Mass error</b>         | -3.57E-4 |

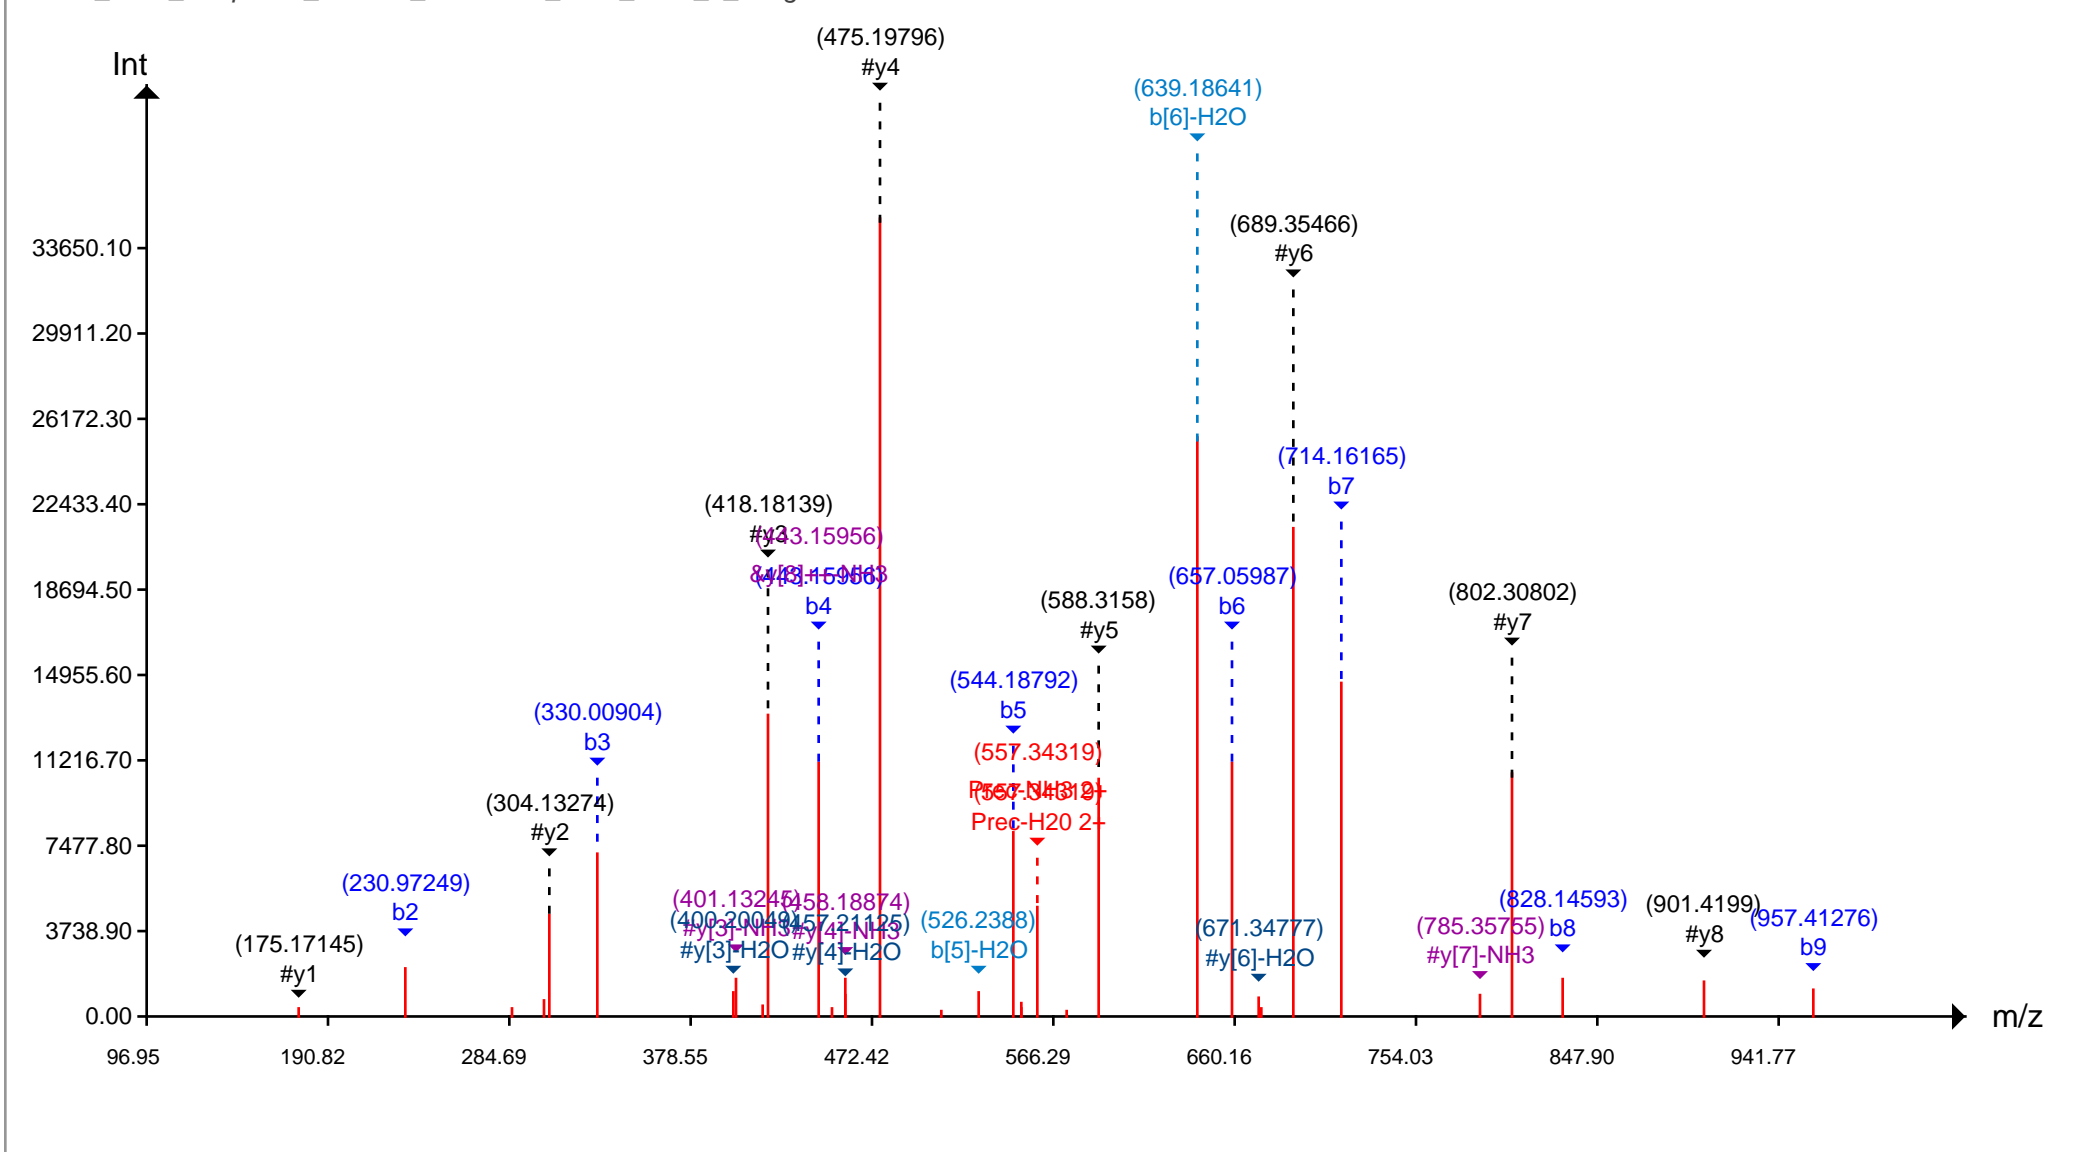

## Info

|                          |                                                                                |                           |          |
|--------------------------|--------------------------------------------------------------------------------|---------------------------|----------|
| <b>Modified Sequence</b> | AcD3-GQVITIGNER-COOH                                                           | <b>Ion score</b>          | 92.14    |
| <b>Protein</b>           | P62736, Q562R1, Q9BYX7, P60709, P68032, P63261, P63267, P68133, Q6S8J3, A5A3E0 | <b>Confidence level</b>   | 99.00%   |
| <b>Precursor m/z</b>     | 566.31331                                                                      | <b>Identity Threshold</b> | 48.86    |
| <b>Charge</b>            | 2+                                                                             | <b>Mass error</b>         | -2.37E-4 |

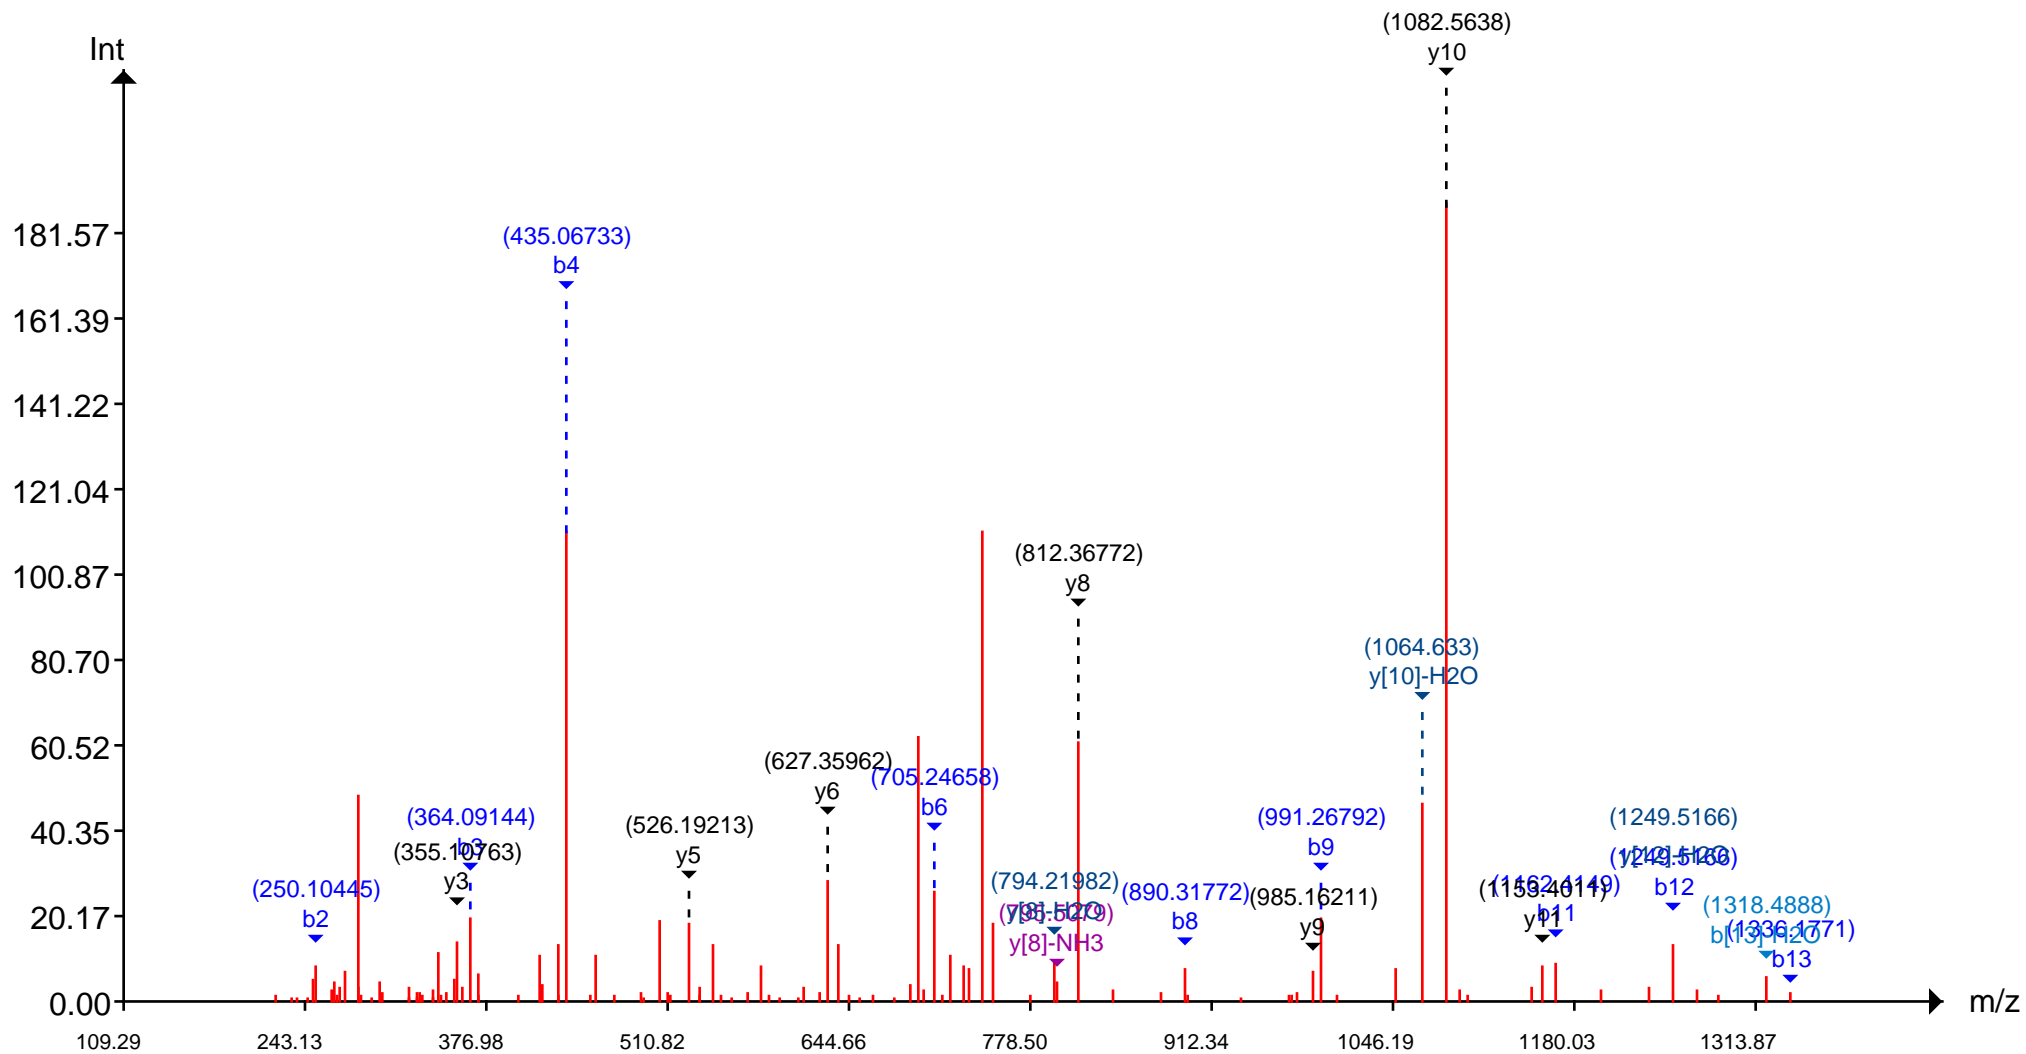

## Info

|                          |                                             |                           |         |
|--------------------------|---------------------------------------------|---------------------------|---------|
| <b>Modified Sequence</b> | AcD3-GM<Mox*>NAPK<AcD3K*>GQTGNSSR<C13>-COOH | <b>Ion score</b>          | 73.41   |
| <b>Protein</b>           | P23588                                      | <b>Confidence level</b>   | 99.00%  |
| <b>Precursor m/z</b>     | 758.87319                                   | <b>Identity Threshold</b> | 48.10   |
| <b>Charge</b>            | 2+                                          | <b>Mass error</b>         | 4.28E-4 |

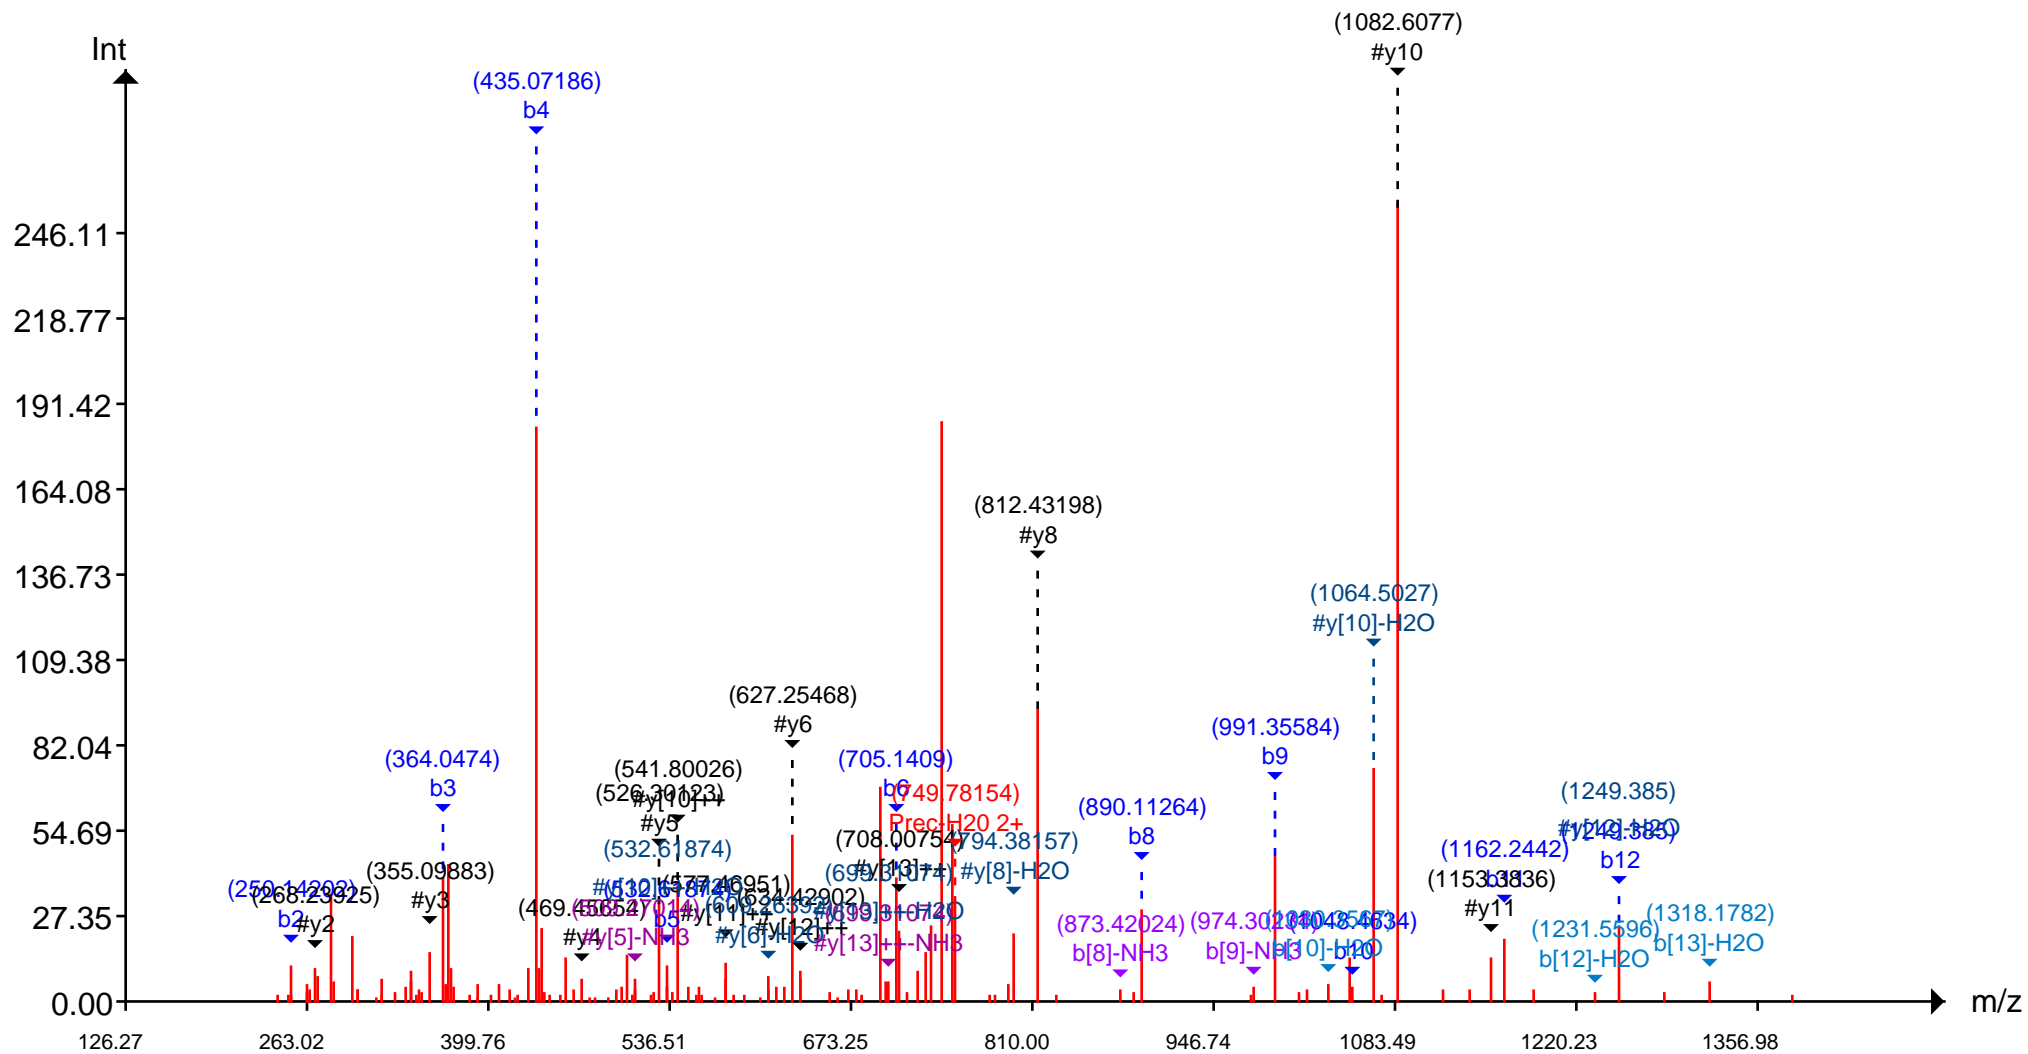

## Info

|                          |                                             |                           |         |
|--------------------------|---------------------------------------------|---------------------------|---------|
| <b>Modified Sequence</b> | AcD3-GM<Mox*>NAPK<AcD3K*>GQTGNSSR<C13>-COOH | <b>Ion score</b>          | 71.59   |
| <b>Protein</b>           | P23588                                      | <b>Confidence level</b>   | 99.00%  |
| <b>Precursor m/z</b>     | 758.87312                                   | <b>Identity Threshold</b> | 48.07   |
| <b>Charge</b>            | 2+                                          | <b>Mass error</b>         | 2.88E-4 |

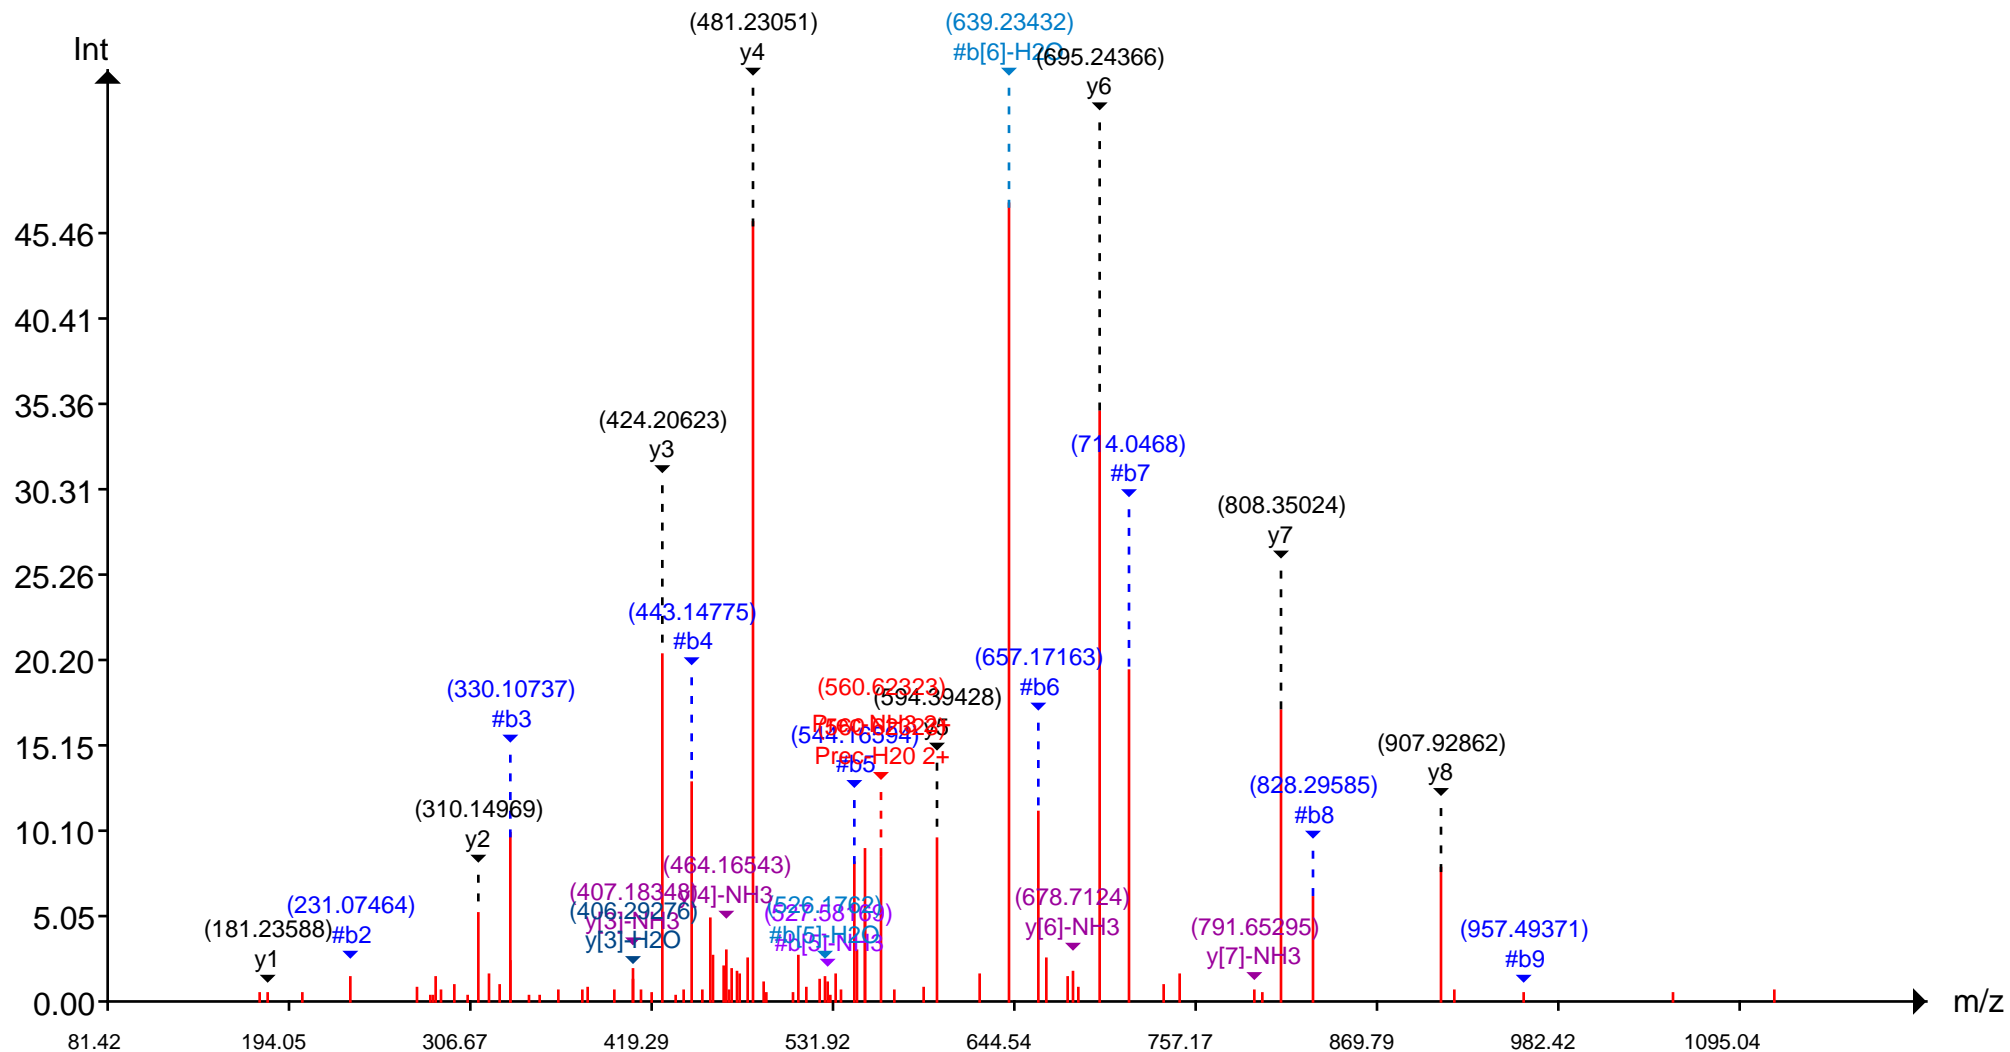

## Info

|                          |                                                                                |                           |         |
|--------------------------|--------------------------------------------------------------------------------|---------------------------|---------|
| <b>Modified Sequence</b> | AcD3-GQVITIGNER<C13>-COOH                                                      | <b>Ion score</b>          | 68.27   |
| <b>Protein</b>           | P62736, Q562R1, Q9BYX7, P60709, P68032, P63261, P63267, P68133, Q6S8J3, A5A3E0 | <b>Confidence level</b>   | 99.00%  |
| <b>Precursor m/z</b>     | 569.32374                                                                      | <b>Identity Threshold</b> | 47.93   |
| <b>Charge</b>            | 2+                                                                             | <b>Mass error</b>         | 4.82E-4 |



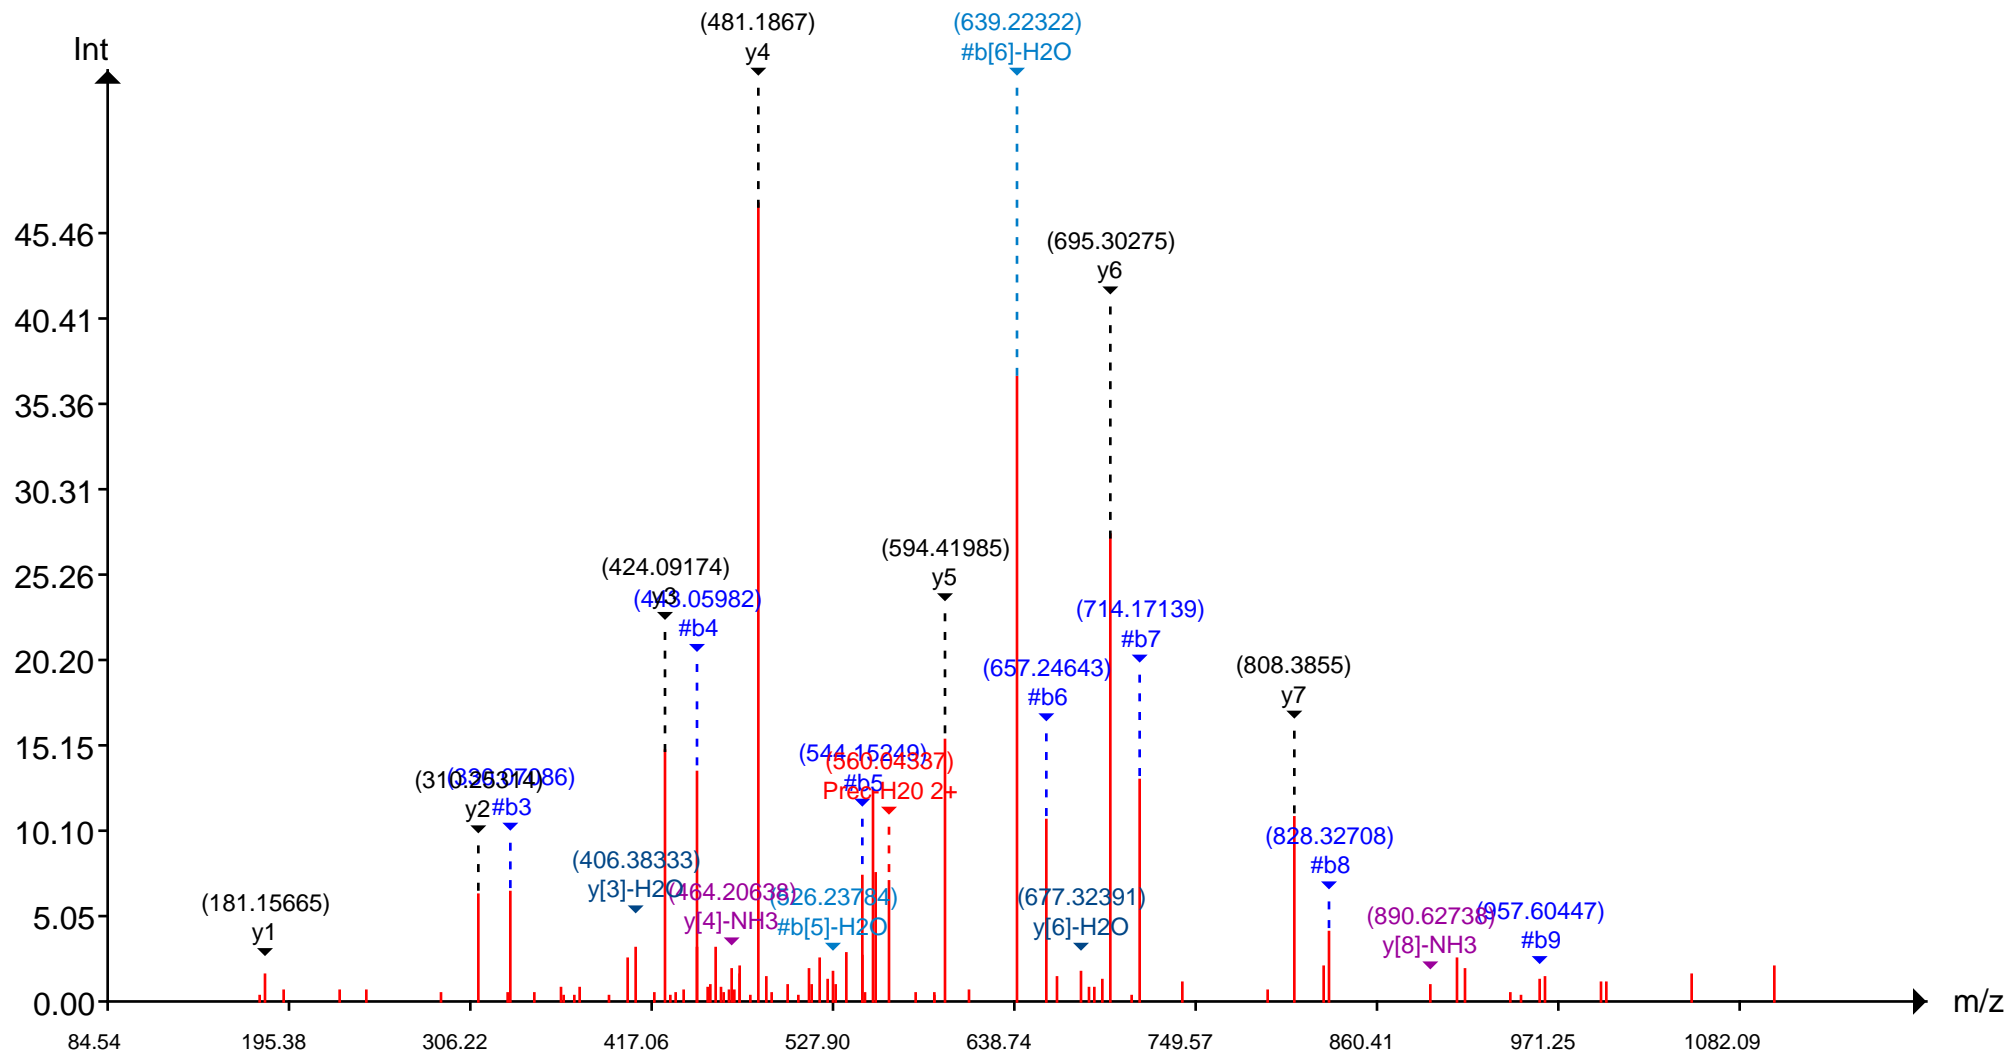

## Info

|                          |                                                                                |                           |         |
|--------------------------|--------------------------------------------------------------------------------|---------------------------|---------|
| <b>Modified Sequence</b> | AcD3-GQVITIGNER<C13>-COOH                                                      | <b>Ion score</b>          | 52.98   |
| <b>Protein</b>           | P62736, Q562R1, Q9BYX7, P60709, P68032, P63261, P63267, P68133, Q6S8J3, A5A3E0 | <b>Confidence level</b>   | 99.00%  |
| <b>Precursor m/z</b>     | 569.32372                                                                      | <b>Identity Threshold</b> | 47.92   |
| <b>Charge</b>            | 2+                                                                             | <b>Mass error</b>         | 4.42E-4 |

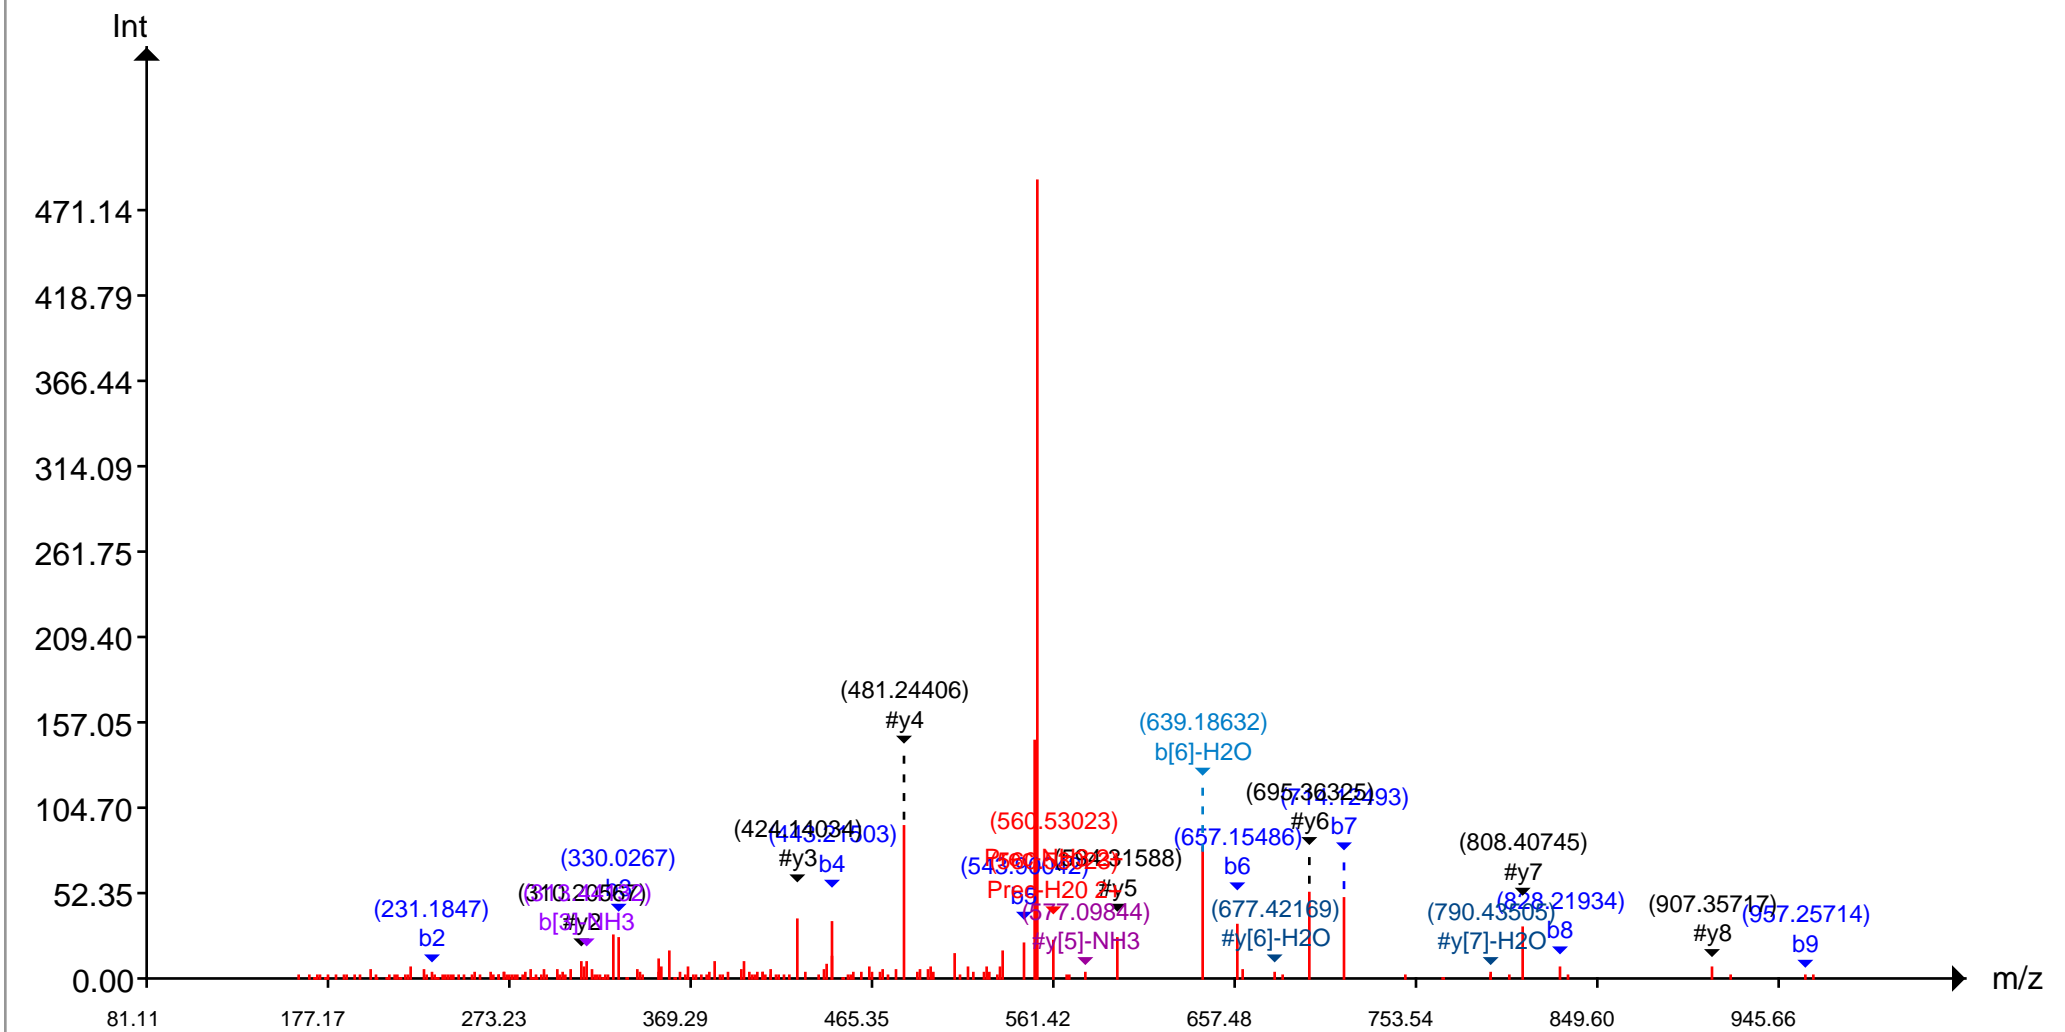

## Info

|                          |                                                                                |                           |          |
|--------------------------|--------------------------------------------------------------------------------|---------------------------|----------|
| <b>Modified Sequence</b> | AcD3-GQVITIGNER<C13>-COOH                                                      | <b>Ion score</b>          | 50.54    |
| <b>Protein</b>           | P62736, Q562R1, Q9BYX7, P60709, P68032, P63261, P63267, P68133, Q6S8J3, A5A3E0 | <b>Confidence level</b>   | 99.00%   |
| <b>Precursor m/z</b>     | 569.32404                                                                      | <b>Identity Threshold</b> | 47.93    |
| <b>Charge</b>            | 2+                                                                             | <b>Mass error</b>         | 0.001082 |

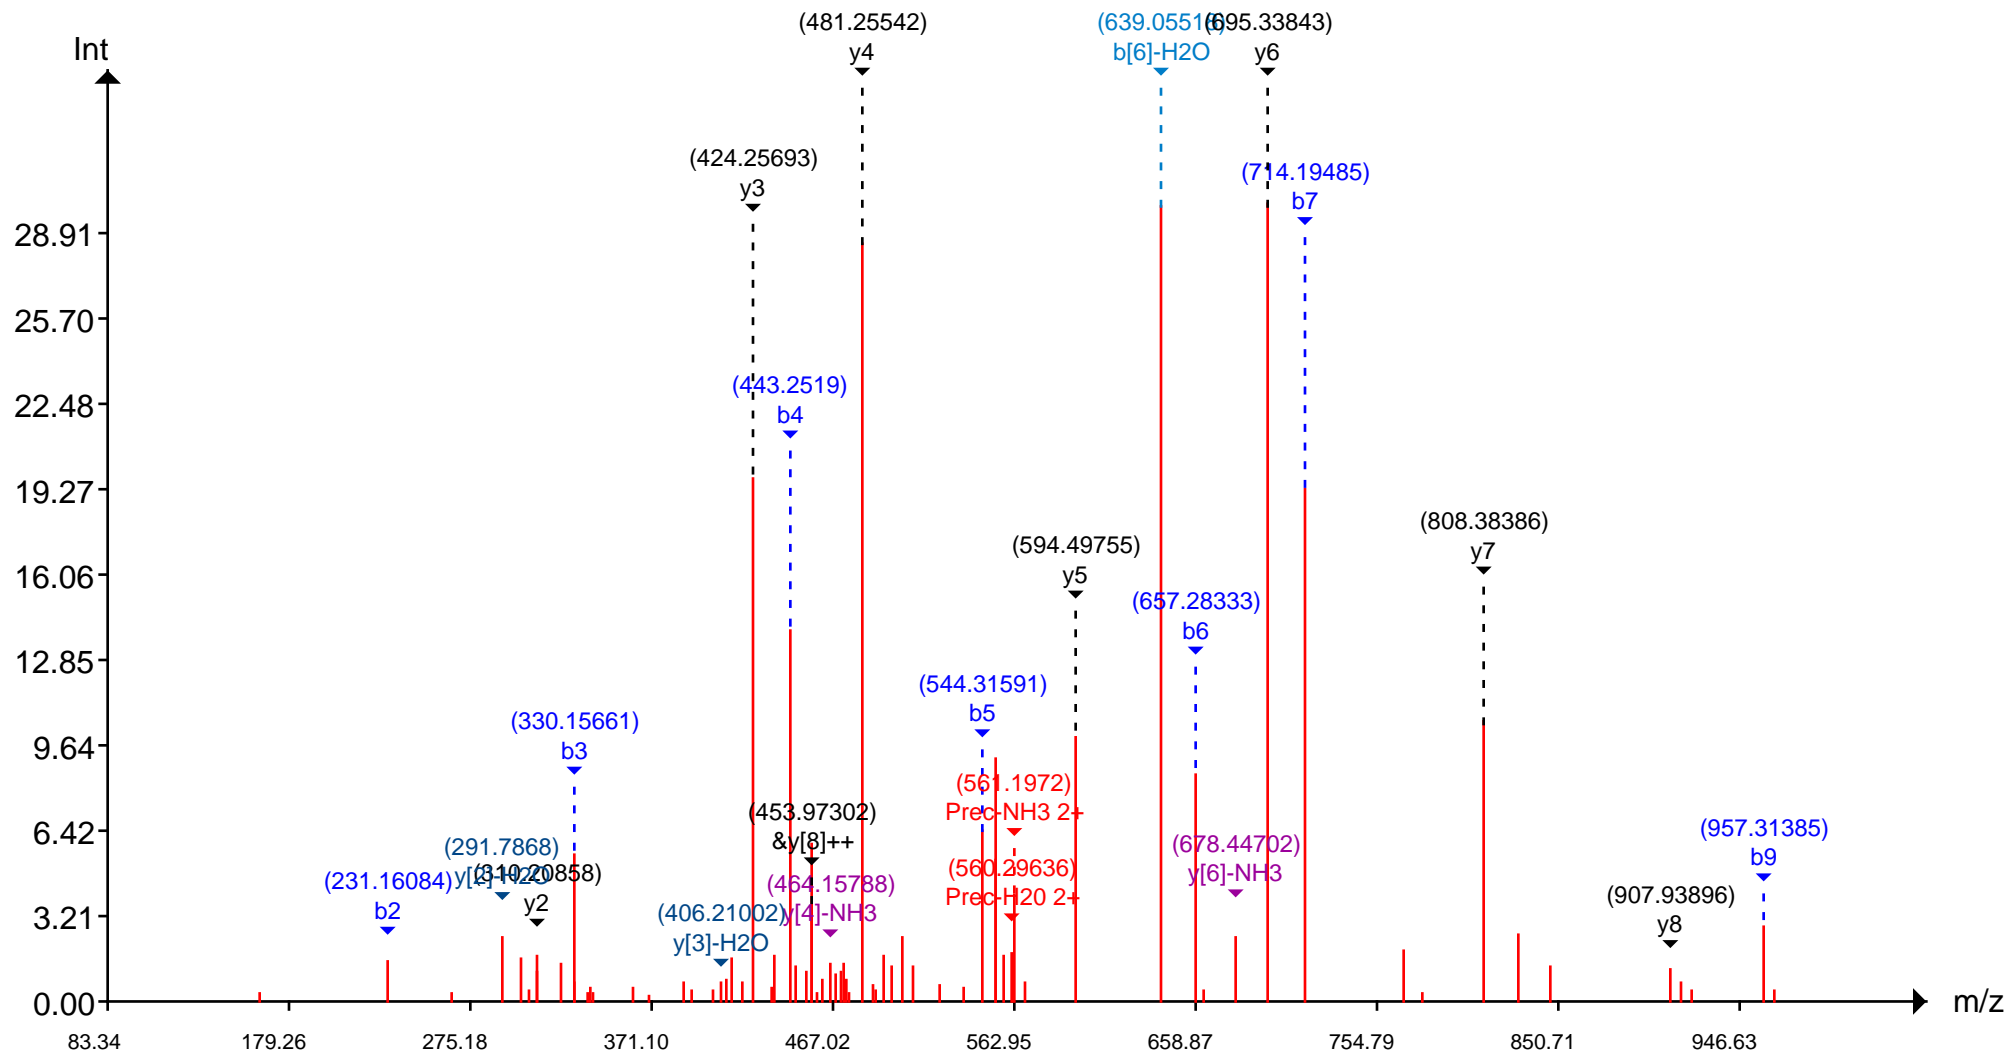

## Info

|                          |                                                                                |                           |         |
|--------------------------|--------------------------------------------------------------------------------|---------------------------|---------|
| <b>Modified Sequence</b> | AcD3-GQVITIGNER<C13>-COOH                                                      | <b>Ion score</b>          | 65.44   |
| <b>Protein</b>           | P62736, Q562R1, Q9BYX7, P60709, P68032, P63261, P63267, P68133, Q6S8J3, A5A3E0 | <b>Confidence level</b>   | 99.00%  |
| <b>Precursor m/z</b>     | 569.32375                                                                      | <b>Identity Threshold</b> | 47.93   |
| <b>Charge</b>            | 2+                                                                             | <b>Mass error</b>         | 5.02E-4 |

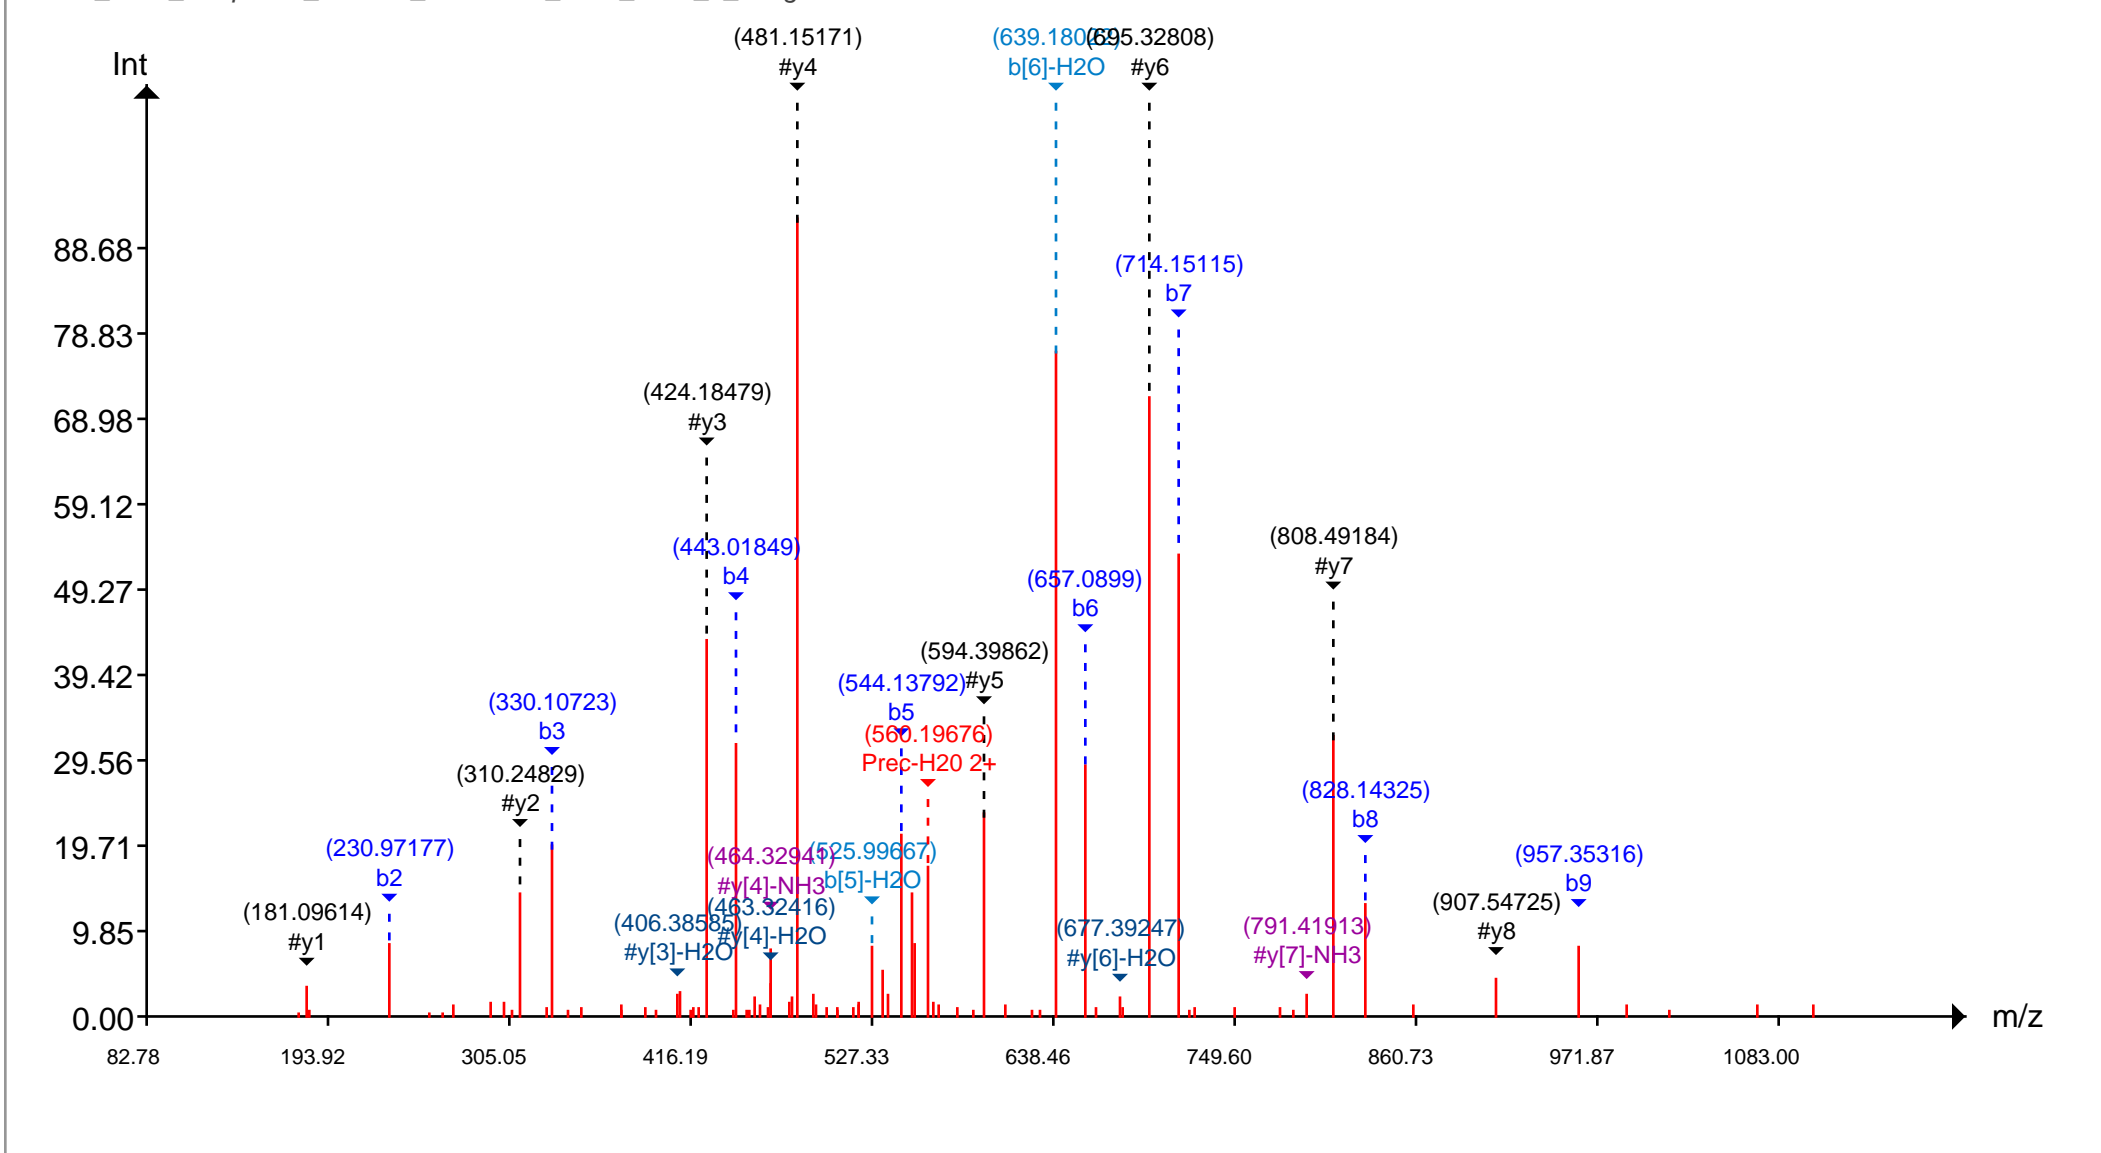

| Info                     |                                                                                |                           |          |
|--------------------------|--------------------------------------------------------------------------------|---------------------------|----------|
| <b>Modified Sequence</b> | AcD3-GQVITIGNER<C13>-COOH                                                      | <b>Ion score</b>          | 81.84    |
| <b>Protein</b>           | P62736, Q562R1, Q9BYX7, P60709, P68032, P63261, P63267, P68133, Q6S8J3, A5A3E0 | <b>Confidence level</b>   | 99.00%   |
| <b>Precursor m/z</b>     | 569.32344                                                                      | <b>Identity Threshold</b> | 48.31    |
| <b>Charge</b>            | 2+                                                                             | <b>Mass error</b>         | -1.18E-4 |

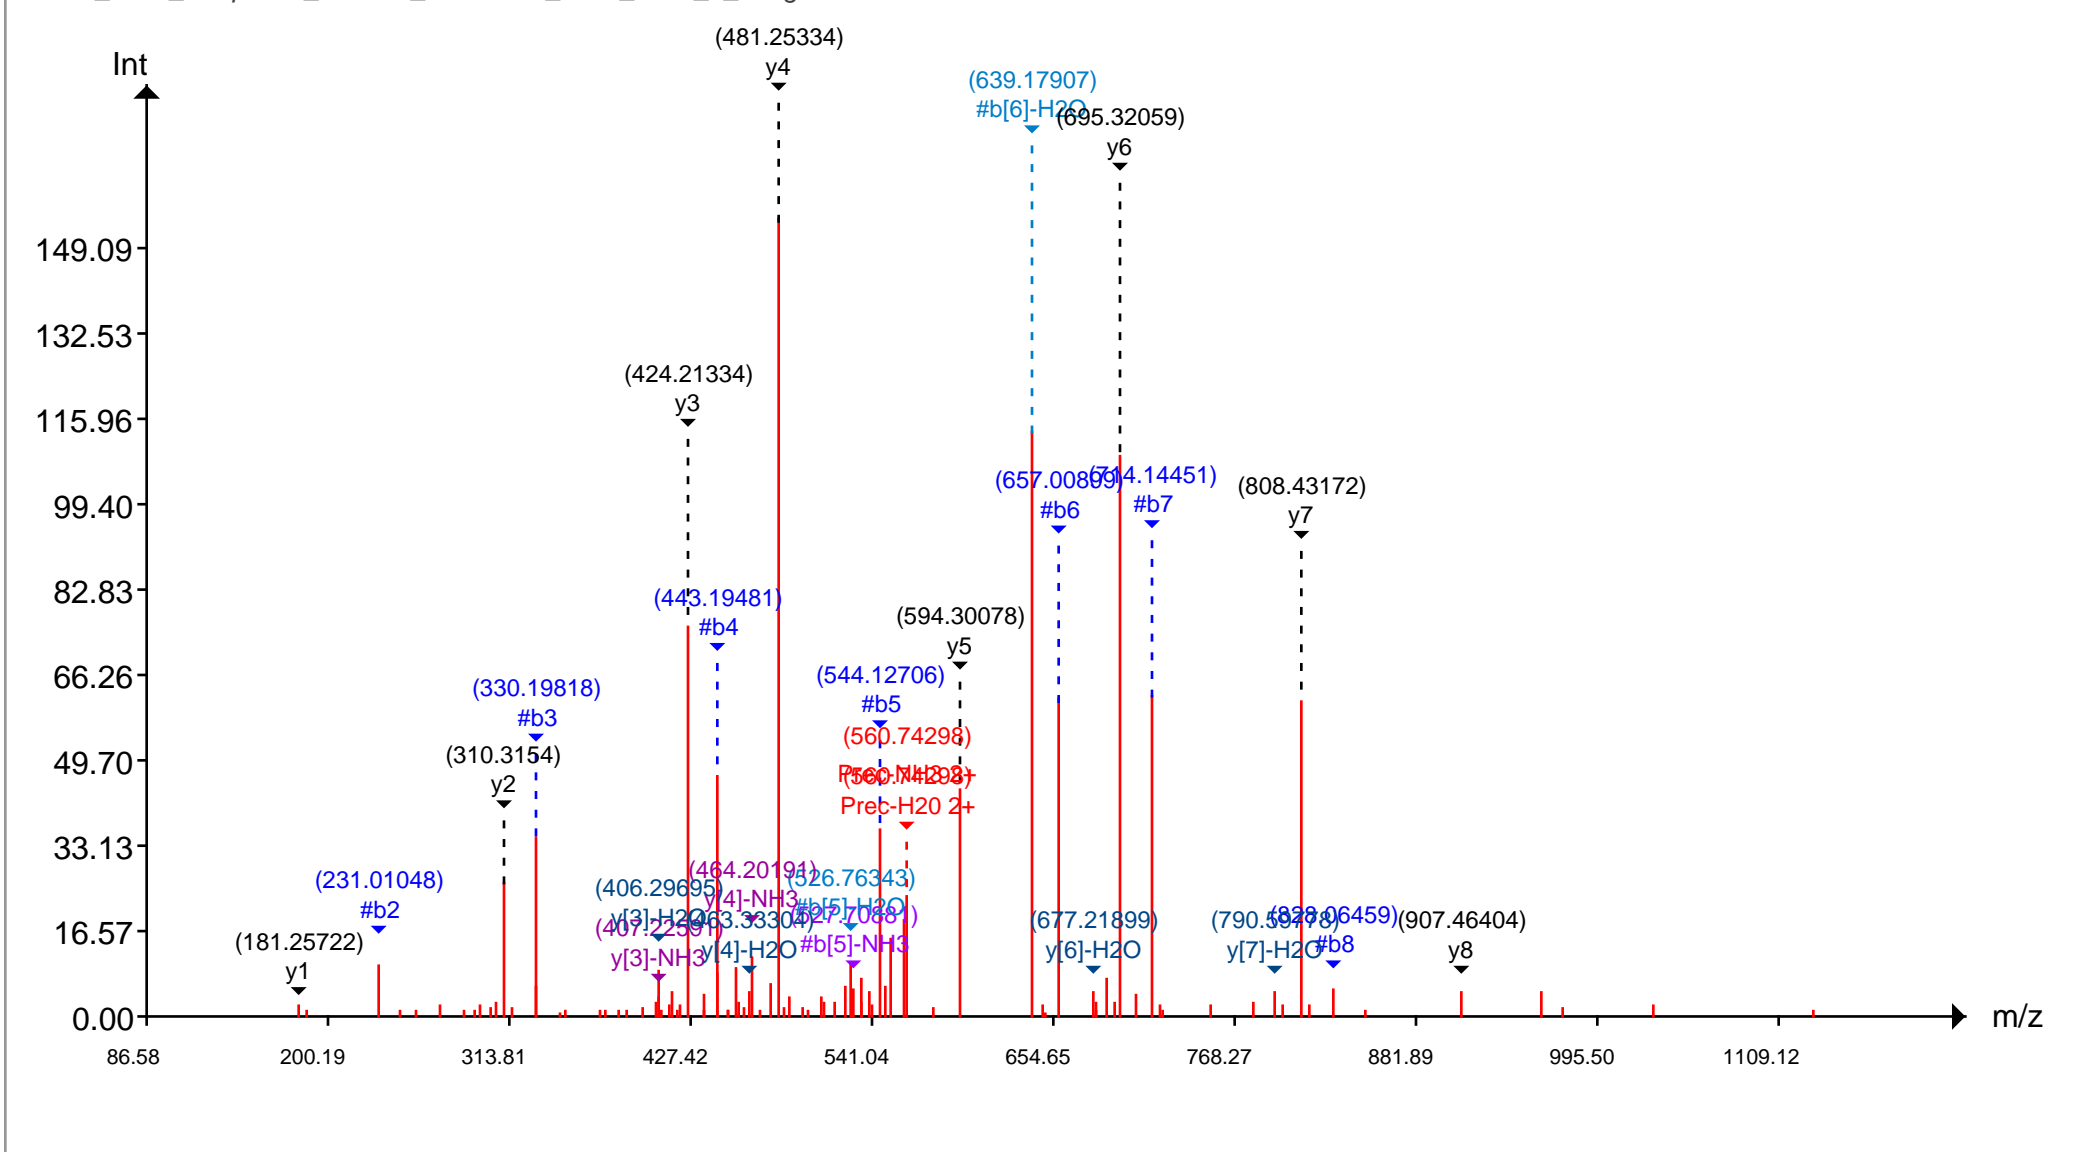

## Info

|                          |                                                                                |                           |          |
|--------------------------|--------------------------------------------------------------------------------|---------------------------|----------|
| <b>Modified Sequence</b> | AcD3-GQVITIGNER<C13>-COOH                                                      | <b>Ion score</b>          | 63.92    |
| <b>Protein</b>           | P62736, Q562R1, Q9BYX7, P60709, P68032, P63261, P63267, P68133, Q6S8J3, A5A3E0 | <b>Confidence level</b>   | 99.00%   |
| <b>Precursor m/z</b>     | 569.32343                                                                      | <b>Identity Threshold</b> | 48.31    |
| <b>Charge</b>            | 2+                                                                             | <b>Mass error</b>         | -1.38E-4 |

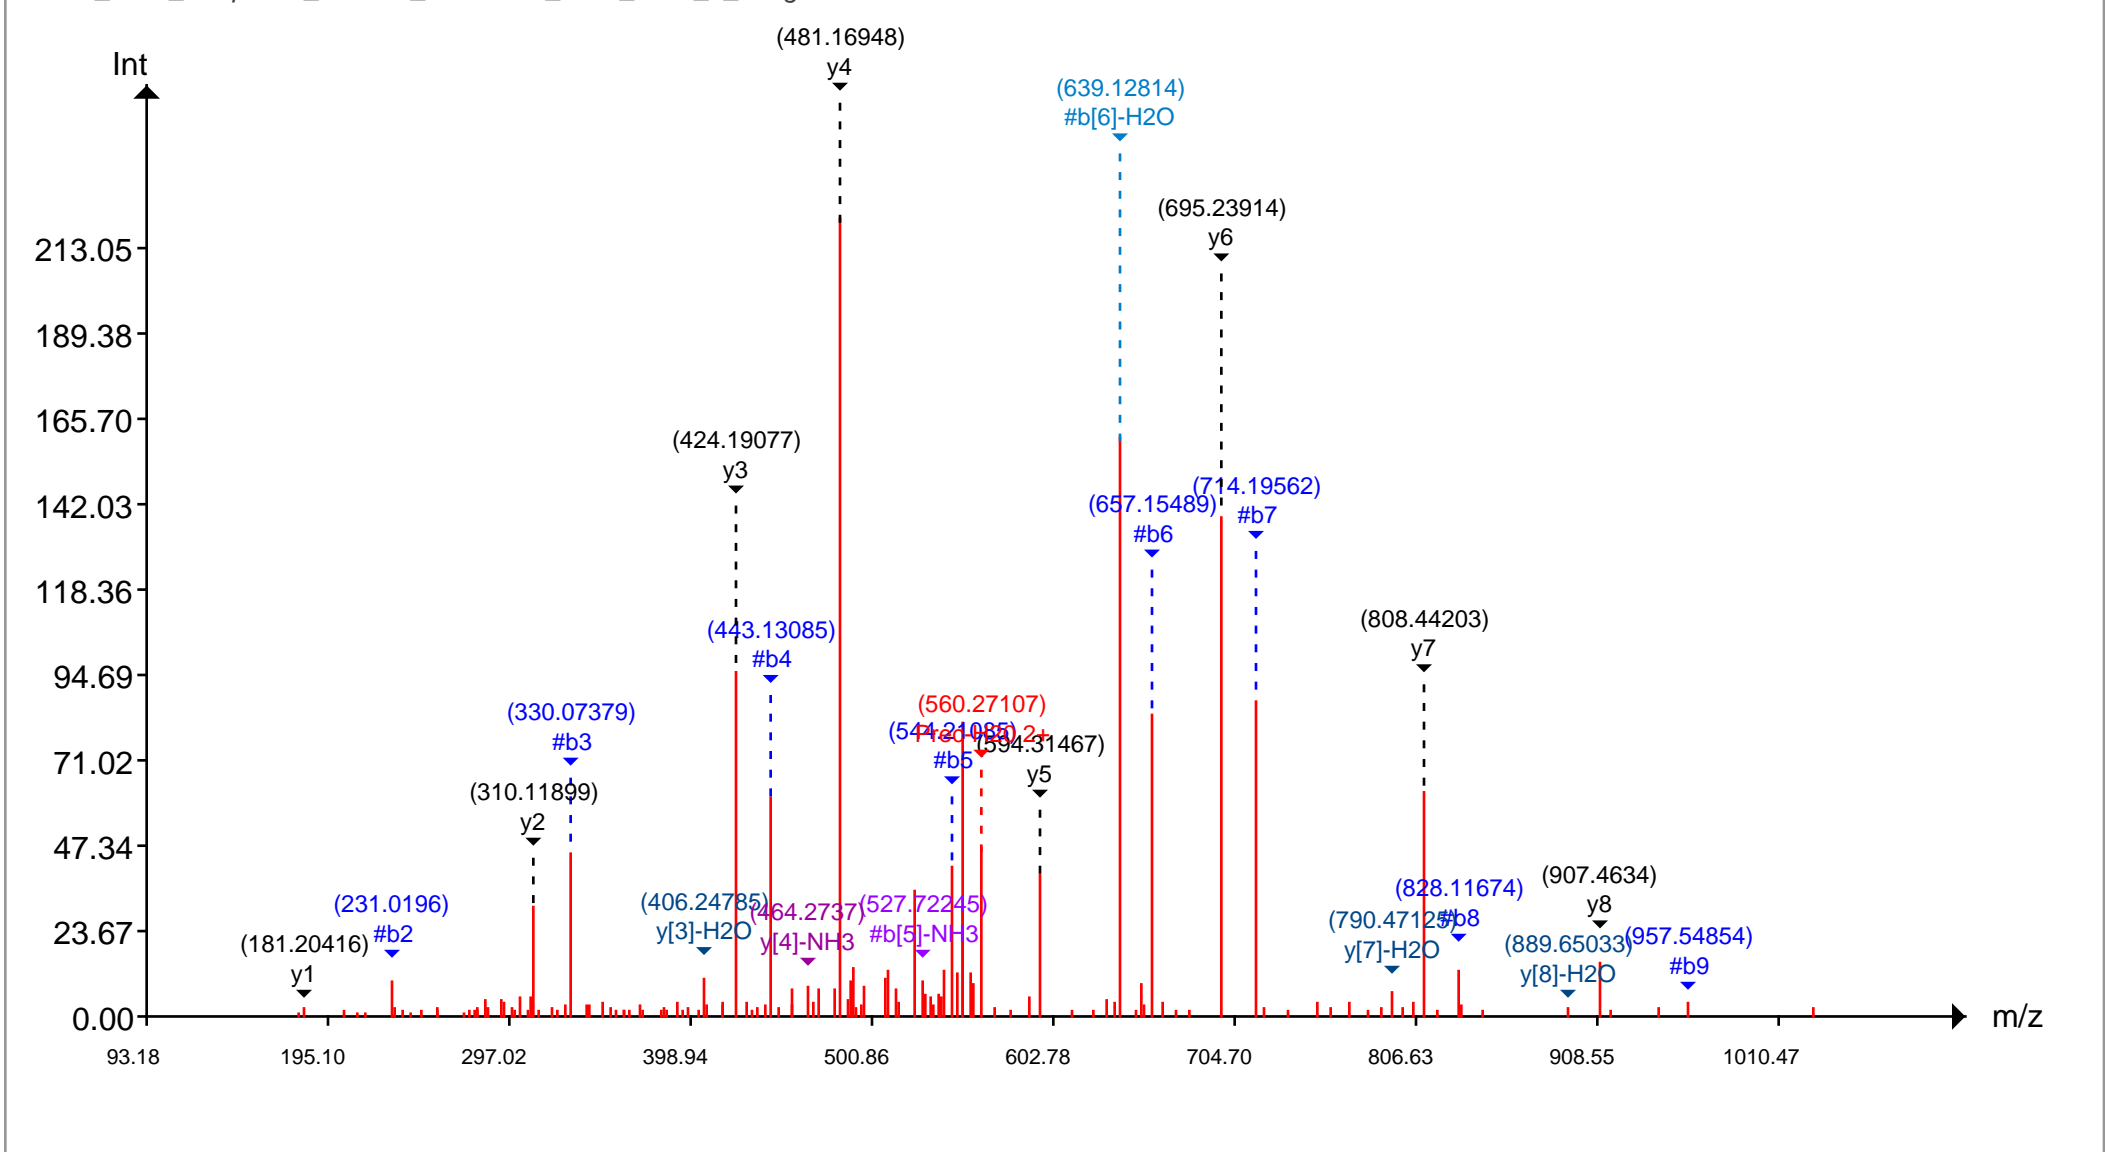

## Info

|                          |                                                                                |                           |         |
|--------------------------|--------------------------------------------------------------------------------|---------------------------|---------|
| <b>Modified Sequence</b> | AcD3-GQVITIGNER<C13>-COOH                                                      | <b>Ion score</b>          | 75.82   |
| <b>Protein</b>           | P62736, Q562R1, Q9BYX7, P60709, P68032, P63261, P63267, P68133, Q6S8J3, A5A3E0 | <b>Confidence level</b>   | 99.00%  |
| <b>Precursor m/z</b>     | 569.32347                                                                      | <b>Identity Threshold</b> | 48.30   |
| <b>Charge</b>            | 2+                                                                             | <b>Mass error</b>         | -5.8E-5 |

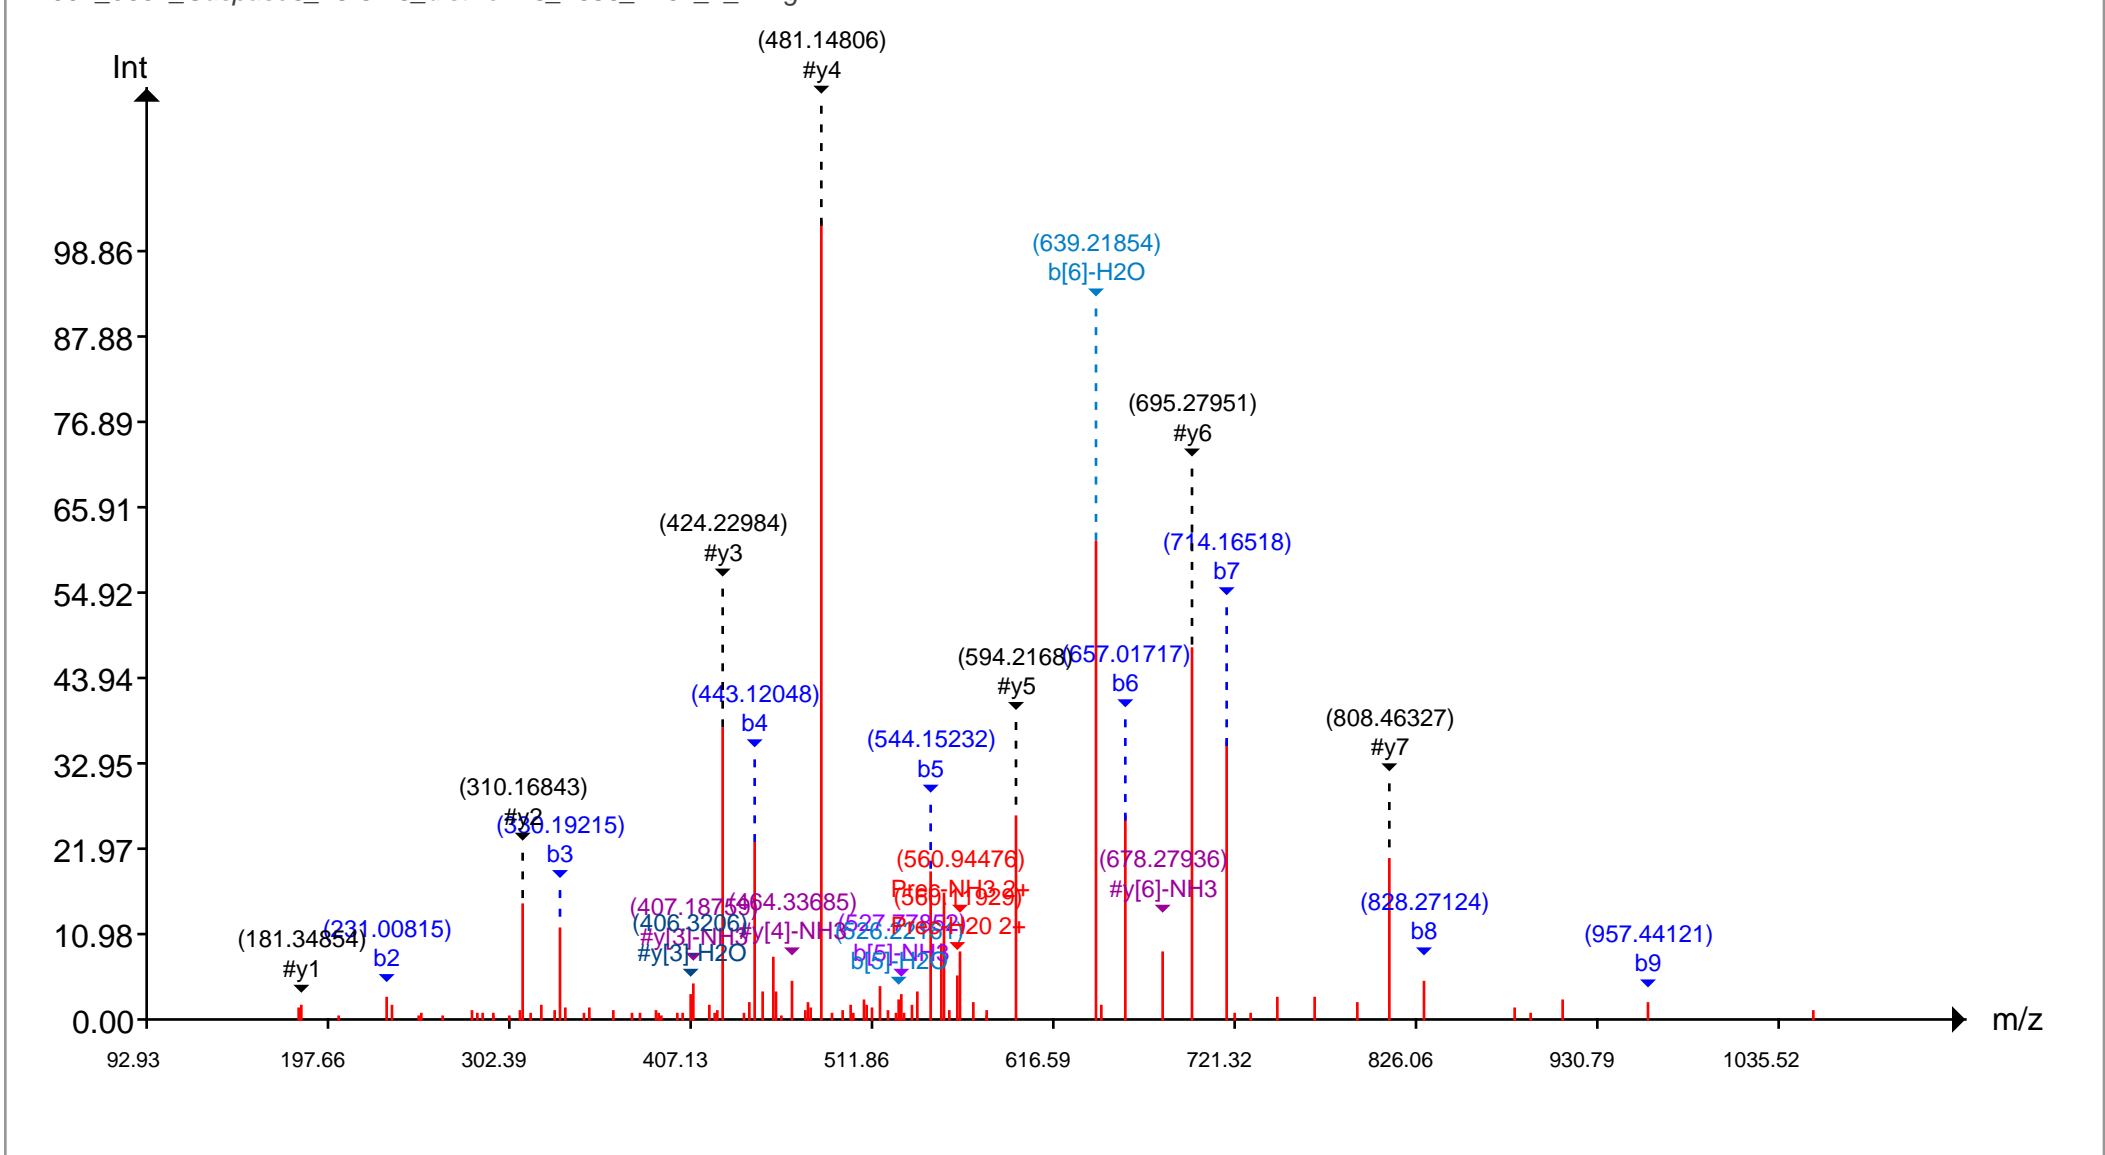

## Info

|                          |                                                                                |                           |        |
|--------------------------|--------------------------------------------------------------------------------|---------------------------|--------|
| <b>Modified Sequence</b> | AcD3-GQVITIGNER<C13>-COOH                                                      | <b>Ion score</b>          | 81.28  |
| <b>Protein</b>           | P62736, Q562R1, Q9BYX7, P60709, P68032, P63261, P63267, P68133, Q6S8J3, A5A3E0 | <b>Confidence level</b>   | 99.00% |
| <b>Precursor m/z</b>     | 569.32353                                                                      | <b>Identity Threshold</b> | 48.15  |
| <b>Charge</b>            | 2+                                                                             | <b>Mass error</b>         | 6.2E-5 |

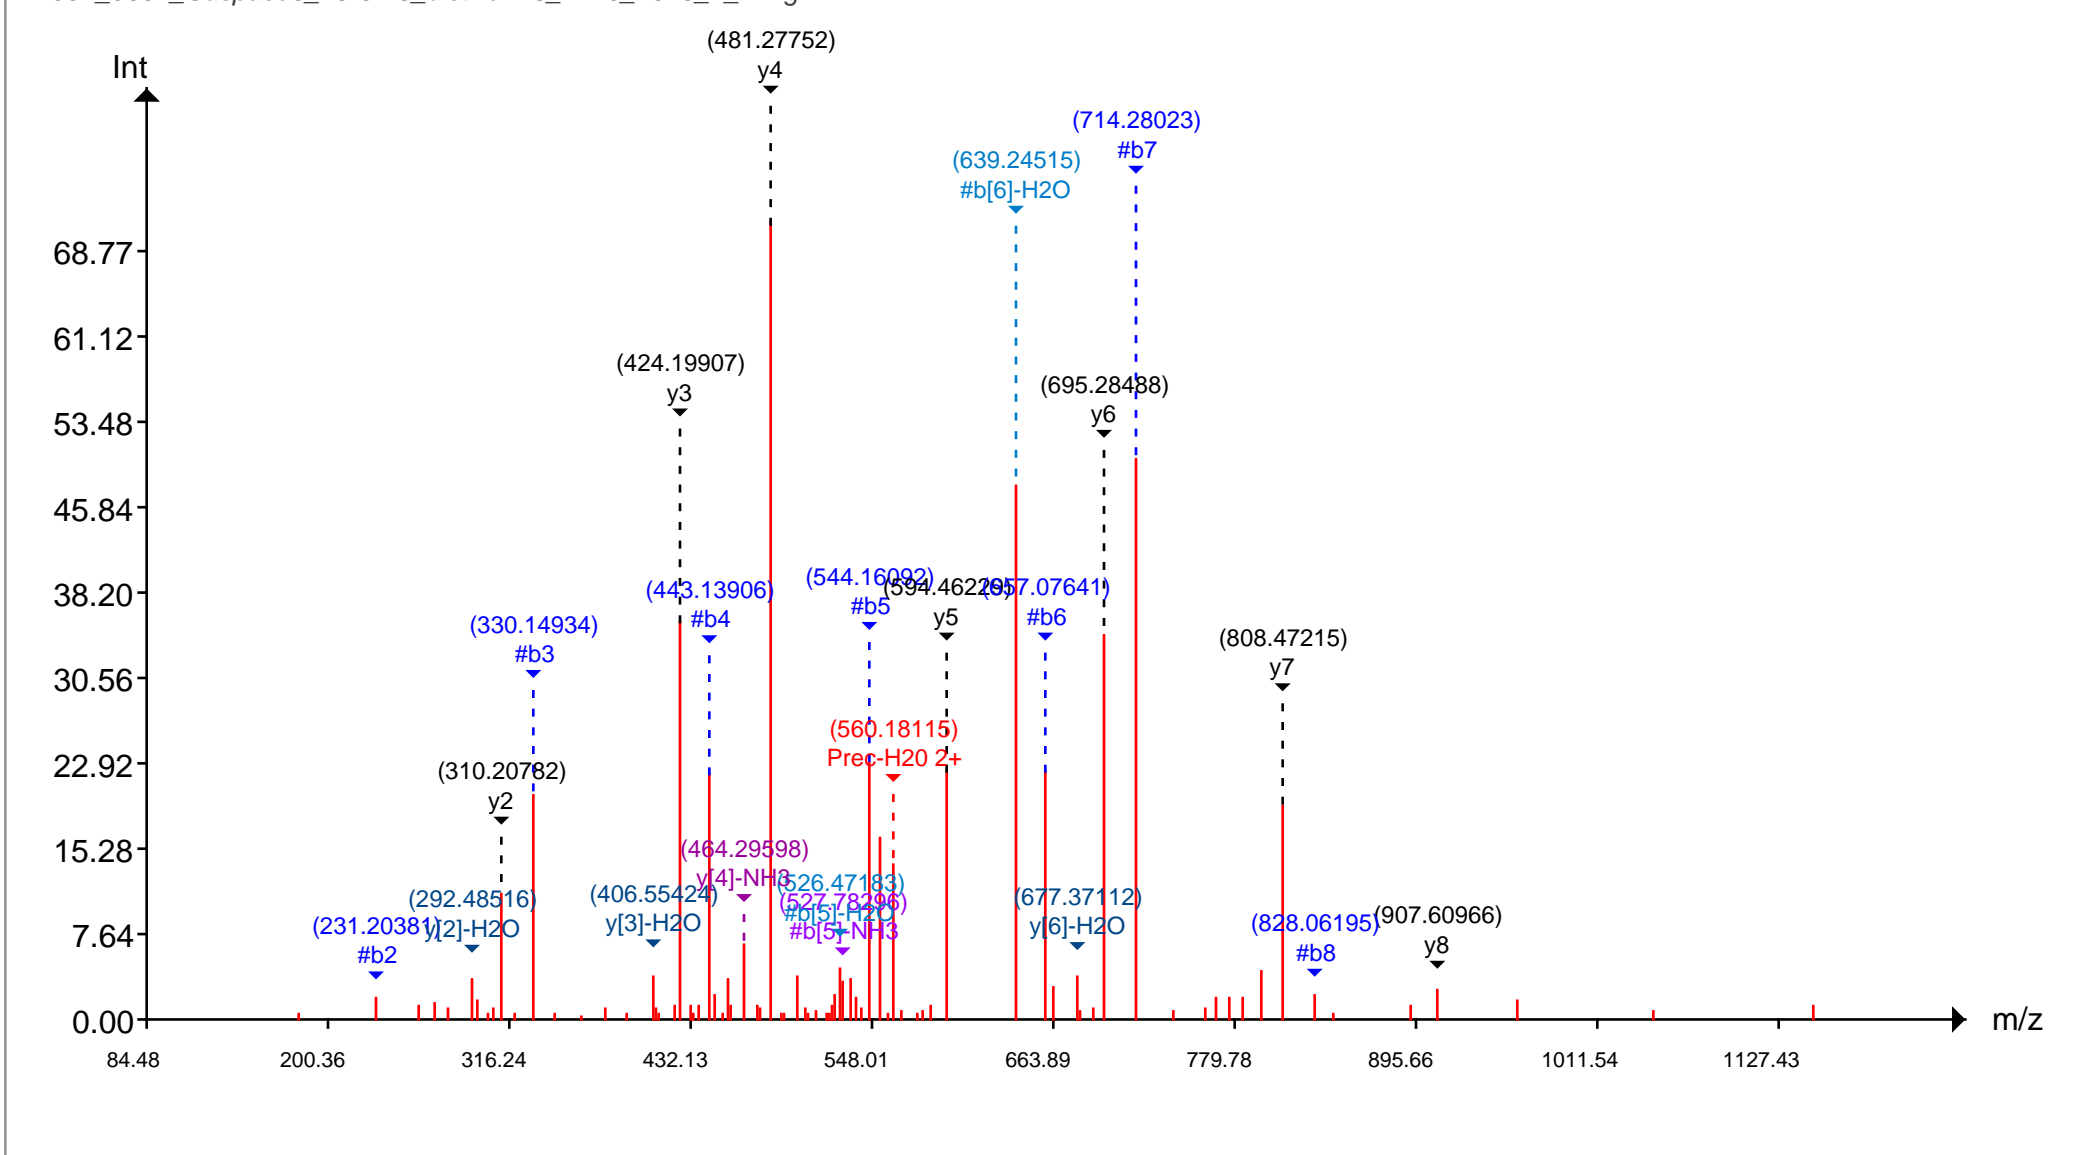

## Info

|                          |                                                                                |                           |         |
|--------------------------|--------------------------------------------------------------------------------|---------------------------|---------|
| <b>Modified Sequence</b> | AcD3-GQVITIGNER<C13>-COOH                                                      | <b>Ion score</b>          | 61.01   |
| <b>Protein</b>           | P62736, Q562R1, Q9BYX7, P60709, P68032, P63261, P63267, P68133, Q6S8J3, A5A3E0 | <b>Confidence level</b>   | 99.00%  |
| <b>Precursor m/z</b>     | 569.32358                                                                      | <b>Identity Threshold</b> | 47.96   |
| <b>Charge</b>            | 2+                                                                             | <b>Mass error</b>         | 1.62E-4 |



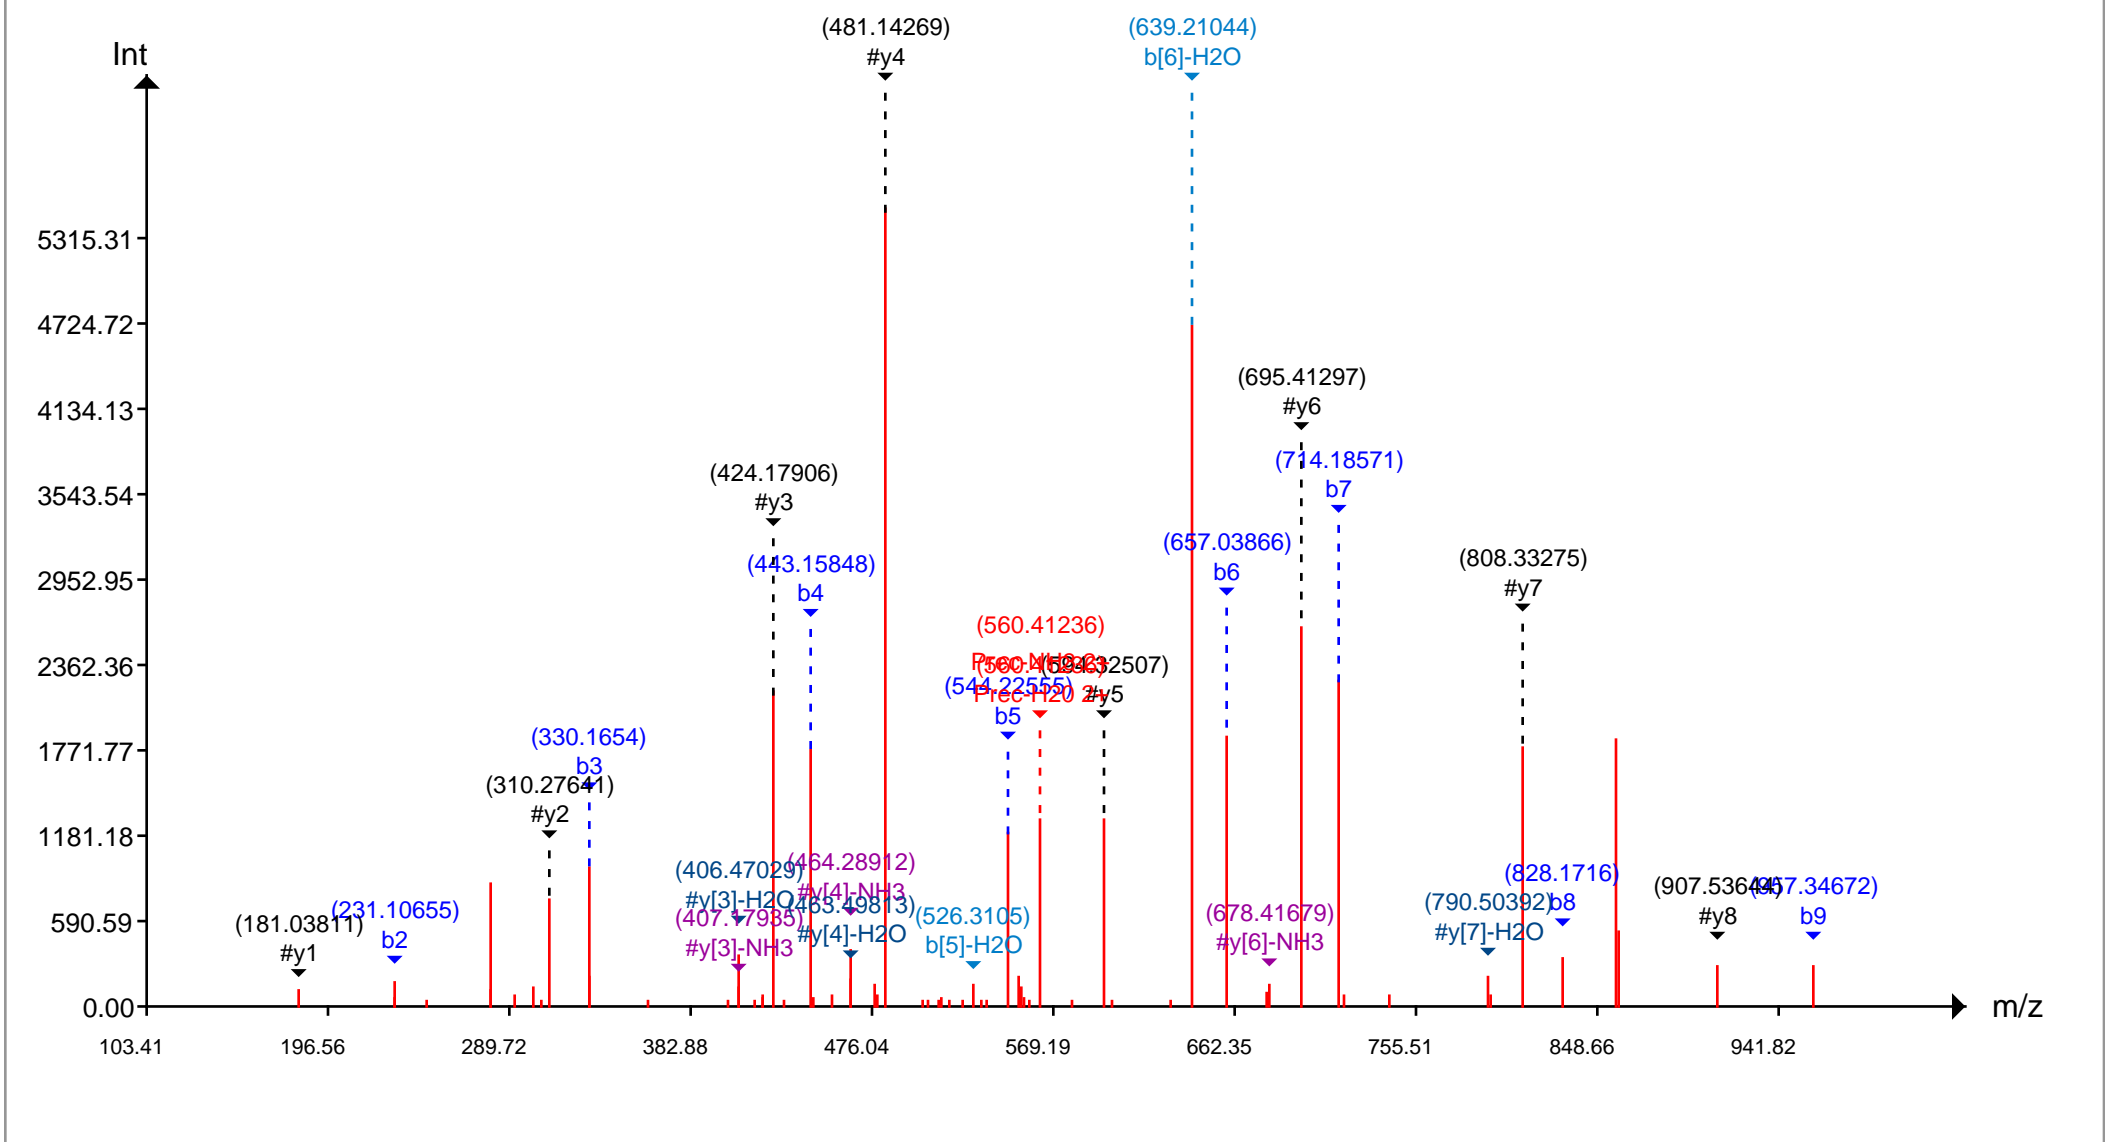

## Info

|                          |                                                                                |                           |         |
|--------------------------|--------------------------------------------------------------------------------|---------------------------|---------|
| <b>Modified Sequence</b> | AcD3-GQVITIGNER<C13>-COOH                                                      | <b>Ion score</b>          | 63.1    |
| <b>Protein</b>           | P62736, Q562R1, Q9BYX7, P60709, P68032, P63261, P63267, P68133, Q6S8J3, A5A3E0 | <b>Confidence level</b>   | 99.00%  |
| <b>Precursor m/z</b>     | 569.32356                                                                      | <b>Identity Threshold</b> | 48.03   |
| <b>Charge</b>            | 2+                                                                             | <b>Mass error</b>         | 1.22E-4 |

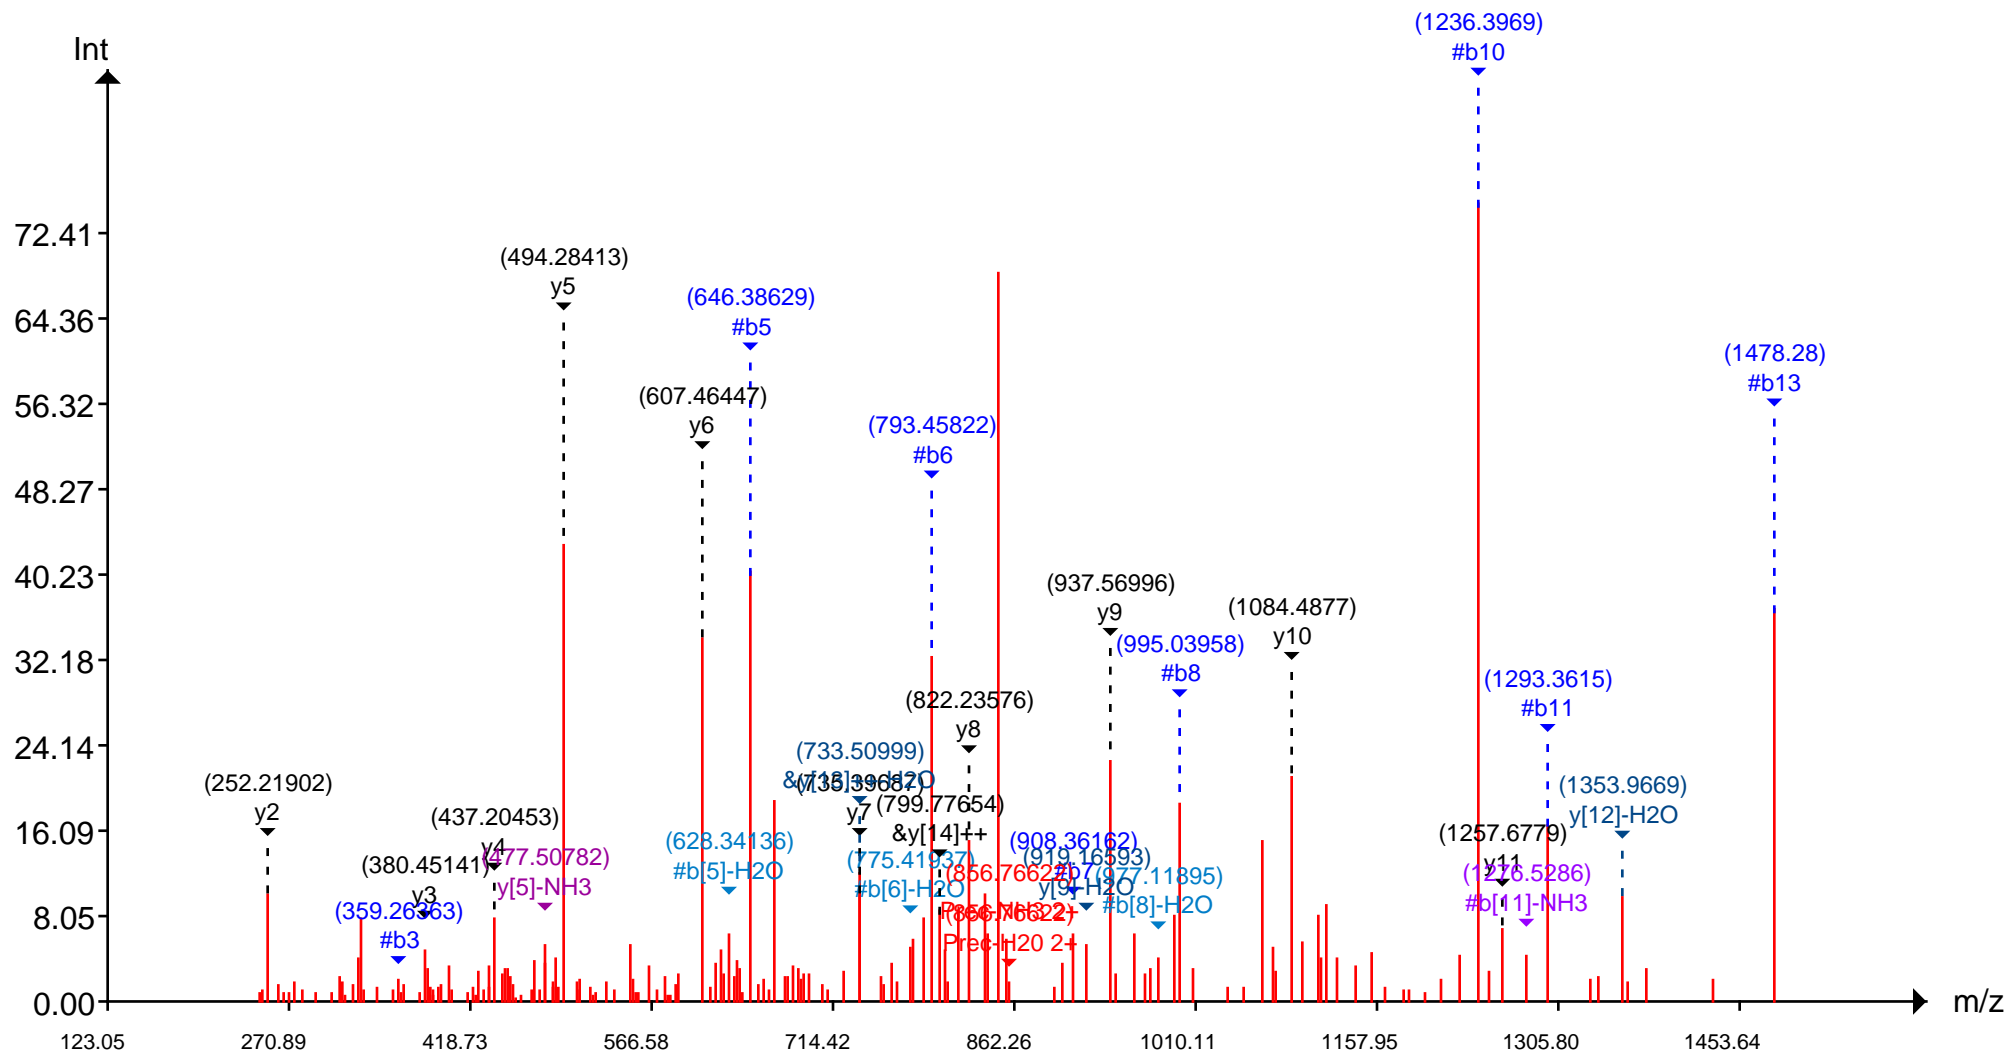

## Info

**Modified Sequence** AcD3-SLINK<AcD3K\*>FDSQLGGQAR<C13>-COOH

**Ion score** 71.63

**Protein** Q9P2M7

**Confidence level** 99.00%

**Precursor m/z** 865.4757

**Identity Threshold** 48.42

**Charge** 2+

**Mass error** -4.38E-4

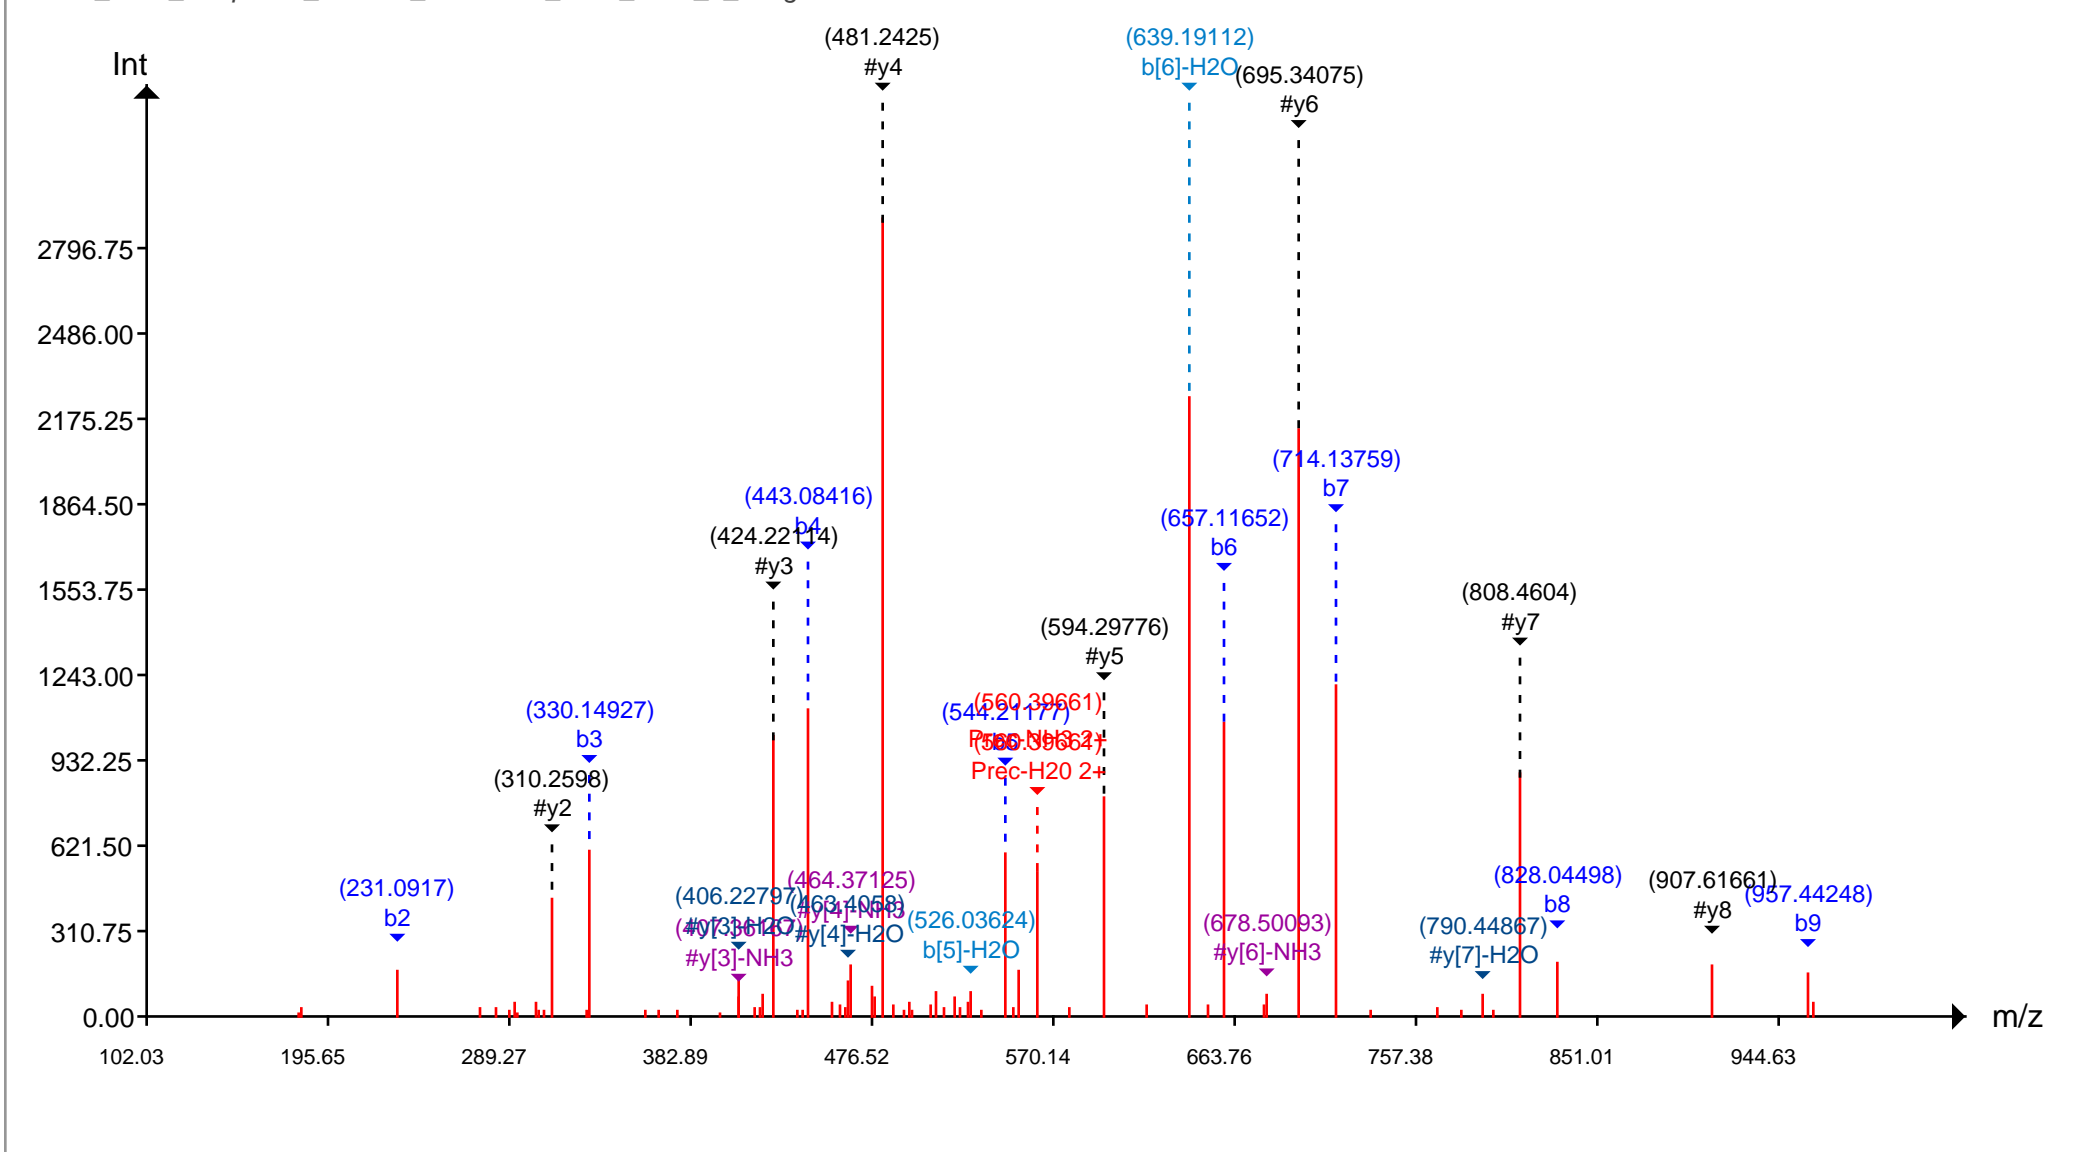

## Info

|                          |                                                                                |                           |          |
|--------------------------|--------------------------------------------------------------------------------|---------------------------|----------|
| <b>Modified Sequence</b> | AcD3-GQVITIGNER<C13>-COOH                                                      | <b>Ion score</b>          | 86.14    |
| <b>Protein</b>           | P62736, Q562R1, Q9BYX7, P60709, P68032, P63261, P63267, P68133, Q6S8J3, A5A3E0 | <b>Confidence level</b>   | 99.00%   |
| <b>Precursor m/z</b>     | 569.32322                                                                      | <b>Identity Threshold</b> | 48.30    |
| <b>Charge</b>            | 2+                                                                             | <b>Mass error</b>         | -5.58E-4 |

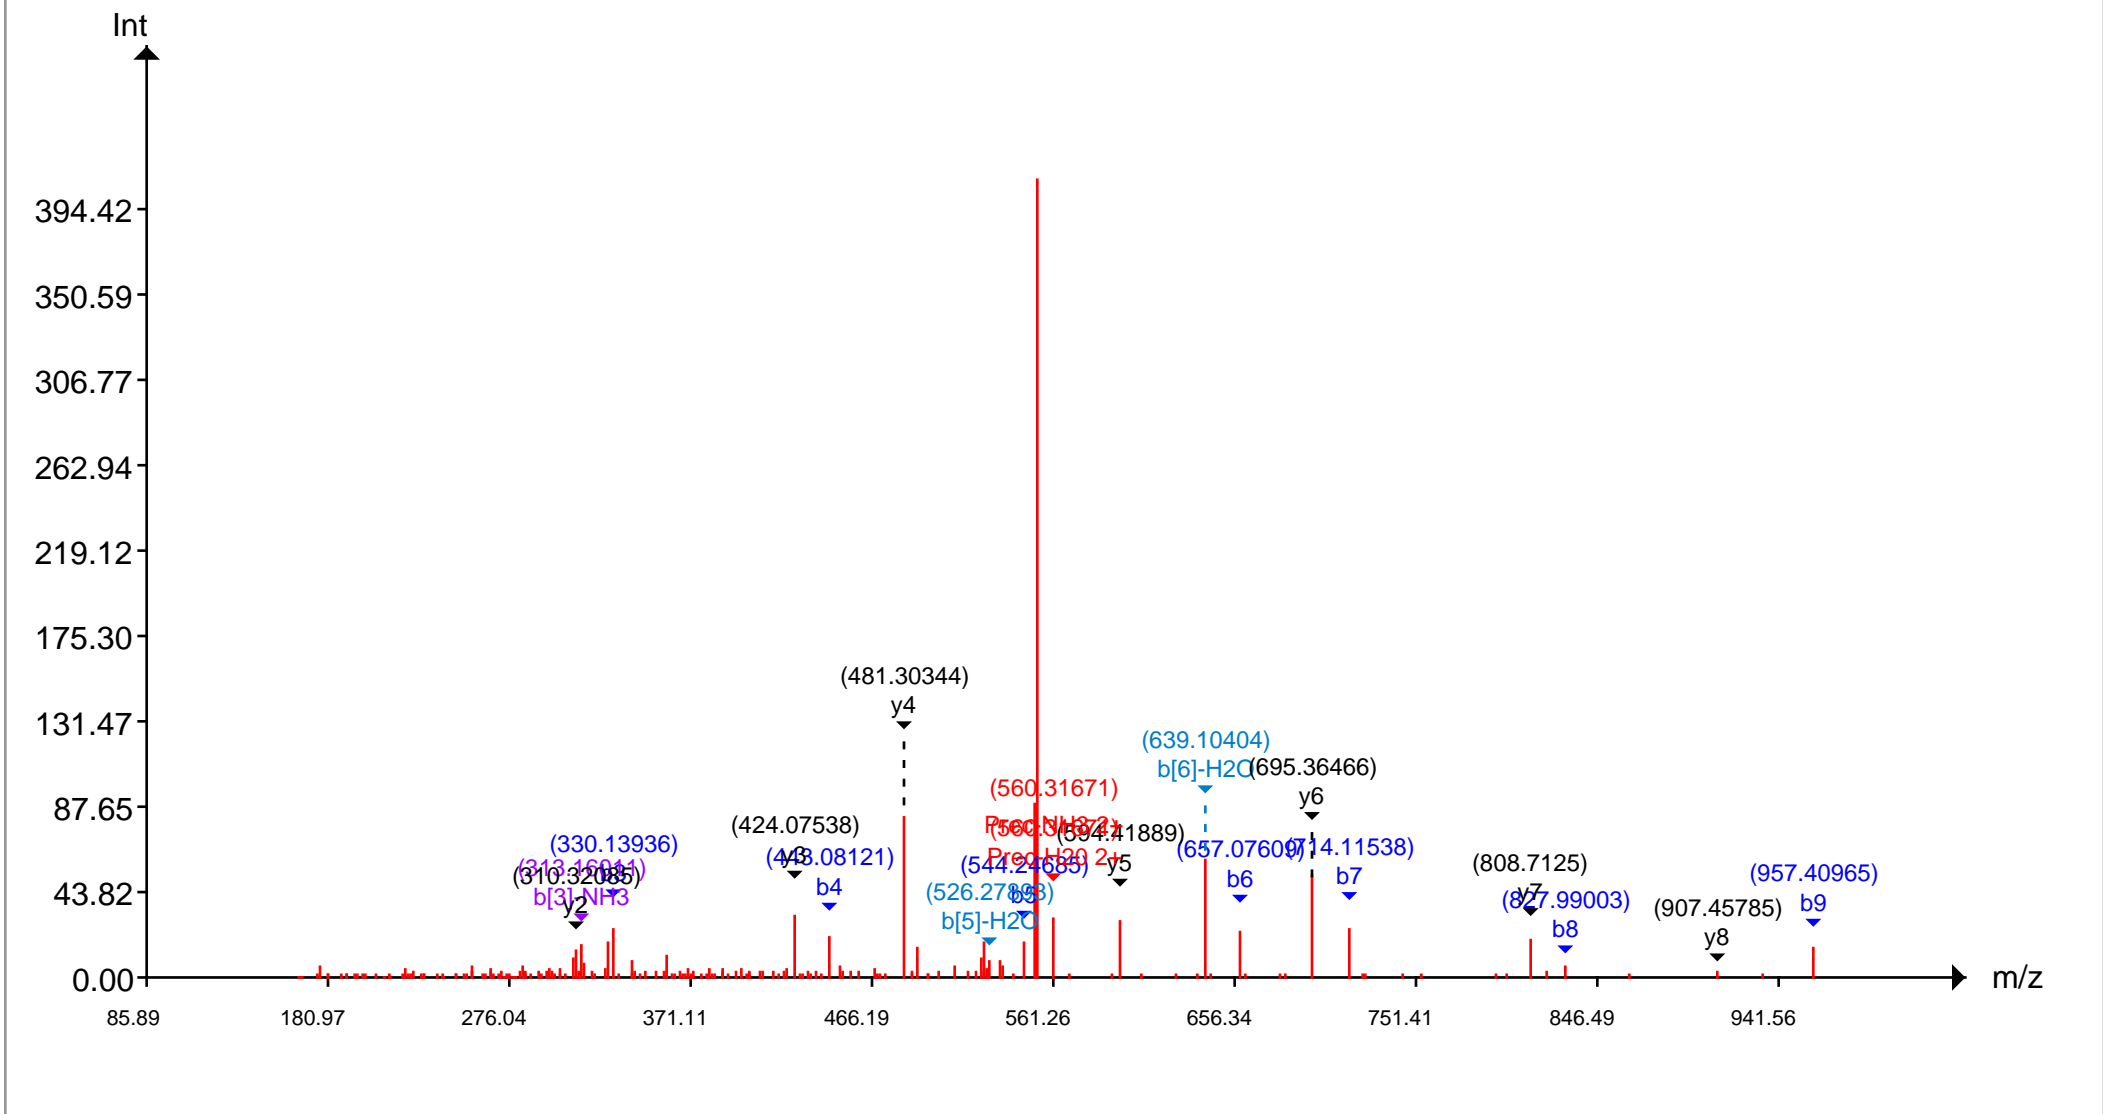

Info

|                          |                                                                                |                           |          |
|--------------------------|--------------------------------------------------------------------------------|---------------------------|----------|
| <b>Modified Sequence</b> | AcD3-GQVITIGNER<C13>-COOH                                                      | <b>Ion score</b>          | 48.92    |
| <b>Protein</b>           | P62736, Q562R1, Q9BYX7, P60709, P68032, P63261, P63267, P68133, Q6S8J3, A5A3E0 | <b>Confidence level</b>   | 99.00%   |
| <b>Precursor m/z</b>     | 569.32335                                                                      | <b>Identity Threshold</b> | 48.29    |
| <b>Charge</b>            | 2+                                                                             | <b>Mass error</b>         | -2.98E-4 |

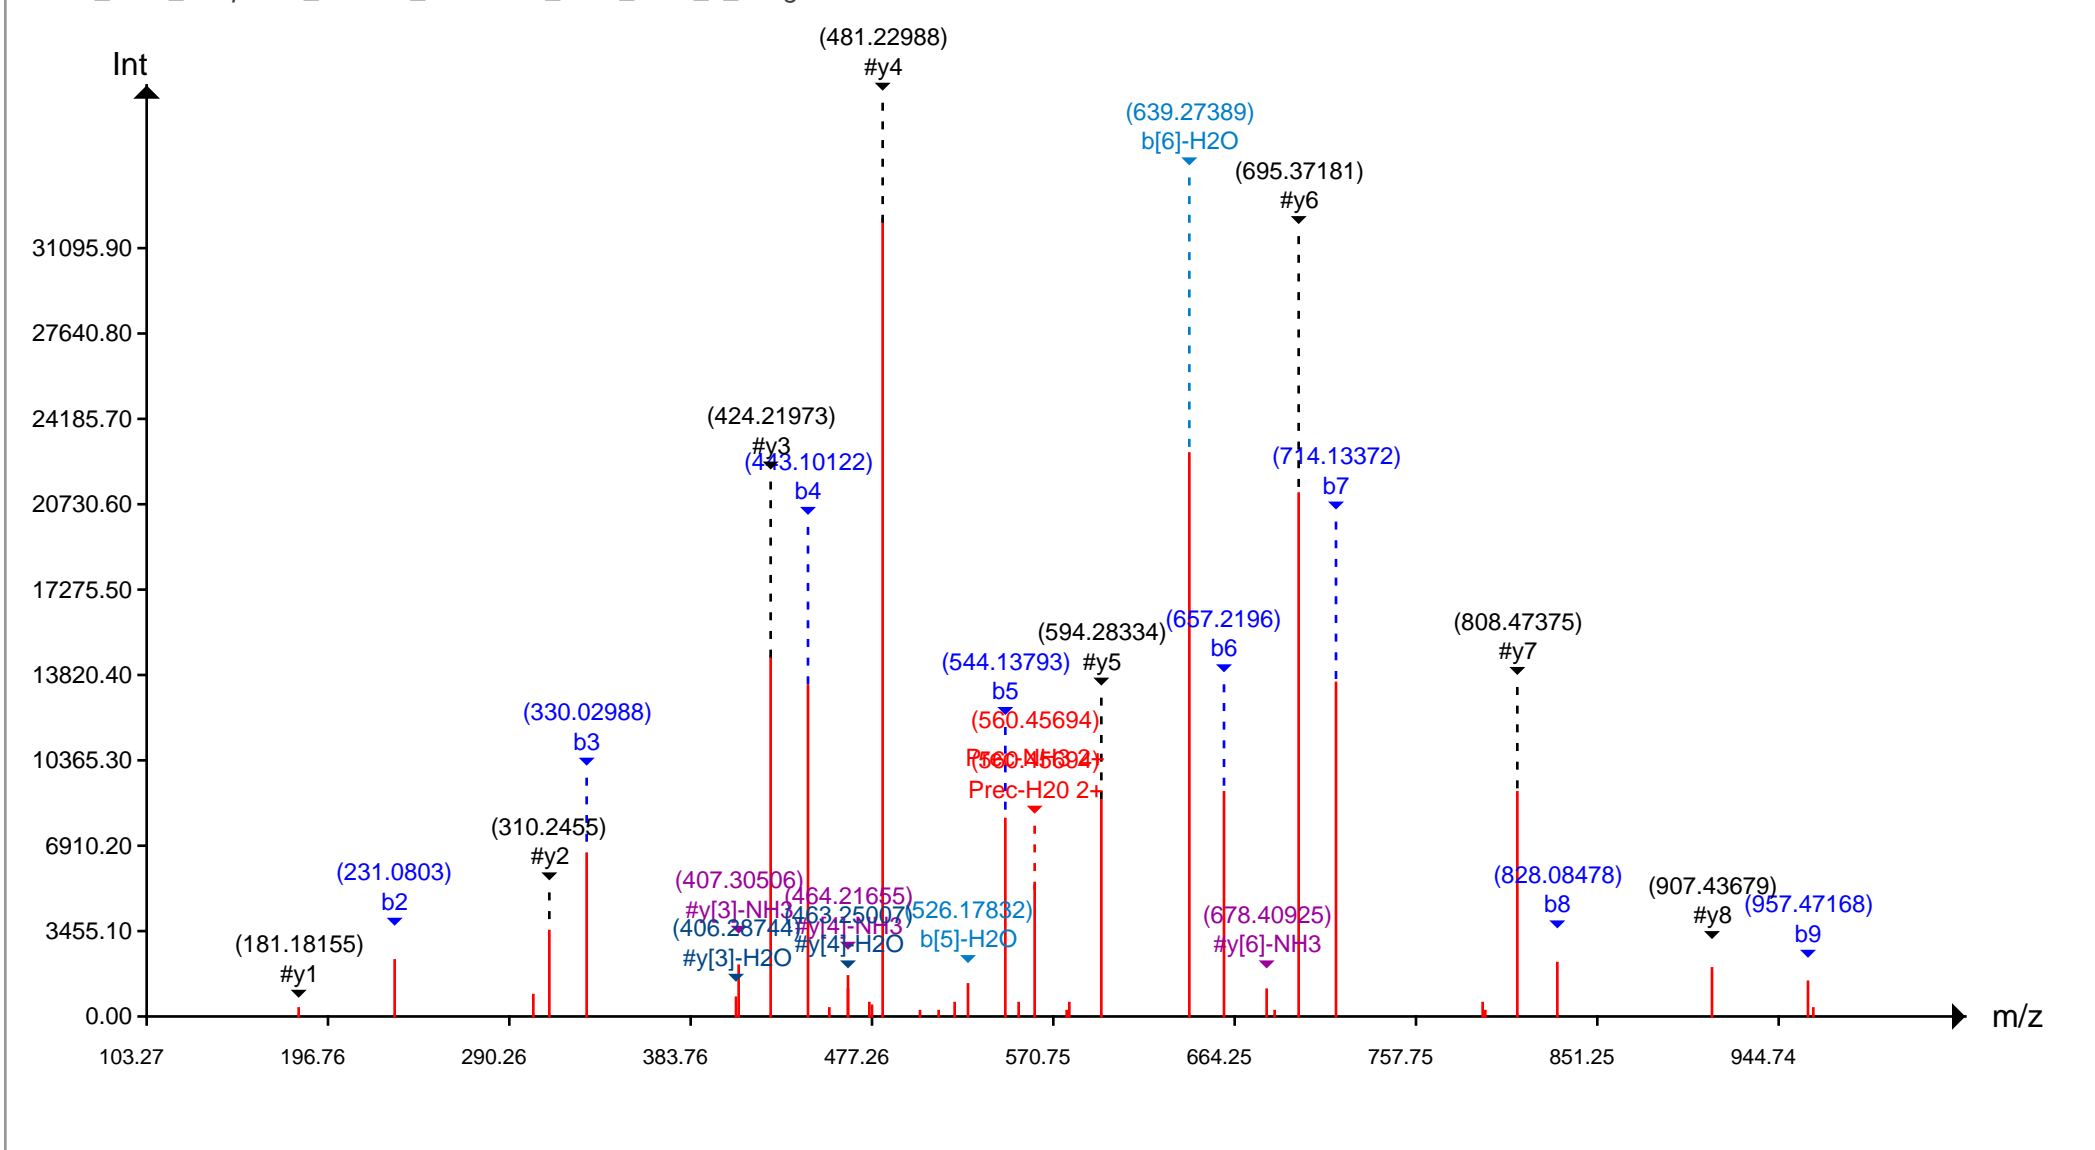

## Info

|                          |                                                                                |                           |          |
|--------------------------|--------------------------------------------------------------------------------|---------------------------|----------|
| <b>Modified Sequence</b> | AcD3-GQVITIGNER<C13>-COOH                                                      | <b>Ion score</b>          | 92.1     |
| <b>Protein</b>           | P62736, Q562R1, Q9BYX7, P60709, P68032, P63261, P63267, P68133, Q6S8J3, A5A3E0 | <b>Confidence level</b>   | 99.00%   |
| <b>Precursor m/z</b>     | 569.32323                                                                      | <b>Identity Threshold</b> | 48.29    |
| <b>Charge</b>            | 2+                                                                             | <b>Mass error</b>         | -5.38E-4 |

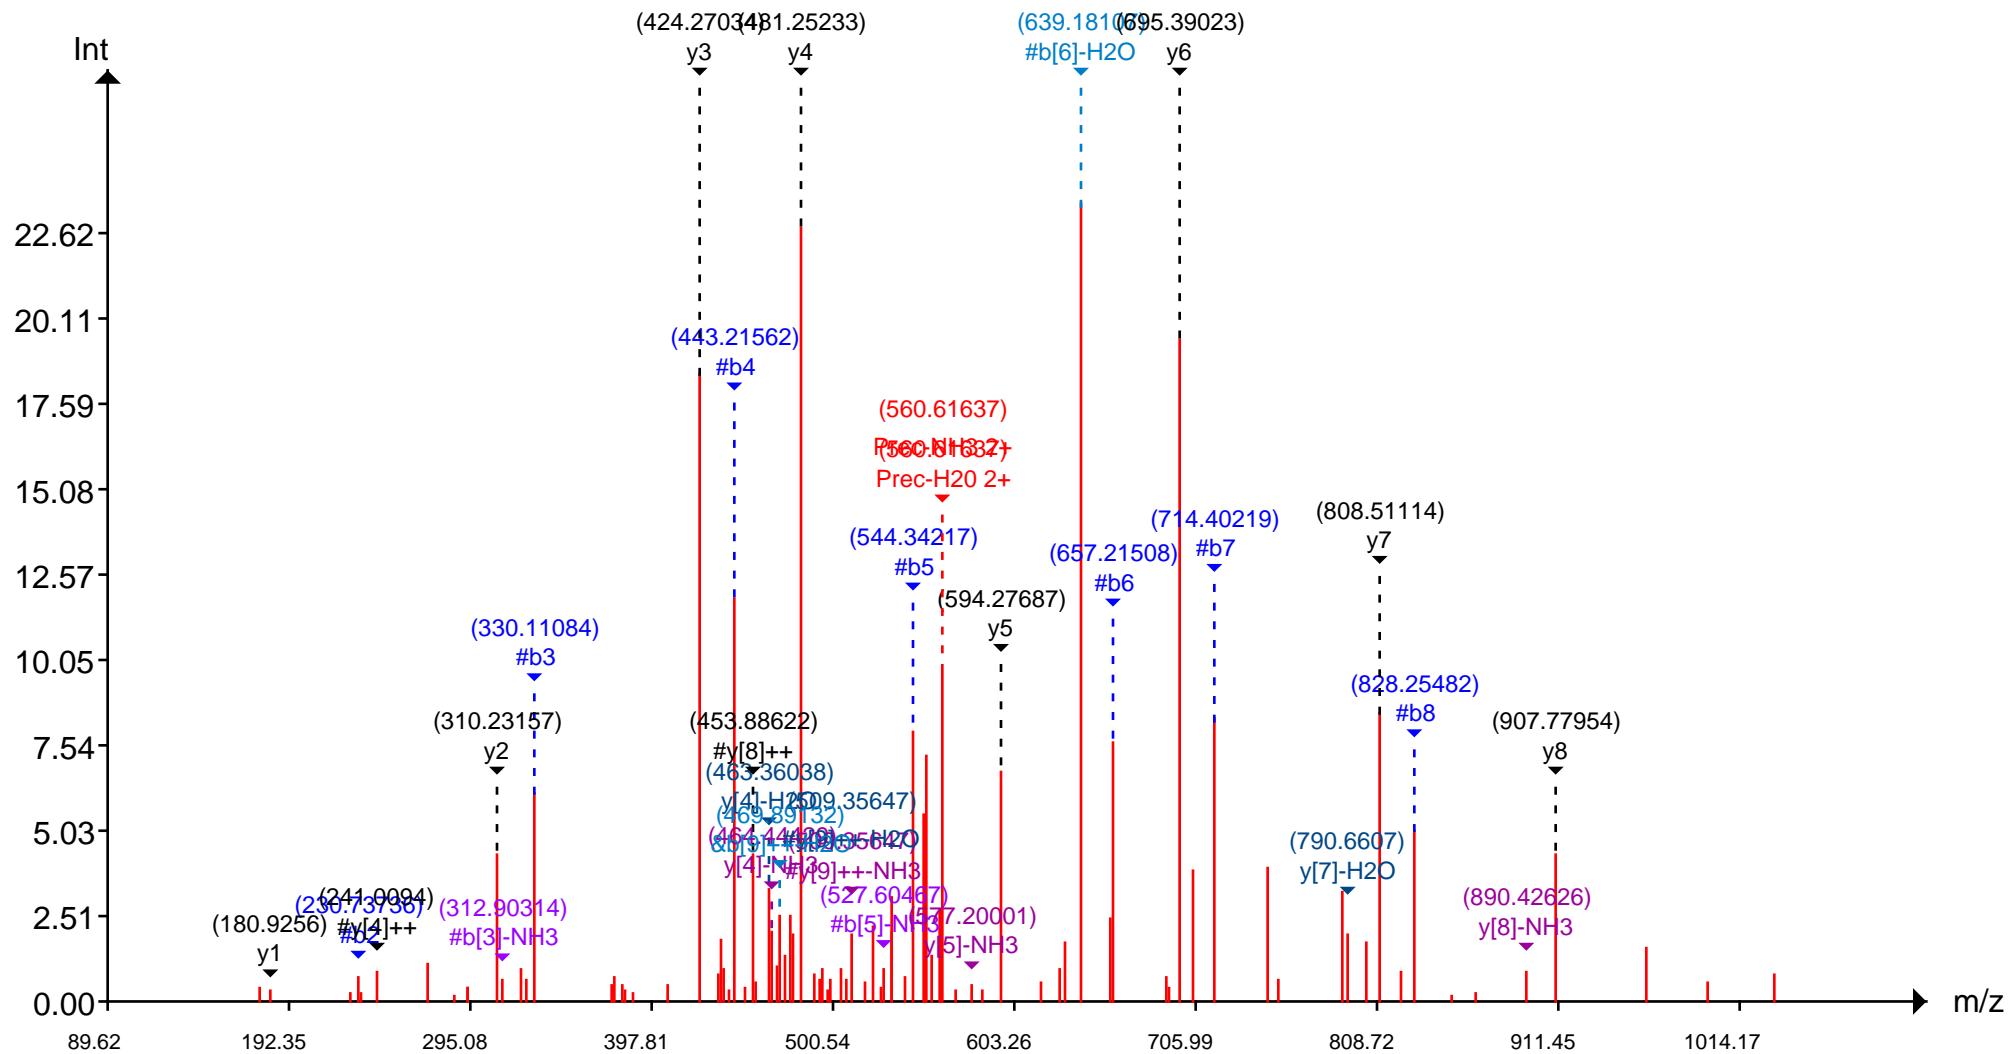

## Info

|                          |                                                                                |                           |         |
|--------------------------|--------------------------------------------------------------------------------|---------------------------|---------|
| <b>Modified Sequence</b> | AcD3-GQVITIGNER<C13>-COOH                                                      | <b>Ion score</b>          | 55.47   |
| <b>Protein</b>           | P62736, Q562R1, Q9BYX7, P60709, P68032, P63261, P63267, P68133, Q6S8J3, A5A3E0 | <b>Confidence level</b>   | 99.00%  |
| <b>Precursor m/z</b>     | 569.32365                                                                      | <b>Identity Threshold</b> | 47.96   |
| <b>Charge</b>            | 2+                                                                             | <b>Mass error</b>         | 3.02E-4 |

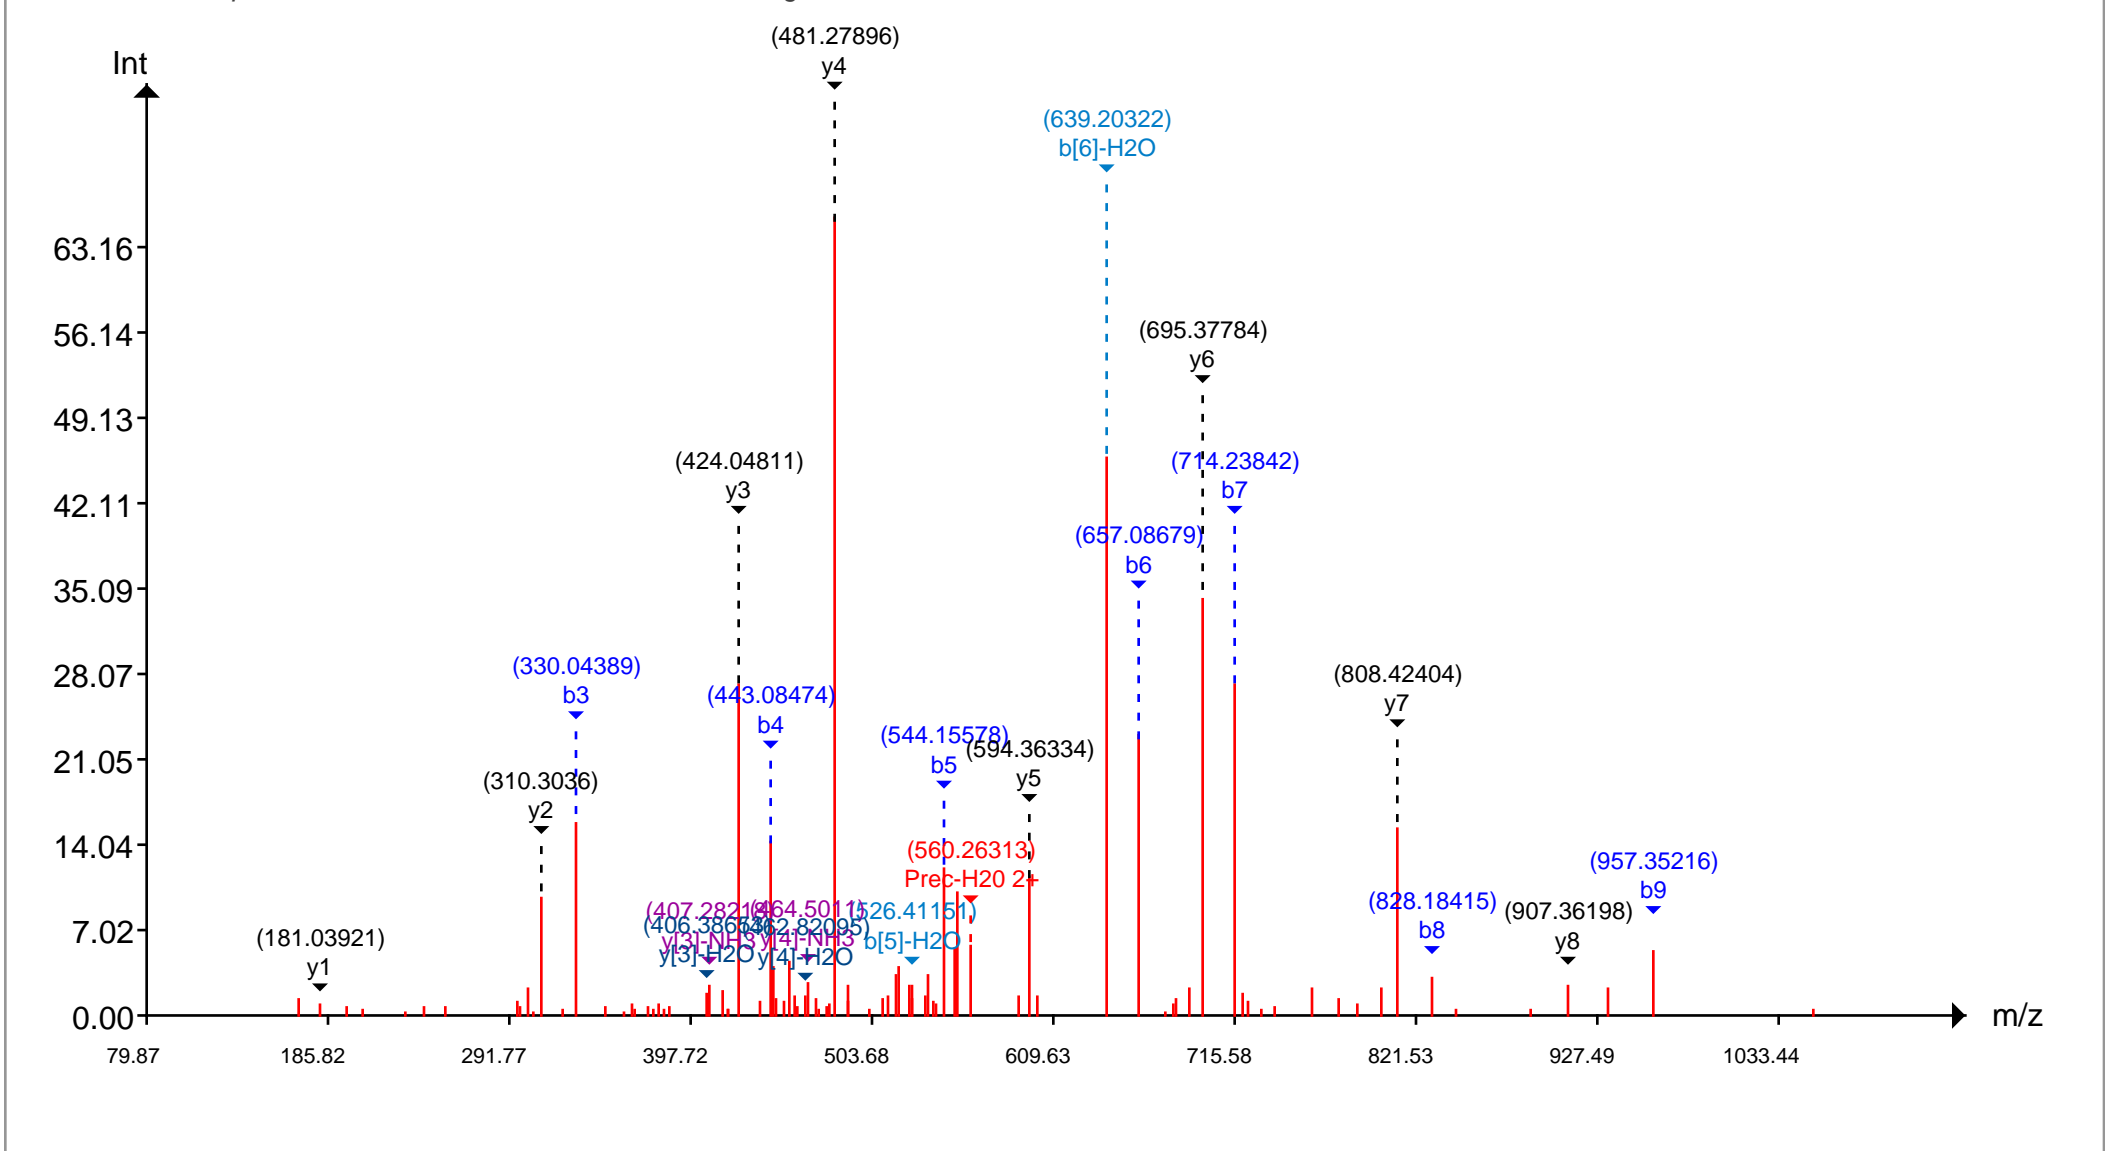

## Info

|                          |                                                                                |                           |         |
|--------------------------|--------------------------------------------------------------------------------|---------------------------|---------|
| <b>Modified Sequence</b> | AcD3-GQVITIGNER<C13>-COOH                                                      | <b>Ion score</b>          | 75.0    |
| <b>Protein</b>           | P62736, Q562R1, Q9BYX7, P60709, P68032, P63261, P63267, P68133, Q6S8J3, A5A3E0 | <b>Confidence level</b>   | 99.00%  |
| <b>Precursor m/z</b>     | 569.32365                                                                      | <b>Identity Threshold</b> | 47.96   |
| <b>Charge</b>            | 2+                                                                             | <b>Mass error</b>         | 3.02E-4 |

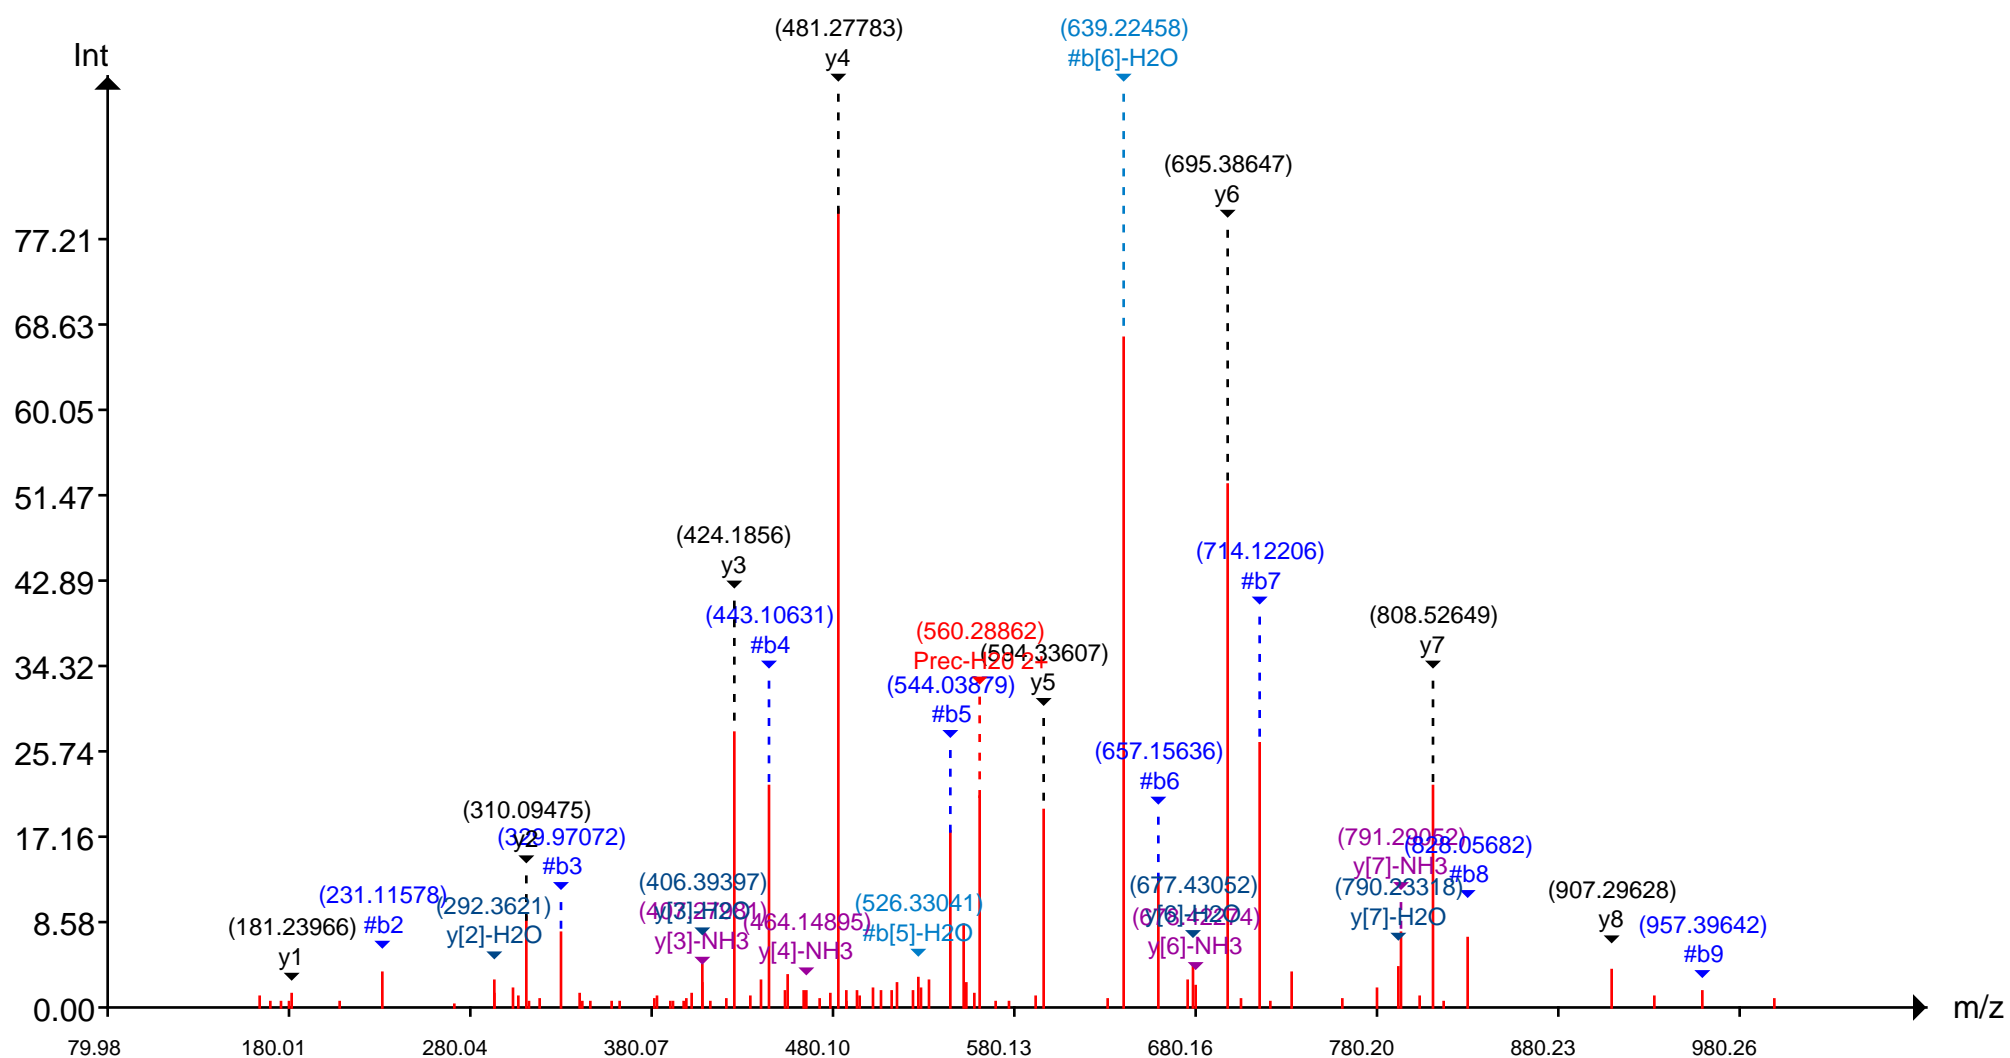

## Info

|                          |                                                                                |                           |         |
|--------------------------|--------------------------------------------------------------------------------|---------------------------|---------|
| <b>Modified Sequence</b> | AcD3-GQVITIGNER<C13>-COOH                                                      | <b>Ion score</b>          | 81.41   |
| <b>Protein</b>           | P62736, Q562R1, Q9BYX7, P60709, P68032, P63261, P63267, P68133, Q6S8J3, A5A3E0 | <b>Confidence level</b>   | 99.00%  |
| <b>Precursor m/z</b>     | 569.32367                                                                      | <b>Identity Threshold</b> | 47.93   |
| <b>Charge</b>            | 2+                                                                             | <b>Mass error</b>         | 3.42E-4 |



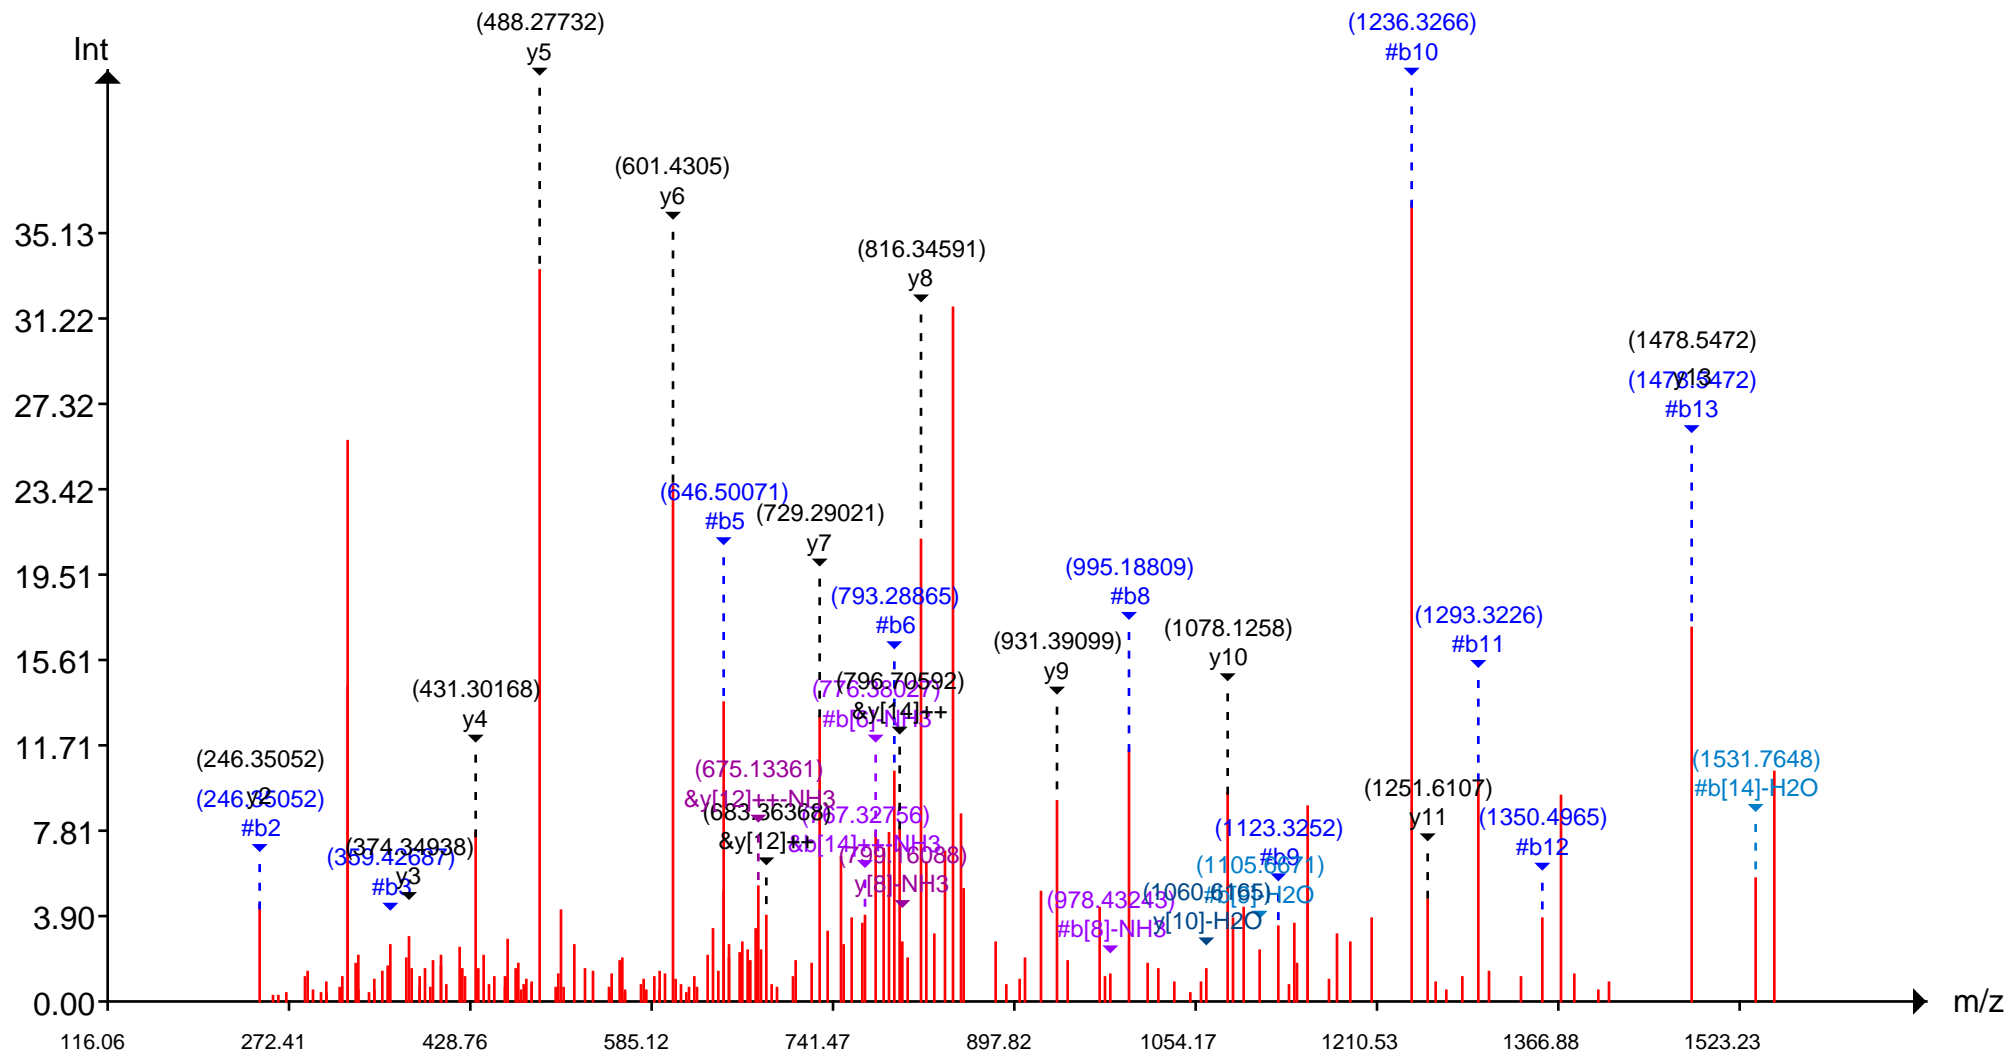

## Info

|                          |                                   |                           |          |
|--------------------------|-----------------------------------|---------------------------|----------|
| <b>Modified Sequence</b> | AcD3-SLINK<AcD3K*>FDSQLGGQAR-COOH | <b>Ion score</b>          | 69.23    |
| <b>Protein</b>           | Q9P2M7                            | <b>Confidence level</b>   | 99.00%   |
| <b>Precursor m/z</b>     | 862.46654                         | <b>Identity Threshold</b> | 48.79    |
| <b>Charge</b>            | 2+                                | <b>Mass error</b>         | 0.001383 |

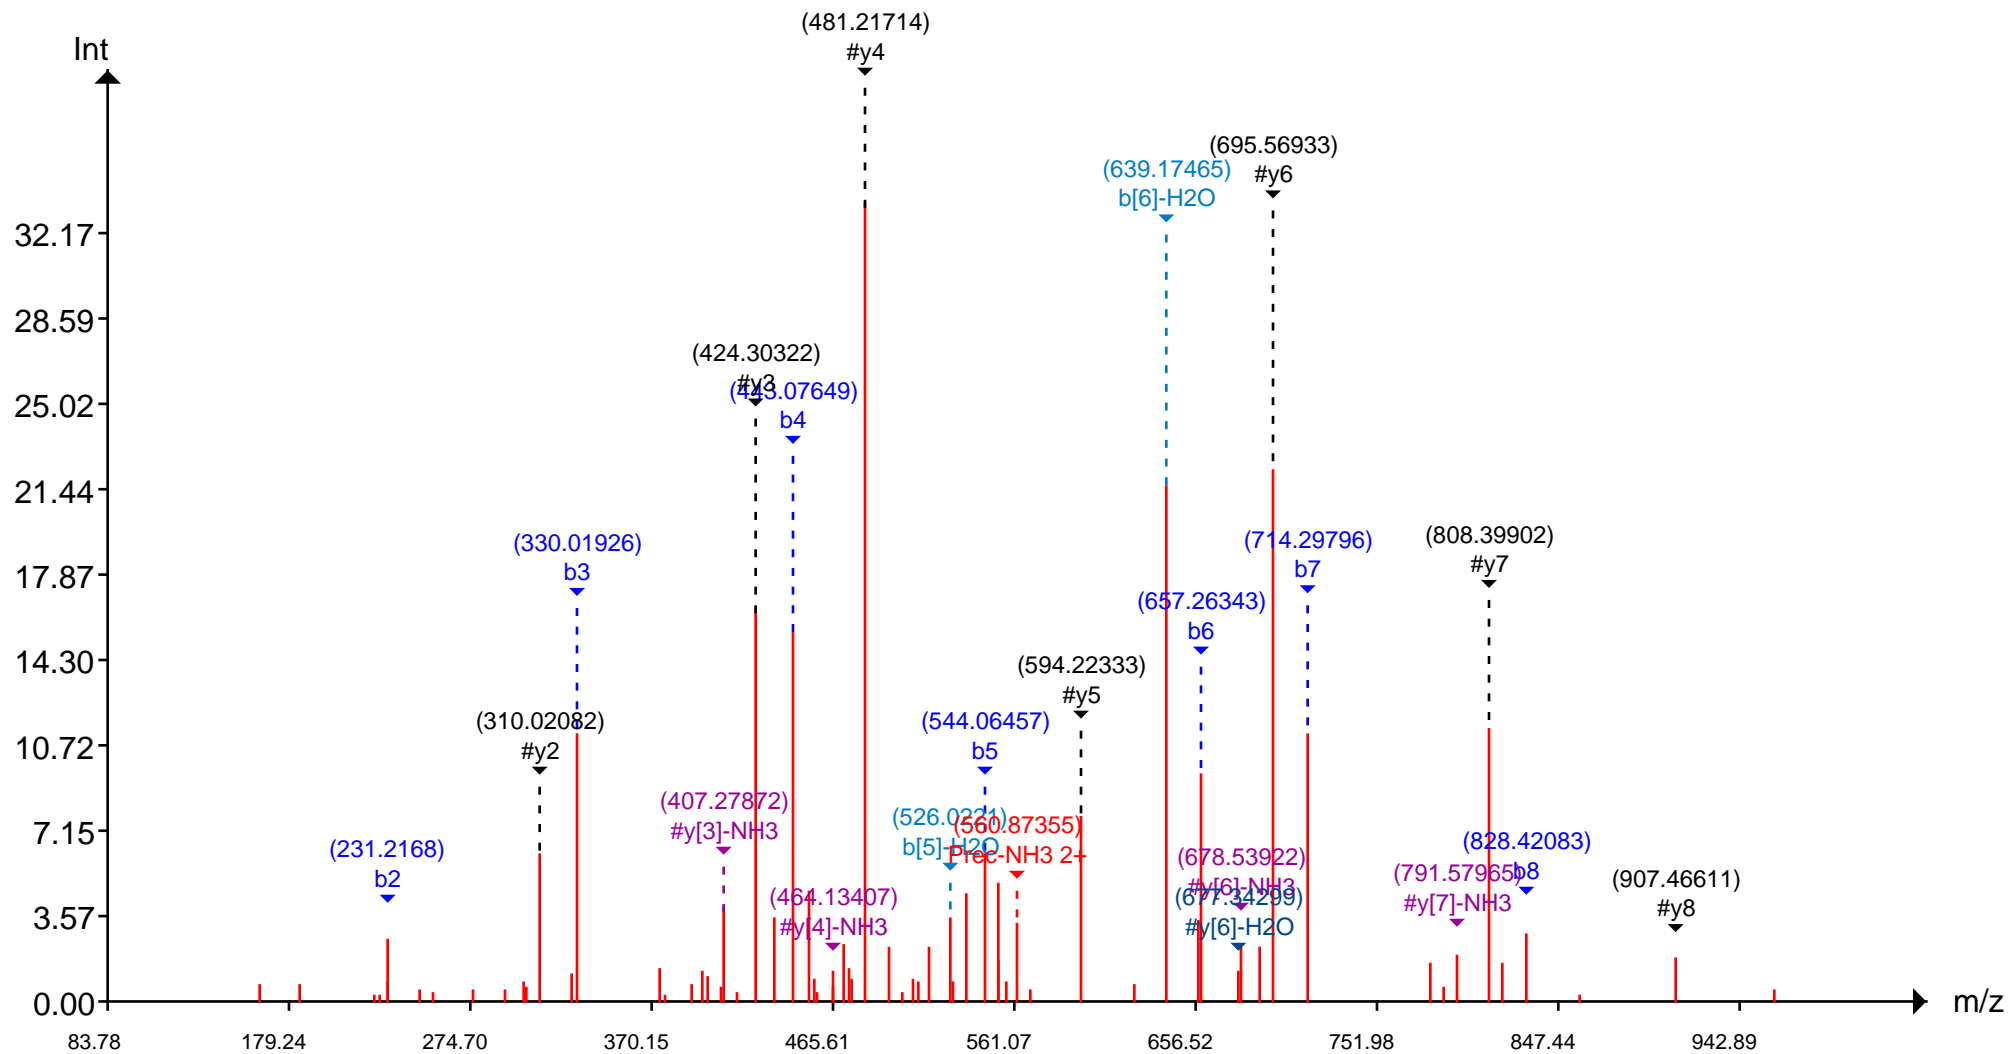

## Info

|                          |                                                                                |                           |         |
|--------------------------|--------------------------------------------------------------------------------|---------------------------|---------|
| <b>Modified Sequence</b> | AcD3-GQVITIGNER<C13>-COOH                                                      | <b>Ion score</b>          | 67.4    |
| <b>Protein</b>           | P62736, Q562R1, Q9BYX7, P60709, P68032, P63261, P63267, P68133, Q6S8J3, A5A3E0 | <b>Confidence level</b>   | 99.00%  |
| <b>Precursor m/z</b>     | 569.32368                                                                      | <b>Identity Threshold</b> | 47.93   |
| <b>Charge</b>            | 2+                                                                             | <b>Mass error</b>         | 3.62E-4 |

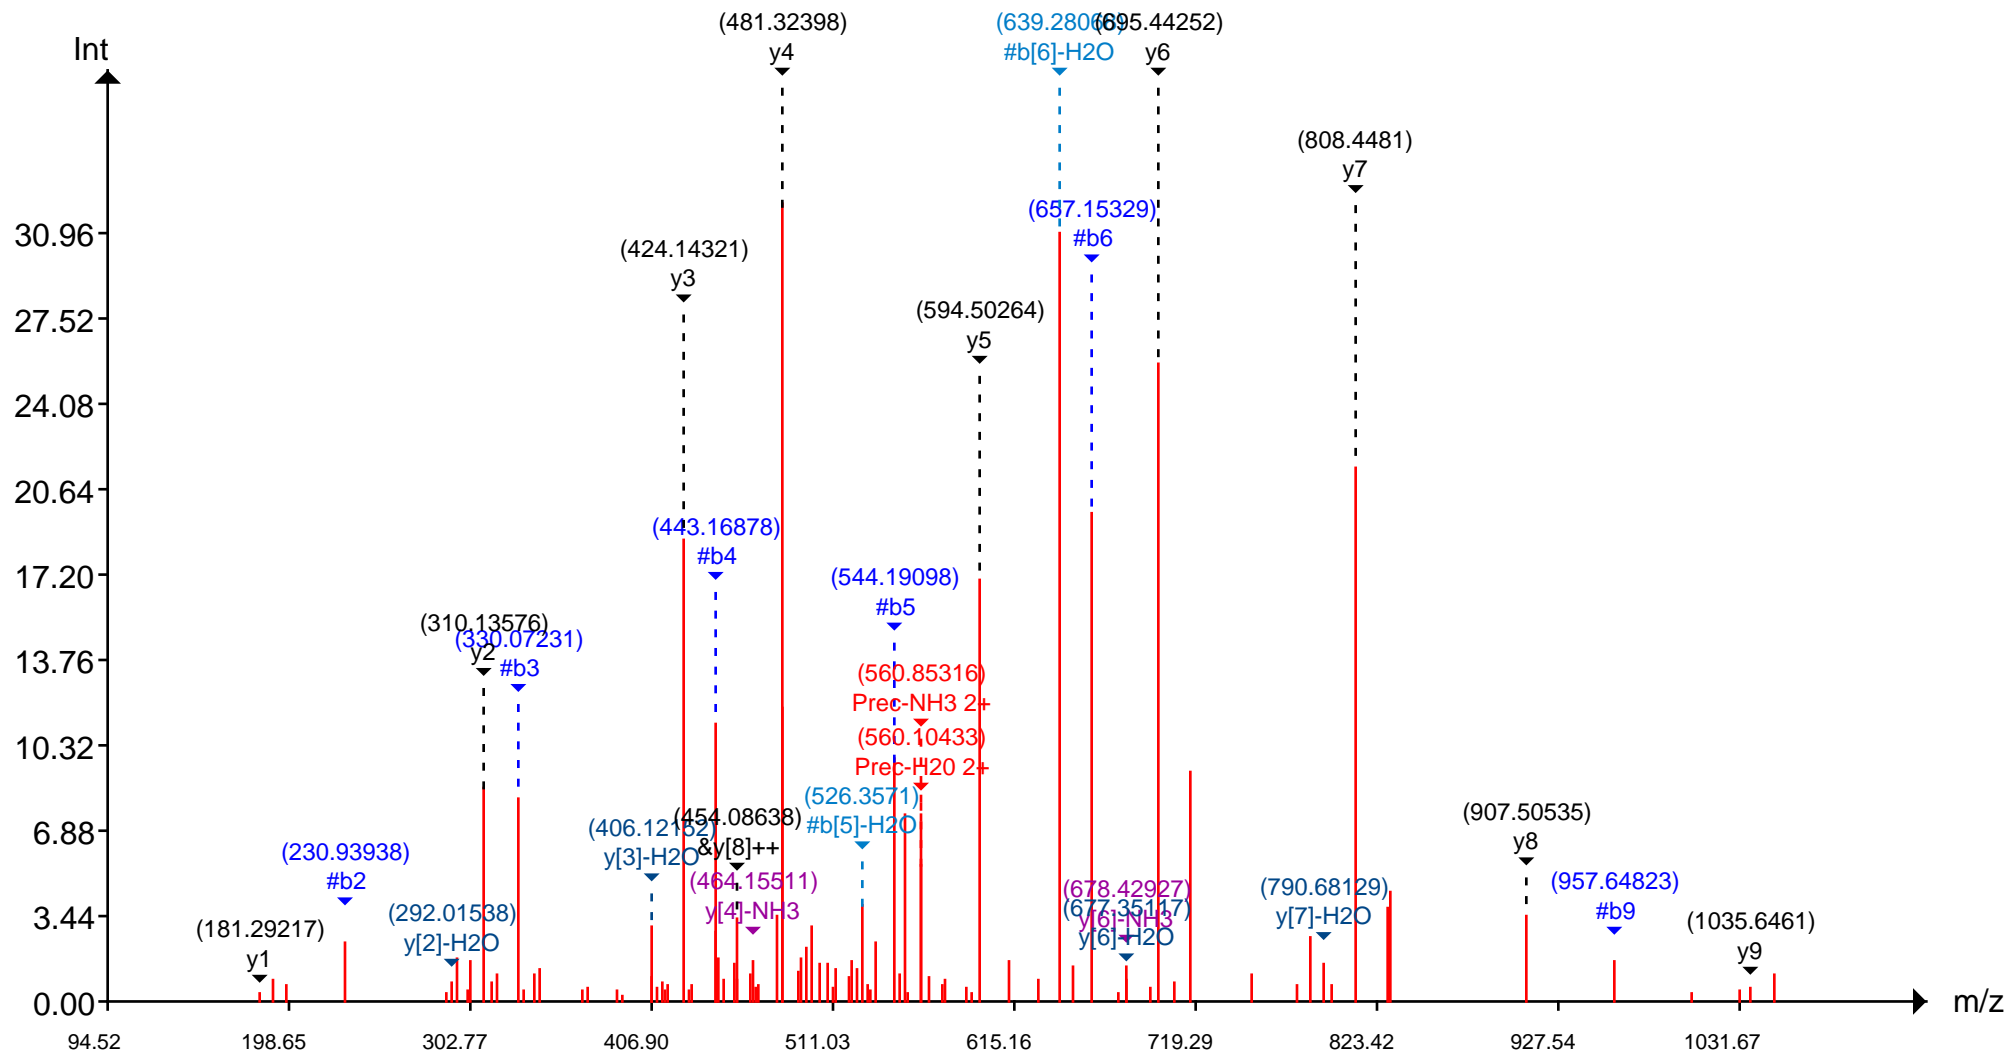

## Info

|                          |                                                                                |                           |         |
|--------------------------|--------------------------------------------------------------------------------|---------------------------|---------|
| <b>Modified Sequence</b> | AcD3-GQVITIGNER<C13>-COOH                                                      | <b>Ion score</b>          | 62.51   |
| <b>Protein</b>           | P62736, Q562R1, Q9BYX7, P60709, P68032, P63261, P63267, P68133, Q6S8J3, A5A3E0 | <b>Confidence level</b>   | 99.00%  |
| <b>Precursor m/z</b>     | 569.32359                                                                      | <b>Identity Threshold</b> | 47.96   |
| <b>Charge</b>            | 2+                                                                             | <b>Mass error</b>         | 1.82E-4 |

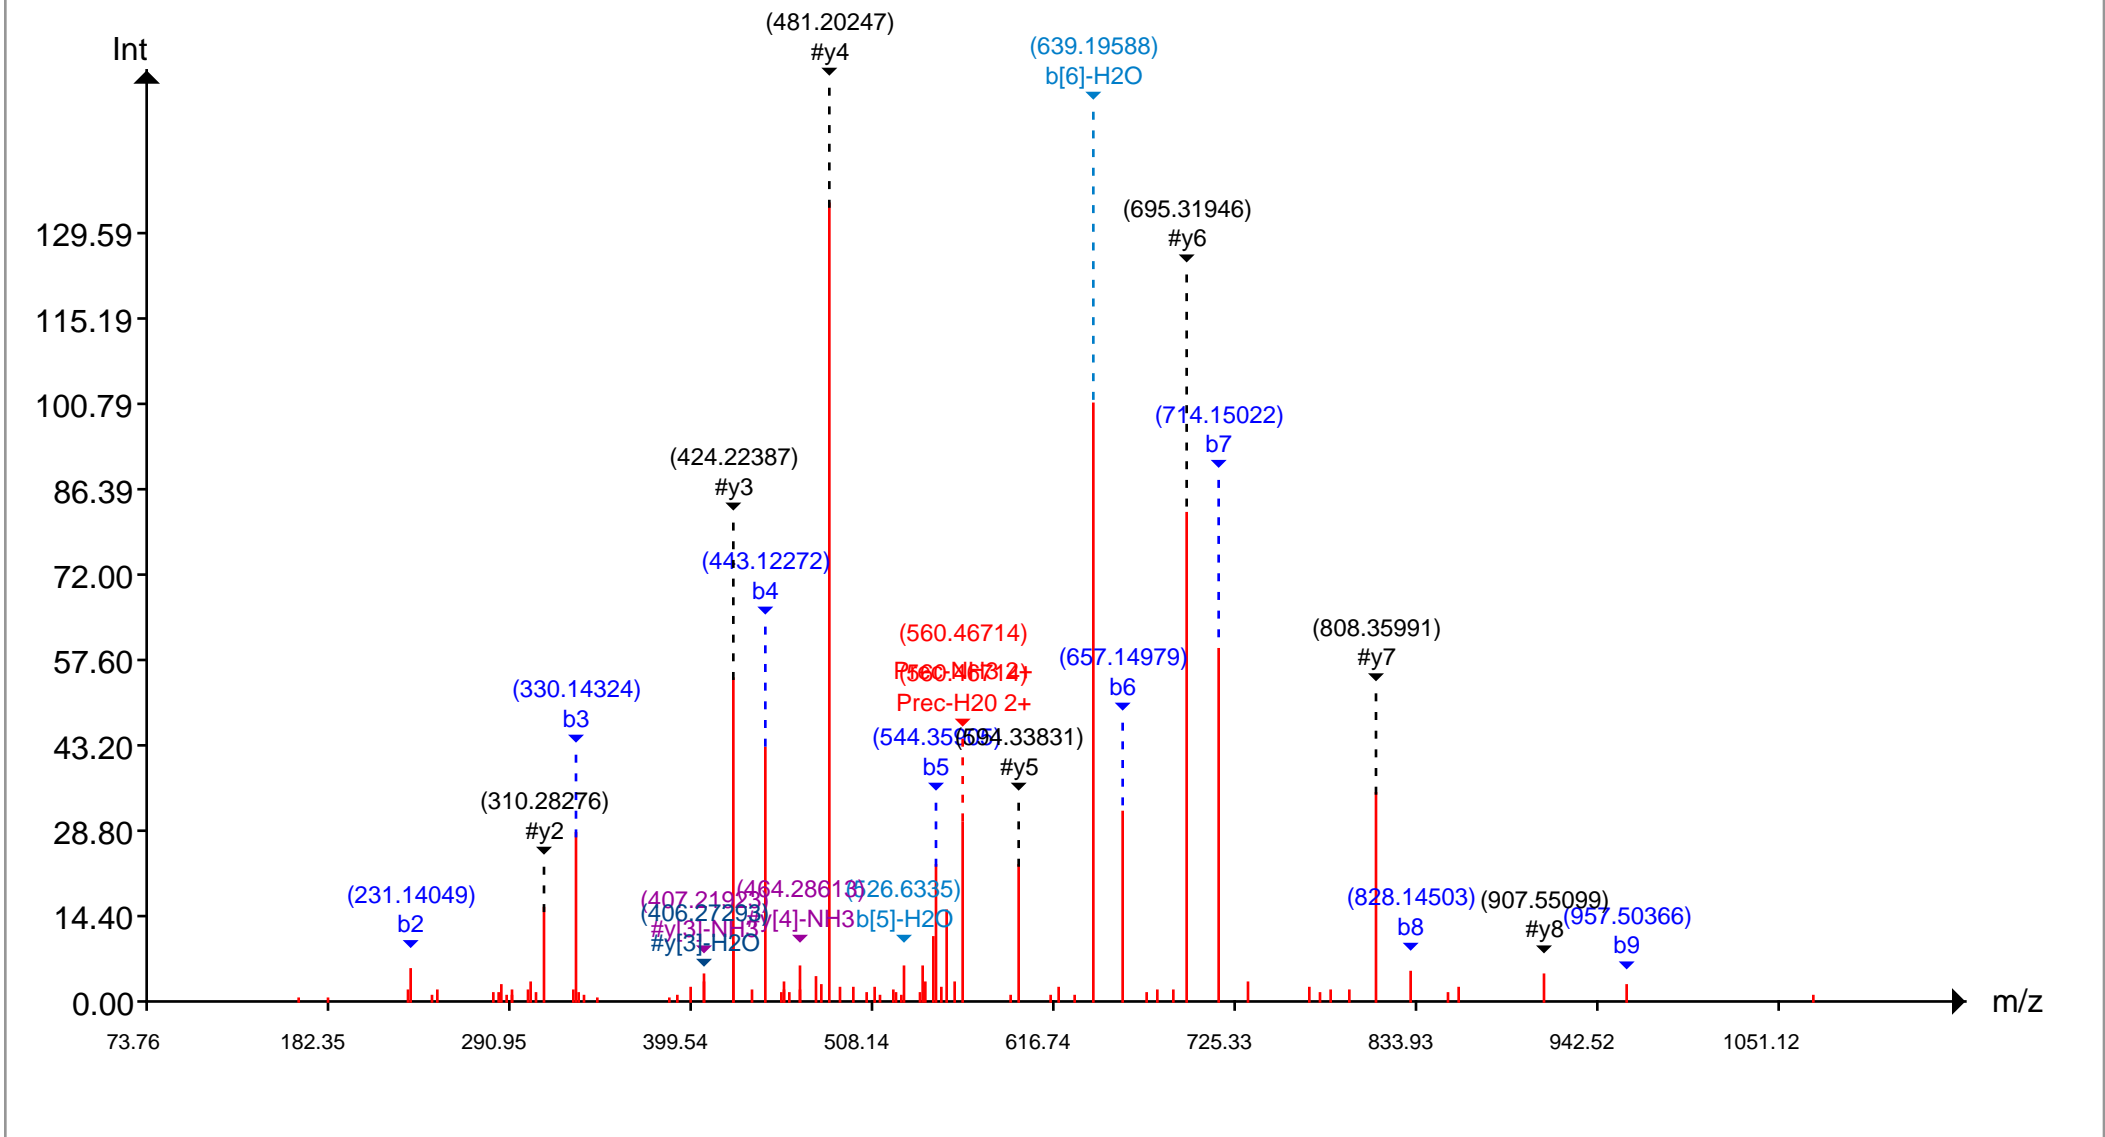

## Info

|                          |                                                                                |                           |         |
|--------------------------|--------------------------------------------------------------------------------|---------------------------|---------|
| <b>Modified Sequence</b> | AcD3-GQVITIGNER<C13>-COOH                                                      | <b>Ion score</b>          | 65.53   |
| <b>Protein</b>           | P62736, Q562R1, Q9BYX7, P60709, P68032, P63261, P63267, P68133, Q6S8J3, A5A3E0 | <b>Confidence level</b>   | 99.00%  |
| <b>Precursor m/z</b>     | 569.32359                                                                      | <b>Identity Threshold</b> | 47.96   |
| <b>Charge</b>            | 2+                                                                             | <b>Mass error</b>         | 1.82E-4 |

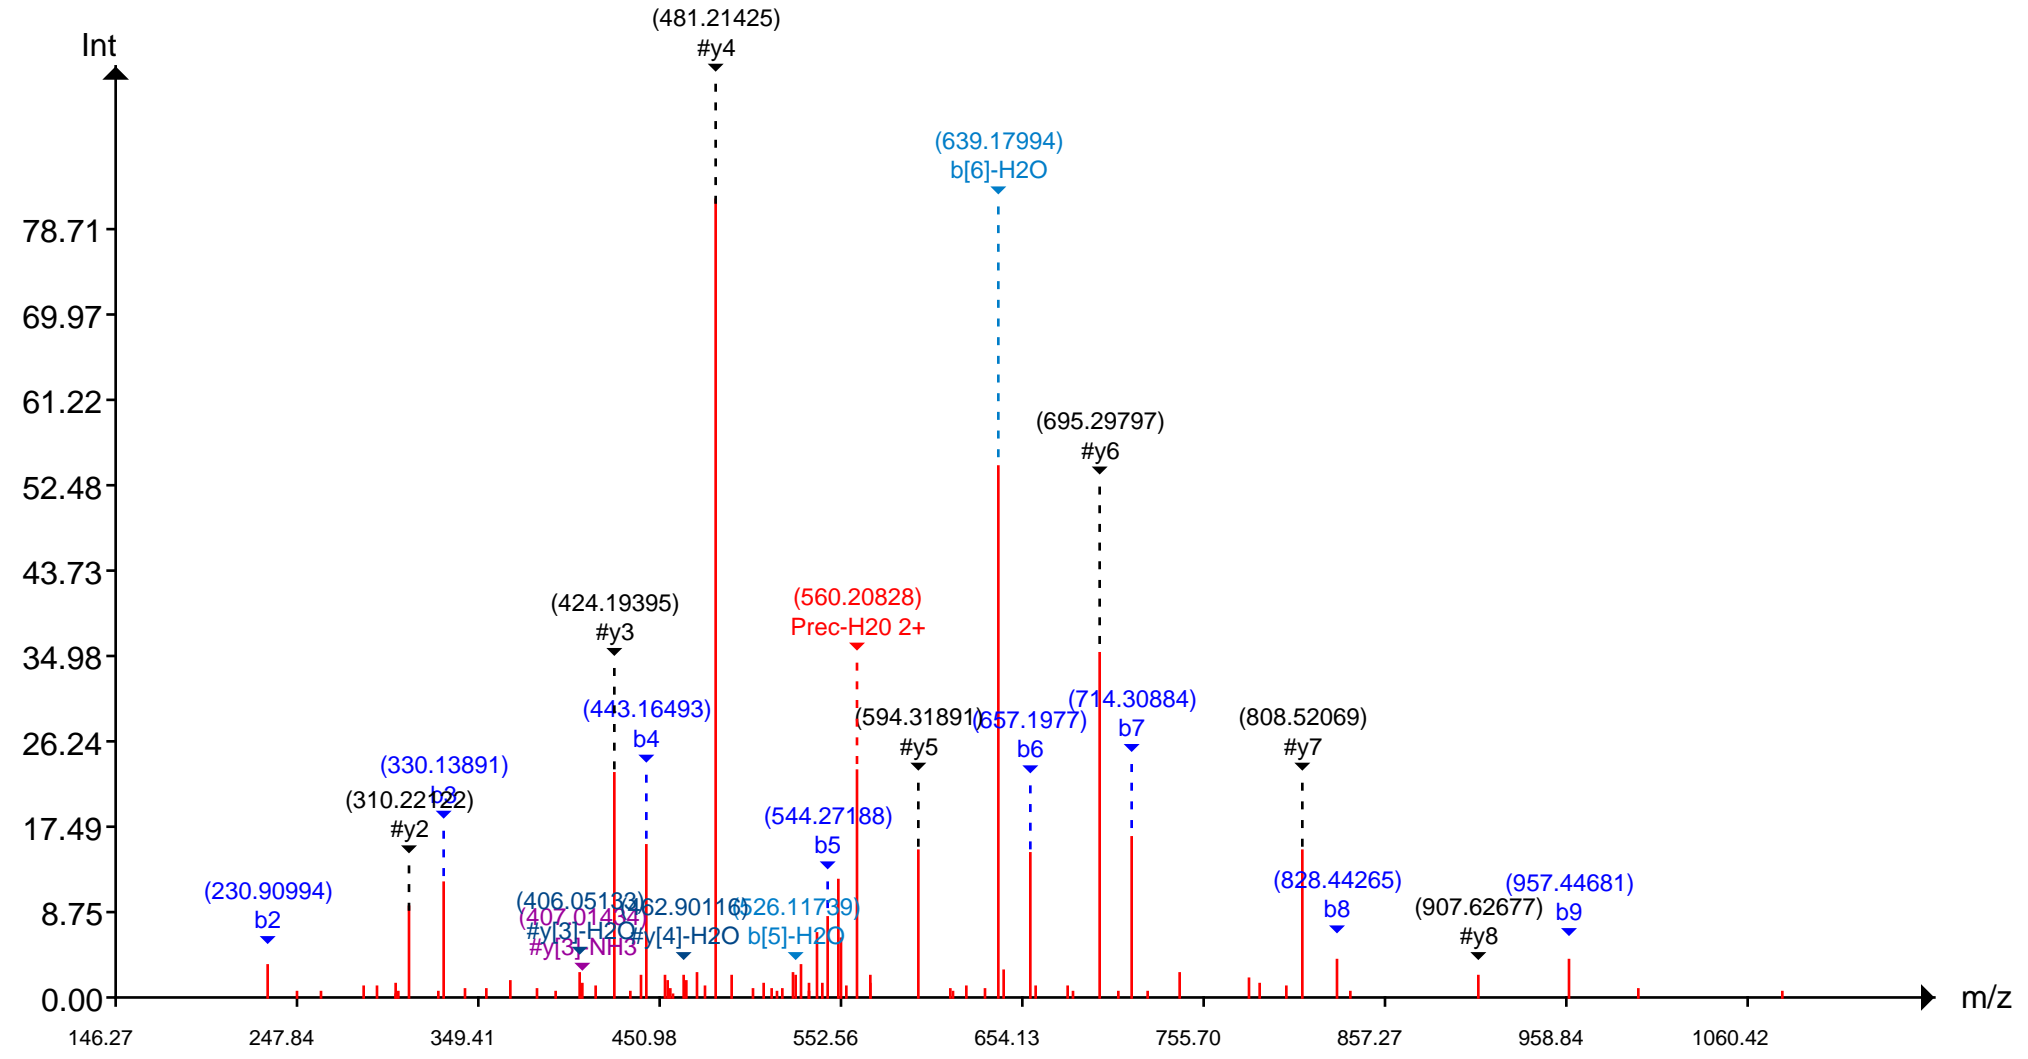

Info

|                          |                                                                                |                           |         |
|--------------------------|--------------------------------------------------------------------------------|---------------------------|---------|
| <b>Modified Sequence</b> | AcD3-GQVITIGNER<C13>-COOH                                                      | <b>Ion score</b>          | 62.7    |
| <b>Protein</b>           | P62736, Q562R1, Q9BYX7, P60709, P68032, P63261, P63267, P68133, Q6S8J3, A5A3E0 | <b>Confidence level</b>   | 99.00%  |
| <b>Precursor m/z</b>     | 569.32362                                                                      | <b>Identity Threshold</b> | 47.96   |
| <b>Charge</b>            | 2+                                                                             | <b>Mass error</b>         | 2.42E-4 |

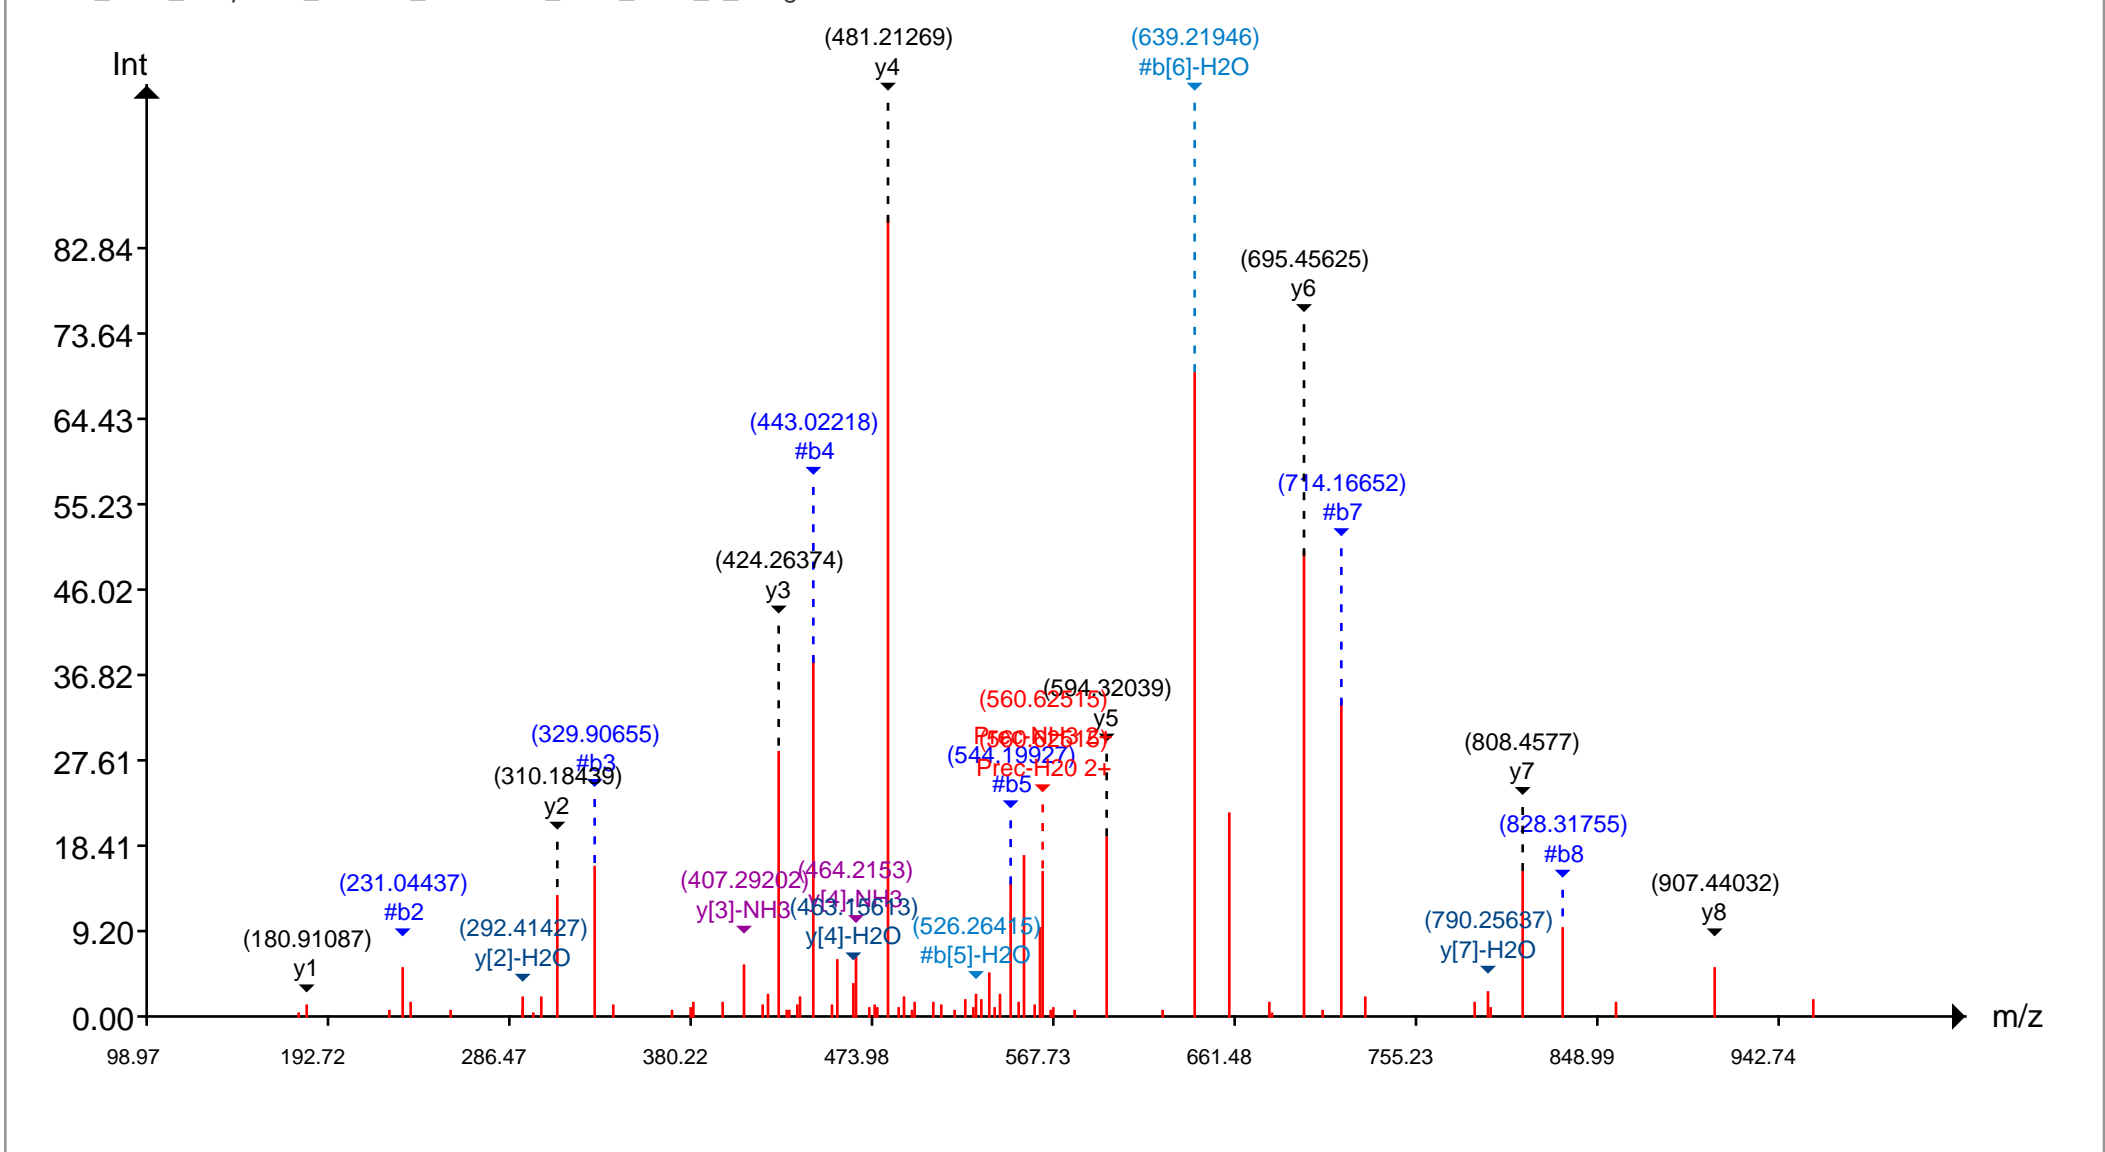

## Info

|                          |                                                                                |                           |         |
|--------------------------|--------------------------------------------------------------------------------|---------------------------|---------|
| <b>Modified Sequence</b> | AcD3-GQVITIGNER<C13>-COOH                                                      | <b>Ion score</b>          | 72.74   |
| <b>Protein</b>           | P62736, Q562R1, Q9BYX7, P60709, P68032, P63261, P63267, P68133, Q6S8J3, A5A3E0 | <b>Confidence level</b>   | 99.00%  |
| <b>Precursor m/z</b>     | 569.32362                                                                      | <b>Identity Threshold</b> | 47.96   |
| <b>Charge</b>            | 2+                                                                             | <b>Mass error</b>         | 2.42E-4 |

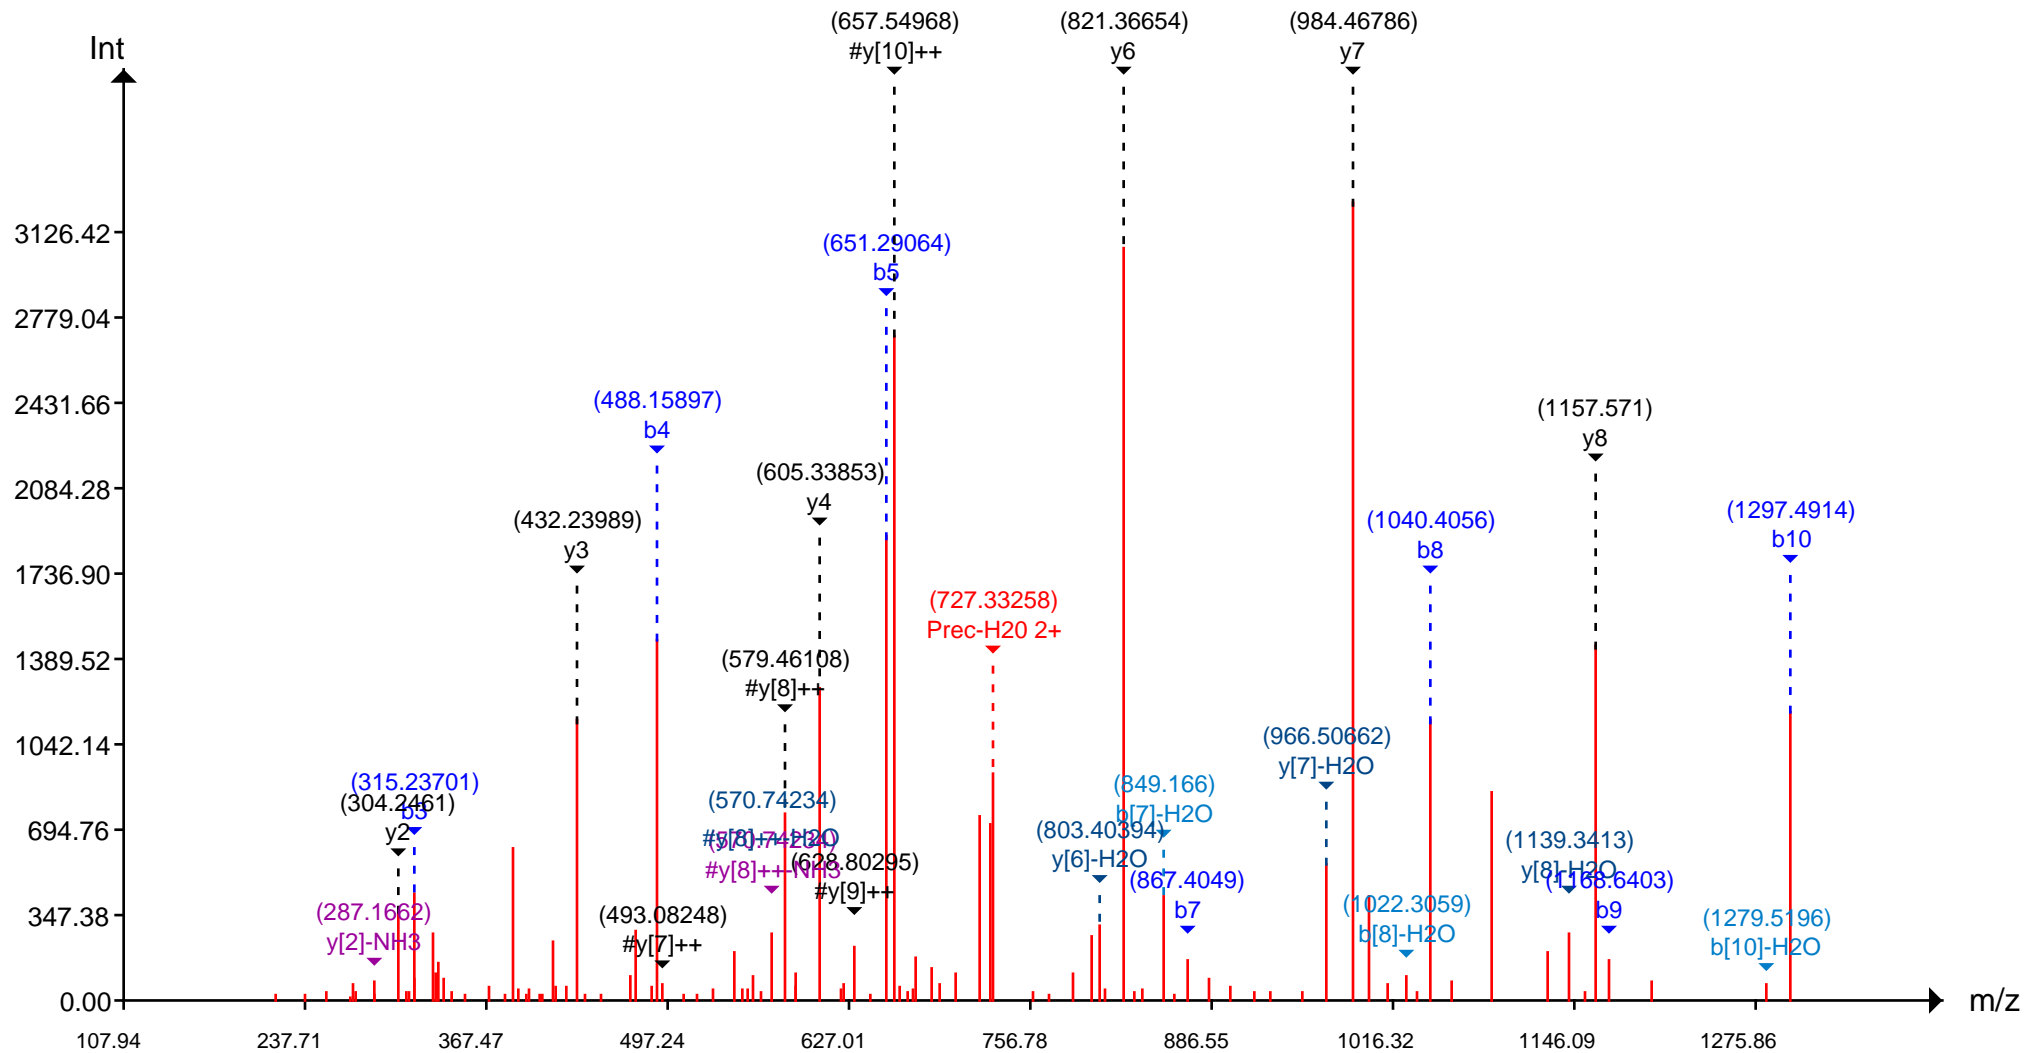

## Info

|                          |                                       |                           |         |
|--------------------------|---------------------------------------|---------------------------|---------|
| <b>Modified Sequence</b> | AcD3-IGVK<AcD3K*>YSEK<AcD3K*>QER-COOH | <b>Ion score</b>          | 48.99   |
| <b>Protein</b>           | Q99439                                | <b>Confidence level</b>   | 99.00%  |
| <b>Precursor m/z</b>     | 736.40908                             | <b>Identity Threshold</b> | 48.38   |
| <b>Charge</b>            | 2+                                    | <b>Mass error</b>         | 7.82E-4 |

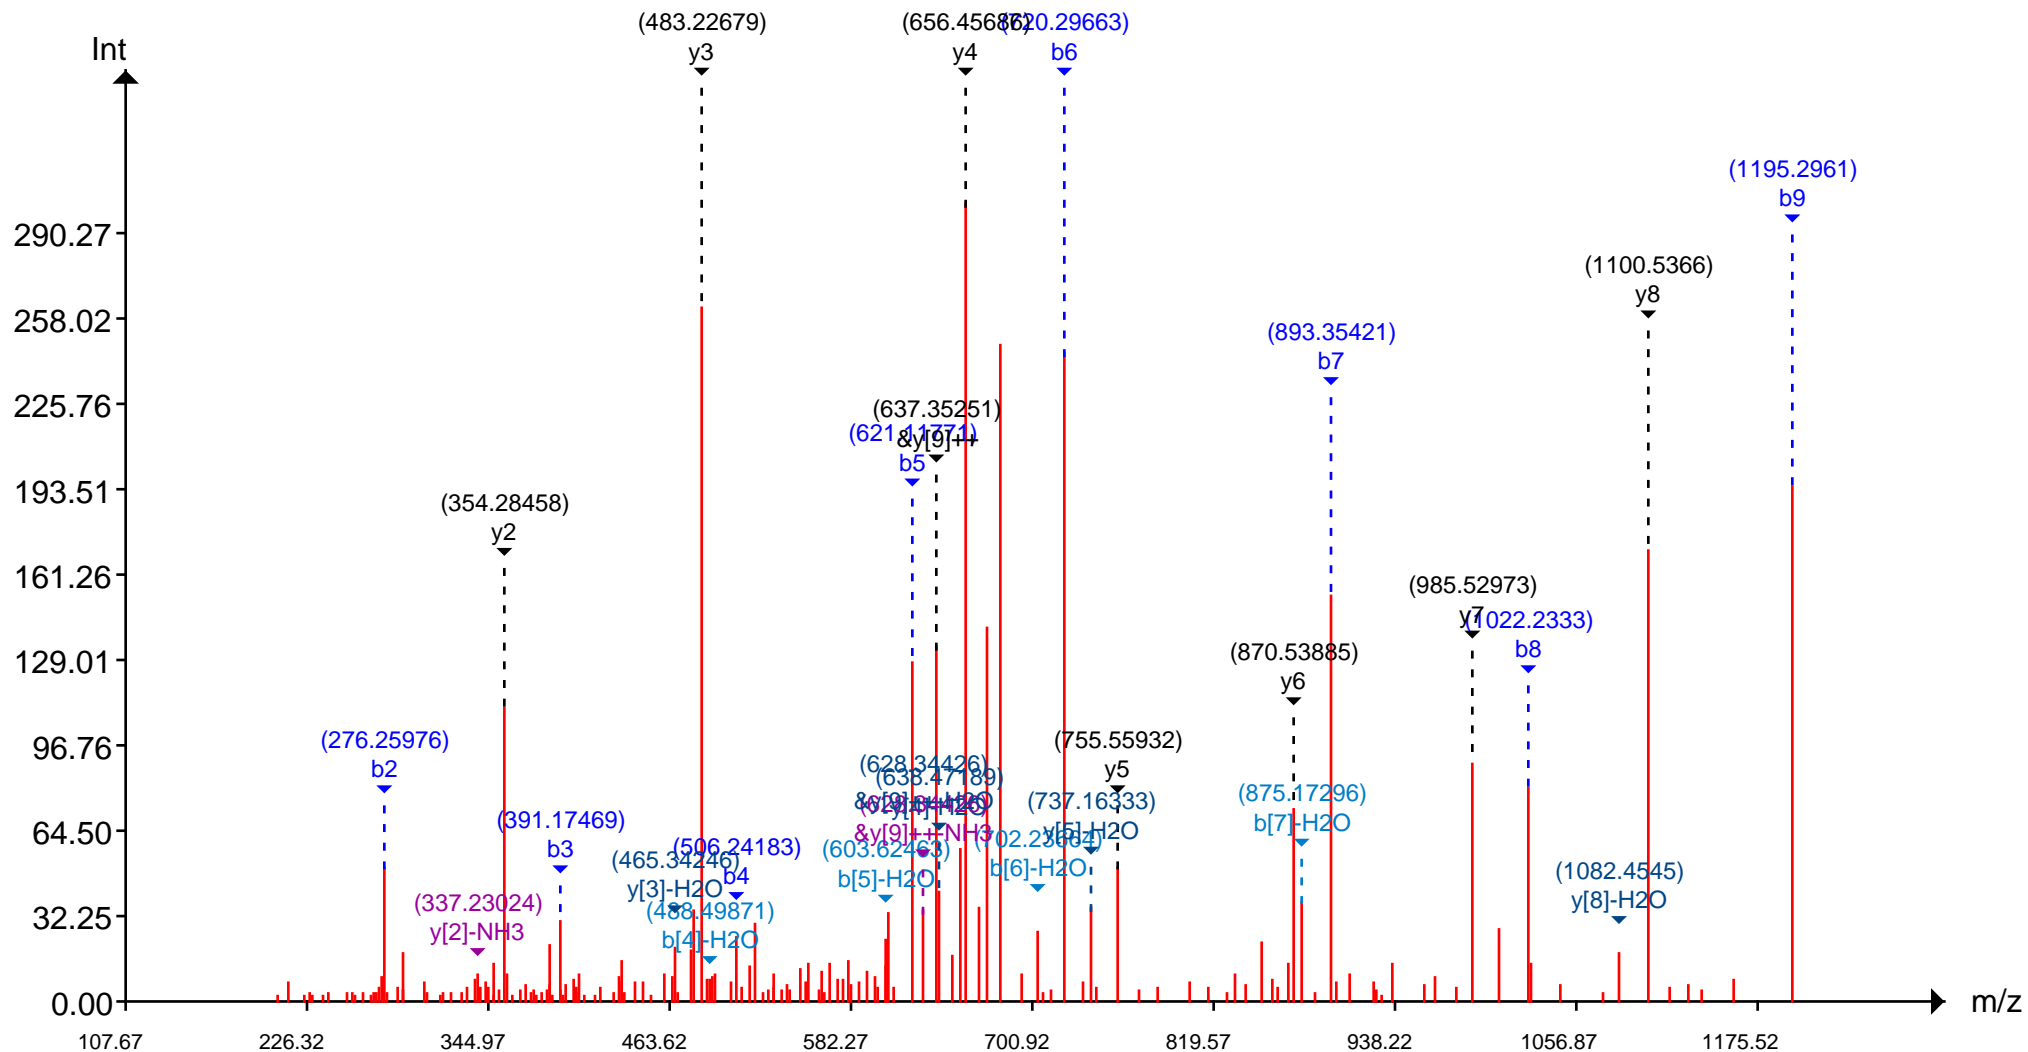

## Info

|                          |                                                   |                           |          |
|--------------------------|---------------------------------------------------|---------------------------|----------|
| <b>Modified Sequence</b> | AcD3-GK<AcD3K*>DDDVK<AcD3K*>EK<AcD3K*>R<C13>-COOH | <b>Ion score</b>          | 51.5     |
| <b>Protein</b>           | O94913                                            | <b>Confidence level</b>   | 99.00%   |
| <b>Precursor m/z</b>     | 688.38076                                         | <b>Identity Threshold</b> | 48.78    |
| <b>Charge</b>            | 2+                                                | <b>Mass error</b>         | -6.21E-4 |



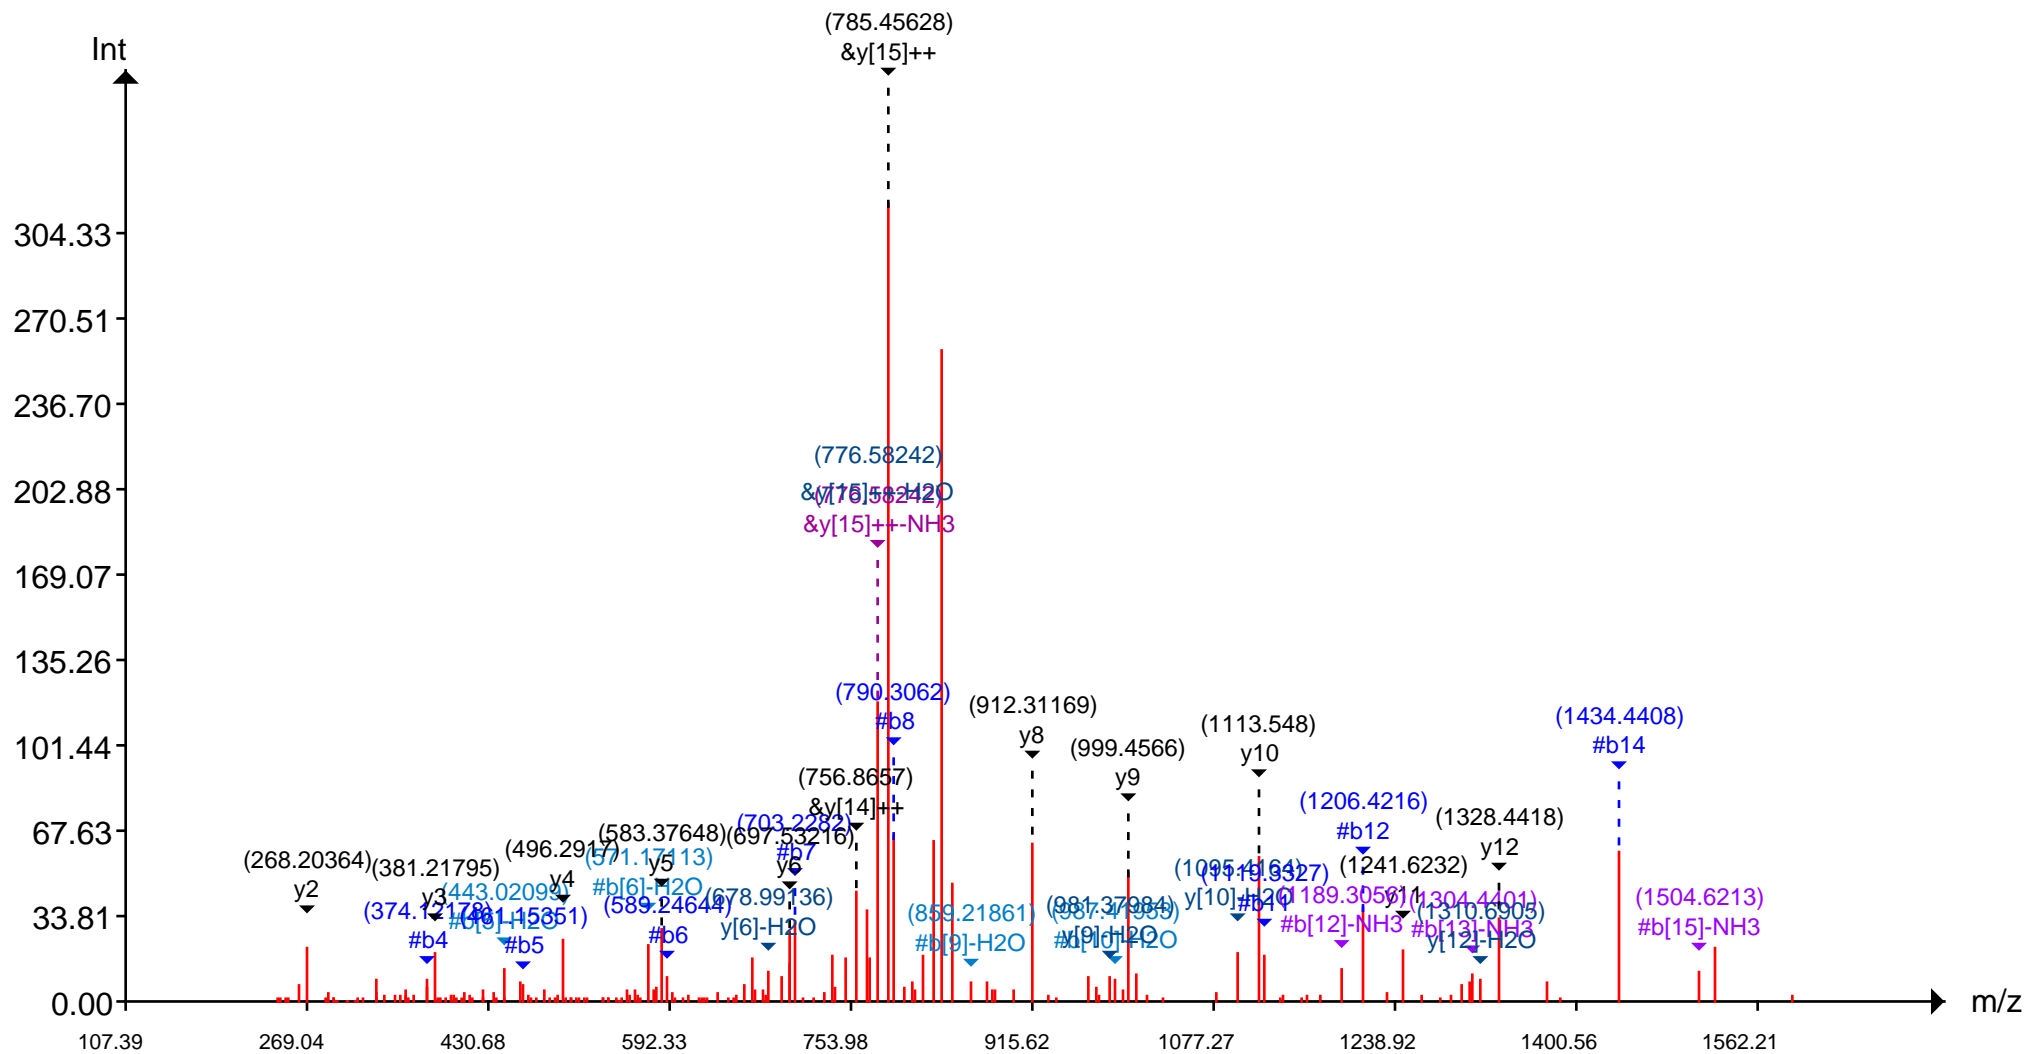

## Info

|                          |                                |                           |         |
|--------------------------|--------------------------------|---------------------------|---------|
| <b>Modified Sequence</b> | AcD3-SGPSSQNSSQNSDLR<C13>-COOH | <b>Ion score</b>          | 84.19   |
| <b>Protein</b>           | Q96N21                         | <b>Confidence level</b>   | 99.00%  |
| <b>Precursor m/z</b>     | 851.39451                      | <b>Identity Threshold</b> | 46.26   |
| <b>Charge</b>            | 2+                             | <b>Mass error</b>         | 8.32E-4 |

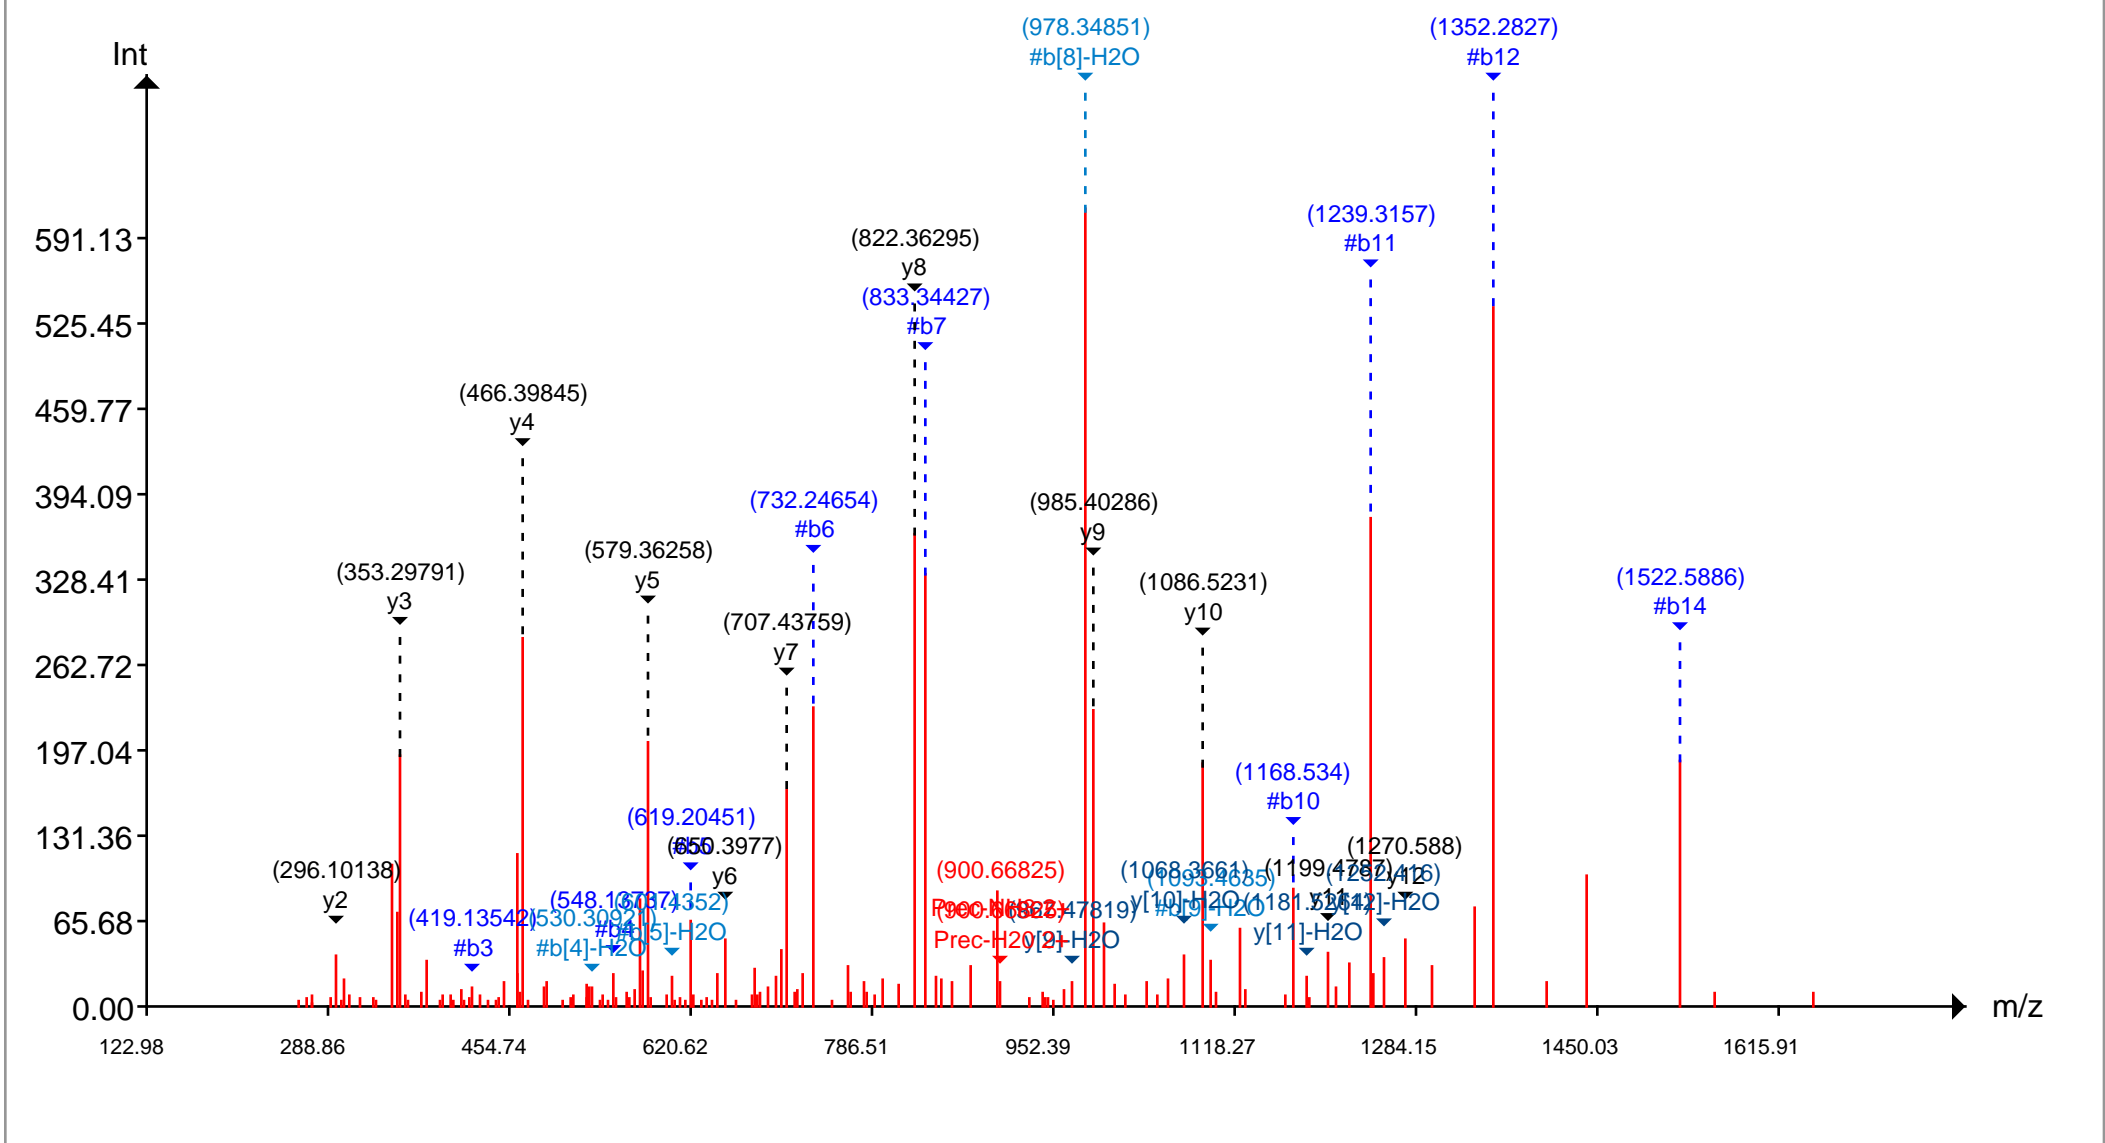

## Info

**Modified Sequence** AcD3-SLK<AcD3K\*>EALTYDGALLGDR<C13>-COOH

**Ion score** 65.32

**Protein** Q15056

**Confidence level** 99.00%

**Precursor m/z** 909.49715

**Identity Threshold** 48.50

**Charge** 2+

**Mass error** 0.001278

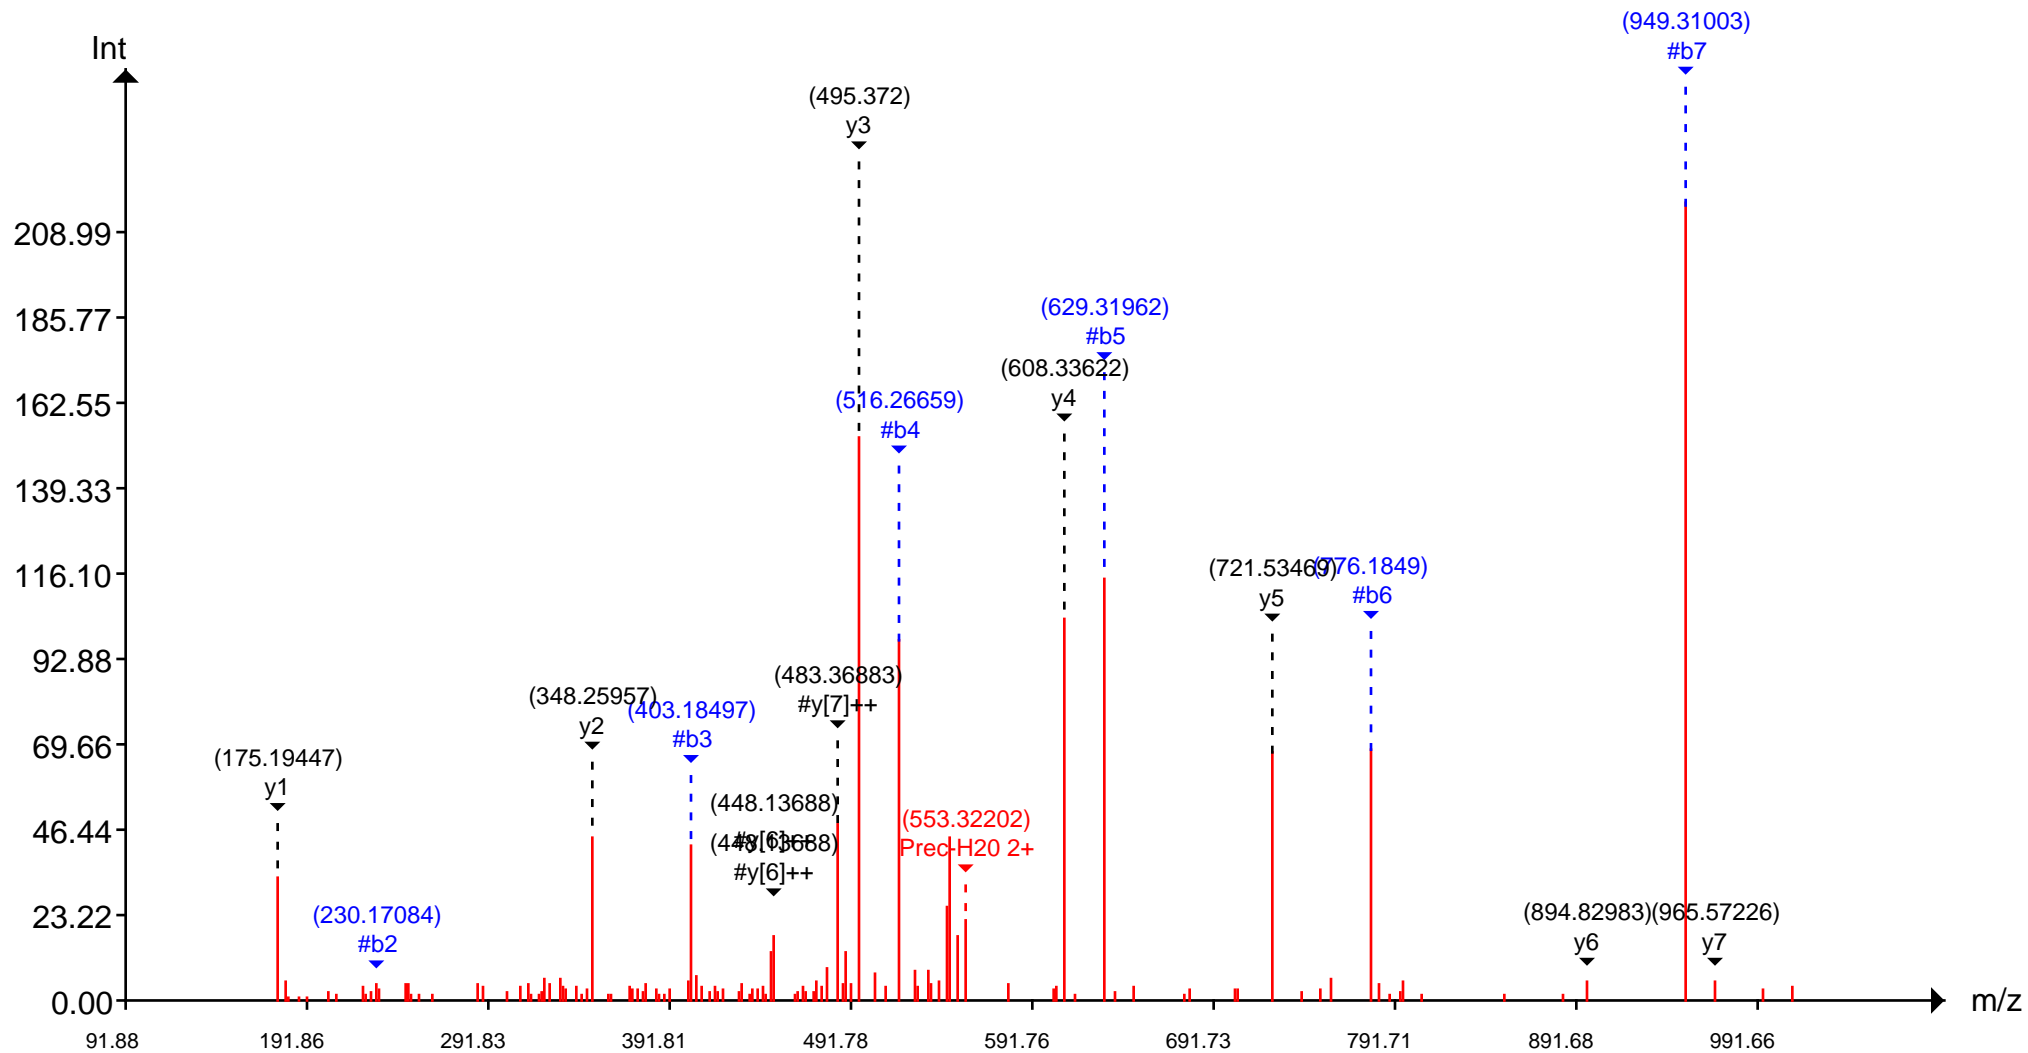

## Info

**Modified Sequence** AcD3-LAK<AcD3K\*>IIFK<AcD3K\*>R-COOH

**Ion score** 48.04

**Protein** P49321

**Confidence level** 99.00%

**Precursor m/z** 562.38095

**Identity Threshold** 35.61

**Charge** 2+

**Mass error** -1.34E-4

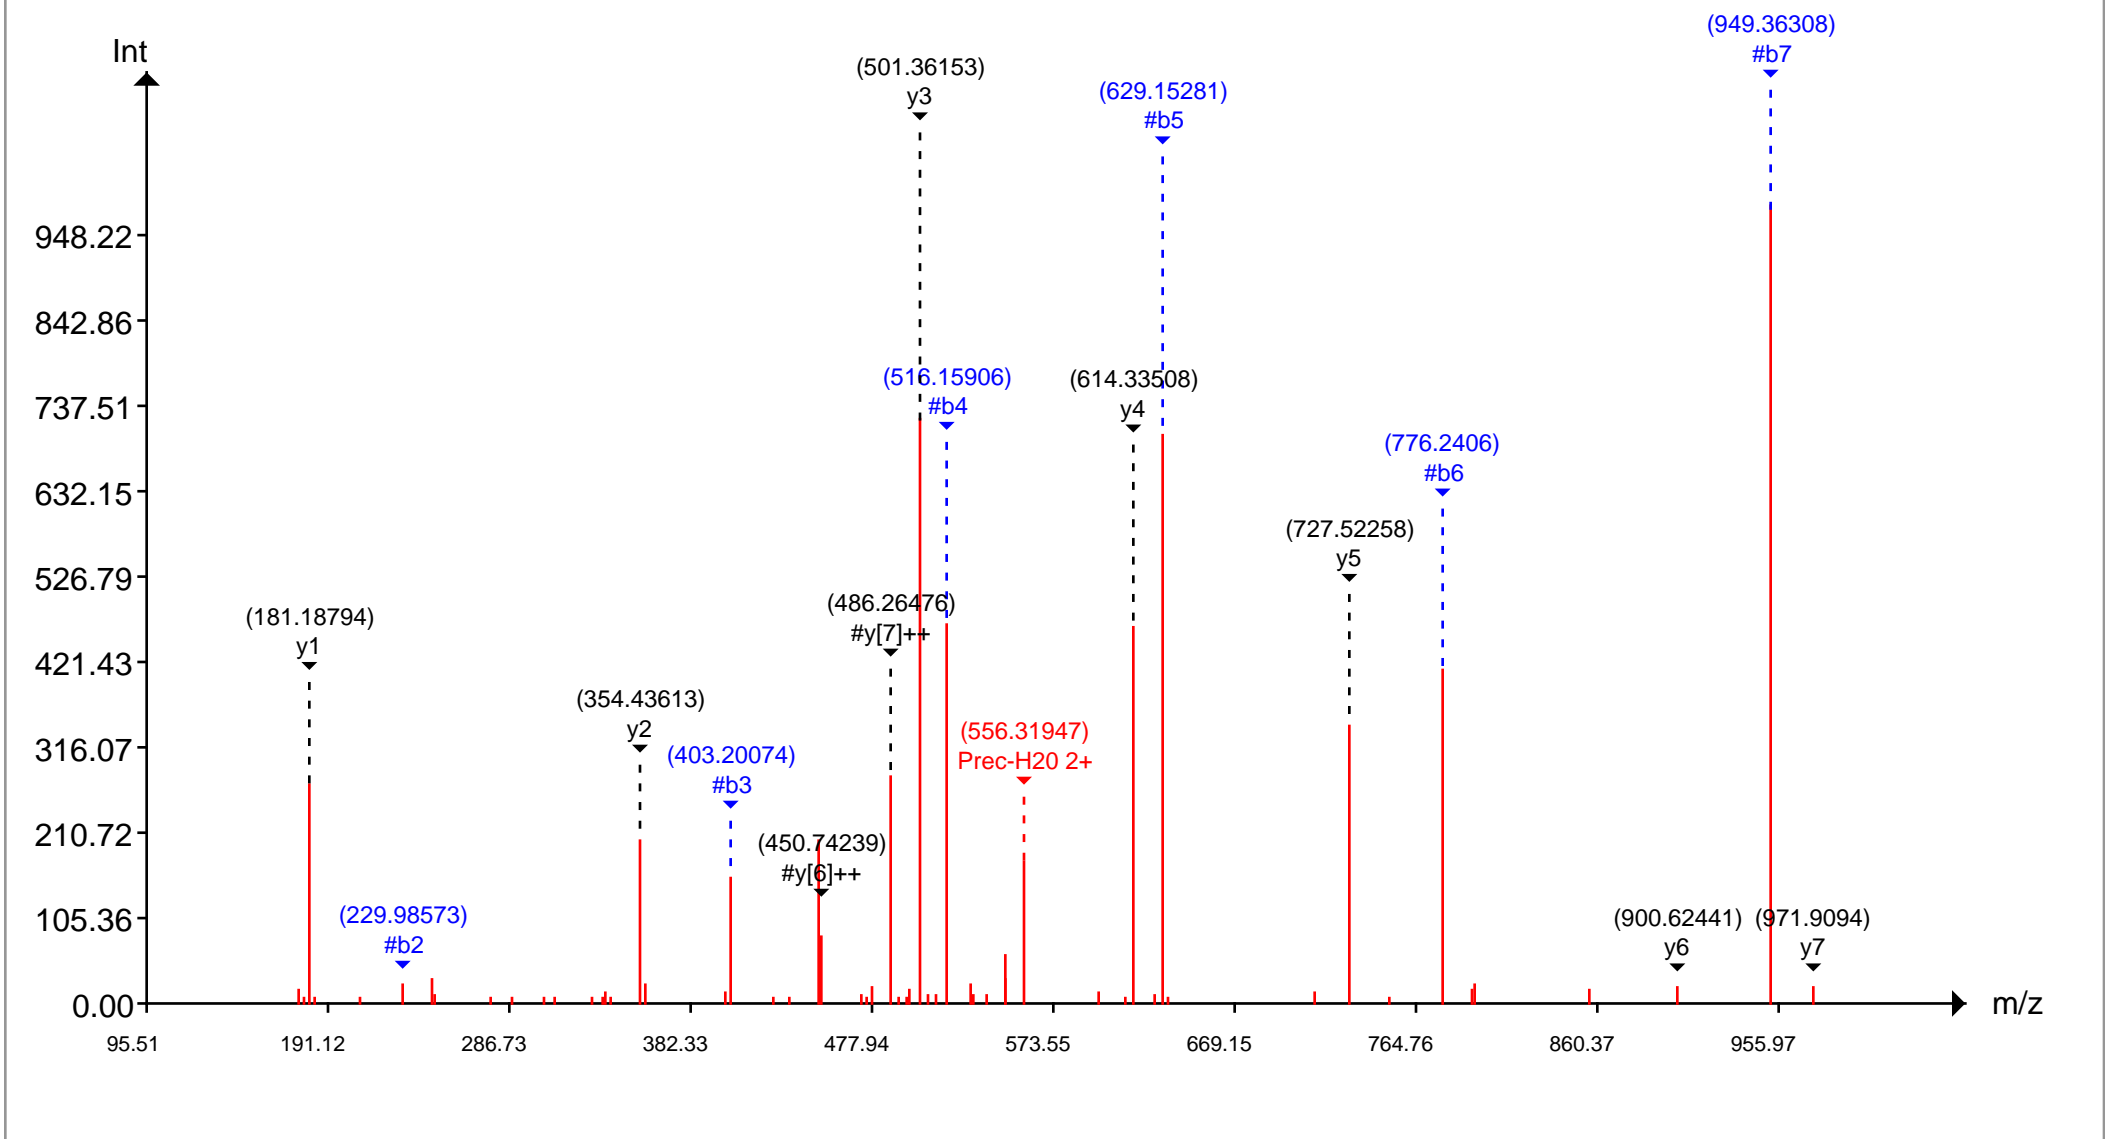

## Info

**Modified Sequence** AcD3-LAK<AcD3K\*>IIFK<AcD3K\*>R<C13>-COOH

**Ion score** 51.65

**Protein** P49321

**Confidence level** 99.00%

**Precursor m/z** 565.39103

**Identity Threshold** 32.94

**Charge** 2+

**Mass error** -1.16E-4

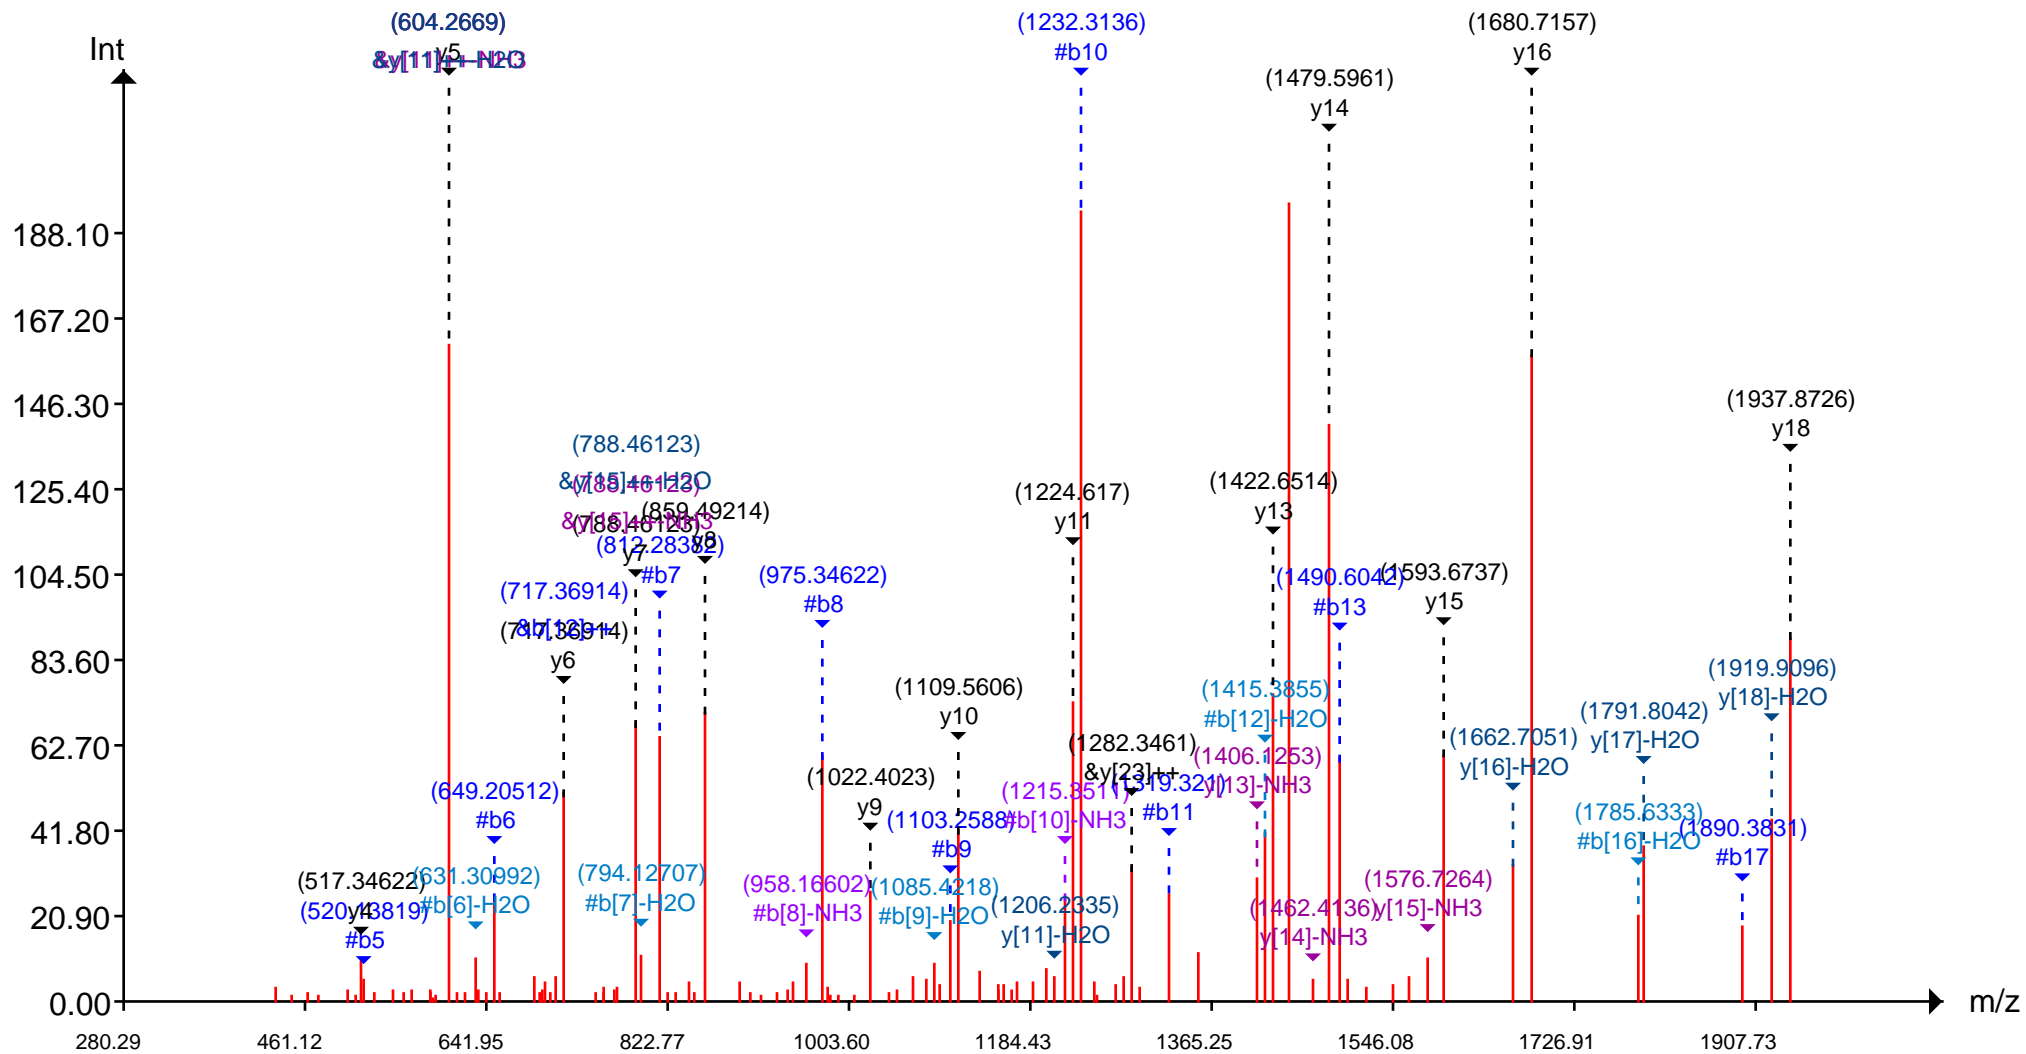

## Info

|                          |                                            |                           |           |
|--------------------------|--------------------------------------------|---------------------------|-----------|
| <b>Modified Sequence</b> | AcD3-GVM<Mox*>NGEYYQESNGPTDSYAAISQVDR-COOH | <b>Ion score</b>          | 126.03    |
| <b>Protein</b>           | P09496                                     | <b>Confidence level</b>   | 99.00%    |
| <b>Precursor m/z</b>     | 1456.638                                   | <b>Identity Threshold</b> | 41.48     |
| <b>Charge</b>            | 2+                                         | <b>Mass error</b>         | -0.003109 |

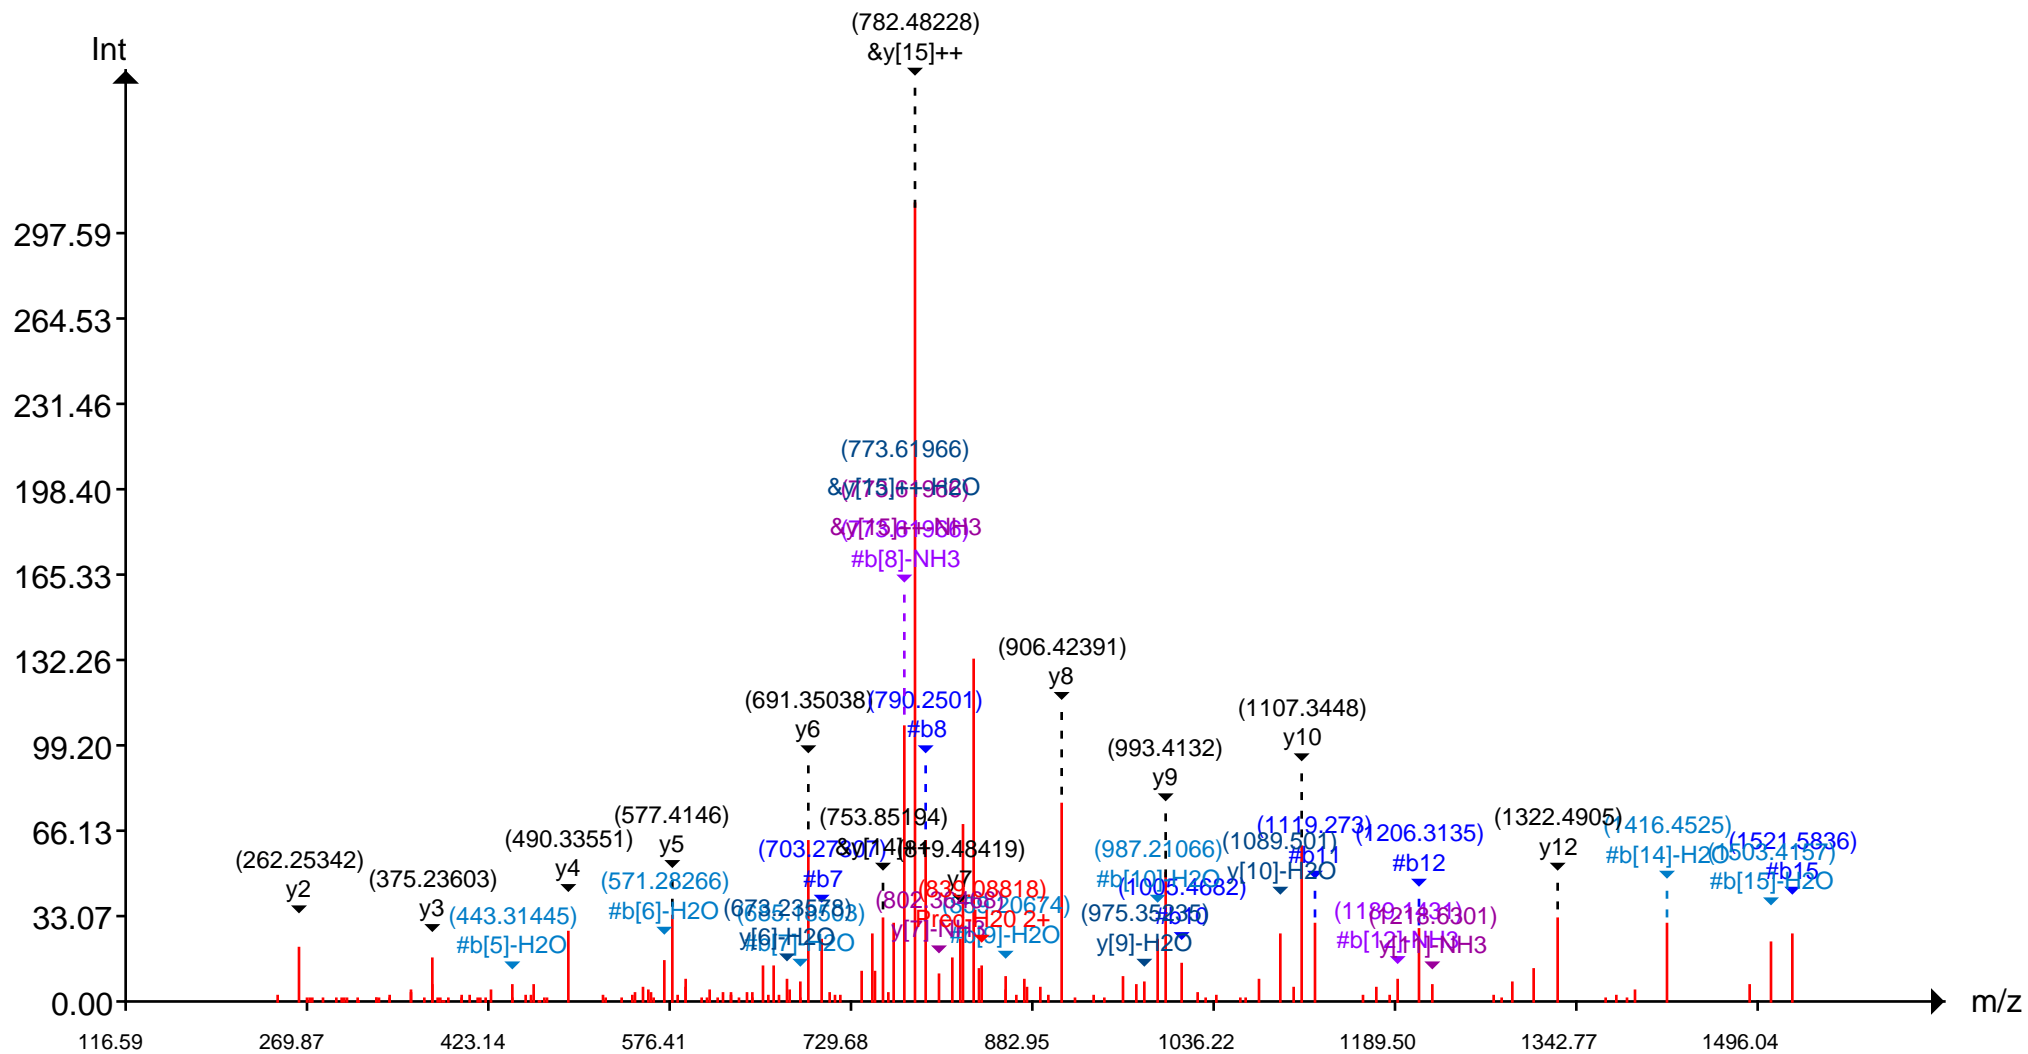

## Info

|                          |                           |                           |         |
|--------------------------|---------------------------|---------------------------|---------|
| <b>Modified Sequence</b> | AcD3-SGPSSQNSSQNSDLR-COOH | <b>Ion score</b>          | 87.08   |
| <b>Protein</b>           | Q96N21                    | <b>Confidence level</b>   | 99.00%  |
| <b>Precursor m/z</b>     | 848.384                   | <b>Identity Threshold</b> | 45.18   |
| <b>Charge</b>            | 2+                        | <b>Mass error</b>         | -4.6E-5 |

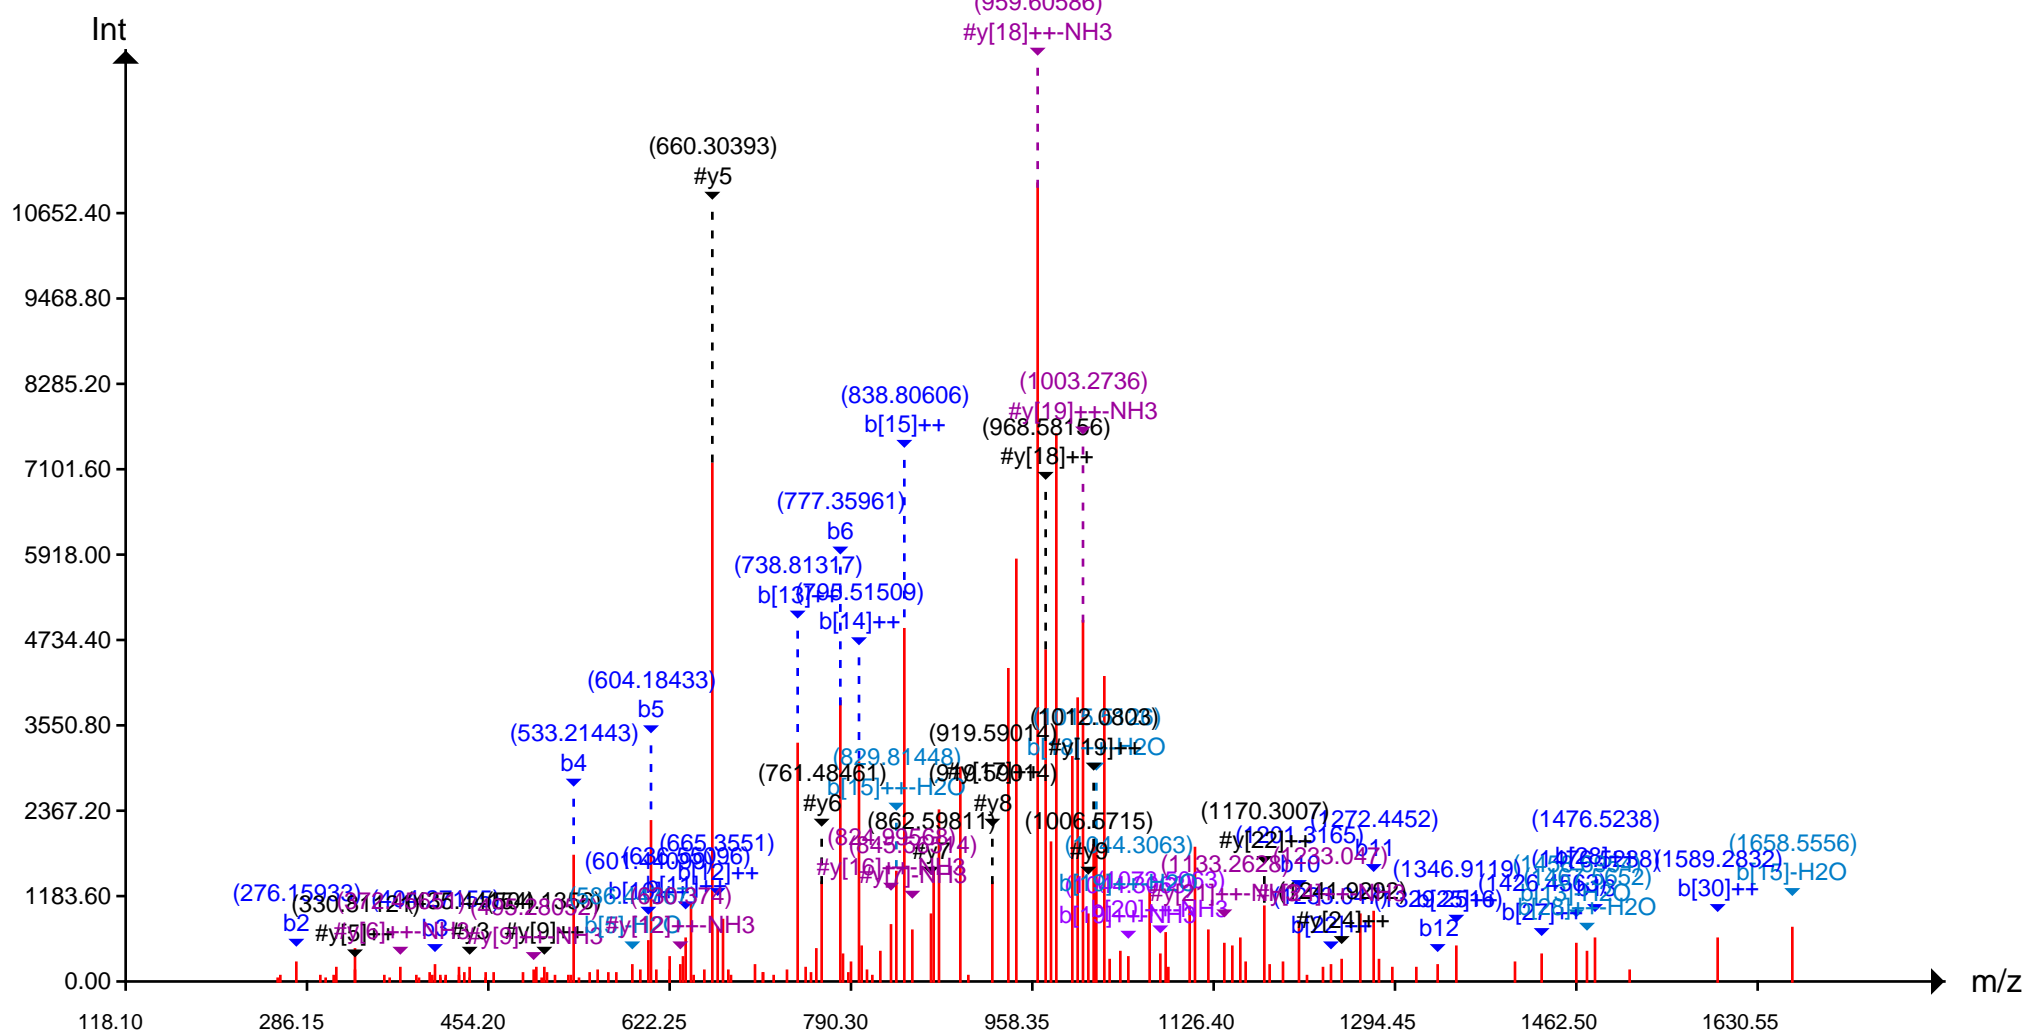

| Info      |                                                                                          |
|-----------|------------------------------------------------------------------------------------------|
| Mo...     | AcD3-GK<AcD3K*>QEAK<AcD3K*>PQQAAGM<Mox*>LSPK<AcD3K*>TGGK<AcD3K*>EAASGTPQK<AcD3K*>SR-COOH |
|           | Ion score                                                                                |
| Q13428    | Confidence level                                                                         |
| 903.73039 | Identity Threshold                                                                       |
| 4+        | Mass error                                                                               |

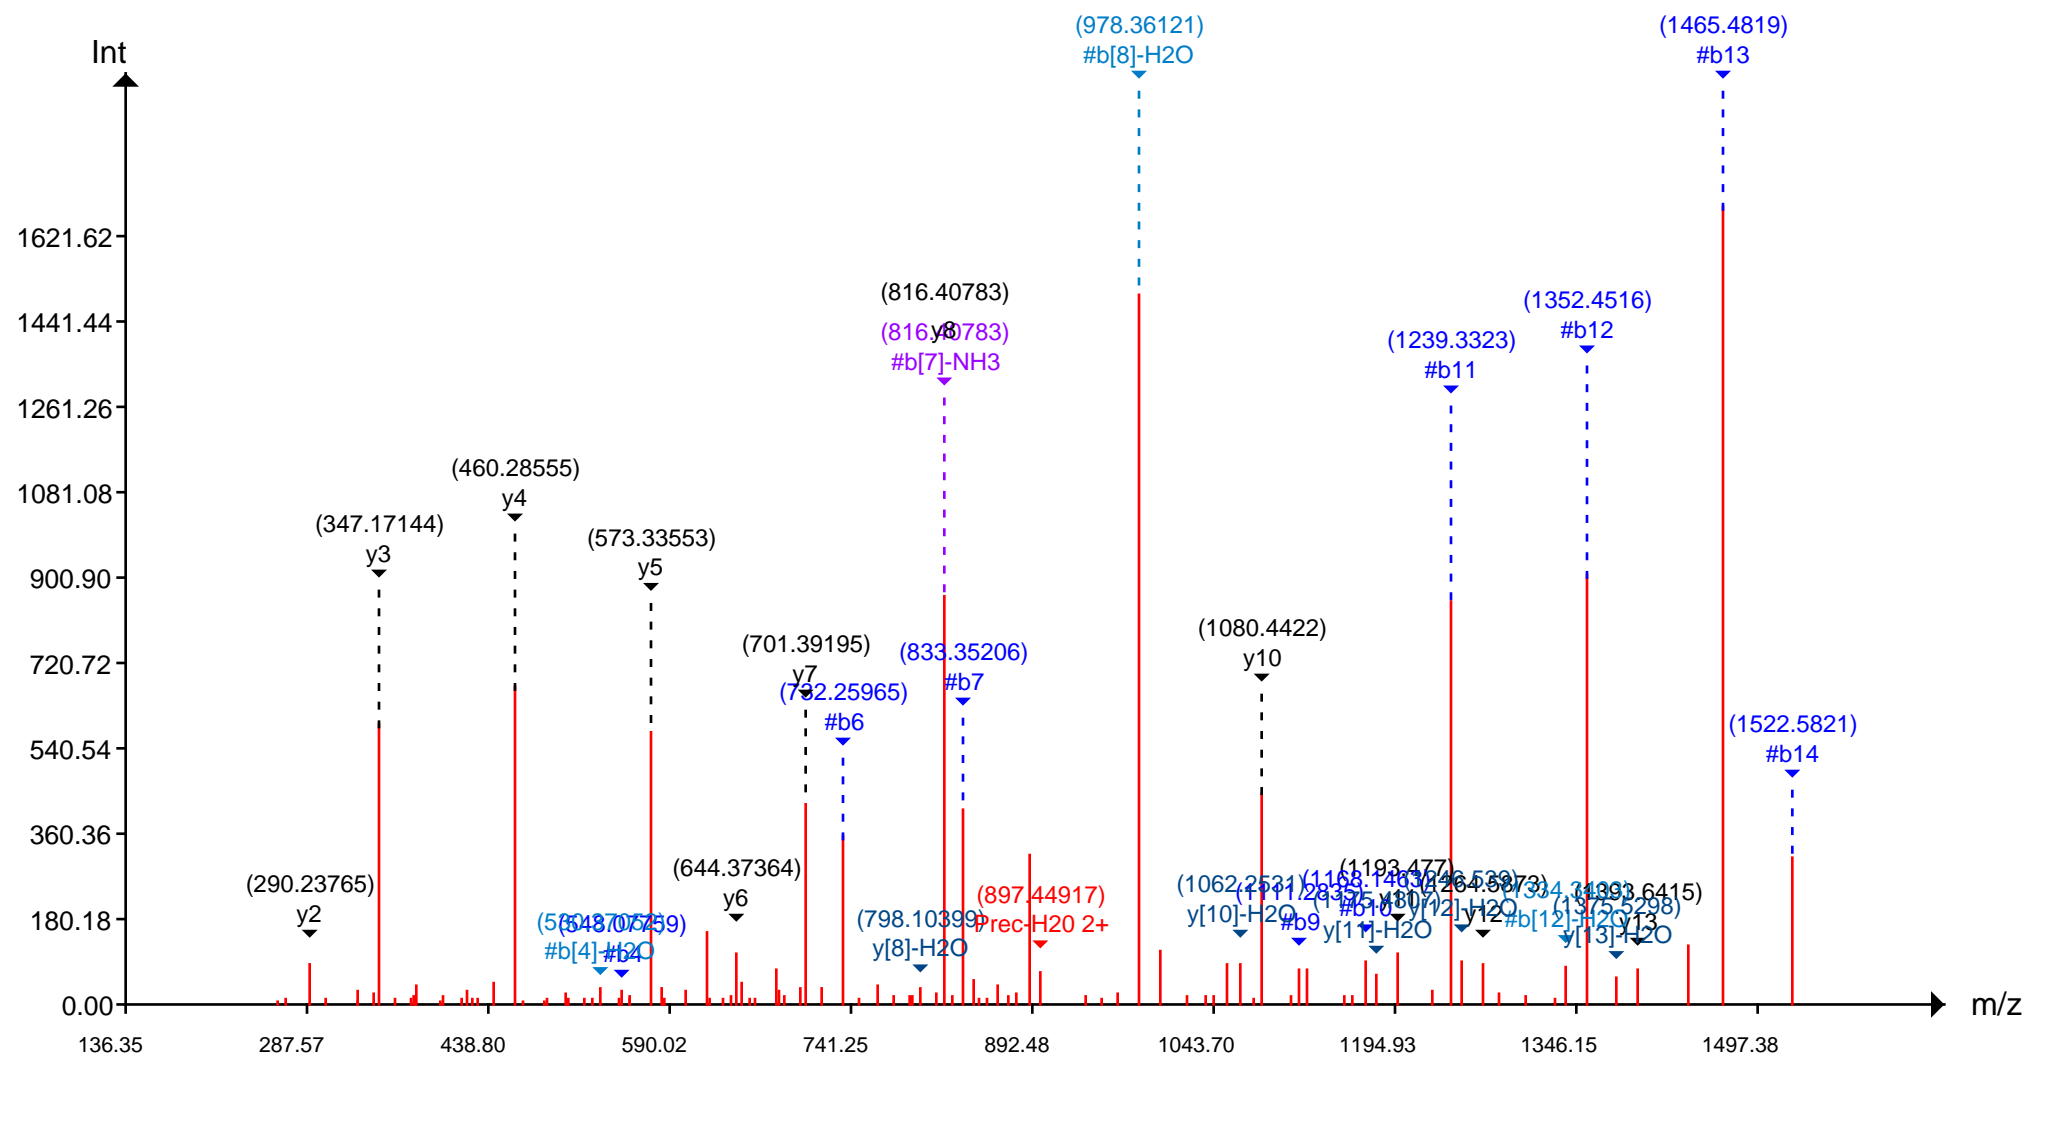

| Info                     |                                    |                           |         |
|--------------------------|------------------------------------|---------------------------|---------|
| <b>Modified Sequence</b> | AcD3-SLK<AcD3K*>EALTYDGALLGDR-COOH | <b>Ion score</b>          | 86.58   |
| <b>Protein</b>           | Q15056                             | <b>Confidence level</b>   | 99.00%  |
| <b>Precursor m/z</b>     | 906.48705                          | <b>Identity Threshold</b> | 48.88   |
| <b>Charge</b>            | 2+                                 | <b>Mass error</b>         | 0.00122 |



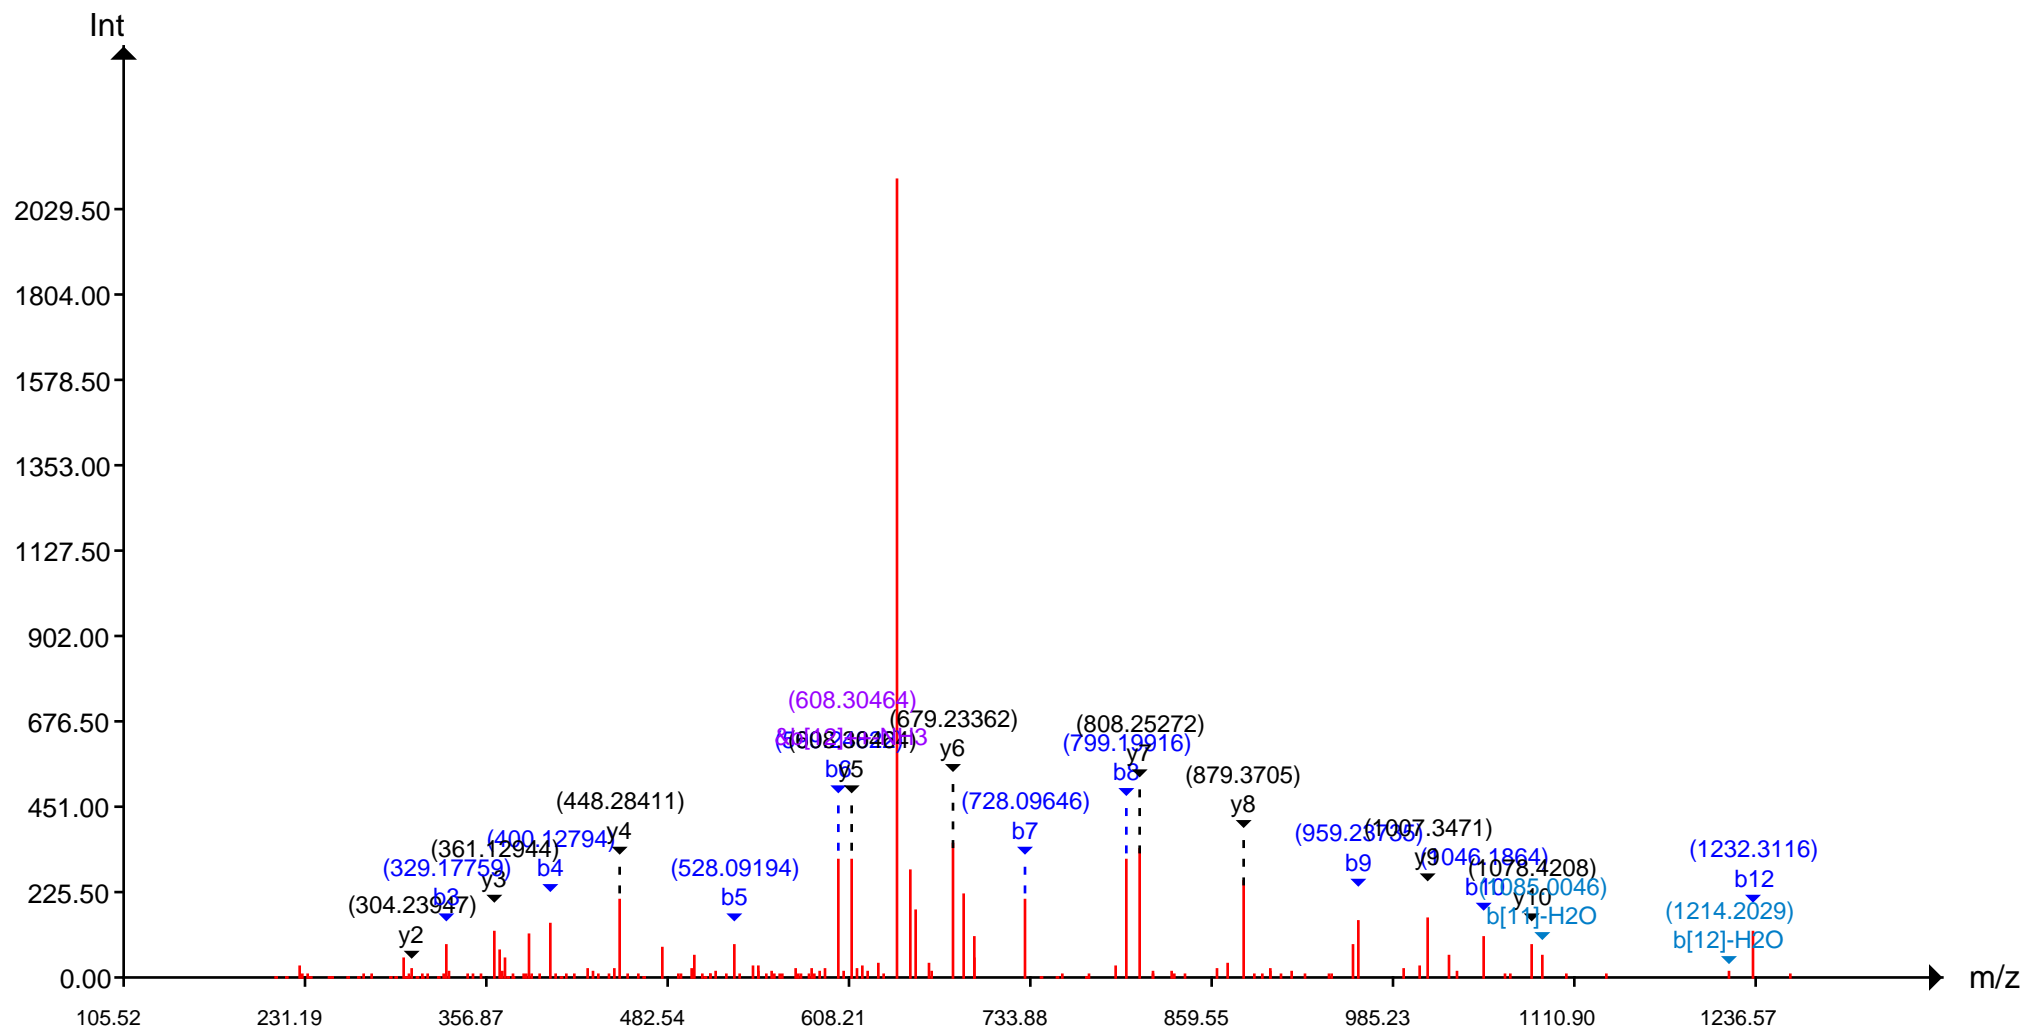

## Info

**Modified Sequence** AcD3-GPEAQAEAC<Cmm\*>SGER-COOH

**Ion score** 64.47

**Protein** Q9NX24

**Confidence level** 99.00%

**Precursor m/z** 703.80601

**Identity Threshold** 43.21

**Charge** 2+

**Mass error** 3.61E-4

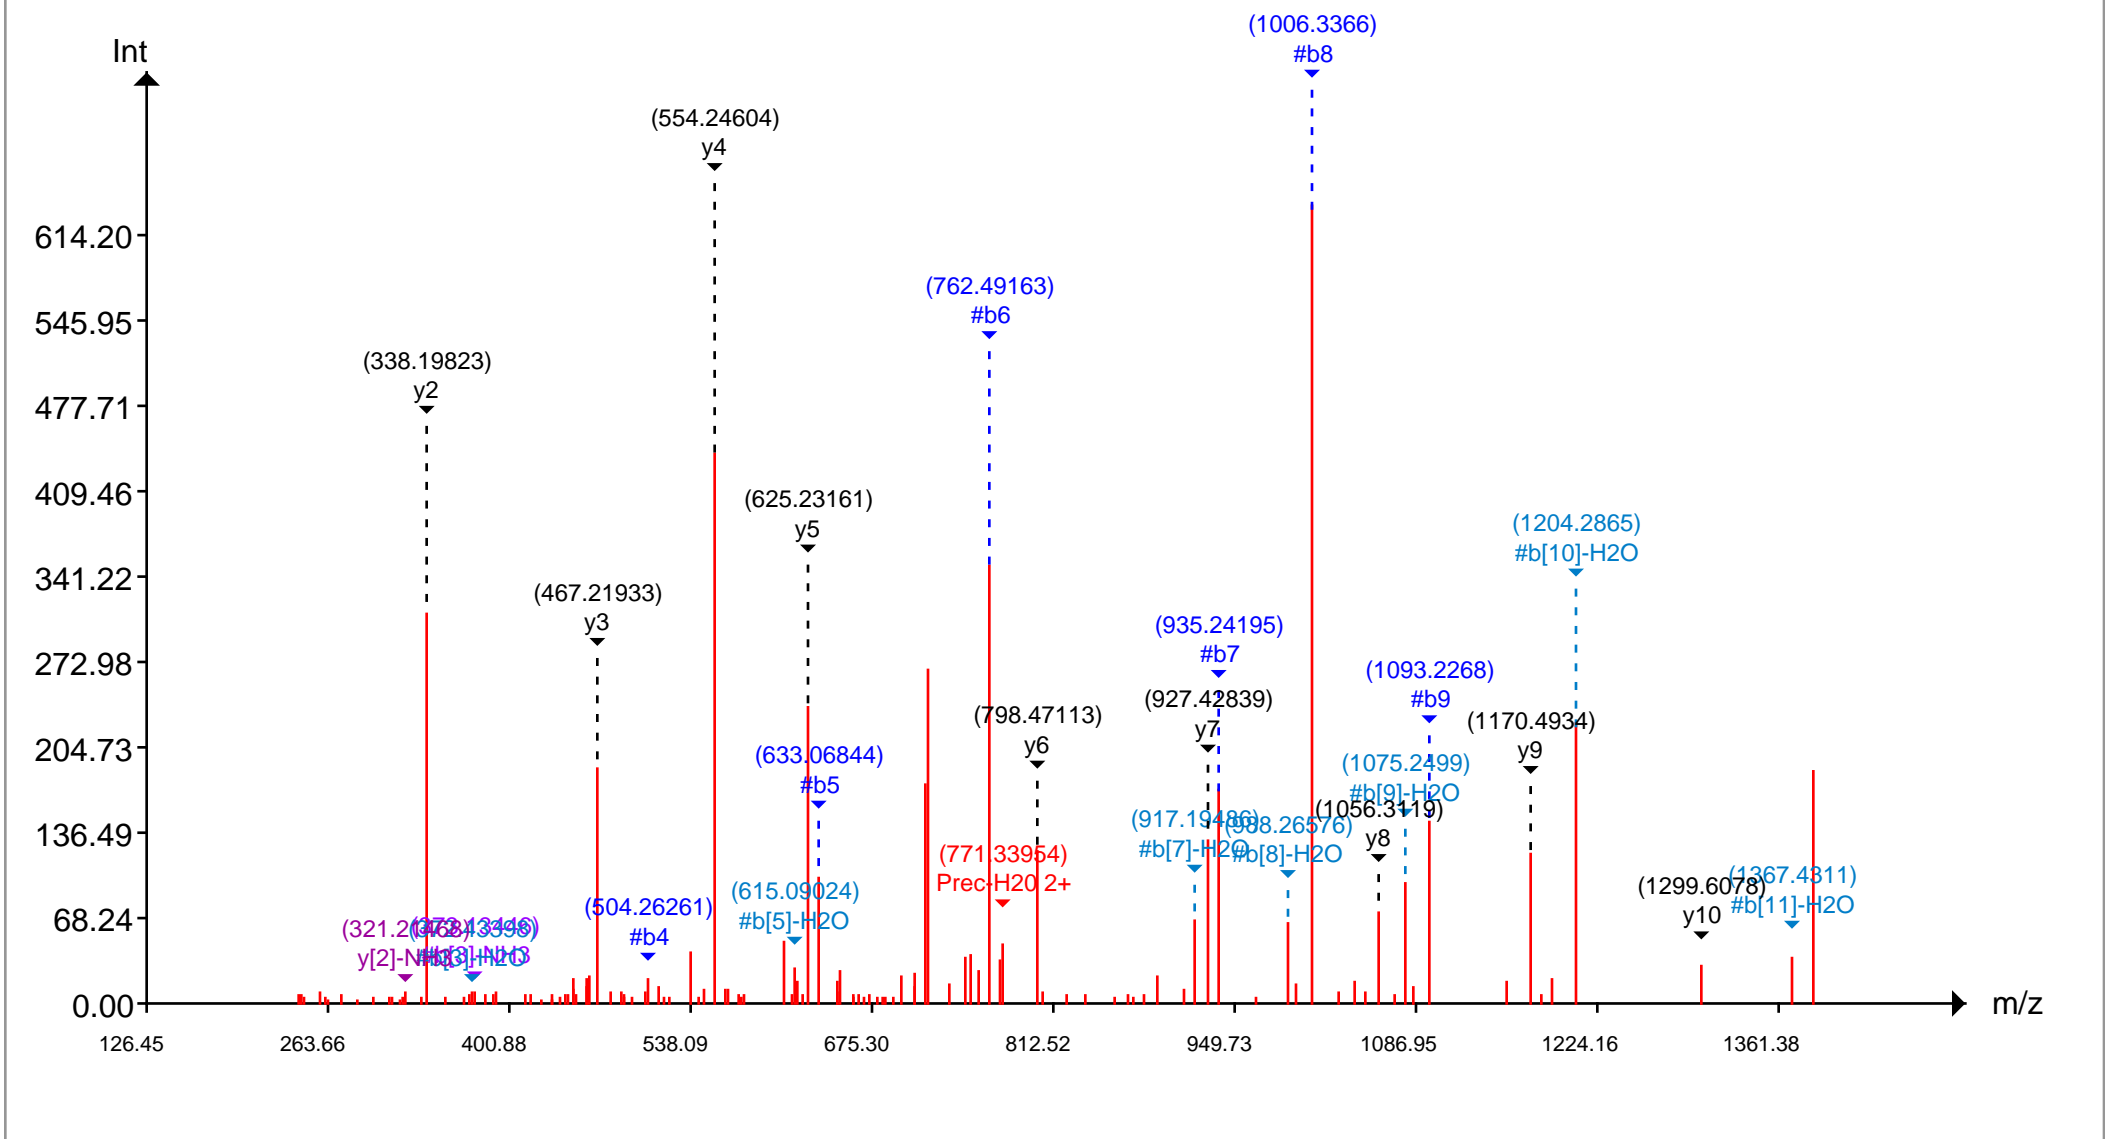

## Info

**Modified Sequence** AcD3-SQENEEK<AcD3K\*>ASEYR-COOH

**Ion score** 68.89

**Protein** O94782

**Confidence level** 99.00%

**Precursor m/z** 780.35824

**Identity Threshold** 45.66

**Charge** 2+

**Mass error** 1.76E-4

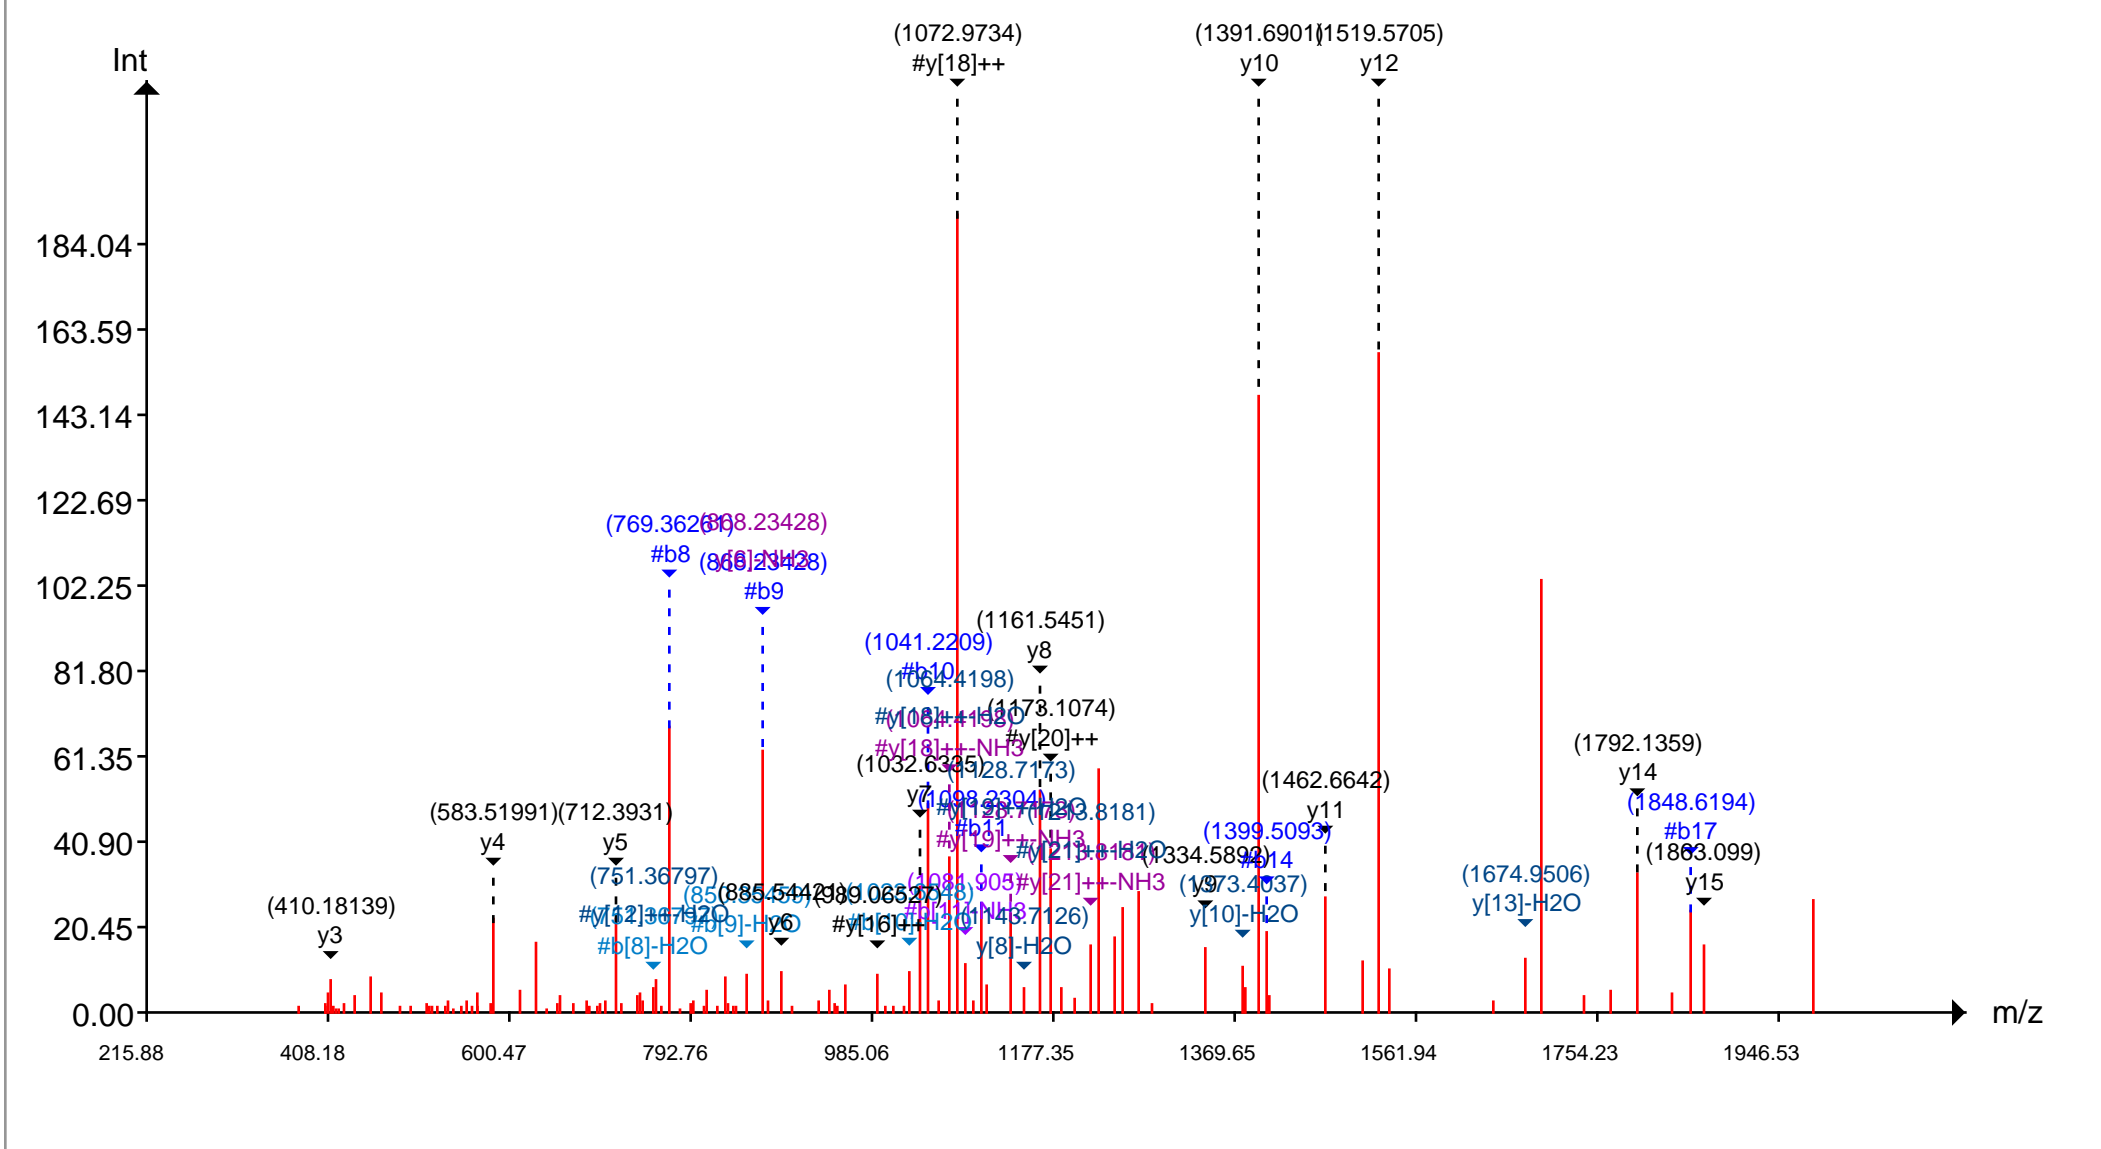

| Info           |                                                                             |                    |      |
|----------------|-----------------------------------------------------------------------------|--------------------|------|
| Modified Se... | AcD3-AVAEPANAVK<AcD3K*>GAGK<AcD3K*>EM<Mox*>K<AcD3K*>EK<AcD3K*>TQR<C13>-COOH | Ion score          | 62.2 |
| ...            | Q9HCF4                                                                      | Confidence level   | 99.0 |
| Precurs...     | 1280.7044                                                                   | Identity Threshold | 47.2 |
| ...            | 2+                                                                          | Mass error         | 0.00 |

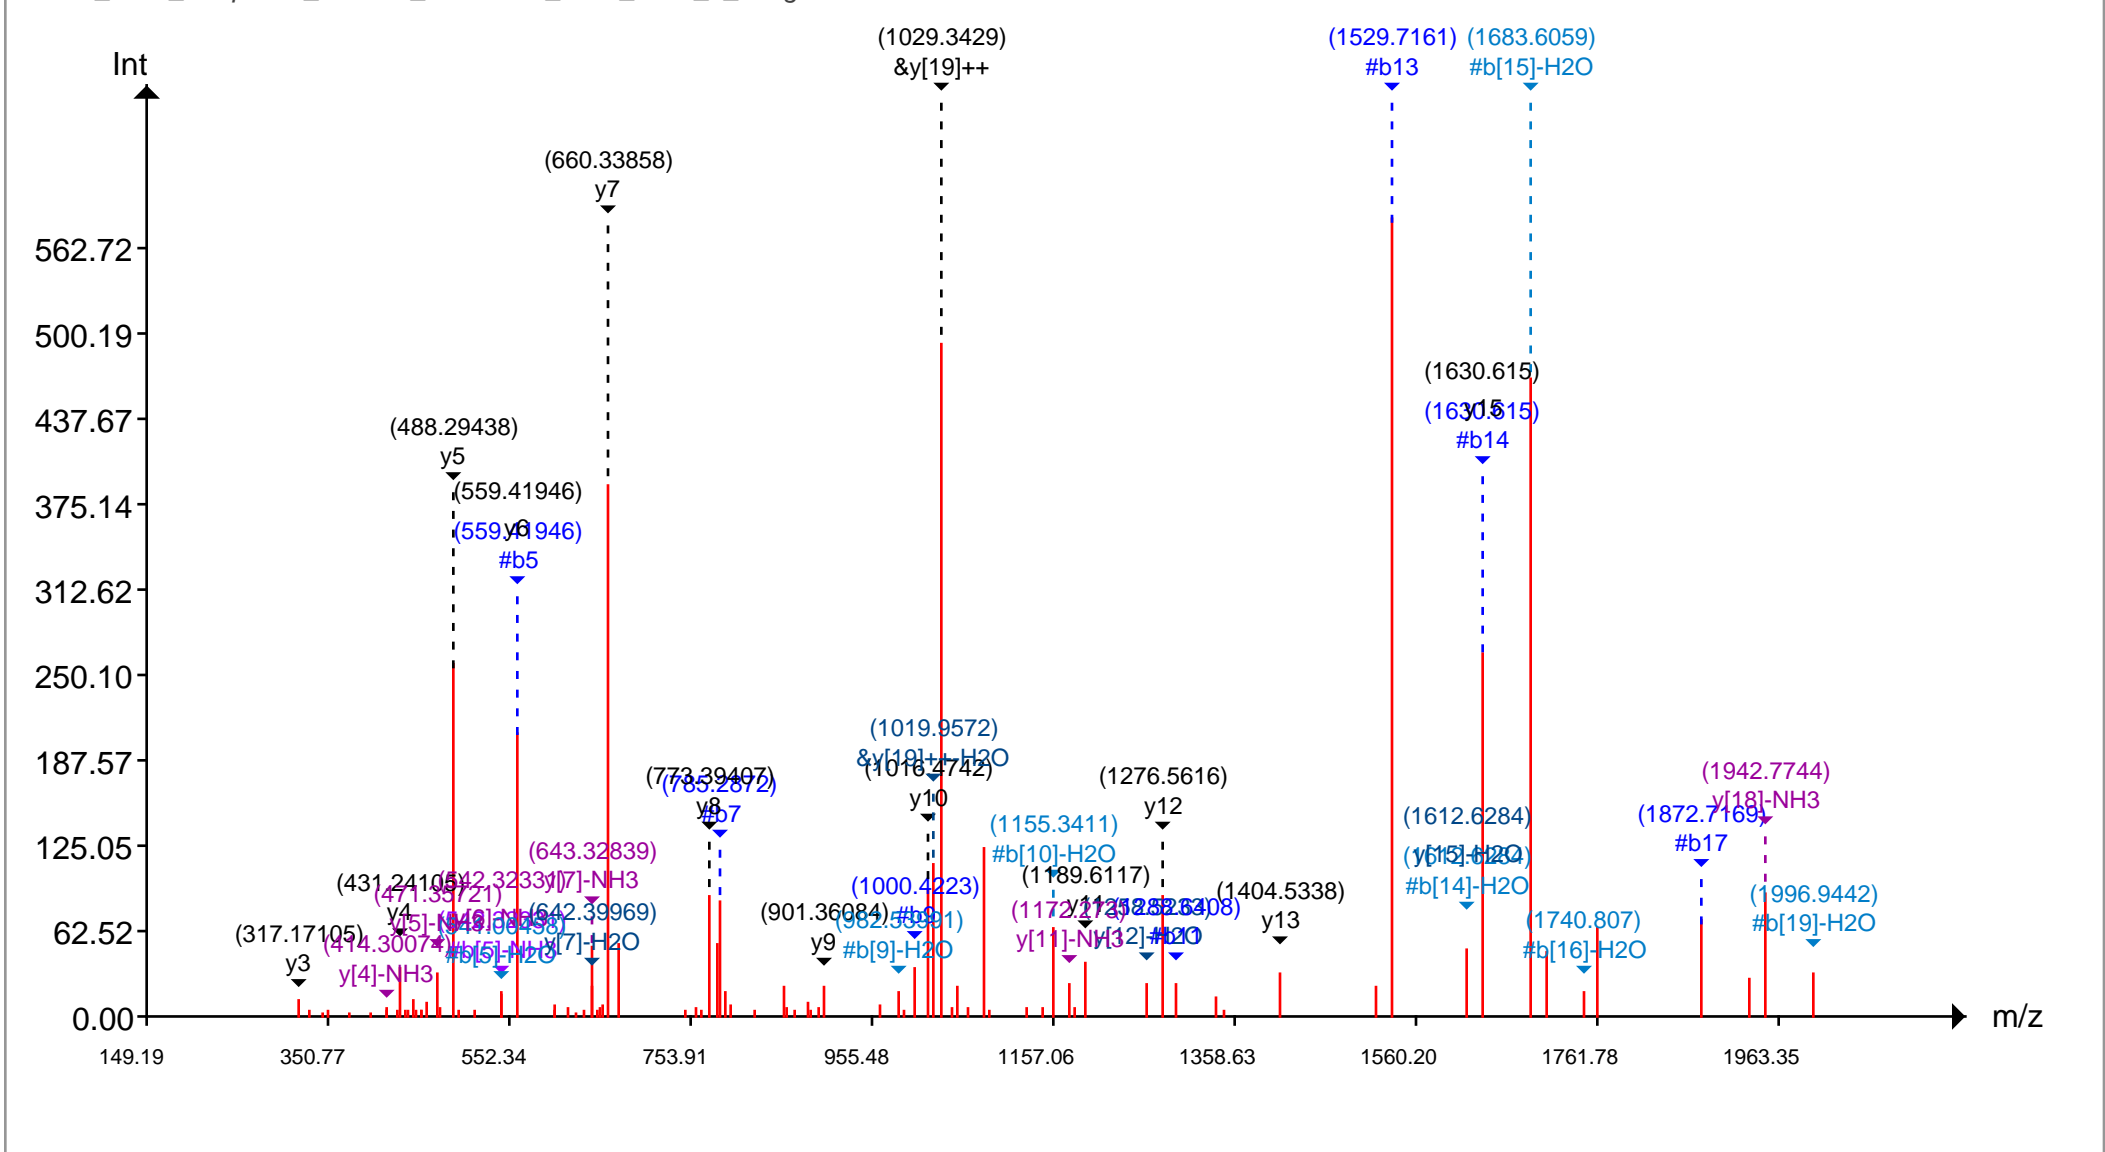

| Info                     |                                                |                           |           |
|--------------------------|------------------------------------------------|---------------------------|-----------|
| <b>Modified Sequence</b> | AcD3-SPGK<AcD3K*>VLLQSK<AcD3K*>DQITAGNAAR-COOH | <b>Ion score</b>          | 103.94    |
| <b>Protein</b>           | P22234                                         | <b>Confidence level</b>   | 99.00%    |
| <b>Precursor m/z</b>     | 1095.1148                                      | <b>Identity Threshold</b> | 46.92     |
| <b>Charge</b>            | 2+                                             | <b>Mass error</b>         | -0.001123 |

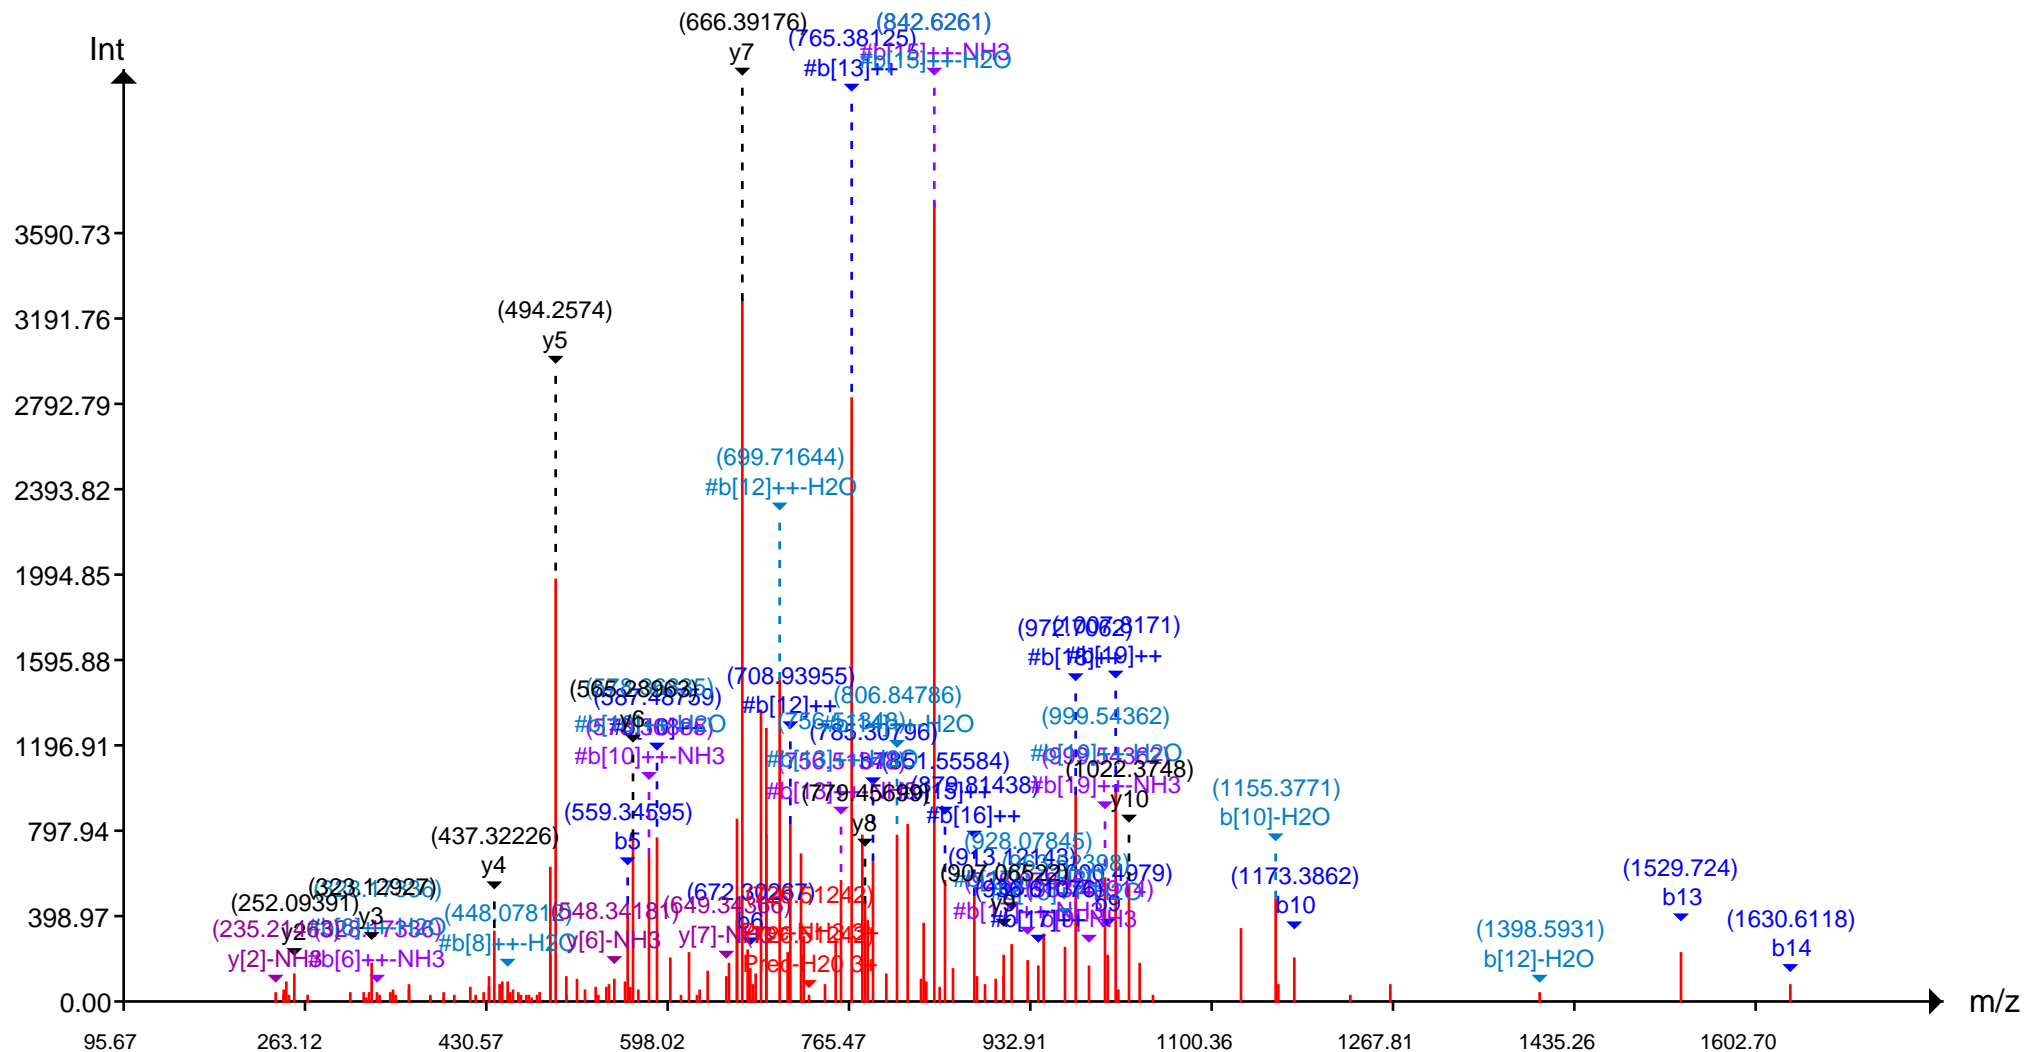

## Info

|                          |                                                     |                           |          |
|--------------------------|-----------------------------------------------------|---------------------------|----------|
| <b>Modified Sequence</b> | AcD3-SPGK<AcD3K*>VLLQSK<AcD3K*>DQITAGNAAR<C13>-COOH | <b>Ion score</b>          | 53.23    |
| <b>Protein</b>           | P22234                                              | <b>Confidence level</b>   | 99.00%   |
| <b>Precursor m/z</b>     | 732.41921                                           | <b>Identity Threshold</b> | 45.90    |
| <b>Charge</b>            | 3+                                                  | <b>Mass error</b>         | -5.11E-4 |

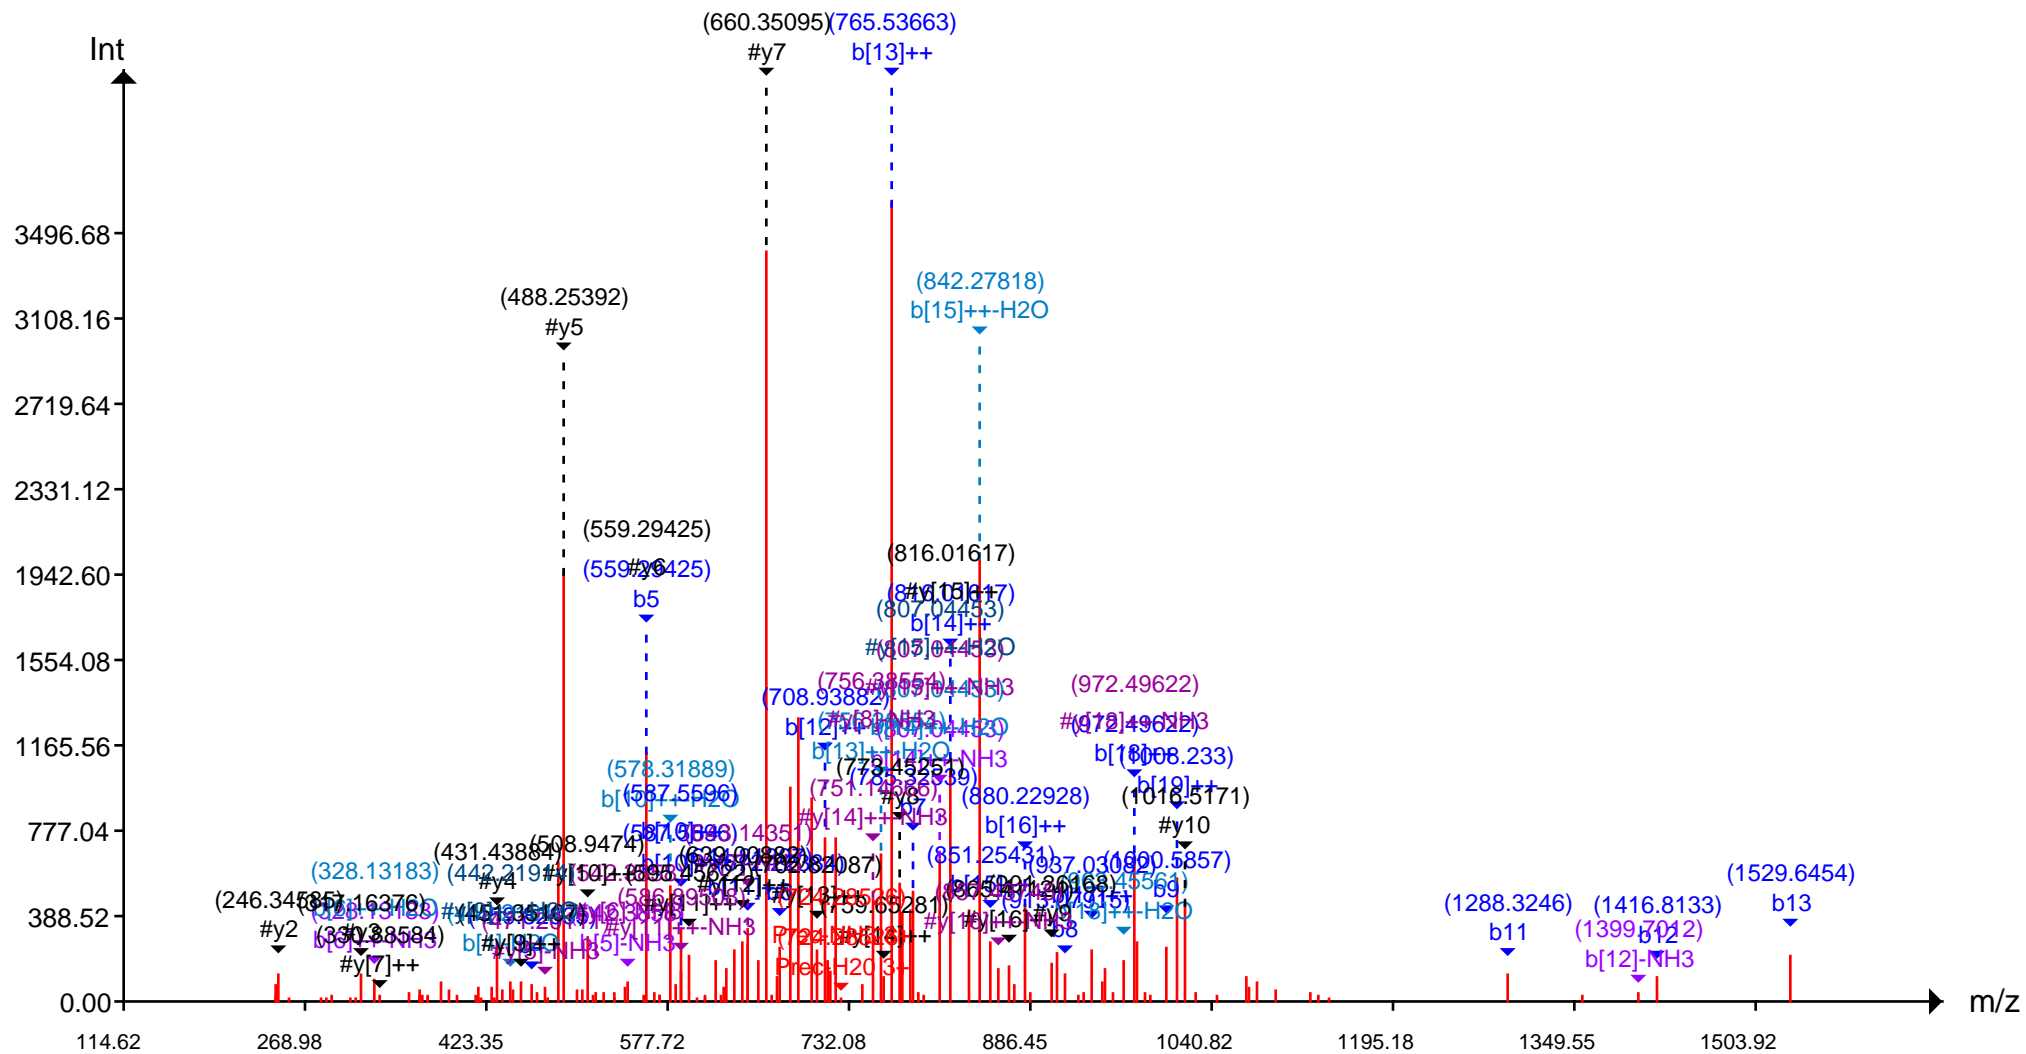

## Info

**Modified Sequence** AcD3-SPGK<AcD3K\*>VLLQSK<AcD3K\*>DQITAGNAAR-COOH

**Ion score** 63.35

**Protein** P22234

**Confidence level** 99.00%

**Precursor m/z** 730.4126

**Identity Threshold** 46.89

**Charge** 3+

**Mass error** -1.99E-4

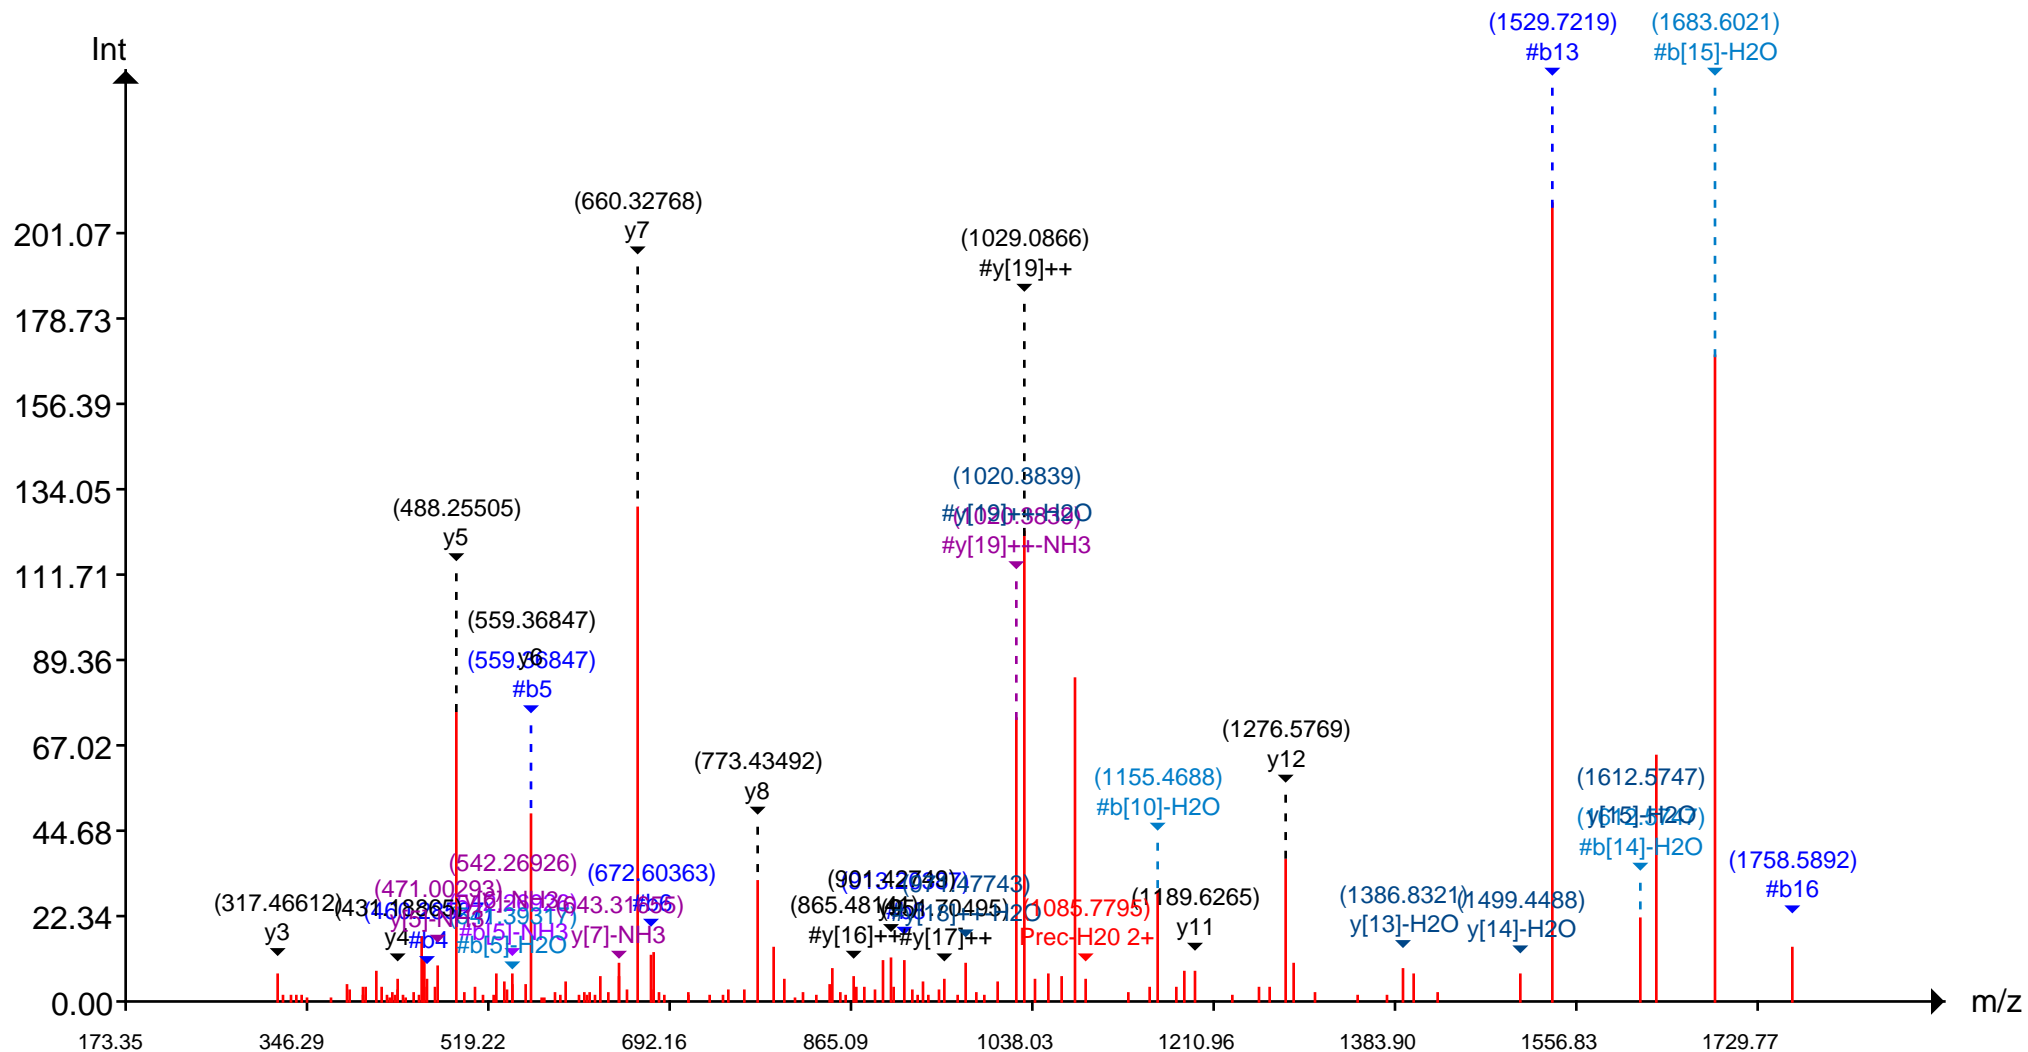

## Info

|                          |                                                |                           |         |
|--------------------------|------------------------------------------------|---------------------------|---------|
| <b>Modified Sequence</b> | AcD3-SPGK<AcD3K*>VLLQSK<AcD3K*>DQITAGNAAR-COOH | <b>Ion score</b>          | 50.97   |
| <b>Protein</b>           | P22234                                         | <b>Confidence level</b>   | 99.00%  |
| <b>Precursor m/z</b>     | 1095.1158                                      | <b>Identity Threshold</b> | 46.81   |
| <b>Charge</b>            | 2+                                             | <b>Mass error</b>         | 8.77E-4 |

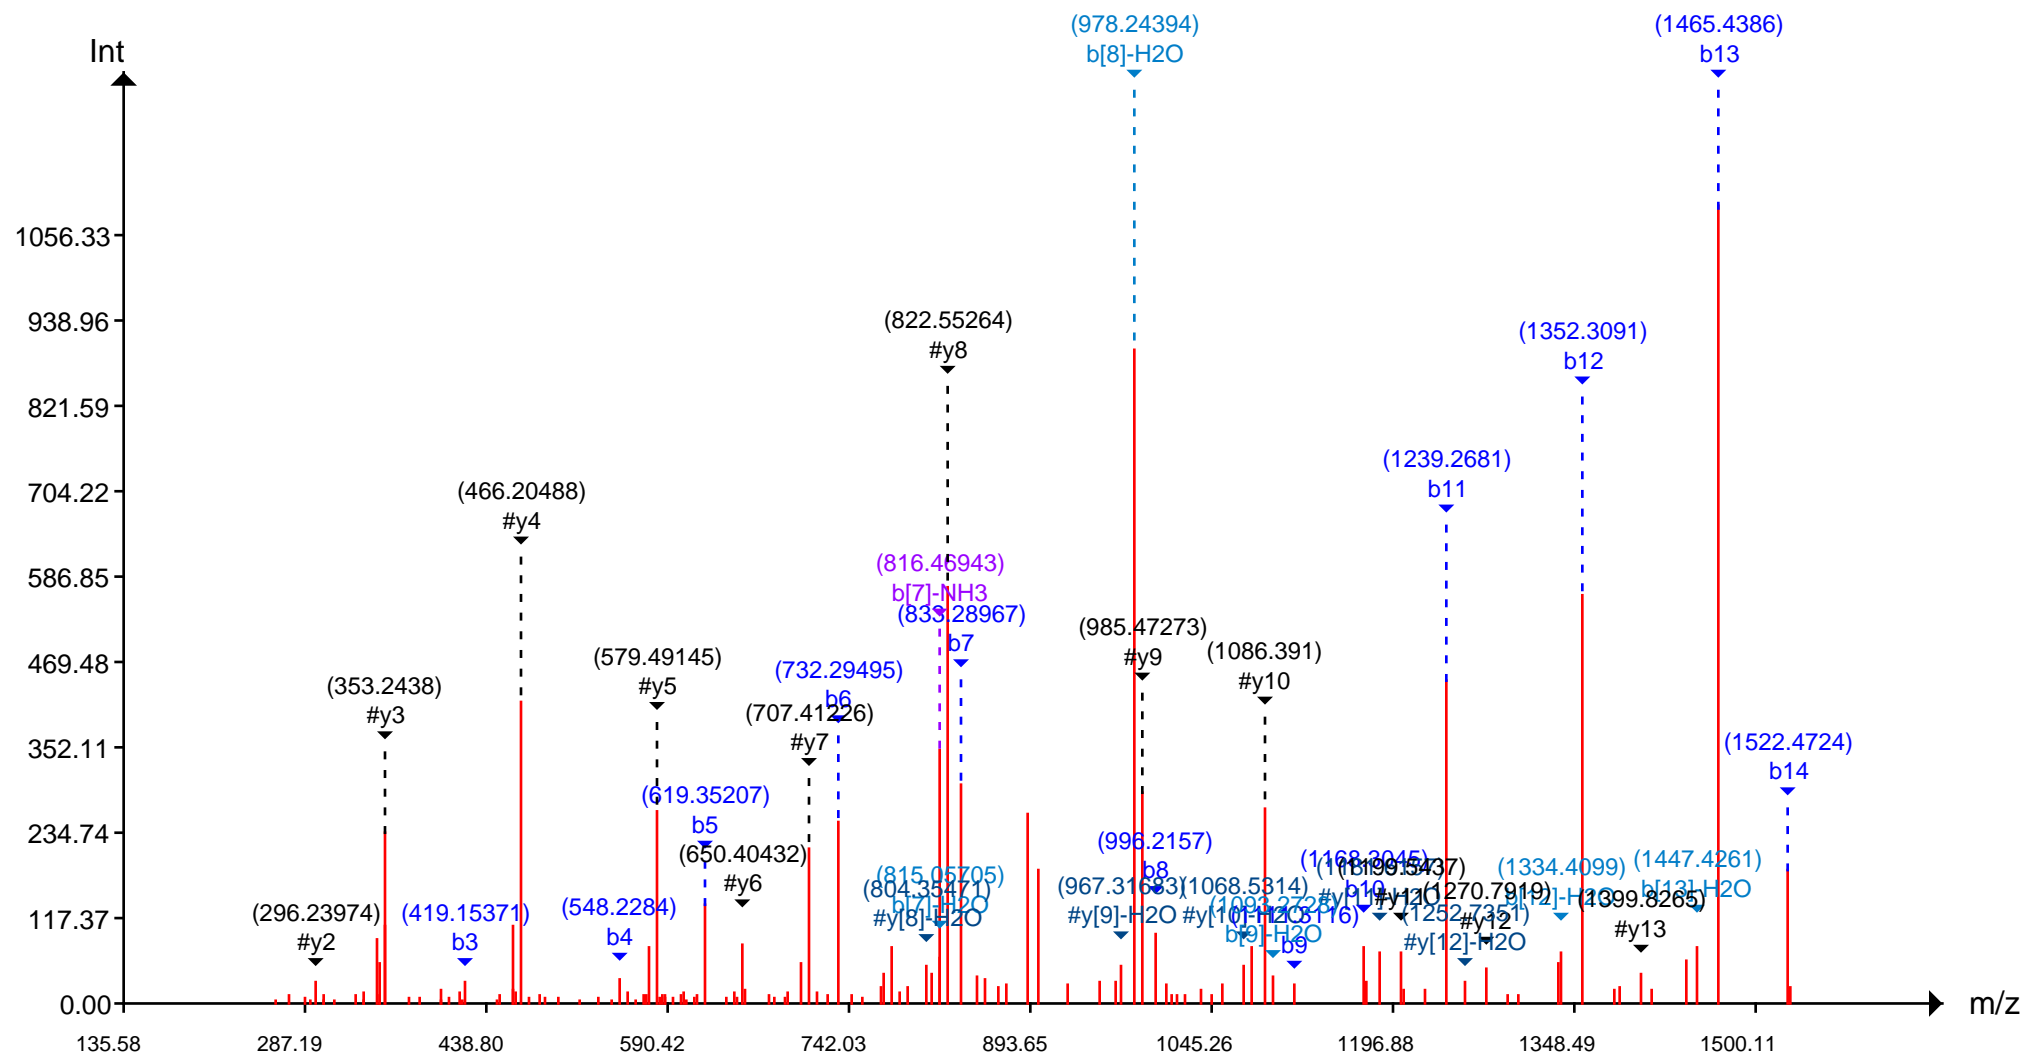

## Info

|                          |                                         |                           |          |
|--------------------------|-----------------------------------------|---------------------------|----------|
| <b>Modified Sequence</b> | AcD3-SLK<AcD3K*>EALTYDGALLGDR<C13>-COOH | <b>Ion score</b>          | 81.41    |
| <b>Protein</b>           | Q15056                                  | <b>Confidence level</b>   | 99.00%   |
| <b>Precursor m/z</b>     | 909.49637                               | <b>Identity Threshold</b> | 48.54    |
| <b>Charge</b>            | 2+                                      | <b>Mass error</b>         | -2.82E-4 |



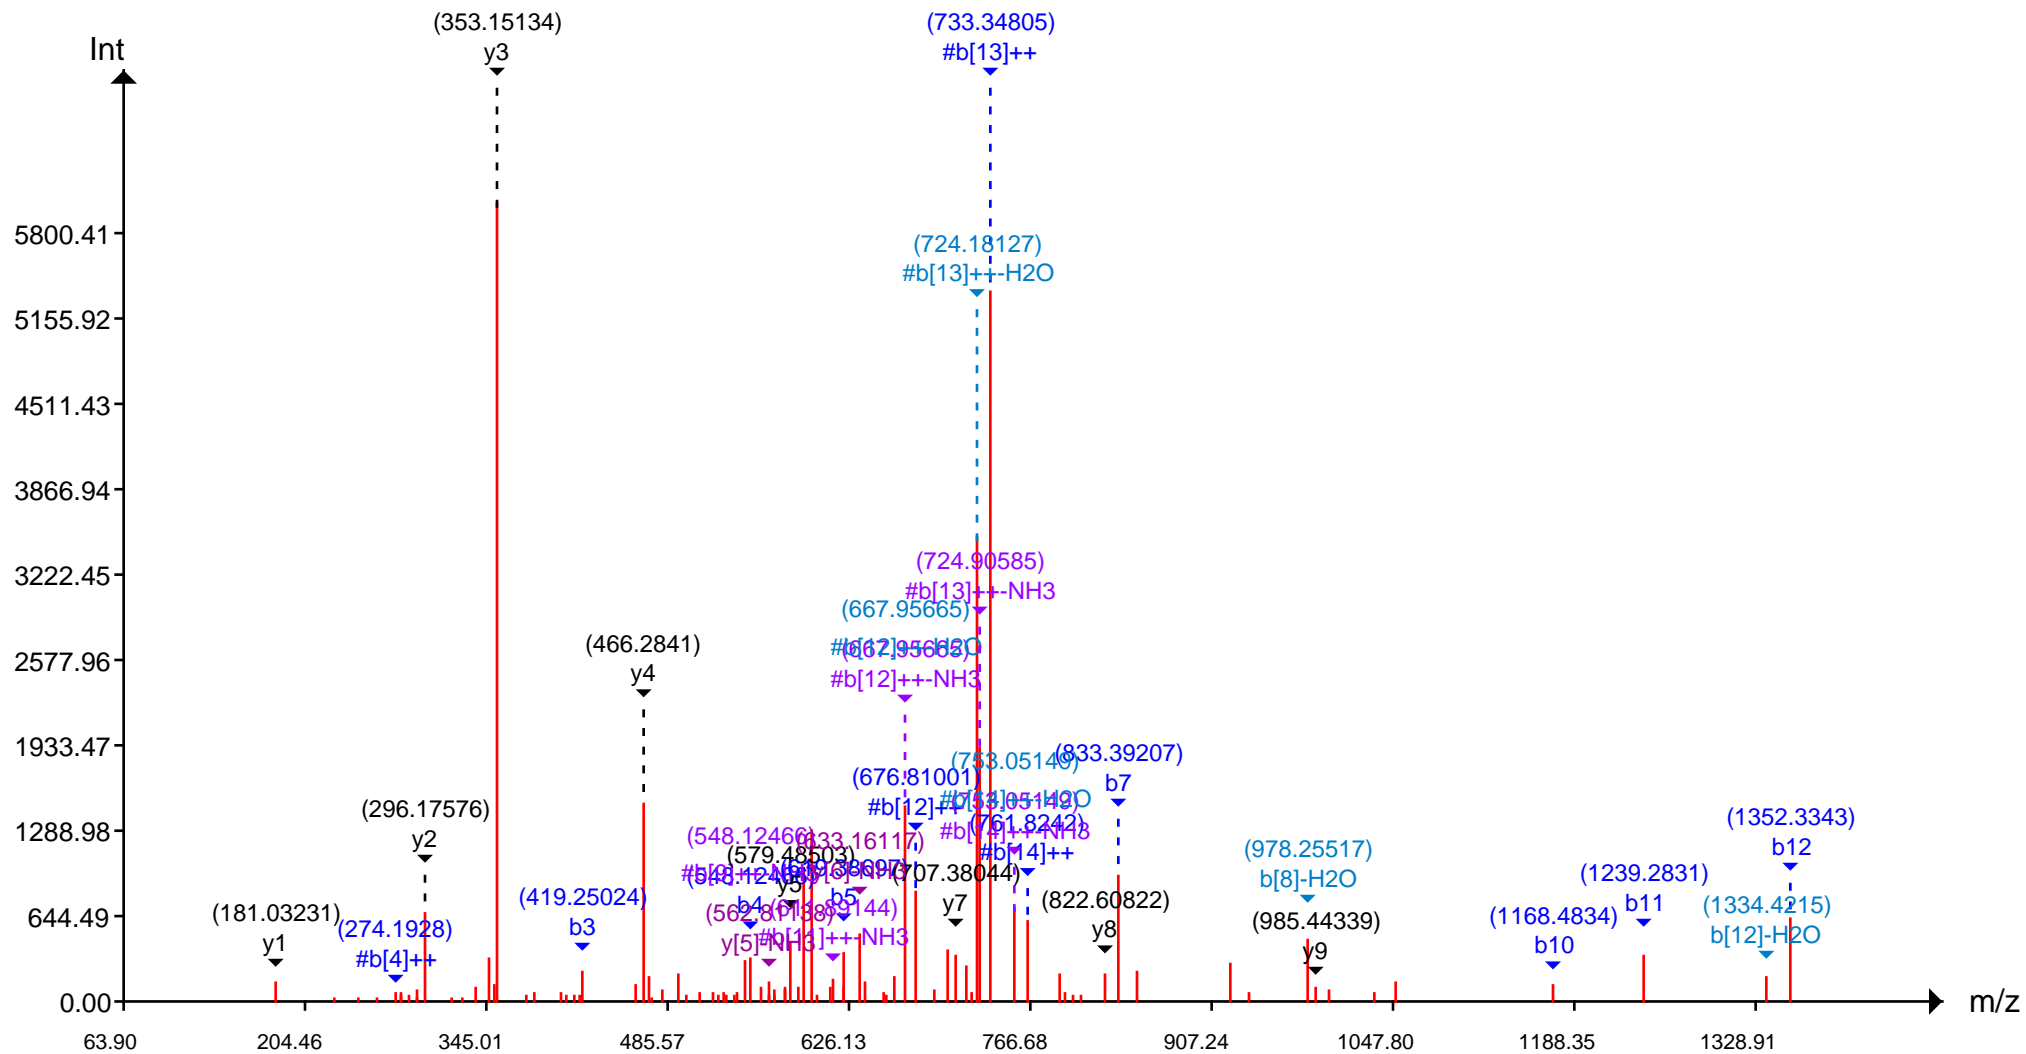

## Info

|                          |                                         |                           |         |
|--------------------------|-----------------------------------------|---------------------------|---------|
| <b>Modified Sequence</b> | AcD3-SLK<AcD3K*>EALTYDGALLGDR<C13>-COOH | <b>Ion score</b>          | 57.25   |
| <b>Protein</b>           | Q15056                                  | <b>Confidence level</b>   | 99.00%  |
| <b>Precursor m/z</b>     | 606.66694                               | <b>Identity Threshold</b> | 48.51   |
| <b>Charge</b>            | 3+                                      | <b>Mass error</b>         | 5.22E-4 |

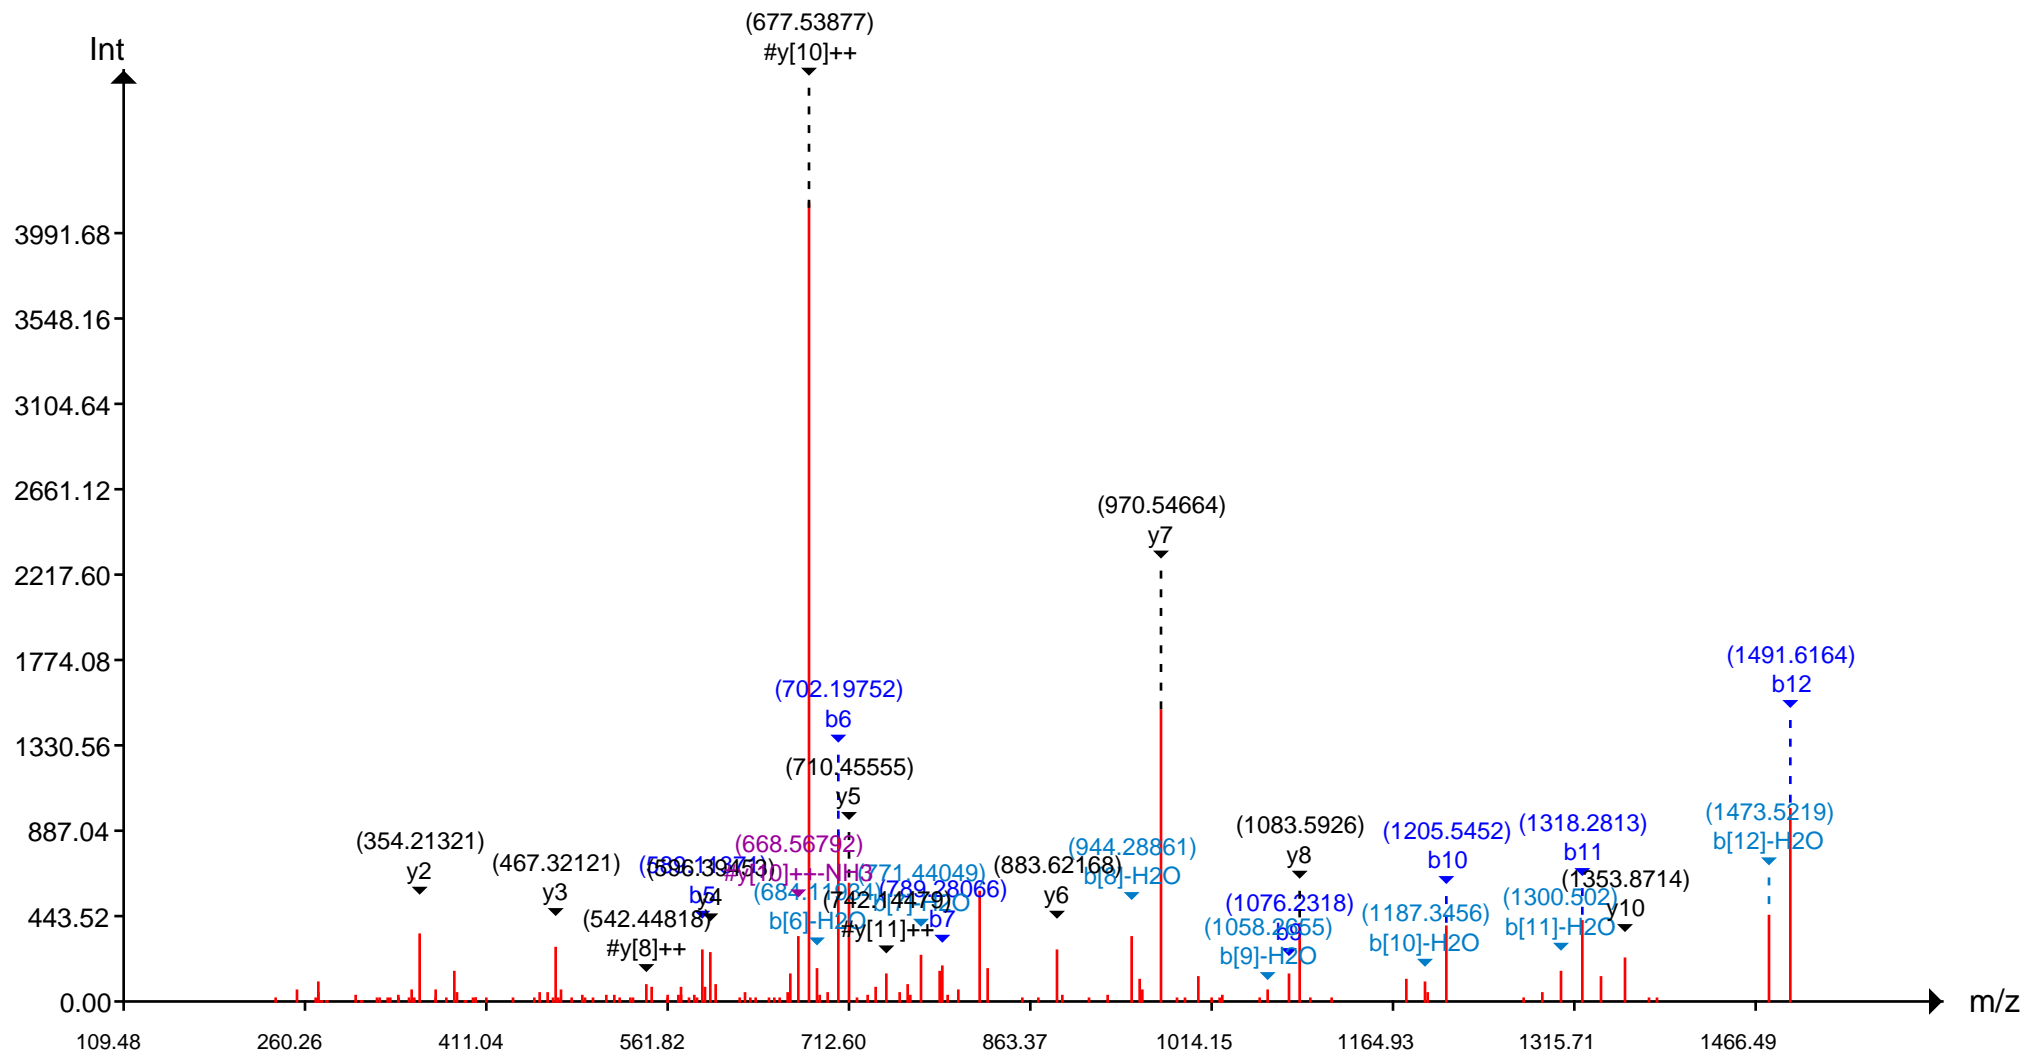

## Info

|                          |                                                      |                           |          |
|--------------------------|------------------------------------------------------|---------------------------|----------|
| <b>Modified Sequence</b> | AcD3-GSEPK<AcD3K*>LSK<AcD3K*>NELK<AcD3K*>R<C13>-COOH | <b>Ion score</b>          | 50.67    |
| <b>Protein</b>           | Q15046                                               | <b>Confidence level</b>   | 99.00%   |
| <b>Precursor m/z</b>     | 836.49218                                            | <b>Identity Threshold</b> | 45.41    |
| <b>Charge</b>            | 2+                                                   | <b>Mass error</b>         | 0.001027 |

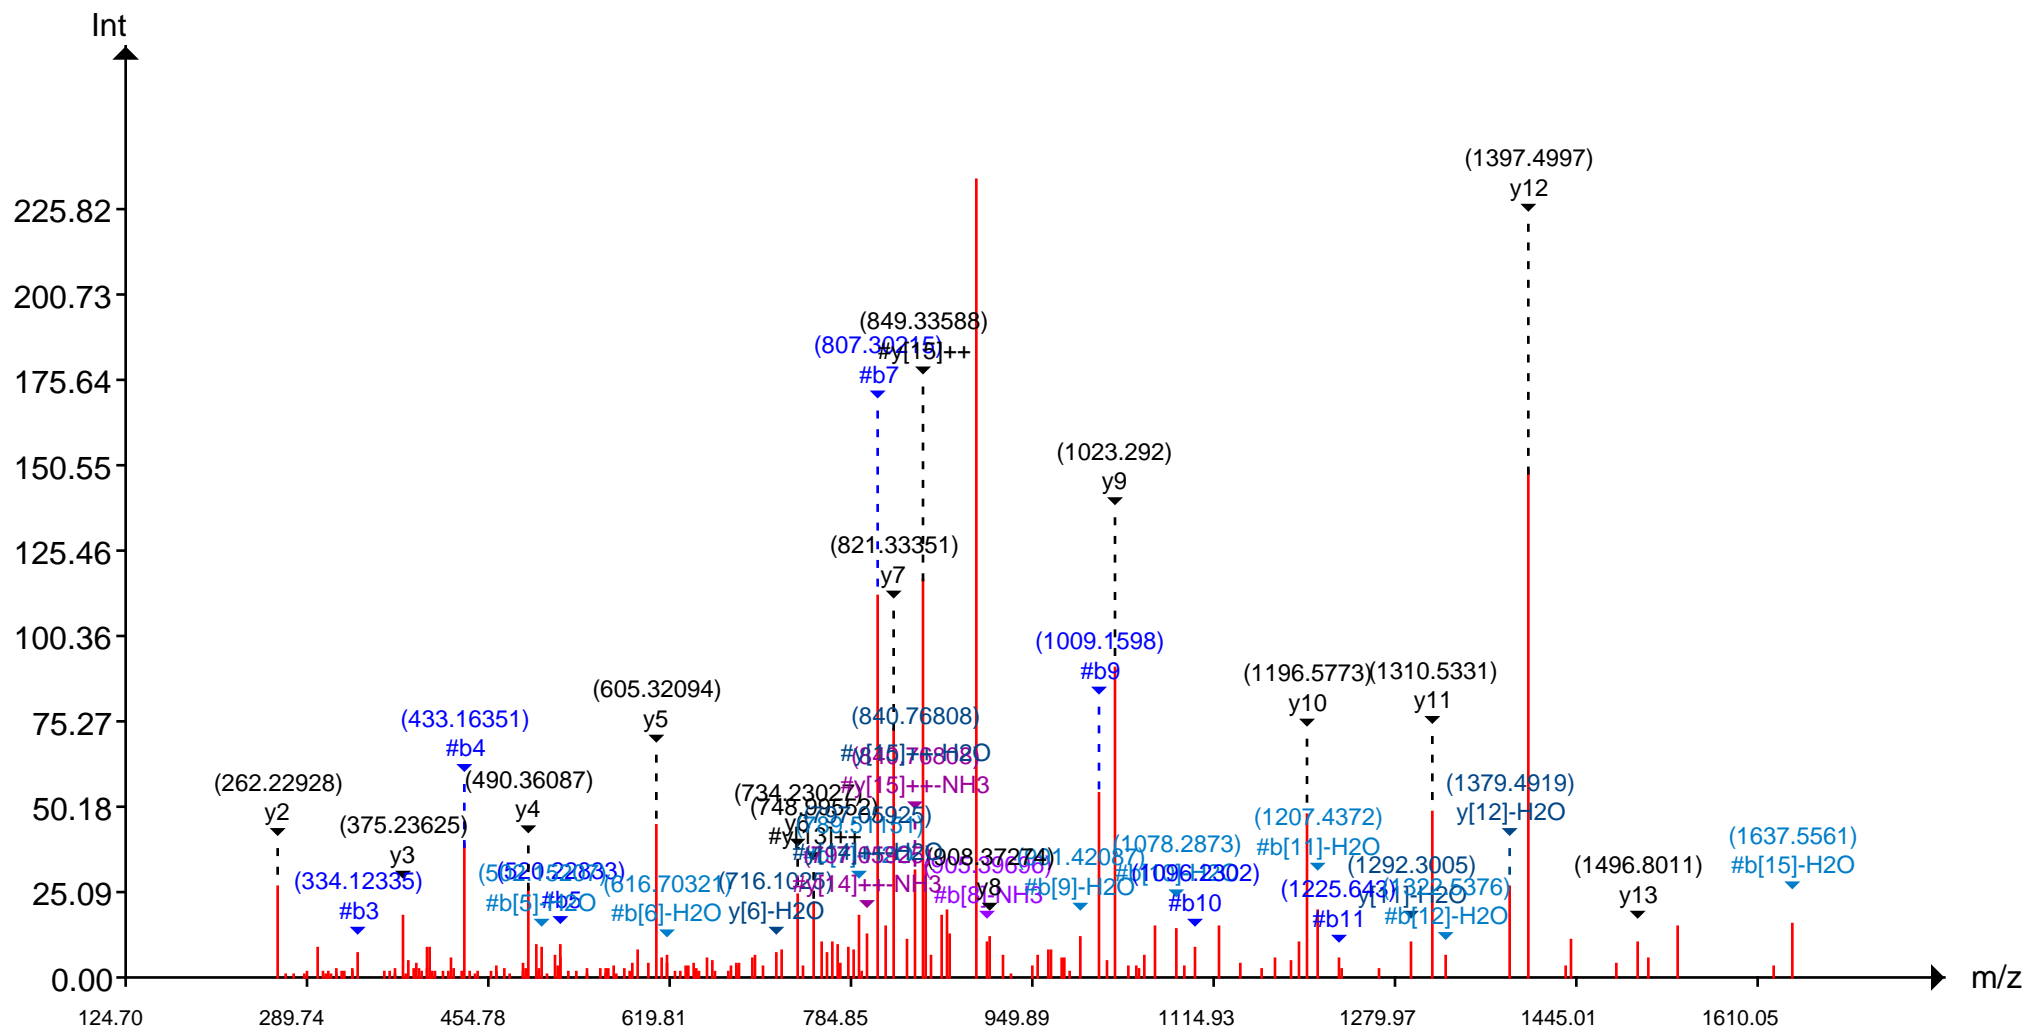

| Info                     |                                    |                           |          |
|--------------------------|------------------------------------|---------------------------|----------|
| <b>Modified Sequence</b> | AcD3-SSNVSNK<AcD3K*>DSSEDDISR-COOH | <b>Ion score</b>          | 82.92    |
| <b>Protein</b>           | Q5W0B1                             | <b>Confidence level</b>   | 99.00%   |
| <b>Precursor m/z</b>     | 915.41752                          | <b>Identity Threshold</b> | 45.57    |
| <b>Charge</b>            | 2+                                 | <b>Mass error</b>         | 0.001152 |

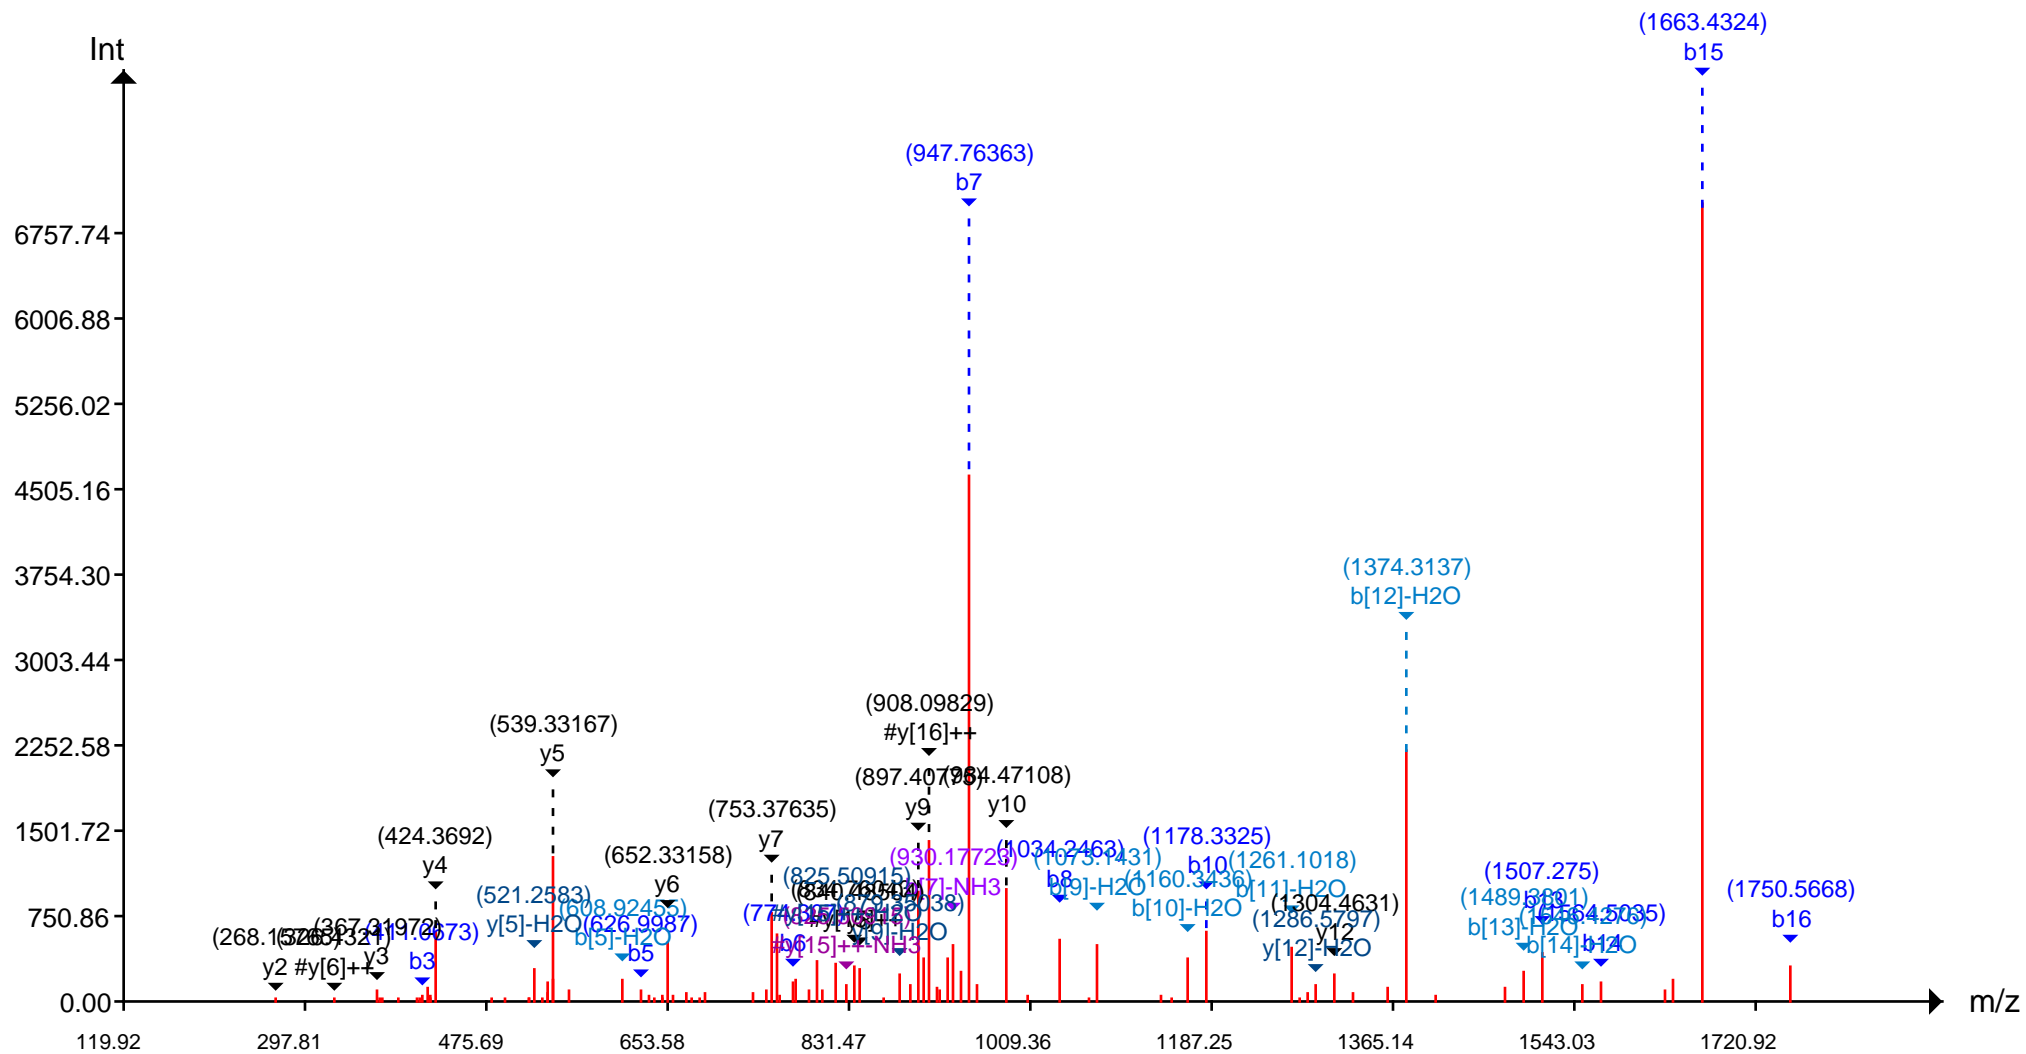

## Info

|                          |                                                      |                           |          |
|--------------------------|------------------------------------------------------|---------------------------|----------|
| <b>Modified Sequence</b> | AcD3-AFM<Mox*>SEM<Mox*>K<AcD3K*>SGSTLDGVSR<C13>-COOH | <b>Ion score</b>          | 69.66    |
| <b>Protein</b>           | Q9BWU0                                               | <b>Confidence level</b>   | 99.00%   |
| <b>Precursor m/z</b>     | 965.95911                                            | <b>Identity Threshold</b> | 47.25    |
| <b>Charge</b>            | 2+                                                   | <b>Mass error</b>         | 0.001034 |

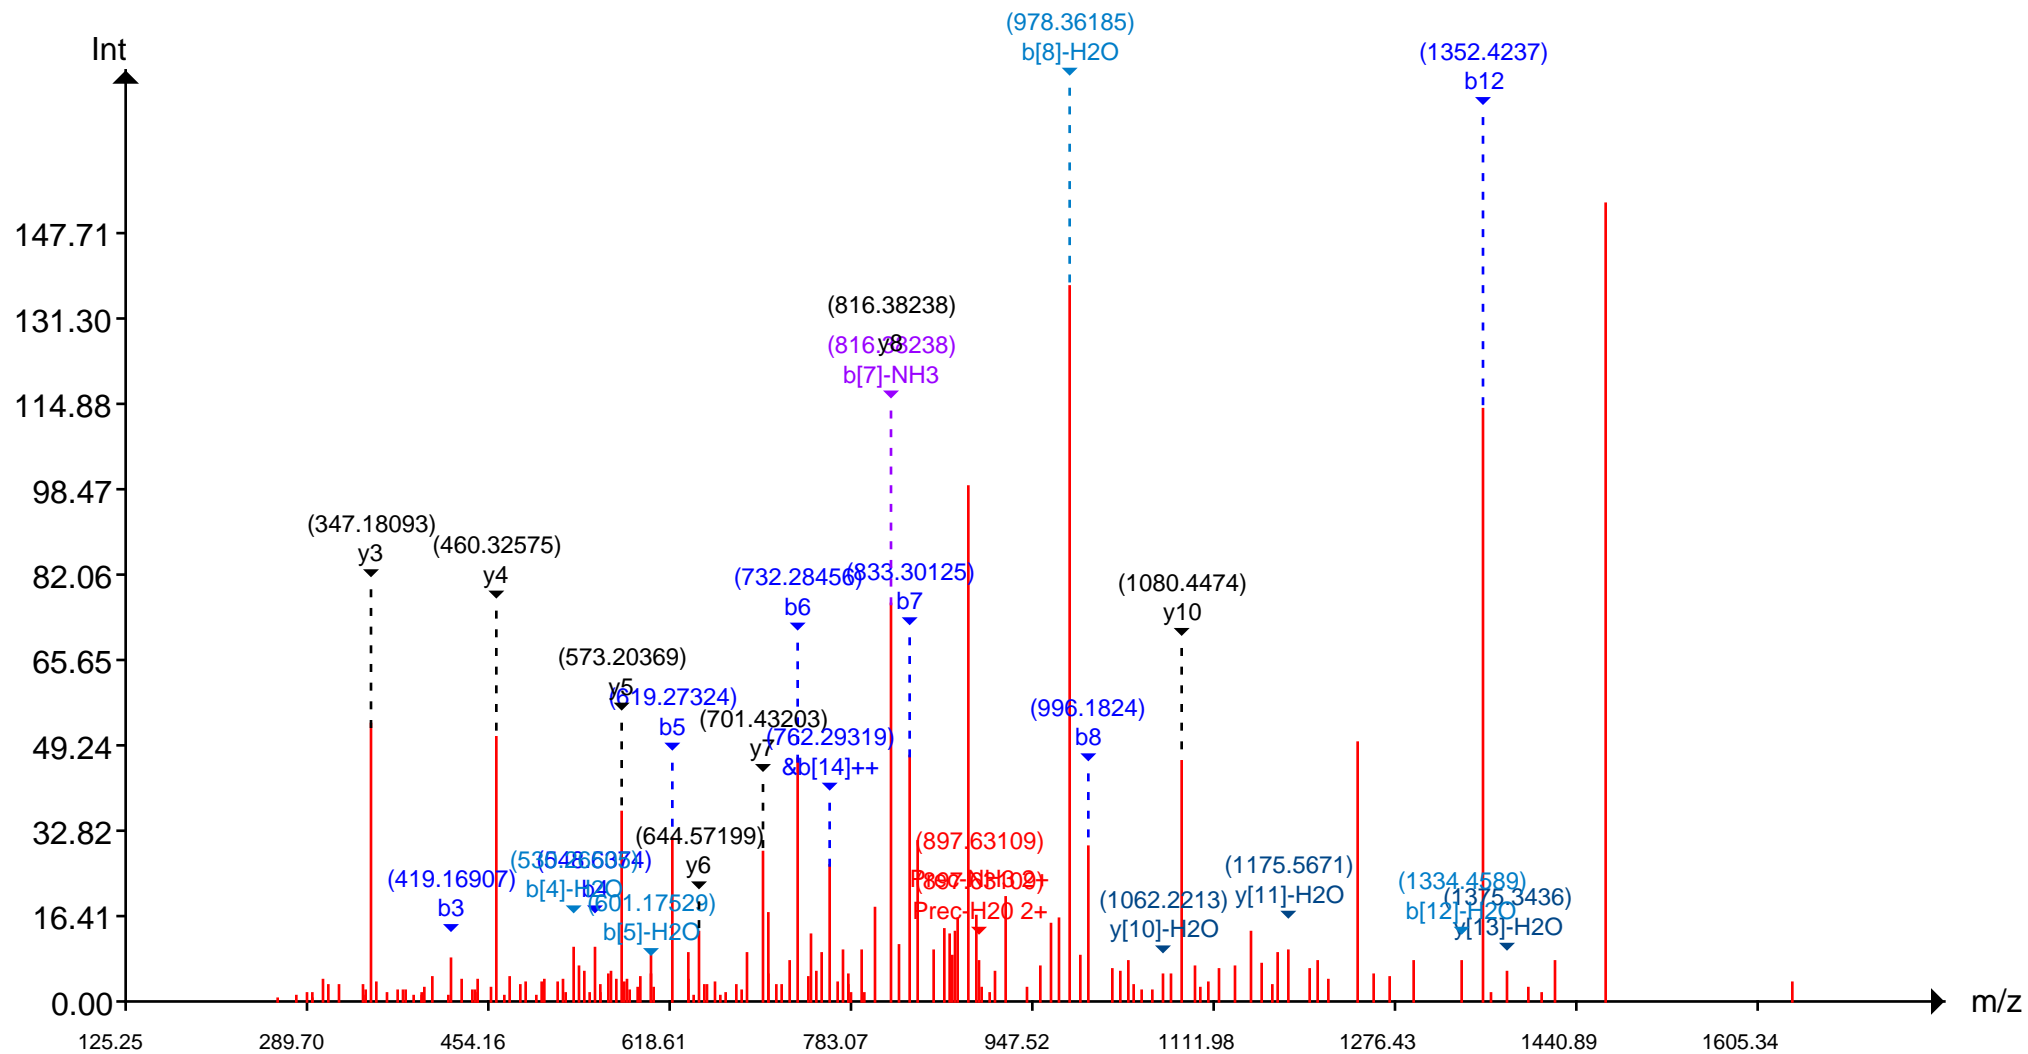

## Info

**Modified Sequence** AcD3-SLK<AcD3K\*>EALTYDGALLGDR-COOH

**Ion score** 51.53

**Protein** Q15056

**Confidence level** 99.00%

**Precursor m/z** 906.48719

**Identity Threshold** 48.91

**Charge** 2+

**Mass error** 0.0015

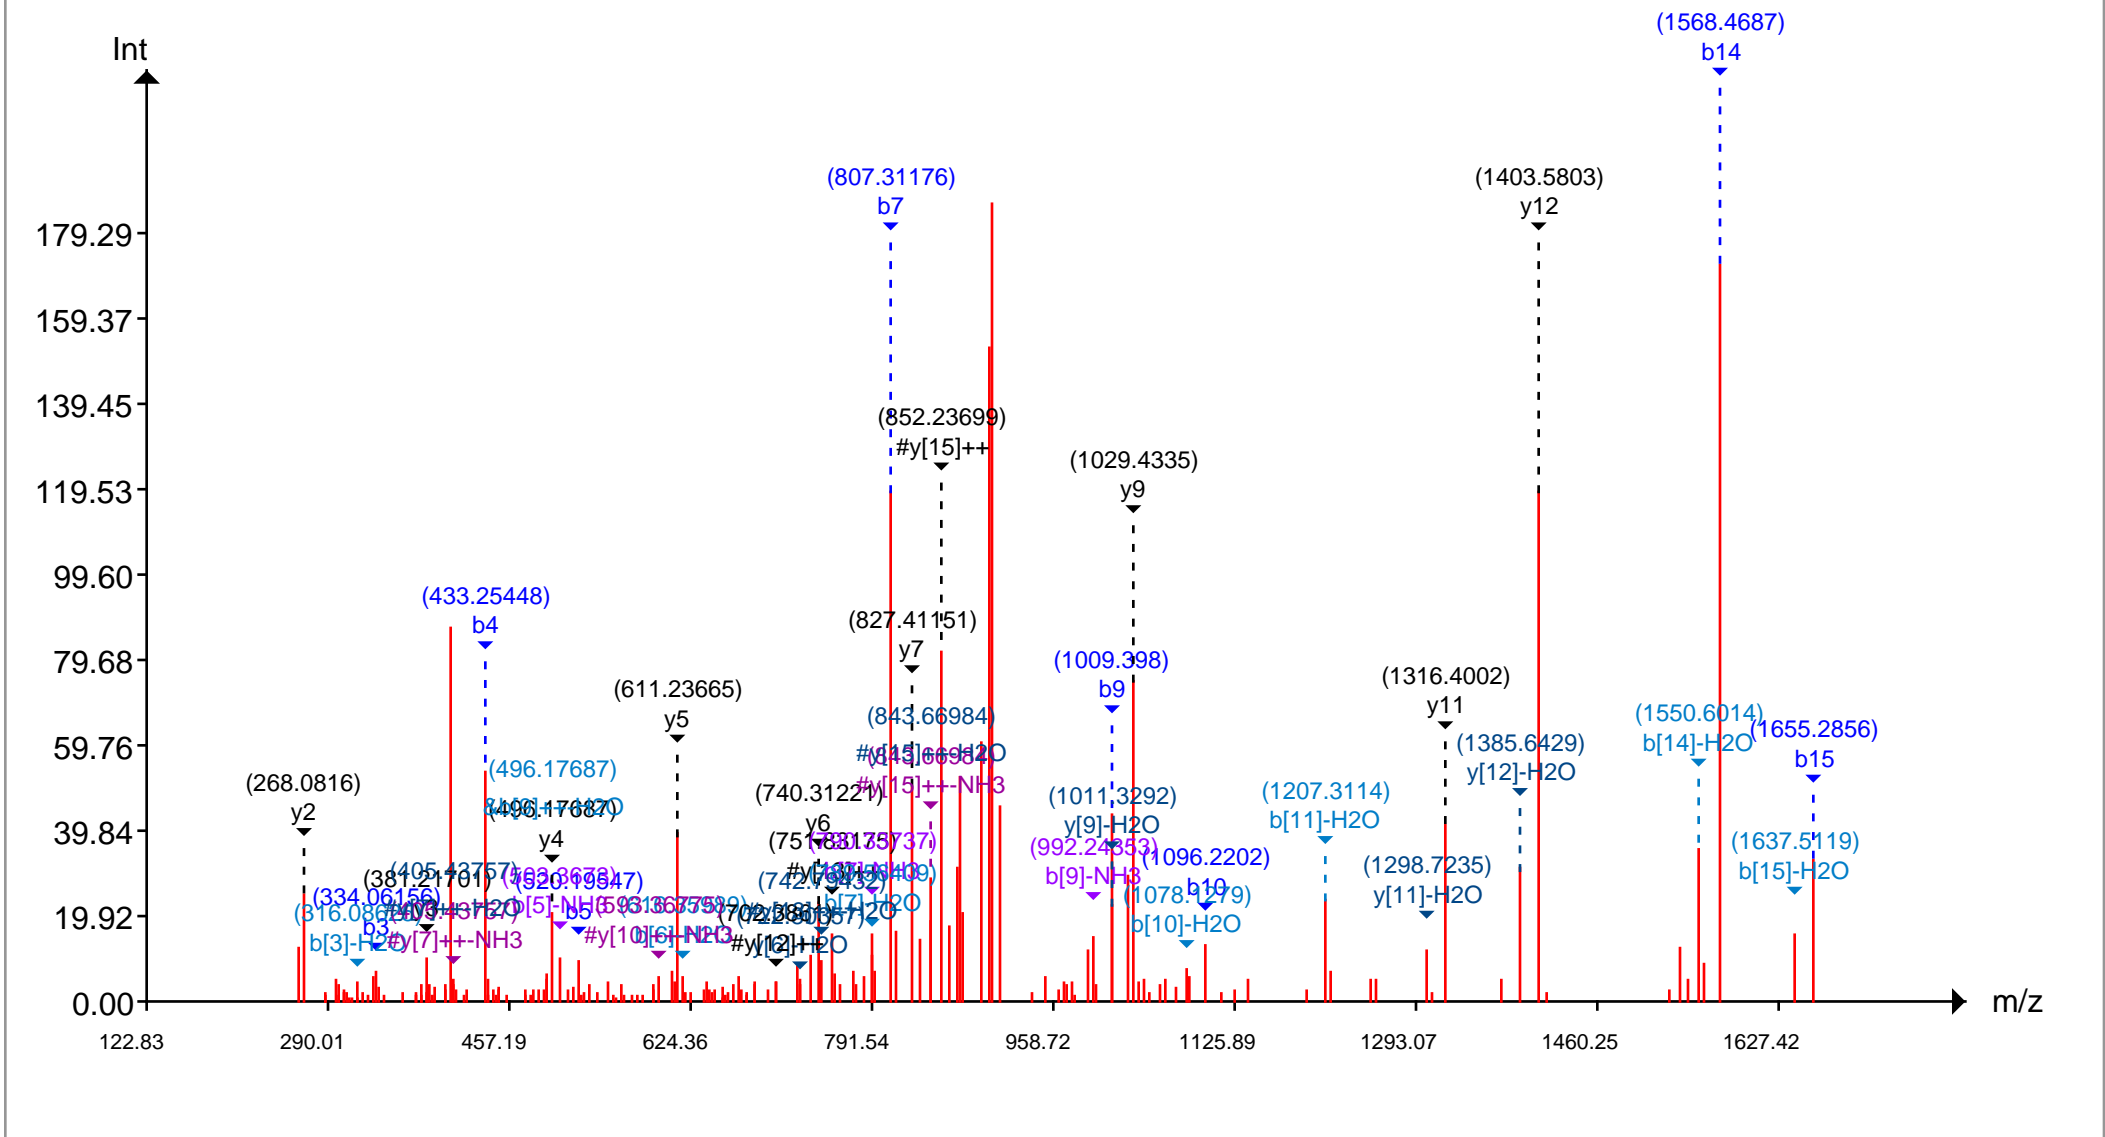

## Info

|                          |                                         |                           |        |
|--------------------------|-----------------------------------------|---------------------------|--------|
| <b>Modified Sequence</b> | AcD3-SSNVSNK<AcD3K*>DSSEDDISR<C13>-COOH | <b>Ion score</b>          | 63.05  |
| <b>Protein</b>           | Q5W0B1                                  | <b>Confidence level</b>   | 99.00% |
| <b>Precursor m/z</b>     | 918.42724                               | <b>Identity Threshold</b> | 46.41  |
| <b>Charge</b>            | 2+                                      | <b>Mass error</b>         | 4.5E-4 |

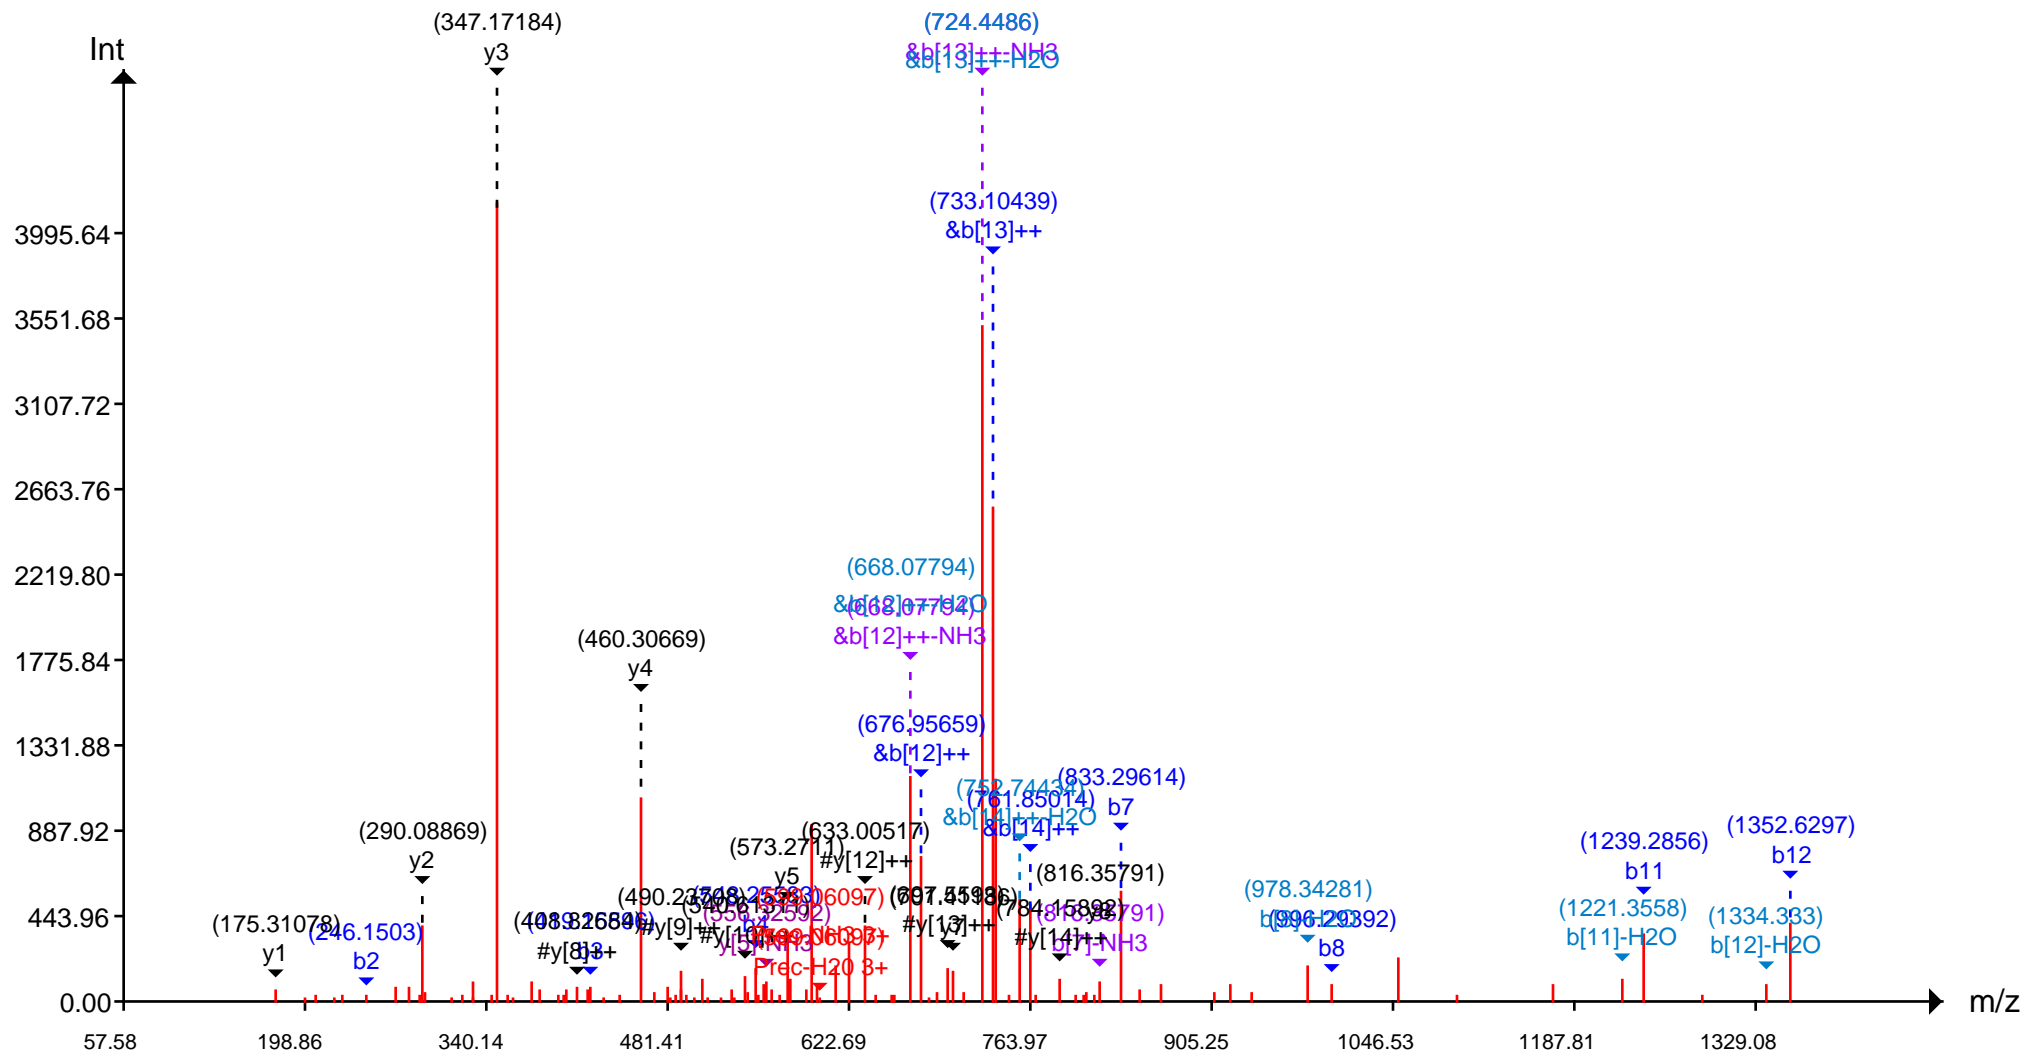

## Info

|                          |                                    |                           |         |
|--------------------------|------------------------------------|---------------------------|---------|
| <b>Modified Sequence</b> | AcD3-SLK<AcD3K*>EALTYDGALLGDR-COOH | <b>Ion score</b>          | 51.47   |
| <b>Protein</b>           | Q15056                             | <b>Confidence level</b>   | 99.00%  |
| <b>Precursor m/z</b>     | 604.66031                          | <b>Identity Threshold</b> | 48.90   |
| <b>Charge</b>            | 3+                                 | <b>Mass error</b>         | 7.74E-4 |





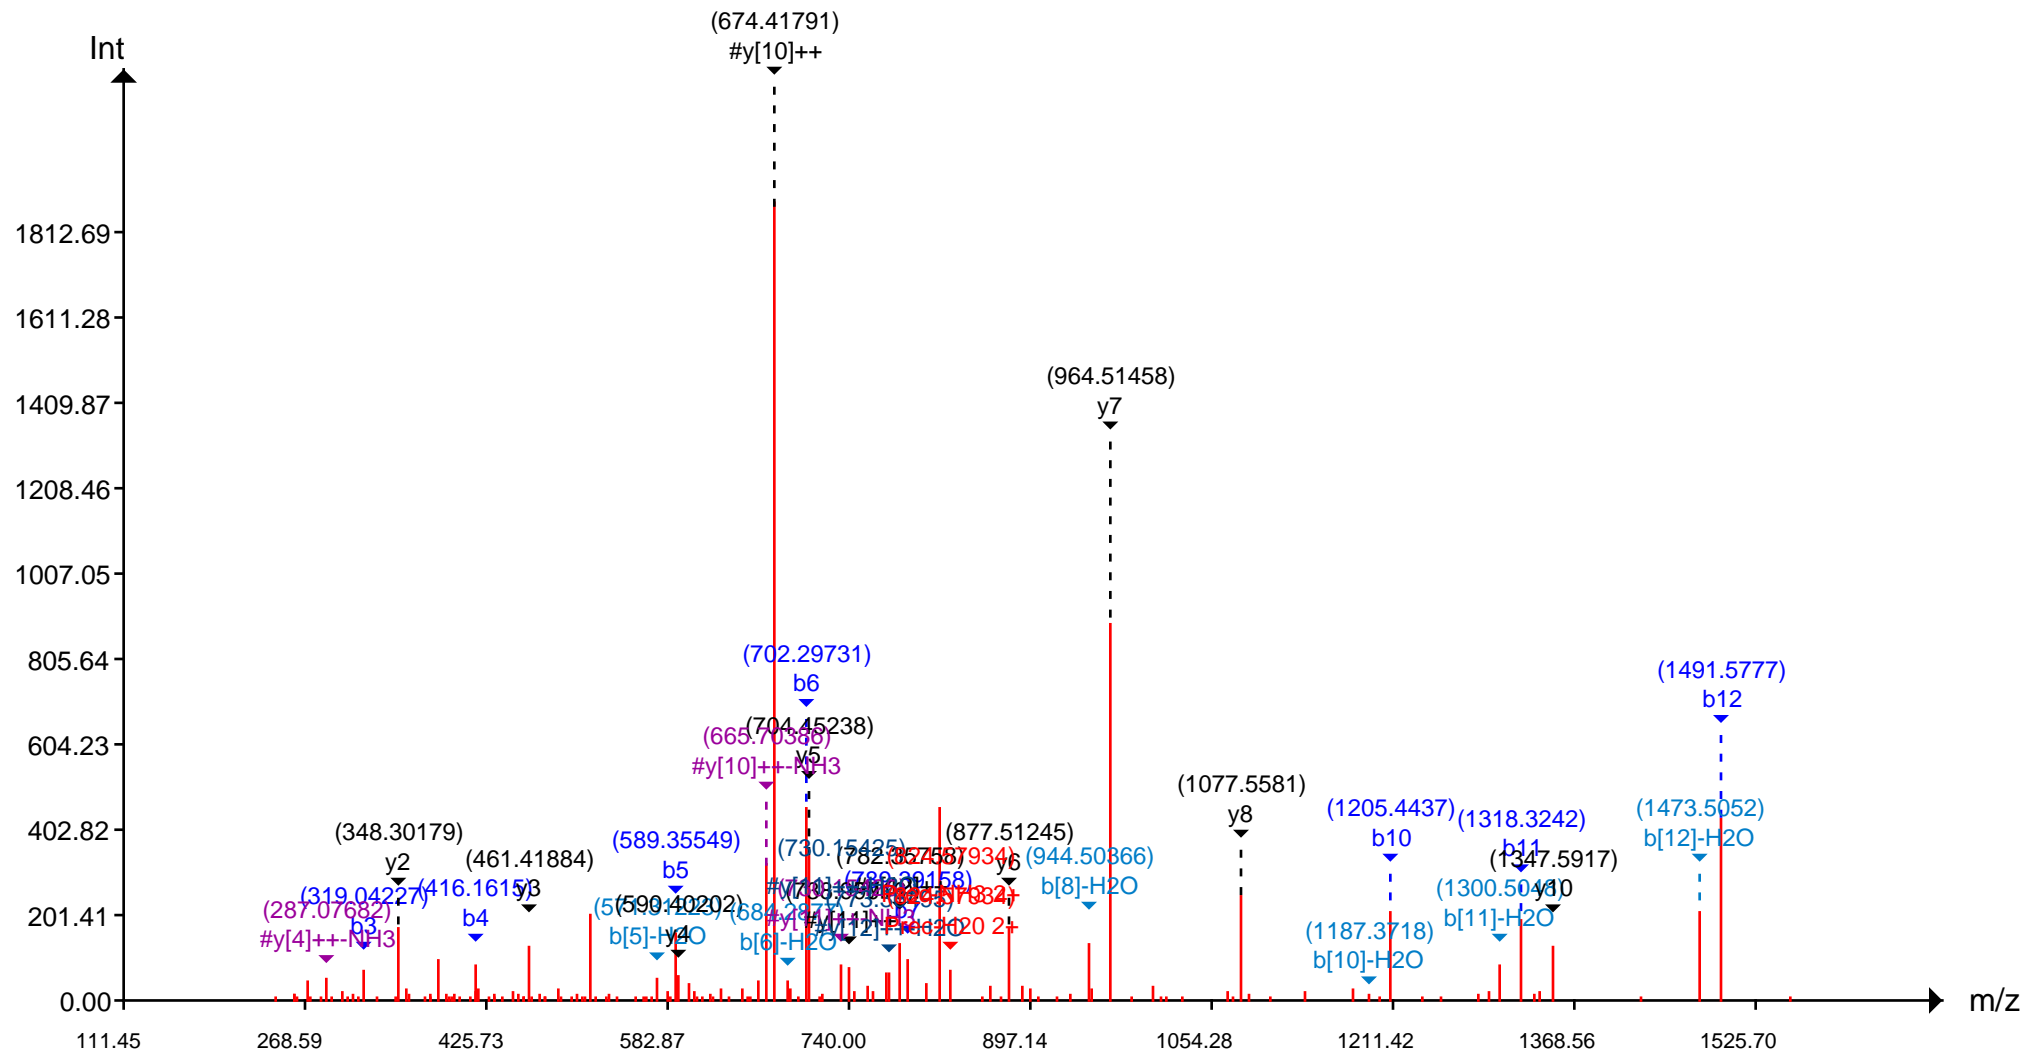

## Info

|                          |                                                 |                           |          |
|--------------------------|-------------------------------------------------|---------------------------|----------|
| <b>Modified Sequence</b> | AcD3-GSEPK<AcD3K*>LSK<AcD3K*>NELK<AcD3K*>R-COOH | <b>Ion score</b>          | 62.29    |
| <b>Protein</b>           | Q15046                                          | <b>Confidence level</b>   | 99.00%   |
| <b>Precursor m/z</b>     | 833.4824                                        | <b>Identity Threshold</b> | 46.33    |
| <b>Charge</b>            | 2+                                              | <b>Mass error</b>         | 0.001609 |

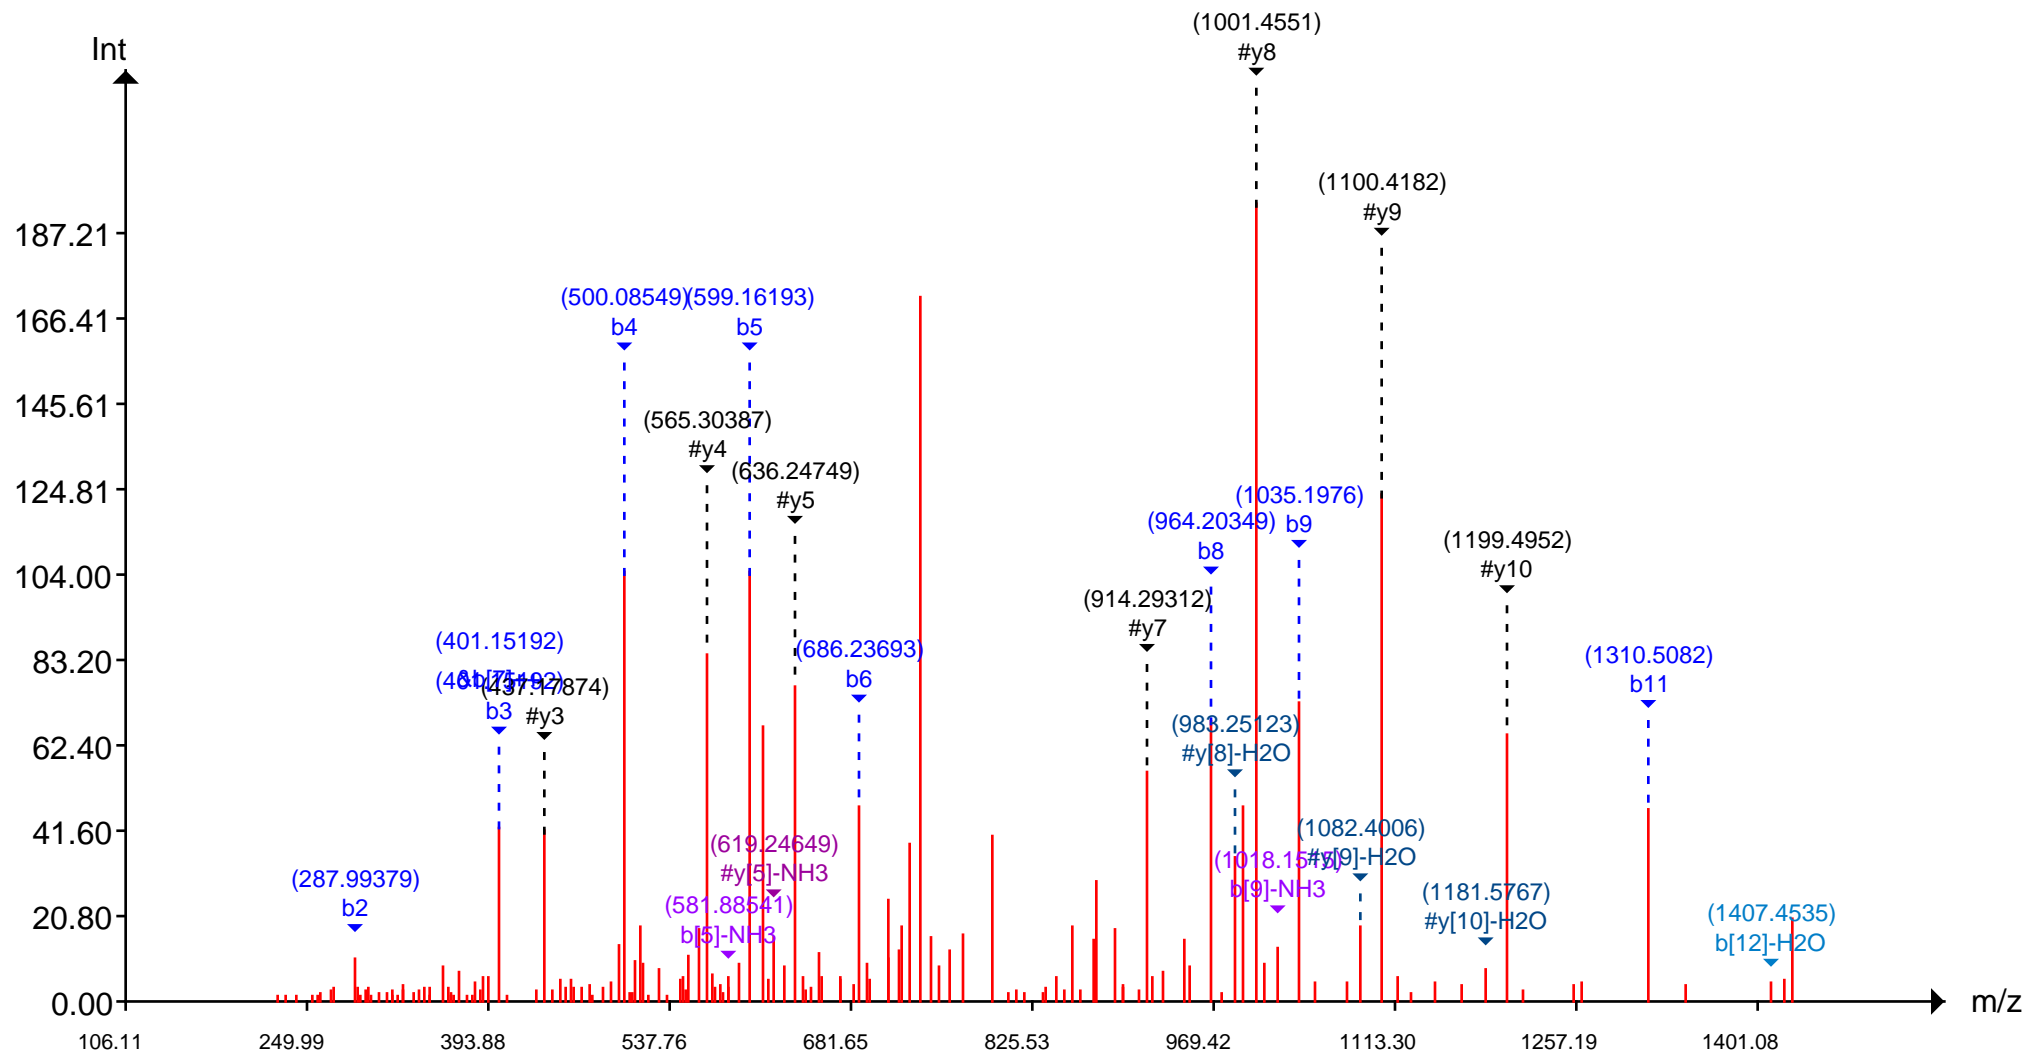

## Info

**Modified Sequence** AcD3-NQIVVSDYAQM<Mox\*>DR-COOH

**Ion score** 56.24

**Protein** P50991

**Confidence level** 99.00%

**Precursor m/z** 800.37868

**Identity Threshold** 46.97

**Charge** 2+

**Mass error** -9.82E-4

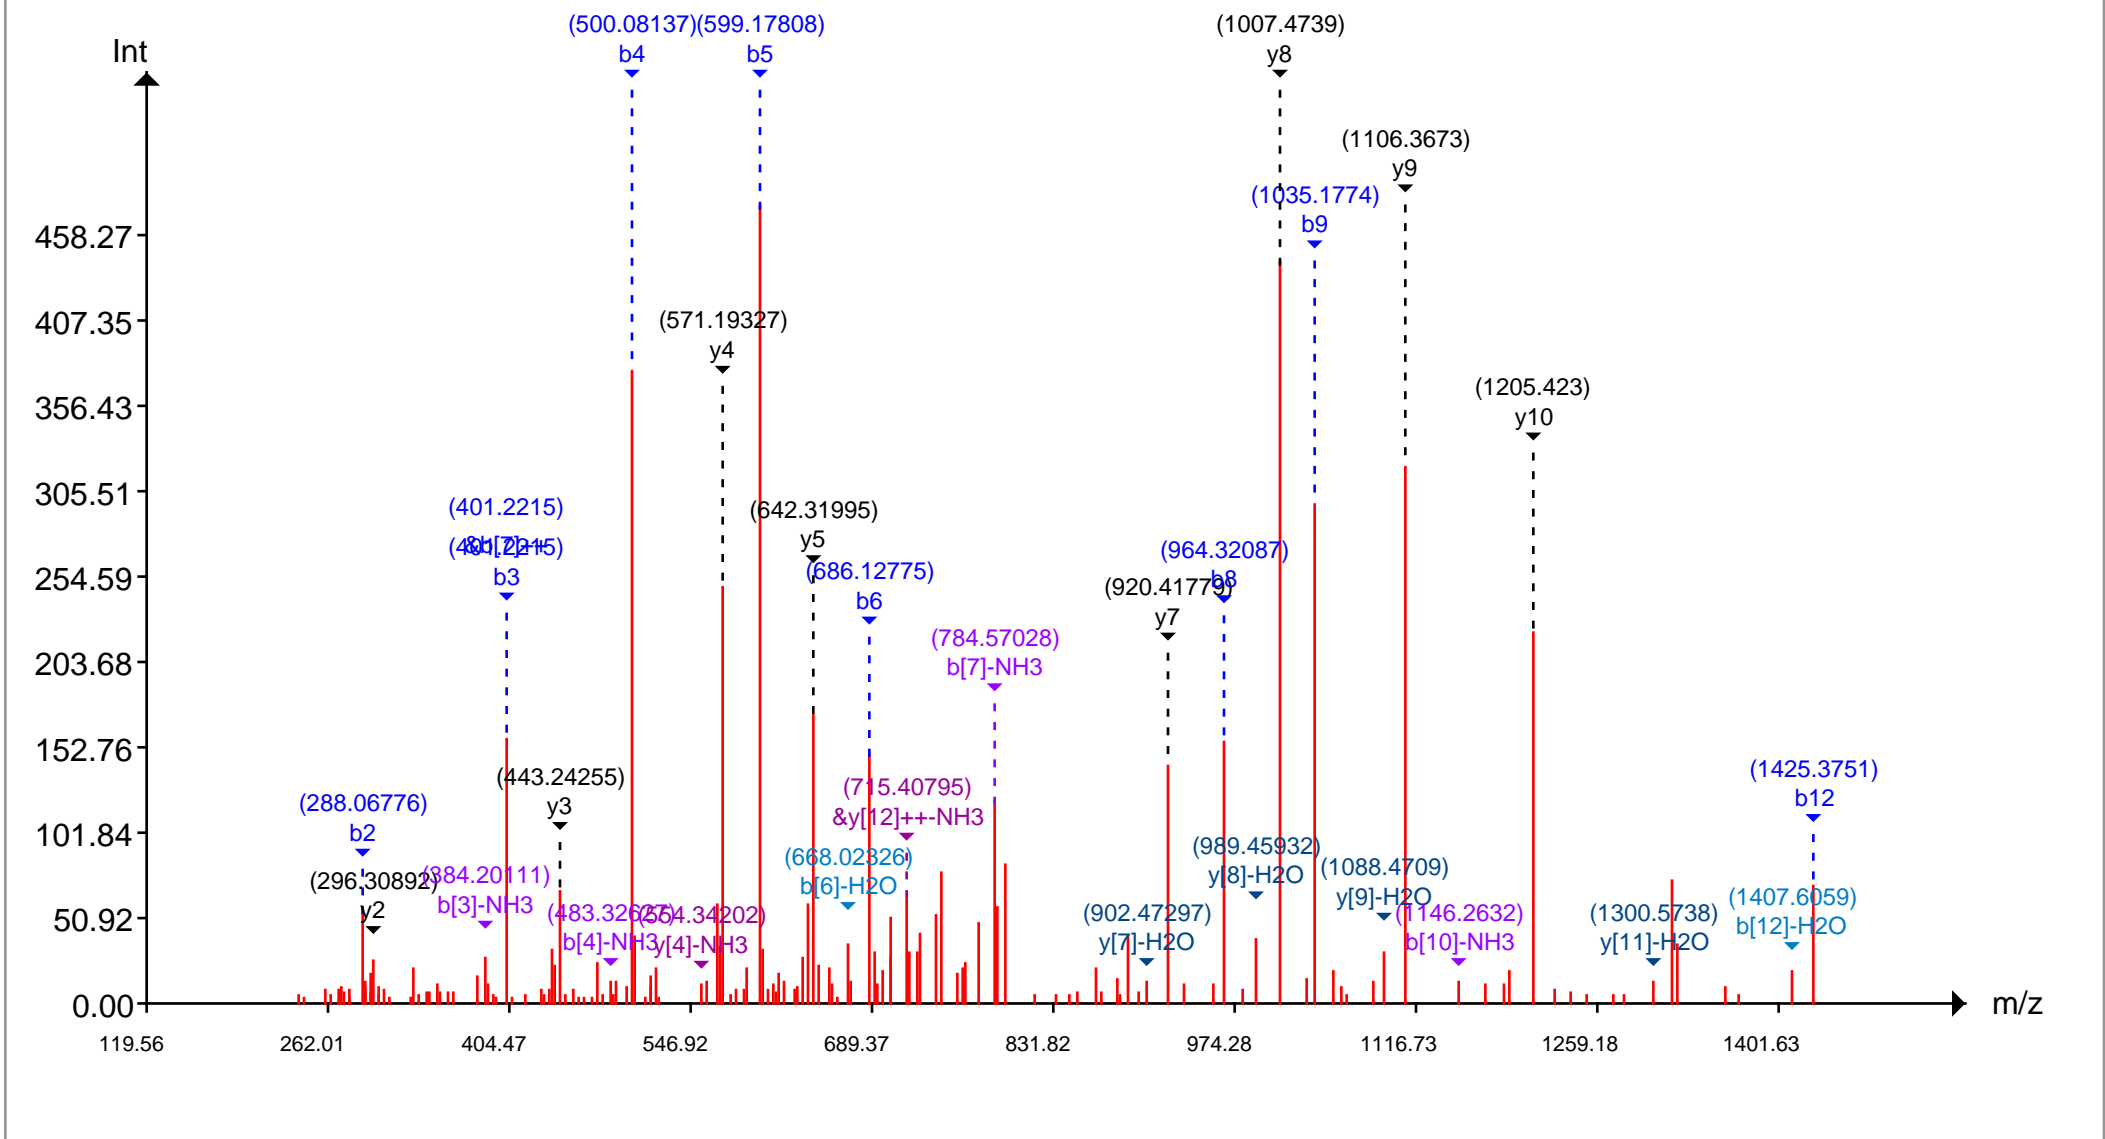

## Info

**Modified Sequence** AcD3-NQIVVSDYAQM<Mox\*>DR<C13>-COOH

**Ion score** 69.17

**Protein** P50991

**Confidence level** 99.00%

**Precursor m/z** 803.38952

**Identity Threshold** 47.91

**Charge** 2+

**Mass error** 5.57E-4

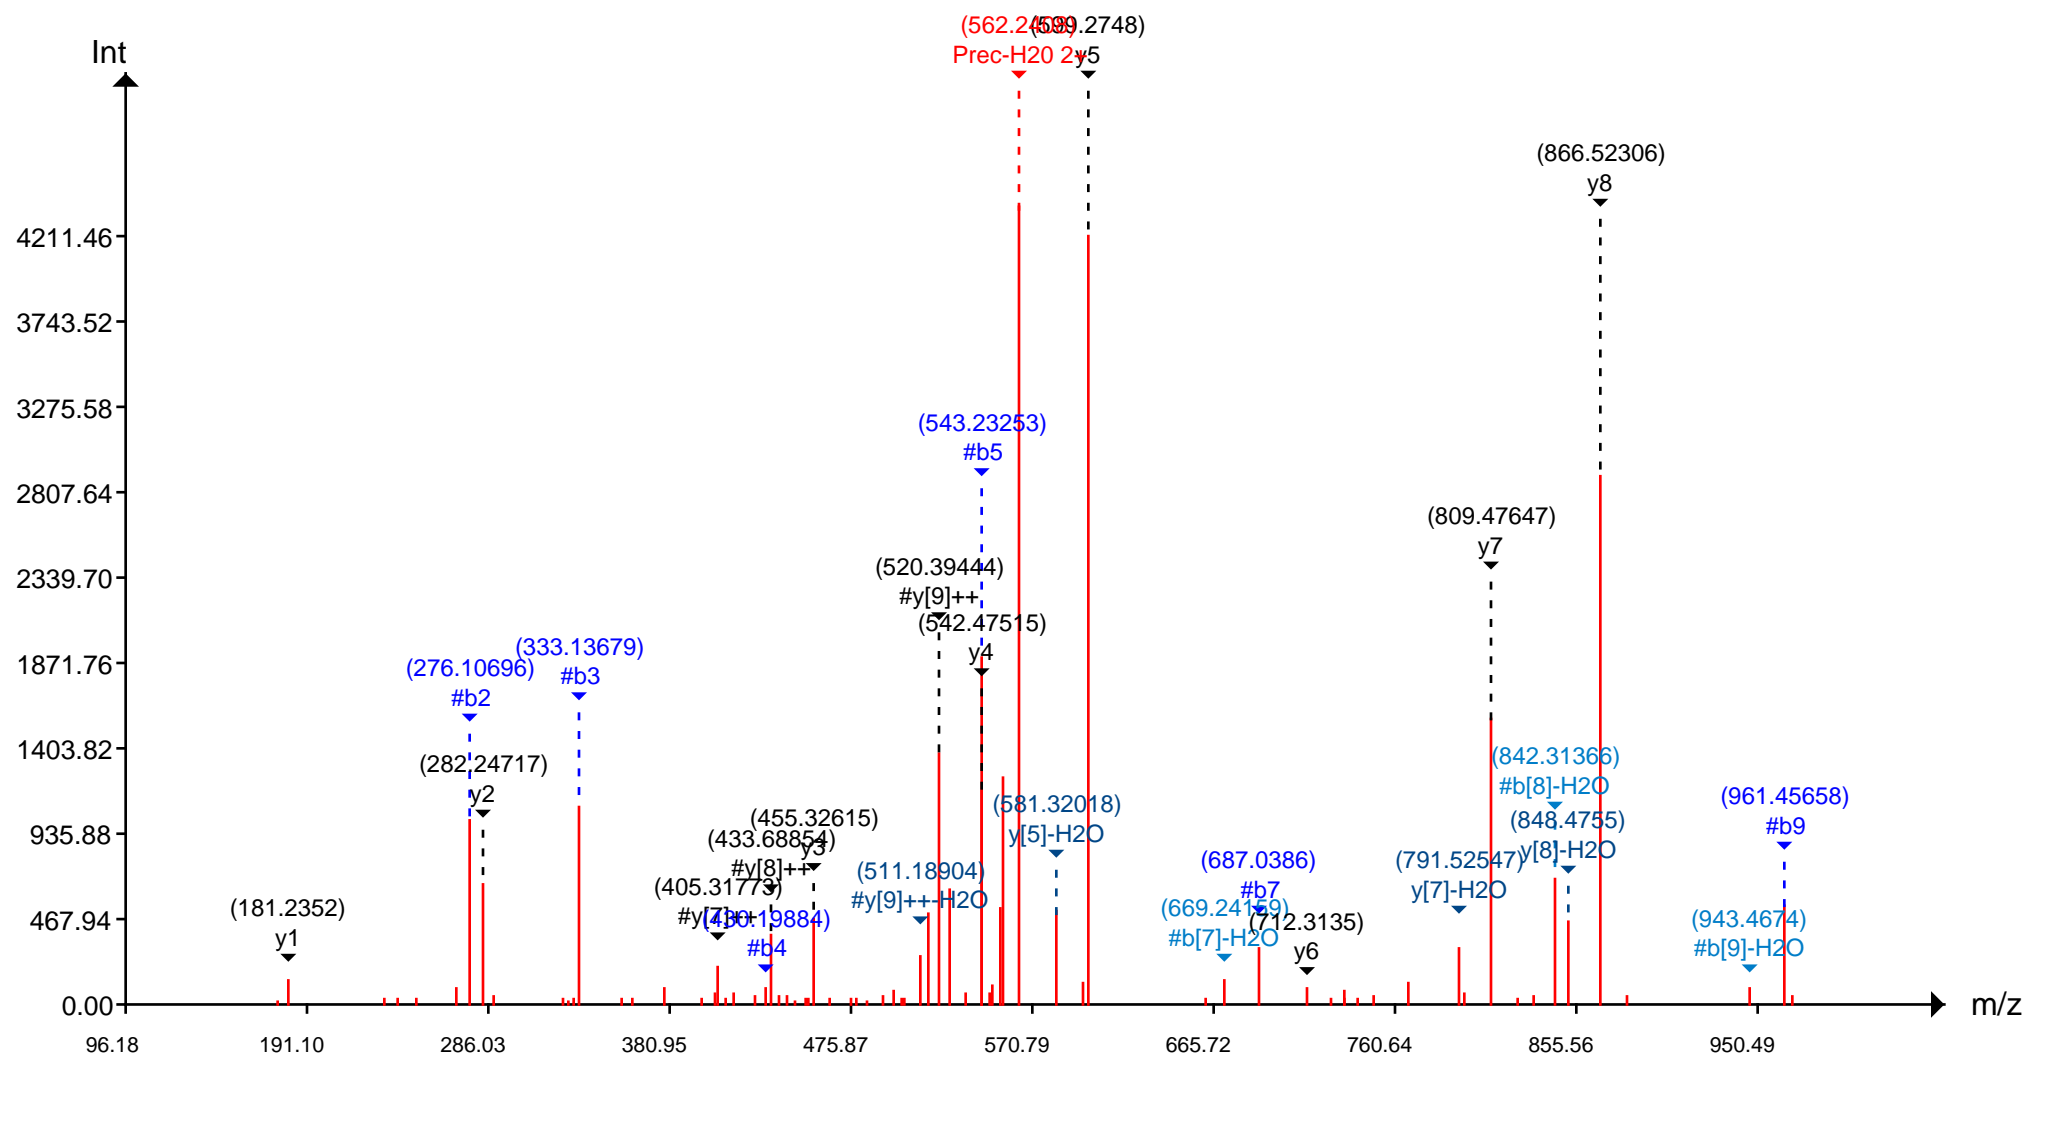

| Info                     |                                           |                           |          |
|--------------------------|-------------------------------------------|---------------------------|----------|
| <b>Modified Sequence</b> | AcD3-GK<AcD3K*>GPIGSK<AcD3K*>TR<C13>-COOH | <b>Ion score</b>          | 59.97    |
| <b>Protein</b>           | P25705                                    | <b>Confidence level</b>   | 99.00%   |
| <b>Precursor m/z</b>     | 571.35264                                 | <b>Identity Threshold</b> | 44.59    |
| <b>Charge</b>            | 2+                                        | <b>Mass error</b>         | -1.29E-4 |

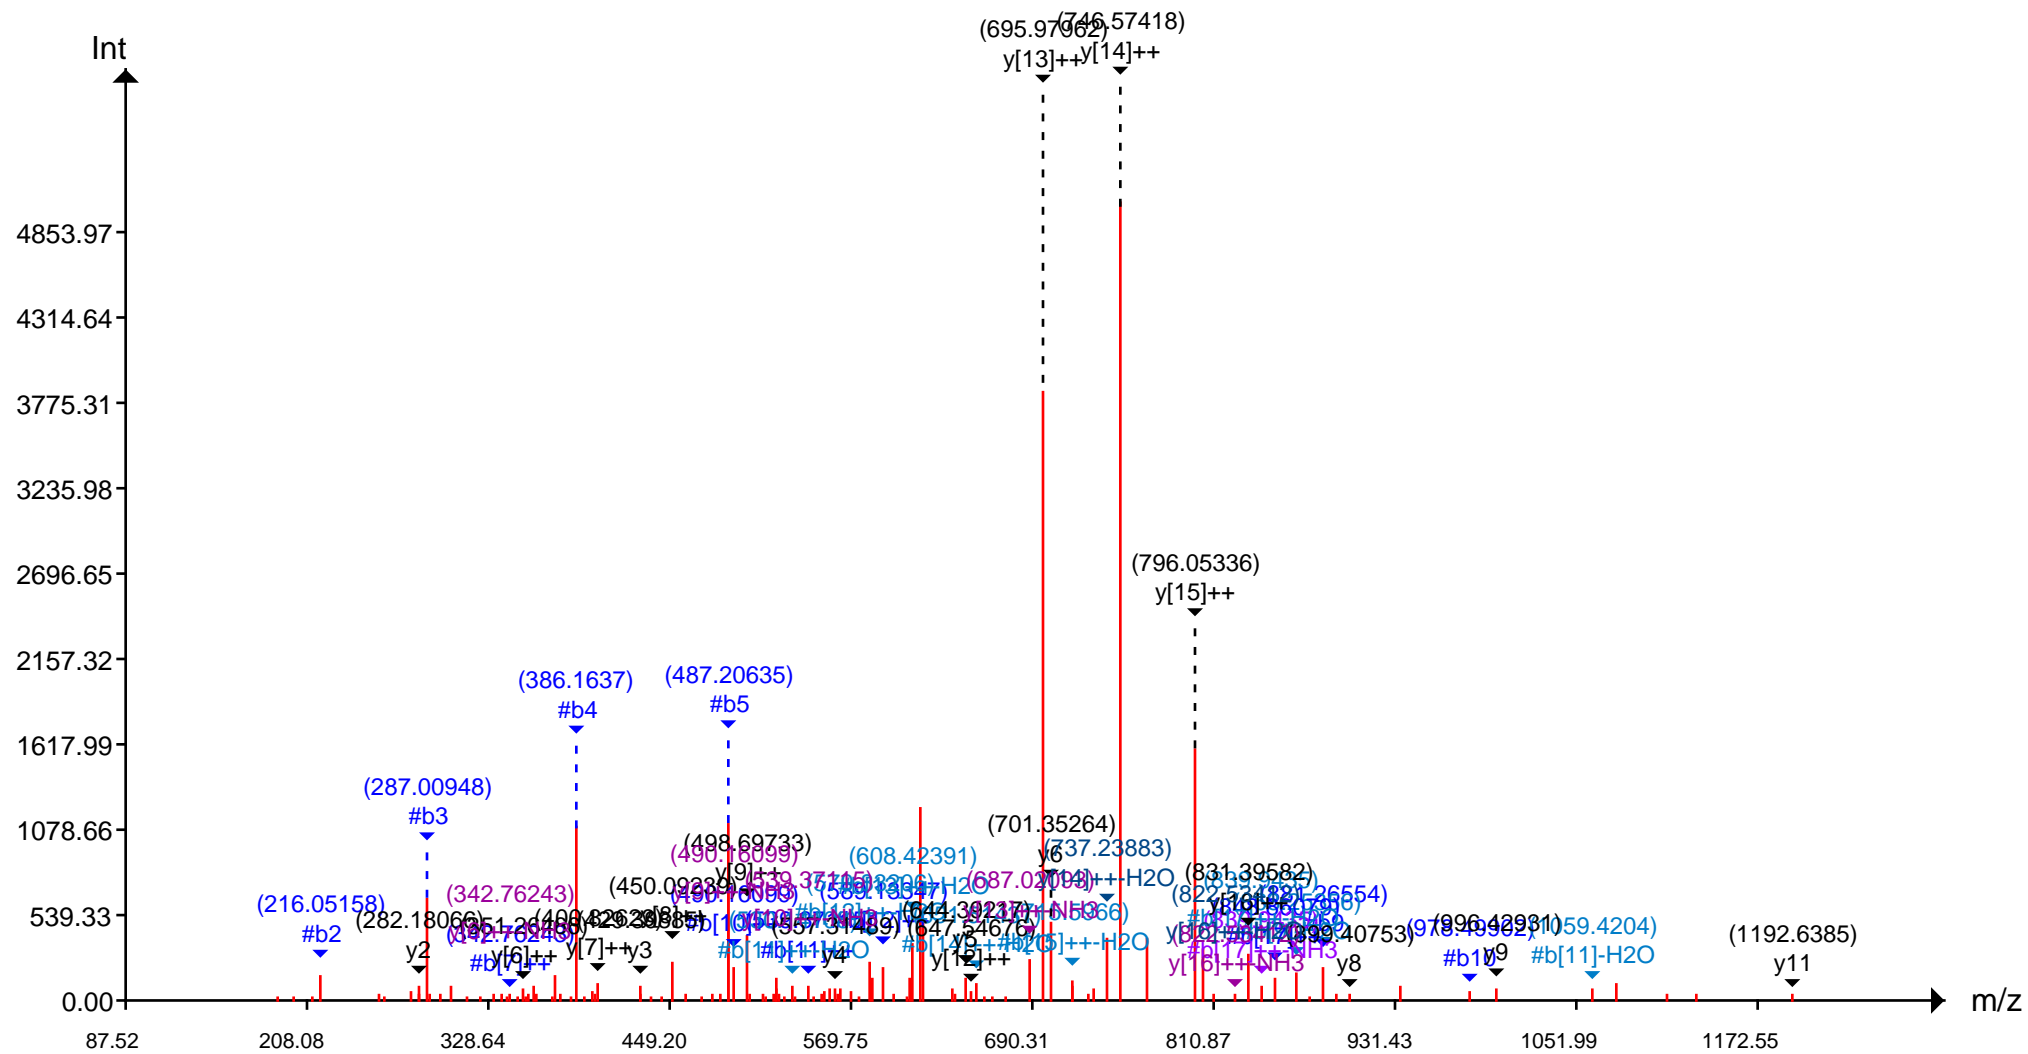

## Info

**Modified Sequence** AcD3-GLAVTPTPVVGSQM<Mox\*>TR<C13>-COOH

**Ion score** 54.67

**Protein** P26368

**Confidence level** 99.00%

**Precursor m/z** 626.34933

**Identity Threshold** 48.07

**Charge** 3+

**Mass error** -1.75E-4

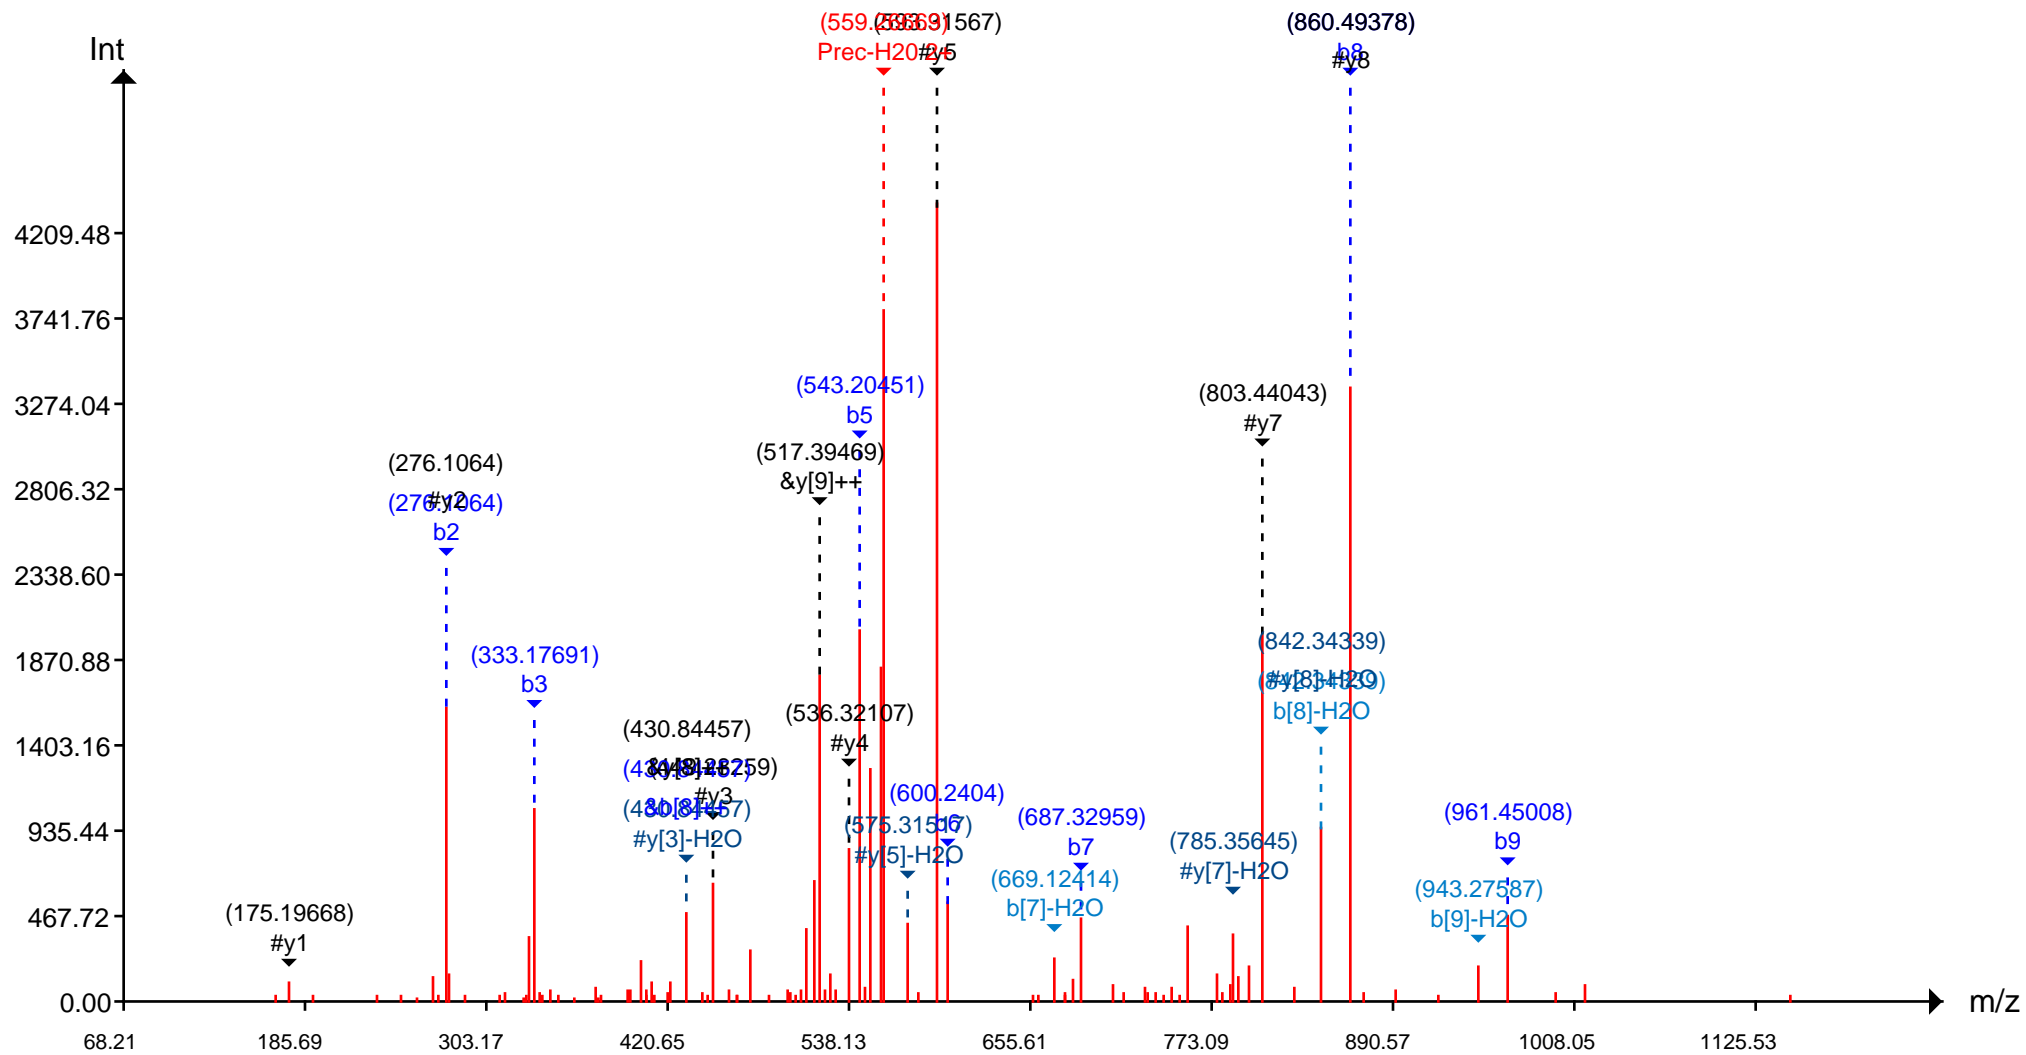

## Info

|                          |                                      |                           |          |
|--------------------------|--------------------------------------|---------------------------|----------|
| <b>Modified Sequence</b> | AcD3-GK<AcD3K*>GPIGSK<AcD3K*>TR-COOH | <b>Ion score</b>          | 57.69    |
| <b>Protein</b>           | P25705                               | <b>Confidence level</b>   | 99.00%   |
| <b>Precursor m/z</b>     | 568.34253                            | <b>Identity Threshold</b> | 45.68    |
| <b>Charge</b>            | 2+                                   | <b>Mass error</b>         | -2.07E-4 |

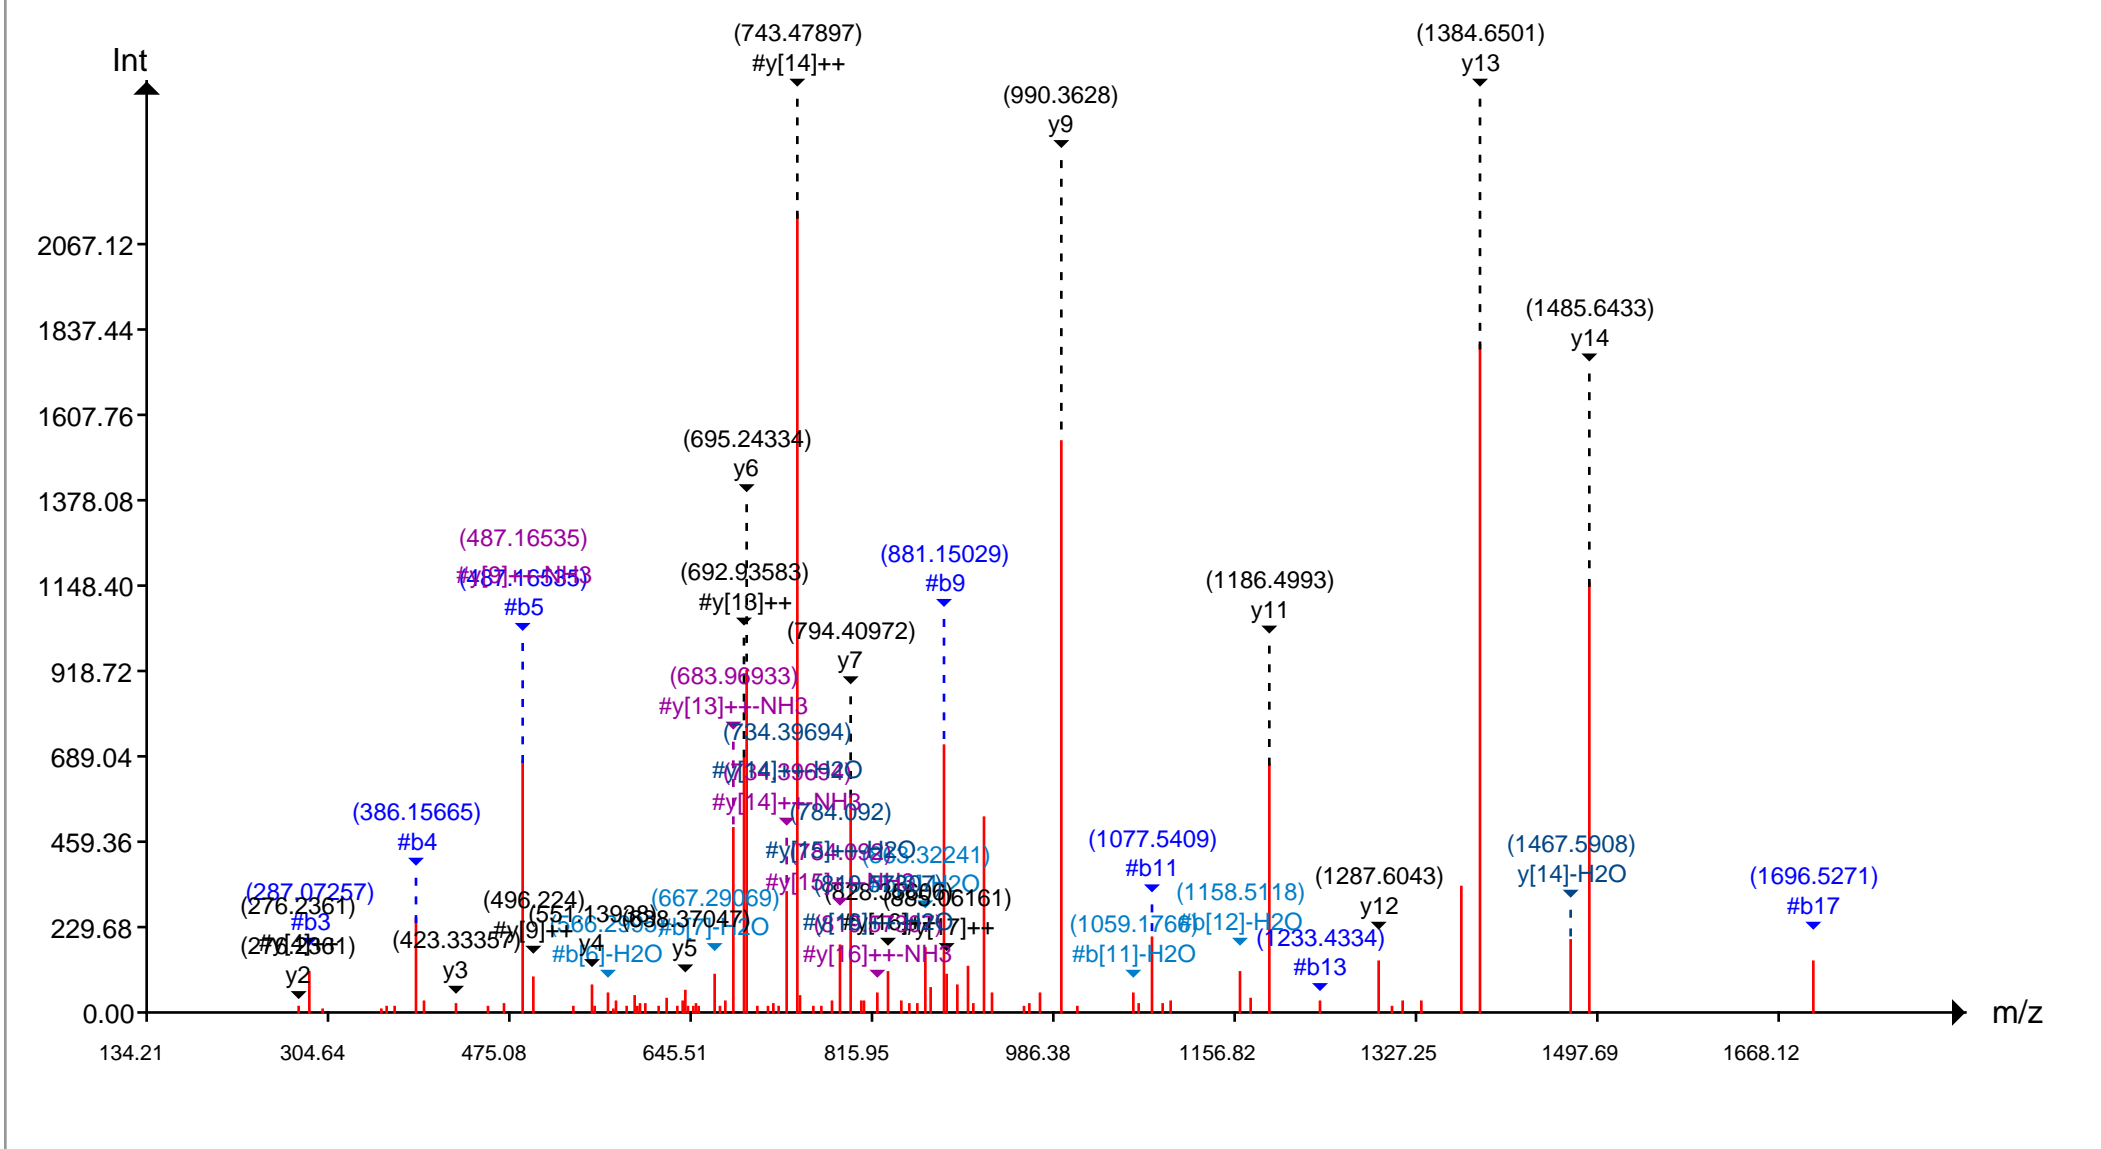

| Info                     |                                    |                           |          |
|--------------------------|------------------------------------|---------------------------|----------|
| <b>Modified Sequence</b> | AcD3-GLAVTPTPVPVVGSMQ<Mox*>TR-COOH | <b>Ion score</b>          | 85.95    |
| <b>Protein</b>           | P26368                             | <b>Confidence level</b>   | 99.00%   |
| <b>Precursor m/z</b>     | 936.01089                          | <b>Identity Threshold</b> | 48.49    |
| <b>Charge</b>            | 2+                                 | <b>Mass error</b>         | 0.001033 |

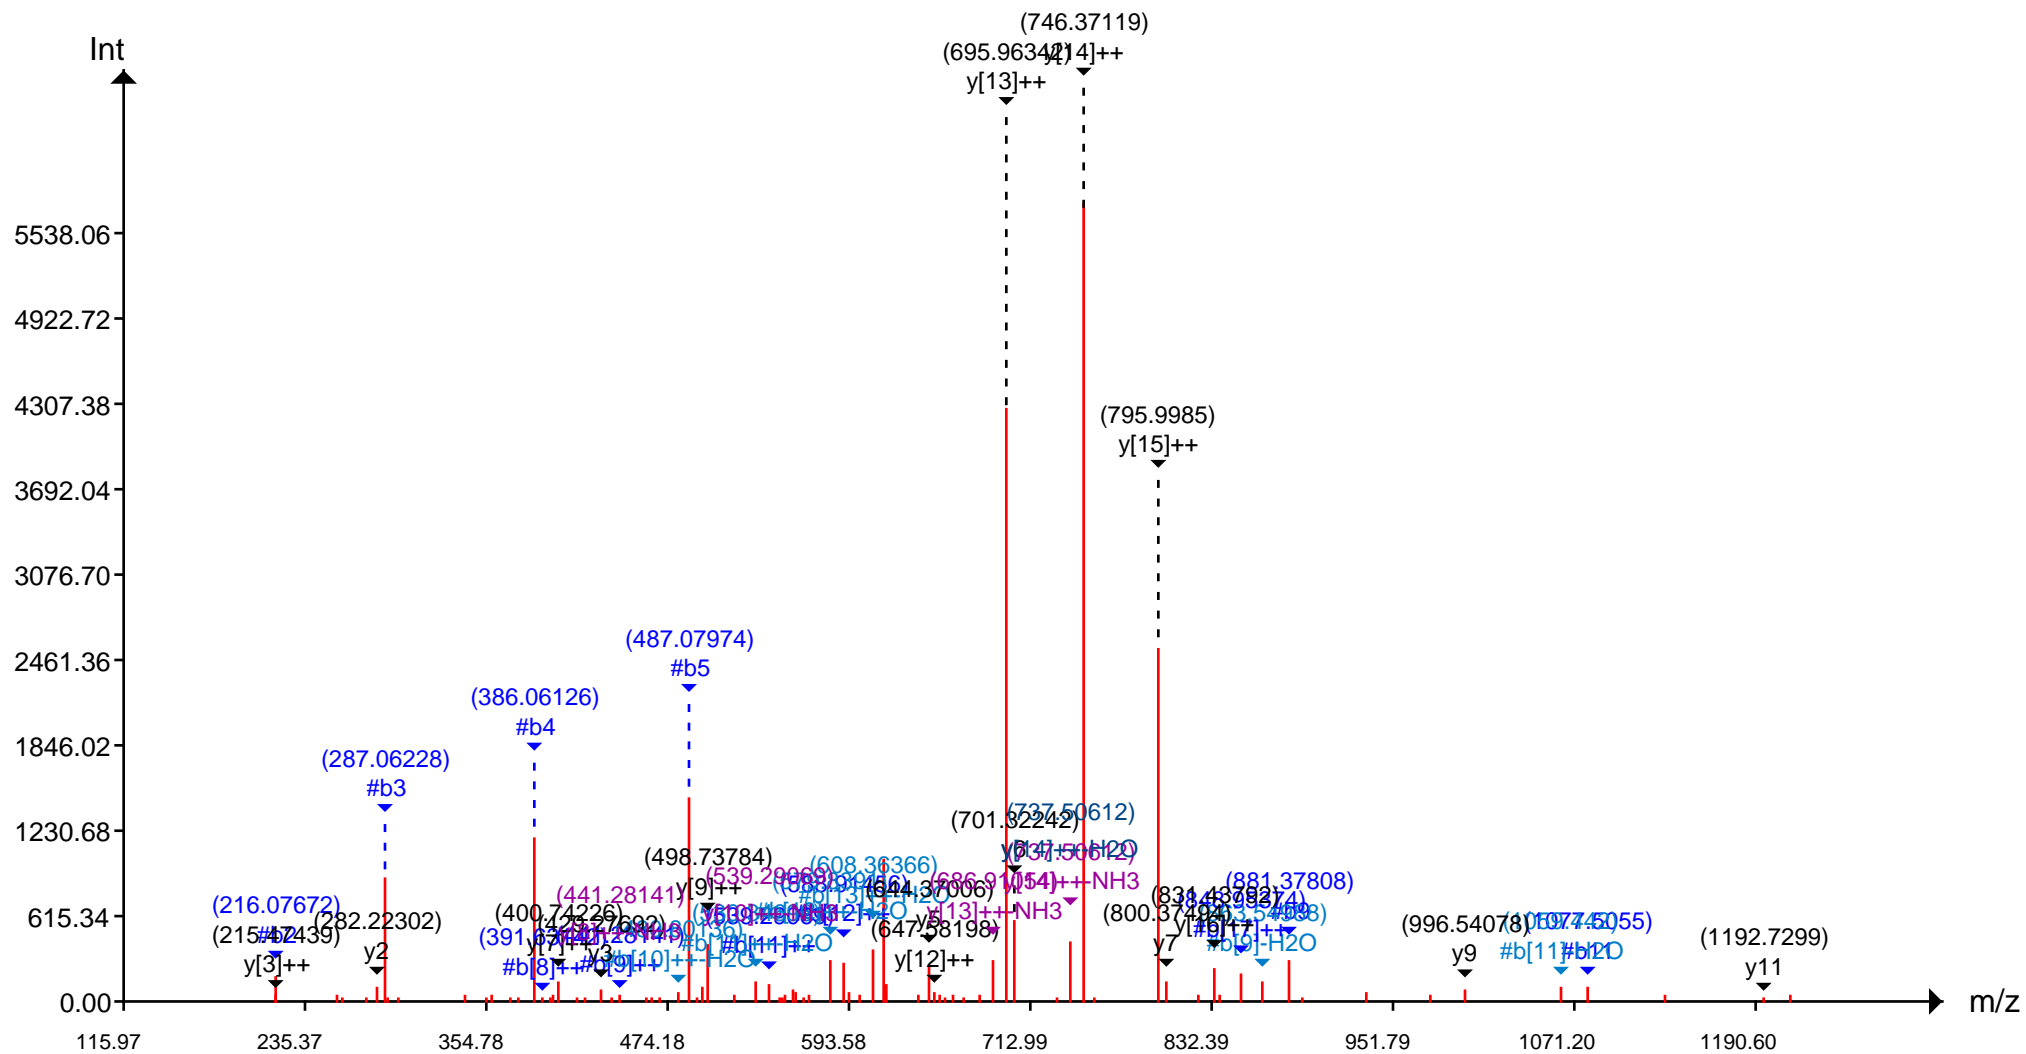



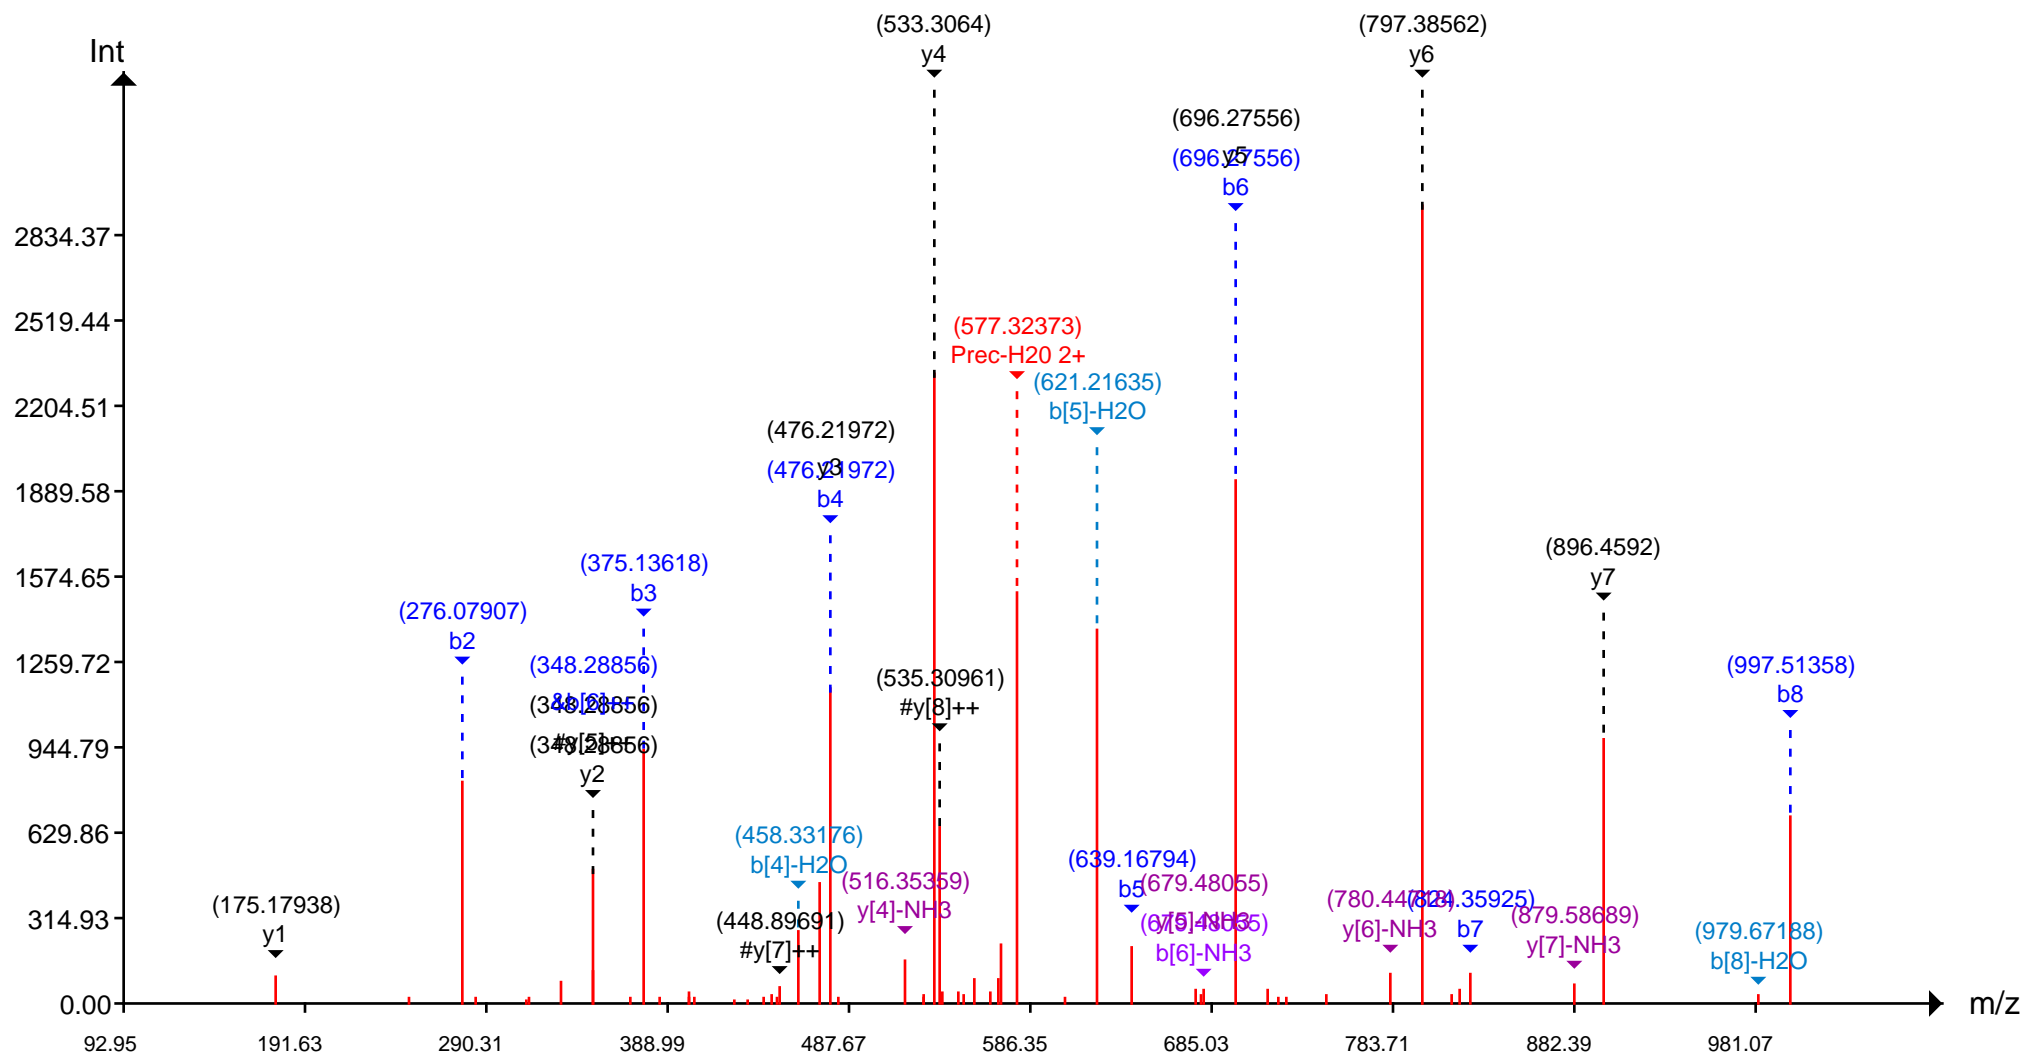

## Info

|                          |                                     |                           |          |
|--------------------------|-------------------------------------|---------------------------|----------|
| <b>Modified Sequence</b> | AcD3-GK<AcD3K*>VTYGQK<AcD3K*>R-COOH | <b>Ion score</b>          | 64.07    |
| <b>Protein</b>           | Q92499                              | <b>Confidence level</b>   | 99.00%   |
| <b>Precursor m/z</b>     | 586.34258                           | <b>Identity Threshold</b> | 47.48    |
| <b>Charge</b>            | 2+                                  | <b>Mass error</b>         | -1.07E-4 |

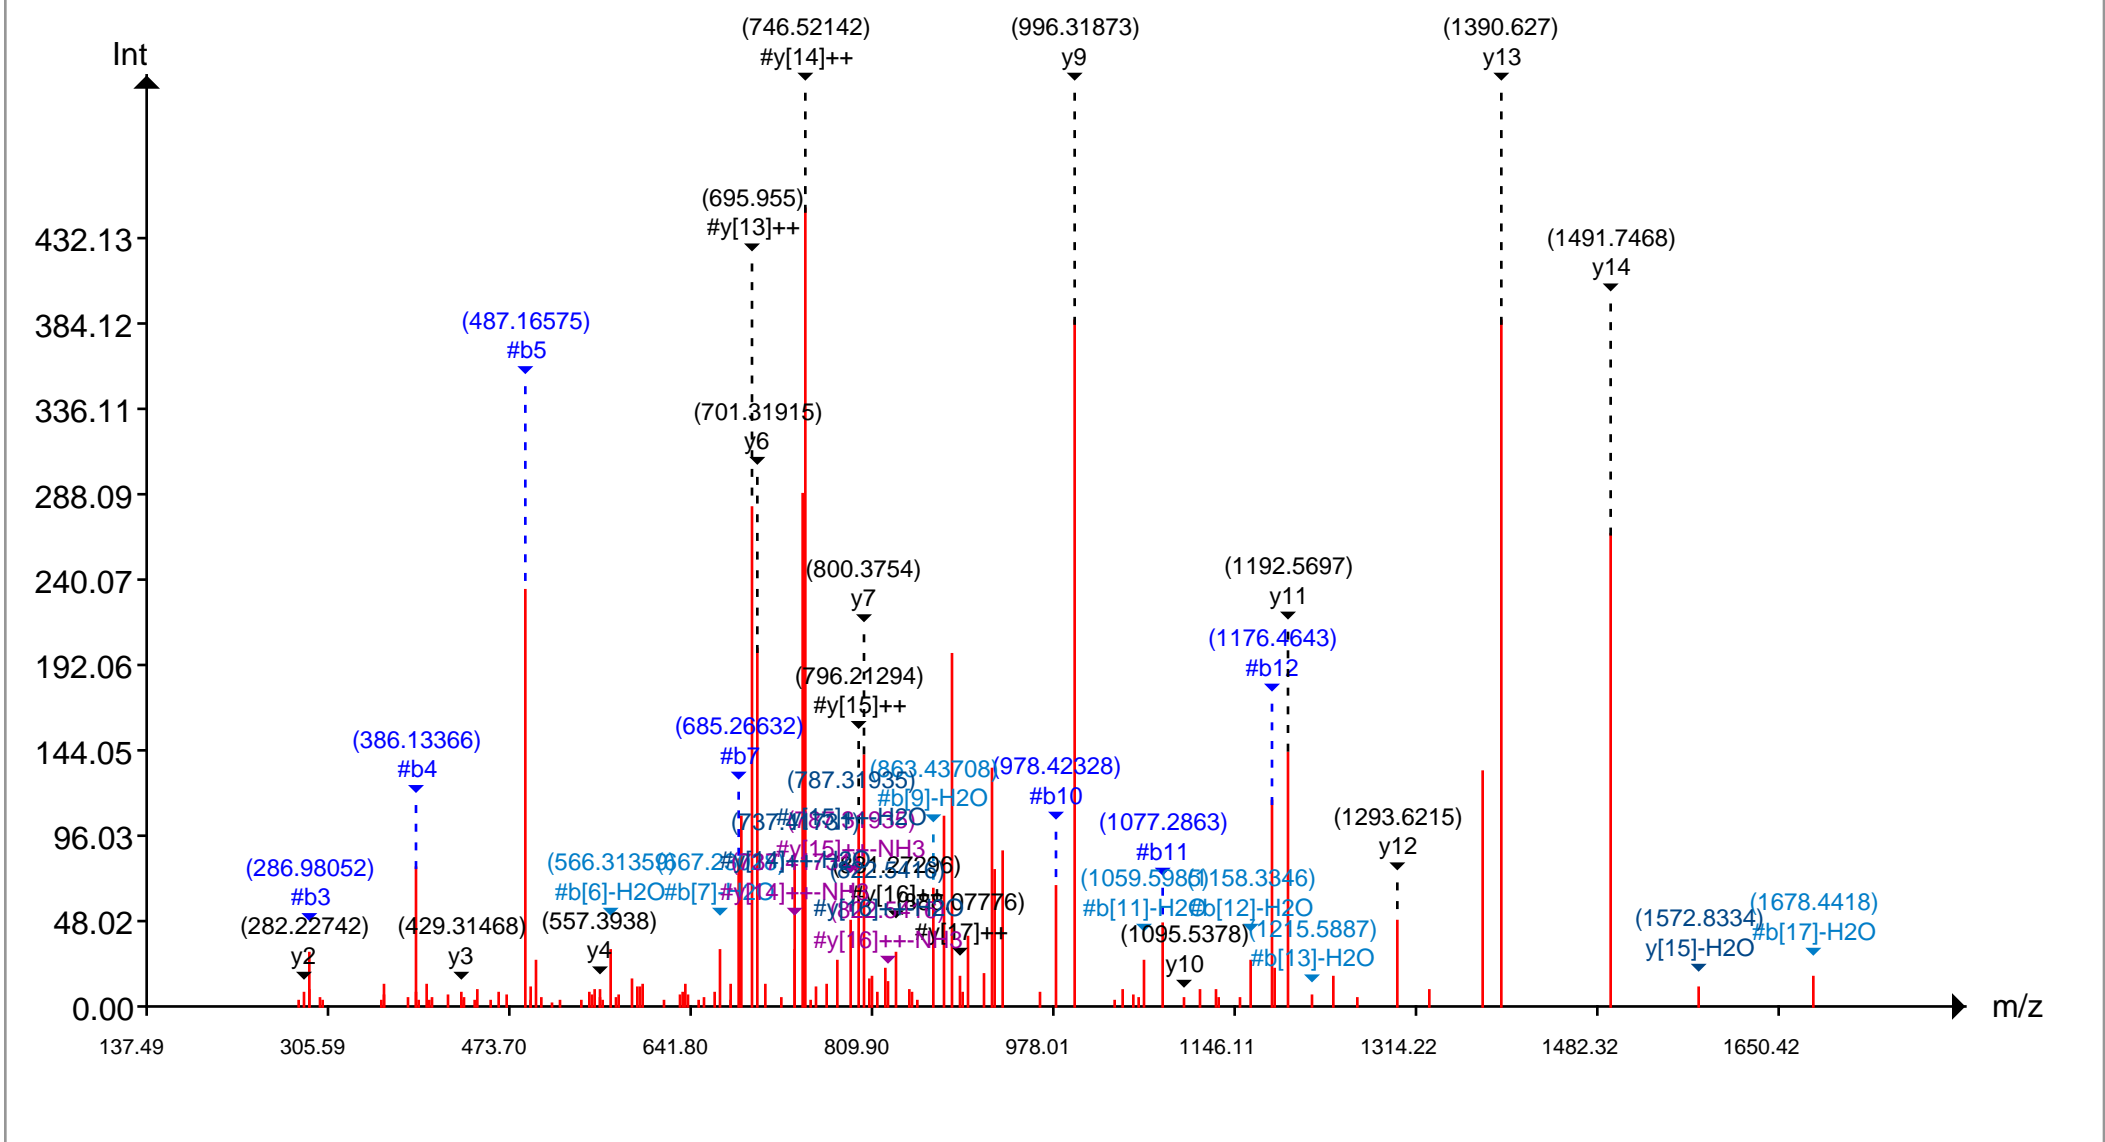

## Info

**Modified Sequence** AcD3-GLAVTPTPVVGSQM<Mox\*>TR<C13>-COOH

**Ion score** 60.33

**Protein** P26368

**Confidence level** 99.00%

**Precursor m/z** 939.02085

**Identity Threshold** 47.92

**Charge** 2+

**Mass error** 8.11E-4

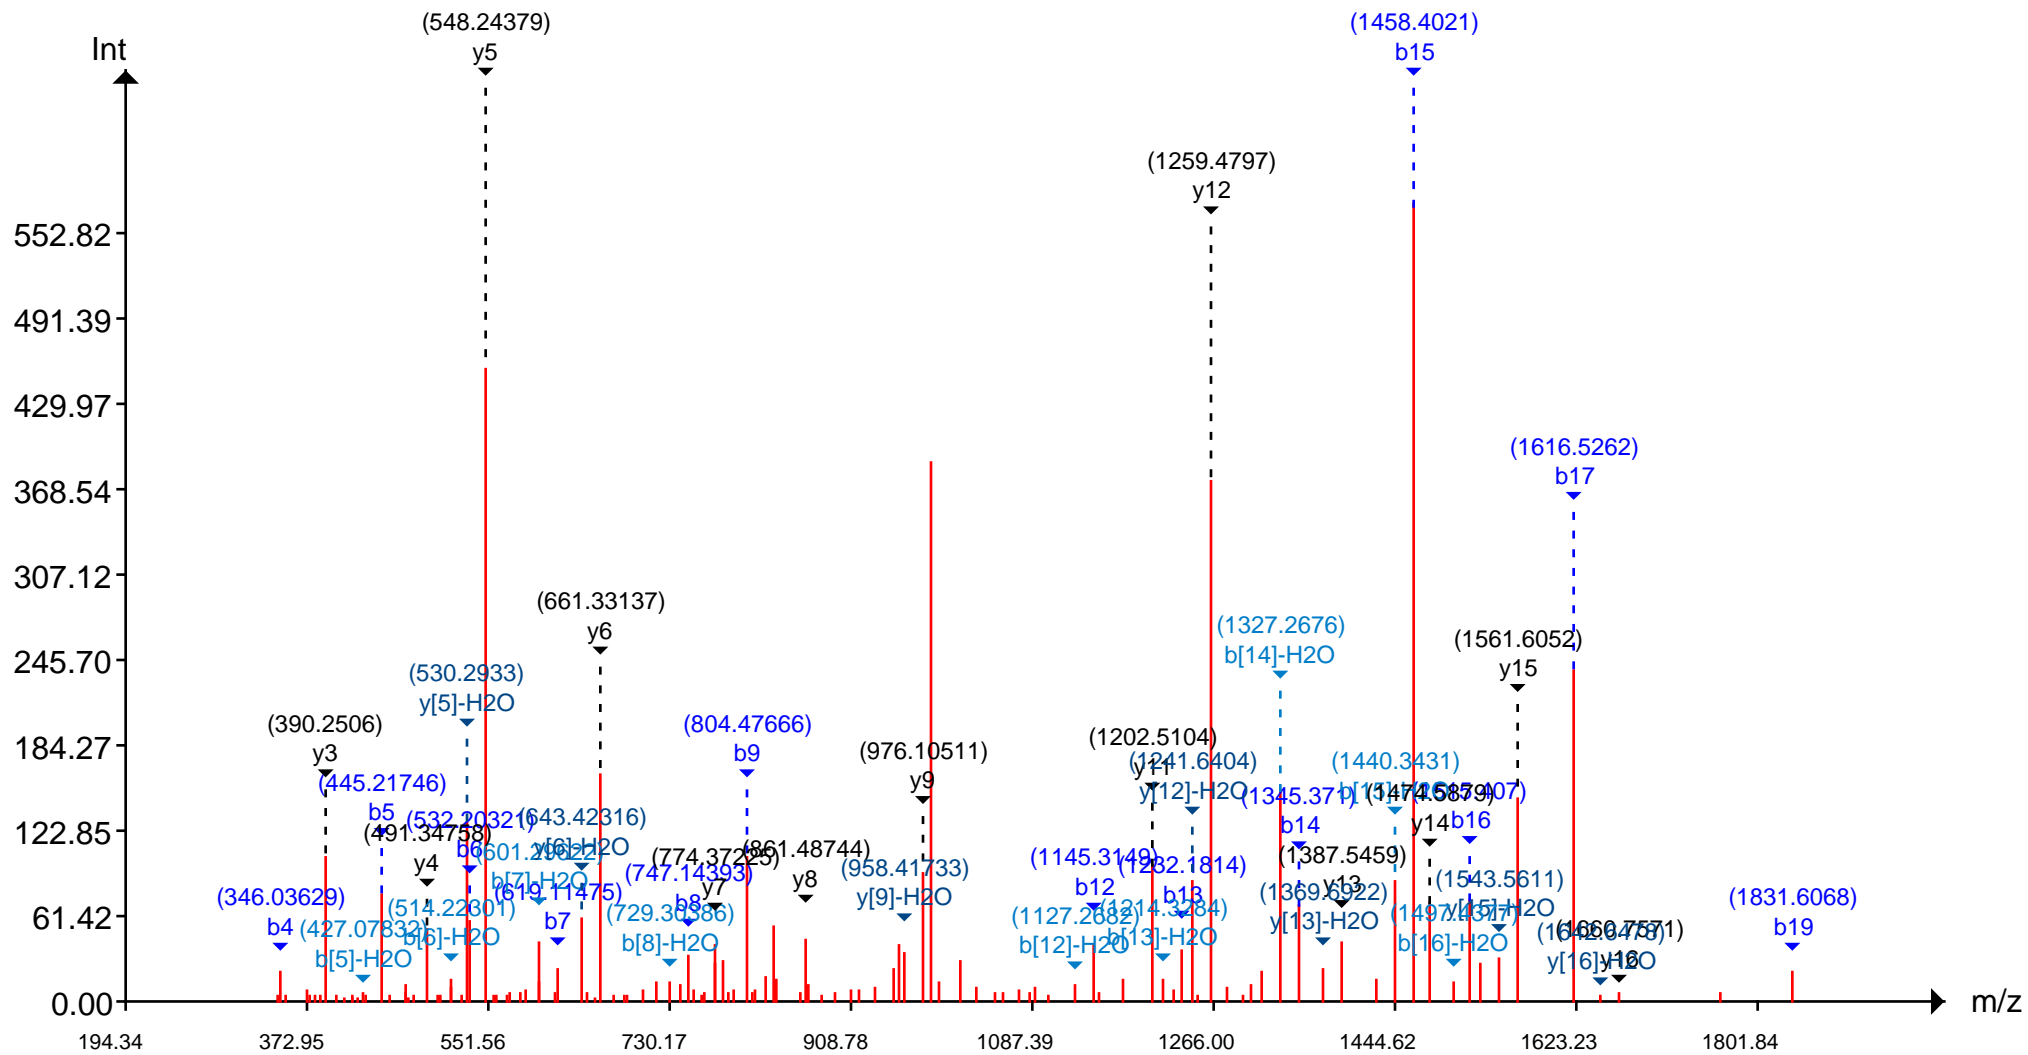

## Info

|                          |                                |                           |          |
|--------------------------|--------------------------------|---------------------------|----------|
| <b>Modified Sequence</b> | AcD3-GGGEVSSQGPEDSLLGTQSR-COOH | <b>Ion score</b>          | 106.96   |
| <b>Protein</b>           | Q9P107                         | <b>Confidence level</b>   | 99.00%   |
| <b>Precursor m/z</b>     | 1003.4792                      | <b>Identity Threshold</b> | 47.43    |
| <b>Charge</b>            | 2+                             | <b>Mass error</b>         | 0.001068 |

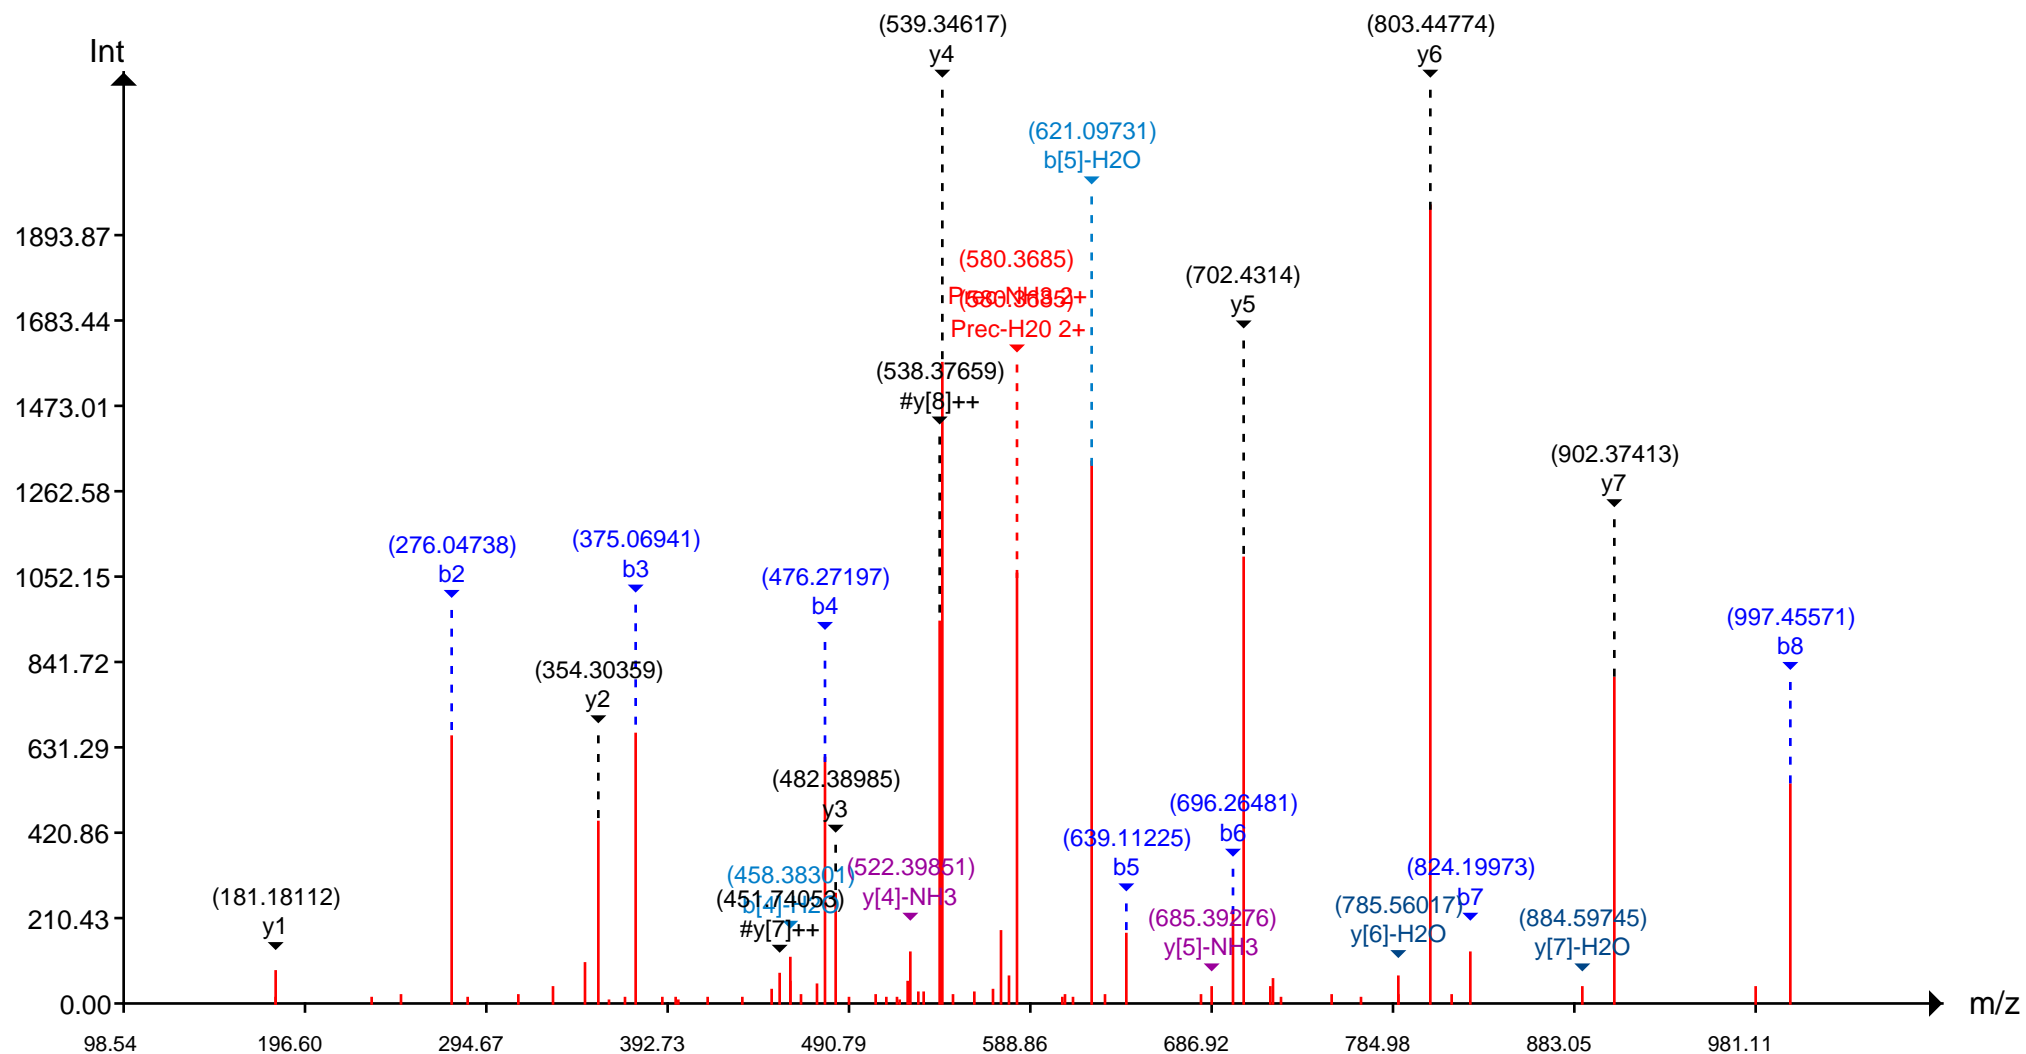

## Info

|                          |                                          |                           |          |
|--------------------------|------------------------------------------|---------------------------|----------|
| <b>Modified Sequence</b> | AcD3-GK<AcD3K*>VTYGQK<AcD3K*>R<C13>-COOH | <b>Ion score</b>          | 61.34    |
| <b>Protein</b>           | Q92499                                   | <b>Confidence level</b>   | 99.00%   |
| <b>Precursor m/z</b>     | 589.35262                                | <b>Identity Threshold</b> | 46.55    |
| <b>Charge</b>            | 2+                                       | <b>Mass error</b>         | -1.69E-4 |

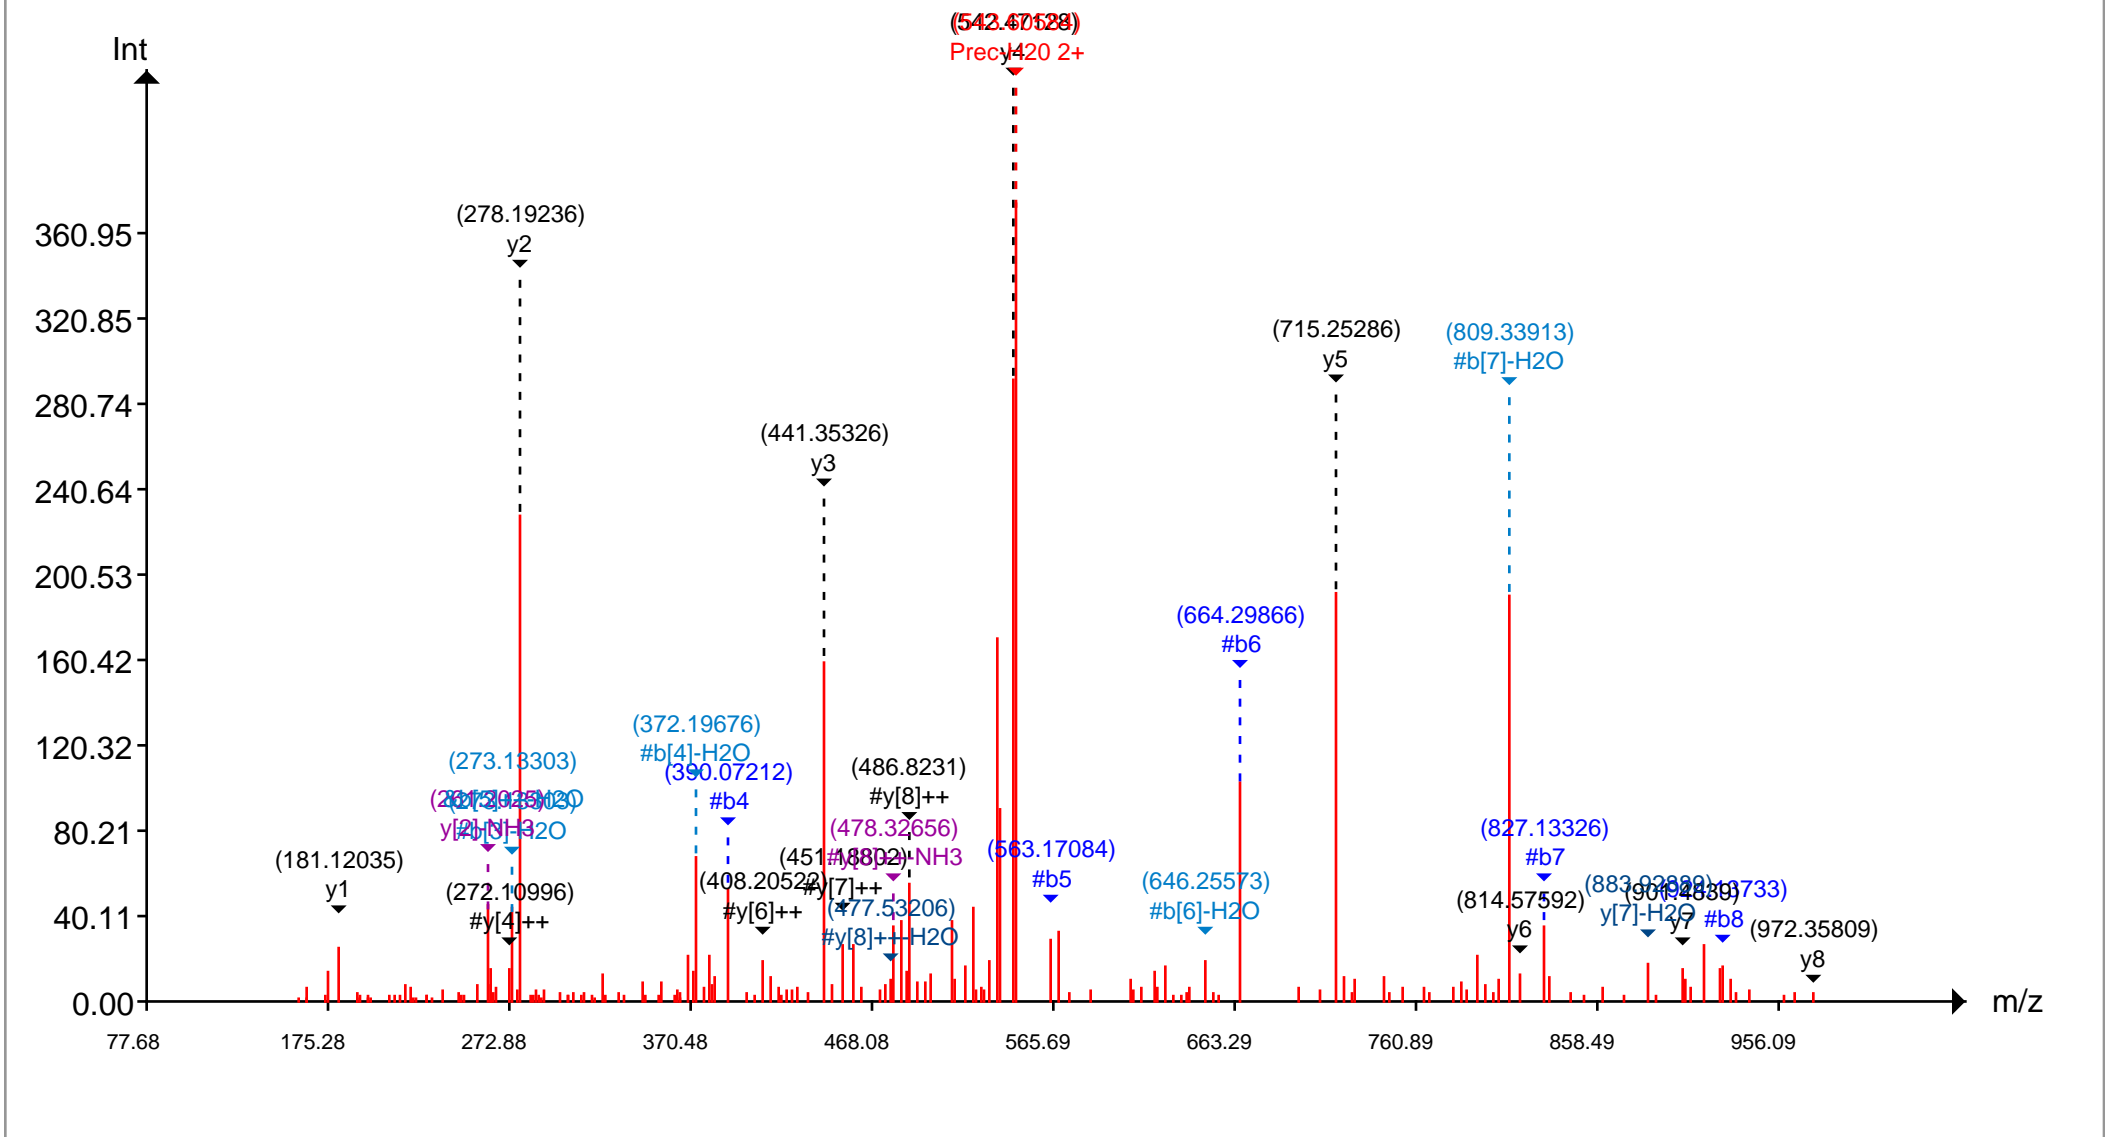

## Info

**Modified Sequence** AcD3-SASVK<AcD3K\*>TYPR<C13>-COOH

**Ion score** 54.13

**Protein** Q8N9T8

**Confidence level** 99.00%

**Precursor m/z** 552.81663

**Identity Threshold** 48.15

**Charge** 2+

**Mass error** -2.04E-4

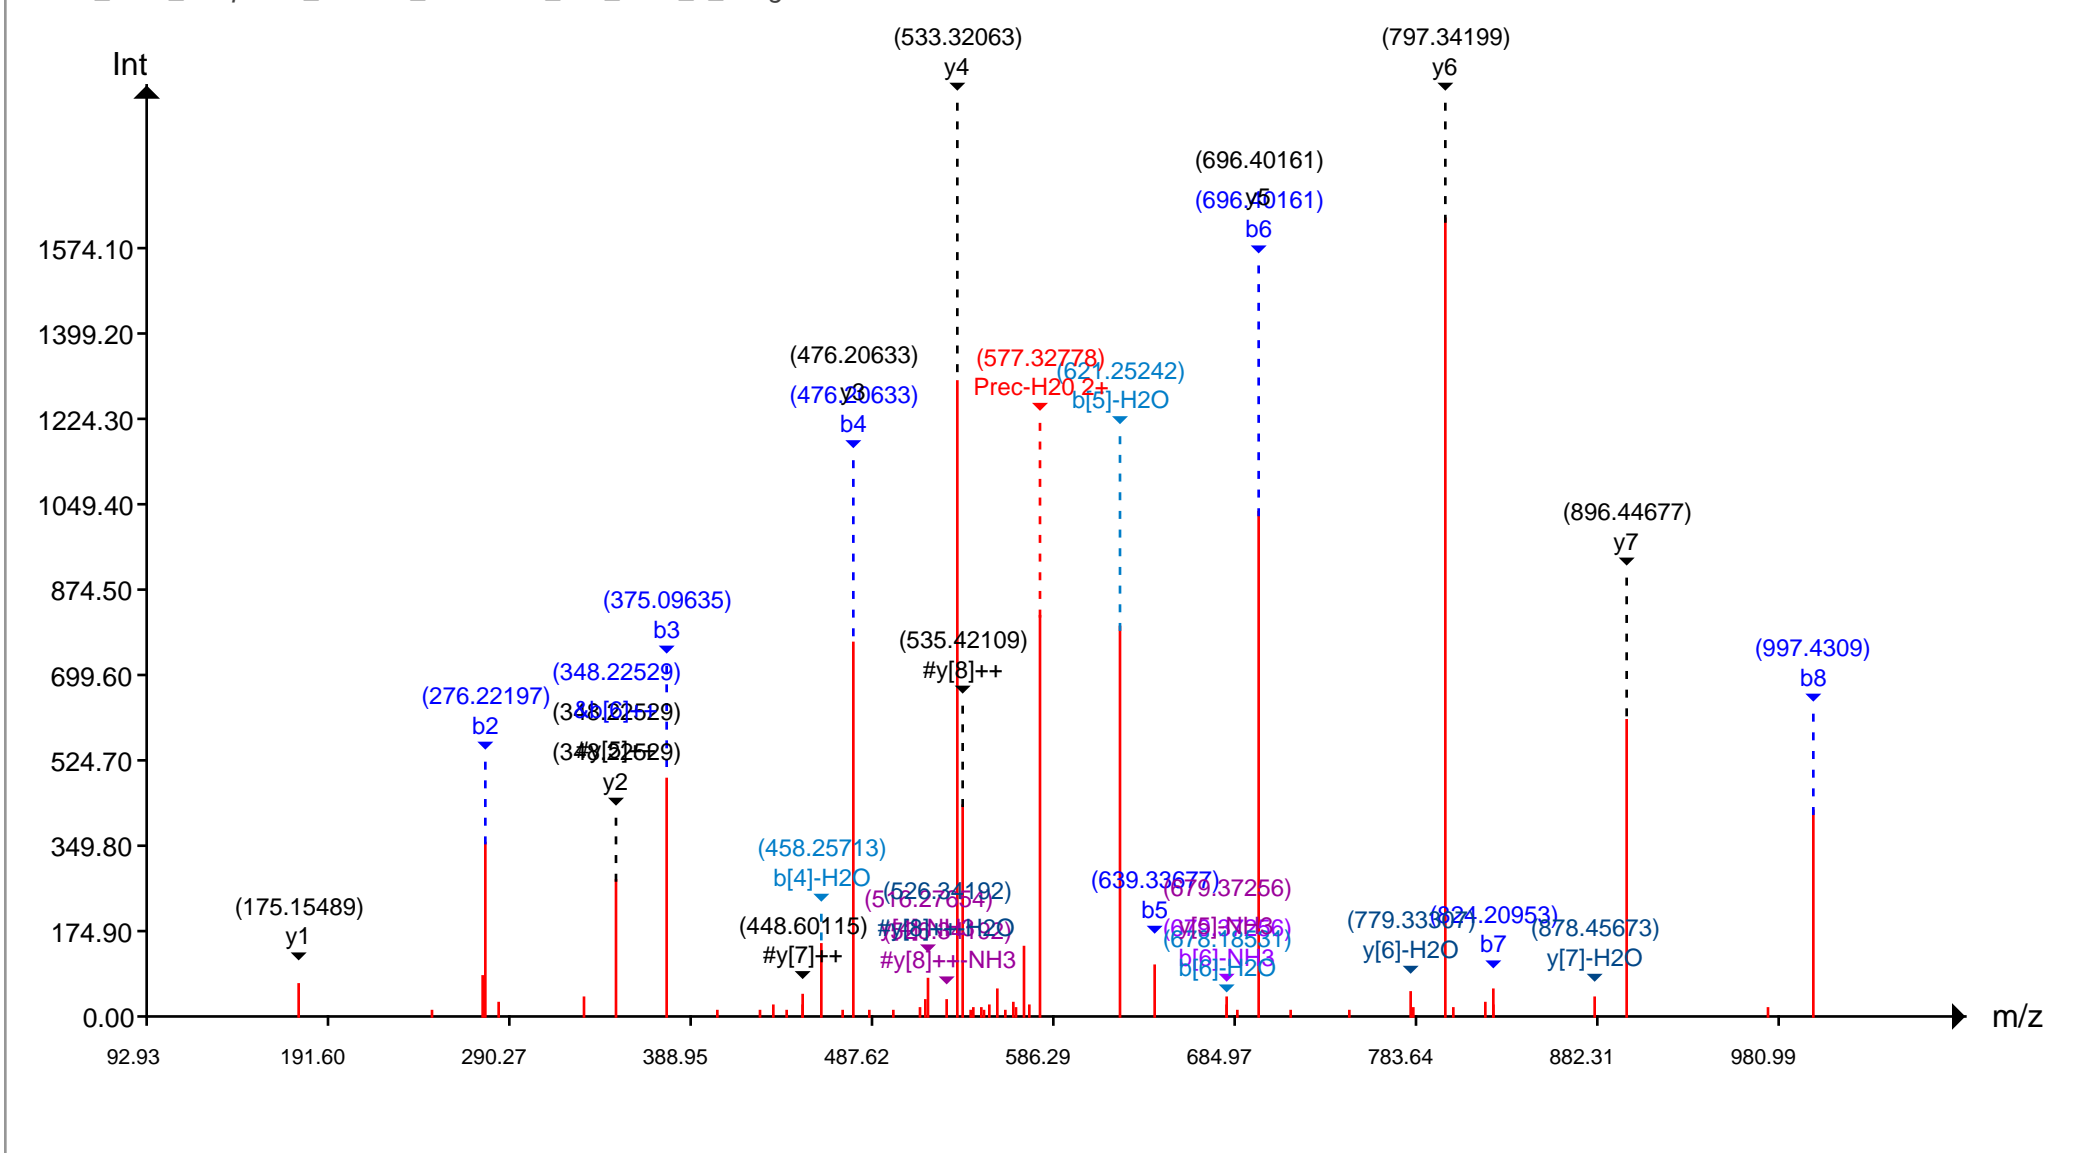

| Info                     |                                     |                           |         |
|--------------------------|-------------------------------------|---------------------------|---------|
| <b>Modified Sequence</b> | AcD3-GK<AcD3K*>VTYGQK<AcD3K*>R-COOH | <b>Ion score</b>          | 64.18   |
| <b>Protein</b>           | Q92499                              | <b>Confidence level</b>   | 99.00%  |
| <b>Precursor m/z</b>     | 586.34281                           | <b>Identity Threshold</b> | 47.32   |
| <b>Charge</b>            | 2+                                  | <b>Mass error</b>         | 3.53E-4 |

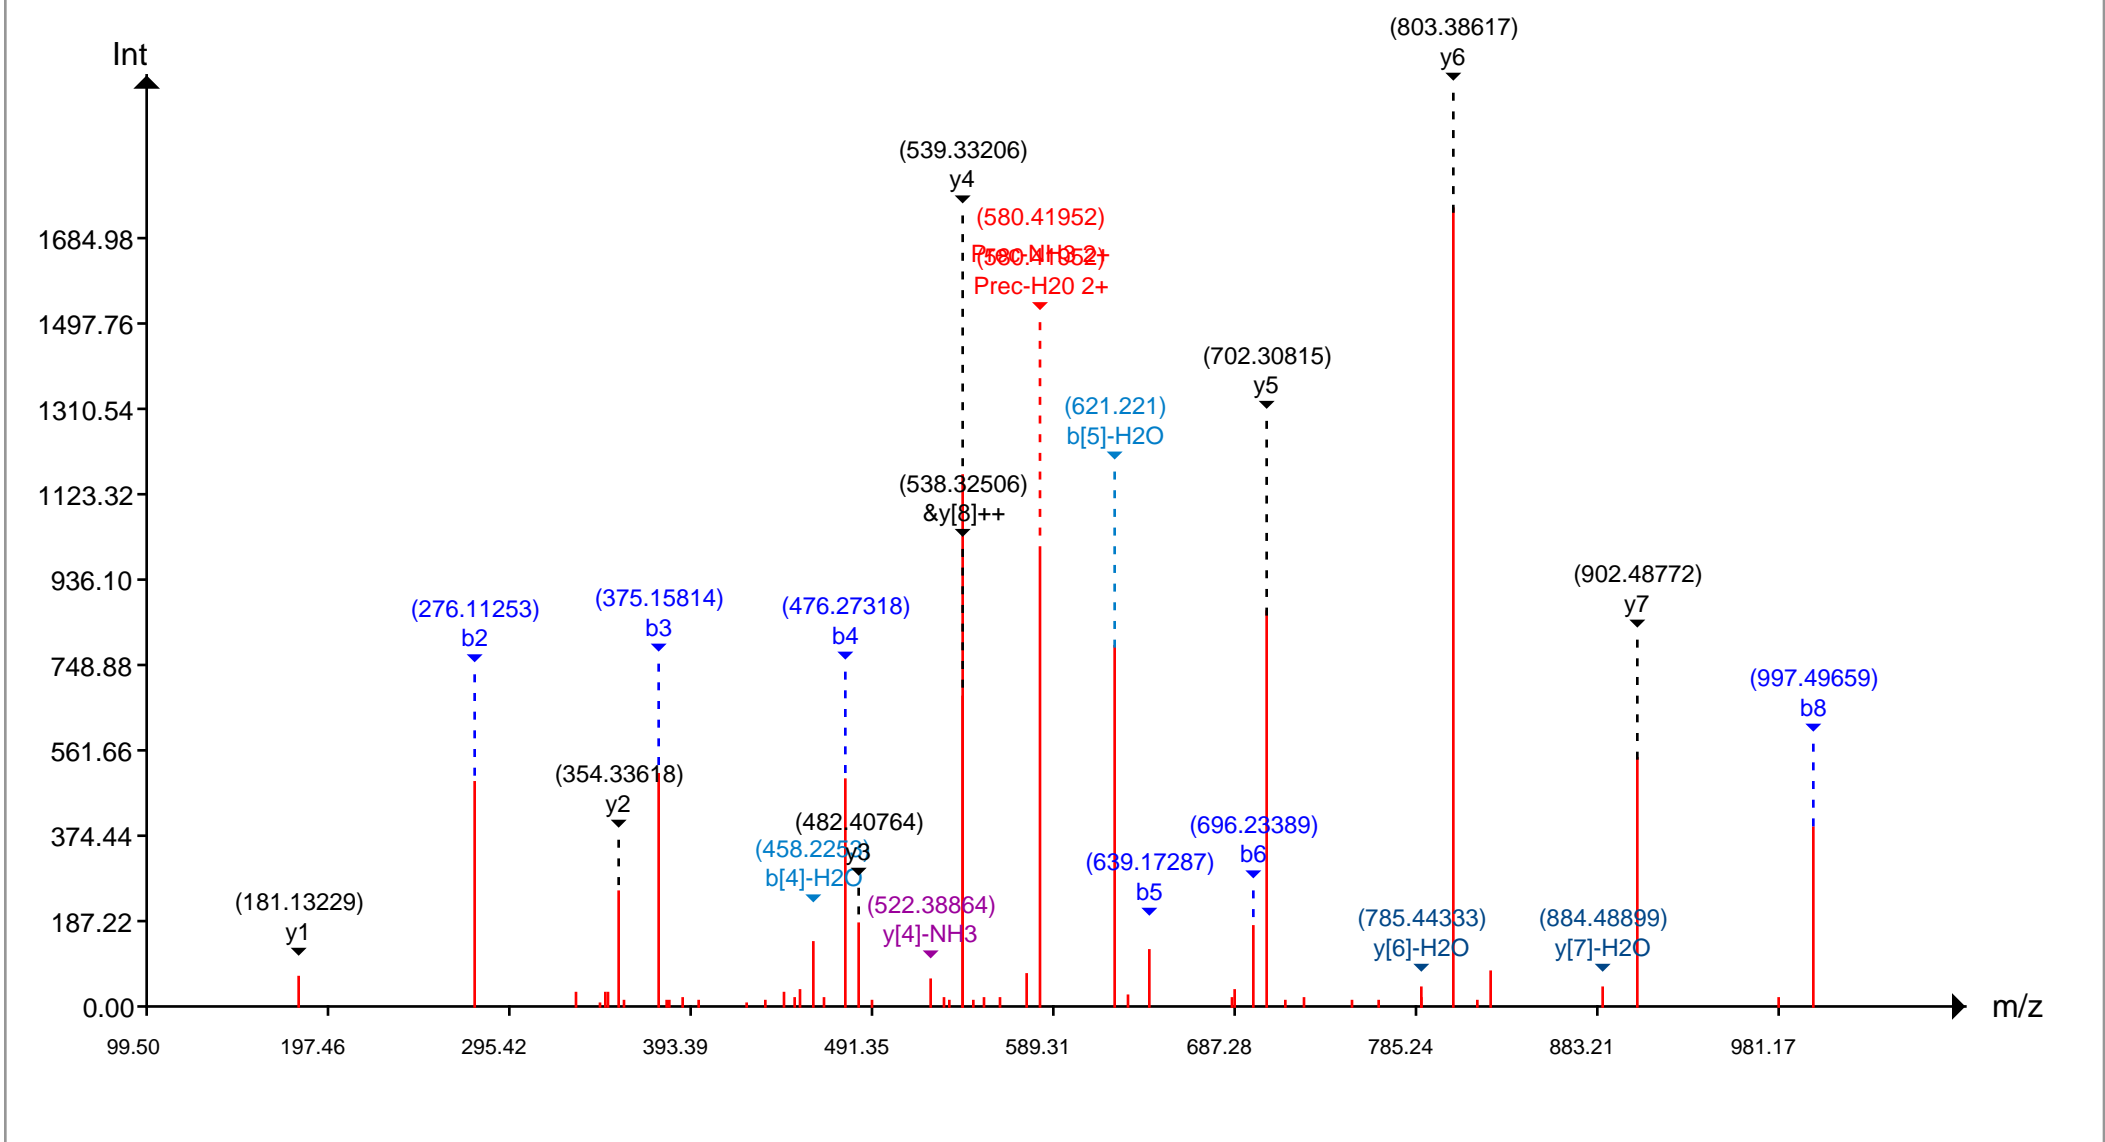

## Info

**Modified Sequence** AcD3-GK<AcD3K\*>VTYGQK<AcD3K\*>R<C13>-COOH

**Ion score** 62.56

**Protein** Q92499

**Confidence level** 99.00%

**Precursor m/z** 589.35279

**Identity Threshold** 46.50

**Charge** 2+

**Mass error** 1.71E-4

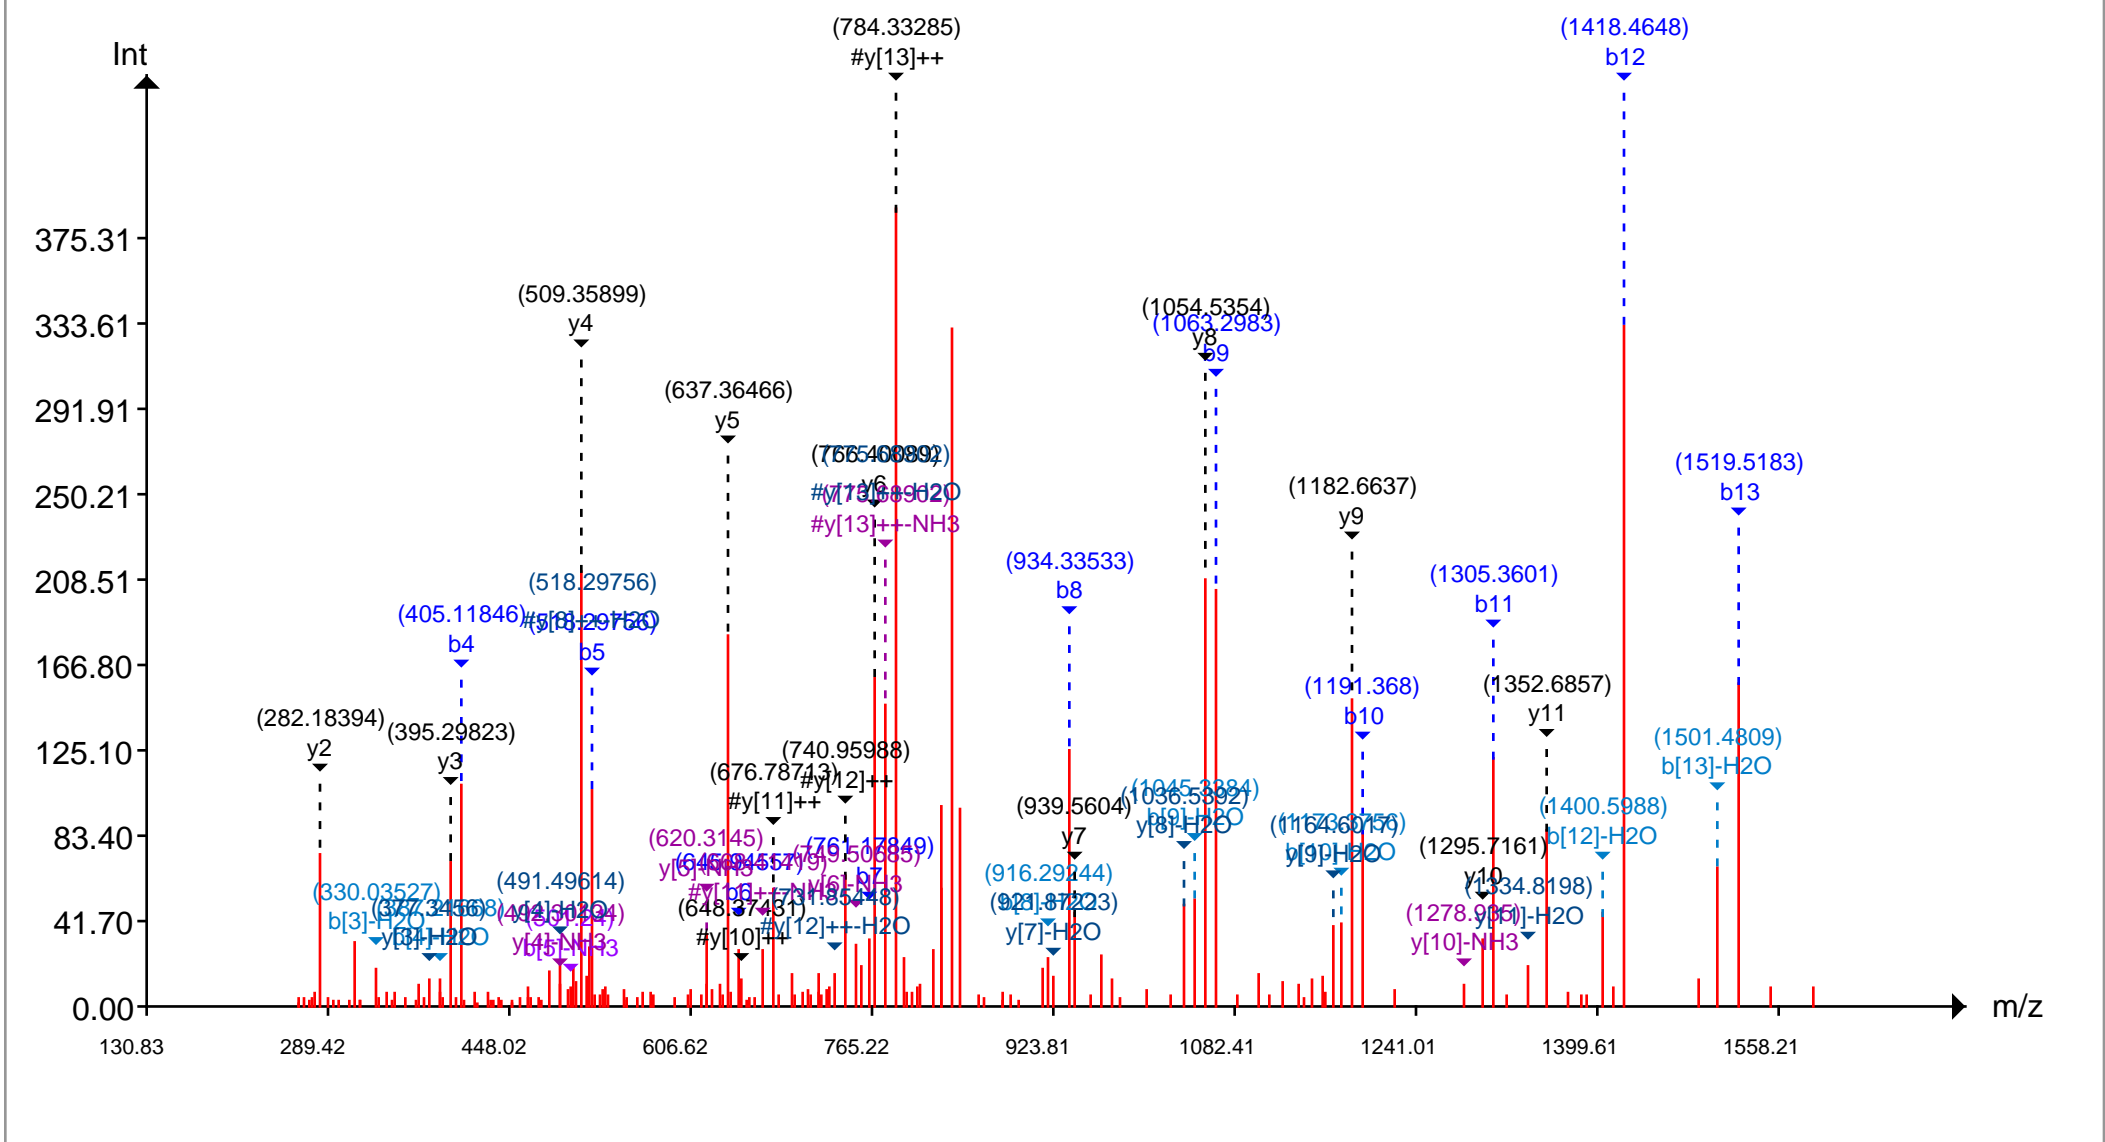

## Info

|                          |                                       |                           |          |
|--------------------------|---------------------------------------|---------------------------|----------|
| <b>Modified Sequence</b> | AcD3-SSQGLQDK<AcD3K*>EQNLTR<C13>-COOH | <b>Ion score</b>          | 90.2     |
| <b>Protein</b>           | O60293                                | <b>Confidence level</b>   | 99.00%   |
| <b>Precursor m/z</b>     | 850.44468                             | <b>Identity Threshold</b> | 48.96    |
| <b>Charge</b>            | 2+                                    | <b>Mass error</b>         | -2.68E-4 |



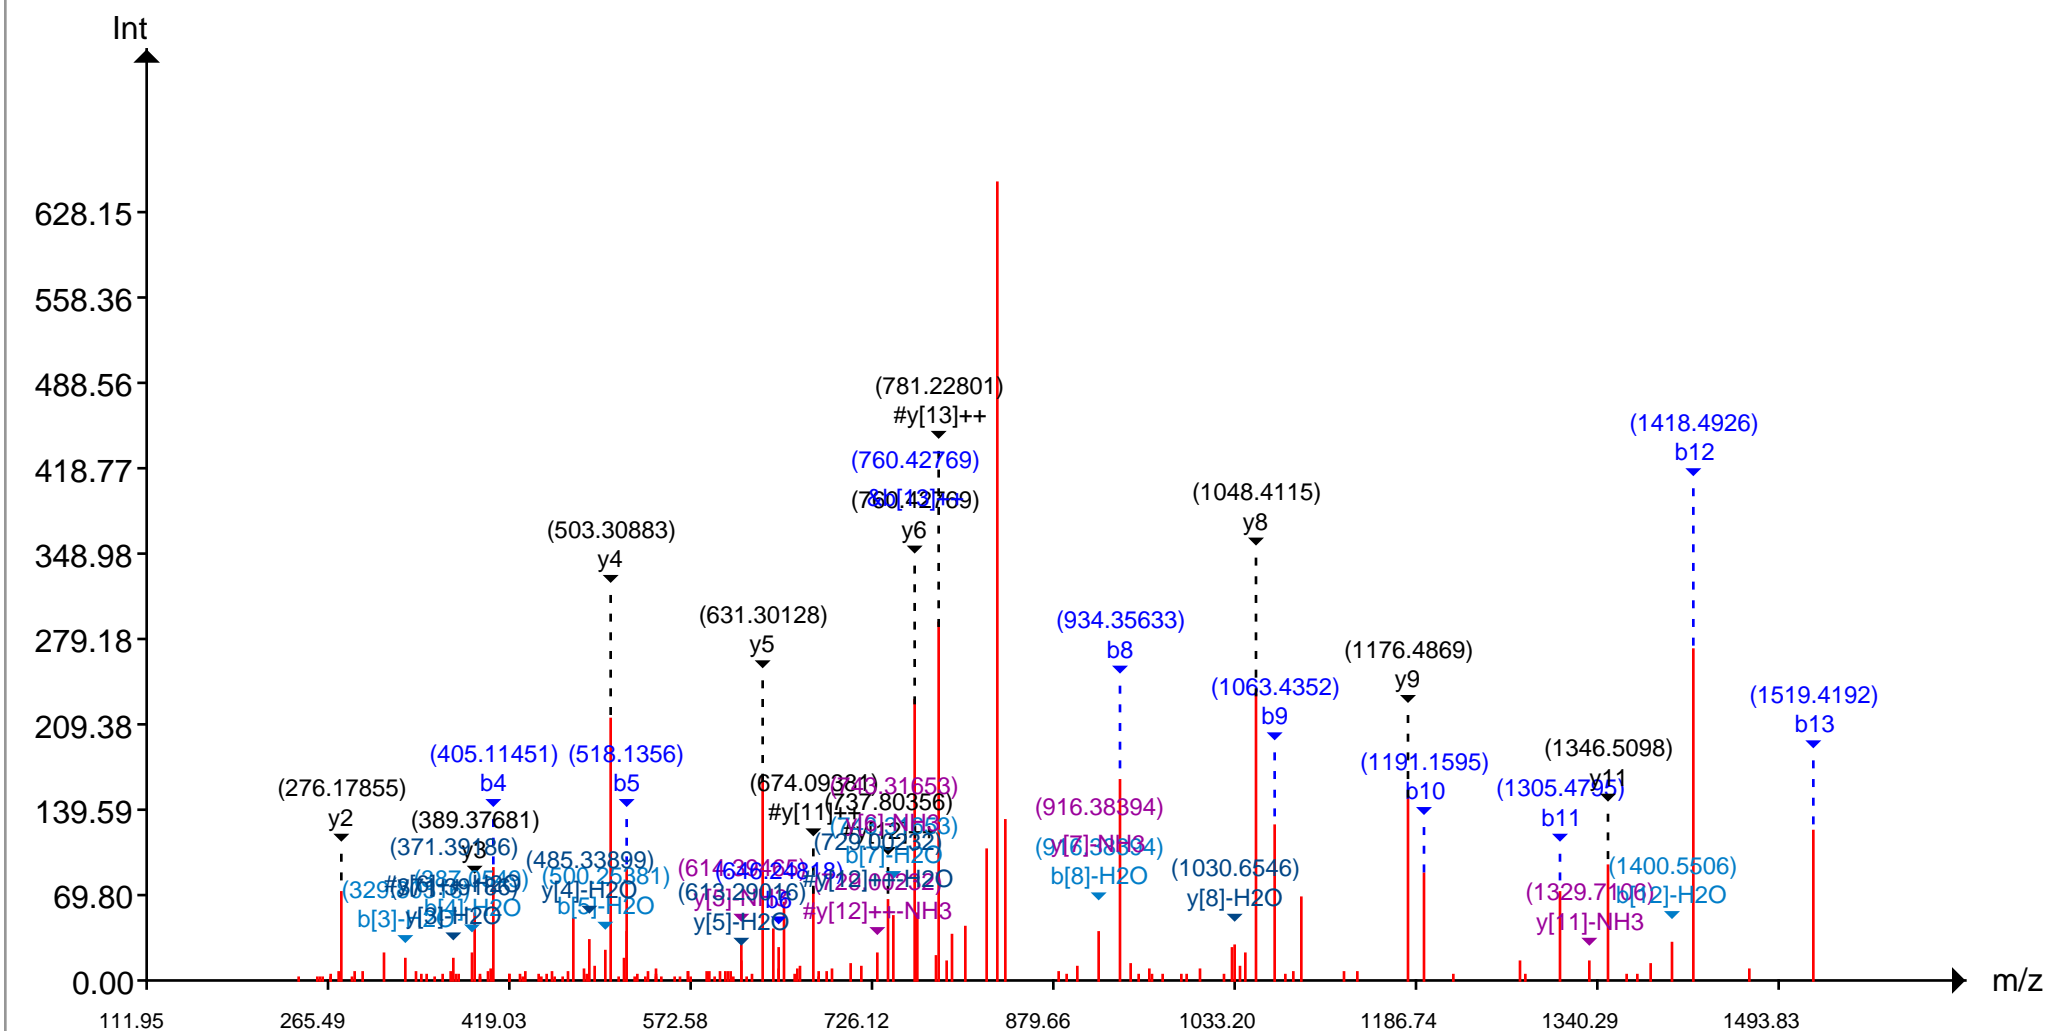

## Info

**Modified Sequence** AcD3-SSQGLQDK<AcD3K\*>EQNLTR-COOH

**Ion score** 77.96

**Protein** O60293

**Confidence level** 99.00%

**Precursor m/z** 847.43536

**Identity Threshold** 49.10

**Charge** 2+

**Mass error** 0.001233

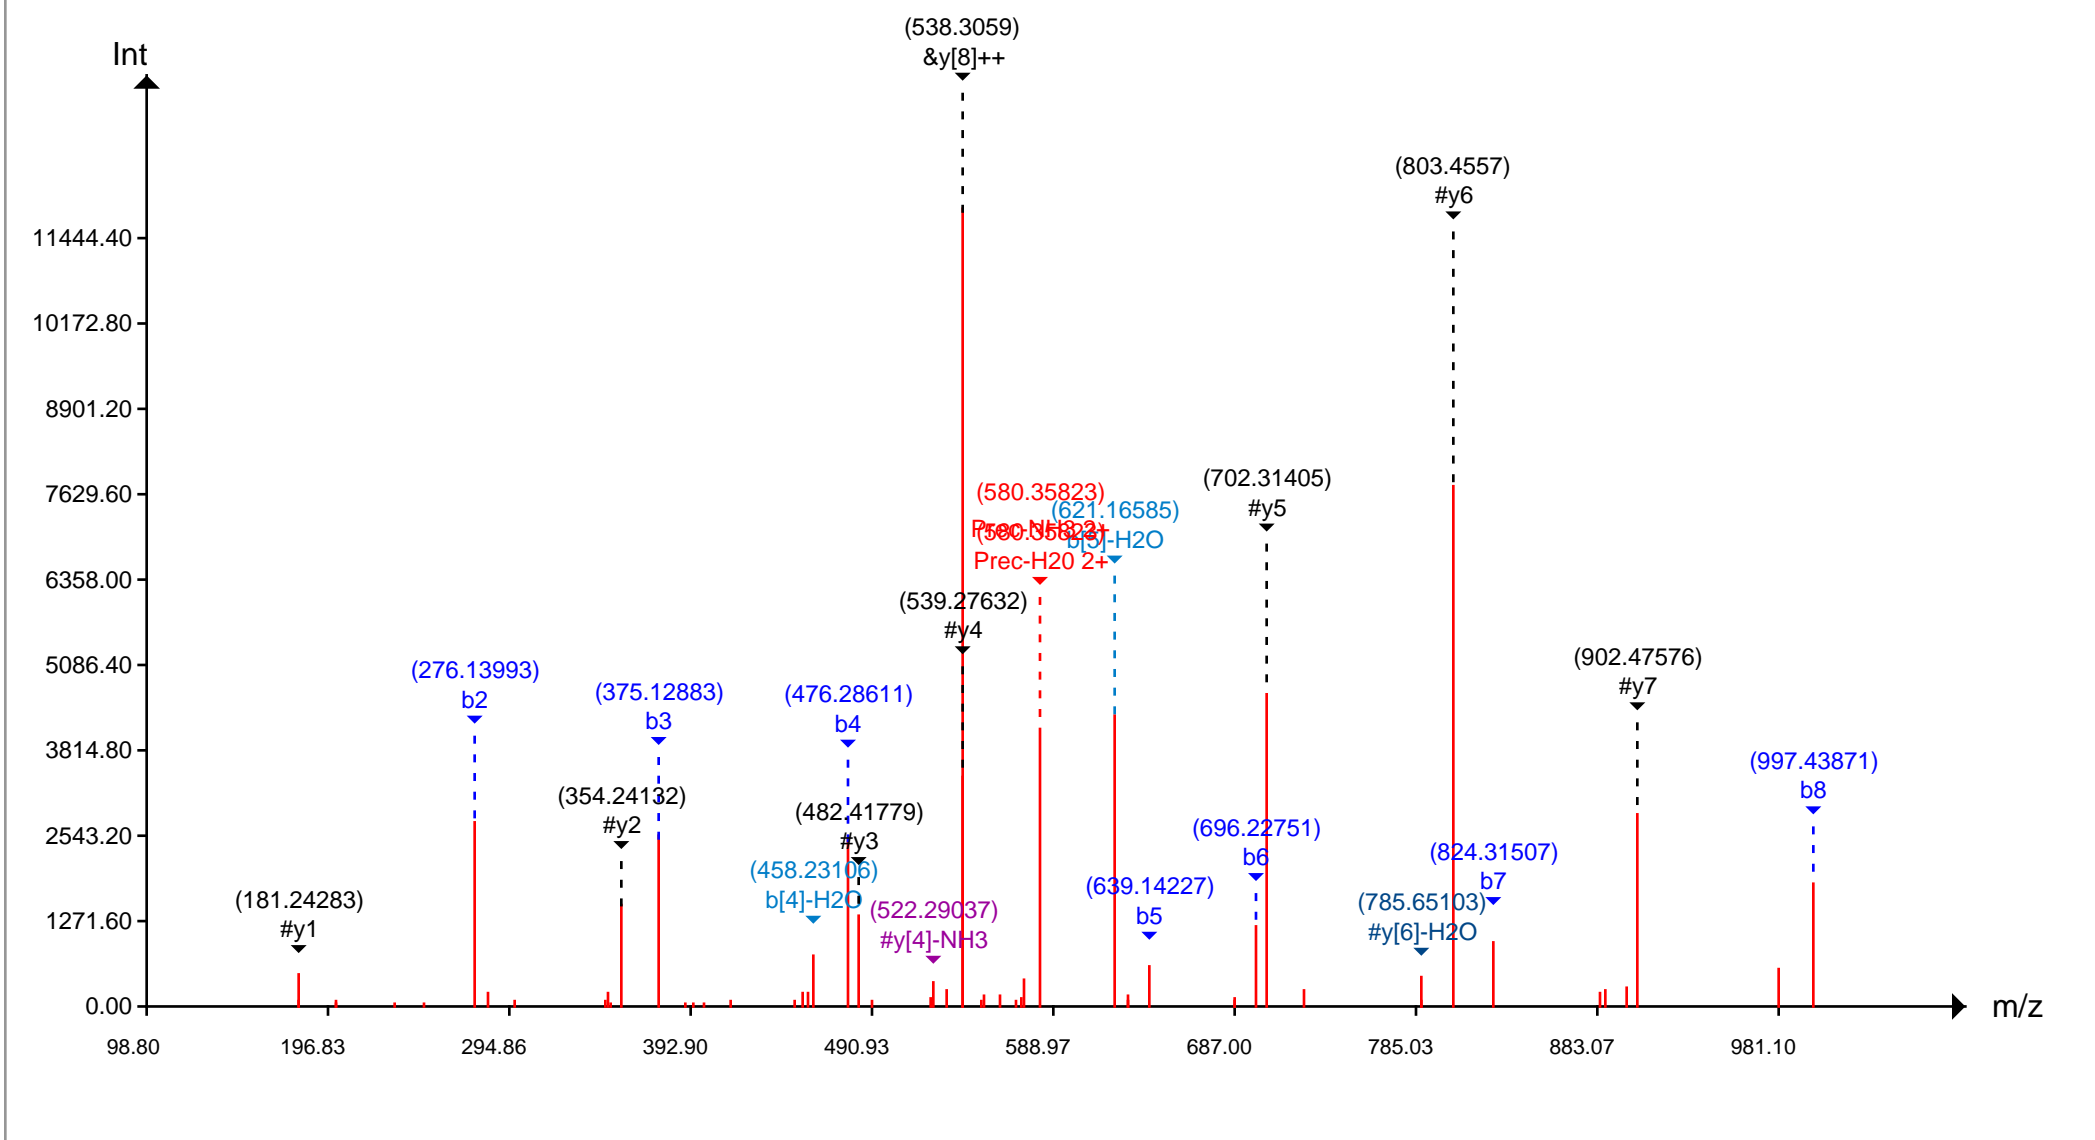

## Info

**Modified Sequence** AcD3-GK<AcD3K\*>VTYGQK<AcD3K\*>R<C13>-COOH

**Ion score** 64.74

**Protein** Q92499

**Confidence level** 99.00%

**Precursor m/z** 589.35298

**Identity Threshold** 46.46

**Charge** 2+

**Mass error** 5.51E-4

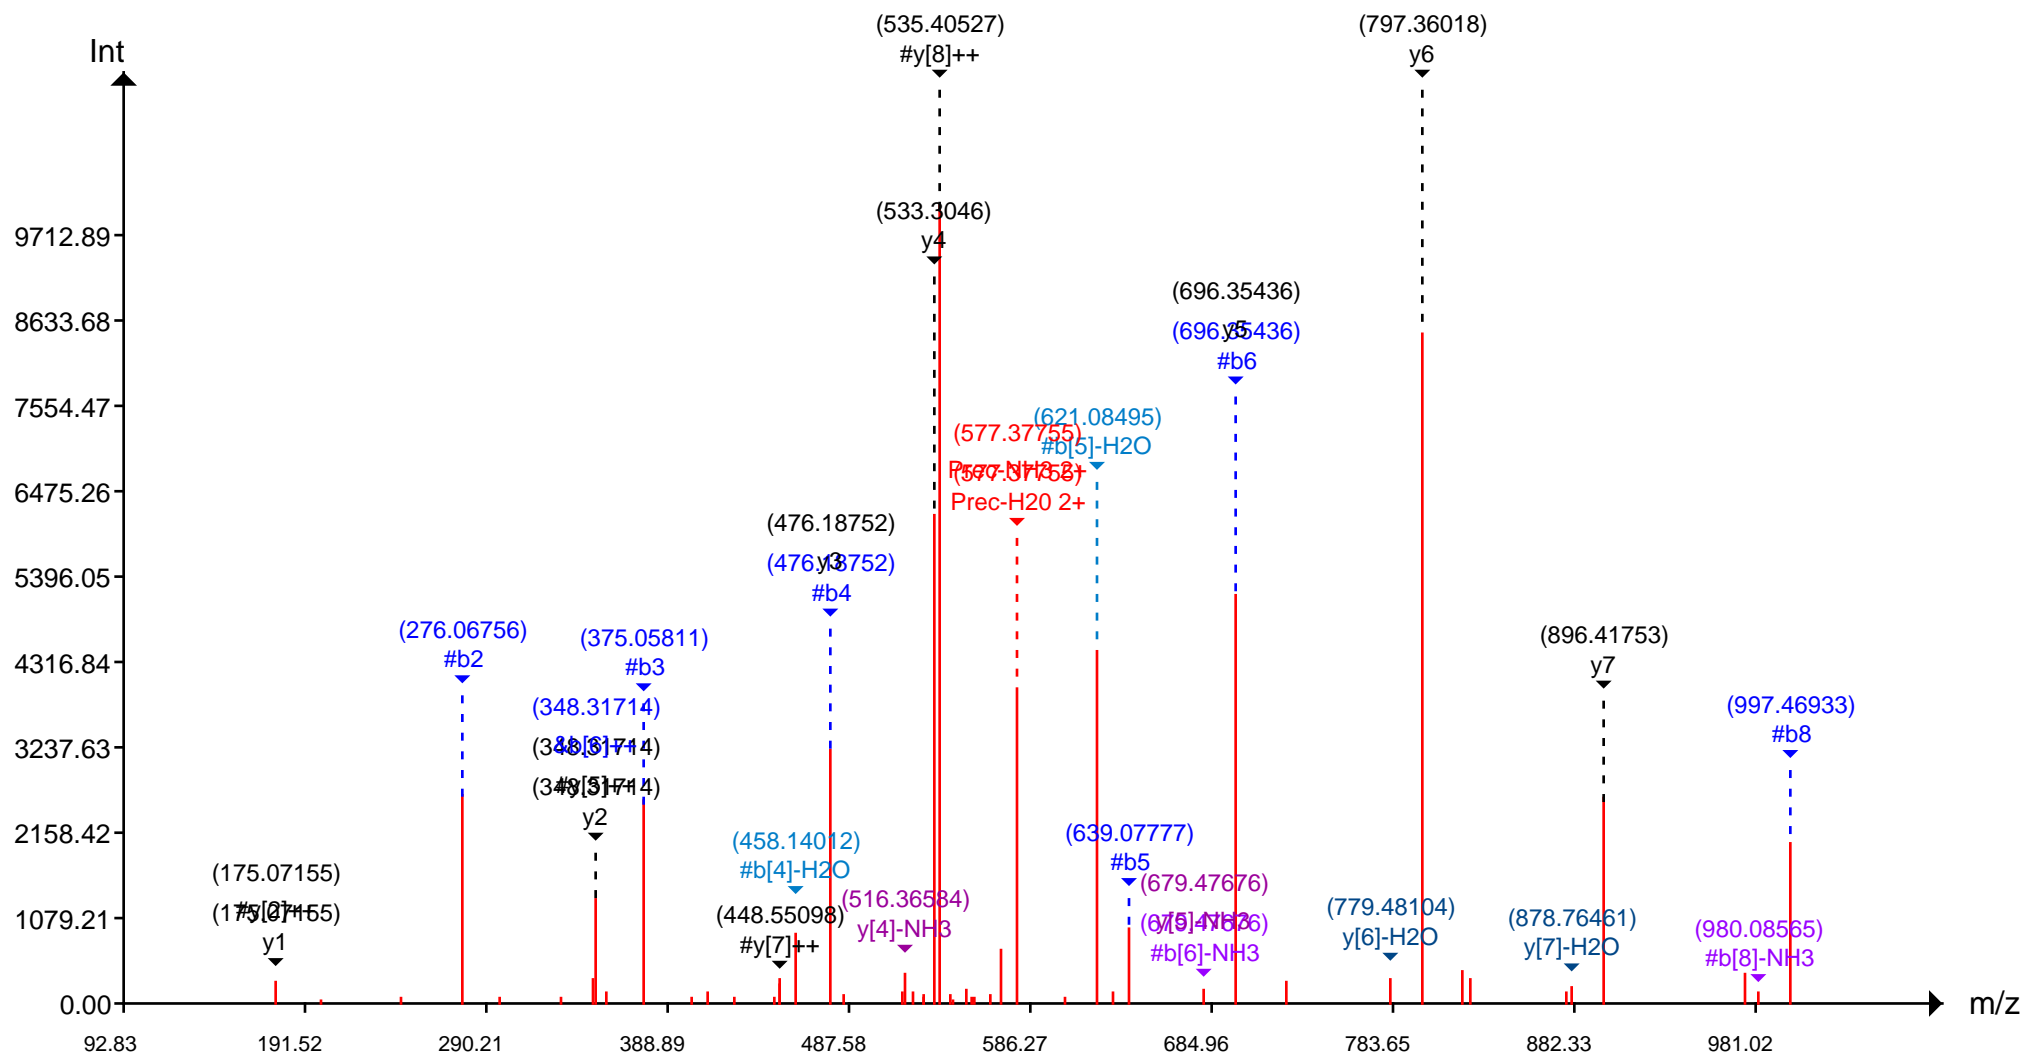

## Info

|                          |                                     |                           |         |
|--------------------------|-------------------------------------|---------------------------|---------|
| <b>Modified Sequence</b> | AcD3-GK<AcD3K*>VTYGQK<AcD3K*>R-COOH | <b>Ion score</b>          | 56.62   |
| <b>Protein</b>           | Q92499                              | <b>Confidence level</b>   | 99.00%  |
| <b>Precursor m/z</b>     | 586.34295                           | <b>Identity Threshold</b> | 47.28   |
| <b>Charge</b>            | 2+                                  | <b>Mass error</b>         | 6.33E-4 |

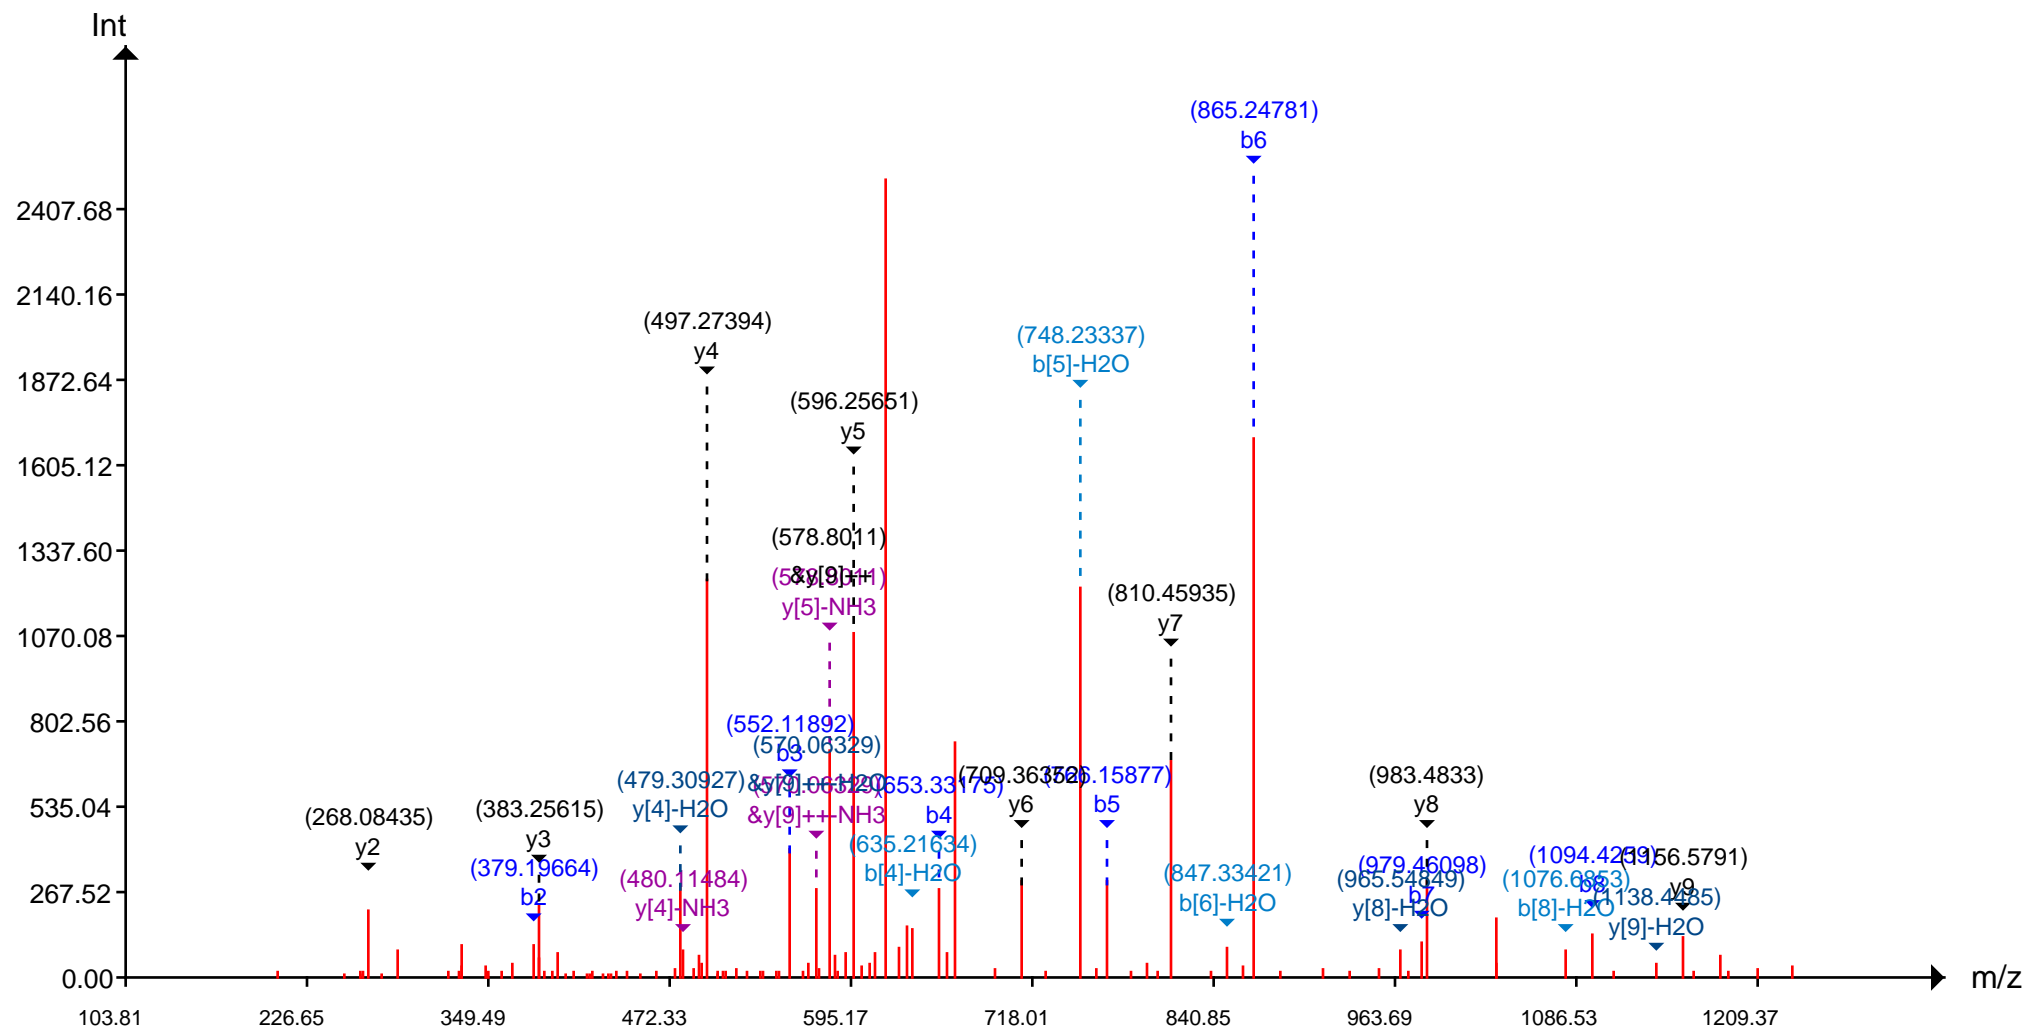

## Info

|                          |                                                 |                           |         |
|--------------------------|-------------------------------------------------|---------------------------|---------|
| <b>Modified Sequence</b> | AcD3-C<Cmm*>K<AcD3K*>K<AcD3K*>TIVNDSR<C13>-COOH | <b>Ion score</b>          | 69.49   |
| <b>Protein</b>           | Q00987                                          | <b>Confidence level</b>   | 99.00%  |
| <b>Precursor m/z</b>     | 681.37896                                       | <b>Identity Threshold</b> | 48.55   |
| <b>Charge</b>            | 2+                                              | <b>Mass error</b>         | 7.38E-4 |

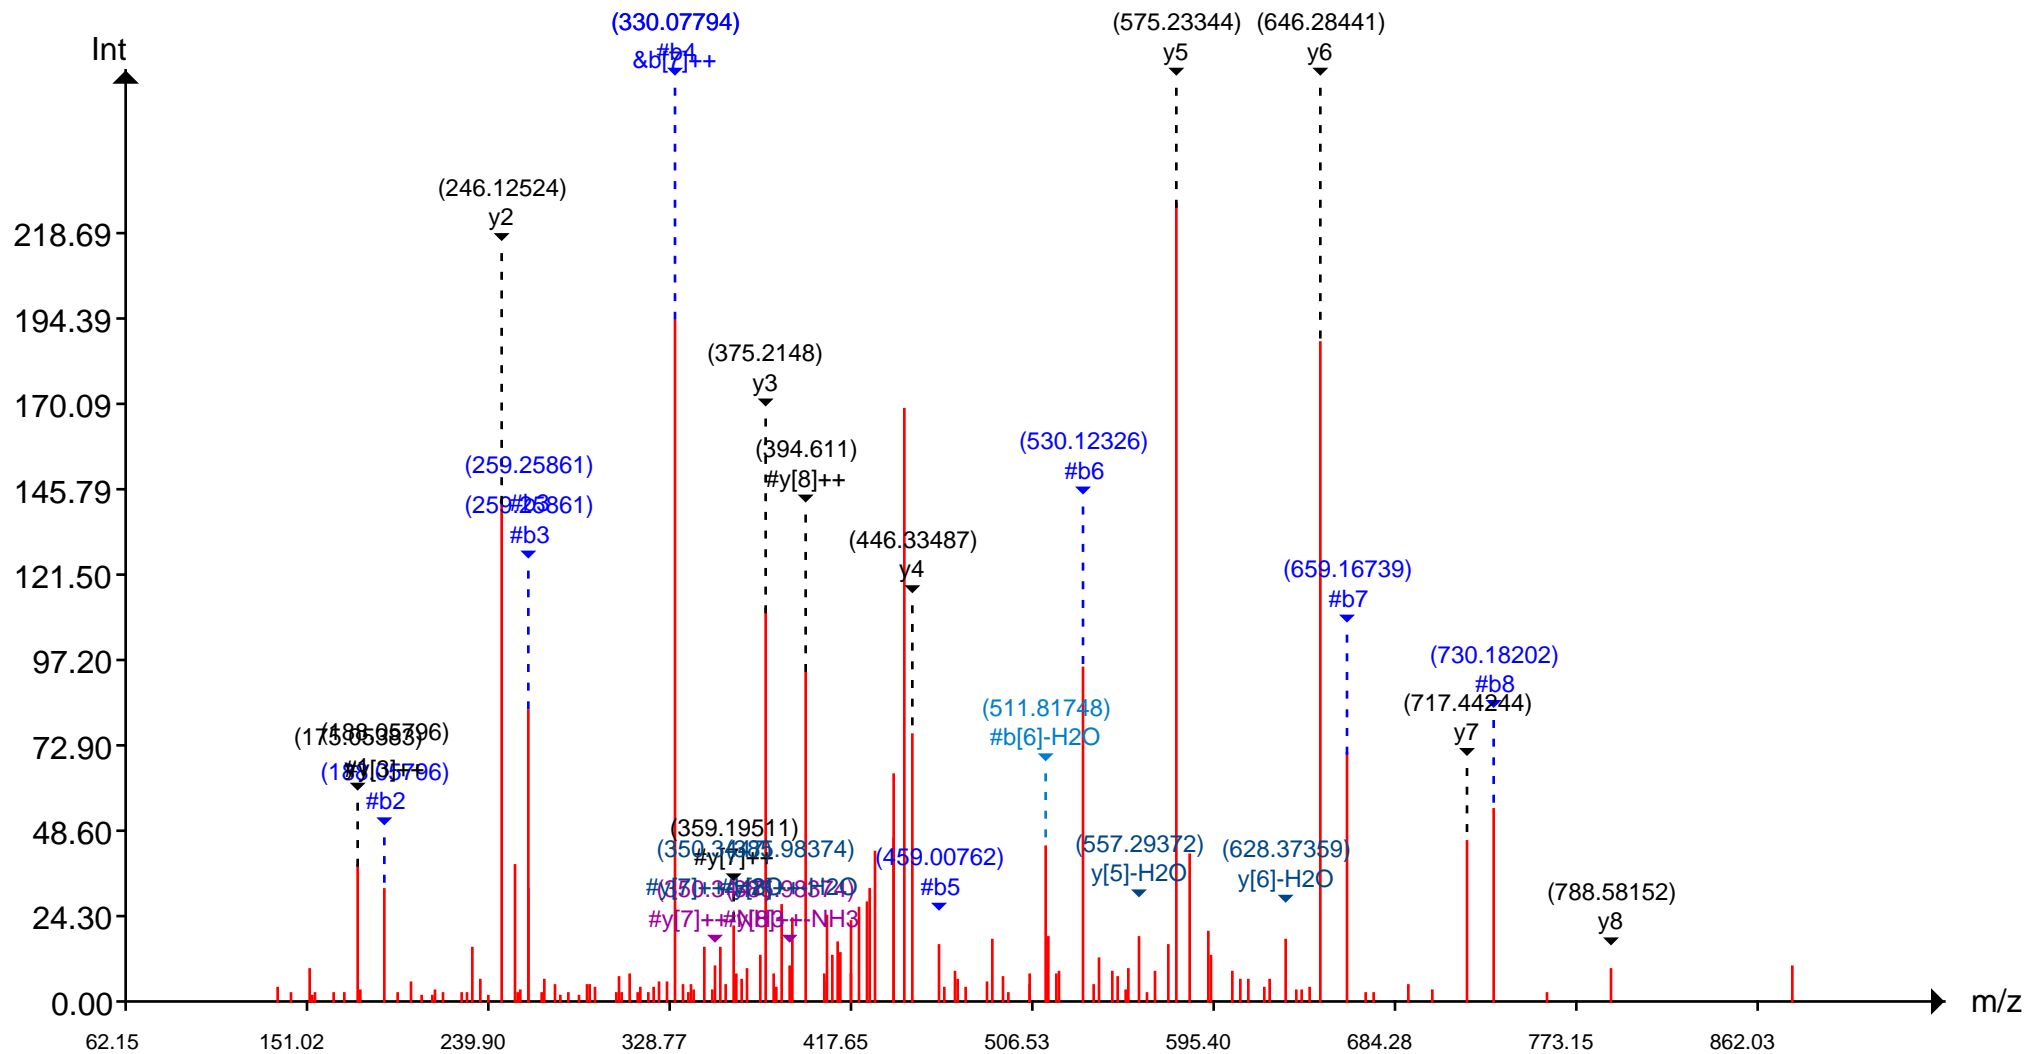

## Info

|                          |                     |                           |         |
|--------------------------|---------------------|---------------------------|---------|
| <b>Modified Sequence</b> | AcD3-AAAAEAEAR-COOH | <b>Ion score</b>          | 66.83   |
| <b>Protein</b>           | Q9Y5V3              | <b>Confidence level</b>   | 99.00%  |
| <b>Precursor m/z</b>     | 452.73185           | <b>Identity Threshold</b> | 48.43   |
| <b>Charge</b>            | 2+                  | <b>Mass error</b>         | 2.65E-4 |

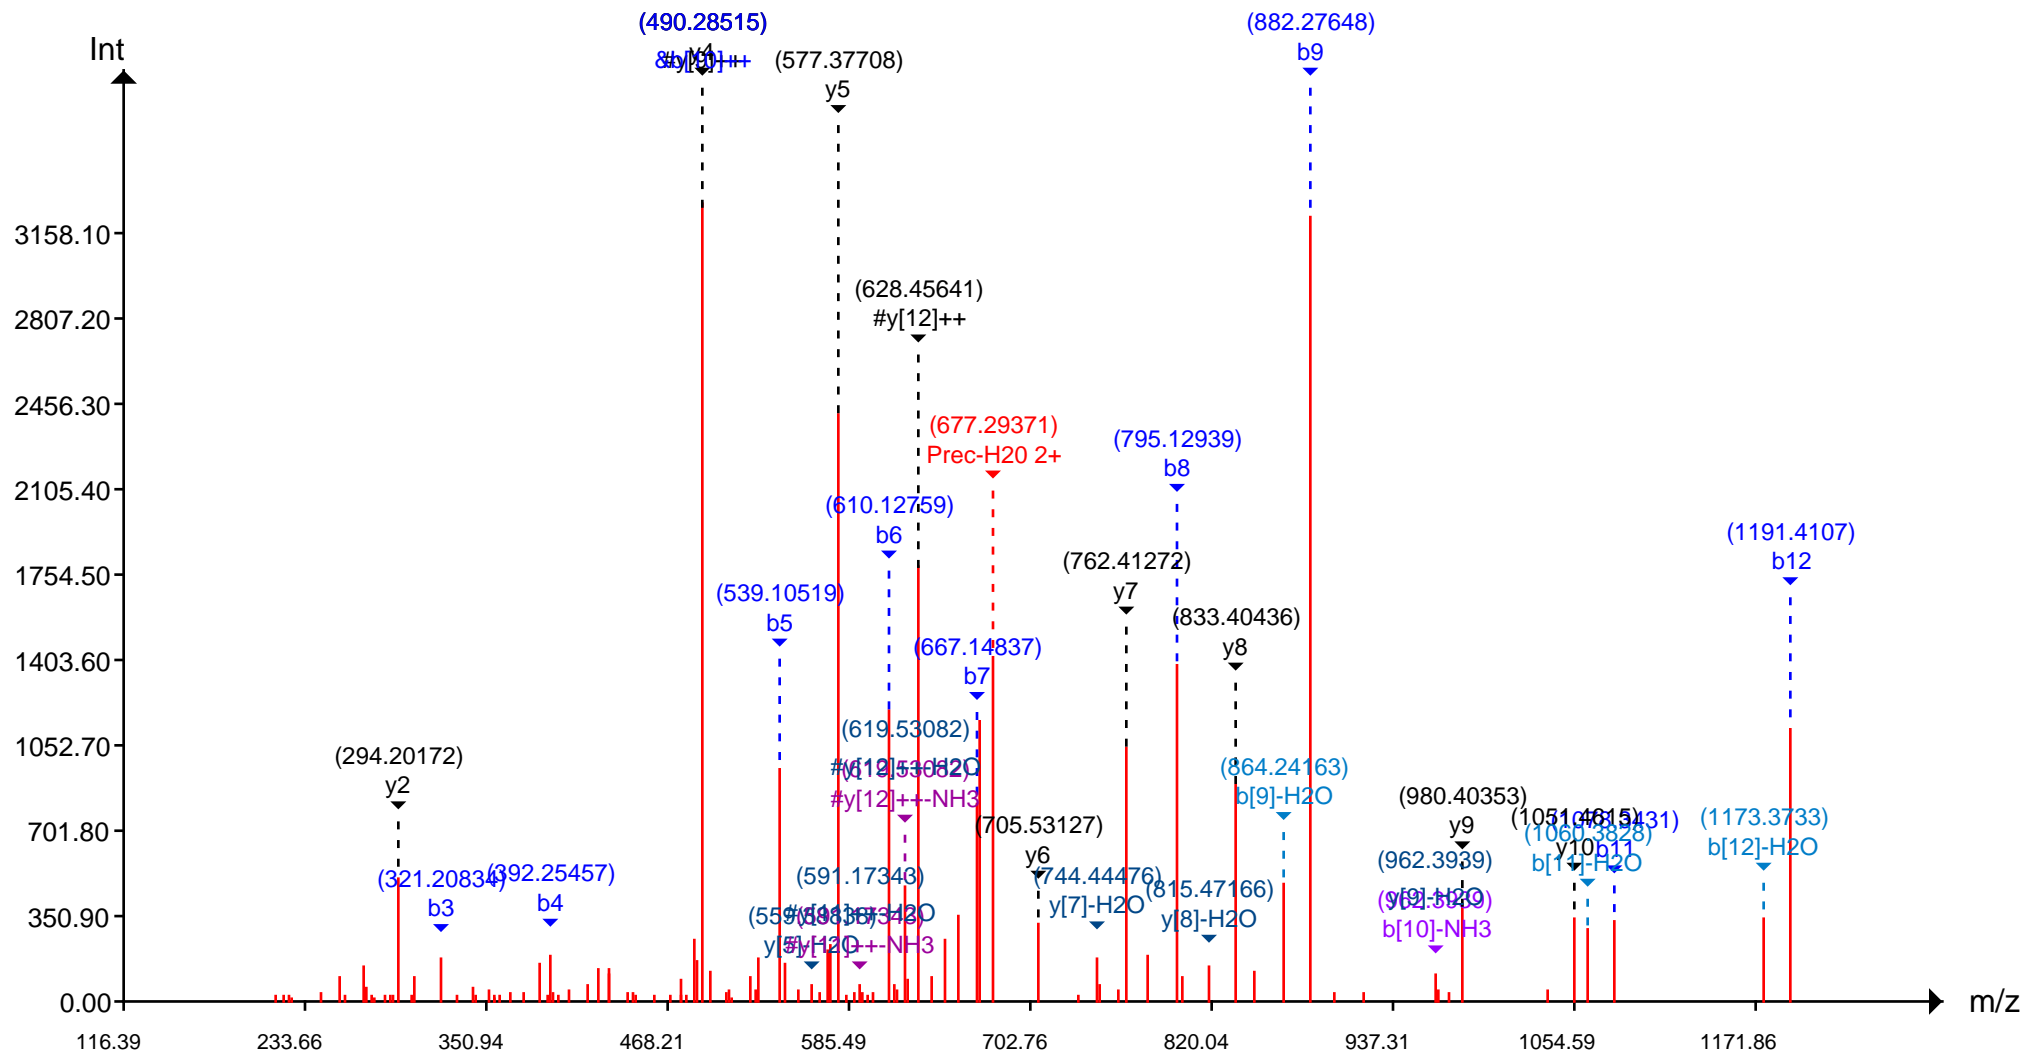

## Info

|                          |                                          |                           |         |
|--------------------------|------------------------------------------|---------------------------|---------|
| <b>Modified Sequence</b> | AcD3-AGM<Mox*>AM<Mox*>AGQSPVLR<C13>-COOH | <b>Ion score</b>          | 68.04   |
| <b>Protein</b>           | P26599                                   | <b>Confidence level</b>   | 99.00%  |
| <b>Precursor m/z</b>     | 686.34845                                | <b>Identity Threshold</b> | 48.74   |
| <b>Charge</b>            | 2+                                       | <b>Mass error</b>         | 2.34E-4 |

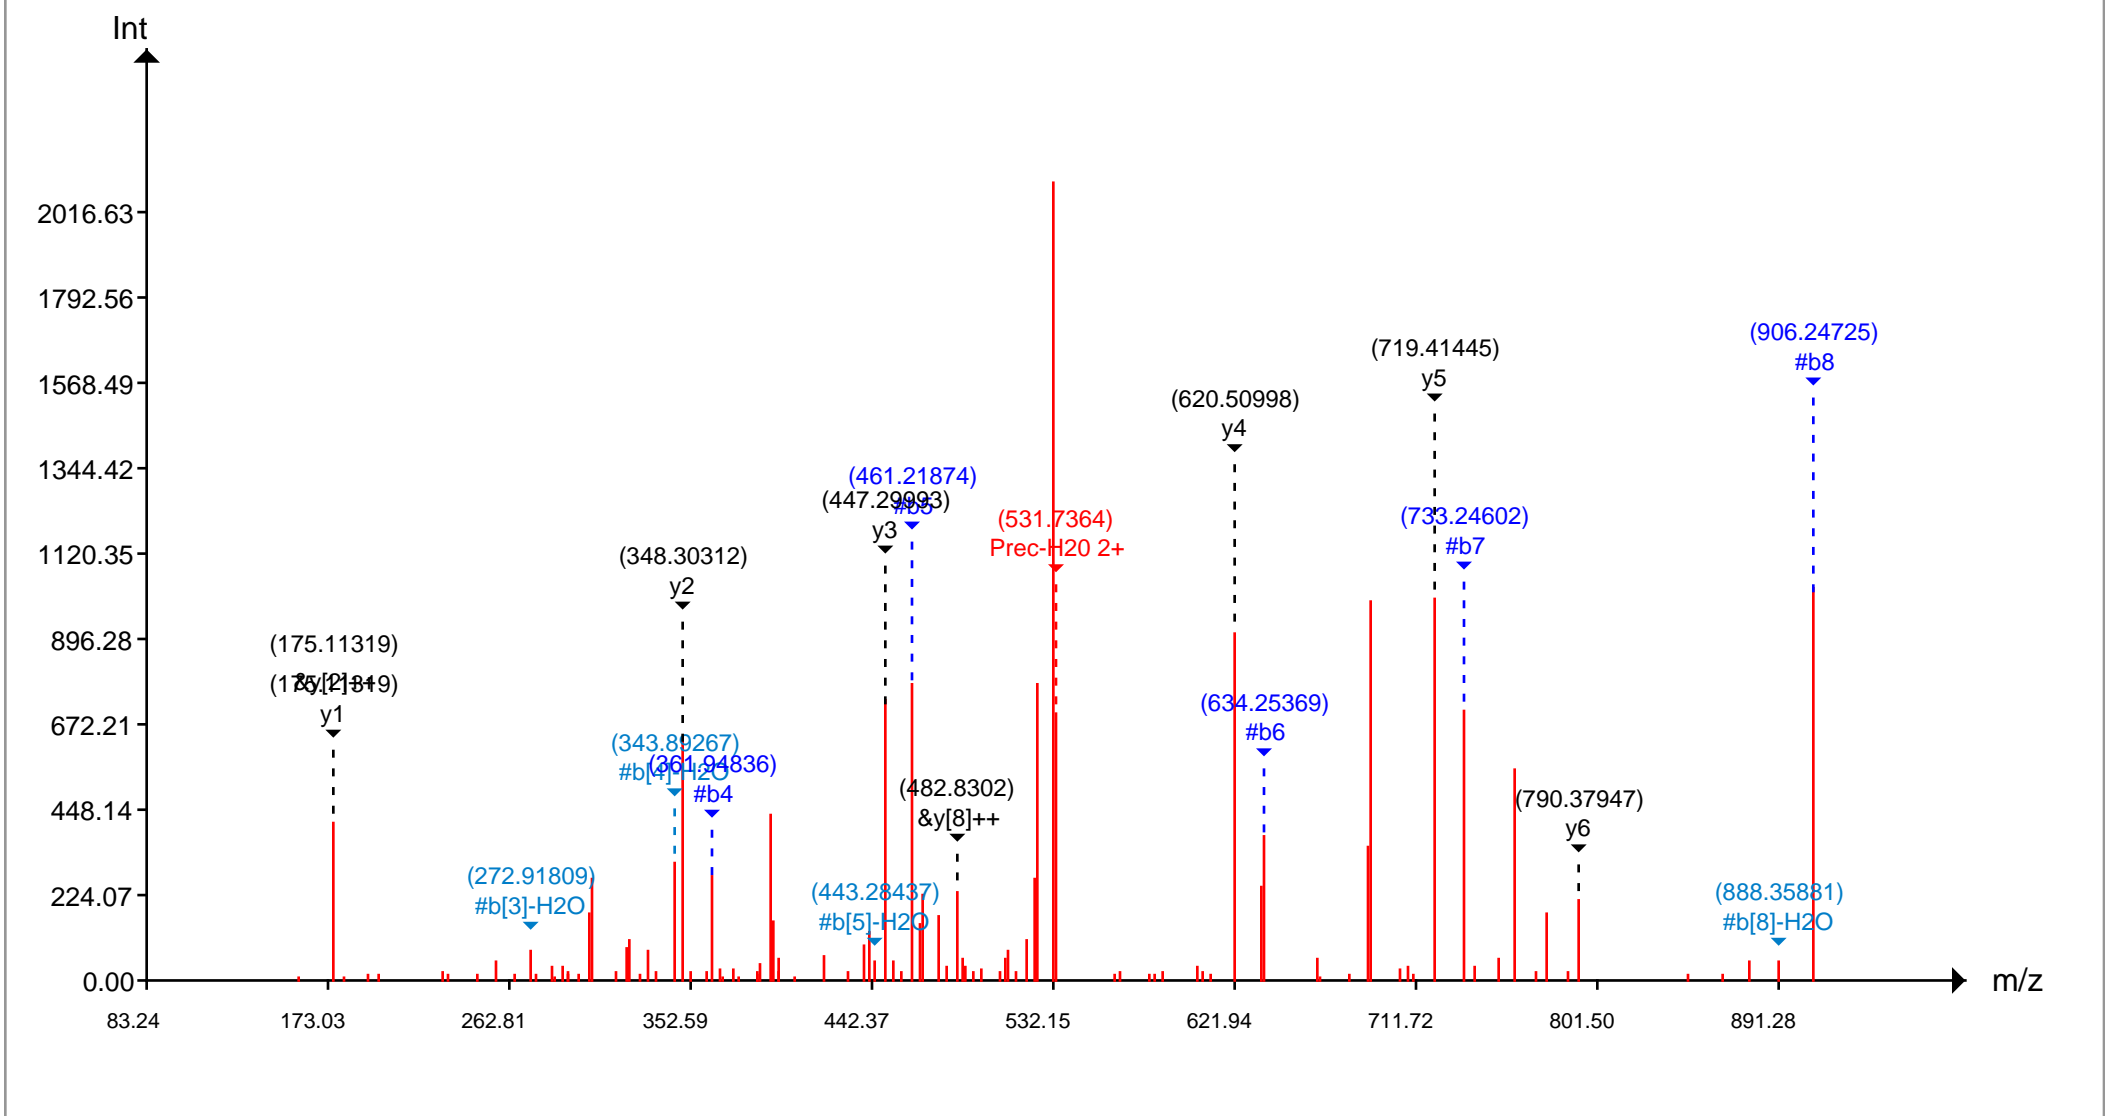

## Info

**Modified Sequence** AcD3-ASSAVK<AcD3K\*>VK<AcD3K\*>R-COOH

**Ion score** 44.87

**Protein** Q13148

**Confidence level** 99.00%

**Precursor m/z** 540.83992

**Identity Threshold** 43.82

**Charge** 2+

**Mass error** 4.02E-4

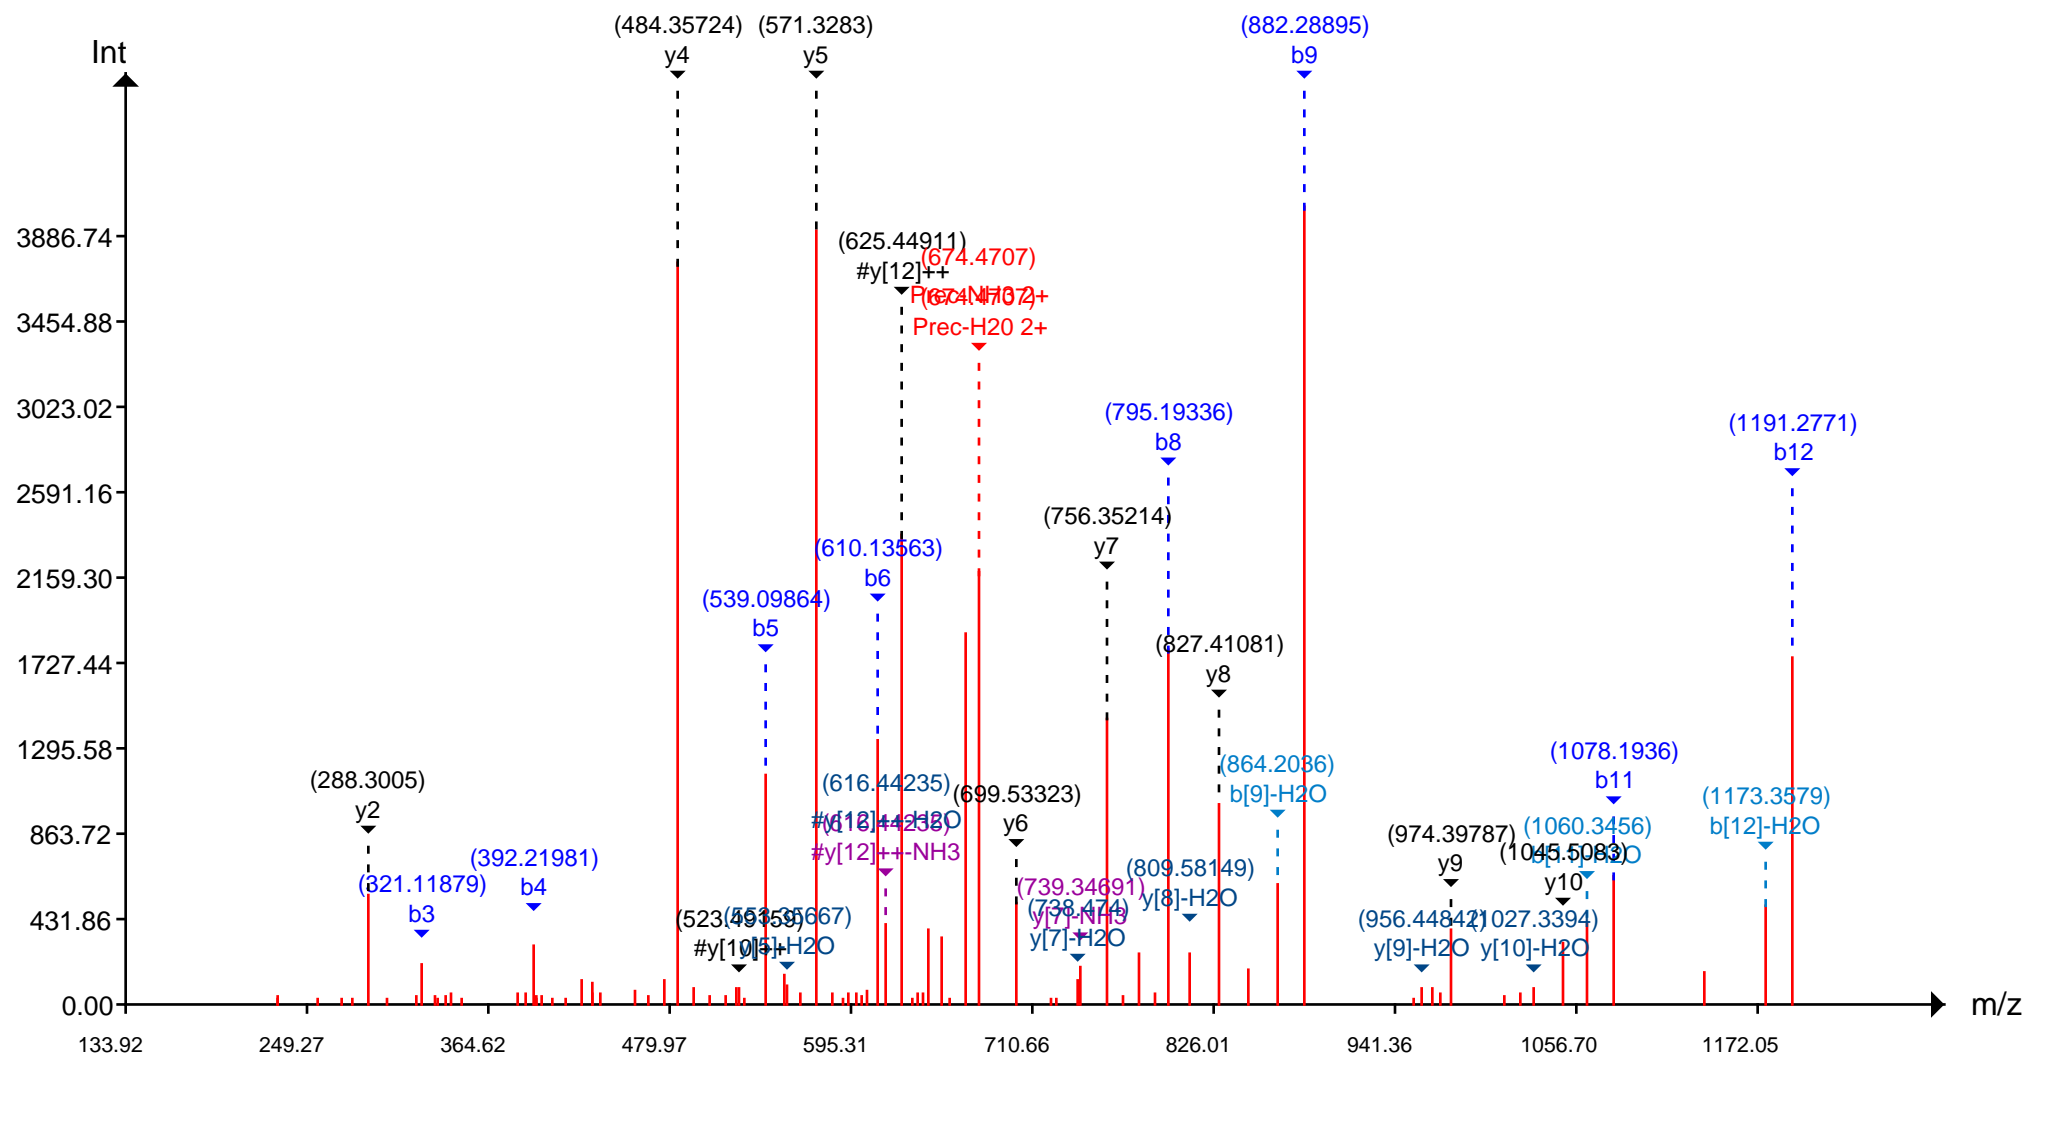

| Info                     |                                     |                           |          |
|--------------------------|-------------------------------------|---------------------------|----------|
| <b>Modified Sequence</b> | AcD3-AGM<Mox*>AM<Mox*>AGQSPVLR-COOH | <b>Ion score</b>          | 66.77    |
| <b>Protein</b>           | P26599                              | <b>Confidence level</b>   | 99.00%   |
| <b>Precursor m/z</b>     | 683.33821                           | <b>Identity Threshold</b> | 48.43    |
| <b>Charge</b>            | 2+                                  | <b>Mass error</b>         | -1.04E-4 |



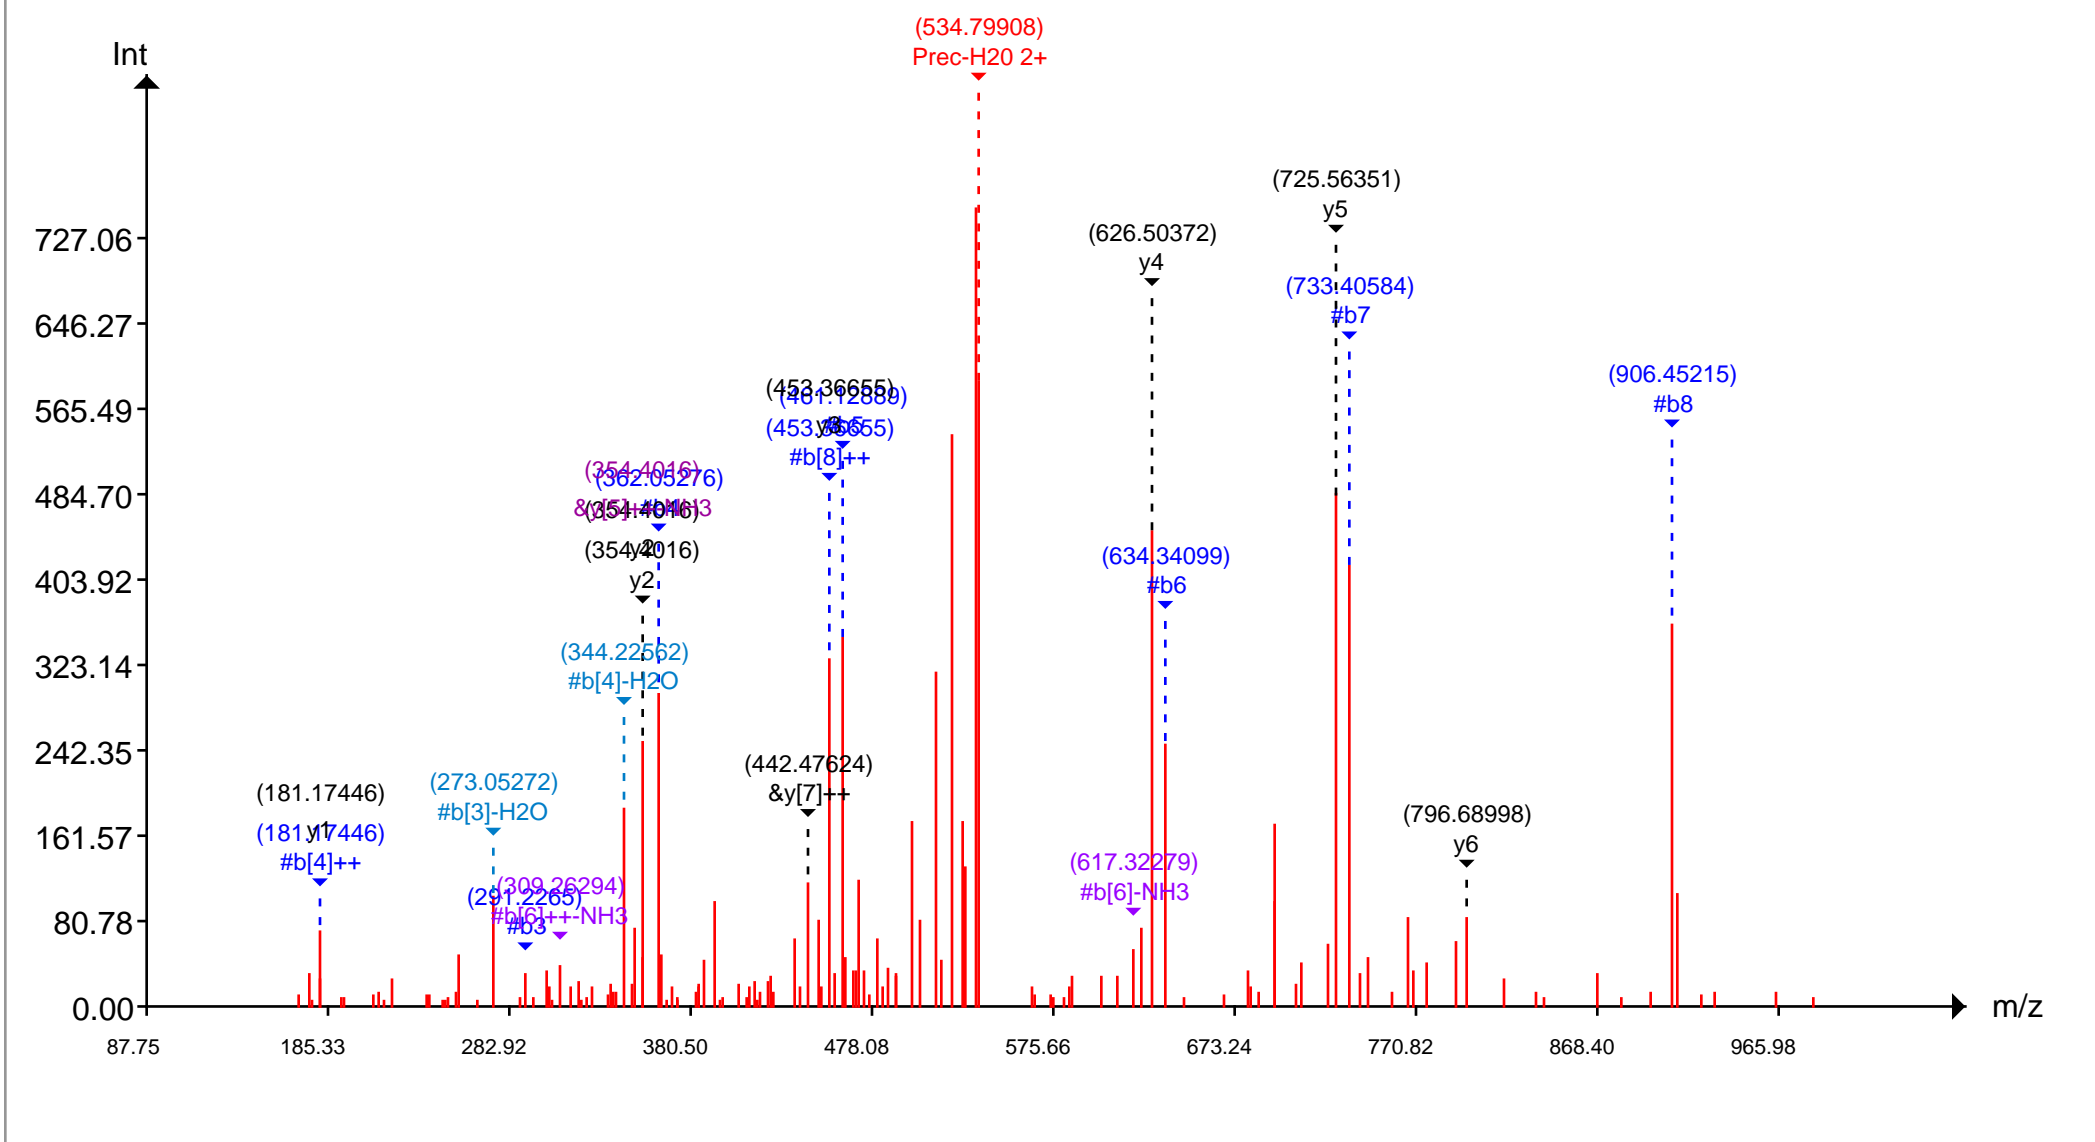

## Info

**Modified Sequence** AcD3-ASSAVK<AcD3K\*>VK<AcD3K\*>R<C13>-COOH

**Ion score** 45.94

**Protein** Q13148

**Confidence level** 99.00%

**Precursor m/z** 543.84999

**Identity Threshold** 42.35

**Charge** 2+

**Mass error** 4.0E-4

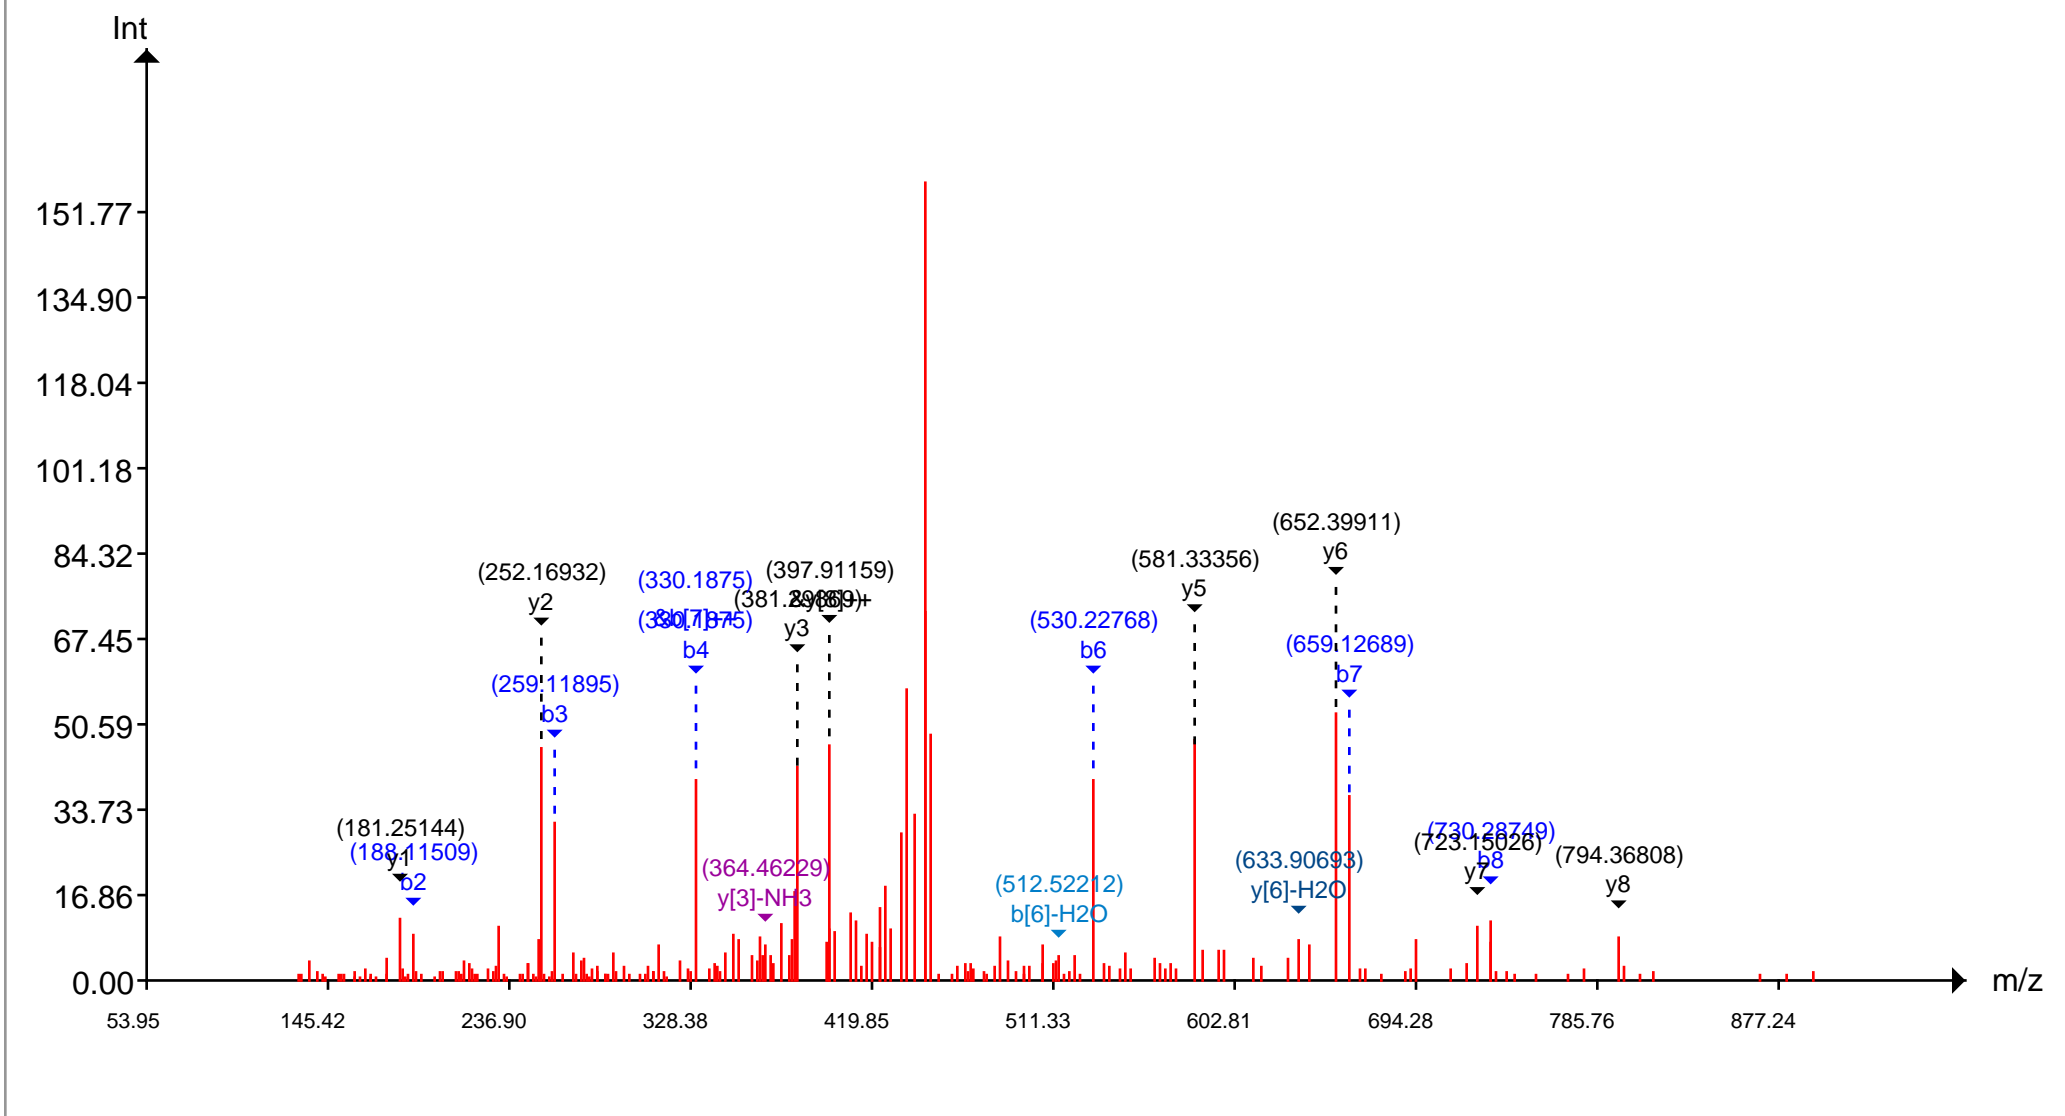

## Info

**Modified Sequence** AcD3-AAAAEAEAR<C13>-COOH

**Ion score** 54.14

**Protein** Q9Y5V3

**Confidence level** 99.00%

**Precursor m/z** 455.74177

**Identity Threshold** 48.95

**Charge** 2+

**Mass error** -3.7E-5

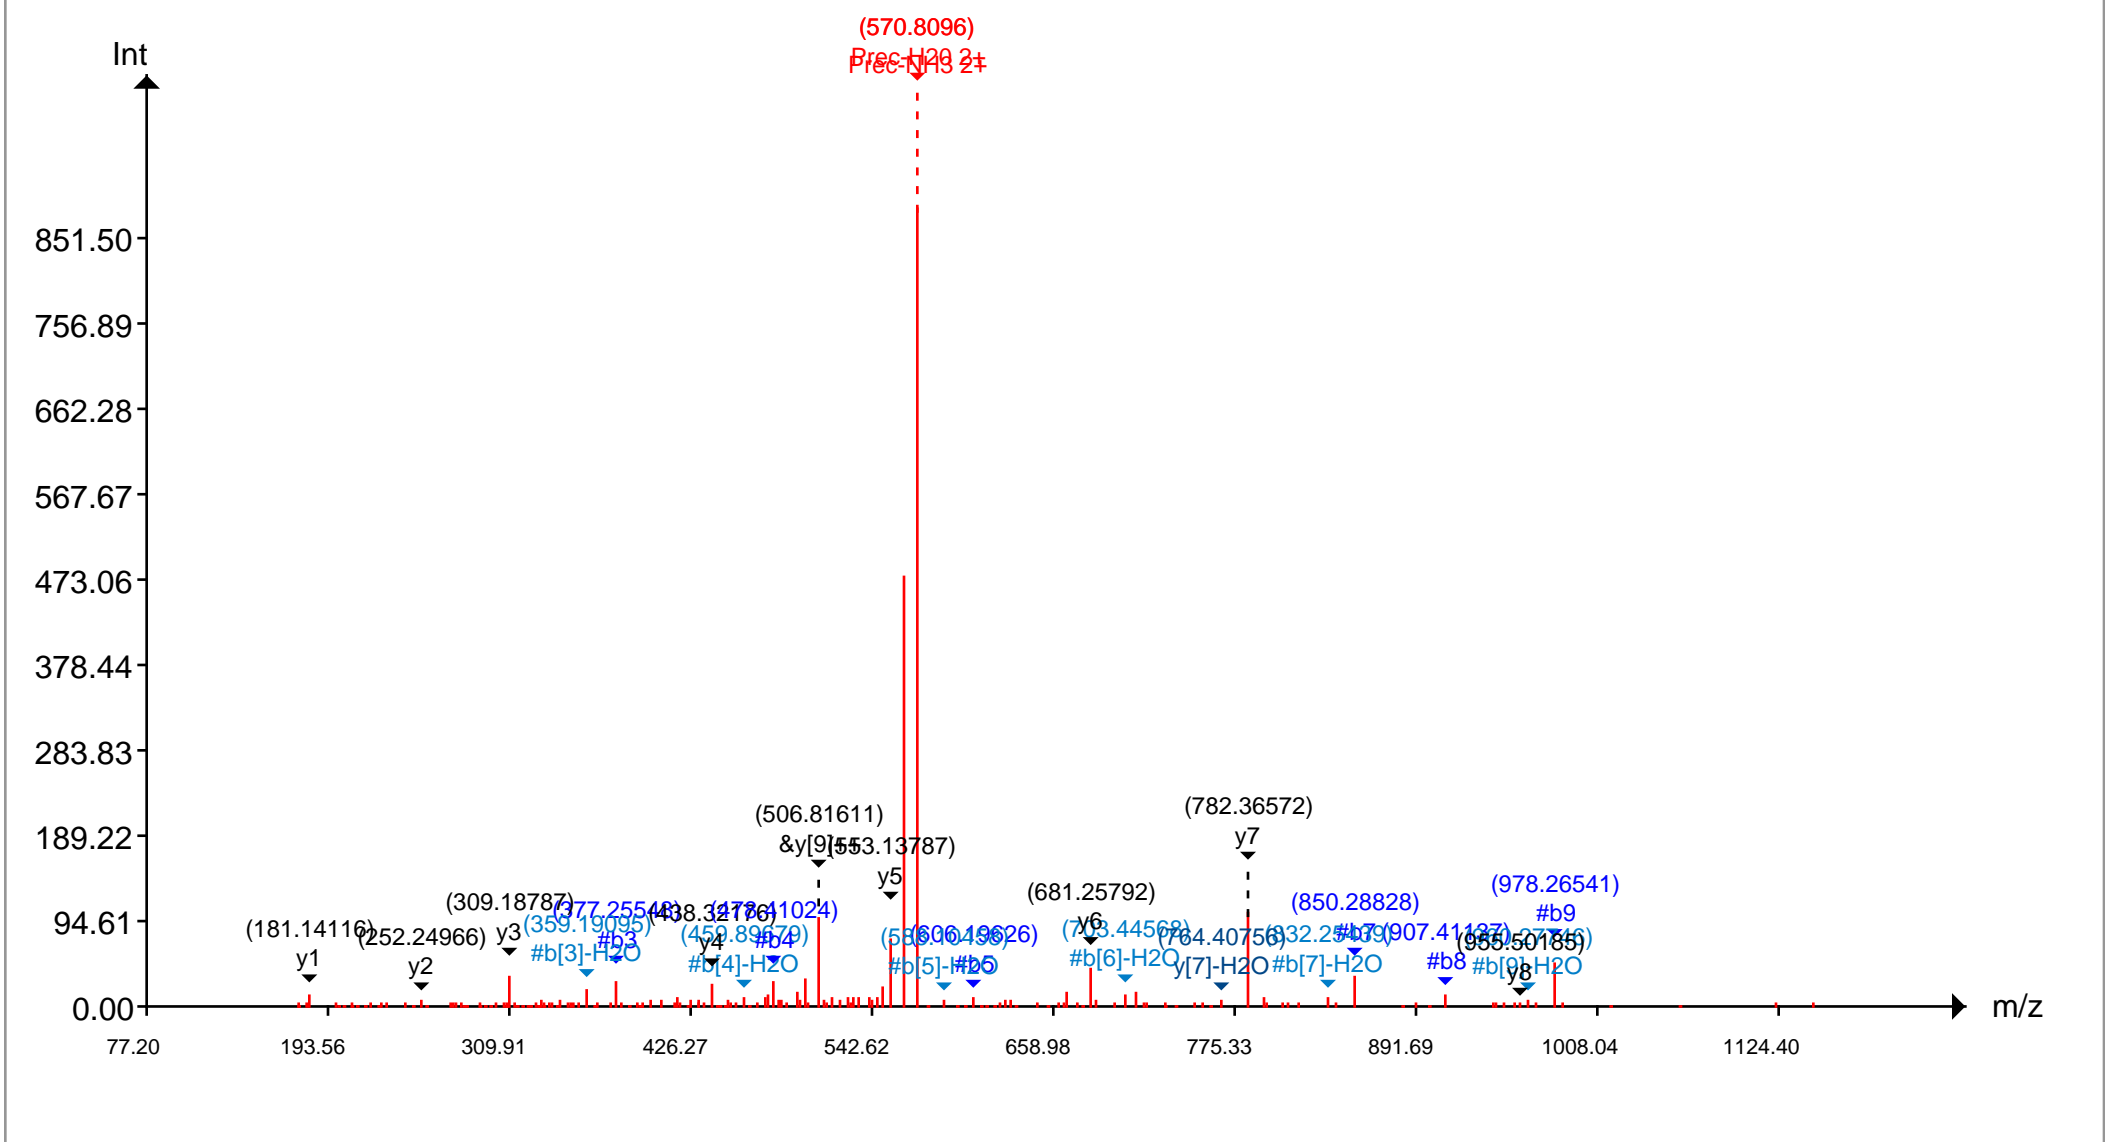

## Info

|                          |                                   |                           |          |
|--------------------------|-----------------------------------|---------------------------|----------|
| <b>Modified Sequence</b> | AcD3-TGK<AcD3K*>TQDEGAR<C13>-COOH | <b>Ion score</b>          | 49.85    |
| <b>Protein</b>           | Q9BQC3                            | <b>Confidence level</b>   | 99.00%   |
| <b>Precursor m/z</b>     | 579.80161                         | <b>Identity Threshold</b> | 48.72    |
| <b>Charge</b>            | 2+                                | <b>Mass error</b>         | -4.13E-4 |

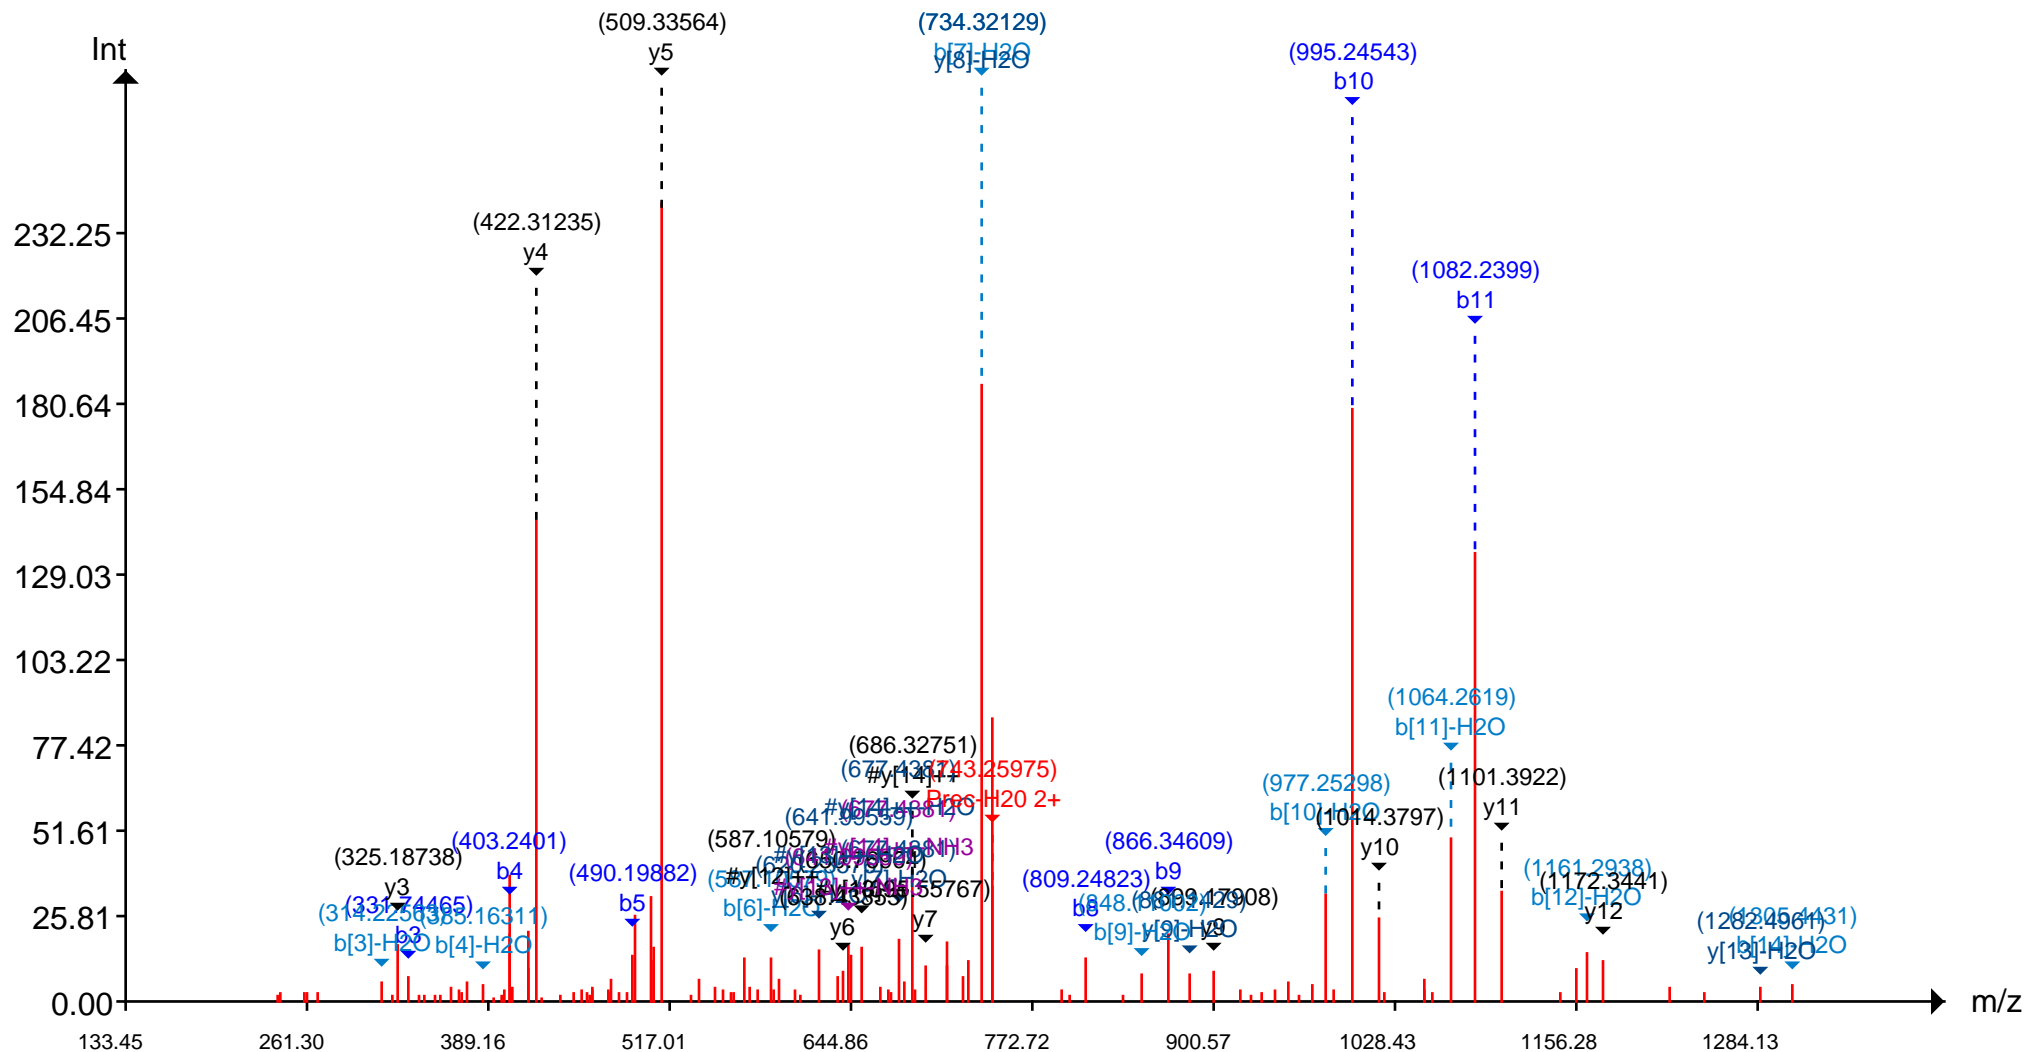

## Info

**Modified Sequence** AcD3-SAQASDM<Mox\*>GGESPGSR<C13>-COOH

**Ion score** 53.99

**Protein** P50851

**Confidence level** 99.00%

**Precursor m/z** 752.32957

**Identity Threshold** 43.26

**Charge** 2+

**Mass error** 3.77E-4

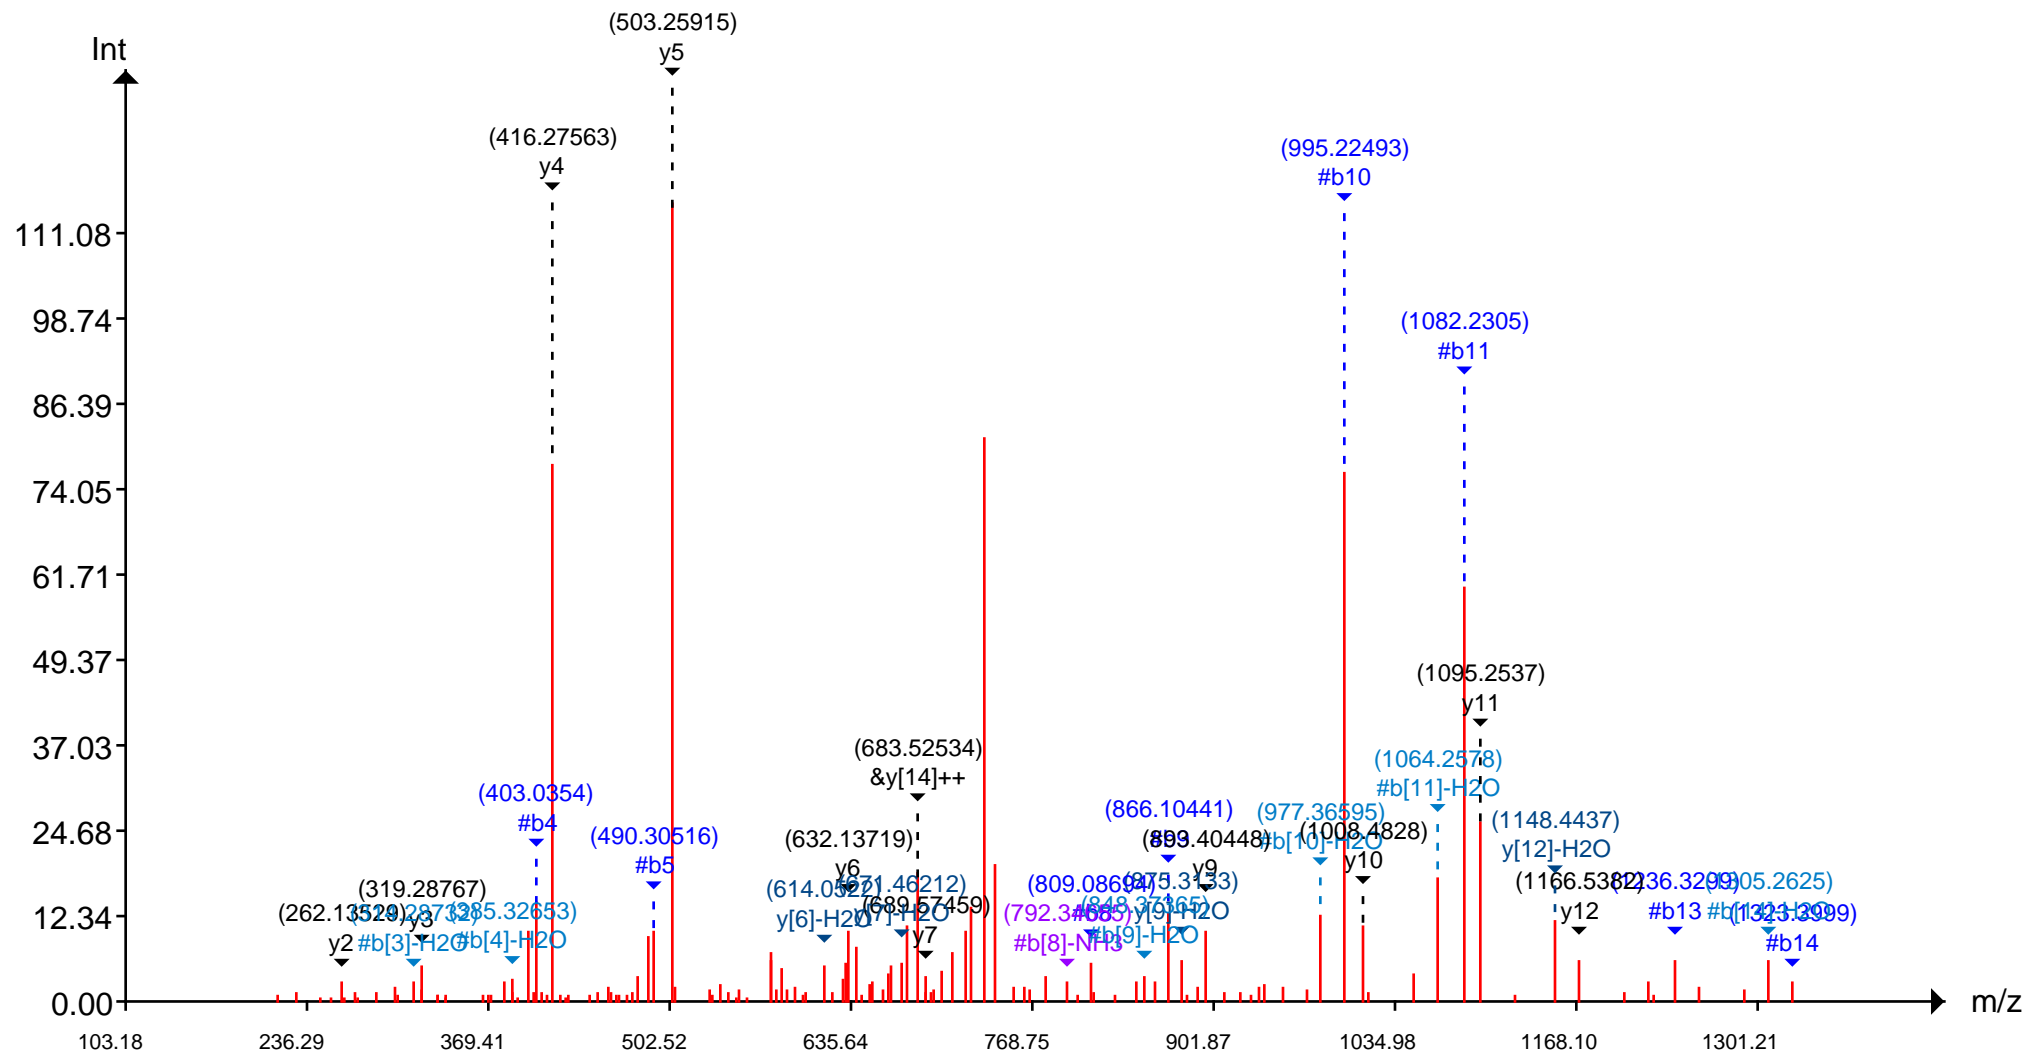

## Info

**Modified Sequence** AcD3-SAQASDM<Mox\*>GGESPGSR-COOH

**Ion score** 76.06

**Protein** P50851

**Confidence level** 99.00%

**Precursor m/z** 749.3196

**Identity Threshold** 42.13

**Charge** 2+

**Mass error** 5.79E-4

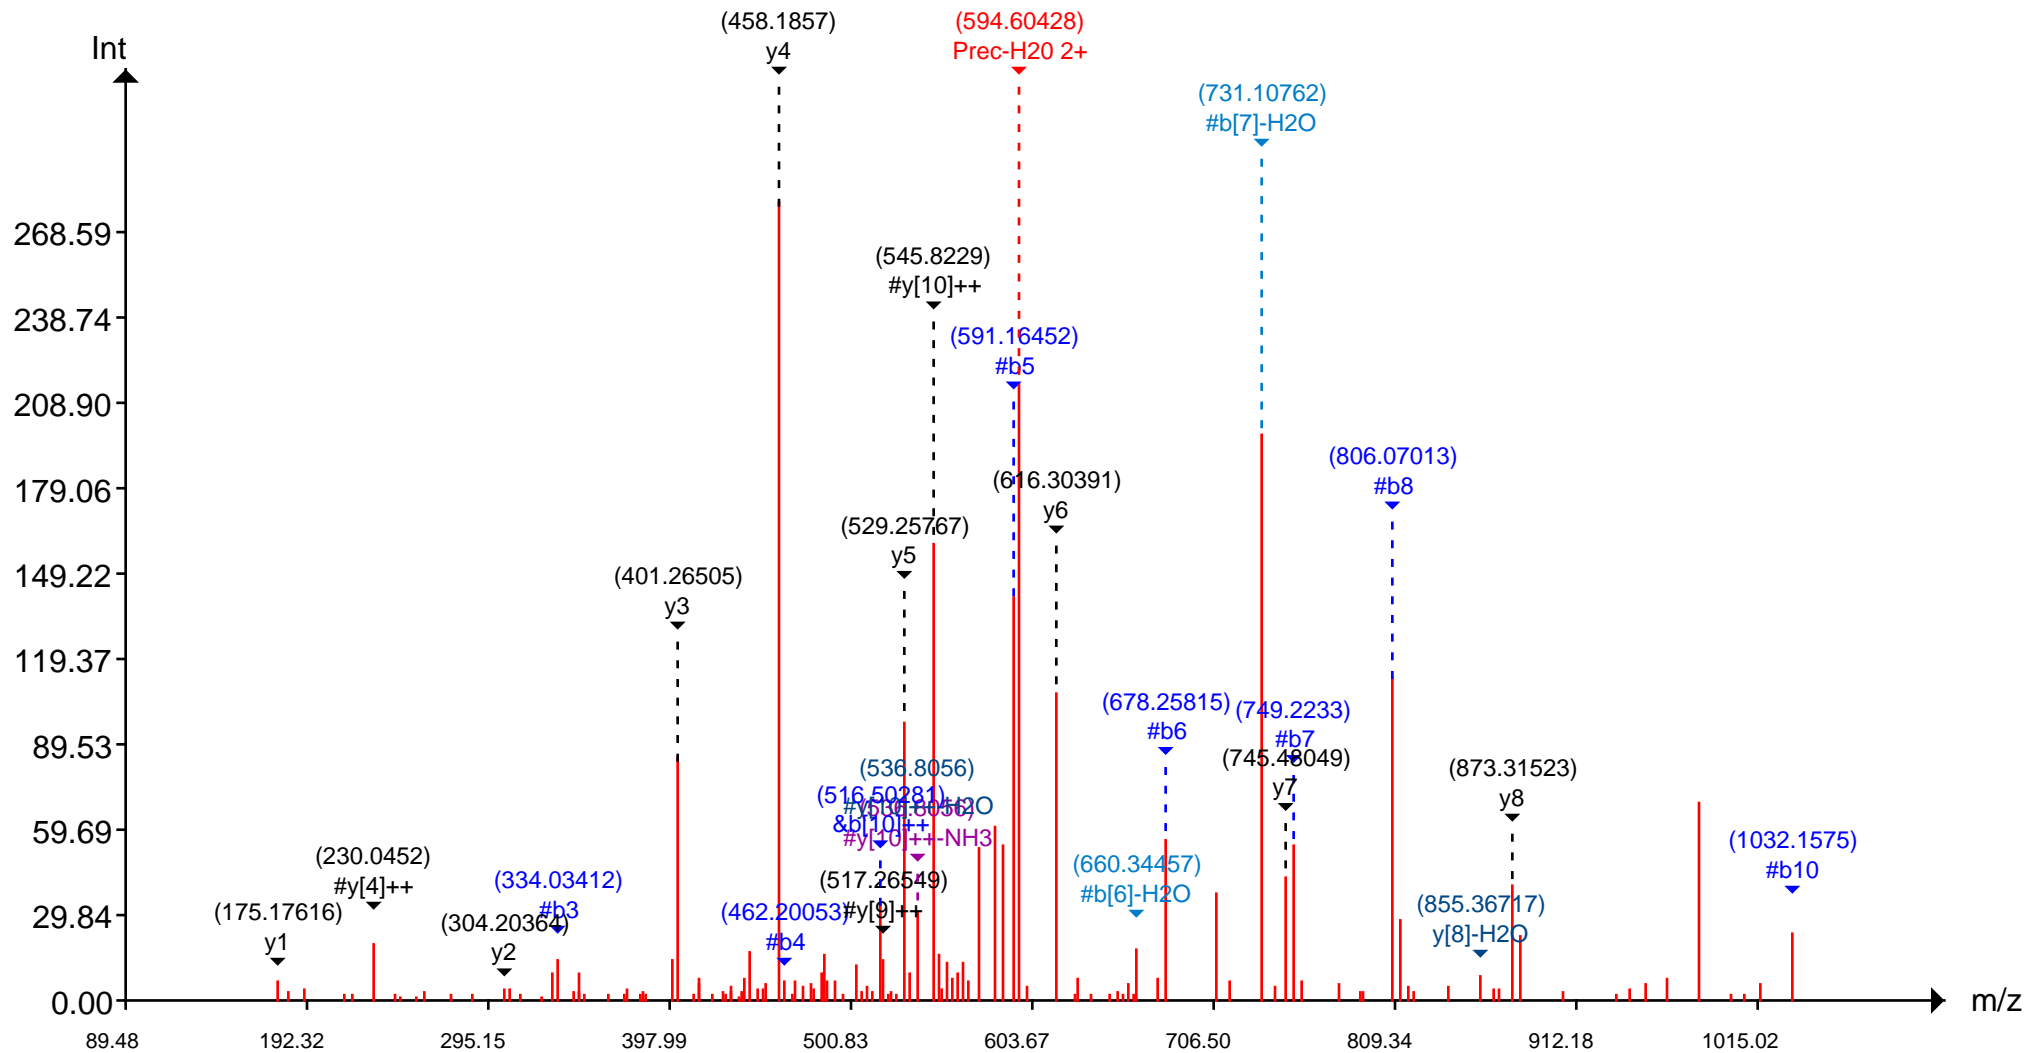

## Info

|                          |                             |                           |          |
|--------------------------|-----------------------------|---------------------------|----------|
| <b>Modified Sequence</b> | AcD3-AGC<Cmm*>QESAGPER-COOH | <b>Ion score</b>          | 54.17    |
| <b>Protein</b>           | Q99575                      | <b>Confidence level</b>   | 99.00%   |
| <b>Precursor m/z</b>     | 603.76582                   | <b>Identity Threshold</b> | 43.79    |
| <b>Charge</b>            | 2+                          | <b>Mass error</b>         | -3.22E-4 |

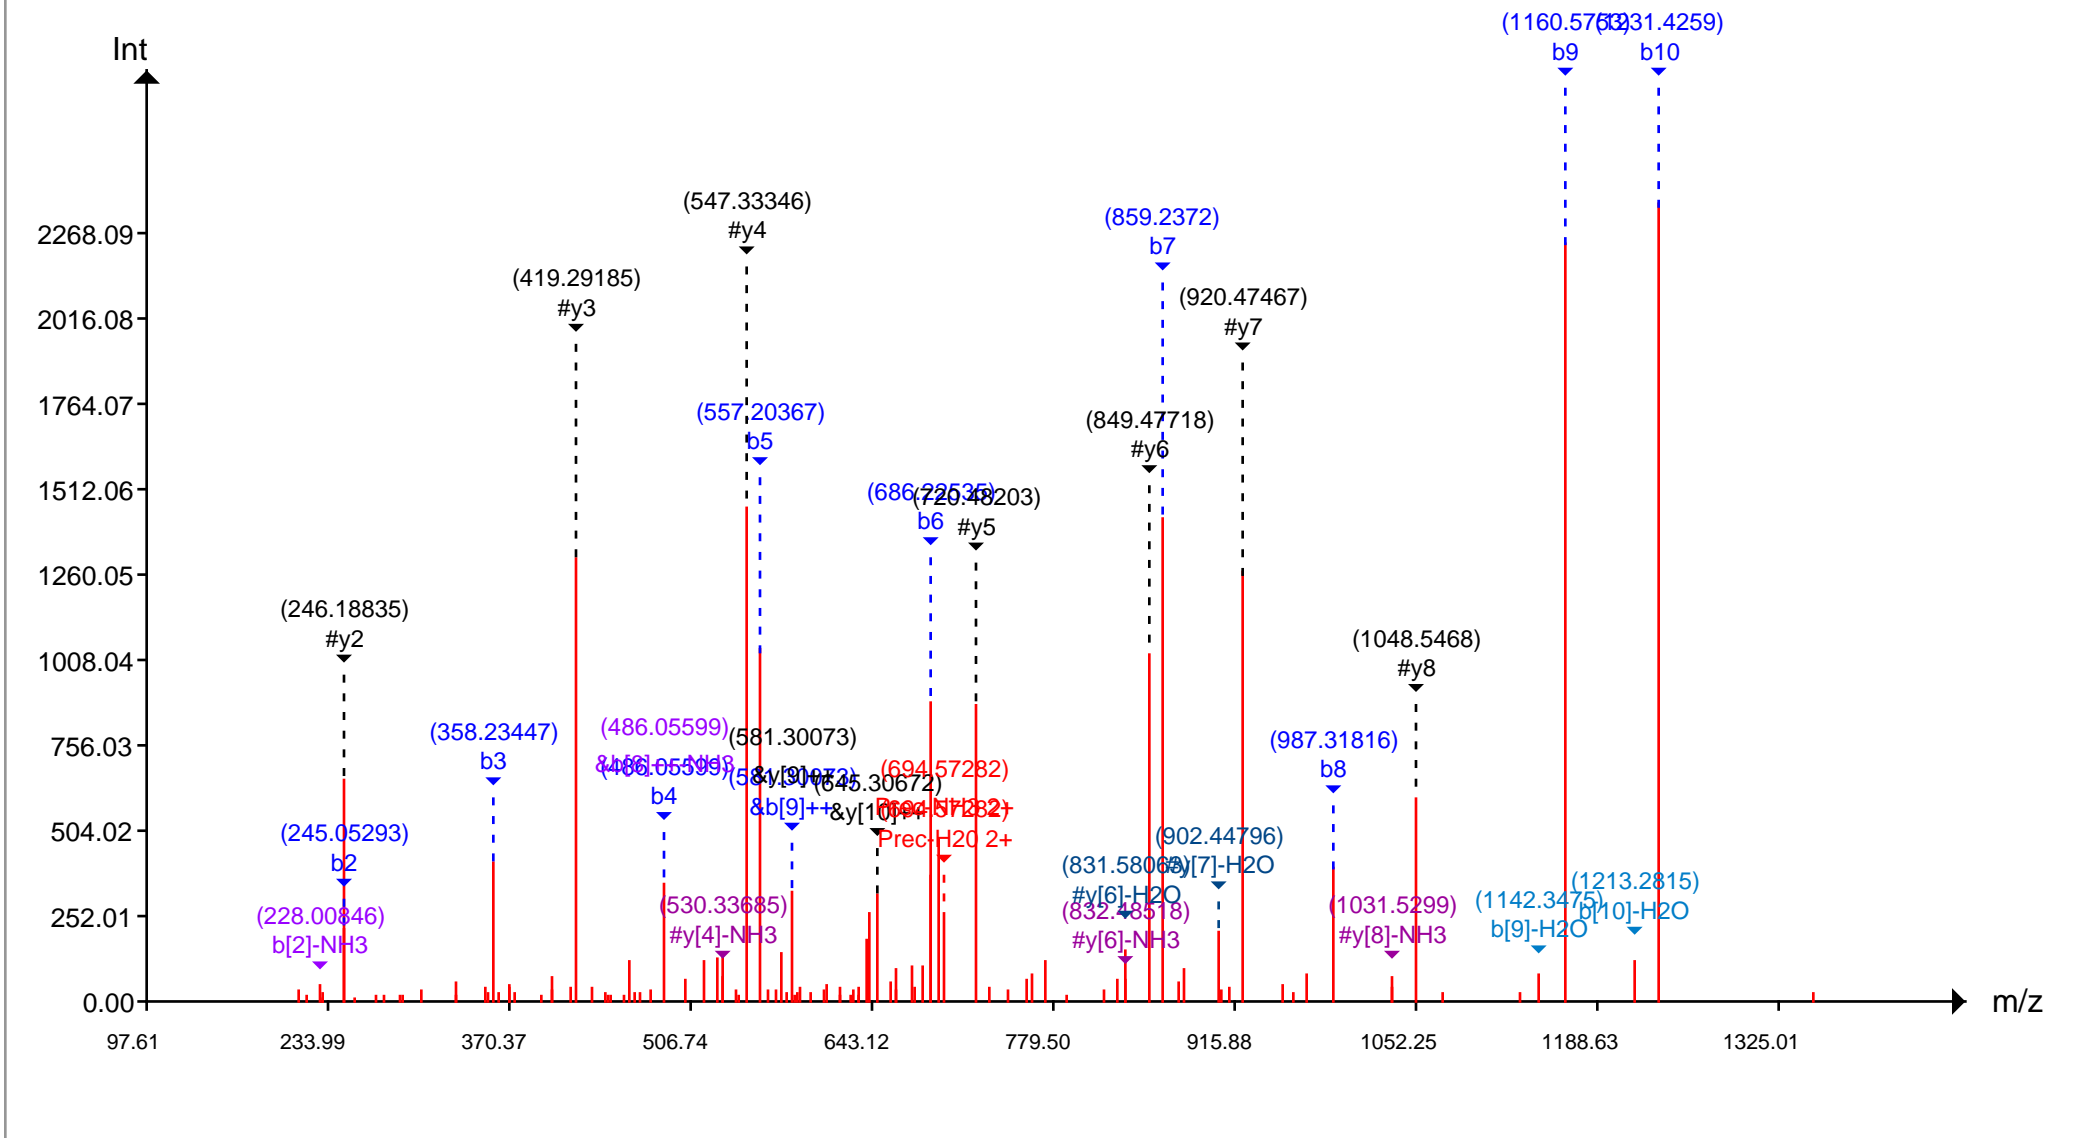

| Info                     |                                       |                           |         |
|--------------------------|---------------------------------------|---------------------------|---------|
| <b>Modified Sequence</b> | AcD3-AQLQAEK<AcD3K*>QK<AcD3K*>AR-COOH | <b>Ion score</b>          | 83.99   |
| <b>Protein</b>           | Q13442                                | <b>Confidence level</b>   | 99.00%  |
| <b>Precursor m/z</b>     | 703.4092                              | <b>Identity Threshold</b> | 47.10   |
| <b>Charge</b>            | 2+                                    | <b>Mass error</b>         | 3.66E-4 |

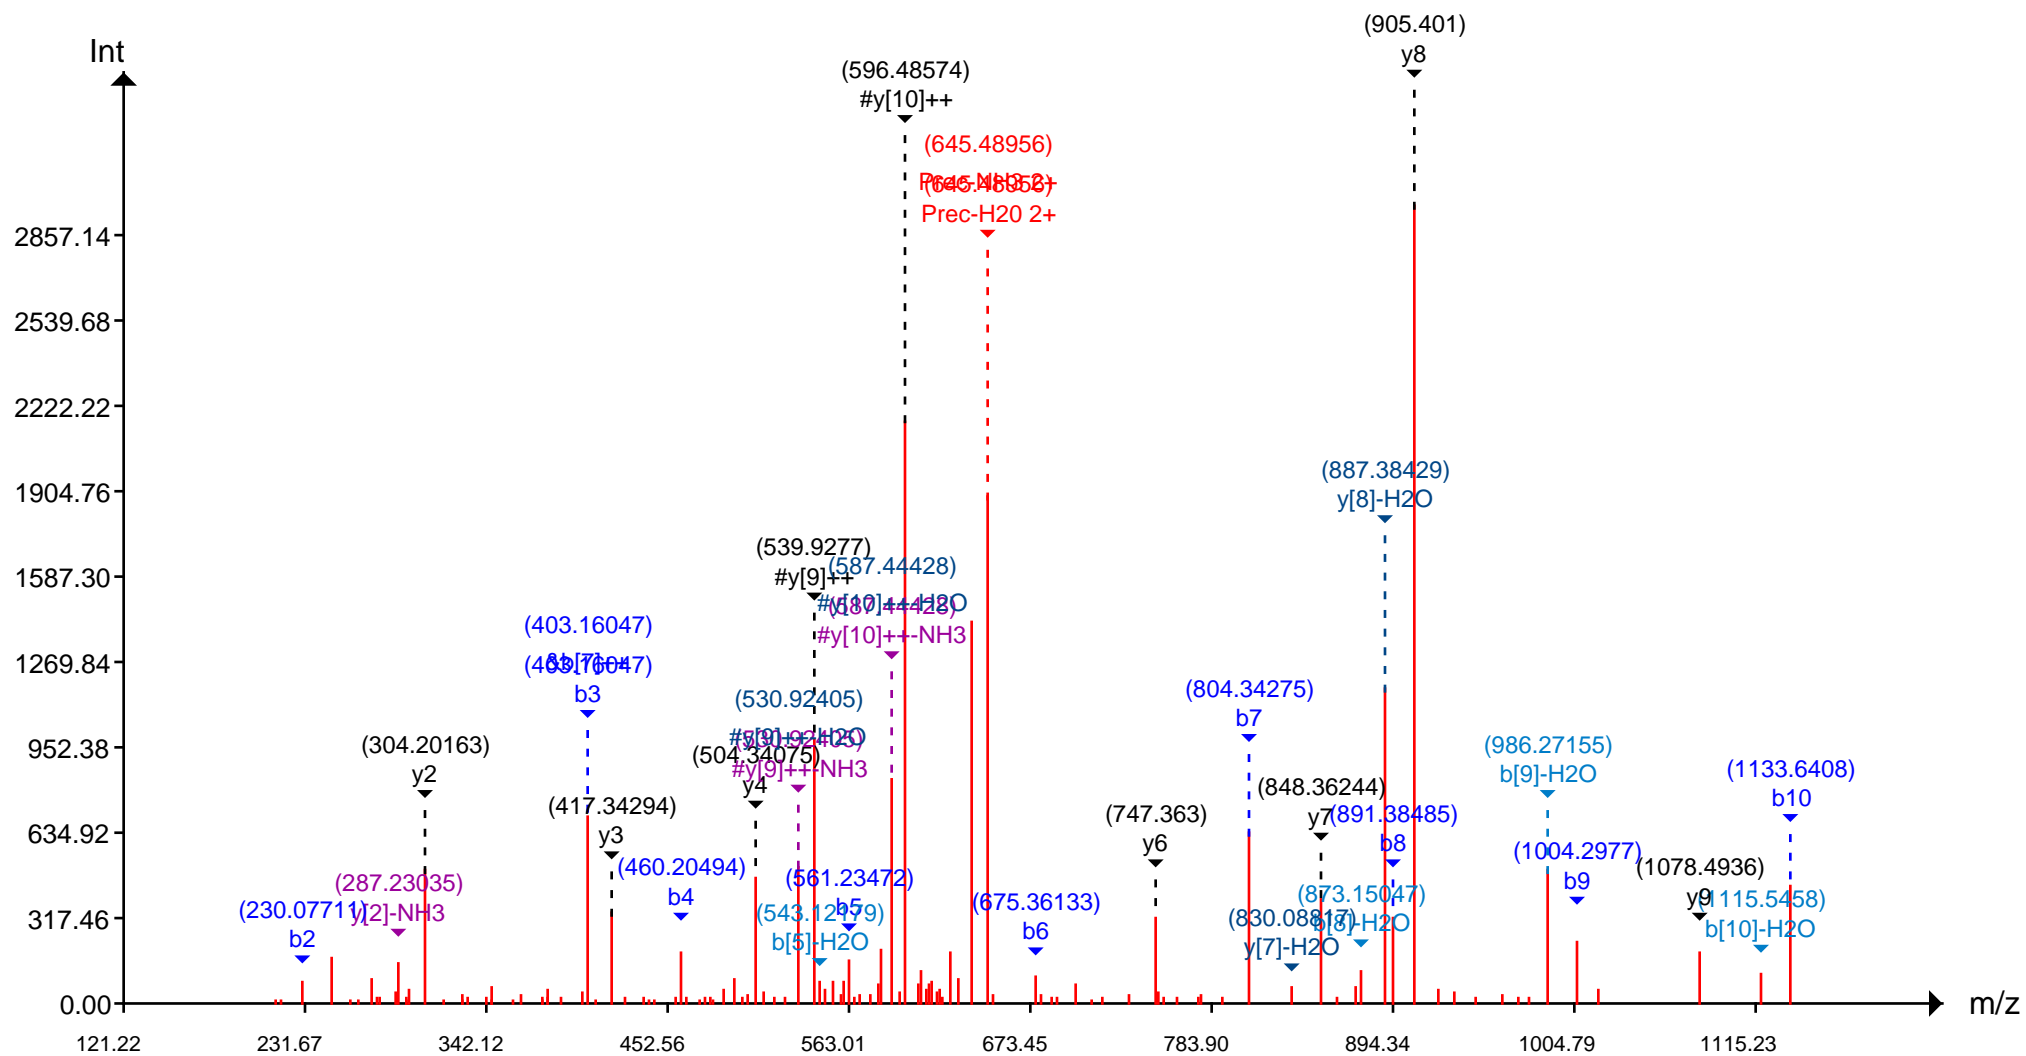

## Info

|                          |                               |                           |         |
|--------------------------|-------------------------------|---------------------------|---------|
| <b>Modified Sequence</b> | AcD3-ALK<AcD3K*>GTNESLER-COOH | <b>Ion score</b>          | 59.8    |
| <b>Protein</b>           | P08670                        | <b>Confidence level</b>   | 99.00%  |
| <b>Precursor m/z</b>     | 654.35732                     | <b>Identity Threshold</b> | 48.69   |
| <b>Charge</b>            | 2+                            | <b>Mass error</b>         | 1.67E-4 |



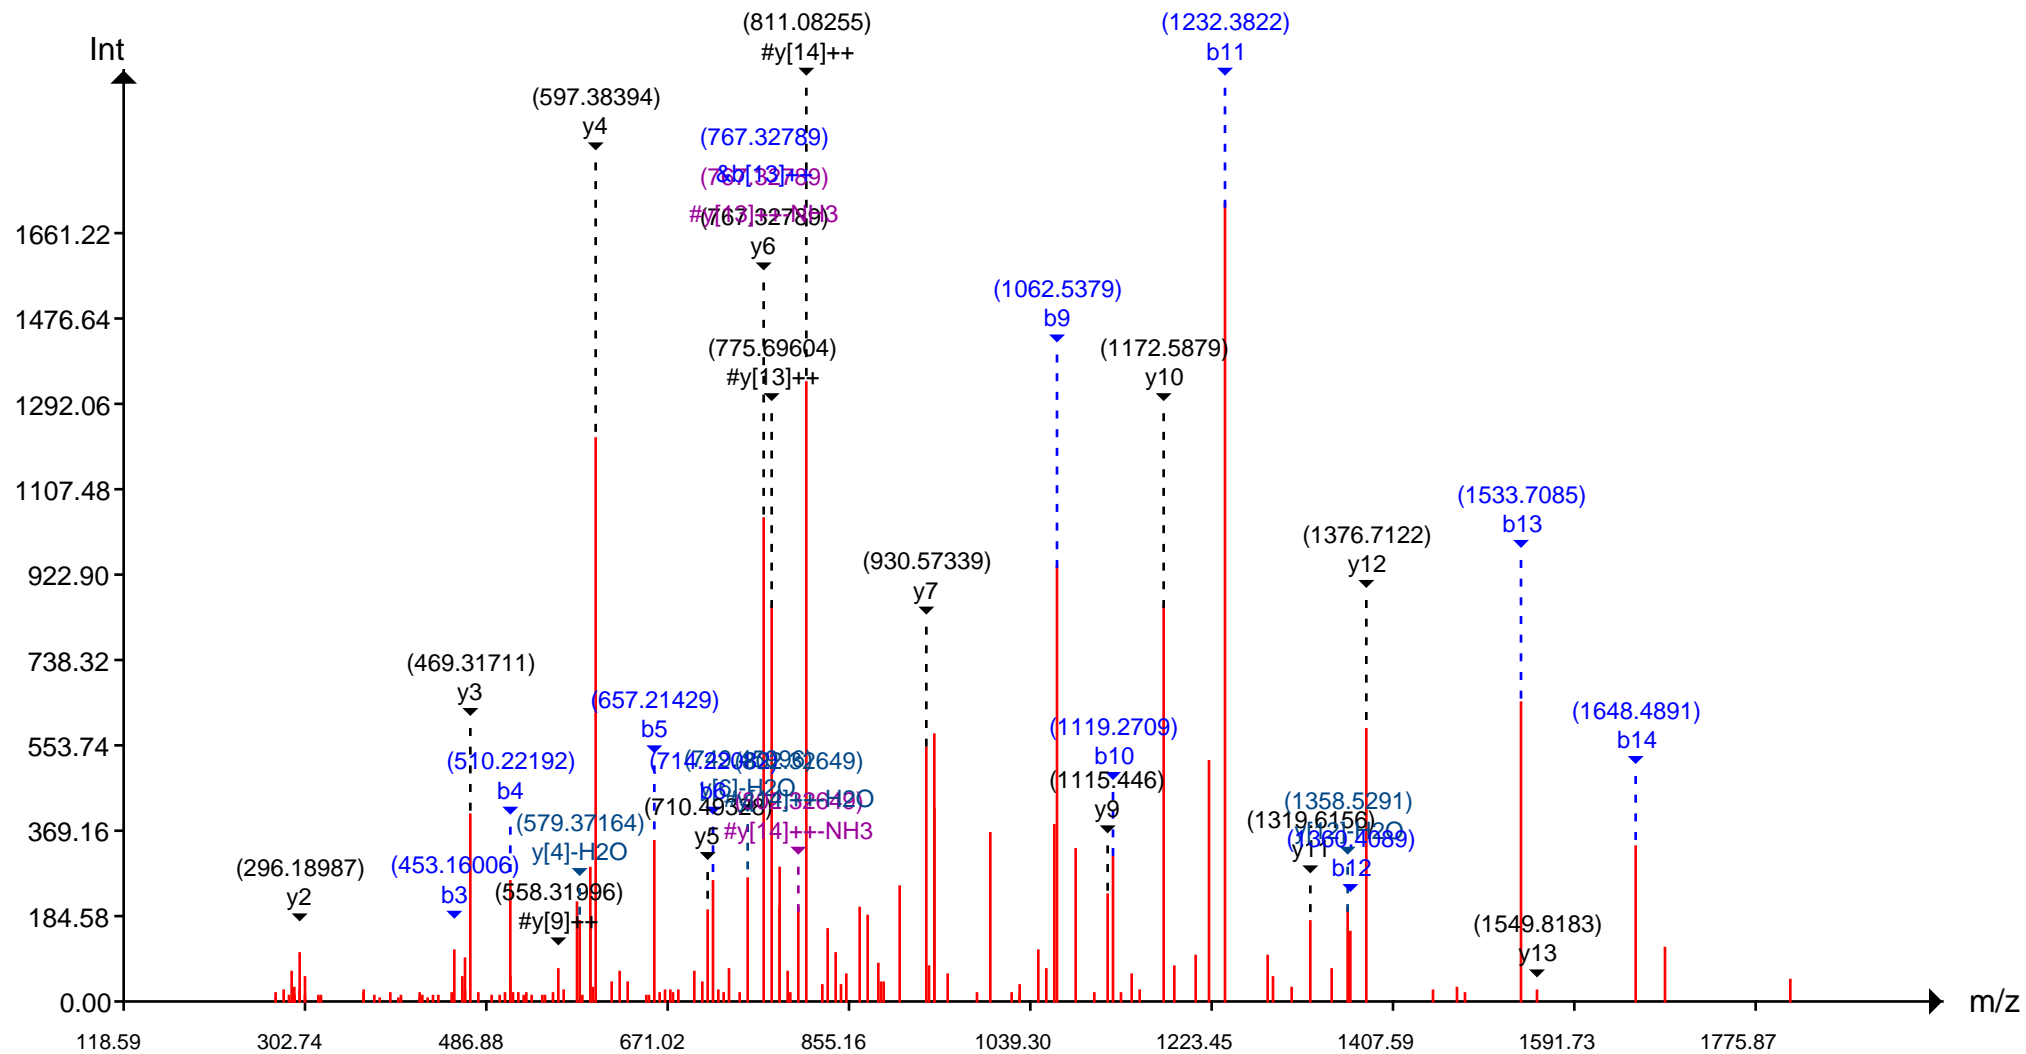

## Info

|                          |                                                |                           |          |
|--------------------------|------------------------------------------------|---------------------------|----------|
| <b>Modified Sequence</b> | AcD3-YAK<AcD3K*>GFGGQYGIQK<AcD3K*>DR<C13>-COOH | <b>Ion score</b>          | 75.92    |
| <b>Protein</b>           | P14317                                         | <b>Confidence level</b>   | 99.00%   |
| <b>Precursor m/z</b>     | 914.98527                                      | <b>Identity Threshold</b> | 49.12    |
| <b>Charge</b>            | 2+                                             | <b>Mass error</b>         | -1.43E-4 |

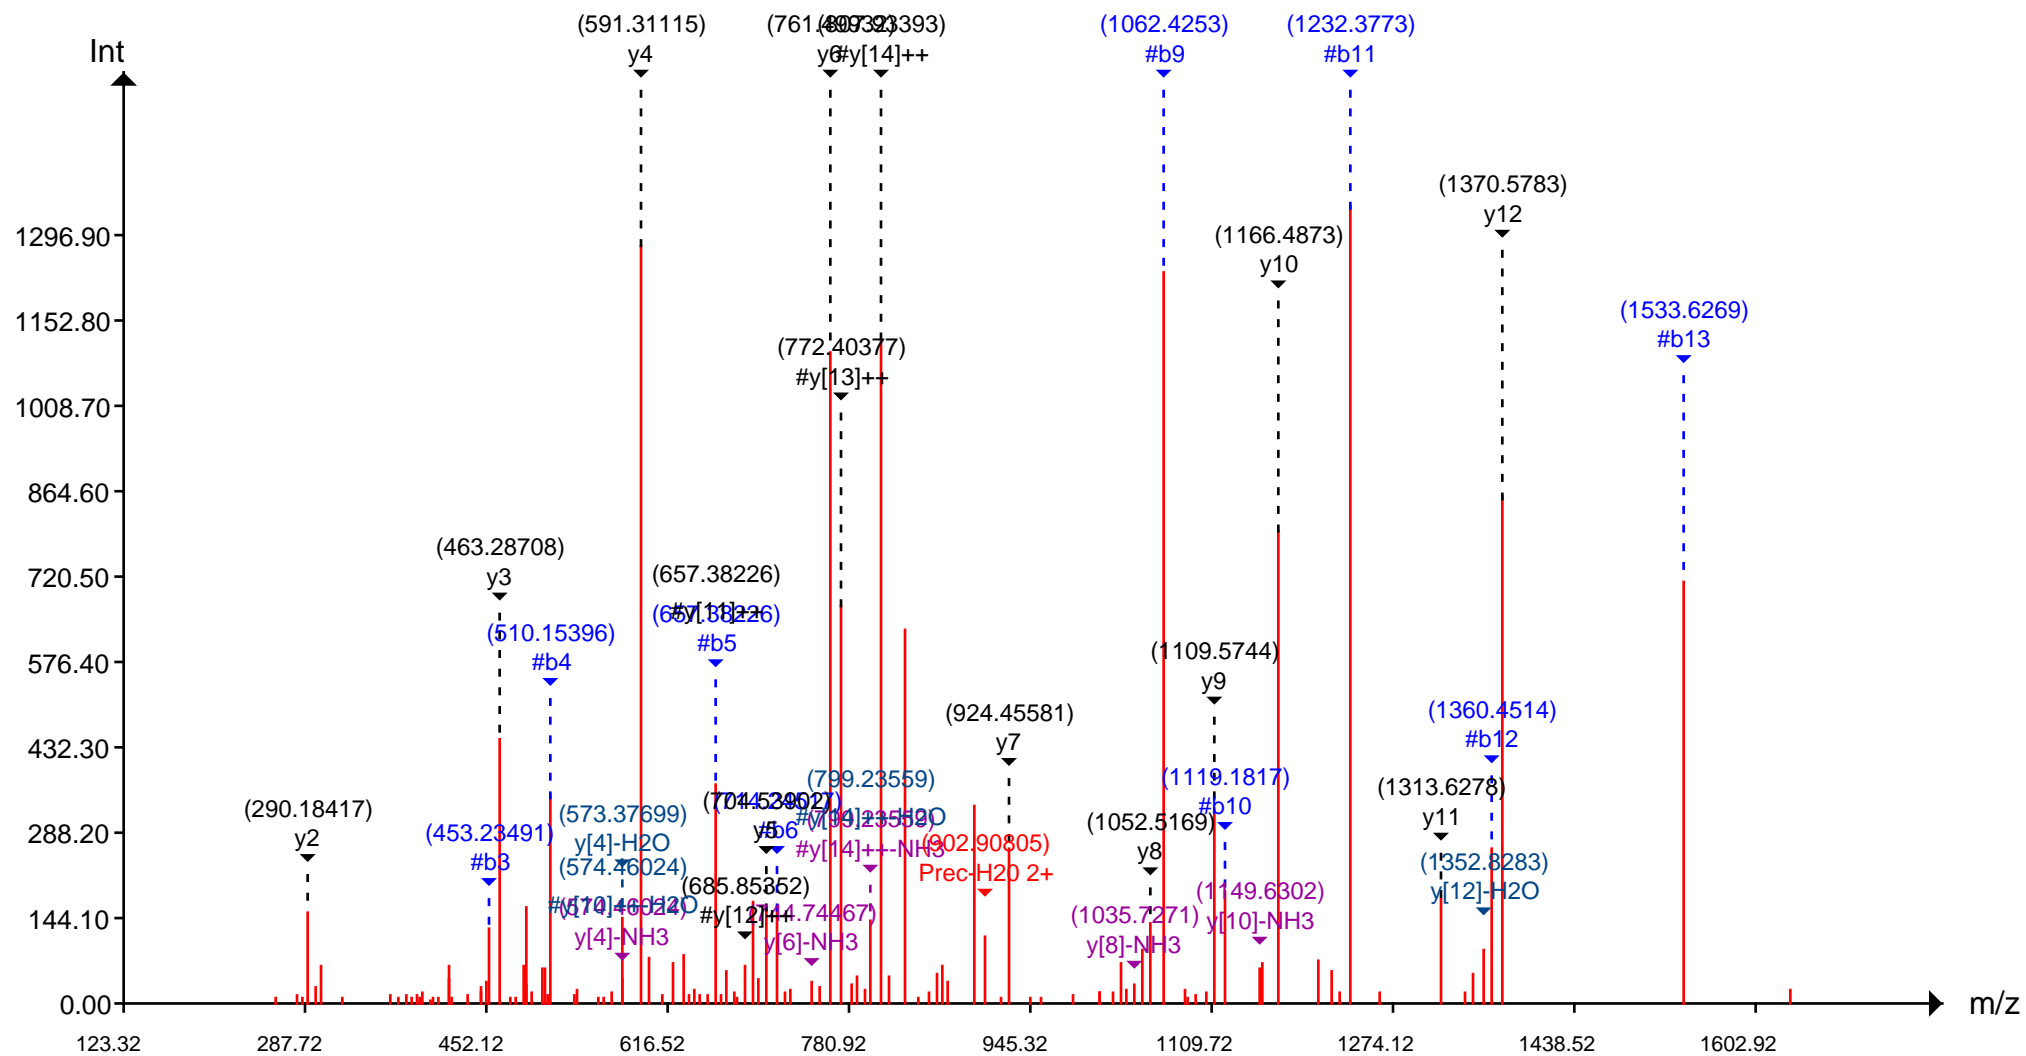

## Info

**Modified Sequence** AcD3-YAK<AcD3K\*>GFGGQYGIQK<AcD3K\*>DR-COOH

**Ion score** 85.92

**Protein** P14317

**Confidence level** 99.00%

**Precursor m/z** 911.97551

**Identity Threshold** 49.23

**Charge** 2+

**Mass error** 4.79E-4

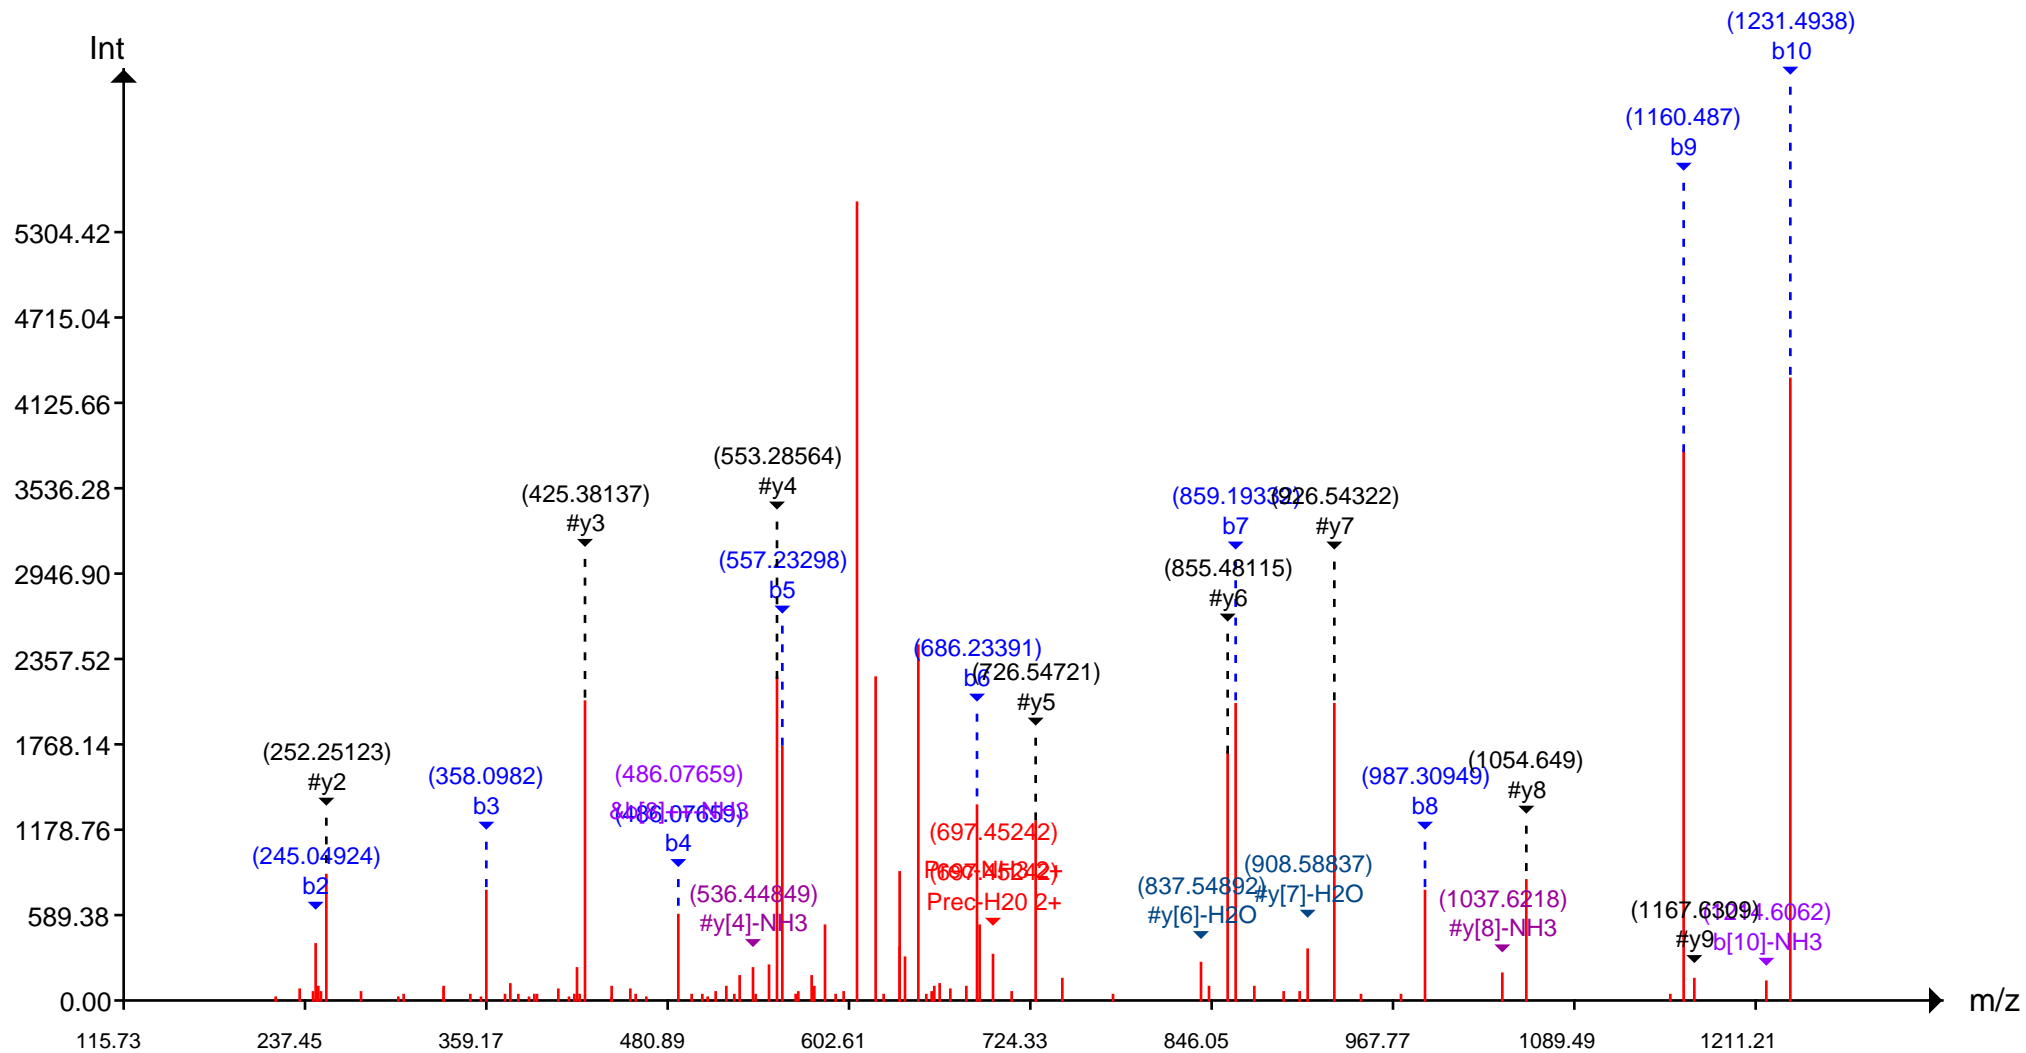

## Info

|                          |                                            |                           |        |
|--------------------------|--------------------------------------------|---------------------------|--------|
| <b>Modified Sequence</b> | AcD3-AQLQAEK<AcD3K*>QK<AcD3K*>AR<C13>-COOH | <b>Ion score</b>          | 71.46  |
| <b>Protein</b>           | Q13442                                     | <b>Confidence level</b>   | 99.00% |
| <b>Precursor m/z</b>     | 706.4191                                   | <b>Identity Threshold</b> | 45.62  |
| <b>Charge</b>            | 2+                                         | <b>Mass error</b>         | 2.4E-5 |





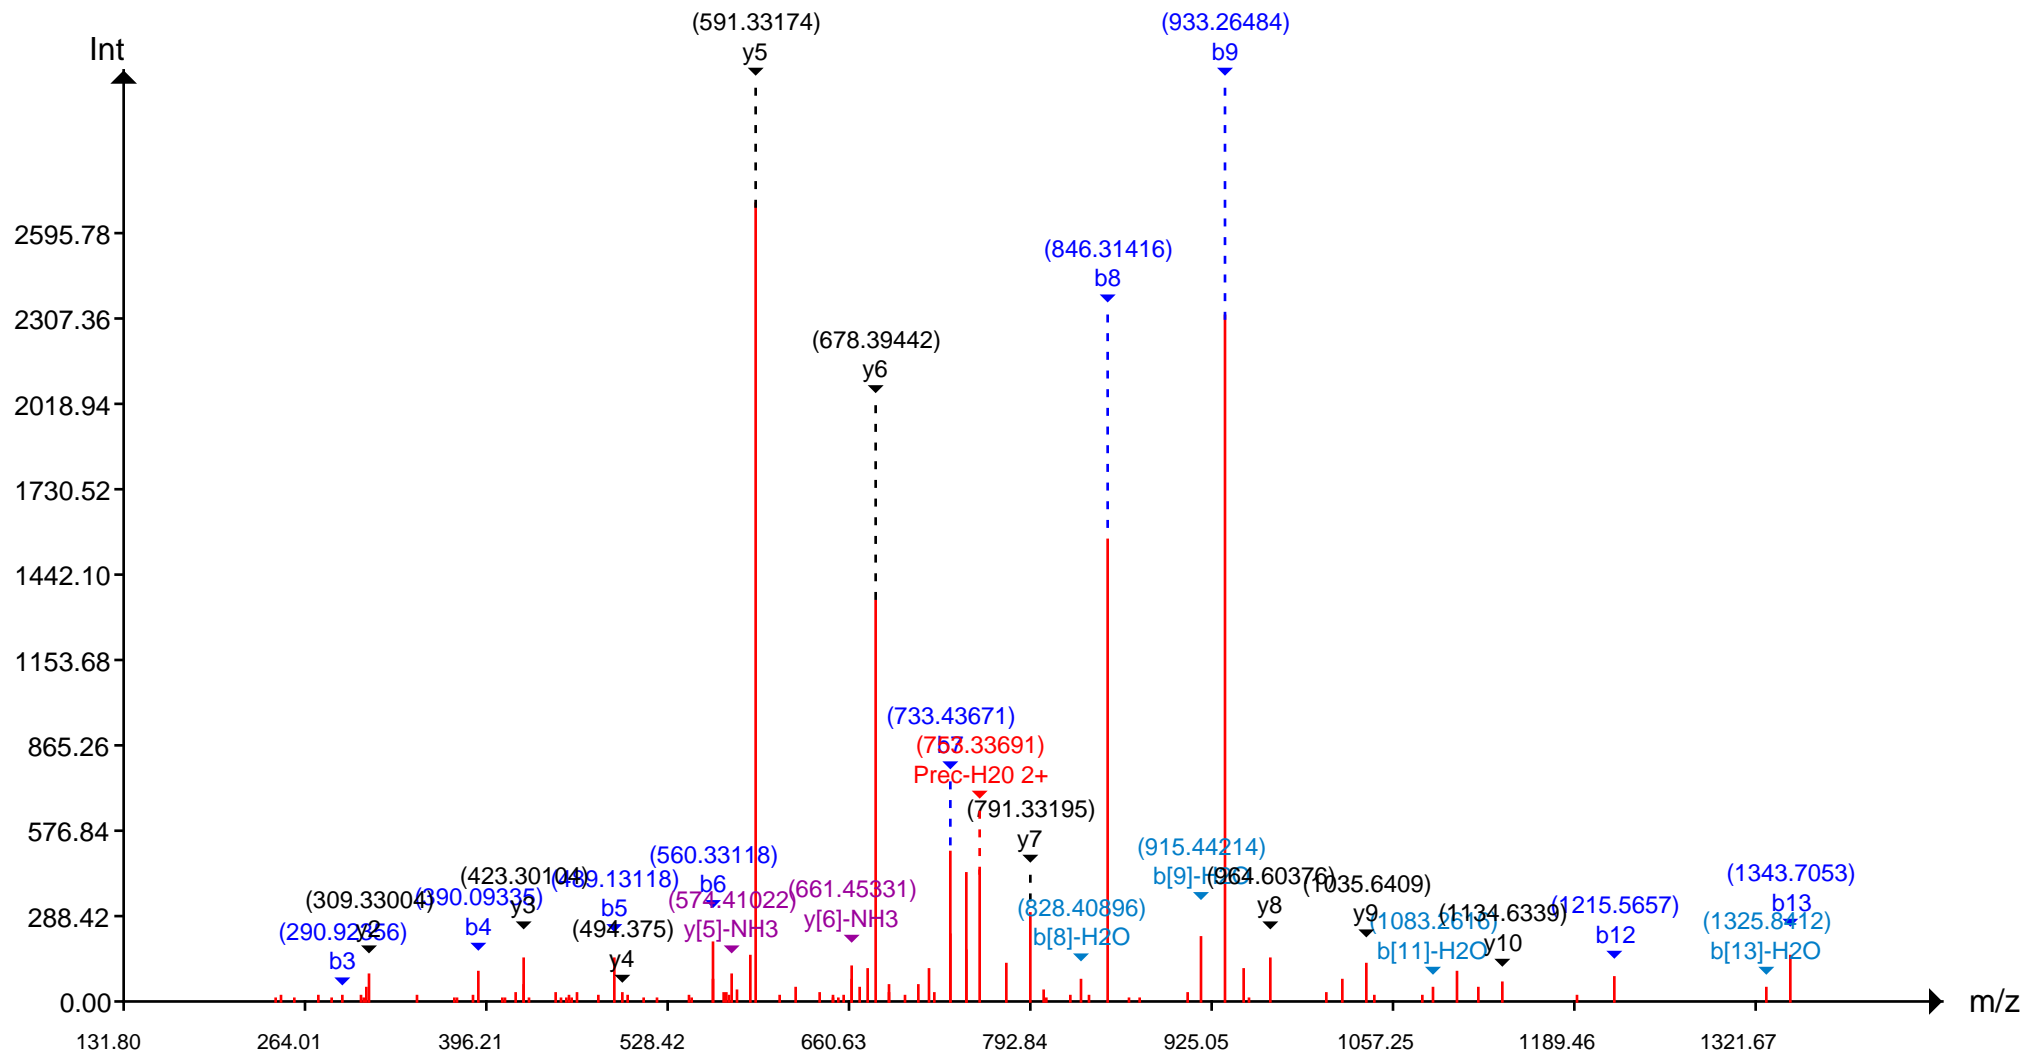

## Info

|                          |                                       |                           |         |
|--------------------------|---------------------------------------|---------------------------|---------|
| <b>Modified Sequence</b> | AcD3-STGVVAK<AcD3K*>LSPANQR<C13>-COOH | <b>Ion score</b>          | 75.89   |
| <b>Protein</b>           | Q13263                                | <b>Confidence level</b>   | 99.00%  |
| <b>Precursor m/z</b>     | 762.44152                             | <b>Identity Threshold</b> | 46.68   |
| <b>Charge</b>            | 2+                                    | <b>Mass error</b>         | 3.39E-4 |

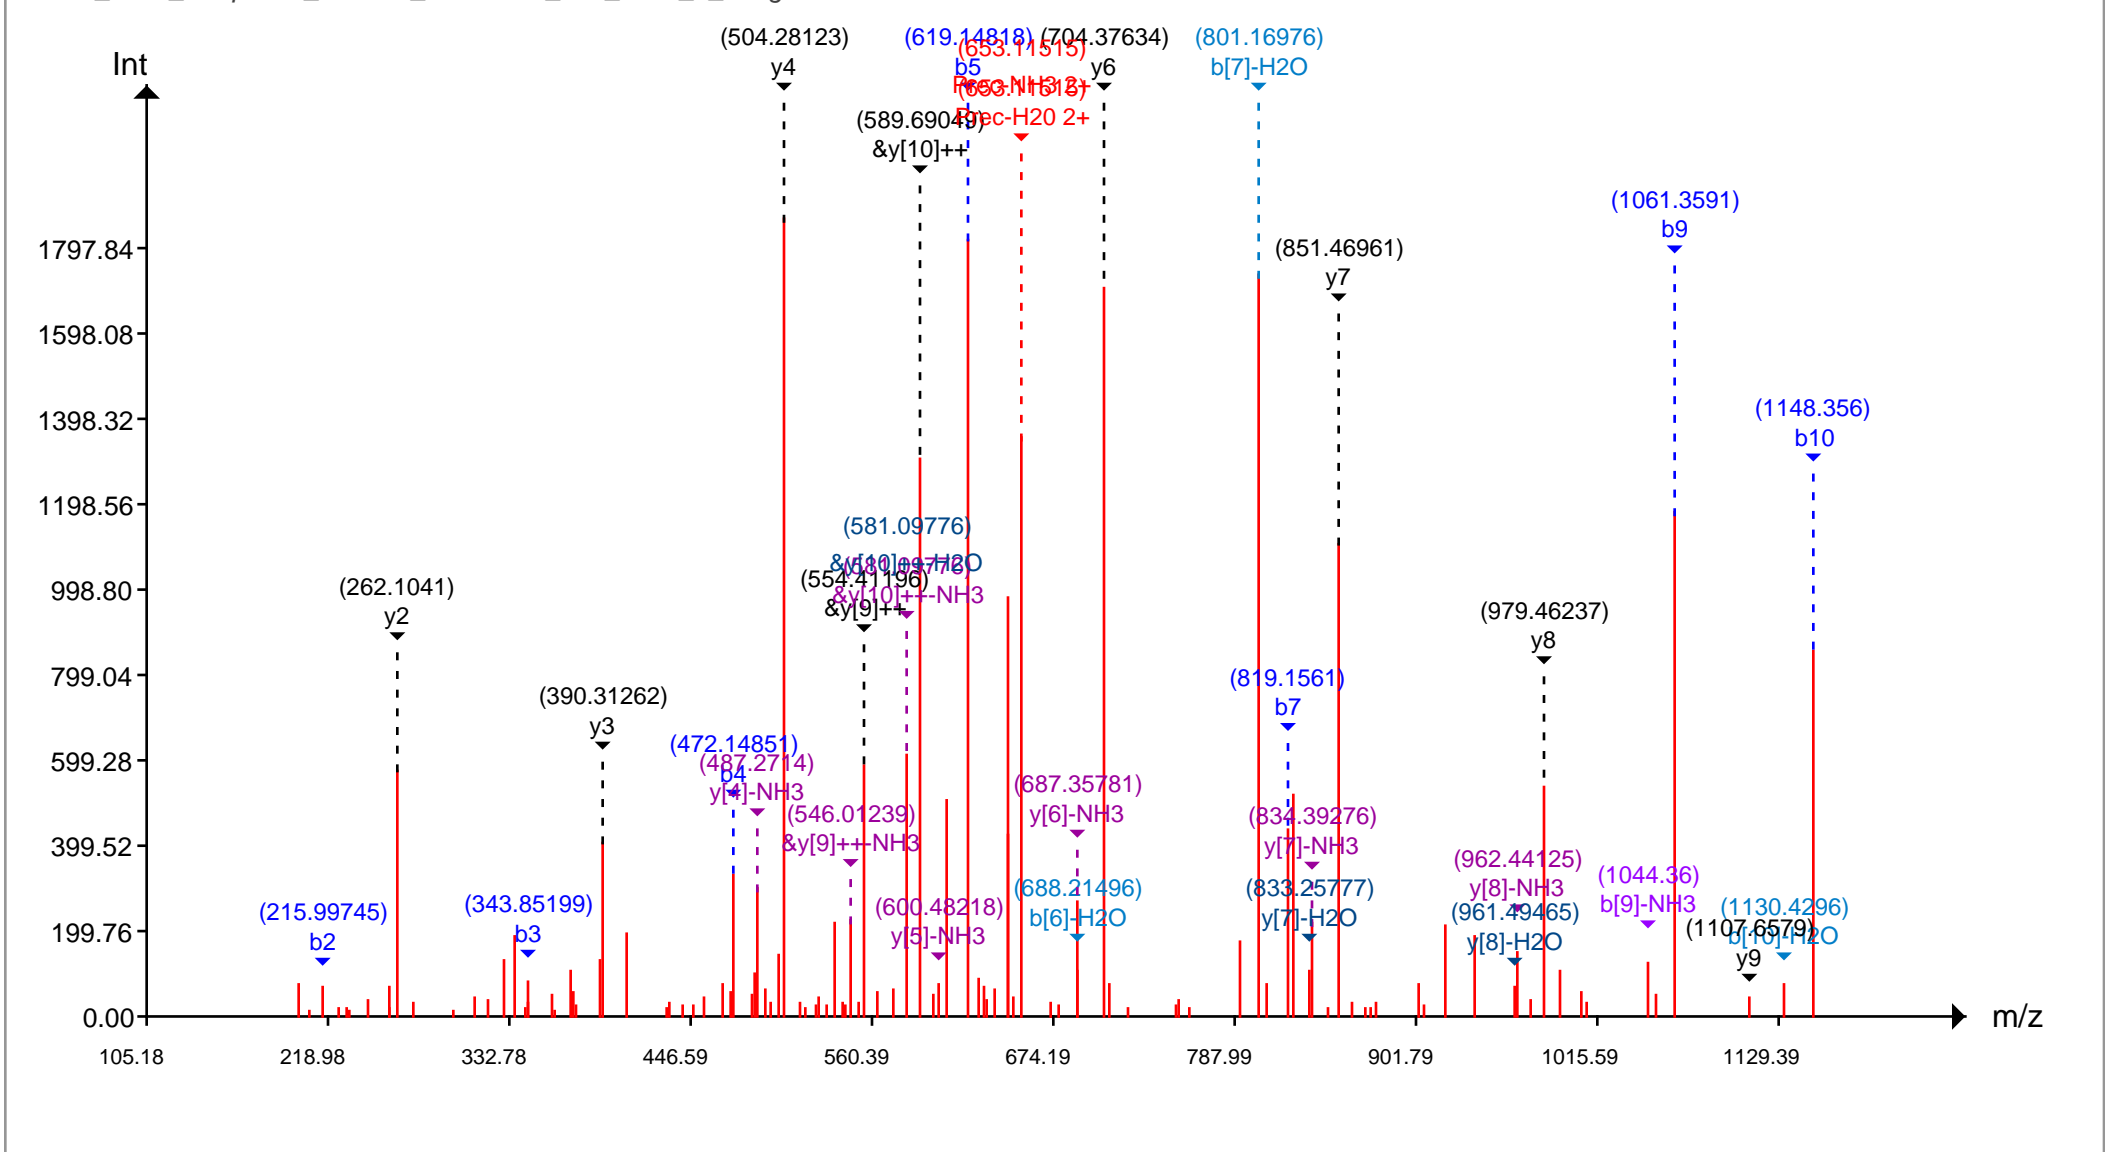

## Info

**Modified Sequence** AcD3-VAQQFSLNQSR-COOH

**Ion score** 56.28

**Protein** O60216

**Confidence level** 99.00%

**Precursor m/z** 661.84667

**Identity Threshold** 49.07

**Charge** 2+

**Mass error** -0.00299

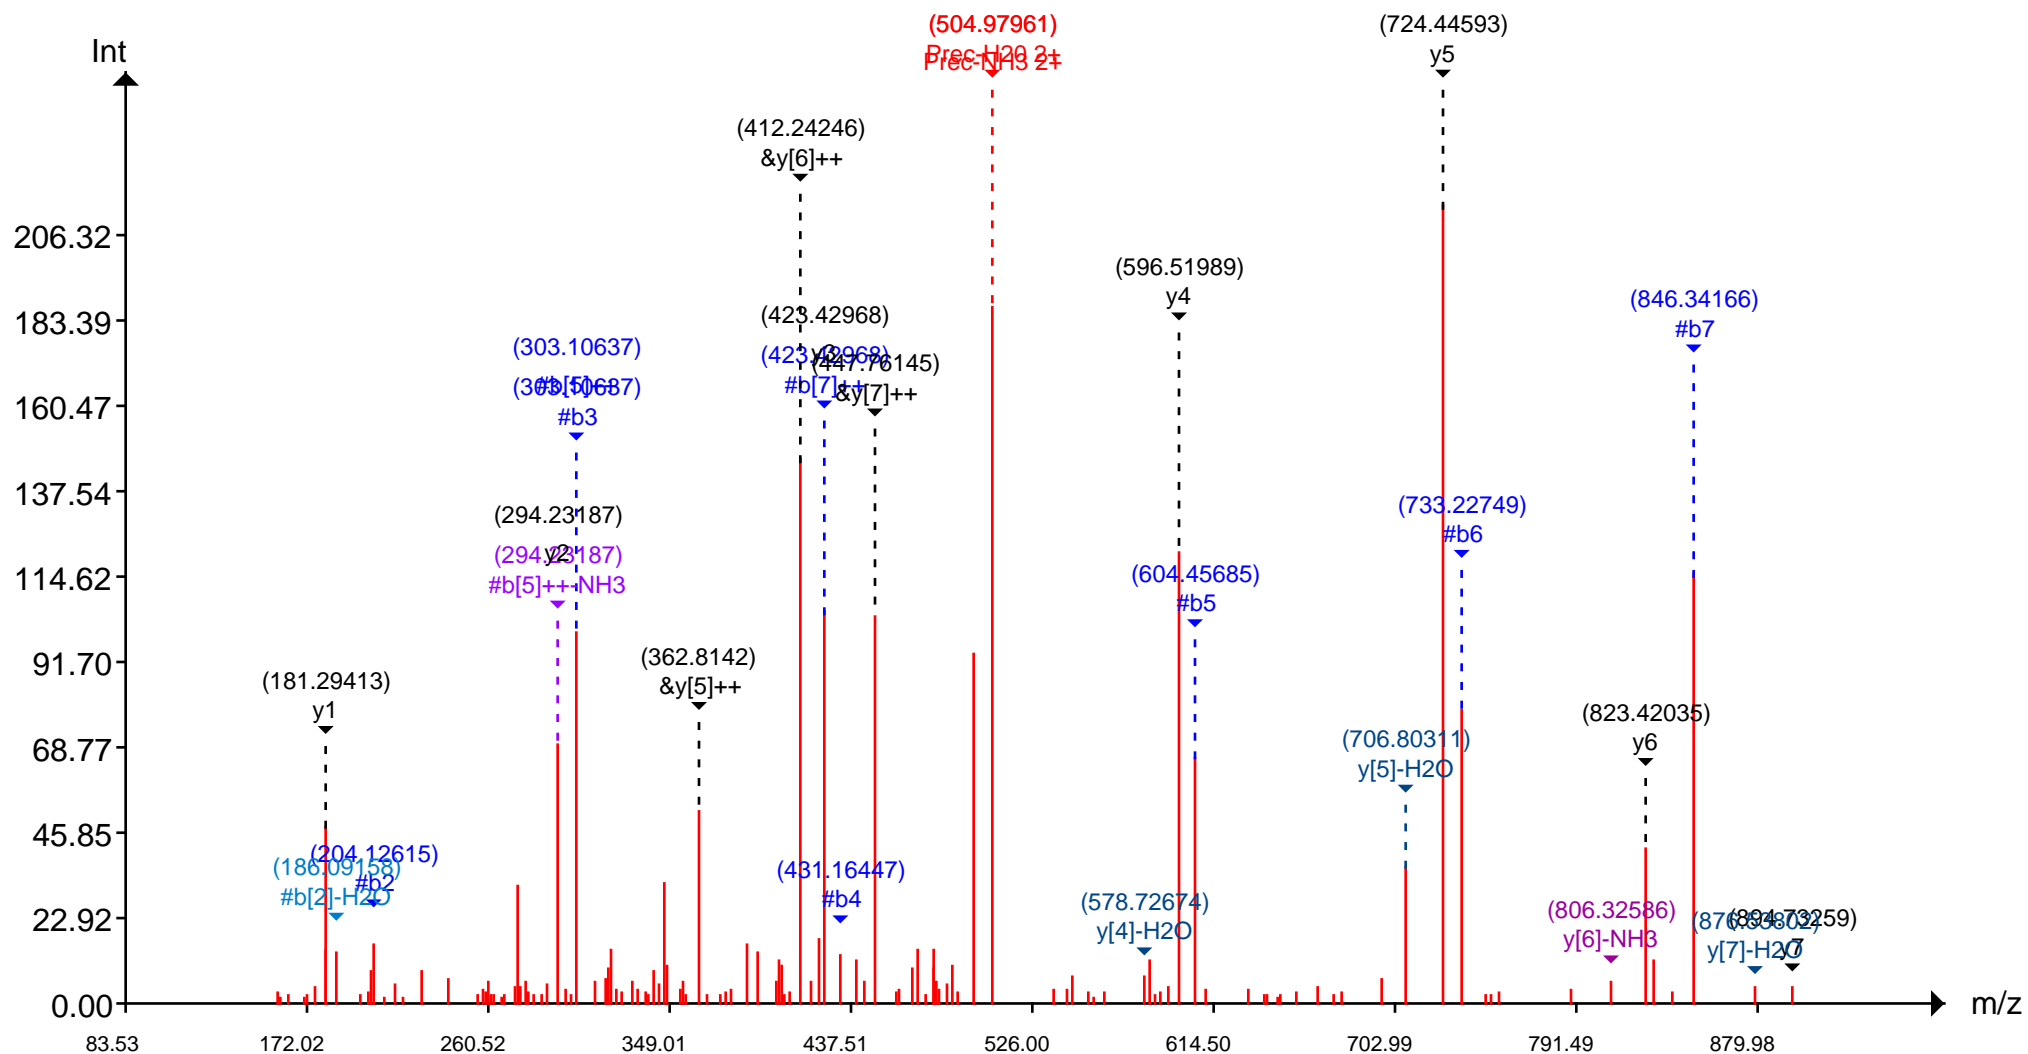

## Info

**Modified Sequence** AcD3-SAVQK<AcD3K\*>ELR<C13>-COOH

**Ion score** 73.59

**Protein** Q9P265

**Confidence level** 99.00%

**Precursor m/z** 513.81135

**Identity Threshold** 46.30

**Charge** 2+

**Mass error** -1.89E-4



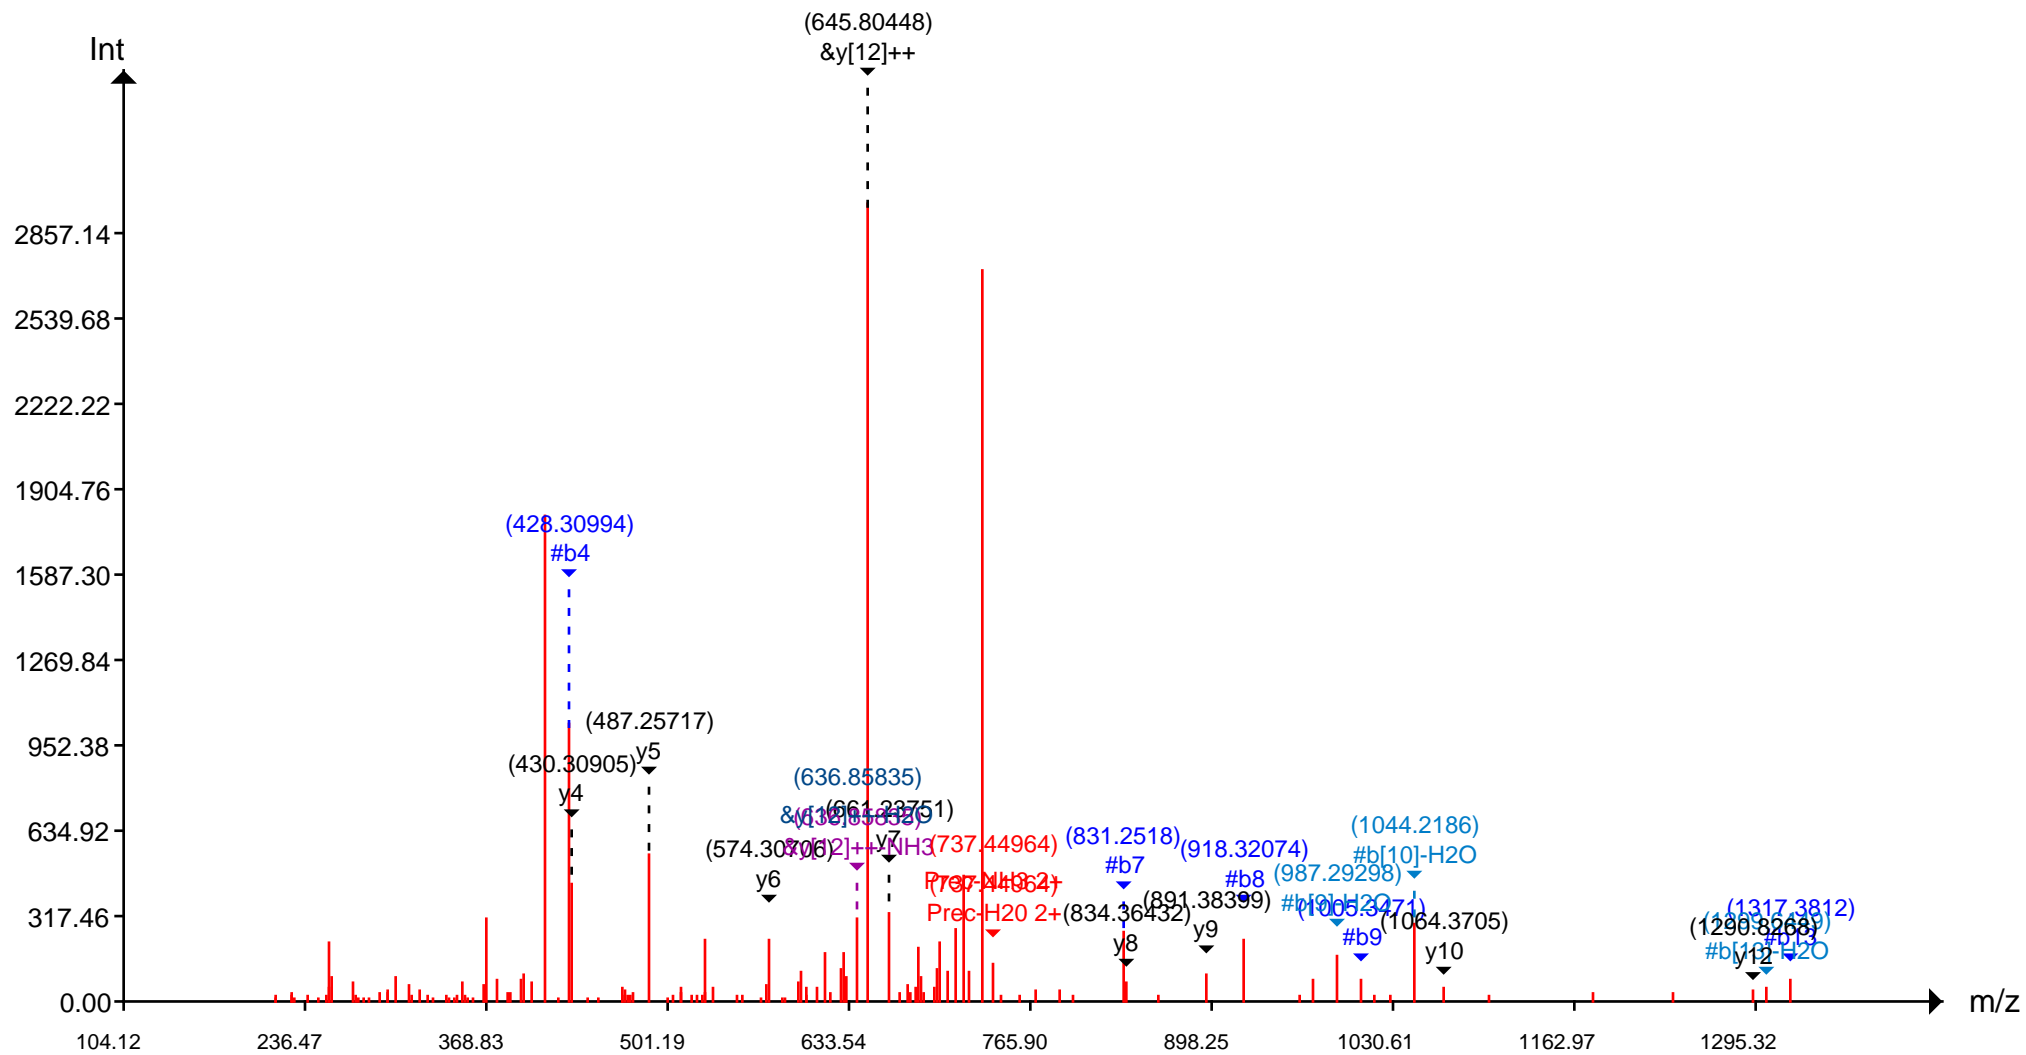

## Info

**Modified Sequence** AcD3-GVPEK<AcD3K\*>GK<AcD3K\*>SSGPSAR-COOH

**Ion score** 51.13

**Protein** Q96IZ0

**Confidence level** 99.00%

**Precursor m/z** 746.41346

**Identity Threshold** 48.56

**Charge** 2+

**Mass error** 0.008459

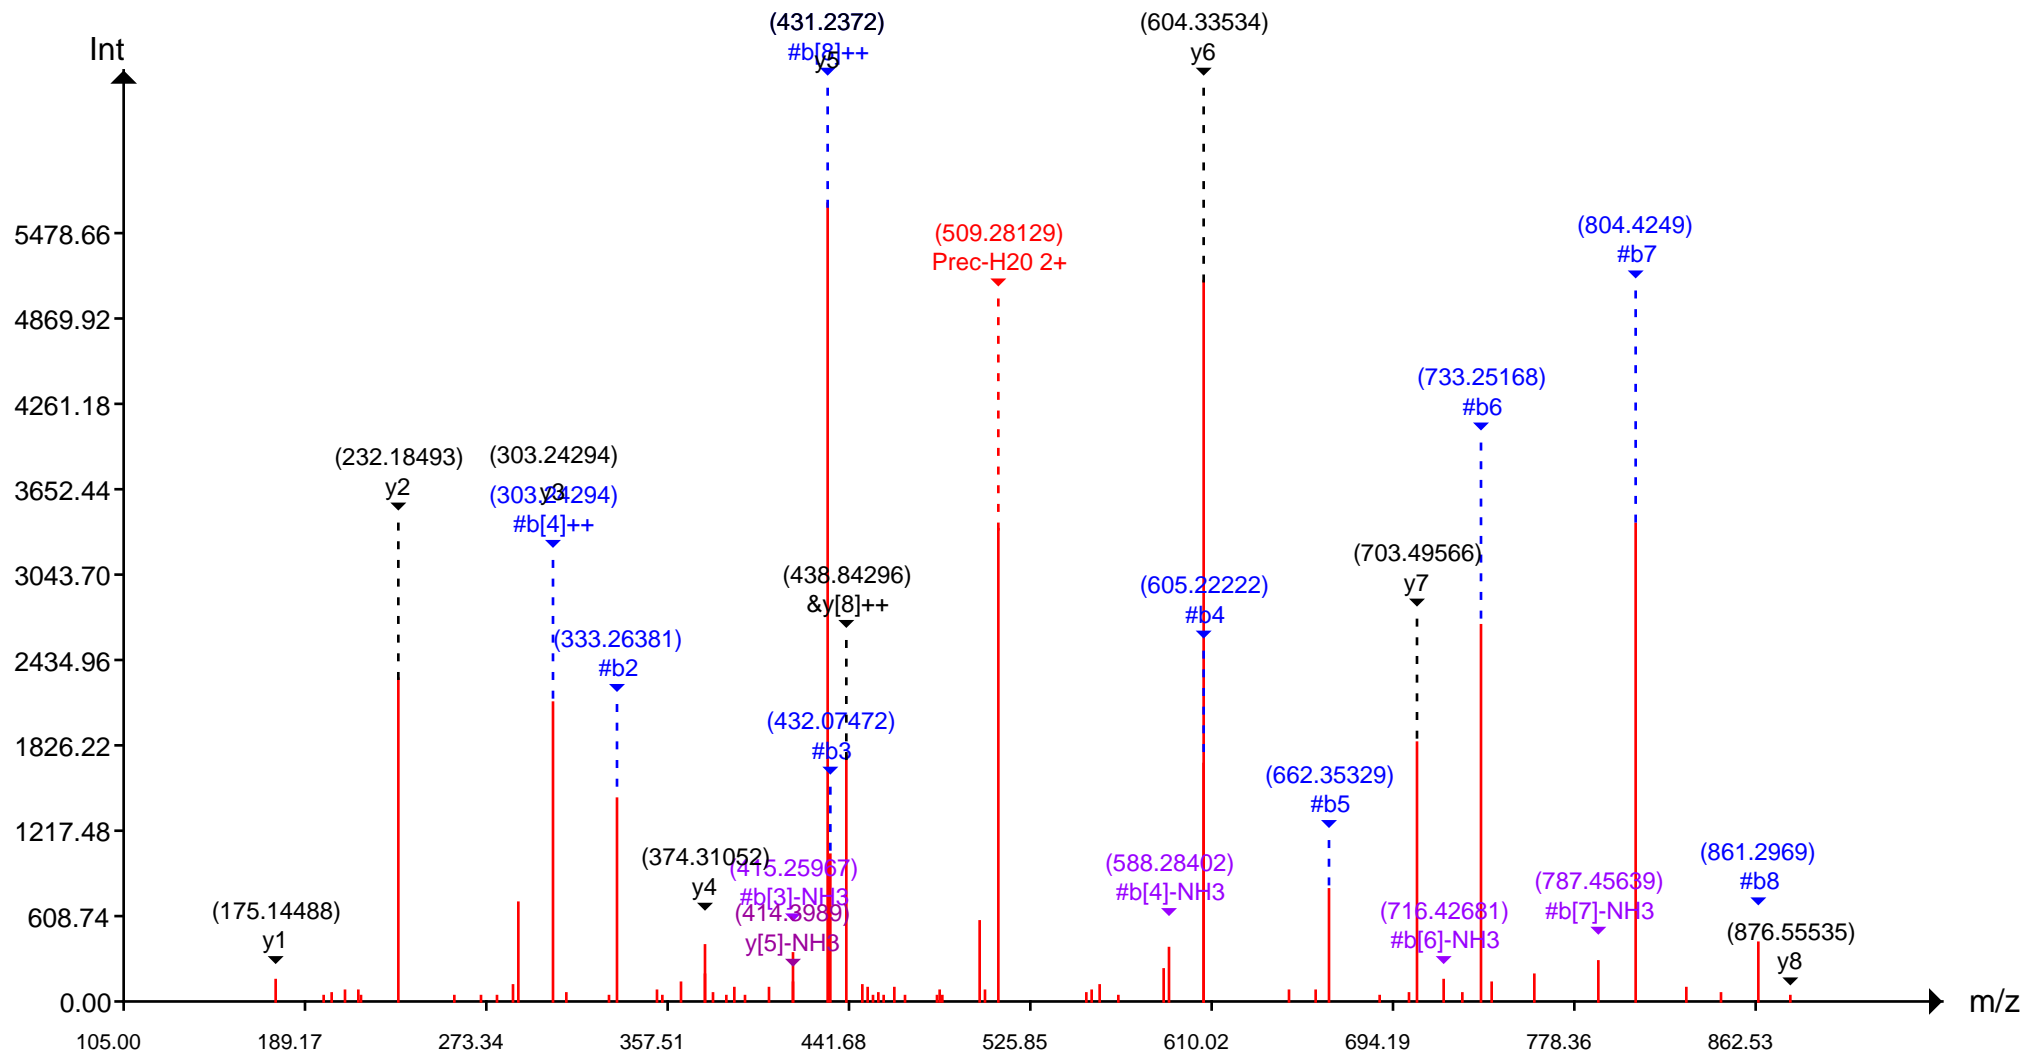

## Info

**Modified Sequence** AcD3-NK<AcD3K\*>VK<AcD3K\*>GAAGR-COOH

**Ion score** 74.23

**Protein** P78527

**Confidence level** 99.00%

**Precursor m/z** 518.31674

**Identity Threshold** 45.74

**Charge** 2+

**Mass error** 6.57E-4

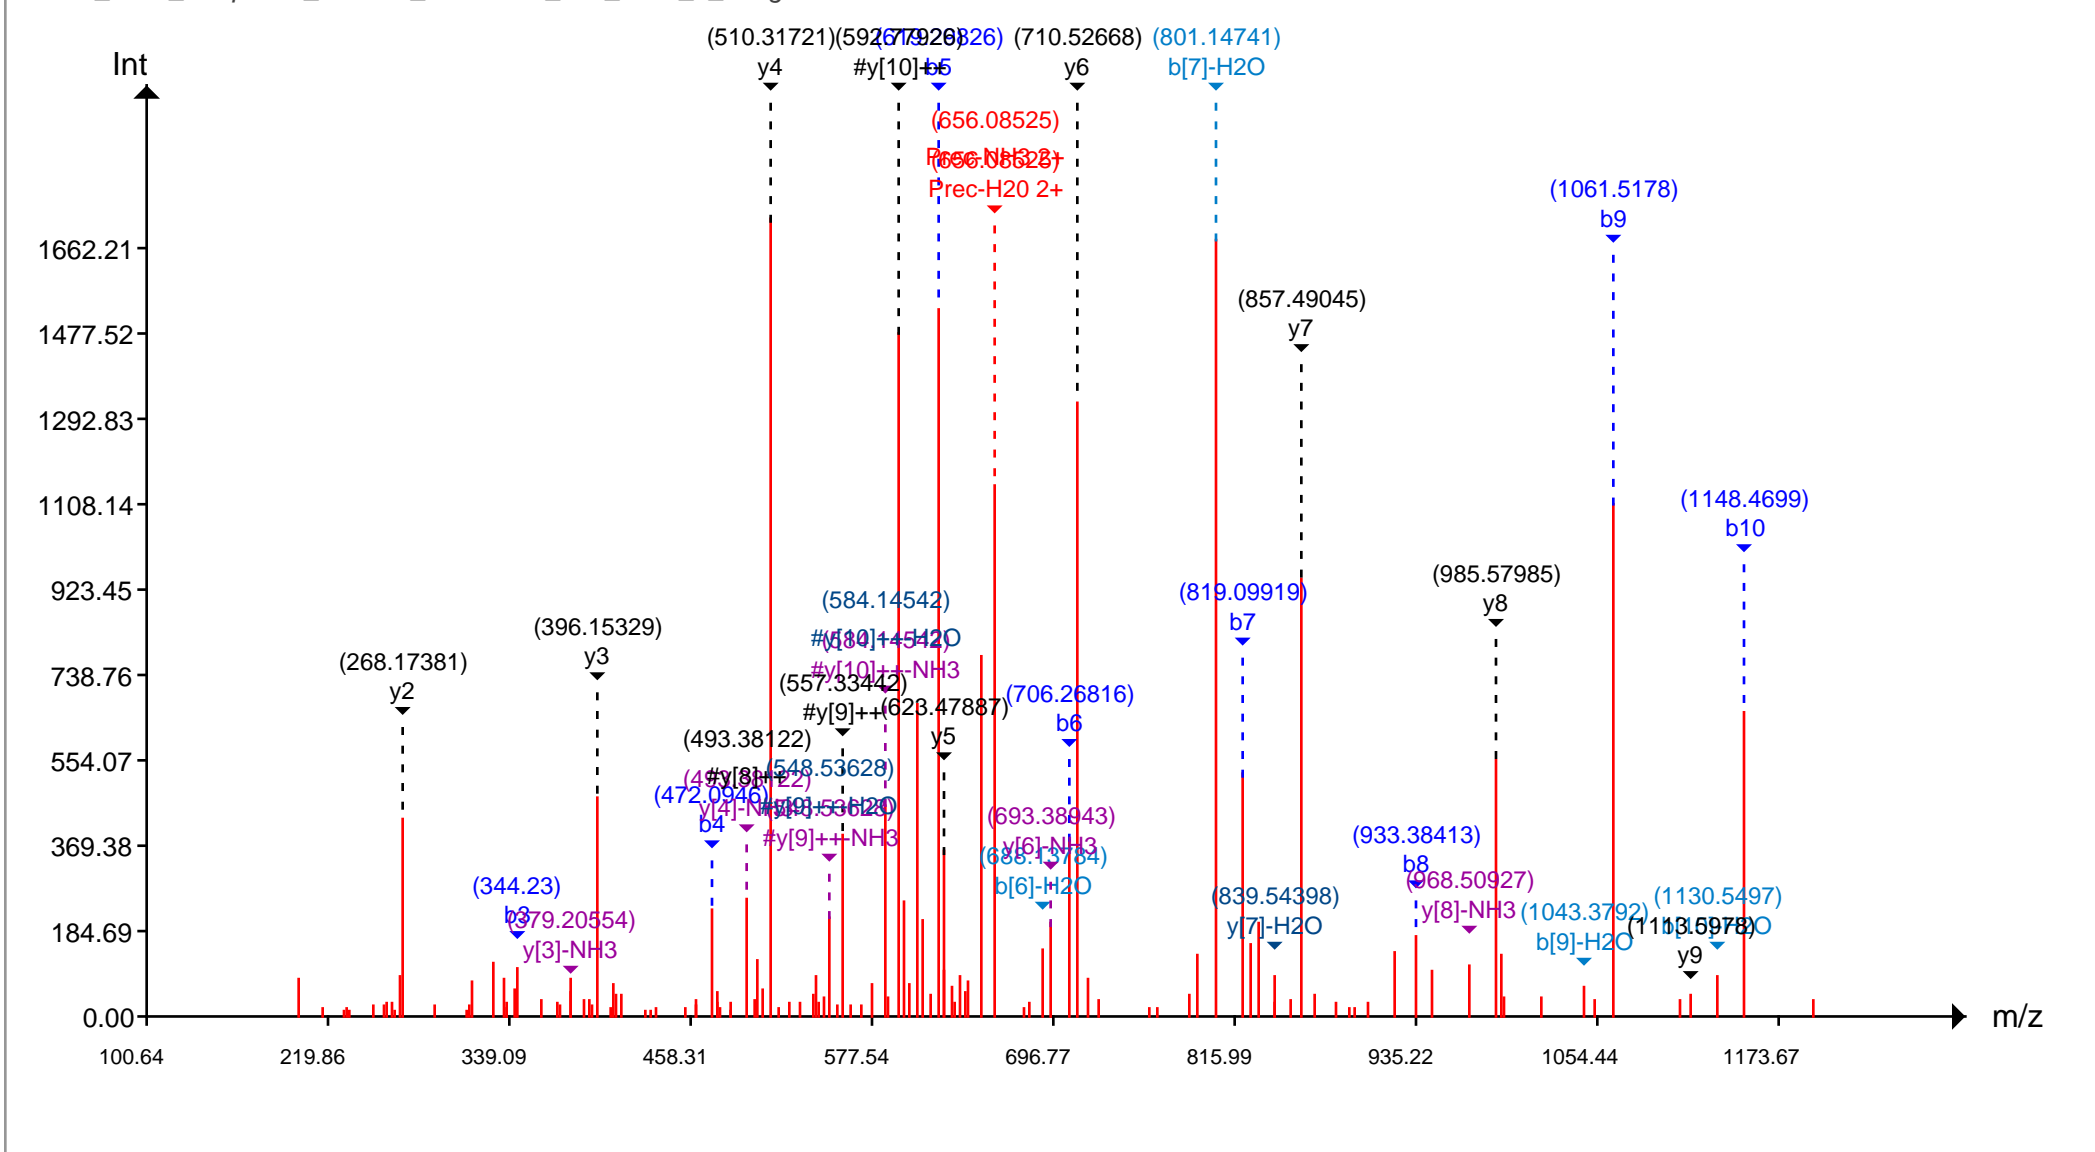

## Info

**Modified Sequence** AcD3-VAQQFSLNQSR<C13>-COOH

**Ion score** 65.48

**Protein** O60216

**Confidence level** 99.00%

**Precursor m/z** 664.8574

**Identity Threshold** 49.00

**Charge** 2+

**Mass error** -0.001672

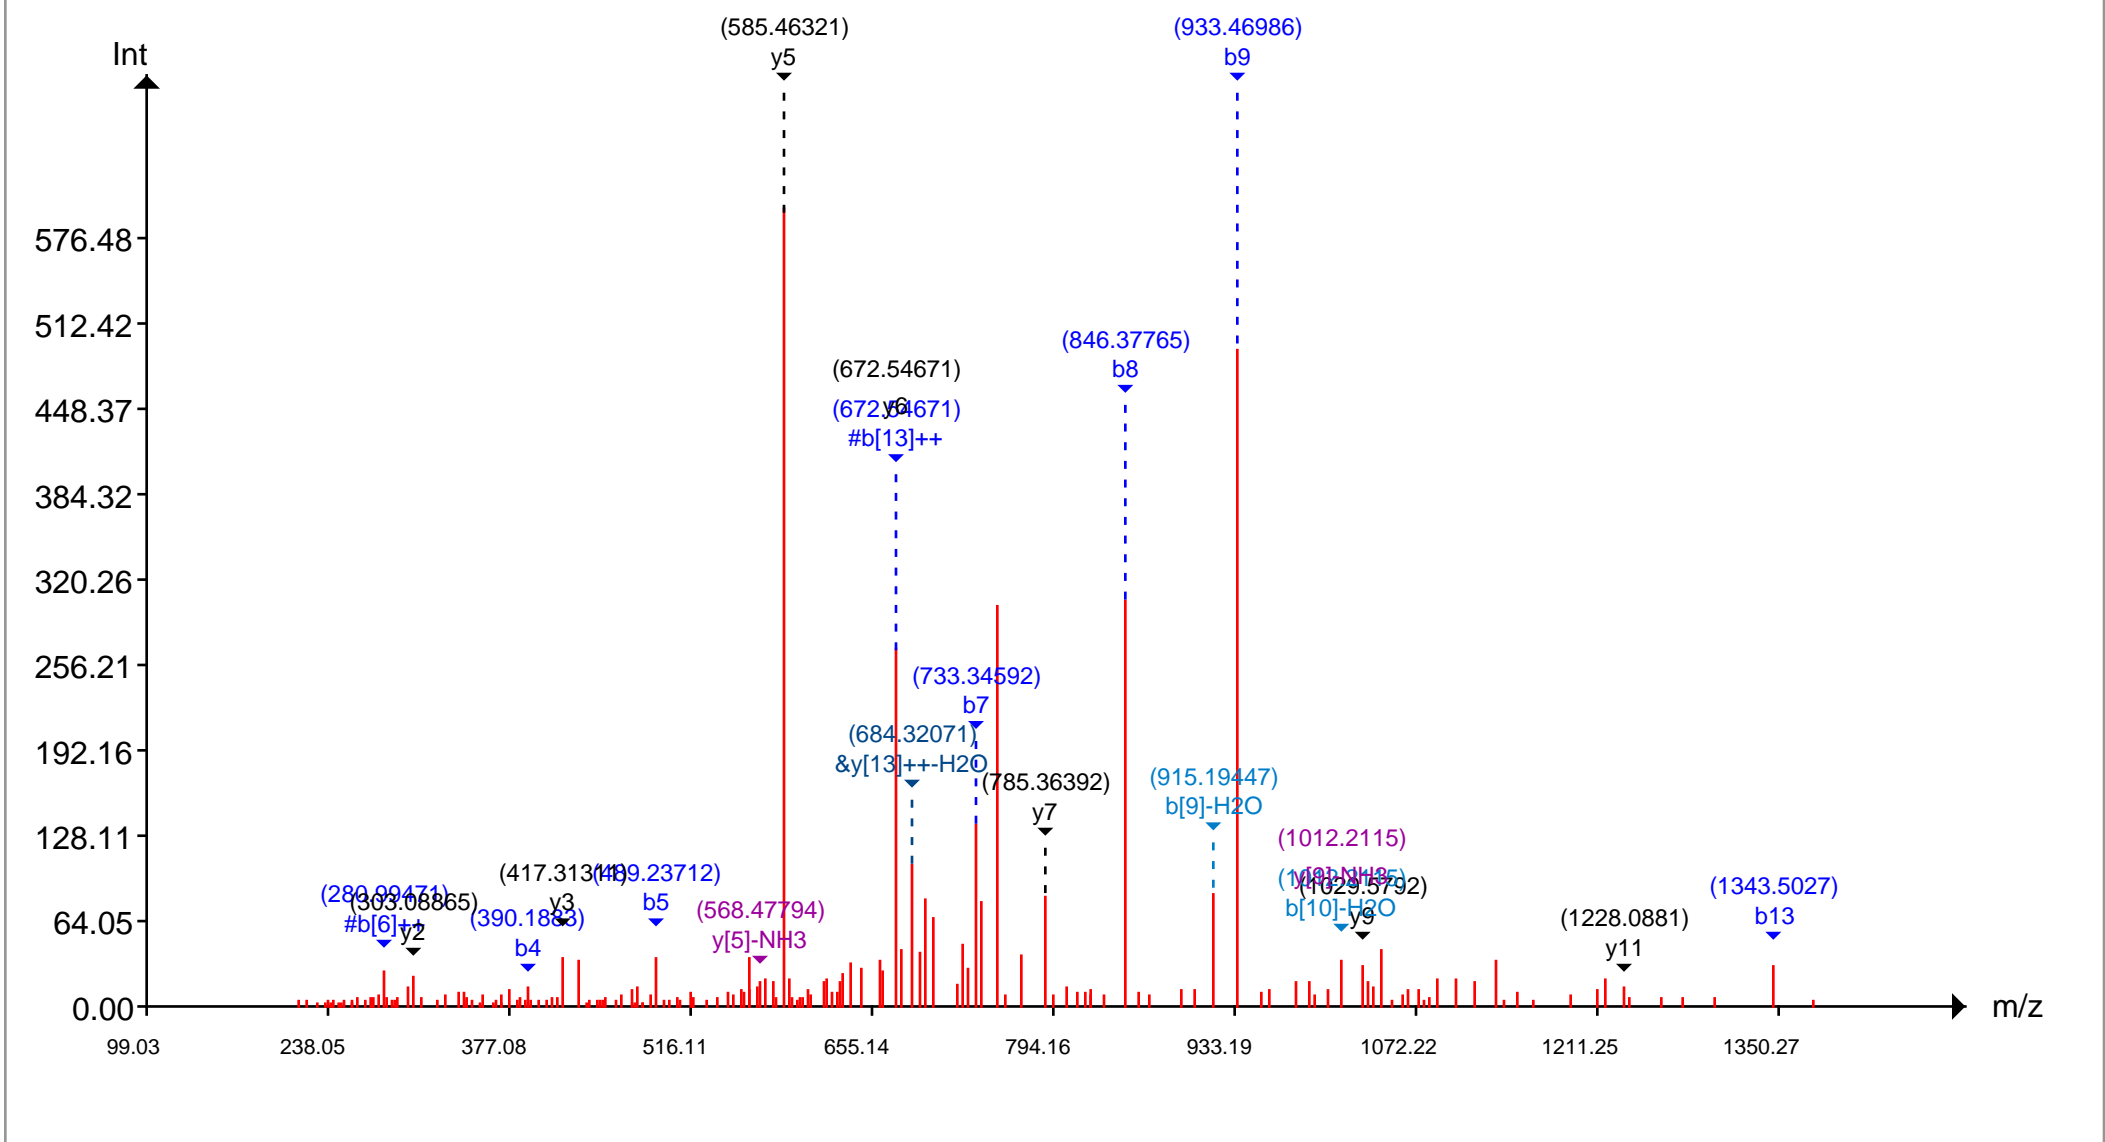

## Info

|                          |                                  |                           |         |
|--------------------------|----------------------------------|---------------------------|---------|
| <b>Modified Sequence</b> | AcD3-STGVVAK<AcD3K*>LSPANQR-COOH | <b>Ion score</b>          | 48.13   |
| <b>Protein</b>           | Q13263                           | <b>Confidence level</b>   | 99.00%  |
| <b>Precursor m/z</b>     | 759.43162                        | <b>Identity Threshold</b> | 47.76   |
| <b>Charge</b>            | 2+                               | <b>Mass error</b>         | 6.81E-4 |

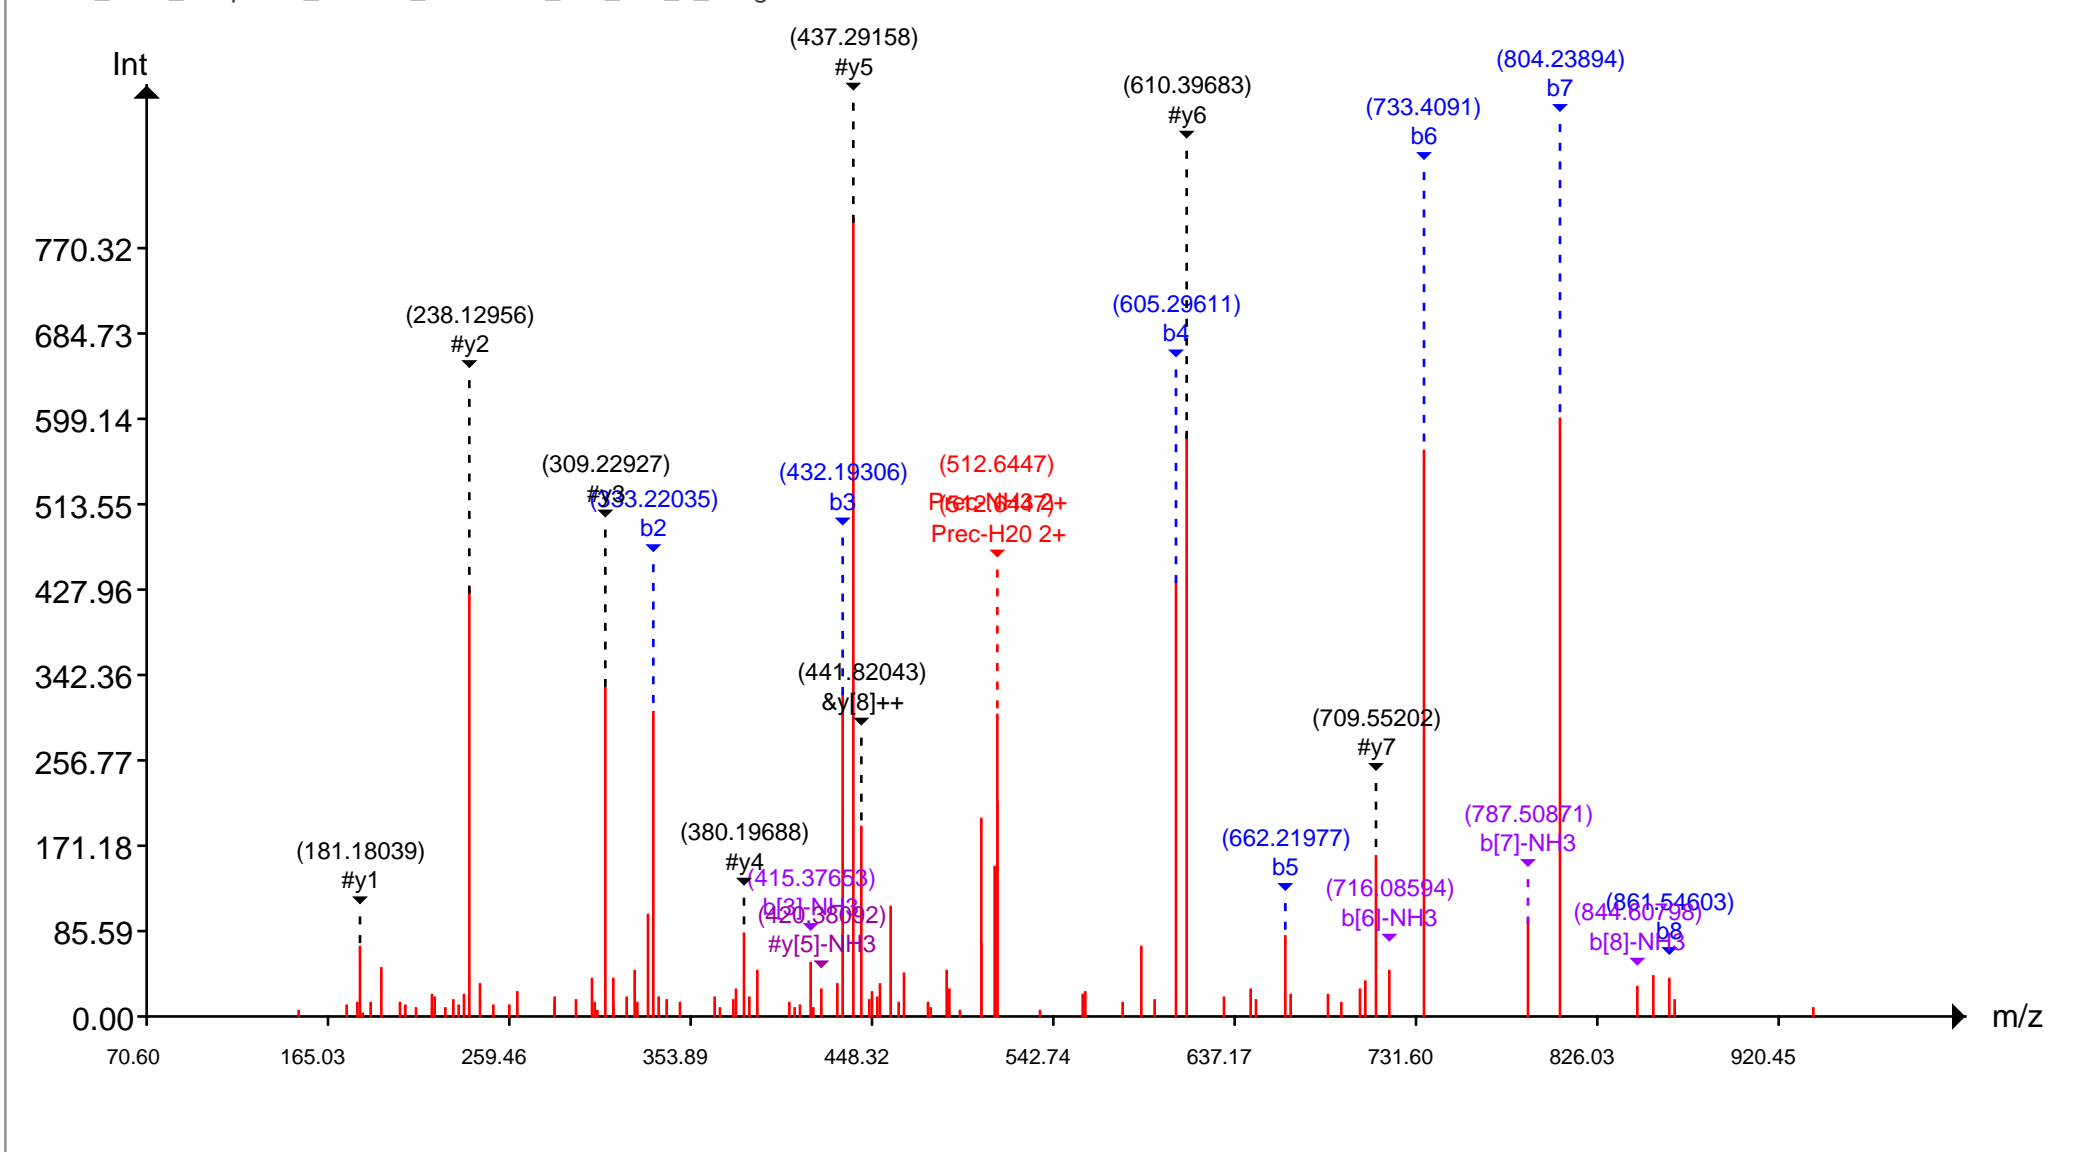

## Info

**Modified Sequence** AcD3-NK<AcD3K\*>VK<AcD3K\*>GAAGR<C13>-COOH

**Ion score** 55.29

**Protein** P78527

**Confidence level** 99.00%

**Precursor m/z** 521.3265

**Identity Threshold** 43.74

**Charge** 2+

**Mass error** 3.6E-5

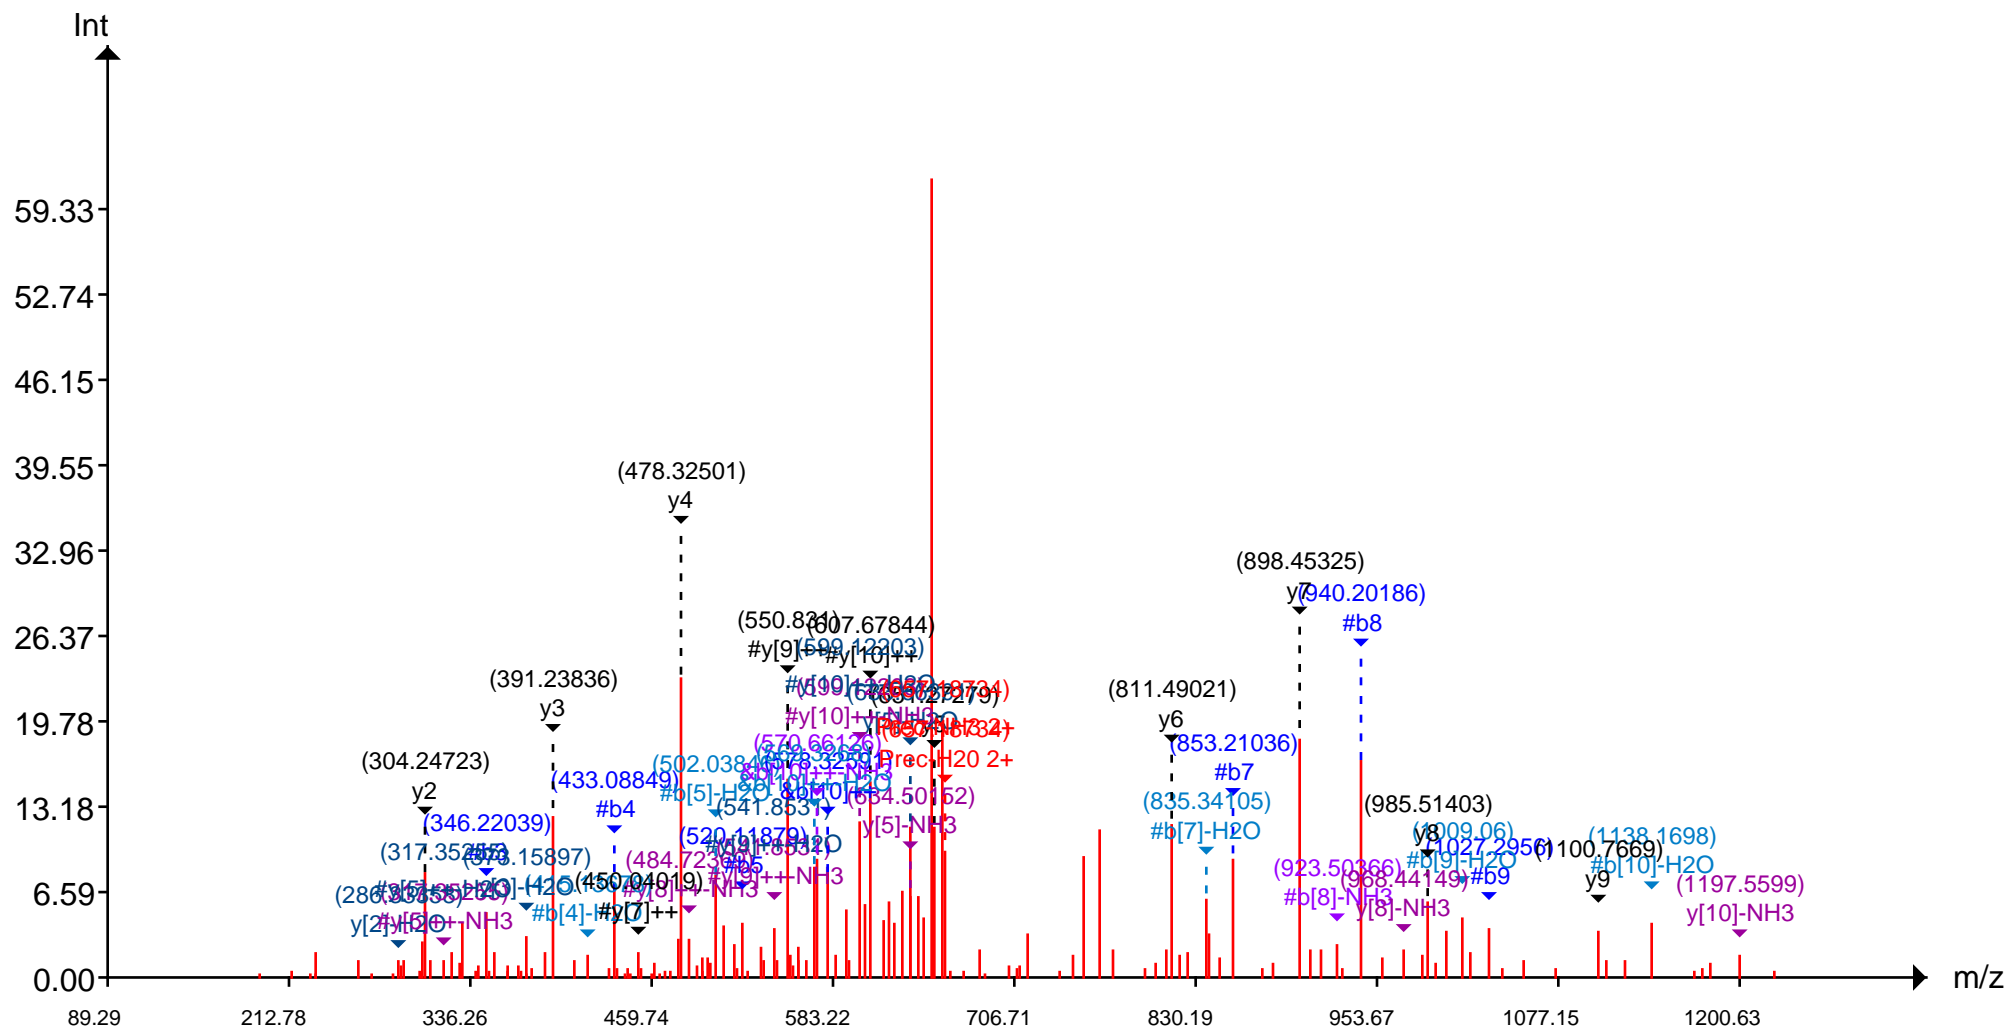

## Info

|                          |                                     |                           |          |
|--------------------------|-------------------------------------|---------------------------|----------|
| <b>Modified Sequence</b> | AcD3-ANDSSC<Cmm*>K<AcD3K*>SSER-COOH | <b>Ion score</b>          | 49.88    |
| <b>Protein</b>           | Q9Y2H0                              | <b>Confidence level</b>   | 99.00%   |
| <b>Precursor m/z</b>     | 665.7937                            | <b>Identity Threshold</b> | 43.71    |
| <b>Charge</b>            | 2+                                  | <b>Mass error</b>         | -8.98E-4 |

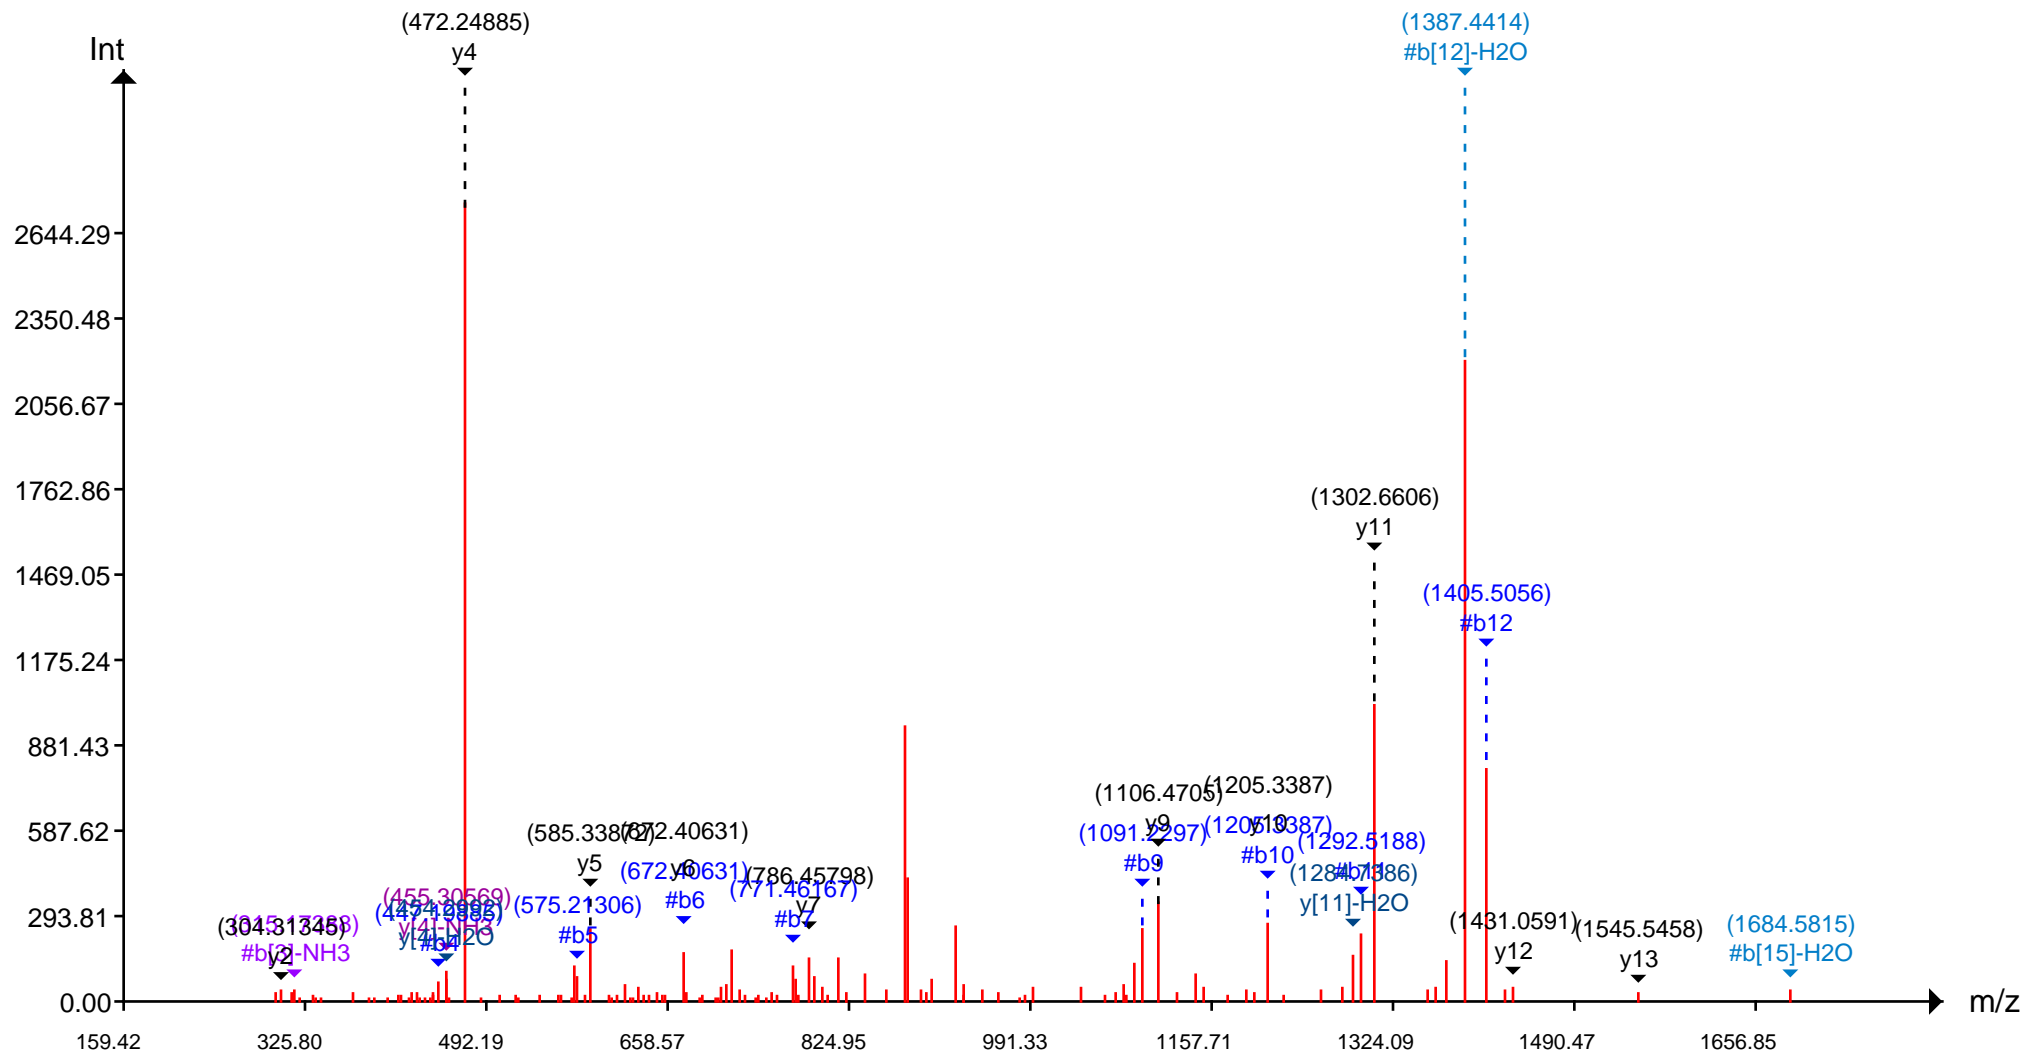

## Info

|                          |                                          |                           |         |
|--------------------------|------------------------------------------|---------------------------|---------|
| <b>Modified Sequence</b> | AcD3-SAQDQPVK<AcD3K*>M<Mox*>NSLPAER-COOH | <b>Ion score</b>          | 77.07   |
| <b>Protein</b>           | P30419                                   | <b>Confidence level</b>   | 99.00%  |
| <b>Precursor m/z</b>     | 938.97079                                | <b>Identity Threshold</b> | 48.81   |
| <b>Charge</b>            | 2+                                       | <b>Mass error</b>         | 3.16E-4 |

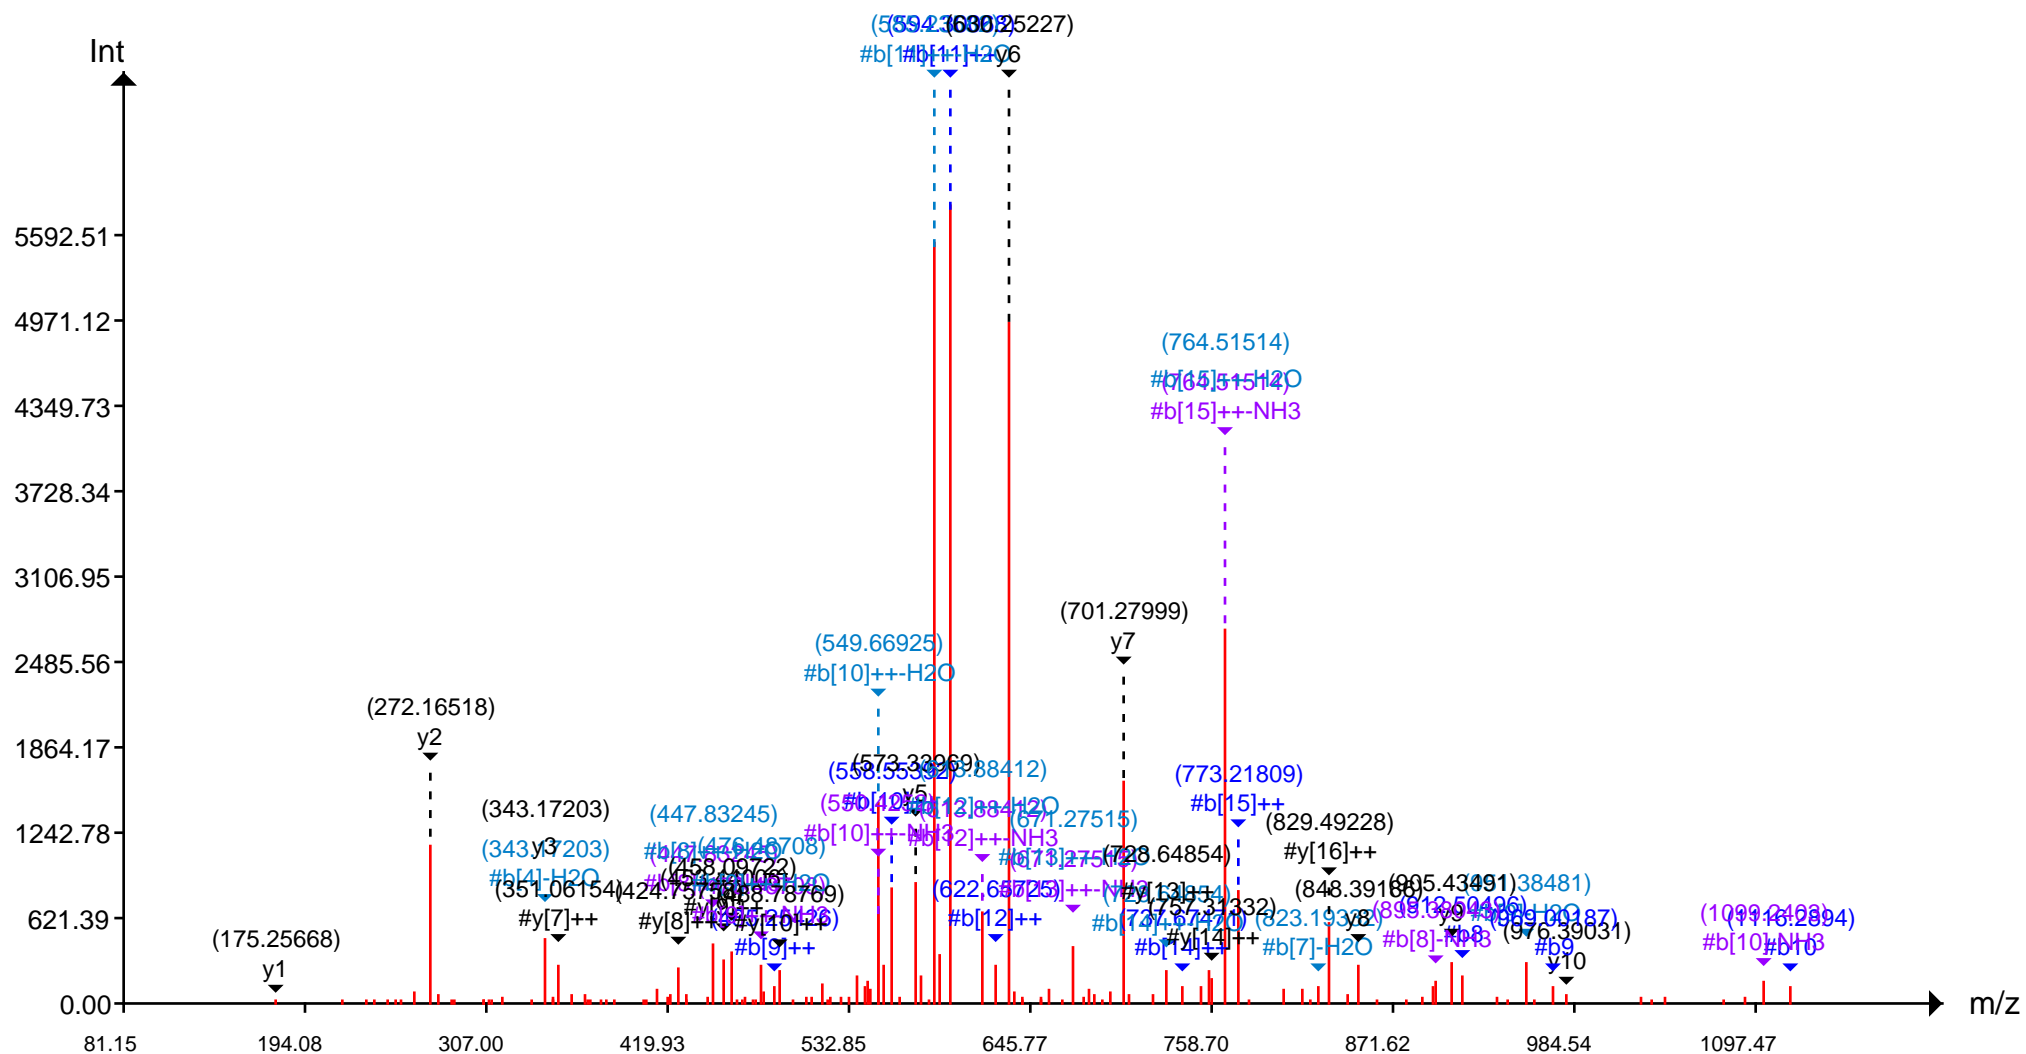

## Info

|                          |                                                 |                           |         |
|--------------------------|-------------------------------------------------|---------------------------|---------|
| <b>Modified Sequence</b> | AcD3-NGSGM<Mox*>C<Cmm*>K<AcD3K*>AGFAGDDAPR-COOH | <b>Ion score</b>          | 87.21   |
| <b>Protein</b>           | P60709, P63261, Q6S8J3, A5A3E0                  | <b>Confidence level</b>   | 99.00%  |
| <b>Precursor m/z</b>     | 606.26681                                       | <b>Identity Threshold</b> | 42.96   |
| <b>Charge</b>            | 3+                                              | <b>Mass error</b>         | -1.0E-4 |



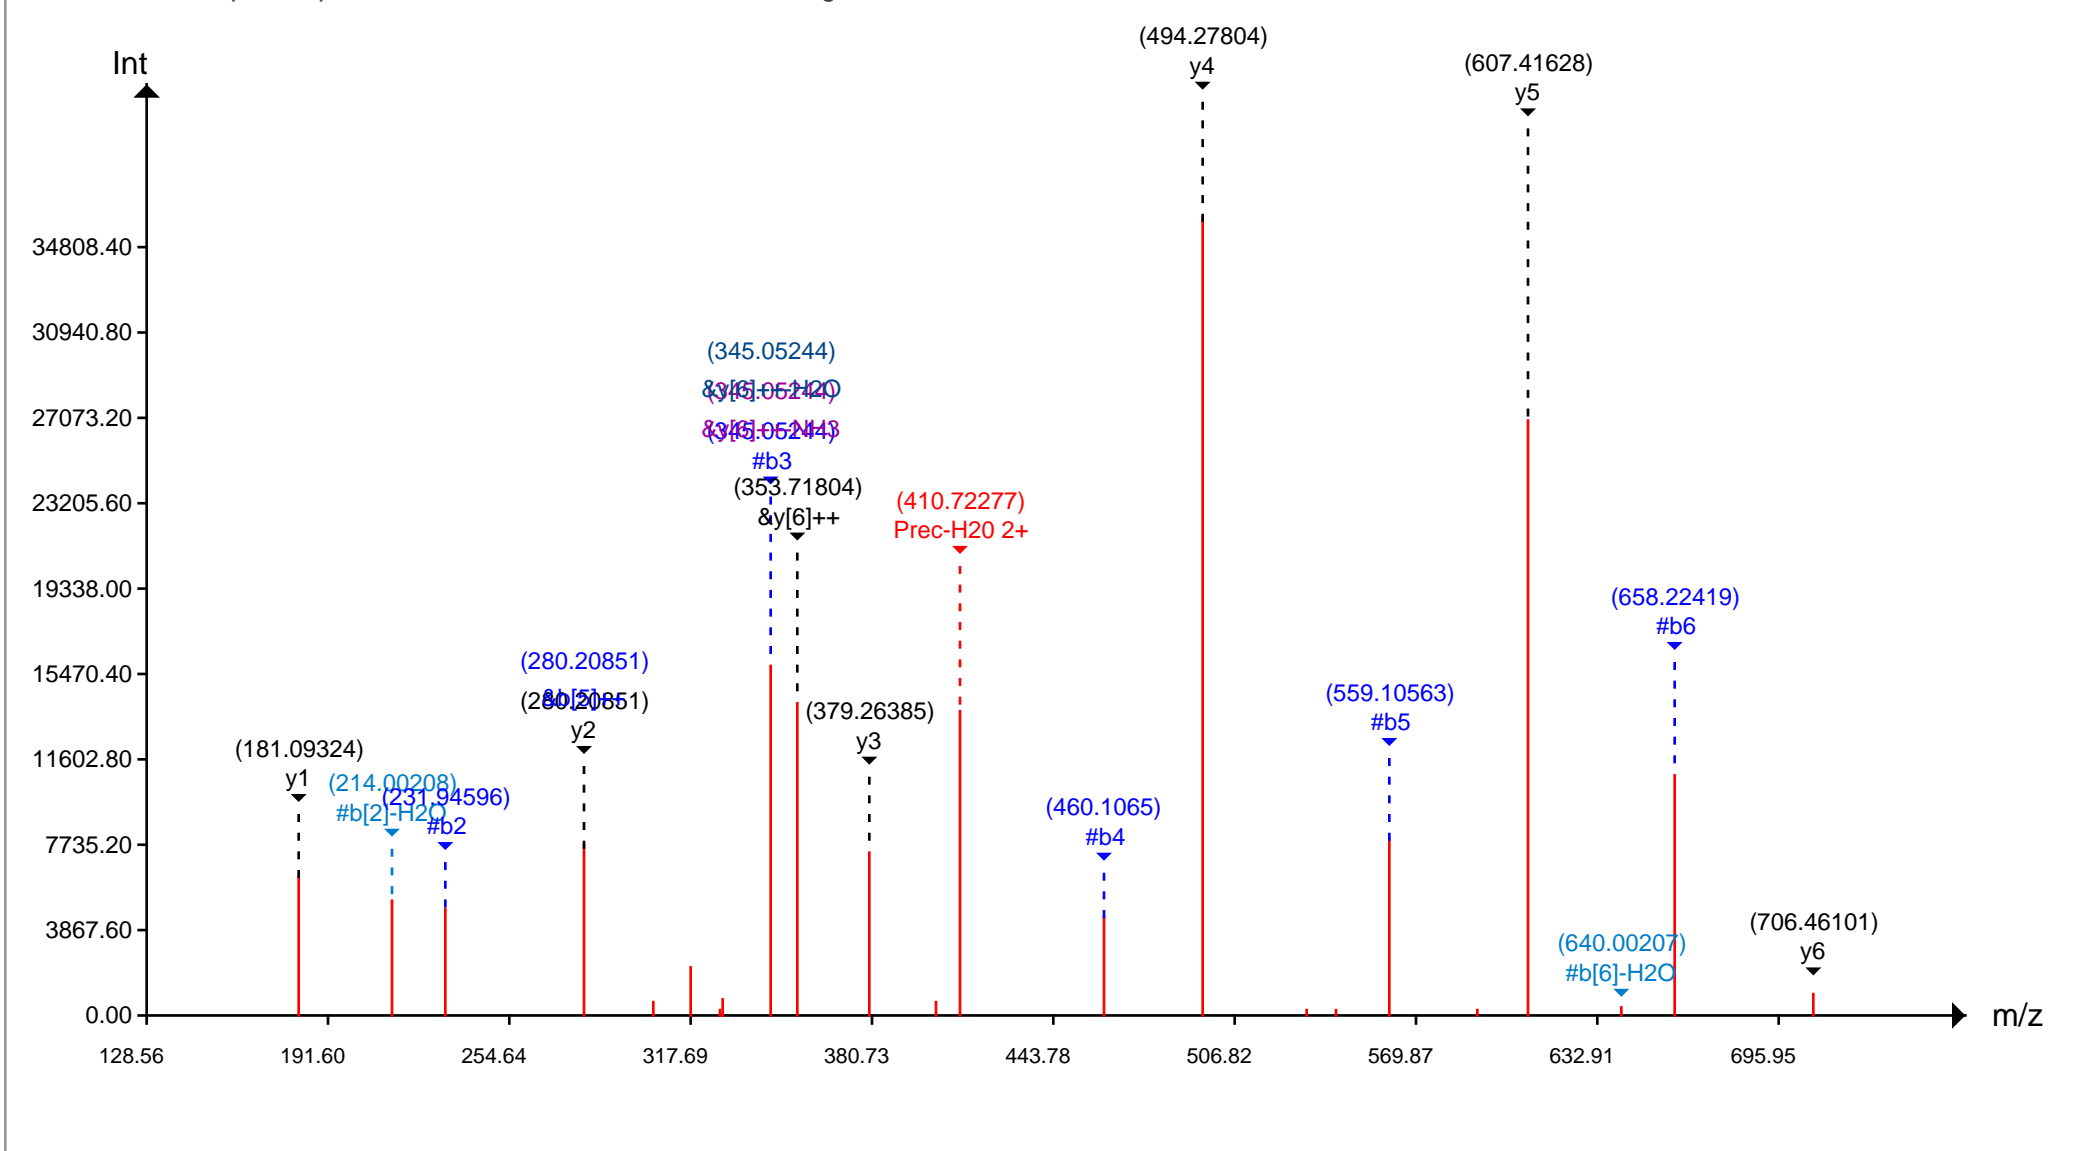

## Info

|                          |                                        |                           |         |
|--------------------------|----------------------------------------|---------------------------|---------|
| <b>Modified Sequence</b> | AcD3-SVLDVVR<C13>-COOH                 | <b>Ion score</b>          | 58.45   |
| <b>Protein</b>           | Q13885, Q9BVA1, P68371, Q13509, P07437 | <b>Confidence level</b>   | 99.00%  |
| <b>Precursor m/z</b>     | 419.762                                | <b>Identity Threshold</b> | 45.46   |
| <b>Charge</b>            | 2+                                     | <b>Mass error</b>         | -4.3E-5 |

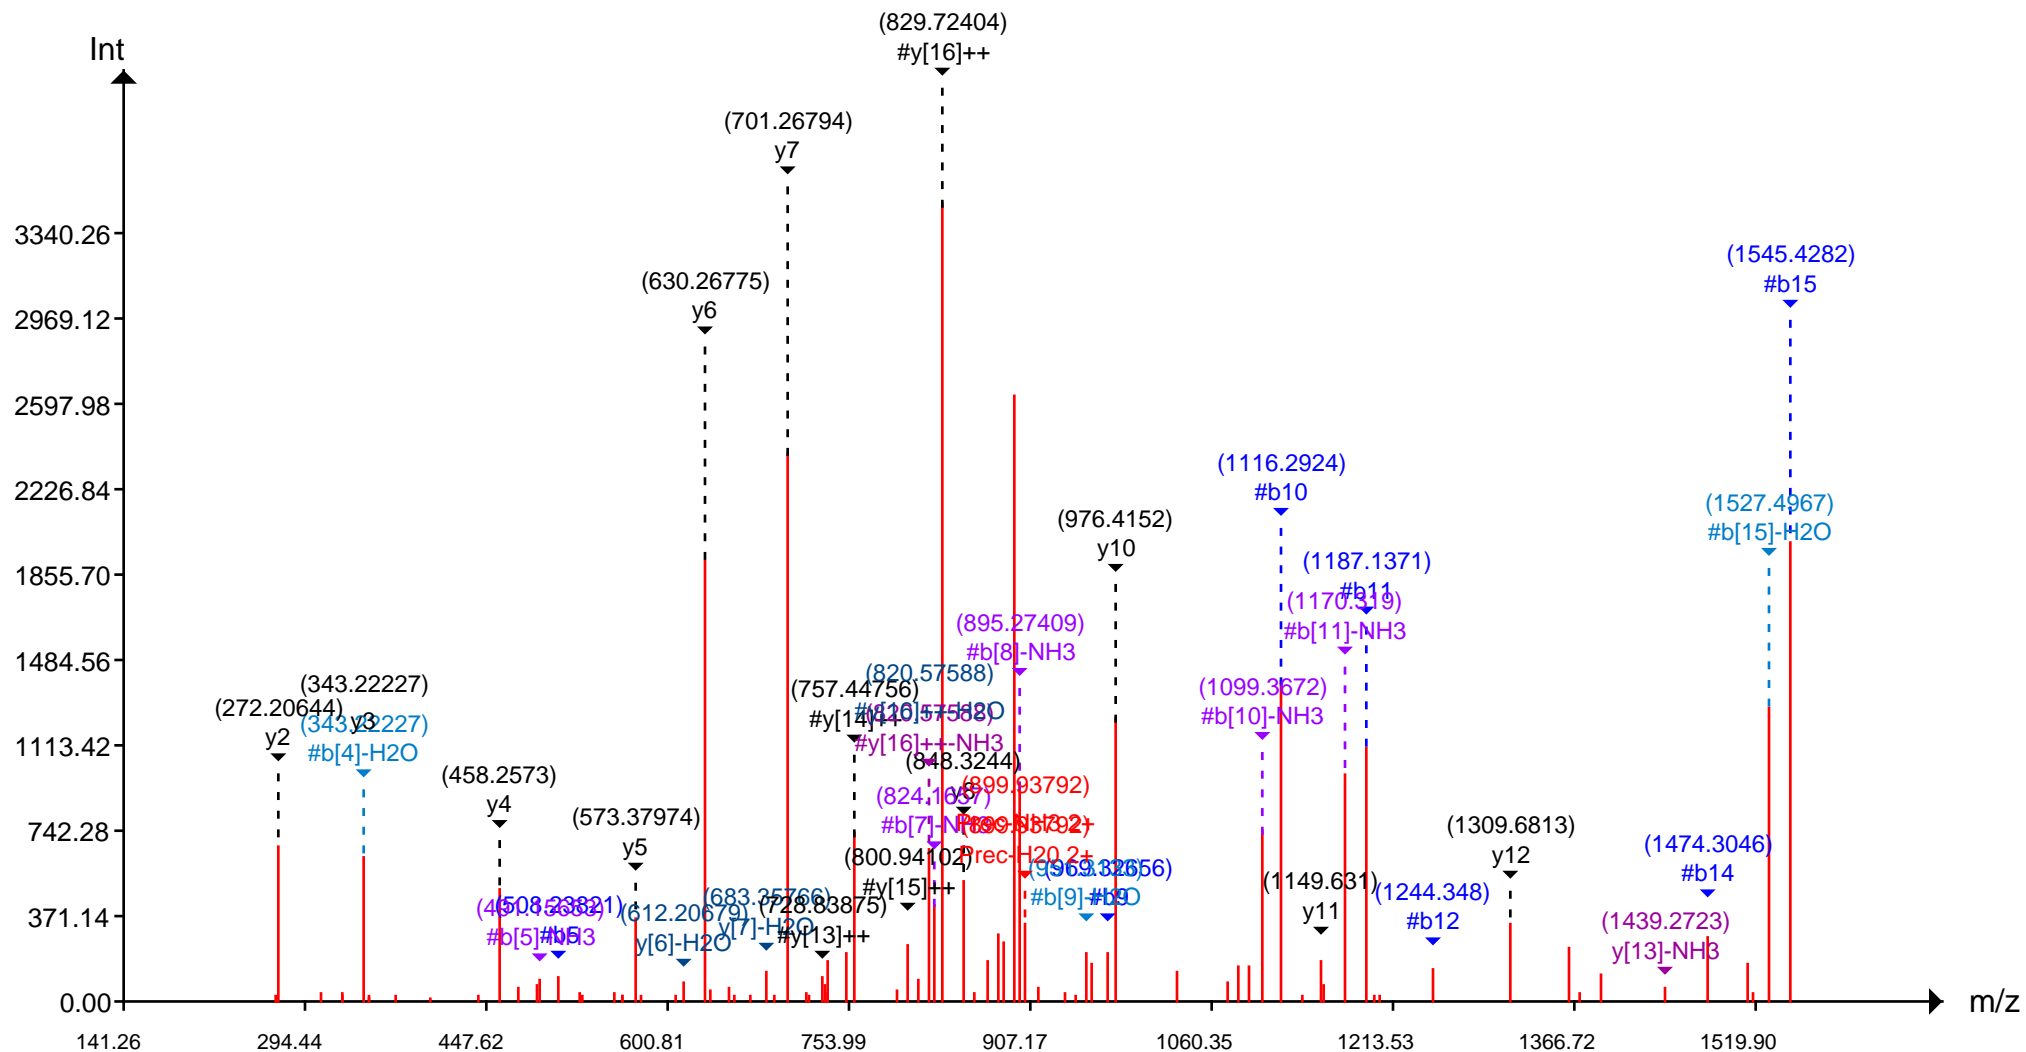

## Info

|                          |                                                 |                           |         |
|--------------------------|-------------------------------------------------|---------------------------|---------|
| <b>Modified Sequence</b> | AcD3-NGSGM<Mox*>C<Cmm*>K<AcD3K*>AGFAGDDAPR-COOH | <b>Ion score</b>          | 80.83   |
| <b>Protein</b>           | P60709, P63261, Q6S8J3, A5A3E0                  | <b>Confidence level</b>   | 99.00%  |
| <b>Precursor m/z</b>     | 908.89686                                       | <b>Identity Threshold</b> | 42.99   |
| <b>Charge</b>            | 2+                                              | <b>Mass error</b>         | 4.66E-4 |

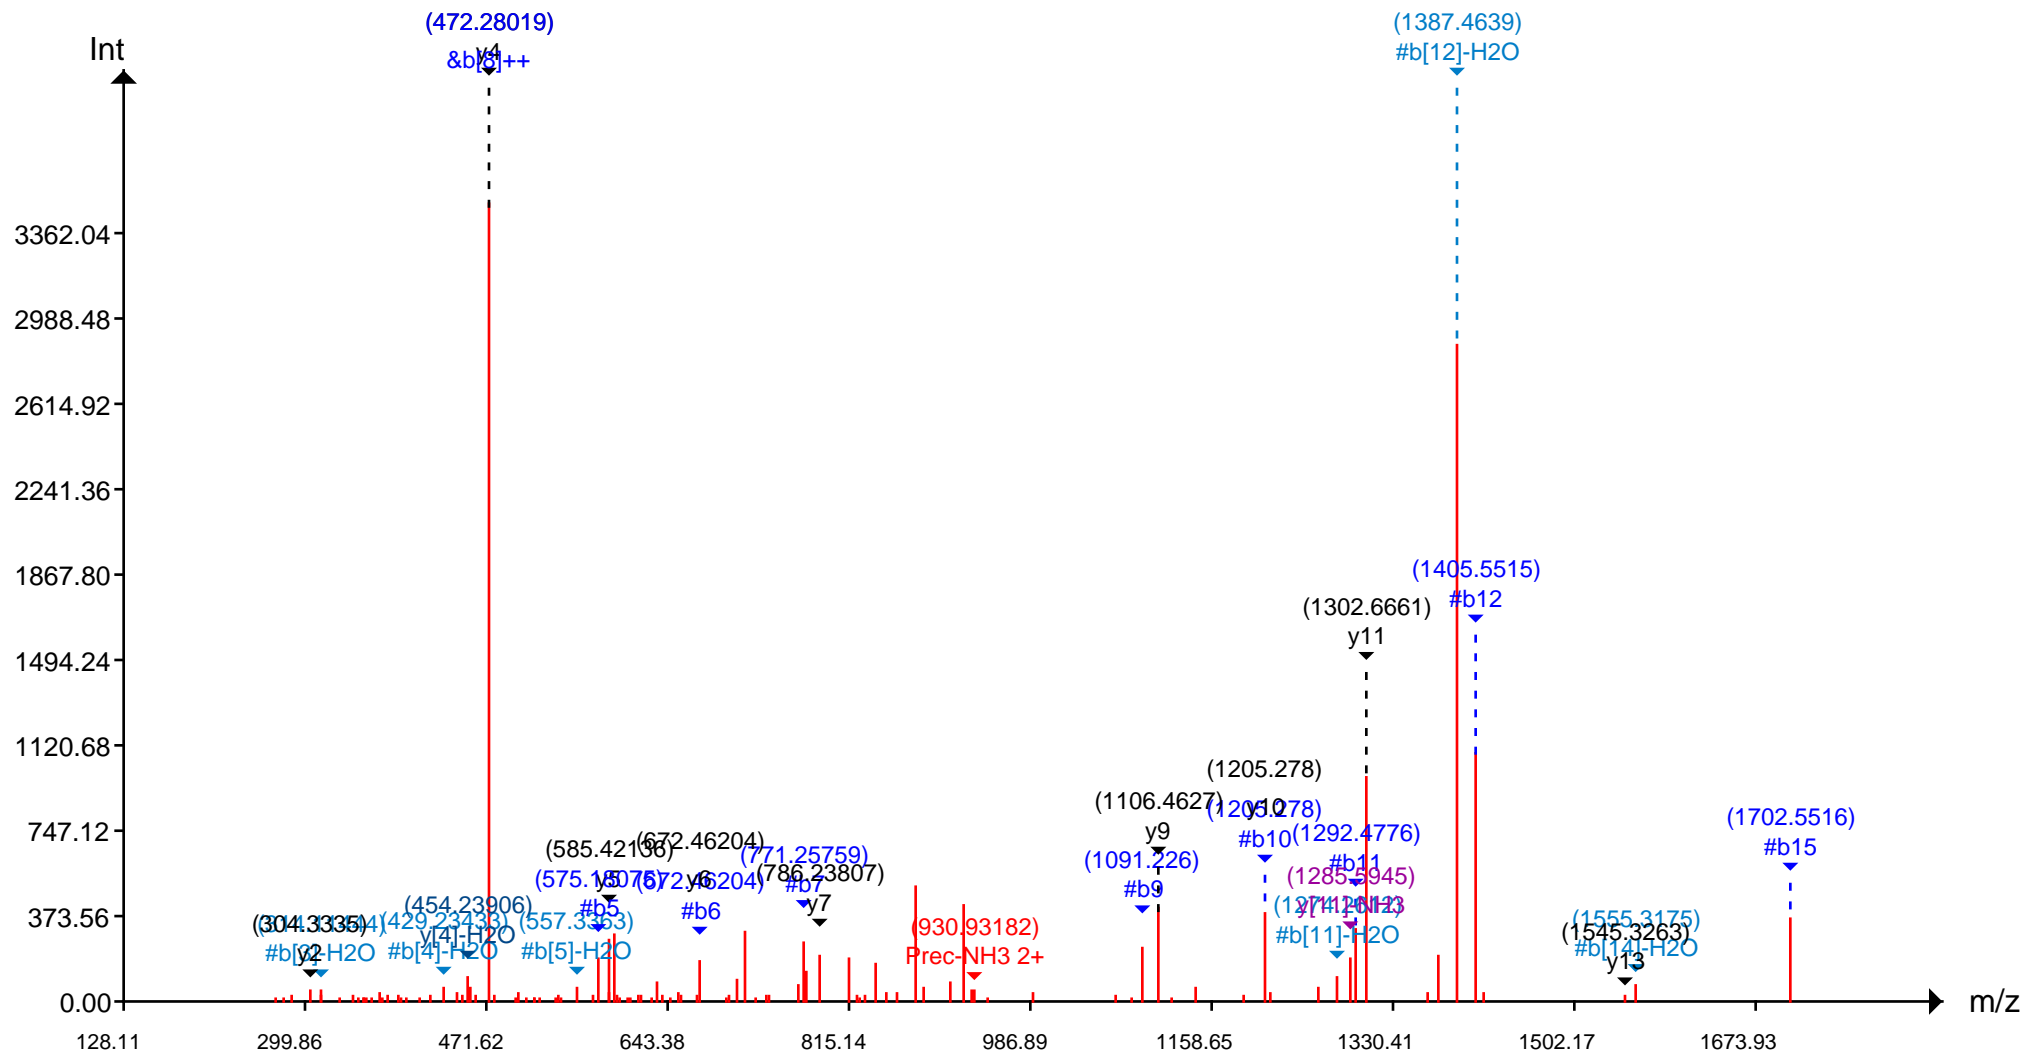

## Info

|                          |                                          |                           |         |
|--------------------------|------------------------------------------|---------------------------|---------|
| <b>Modified Sequence</b> | AcD3-SAQDQPVK<AcD3K*>M<Mox*>NSLPAER-COOH | <b>Ion score</b>          | 71.83   |
| <b>Protein</b>           | P30419                                   | <b>Confidence level</b>   | 99.00%  |
| <b>Precursor m/z</b>     | 938.971                                  | <b>Identity Threshold</b> | 48.84   |
| <b>Charge</b>            | 2+                                       | <b>Mass error</b>         | 7.36E-4 |

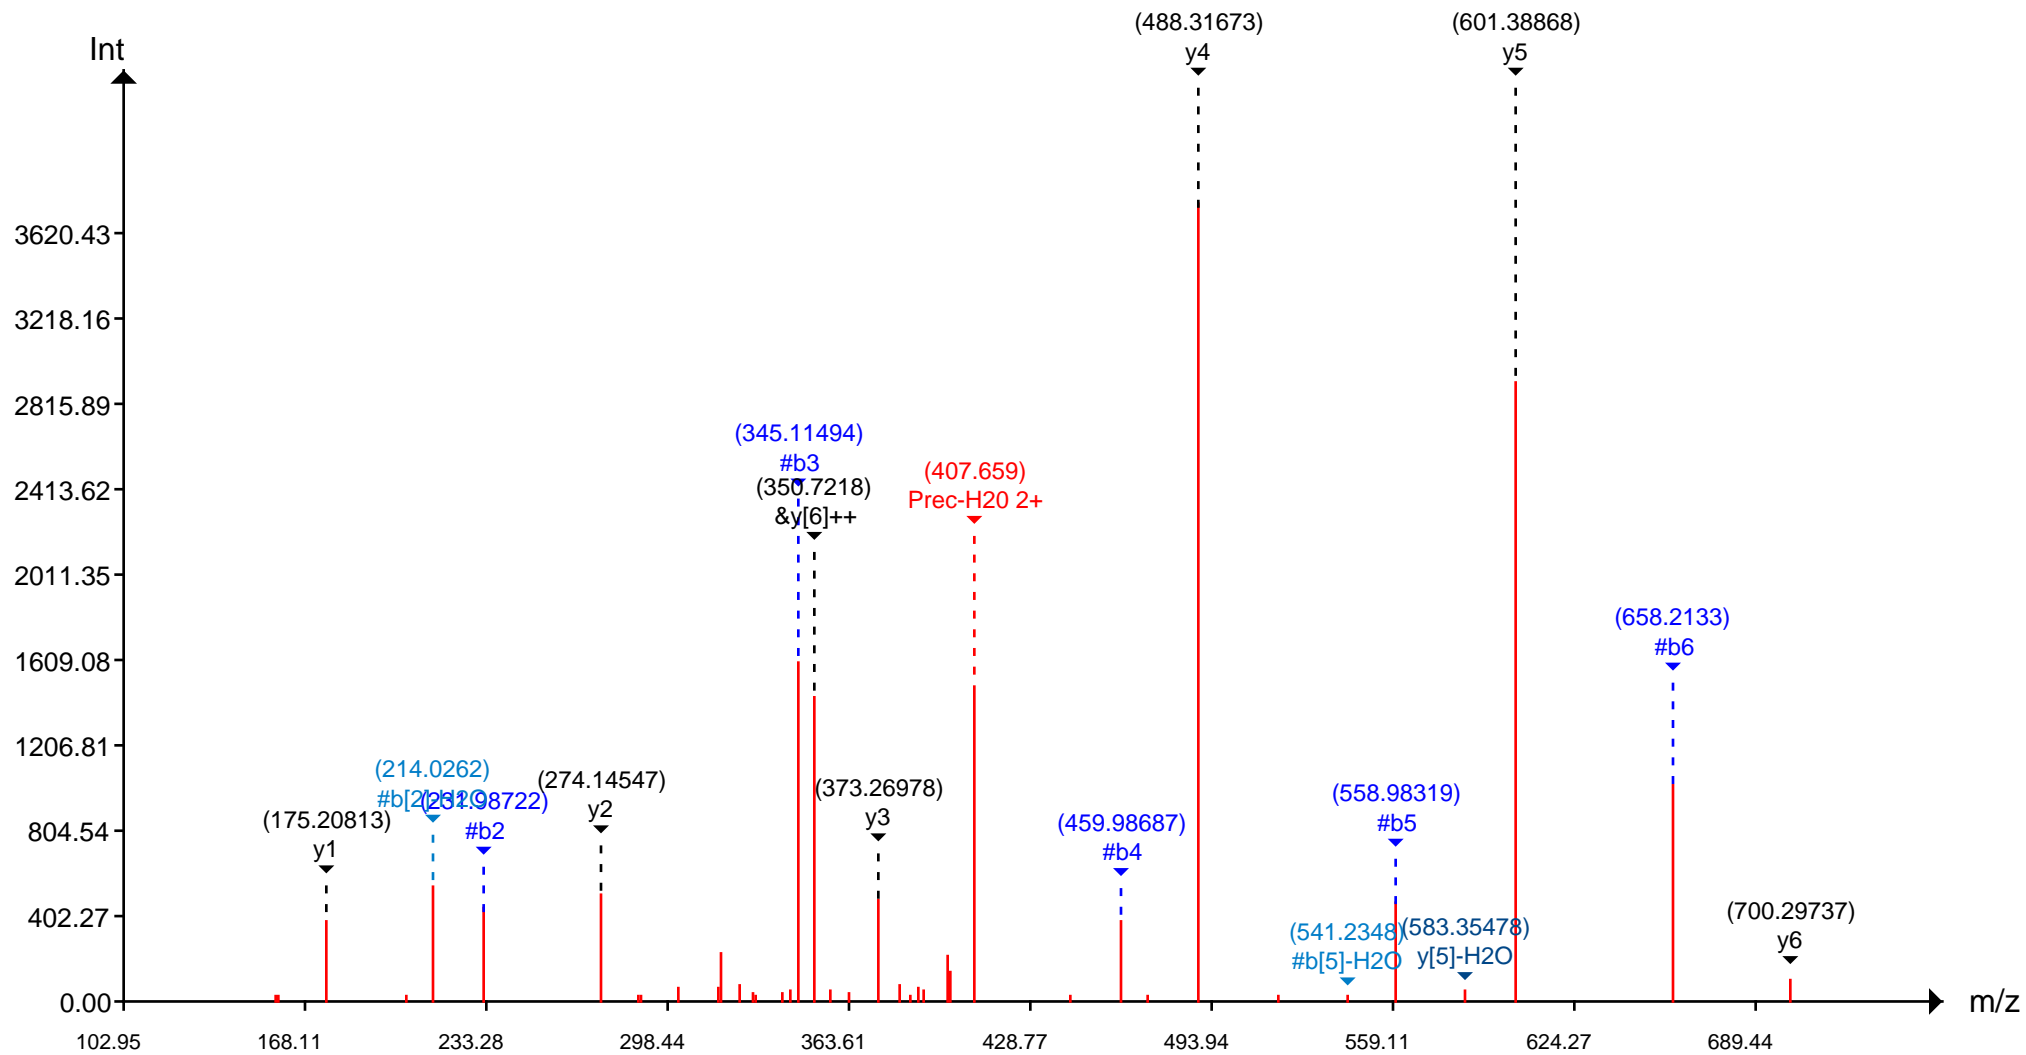

## Info

|                          |                                        |                           |         |
|--------------------------|----------------------------------------|---------------------------|---------|
| <b>Modified Sequence</b> | AcD3-SVLDVVR-COOH                      | <b>Ion score</b>          | 61.74   |
| <b>Protein</b>           | Q13885, Q9BVA1, P68371, Q13509, P07437 | <b>Confidence level</b>   | 99.00%  |
| <b>Precursor m/z</b>     | 416.75204                              | <b>Identity Threshold</b> | 47.58   |
| <b>Charge</b>            | 2+                                     | <b>Mass error</b>         | 1.79E-4 |

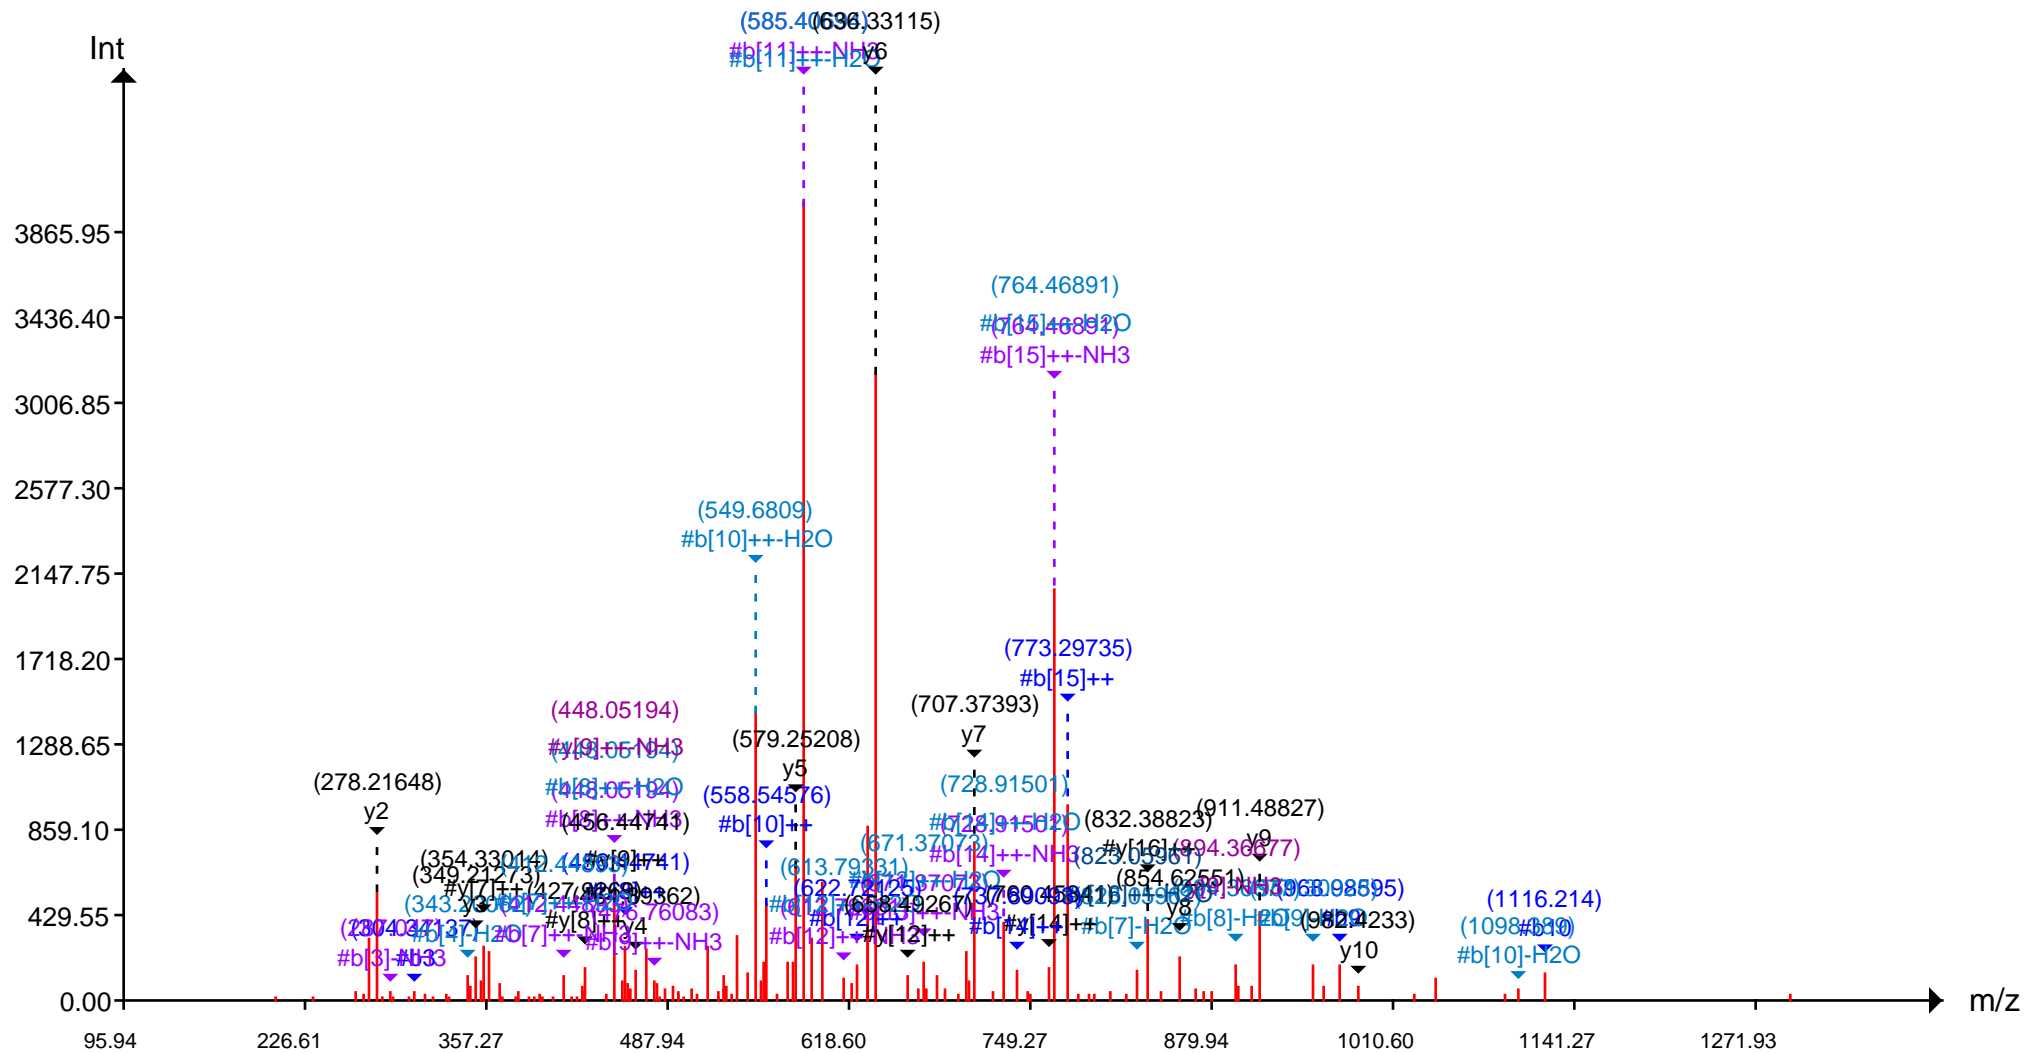

## Info

|                          |                                                      |                           |          |
|--------------------------|------------------------------------------------------|---------------------------|----------|
| <b>Modified Sequence</b> | AcD3-NGSGM<Mox*>C<Cmm*>K<AcD3K*>AGFAGDDAPR<C13>-COOH | <b>Ion score</b>          | 57.99    |
| <b>Protein</b>           | P60709, P63261, Q6S8J3, A5A3E0                       | <b>Confidence level</b>   | 99.00%   |
| <b>Precursor m/z</b>     | 608.27339                                            | <b>Identity Threshold</b> | 44.19    |
| <b>Charge</b>            | 3+                                                   | <b>Mass error</b>         | -5.01E-4 |

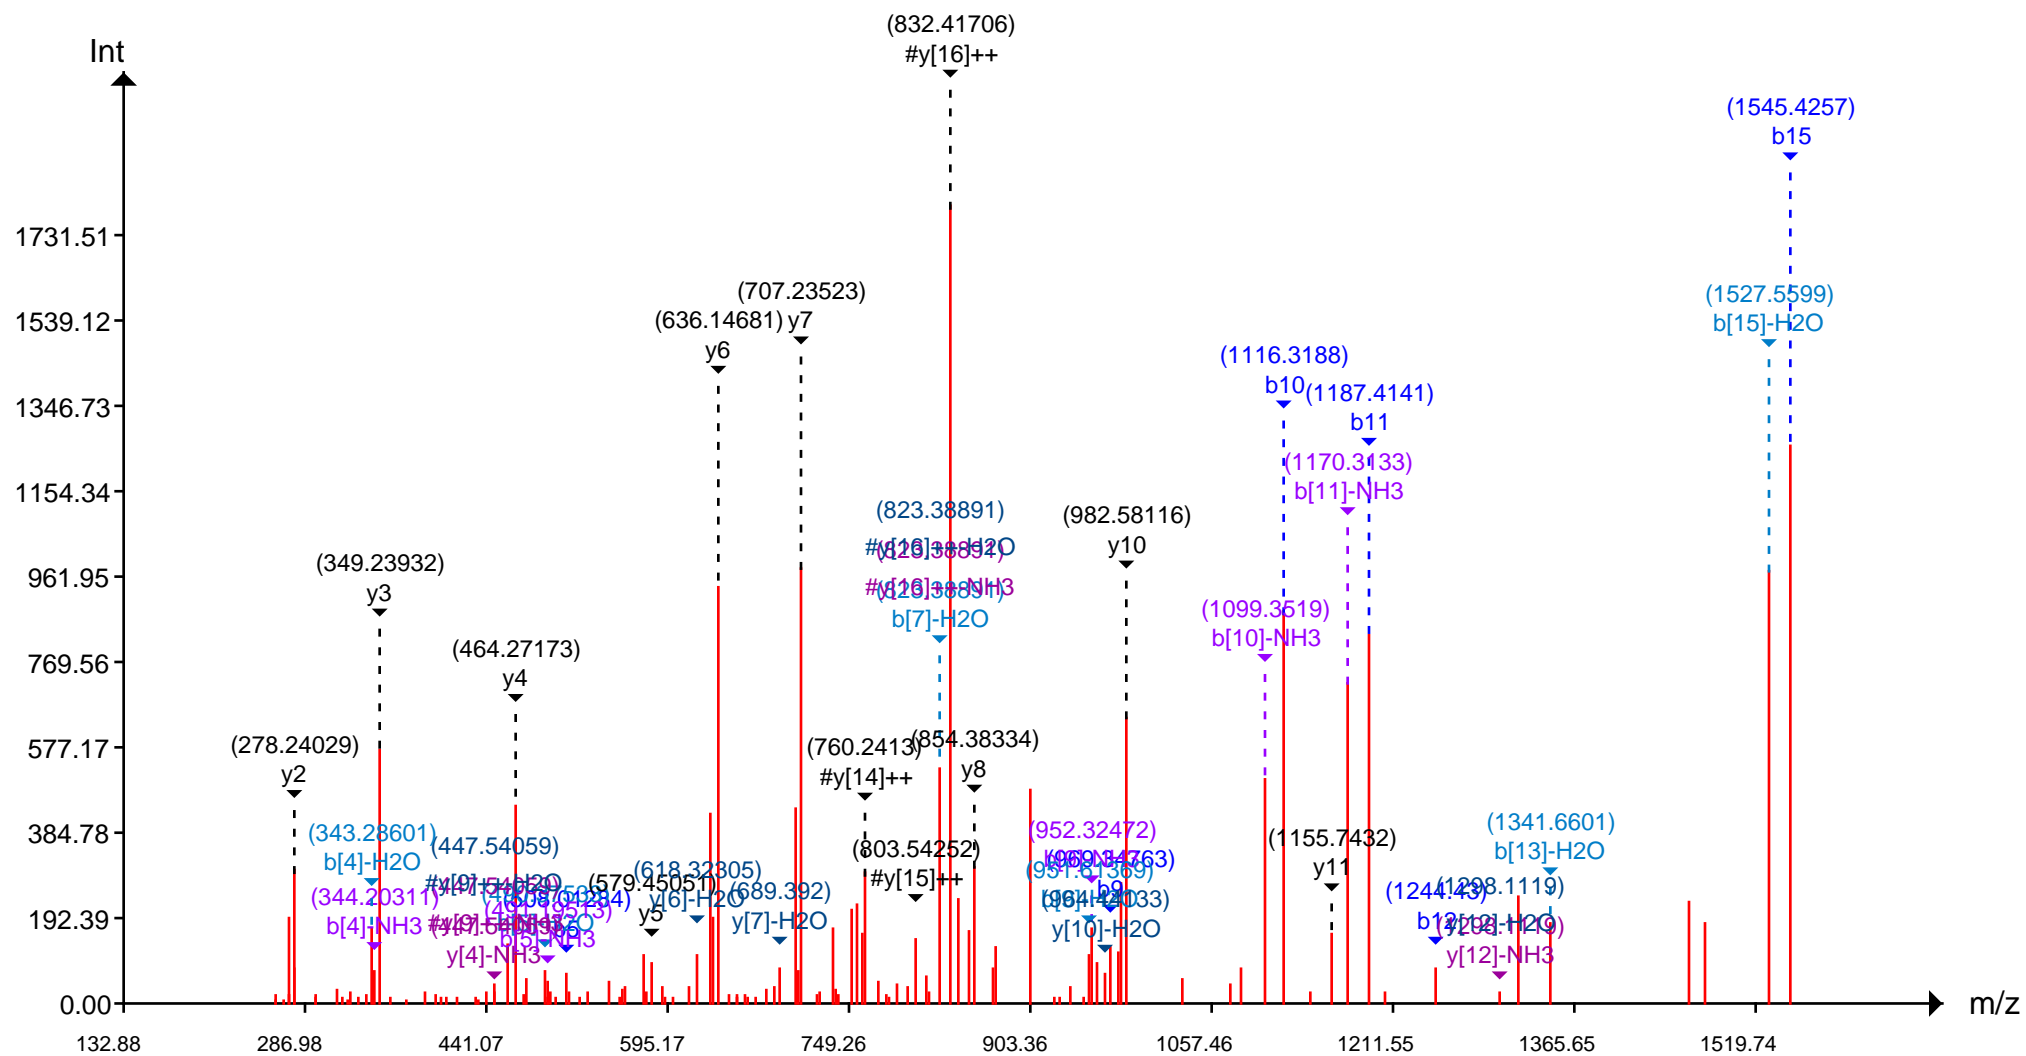

## Info

|                          |                                                      |                           |         |
|--------------------------|------------------------------------------------------|---------------------------|---------|
| <b>Modified Sequence</b> | AcD3-NGSGM<Mox*>C<Cmm*>K<AcD3K*>AGFAGDDAPR<C13>-COOH | <b>Ion score</b>          | 54.86   |
| <b>Protein</b>           | P60709, P63261, Q6S8J3, A5A3E0                       | <b>Confidence level</b>   | 99.00%  |
| <b>Precursor m/z</b>     | 911.90679                                            | <b>Identity Threshold</b> | 44.25   |
| <b>Charge</b>            | 2+                                                   | <b>Mass error</b>         | 1.85E-4 |

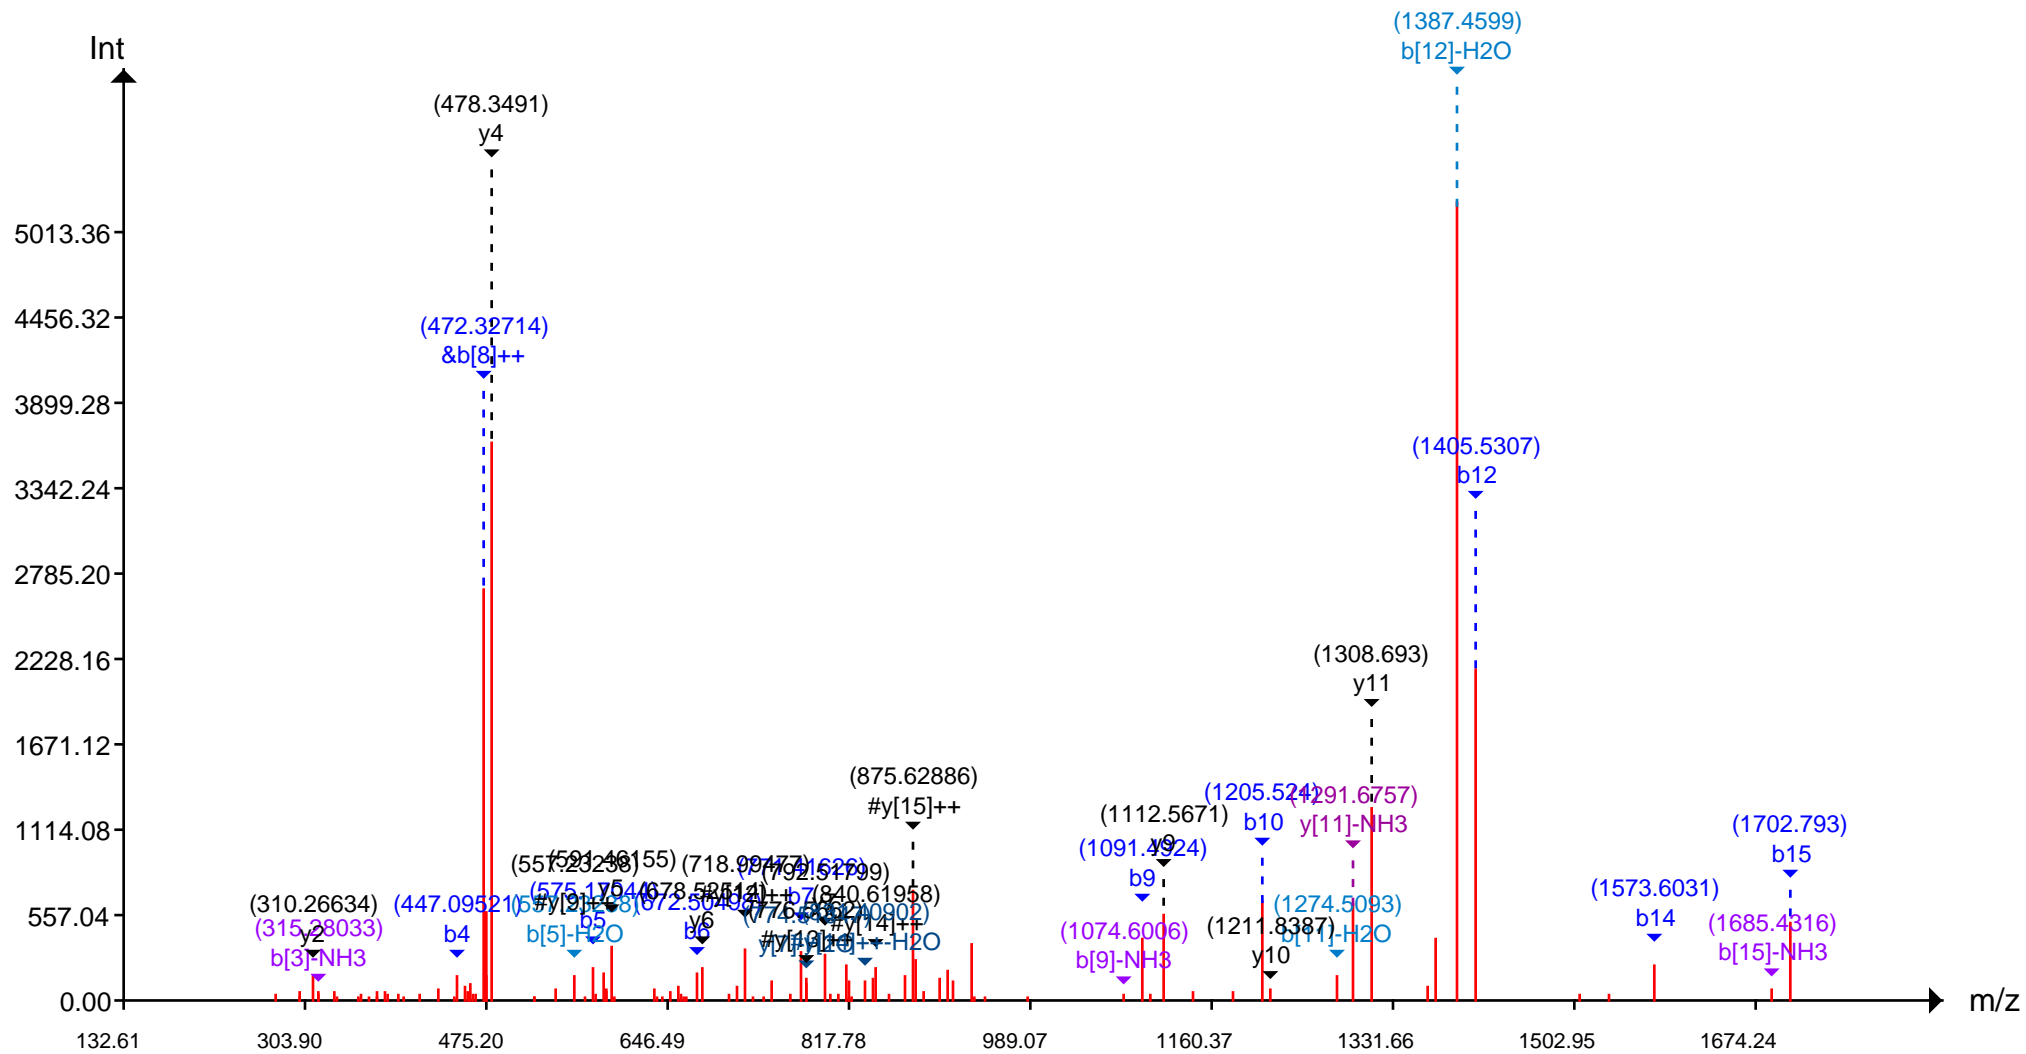

## Info

|                          |                                               |                           |         |
|--------------------------|-----------------------------------------------|---------------------------|---------|
| <b>Modified Sequence</b> | AcD3-SAQDQPVK<AcD3K*>M<Mox*>NSLPAER<C13>-COOH | <b>Ion score</b>          | 63.36   |
| <b>Protein</b>           | P30419                                        | <b>Confidence level</b>   | 99.00%  |
| <b>Precursor m/z</b>     | 941.98093                                     | <b>Identity Threshold</b> | 48.86   |
| <b>Charge</b>            | 2+                                            | <b>Mass error</b>         | 4.54E-4 |

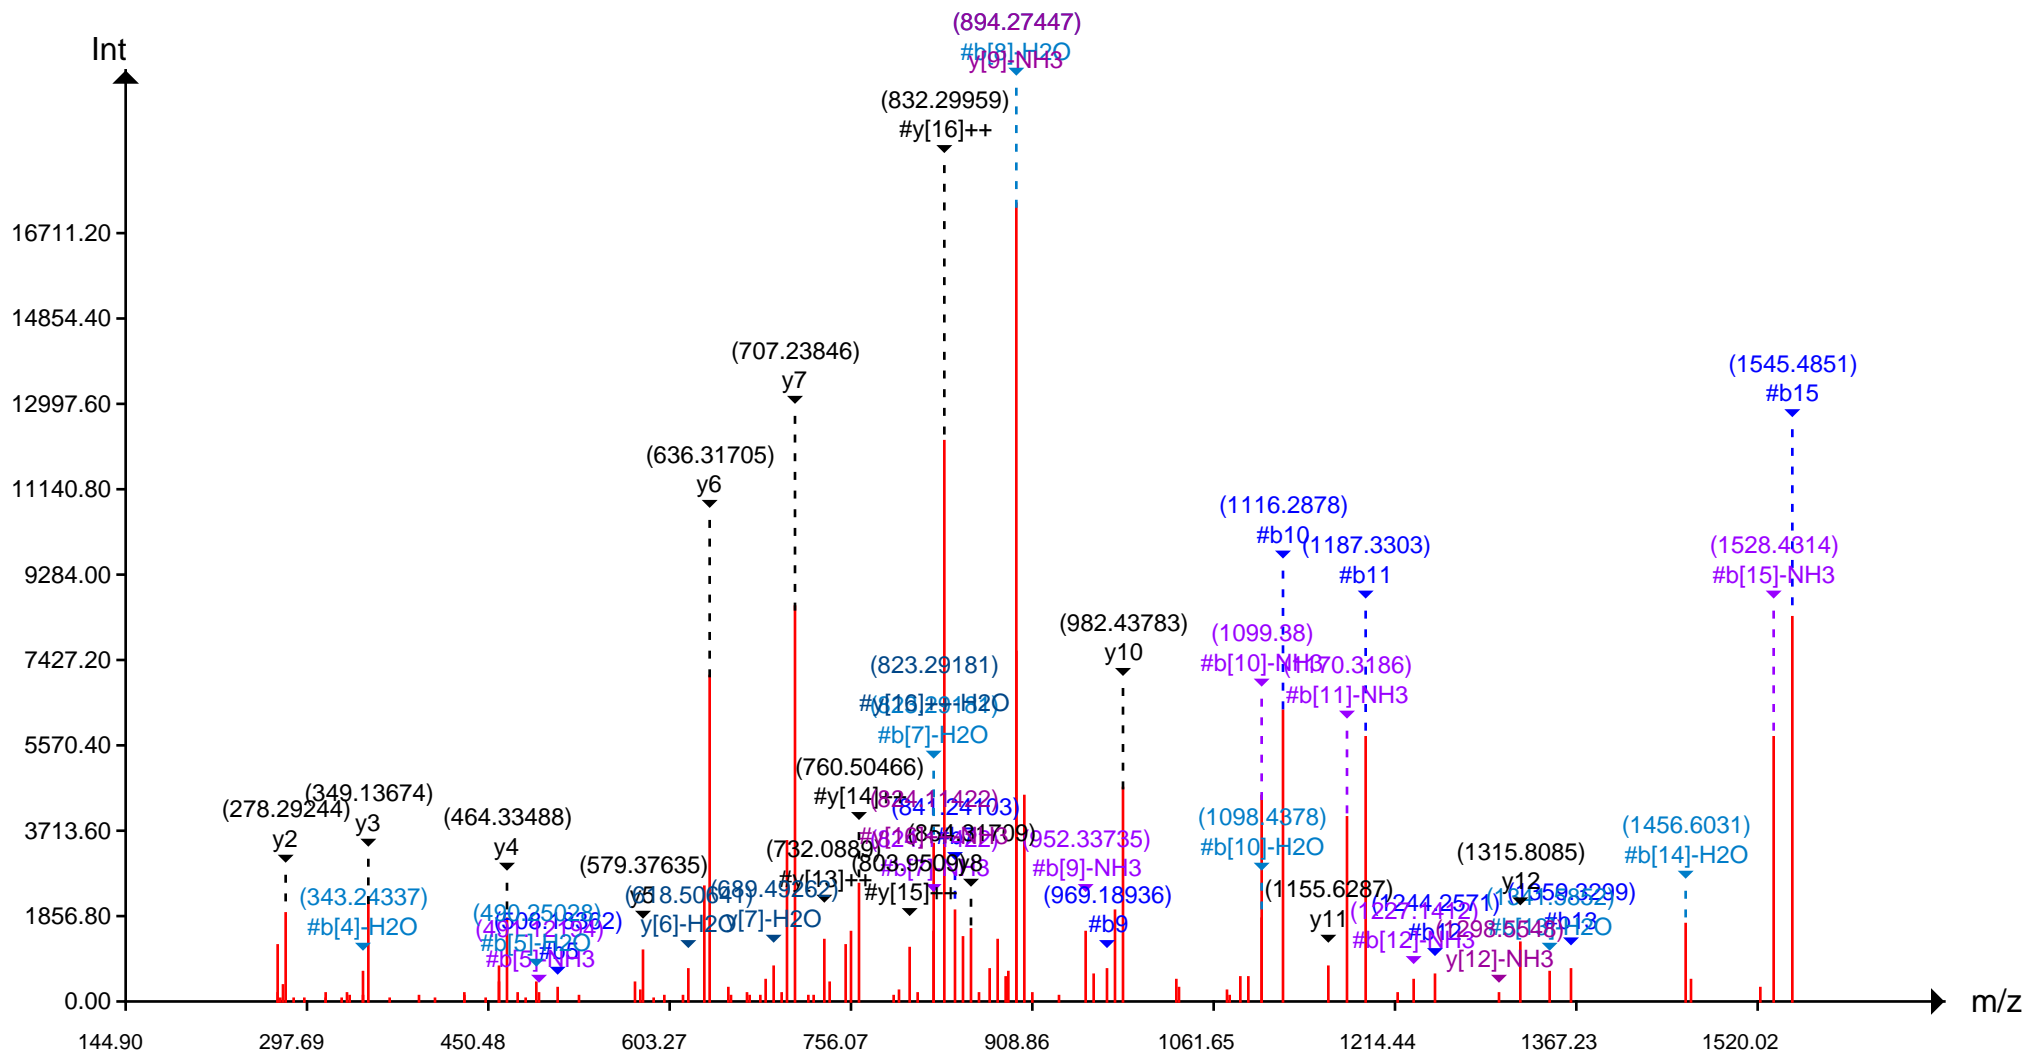

## Info

|                          |                                                      |                           |         |
|--------------------------|------------------------------------------------------|---------------------------|---------|
| <b>Modified Sequence</b> | AcD3-NGSGM<Mox*>C<Cmm*>K<AcD3K*>AGFAGDDAPR<C13>-COOH | <b>Ion score</b>          | 61.03   |
| <b>Protein</b>           | P60709, P63261, Q6S8J3, A5A3E0                       | <b>Confidence level</b>   | 99.00%  |
| <b>Precursor m/z</b>     | 911.9069                                             | <b>Identity Threshold</b> | 44.24   |
| <b>Charge</b>            | 2+                                                   | <b>Mass error</b>         | 4.05E-4 |



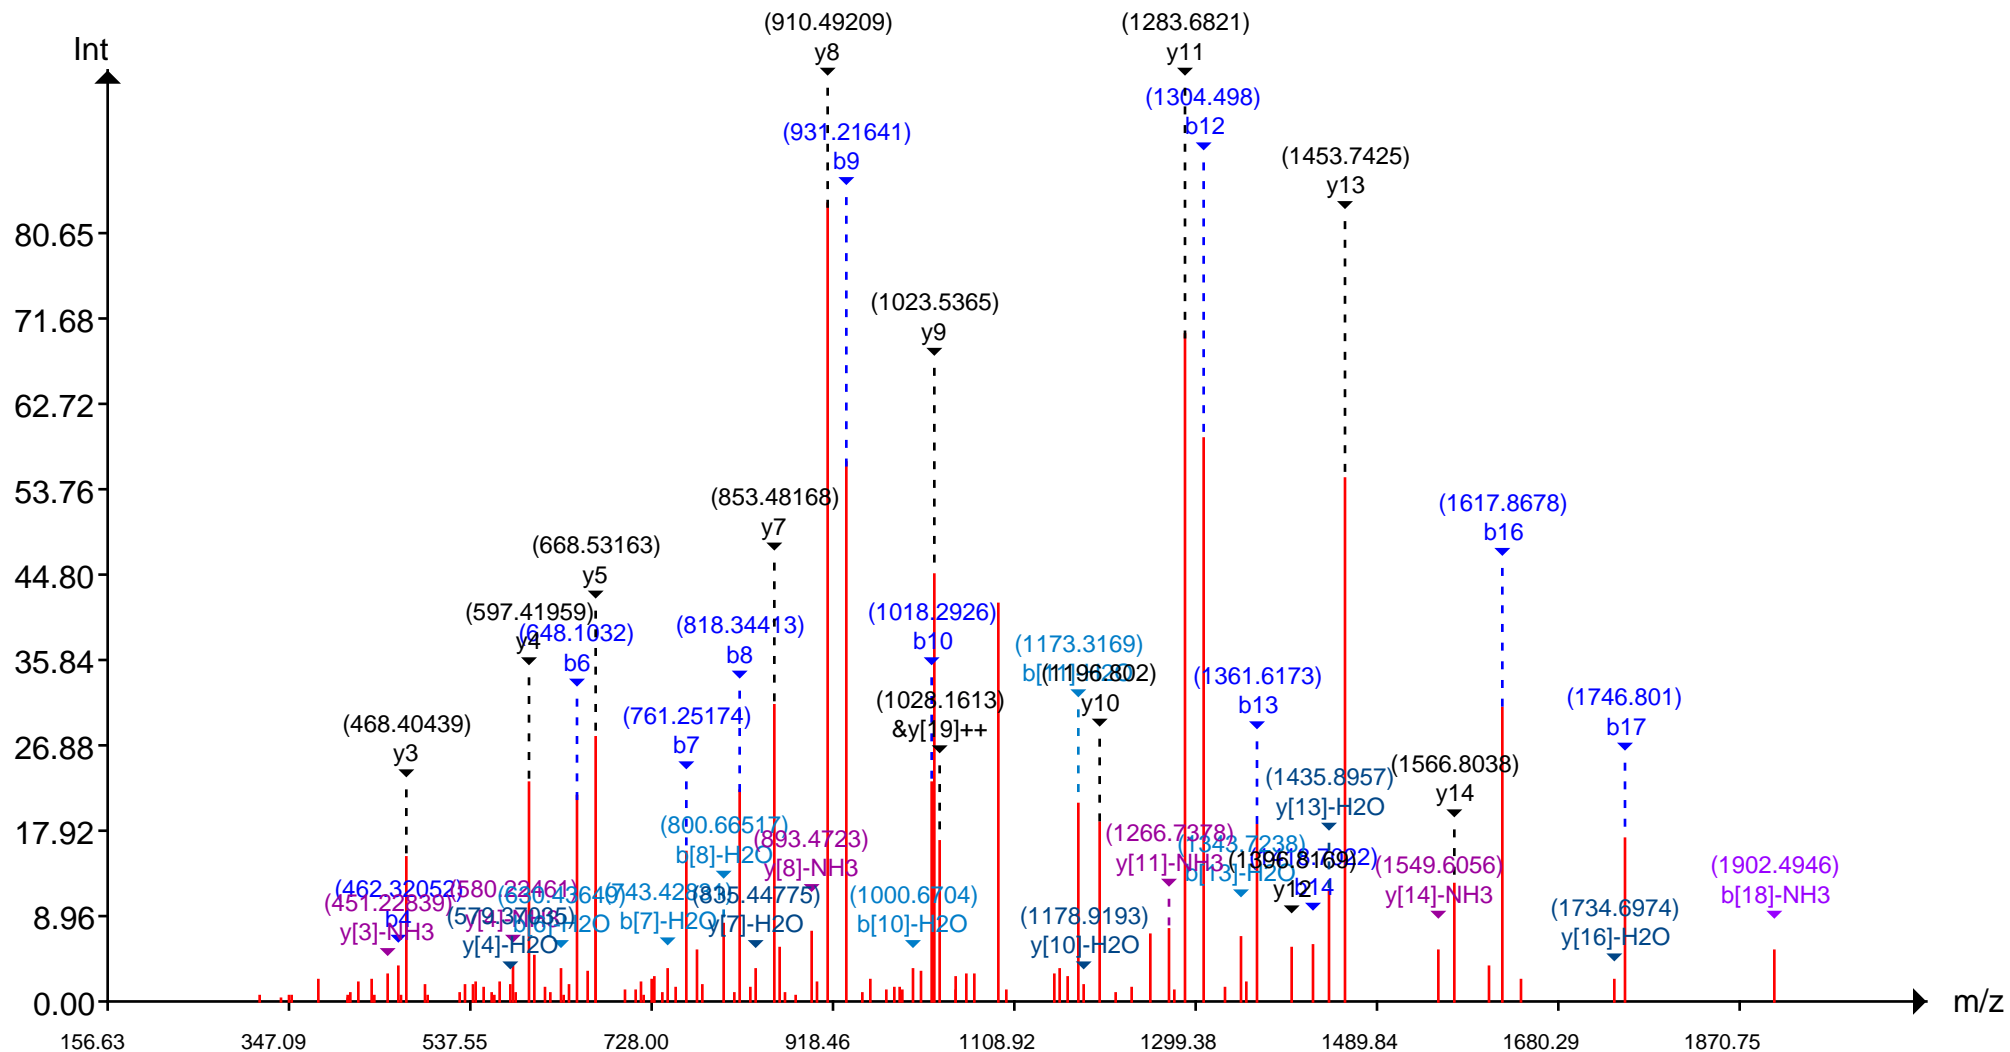

## Info

|                          |                                                     |                           |         |
|--------------------------|-----------------------------------------------------|---------------------------|---------|
| <b>Modified Sequence</b> | AcD3-NSSQDALGLSK<AcD3K*>LGGQAEK<AcD3K*>NR<C13>-COOH | <b>Ion score</b>          | 94.22   |
| <b>Protein</b>           | Q13136                                              | <b>Confidence level</b>   | 99.00%  |
| <b>Precursor m/z</b>     | 1107.5922                                           | <b>Identity Threshold</b> | 48.64   |
| <b>Charge</b>            | 2+                                                  | <b>Mass error</b>         | 5.06E-4 |

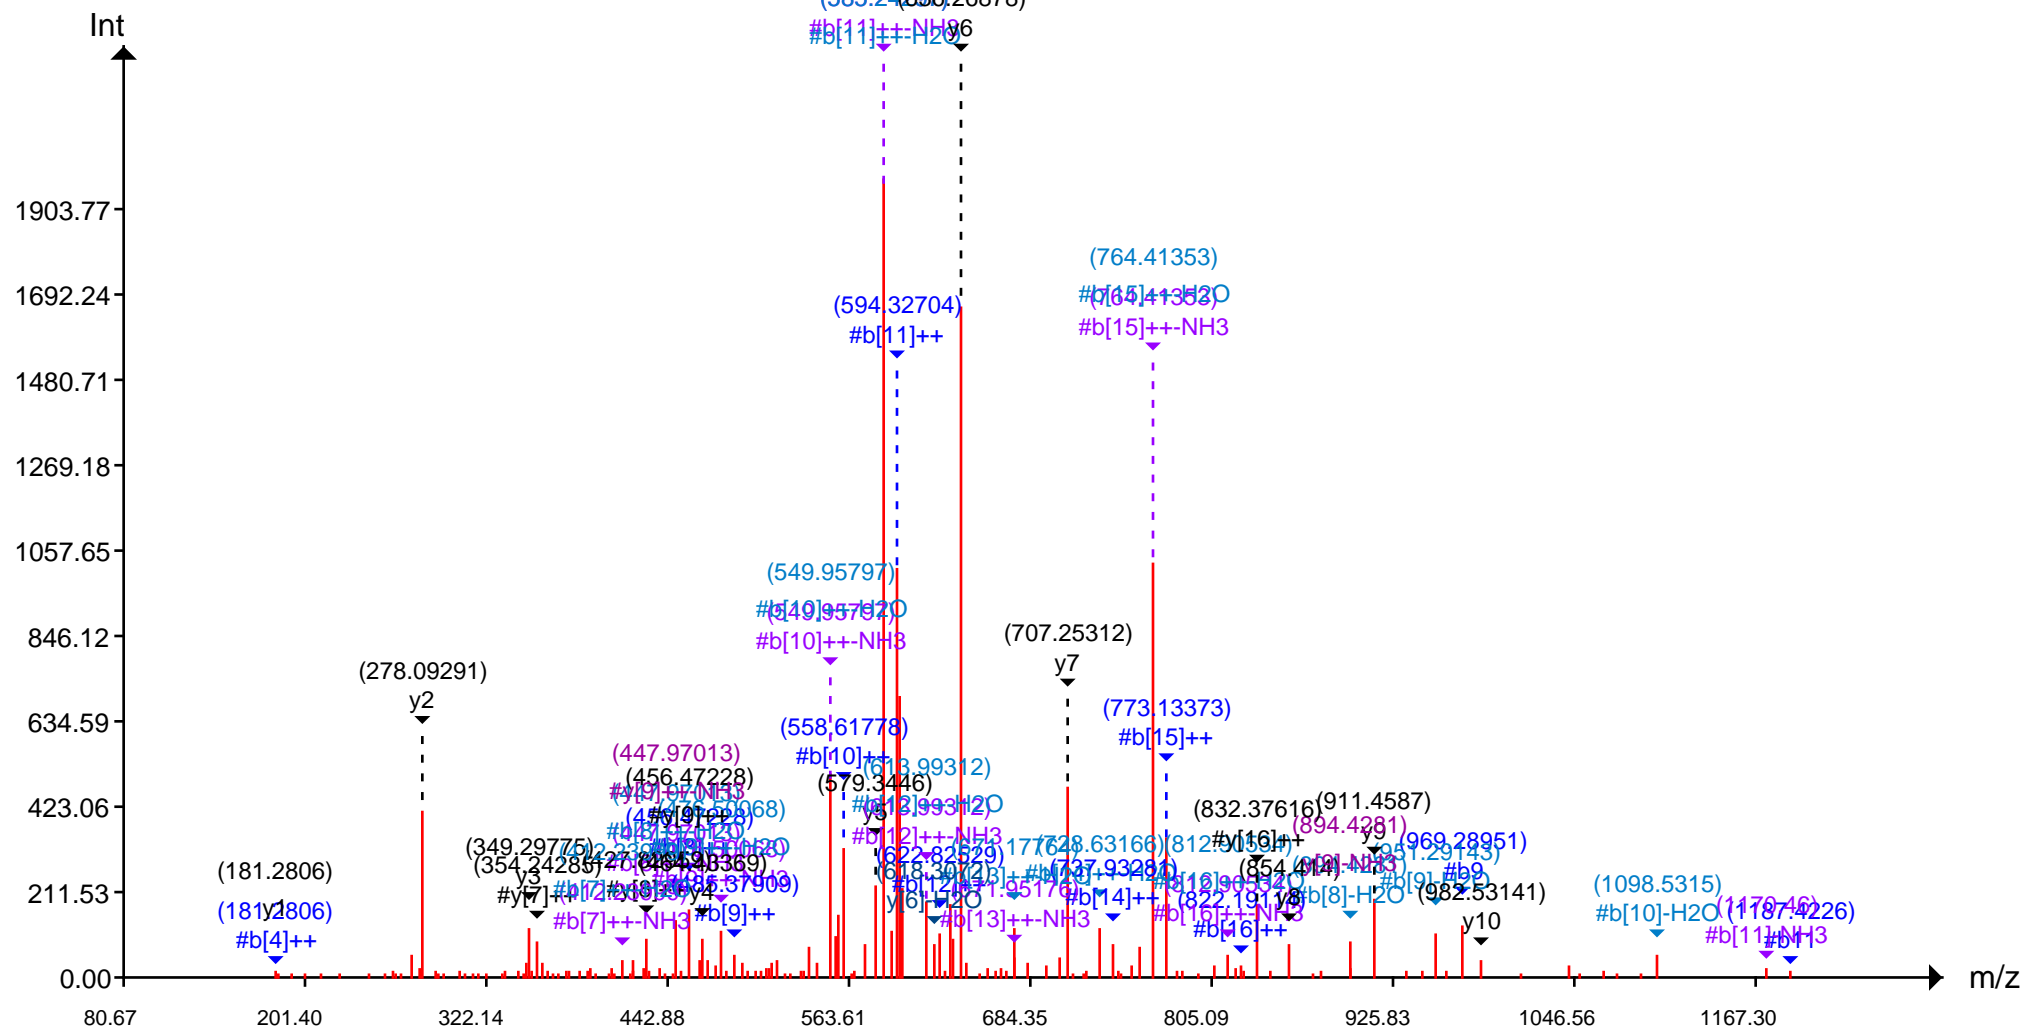

## Info

|                          |                                                      |                           |        |
|--------------------------|------------------------------------------------------|---------------------------|--------|
| <b>Modified Sequence</b> | AcD3-NGSGM<Mox*>C<Cmm*>K<AcD3K*>AGFAGDDAPR<C13>-COOH | <b>Ion score</b>          | 65.21  |
| <b>Protein</b>           | P60709, P63261, Q6S8J3, A5A3E0                       | <b>Confidence level</b>   | 99.00% |
| <b>Precursor m/z</b>     | 608.27356                                            | <b>Identity Threshold</b> | 44.24  |
| <b>Charge</b>            | 3+                                                   | <b>Mass error</b>         | 9.0E-6 |

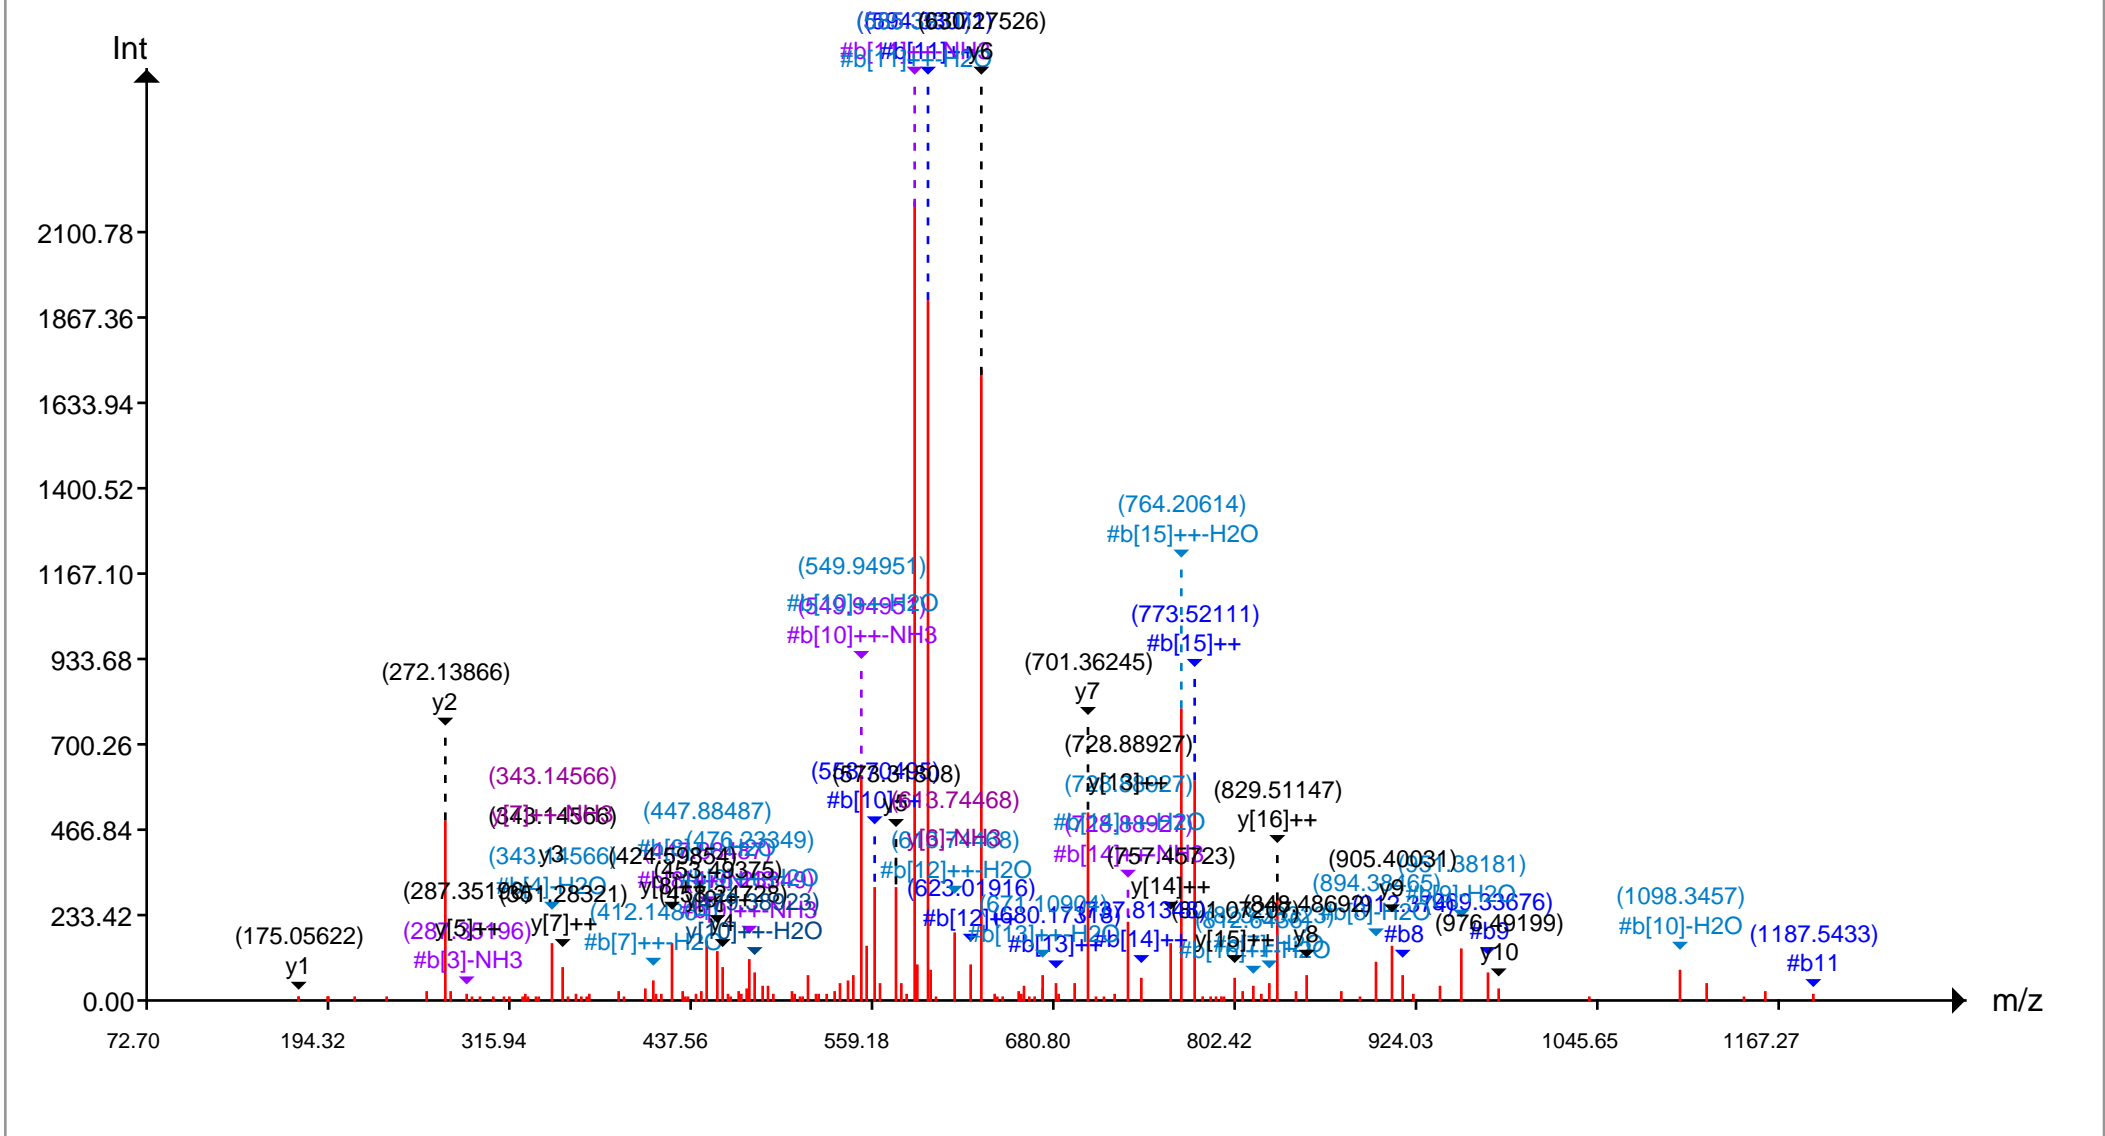

## Info

|                          |                                                 |                           |         |
|--------------------------|-------------------------------------------------|---------------------------|---------|
| <b>Modified Sequence</b> | AcD3-NGSGM<Mox*>C<Cmm*>K<AcD3K*>AGFAGDDAPR-COOH | <b>Ion score</b>          | 92.04   |
| <b>Protein</b>           | P60709, P63261, Q6S8J3, A5A3E0                  | <b>Confidence level</b>   | 99.00%  |
| <b>Precursor m/z</b>     | 606.26684                                       | <b>Identity Threshold</b> | 42.97   |
| <b>Charge</b>            | 3+                                              | <b>Mass error</b>         | -1.0E-5 |

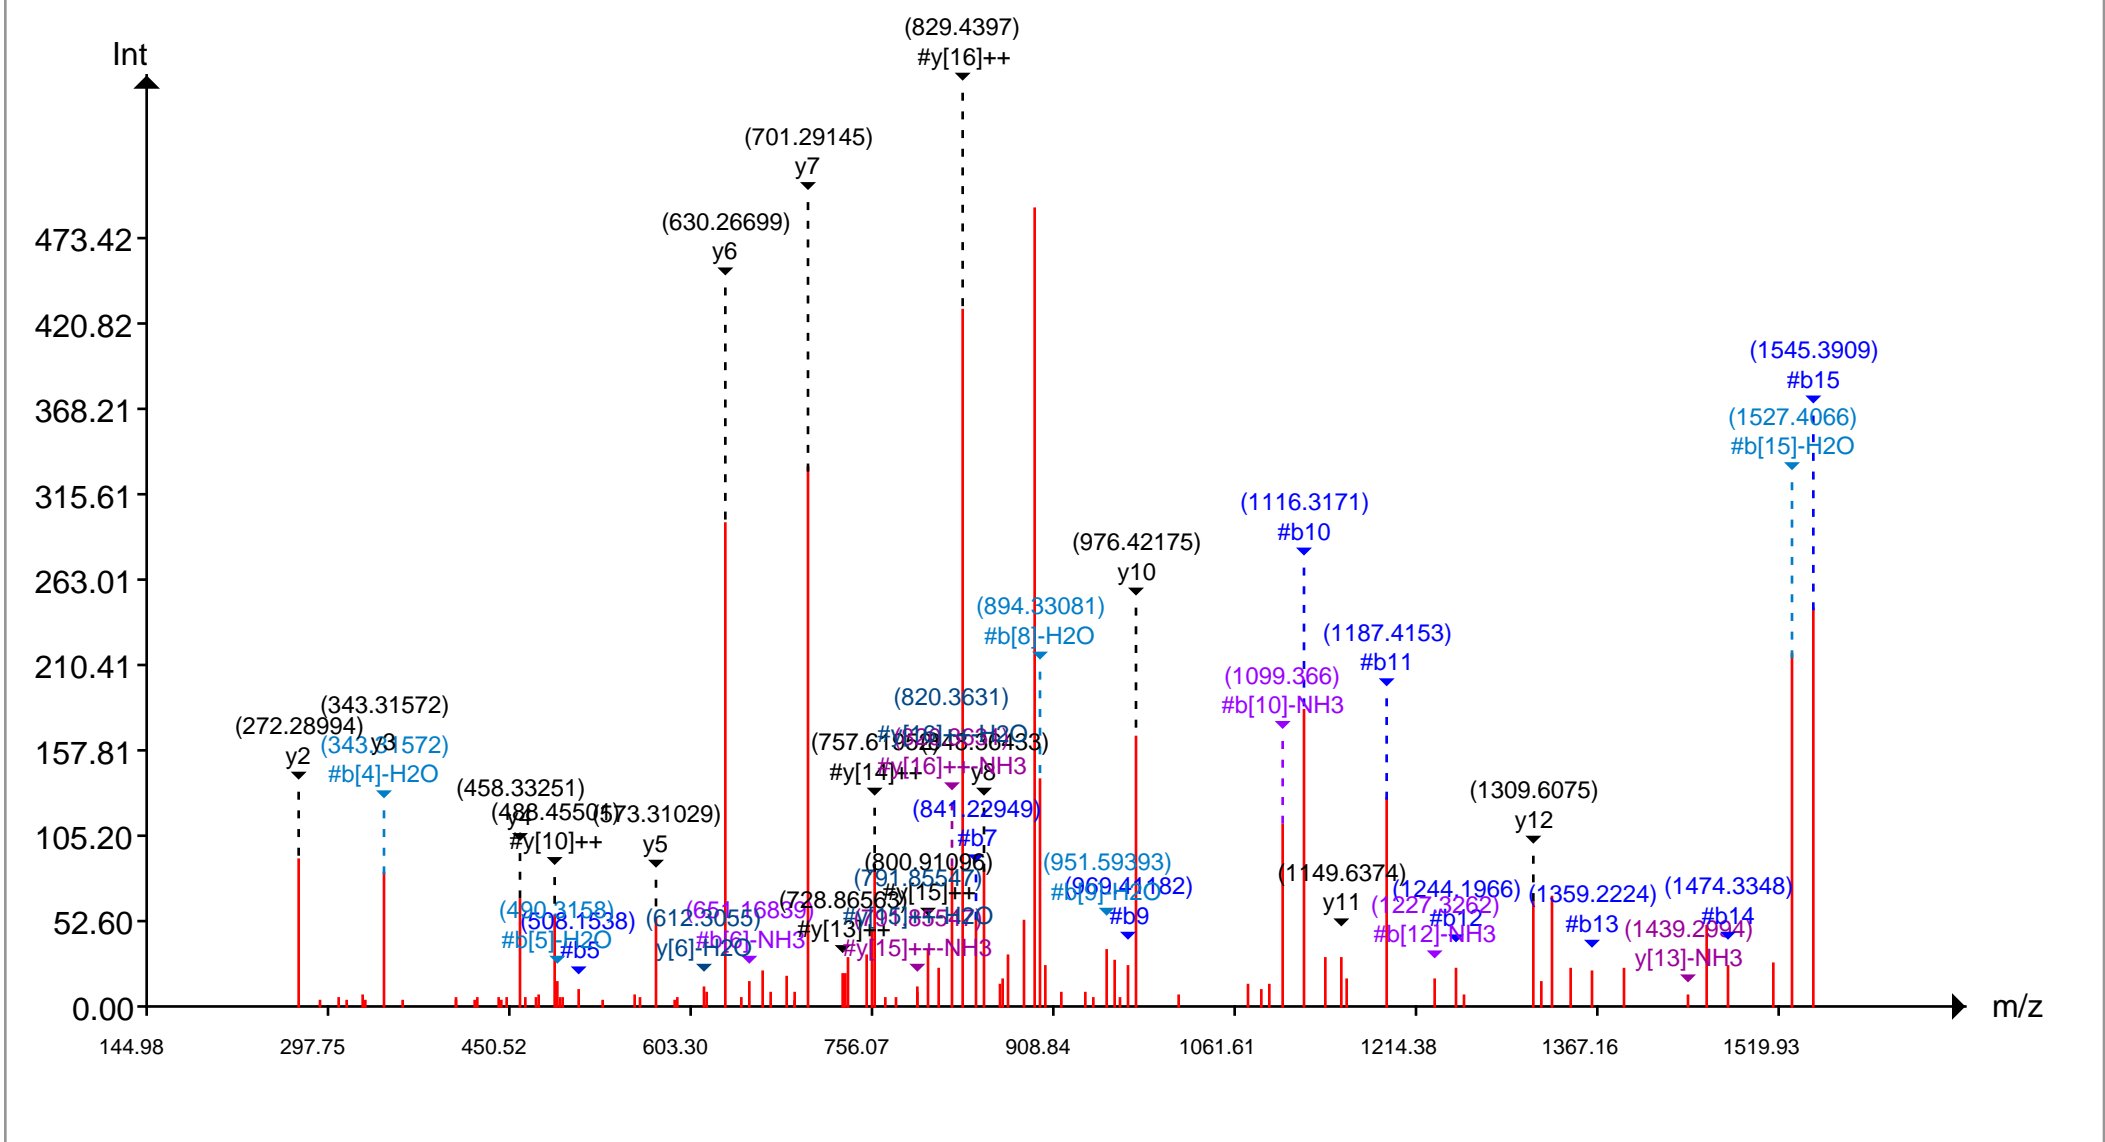

## Info

**Modified Sequence** AcD3-NGSGM<Mox\*>C<Cmm\*>K<AcD3K\*>AGFAGDDAPR-COOH

**Ion score** 76.28

**Protein** P60709, P63261, Q6S8J3, A5A3E0

**Confidence level** 99.00%

**Precursor m/z** 908.89694

**Identity Threshold** 43.00

**Charge** 2+

**Mass error** 6.26E-4

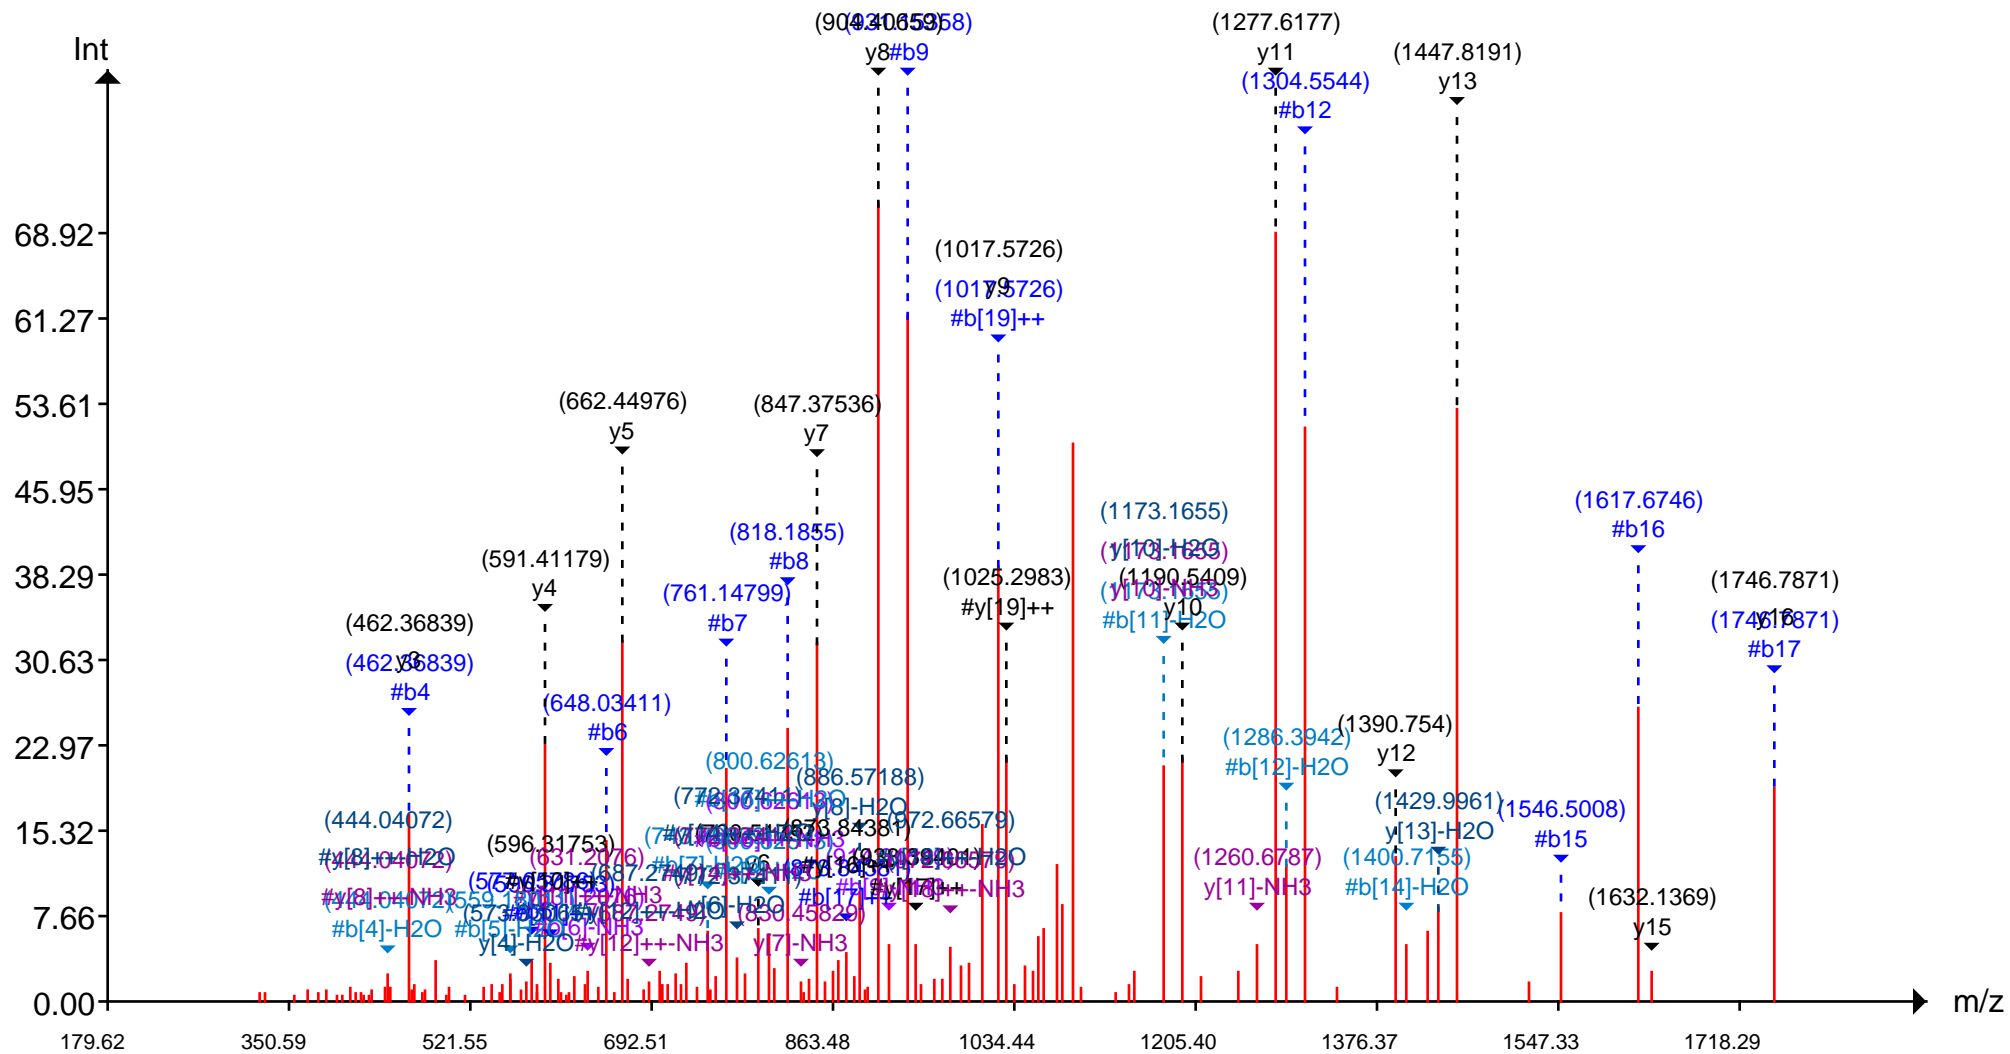

## Info

|                          |                                                |                           |         |
|--------------------------|------------------------------------------------|---------------------------|---------|
| <b>Modified Sequence</b> | AcD3-NSSQDALGLSK<AcD3K*>LGGQAEK<AcD3K*>NR-COOH | <b>Ion score</b>          | 109.15  |
| <b>Protein</b>           | Q13136                                         | <b>Confidence level</b>   | 99.00%  |
| <b>Precursor m/z</b>     | 1104.5822                                      | <b>Identity Threshold</b> | 48.86   |
| <b>Charge</b>            | 2+                                             | <b>Mass error</b>         | 6.48E-4 |

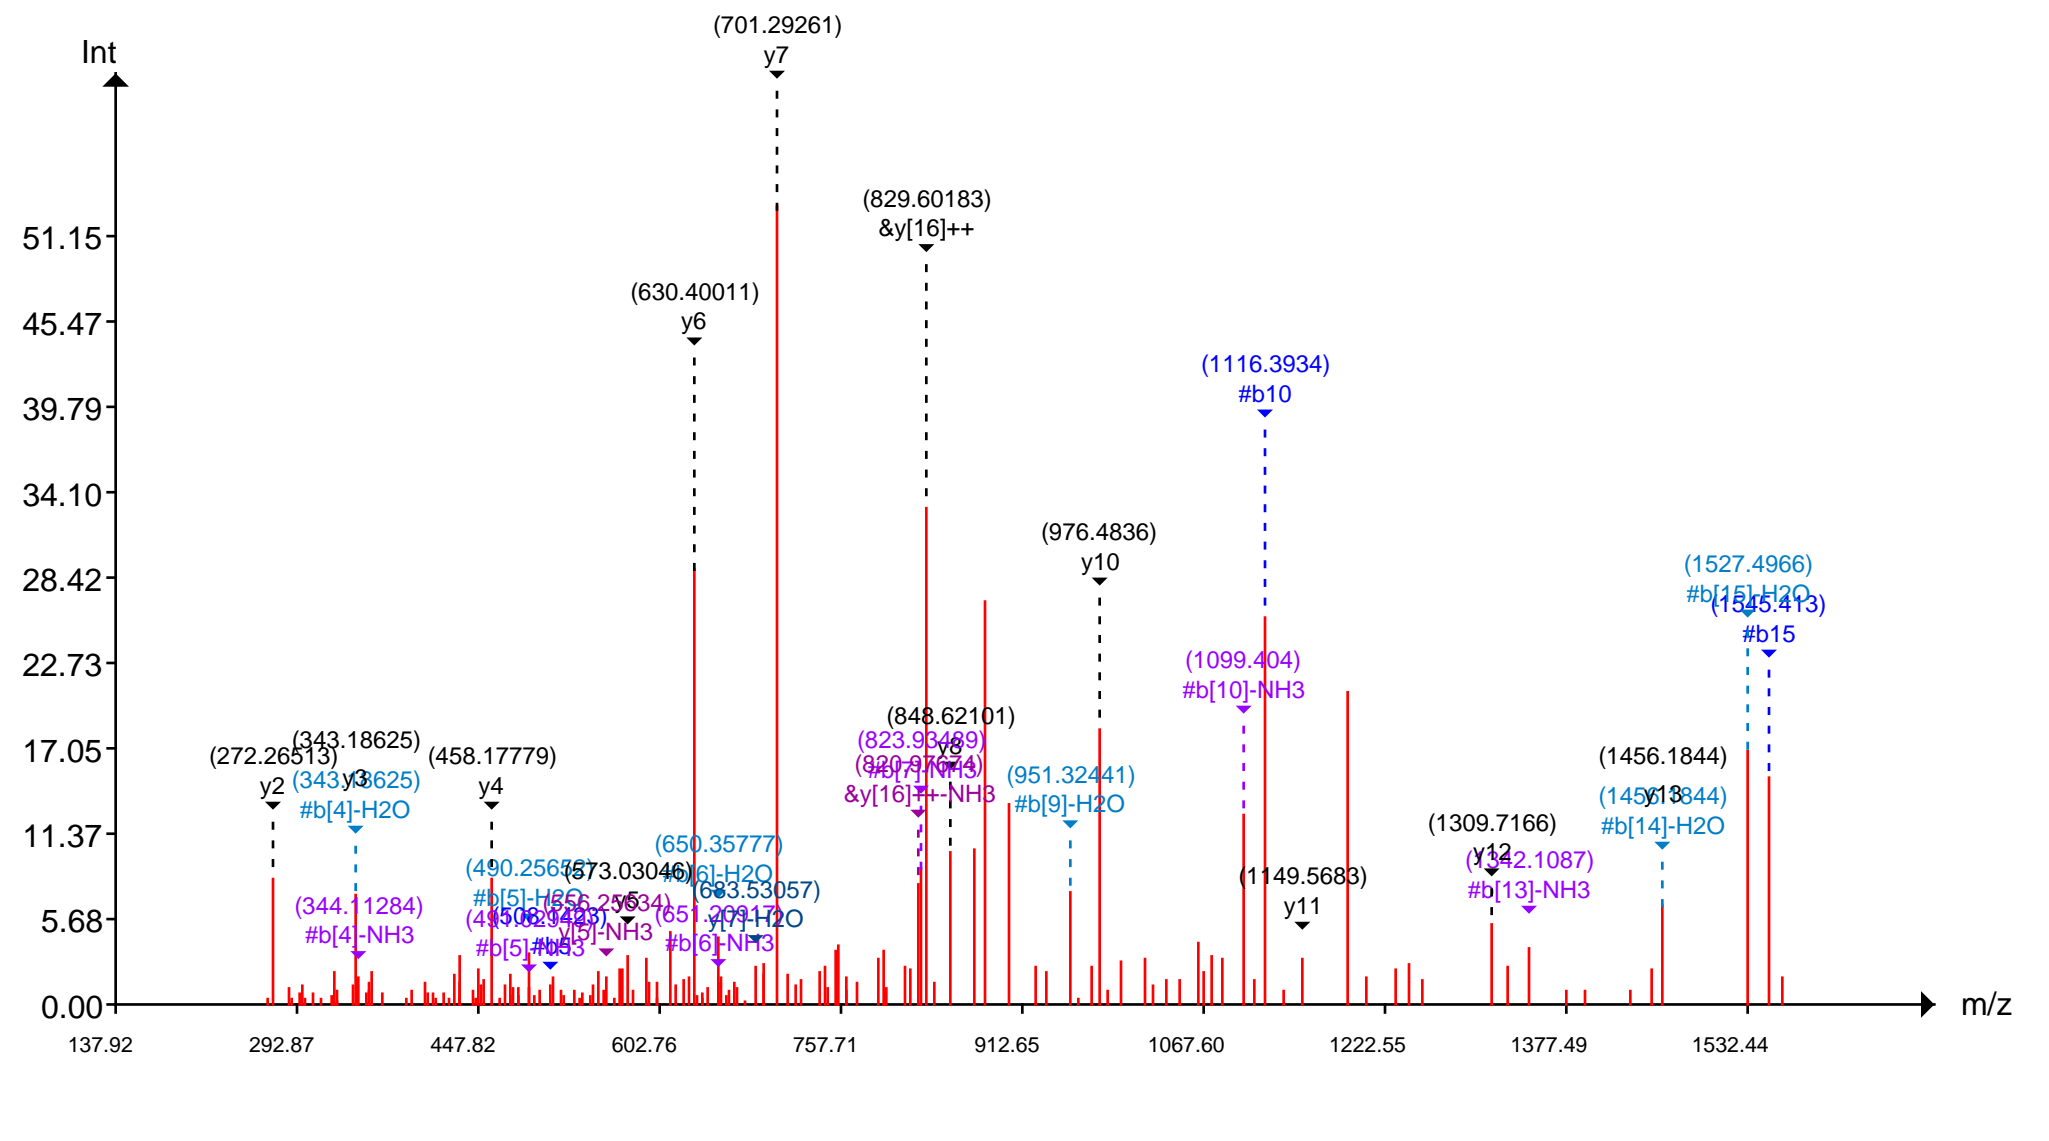

| Info                     |                                                 |                           |          |
|--------------------------|-------------------------------------------------|---------------------------|----------|
| <b>Modified Sequence</b> | AcD3-NGSGM<Mox*>C<Cmm*>K<AcD3K*>AGFAGDDAPR-COOH | <b>Ion score</b>          | 62.71    |
| <b>Protein</b>           | P60709, P63261, Q6S8J3, A5A3E0                  | <b>Confidence level</b>   | 99.00%   |
| <b>Precursor m/z</b>     | 908.89746                                       | <b>Identity Threshold</b> | 43.04    |
| <b>Charge</b>            | 2+                                              | <b>Mass error</b>         | 0.001666 |

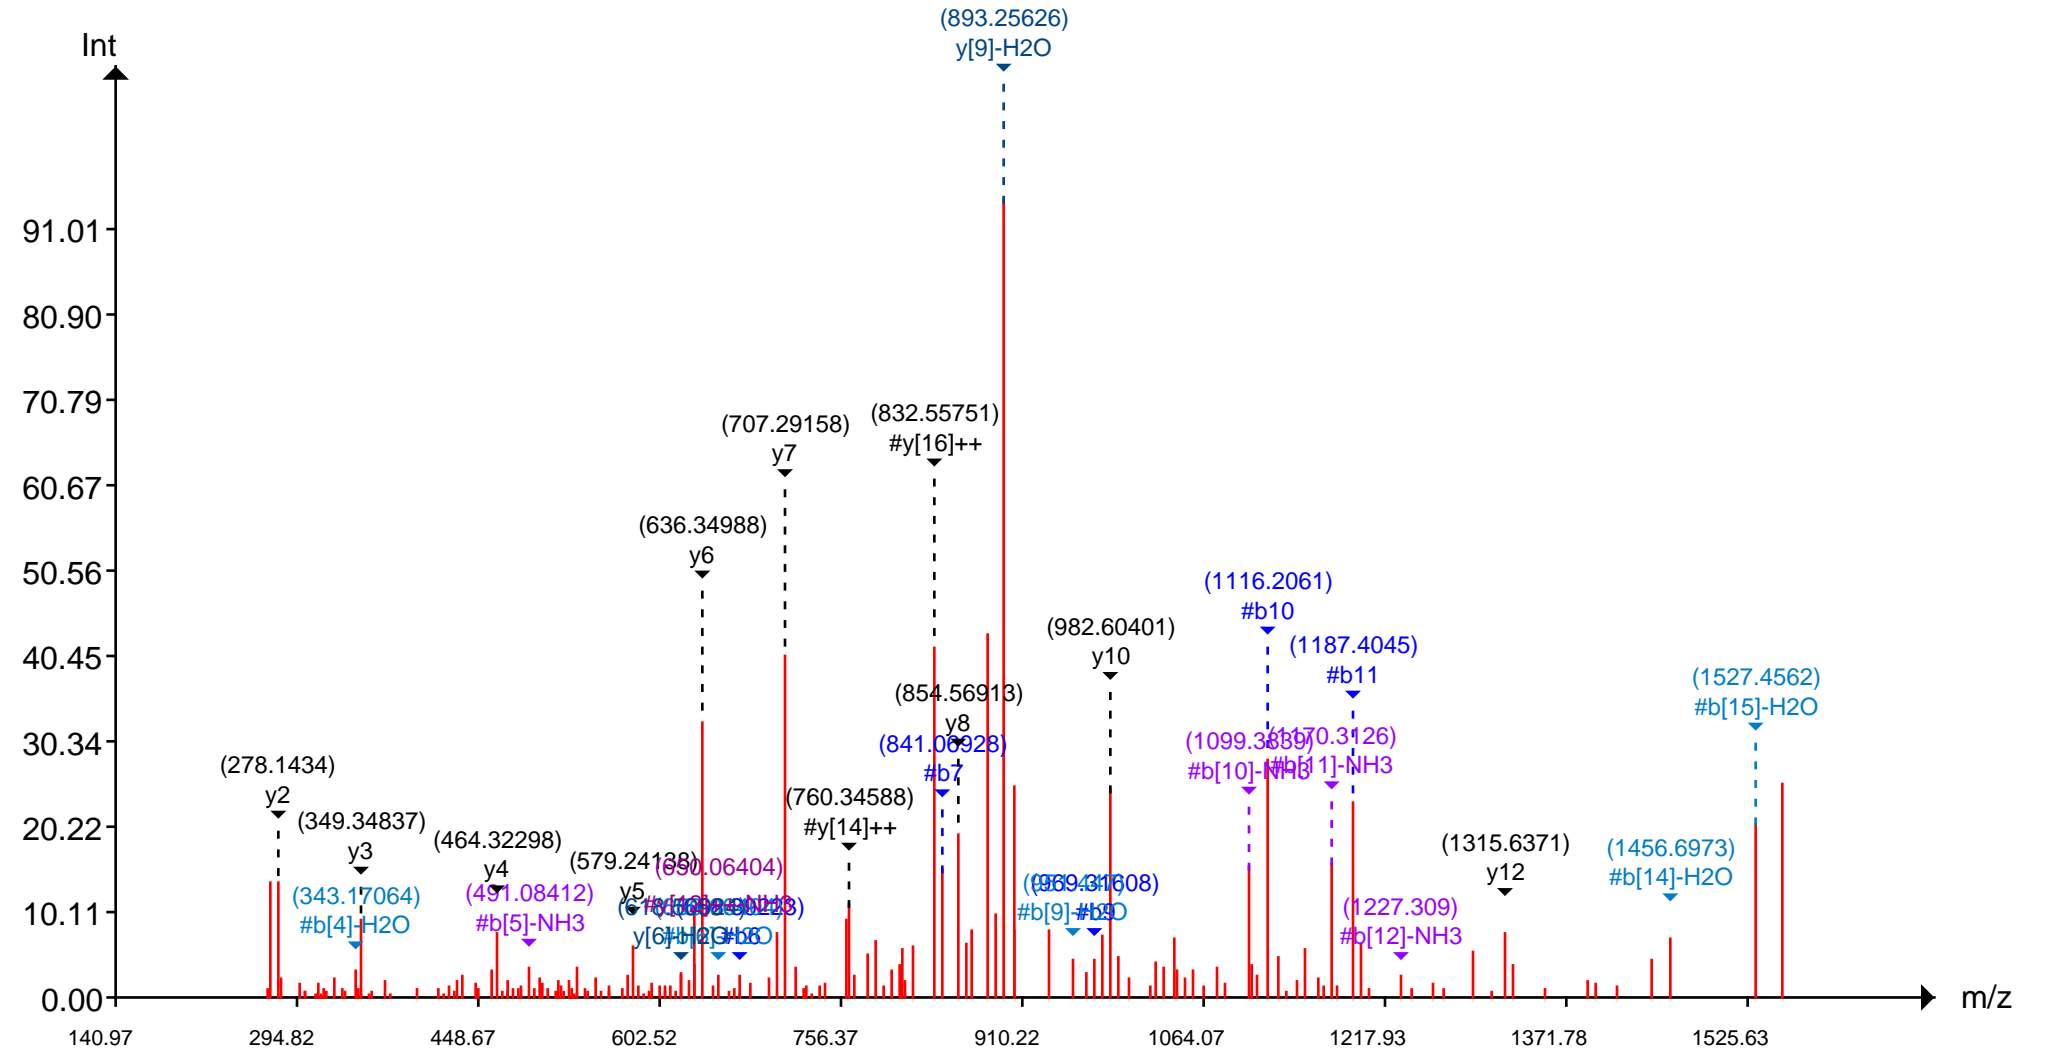

| Info                     |                                                      |                           |           |
|--------------------------|------------------------------------------------------|---------------------------|-----------|
| <b>Modified Sequence</b> | AcD3-NGSGM<Mox*>C<Cmm*>K<AcD3K*>AGFAGDDAPR<C13>-COOH | <b>Ion score</b>          | 49.7      |
| <b>Protein</b>           | P60709, P63261, Q6S8J3, A5A3E0                       | <b>Confidence level</b>   | 99.00%    |
| <b>Precursor m/z</b>     | 911.90576                                            | <b>Identity Threshold</b> | 44.13     |
| <b>Charge</b>            | 2+                                                   | <b>Mass error</b>         | -0.001875 |

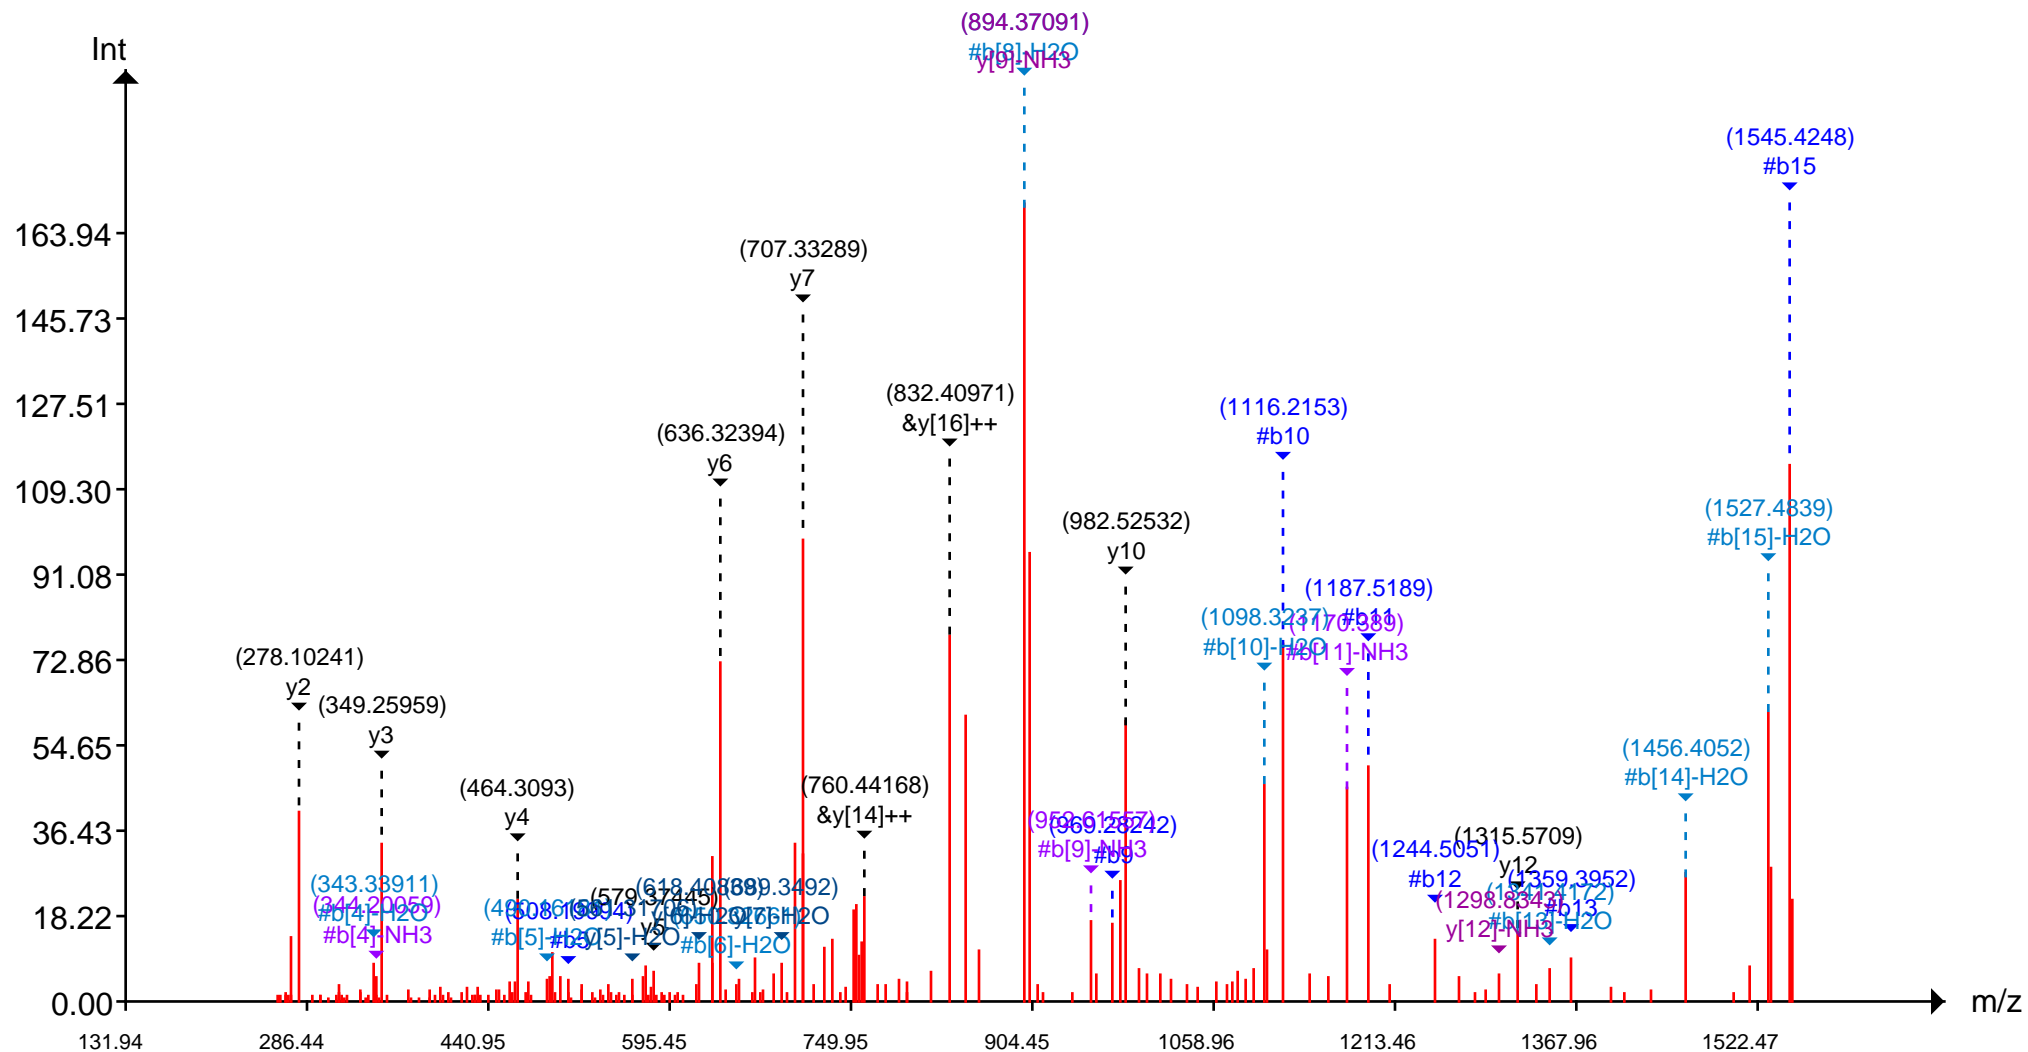

## Info

|                          |                                                      |                           |         |
|--------------------------|------------------------------------------------------|---------------------------|---------|
| <b>Modified Sequence</b> | AcD3-NGSGM<Mox*>C<Cmm*>K<AcD3K*>AGFAGDDAPR<C13>-COOH | <b>Ion score</b>          | 46.01   |
| <b>Protein</b>           | P60709, P63261, Q6S8J3, A5A3E0                       | <b>Confidence level</b>   | 99.00%  |
| <b>Precursor m/z</b>     | 911.90679                                            | <b>Identity Threshold</b> | 44.25   |
| <b>Charge</b>            | 2+                                                   | <b>Mass error</b>         | 1.85E-4 |



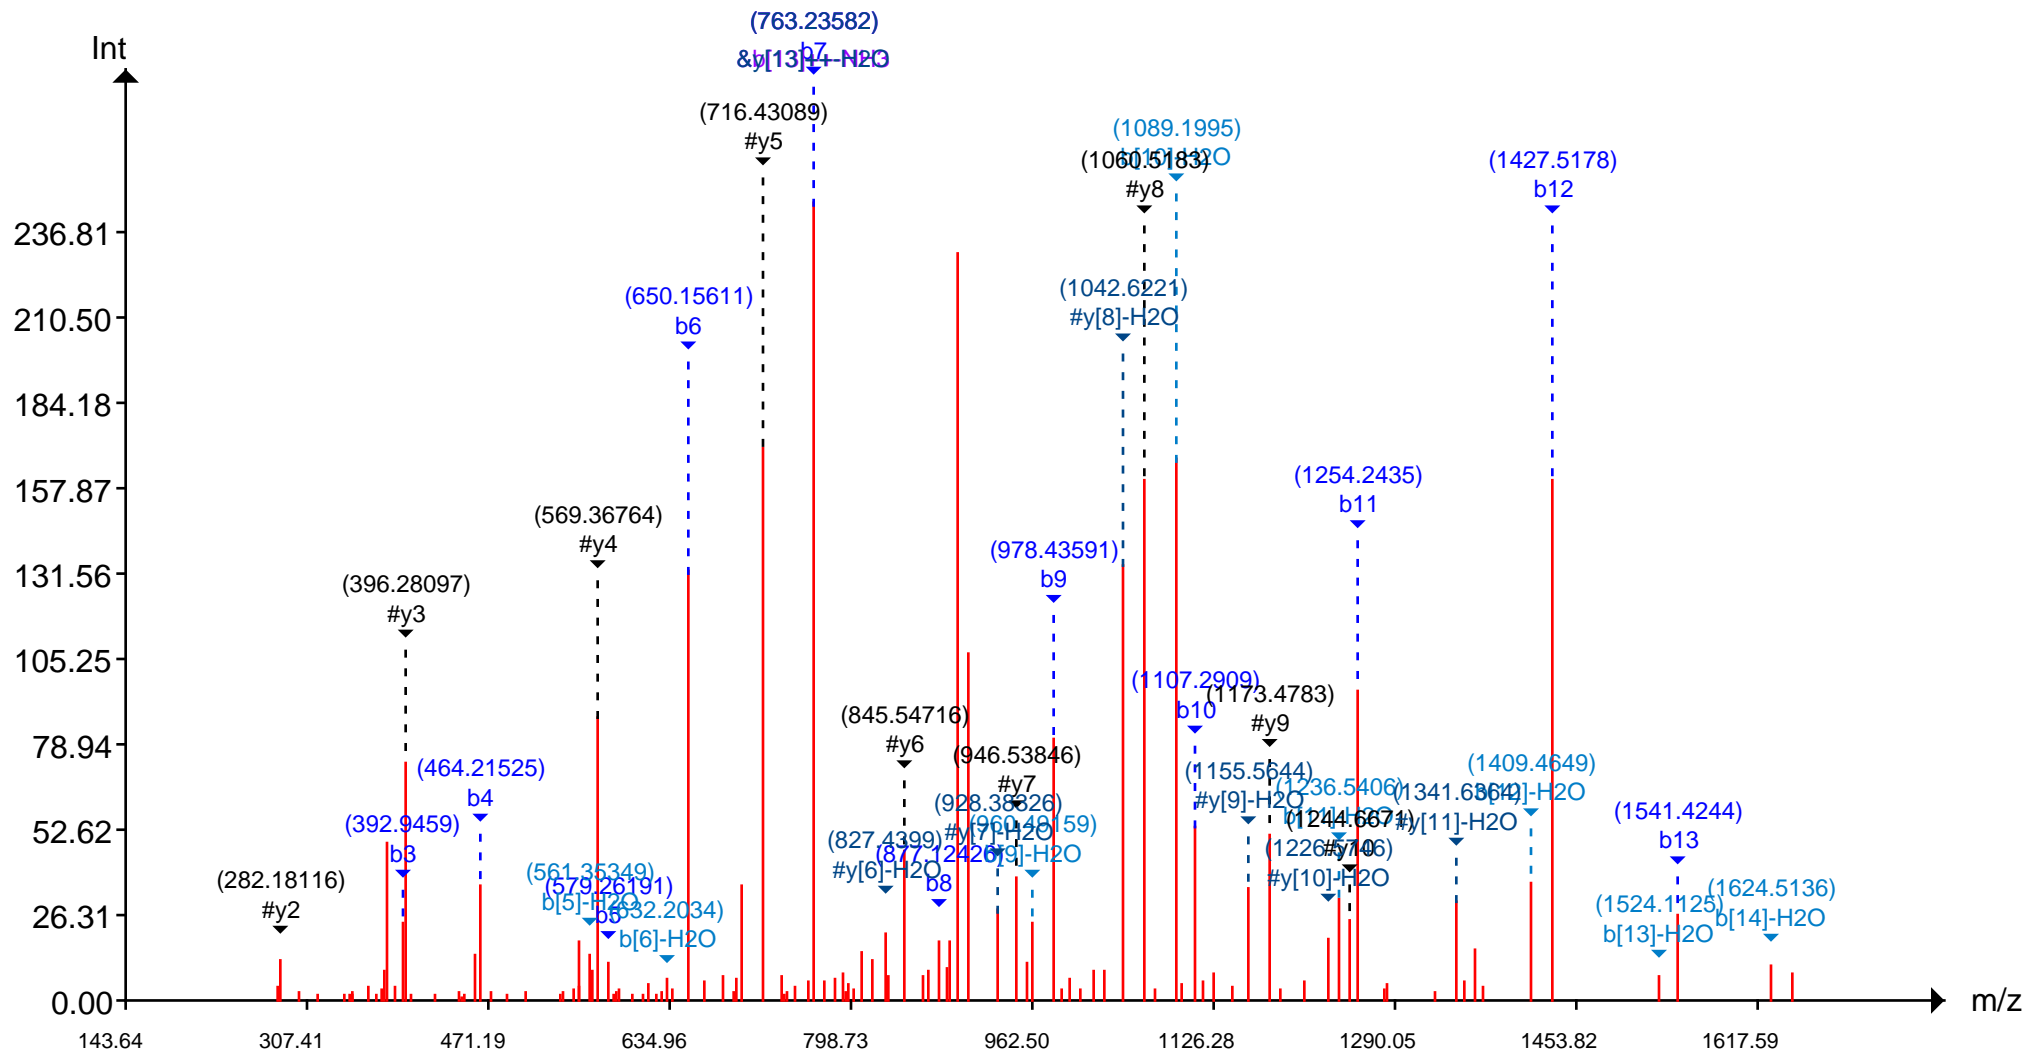

## Info

|                          |                                        |                           |         |
|--------------------------|----------------------------------------|---------------------------|---------|
| <b>Modified Sequence</b> | AcD3-FSLADAINTEFK<AcD3K*>NTR<C13>-COOH | <b>Ion score</b>          | 86.12   |
| <b>Protein</b>           | P08670                                 | <b>Confidence level</b>   | 99.00%  |
| <b>Precursor m/z</b>     | 911.98138                              | <b>Identity Threshold</b> | 49.13   |
| <b>Charge</b>            | 2+                                     | <b>Mass error</b>         | 6.98E-4 |

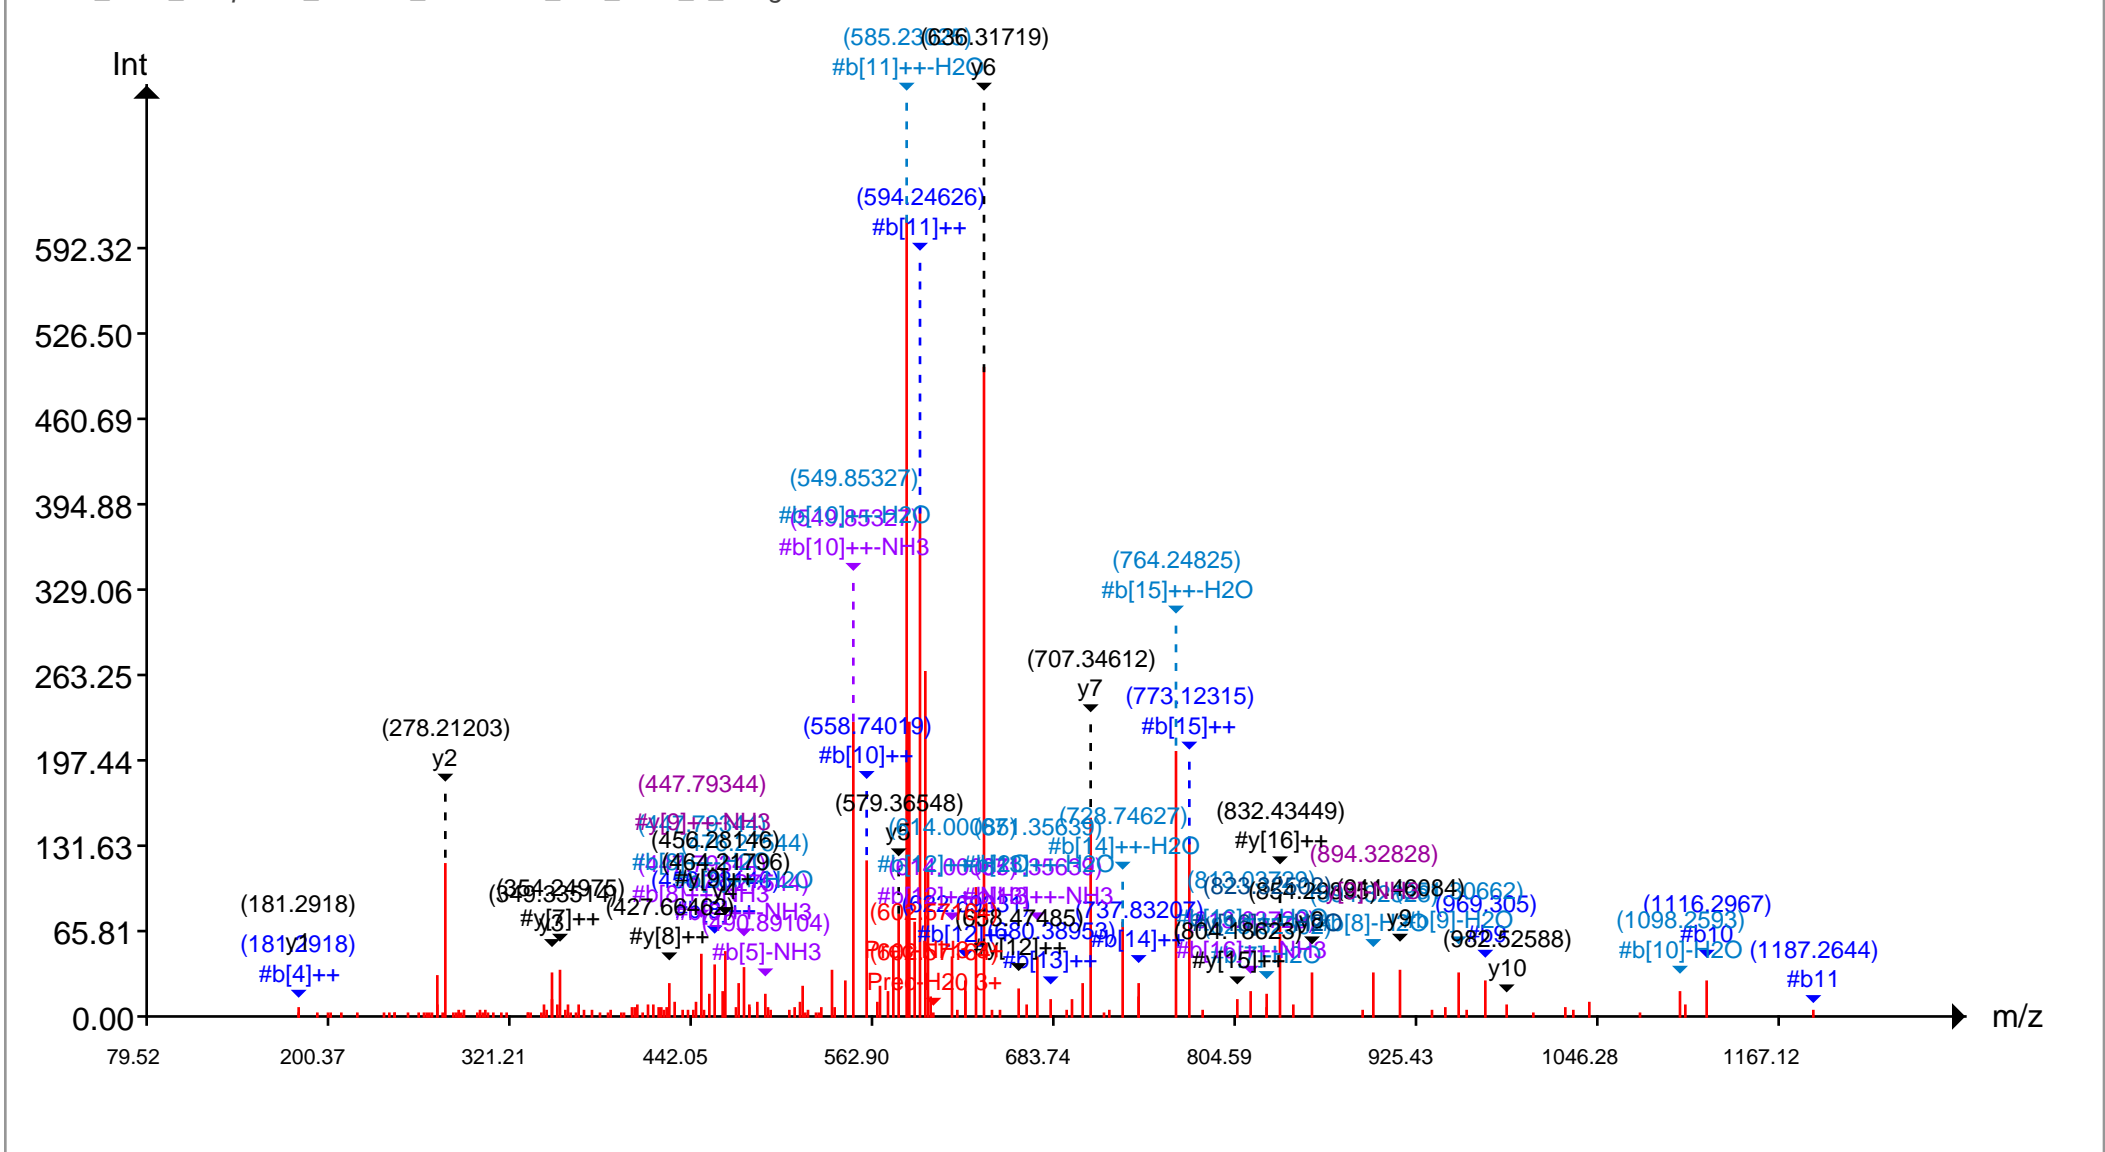

## Info

|                          |                                                      |                           |          |
|--------------------------|------------------------------------------------------|---------------------------|----------|
| <b>Modified Sequence</b> | AcD3-NGSGM<Mox*>C<Cmm*>K<AcD3K*>AGFAGDDAPR<C13>-COOH | <b>Ion score</b>          | 75.95    |
| <b>Protein</b>           | P60709, P63261, Q6S8J3, A5A3E0                       | <b>Confidence level</b>   | 99.00%   |
| <b>Precursor m/z</b>     | 608.27342                                            | <b>Identity Threshold</b> | 44.20    |
| <b>Charge</b>            | 3+                                                   | <b>Mass error</b>         | -4.11E-4 |

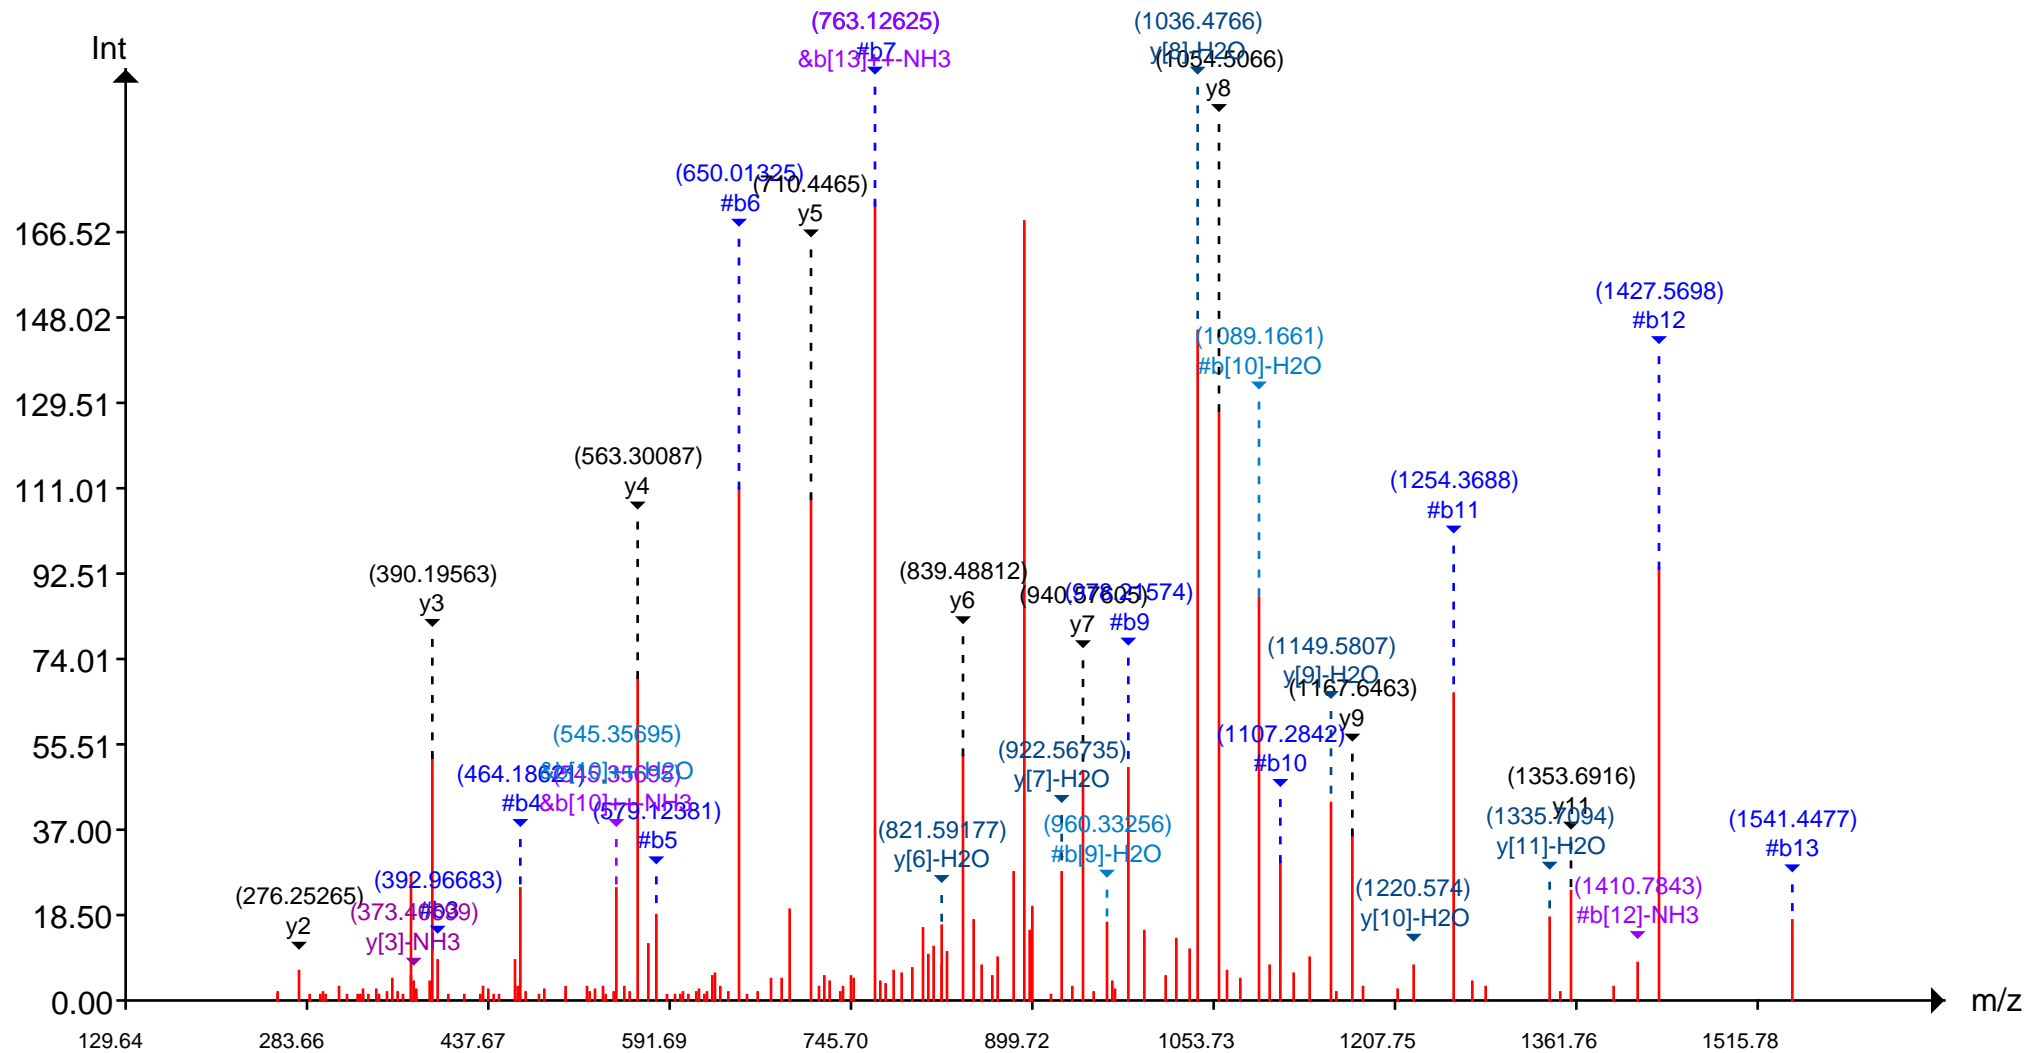

## Info

**Modified Sequence** AcD3-FSLADAINTEFK<AcD3K\*>NTR-COOH

**Ion score** 88.45

**Protein** P08670

**Confidence level** 99.00%

**Precursor m/z** 908.97148

**Identity Threshold** 49.15

**Charge** 2+

**Mass error** 0.00104



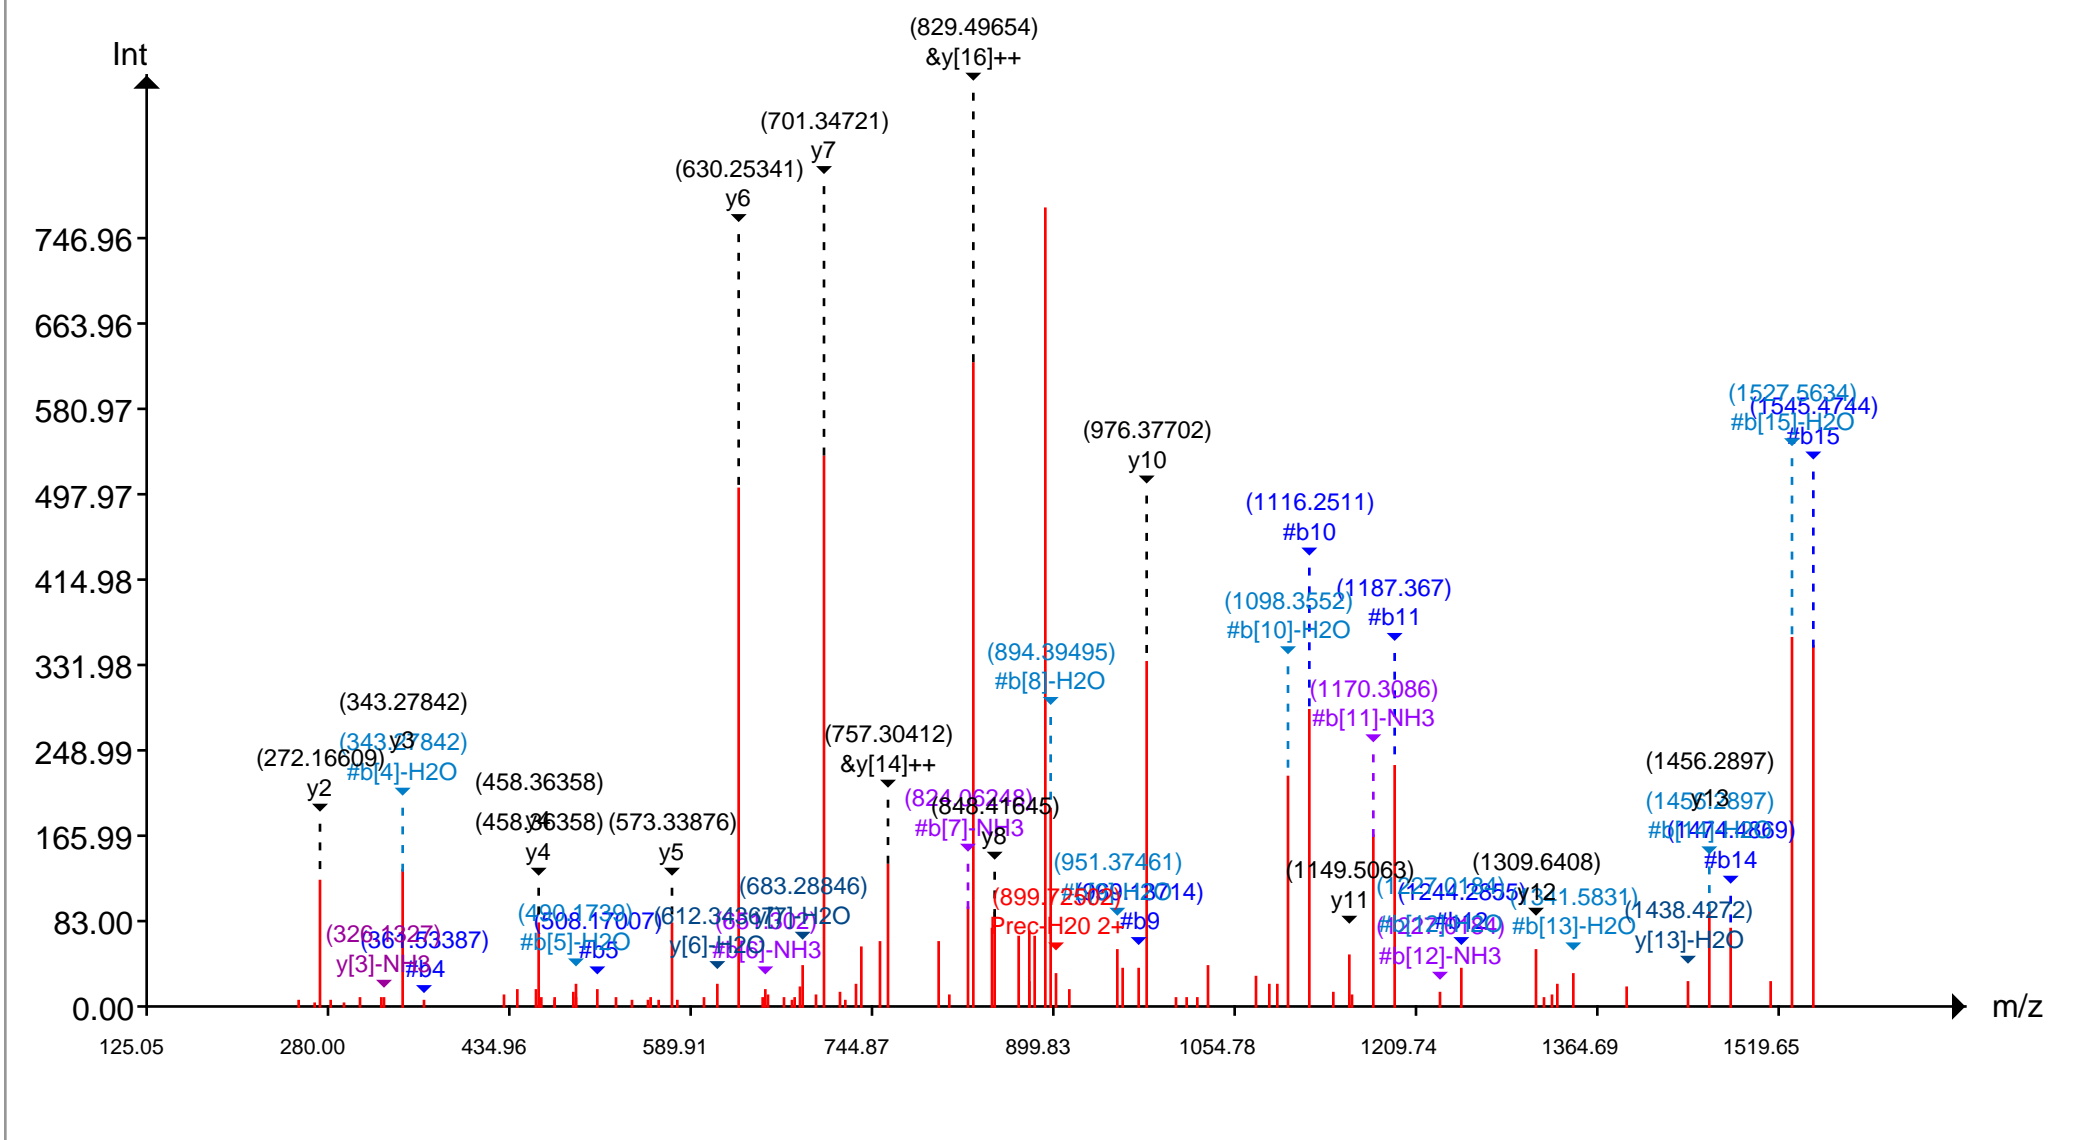

## Info

|                          |                                                 |                           |          |
|--------------------------|-------------------------------------------------|---------------------------|----------|
| <b>Modified Sequence</b> | AcD3-NGSGM<Mox*>C<Cmm*>K<AcD3K*>AGFAGDDAPR-COOH | <b>Ion score</b>          | 86.12    |
| <b>Protein</b>           | P60709, P63261, Q6S8J3, A5A3E0                  | <b>Confidence level</b>   | 99.00%   |
| <b>Precursor m/z</b>     | 908.89656                                       | <b>Identity Threshold</b> | 42.94    |
| <b>Charge</b>            | 2+                                              | <b>Mass error</b>         | -1.34E-4 |



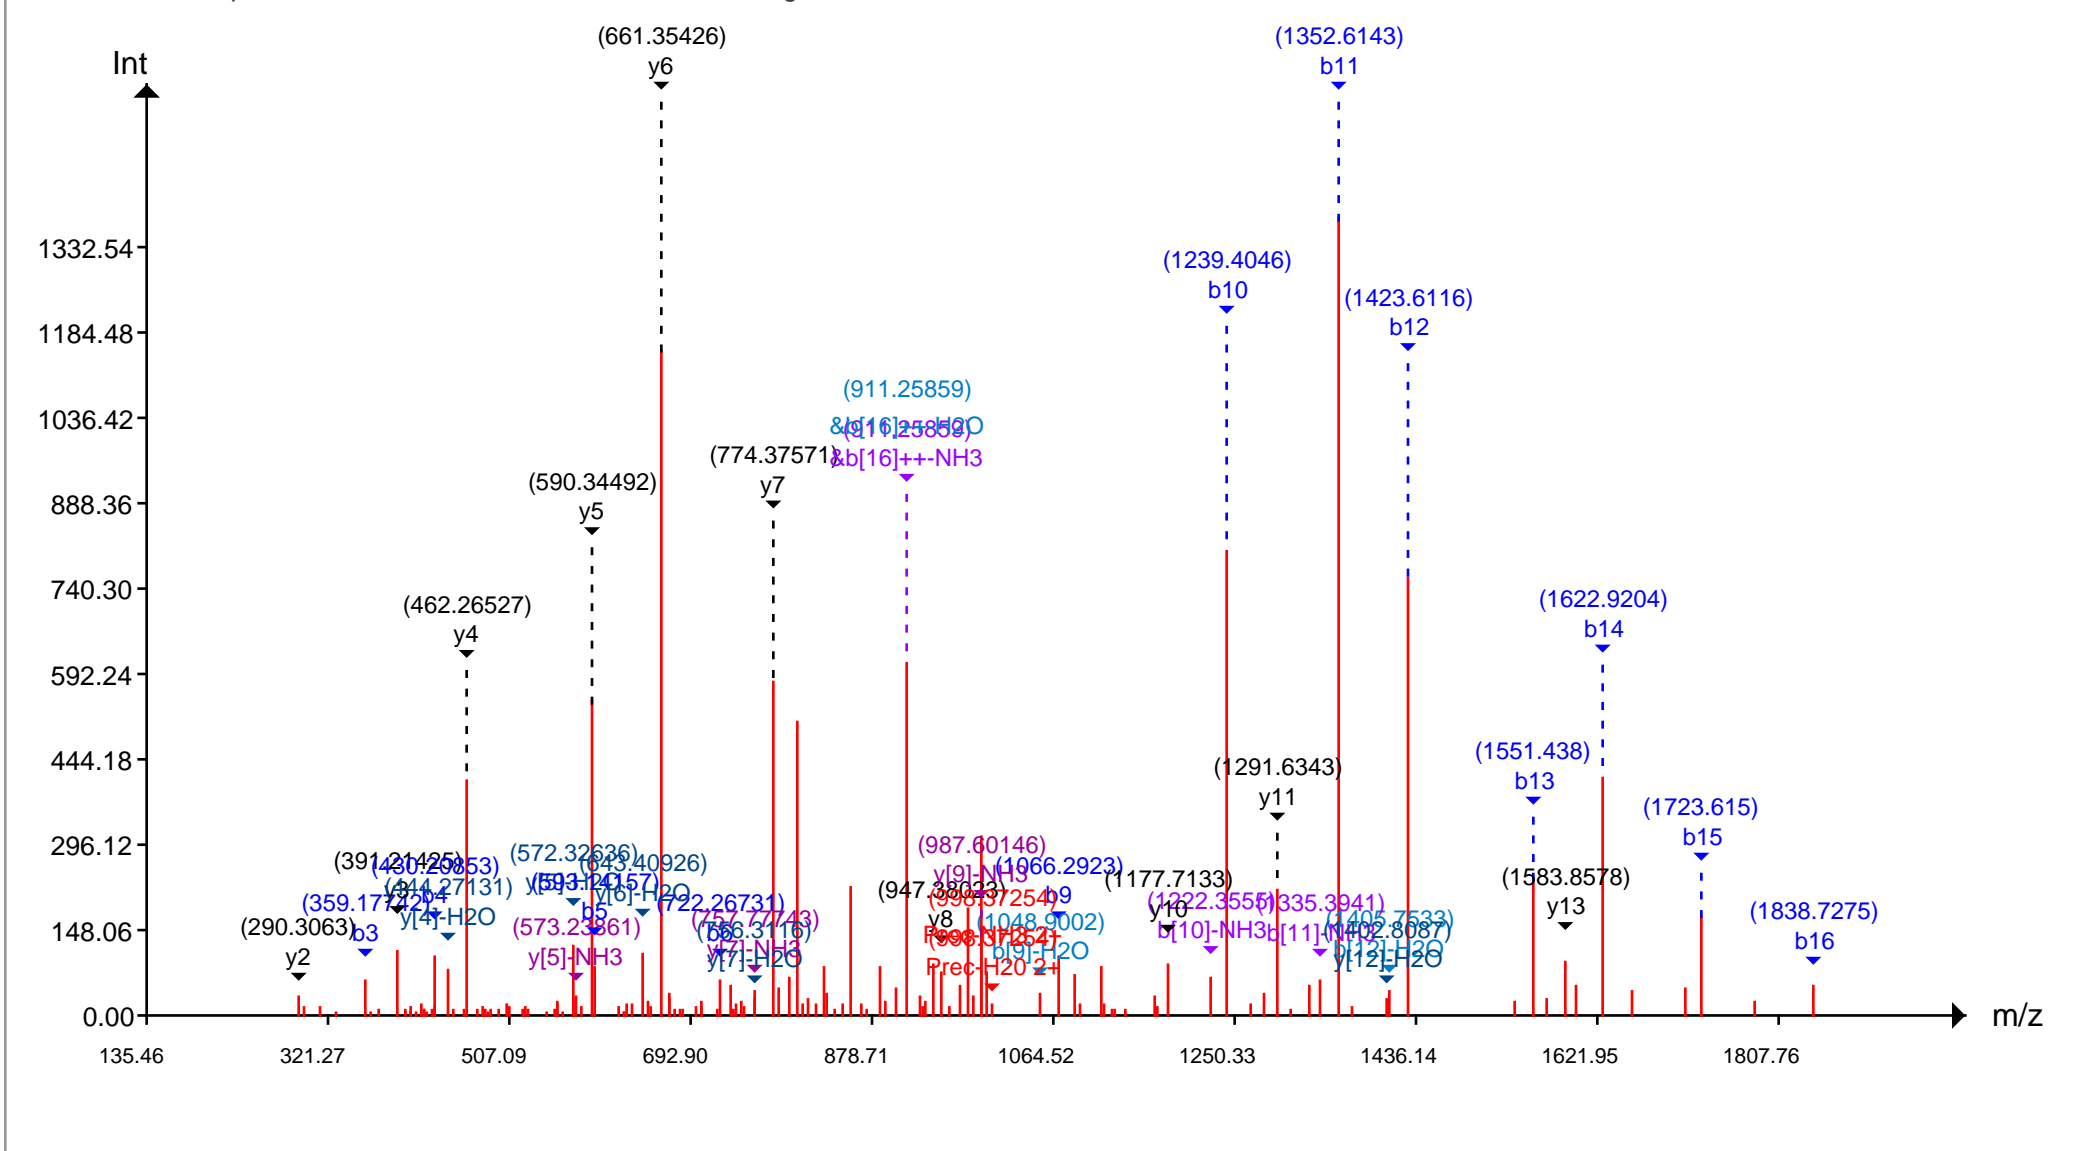

## Info

**Modified Sequence** AcD3-TVLAYENK<AcD3K\*>GK<AcD3K\*>IAQATDR-COOH

**Ion score** 89.01

**Protein** Q8N806

**Confidence level** 99.00%

**Precursor m/z** 1007.0522

**Identity Threshold** 48.19

**Charge** 2+

**Mass error** 0.001011

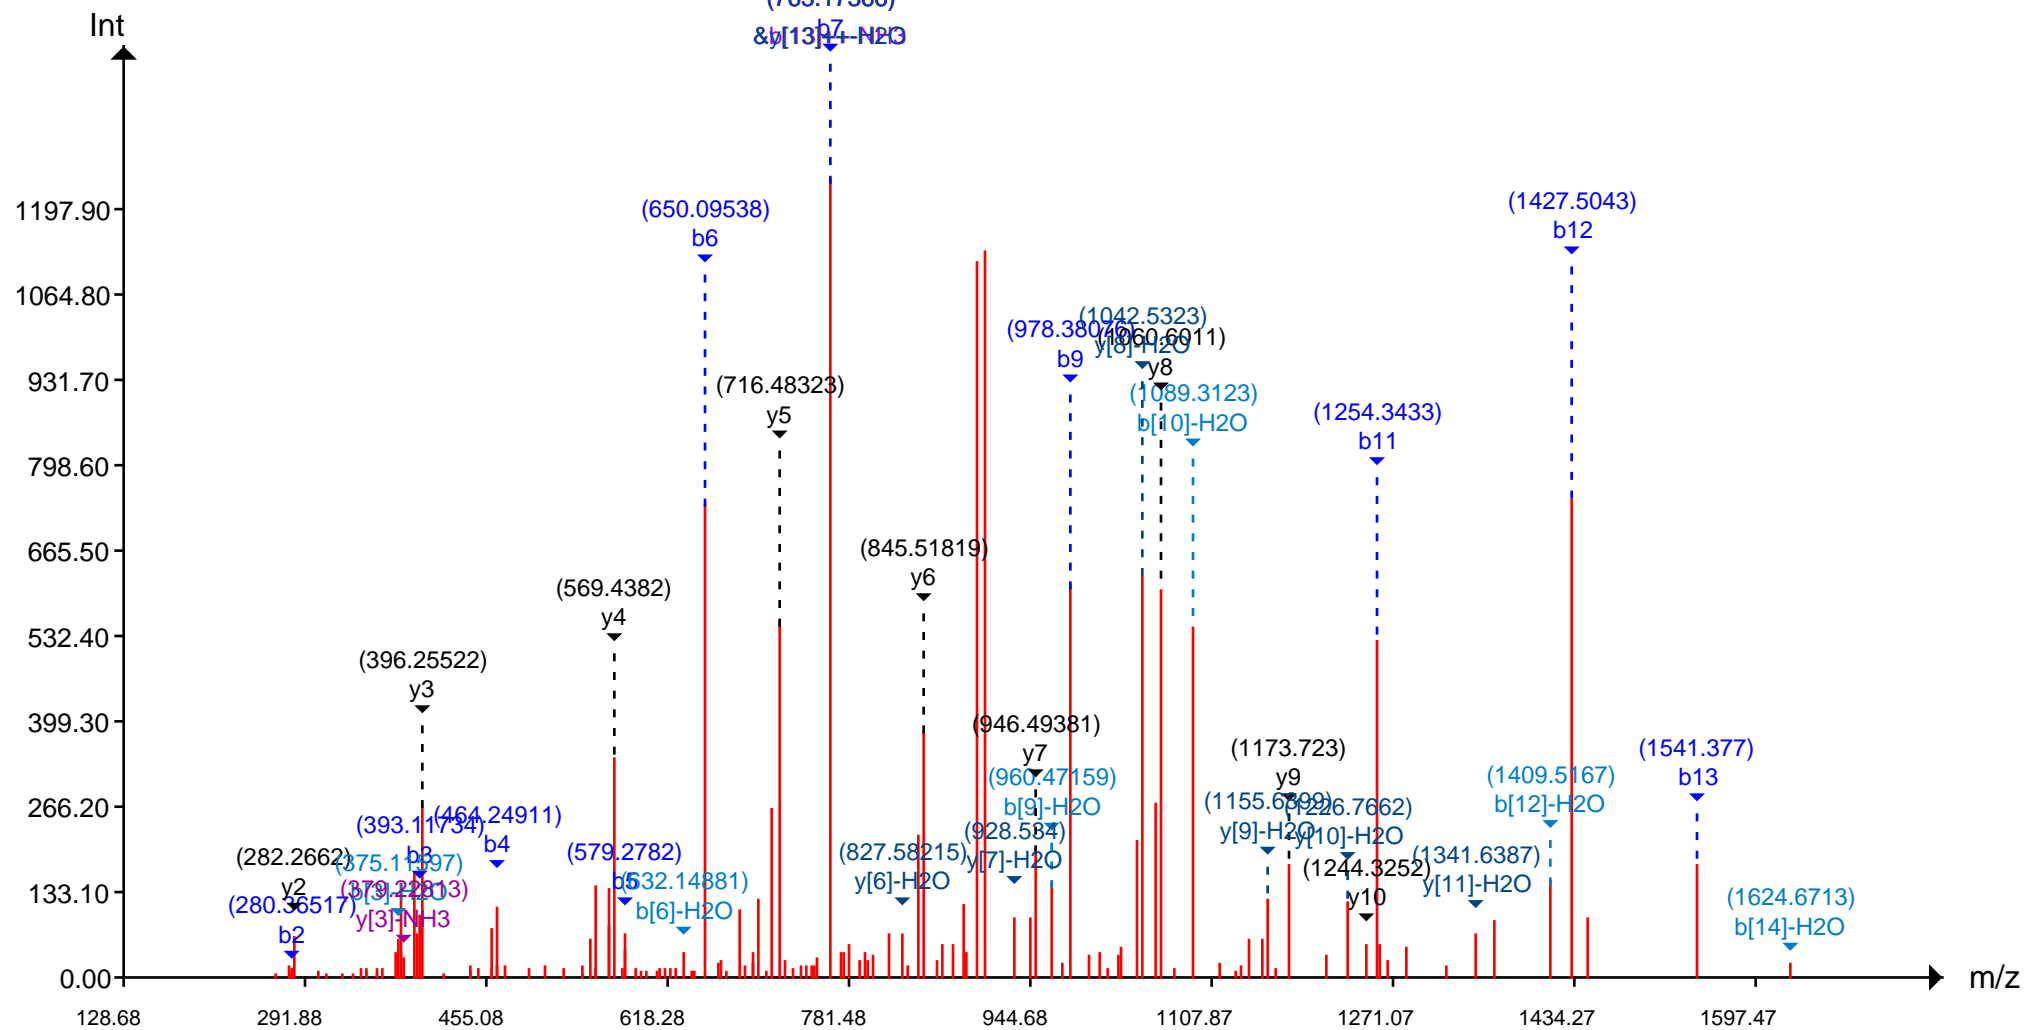

## Info

|                          |                                        |                           |         |
|--------------------------|----------------------------------------|---------------------------|---------|
| <b>Modified Sequence</b> | AcD3-FSLADAINTEFK<AcD3K*>NTR<C13>-COOH | <b>Ion score</b>          | 64.52   |
| <b>Protein</b>           | P08670                                 | <b>Confidence level</b>   | 99.00%  |
| <b>Precursor m/z</b>     | 911.98148                              | <b>Identity Threshold</b> | 49.11   |
| <b>Charge</b>            | 2+                                     | <b>Mass error</b>         | 8.98E-4 |



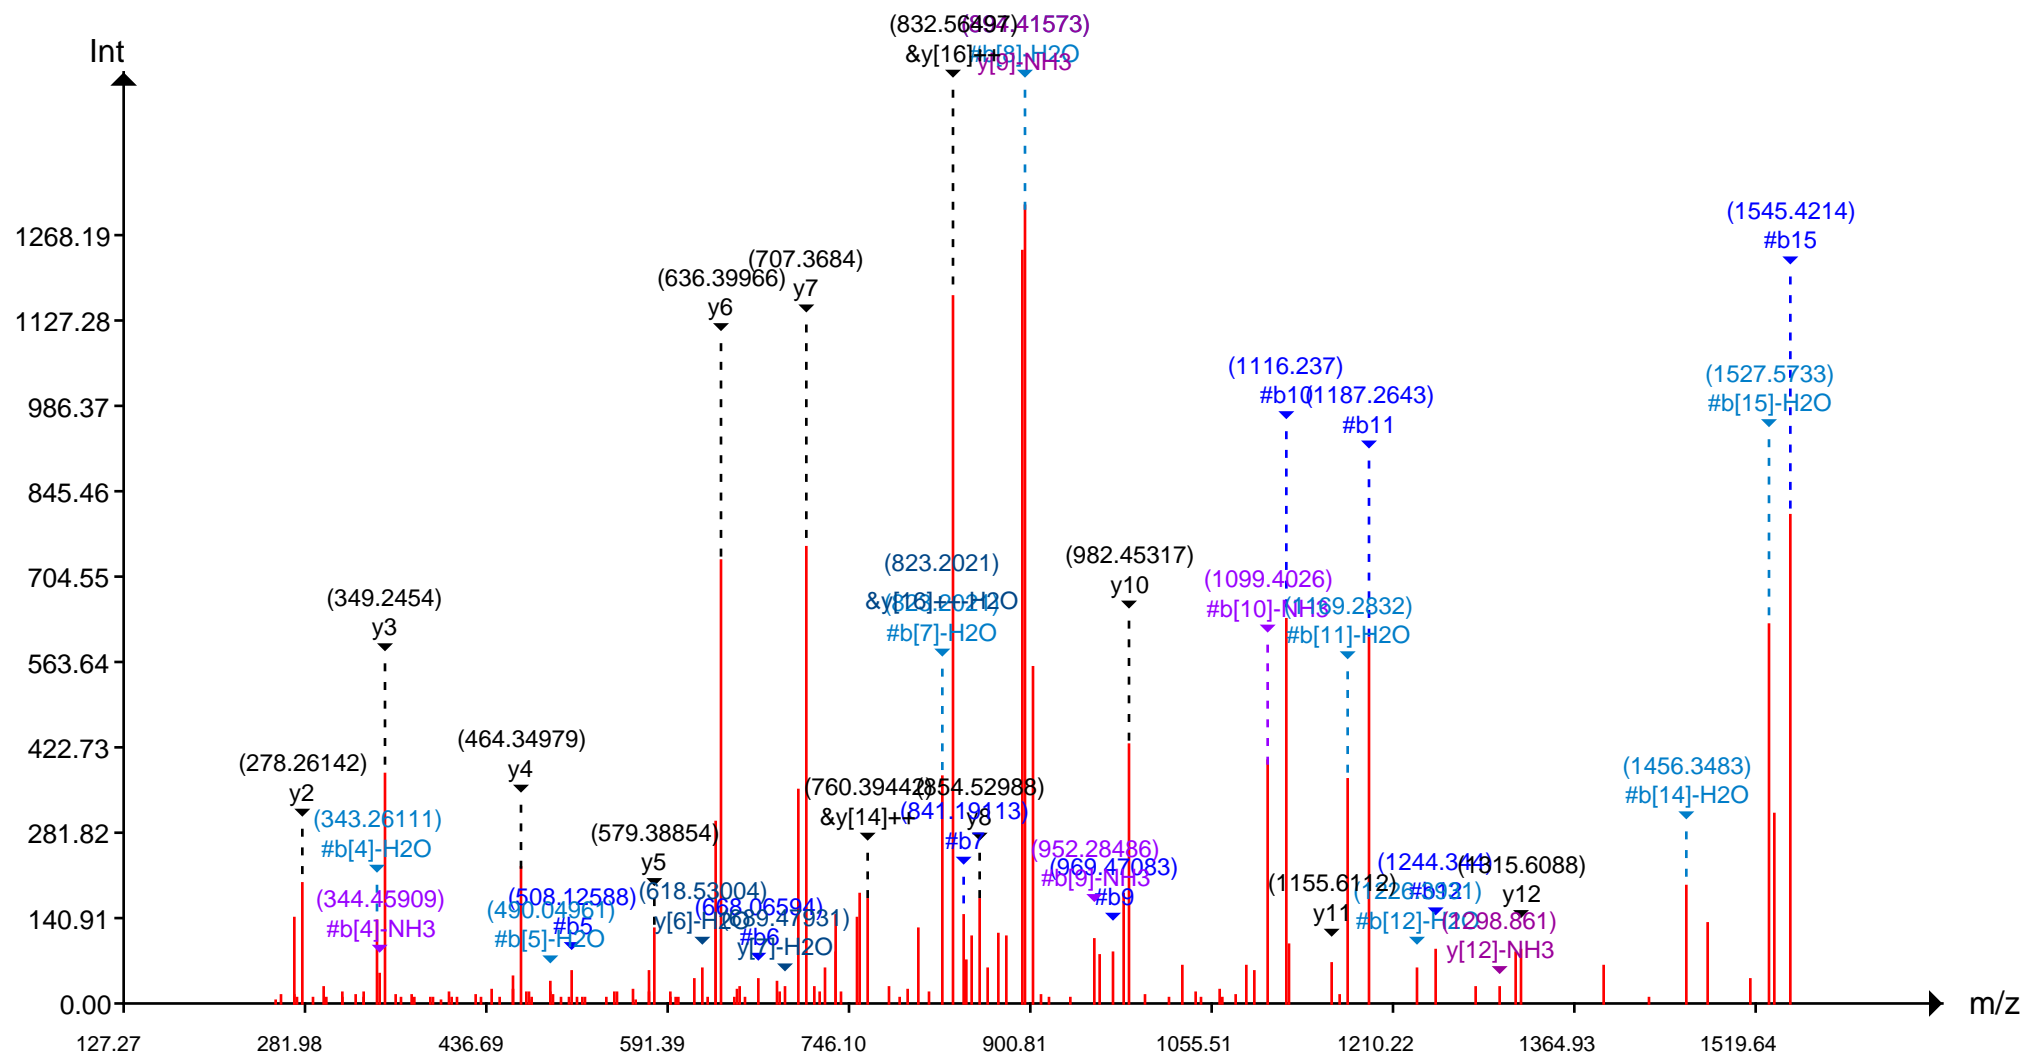

## Info

|                          |                                                      |                           |          |
|--------------------------|------------------------------------------------------|---------------------------|----------|
| <b>Modified Sequence</b> | AcD3-NGSGM<Mox*>C<Cmm*>K<AcD3K*>AGFAGDDAPR<C13>-COOH | <b>Ion score</b>          | 55.39    |
| <b>Protein</b>           | P60709, P63261, Q6S8J3, A5A3E0                       | <b>Confidence level</b>   | 99.00%   |
| <b>Precursor m/z</b>     | 911.90643                                            | <b>Identity Threshold</b> | 44.20    |
| <b>Charge</b>            | 2+                                                   | <b>Mass error</b>         | -5.35E-4 |

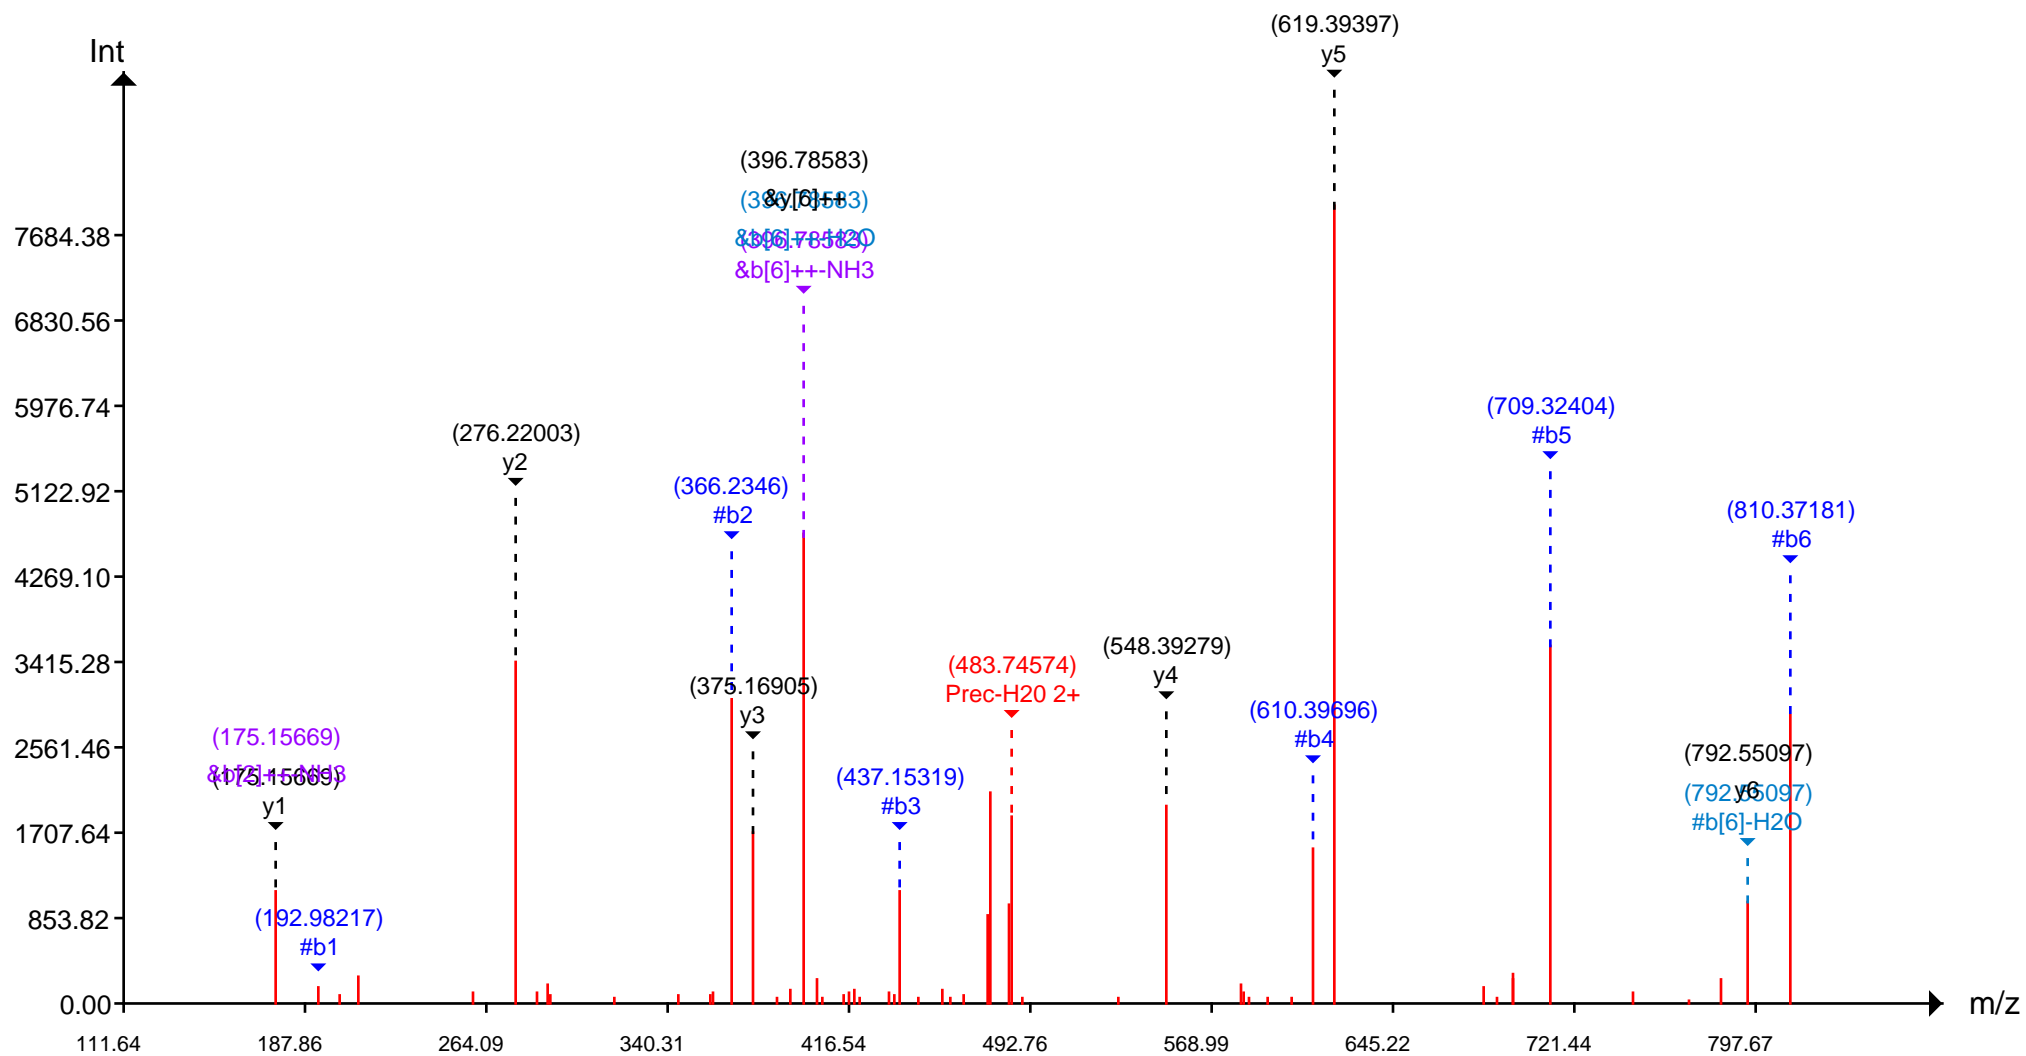

## Info

|                          |                                   |                           |          |
|--------------------------|-----------------------------------|---------------------------|----------|
| <b>Modified Sequence</b> | AcD3-FK<AcD3K*>AK<AcD3K*>VTR-COOH | <b>Ion score</b>          | 45.15    |
| <b>Protein</b>           | Q9Y4L1                            | <b>Confidence level</b>   | 99.00%   |
| <b>Precursor m/z</b>     | 492.81274                         | <b>Identity Threshold</b> | 43.72    |
| <b>Charge</b>            | 2+                                | <b>Mass error</b>         | -4.76E-4 |

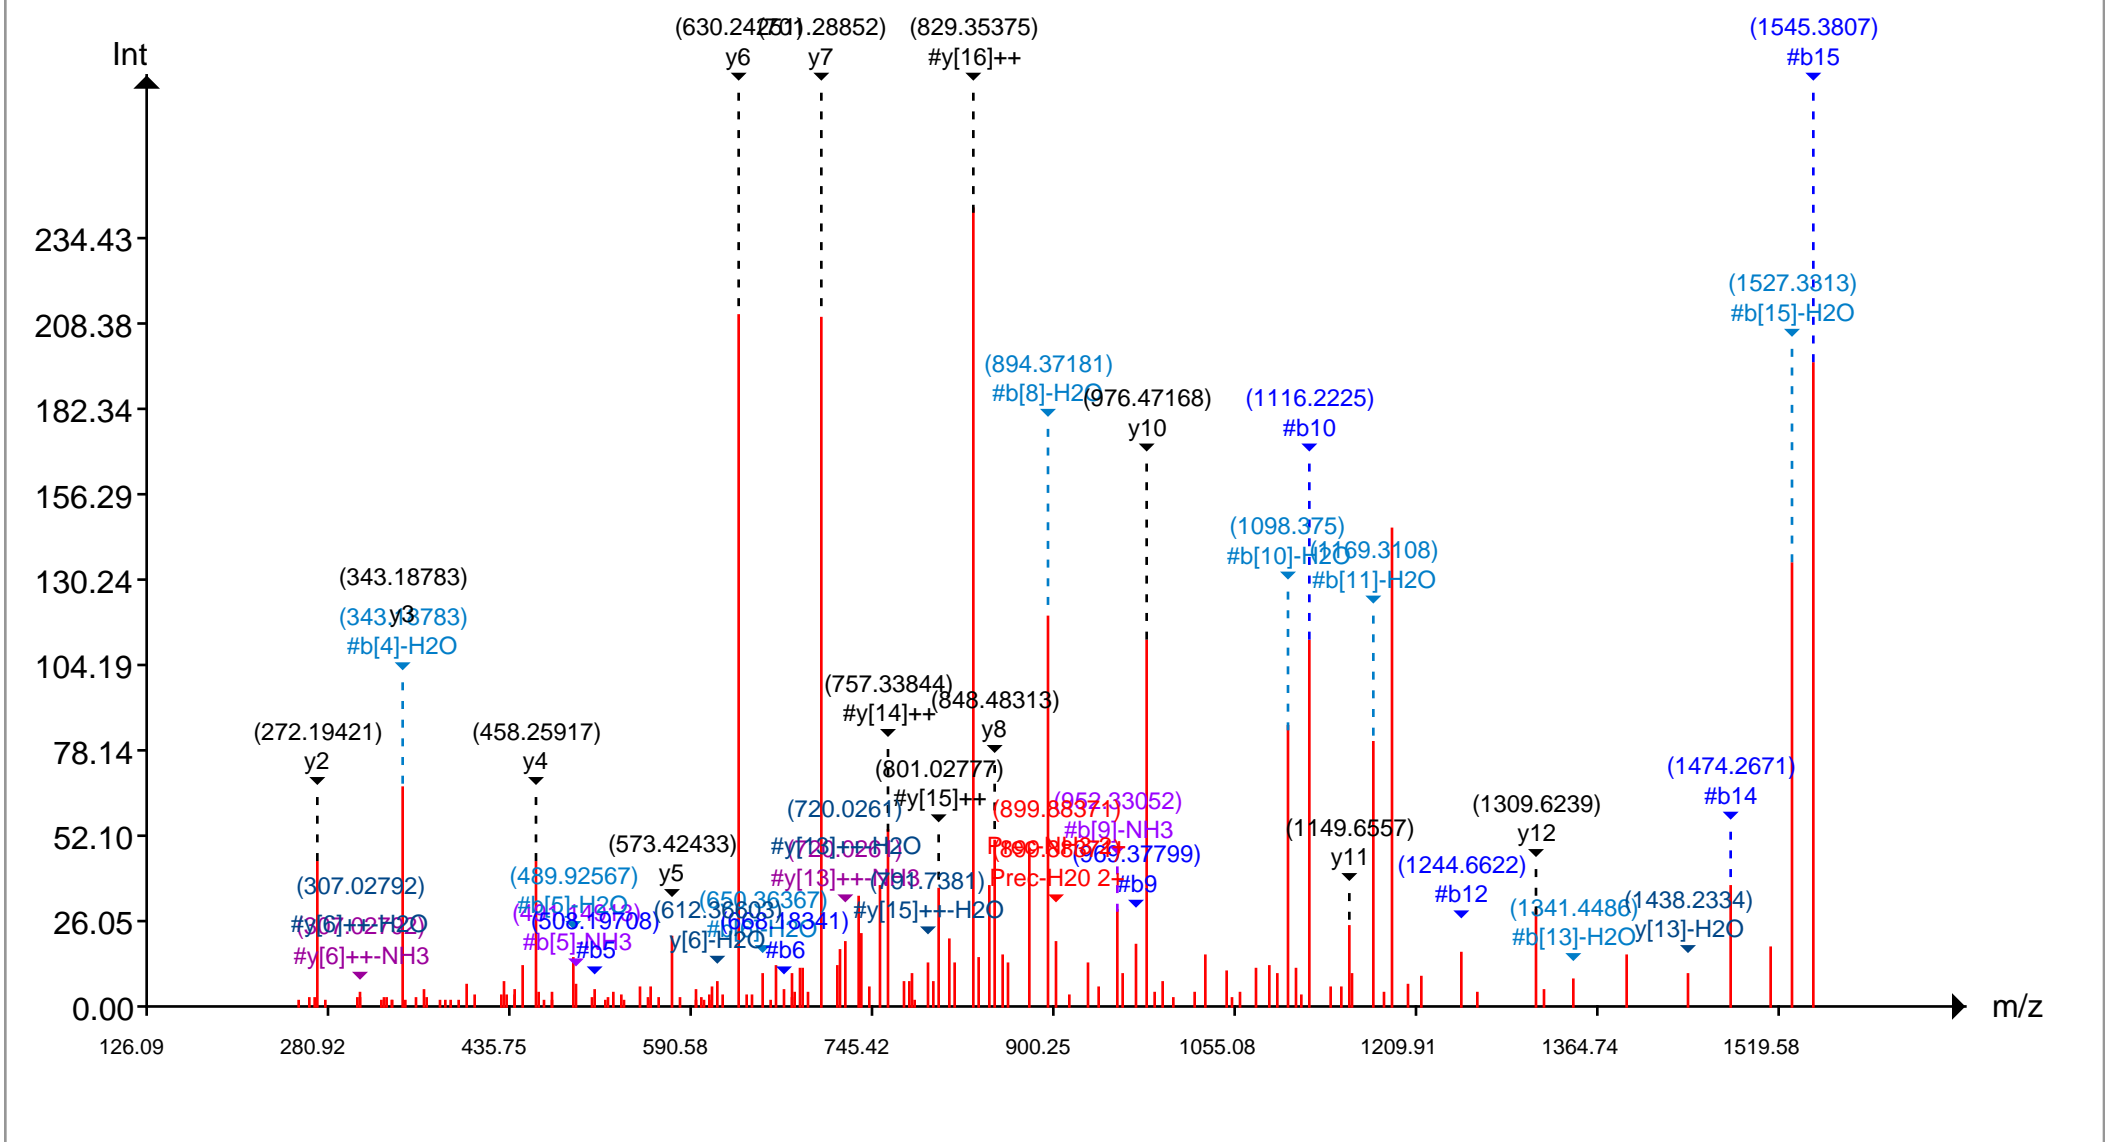

## Info

|                          |                                                 |                           |          |
|--------------------------|-------------------------------------------------|---------------------------|----------|
| <b>Modified Sequence</b> | AcD3-NGSGM<Mox*>C<Cmm*>K<AcD3K*>AGFAGDDAPR-COOH | <b>Ion score</b>          | 75.62    |
| <b>Protein</b>           | P60709, P63261, Q6S8J3, A5A3E0                  | <b>Confidence level</b>   | 99.00%   |
| <b>Precursor m/z</b>     | 908.89647                                       | <b>Identity Threshold</b> | 42.90    |
| <b>Charge</b>            | 2+                                              | <b>Mass error</b>         | -3.14E-4 |

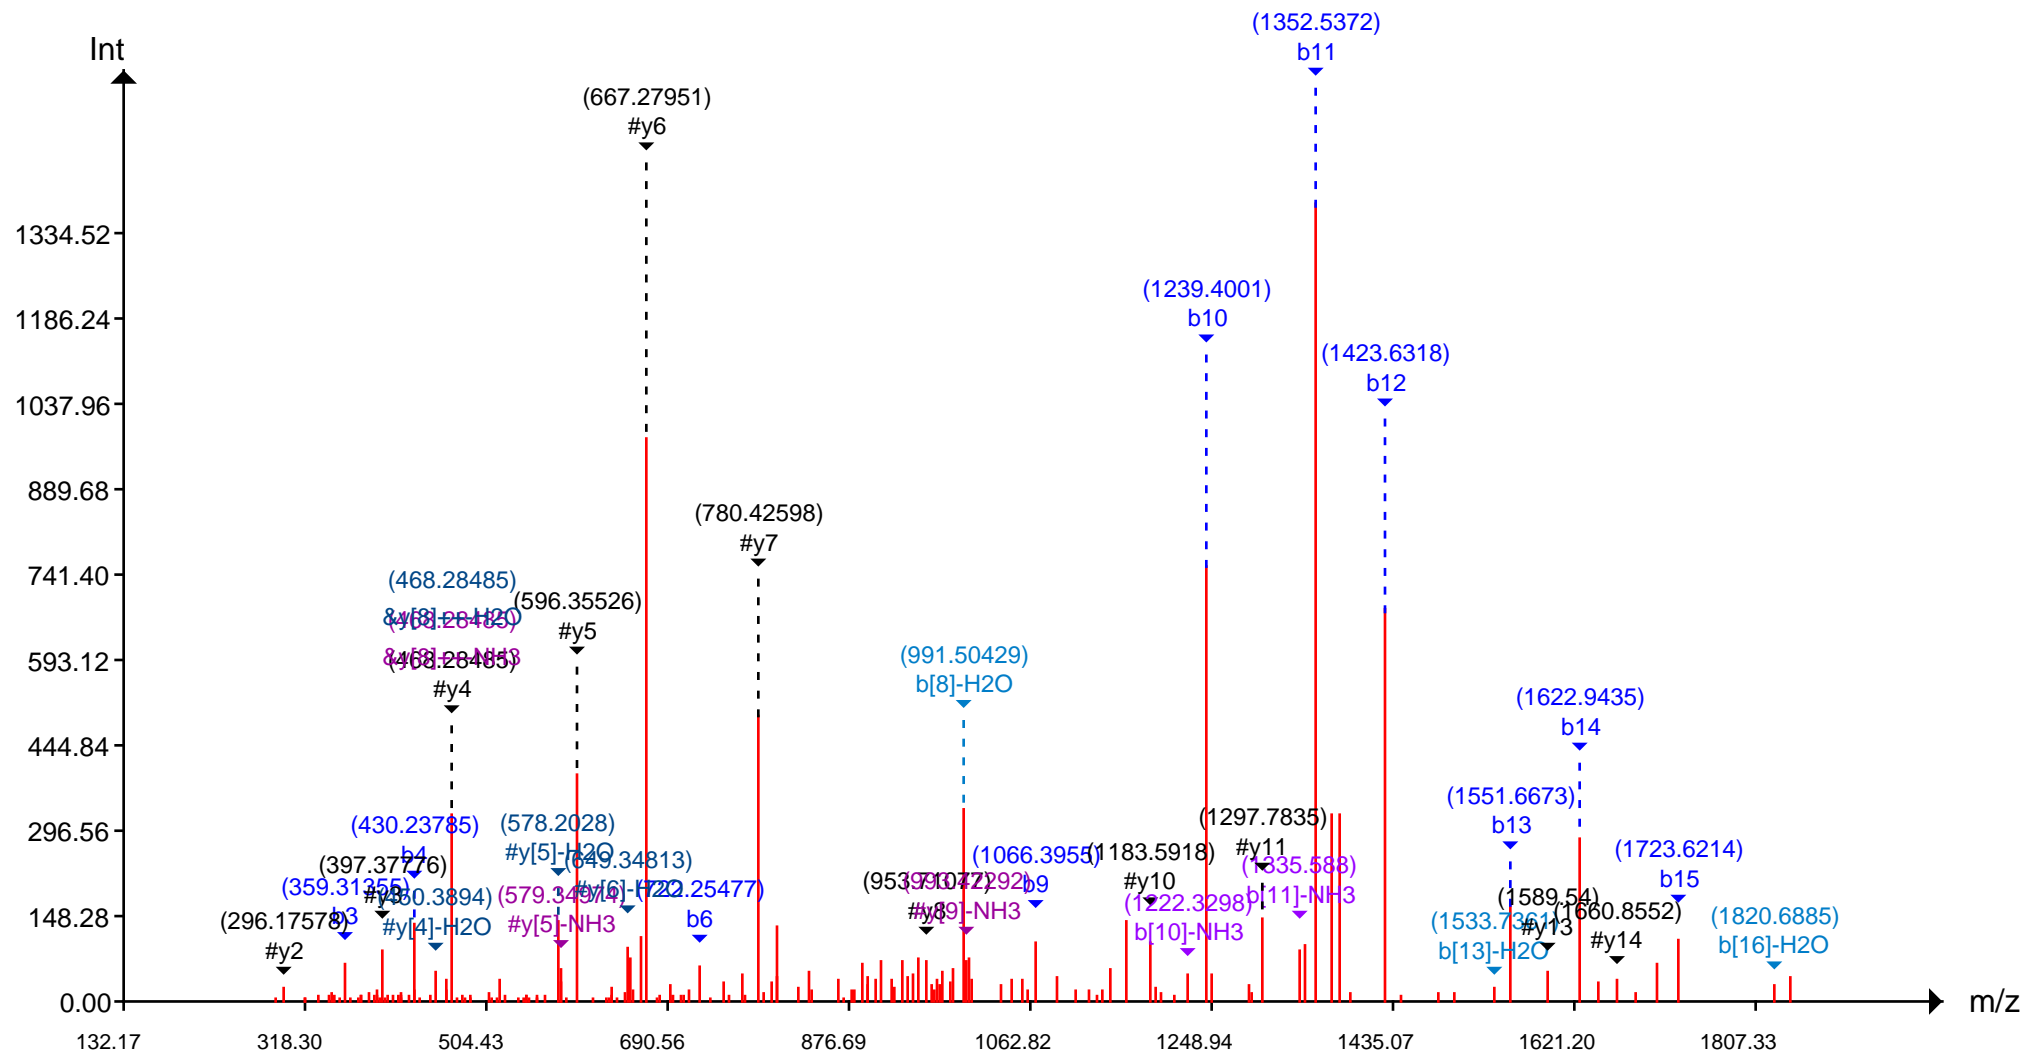

## Info

|                          |                                                  |                           |         |
|--------------------------|--------------------------------------------------|---------------------------|---------|
| <b>Modified Sequence</b> | AcD3-TVLAYENK<AcD3K*>GK<AcD3K*>IAQATDR<C13>-COOH | <b>Ion score</b>          | 73.06   |
| <b>Protein</b>           | Q8N806                                           | <b>Confidence level</b>   | 99.00%  |
| <b>Precursor m/z</b>     | 1010.0623                                        | <b>Identity Threshold</b> | 47.58   |
| <b>Charge</b>            | 2+                                               | <b>Mass error</b>         | 0.00107 |

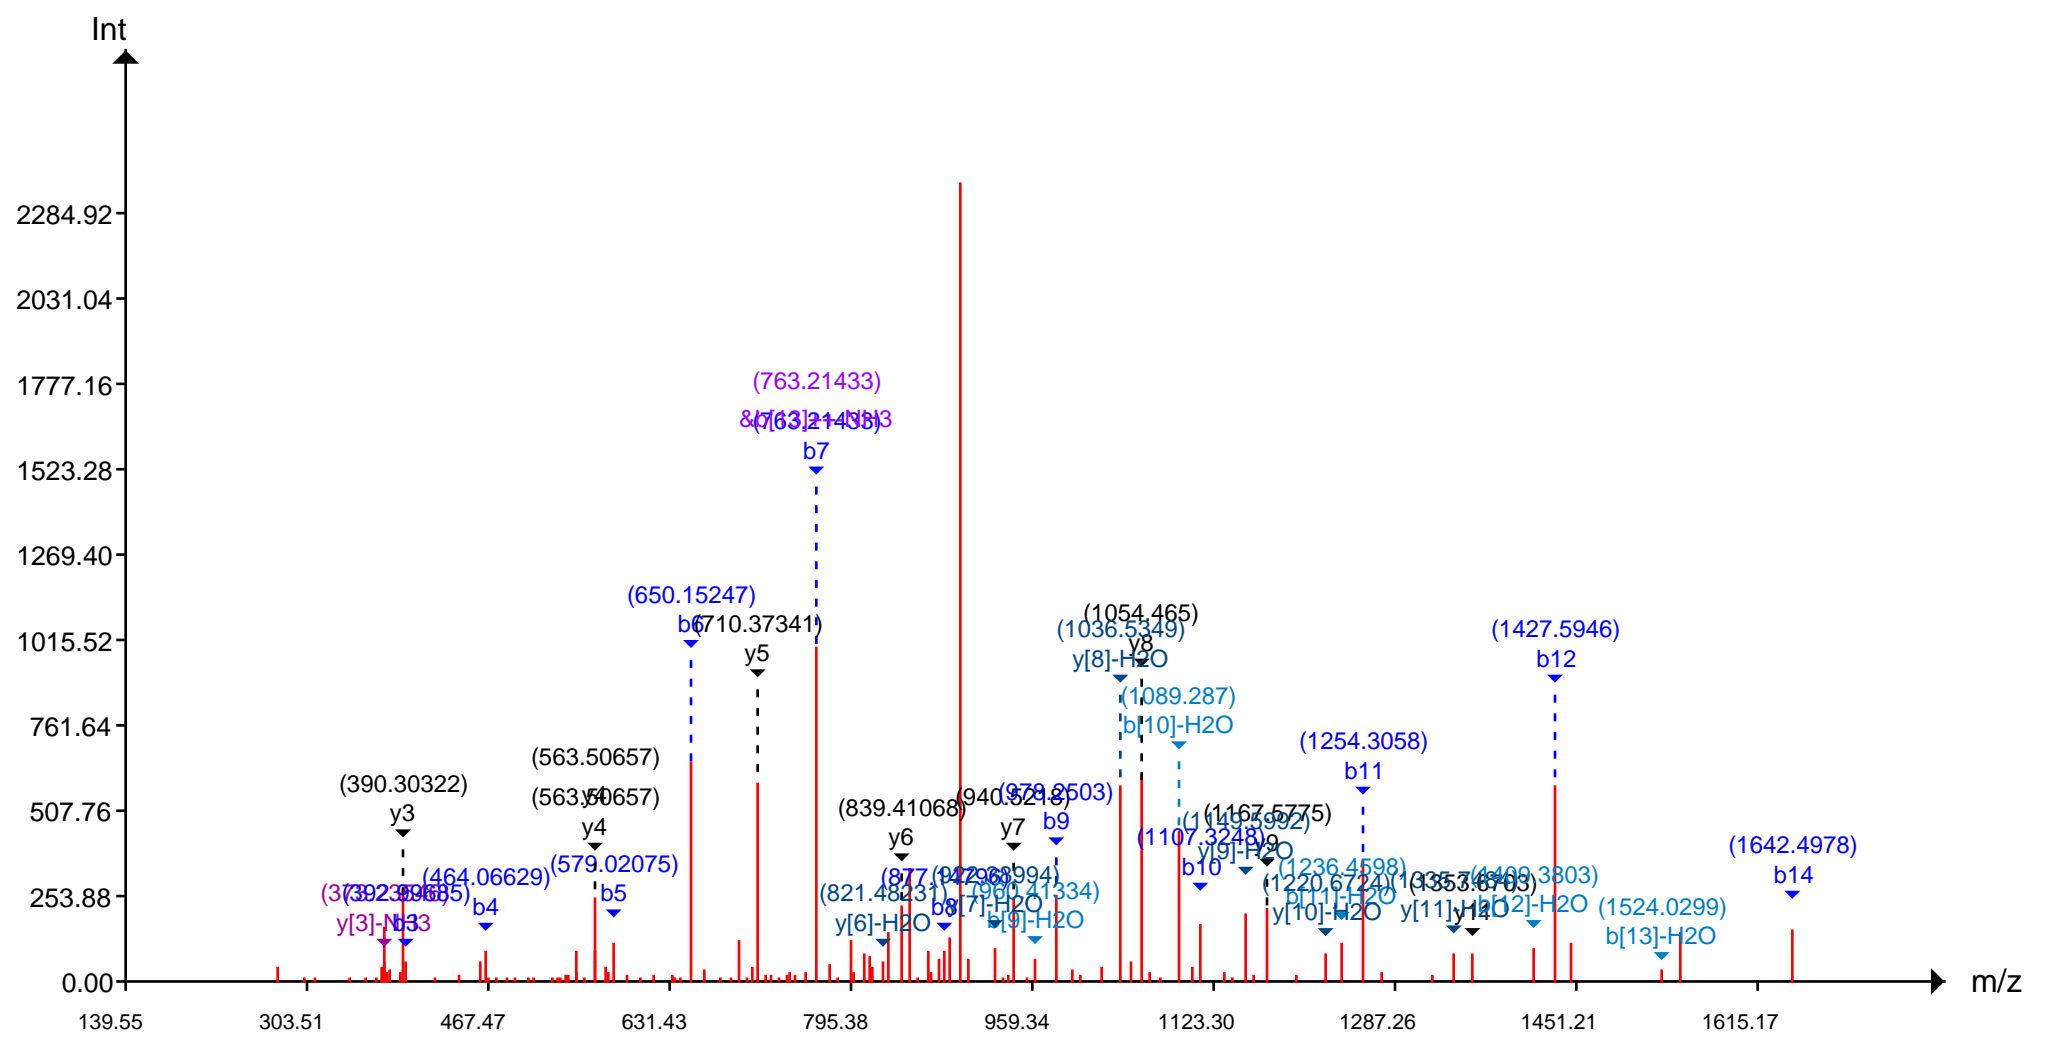

| Info                     |                                   |                           |         |
|--------------------------|-----------------------------------|---------------------------|---------|
| <b>Modified Sequence</b> | AcD3-FSLADAINTEFK<AcD3K*>NTR-COOH | <b>Ion score</b>          | 77.08   |
| <b>Protein</b>           | P08670                            | <b>Confidence level</b>   | 99.00%  |
| <b>Precursor m/z</b>     | 909.48047                         | <b>Identity Threshold</b> | 49.07   |
| <b>Charge</b>            | 2+                                | <b>Mass error</b>         | 1.01902 |

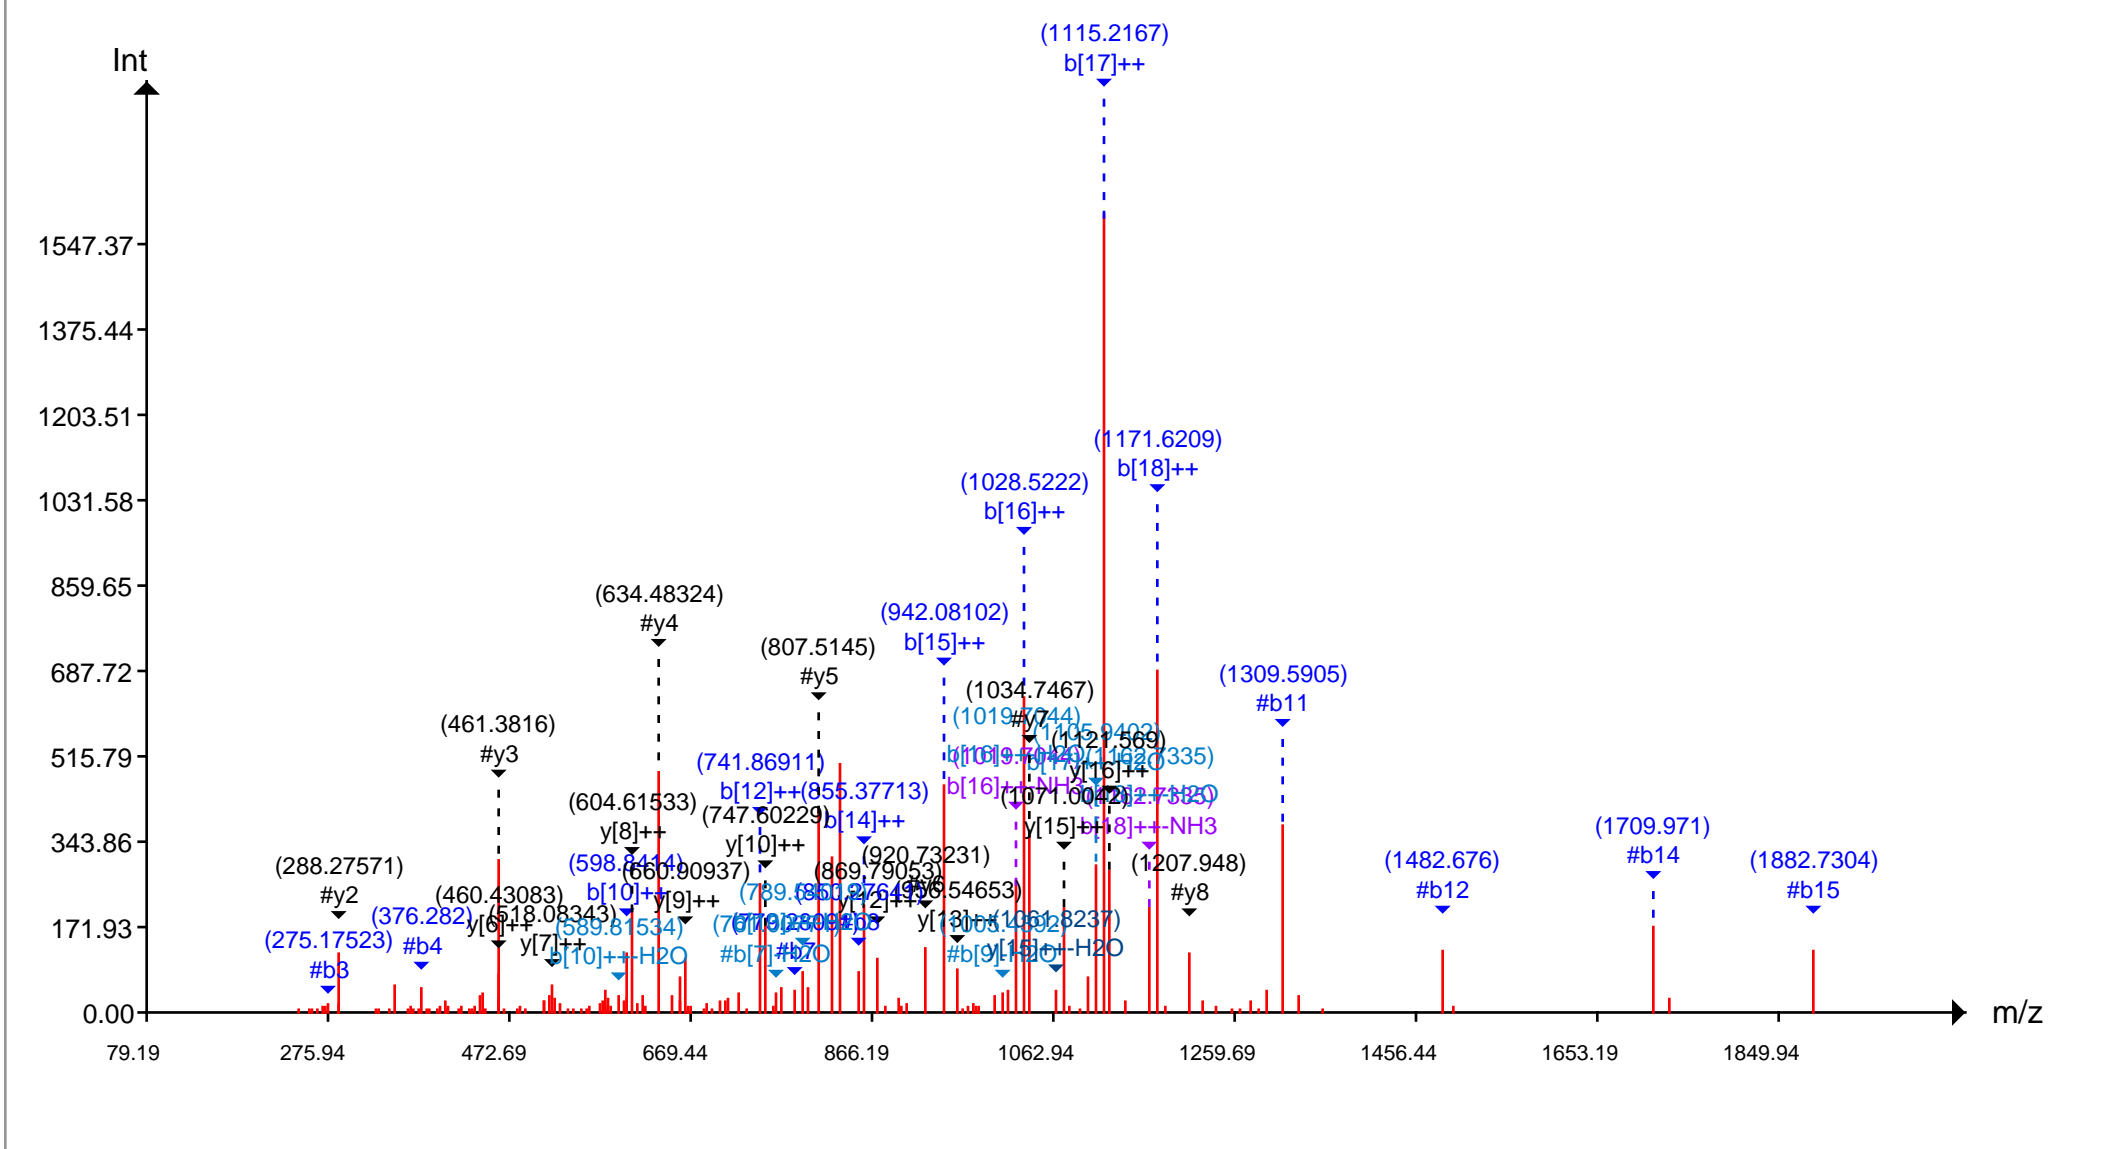

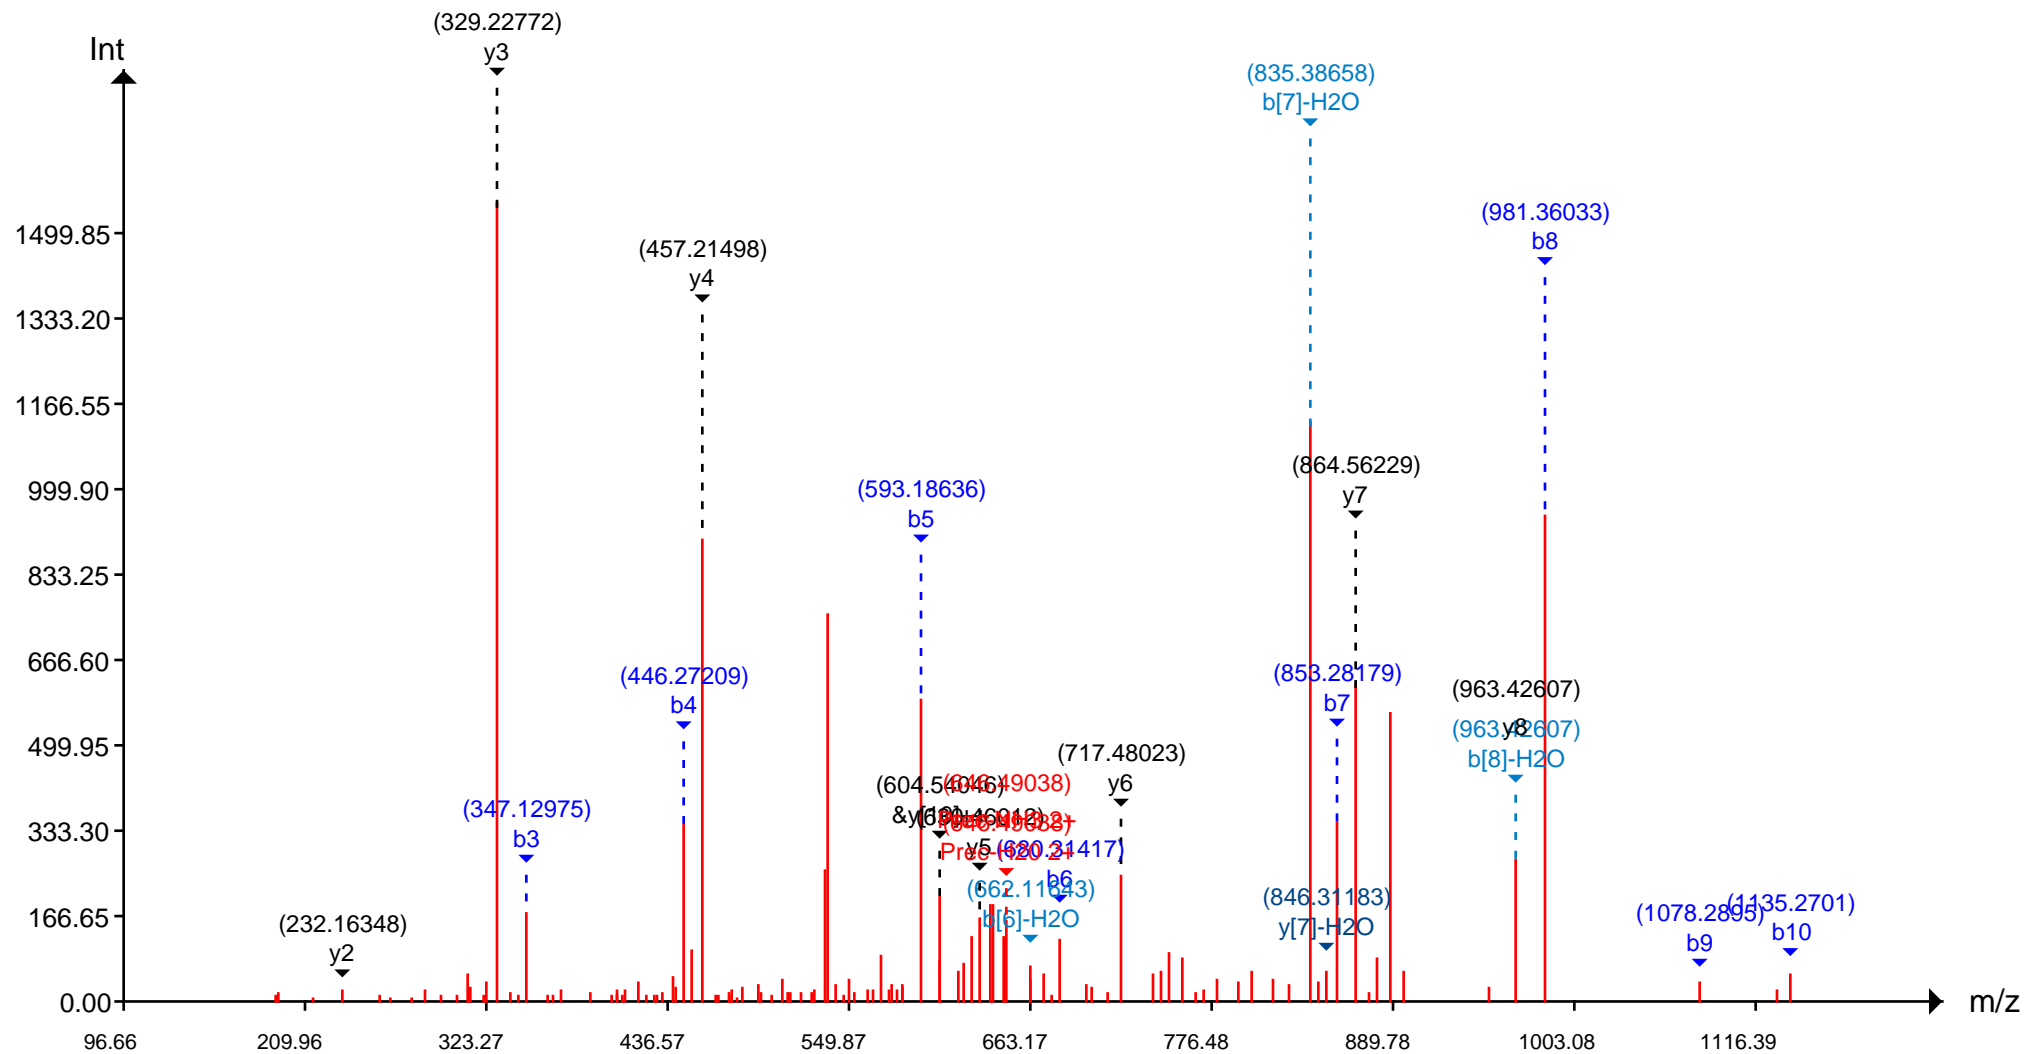

## Info

**Modified Sequence** AcD3-GAK<AcD3K\*>VFSK<AcD3K\*>QPGR-COOH

**Protein** P61011

**Precursor m/z** 655.38224

**Charge** 2+

**Ion score** 47.91

**Confidence level** 99.00%

**Identity Threshold** 46.98

**Mass error** -1.03E-4

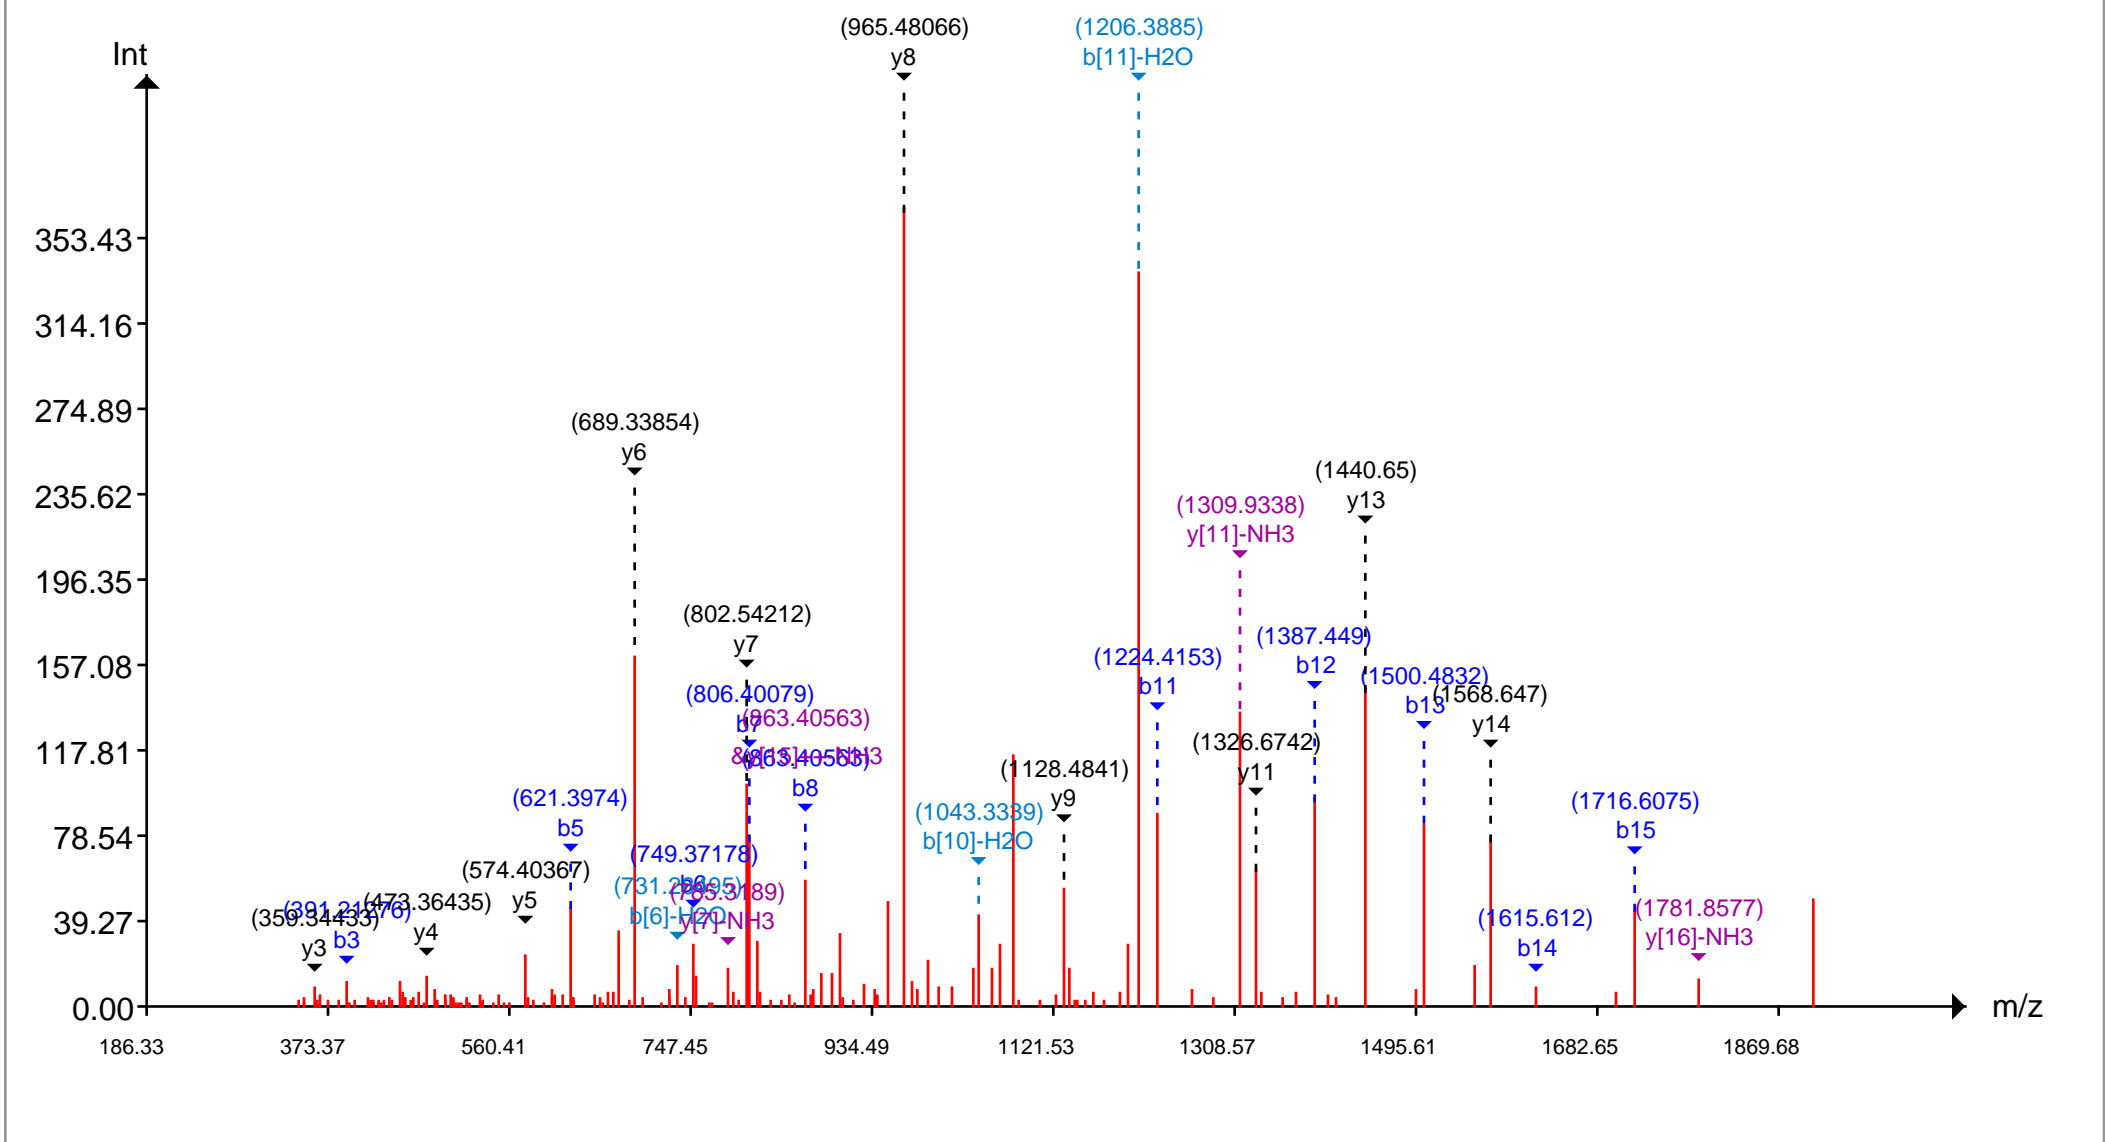

## Info

|                          |                                                |                           |          |
|--------------------------|------------------------------------------------|---------------------------|----------|
| <b>Modified Sequence</b> | AcD3-GDK<AcD3K*>GK<AcD3K*>QGGPTYIYIDTNALR-COOH | <b>Ion score</b>          | 87.61    |
| <b>Protein</b>           | O96019                                         | <b>Confidence level</b>   | 99.00%   |
| <b>Precursor m/z</b>     | 1095.0638                                      | <b>Identity Threshold</b> | 49.06    |
| <b>Charge</b>            | 2+                                             | <b>Mass error</b>         | 0.001995 |



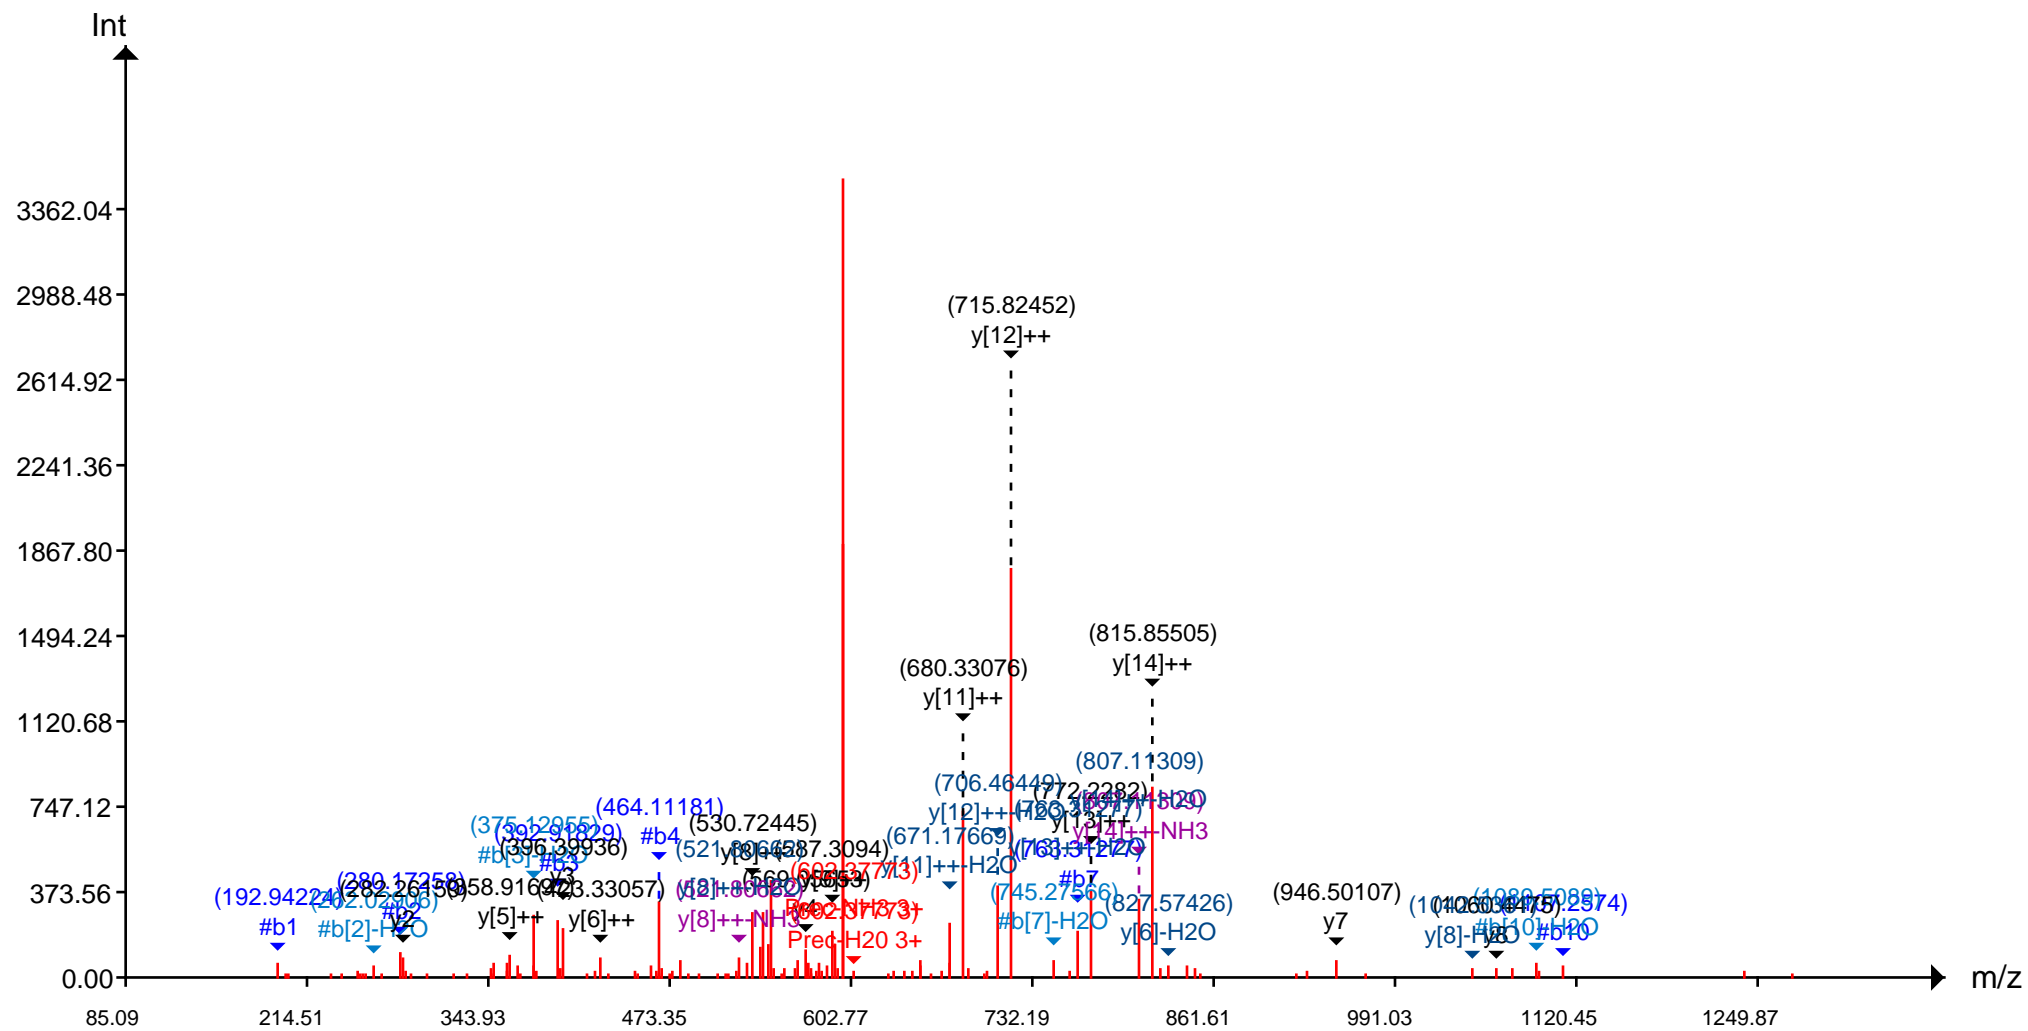

| Info                     |                                        |                           |          |
|--------------------------|----------------------------------------|---------------------------|----------|
| <b>Modified Sequence</b> | AcD3-FSLADAINTEFK<AcD3K*>NTR<C13>-COOH | <b>Ion score</b>          | 51.1     |
| <b>Protein</b>           | P08670                                 | <b>Confidence level</b>   | 99.00%   |
| <b>Precursor m/z</b>     | 608.32307                              | <b>Identity Threshold</b> | 49.11    |
| <b>Charge</b>            | 3+                                     | <b>Mass error</b>         | -1.28E-4 |

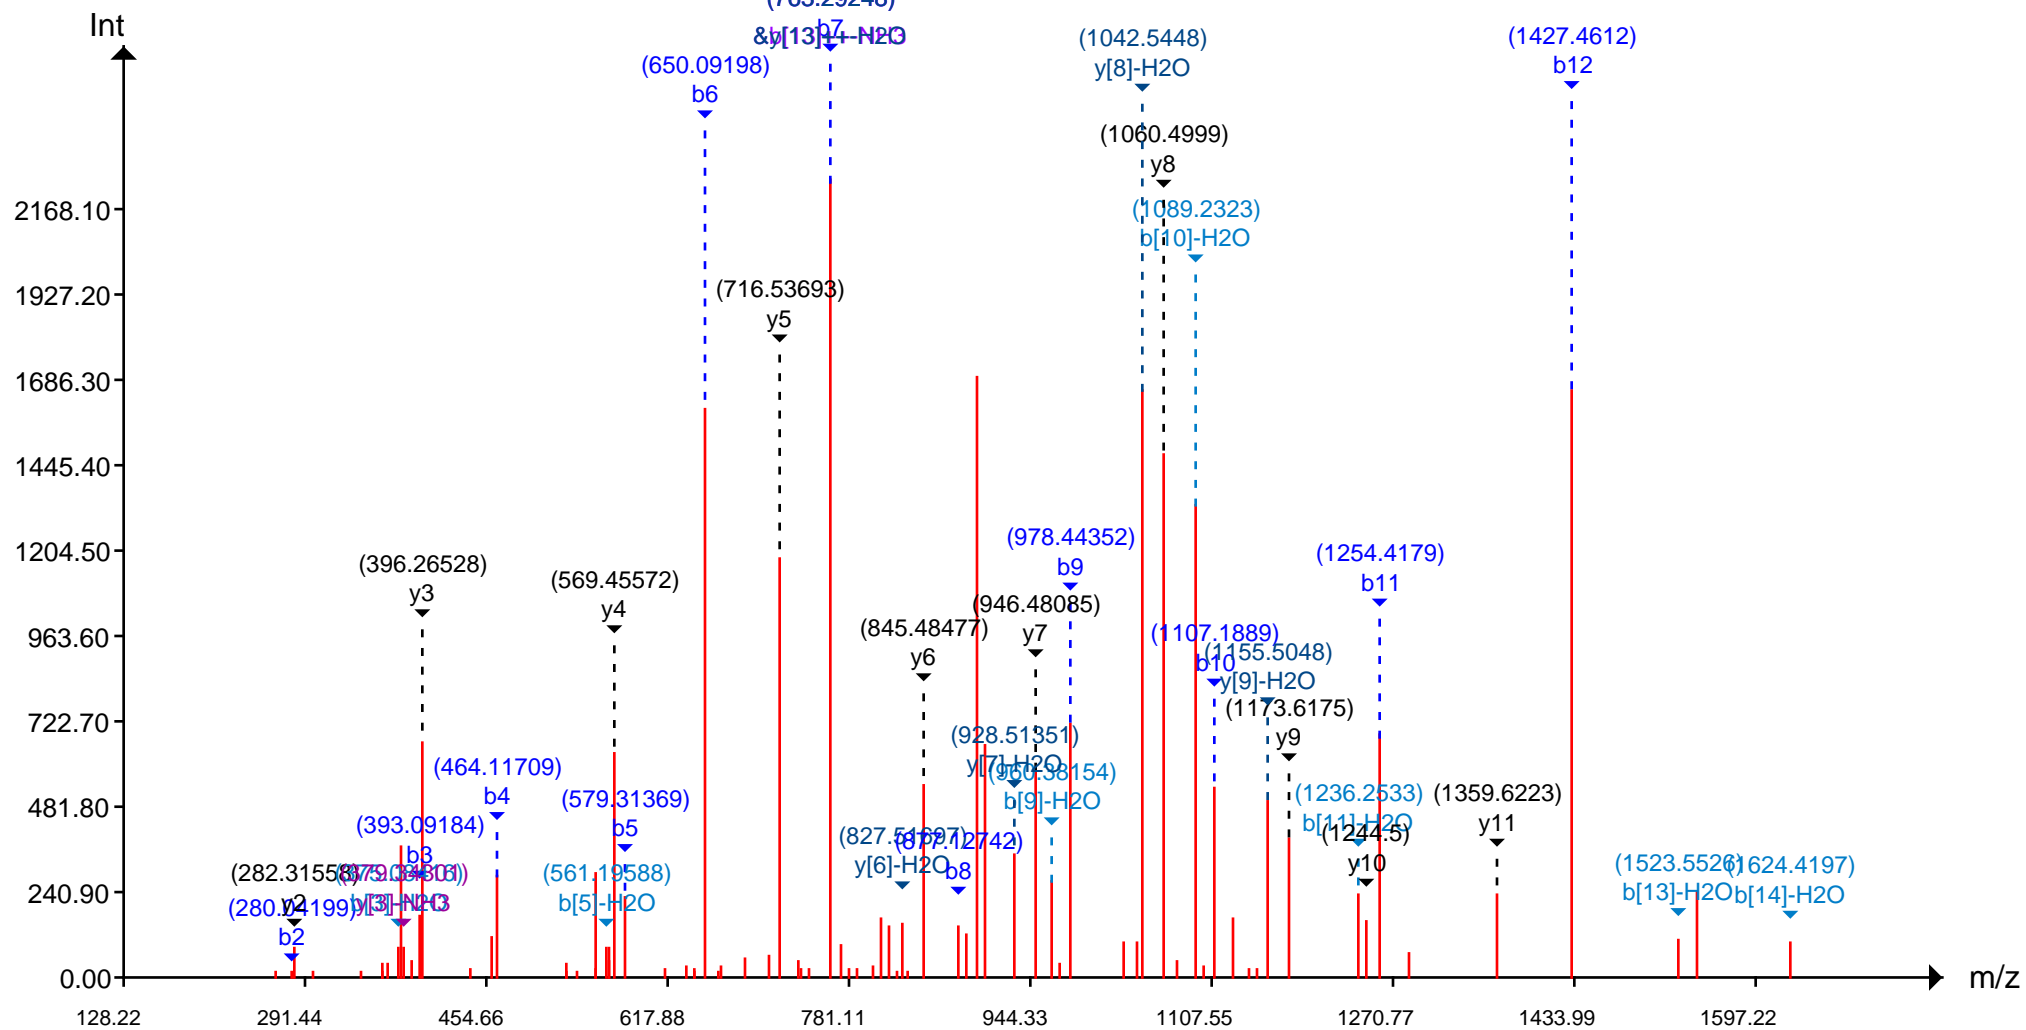

## Info

|                          |                                        |                           |         |
|--------------------------|----------------------------------------|---------------------------|---------|
| <b>Modified Sequence</b> | AcD3-FSLADAINTEFK<AcD3K*>NTR<C13>-COOH | <b>Ion score</b>          | 87.58   |
| <b>Protein</b>           | P08670                                 | <b>Confidence level</b>   | 99.00%  |
| <b>Precursor m/z</b>     | 911.98139                              | <b>Identity Threshold</b> | 49.13   |
| <b>Charge</b>            | 2+                                     | <b>Mass error</b>         | 7.18E-4 |

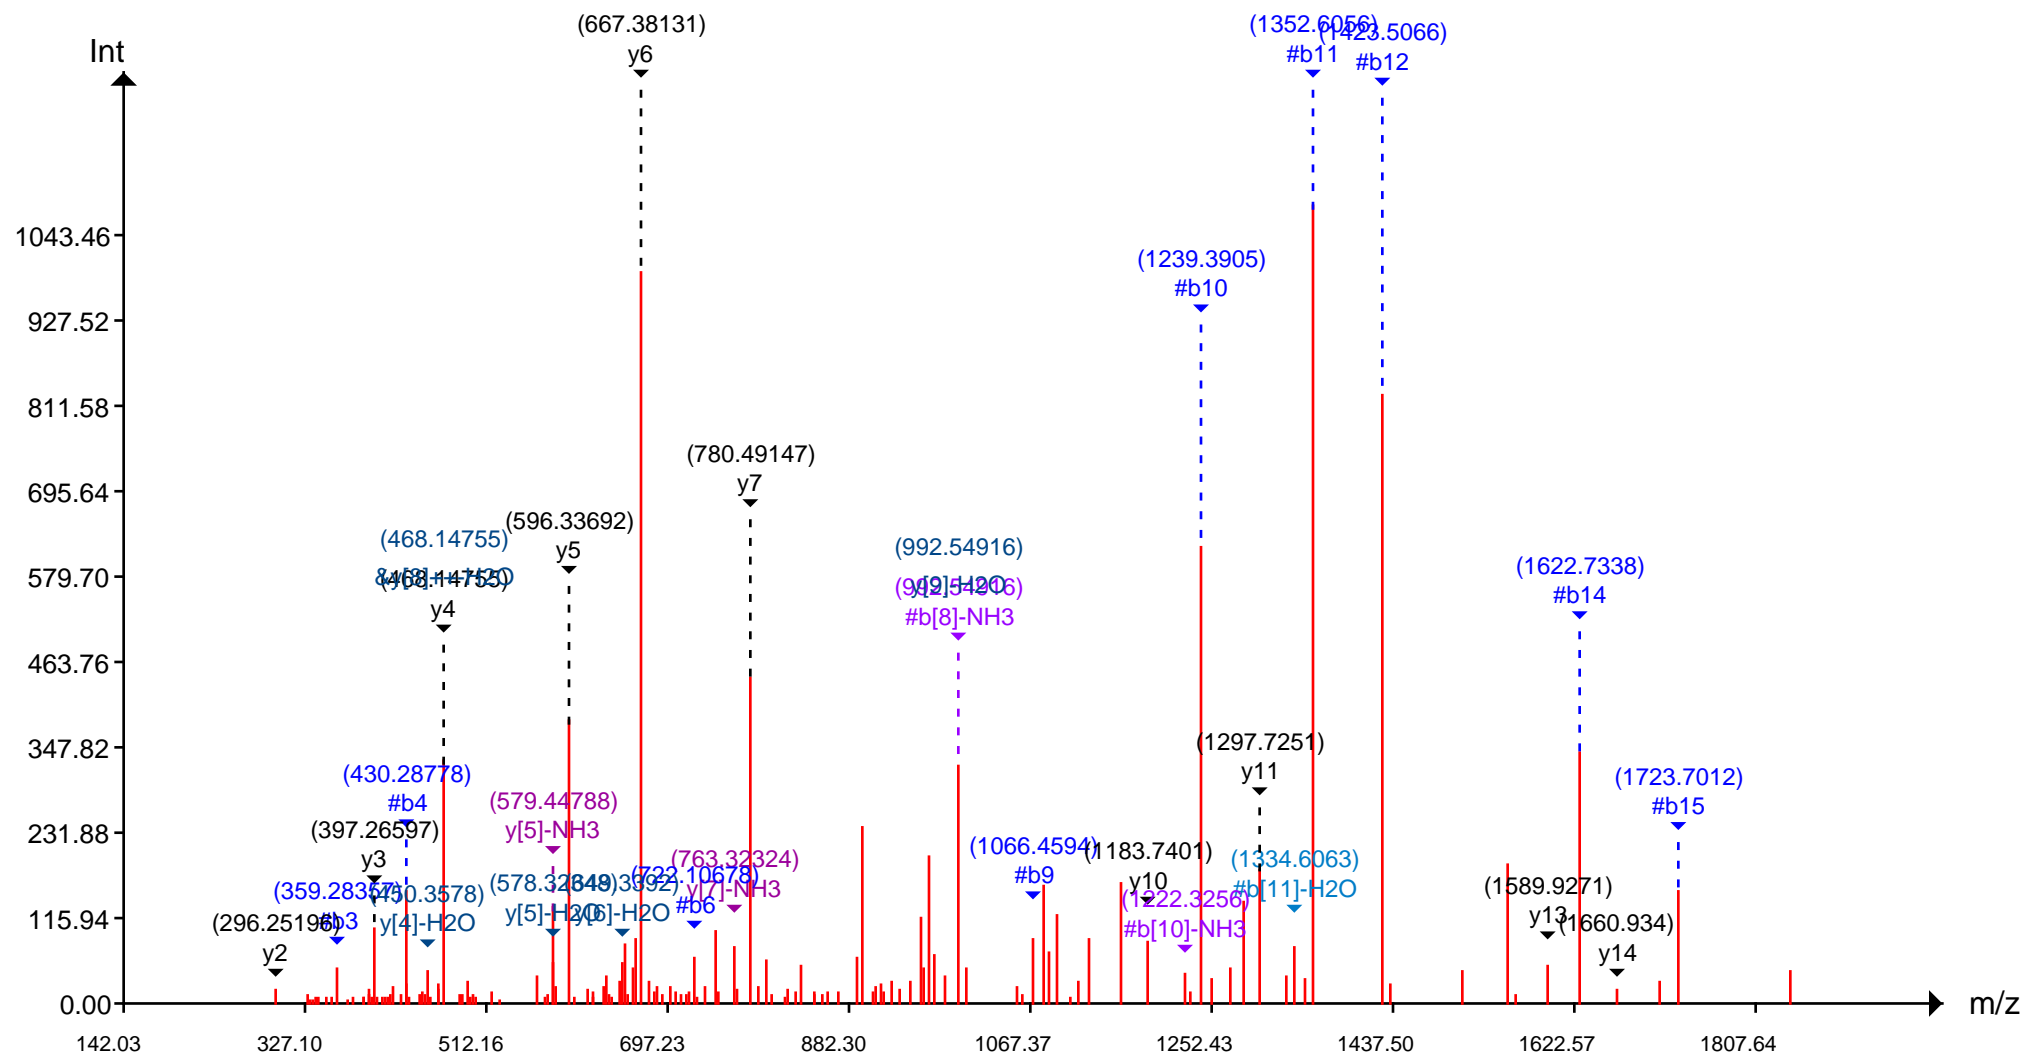

## Info

|                          |                                                  |                           |         |
|--------------------------|--------------------------------------------------|---------------------------|---------|
| <b>Modified Sequence</b> | AcD3-TVLAYENK<AcD3K*>GK<AcD3K*>IAQATDR<C13>-COOH | <b>Ion score</b>          | 56.05   |
| <b>Protein</b>           | Q8N806                                           | <b>Confidence level</b>   | 99.00%  |
| <b>Precursor m/z</b>     | 1010.0613                                        | <b>Identity Threshold</b> | 47.67   |
| <b>Charge</b>            | 2+                                               | <b>Mass error</b>         | -9.3E-4 |

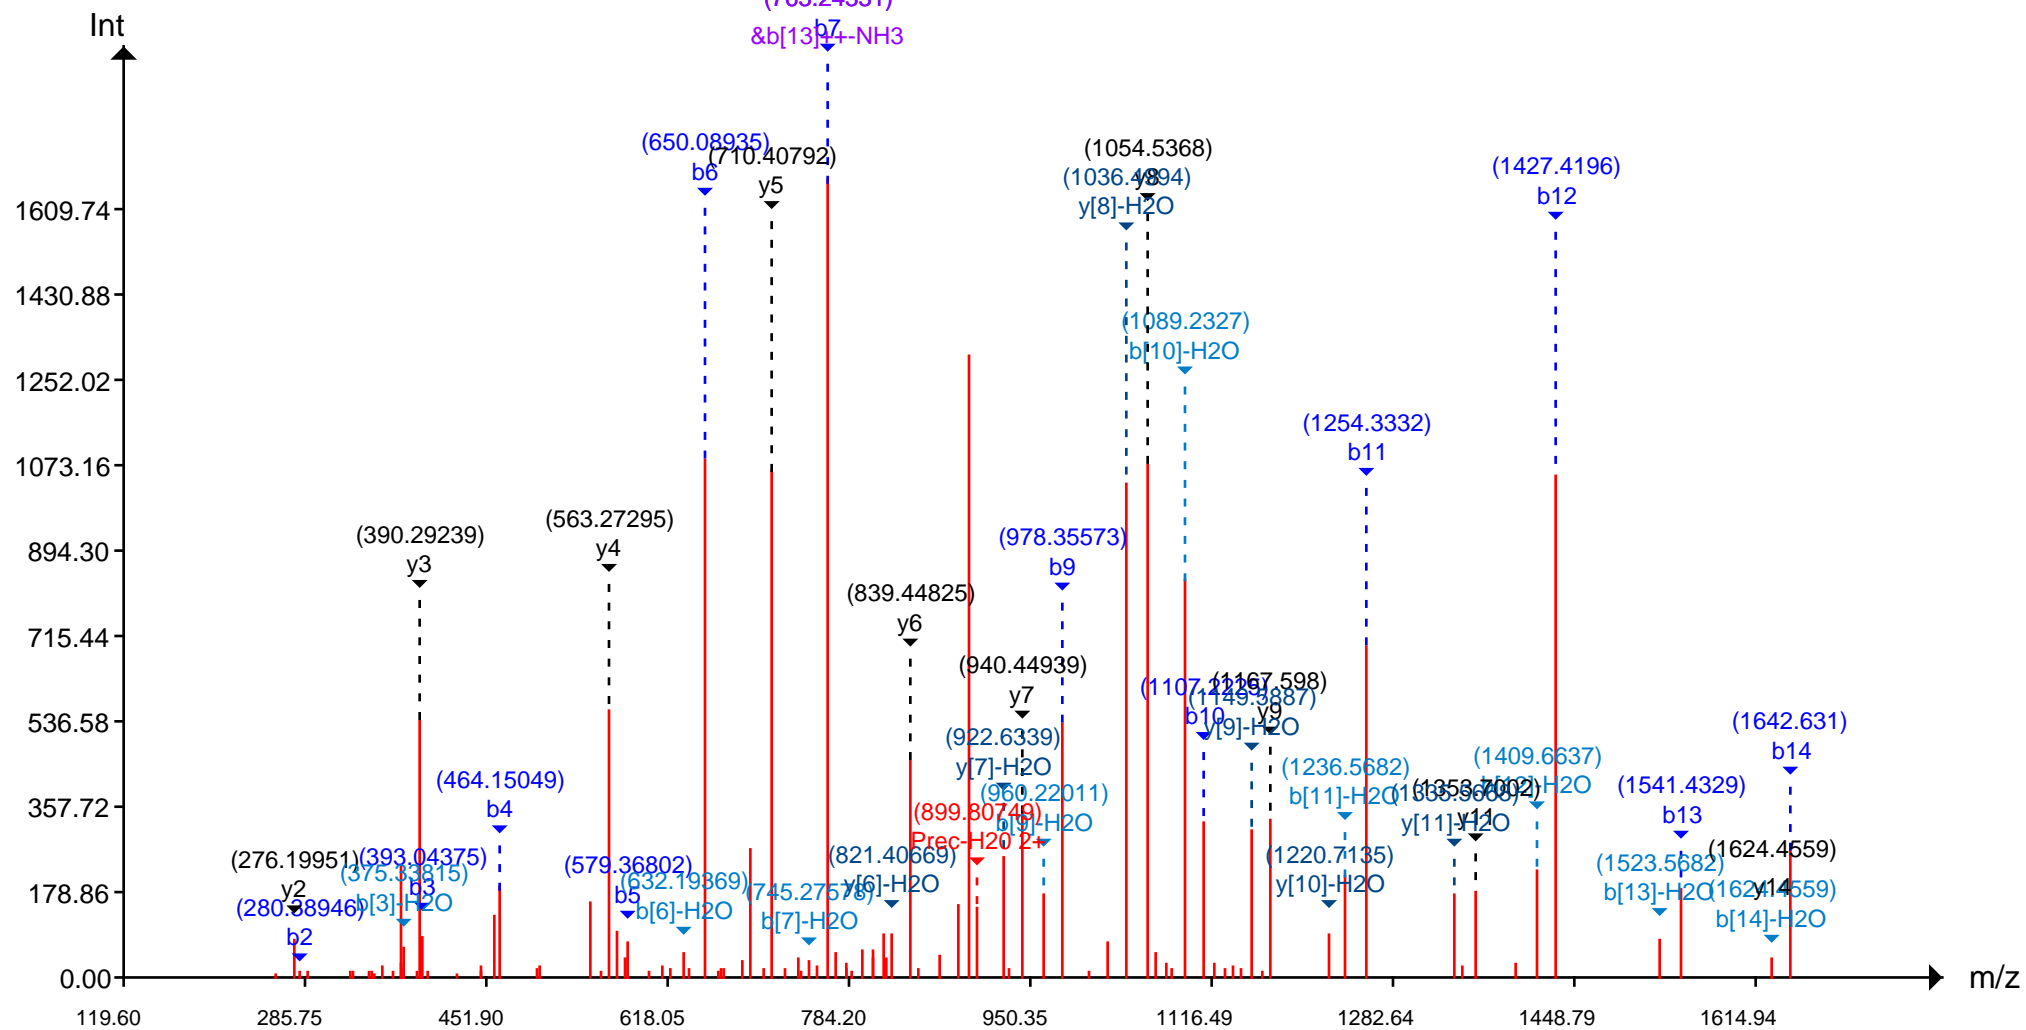



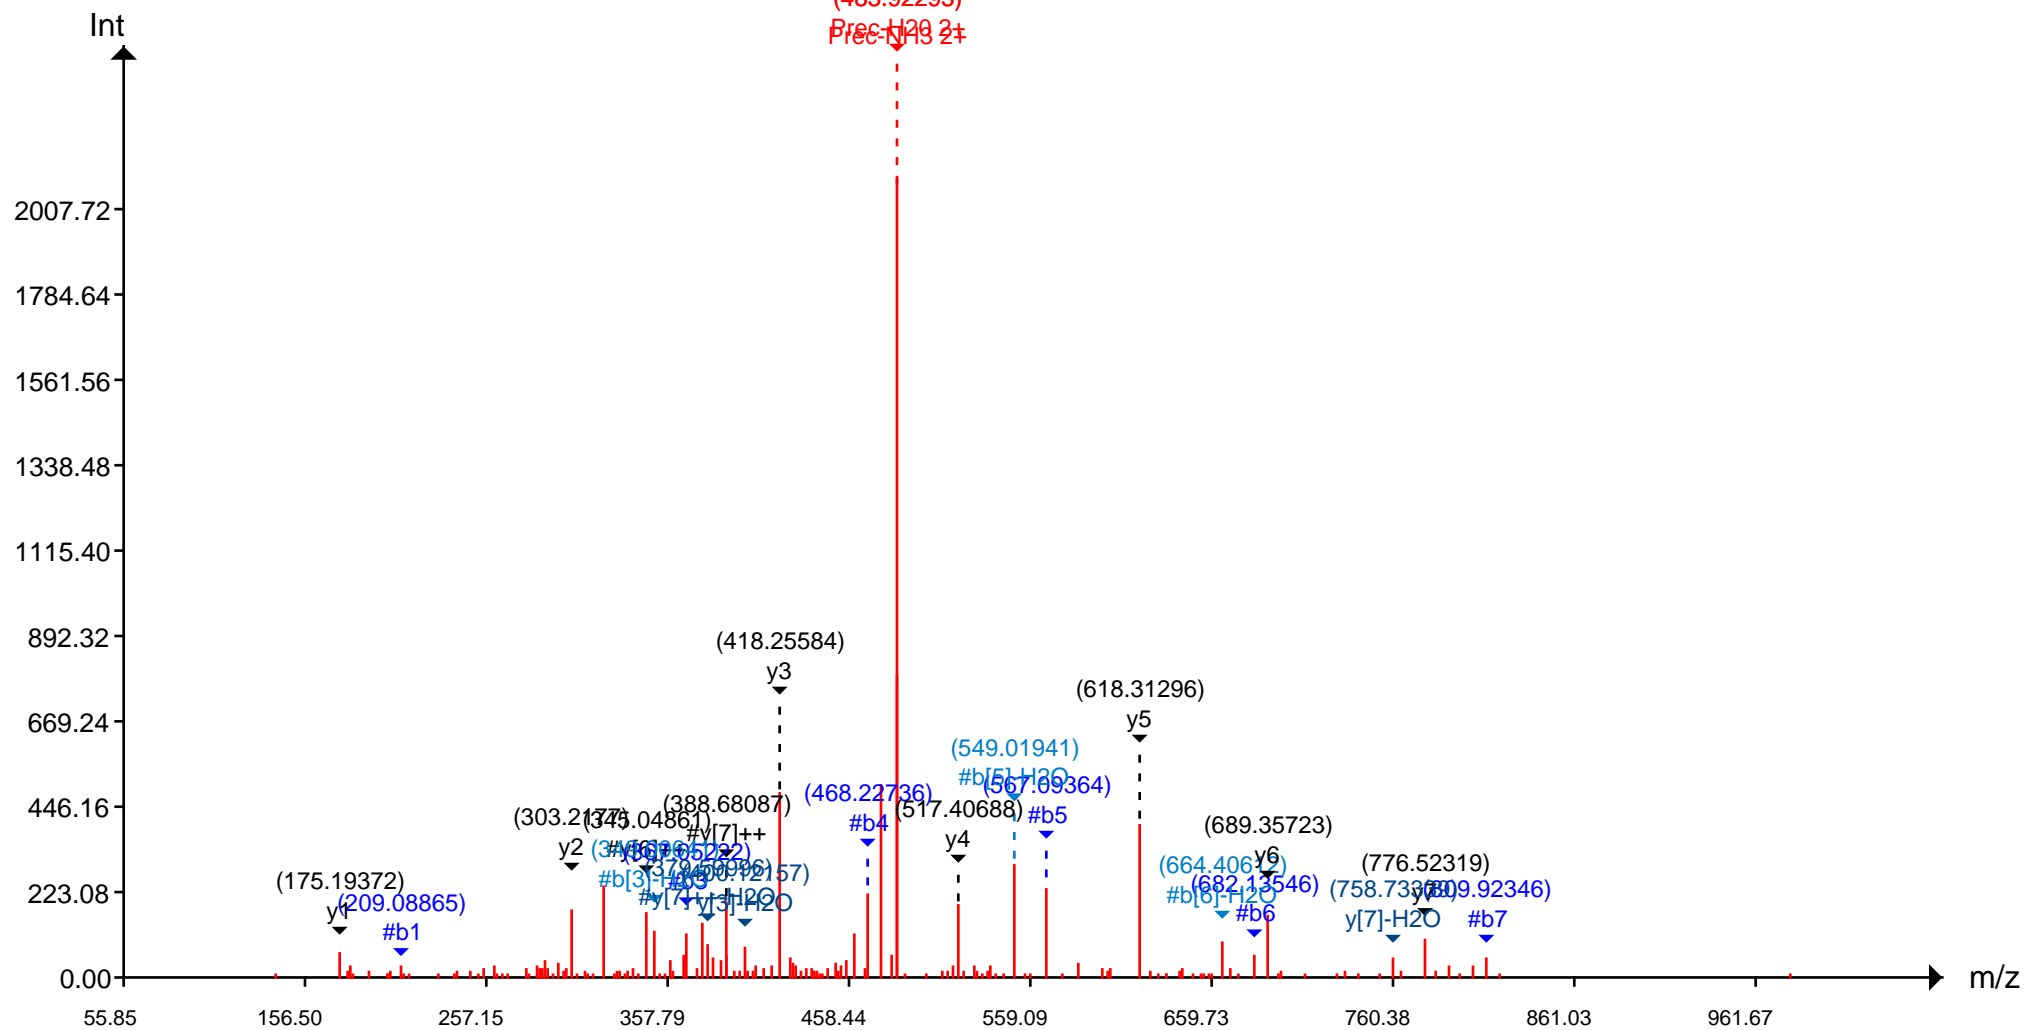

## Info

**Modified Sequence** AcD3-YSATVDQR-COOH

**Protein** O00232

**Precursor m/z** 492.74477

**Charge** 2+

**Ion score** 48.2

**Confidence level** 99.00%

**Identity Threshold** 47.91

**Mass error** -1.55E-4

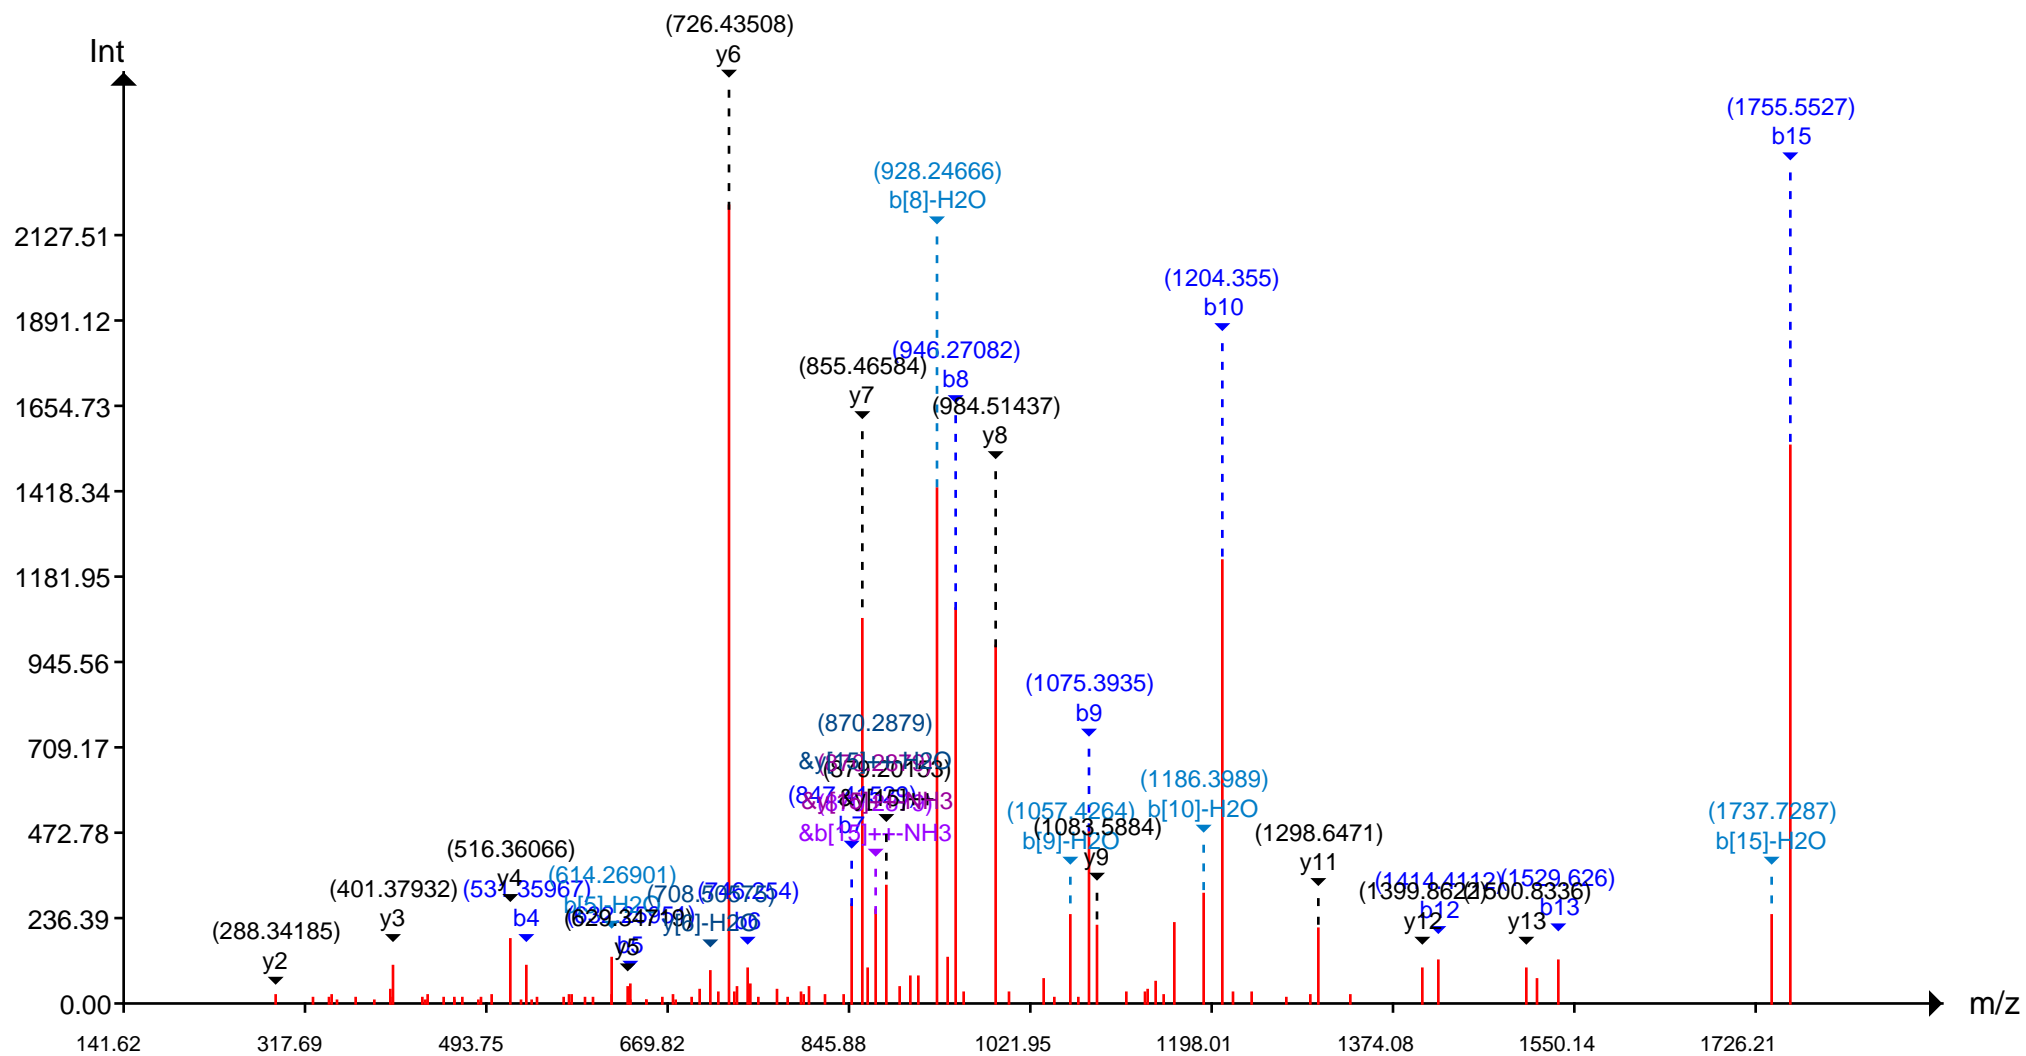

## Info

**Modified Sequence** AcD3-QQTTNTVEEPLDLIR-COOH

**Ion score** 86.48

**Protein** P62310

**Confidence level** 99.00%

**Precursor m/z** 965.50197

**Identity Threshold** 49.02

**Charge** 2+

**Mass error** 0.001137

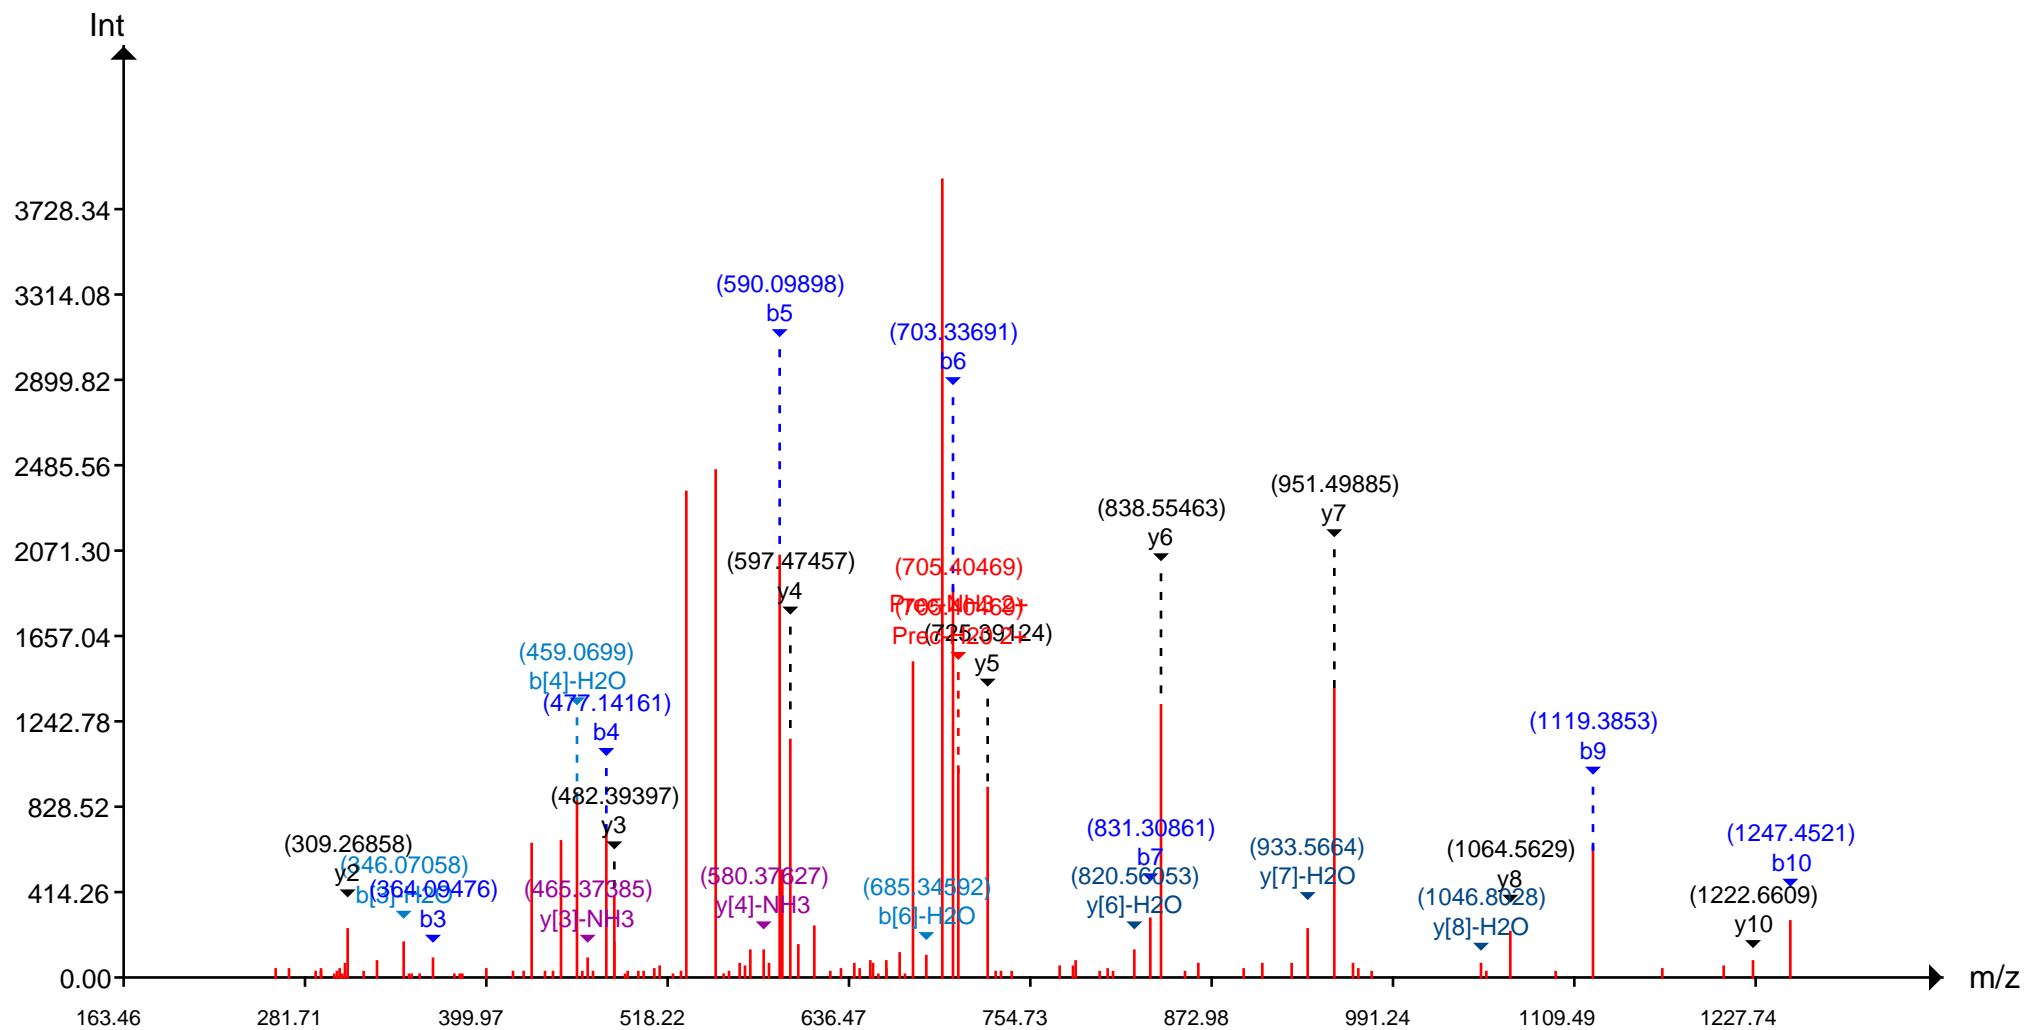

## Info

|                          |                                          |                           |         |
|--------------------------|------------------------------------------|---------------------------|---------|
| <b>Modified Sequence</b> | AcD3-C<Cmm*>GTILLQDK<AcD3K*>QR<C13>-COOH | <b>Ion score</b>          | 48.37   |
| <b>Protein</b>           | O60232                                   | <b>Confidence level</b>   | 99.00%  |
| <b>Precursor m/z</b>     | 714.39816                                | <b>Identity Threshold</b> | 48.25   |
| <b>Charge</b>            | 2+                                       | <b>Mass error</b>         | 1.21E-4 |



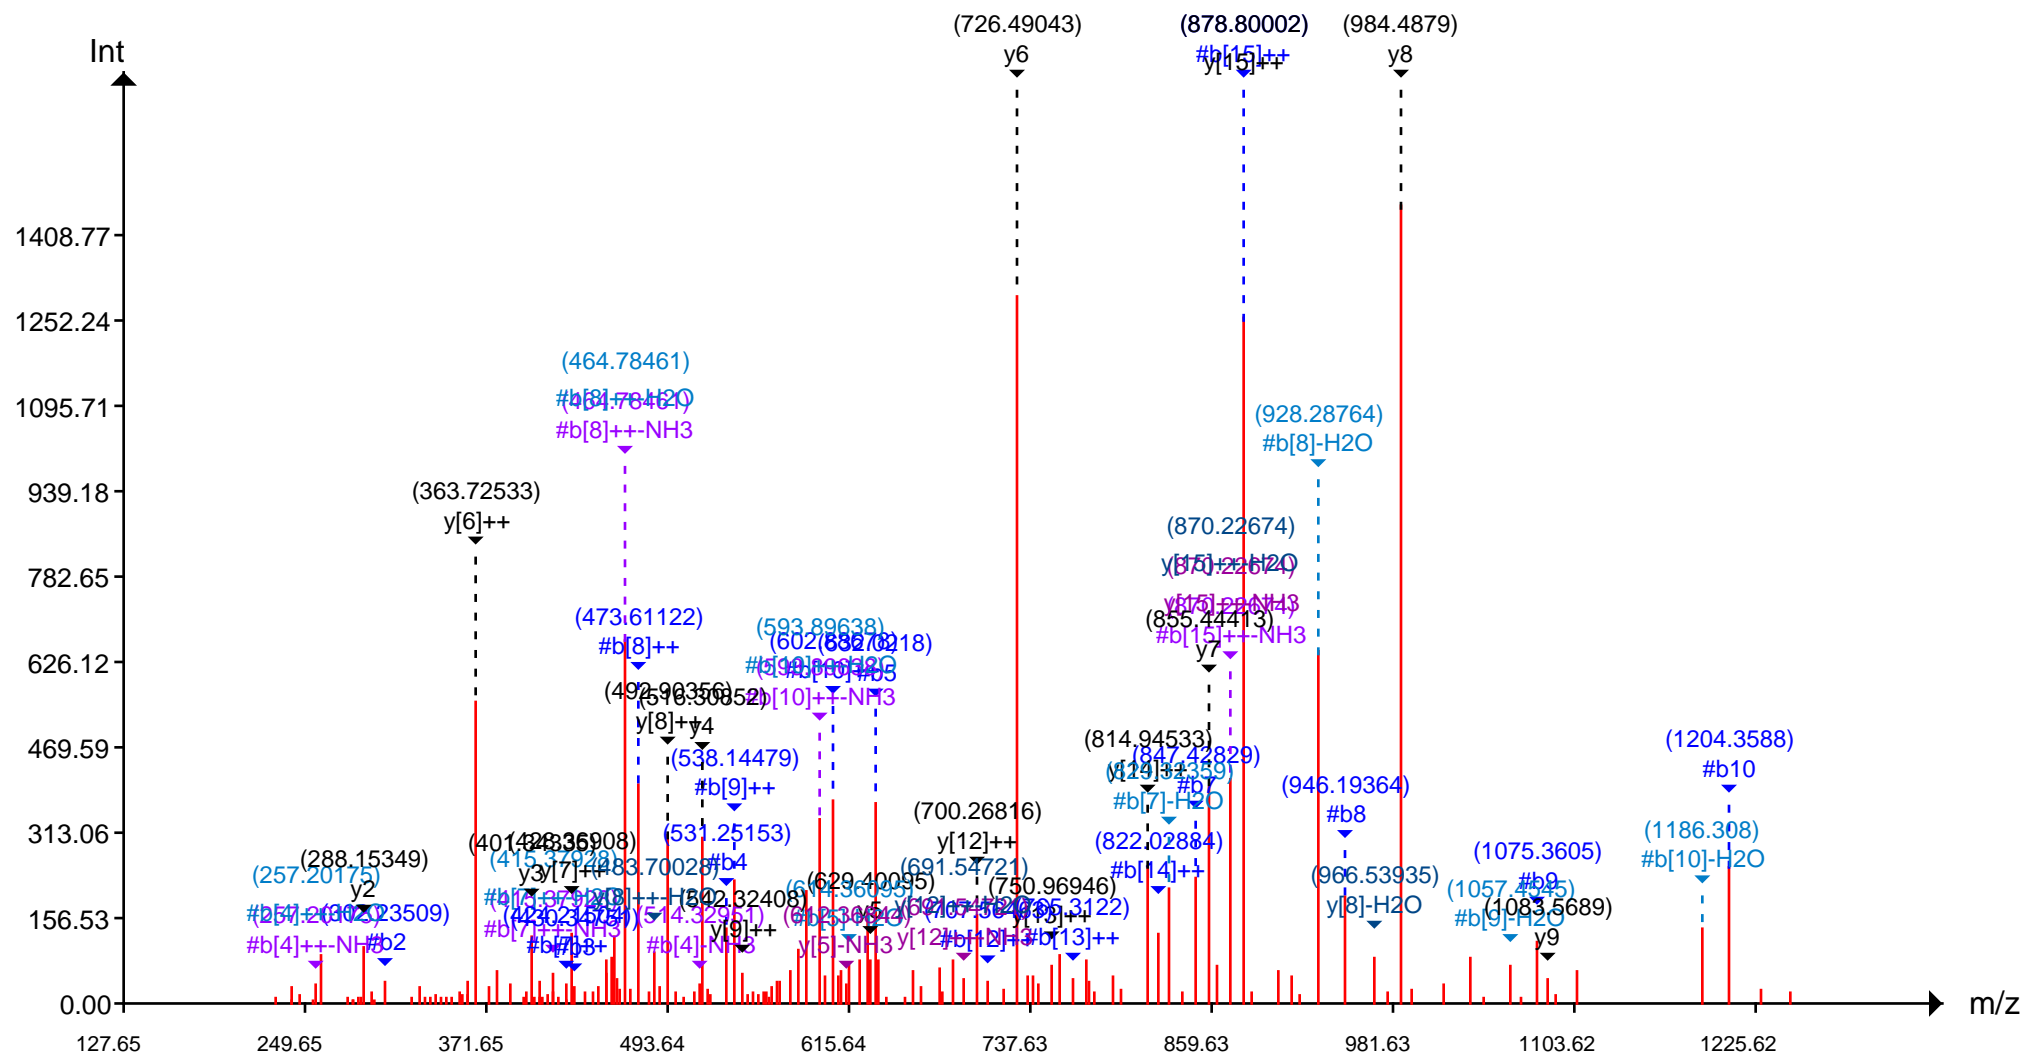

## Info

|                          |                           |                           |        |
|--------------------------|---------------------------|---------------------------|--------|
| <b>Modified Sequence</b> | AcD3-QQTTNTVEEPLDLIR-COOH | <b>Ion score</b>          | 56.87  |
| <b>Protein</b>           | P62310                    | <b>Confidence level</b>   | 99.00% |
| <b>Precursor m/z</b>     | 644.00337                 | <b>Identity Threshold</b> | 49.00  |
| <b>Charge</b>            | 3+                        | <b>Mass error</b>         | 3.1E-5 |

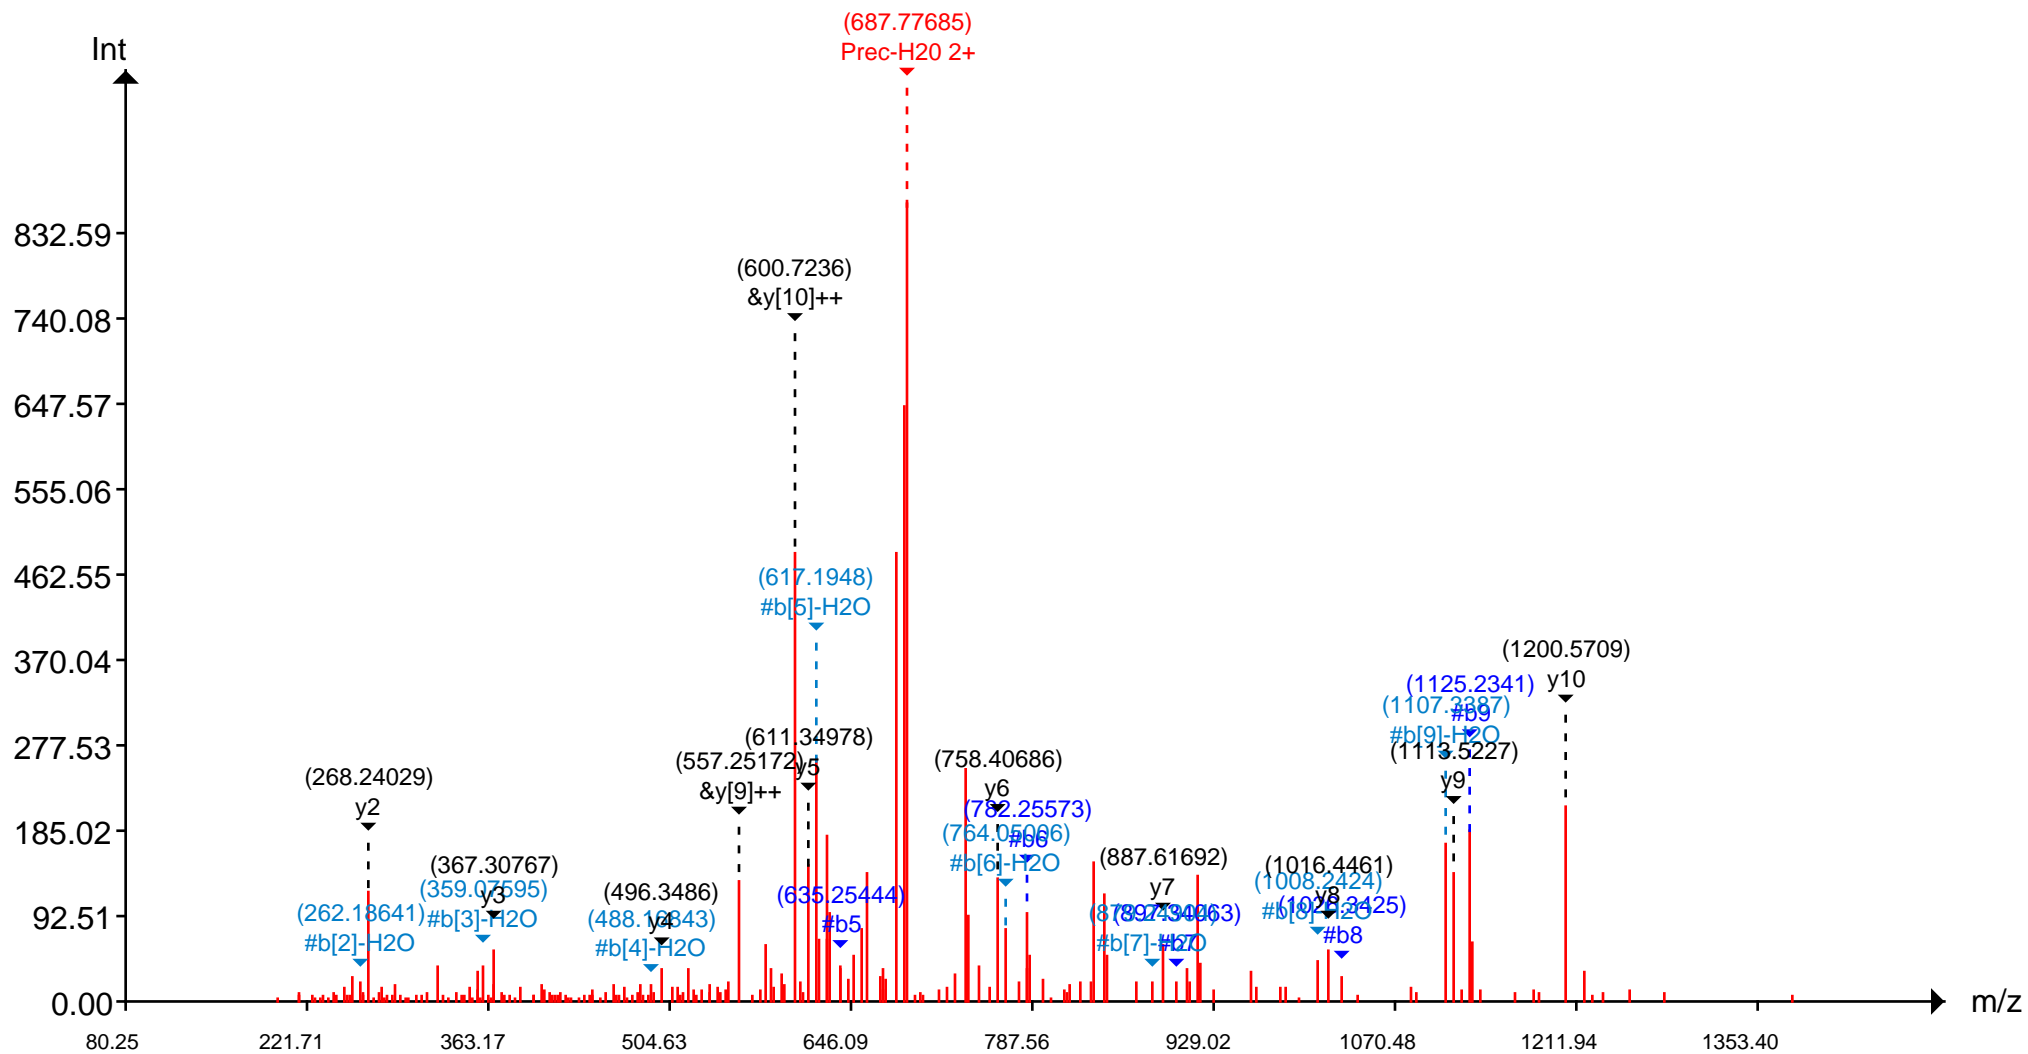

## Info

|                          |                                  |                           |         |
|--------------------------|----------------------------------|---------------------------|---------|
| <b>Modified Sequence</b> | AcD3-M<Mox*>SPEEFDEVSR<C13>-COOH | <b>Ion score</b>          | 44.96   |
| <b>Protein</b>           | P42224                           | <b>Confidence level</b>   | 99.00%  |
| <b>Precursor m/z</b>     | 696.81012                        | <b>Identity Threshold</b> | 44.45   |
| <b>Charge</b>            | 2+                               | <b>Mass error</b>         | 7.23E-4 |

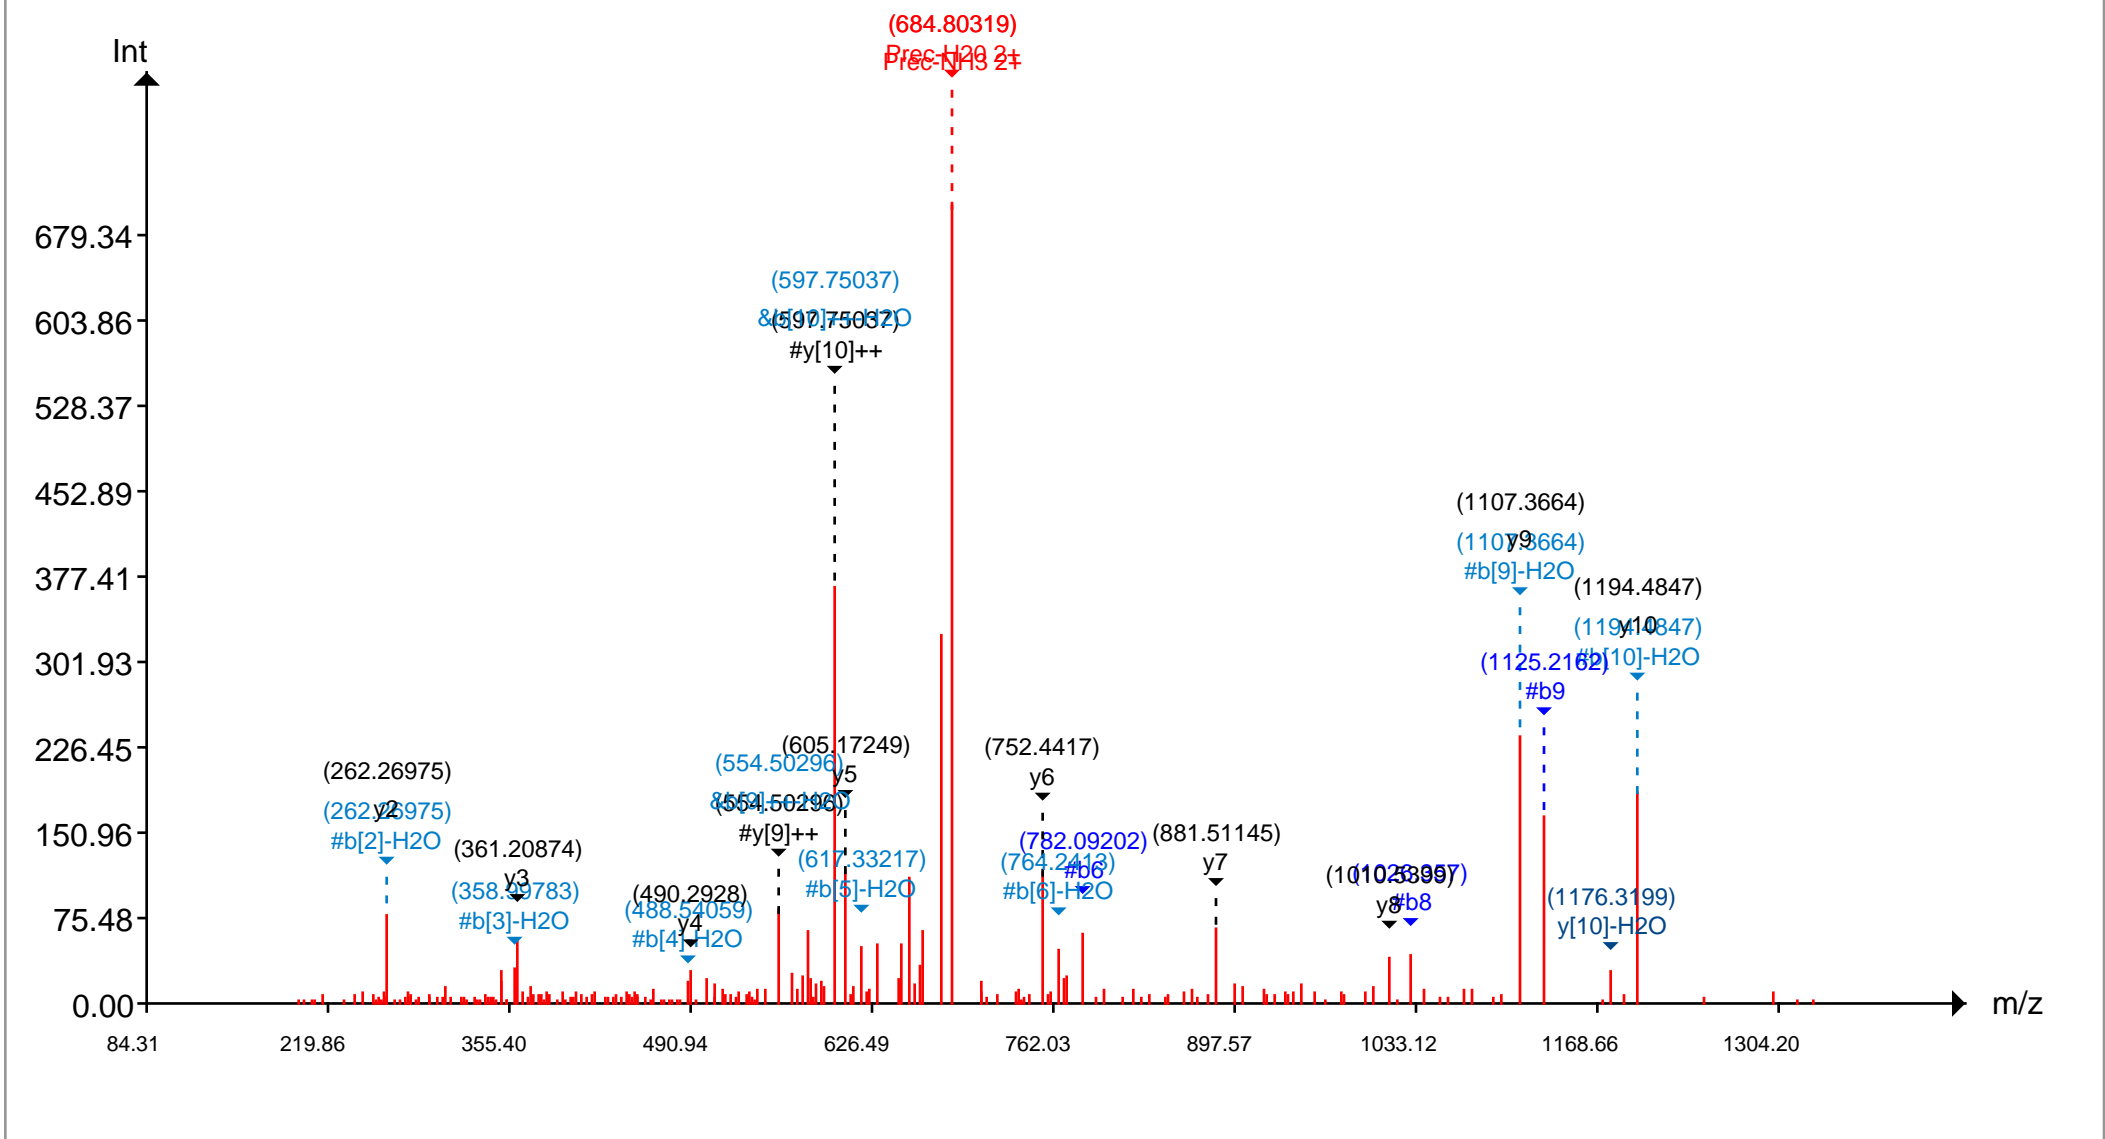

## Info

**Modified Sequence** AcD3-M<Mox\*>SPEEFDEVSR-COOH

**Ion score** 54.75

**Protein** P42224

**Confidence level** 99.00%

**Precursor m/z** 693.79997

**Identity Threshold** 42.73

**Charge** 2+

**Mass error** 5.64E-4

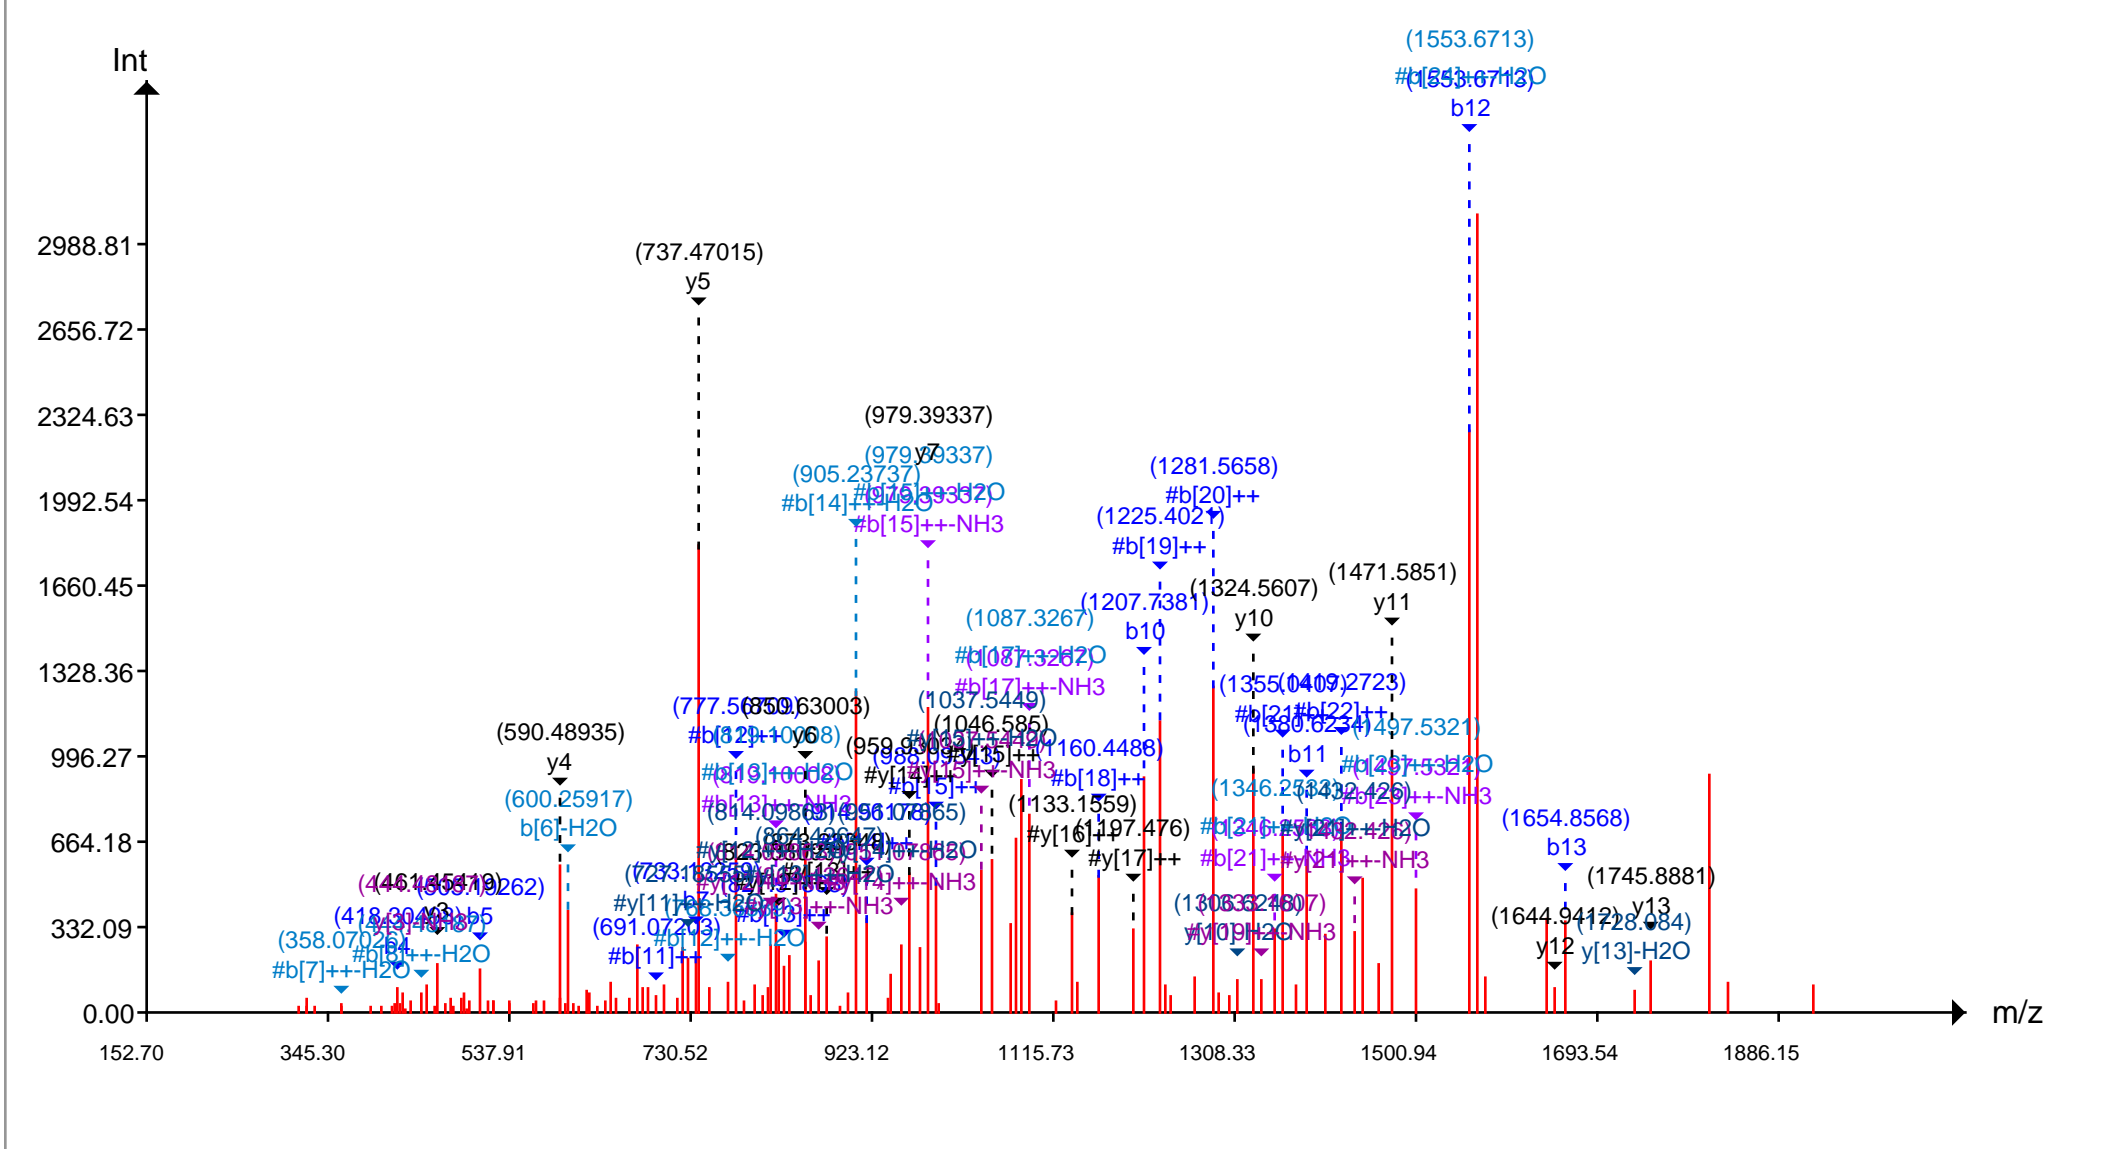

| Info                                                                                                    | Ion score | Confidence |
|---------------------------------------------------------------------------------------------------------|-----------|------------|
| AcD3-GAAK<AcD3K*>SLDK<AcD3K*>QK<AcD3K*>K<AcD3K*>K<AcD3K*>TK<AcD3K*>M<Mox*>TDEEIM<Mox*>EK<AcD3K*>LR-COOH | 1100.2738 | High       |
| Q13177                                                                                                  |           | Identified |
| 3+                                                                                                      |           | Mass error |

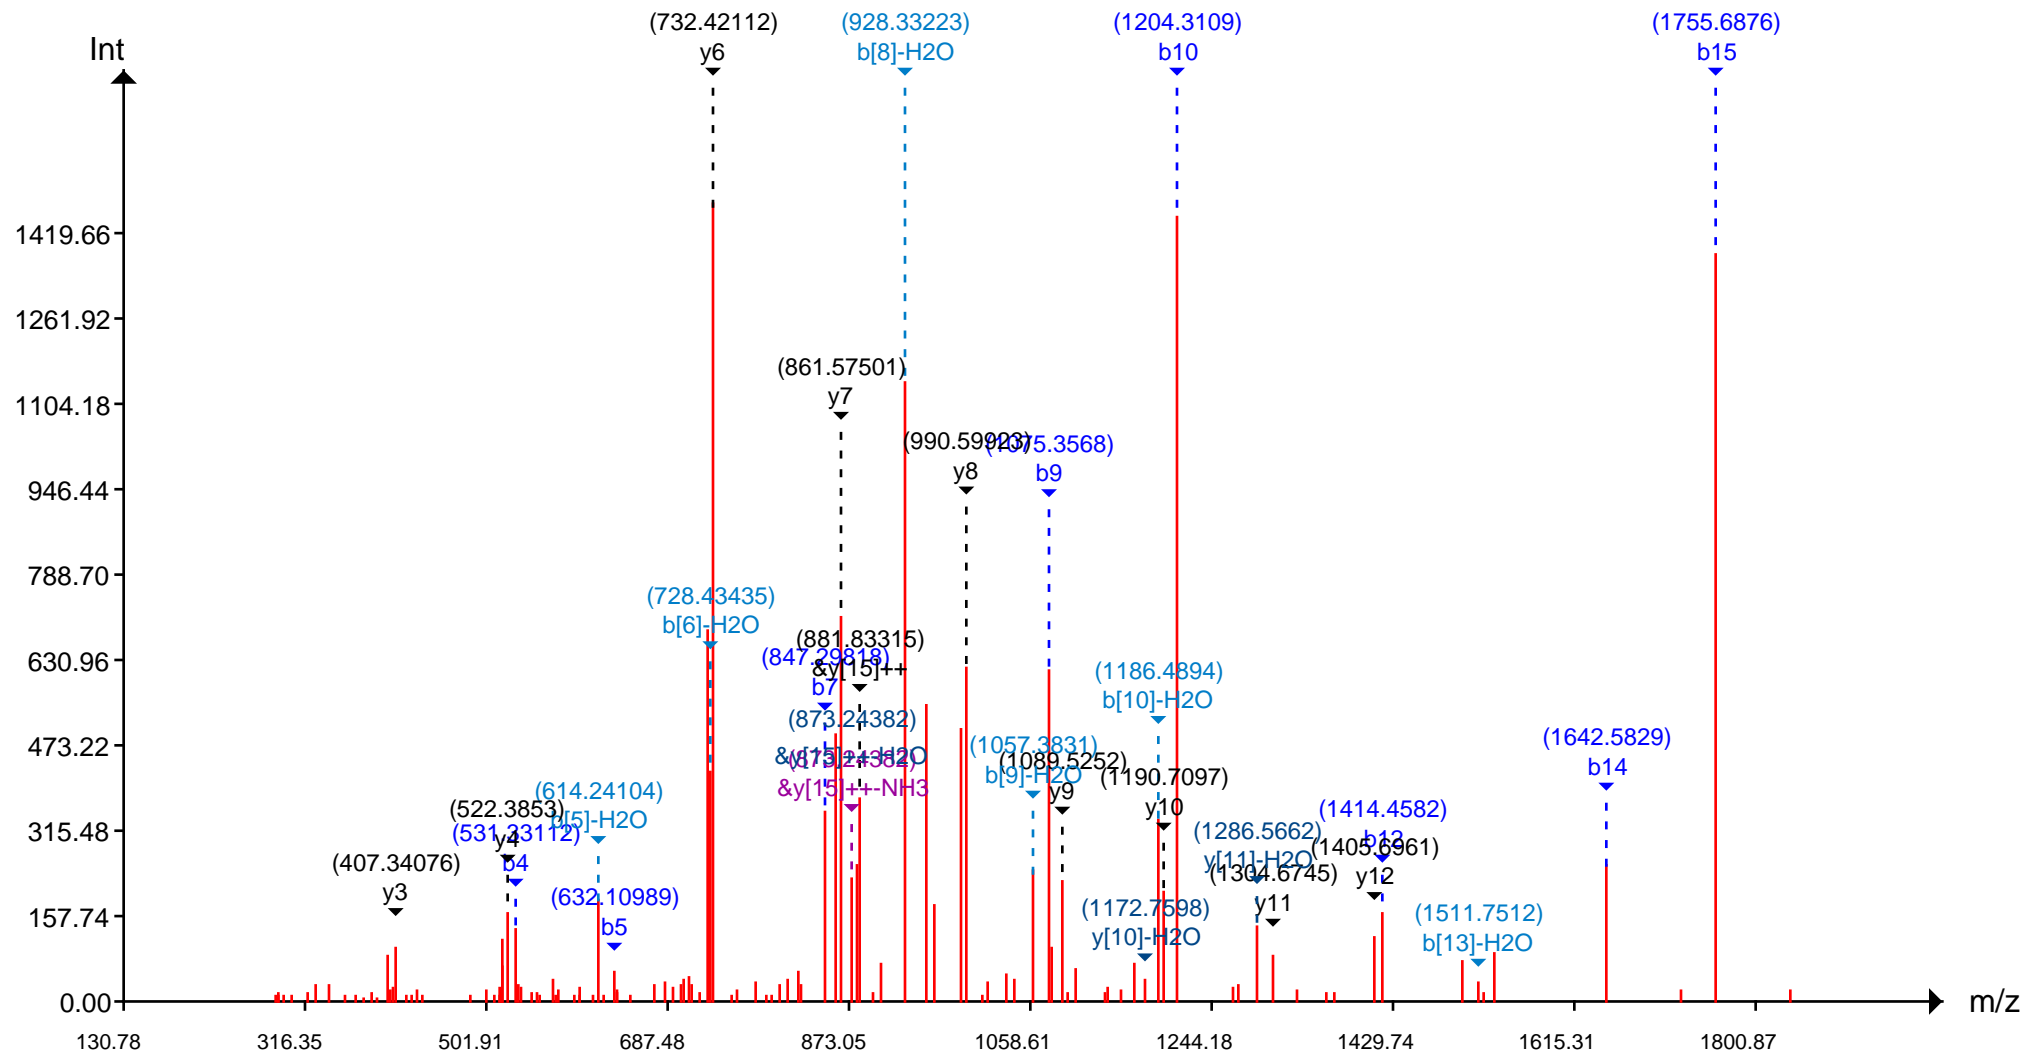

## Info

**Modified Sequence** AcD3-QQTTNTVEEPLDLIR<C13>-COOH

**Ion score** 57.09

**Protein** P62310

**Confidence level** 99.00%

**Precursor m/z** 968.51201

**Identity Threshold** 48.98

**Charge** 2+

**Mass error** 0.001076

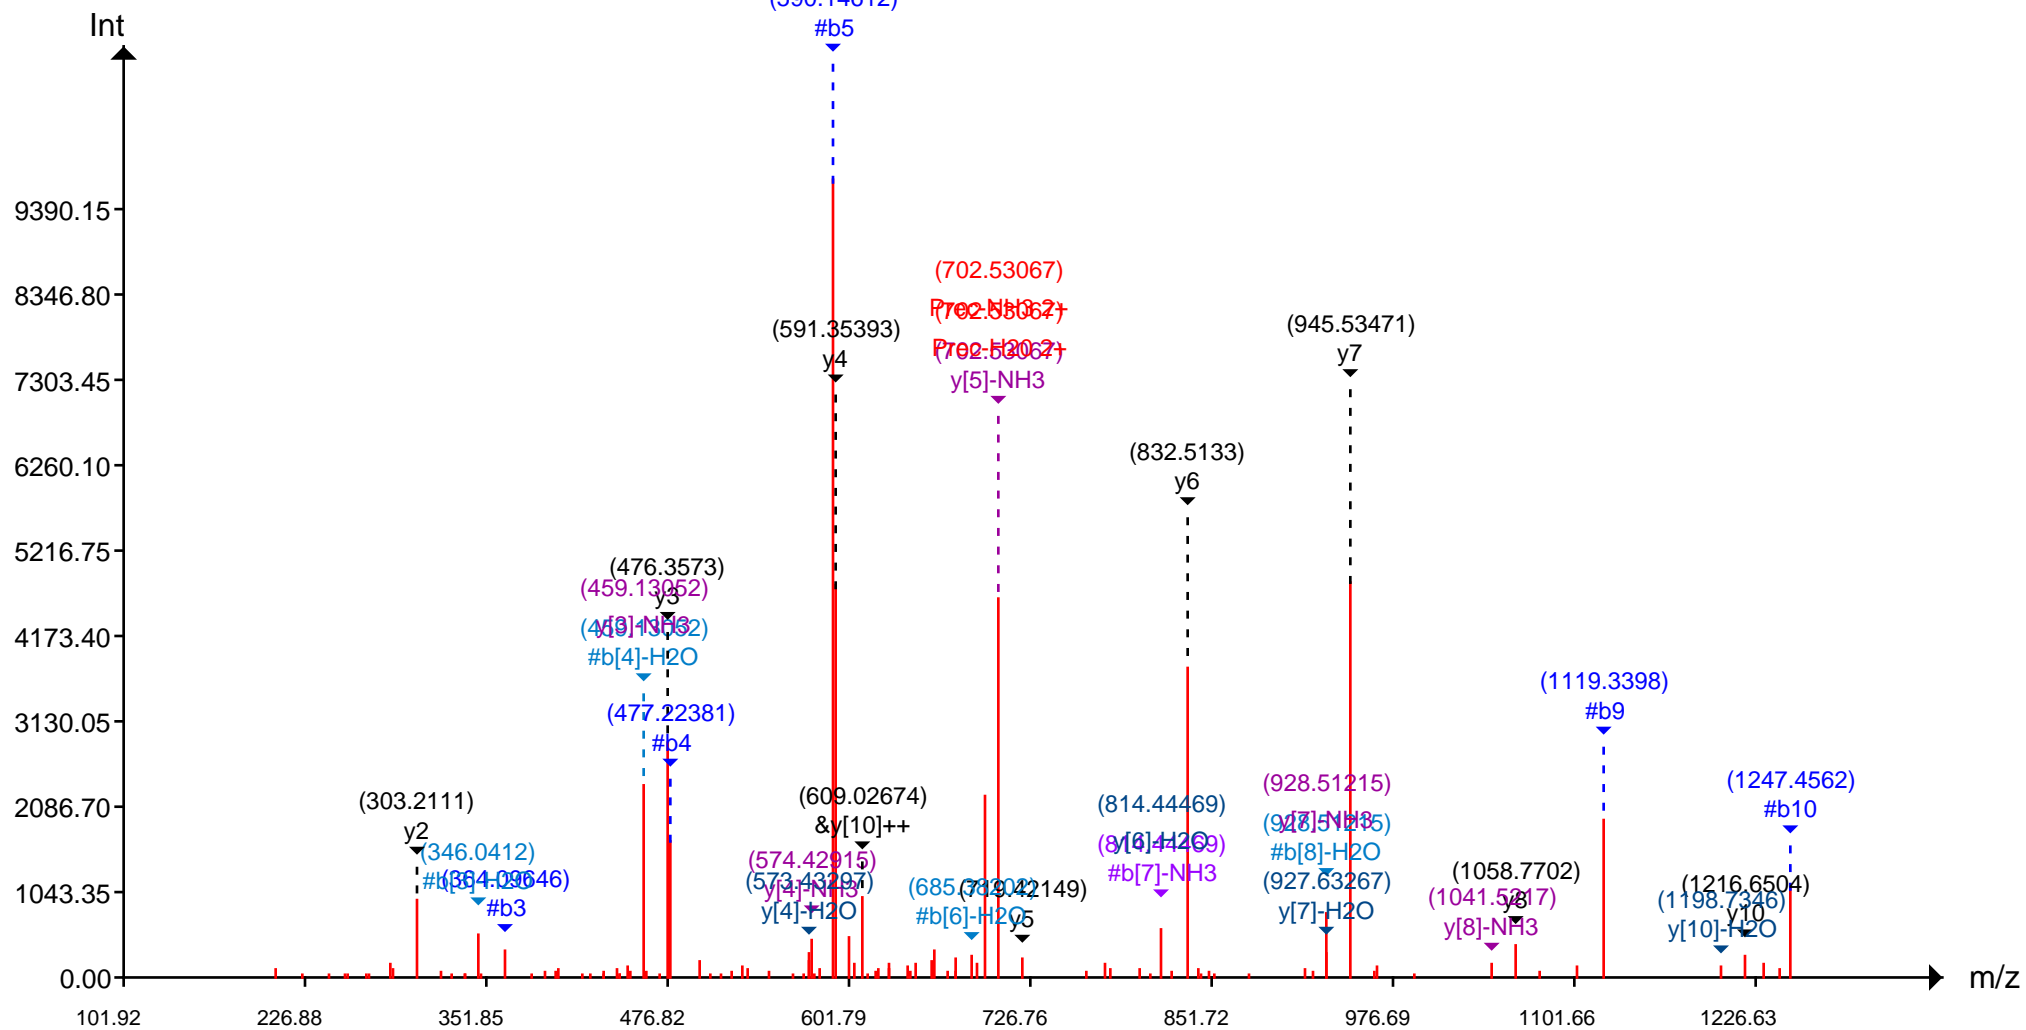

## Info

|                          |                                     |                           |        |
|--------------------------|-------------------------------------|---------------------------|--------|
| <b>Modified Sequence</b> | AcD3-C<Cmm*>GTILLQDK<AcD3K*>QR-COOH | <b>Ion score</b>          | 78.02  |
| <b>Protein</b>           | O60232                              | <b>Confidence level</b>   | 99.00% |
| <b>Precursor m/z</b>     | 711.38805                           | <b>Identity Threshold</b> | 48.85  |
| <b>Charge</b>            | 2+                                  | <b>Mass error</b>         | 4.3E-5 |

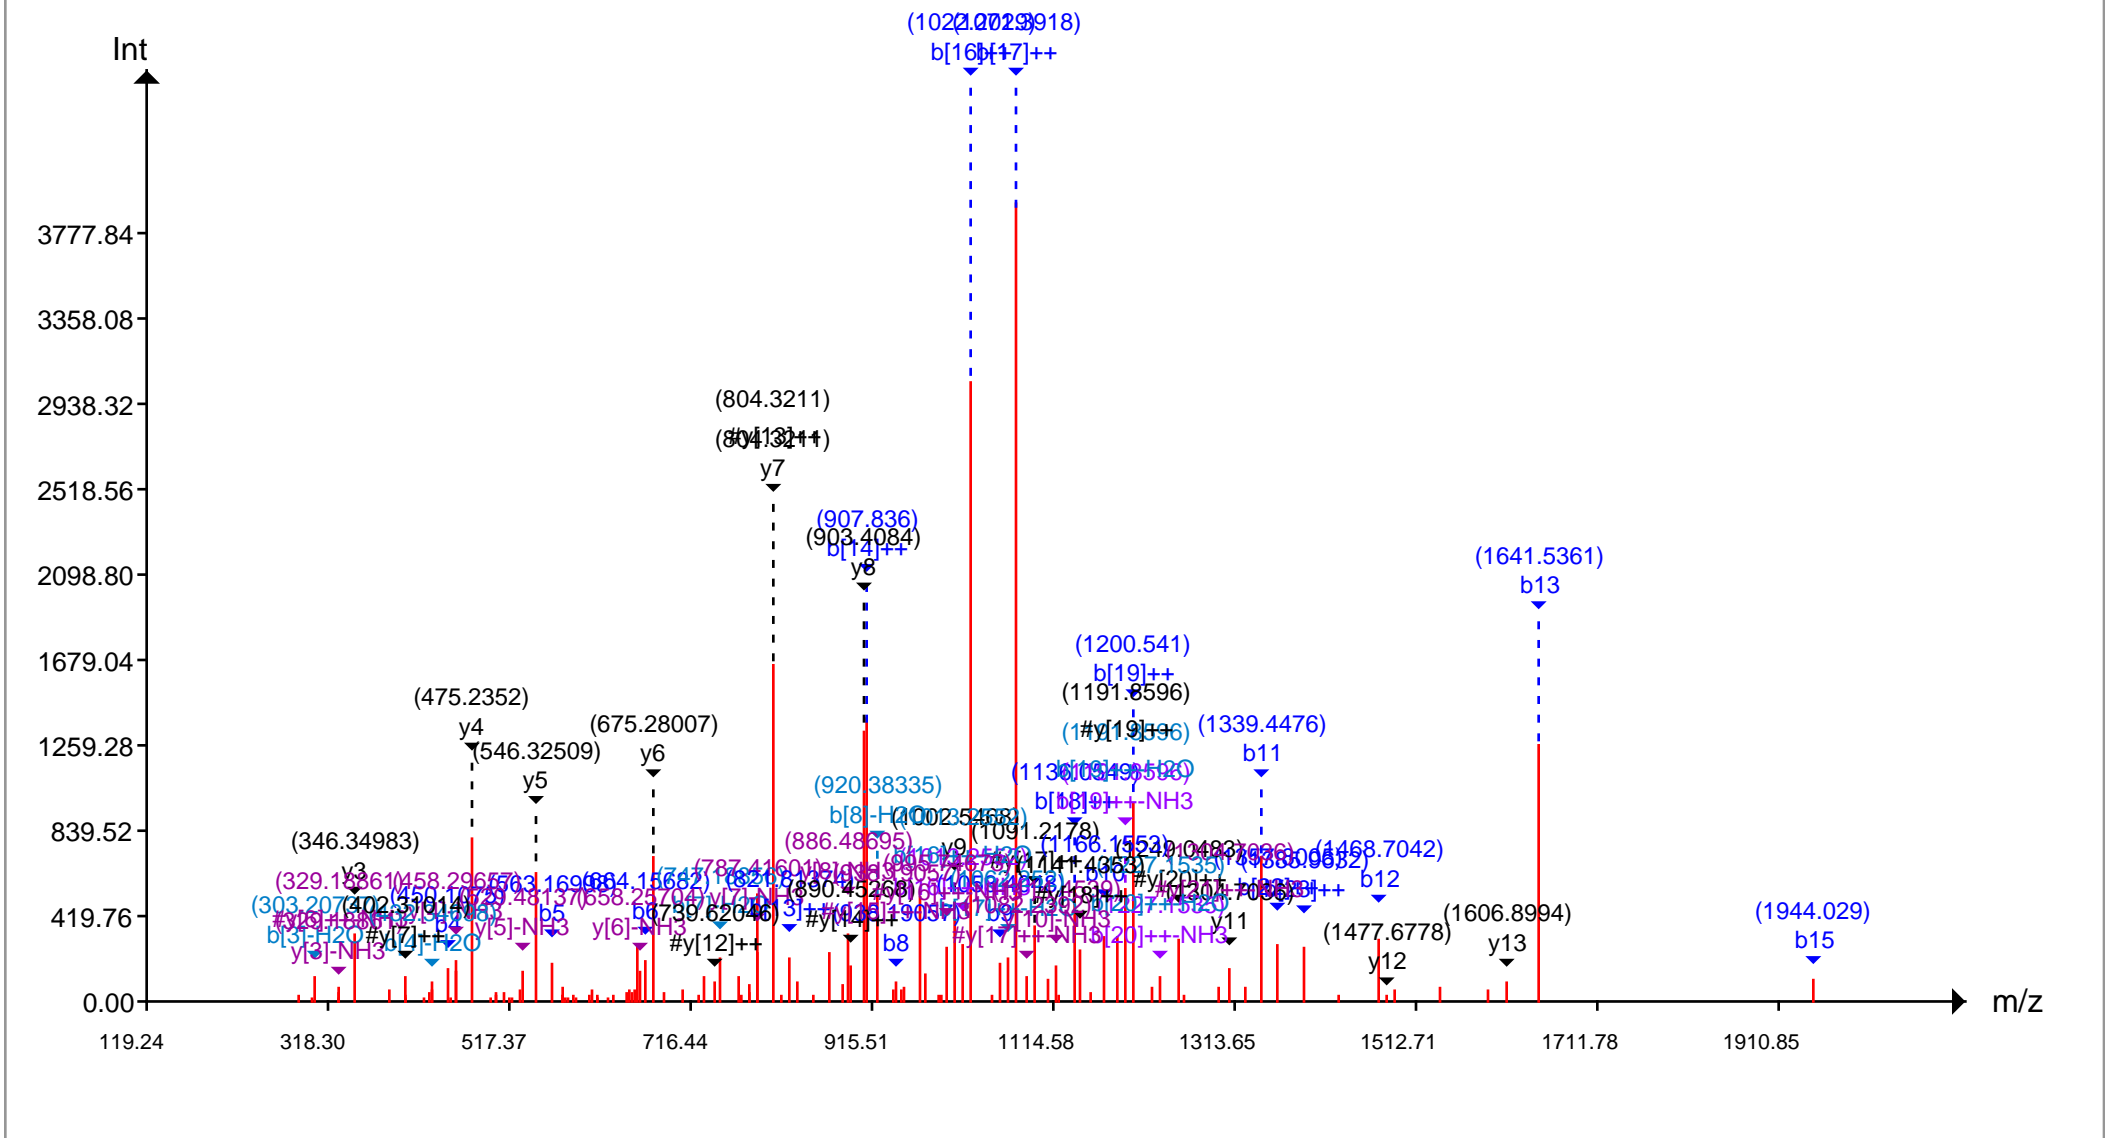

## Info

|                          |                                                                    |                           |          |
|--------------------------|--------------------------------------------------------------------|---------------------------|----------|
| <b>Modified Sequence</b> | AcD3-TSSEITTK<AcD3K*>DLK<AcD3K*>EK<AcD3K*>K<AcD3K*>EVVEEAENGR-COOH | <b>Ion score</b>          | 86.64    |
| <b>Protein</b>           | P06454                                                             | <b>Confidence level</b>   | 99.00%   |
| <b>Precursor m/z</b>     | 982.85492                                                          | <b>Identity Threshold</b> | 48.24    |
| <b>Charge</b>            | 3+                                                                 | <b>Mass error</b>         | 1.008401 |

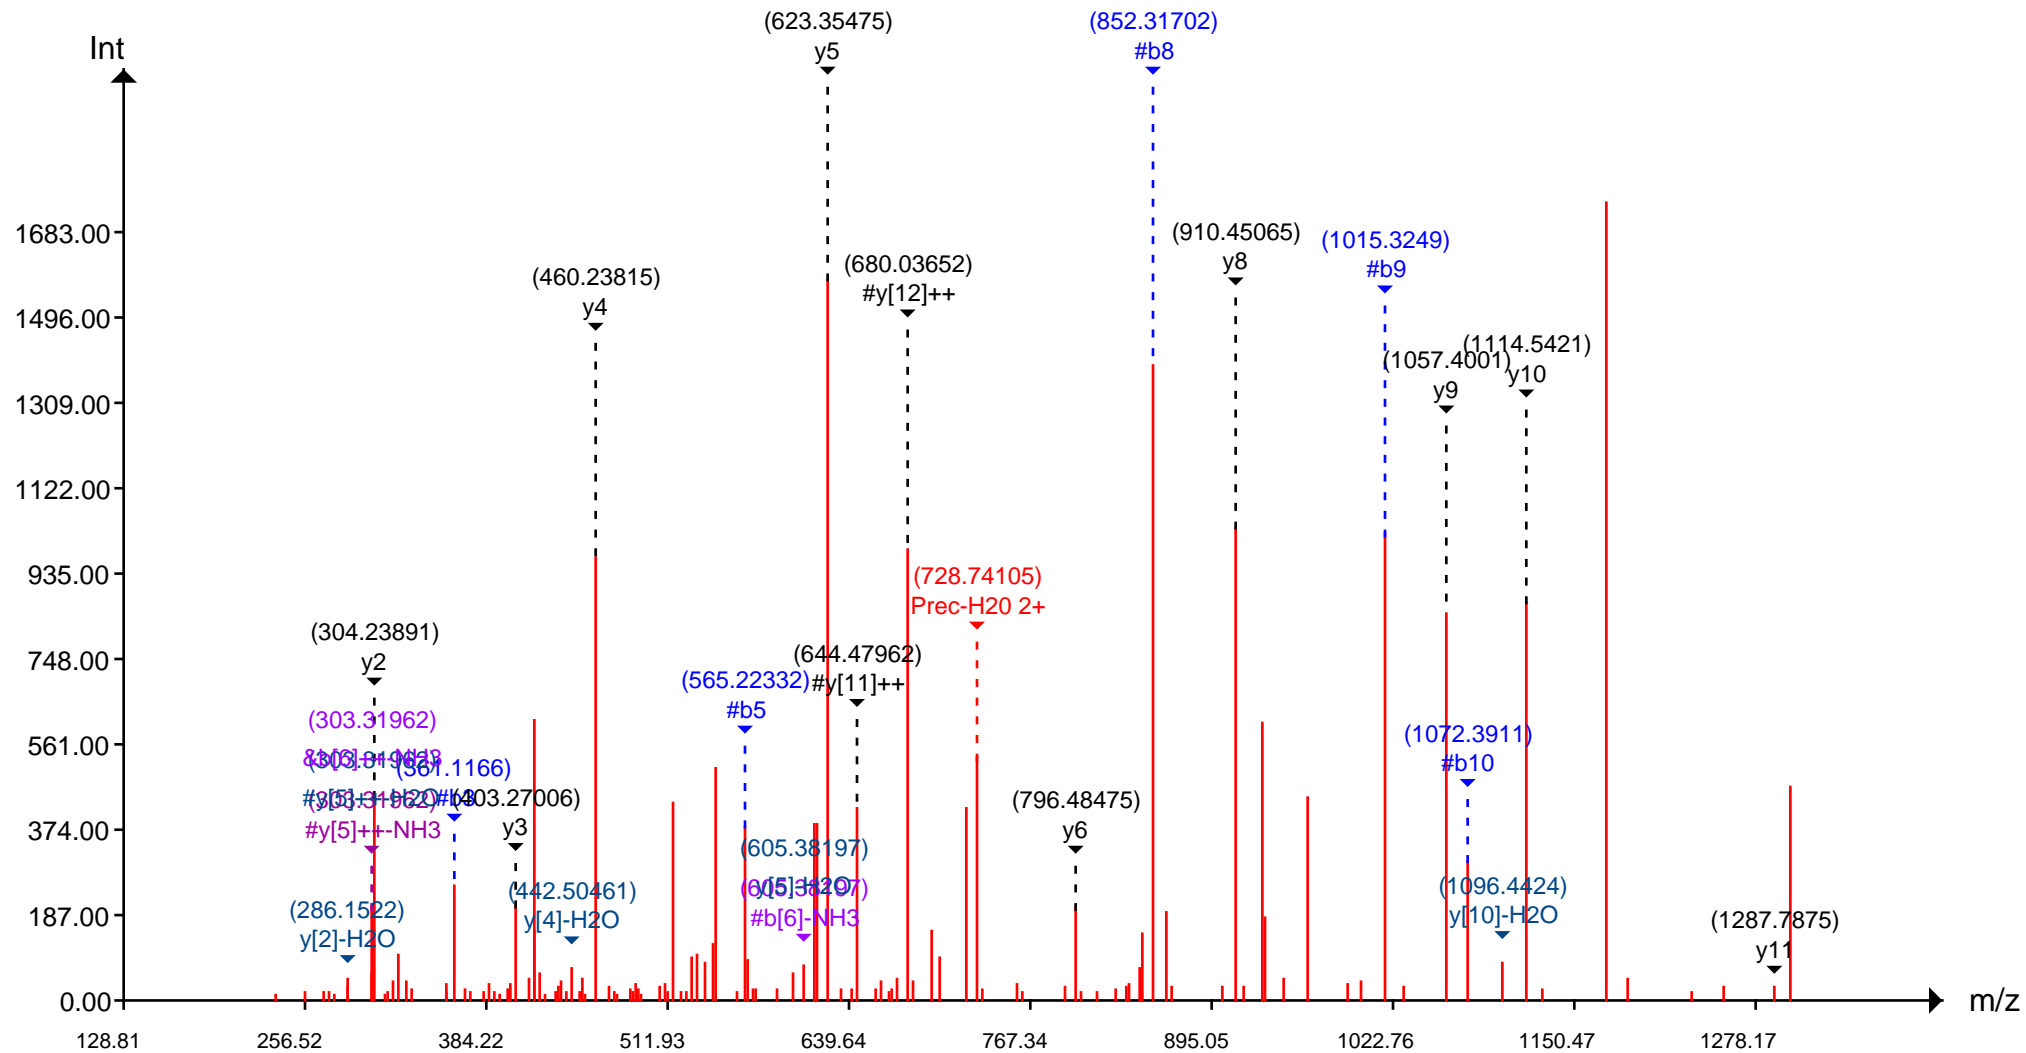

## Info

**Modified Sequence** AcD3-AAK<AcD3K\*>GFGGK<AcD3K\*>YGVER-COOH

**Ion score** 53.79

**Protein** P14317

**Confidence level** 99.00%

**Precursor m/z** 737.90398

**Identity Threshold** 48.85

**Charge** 2+

**Mass error** 7.9E-4



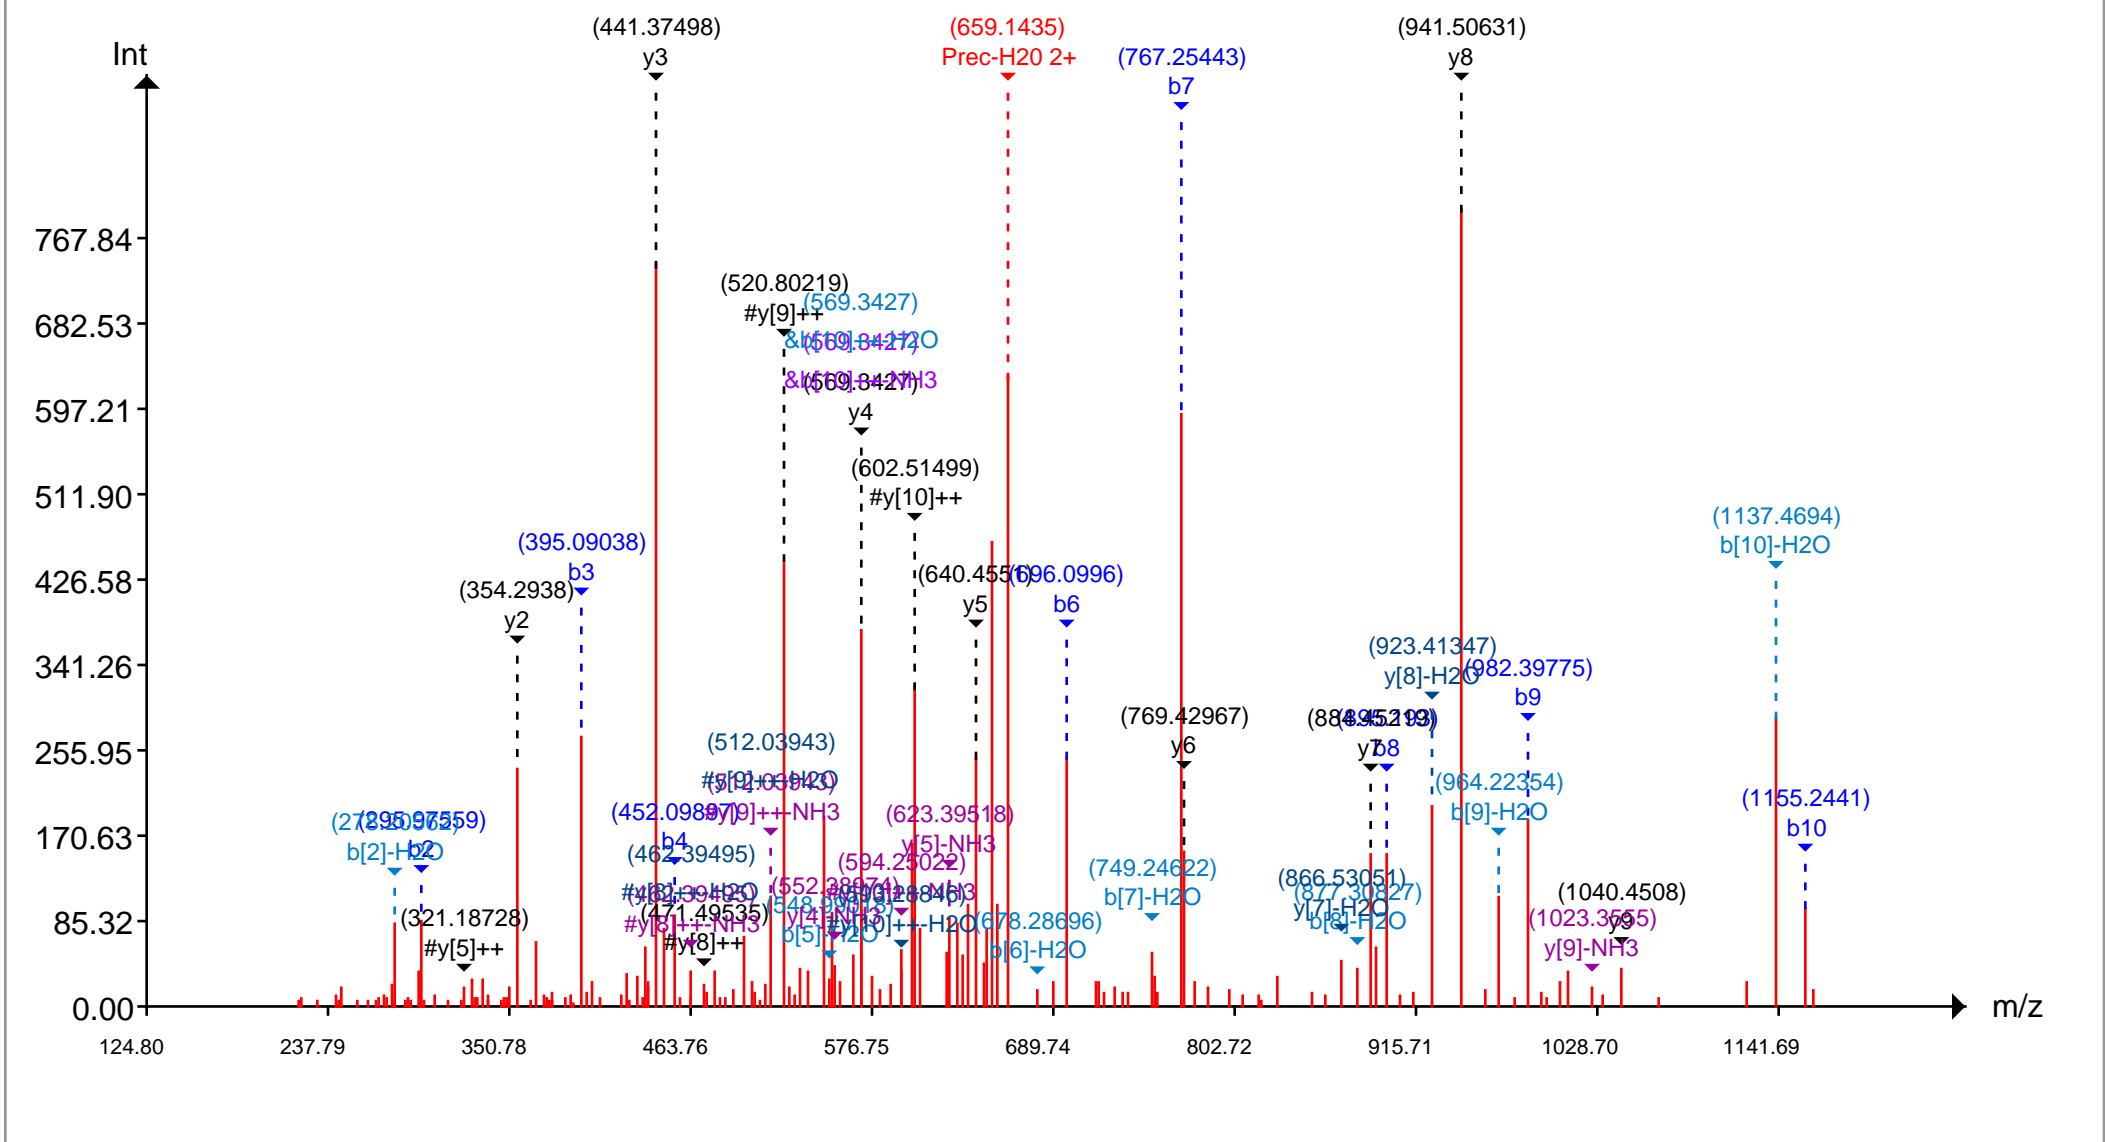

## Info

|                          |                                                |                           |         |
|--------------------------|------------------------------------------------|---------------------------|---------|
| <b>Modified Sequence</b> | AcD3-SYVGDEAQS<AcD3K*>R<C13>-COOH              | <b>Ion score</b>          | 68.55   |
| <b>Protein</b>           | P62736, P60709, P68032, P63261, P63267, P68133 | <b>Confidence level</b>   | 99.00%  |
| <b>Precursor m/z</b>     | 668.34153                                      | <b>Identity Threshold</b> | 48.89   |
| <b>Charge</b>            | 2+                                             | <b>Mass error</b>         | 4.63E-4 |

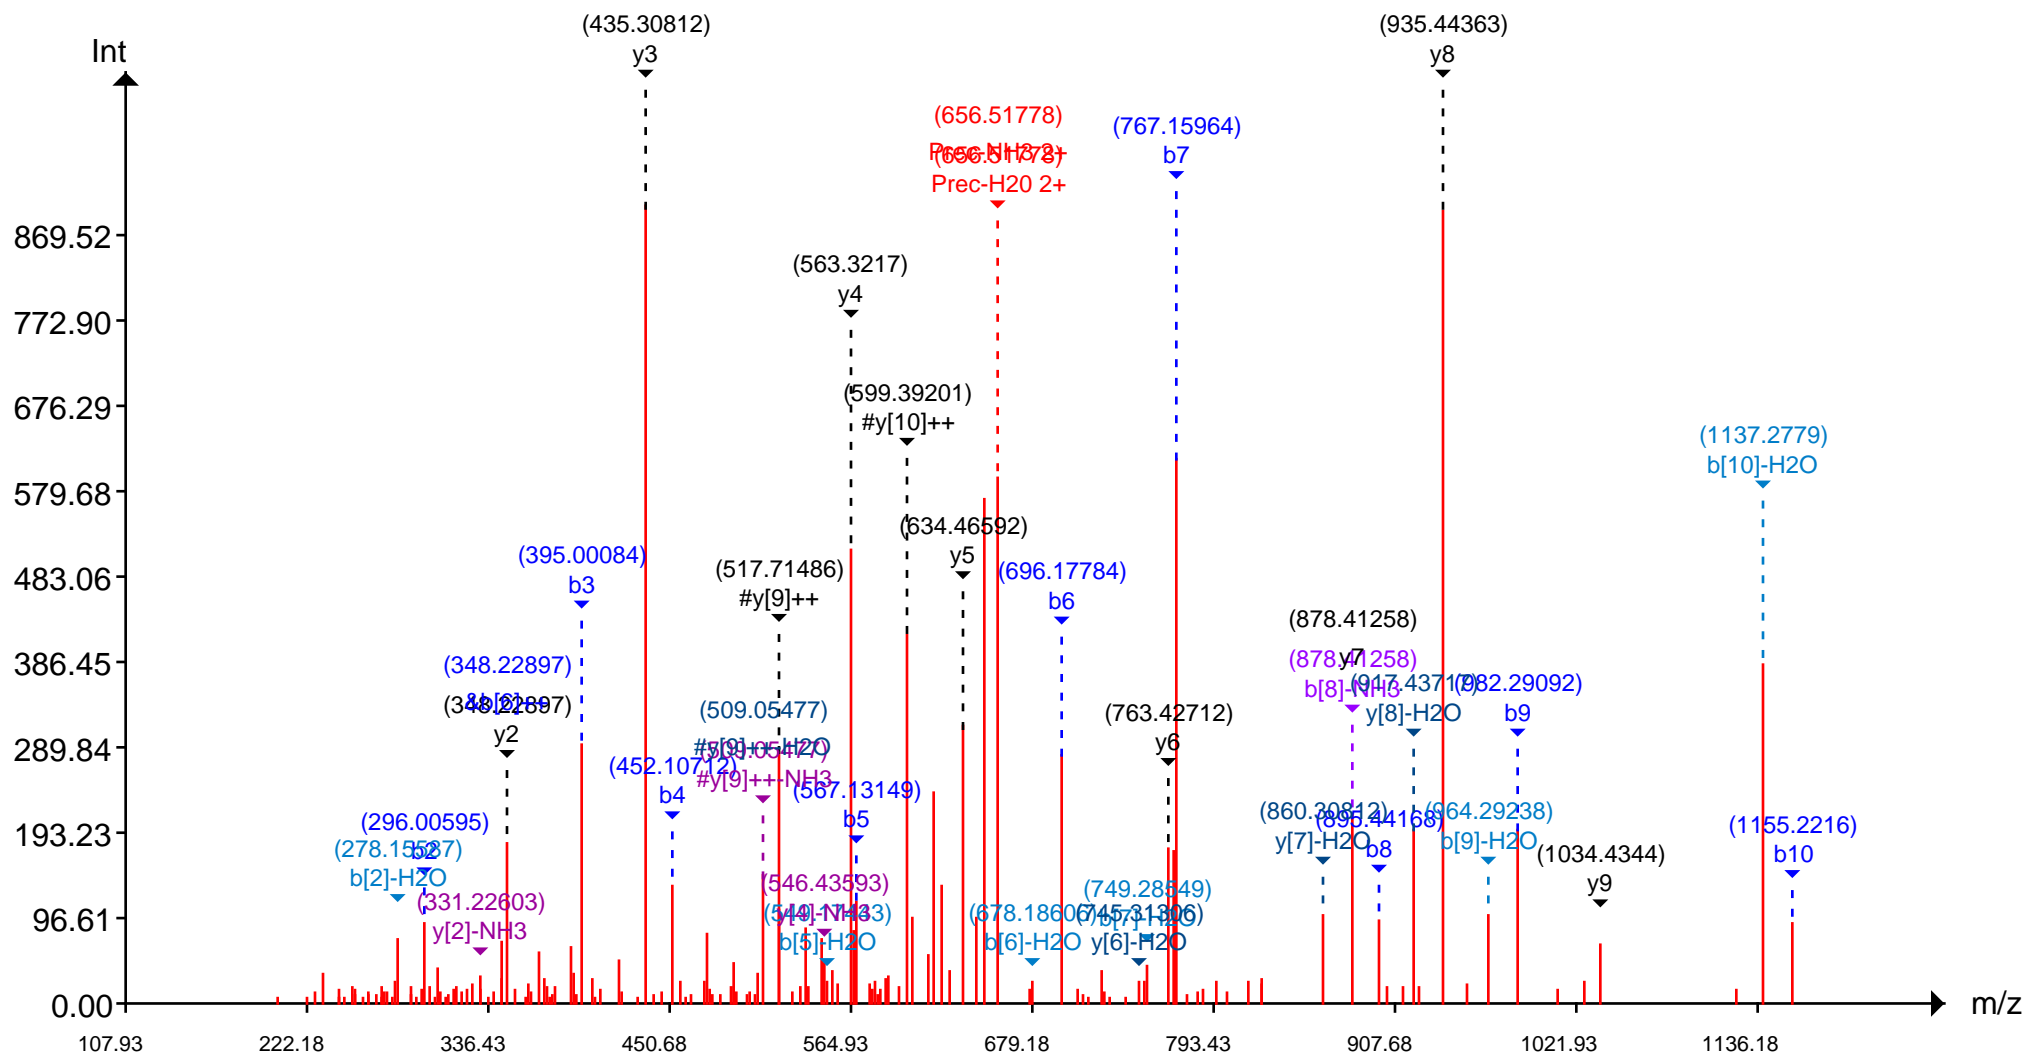

## Info

|                          |                                                |                           |         |
|--------------------------|------------------------------------------------|---------------------------|---------|
| <b>Modified Sequence</b> | AcD3-SYVGDEAQSK<AcD3K*>R-COOH                  | <b>Ion score</b>          | 65.32   |
| <b>Protein</b>           | P62736, P60709, P68032, P63261, P63267, P68133 | <b>Confidence level</b>   | 99.00%  |
| <b>Precursor m/z</b>     | 665.3316                                       | <b>Identity Threshold</b> | 48.48   |
| <b>Charge</b>            | 2+                                             | <b>Mass error</b>         | 7.45E-4 |

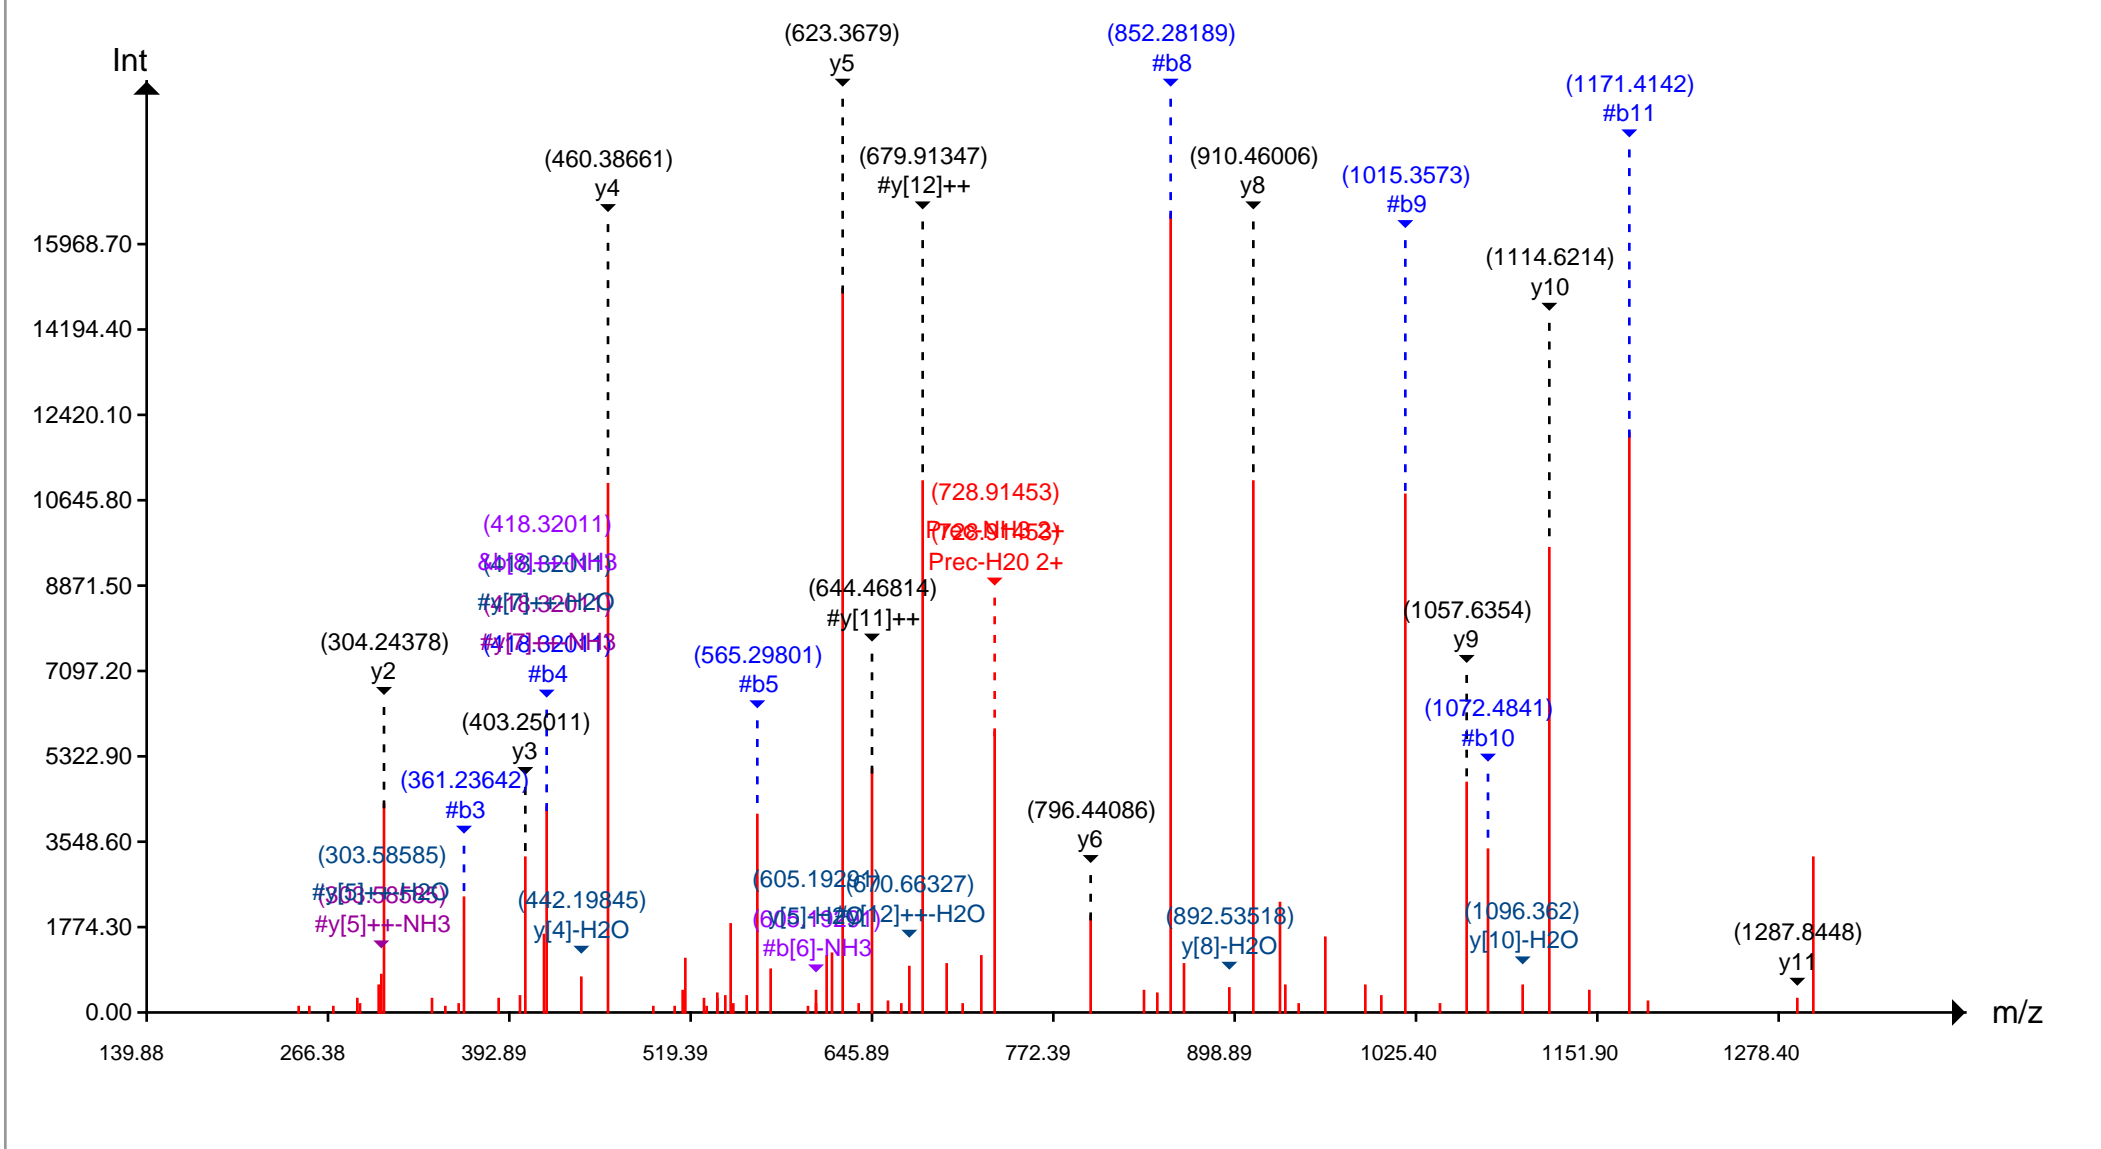

| Info                     |                                         |                           |        |
|--------------------------|-----------------------------------------|---------------------------|--------|
| <b>Modified Sequence</b> | AcD3-AAK<AcD3K*>GFGGK<AcD3K*>YGVER-COOH | <b>Ion score</b>          | 75.52  |
| <b>Protein</b>           | P14317                                  | <b>Confidence level</b>   | 99.00% |
| <b>Precursor m/z</b>     | 737.90381                               | <b>Identity Threshold</b> | 48.87  |
| <b>Charge</b>            | 2+                                      | <b>Mass error</b>         | 4.5E-4 |

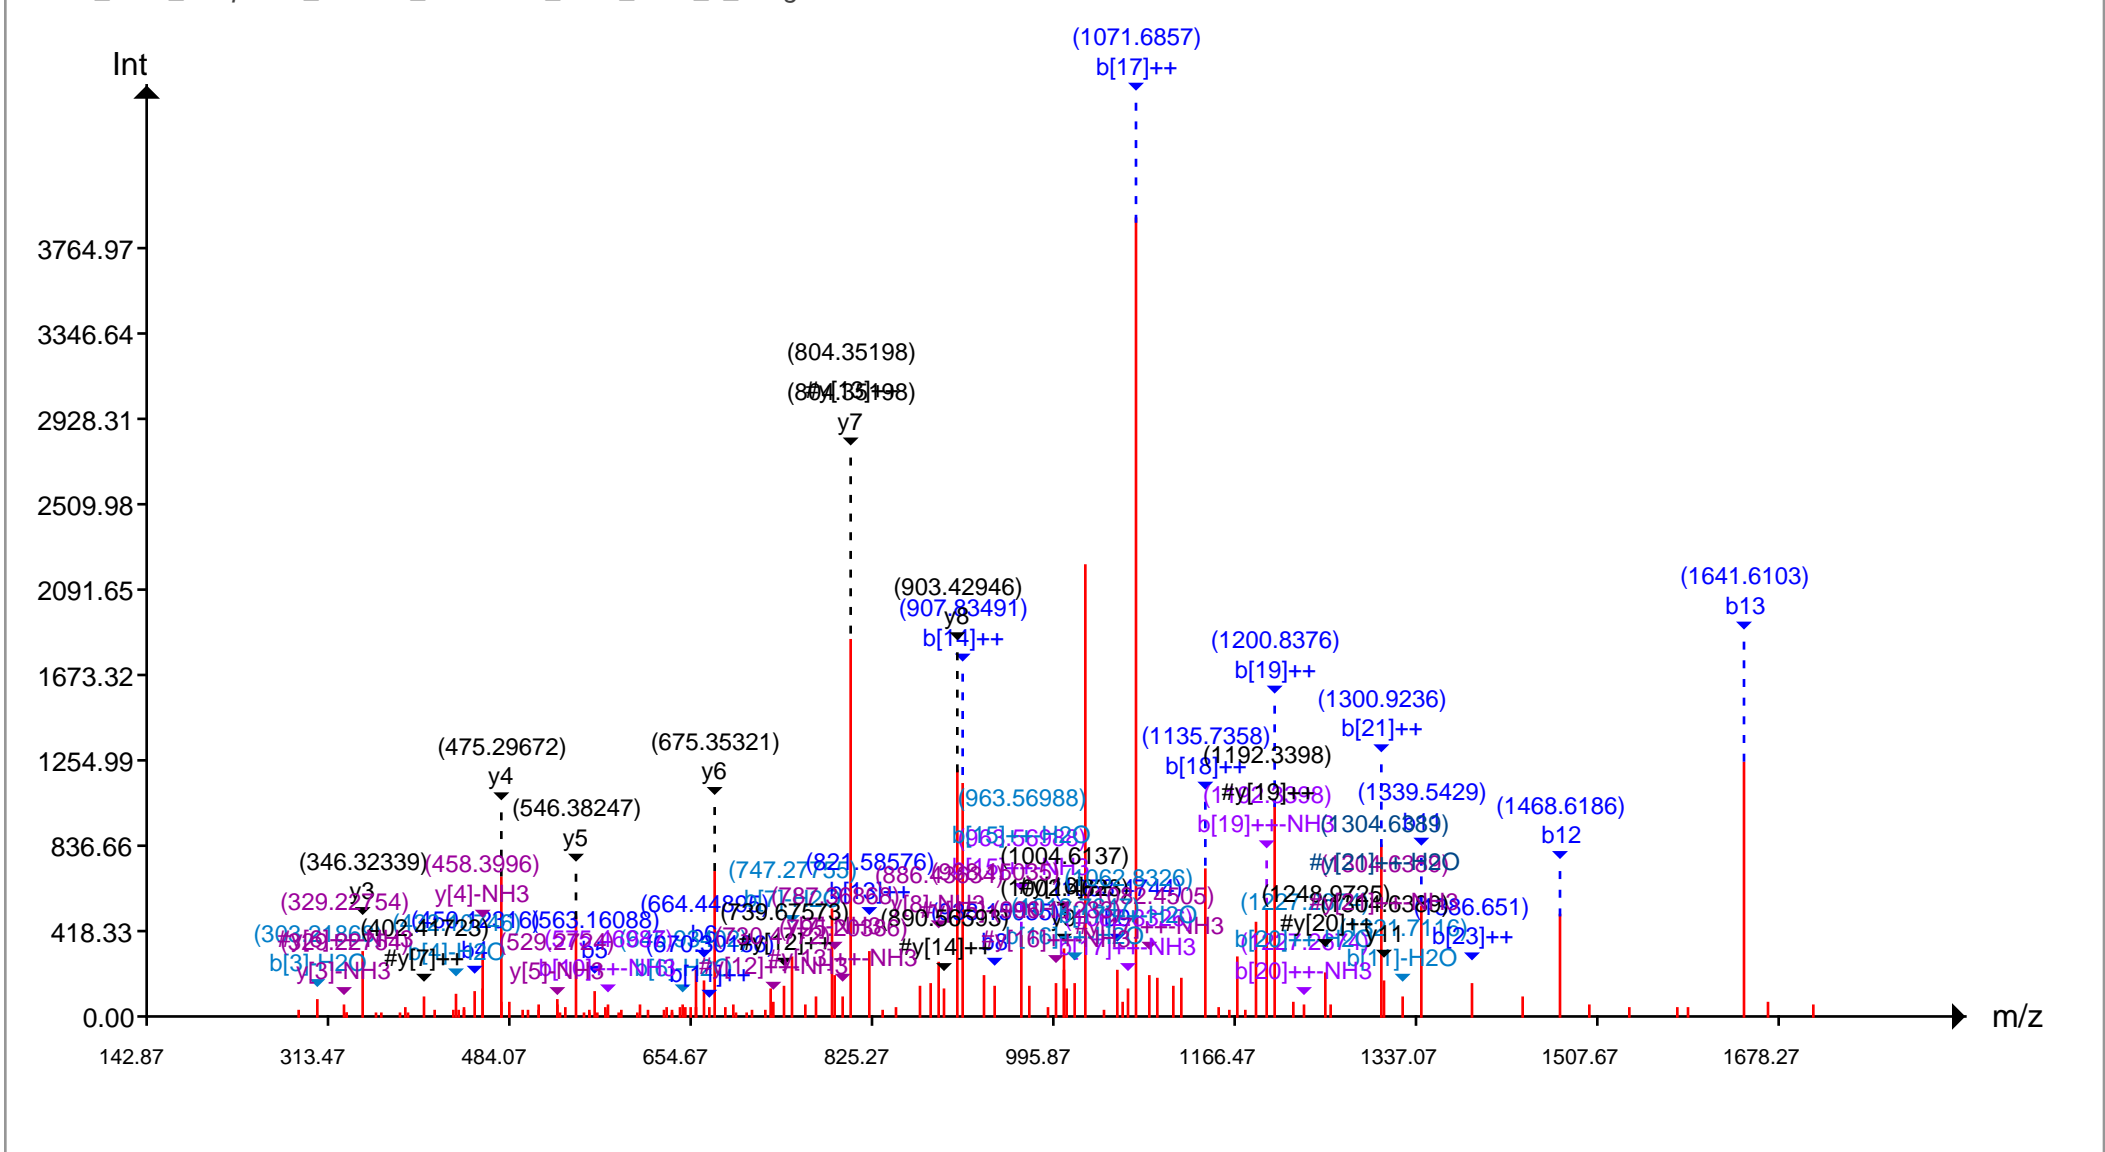

## Info

|                          |                                                                    |                           |          |
|--------------------------|--------------------------------------------------------------------|---------------------------|----------|
| <b>Modified Sequence</b> | AcD3-TSSEITTK<AcD3K*>DLK<AcD3K*>EK<AcD3K*>K<AcD3K*>EVVEEAENGR-COOH | <b>Ion score</b>          | 59.22    |
| <b>Protein</b>           | P06454                                                             | <b>Confidence level</b>   | 99.00%   |
| <b>Precursor m/z</b>     | 982.51923                                                          | <b>Identity Threshold</b> | 48.35    |
| <b>Charge</b>            | 3+                                                                 | <b>Mass error</b>         | 0.001331 |

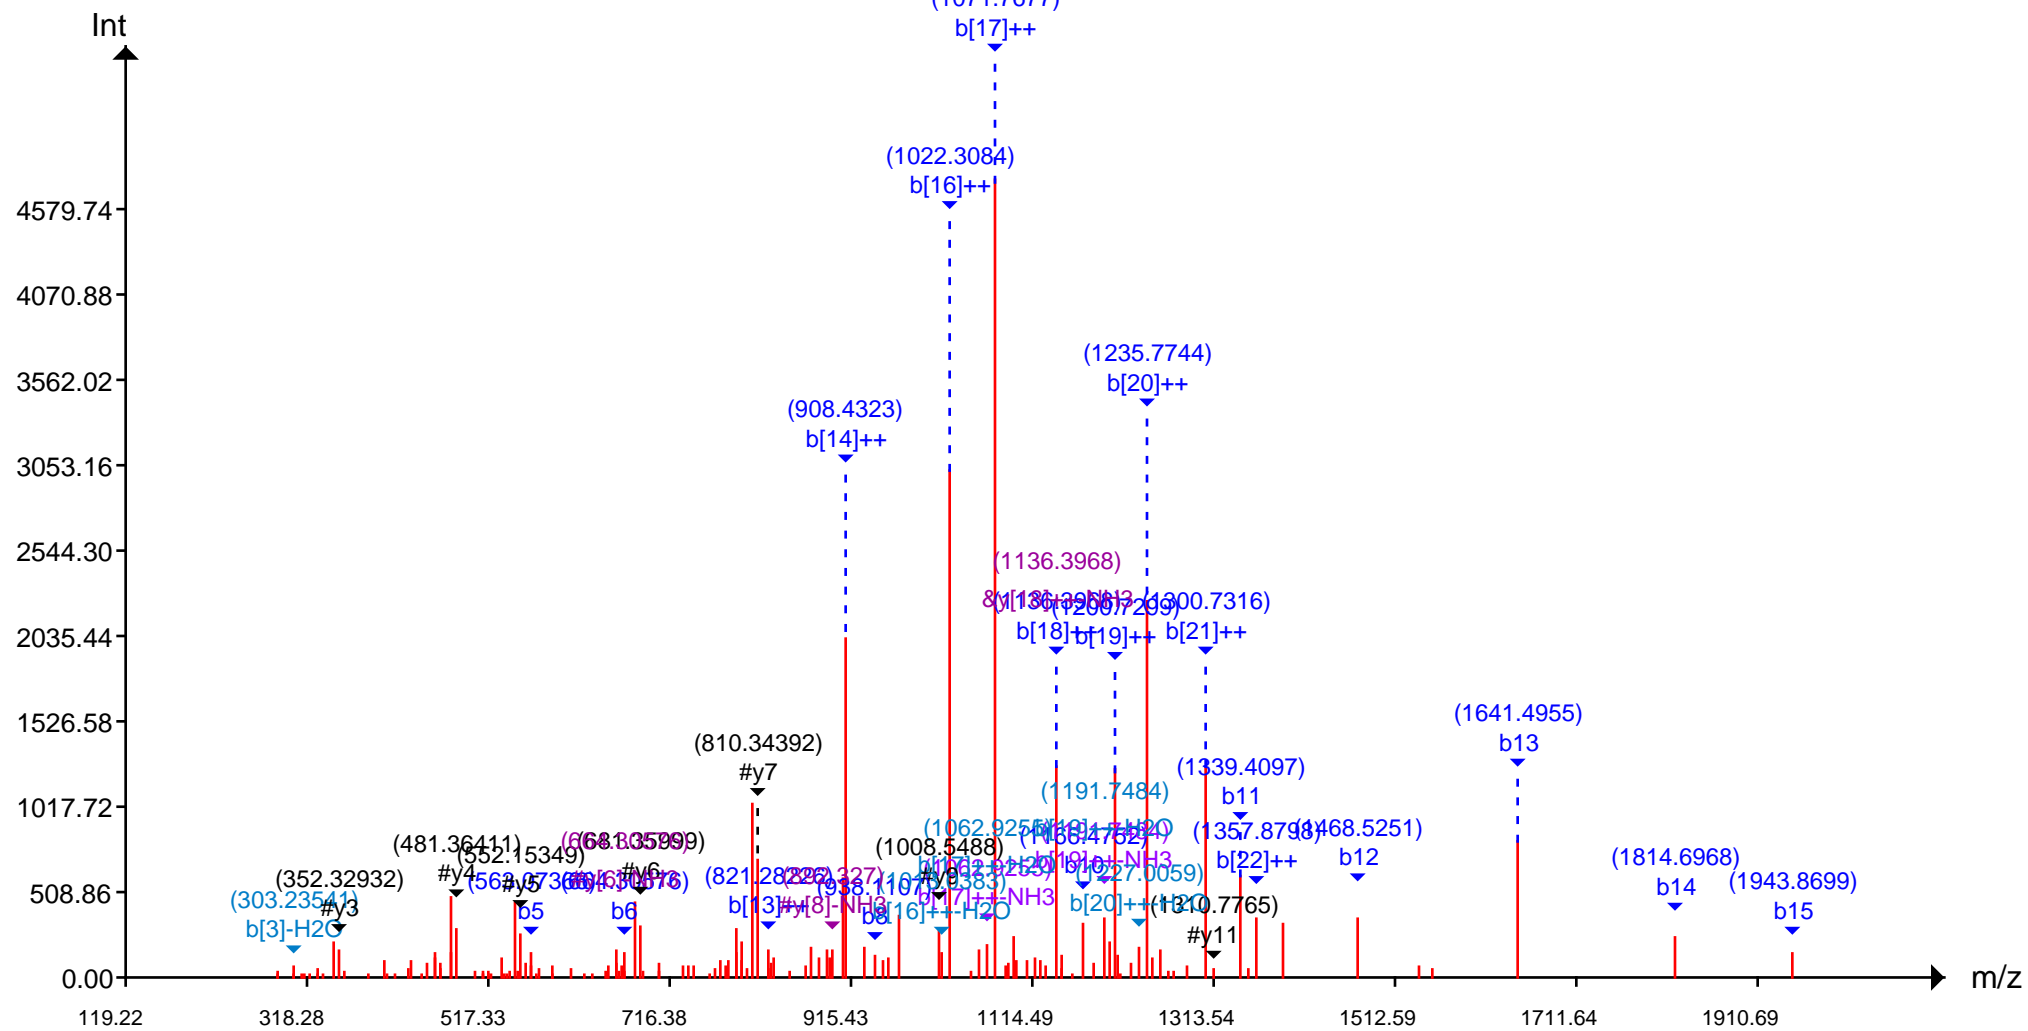

| Info                     |                                                                         |                           |        |
|--------------------------|-------------------------------------------------------------------------|---------------------------|--------|
| <b>Modified Sequence</b> | AcD3-TSSEITTK<AcD3K*>DLK<AcD3K*>EK<AcD3K*>K<AcD3K*>EVVEEAENGR<C13>-COOH | <b>Ion score</b>          | 54.05  |
| <b>Protein</b>           | P06454                                                                  | <b>Confidence level</b>   | 99.00% |
| <b>Precursor Ion</b>     | 984.52594                                                               | <b>Identity Threshold</b> | 48.03  |
| <b>Charge</b>            | 3+                                                                      | <b>Mass error</b>         | 0.0013 |

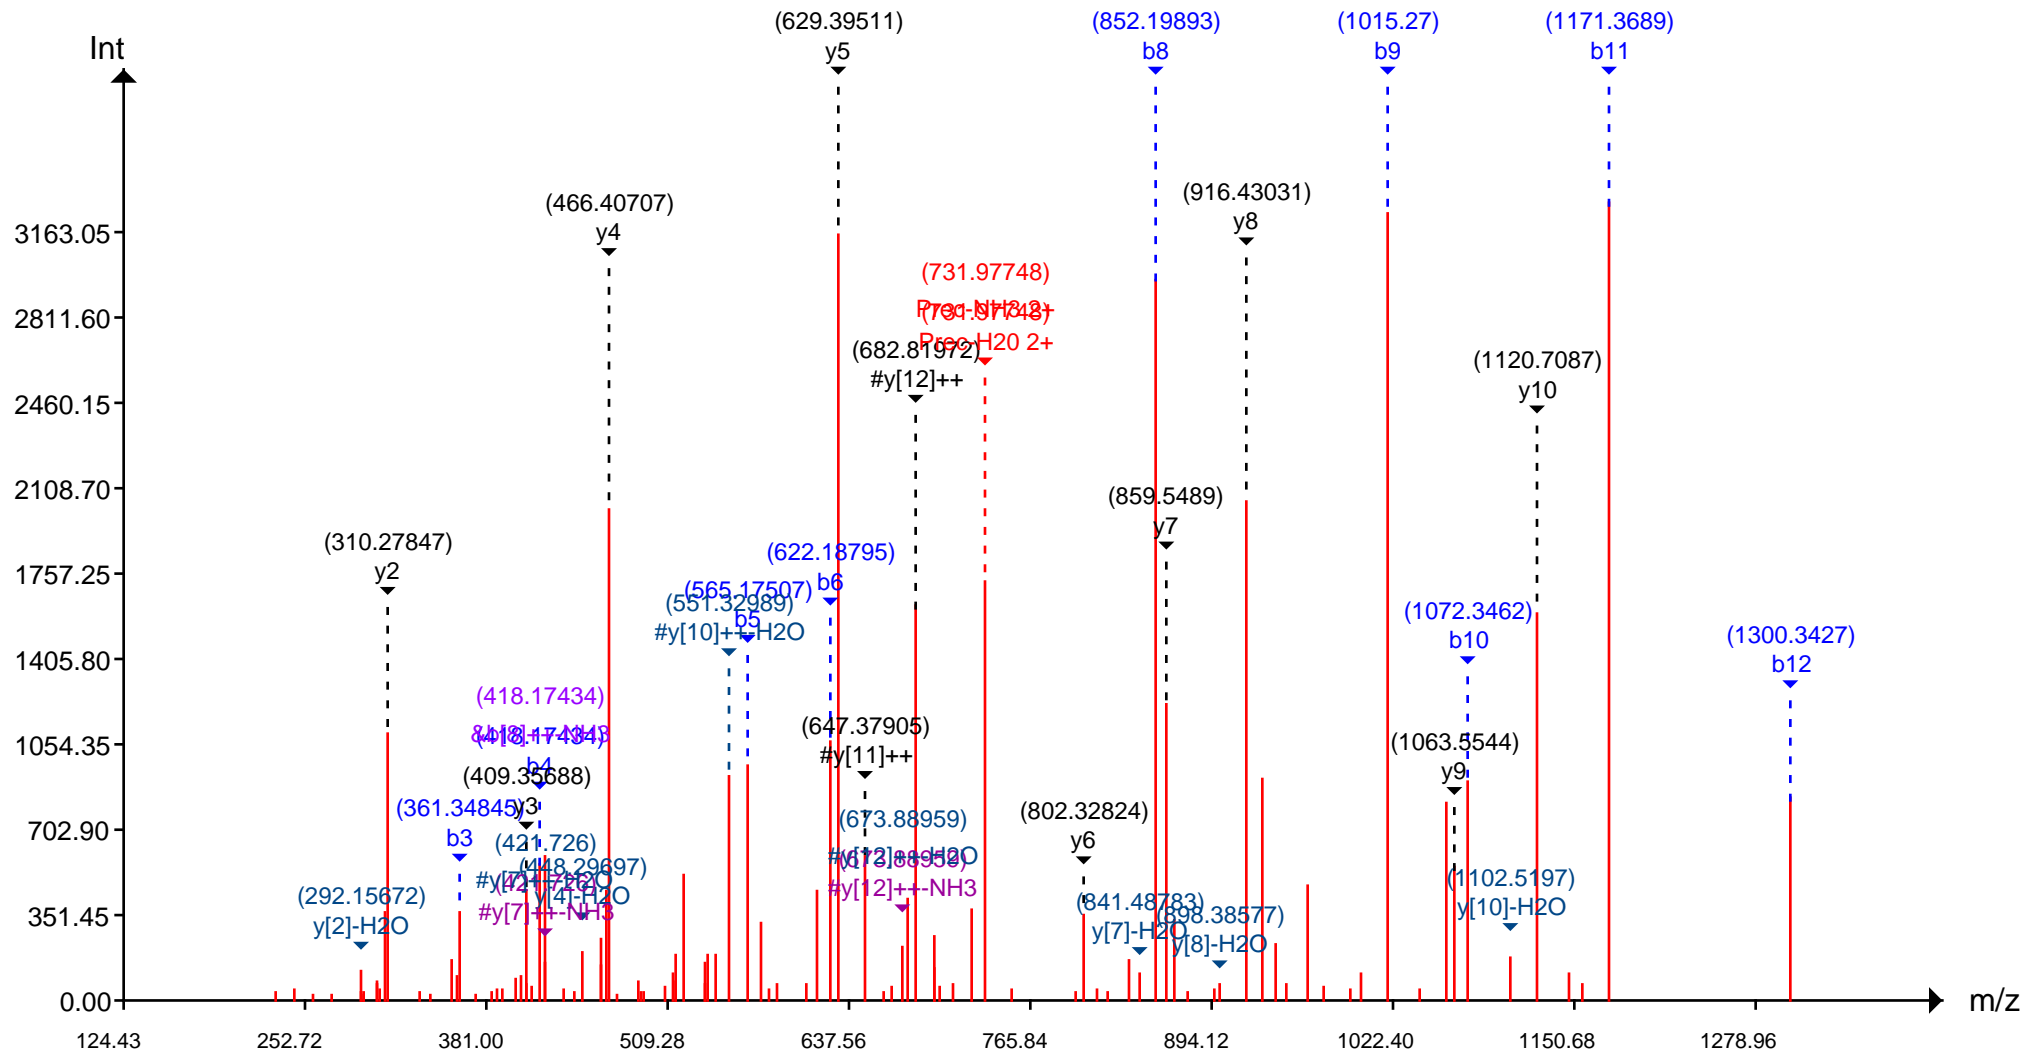

## Info

|                          |                                              |                           |         |
|--------------------------|----------------------------------------------|---------------------------|---------|
| <b>Modified Sequence</b> | AcD3-AAK<AcD3K*>GFGGK<AcD3K*>YGVER<C13>-COOH | <b>Ion score</b>          | 63.04   |
| <b>Protein</b>           | P14317                                       | <b>Confidence level</b>   | 99.00%  |
| <b>Precursor m/z</b>     | 740.91381                                    | <b>Identity Threshold</b> | 48.30   |
| <b>Charge</b>            | 2+                                           | <b>Mass error</b>         | 3.09E-4 |

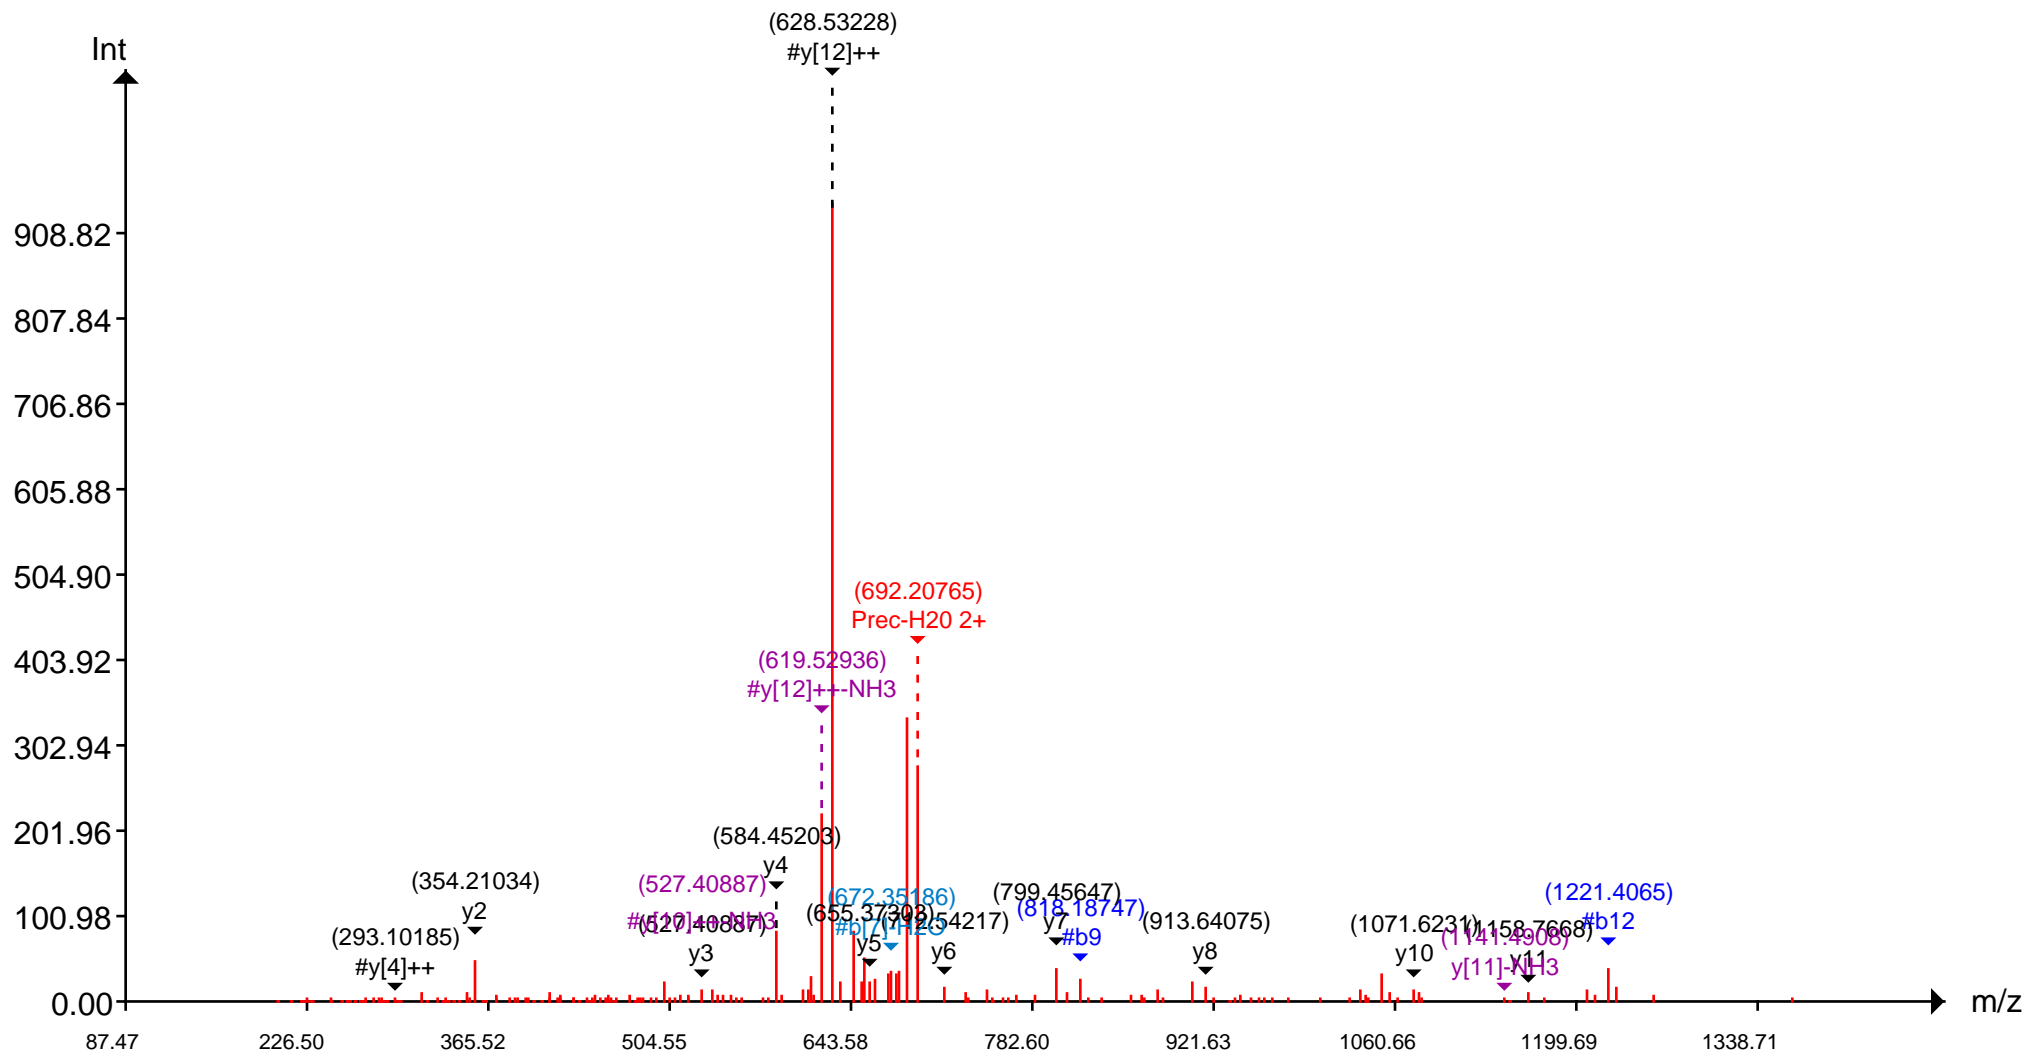

## Info

|                          |                                              |                           |         |
|--------------------------|----------------------------------------------|---------------------------|---------|
| <b>Modified Sequence</b> | AcD3-TPSGTNSGAGK<AcD3K*>K<AcD3K*>R<C13>-COOH | <b>Ion score</b>          | 56.93   |
| <b>Protein</b>           | P62877                                       | <b>Confidence level</b>   | 99.00%  |
| <b>Precursor m/z</b>     | 701.39054                                    | <b>Identity Threshold</b> | 48.53   |
| <b>Charge</b>            | 2+                                           | <b>Mass error</b>         | -1.3E-5 |

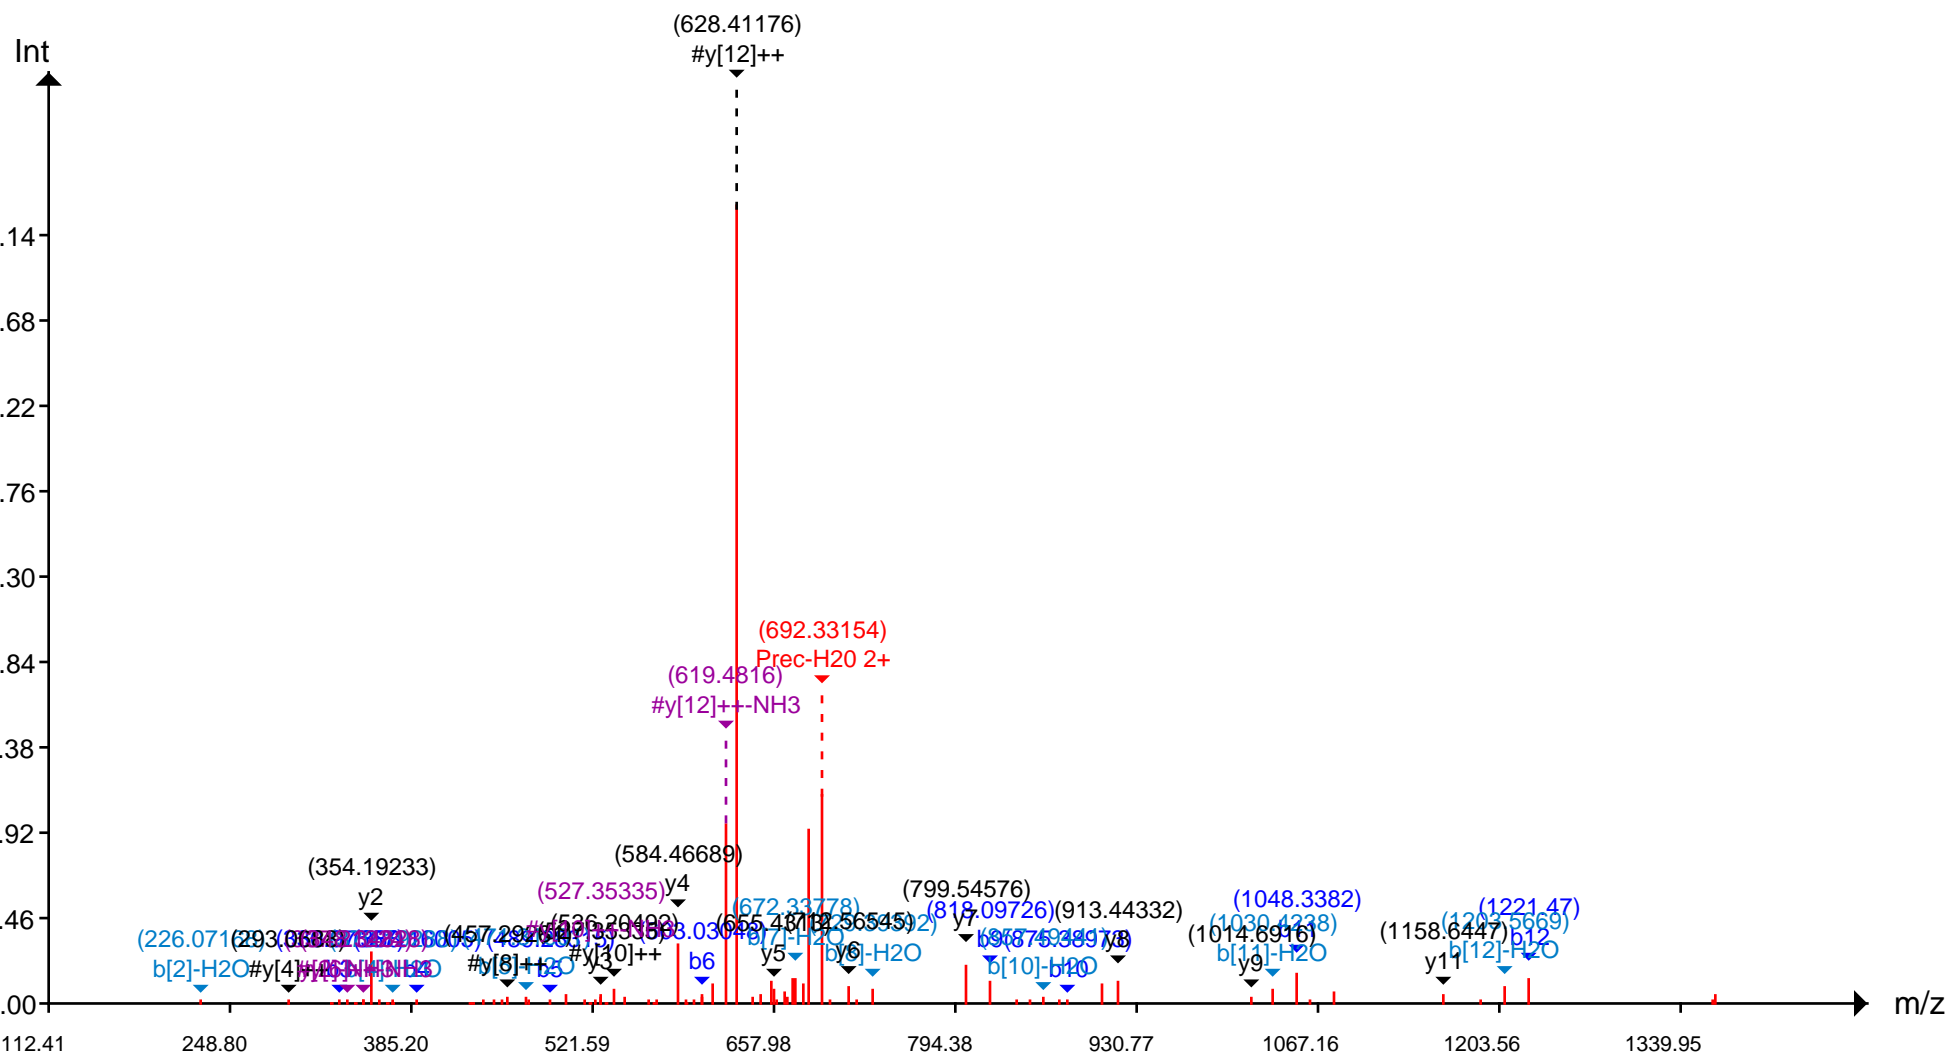

## Info

|                          |                                              |                           |          |
|--------------------------|----------------------------------------------|---------------------------|----------|
| <b>Modified Sequence</b> | AcD3-TPSGTNSGAGK<AcD3K*>K<AcD3K*>R<C13>-COOH | <b>Ion score</b>          | 60.04    |
| <b>Protein</b>           | P62877                                       | <b>Confidence level</b>   | 99.00%   |
| <b>Precursor m/z</b>     | 701.39031                                    | <b>Identity Threshold</b> | 48.58    |
| <b>Charge</b>            | 2+                                           | <b>Mass error</b>         | -4.73E-4 |



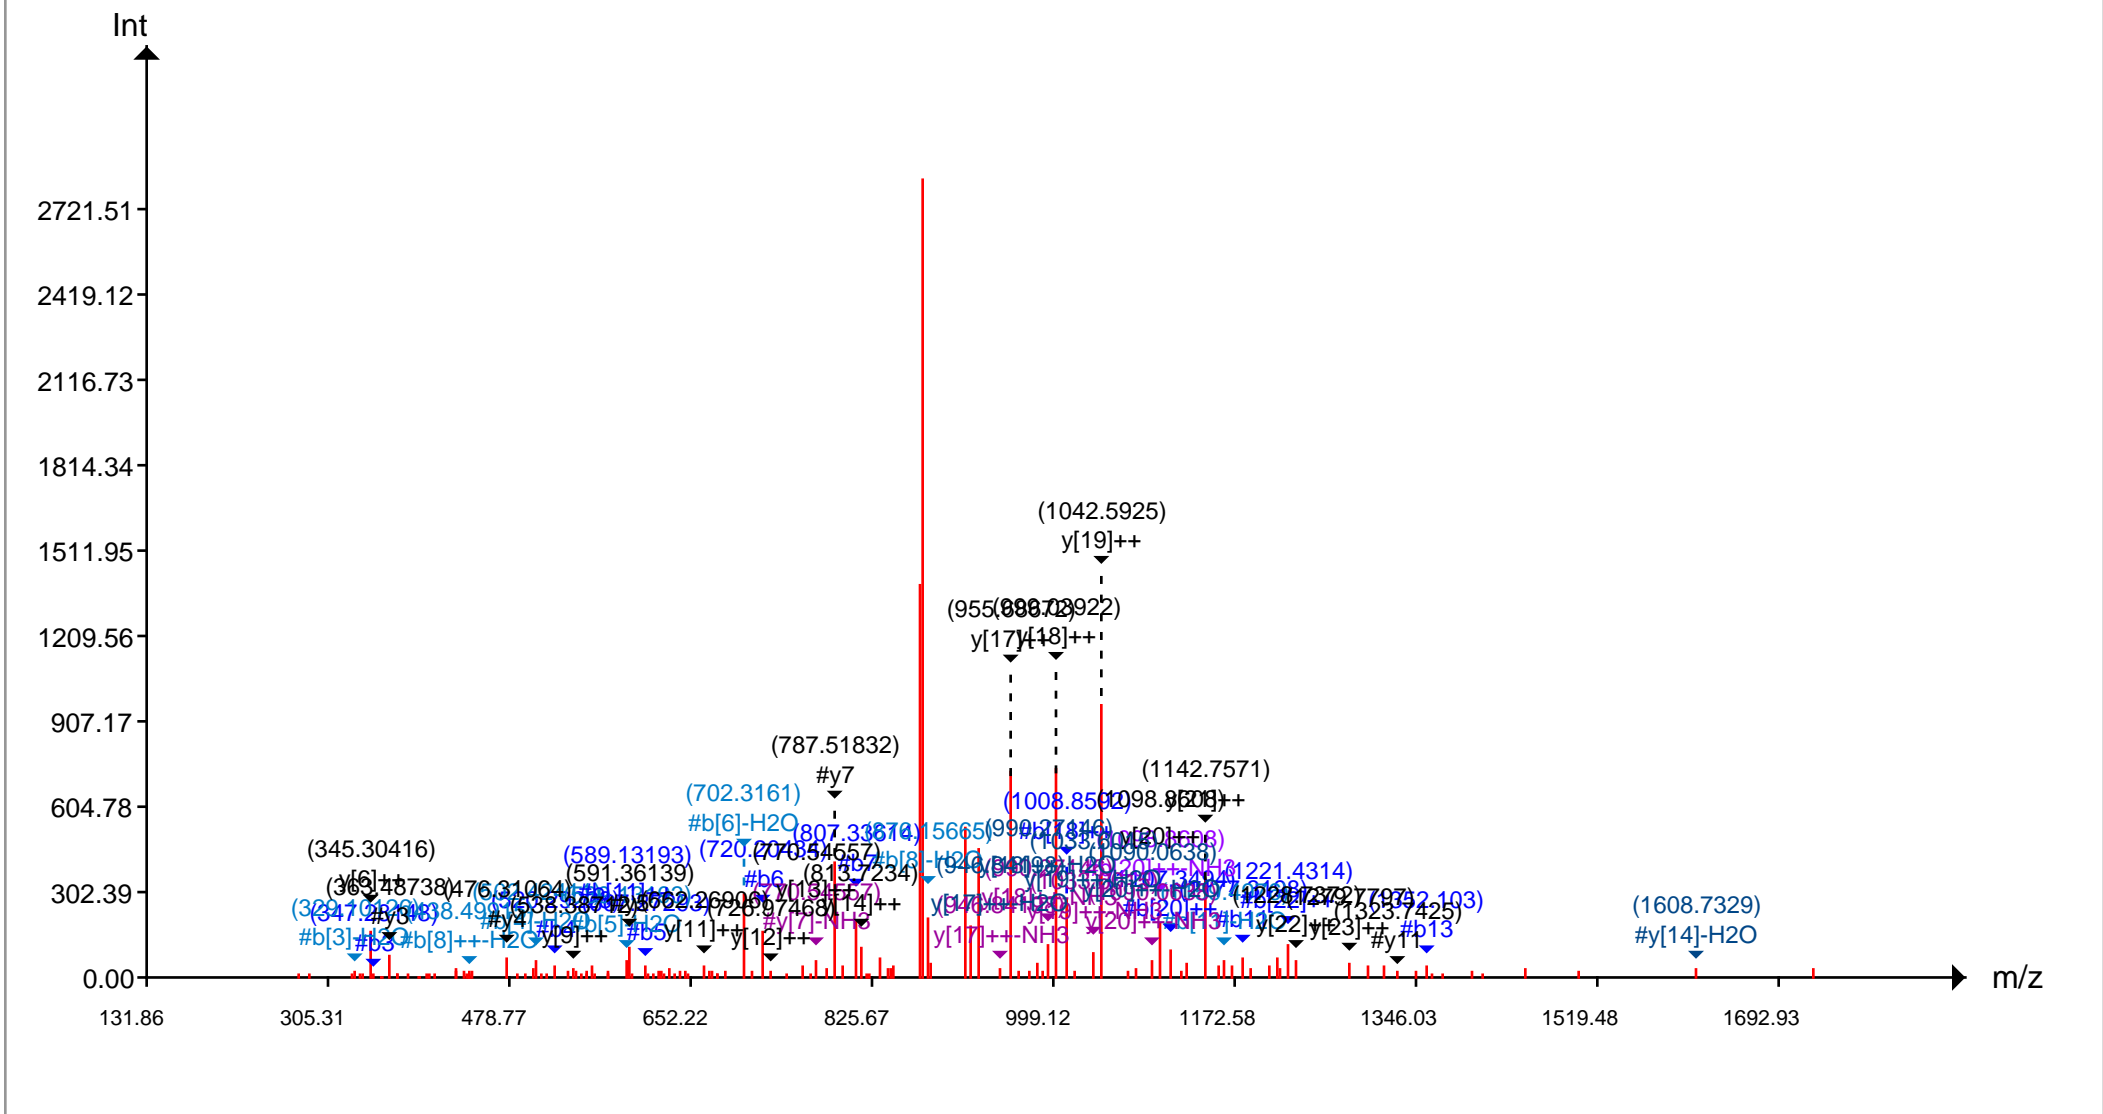

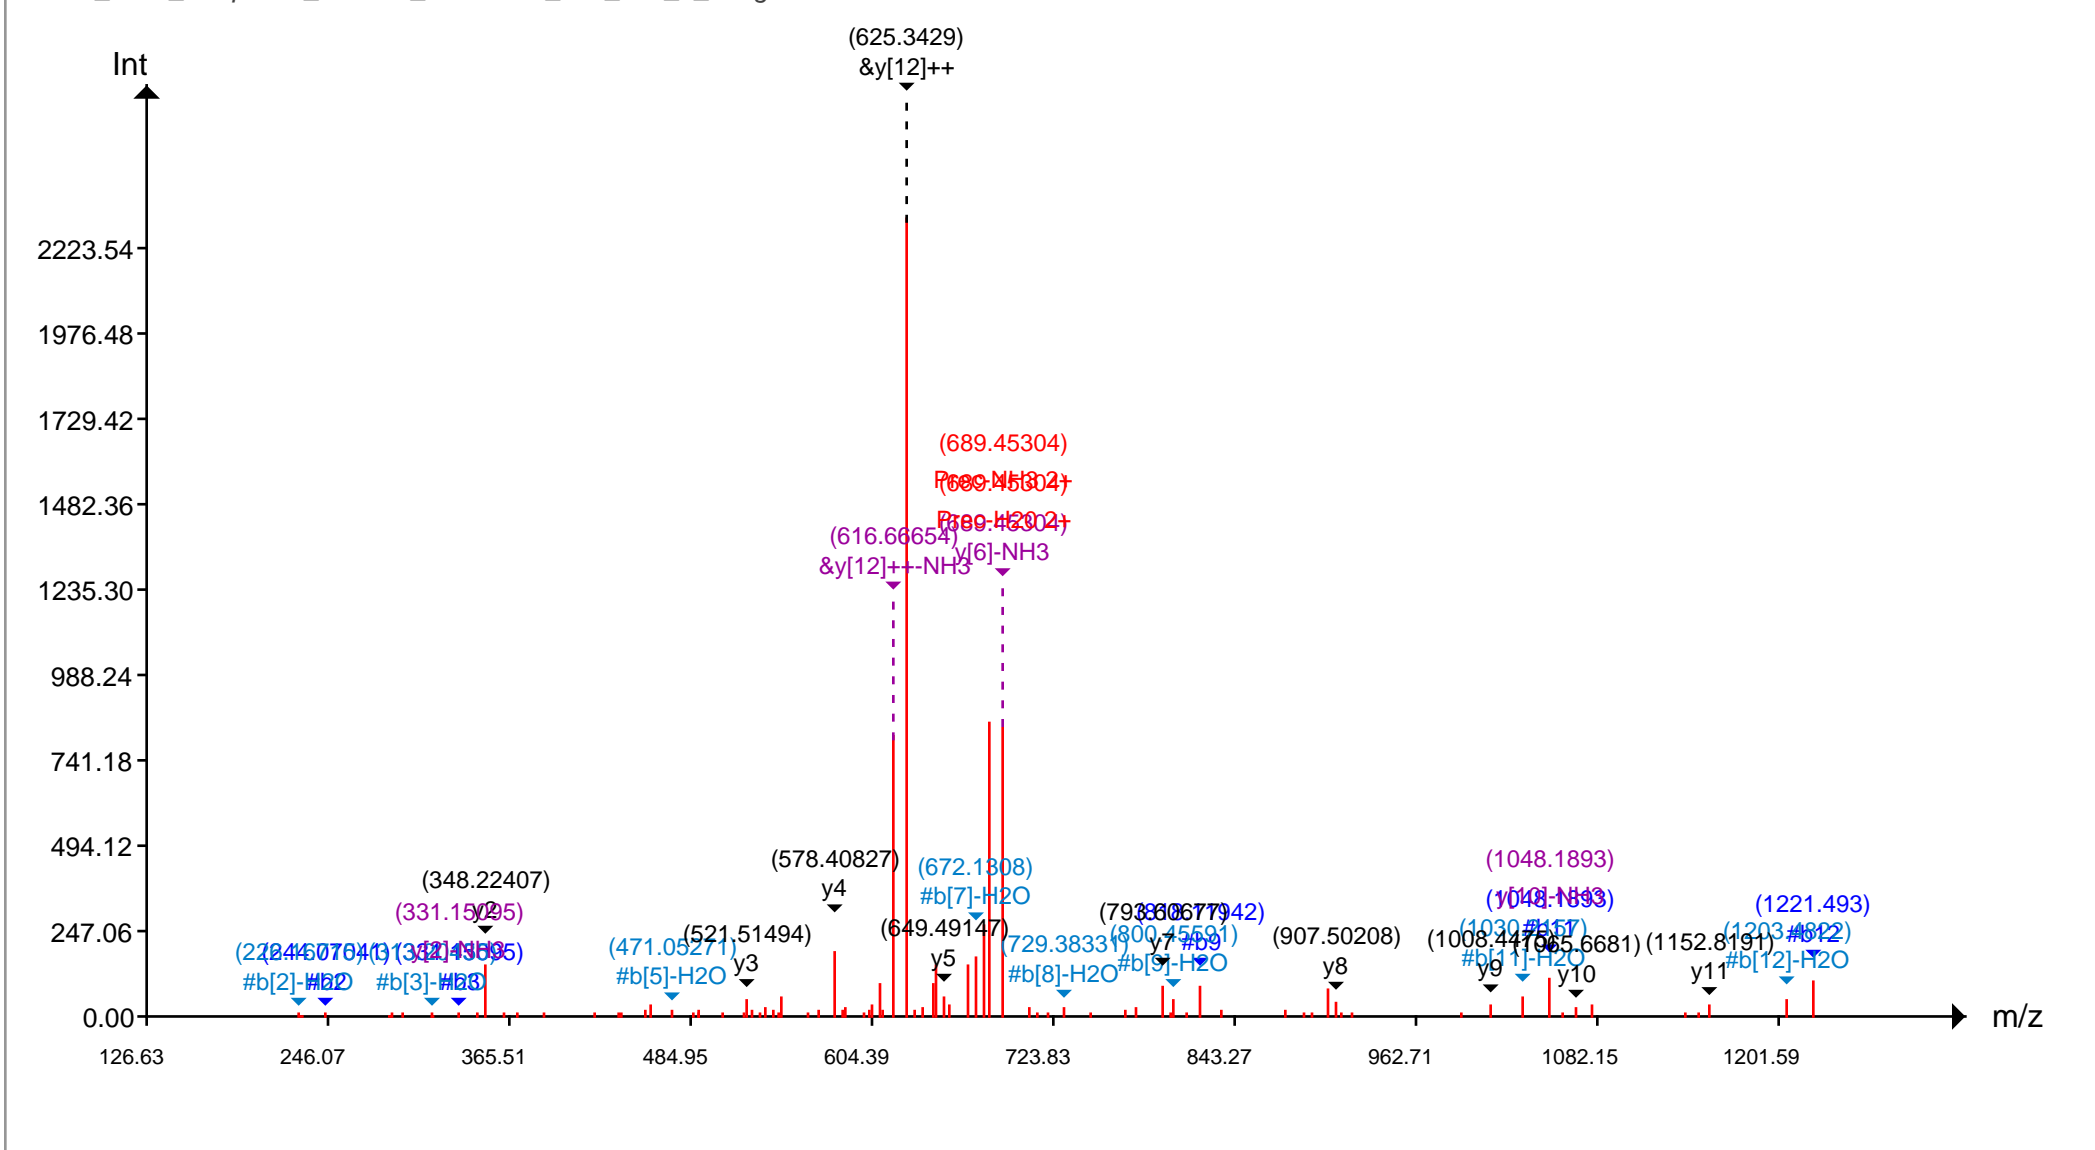

## Info

**Modified Sequence** AcD3-TPSGTNSGAGK<AcD3K\*>K<AcD3K\*>R-COOH

**Ion score** 55.78

**Protein** P62877

**Confidence level** 99.00%

**Precursor m/z** 698.38003

**Identity Threshold** 48.85

**Charge** 2+

**Mass error** -8.91E-4

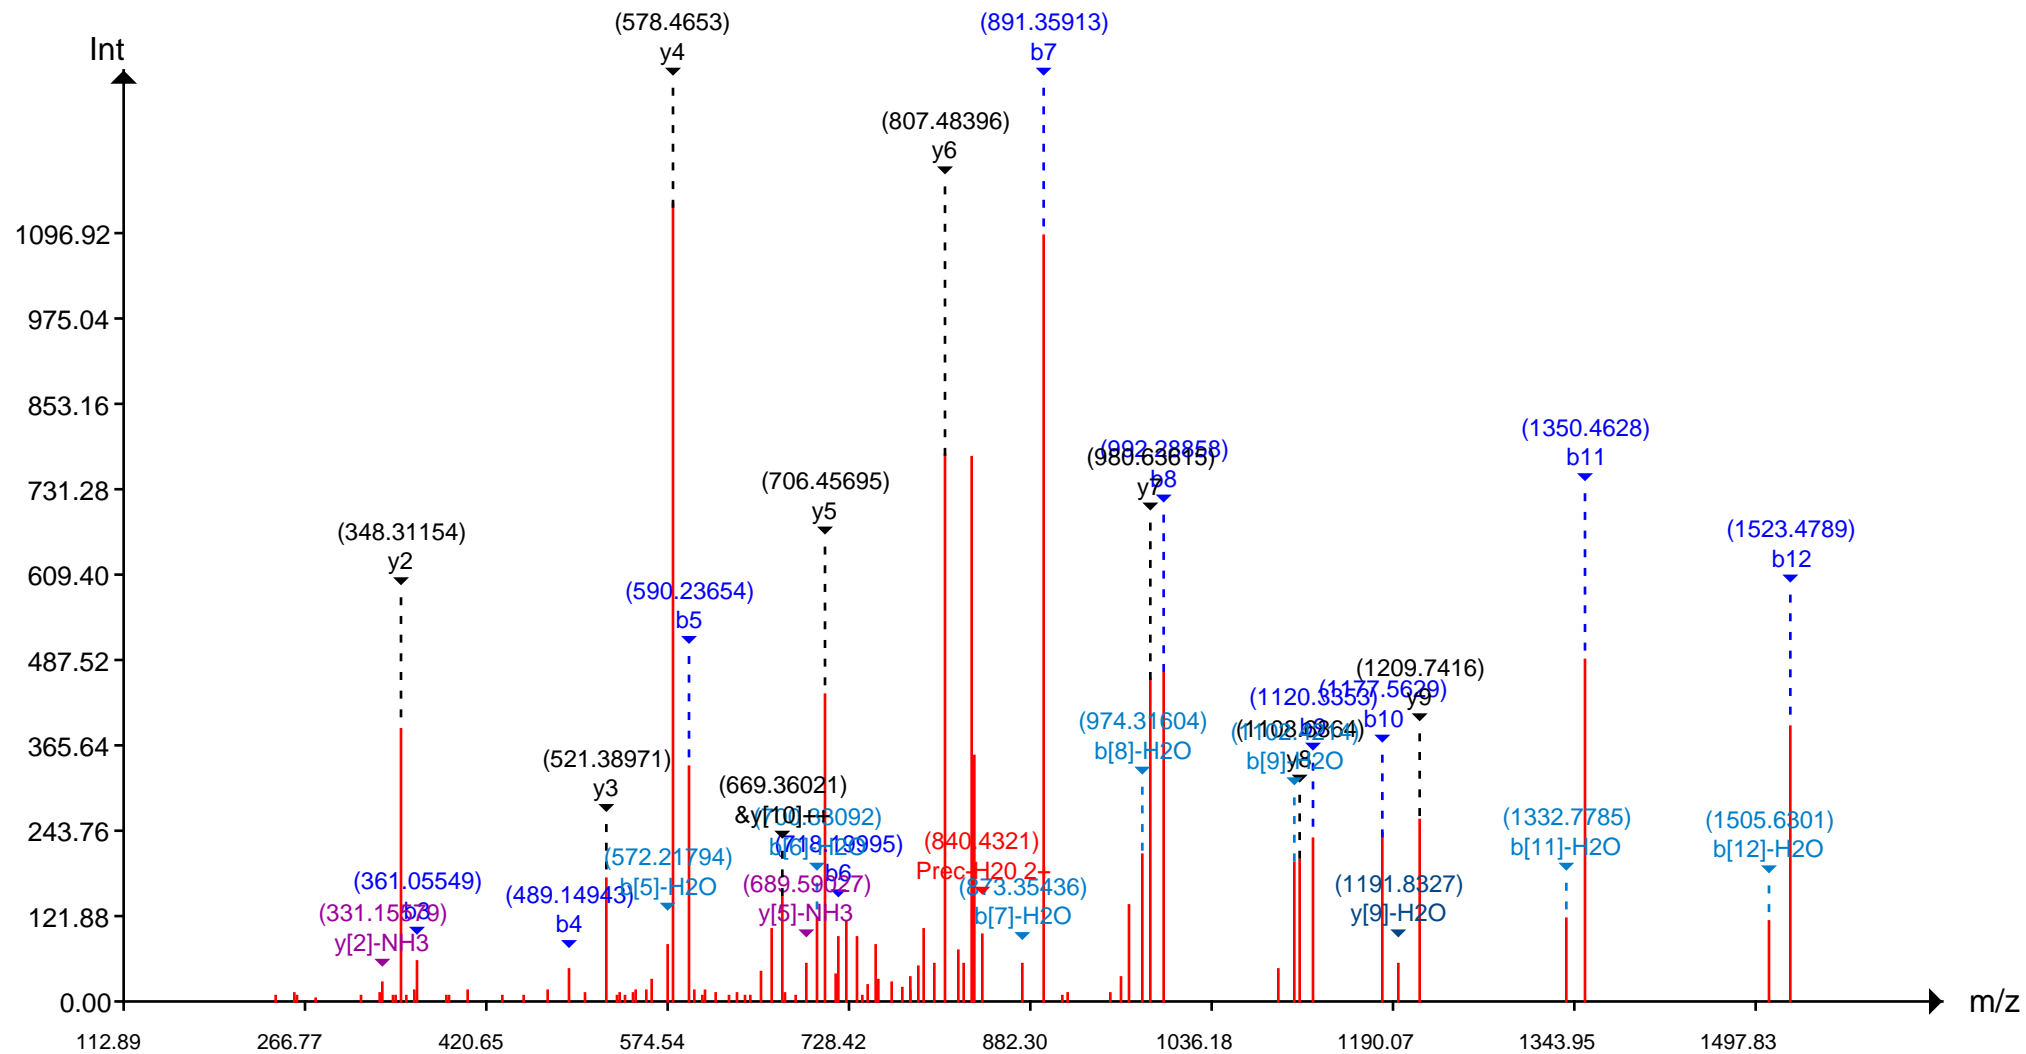

## Info

|                          |                                                 |                           |         |
|--------------------------|-------------------------------------------------|---------------------------|---------|
| <b>Modified Sequence</b> | AcD3-GEEQTQK<AcD3K*>TQGK<AcD3K*>K<AcD3K*>R-COOH | <b>Ion score</b>          | 90.52   |
| <b>Protein</b>           | Q9UEE9                                          | <b>Confidence level</b>   | 99.00%  |
| <b>Precursor m/z</b>     | 849.46415                                       | <b>Identity Threshold</b> | 48.60   |
| <b>Charge</b>            | 2+                                              | <b>Mass error</b>         | 4.03E-4 |

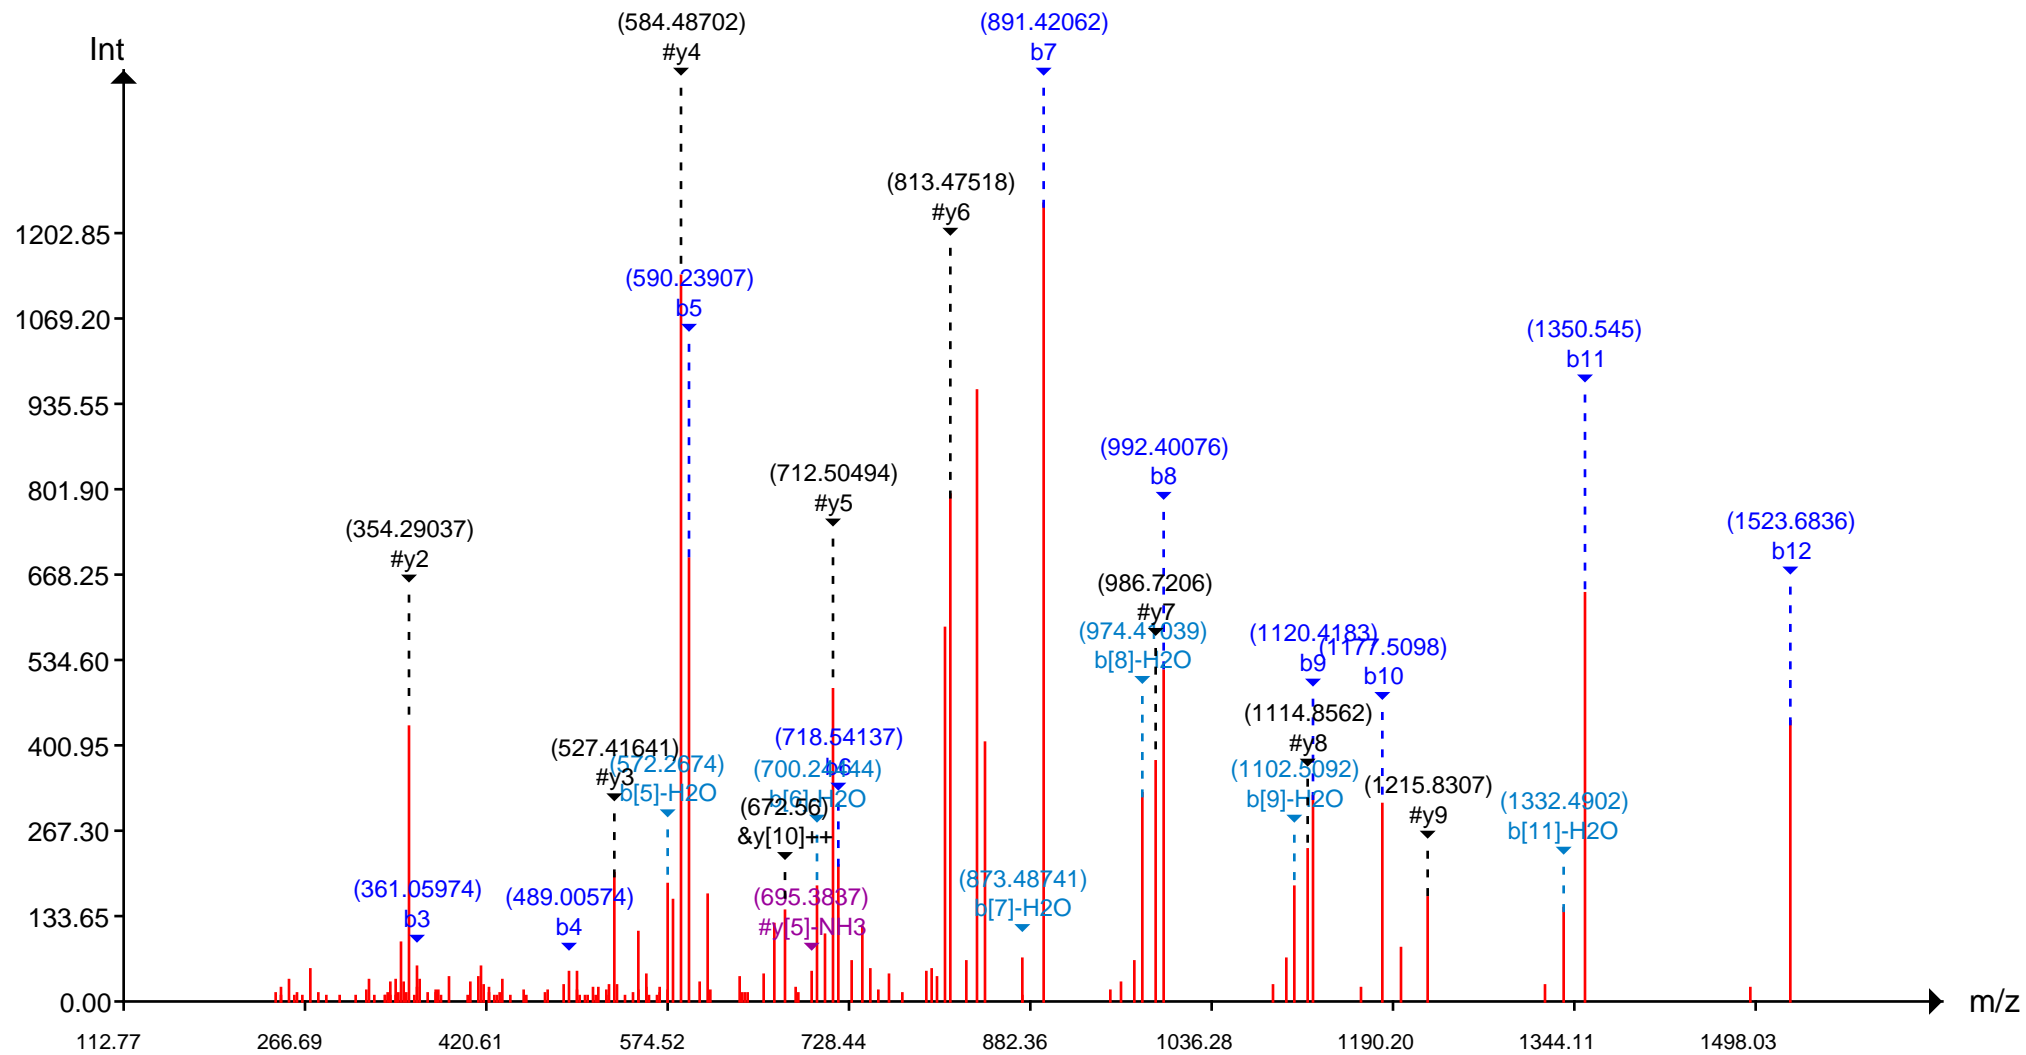

## Info

|                          |                                                      |                           |        |
|--------------------------|------------------------------------------------------|---------------------------|--------|
| <b>Modified Sequence</b> | AcD3-GEEQTQK<AcD3K*>TQGK<AcD3K*>K<AcD3K*>R<C13>-COOH | <b>Ion score</b>          | 79.28  |
| <b>Protein</b>           | Q9UEE9                                               | <b>Confidence level</b>   | 99.00% |
| <b>Precursor m/z</b>     | 852.47404                                            | <b>Identity Threshold</b> | 48.07  |
| <b>Charge</b>            | 2+                                                   | <b>Mass error</b>         | 4.1E-5 |

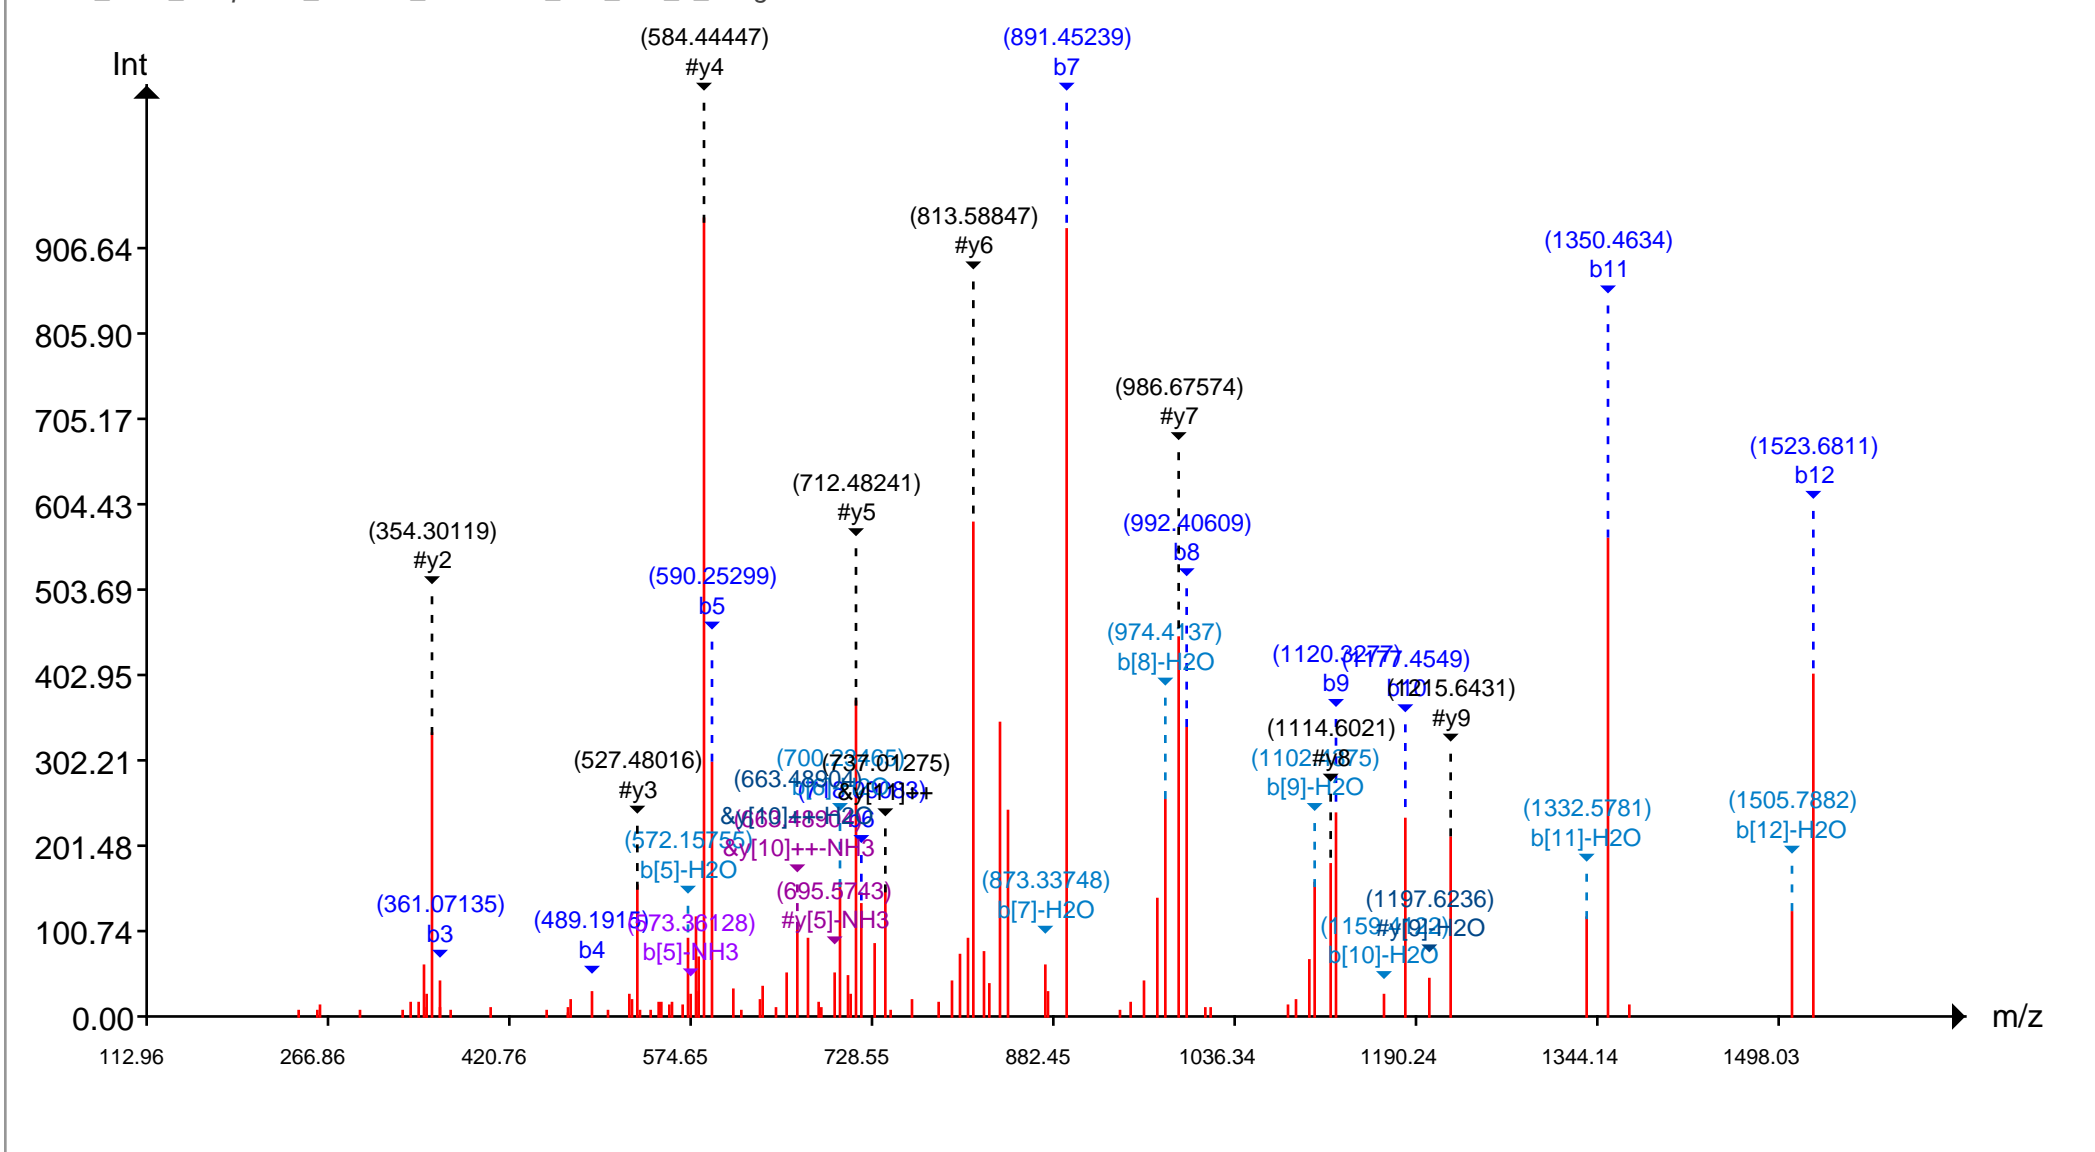

## Info

|                          |                                                      |                           |         |
|--------------------------|------------------------------------------------------|---------------------------|---------|
| <b>Modified Sequence</b> | AcD3-GEEQTQK<AcD3K*>TQGK<AcD3K*>K<AcD3K*>R<C13>-COOH | <b>Ion score</b>          | 73.84   |
| <b>Protein</b>           | Q9UEE9                                               | <b>Confidence level</b>   | 99.00%  |
| <b>Precursor m/z</b>     | 852.47415                                            | <b>Identity Threshold</b> | 48.08   |
| <b>Charge</b>            | 2+                                                   | <b>Mass error</b>         | 2.61E-4 |

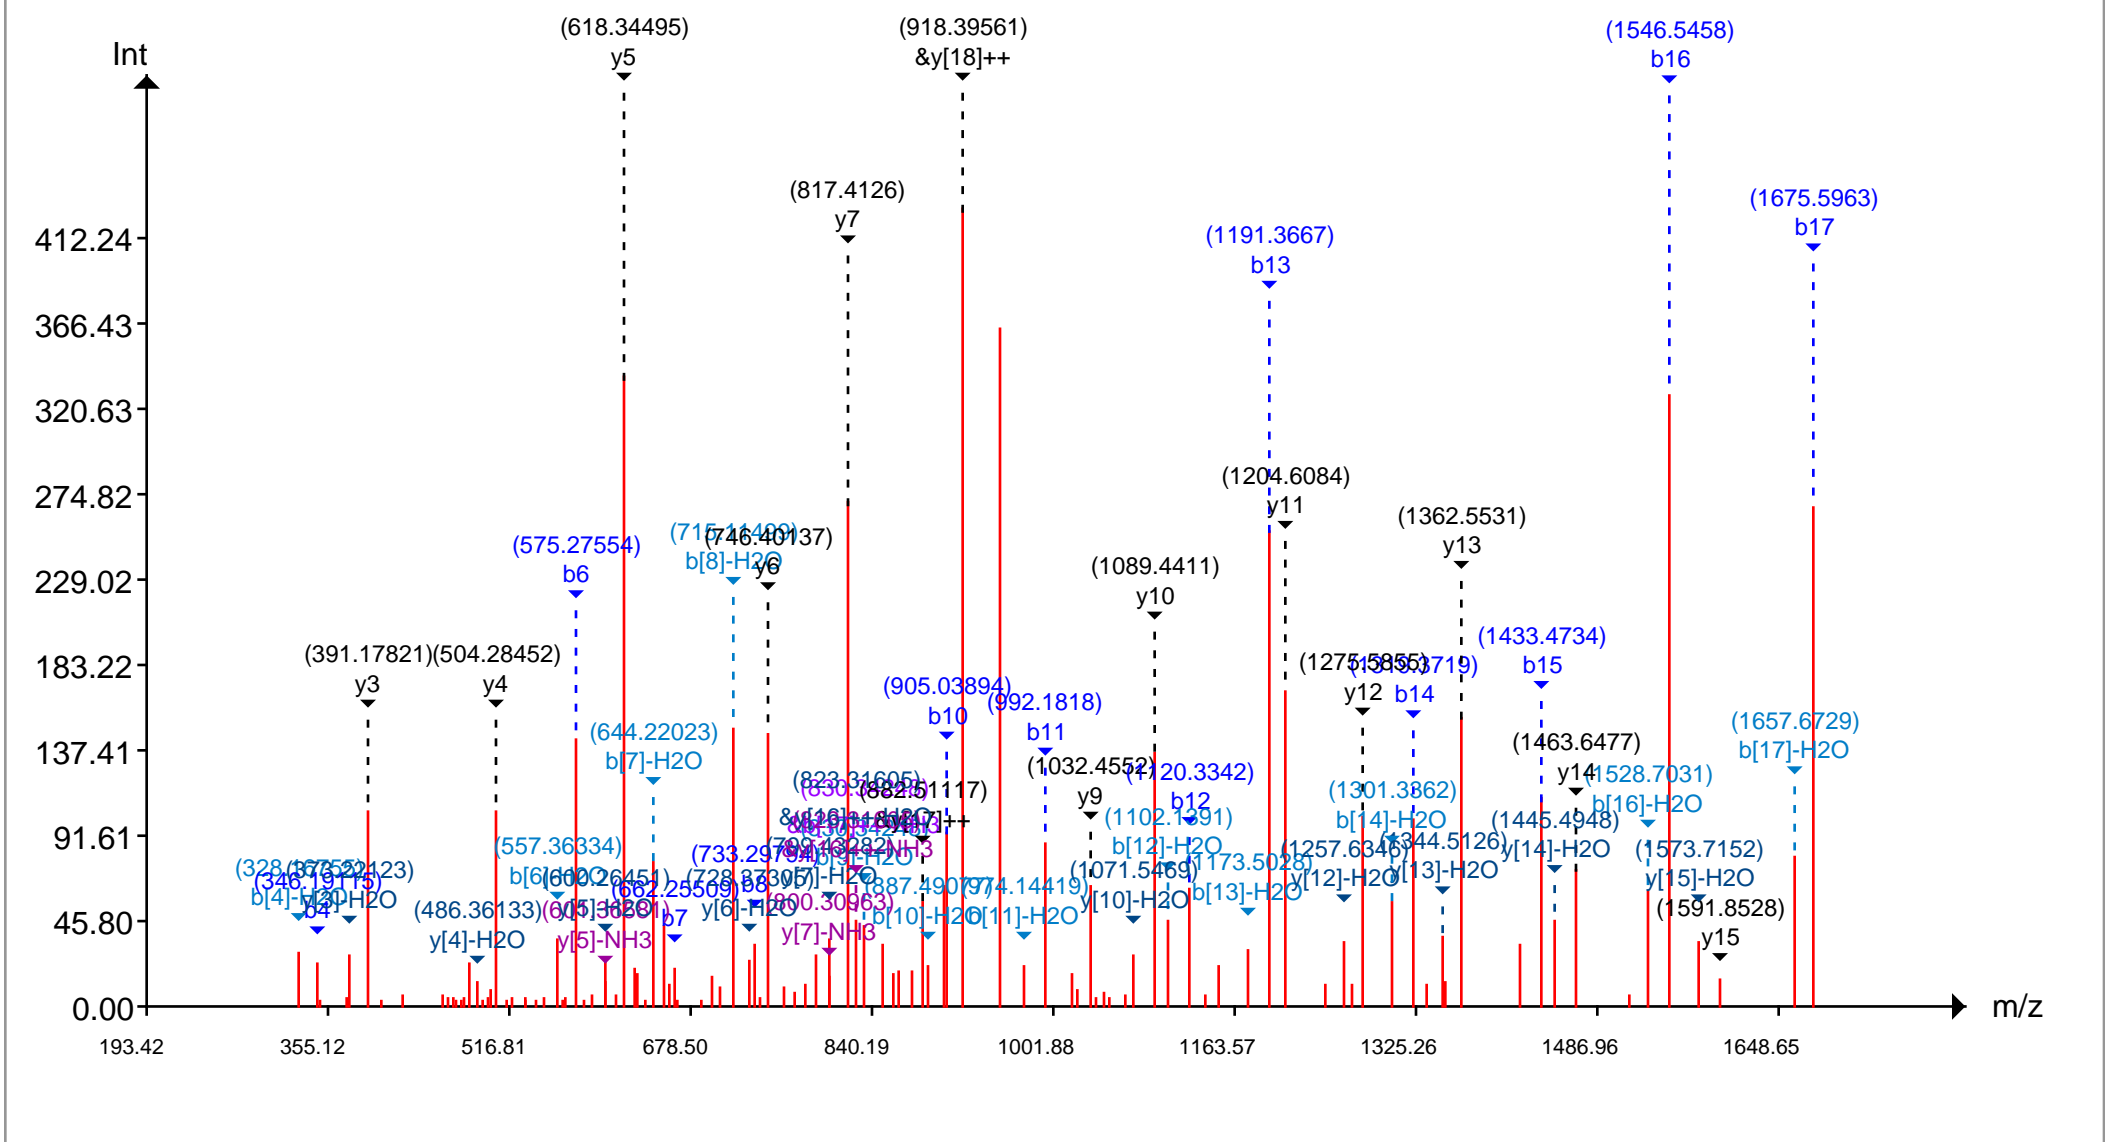

## Info

|                          |                                |                           |         |
|--------------------------|--------------------------------|---------------------------|---------|
| <b>Modified Sequence</b> | AcD3-GATAQTSADGGSQAQNLESR-COOH | <b>Ion score</b>          | 109.62  |
| <b>Protein</b>           | Q9Y5V3                         | <b>Confidence level</b>   | 99.00%  |
| <b>Precursor m/z</b>     | 968.95541                      | <b>Identity Threshold</b> | 46.77   |
| <b>Charge</b>            | 2+                             | <b>Mass error</b>         | 1.35E-4 |

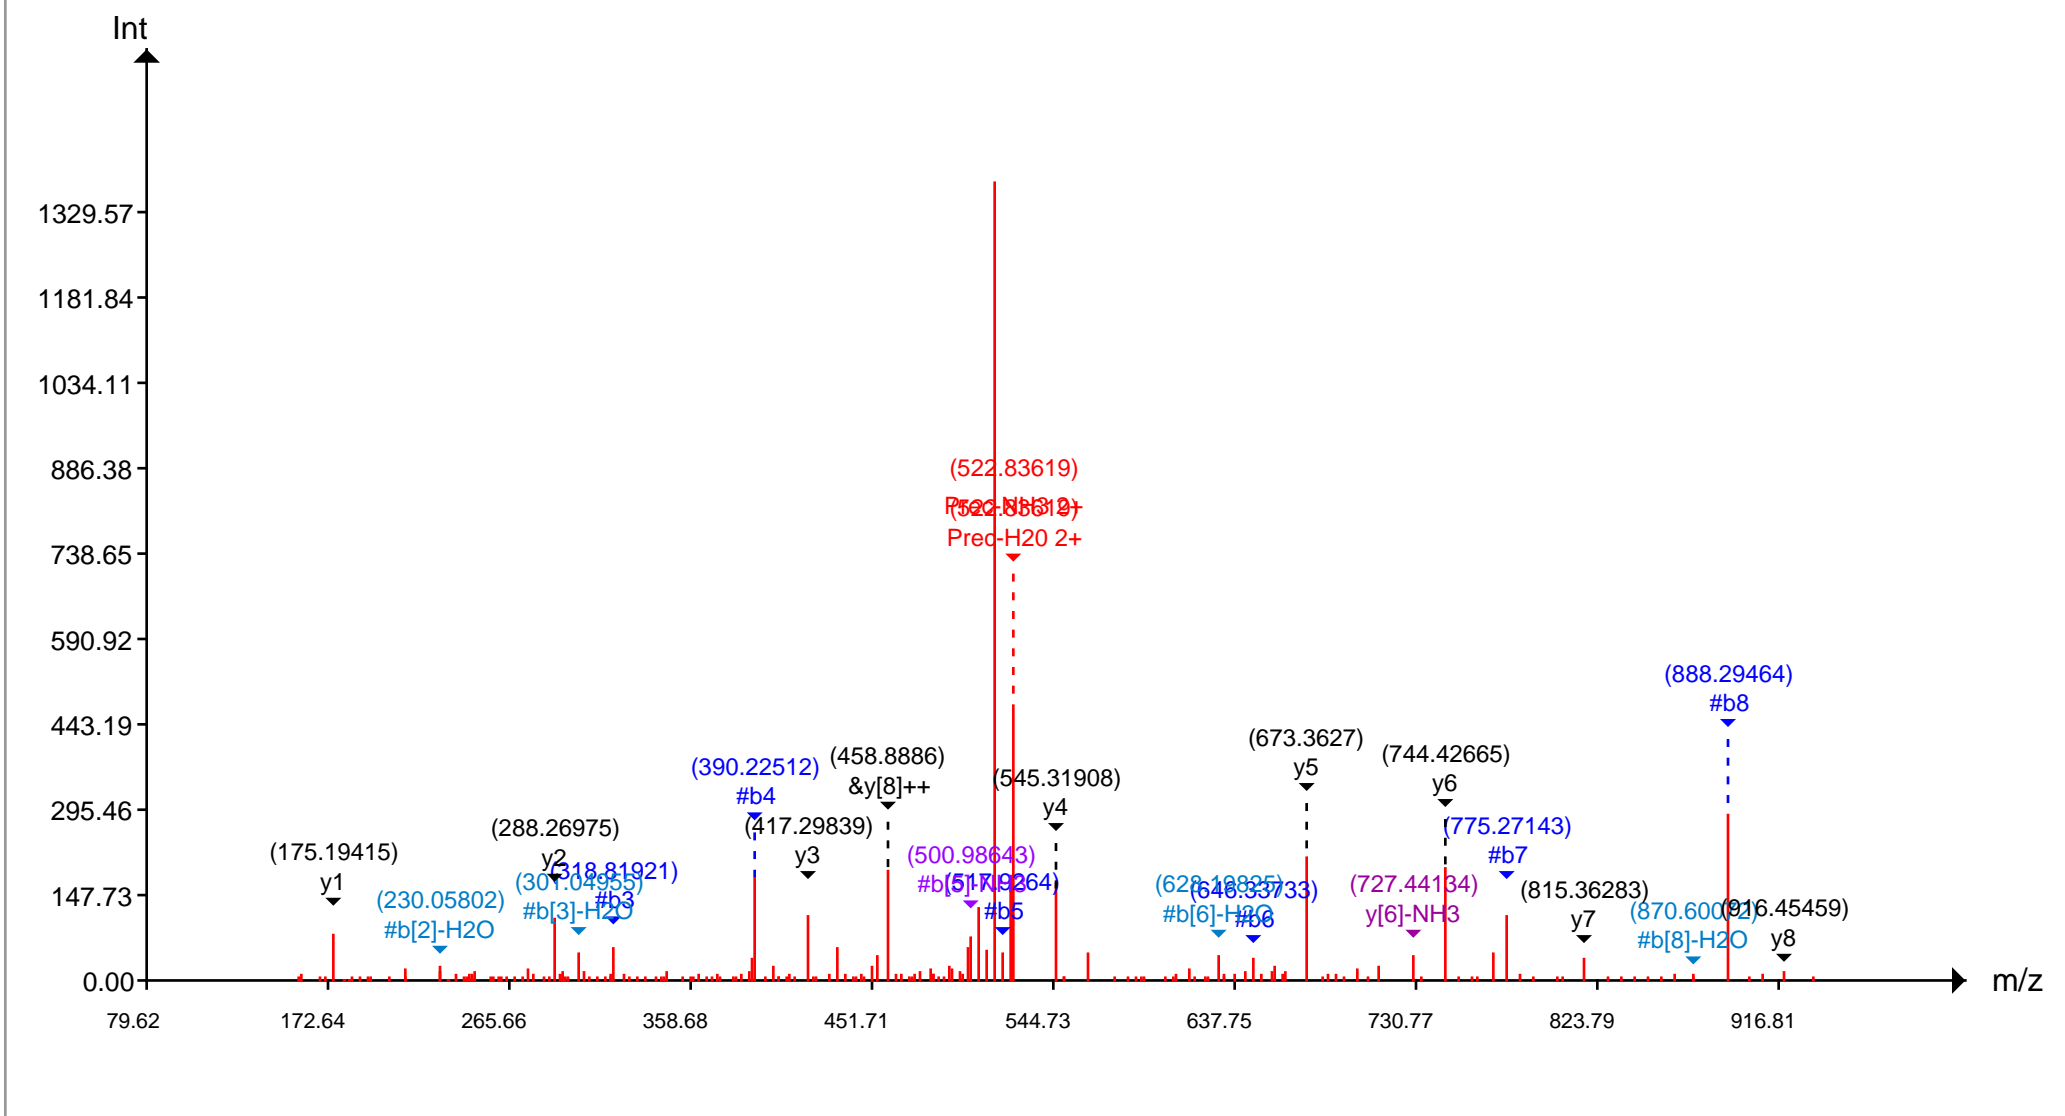

## Info

|                          |                     |                           |         |
|--------------------------|---------------------|---------------------------|---------|
| <b>Modified Sequence</b> | AcD3-TTAAQQELR-COOH | <b>Ion score</b>          | 59.34   |
| <b>Protein</b>           | P35580              | <b>Confidence level</b>   | 99.00%  |
| <b>Precursor m/z</b>     | 531.78459           | <b>Identity Threshold</b> | 49.03   |
| <b>Charge</b>            | 2+                  | <b>Mass error</b>         | 1.85E-4 |

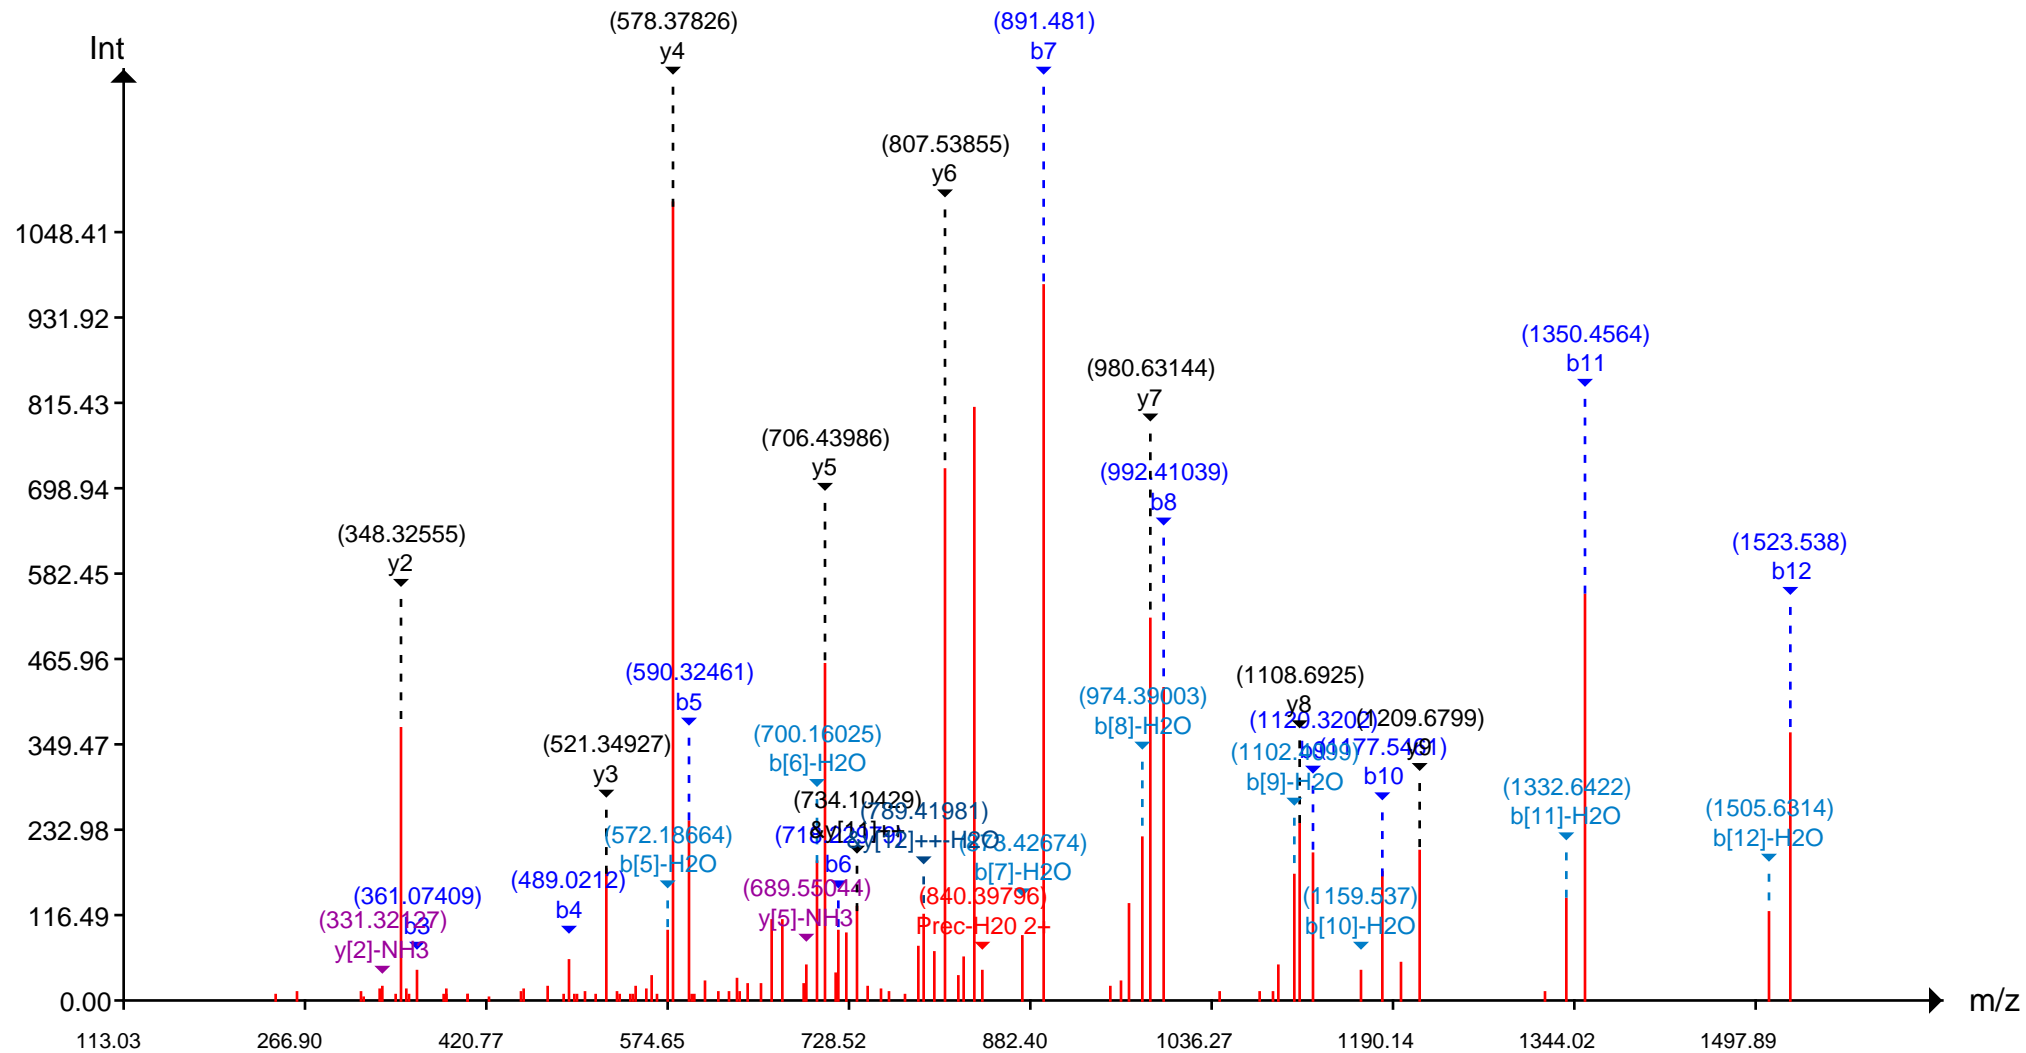

## Info

|                          |                                                 |                           |         |
|--------------------------|-------------------------------------------------|---------------------------|---------|
| <b>Modified Sequence</b> | AcD3-GEEQTQK<AcD3K*>TQGK<AcD3K*>K<AcD3K*>R-COOH | <b>Ion score</b>          | 90.68   |
| <b>Protein</b>           | Q9UEE9                                          | <b>Confidence level</b>   | 99.00%  |
| <b>Precursor m/z</b>     | 849.46419                                       | <b>Identity Threshold</b> | 48.60   |
| <b>Charge</b>            | 2+                                              | <b>Mass error</b>         | 4.83E-4 |



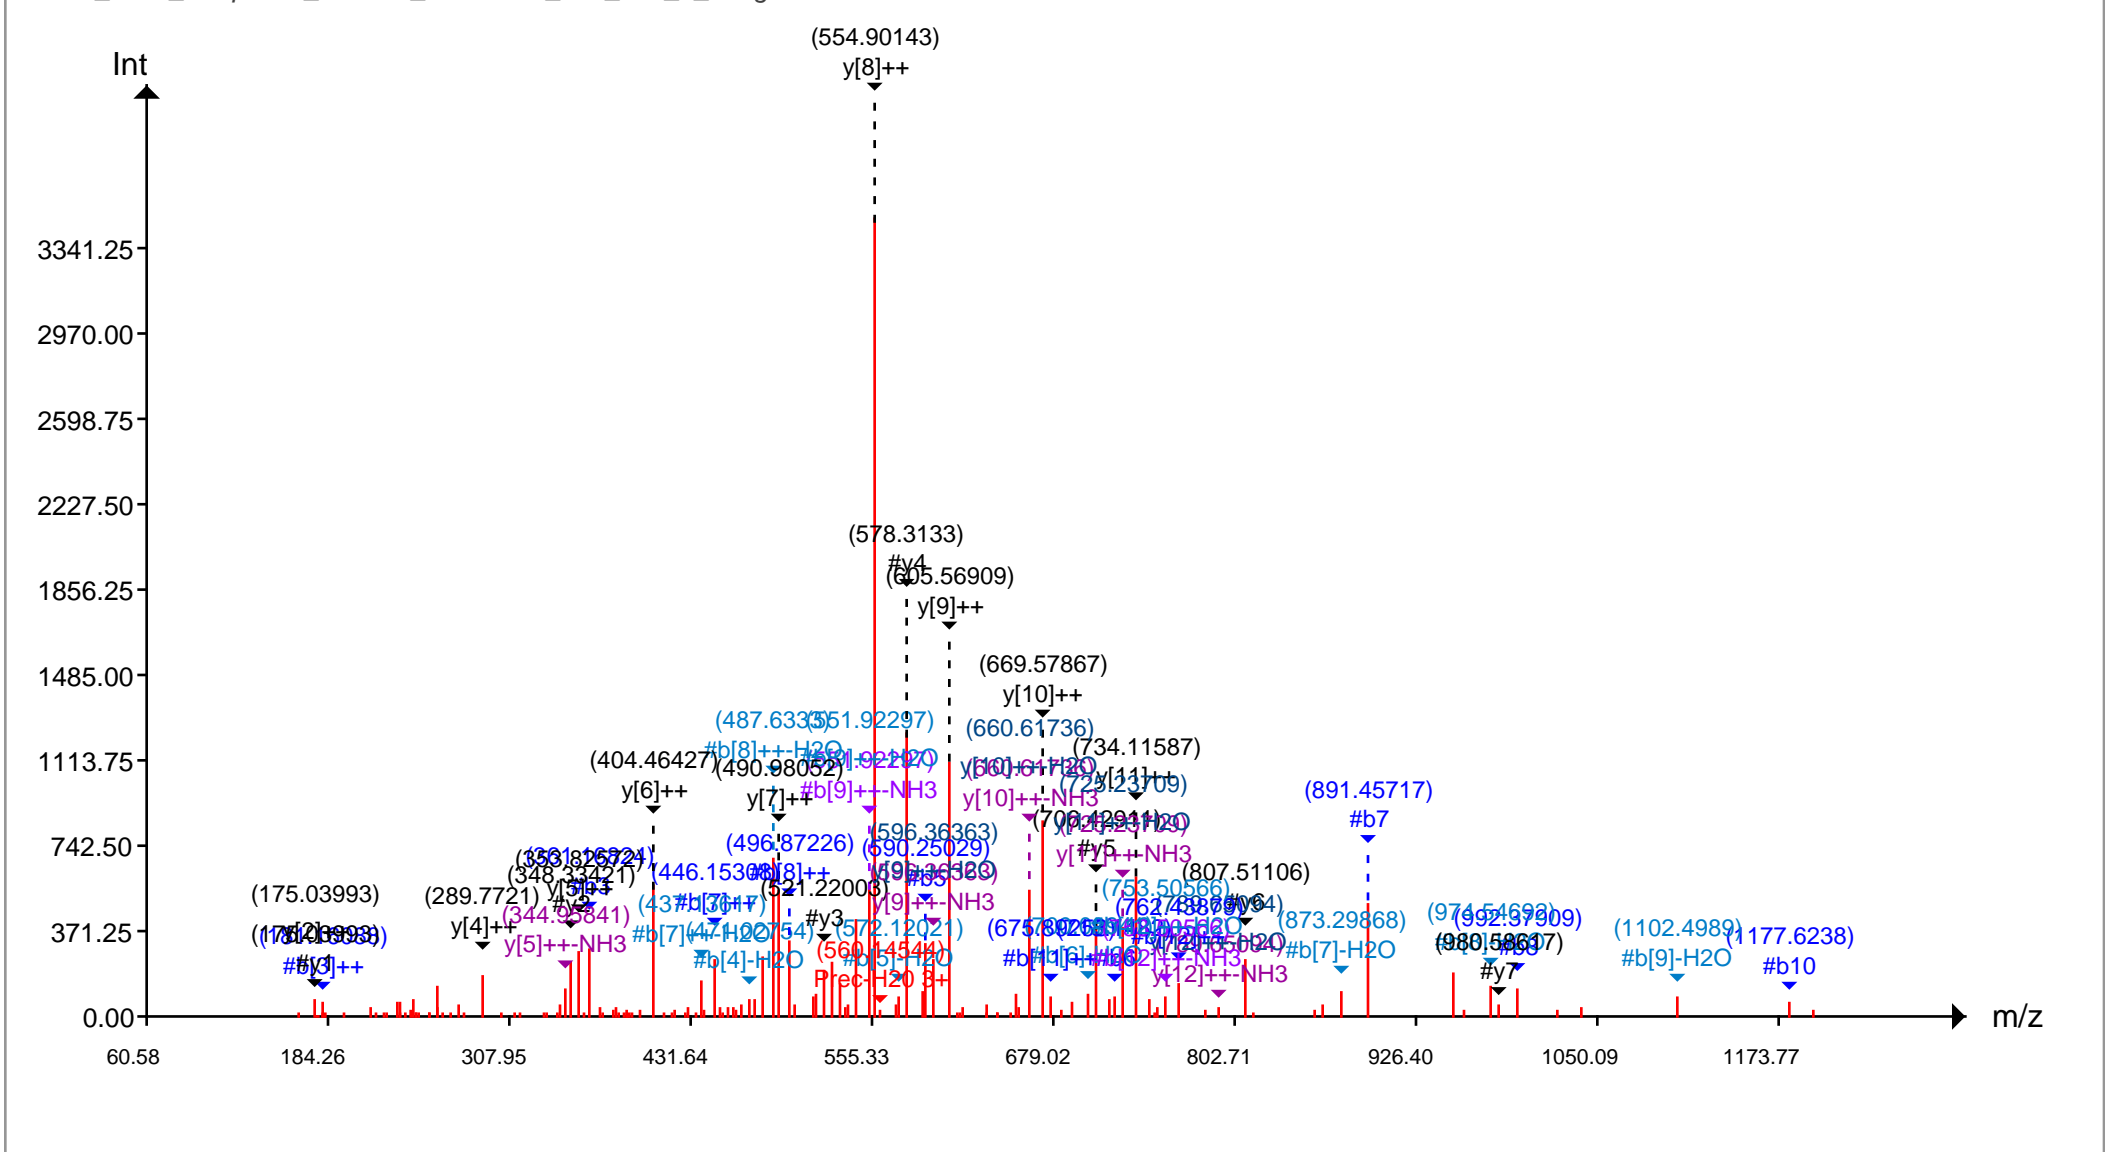

| Info                     |                                                 |                           |           |
|--------------------------|-------------------------------------------------|---------------------------|-----------|
| <b>Modified Sequence</b> | AcD3-GEEQTQK<AcD3K*>TQGK<AcD3K*>K<AcD3K*>R-COOH | <b>Ion score</b>          | 68.57     |
| <b>Protein</b>           | Q9UEE9                                          | <b>Confidence level</b>   | 99.00%    |
| <b>Precursor m/z</b>     | 566.64469                                       | <b>Identity Threshold</b> | 48.60     |
| <b>Charge</b>            | 3+                                              | <b>Mass error</b>         | -0.001103 |

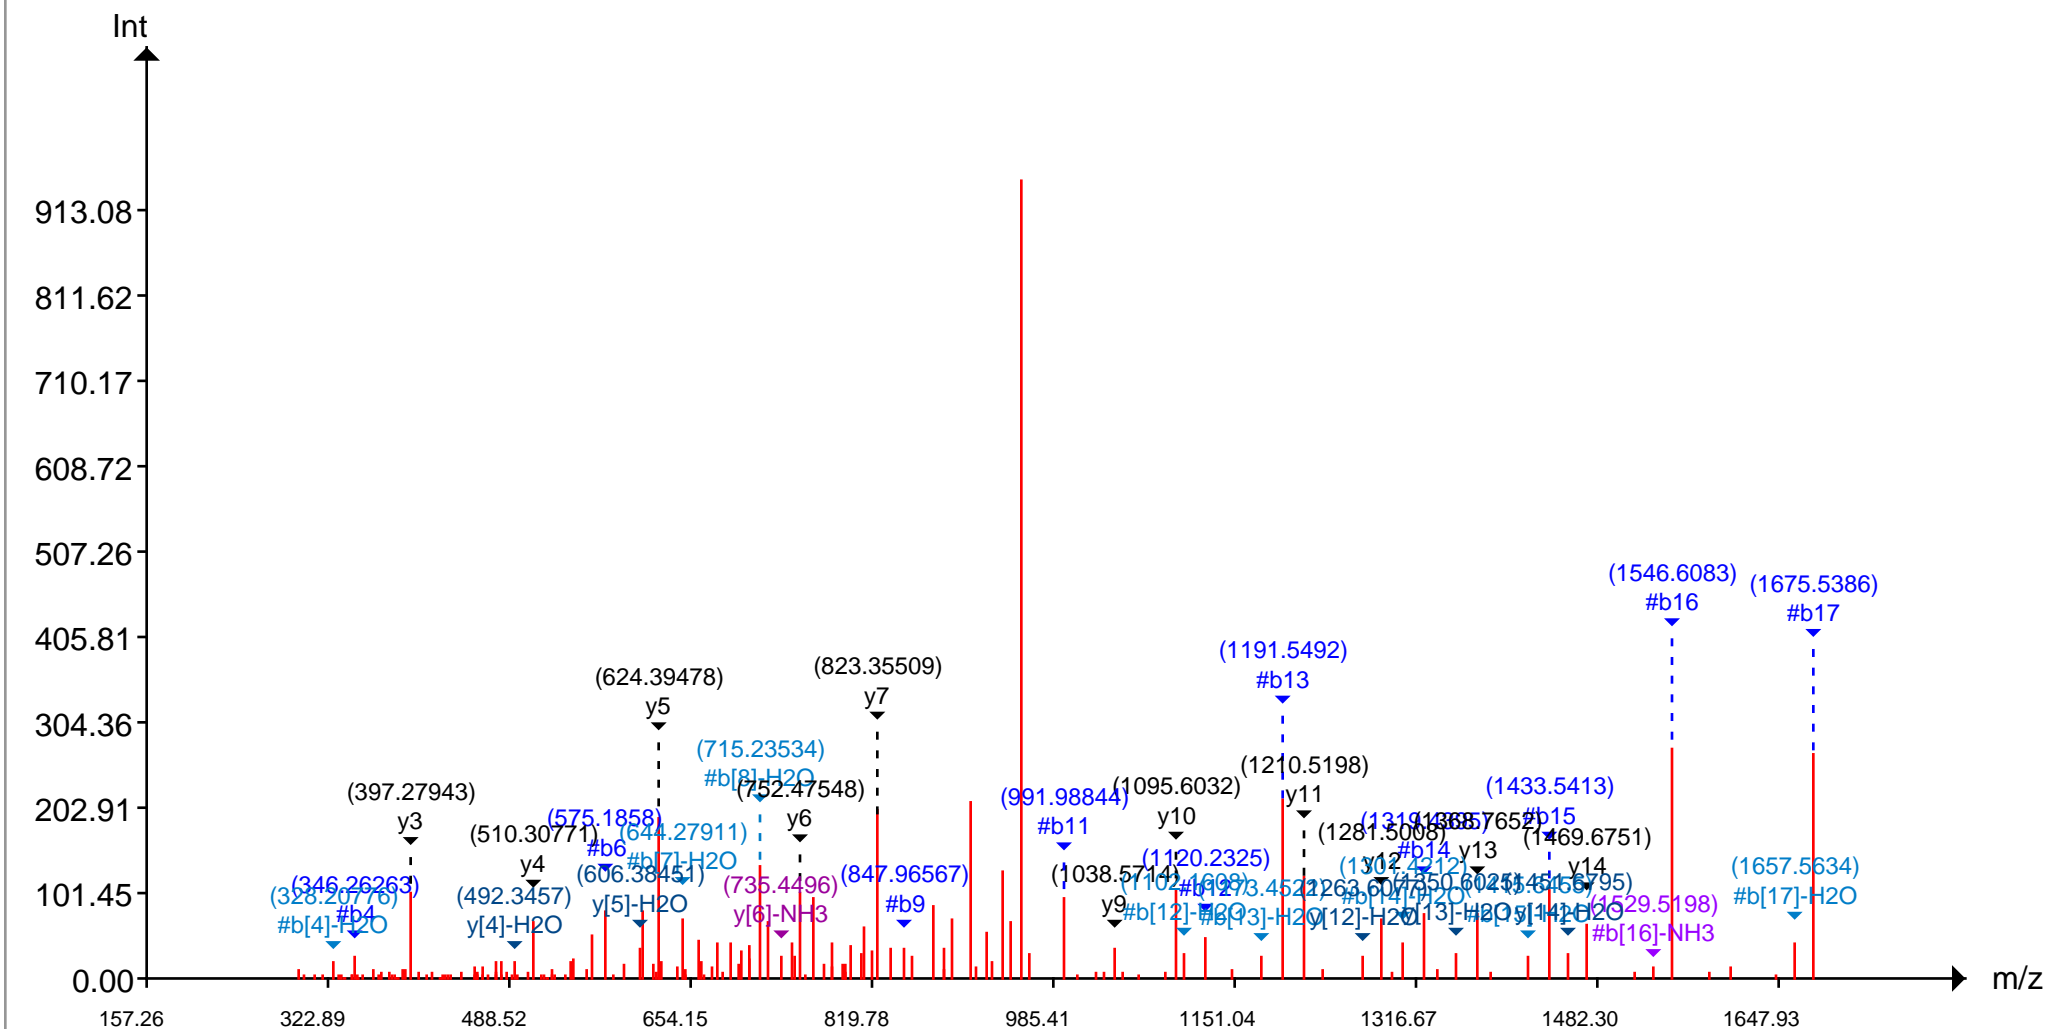

## Info

**Modified Sequence** AcD3-GATAQTSADGSQAQNLESR<C13>-COOH

**Ion score** 97.77

**Protein** Q9Y5V3

**Confidence level** 99.00%

**Precursor m/z** 971.96531

**Identity Threshold** 47.55

**Charge** 2+

**Mass error** -2.07E-4

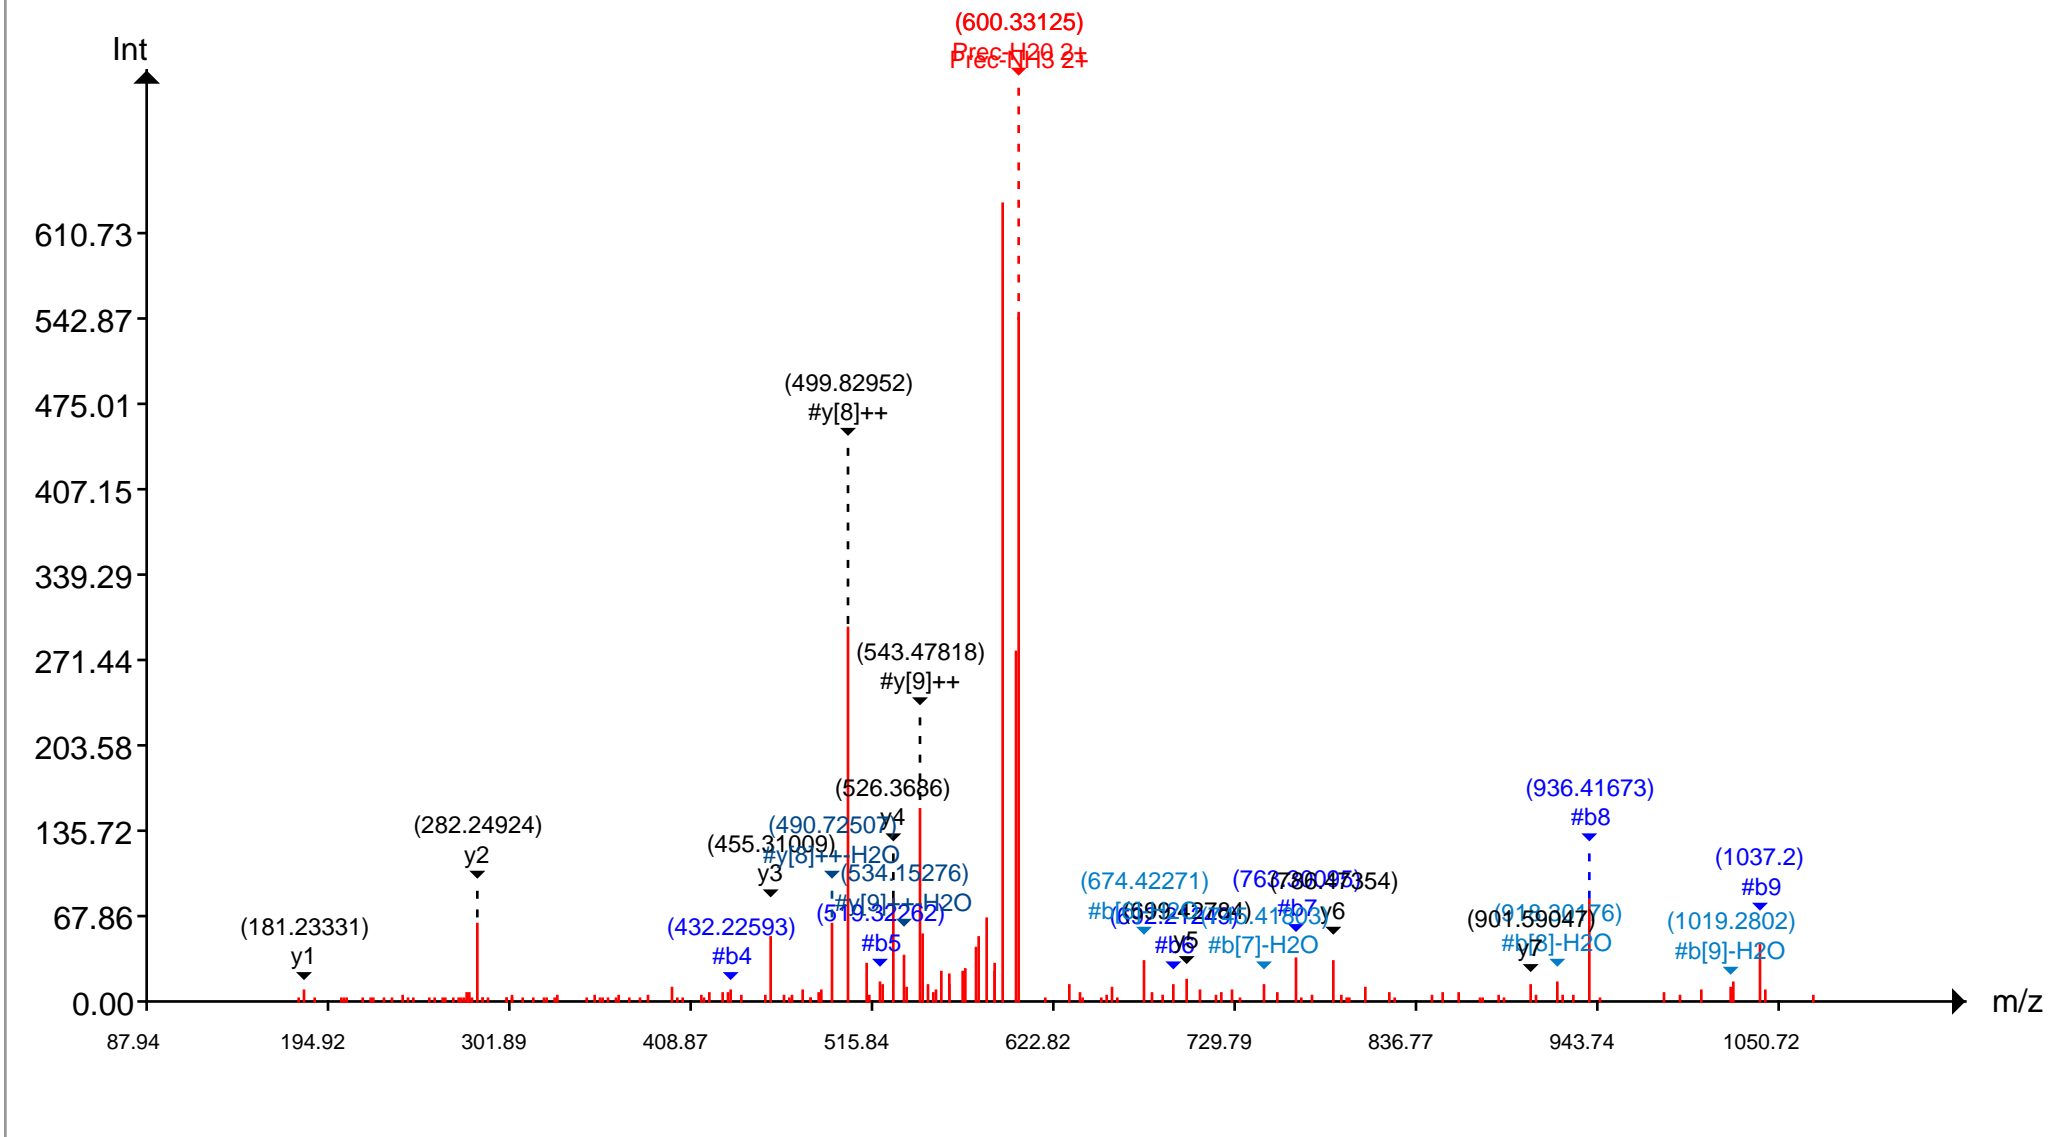

## Info

**Modified Sequence** AcD3-SSPDSK<AcD3K\*>AK<AcD3K\*>TR<C13>-COOH

**Ion score** 49.62

**Protein** Q9UQ35

**Confidence level** 99.00%

**Precursor m/z** 609.34227

**Identity Threshold** 48.51

**Charge** 2+

**Mass error** -5.14E-4

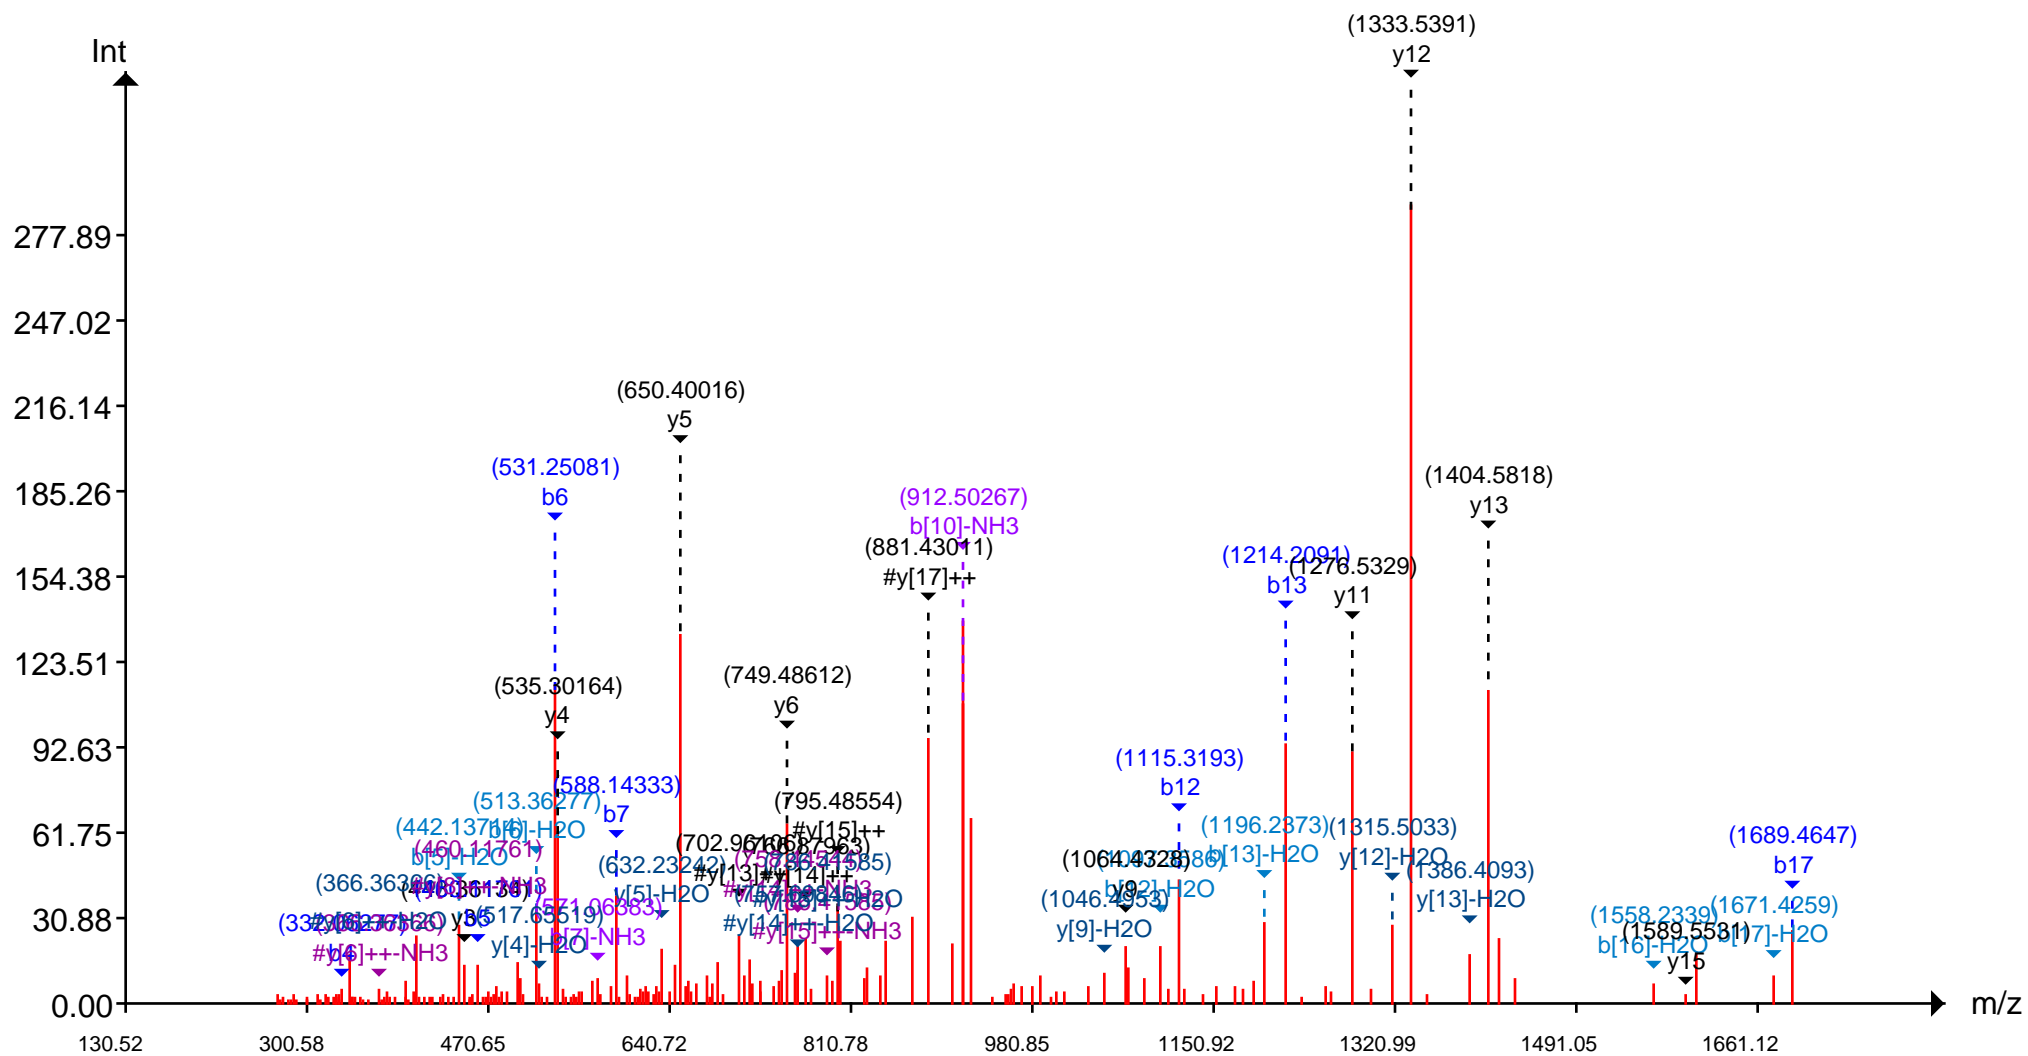

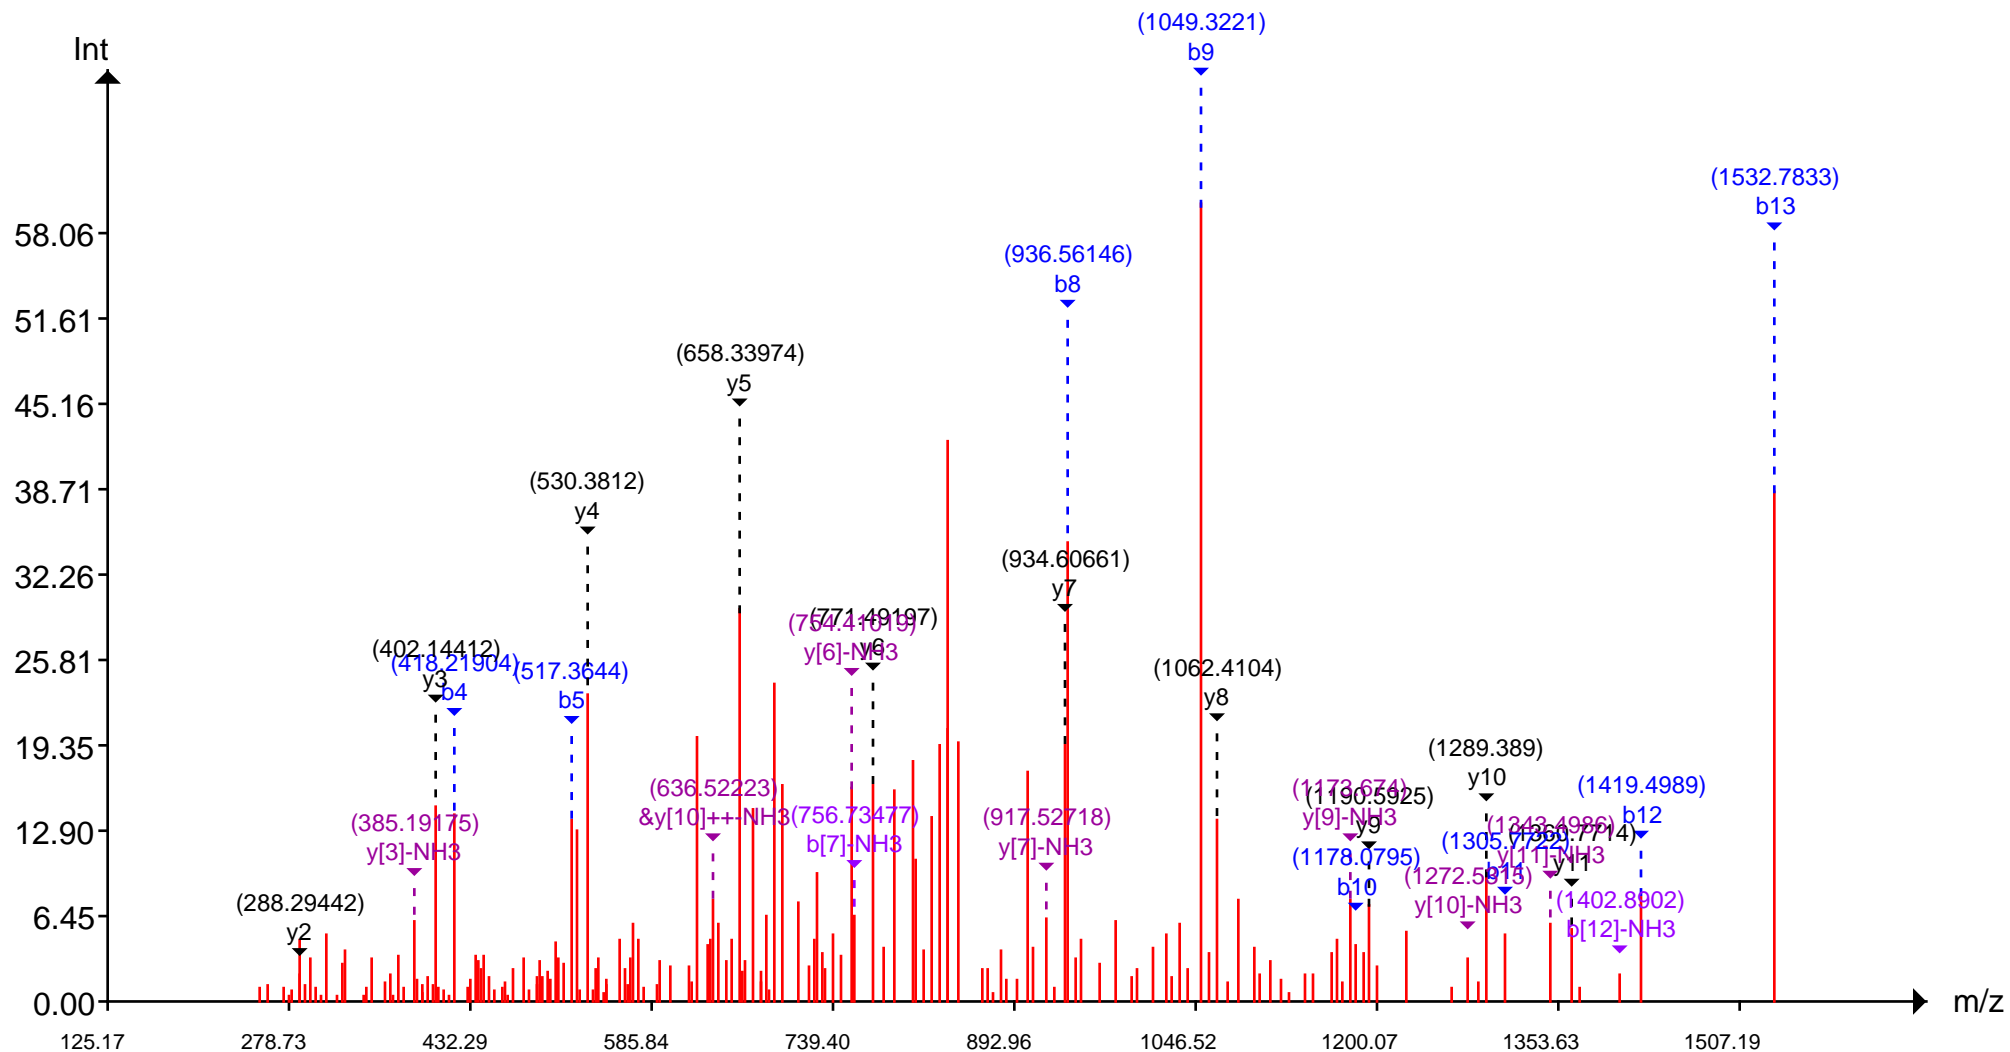

## Info

|                          |                          |                           |         |
|--------------------------|--------------------------|---------------------------|---------|
| <b>Modified Sequence</b> | AcD3-STLAVQQYIQQNIR-COOH | <b>Ion score</b>          | 61.52   |
| <b>Protein</b>           | Q9Y3A3                   | <b>Confidence level</b>   | 99.00%  |
| <b>Precursor m/z</b>     | 853.96685                | <b>Identity Threshold</b> | 48.57   |
| <b>Charge</b>            | 2+                       | <b>Mass error</b>         | 1.11E-4 |

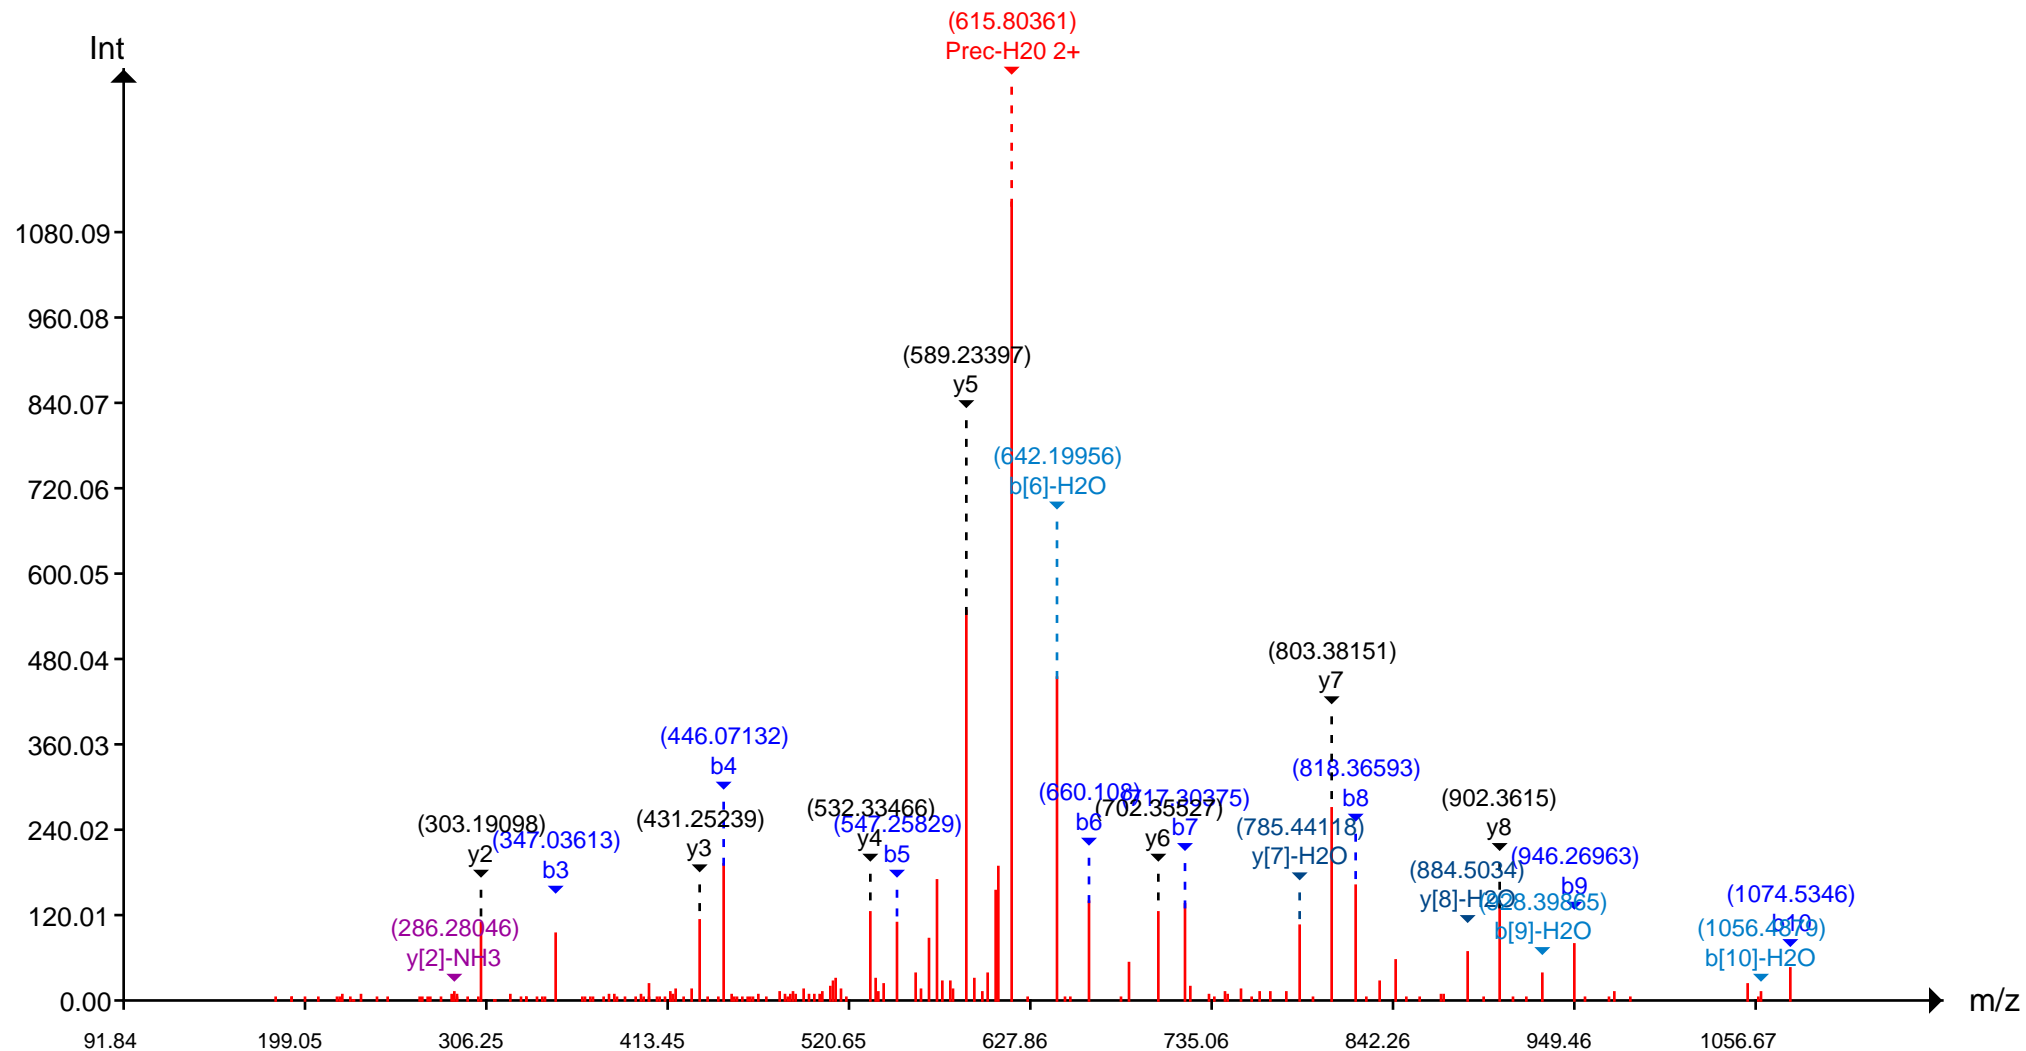

## Info

|                          |                               |                           |          |
|--------------------------|-------------------------------|---------------------------|----------|
| <b>Modified Sequence</b> | AcD3-AGK<AcD3K*>VTLGTQQR-COOH | <b>Ion score</b>          | 64.2     |
| <b>Protein</b>           | Q08AF3                        | <b>Confidence level</b>   | 99.00%   |
| <b>Precursor m/z</b>     | 624.86245                     | <b>Identity Threshold</b> | 47.59    |
| <b>Charge</b>            | 2+                            | <b>Mass error</b>         | -1.16E-4 |

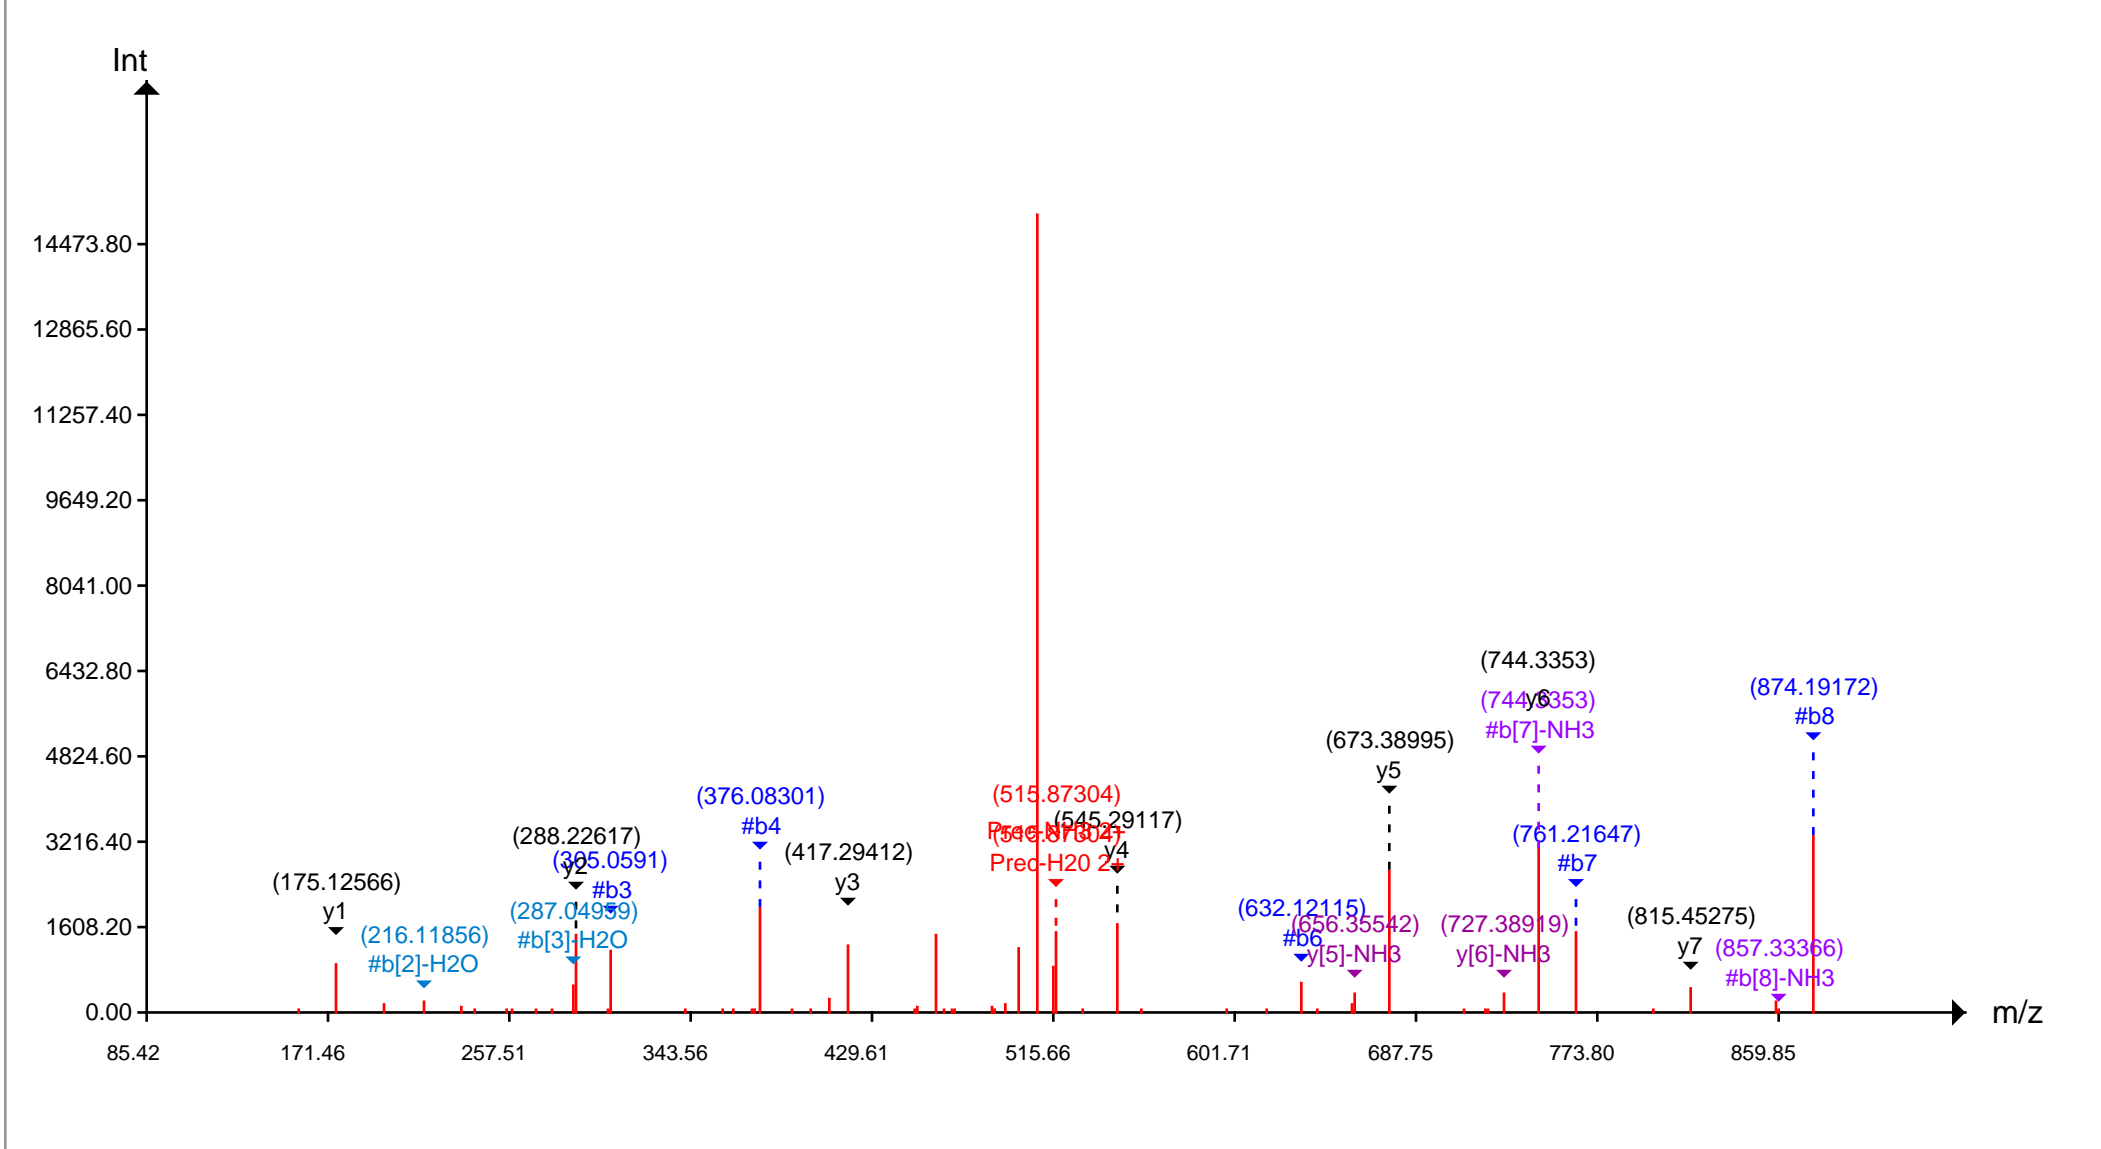

| Info                     |                     |                           |         |
|--------------------------|---------------------|---------------------------|---------|
| <b>Modified Sequence</b> | AcD3-STAAQQELR-COOH | <b>Ion score</b>          | 79.64   |
| <b>Protein</b>           | P35579              | <b>Confidence level</b>   | 99.00%  |
| <b>Precursor m/z</b>     | 524.77666           | <b>Identity Threshold</b> | 49.07   |
| <b>Charge</b>            | 2+                  | <b>Mass error</b>         | -2.0E-5 |

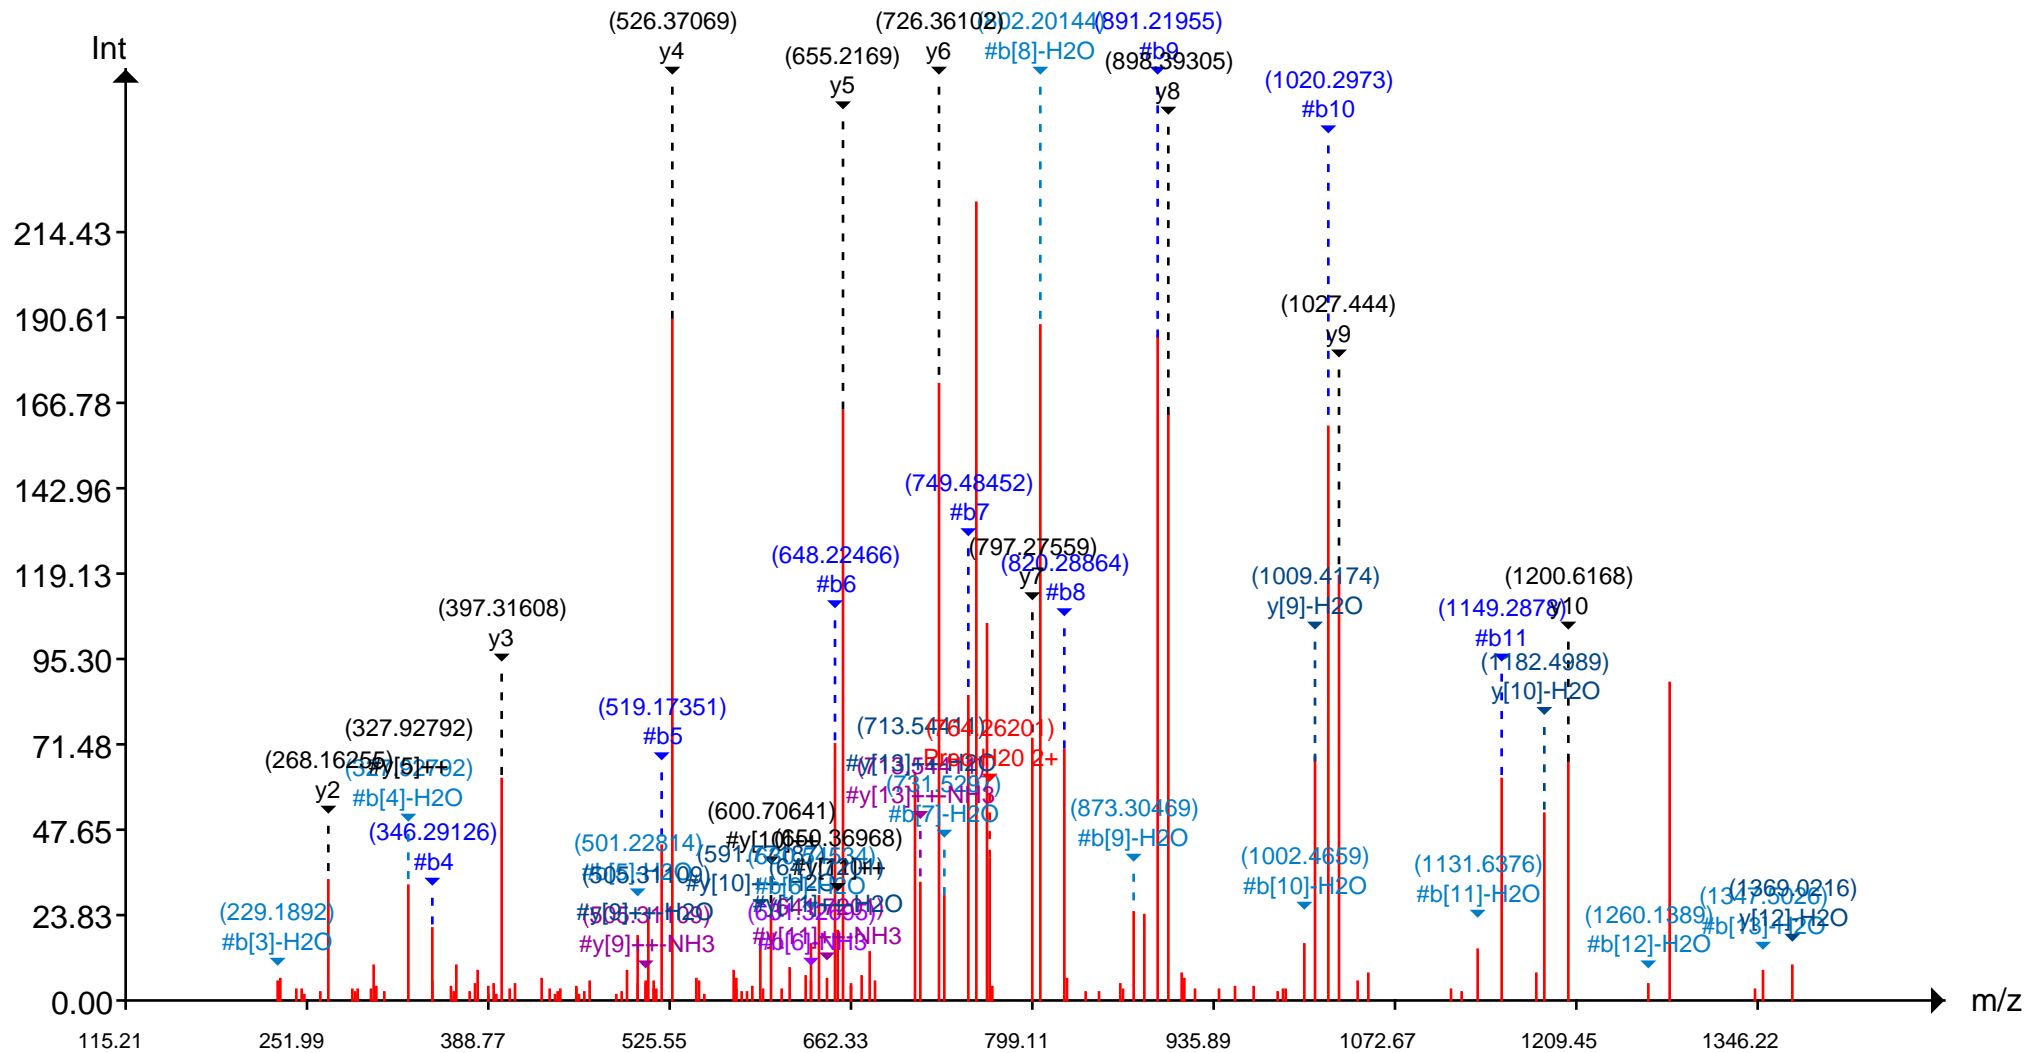

## Info

**Modified Sequence** AcD3-GGSVK<AcD3K\*>ETAAEEESR<C13>-COOH

**Protein** Q7Z5W3

**Precursor m/z** 773.38403

**Charge** 2+

**Ion score** 71.73

**Confidence level** 99.00%

**Identity Threshold** 48.45

**Mass error** 2.88E-4



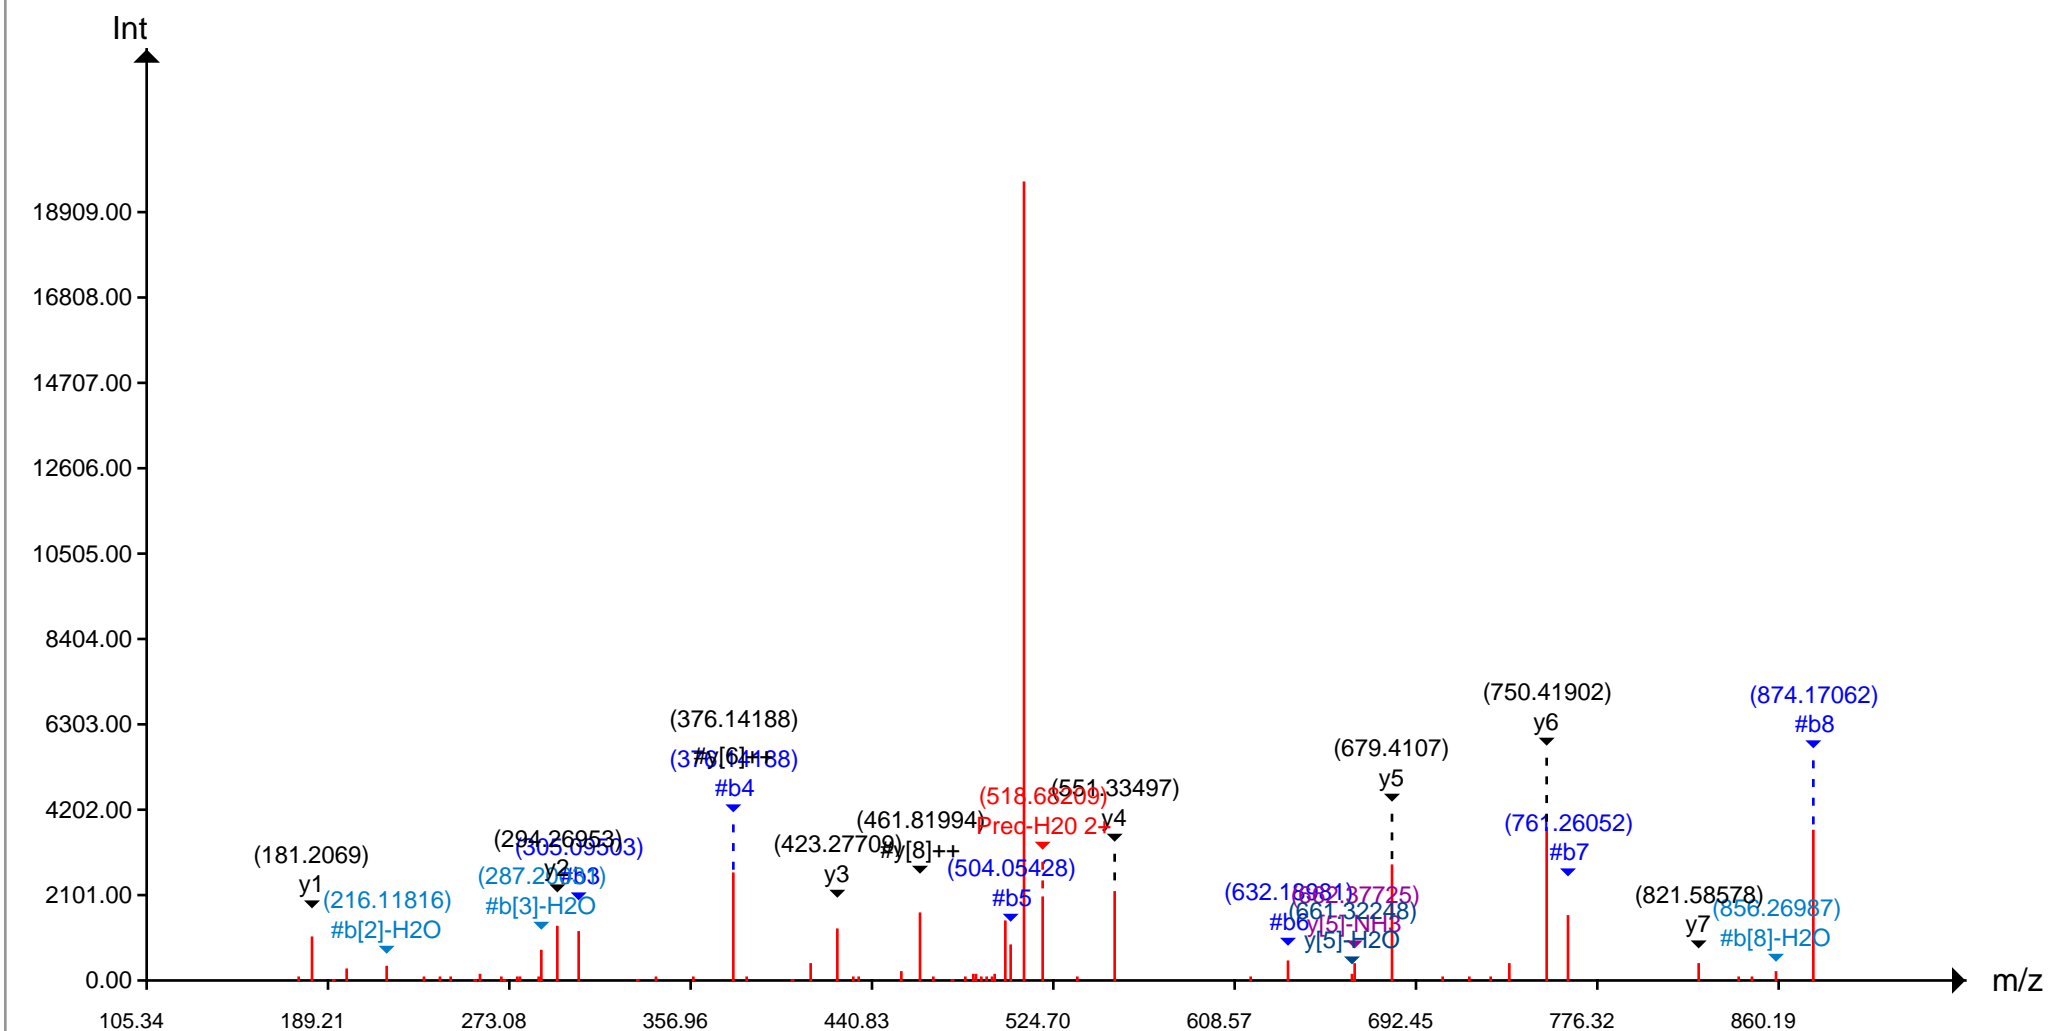

## Info

**Modified Sequence** AcD3-STAAQQELR<C13>-COOH

**Protein** P35579

**Precursor m/z** 527.78667

**Charge** 2+

**Ion score** 71.03

**Confidence level** 99.00%

**Identity Threshold** 48.62

**Mass error** -1.41E-4

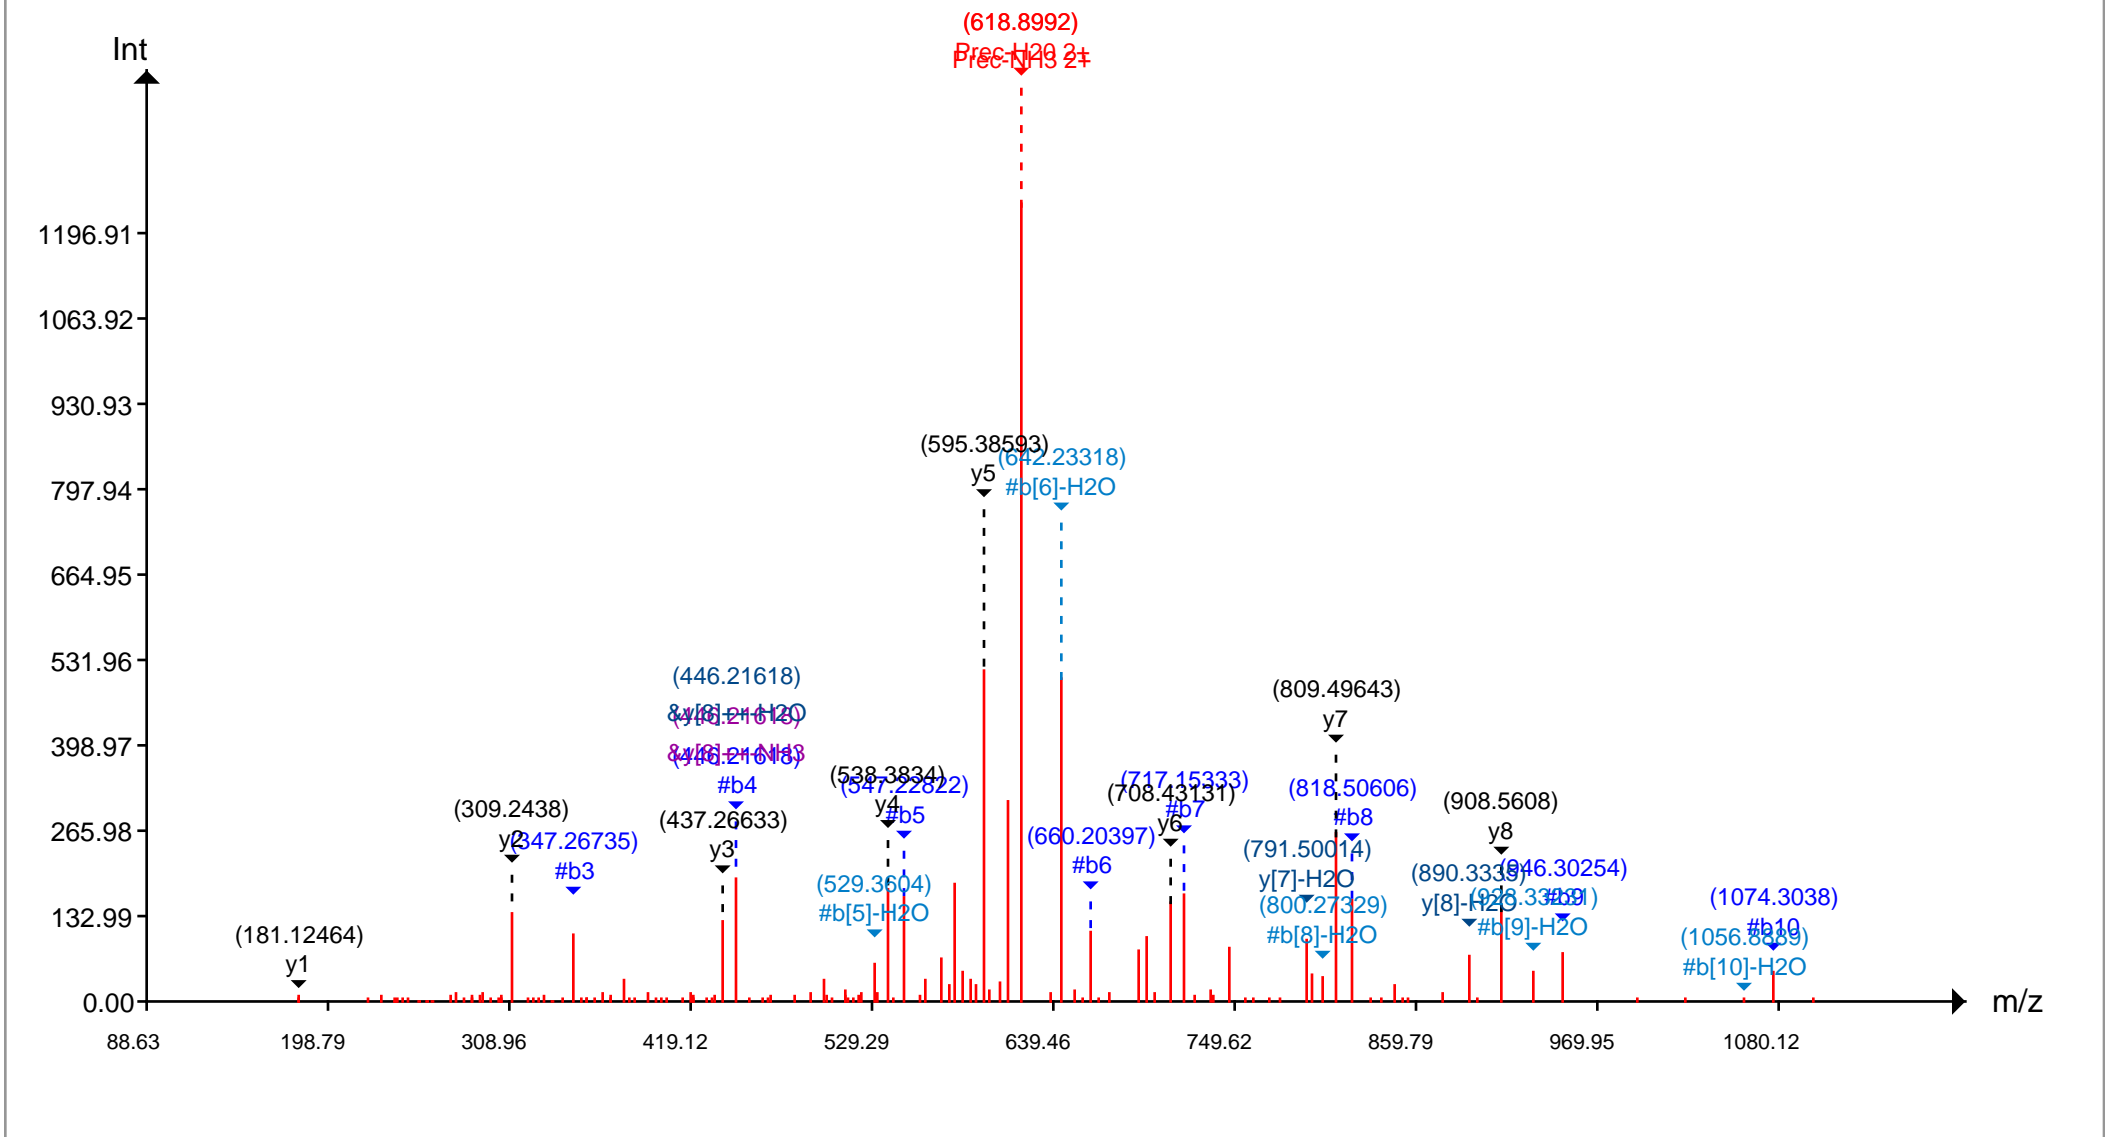

## Info

|                          |                                    |                           |          |
|--------------------------|------------------------------------|---------------------------|----------|
| <b>Modified Sequence</b> | AcD3-AGK<AcD3K*>VTLGTQQR<C13>-COOH | <b>Ion score</b>          | 63.96    |
| <b>Protein</b>           | Q08AF3                             | <b>Confidence level</b>   | 99.00%   |
| <b>Precursor m/z</b>     | 627.87236                          | <b>Identity Threshold</b> | 46.36    |
| <b>Charge</b>            | 2+                                 | <b>Mass error</b>         | -4.38E-4 |

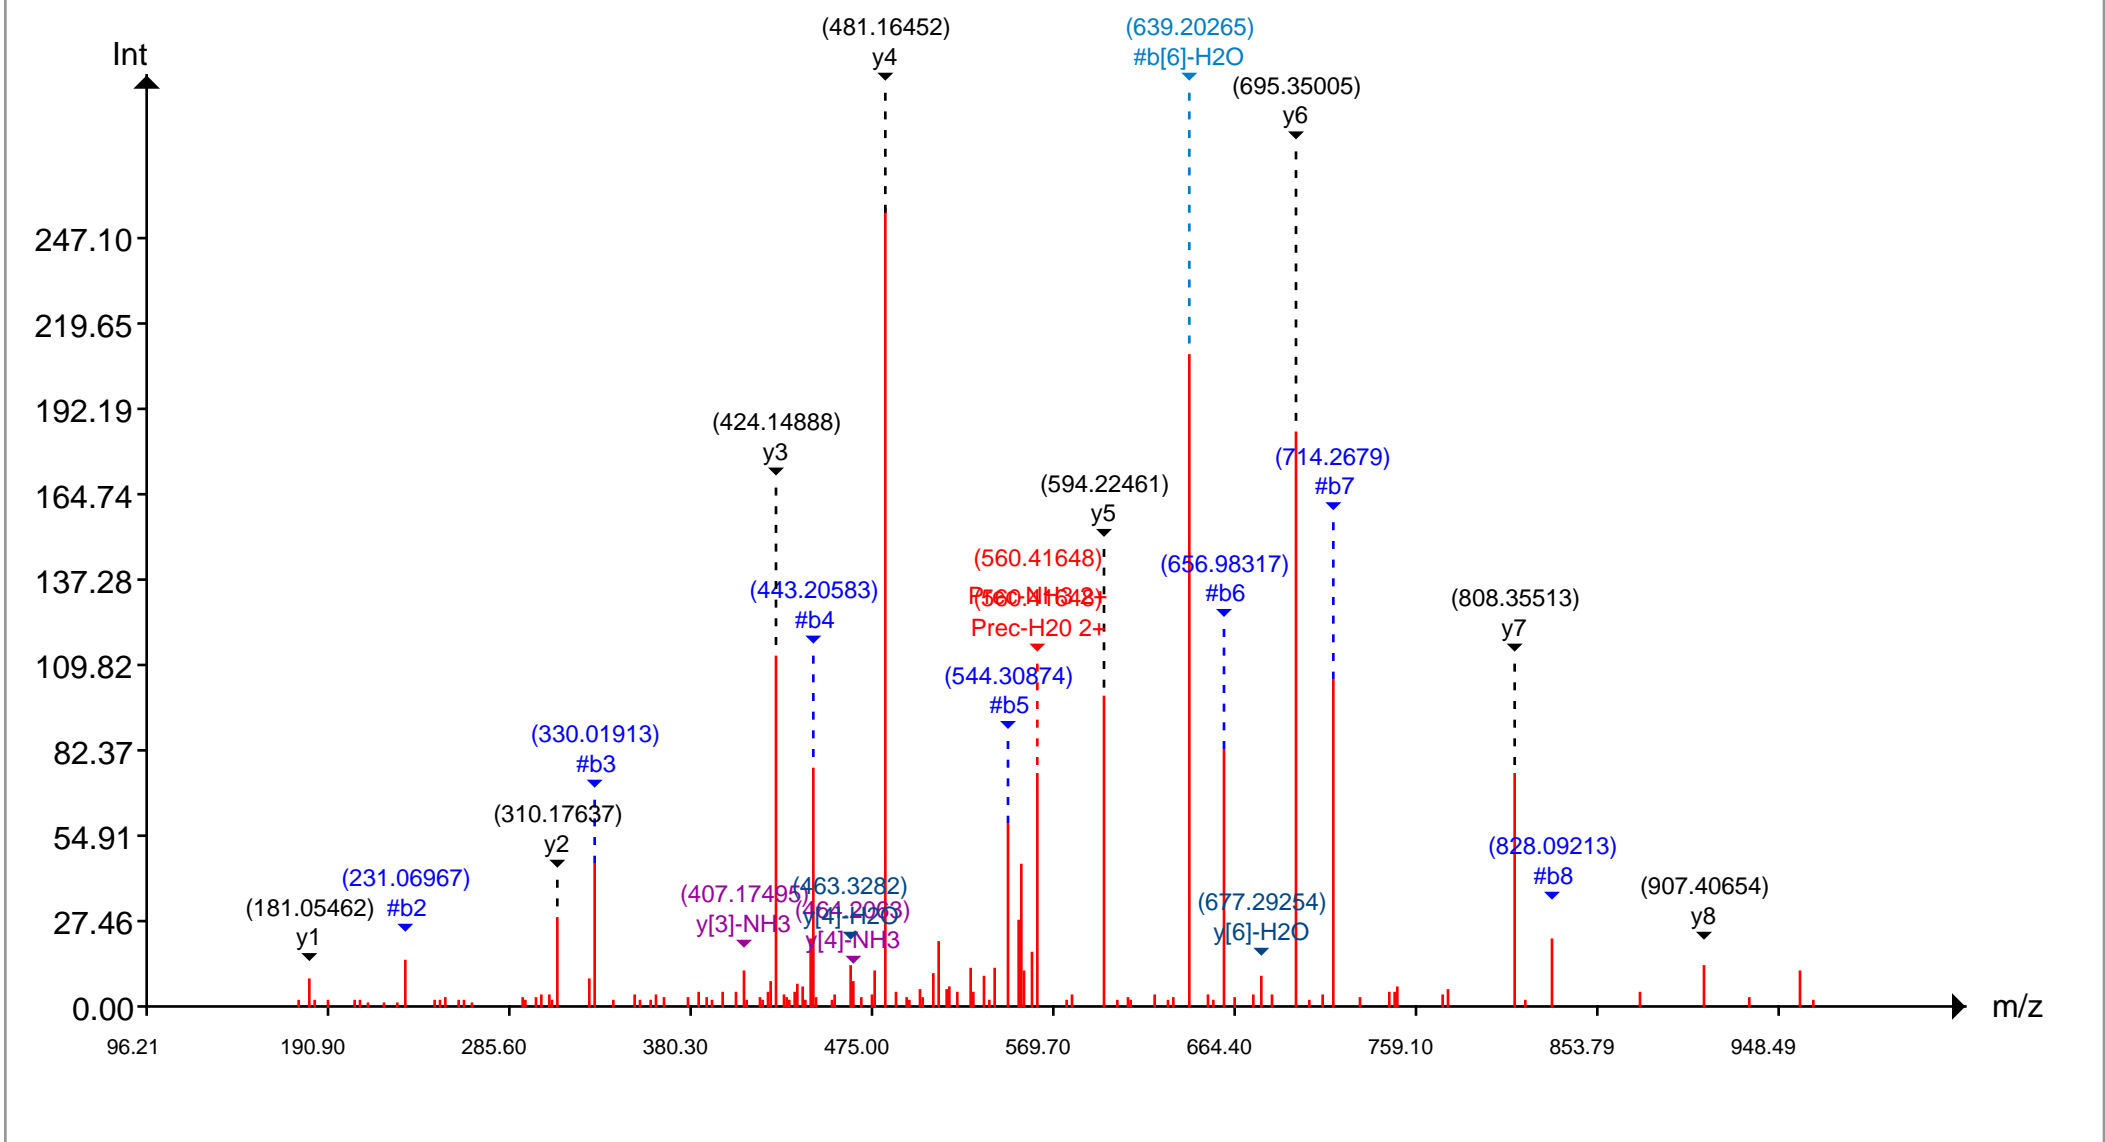

## Info

|                          |                                                                                |                           |          |
|--------------------------|--------------------------------------------------------------------------------|---------------------------|----------|
| <b>Modified Sequence</b> | AcD3-GQVITIGNER<C13>-COOH                                                      | <b>Ion score</b>          | 81.1     |
| <b>Protein</b>           | P62736, Q562R1, Q9BYX7, P60709, P68032, P63261, P63267, P68133, Q6S8J3, A5A3E0 | <b>Confidence level</b>   | 99.00%   |
| <b>Precursor m/z</b>     | 569.3234                                                                       | <b>Identity Threshold</b> | 48.34    |
| <b>Charge</b>            | 2+                                                                             | <b>Mass error</b>         | -1.98E-4 |

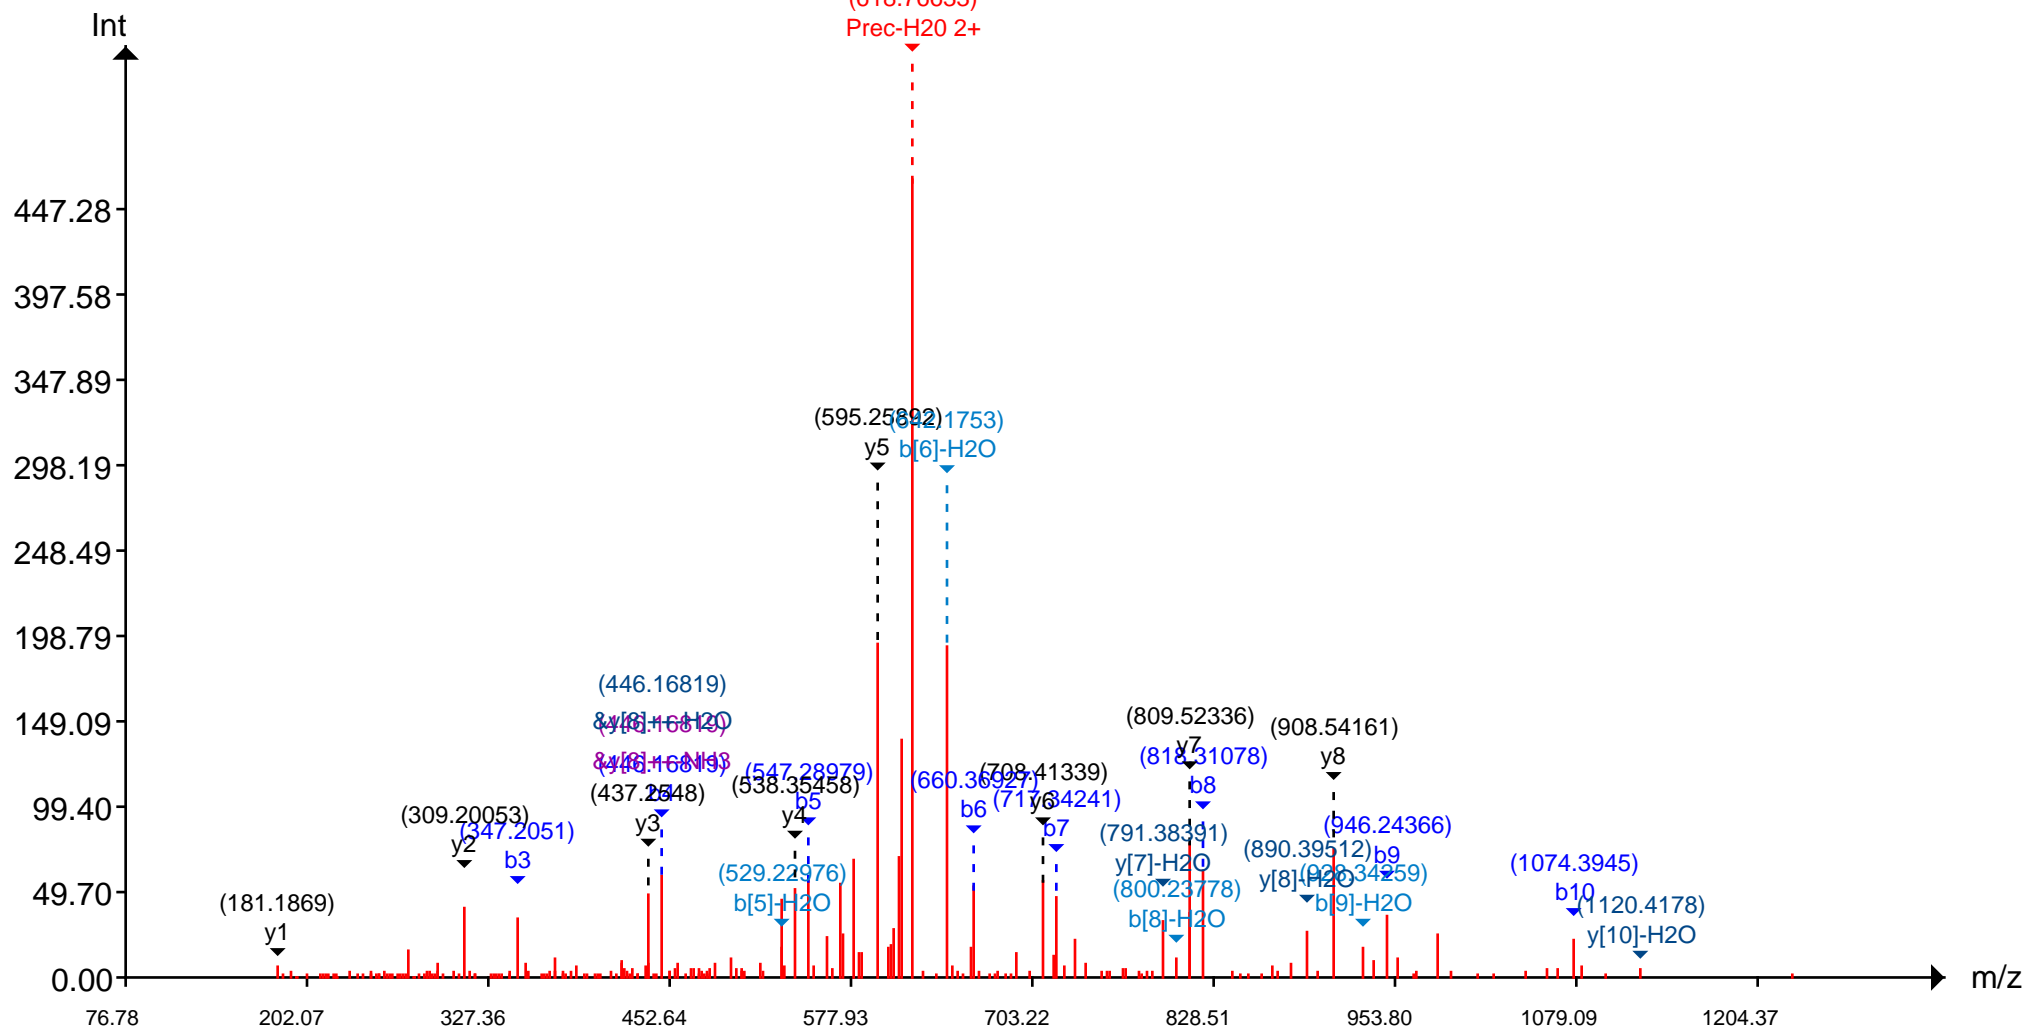

## Info

|                          |                                    |                           |          |
|--------------------------|------------------------------------|---------------------------|----------|
| <b>Modified Sequence</b> | AcD3-AGK<AcD3K*>VTLGTQQR<C13>-COOH | <b>Ion score</b>          | 61.82    |
| <b>Protein</b>           | Q08AF3                             | <b>Confidence level</b>   | 99.00%   |
| <b>Precursor m/z</b>     | 627.87242                          | <b>Identity Threshold</b> | 46.35    |
| <b>Charge</b>            | 2+                                 | <b>Mass error</b>         | -3.18E-4 |

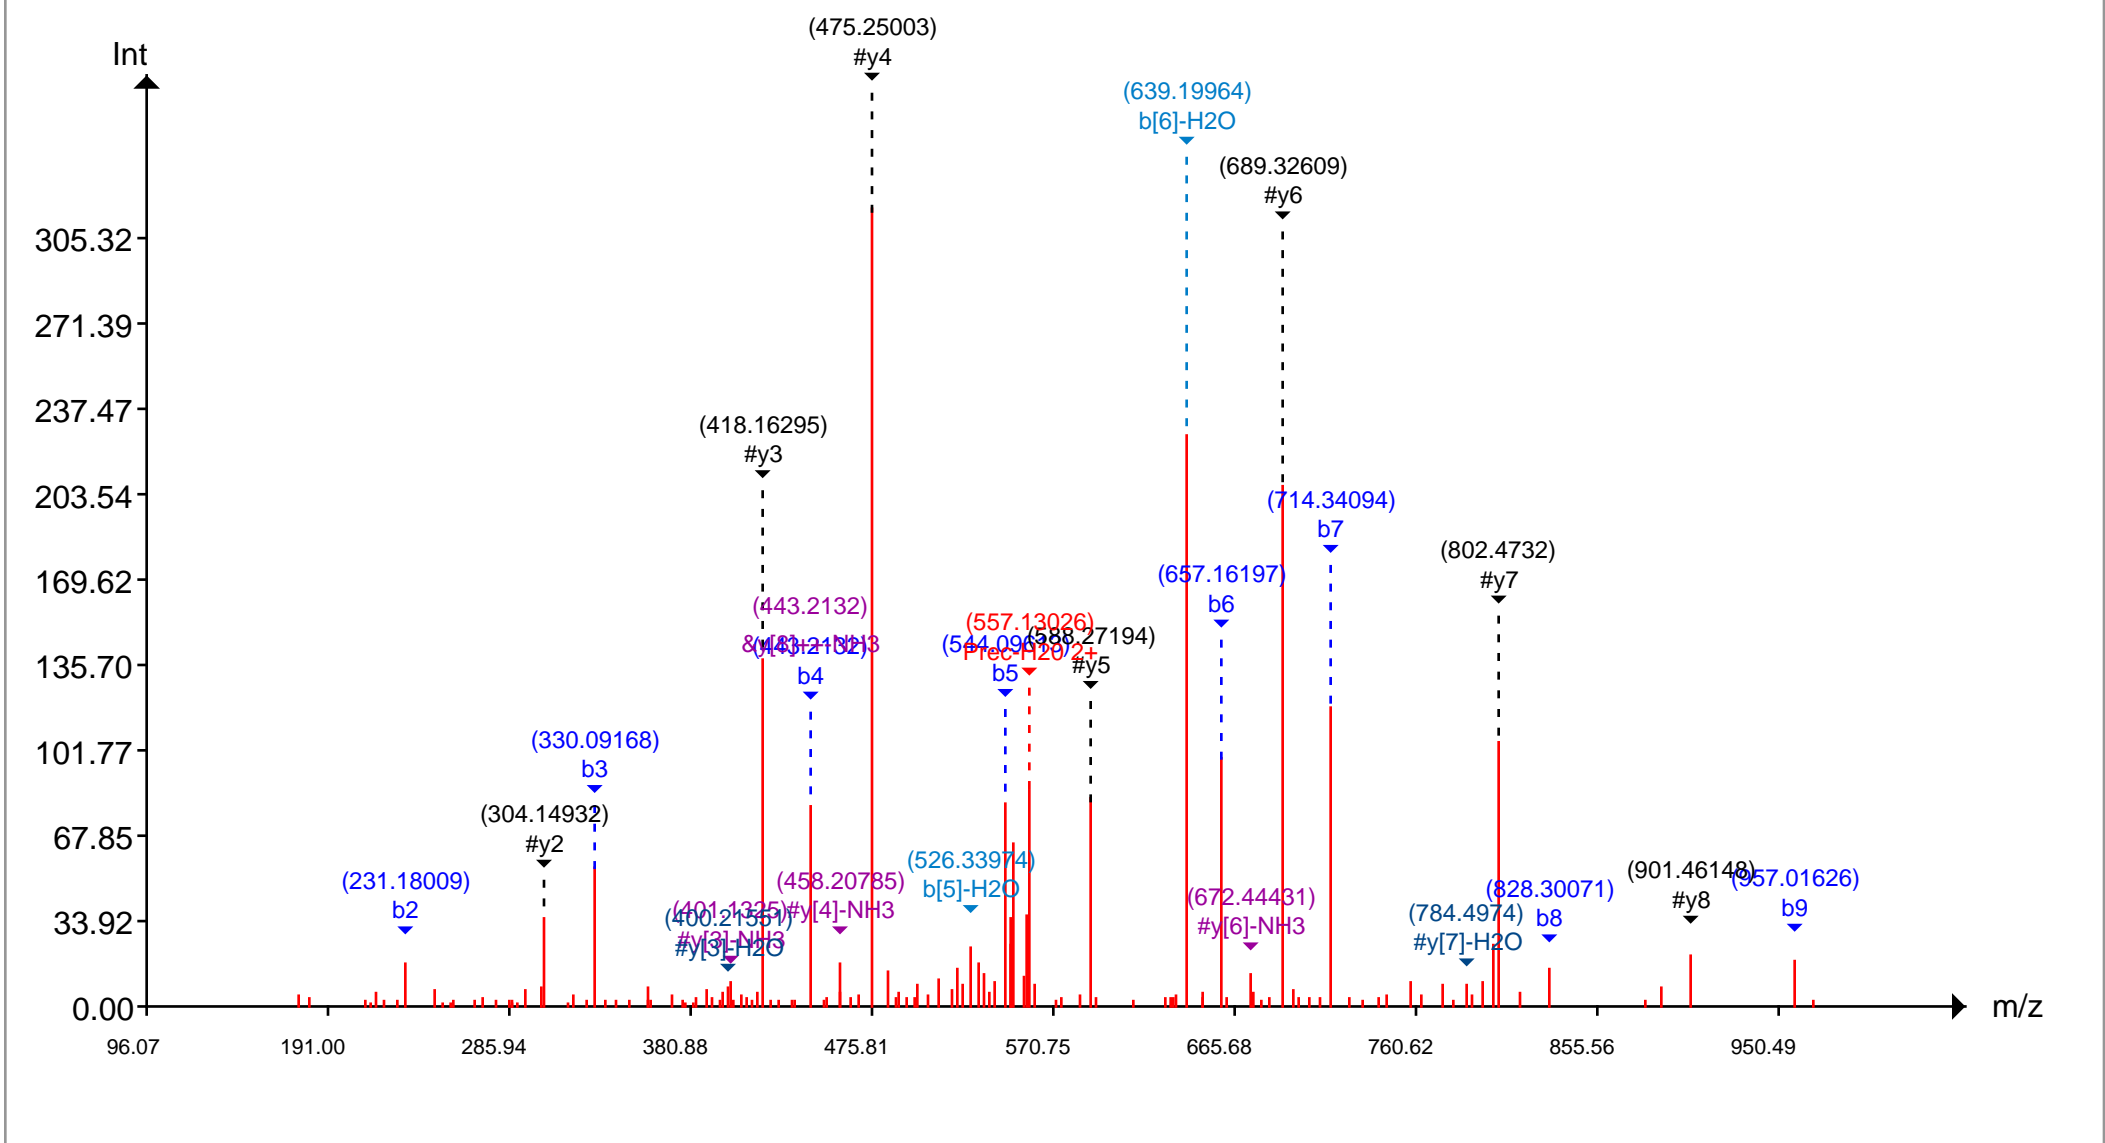

## Info

|                          |                                                                                |                           |          |
|--------------------------|--------------------------------------------------------------------------------|---------------------------|----------|
| <b>Modified Sequence</b> | AcD3-GQVITIGNER-COOH                                                           | <b>Ion score</b>          | 67.63    |
| <b>Protein</b>           | P62736, Q562R1, Q9BYX7, P60709, P68032, P63261, P63267, P68133, Q6S8J3, A5A3E0 | <b>Confidence level</b>   | 99.00%   |
| <b>Precursor m/z</b>     | 566.31335                                                                      | <b>Identity Threshold</b> | 48.86    |
| <b>Charge</b>            | 2+                                                                             | <b>Mass error</b>         | -1.57E-4 |

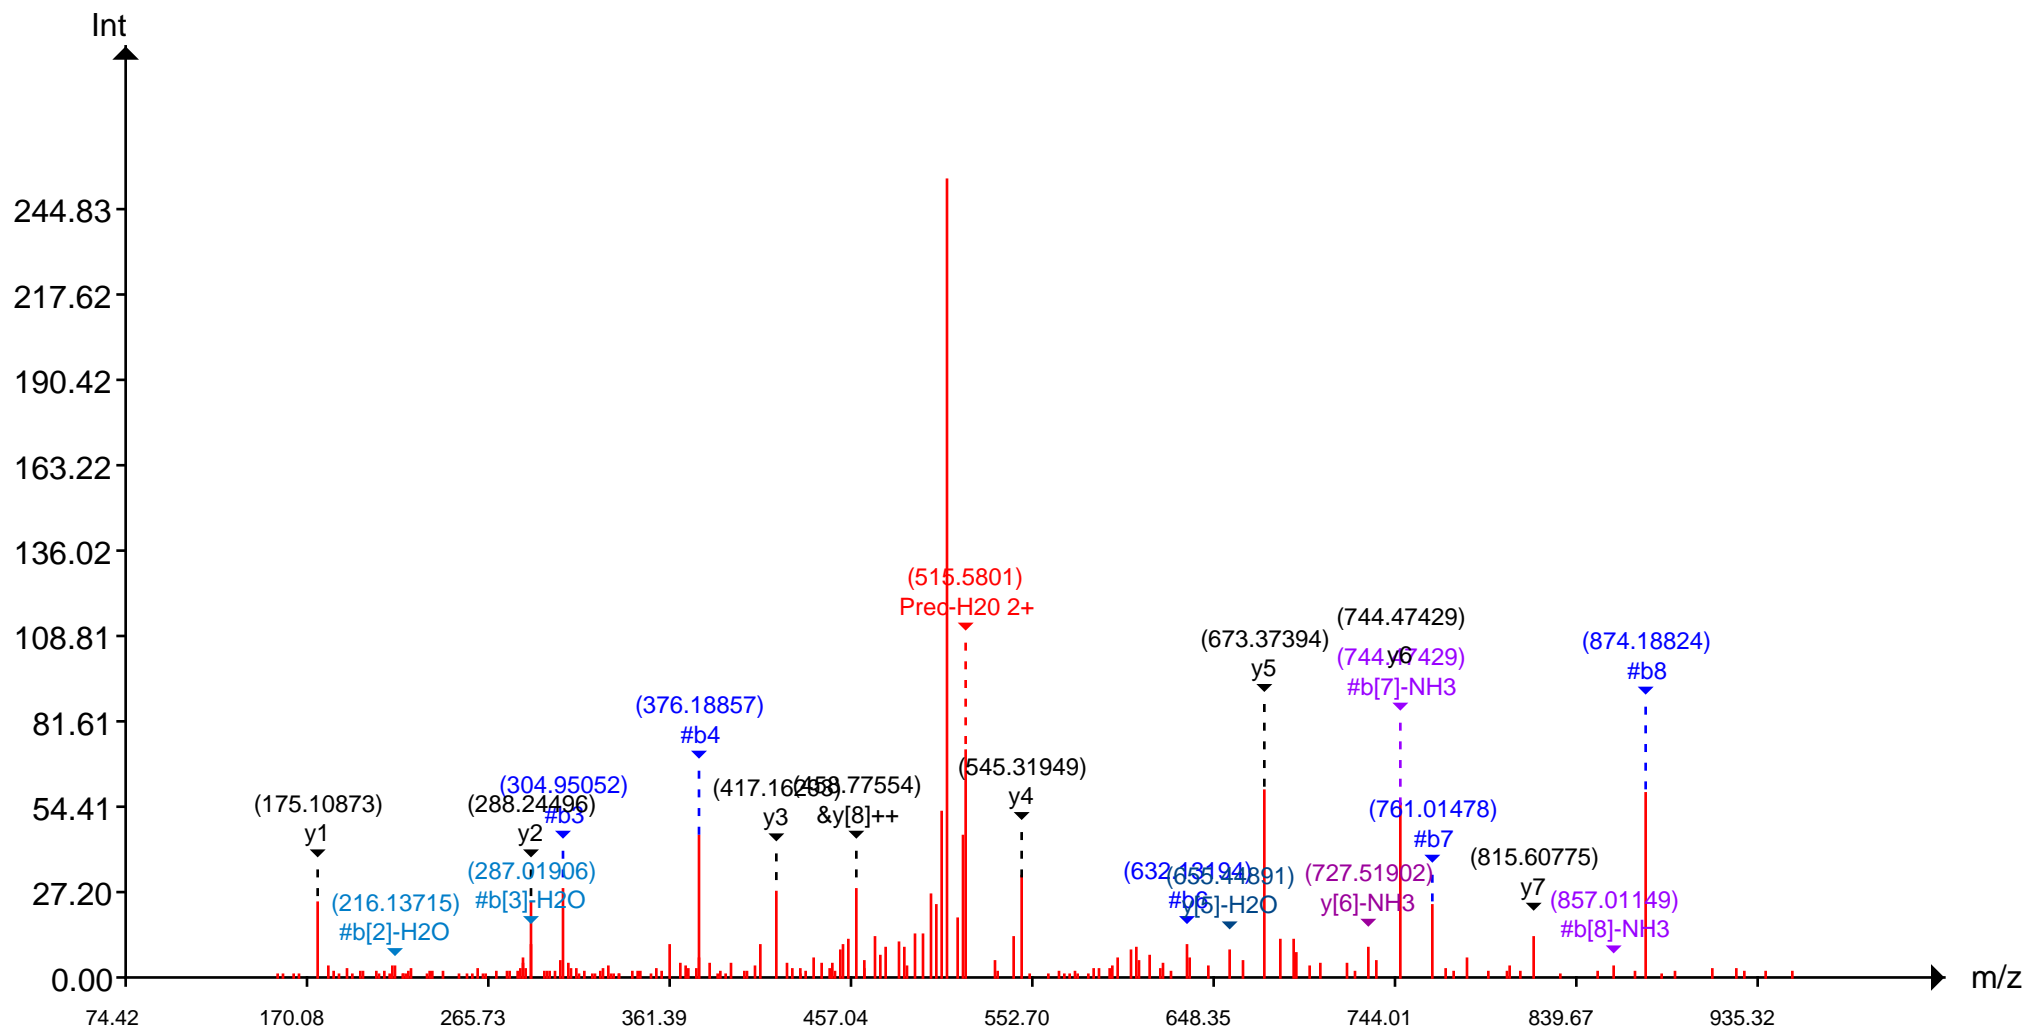

## Info

|                          |                     |                           |        |
|--------------------------|---------------------|---------------------------|--------|
| <b>Modified Sequence</b> | AcD3-STAAQQELR-COOH | <b>Ion score</b>          | 55.45  |
| <b>Protein</b>           | P35579              | <b>Confidence level</b>   | 99.00% |
| <b>Precursor m/z</b>     | 524.77674           | <b>Identity Threshold</b> | 49.05  |
| <b>Charge</b>            | 2+                  | <b>Mass error</b>         | 1.4E-4 |

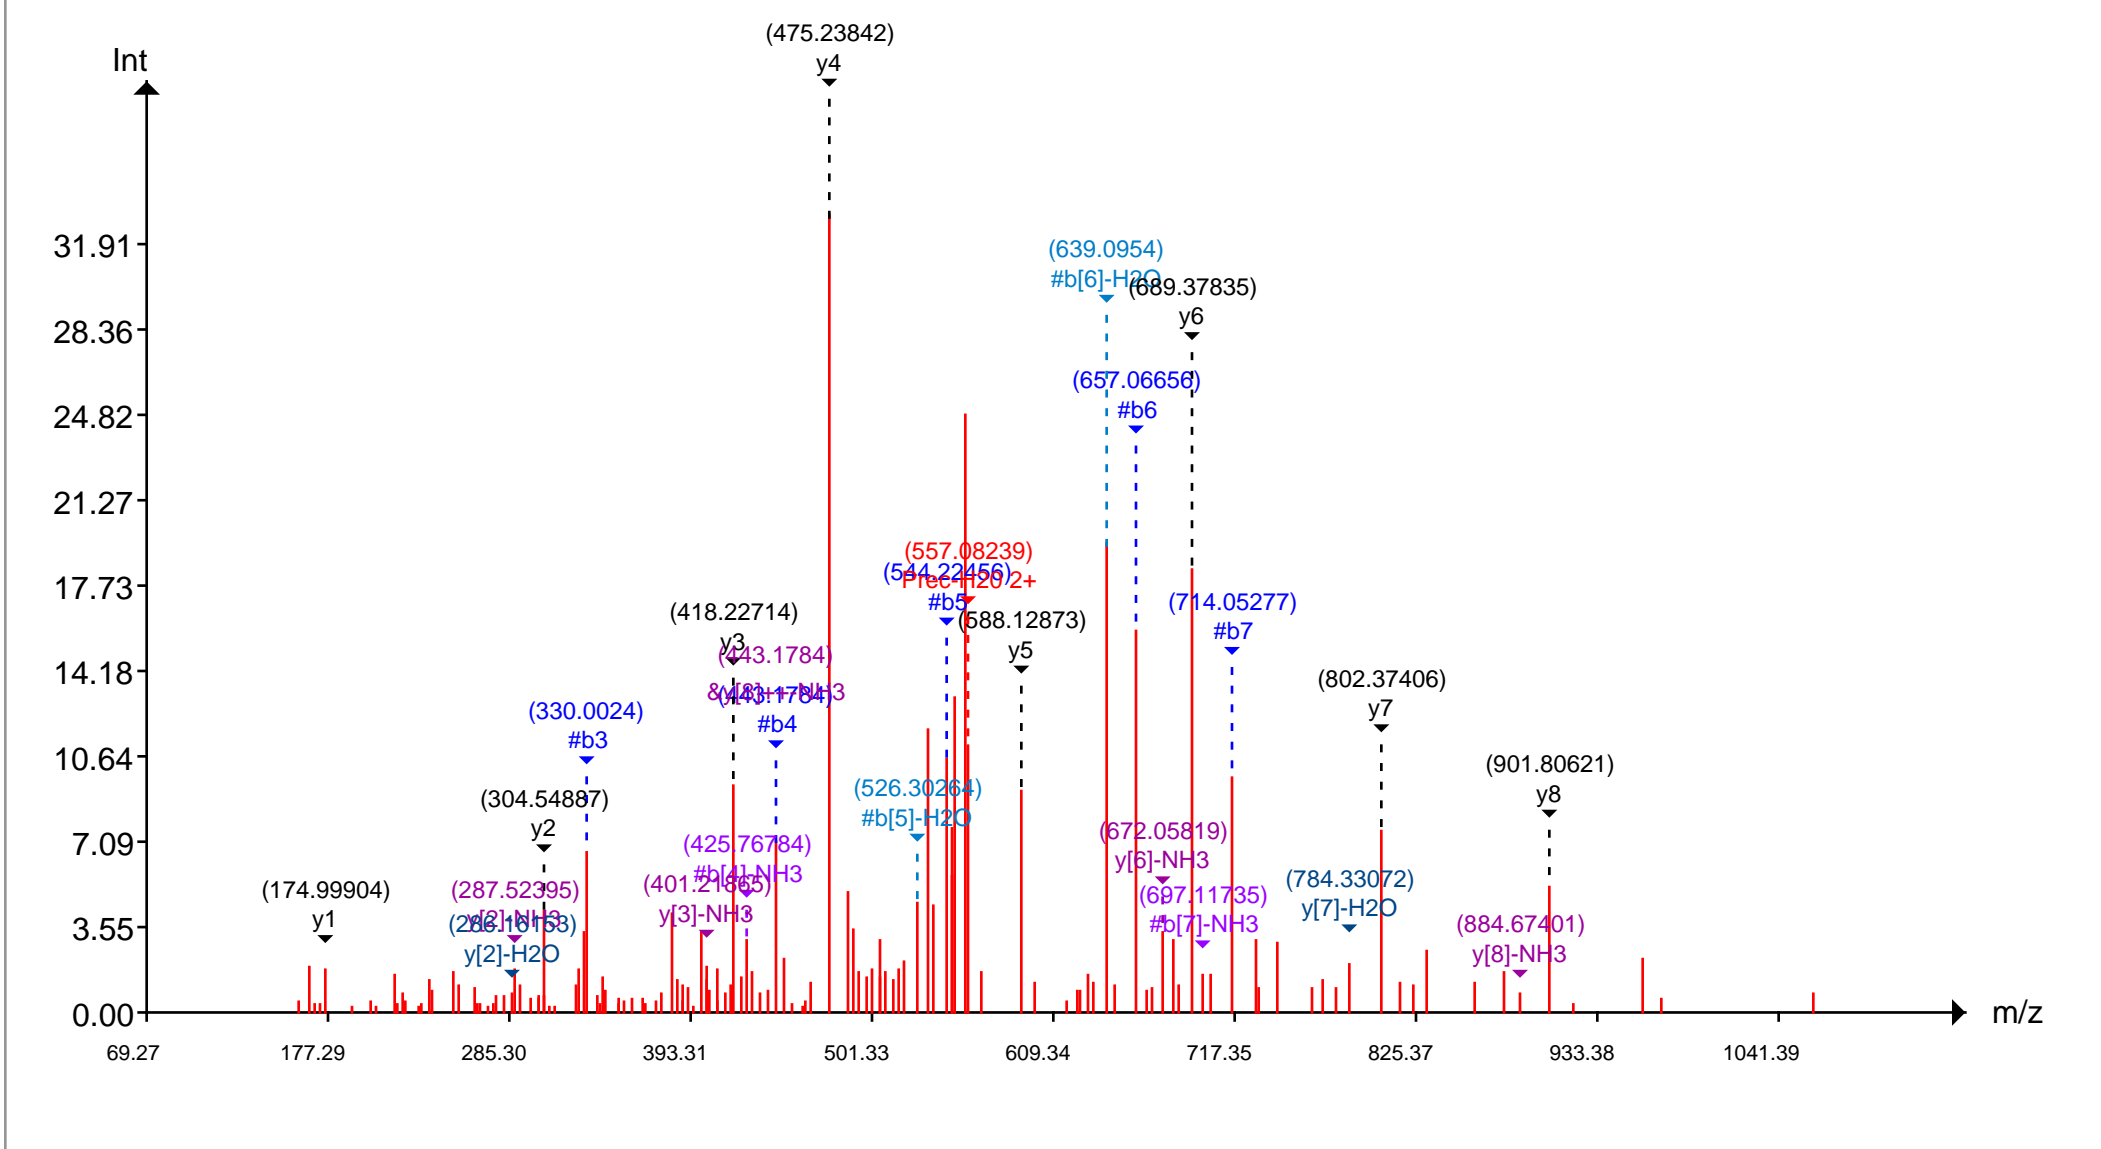

| Info                     |                                                                                |                           |          |
|--------------------------|--------------------------------------------------------------------------------|---------------------------|----------|
| <b>Modified Sequence</b> | AcD3-GQVITIGNER-COOH                                                           | <b>Ion score</b>          | 59.63    |
| <b>Protein</b>           | P62736, Q562R1, Q9BYX7, P60709, P68032, P63261, P63267, P68133, Q6S8J3, A5A3E0 | <b>Confidence level</b>   | 99.00%   |
| <b>Precursor m/z</b>     | 566.31336                                                                      | <b>Identity Threshold</b> | 48.86    |
| <b>Charge</b>            | 2+                                                                             | <b>Mass error</b>         | -1.37E-4 |
