# Supplementary material
Source: PubMed Central journal article supplement (PMC2953924)
Supplement: supp_M110.001271_mcp.M110.001271-9.pdf [file supp_M110.001271_mcp.M110.001271-9.pdf]

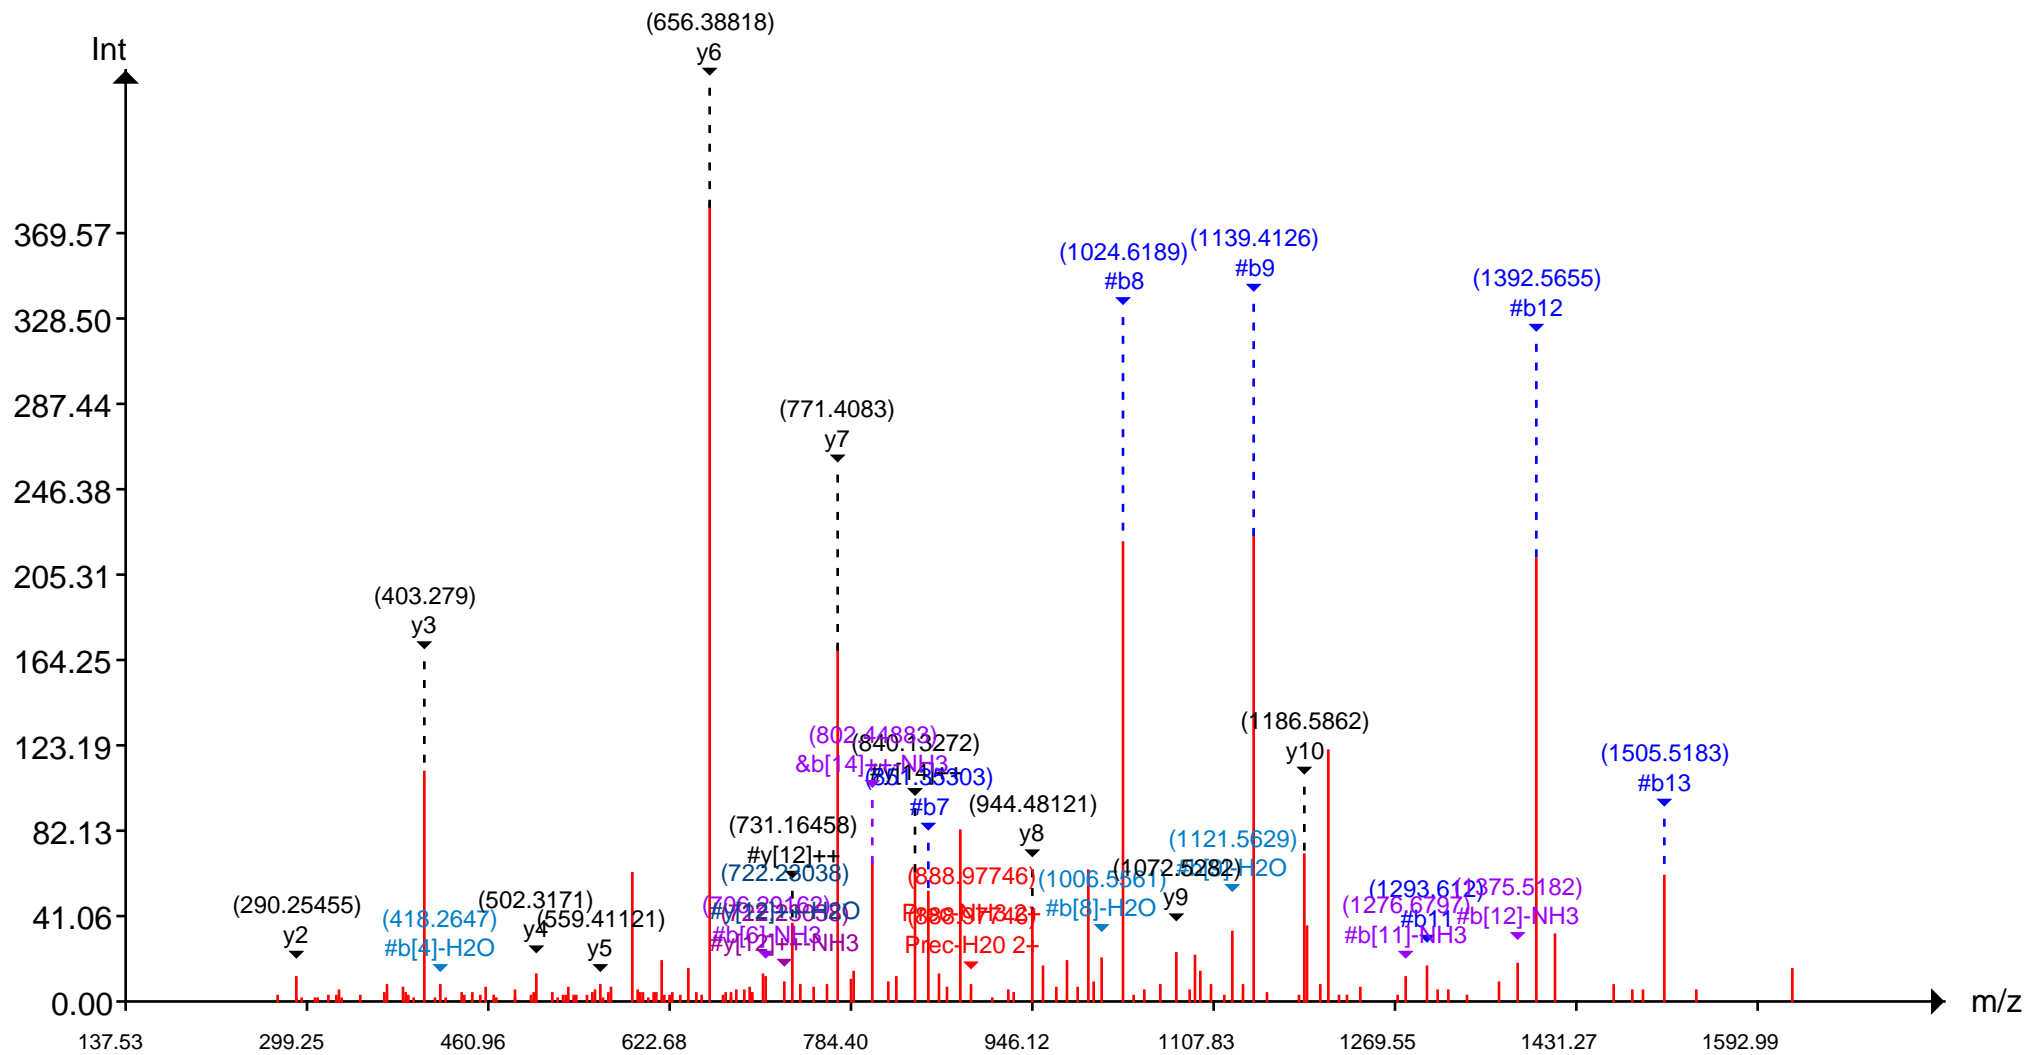

## Info

**Modified Sequence** AcD3-AAFTK<AcD3K\*>NQK<AcD3K\*>DPGVLDK-COOH

**Ion score** 55.32

**Protein** P50543

**Confidence level** 99.00%

**Precursor m/z** 897.98991

**Identity Threshold** 47.57

**Charge** 2+

**Mass error** 0.003064

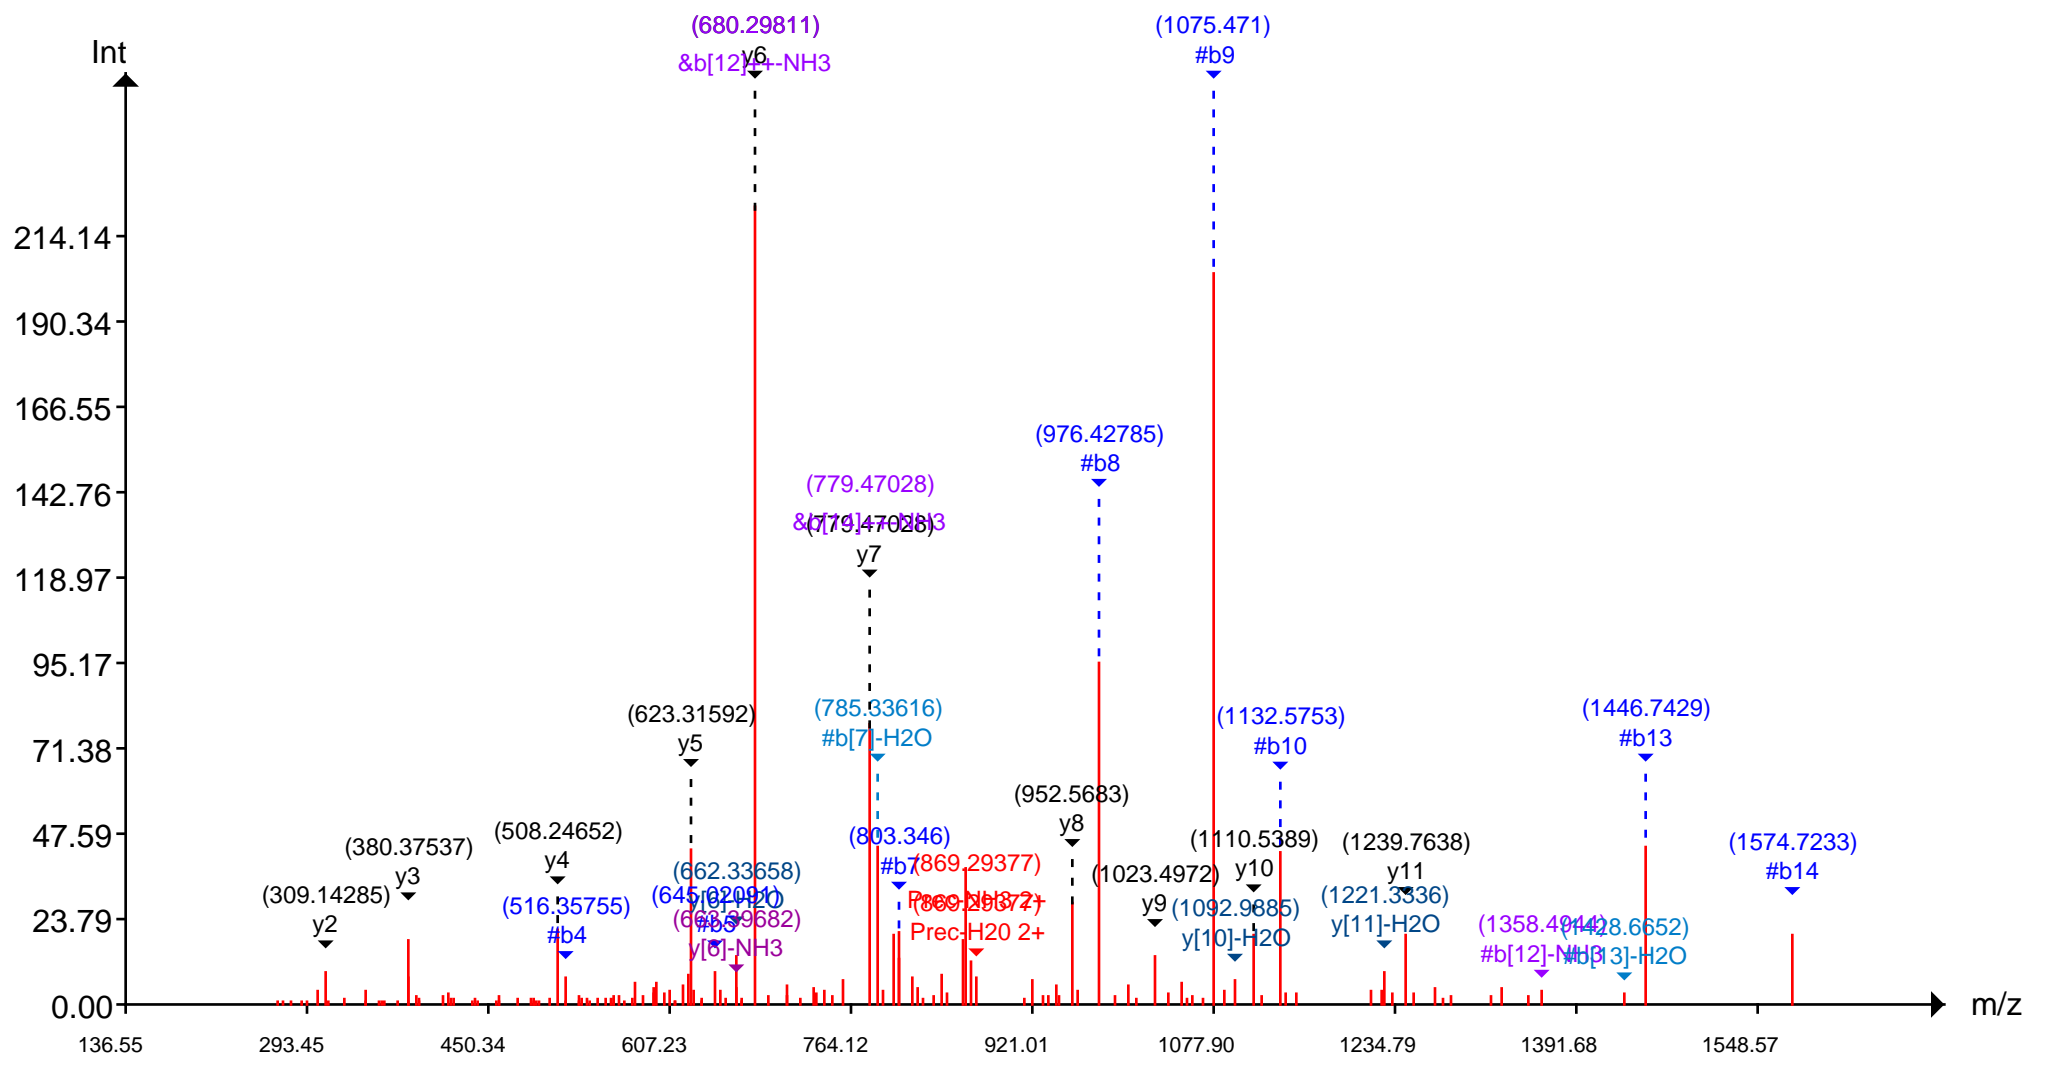

Info

|                          |                                                |                           |          |
|--------------------------|------------------------------------------------|---------------------------|----------|
| <b>Modified Sequence</b> | AcD3-IAIK<AcD3K*>ESAK<AcD3K*>VGDQAQR<C13>-COOH | <b>Ion score</b>          | 81.8     |
| <b>Protein</b>           | Q99JY9                                         | <b>Confidence level</b>   | 99.00%   |
| <b>Precursor m/z</b>     | 878.00749                                      | <b>Identity Threshold</b> | 45.12    |
| <b>Charge</b>            | 2+                                             | <b>Mass error</b>         | 0.002457 |

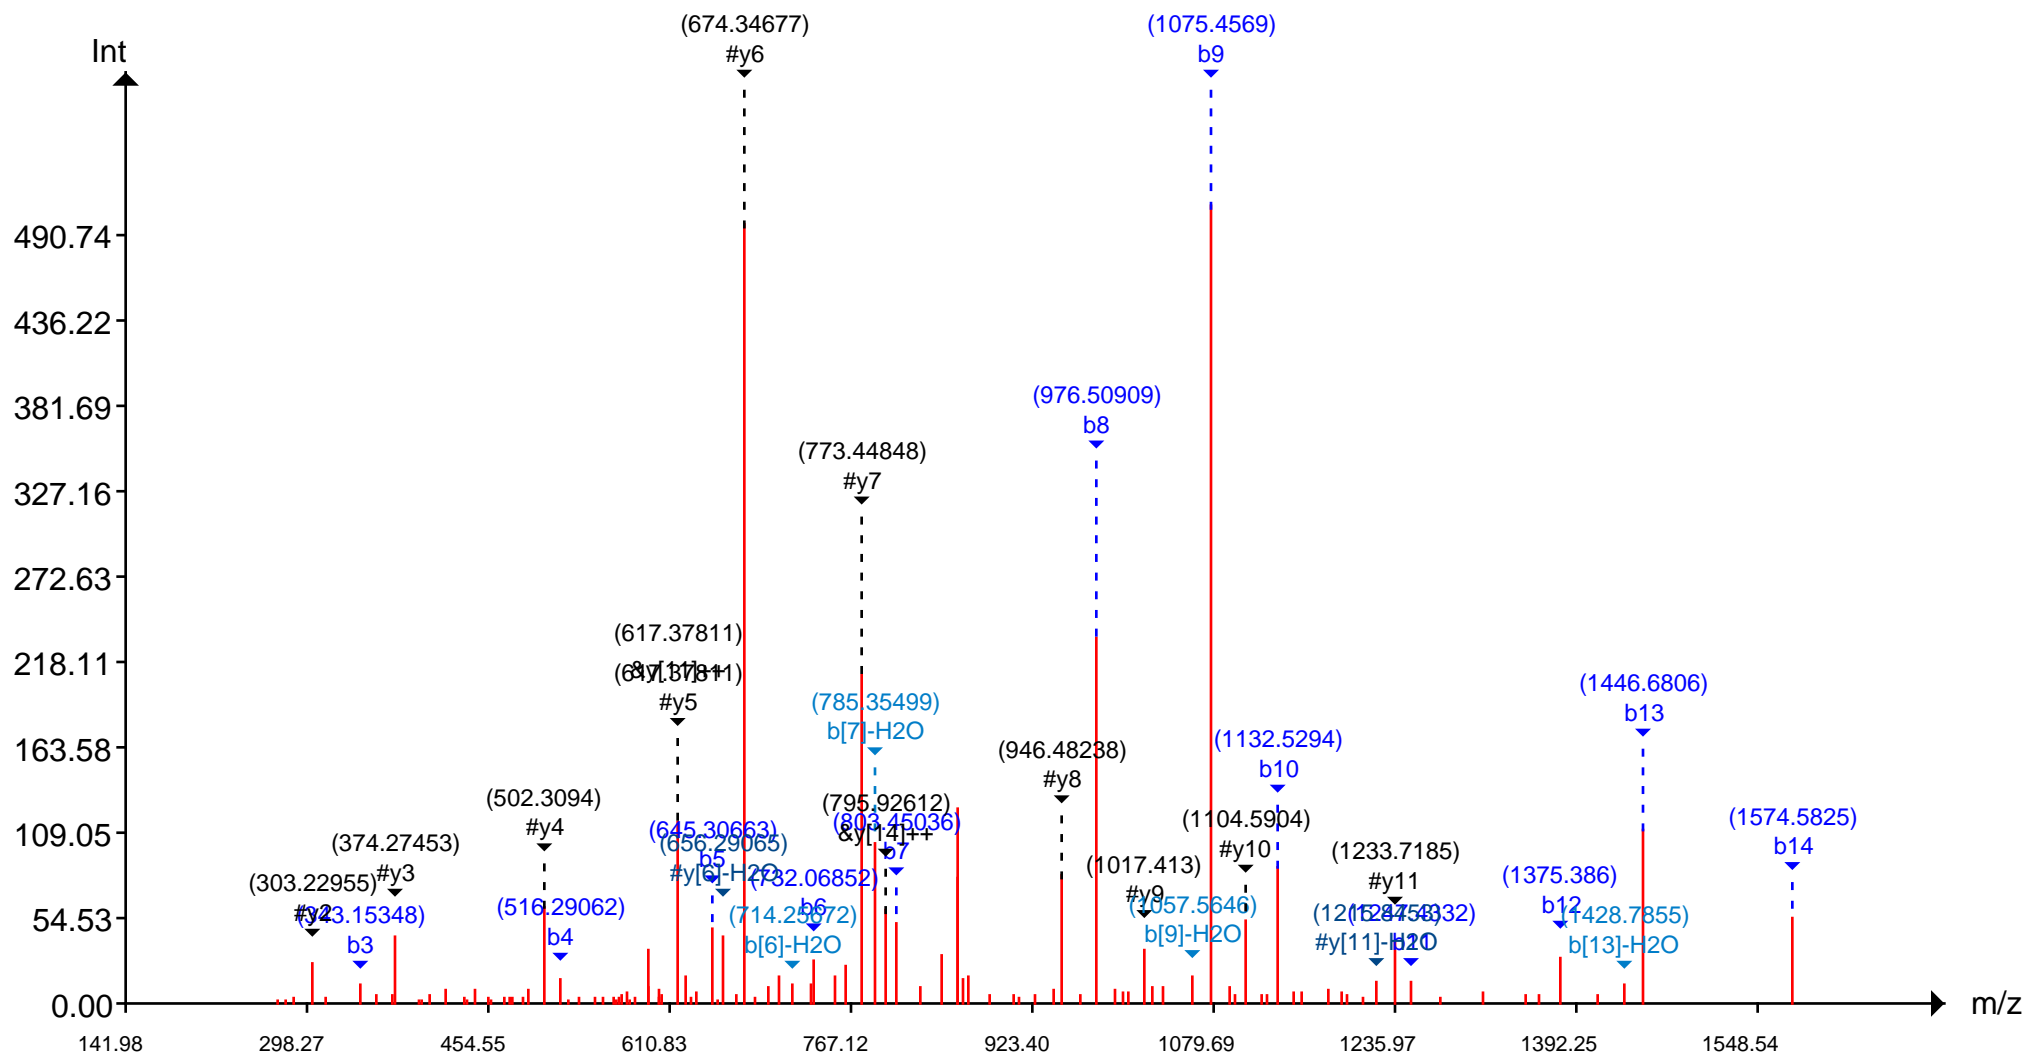

## Info

**Modified Sequence** AcD3-IAIK<AcD3K\*>ESAK<AcD3K\*>VGDQAQR-COOH

**Ion score** 103.98

**Protein** Q99JY9

**Confidence level** 99.00%

**Precursor m/z** 874.99705

**Identity Threshold** 46.20

**Charge** 2+

**Mass error** 0.001719

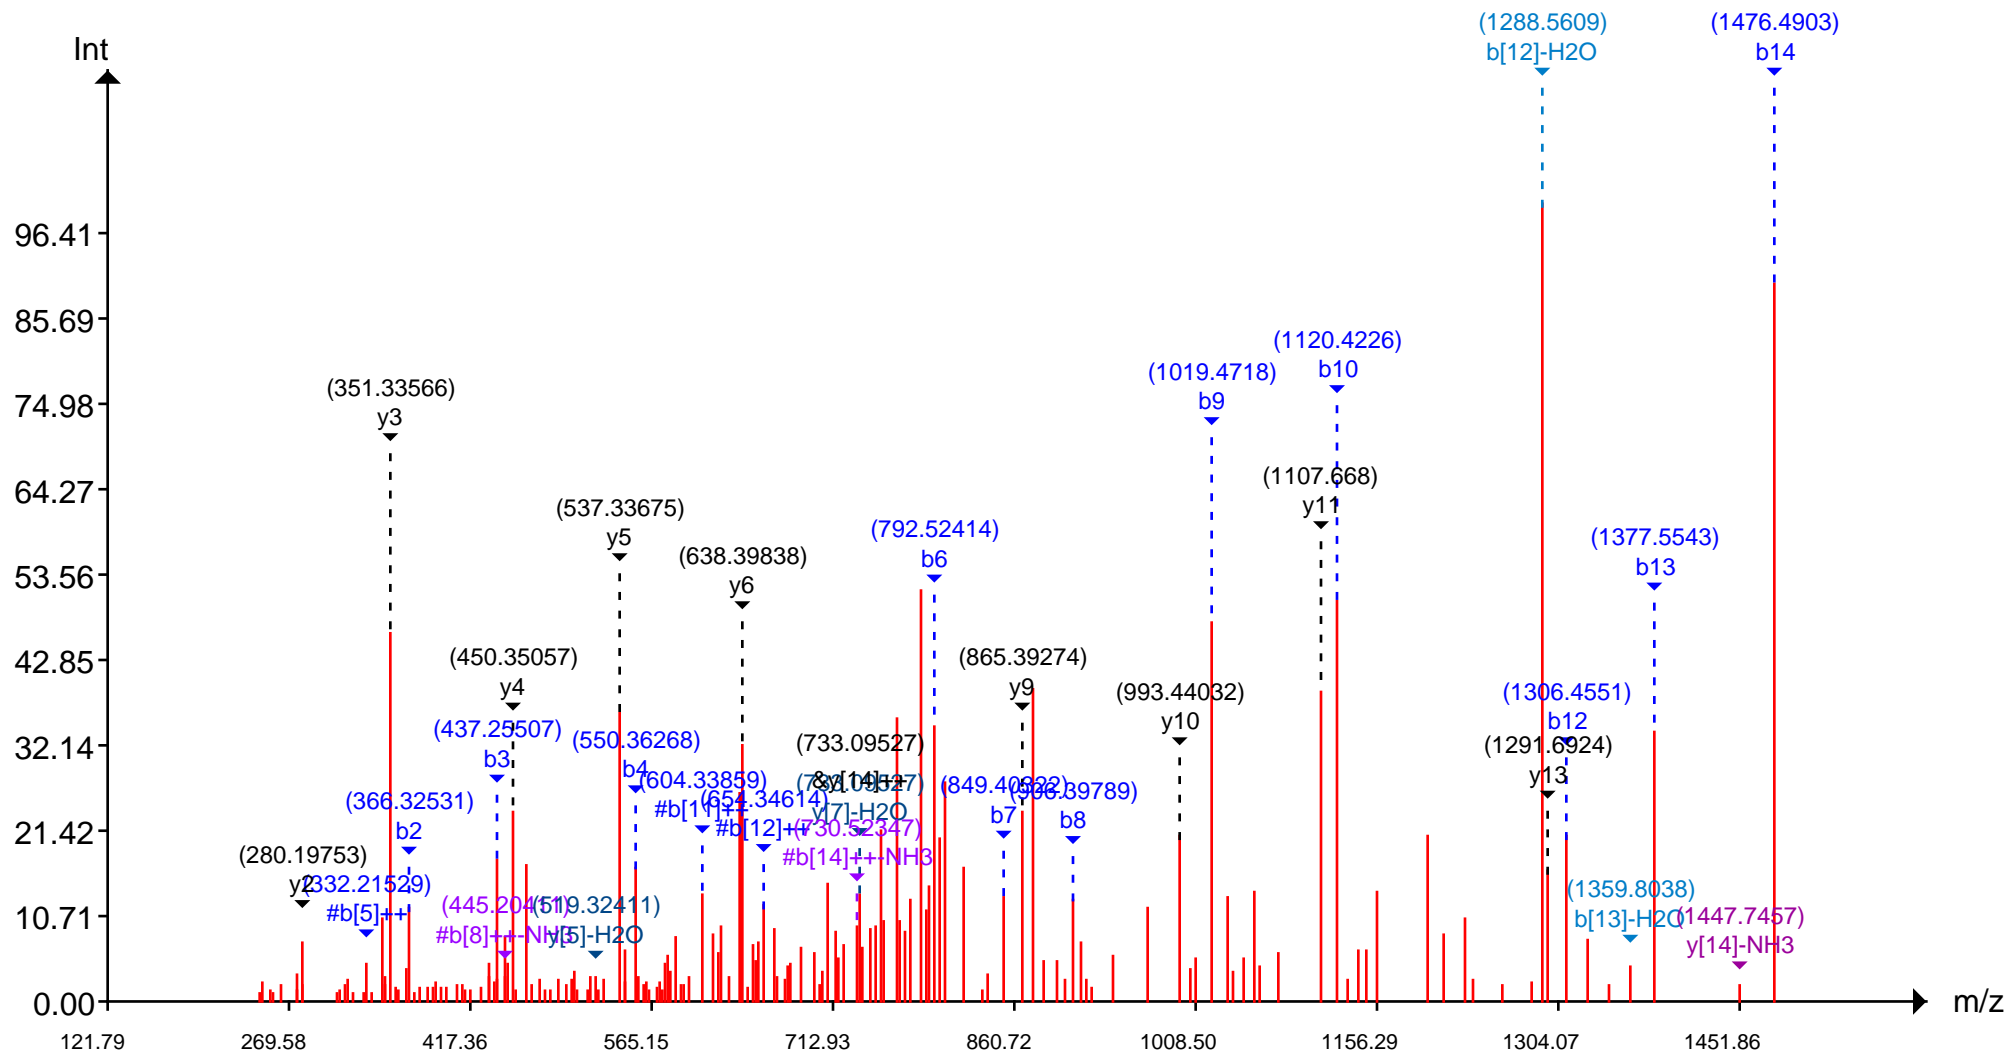

## Info

|                          |                                        |                           |         |
|--------------------------|----------------------------------------|---------------------------|---------|
| <b>Modified Sequence</b> | AcD3-FK<AcD3K*>AINQGGLTSVAVR<C13>-COOH | <b>Ion score</b>          | 79.68   |
| <b>Protein</b>           | Q9QUM9                                 | <b>Confidence level</b>   | 99.00%  |
| <b>Precursor m/z</b>     | 828.98633                              | <b>Identity Threshold</b> | 44.65   |
| <b>Charge</b>            | 2+                                     | <b>Mass error</b>         | 8.02E-4 |

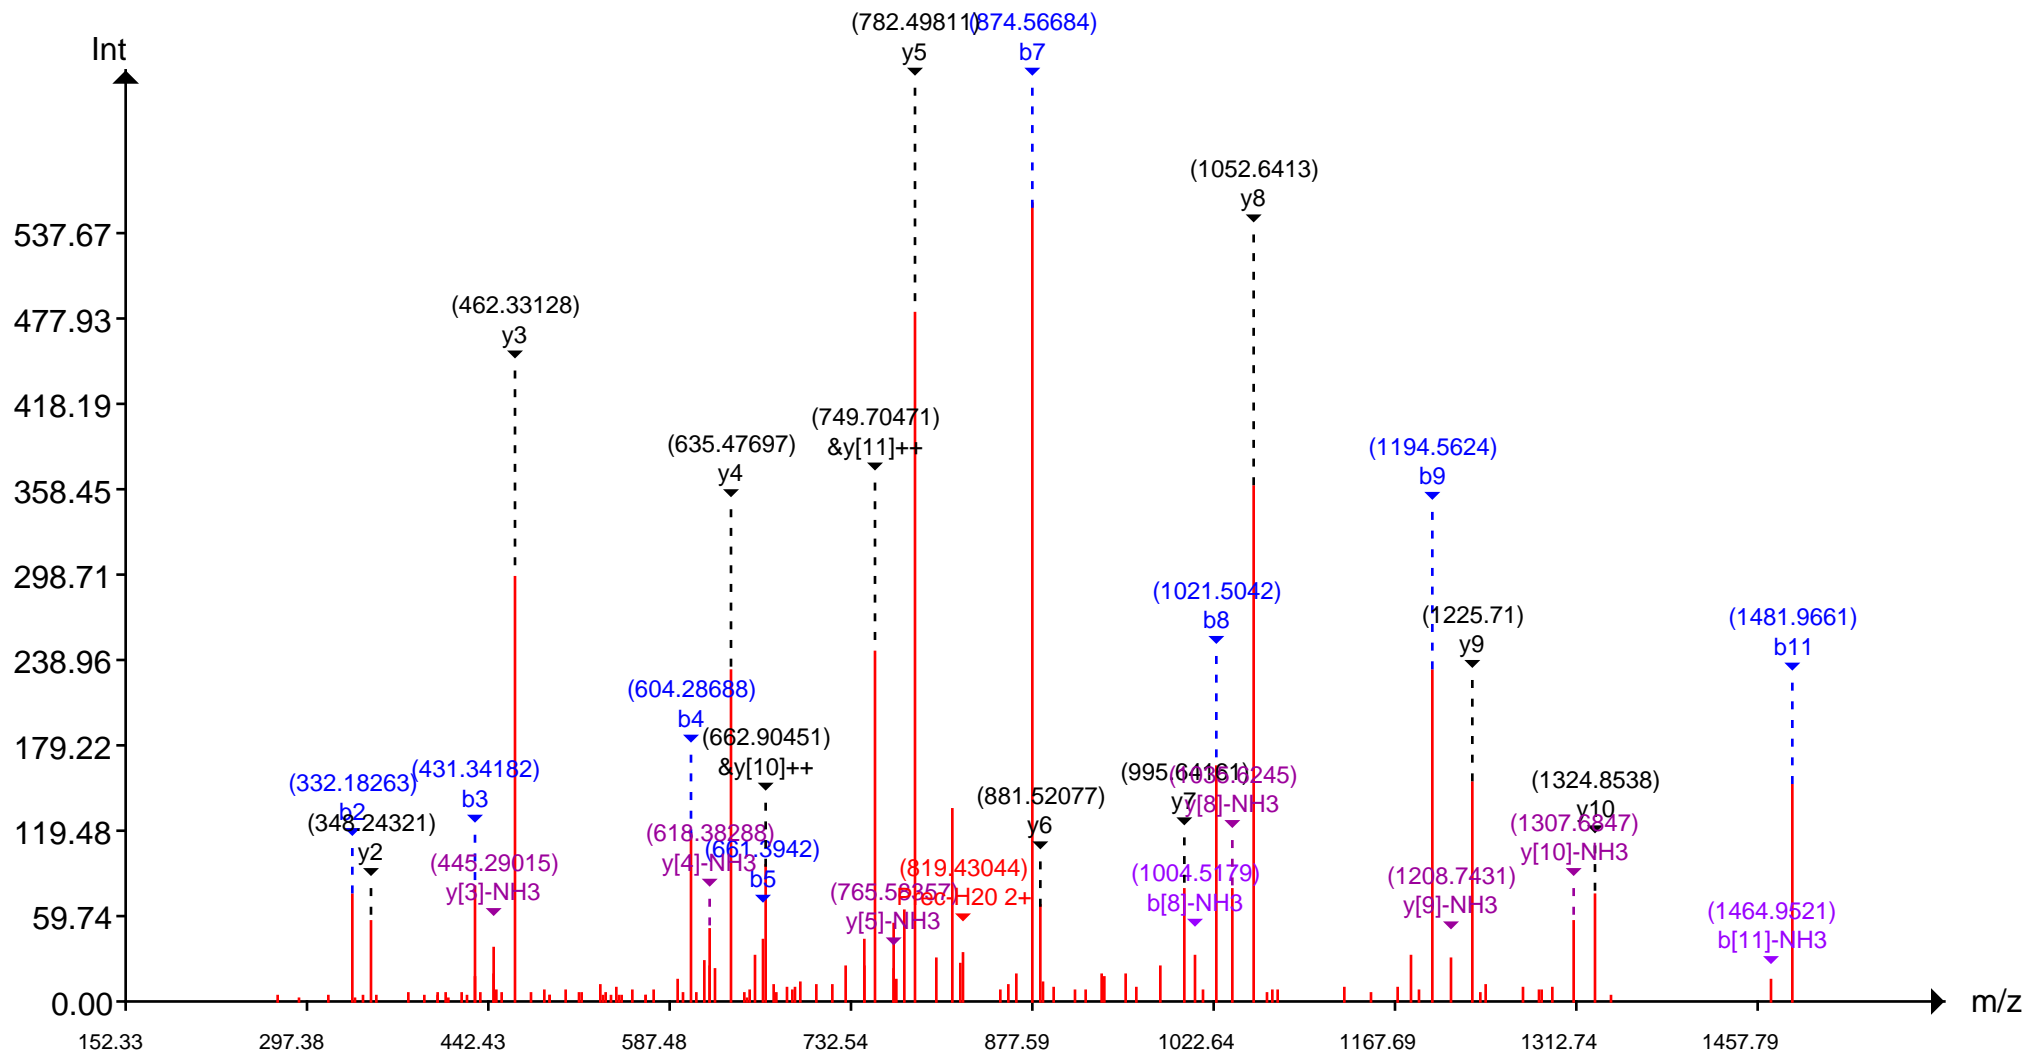

## Info

|                          |                                                        |                           |          |
|--------------------------|--------------------------------------------------------|---------------------------|----------|
| <b>Modified Sequence</b> | AcD3-LK<AcD3K*>VK<AcD3K*>GNVFK<AcD3K*>NK<AcD3K*>R-COOH | <b>Ion score</b>          | 65.15    |
| <b>Protein</b>           | P84099                                                 | <b>Confidence level</b>   | 99.00%   |
| <b>Precursor m/z</b>     | 828.52588                                              | <b>Identity Threshold</b> | 37.11    |
| <b>Charge</b>            | 2+                                                     | <b>Mass error</b>         | 0.002082 |

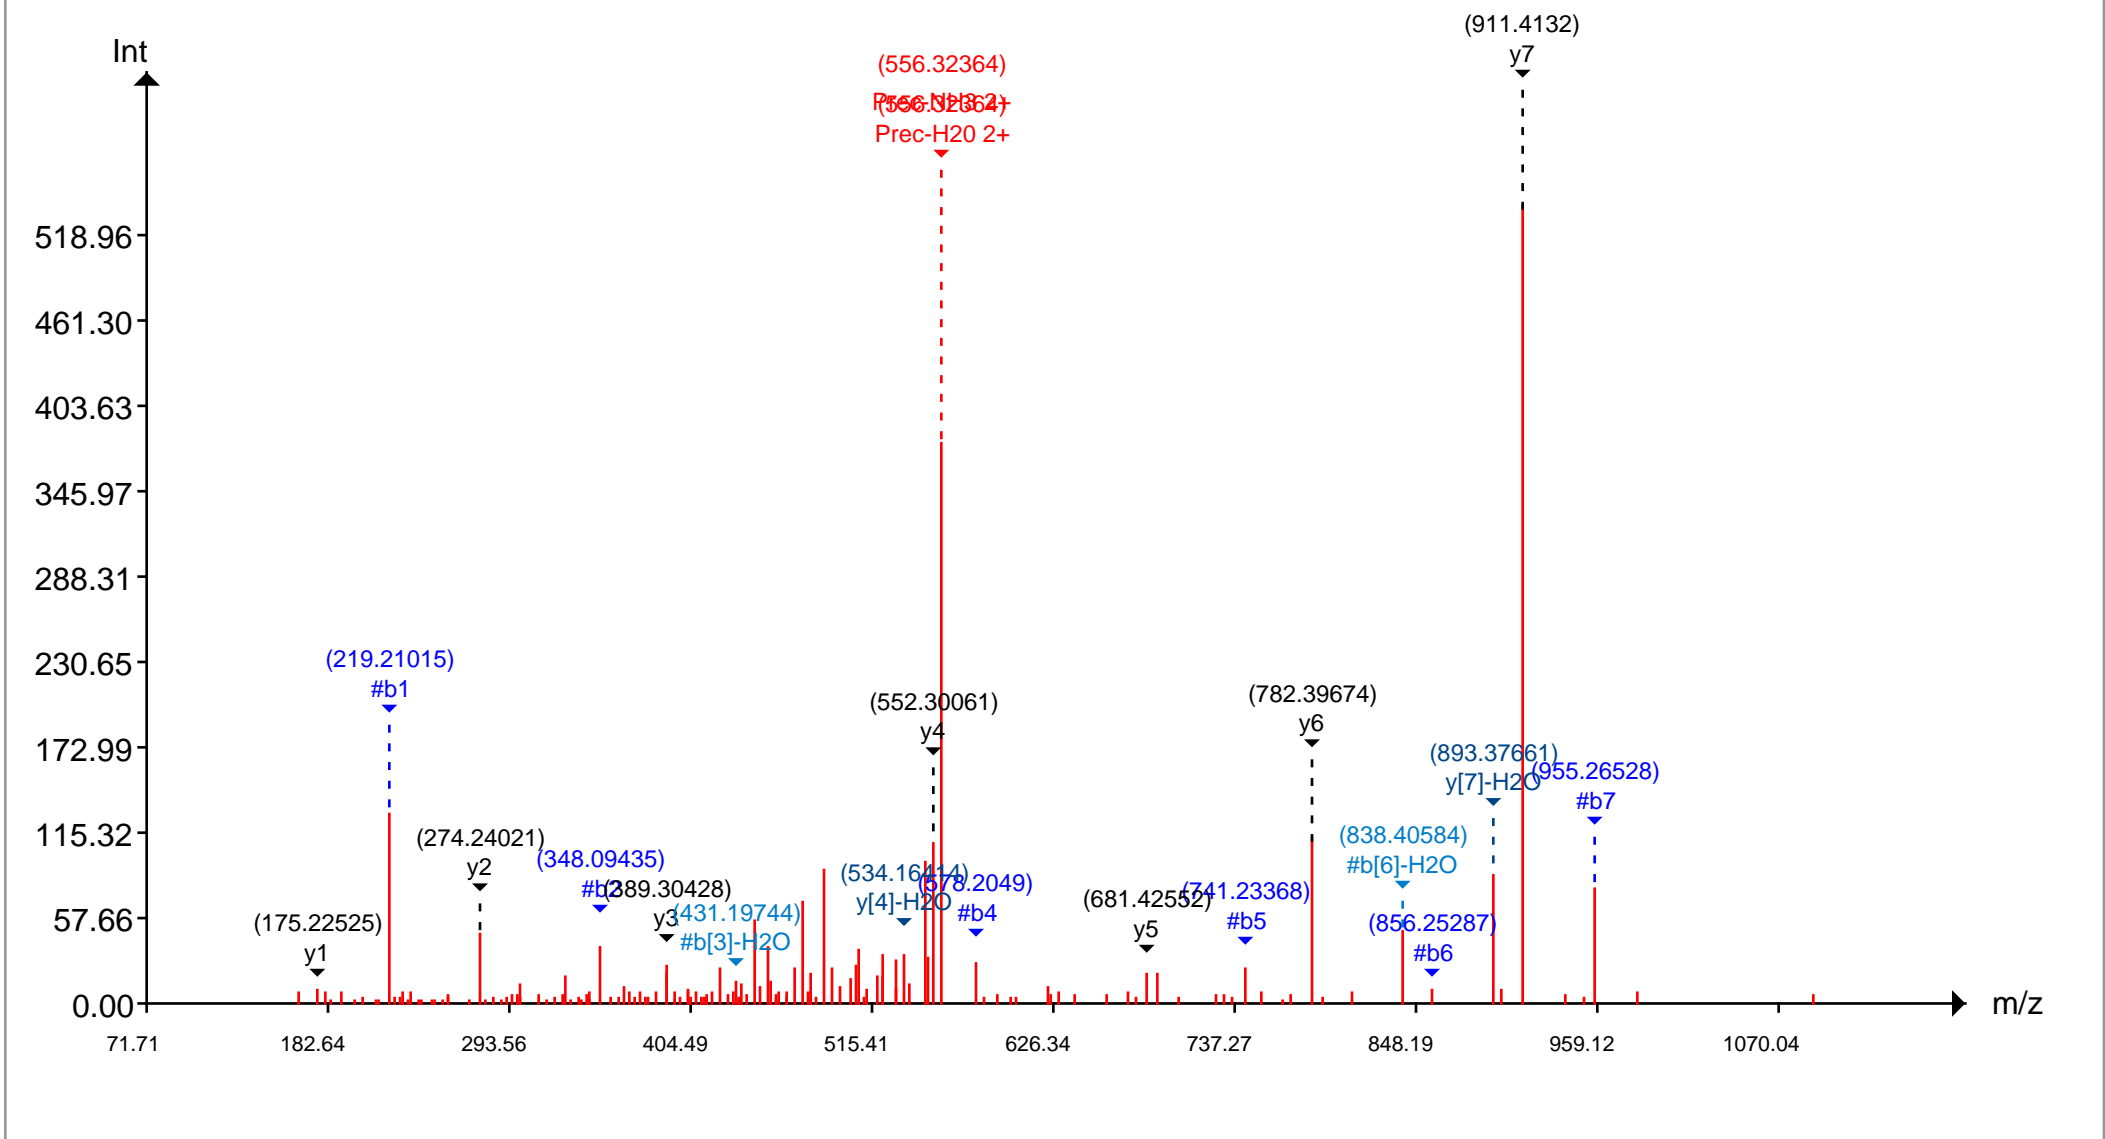

## Info

**Modified Sequence** AcD3-K<AcD3K\*>ETEYDVR-COOH

**Ion score** 49.46

**Protein** Q61176

**Confidence level** 99.00%

**Precursor m/z** 565.28596

**Identity Threshold** 47.45

**Charge** 2+

**Mass error** 4.07E-4

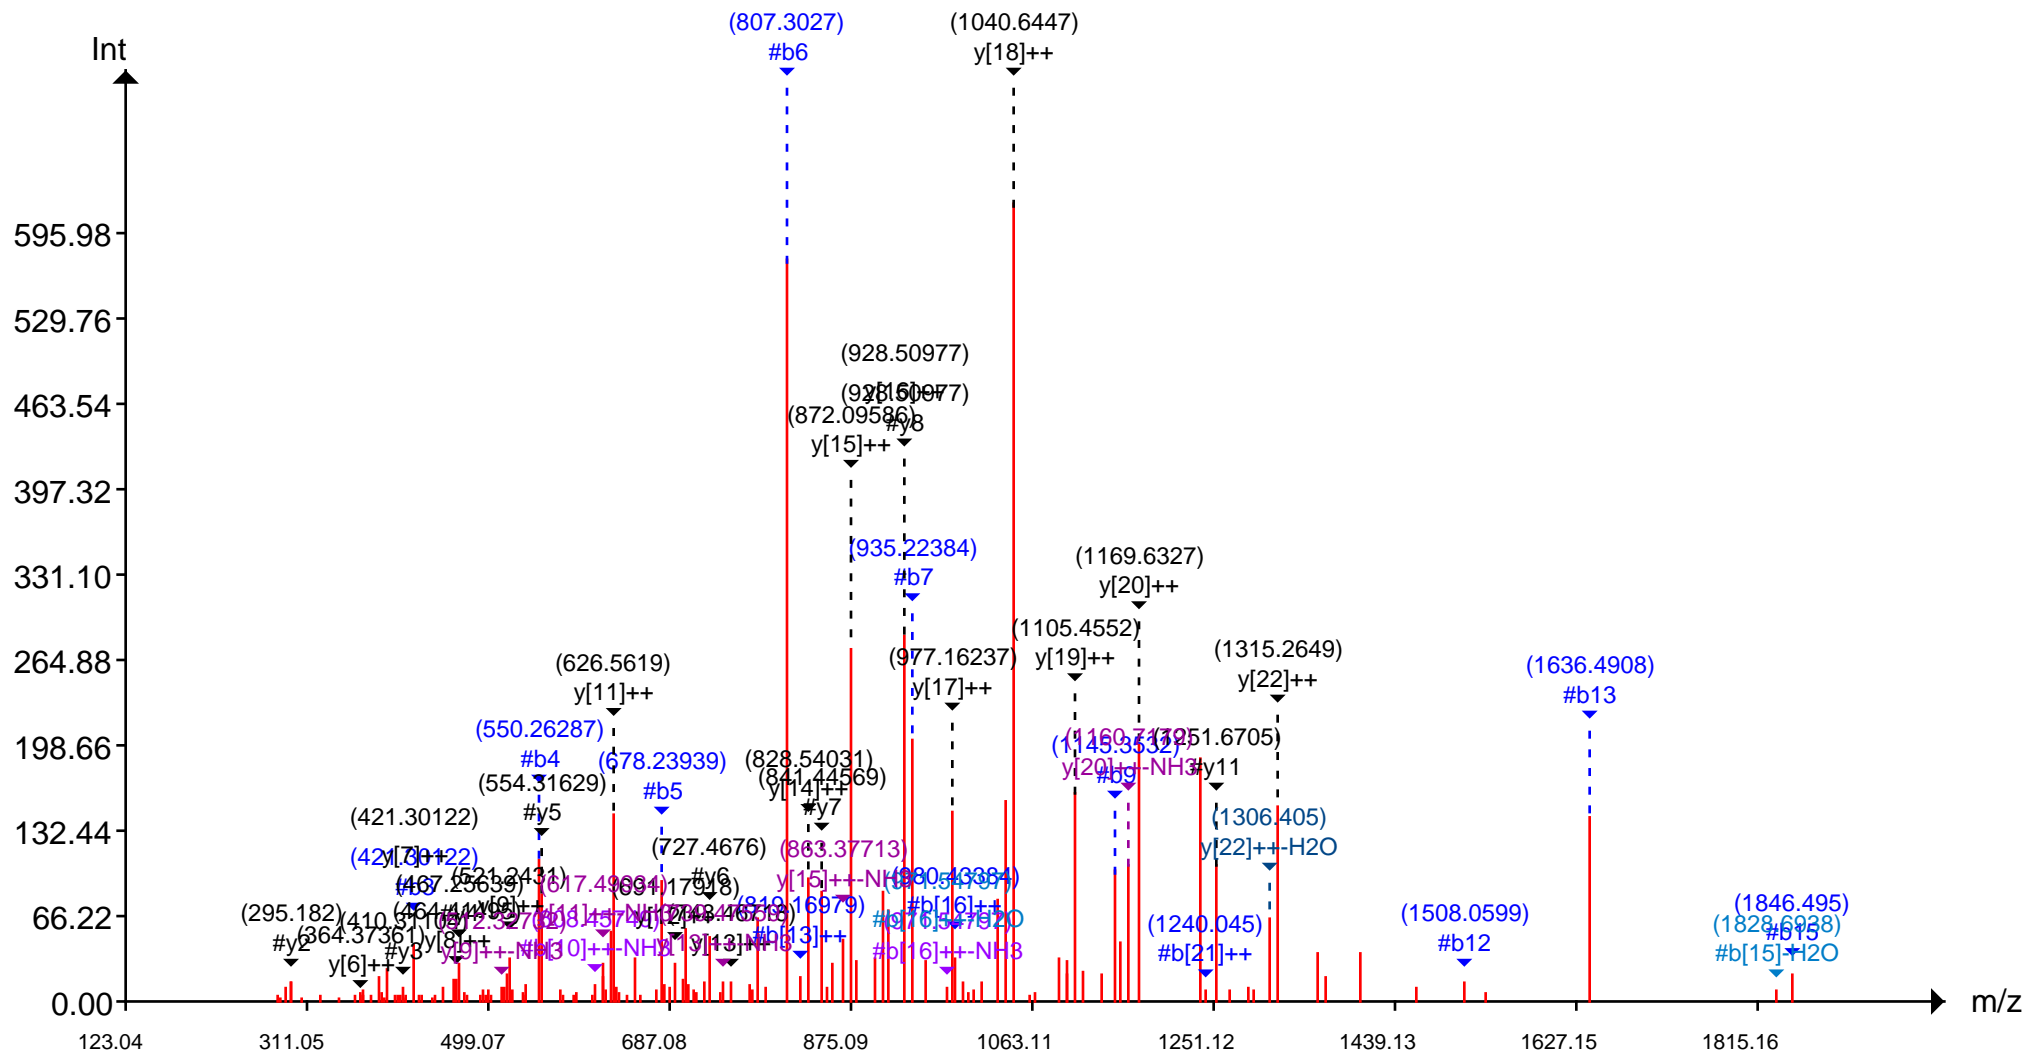

## Info

|                          |                                                       |                           |          |
|--------------------------|-------------------------------------------------------|---------------------------|----------|
| <b>Modified Sequence</b> | AcD3-LVYEQEQPLSC<Cmm*>DEPILSNK<AcD3K*>SGDNR<C13>-COOH | <b>Ion score</b>          | 79.24    |
| <b>Protein</b>           | P70296                                                | <b>Confidence level</b>   | 99.00%   |
| <b>Precursor m/z</b>     | 963.13895                                             | <b>Identity Threshold</b> | 46.88    |
| <b>Charge</b>            | 3+                                                    | <b>Mass error</b>         | 0.003085 |

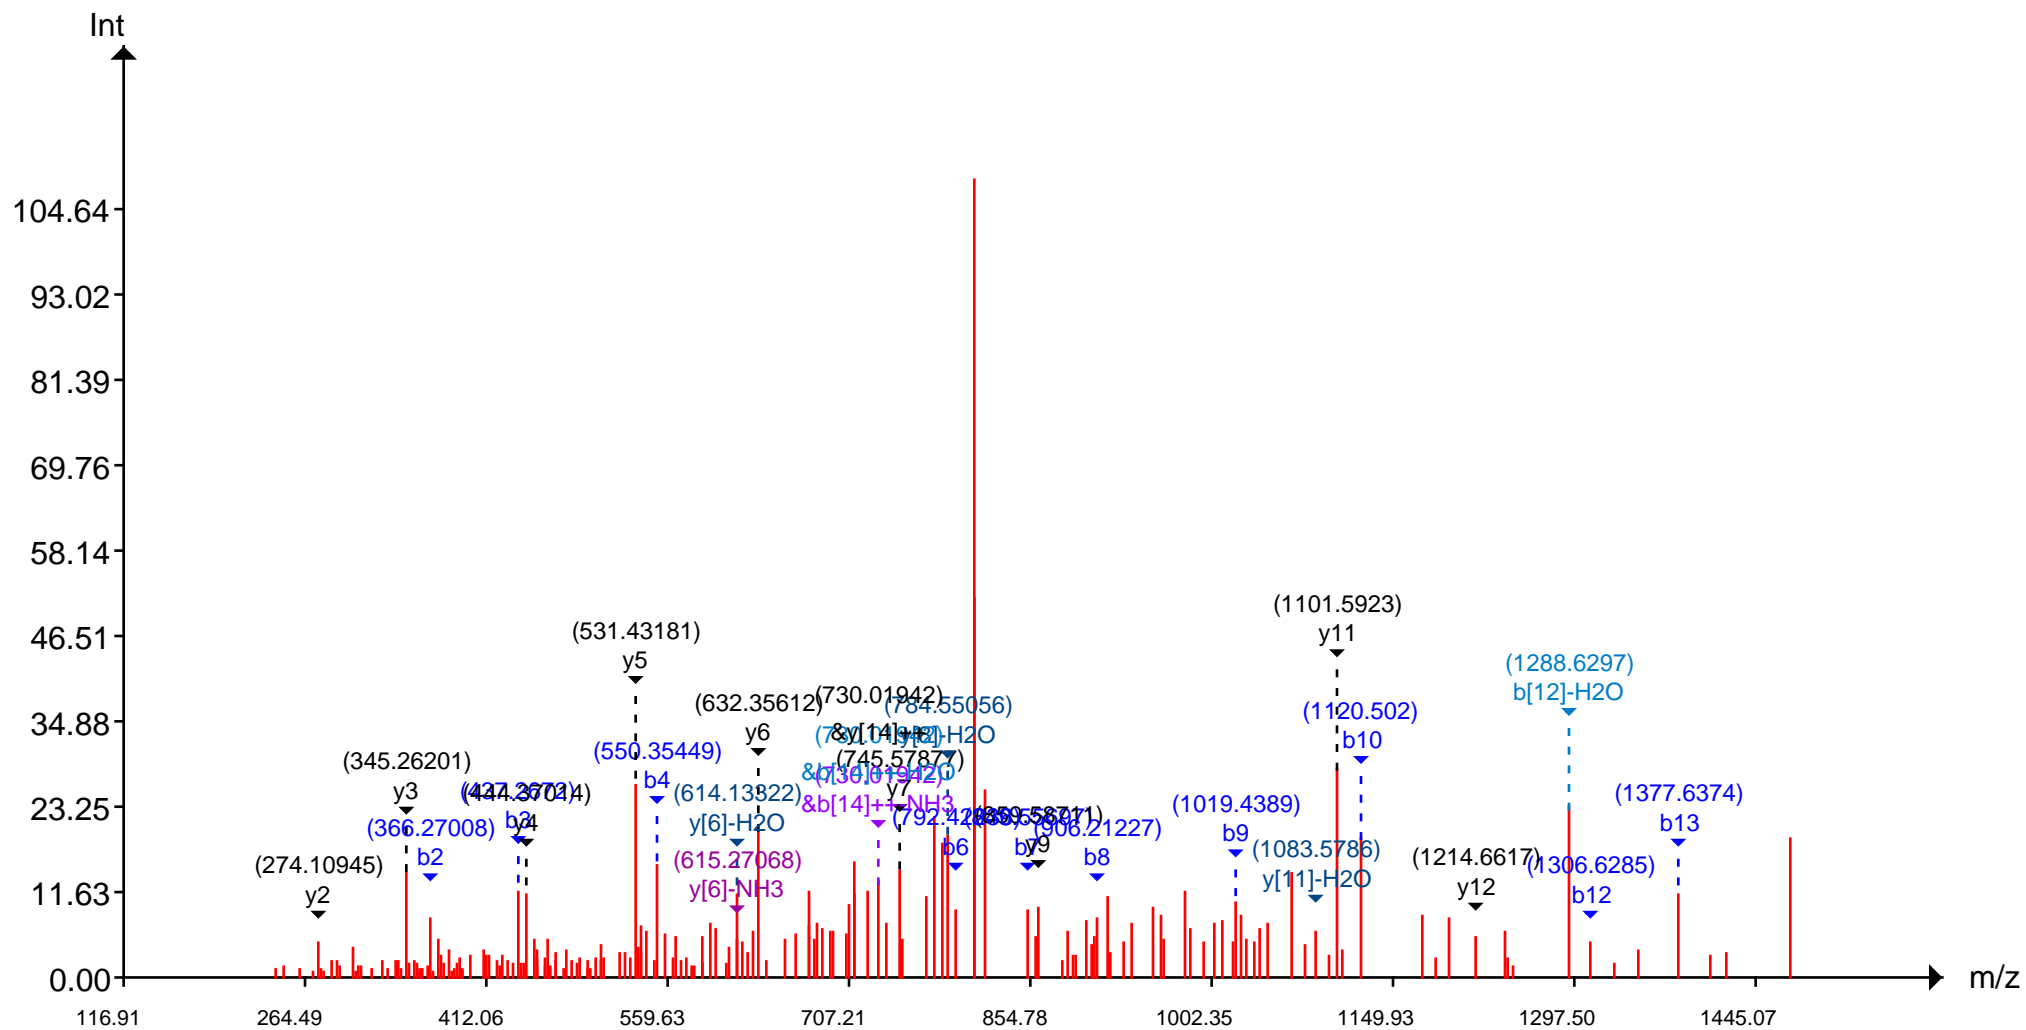

## Info

|                          |                                   |                           |         |
|--------------------------|-----------------------------------|---------------------------|---------|
| <b>Modified Sequence</b> | AcD3-FK<AcD3K*>AINQGGLTSVAVR-COOH | <b>Ion score</b>          | 46.14   |
| <b>Protein</b>           | Q9QUM9                            | <b>Confidence level</b>   | 99.00%  |
| <b>Precursor m/z</b>     | 825.97616                         | <b>Identity Threshold</b> | 45.56   |
| <b>Charge</b>            | 2+                                | <b>Mass error</b>         | 6.04E-4 |





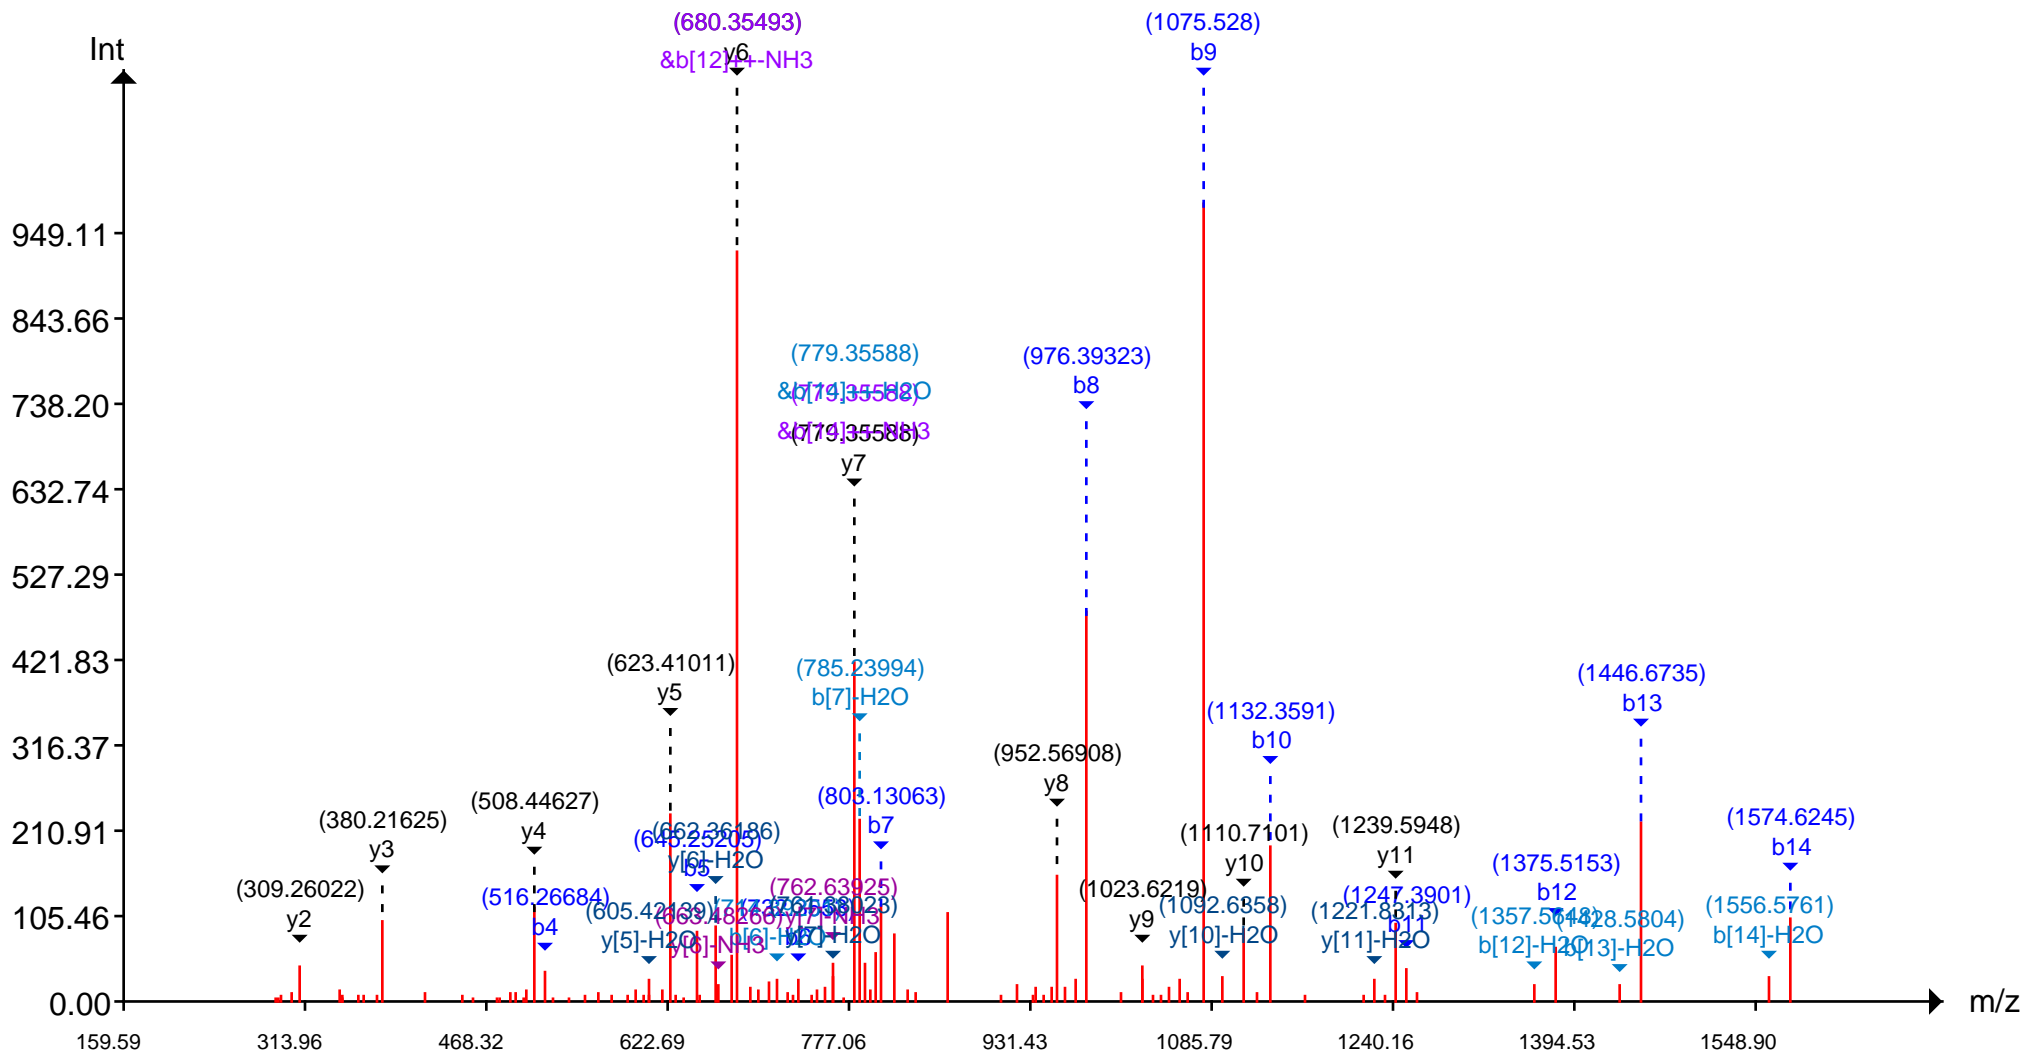

## Info

**Modified Sequence** AcD3-IAIK<AcD3K\*>ESAK<AcD3K\*>VGDQAQR<C13>-COOH

**Ion score** 103.9

**Protein** Q99JY9

**Confidence level** 99.00%

**Precursor m/z** 878.00745

**Identity Threshold** 45.14

**Charge** 2+

**Mass error** 0.002377

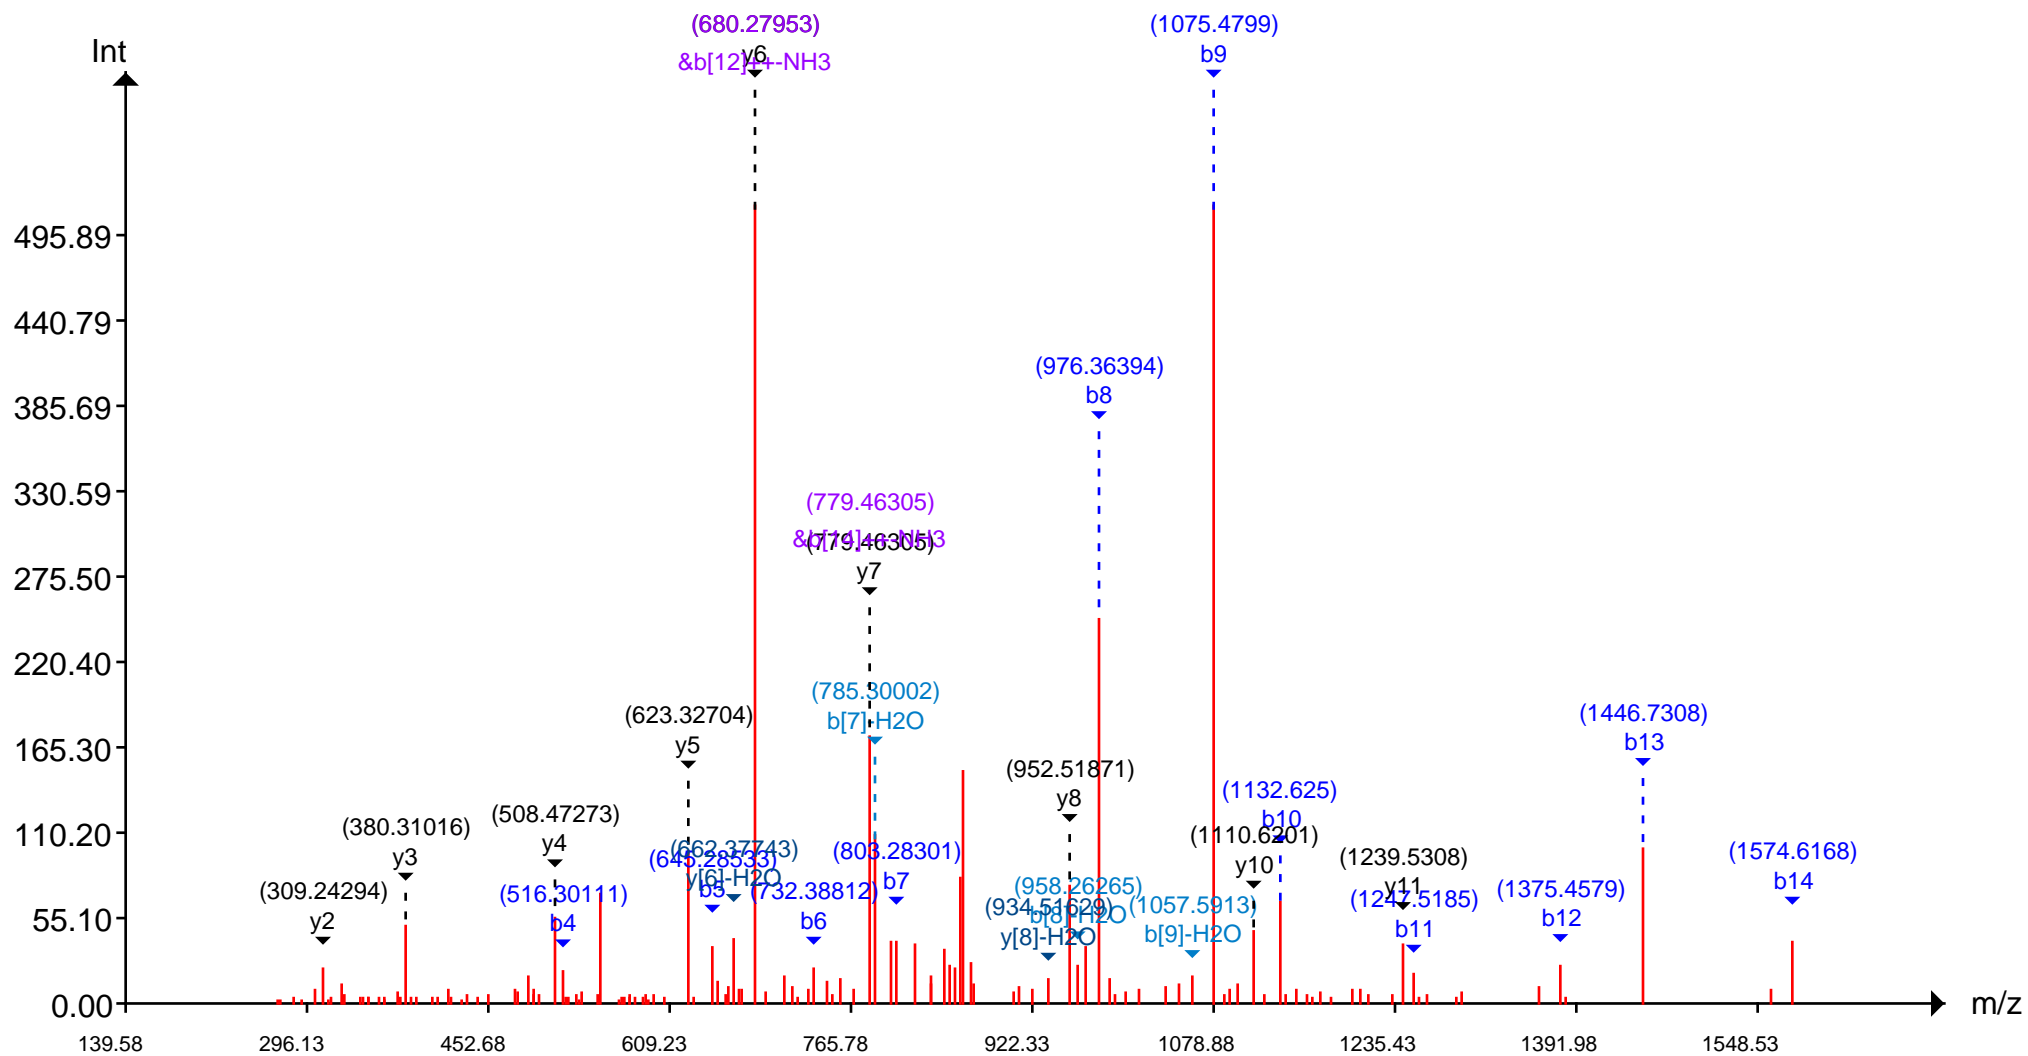

## Info

|                          |                                                |                           |          |
|--------------------------|------------------------------------------------|---------------------------|----------|
| <b>Modified Sequence</b> | AcD3-IAIK<AcD3K*>ESAK<AcD3K*>VGDQAQR<C13>-COOH | <b>Ion score</b>          | 72.66    |
| <b>Protein</b>           | Q99JY9                                         | <b>Confidence level</b>   | 99.00%   |
| <b>Precursor m/z</b>     | 878.0076                                       | <b>Identity Threshold</b> | 45.10    |
| <b>Charge</b>            | 2+                                             | <b>Mass error</b>         | 0.002677 |

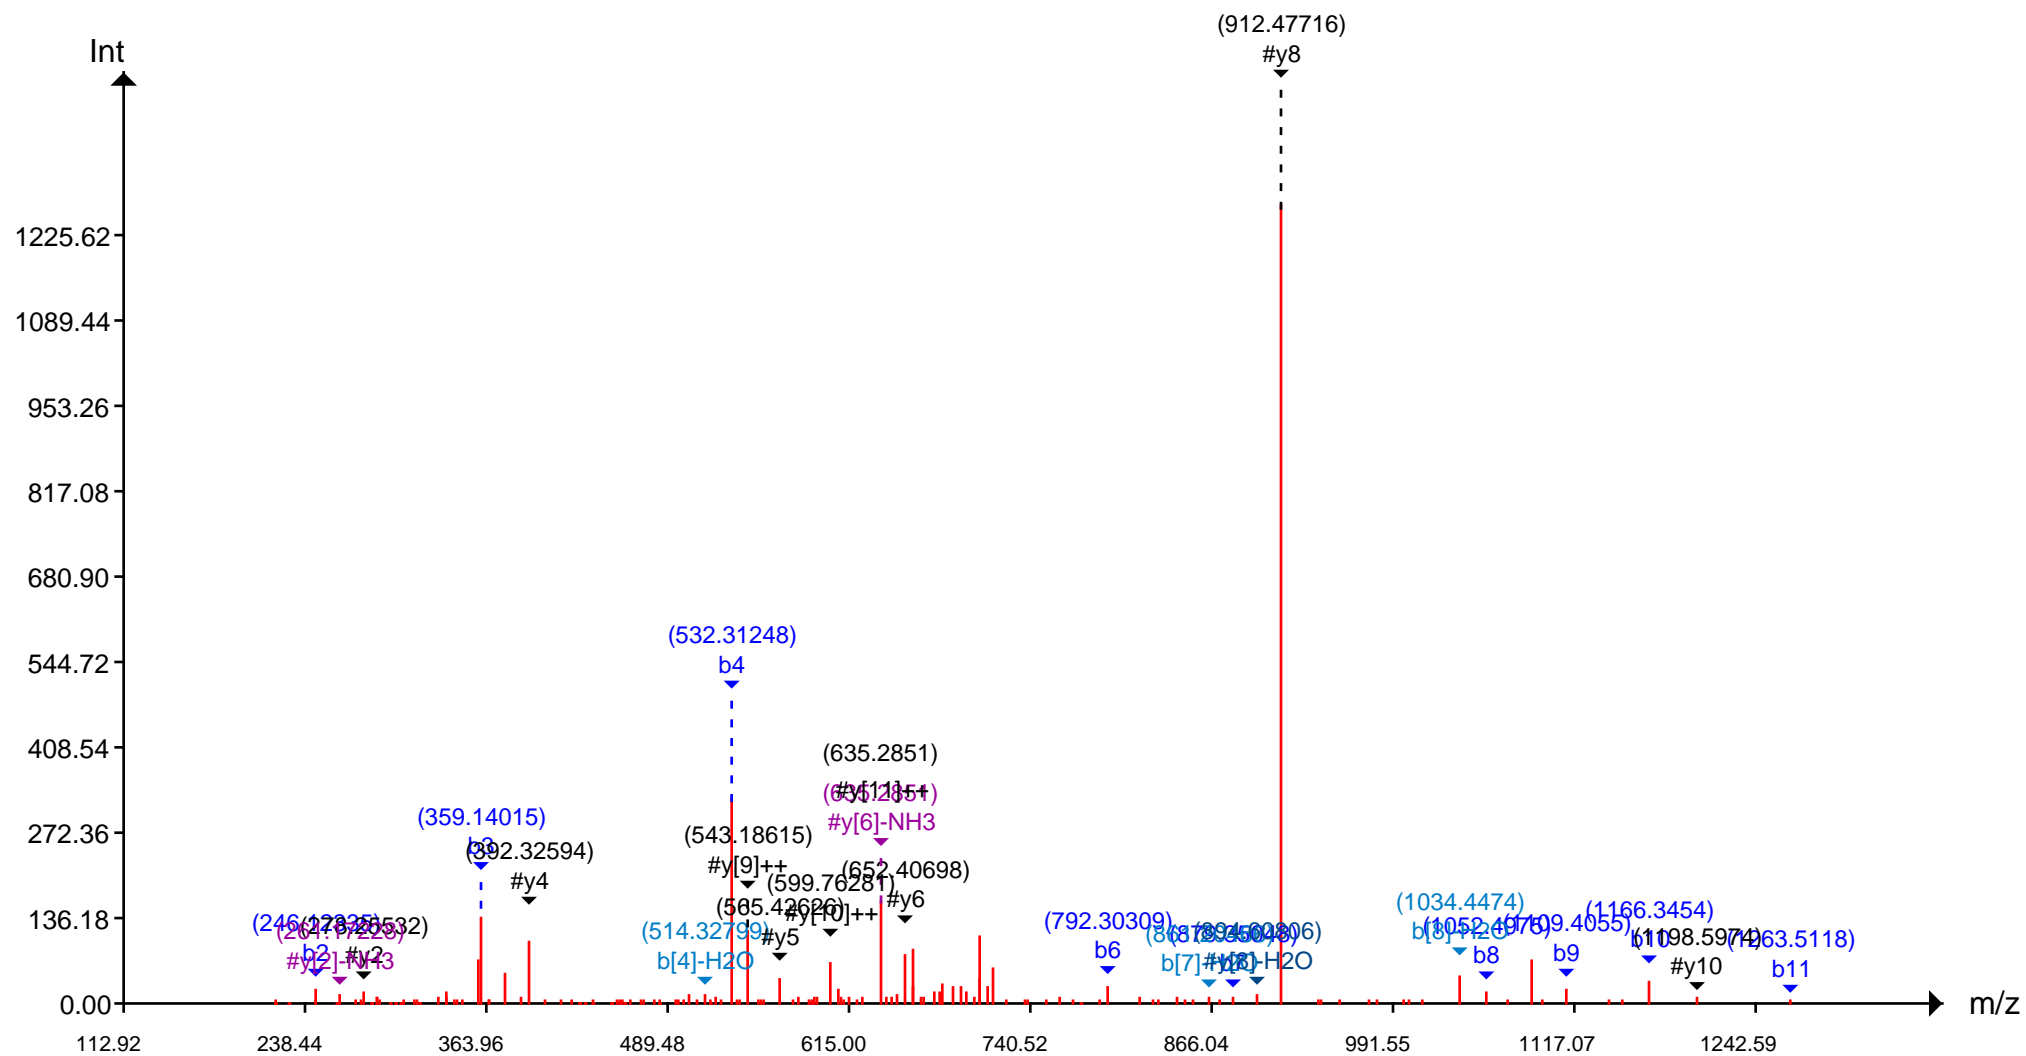

## Info

**Modified Sequence** AcD3-EALK<AcD3K\*>PYSK<AcD3K\*>GGPR<C13>-COOH

**Ion score** 59.1

**Protein** P06745

**Confidence level** 99.00%

**Precursor m/z** 722.41652

**Identity Threshold** 46.07

**Charge** 2+

**Mass error** 9.98E-4

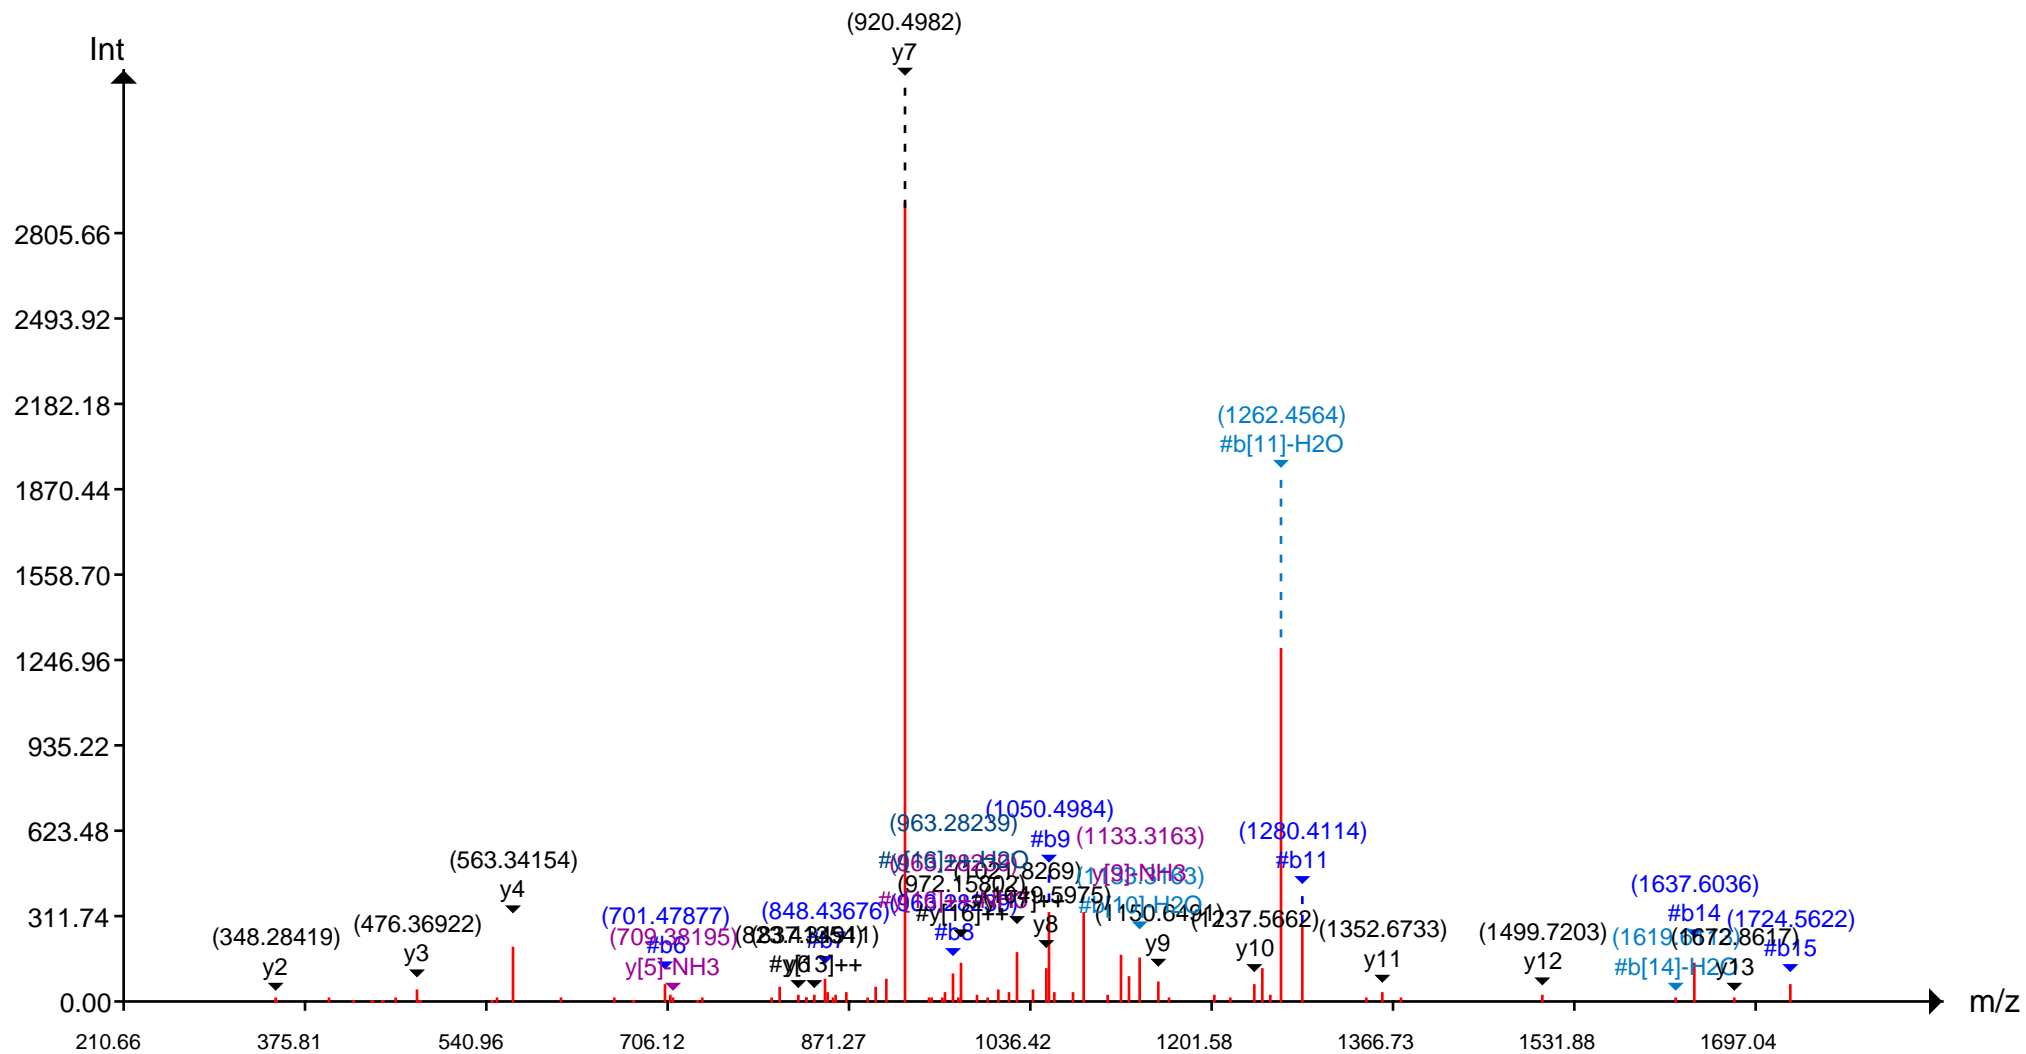

## Info

|                          |                                                    |                           |          |
|--------------------------|----------------------------------------------------|---------------------------|----------|
| <b>Modified Sequence</b> | AcD3-IVGVNK<AcD3K*>M<Mox*>DSTEPPYSQK<AcD3K*>R-COOH | <b>Ion score</b>          | 71.83    |
| <b>Protein</b>           | P10126                                             | <b>Confidence level</b>   | 99.00%   |
| <b>Precursor m/z</b>     | 1100.5685                                          | <b>Identity Threshold</b> | 47.97    |
| <b>Charge</b>            | 2+                                                 | <b>Mass error</b>         | 0.003277 |

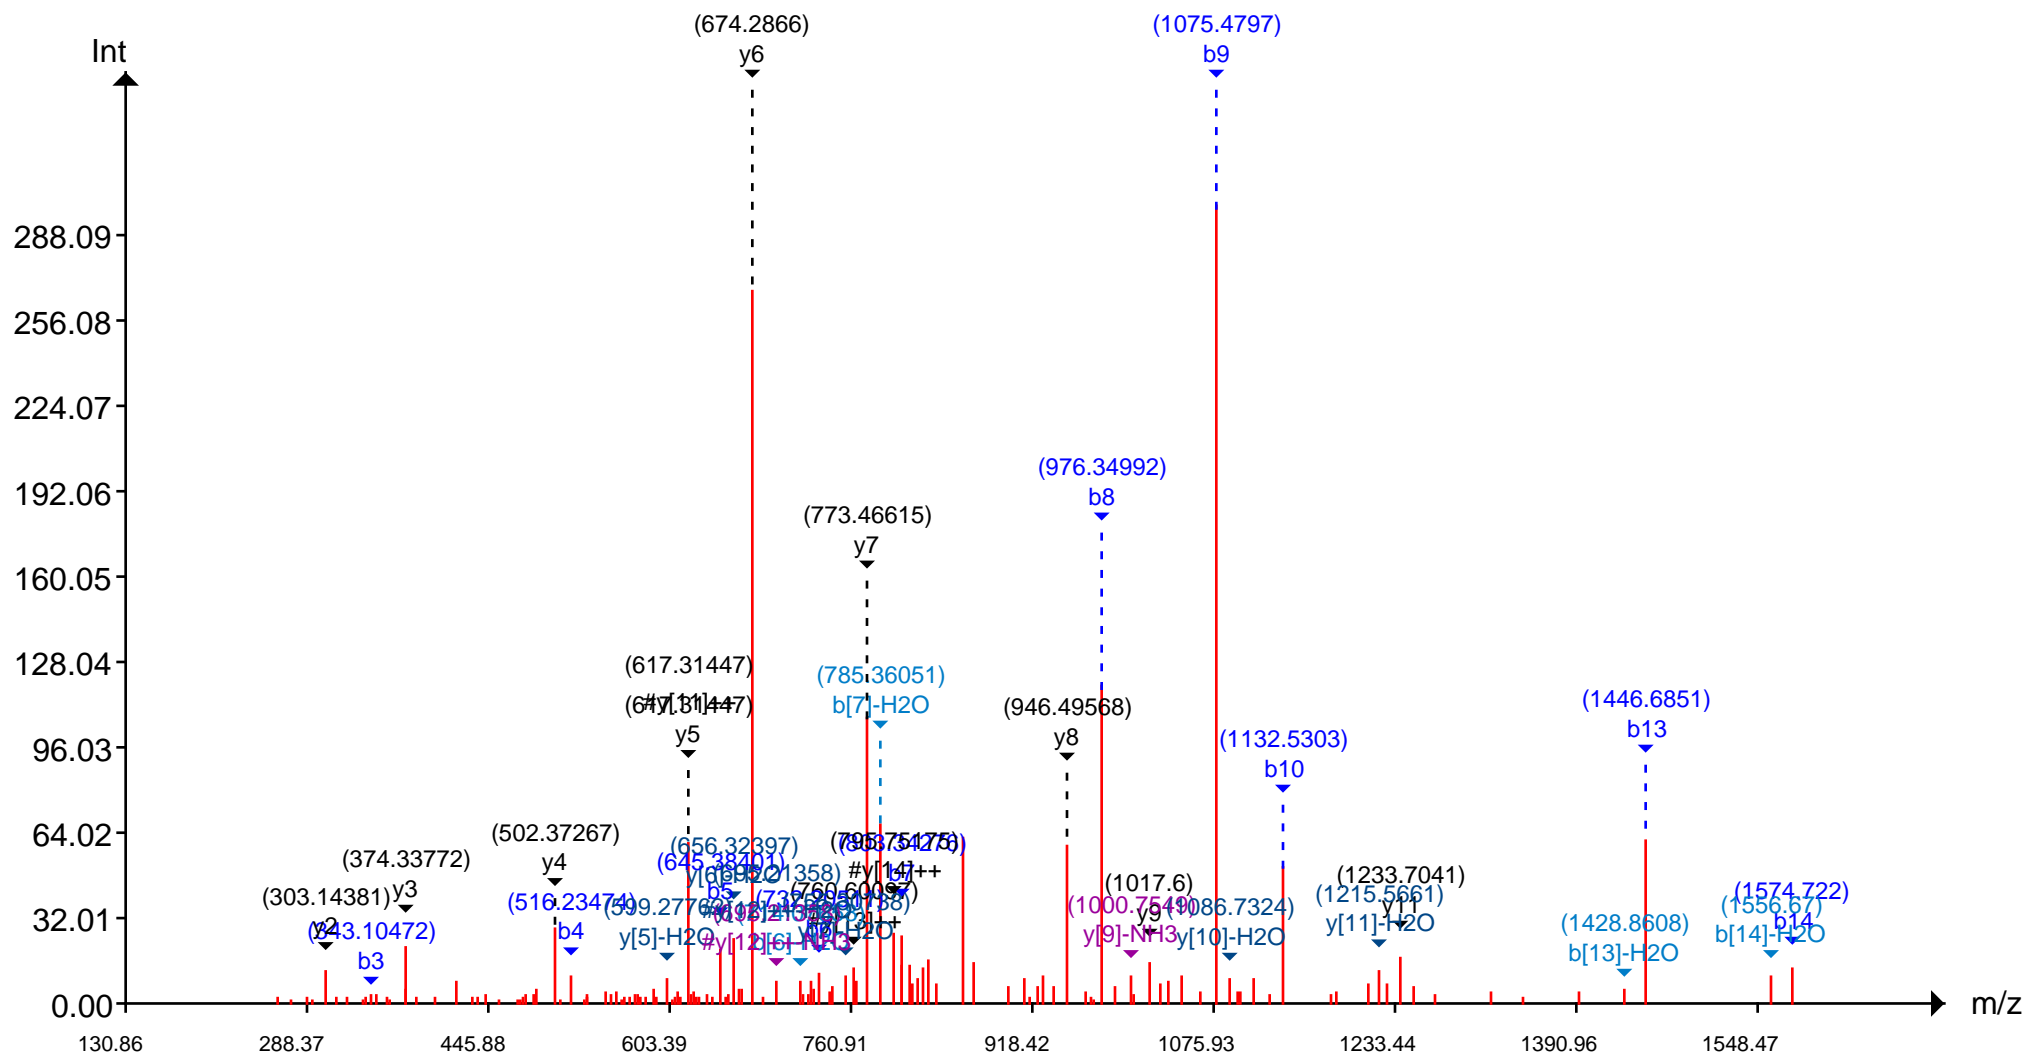

## Info

**Modified Sequence** AcD3-IAIK<AcD3K\*>ESAK<AcD3K\*>VGDQAQR-COOH

**Ion score** 83.3

**Protein** Q99JY9

**Confidence level** 99.00%

**Precursor m/z** 874.99746

**Identity Threshold** 46.10

**Charge** 2+

**Mass error** 0.002539

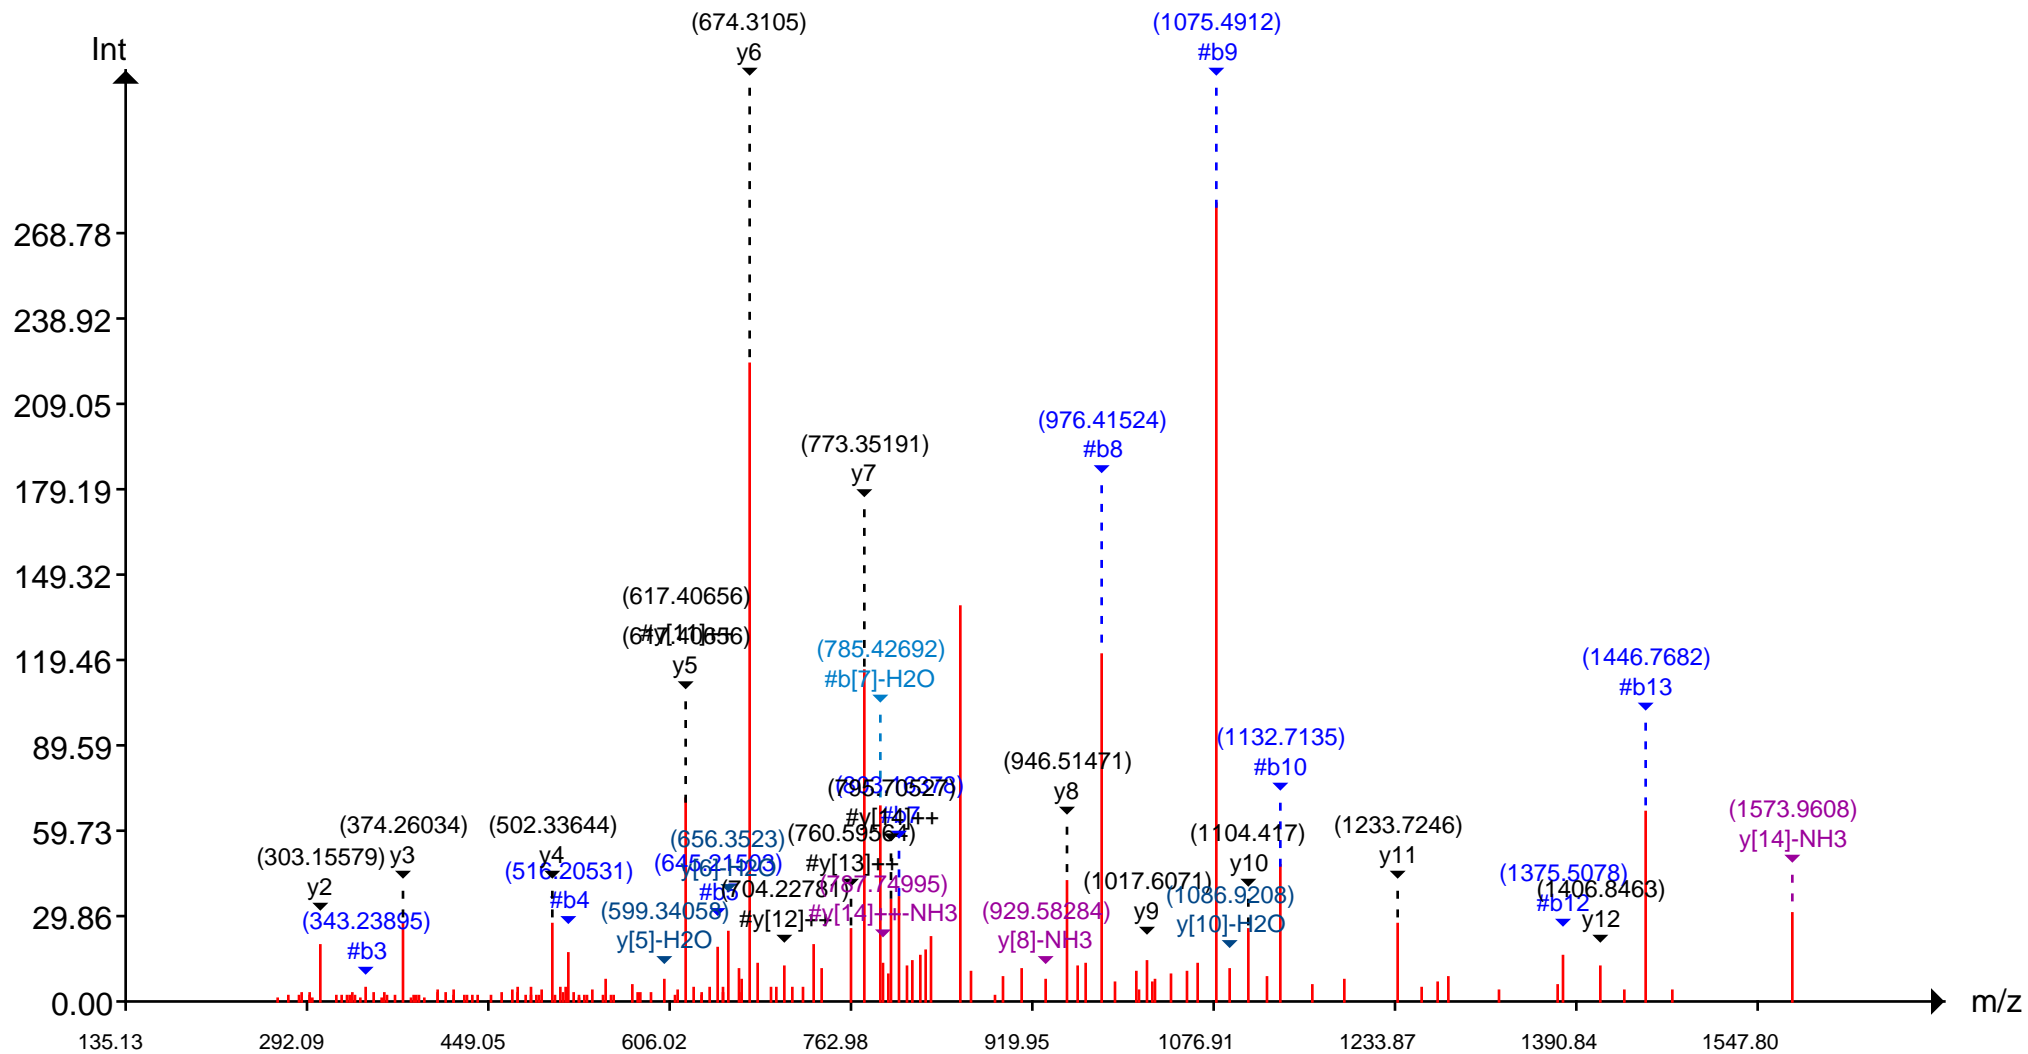

## Info

**Modified Sequence** AcD3-IAIK<AcD3K\*>ESAK<AcD3K\*>VGDQAQR-COOH

**Ion score** 80.63

**Protein** Q99JY9

**Confidence level** 99.00%

**Precursor m/z** 874.9976

**Identity Threshold** 46.08

**Charge** 2+

**Mass error** 0.002819

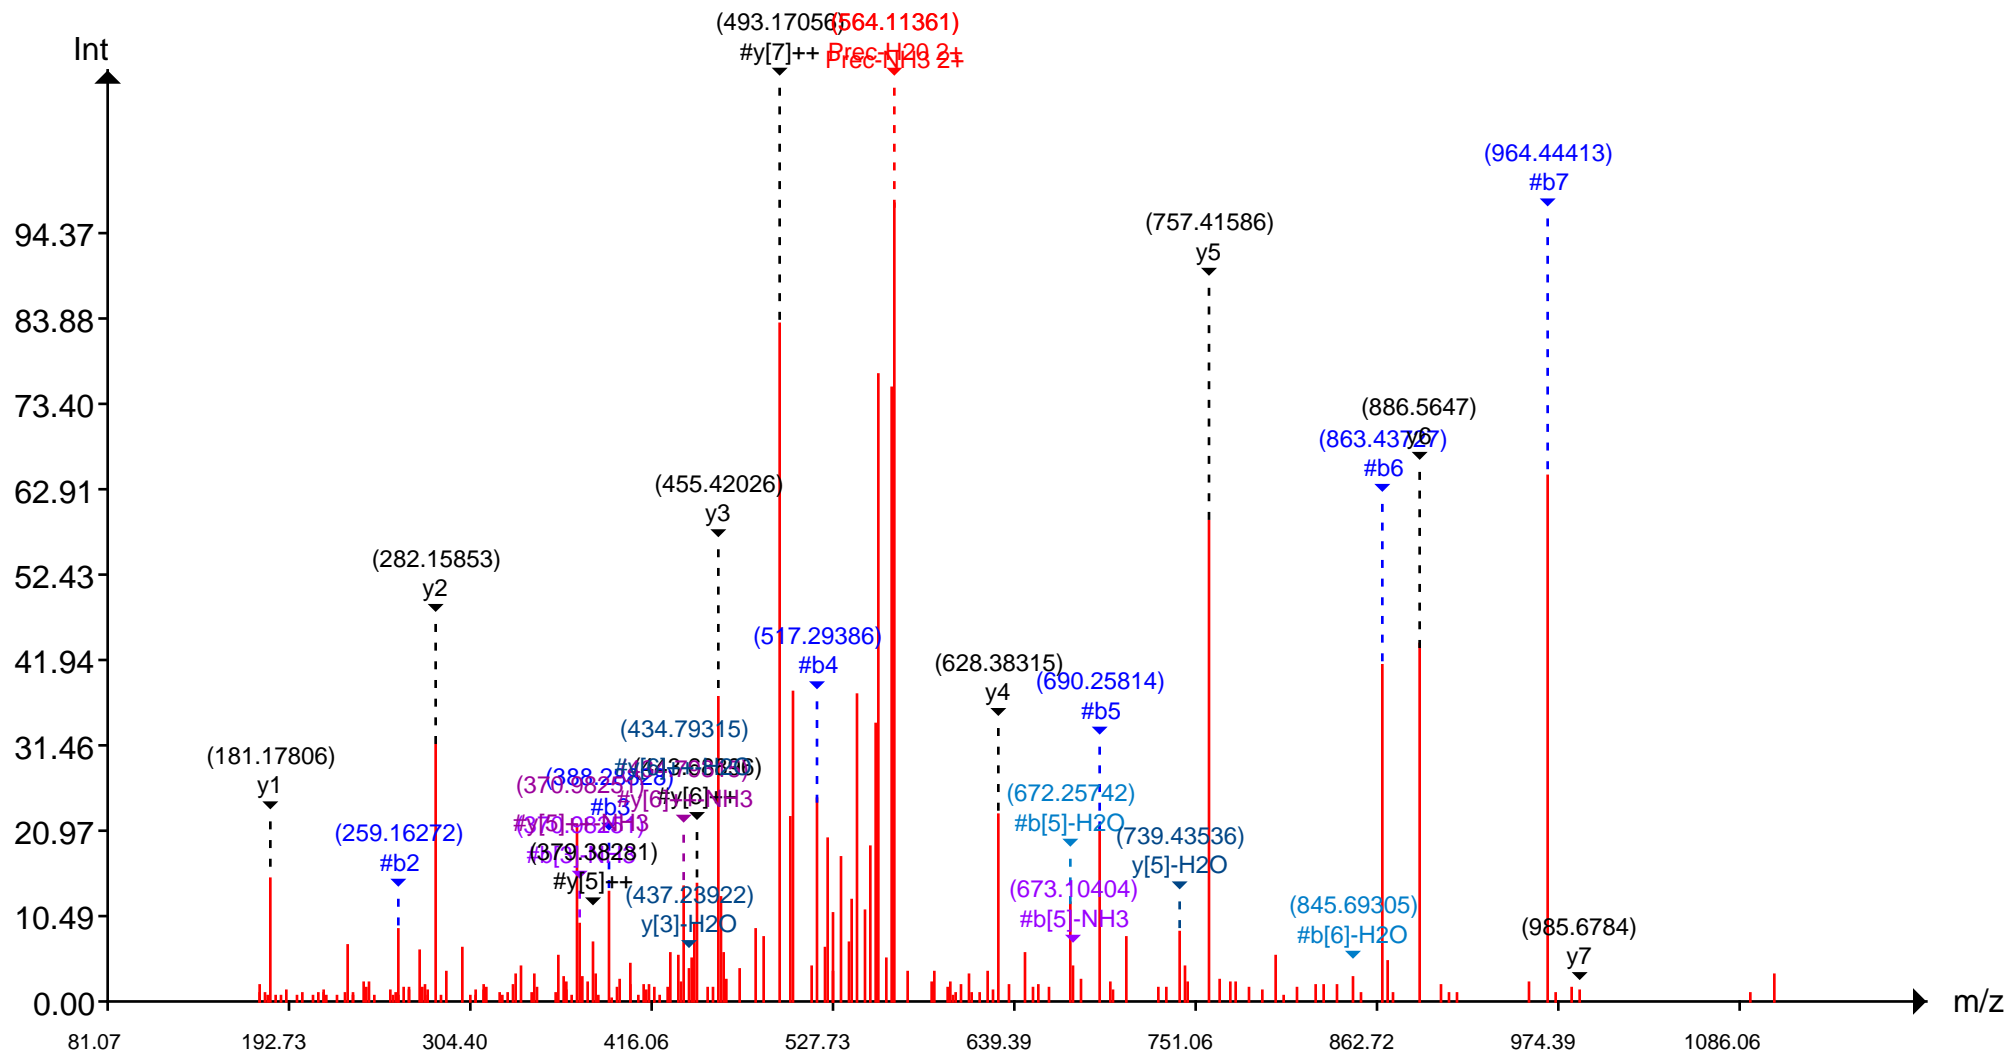

## Info

|                          |                                         |                           |         |
|--------------------------|-----------------------------------------|---------------------------|---------|
| <b>Modified Sequence</b> | AcD3-NVEEK<AcD3K*>K<AcD3K*>TR<C13>-COOH | <b>Ion score</b>          | 54.6    |
| <b>Protein</b>           | P97855, P97379                          | <b>Confidence level</b>   | 99.00%  |
| <b>Precursor m/z</b>     | 572.83455                               | <b>Identity Threshold</b> | 46.70   |
| <b>Charge</b>            | 2+                                      | <b>Mass error</b>         | 4.34E-4 |





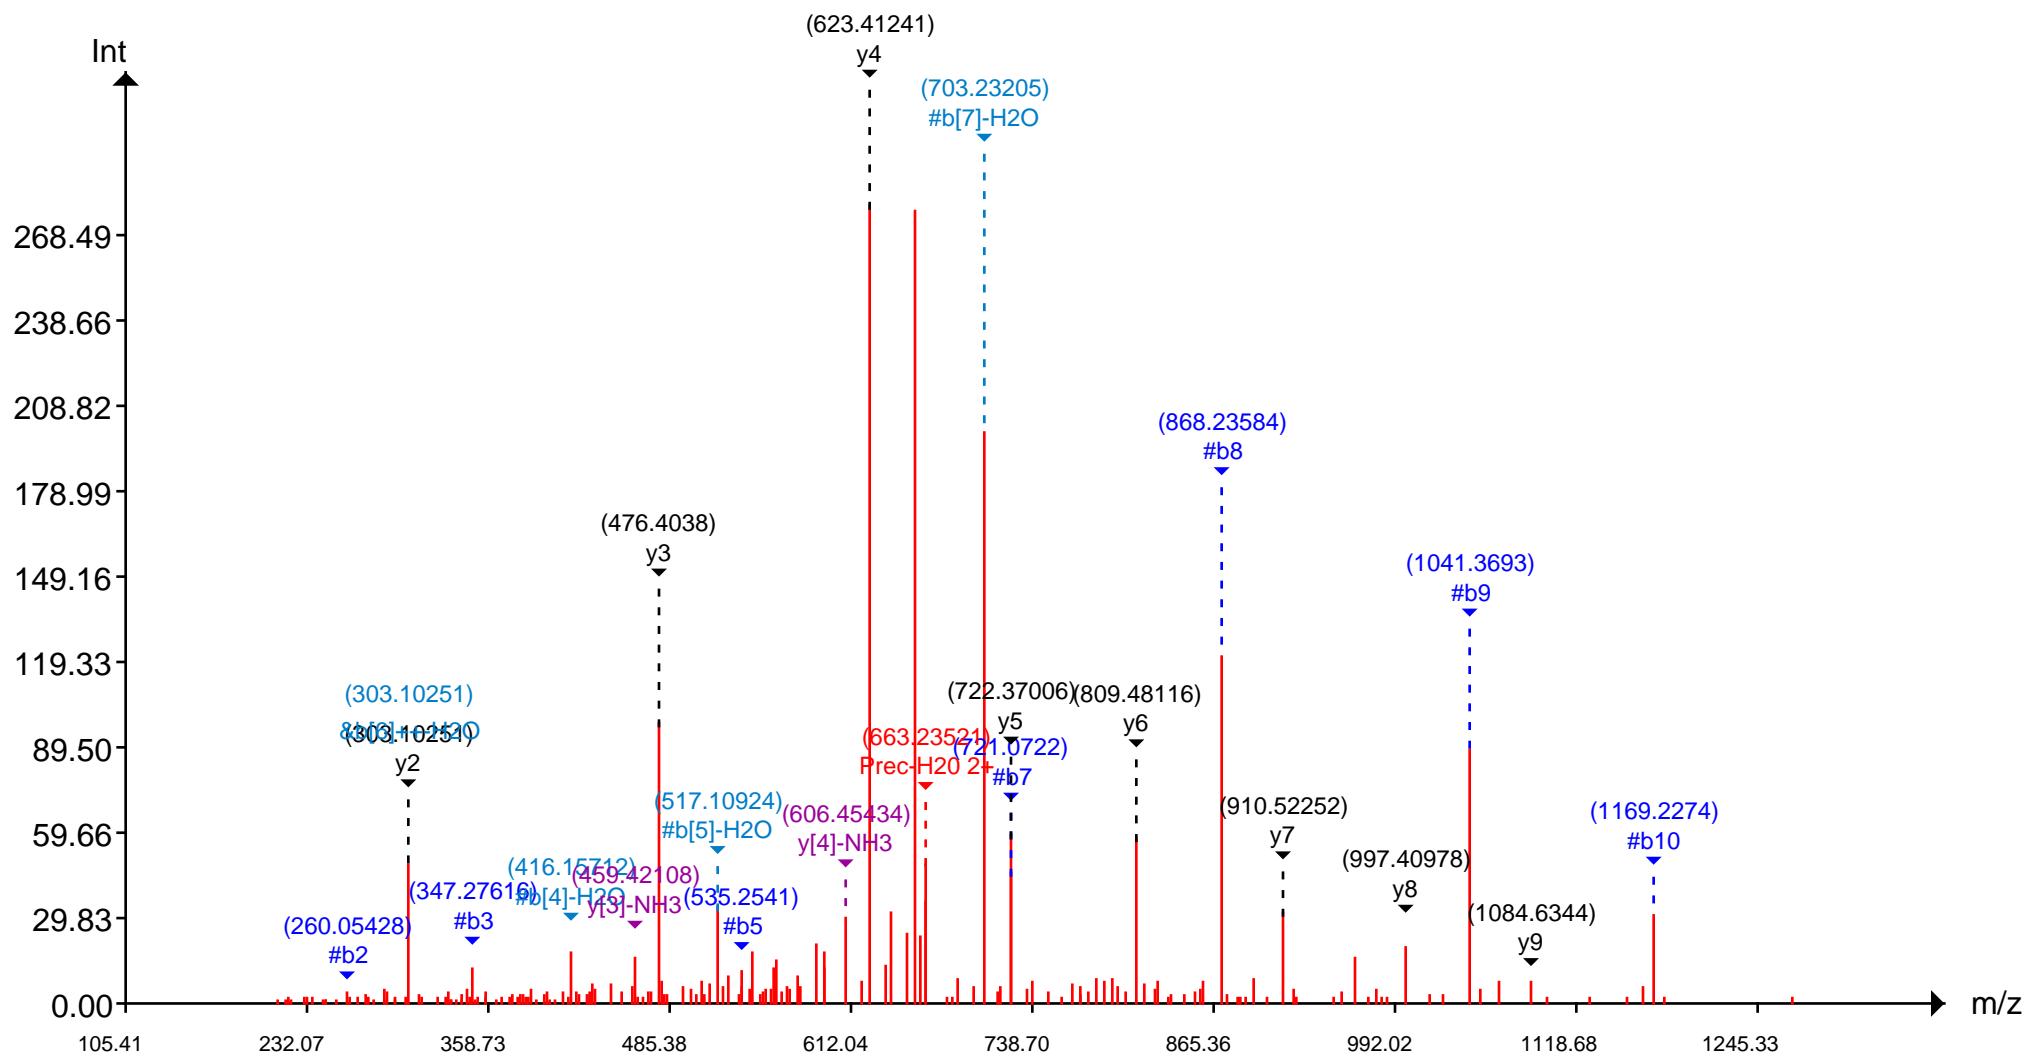

## Info

|                          |                               |                           |          |
|--------------------------|-------------------------------|---------------------------|----------|
| <b>Modified Sequence</b> | AcD3-DVSSTSVFK<AcD3K*>QR-COOH | <b>Ion score</b>          | 56.71    |
| <b>Protein</b>           | Q8R1F1                        | <b>Confidence level</b>   | 99.00%   |
| <b>Precursor m/z</b>     | 672.35791                     | <b>Identity Threshold</b> | 48.09    |
| <b>Charge</b>            | 2+                            | <b>Mass error</b>         | 0.001302 |

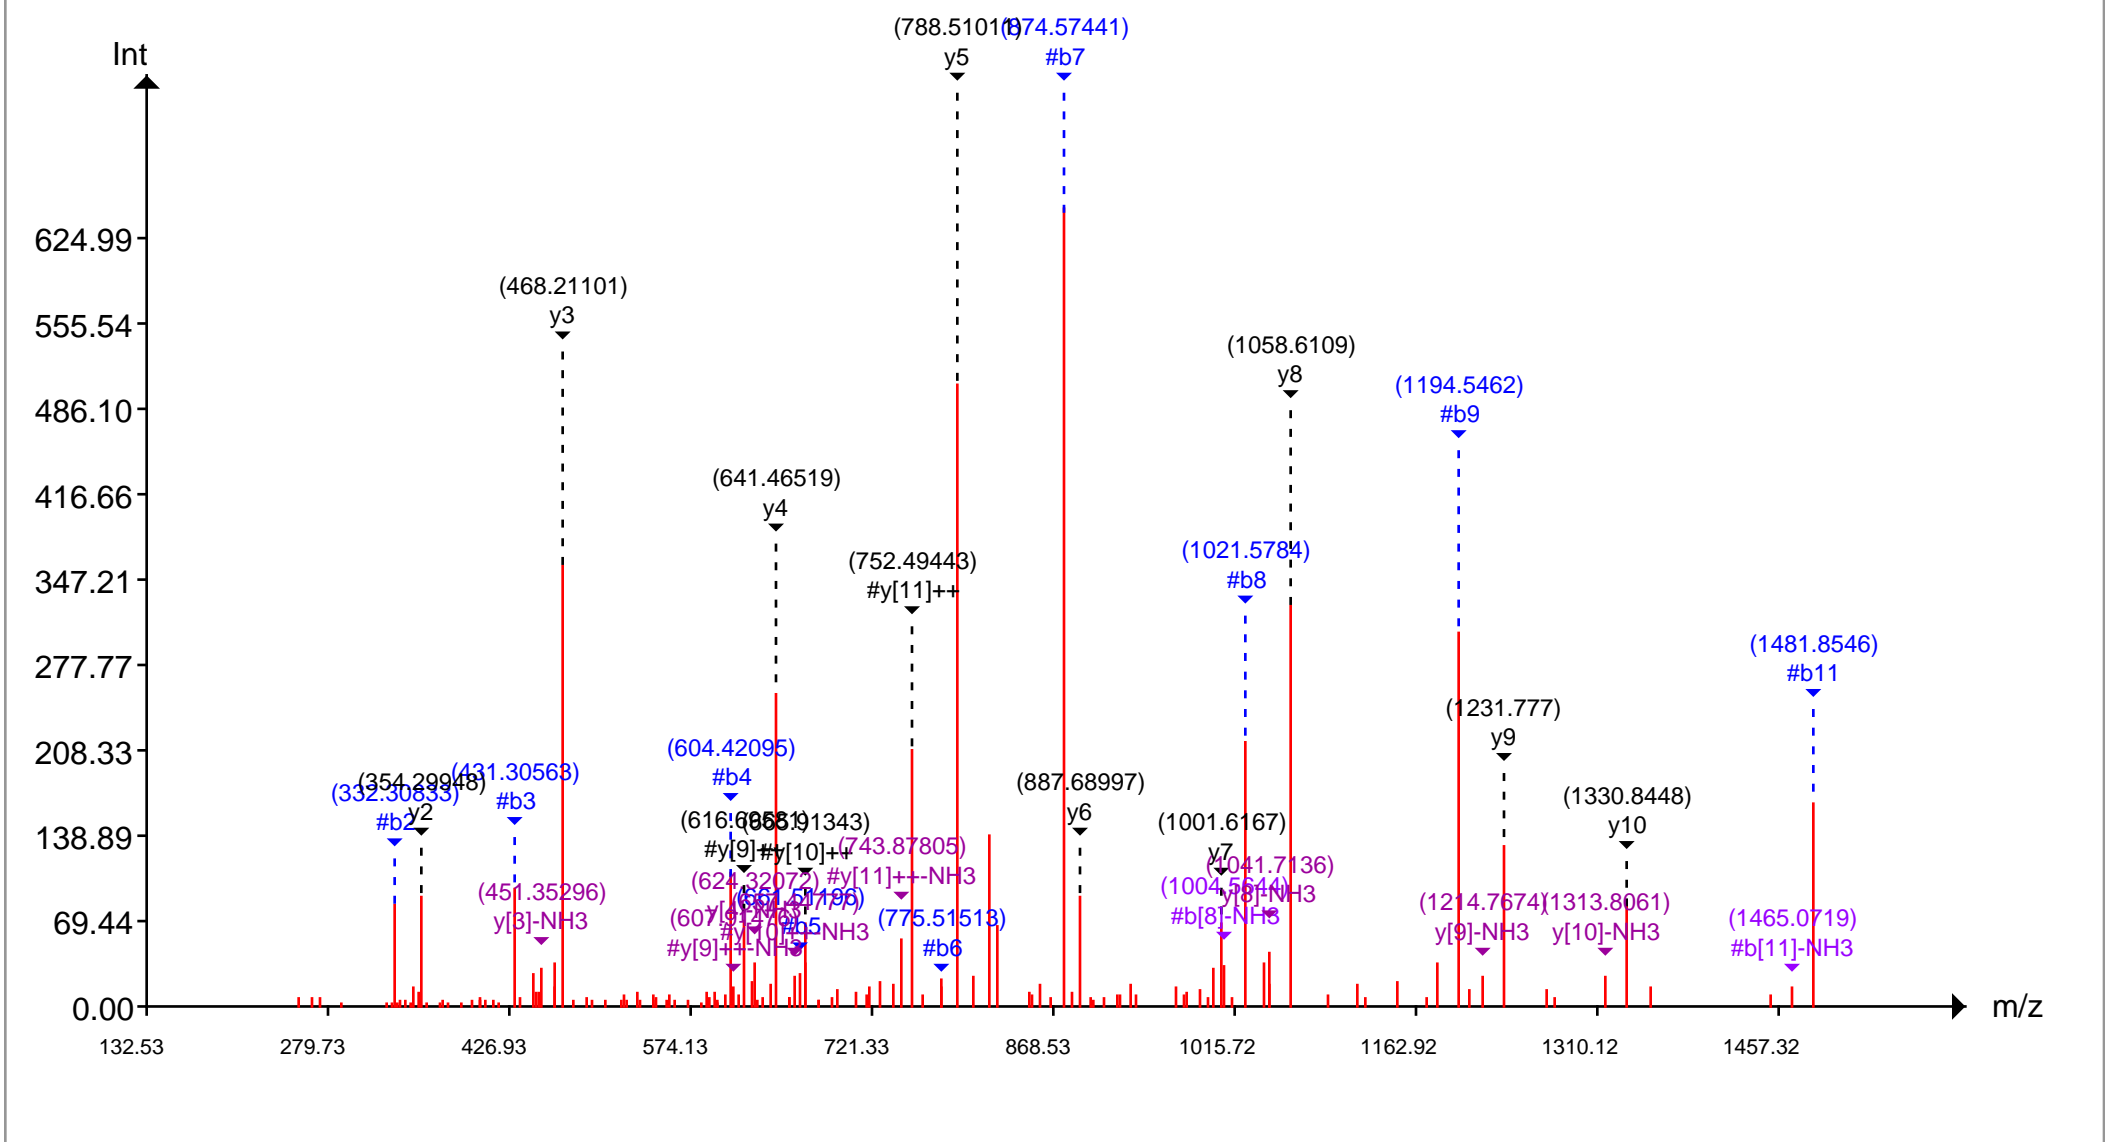

## Info

|                          |                                                             |                           |          |
|--------------------------|-------------------------------------------------------------|---------------------------|----------|
| <b>Modified Sequence</b> | AcD3-LK<AcD3K*>VK<AcD3K*>GNVFK<AcD3K*>NK<AcD3K*>R<C13>-COOH | <b>Ion score</b>          | 83.71    |
| <b>Protein</b>           | P84099                                                      | <b>Confidence level</b>   | 99.00%   |
| <b>Precursor m/z</b>     | 831.53565                                                   | <b>Identity Threshold</b> | 34.88    |
| <b>Charge</b>            | 2+                                                          | <b>Mass error</b>         | 0.001481 |

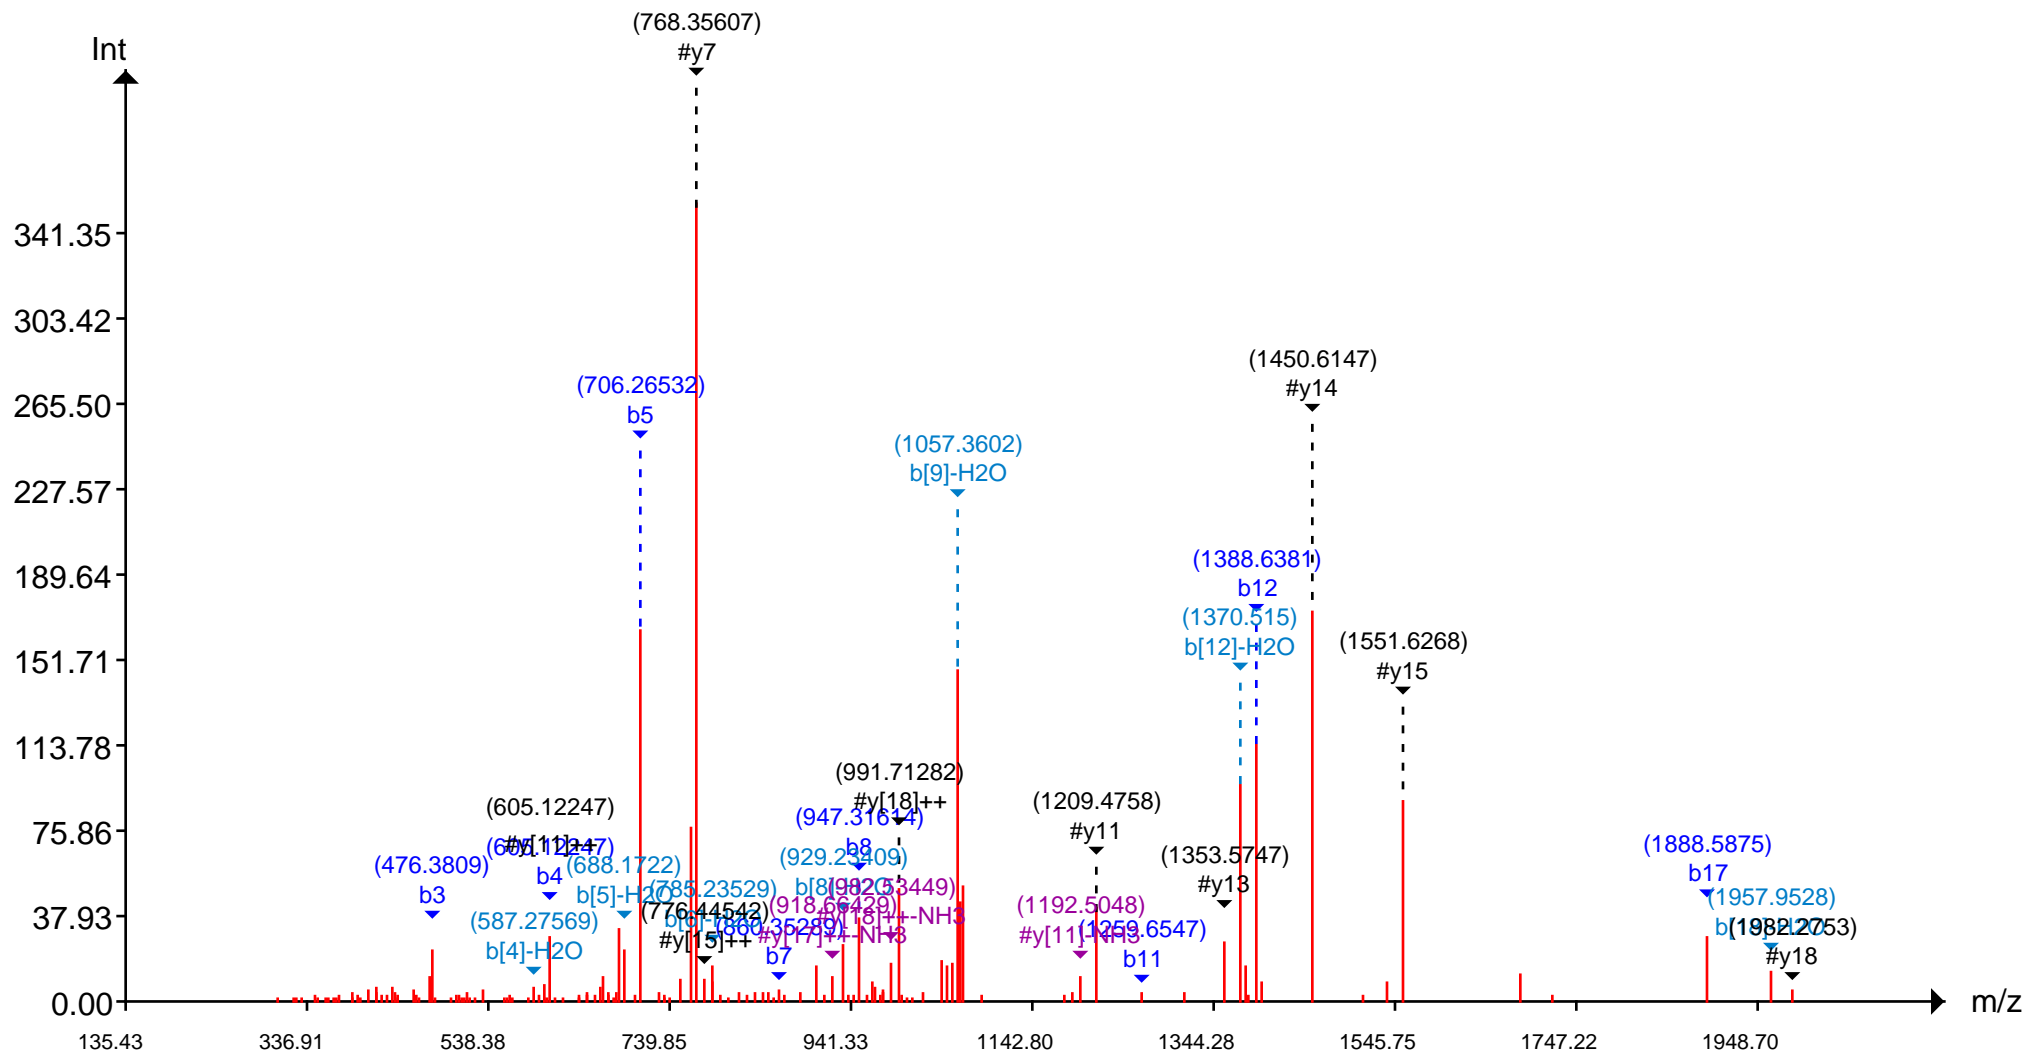

## Info

|                          |                                                  |                           |          |
|--------------------------|--------------------------------------------------|---------------------------|----------|
| <b>Modified Sequence</b> | AcD3-EQK<AcD3K*>ETPGSQPSEPC<Cmm*>SGVSR<C13>-COOH | <b>Ion score</b>          | 51.38    |
| <b>Protein</b>           | P27546                                           | <b>Confidence level</b>   | 99.00%   |
| <b>Precursor m/z</b>     | 1078.5121                                        | <b>Identity Threshold</b> | 46.15    |
| <b>Charge</b>            | 2+                                               | <b>Mass error</b>         | 0.003071 |

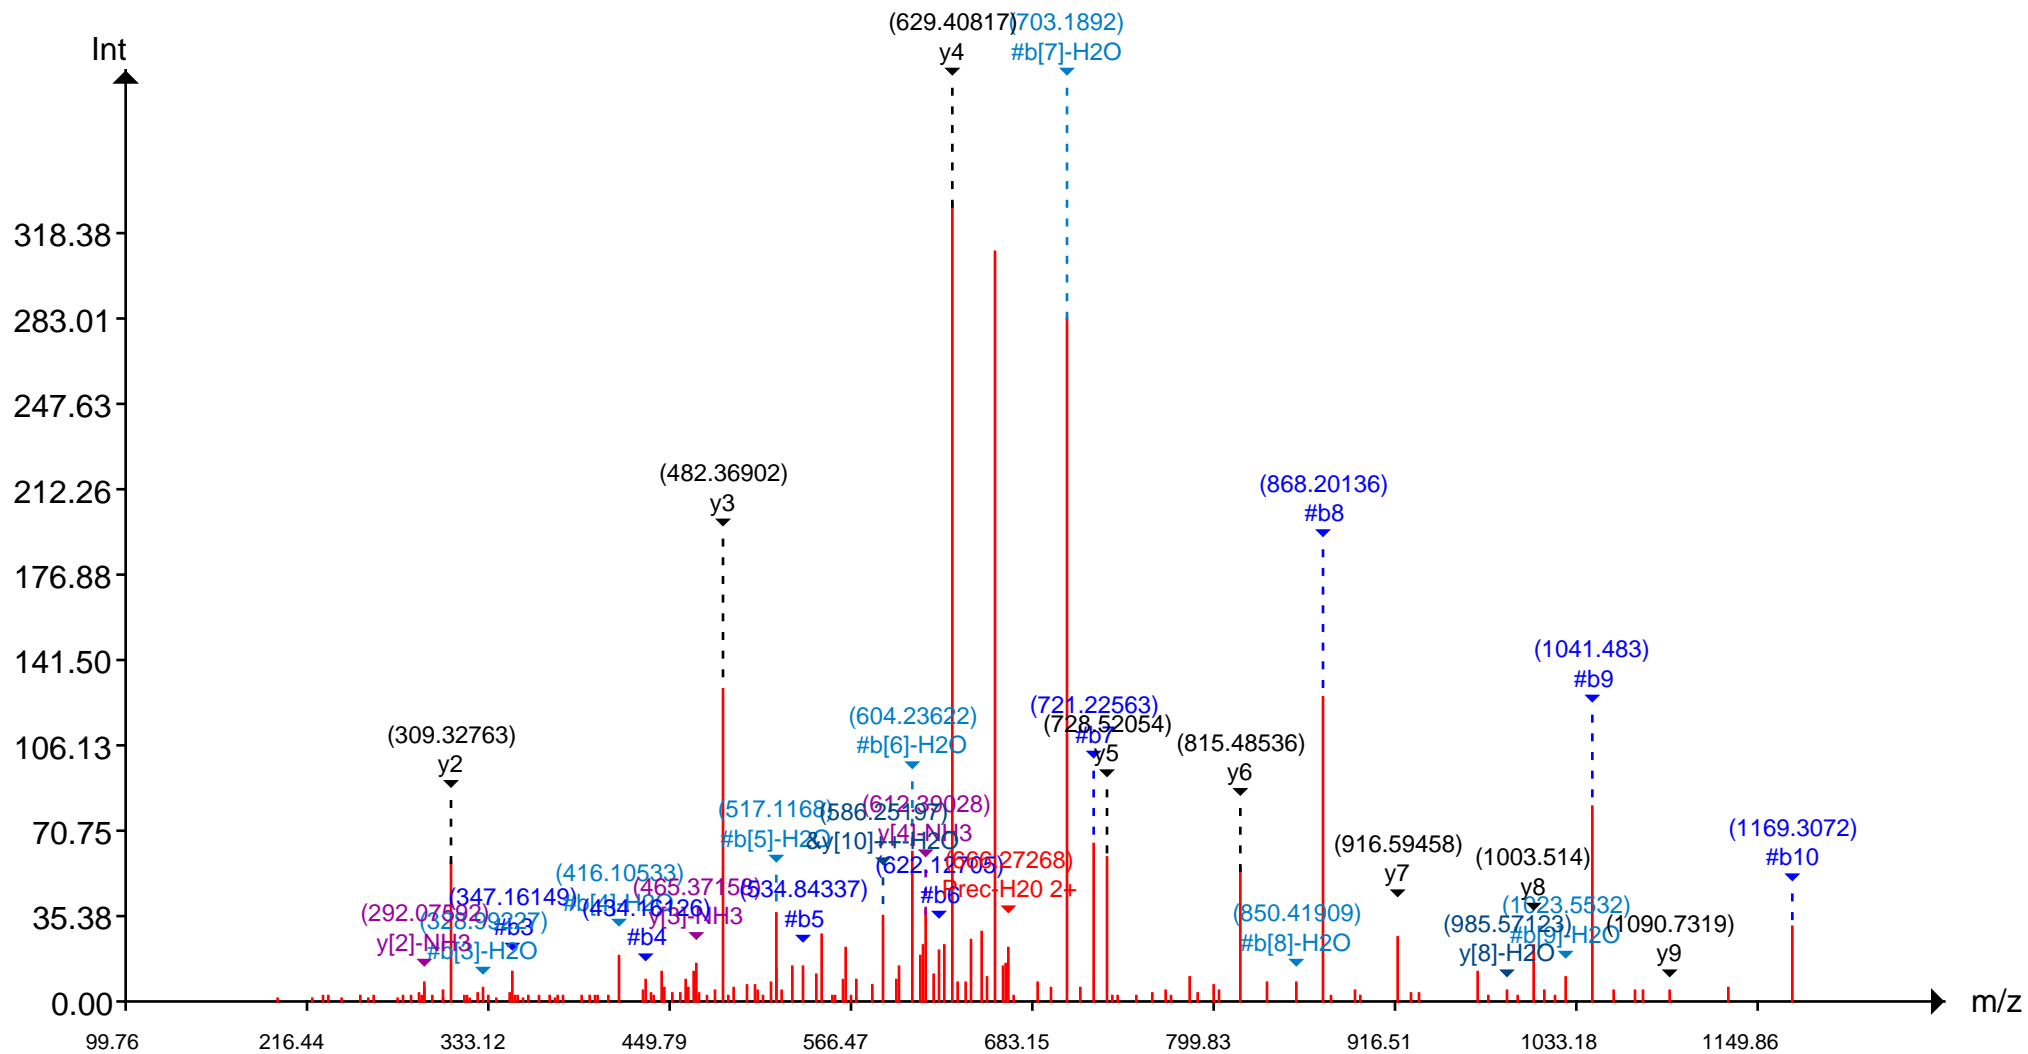

## Info

|                          |                                    |                           |         |
|--------------------------|------------------------------------|---------------------------|---------|
| <b>Modified Sequence</b> | AcD3-DVSSTSVFK<AcD3K*>QR<C13>-COOH | <b>Ion score</b>          | 57.14   |
| <b>Protein</b>           | Q8R1F1                             | <b>Confidence level</b>   | 99.00%  |
| <b>Precursor m/z</b>     | 675.36802                          | <b>Identity Threshold</b> | 47.97   |
| <b>Charge</b>            | 2+                                 | <b>Mass error</b>         | 0.00138 |

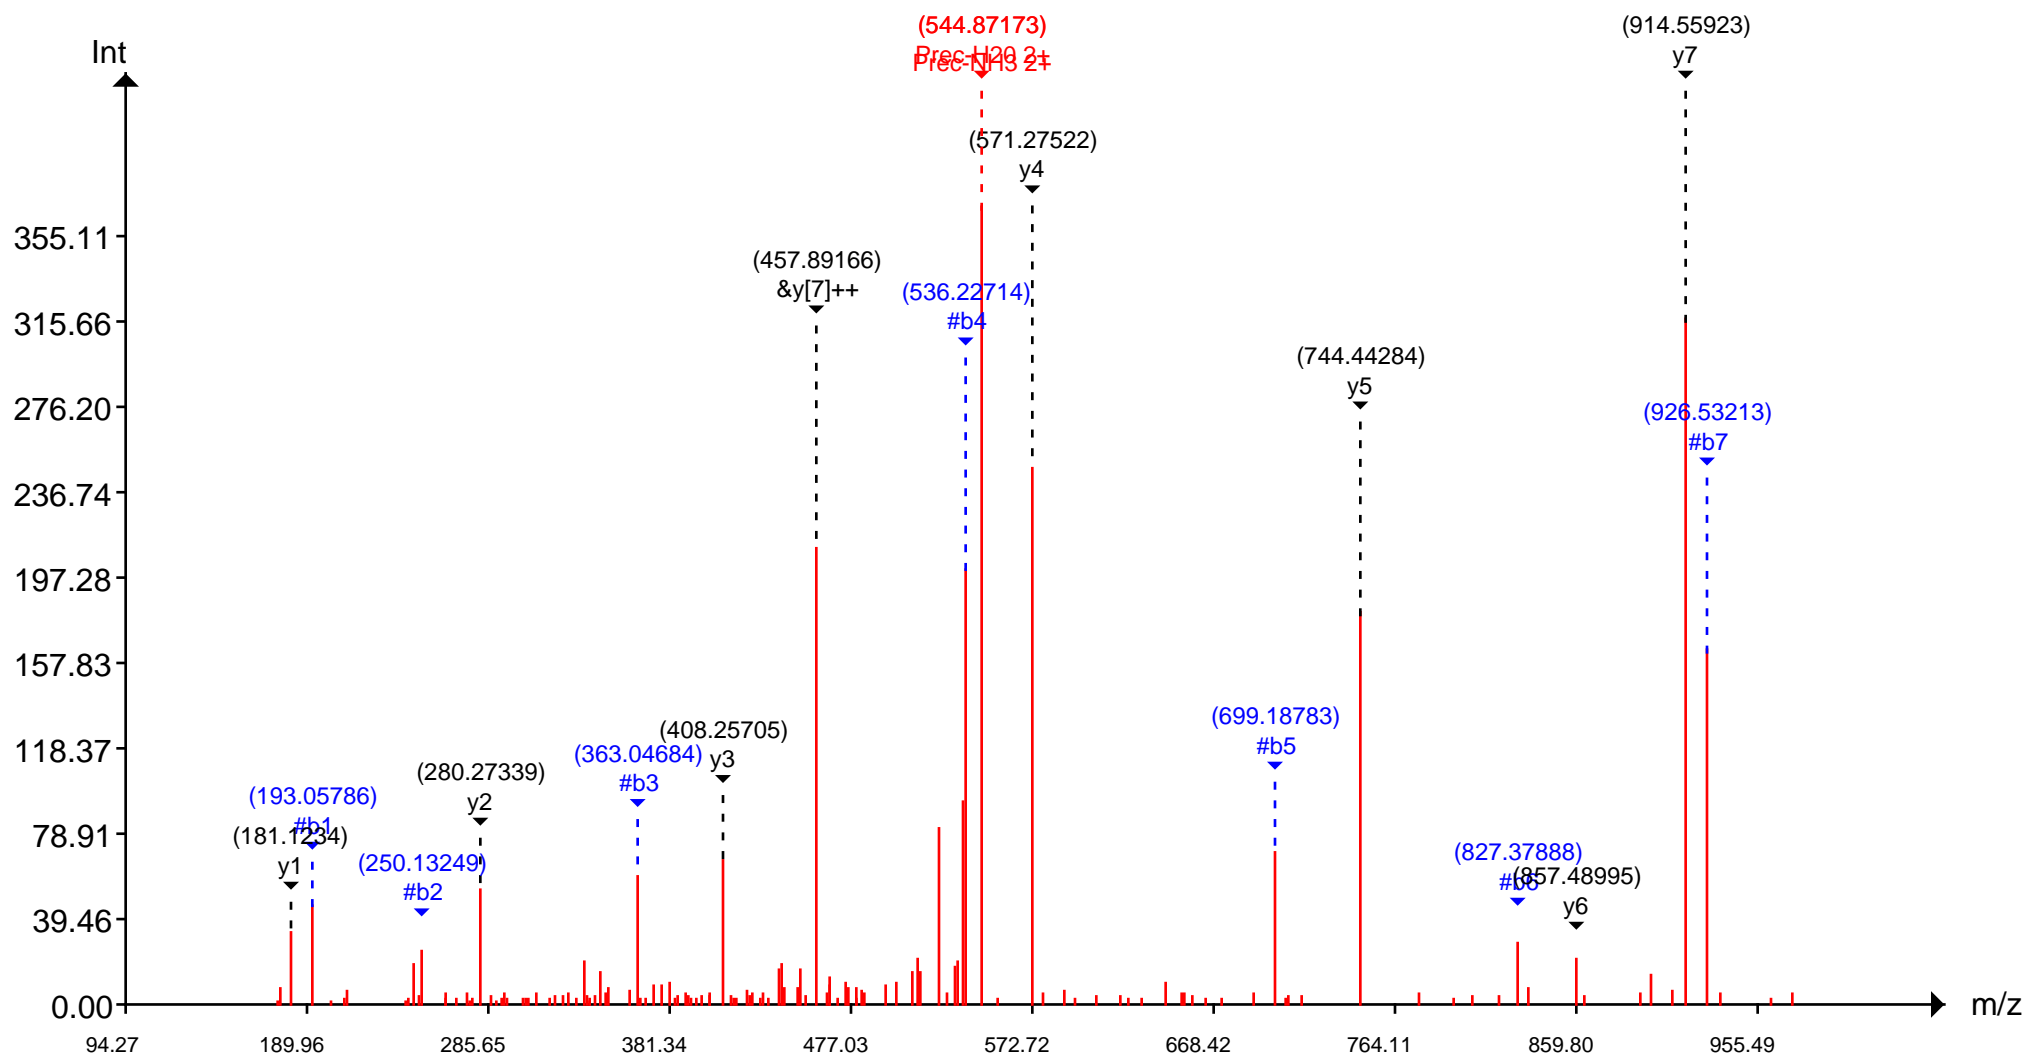

## Info

|                          |                                       |                           |          |
|--------------------------|---------------------------------------|---------------------------|----------|
| <b>Modified Sequence</b> | AcD3-M<Mox*>GLK<AcD3K*>YQVR<C13>-COOH | <b>Ion score</b>          | 62.55    |
| <b>Protein</b>           | P70677                                | <b>Confidence level</b>   | 99.00%   |
| <b>Precursor m/z</b>     | 553.81551                             | <b>Identity Threshold</b> | 47.70    |
| <b>Charge</b>            | 2+                                    | <b>Mass error</b>         | -3.38E-4 |

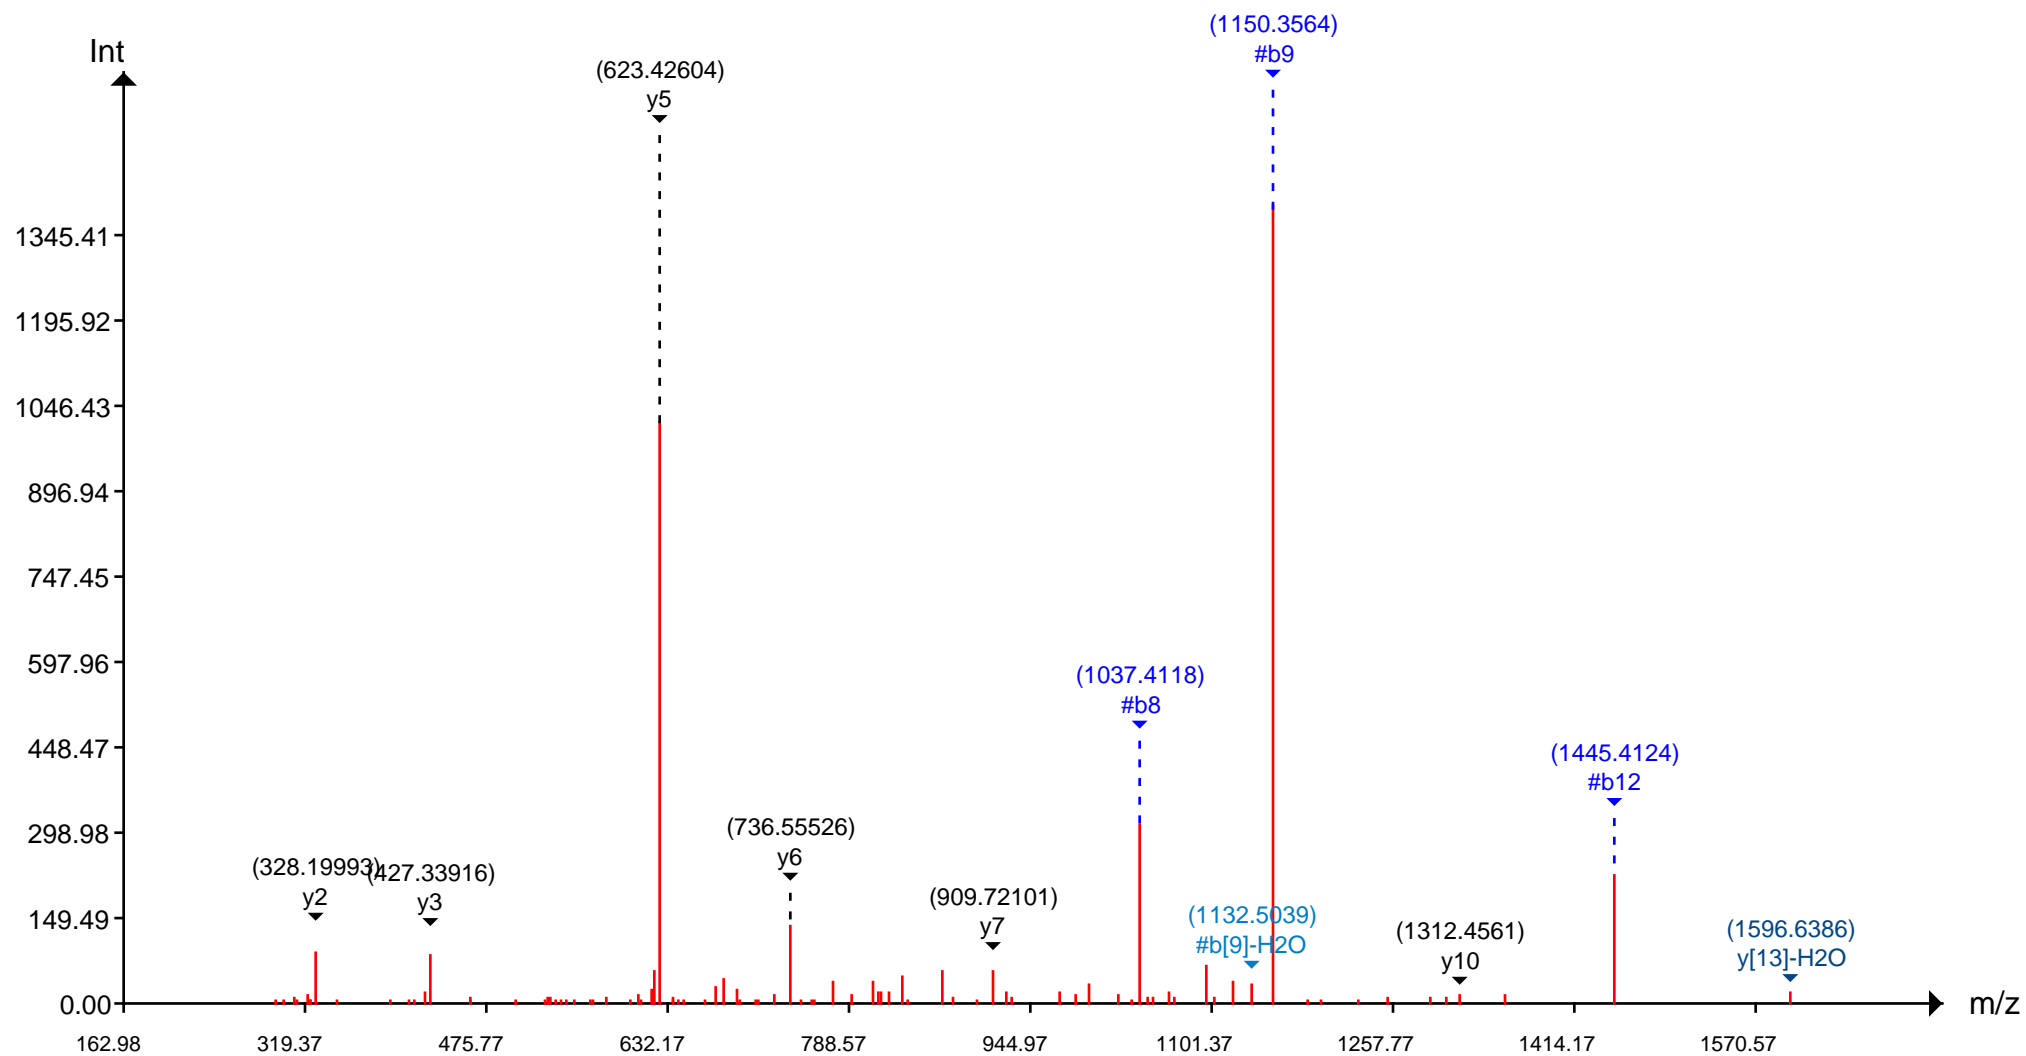

## Info

|                          |                                                     |                           |          |
|--------------------------|-----------------------------------------------------|---------------------------|----------|
| <b>Modified Sequence</b> | AcD3-IAAC<Cmm*>TEK<AcD3K*>K<AcD3K*>IPVVFR<C13>-COOH | <b>Ion score</b>          | 45.75    |
| <b>Protein</b>           | Q9R0P3                                              | <b>Confidence level</b>   | 99.00%   |
| <b>Precursor m/z</b>     | 887.02409                                           | <b>Identity Threshold</b> | 43.64    |
| <b>Charge</b>            | 2+                                                  | <b>Mass error</b>         | 0.002424 |

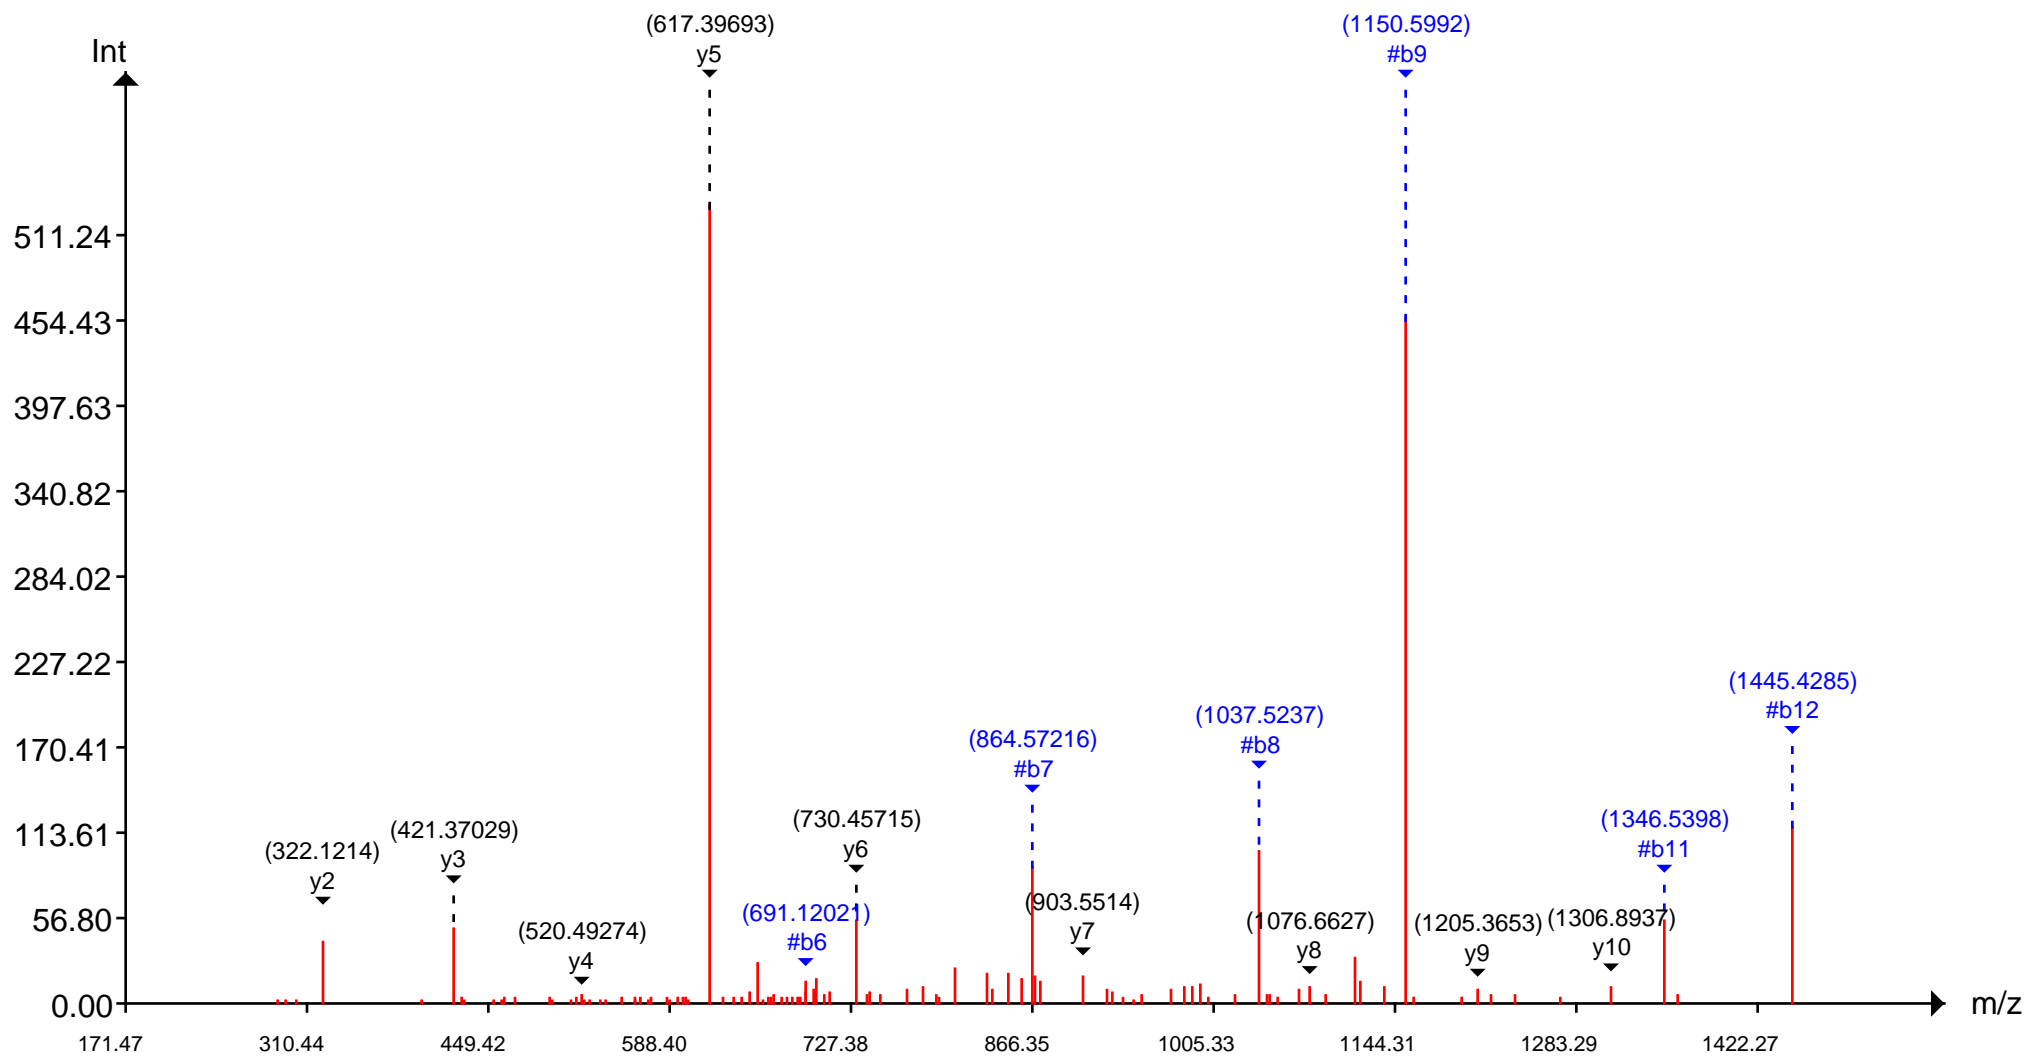

## Info

|                          |                                                |                           |          |
|--------------------------|------------------------------------------------|---------------------------|----------|
| <b>Modified Sequence</b> | AcD3-IAAC<Cmm*>TEK<AcD3K*>K<AcD3K*>IPVVFR-COOH | <b>Ion score</b>          | 70.0     |
| <b>Protein</b>           | Q9R0P3                                         | <b>Confidence level</b>   | 99.00%   |
| <b>Precursor m/z</b>     | 884.0141                                       | <b>Identity Threshold</b> | 44.73    |
| <b>Charge</b>            | 2+                                             | <b>Mass error</b>         | 0.002585 |



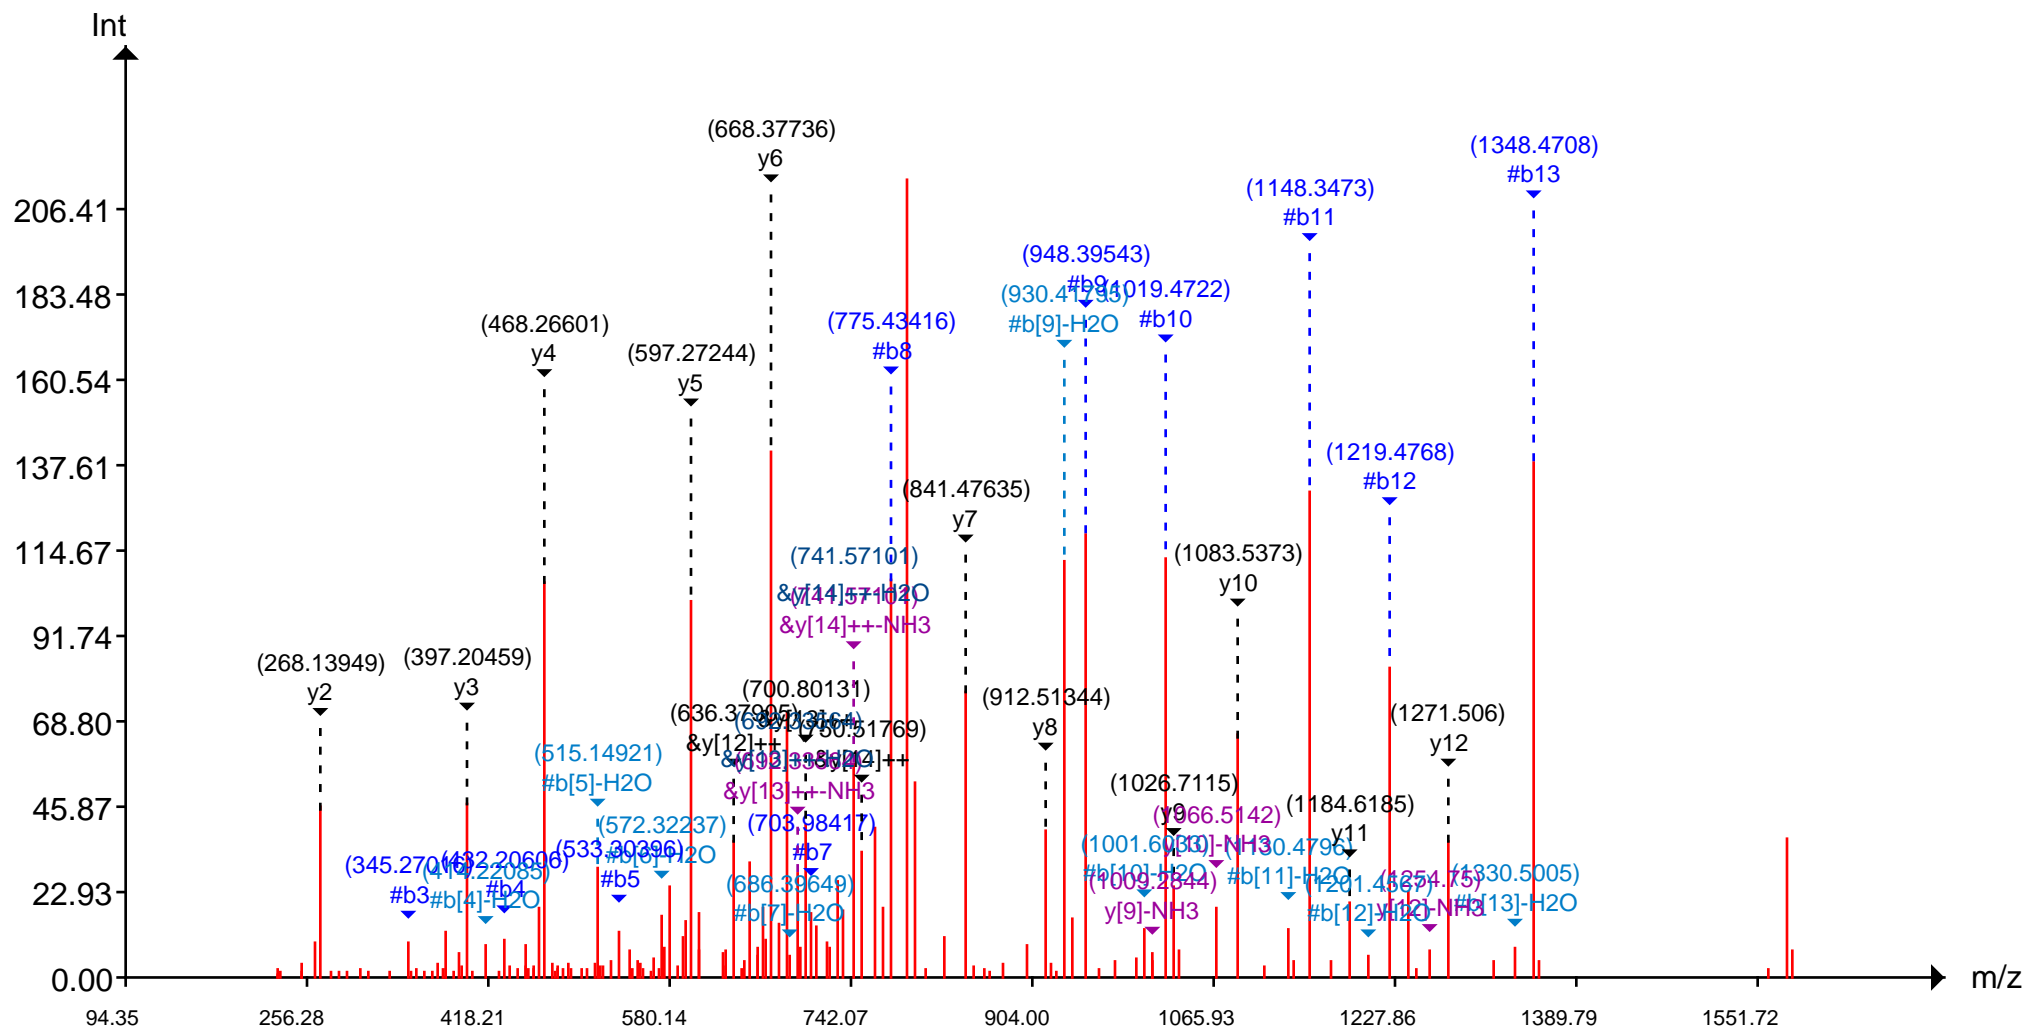

## Info

|                          |                                        |                           |          |
|--------------------------|----------------------------------------|---------------------------|----------|
| <b>Modified Sequence</b> | AcD3-AVESTGNAK<AcD3K*>AEAESR<C13>-COOH | <b>Ion score</b>          | 79.75    |
| <b>Protein</b>           | Q9EQK5                                 | <b>Confidence level</b>   | 99.00%   |
| <b>Precursor m/z</b>     | 808.41107                              | <b>Identity Threshold</b> | 47.95    |
| <b>Charge</b>            | 2+                                     | <b>Mass error</b>         | 0.001283 |



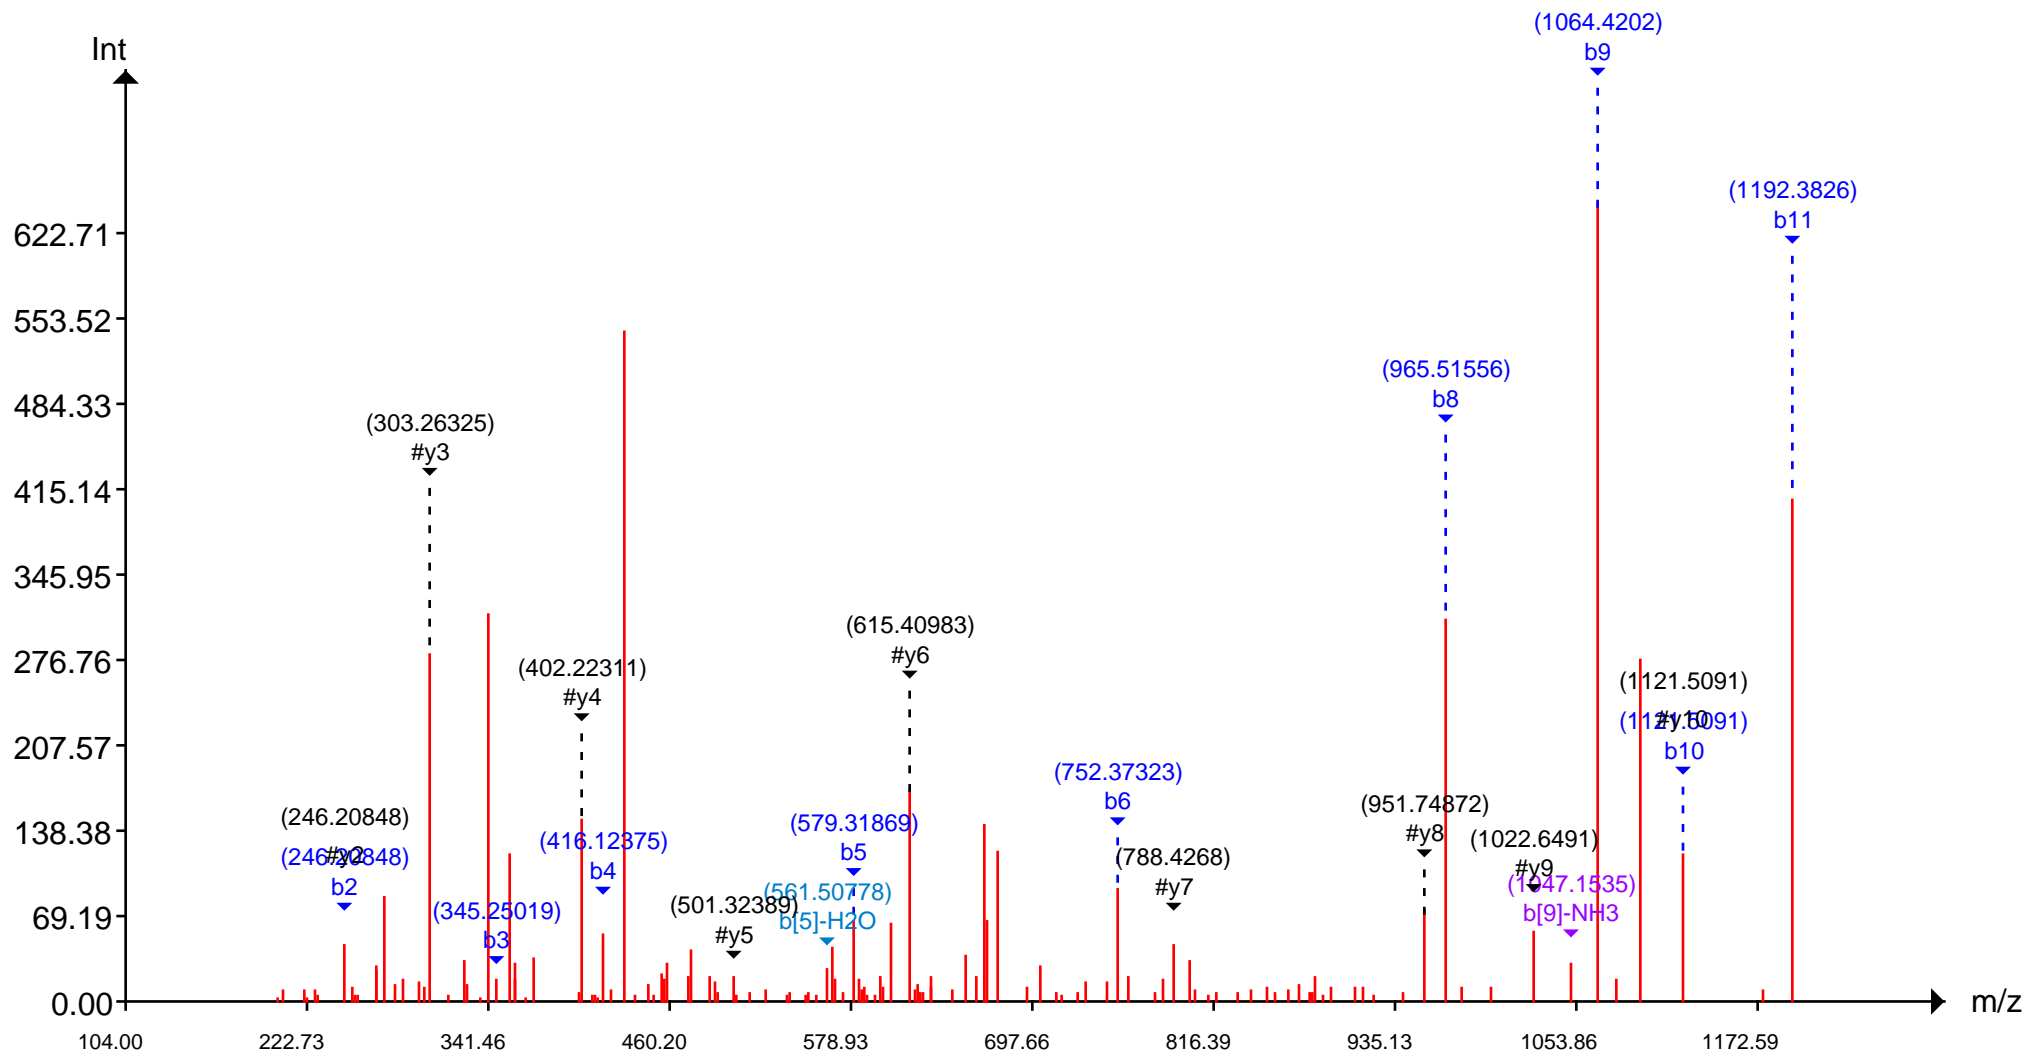

## Info

**Modified Sequence** AcD3-LSVAYK<AcD3K\*>NVVGAR-COOH

**Ion score** 56.81

**Protein** Q9CQV8, P68510, P61982, P63101

**Confidence level** 99.00%

**Precursor m/z** 683.90198

**Identity Threshold** 45.44

**Charge** 2+

**Mass error** 7.12E-4

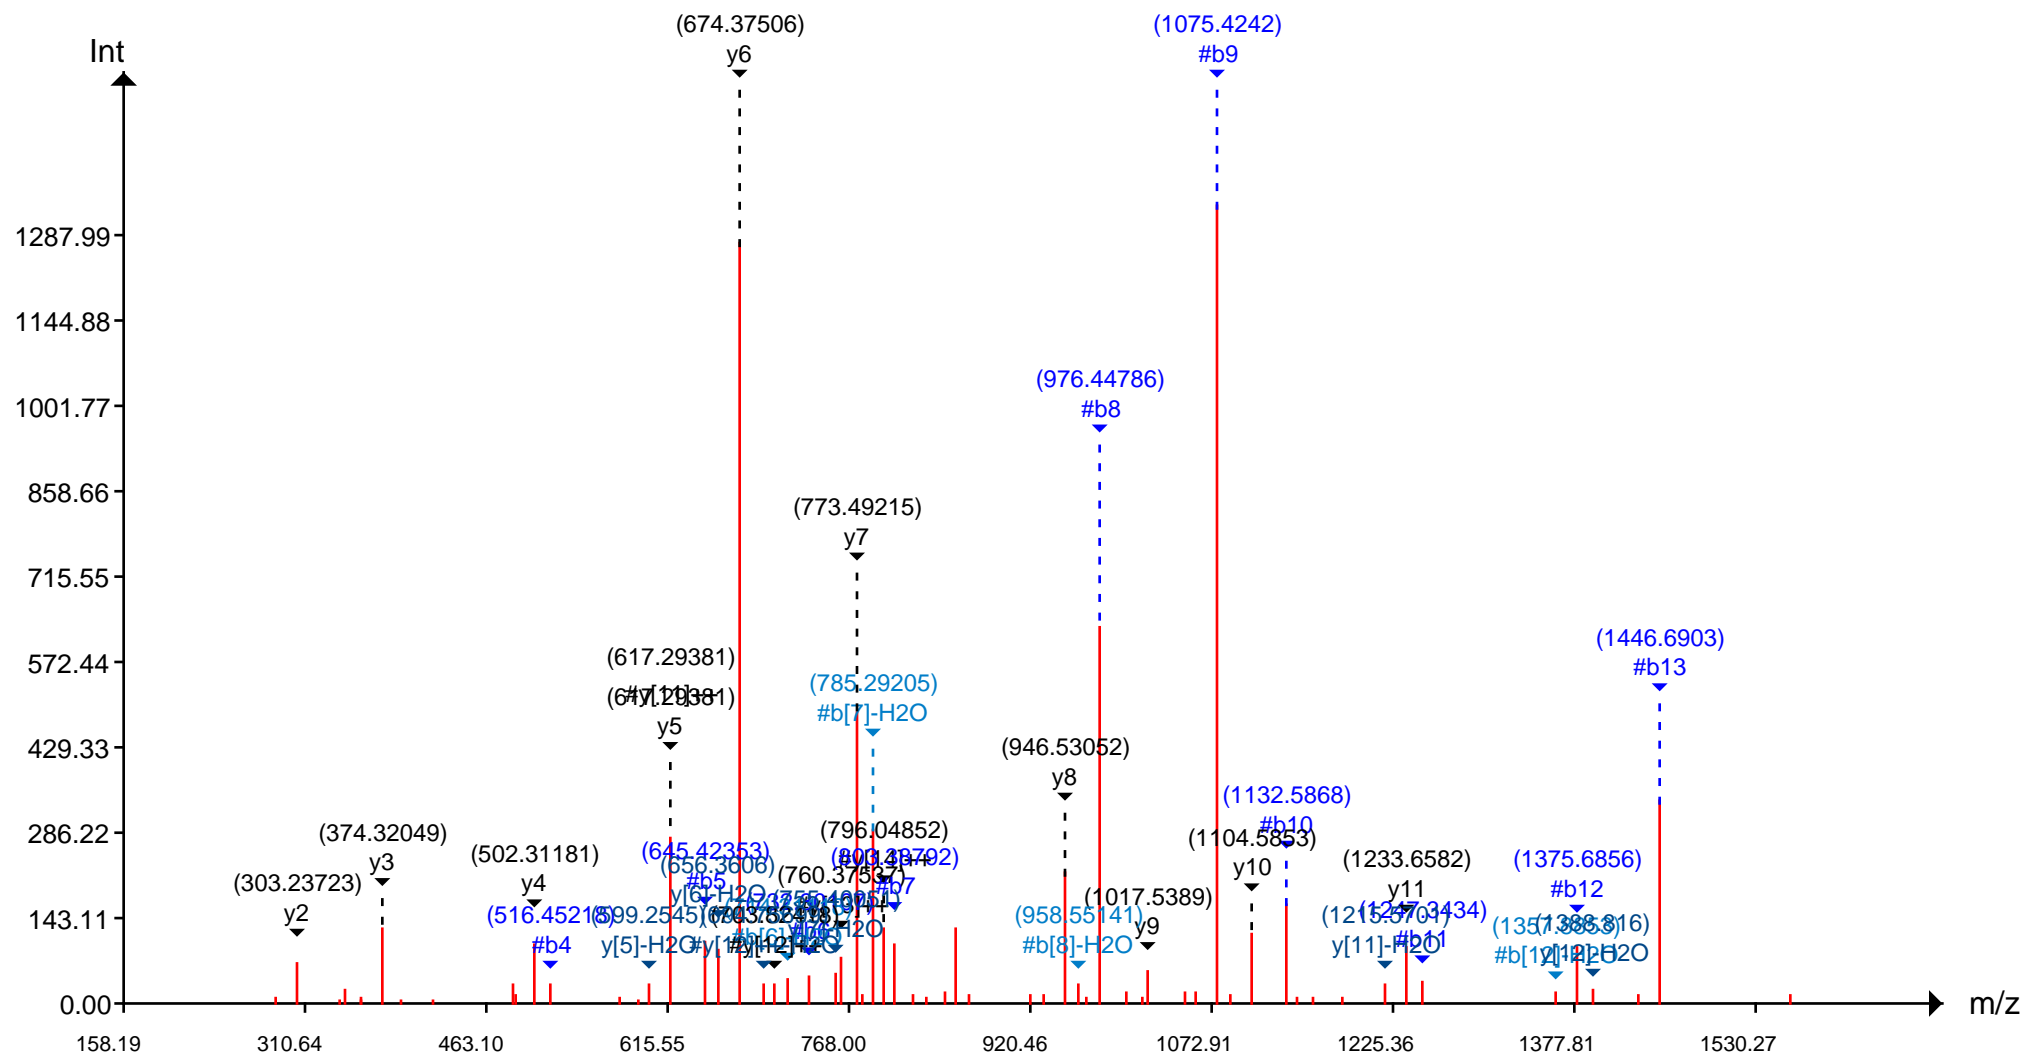

## Info

**Modified Sequence** AcD3-IAIK<AcD3K\*>ESAK<AcD3K\*>VGDQAQR-COOH

**Ion score** 95.24

**Protein** Q99JY9

**Confidence level** 99.00%

**Precursor m/z** 874.99725

**Identity Threshold** 46.20

**Charge** 2+

**Mass error** 0.002119

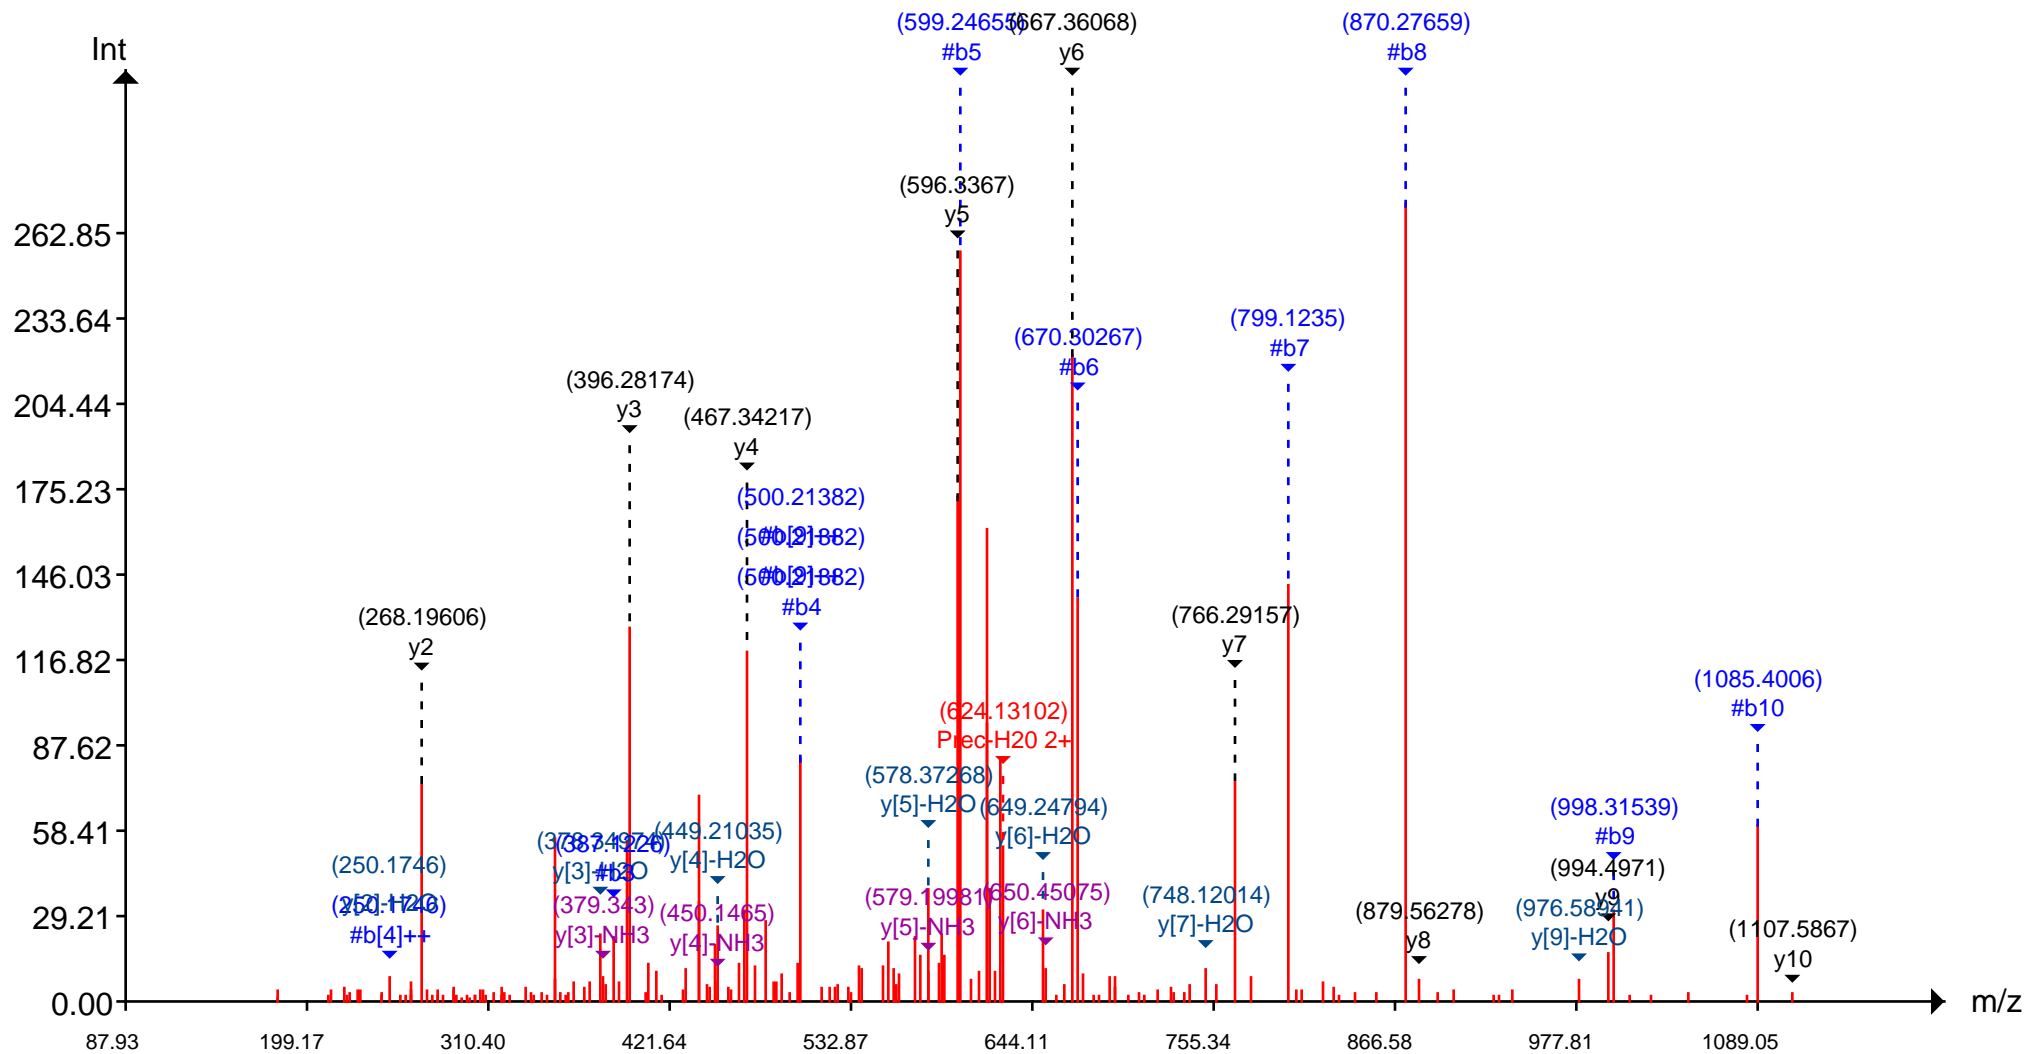

## Info

|                          |                            |                           |         |
|--------------------------|----------------------------|---------------------------|---------|
| <b>Modified Sequence</b> | AcD3-LLDLVAEAQSR<C13>-COOH | <b>Ion score</b>          | 75.61   |
| <b>Protein</b>           | Q3U1Z5                     | <b>Confidence level</b>   | 99.00%  |
| <b>Precursor m/z</b>     | 633.36569                  | <b>Identity Threshold</b> | 46.31   |
| <b>Charge</b>            | 2+                         | <b>Mass error</b>         | 6.72E-4 |



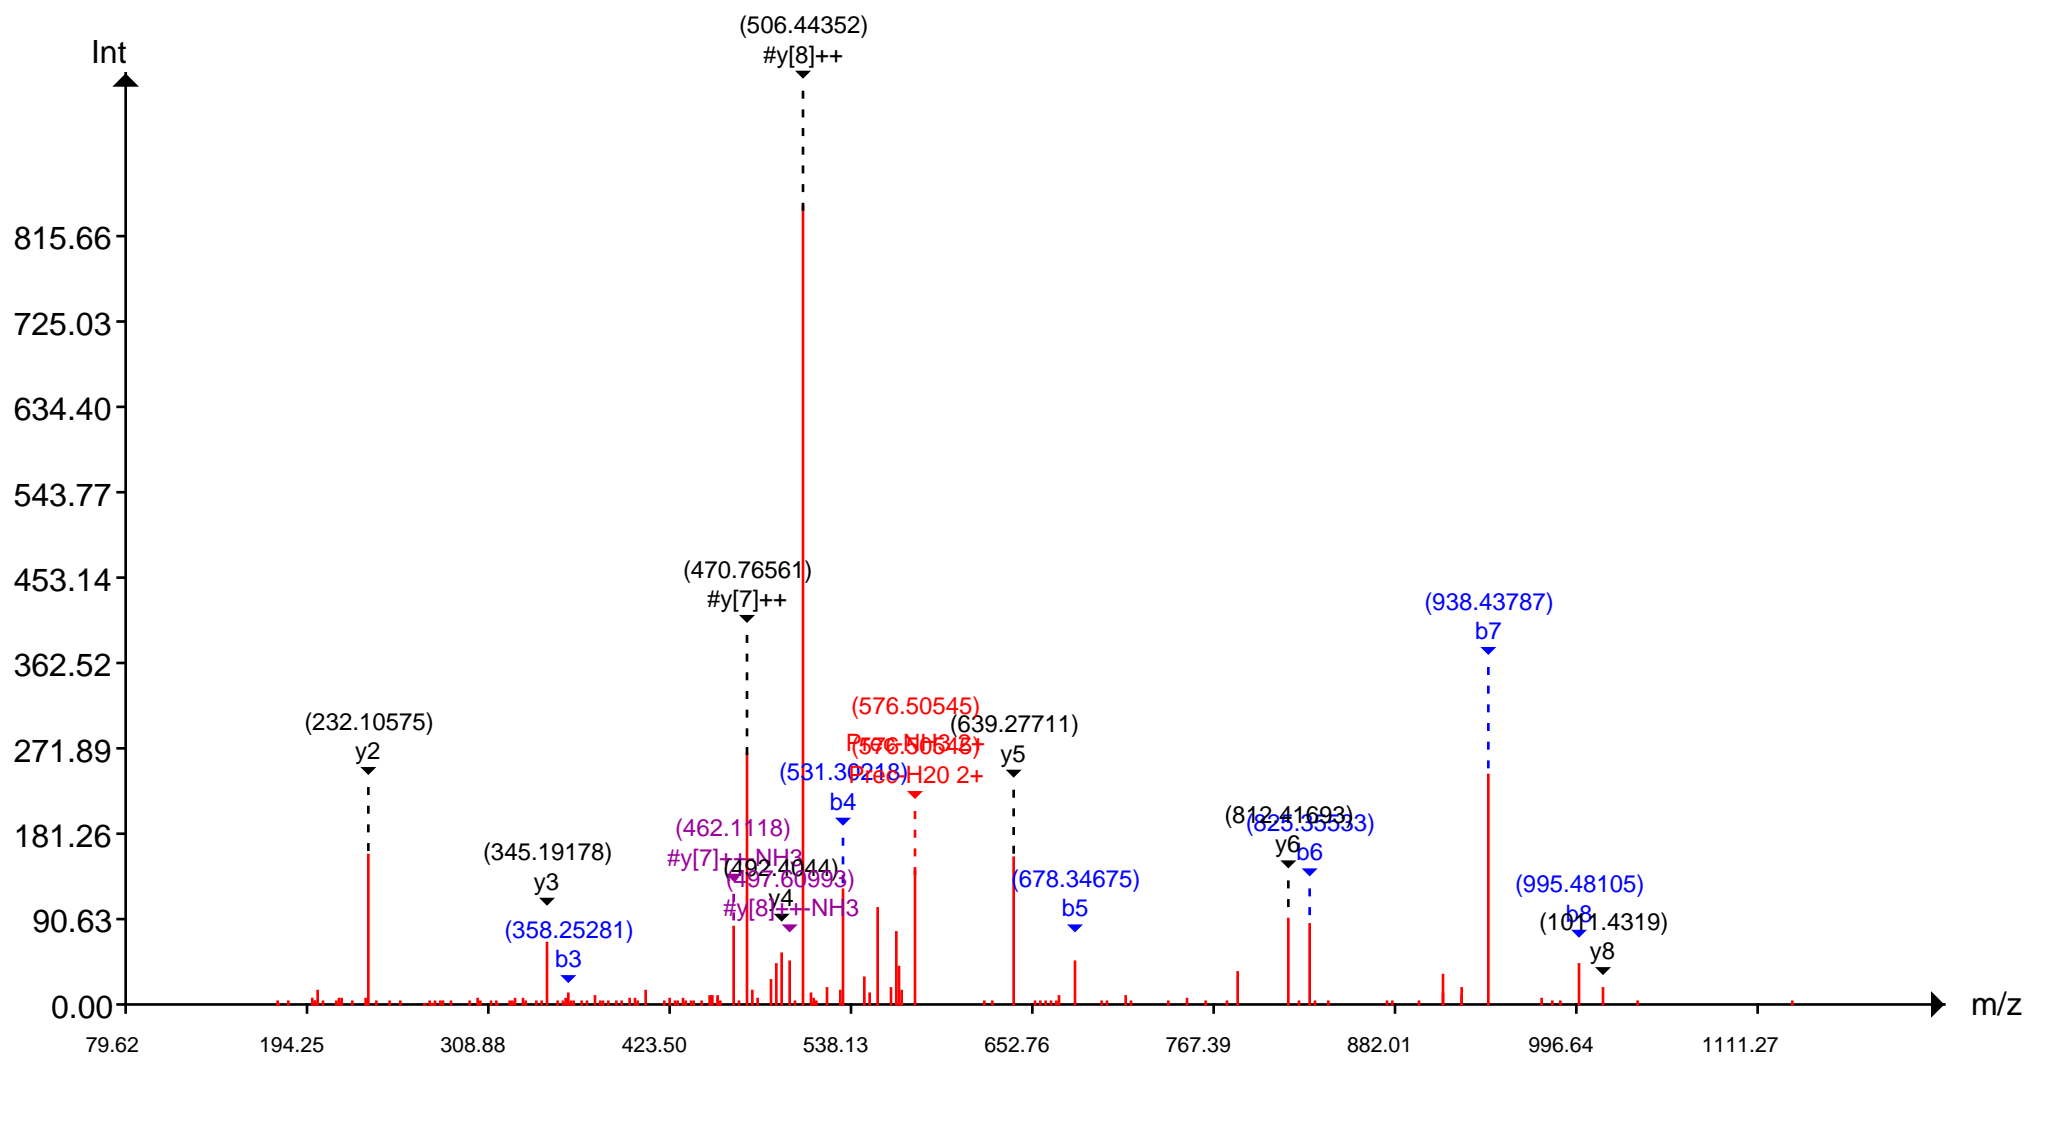

| Info                     |                                         |                           |         |
|--------------------------|-----------------------------------------|---------------------------|---------|
| <b>Modified Sequence</b> | AcD3-LAQQ<AcD3K*>M<Mox*>M<Mox*>IGR-COOH | <b>Ion score</b>          | 49.22   |
| <b>Protein</b>           | P52480, P53657                          | <b>Confidence level</b>   | 99.00%  |
| <b>Precursor m/z</b>     | 585.31818                               | <b>Identity Threshold</b> | 47.86   |
| <b>Charge</b>            | 2+                                      | <b>Mass error</b>         | 3.18E-4 |

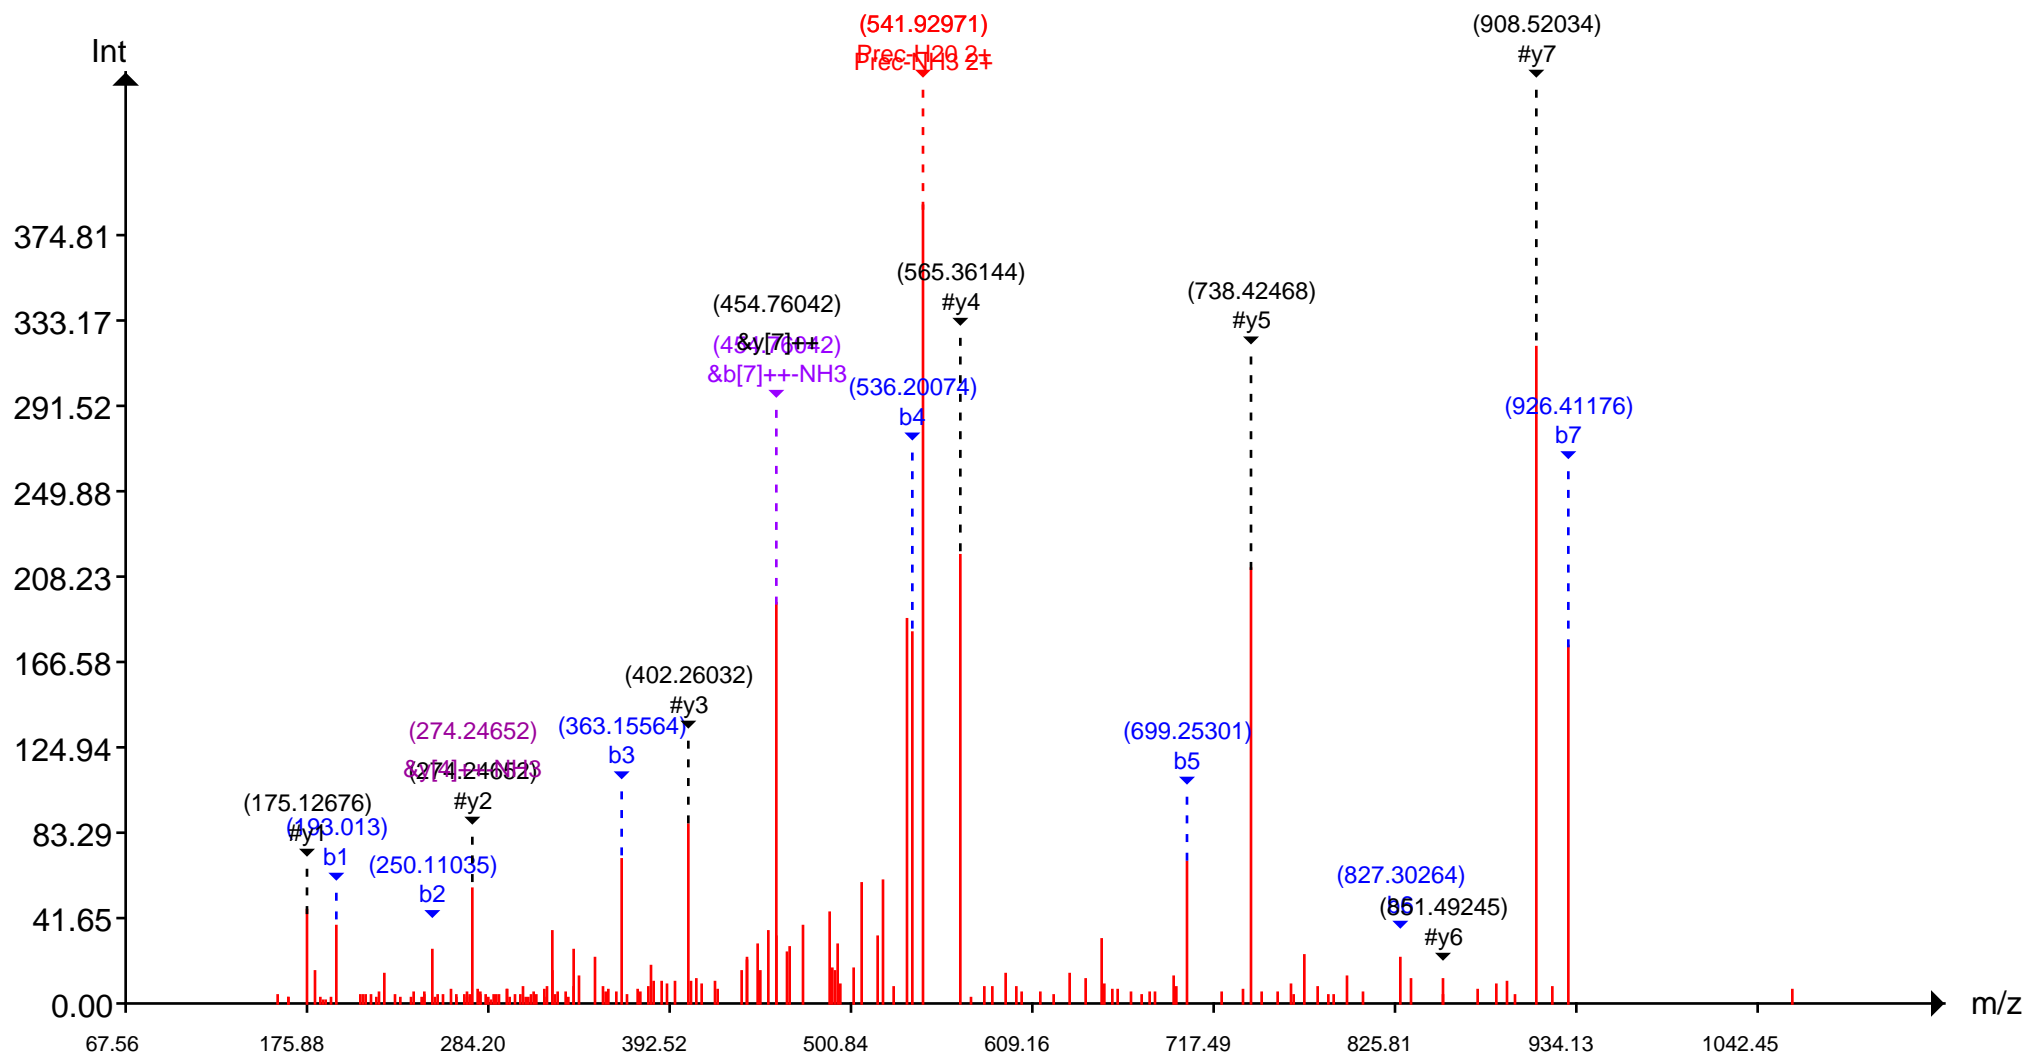

## Info

**Modified Sequence** AcD3-M<Mox\*>GLK<AcD3K\*>YQVR-COOH

**Protein** P70677

**Precursor m/z** 550.80555

**Charge** 2+

**Ion score** 51.17

**Confidence level** 99.00%

**Identity Threshold** 47.53

**Mass error** -1.16E-4



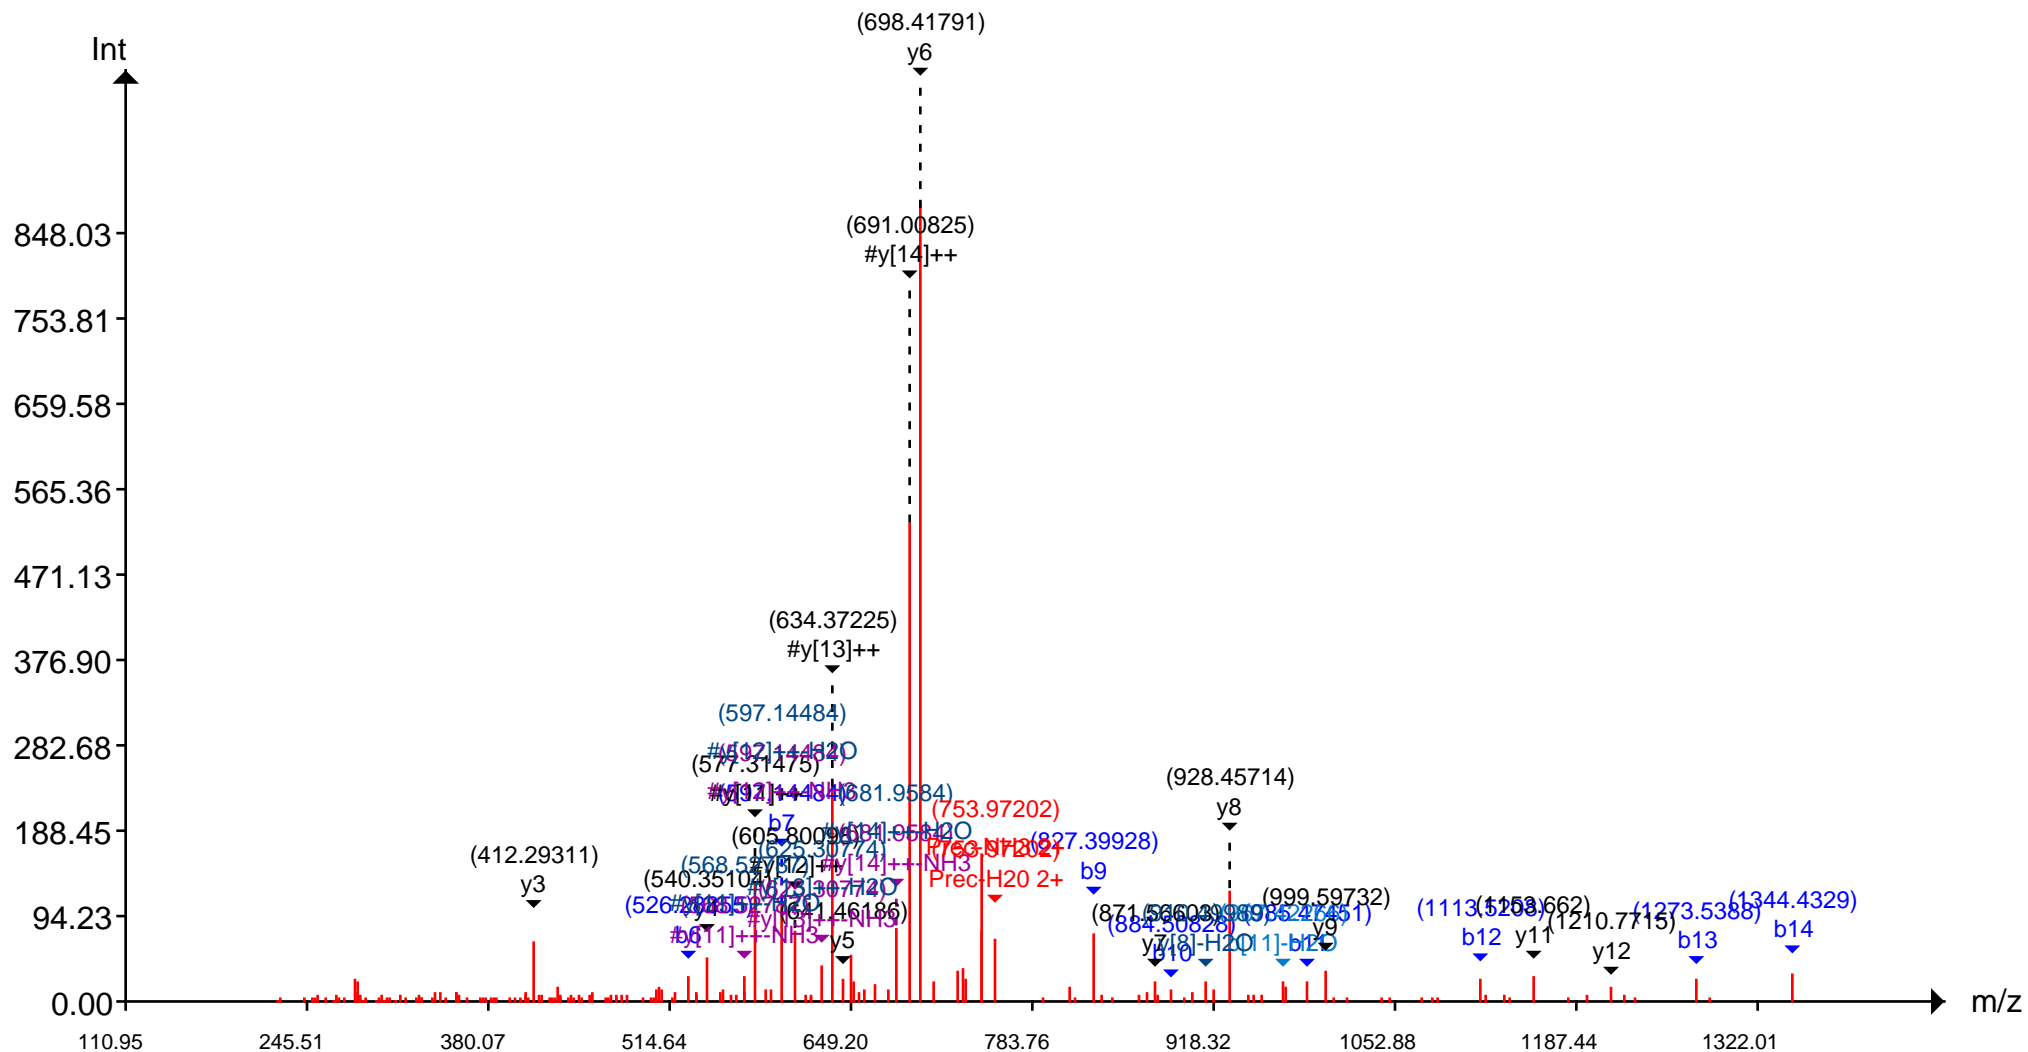

## Info

|                          |                                              |                           |         |
|--------------------------|----------------------------------------------|---------------------------|---------|
| <b>Modified Sequence</b> | AcD3-VLGGPGAGK<AcD3K*>GTQC<Cmm*>AR<C13>-COOH | <b>Ion score</b>          | 51.52   |
| <b>Protein</b>           | Q9DBP5                                       | <b>Confidence level</b>   | 99.00%  |
| <b>Precursor m/z</b>     | 762.91215                                    | <b>Identity Threshold</b> | 47.95   |
| <b>Charge</b>            | 2+                                           | <b>Mass error</b>         | 4.68E-4 |

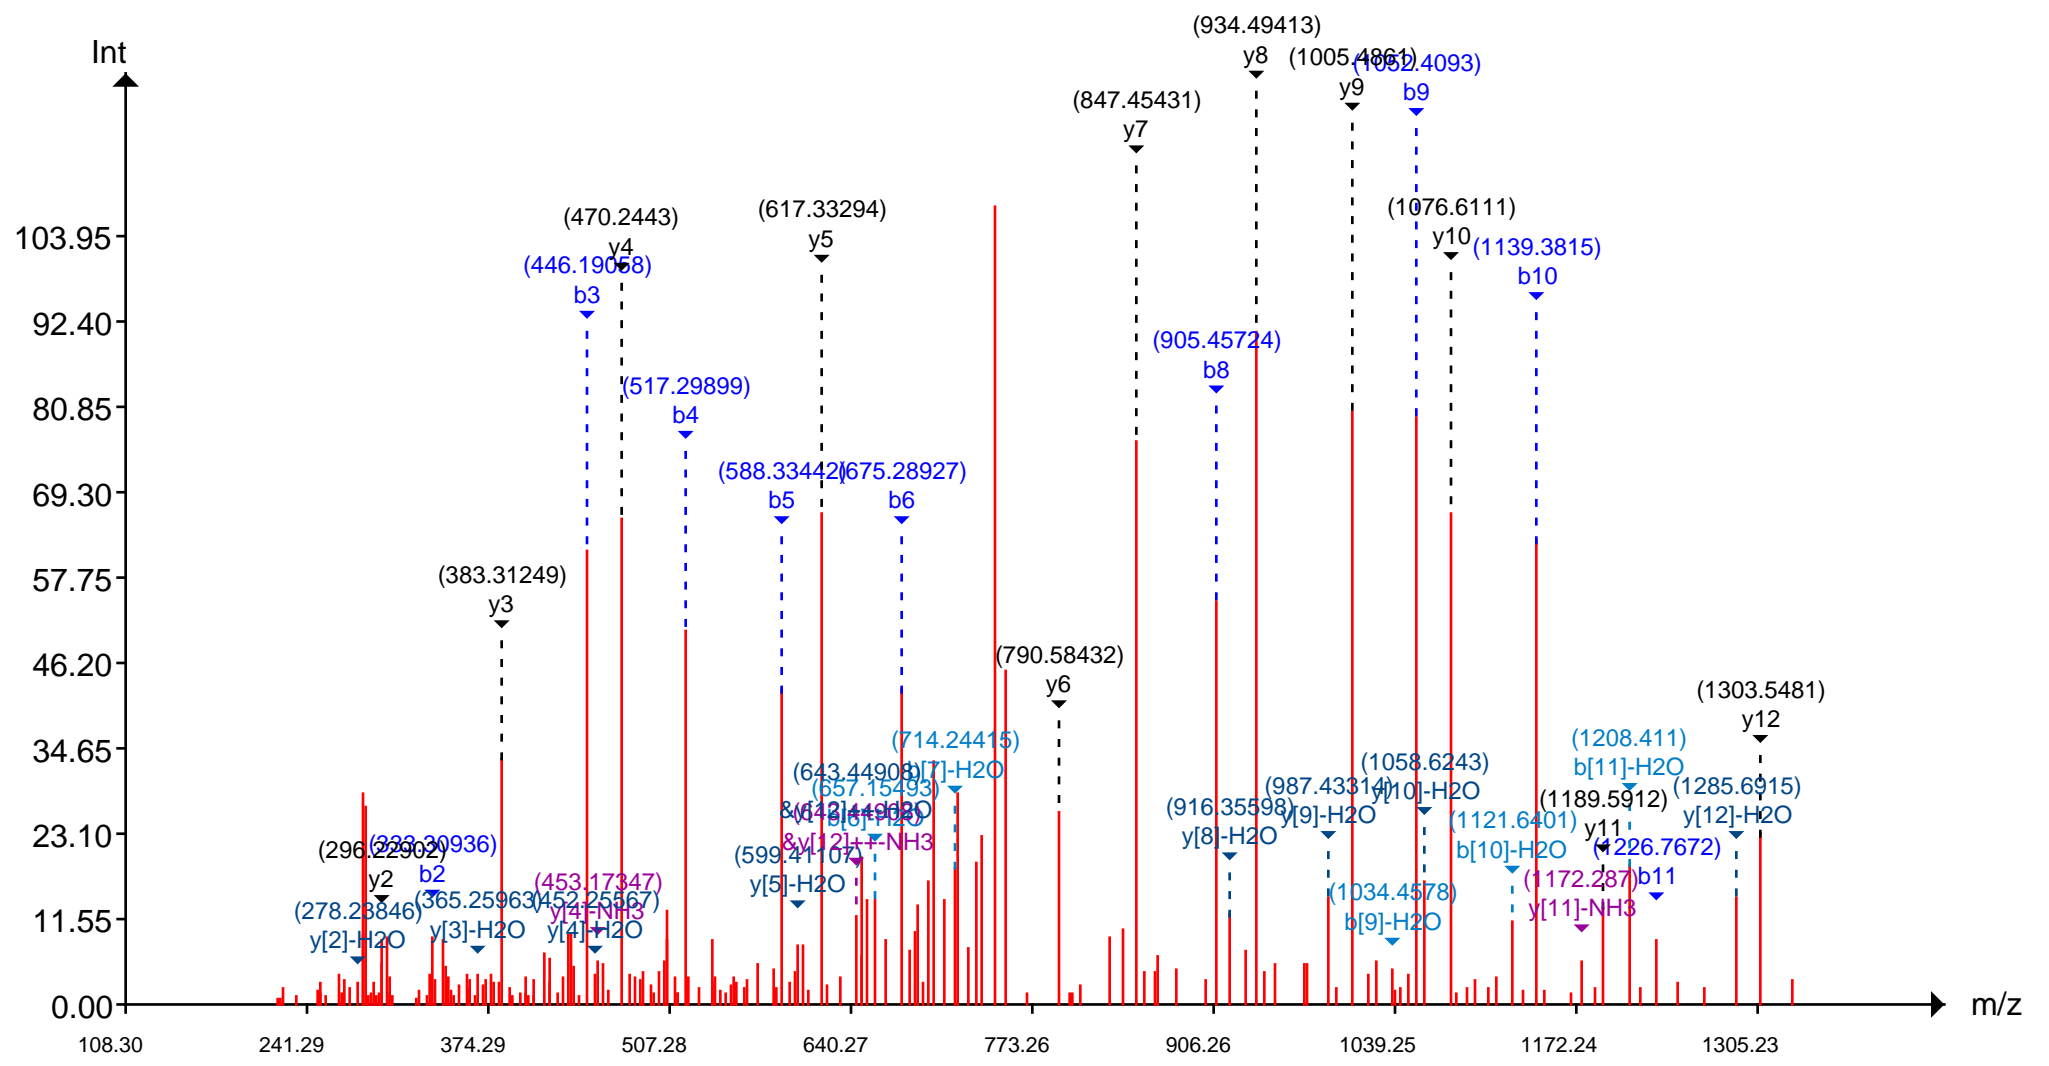

| Info                     |                                              |                           |          |
|--------------------------|----------------------------------------------|---------------------------|----------|
| <b>Modified Sequence</b> | AcD3-K<AcD3K*>NIAASGK<AcD3K*>FSSDR<C13>-COOH | <b>Ion score</b>          | 83.49    |
| <b>Protein</b>           | Q9ET01                                       | <b>Confidence level</b>   | 99.00%   |
| <b>Precursor m/z</b>     | 761.42044                                    | <b>Identity Threshold</b> | 47.62    |
| <b>Charge</b>            | 2+                                           | <b>Mass error</b>         | 0.002292 |

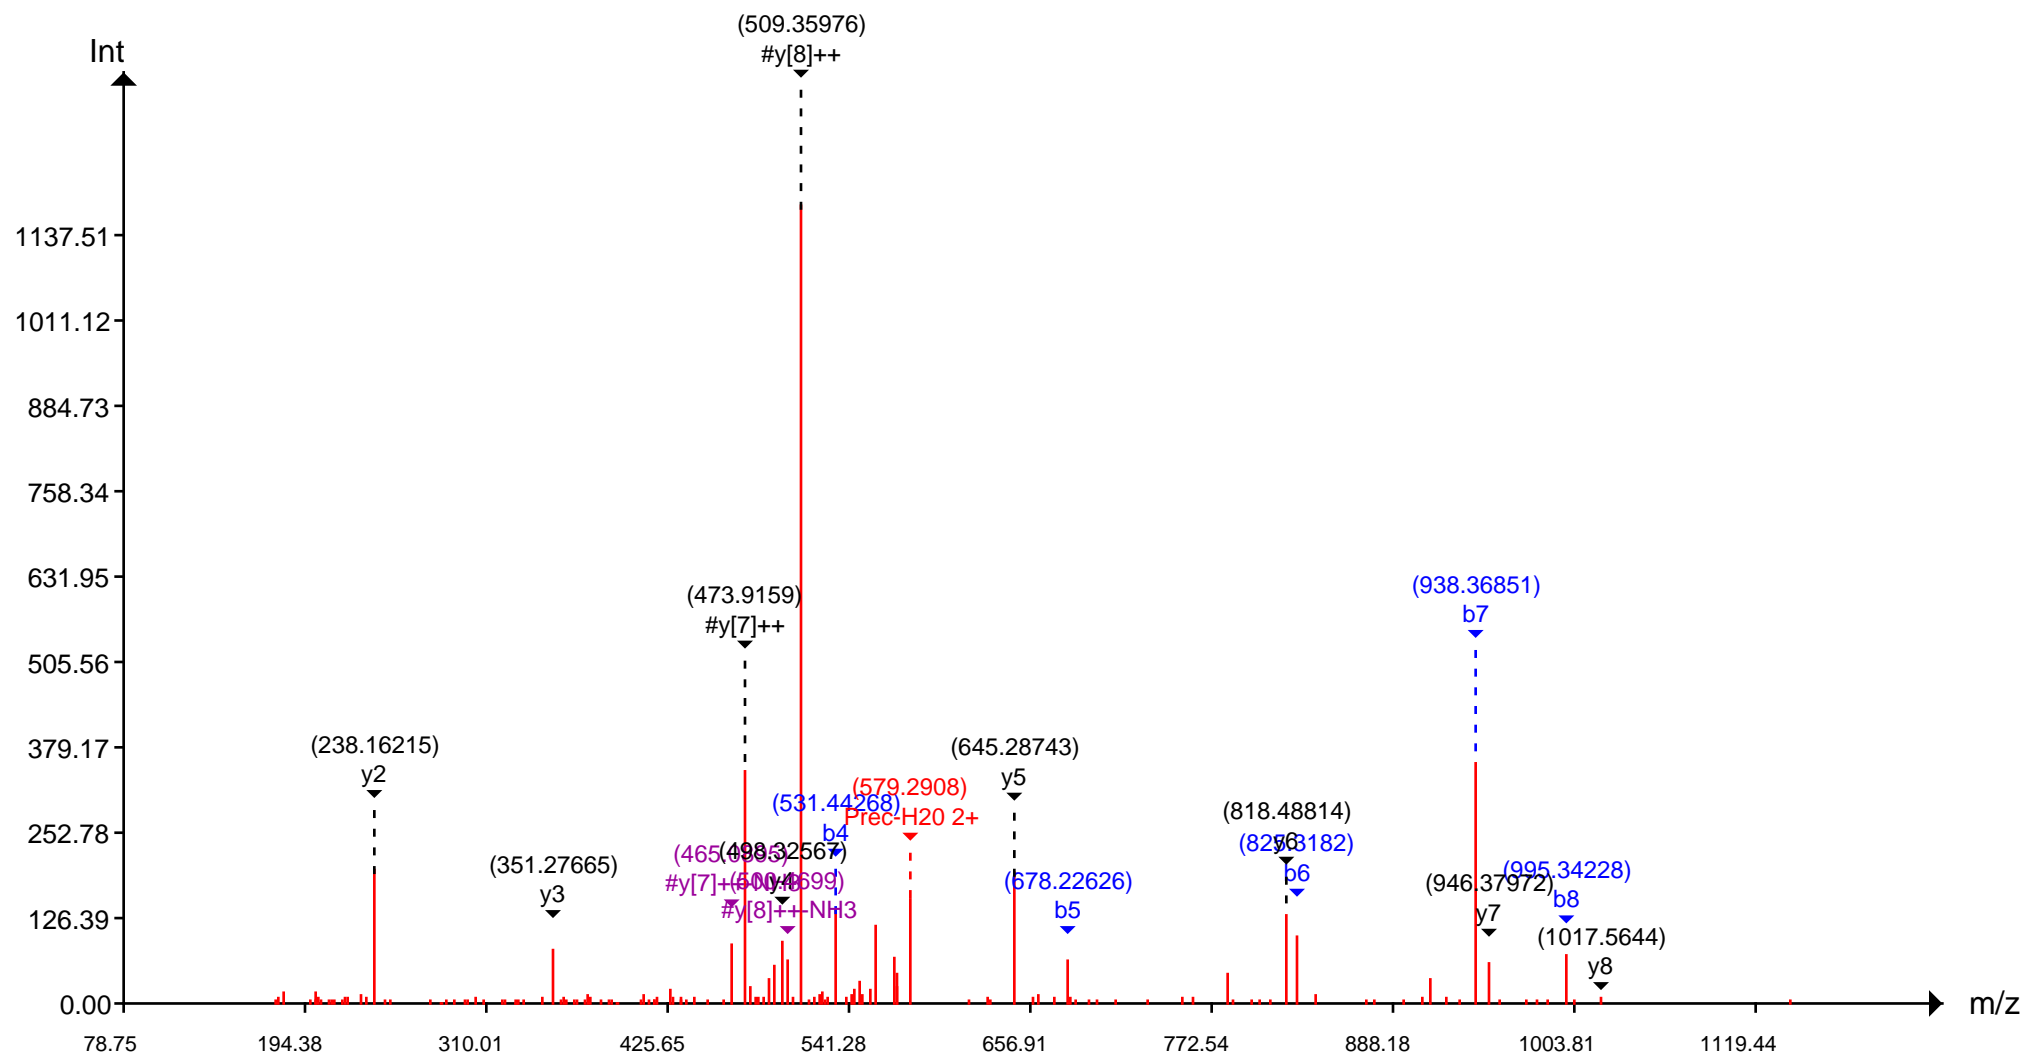

## Info

**Modified Sequence** AcD3-LAQK<AcD3K\*>M<Mox\*>M<Mox\*>IGR<C13>-COOH

**Ion score** 54.04

**Protein** P52480, P53657

**Confidence level** 99.00%

**Precursor m/z** 588.32796

**Identity Threshold** 47.60

**Charge** 2+

**Mass error** -2.64E-4

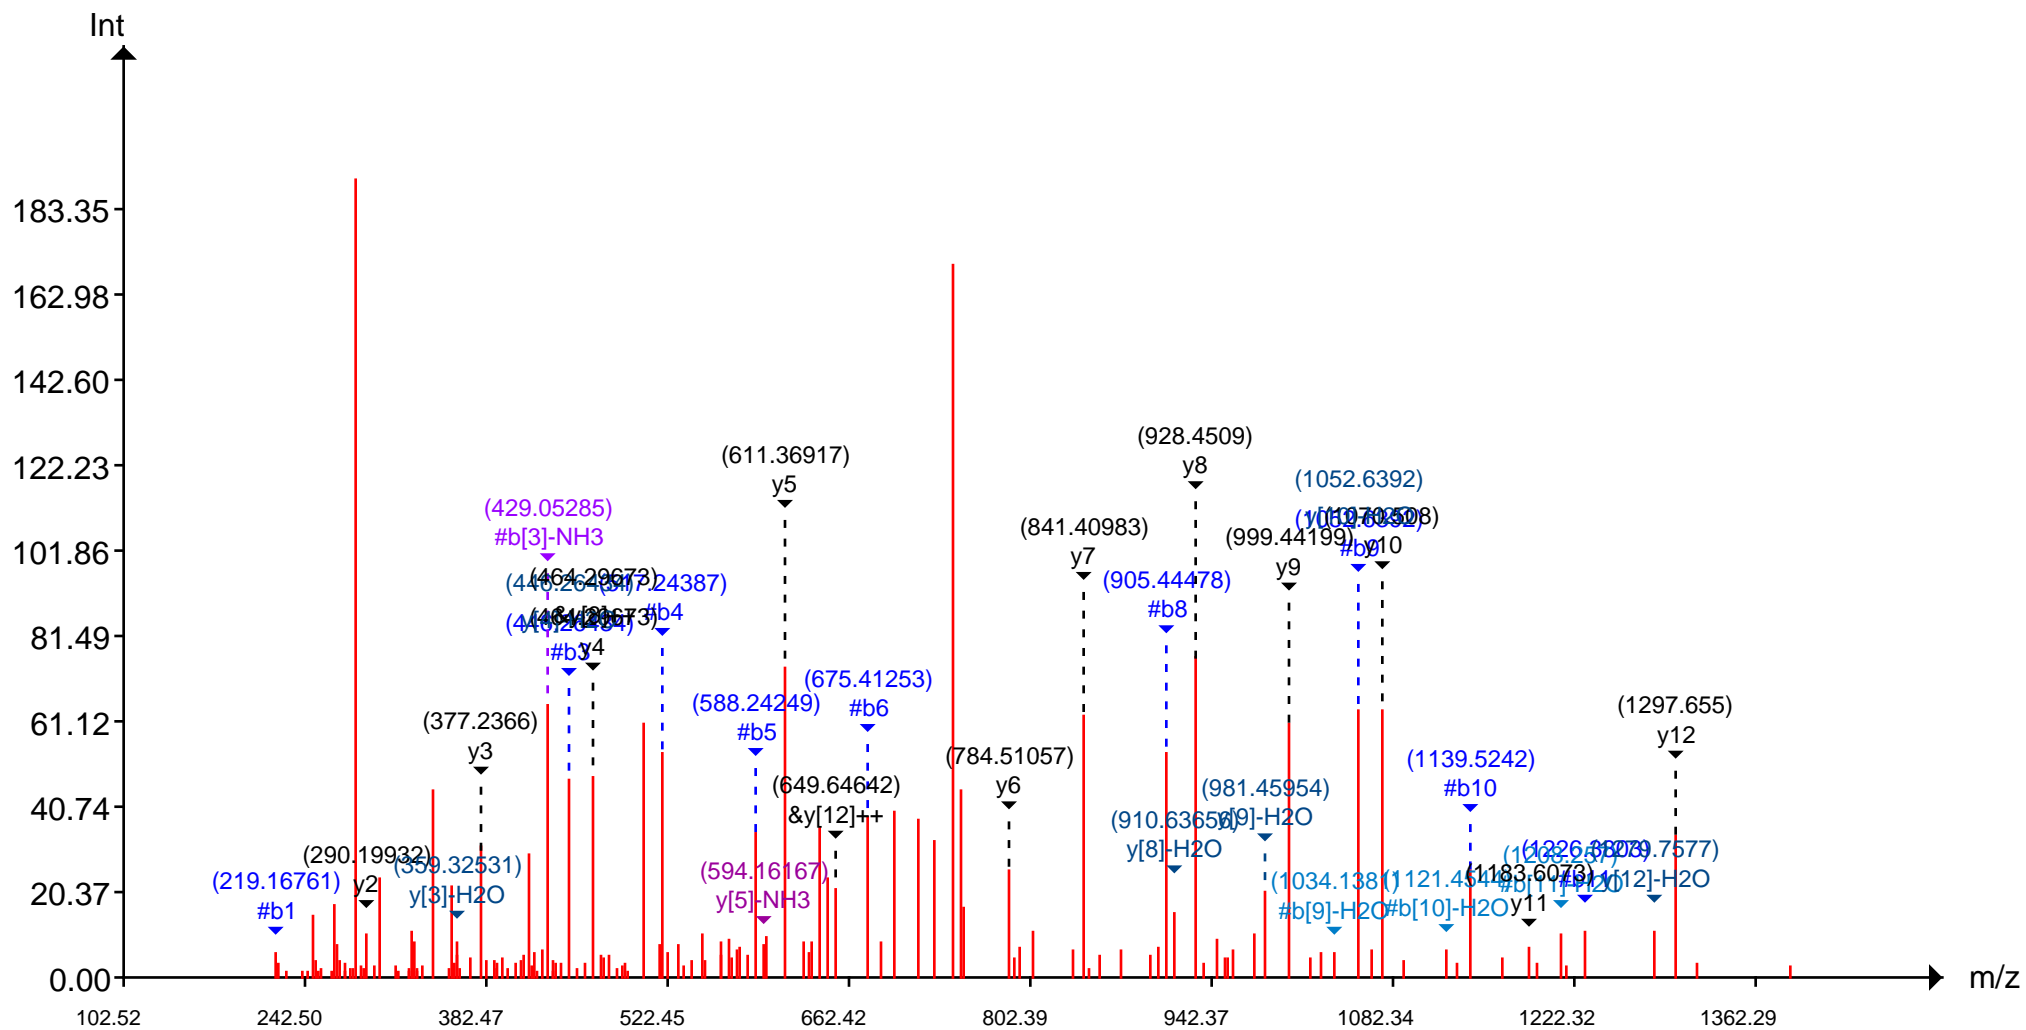

## Info

|                          |                                         |                           |          |
|--------------------------|-----------------------------------------|---------------------------|----------|
| <b>Modified Sequence</b> | AcD3-K<AcD3K*>NIAASGK<AcD3K*>FSSDR-COOH | <b>Ion score</b>          | 69.17    |
| <b>Protein</b>           | Q9ET01                                  | <b>Confidence level</b>   | 99.00%   |
| <b>Precursor m/z</b>     | 758.41017                               | <b>Identity Threshold</b> | 47.84    |
| <b>Charge</b>            | 2+                                      | <b>Mass error</b>         | 0.001894 |

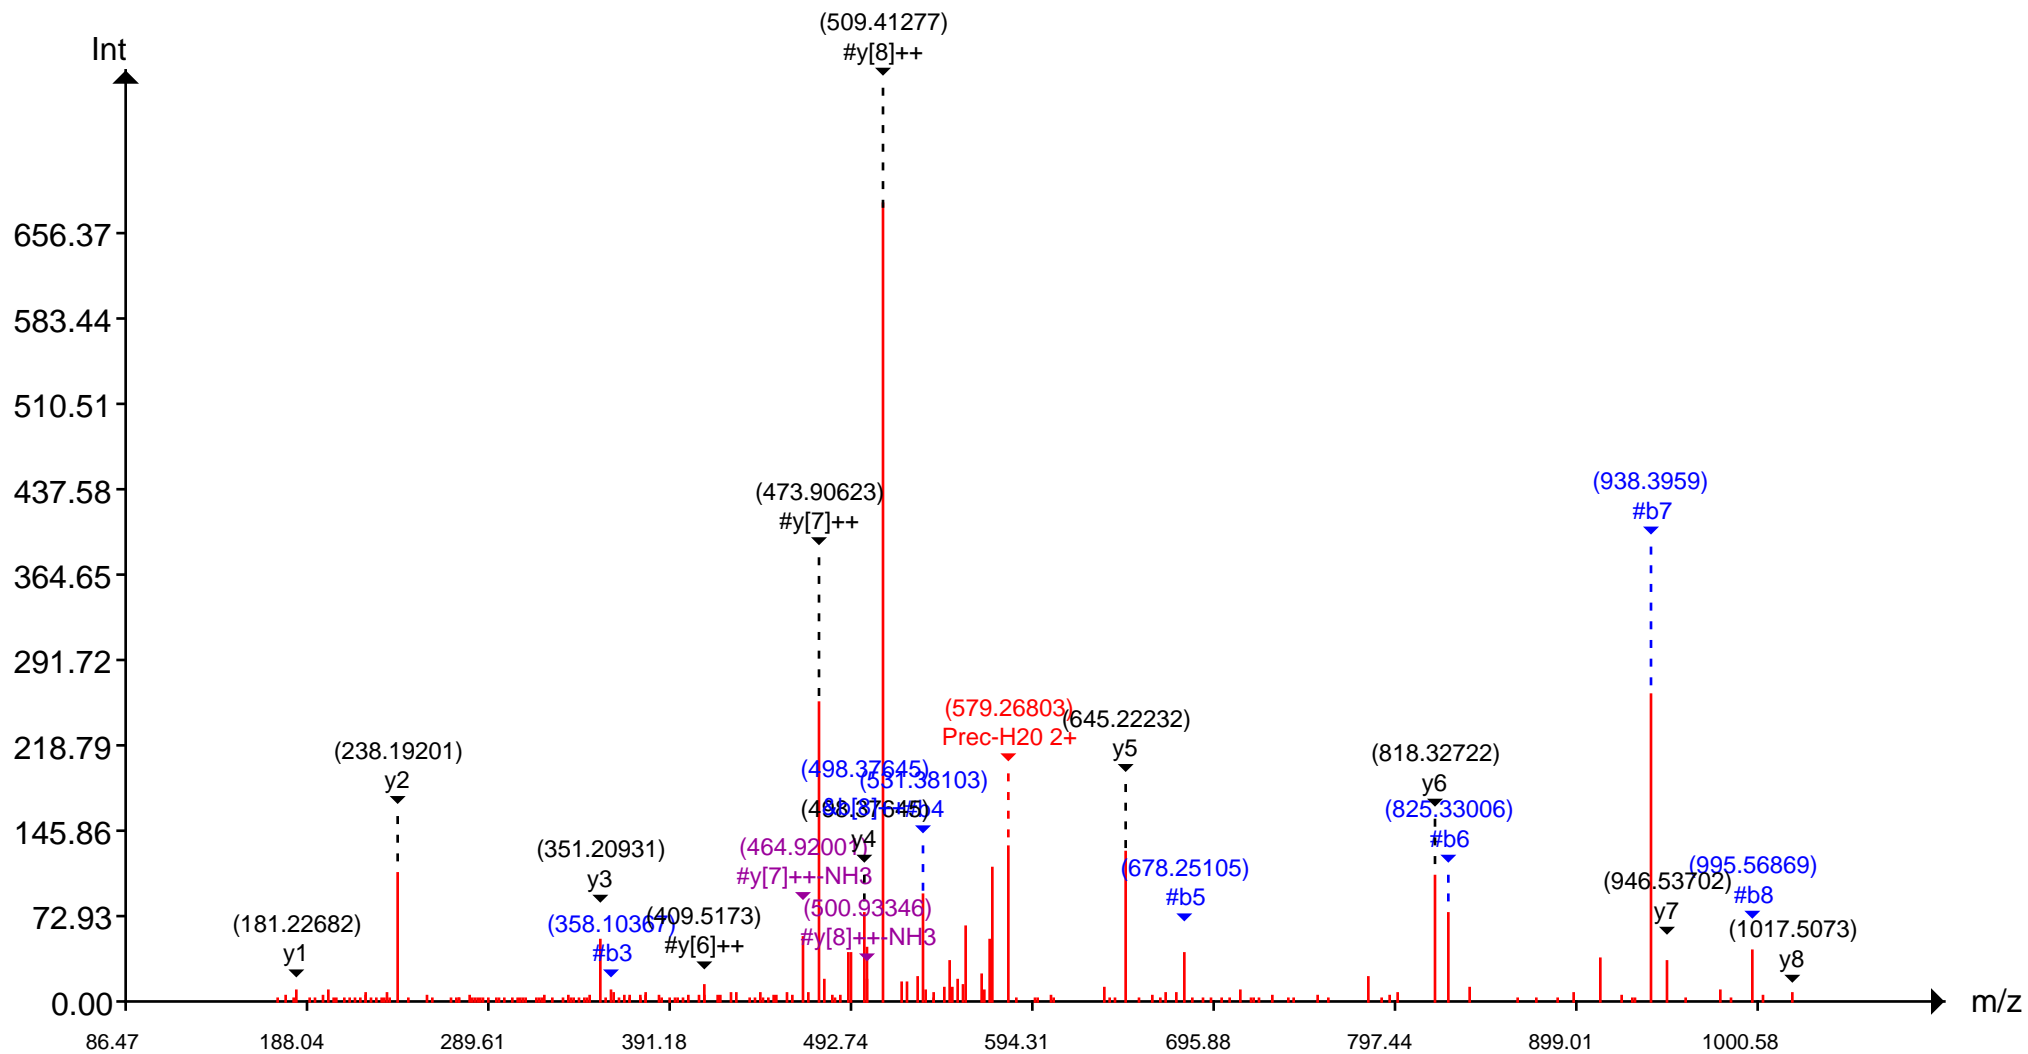

## Info

|                          |                                              |                           |         |
|--------------------------|----------------------------------------------|---------------------------|---------|
| <b>Modified Sequence</b> | AcD3-LAQK<AcD3K*>M<Mox*>M<Mox*>IGR<C13>-COOH | <b>Ion score</b>          | 48.01   |
| <b>Protein</b>           | P52480, P53657                               | <b>Confidence level</b>   | 99.00%  |
| <b>Precursor m/z</b>     | 588.32822                                    | <b>Identity Threshold</b> | 47.63   |
| <b>Charge</b>            | 2+                                           | <b>Mass error</b>         | 2.56E-4 |

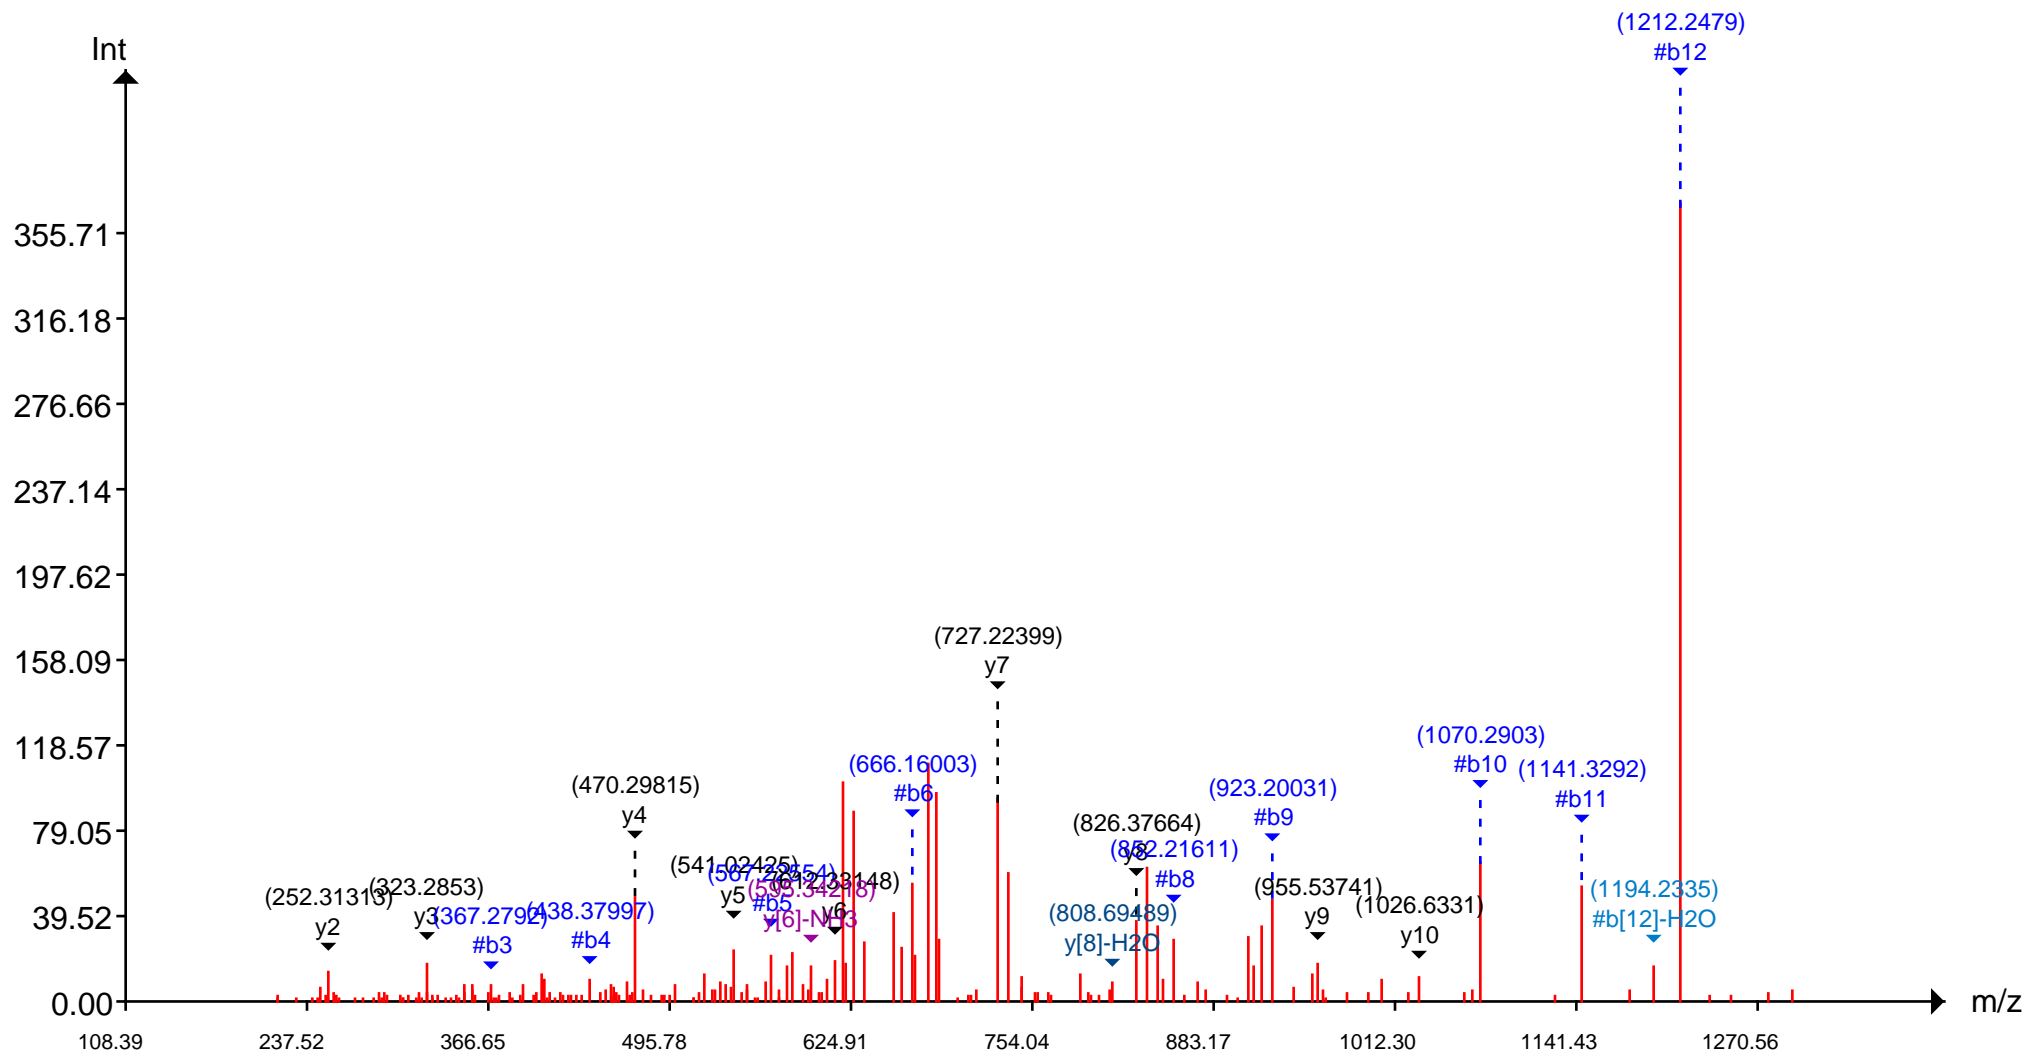

## Info

|                          |                                          |                           |         |
|--------------------------|------------------------------------------|---------------------------|---------|
| <b>Modified Sequence</b> | AcD3-SSM<Mox*>AEVDAAM<Mox*>AAR<C13>-COOH | <b>Ion score</b>          | 57.76   |
| <b>Protein</b>           | O88569                                   | <b>Confidence level</b>   | 99.00%  |
| <b>Precursor m/z</b>     | 696.8174                                 | <b>Identity Threshold</b> | 44.66   |
| <b>Charge</b>            | 2+                                       | <b>Mass error</b>         | 6.95E-4 |

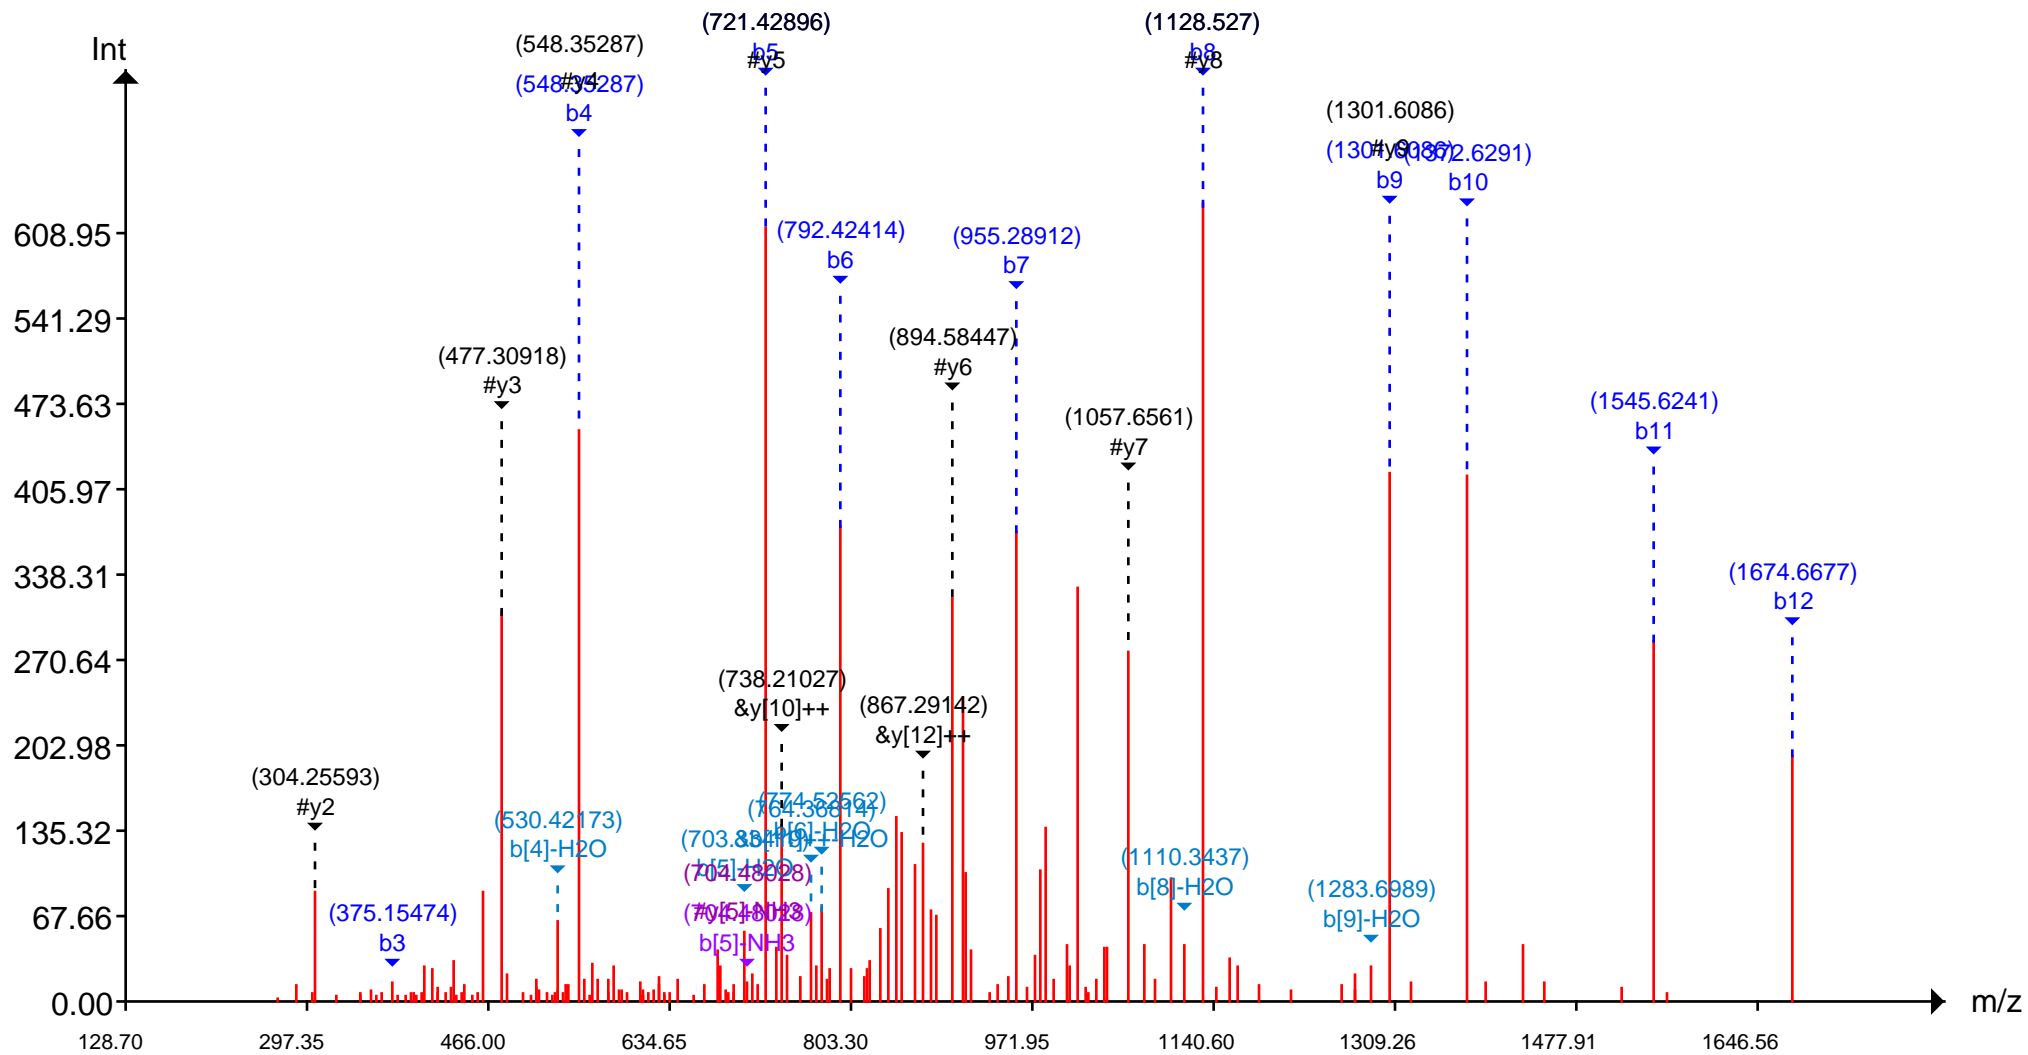

## Info

|                          |                                                                 |                           |          |
|--------------------------|-----------------------------------------------------------------|---------------------------|----------|
| <b>Modified Sequence</b> | AcD3-AEEK<AcD3K*>K<AcD3K*>AYK<AcD3K*>K<AcD3K*>AK<AcD3K*>ER-COOH | <b>Ion score</b>          | 76.3     |
| <b>Protein</b>           | Q810U5                                                          | <b>Confidence level</b>   | 99.00%   |
| <b>Precursor m/z</b>     | 925.04064                                                       | <b>Identity Threshold</b> | 44.12    |
| <b>Charge</b>            | 2+                                                              | <b>Mass error</b>         | 0.001466 |

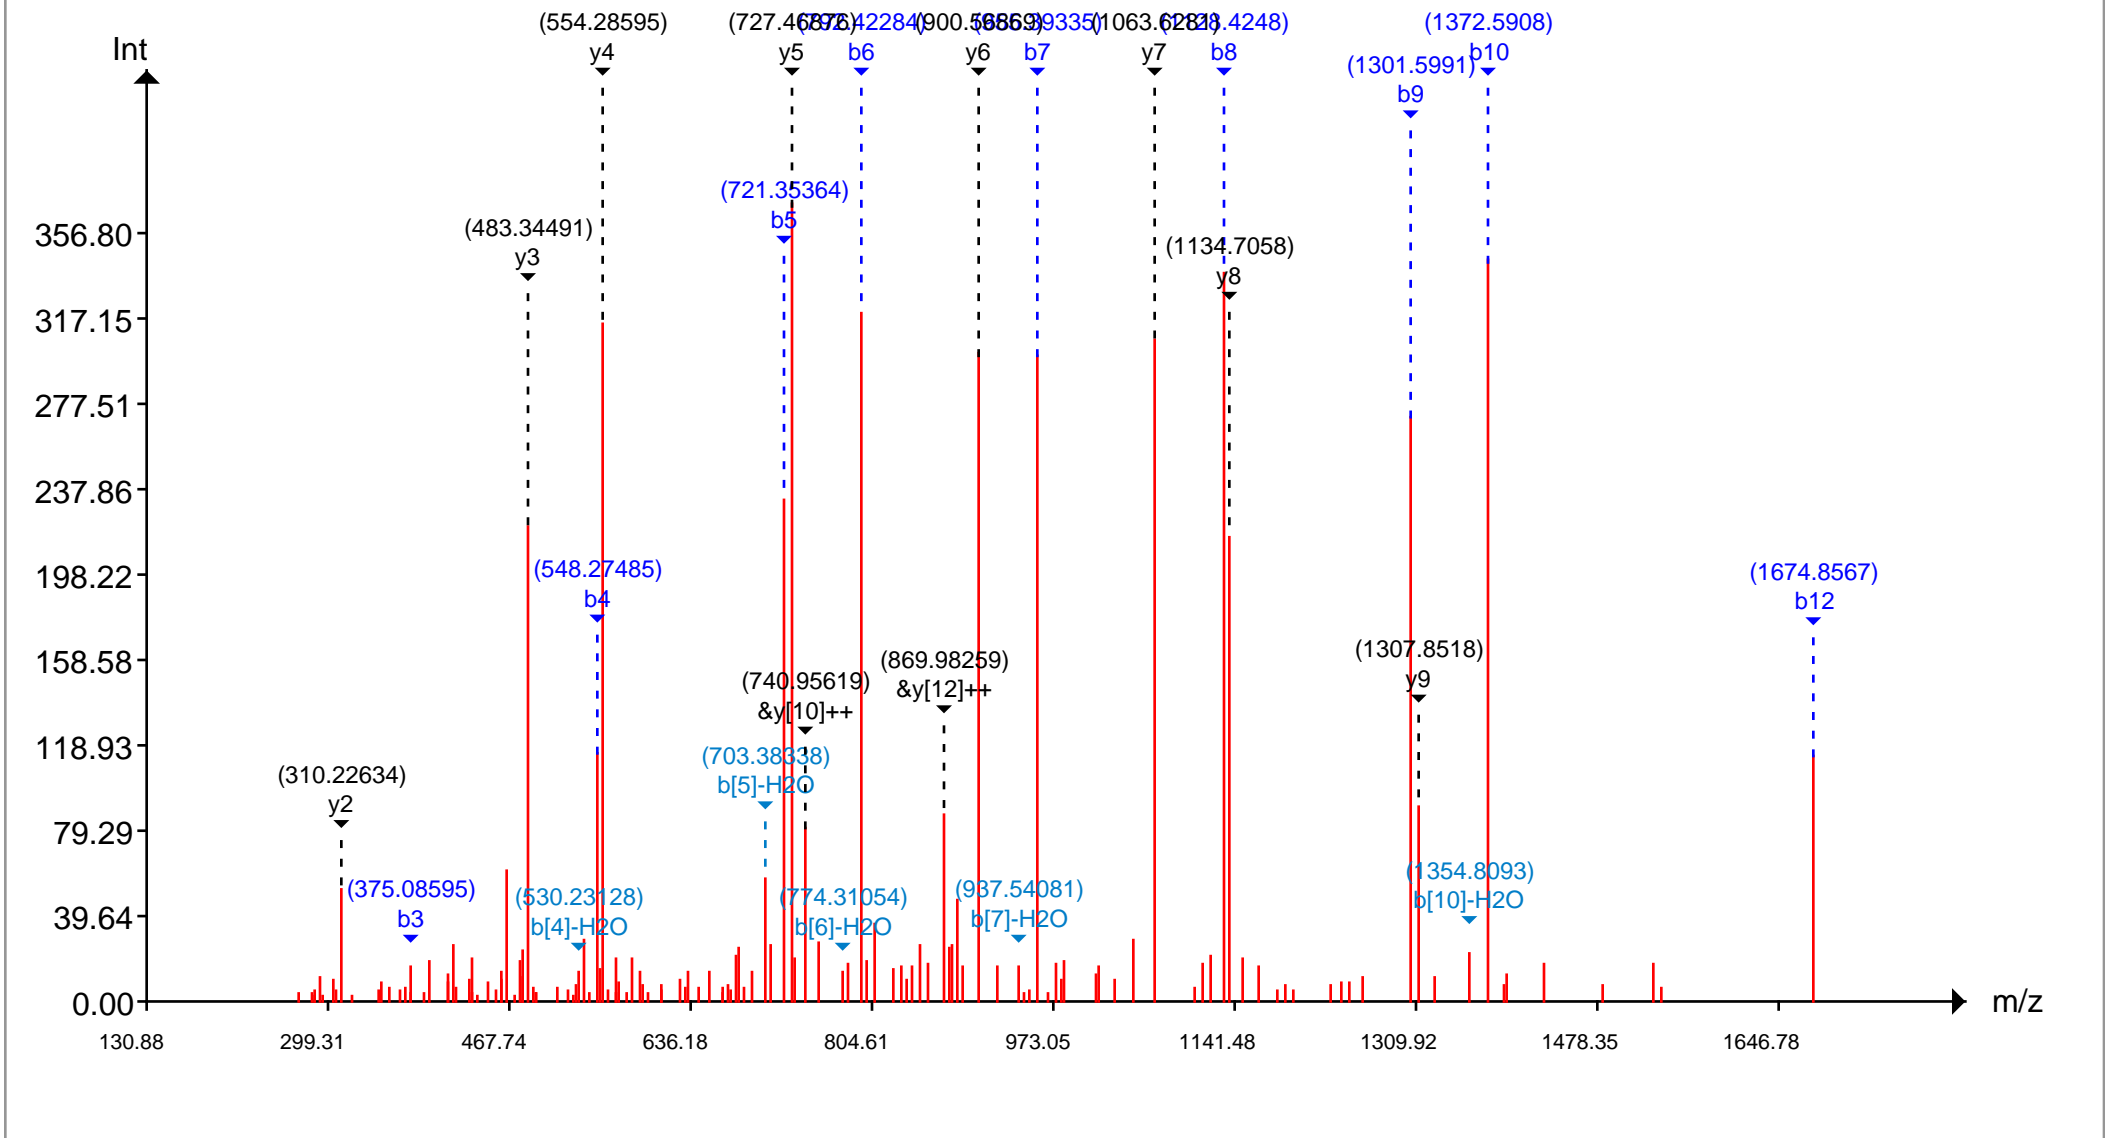

## Info

|                    |                                                                      |                    |          |
|--------------------|----------------------------------------------------------------------|--------------------|----------|
| Modified Sequen... | AcD3-AEEK<AcD3K*>K<AcD3K*>AYK<AcD3K*>K<AcD3K*>AK<AcD3K*>ER<C13>-COOH | Ion score          | 56.41    |
| Prote...           | Q810U5                                                               | Confidence level   | 99.00%   |
| Precursor m...     | 928.05087                                                            | Identity Threshold | 42.88    |
| Char...            | 2+                                                                   | Mass error         | 0.001785 |



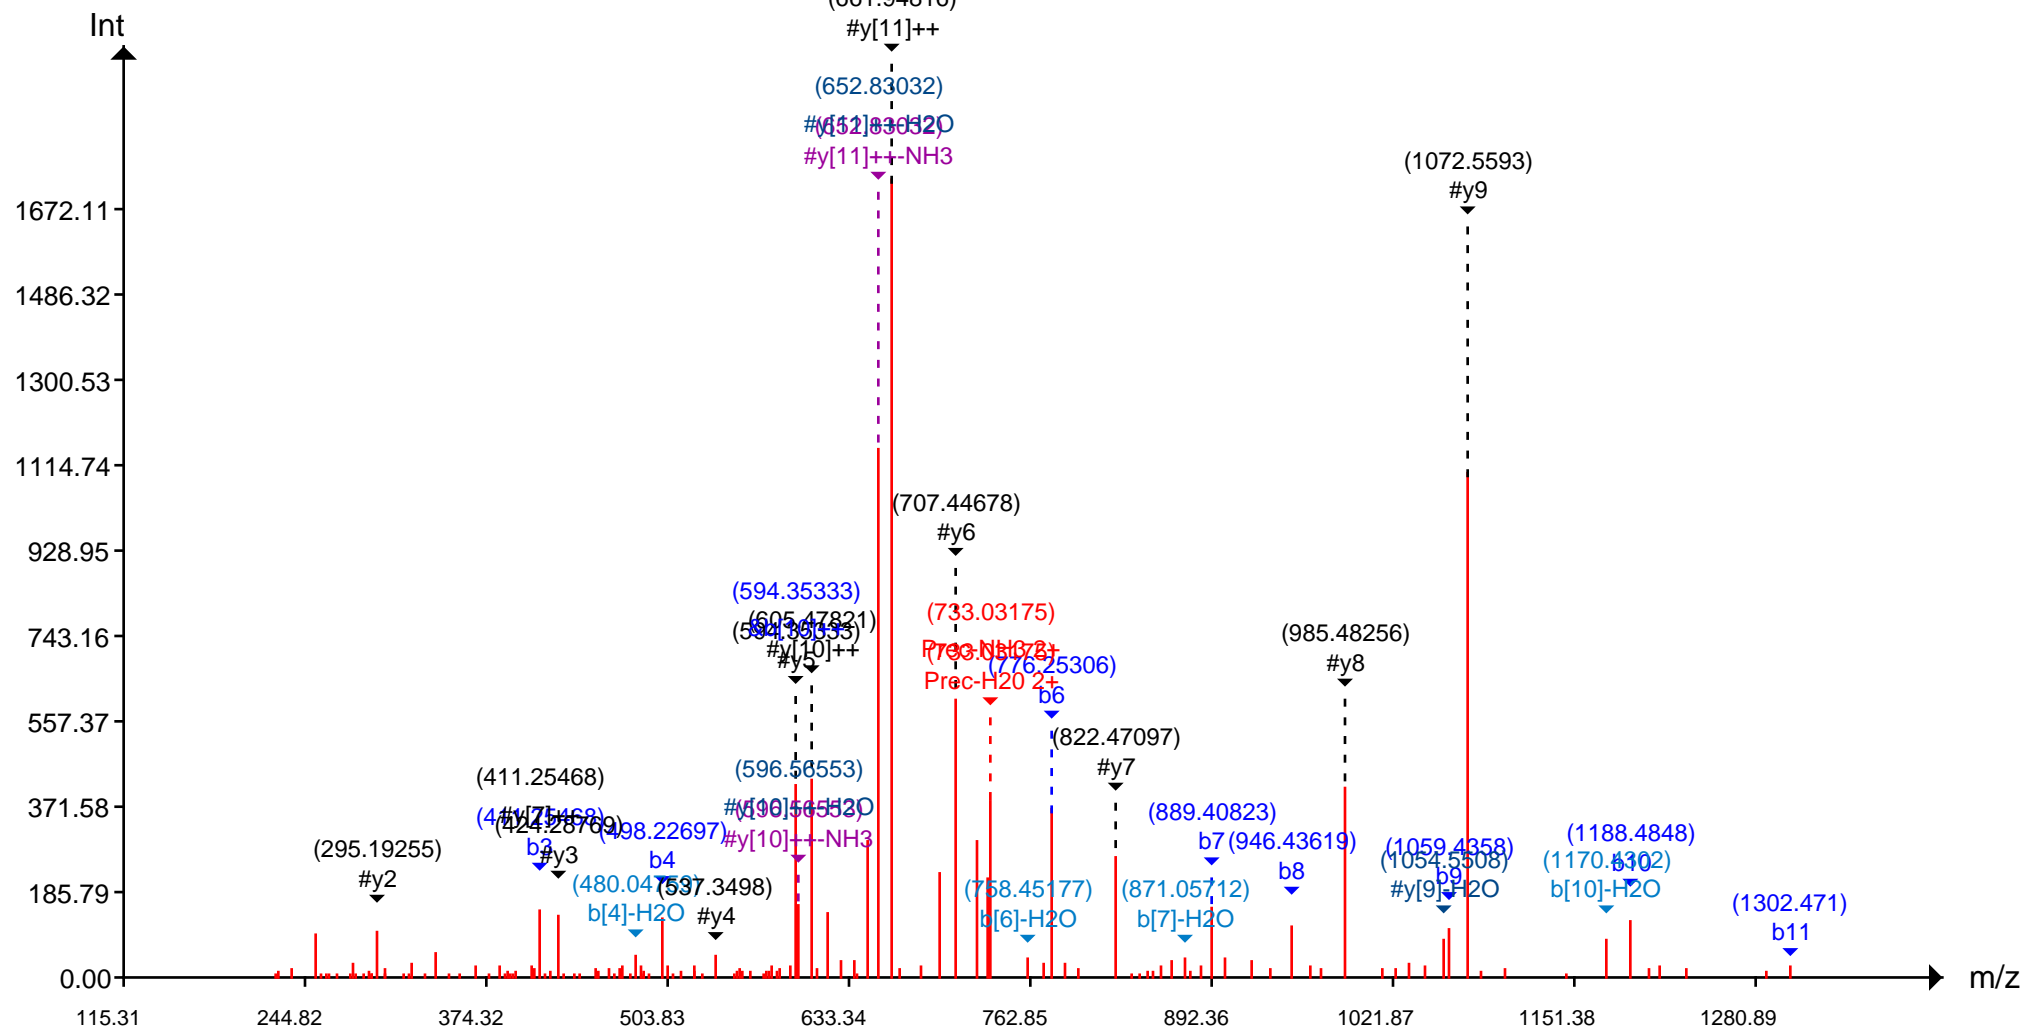

## Info

|                          |                             |                           |          |
|--------------------------|-----------------------------|---------------------------|----------|
| <b>Modified Sequence</b> | AcD3-DLHSYDLGIENR<C13>-COOH | <b>Ion score</b>          | 65.73    |
| <b>Protein</b>           | O88844                      | <b>Confidence level</b>   | 99.00%   |
| <b>Precursor m/z</b>     | 741.87226                   | <b>Identity Threshold</b> | 47.50    |
| <b>Charge</b>            | 2+                          | <b>Mass error</b>         | 0.001452 |

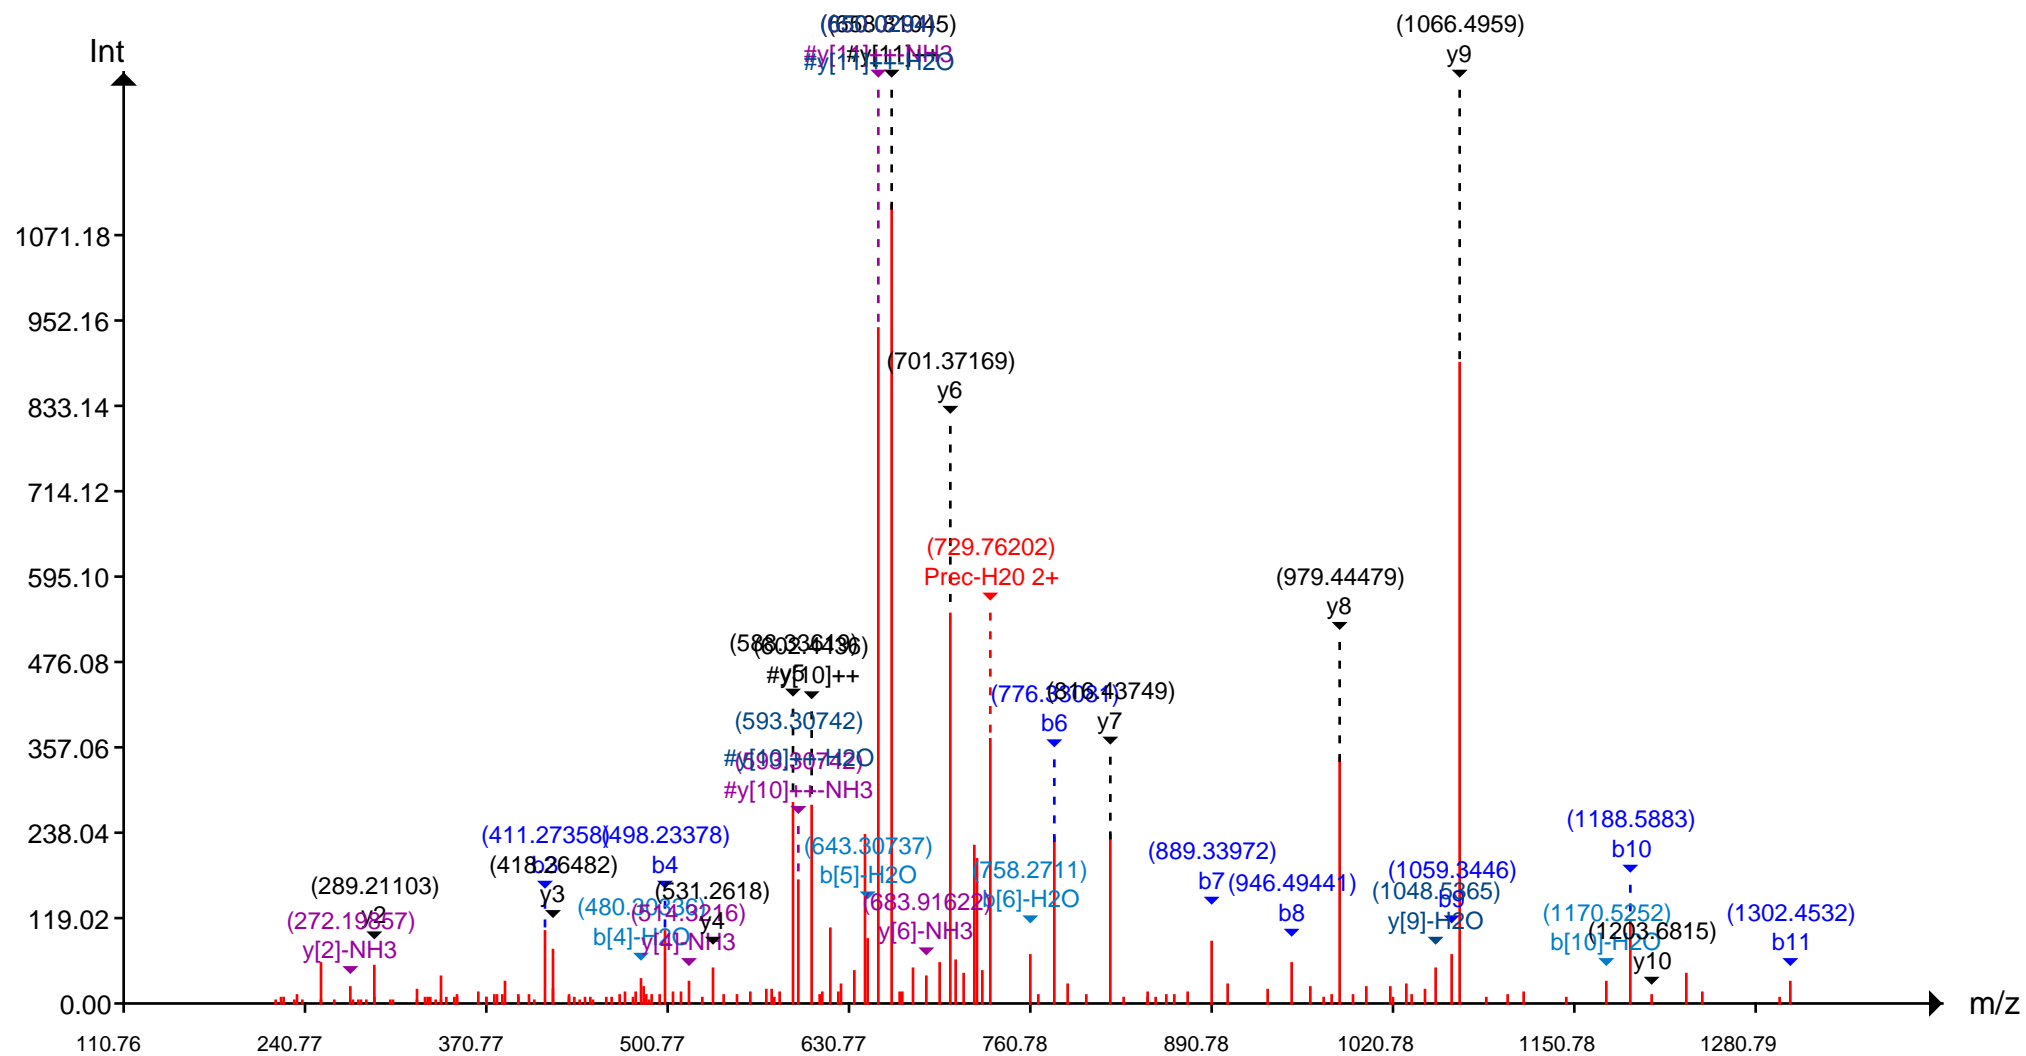

## Info

|                          |                        |                           |          |
|--------------------------|------------------------|---------------------------|----------|
| <b>Modified Sequence</b> | AcD3-DLHSYDLGIENR-COOH | <b>Ion score</b>          | 71.07    |
| <b>Protein</b>           | O88844                 | <b>Confidence level</b>   | 99.00%   |
| <b>Precursor m/z</b>     | 738.86197              | <b>Identity Threshold</b> | 47.09    |
| <b>Charge</b>            | 2+                     | <b>Mass error</b>         | 0.001014 |

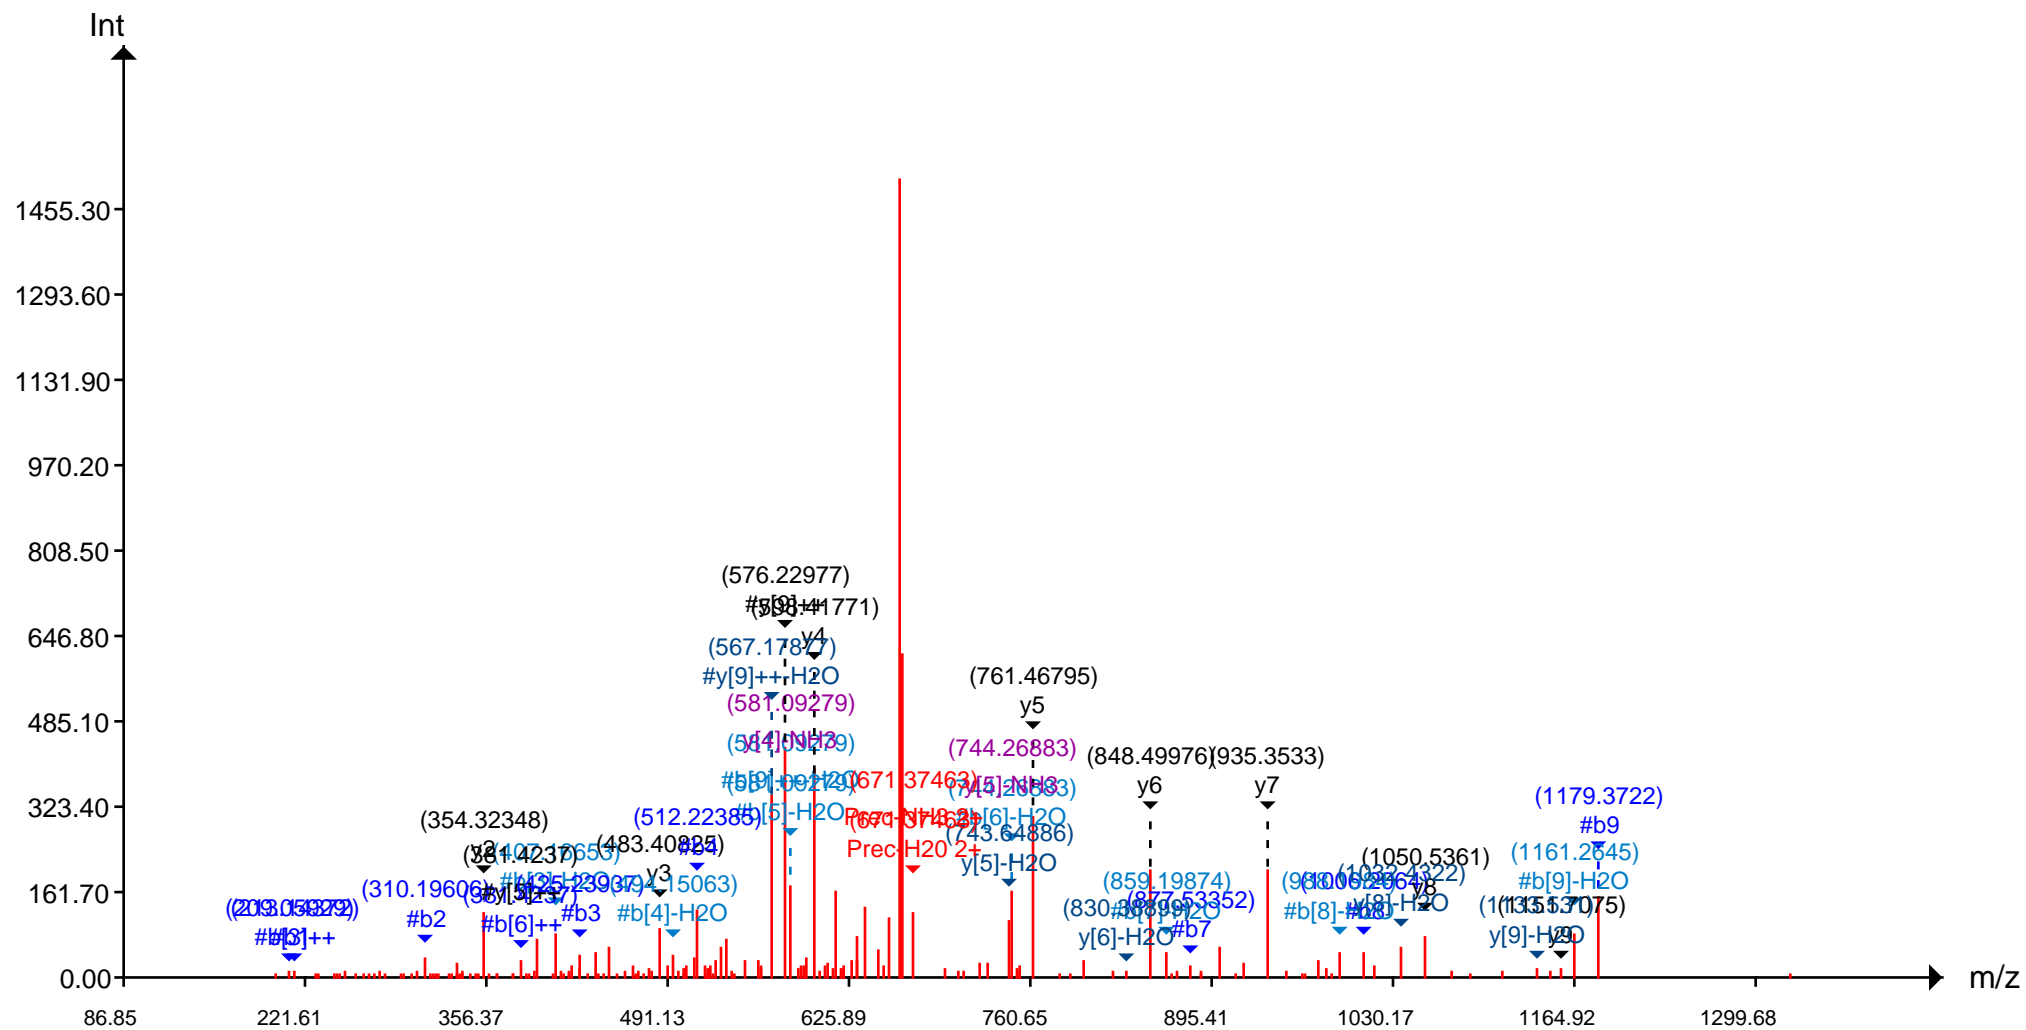

## Info

|                          |                                   |                           |         |
|--------------------------|-----------------------------------|---------------------------|---------|
| <b>Modified Sequence</b> | AcD3-YTDSSYDEK<AcD3K*>R<C13>-COOH | <b>Ion score</b>          | 57.31   |
| <b>Protein</b>           | P10649                            | <b>Confidence level</b>   | 99.00%  |
| <b>Precursor m/z</b>     | 680.31789                         | <b>Identity Threshold</b> | 45.41   |
| <b>Charge</b>            | 2+                                | <b>Mass error</b>         | 8.06E-4 |

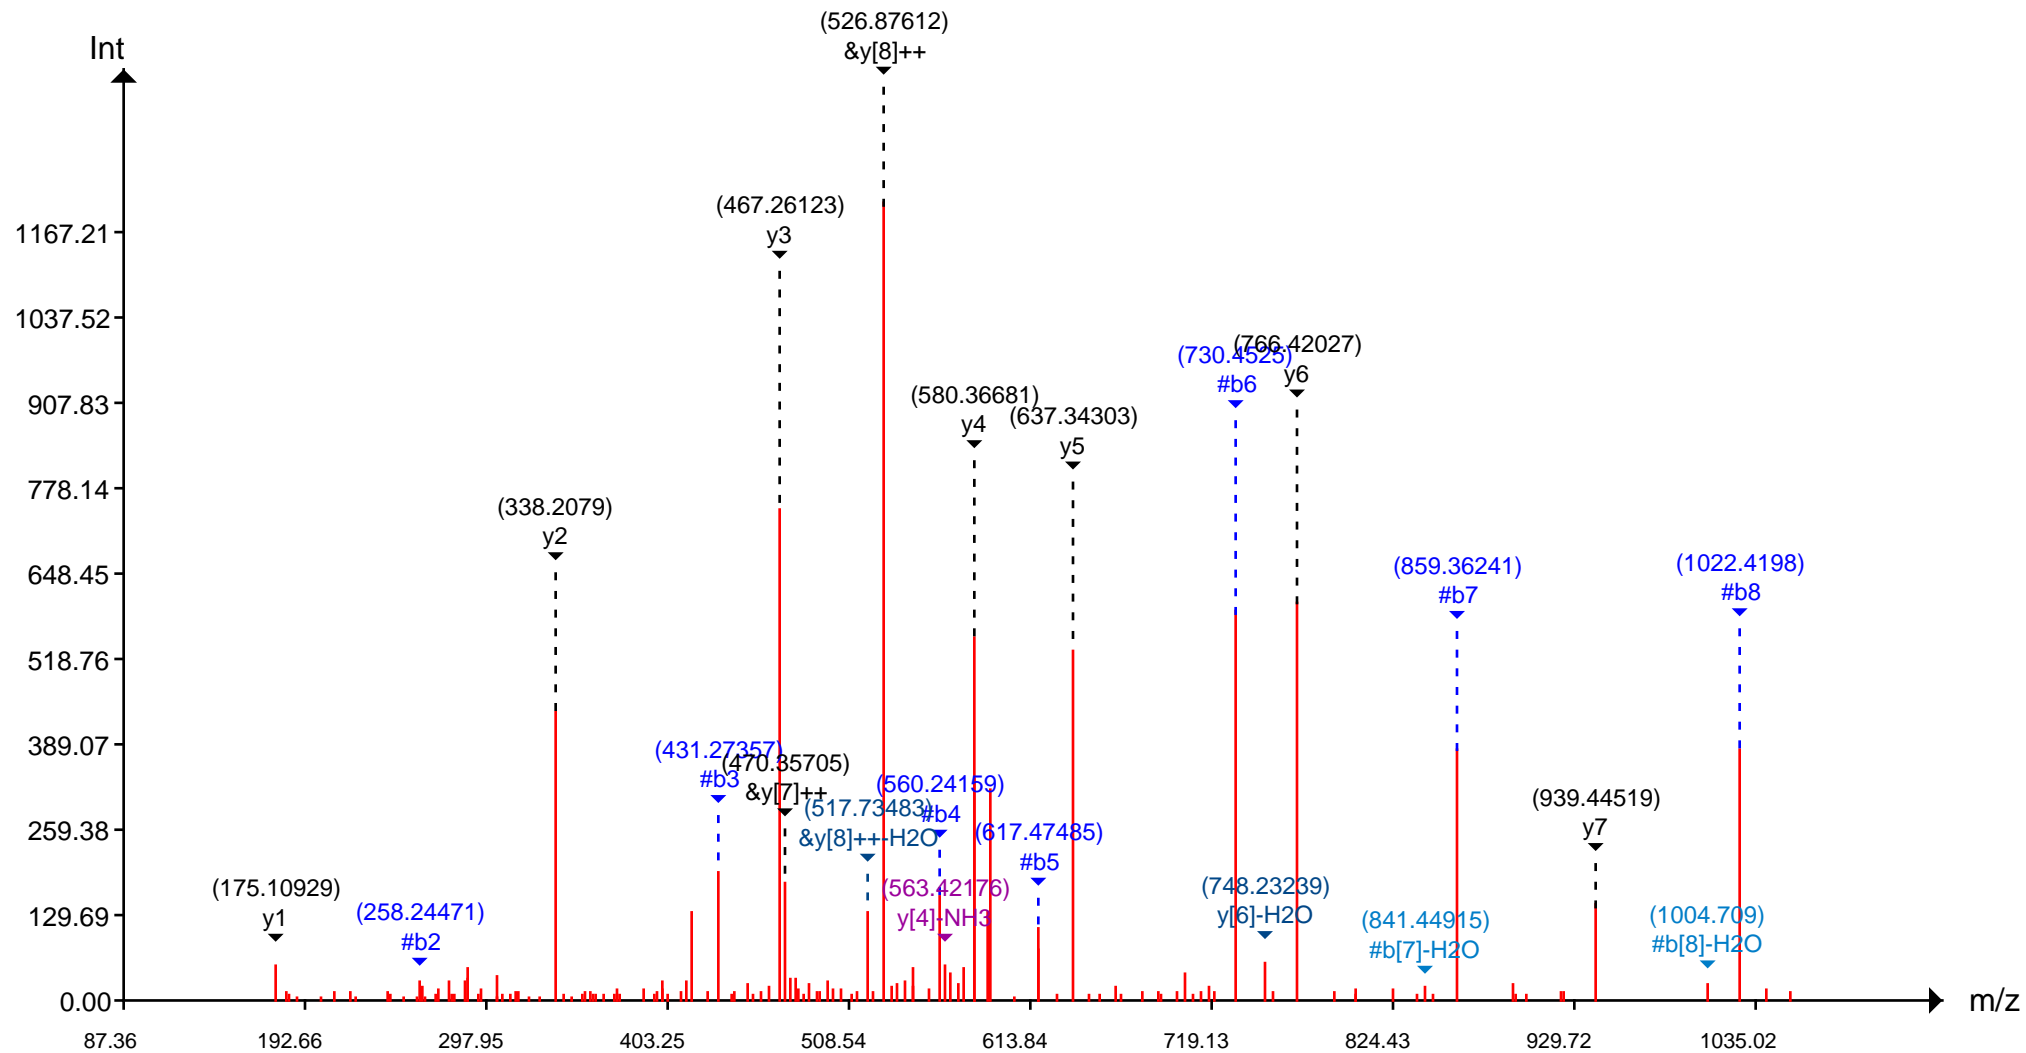

## Info

|                          |                             |                           |         |
|--------------------------|-----------------------------|---------------------------|---------|
| <b>Modified Sequence</b> | AcD3-VLK<AcD3K*>EGIEYR-COOH | <b>Ion score</b>          | 64.19   |
| <b>Protein</b>           | Q61599                      | <b>Confidence level</b>   | 99.00%  |
| <b>Precursor m/z</b>     | 598.84334                   | <b>Identity Threshold</b> | 46.69   |
| <b>Charge</b>            | 2+                          | <b>Mass error</b>         | 2.07E-4 |

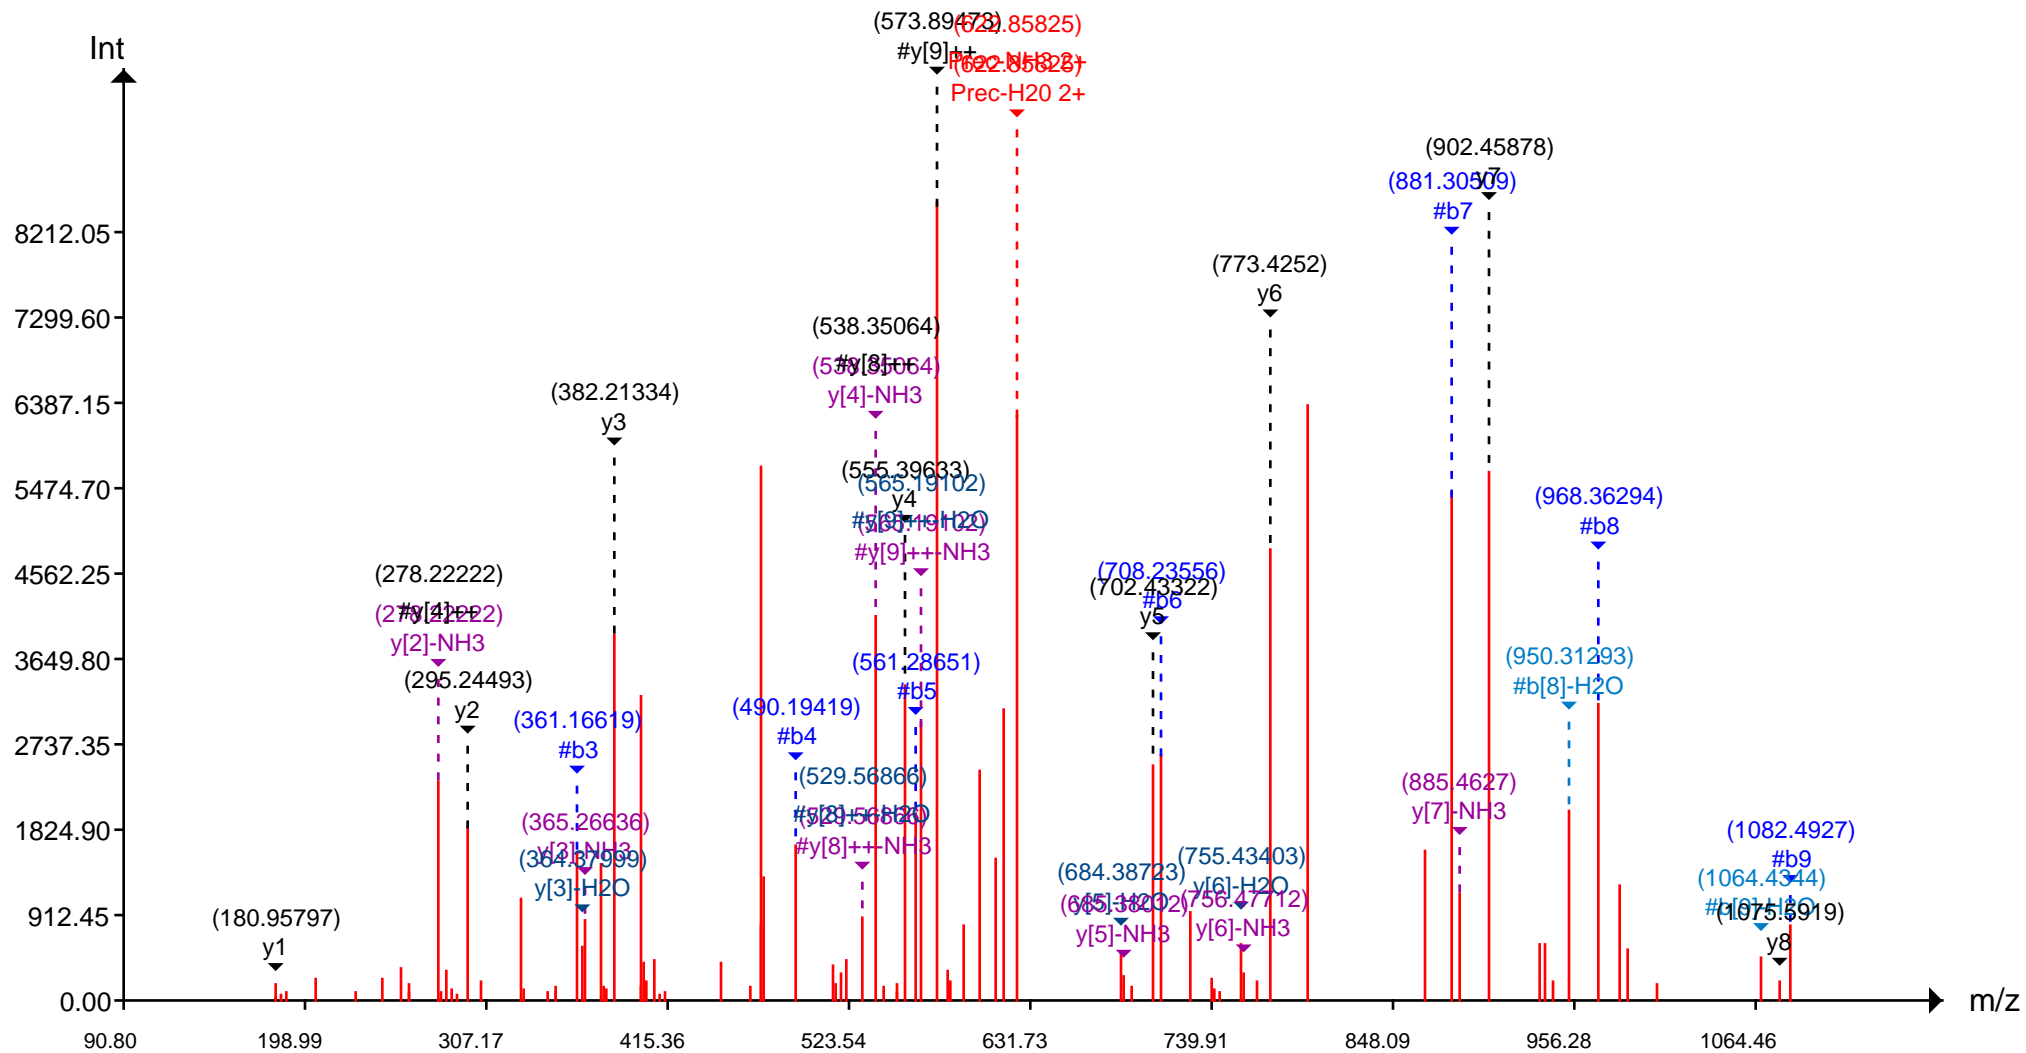

## Info

|                          |                                                 |                           |           |
|--------------------------|-------------------------------------------------|---------------------------|-----------|
| <b>Modified Sequence</b> | AcD3-AAK<AcD3K*>EAM<Mox*>K<AcD3K*>SNR<C13>-COOH | <b>Ion score</b>          | 49.04     |
| <b>Protein</b>           | Q8CIN4                                          | <b>Confidence level</b>   | 99.00%    |
| <b>Precursor m/z</b>     | 631.84366                                       | <b>Identity Threshold</b> | 47.94     |
| <b>Charge</b>            | 2+                                              | <b>Mass error</b>         | -0.001411 |

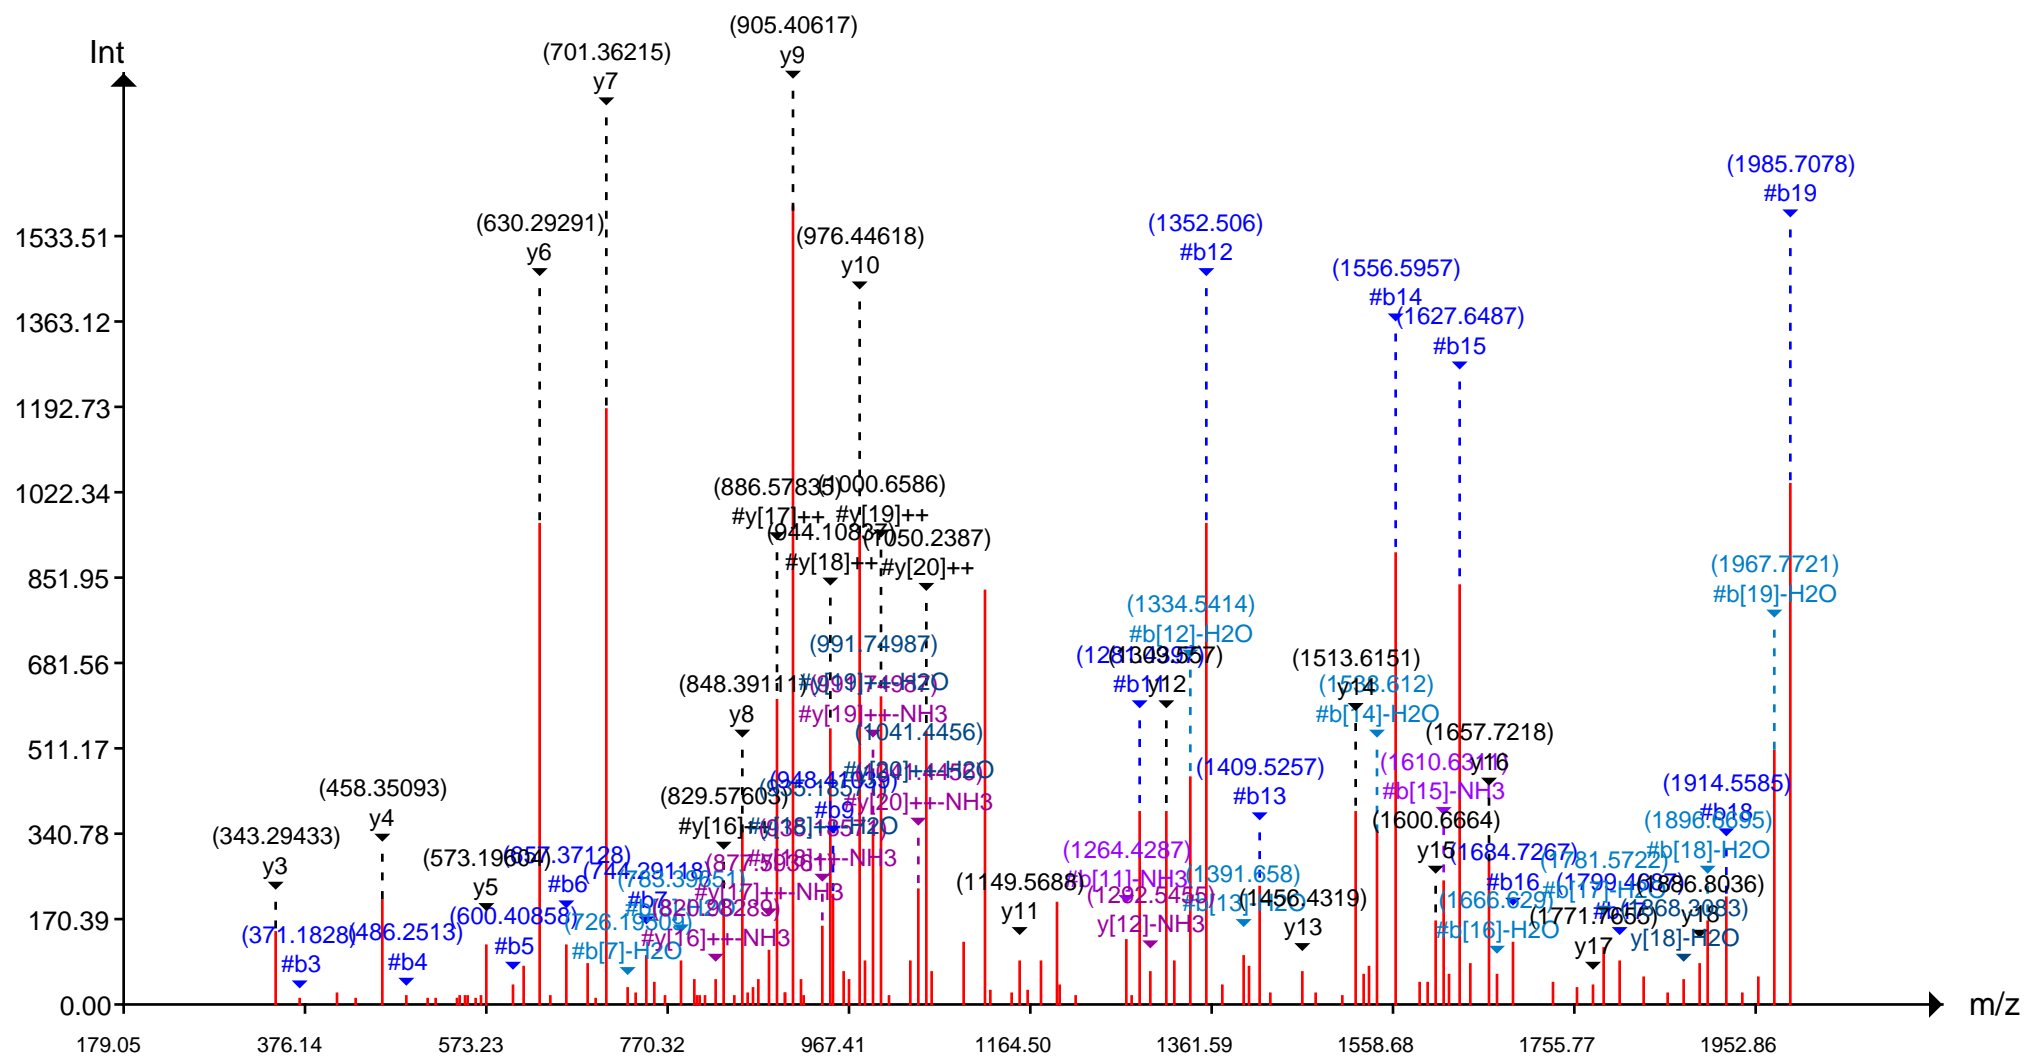

## Info

|                          |                                                     |                           |          |
|--------------------------|-----------------------------------------------------|---------------------------|----------|
| <b>Modified Sequence</b> | AcD3-LVIDNGSGM<Mox*>C<Cmm*>K<AcD3K*>AGFAGDDAPR-COOH | <b>Ion score</b>          | 138.23   |
| <b>Protein</b>           | P63260                                              | <b>Confidence level</b>   | 99.00%   |
| <b>Precursor m/z</b>     | 1129.0295                                           | <b>Identity Threshold</b> | 45.52    |
| <b>Charge</b>            | 2+                                                  | <b>Mass error</b>         | 0.002257 |

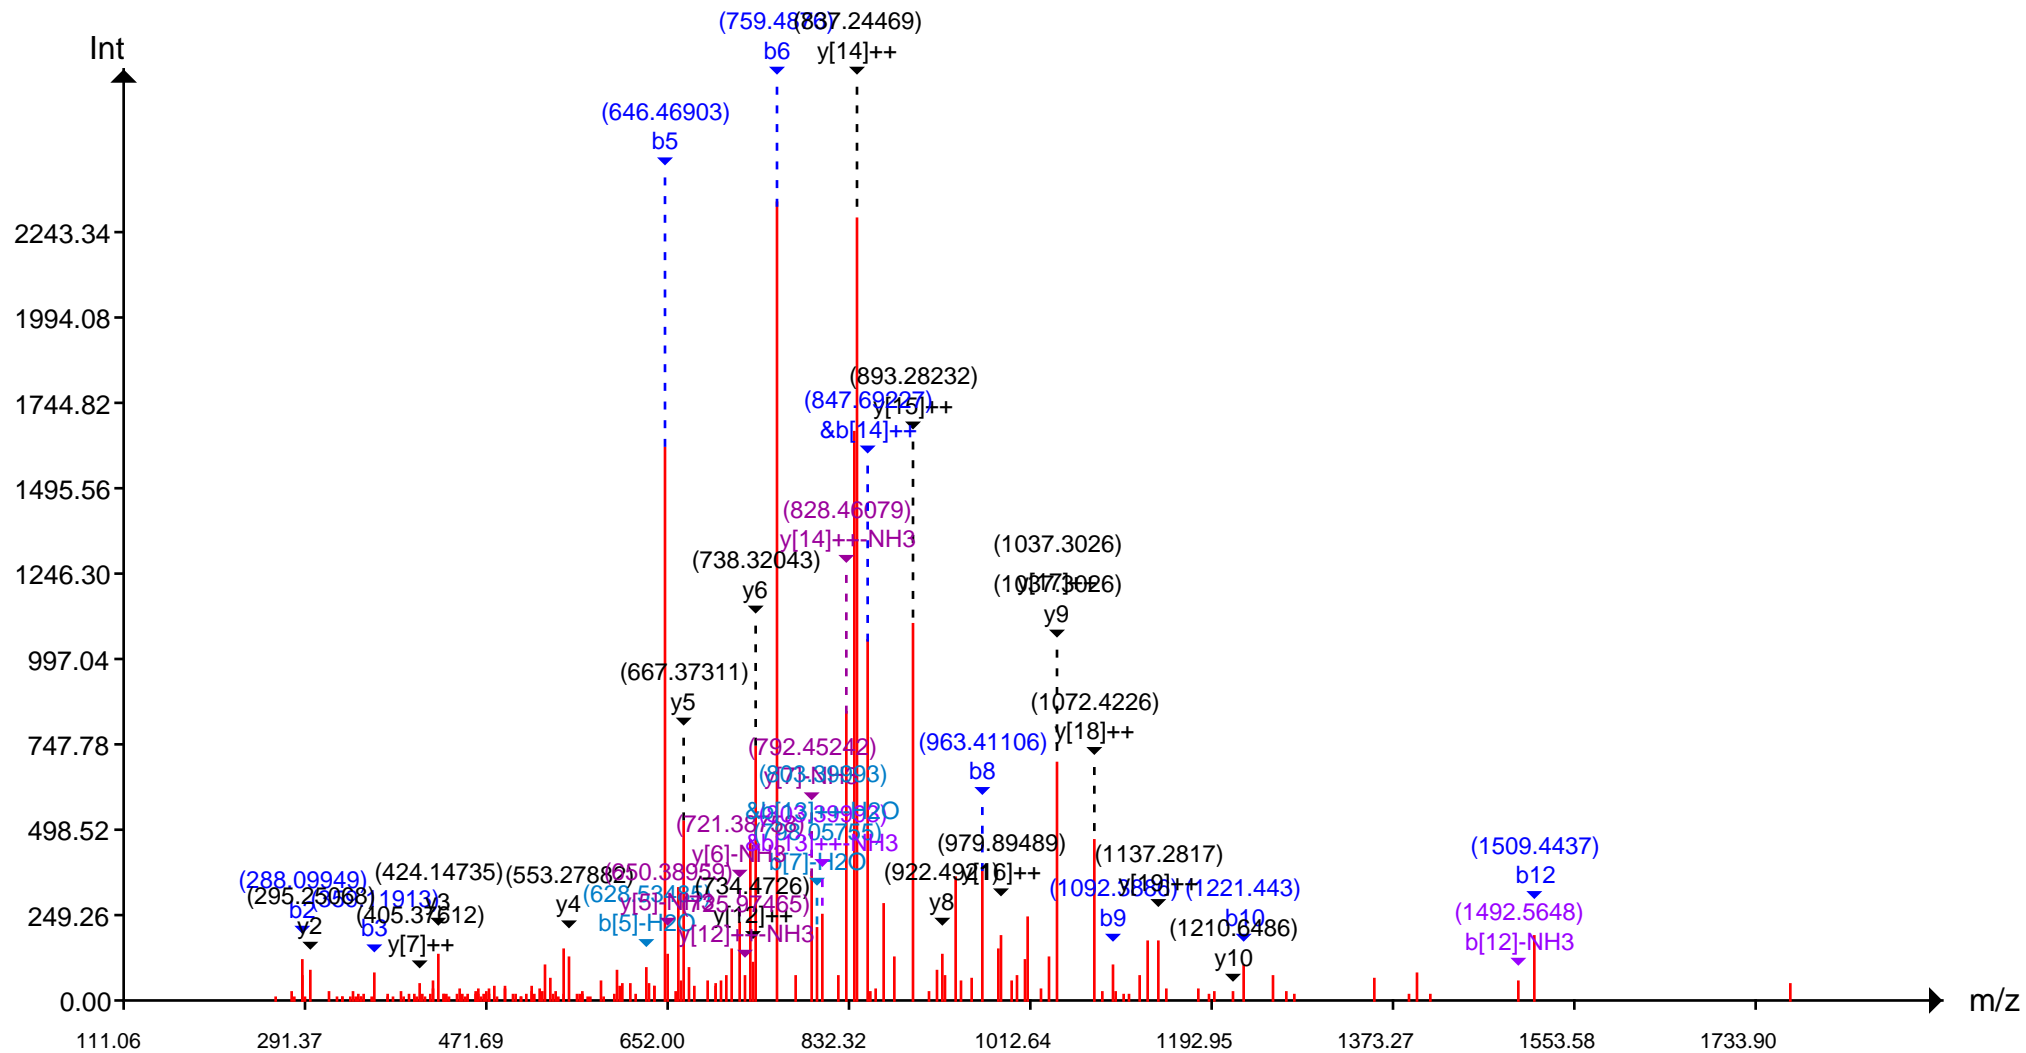

## Info

|                          |                                                     |                           |          |
|--------------------------|-----------------------------------------------------|---------------------------|----------|
| <b>Modified Sequence</b> | AcD3-LEANK<AcD3K*>IGFEEK<AcD3K*>DIAANEENR<C13>-COOH | <b>Ion score</b>          | 58.29    |
| <b>Protein</b>           | Q9JJU8                                              | <b>Confidence level</b>   | 99.00%   |
| <b>Precursor m/z</b>     | 811.08532                                           | <b>Identity Threshold</b> | 47.91    |
| <b>Charge</b>            | 3+                                                  | <b>Mass error</b>         | 0.002168 |

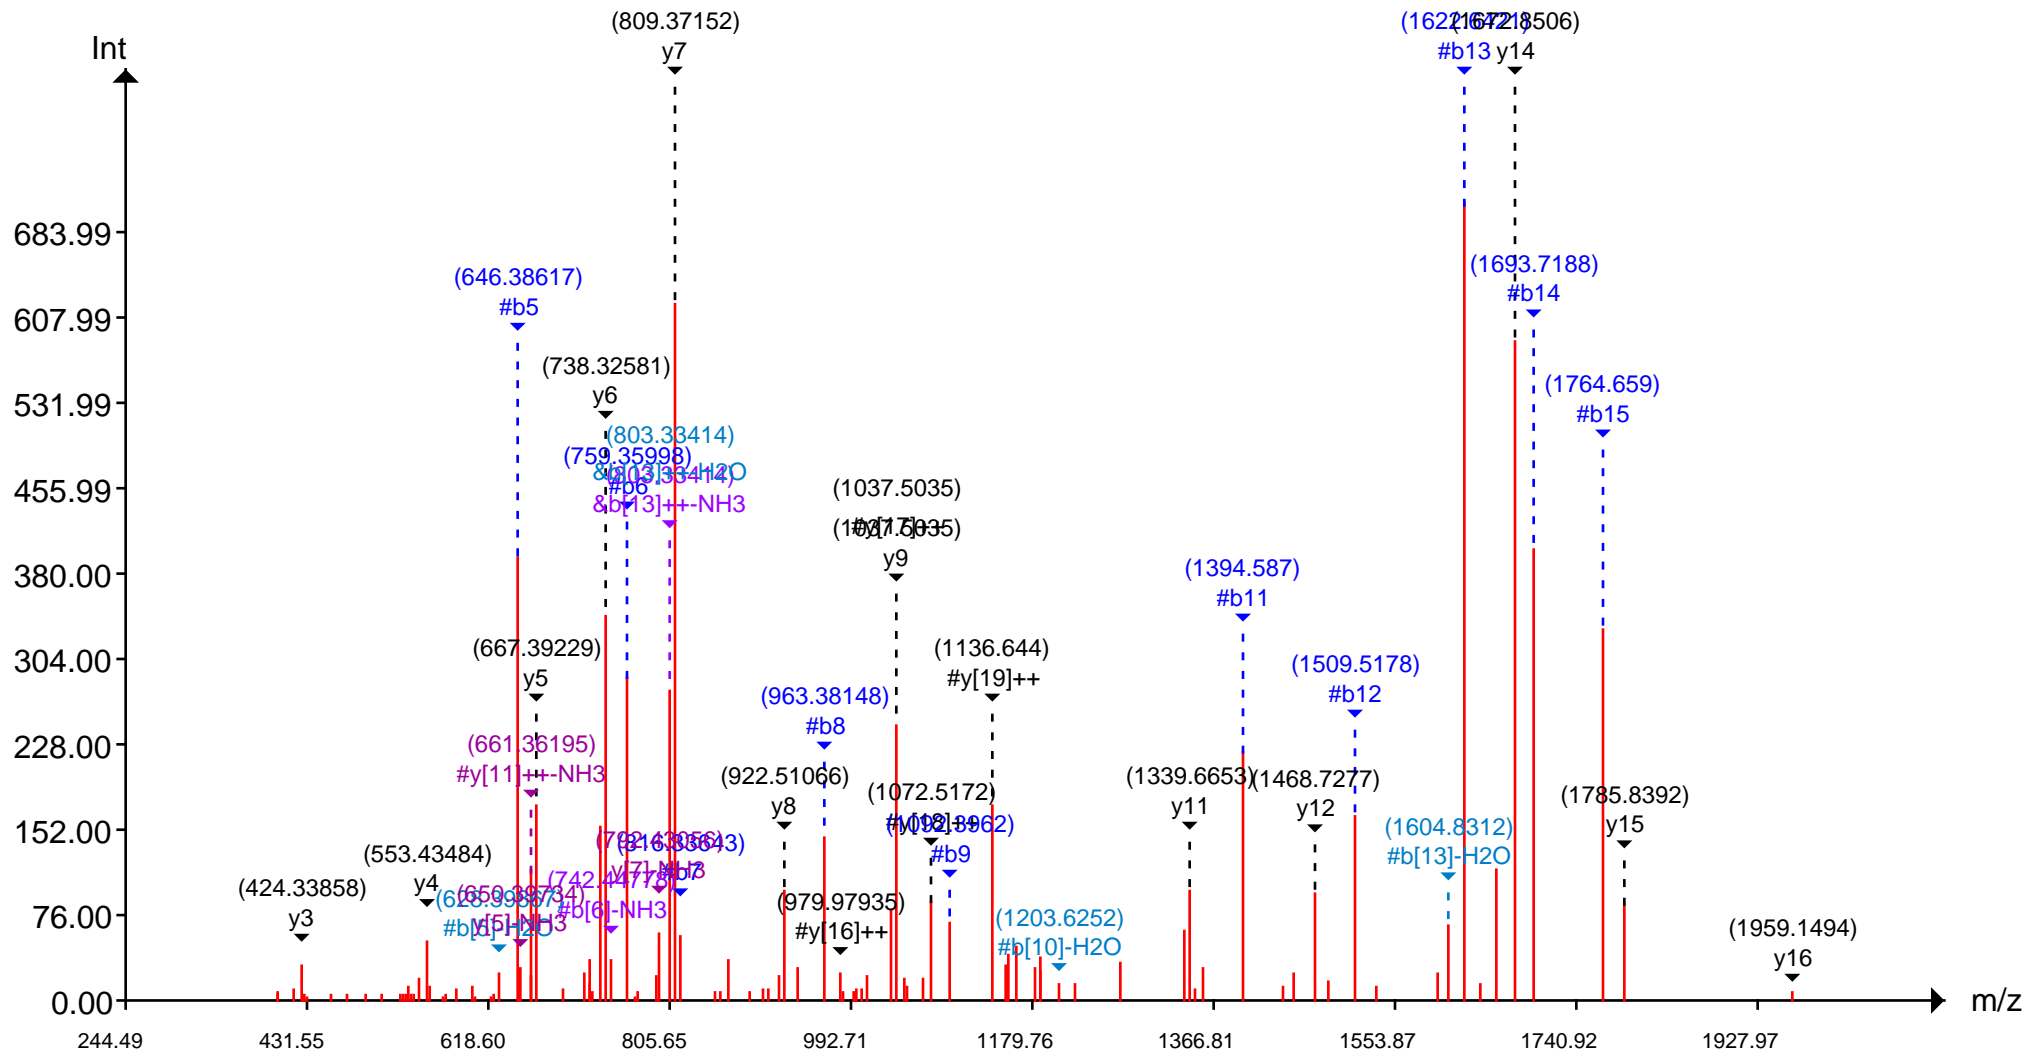

## Info

|                          |                                                     |                           |          |
|--------------------------|-----------------------------------------------------|---------------------------|----------|
| <b>Modified Sequence</b> | AcD3-LEANK<AcD3K*>IGFEEK<AcD3K*>DIAANEENR<C13>-COOH | <b>Ion score</b>          | 99.45    |
| <b>Protein</b>           | Q9JJU8                                              | <b>Confidence level</b>   | 99.00%   |
| <b>Precursor m/z</b>     | 1216.1245                                           | <b>Identity Threshold</b> | 47.91    |
| <b>Charge</b>            | 2+                                                  | <b>Mass error</b>         | 0.002484 |



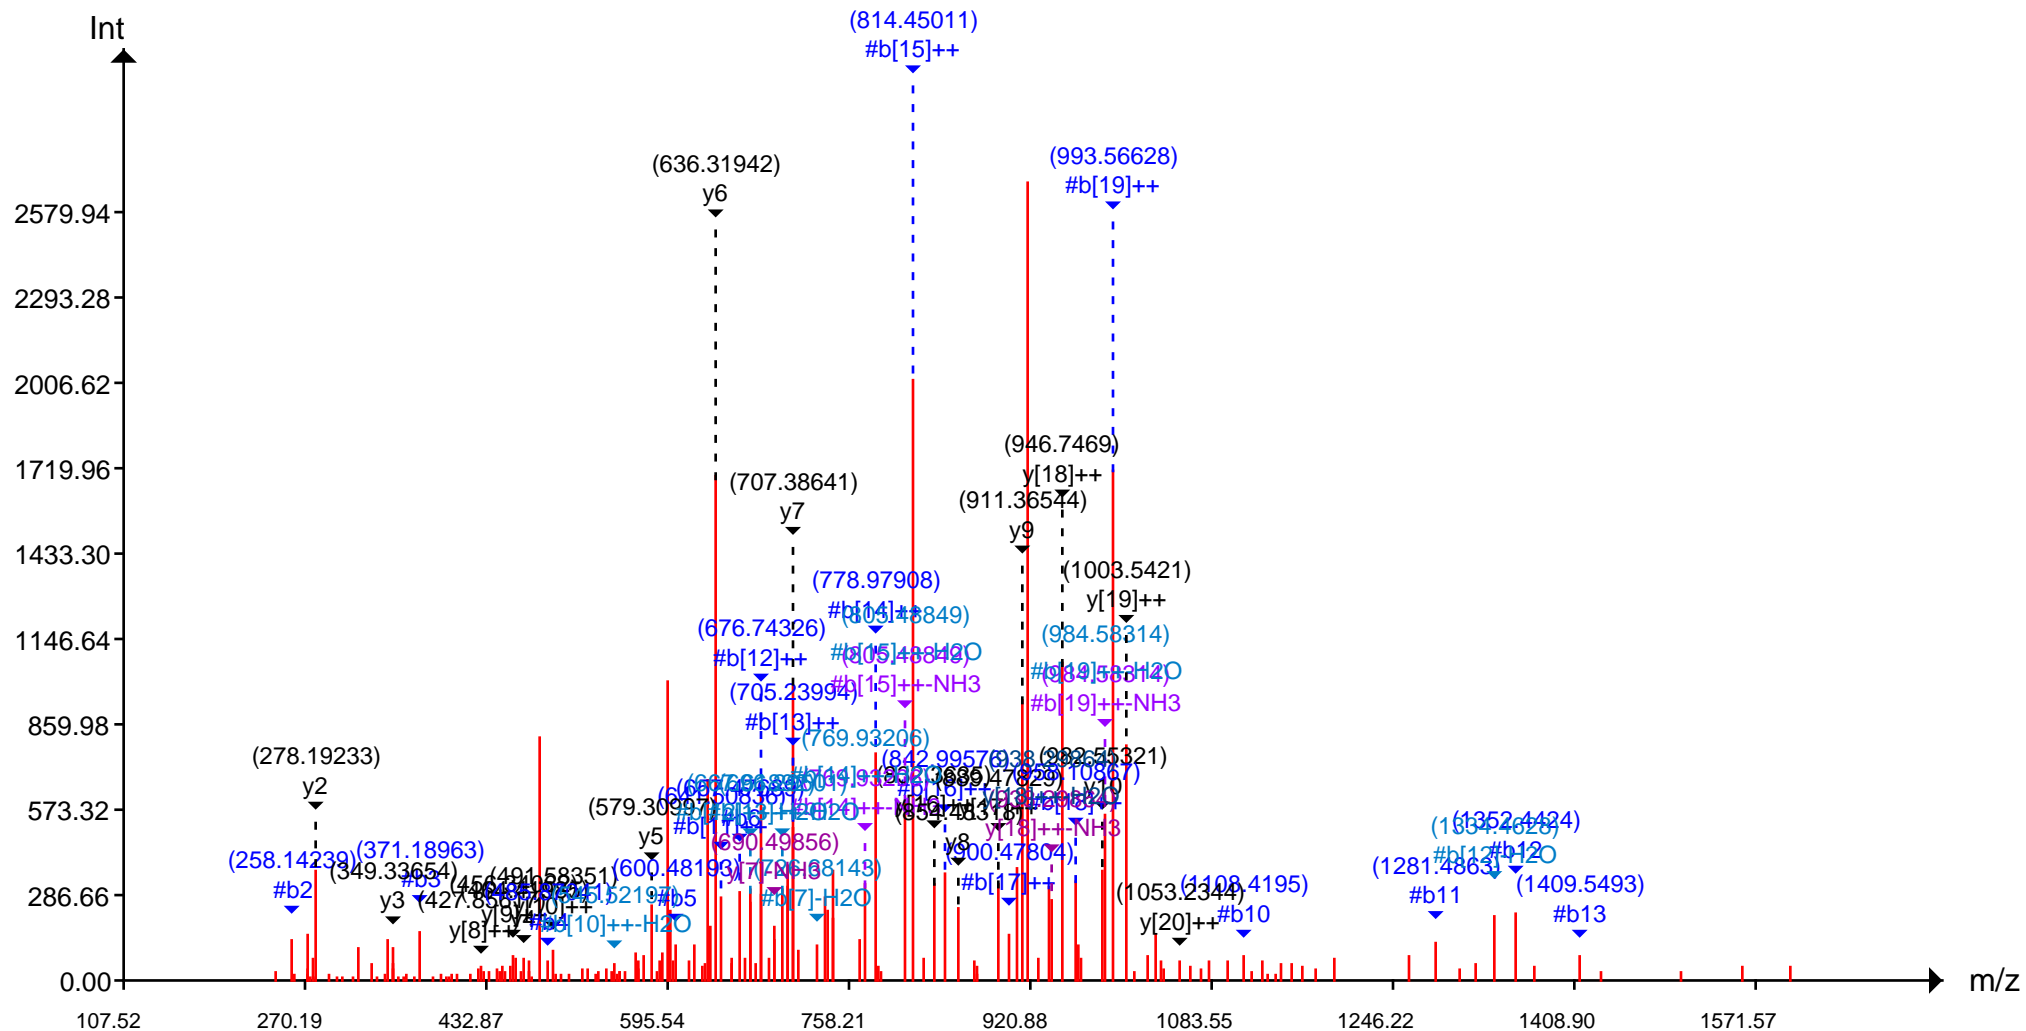

## Info

|                          |                                                          |                           |        |
|--------------------------|----------------------------------------------------------|---------------------------|--------|
| <b>Modified Sequence</b> | AcD3-LVIDNGSGM<Mox*>C<Cmm*>K<AcD3K*>AGFAGDDAPR<C13>-COOH | <b>Ion score</b>          | 51.69  |
| <b>Protein</b>           | P63260                                                   | <b>Confidence level</b>   | 99.00% |
| <b>Precursor m/z</b>     | 755.02825                                                | <b>Identity Threshold</b> | 46.30  |
| <b>Charge</b>            | 3+                                                       | <b>Mass error</b>         | 5.9E-4 |

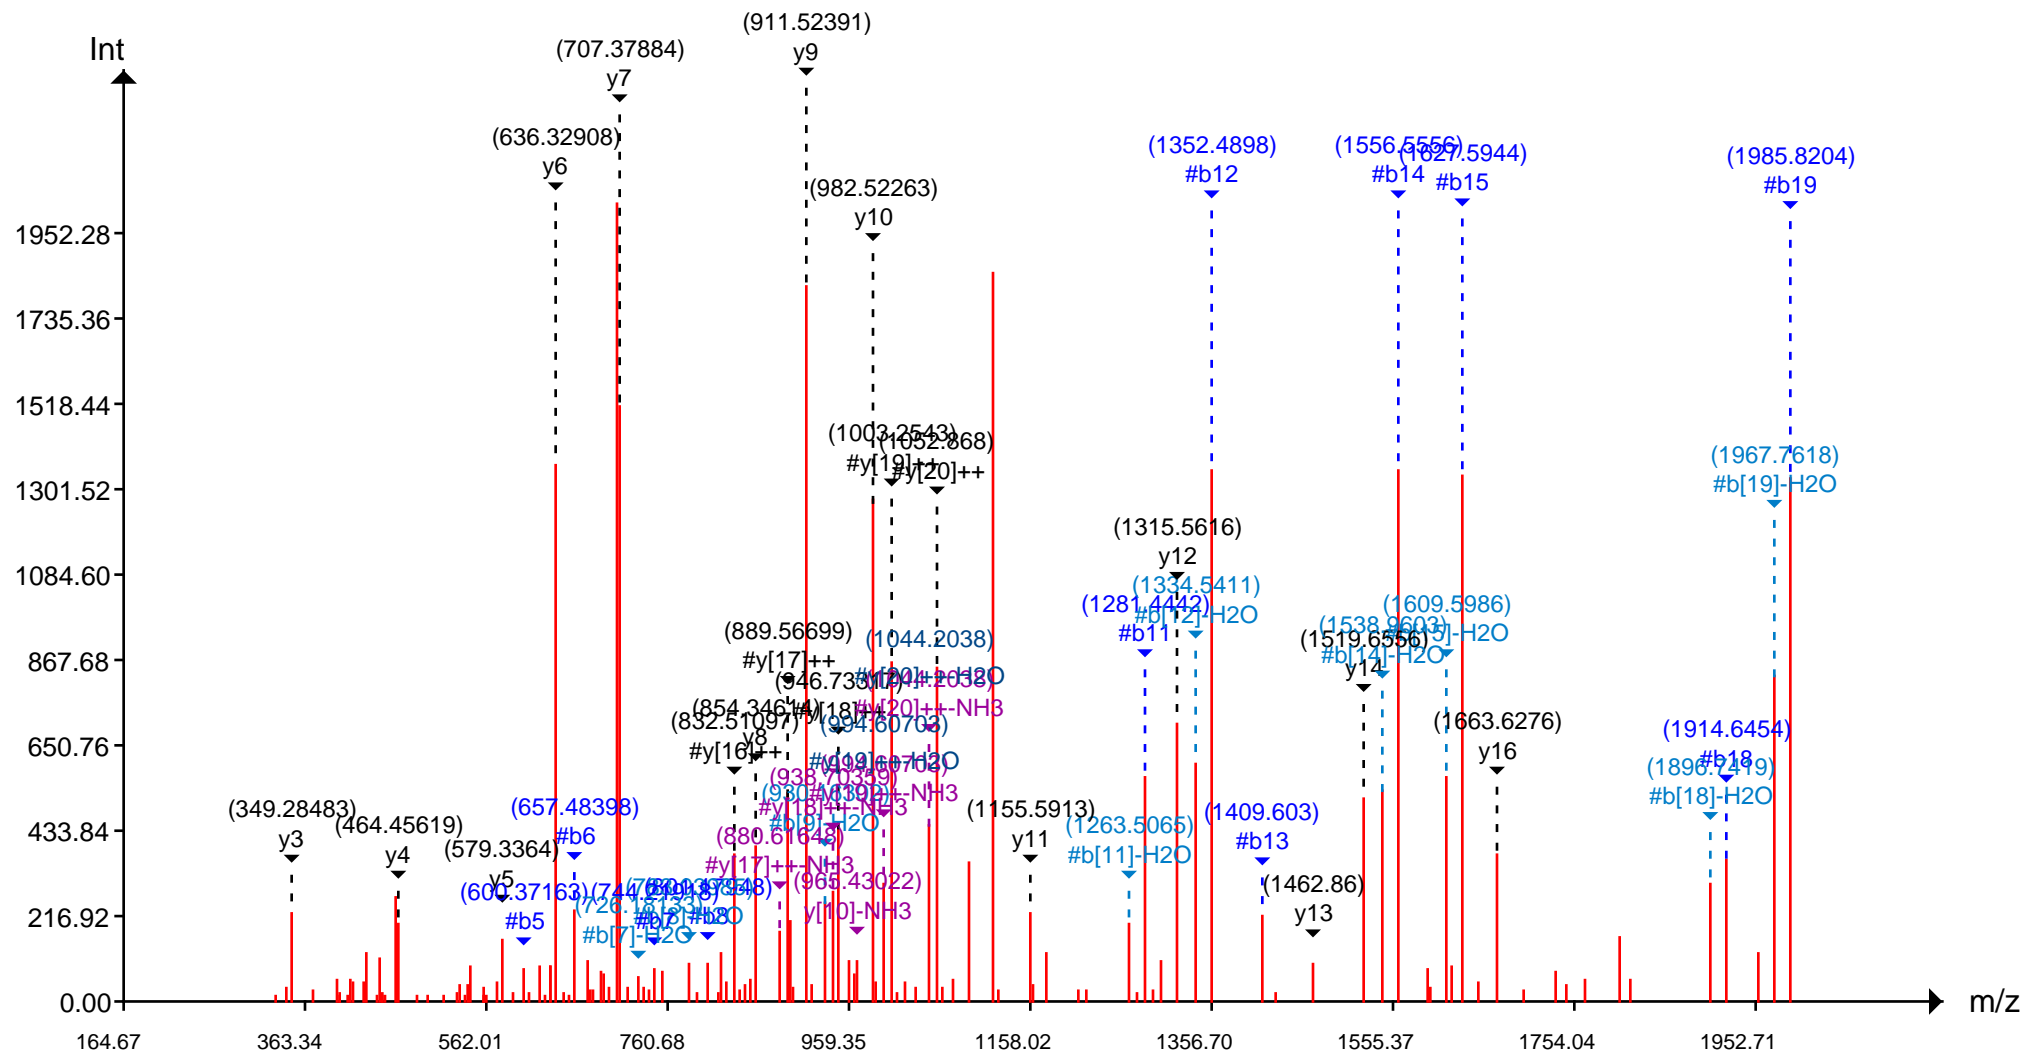

## Info

|                          |                                                          |                           |          |
|--------------------------|----------------------------------------------------------|---------------------------|----------|
| <b>Modified Sequence</b> | AcD3-LVIDNGSGM<Mox*>C<Cmm*>K<AcD3K*>AGFAGDDAPR<C13>-COOH | <b>Ion score</b>          | 99.25    |
| <b>Protein</b>           | P63260                                                   | <b>Confidence level</b>   | 99.00%   |
| <b>Precursor m/z</b>     | 1132.039                                                 | <b>Identity Threshold</b> | 46.38    |
| <b>Charge</b>            | 2+                                                       | <b>Mass error</b>         | 0.001116 |

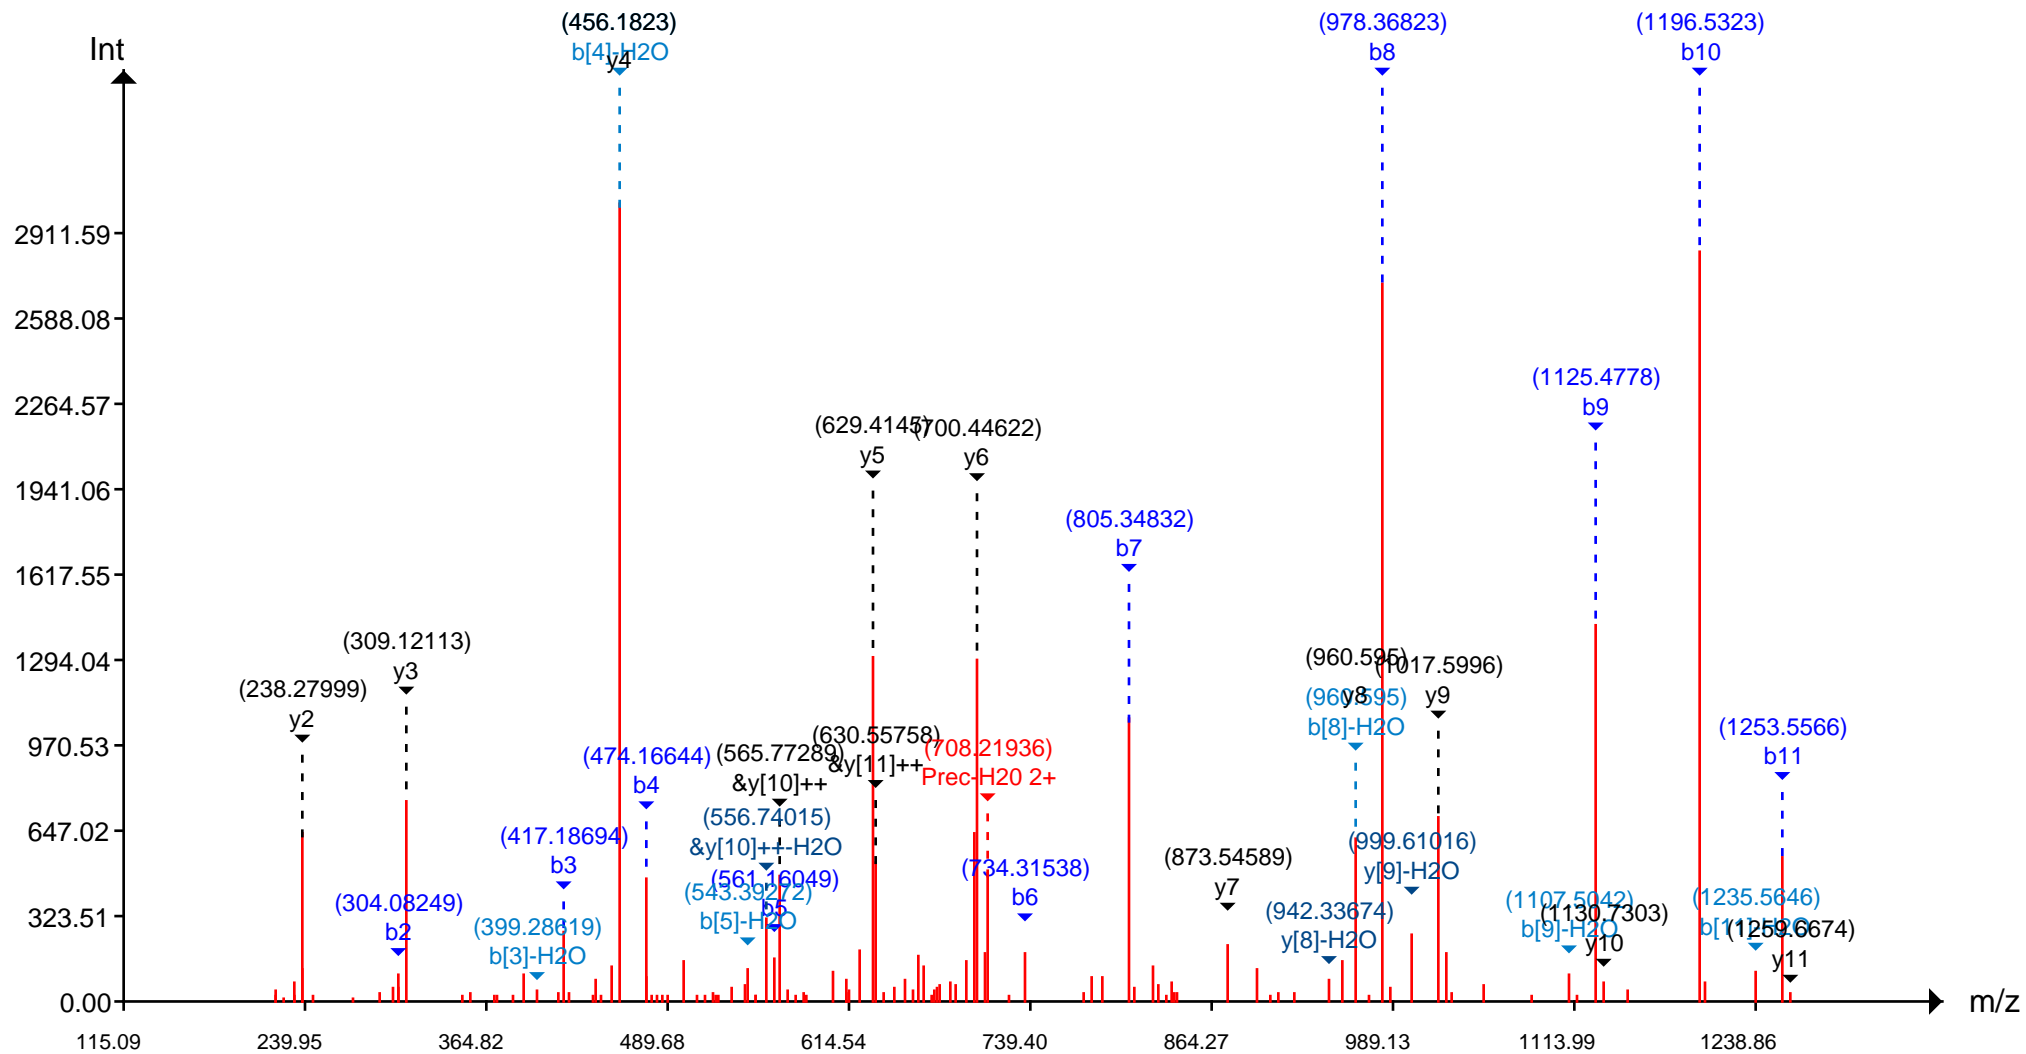

## Info

**Modified Sequence** AcD3-EELGSK<AcD3K\*>AK<AcD3K\*>FAGR<C13>-COOH

**Ion score** 89.02

**Protein** P17182

**Confidence level** 99.00%

**Precursor m/z** 717.40618

**Identity Threshold** 46.98

**Charge** 2+

**Mass error** 0.001055

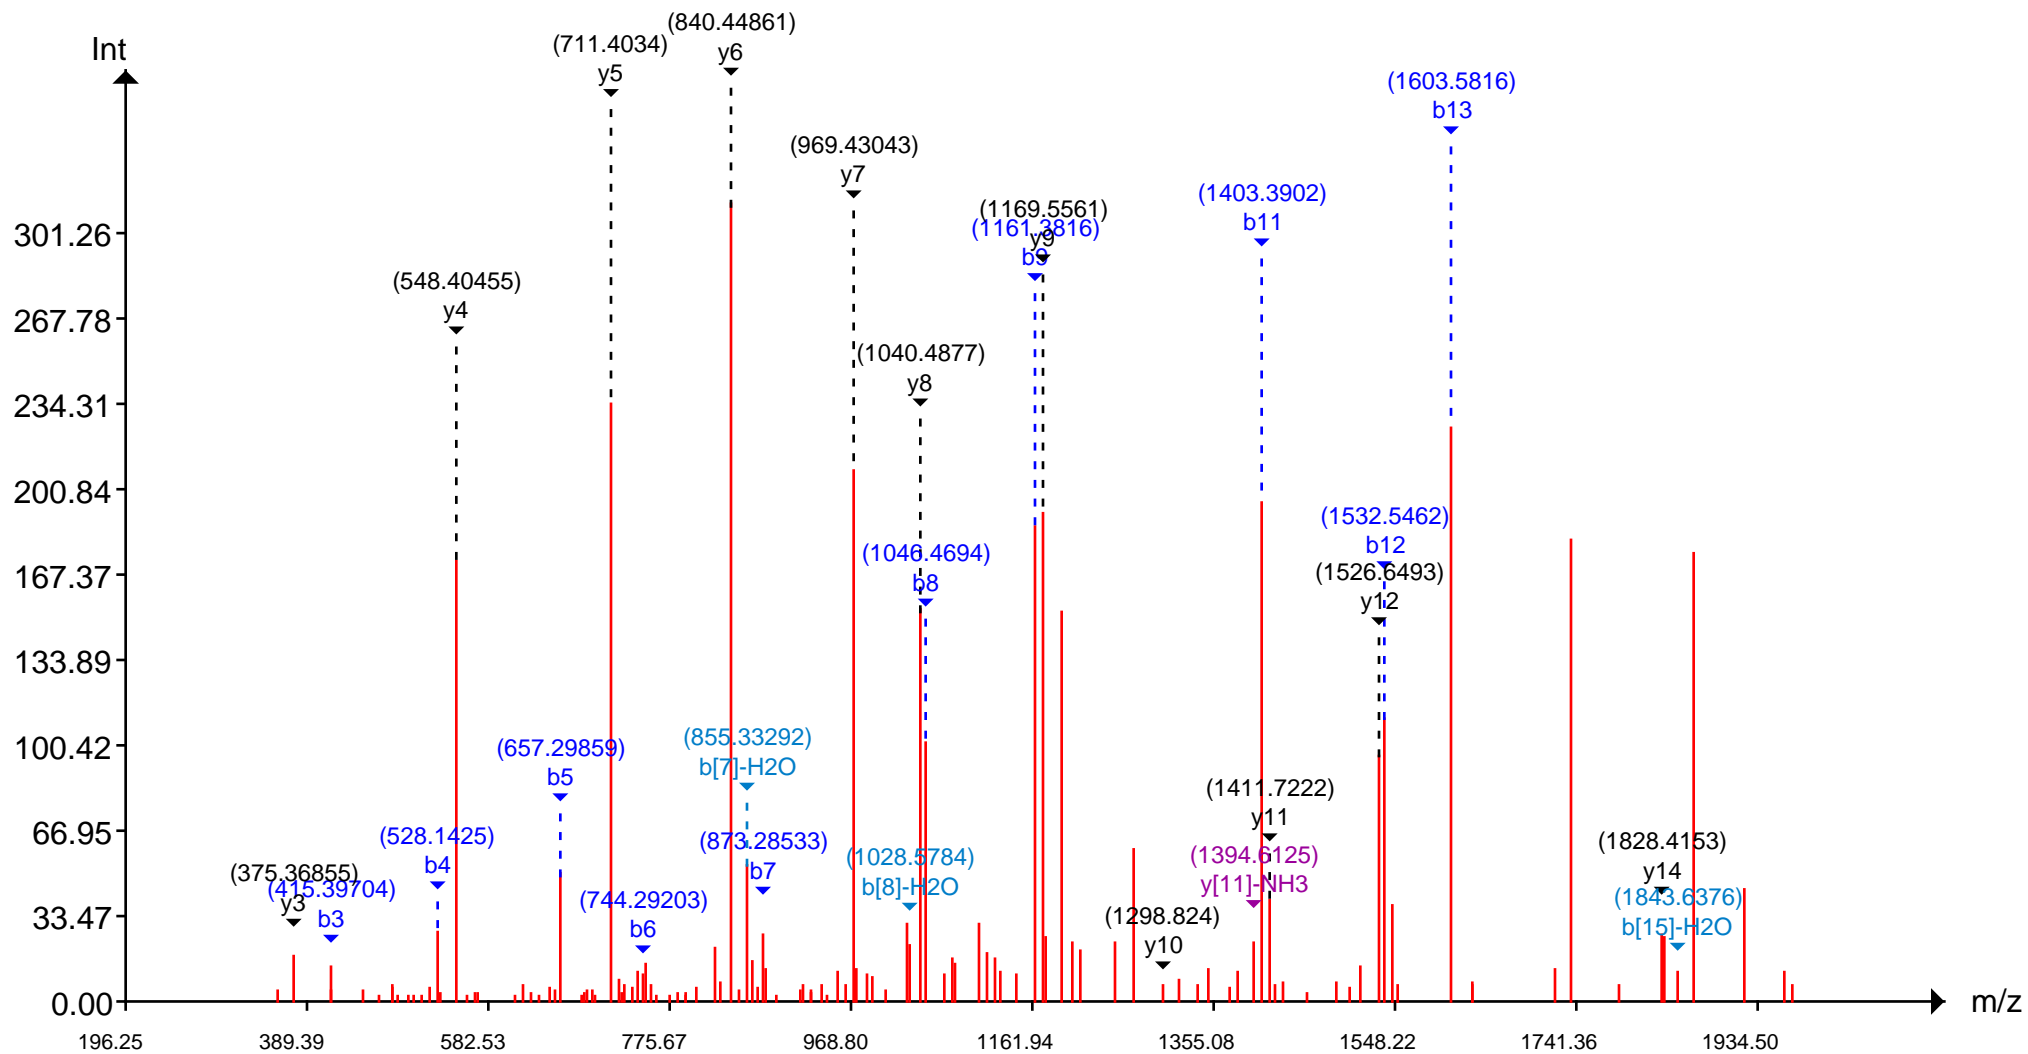

## Info

|                          |                                                |                           |         |
|--------------------------|------------------------------------------------|---------------------------|---------|
| <b>Modified Sequence</b> | AcD3-QQILESEK<AcD3K*>DLEEAEEYK<AcD3K*>EAR-COOH | <b>Ion score</b>          | 66.04   |
| <b>Protein</b>           | P48428                                         | <b>Confidence level</b>   | 99.00%  |
| <b>Precursor m/z</b>     | 1286.6361                                      | <b>Identity Threshold</b> | 47.31   |
| <b>Charge</b>            | 2+                                             | <b>Mass error</b>         | 0.00391 |

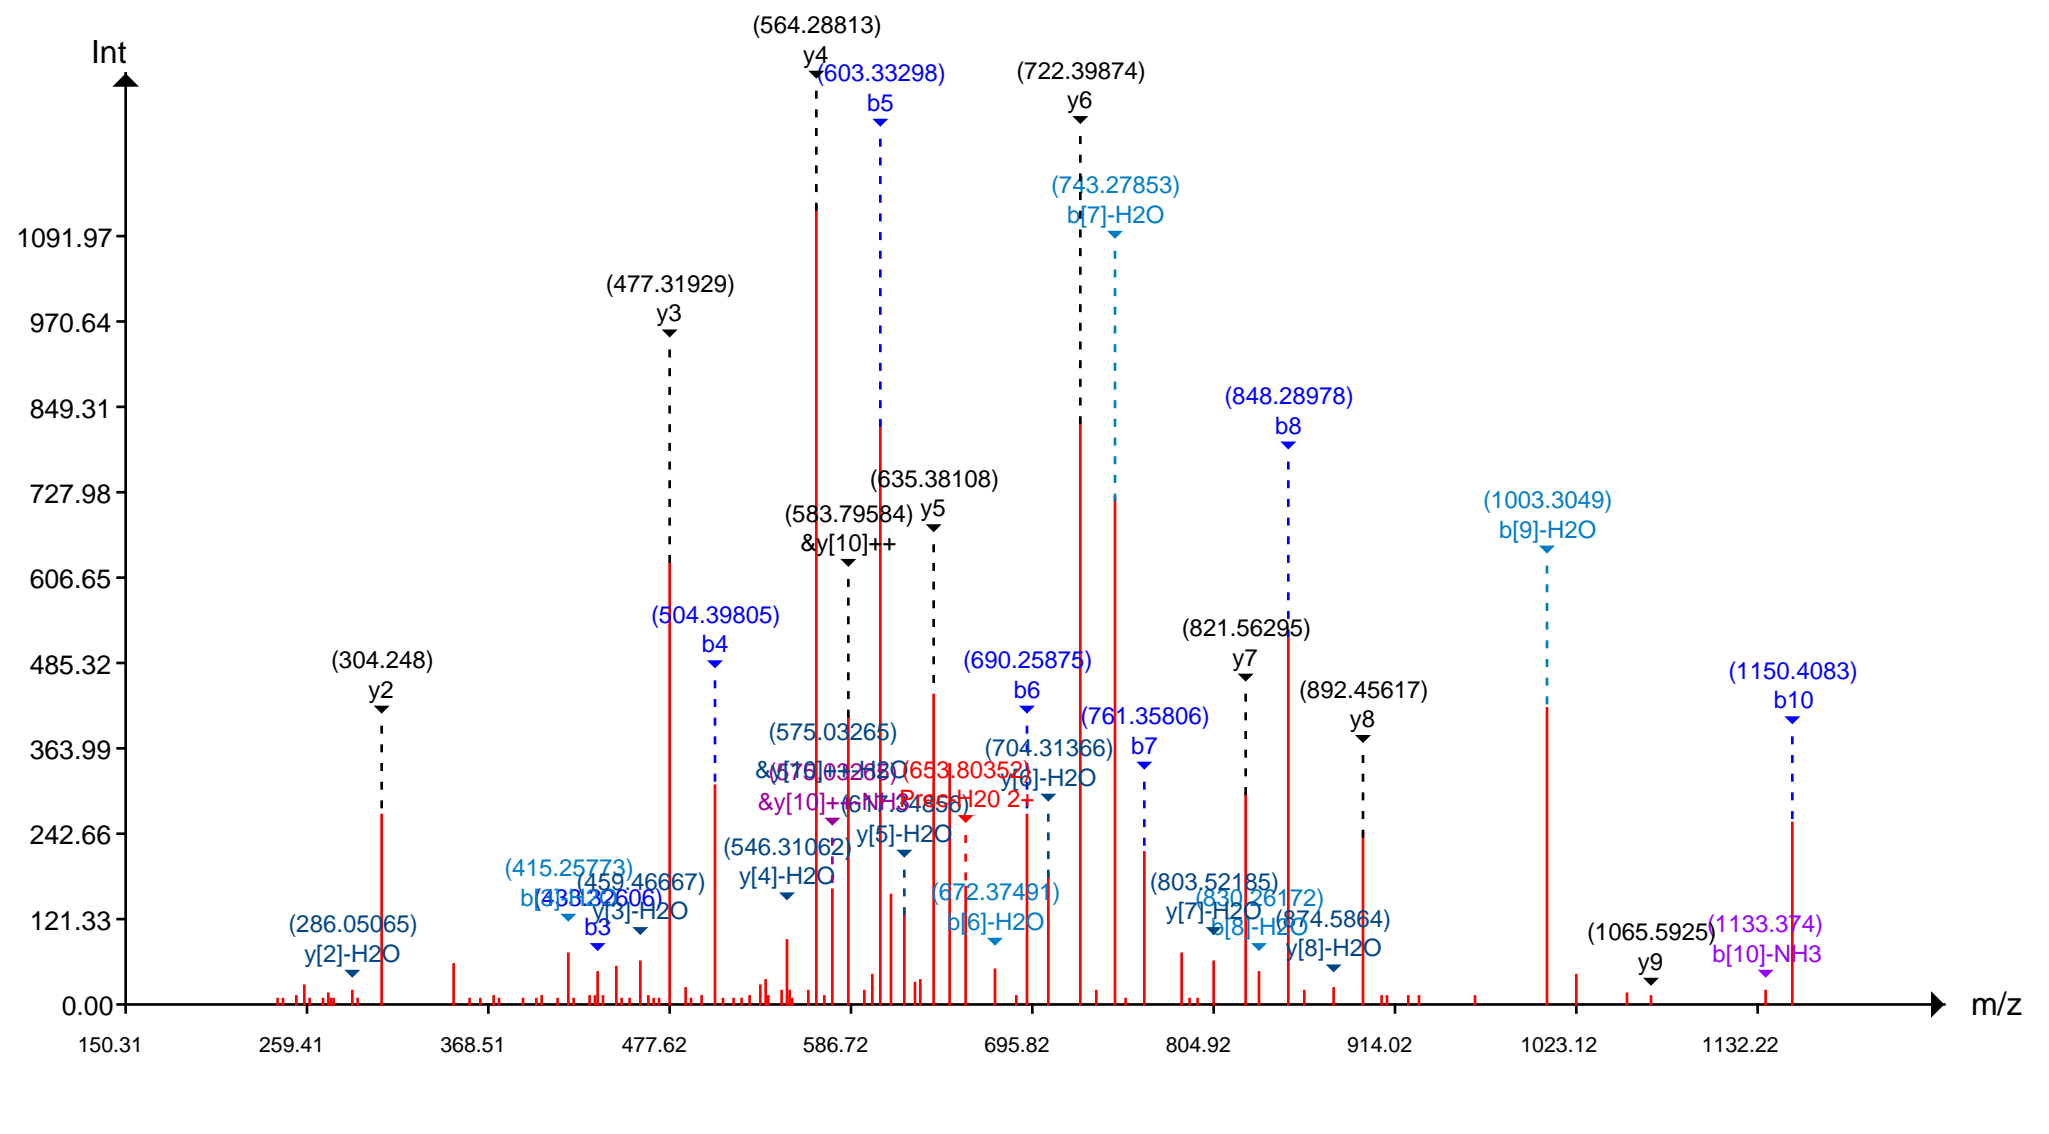

| Info                     |                                       |                           |        |
|--------------------------|---------------------------------------|---------------------------|--------|
| <b>Modified Sequence</b> | AcD3-ITK<AcD3K*>AVSASK<AcD3K*>ER-COOH | <b>Ion score</b>          | 73.1   |
| <b>Protein</b>           | P43276                                | <b>Confidence level</b>   | 99.00% |
| <b>Precursor m/z</b>     | 662.8931                              | <b>Identity Threshold</b> | 44.95  |
| <b>Charge</b>            | 2+                                    | <b>Mass error</b>         | 8.5E-4 |

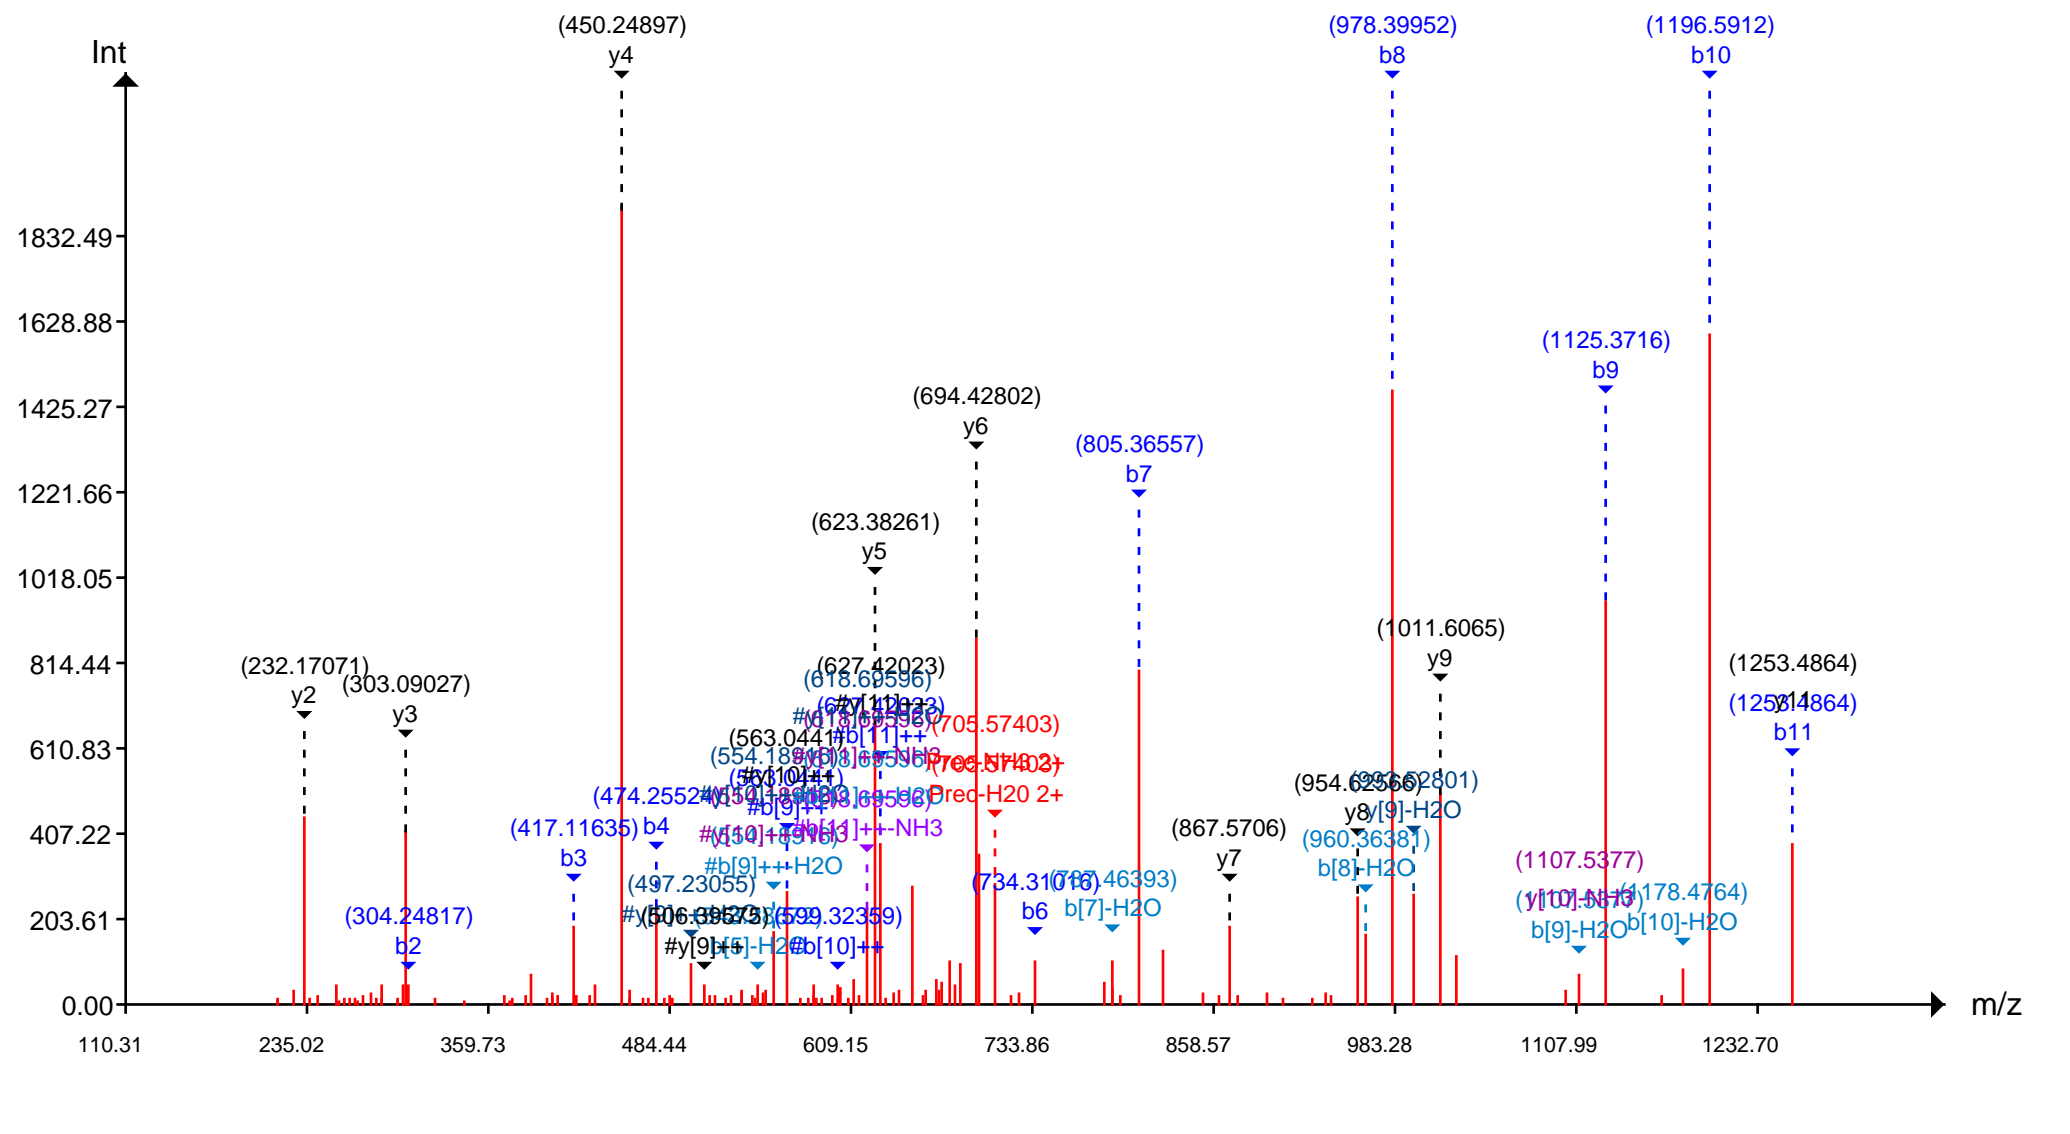

| Info                     |                                        |                           |          |
|--------------------------|----------------------------------------|---------------------------|----------|
| <b>Modified Sequence</b> | AcD3-EELGSK<AcD3K*>AK<AcD3K*>FAGR-COOH | <b>Ion score</b>          | 70.4     |
| <b>Protein</b>           | P17182                                 | <b>Confidence level</b>   | 99.00%   |
| <b>Precursor m/z</b>     | 714.39625                              | <b>Identity Threshold</b> | 47.38    |
| <b>Charge</b>            | 2+                                     | <b>Mass error</b>         | 0.001337 |

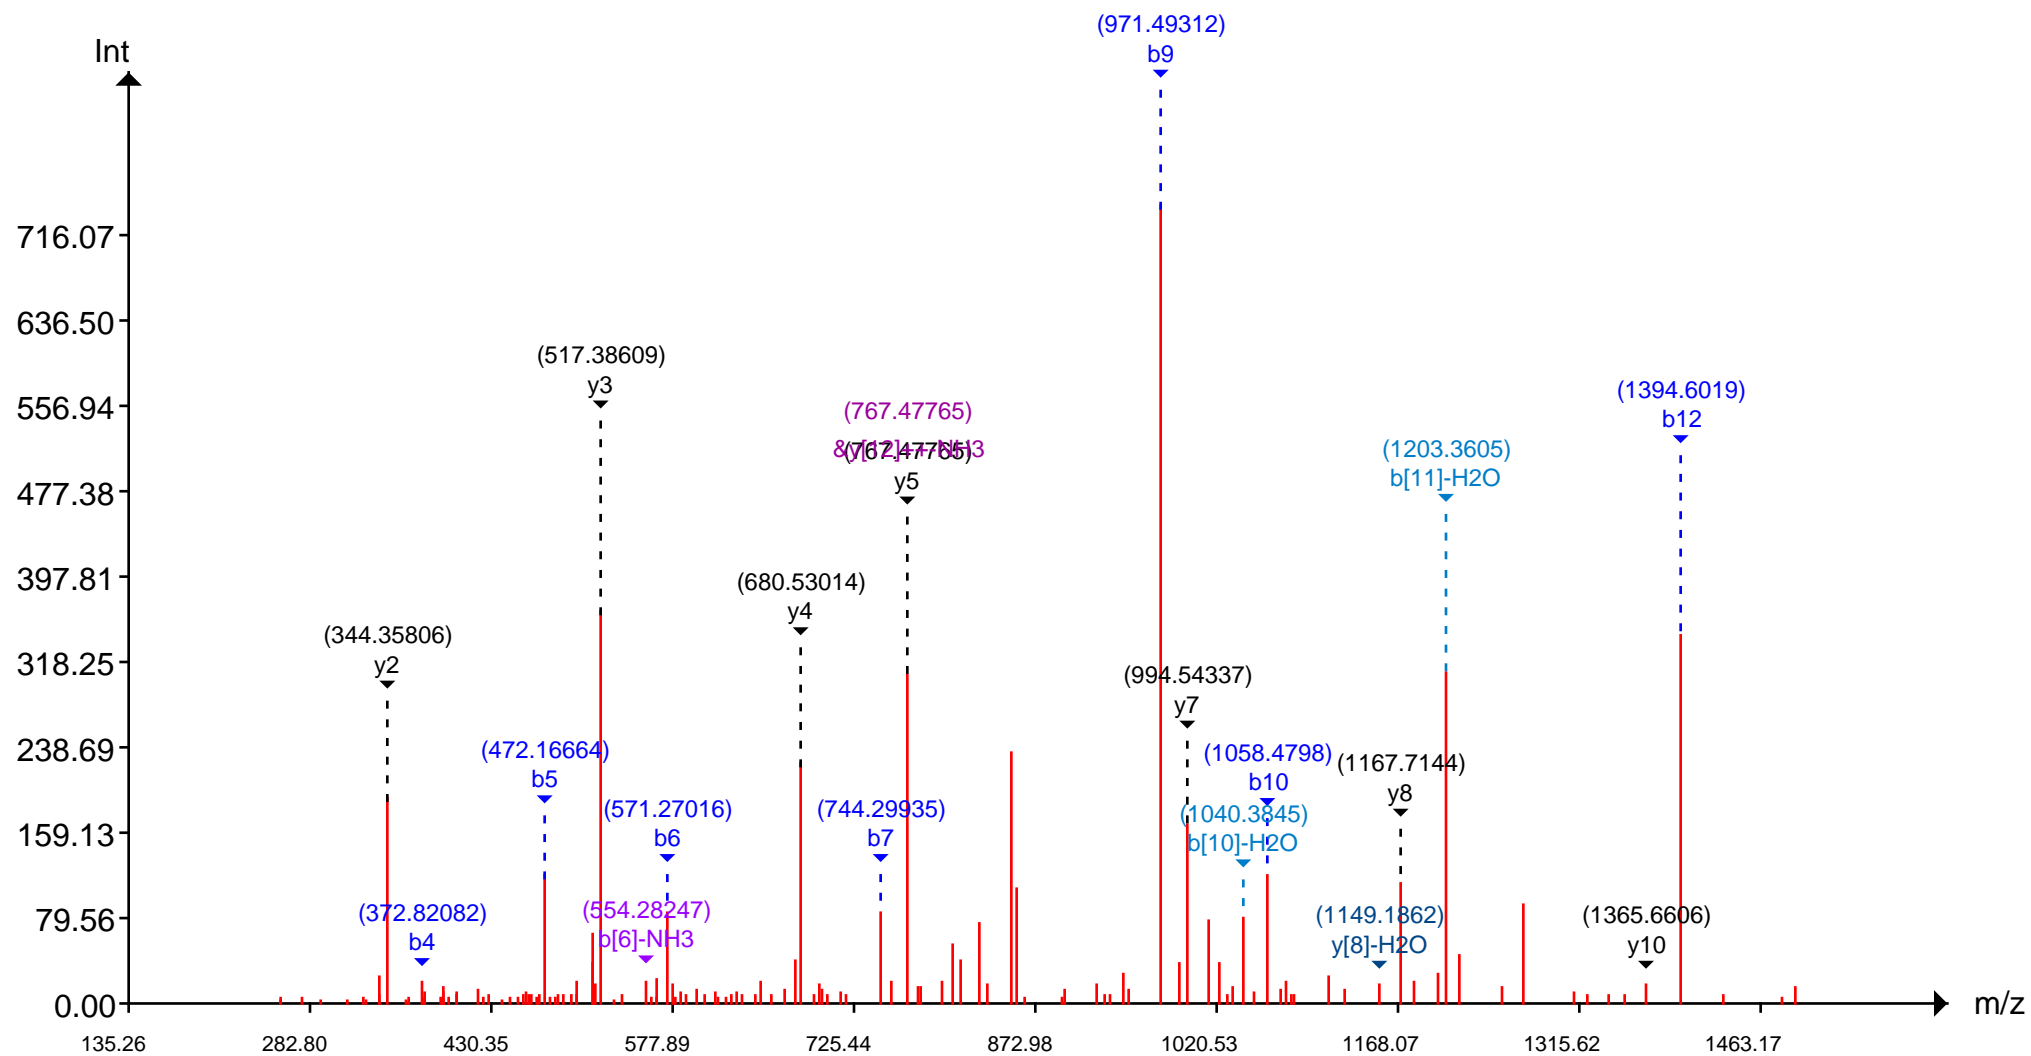

## Info

|                          |                                               |                           |          |
|--------------------------|-----------------------------------------------|---------------------------|----------|
| <b>Modified Sequence</b> | AcD3-AAANVVK<AcD3K*>NISYK<AcD3K*>YR<C13>-COOH | <b>Ion score</b>          | 45.54    |
| <b>Protein</b>           | P28076, O35522                                | <b>Confidence level</b>   | 99.00%   |
| <b>Precursor m/z</b>     | 869.50158                                     | <b>Identity Threshold</b> | 45.39    |
| <b>Charge</b>            | 2+                                            | <b>Mass error</b>         | 0.001944 |

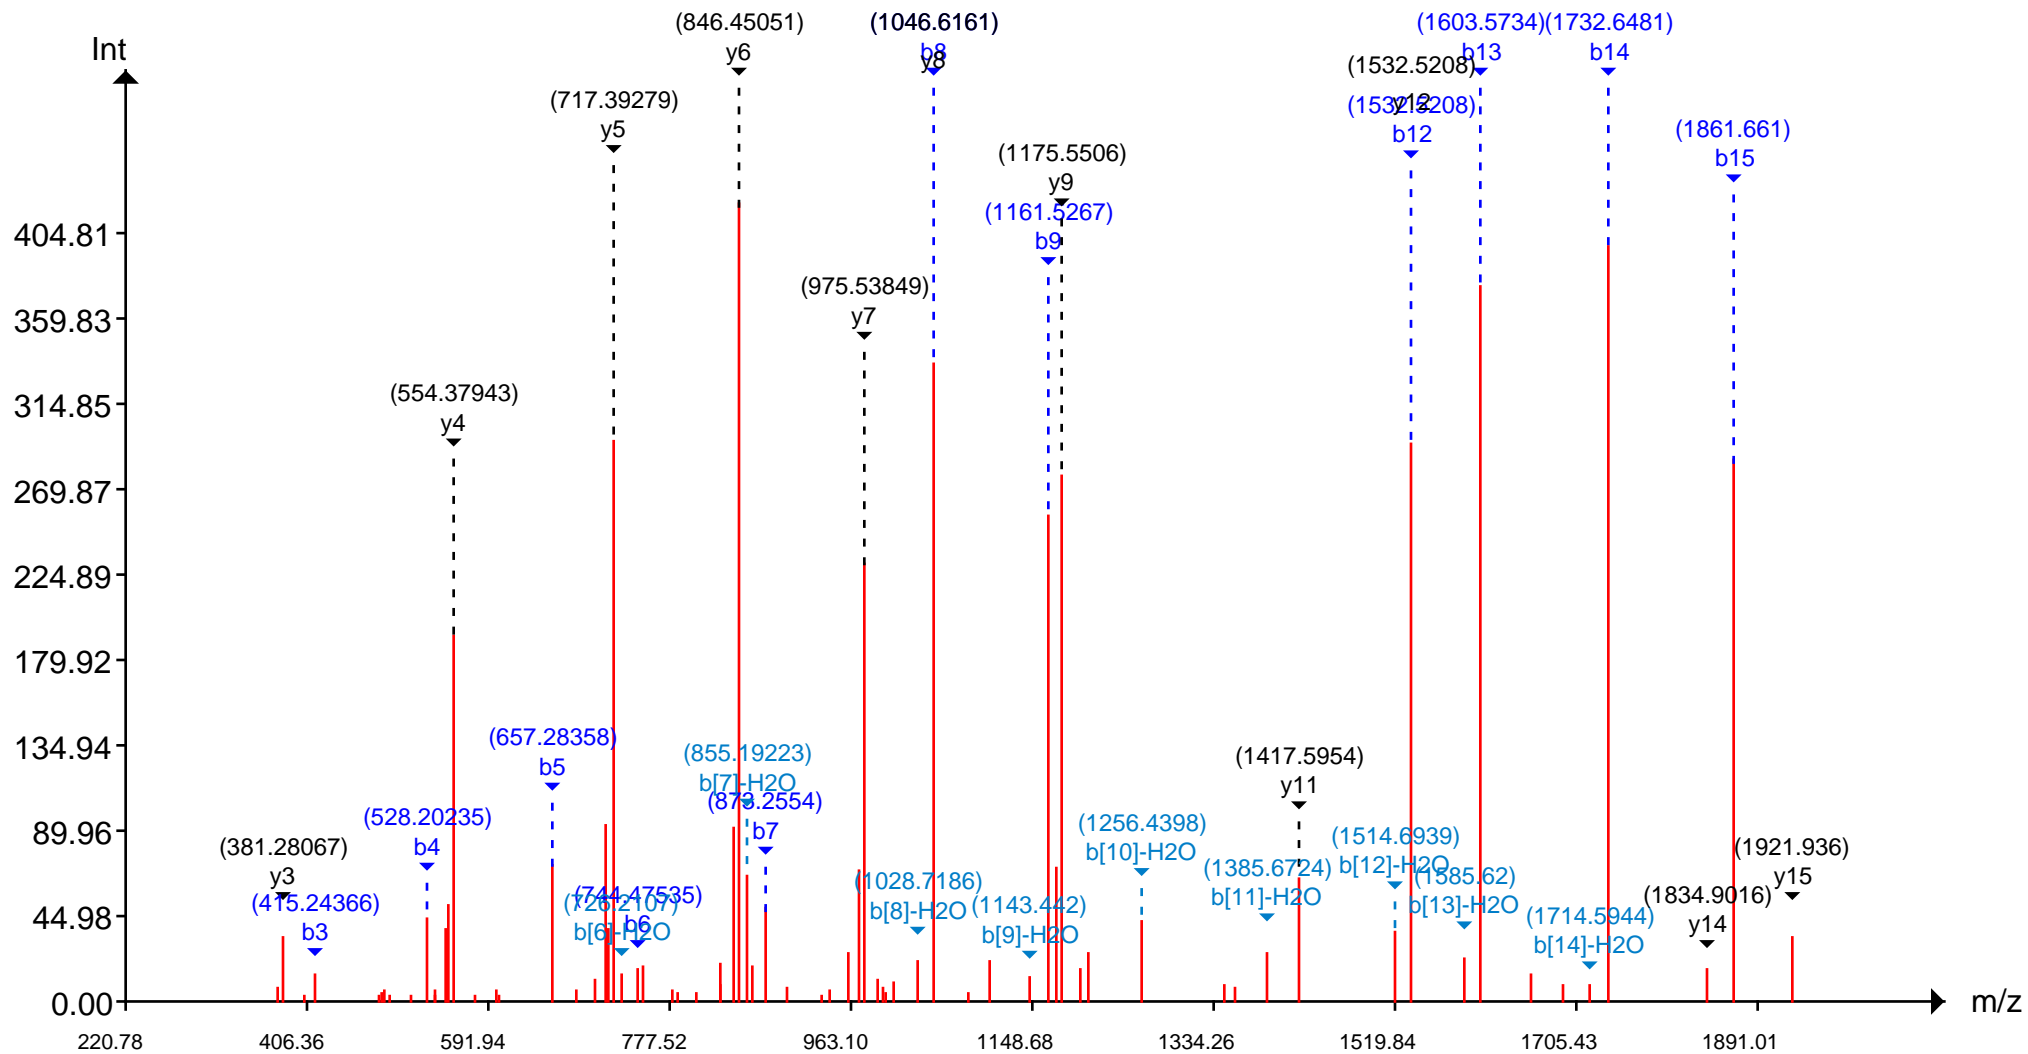

## Info

|                          |                                                    |                           |          |
|--------------------------|----------------------------------------------------|---------------------------|----------|
| <b>Modified Sequence</b> | AcD3-QQILESEK<AcD3K*>DLEEAEYK<AcD3K*>EAR<C13>-COOH | <b>Ion score</b>          | 78.26    |
| <b>Protein</b>           | P48428                                             | <b>Confidence level</b>   | 99.00%   |
| <b>Precursor m/z</b>     | 1289.6462                                          | <b>Identity Threshold</b> | 47.57    |
| <b>Charge</b>            | 2+                                                 | <b>Mass error</b>         | 0.003968 |



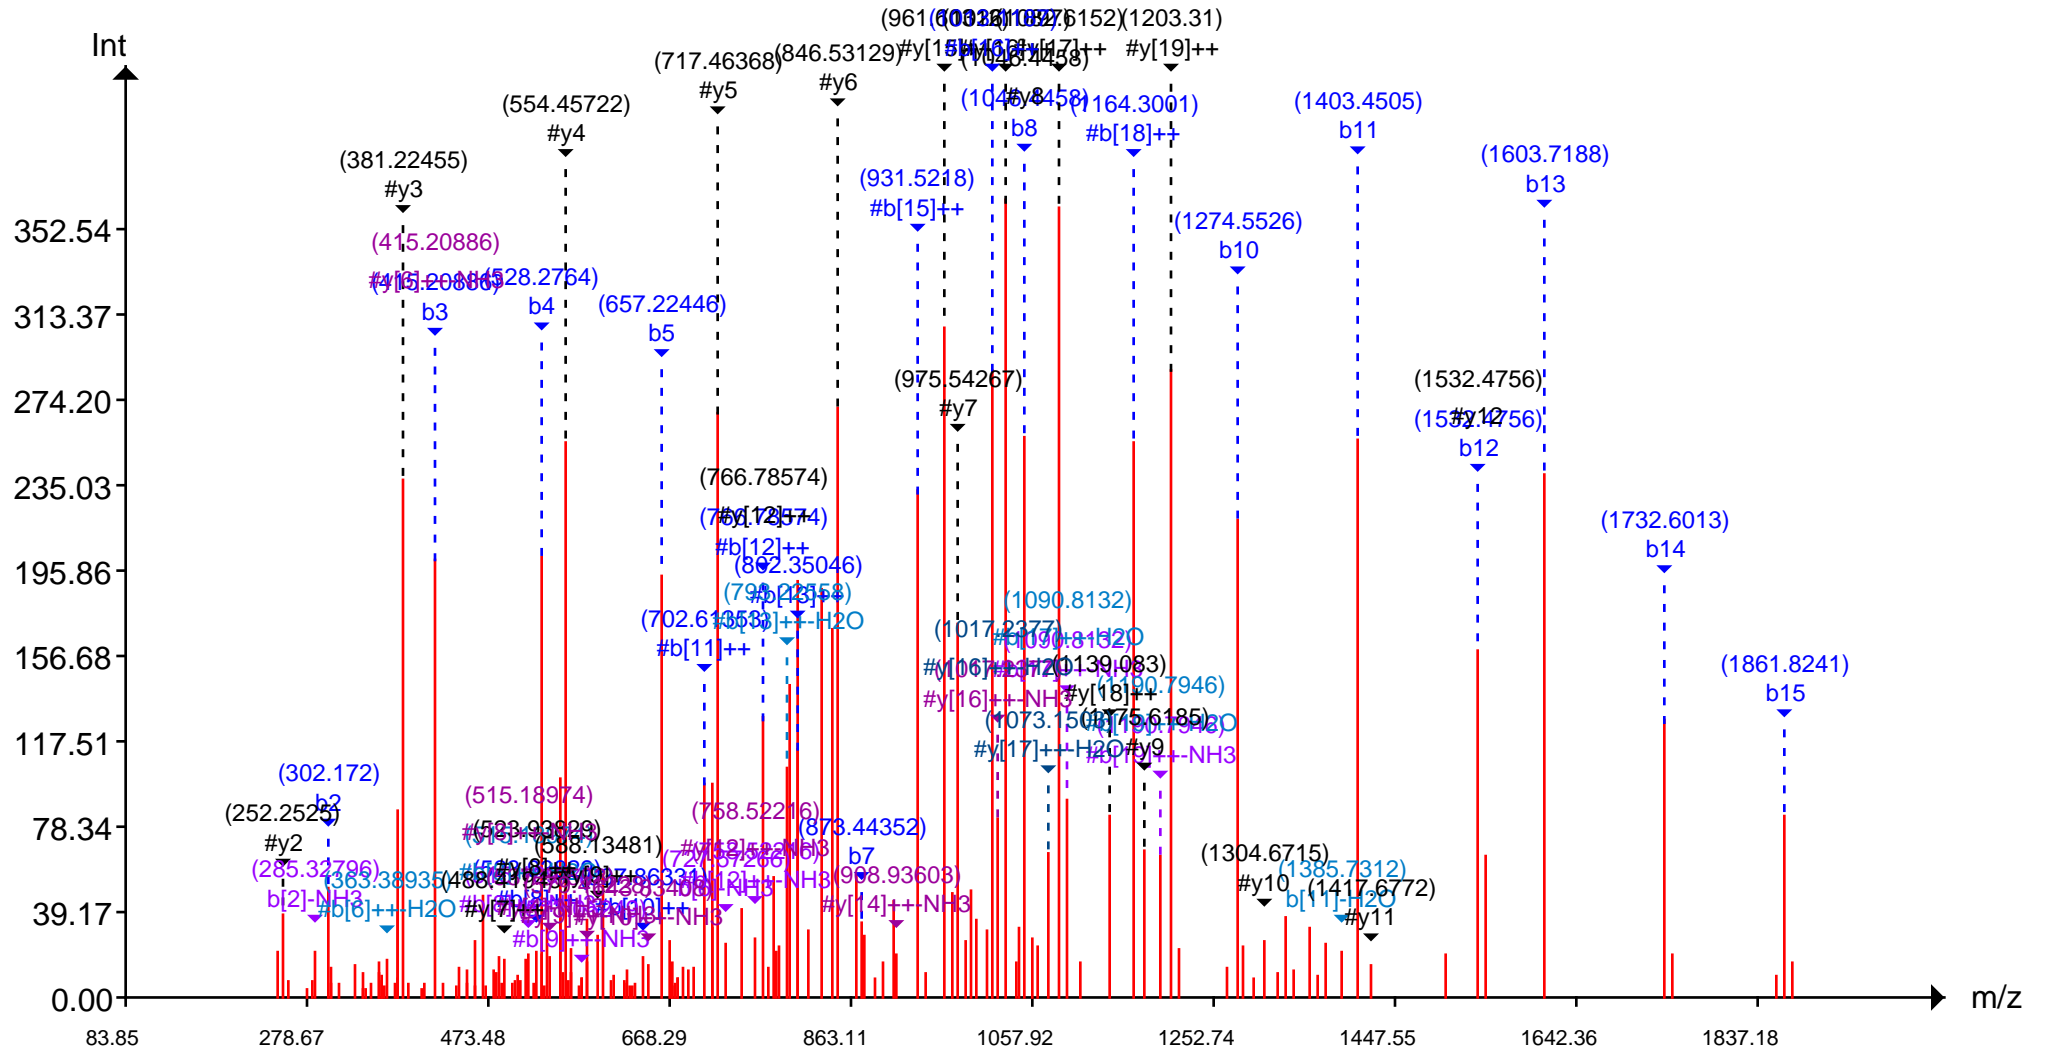

| Info                     |                                                    |                           |          |
|--------------------------|----------------------------------------------------|---------------------------|----------|
| <b>Modified Sequence</b> | AcD3-QQILESEK<AcD3K*>DLEEAEYK<AcD3K*>EAR<C13>-COOH | <b>Ion score</b>          | 79.25    |
| <b>Protein</b>           | P48428                                             | <b>Confidence level</b>   | 99.00%   |
| <b>Precursor m/z</b>     | 860.09977                                          | <b>Identity Threshold</b> | 47.56    |
| <b>Charge</b>            | 3+                                                 | <b>Mass error</b>         | 0.003602 |

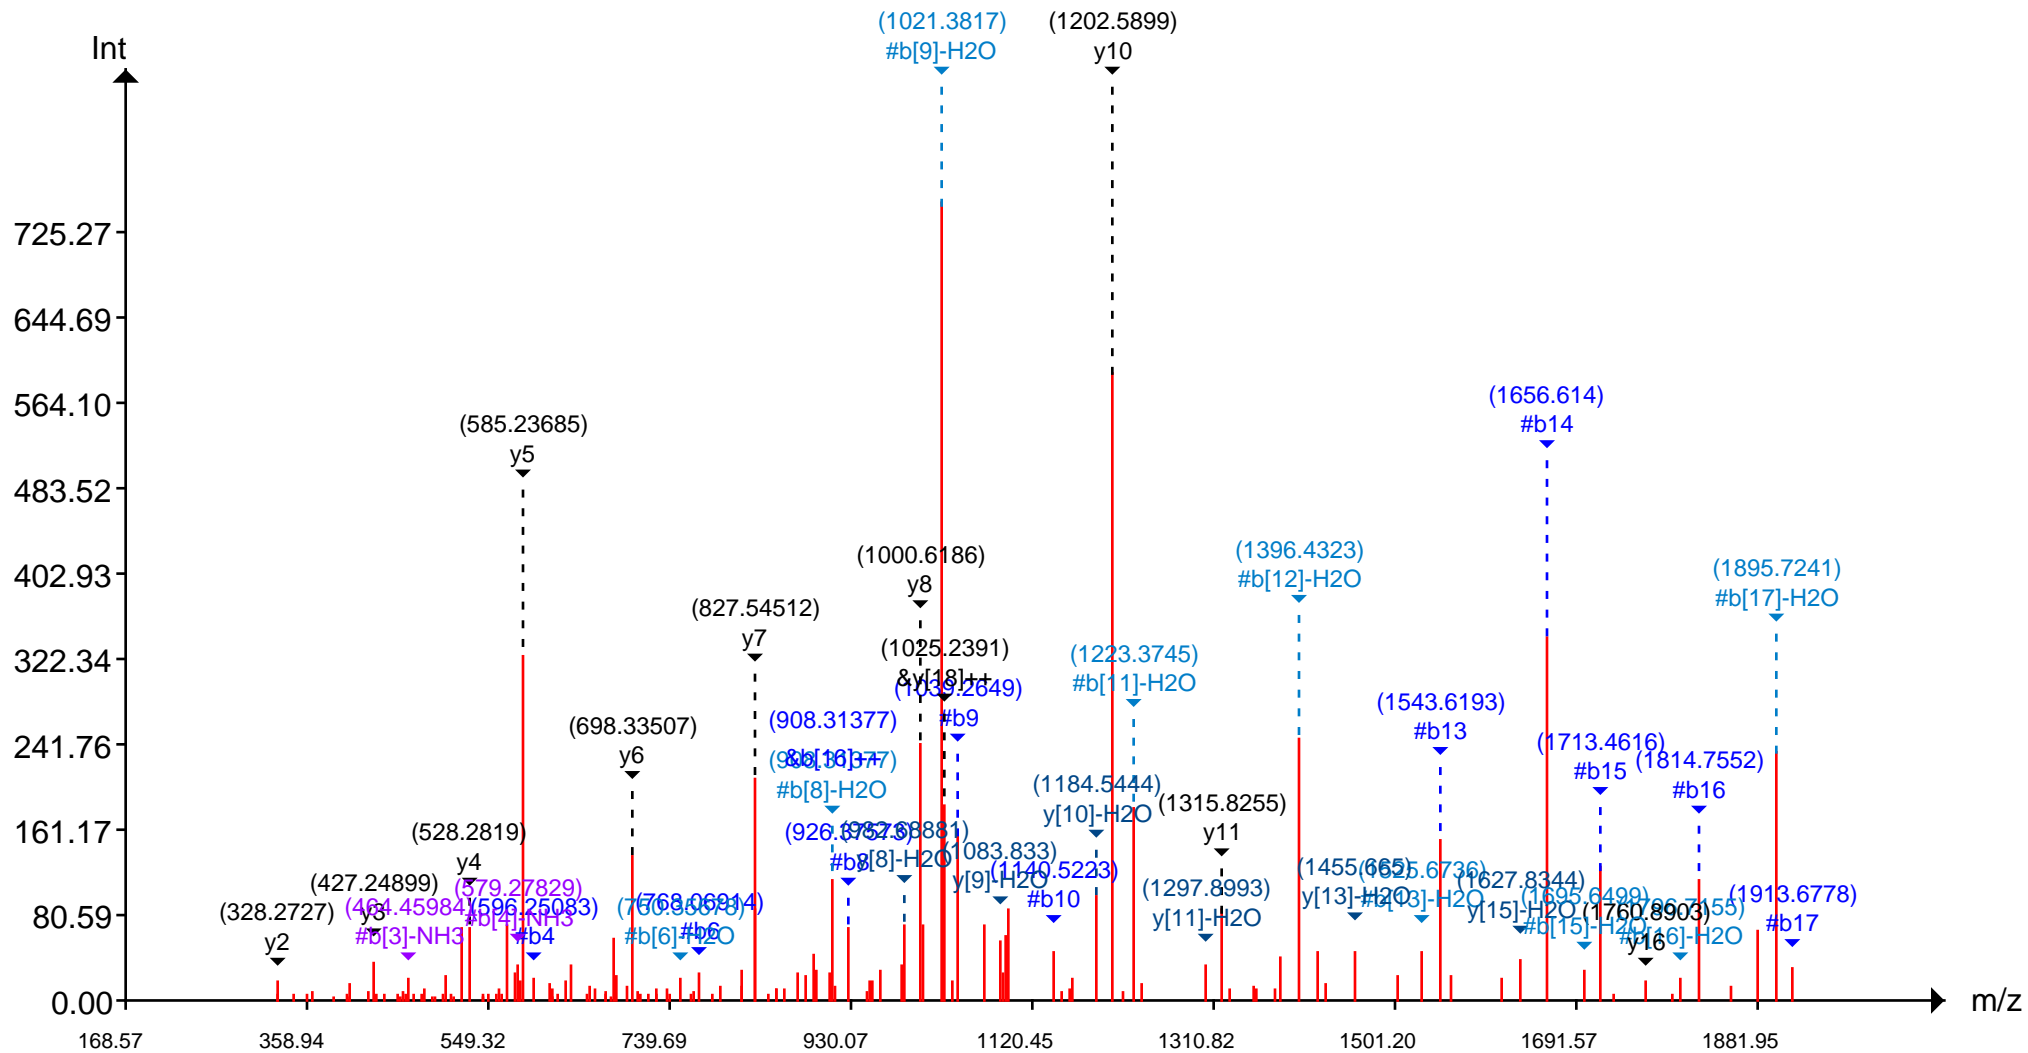

## Info

|                          |                                                          |                           |          |
|--------------------------|----------------------------------------------------------|---------------------------|----------|
| <b>Modified Sequence</b> | AcD3-FDK<AcD3K*>DGDGTITTK<AcD3K*>ELGTVM<MoX*>R<C13>-COOH | <b>Ion score</b>          | 63.16    |
| <b>Protein</b>           | P62204                                                   | <b>Confidence level</b>   | 99.00%   |
| <b>Precursor m/z</b>     | 1121.0728                                                | <b>Identity Threshold</b> | 47.96    |
| <b>Charge</b>            | 2+                                                       | <b>Mass error</b>         | 0.002203 |

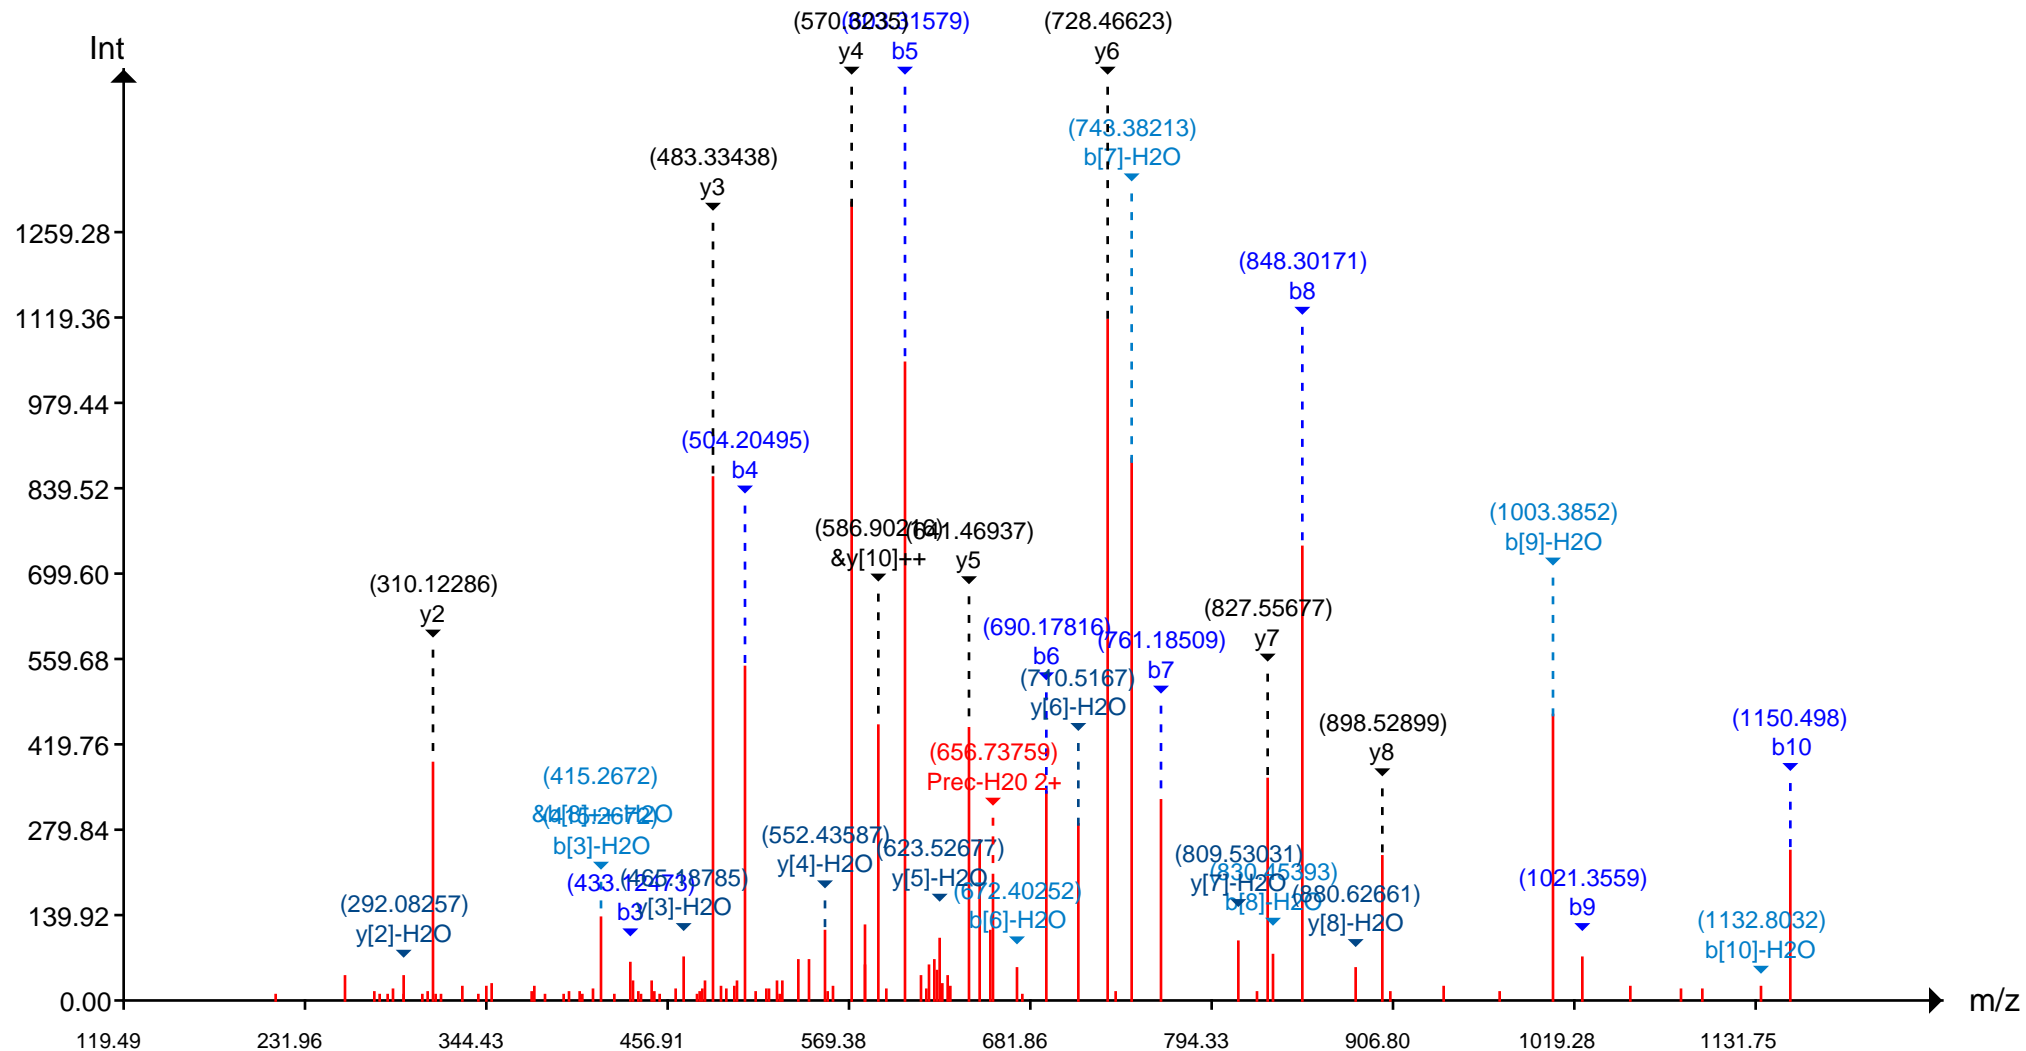

## Info

|                          |                                            |                           |          |
|--------------------------|--------------------------------------------|---------------------------|----------|
| <b>Modified Sequence</b> | AcD3-ITK<AcD3K*>AVSASK<AcD3K*>ER<C13>-COOH | <b>Ion score</b>          | 55.5     |
| <b>Protein</b>           | P43276                                     | <b>Confidence level</b>   | 99.00%   |
| <b>Precursor m/z</b>     | 665.90253                                  | <b>Identity Threshold</b> | 44.00    |
| <b>Charge</b>            | 2+                                         | <b>Mass error</b>         | -4.31E-4 |

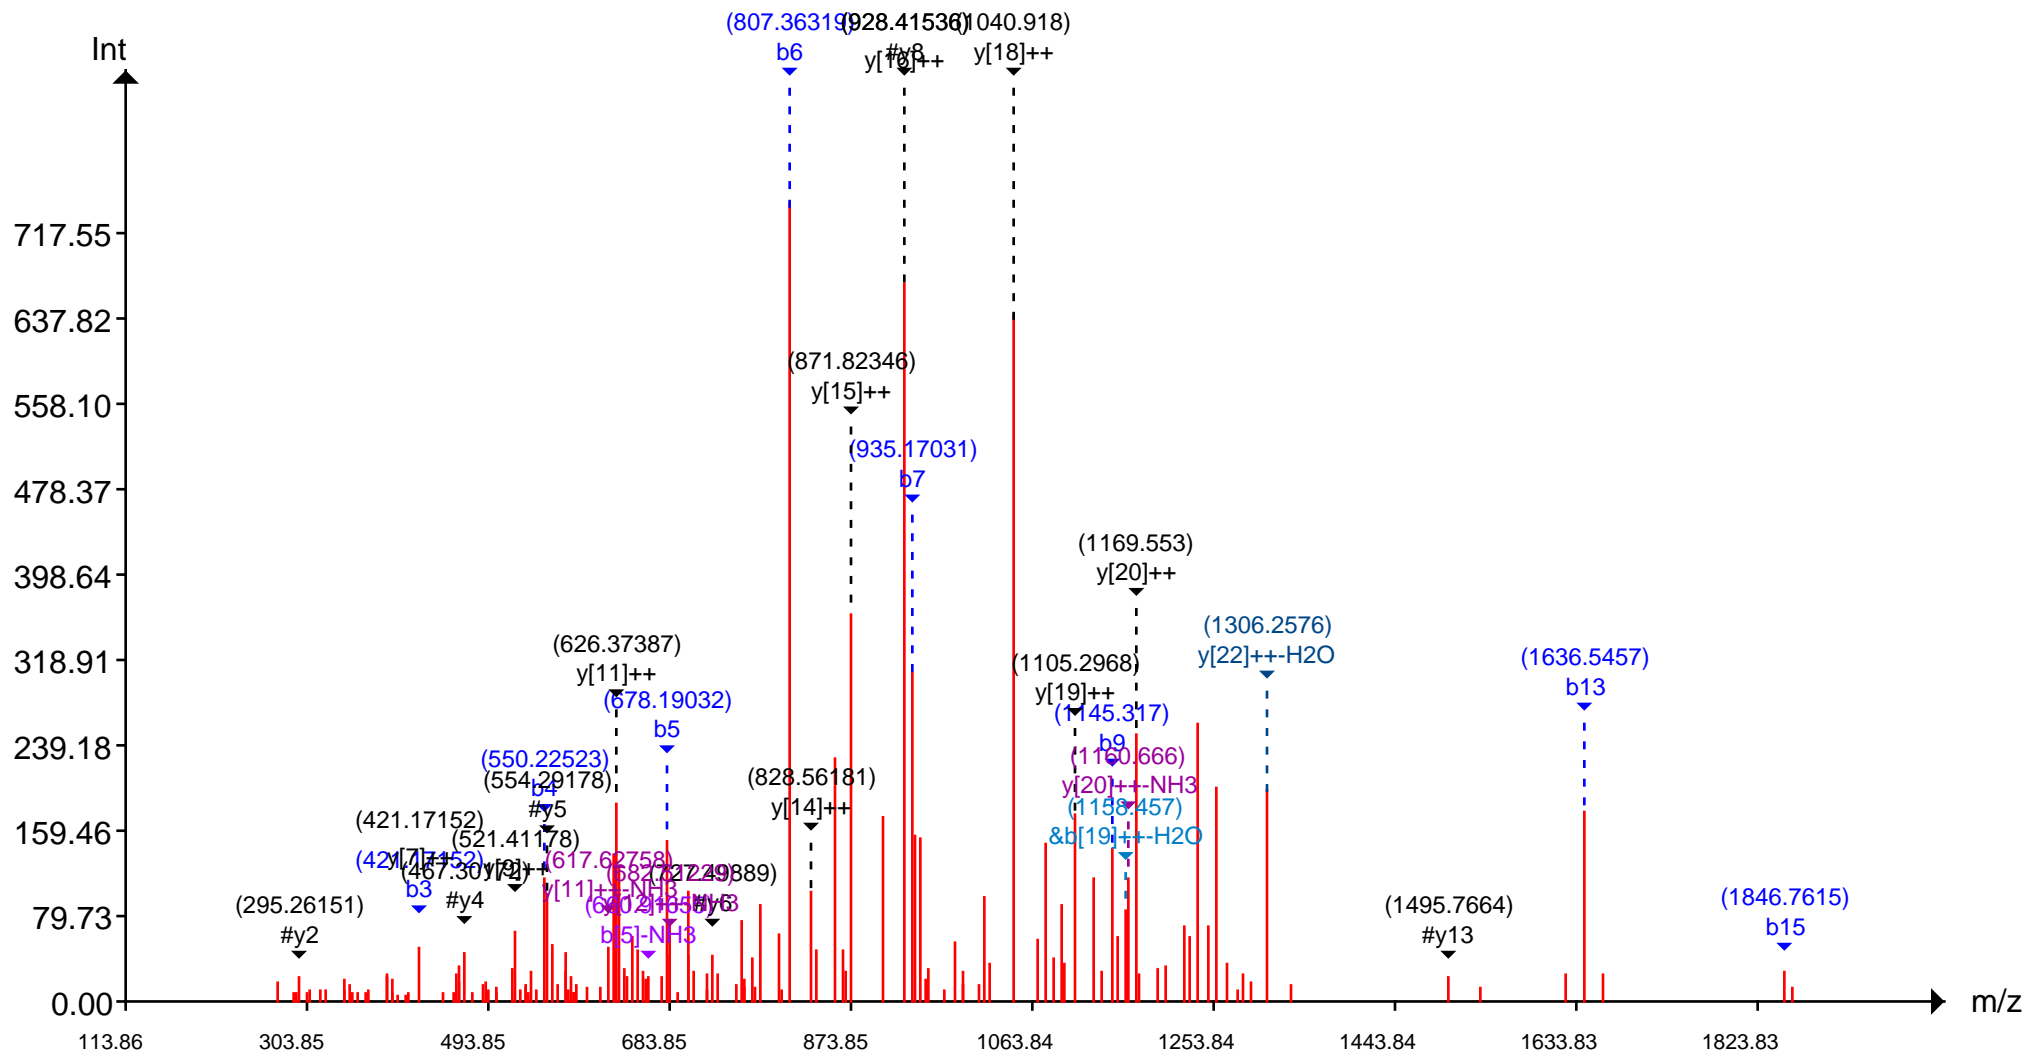

## Info

|                          |                                                       |                           |          |
|--------------------------|-------------------------------------------------------|---------------------------|----------|
| <b>Modified Sequence</b> | AcD3-LVYEQEQPLSC<Cmm*>DEPILSNK<AcD3K*>SGDNR<C13>-COOH | <b>Ion score</b>          | 55.27    |
| <b>Protein</b>           | P70296                                                | <b>Confidence level</b>   | 99.00%   |
| <b>Precursor m/z</b>     | 963.13831                                             | <b>Identity Threshold</b> | 46.84    |
| <b>Charge</b>            | 3+                                                    | <b>Mass error</b>         | 0.001165 |

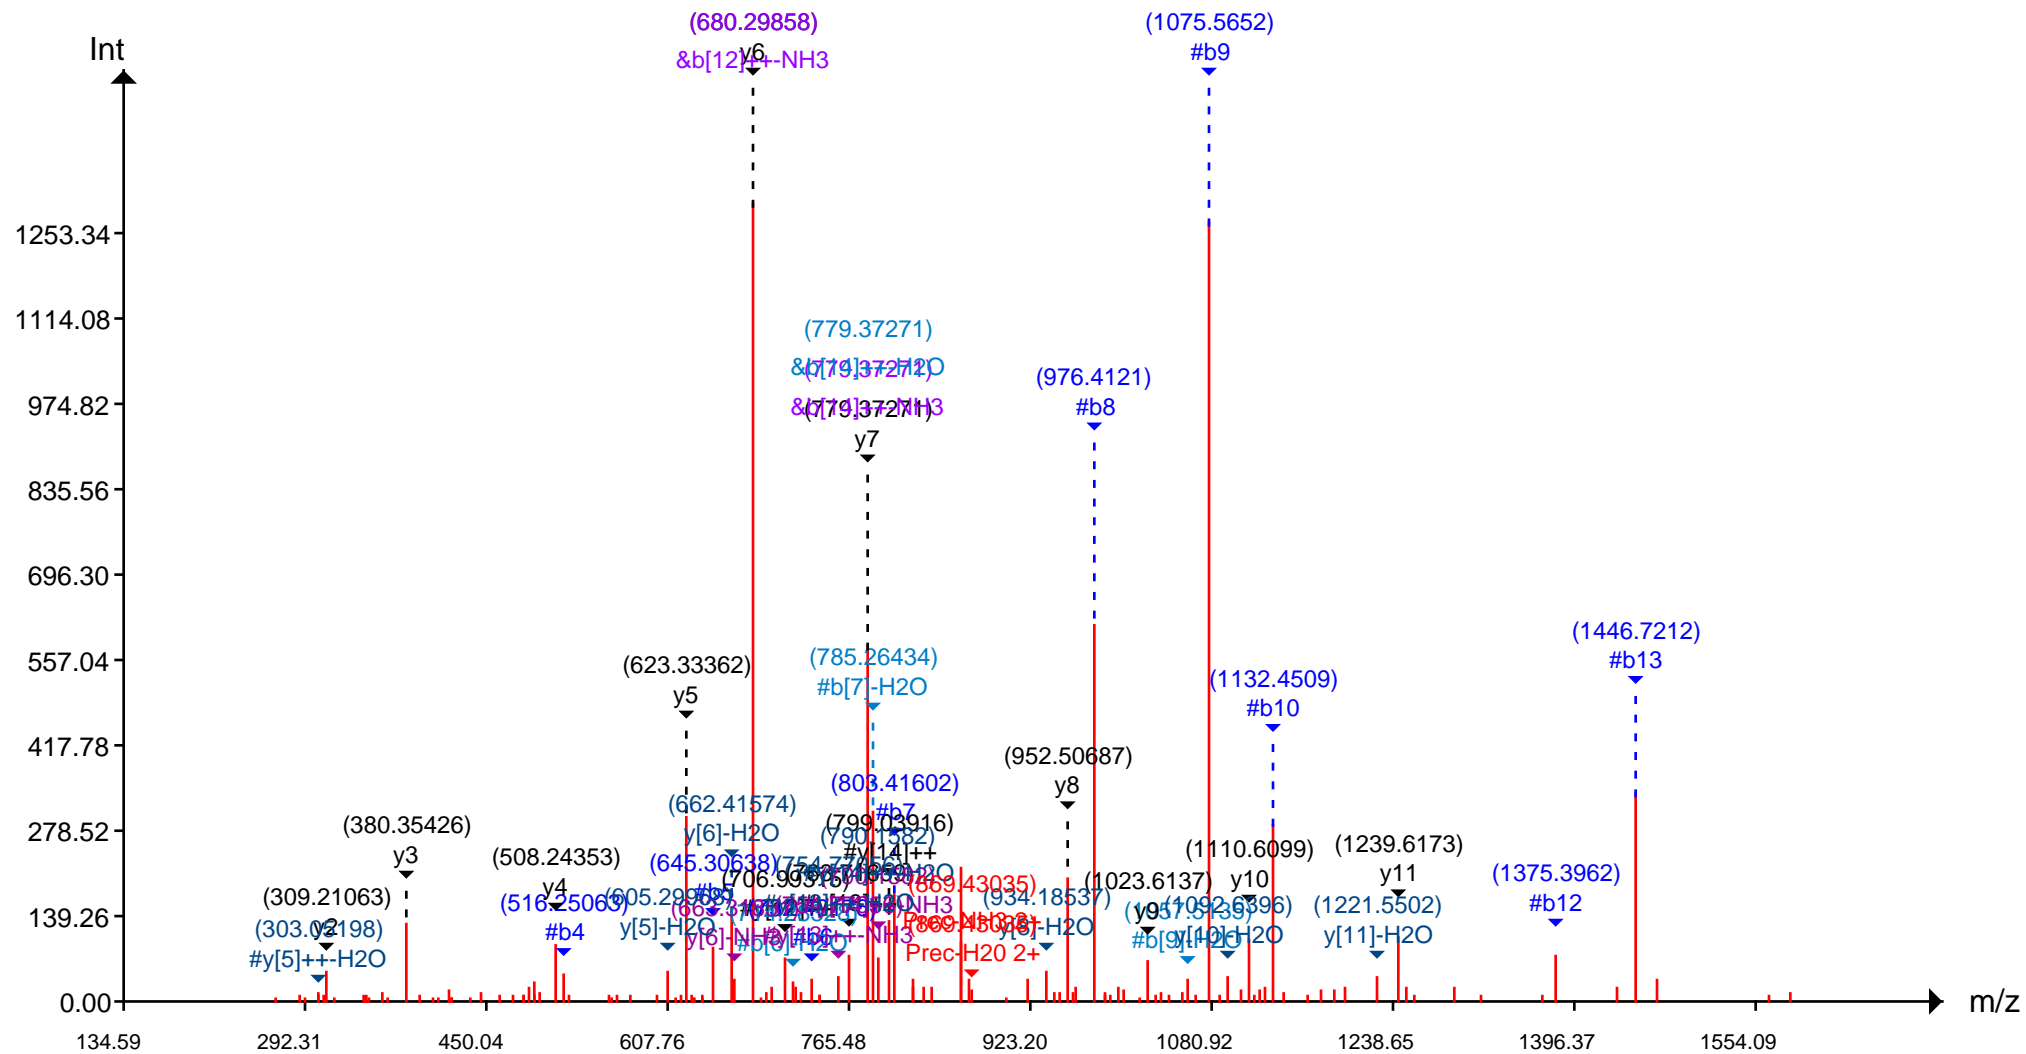

## Info

|                          |                                                |                           |          |
|--------------------------|------------------------------------------------|---------------------------|----------|
| <b>Modified Sequence</b> | AcD3-IAIK<AcD3K*>ESAK<AcD3K*>VGDQAQR<C13>-COOH | <b>Ion score</b>          | 75.97    |
| <b>Protein</b>           | Q99JY9                                         | <b>Confidence level</b>   | 99.00%   |
| <b>Precursor m/z</b>     | 878.00766                                      | <b>Identity Threshold</b> | 45.10    |
| <b>Charge</b>            | 2+                                             | <b>Mass error</b>         | 0.002797 |

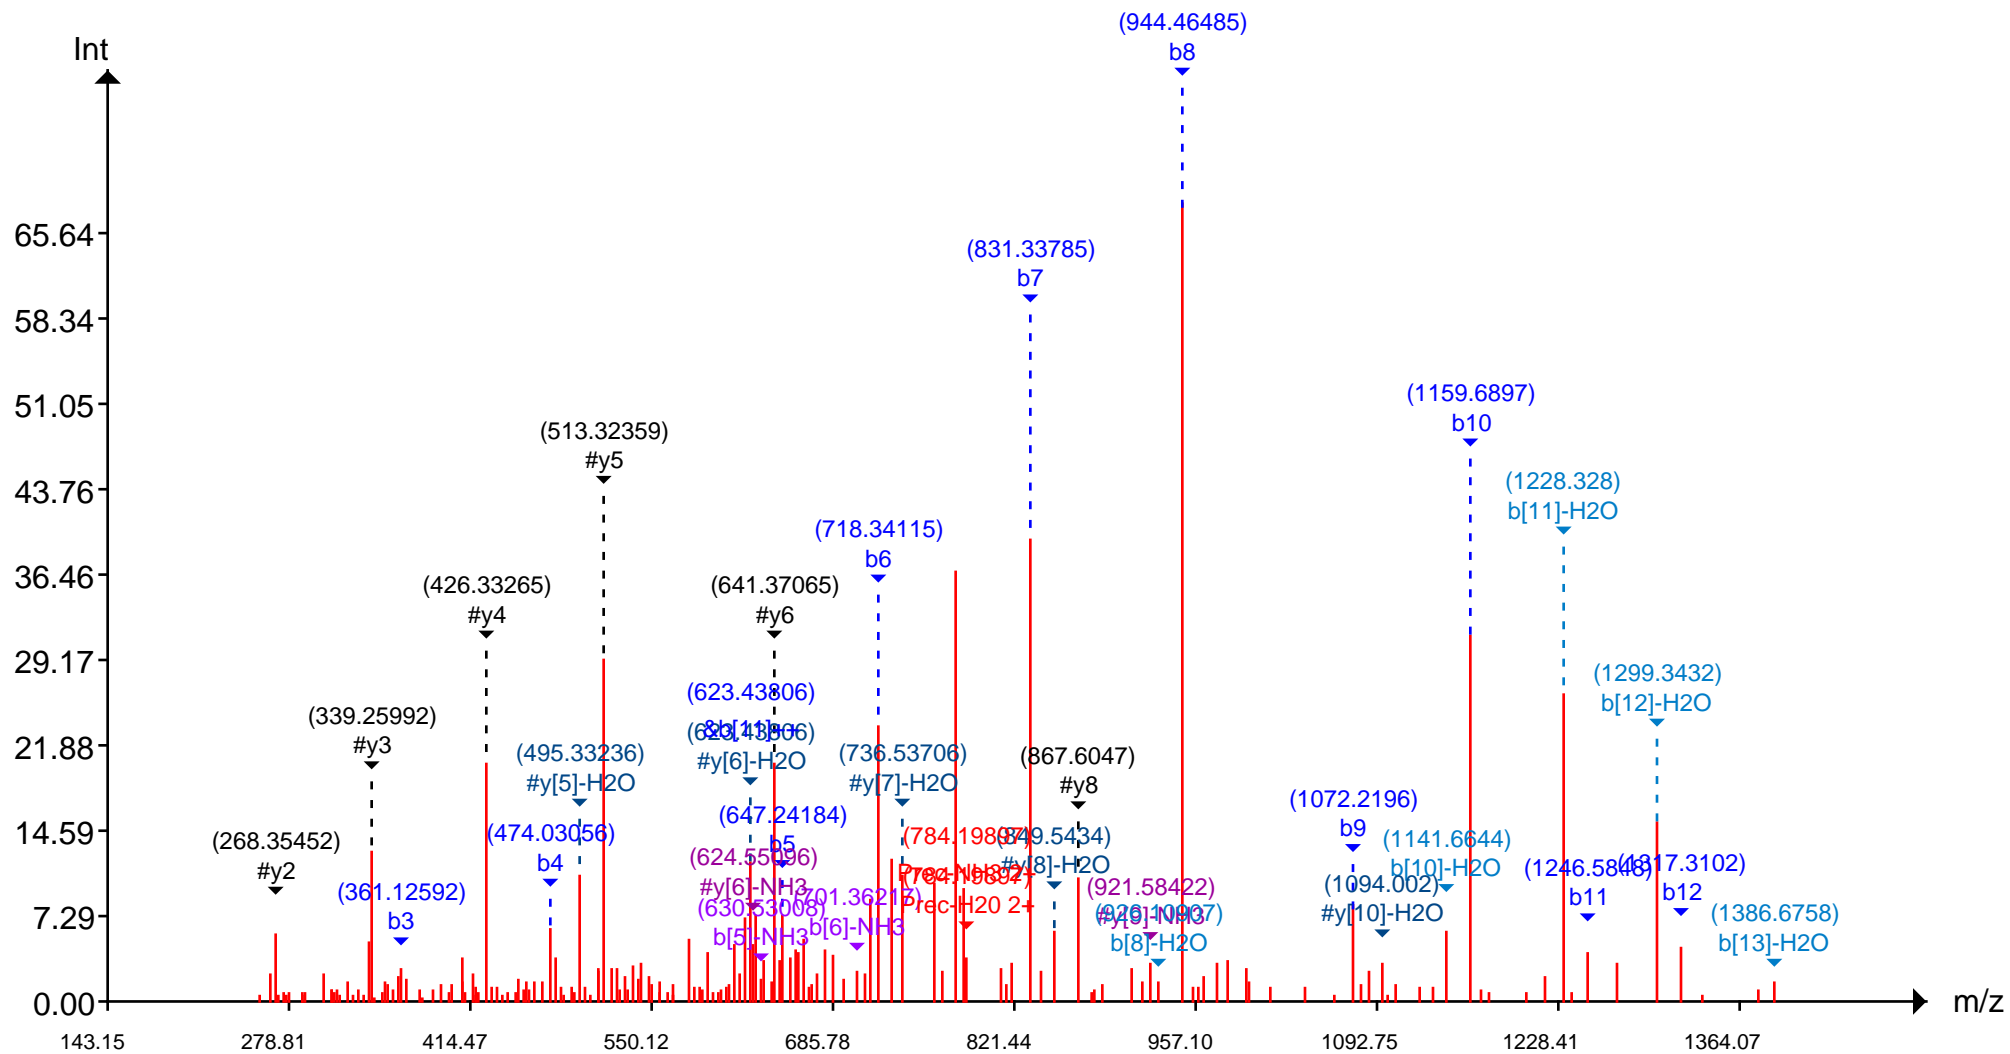

## Info

|                          |                                       |                           |          |
|--------------------------|---------------------------------------|---------------------------|----------|
| <b>Modified Sequence</b> | AcD3-DAELK<AcD3K*>ALLQSSASR<C13>-COOH | <b>Ion score</b>          | 83.06    |
| <b>Protein</b>           | P50580                                | <b>Confidence level</b>   | 99.00%   |
| <b>Precursor m/z</b>     | 792.94463                             | <b>Identity Threshold</b> | 47.04    |
| <b>Charge</b>            | 2+                                    | <b>Mass error</b>         | 0.001448 |

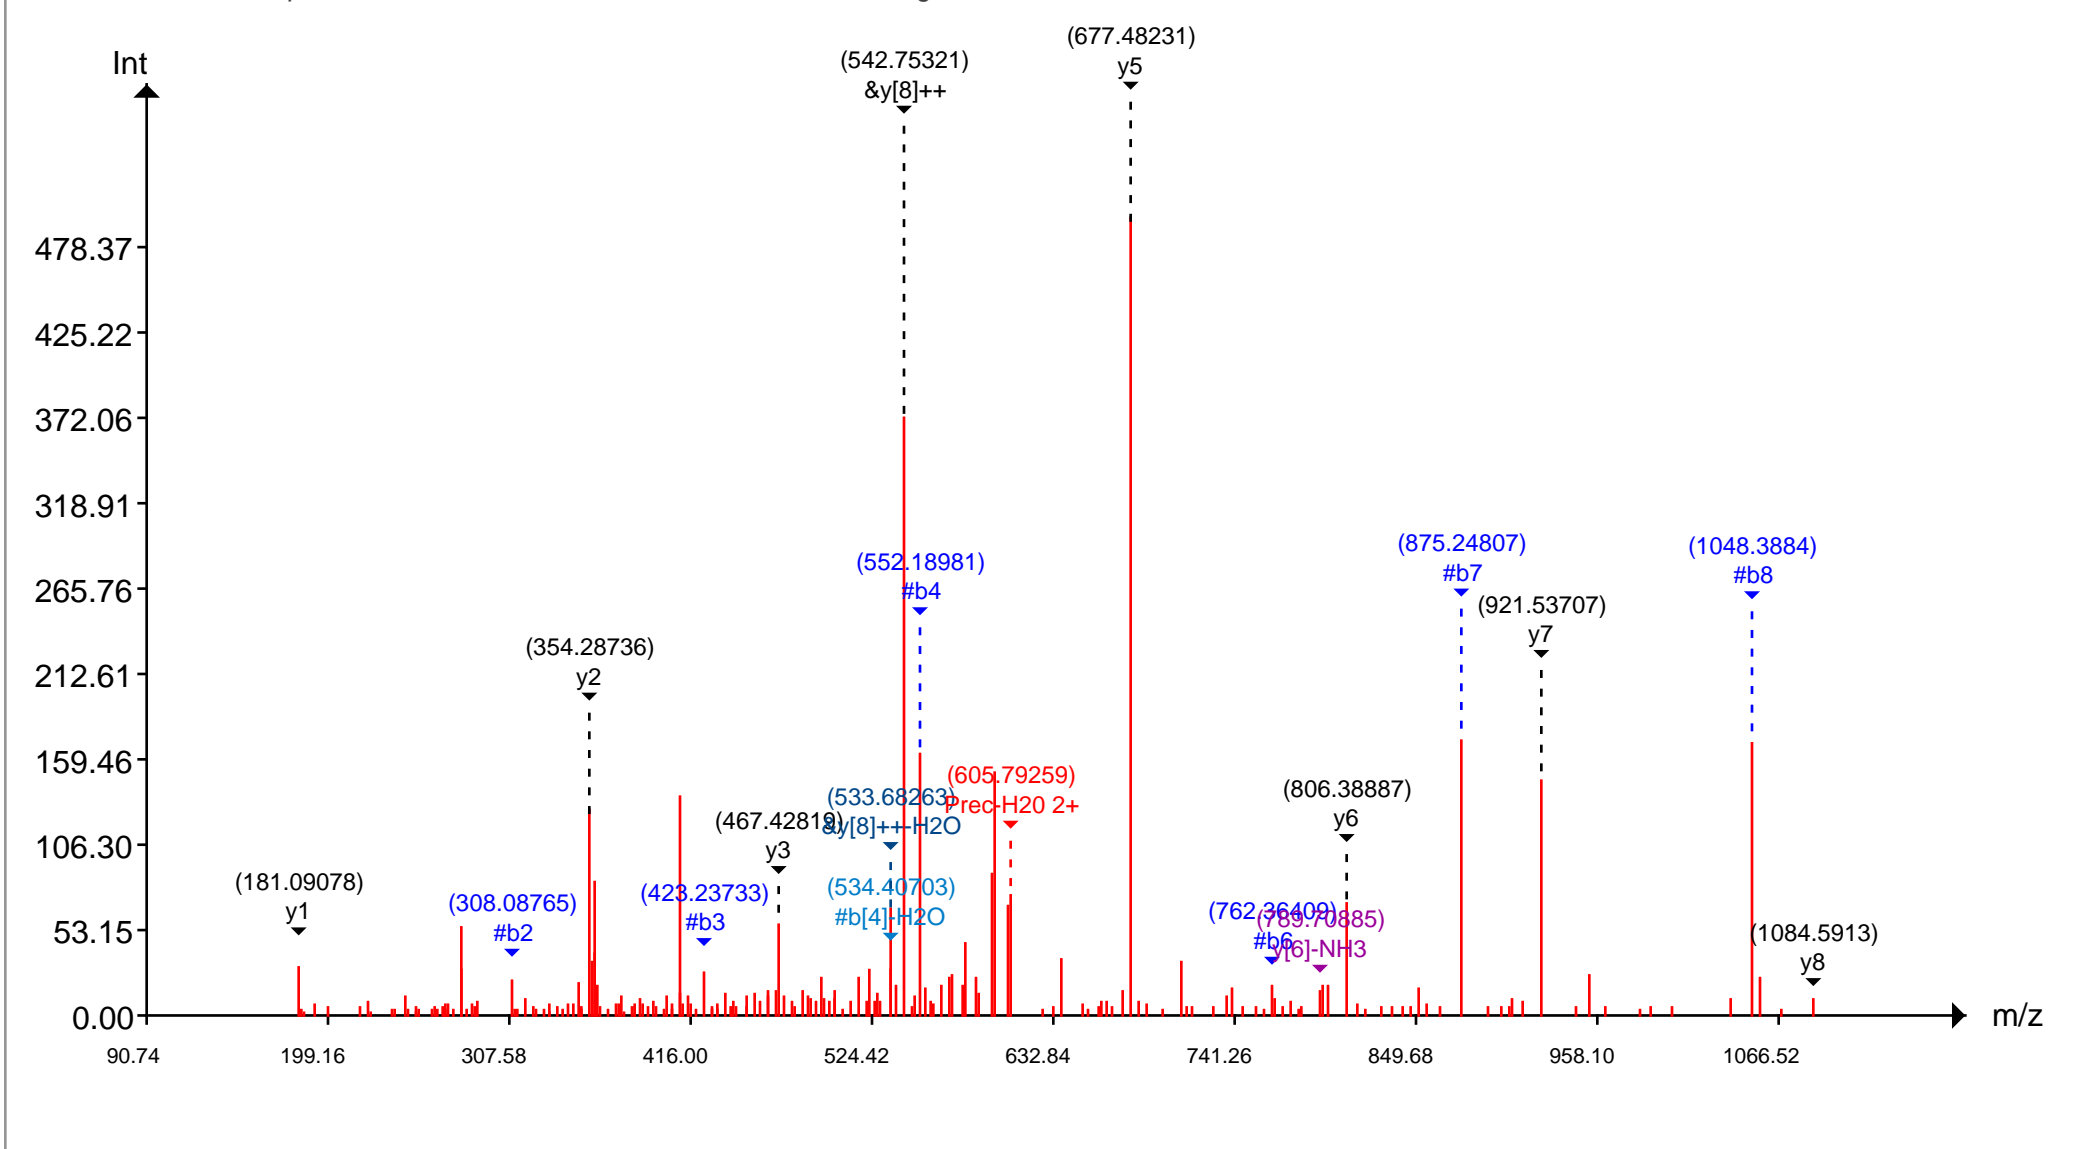

## Info

**Modified Sequence** AcD3-VYDEPLLK<AcD3K\*>R<C13>-COOH

**Ion score** 50.63

**Protein** A2A8Z1

**Confidence level** 99.00%

**Precursor m/z** 614.86094

**Identity Threshold** 46.15

**Charge** 2+

**Mass error** -3.9E-4

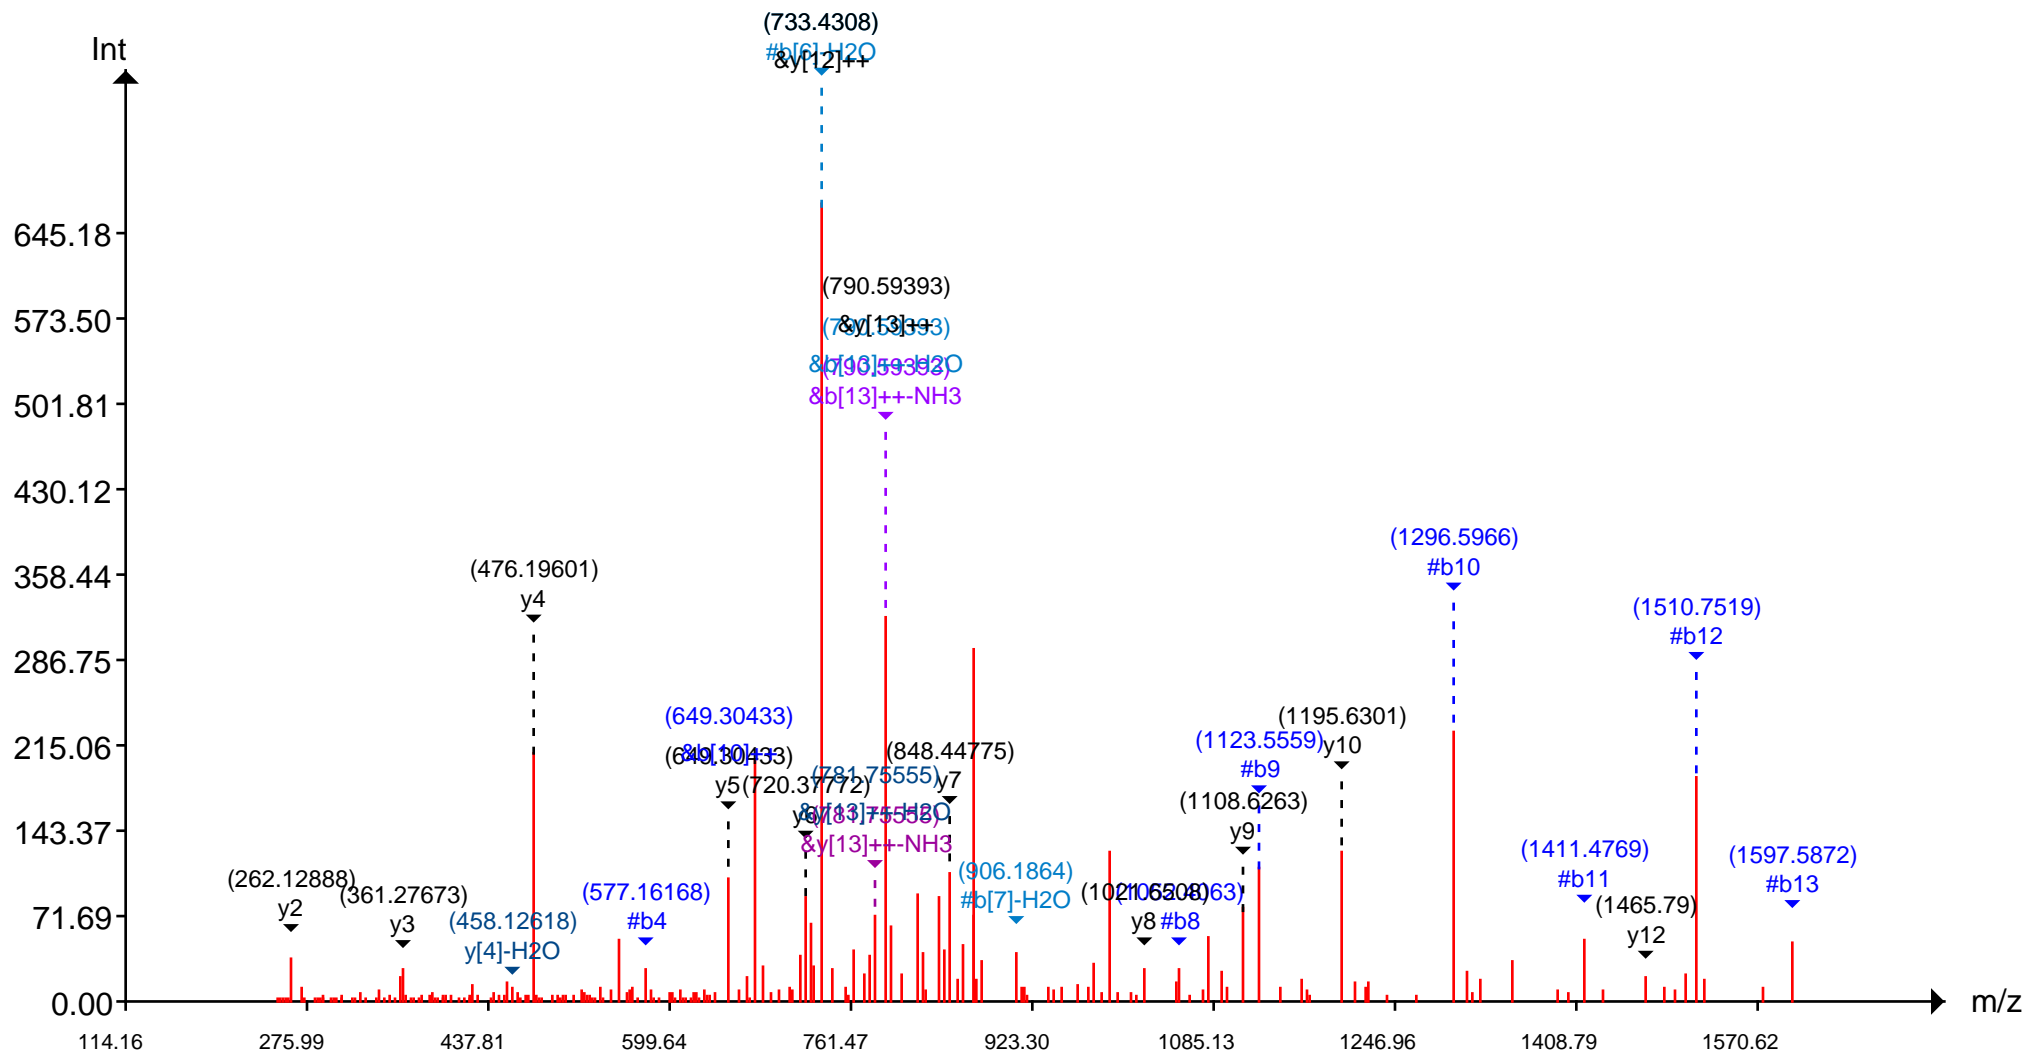

## Info

|                          |                                                  |                           |         |
|--------------------------|--------------------------------------------------|---------------------------|---------|
| <b>Modified Sequence</b> | AcD3-FNPK<AcD3K*>SSK<AcD3K*>QAK<AcD3K*>DVSR-COOH | <b>Ion score</b>          | 48.68   |
| <b>Protein</b>           | O08585                                           | <b>Confidence level</b>   | 99.00%  |
| <b>Precursor m/z</b>     | 886.49105                                        | <b>Identity Threshold</b> | 47.22   |
| <b>Charge</b>            | 2+                                               | <b>Mass error</b>         | 0.00217 |



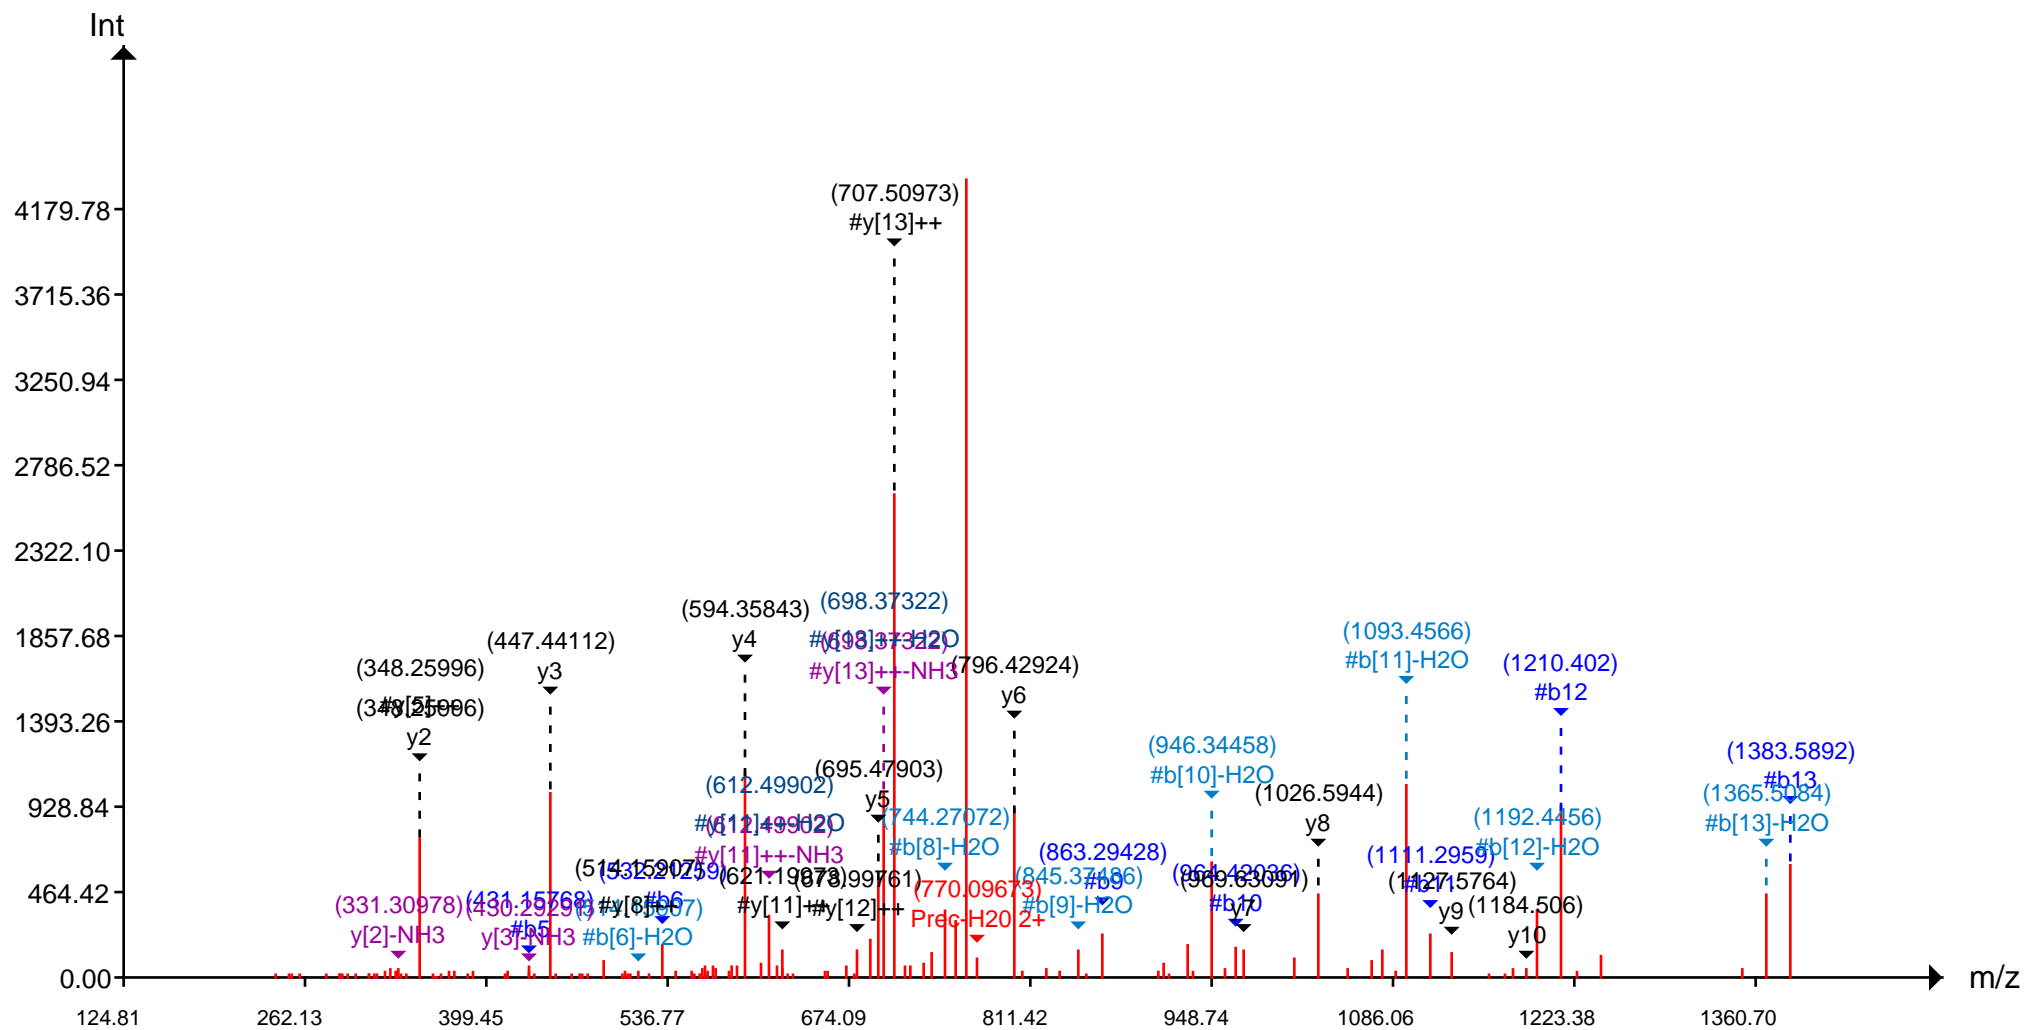

## Info

**Modified Sequence** AcD3-VGDGGTgk<AcD3K\*>TTFVK<AcD3K\*>R-COOH

**Ion score** 62.85

**Protein** P62827

**Confidence level** 99.00%

**Precursor m/z** 779.43334

**Identity Threshold** 47.33

**Charge** 2+

**Mass error** 0.001222

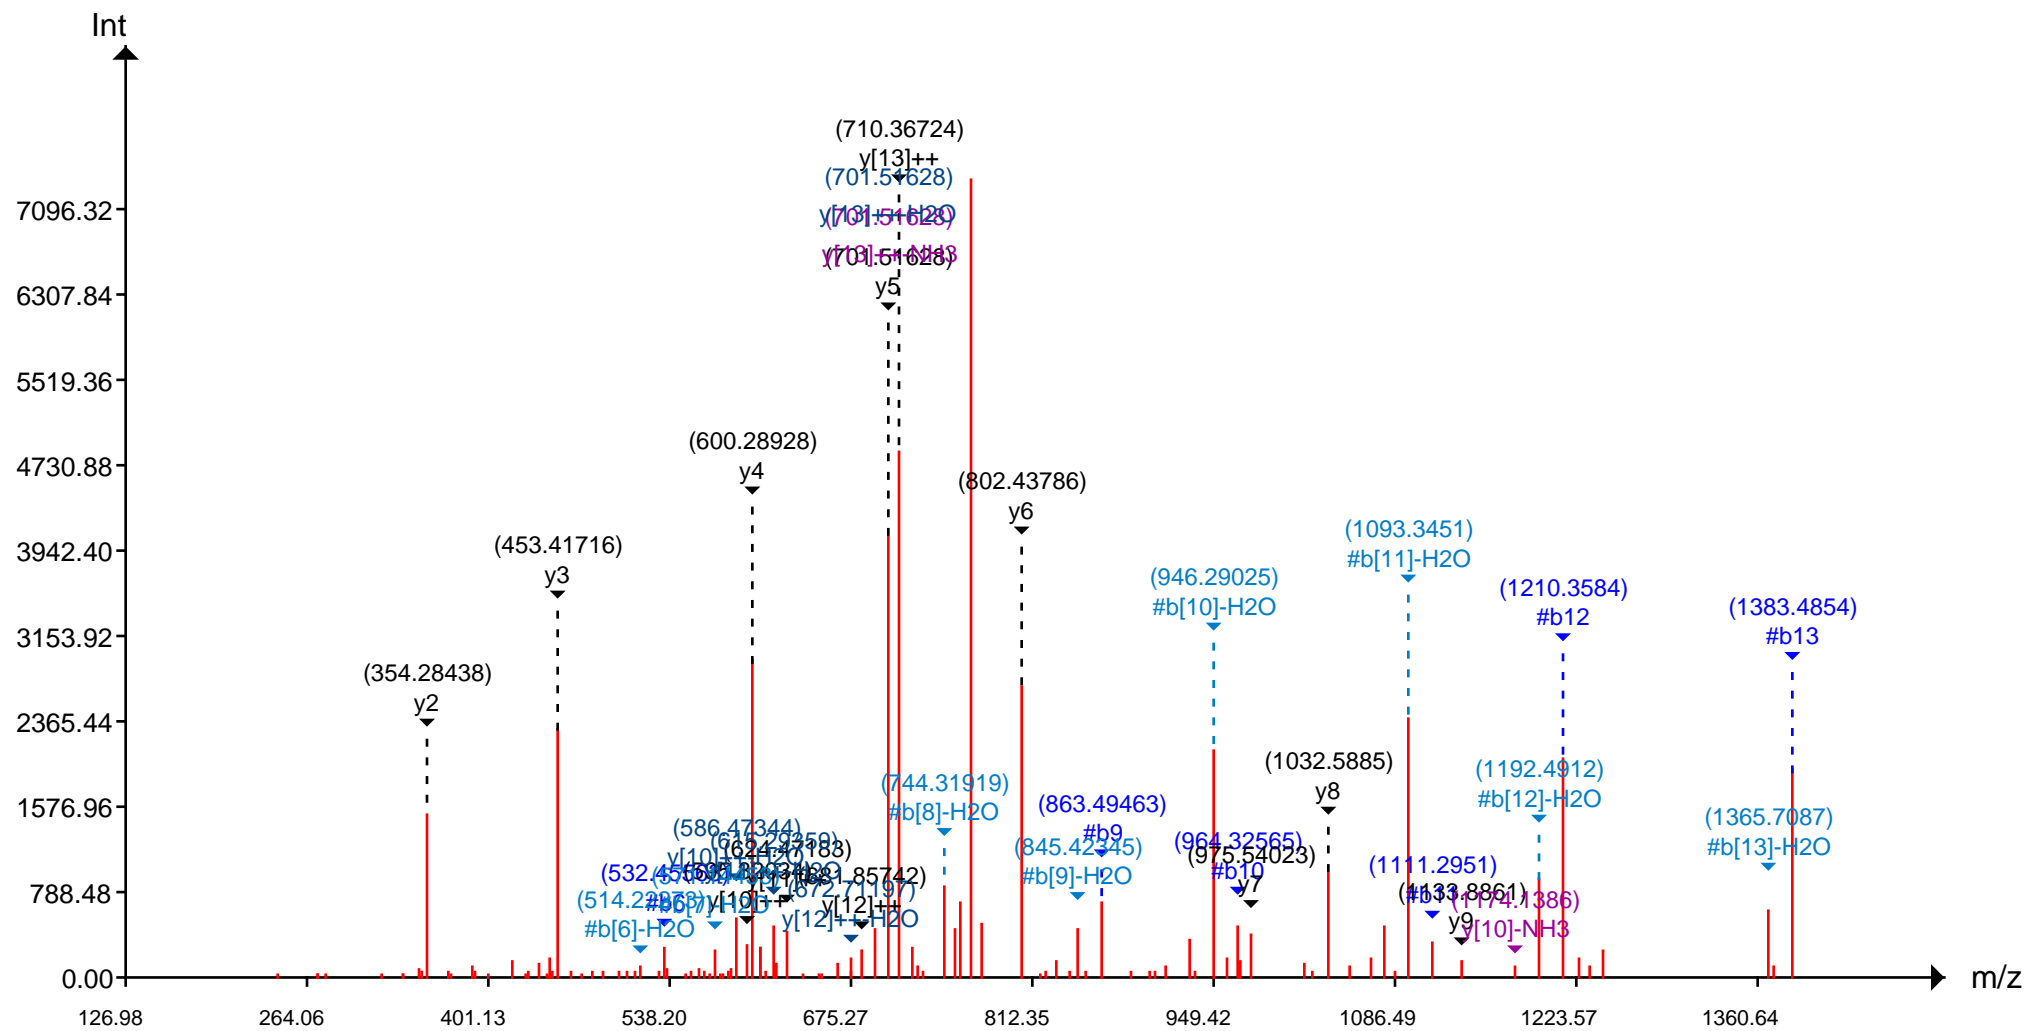

## Info

|                          |                                               |                           |        |
|--------------------------|-----------------------------------------------|---------------------------|--------|
| <b>Modified Sequence</b> | AcD3-VGDGGTGK<AcD3K*>TTFVK<AcD3K*>R<C13>-COOH | <b>Ion score</b>          | 50.84  |
| <b>Protein</b>           | P62827                                        | <b>Confidence level</b>   | 99.00% |
| <b>Precursor m/z</b>     | 782.44285                                     | <b>Identity Threshold</b> | 46.93  |
| <b>Charge</b>            | 2+                                            | <b>Mass error</b>         | 1.0E-4 |



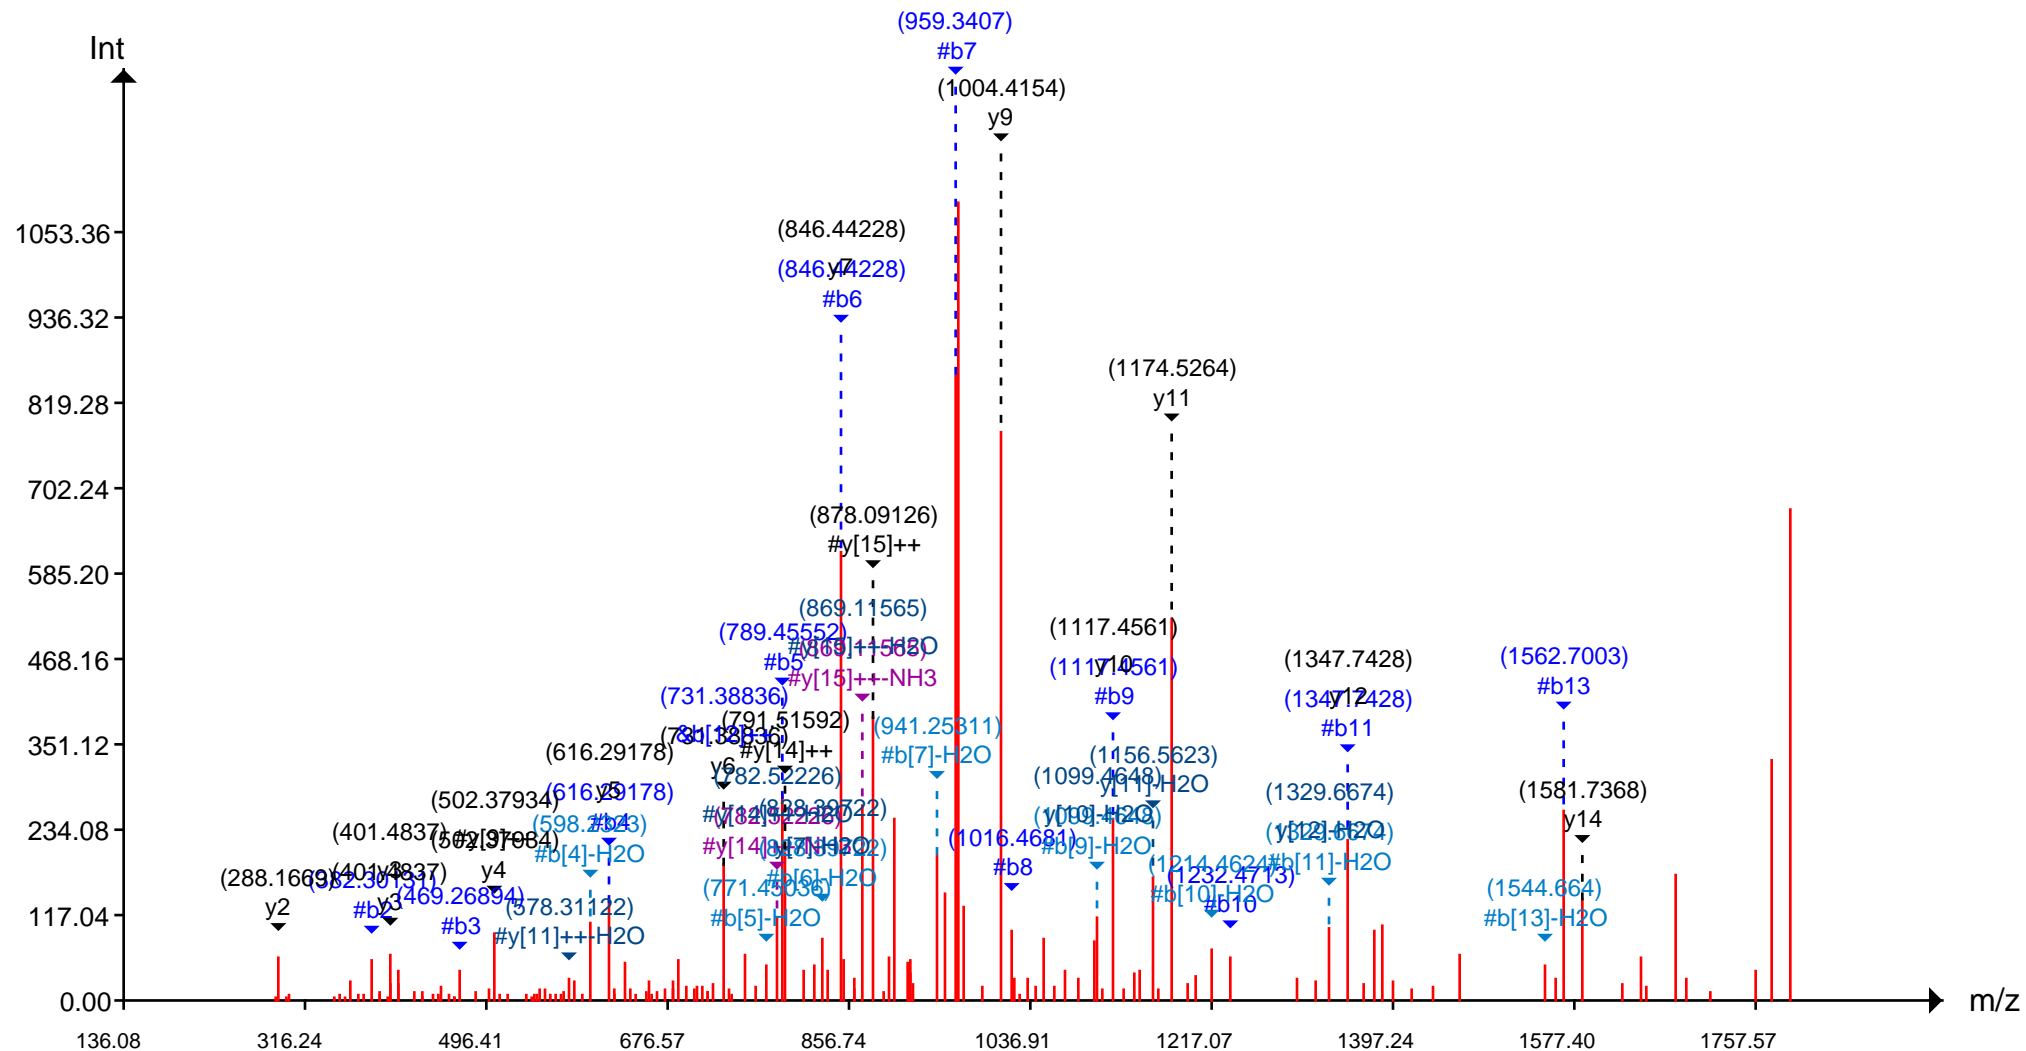

## Info

**Modified Sequence** AcD3-YK<AcD3K\*>SM<Mox\*>K<AcD3K\*>GLGTDDNTLIR-COOH

**Ion score** 84.92

**Protein** P97429

**Confidence level** 99.00%

**Precursor m/z** 982.01251

**Identity Threshold** 47.94

**Charge** 2+

**Mass error** 0.00264

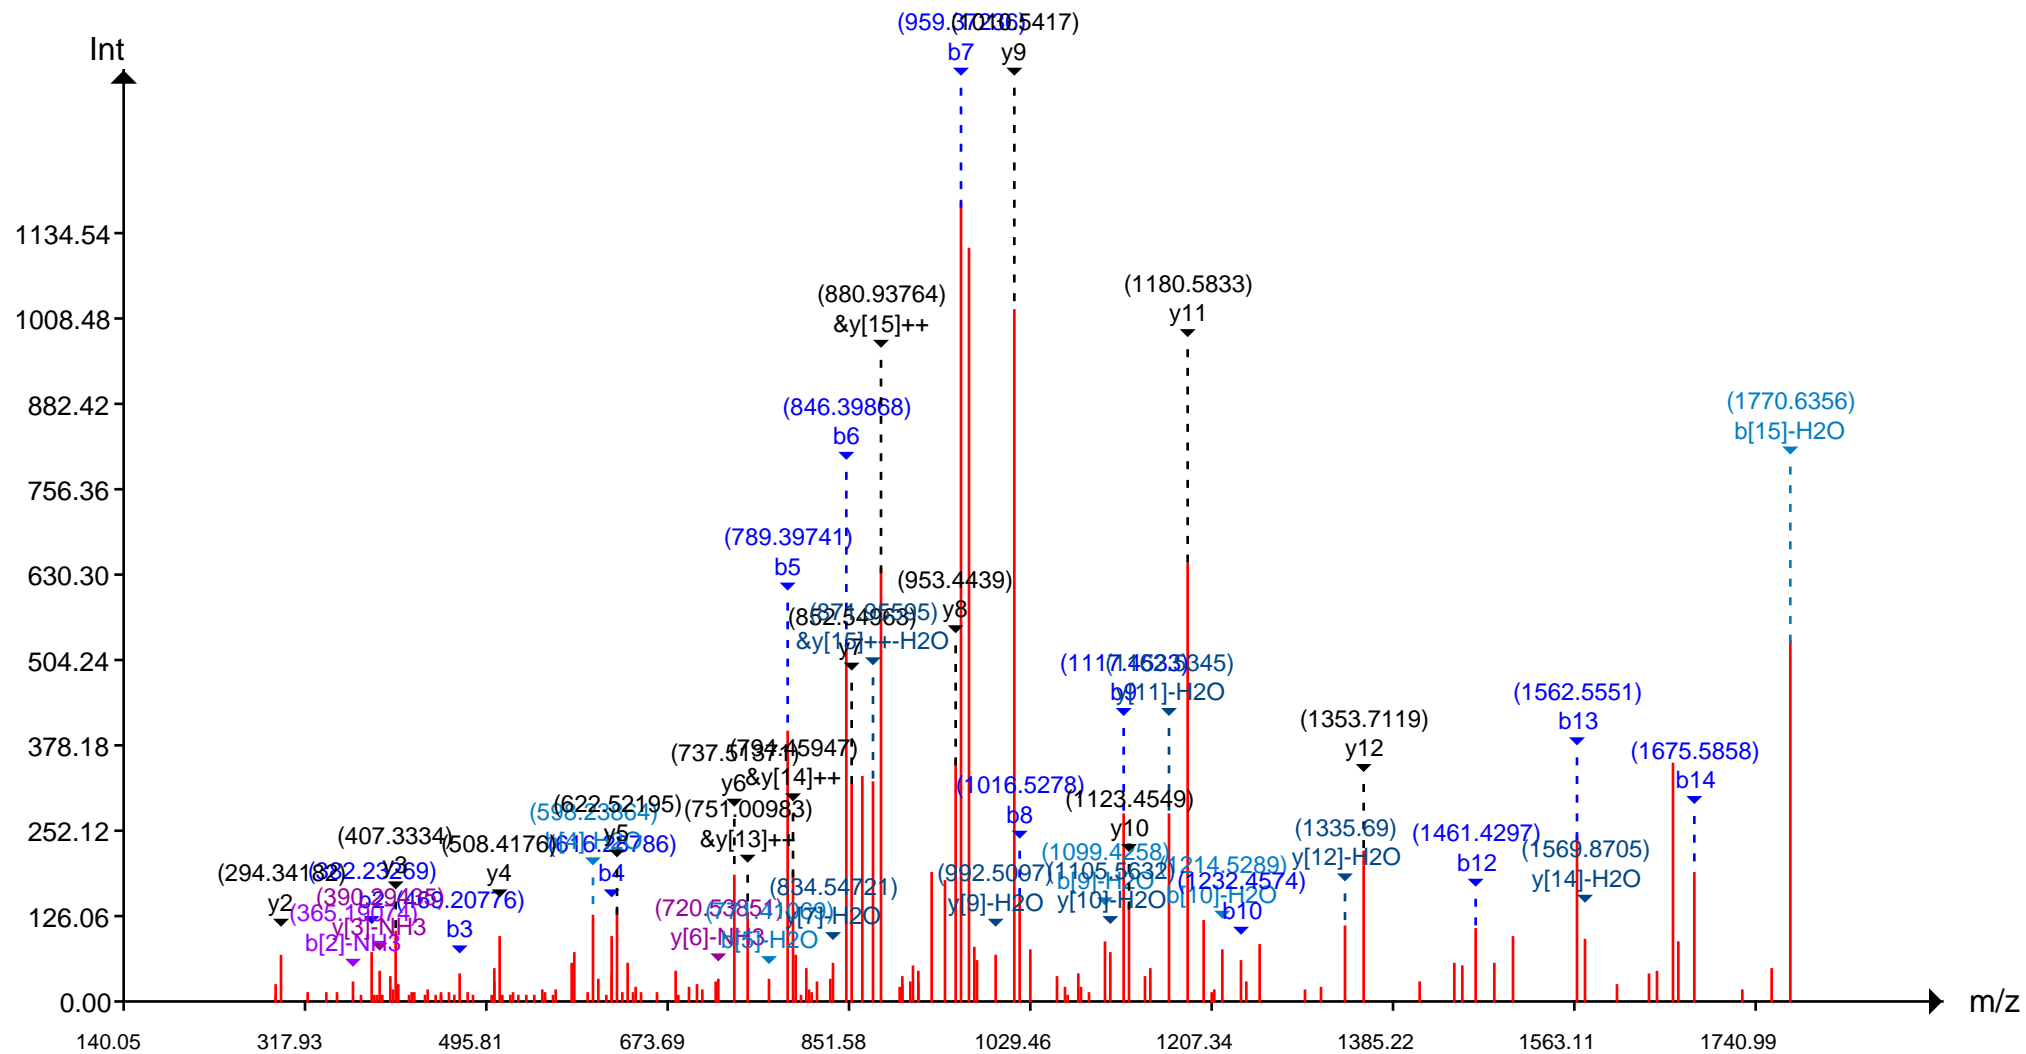

## Info

|                          |                                                       |                           |          |
|--------------------------|-------------------------------------------------------|---------------------------|----------|
| <b>Modified Sequence</b> | AcD3-YK<AcD3K*>SM<Mox*>K<AcD3K*>GLGTTDNTLIR<C13>-COOH | <b>Ion score</b>          | 81.29    |
| <b>Protein</b>           | P97429                                                | <b>Confidence level</b>   | 99.00%   |
| <b>Precursor m/z</b>     | 985.02256                                             | <b>Identity Threshold</b> | 47.82    |
| <b>Charge</b>            | 2+                                                    | <b>Mass error</b>         | 0.002599 |

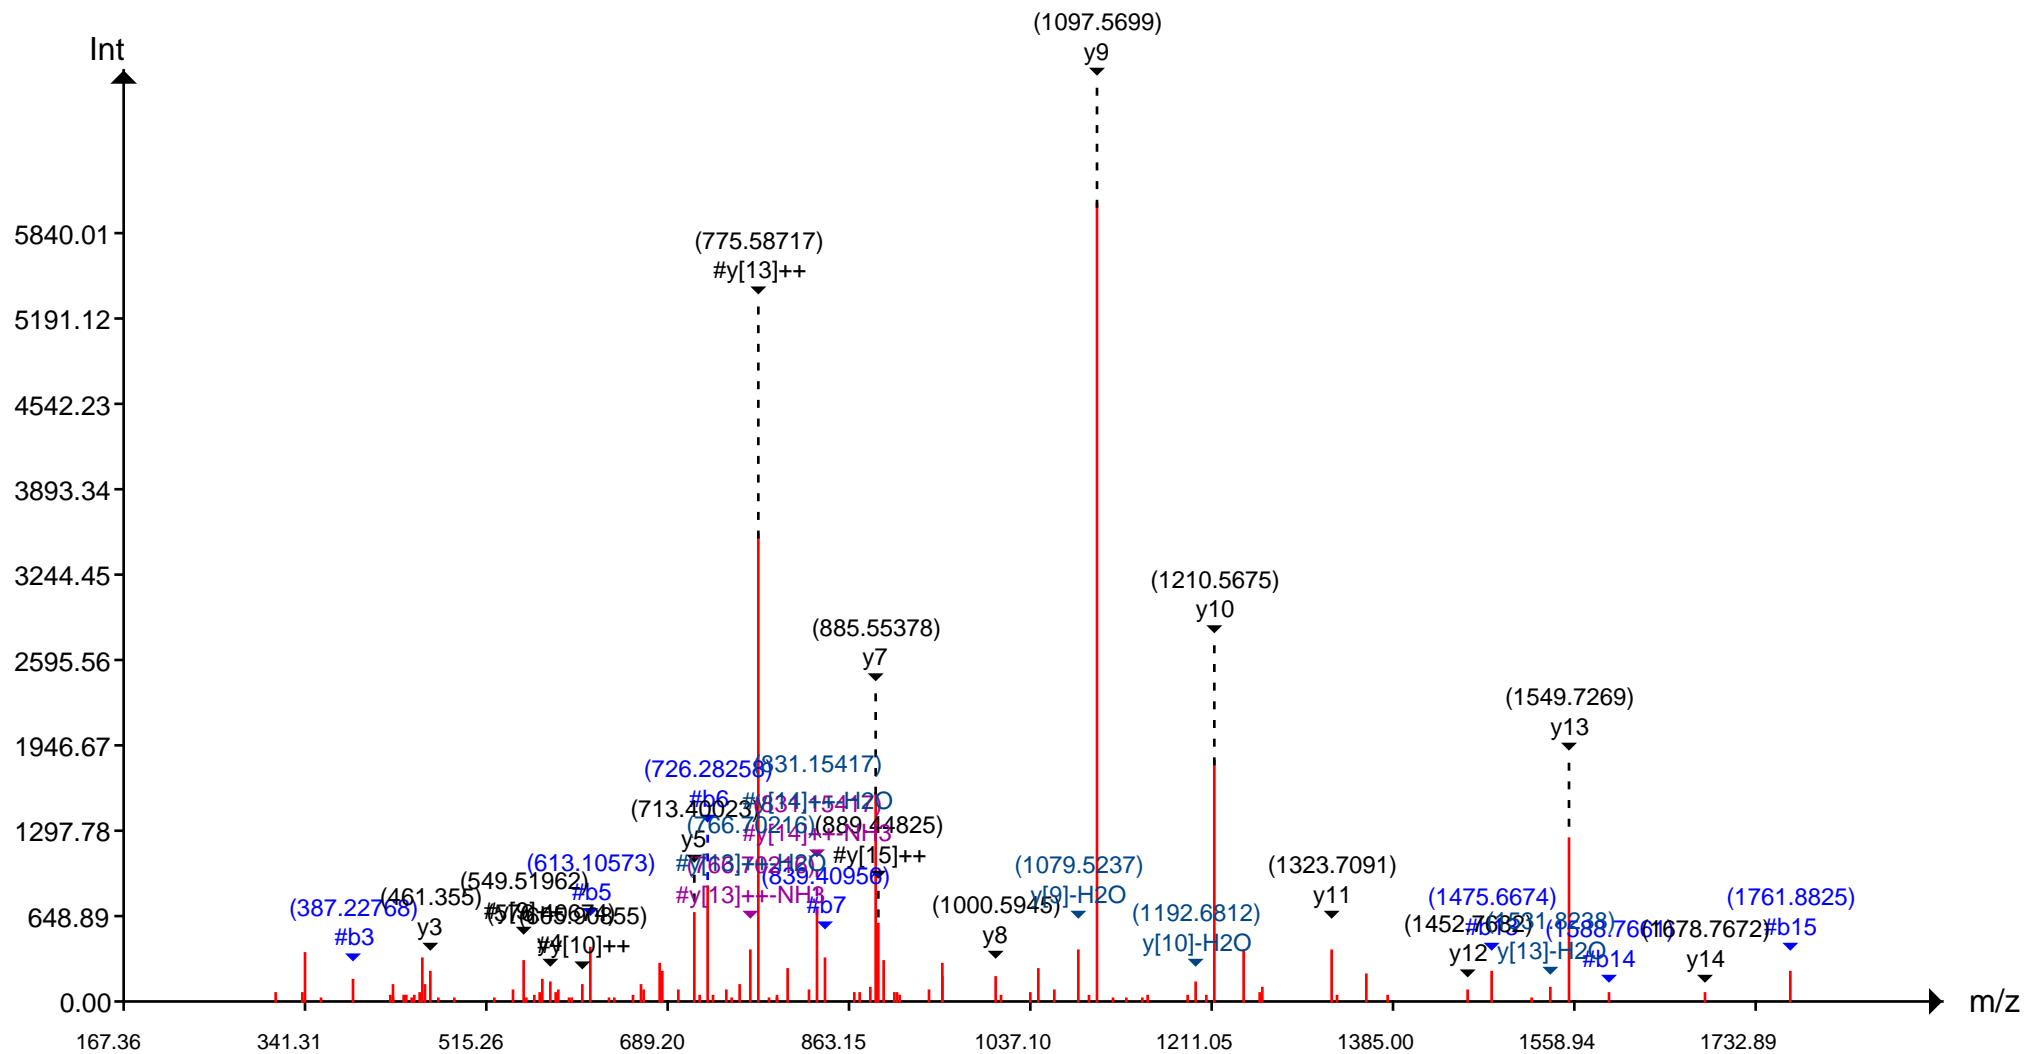

## Info

|                          |                                    |                           |          |
|--------------------------|------------------------------------|---------------------------|----------|
| <b>Modified Sequence</b> | AcD3-IVEPEILPDGDHDLK<AcD3K*>R-COOH | <b>Ion score</b>          | 76.01    |
| <b>Protein</b>           | P05064, P05063                     | <b>Confidence level</b>   | 99.00%   |
| <b>Precursor m/z</b>     | 968.51973                          | <b>Identity Threshold</b> | 47.79    |
| <b>Charge</b>            | 2+                                 | <b>Mass error</b>         | 0.002905 |

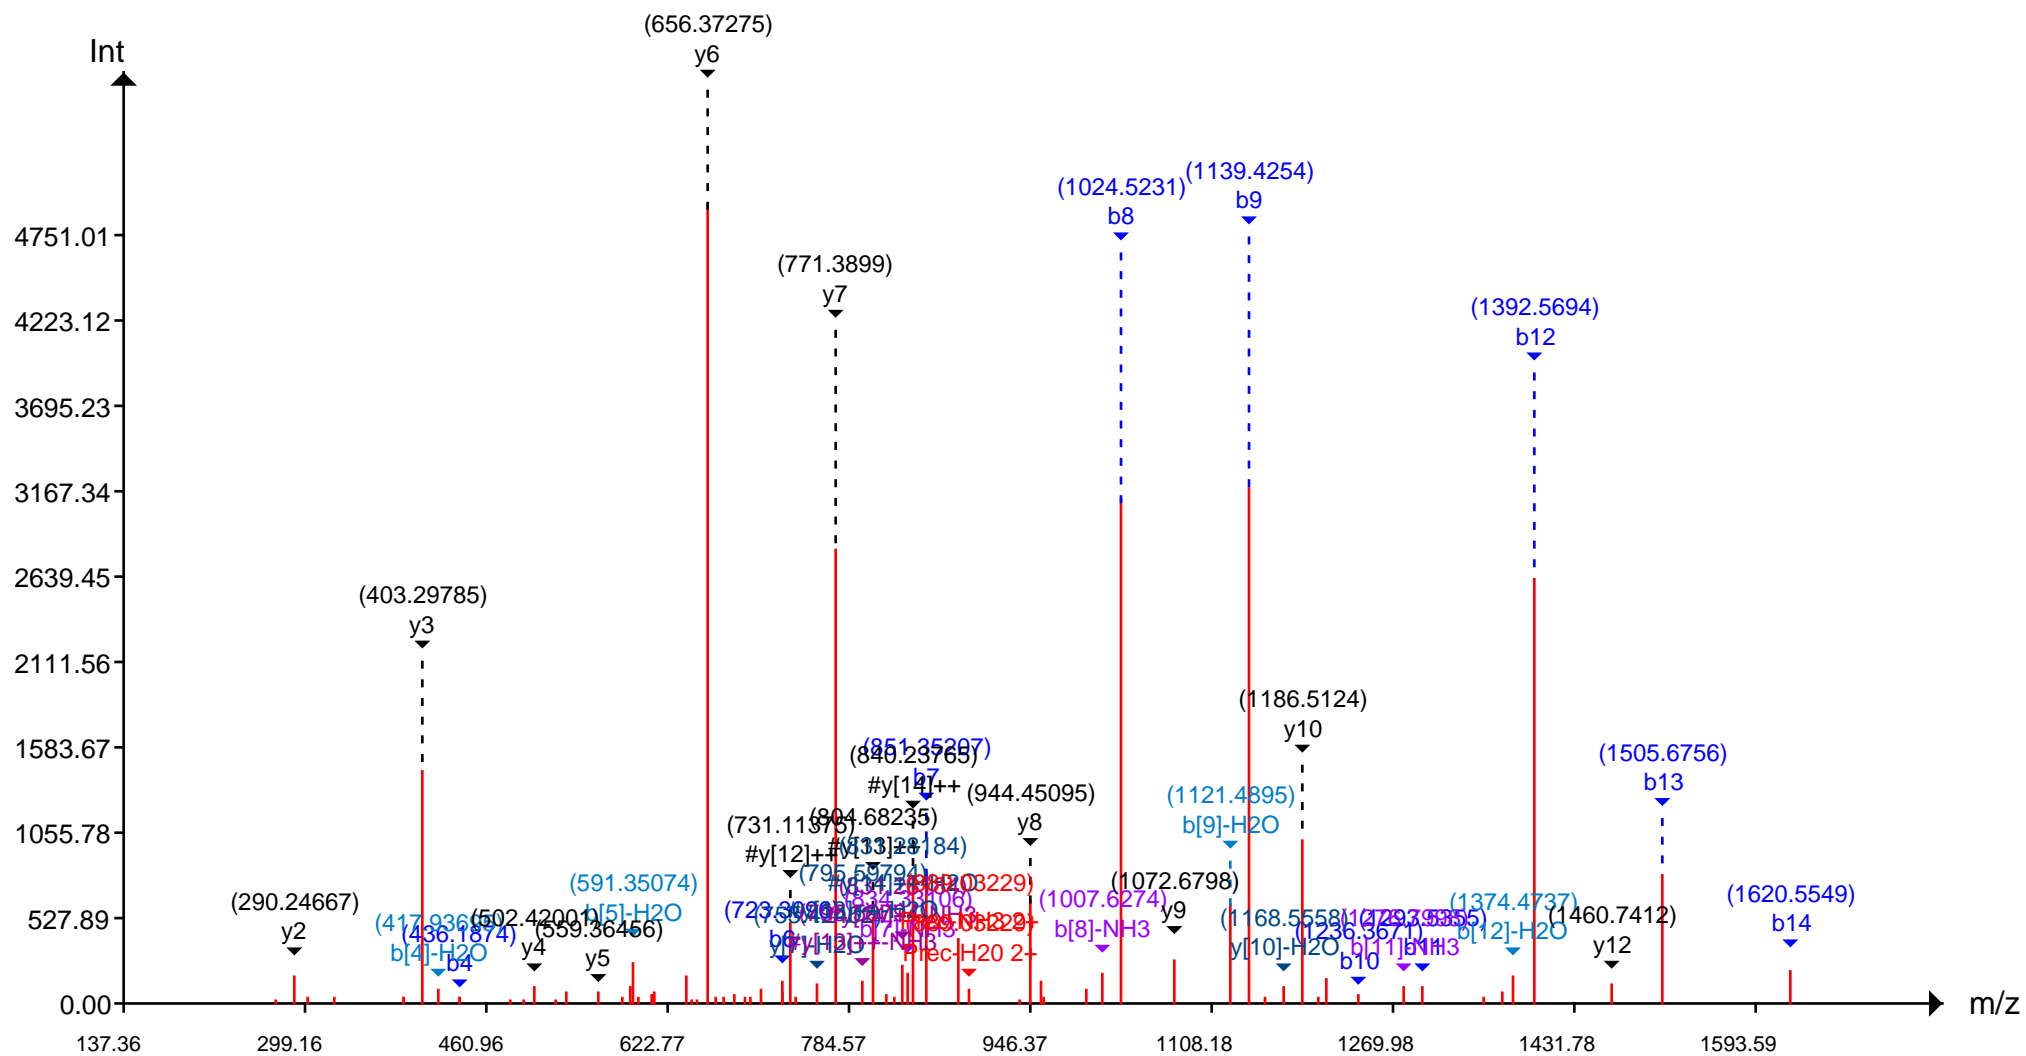

## Info

|                          |                                           |                           |          |
|--------------------------|-------------------------------------------|---------------------------|----------|
| <b>Modified Sequence</b> | AcD3-AAFTK<AcD3K*>NQK<AcD3K*>DPGVLDK-COOH | <b>Ion score</b>          | 94.4     |
| <b>Protein</b>           | P50543                                    | <b>Confidence level</b>   | 99.00%   |
| <b>Precursor m/z</b>     | 897.98929                                 | <b>Identity Threshold</b> | 47.71    |
| <b>Charge</b>            | 2+                                        | <b>Mass error</b>         | 0.001824 |

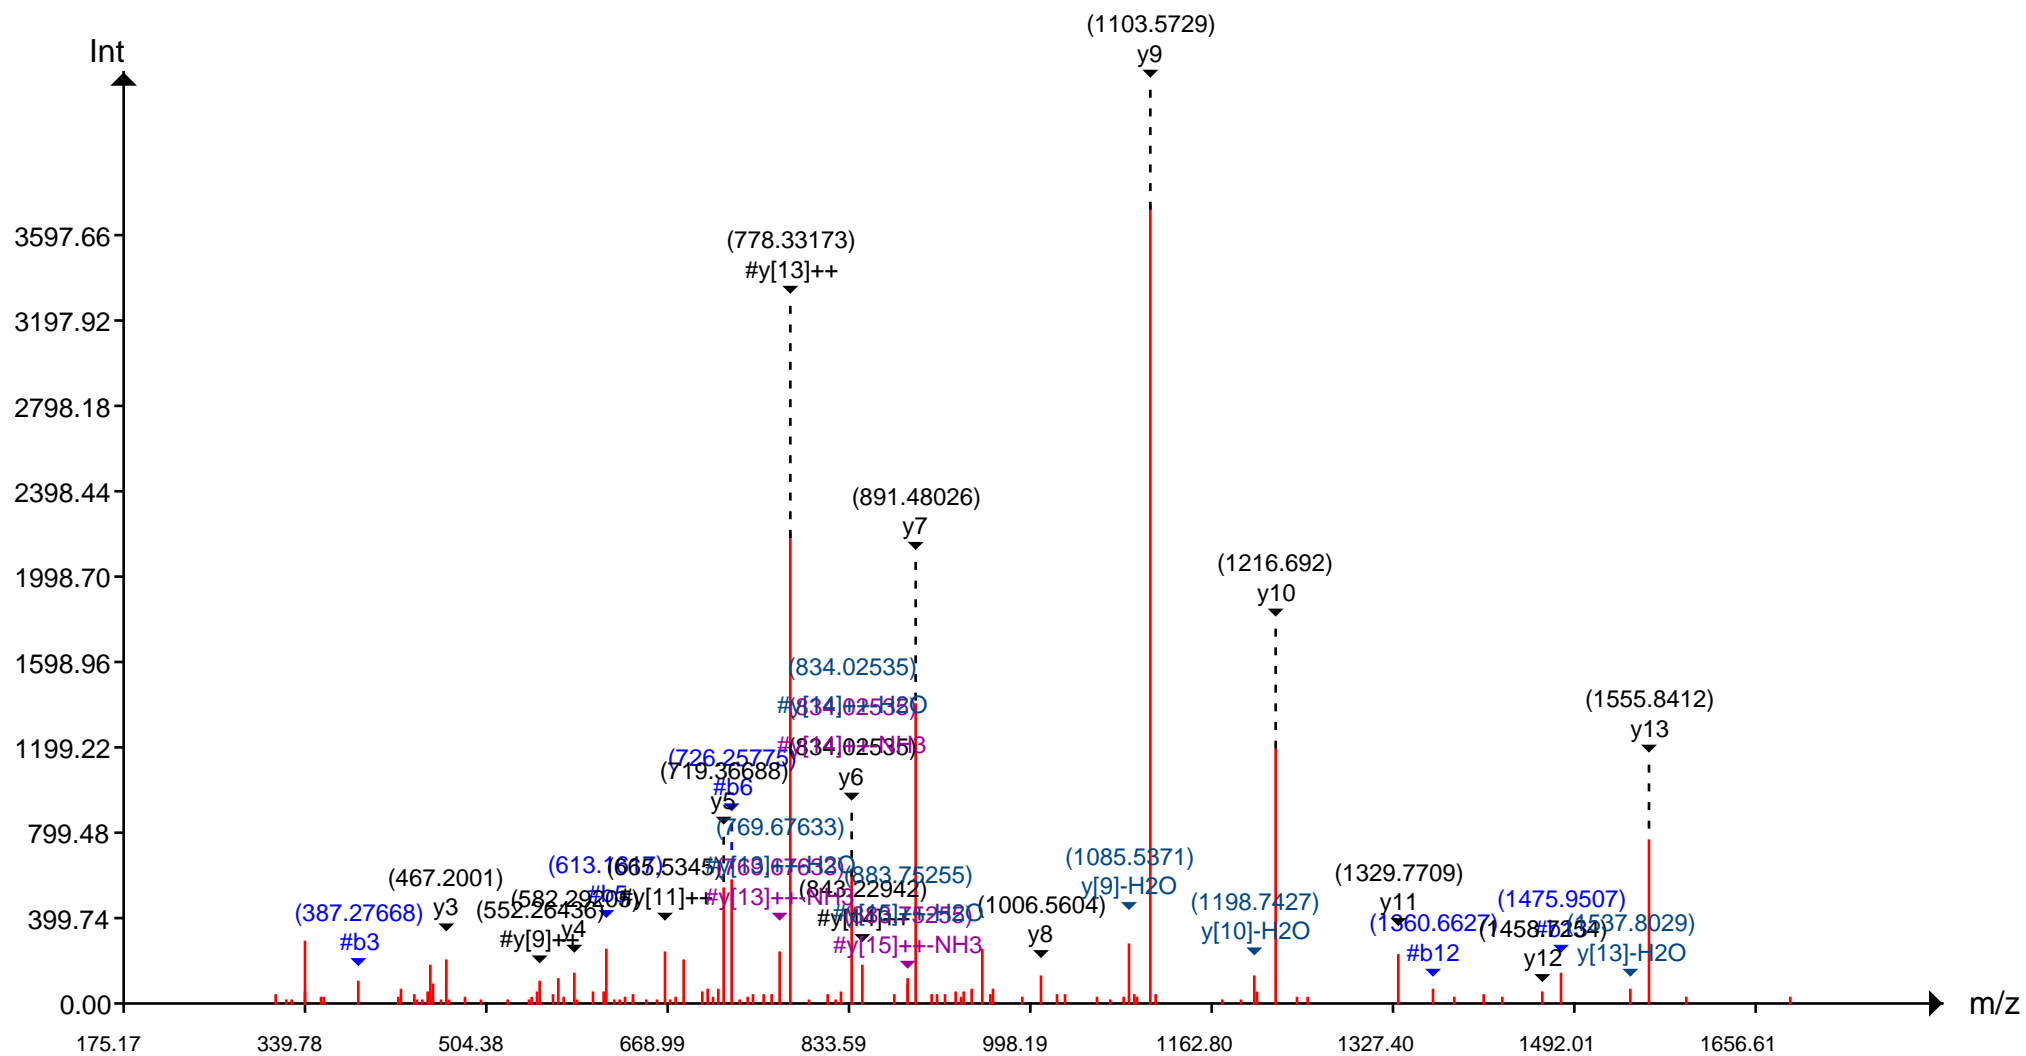

## Info

**Modified Sequence** AcD3-IVEPEILPDGDHDLK<AcD3K\*>R<C13>-COOH

**Ion score** 81.82

**Protein** P05064, P05063

**Confidence level** 99.00%

**Precursor m/z** 971.52929

**Identity Threshold** 47.46

**Charge** 2+

**Mass error** 0.001883



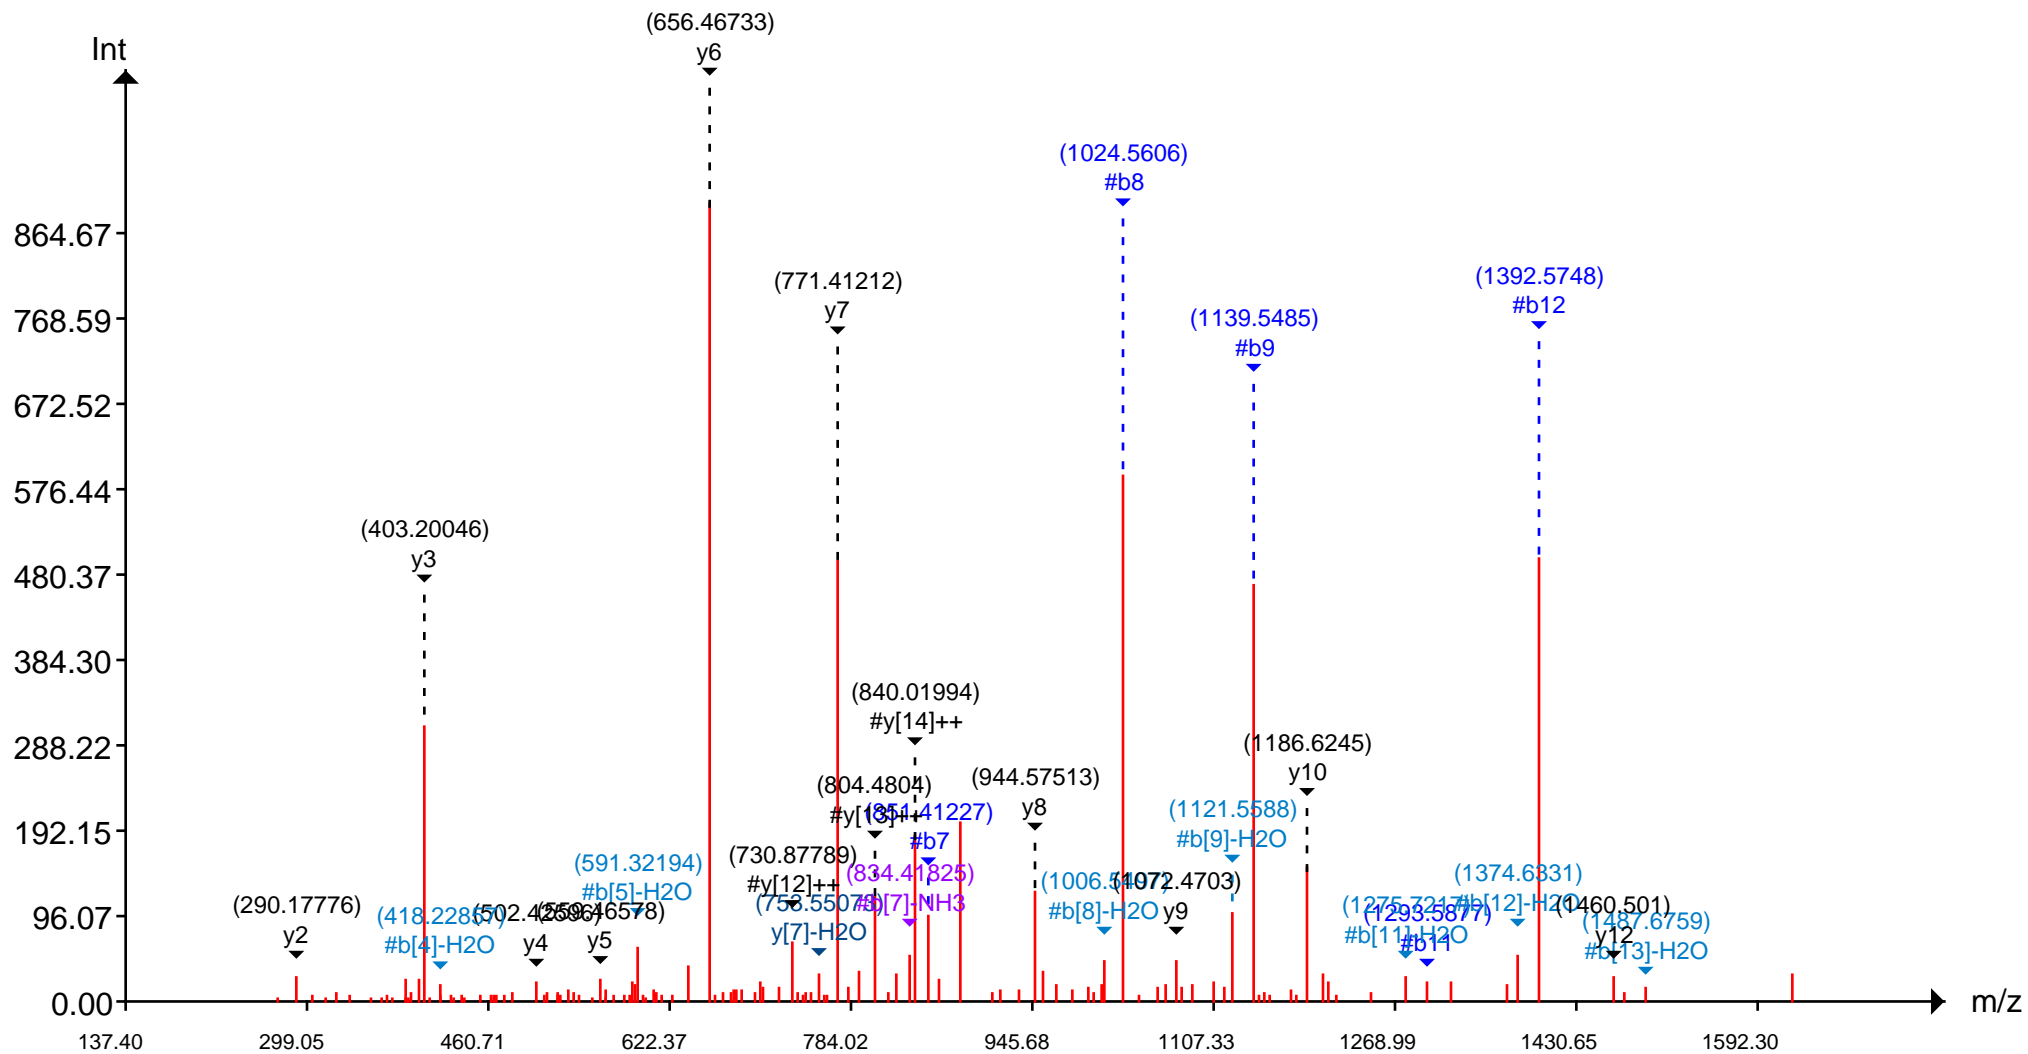

## Info

**Modified Sequence** AcD3-AAFTK<AcD3K\*>NQK<AcD3K\*>DPGVLDK-COOH

**Ion score** 74.18

**Protein** P50543

**Confidence level** 99.00%

**Precursor m/z** 897.98942

**Identity Threshold** 47.66

**Charge** 2+

**Mass error** 0.002084

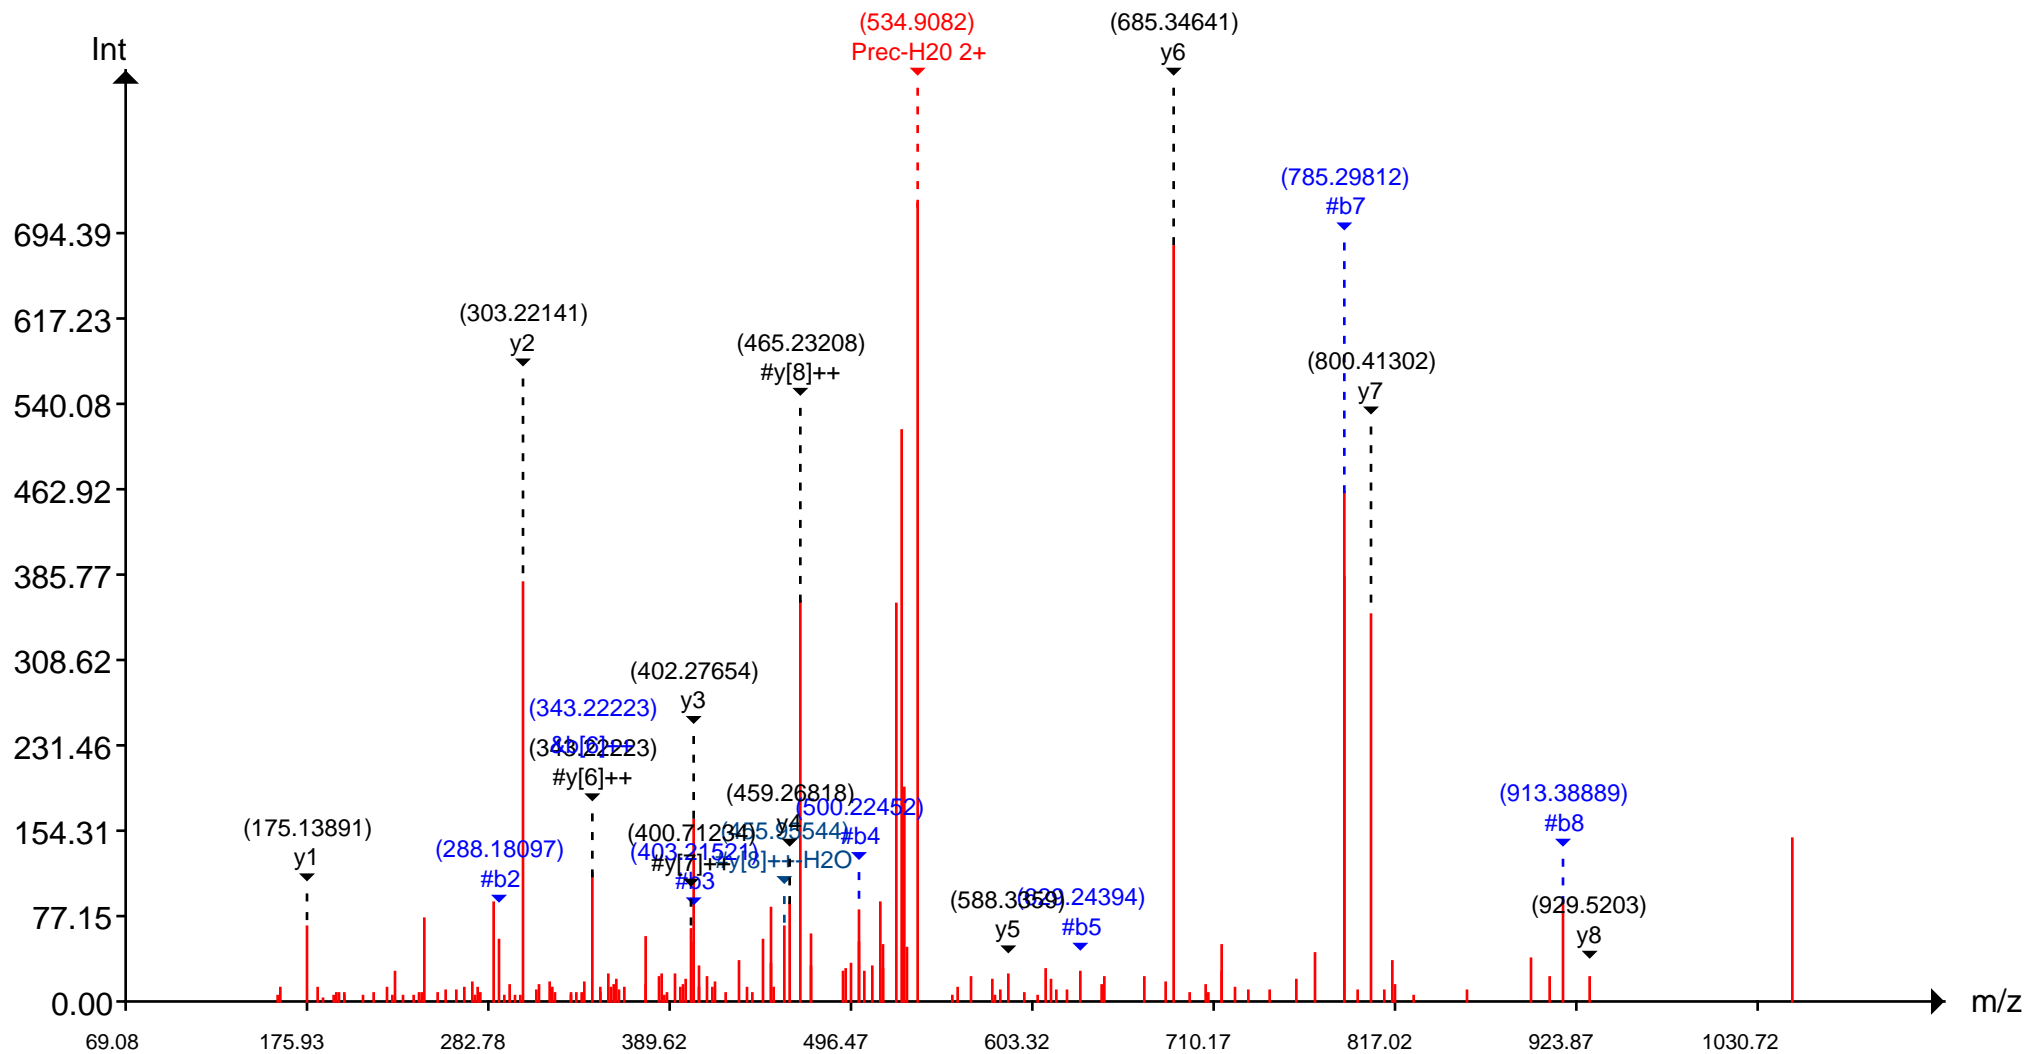

## Info

|                          |                     |                           |         |
|--------------------------|---------------------|---------------------------|---------|
| <b>Modified Sequence</b> | AcD3-LEDPEGVQR-COOH | <b>Ion score</b>          | 47.96   |
| <b>Protein</b>           | Q9CQE5              | <b>Confidence level</b>   | 99.00%  |
| <b>Precursor m/z</b>     | 544.27656           | <b>Identity Threshold</b> | 47.33   |
| <b>Charge</b>            | 2+                  | <b>Mass error</b>         | 1.01E-4 |

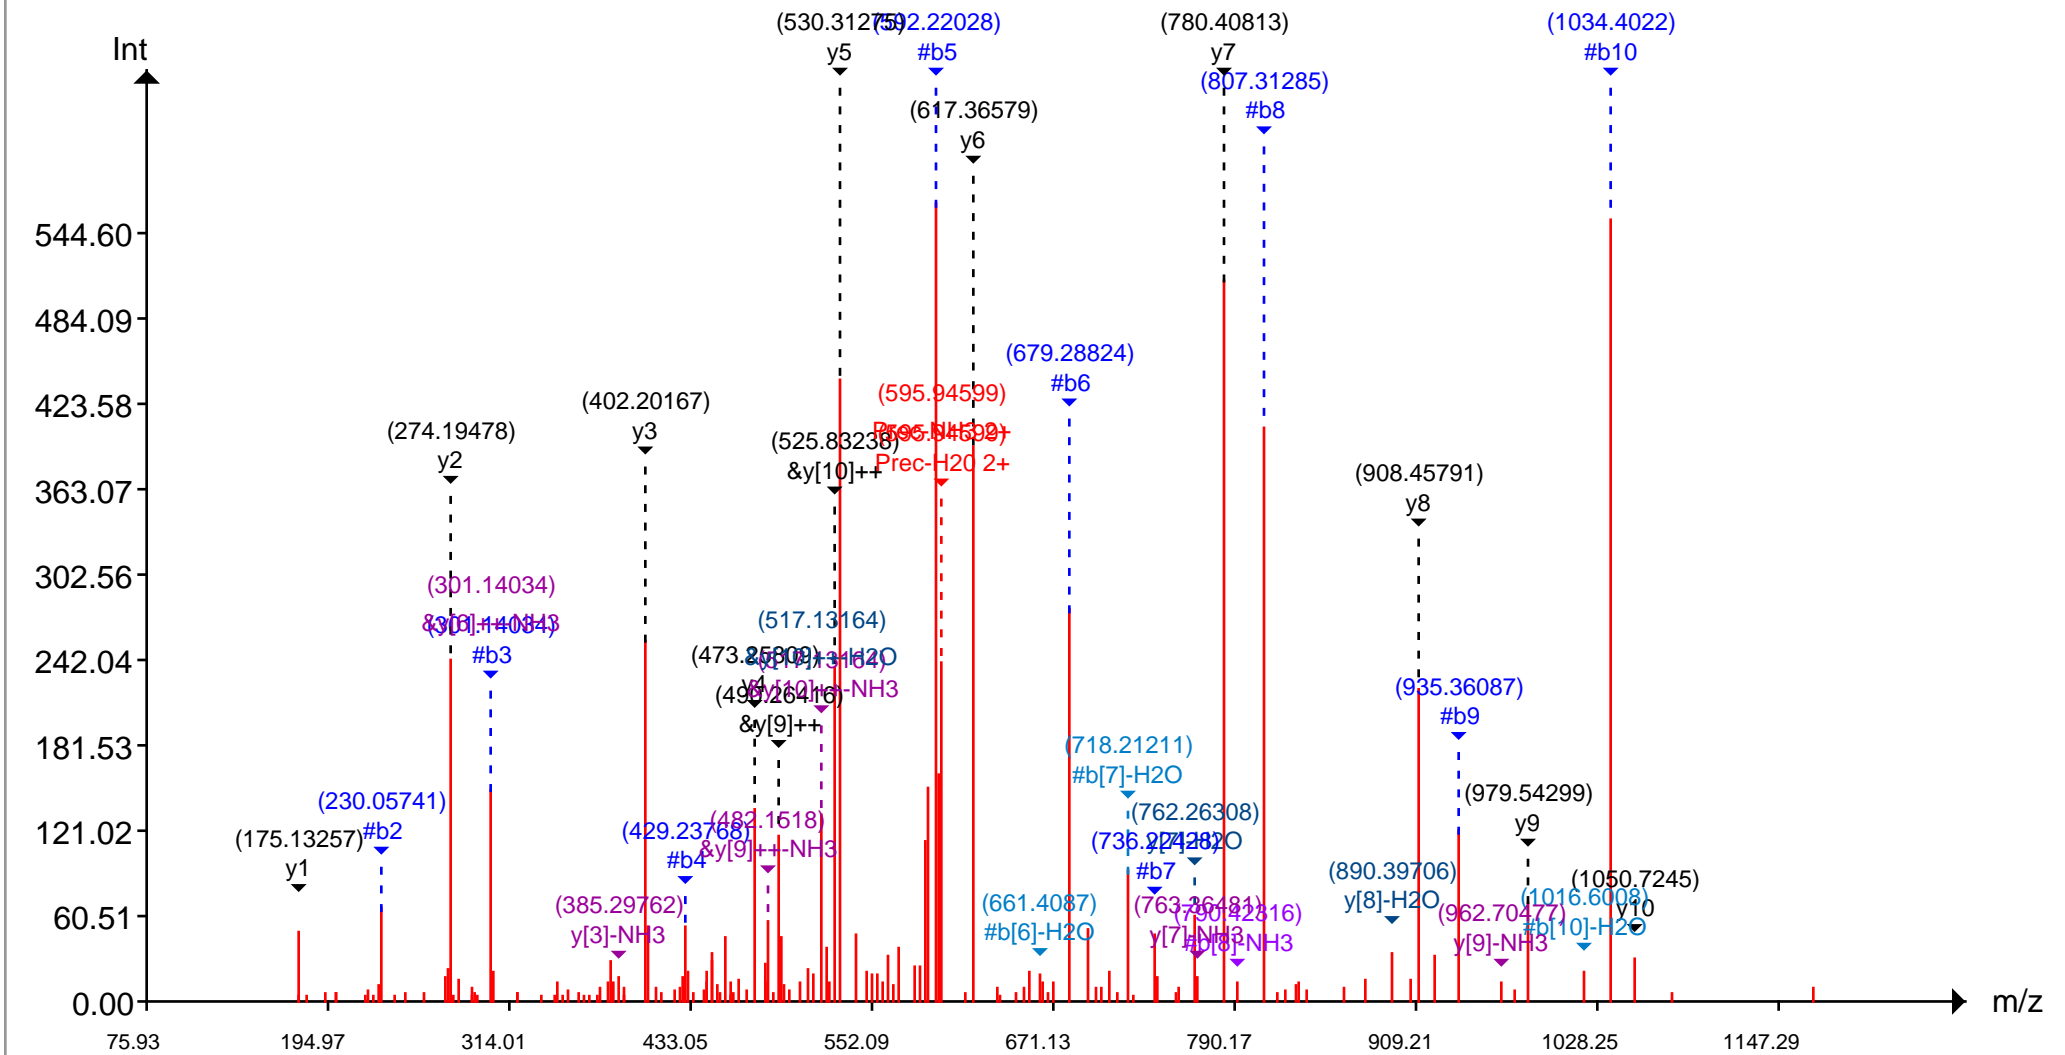

## Info

|                          |                       |                           |         |
|--------------------------|-----------------------|---------------------------|---------|
| <b>Modified Sequence</b> | AcD3-IAAQYSGAQVR-COOH | <b>Ion score</b>          | 96.24   |
| <b>Protein</b>           | Q9D8N0                | <b>Confidence level</b>   | 99.00%  |
| <b>Precursor m/z</b>     | 604.82681             | <b>Identity Threshold</b> | 48.20   |
| <b>Charge</b>            | 2+                    | <b>Mass error</b>         | 2.28E-4 |

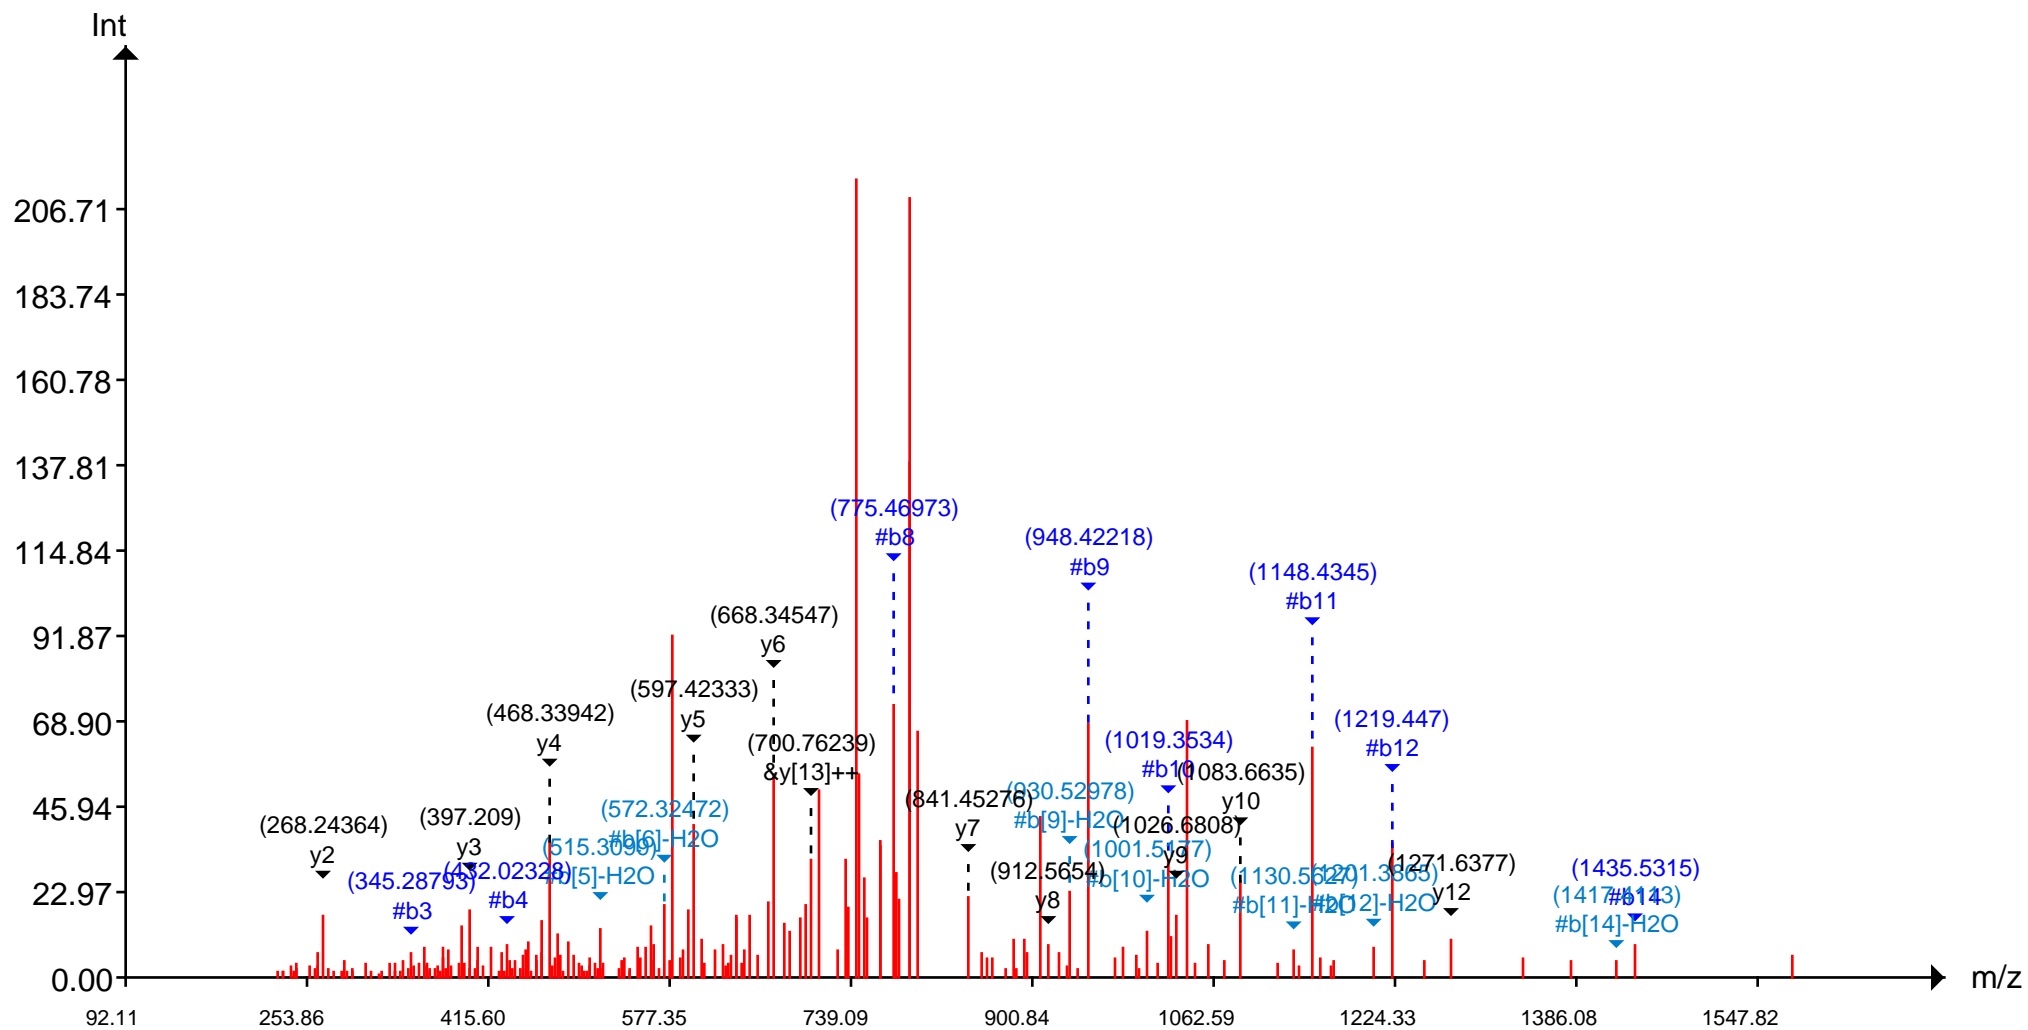

## Info

|                          |                                        |                           |         |
|--------------------------|----------------------------------------|---------------------------|---------|
| <b>Modified Sequence</b> | AcD3-AVESTGNAK<AcD3K*>AEAESR<C13>-COOH | <b>Ion score</b>          | 50.51   |
| <b>Protein</b>           | Q9EQK5                                 | <b>Confidence level</b>   | 99.00%  |
| <b>Precursor m/z</b>     | 808.4108                               | <b>Identity Threshold</b> | 47.89   |
| <b>Charge</b>            | 2+                                     | <b>Mass error</b>         | 7.43E-4 |

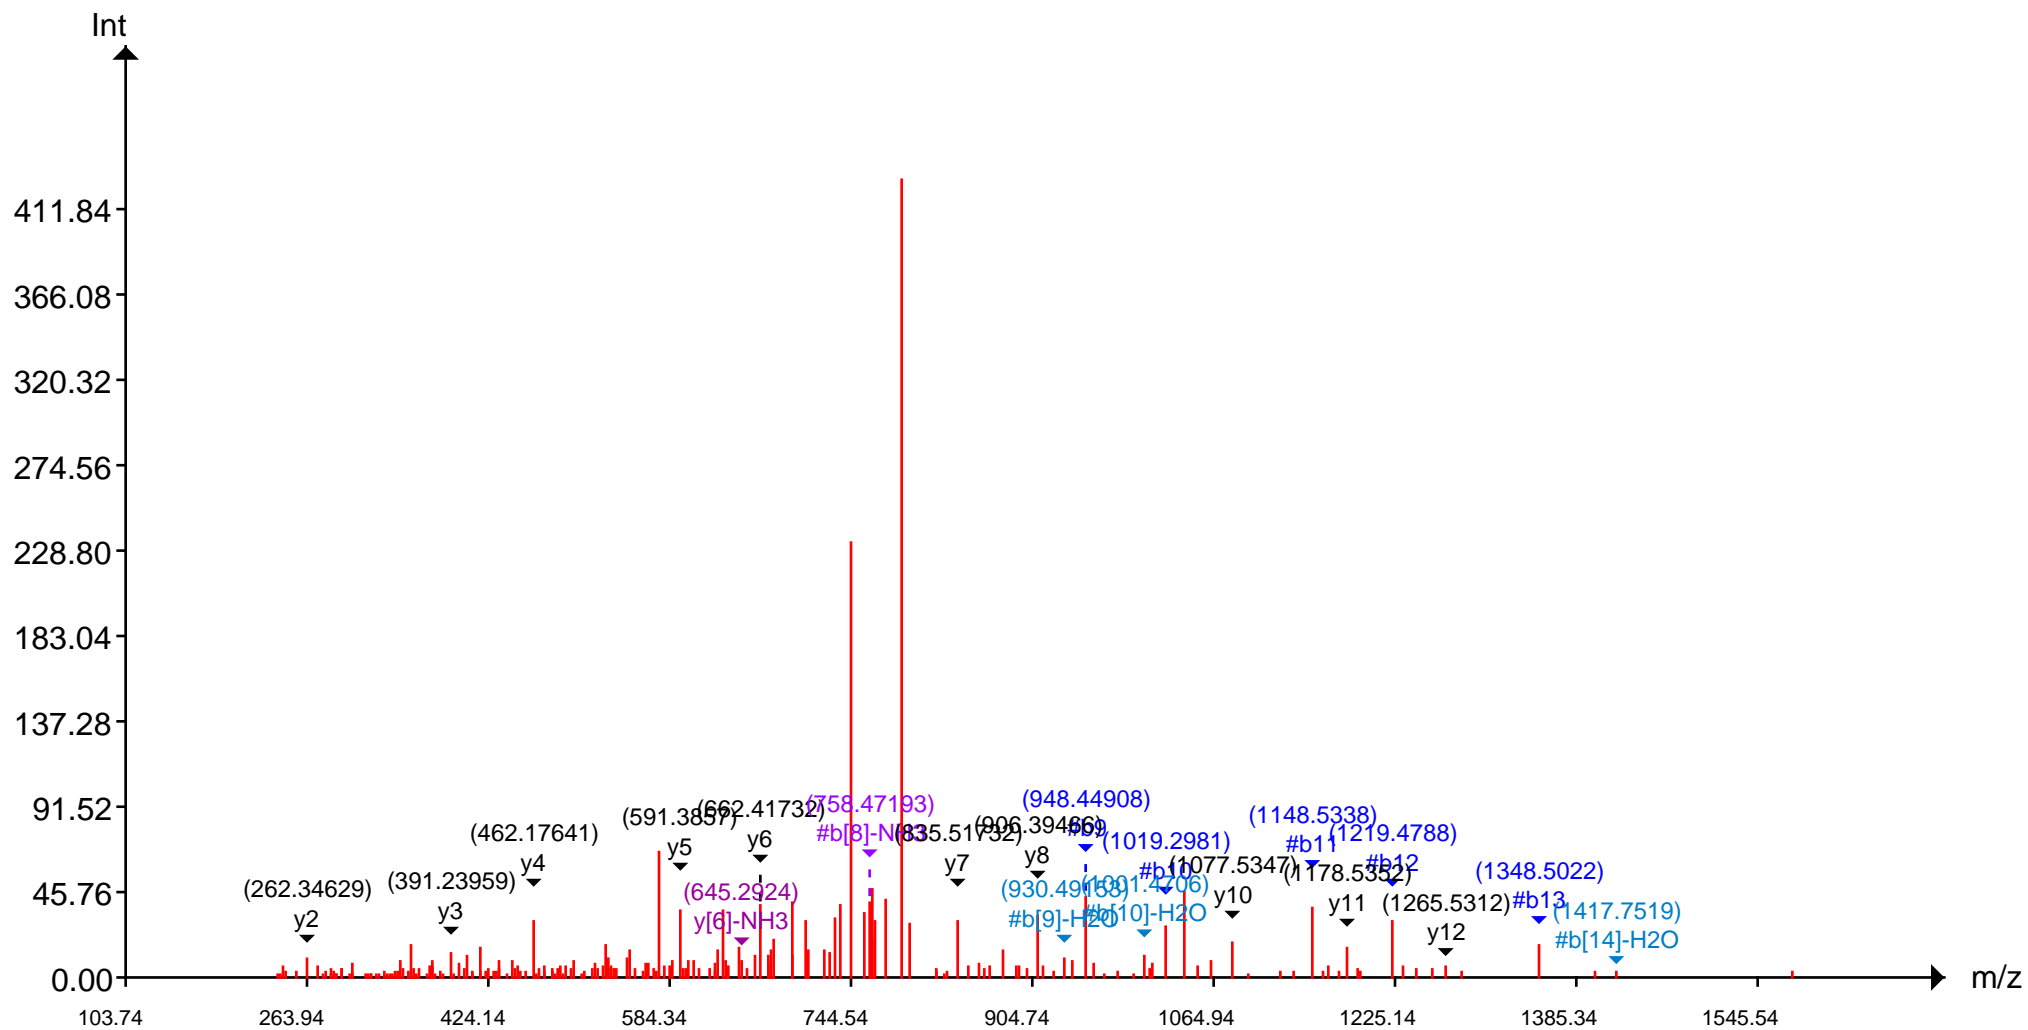

## Info

|                          |                                   |                           |          |
|--------------------------|-----------------------------------|---------------------------|----------|
| <b>Modified Sequence</b> | AcD3-AVESTGNAK<AcD3K*>AEAESR-COOH | <b>Ion score</b>          | 51.16    |
| <b>Protein</b>           | Q9EQK5                            | <b>Confidence level</b>   | 99.00%   |
| <b>Precursor m/z</b>     | 805.40093                         | <b>Identity Threshold</b> | 47.59    |
| <b>Charge</b>            | 2+                                | <b>Mass error</b>         | 0.001145 |

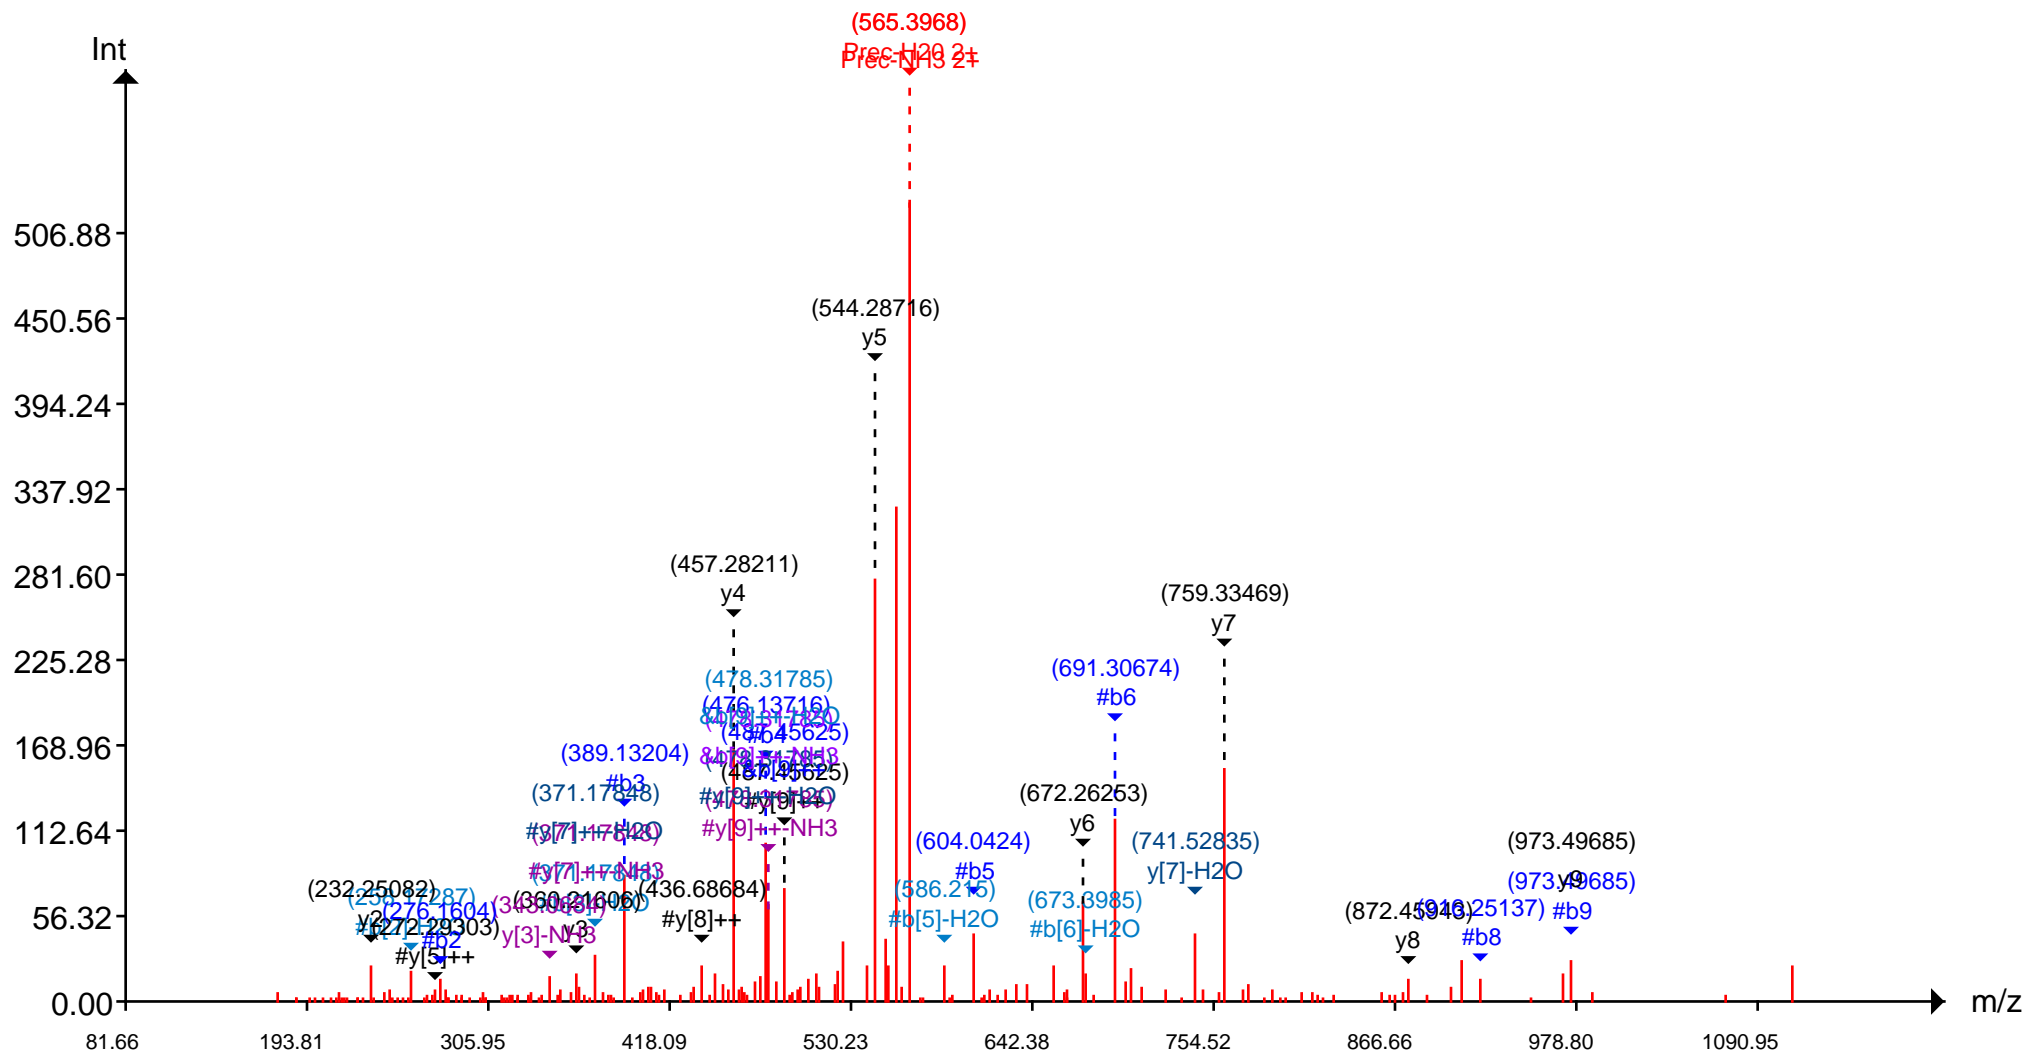

## Info

**Modified Sequence** AcD3-ETLSQSPQGR-COOH

**Protein** P60335

**Precursor m/z** 574.29194

**Charge** 2+

**Ion score** 65.67

**Confidence level** 99.00%

**Identity Threshold** 47.55

**Mass error** -0.001503



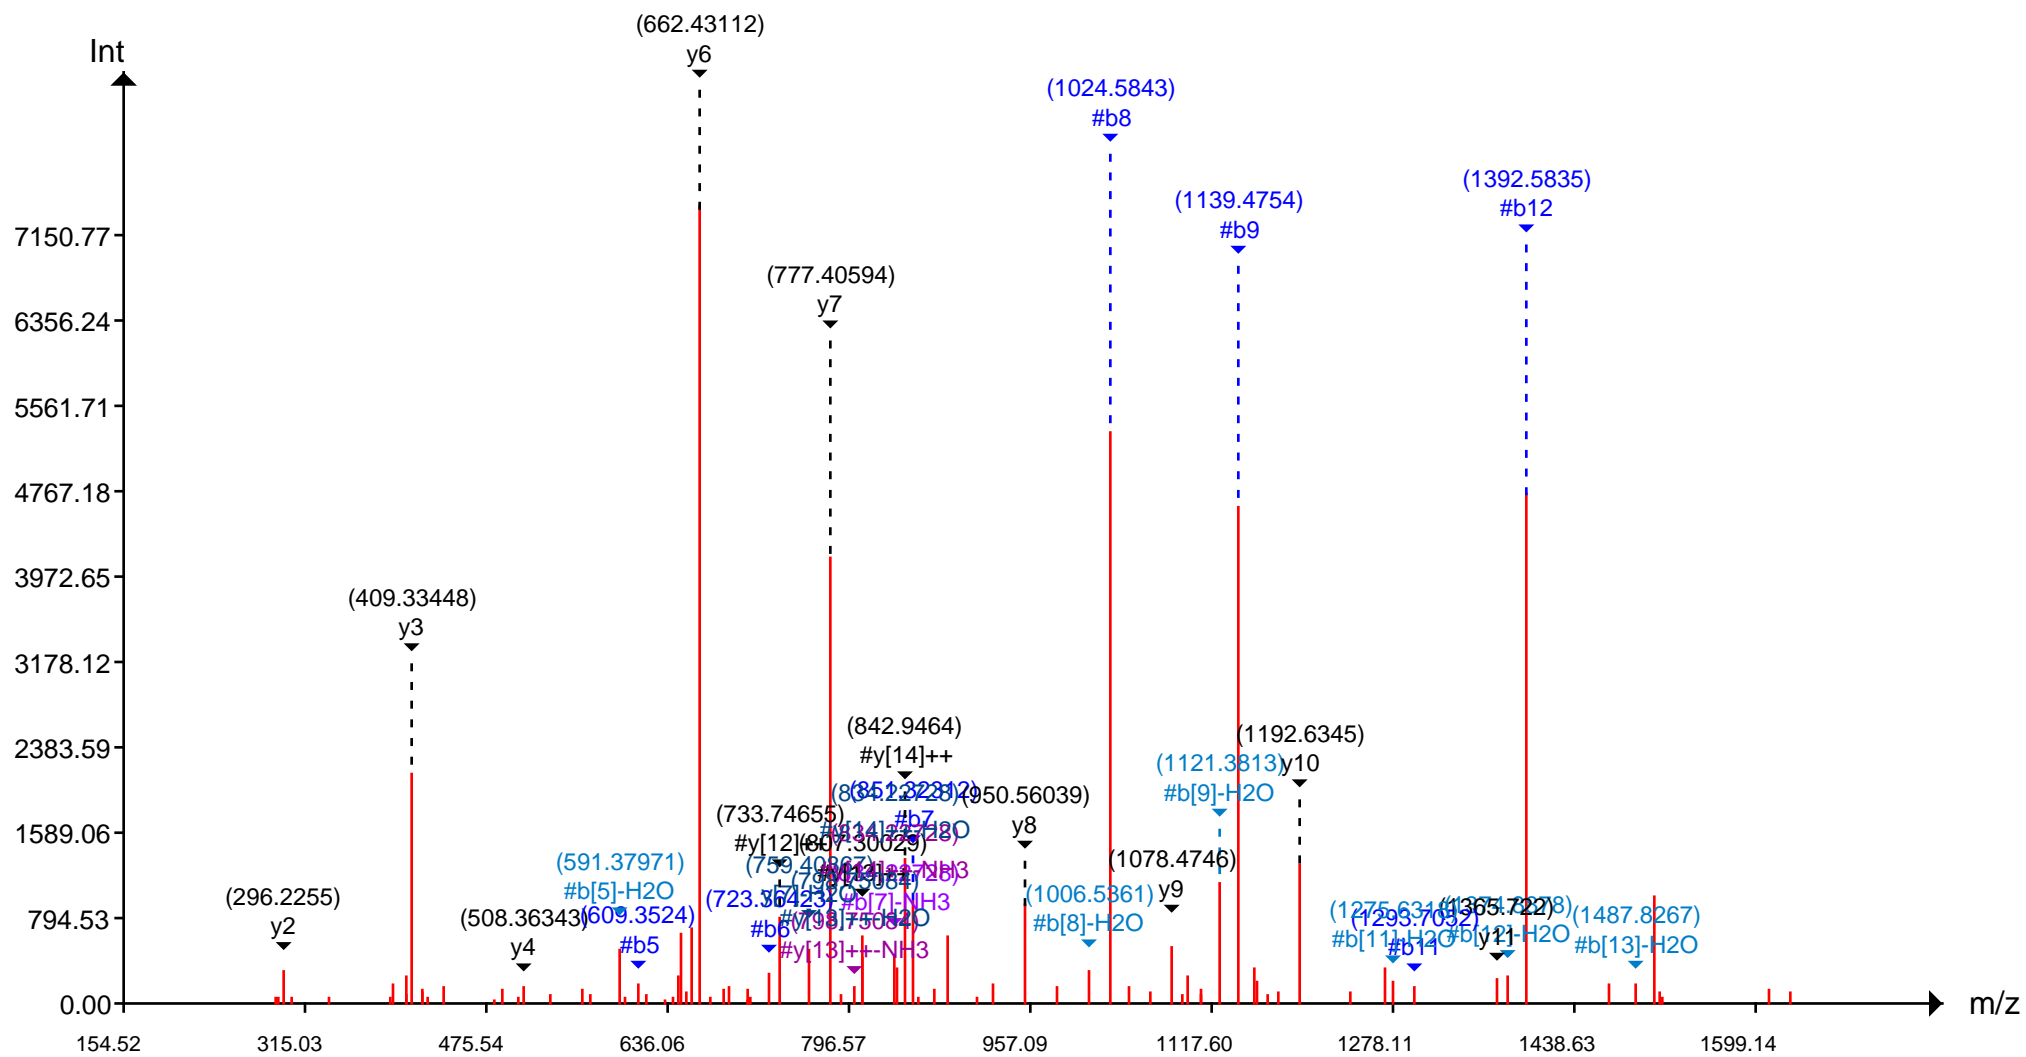

## Info

|                          |                                                |                           |          |
|--------------------------|------------------------------------------------|---------------------------|----------|
| <b>Modified Sequence</b> | AcD3-AAFTK<AcD3K*>NQK<AcD3K*>DPGVLDK<C13>-COOH | <b>Ion score</b>          | 62.34    |
| <b>Protein</b>           | P50543                                         | <b>Confidence level</b>   | 99.00%   |
| <b>Precursor m/z</b>     | 900.99919                                      | <b>Identity Threshold</b> | 47.12    |
| <b>Charge</b>            | 2+                                             | <b>Mass error</b>         | 0.001482 |



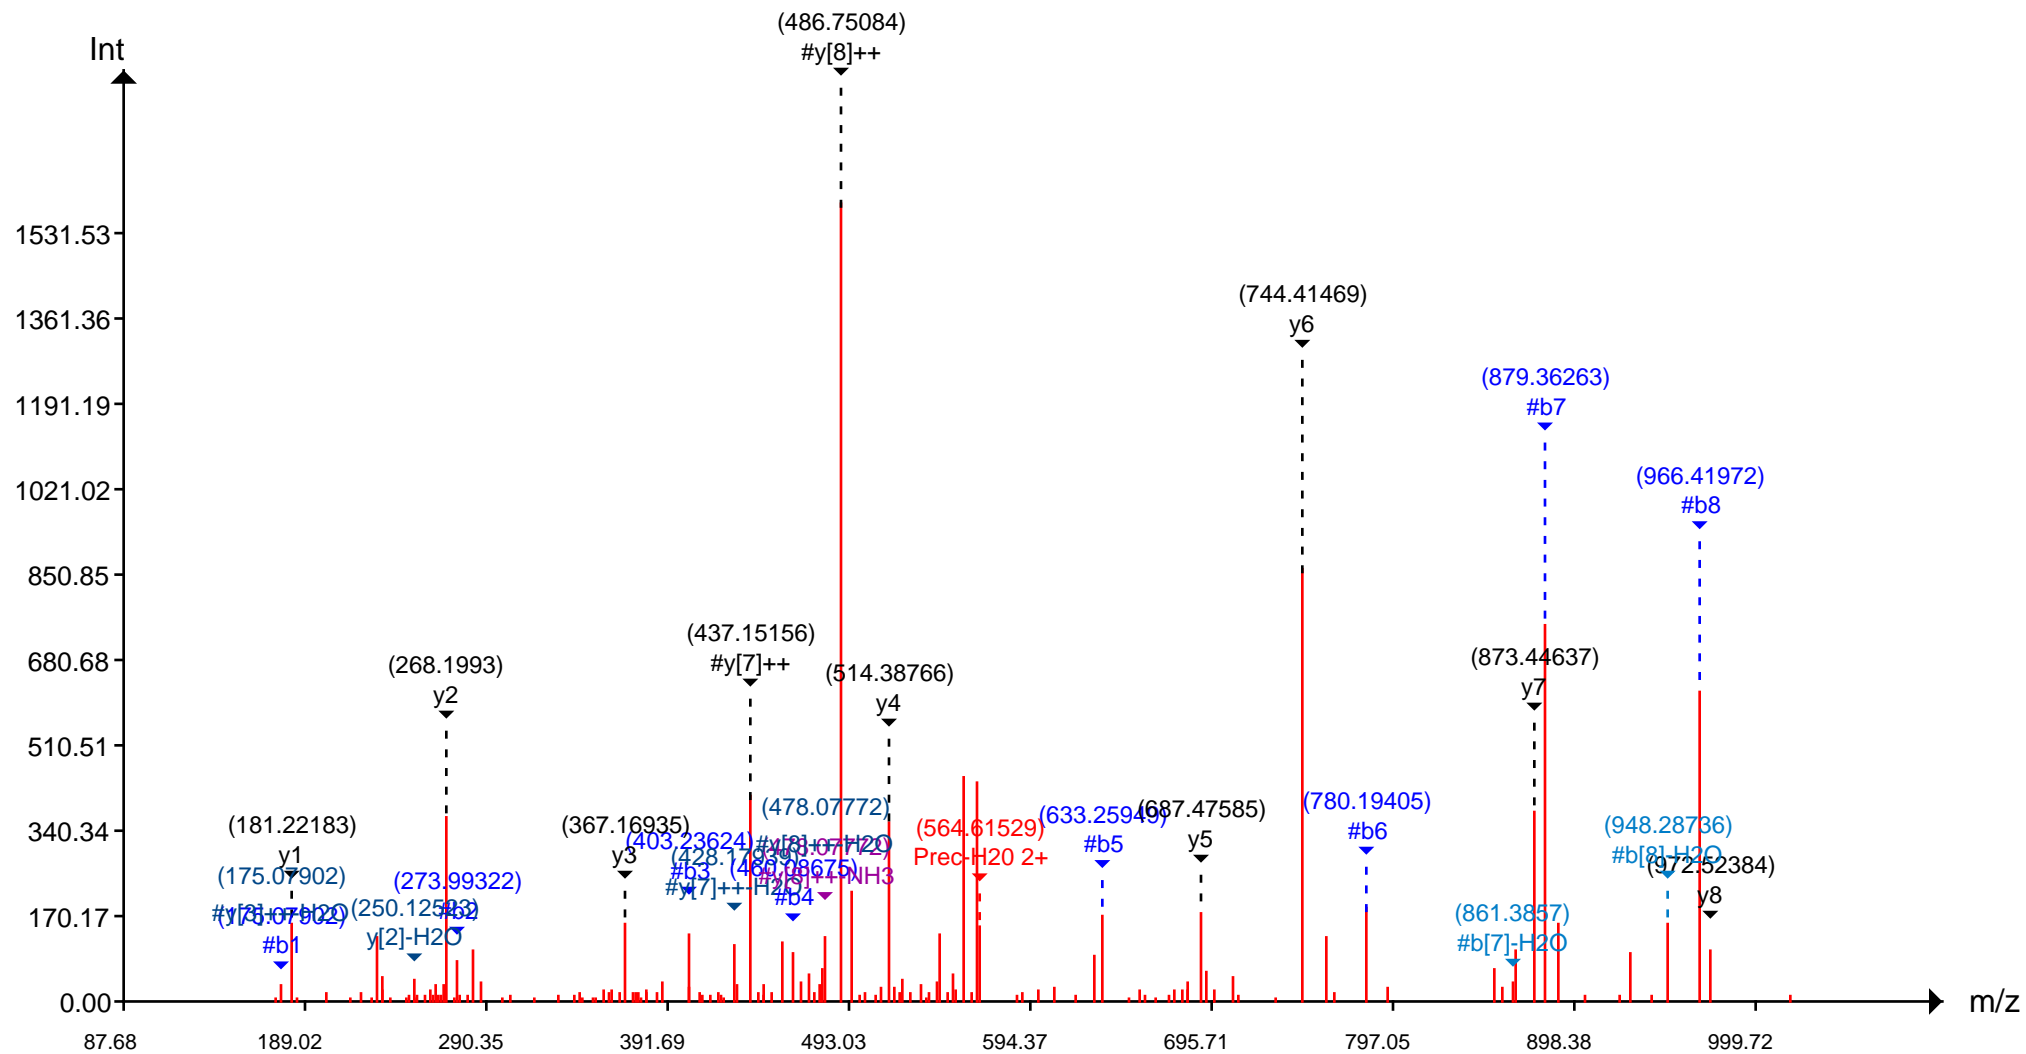

## Info

**Modified Sequence** AcD3-EVEGK<AcD3K\*>M<Mox\*>VSR<C13>-COOH

**Ion score** 54.49

**Protein** P63028

**Confidence level** 99.00%

**Precursor m/z** 573.80532

**Identity Threshold** 47.96

**Charge** 2+

**Mass error** -3.78E-4

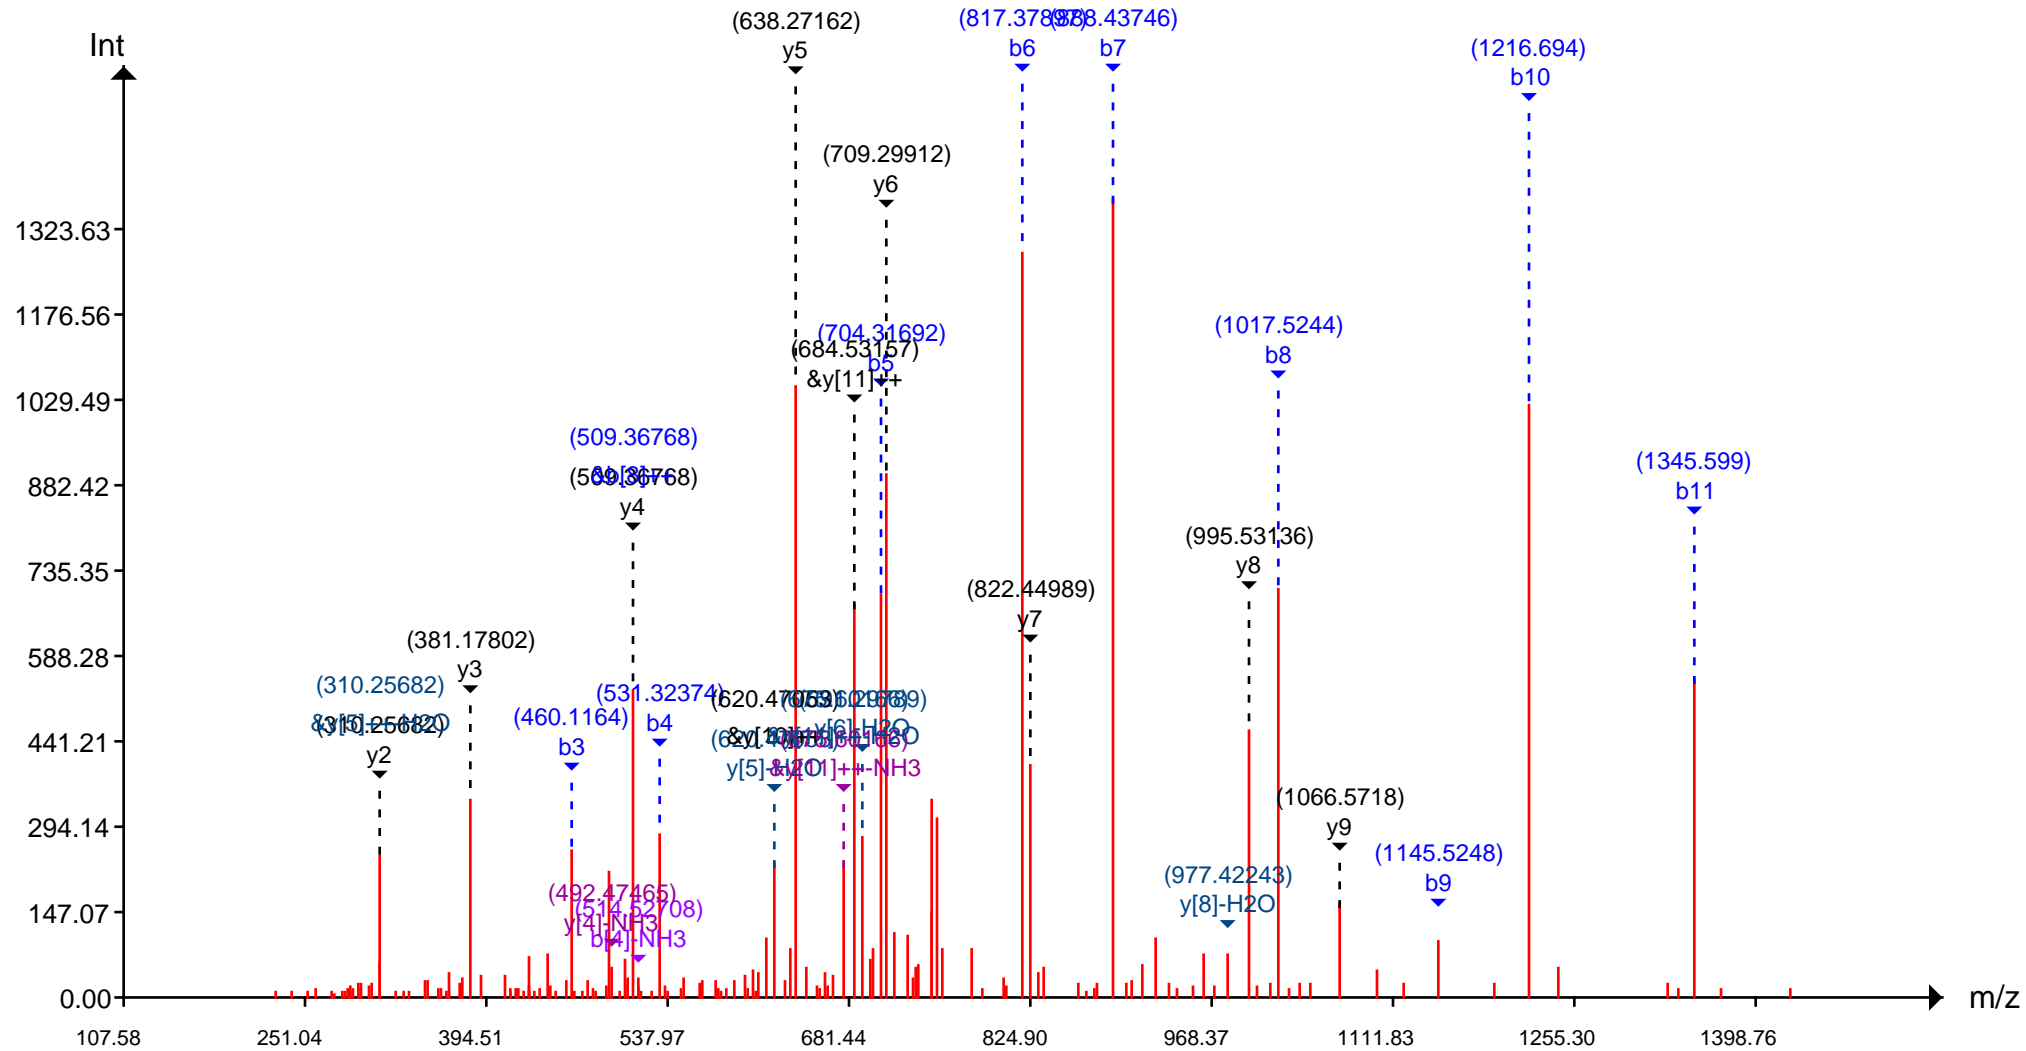

## Info

**Modified Sequence** AcD3-IQK<AcD3K\*>AK<AcD3K\*>LAEQAER<C13>-COOH

**Ion score** 66.6

**Protein** O70456, P68254

**Confidence level** 99.00%

**Precursor m/z** 763.45394

**Identity Threshold** 44.19

**Charge** 2+

**Mass error** 0.001635

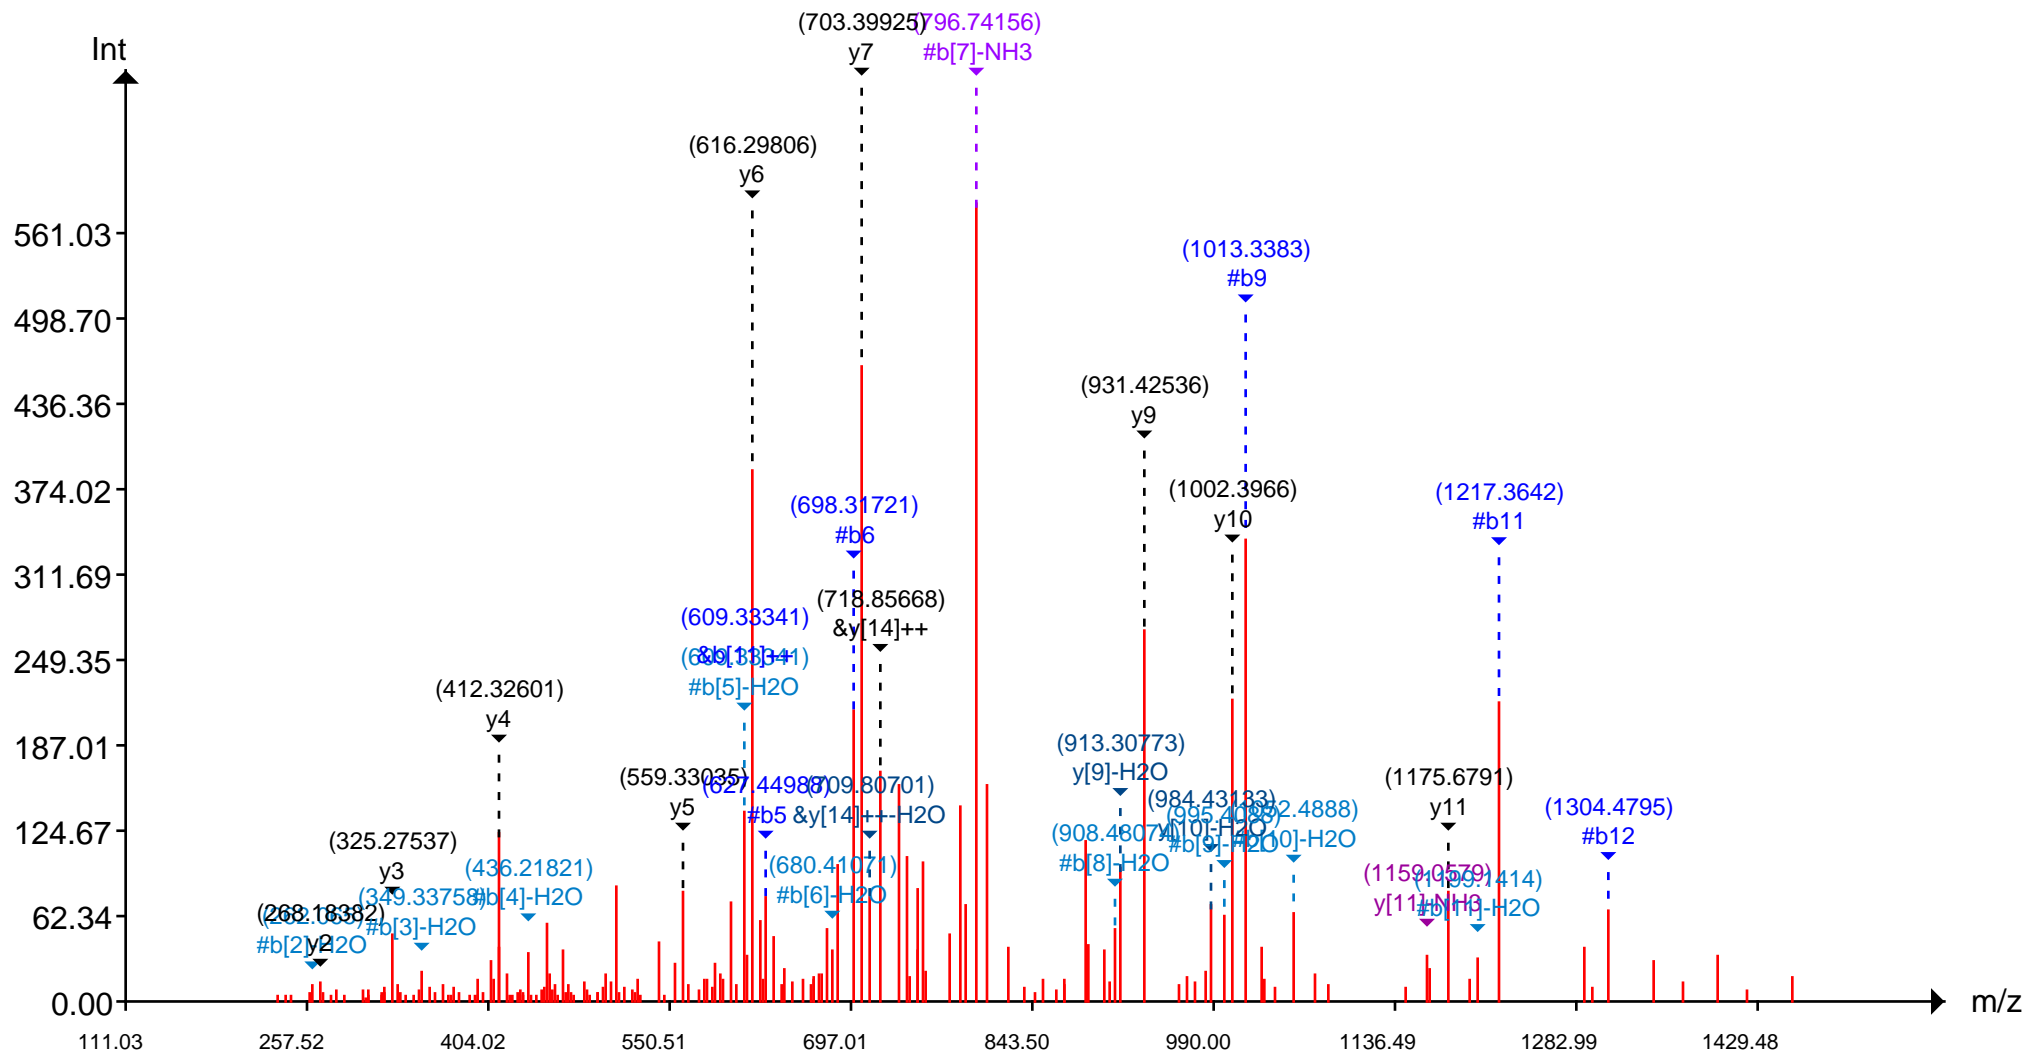

## Info

|                          |                                              |                           |        |
|--------------------------|----------------------------------------------|---------------------------|--------|
| <b>Modified Sequence</b> | AcD3-FSSSK<AcD3K*>ADLSGM<Mox*>SGSR<C13>-COOH | <b>Ion score</b>          | 54.18  |
| <b>Protein</b>           | Q9D154, Q5SV42                               | <b>Confidence level</b>   | 99.00% |
| <b>Precursor m/z</b>     | 814.89387                                    | <b>Identity Threshold</b> | 46.66  |
| <b>Charge</b>            | 2+                                           | <b>Mass error</b>         | 5.9E-4 |

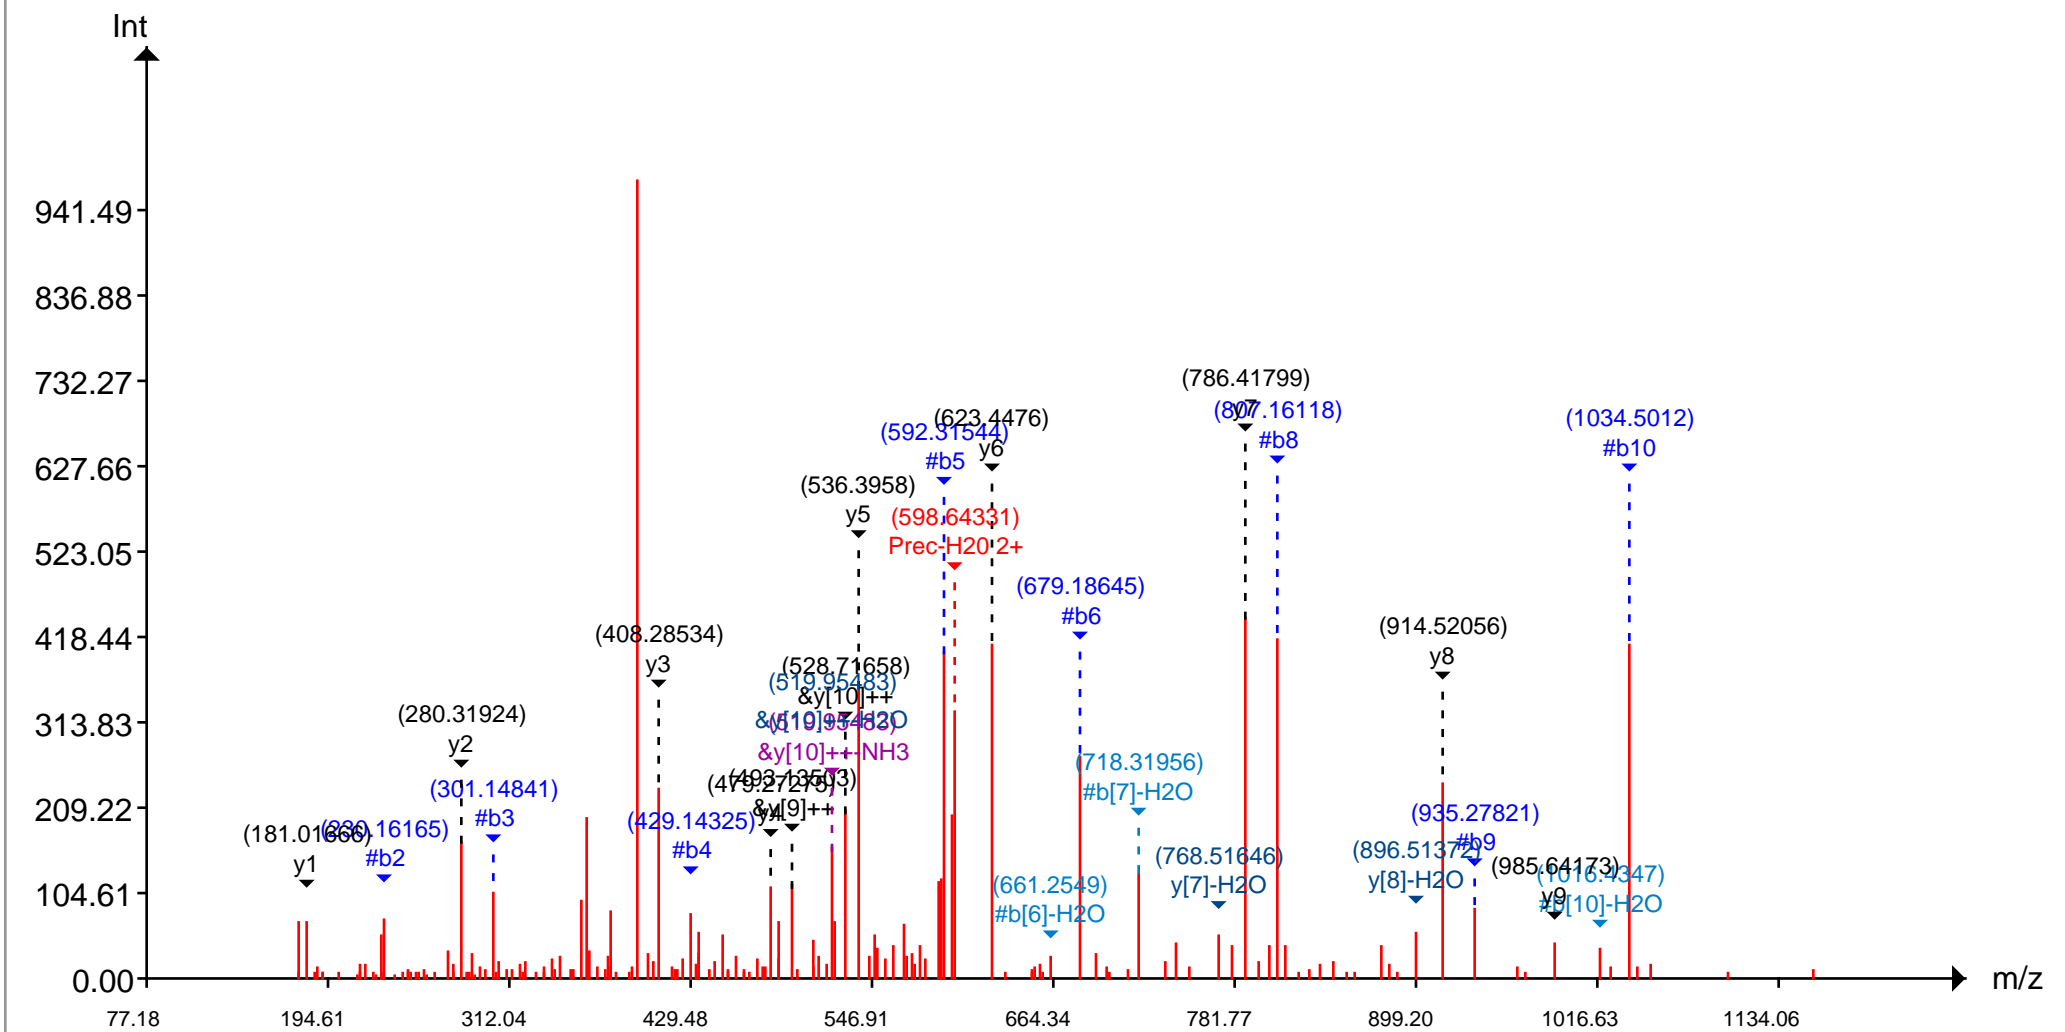

## Info

**Modified Sequence** AcD3-IAAQYSGAQVR<C13>-COOH

**Ion score** 63.12

**Protein** Q9D8N0

**Confidence level** 99.00%

**Precursor m/z** 607.83679

**Identity Threshold** 47.89

**Charge** 2+

**Mass error** 4.7E-5

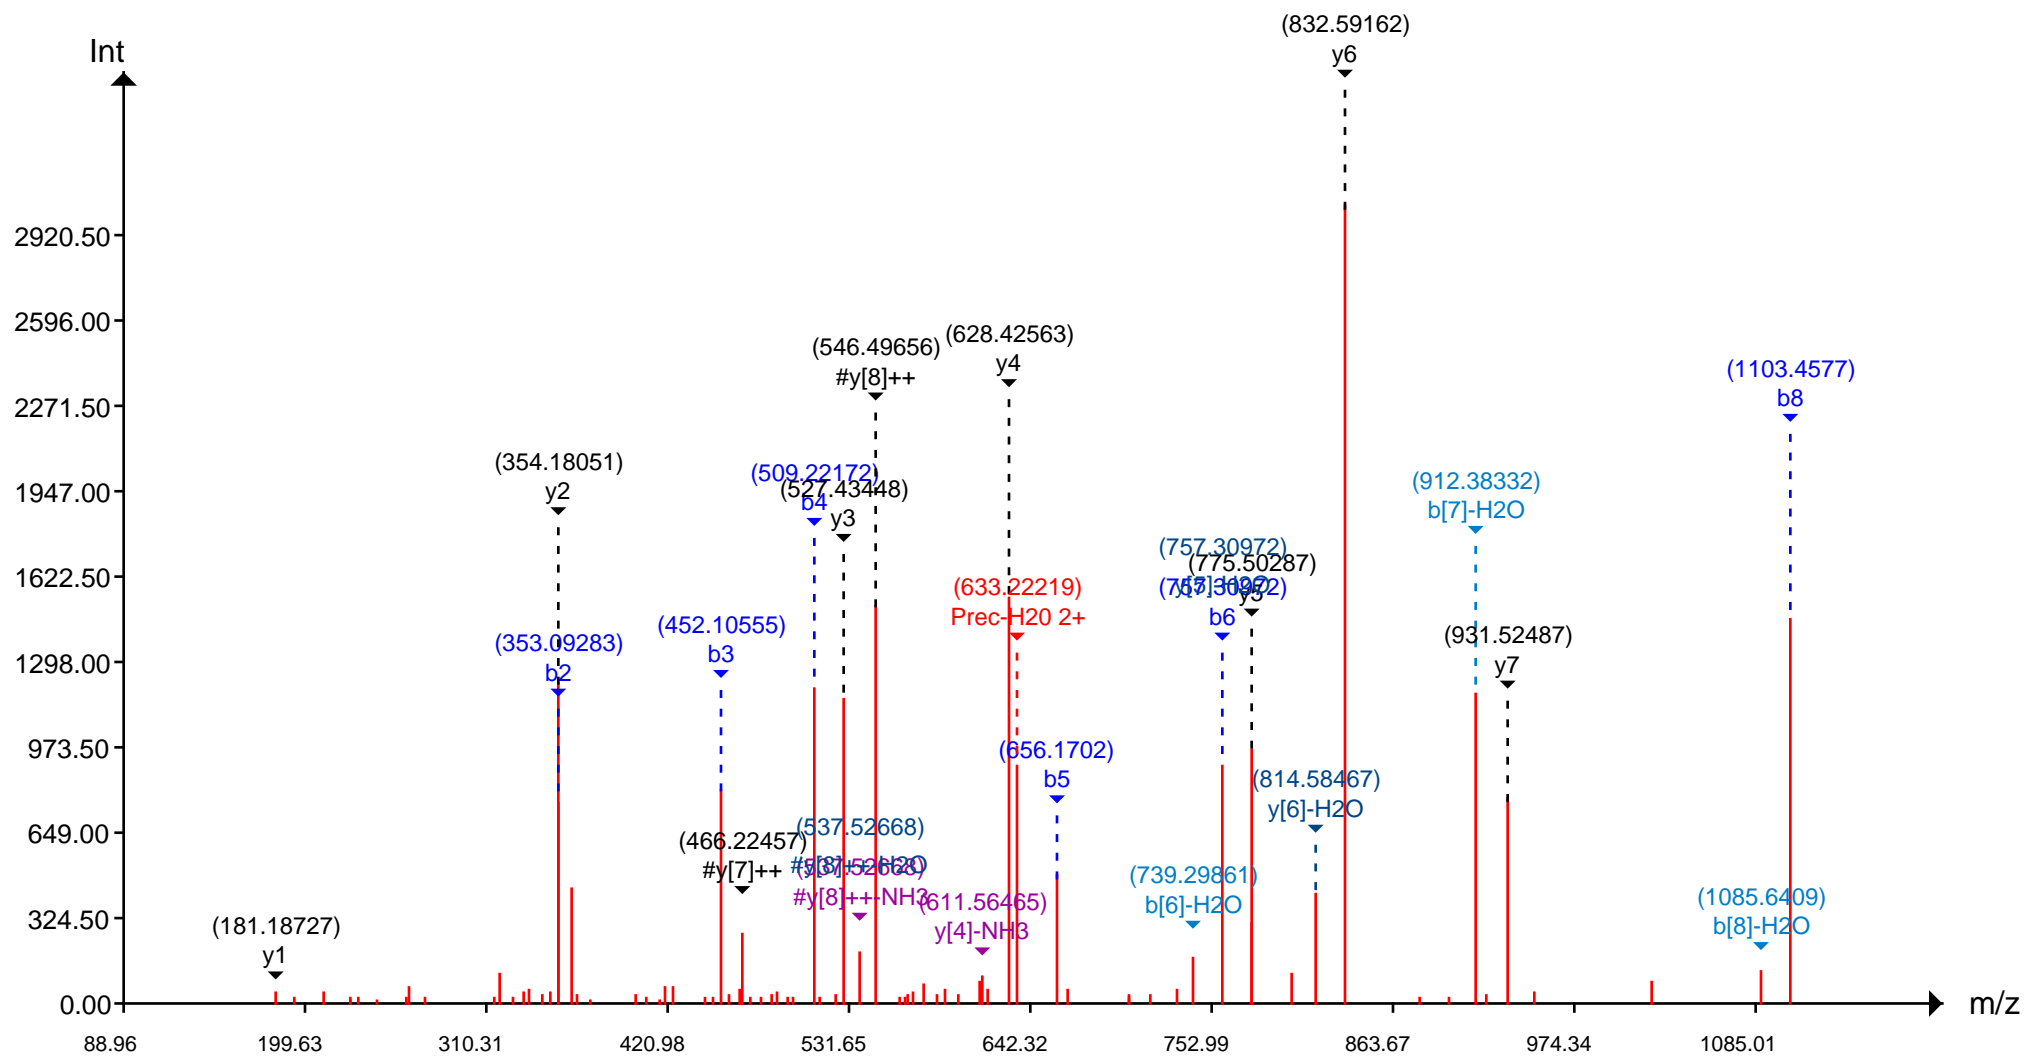

## Info

|                          |                                                |                           |          |
|--------------------------|------------------------------------------------|---------------------------|----------|
| <b>Modified Sequence</b> | AcD3-FC<Cmm*>VGFTK<AcD3K*>K<AcD3K*>R<C13>-COOH | <b>Ion score</b>          | 53.86    |
| <b>Protein</b>           | P97351                                         | <b>Confidence level</b>   | 99.00%   |
| <b>Precursor m/z</b>     | 642.36542                                      | <b>Identity Threshold</b> | 47.19    |
| <b>Charge</b>            | 2+                                             | <b>Mass error</b>         | 0.001307 |

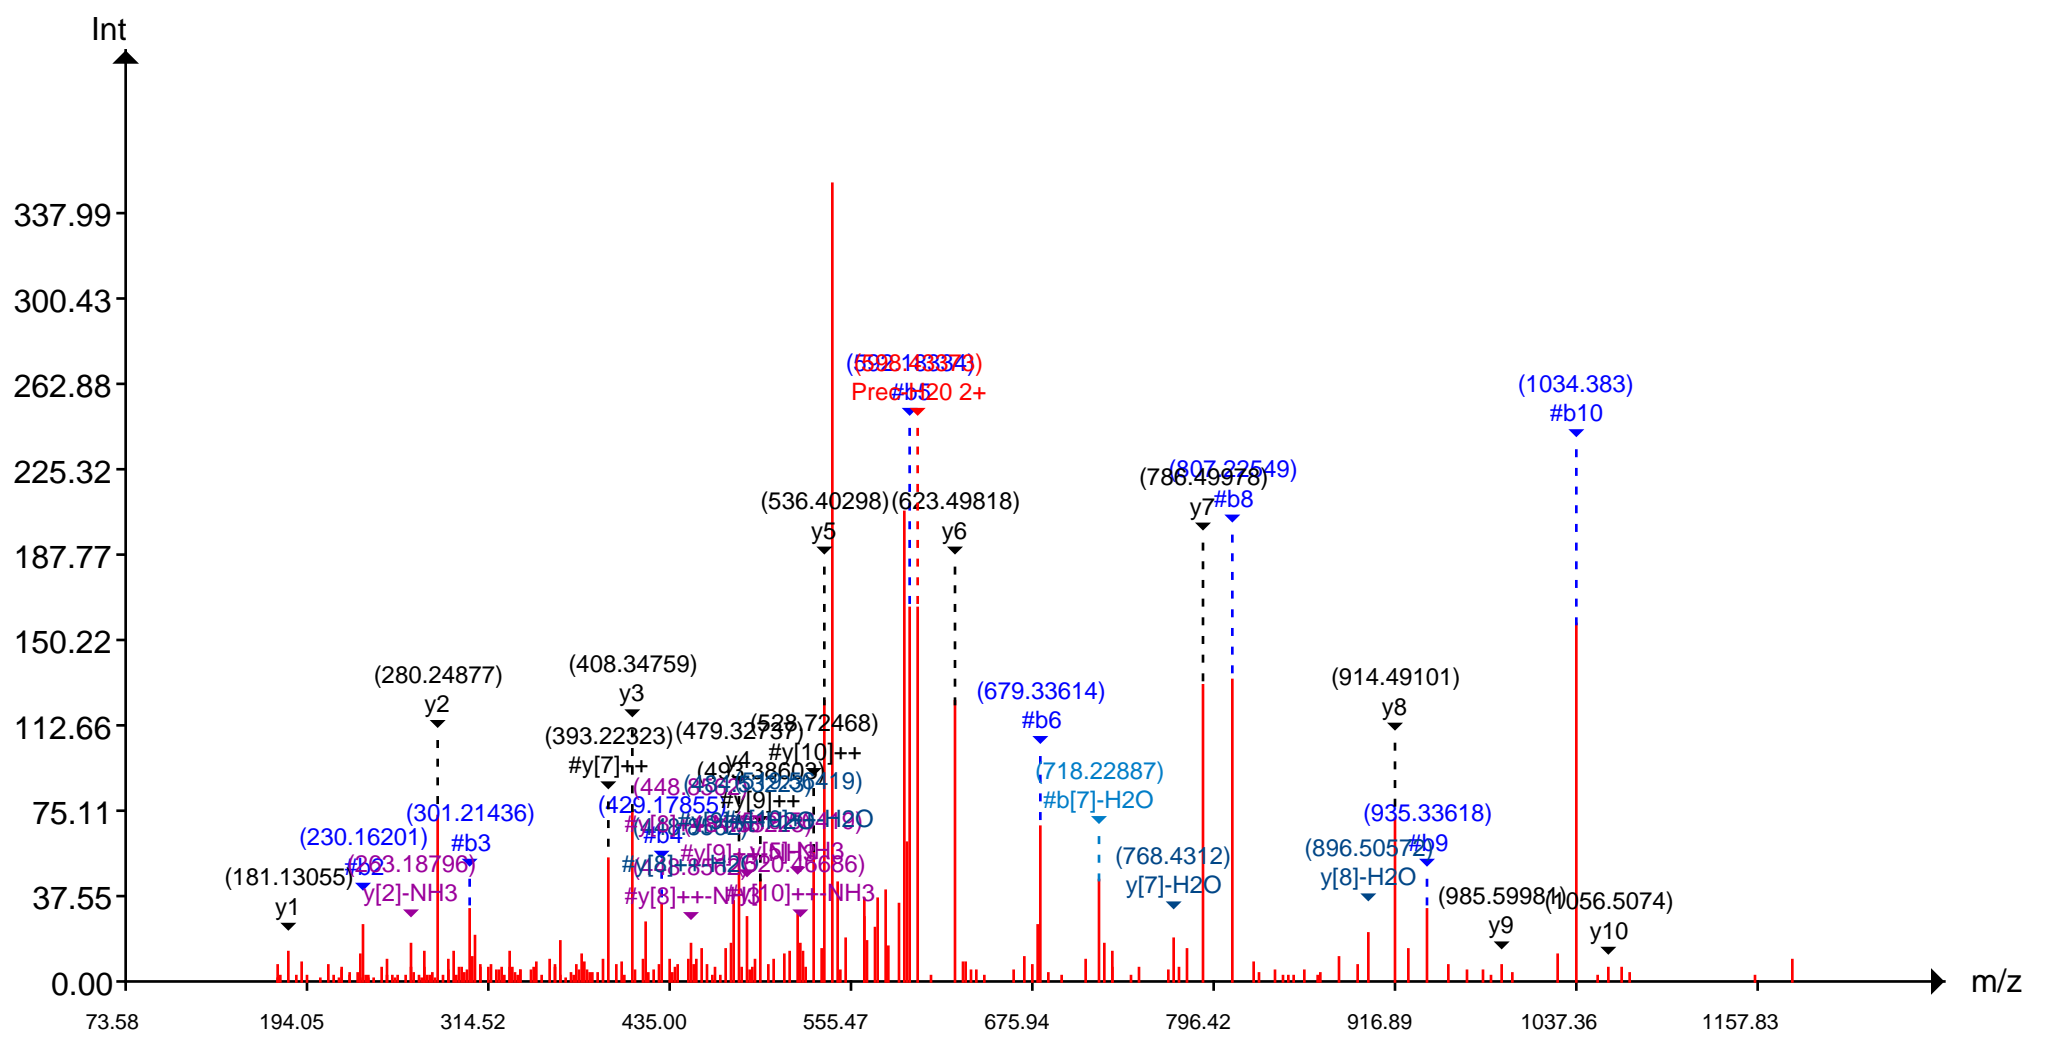

| Info                     |                            |                           |          |
|--------------------------|----------------------------|---------------------------|----------|
| <b>Modified Sequence</b> | AcD3-IAAQYSGAQVR<C13>-COOH | <b>Ion score</b>          | 76.45    |
| <b>Protein</b>           | Q9D8N0                     | <b>Confidence level</b>   | 99.00%   |
| <b>Precursor m/z</b>     | 607.83659                  | <b>Identity Threshold</b> | 47.85    |
| <b>Charge</b>            | 2+                         | <b>Mass error</b>         | -3.53E-4 |

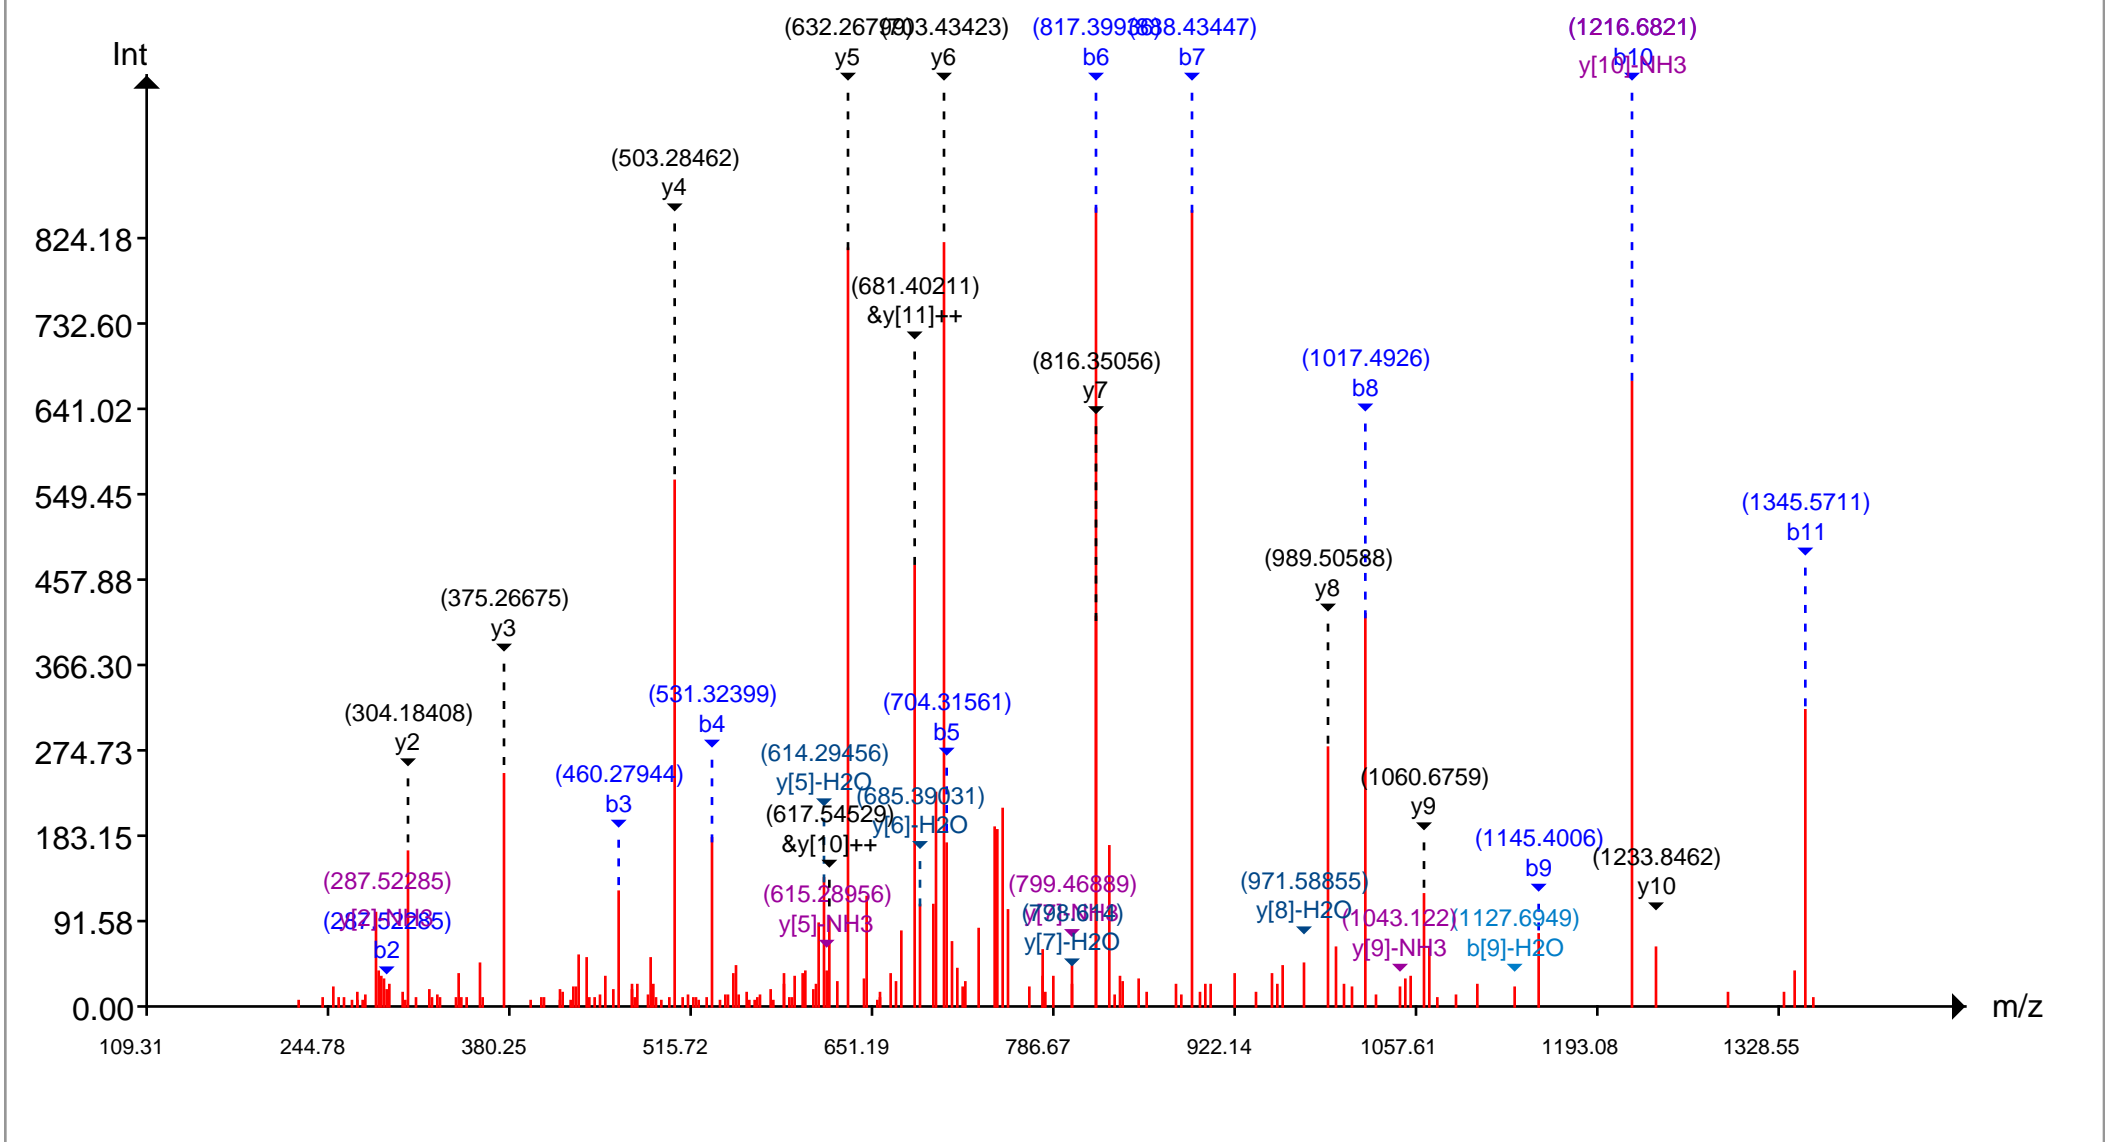

## Info

**Modified Sequence** AcD3-IQK<AcD3K\*>AK<AcD3K\*>LAEQAER-COOH

**Ion score** 80.82

**Protein** O70456, P68254

**Confidence level** 99.00%

**Precursor m/z** 760.44347

**Identity Threshold** 45.46

**Charge** 2+

**Mass error** 8.36E-4

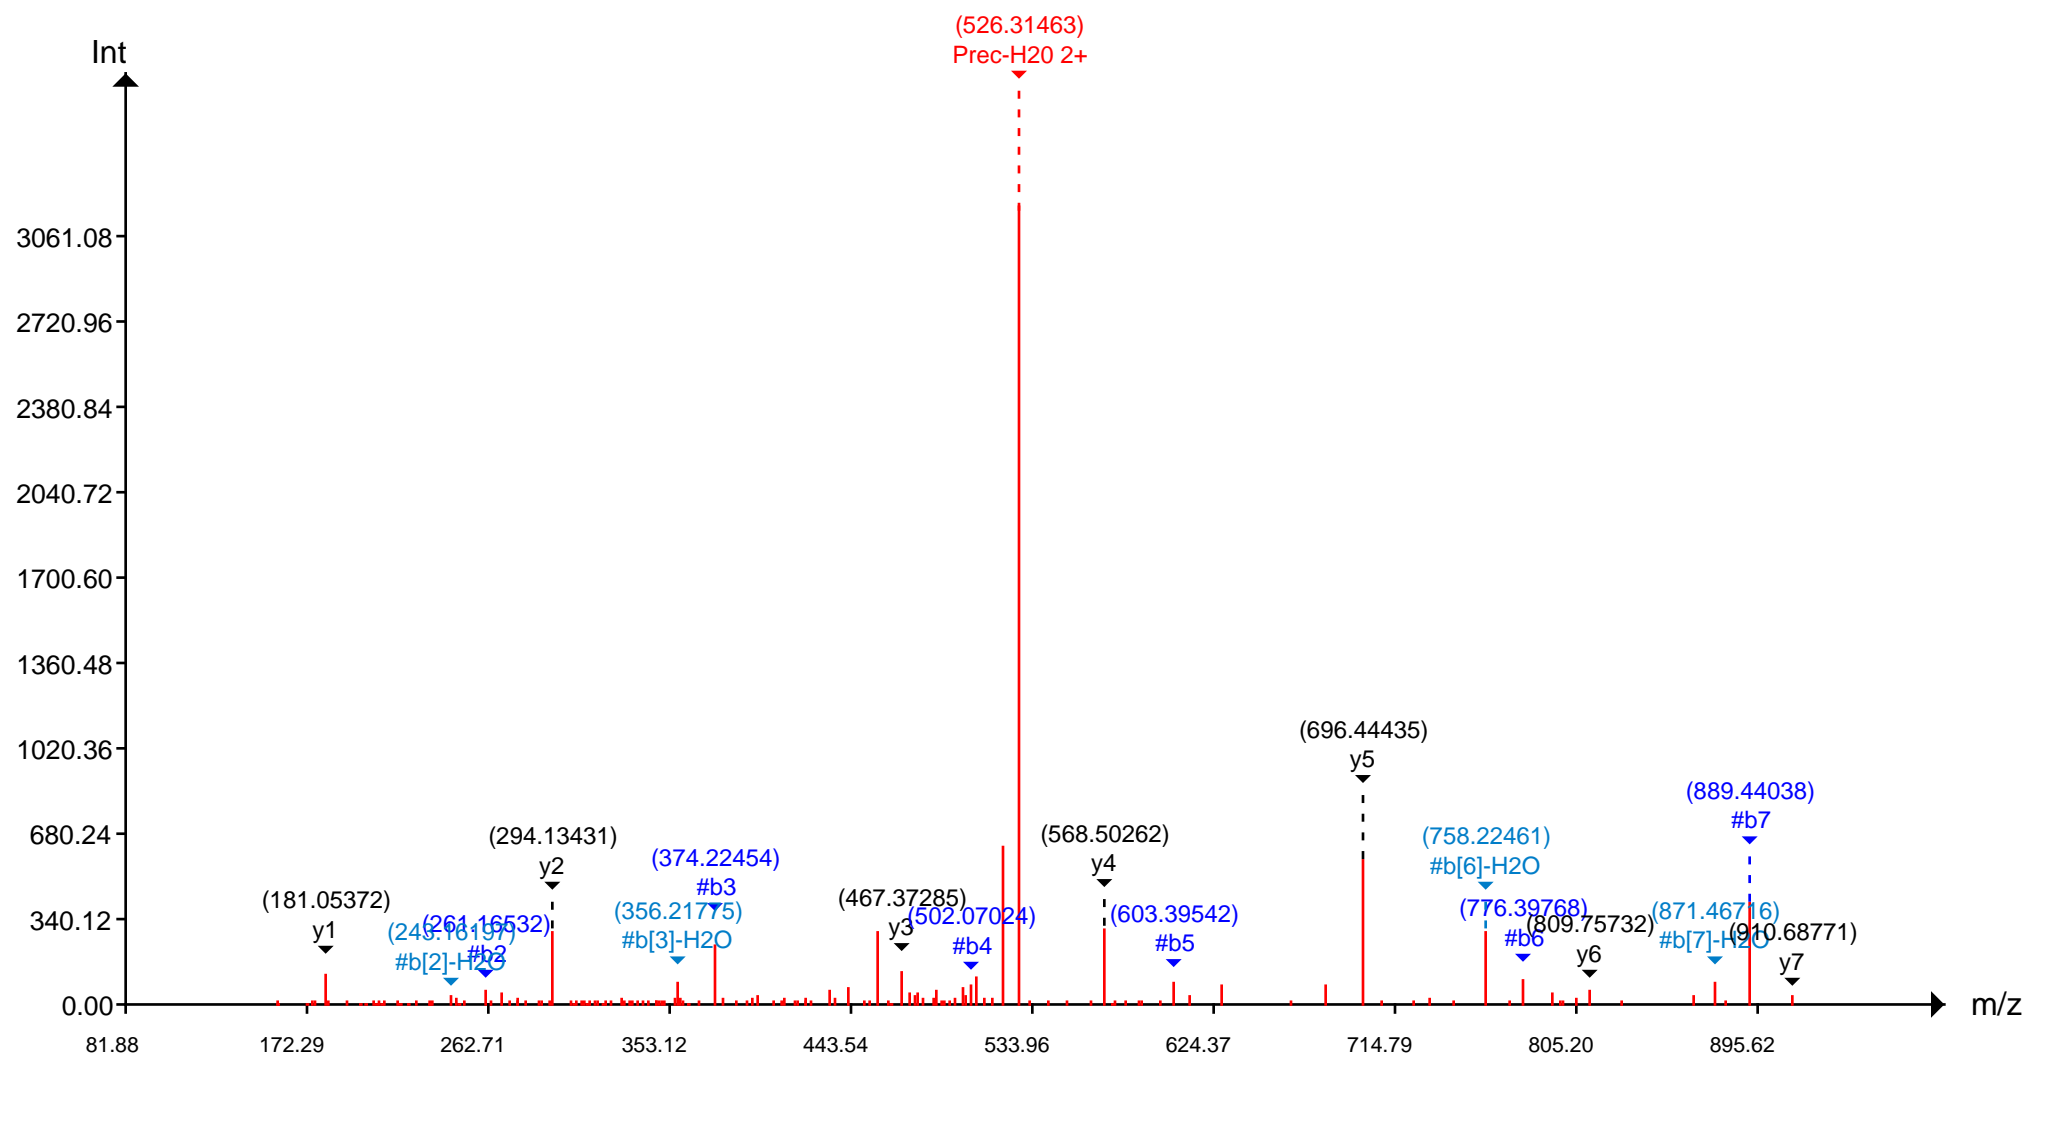

| Info                     |                                 |                           |          |
|--------------------------|---------------------------------|---------------------------|----------|
| <b>Modified Sequence</b> | AcD3-NTLQTK<AcD3K*>LR<C13>-COOH | <b>Ion score</b>          | 49.22    |
| <b>Protein</b>           | Q7TPR4, Q9JI91, O88990, P57780  | <b>Confidence level</b>   | 99.00%   |
| <b>Precursor m/z</b>     | 535.33213                       | <b>Identity Threshold</b> | 43.98    |
| <b>Charge</b>            | 2+                              | <b>Mass error</b>         | -8.35E-4 |



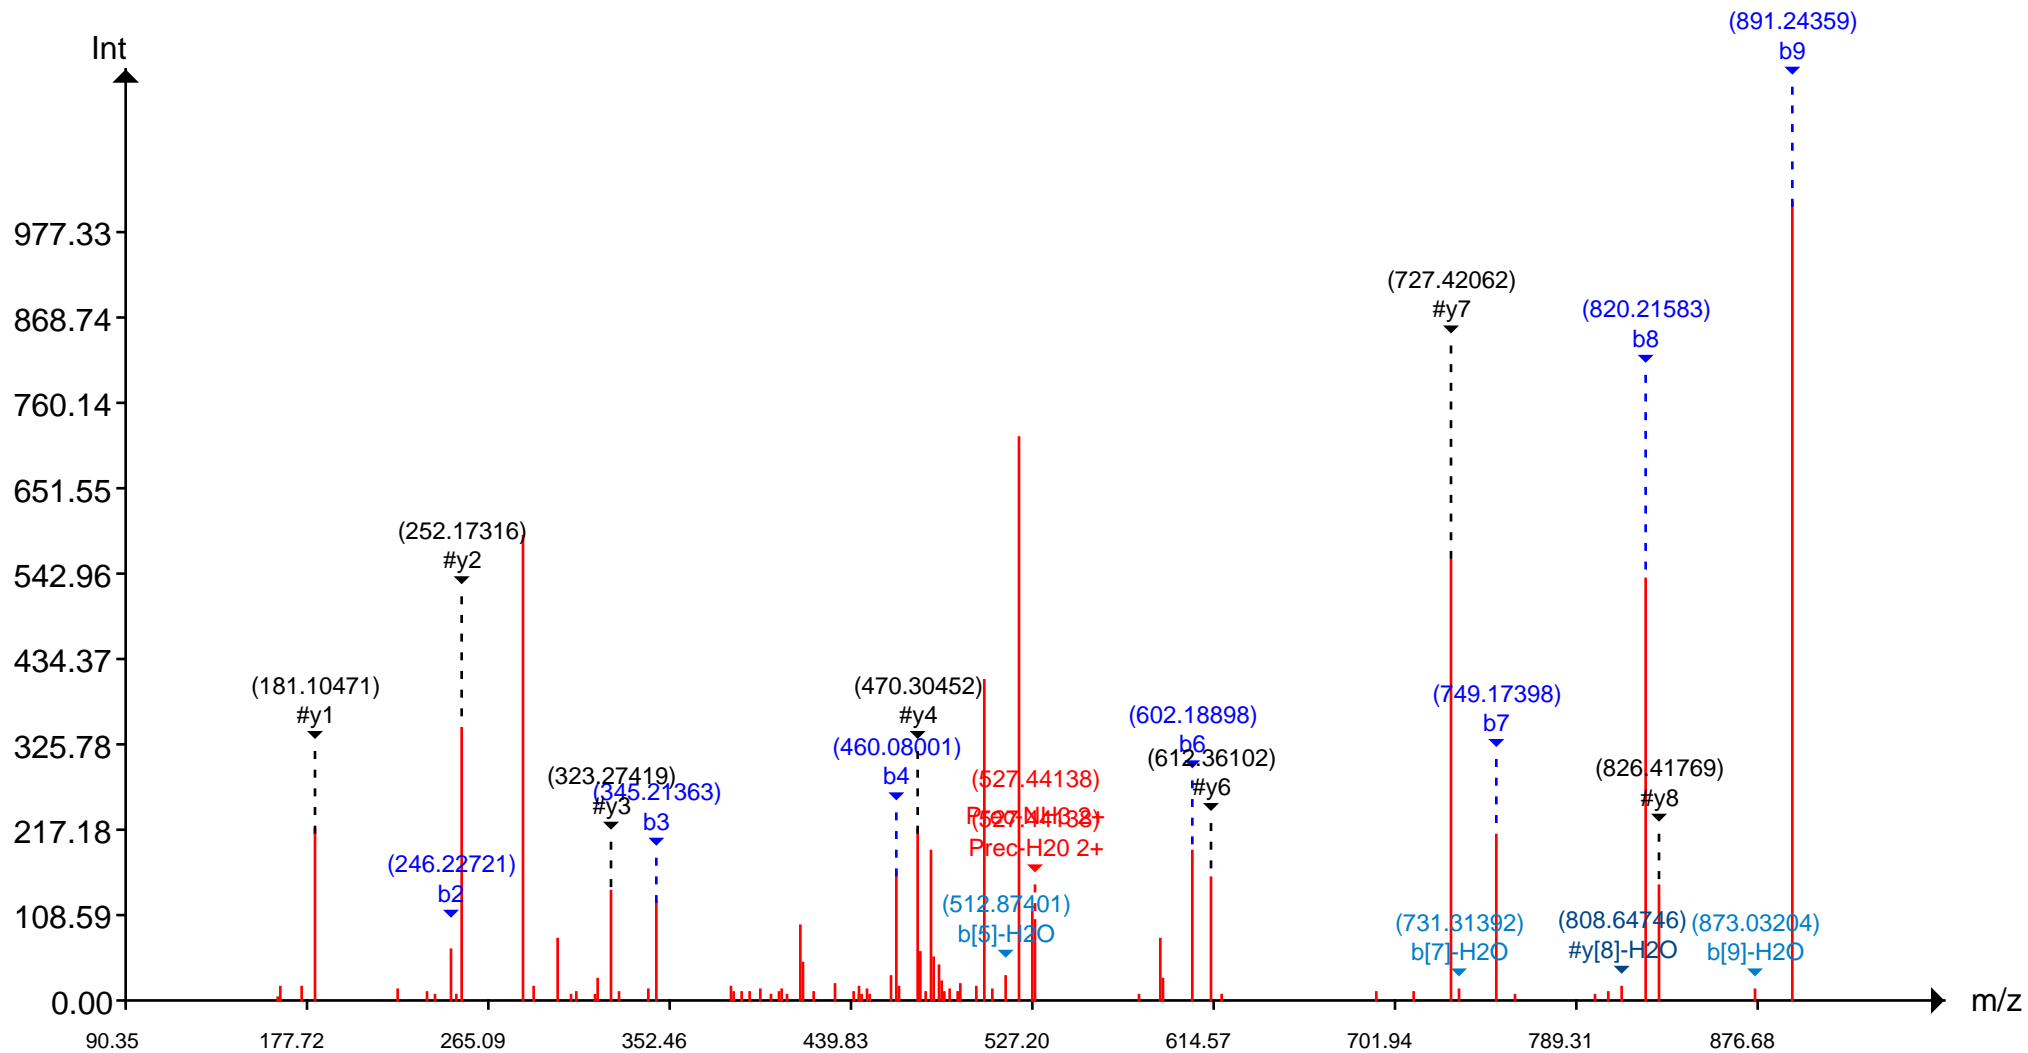

## Info

**Modified Sequence** AcD3-AEVDAAAM<Mox\*>AAR<C13>-COOH

**Protein** O88569

**Precursor m/z** 536.26715

**Charge** 2+

**Ion score** 61.4

**Confidence level** 99.00%

**Identity Threshold** 46.77

**Mass error** -3.48E-4

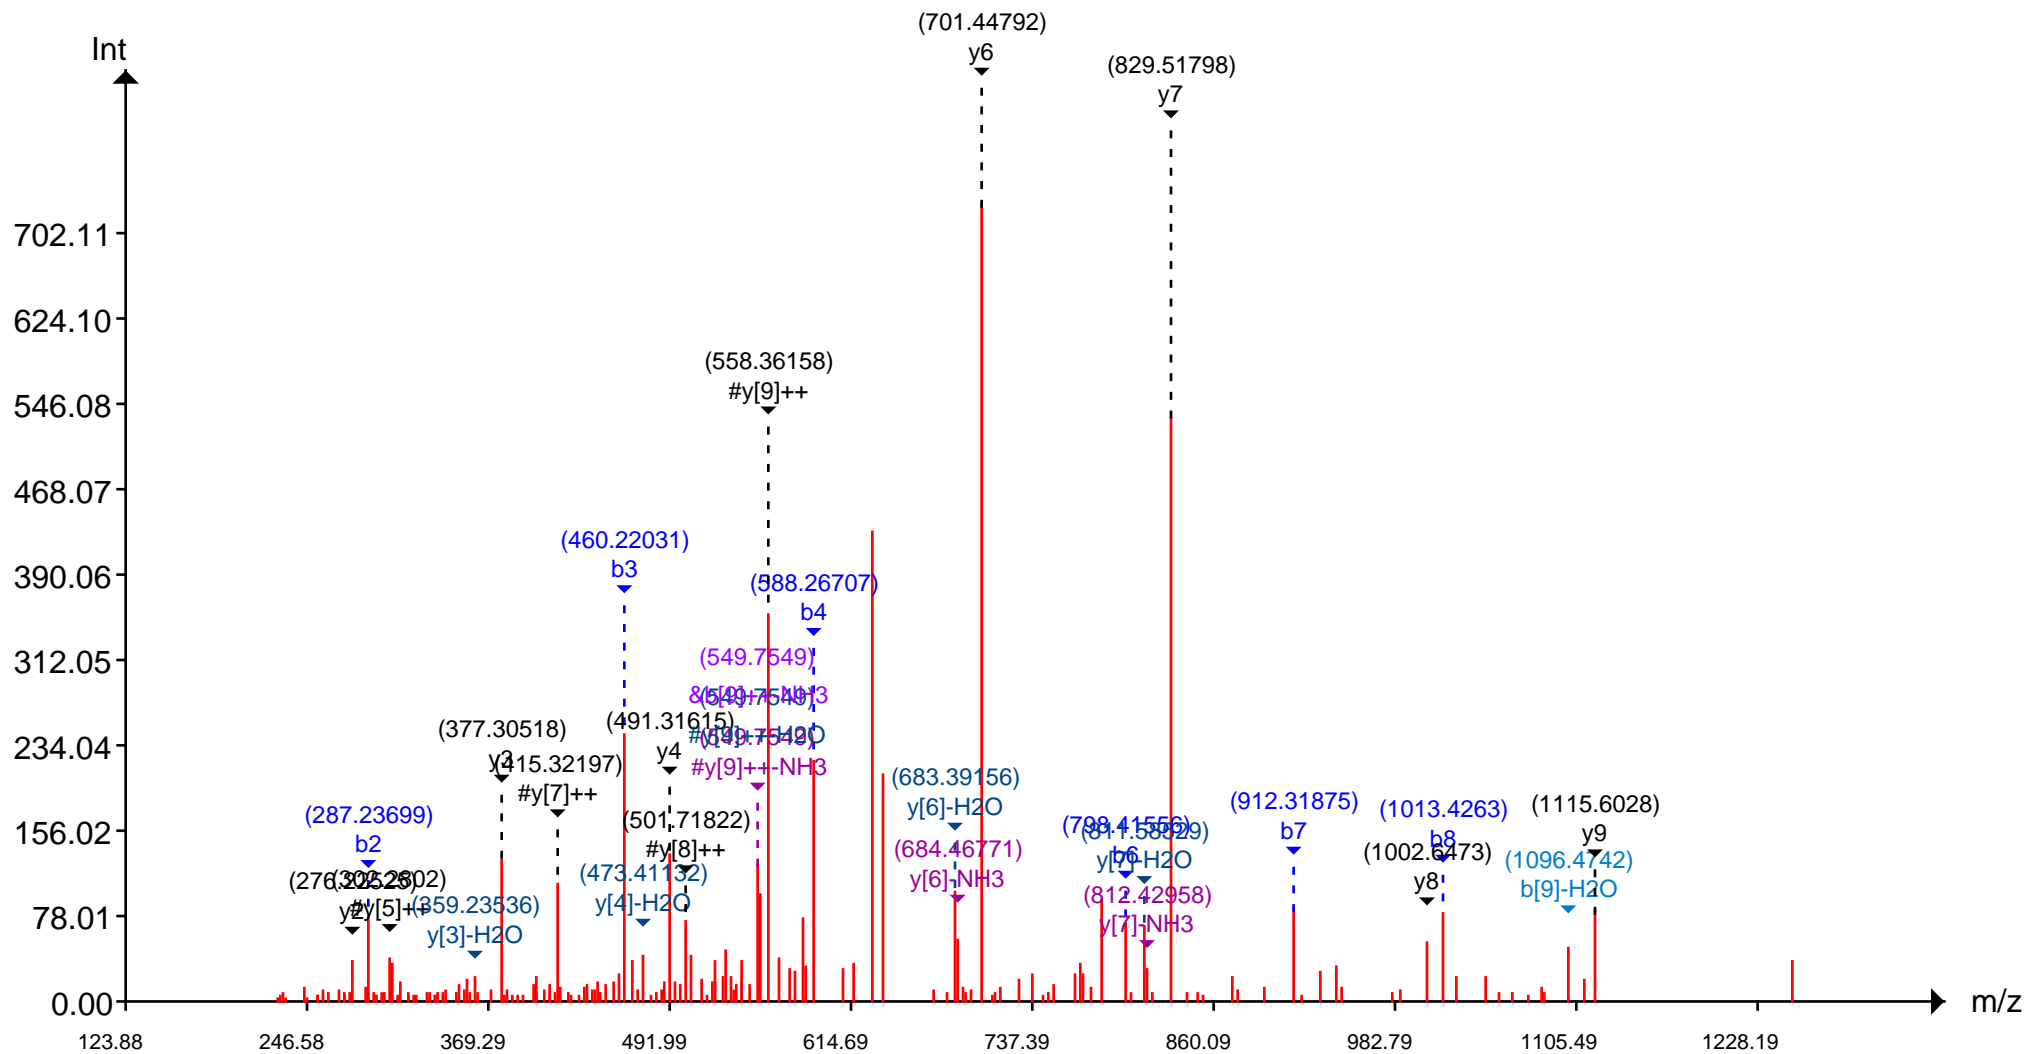

## Info

|                          |                             |                           |         |
|--------------------------|-----------------------------|---------------------------|---------|
| <b>Modified Sequence</b> | AcD3-QLK<AcD3K*>QPLNTR-COOH | <b>Ion score</b>          | 60.18   |
| <b>Protein</b>           | P35235                      | <b>Confidence level</b>   | 99.00%  |
| <b>Precursor m/z</b>     | 644.87812                   | <b>Identity Threshold</b> | 46.07   |
| <b>Charge</b>            | 2+                          | <b>Mass error</b>         | -5.7E-5 |

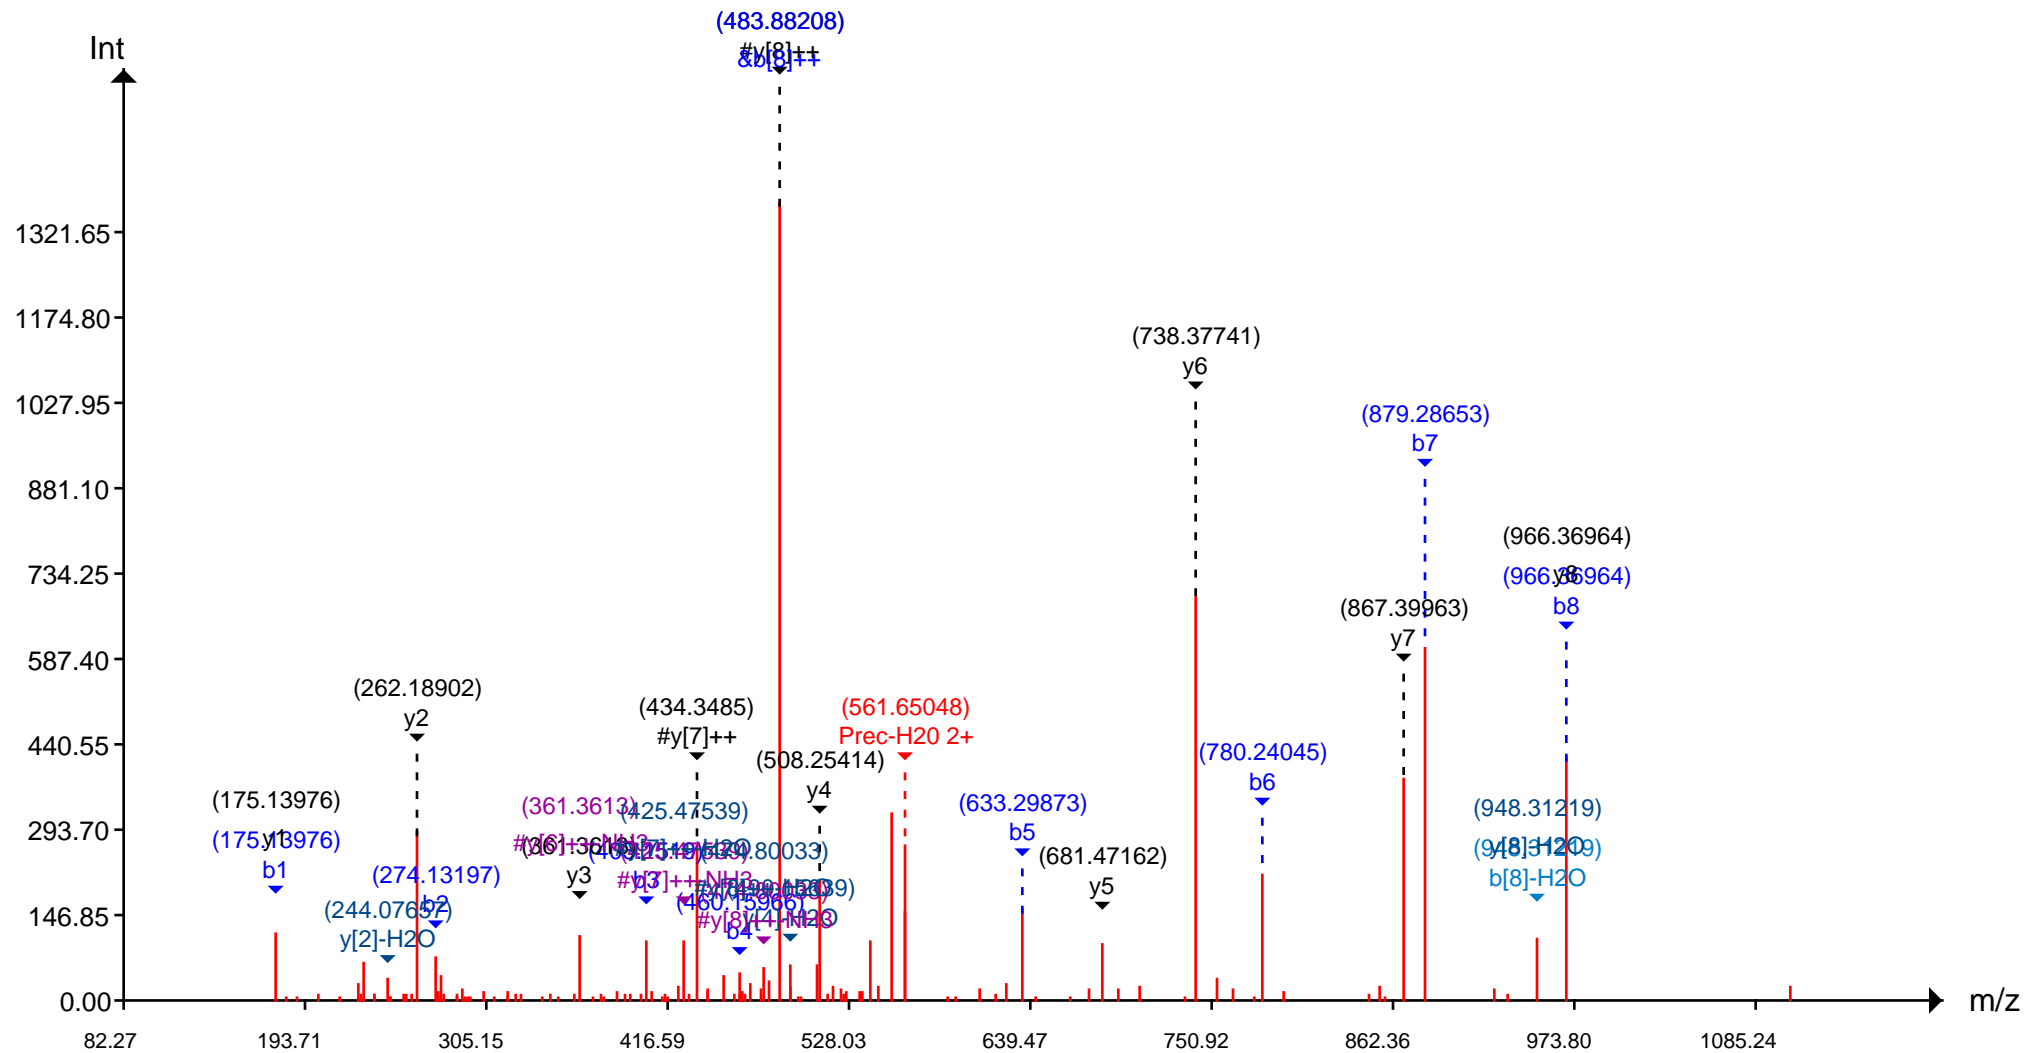

## Info

|                          |                                   |                           |        |
|--------------------------|-----------------------------------|---------------------------|--------|
| <b>Modified Sequence</b> | AcD3-EVEGK<AcD3K*>M<Mox*>VSR-COOH | <b>Ion score</b>          | 66.89  |
| <b>Protein</b>           | P63028                            | <b>Confidence level</b>   | 99.00% |
| <b>Precursor m/z</b>     | 570.79548                         | <b>Identity Threshold</b> | 47.78  |
| <b>Charge</b>            | 2+                                | <b>Mass error</b>         | 8.4E-5 |

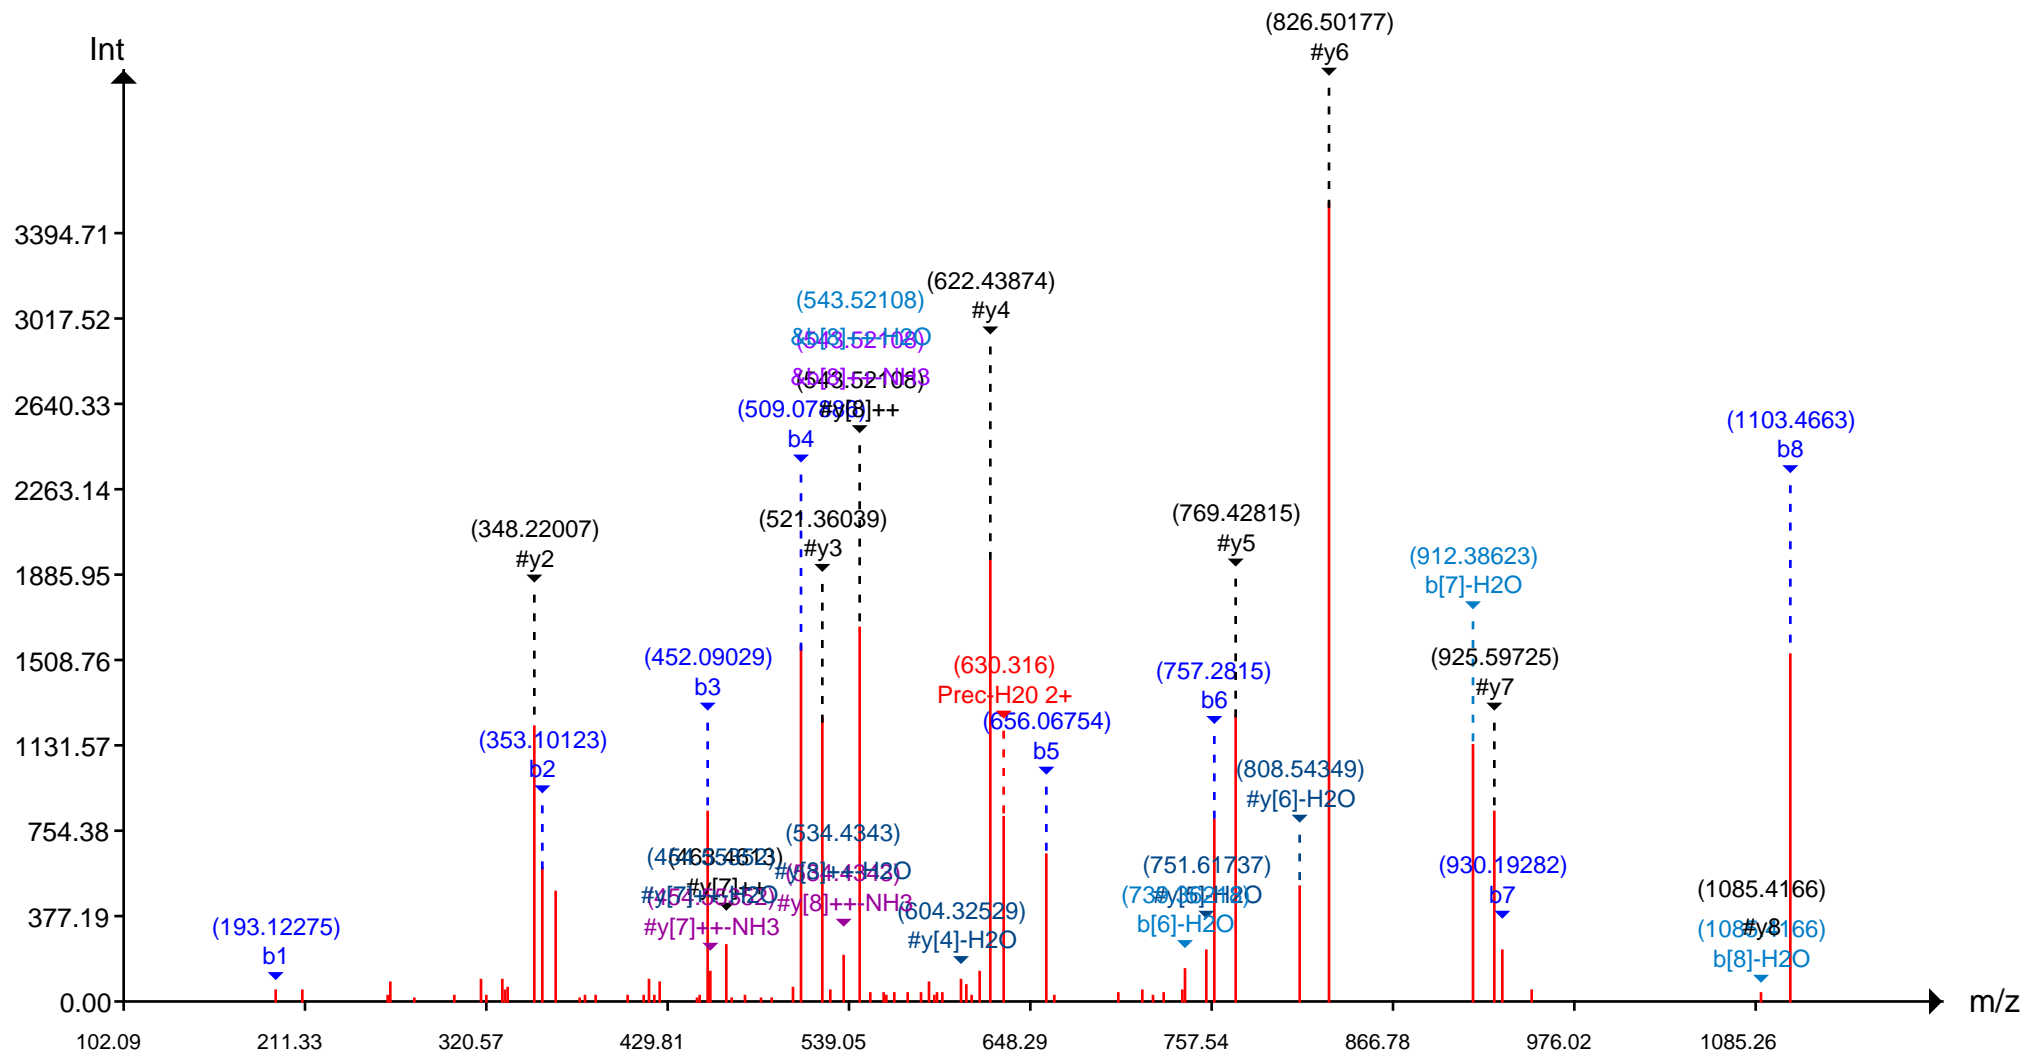

## Info

**Modified Sequence** AcD3-FC<Cmm\*>VGFTK<AcD3K\*>K<AcD3K\*>R-COOH

**Ion score** 74.06

**Protein** P97351

**Confidence level** 99.00%

**Precursor m/z** 639.35558

**Identity Threshold** 47.69

**Charge** 2+

**Mass error** 0.001769

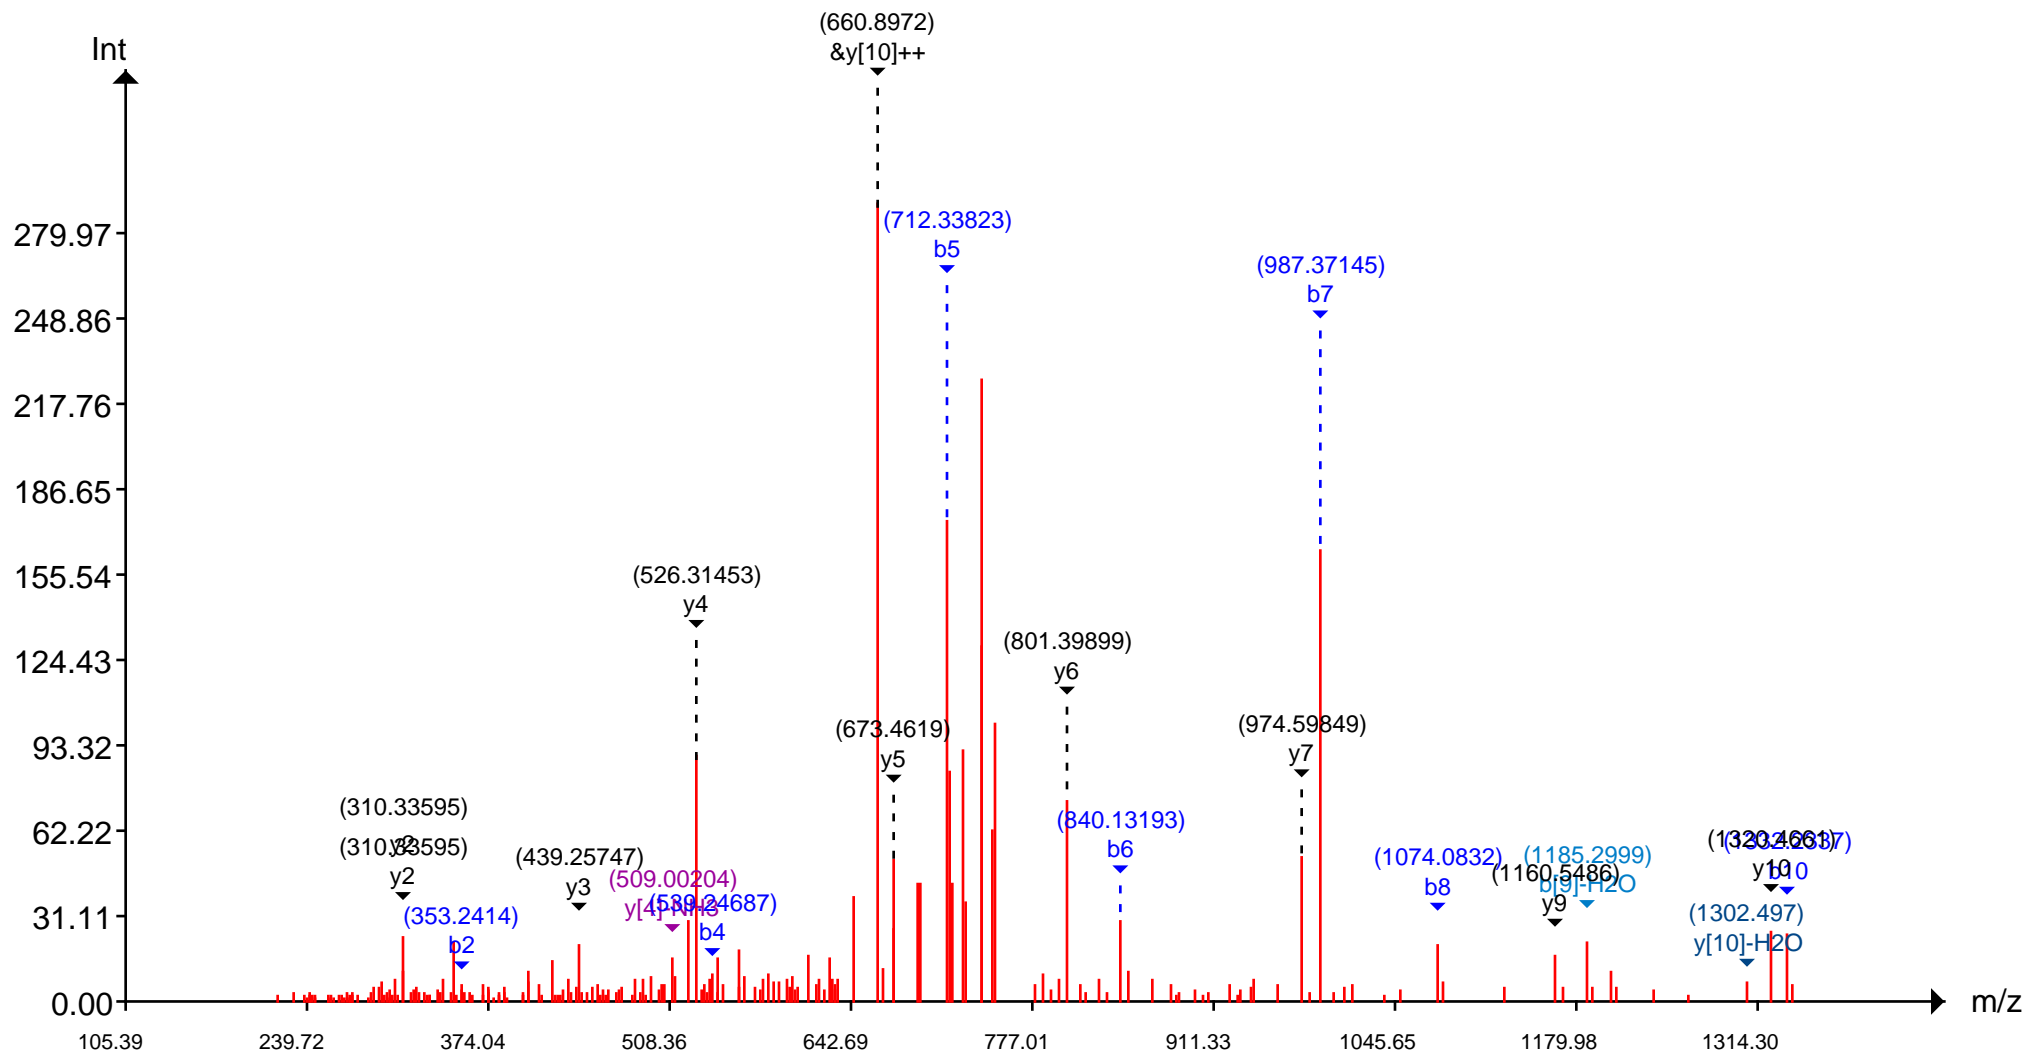

## Info

|                          |                                                |                           |         |
|--------------------------|------------------------------------------------|---------------------------|---------|
| <b>Modified Sequence</b> | AcD3-M<Mox*>C<Cmm*>GEK<AcD3K*>QFSEER<C13>-COOH | <b>Ion score</b>          | 48.82   |
| <b>Protein</b>           | P39749                                         | <b>Confidence level</b>   | 99.00%  |
| <b>Precursor m/z</b>     | 756.83753                                      | <b>Identity Threshold</b> | 43.60   |
| <b>Charge</b>            | 2+                                             | <b>Mass error</b>         | 6.42E-4 |

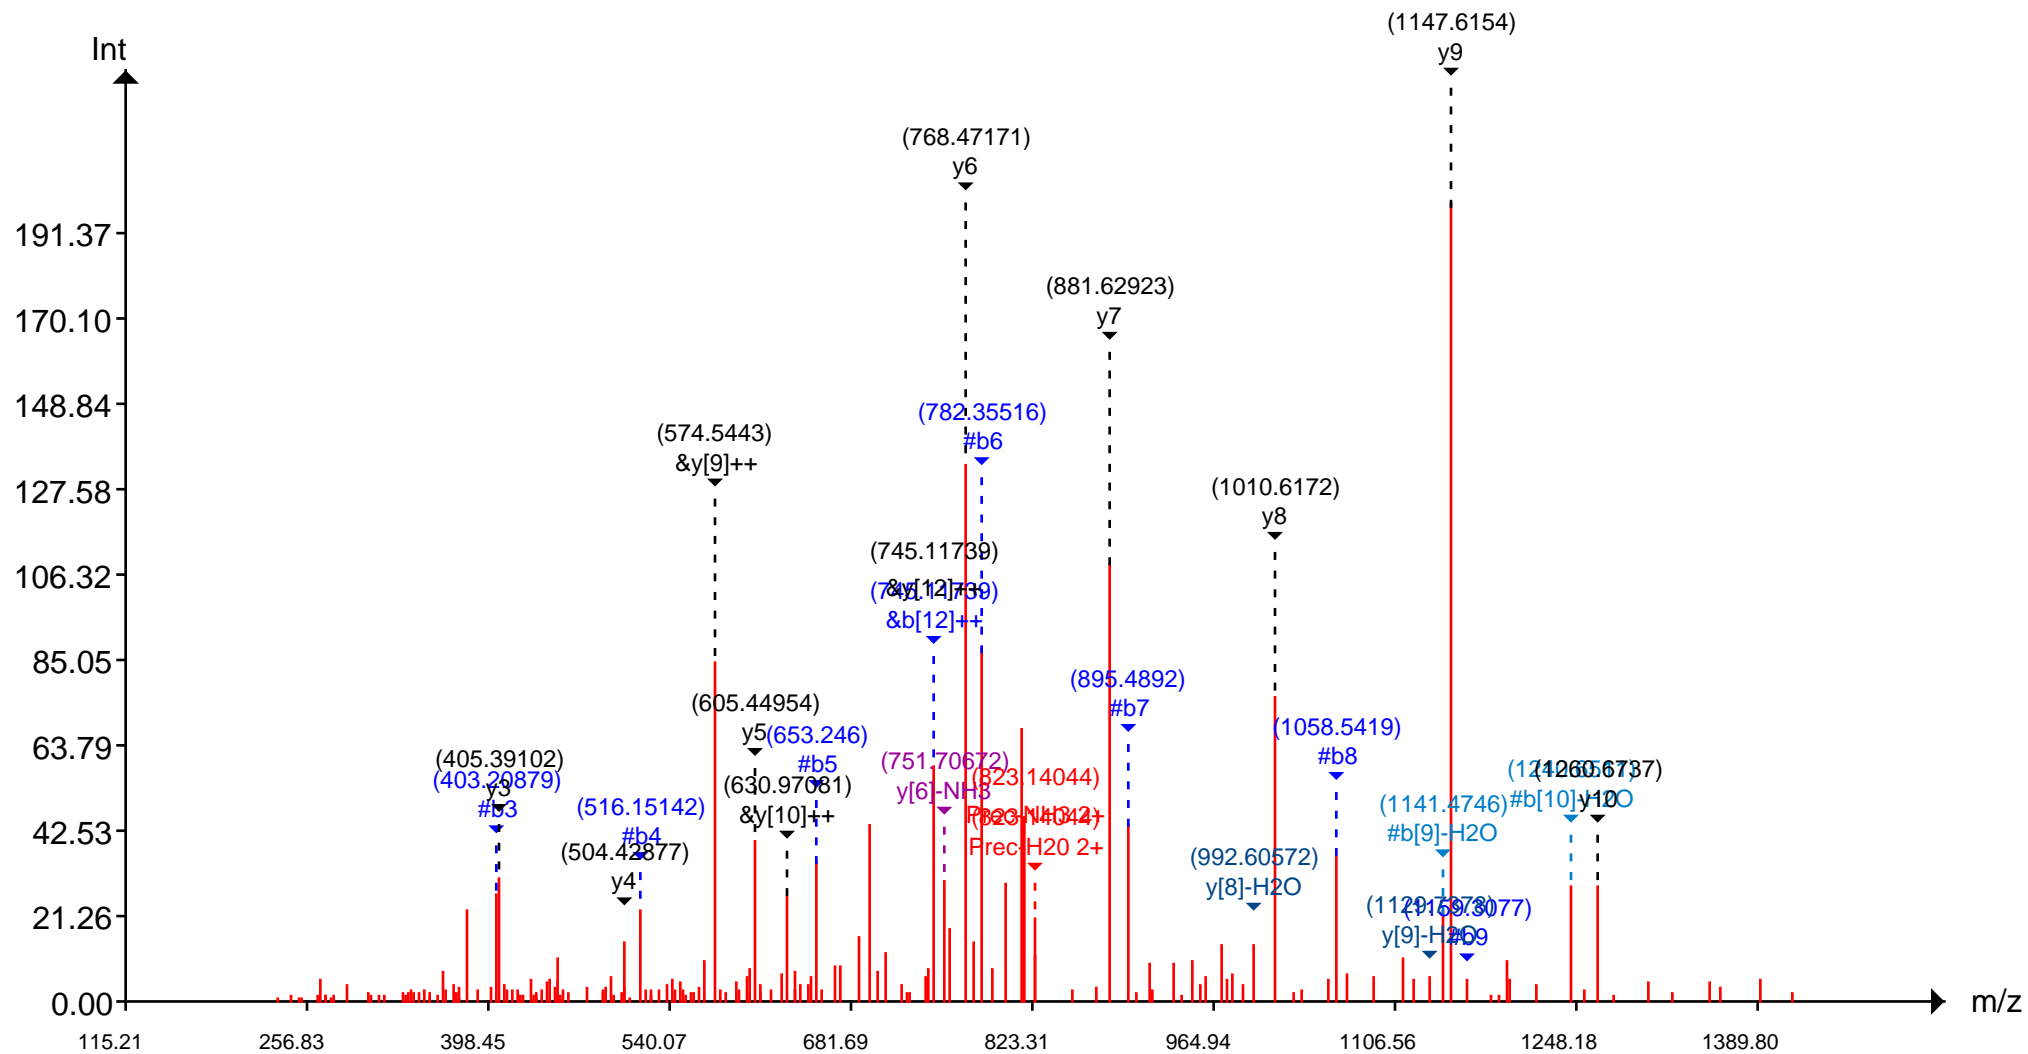

## Info

|                          |                                 |                           |          |
|--------------------------|---------------------------------|---------------------------|----------|
| <b>Modified Sequence</b> | AcD3-EDLIHEIYTVGK<AcD3K*>R-COOH | <b>Ion score</b>          | 58.98    |
| <b>Protein</b>           | P14148                          | <b>Confidence level</b>   | 99.00%   |
| <b>Precursor m/z</b>     | 831.95289                       | <b>Identity Threshold</b> | 47.76    |
| <b>Charge</b>            | 2+                              | <b>Mass error</b>         | 0.001702 |

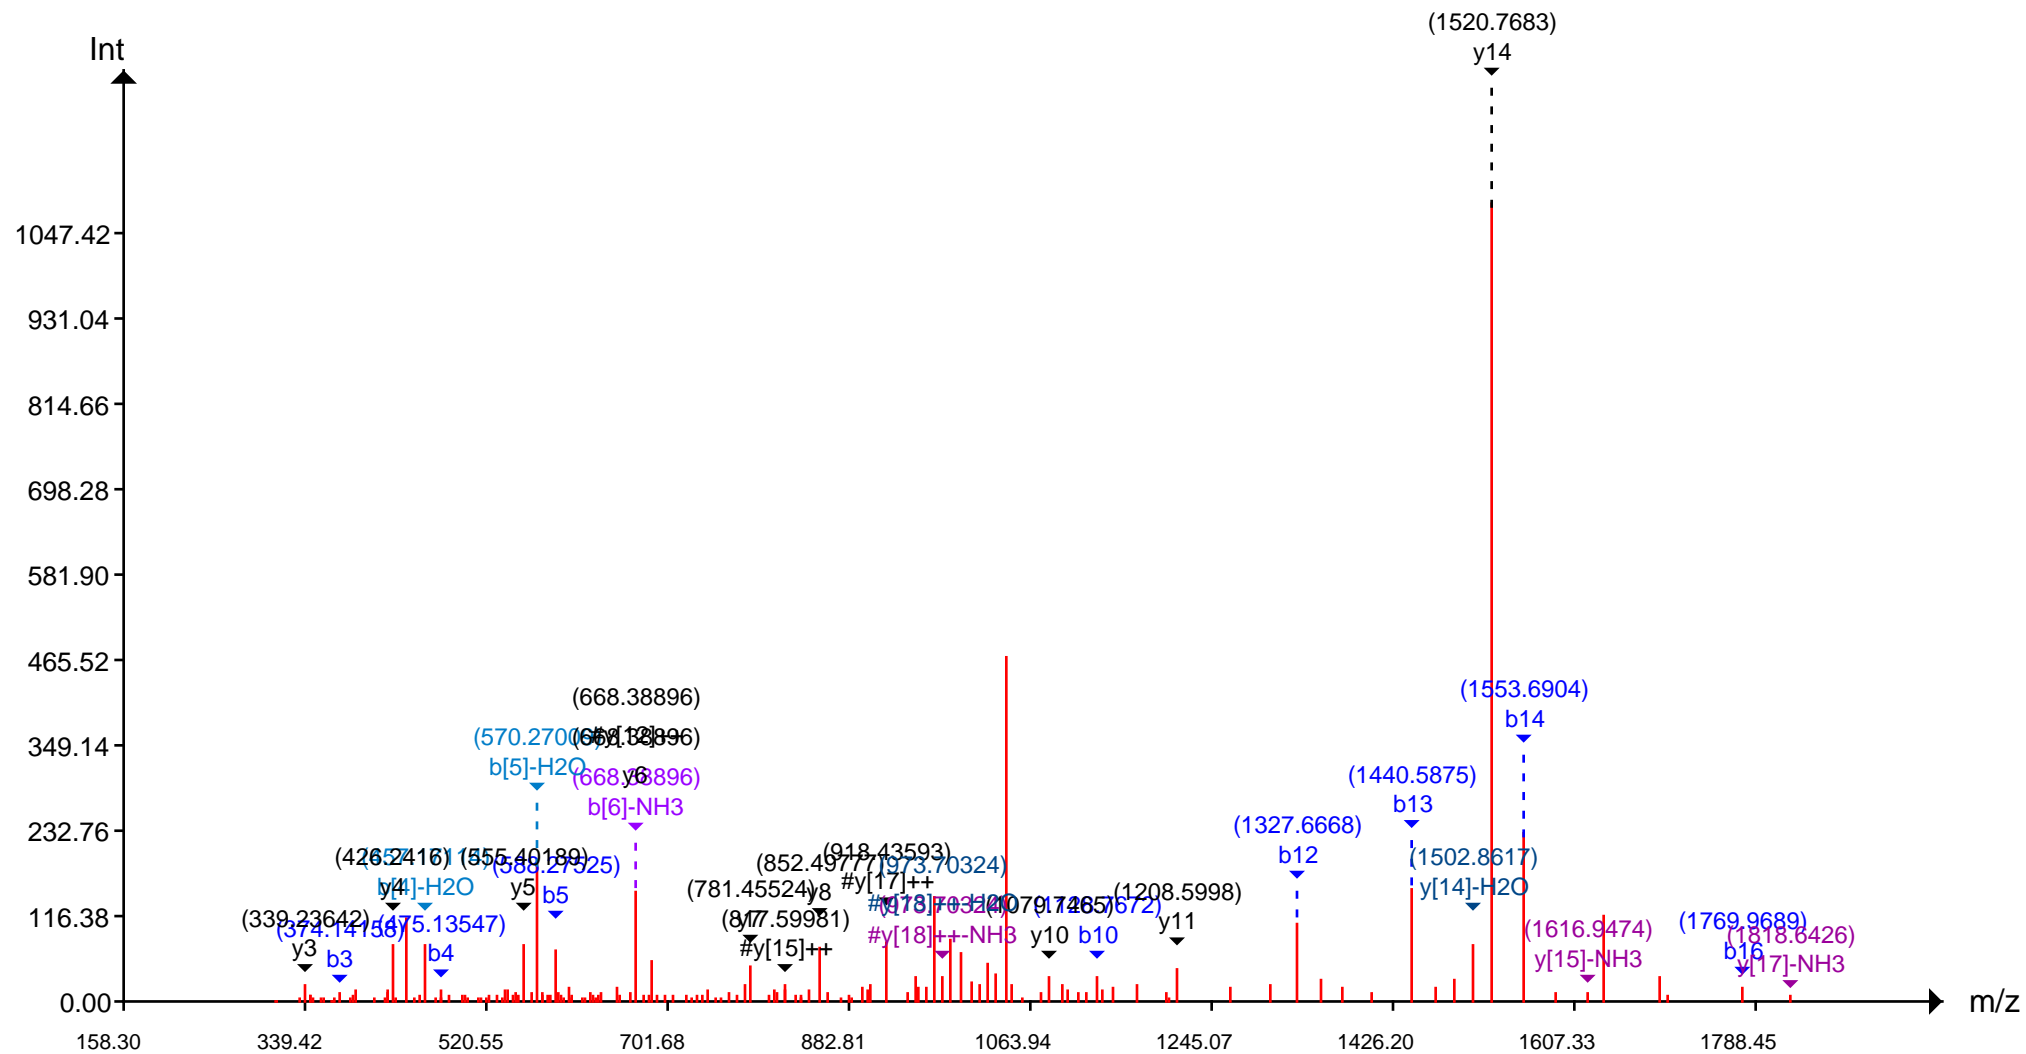

## Info

|                          |                                    |                           |         |
|--------------------------|------------------------------------|---------------------------|---------|
| <b>Modified Sequence</b> | AcD3-VQTTLPSQEVQALLESTGR<C13>-COOH | <b>Ion score</b>          | 47.47   |
| <b>Protein</b>           | Q9WU84                             | <b>Confidence level</b>   | 99.00%  |
| <b>Precursor m/z</b>     | 1054.5739                          | <b>Identity Threshold</b> | 47.21   |
| <b>Charge</b>            | 2+                                 | <b>Mass error</b>         | 0.00367 |

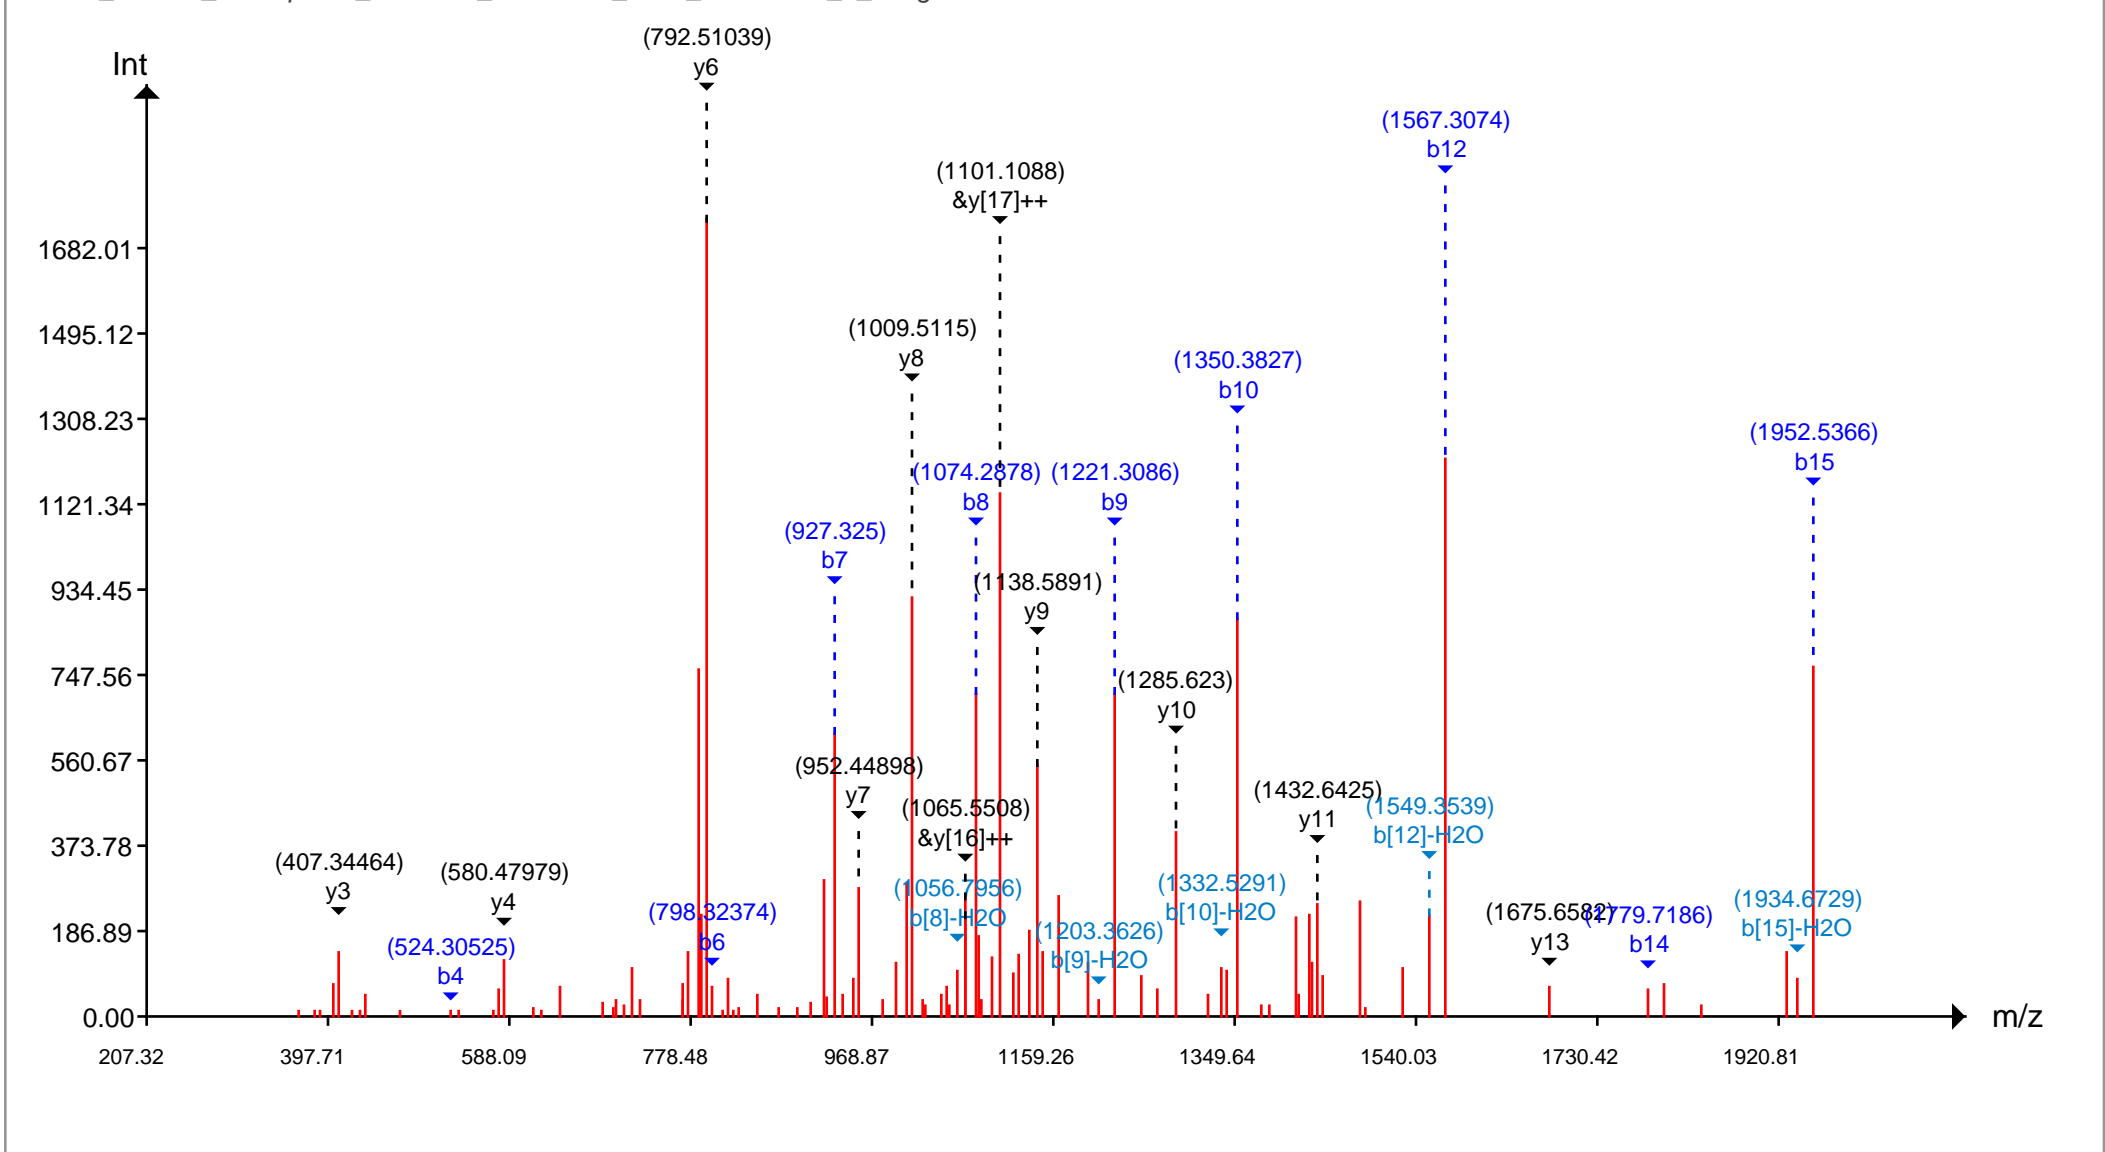

## Info

|                          |                                                                   |                           |          |
|--------------------------|-------------------------------------------------------------------|---------------------------|----------|
| <b>Modified Sequence</b> | AcD3-IAM<Mox*>M<Mox*>C<Cmm*>NEFFEGC<Cmm*>PDK<AcD3K*>EPR<C13>-COOH | <b>Ion score</b>          | 48.01    |
| <b>Protein</b>           | P07091                                                            | <b>Confidence level</b>   | 99.00%   |
| <b>Precursor m/z</b>     | 1180.0086                                                         | <b>Identity Threshold</b> | 40.40    |
| <b>Charge</b>            | 2+                                                                | <b>Mass error</b>         | 0.002343 |



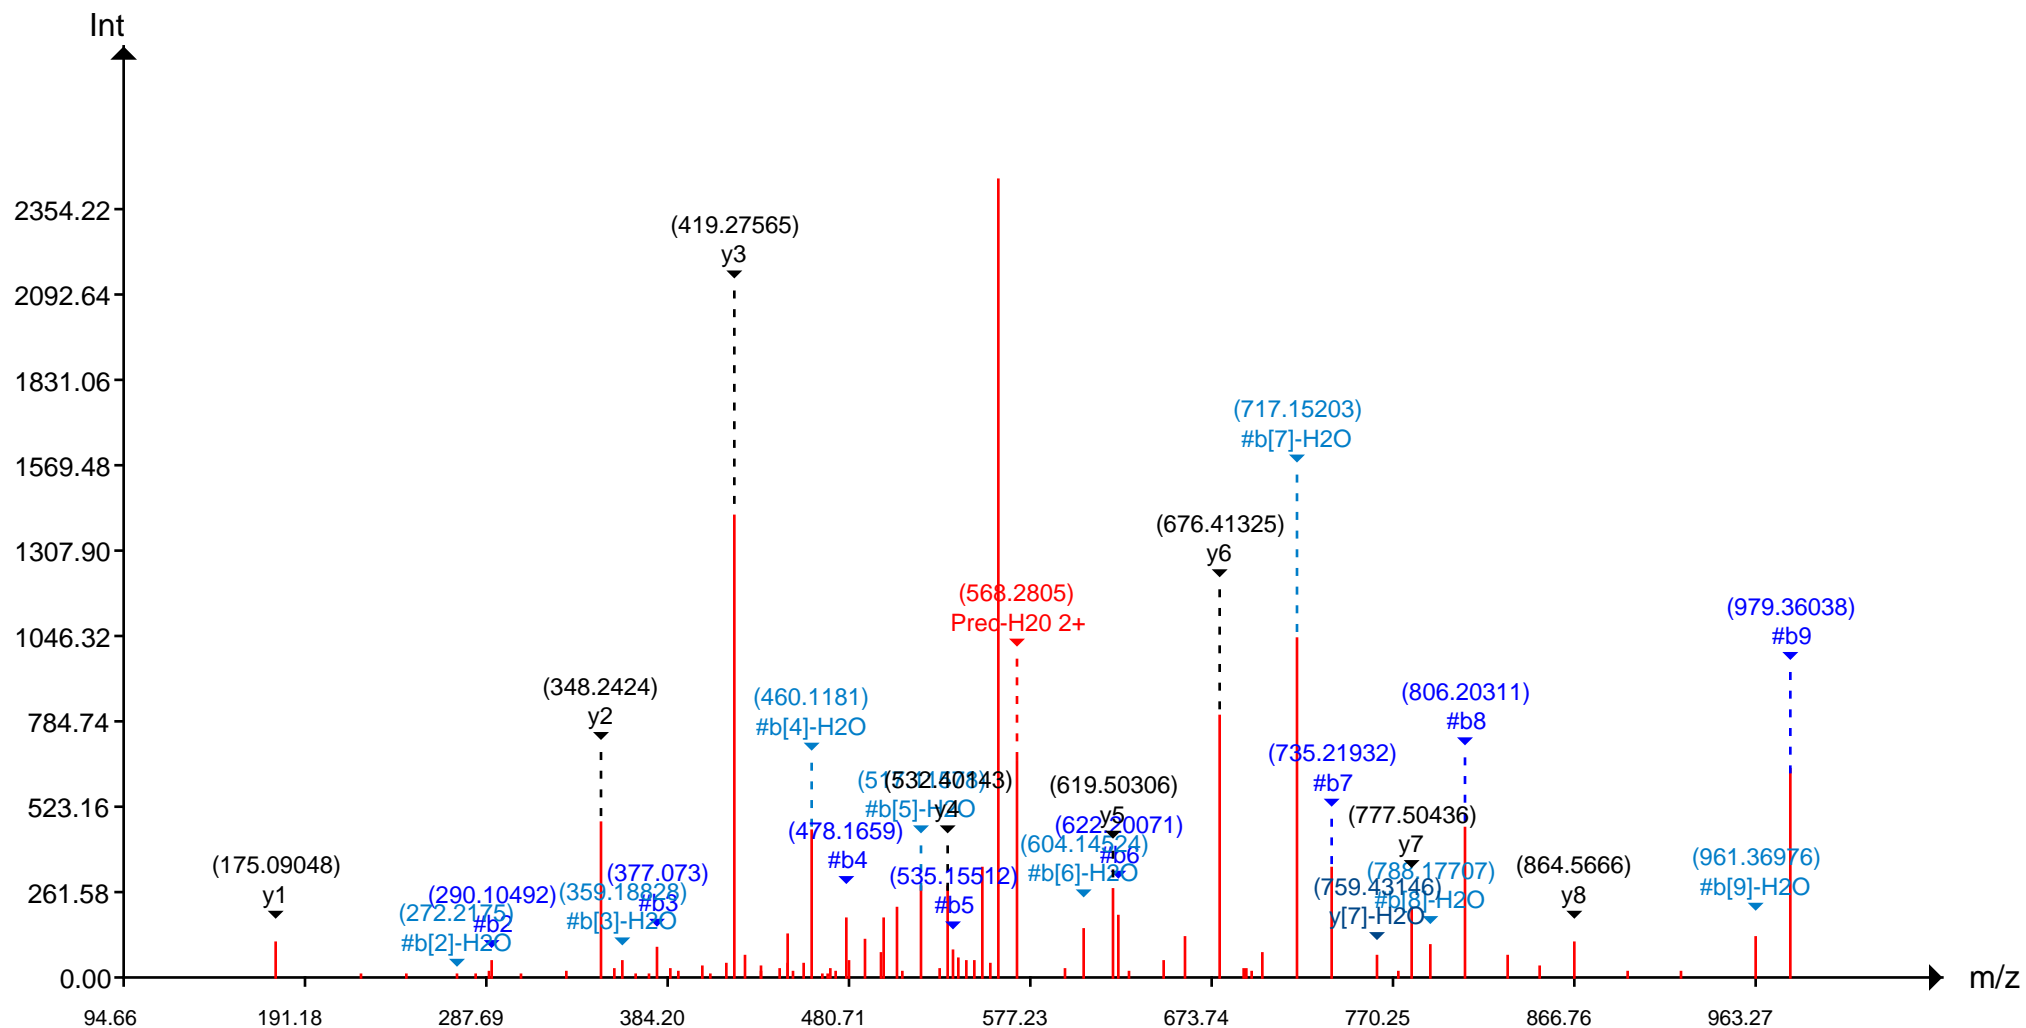

## Info

**Modified Sequence** AcD3-DESTGSIK<AcD3K\*>R-COOH

**Ion score** 63.15

**Protein** P05064

**Confidence level** 99.00%

**Precursor m/z** 577.30195

**Identity Threshold** 47.87

**Charge** 2+

**Mass error** 2.3E-5

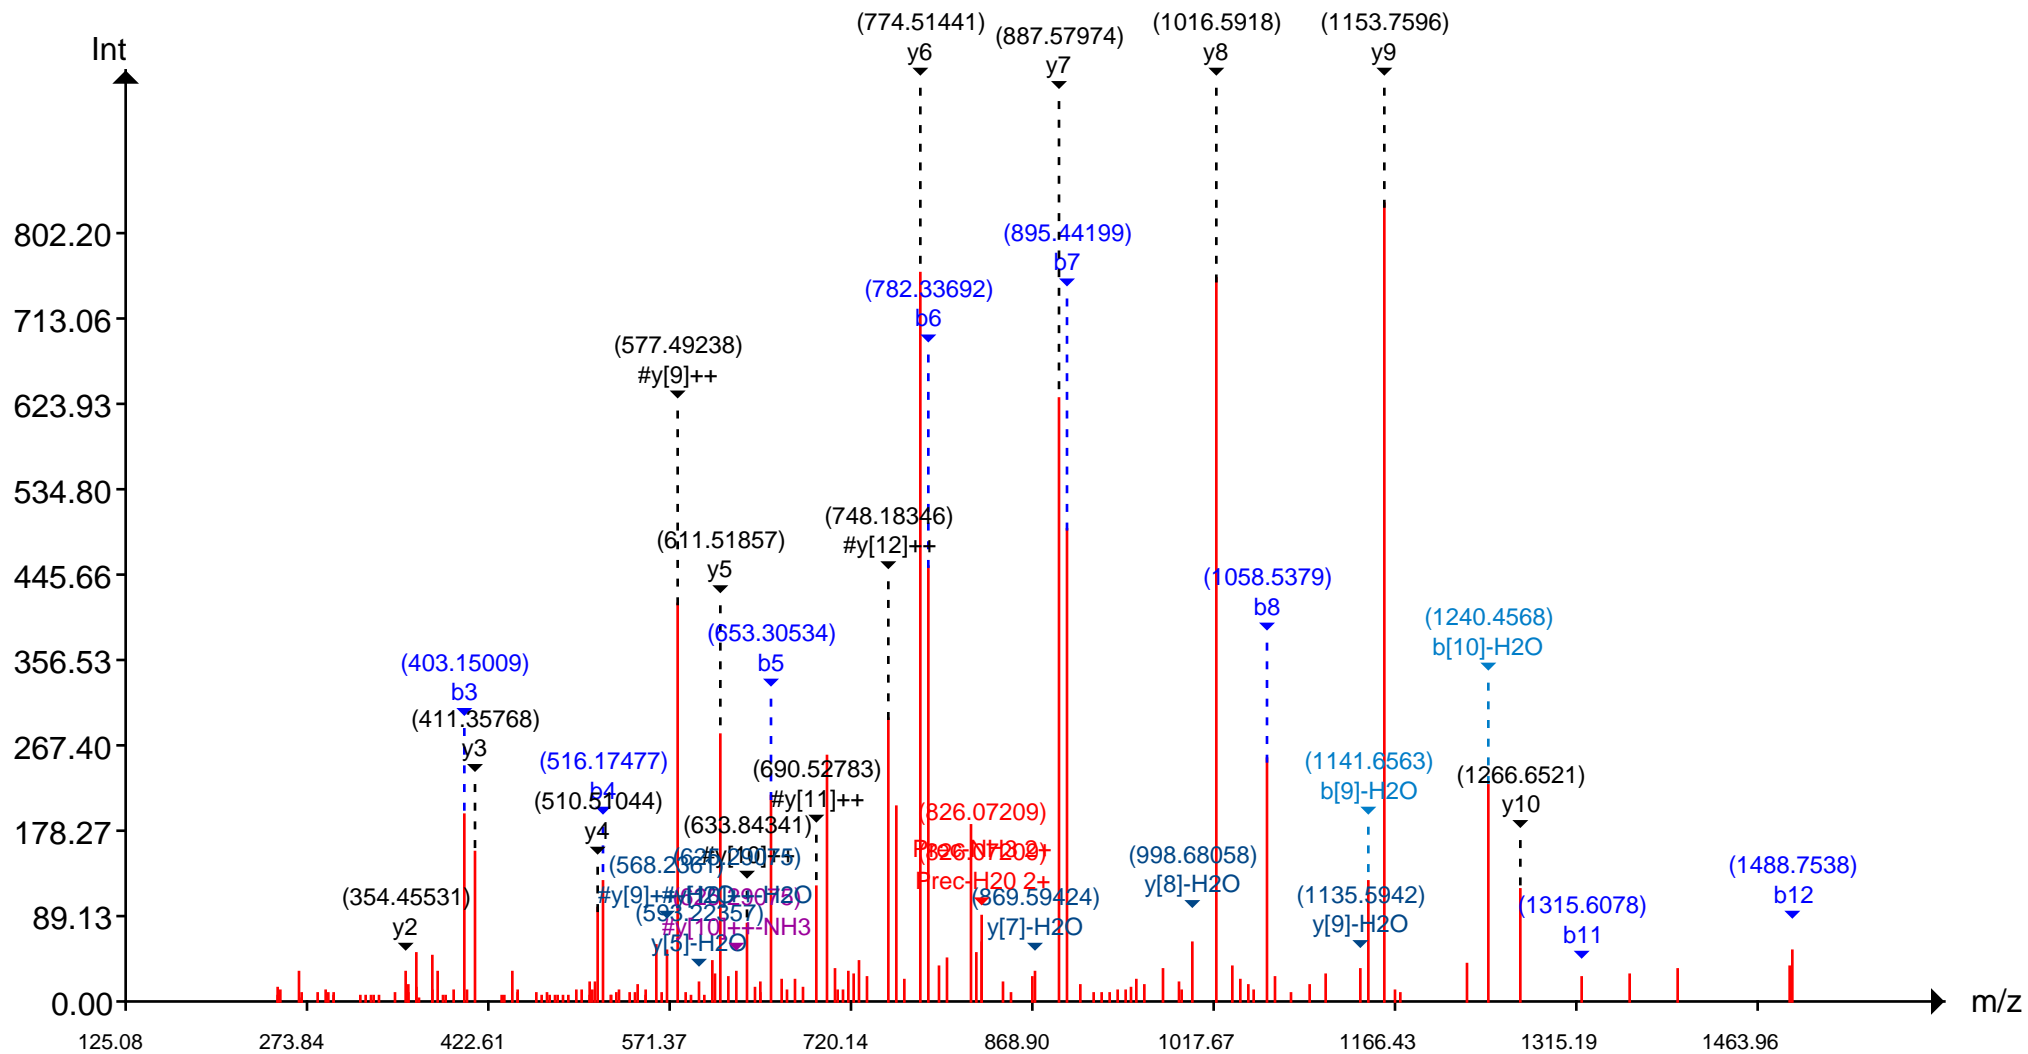

## Info

**Modified Sequence** AcD3-EDLIHEIYTVGK<AcD3K\*>R<C13>-COOH

**Ion score** 68.56

**Protein** P14148

**Confidence level** 99.00%

**Precursor m/z** 834.96311

**Identity Threshold** 47.20

**Charge** 2+

**Mass error** 0.0020

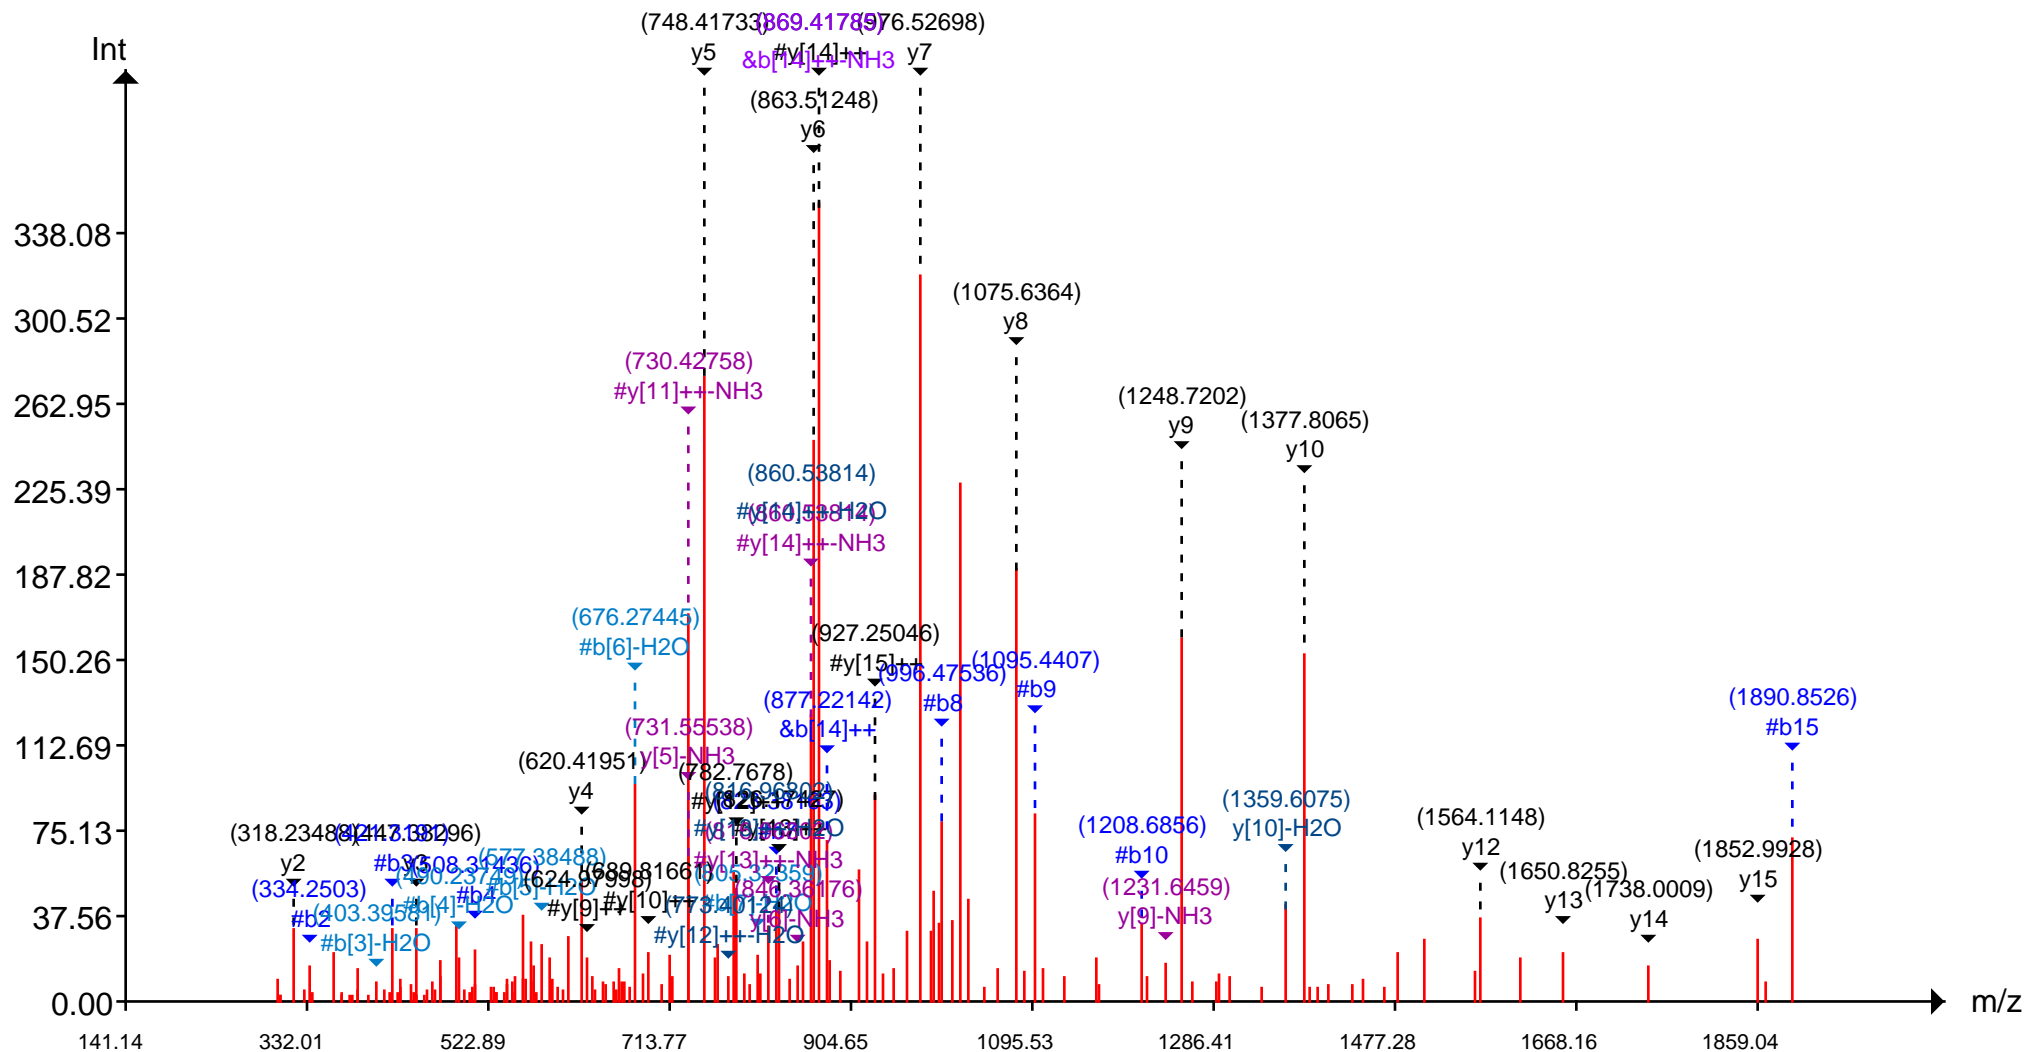

## Info

|                          |                                                         |                           |          |
|--------------------------|---------------------------------------------------------|---------------------------|----------|
| <b>Modified Sequence</b> | AcD3-K<AcD3K*>DSSSVEK<AcD3K*>VLDQK<AcD3K*>EHR<C13>-COOH | <b>Ion score</b>          | 107.56   |
| <b>Protein</b>           | Q99020                                                  | <b>Confidence level</b>   | 99.00%   |
| <b>Precursor m/z</b>     | 1036.0628                                               | <b>Identity Threshold</b> | 47.46    |
| <b>Charge</b>            | 2+                                                      | <b>Mass error</b>         | 0.003229 |

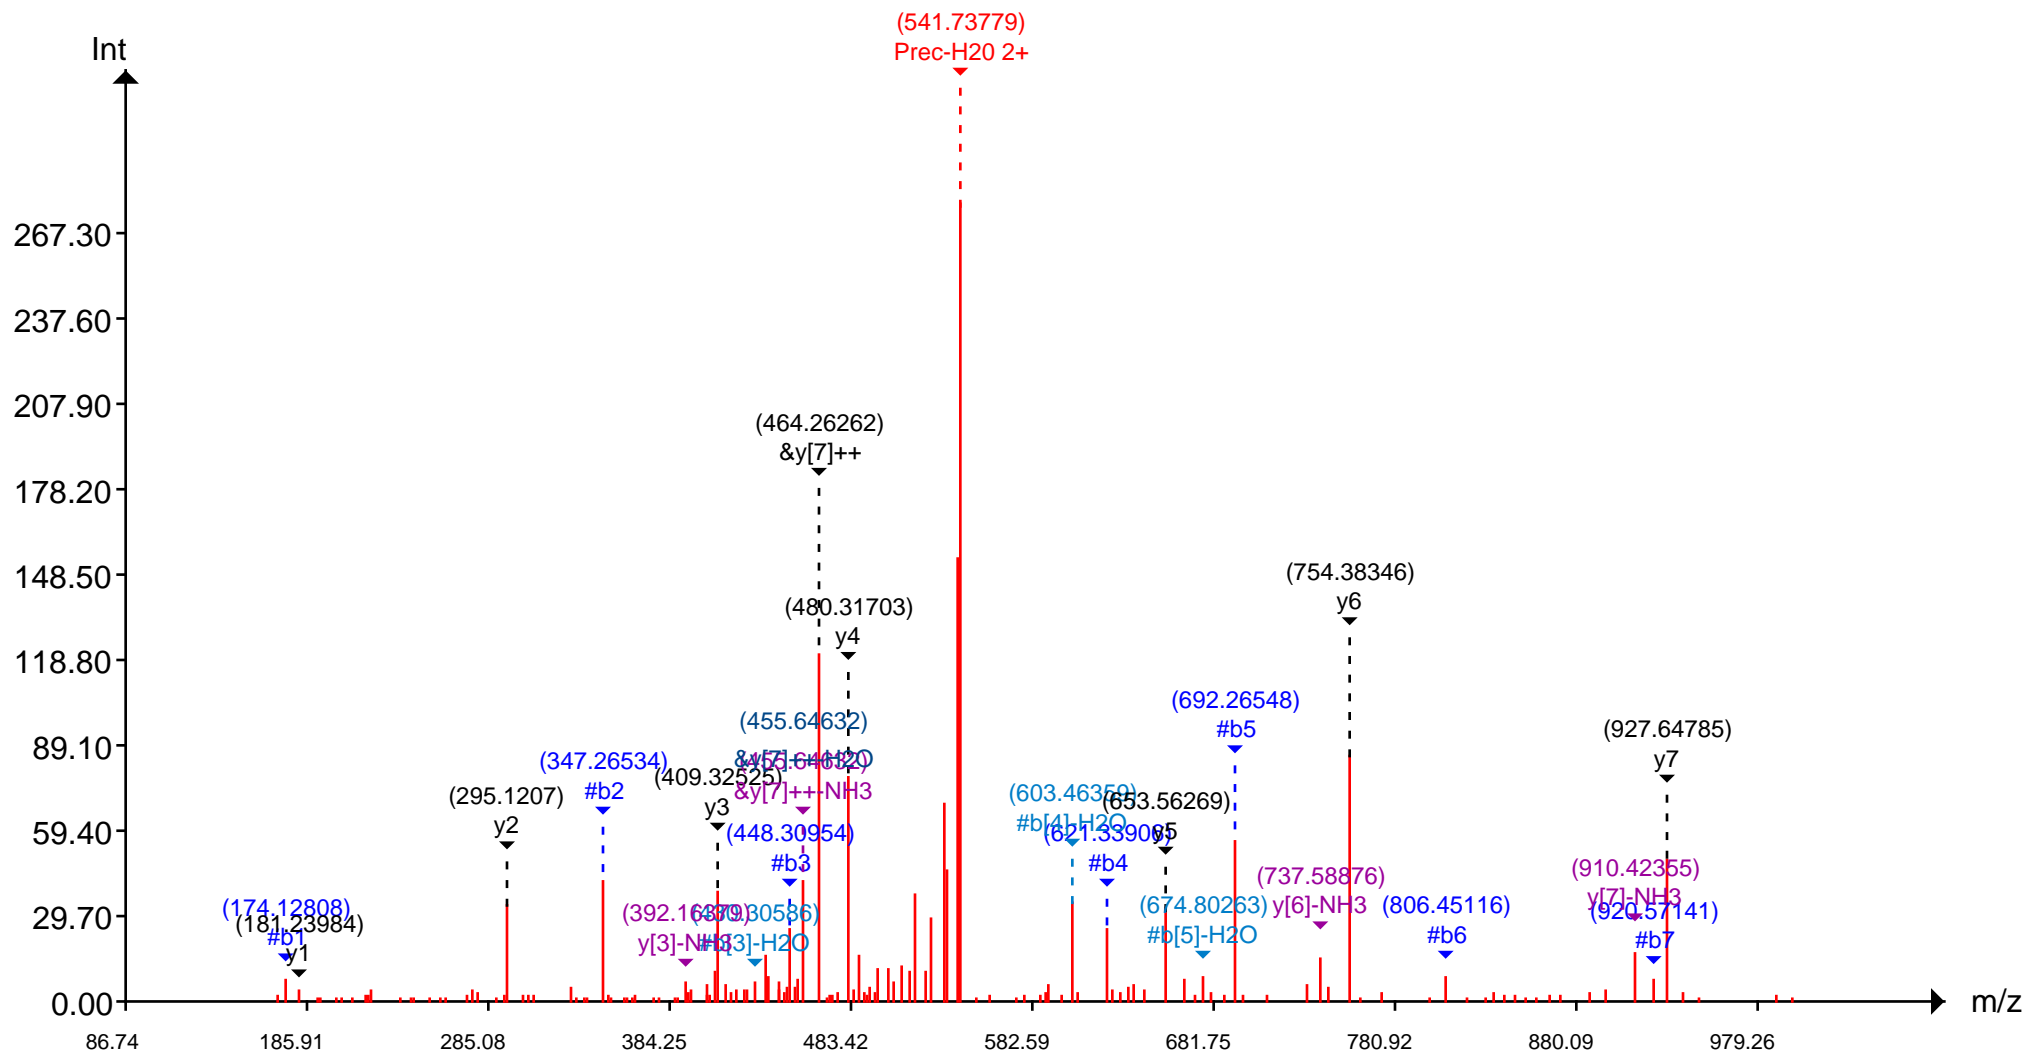

## Info

|                          |                                         |                           |          |
|--------------------------|-----------------------------------------|---------------------------|----------|
| <b>Modified Sequence</b> | AcD3-QK<AcD3K*>TK<AcD3K*>ANNR<C13>-COOH | <b>Ion score</b>          | 52.96    |
| <b>Protein</b>           | O08585                                  | <b>Confidence level</b>   | 99.00%   |
| <b>Precursor m/z</b>     | 550.82645                               | <b>Identity Threshold</b> | 45.71    |
| <b>Charge</b>            | 2+                                      | <b>Mass error</b>         | -7.82E-4 |

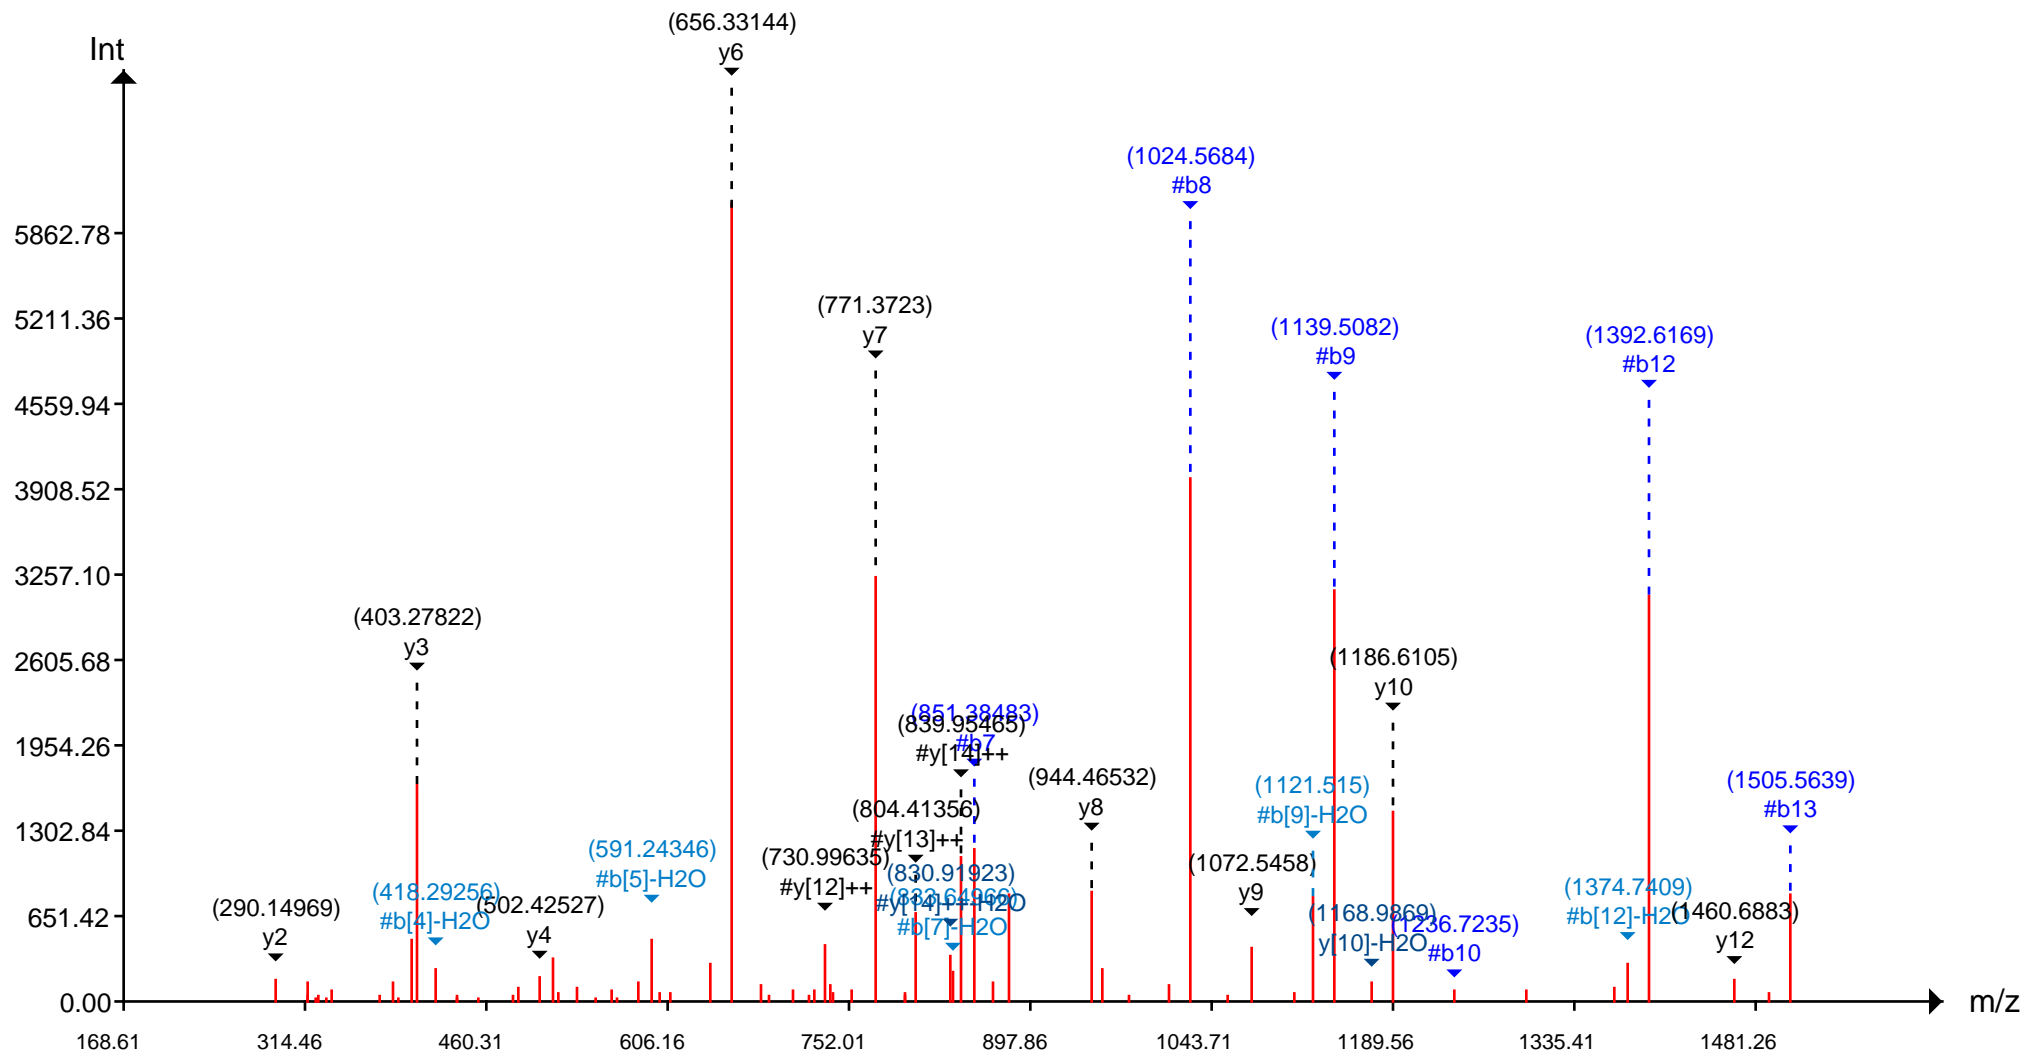

## Info

**Modified Sequence** AcD3-AAFTK<AcD3K\*>NQK<AcD3K\*>DPGVLDK-COOH

**Ion score** 74.25

**Protein** P50543

**Confidence level** 99.00%

**Precursor m/z** 897.98943

**Identity Threshold** 47.66

**Charge** 2+

**Mass error** 0.002104

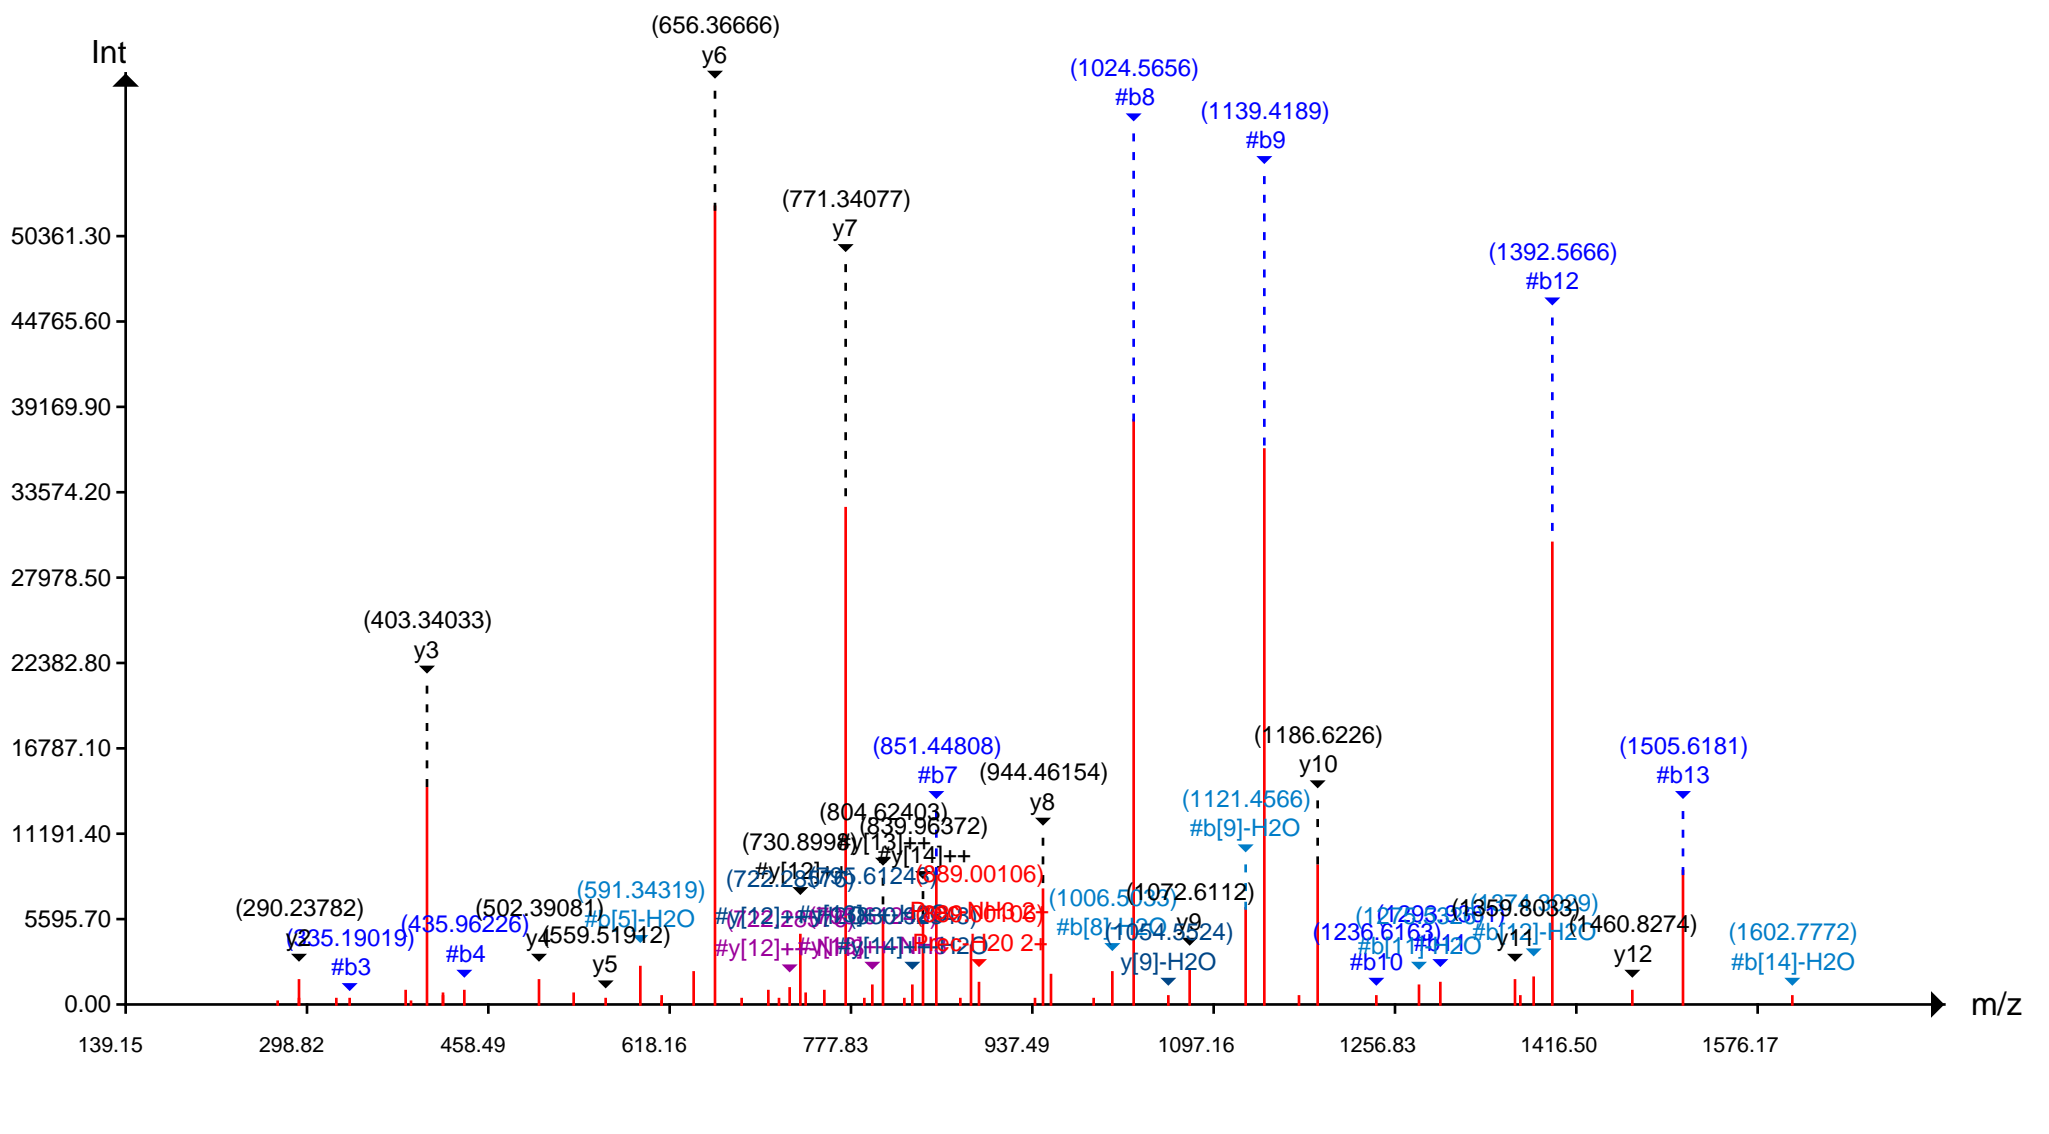

| Info                     |                                           |                           |          |
|--------------------------|-------------------------------------------|---------------------------|----------|
| <b>Modified Sequence</b> | AcD3-AAFTK<AcD3K*>NQK<AcD3K*>DPGVLDR-COOH | <b>Ion score</b>          | 107.92   |
| <b>Protein</b>           | P50543                                    | <b>Confidence level</b>   | 99.00%   |
| <b>Precursor m/z</b>     | 897.98974                                 | <b>Identity Threshold</b> | 47.62    |
| <b>Charge</b>            | 2+                                        | <b>Mass error</b>         | 0.002724 |

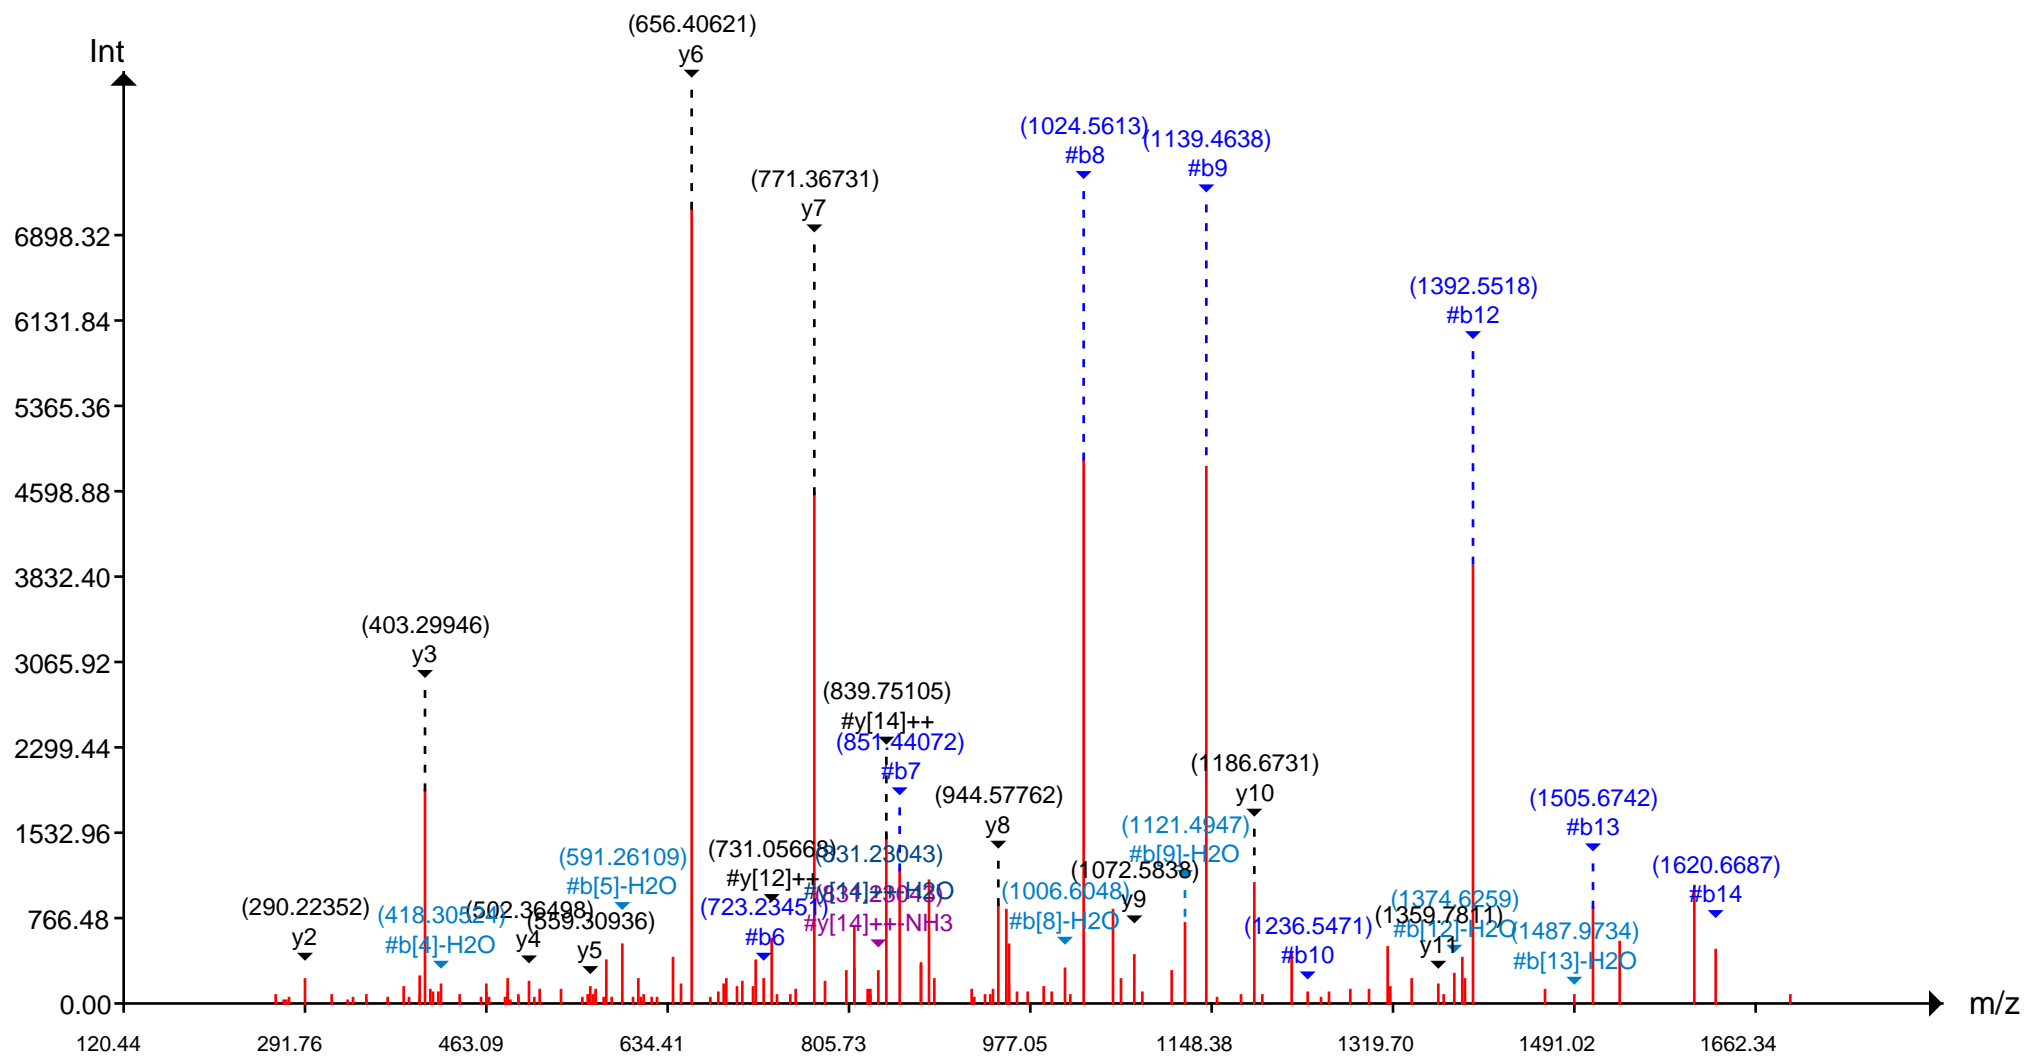

## Info

**Modified Sequence** AcD3-AAFTK<AcD3K\*>NQK<AcD3K\*>DPGVLDK-COOH

**Ion score** 67.25

**Protein** P50543

**Confidence level** 99.00%

**Precursor m/z** 897.99012

**Identity Threshold** 47.62

**Charge** 2+

**Mass error** 0.003484

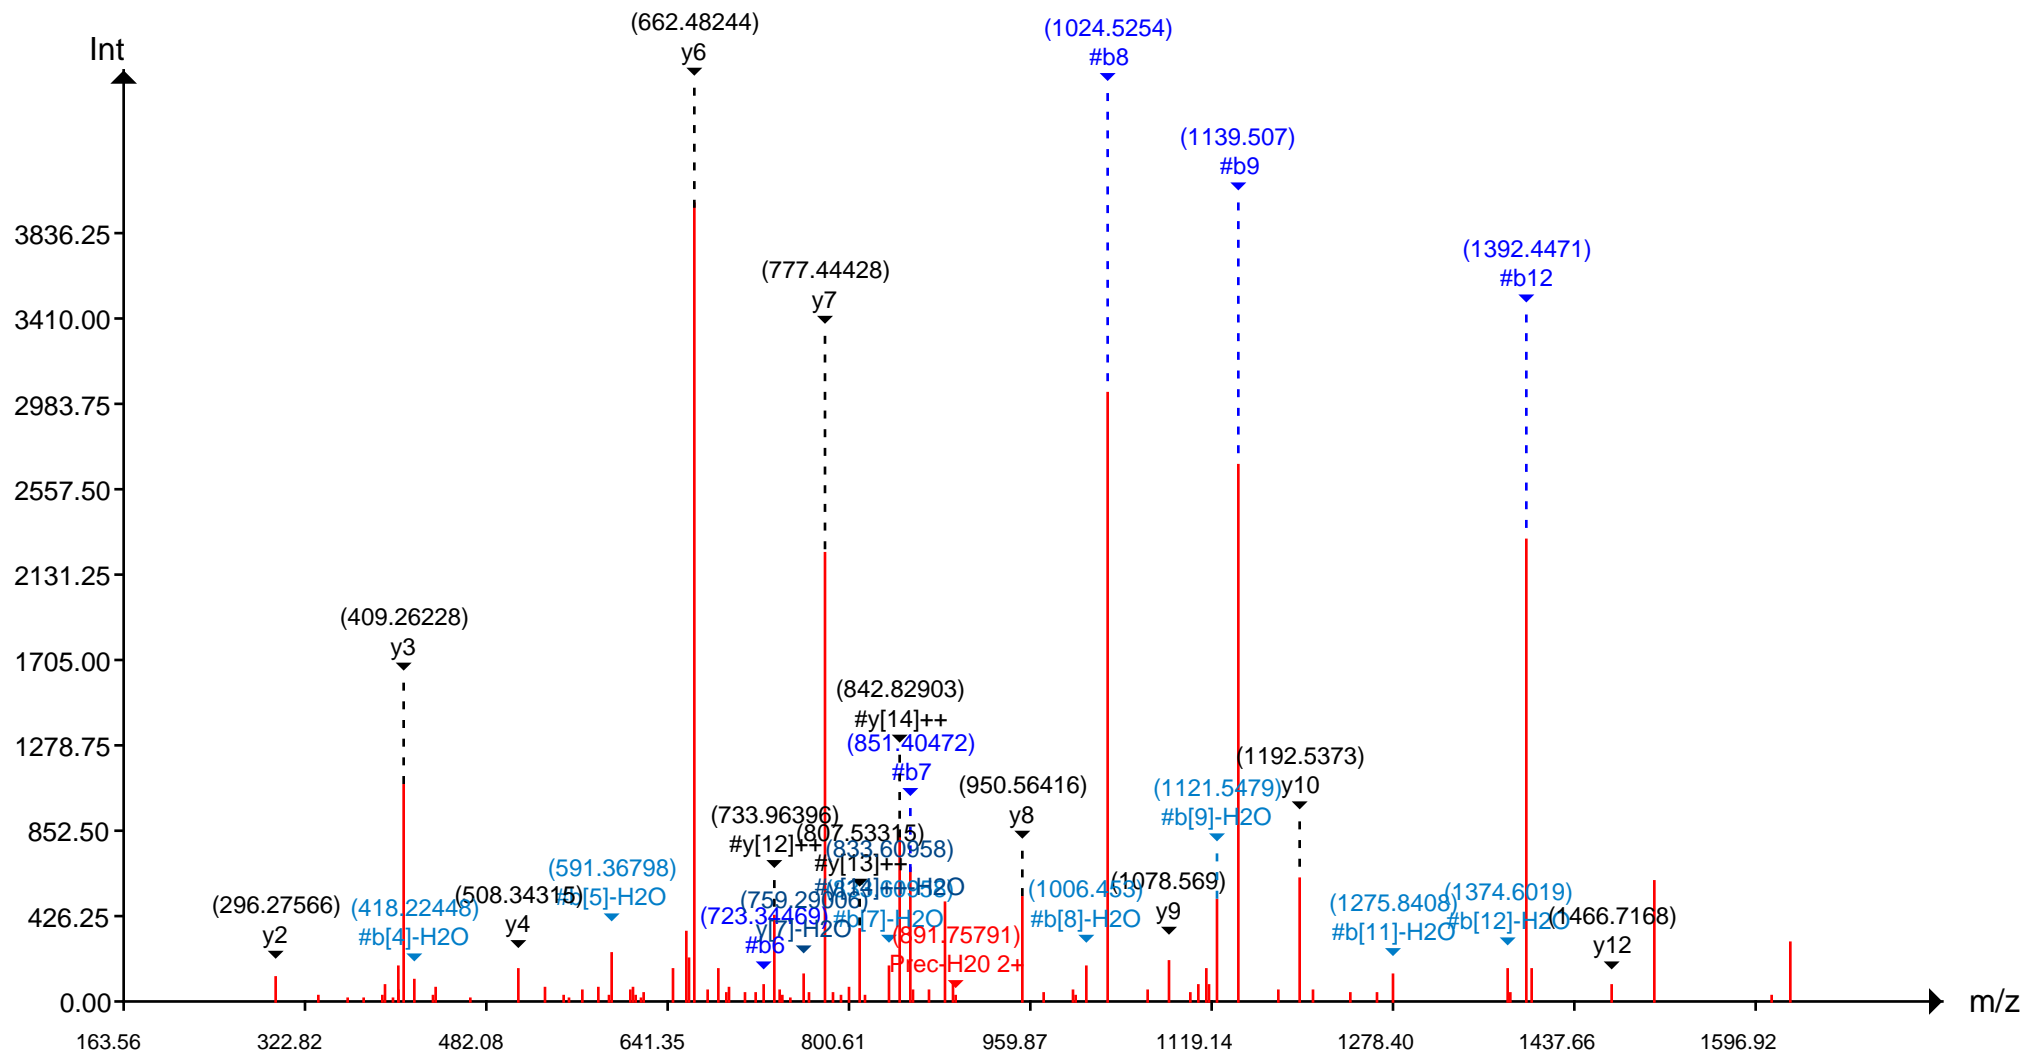

## Info

**Modified Sequence** AcD3-AAFTK<AcD3K\*>NQK<AcD3K\*>DPGVLDK<C13>-COOH

**Ion score** 66.75

**Protein** P50543

**Confidence level** 99.00%

**Precursor m/z** 900.99662

**Identity Threshold** 47.32

**Charge** 2+

**Mass error** -0.003658



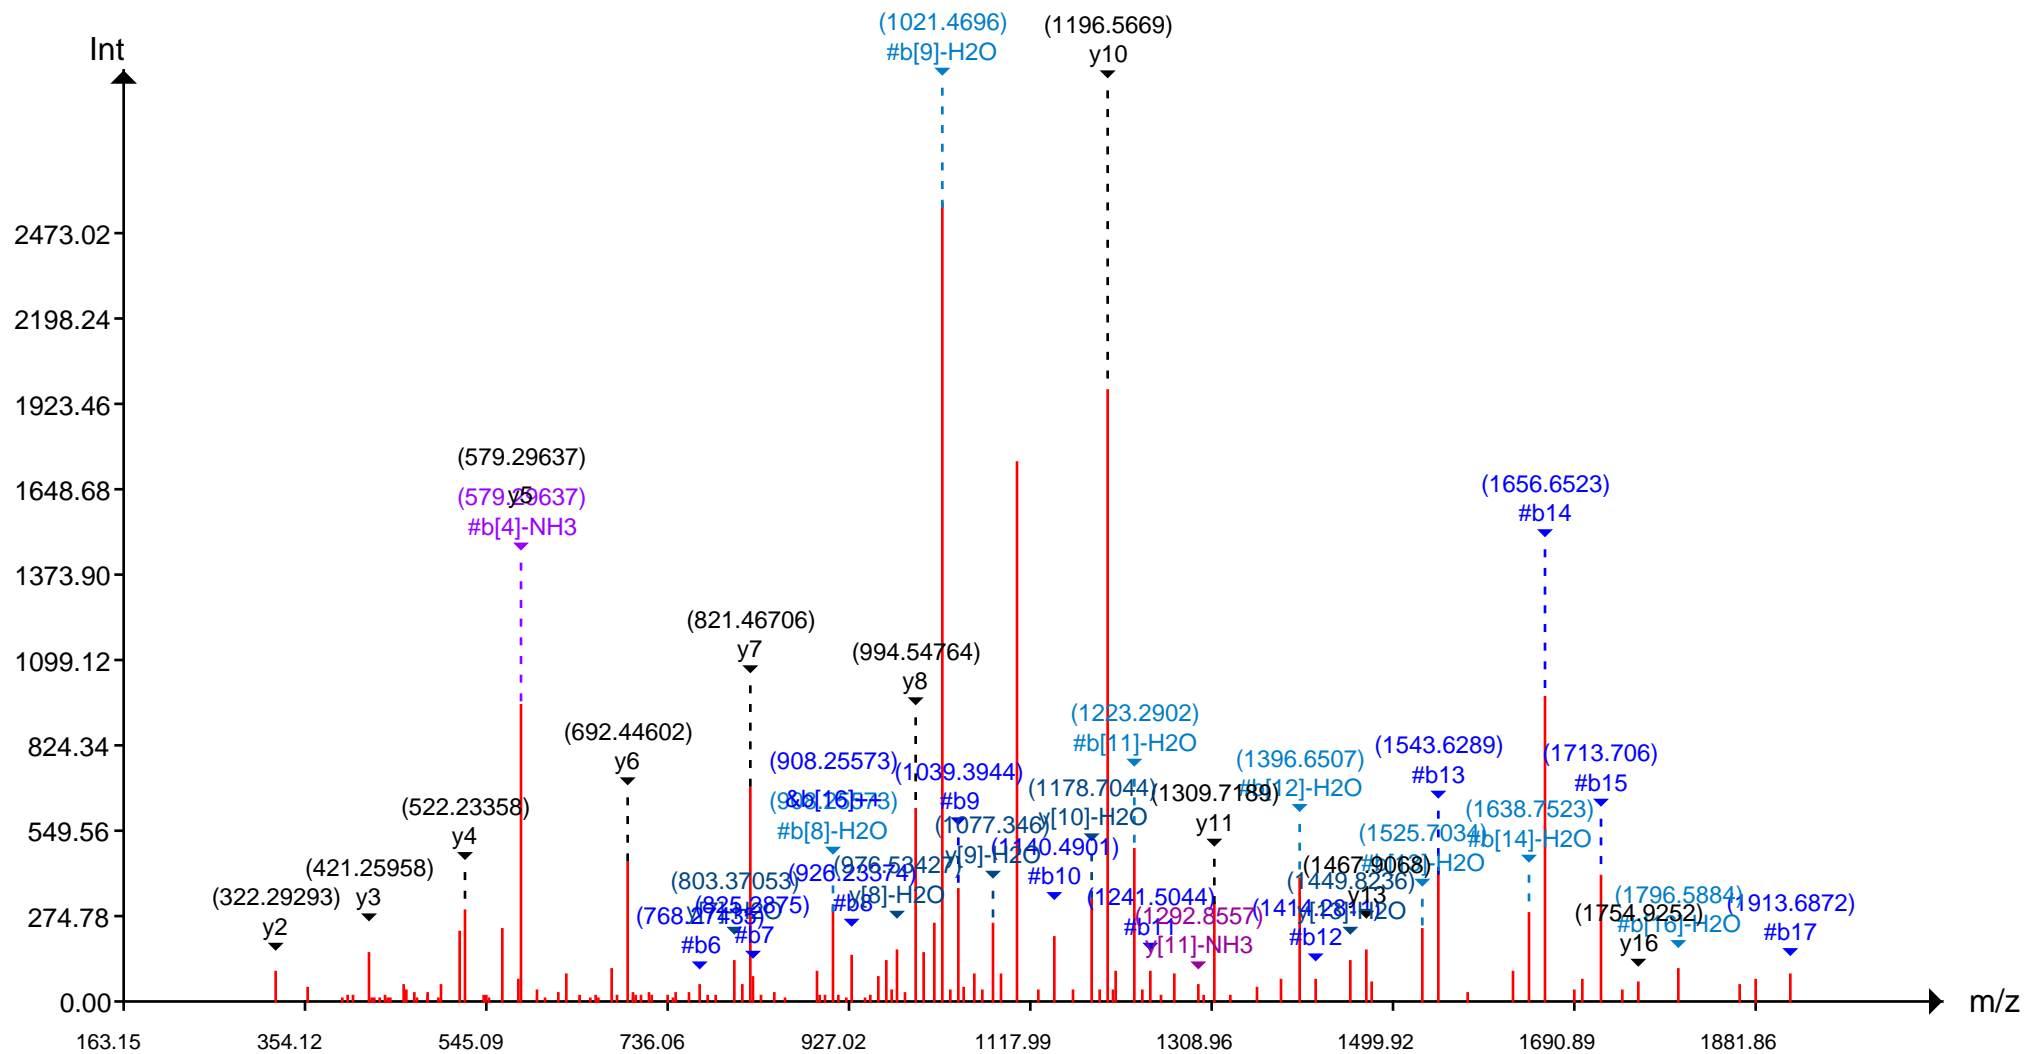

## Info

|                          |                                                     |                           |          |
|--------------------------|-----------------------------------------------------|---------------------------|----------|
| <b>Modified Sequence</b> | AcD3-FDK<AcD3K*>DGDGTITTK<AcD3K*>ELGTVM<MoX*>R-COOH | <b>Ion score</b>          | 99.89    |
| <b>Protein</b>           | P62204                                              | <b>Confidence level</b>   | 99.00%   |
| <b>Precursor m/z</b>     | 1118.0627                                           | <b>Identity Threshold</b> | 47.77    |
| <b>Charge</b>            | 2+                                                  | <b>Mass error</b>         | 0.002144 |

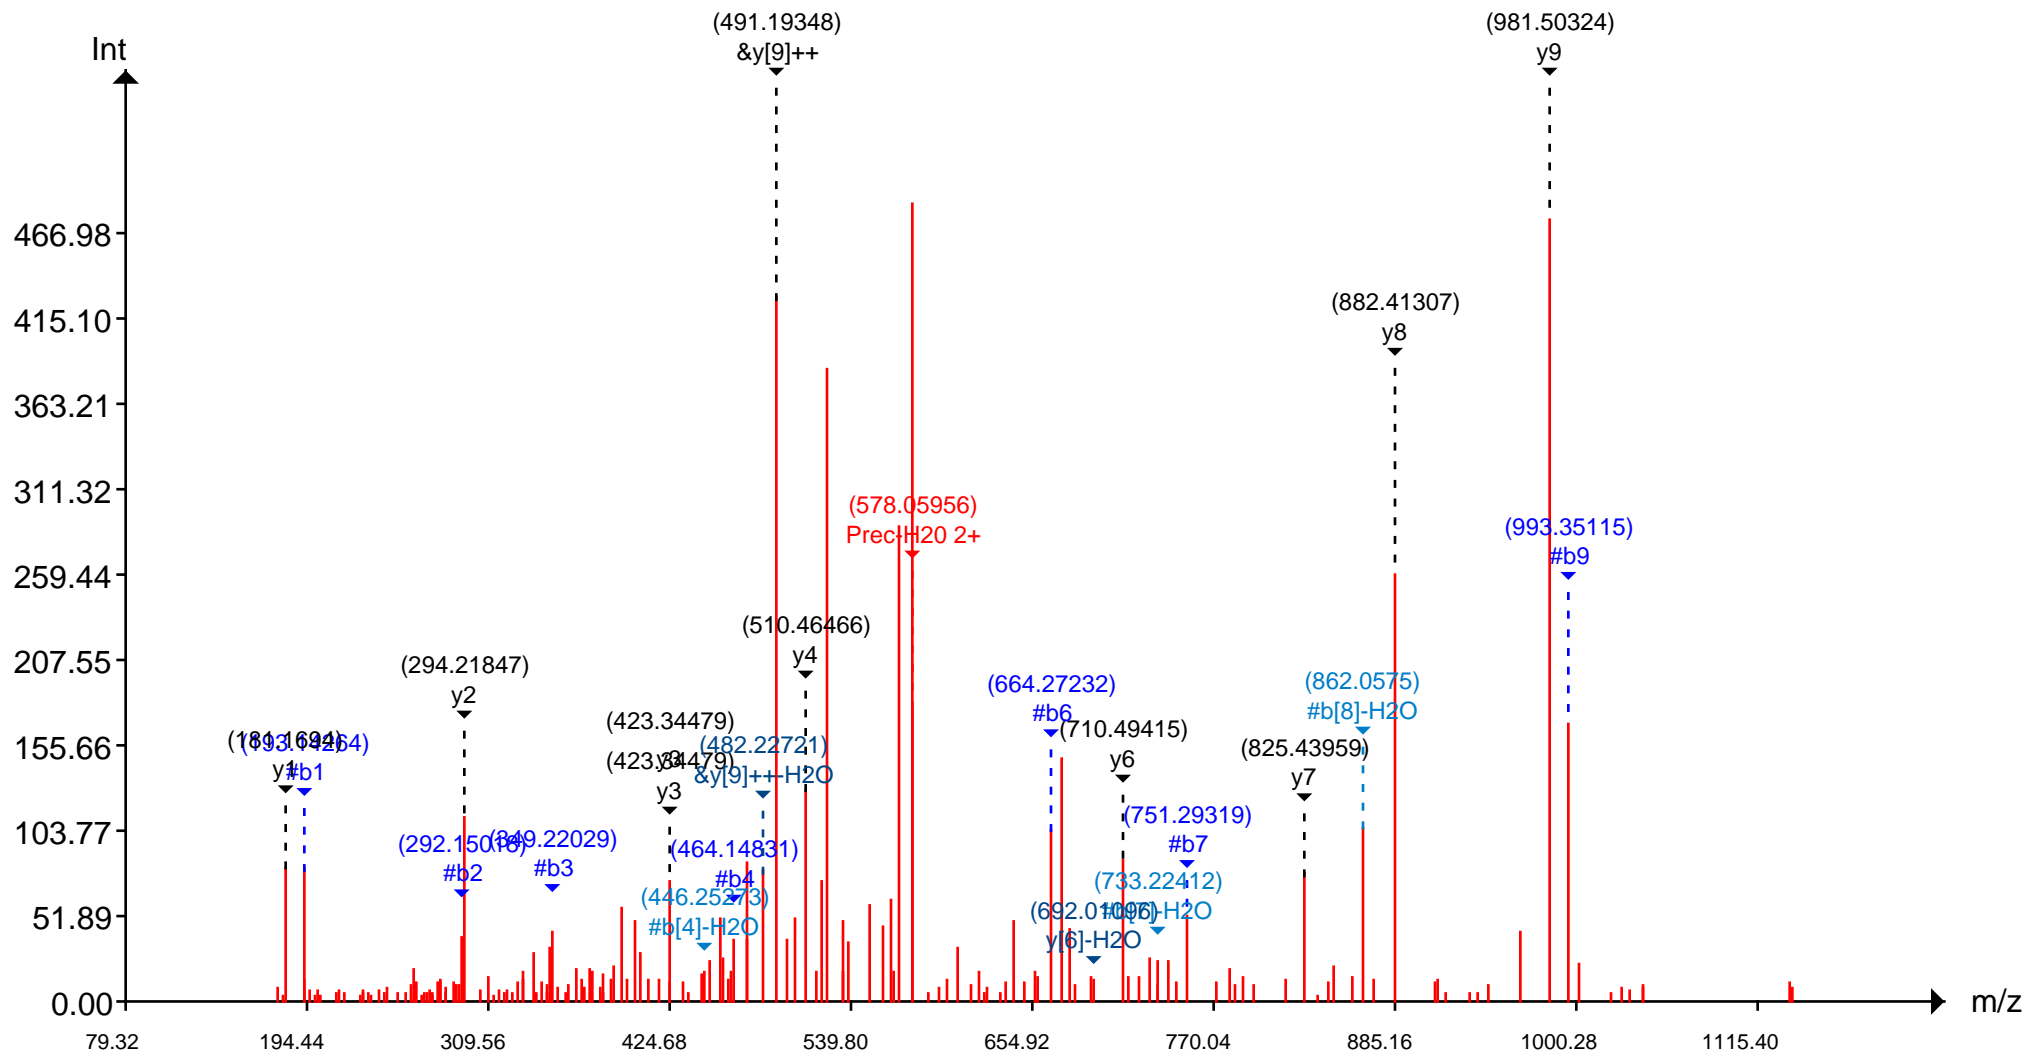

## Info

**Modified Sequence** AcD3-M<Mox\*>VGDEASELR<C13>-COOH

**Protein** P61161

**Precursor m/z** 587.28303

**Charge** 2+

**Ion score** 49.0

**Confidence level** 99.00%

**Identity Threshold** 46.33

**Mass error** -2.96E-4

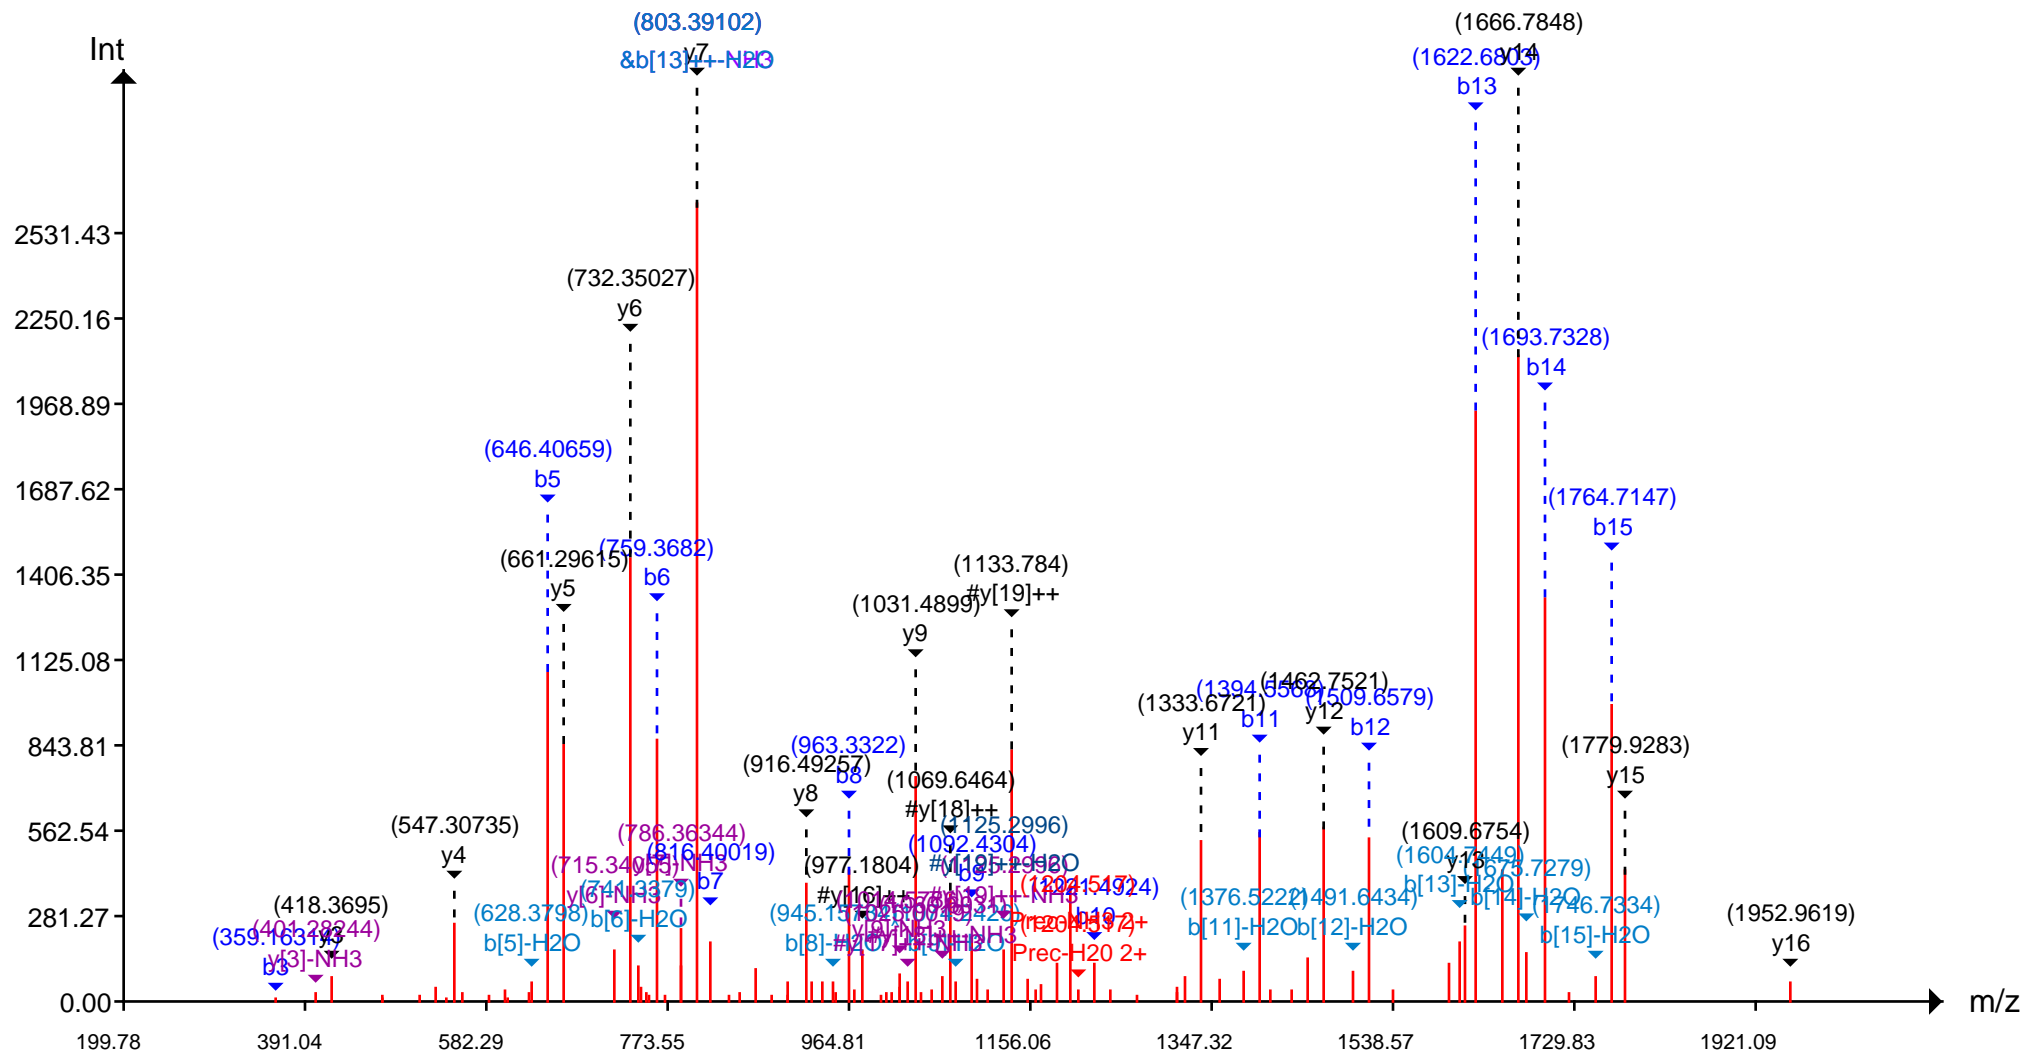

## Info

|                          |                                                |                           |          |
|--------------------------|------------------------------------------------|---------------------------|----------|
| <b>Modified Sequence</b> | AcD3-LEANK<AcD3K*>IGFEEK<AcD3K*>DIAANEENR-COOH | <b>Ion score</b>          | 115.31   |
| <b>Protein</b>           | Q9JJU8                                         | <b>Confidence level</b>   | 99.00%   |
| <b>Precursor m/z</b>     | 1213.1145                                      | <b>Identity Threshold</b> | 47.87    |
| <b>Charge</b>            | 2+                                             | <b>Mass error</b>         | 0.002625 |

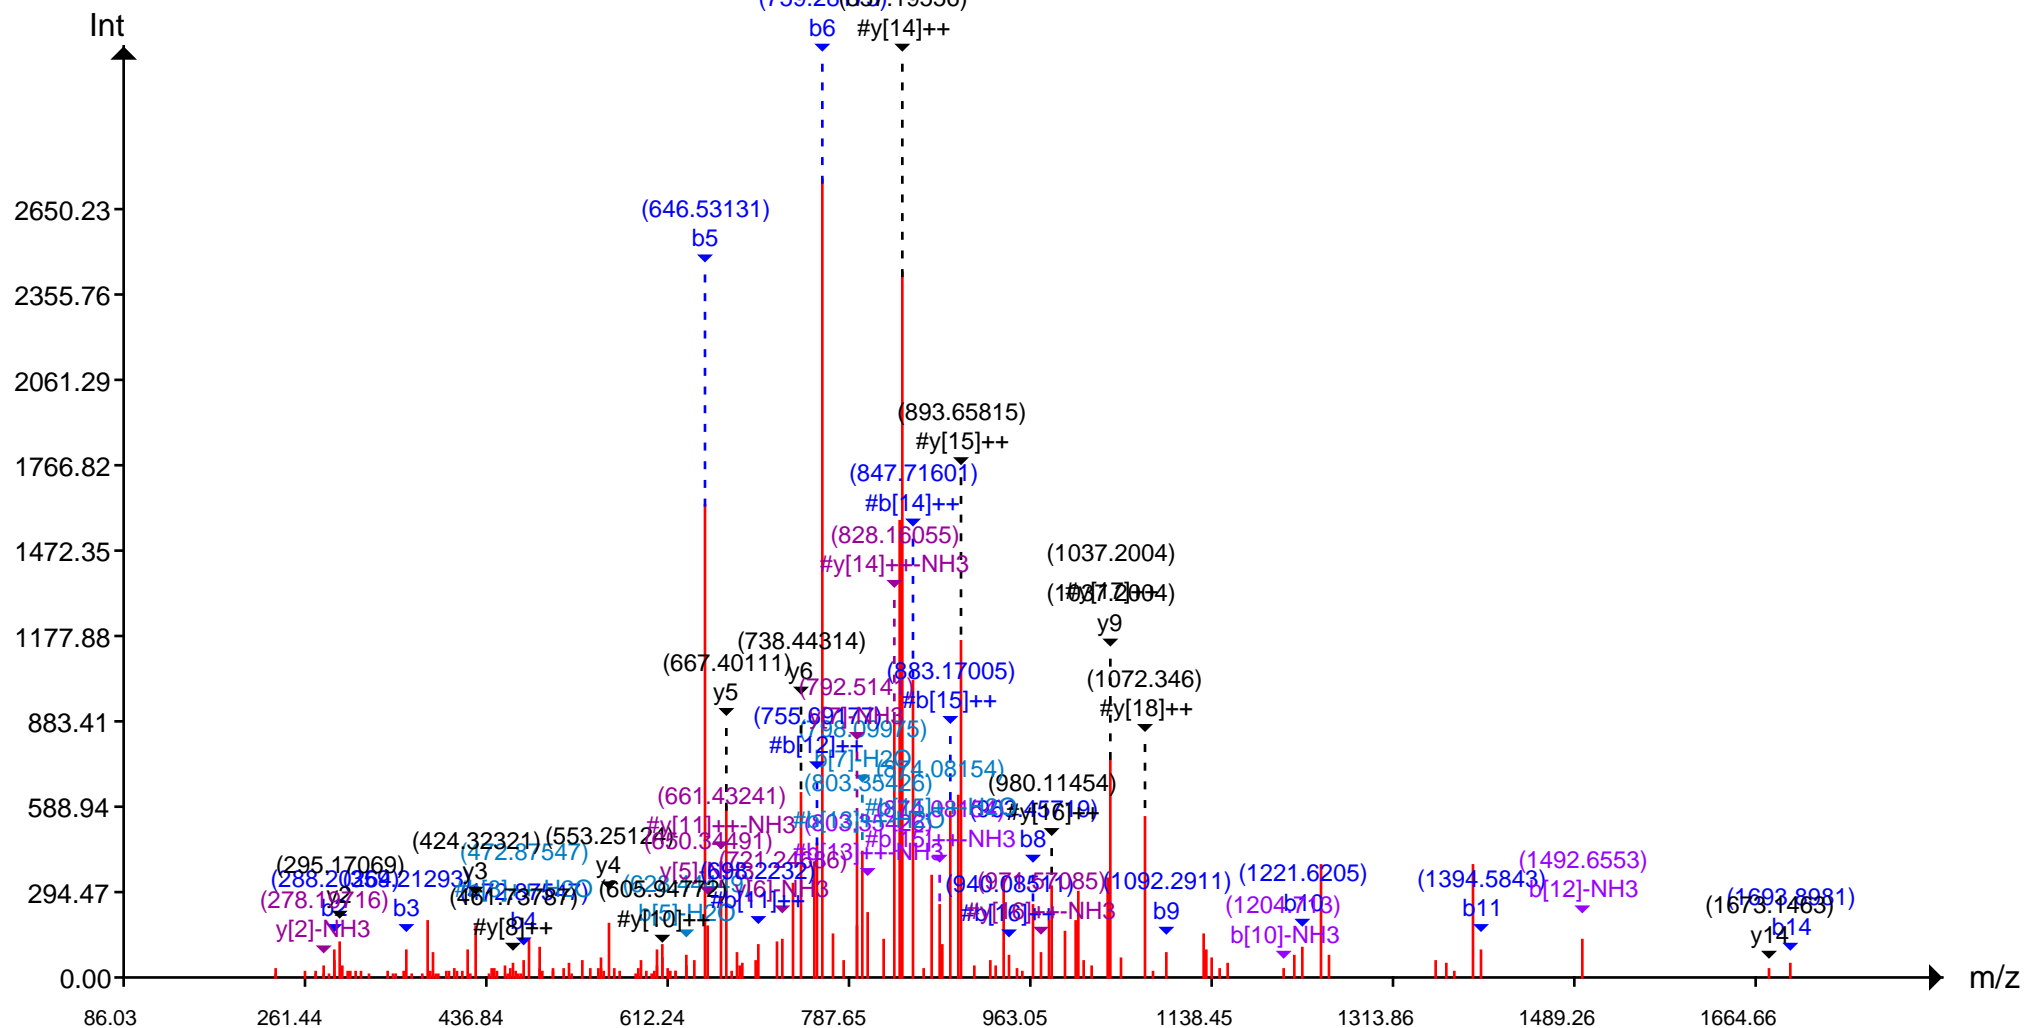

## Info

**Modified Sequence** AcD3-LEANK<AcD3K\*>IGFEEK<AcD3K\*>DIAANEENR<C13>-COOH

**Ion score** 51.52

**Protein** Q9JJU8

**Confidence level** 99.00%

**Precursor m/z** 811.08537

**Identity Threshold** 47.92

**Charge** 3+

**Mass error** 0.002318

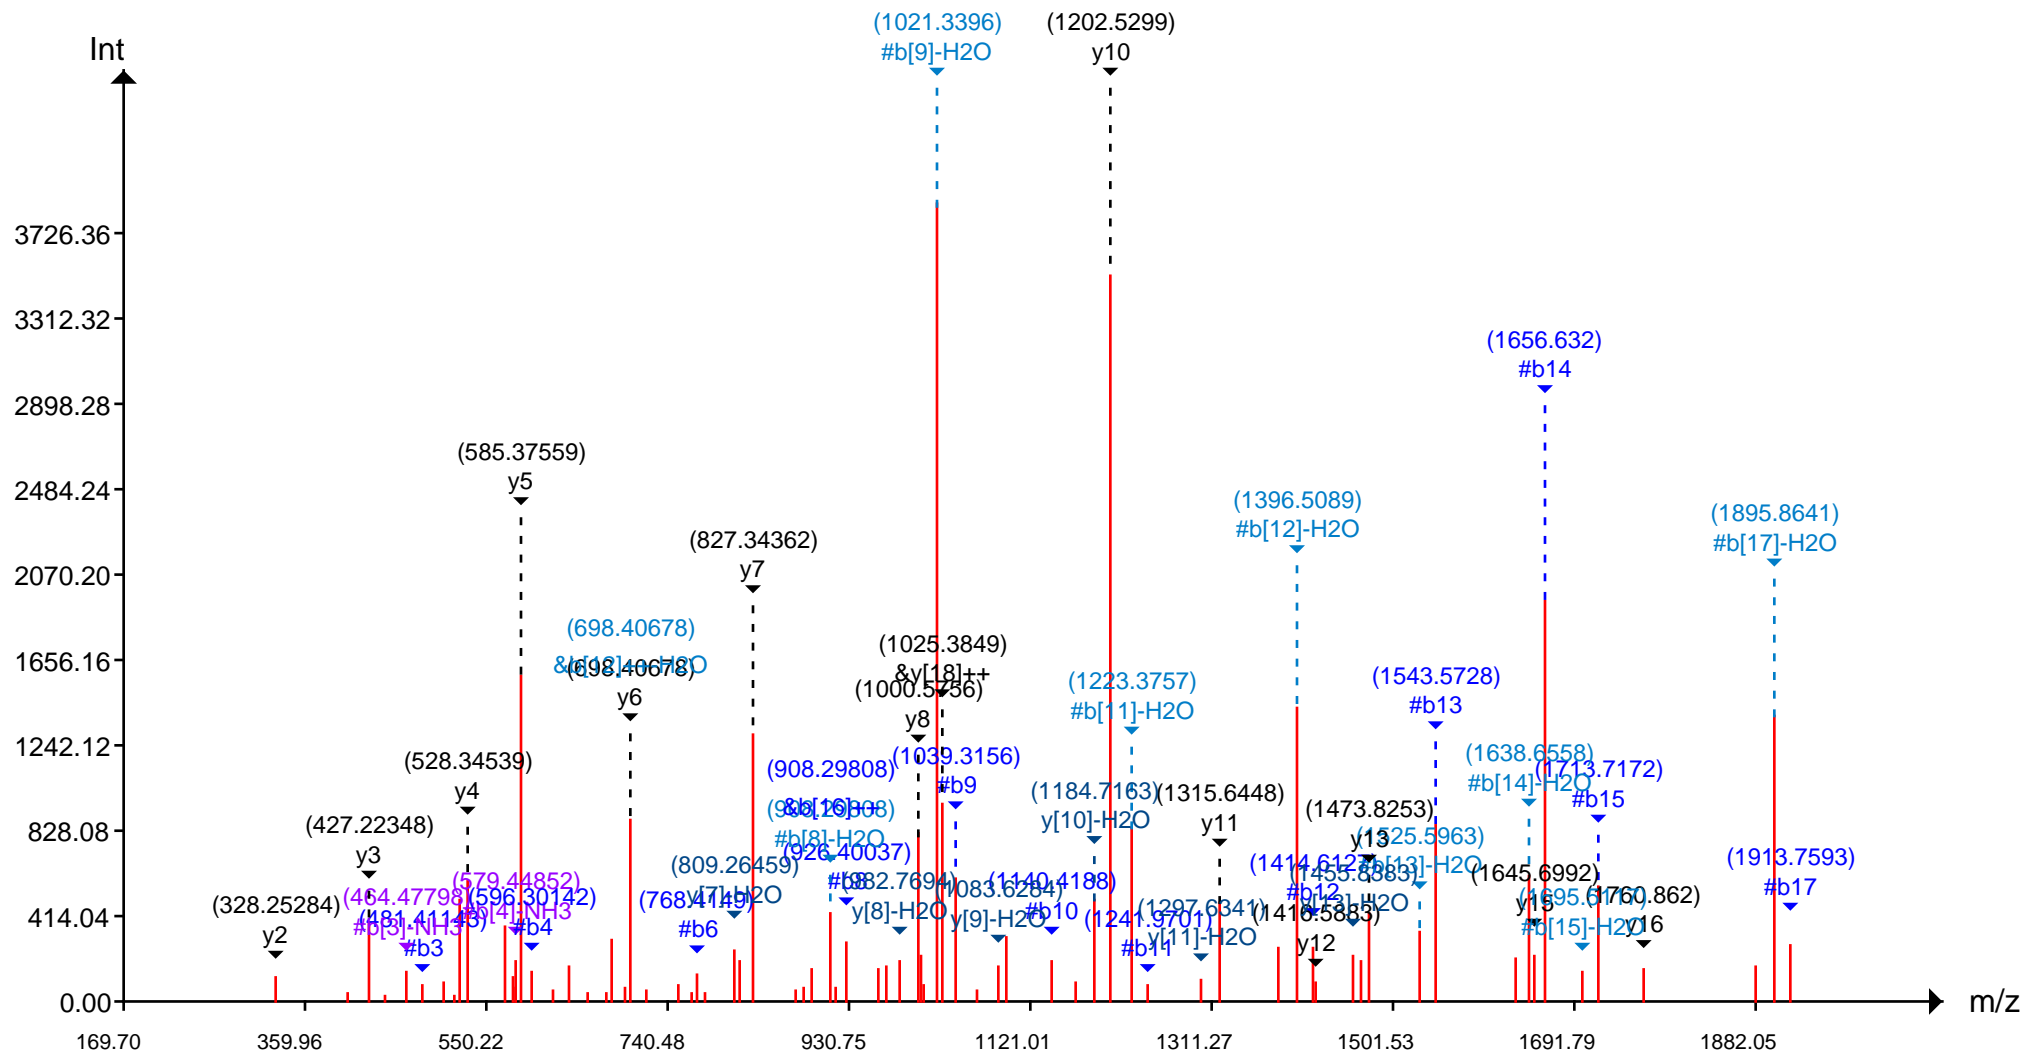

## Info

|                          |                                                          |                           |          |
|--------------------------|----------------------------------------------------------|---------------------------|----------|
| <b>Modified Sequence</b> | AcD3-FDK<AcD3K*>DGDGTITTK<AcD3K*>ELGTVM<MoX*>R<C13>-COOH | <b>Ion score</b>          | 99.28    |
| <b>Protein</b>           | P62204                                                   | <b>Confidence level</b>   | 99.00%   |
| <b>Precursor m/z</b>     | 1121.0724                                                | <b>Identity Threshold</b> | 47.93    |
| <b>Charge</b>            | 2+                                                       | <b>Mass error</b>         | 0.001403 |



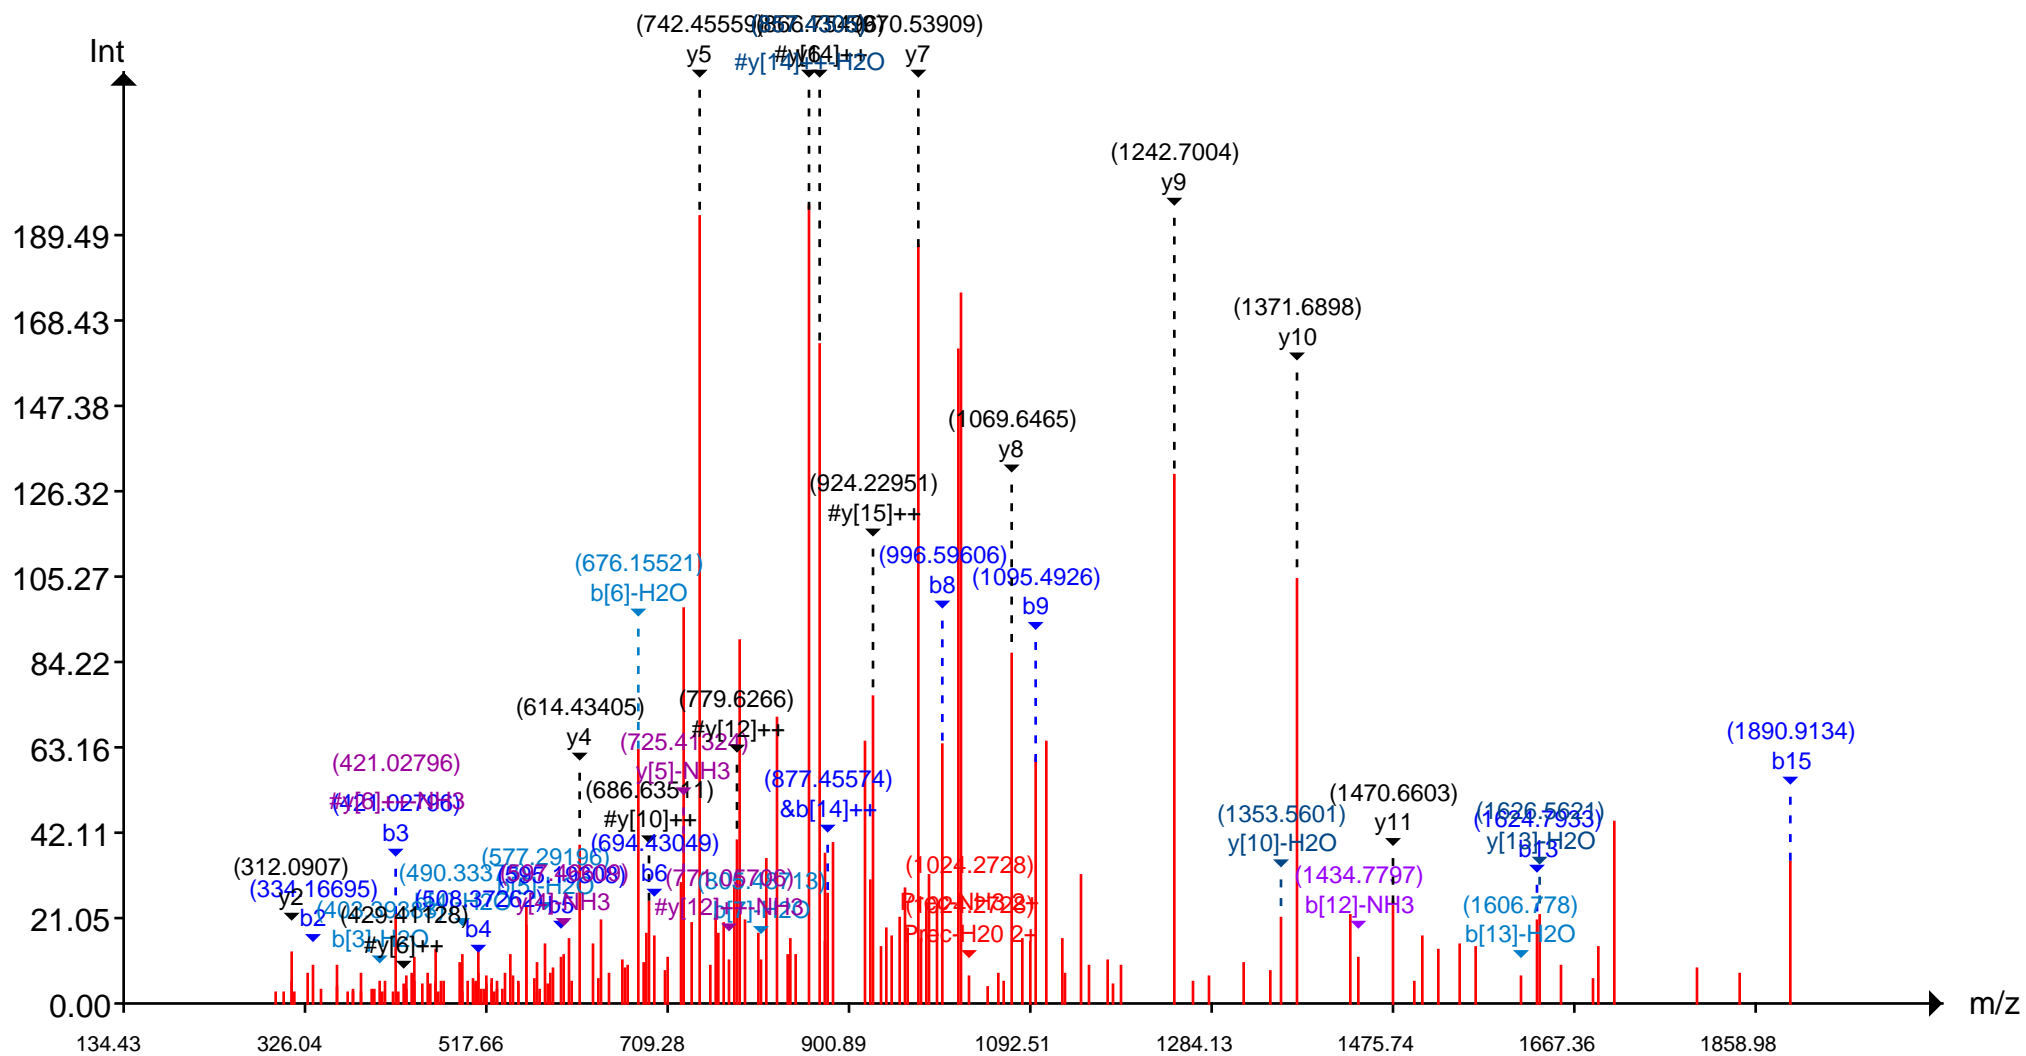

## Info

|                          |                                                    |                           |          |
|--------------------------|----------------------------------------------------|---------------------------|----------|
| <b>Modified Sequence</b> | AcD3-K<AcD3K*>DSSSVEK<AcD3K*>VLDQK<AcD3K*>EHR-COOH | <b>Ion score</b>          | 51.38    |
| <b>Protein</b>           | Q99020                                             | <b>Confidence level</b>   | 99.00%   |
| <b>Precursor m/z</b>     | 1033.0527                                          | <b>Identity Threshold</b> | 47.74    |
| <b>Charge</b>            | 2+                                                 | <b>Mass error</b>         | 0.003171 |

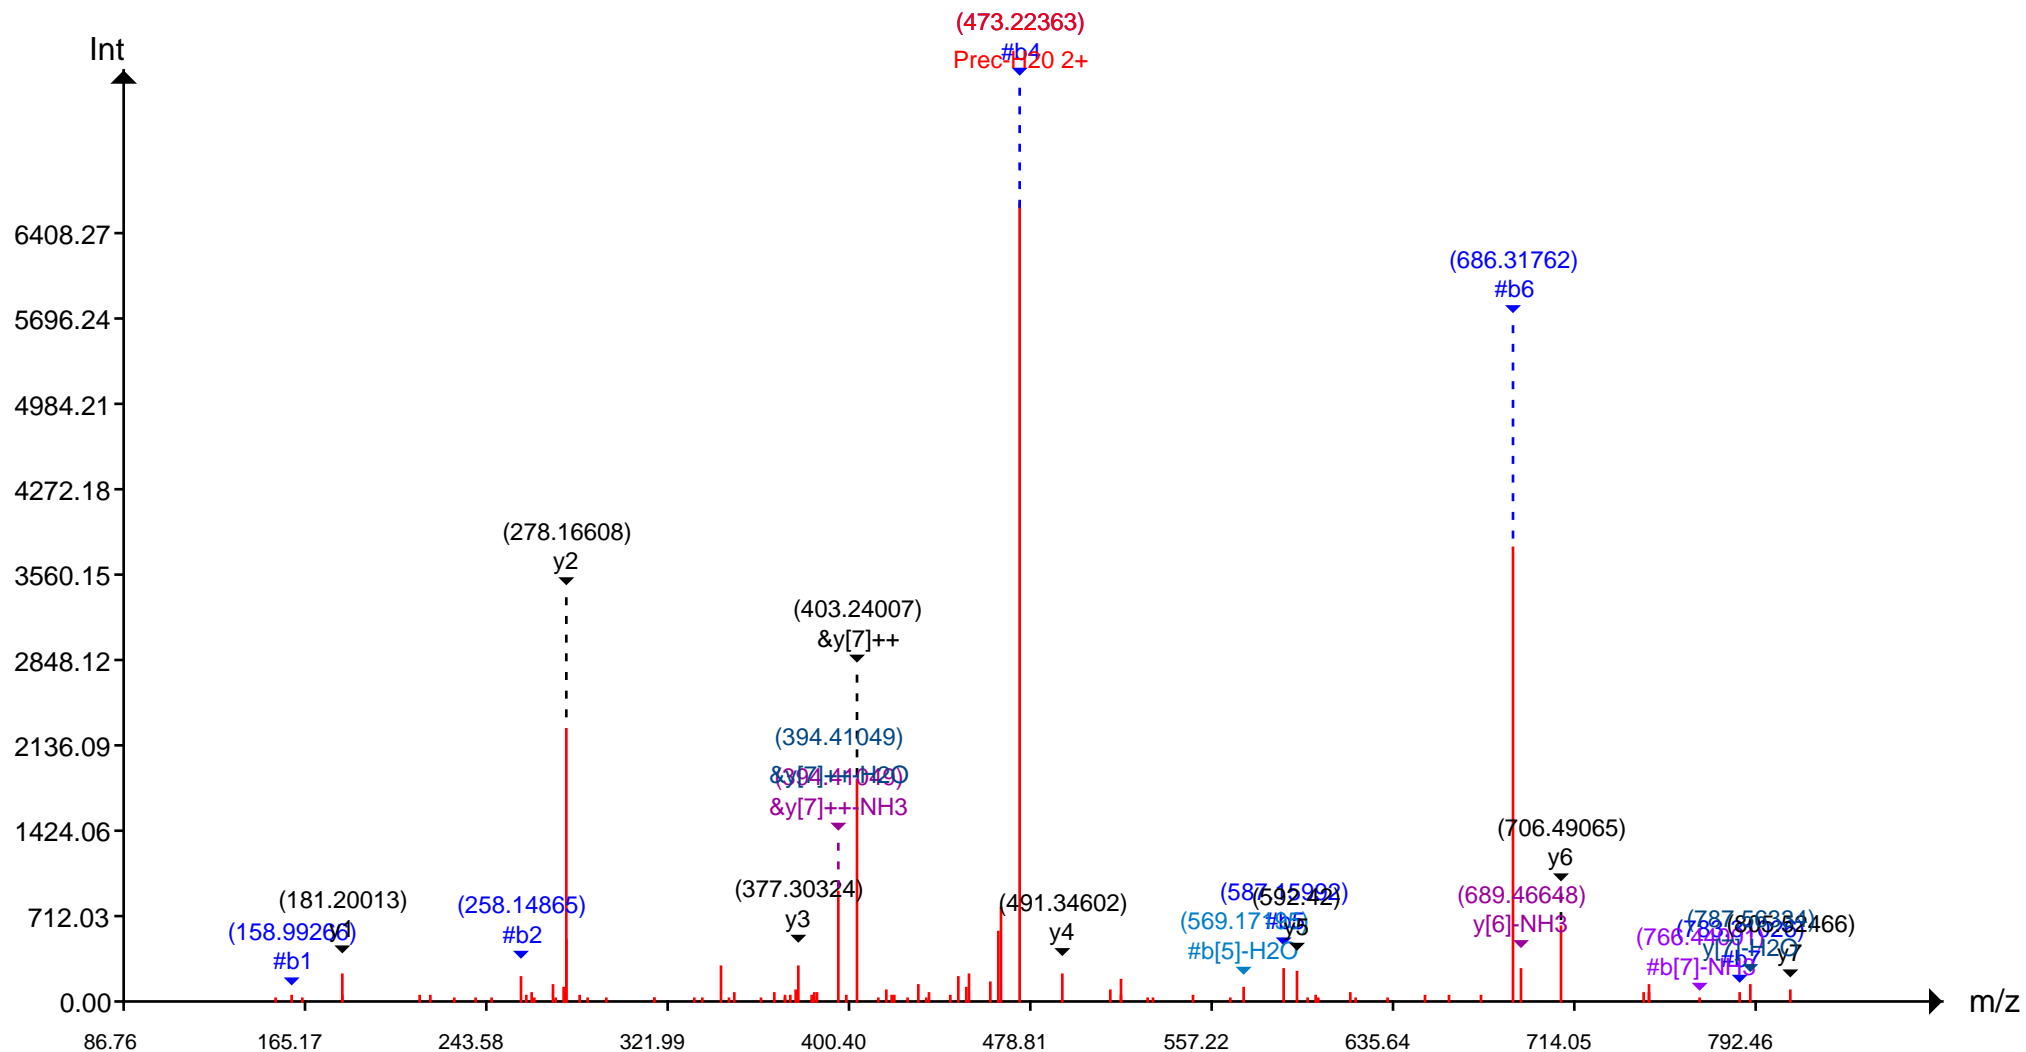

## Info

|                          |                         |                           |           |
|--------------------------|-------------------------|---------------------------|-----------|
| <b>Modified Sequence</b> | AcD3-IVNTNVPR<C13>-COOH | <b>Ion score</b>          | 61.12     |
| <b>Protein</b>           | P34884                  | <b>Confidence level</b>   | 99.00%    |
| <b>Precursor m/z</b>     | 482.28997               | <b>Identity Threshold</b> | 45.74     |
| <b>Charge</b>            | 2+                      | <b>Mass error</b>         | -0.003002 |



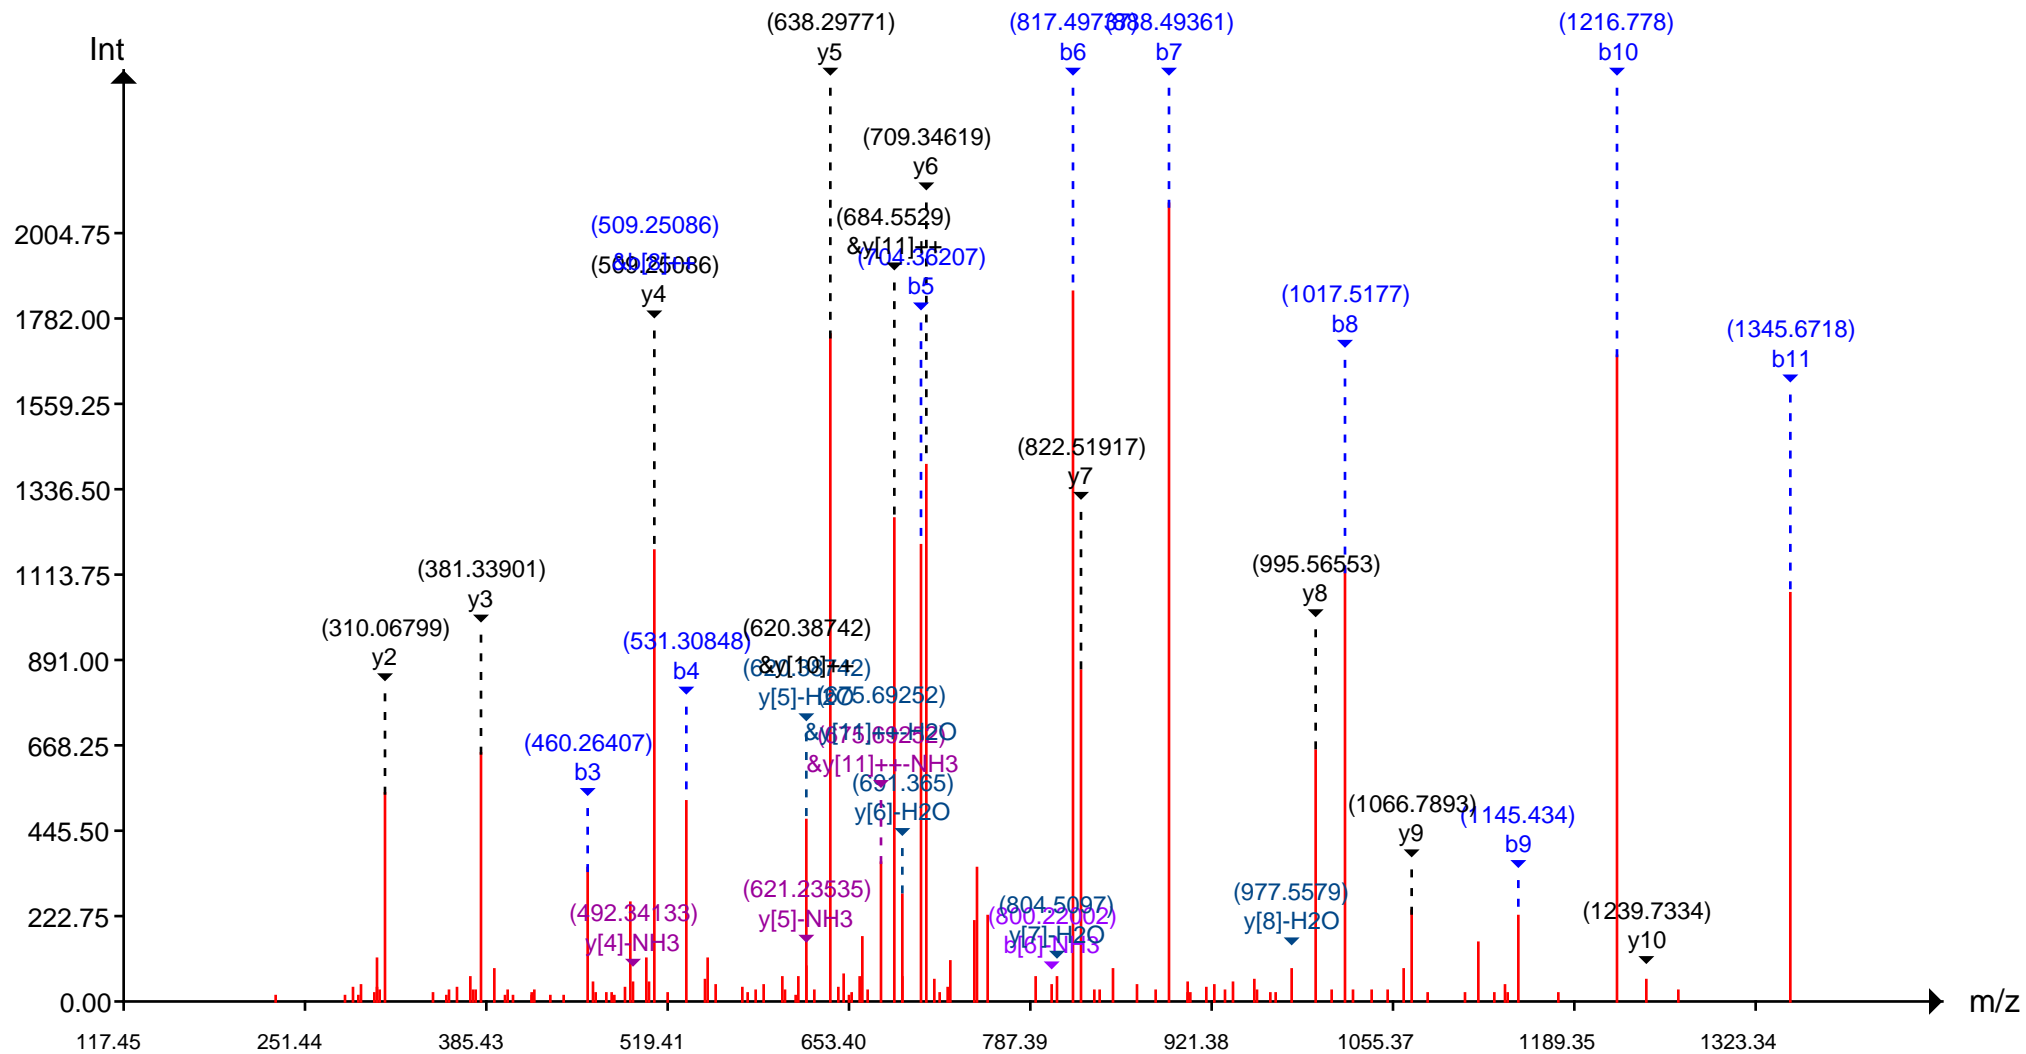

## Info

**Modified Sequence** AcD3-IQK<AcD3K\*>AK<AcD3K\*>LAEQAER<C13>-COOH

**Ion score** 81.11

**Protein** O70456, P68254

**Confidence level** 99.00%

**Precursor m/z** 763.45384

**Identity Threshold** 44.20

**Charge** 2+

**Mass error** 0.001435

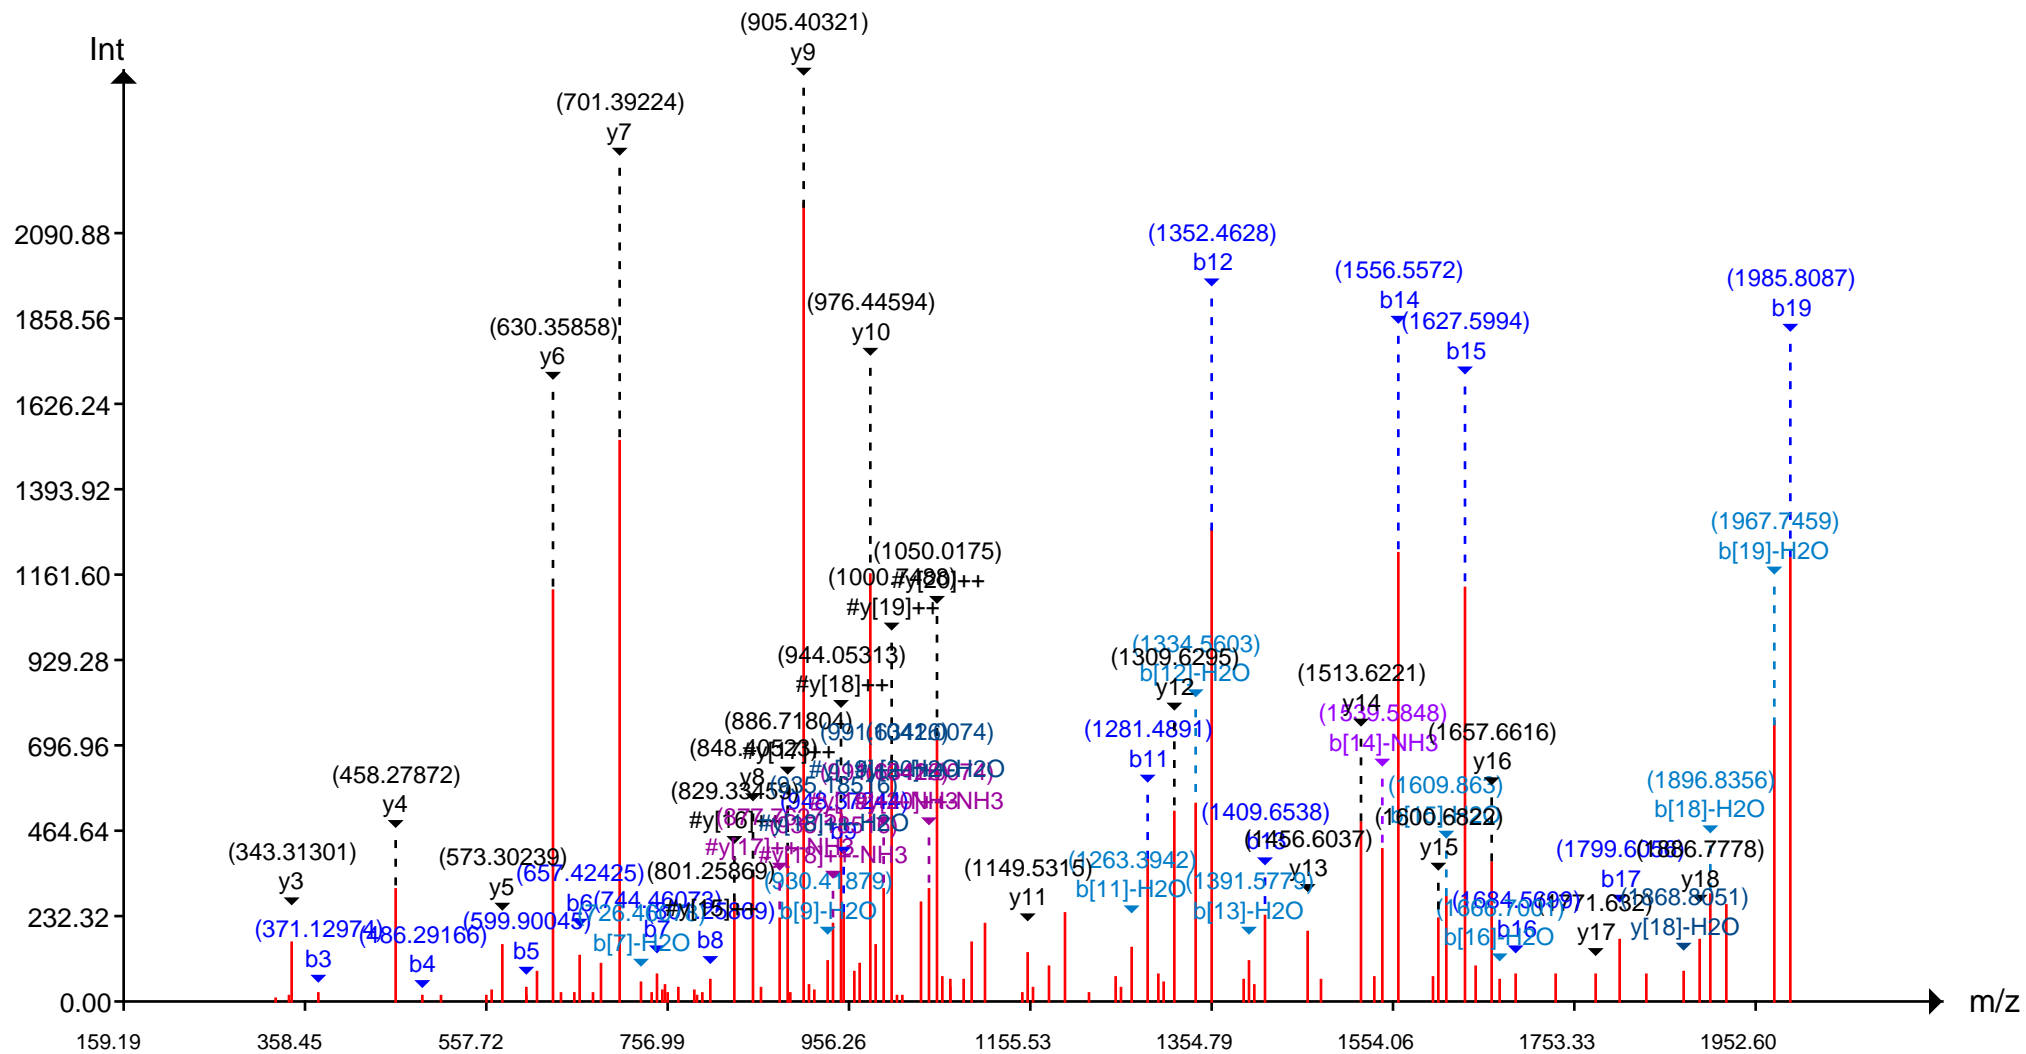

## Info

|                          |                                                     |                           |          |
|--------------------------|-----------------------------------------------------|---------------------------|----------|
| <b>Modified Sequence</b> | AcD3-LVIDNGSGM<Mox*>C<Cmm*>K<AcD3K*>AGFAGDDAPR-COOH | <b>Ion score</b>          | 141.17   |
| <b>Protein</b>           | P63260                                              | <b>Confidence level</b>   | 99.00%   |
| <b>Precursor m/z</b>     | 1129.0298                                           | <b>Identity Threshold</b> | 45.59    |
| <b>Charge</b>            | 2+                                                  | <b>Mass error</b>         | 0.002857 |

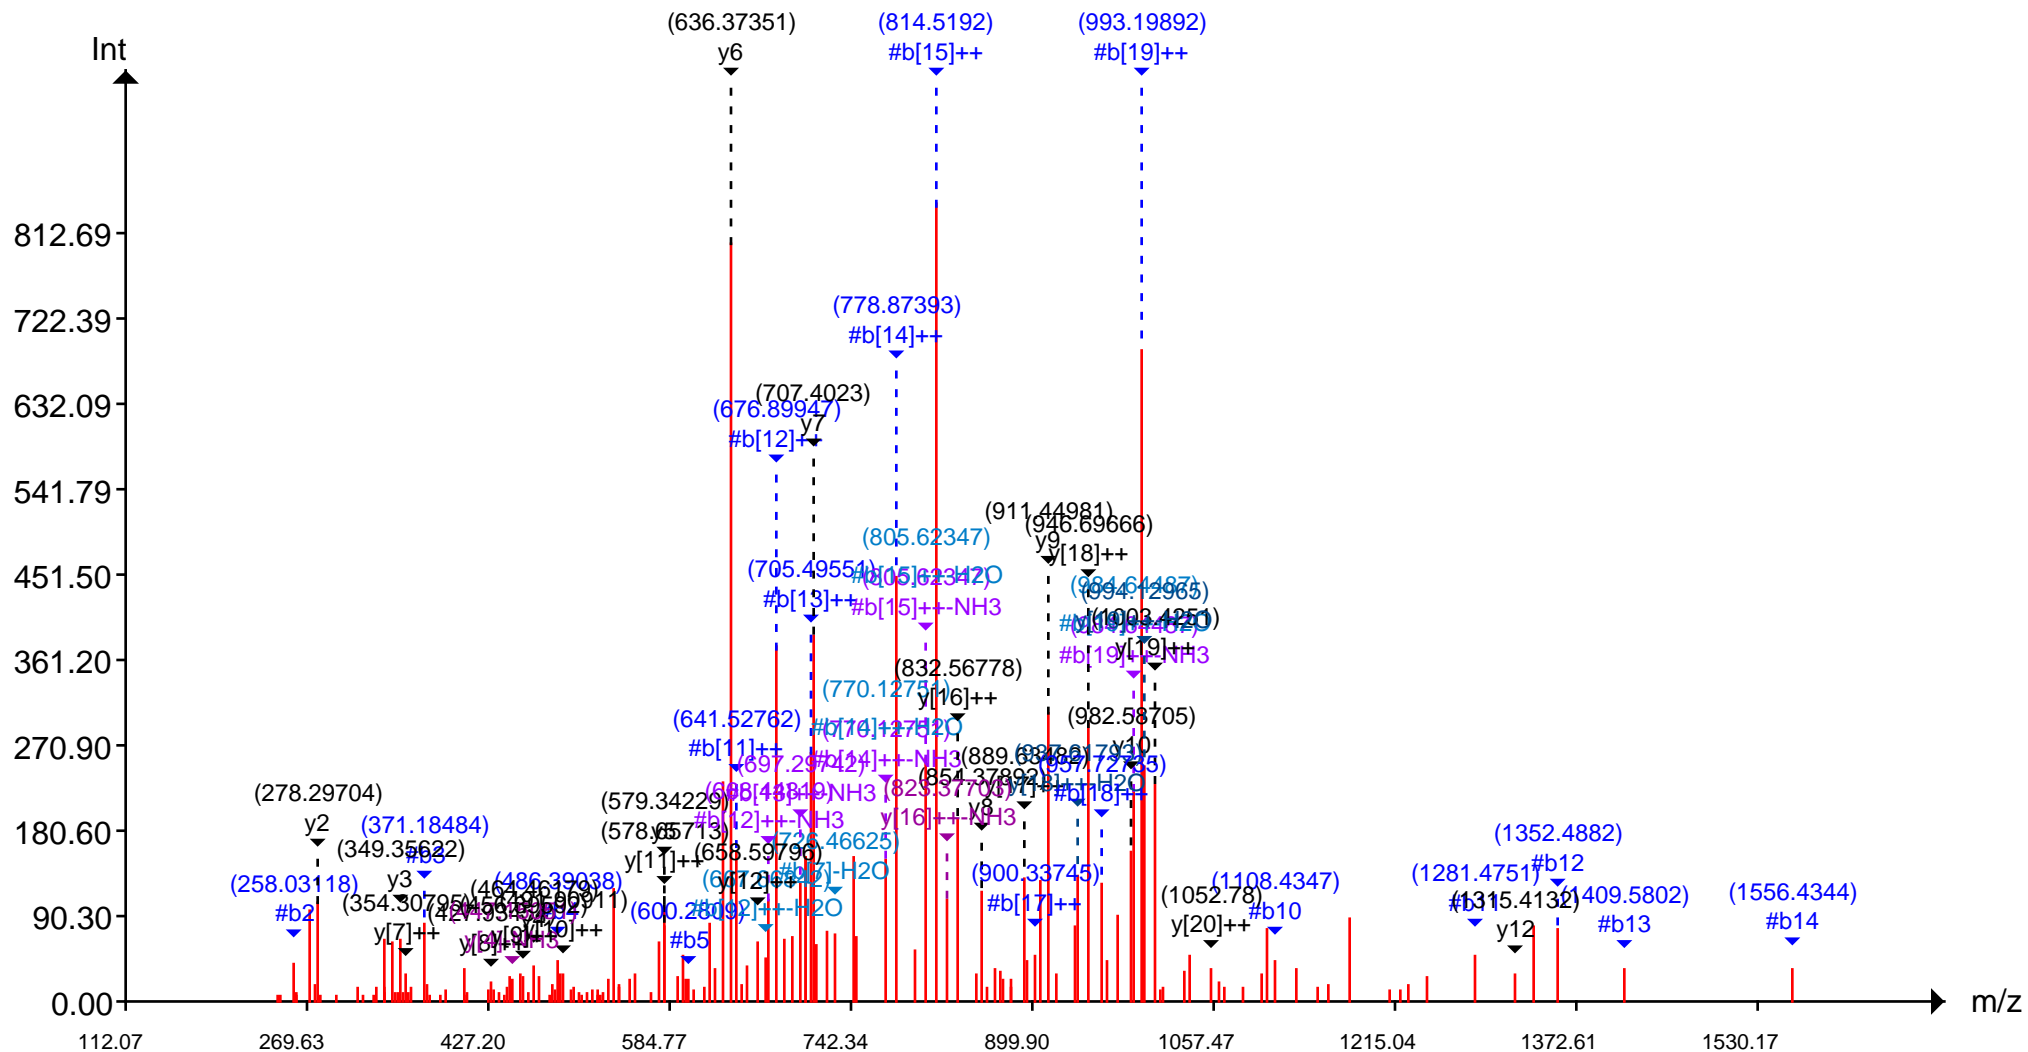

## Info

|                          |                                                          |                           |         |
|--------------------------|----------------------------------------------------------|---------------------------|---------|
| <b>Modified Sequence</b> | AcD3-LVIDNGSGM<Mox*>C<Cmm*>K<AcD3K*>AGFAGDDAPR<C13>-COOH | <b>Ion score</b>          | 75.23   |
| <b>Protein</b>           | P63260                                                   | <b>Confidence level</b>   | 99.00%  |
| <b>Precursor m/z</b>     | 755.0287                                                 | <b>Identity Threshold</b> | 46.36   |
| <b>Charge</b>            | 3+                                                       | <b>Mass error</b>         | 0.00194 |

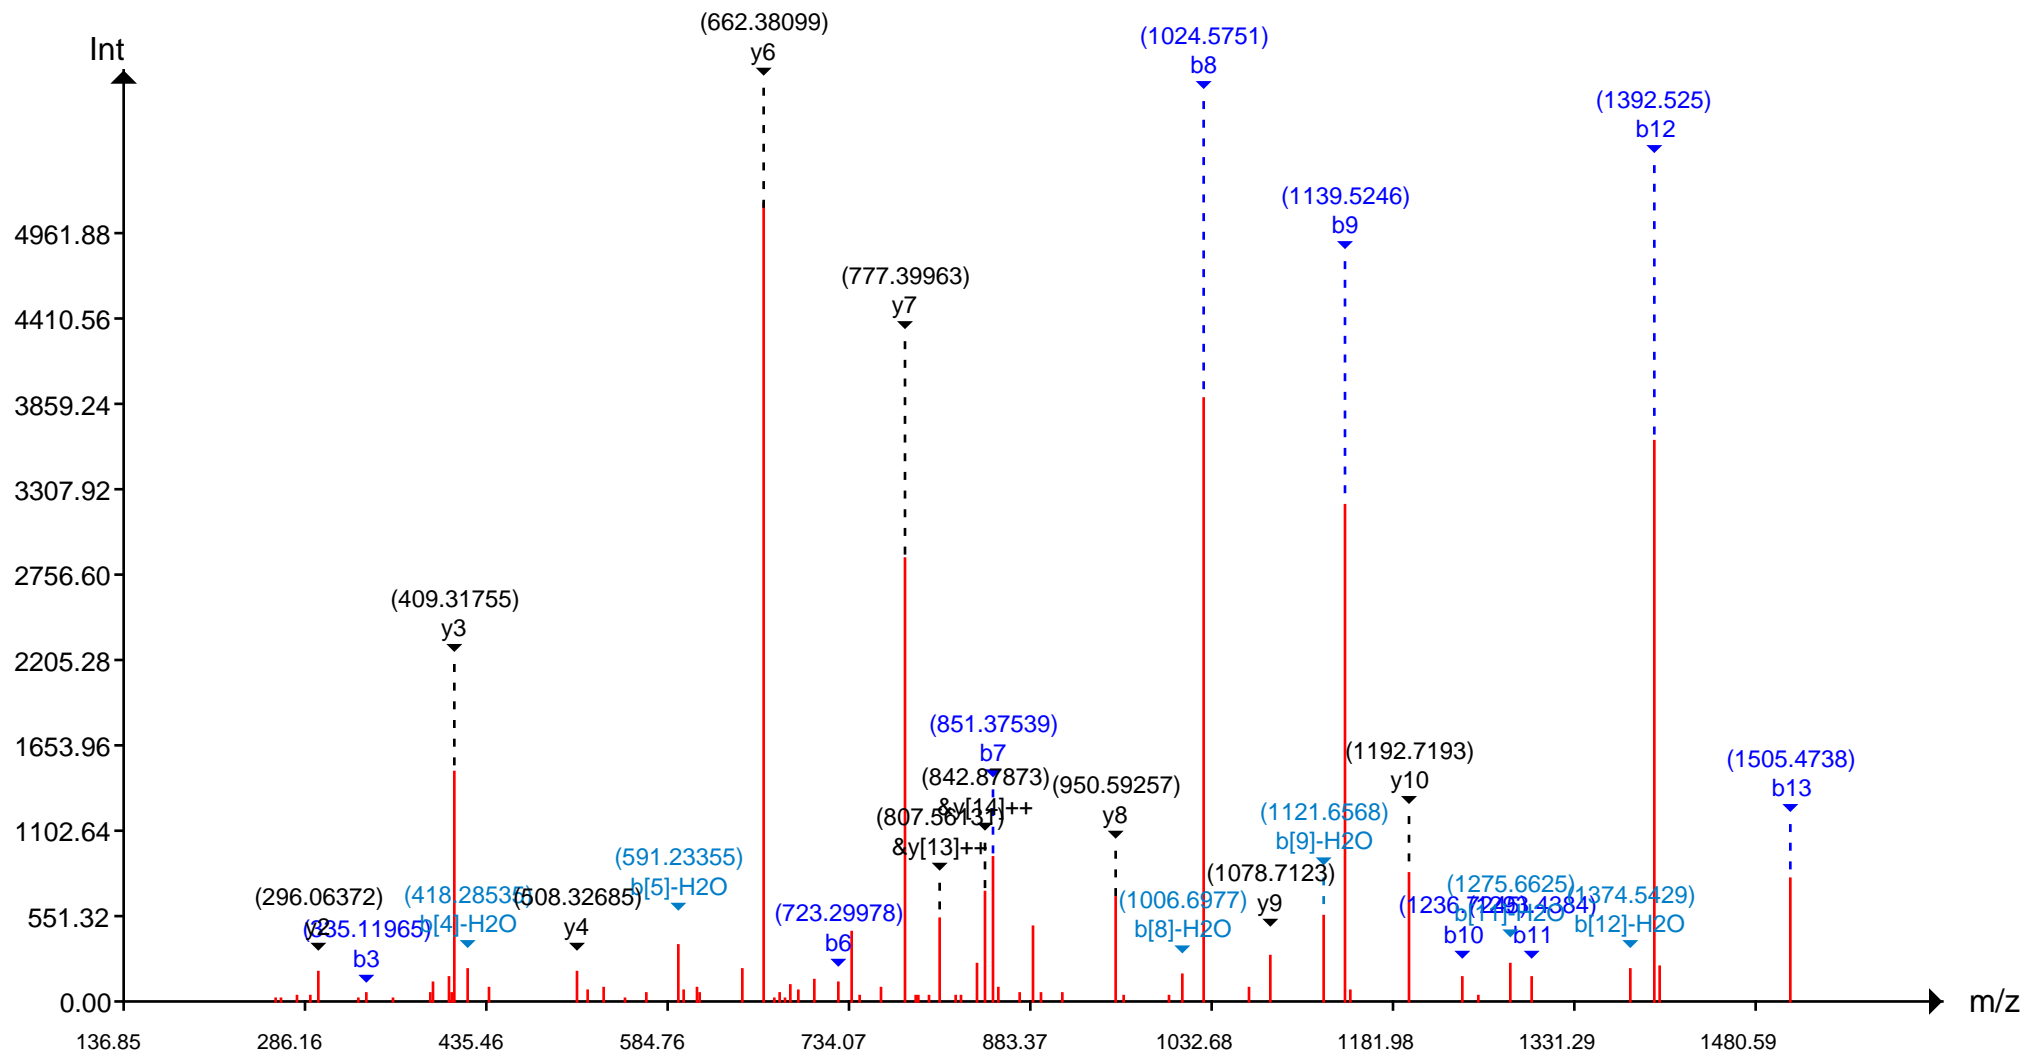

## Info

**Modified Sequence** AcD3-AAFTK<AcD3K\*>NQK<AcD3K\*>DPGVLDK<C13>-COOH

**Ion score** 77.42

**Protein** P50543

**Confidence level** 99.00%

**Precursor m/z** 900.99928

**Identity Threshold** 47.12

**Charge** 2+

**Mass error** 0.001662

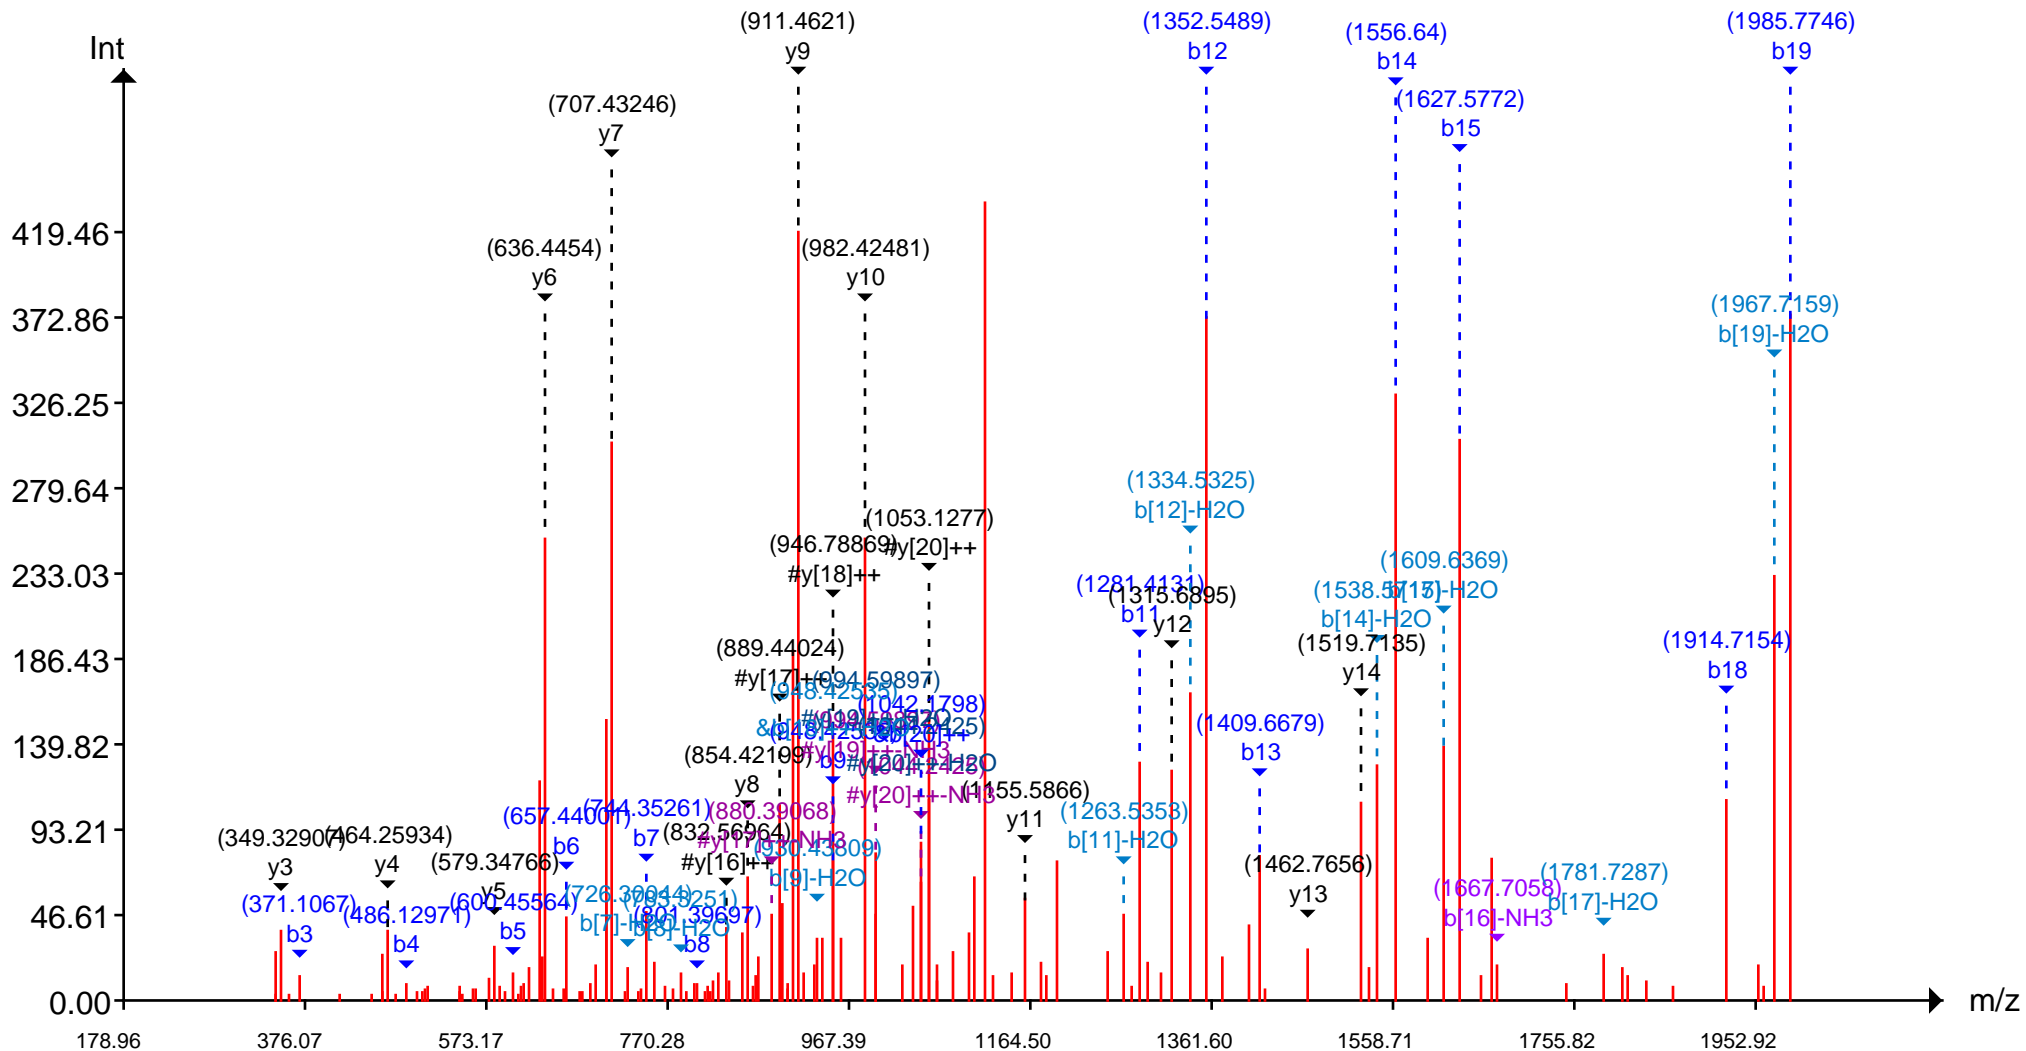

## Info

|                          |                                                          |                           |          |
|--------------------------|----------------------------------------------------------|---------------------------|----------|
| <b>Modified Sequence</b> | AcD3-LVIDNGSGM<Mox*>C<Cmm*>K<AcD3K*>AGFAGDDAPR<C13>-COOH | <b>Ion score</b>          | 80.56    |
| <b>Protein</b>           | P63260                                                   | <b>Confidence level</b>   | 99.00%   |
| <b>Precursor m/z</b>     | 1132.0399                                                | <b>Identity Threshold</b> | 46.36    |
| <b>Charge</b>            | 2+                                                       | <b>Mass error</b>         | 0.002916 |

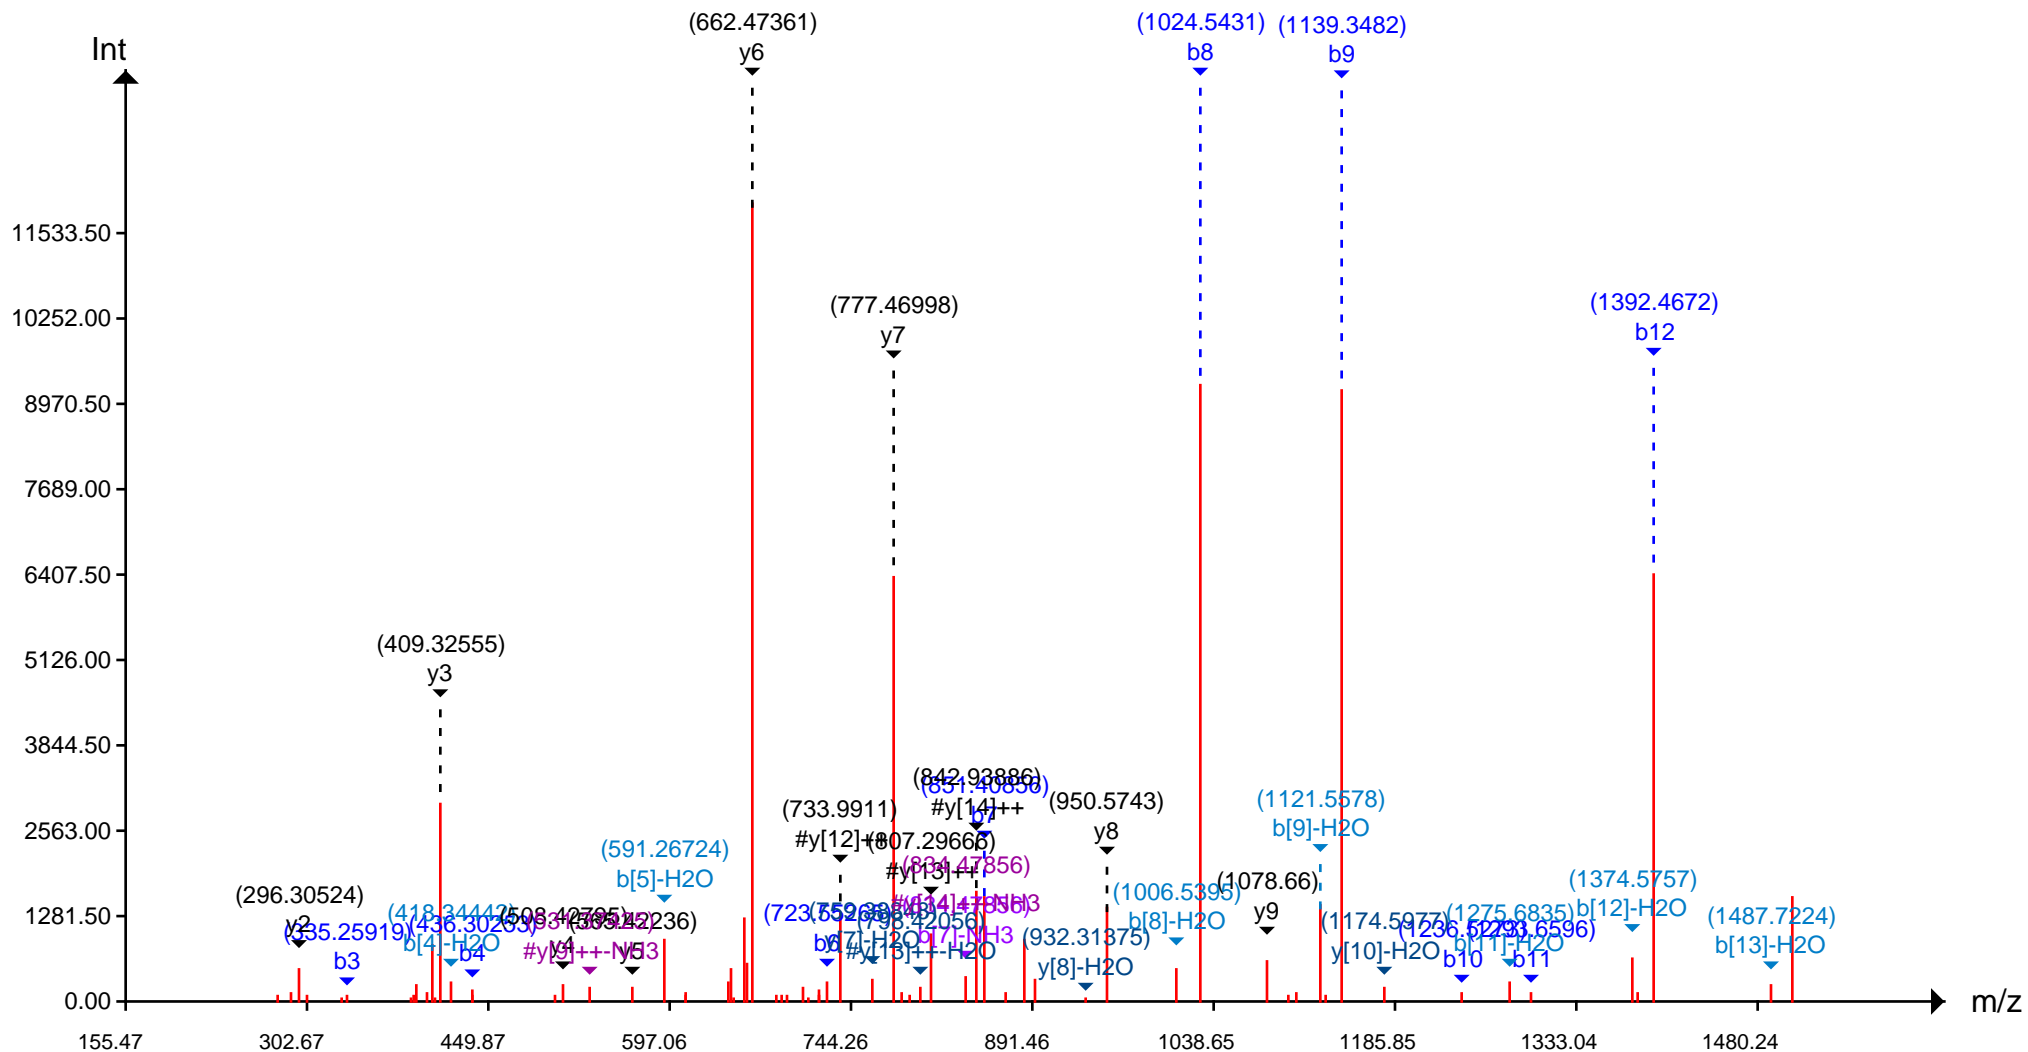

## Info

**Modified Sequence** AcD3-AAFTK<AcD3K\*>NQK<AcD3K\*>DPGVLDK<C13>-COOH

**Ion score** 66.61

**Protein** P50543

**Confidence level** 99.00%

**Precursor m/z** 900.99891

**Identity Threshold** 47.09

**Charge** 2+

**Mass error** 9.22E-4

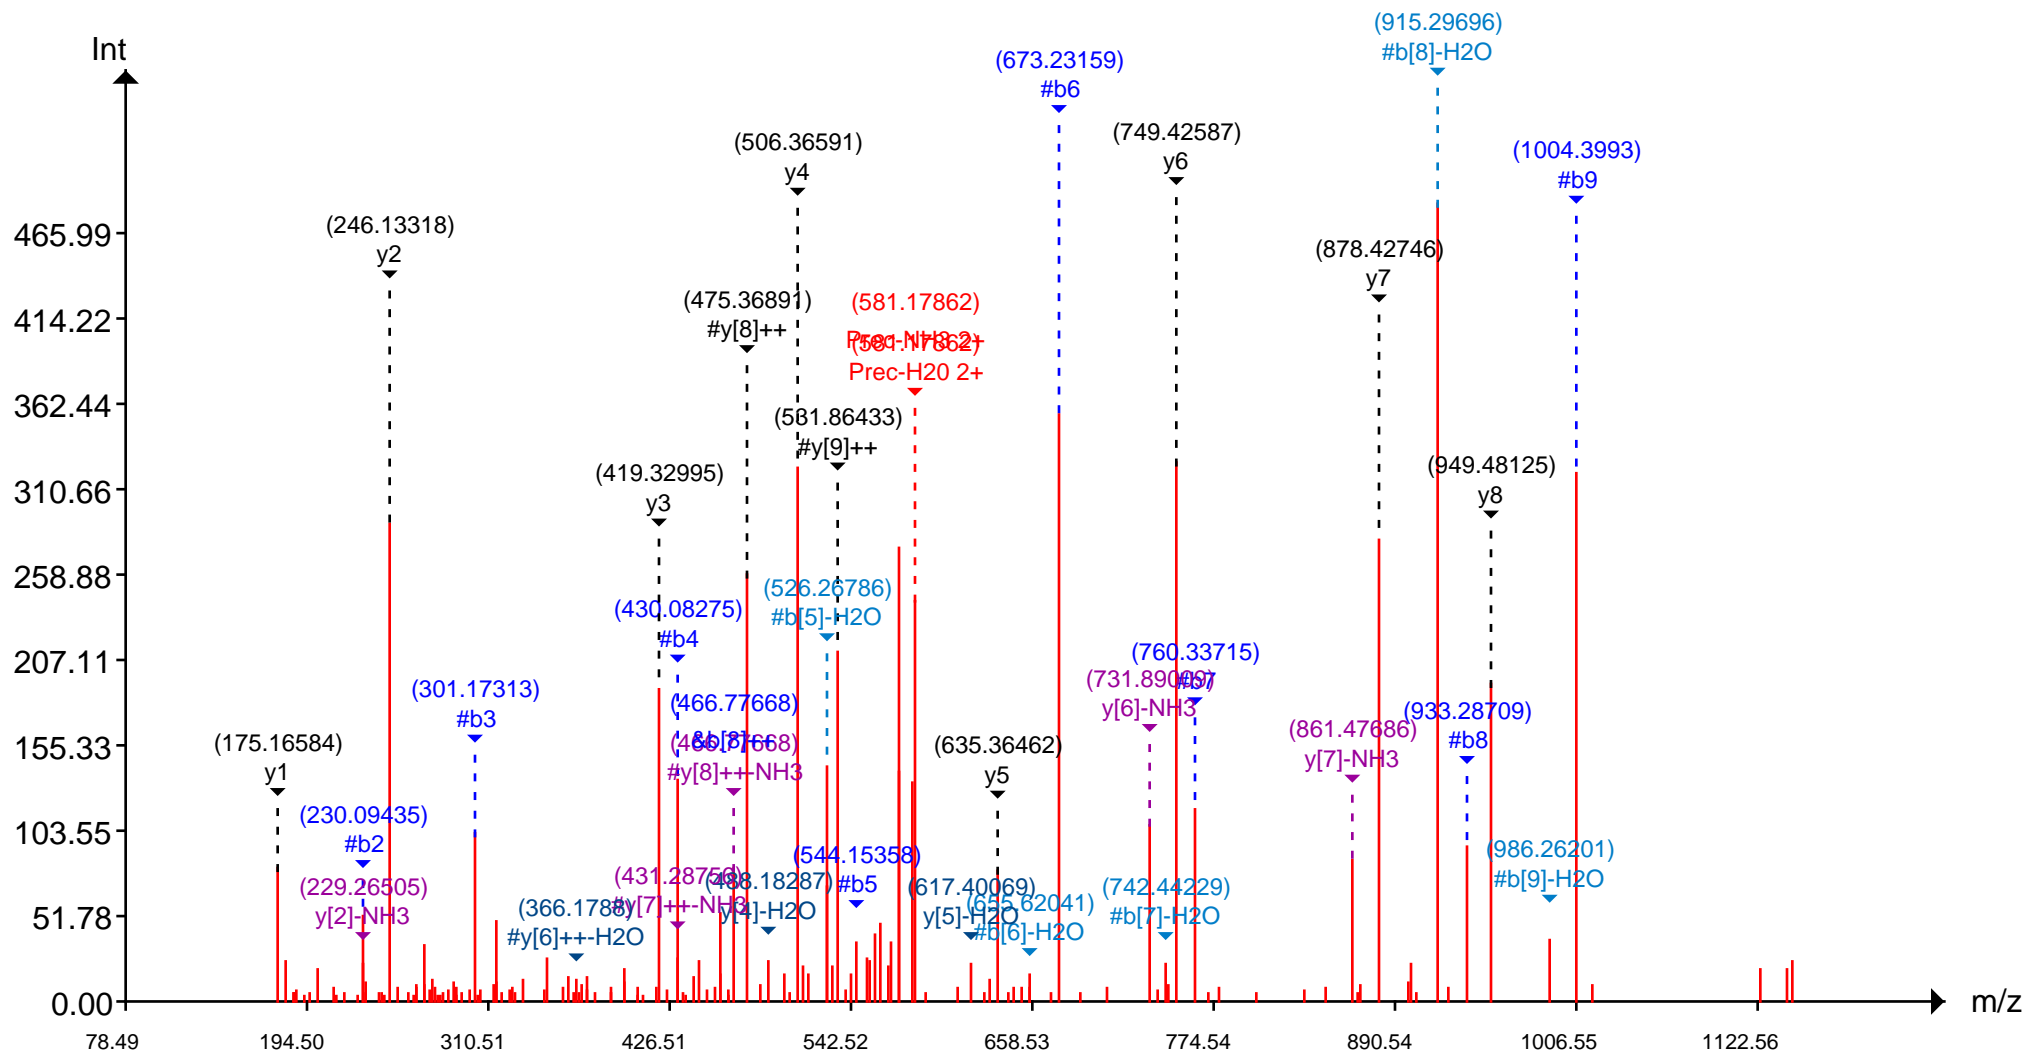

## Info

|                          |                              |                           |        |
|--------------------------|------------------------------|---------------------------|--------|
| <b>Modified Sequence</b> | AcD3-AIAENESK<AcD3K*>AR-COOH | <b>Ion score</b>          | 57.98  |
| <b>Protein</b>           | Q923D4                       | <b>Confidence level</b>   | 99.00% |
| <b>Precursor m/z</b>     | 589.81776                    | <b>Identity Threshold</b> | 48.18  |
| <b>Charge</b>            | 2+                           | <b>Mass error</b>         | 4.2E-5 |

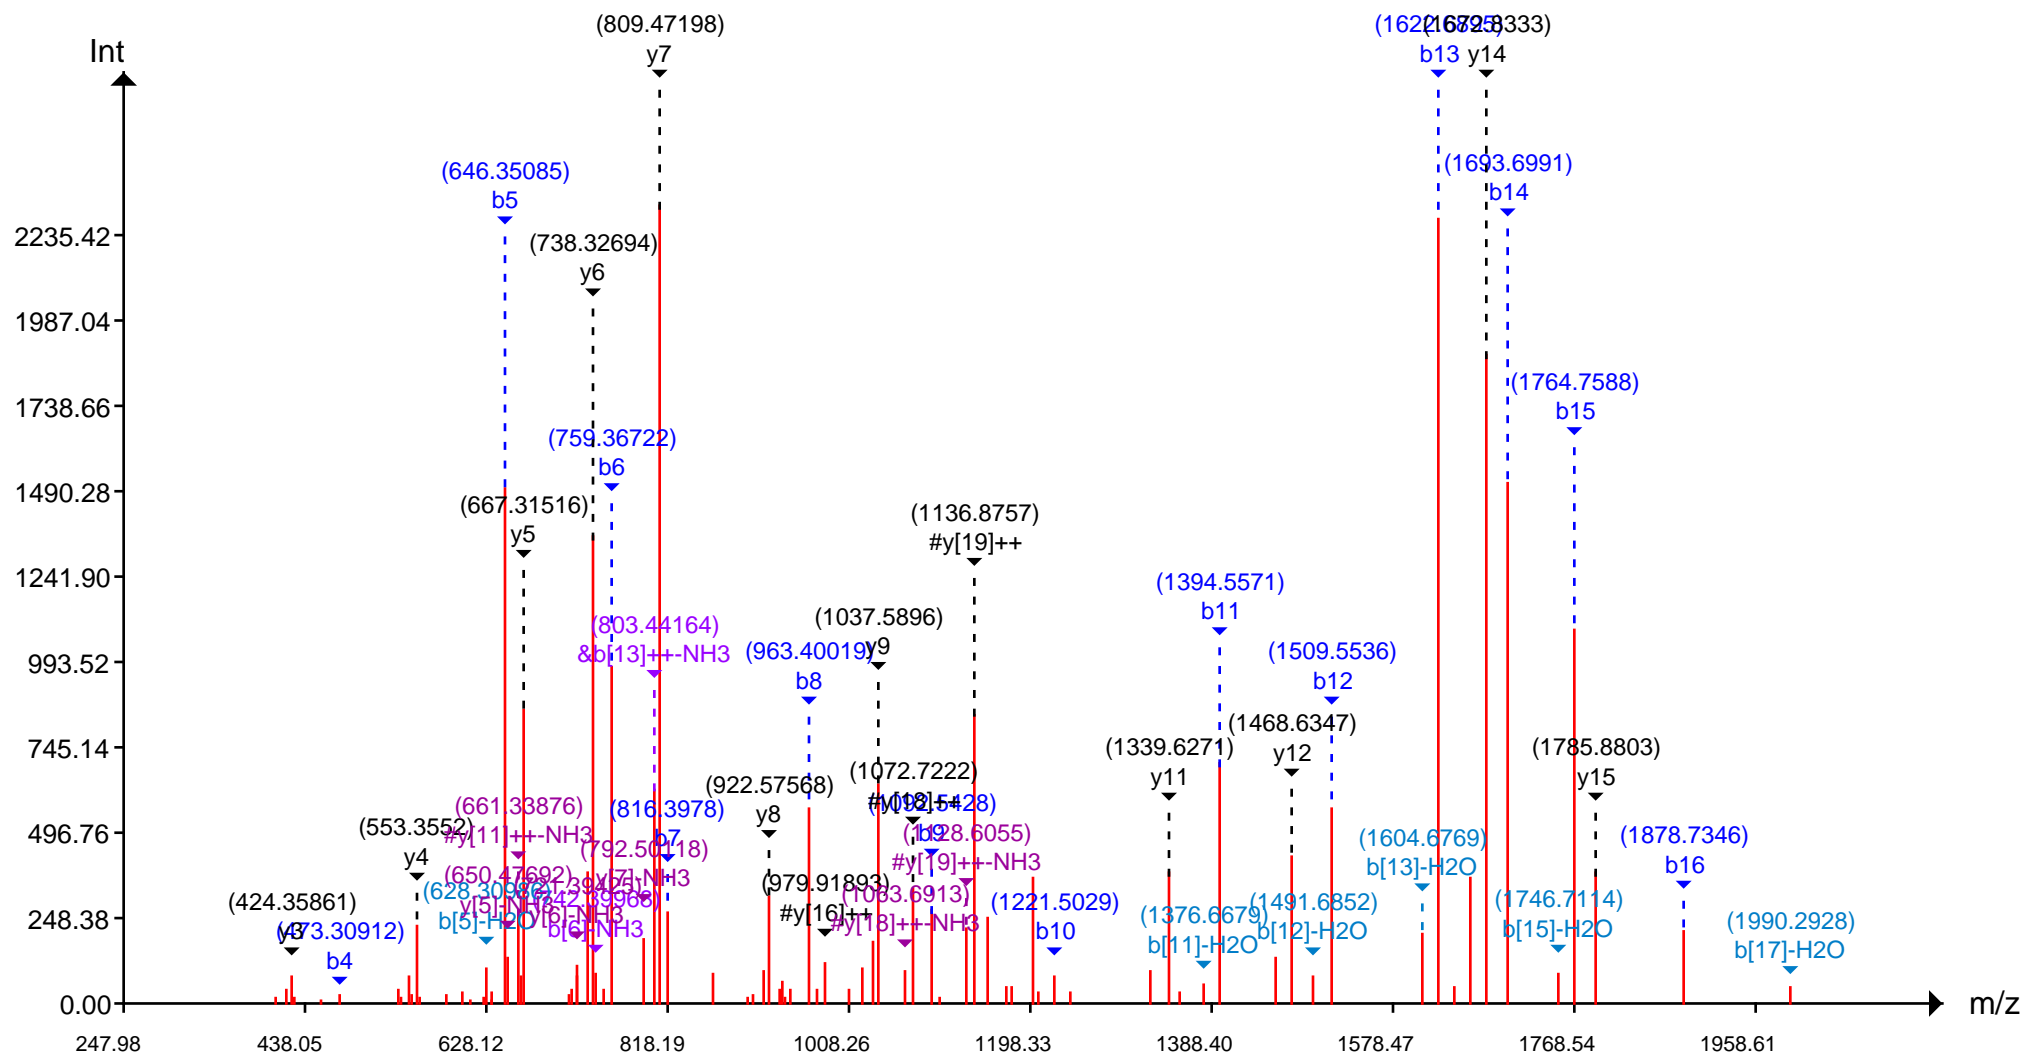

## Info

|                          |                                                     |                           |          |
|--------------------------|-----------------------------------------------------|---------------------------|----------|
| <b>Modified Sequence</b> | AcD3-LEANK<AcD3K*>IGFEEK<AcD3K*>DIAANEENR<C13>-COOH | <b>Ion score</b>          | 118.56   |
| <b>Protein</b>           | Q9JJU8                                              | <b>Confidence level</b>   | 99.00%   |
| <b>Precursor m/z</b>     | 1216.1247                                           | <b>Identity Threshold</b> | 47.92    |
| <b>Charge</b>            | 2+                                                  | <b>Mass error</b>         | 0.002884 |



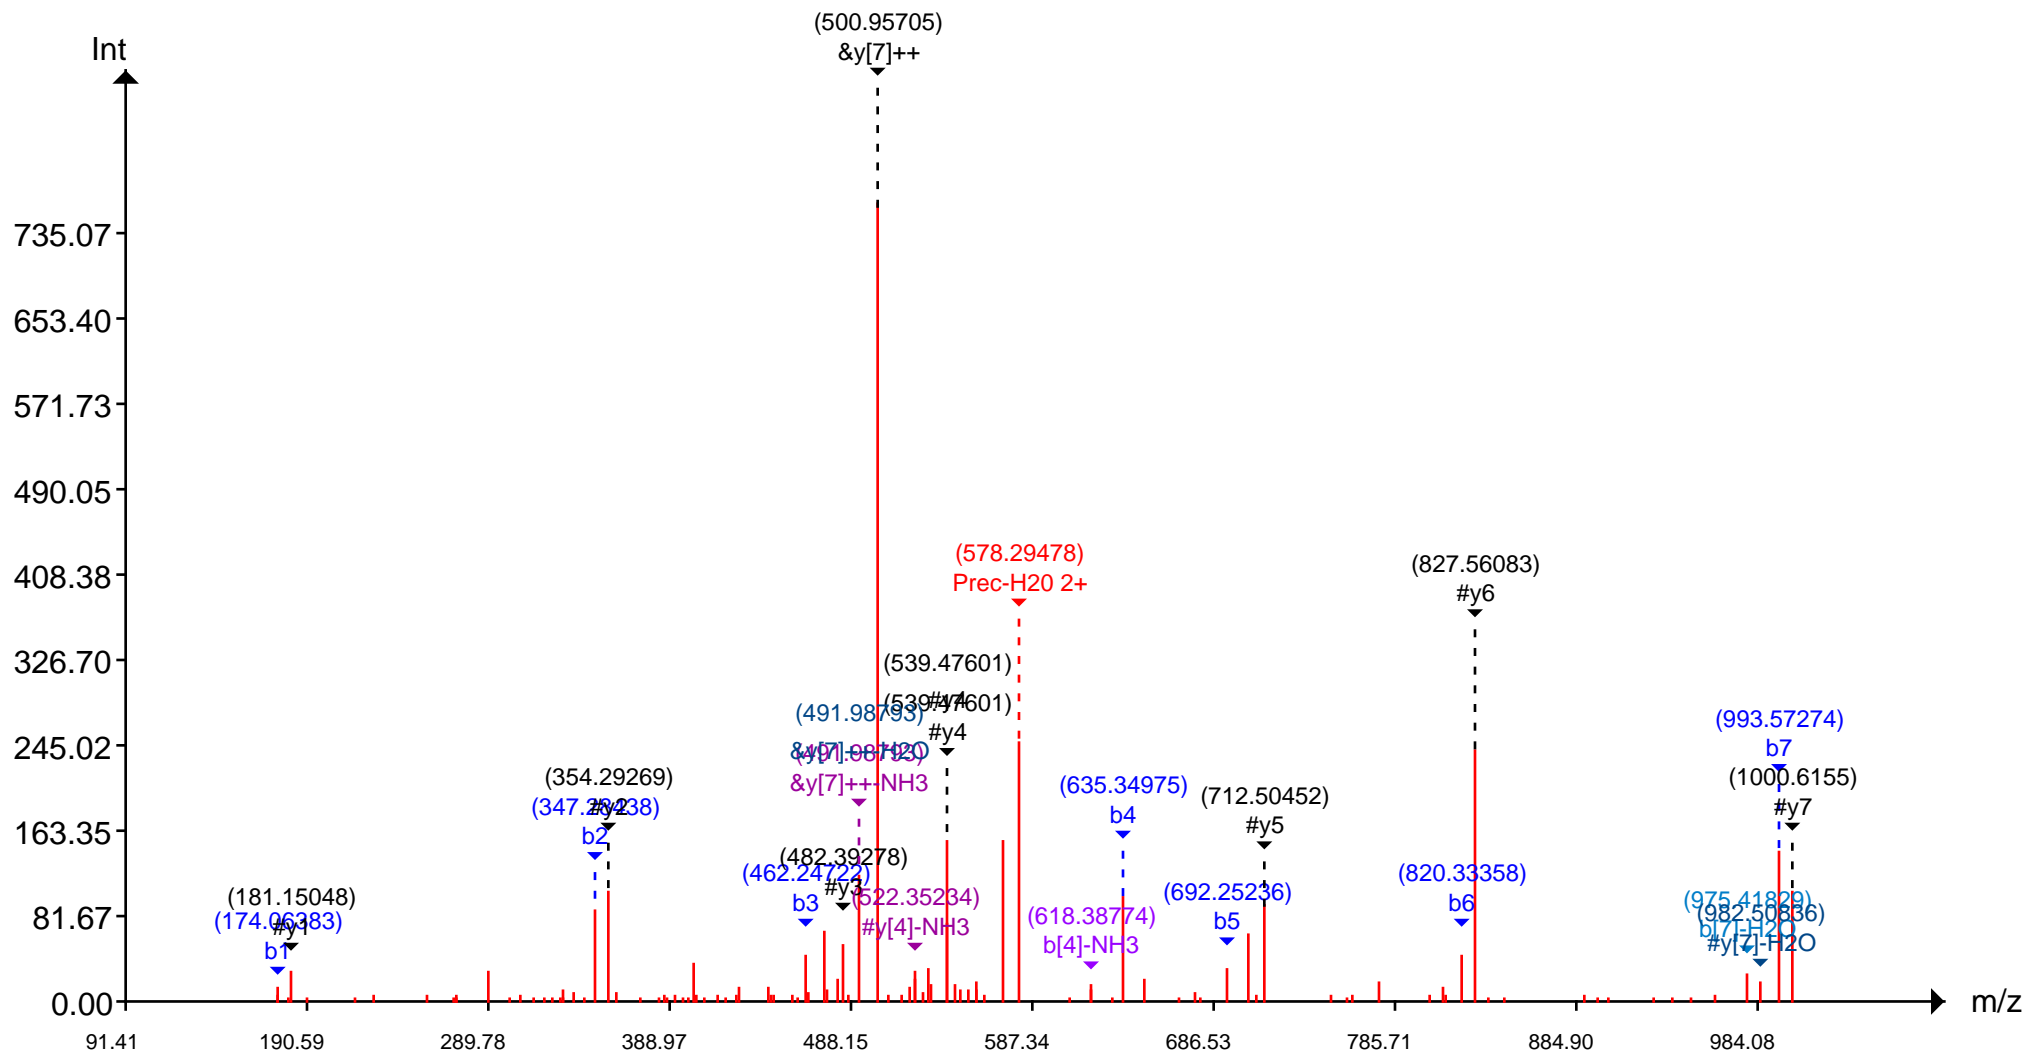

## Info

|                          |                                                 |                           |          |
|--------------------------|-------------------------------------------------|---------------------------|----------|
| <b>Modified Sequence</b> | AcD3-QK<AcD3K*>DK<AcD3K*>GQK<AcD3K*>R<C13>-COOH | <b>Ion score</b>          | 46.43    |
| <b>Protein</b>           | Q9CT10                                          | <b>Confidence level</b>   | 99.00%   |
| <b>Precursor m/z</b>     | 587.357                                         | <b>Identity Threshold</b> | 44.42    |
| <b>Charge</b>            | 2+                                              | <b>Mass error</b>         | -3.96E-4 |

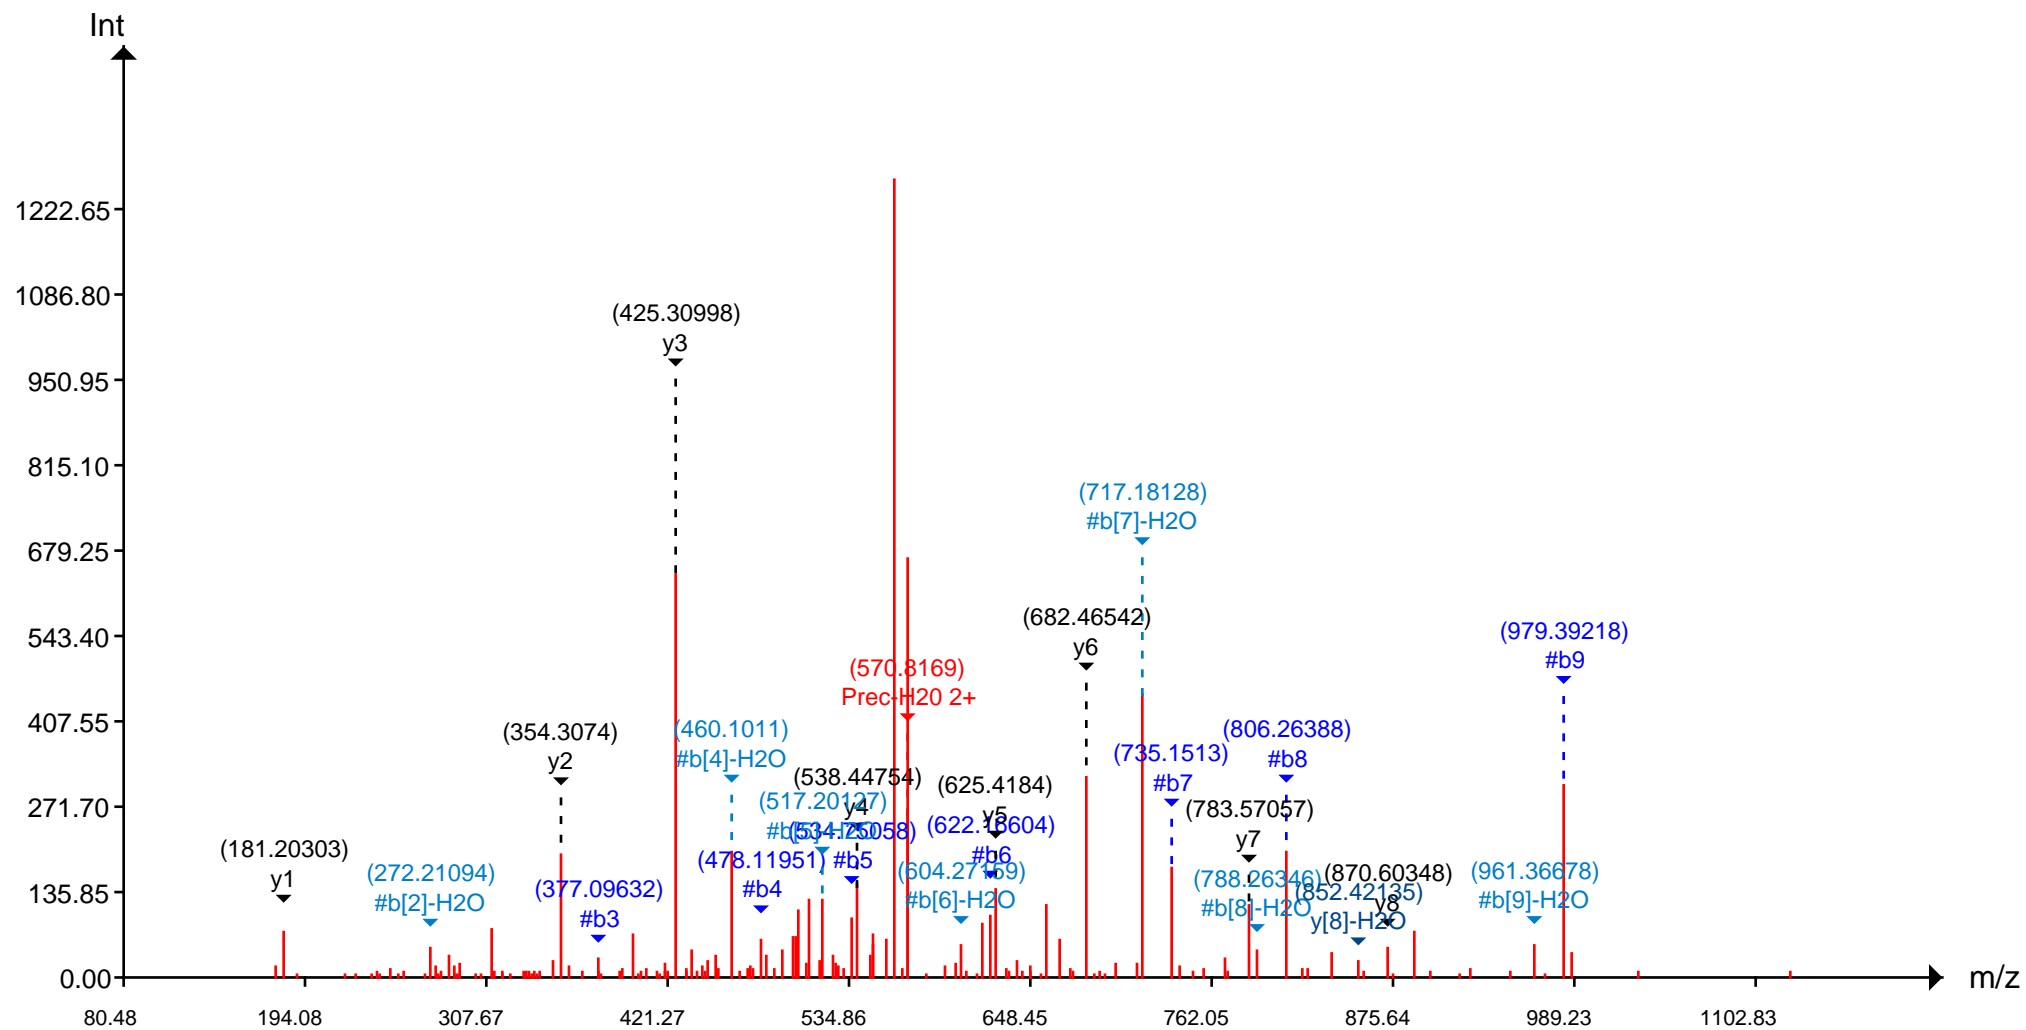

## Info

|                          |                                  |                           |        |
|--------------------------|----------------------------------|---------------------------|--------|
| <b>Modified Sequence</b> | AcD3-DESTGSIK<AcD3K*>R<C13>-COOH | <b>Ion score</b>          | 50.41  |
| <b>Protein</b>           | P05064                           | <b>Confidence level</b>   | 99.00% |
| <b>Precursor m/z</b>     | 580.31202                        | <b>Identity Threshold</b> | 47.73  |
| <b>Charge</b>            | 2+                               | <b>Mass error</b>         | 2.1E-5 |

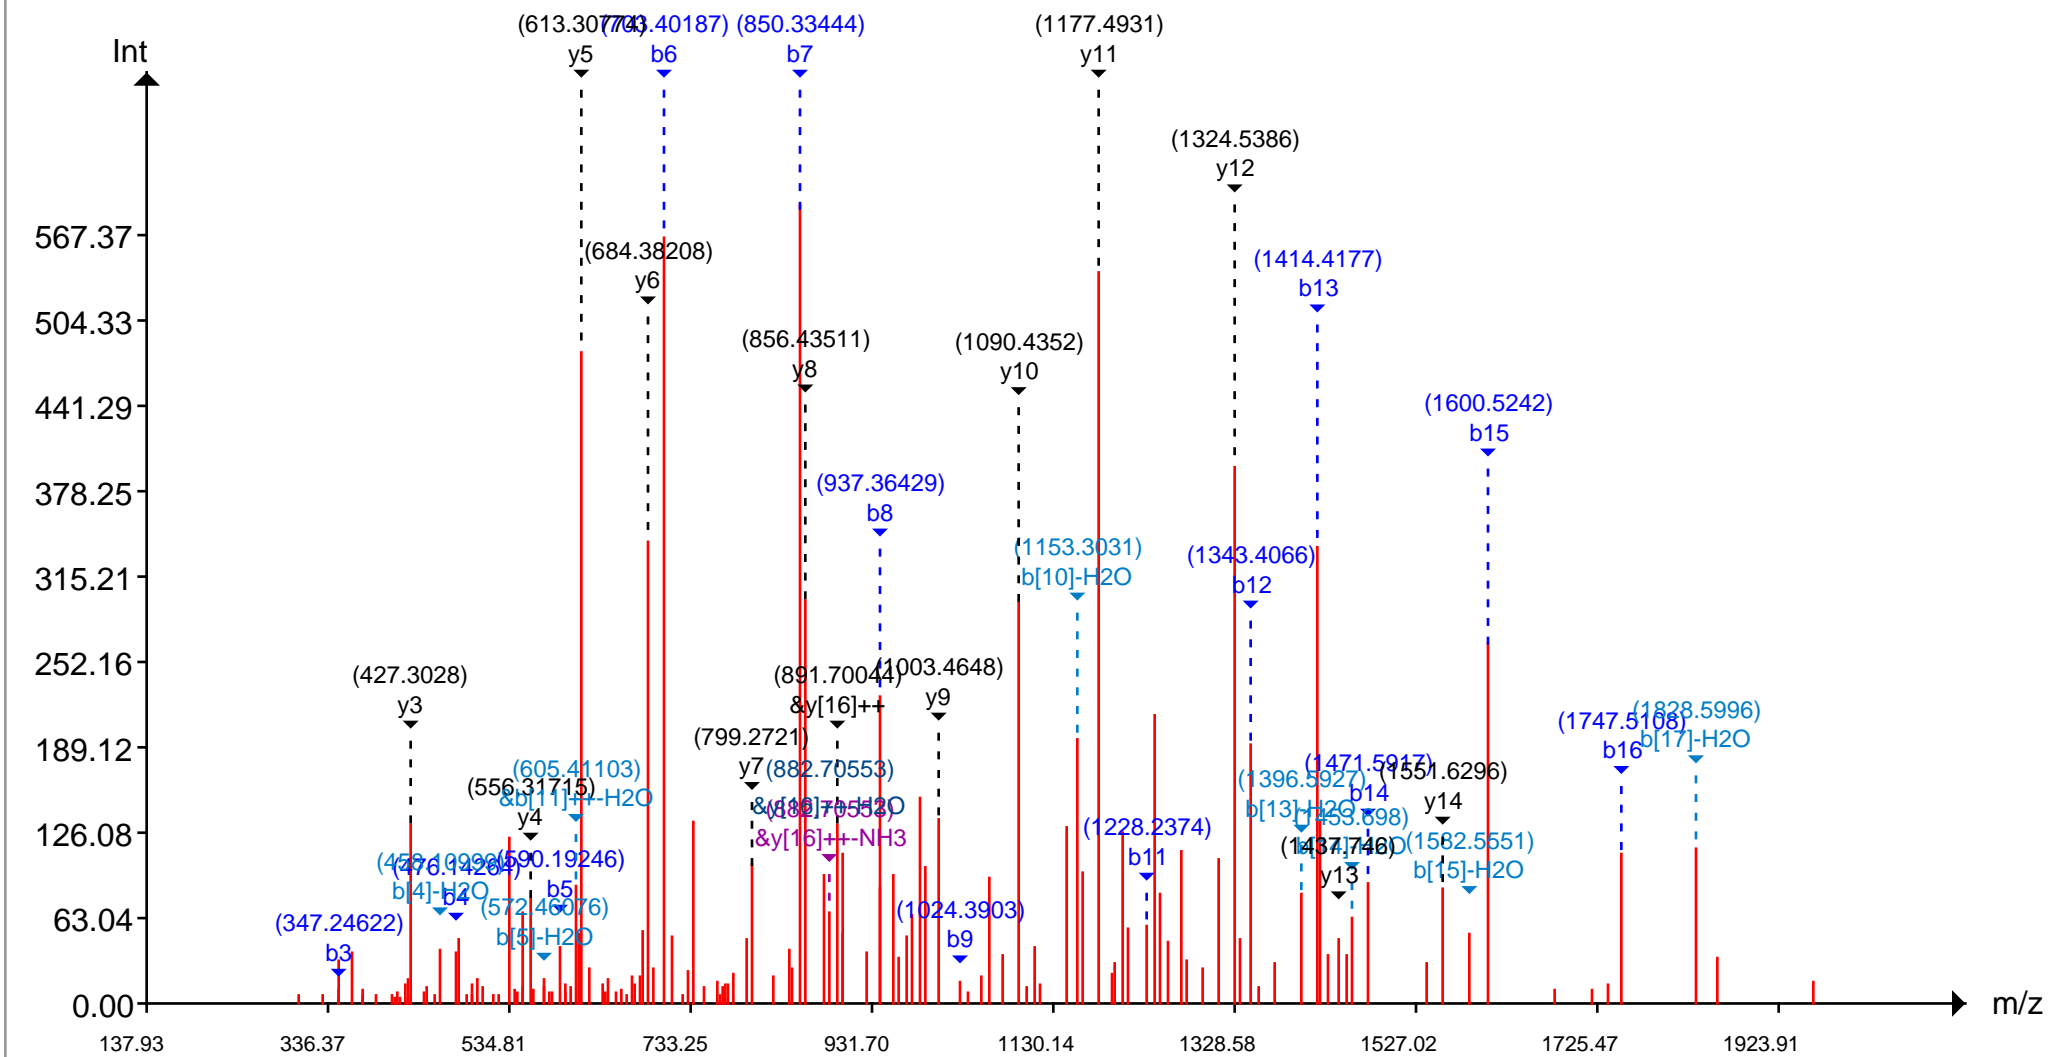

## Info

|                          |                                               |                           |          |
|--------------------------|-----------------------------------------------|---------------------------|----------|
| <b>Modified Sequence</b> | AcD3-TVTENIFSSM<Mox*>GDAGEM<Mox*>VR<C13>-COOH | <b>Ion score</b>          | 75.7     |
| <b>Protein</b>           | P26039                                        | <b>Confidence level</b>   | 99.00%   |
| <b>Precursor m/z</b>     | 1013.966                                      | <b>Identity Threshold</b> | 44.67    |
| <b>Charge</b>            | 2+                                            | <b>Mass error</b>         | 0.001615 |



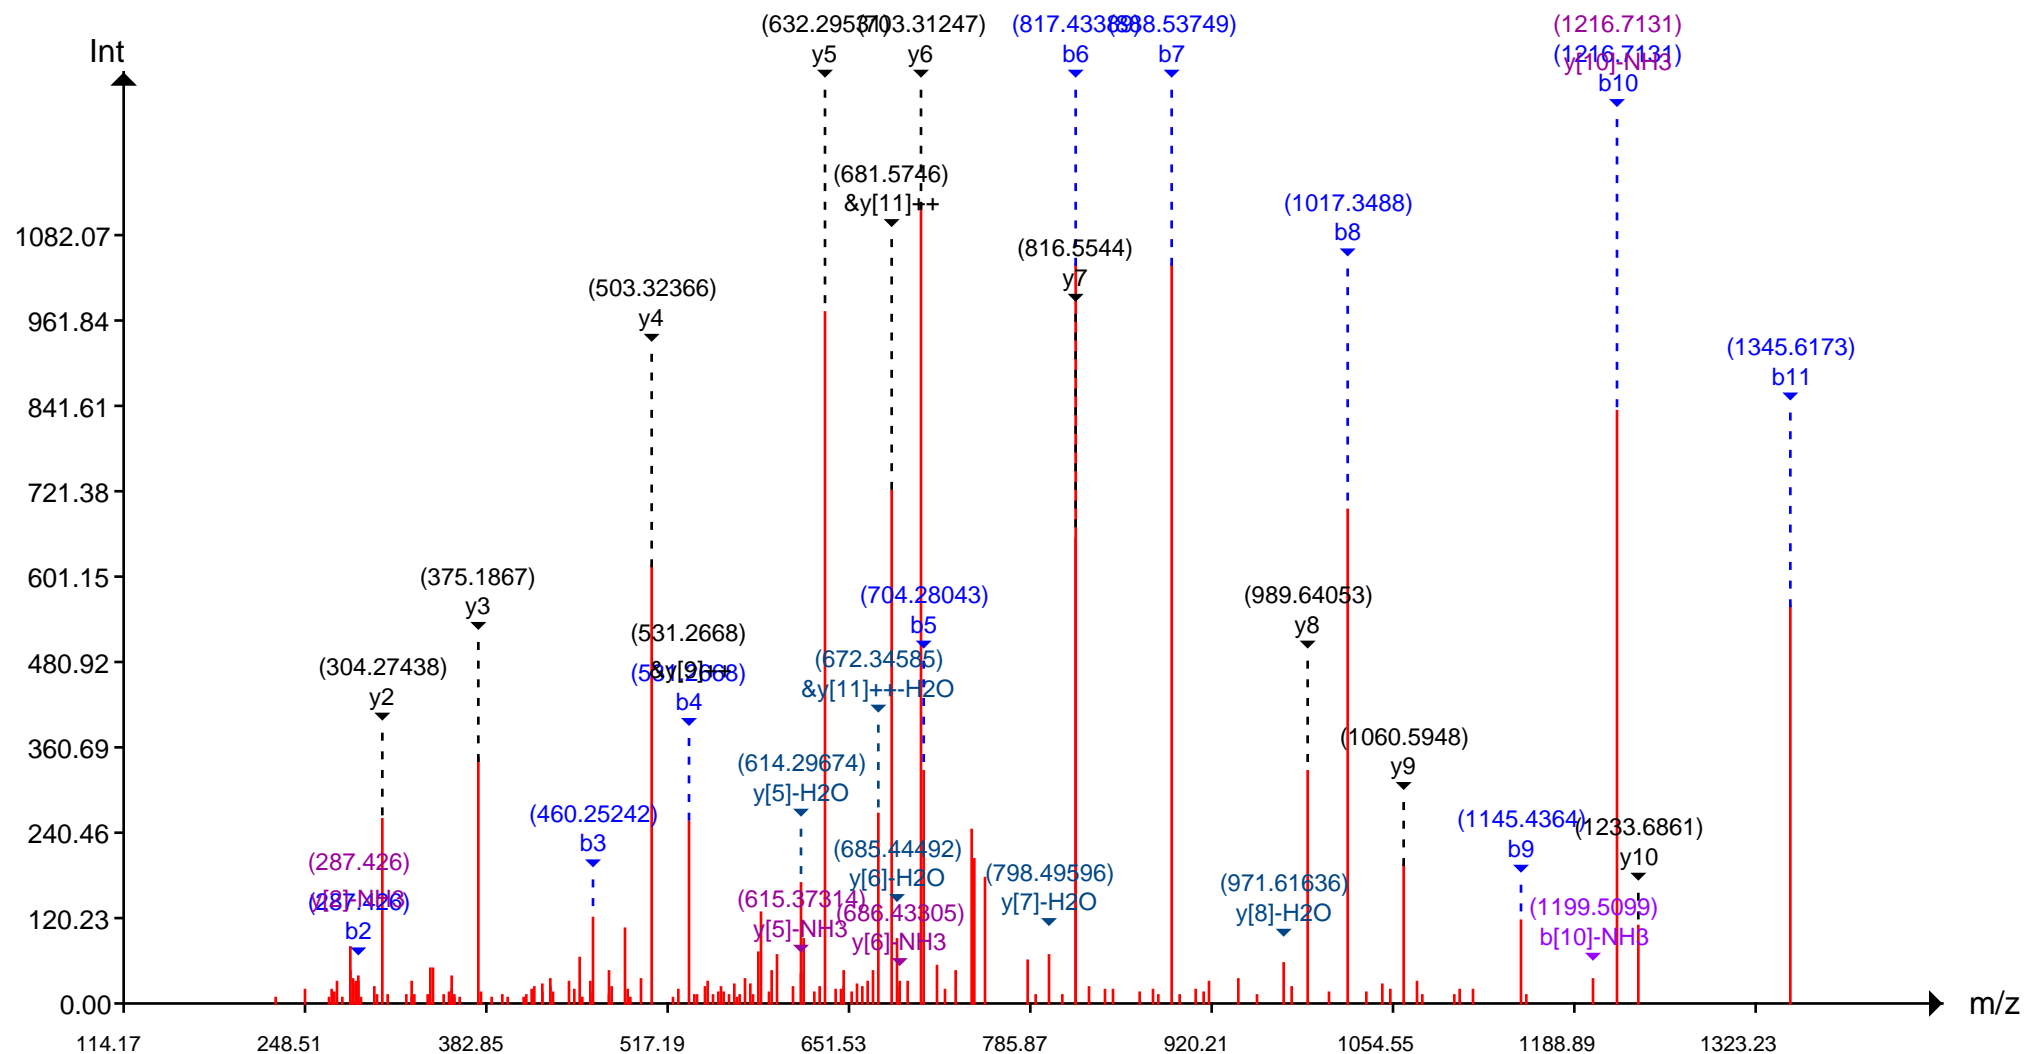

## Info

**Modified Sequence** AcD3-IQK<AcD3K\*>AK<AcD3K\*>LAEQAER-COOH

**Ion score** 88.32

**Protein** O70456, P68254

**Confidence level** 99.00%

**Precursor m/z** 760.44385

**Identity Threshold** 45.41

**Charge** 2+

**Mass error** 0.001596

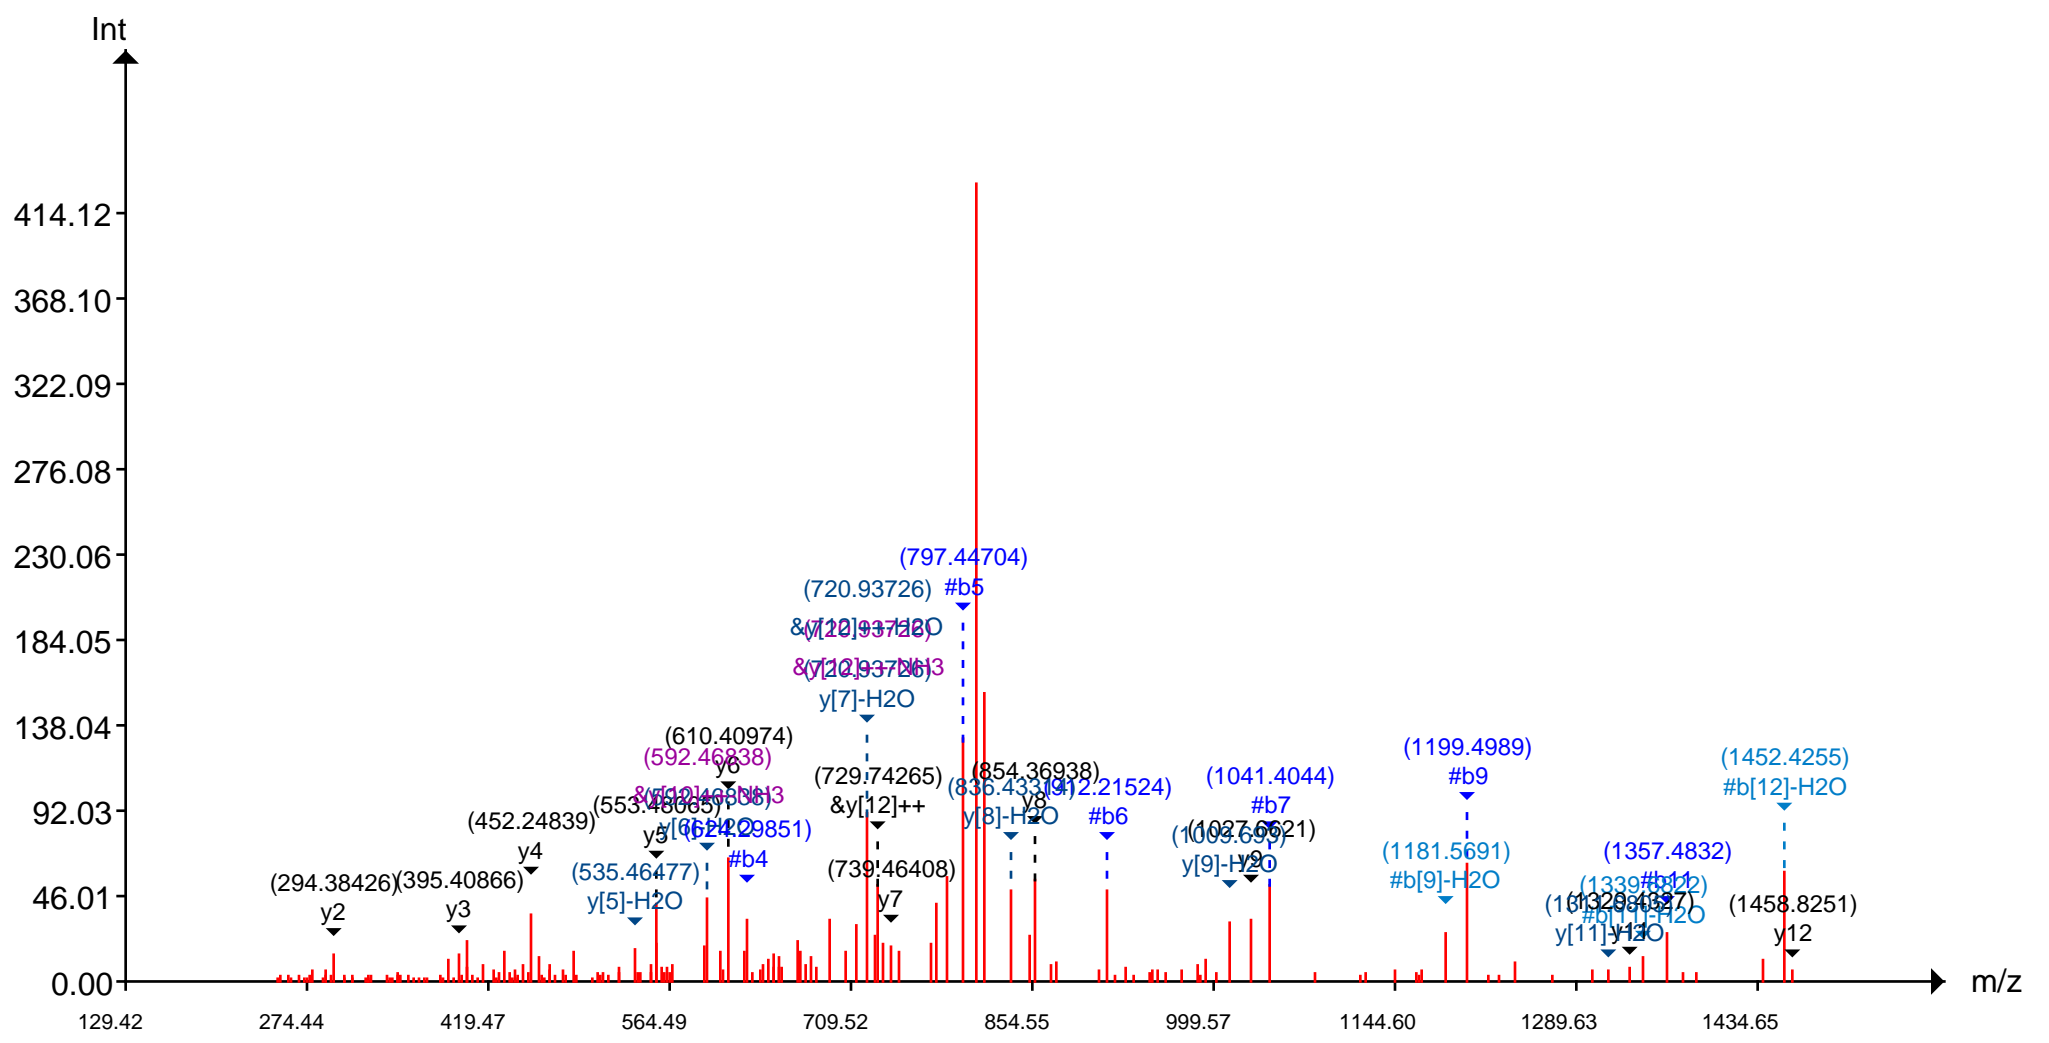

| Info                     |                                                    |                           |         |
|--------------------------|----------------------------------------------------|---------------------------|---------|
| <b>Modified Sequence</b> | AcD3-M<Mox*>EEK<AcD3K*>K<AcD3K*>DEGTGTLR<C13>-COOH | <b>Ion score</b>          | 57.99   |
| <b>Protein</b>           | P26039                                             | <b>Confidence level</b>   | 99.00%  |
| <b>Precursor m/z</b>     | 825.91908                                          | <b>Identity Threshold</b> | 47.99   |
| <b>Charge</b>            | 2+                                                 | <b>Mass error</b>         | 0.00122 |

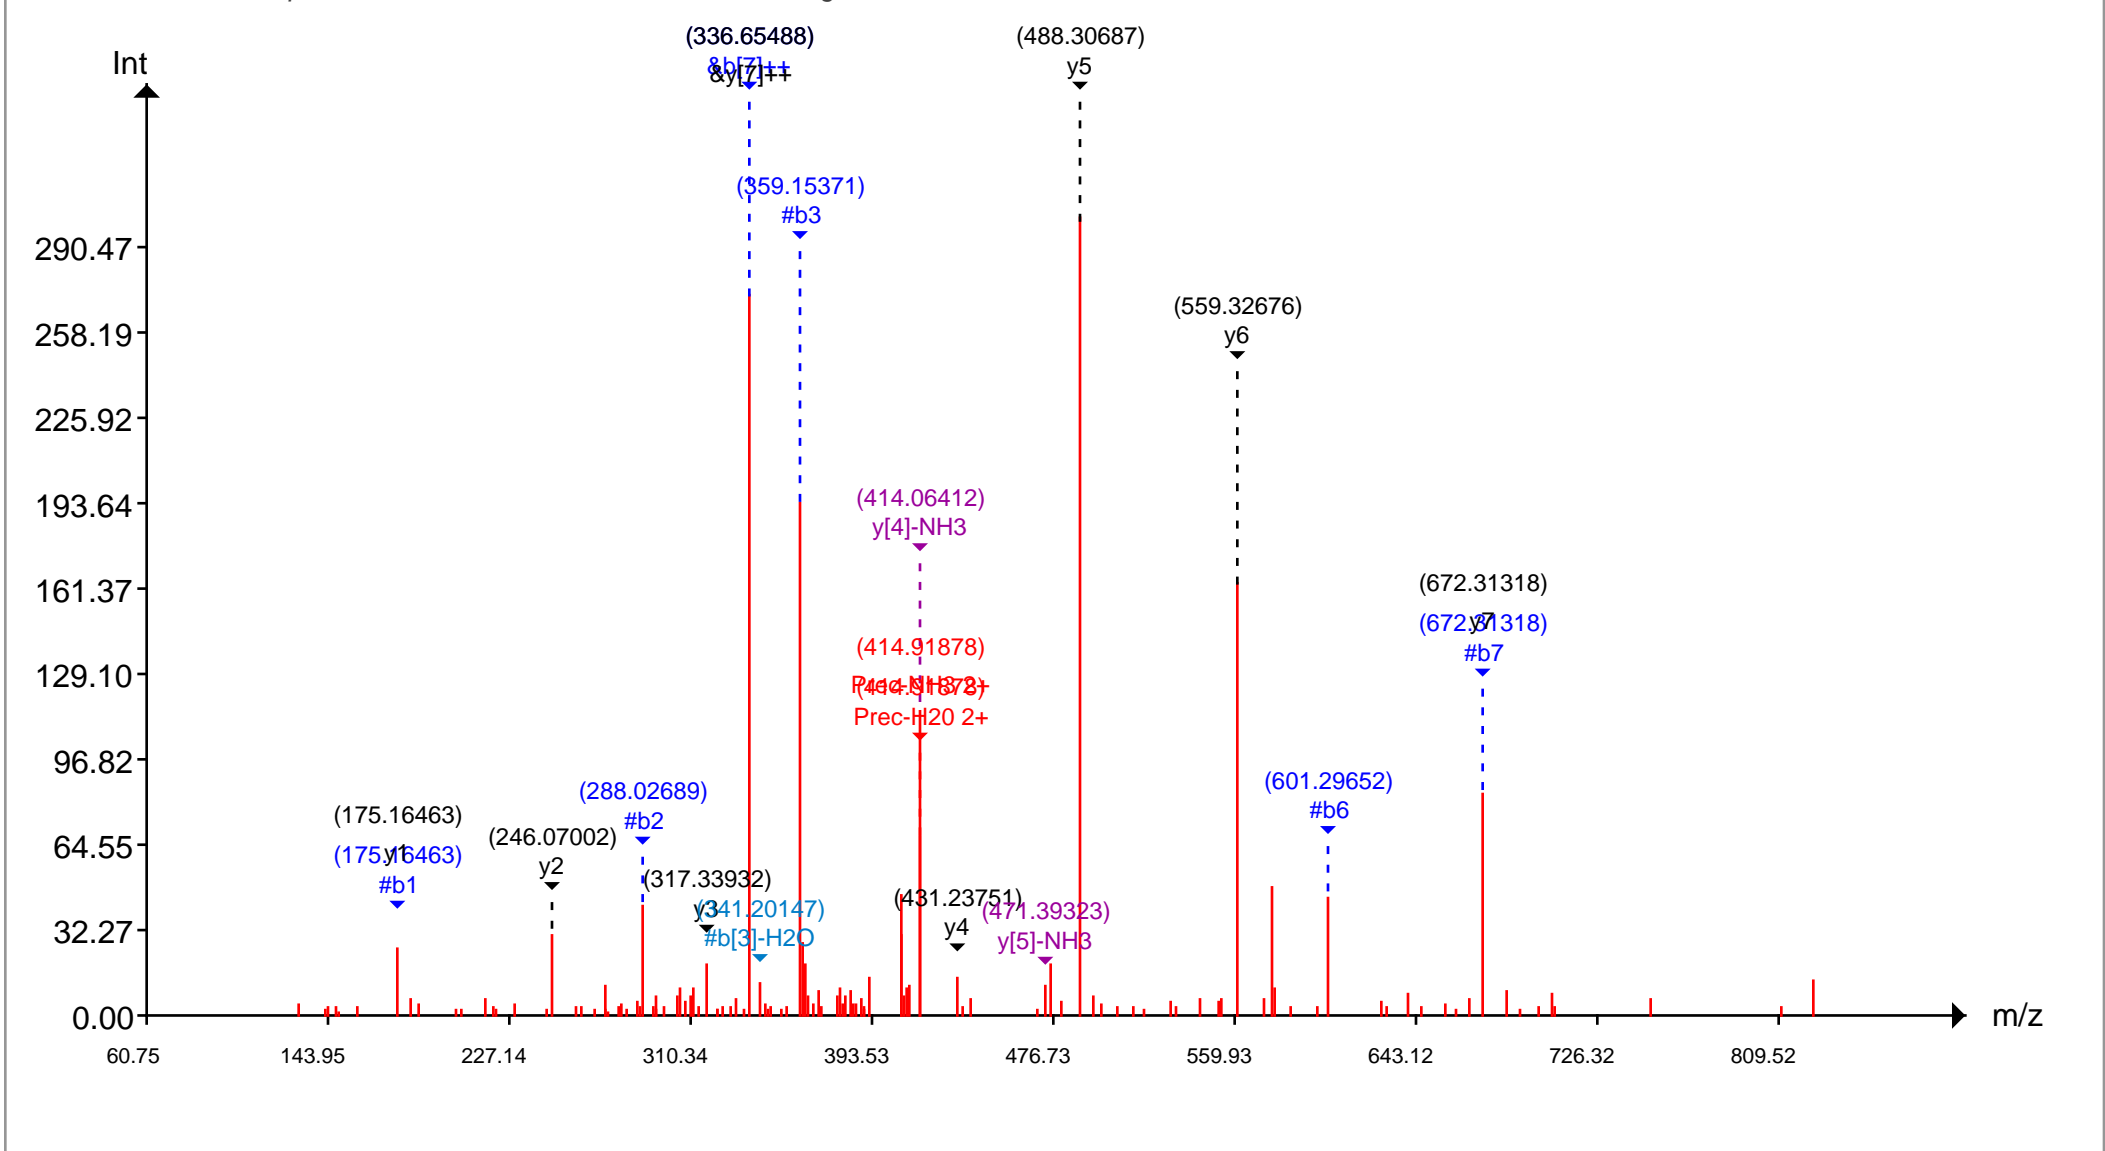

## Info

|          |                                                                                                |                    |
|----------|------------------------------------------------------------------------------------------------|--------------------|
| Modif... | AcD3-ELAGNAAR-COOH                                                                             | Ion score          |
|          | Q8CGP5, Q8CGP6, Q8CGP7, P22752, Q6GSS7, Q64522, Q64523, Q8BFU2, Q8R1M2, Q8CCK0, P27661, Q9QZQ8 | Confidence level   |
|          | 423.72891                                                                                      | Identity Threshold |
|          | 2+                                                                                             | Mass error         |





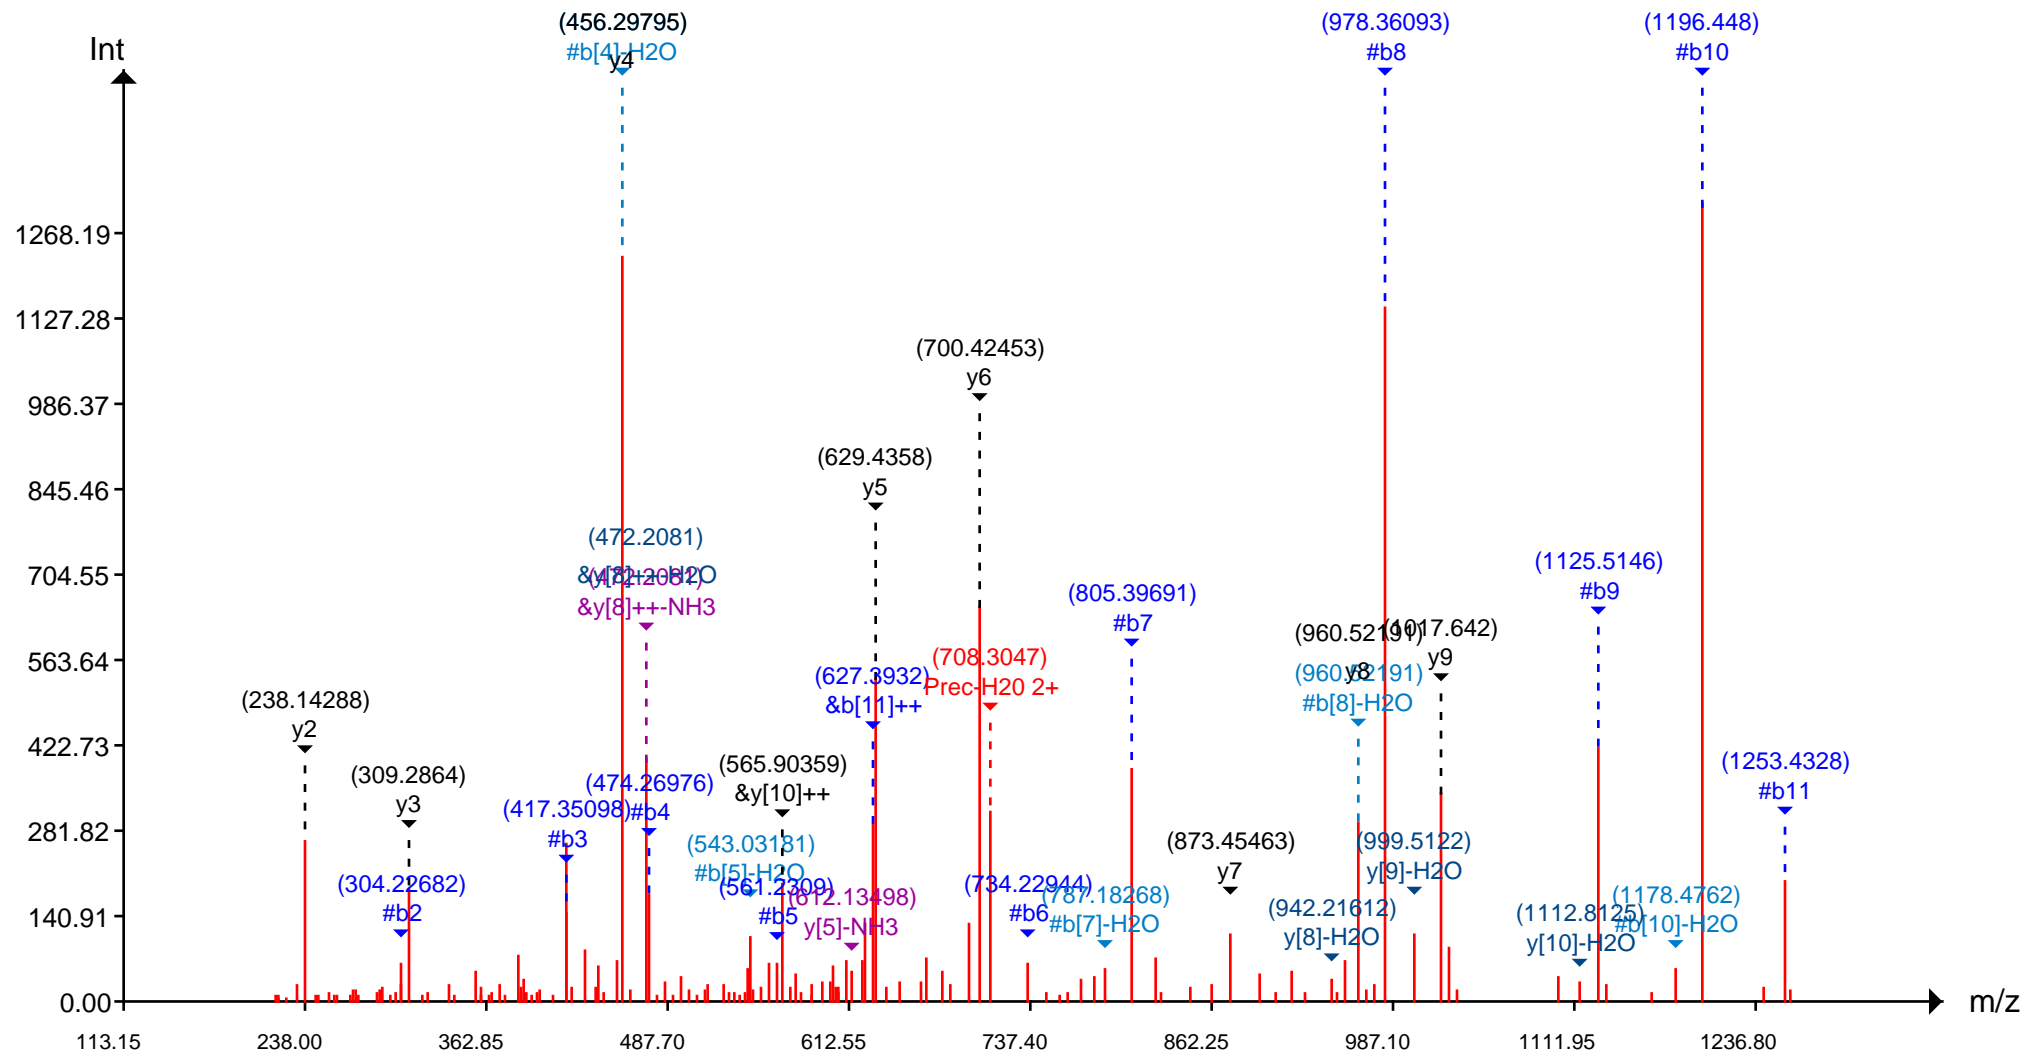

## Info

**Modified Sequence** AcD3-EELGSK<AcD3K\*>AK<AcD3K\*>FAGR<C13>-COOH

**Ion score** 64.79

**Protein** P17182

**Confidence level** 99.00%

**Precursor m/z** 717.40611

**Identity Threshold** 47.06

**Charge** 2+

**Mass error** 9.15E-4

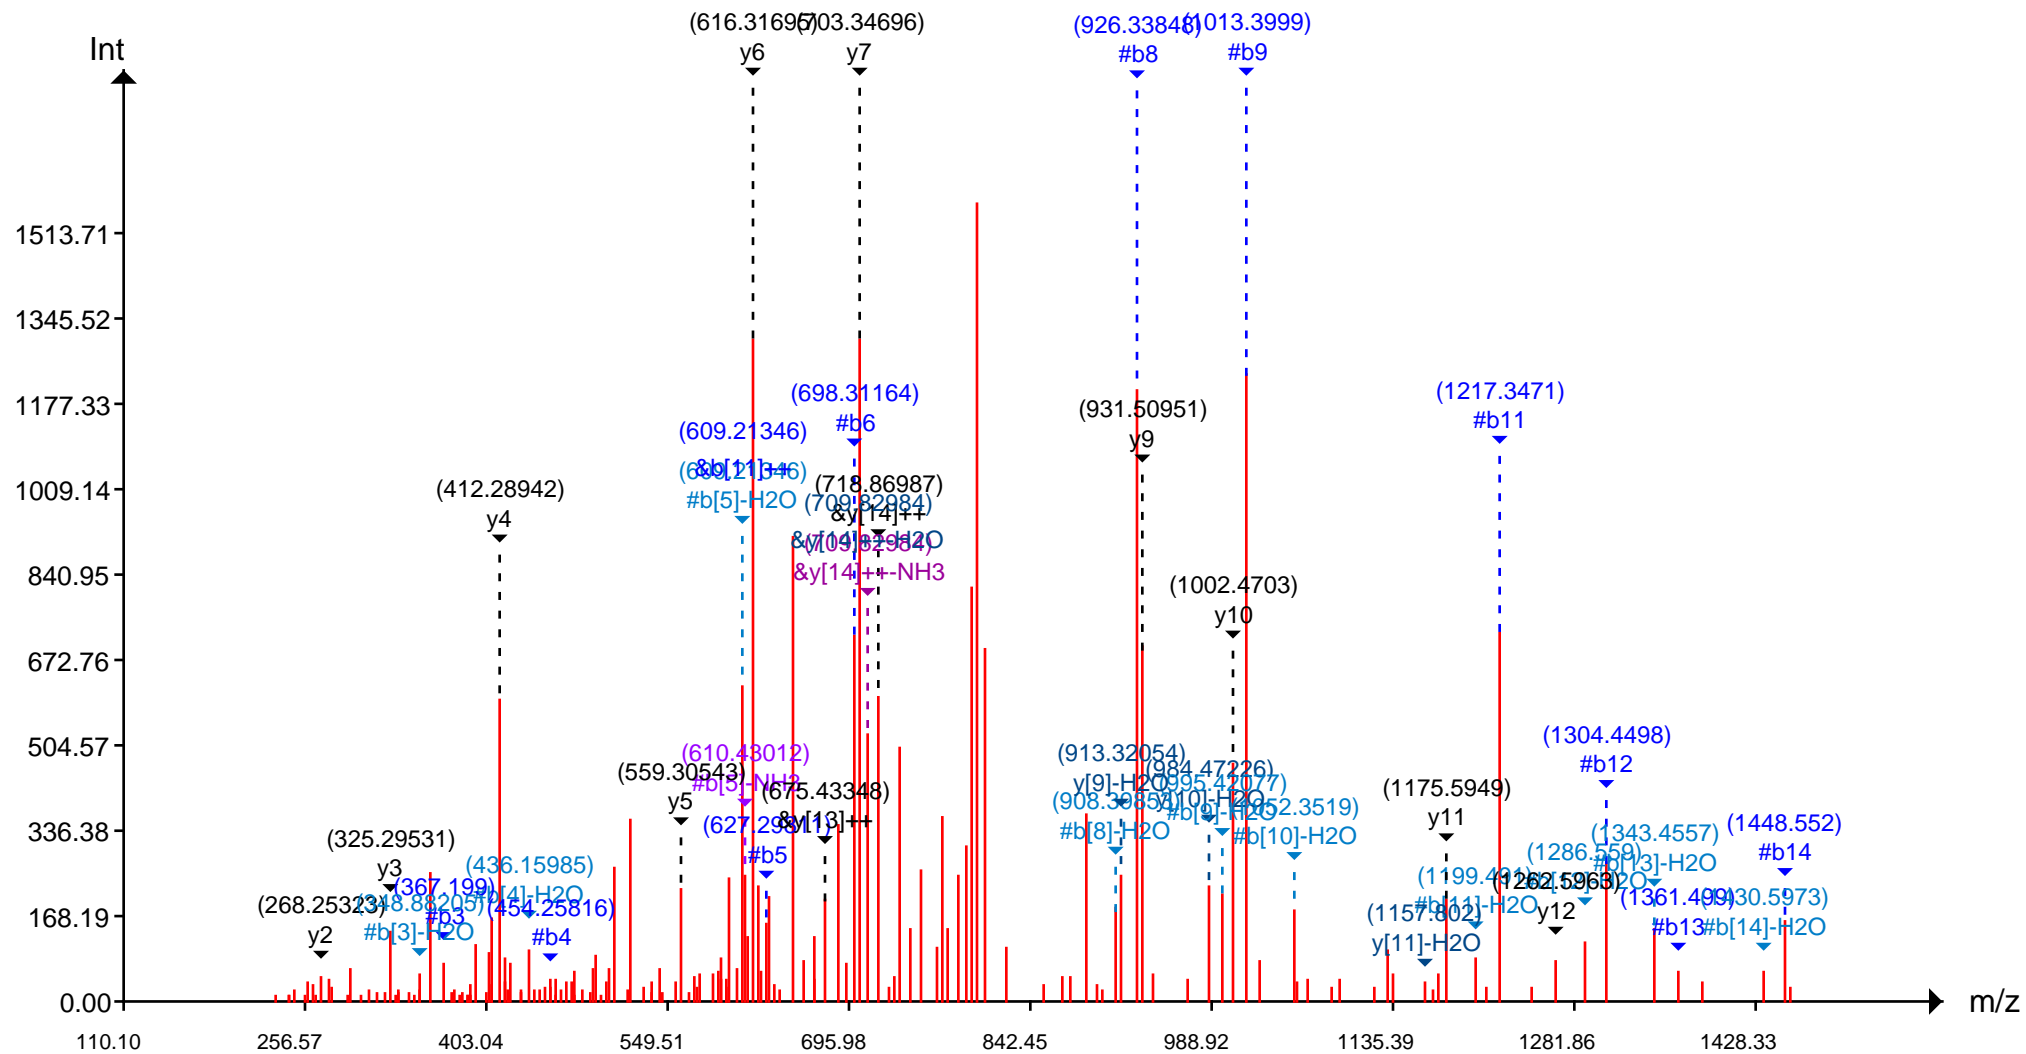

## Info

|                          |                                              |                           |         |
|--------------------------|----------------------------------------------|---------------------------|---------|
| <b>Modified Sequence</b> | AcD3-FSSSK<AcD3K*>ADLSGM<Mox*>SGSR<C13>-COOH | <b>Ion score</b>          | 62.99   |
| <b>Protein</b>           | Q9D154, Q5SV42                               | <b>Confidence level</b>   | 99.00%  |
| <b>Precursor m/z</b>     | 814.89411                                    | <b>Identity Threshold</b> | 46.74   |
| <b>Charge</b>            | 2+                                           | <b>Mass error</b>         | 0.00107 |

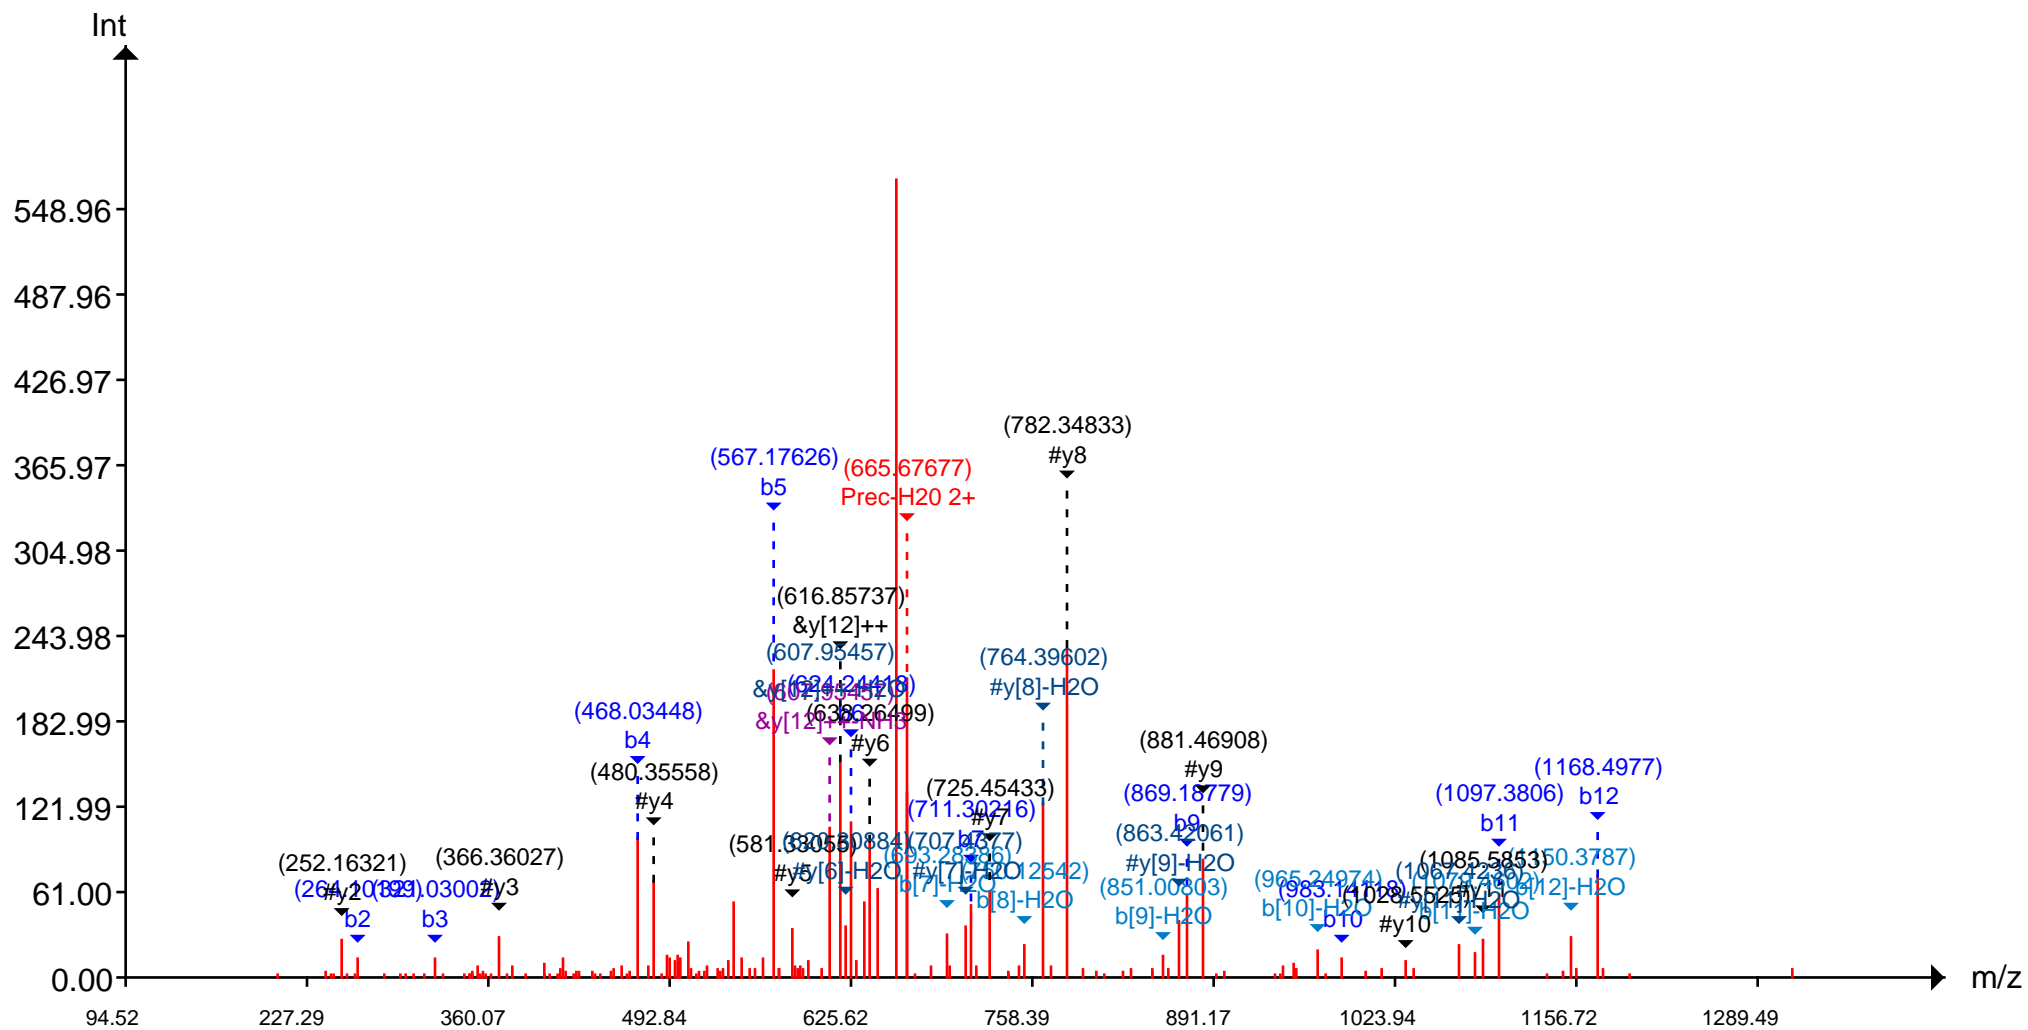

## Info

|                          |                                           |                           |           |
|--------------------------|-------------------------------------------|---------------------------|-----------|
| <b>Modified Sequence</b> | AcD3-AM<Mox*>GM<Mox*>VGS GTNNAR<C13>-COOH | <b>Ion score</b>          | 72.78     |
| <b>Protein</b>           | Q8VDM4                                    | <b>Confidence level</b>   | 99.00%    |
| <b>Precursor m/z</b>     | 674.80901                                 | <b>Identity Threshold</b> | 44.71     |
| <b>Charge</b>            | 2+                                        | <b>Mass error</b>         | -0.001131 |

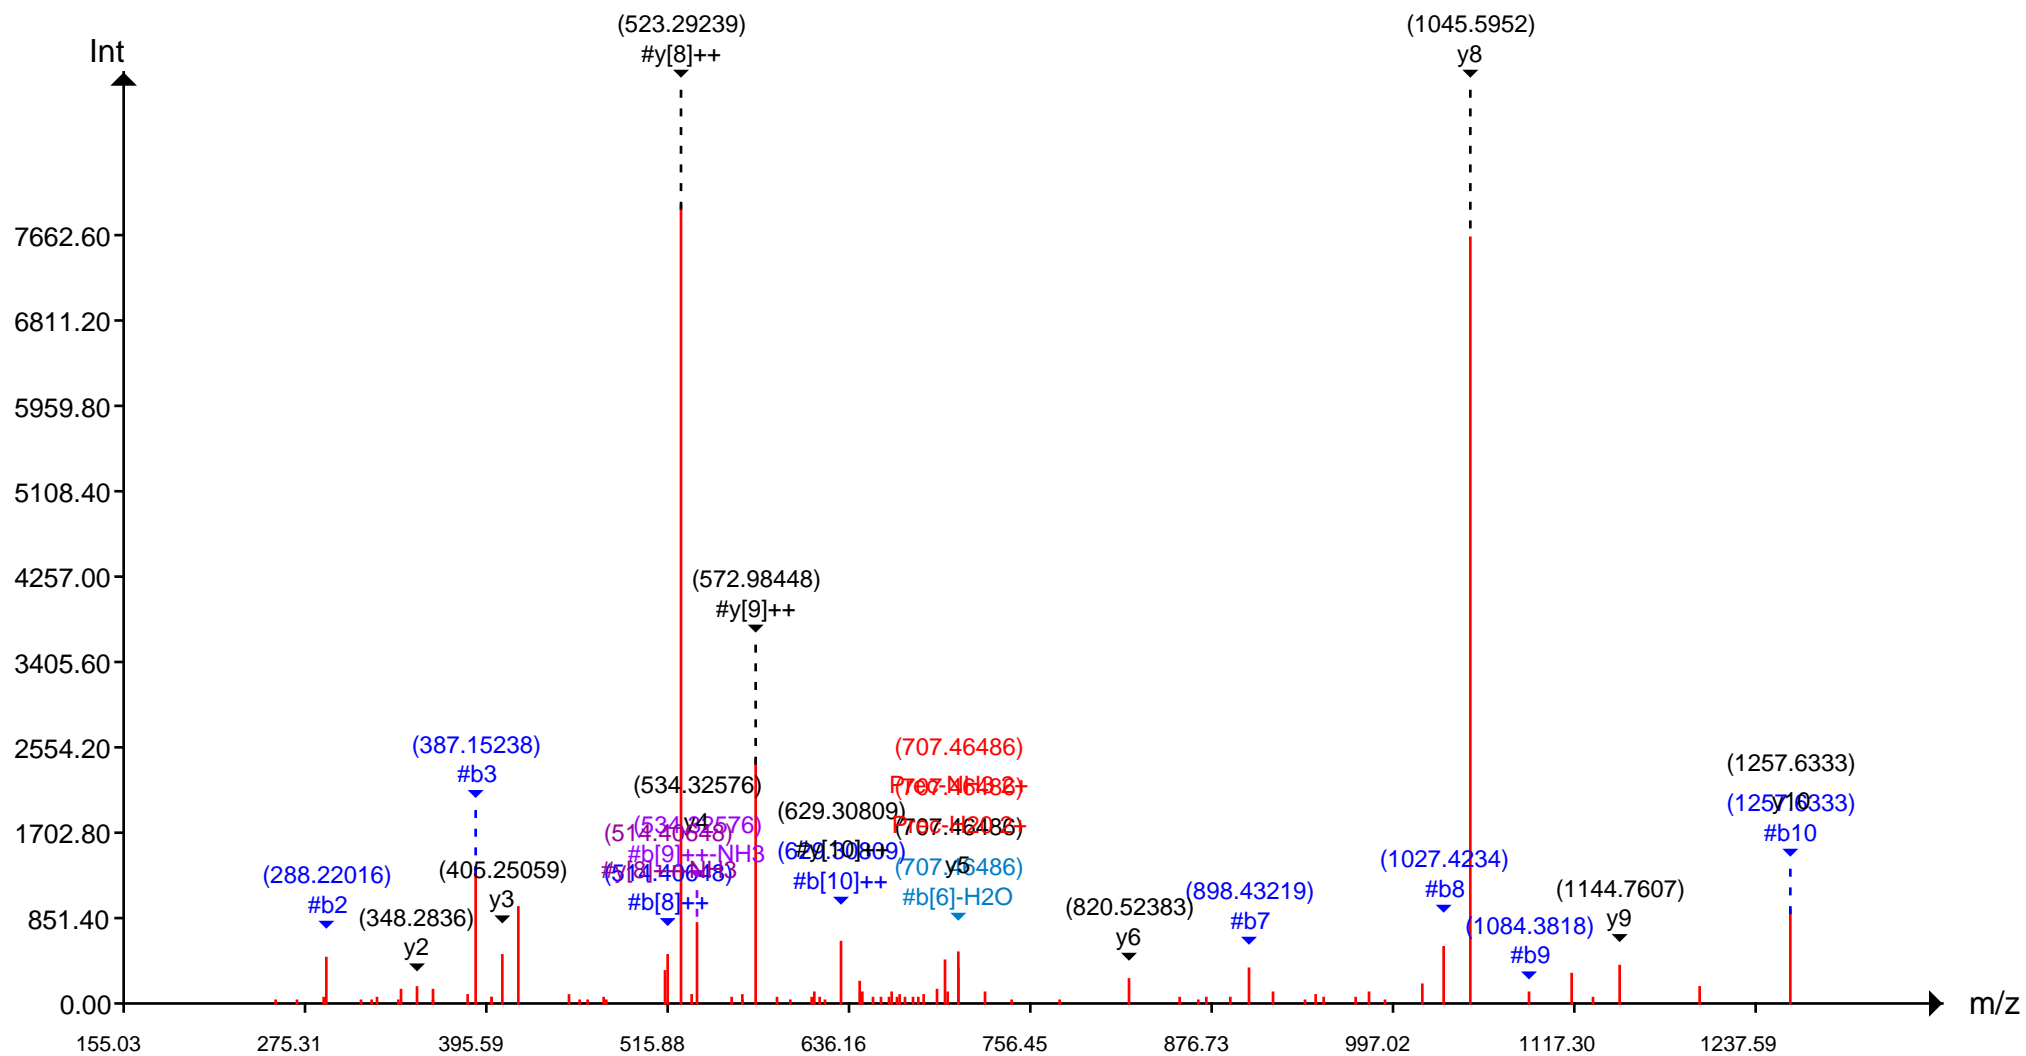

## Info

**Modified Sequence** AcD3-EIVPQIK<AcD3K\*>EGK<AcD3K\*>R-COOH

**Ion score** 56.65

**Protein** Q9DBJ1

**Confidence level** 99.00%

**Precursor m/z** 716.42989

**Identity Threshold** 44.04

**Charge** 2+

**Mass error** 9.29E-4

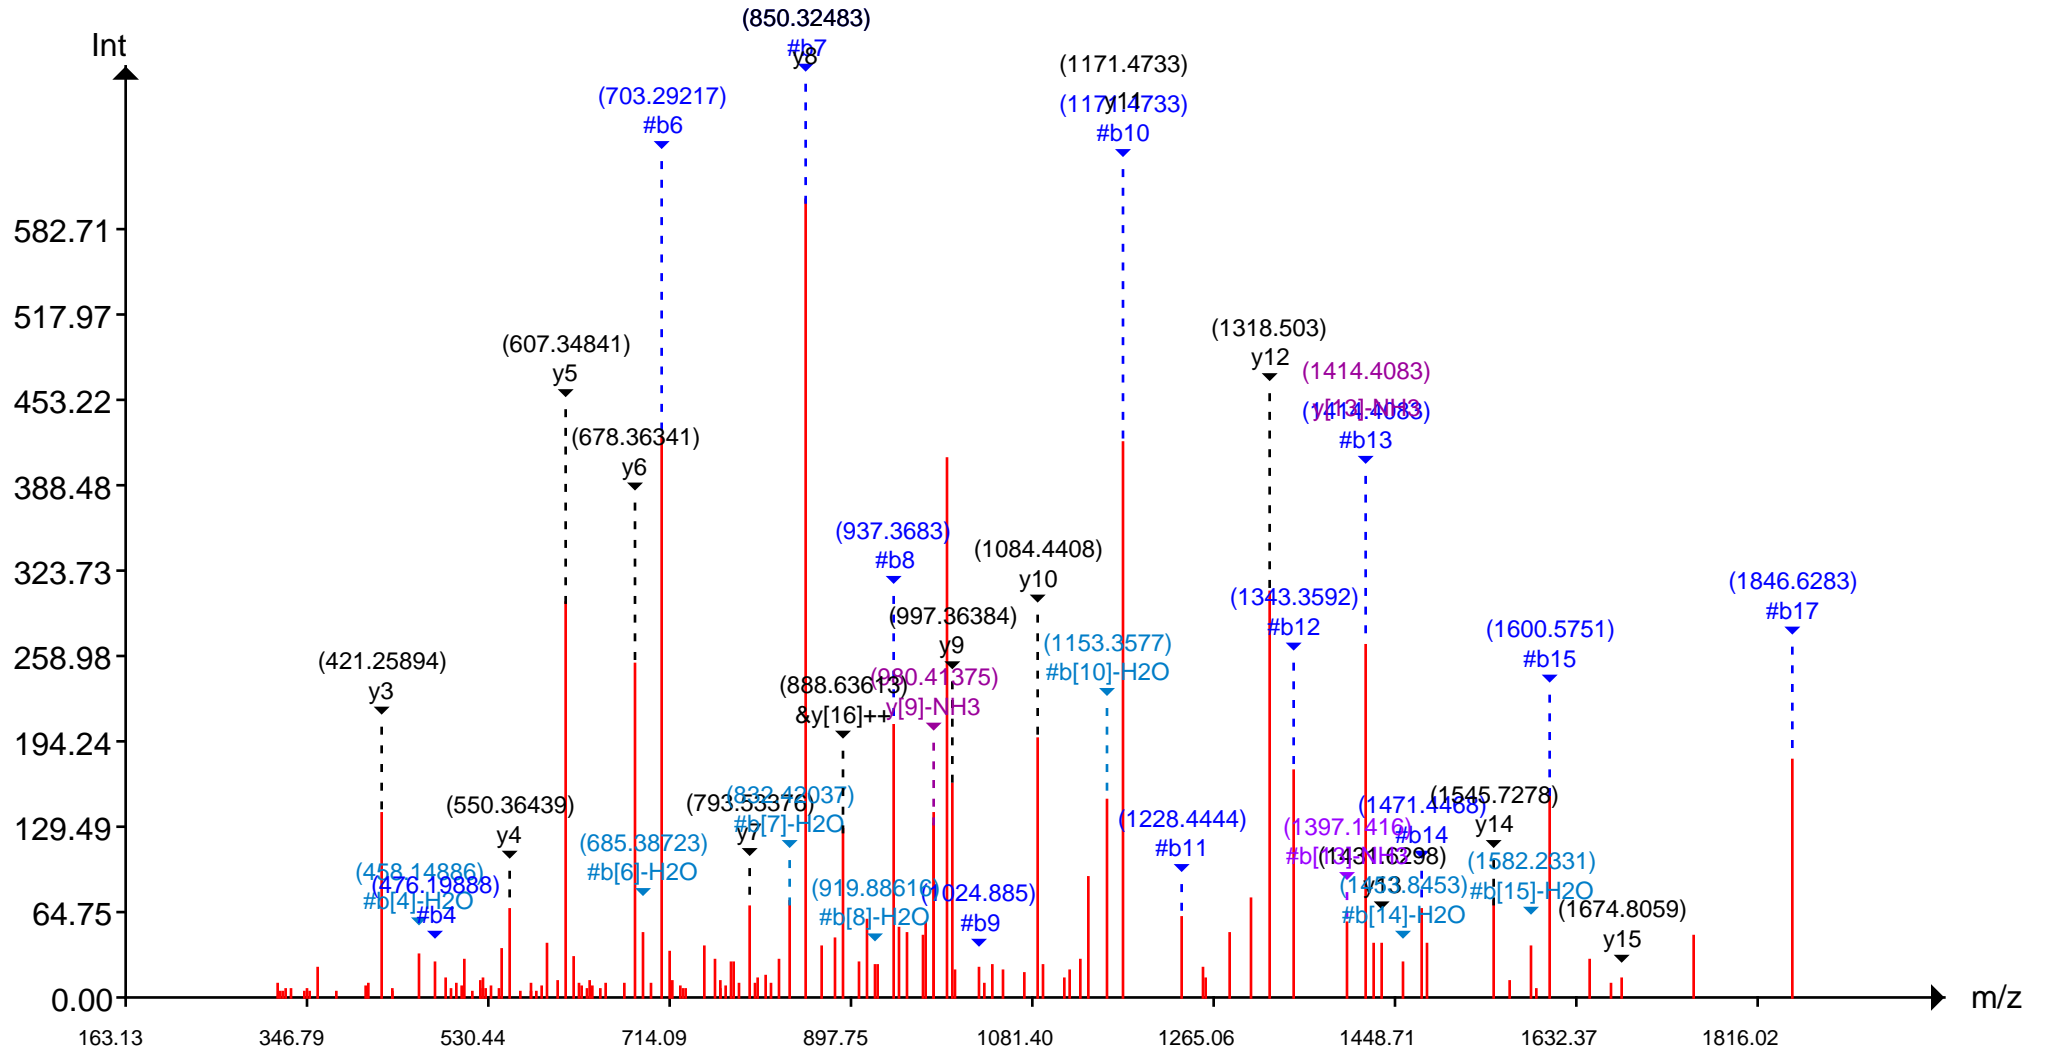

Info

|                          |                                          |                           |          |
|--------------------------|------------------------------------------|---------------------------|----------|
| <b>Modified Sequence</b> | AcD3-TVTENIFSSM<Mox*>GDAGEM<Mox*>VR-COOH | <b>Ion score</b>          | 97.95    |
| <b>Protein</b>           | P26039                                   | <b>Confidence level</b>   | 99.00%   |
| <b>Precursor m/z</b>     | 1010.9558                                | <b>Identity Threshold</b> | 43.54    |
| <b>Charge</b>            | 2+                                       | <b>Mass error</b>         | 0.001357 |

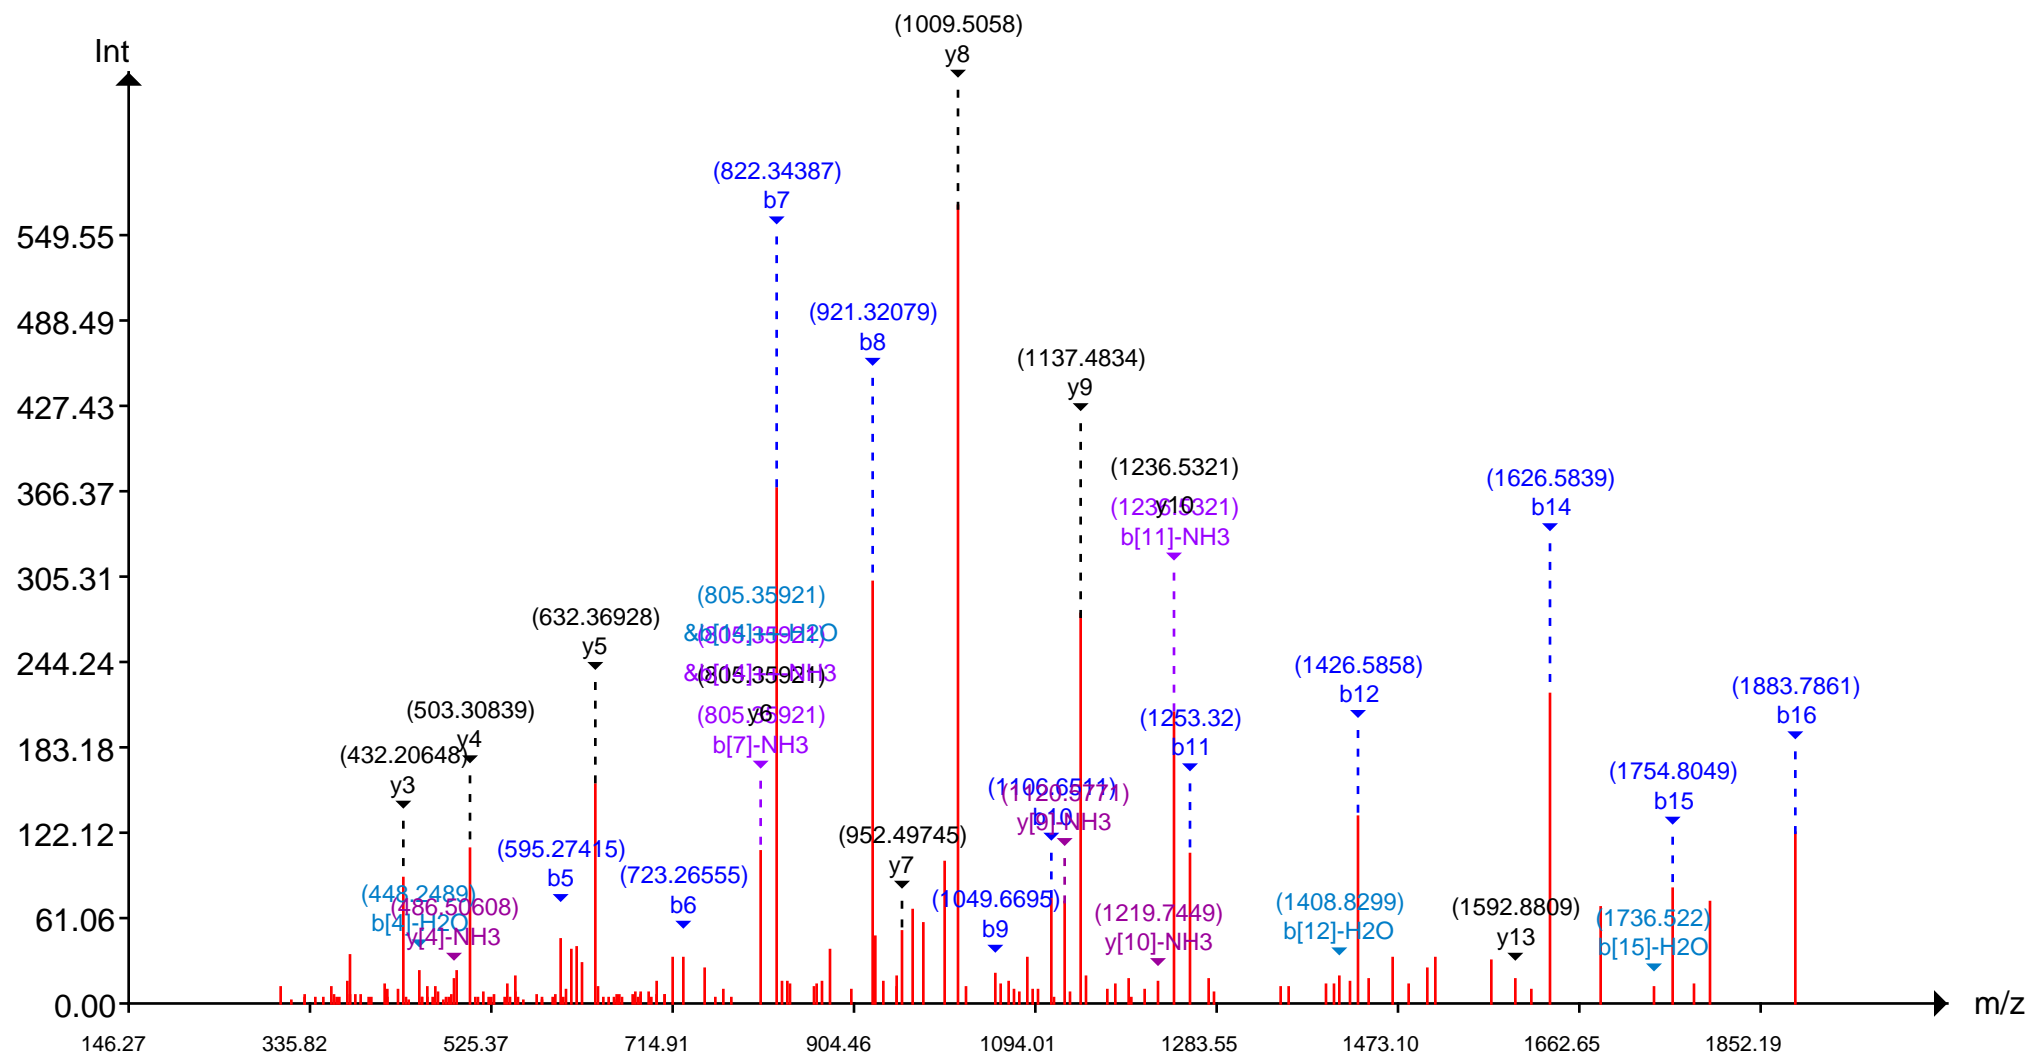

## Info

**Modified Sequence** AcD3-YVSAEQVVQGM<Mox\*>K<AcD3K\*>EAQER-COOH

**Ion score** 66.72

**Protein** Q9CQU0

**Confidence level** 99.00%

**Precursor m/z** 1029.5089

**Identity Threshold** 47.49

**Charge** 2+

**Mass error** 0.002638

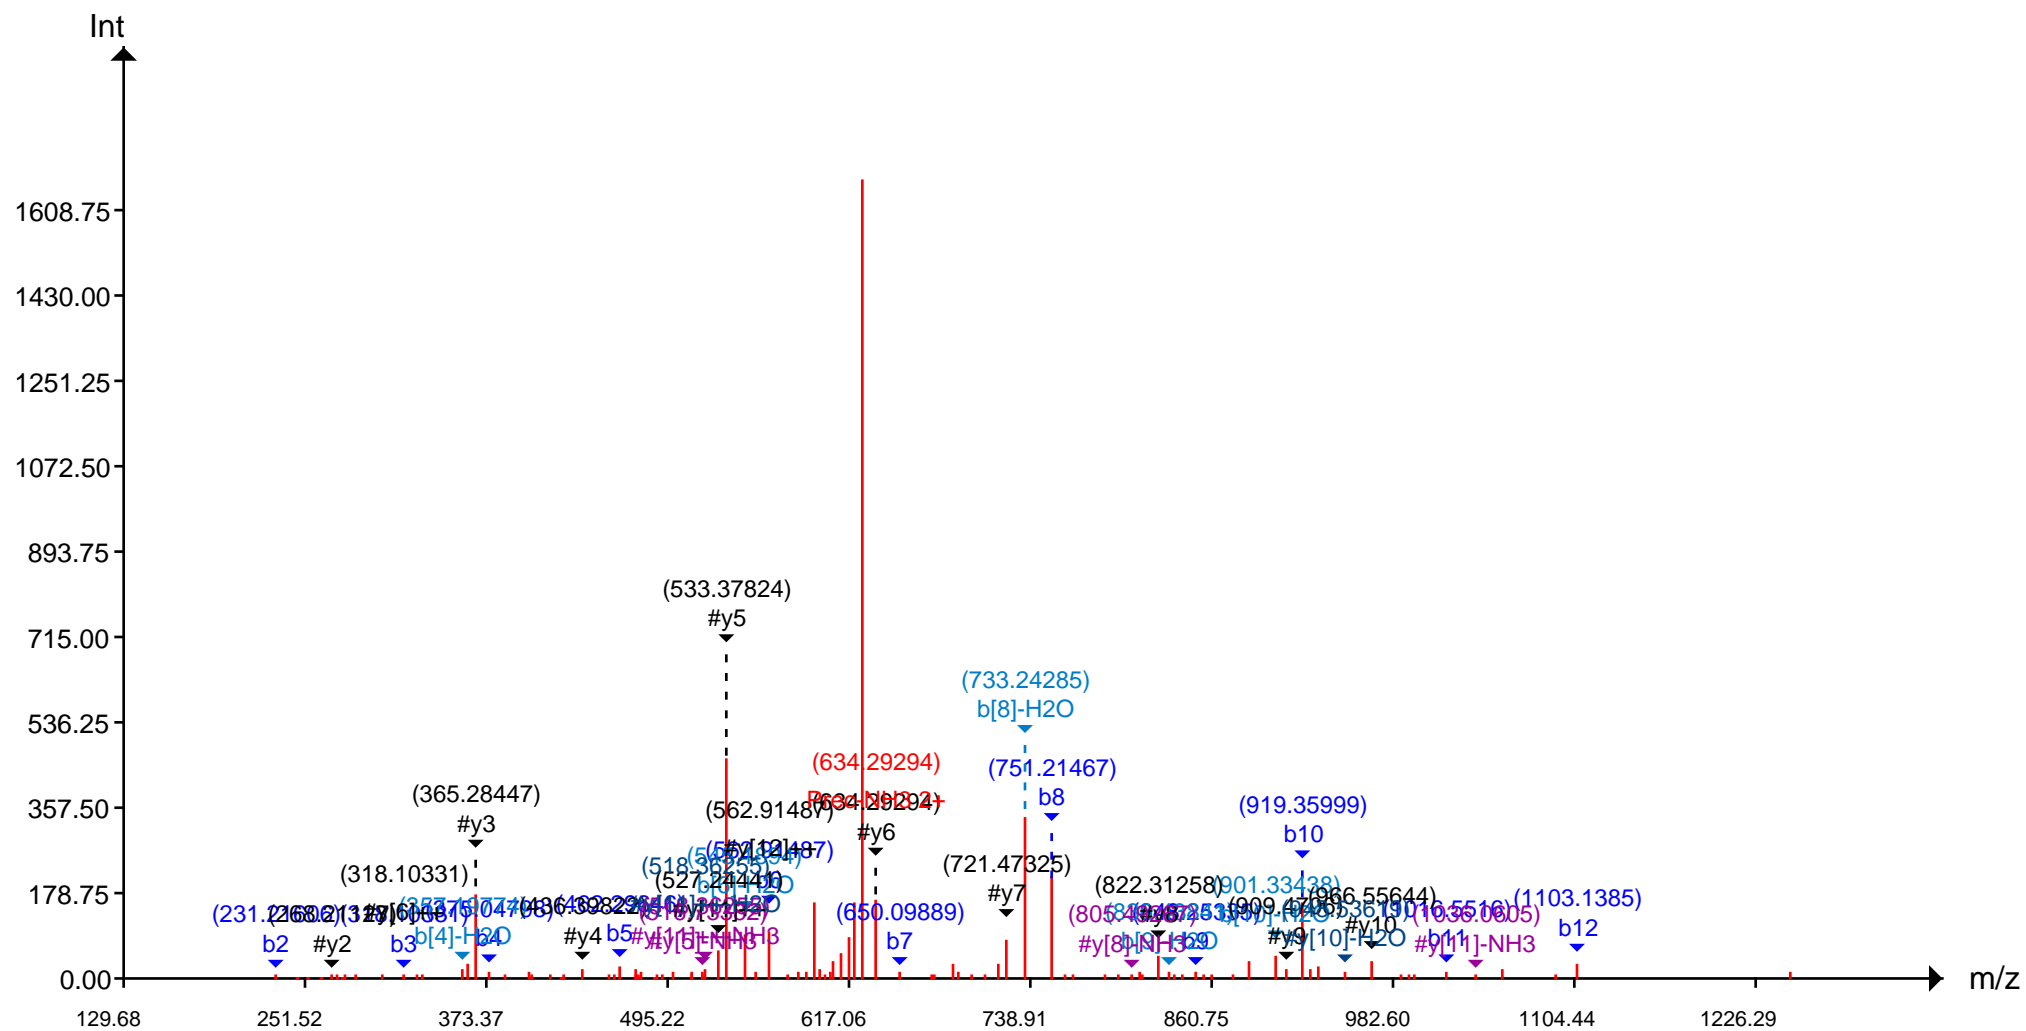

## Info

|                          |                              |                           |          |
|--------------------------|------------------------------|---------------------------|----------|
| <b>Modified Sequence</b> | AcD3-NASGSTSTPAPSR<C13>-COOH | <b>Ion score</b>          | 75.78    |
| <b>Protein</b>           | Q91V92                       | <b>Confidence level</b>   | 99.00%   |
| <b>Precursor m/z</b>     | 642.32153                    | <b>Identity Threshold</b> | 47.35    |
| <b>Charge</b>            | 2+                           | <b>Mass error</b>         | -3.07E-4 |

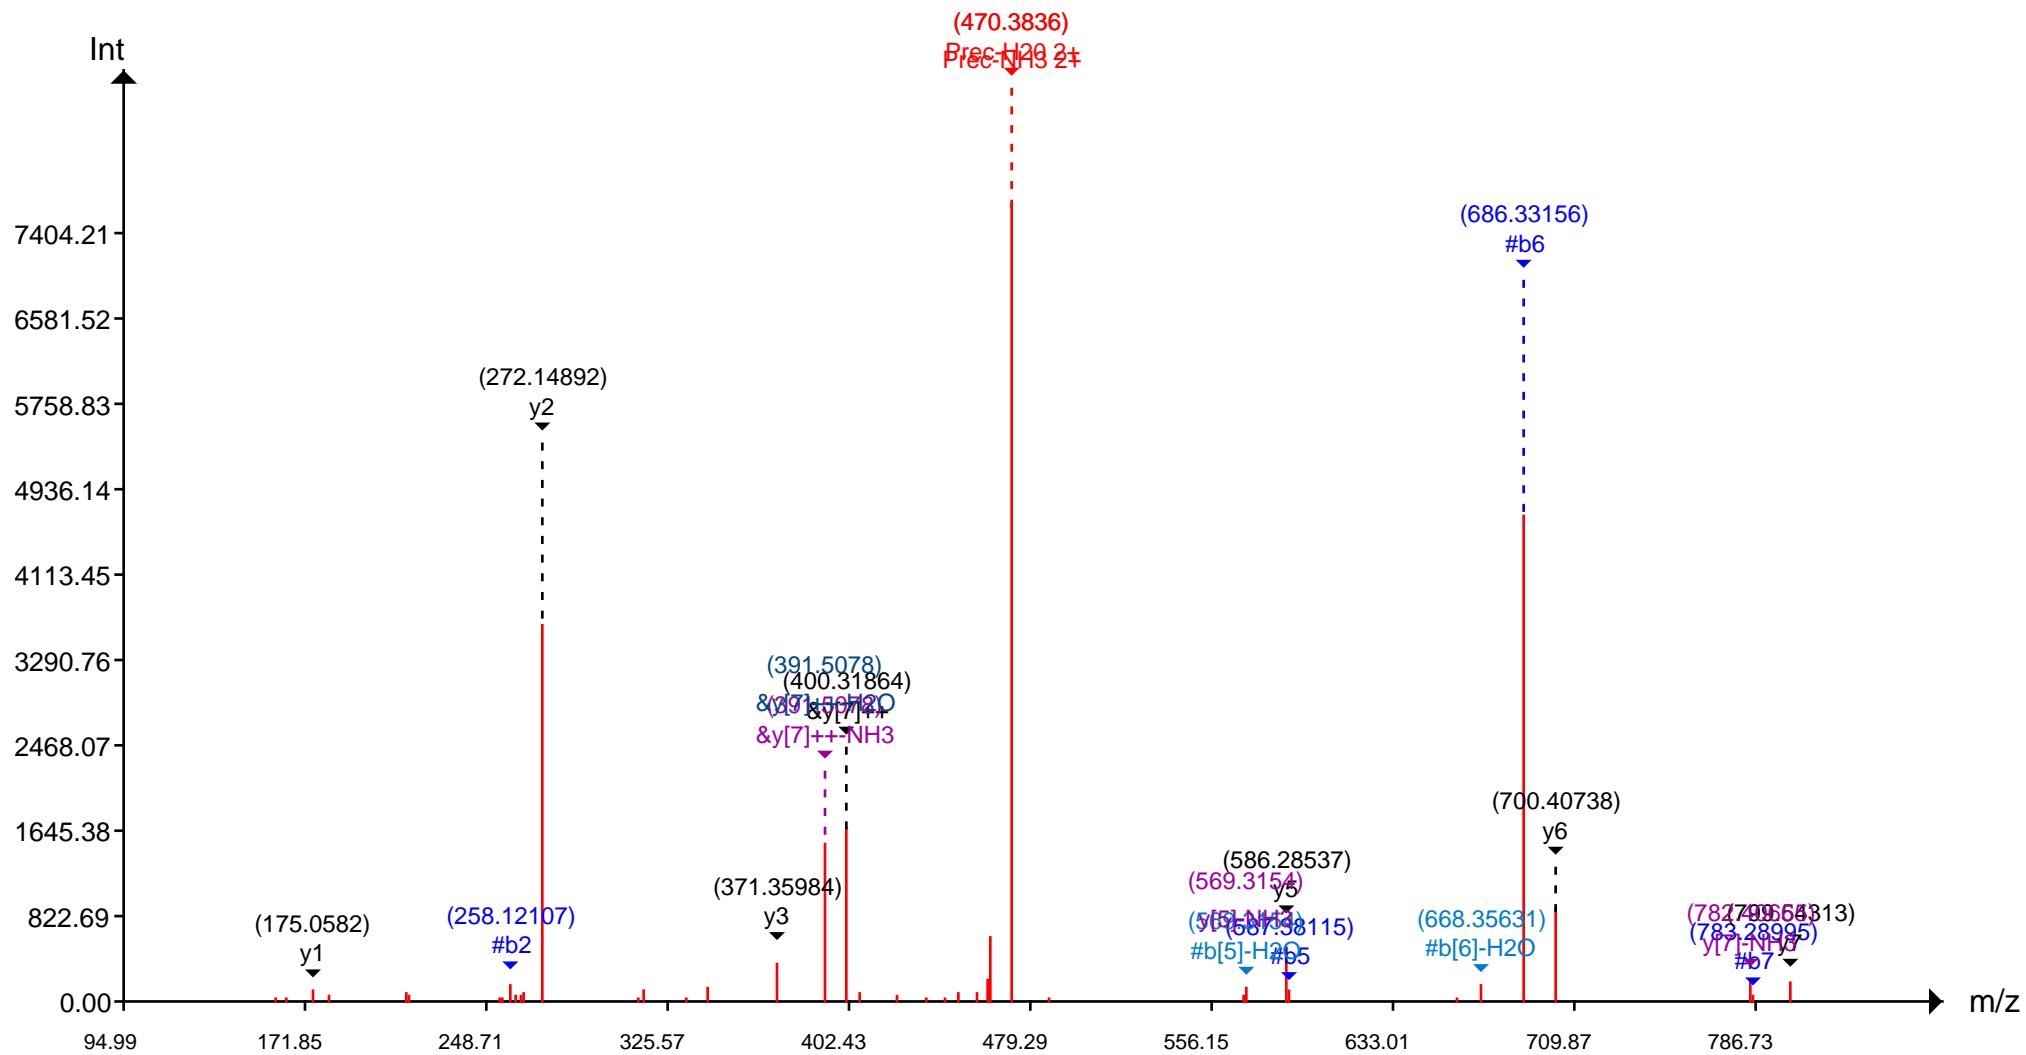

## Info

**Modified Sequence** AcD3-IVNTNVPR-COOH

**Ion score** 51.93

**Protein** P34884

**Confidence level** 99.00%

**Precursor m/z** 479.28149

**Identity Threshold** 46.47

**Charge** 2+

**Mass error** 1.8E-4



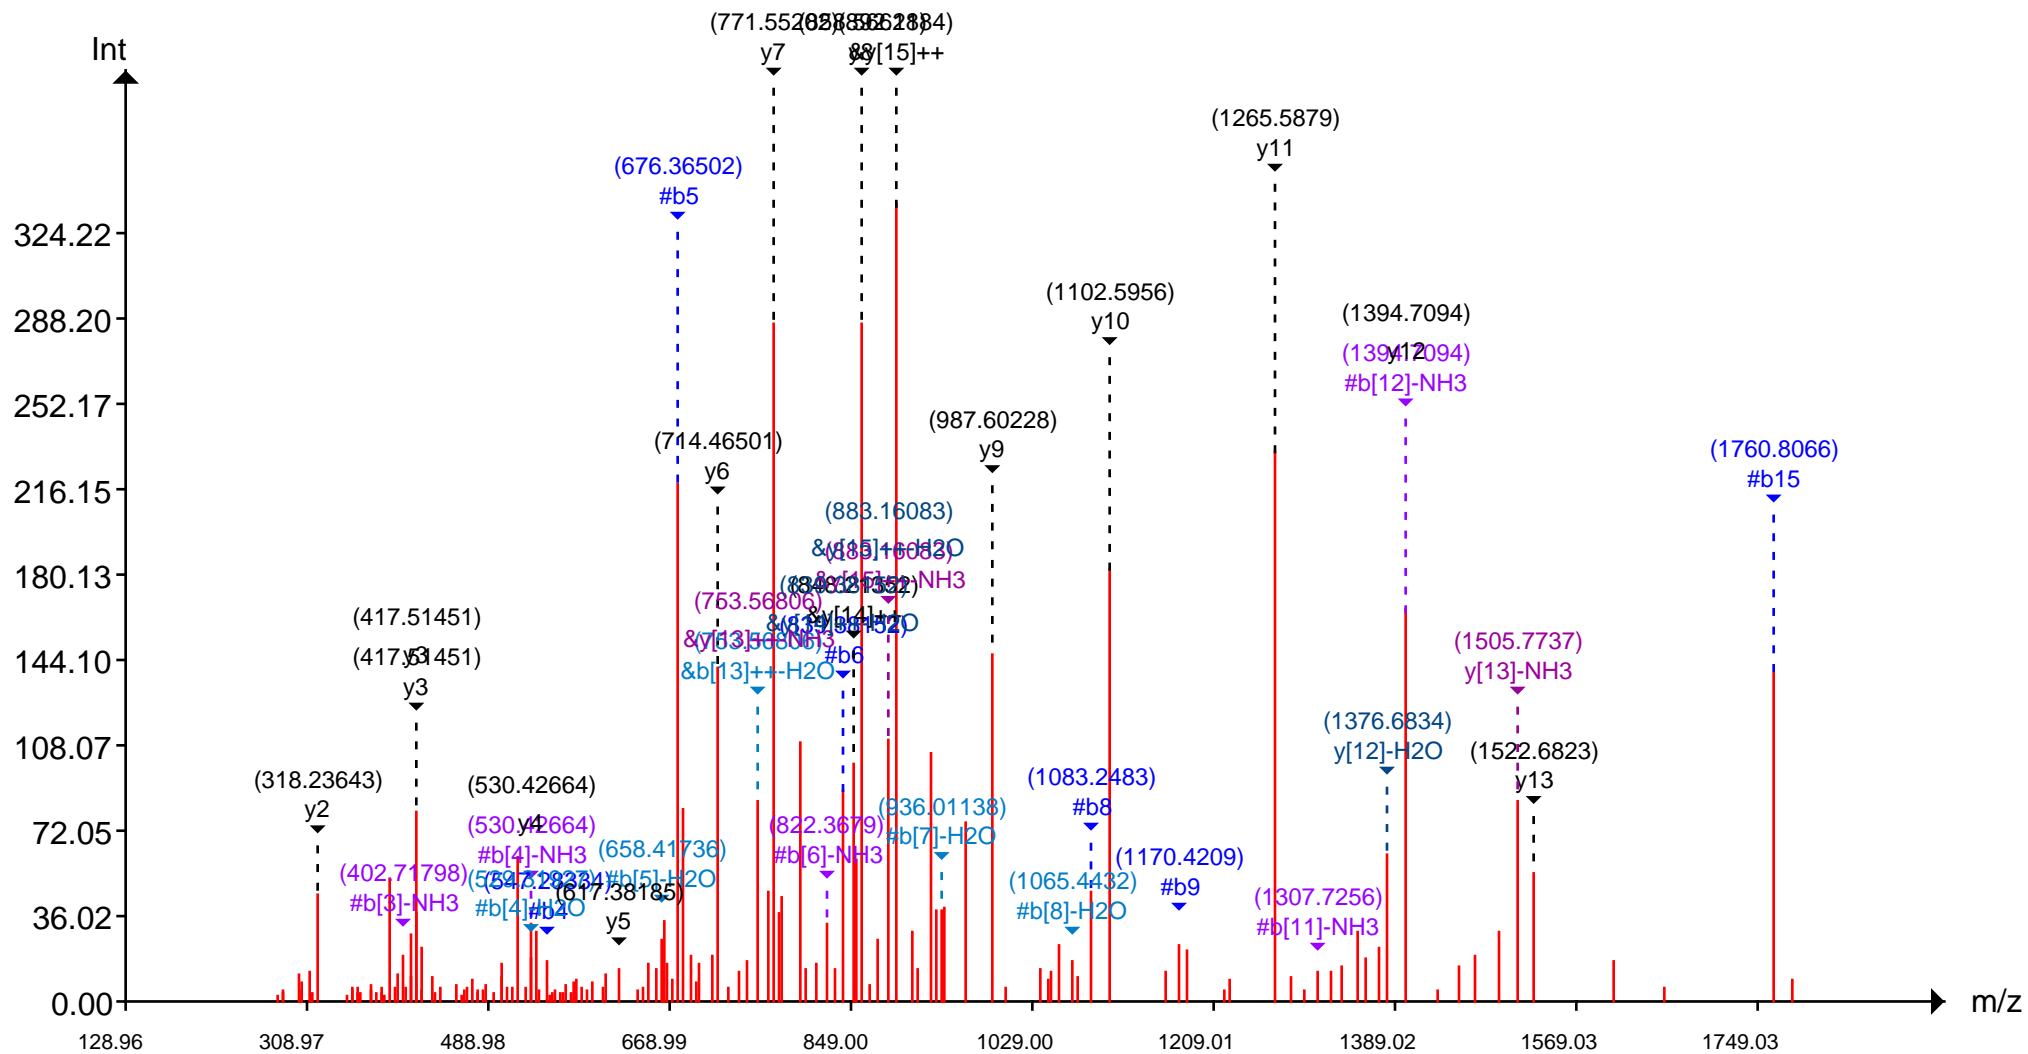

## Info

|                          |                                         |                           |          |
|--------------------------|-----------------------------------------|---------------------------|----------|
| <b>Modified Sequence</b> | AcD3-ISK<AcD3K*>QEYDESGPSIVHR<C13>-COOH | <b>Ion score</b>          | 74.69    |
| <b>Protein</b>           | P60710, P63260                          | <b>Confidence level</b>   | 99.00%   |
| <b>Precursor m/z</b>     | 971.00085                               | <b>Identity Threshold</b> | 48.20    |
| <b>Charge</b>            | 2+                                      | <b>Mass error</b>         | 0.001796 |

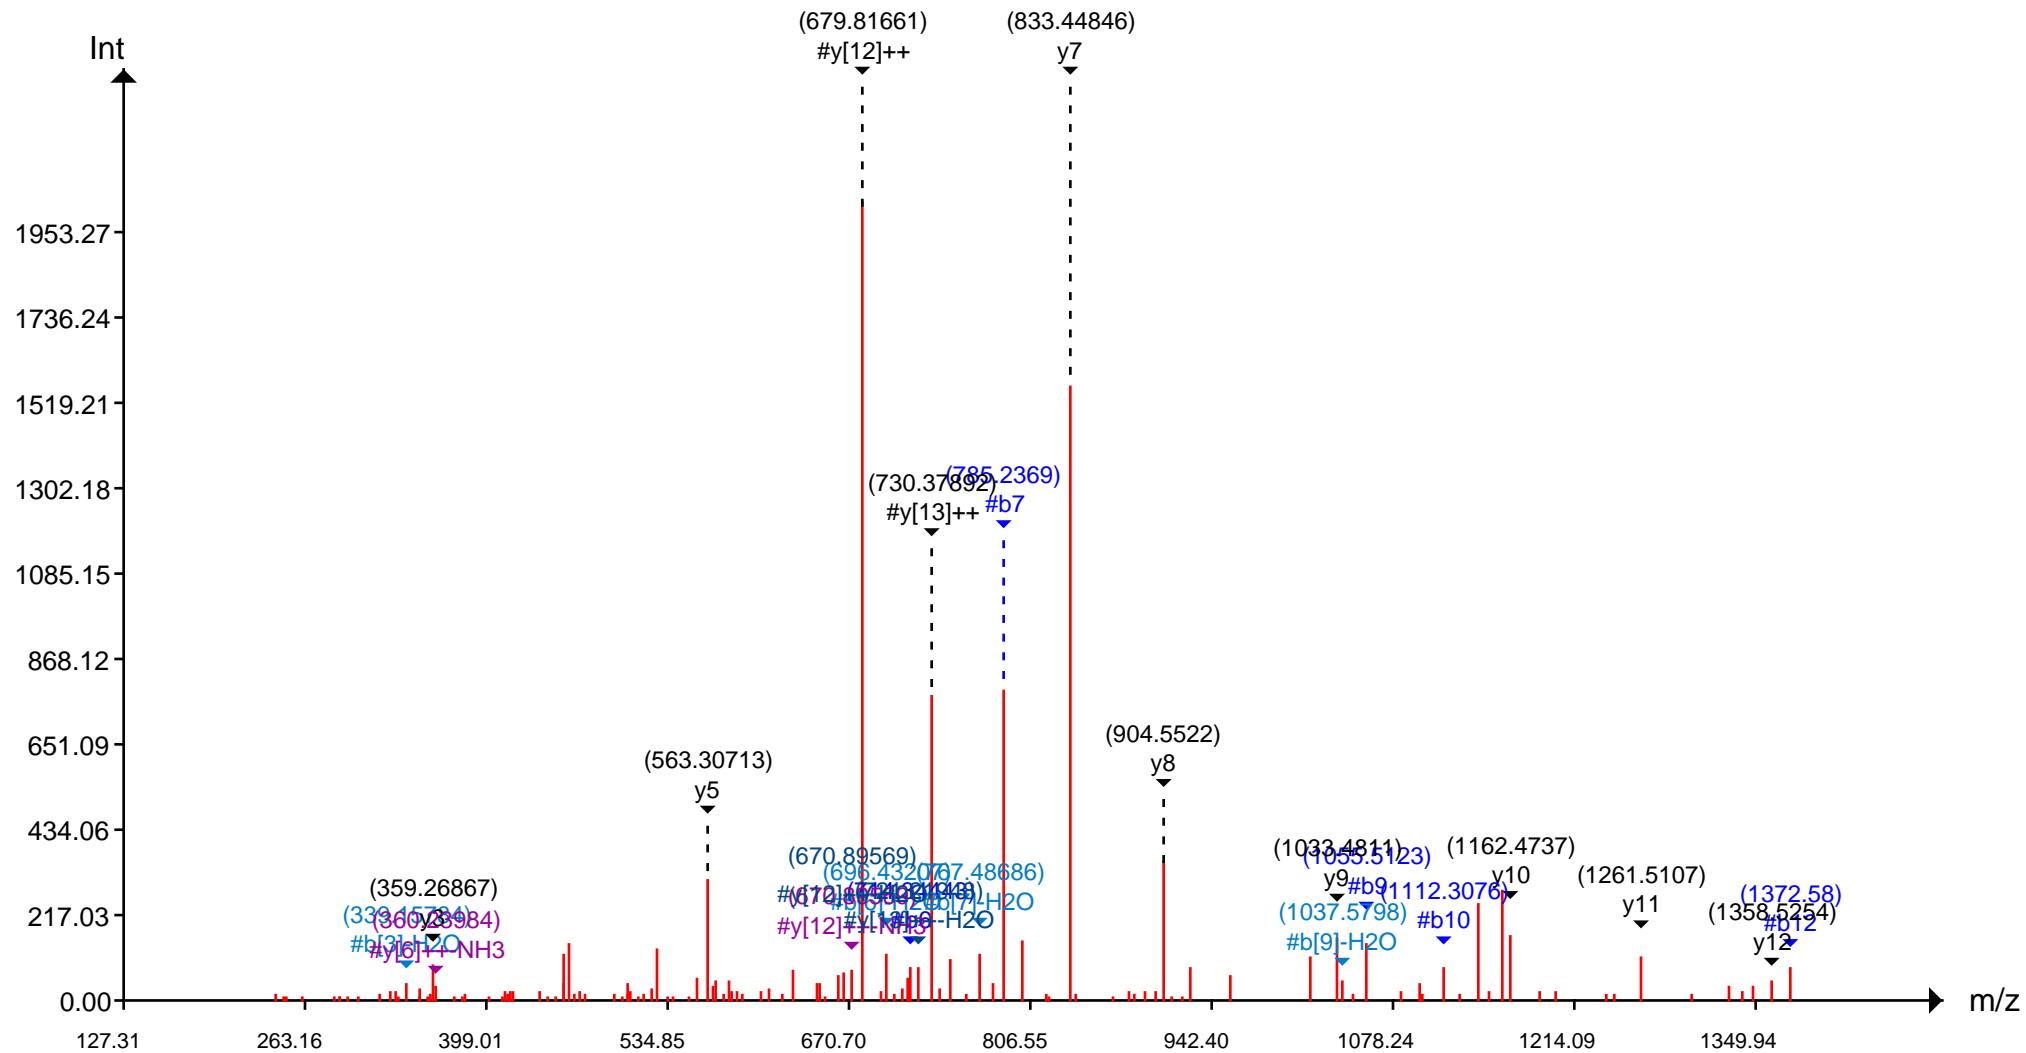

## Info

**Modified Sequence** AcD3-LTPVEEAPK<AcD3K\*>GM<Mox\*>LAR-COOH

**Ion score** 54.87

**Protein** Q61599

**Confidence level** 99.00%

**Precursor m/z** 809.44475

**Identity Threshold** 47.68

**Charge** 2+

**Mass error** 0.003519

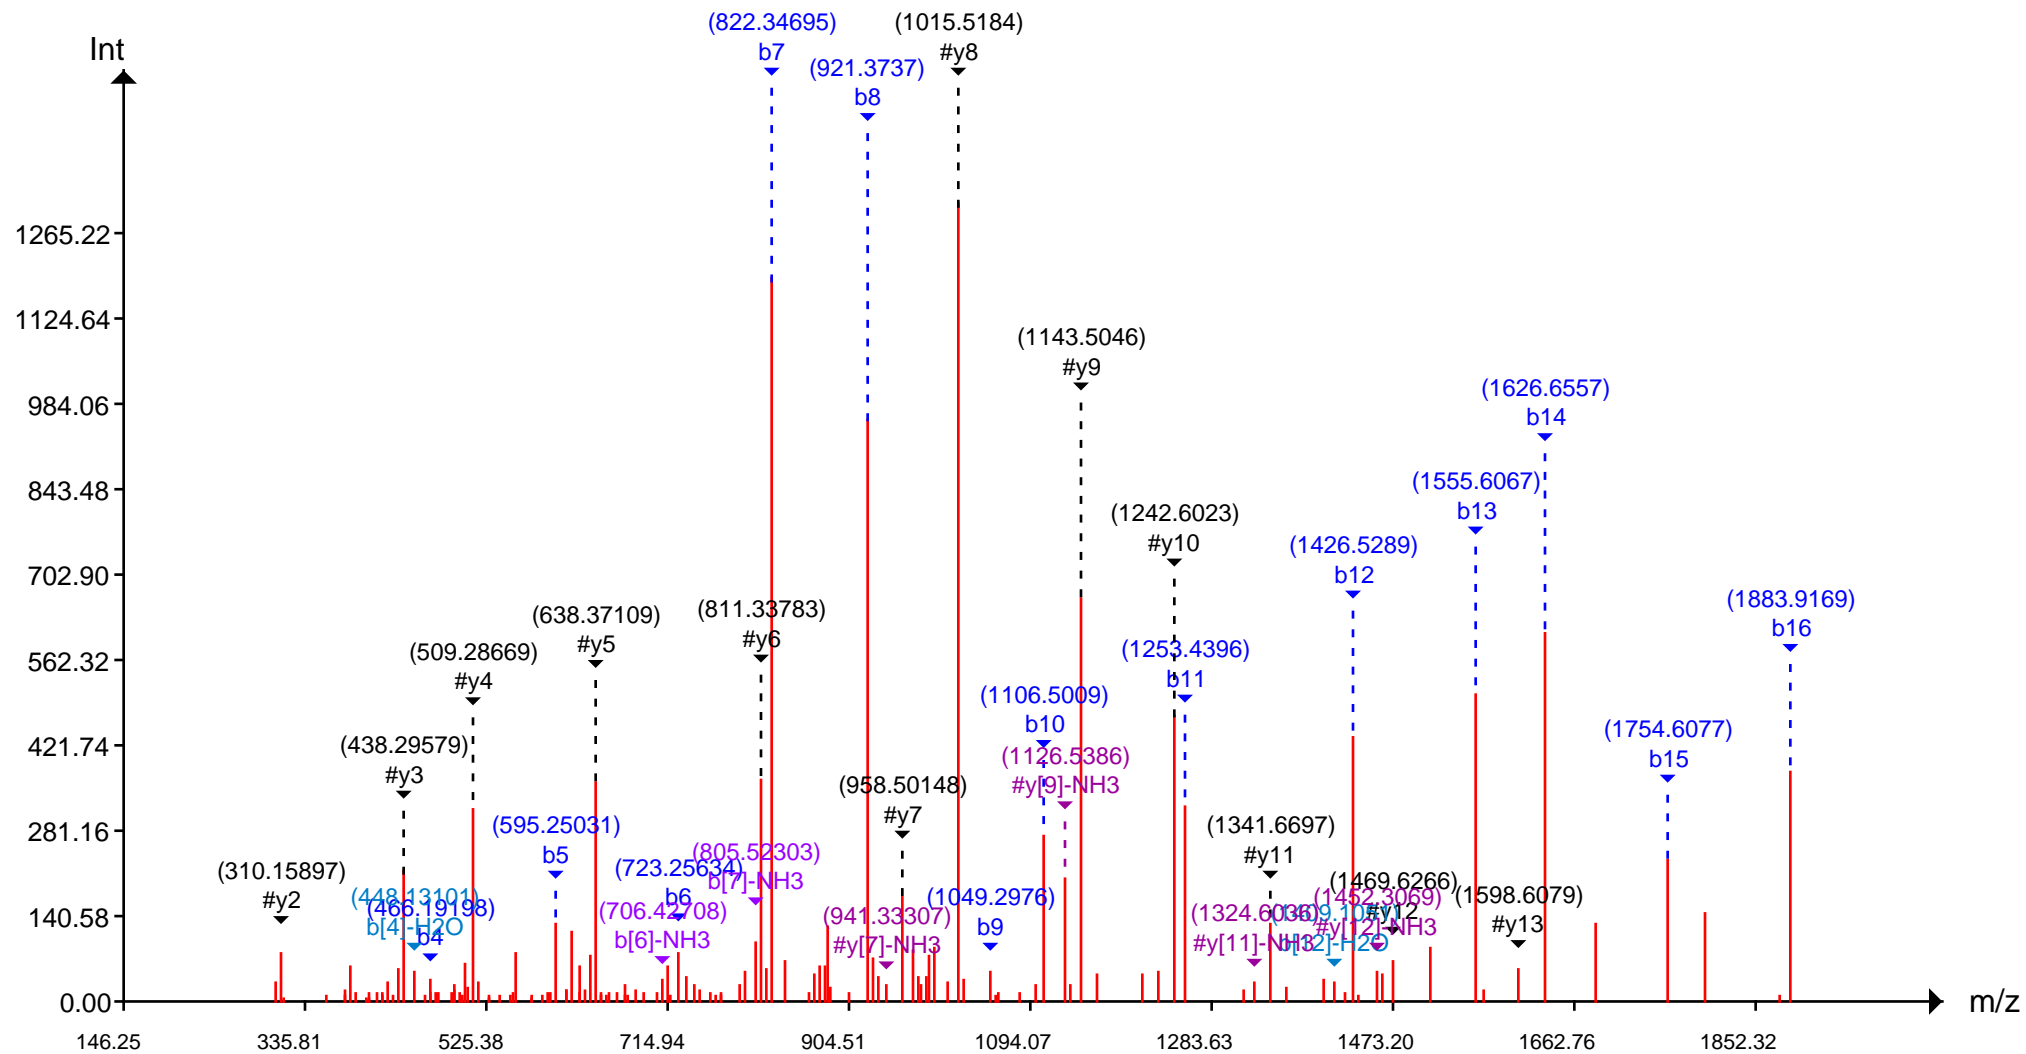

## Info

|                          |                                                |                           |          |
|--------------------------|------------------------------------------------|---------------------------|----------|
| <b>Modified Sequence</b> | AcD3-YVSAEQVVQGM<Mox*>K<AcD3K*>EAQER<C13>-COOH | <b>Ion score</b>          | 96.6     |
| <b>Protein</b>           | Q9CQU0                                         | <b>Confidence level</b>   | 99.00%   |
| <b>Precursor m/z</b>     | 1032.5191                                      | <b>Identity Threshold</b> | 47.81    |
| <b>Charge</b>            | 2+                                             | <b>Mass error</b>         | 0.002896 |



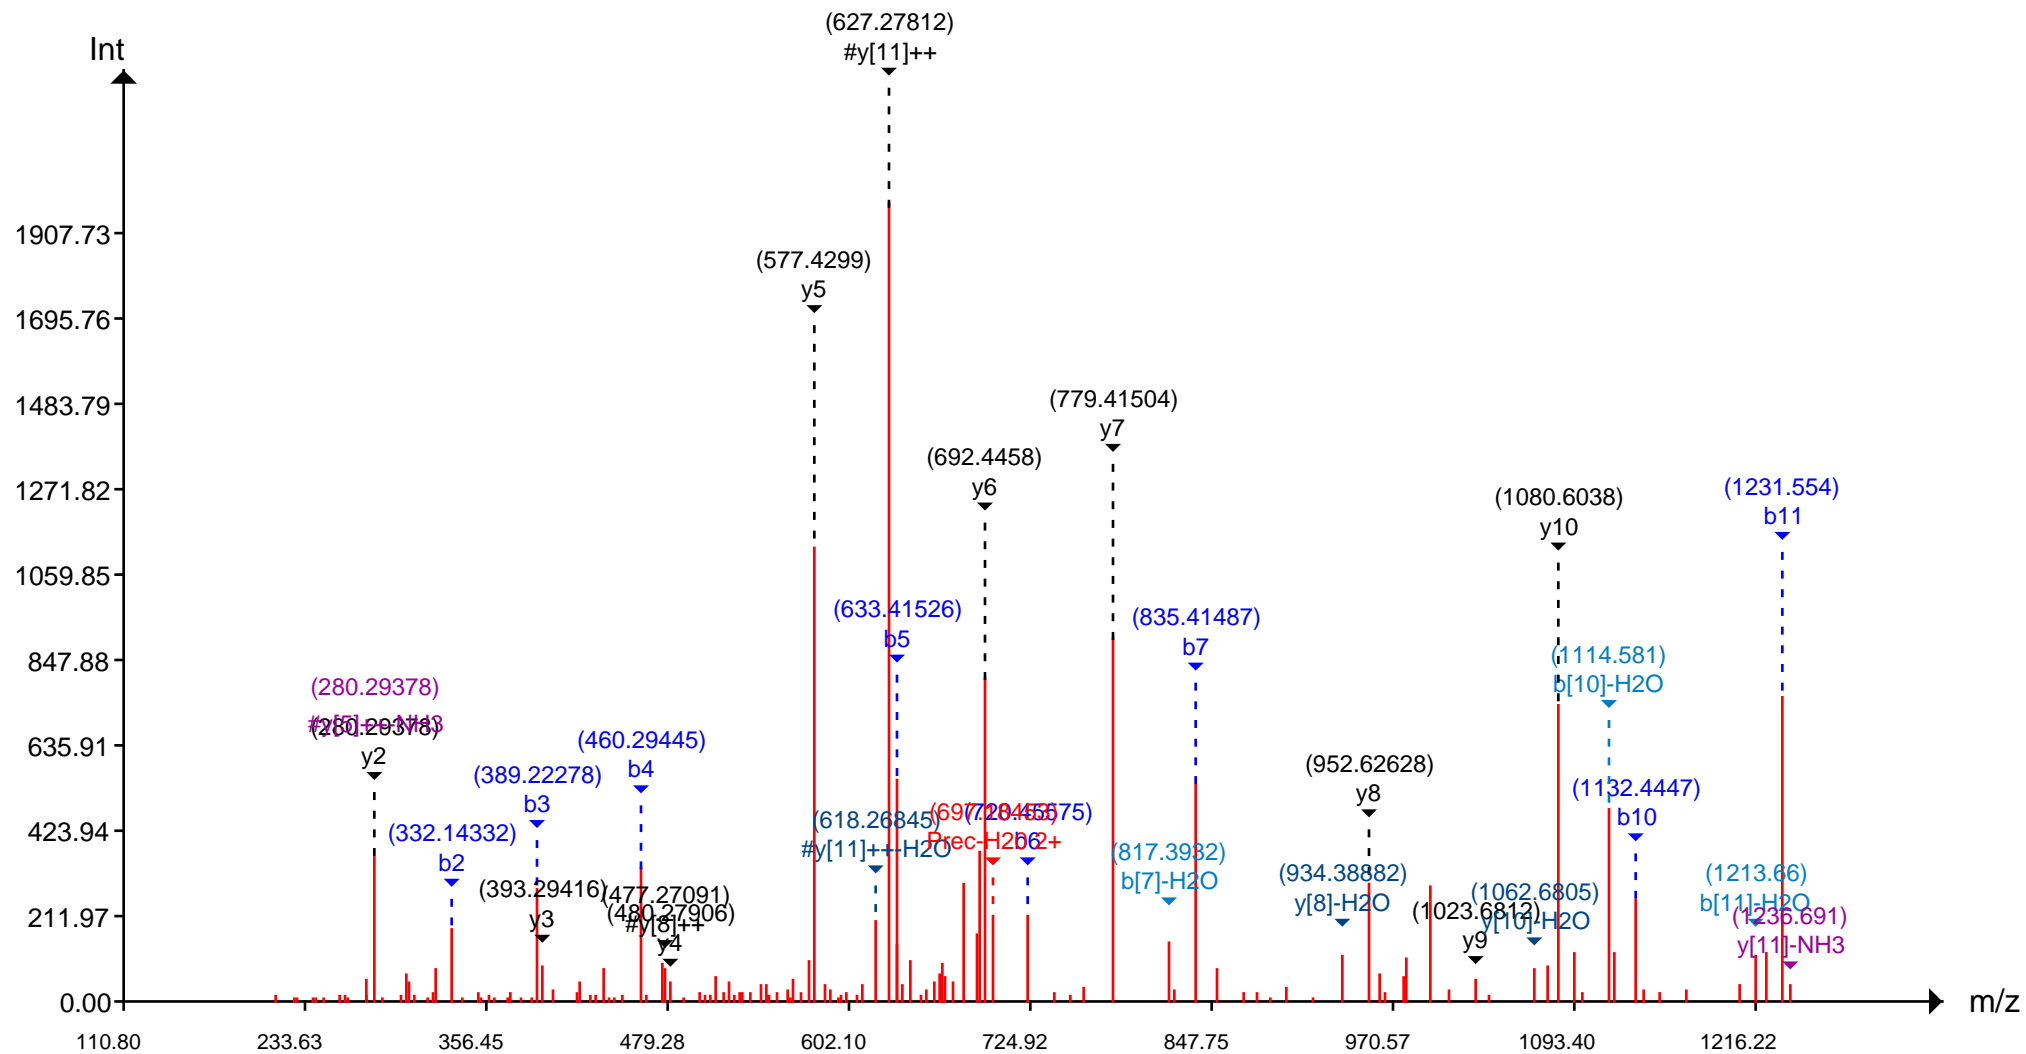

## Info

**Modified Sequence** AcD3-IK<AcD3K\*>GAK<AcD3K\*>SDPSIVR<C13>-COOH

**Ion score** 56.23

**Protein** P62748

**Confidence level** 99.00%

**Precursor m/z** 706.43205

**Identity Threshold** 42.59

**Charge** 2+

**Mass error** 7.47E-4



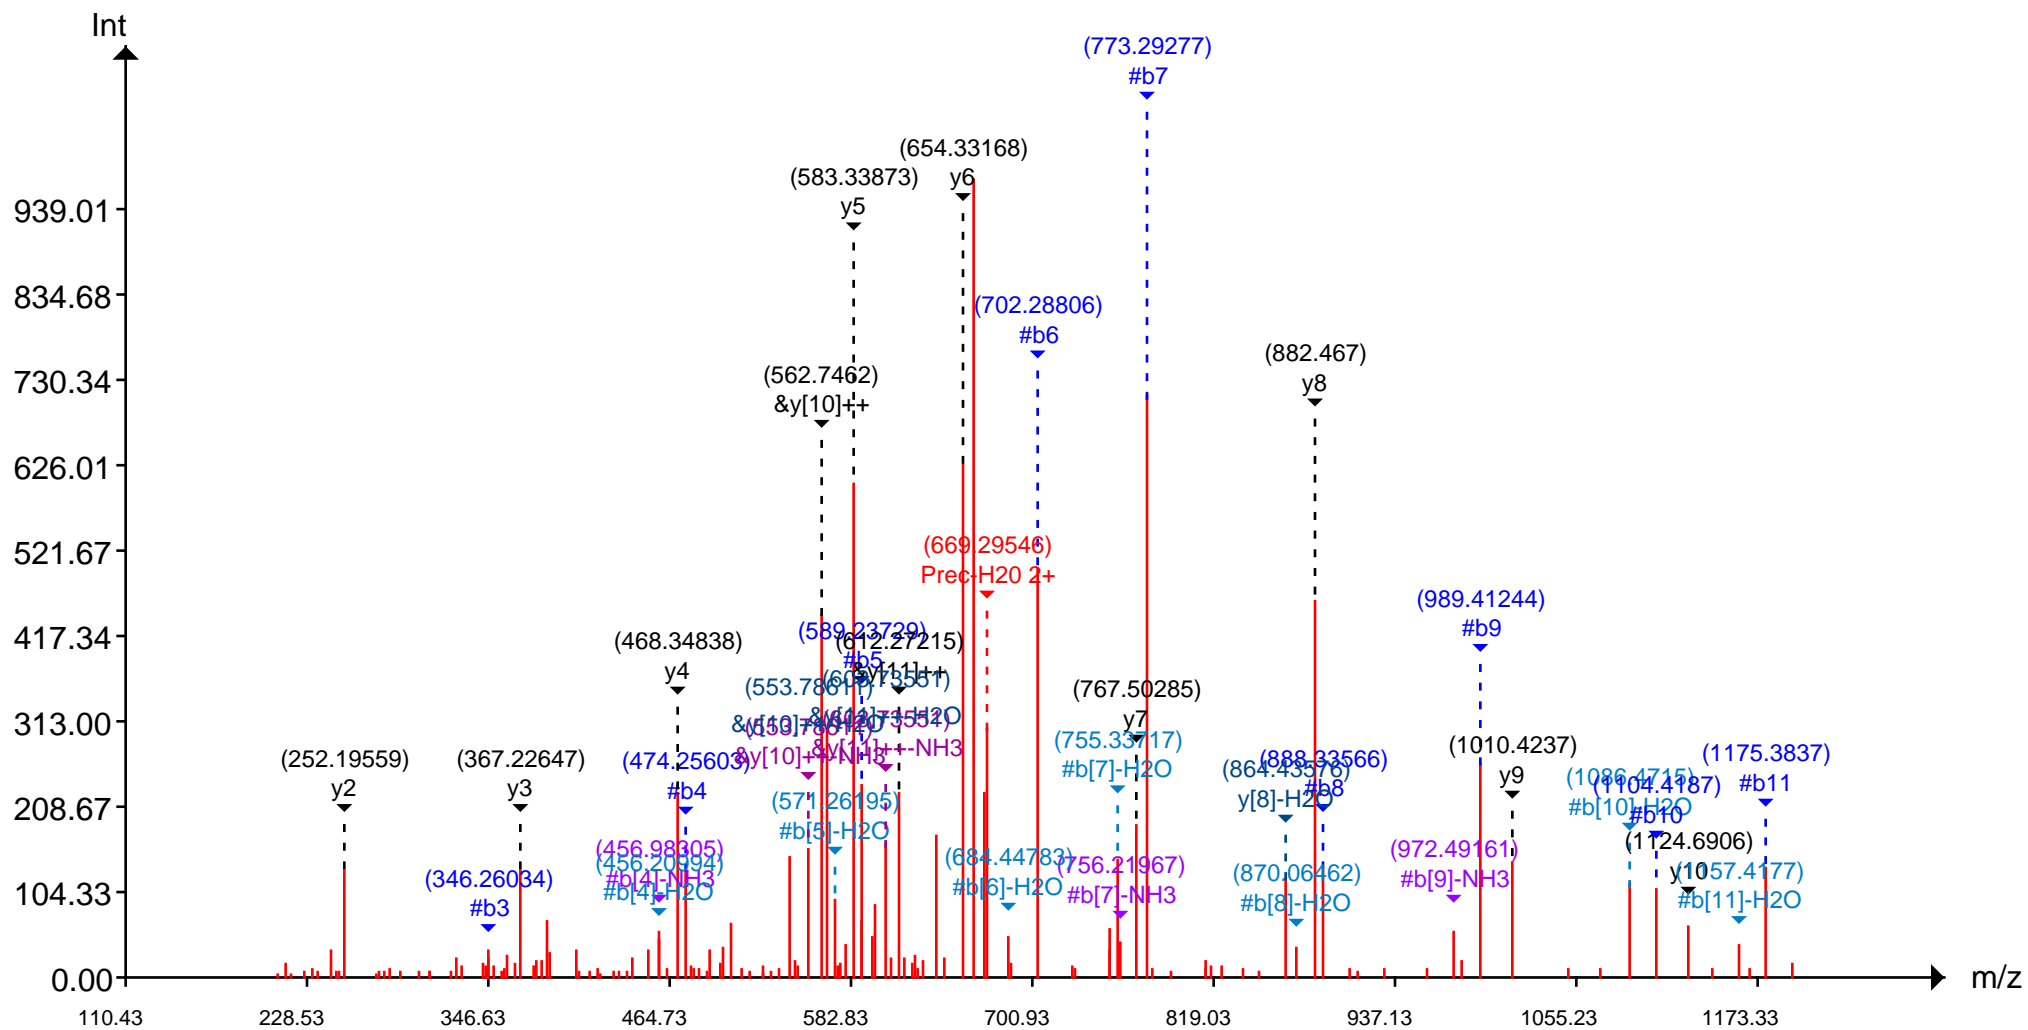

## Info

|                          |                             |                           |        |
|--------------------------|-----------------------------|---------------------------|--------|
| <b>Modified Sequence</b> | AcD3-SVNQLDADTDAR<C13>-COOH | <b>Ion score</b>          | 85.7   |
| <b>Protein</b>           | P10107                      | <b>Confidence level</b>   | 99.00% |
| <b>Precursor m/z</b>     | 678.3325                    | <b>Identity Threshold</b> | 47.09  |
| <b>Charge</b>            | 2+                          | <b>Mass error</b>         | 5.0E-4 |

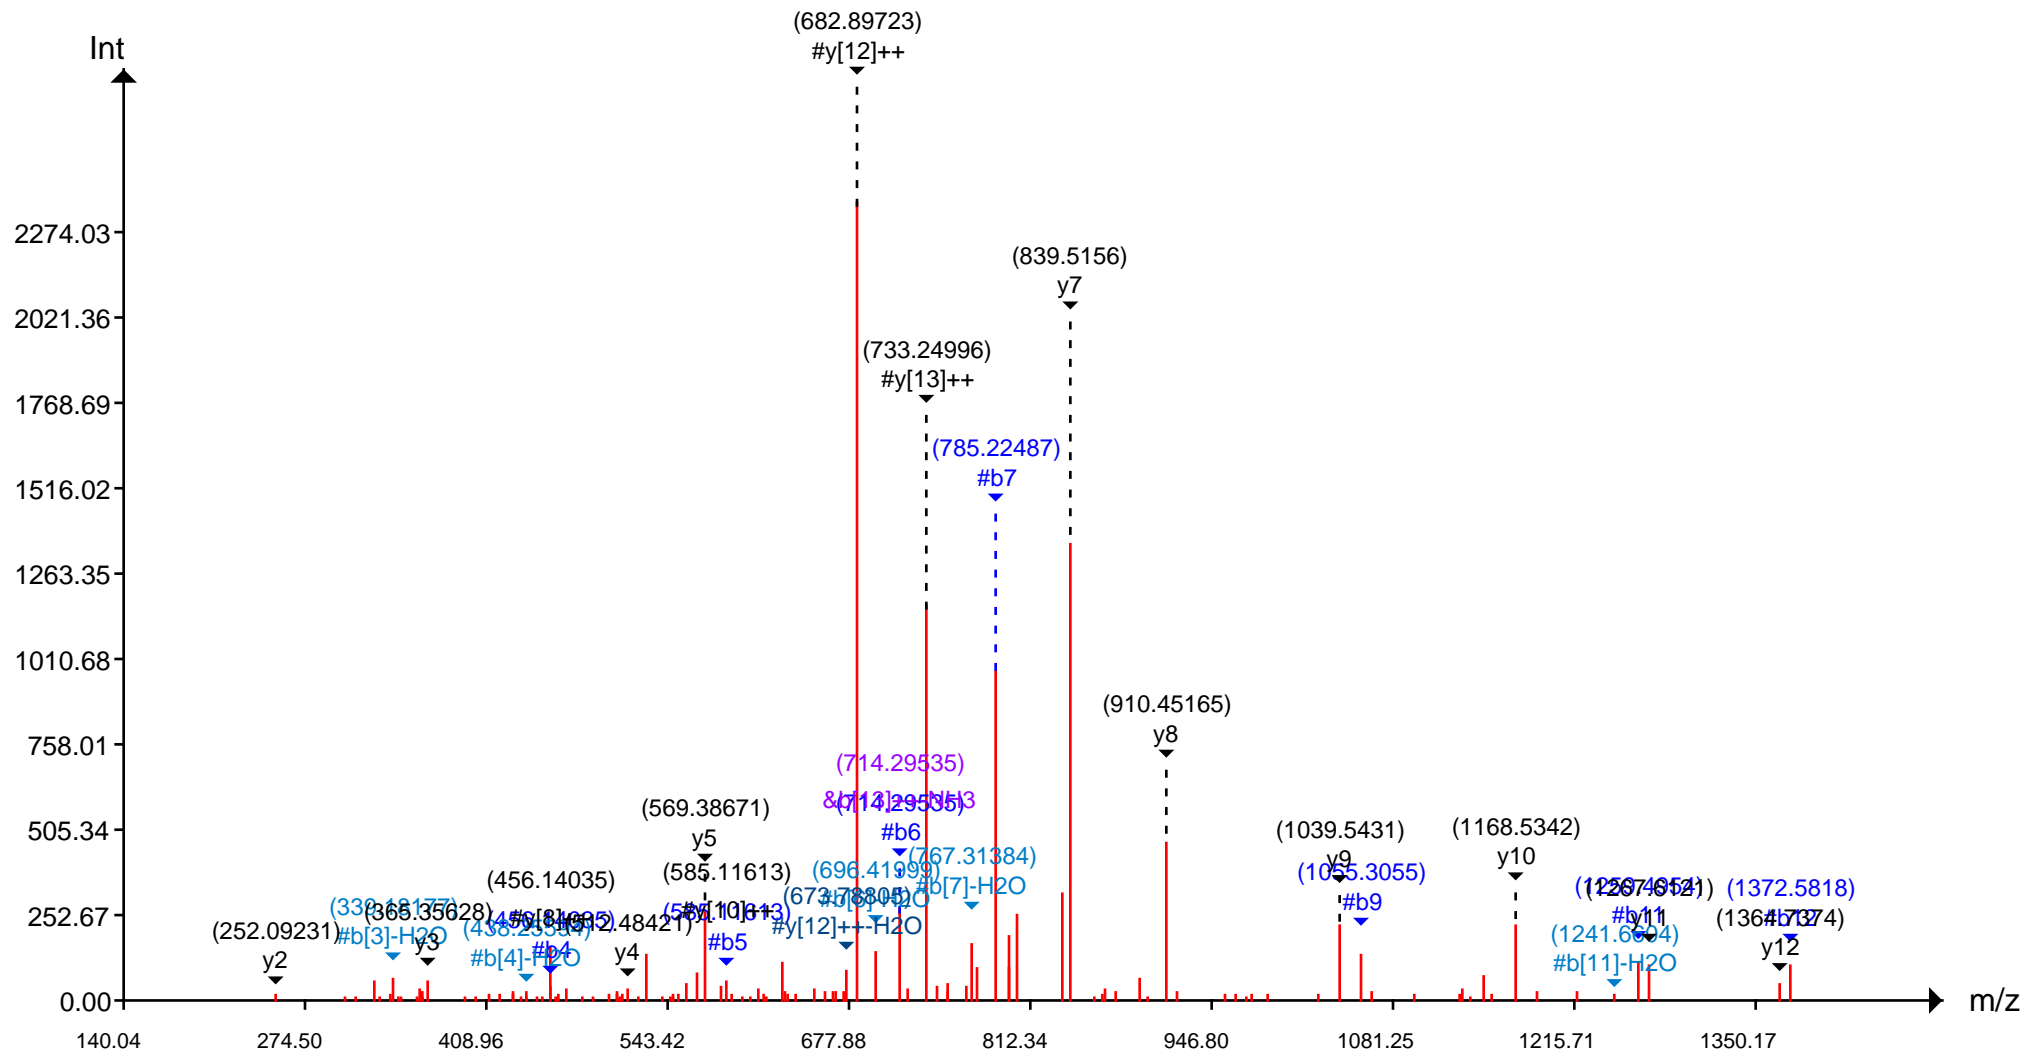

## Info

**Modified Sequence** AcD3-LTPVEEAPK<AcD3K\*>GM<Mox\*>LAR<C13>-COOH

**Ion score** 61.85

**Protein** Q61599

**Confidence level** 99.00%

**Precursor m/z** 812.45434

**Identity Threshold** 47.16

**Charge** 2+

**Mass error** 0.002557



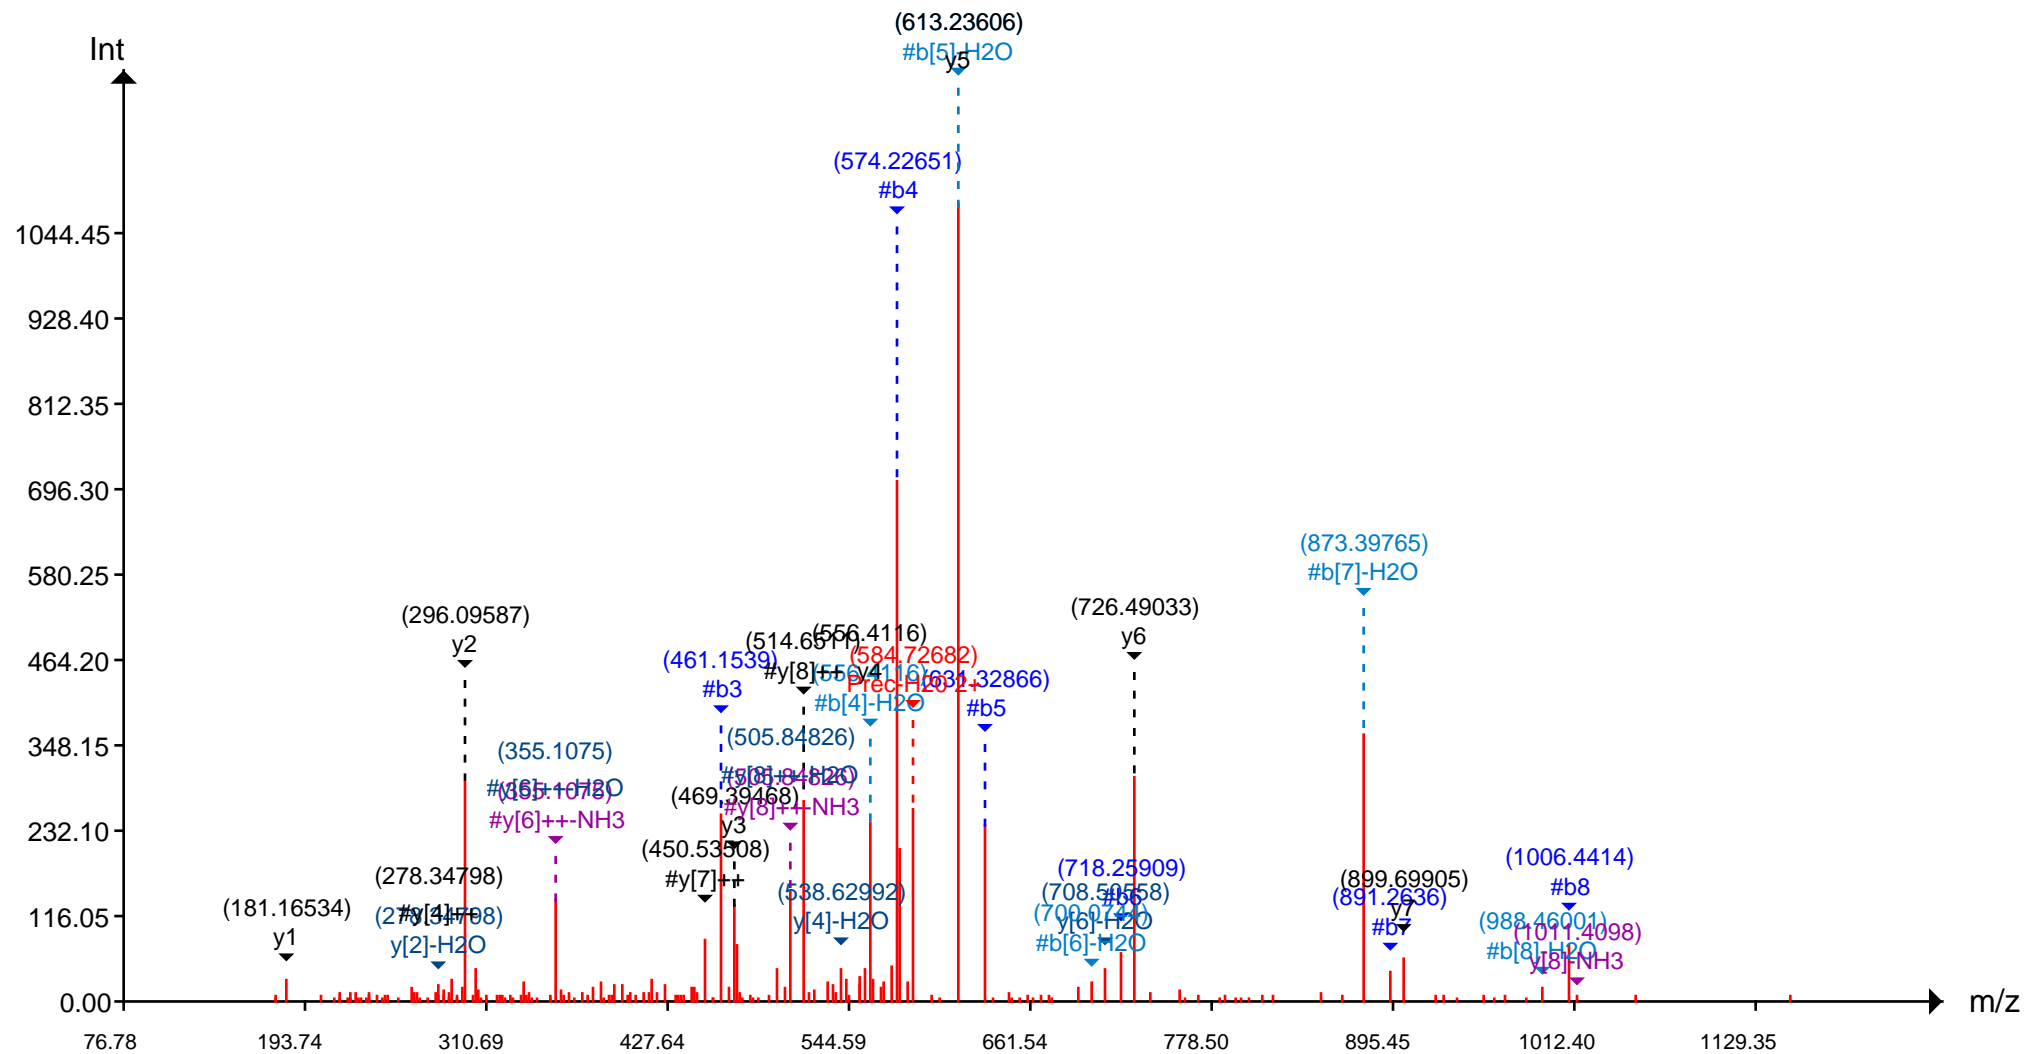

## Info

**Modified Sequence** AcD3-IEK<AcD3K\*>LGSK<AcD3K\*>DR<C13>-COOH

**Ion score** 56.25

**Protein** Q921Y0

**Confidence level** 99.00%

**Precursor m/z** 593.85779

**Identity Threshold** 45.01

**Charge** 2+

**Mass error** -3.7E-5

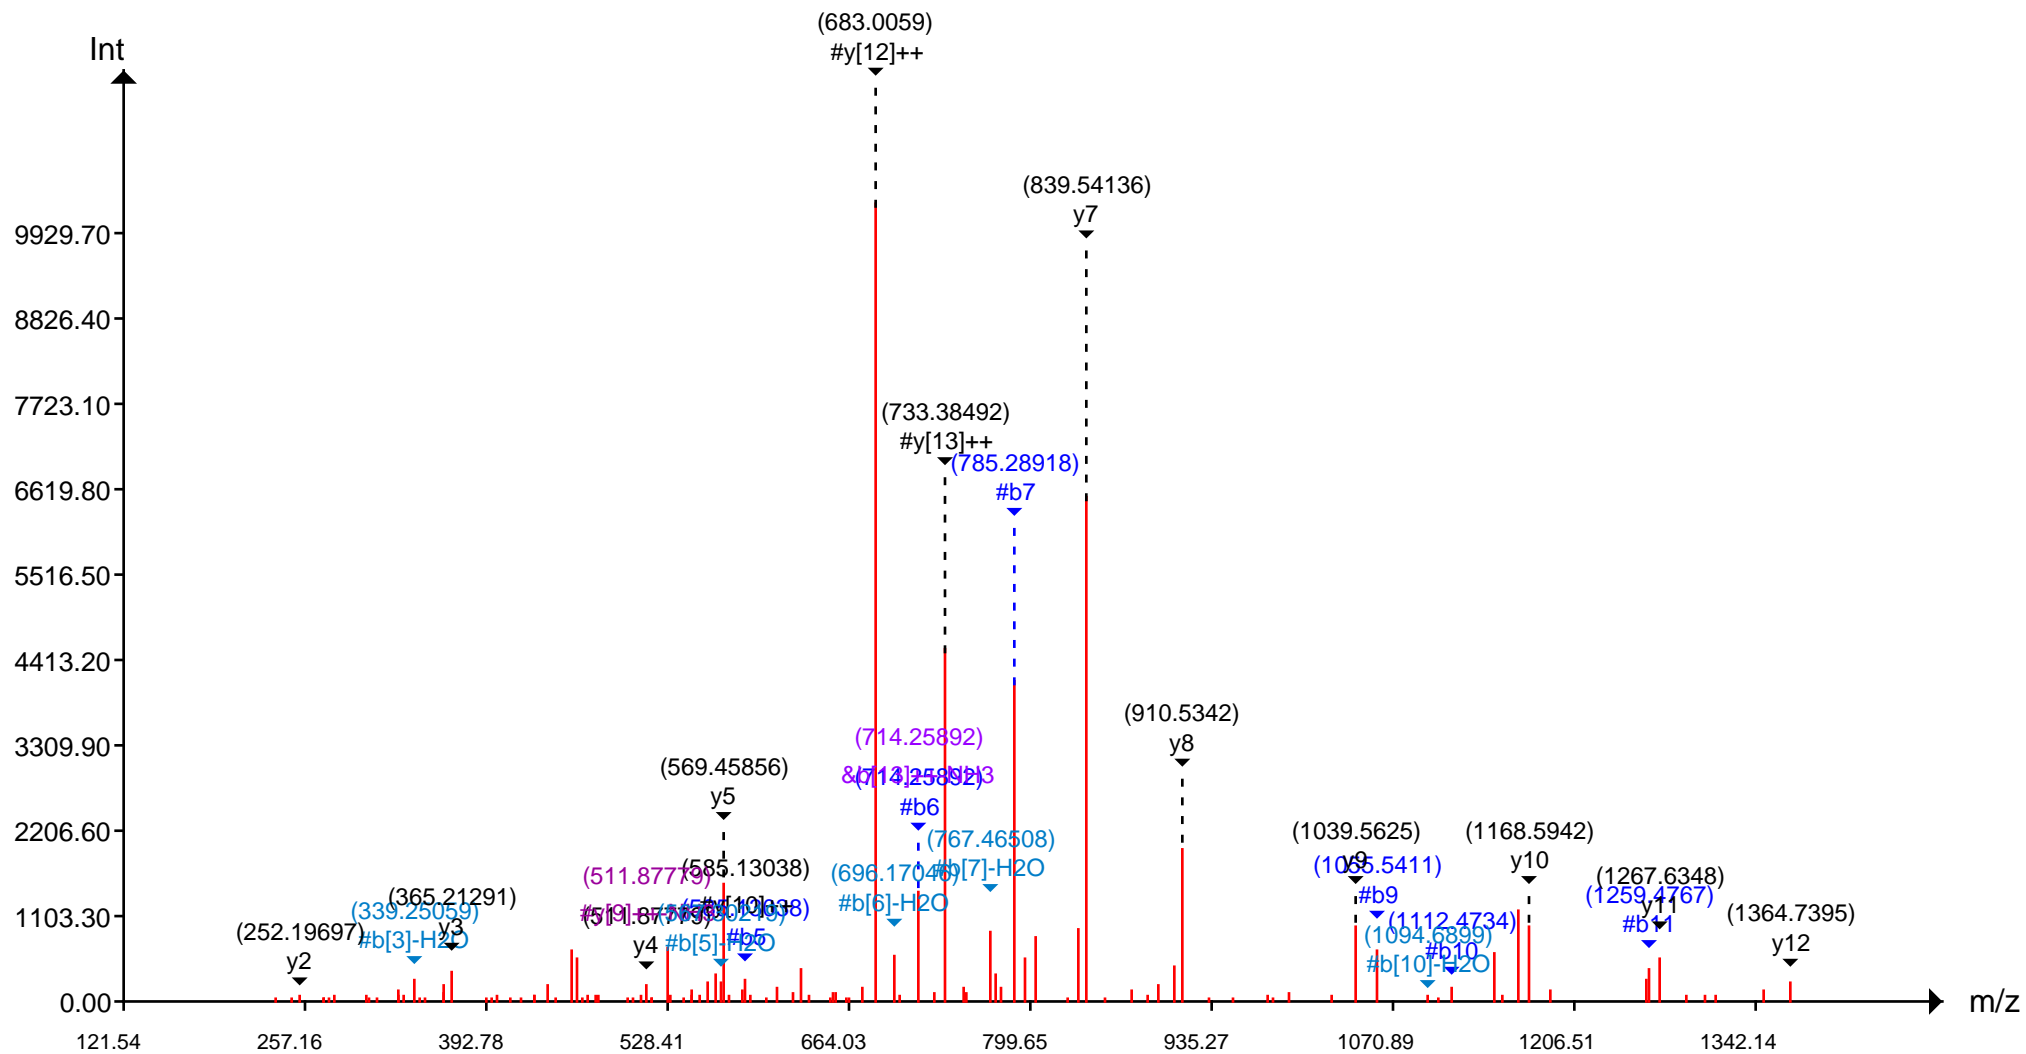

## Info

|                          |                                             |                           |          |
|--------------------------|---------------------------------------------|---------------------------|----------|
| <b>Modified Sequence</b> | AcD3-LTPVEEAPK<AcD3K*>GM<Mox*>LAR<C13>-COOH | <b>Ion score</b>          | 59.61    |
| <b>Protein</b>           | Q61599                                      | <b>Confidence level</b>   | 99.00%   |
| <b>Precursor m/z</b>     | 812.45485                                   | <b>Identity Threshold</b> | 47.01    |
| <b>Charge</b>            | 2+                                          | <b>Mass error</b>         | 0.003577 |

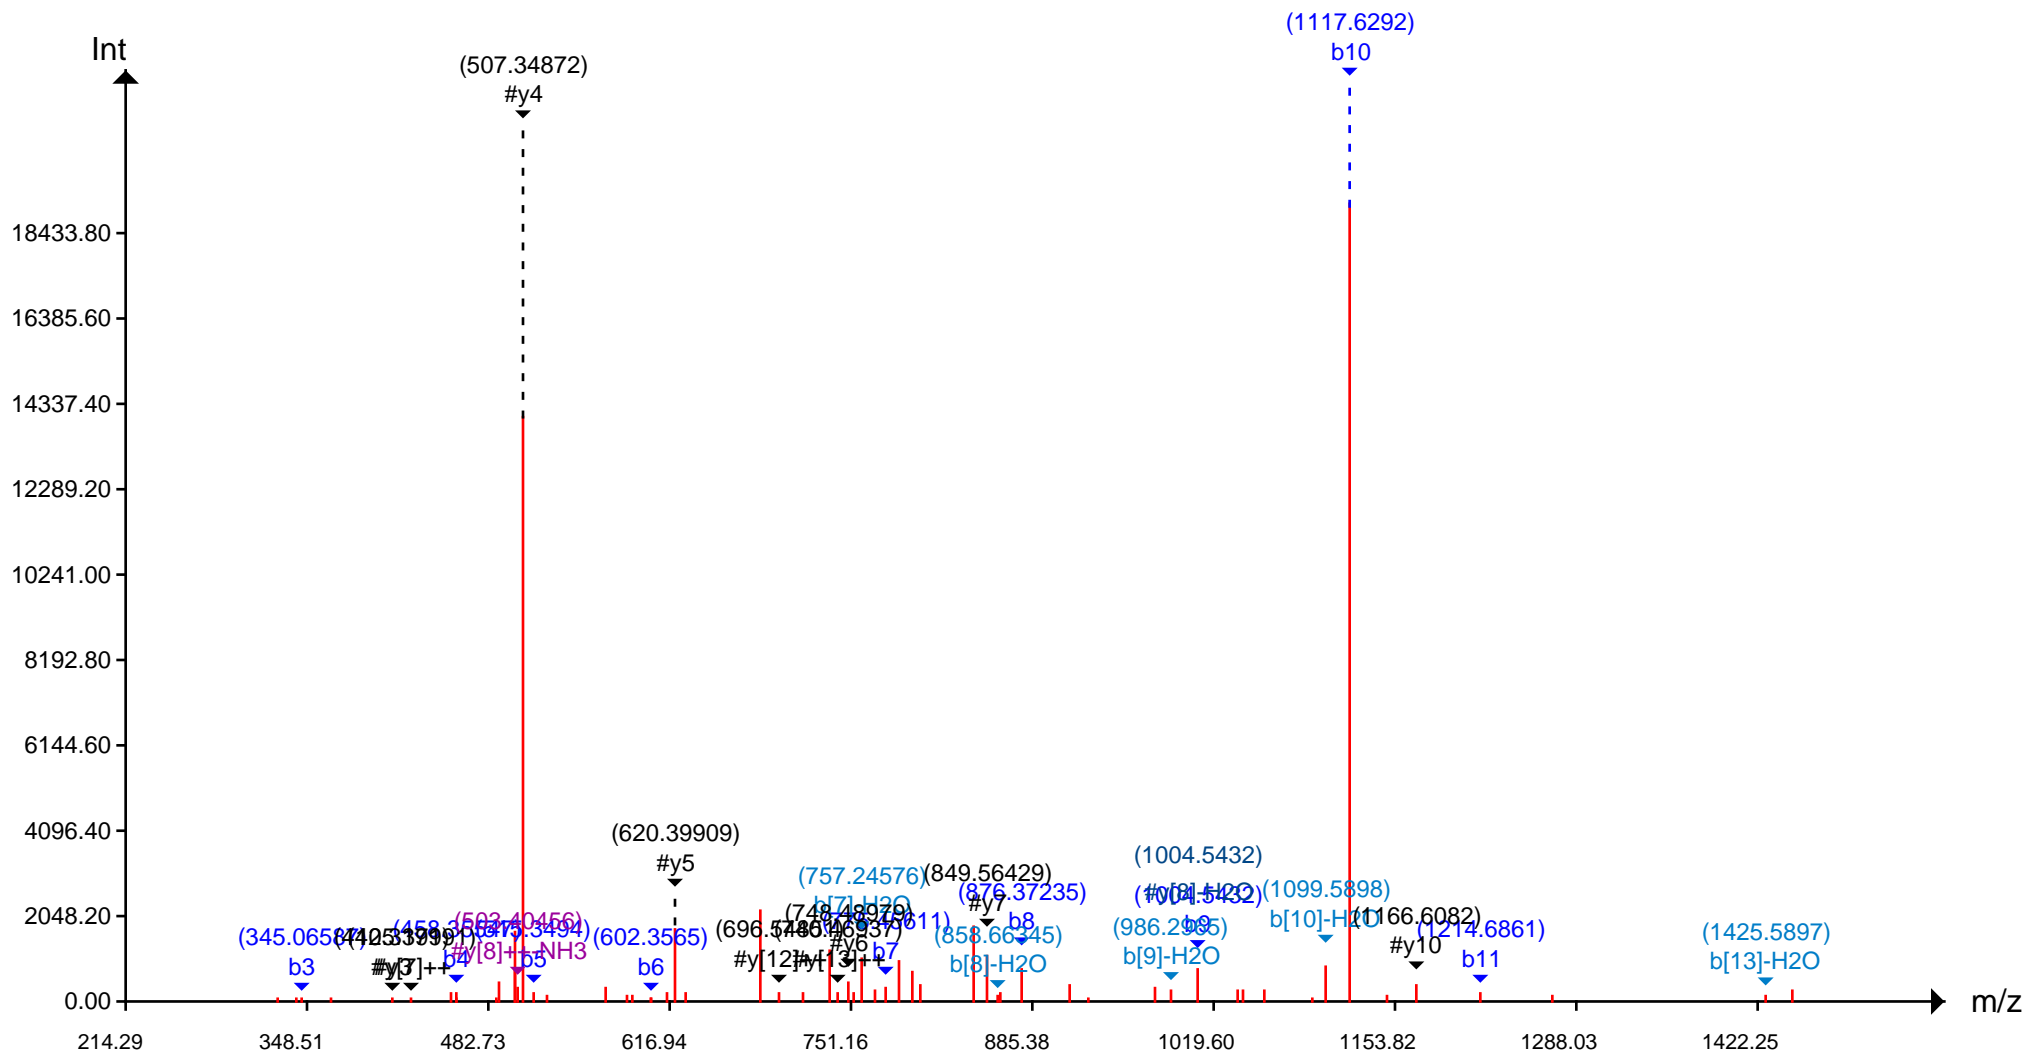

## Info

**Modified Sequence** AcD3-VSLIGSK<AcD3K\*>TQIPTQR<C13>-COOH

**Ion score** 45.81

**Protein** Q9R1P4

**Confidence level** 99.00%

**Precursor m/z** 812.48644

**Identity Threshold** 43.30

**Charge** 2+

**Mass error** 0.001358

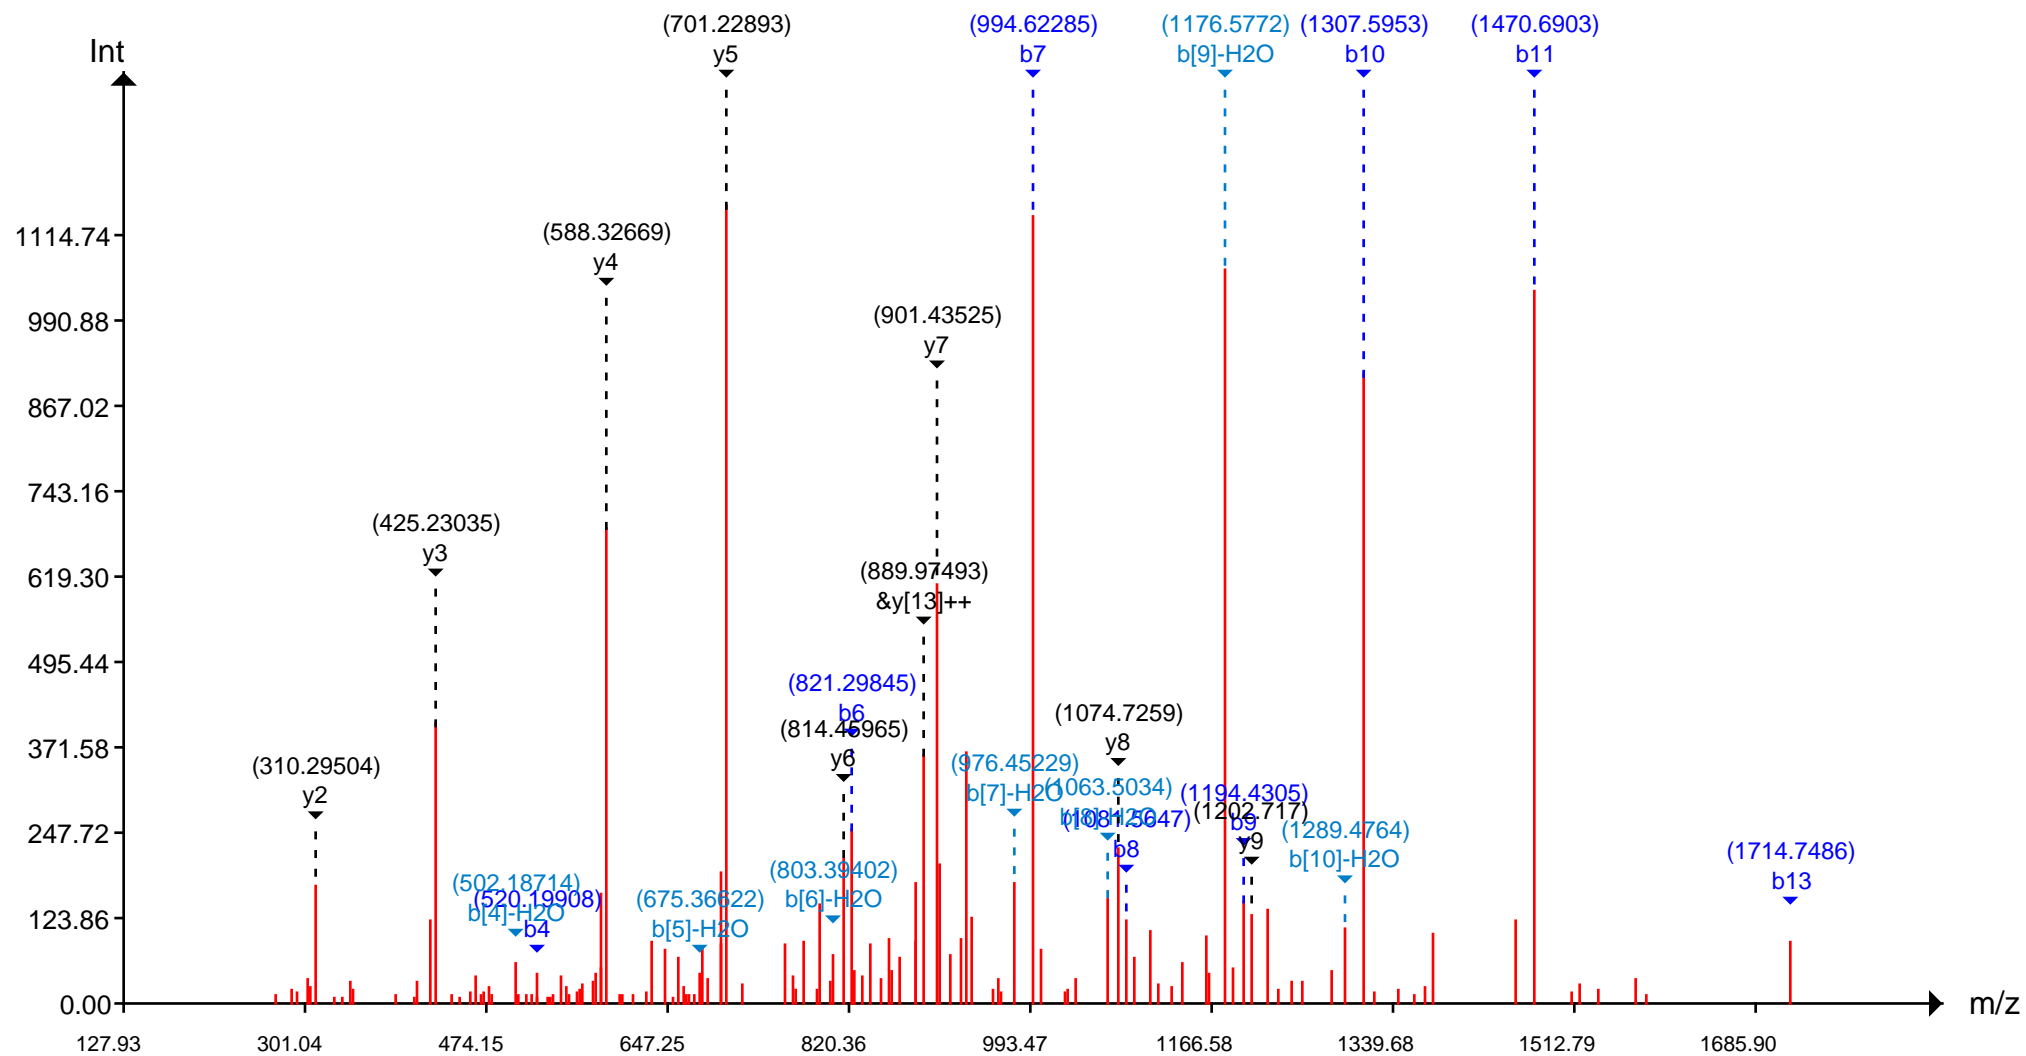

## Info

|                          |                                                       |                           |         |
|--------------------------|-------------------------------------------------------|---------------------------|---------|
| <b>Modified Sequence</b> | AcD3-ATEK<AcD3K*>K<AcD3K*>QK<AcD3K*>SILYDER<C13>-COOH | <b>Ion score</b>          | 57.34   |
| <b>Protein</b>           | P49722                                                | <b>Confidence level</b>   | 99.00%  |
| <b>Precursor m/z</b>     | 948.03468                                             | <b>Identity Threshold</b> | 46.31   |
| <b>Charge</b>            | 2+                                                    | <b>Mass error</b>         | 0.00157 |

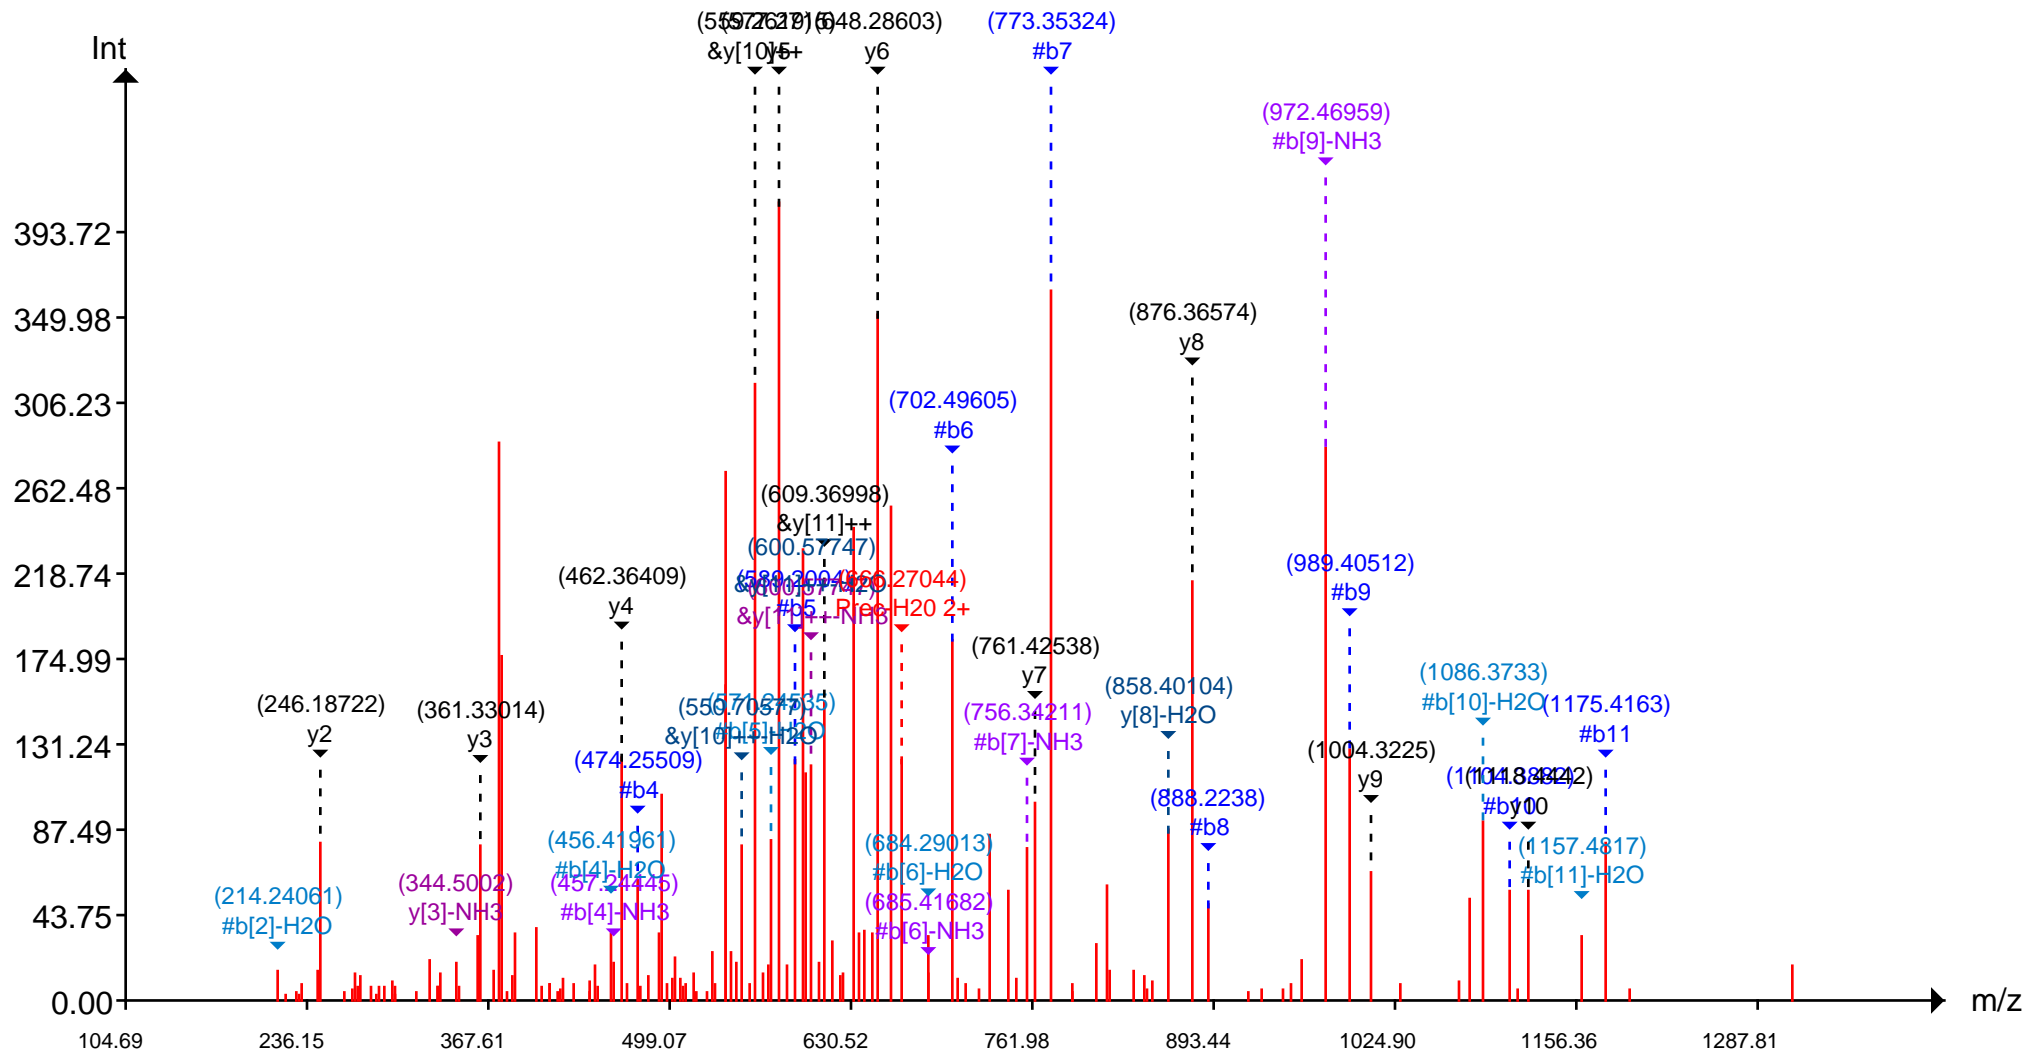

## Info

|                          |                        |                           |         |
|--------------------------|------------------------|---------------------------|---------|
| <b>Modified Sequence</b> | AcD3-SVNQLDADTDAR-COOH | <b>Ion score</b>          | 70.85   |
| <b>Protein</b>           | P10107                 | <b>Confidence level</b>   | 99.00%  |
| <b>Precursor m/z</b>     | 675.32262              | <b>Identity Threshold</b> | 46.16   |
| <b>Charge</b>            | 2+                     | <b>Mass error</b>         | 8.81E-4 |

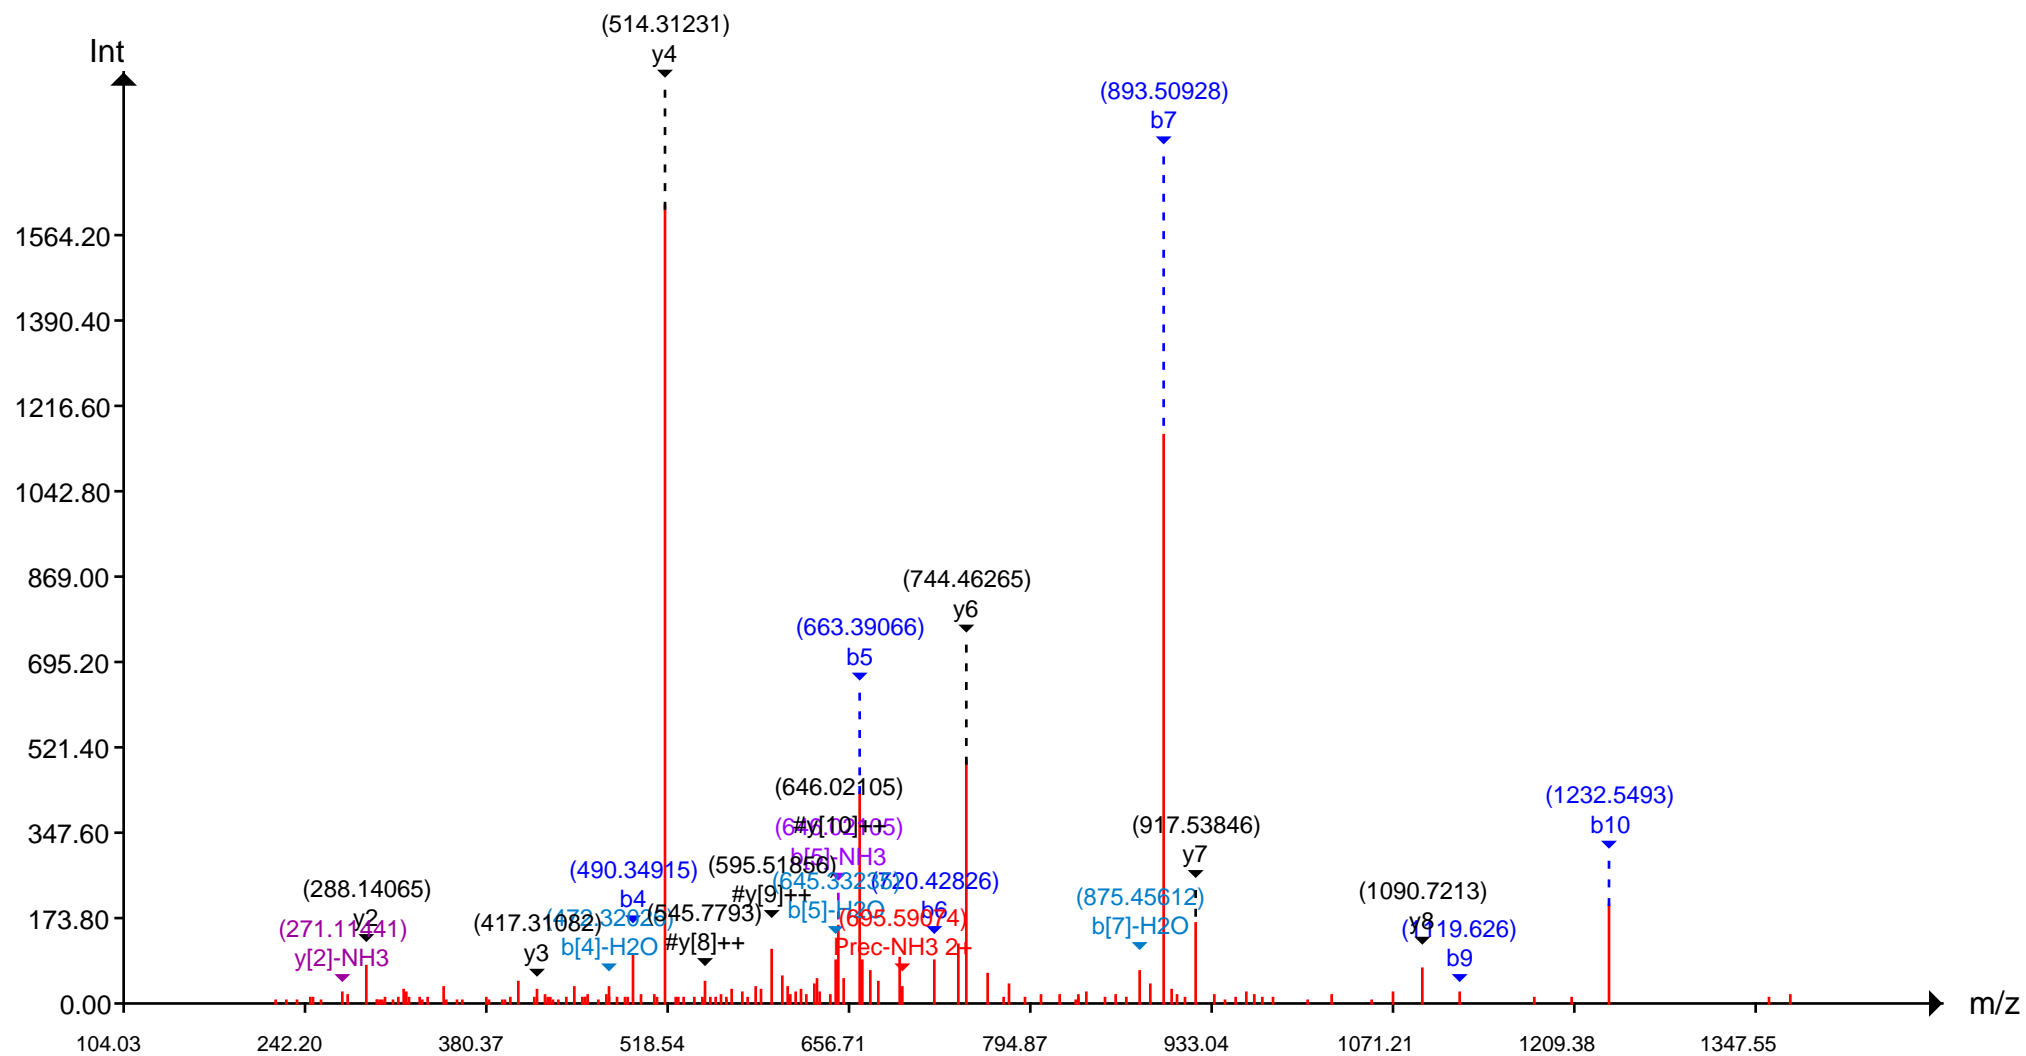

## Info

**Modified Sequence** AcD3-ATVK<AcD3K\*>K<AcD3K\*>GK<AcD3K\*>PELR-COOH

**Ion score** 40.38

**Protein** P62830

**Confidence level** 99.00%

**Precursor m/z** 703.94144

**Identity Threshold** 39.92

**Charge** 2+

**Mass error** 1.03E-4

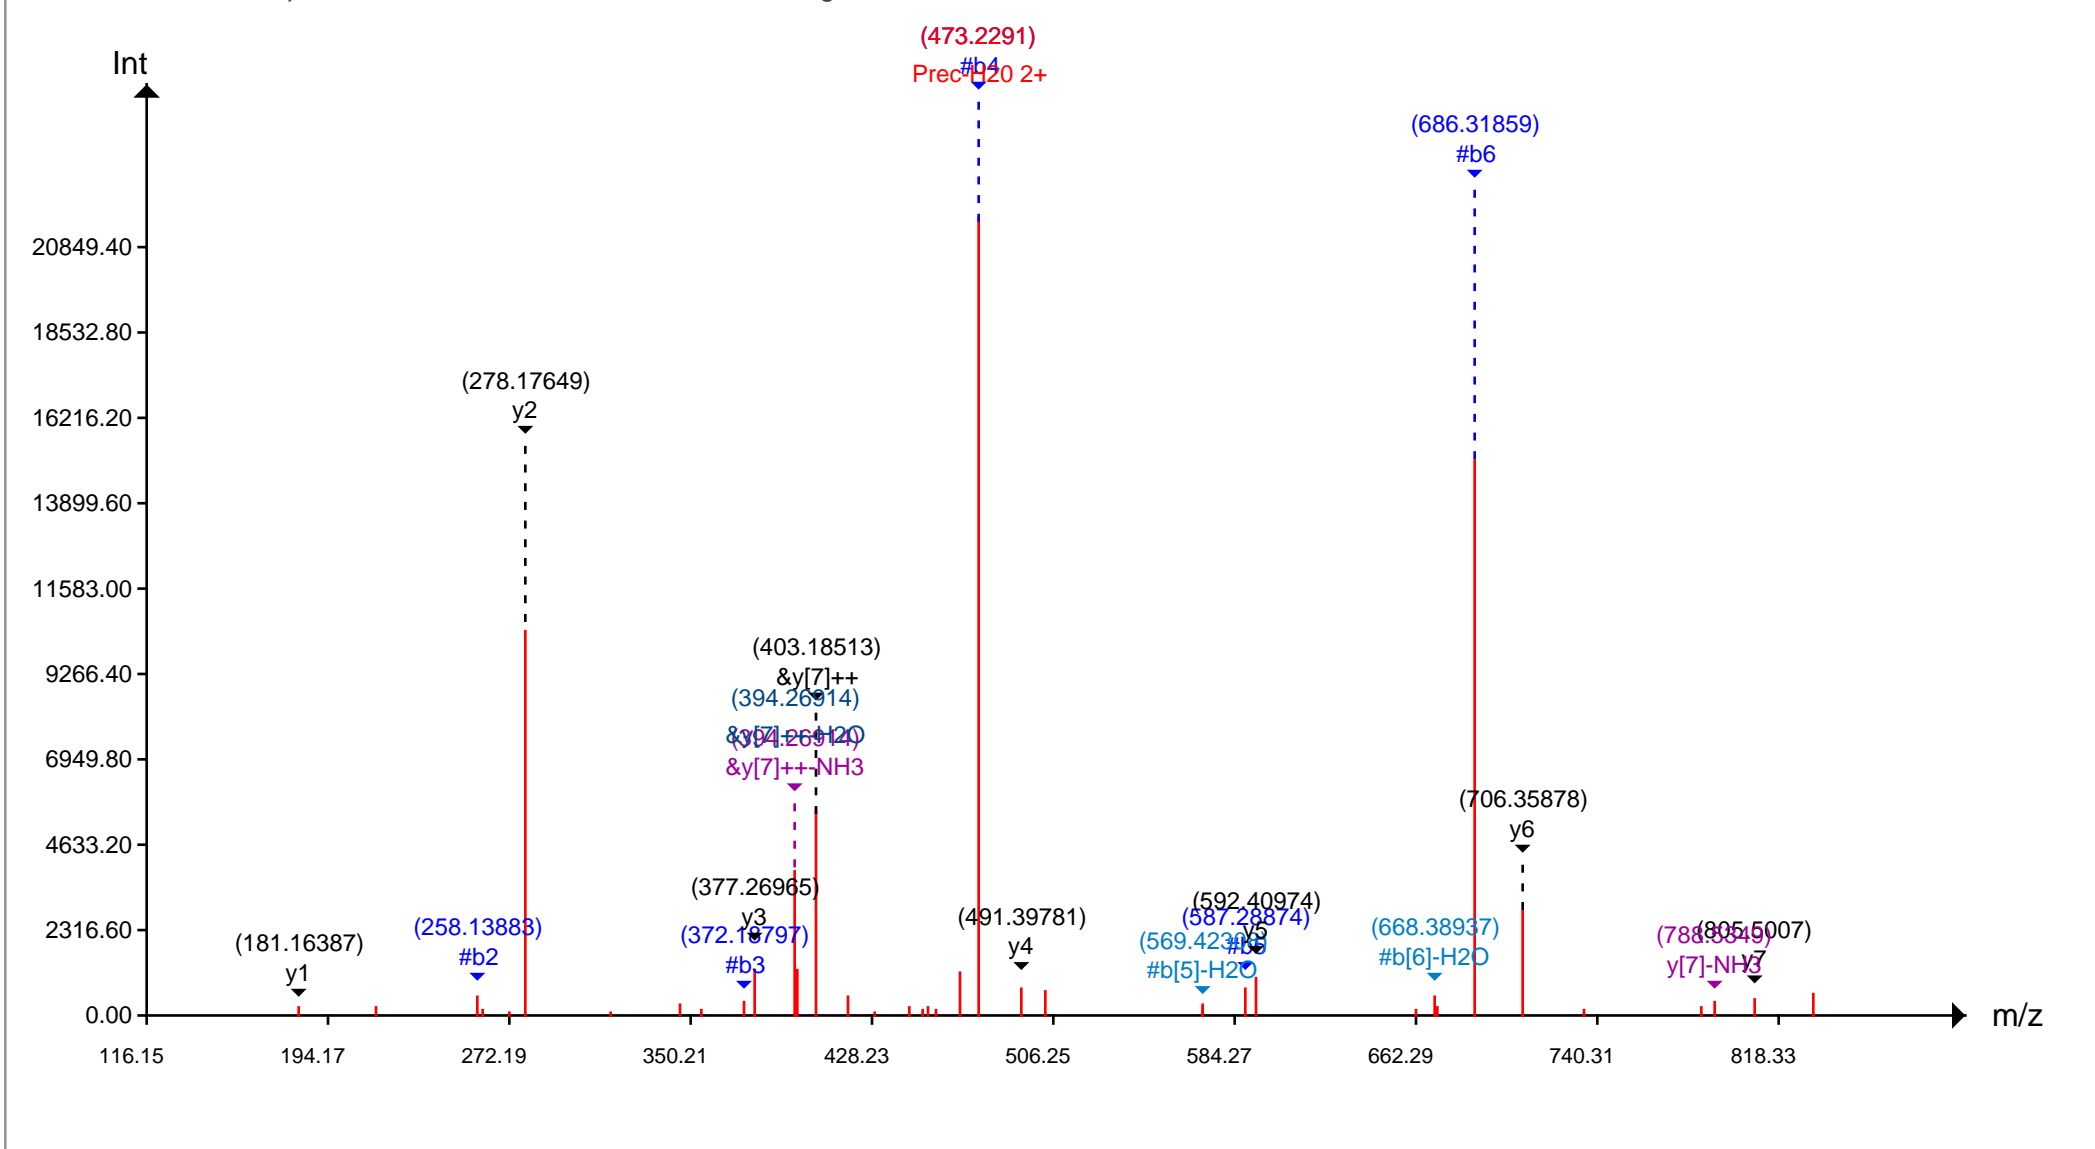

## Info

**Modified Sequence** AcD3-IVNTNVPR<C13>-COOH

**Ion score** 67.34

**Protein** P34884

**Confidence level** 99.00%

**Precursor m/z** 482.2911

**Identity Threshold** 45.65

**Charge** 2+

**Mass error** -7.42E-4

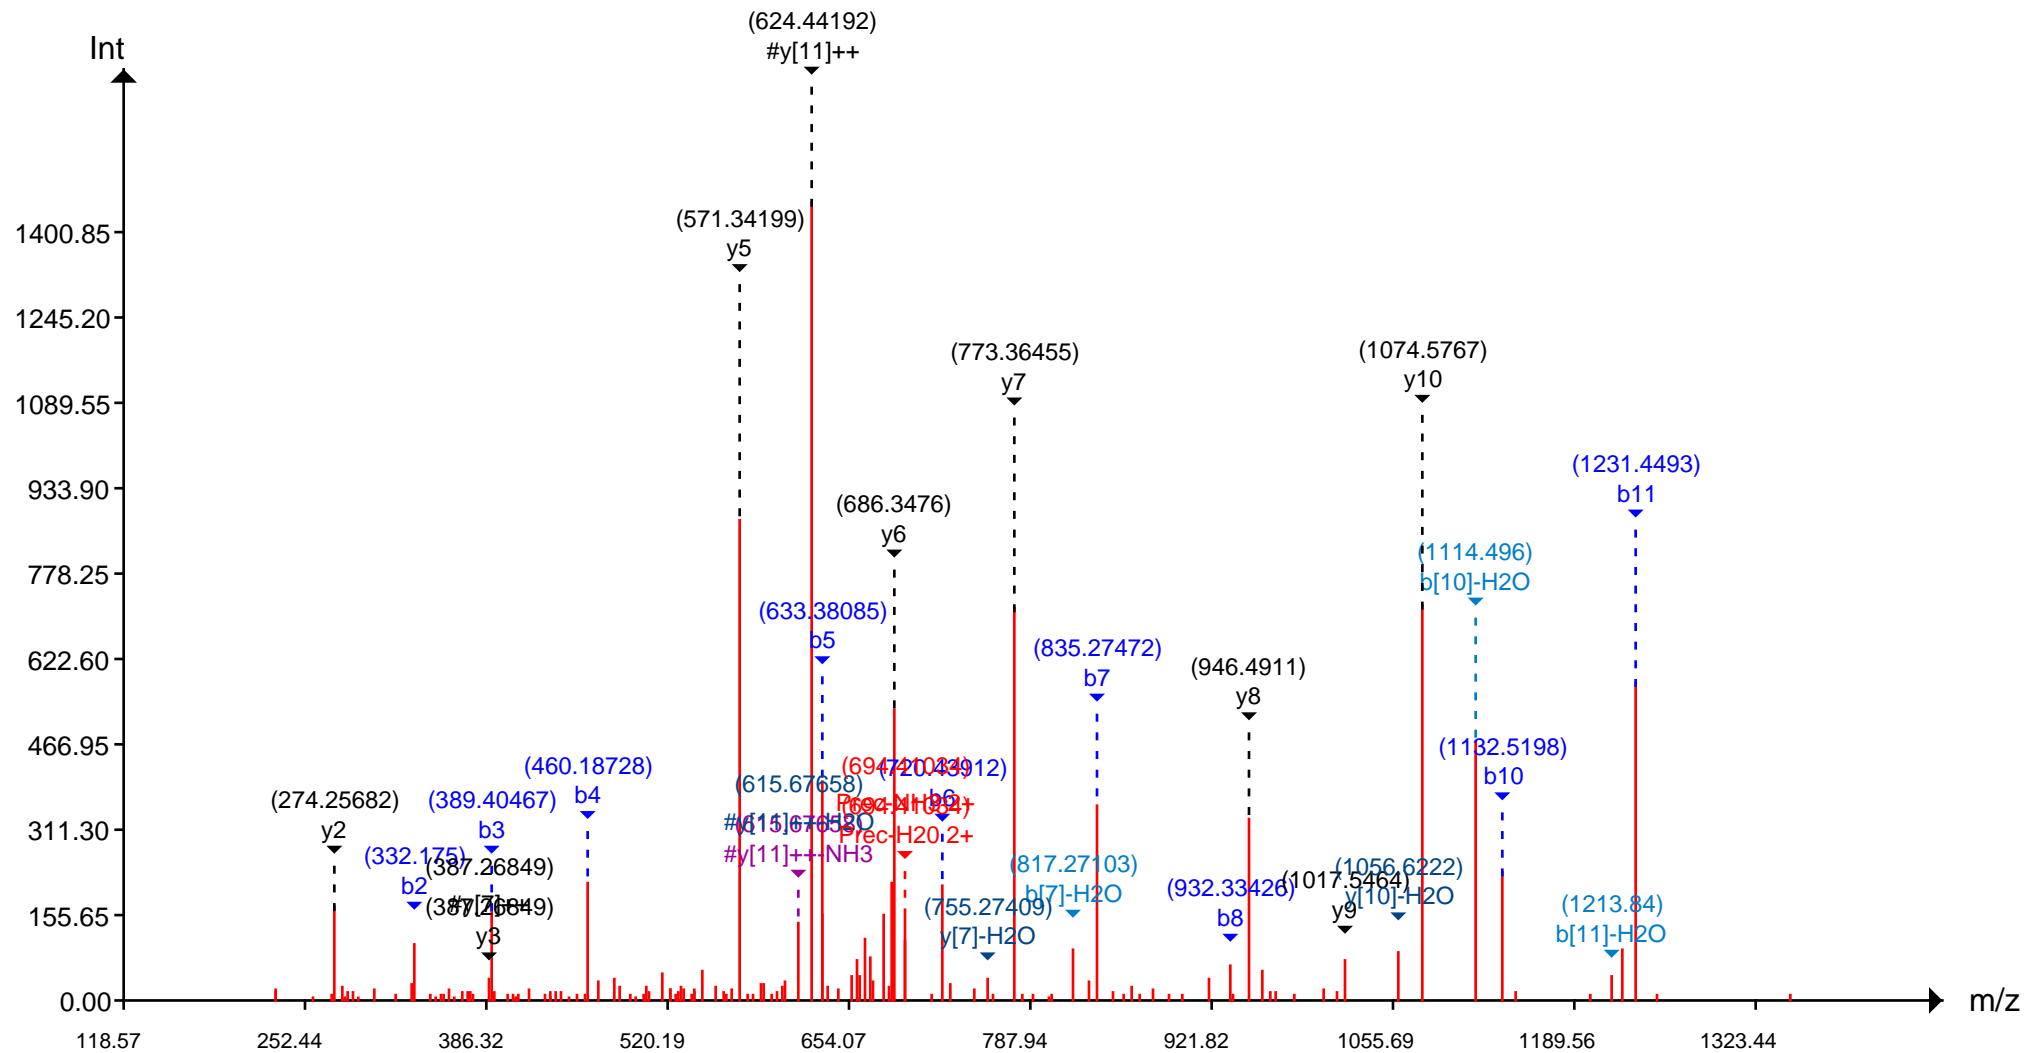

## Info

**Modified Sequence** AcD3-IK<AcD3K\*>GAK<AcD3K\*>SDPSIVR-COOH

**Ion score** 63.47

**Protein** P62748

**Confidence level** 99.00%

**Precursor m/z** 703.42212

**Identity Threshold** 43.98

**Charge** 2+

**Mass error** 0.001029



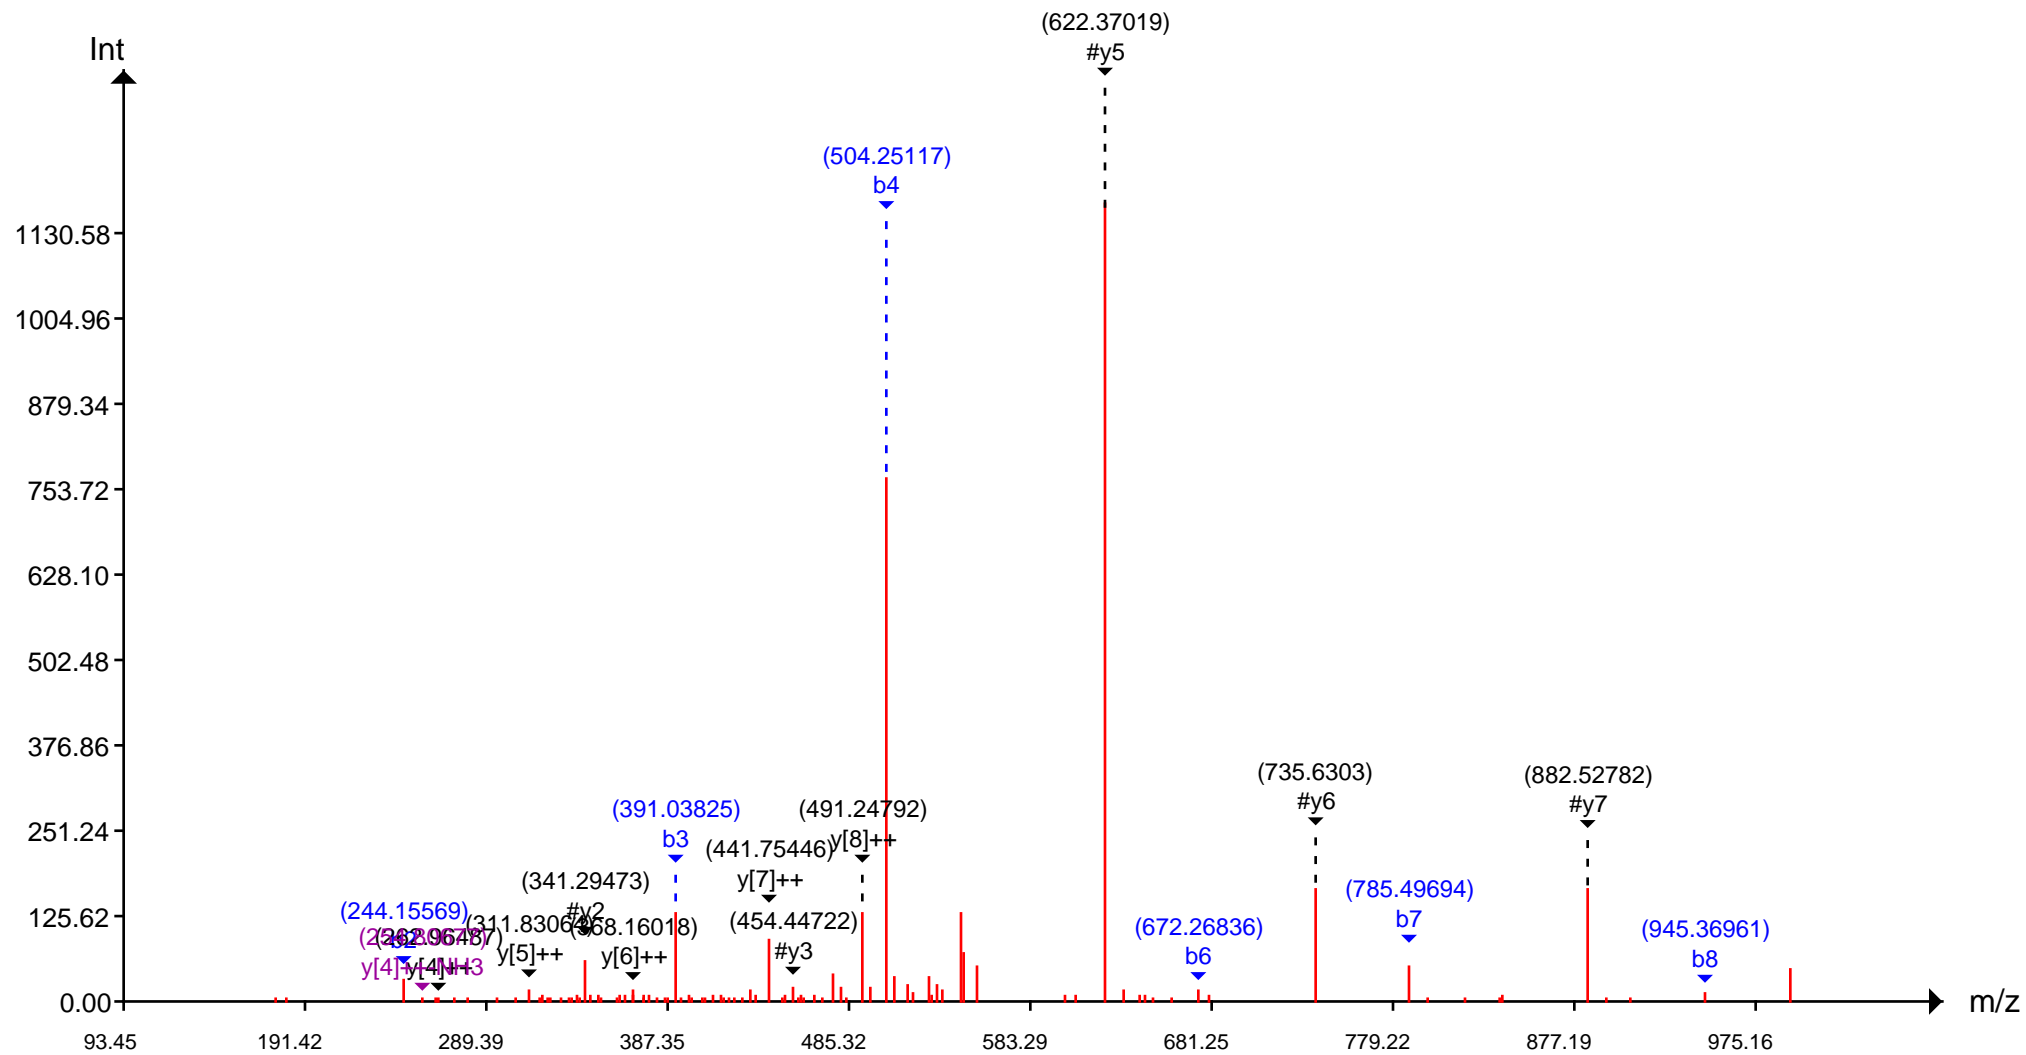

## Info

**Modified Sequence** AcD3-VVFLPALC<Cmm\*>R<C13>-COOH

**Ion score** 50.57

**Protein** P12970

**Confidence level** 99.00%

**Precursor m/z** 563.33507

**Identity Threshold** 45.32

**Charge** 2+

**Mass error** 4.82E-4

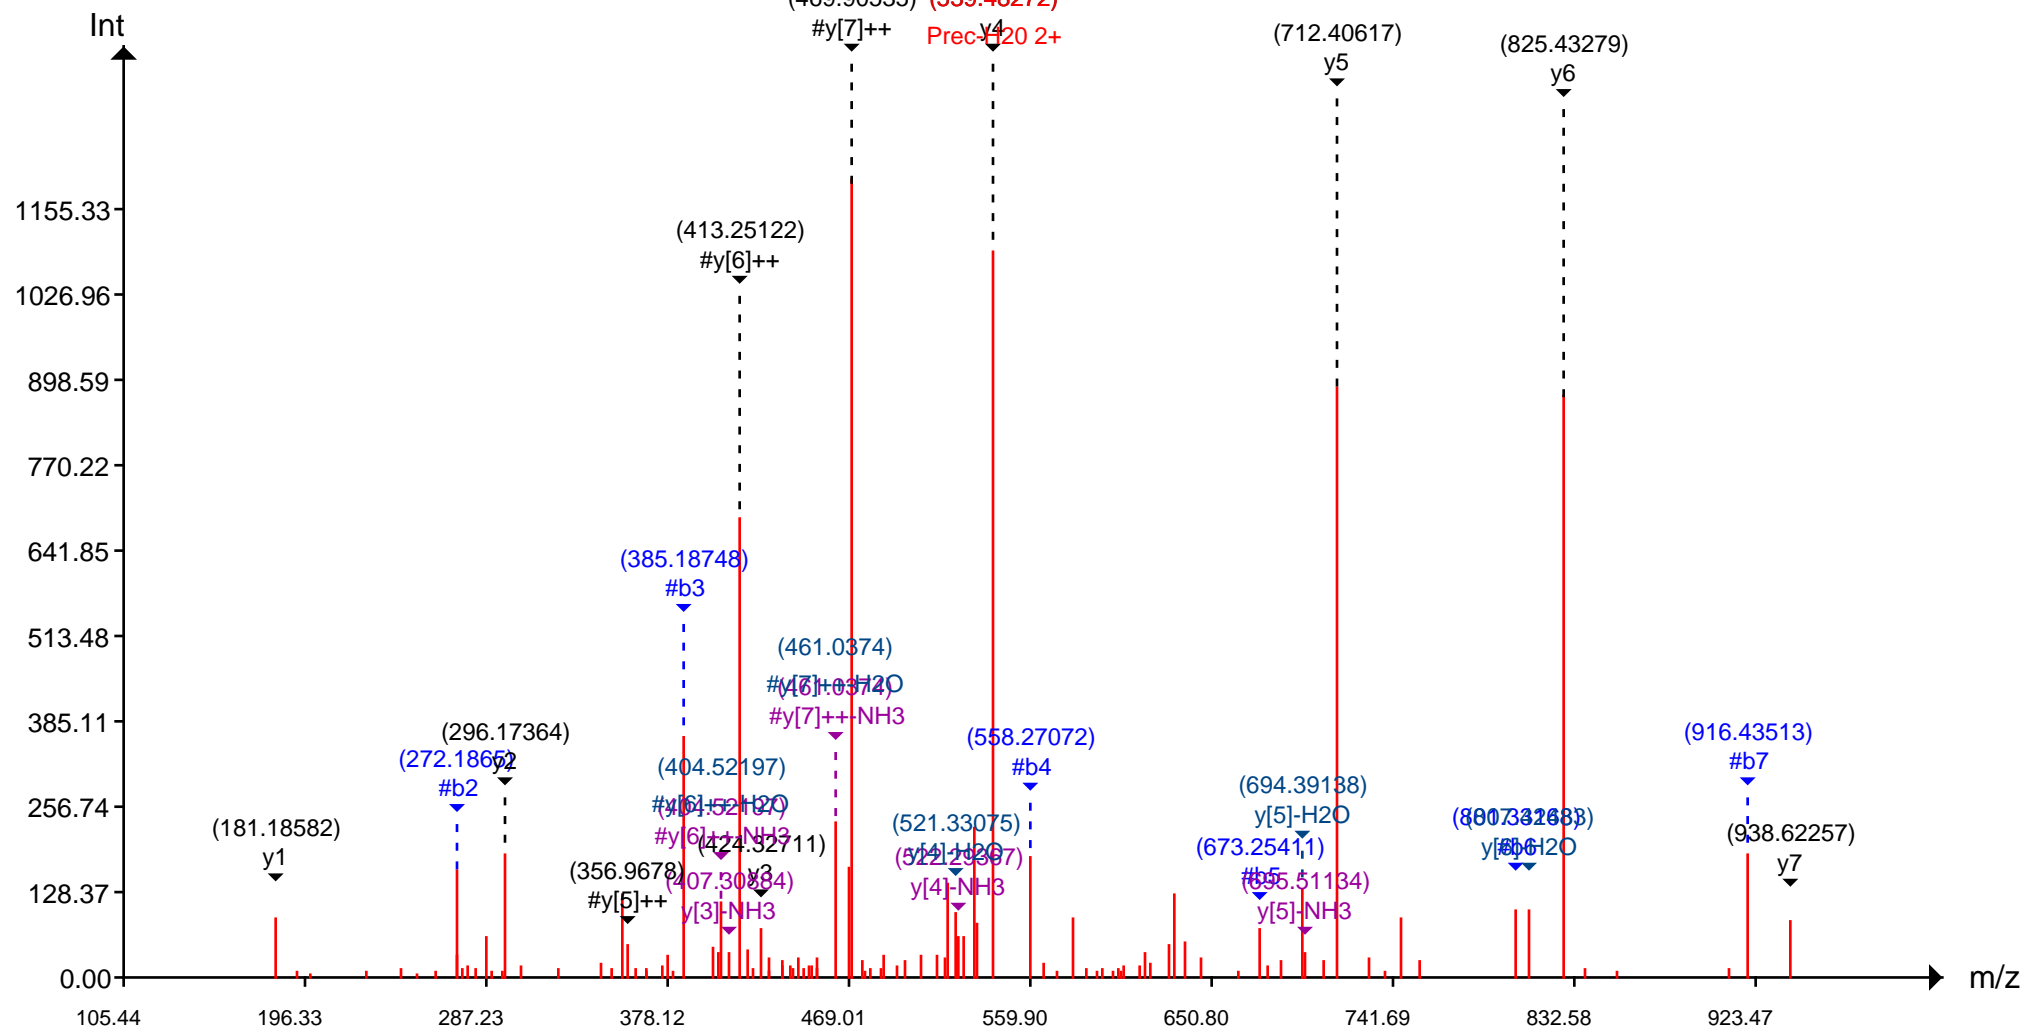

## Info

|                          |                                 |                           |        |
|--------------------------|---------------------------------|---------------------------|--------|
| <b>Modified Sequence</b> | AcD3-LIIK<AcD3K*>DQDR<C13>-COOH | <b>Ion score</b>          | 56.05  |
| <b>Protein</b>           | P80316                          | <b>Confidence level</b>   | 99.00% |
| <b>Precursor m/z</b>     | 548.83273                       | <b>Identity Threshold</b> | 44.82  |
| <b>Charge</b>            | 2+                              | <b>Mass error</b>         | 7.0E-4 |

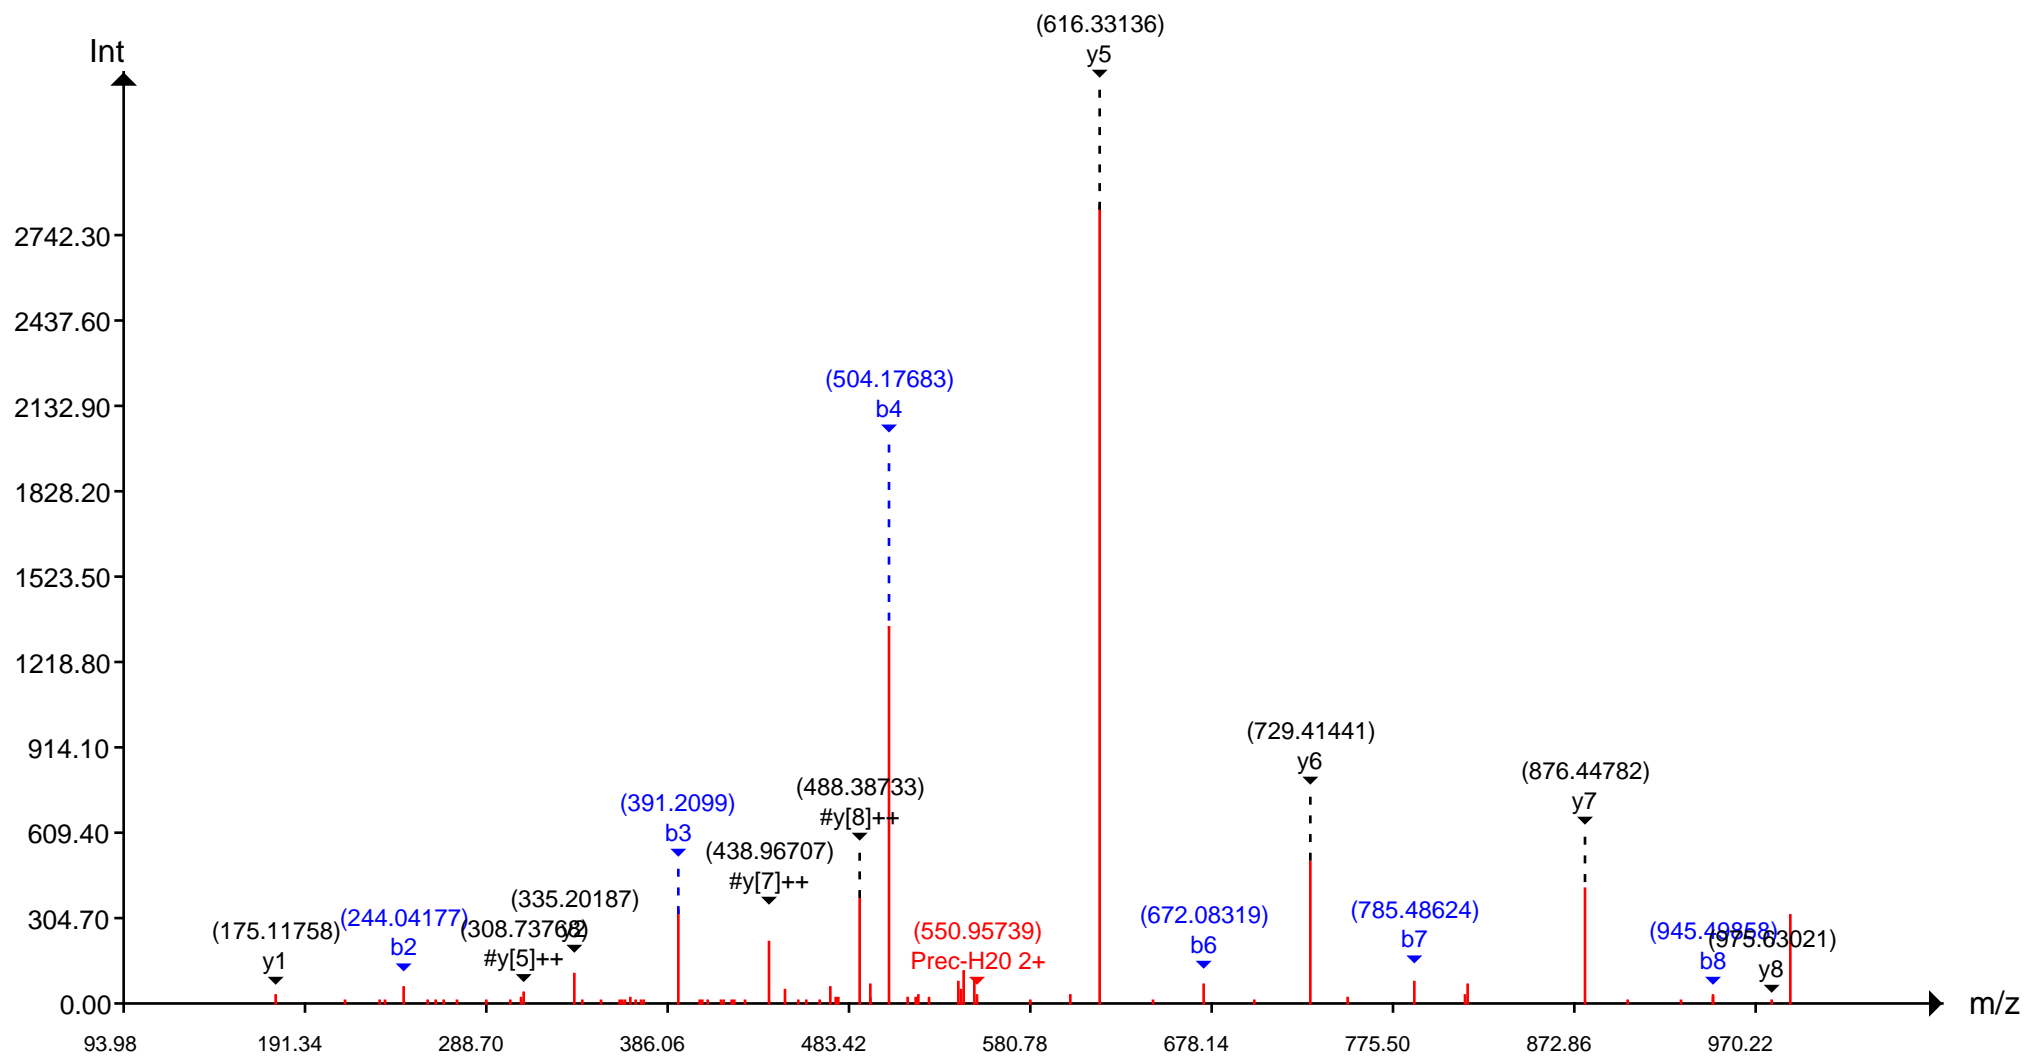

## Info

|                          |                           |                           |           |
|--------------------------|---------------------------|---------------------------|-----------|
| <b>Modified Sequence</b> | AcD3-VVFLPALC<Cmm*>R-COOH | <b>Ion score</b>          | 58.9      |
| <b>Protein</b>           | P12970                    | <b>Confidence level</b>   | 99.00%    |
| <b>Precursor m/z</b>     | 560.32408                 | <b>Identity Threshold</b> | 46.55     |
| <b>Charge</b>            | 2+                        | <b>Mass error</b>         | -0.001356 |

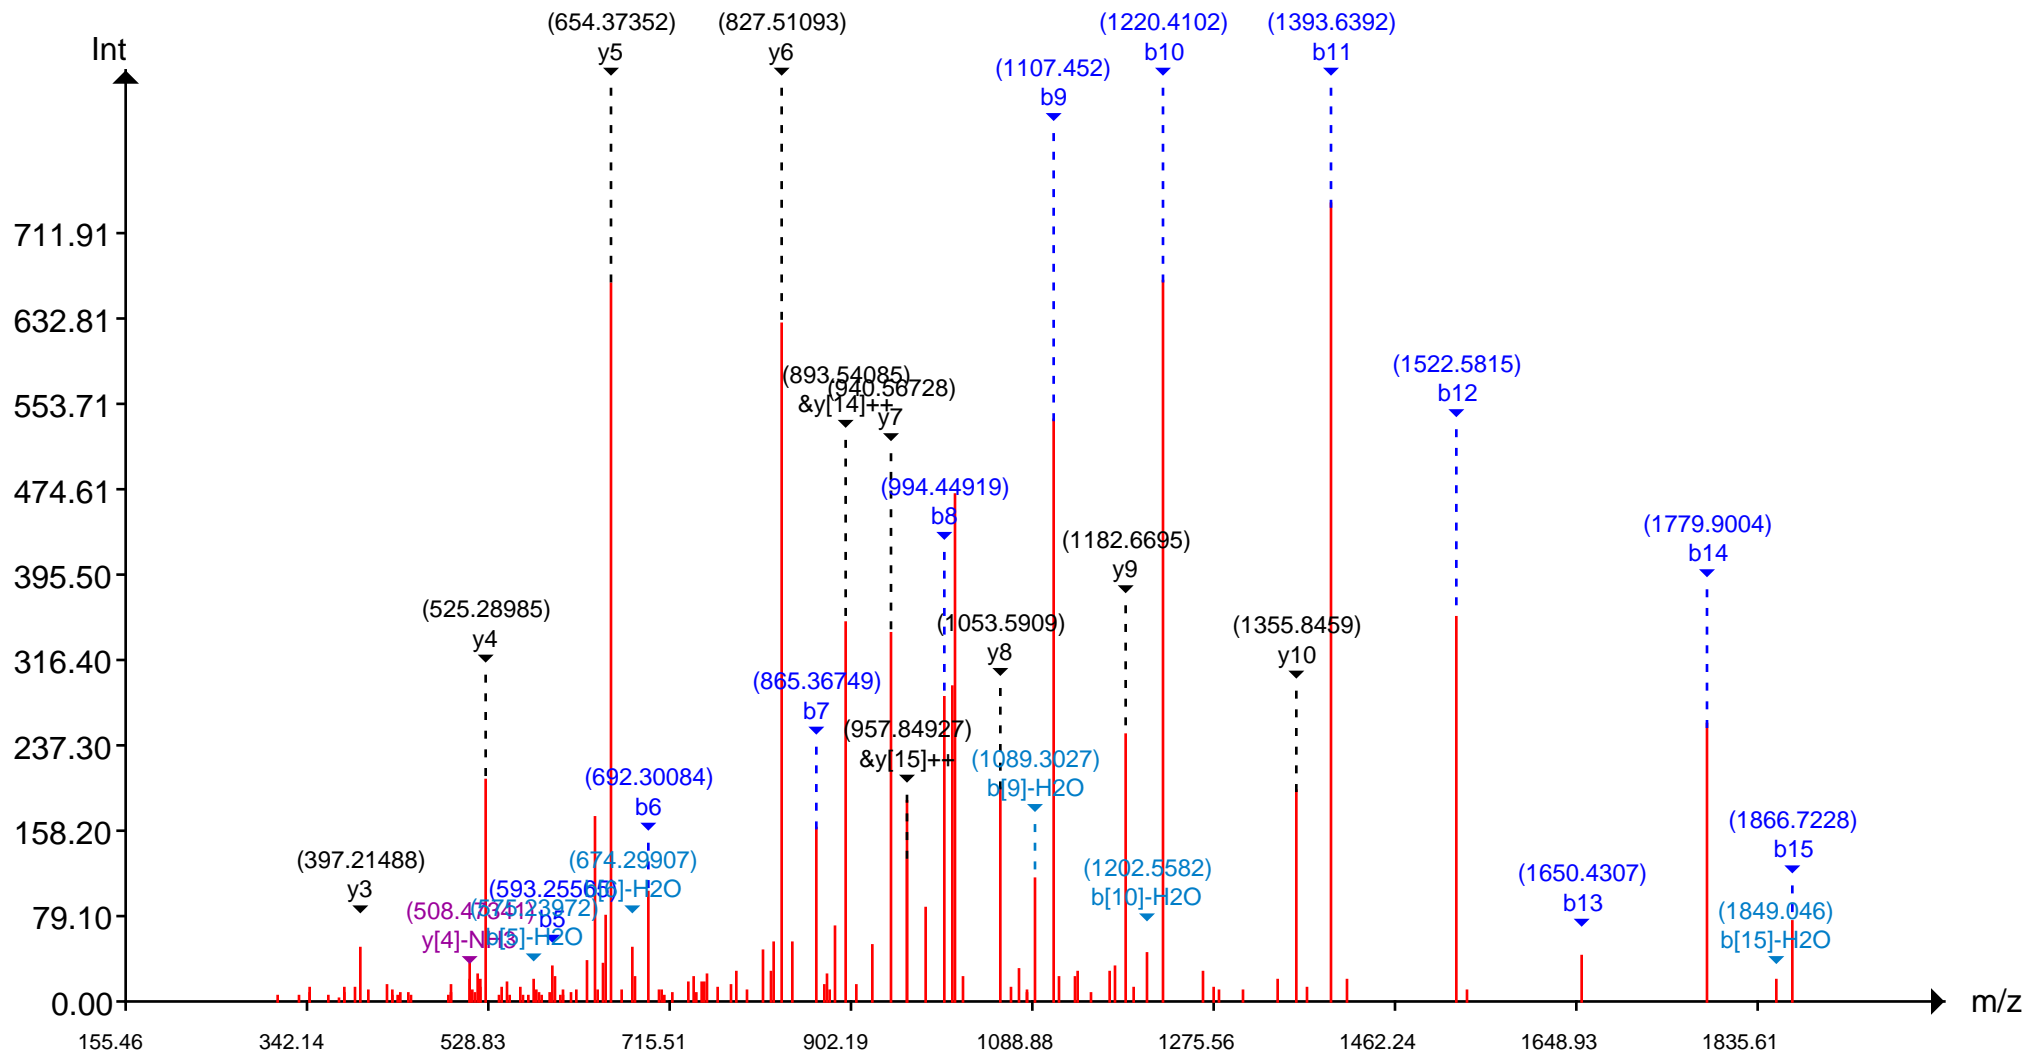

## Info

|                          |                                                       |                           |          |
|--------------------------|-------------------------------------------------------|---------------------------|----------|
| <b>Modified Sequence</b> | AcD3-SESPM<Mox*>VK<AcD3K*>EILK<AcD3K*>EQESR<C13>-COOH | <b>Ion score</b>          | 76.31    |
| <b>Protein</b>           | Q99LX0                                                | <b>Confidence level</b>   | 99.00%   |
| <b>Precursor m/z</b>     | 1024.0383                                             | <b>Identity Threshold</b> | 48.04    |
| <b>Charge</b>            | 2+                                                    | <b>Mass error</b>         | 0.002417 |

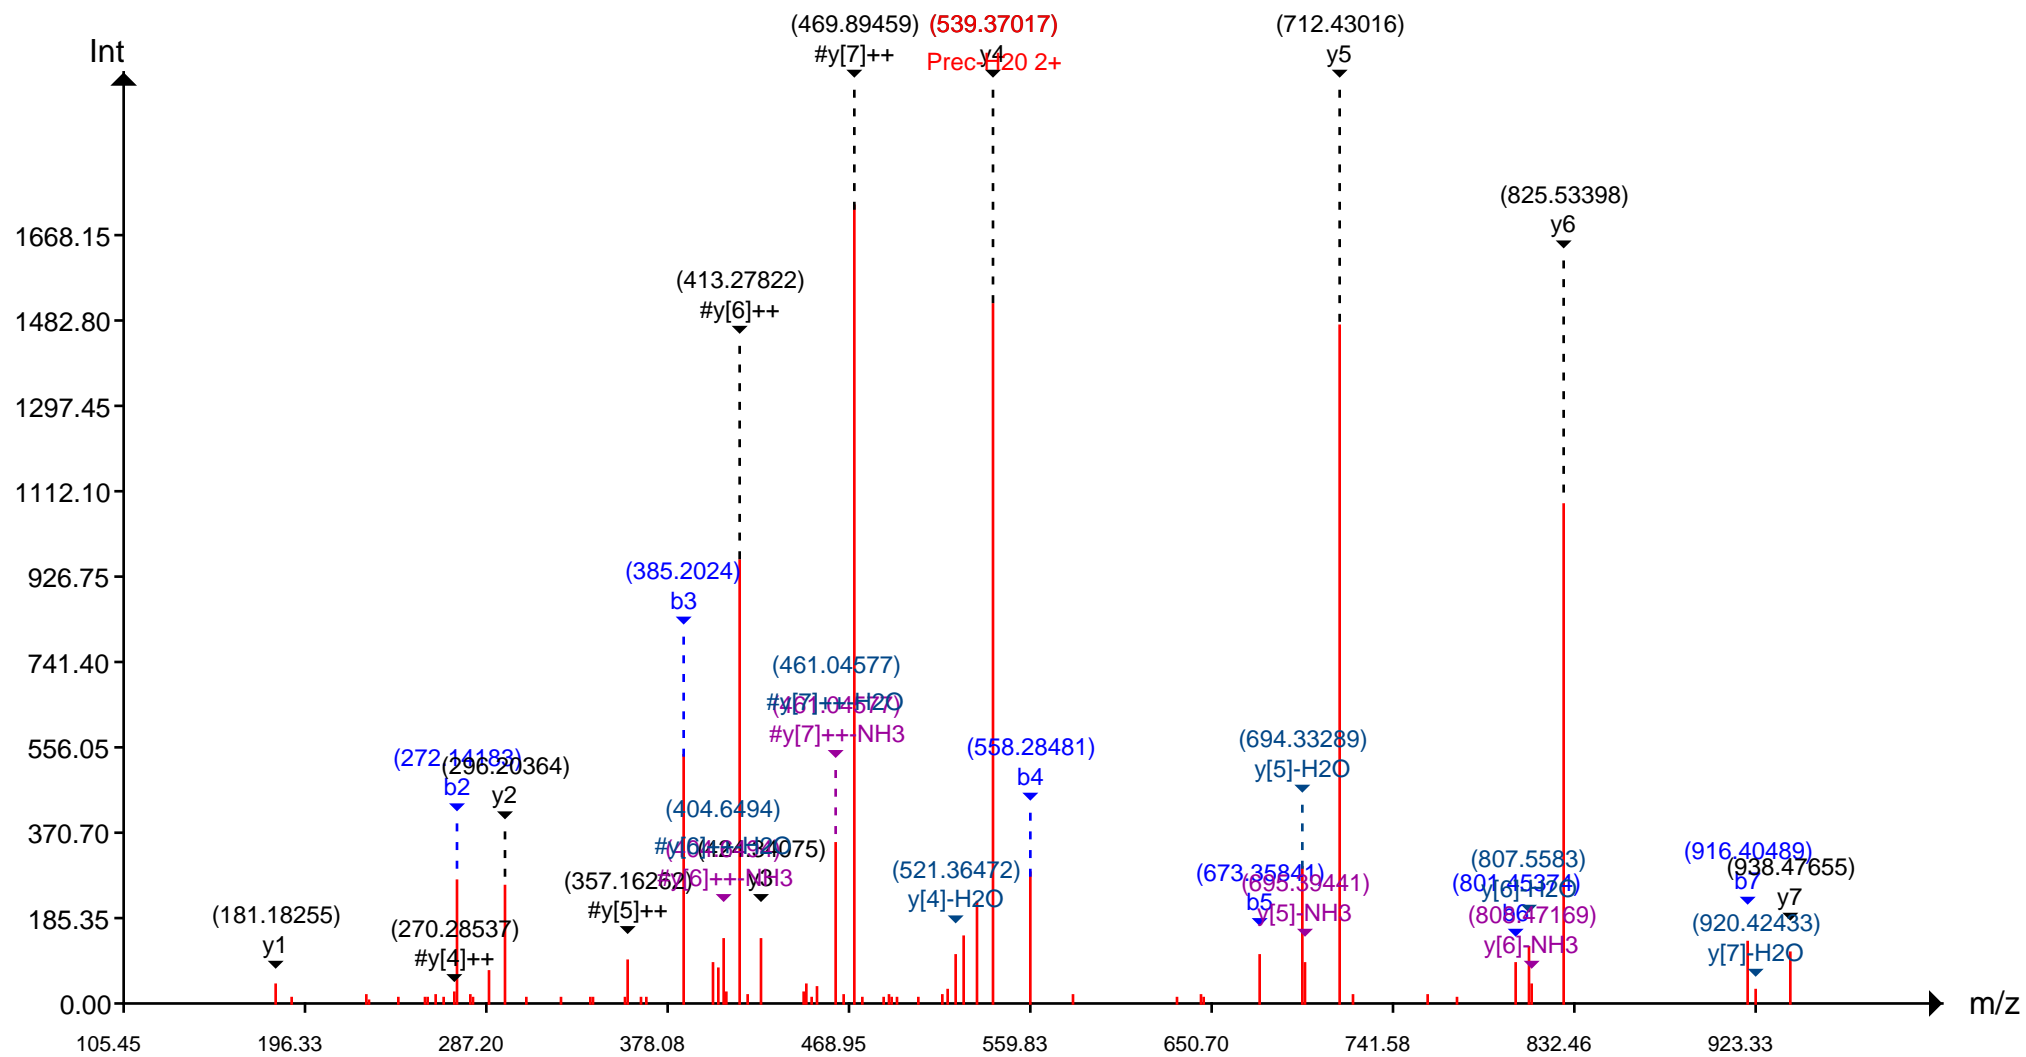

## Info

**Modified Sequence** AcD3-LIIK<AcD3K\*>DQDR<C13>-COOH

**Ion score** 60.88

**Protein** P80316

**Confidence level** 99.00%

**Precursor m/z** 548.83231

**Identity Threshold** 44.61

**Charge** 2+

**Mass error** -1.4E-4

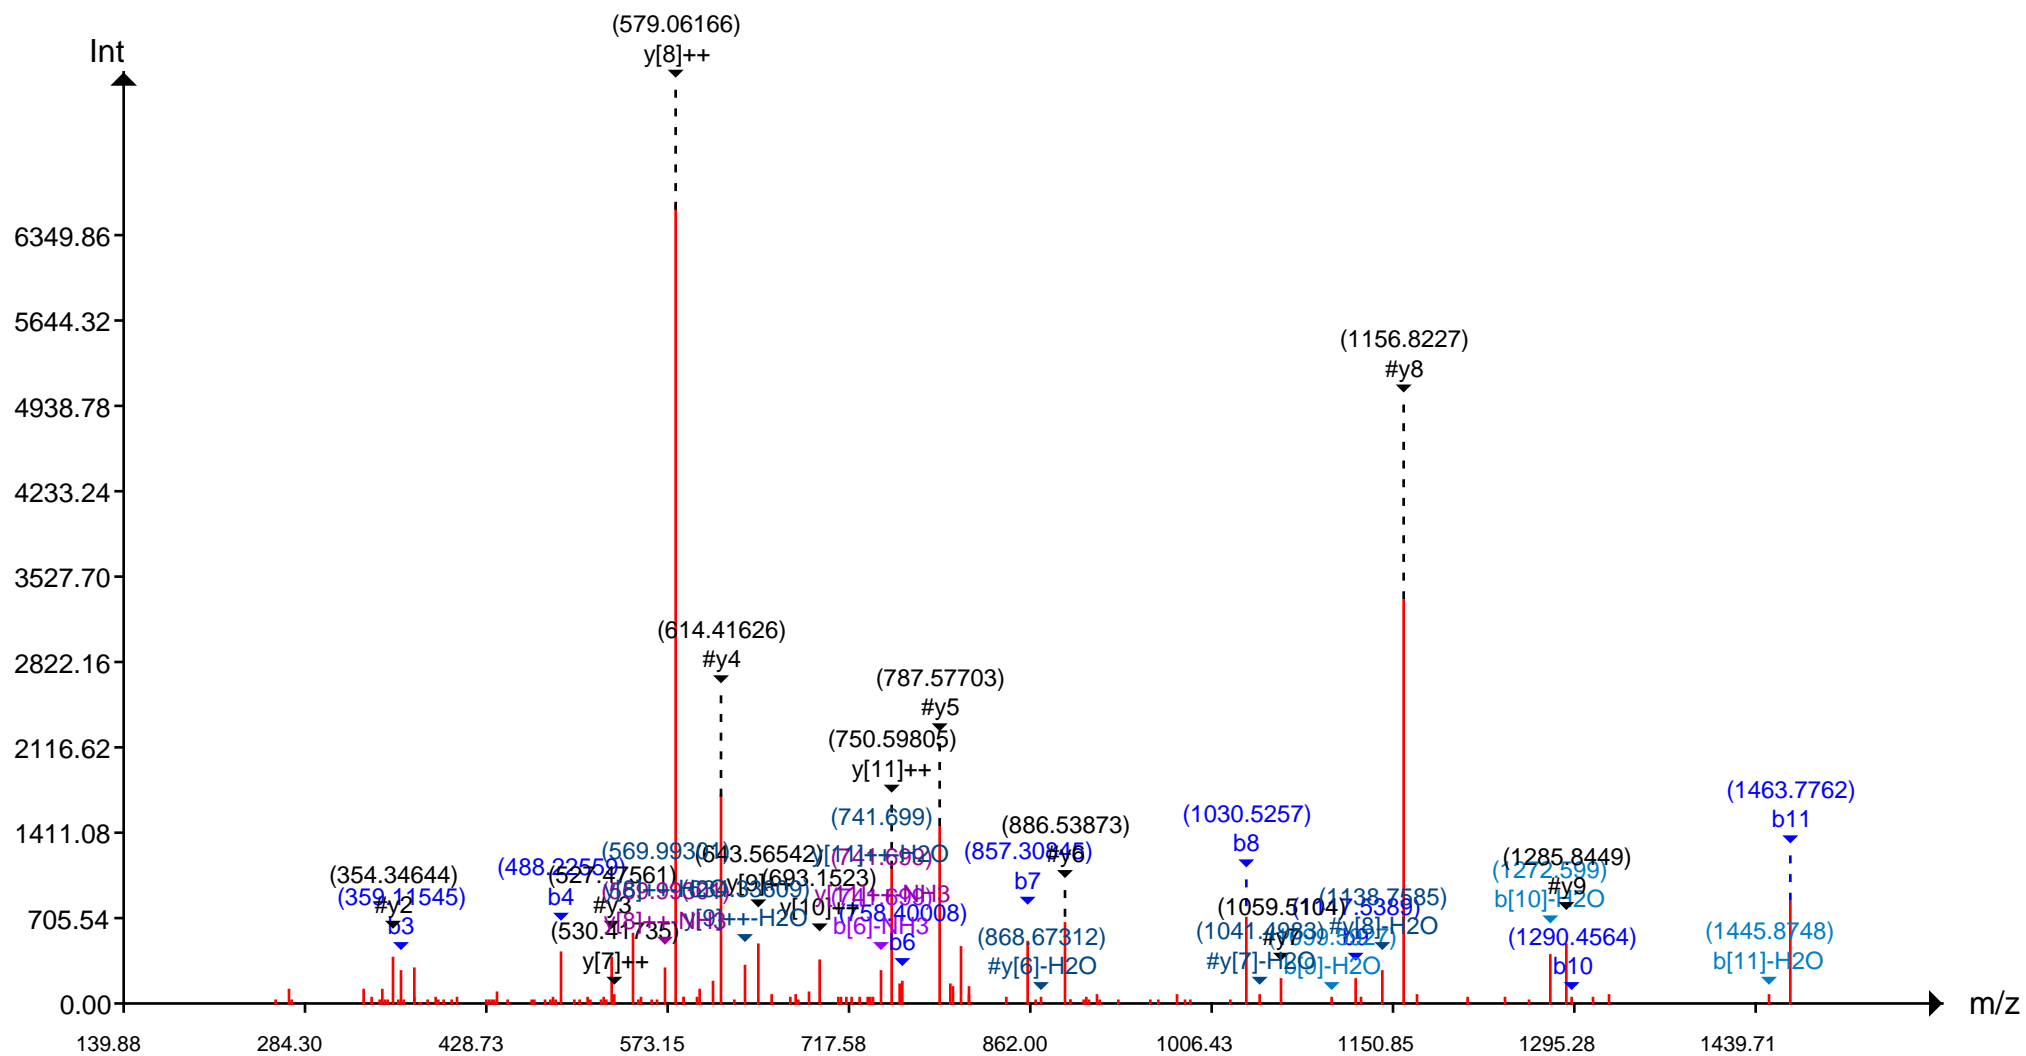

## Info

|                          |                                                             |                           |          |
|--------------------------|-------------------------------------------------------------|---------------------------|----------|
| <b>Modified Sequence</b> | AcD3-VDVEPK<AcD3K*>VK<AcD3K*>SK<AcD3K*>K<AcD3K*>R<C13>-COOH | <b>Ion score</b>          | 55.81    |
| <b>Protein</b>           | P62315                                                      | <b>Confidence level</b>   | 99.00%   |
| <b>Precursor m/z</b>     | 822.51699                                                   | <b>Identity Threshold</b> | 38.37    |
| <b>Charge</b>            | 2+                                                          | <b>Mass error</b>         | 0.001209 |

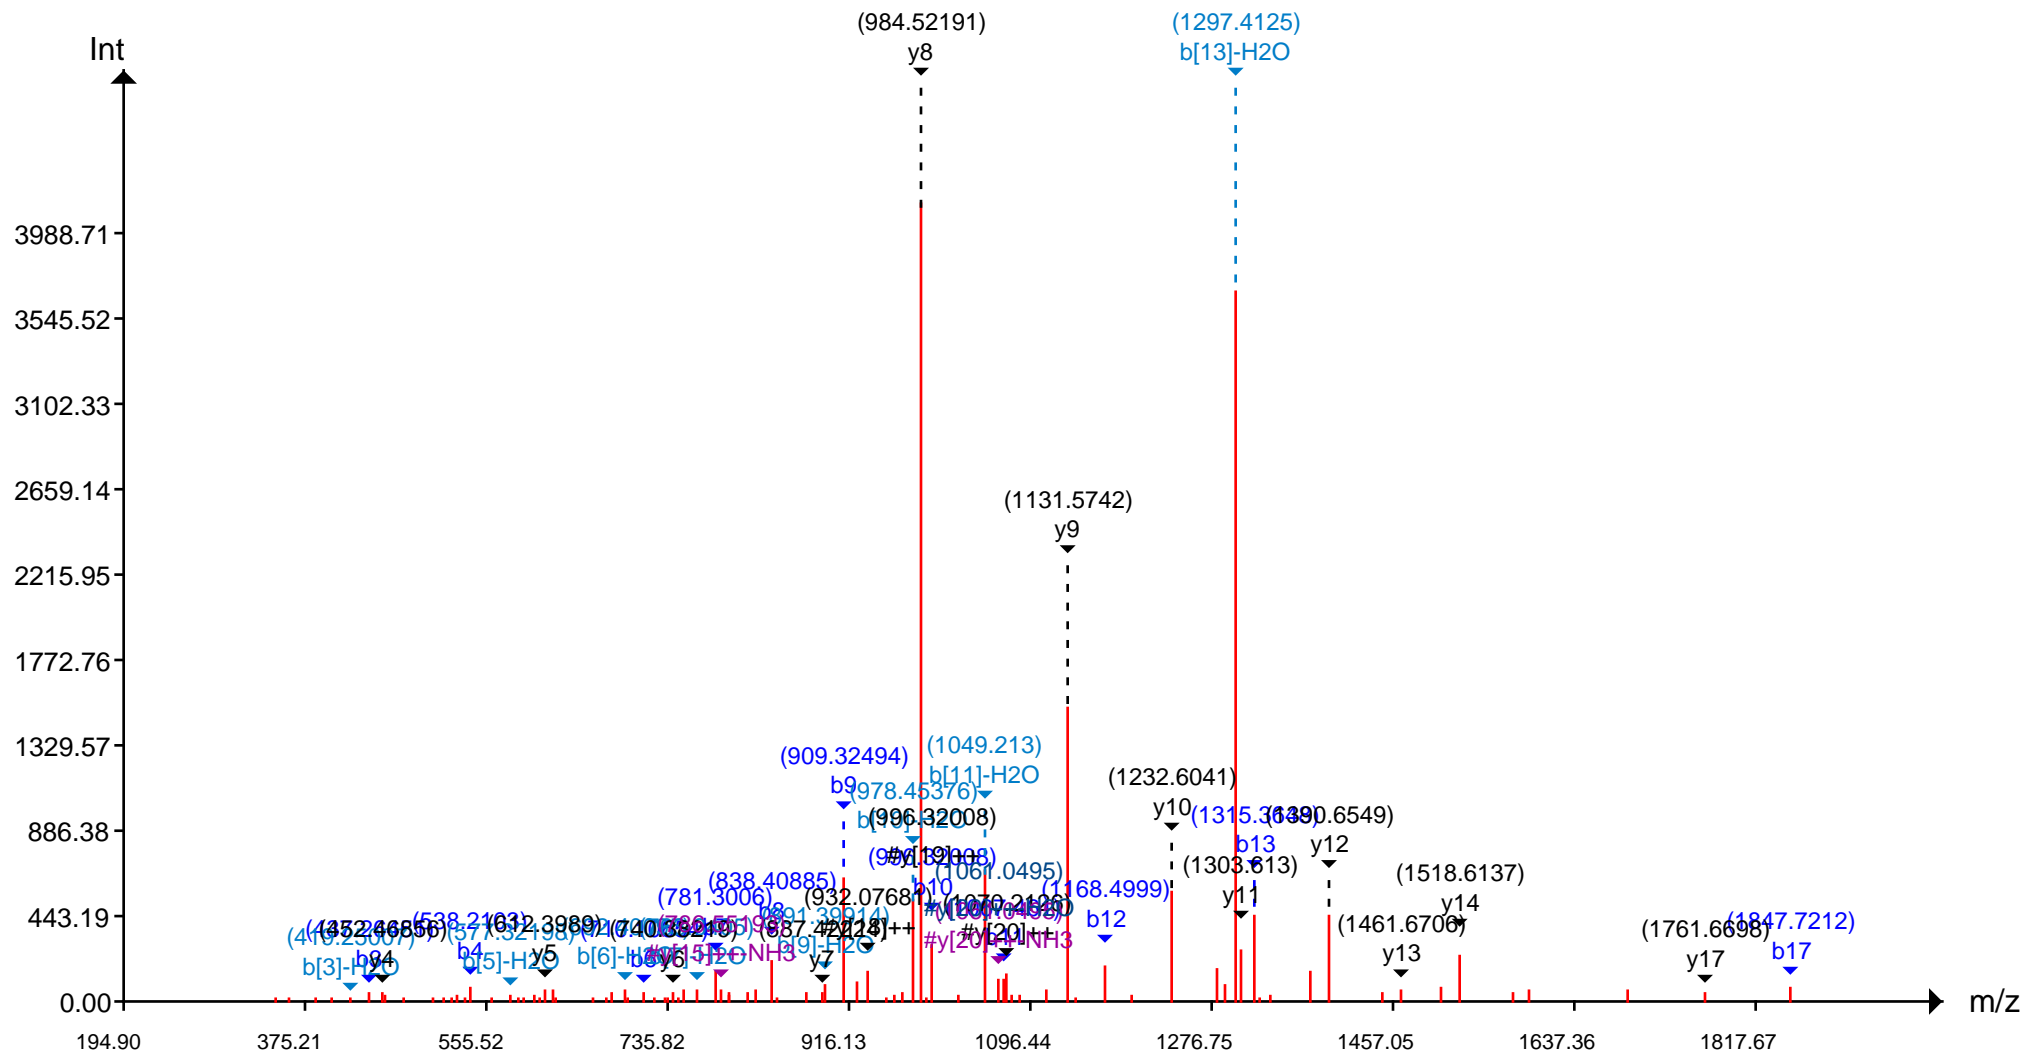

## Info

|                          |                                                  |                           |          |
|--------------------------|--------------------------------------------------|---------------------------|----------|
| <b>Modified Sequence</b> | AcD3-DFETGDAGASATFPM<Mox*>QC<Cmm*>SALR<C13>-COOH | <b>Ion score</b>          | 90.47    |
| <b>Protein</b>           | P63242                                           | <b>Confidence level</b>   | 99.00%   |
| <b>Precursor m/z</b>     | 1150.012                                         | <b>Identity Threshold</b> | 42.62    |
| <b>Charge</b>            | 2+                                               | <b>Mass error</b>         | 0.002673 |

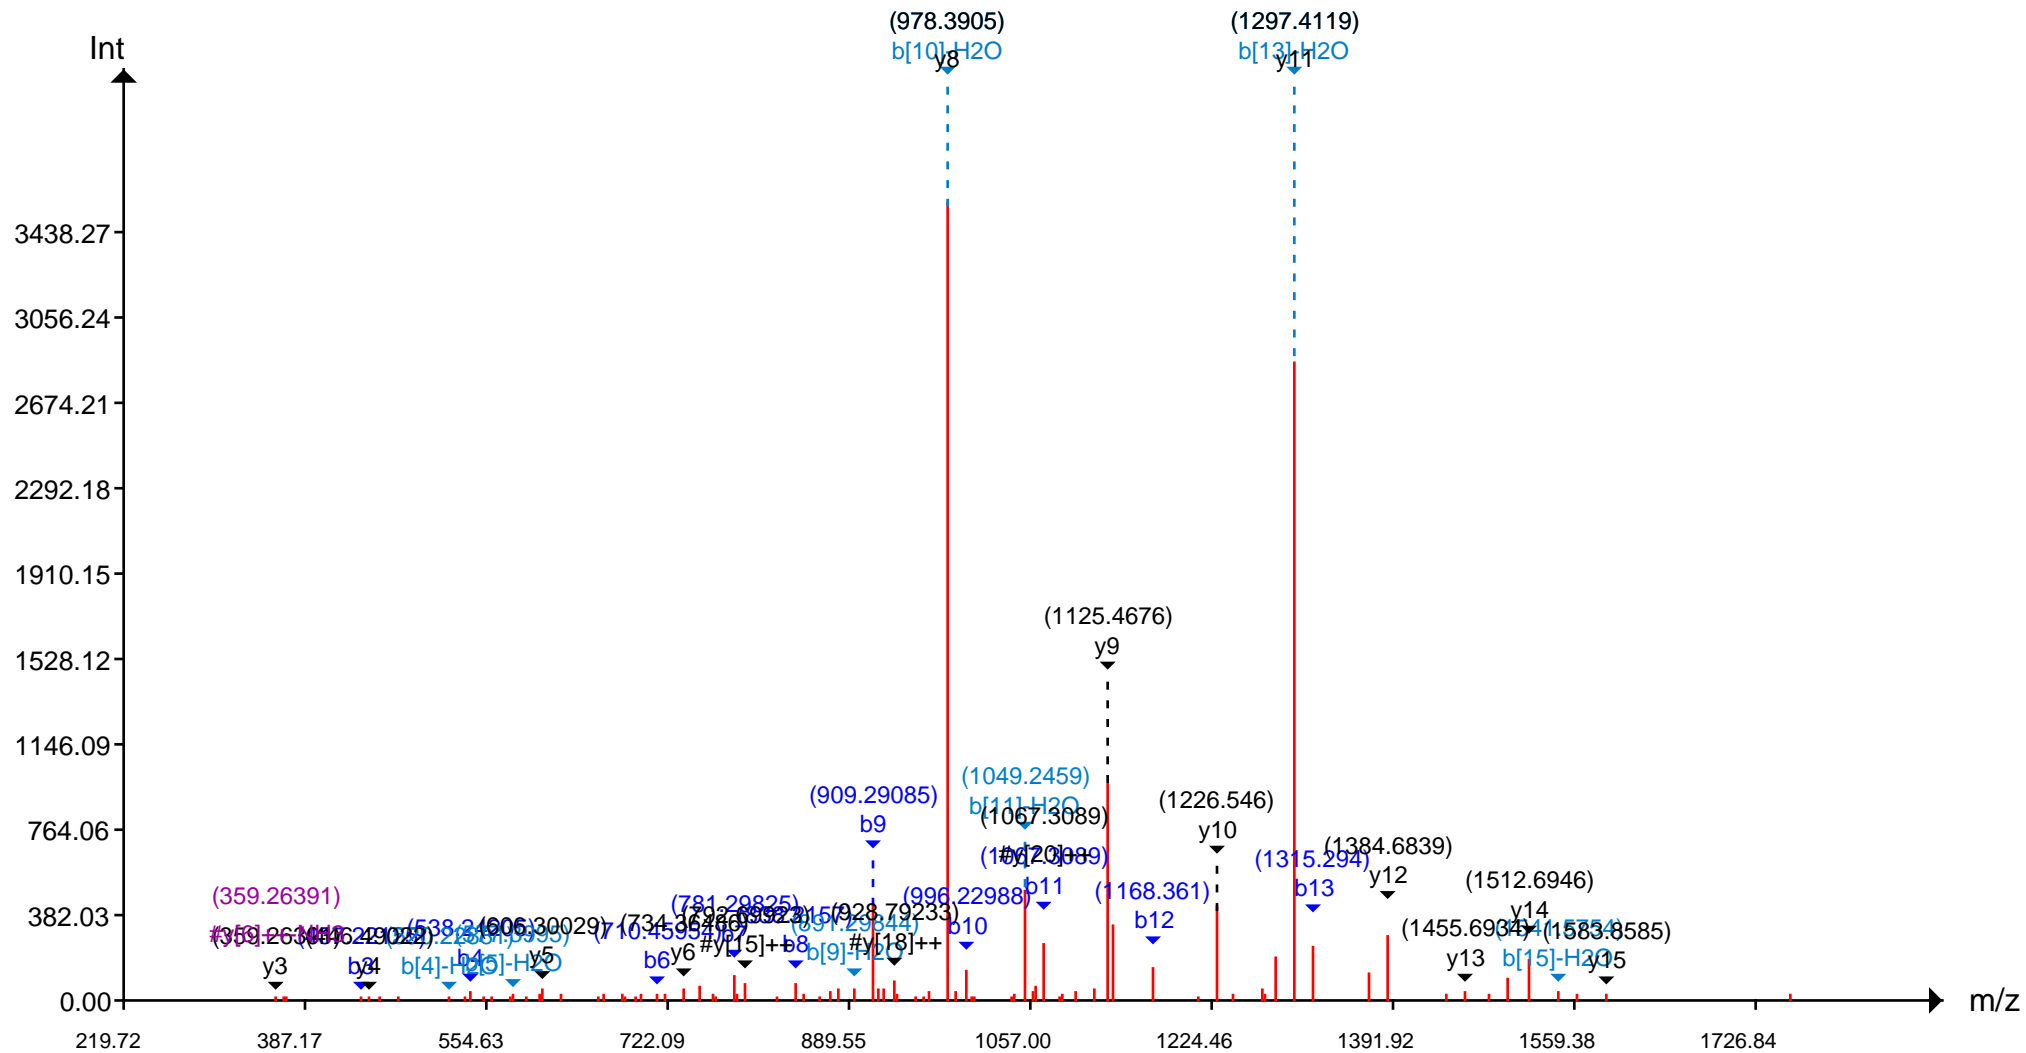

## Info

|                          |                                             |                           |          |
|--------------------------|---------------------------------------------|---------------------------|----------|
| <b>Modified Sequence</b> | AcD3-DFETGDAGASATFPM<Mox*>QC<Cmm*>SALR-COOH | <b>Ion score</b>          | 112.25   |
| <b>Protein</b>           | P63242                                      | <b>Confidence level</b>   | 99.00%   |
| <b>Precursor m/z</b>     | 1147.0024                                   | <b>Identity Threshold</b> | 41.59    |
| <b>Charge</b>            | 2+                                          | <b>Mass error</b>         | 0.003615 |



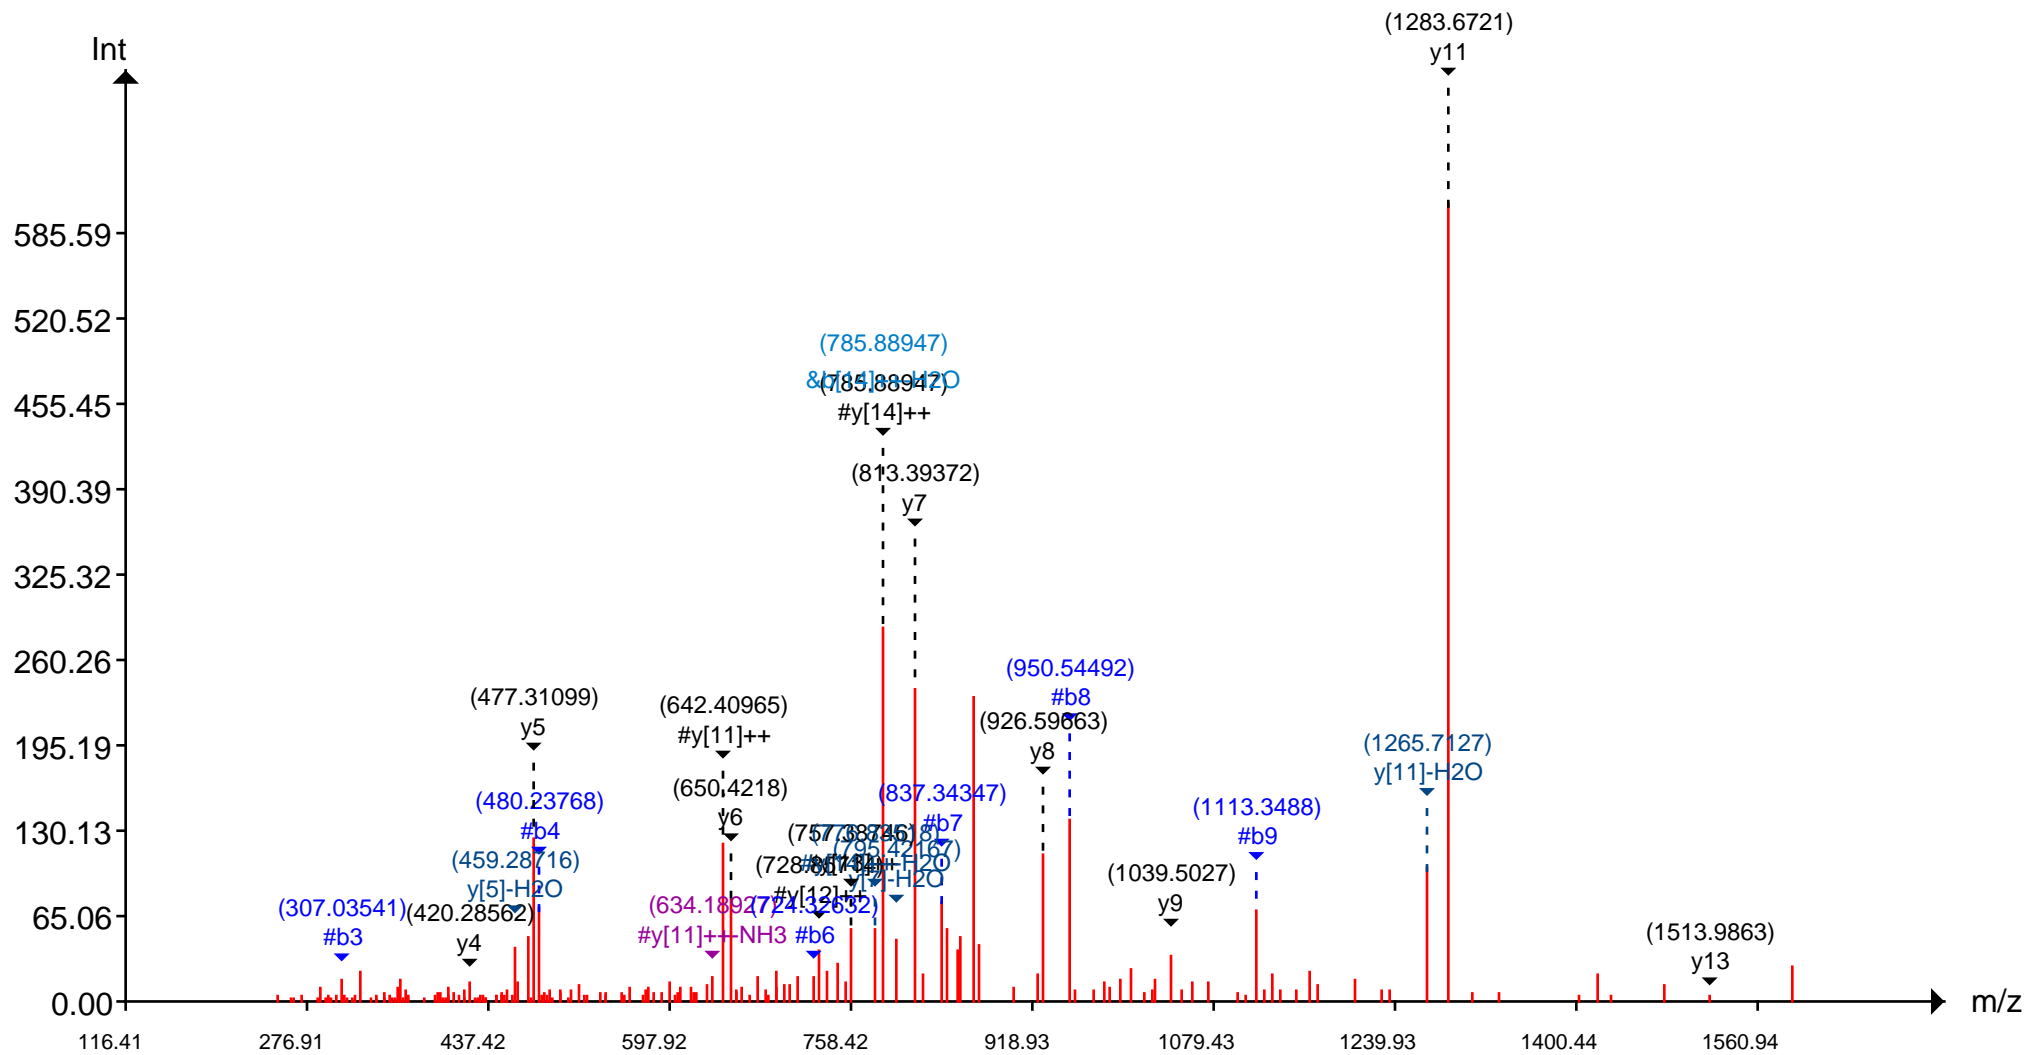

## Info

|                          |                                                  |                           |          |
|--------------------------|--------------------------------------------------|---------------------------|----------|
| <b>Modified Sequence</b> | AcD3-FGGK<AcD3K*>PM<Mox*>IITYK<AcD3K*>GGTSR-COOH | <b>Ion score</b>          | 54.41    |
| <b>Protein</b>           | P13020                                           | <b>Confidence level</b>   | 99.00%   |
| <b>Precursor m/z</b>     | 881.97972                                        | <b>Identity Threshold</b> | 47.74    |
| <b>Charge</b>            | 2+                                               | <b>Mass error</b>         | 0.001498 |

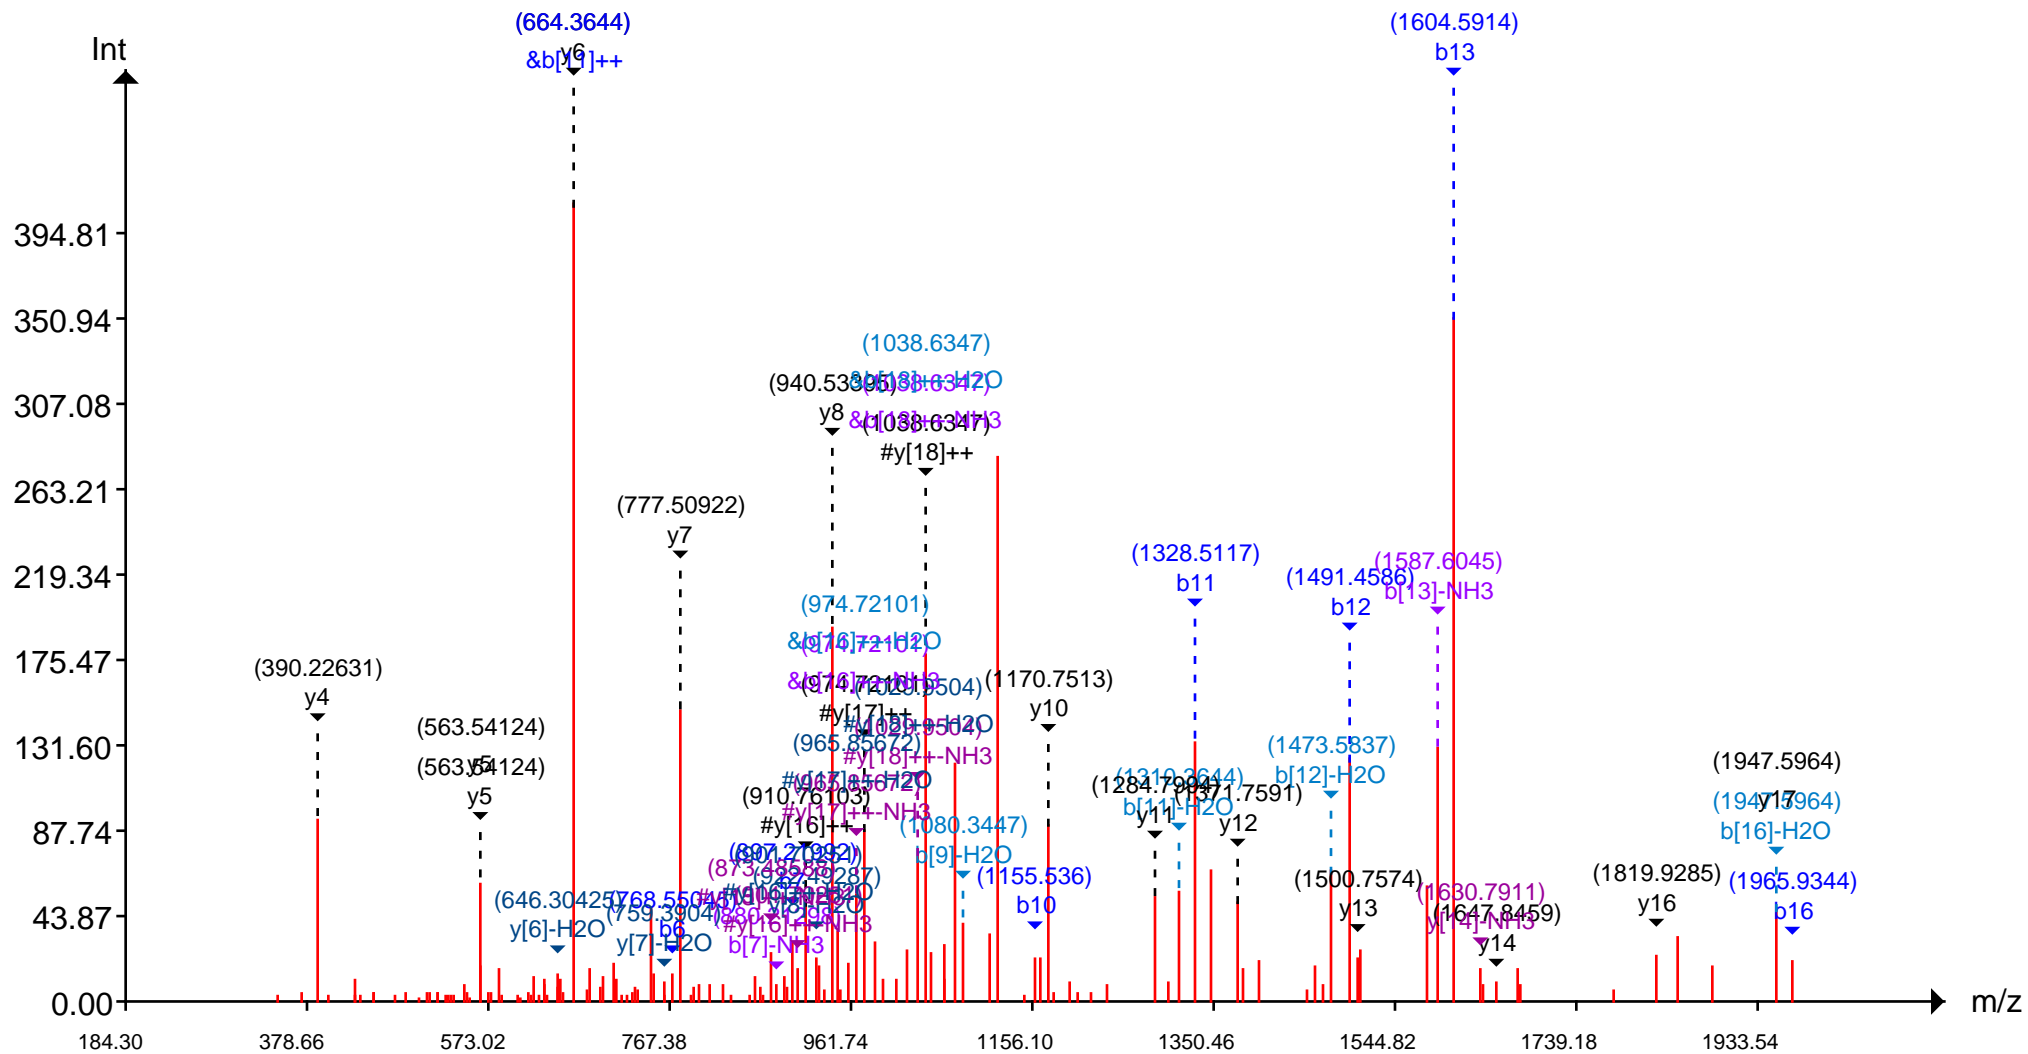

## Info

|                          |                                                     |                           |          |
|--------------------------|-----------------------------------------------------|---------------------------|----------|
| <b>Modified Sequence</b> | AcD3-FQQGDM<Mox*>ESNGK<AcD3K*>YITK<AcD3K*>SGAR-COOH | <b>Ion score</b>          | 72.74    |
| <b>Protein</b>           | P06745                                              | <b>Confidence level</b>   | 99.00%   |
| <b>Precursor m/z</b>     | 1134.5509                                           | <b>Identity Threshold</b> | 46.97    |
| <b>Charge</b>            | 2+                                                  | <b>Mass error</b>         | 0.003401 |

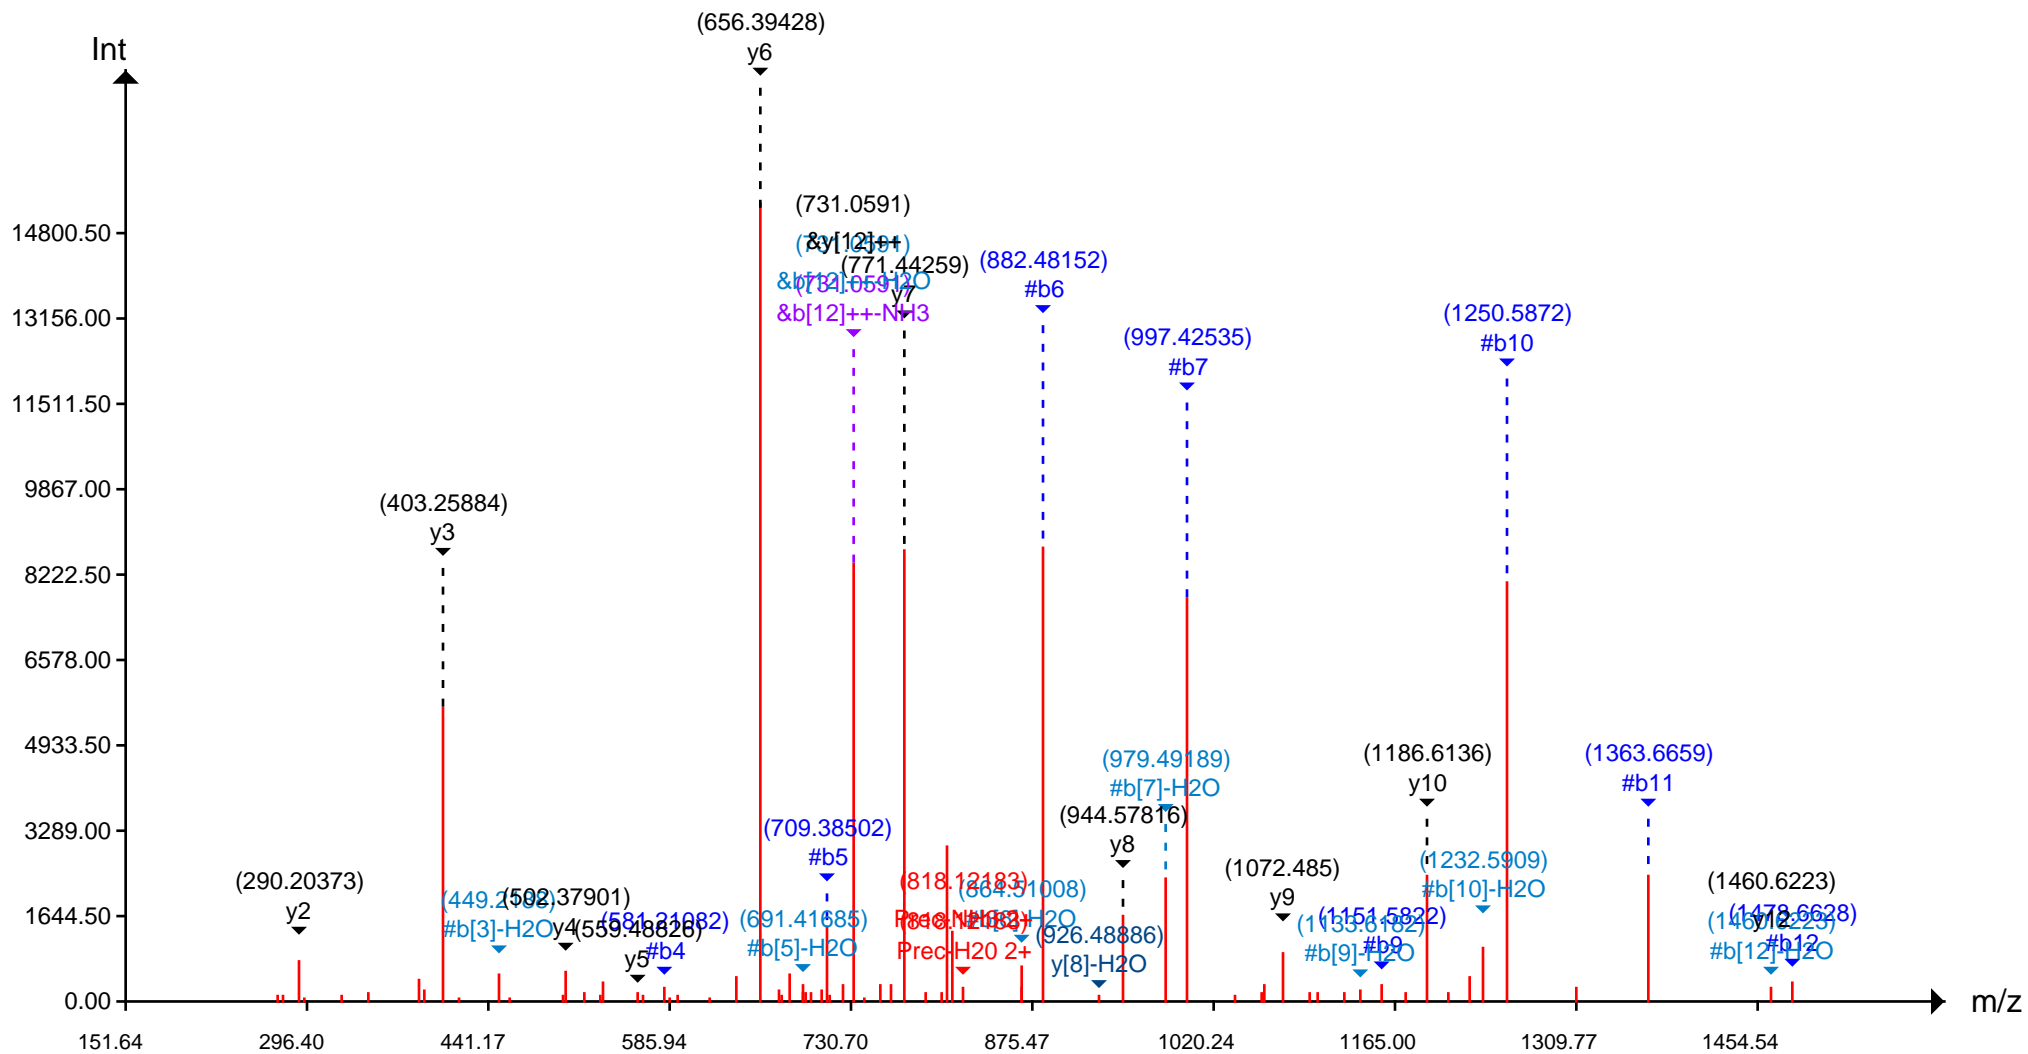

## Info

|                          |                                        |                           |          |
|--------------------------|----------------------------------------|---------------------------|----------|
| <b>Modified Sequence</b> | AcD3-FTK<AcD3K*>NQK<AcD3K*>DPGVLR-COOH | <b>Ion score</b>          | 91.92    |
| <b>Protein</b>           | P50543                                 | <b>Confidence level</b>   | 99.00%   |
| <b>Precursor m/z</b>     | 826.95226                              | <b>Identity Threshold</b> | 47.53    |
| <b>Charge</b>            | 2+                                     | <b>Mass error</b>         | 0.001983 |

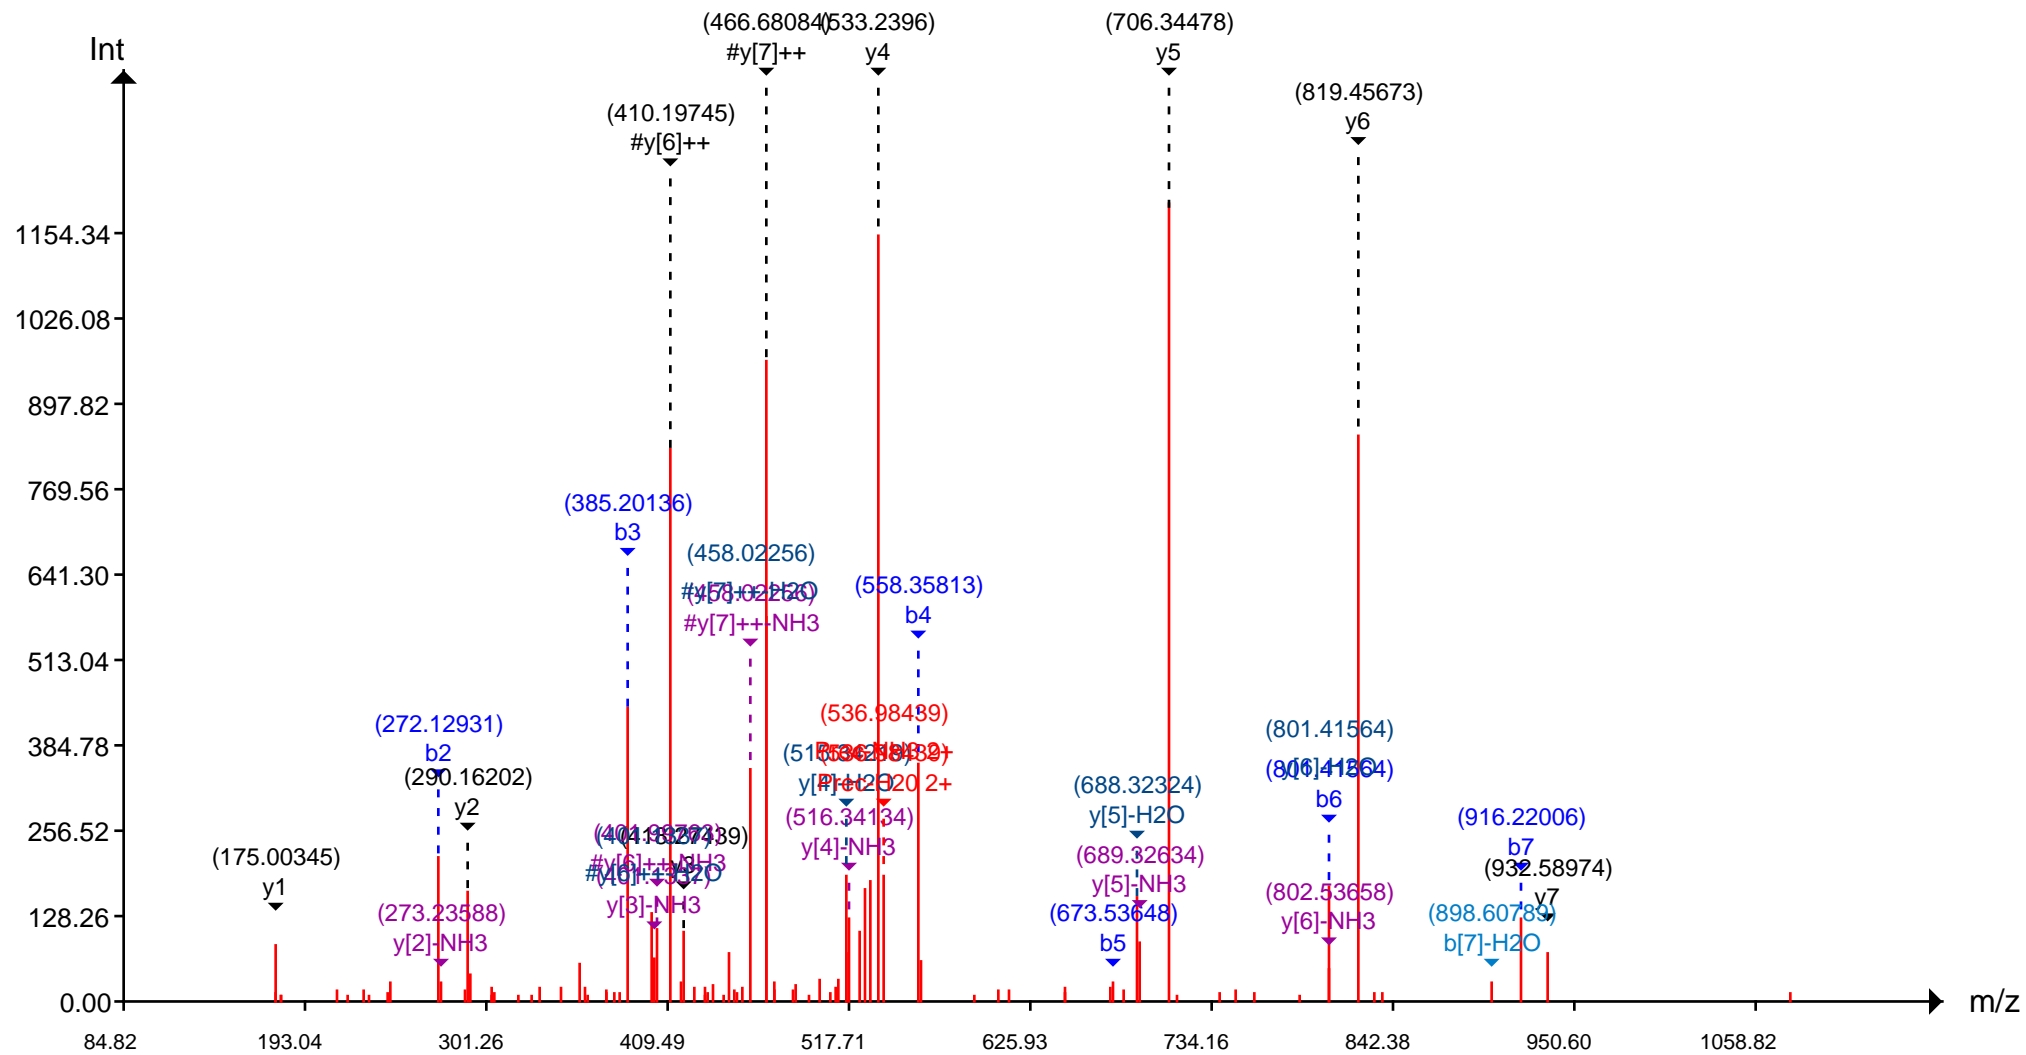

## Info

**Modified Sequence** AcD3-LIIK<AcD3K\*>DQDR-COOH

**Ion score** 55.27

**Protein** P80316

**Confidence level** 99.00%

**Precursor m/z** 545.82225

**Identity Threshold** 45.60

**Charge** 2+

**Mass error** -1.18E-4

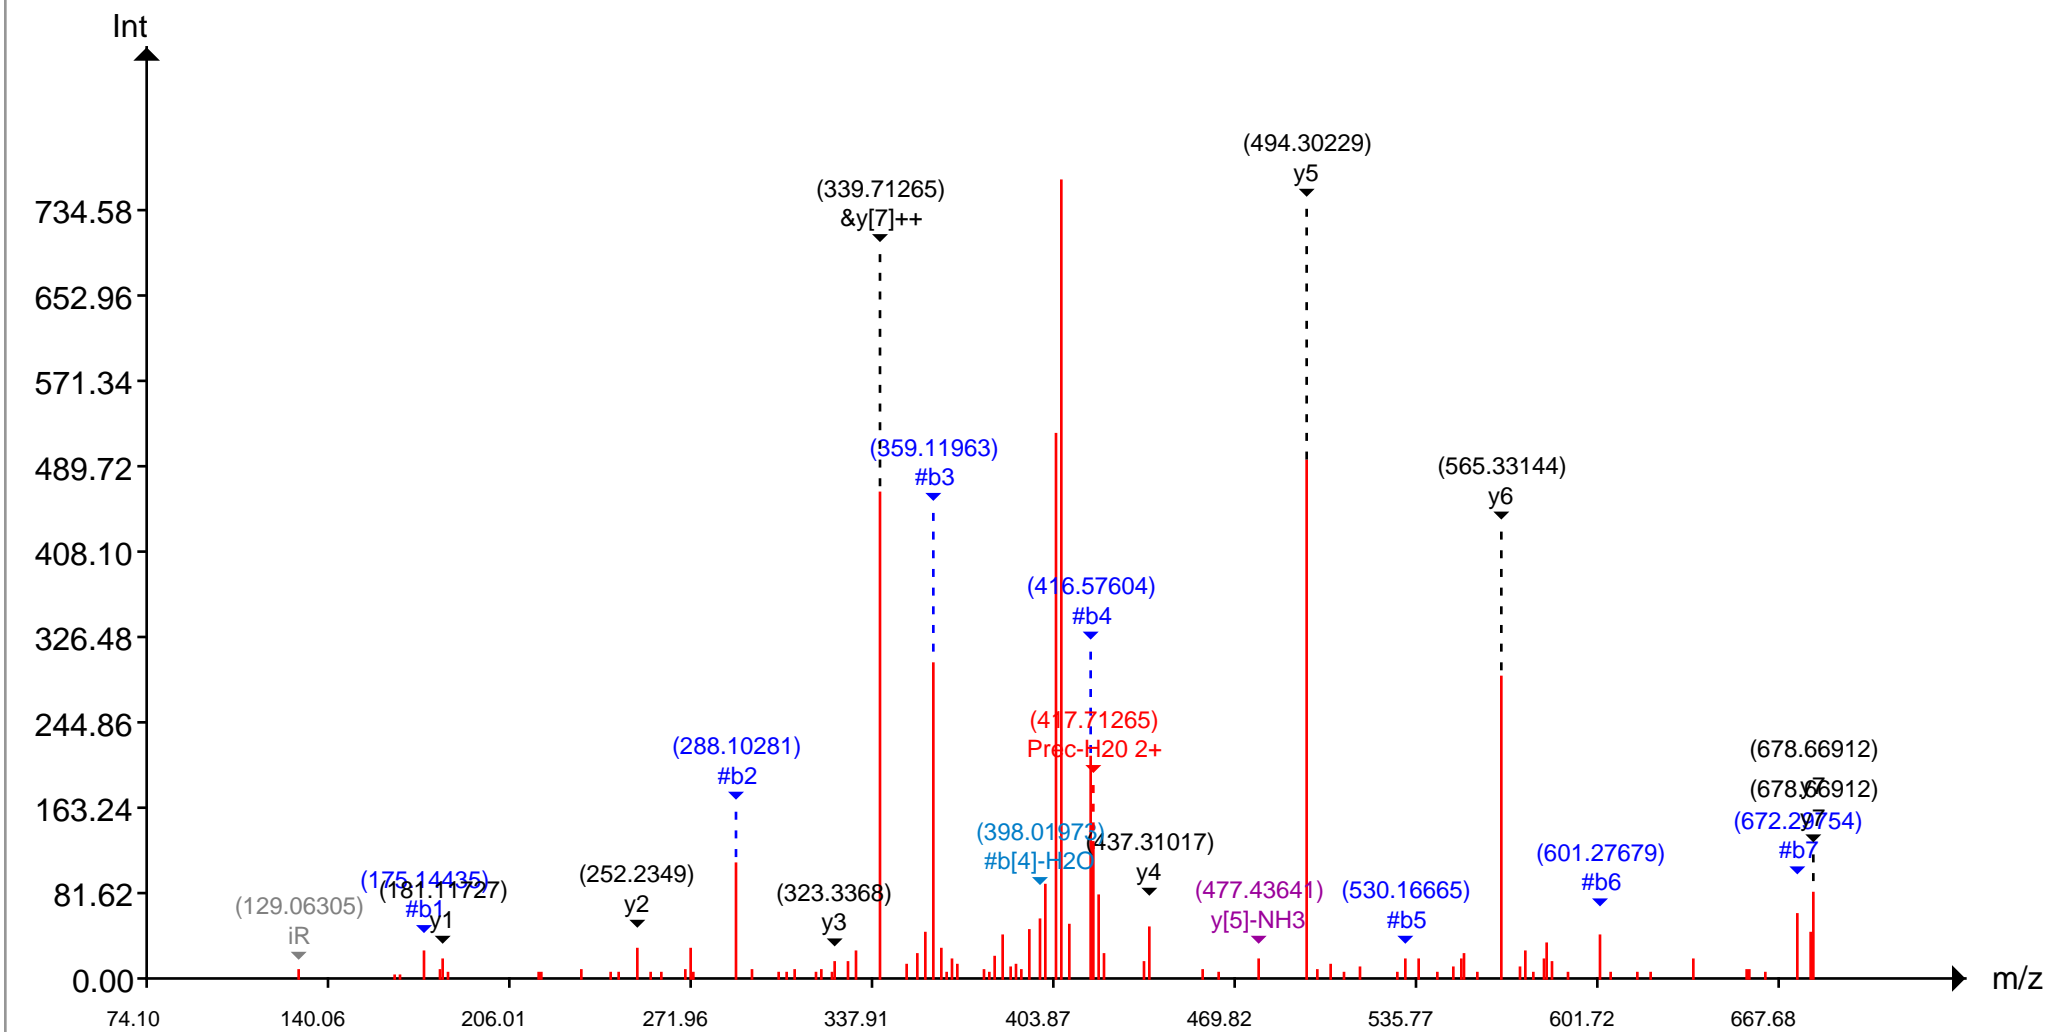

## Info

|                 |                                                                                                |                           |
|-----------------|------------------------------------------------------------------------------------------------|---------------------------|
| <b>Modif...</b> | AcD3-ELAGNAAR<C13>-COOH                                                                        | <b>Ion score</b>          |
| <b>P...</b>     | Q8CGP5, Q8CGP6, Q8CGP7, P22752, Q6GSS7, Q64522, Q64523, Q8BFU2, Q8R1M2, Q8CCK0, P27661, Q9QZQ8 | <b>Confidence level</b>   |
|                 | 426.73914                                                                                      | <b>Identity Threshold</b> |
|                 | 2+                                                                                             | <b>Mass error</b>         |

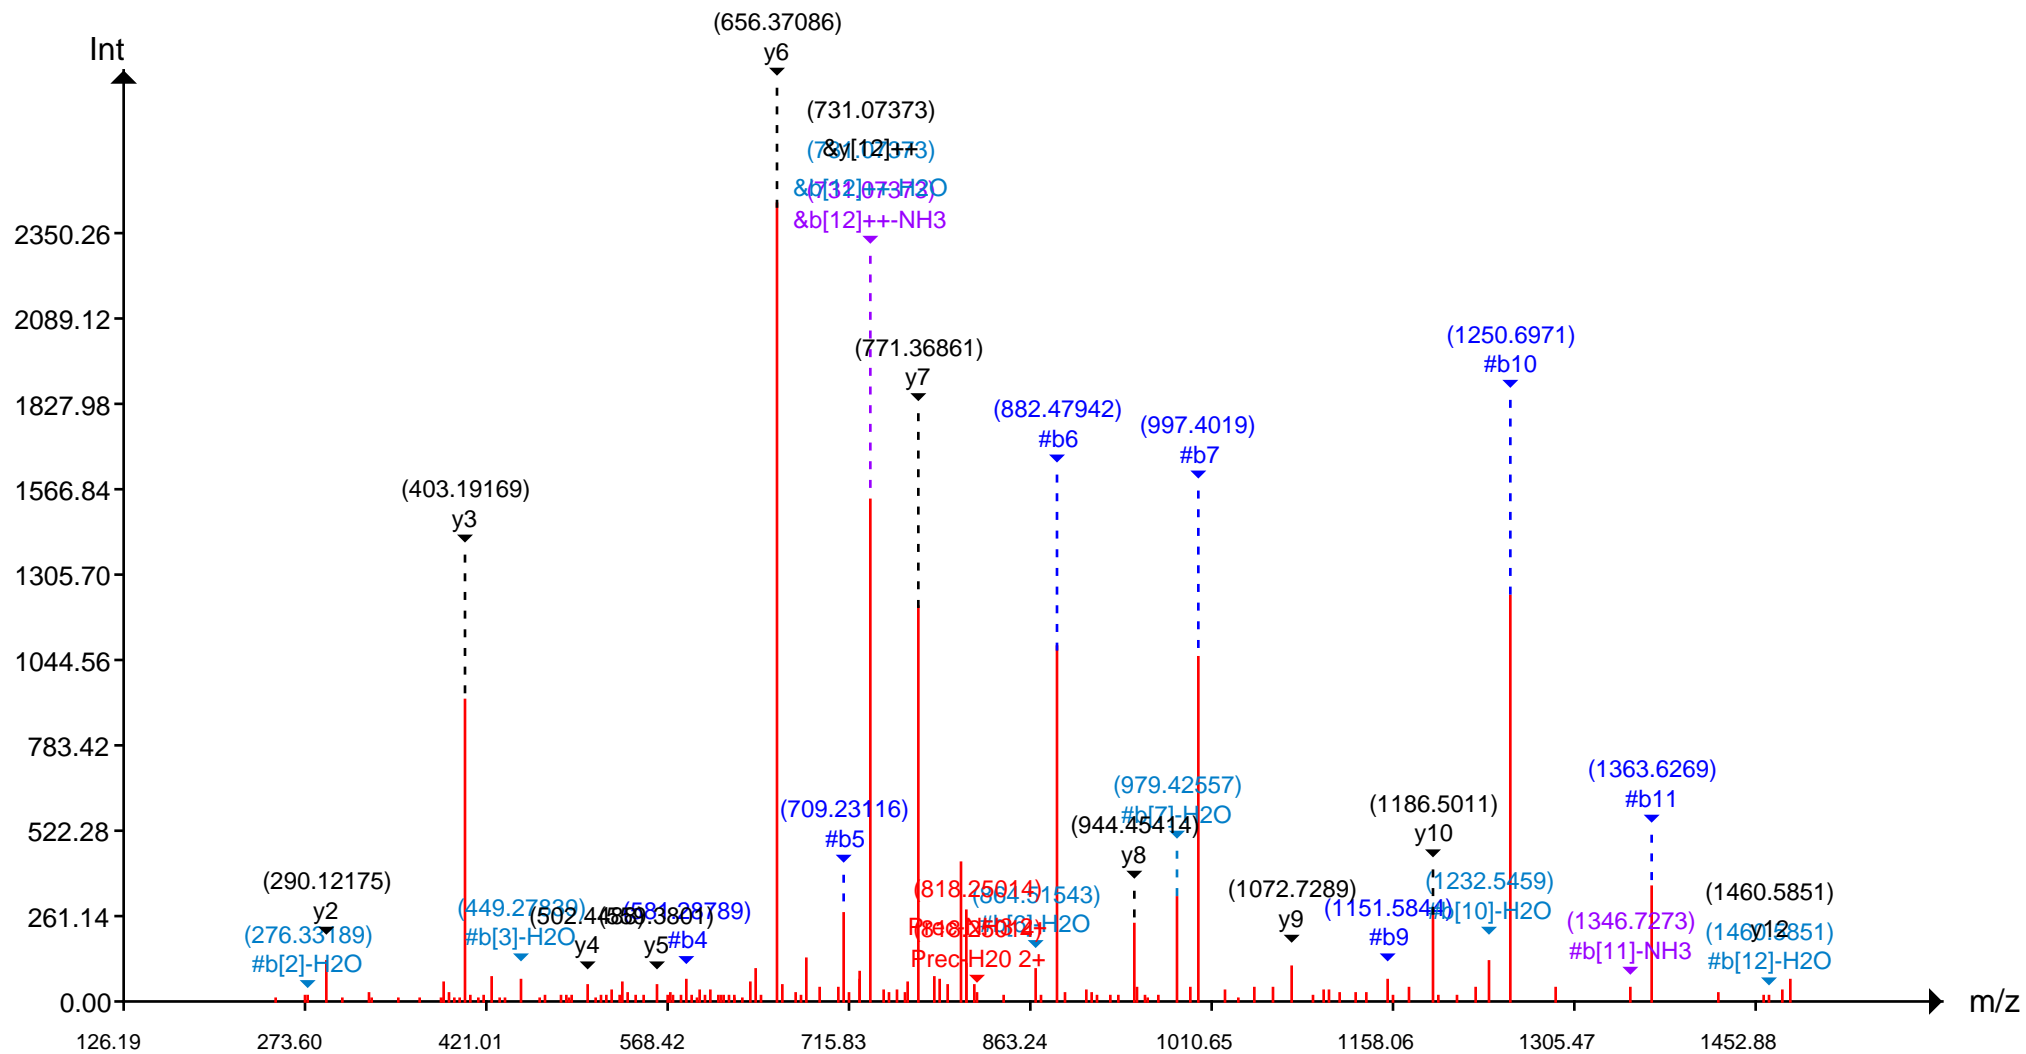

## Info

**Modified Sequence** AcD3-FTK<AcD3K\*>NQK<AcD3K\*>DPGVLR-COOH

**Ion score** 64.12

**Protein** P50543

**Confidence level** 99.00%

**Precursor m/z** 826.95223

**Identity Threshold** 47.53

**Charge** 2+

**Mass error** 0.001923

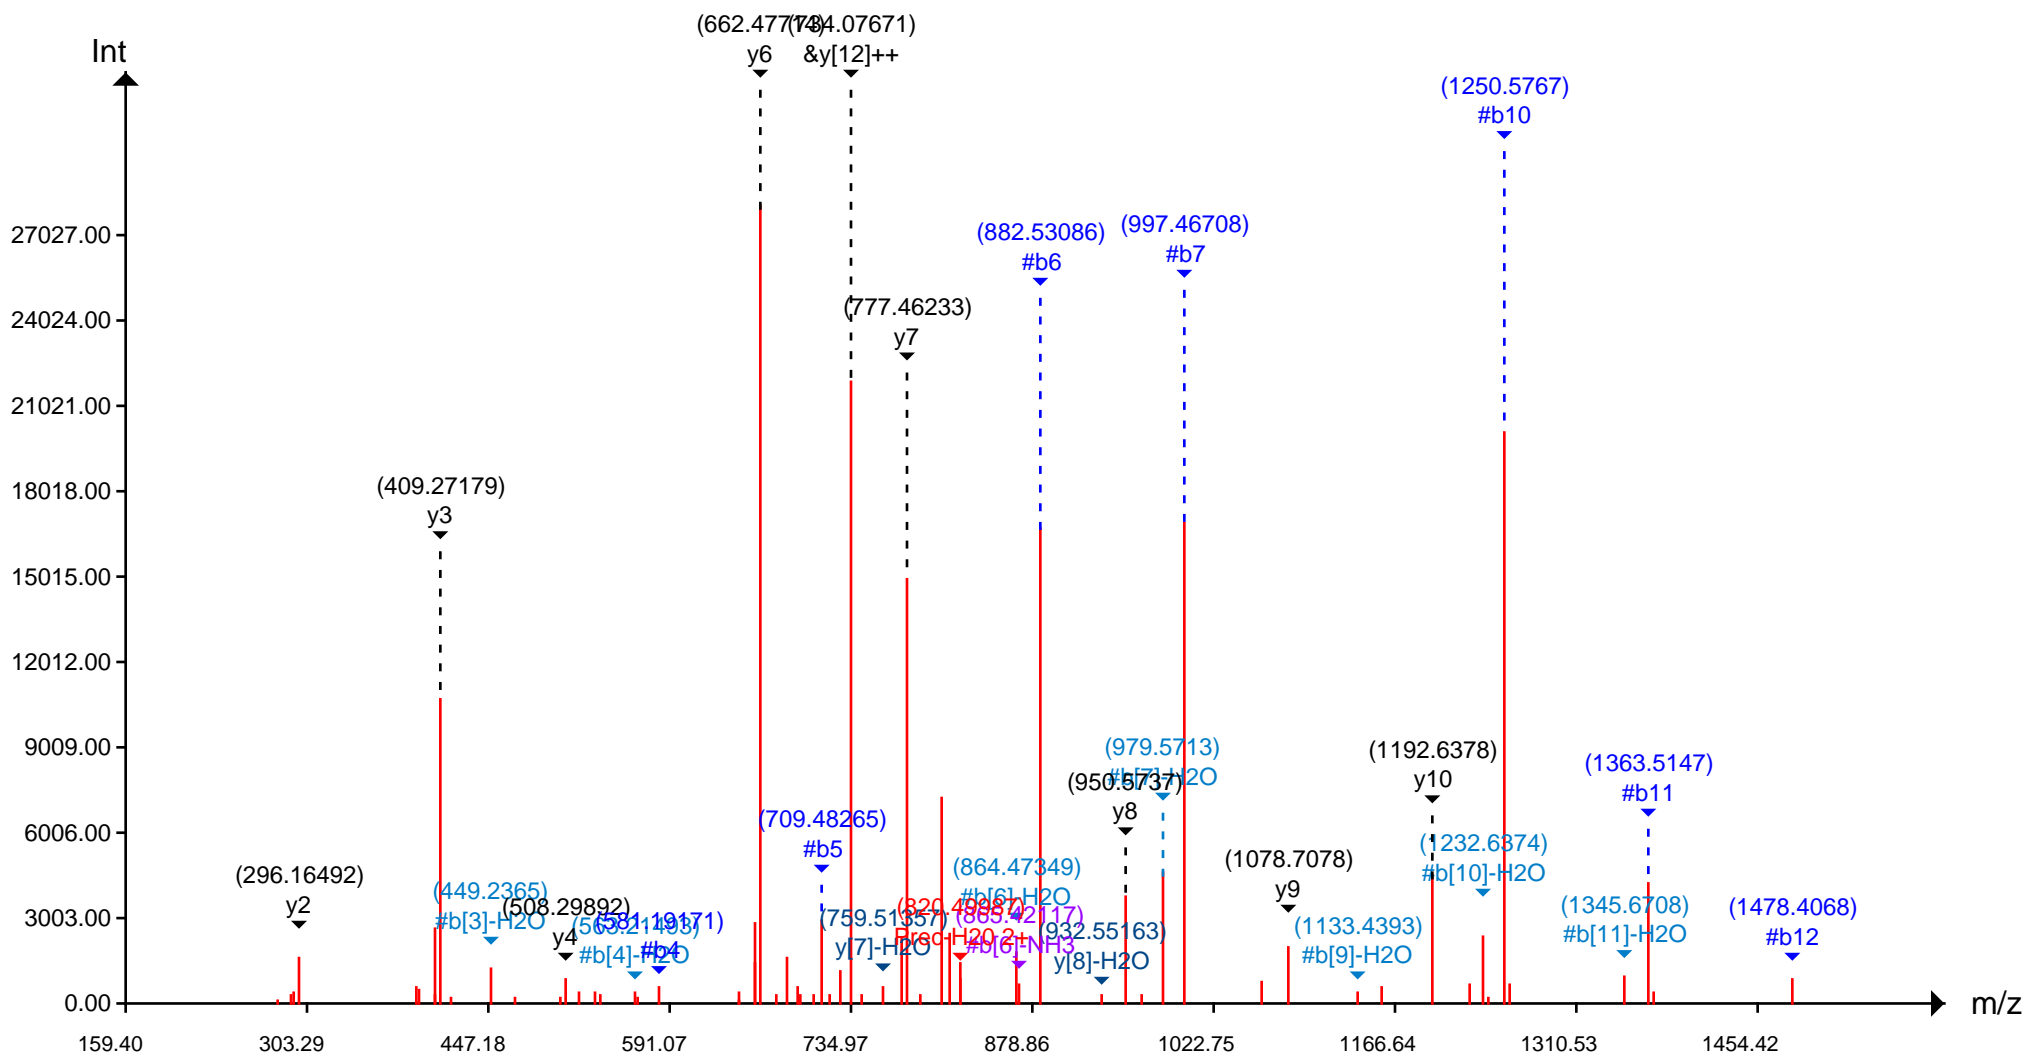

## Info

**Modified Sequence** AcD3-FTK<AcD3K\*>NQK<AcD3K\*>DPGVLDK<C13>-COOH

**Ion score** 58.36

**Protein** P50543

**Confidence level** 99.00%

**Precursor m/z** 829.96208

**Identity Threshold** 47.11

**Charge** 2+

**Mass error** 0.001481

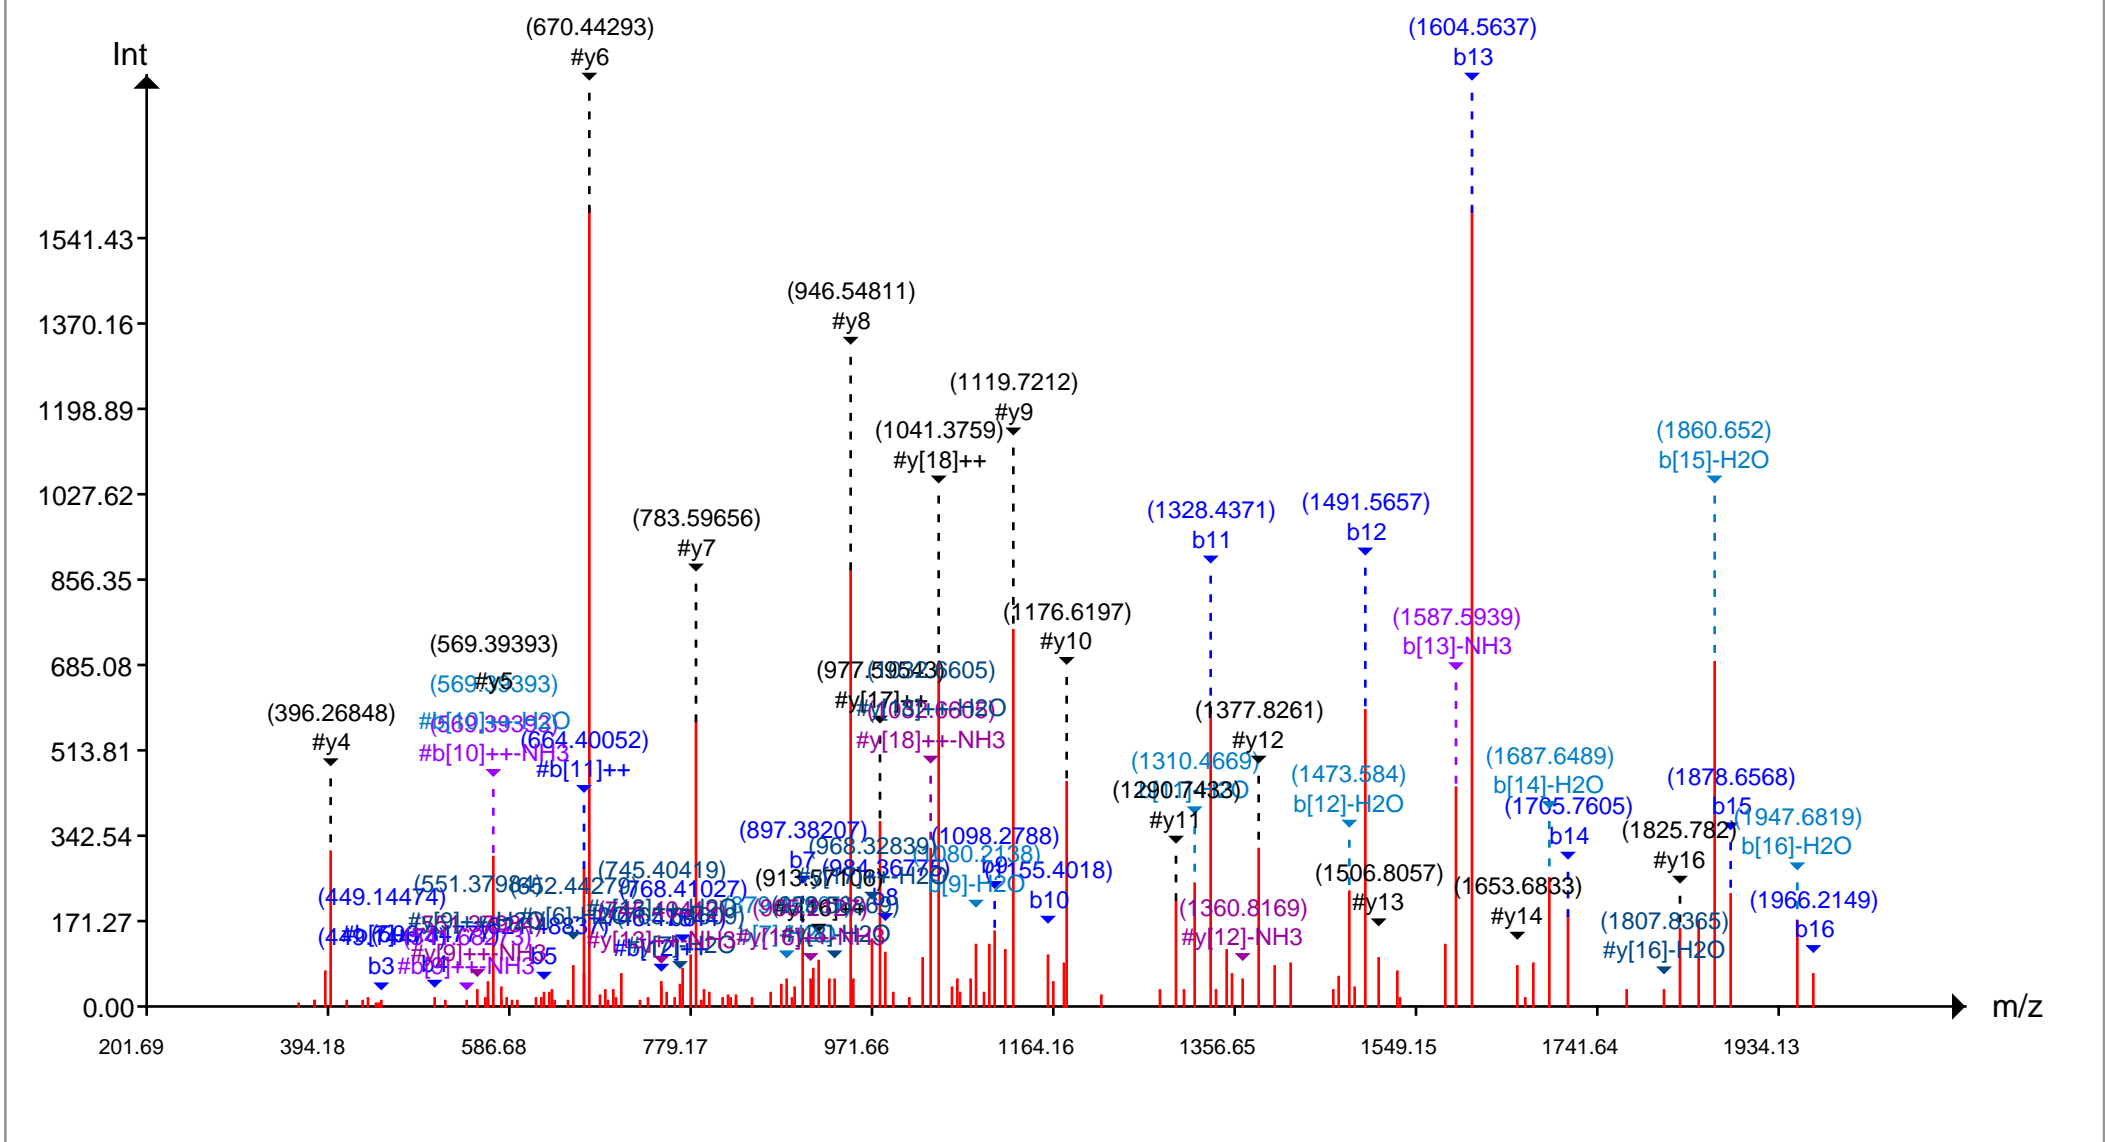

## Info

|                          |                                                          |                           |          |
|--------------------------|----------------------------------------------------------|---------------------------|----------|
| <b>Modified Sequence</b> | AcD3-FQQGDM<Mox*>ESNGK<AcD3K*>YITK<AcD3K*>SGAR<C13>-COOH | <b>Ion score</b>          | 86.79    |
| <b>Protein</b>           | P06745                                                   | <b>Confidence level</b>   | 99.00%   |
| <b>Precursor m/z</b>     | 1137.5606                                                | <b>Identity Threshold</b> | 47.34    |
| <b>Charge</b>            | 2+                                                       | <b>Mass error</b>         | 0.002659 |



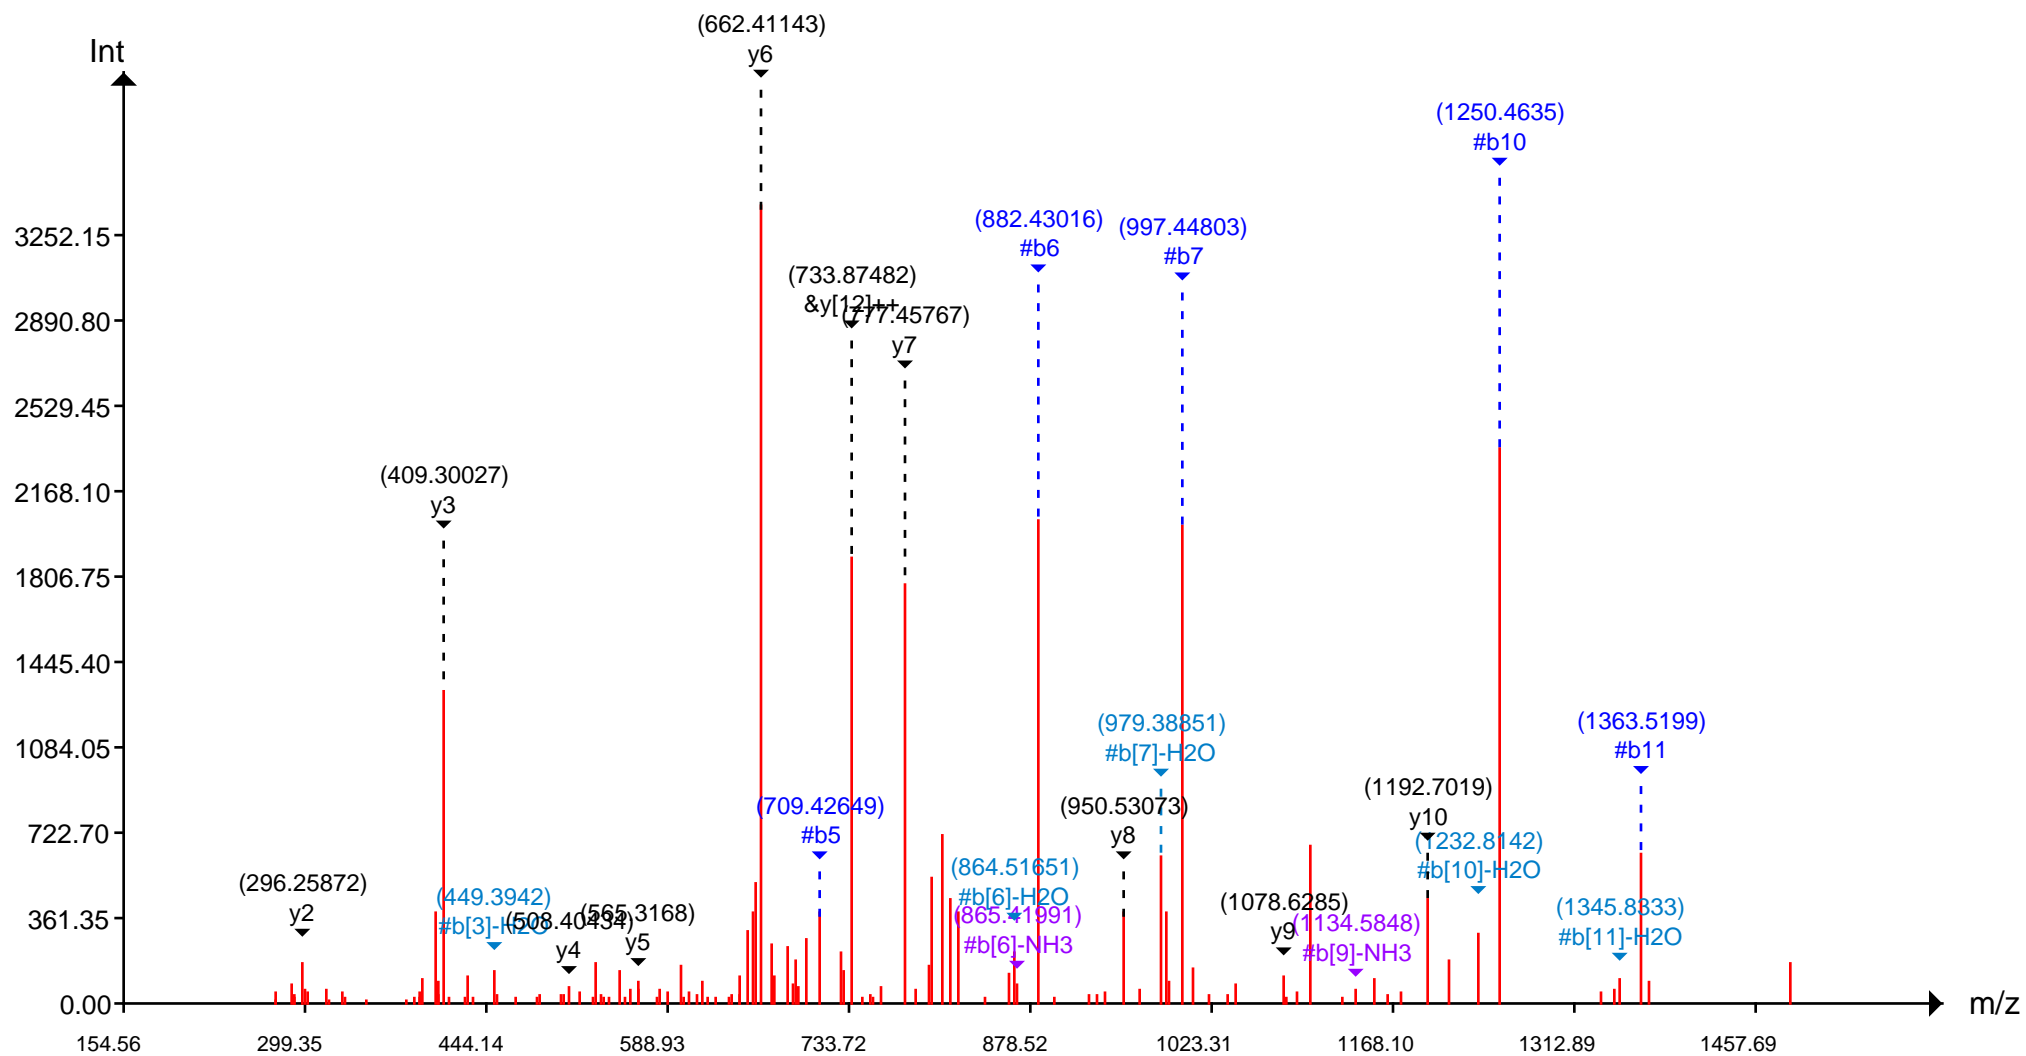

## Info

|                          |                                                |                           |          |
|--------------------------|------------------------------------------------|---------------------------|----------|
| <b>Modified Sequence</b> | AcD3-FTK<AcD3K*>NQK<AcD3K*>DPGVLDLDR<C13>-COOH | <b>Ion score</b>          | 49.18    |
| <b>Protein</b>           | P50543                                         | <b>Confidence level</b>   | 99.00%   |
| <b>Precursor m/z</b>     | 829.96235                                      | <b>Identity Threshold</b> | 47.14    |
| <b>Charge</b>            | 2+                                             | <b>Mass error</b>         | 0.002021 |



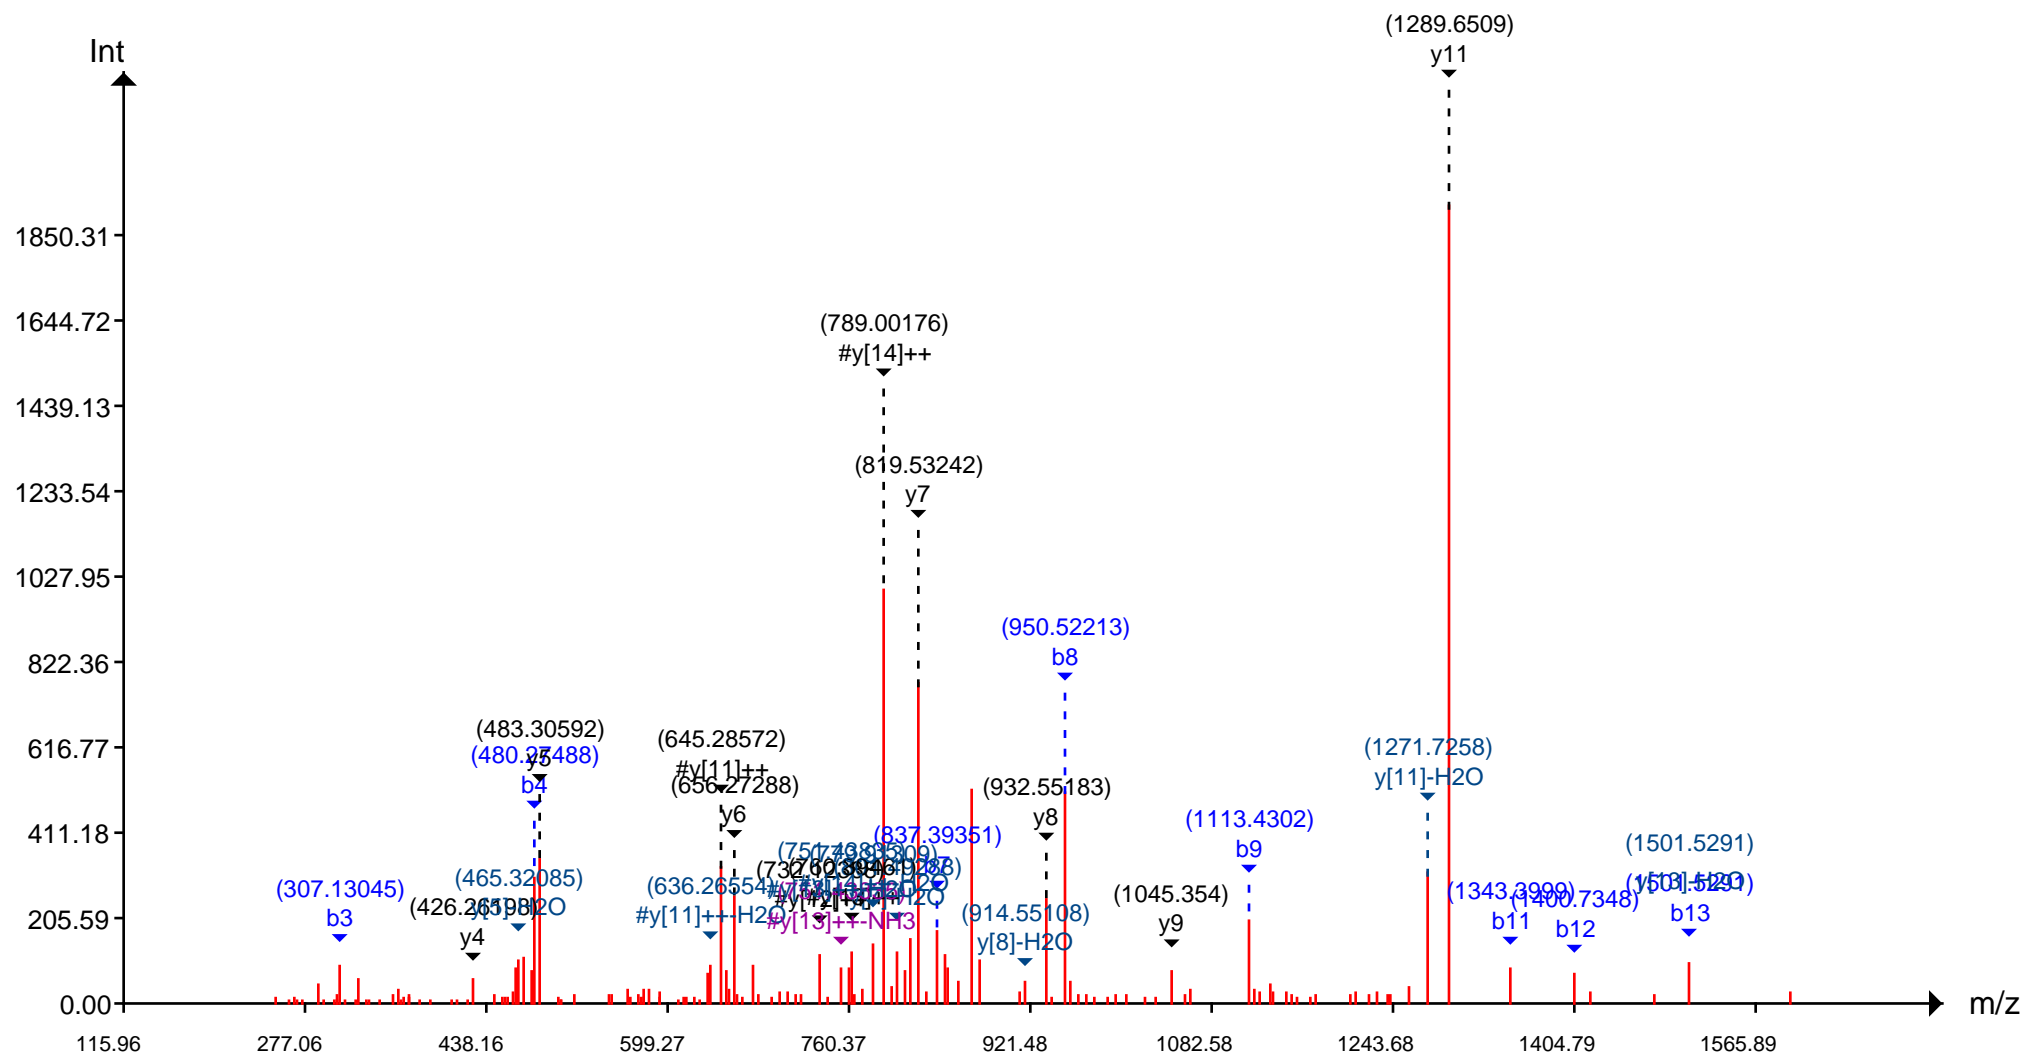

## Info

|                          |                                                      |                           |          |
|--------------------------|------------------------------------------------------|---------------------------|----------|
| <b>Modified Sequence</b> | AcD3-FGGK<AcD3K*>PM<Mox*>IIYK<AcD3K*>GGTSR<C13>-COOH | <b>Ion score</b>          | 57.05    |
| <b>Protein</b>           | P13020                                               | <b>Confidence level</b>   | 99.00%   |
| <b>Precursor m/z</b>     | 884.98959                                            | <b>Identity Threshold</b> | 47.13    |
| <b>Charge</b>            | 2+                                                   | <b>Mass error</b>         | 0.001097 |

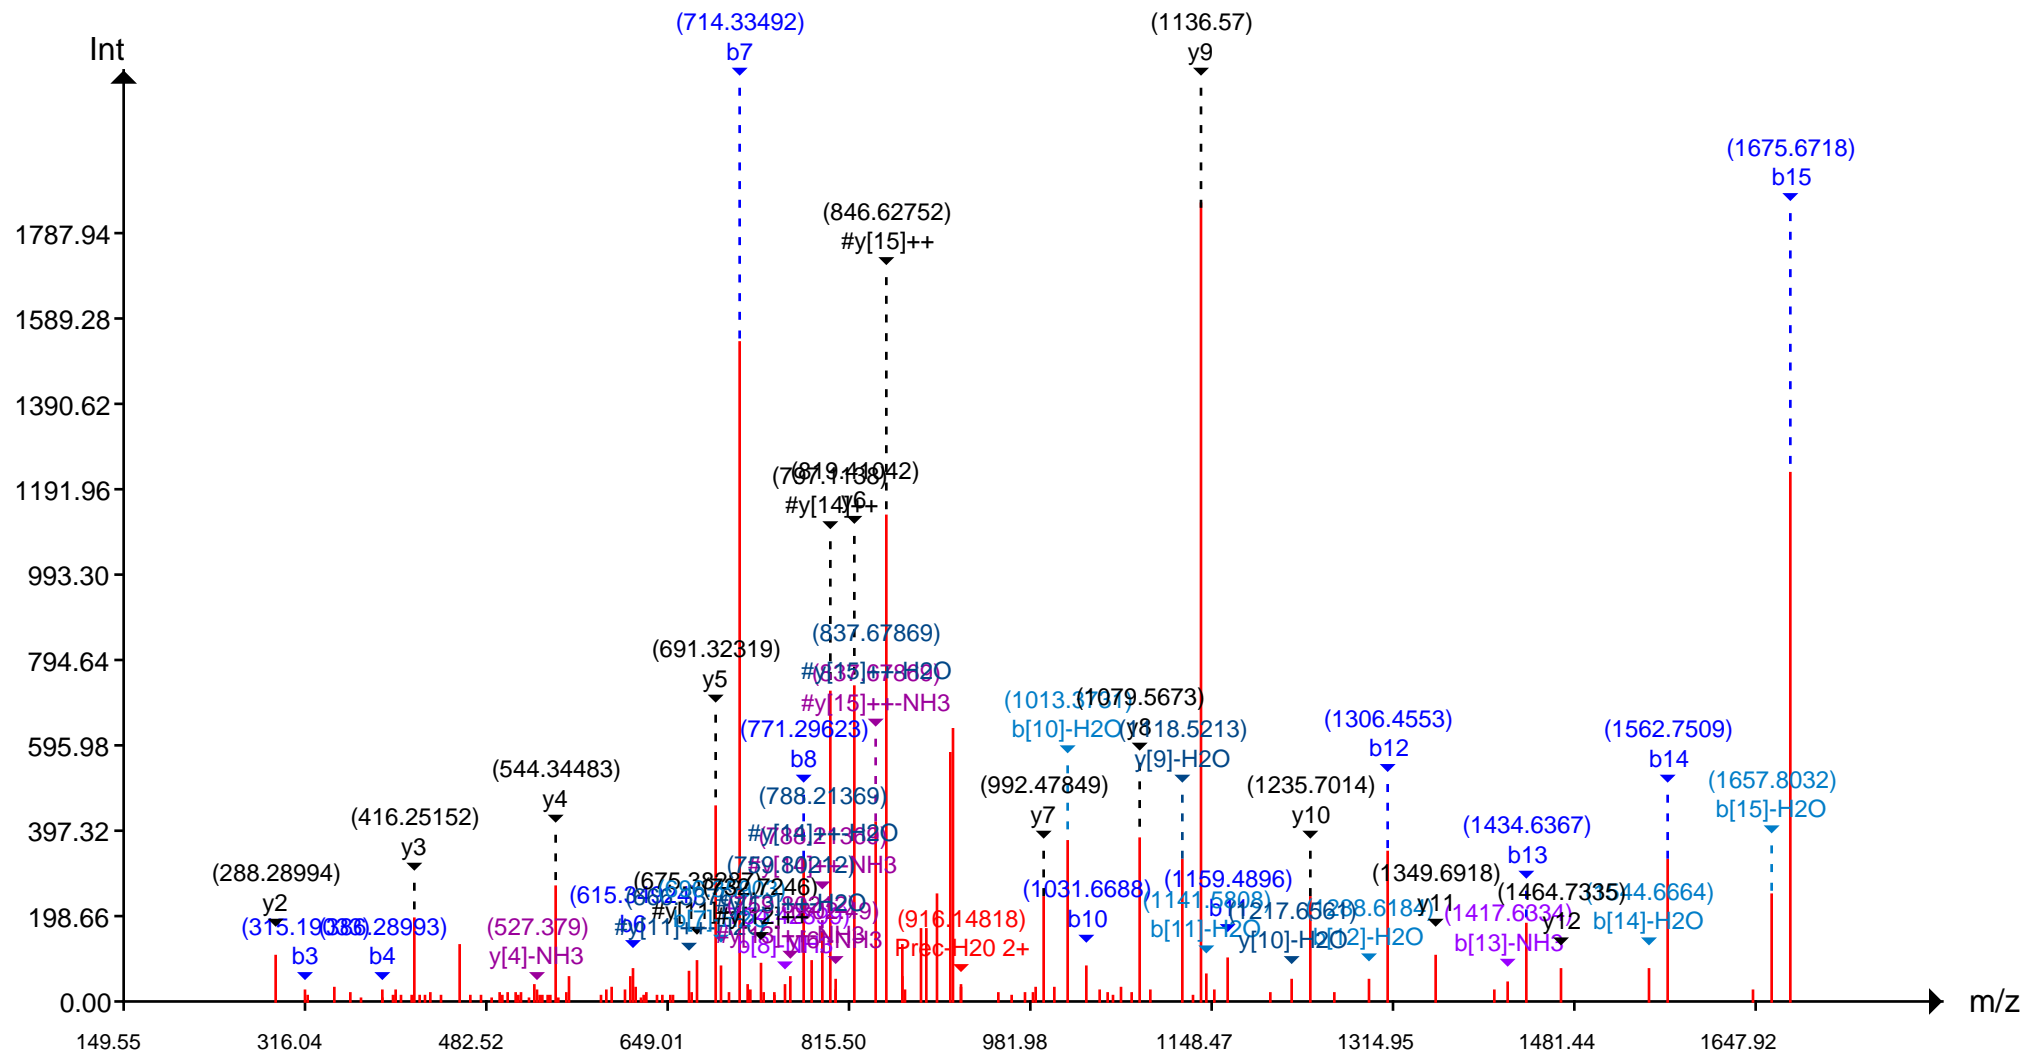

## Info

|                          |                                          |                           |          |
|--------------------------|------------------------------------------|---------------------------|----------|
| <b>Modified Sequence</b> | AcD3-IVGADNVGSK<AcD3K*>QM<Mox*>QQIR-COOH | <b>Ion score</b>          | 93.24    |
| <b>Protein</b>           | P14869                                   | <b>Confidence level</b>   | 99.00%   |
| <b>Precursor m/z</b>     | 925.48981                                | <b>Identity Threshold</b> | 47.99    |
| <b>Charge</b>            | 2+                                       | <b>Mass error</b>         | 0.001613 |

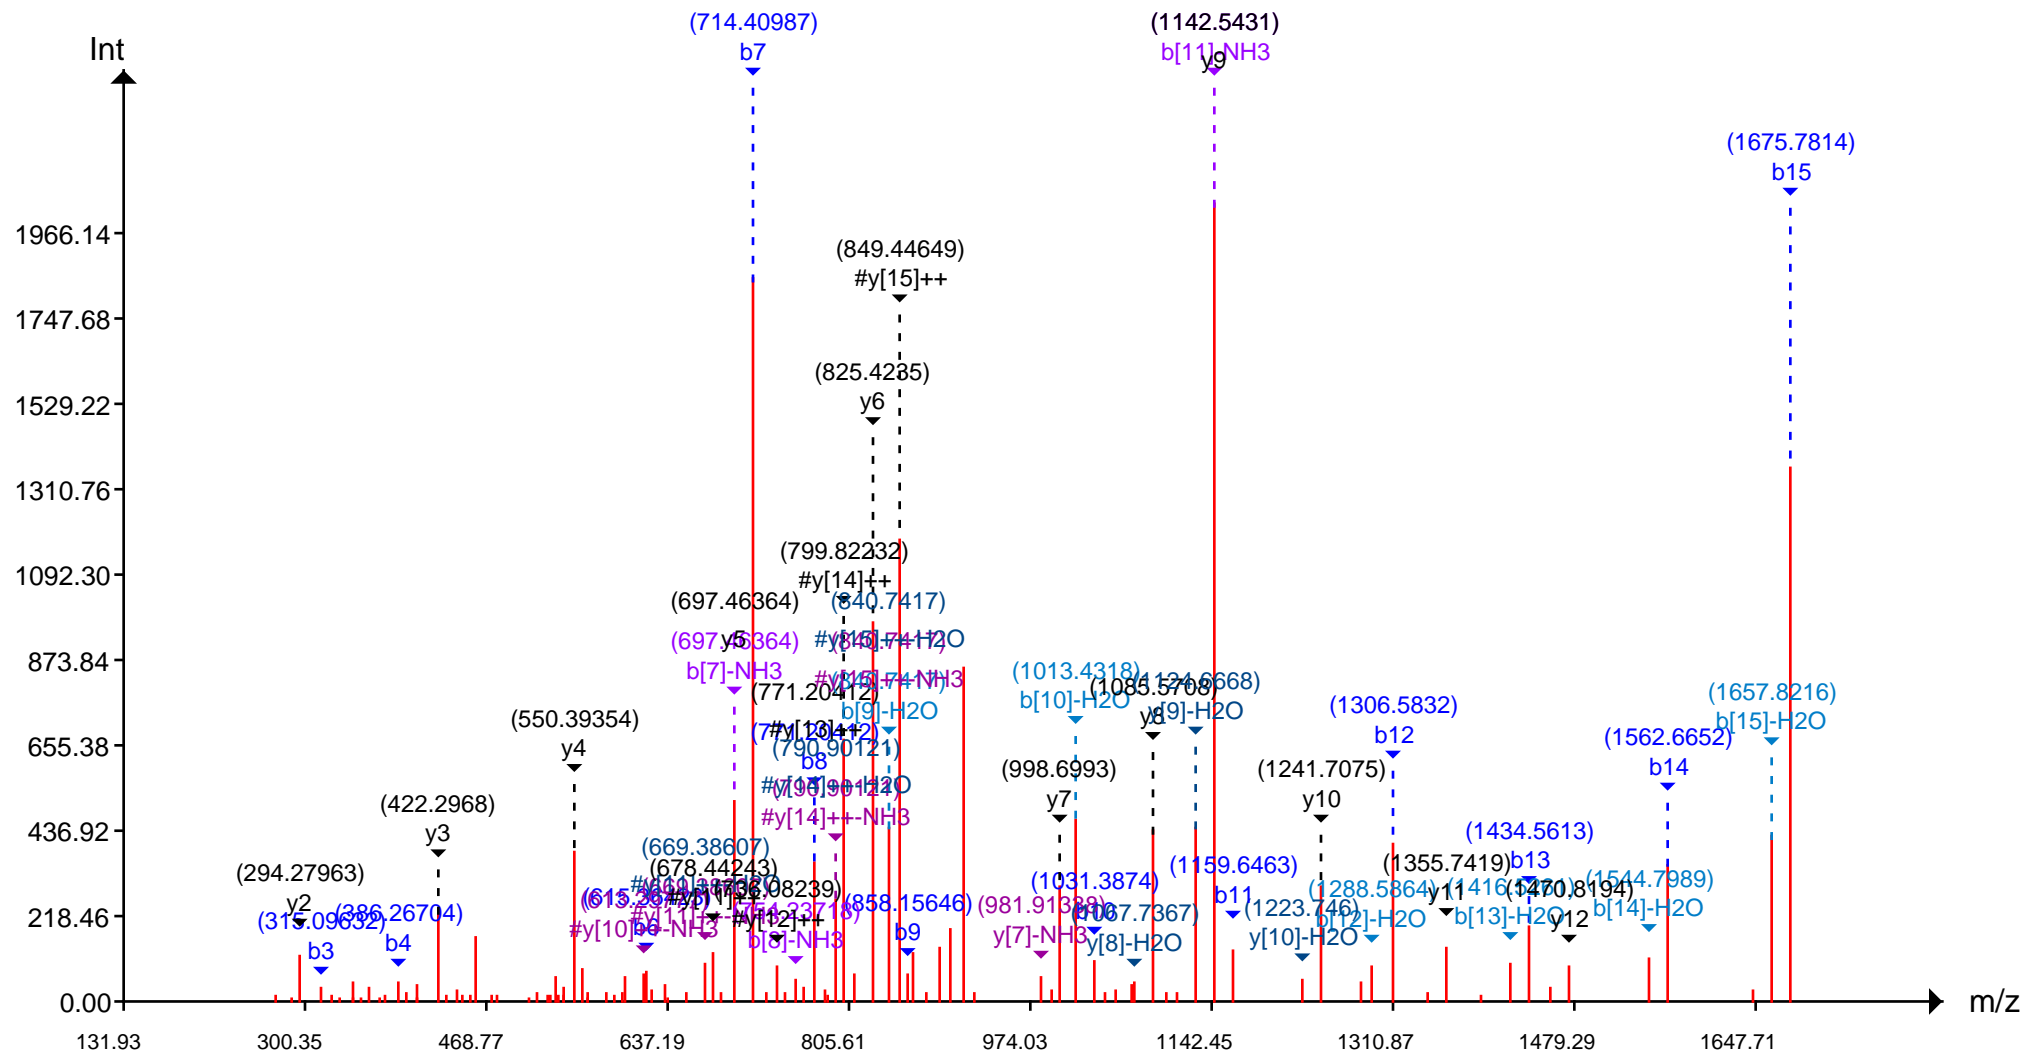

## Info

|                          |                                               |                           |          |
|--------------------------|-----------------------------------------------|---------------------------|----------|
| <b>Modified Sequence</b> | AcD3-IVGADNVGSK<AcD3K*>QM<Mox*>QQIR<C13>-COOH | <b>Ion score</b>          | 103.07   |
| <b>Protein</b>           | P14869                                        | <b>Confidence level</b>   | 99.00%   |
| <b>Precursor m/z</b>     | 928.4997                                      | <b>Identity Threshold</b> | 47.76    |
| <b>Charge</b>            | 2+                                            | <b>Mass error</b>         | 0.001251 |

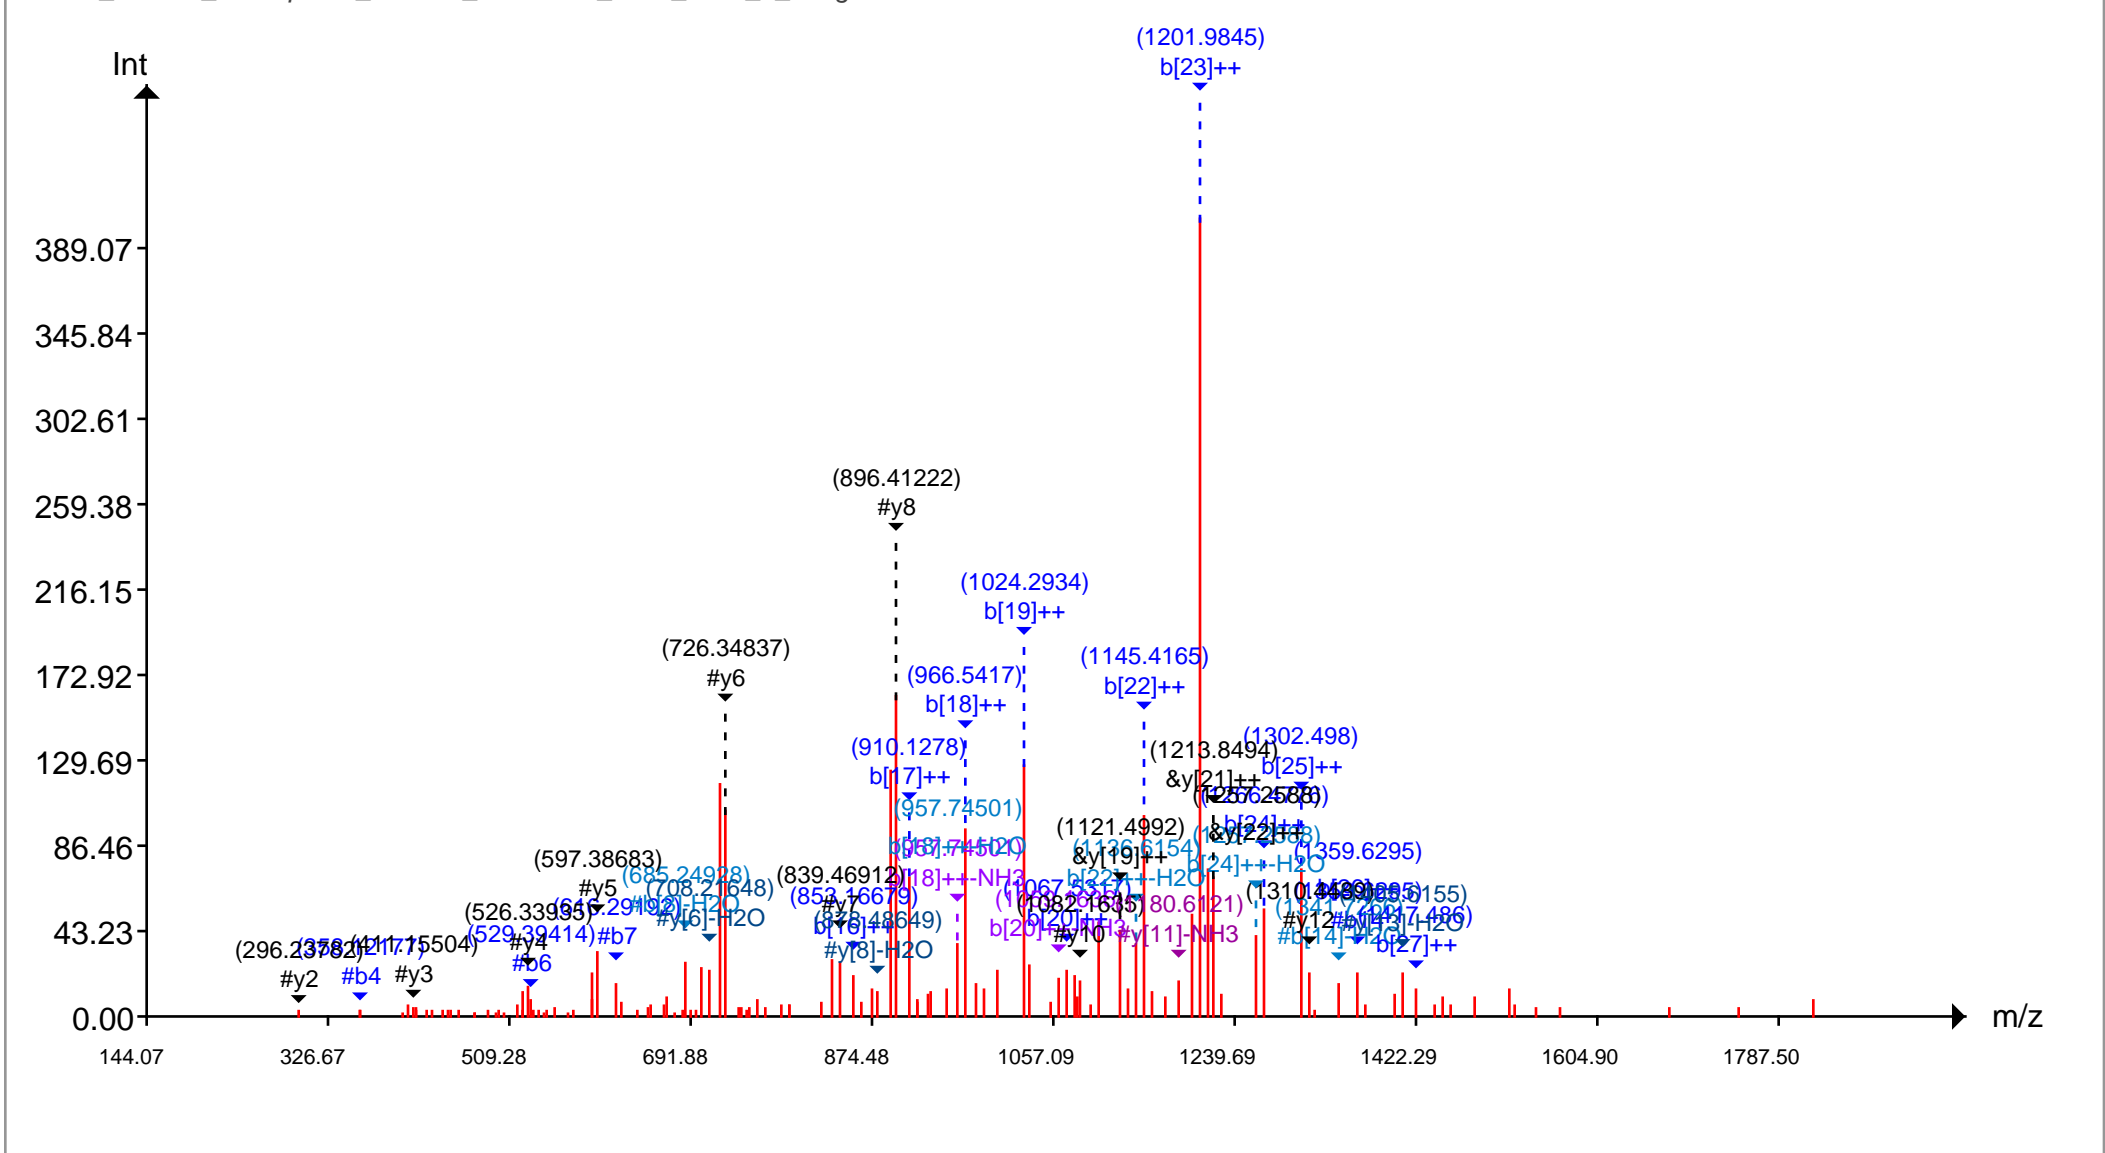

## Info

|                          |                                                                      |                           |         |
|--------------------------|----------------------------------------------------------------------|---------------------------|---------|
| <b>Modified Sequence</b> | AcD3-AALGGNSSPSAK<AcD3K*>DIK<AcD3K*>K<AcD3K*>ILDSVGIEADDDR<C13>-COOH | <b>Ion score</b>          | 49.07   |
| <b>Protein</b>           | P99027                                                               | <b>Confidence level</b>   | 99.00%  |
| <b>Precursor m/z</b>     | 1043.5532                                                            | <b>Identity Threshold</b> | 47.22   |
| <b>Charge</b>            | 3+                                                                   | <b>Mass error</b>         | 8.09E-4 |

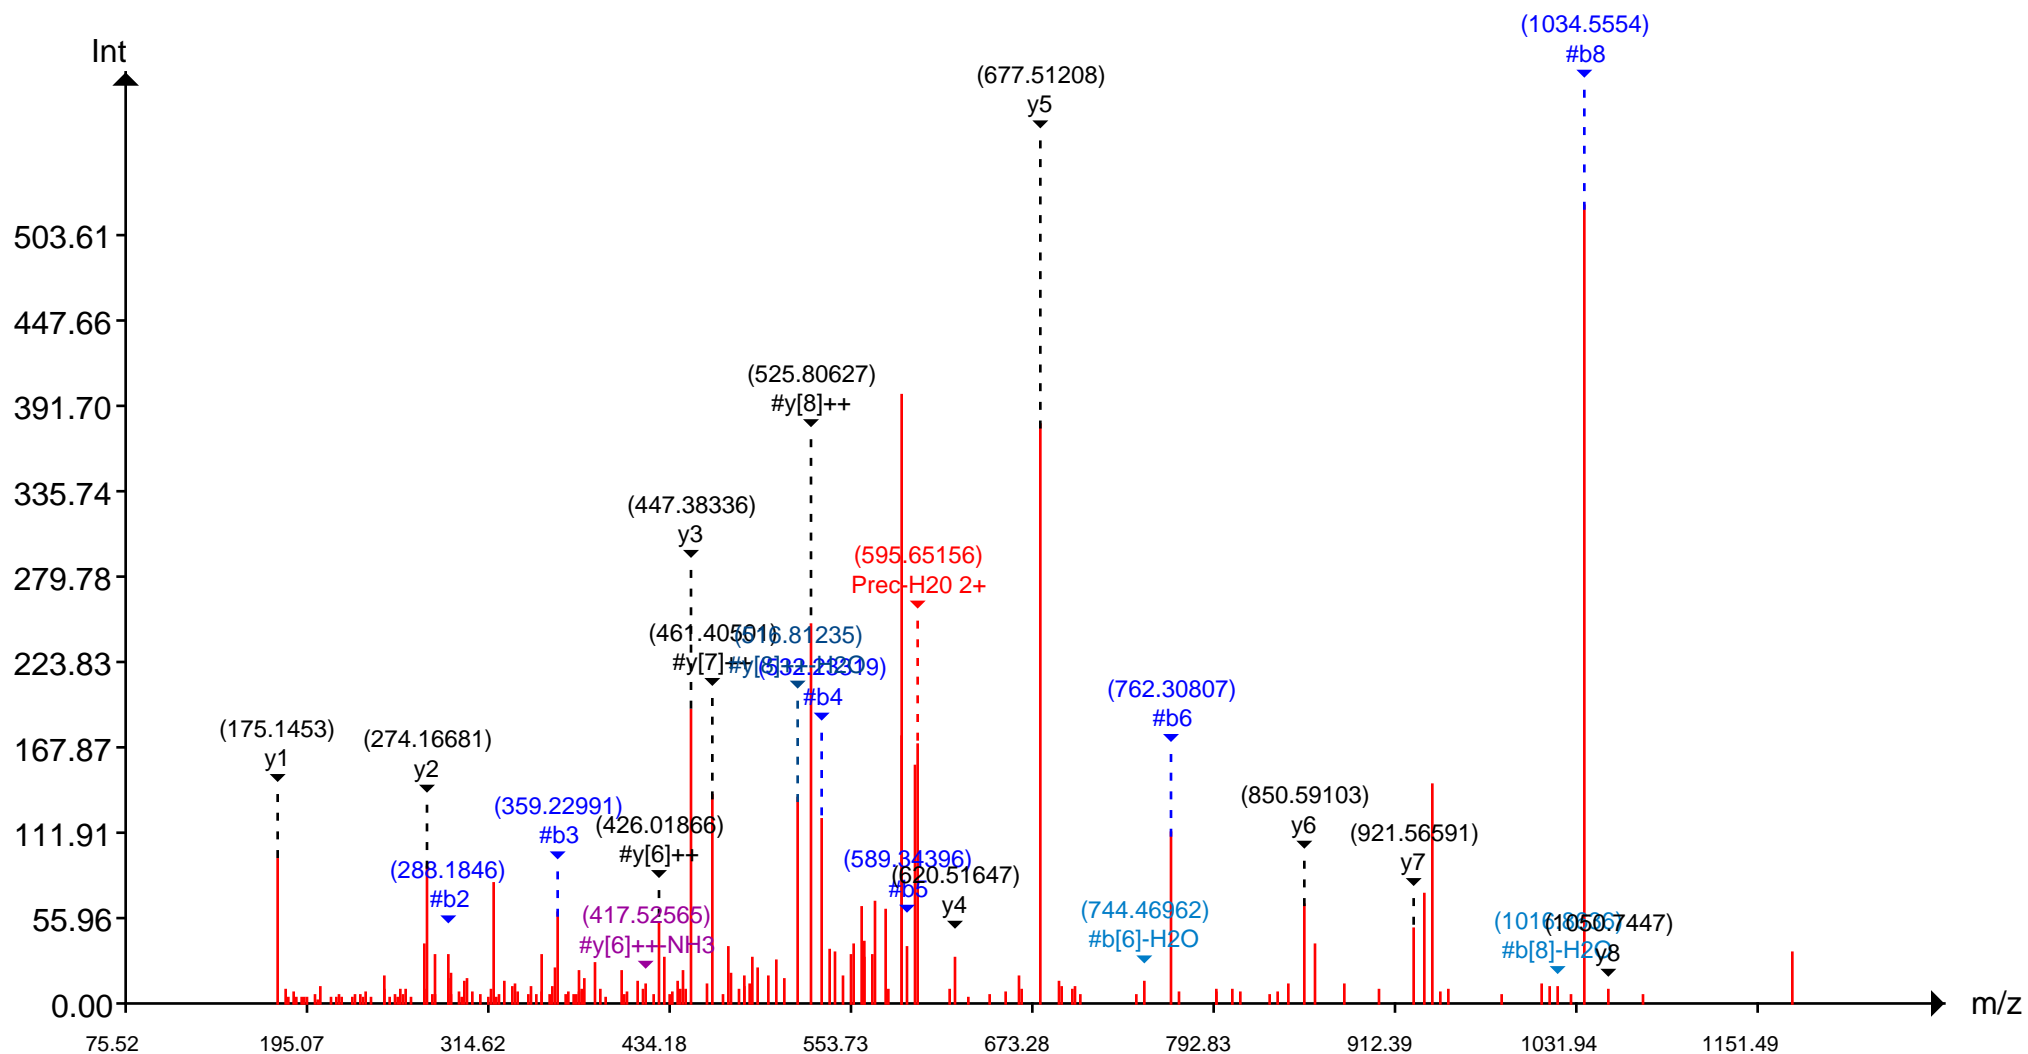

## Info

|                          |                                             |                           |         |
|--------------------------|---------------------------------------------|---------------------------|---------|
| <b>Modified Sequence</b> | AcD3-IEAK<AcD3K*>GK<AcD3K*>K<AcD3K*>VR-COOH | <b>Ion score</b>          | 39.35   |
| <b>Protein</b>           | P42208                                      | <b>Confidence level</b>   | 99.00%  |
| <b>Precursor m/z</b>     | 604.8913                                    | <b>Identity Threshold</b> | 38.50   |
| <b>Charge</b>            | 2+                                          | <b>Mass error</b>         | 2.72E-4 |

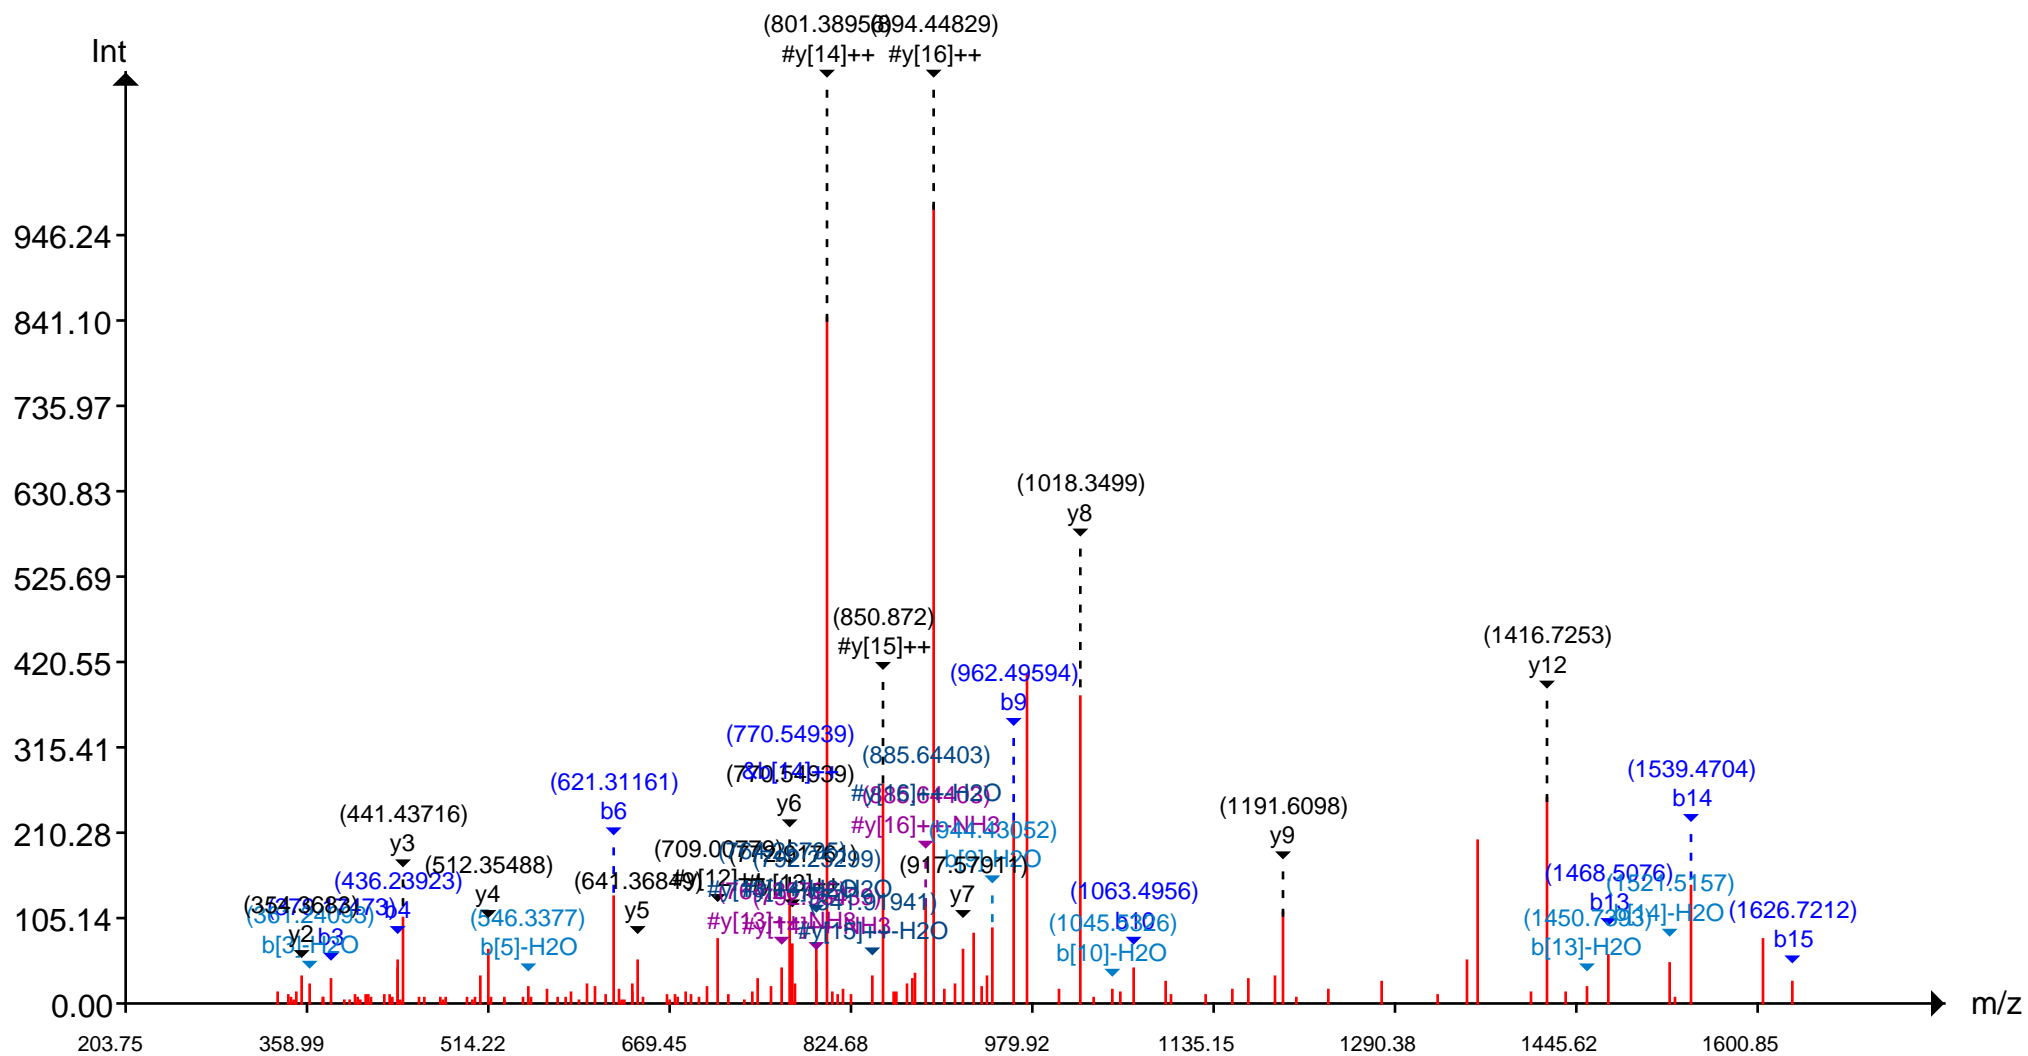

## Info

|                          |                                                        |                           |         |
|--------------------------|--------------------------------------------------------|---------------------------|---------|
| <b>Modified Sequence</b> | AcD3-FSVGQGPAK<AcD3K*>TM<Mox*>EEASK<AcD3K*>R<C13>-COOH | <b>Ion score</b>          | 68.68   |
| <b>Protein</b>           | O70310                                                 | <b>Confidence level</b>   | 99.00%  |
| <b>Precursor m/z</b>     | 990.51234                                              | <b>Identity Threshold</b> | 48.06   |
| <b>Charge</b>            | 2+                                                     | <b>Mass error</b>         | 0.00256 |



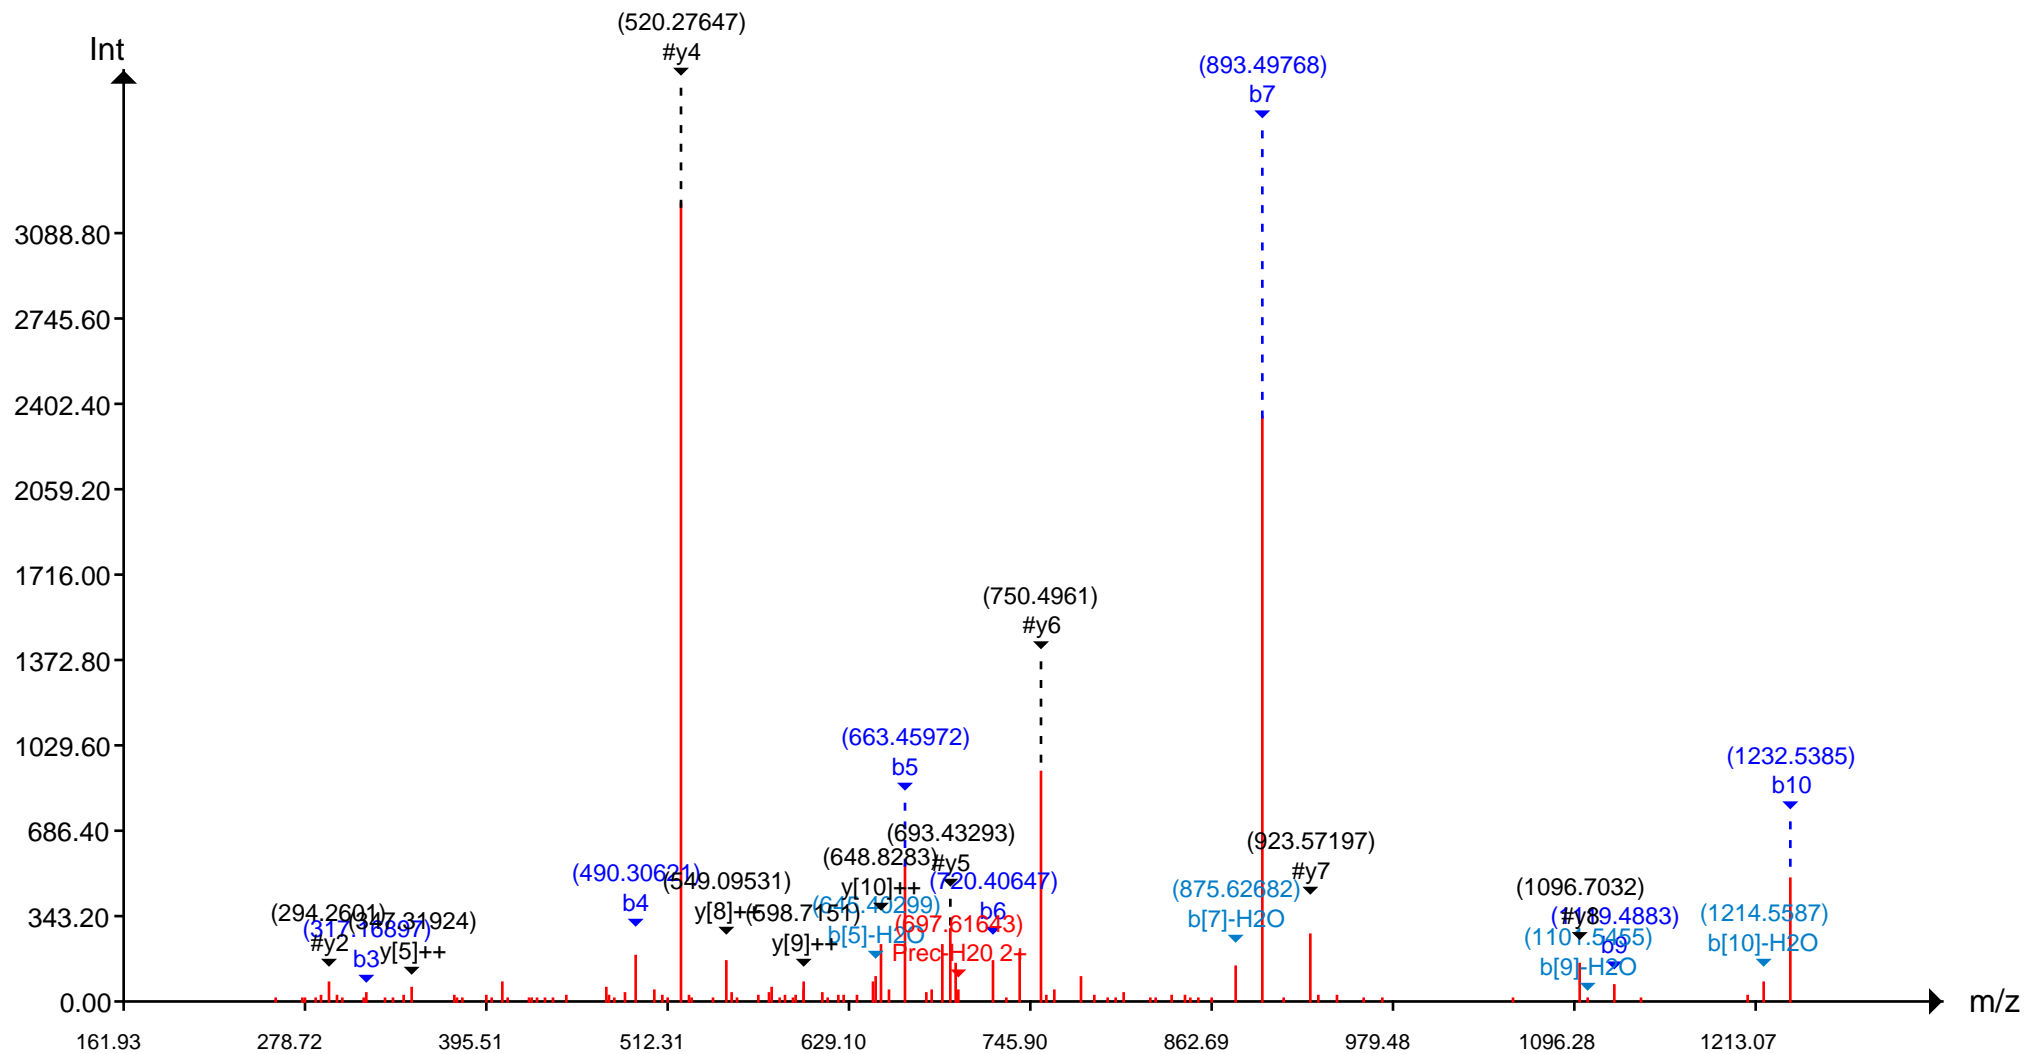

## Info

|                          |                                                    |                           |         |
|--------------------------|----------------------------------------------------|---------------------------|---------|
| <b>Modified Sequence</b> | AcD3-ATVK<AcD3K*>K<AcD3K*>GK<AcD3K*>PELR<C13>-COOH | <b>Ion score</b>          | 46.67   |
| <b>Protein</b>           | P62830                                             | <b>Confidence level</b>   | 99.00%  |
| <b>Precursor m/z</b>     | 706.9518                                           | <b>Identity Threshold</b> | 38.29   |
| <b>Charge</b>            | 2+                                                 | <b>Mass error</b>         | 6.81E-4 |

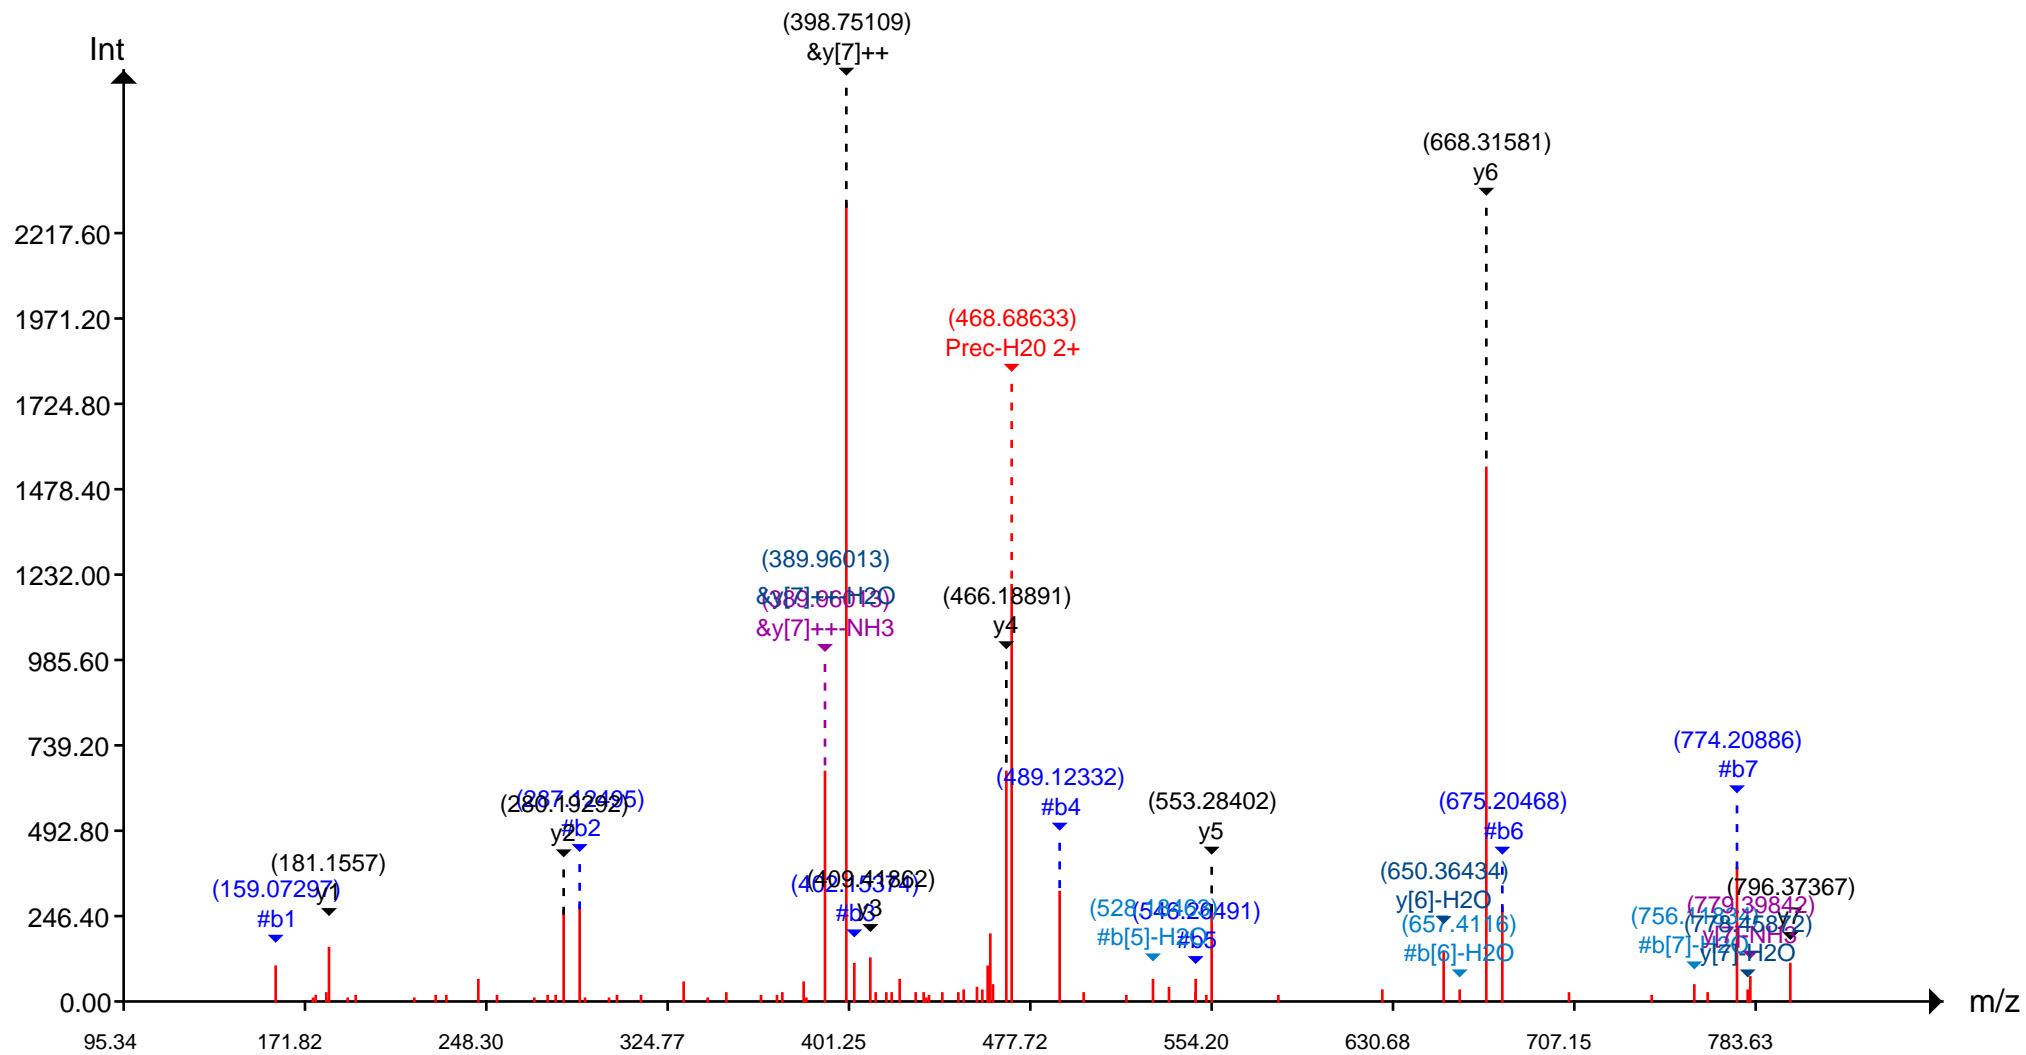

## Info

|                          |                         |                           |          |
|--------------------------|-------------------------|---------------------------|----------|
| <b>Modified Sequence</b> | AcD3-LQDSGEVR<C13>-COOH | <b>Ion score</b>          | 57.44    |
| <b>Protein</b>           | P63242                  | <b>Confidence level</b>   | 99.00%   |
| <b>Precursor m/z</b>     | 477.75459               | <b>Identity Threshold</b> | 47.48    |
| <b>Charge</b>            | 2+                      | <b>Mass error</b>         | -6.57E-4 |

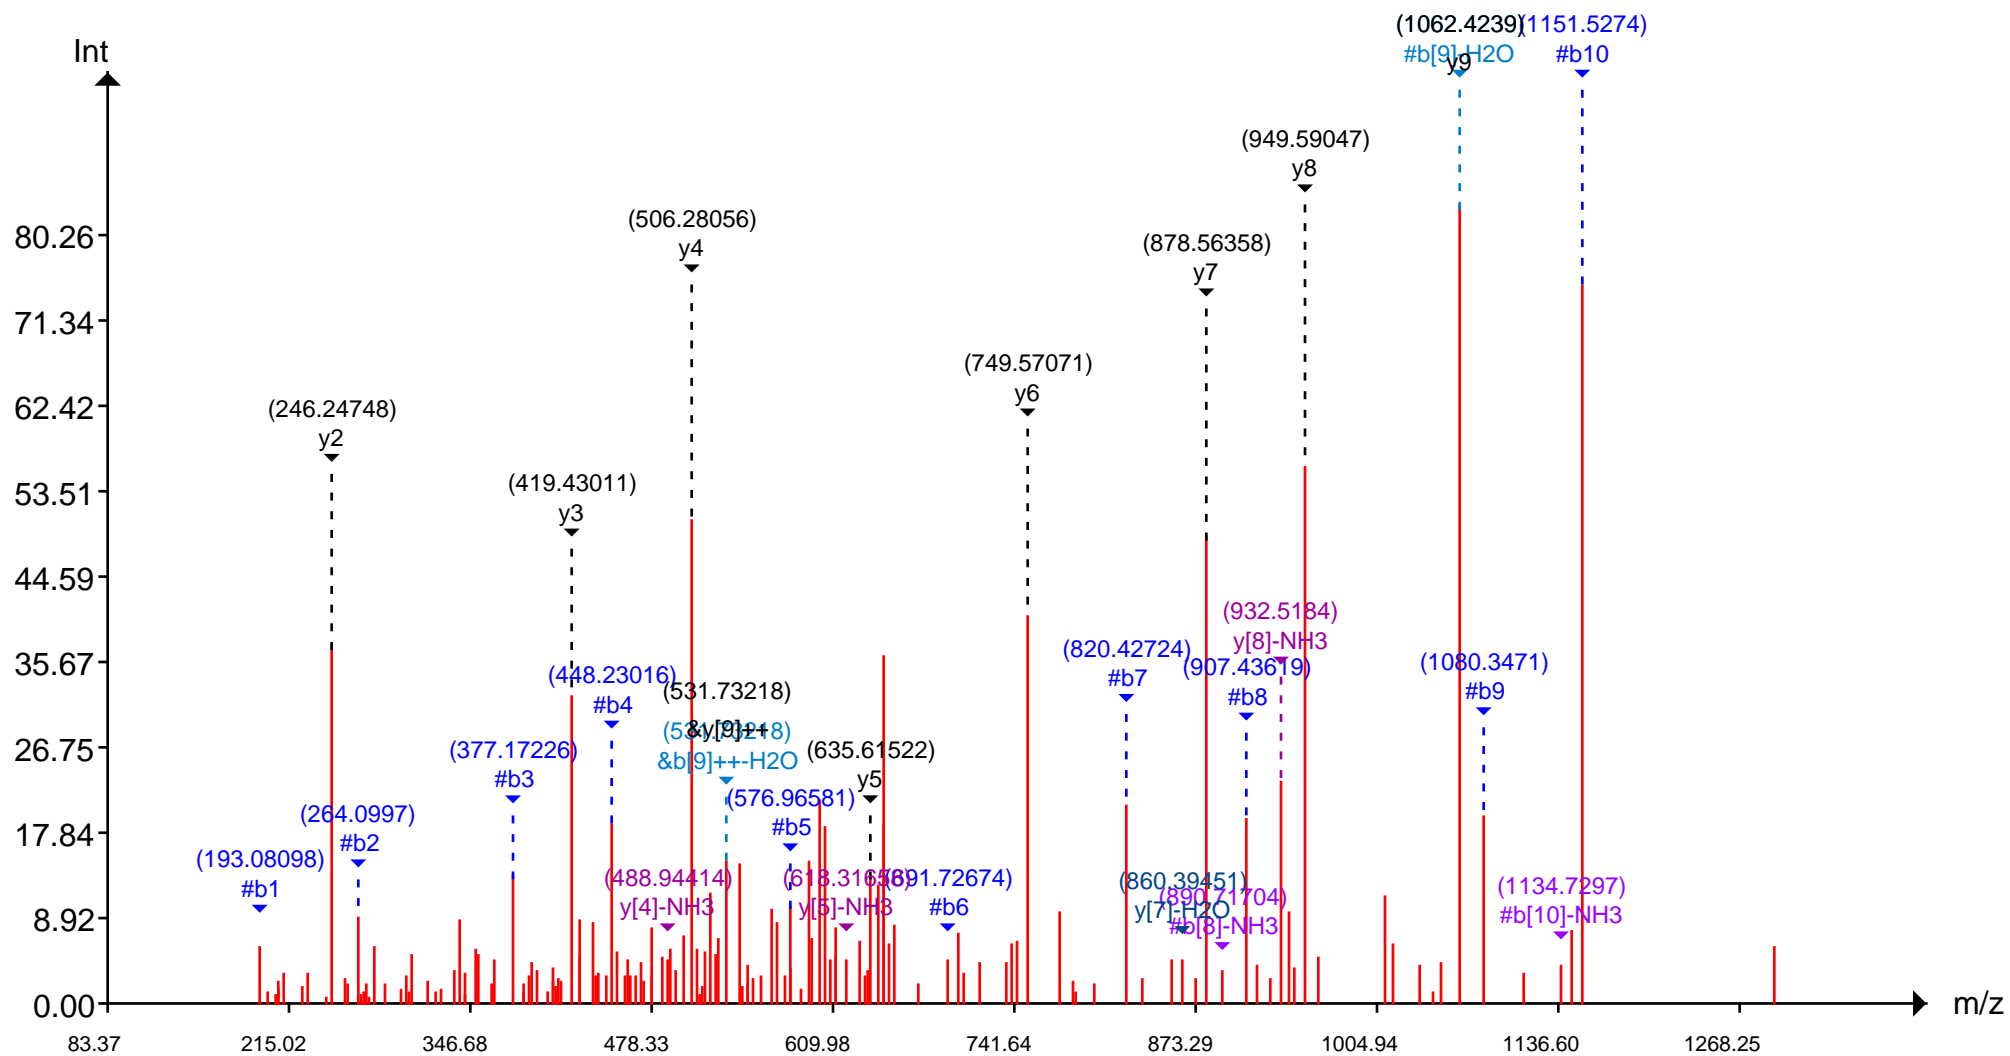

## Info

**Modified Sequence** AcD3-FAIAENESK<AcD3K\*>AR-COOH

**Ion score** 73.26

**Protein** Q923D4

**Confidence level** 99.00%

**Precursor m/z** 663.35233

**Identity Threshold** 47.97

**Charge** 2+

**Mass error** 7.62E-4

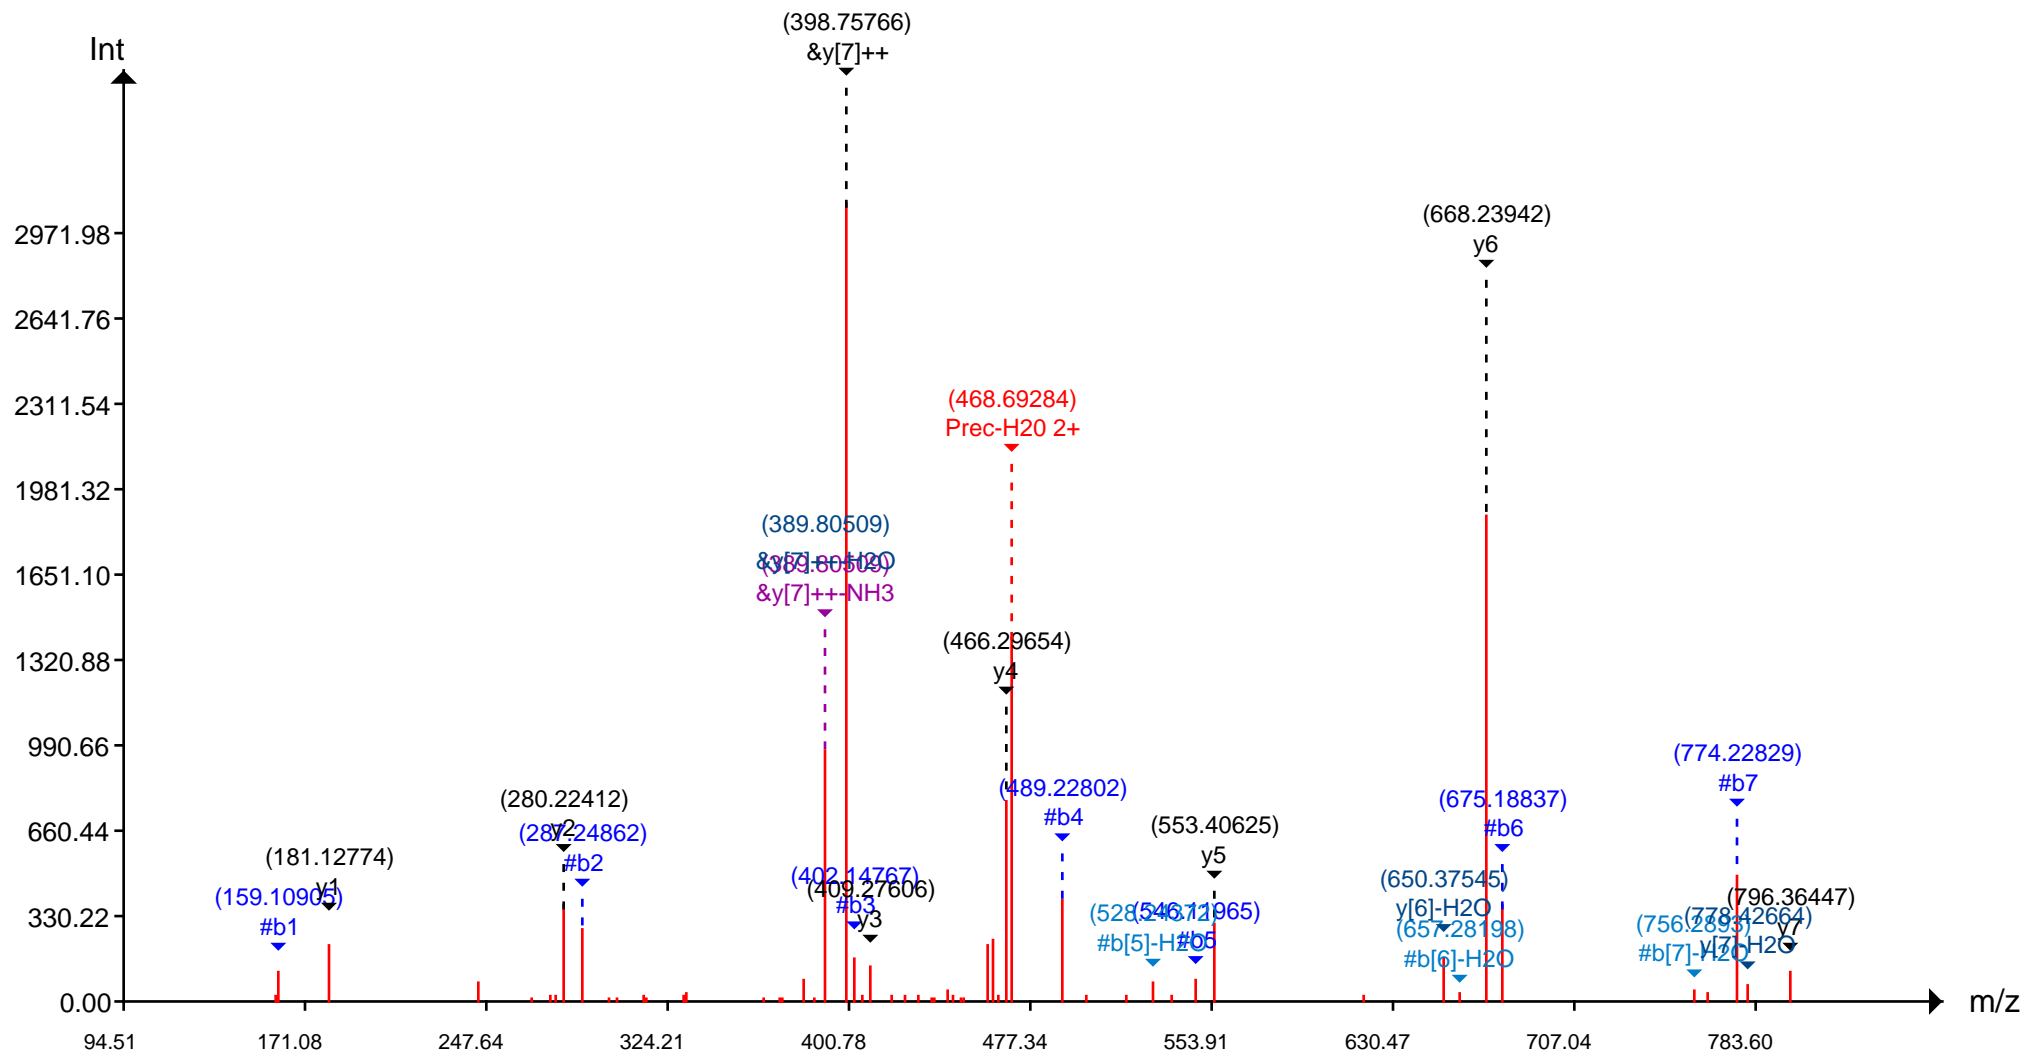

## Info

|                          |                         |                           |          |
|--------------------------|-------------------------|---------------------------|----------|
| <b>Modified Sequence</b> | AcD3-LQDSGEVR<C13>-COOH | <b>Ion score</b>          | 56.08    |
| <b>Protein</b>           | P63242                  | <b>Confidence level</b>   | 99.00%   |
| <b>Precursor m/z</b>     | 477.75447               | <b>Identity Threshold</b> | 47.50    |
| <b>Charge</b>            | 2+                      | <b>Mass error</b>         | -8.97E-4 |

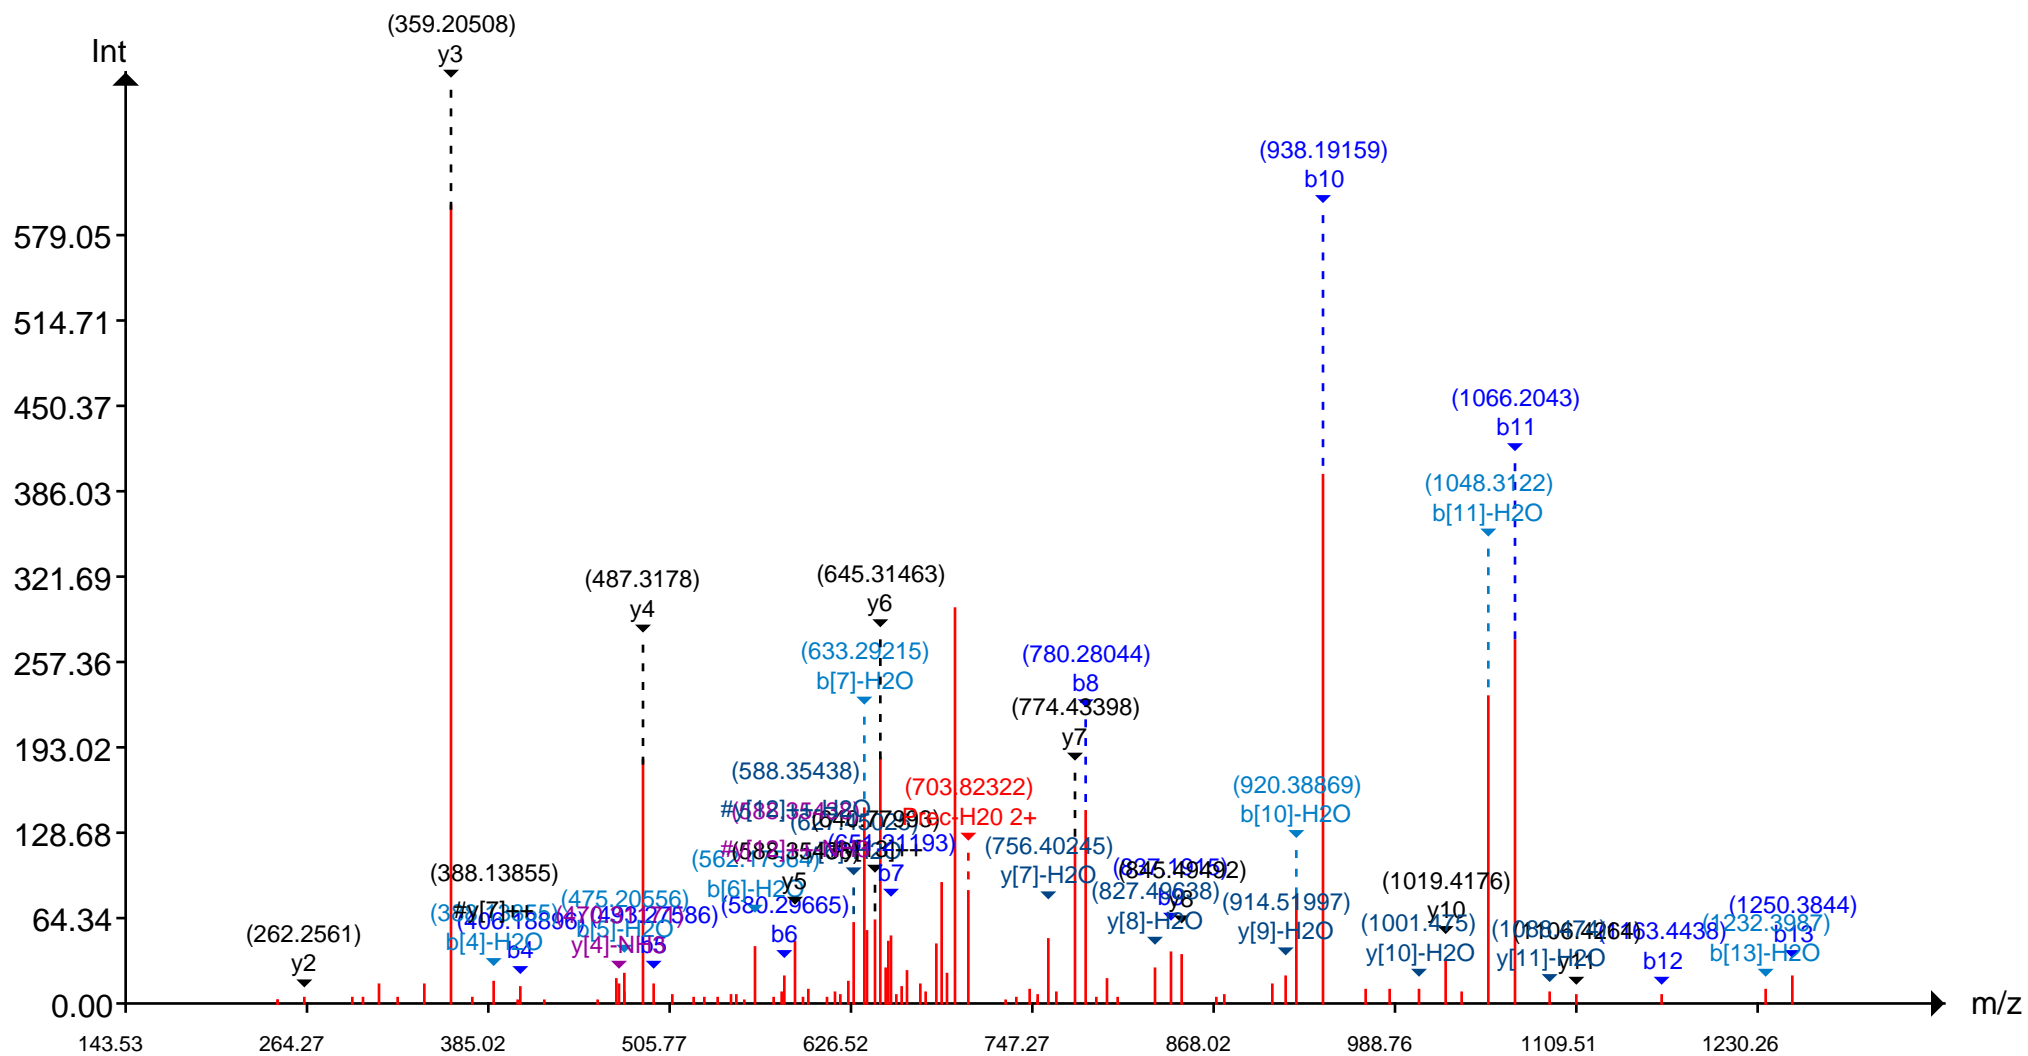

## Info

|                          |                          |                           |         |
|--------------------------|--------------------------|---------------------------|---------|
| <b>Modified Sequence</b> | AcD3-VSSSSSAEGTQPSR-COOH | <b>Ion score</b>          | 77.51   |
| <b>Protein</b>           | Q8R317                   | <b>Confidence level</b>   | 99.00%  |
| <b>Precursor m/z</b>     | 712.8386                 | <b>Identity Threshold</b> | 46.08   |
| <b>Charge</b>            | 2+                       | <b>Mass error</b>         | 8.13E-4 |

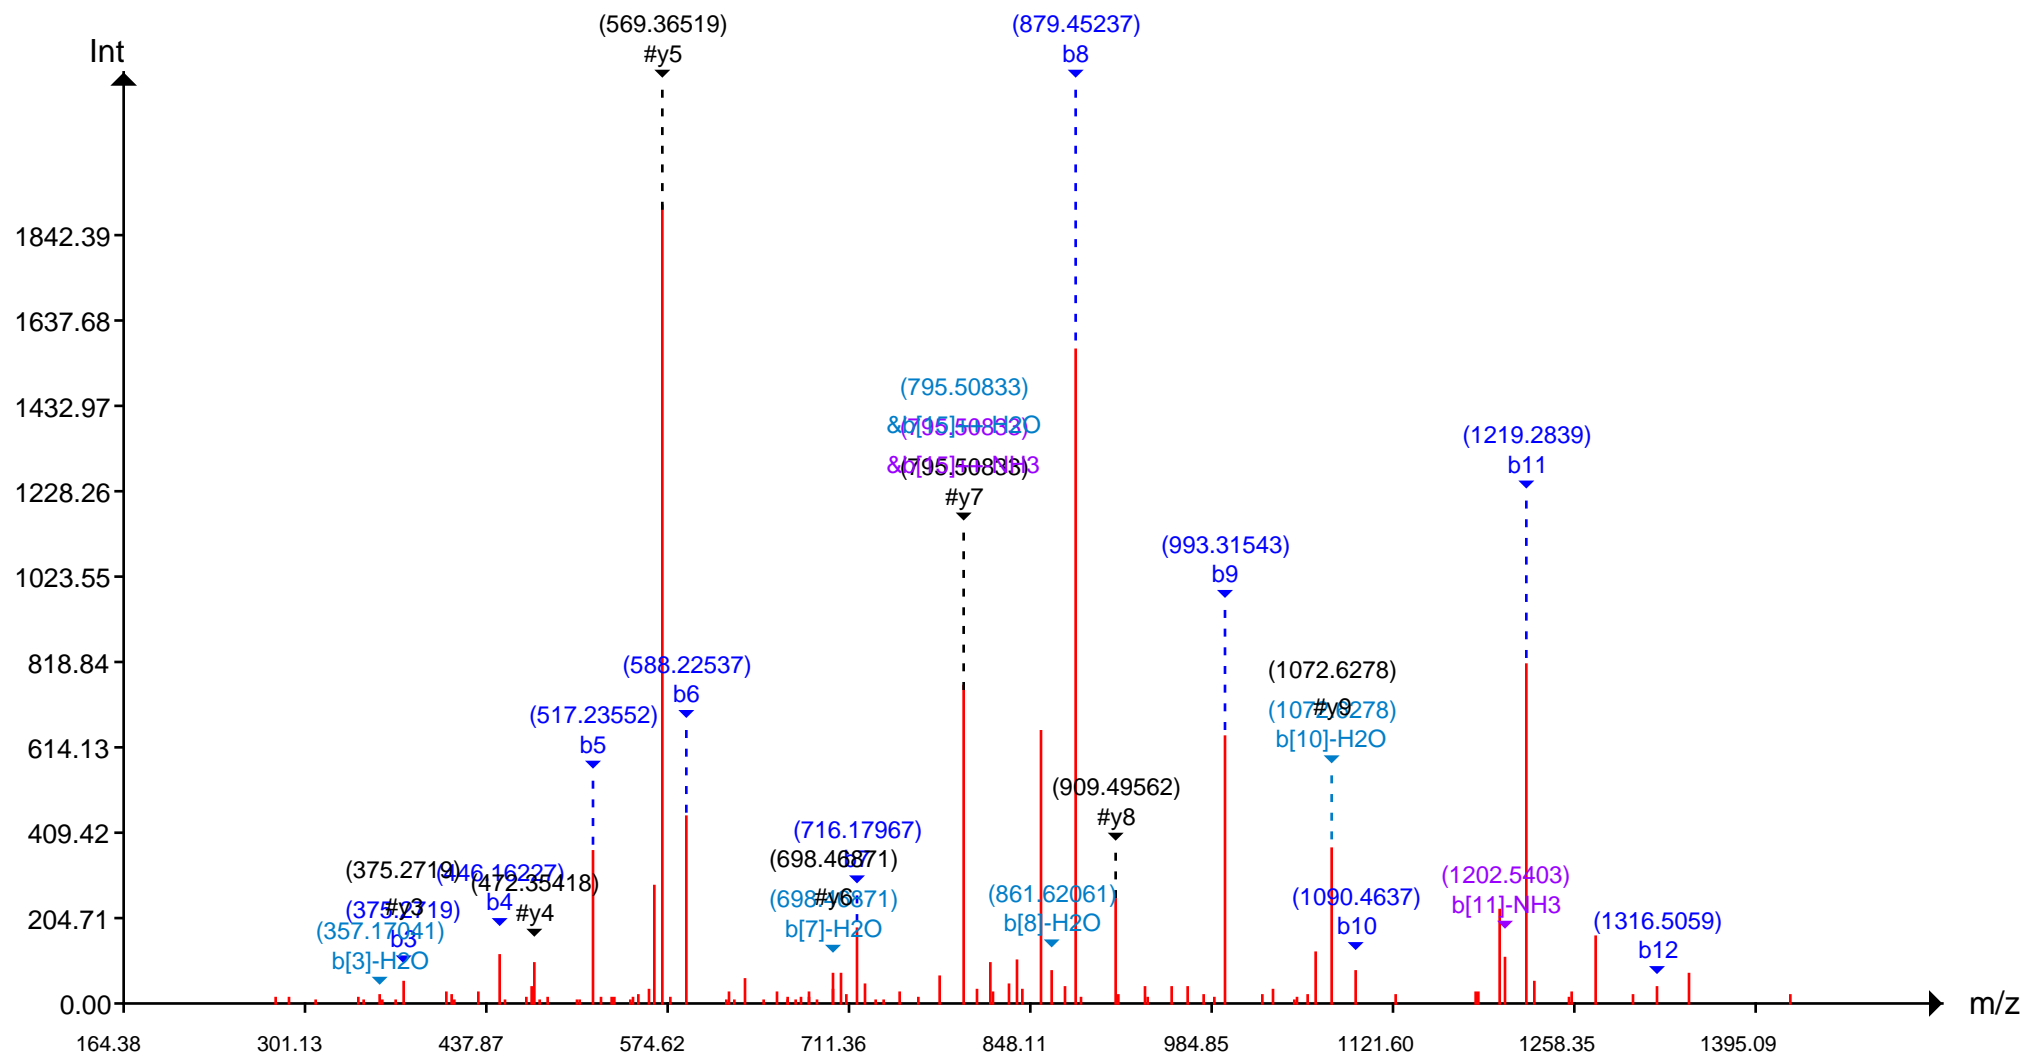

## Info

**Modified Sequence** AcD3-ISEAAQYNPEPPPPR<C13>-COOH

**Ion score** 78.99

**Protein** O88456

**Confidence level** 99.00%

**Precursor m/z** 894.45945

**Identity Threshold** 48.05

**Charge** 2+

**Mass error** 0.001913

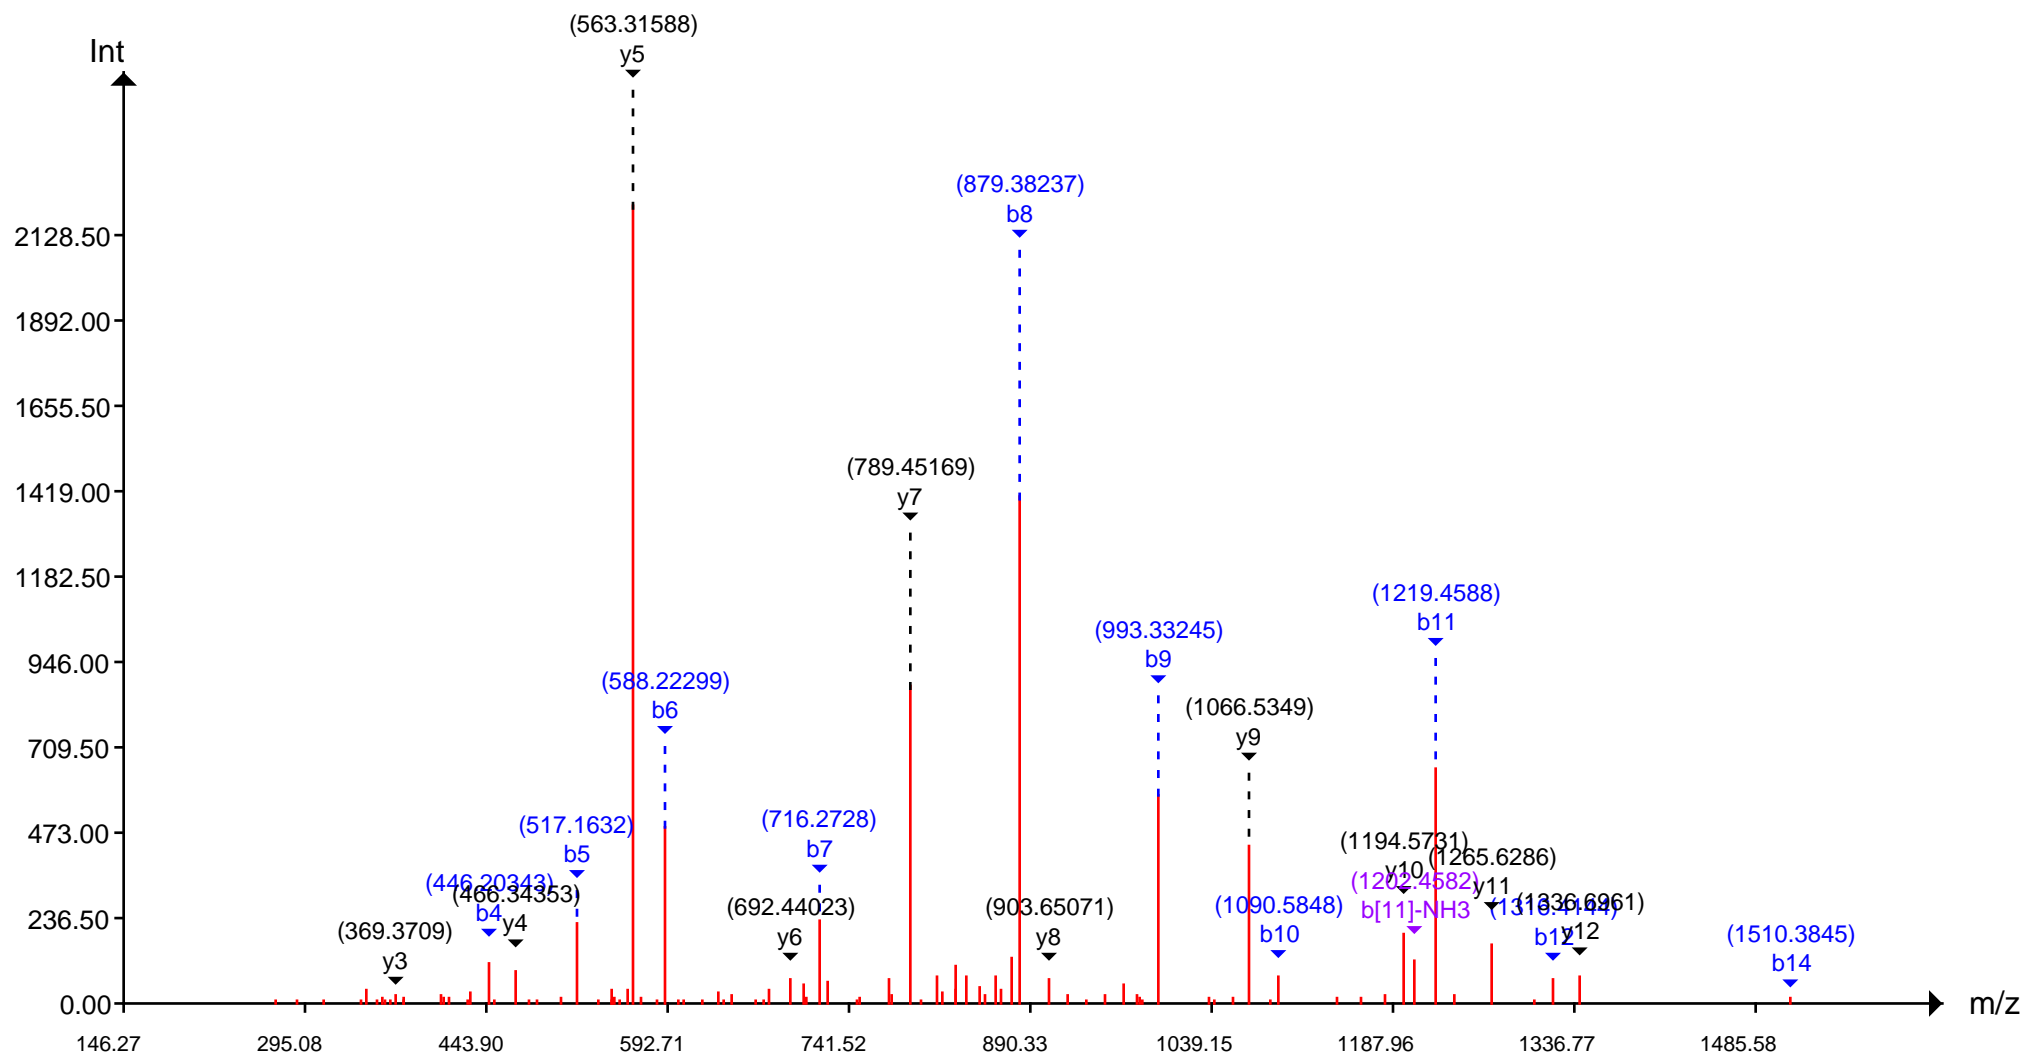

## Info

|                          |                           |                           |          |
|--------------------------|---------------------------|---------------------------|----------|
| <b>Modified Sequence</b> | AcD3-ISEAAQYNPEPPPPR-COOH | <b>Ion score</b>          | 85.98    |
| <b>Protein</b>           | O88456                    | <b>Confidence level</b>   | 99.00%   |
| <b>Precursor m/z</b>     | 891.44917                 | <b>Identity Threshold</b> | 47.86    |
| <b>Charge</b>            | 2+                        | <b>Mass error</b>         | 0.001494 |

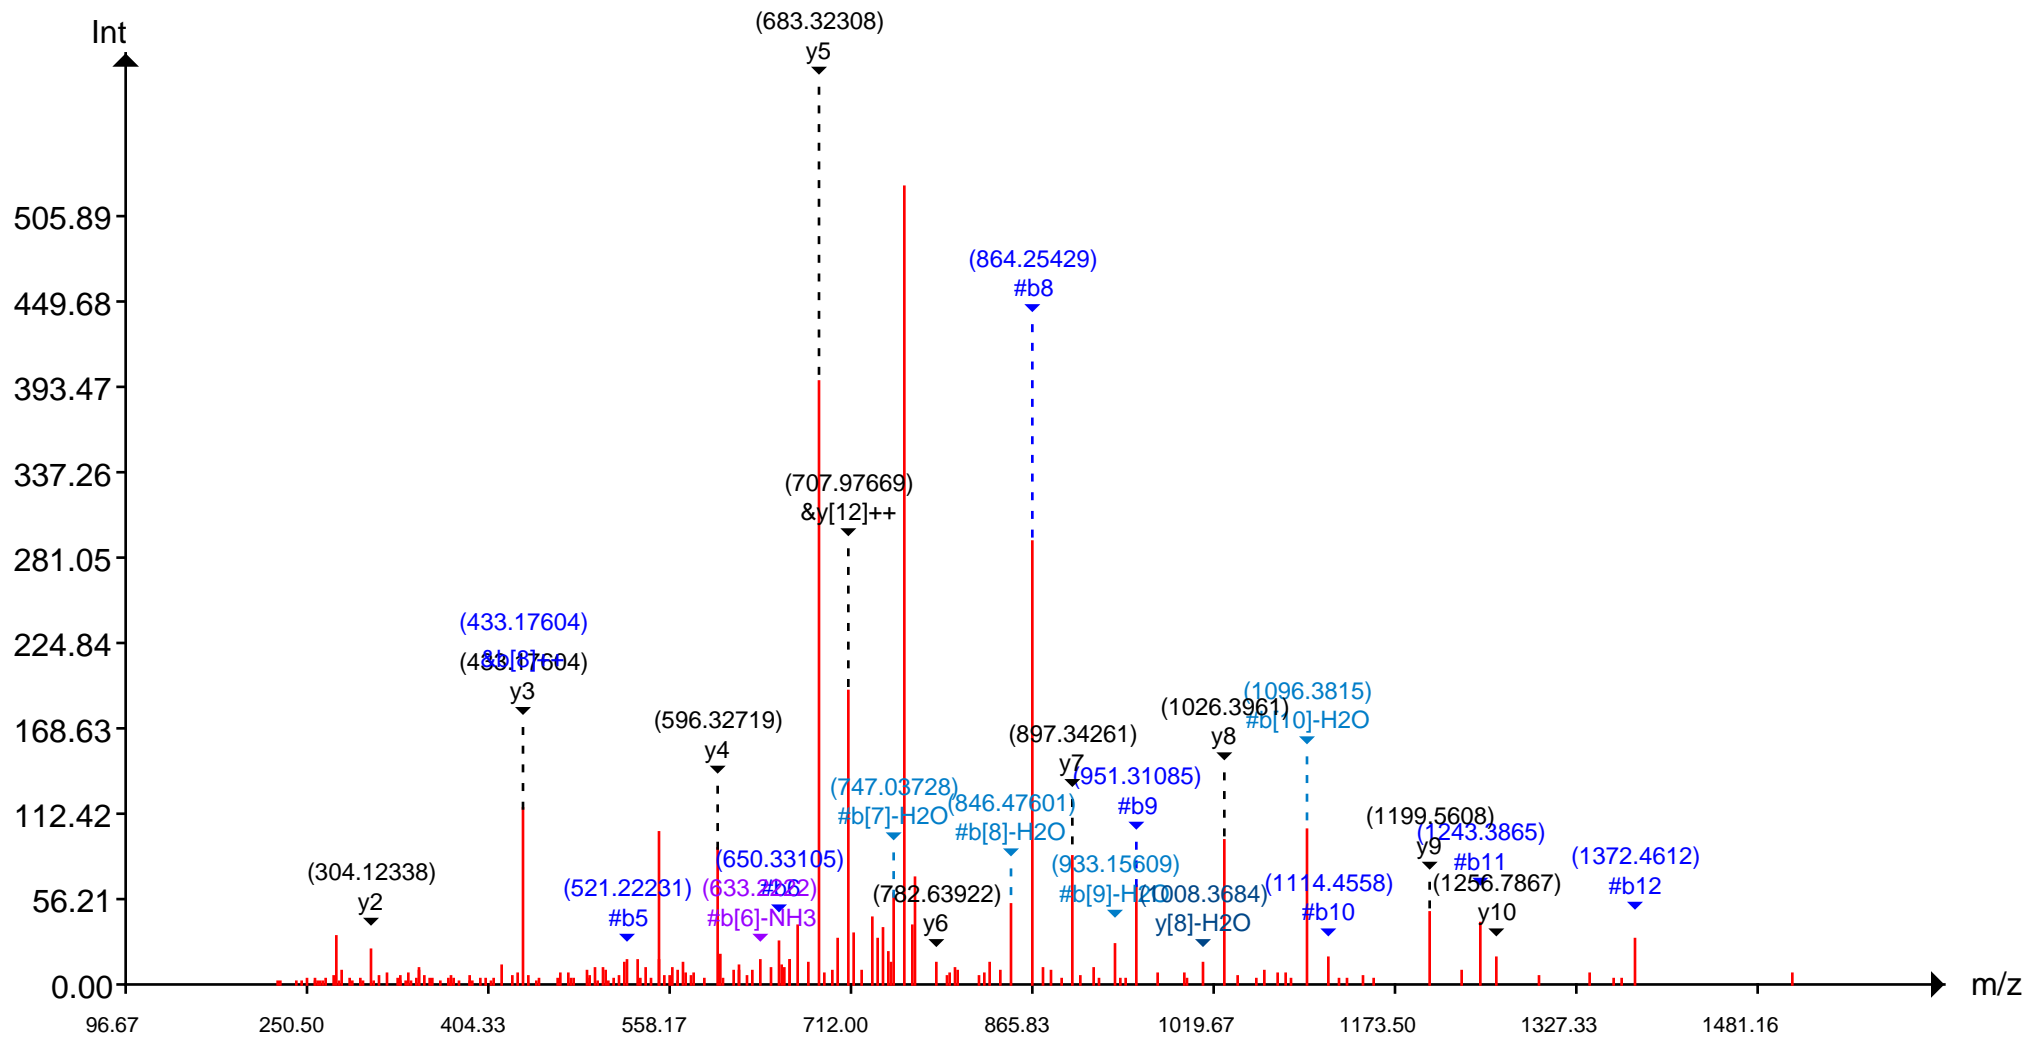

## Info

**Modified Sequence** AcD3-STGGK<AcD3K\*>EDVSYEER-COOH

**Ion score** 58.92

**Protein** Q9R257

**Confidence level** 99.00%

**Precursor m/z** 773.86043

**Identity Threshold** 45.36

**Charge** 2+

**Mass error** -2.35E-4



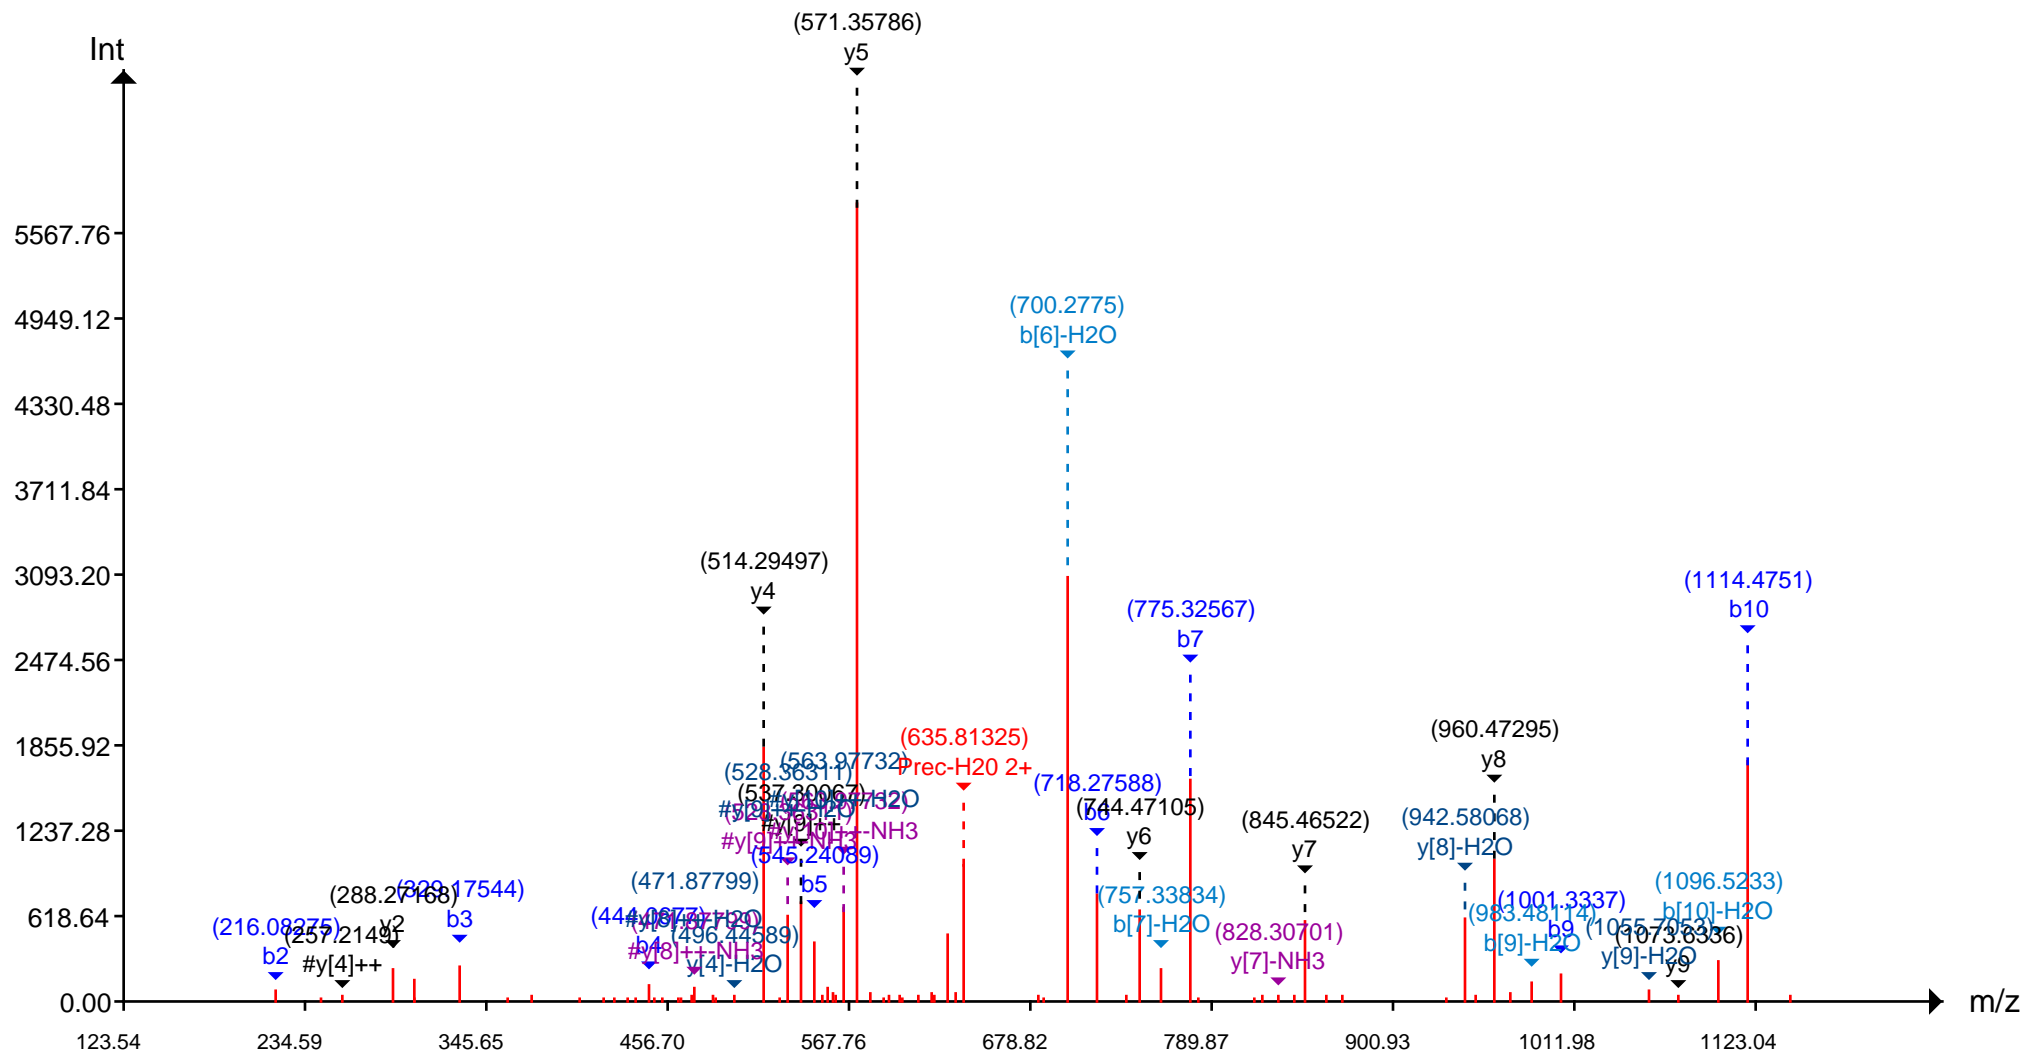

## Info

**Modified Sequence** AcD3-VALDTK<AcD3K\*>GPEIR-COOH

**Ion score** 57.07

**Protein** P52480

**Confidence level** 99.00%

**Precursor m/z** 644.8731

**Identity Threshold** 46.56

**Charge** 2+

**Mass error** 0.001133

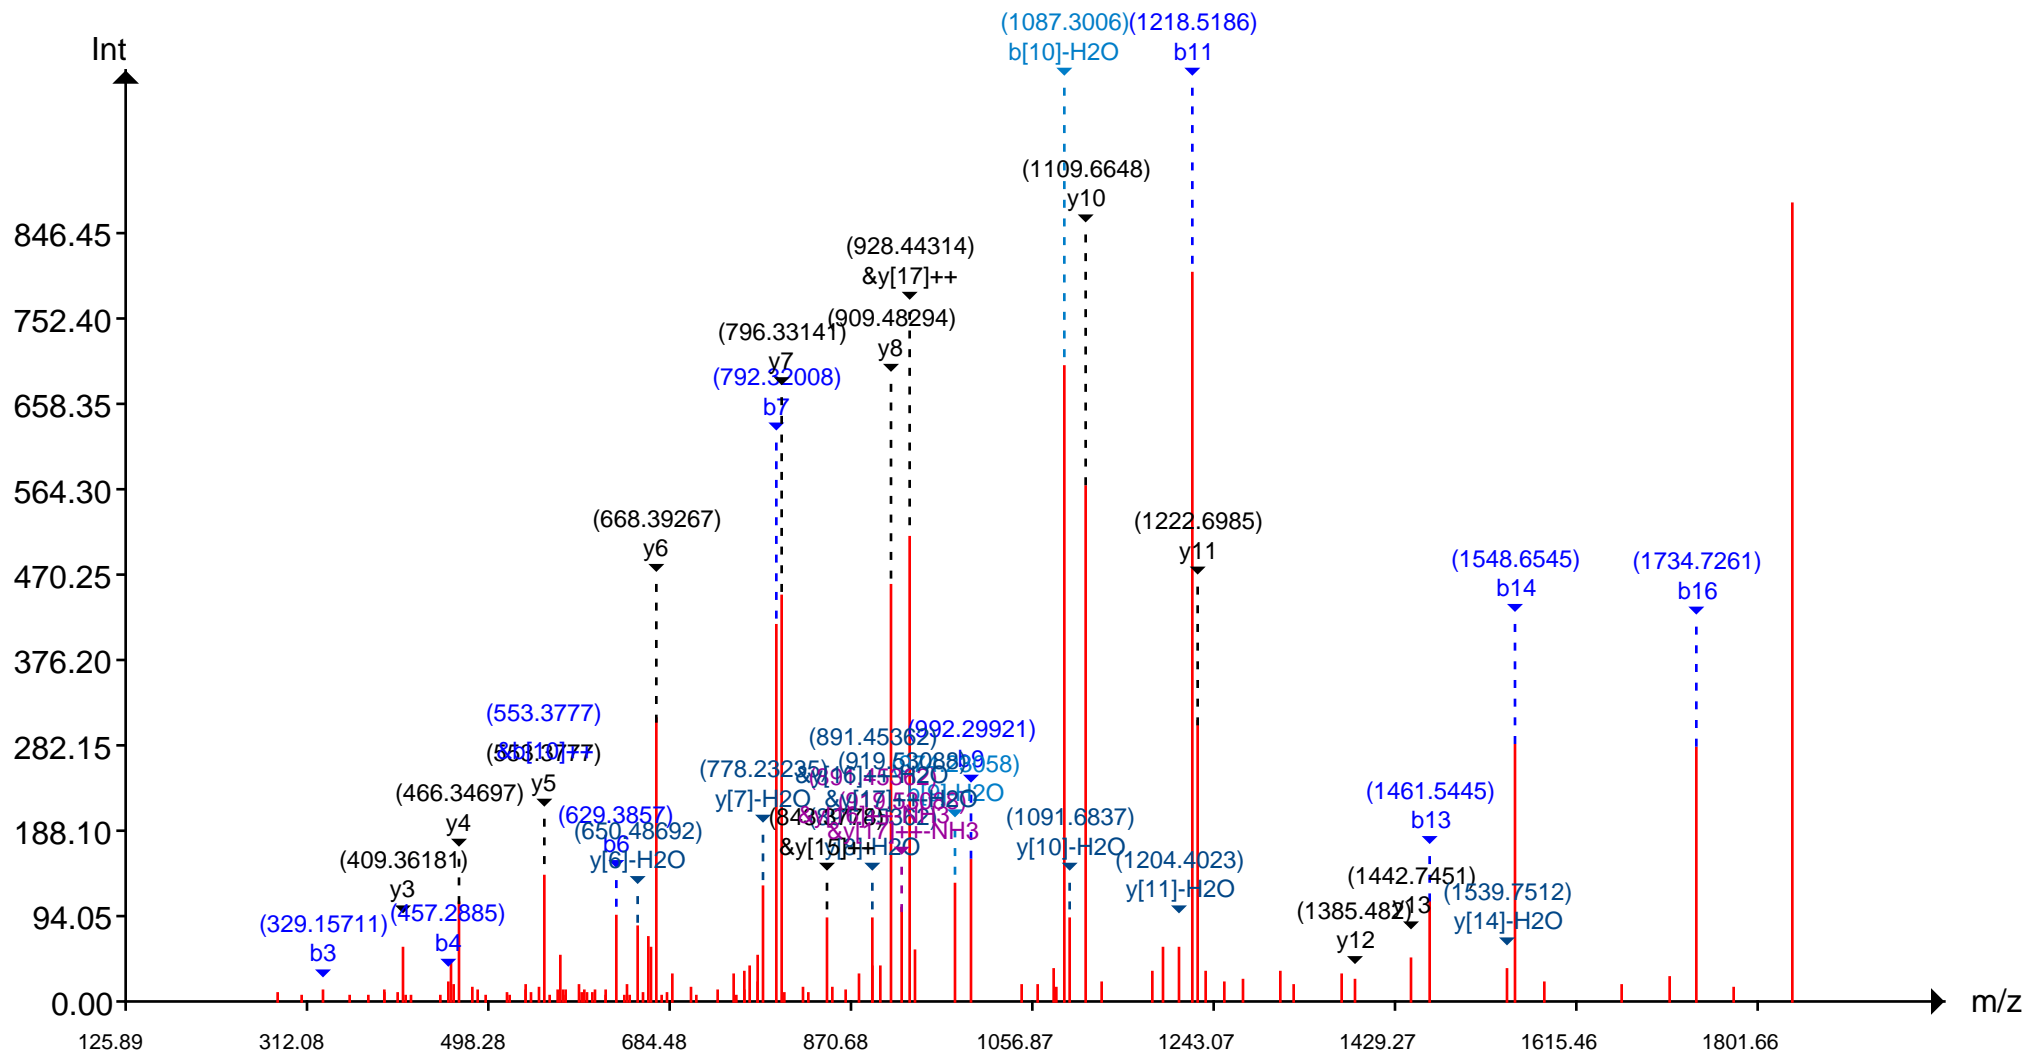

## Info

|                          |                                   |                           |          |
|--------------------------|-----------------------------------|---------------------------|----------|
| <b>Modified Sequence</b> | AcD3-IGIQDGYLSLLQDSGEVR<C13>-COOH | <b>Ion score</b>          | 75.43    |
| <b>Protein</b>           | P63242                            | <b>Confidence level</b>   | 99.00%   |
| <b>Precursor m/z</b>     | 1007.5359                         | <b>Identity Threshold</b> | 47.88    |
| <b>Charge</b>            | 2+                                | <b>Mass error</b>         | 0.001904 |

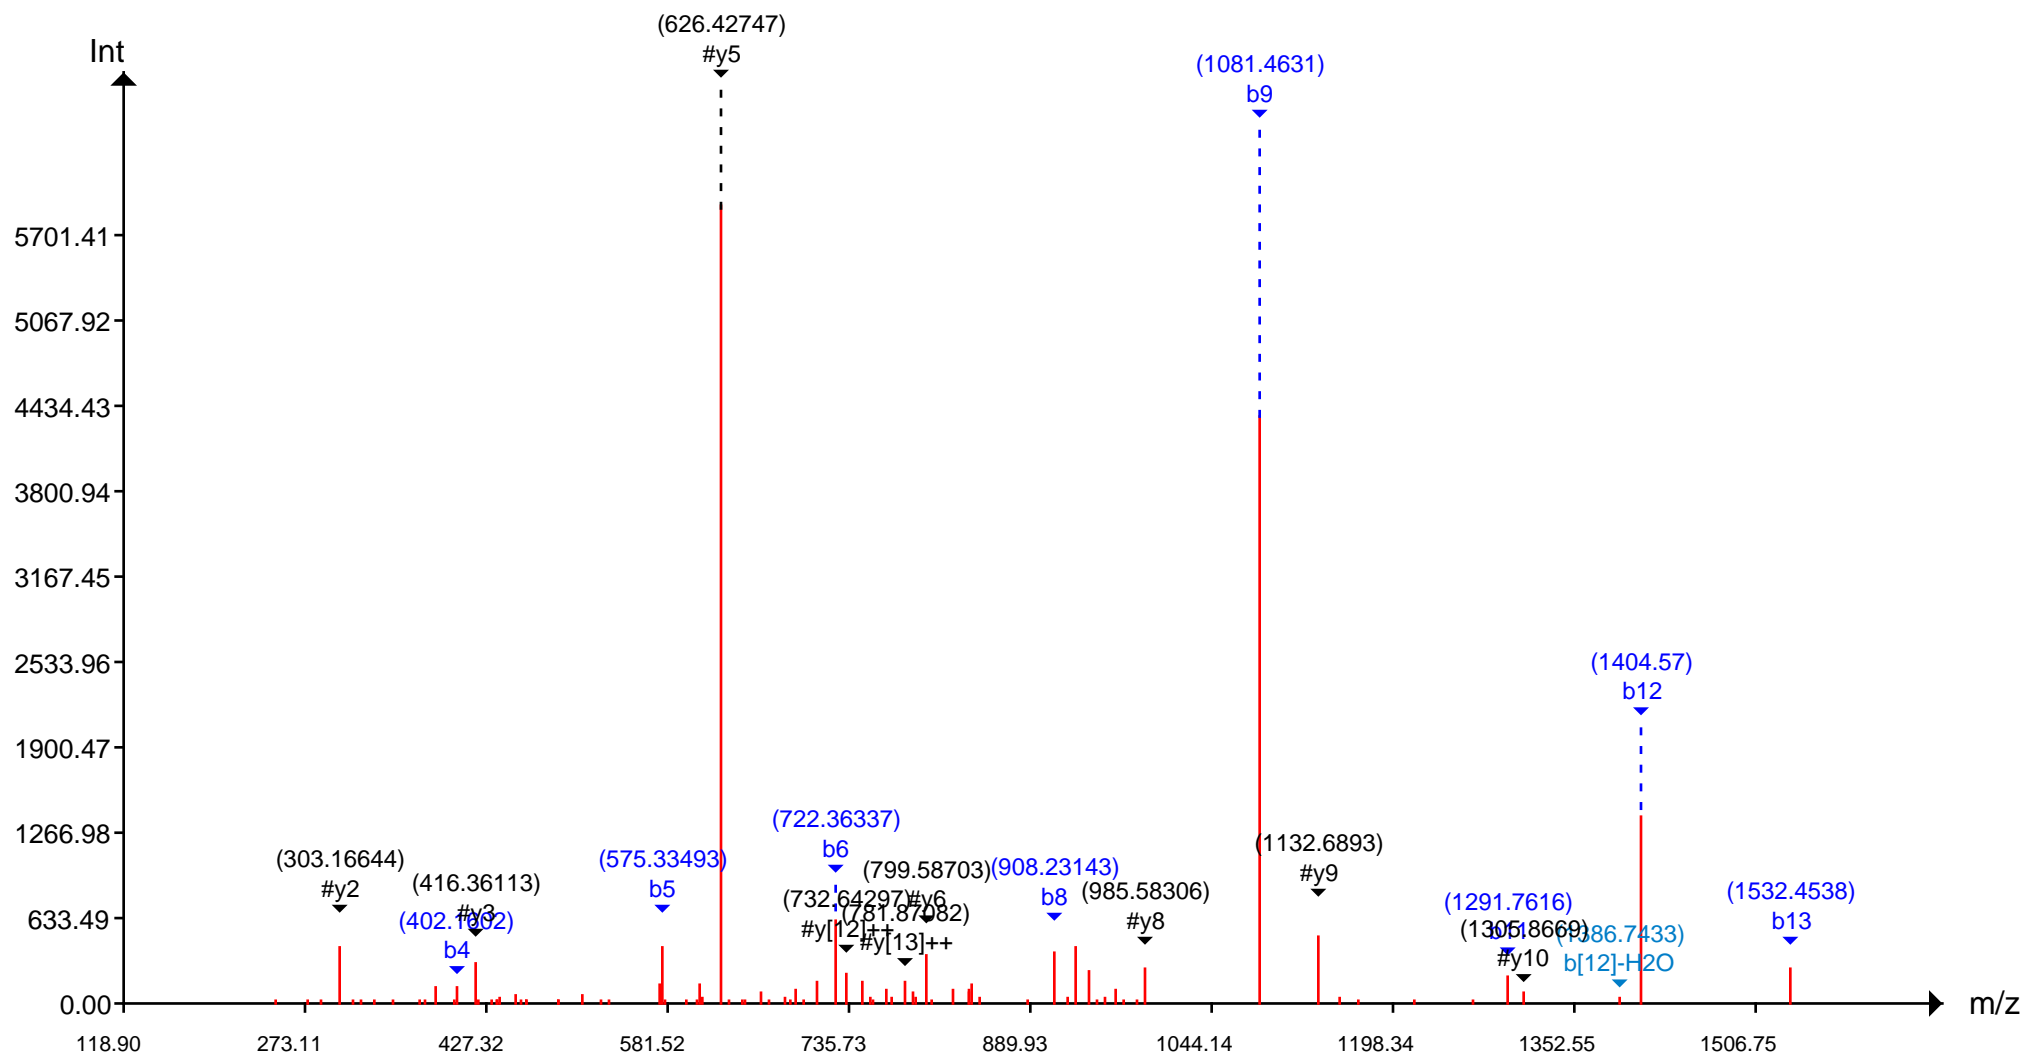

## Info

**Modified Sequence** AcD3-VVSAK<AcD3K\*>FEGK<AcD3K\*>PLLQR-COOH

**Ion score** 59.46

**Protein** Q8BGS2

**Confidence level** 99.00%

**Precursor m/z** 854.01221

**Identity Threshold** 42.77

**Charge** 2+

**Mass error** 0.002178

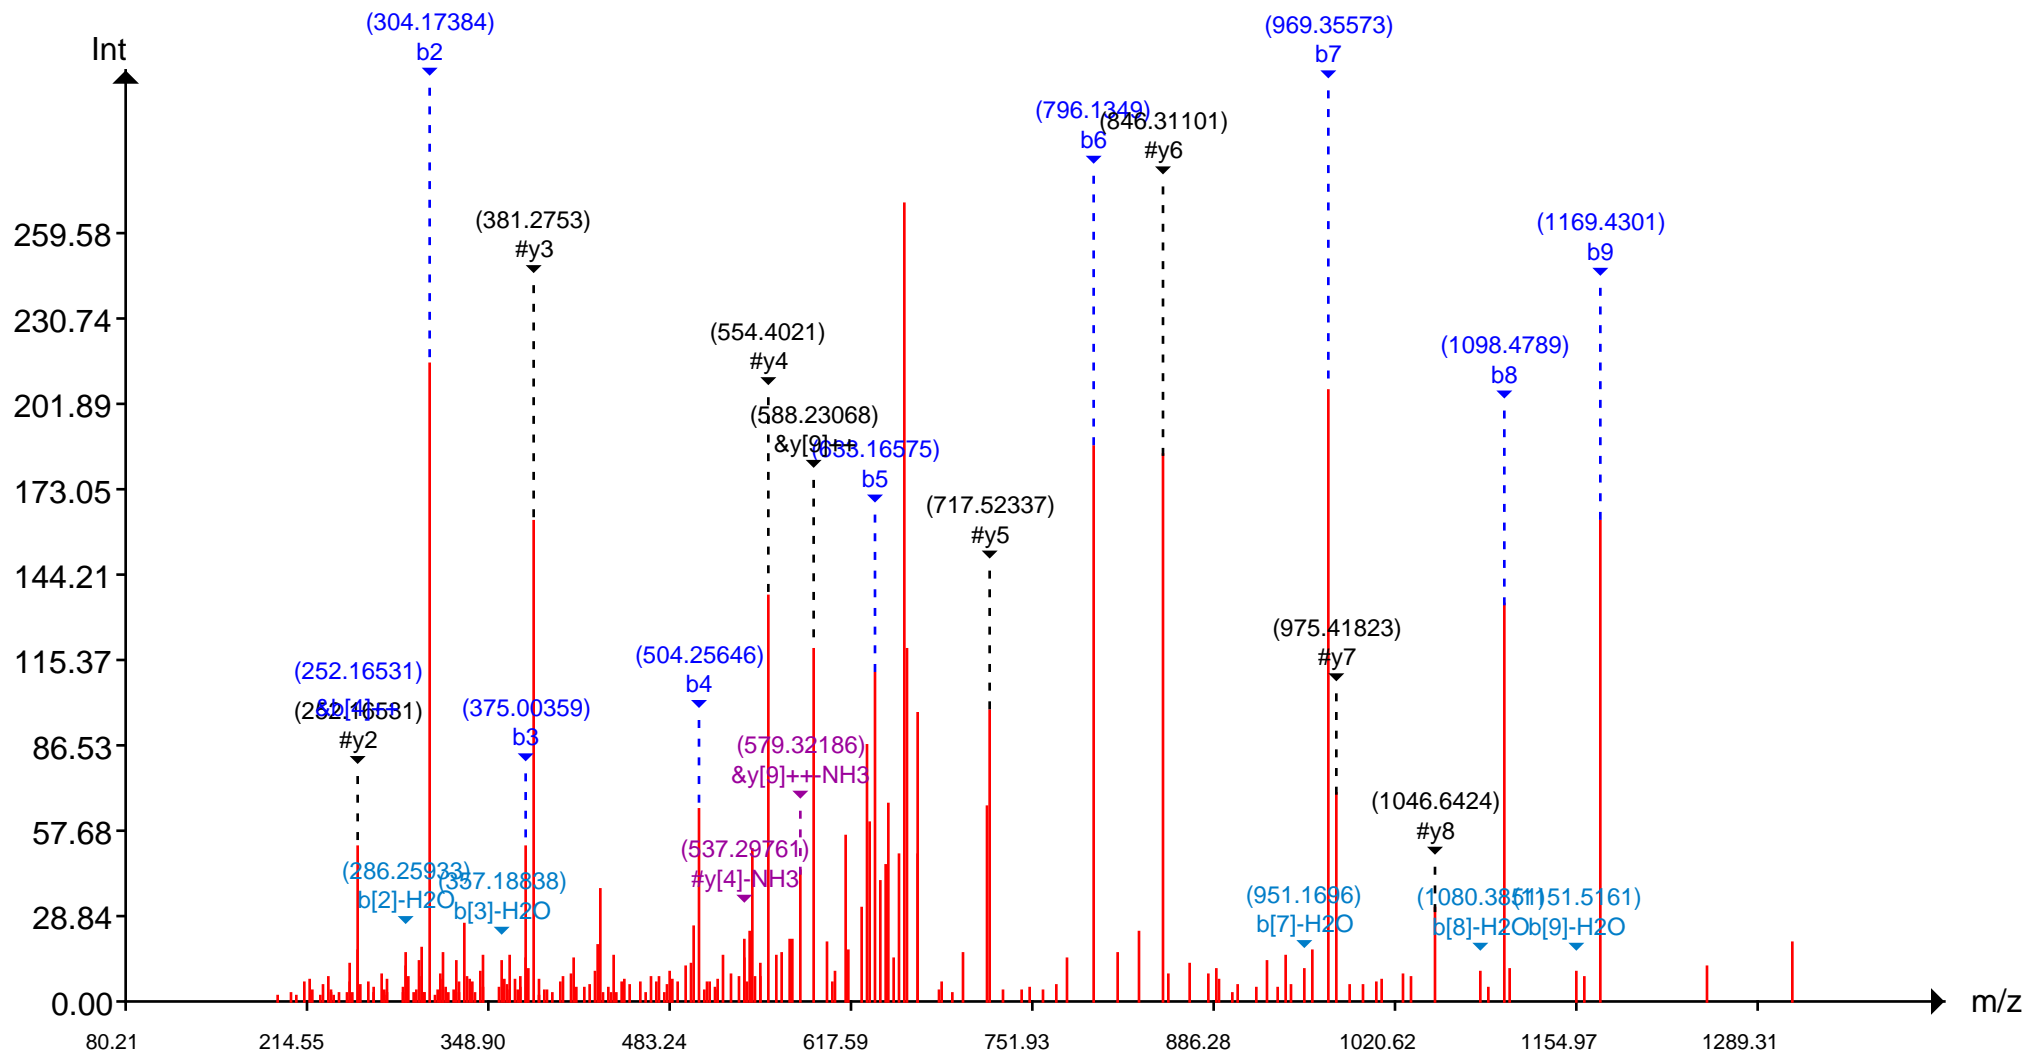

## Info

**Modified Sequence** AcD3-EEAEEYK<AcD3K\*>EAR<C13>-COOH

**Ion score** 56.0

**Protein** P48428

**Confidence level** 99.00%

**Precursor m/z** 675.32552

**Identity Threshold** 46.65

**Charge** 2+

**Mass error** 4.56E-4

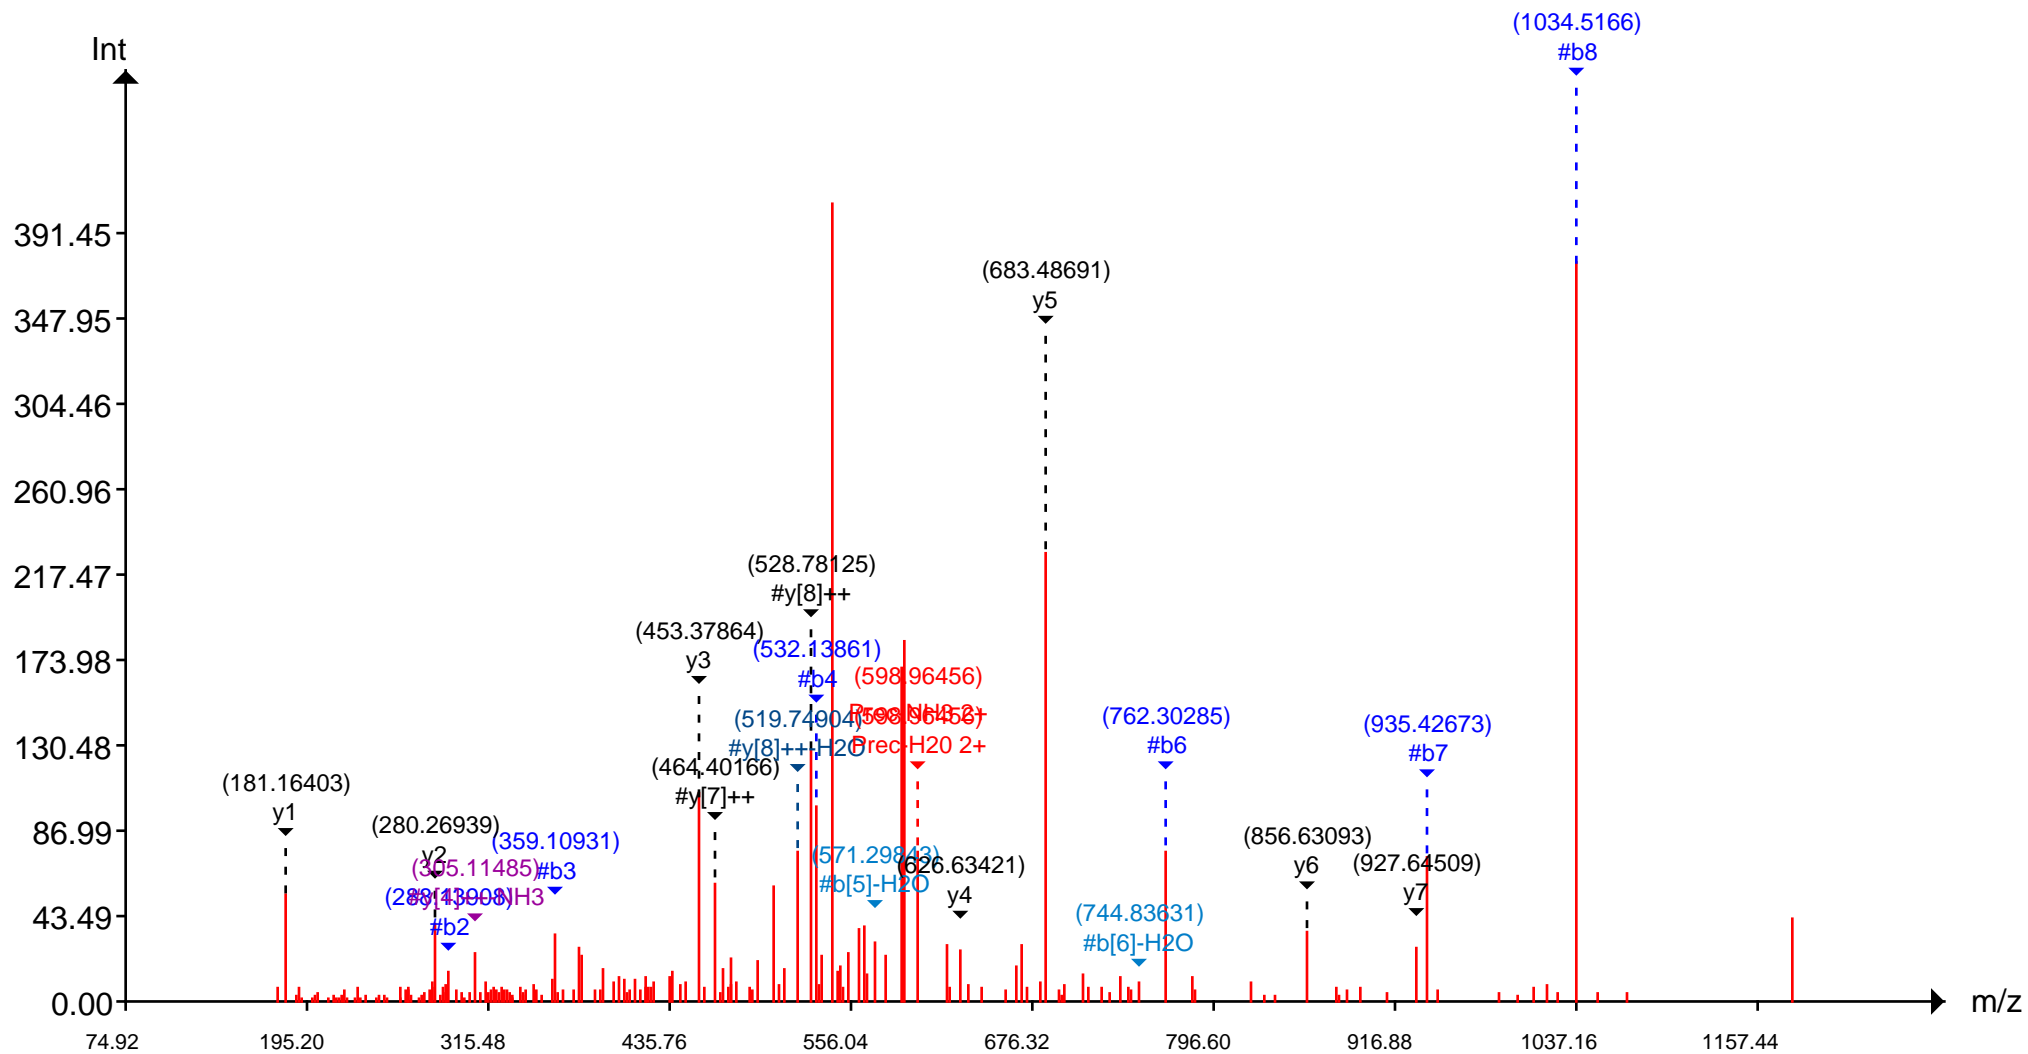

## Info

|                          |                                                  |                           |        |
|--------------------------|--------------------------------------------------|---------------------------|--------|
| <b>Modified Sequence</b> | AcD3-IEAK<AcD3K*>GK<AcD3K*>K<AcD3K*>VR<C13>-COOH | <b>Ion score</b>          | 42.69  |
| <b>Protein</b>           | P42208                                           | <b>Confidence level</b>   | 99.00% |
| <b>Precursor m/z</b>     | 607.90136                                        | <b>Identity Threshold</b> | 37.45  |
| <b>Charge</b>            | 2+                                               | <b>Mass error</b>         | 2.5E-4 |

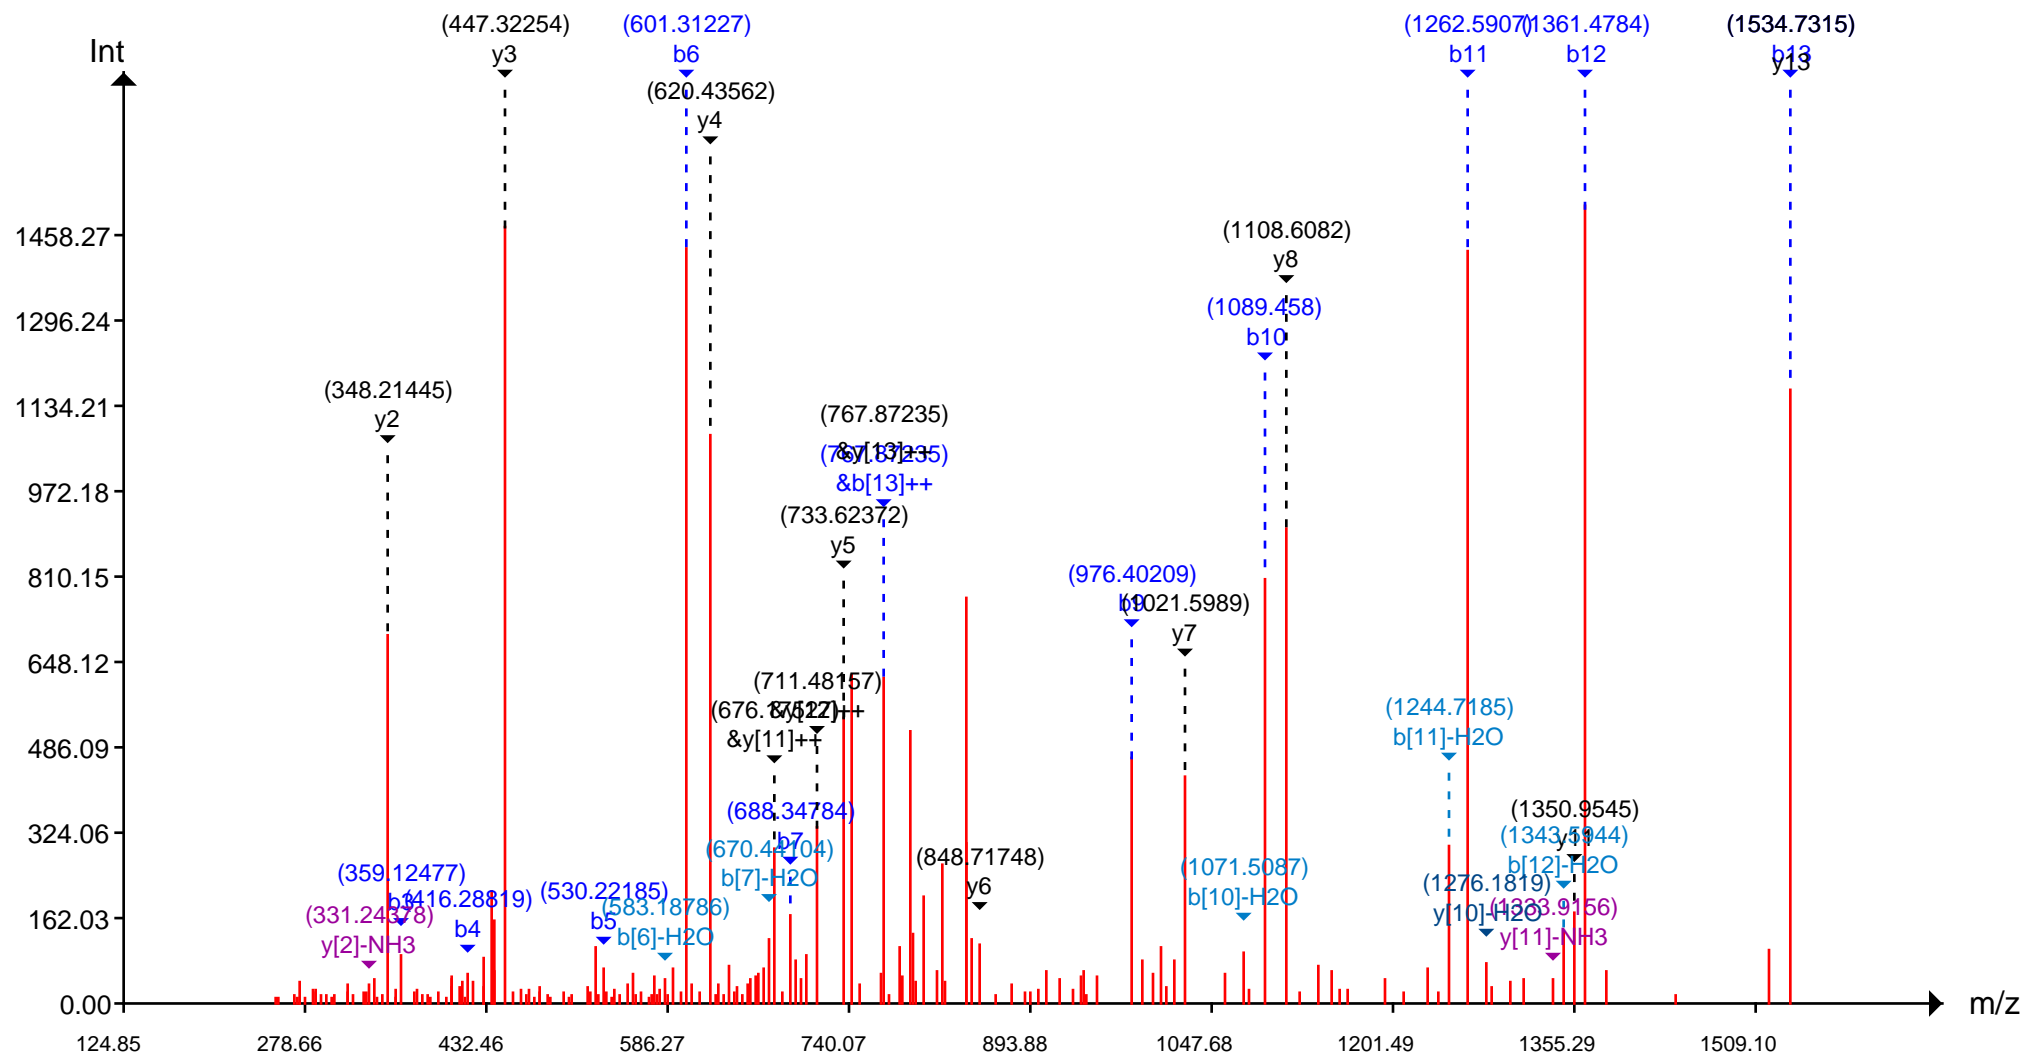

## Info

|                          |                                                  |                           |          |
|--------------------------|--------------------------------------------------|---------------------------|----------|
| <b>Modified Sequence</b> | AcD3-ELAGNASK<AcD3K*>DLK<AcD3K*>VK<AcD3K*>R-COOH | <b>Ion score</b>          | 54.47    |
| <b>Protein</b>           | Q3THW5, P0C0S6                                   | <b>Confidence level</b>   | 99.00%   |
| <b>Precursor m/z</b>     | 855.00551                                        | <b>Identity Threshold</b> | 43.83    |
| <b>Charge</b>            | 2+                                               | <b>Mass error</b>         | 0.005623 |

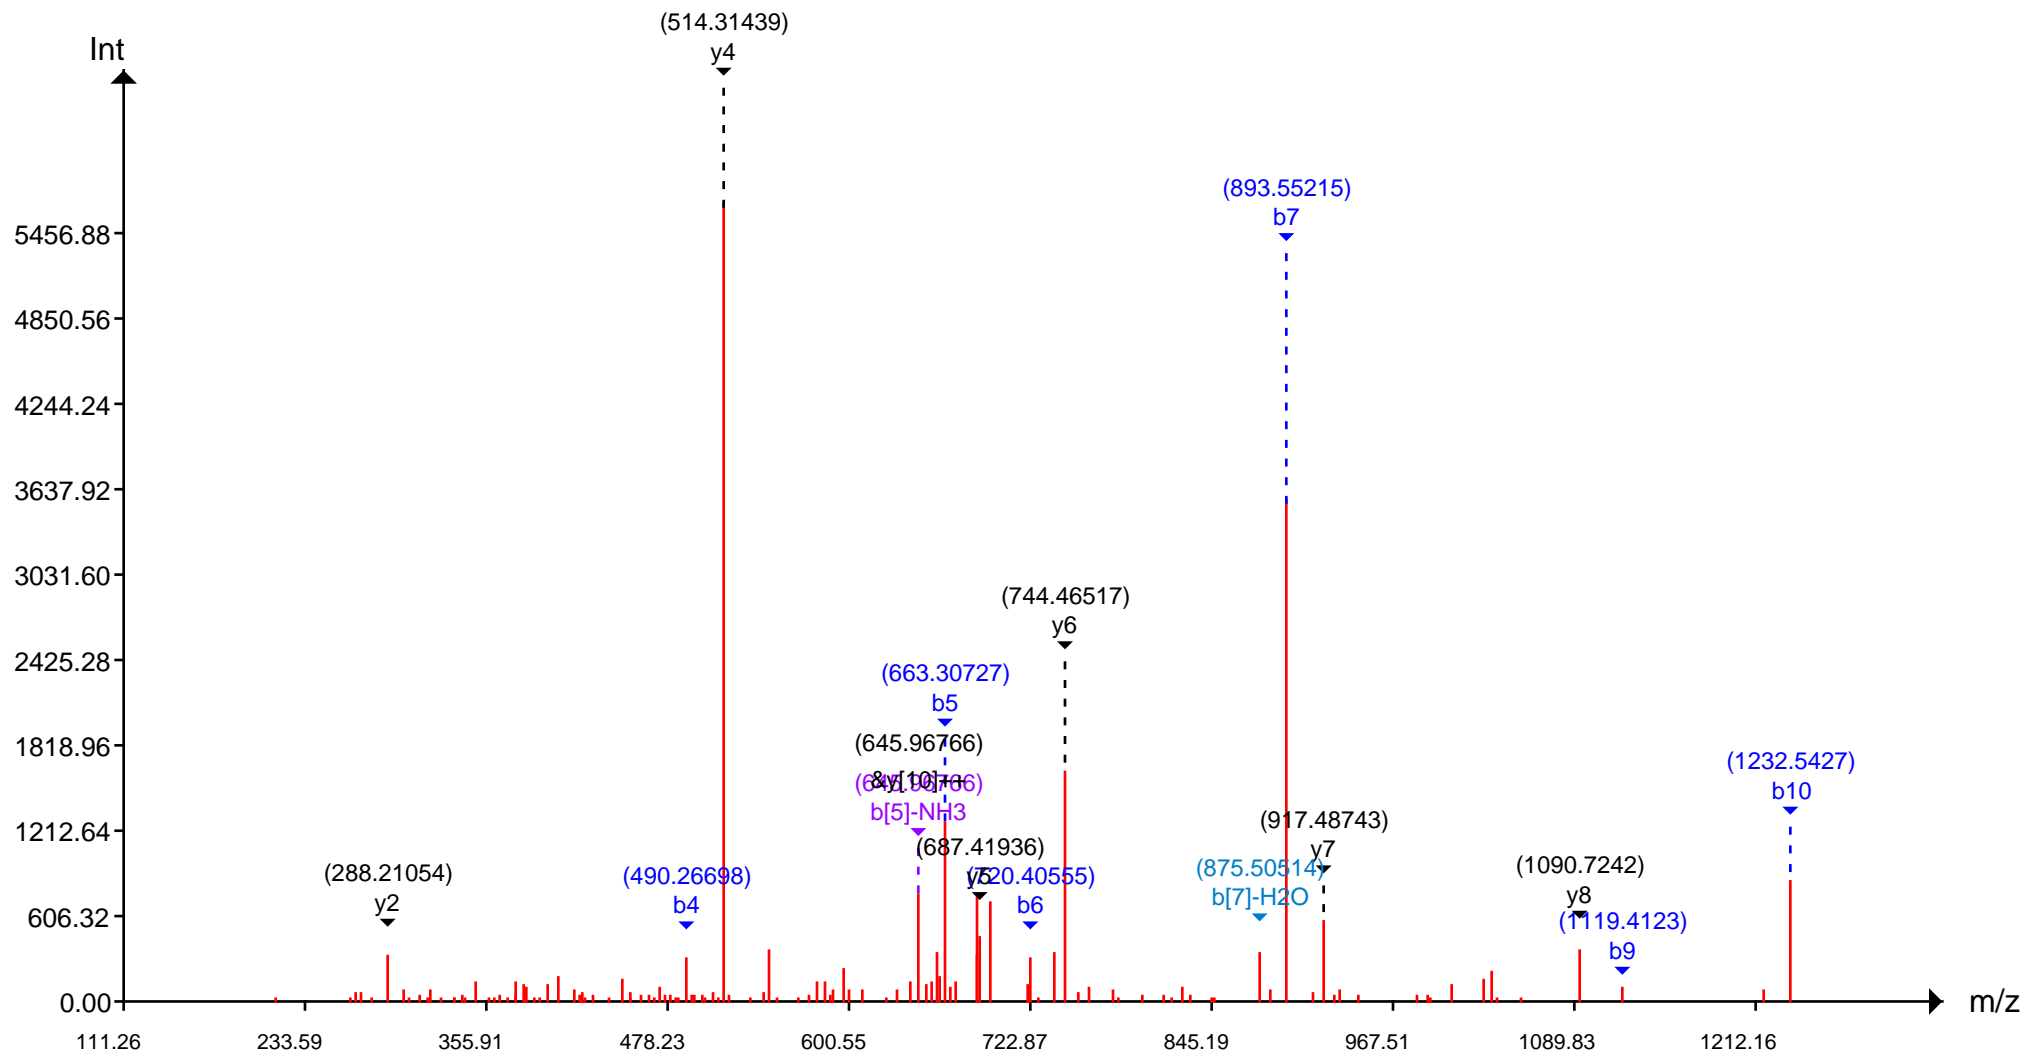

## Info

|                          |                                               |                           |          |
|--------------------------|-----------------------------------------------|---------------------------|----------|
| <b>Modified Sequence</b> | AcD3-ATVK<AcD3K*>K<AcD3K*>GK<AcD3K*>PELR-COOH | <b>Ion score</b>          | 50.79    |
| <b>Protein</b>           | P62830                                        | <b>Confidence level</b>   | 99.00%   |
| <b>Precursor m/z</b>     | 703.94208                                     | <b>Identity Threshold</b> | 40.04    |
| <b>Charge</b>            | 2+                                            | <b>Mass error</b>         | 0.001383 |

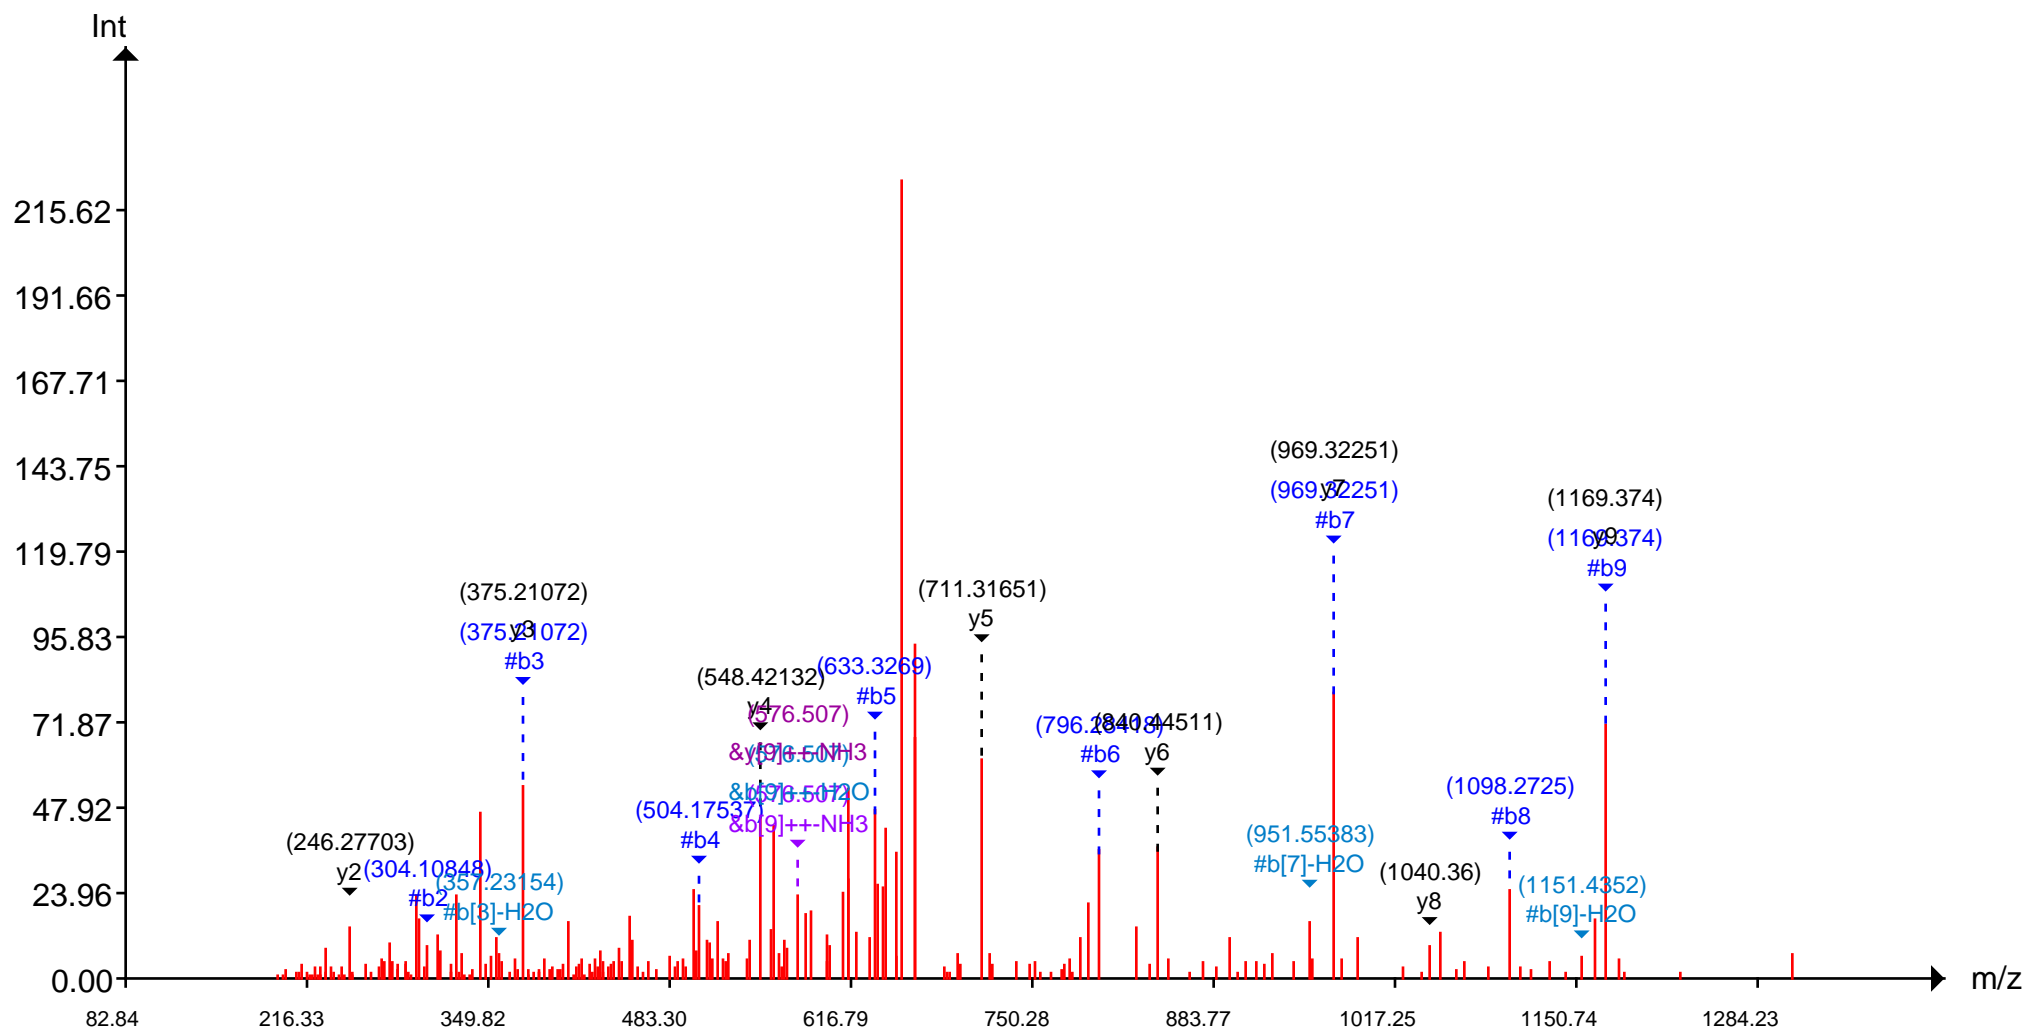

## Info

**Modified Sequence** AcD3-EEAEEYK<AcD3K\*>EAR-COOH

**Ion score** 47.92

**Protein** P48428

**Confidence level** 99.00%

**Precursor m/z** 672.31537

**Identity Threshold** 45.55

**Charge** 2+

**Mass error** 2.97E-4



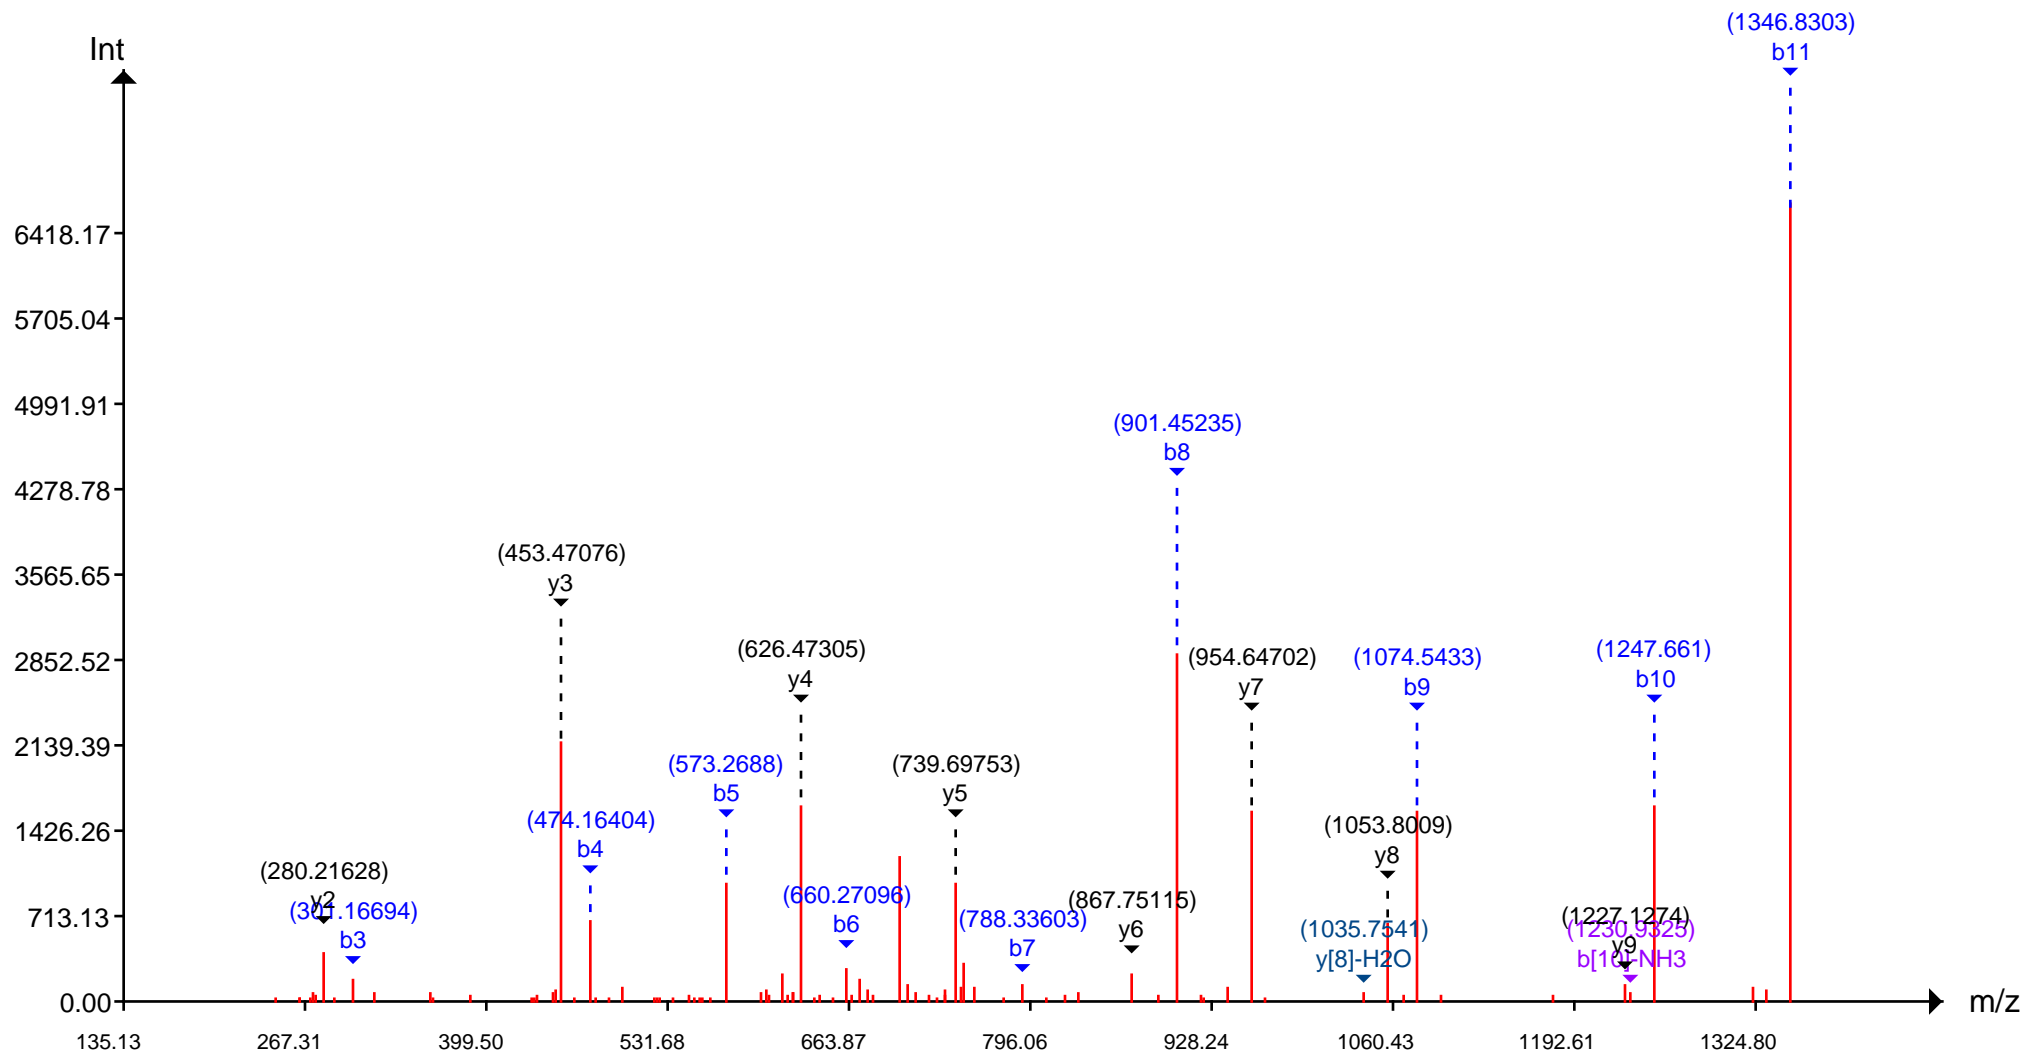

## Info

**Modified Sequence** AcD3-AALK<AcD3K\*>VSQIK<AcD3K\*>K<AcD3K\*>VR<C13>-COOH

**Ion score** 76.67

**Protein** P26638

**Confidence level** 99.00%

**Precursor m/z** 764.01015

**Identity Threshold** 31.87

**Charge** 2+

**Mass error** 0.001689

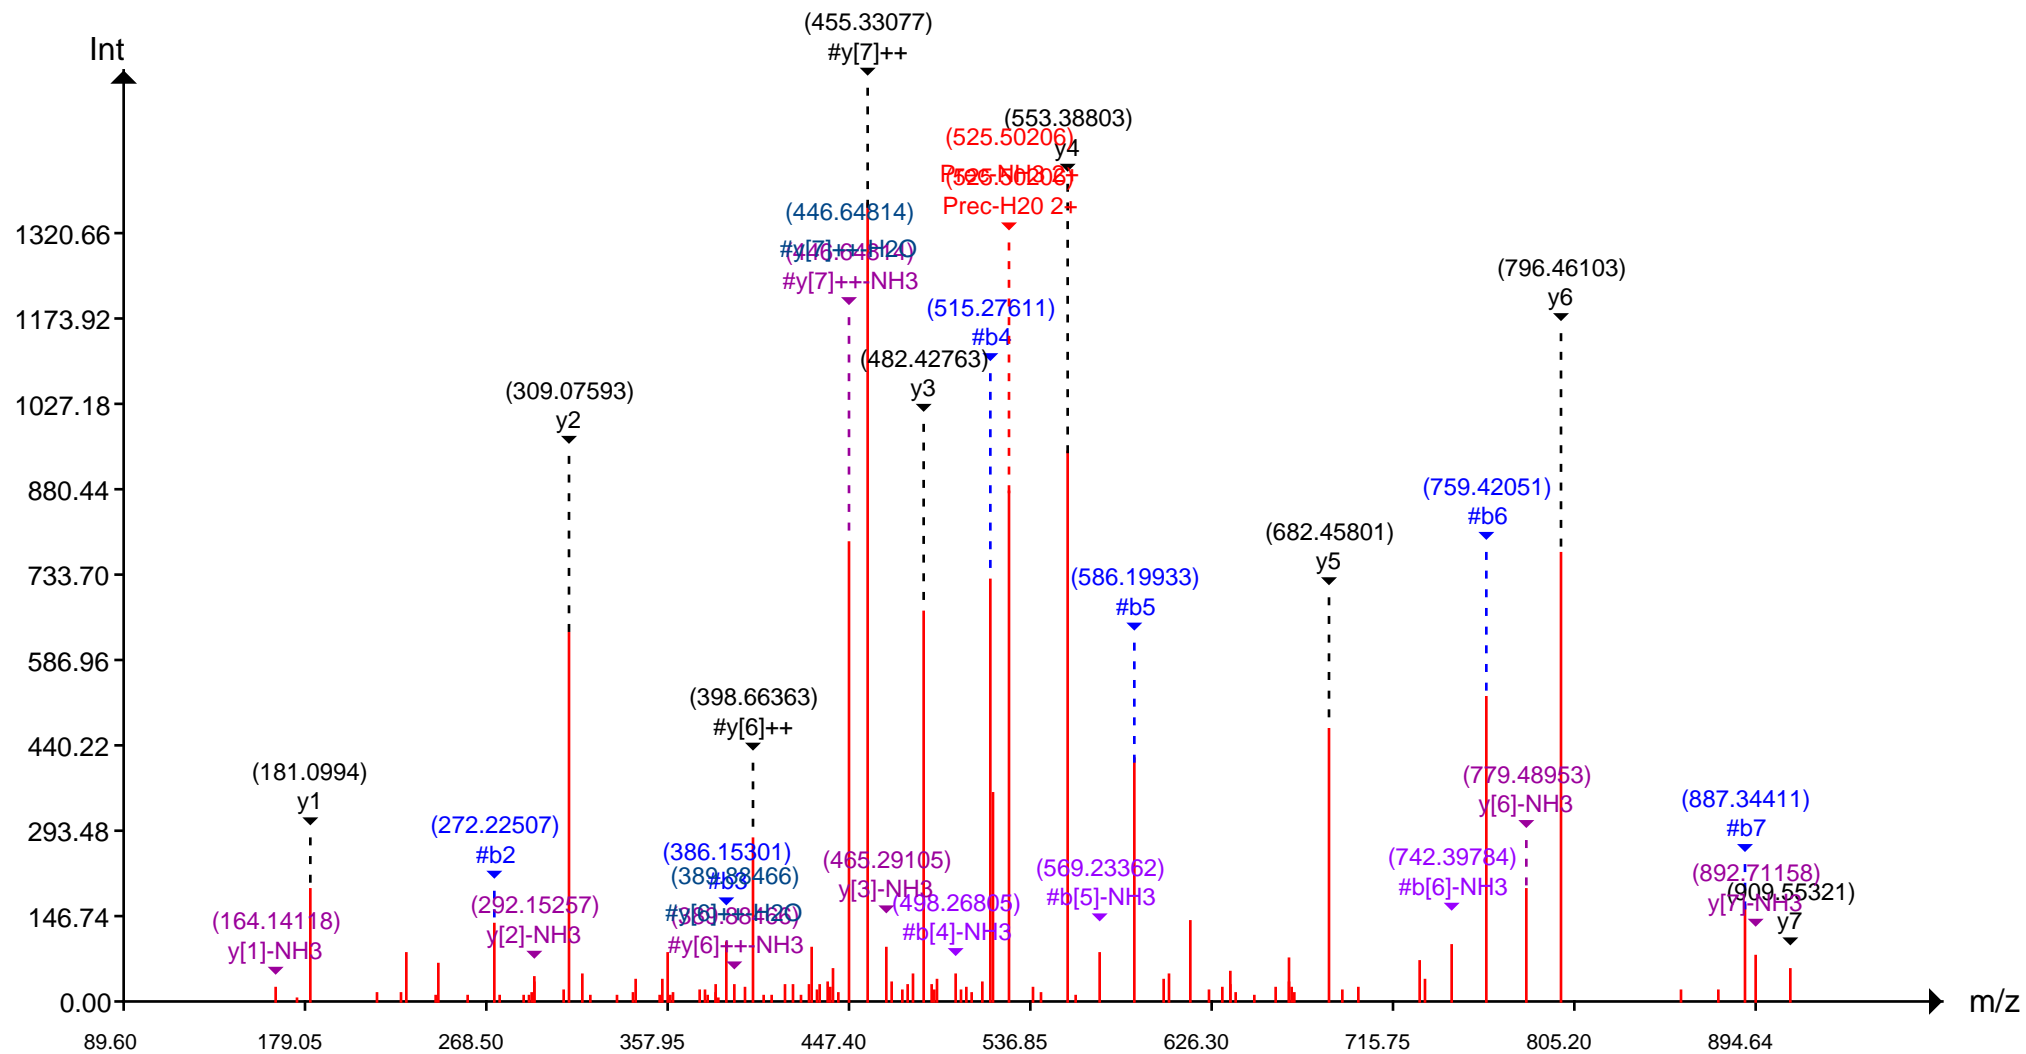

## Info

|                          |                                 |                           |         |
|--------------------------|---------------------------------|---------------------------|---------|
| <b>Modified Sequence</b> | AcD3-LLNEAK<AcD3K*>QR<C13>-COOH | <b>Ion score</b>          | 53.63   |
| <b>Protein</b>           | P50518                          | <b>Confidence level</b>   | 99.00%  |
| <b>Precursor m/z</b>     | 534.32469                       | <b>Identity Threshold</b> | 44.61   |
| <b>Charge</b>            | 2+                              | <b>Mass error</b>         | -4.4E-5 |

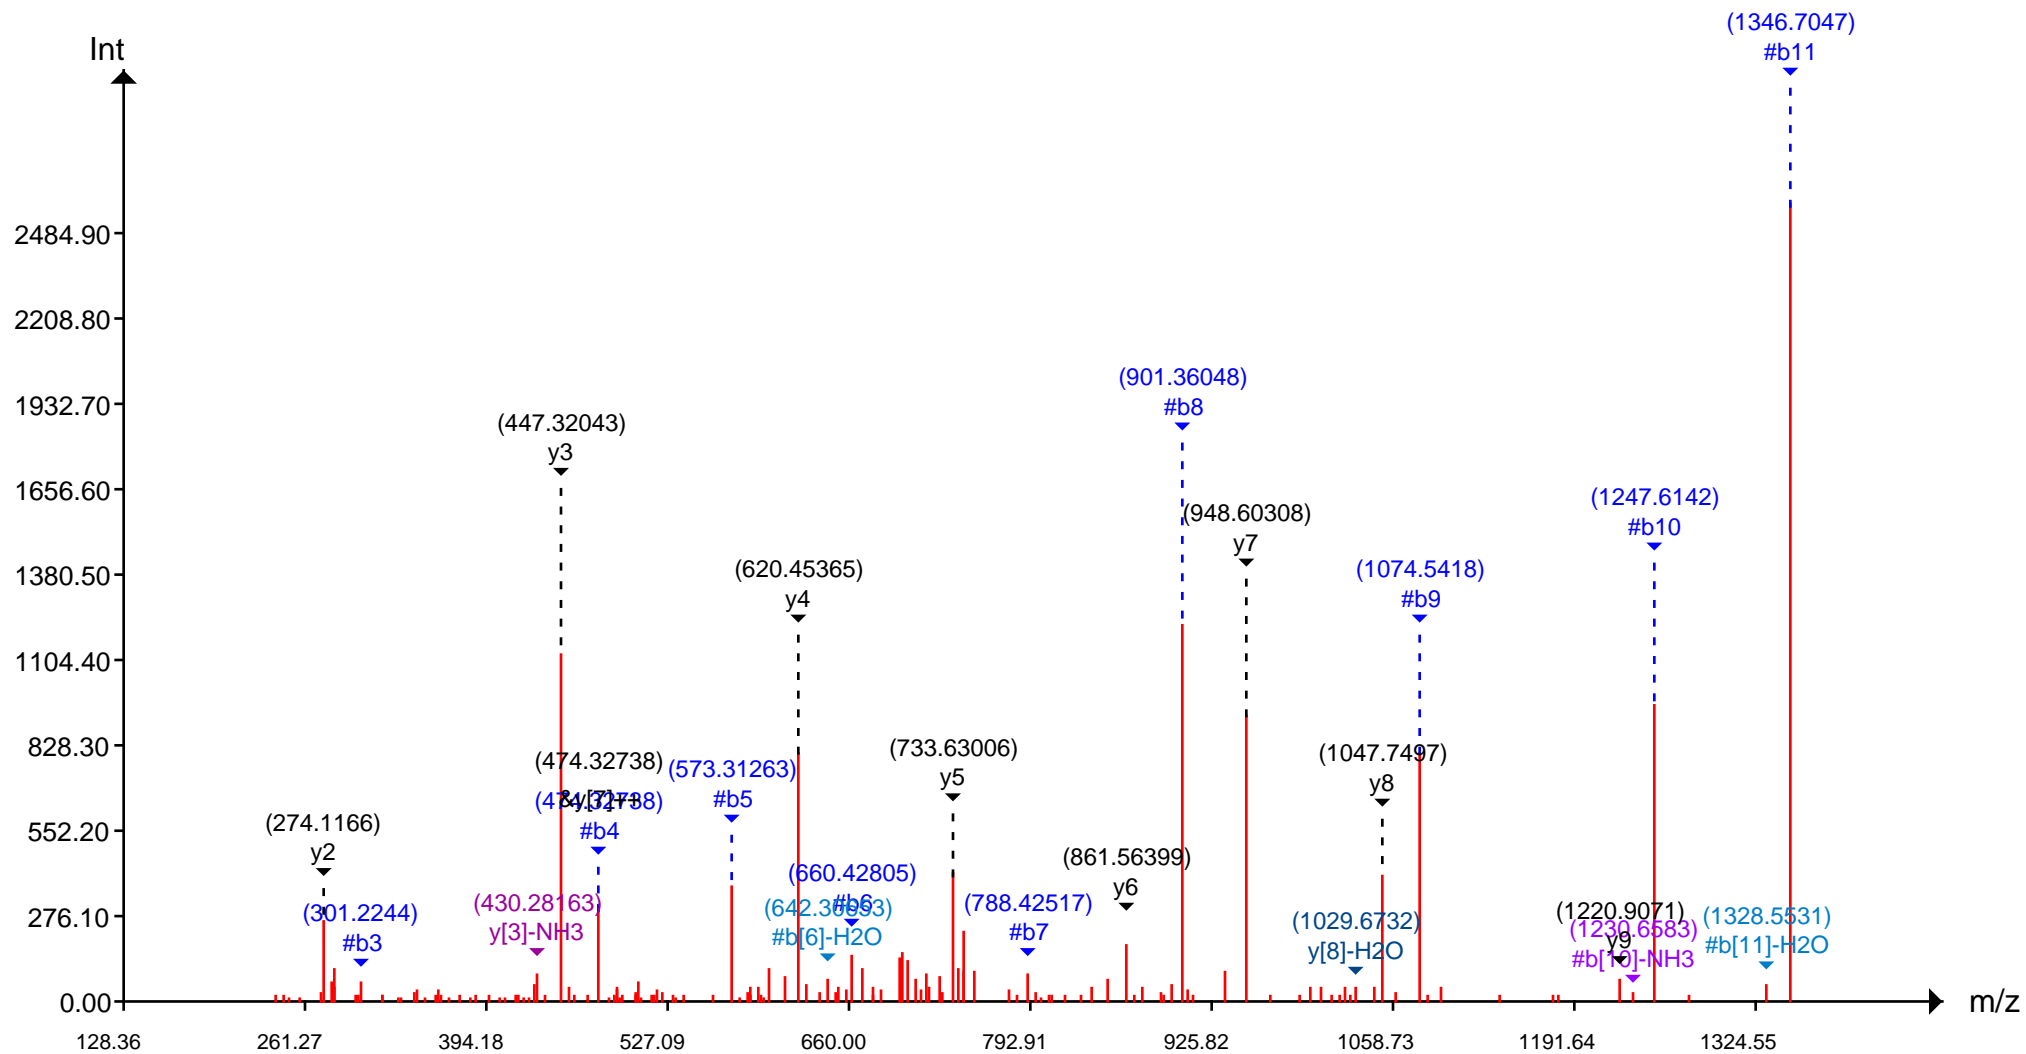

## Info

|                          |                                                |                           |          |
|--------------------------|------------------------------------------------|---------------------------|----------|
| <b>Modified Sequence</b> | AcD3-AALK<AcD3K*>VSQIK<AcD3K*>K<AcD3K*>VR-COOH | <b>Ion score</b>          | 66.47    |
| <b>Protein</b>           | P26638                                         | <b>Confidence level</b>   | 99.00%   |
| <b>Precursor m/z</b>     | 761.00017                                      | <b>Identity Threshold</b> | 33.87    |
| <b>Charge</b>            | 2+                                             | <b>Mass error</b>         | 0.001871 |

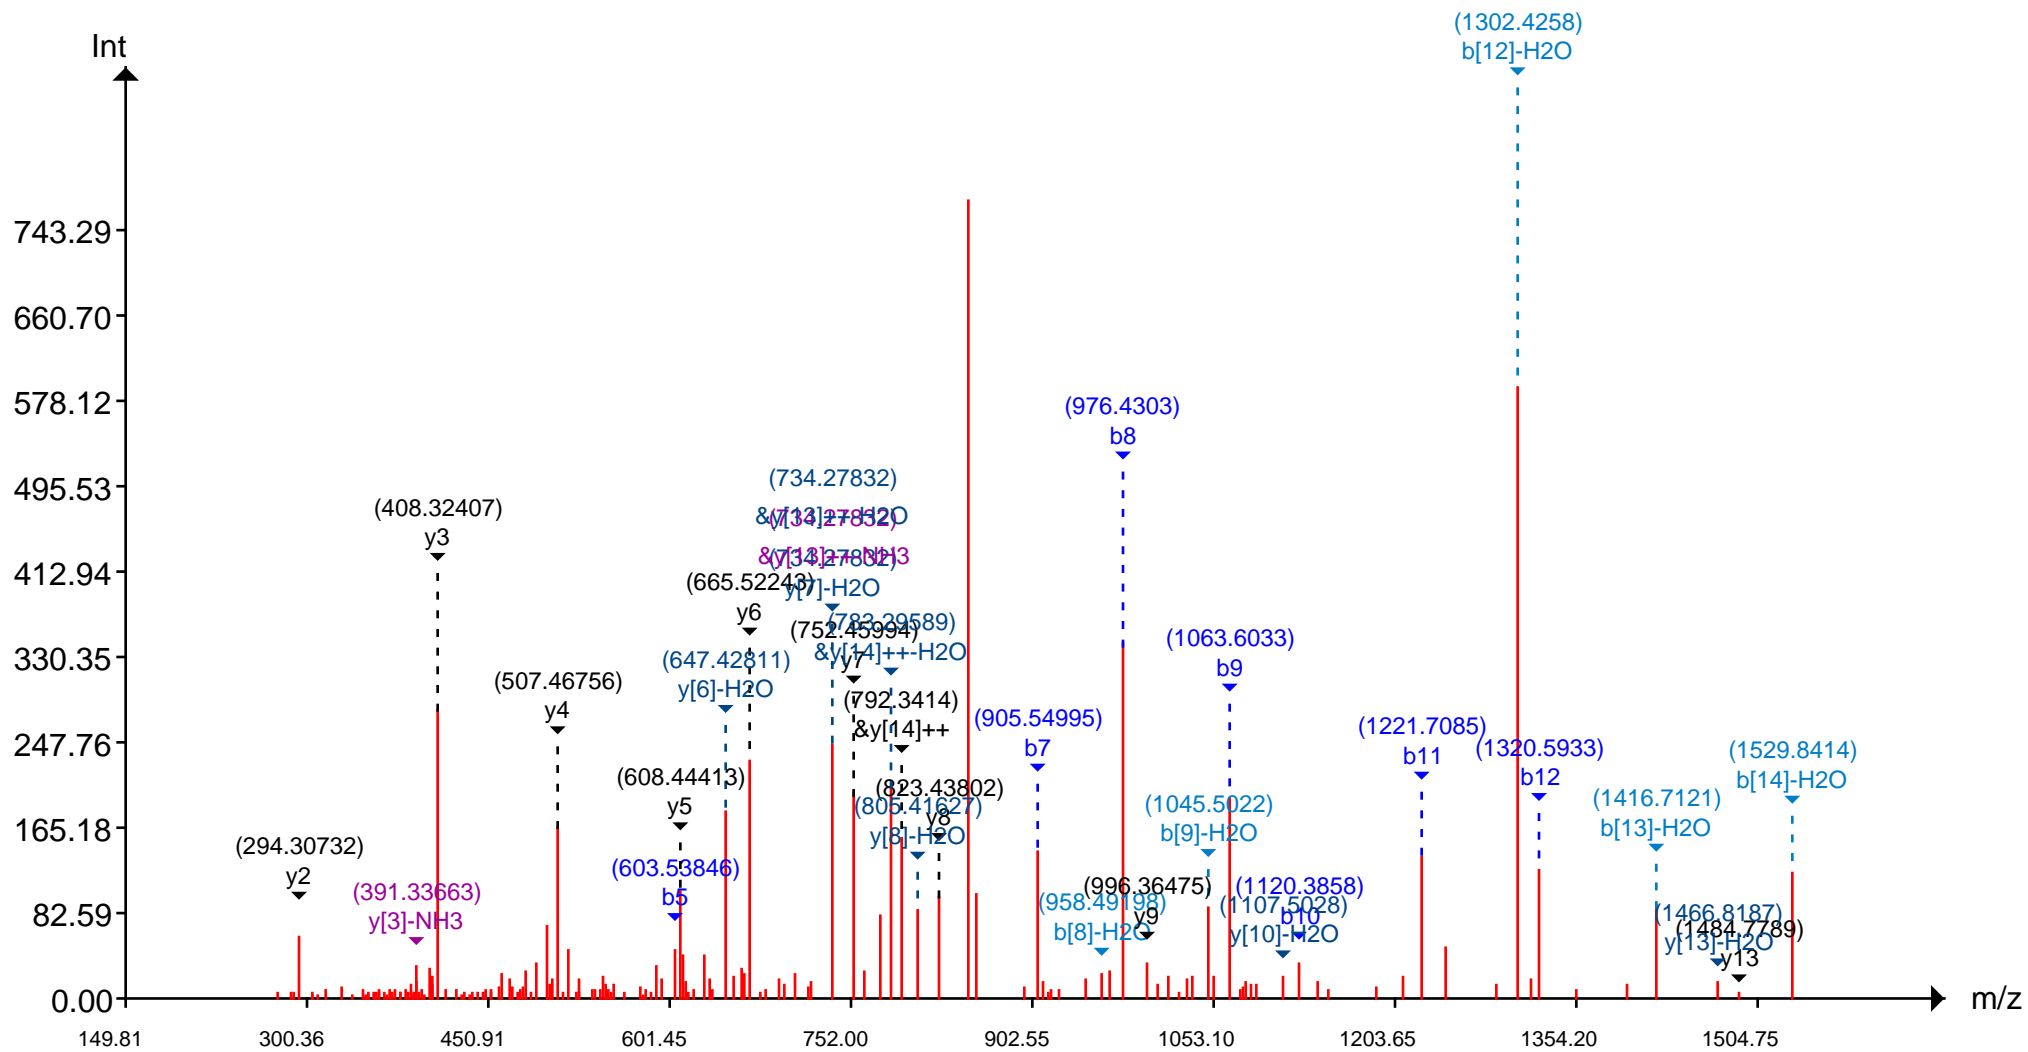

## Info

|                          |                                                |                           |          |
|--------------------------|------------------------------------------------|---------------------------|----------|
| <b>Modified Sequence</b> | AcD3-VVGEK<AcD3K*>EK<AcD3K*>ASGTVNIR<C13>-COOH | <b>Ion score</b>          | 54.88    |
| <b>Protein</b>           | Q9D0R2                                         | <b>Confidence level</b>   | 99.00%   |
| <b>Precursor m/z</b>     | 864.50233                                      | <b>Identity Threshold</b> | 45.02    |
| <b>Charge</b>            | 2+                                             | <b>Mass error</b>         | 0.003017 |

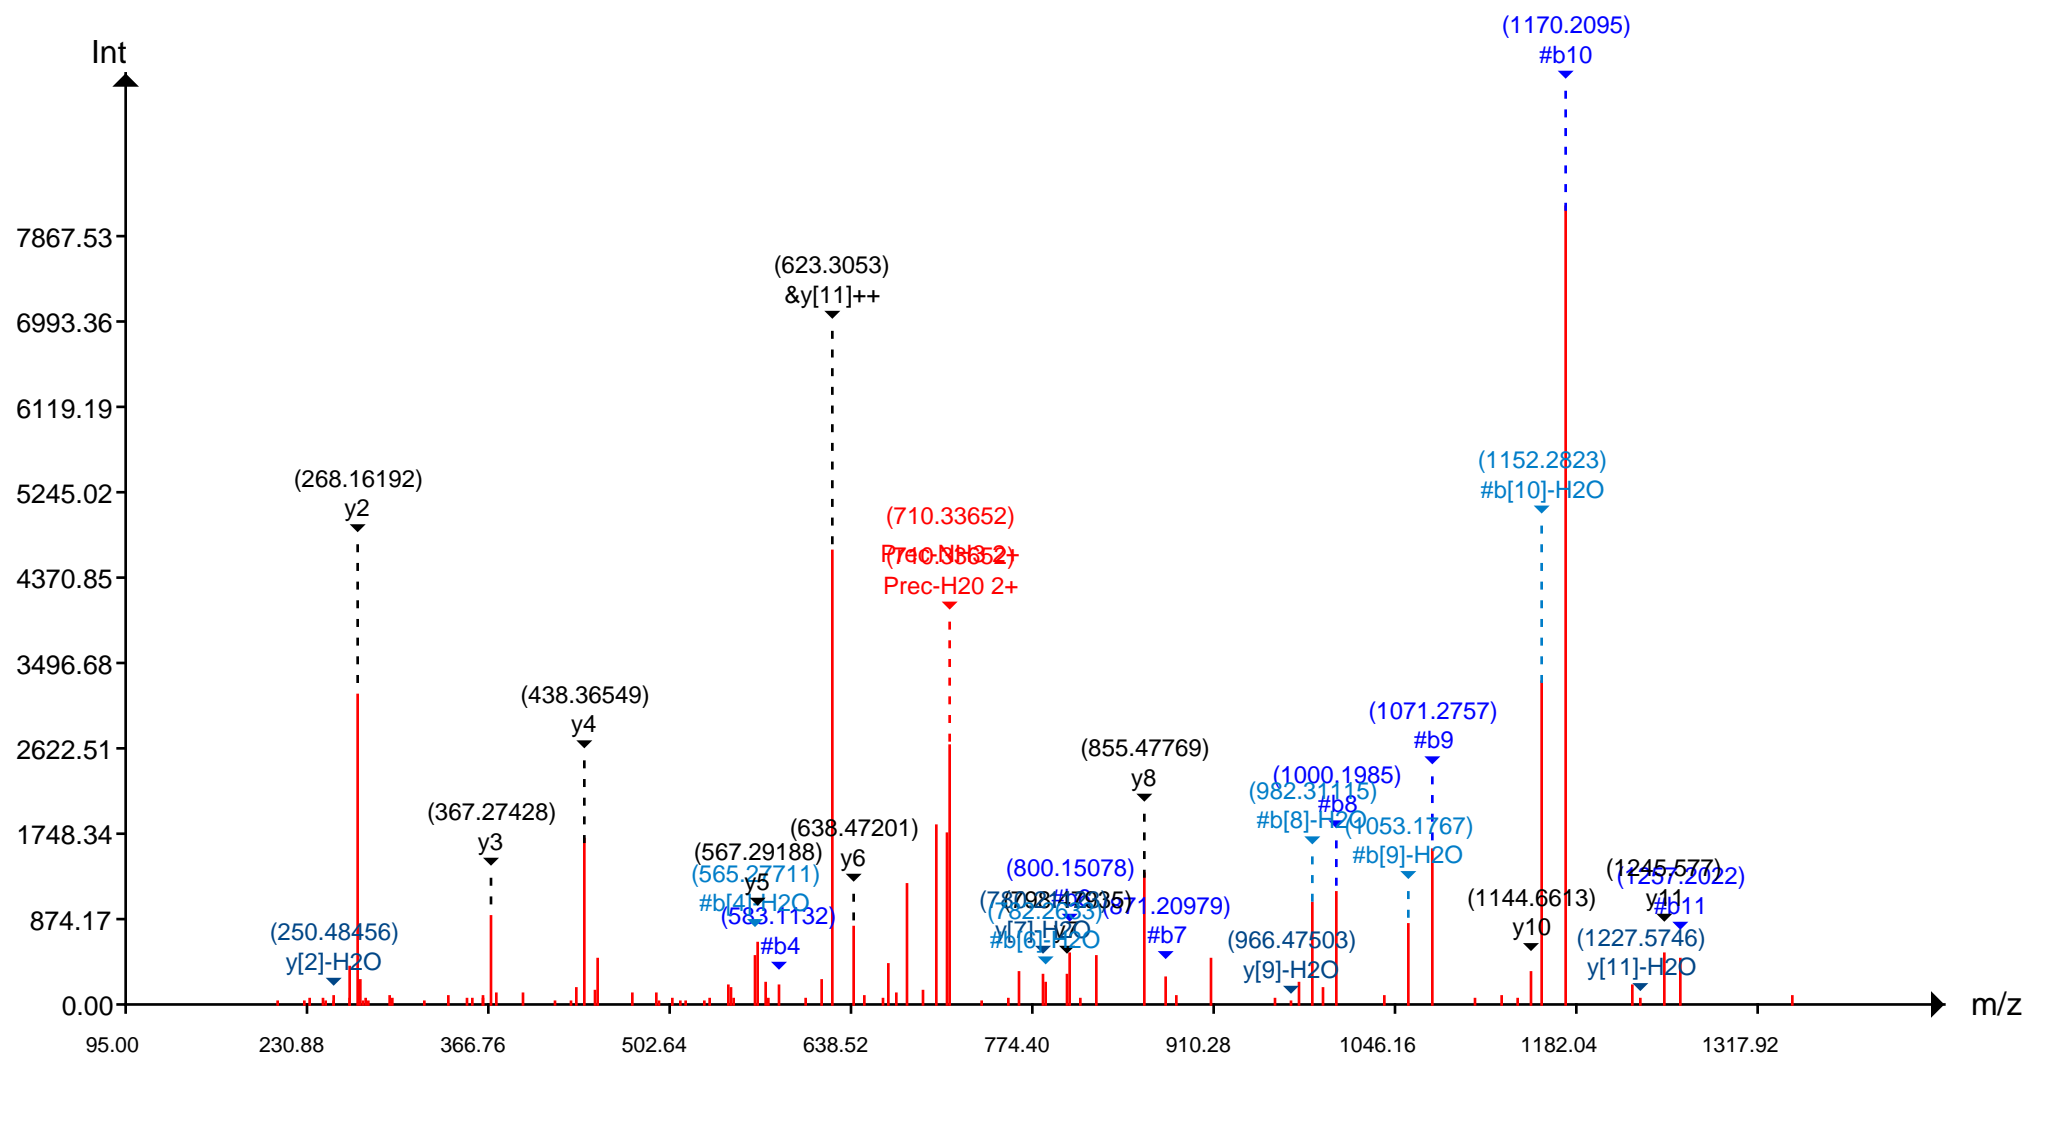

| Info                     |                                               |                           |          |
|--------------------------|-----------------------------------------------|---------------------------|----------|
| <b>Modified Sequence</b> | AcD3-M<Mox*>TC<Cmm*>EGC<Cmm*>AEAVSR<C13>-COOH | <b>Ion score</b>          | 47.52    |
| <b>Protein</b>           | O08997                                        | <b>Confidence level</b>   | 99.00%   |
| <b>Precursor m/z</b>     | 719.30043                                     | <b>Identity Threshold</b> | 40.00    |
| <b>Charge</b>            | 2+                                            | <b>Mass error</b>         | -5.91E-4 |

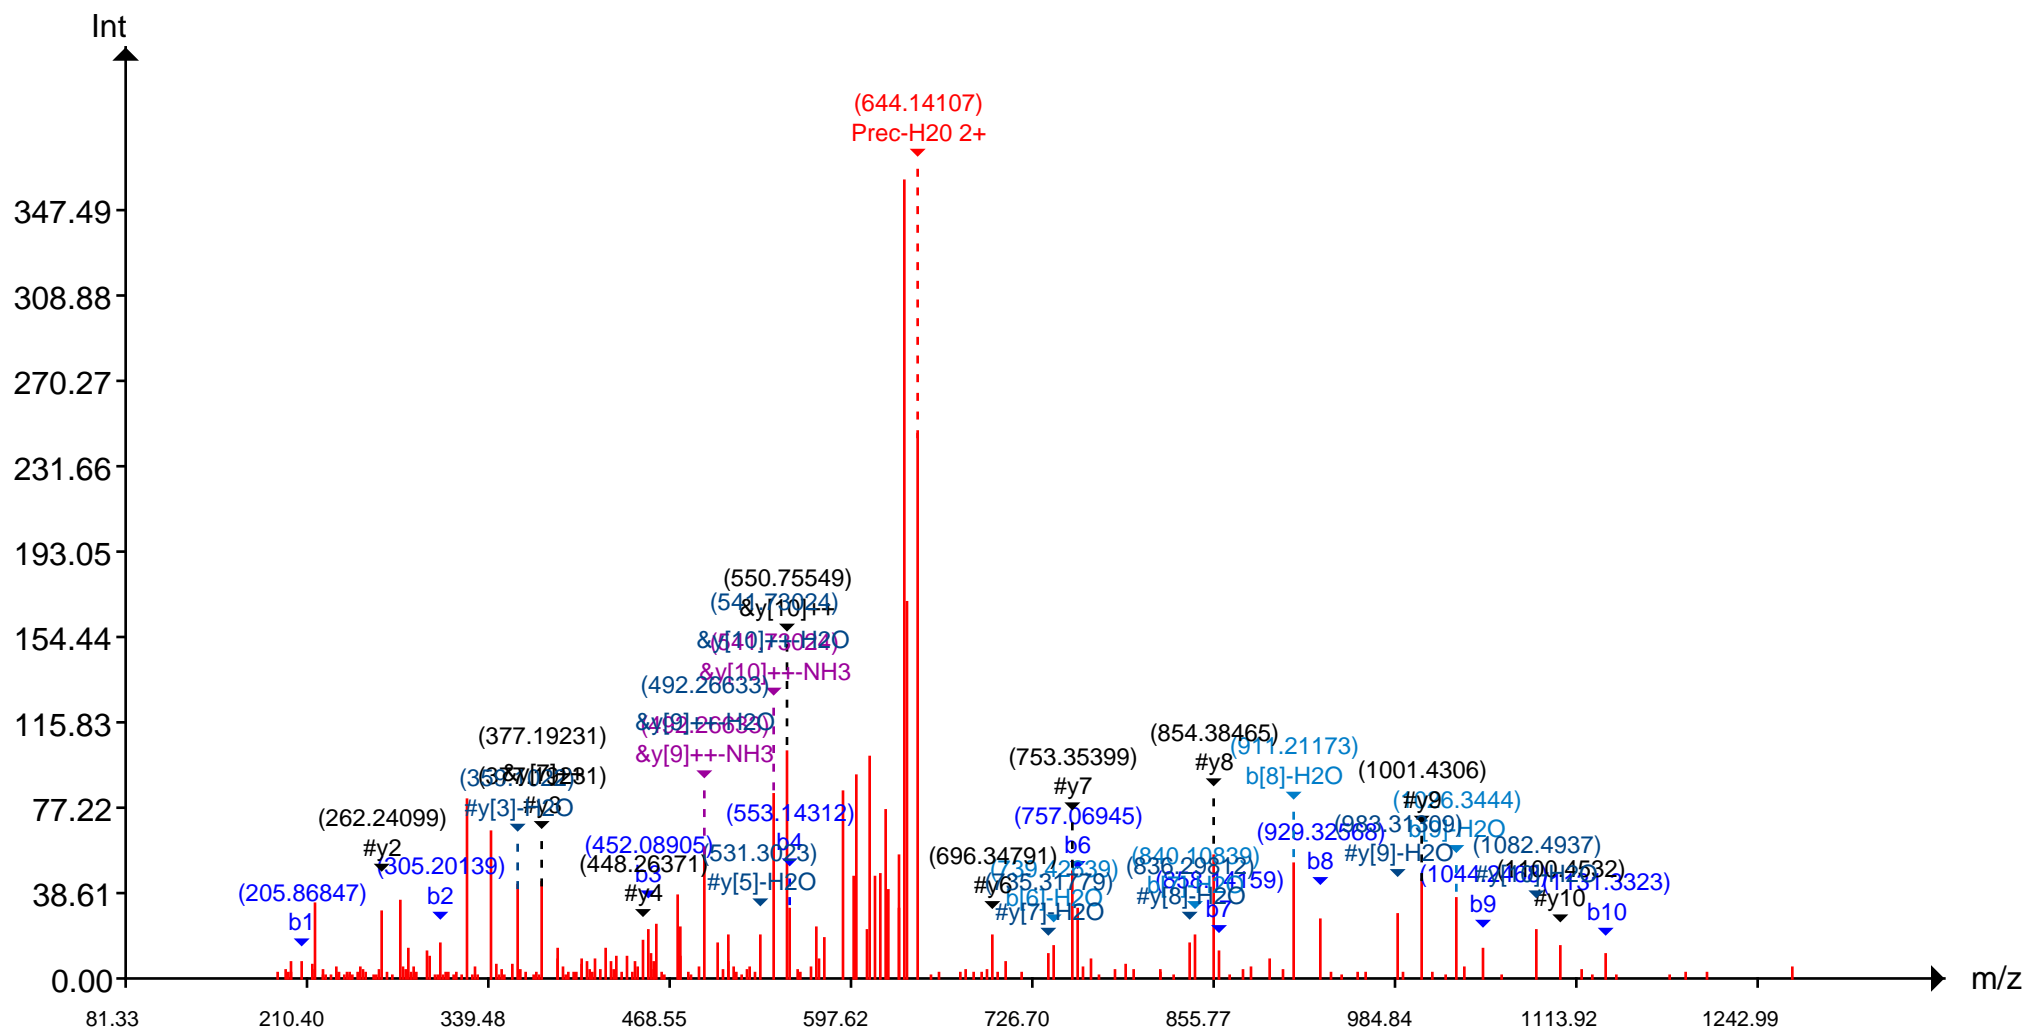

## Info

**Modified Sequence** AcD3-C<Cmm\*>VM<Mox\*>TGM<Mox\*>TADSR-COOH

**Ion score** 57.52

**Protein** Q9QUM9

**Confidence level** 99.00%

**Precursor m/z** 653.26955

**Identity Threshold** 38.98

**Charge** 2+

**Mass error** 6.99E-4

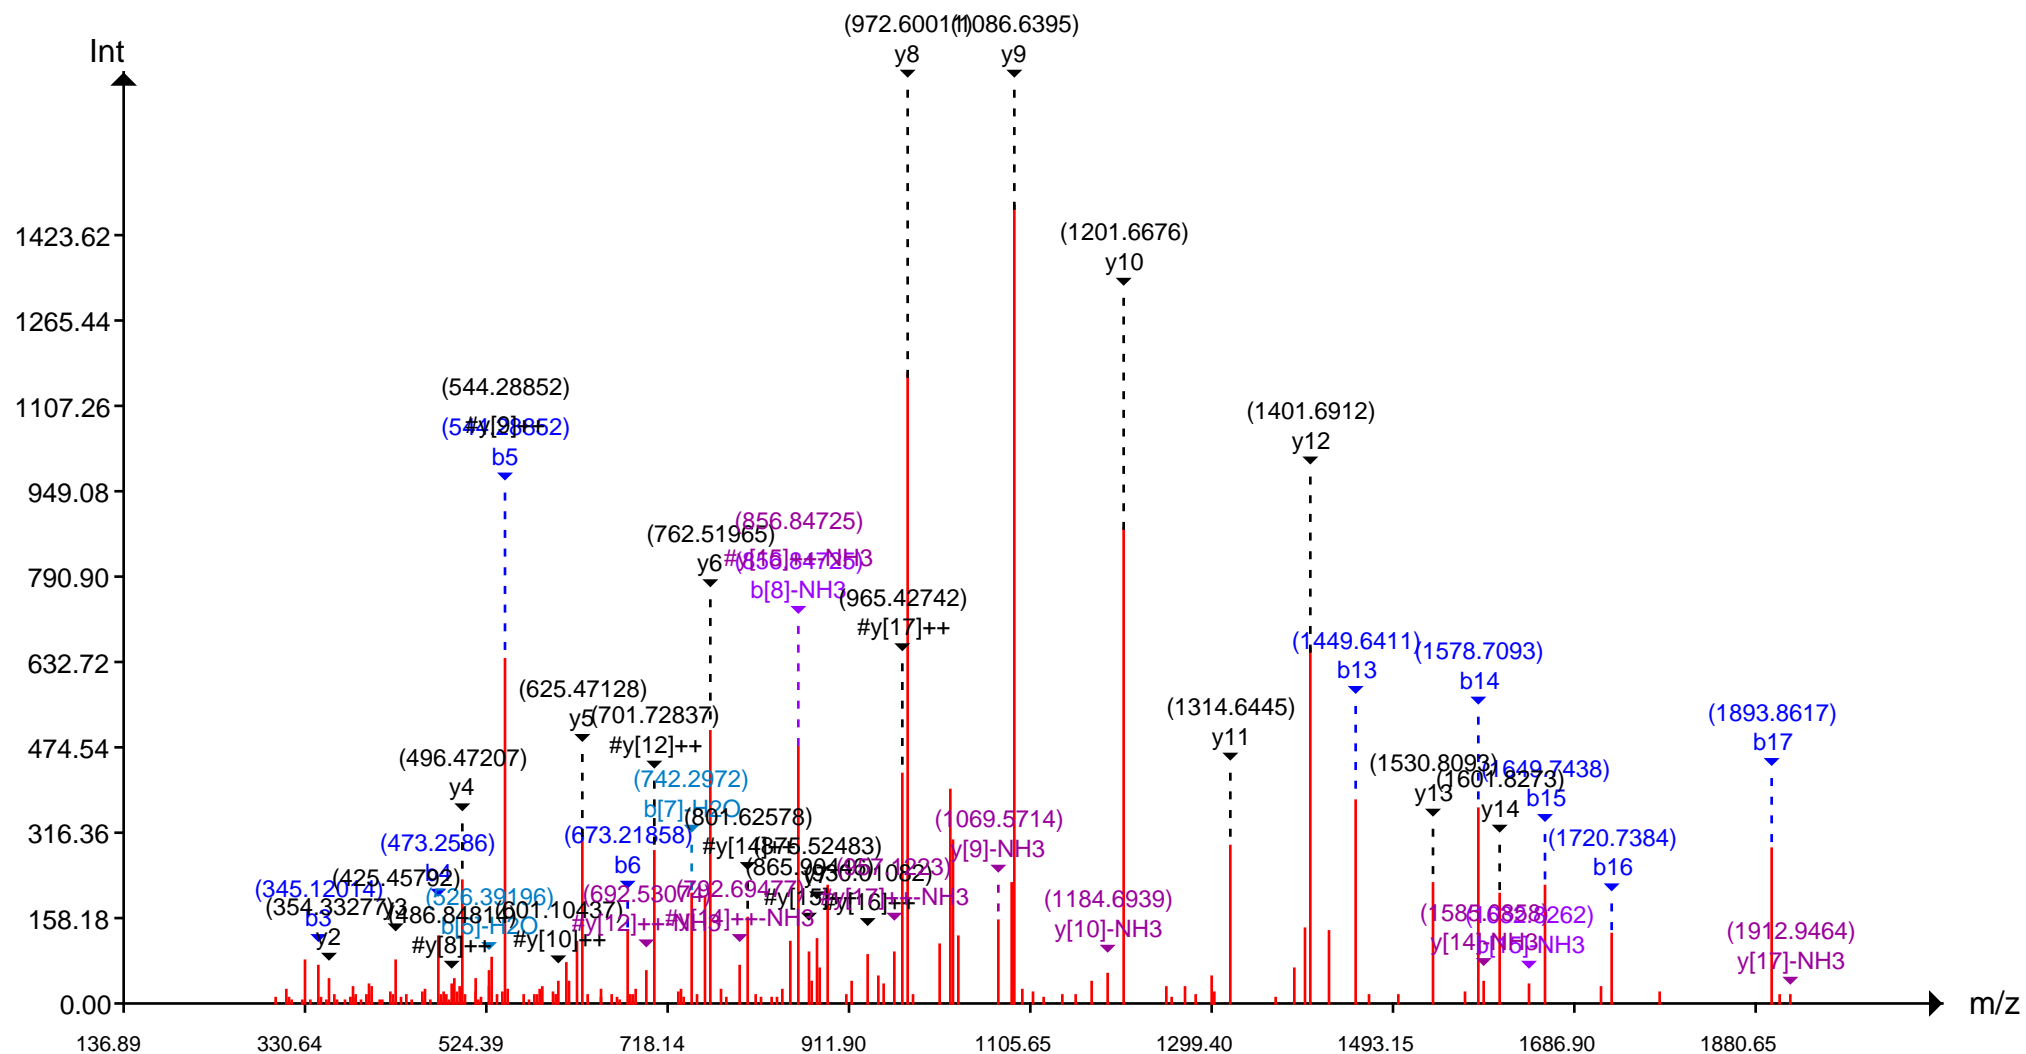

## Info

|                          |                                           |                           |          |
|--------------------------|-------------------------------------------|---------------------------|----------|
| <b>Modified Sequence</b> | AcD3-VAEQAESIDNPLHEAAK<AcD3K*>R<C13>-COOH | <b>Ion score</b>          | 95.84    |
| <b>Protein</b>           | Q62422                                    | <b>Confidence level</b>   | 99.00%   |
| <b>Precursor m/z</b>     | 1037.5438                                 | <b>Identity Threshold</b> | 48.05    |
| <b>Charge</b>            | 2+                                        | <b>Mass error</b>         | 0.002598 |

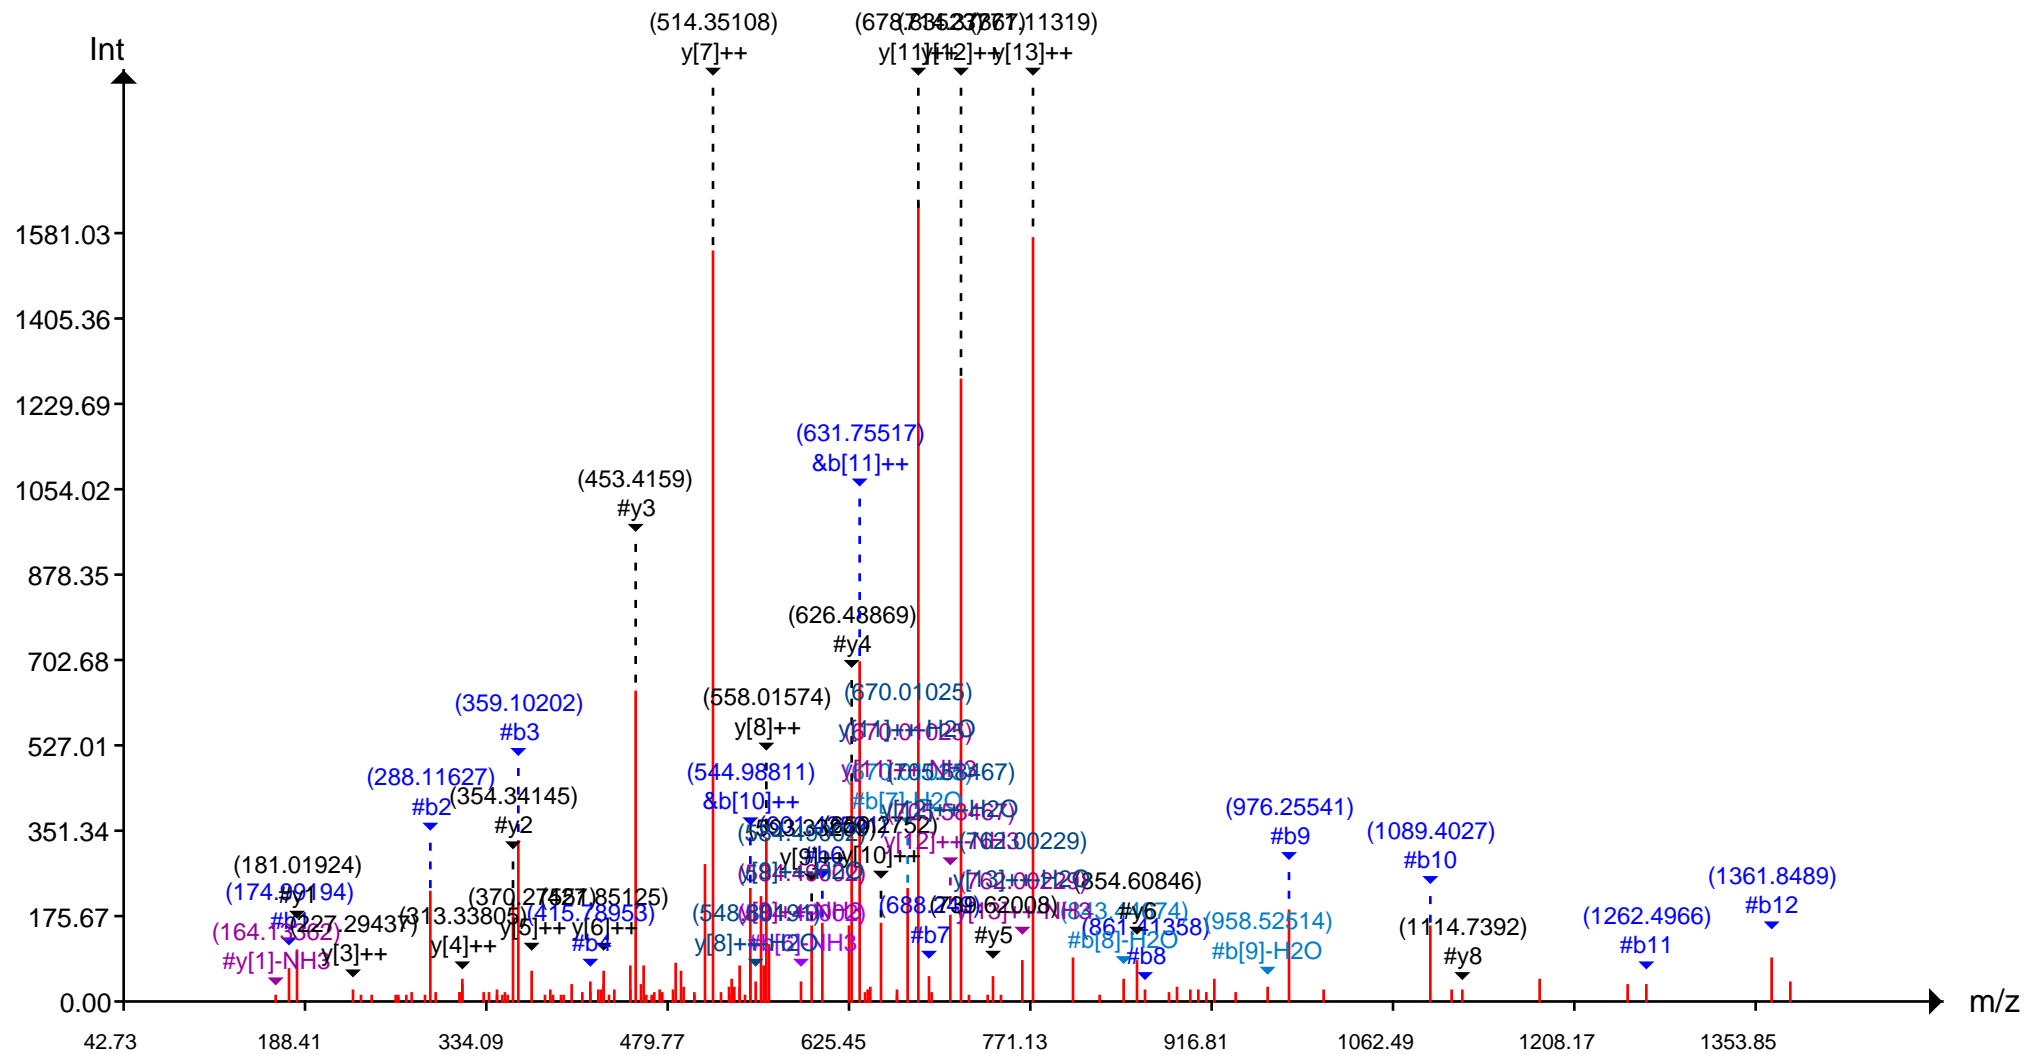

## Info

|                          |                                                       |                           |          |
|--------------------------|-------------------------------------------------------|---------------------------|----------|
| <b>Modified Sequence</b> | AcD3-ELAGNASK<AcD3K*>DLK<AcD3K*>VK<AcD3K*>R<C13>-COOH | <b>Ion score</b>          | 77.94    |
| <b>Protein</b>           | Q3THW5, P0C0S6                                        | <b>Confidence level</b>   | 99.00%   |
| <b>Precursor m/z</b>     | 572.34421                                             | <b>Identity Threshold</b> | 42.96    |
| <b>Charge</b>            | 3+                                                    | <b>Mass error</b>         | -1.84E-4 |



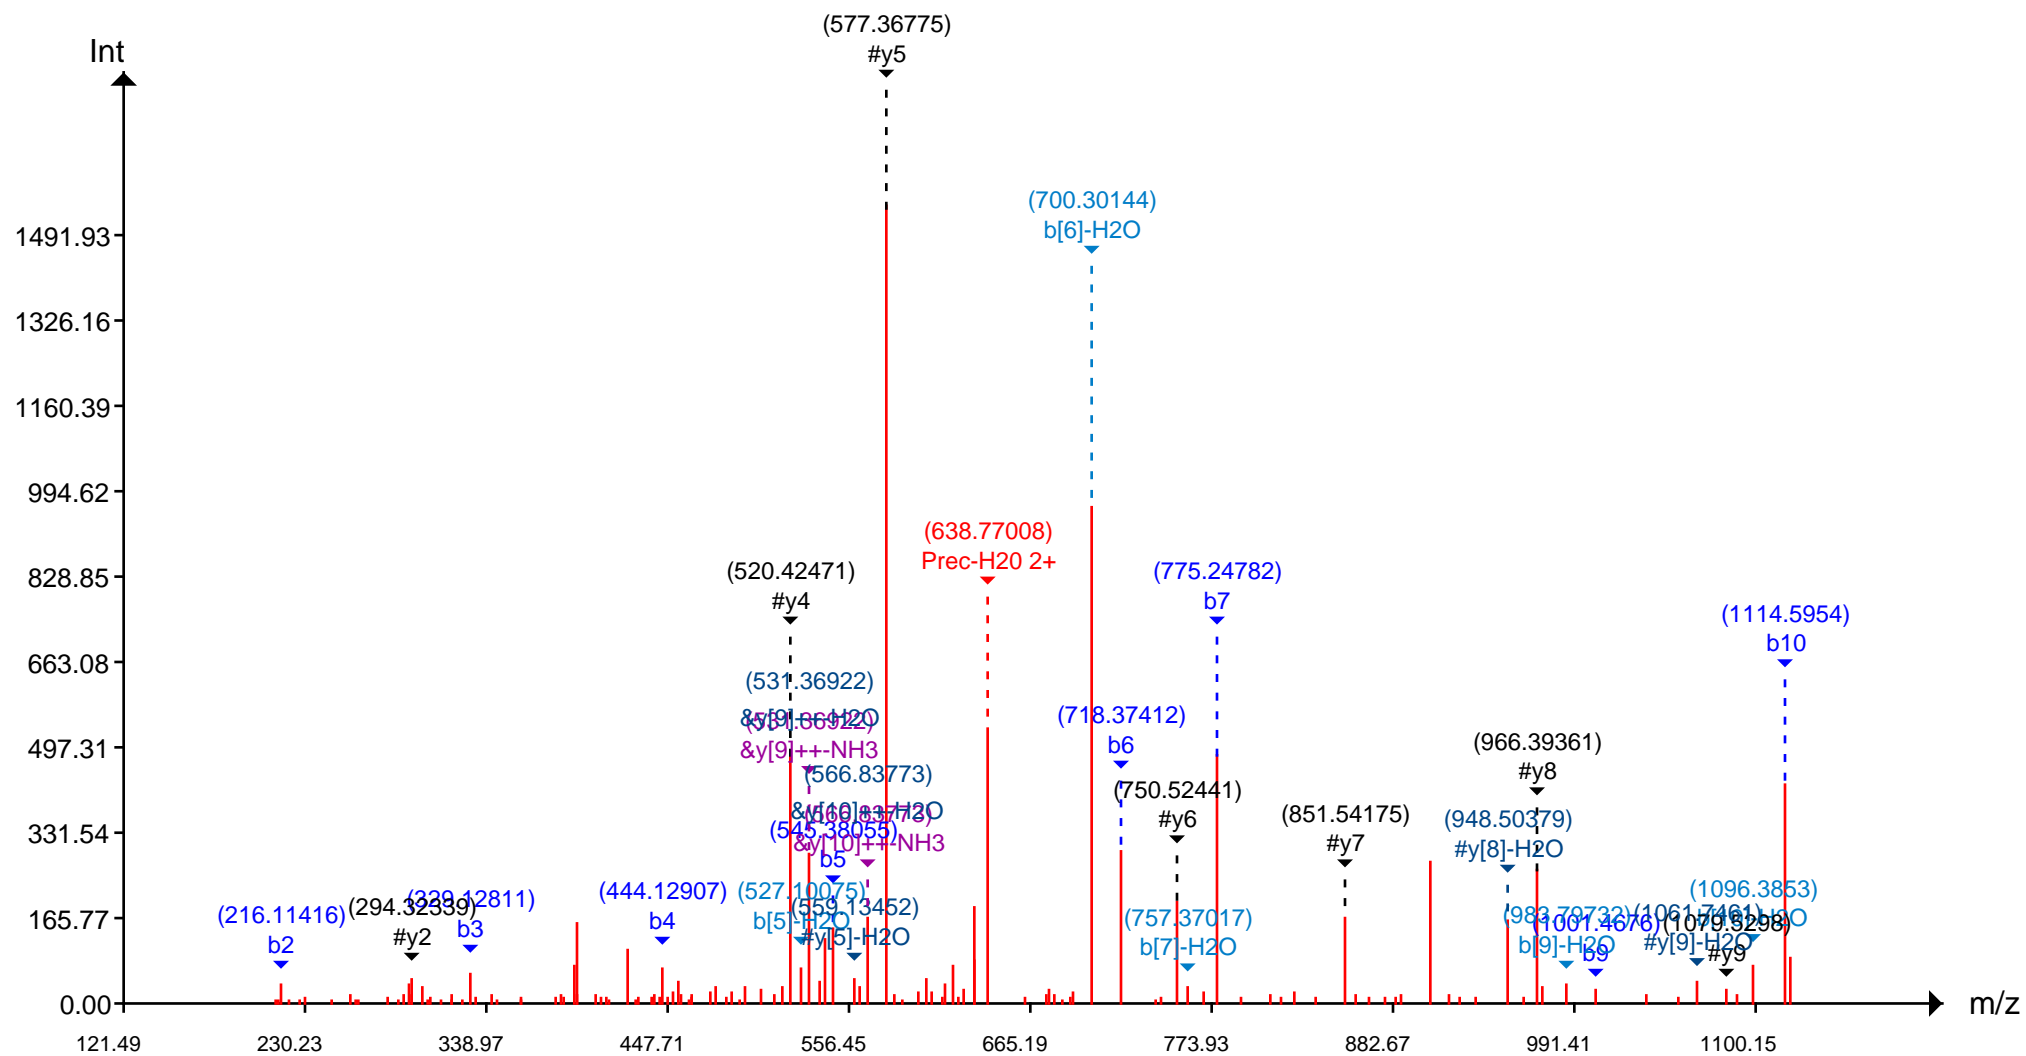

## Info

|                          |                                    |                           |          |
|--------------------------|------------------------------------|---------------------------|----------|
| <b>Modified Sequence</b> | AcD3-VALDTK<AcD3K*>GPEIR<C13>-COOH | <b>Ion score</b>          | 49.91    |
| <b>Protein</b>           | P52480                             | <b>Confidence level</b>   | 99.00%   |
| <b>Precursor m/z</b>     | 647.88313                          | <b>Identity Threshold</b> | 45.41    |
| <b>Charge</b>            | 2+                                 | <b>Mass error</b>         | 0.001052 |

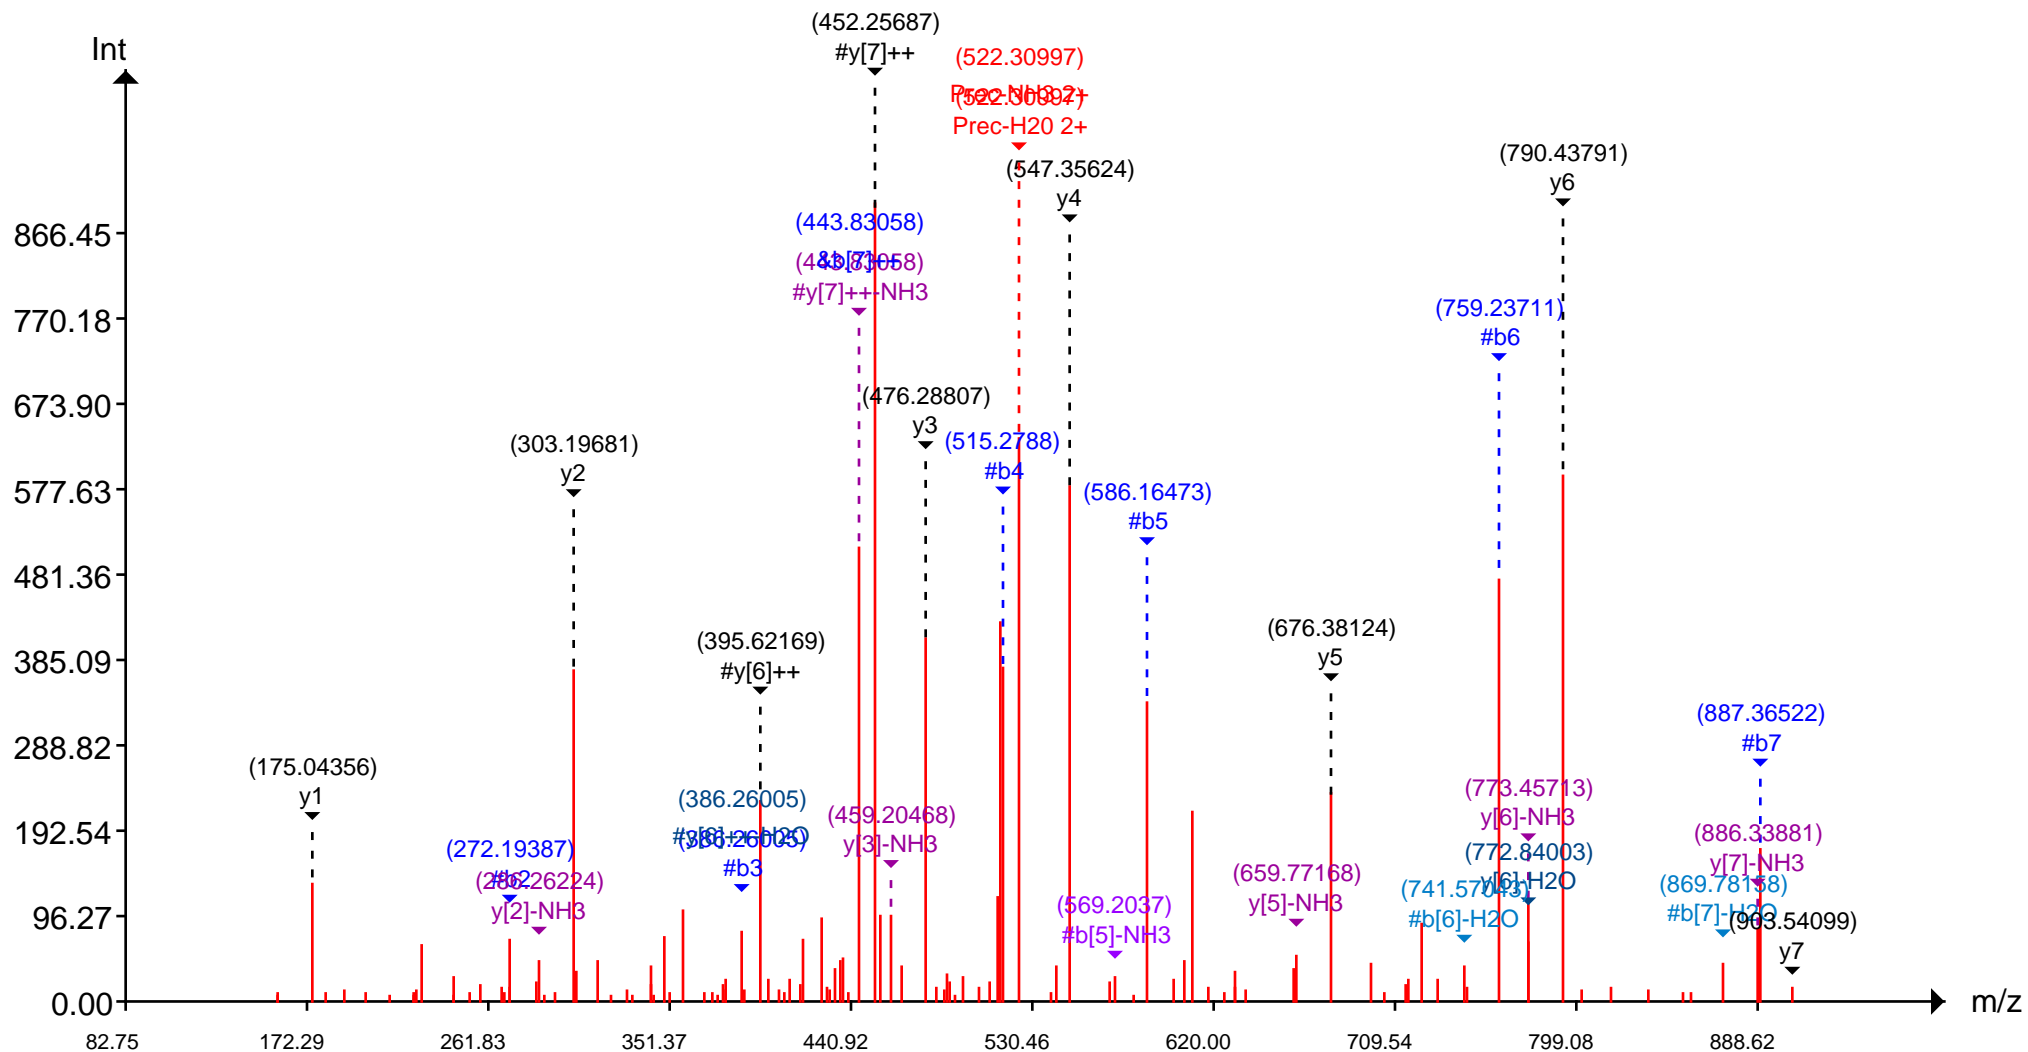

## Info

|                          |                            |                           |         |
|--------------------------|----------------------------|---------------------------|---------|
| <b>Modified Sequence</b> | AcD3-LLNEAK<AcD3K*>QR-COOH | <b>Ion score</b>          | 50.05   |
| <b>Protein</b>           | P50518                     | <b>Confidence level</b>   | 99.00%  |
| <b>Precursor m/z</b>     | 531.31471                  | <b>Identity Threshold</b> | 45.91   |
| <b>Charge</b>            | 2+                         | <b>Mass error</b>         | 1.37E-4 |

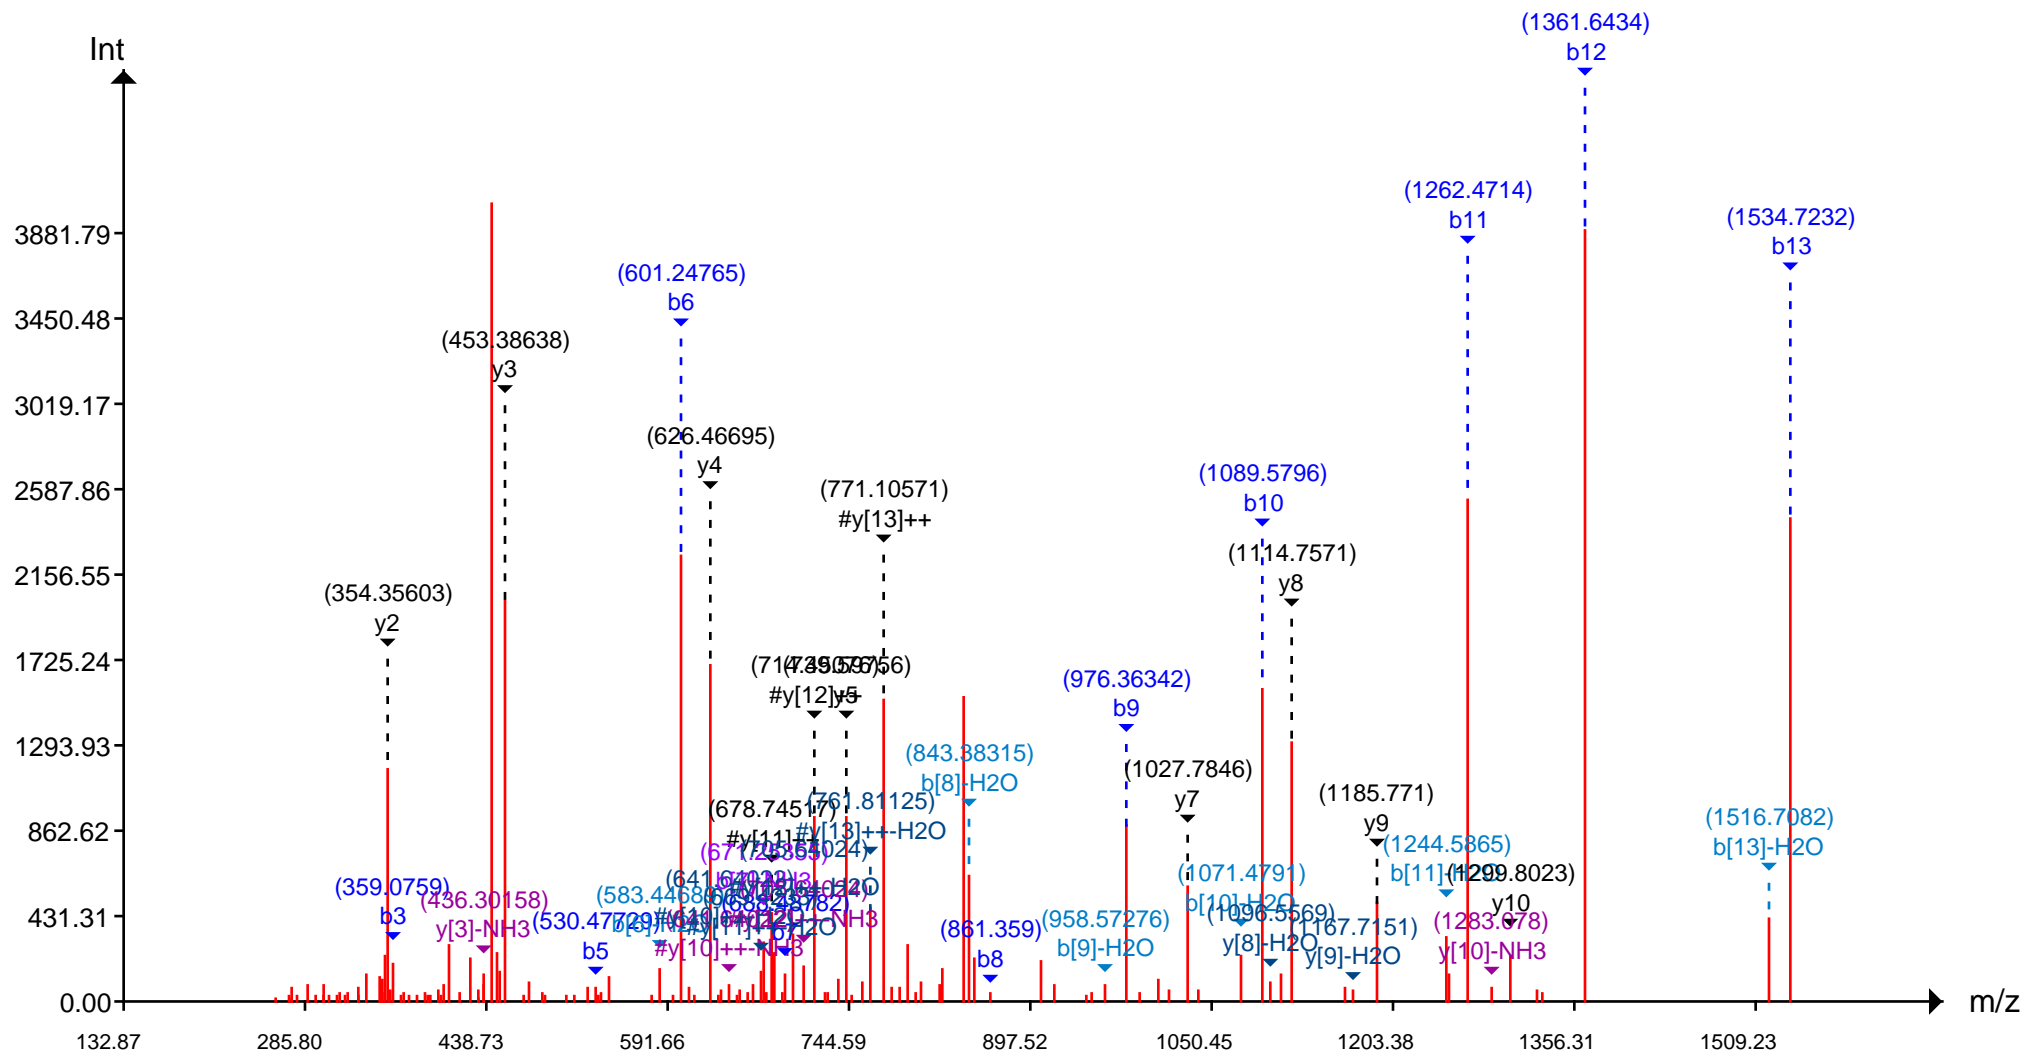

## Info

|                          |                                                       |                           |          |
|--------------------------|-------------------------------------------------------|---------------------------|----------|
| <b>Modified Sequence</b> | AcD3-ELAGNASK<AcD3K*>DLK<AcD3K*>VK<AcD3K*>R<C13>-COOH | <b>Ion score</b>          | 64.7     |
| <b>Protein</b>           | Q3THW5, P0C0S6                                        | <b>Confidence level</b>   | 99.00%   |
| <b>Precursor m/z</b>     | 858.01518                                             | <b>Identity Threshold</b> | 42.63    |
| <b>Charge</b>            | 2+                                                    | <b>Mass error</b>         | 0.004822 |

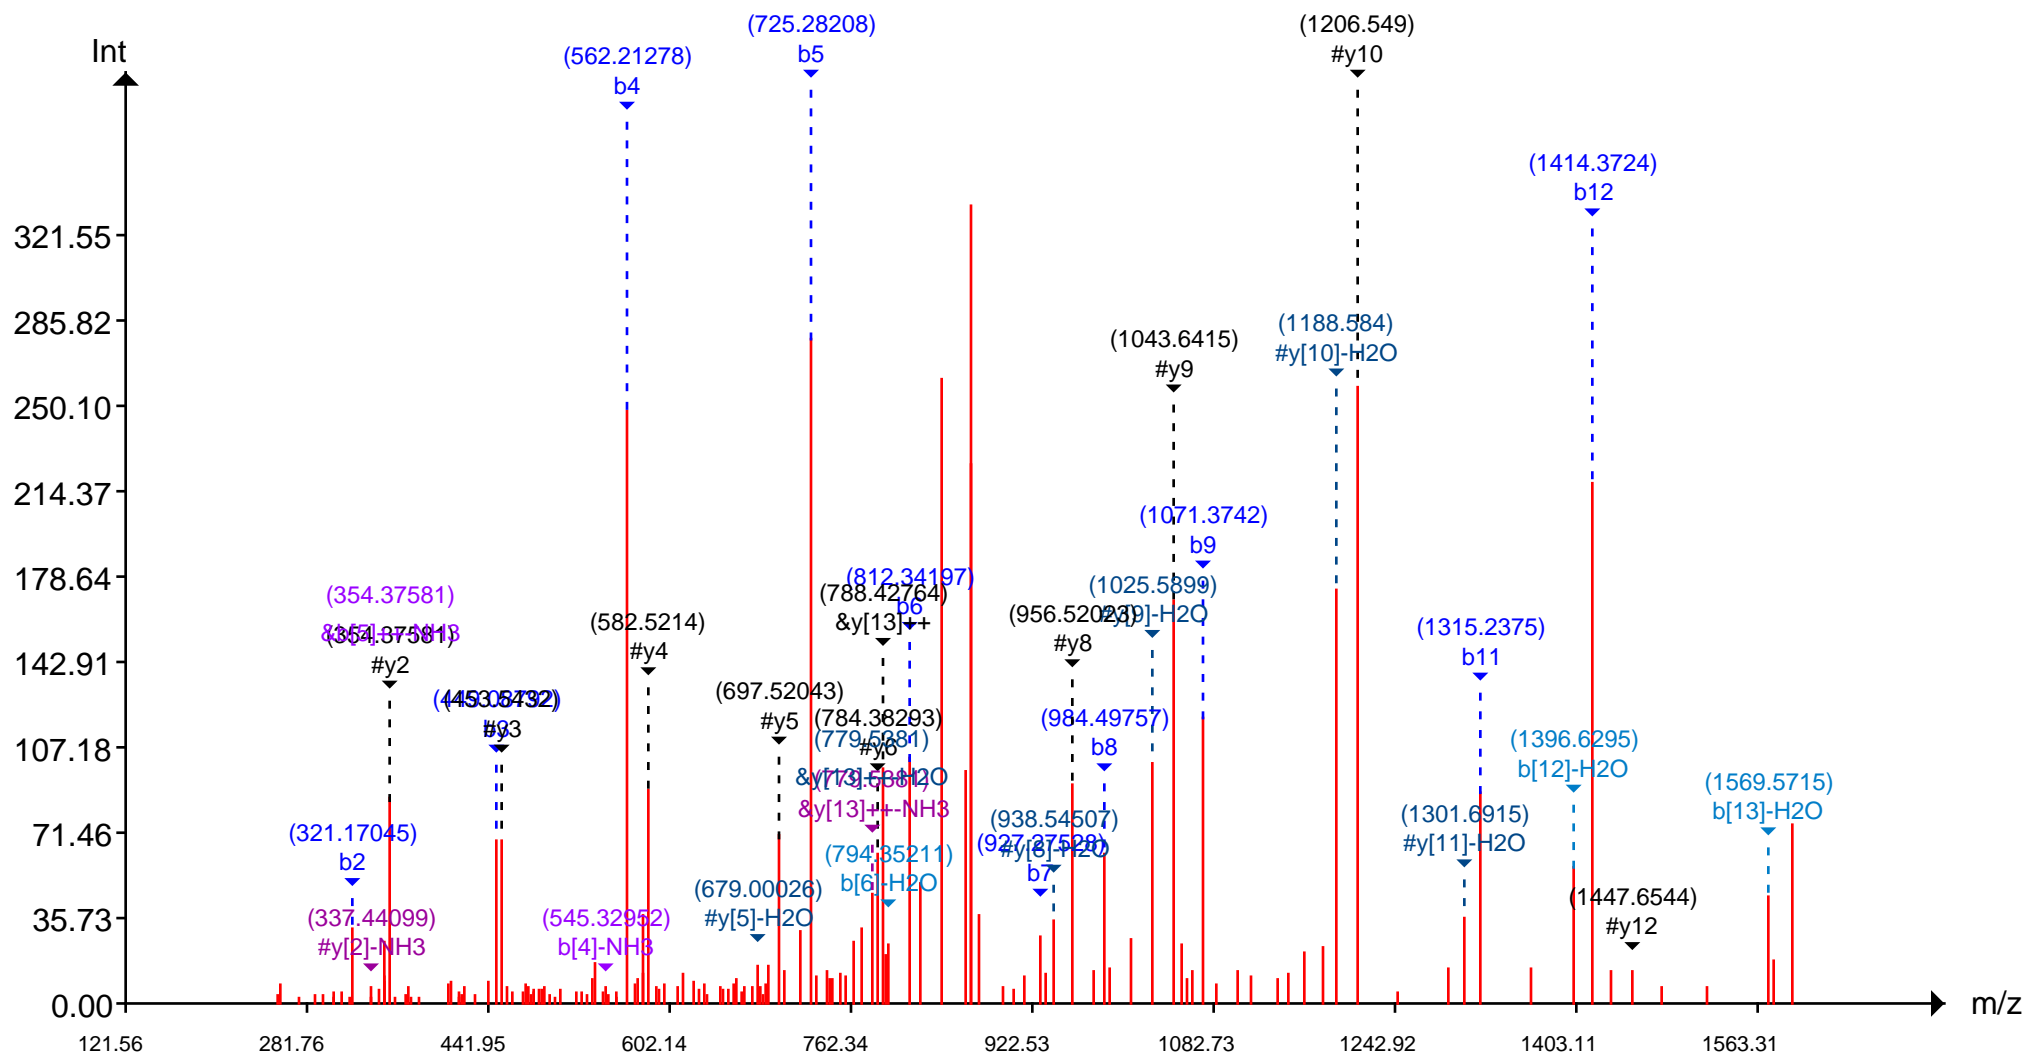

## Info

|                          |                                       |                           |          |
|--------------------------|---------------------------------------|---------------------------|----------|
| <b>Modified Sequence</b> | AcD3-FQQIYSDGSDEVK<AcD3K*>R<C13>-COOH | <b>Ion score</b>          | 56.3     |
| <b>Protein</b>           | Q9CX34                                | <b>Confidence level</b>   | 99.00%   |
| <b>Precursor m/z</b>     | 884.44298                             | <b>Identity Threshold</b> | 47.70    |
| <b>Charge</b>            | 2+                                    | <b>Mass error</b>         | 0.002466 |

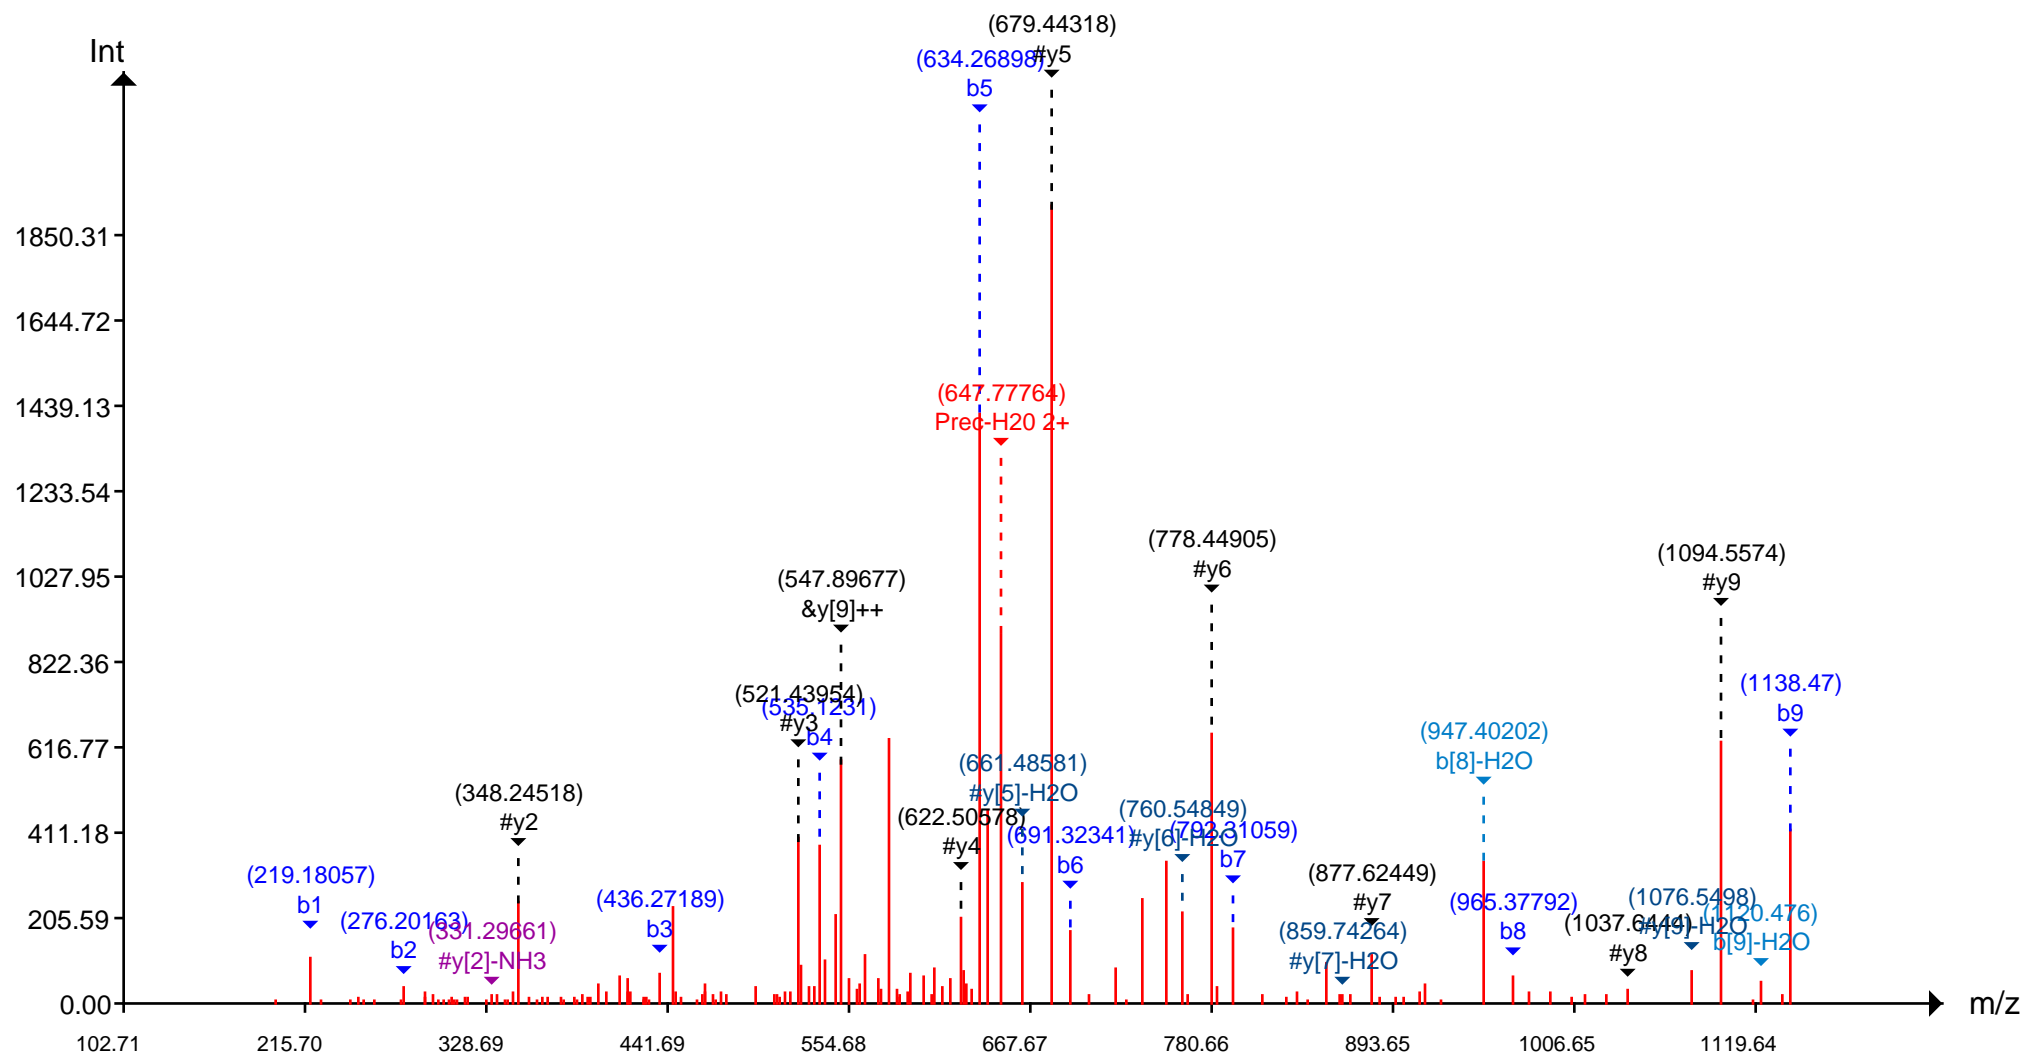

## Info

|                          |                                                    |                           |         |
|--------------------------|----------------------------------------------------|---------------------------|---------|
| <b>Modified Sequence</b> | AcD3-K<AcD3K*>GC<Cmm*>VVGTK<AcD3K*>K<AcD3K*>R-COOH | <b>Ion score</b>          | 45.21   |
| <b>Protein</b>           | P27659                                             | <b>Confidence level</b>   | 99.00%  |
| <b>Precursor m/z</b>     | 656.8936                                           | <b>Identity Threshold</b> | 44.49   |
| <b>Charge</b>            | 2+                                                 | <b>Mass error</b>         | 4.01E-4 |

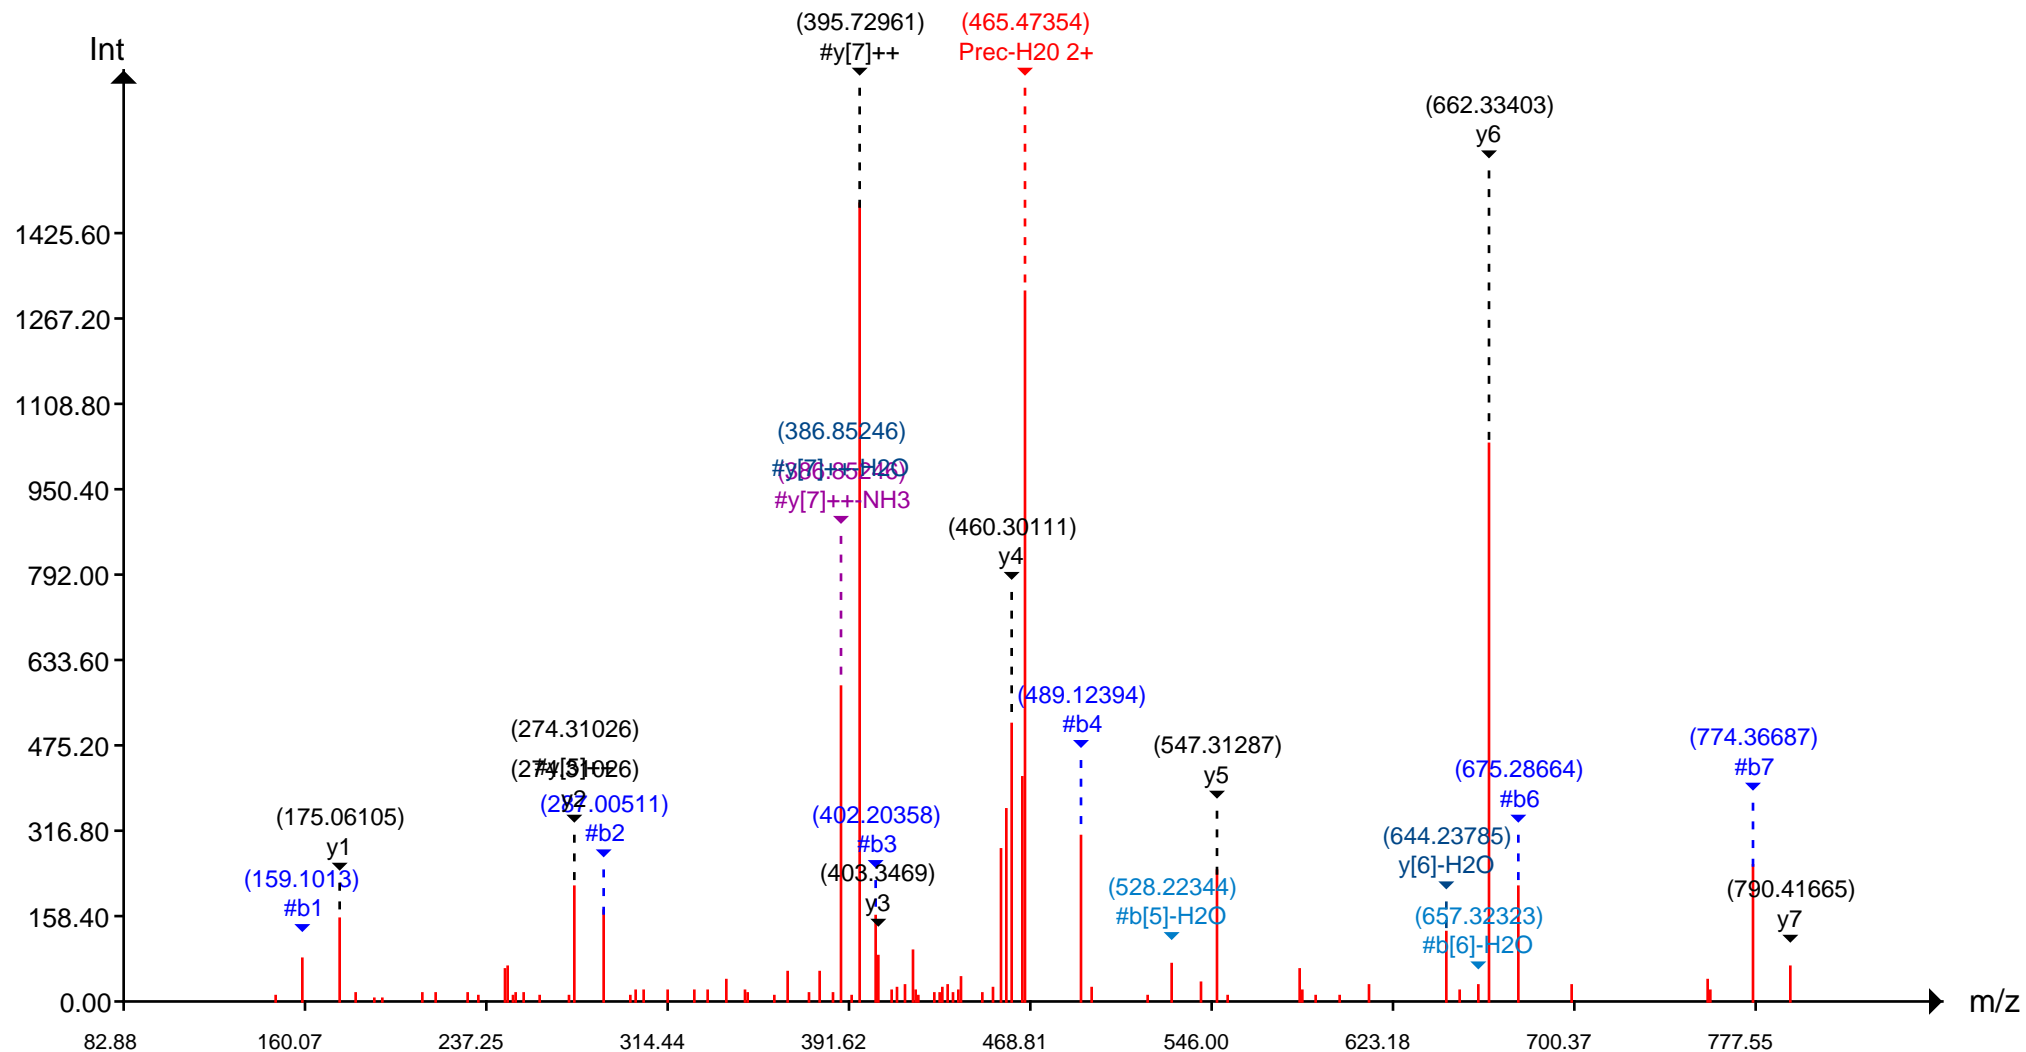

## Info

|                          |                    |                           |         |
|--------------------------|--------------------|---------------------------|---------|
| <b>Modified Sequence</b> | AcD3-LQDSGEVR-COOH | <b>Ion score</b>          | 61.79   |
| <b>Protein</b>           | P63242             | <b>Confidence level</b>   | 99.00%  |
| <b>Precursor m/z</b>     | 474.74484          | <b>Identity Threshold</b> | 47.54   |
| <b>Charge</b>            | 2+                 | <b>Mass error</b>         | -1.5E-5 |

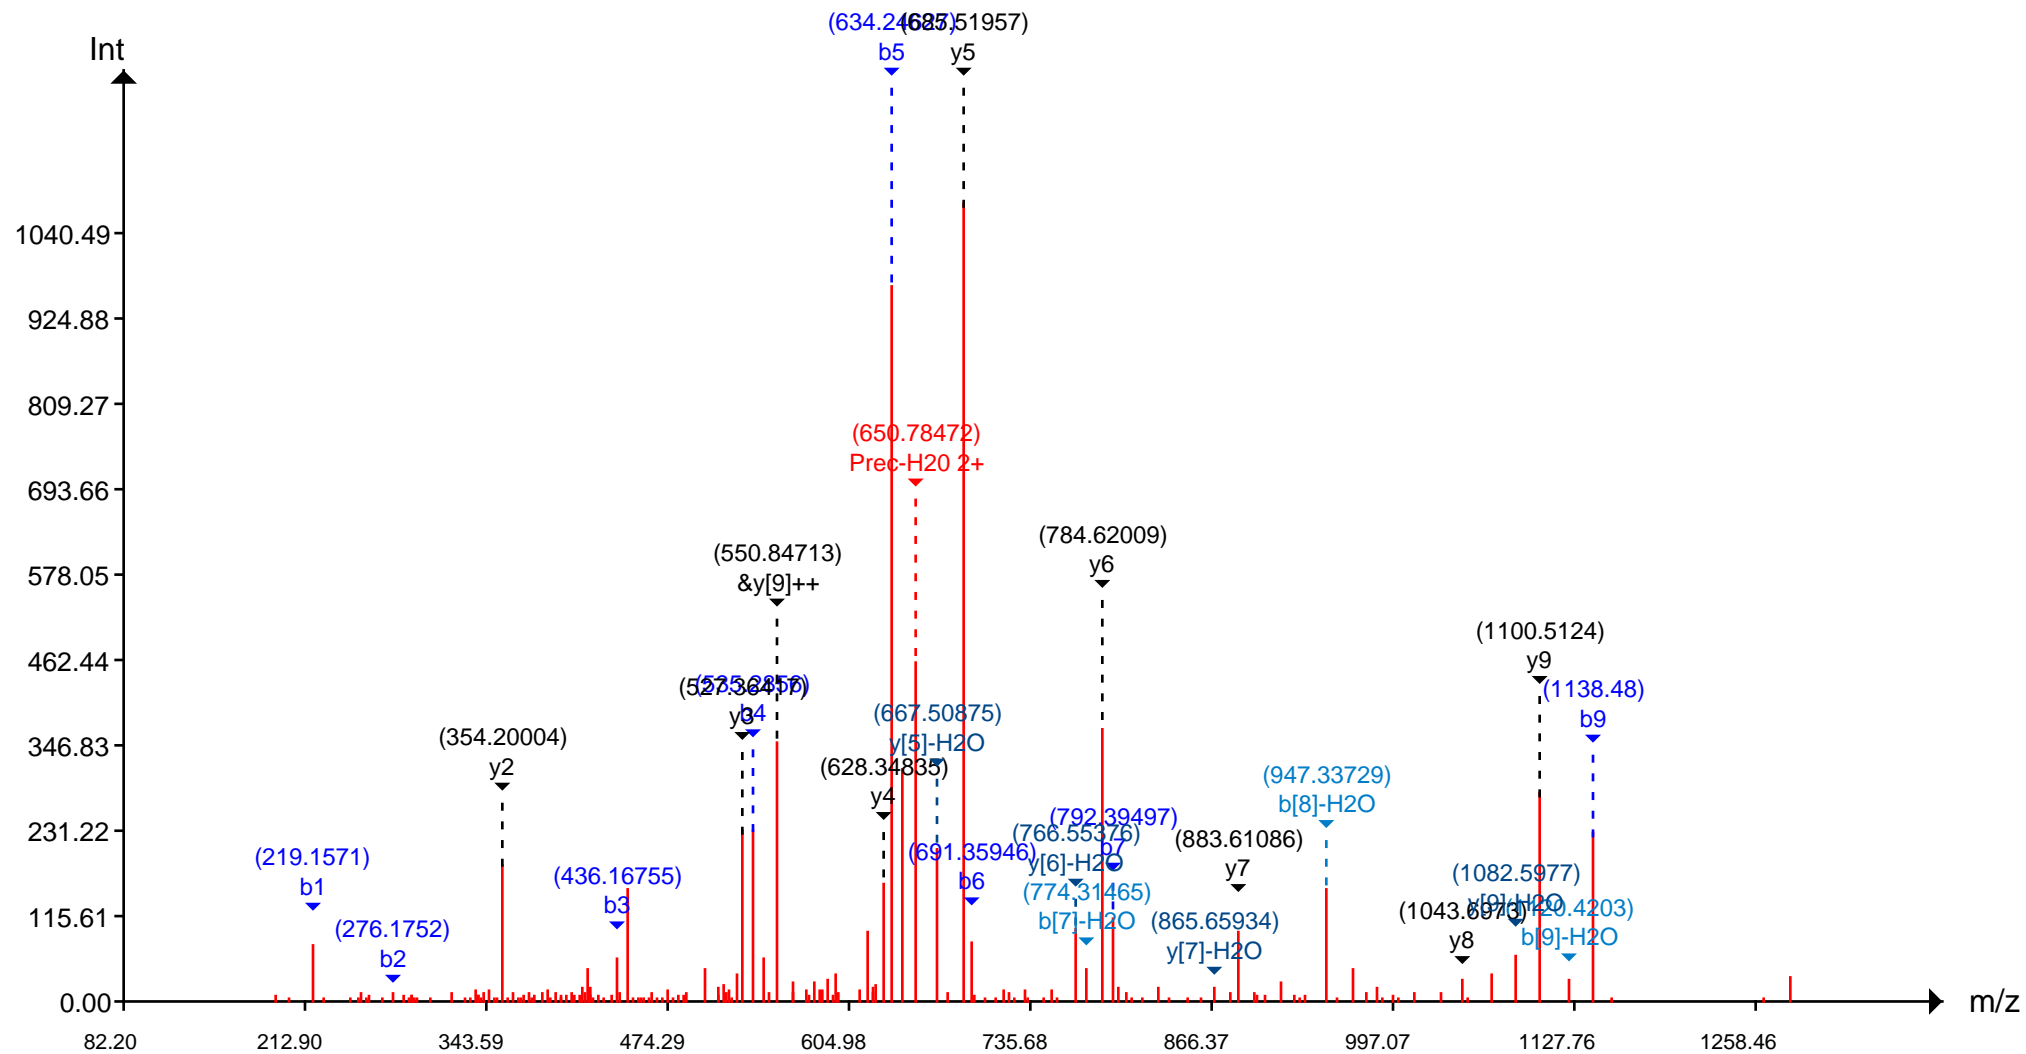

## Info

|                          |                                                         |                           |         |
|--------------------------|---------------------------------------------------------|---------------------------|---------|
| <b>Modified Sequence</b> | AcD3-K<AcD3K*>GC<Cmm*>VVGTK<AcD3K*>K<AcD3K*>R<C13>-COOH | <b>Ion score</b>          | 57.71   |
| <b>Protein</b>           | P27659                                                  | <b>Confidence level</b>   | 99.00%  |
| <b>Precursor m/z</b>     | 659.90388                                               | <b>Identity Threshold</b> | 42.81   |
| <b>Charge</b>            | 2+                                                      | <b>Mass error</b>         | 8.19E-4 |

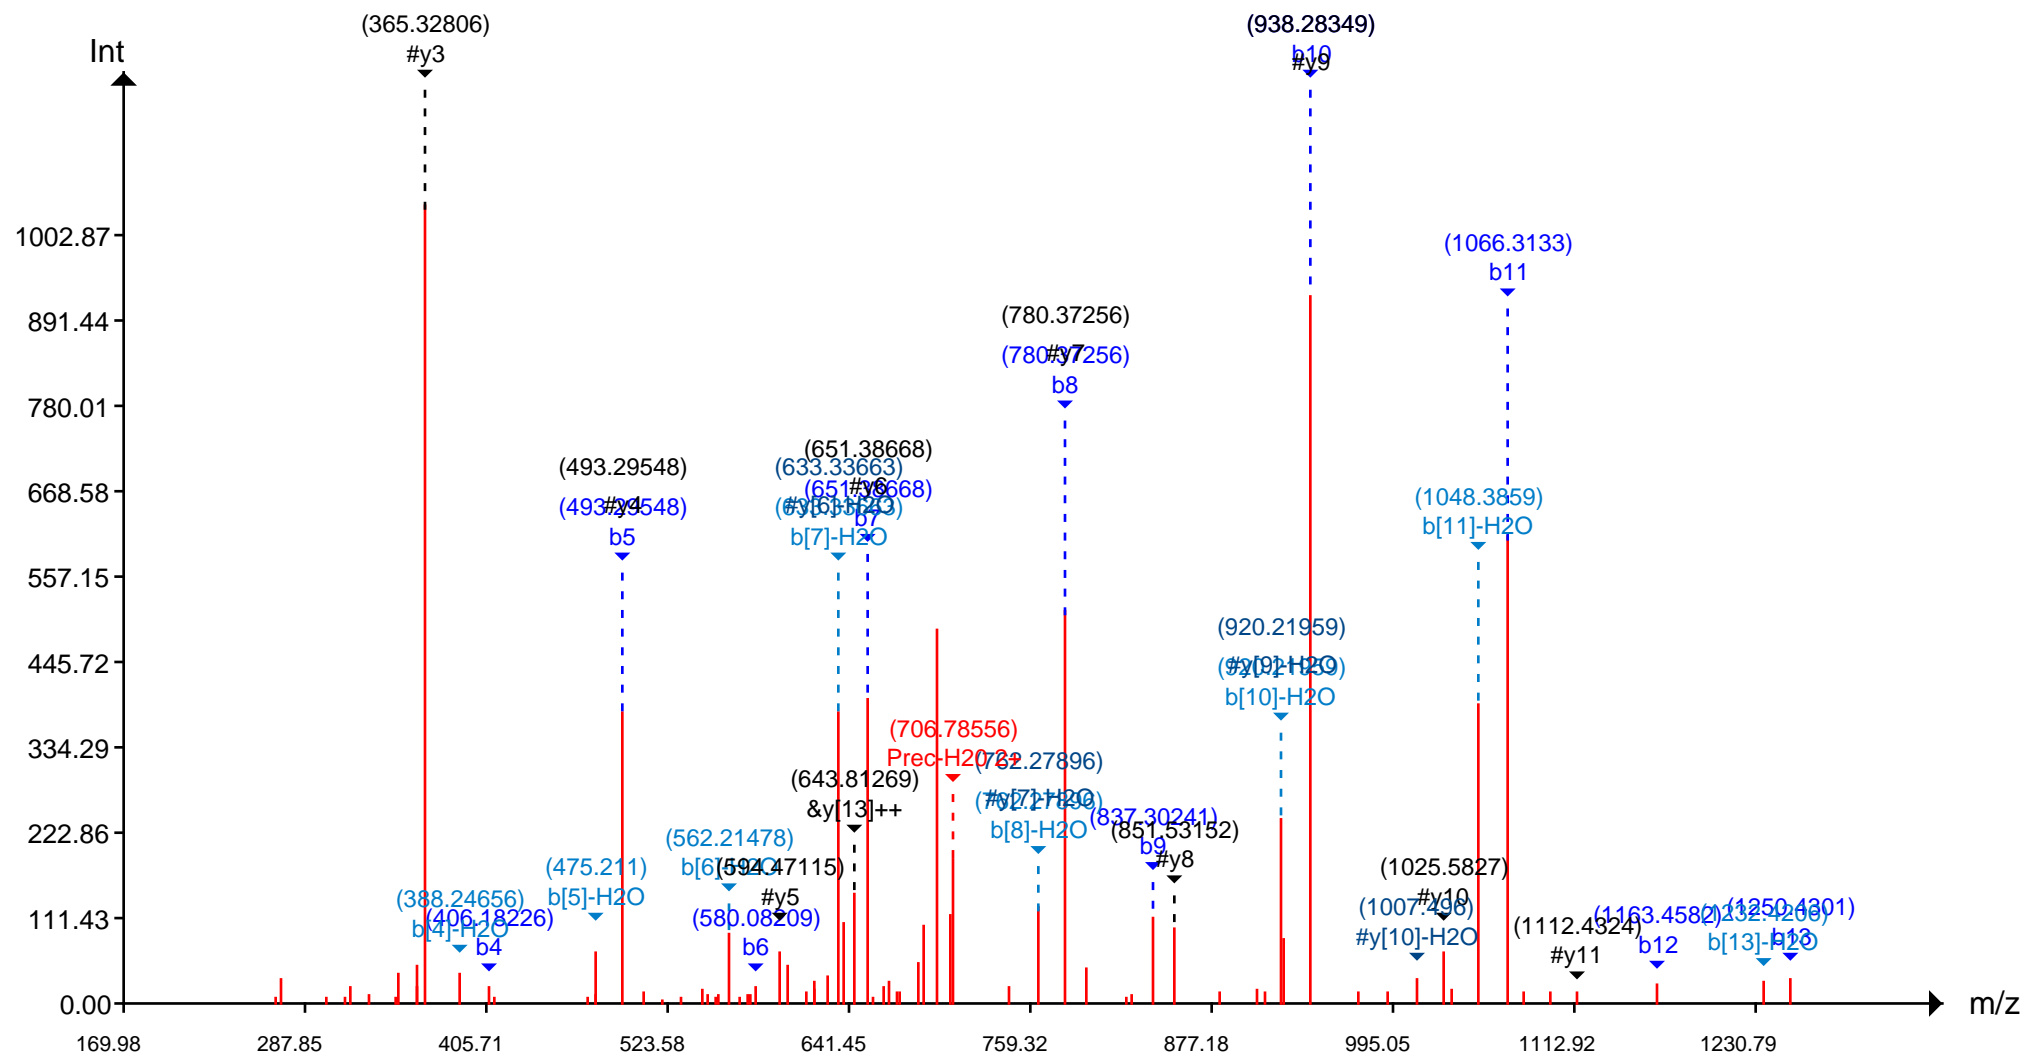

## Info

**Modified Sequence** AcD3-VSSSSSAEGTQPSR<C13>-COOH

**Ion score** 88.95

**Protein** Q8R317

**Confidence level** 99.00%

**Precursor m/z** 715.84863

**Identity Threshold** 46.90

**Charge** 2+

**Mass error** 7.32E-4



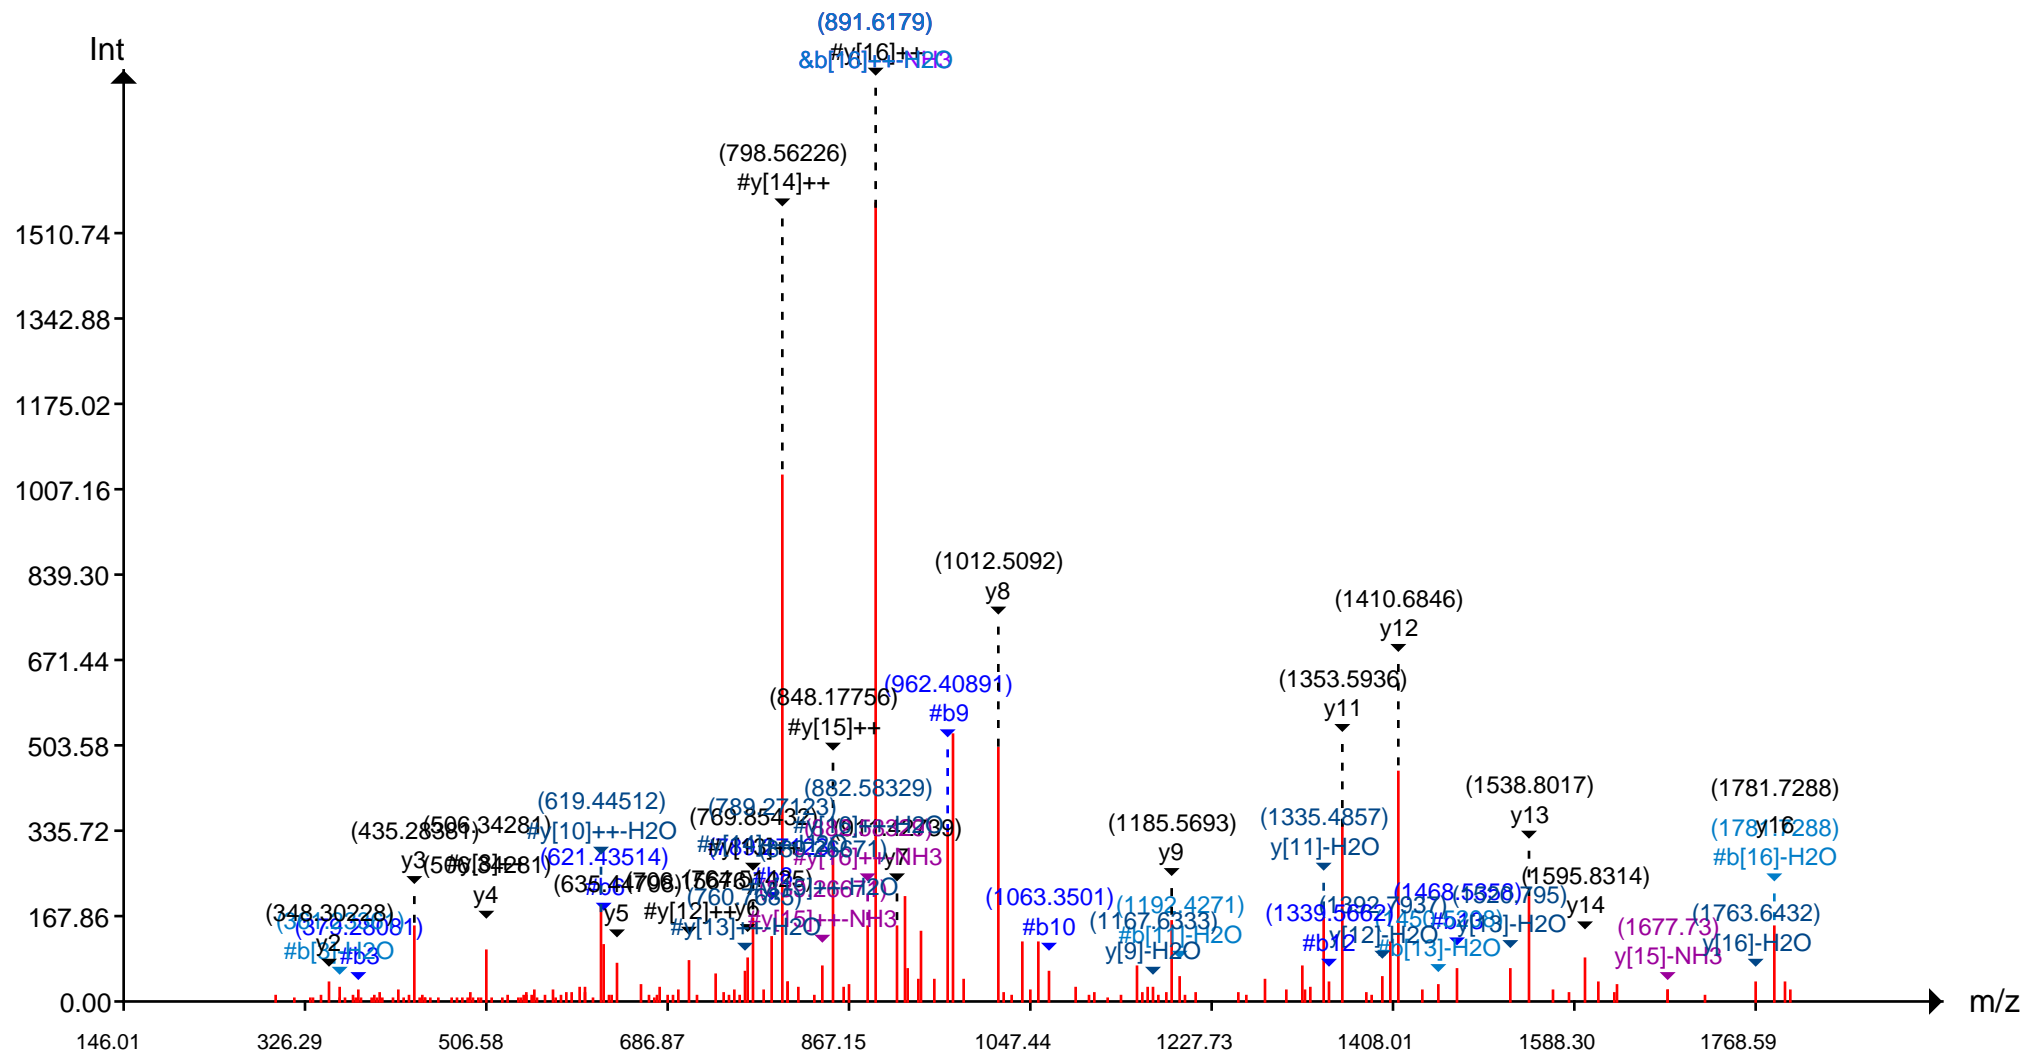

## Info

|                          |                                                   |                           |          |
|--------------------------|---------------------------------------------------|---------------------------|----------|
| <b>Modified Sequence</b> | AcD3-FSVGQGPAK<AcD3K*>TM<Mox*>EEASK<AcD3K*>R-COOH | <b>Ion score</b>          | 88.86    |
| <b>Protein</b>           | O70310                                            | <b>Confidence level</b>   | 99.00%   |
| <b>Precursor m/z</b>     | 987.50214                                         | <b>Identity Threshold</b> | 47.92    |
| <b>Charge</b>            | 2+                                                | <b>Mass error</b>         | 0.002301 |

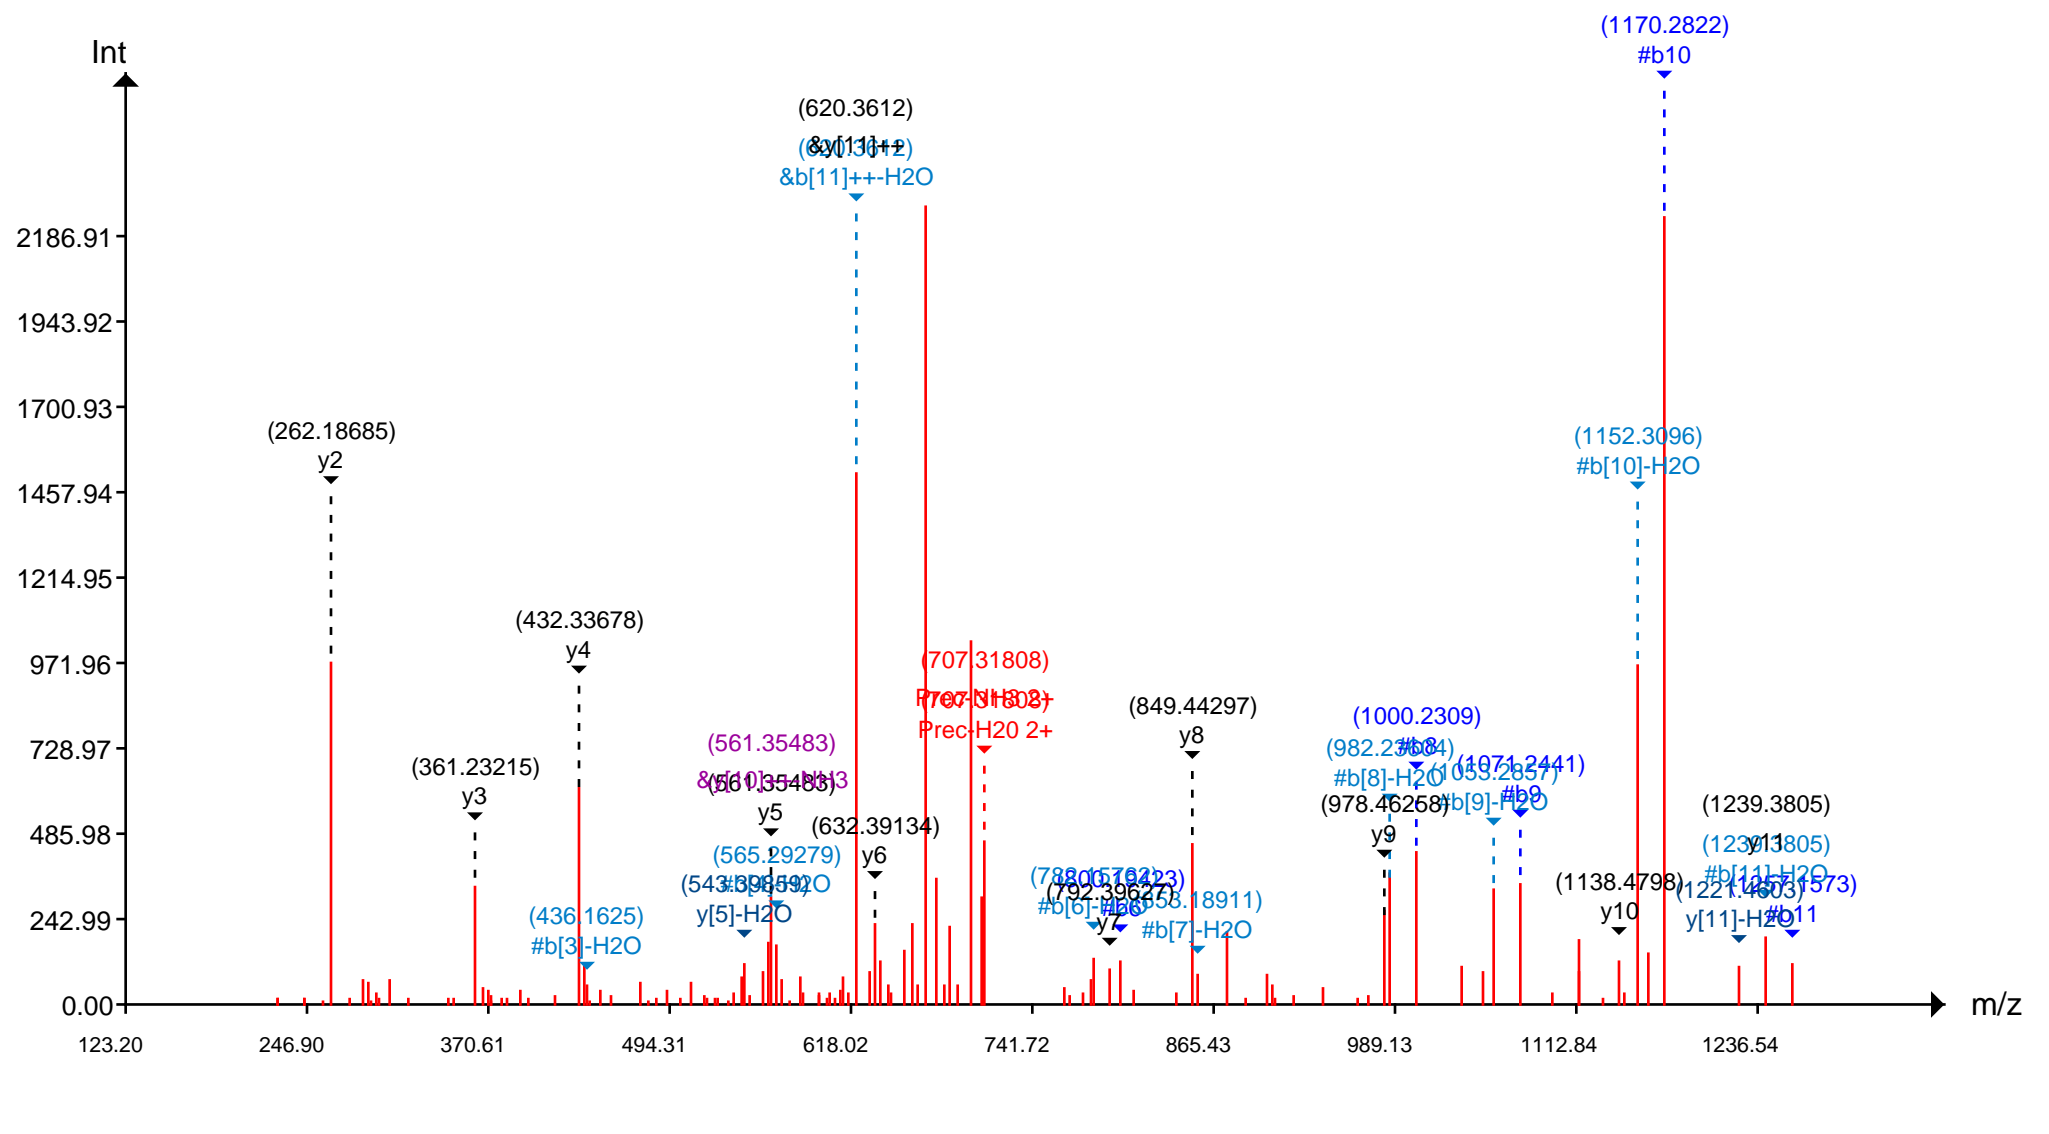

| Info                     |                                          |                           |         |
|--------------------------|------------------------------------------|---------------------------|---------|
| <b>Modified Sequence</b> | AcD3-M<Mox*>TC<Cmm*>EGC<Cmm*>AEAVSR-COOH | <b>Ion score</b>          | 57.24   |
| <b>Protein</b>           | O08997                                   | <b>Confidence level</b>   | 99.00%  |
| <b>Precursor m/z</b>     | 716.29096                                | <b>Identity Threshold</b> | 38.08   |
| <b>Charge</b>            | 2+                                       | <b>Mass error</b>         | 6.11E-4 |

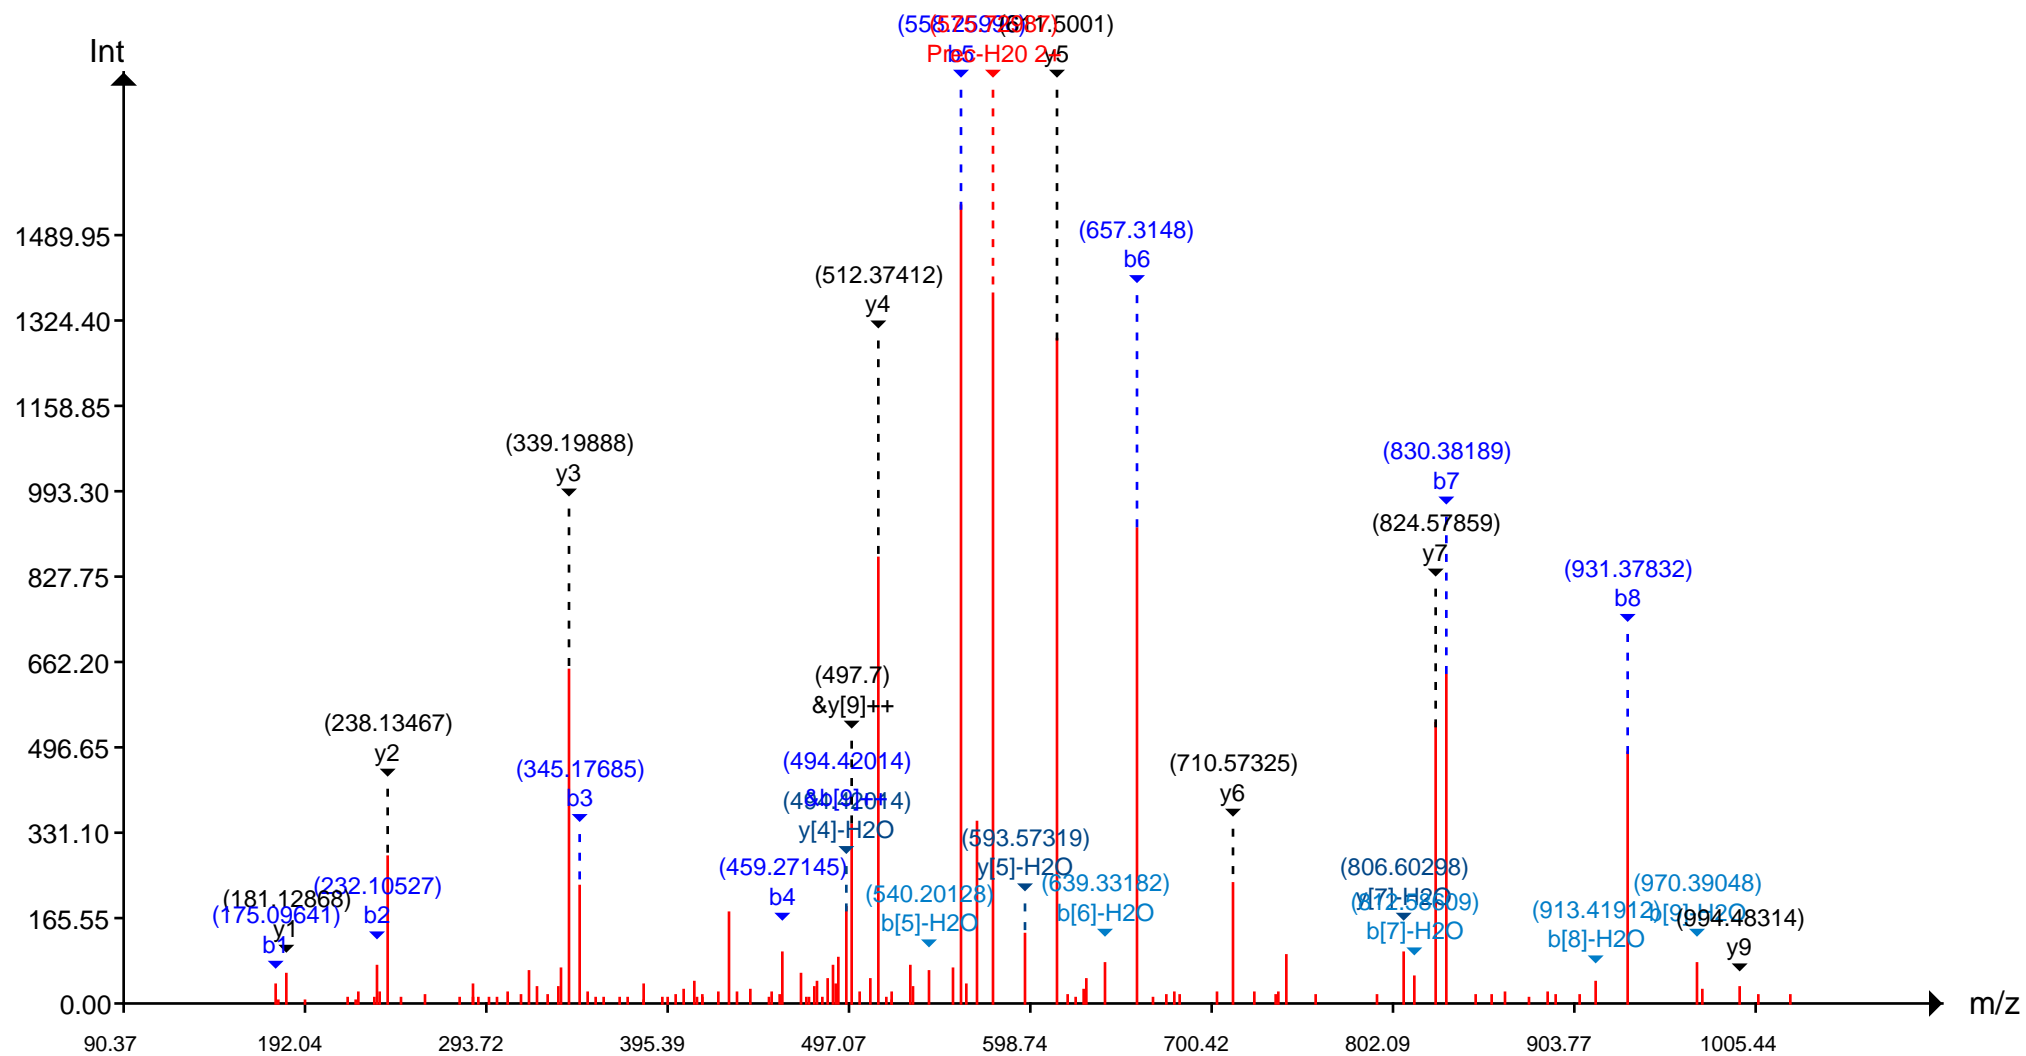

## Info

|                          |                                   |                           |          |
|--------------------------|-----------------------------------|---------------------------|----------|
| <b>Modified Sequence</b> | AcD3-EGLNVVK<AcD3K*>TGR<C13>-COOH | <b>Ion score</b>          | 67.22    |
| <b>Protein</b>           | P15532, Q01768                    | <b>Confidence level</b>   | 99.00%   |
| <b>Precursor m/z</b>     | 584.8492                          | <b>Identity Threshold</b> | 45.23    |
| <b>Charge</b>            | 2+                                | <b>Mass error</b>         | 0.001261 |

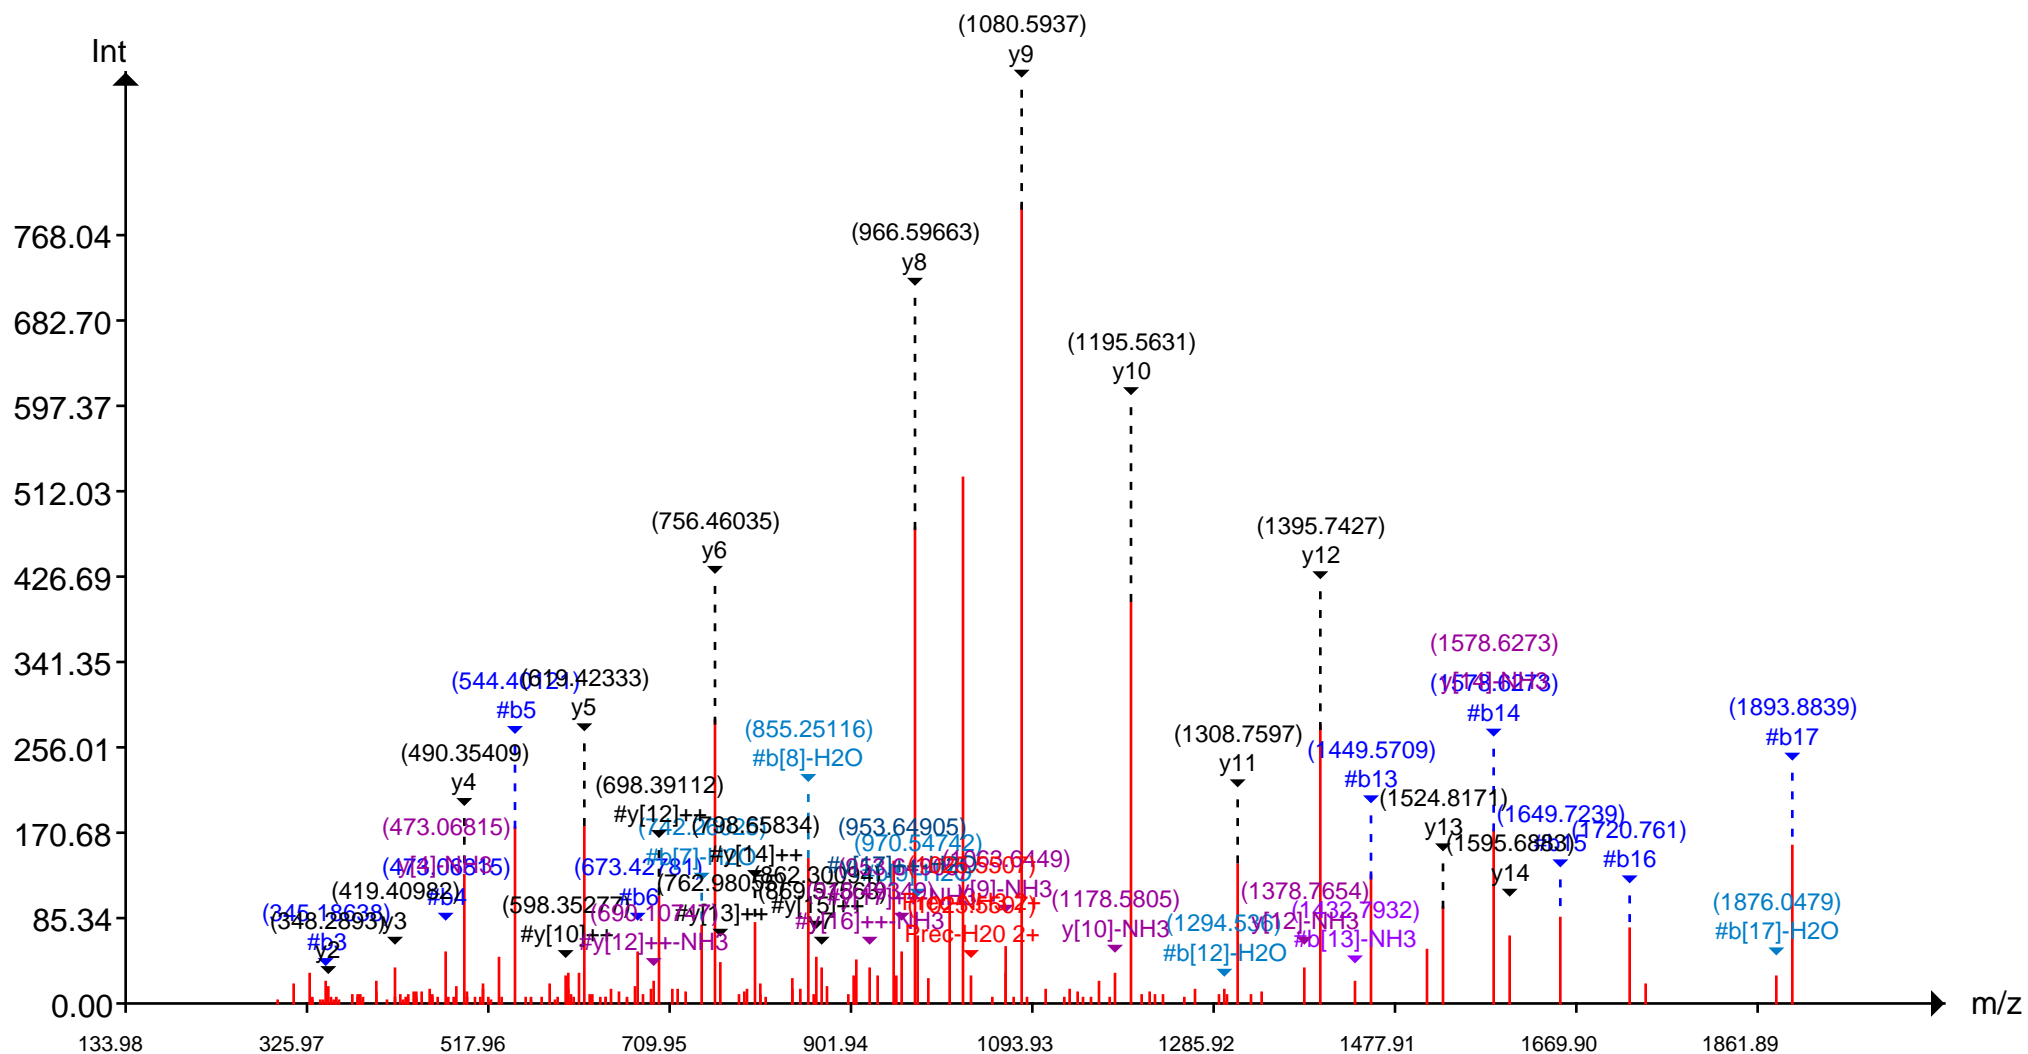

## Info

|                          |                                      |                           |         |
|--------------------------|--------------------------------------|---------------------------|---------|
| <b>Modified Sequence</b> | AcD3-VAEQAESIDNPLHEAAK<AcD3K*>R-COOH | <b>Ion score</b>          | 99.32   |
| <b>Protein</b>           | Q62422                               | <b>Confidence level</b>   | 99.00%  |
| <b>Precursor m/z</b>     | 1034.5337                            | <b>Identity Threshold</b> | 47.96   |
| <b>Charge</b>            | 2+                                   | <b>Mass error</b>         | 0.00254 |

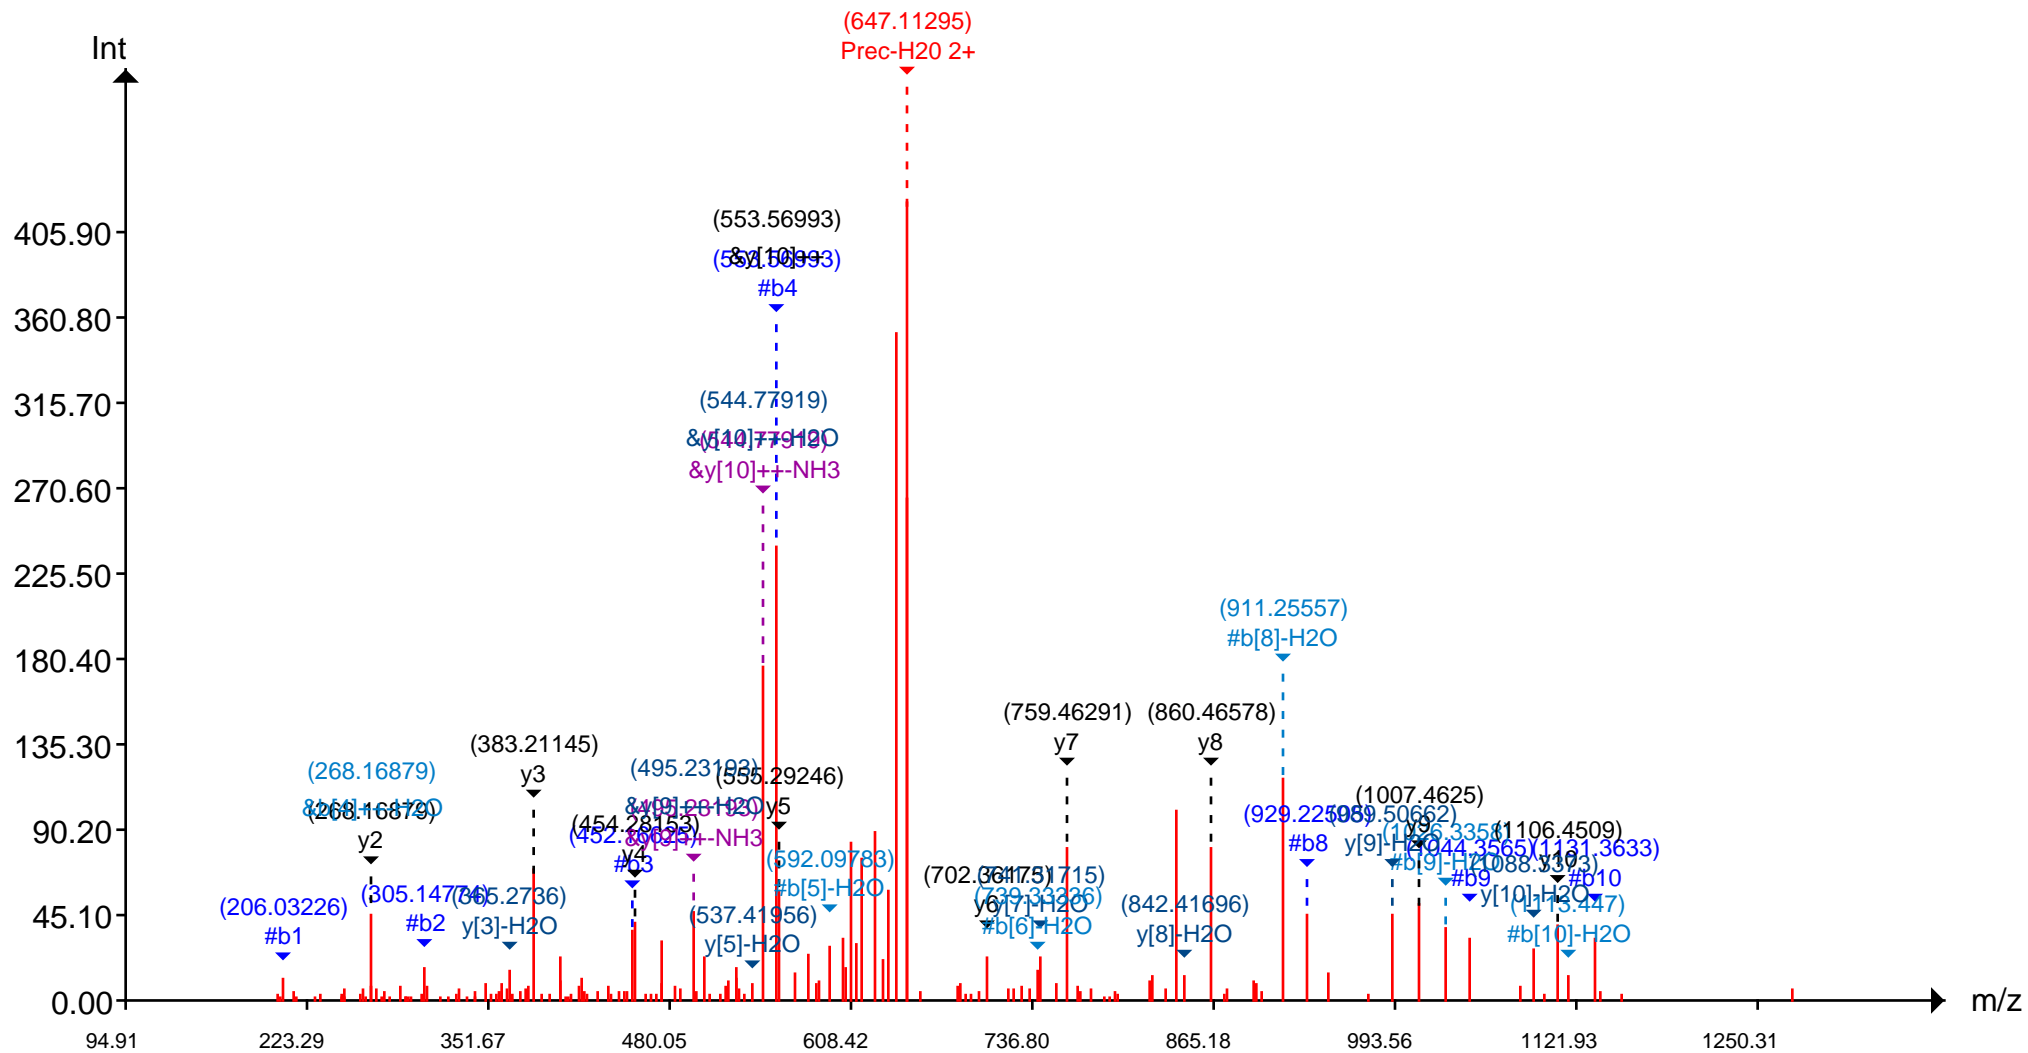

## Info

|                          |                                              |                           |          |
|--------------------------|----------------------------------------------|---------------------------|----------|
| <b>Modified Sequence</b> | AcD3-C<Cmm*>VM<Mox*>TGM<Mox*>TADSR<C13>-COOH | <b>Ion score</b>          | 81.14    |
| <b>Protein</b>           | Q9QUM9                                       | <b>Confidence level</b>   | 99.00%   |
| <b>Precursor m/z</b>     | 656.28003                                    | <b>Identity Threshold</b> | 41.20    |
| <b>Charge</b>            | 2+                                           | <b>Mass error</b>         | 0.001517 |

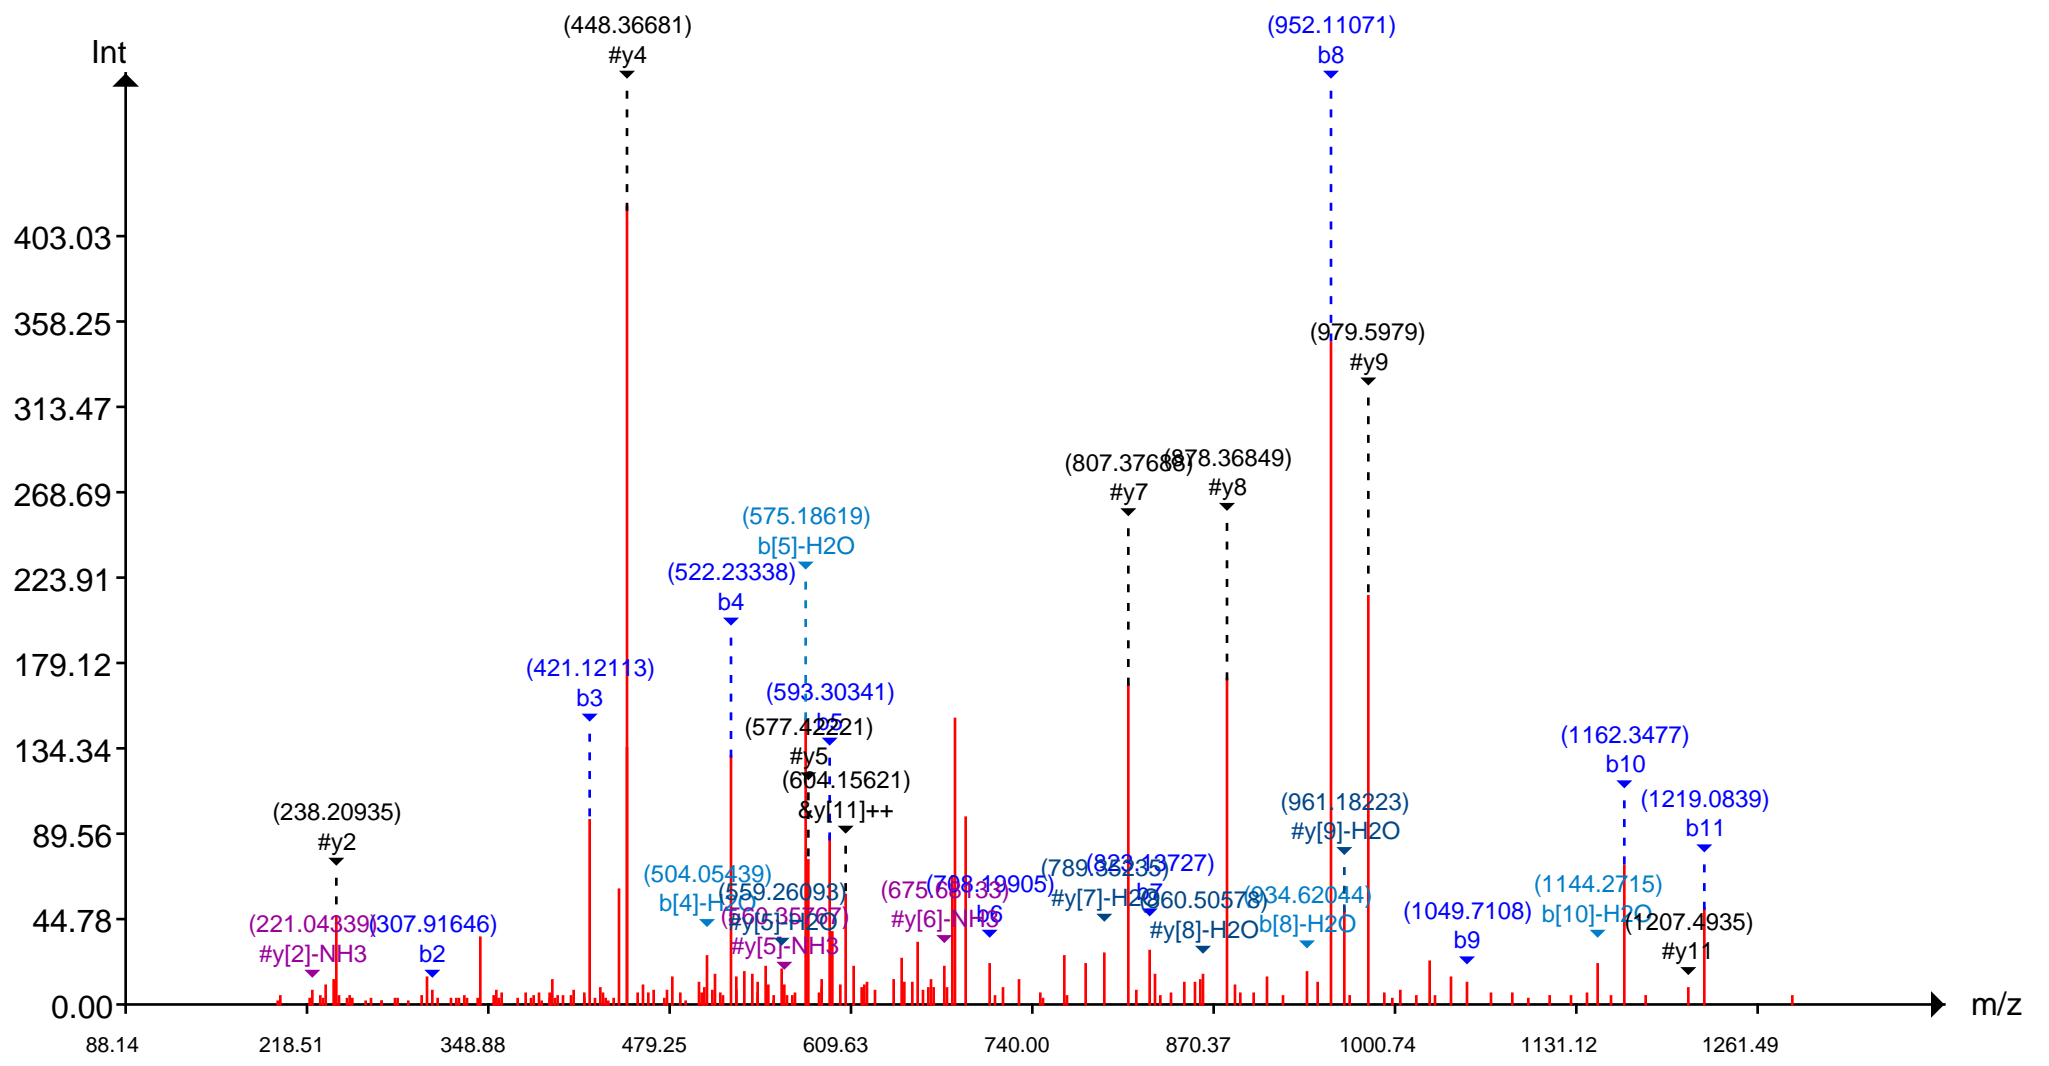

Info

|                          |                             |                           |         |
|--------------------------|-----------------------------|---------------------------|---------|
| <b>Modified Sequence</b> | AcD3-FDITADDEPLGR<C13>-COOH | <b>Ion score</b>          | 70.8    |
| <b>Protein</b>           | P17742                      | <b>Confidence level</b>   | 99.00%  |
| <b>Precursor m/z</b>     | 700.34778                   | <b>Identity Threshold</b> | 47.39   |
| <b>Charge</b>            | 2+                          | <b>Mass error</b>         | 8.17E-4 |

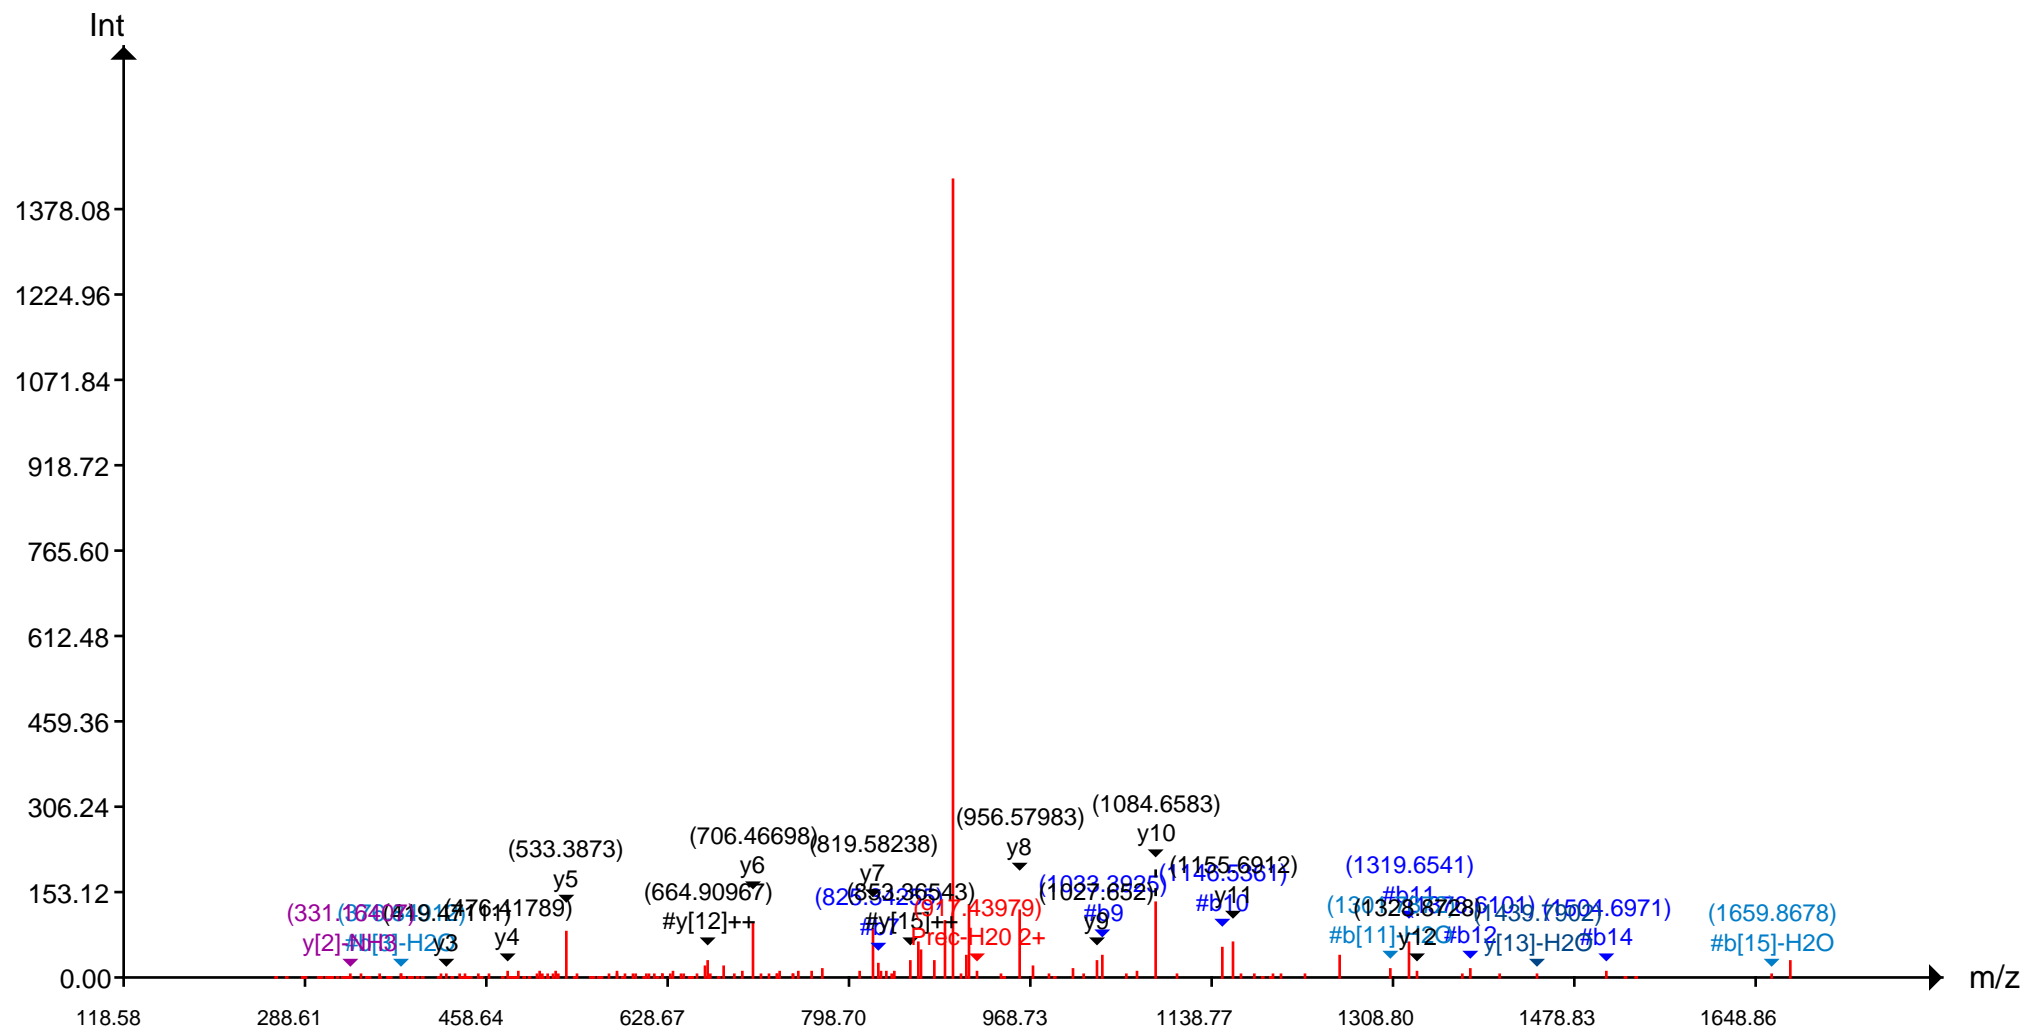

## Info

|                          |                                                           |                           |          |
|--------------------------|-----------------------------------------------------------|---------------------------|----------|
| <b>Modified Sequence</b> | AcD3-TTM<Mox*>EK<AcD3K*>AG AHLK<AcD3K*>GGAK<AcD3K*>R-COOH | <b>Ion score</b>          | 65.57    |
| <b>Protein</b>           | P16858                                                    | <b>Confidence level</b>   | 99.00%   |
| <b>Precursor m/z</b>     | 926.51113                                                 | <b>Identity Threshold</b> | 47.20    |
| <b>Charge</b>            | 2+                                                        | <b>Mass error</b>         | 0.001513 |

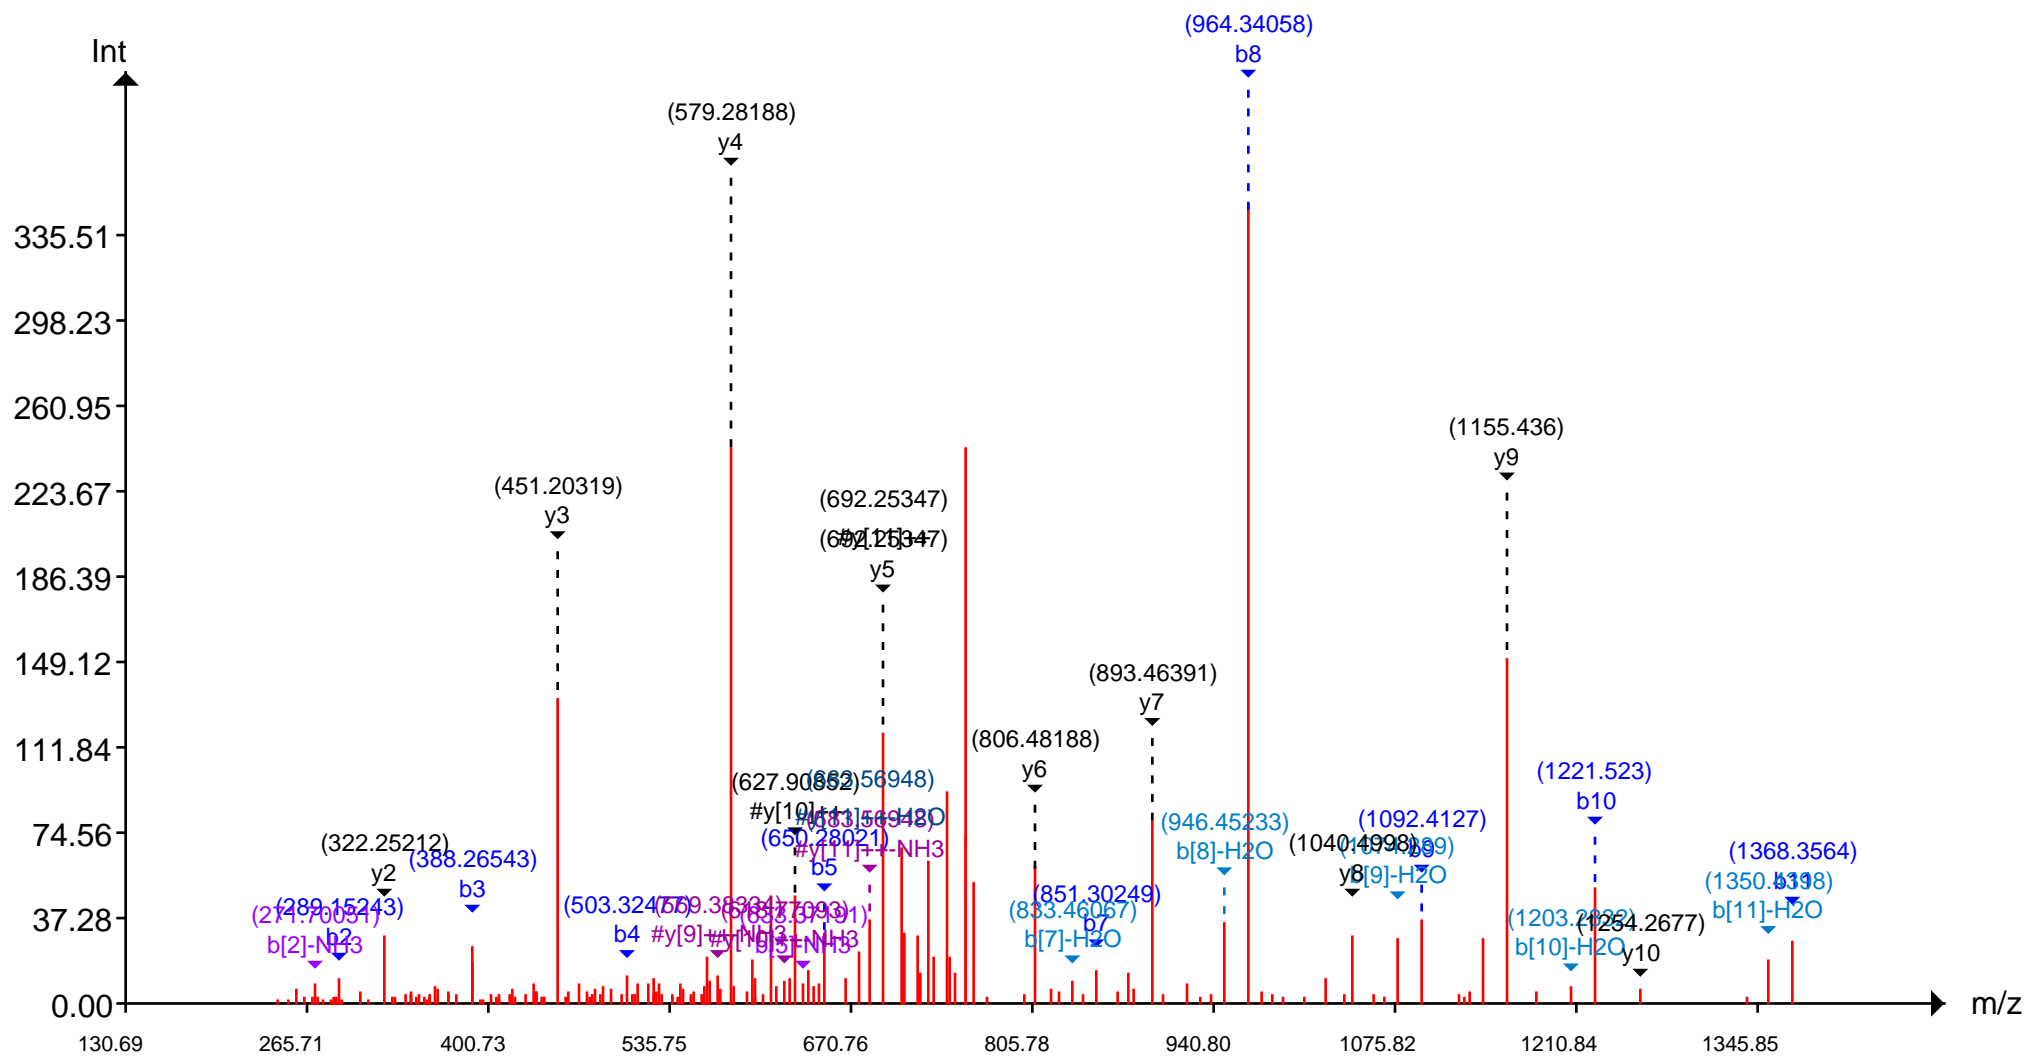

## Info

|                          |                                    |                           |         |
|--------------------------|------------------------------------|---------------------------|---------|
| <b>Modified Sequence</b> | AcD3-NEVDM<Mox*>SNIQEM<Mox*>R-COOH | <b>Ion score</b>          | 79.36   |
| <b>Protein</b>           | Q9D2G2                             | <b>Confidence level</b>   | 99.00%  |
| <b>Precursor m/z</b>     | 771.83454                          | <b>Identity Threshold</b> | 41.85   |
| <b>Charge</b>            | 2+                                 | <b>Mass error</b>         | 0.00162 |



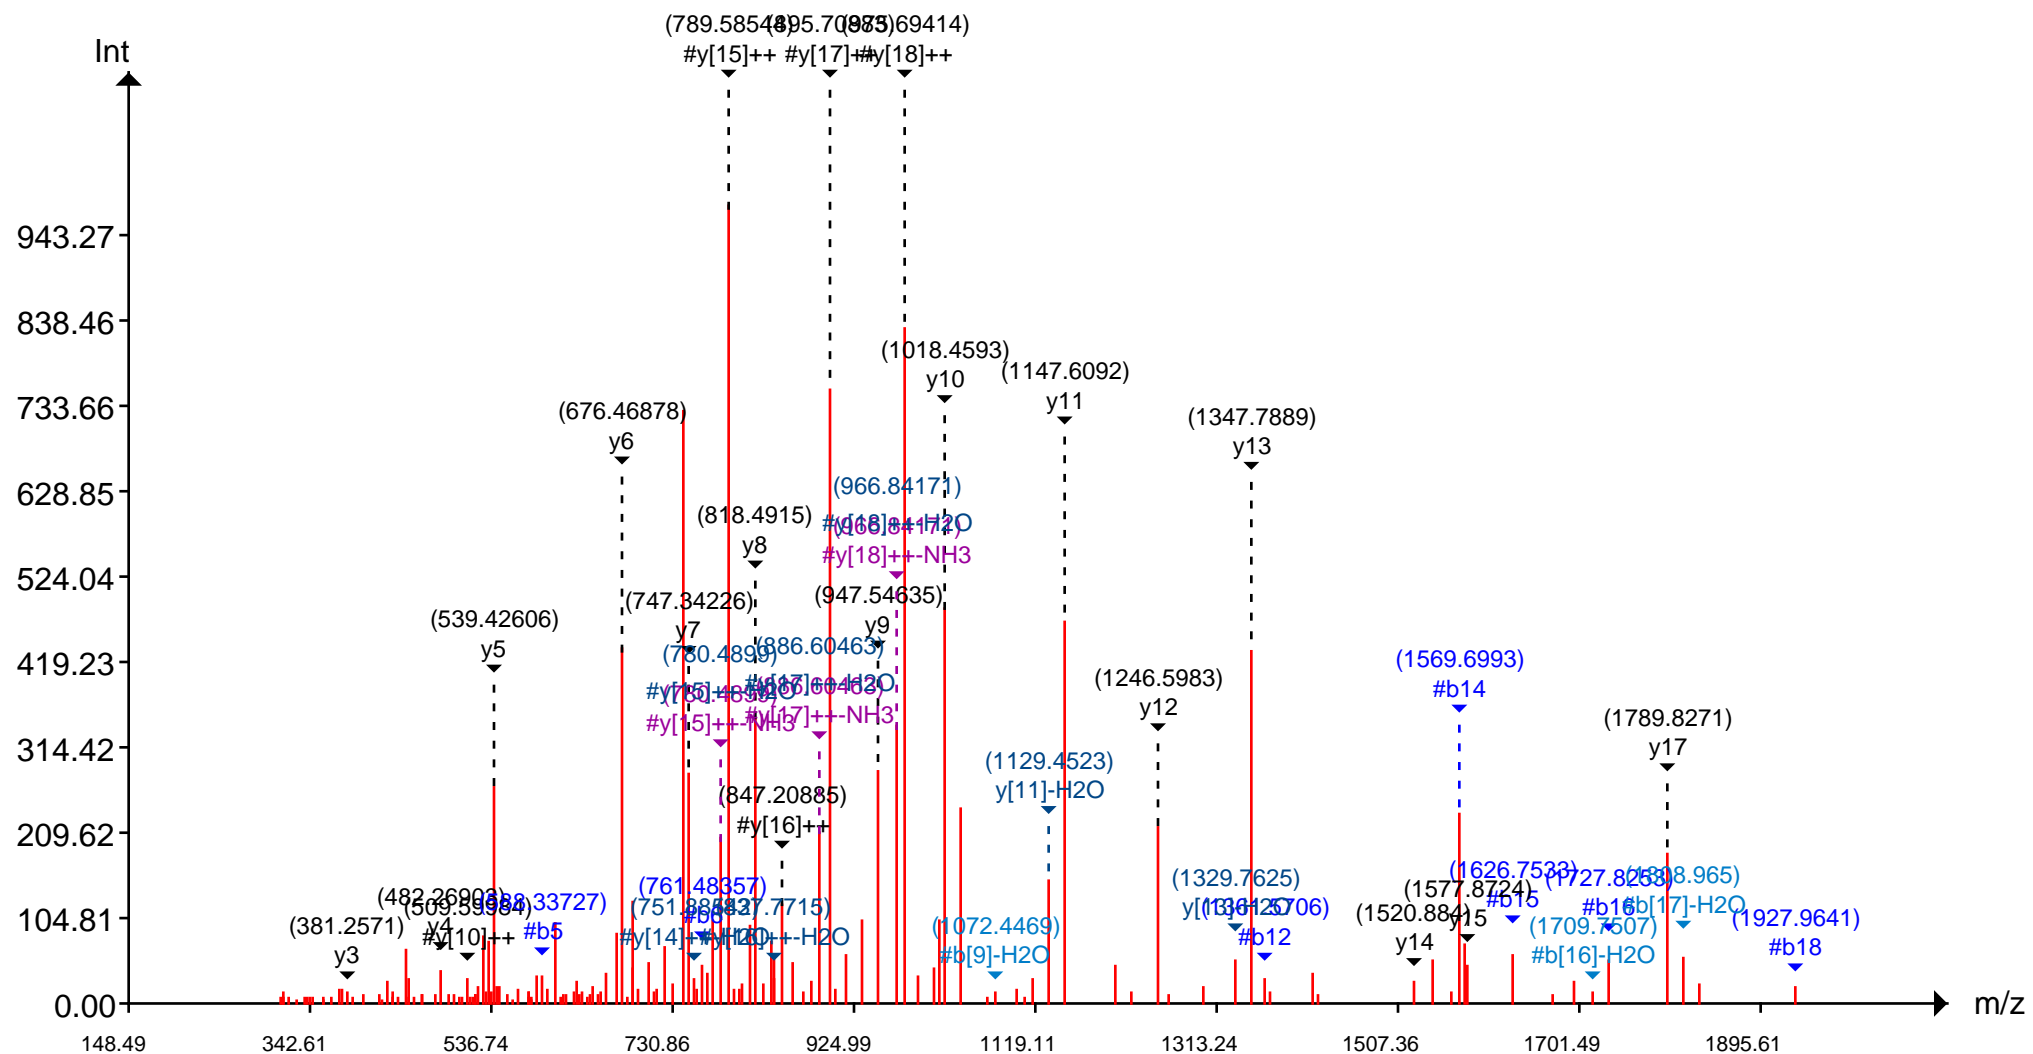

## Info

Modified Sequence AcD3-IC<Cmm\*>PDGK<AcD3K\*>TVEAEAAHGTVTR<C13>-COOH

Ion score 83.44

Protein O88844

Confidence level 99.00%

Precursor m/z 1054.5374

Identity Threshold 47.91

Charge 2+

Mass error 0.00202

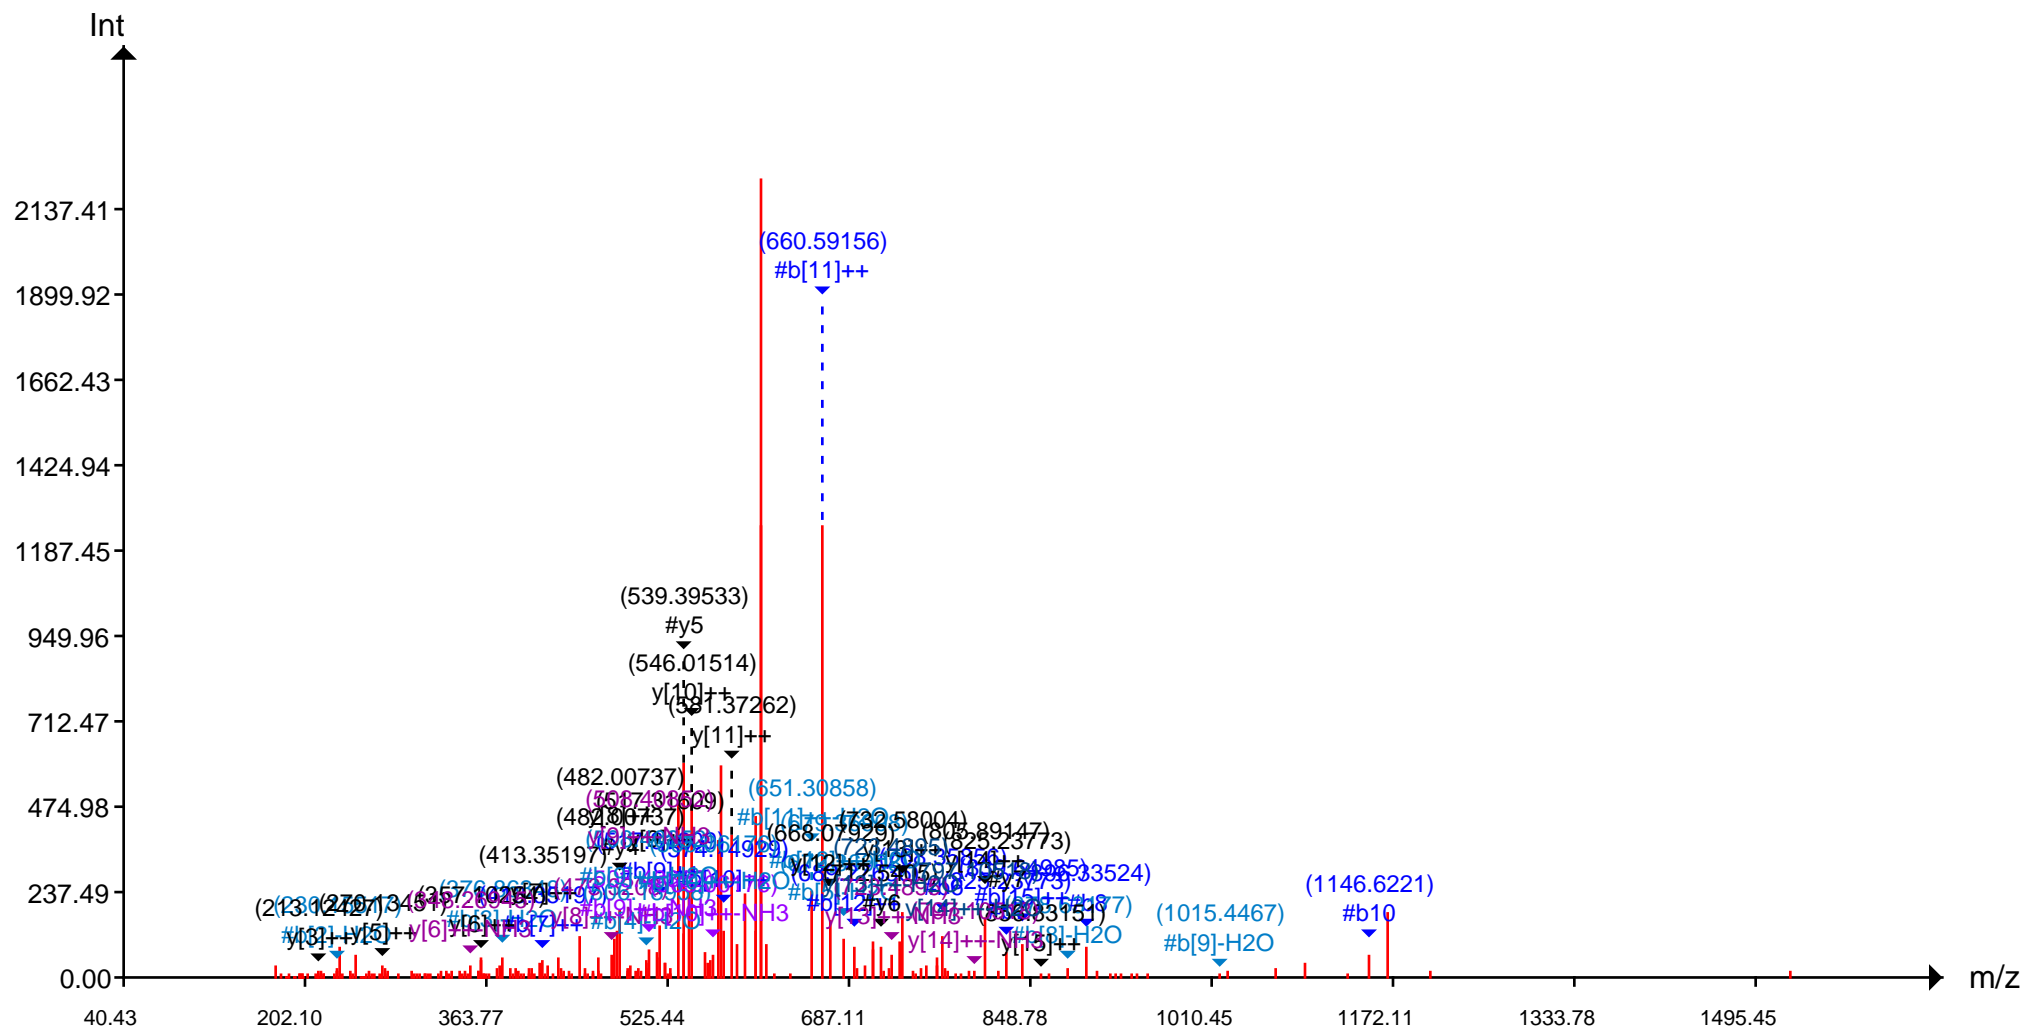

## Info

|                          |                                                                |                           |         |
|--------------------------|----------------------------------------------------------------|---------------------------|---------|
| <b>Modified Sequence</b> | AcD3-TTM<Mox*>EK<AcD3K*>AG AHLK<AcD3K*>GGAK<AcD3K*>R<C13>-COOH | <b>Ion score</b>          | 58.3    |
| <b>Protein</b>           | P16858                                                         | <b>Confidence level</b>   | 99.00%  |
| <b>Precursor m/z</b>     | 620.01603                                                      | <b>Identity Threshold</b> | 46.56   |
| <b>Charge</b>            | 3+                                                             | <b>Mass error</b>         | -7.5E-5 |

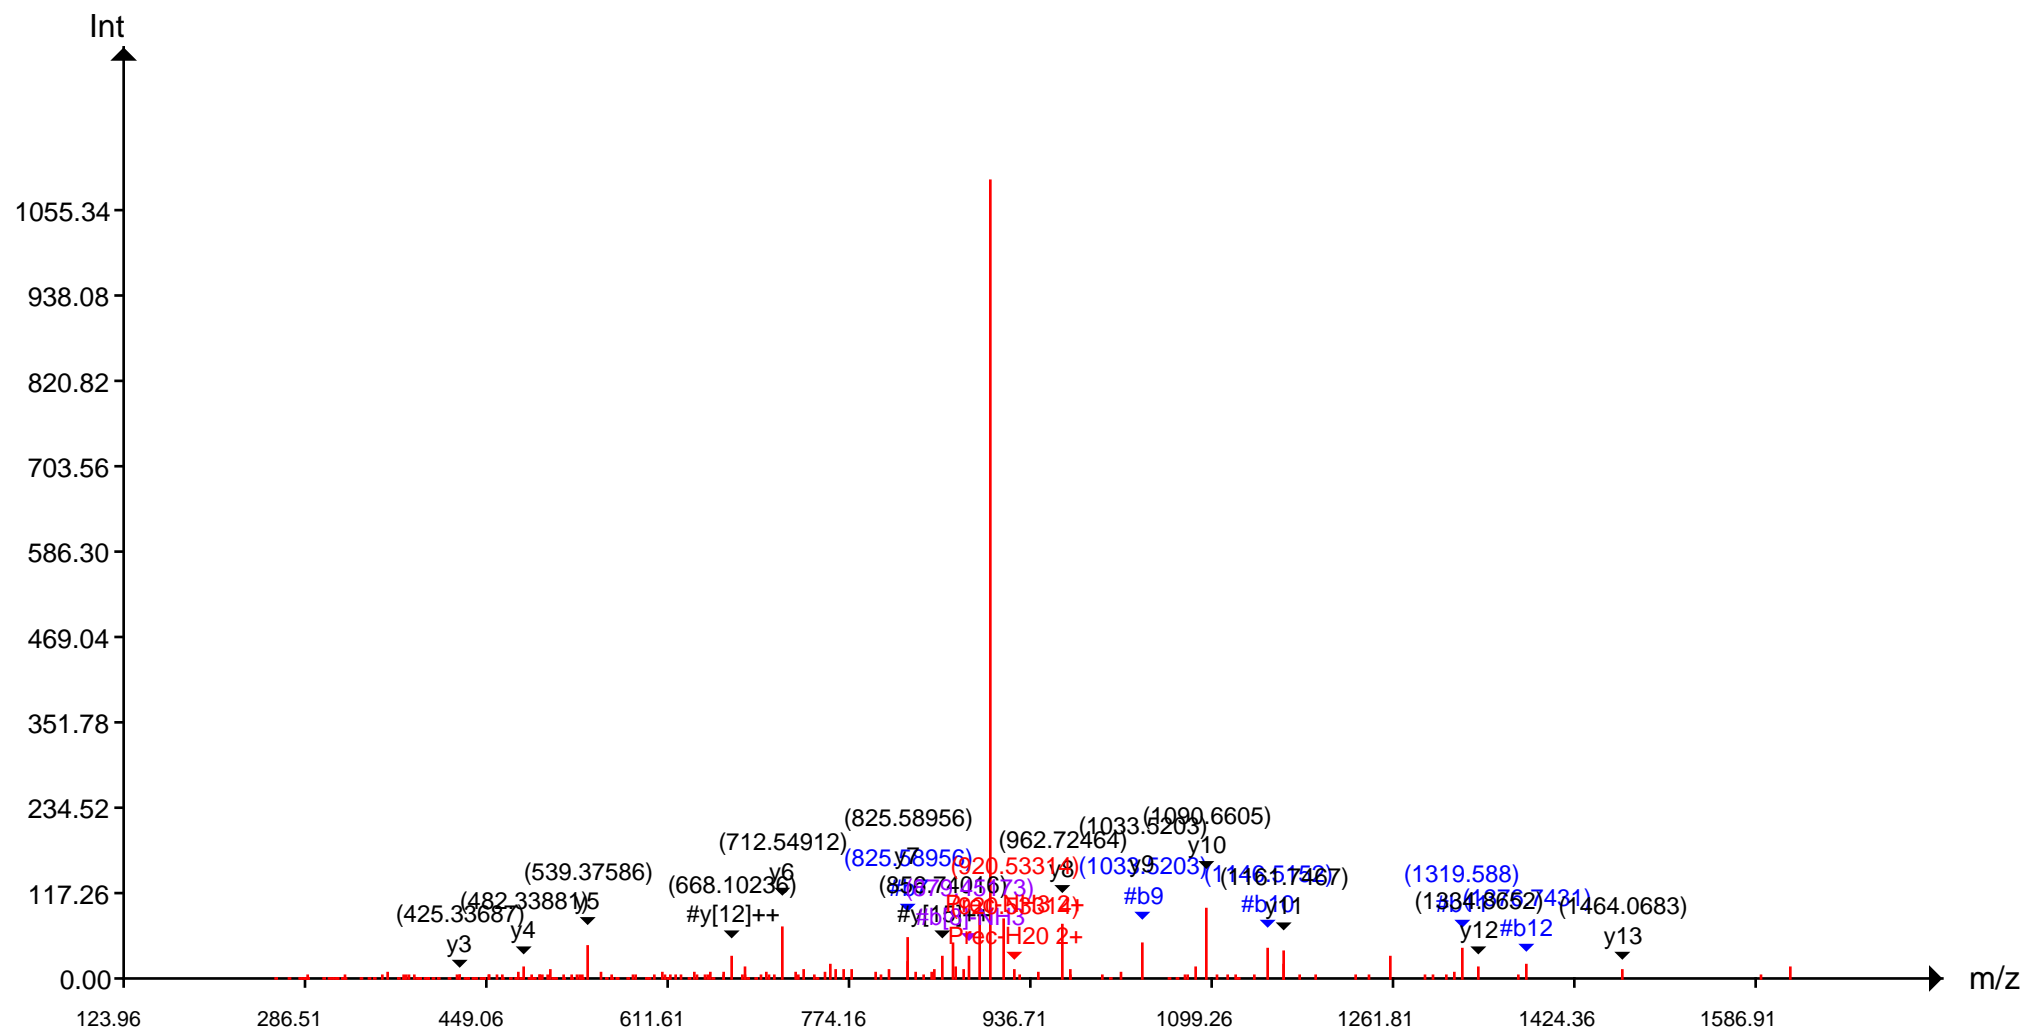

## Info

|                          |                                                              |                           |          |
|--------------------------|--------------------------------------------------------------|---------------------------|----------|
| <b>Modified Sequence</b> | AcD3-TTM<Mox*>EK<AcD3K*>AGHLK<AcD3K*>GGAK<AcD3K*>R<C13>-COOH | <b>Ion score</b>          | 83.71    |
| <b>Protein</b>           | P16858                                                       | <b>Confidence level</b>   | 99.00%   |
| <b>Precursor m/z</b>     | 929.52181                                                    | <b>Identity Threshold</b> | 46.47    |
| <b>Charge</b>            | 2+                                                           | <b>Mass error</b>         | 0.002731 |

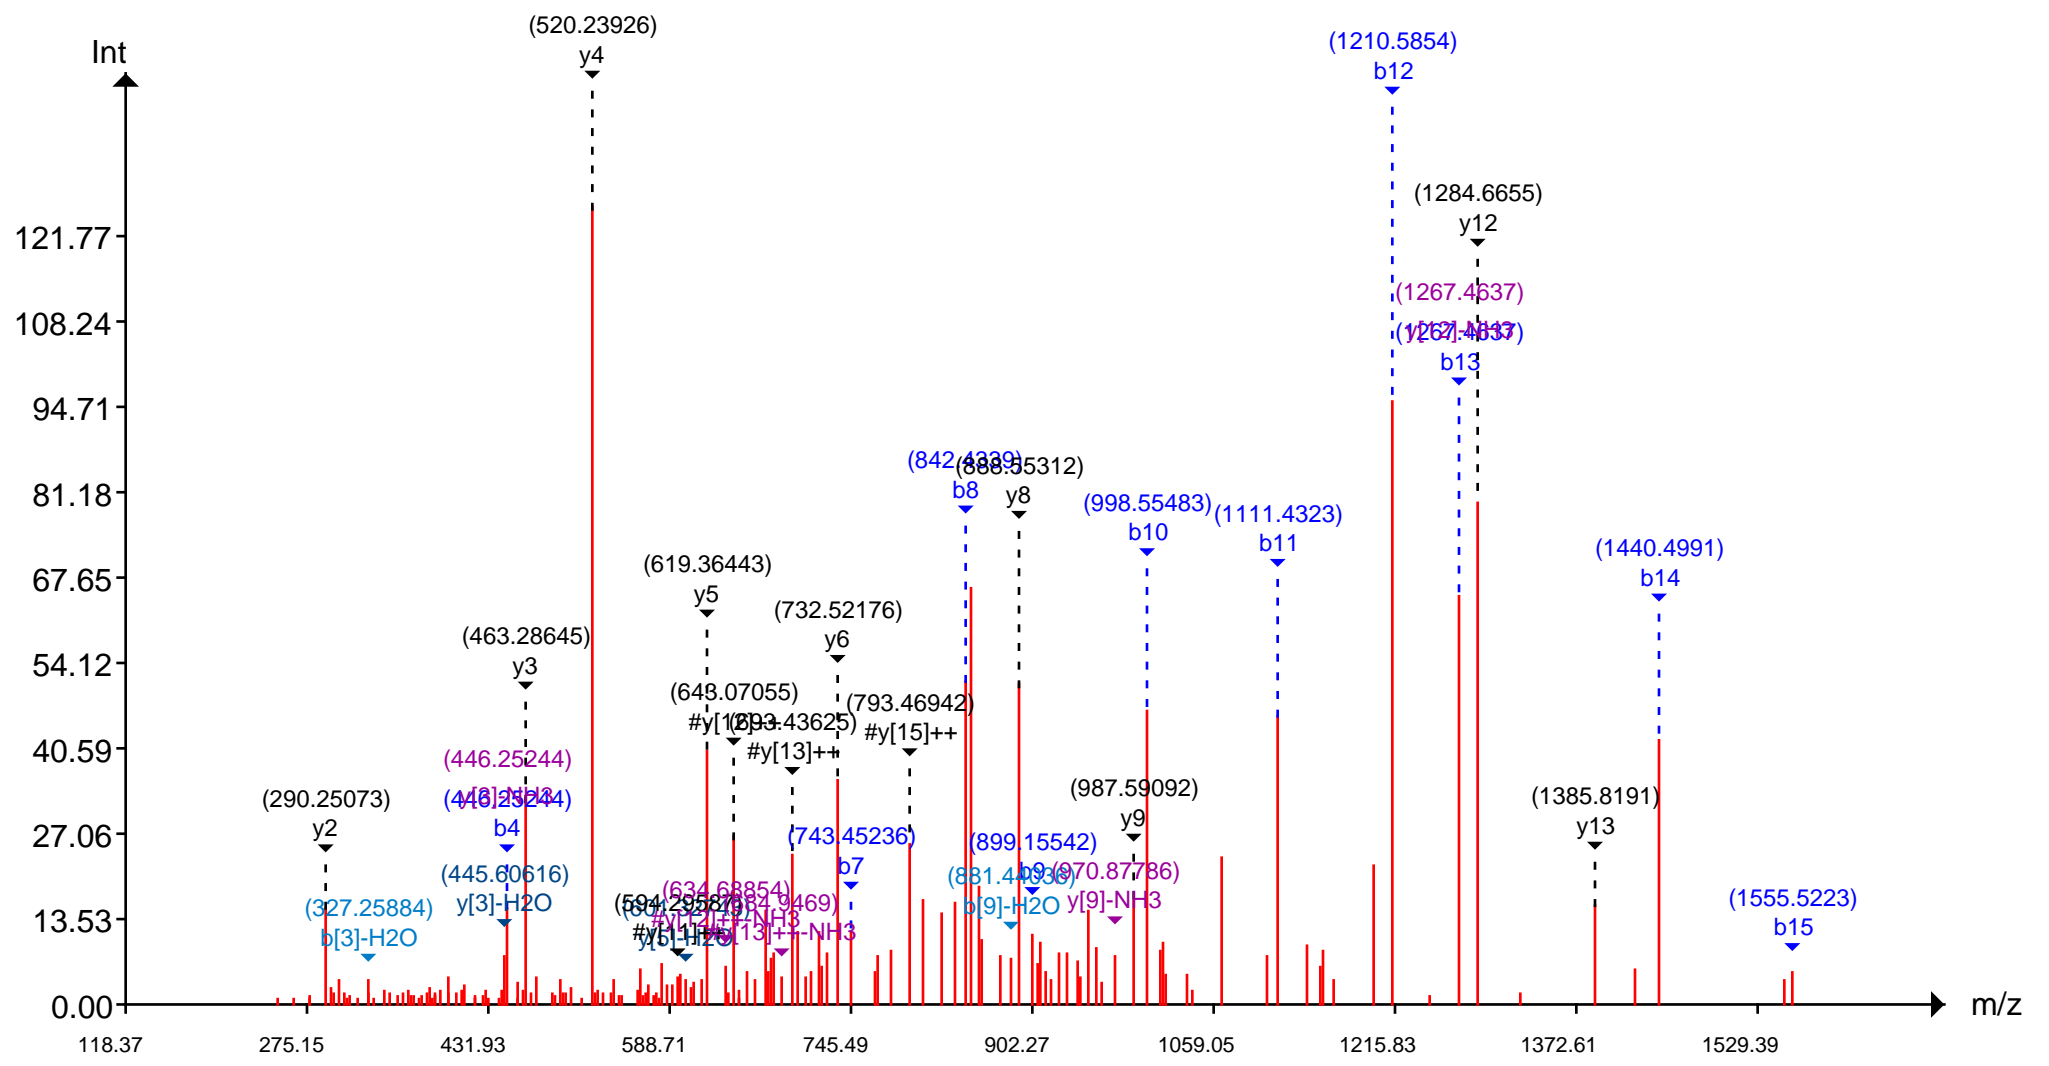

| Info                     |                                    |                           |          |
|--------------------------|------------------------------------|---------------------------|----------|
| <b>Modified Sequence</b> | AcD3-VSITPAEVGVLVGK<AcD3K*>DR-COOH | <b>Ion score</b>          | 81.74    |
| <b>Protein</b>           | P62962                             | <b>Confidence level</b>   | 99.00%   |
| <b>Precursor m/z</b>     | 865.50309                          | <b>Identity Threshold</b> | 44.99    |
| <b>Charge</b>            | 2+                                 | <b>Mass error</b>         | 0.002355 |

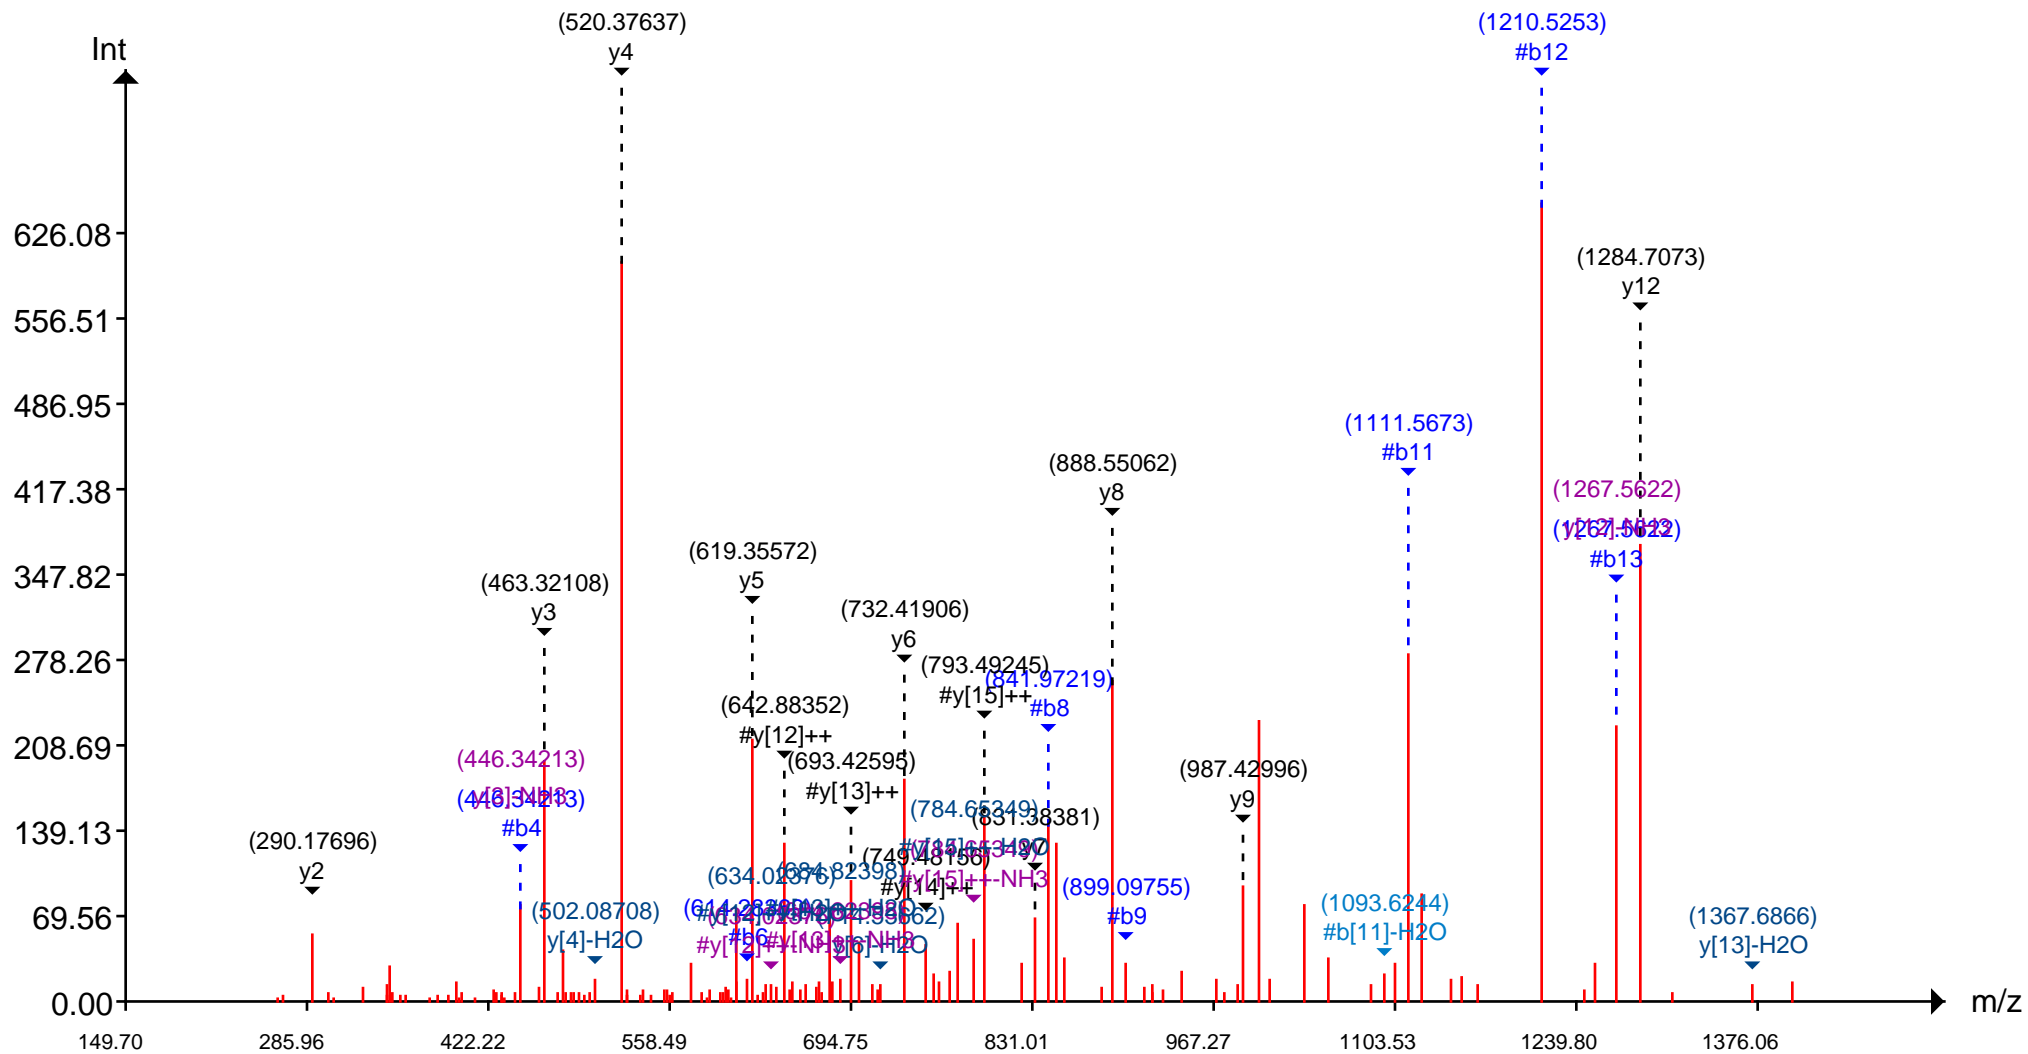

## Info

**Modified Sequence** AcD3-VSITPAEVLVVGK<AcD3K\*>DR-COOH

**Ion score** 60.77

**Protein** P62962

**Confidence level** 99.00%

**Precursor m/z** 865.50296

**Identity Threshold** 45.02

**Charge** 2+

**Mass error** 0.002095

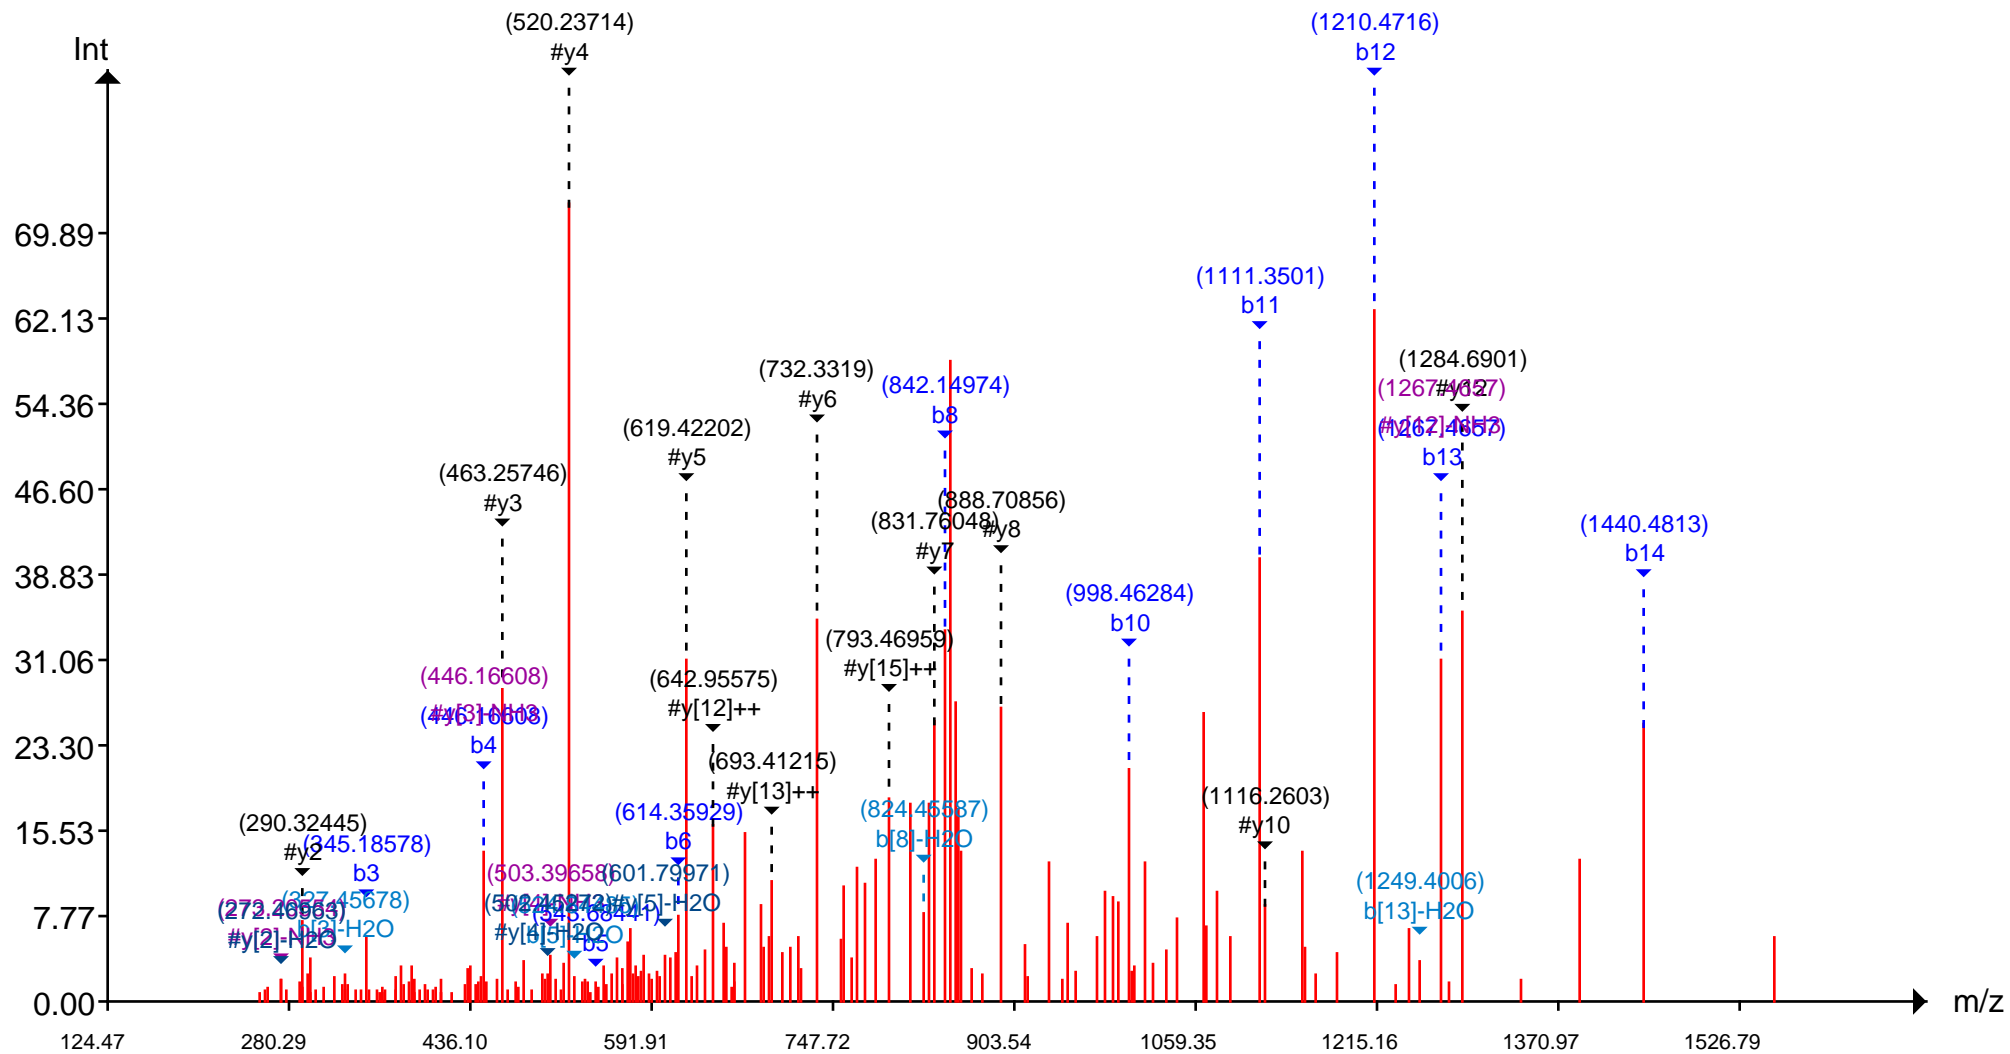

## Info

**Modified Sequence** AcD3-VSITPAEVGVLVGK<AcD3K\*>DR-COOH

**Ion score** 51.32

**Protein** P62962

**Confidence level** 99.00%

**Precursor m/z** 865.50323

**Identity Threshold** 44.97

**Charge** 2+

**Mass error** 0.002635

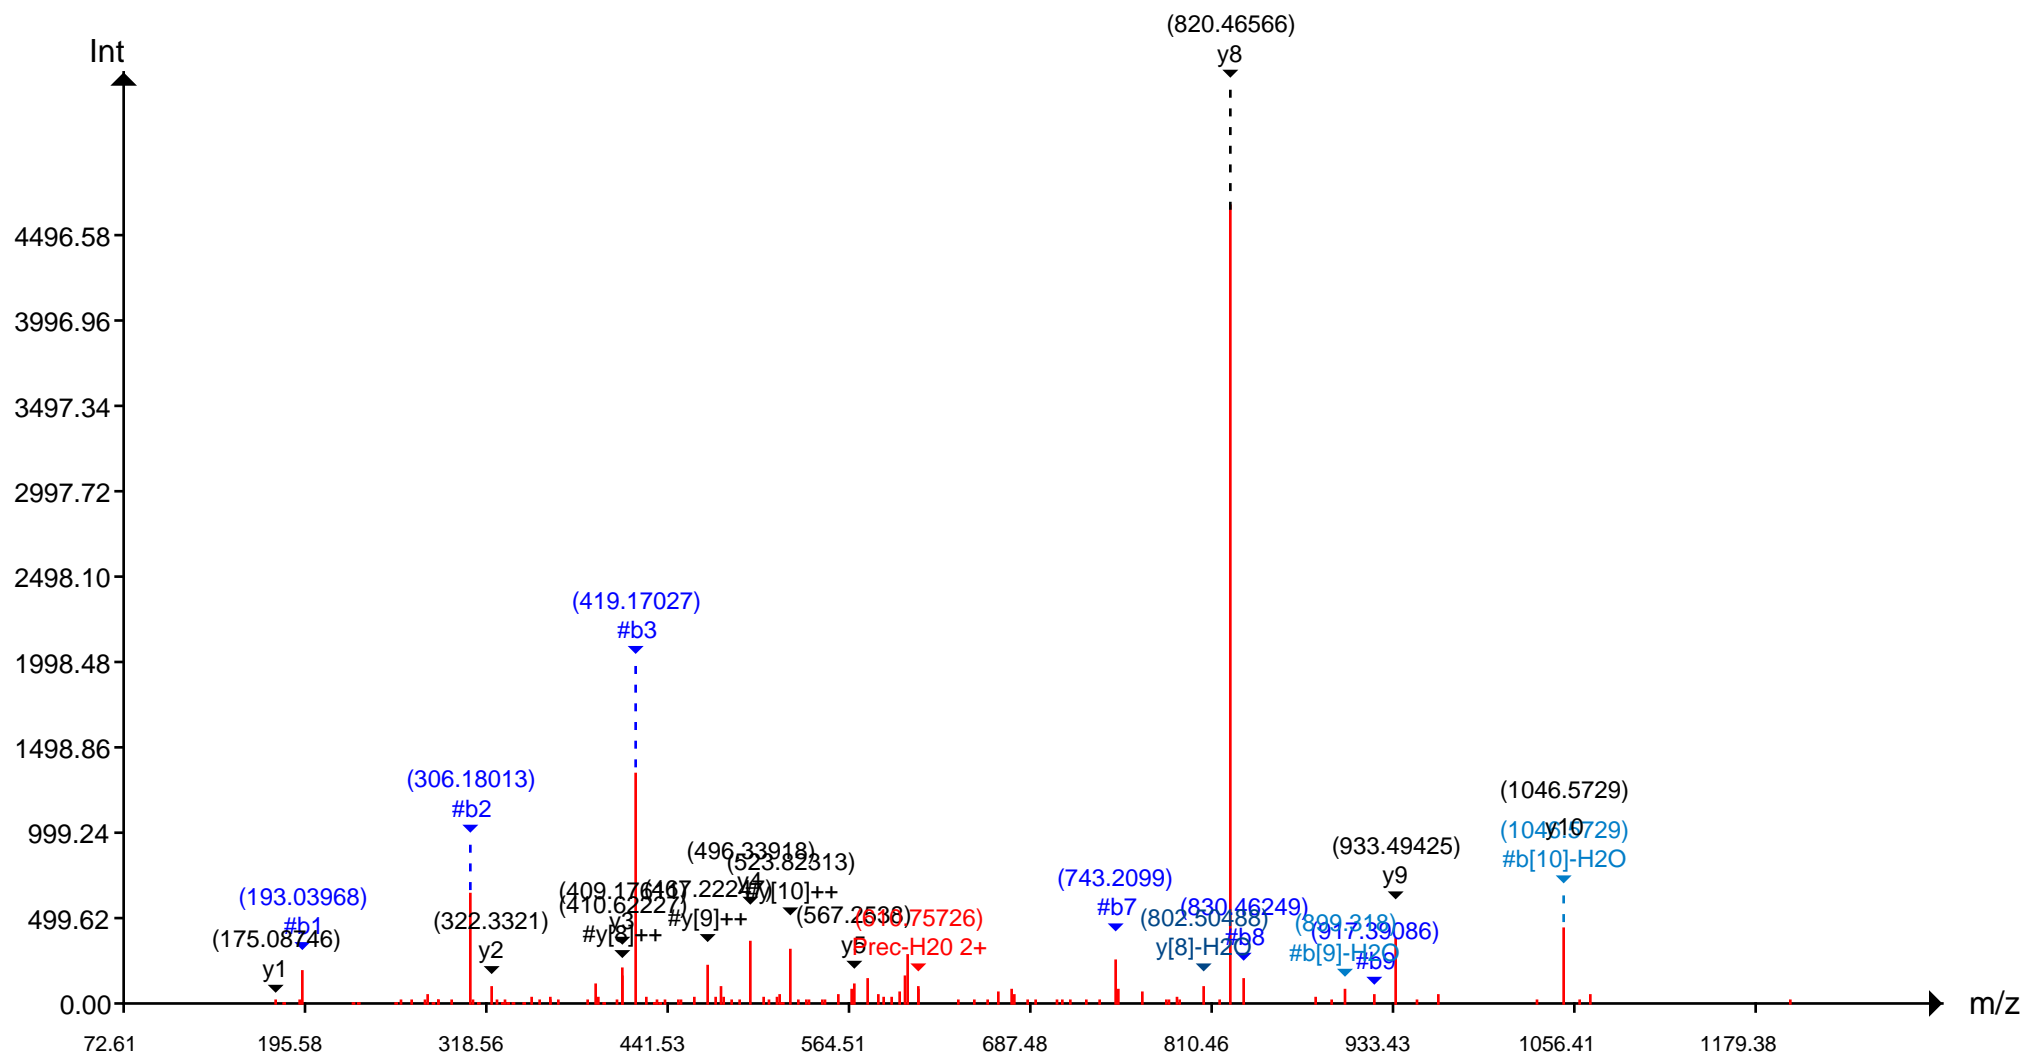

## Info

**Modified Sequence** AcD3-M<Mox\*>ILPVGASSFR-COOH

**Ion score** 62.16

**Protein** P17182

**Confidence level** 99.00%

**Precursor m/z** 619.83584

**Identity Threshold** 47.95

**Charge** 2+

**Mass error** 3.13E-4

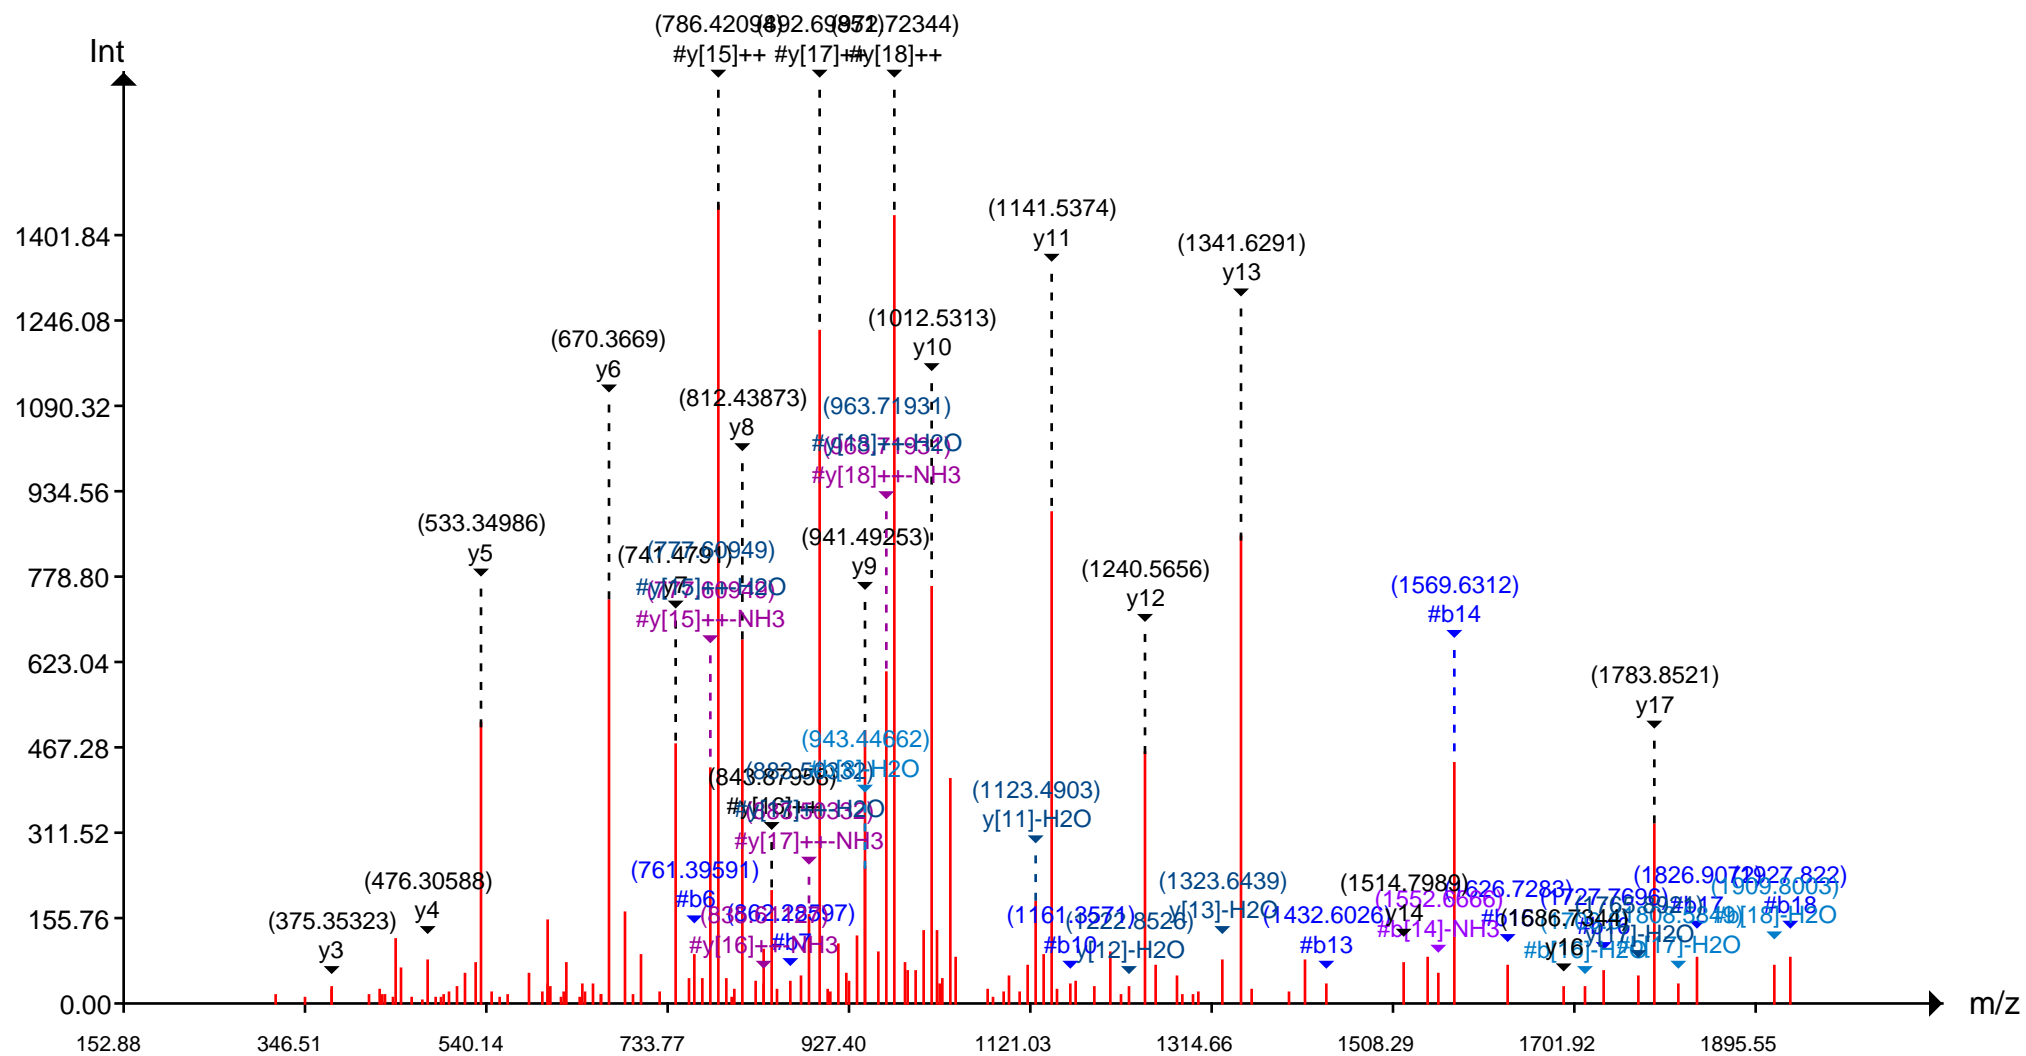

## Info

|                          |                                             |                           |         |
|--------------------------|---------------------------------------------|---------------------------|---------|
| <b>Modified Sequence</b> | AcD3-IC<Cmm*>PDGK<AcD3K*>TVEAEAAHGTVTR-COOH | <b>Ion score</b>          | 101.11  |
| <b>Protein</b>           | O88844                                      | <b>Confidence level</b>   | 99.00%  |
| <b>Precursor m/z</b>     | 1051.5267                                   | <b>Identity Threshold</b> | 47.69   |
| <b>Charge</b>            | 2+                                          | <b>Mass error</b>         | 7.62E-4 |



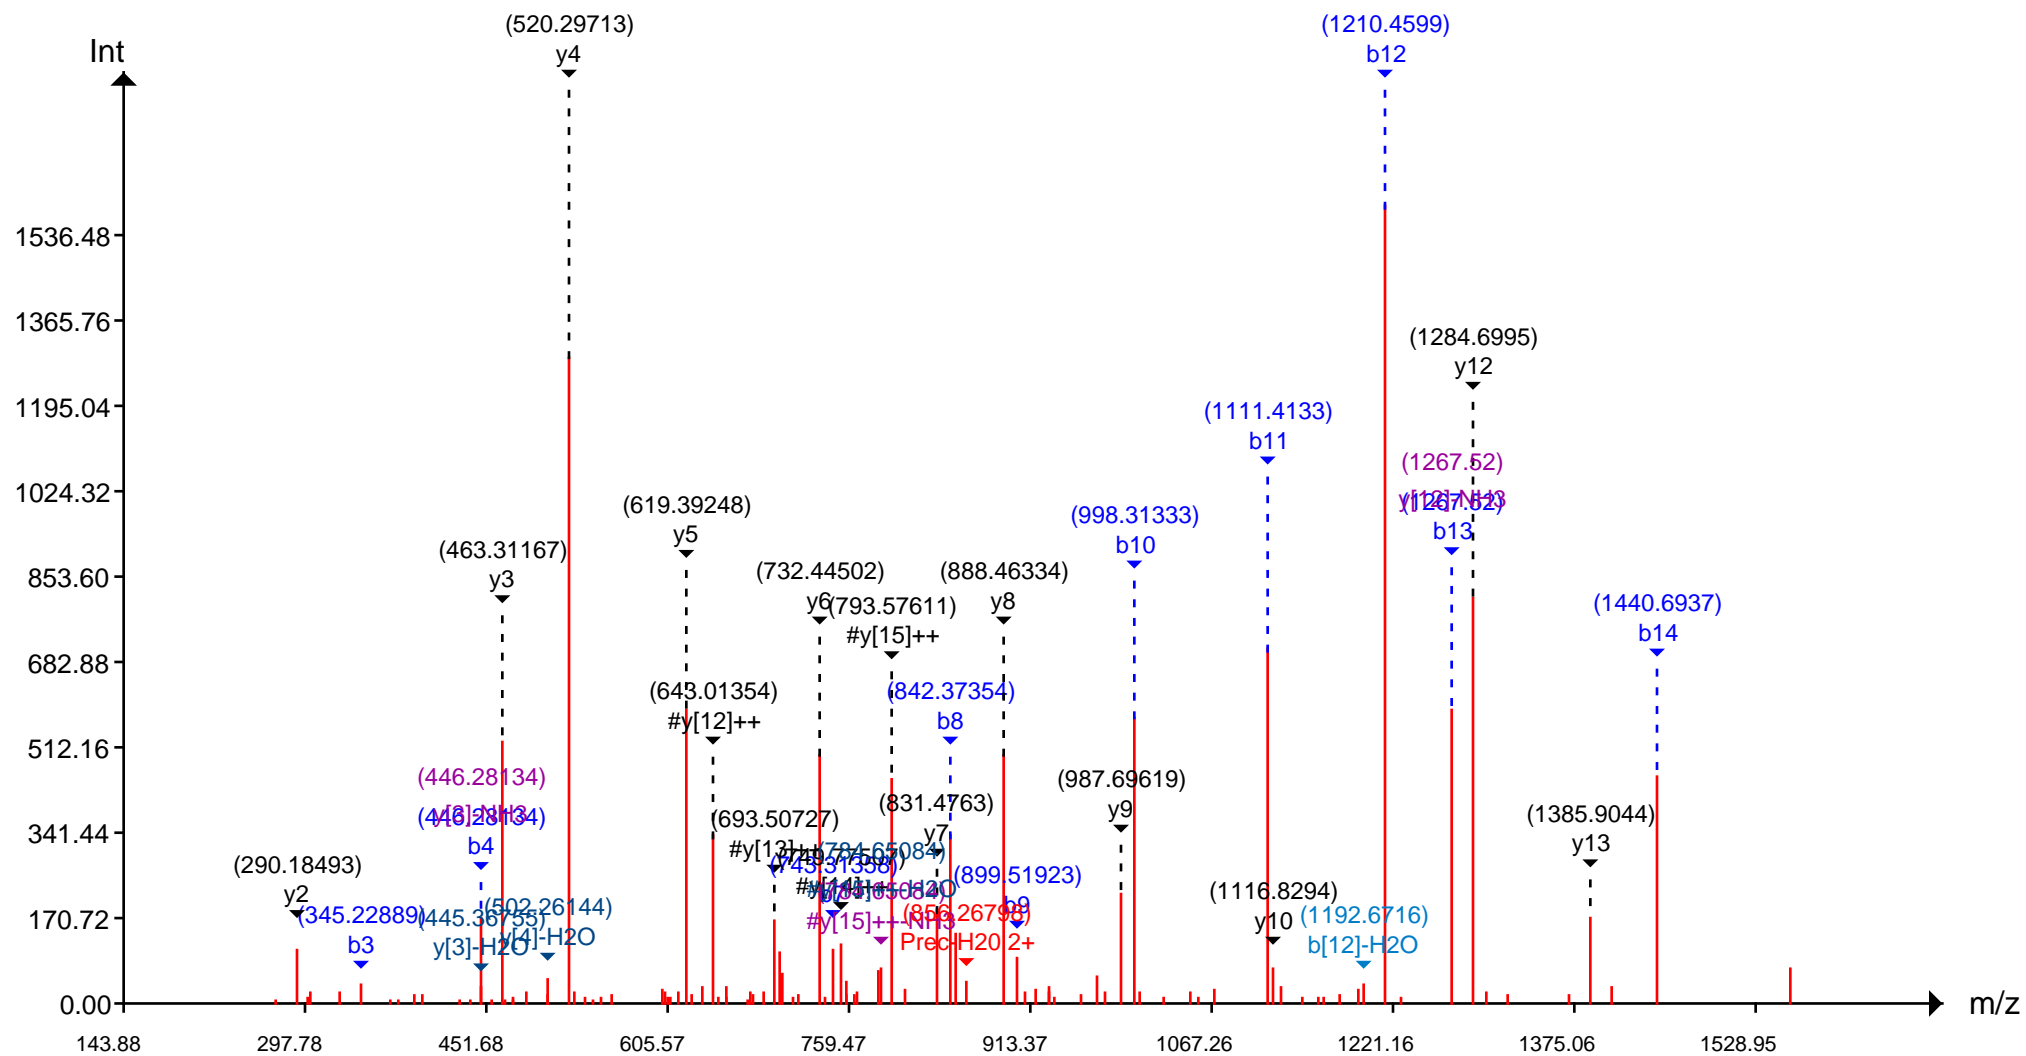

## Info

|                          |                                    |                           |          |
|--------------------------|------------------------------------|---------------------------|----------|
| <b>Modified Sequence</b> | AcD3-VSITPAEVGVLVGK<AcD3K*>DR-COOH | <b>Ion score</b>          | 104.01   |
| <b>Protein</b>           | P62962                             | <b>Confidence level</b>   | 99.00%   |
| <b>Precursor m/z</b>     | 865.50316                          | <b>Identity Threshold</b> | 44.97    |
| <b>Charge</b>            | 2+                                 | <b>Mass error</b>         | 0.002495 |

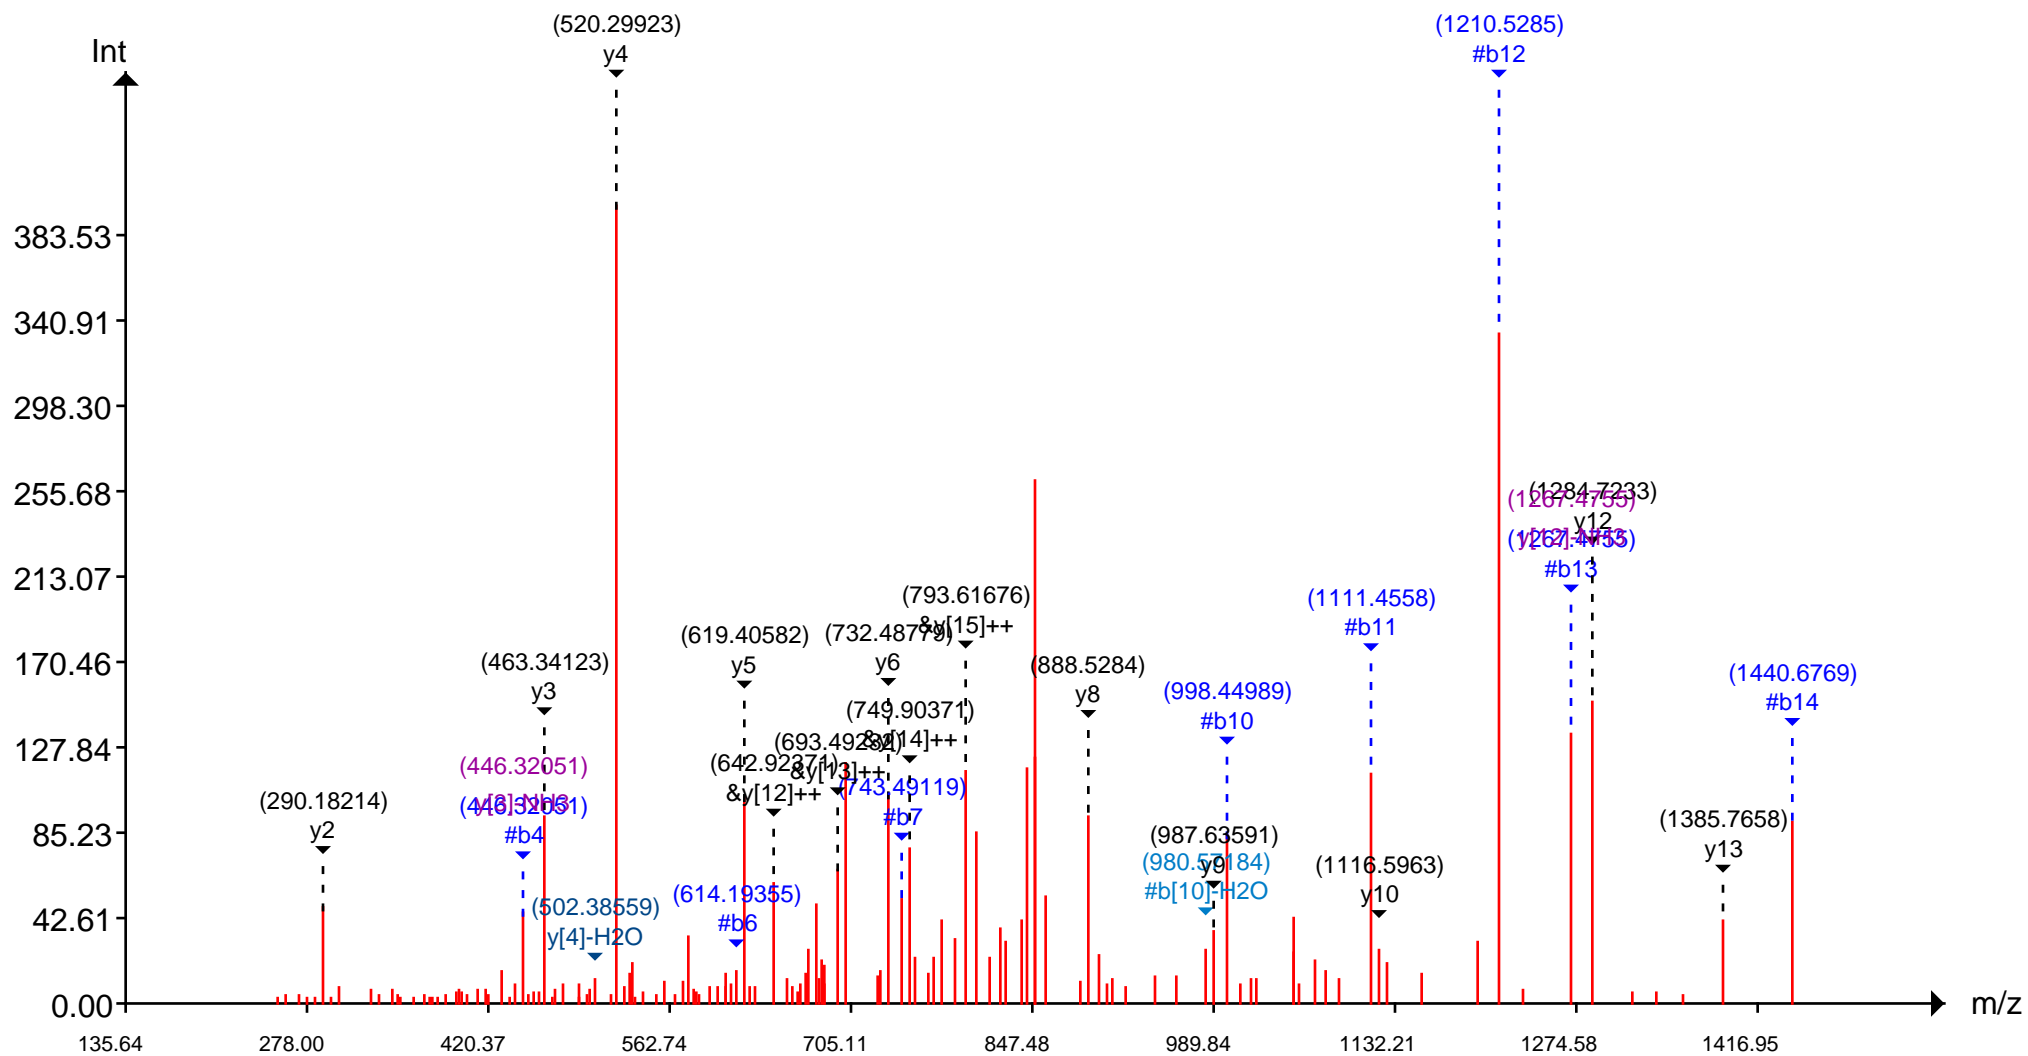

## Info

|                          |                                   |                           |          |
|--------------------------|-----------------------------------|---------------------------|----------|
| <b>Modified Sequence</b> | AcD3-VSITPAEVLVVGK<AcD3K*>DR-COOH | <b>Ion score</b>          | 65.49    |
| <b>Protein</b>           | P62962                            | <b>Confidence level</b>   | 99.00%   |
| <b>Precursor m/z</b>     | 865.50287                         | <b>Identity Threshold</b> | 45.00    |
| <b>Charge</b>            | 2+                                | <b>Mass error</b>         | 0.001915 |

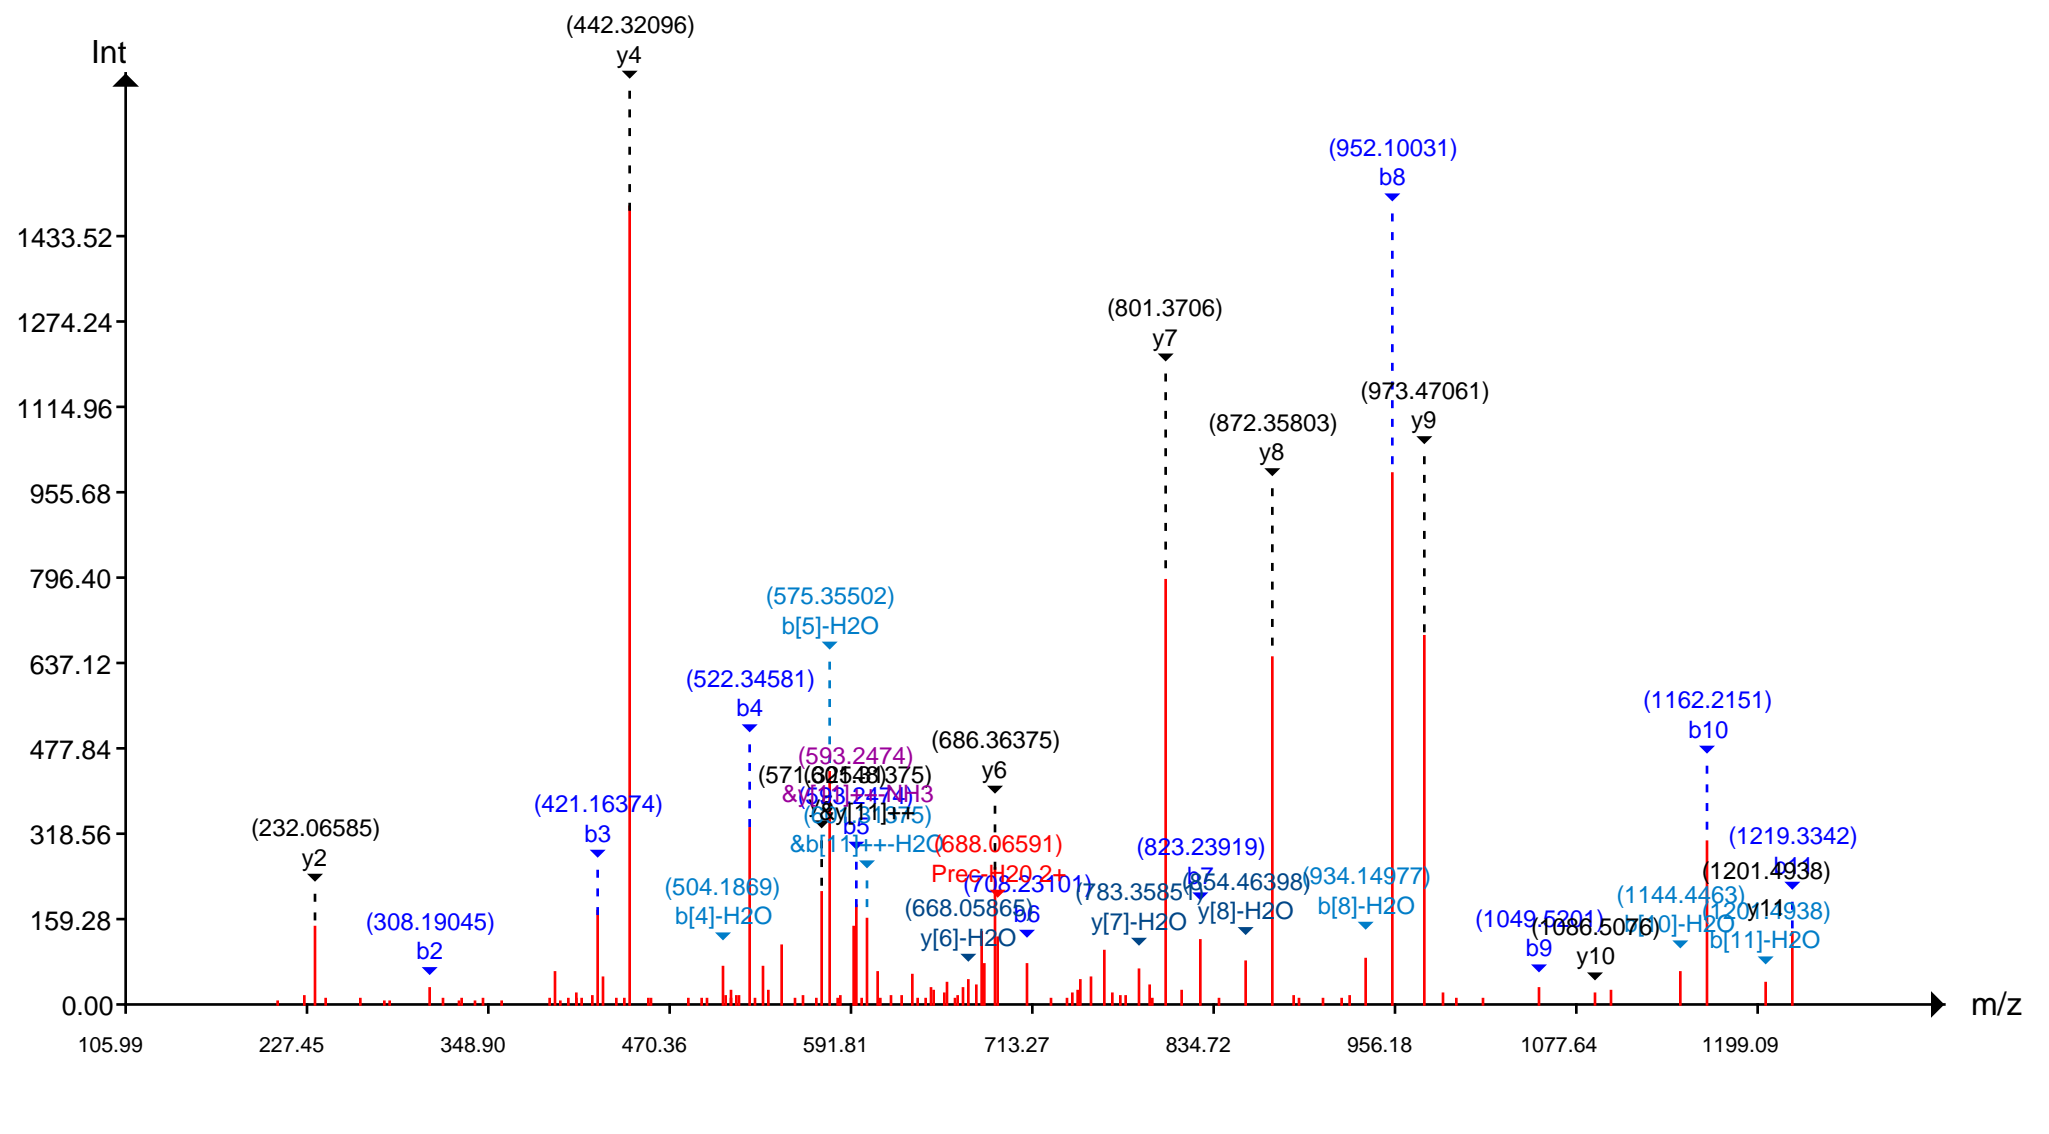

| Info                     |                        |                           |          |
|--------------------------|------------------------|---------------------------|----------|
| <b>Modified Sequence</b> | AcD3-FDITADDEPLGR-COOH | <b>Ion score</b>          | 87.89    |
| <b>Protein</b>           | P17742                 | <b>Confidence level</b>   | 99.00%   |
| <b>Precursor m/z</b>     | 697.33843              | <b>Identity Threshold</b> | 46.90    |
| <b>Charge</b>            | 2+                     | <b>Mass error</b>         | 0.002259 |

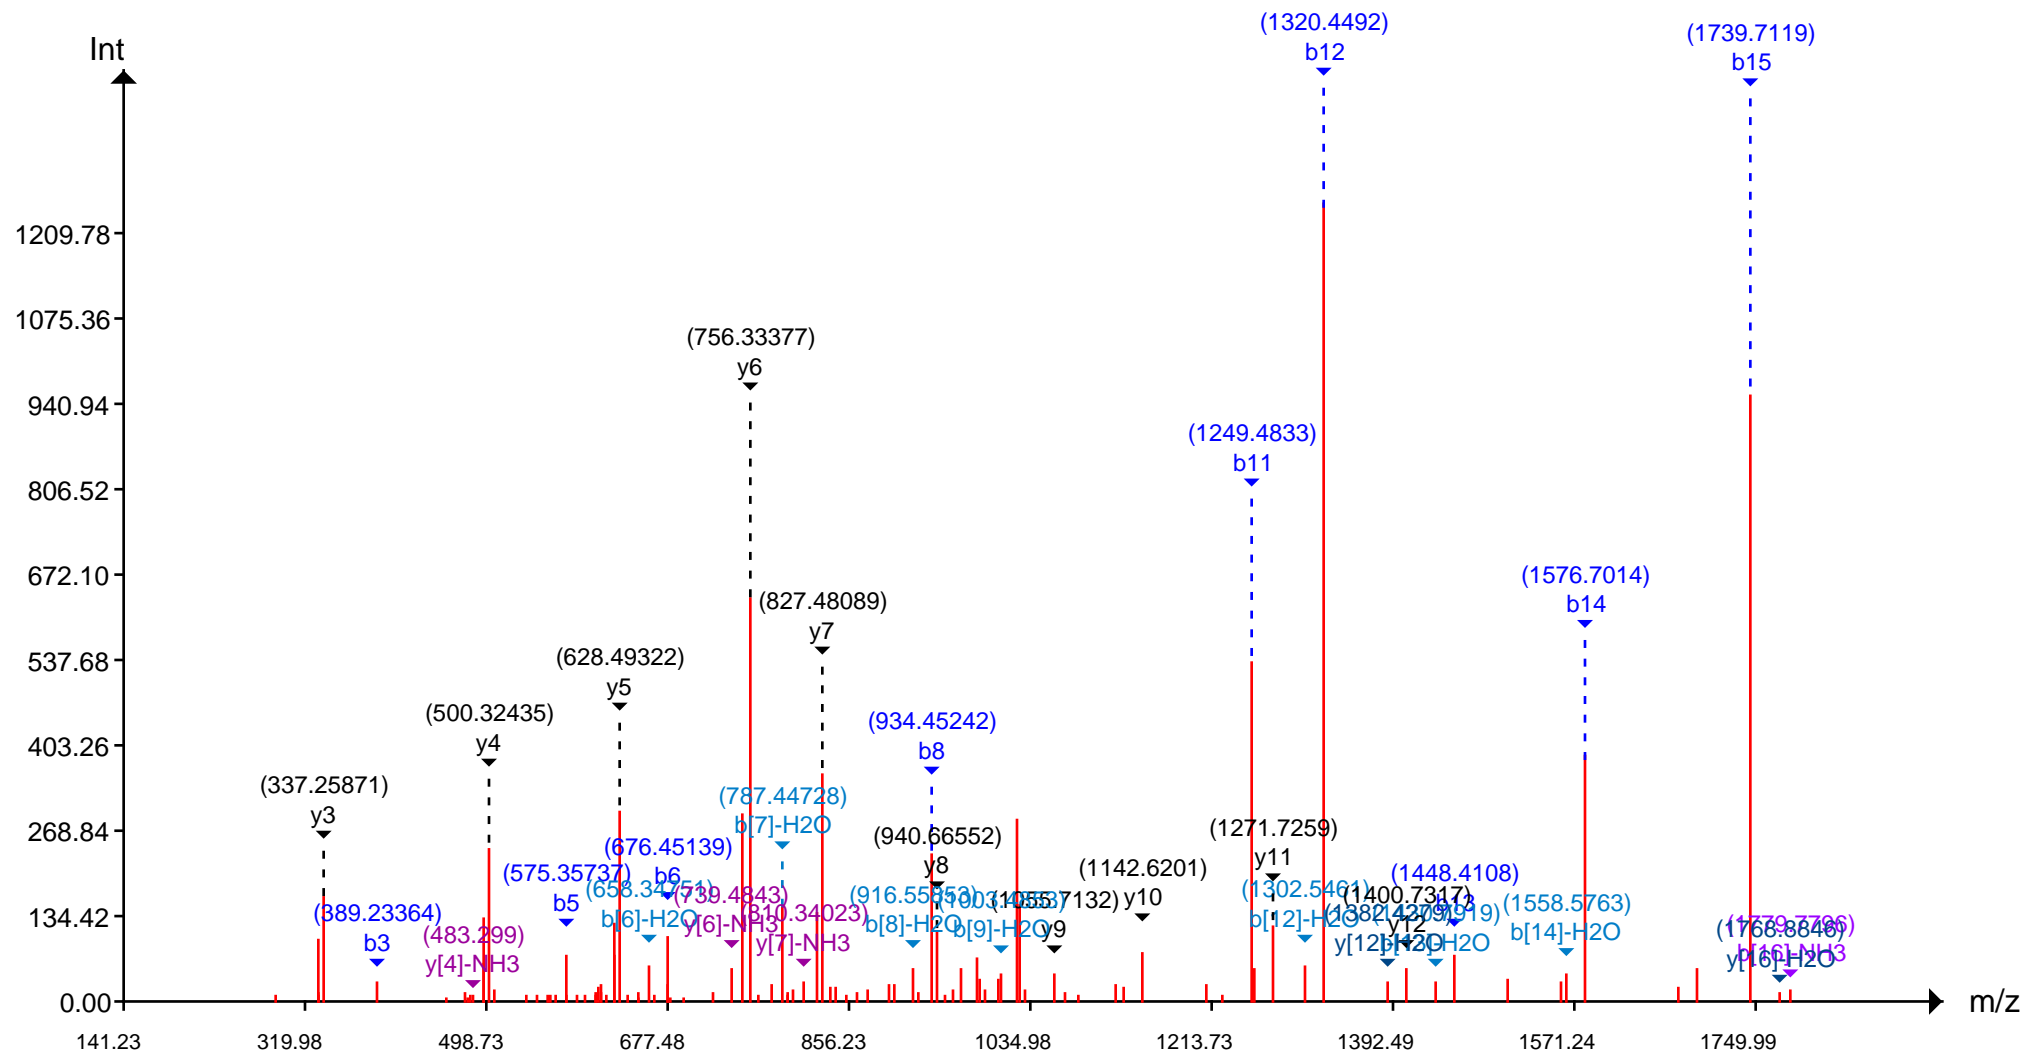

## Info

|                          |                                           |                           |          |
|--------------------------|-------------------------------------------|---------------------------|----------|
| <b>Modified Sequence</b> | AcD3-AK<AcD3K*>VDATEESDLAQQYGVR<C13>-COOH | <b>Ion score</b>          | 74.21    |
| <b>Protein</b>           | P09103                                    | <b>Confidence level</b>   | 99.00%   |
| <b>Precursor m/z</b>     | 1038.528                                  | <b>Identity Threshold</b> | 47.94    |
| <b>Charge</b>            | 2+                                        | <b>Mass error</b>         | 0.002935 |

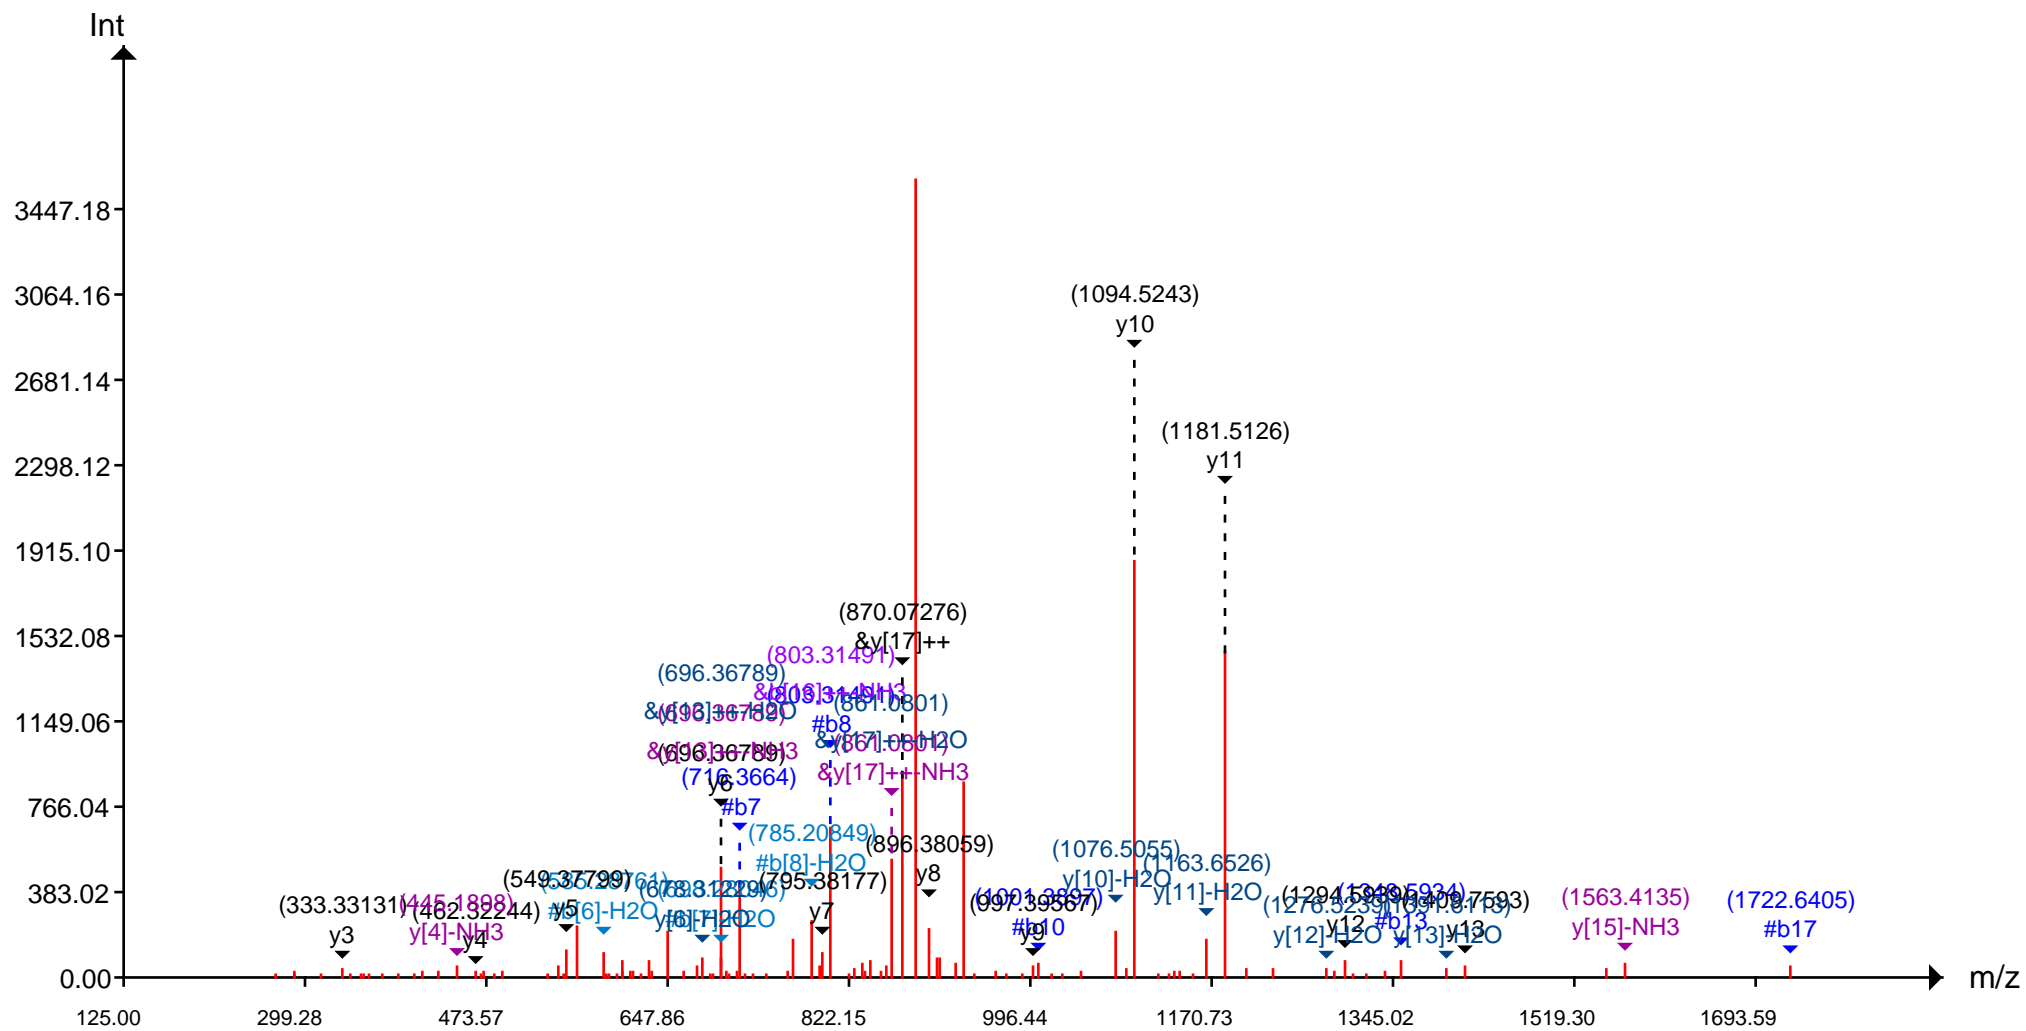

## Info

|                          |                                    |                           |          |
|--------------------------|------------------------------------|---------------------------|----------|
| <b>Modified Sequence</b> | AcD3-LGTGNDLSPTTVM<Mox*>SEGTR-COOH | <b>Ion score</b>          | 65.42    |
| <b>Protein</b>           | Q923D2                             | <b>Confidence level</b>   | 99.00%   |
| <b>Precursor m/z</b>     | 948.95874                          | <b>Identity Threshold</b> | 46.88    |
| <b>Charge</b>            | 2+                                 | <b>Mass error</b>         | 0.005513 |

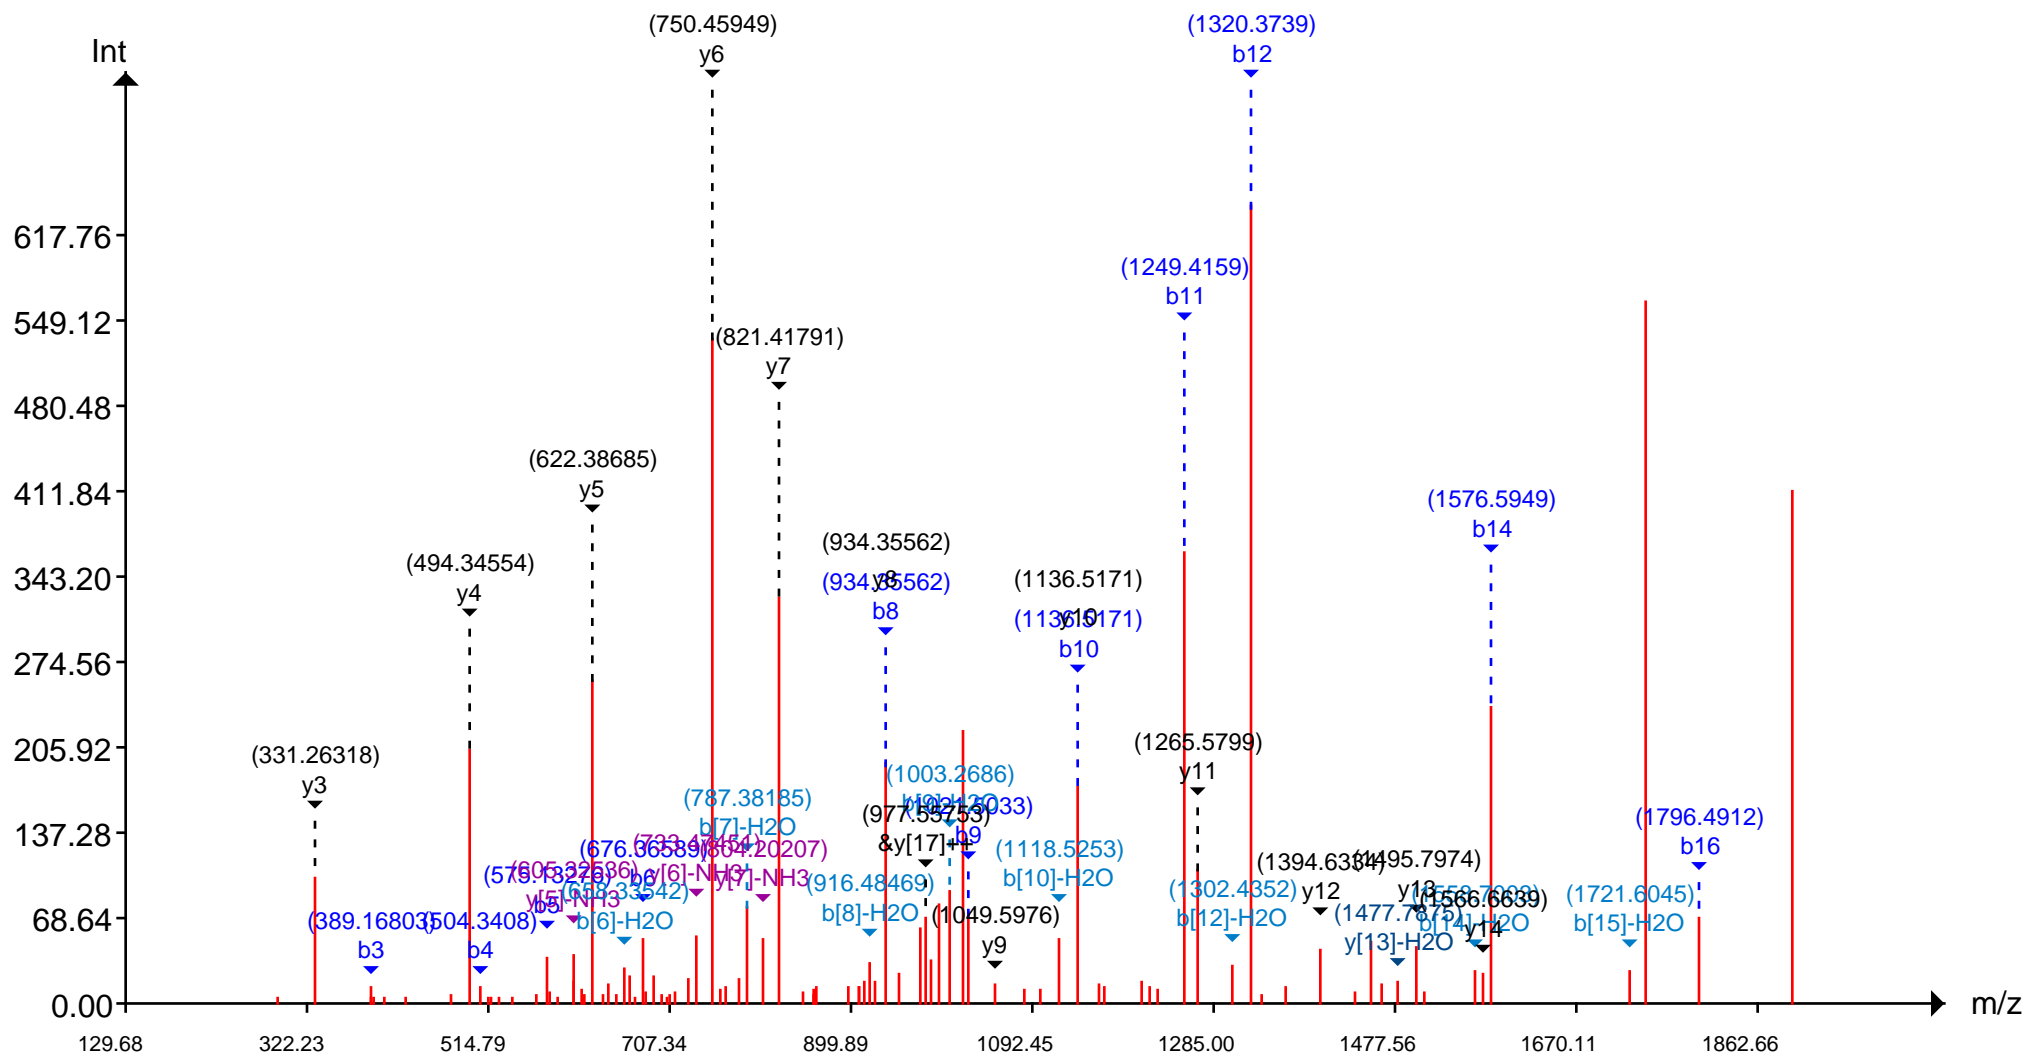

## Info

**Modified Sequence** AcD3-AK<AcD3K\*>VDATEESDLAQQYGVR-COOH

**Ion score** 94.12

**Protein** P09103

**Confidence level** 99.00%

**Precursor m/z** 1035.5179

**Identity Threshold** 47.68

**Charge** 2+

**Mass error** 0.002876

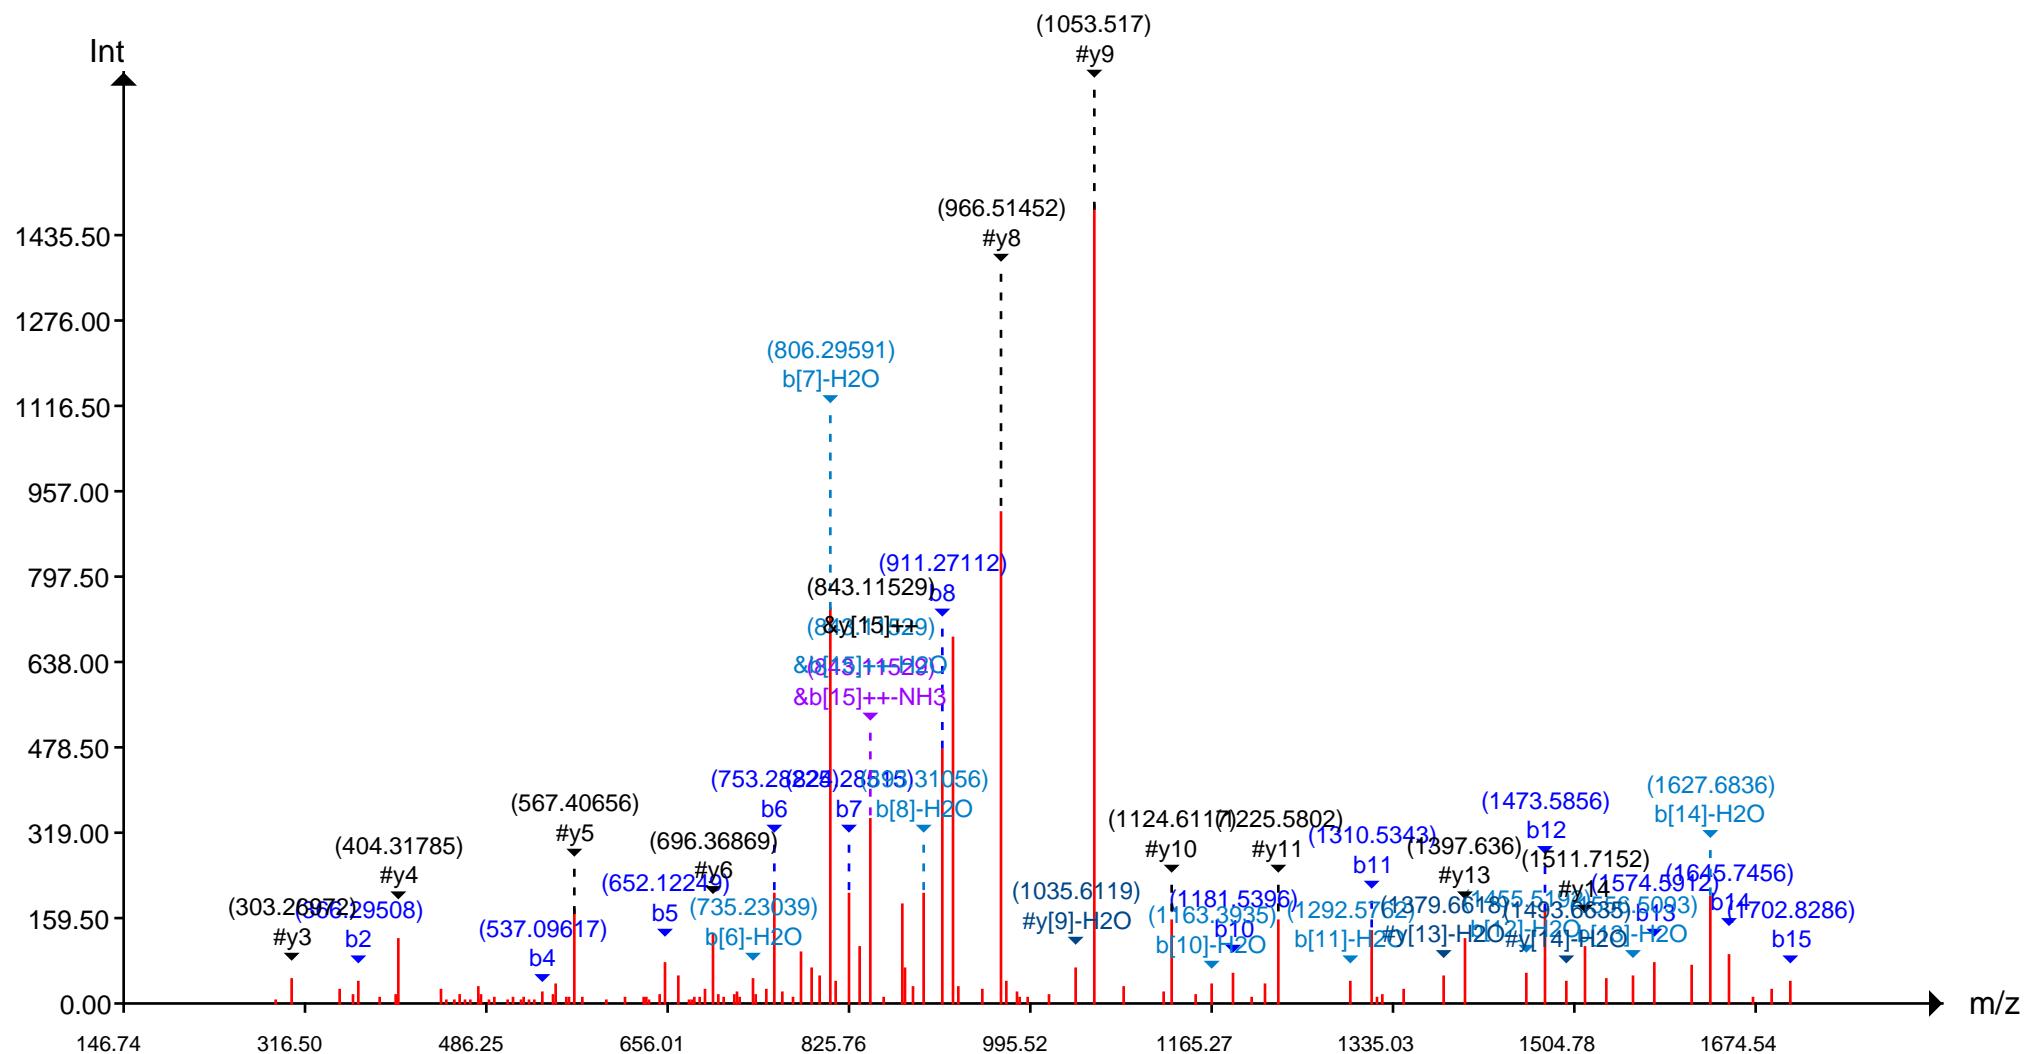

## Info

|                          |                                            |                           |          |
|--------------------------|--------------------------------------------|---------------------------|----------|
| <b>Modified Sequence</b> | AcD3-FK<AcD3K*>NGDTASPK<AcD3K*>EYTAGR-COOH | <b>Ion score</b>          | 106.15   |
| <b>Protein</b>           | P09103                                     | <b>Confidence level</b>   | 99.00%   |
| <b>Precursor m/z</b>     | 938.97439                                  | <b>Identity Threshold</b> | 47.93    |
| <b>Charge</b>            | 2+                                         | <b>Mass error</b>         | 0.002938 |

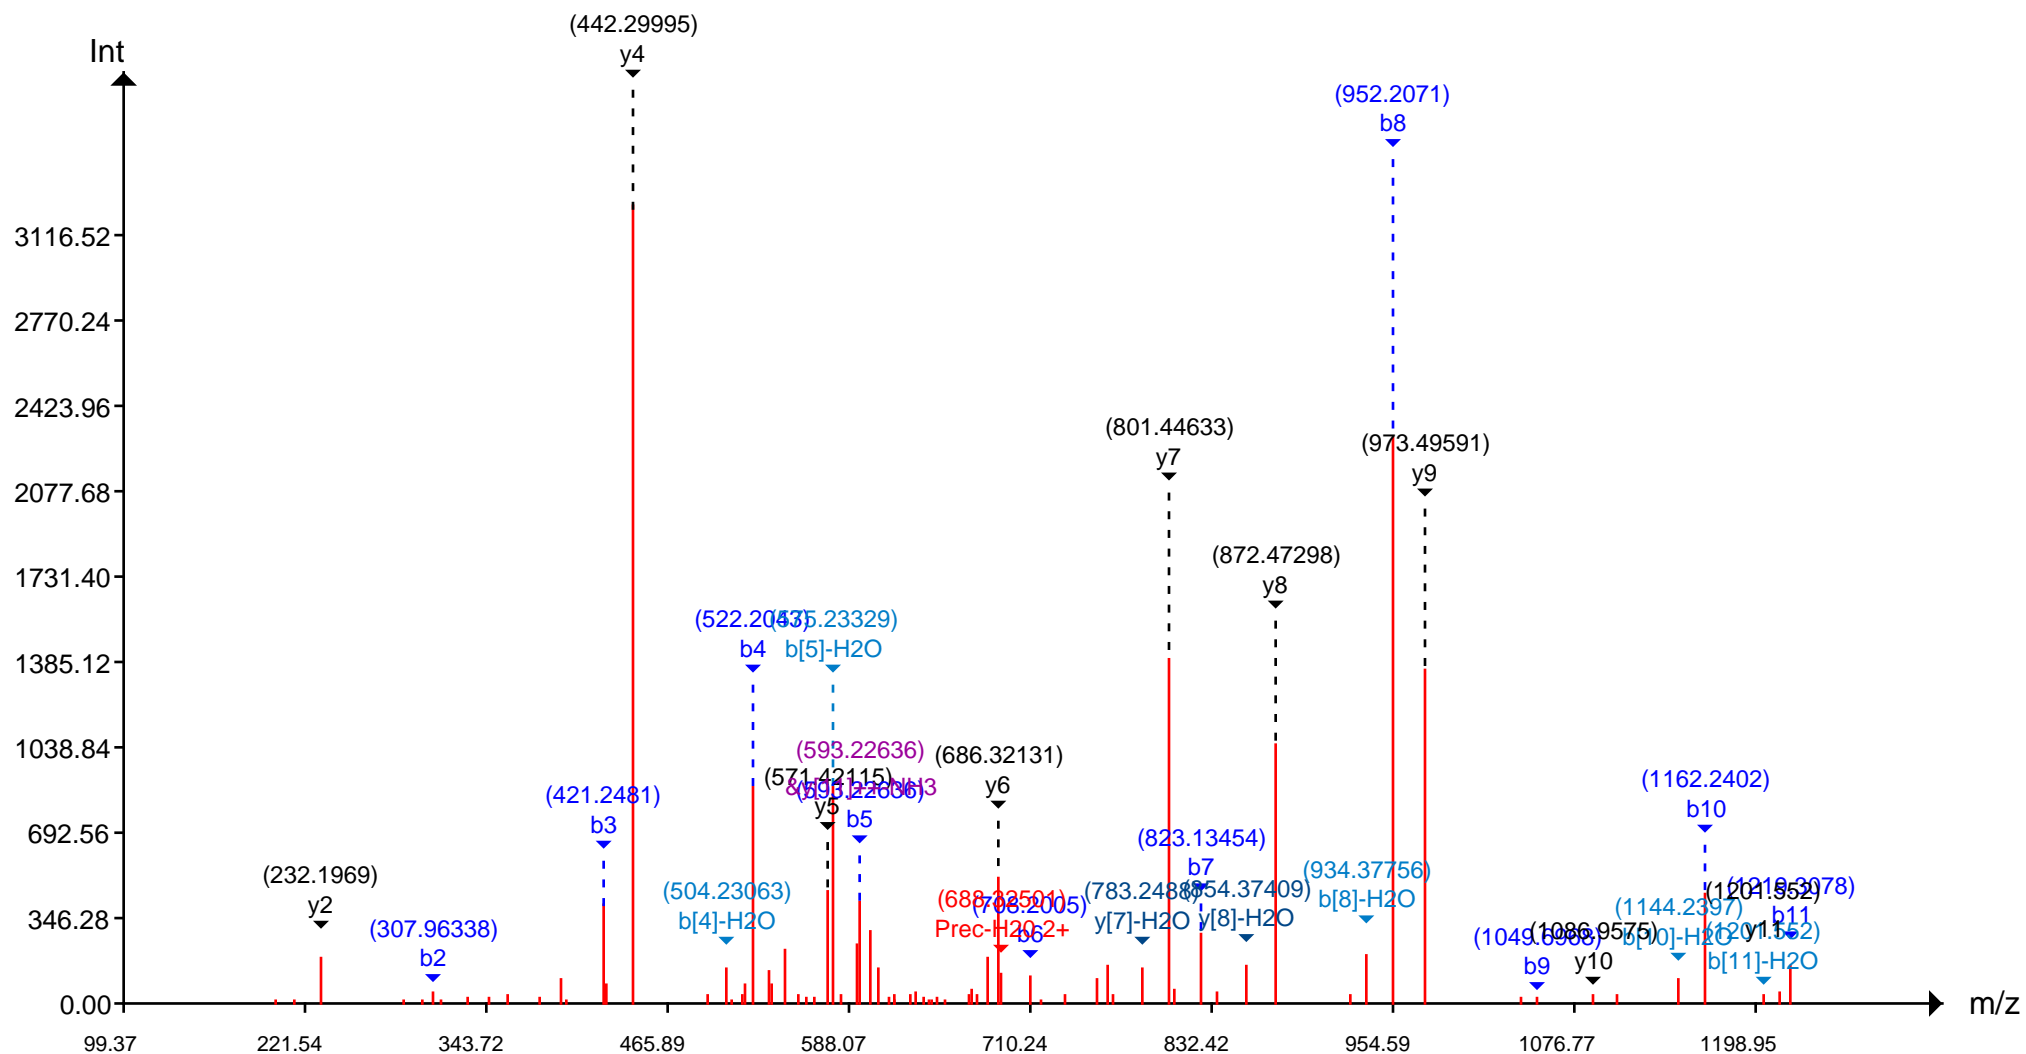

## Info

|                          |                        |                           |          |
|--------------------------|------------------------|---------------------------|----------|
| <b>Modified Sequence</b> | AcD3-FDITADDEPLGR-COOH | <b>Ion score</b>          | 85.78    |
| <b>Protein</b>           | P17742                 | <b>Confidence level</b>   | 99.00%   |
| <b>Precursor m/z</b>     | 697.33829              | <b>Identity Threshold</b> | 46.85    |
| <b>Charge</b>            | 2+                     | <b>Mass error</b>         | 0.001979 |



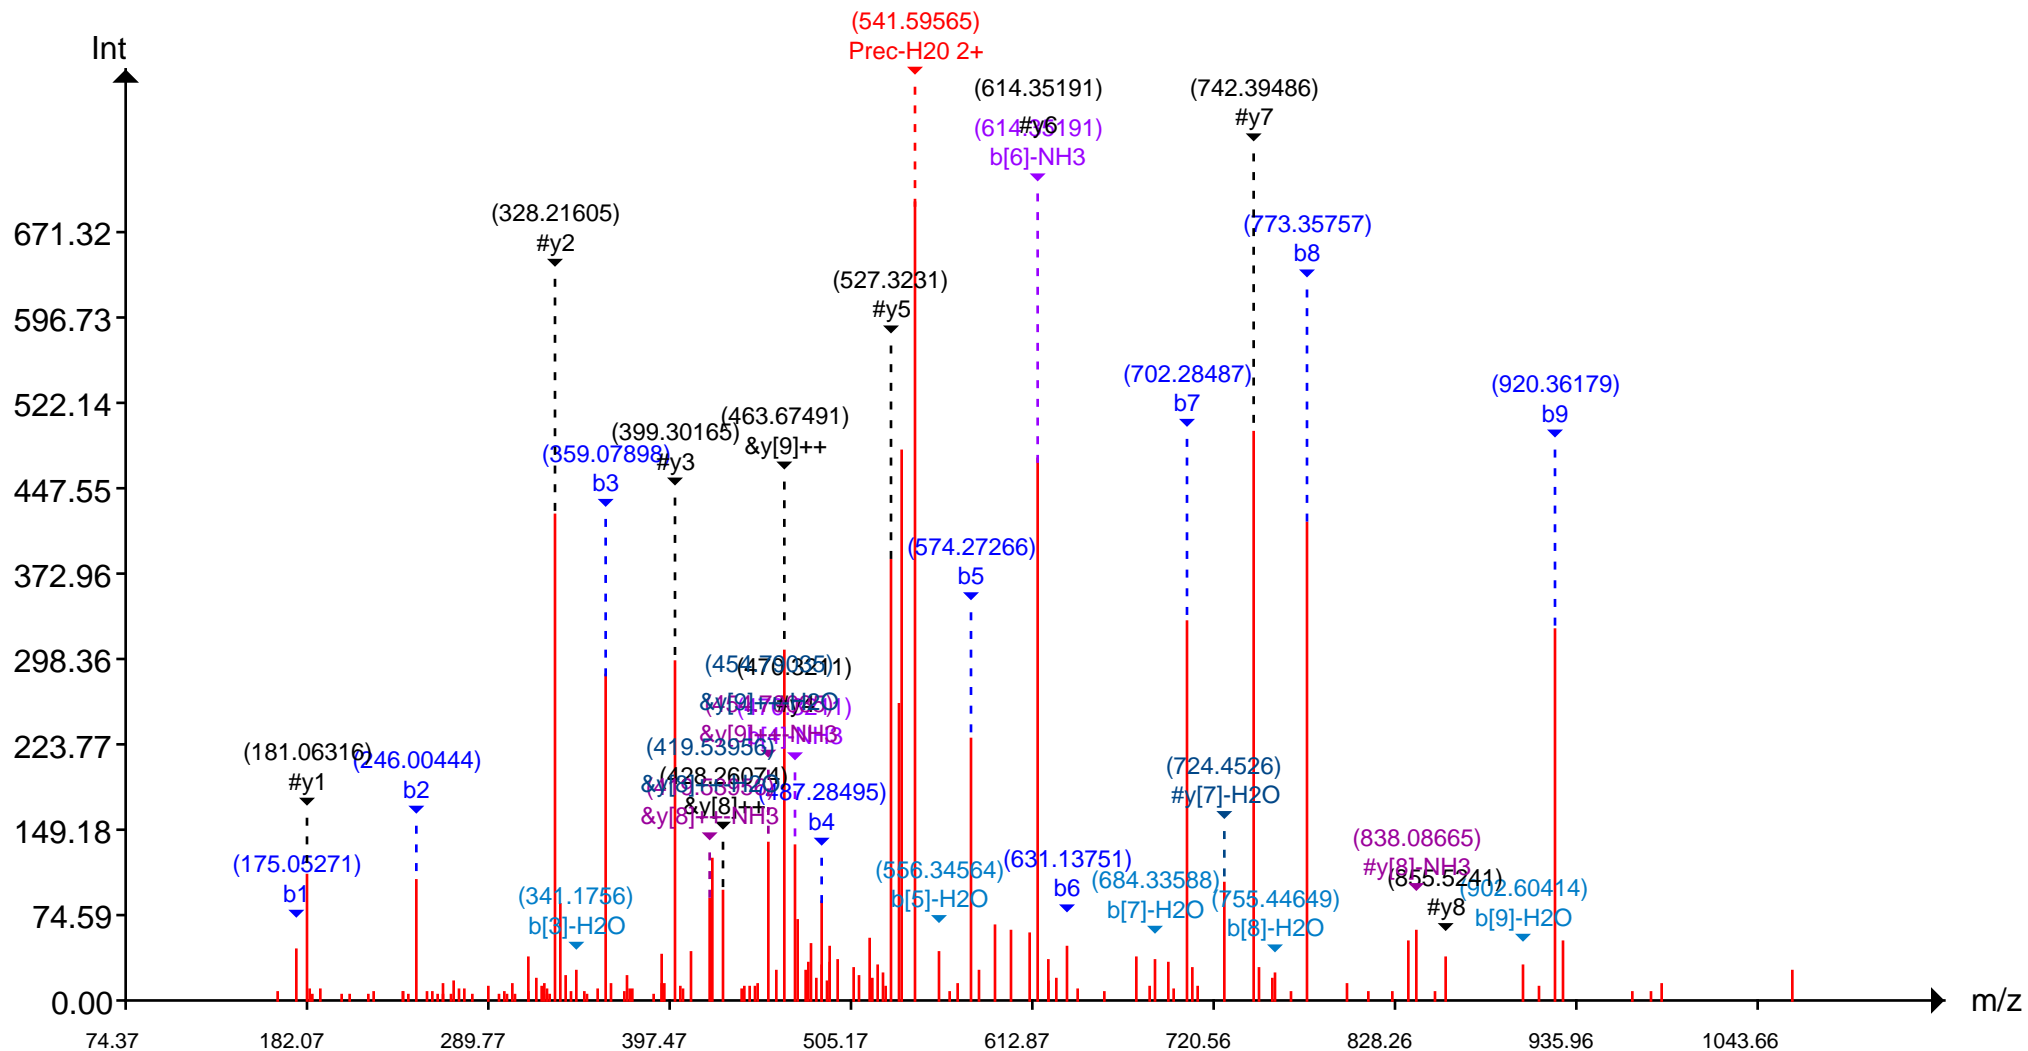

## Info

|                          |                           |                           |          |
|--------------------------|---------------------------|---------------------------|----------|
| <b>Modified Sequence</b> | AcD3-EALQSGAAFR<C13>-COOH | <b>Ion score</b>          | 62.86    |
| <b>Protein</b>           | O08808, O70566, Q9Z207    | <b>Confidence level</b>   | 99.00%   |
| <b>Precursor m/z</b>     | 550.79699                 | <b>Identity Threshold</b> | 48.00    |
| <b>Charge</b>            | 2+                        | <b>Mass error</b>         | -2.38E-4 |

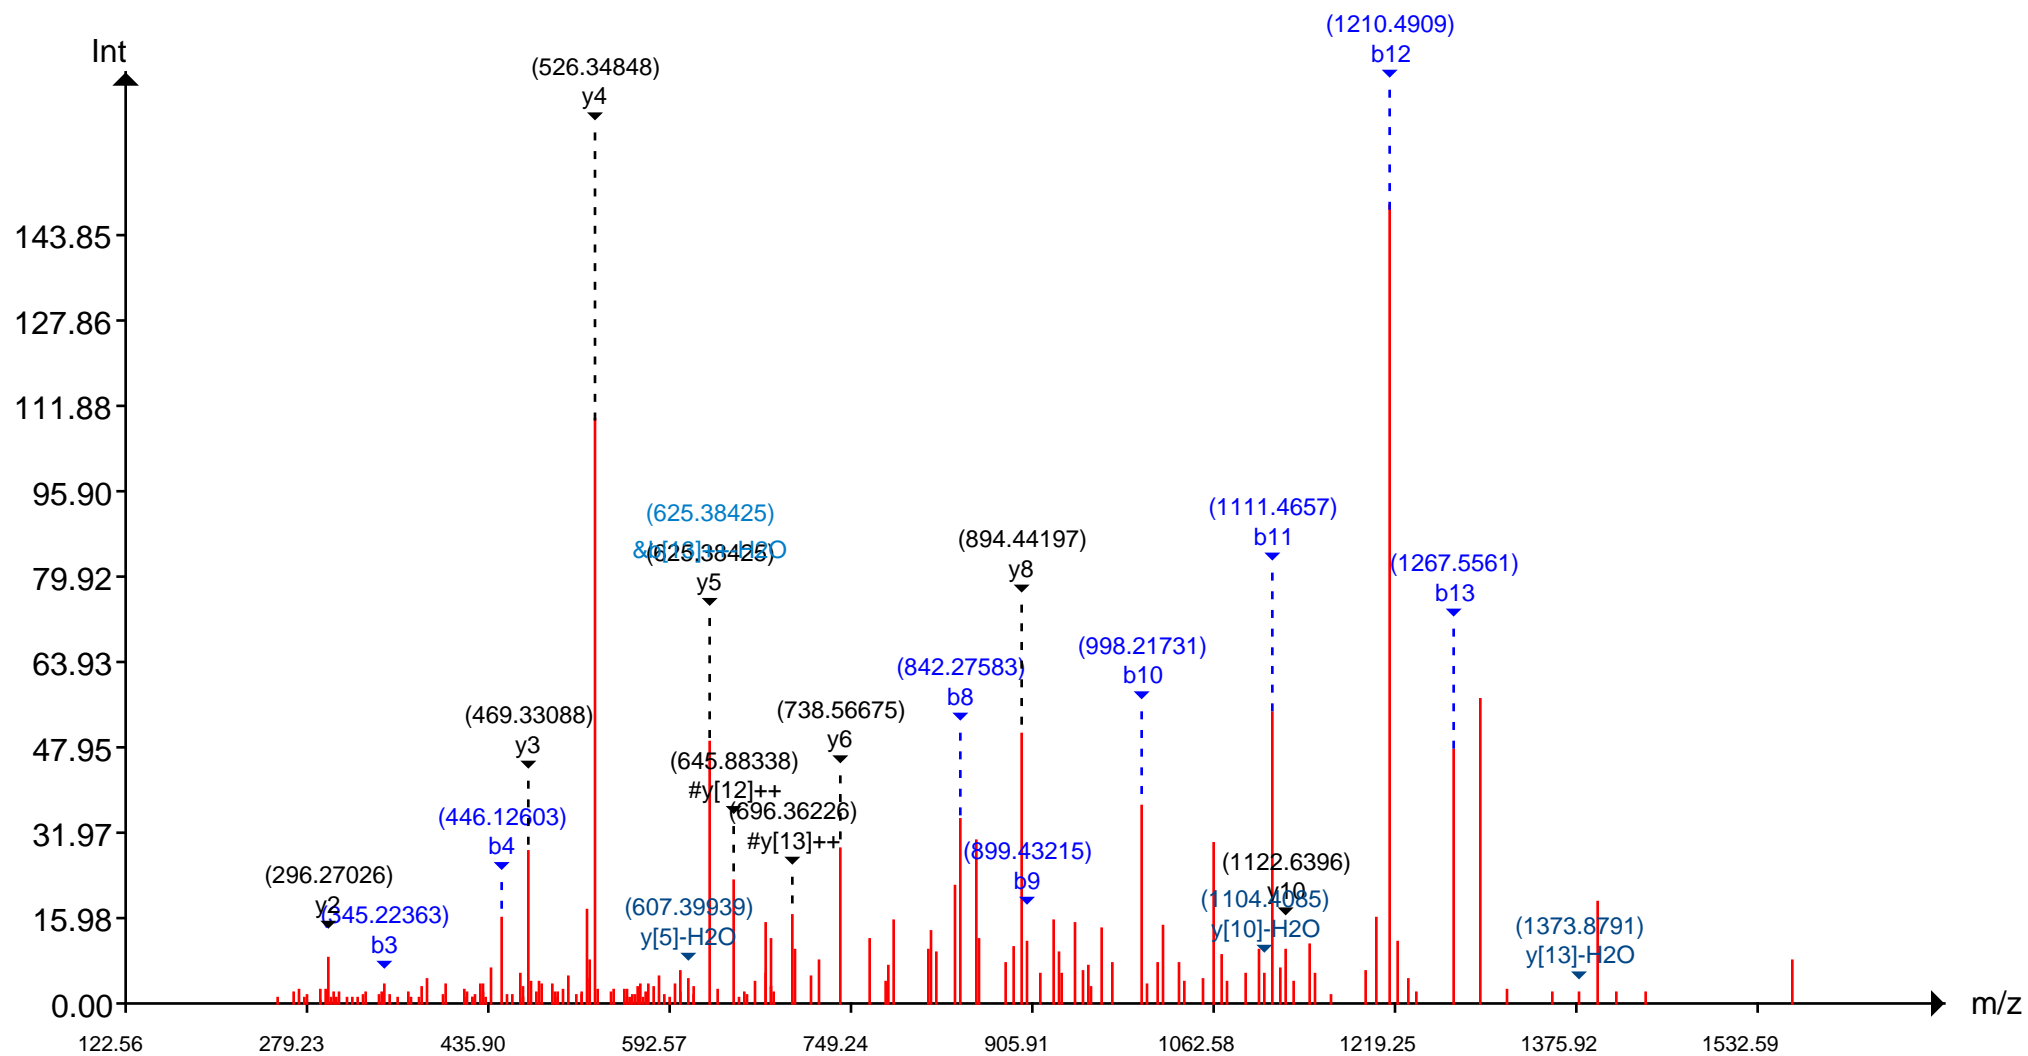

## Info

**Modified Sequence** AcD3-VSITPAEVLVVGK<AcD3K\*>DR<C13>-COOH

**Ion score** 47.24

**Protein** P62962

**Confidence level** 99.00%

**Precursor m/z** 868.51364

**Identity Threshold** 43.75

**Charge** 2+

**Mass error** 0.003313

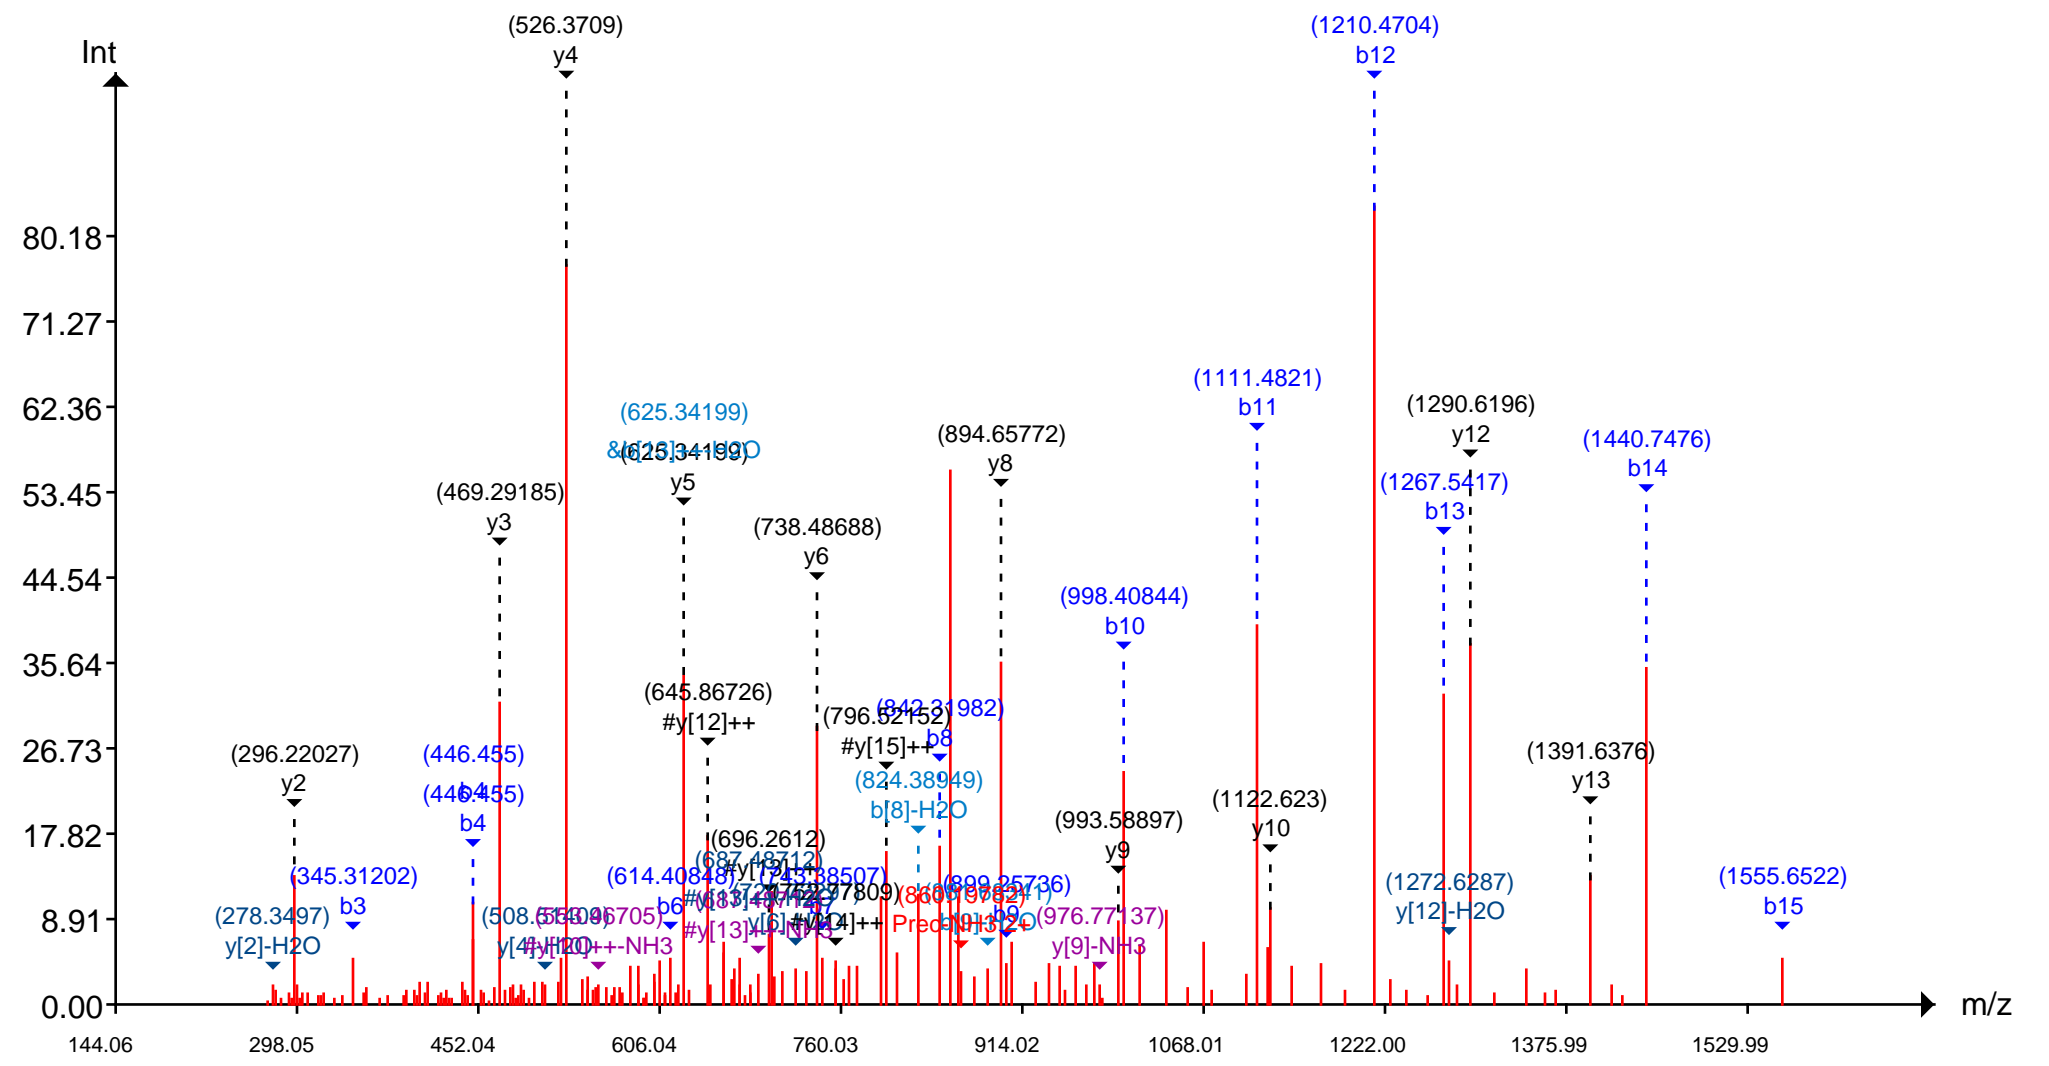

Info

|                          |                                         |                           |          |
|--------------------------|-----------------------------------------|---------------------------|----------|
| <b>Modified Sequence</b> | AcD3-VSITPAEVGVLVGK<AcD3K*>DR<C13>-COOH | <b>Ion score</b>          | 87.07    |
| <b>Protein</b>           | P62962                                  | <b>Confidence level</b>   | 99.00%   |
| <b>Precursor m/z</b>     | 868.51391                               | <b>Identity Threshold</b> | 43.77    |
| <b>Charge</b>            | 2+                                      | <b>Mass error</b>         | 0.003853 |

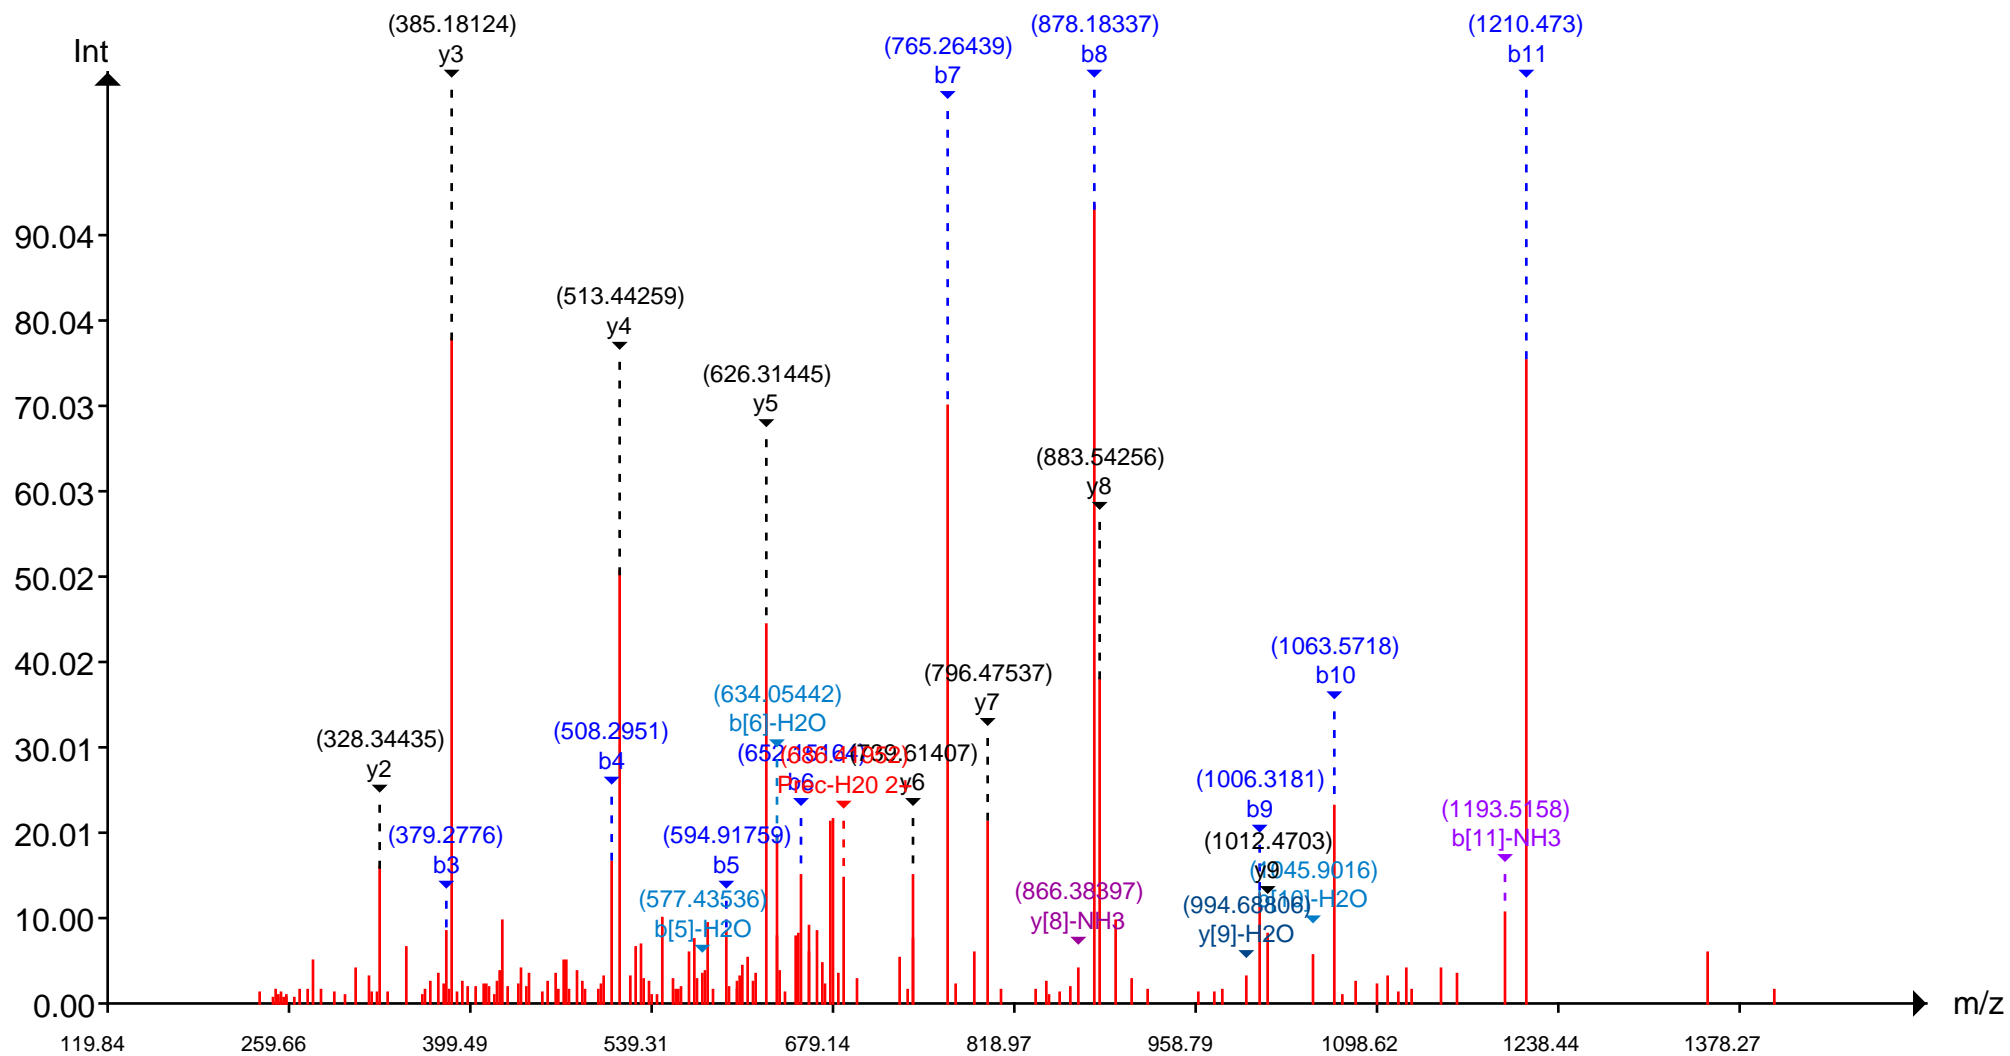

## Info

**Modified Sequence** AcD3-ADFESGLLQGFR<C13>-COOH

**Ion score** 62.58

**Protein** Q9JM14

**Confidence level** 99.00%

**Precursor m/z** 695.86085

**Identity Threshold** 47.92

**Charge** 2+

**Mass error** 8.03E-4

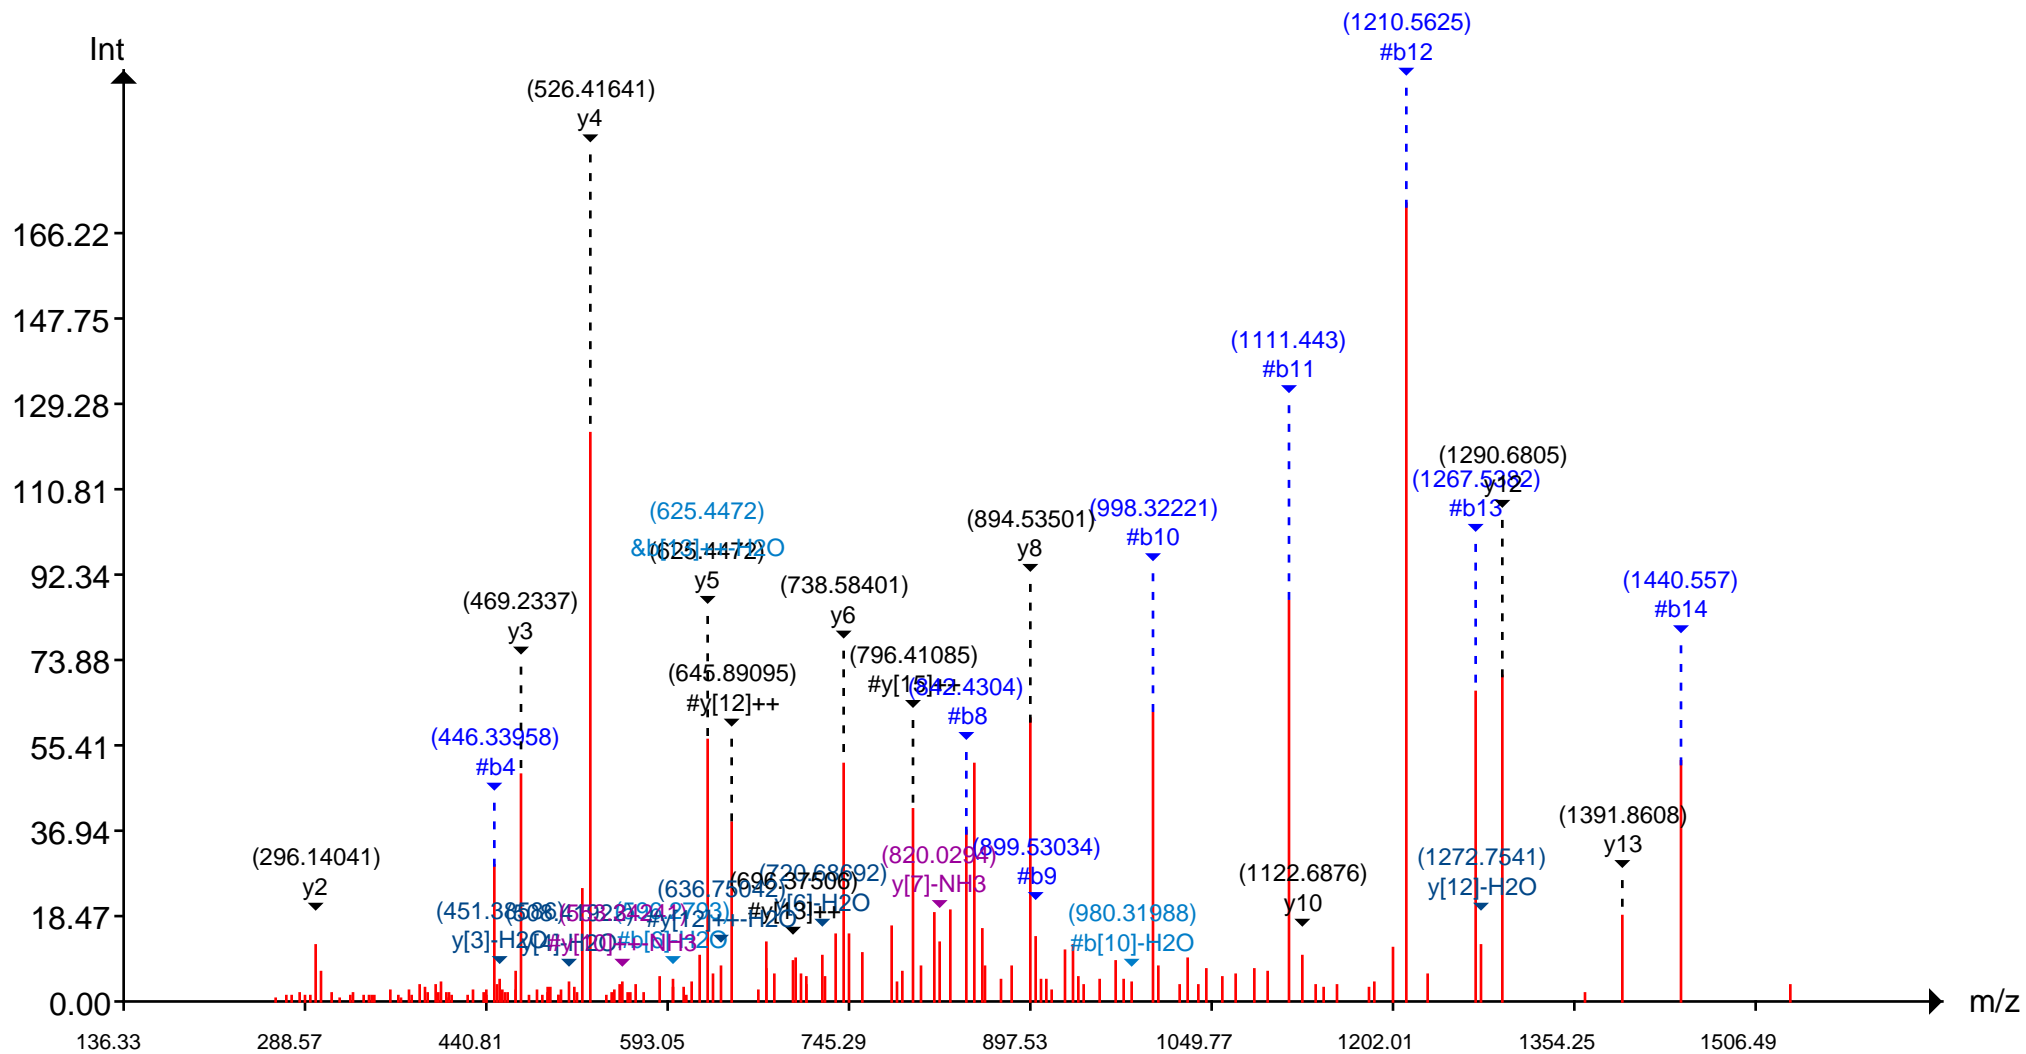

## Info

**Modified Sequence** AcD3-VSITPAEVGVLVGK<AcD3K\*>DR<C13>-COOH

**Ion score** 72.05

**Protein** P62962

**Confidence level** 99.00%

**Precursor m/z** 868.51333

**Identity Threshold** 43.75

**Charge** 2+

**Mass error** 0.002693

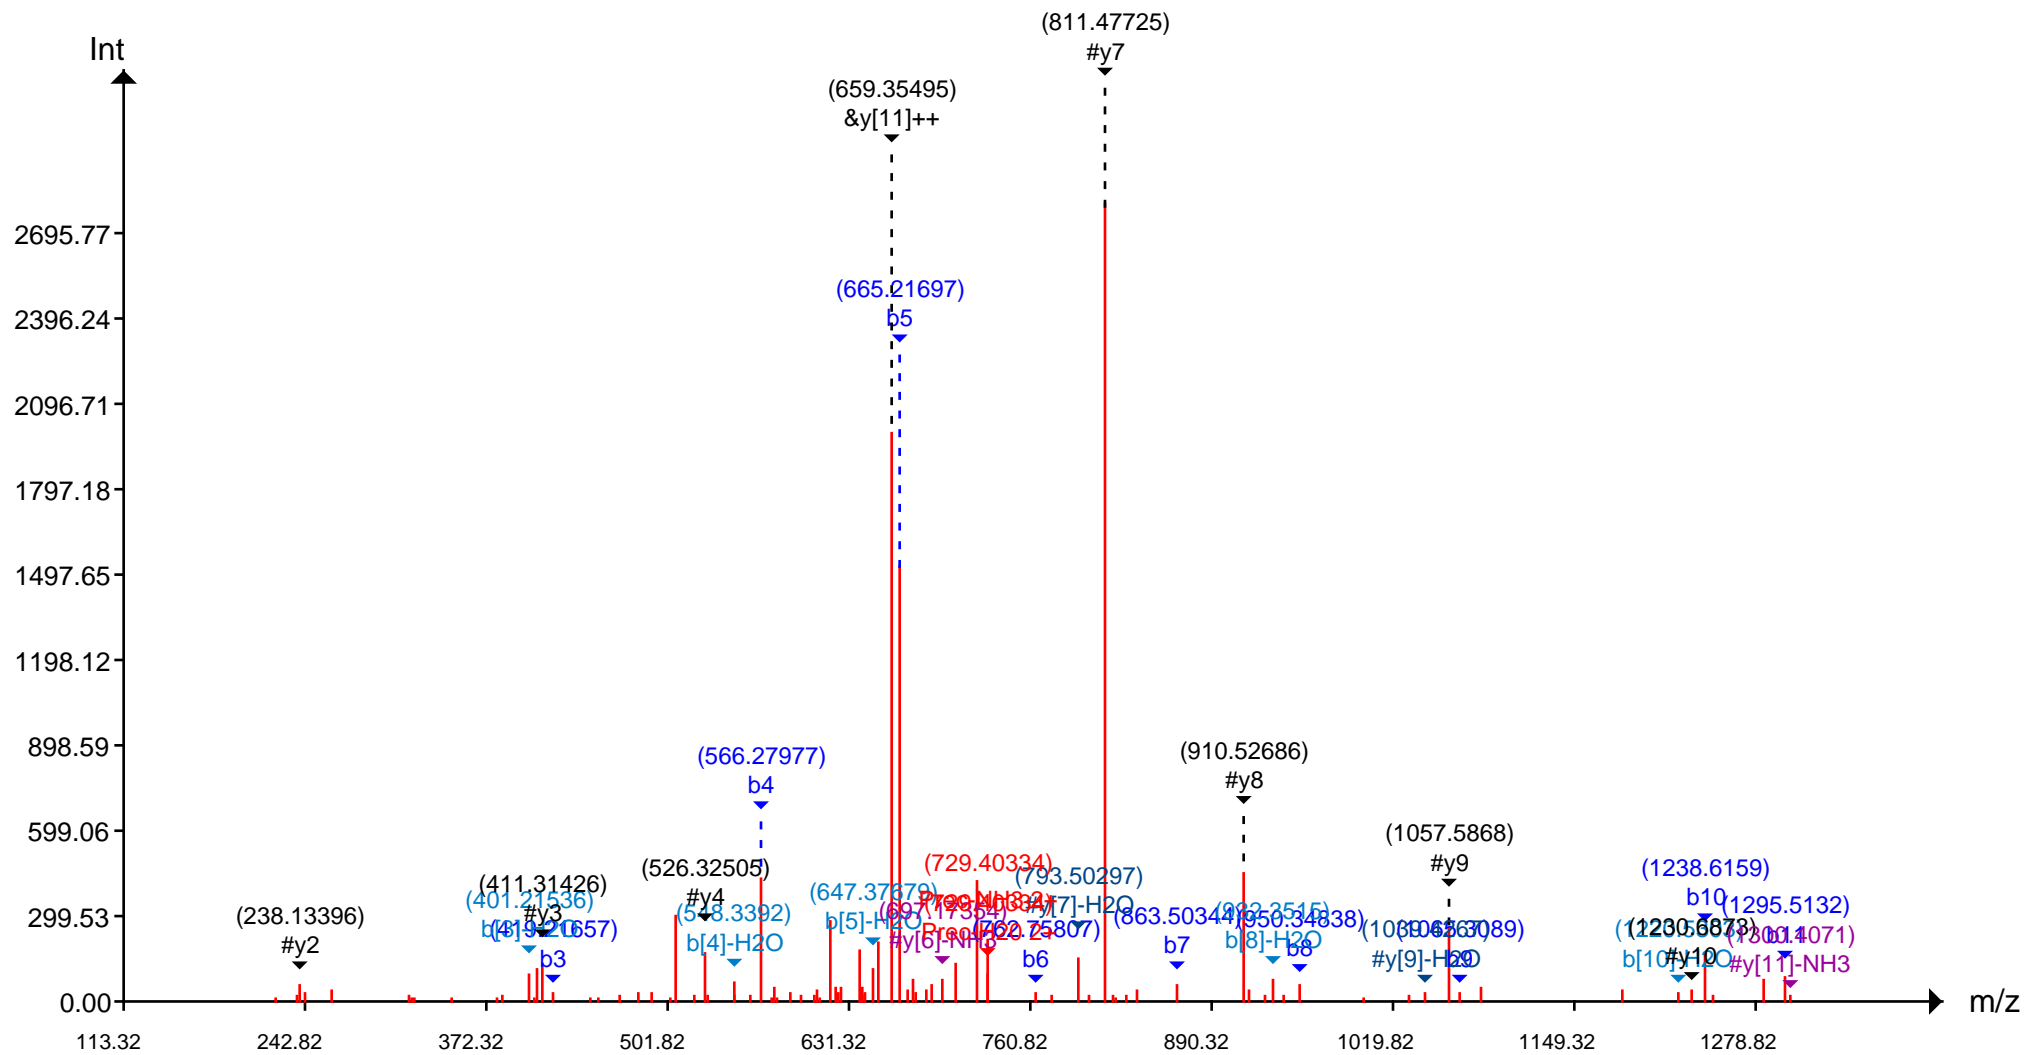

## Info

|                          |                                                   |                           |          |
|--------------------------|---------------------------------------------------|---------------------------|----------|
| <b>Modified Sequence</b> | AcD3-ISK<AcD3K*>M<Mox*>VPTSDK<AcD3K*>GR<C13>-COOH | <b>Ion score</b>          | 51.67    |
| <b>Protein</b>           | P58252                                            | <b>Confidence level</b>   | 99.00%   |
| <b>Precursor m/z</b>     | 738.41379                                         | <b>Identity Threshold</b> | 47.30    |
| <b>Charge</b>            | 2+                                                | <b>Mass error</b>         | 0.002313 |

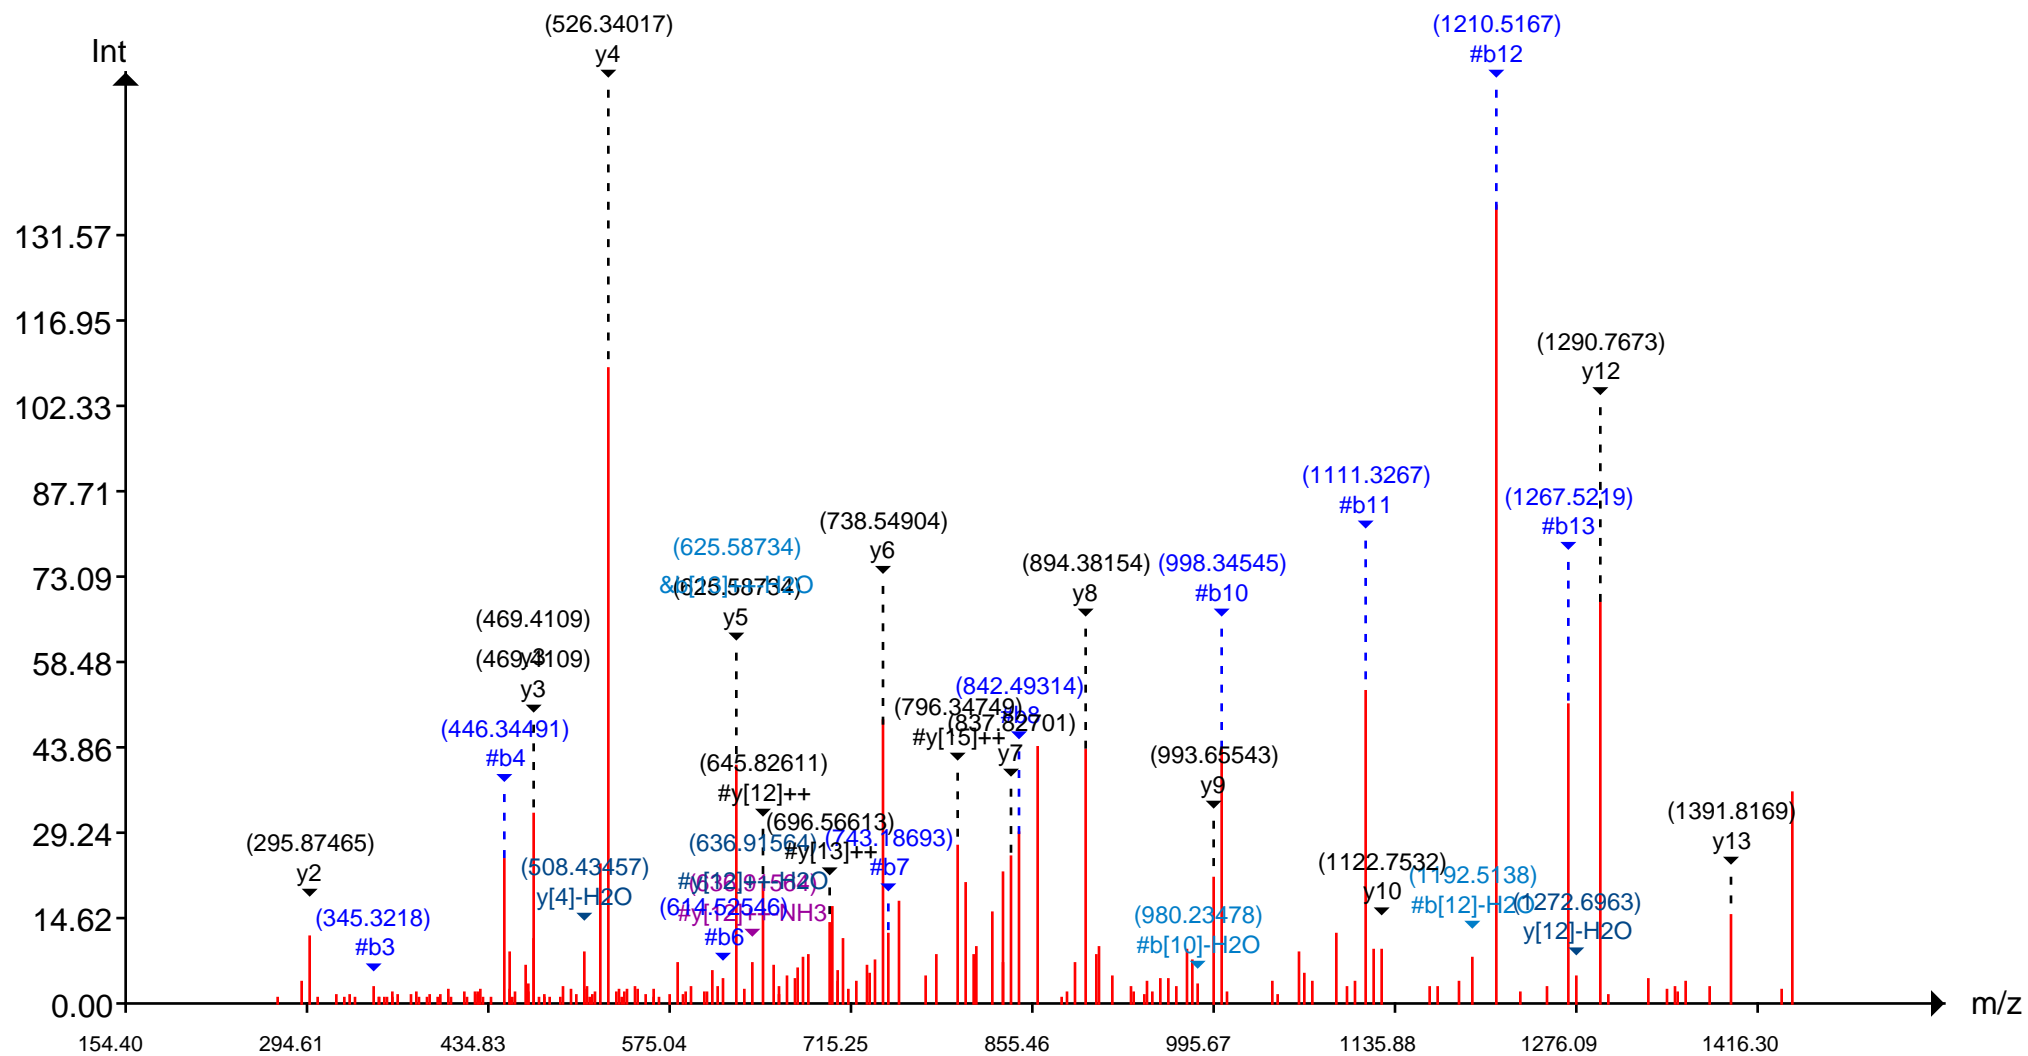

## Info

**Modified Sequence** AcD3-VSITPAEVGVLVGK<AcD3K\*>DR<C13>-COOH

**Ion score** 72.19

**Protein** P62962

**Confidence level** 99.00%

**Precursor m/z** 868.51341

**Identity Threshold** 43.76

**Charge** 2+

**Mass error** 0.002853

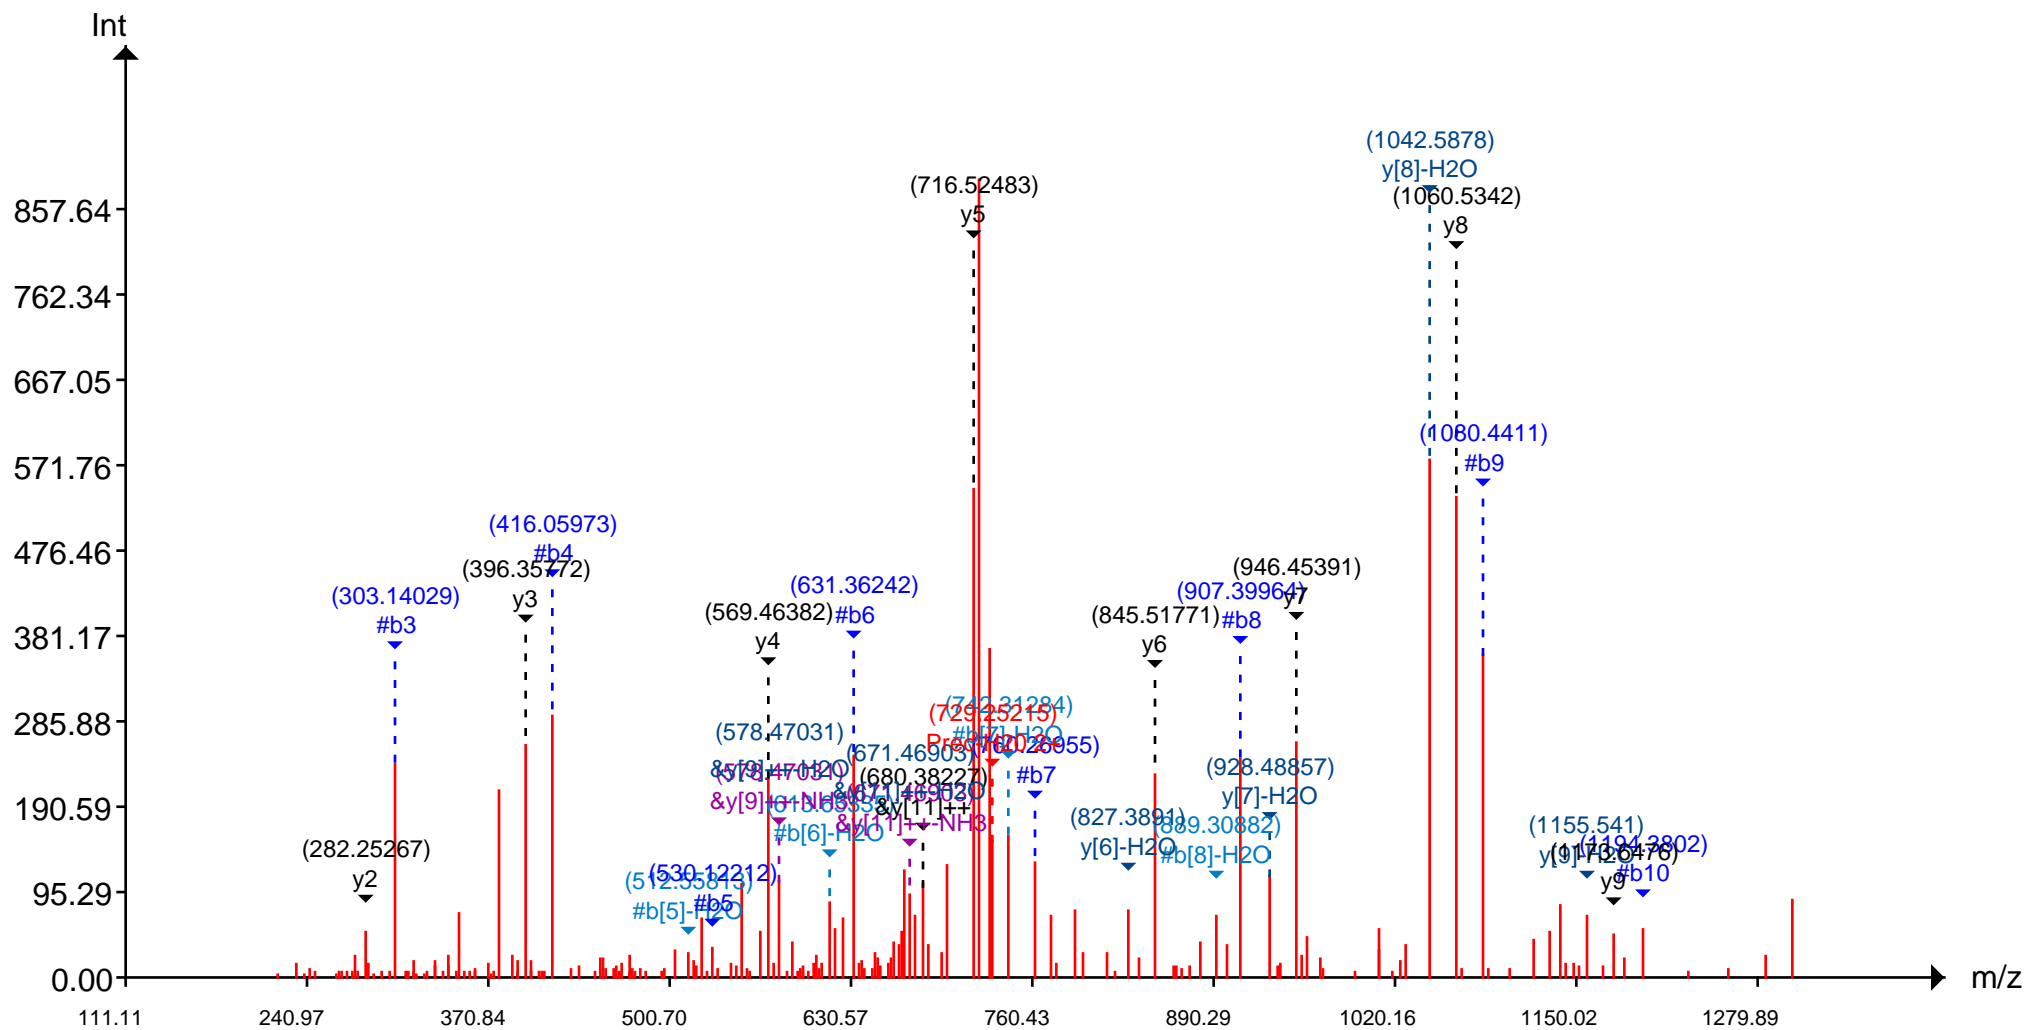

## Info

|                          |                                     |                           |          |
|--------------------------|-------------------------------------|---------------------------|----------|
| <b>Modified Sequence</b> | AcD3-ADAINTEFK<AcD3K*>NTR<C13>-COOH | <b>Ion score</b>          | 53.41    |
| <b>Protein</b>           | P20152                              | <b>Confidence level</b>   | 99.00%   |
| <b>Precursor m/z</b>     | 738.38832                           | <b>Identity Threshold</b> | 48.15    |
| <b>Charge</b>            | 2+                                  | <b>Mass error</b>         | -9.12E-4 |



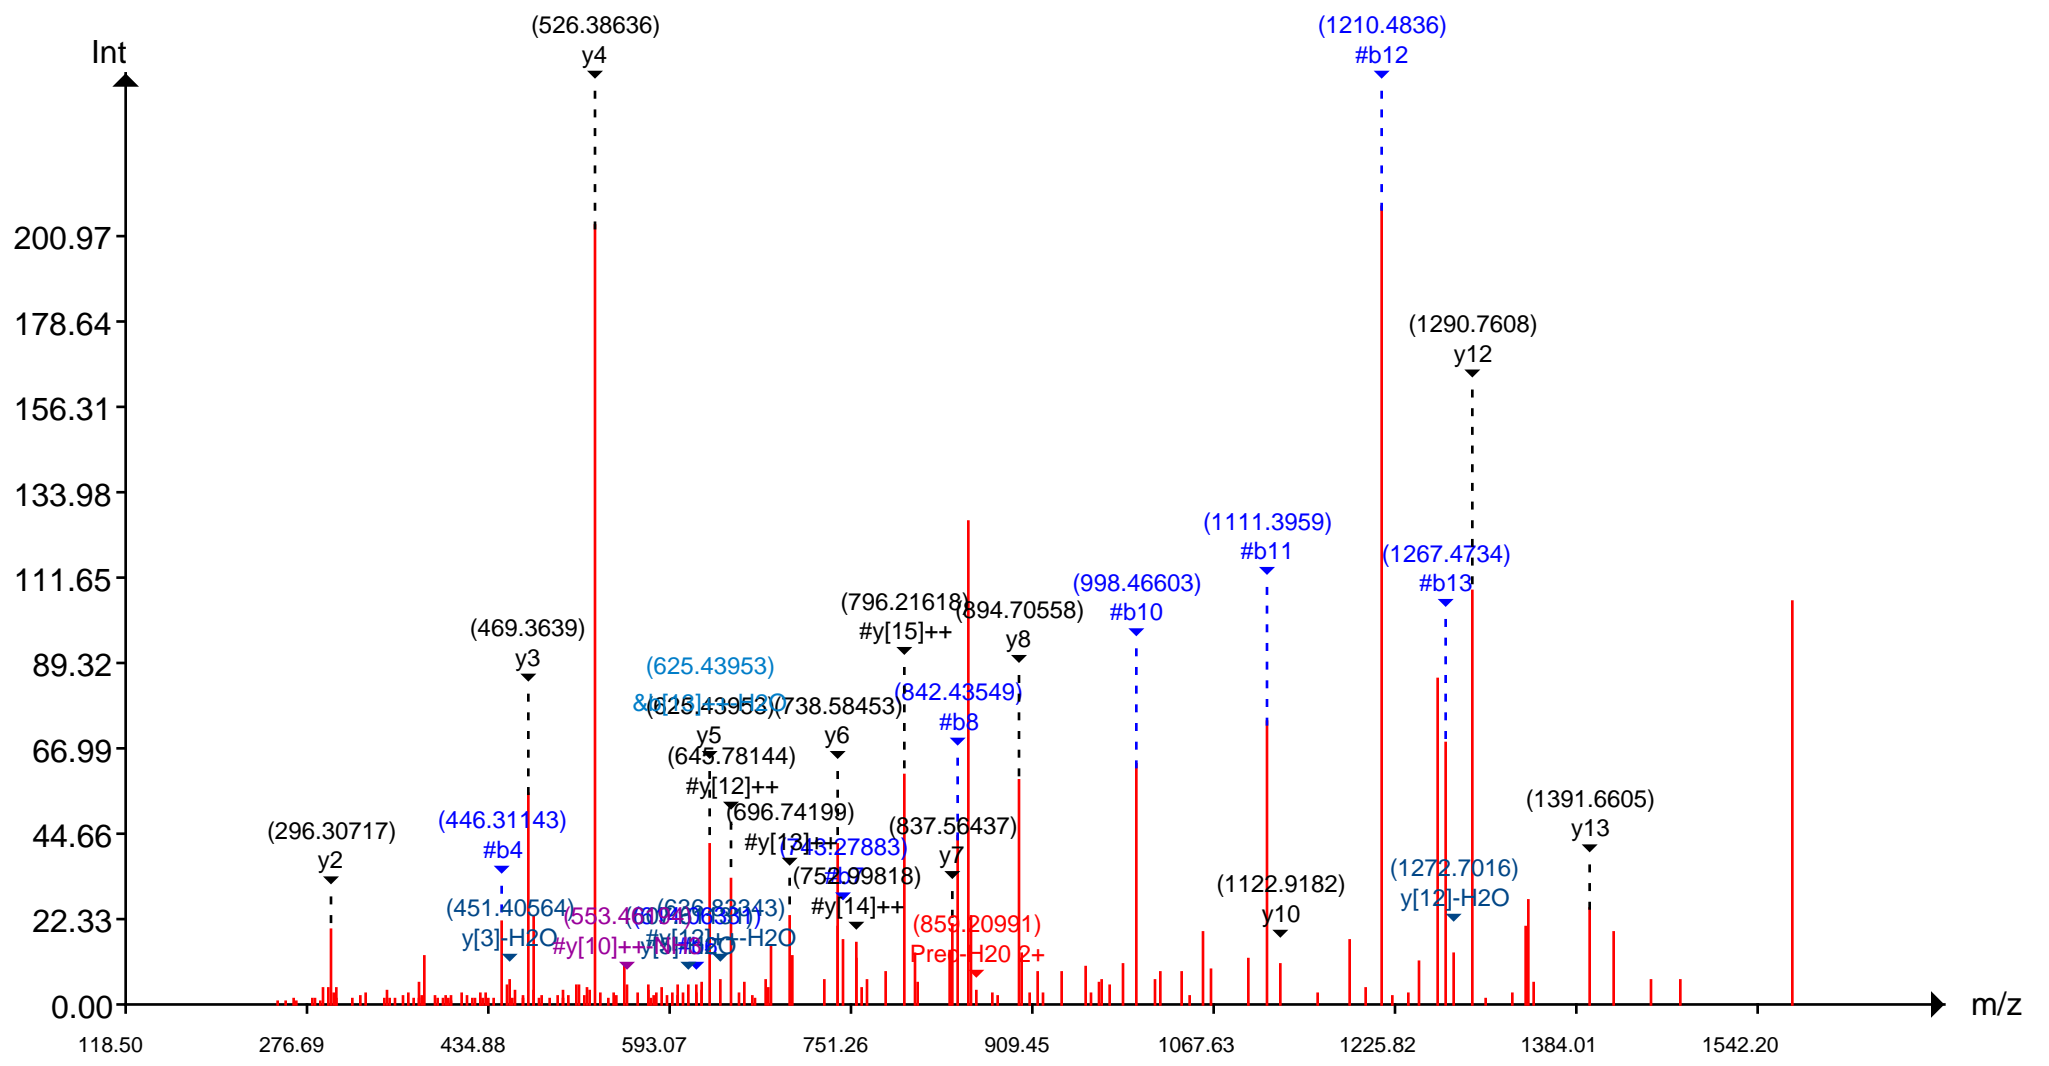

| Info                     |                                        |                           |          |
|--------------------------|----------------------------------------|---------------------------|----------|
| <b>Modified Sequence</b> | AcD3-VSITPAEVLVVGK<AcD3K*>DR<C13>-COOH | <b>Ion score</b>          | 53.86    |
| <b>Protein</b>           | P62962                                 | <b>Confidence level</b>   | 99.00%   |
| <b>Precursor m/z</b>     | 868.51313                              | <b>Identity Threshold</b> | 43.77    |
| <b>Charge</b>            | 2+                                     | <b>Mass error</b>         | 0.002293 |

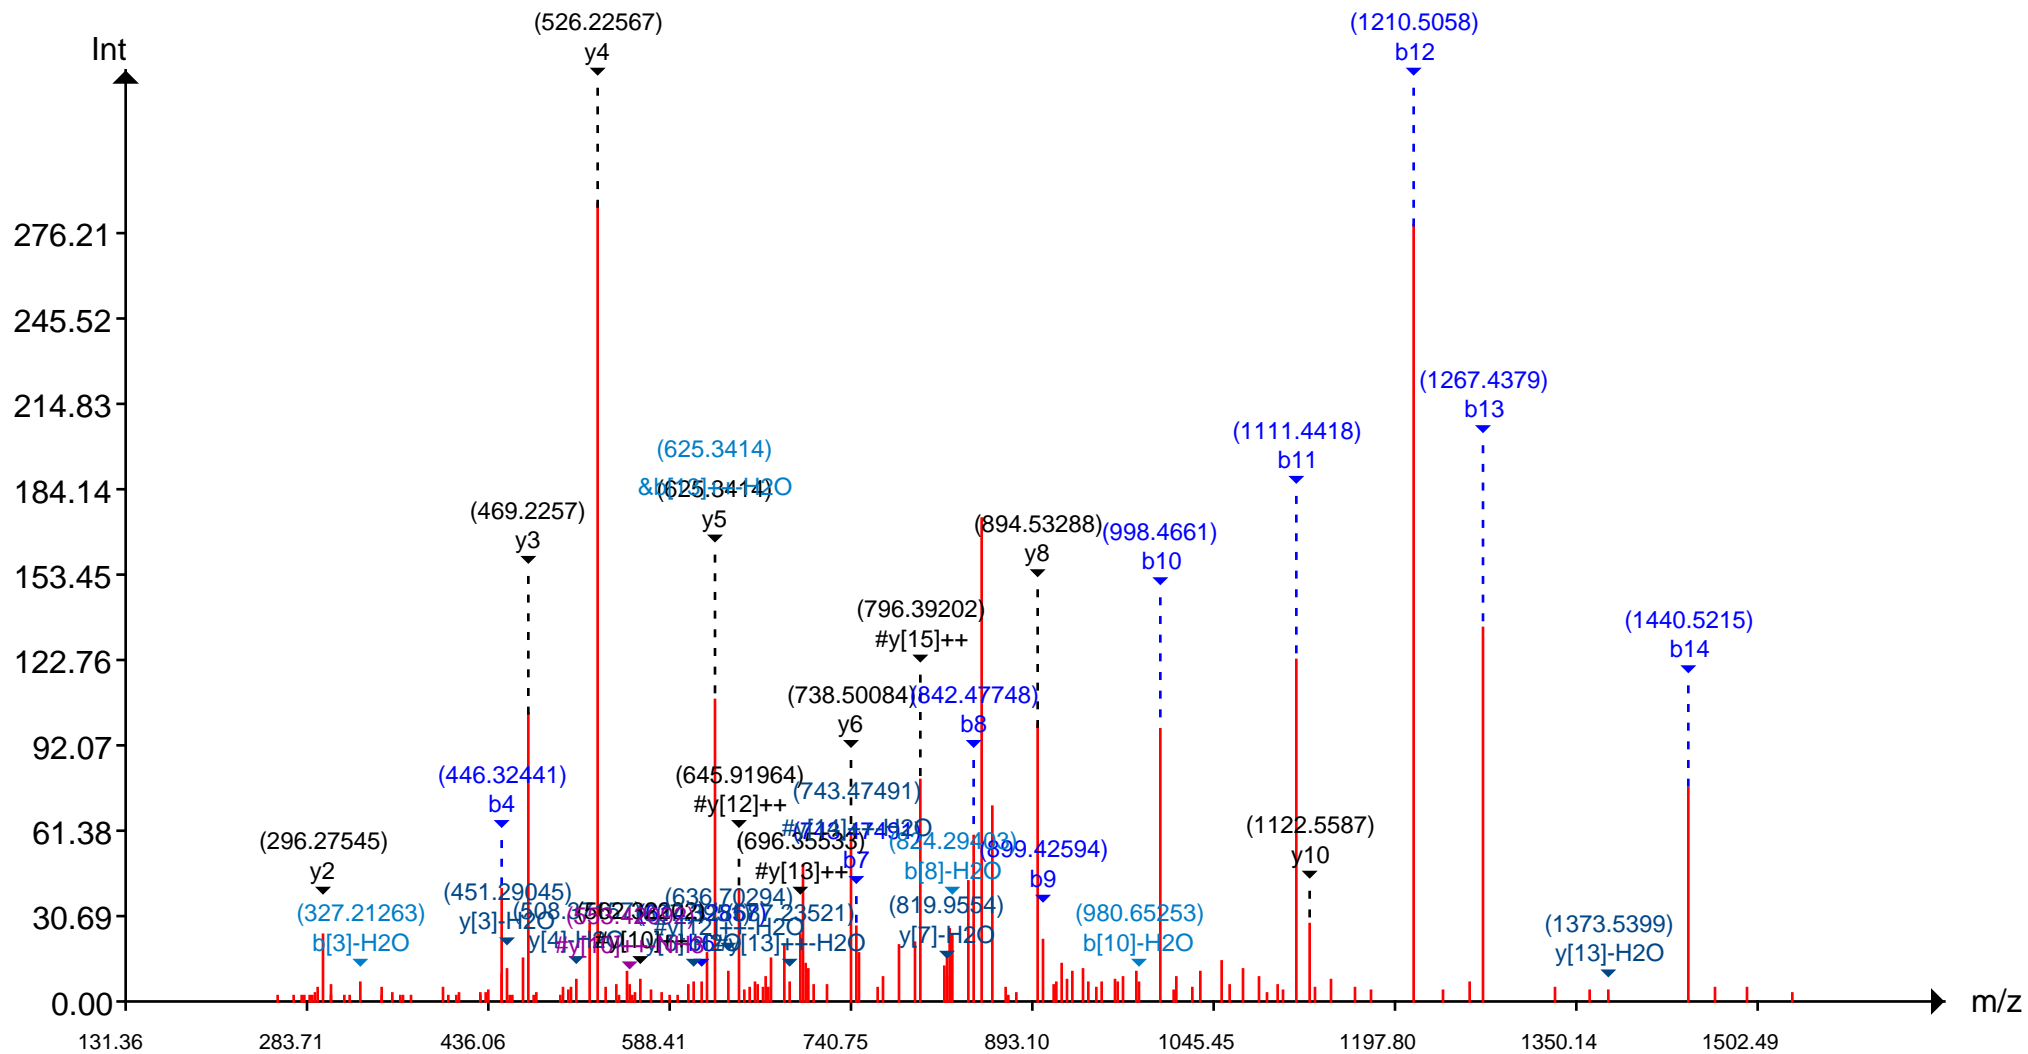

## Info

**Modified Sequence** AcD3-VSITPAEVGVLVGK<AcD3K\*>DR<C13>-COOH

**Ion score** 57.6

**Protein** P62962

**Confidence level** 99.00%

**Precursor m/z** 868.51316

**Identity Threshold** 43.77

**Charge** 2+

**Mass error** 0.002353

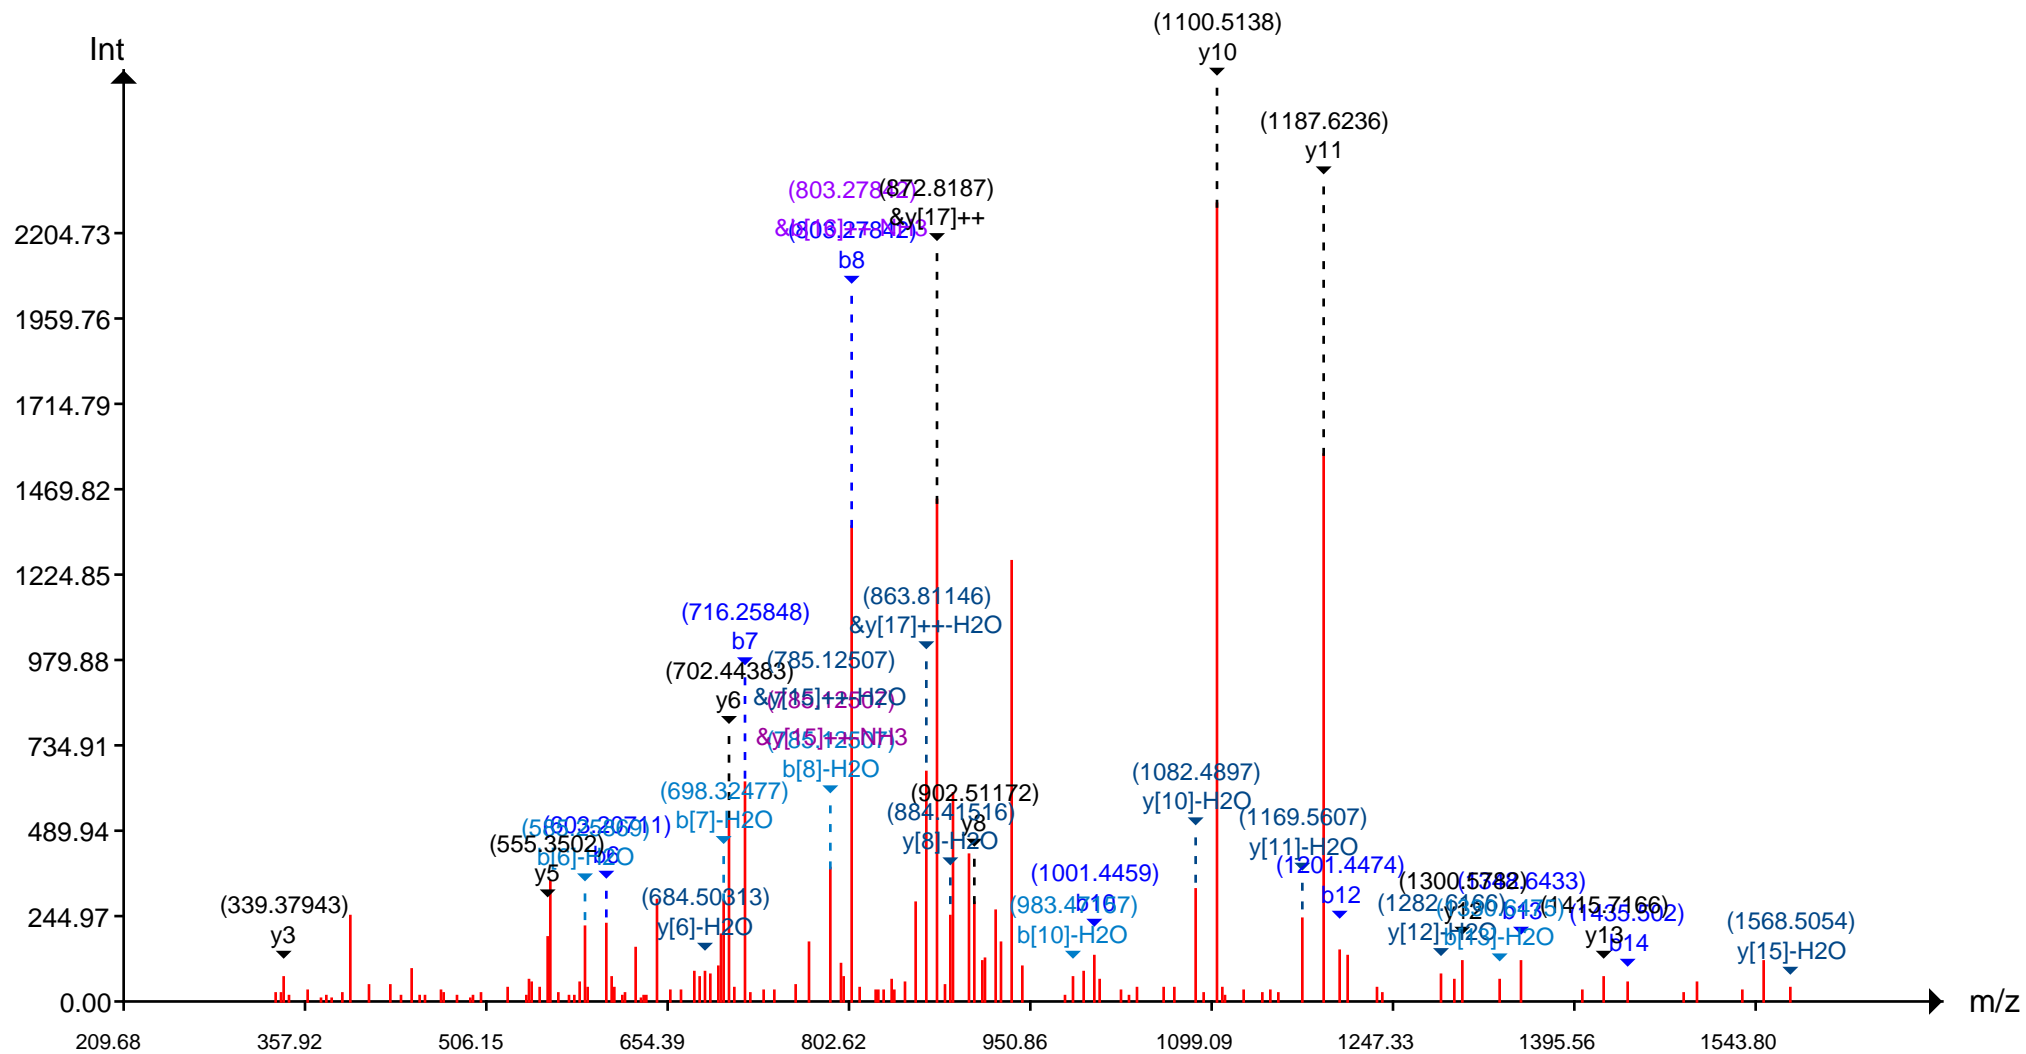

## Info

**Modified Sequence** AcD3-LGTGNDLSPTTVM<Mox\*>SEGTR<C13>-COOH

**Ion score** 49.15

**Protein** Q923D2

**Confidence level** 99.00%

**Precursor m/z** 951.96794

**Identity Threshold** 47.23

**Charge** 2+

**Mass error** 0.003771

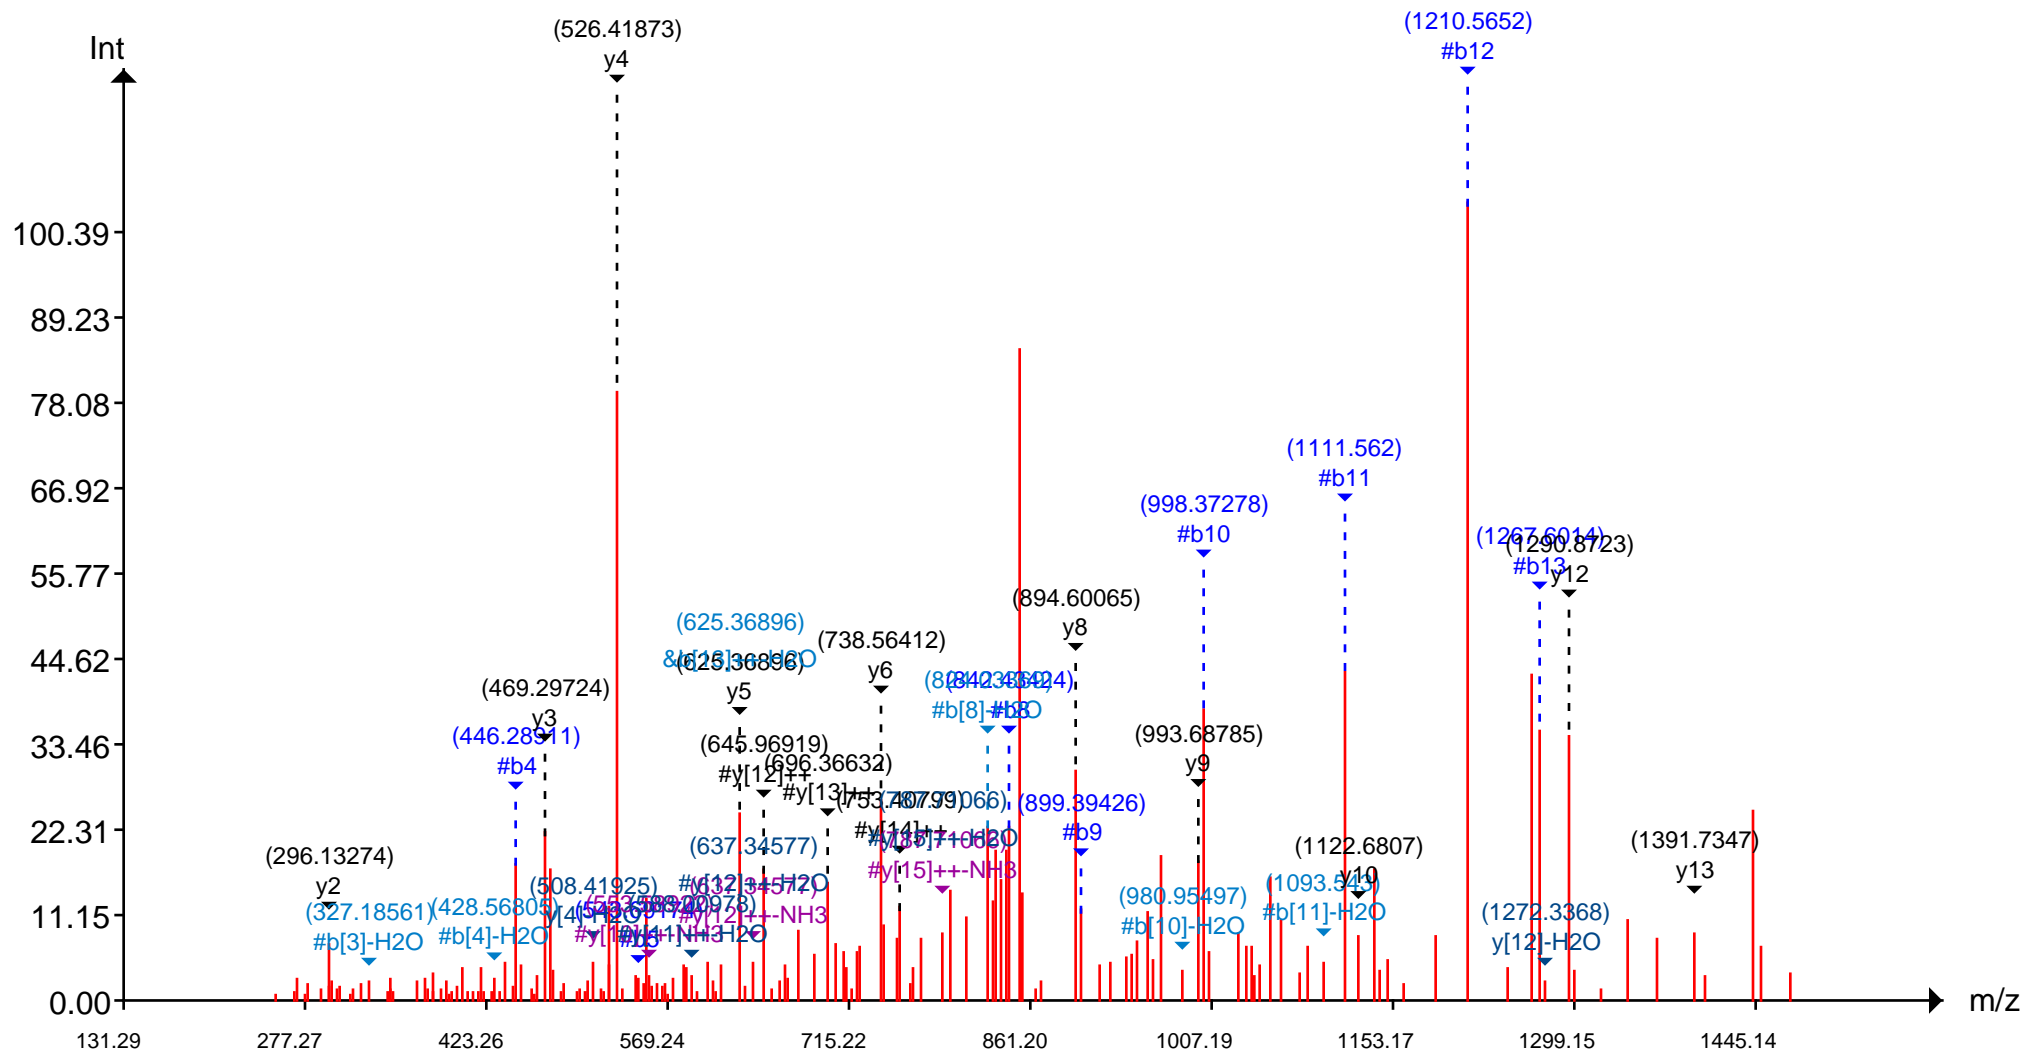

## Info

**Modified Sequence** AcD3-VSITPAEVLVVGK<AcD3K\*>DR<C13>-COOH

**Ion score** 52.26

**Protein** P62962

**Confidence level** 99.00%

**Precursor m/z** 868.51277

**Identity Threshold** 43.89

**Charge** 2+

**Mass error** 0.001573

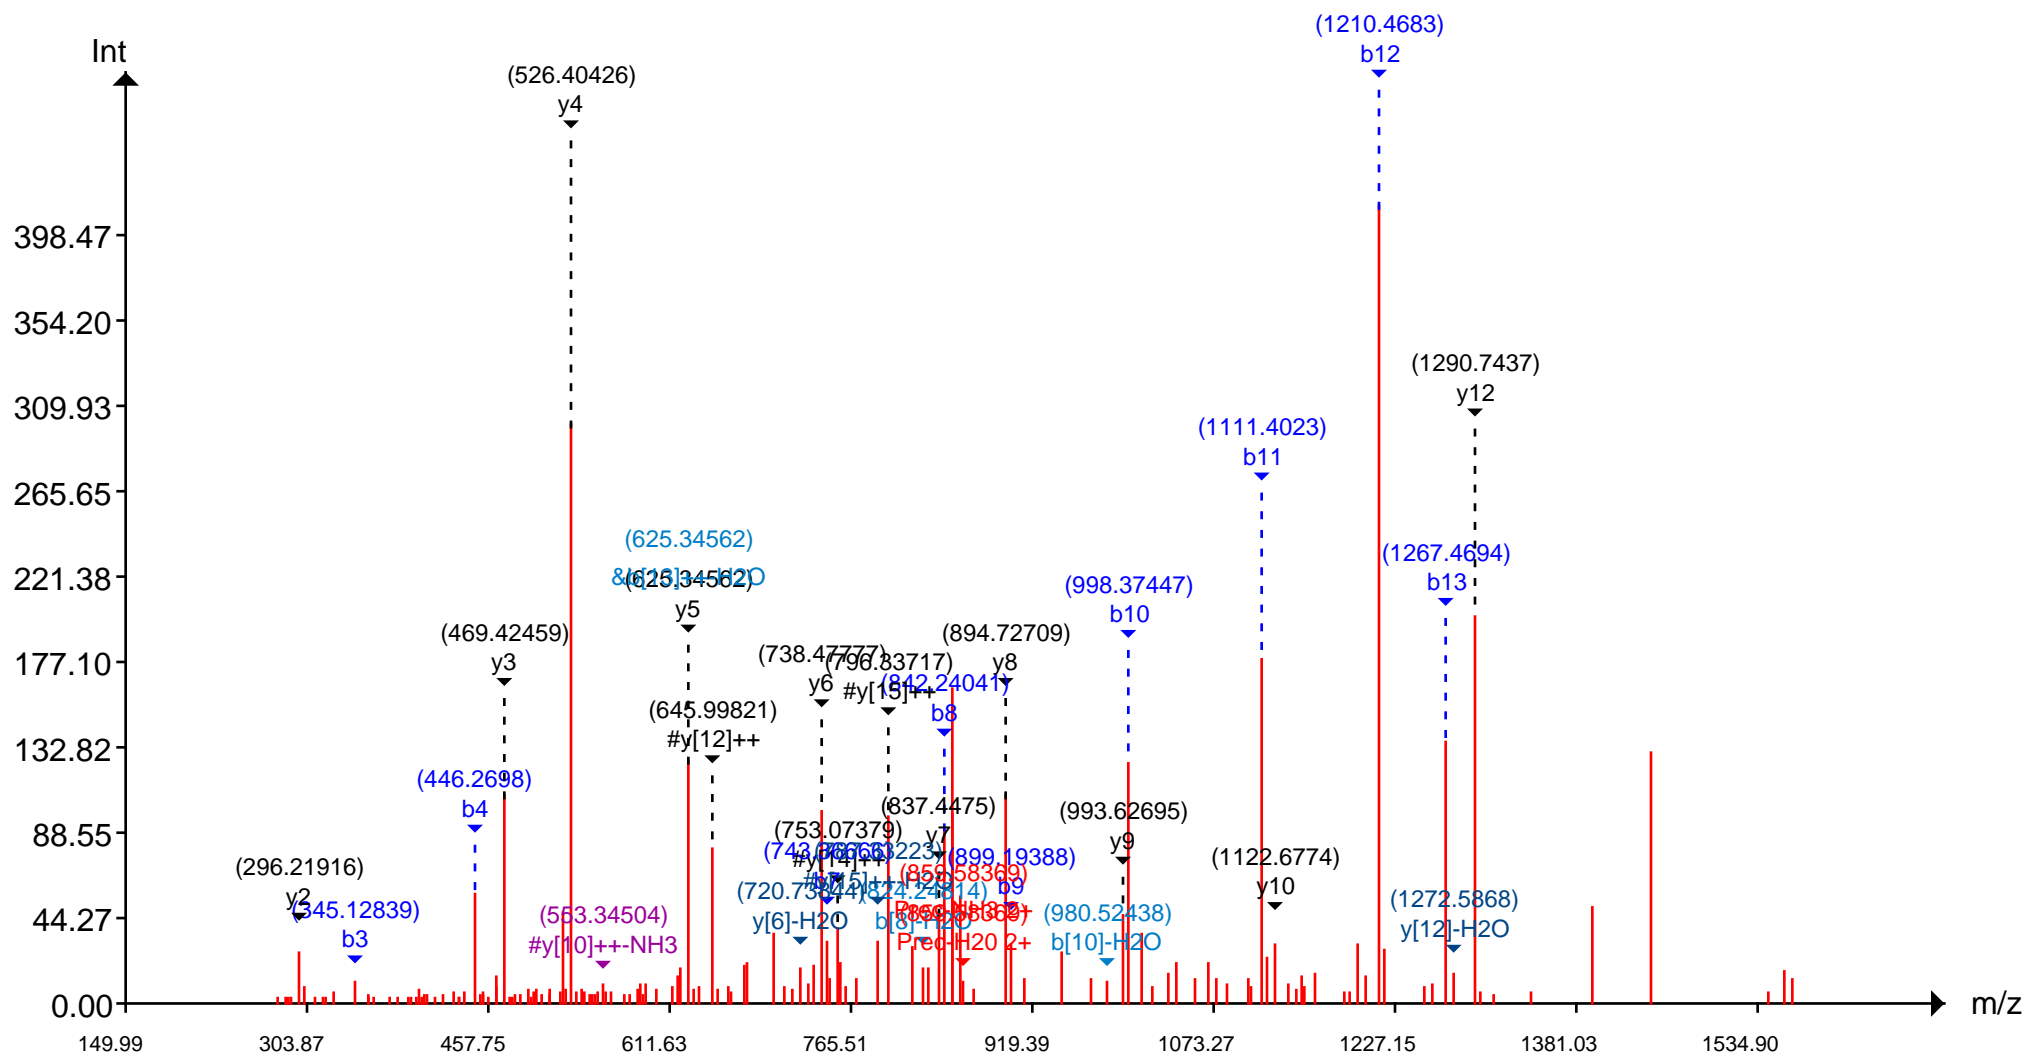

## Info

**Modified Sequence** AcD3-VSITPAEVLVVGK<AcD3K\*>DR<C13>-COOH

**Ion score** 73.33

**Protein** P62962

**Confidence level** 99.00%

**Precursor m/z** 868.51303

**Identity Threshold** 43.77

**Charge** 2+

**Mass error** 0.002093

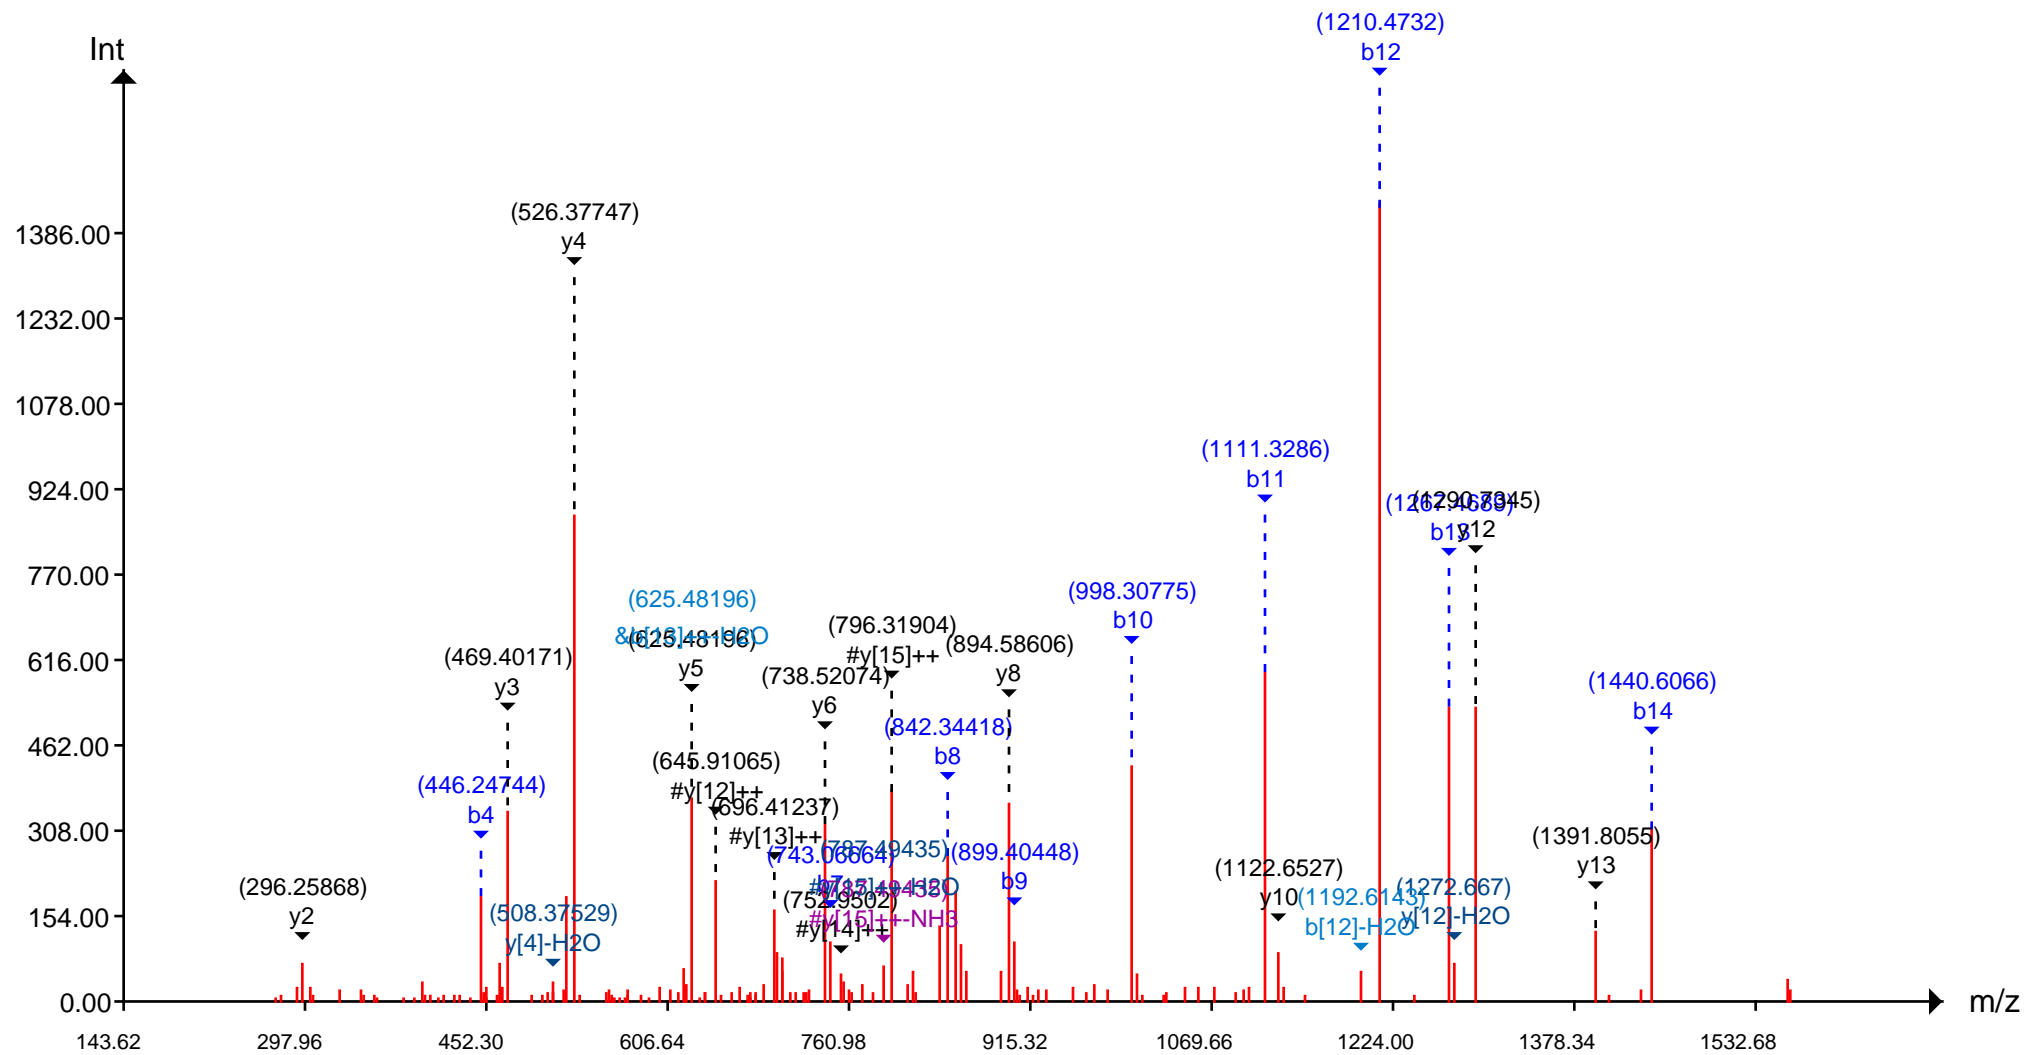

## Info

**Modified Sequence** AcD3-VSITPAEVGVLVGK<AcD3K\*>DR<C13>-COOH

**Ion score** 79.07

**Protein** P62962

**Confidence level** 99.00%

**Precursor m/z** 868.51263

**Identity Threshold** 43.89

**Charge** 2+

**Mass error** 0.001293

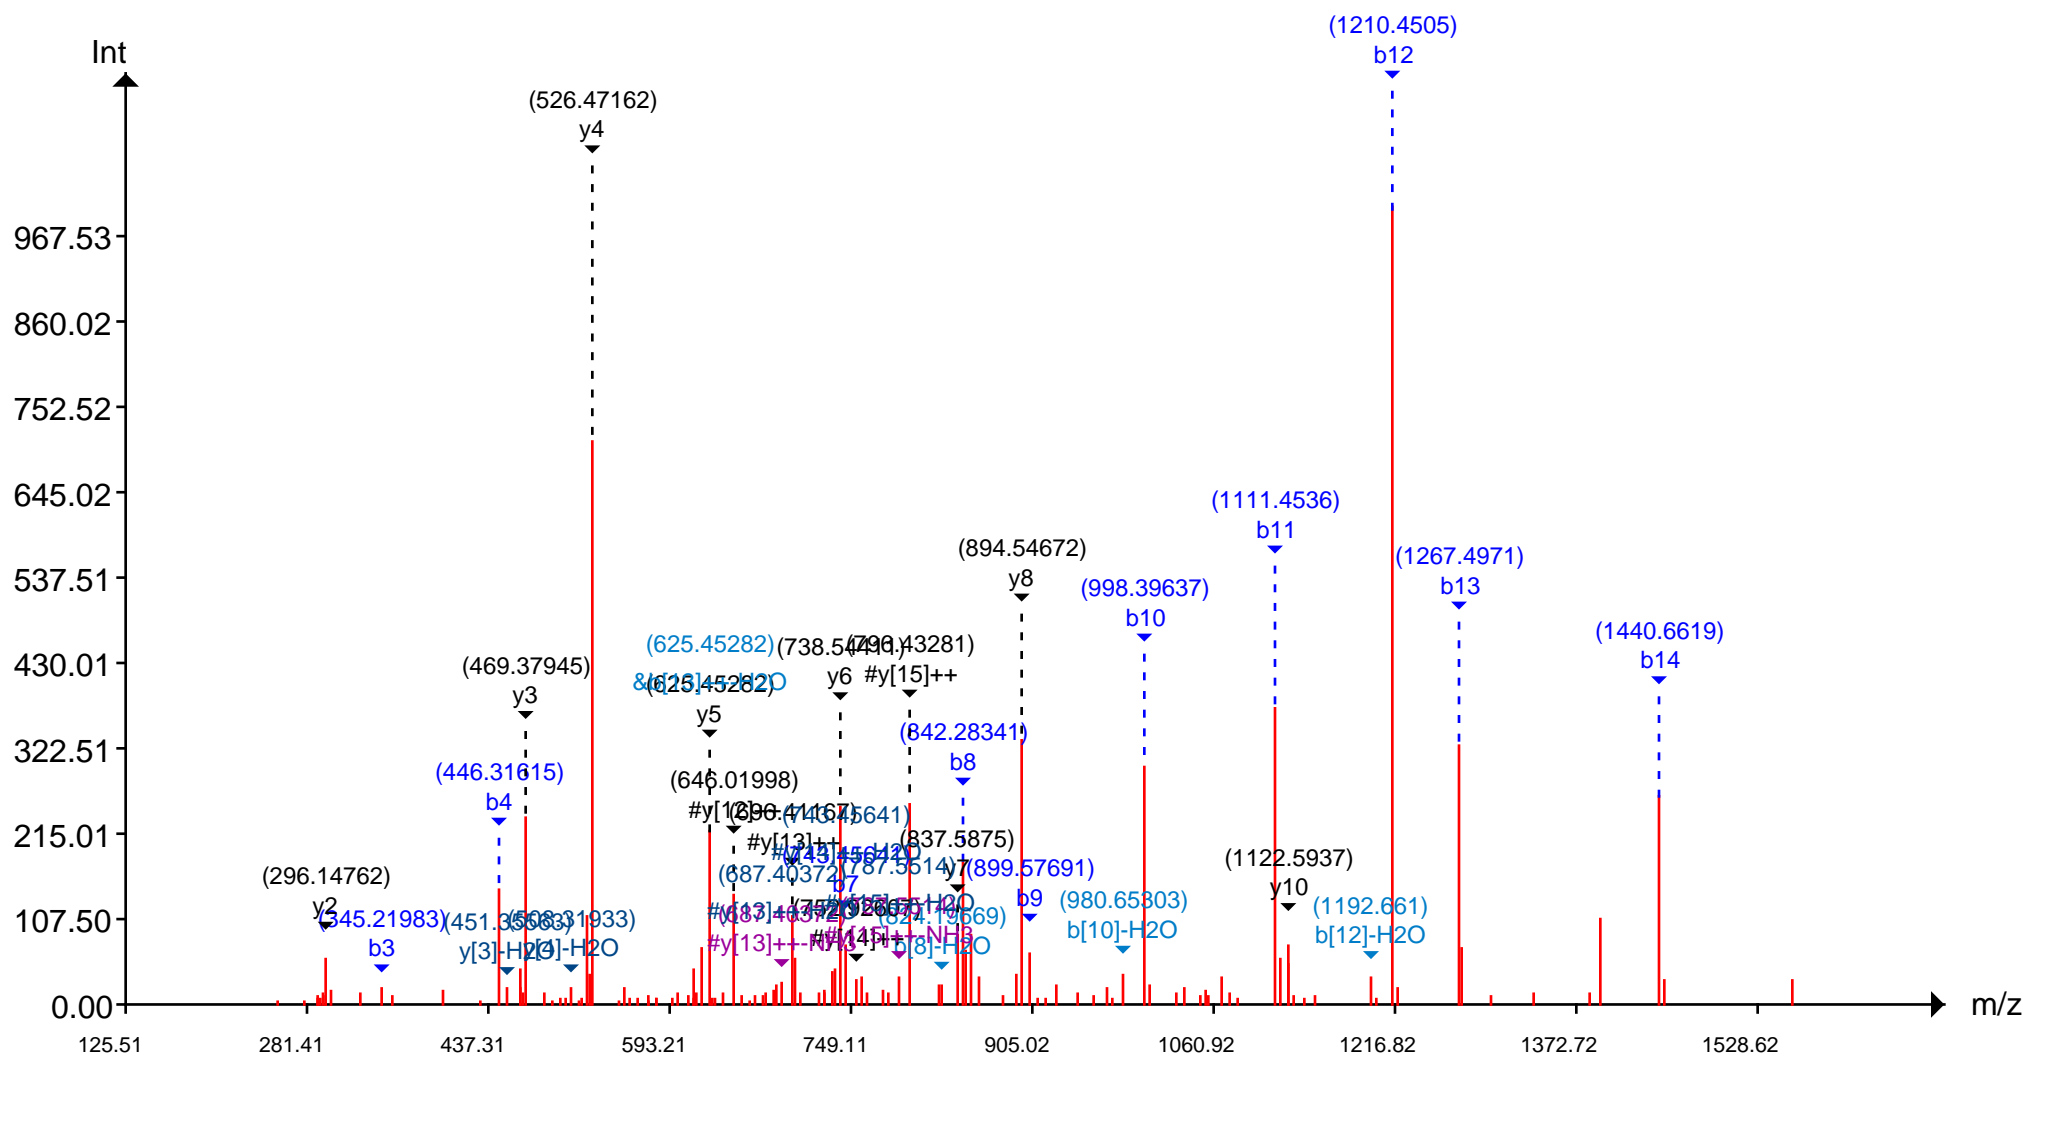

| Info                     |                                         |                           |          |
|--------------------------|-----------------------------------------|---------------------------|----------|
| <b>Modified Sequence</b> | AcD3-VSITPAEVGVLVGK<AcD3K*>DR<C13>-COOH | <b>Ion score</b>          | 82.09    |
| <b>Protein</b>           | P62962                                  | <b>Confidence level</b>   | 99.00%   |
| <b>Precursor m/z</b>     | 868.5127                                | <b>Identity Threshold</b> | 43.89    |
| <b>Charge</b>            | 2+                                      | <b>Mass error</b>         | 0.001433 |

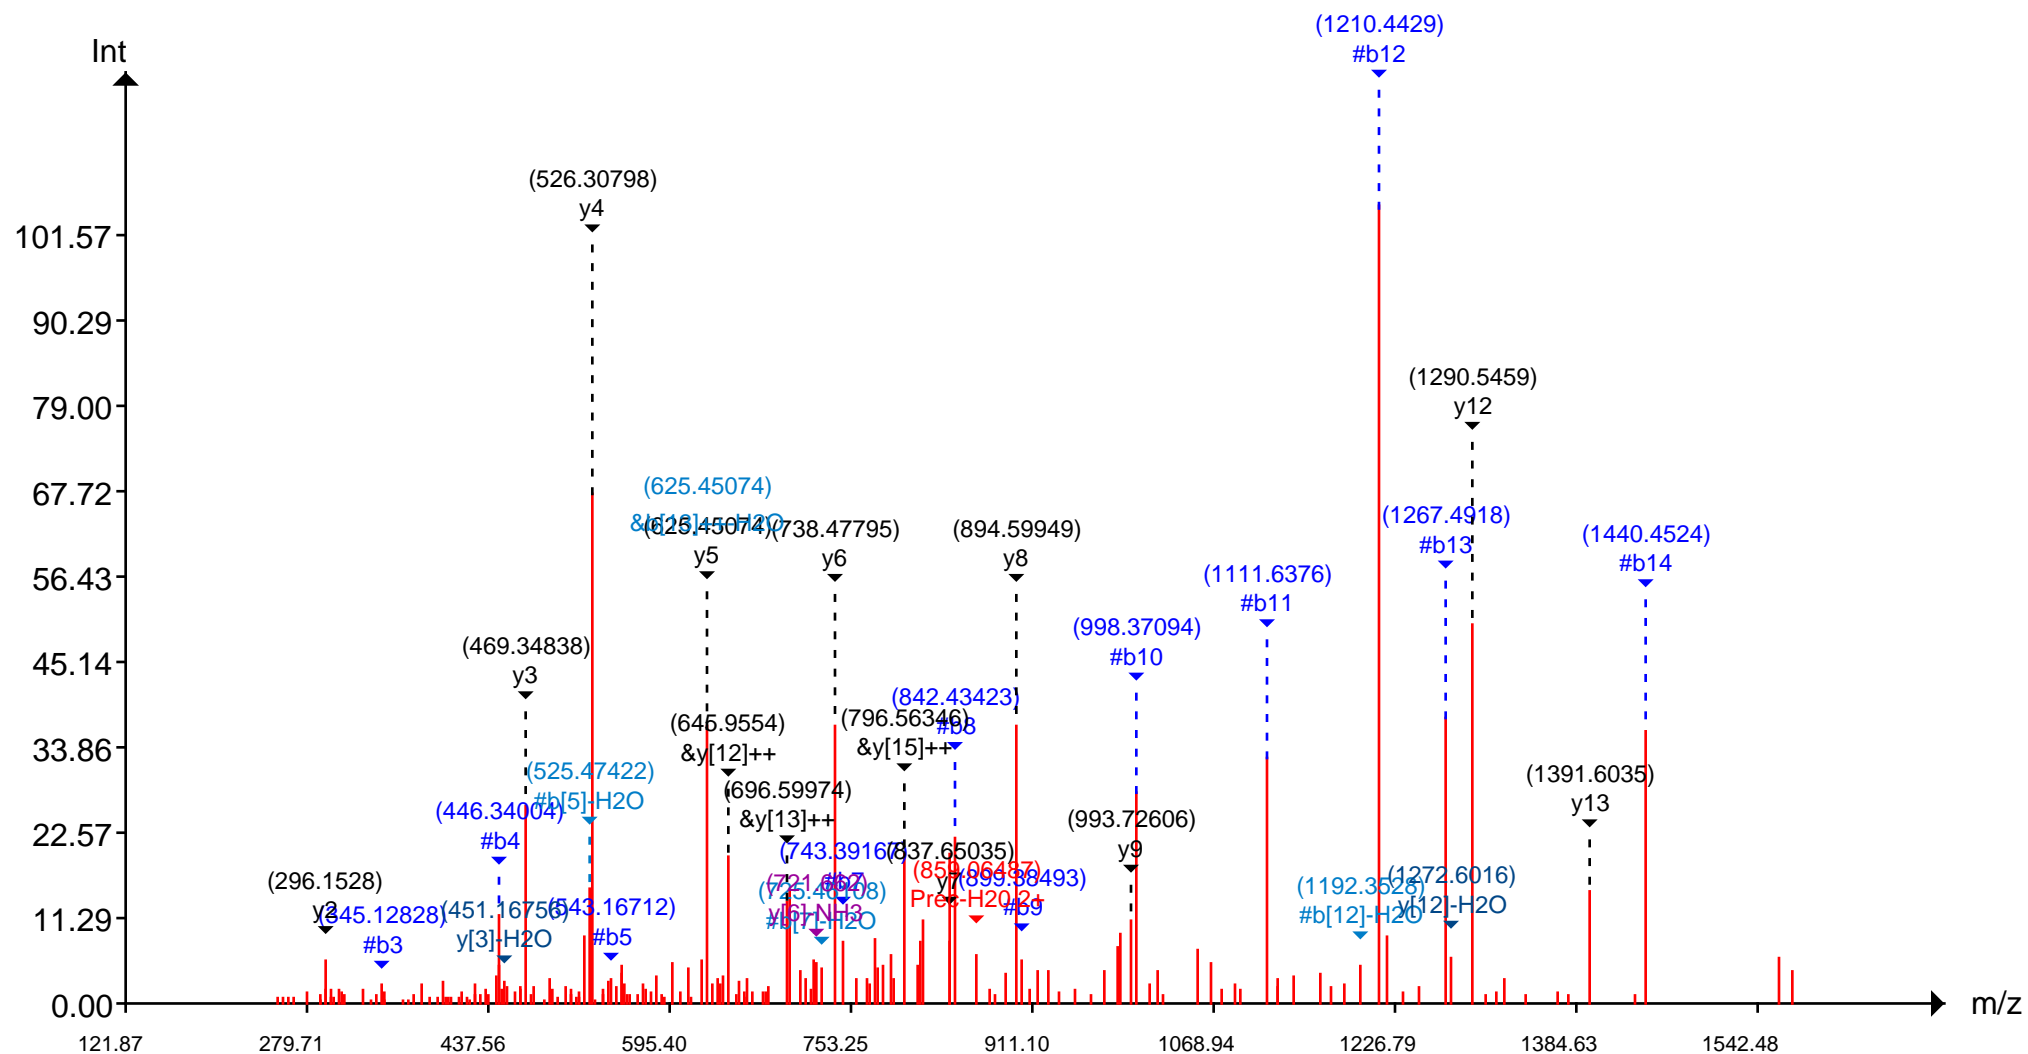

## Info

|                          |                                         |                           |         |
|--------------------------|-----------------------------------------|---------------------------|---------|
| <b>Modified Sequence</b> | AcD3-VSITPAEVGVLVGK<AcD3K*>DR<C13>-COOH | <b>Ion score</b>          | 64.43   |
| <b>Protein</b>           | P62962                                  | <b>Confidence level</b>   | 99.00%  |
| <b>Precursor m/z</b>     | 868.51245                               | <b>Identity Threshold</b> | 43.93   |
| <b>Charge</b>            | 2+                                      | <b>Mass error</b>         | 9.33E-4 |



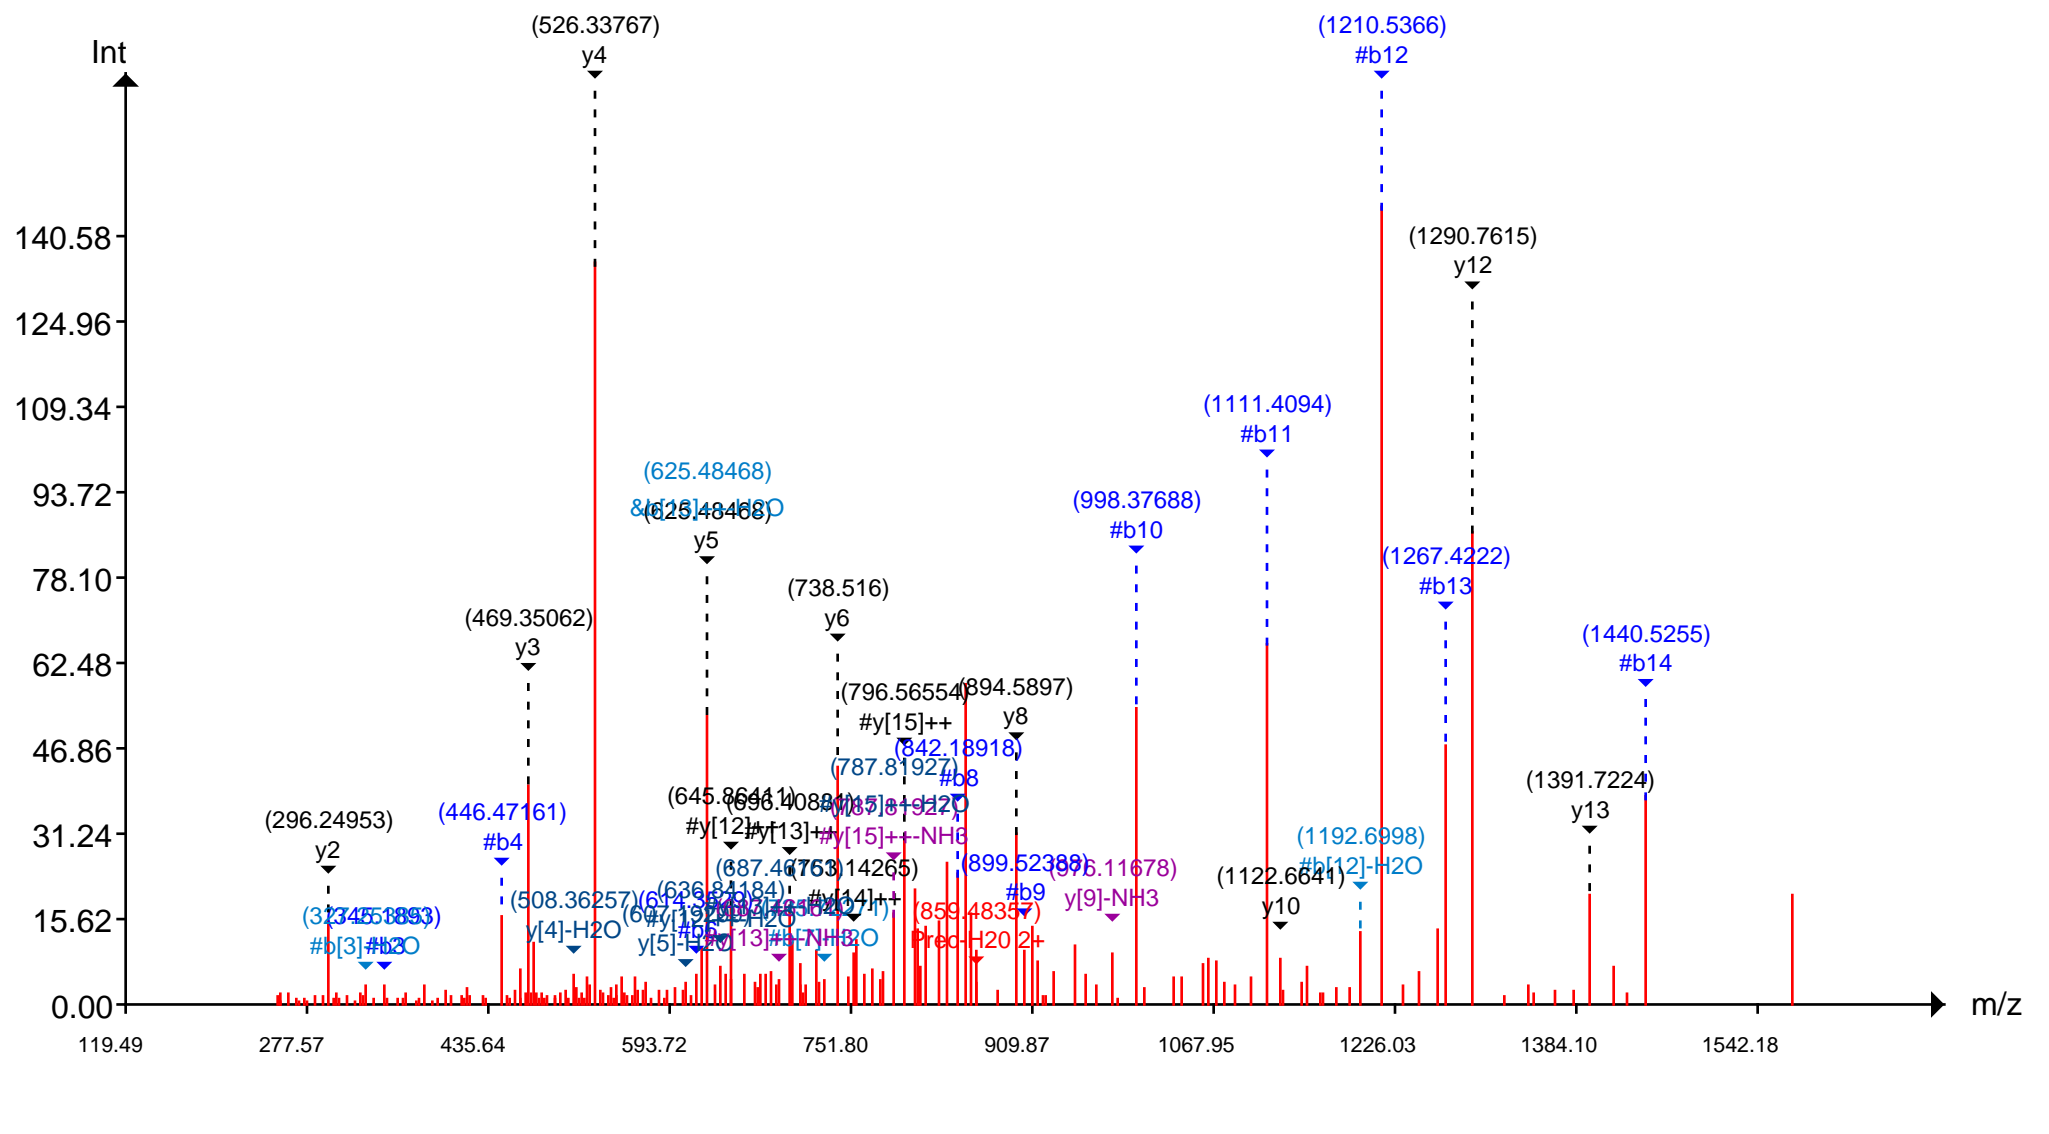

| Info                     |                                         |                           |          |
|--------------------------|-----------------------------------------|---------------------------|----------|
| <b>Modified Sequence</b> | AcD3-VSITPAEVGVLVGK<AcD3K*>DR<C13>-COOH | <b>Ion score</b>          | 81.26    |
| <b>Protein</b>           | P62962                                  | <b>Confidence level</b>   | 99.00%   |
| <b>Precursor m/z</b>     | 868.51261                               | <b>Identity Threshold</b> | 43.89    |
| <b>Charge</b>            | 2+                                      | <b>Mass error</b>         | 0.001253 |

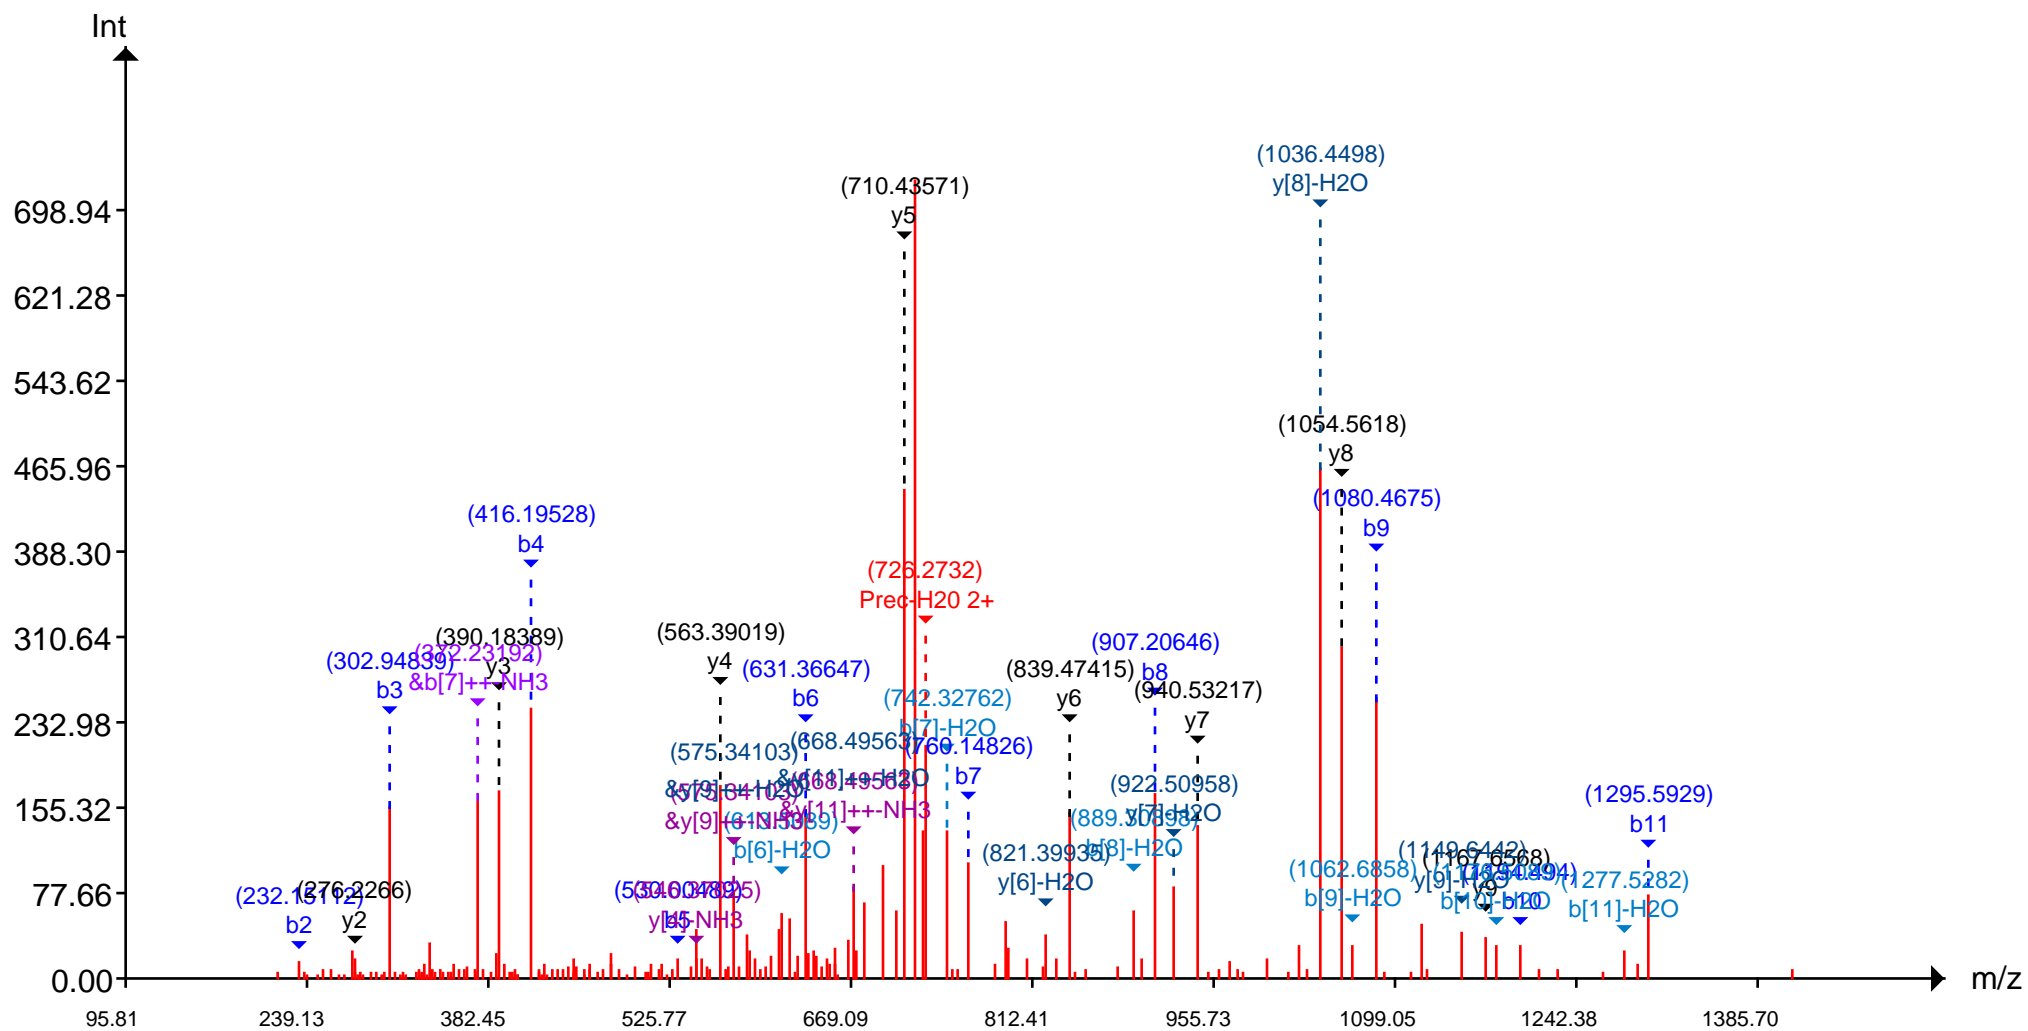

## Info

|                          |                                |                           |          |
|--------------------------|--------------------------------|---------------------------|----------|
| <b>Modified Sequence</b> | AcD3-ADAINTEFK<AcD3K*>NTR-COOH | <b>Ion score</b>          | 59.97    |
| <b>Protein</b>           | P20152                         | <b>Confidence level</b>   | 99.00%   |
| <b>Precursor m/z</b>     | 735.37949                      | <b>Identity Threshold</b> | 47.83    |
| <b>Charge</b>            | 2+                             | <b>Mass error</b>         | 0.001569 |

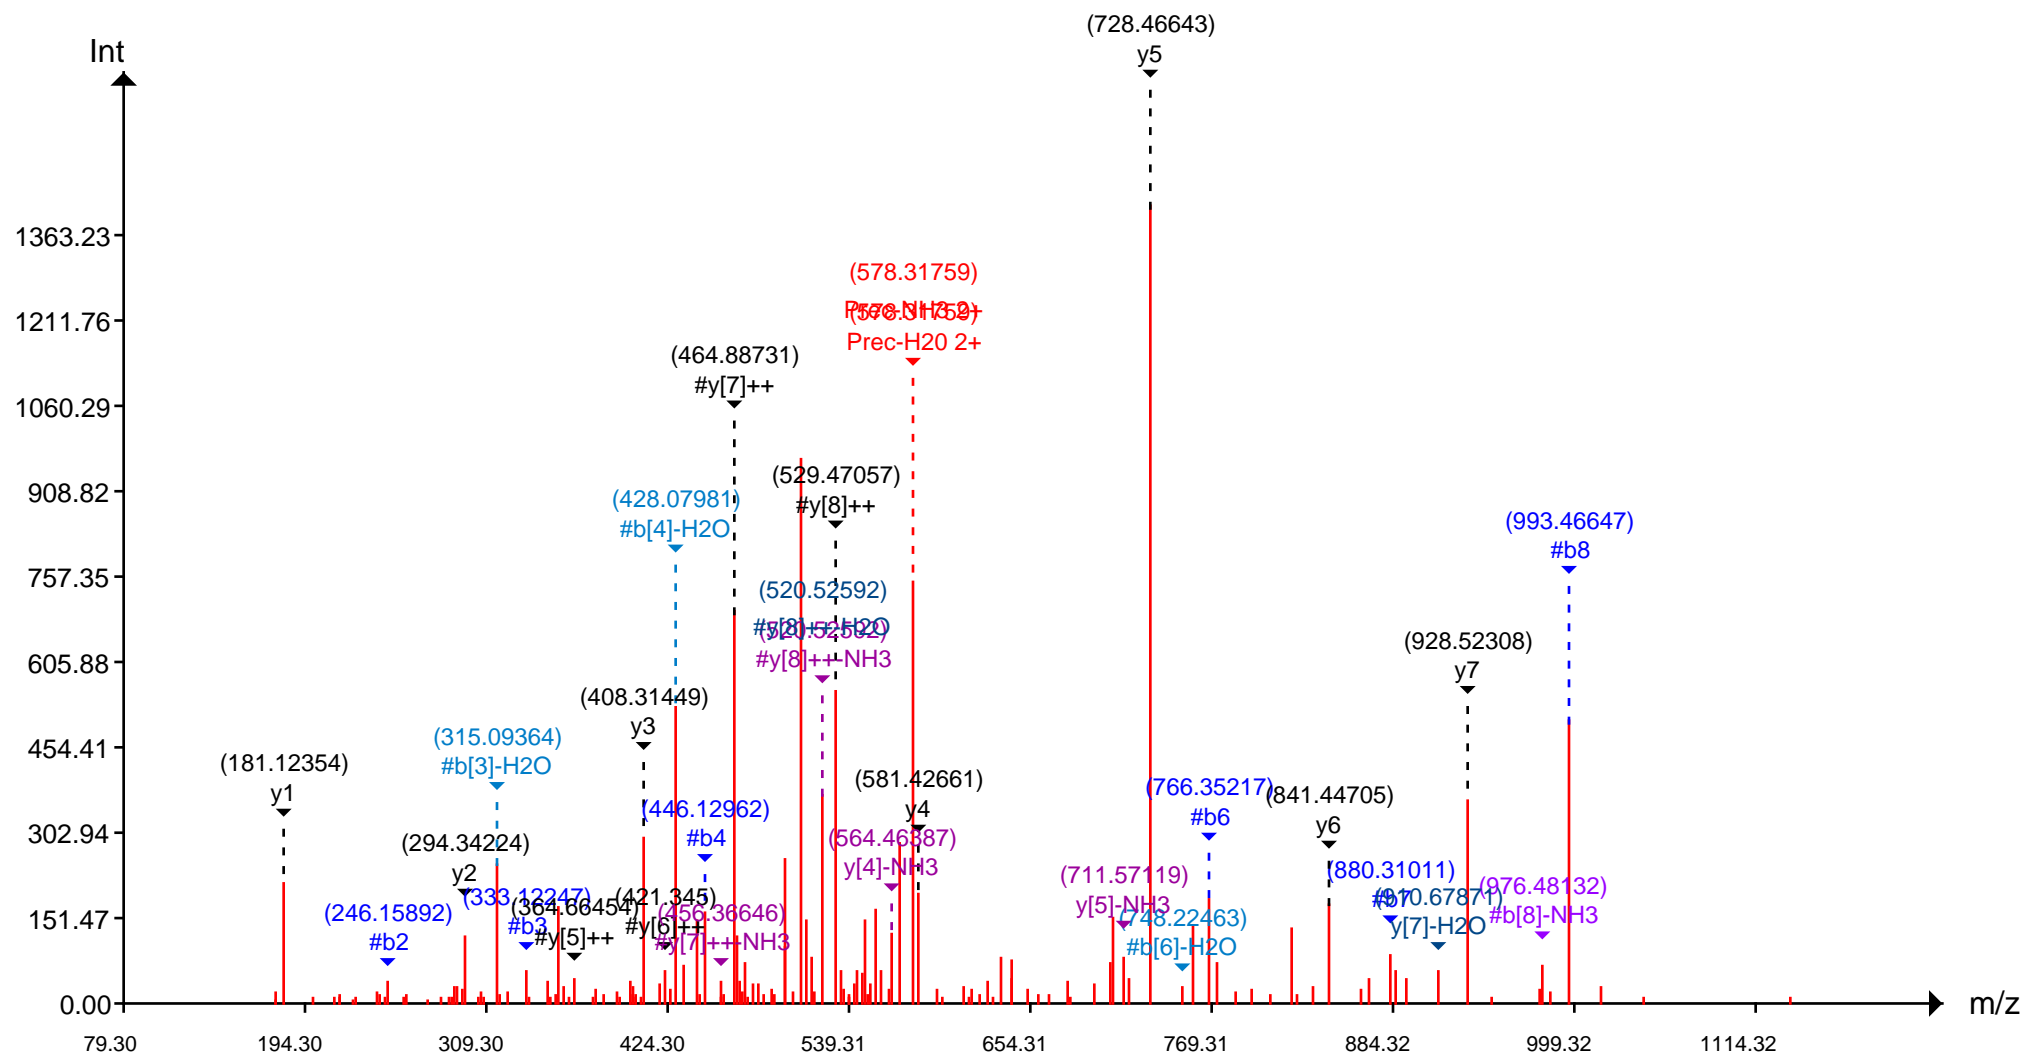

## Info

|                          |                                        |                           |         |
|--------------------------|----------------------------------------|---------------------------|---------|
| <b>Modified Sequence</b> | AcD3-AESIM<Mox*>K<AcD3K*>NLR<C13>-COOH | <b>Ion score</b>          | 49.36   |
| <b>Protein</b>           | P06151                                 | <b>Confidence level</b>   | 99.00%  |
| <b>Precursor m/z</b>     | 587.32935                              | <b>Identity Threshold</b> | 47.59   |
| <b>Charge</b>            | 2+                                     | <b>Mass error</b>         | 4.25E-4 |

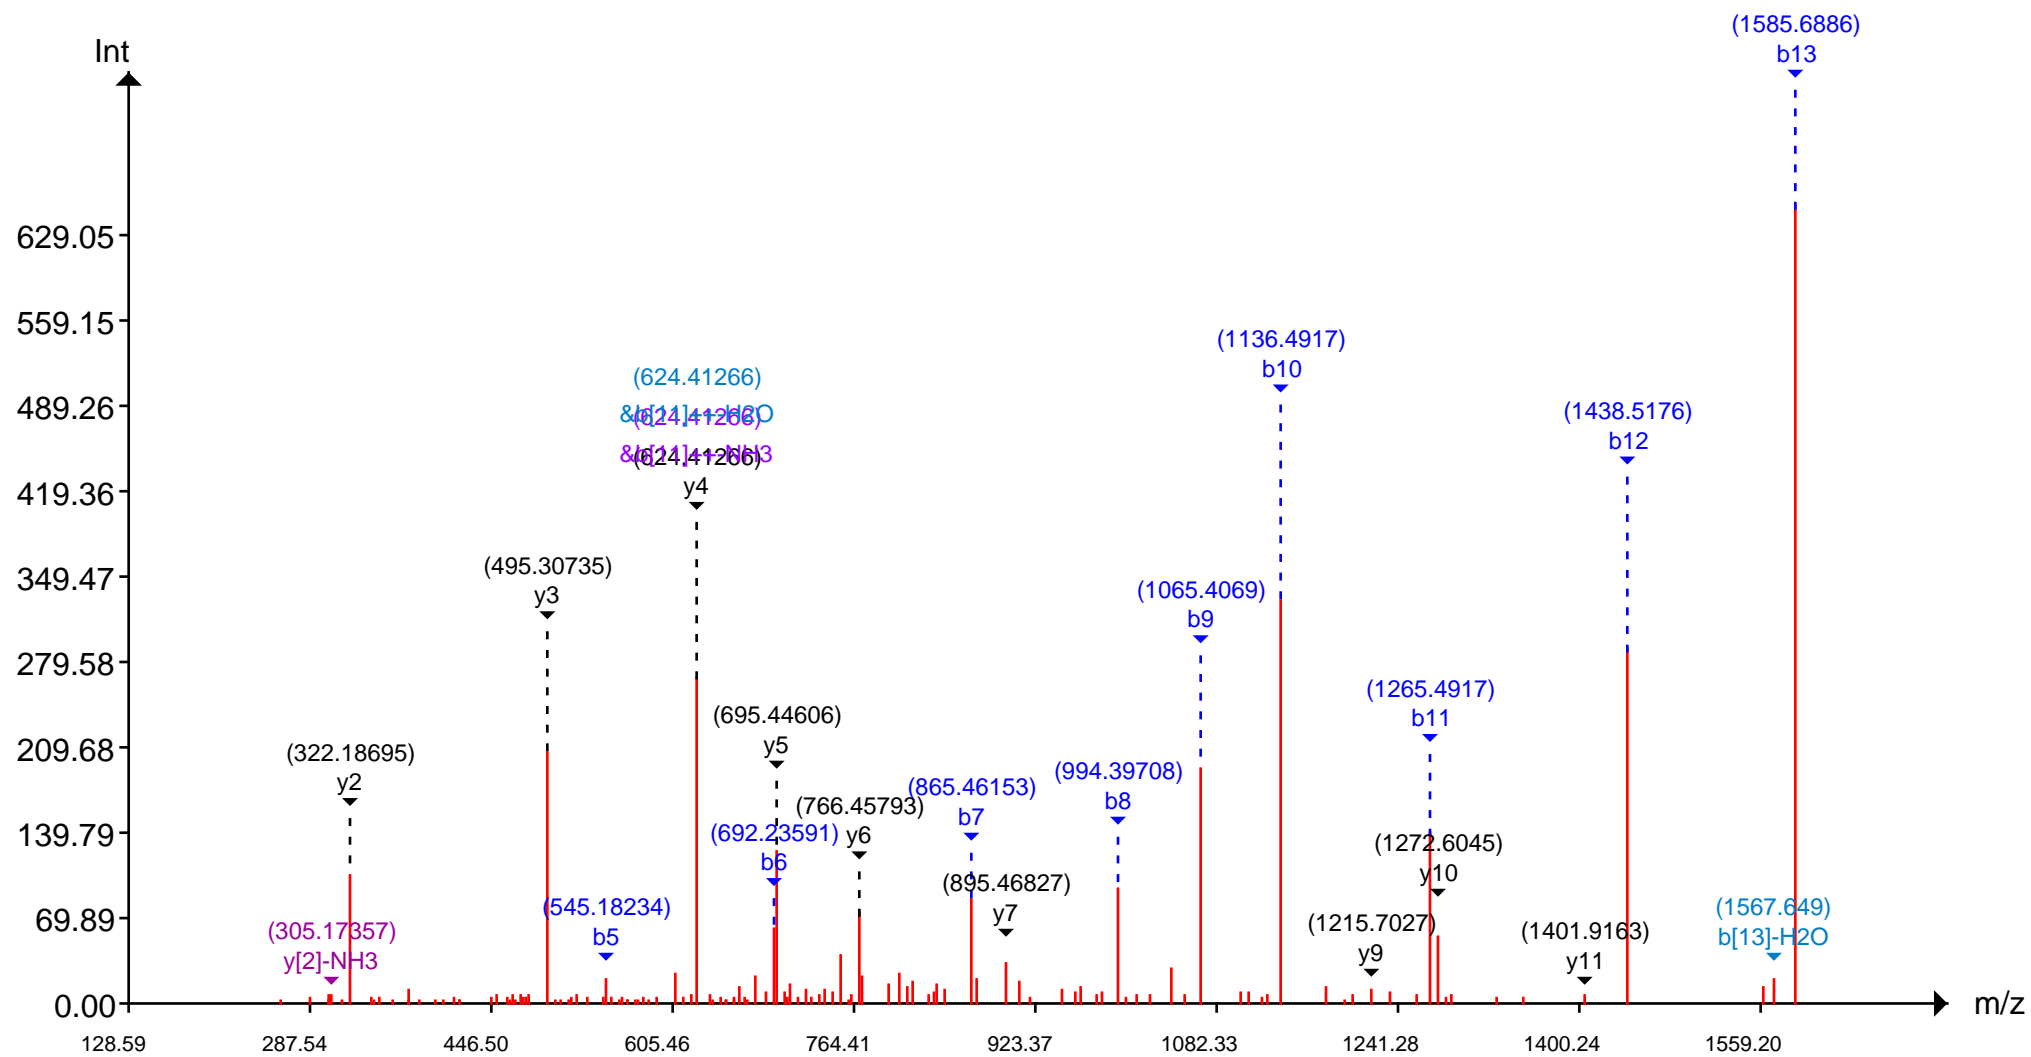

## Info

**Modified Sequence** AcD3-LVTEGFK<AcD3K\*>EAAEK<AcD3K\*>FR-COOH

**Ion score** 88.04

**Protein** Q9D7M1

**Confidence level** 99.00%

**Precursor m/z** 880.48399

**Identity Threshold** 47.47

**Charge** 2+

**Mass error** 0.003202

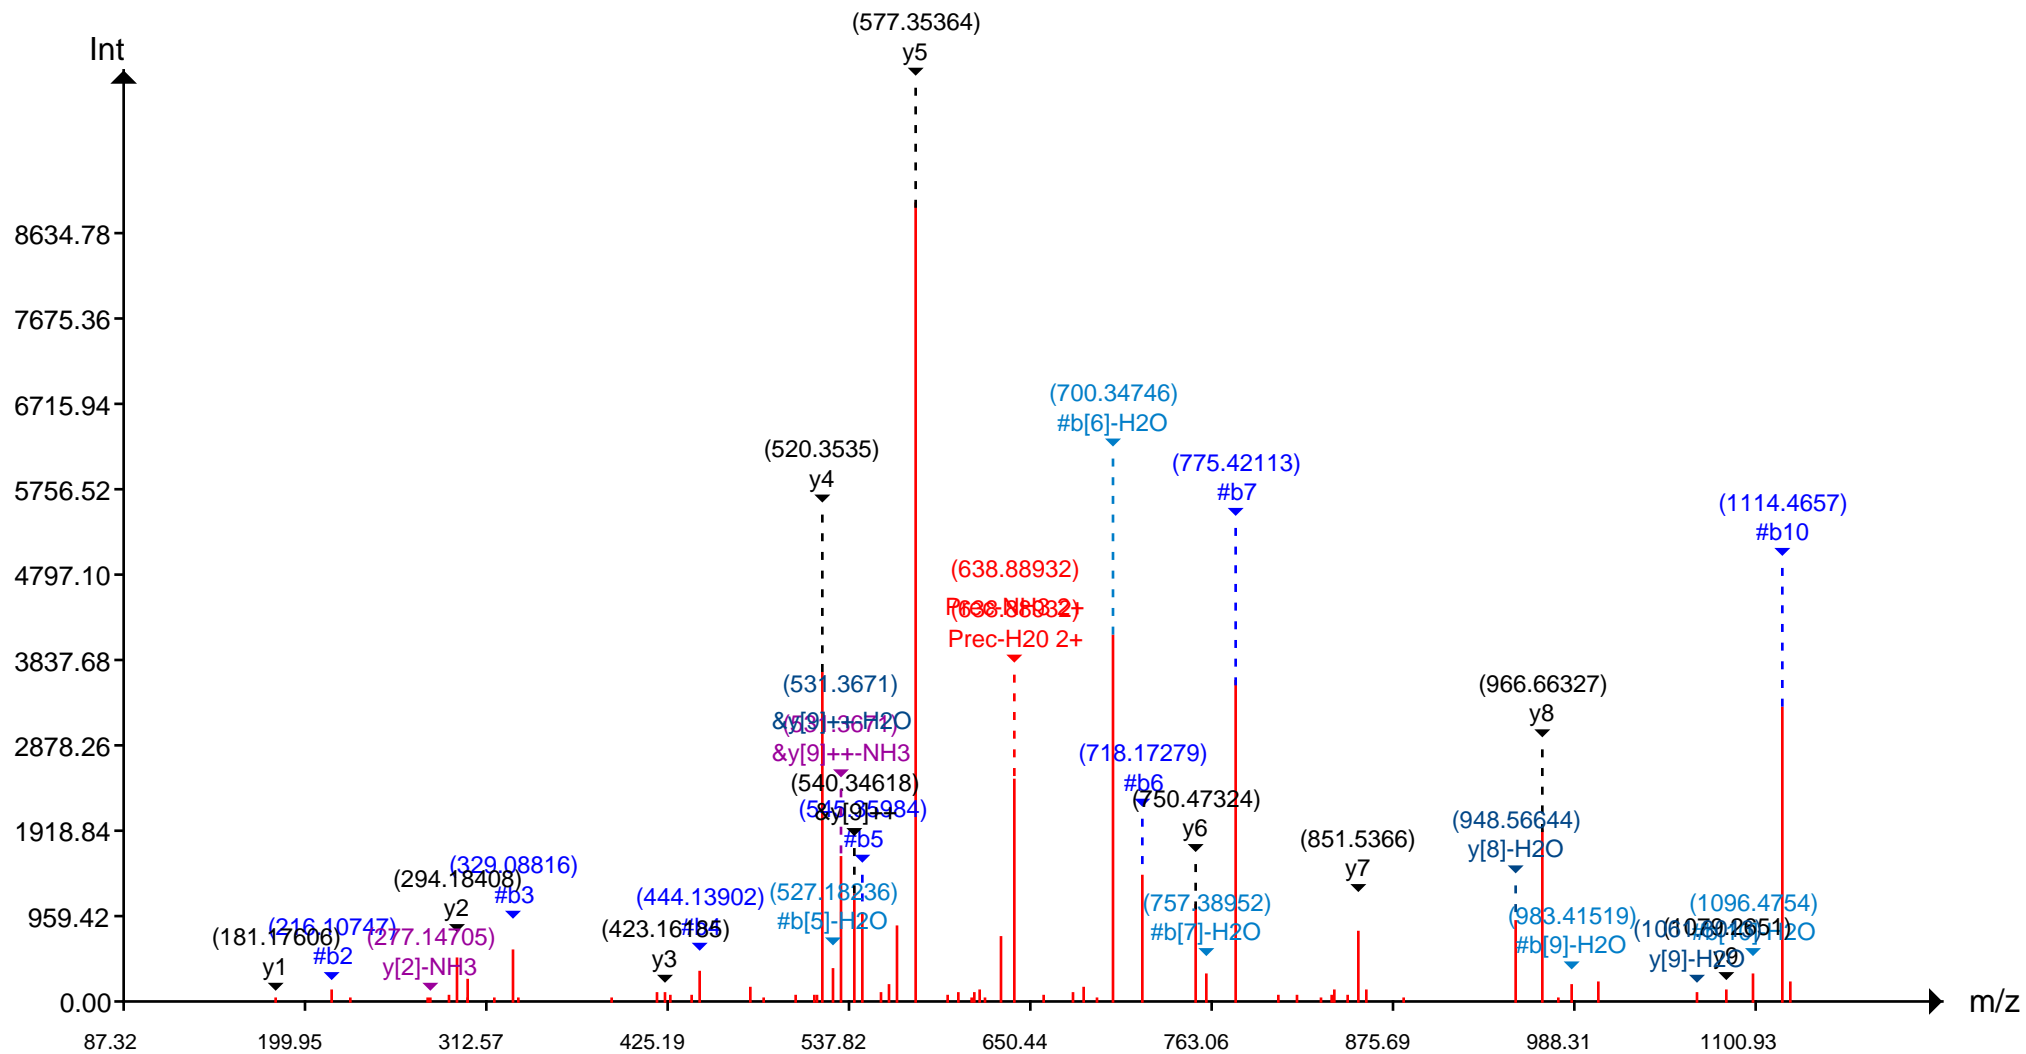

## Info

|                          |                                    |                           |          |
|--------------------------|------------------------------------|---------------------------|----------|
| <b>Modified Sequence</b> | AcD3-VALDTK<AcD3K*>GPEIR<C13>-COOH | <b>Ion score</b>          | 71.32    |
| <b>Protein</b>           | P52480                             | <b>Confidence level</b>   | 99.00%   |
| <b>Precursor m/z</b>     | 647.88252                          | <b>Identity Threshold</b> | 45.38    |
| <b>Charge</b>            | 2+                                 | <b>Mass error</b>         | -1.68E-4 |

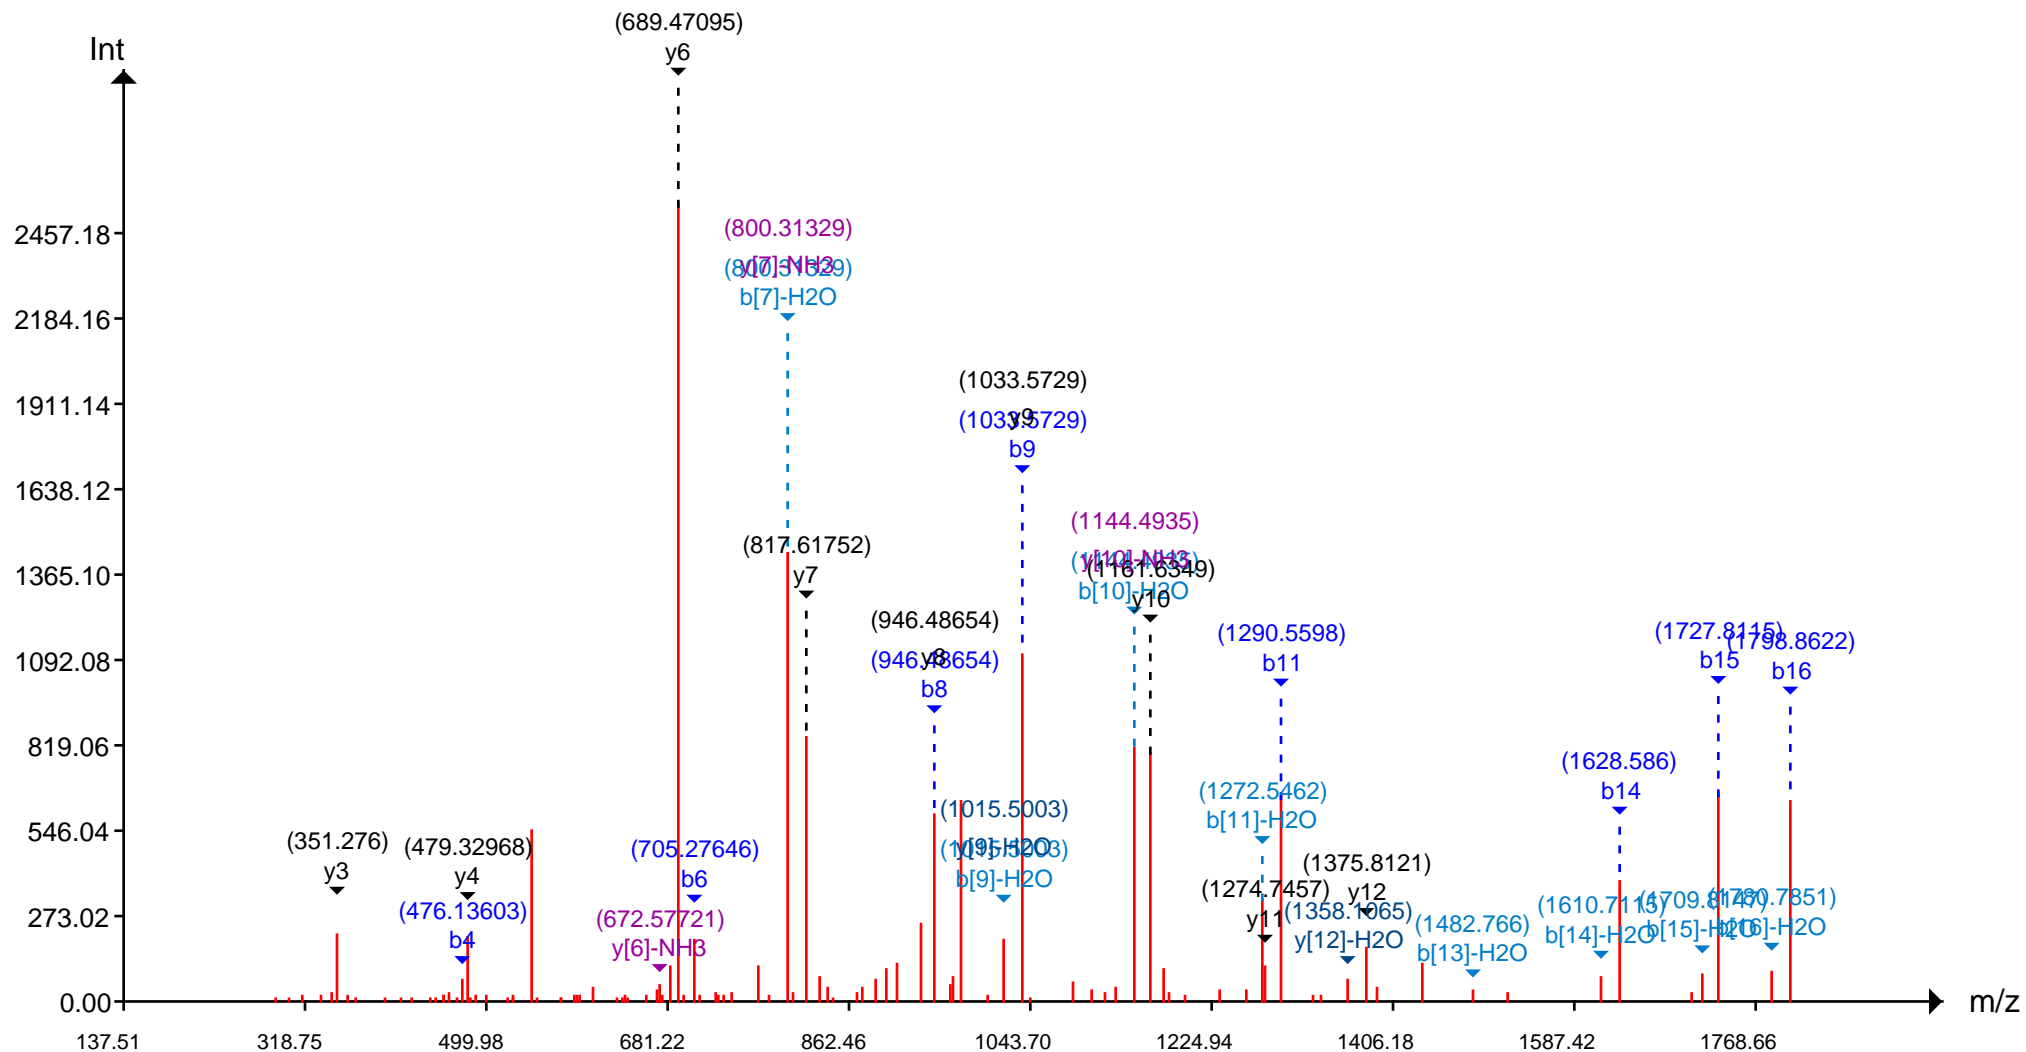

## Info

|                          |                                          |                           |         |
|--------------------------|------------------------------------------|---------------------------|---------|
| <b>Modified Sequence</b> | AcD3-AADK<AcD3K*>QTLQSEQPLQVAR<C13>-COOH | <b>Ion score</b>          | 83.62   |
| <b>Protein</b>           | P46471                                   | <b>Confidence level</b>   | 99.00%  |
| <b>Precursor m/z</b>     | 990.04329                                | <b>Identity Threshold</b> | 47.18   |
| <b>Charge</b>            | 2+                                       | <b>Mass error</b>         | 0.00228 |

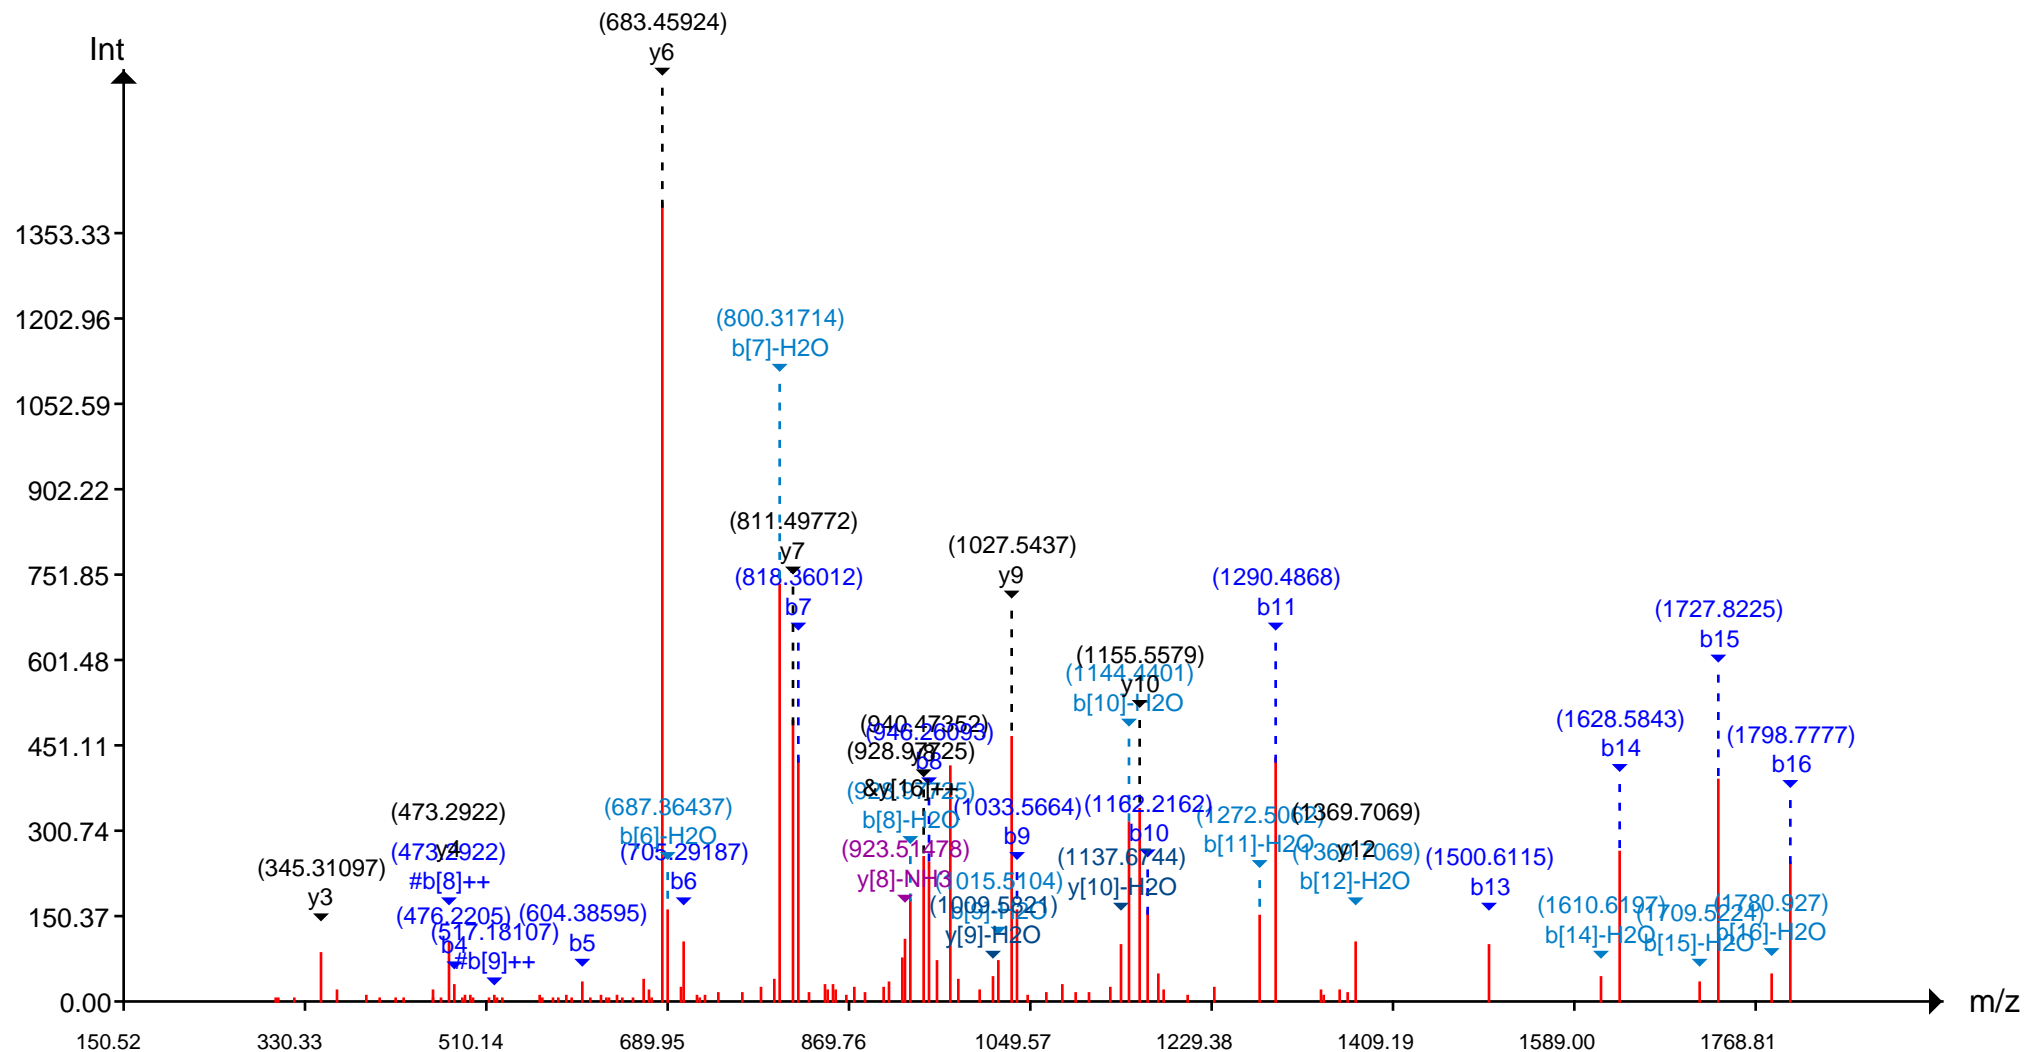

## Info

|                          |                                     |                           |          |
|--------------------------|-------------------------------------|---------------------------|----------|
| <b>Modified Sequence</b> | AcD3-AADK<AcD3K*>QTLQSEQPLQVAR-COOH | <b>Ion score</b>          | 93.5     |
| <b>Protein</b>           | P46471                              | <b>Confidence level</b>   | 99.00%   |
| <b>Precursor m/z</b>     | 987.03361                           | <b>Identity Threshold</b> | 47.61    |
| <b>Charge</b>            | 2+                                  | <b>Mass error</b>         | 0.003062 |

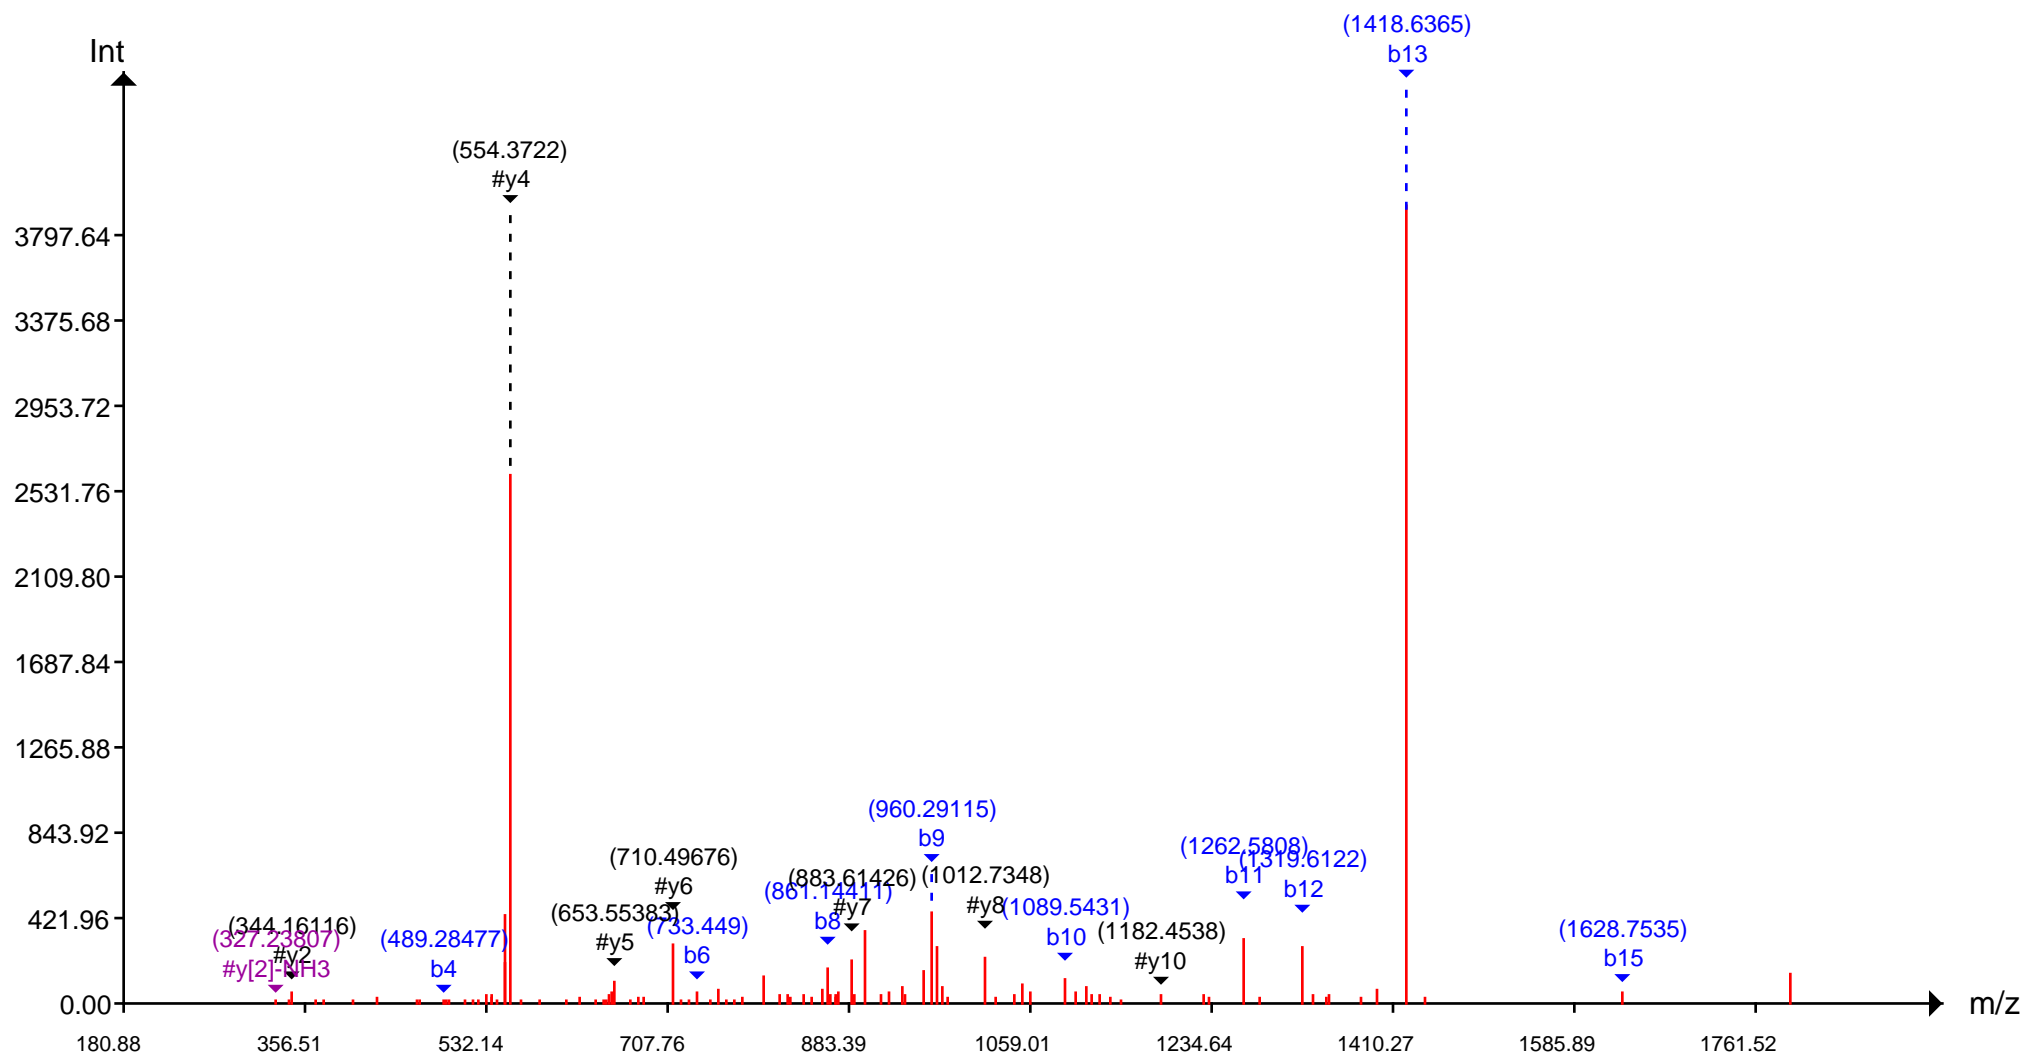

## Info

|                          |                                                        |                           |          |
|--------------------------|--------------------------------------------------------|---------------------------|----------|
| <b>Modified Sequence</b> | AcD3-LAVC<Cmm*>K<AcD3K*>AGAVEK<AcD3K*>GVPLYR<C13>-COOH | <b>Ion score</b>          | 48.76    |
| <b>Protein</b>           | P17182                                                 | <b>Confidence level</b>   | 99.00%   |
| <b>Precursor m/z</b>     | 986.57188                                              | <b>Identity Threshold</b> | 44.33    |
| <b>Charge</b>            | 2+                                                     | <b>Mass error</b>         | 0.002316 |



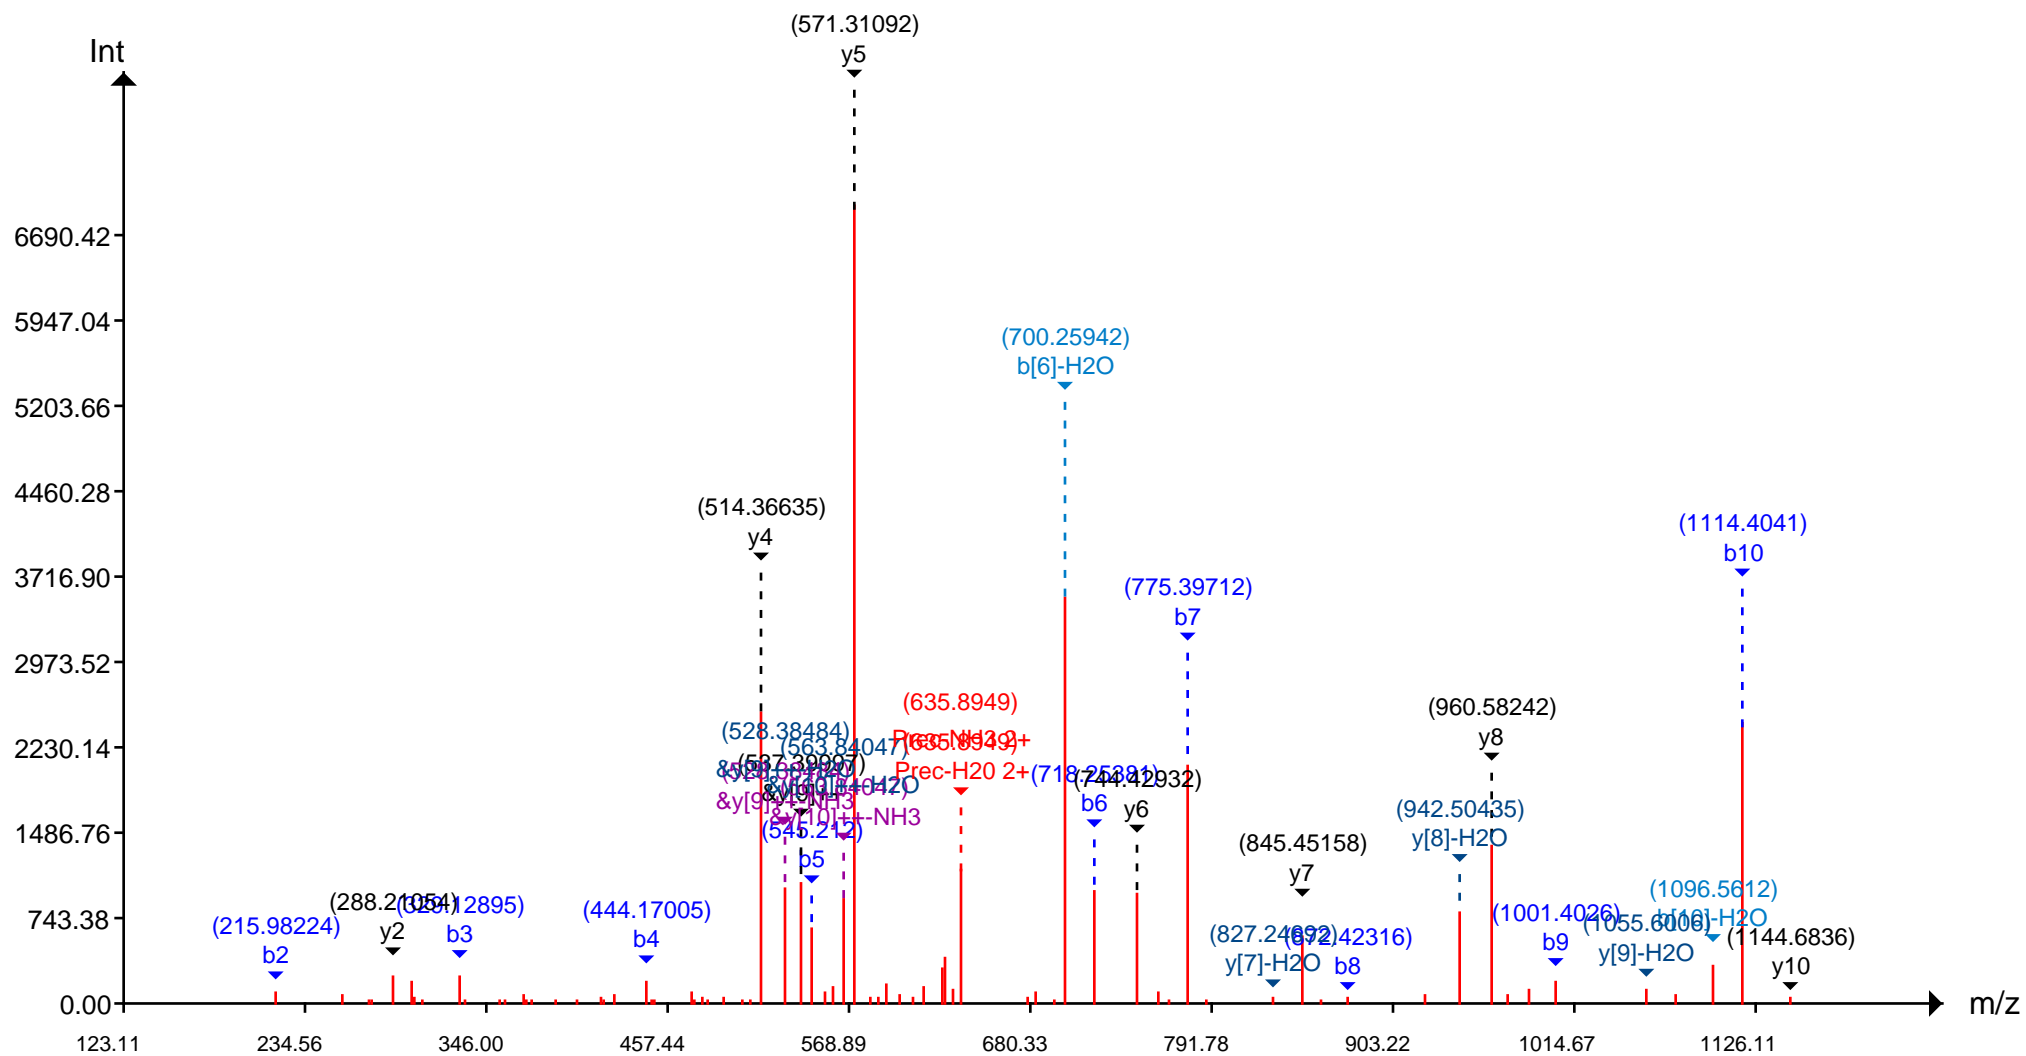

## Info

|                          |                               |                           |         |
|--------------------------|-------------------------------|---------------------------|---------|
| <b>Modified Sequence</b> | AcD3-VALDTK<AcD3K*>GPEIR-COOH | <b>Ion score</b>          | 79.22   |
| <b>Protein</b>           | P52480                        | <b>Confidence level</b>   | 99.00%  |
| <b>Precursor m/z</b>     | 644.87292                     | <b>Identity Threshold</b> | 46.67   |
| <b>Charge</b>            | 2+                            | <b>Mass error</b>         | 7.73E-4 |

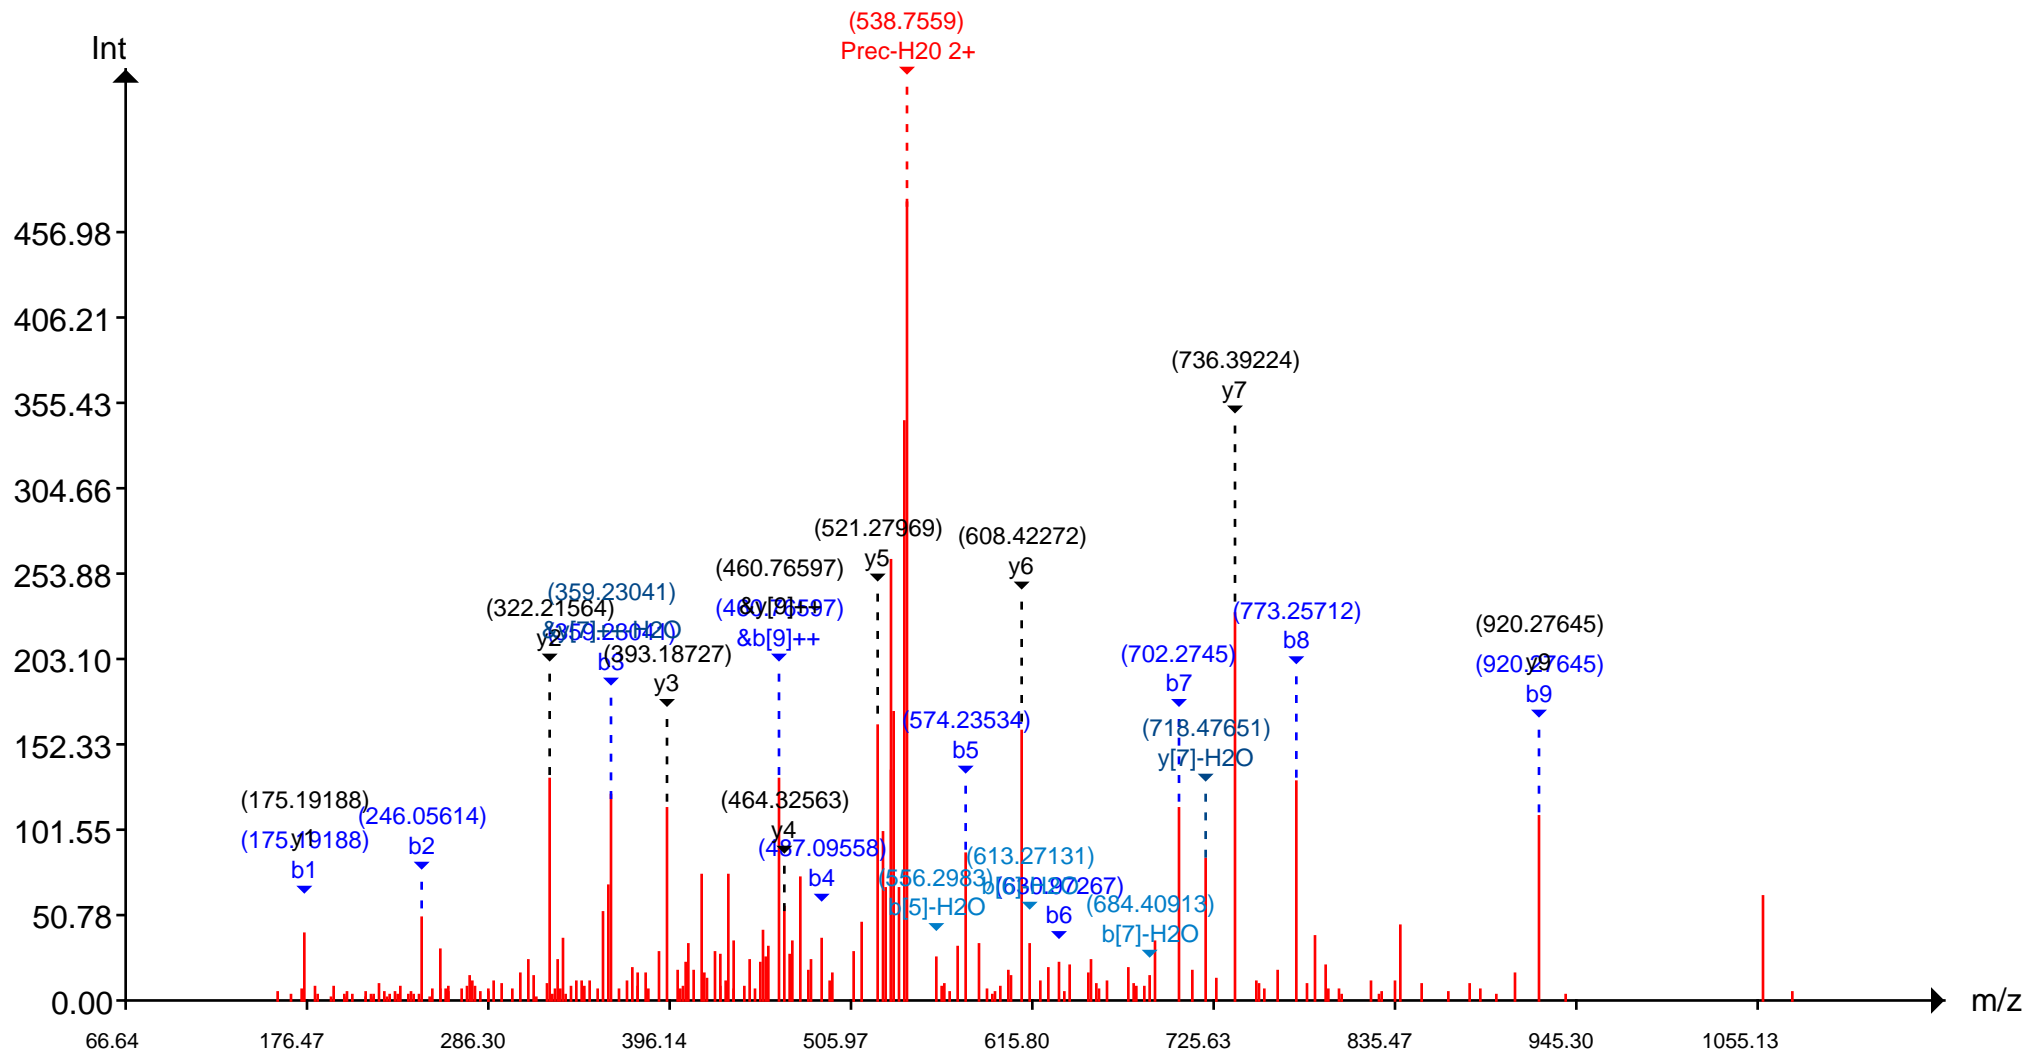

## Info

**Modified Sequence** AcD3-EALQSGAAFR-COOH

**Ion score** 53.98

**Protein** O08808, O70566, Q9Z207

**Confidence level** 99.00%

**Precursor m/z** 547.78694

**Identity Threshold** 47.73

**Charge** 2+

**Mass error** -1.97E-4

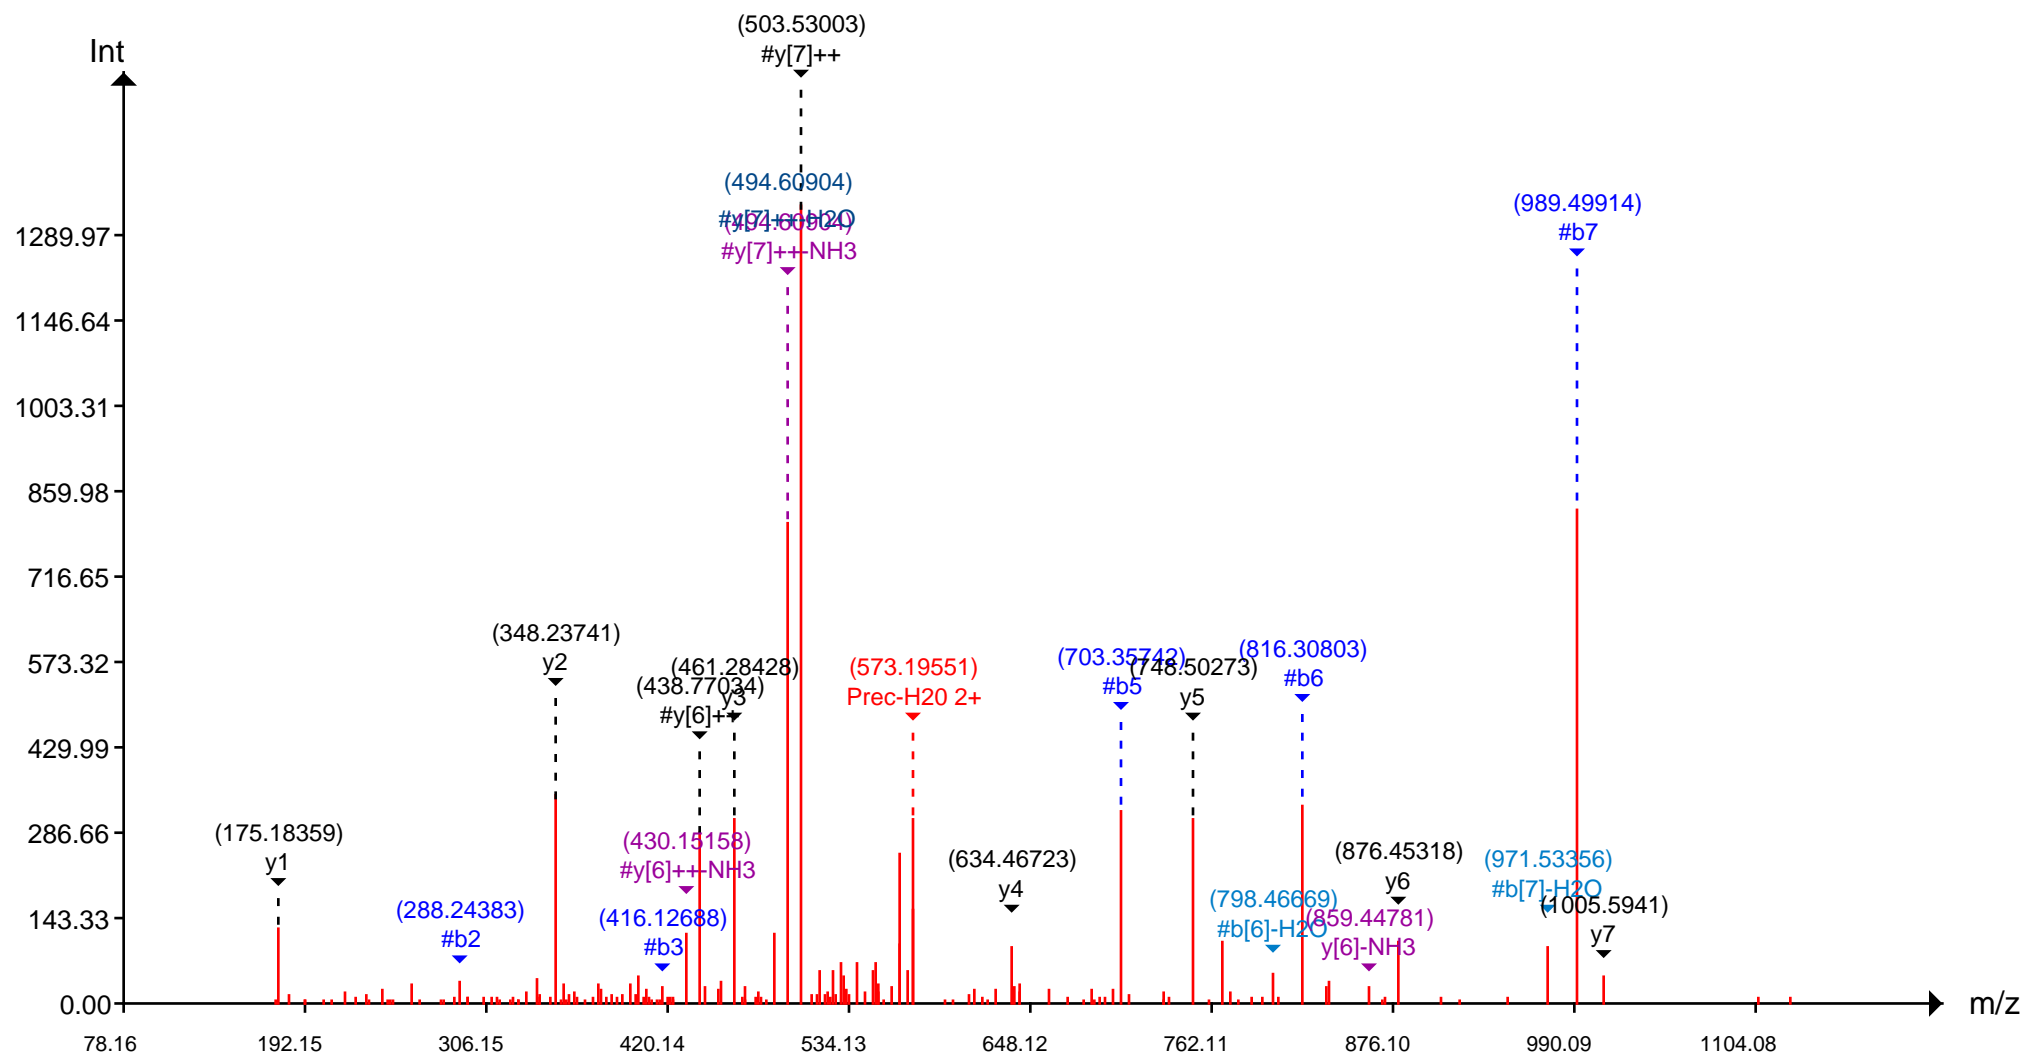

## Info

**Modified Sequence** AcD3-IEQNK<AcD3K\*>LK<AcD3K\*>R-COOH

**Ion score** 58.95

**Protein** Q8K2Q9

**Confidence level** 99.00%

**Precursor m/z** 582.35854

**Identity Threshold** 43.63

**Charge** 2+

**Mass error** 5.47E-4

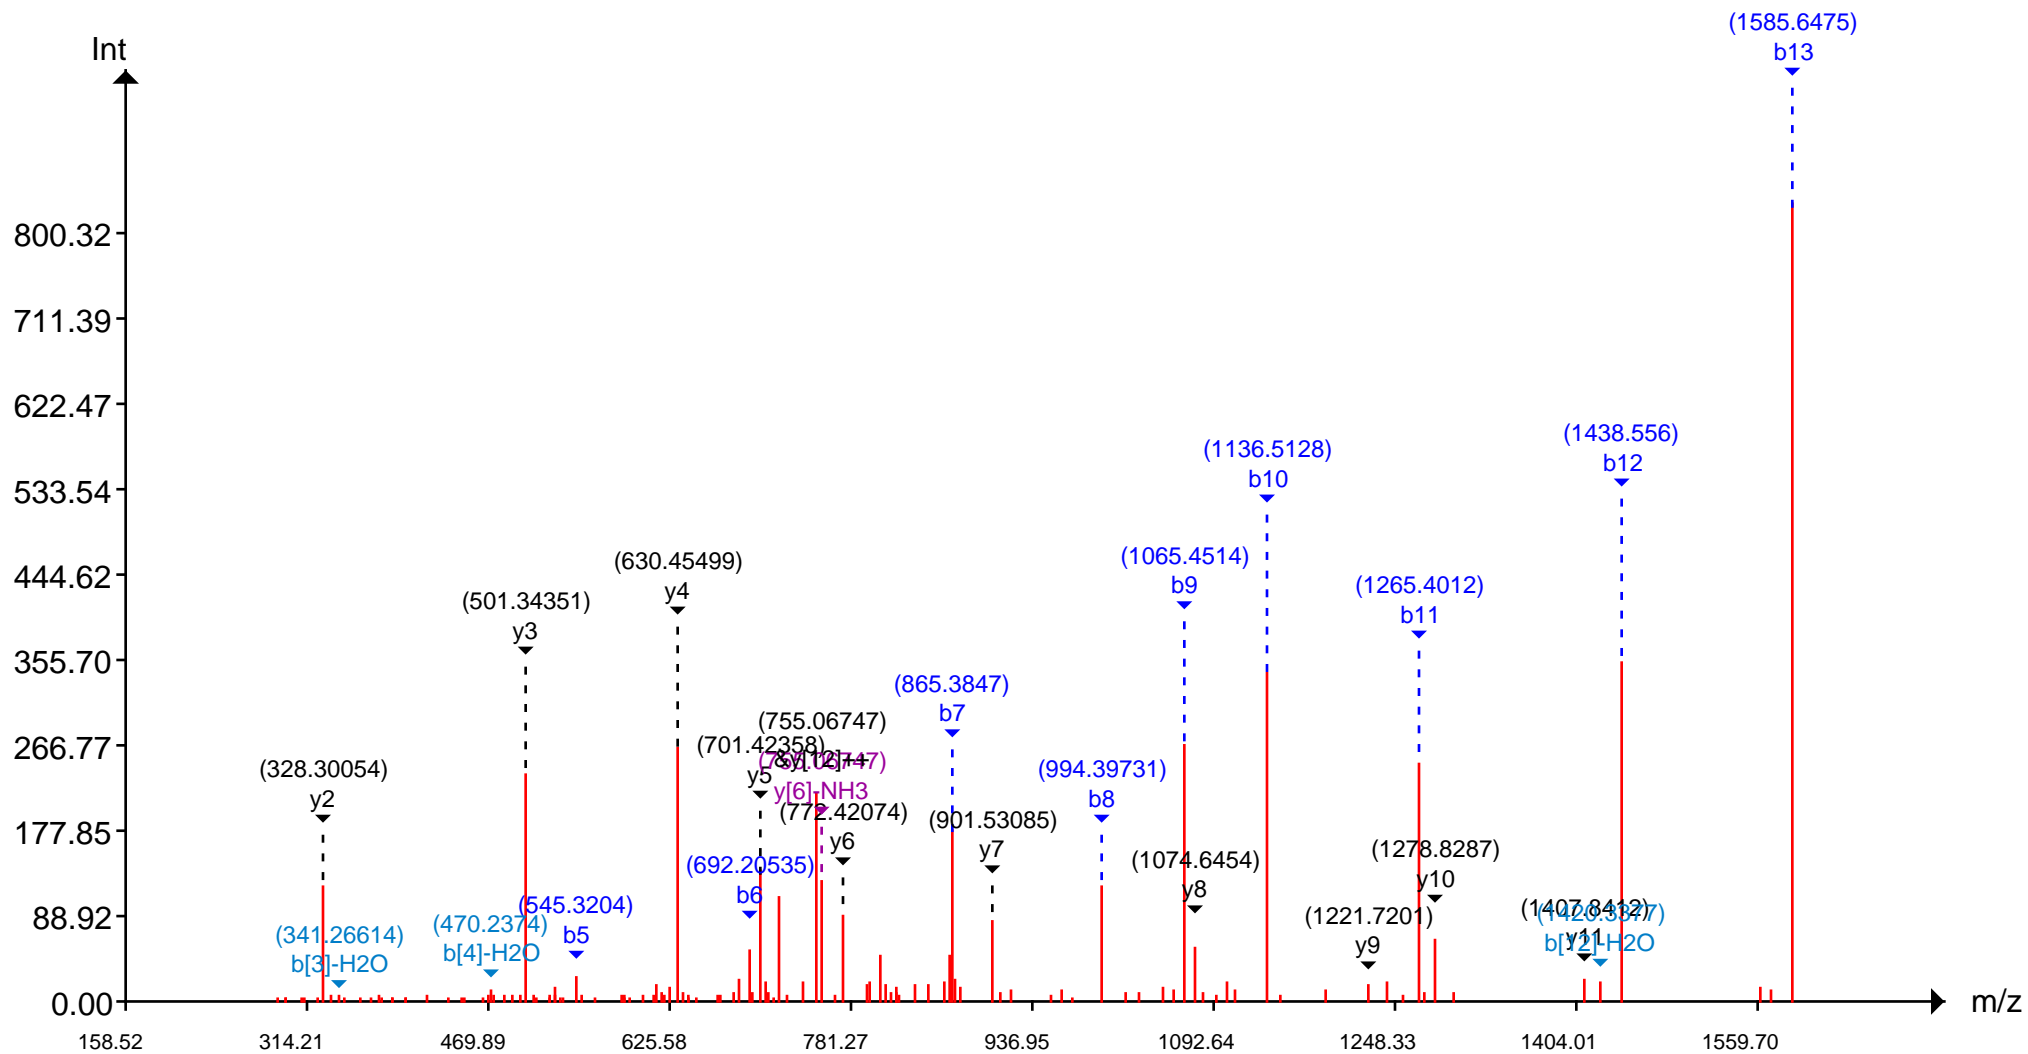

## Info

|                          |                                               |                           |          |
|--------------------------|-----------------------------------------------|---------------------------|----------|
| <b>Modified Sequence</b> | AcD3-LVTEGFK<AcD3K*>EAAEK<AcD3K*>FR<C13>-COOH | <b>Ion score</b>          | 65.79    |
| <b>Protein</b>           | Q9D7M1                                        | <b>Confidence level</b>   | 99.00%   |
| <b>Precursor m/z</b>     | 883.49387                                     | <b>Identity Threshold</b> | 46.90    |
| <b>Charge</b>            | 2+                                            | <b>Mass error</b>         | 0.002821 |

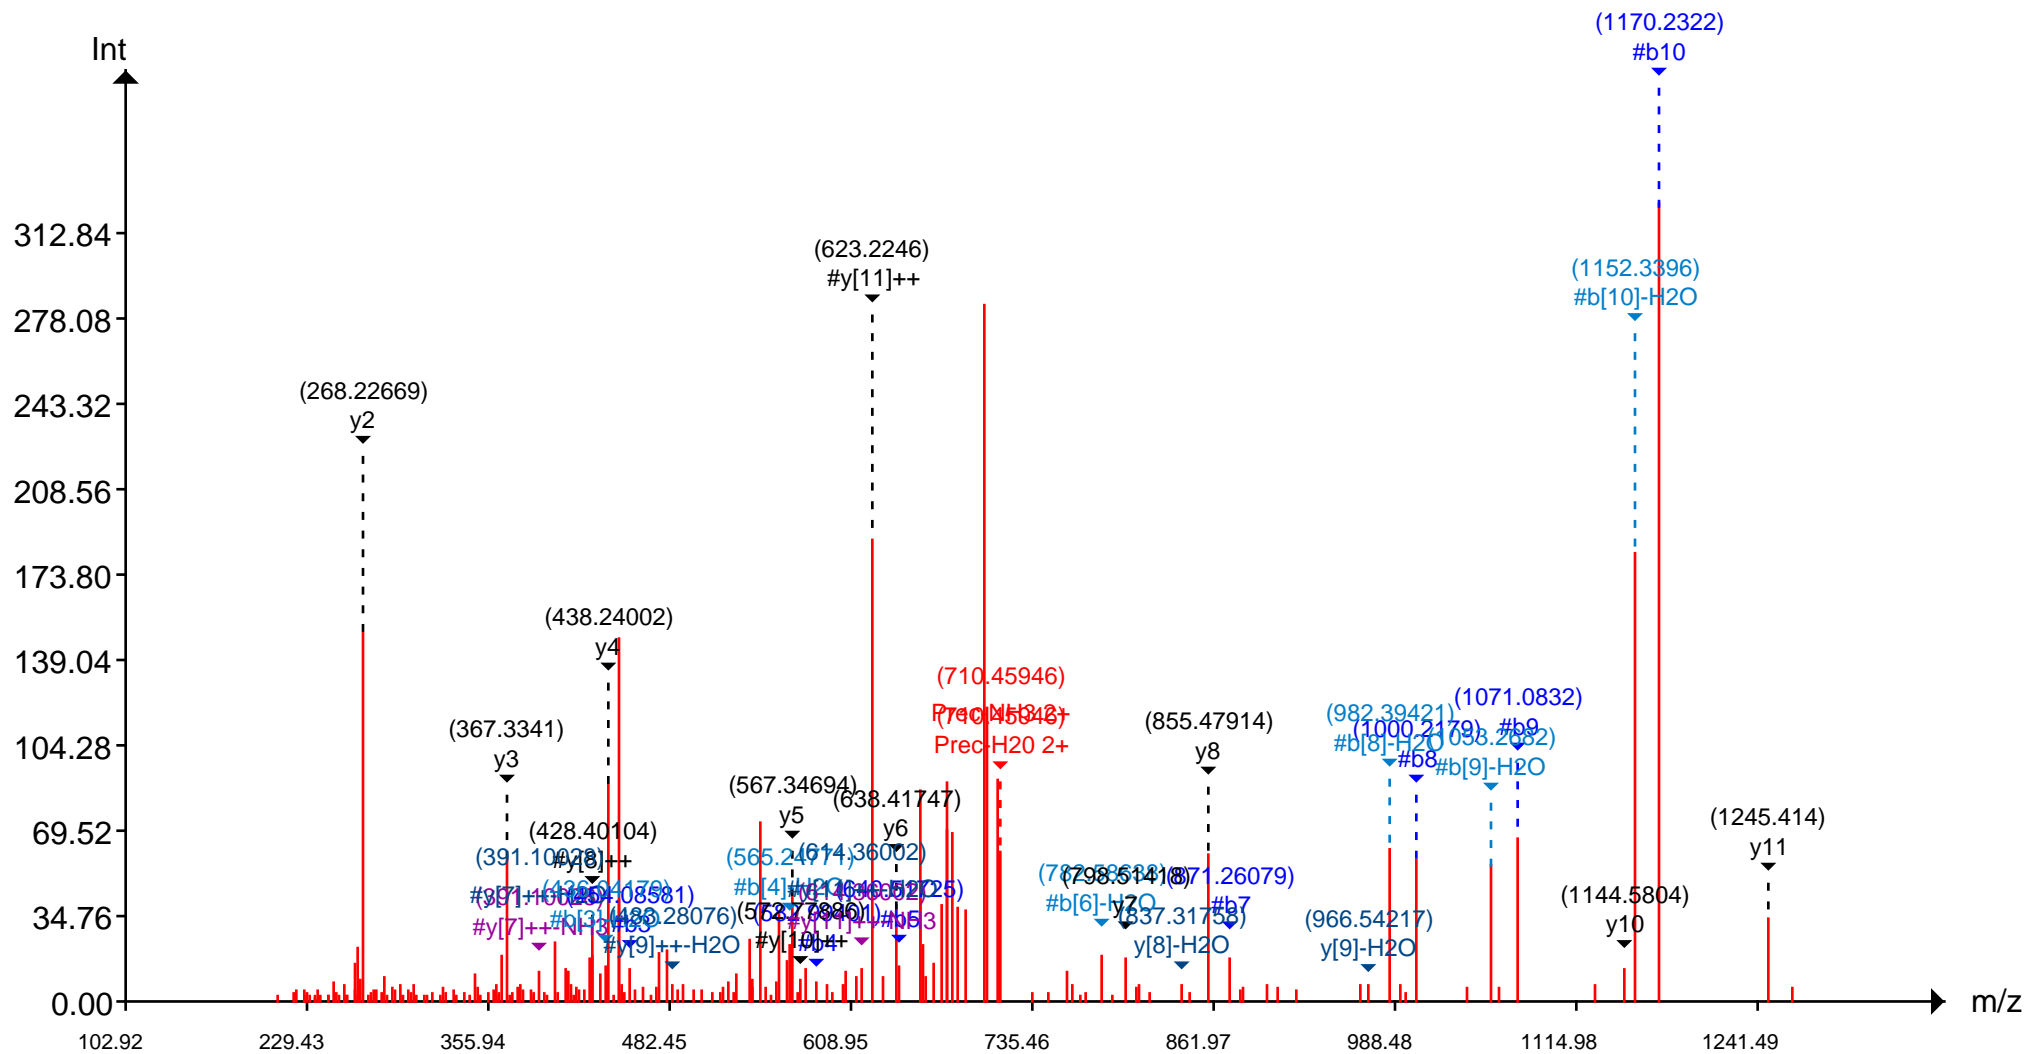

## Info

|                          |                                               |                           |         |
|--------------------------|-----------------------------------------------|---------------------------|---------|
| <b>Modified Sequence</b> | AcD3-M<Mox*>TC<Cmm*>EGC<Cmm*>AEAVSR<C13>-COOH | <b>Ion score</b>          | 44.74   |
| <b>Protein</b>           | O08997                                        | <b>Confidence level</b>   | 99.00%  |
| <b>Precursor m/z</b>     | 719.30093                                     | <b>Identity Threshold</b> | 39.98   |
| <b>Charge</b>            | 2+                                            | <b>Mass error</b>         | 4.09E-4 |

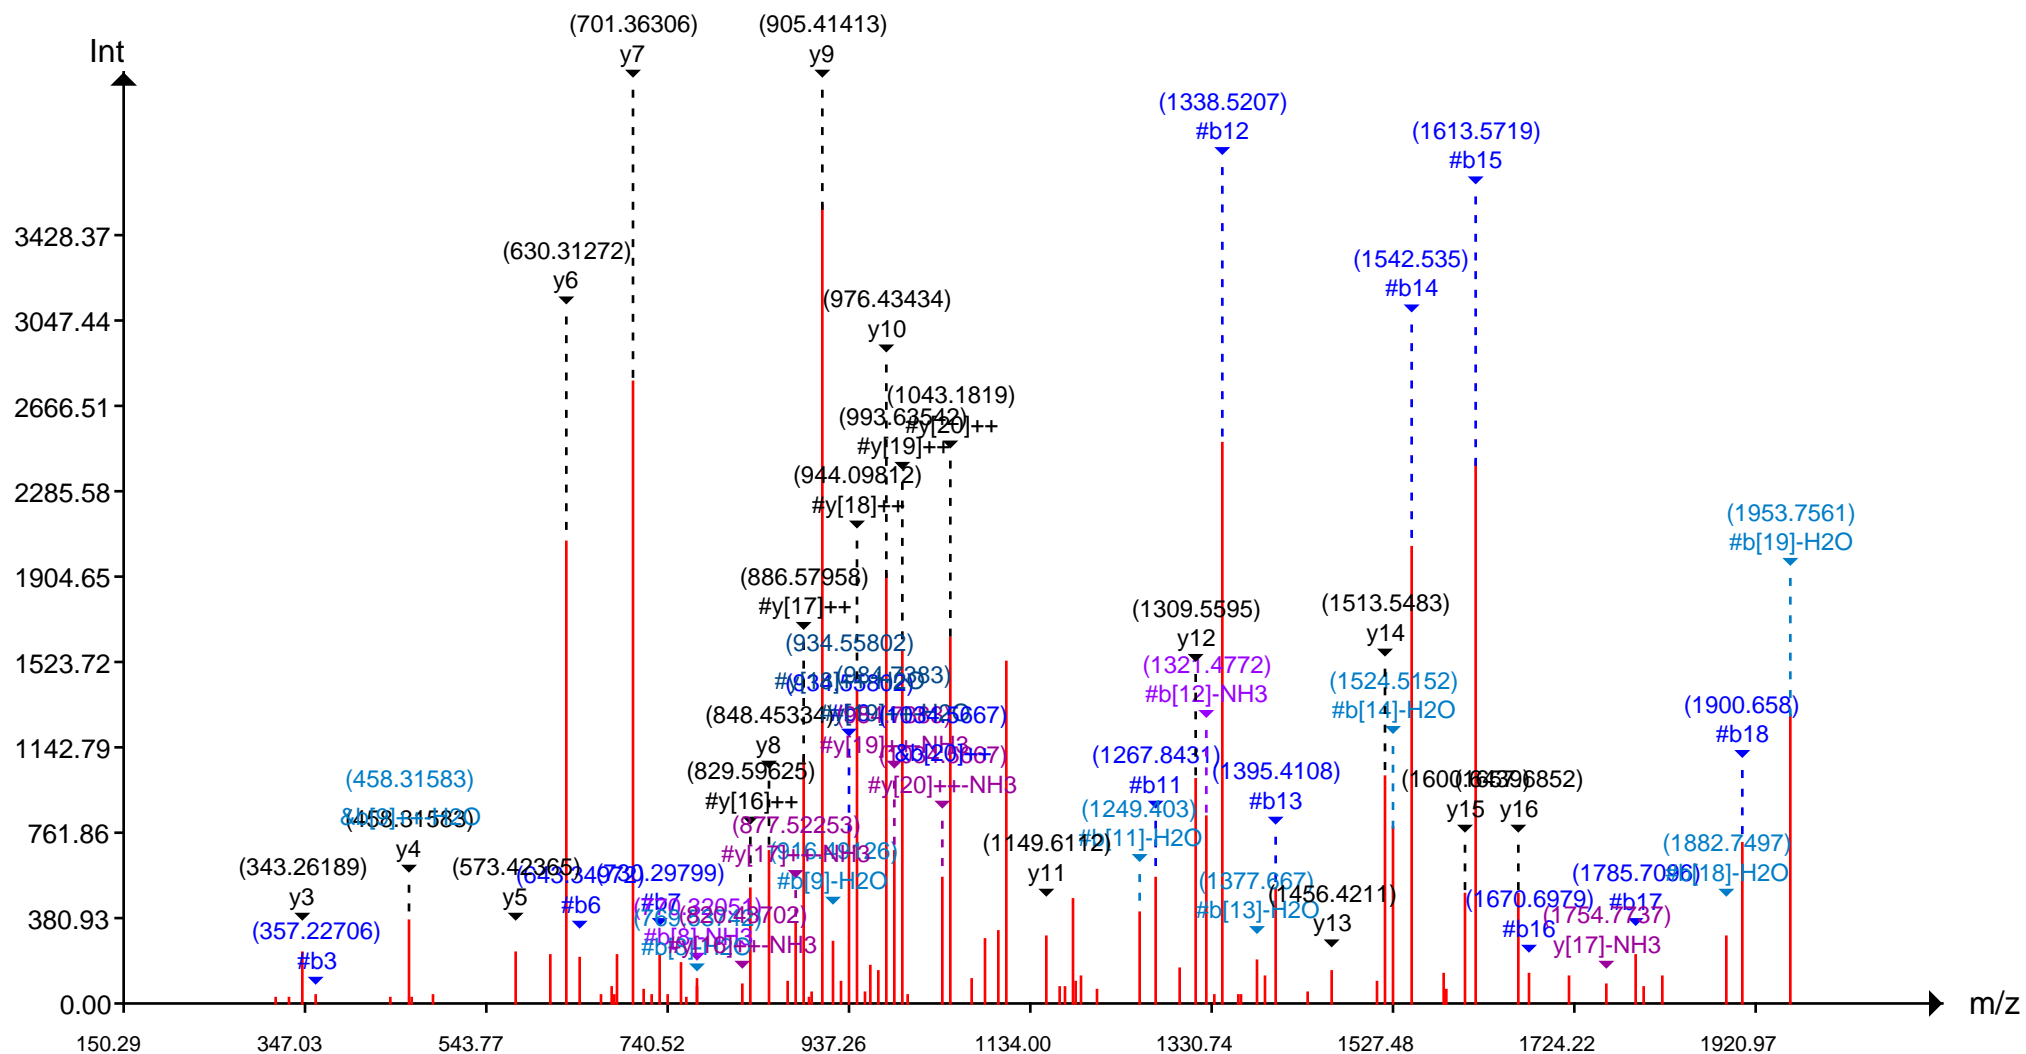

## Info

|                          |                                                     |                           |          |
|--------------------------|-----------------------------------------------------|---------------------------|----------|
| <b>Modified Sequence</b> | AcD3-LVVDNGSGM<Mox*>C<Cmm*>K<AcD3K*>AGFAGDDAPR-COOH | <b>Ion score</b>          | 111.69   |
| <b>Protein</b>           | P60710                                              | <b>Confidence level</b>   | 99.00%   |
| <b>Precursor m/z</b>     | 1122.0215                                           | <b>Identity Threshold</b> | 45.09    |
| <b>Charge</b>            | 2+                                                  | <b>Mass error</b>         | 0.001898 |

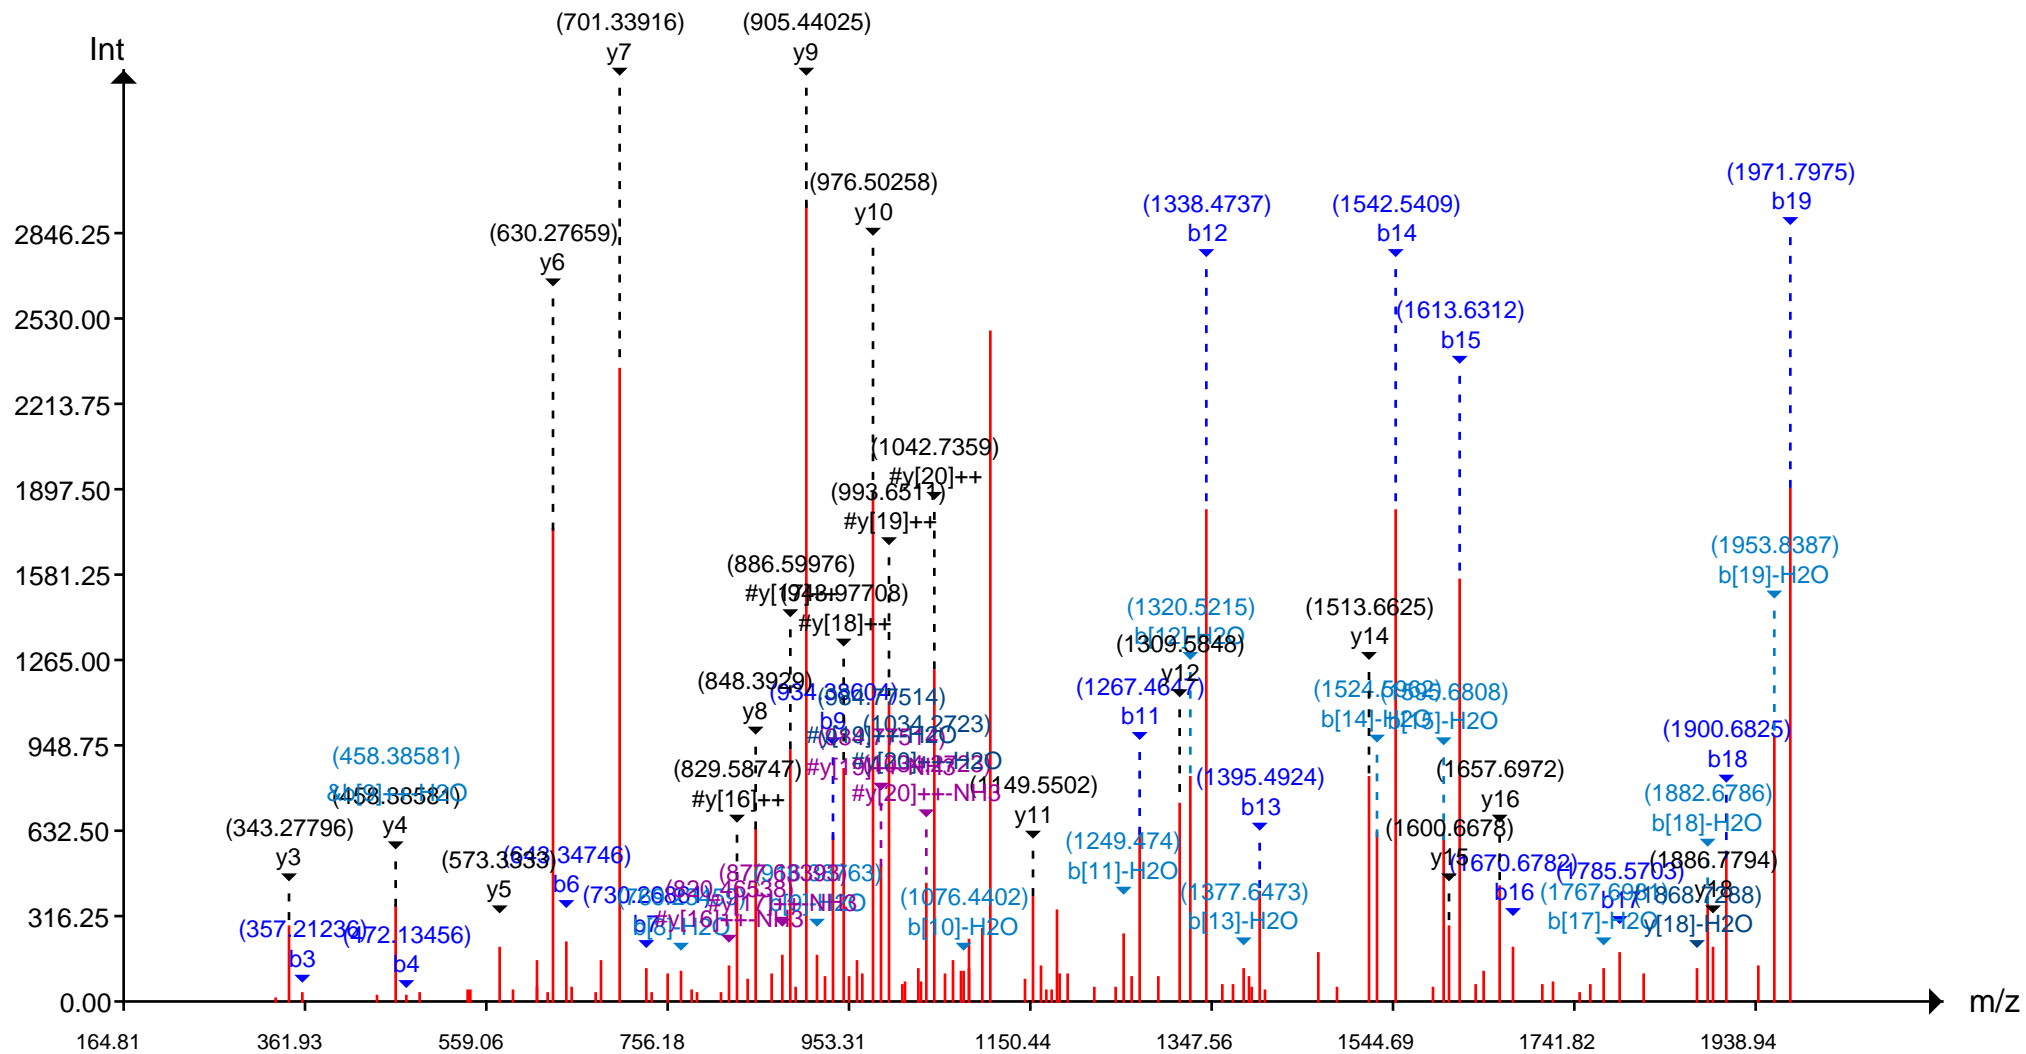

## Info

|                          |                                                     |                           |          |
|--------------------------|-----------------------------------------------------|---------------------------|----------|
| <b>Modified Sequence</b> | AcD3-LVVDNGSGM<Mox*>C<Cmm*>K<AcD3K*>AGFAGDDAPR-COOH | <b>Ion score</b>          | 121.21   |
| <b>Protein</b>           | P60710                                              | <b>Confidence level</b>   | 99.00%   |
| <b>Precursor m/z</b>     | 1122.0219                                           | <b>Identity Threshold</b> | 45.15    |
| <b>Charge</b>            | 2+                                                  | <b>Mass error</b>         | 0.002698 |

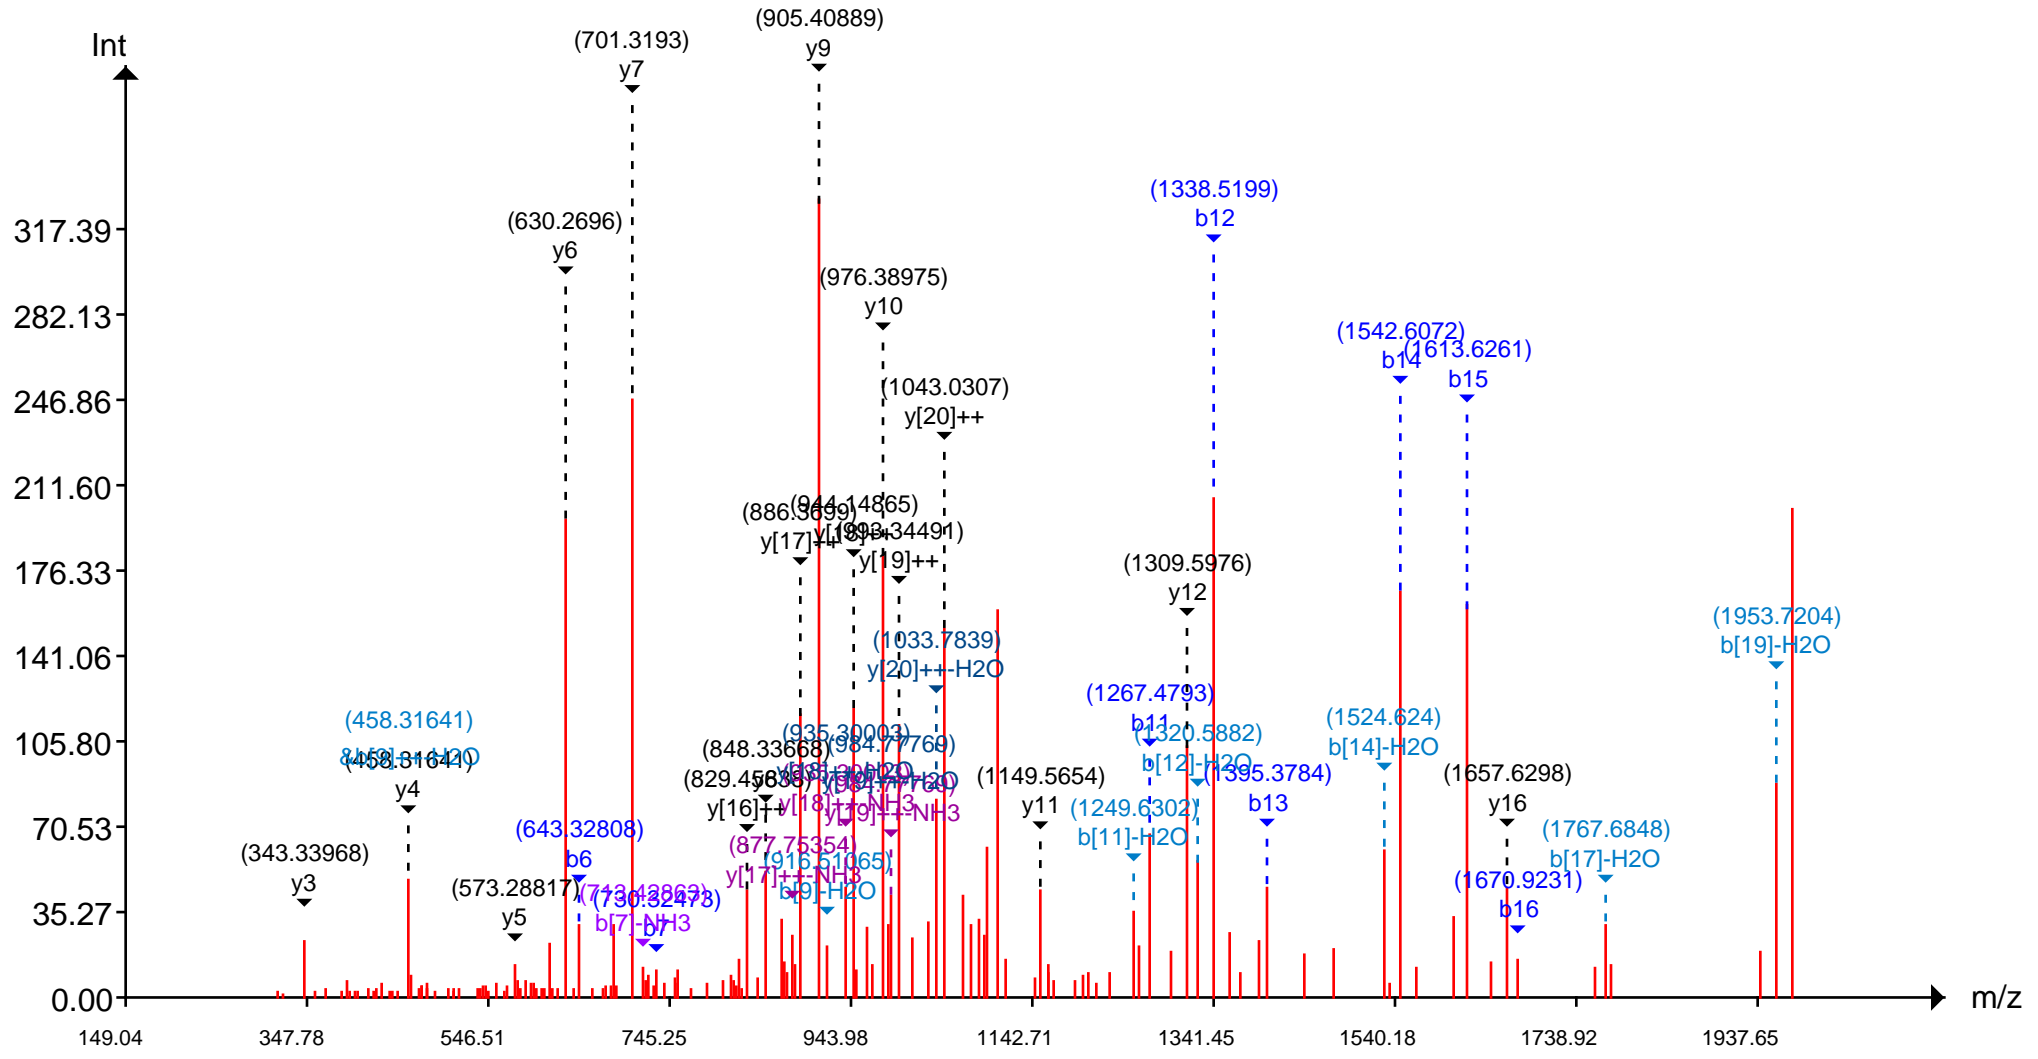

Info

|                          |                                                     |                           |          |
|--------------------------|-----------------------------------------------------|---------------------------|----------|
| <b>Modified Sequence</b> | AcD3-LVVDNGSGM<Mox*>C<Cmm*>K<AcD3K*>AGFAGDDAPR-COOH | <b>Ion score</b>          | 75.26    |
| <b>Protein</b>           | P60710                                              | <b>Confidence level</b>   | 99.00%   |
| <b>Precursor m/z</b>     | 1122.0221                                           | <b>Identity Threshold</b> | 45.20    |
| <b>Charge</b>            | 2+                                                  | <b>Mass error</b>         | 0.003098 |



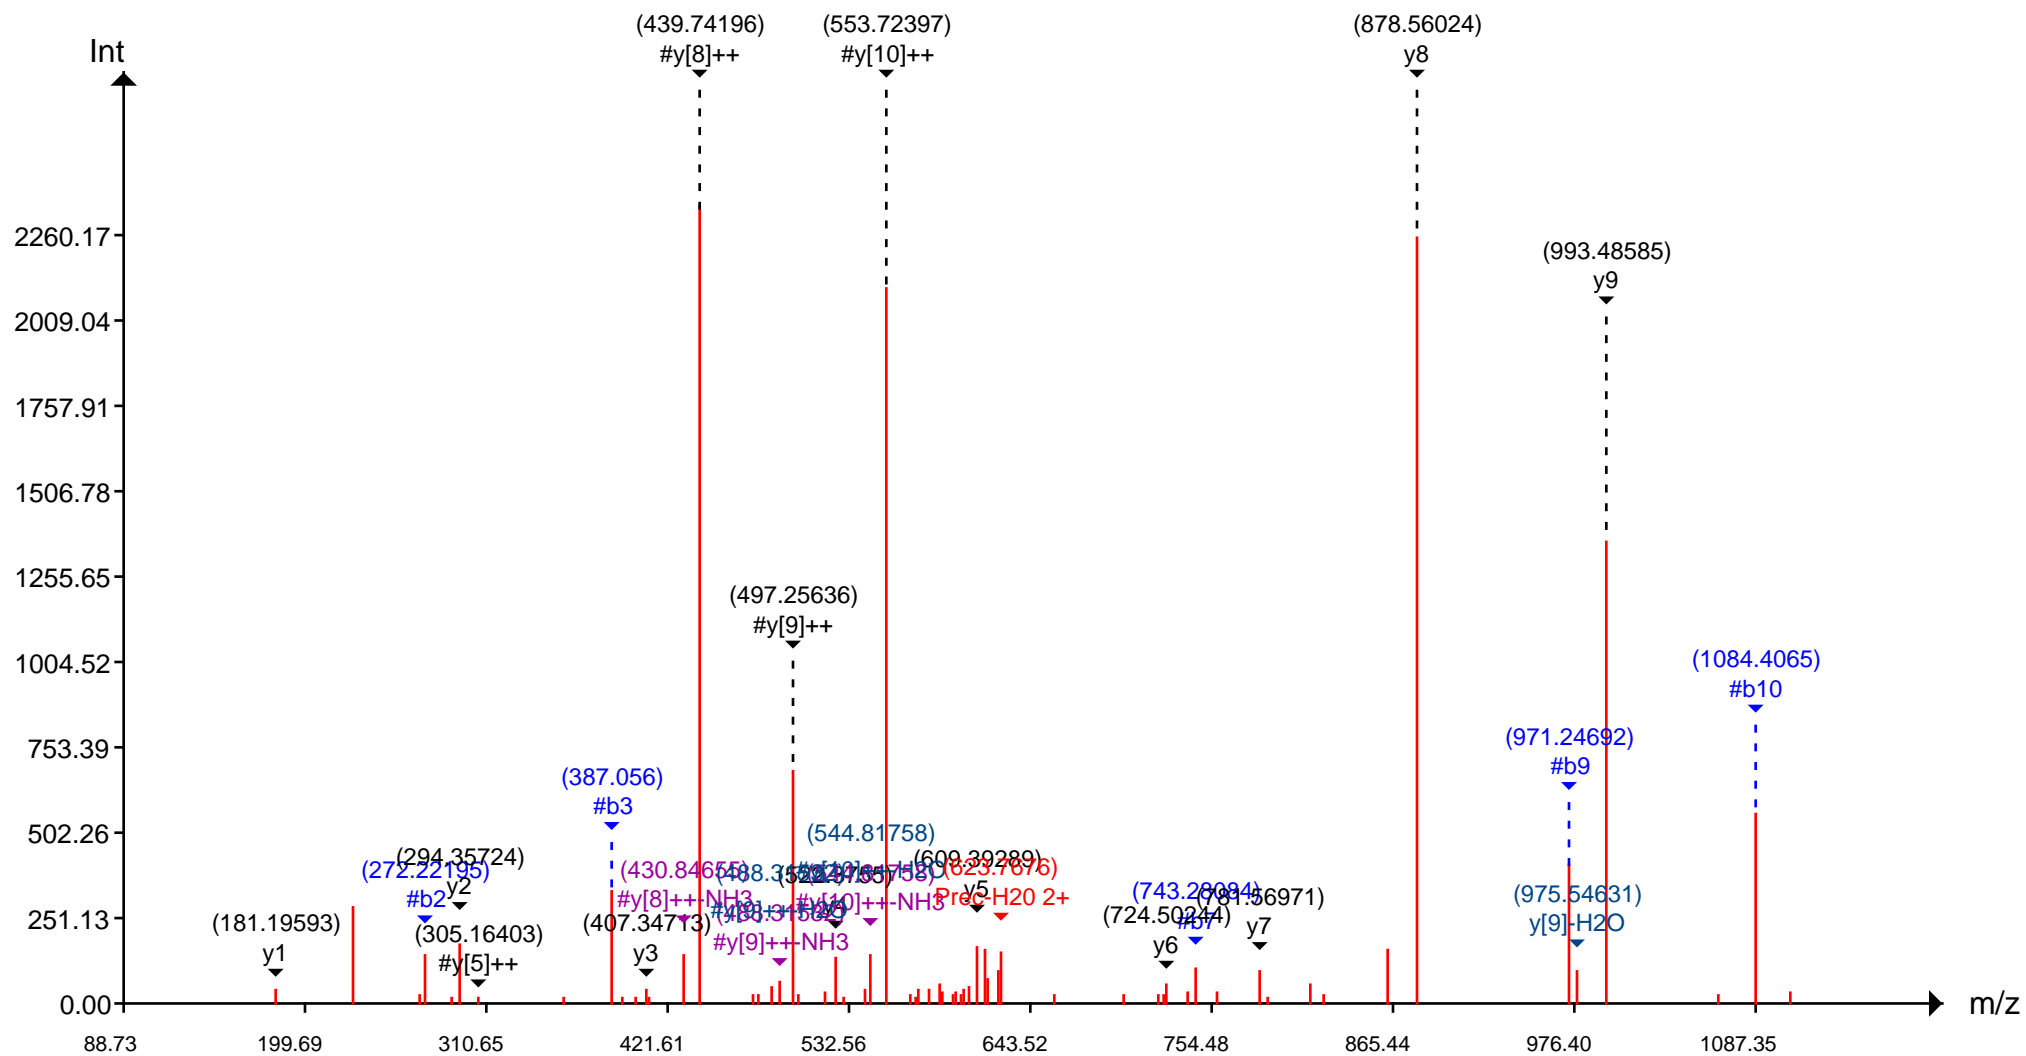

## Info

**Modified Sequence** AcD3-IIDPGDSDIIR<C13>-COOH

**Ion score** 70.28

**Protein** P62889

**Confidence level** 99.00%

**Precursor m/z** 632.84983

**Identity Threshold** 47.84

**Charge** 2+

**Mass error** 5.68E-4

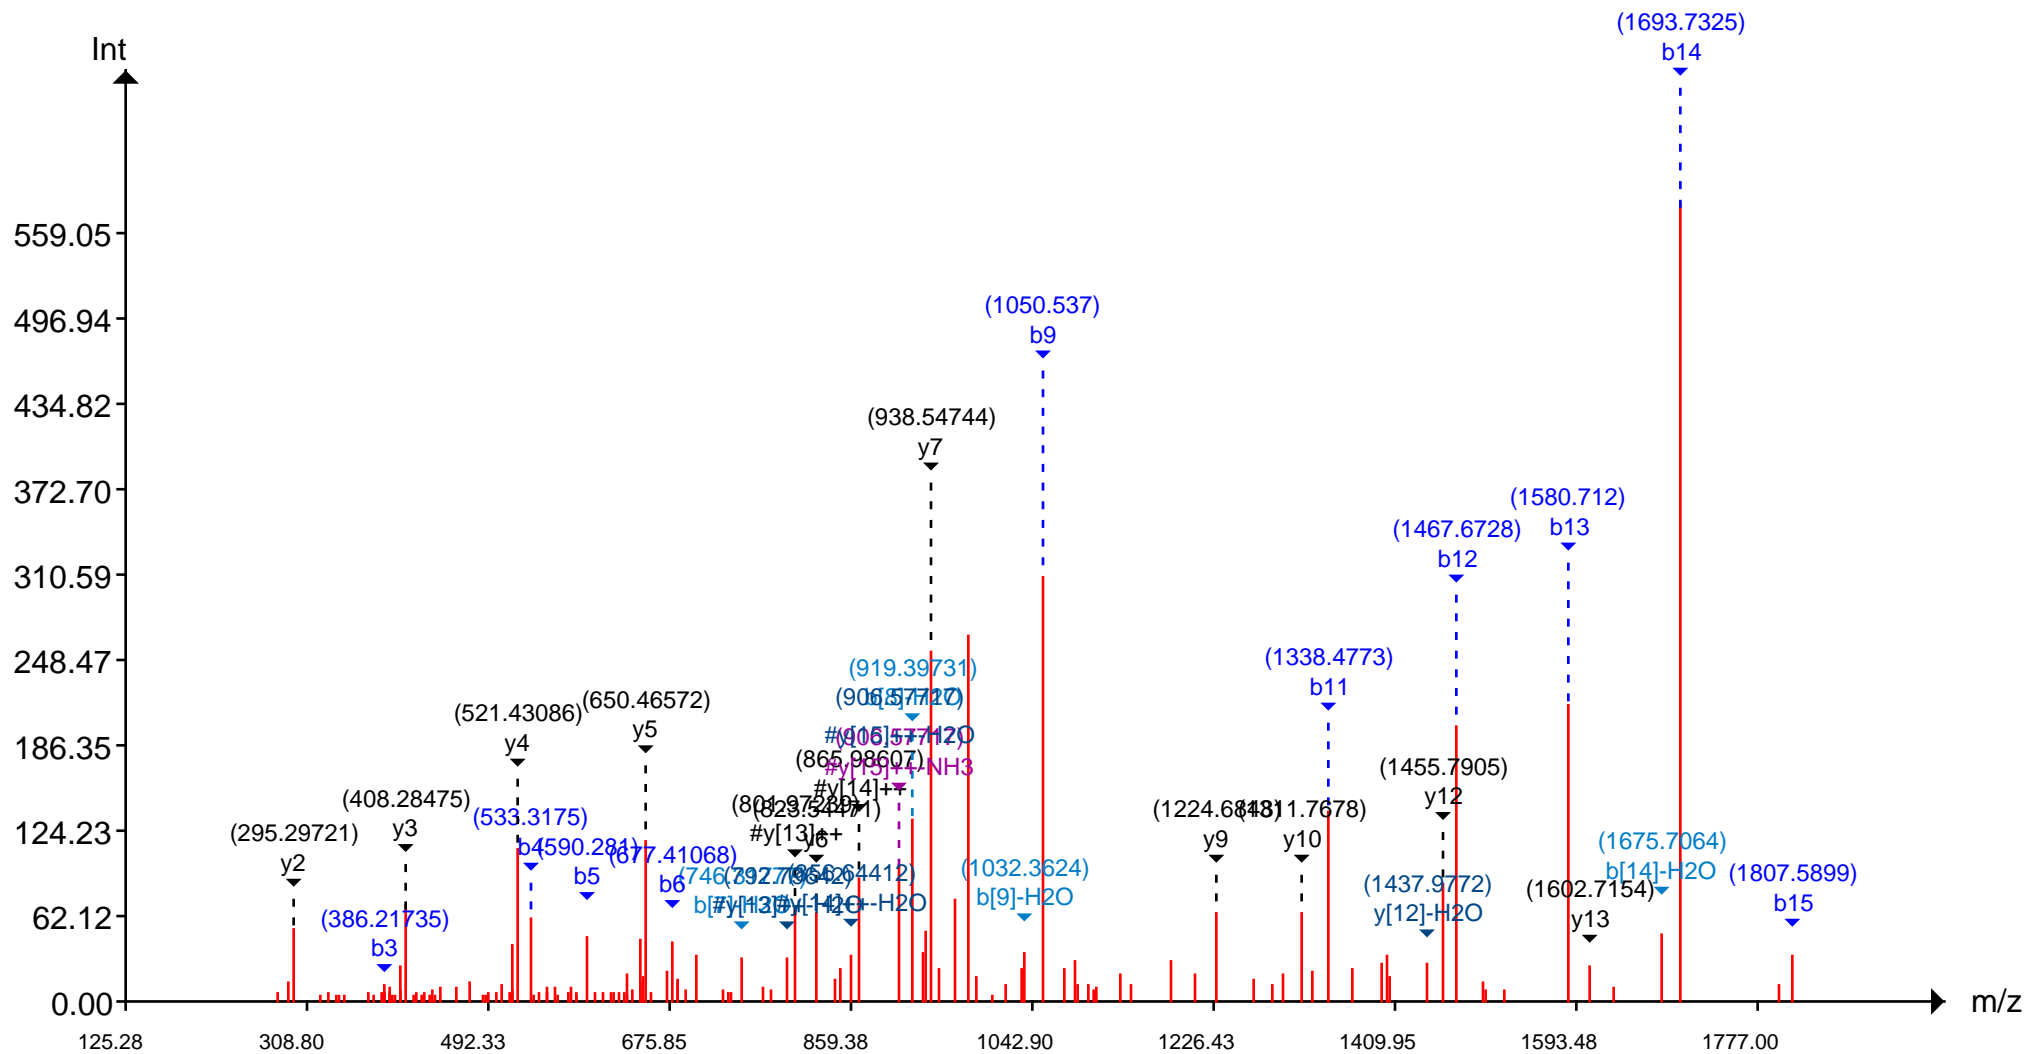

## Info

|                          |                                                 |                           |          |
|--------------------------|-------------------------------------------------|---------------------------|----------|
| <b>Modified Sequence</b> | AcD3-IVQFGSSK<AcD3K*>IDK<AcD3K*>ELINR<C13>-COOH | <b>Ion score</b>          | 60.2     |
| <b>Protein</b>           | P32921                                          | <b>Confidence level</b>   | 99.00%   |
| <b>Precursor m/z</b>     | 994.57835                                       | <b>Identity Threshold</b> | 44.13    |
| <b>Charge</b>            | 2+                                              | <b>Mass error</b>         | 0.002591 |

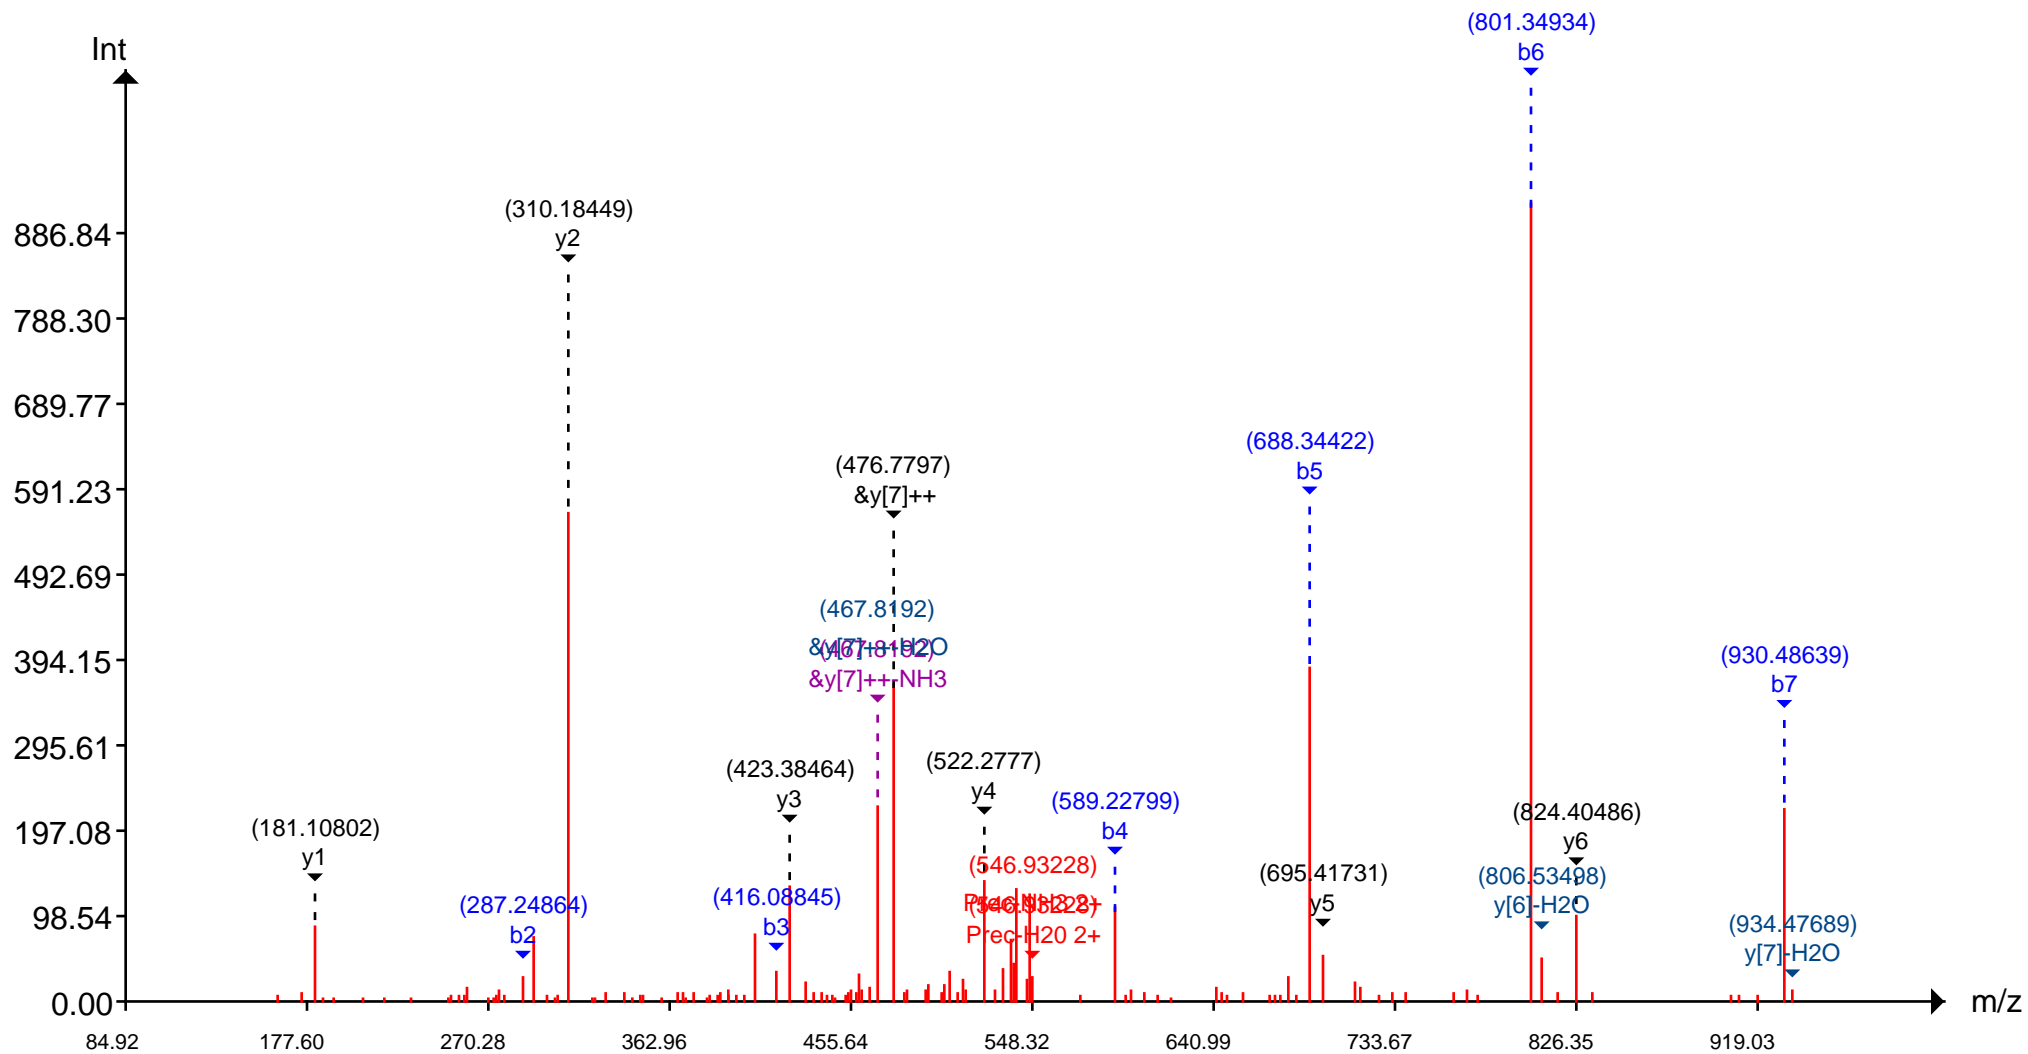

## Info

|                          |                                 |                           |         |
|--------------------------|---------------------------------|---------------------------|---------|
| <b>Modified Sequence</b> | AcD3-IQEK<AcD3K*>VLER<C13>-COOH | <b>Ion score</b>          | 47.96   |
| <b>Protein</b>           | P97372                          | <b>Confidence level</b>   | 99.00%  |
| <b>Precursor m/z</b>     | 555.84016                       | <b>Identity Threshold</b> | 43.94   |
| <b>Charge</b>            | 2+                              | <b>Mass error</b>         | -8.0E-5 |

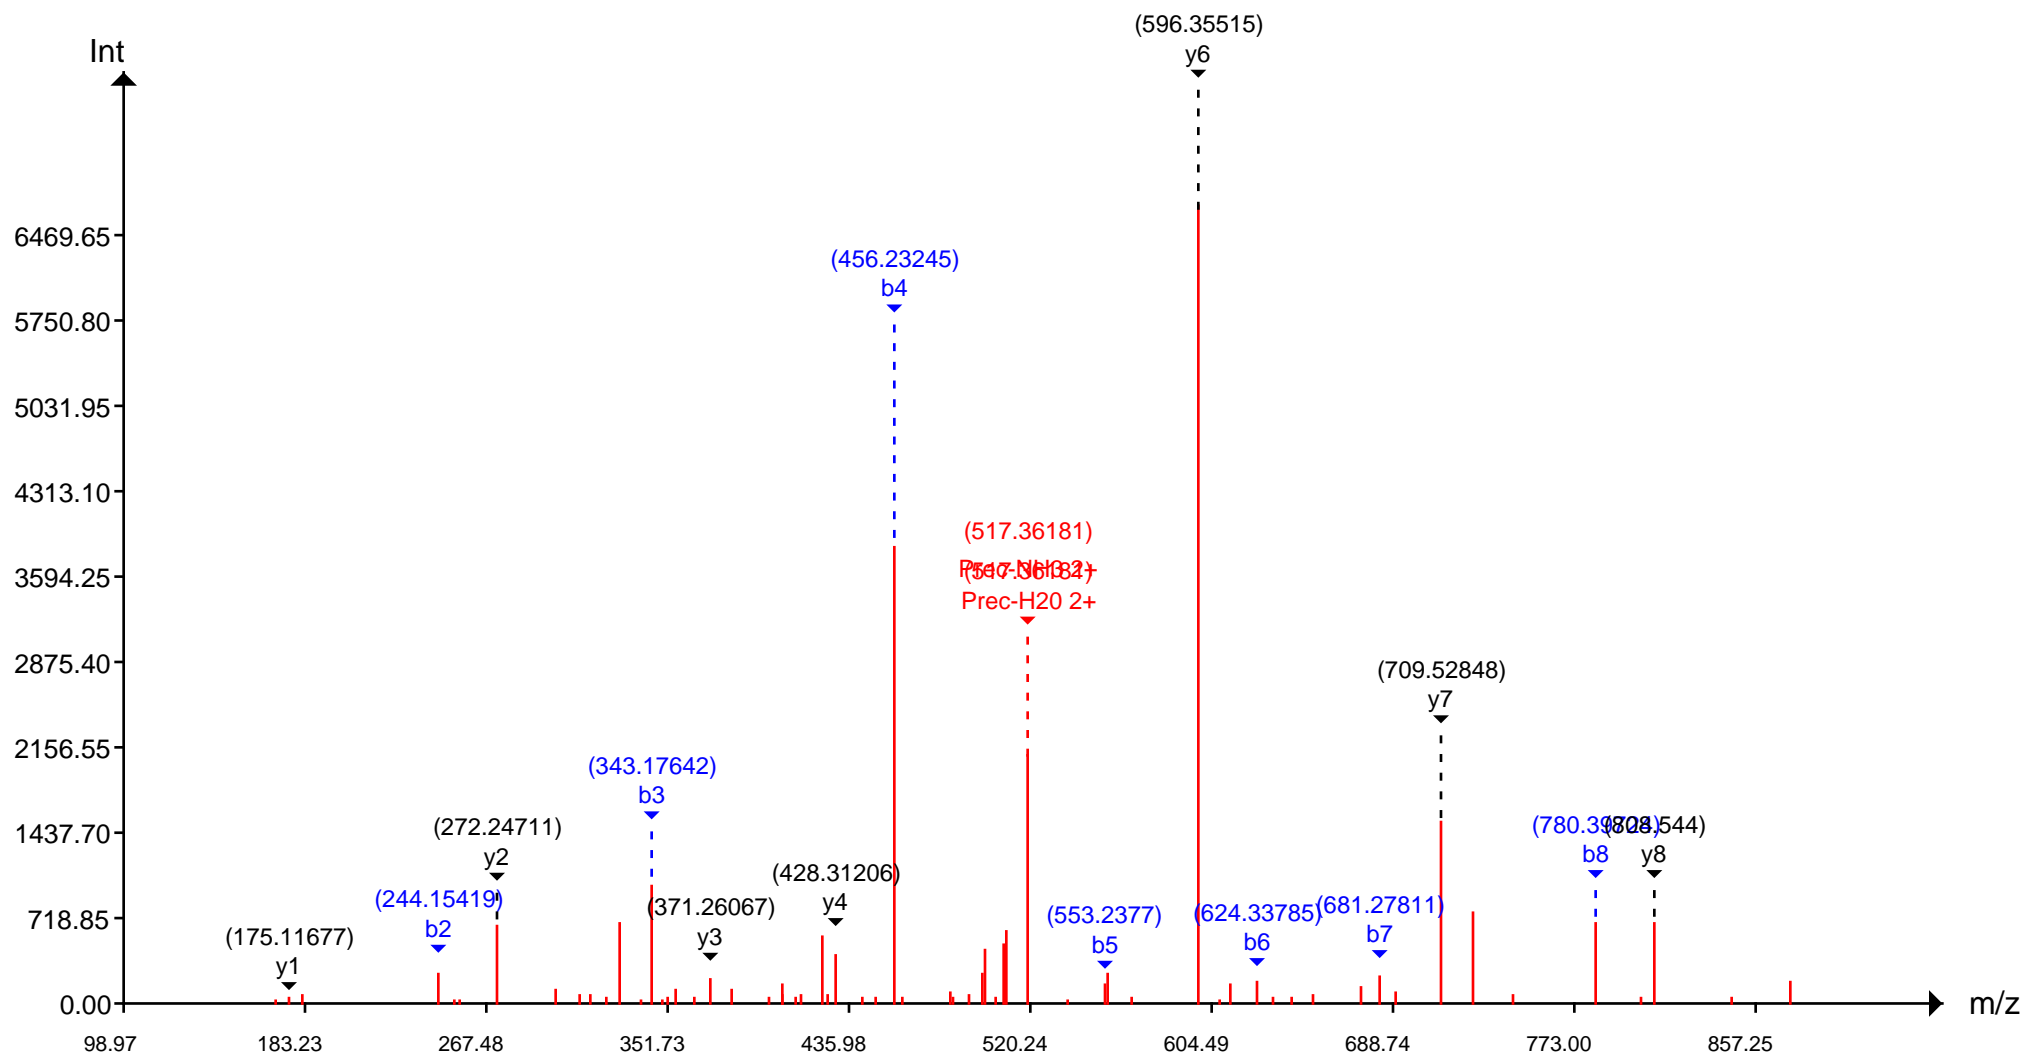

## Info

**Modified Sequence** AcD3-VVVIPAGVPR-COOH

**Ion score** 43.45

**Protein** P08249

**Confidence level** 99.00%

**Precursor m/z** 526.33867

**Identity Threshold** 41.19

**Charge** 2+

**Mass error** -1.15E-4

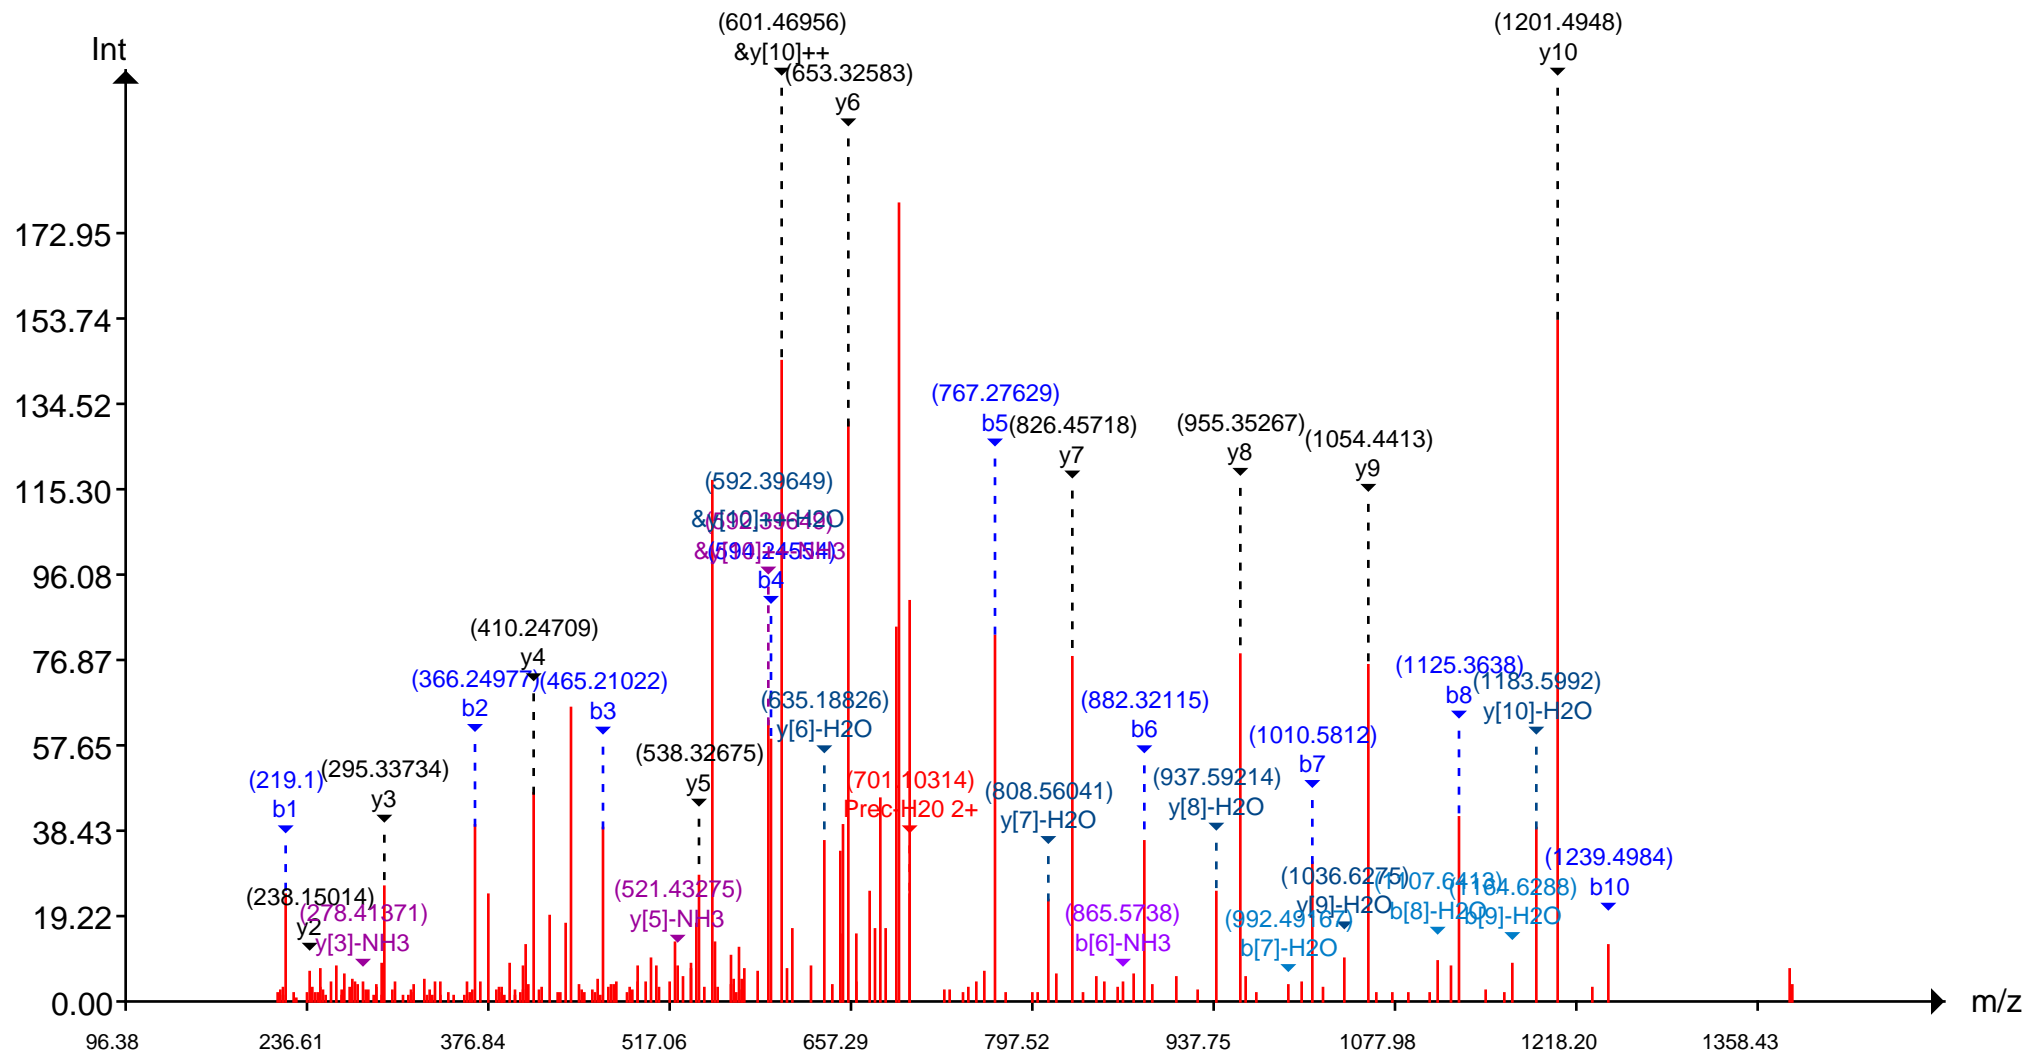

## Info

|                          |                                                  |                           |          |
|--------------------------|--------------------------------------------------|---------------------------|----------|
| <b>Modified Sequence</b> | AcD3-K<AcD3K*>M<Mox*>VEK<AcD3K*>DQDGGR<C13>-COOH | <b>Ion score</b>          | 66.33    |
| <b>Protein</b>           | Q9CZX8                                           | <b>Confidence level</b>   | 99.00%   |
| <b>Precursor m/z</b>     | 710.36367                                        | <b>Identity Threshold</b> | 47.84    |
| <b>Charge</b>            | 2+                                               | <b>Mass error</b>         | 0.001057 |

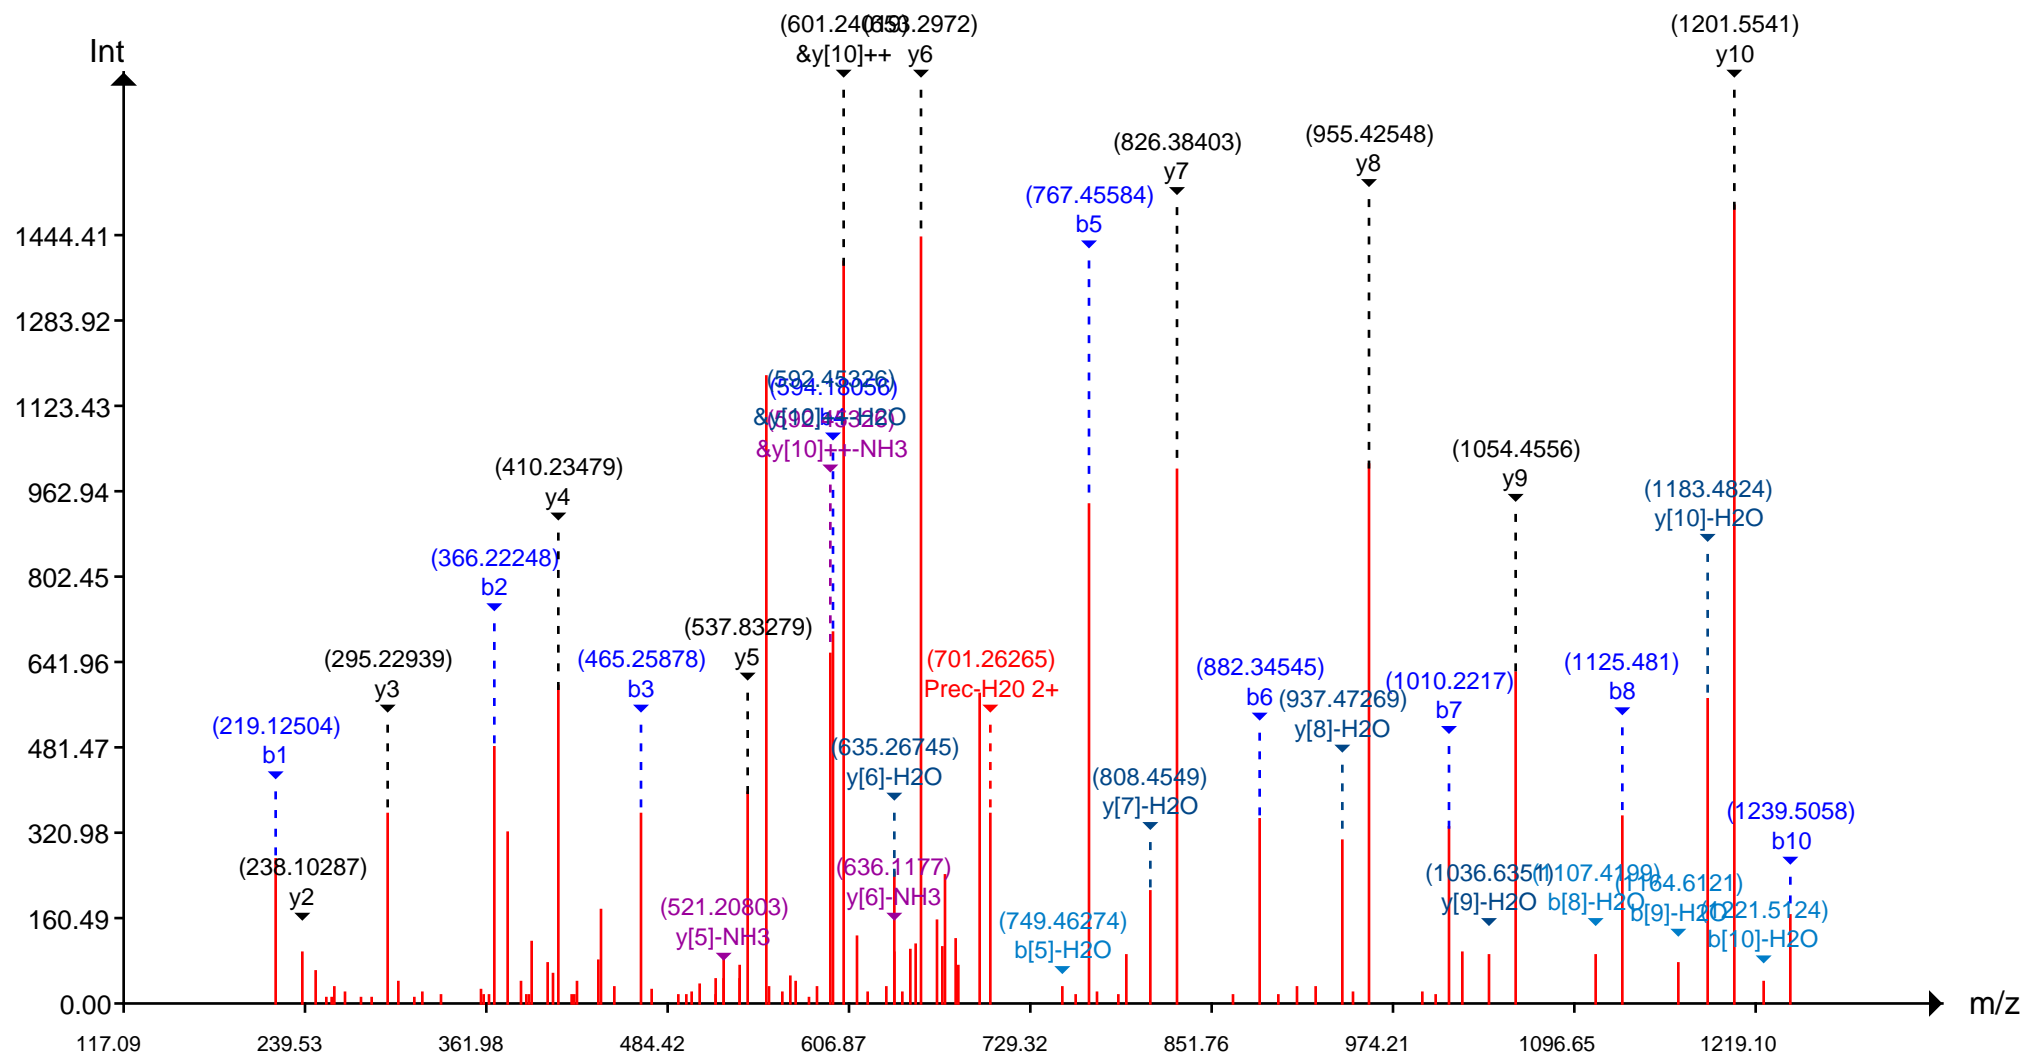

## Info

|                          |                                                  |                           |          |
|--------------------------|--------------------------------------------------|---------------------------|----------|
| <b>Modified Sequence</b> | AcD3-K<AcD3K*>M<Mox*>VEK<AcD3K*>DQDGGR<C13>-COOH | <b>Ion score</b>          | 75.89    |
| <b>Protein</b>           | Q9CZX8                                           | <b>Confidence level</b>   | 99.00%   |
| <b>Precursor m/z</b>     | 710.36365                                        | <b>Identity Threshold</b> | 47.84    |
| <b>Charge</b>            | 2+                                               | <b>Mass error</b>         | 0.001017 |

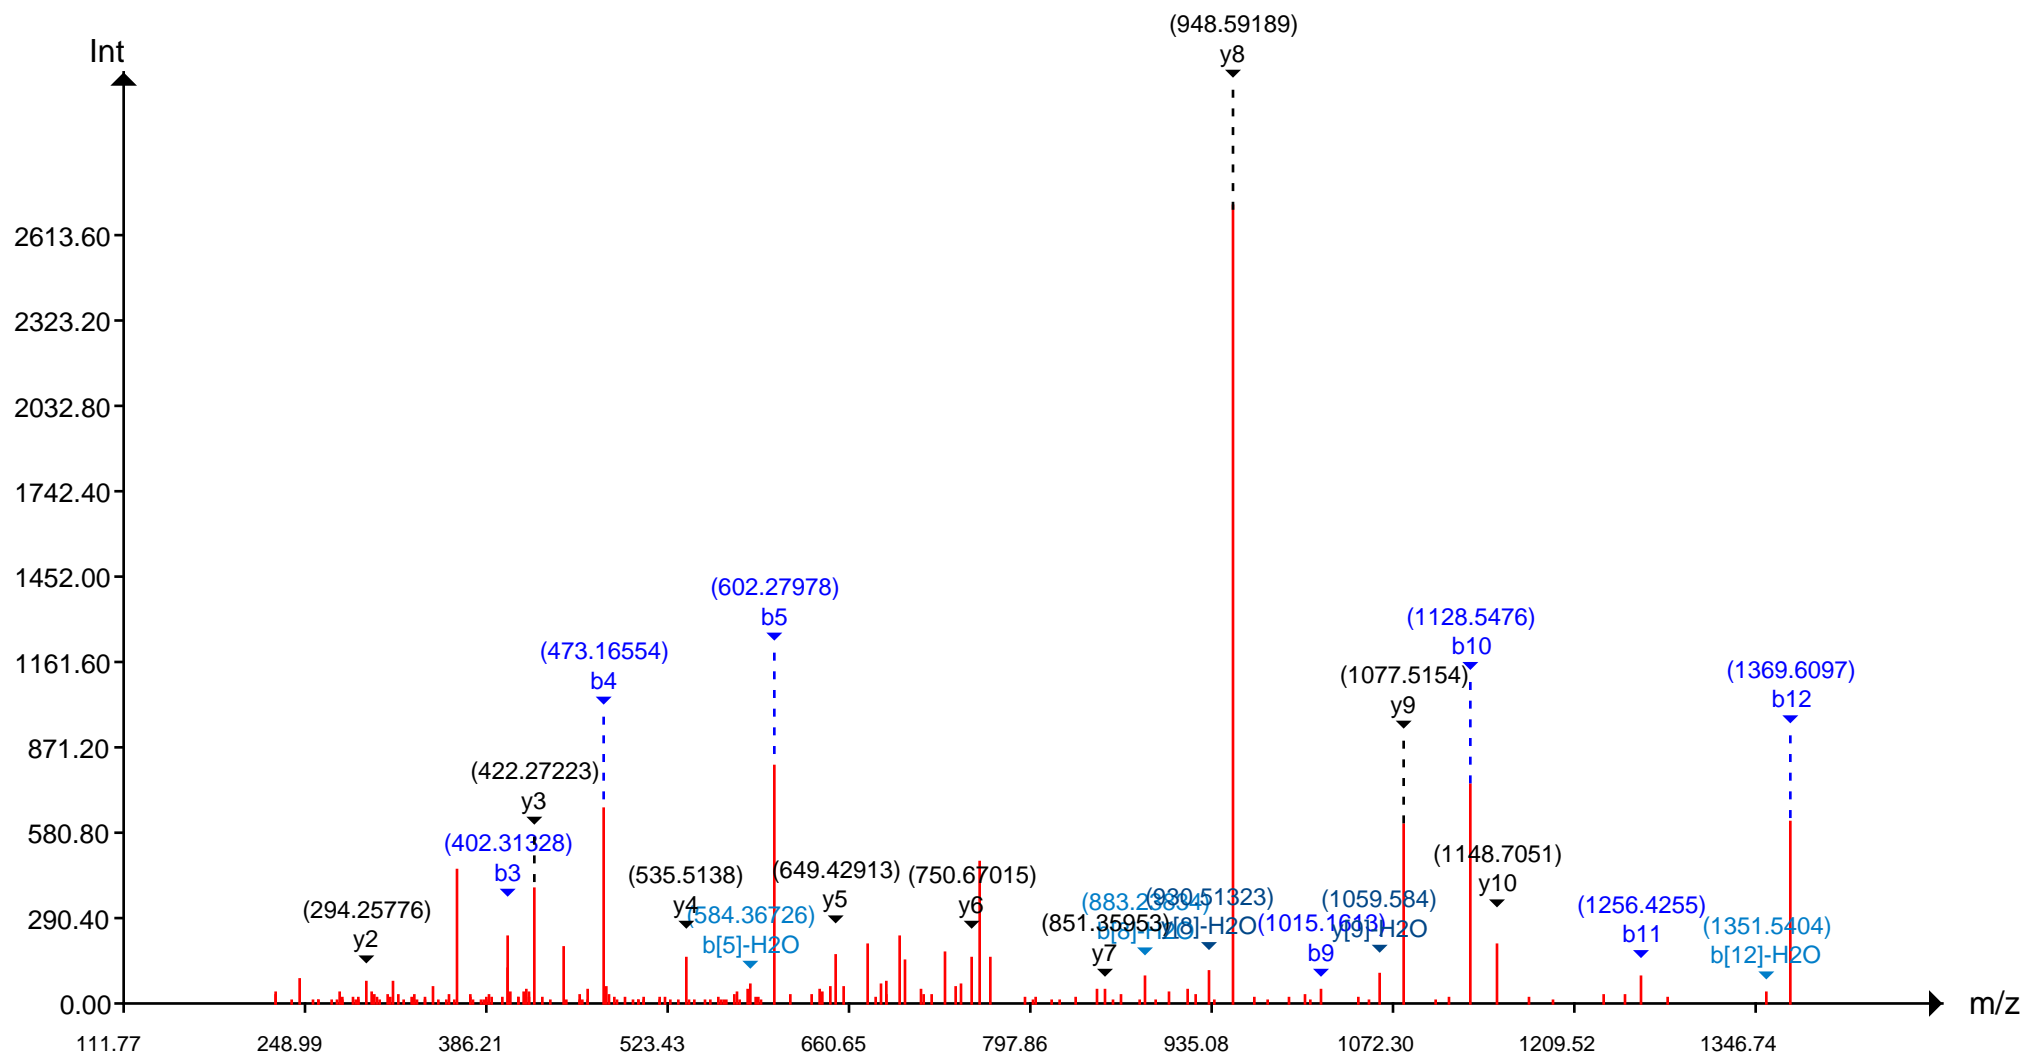

## Info

**Modified Sequence** AcD3-INEAEPTTNIQIR<C13>-COOH

**Ion score** 51.88

**Protein** Q9CZ44

**Confidence level** 99.00%

**Precursor m/z** 775.42202

**Identity Threshold** 47.68

**Charge** 2+

**Mass error** 0.001271

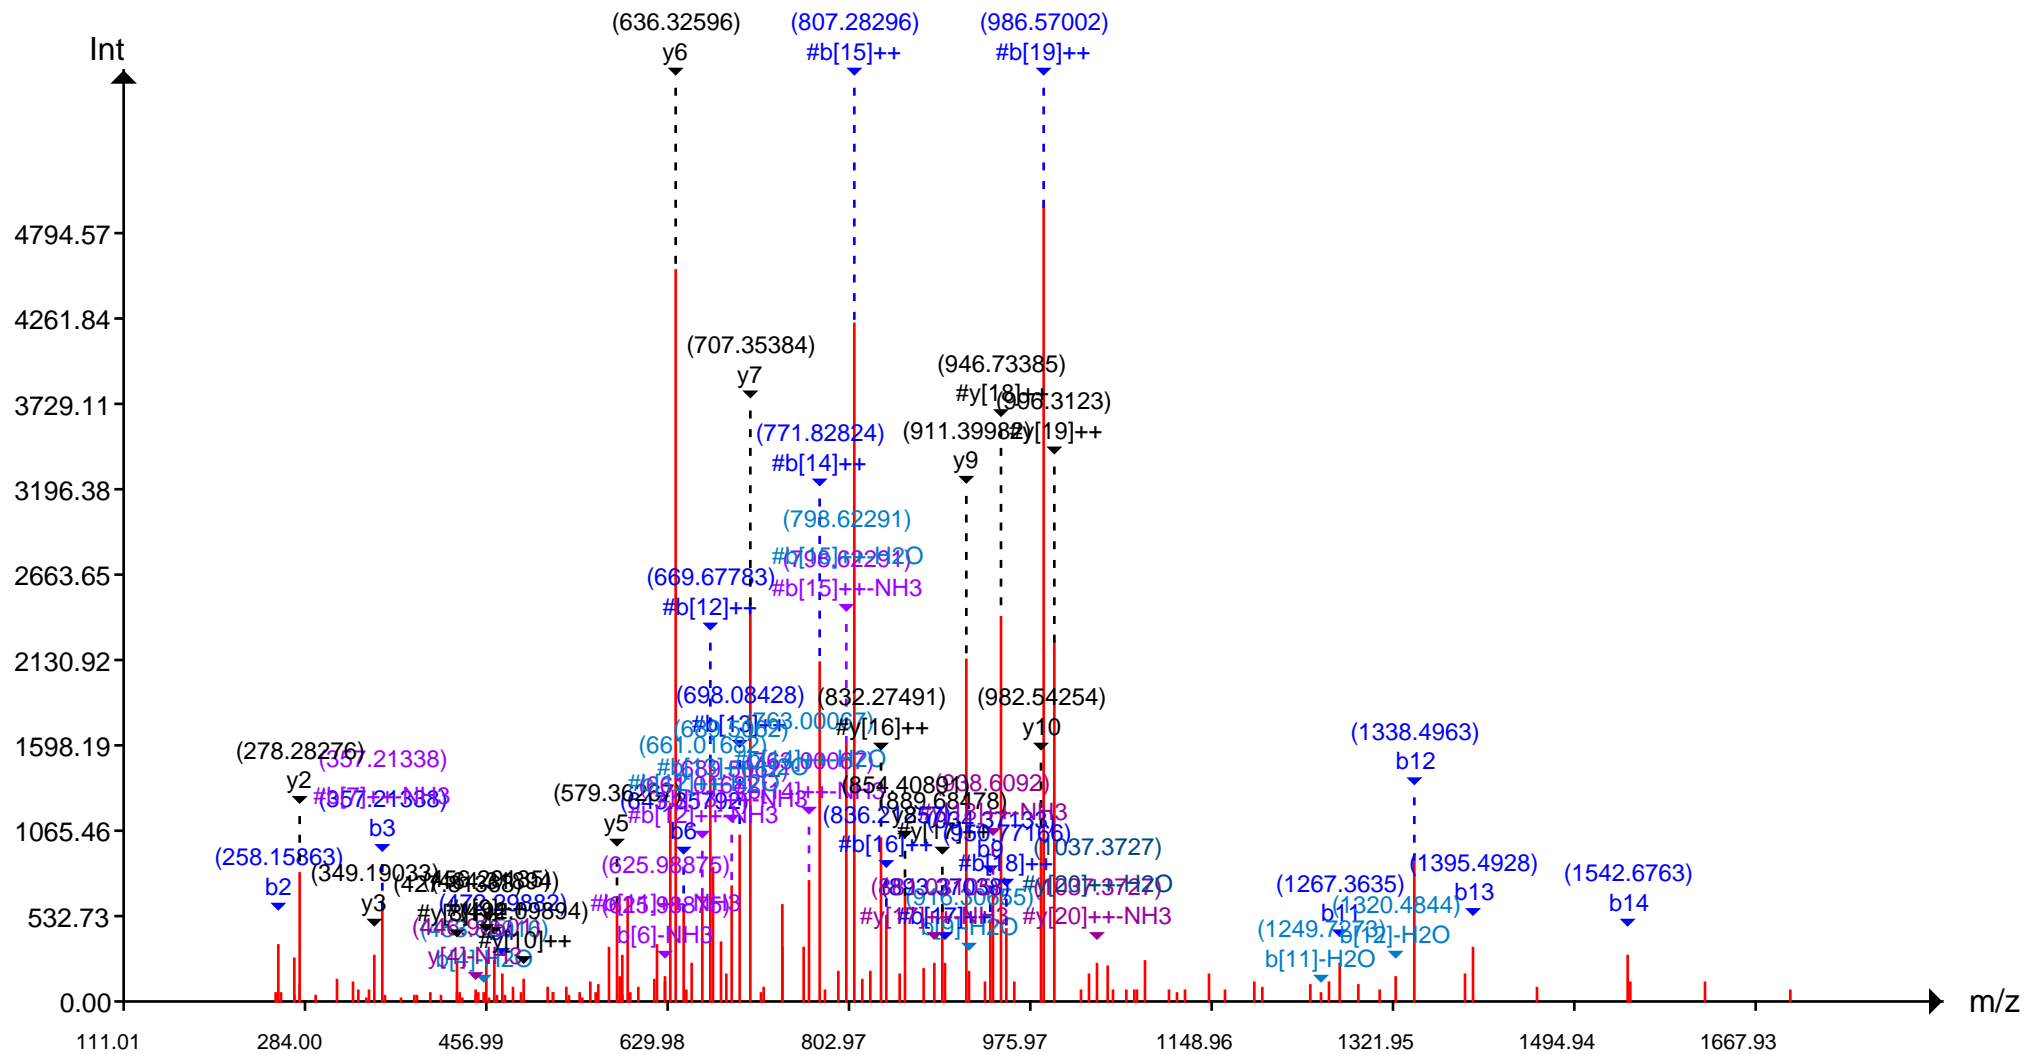

## Info

|                          |                                                          |                           |        |
|--------------------------|----------------------------------------------------------|---------------------------|--------|
| <b>Modified Sequence</b> | AcD3-LVVDNGSGM<Mox*>C<Cmm*>K<AcD3K*>AGFAGDDAPR<C13>-COOH | <b>Ion score</b>          | 62.73  |
| <b>Protein</b>           | P60710                                                   | <b>Confidence level</b>   | 99.00% |
| <b>Precursor m/z</b>     | 750.35645                                                | <b>Identity Threshold</b> | 45.77  |
| <b>Charge</b>            | 3+                                                       | <b>Mass error</b>         | 8.3E-4 |



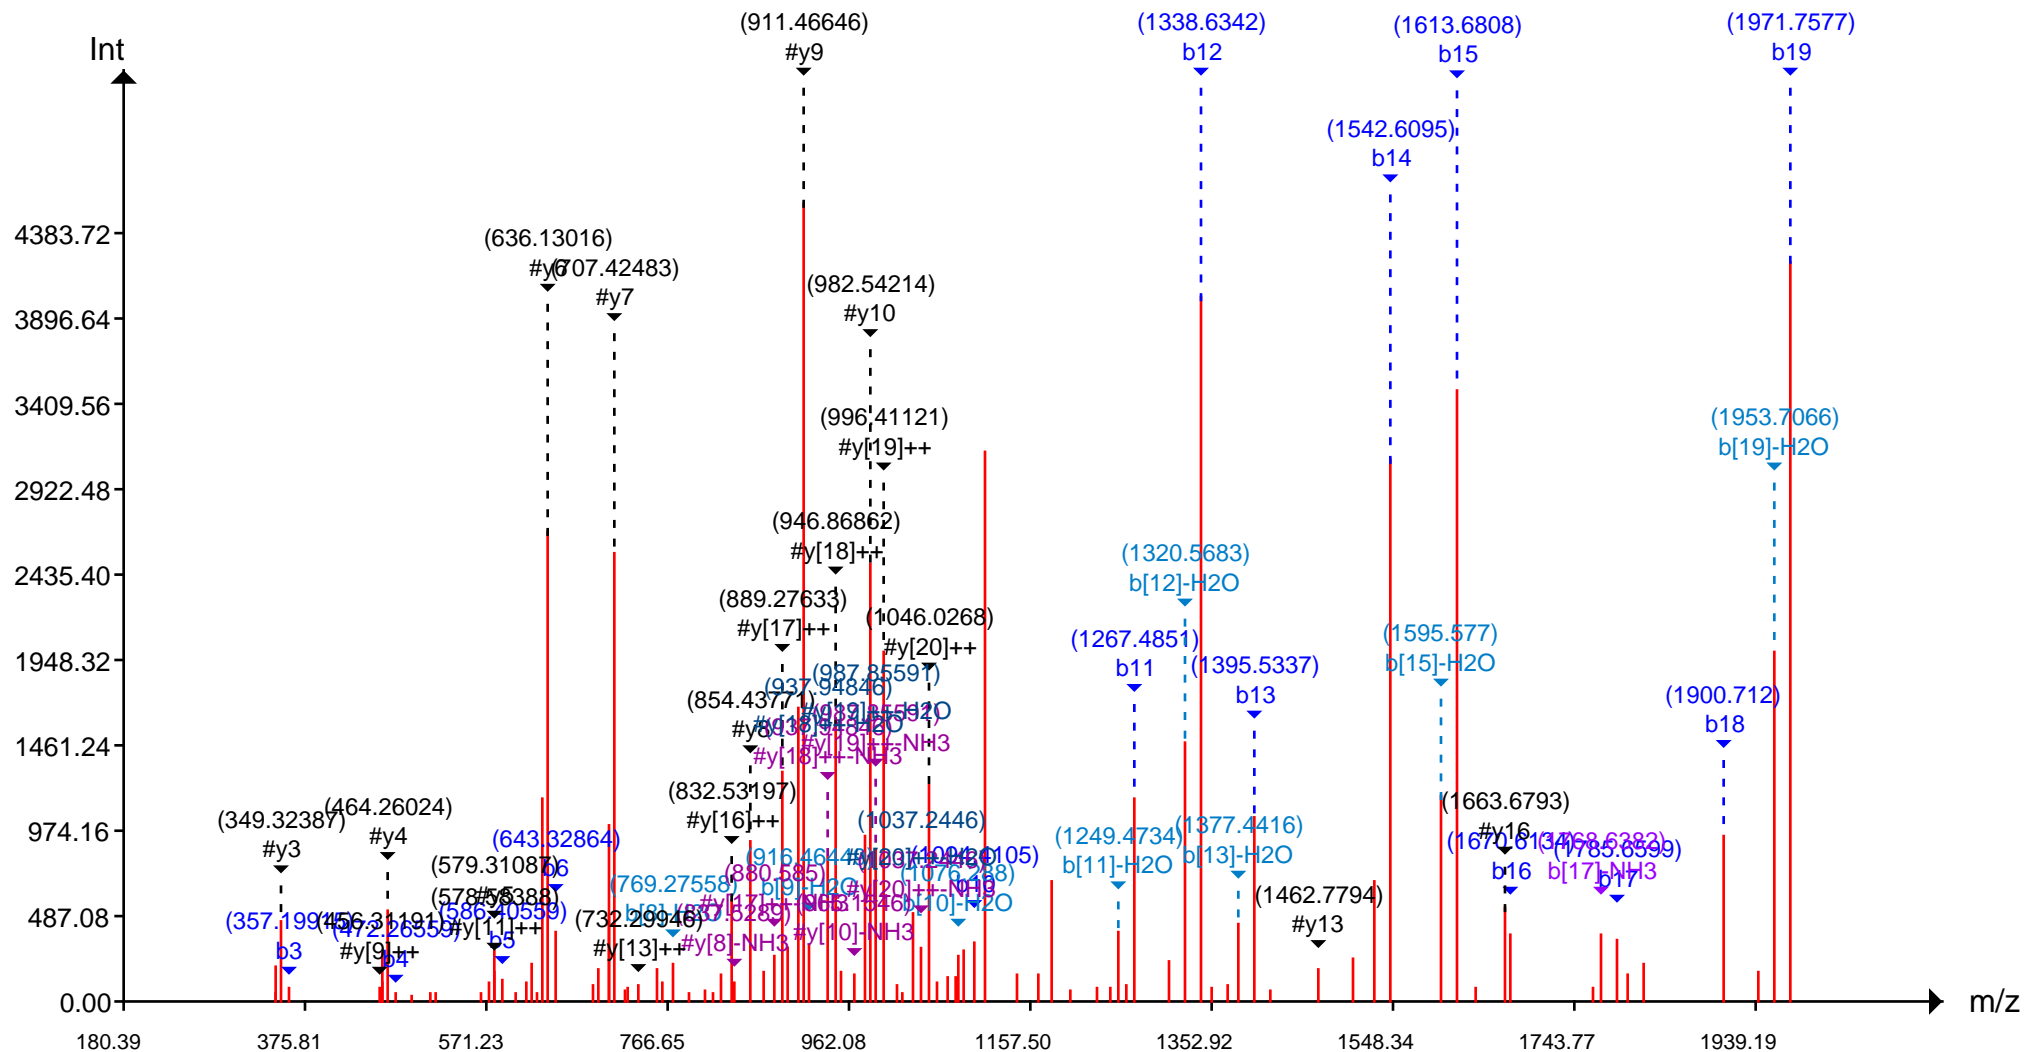

## Info

|                          |                                                          |                           |          |
|--------------------------|----------------------------------------------------------|---------------------------|----------|
| <b>Modified Sequence</b> | AcD3-LVVDNGSGM<Mox*>C<Cmm*>K<AcD3K*>AGFAGDDAPR<C13>-COOH | <b>Ion score</b>          | 91.34    |
| <b>Protein</b>           | P60710                                                   | <b>Confidence level</b>   | 99.00%   |
| <b>Precursor m/z</b>     | 1125.0312                                                | <b>Identity Threshold</b> | 45.83    |
| <b>Charge</b>            | 2+                                                       | <b>Mass error</b>         | 0.001156 |

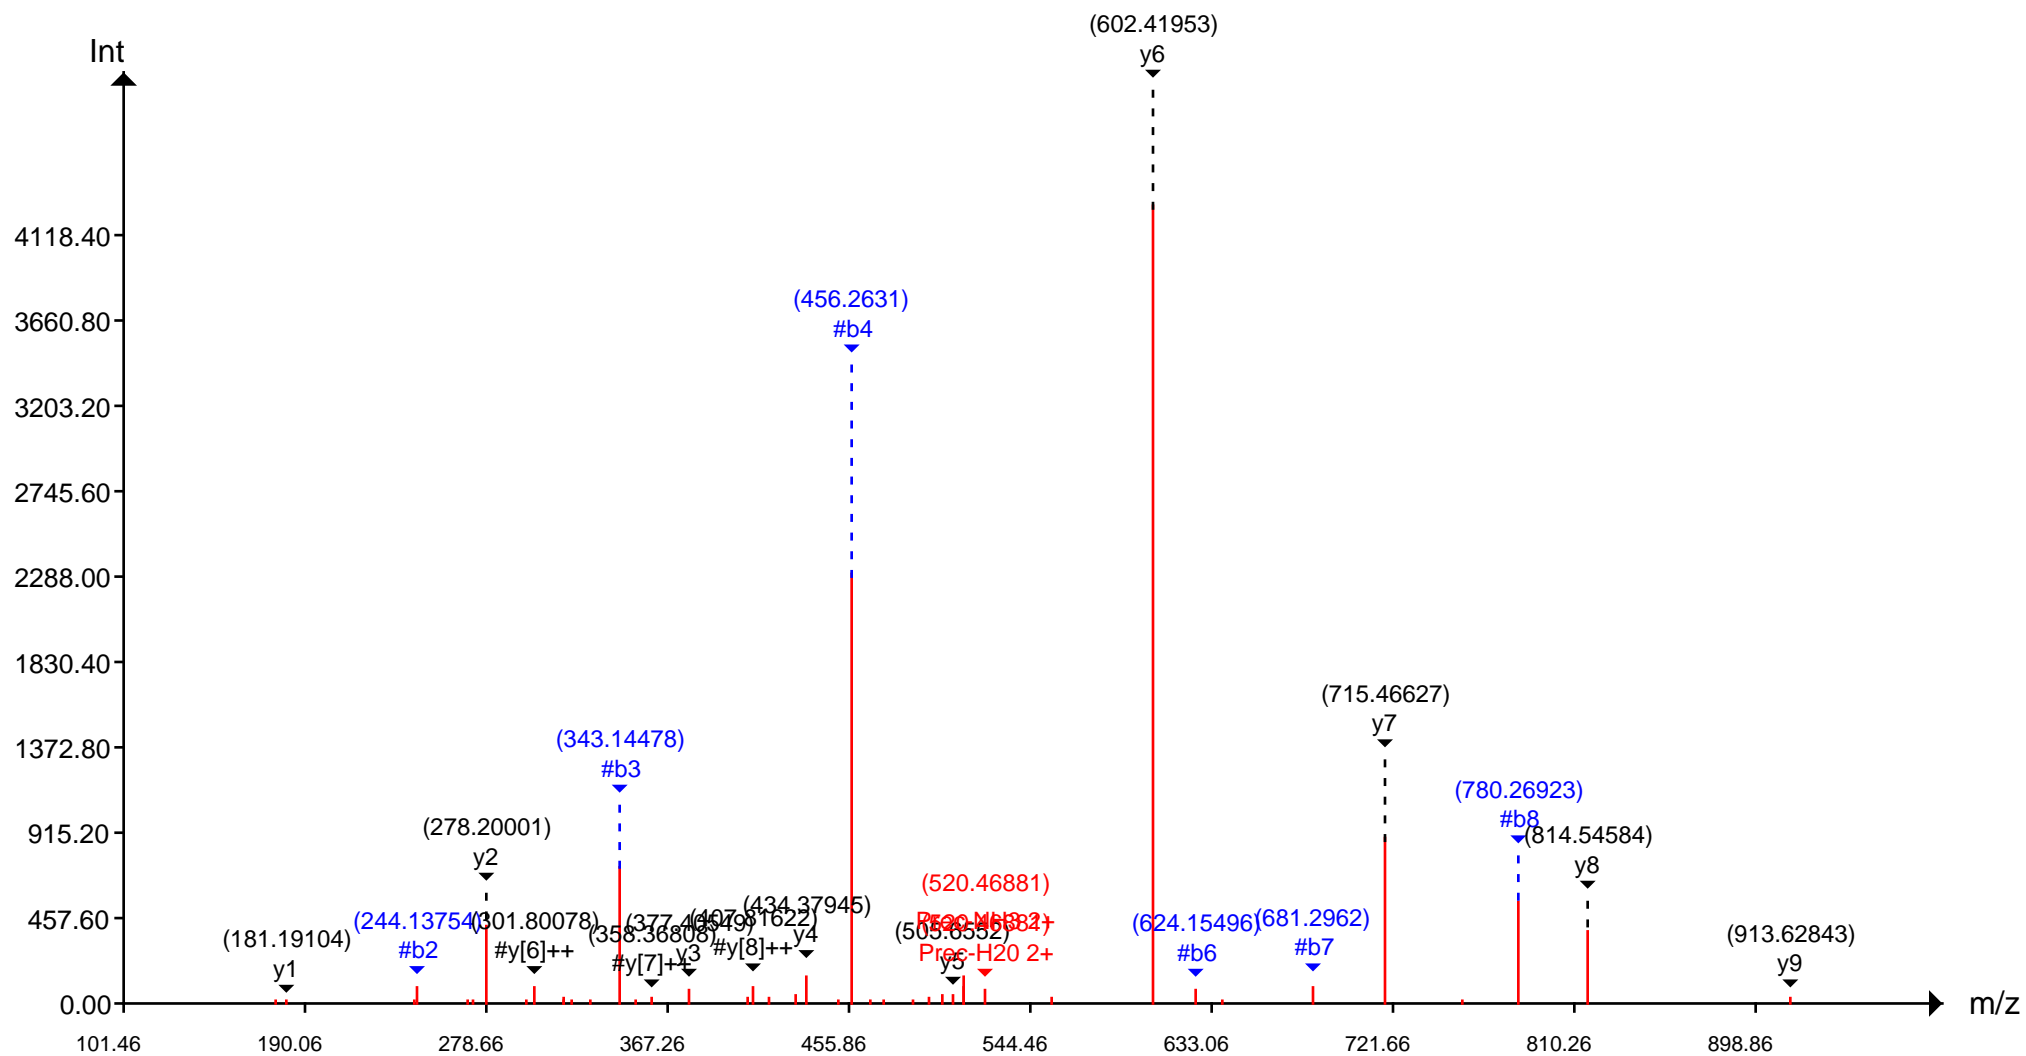

## Info

**Modified Sequence** AcD3-VVVIPAGVPR<C13>-COOH

**Ion score** 77.18

**Protein** P08249

**Confidence level** 99.00%

**Precursor m/z** 529.34884

**Identity Threshold** 38.80

**Charge** 2+

**Mass error** 8.4E-5

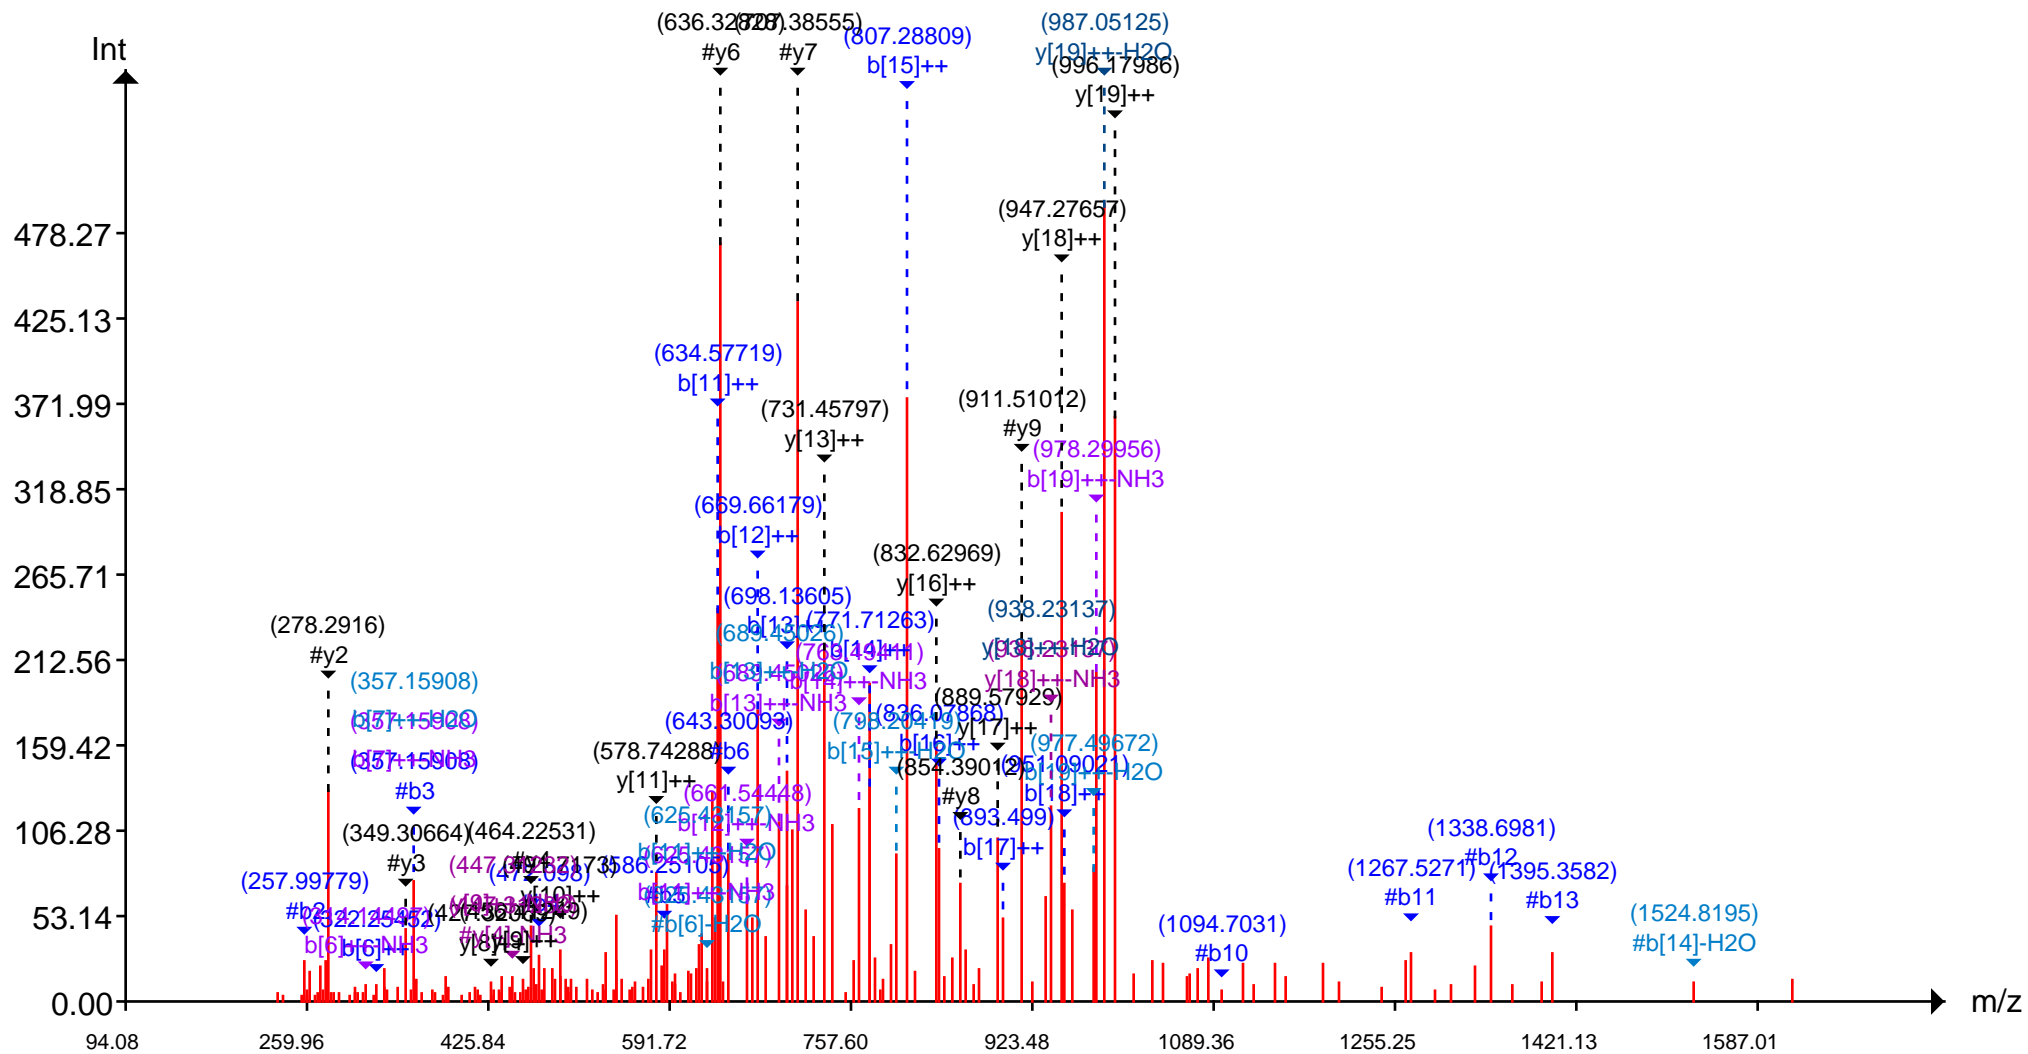

## Info

|                          |                                                          |                           |         |
|--------------------------|----------------------------------------------------------|---------------------------|---------|
| <b>Modified Sequence</b> | AcD3-LVVDNGSGM<Mox*>C<Cmm*>K<AcD3K*>AGFAGDDAPR<C13>-COOH | <b>Ion score</b>          | 50.09   |
| <b>Protein</b>           | P60710                                                   | <b>Confidence level</b>   | 99.00%  |
| <b>Precursor m/z</b>     | 750.3567                                                 | <b>Identity Threshold</b> | 45.83   |
| <b>Charge</b>            | 3+                                                       | <b>Mass error</b>         | 0.00158 |

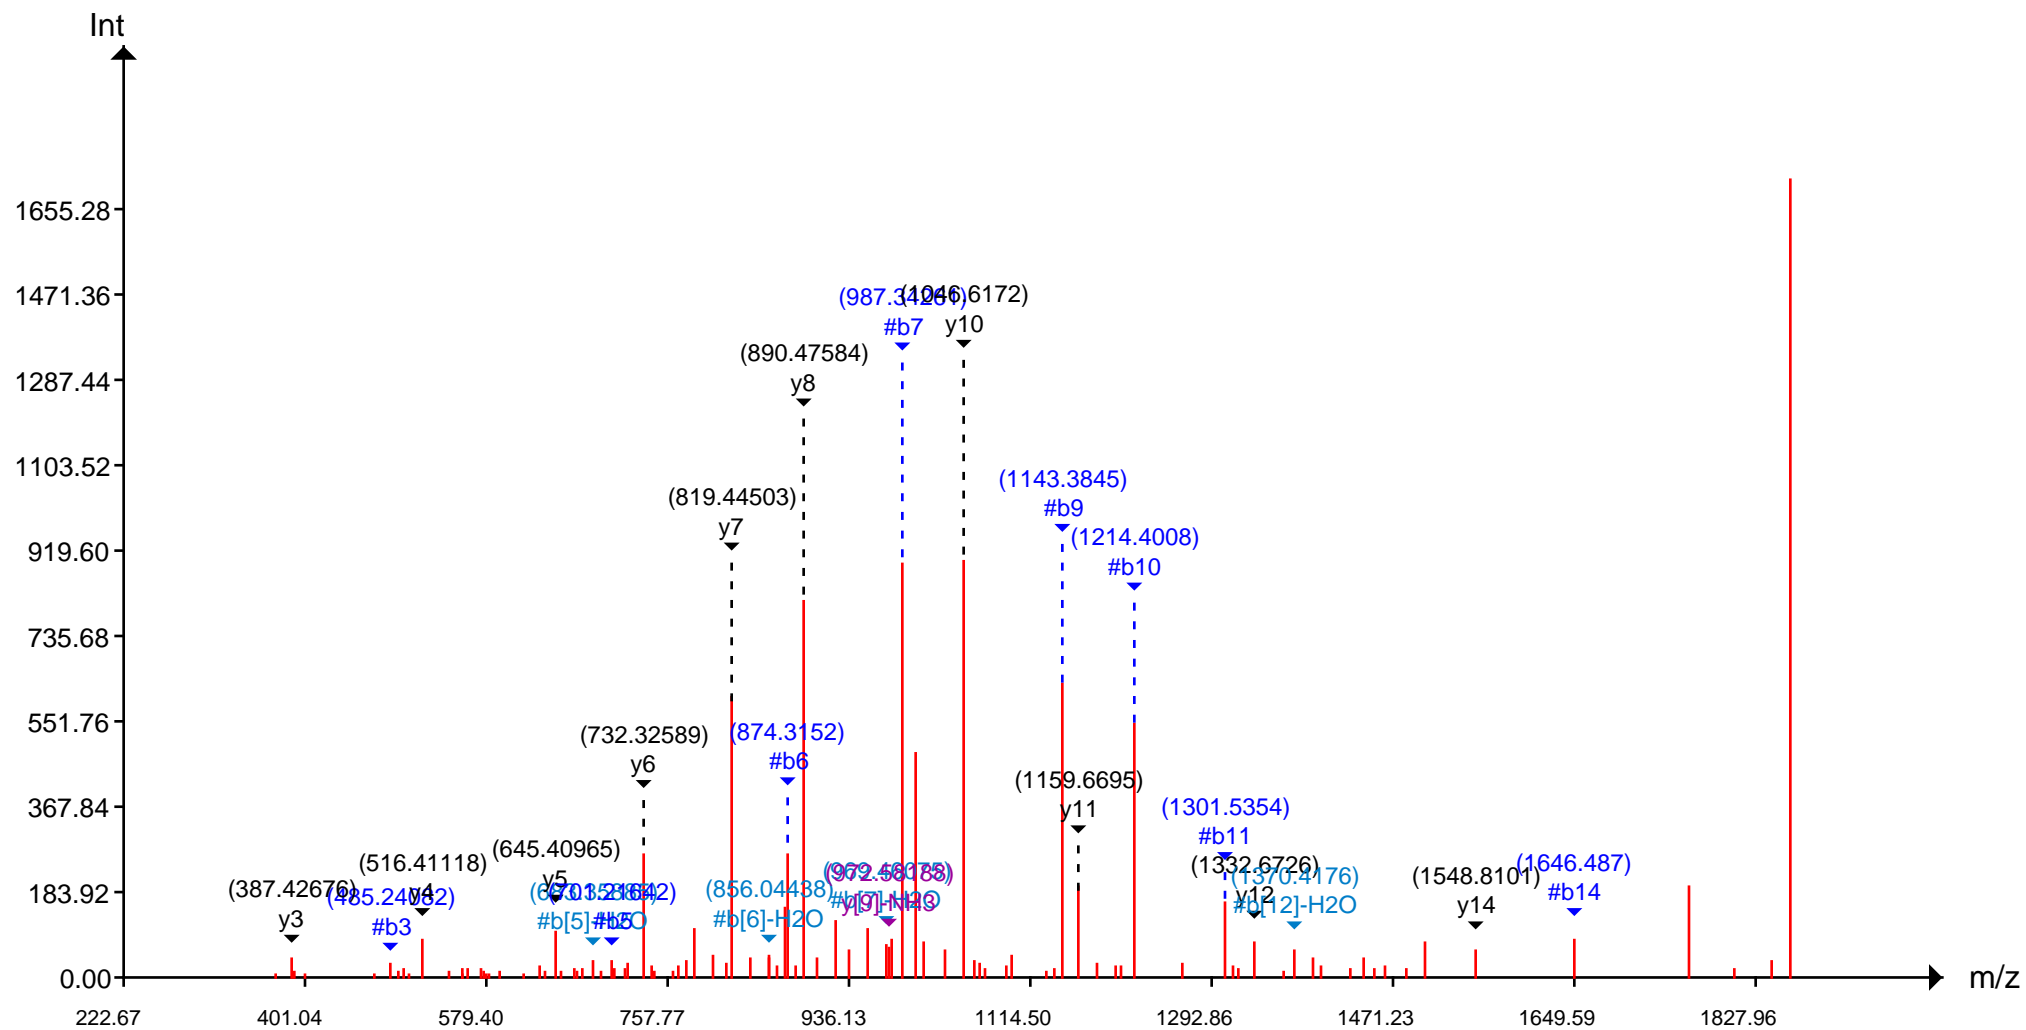

## Info

**Modified Sequence** AcD3-M<Mox\*>YESEK<AcD3K\*>IGVASSEELVR-COOH

**Ion score** 68.8

**Protein** Q9ERB0

**Confidence level** 99.00%

**Precursor m/z** 1017.0055

**Identity Threshold** 47.50

**Charge** 2+

**Mass error** 0.002338

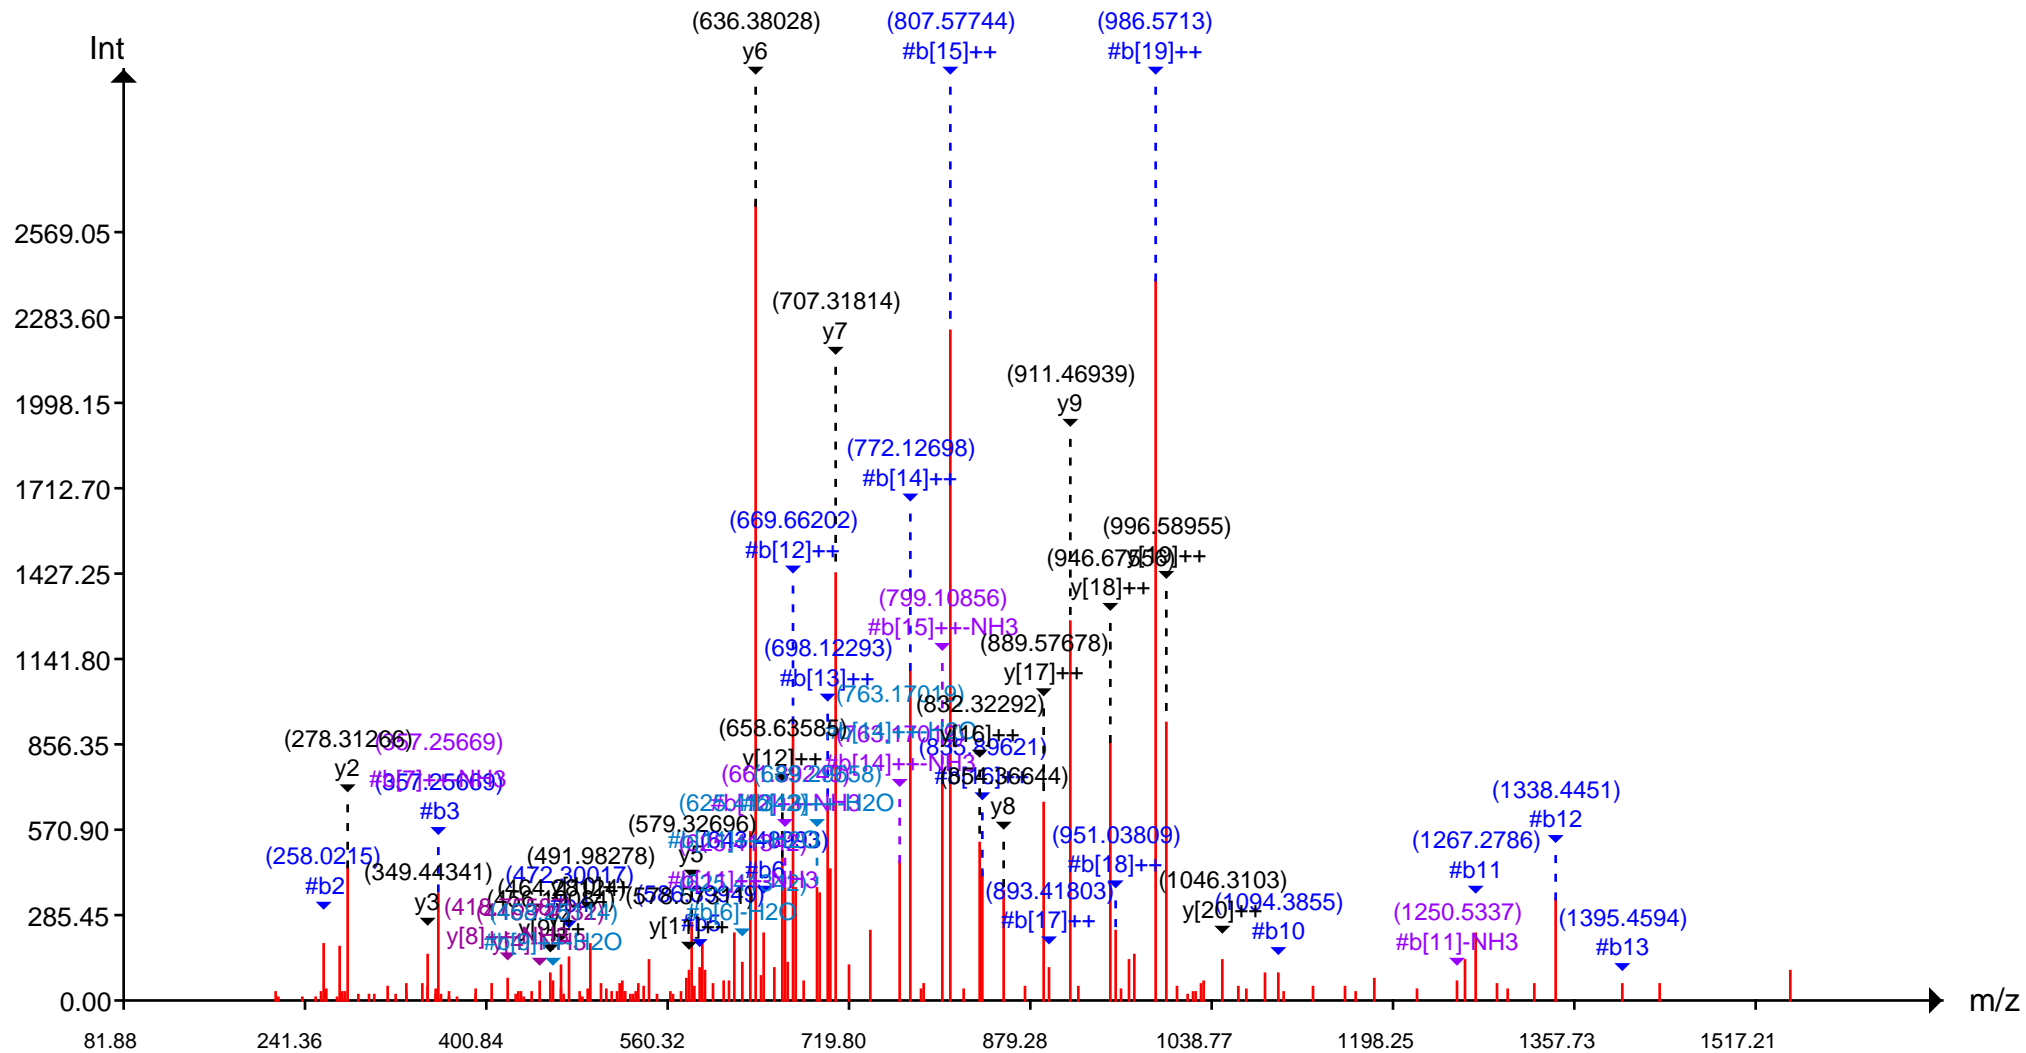

## Info

|                          |                                                          |                           |         |
|--------------------------|----------------------------------------------------------|---------------------------|---------|
| <b>Modified Sequence</b> | AcD3-LVVDNGSGM<Mox*>C<Cmm*>K<AcD3K*>AGFAGDDAPR<C13>-COOH | <b>Ion score</b>          | 65.62   |
| <b>Protein</b>           | P60710                                                   | <b>Confidence level</b>   | 99.00%  |
| <b>Precursor m/z</b>     | 750.35677                                                | <b>Identity Threshold</b> | 45.82   |
| <b>Charge</b>            | 3+                                                       | <b>Mass error</b>         | 0.00179 |

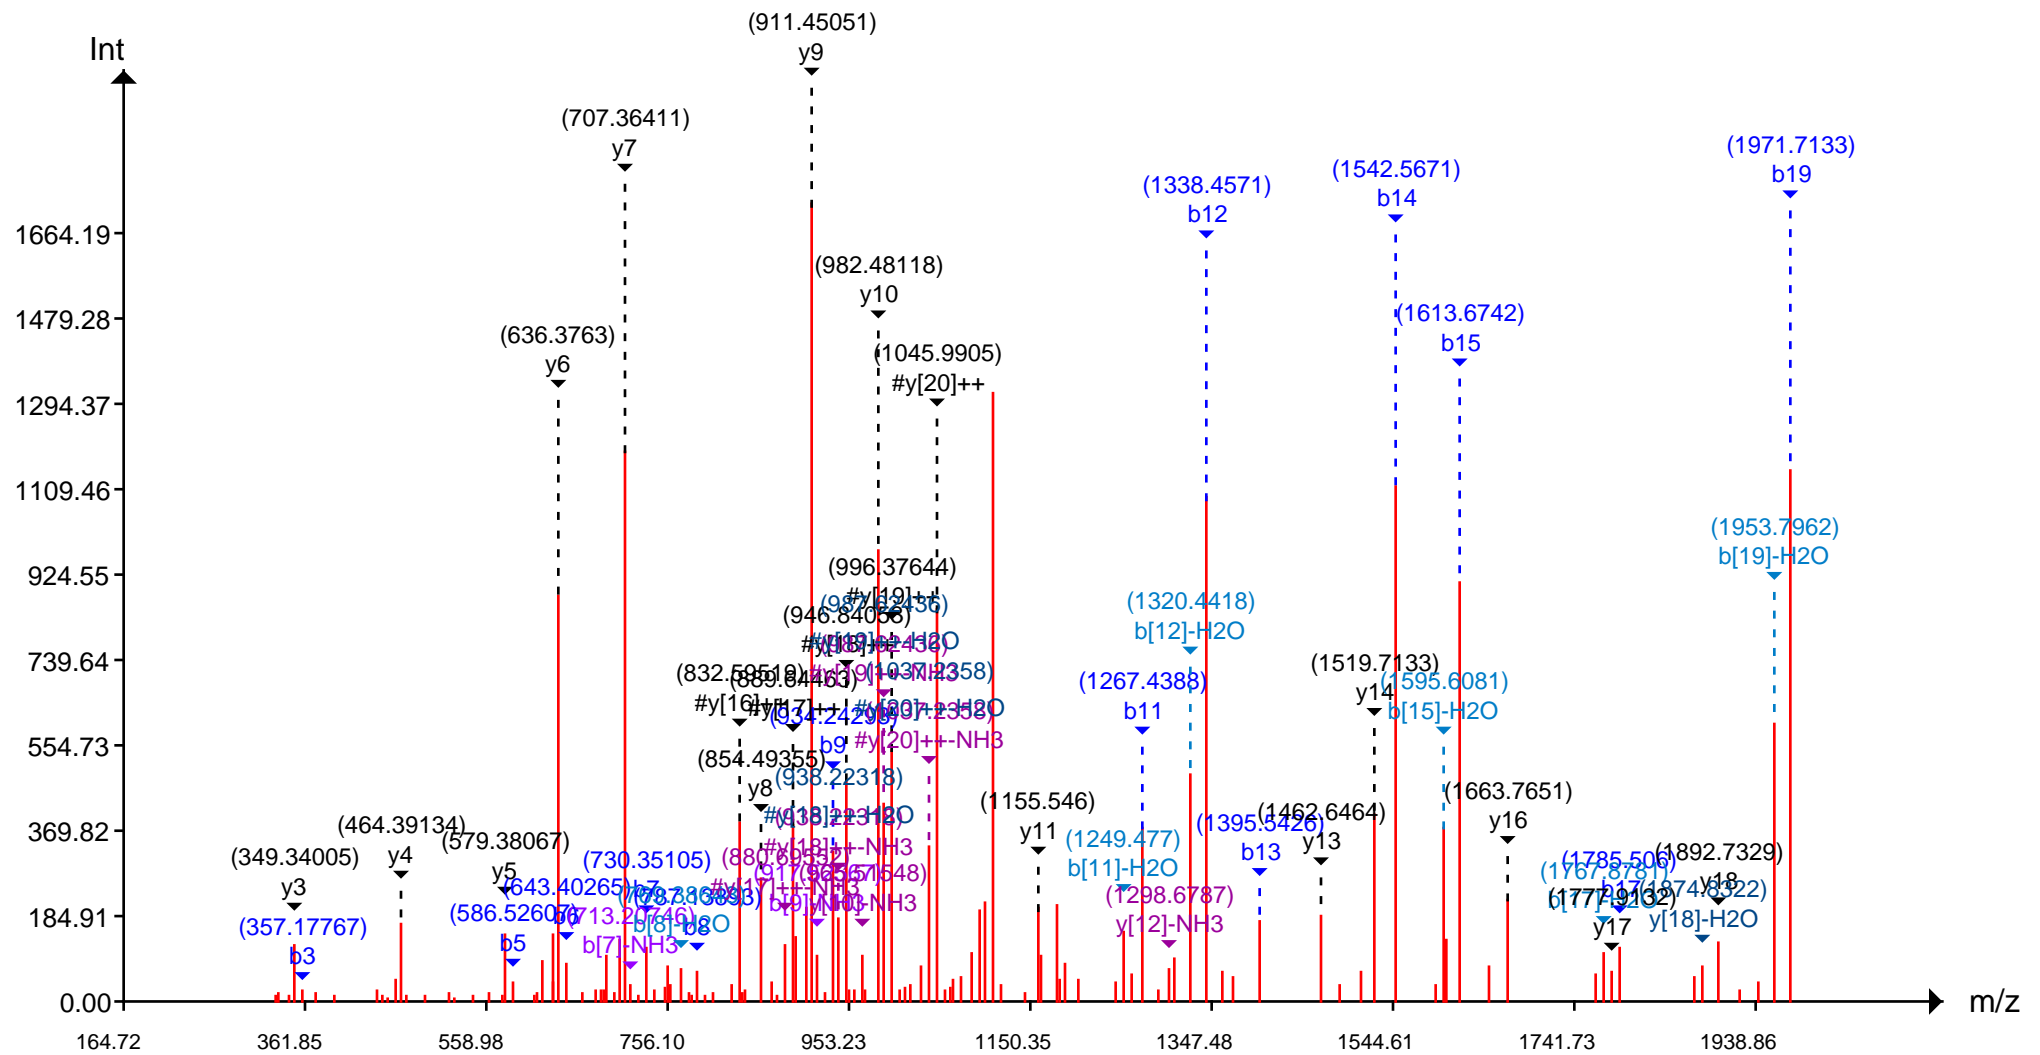

## Info

|                          |                                                          |                           |          |
|--------------------------|----------------------------------------------------------|---------------------------|----------|
| <b>Modified Sequence</b> | AcD3-LVVDNGSGM<Mox*>C<Cmm*>K<AcD3K*>AGFAGDDAPR<C13>-COOH | <b>Ion score</b>          | 119.81   |
| <b>Protein</b>           | P60710                                                   | <b>Confidence level</b>   | 99.00%   |
| <b>Precursor m/z</b>     | 1125.0315                                                | <b>Identity Threshold</b> | 45.83    |
| <b>Charge</b>            | 2+                                                       | <b>Mass error</b>         | 0.001756 |

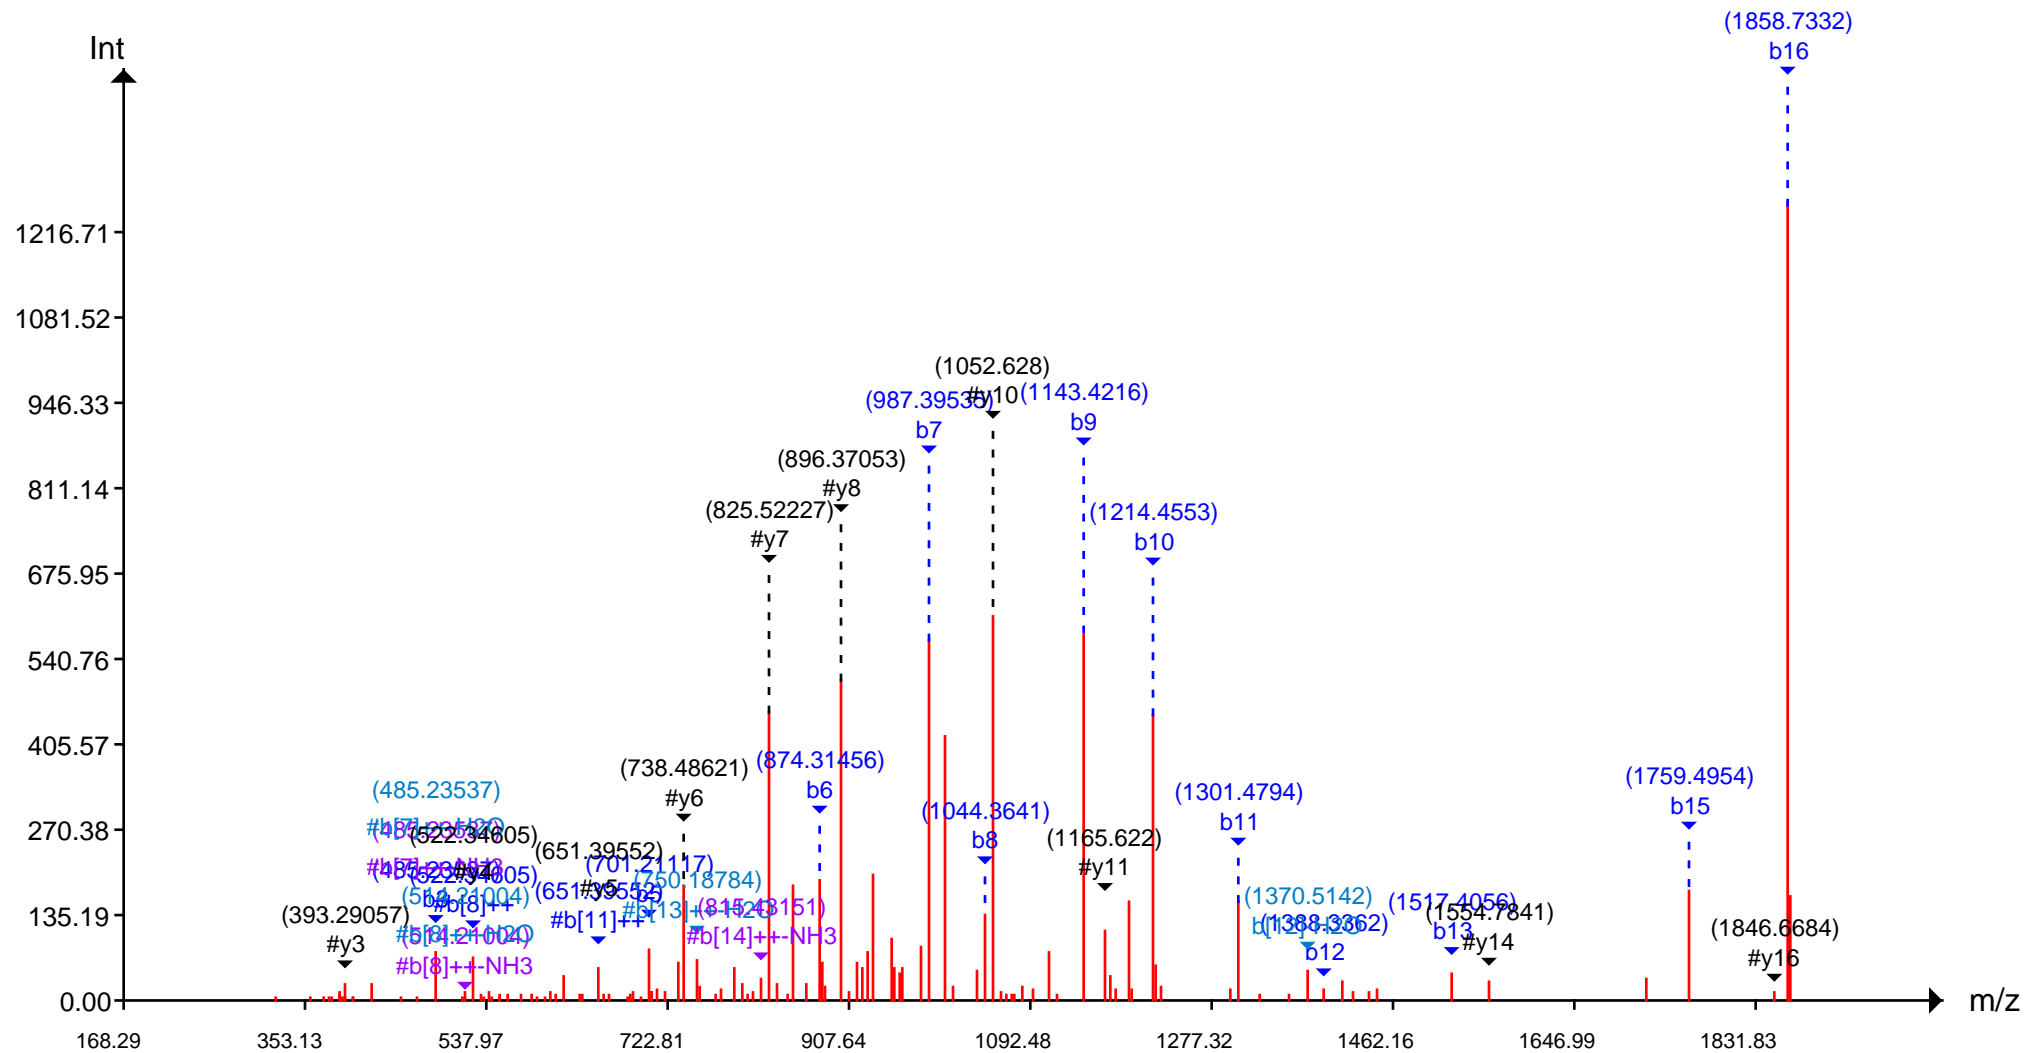

## Info

|                          |                                                |                           |          |
|--------------------------|------------------------------------------------|---------------------------|----------|
| <b>Modified Sequence</b> | AcD3-M<Mox*>YESEK<AcD3K*>IGVASSEELVR<C13>-COOH | <b>Ion score</b>          | 81.5     |
| <b>Protein</b>           | Q9ERB0                                         | <b>Confidence level</b>   | 99.00%   |
| <b>Precursor m/z</b>     | 1020.0157                                      | <b>Identity Threshold</b> | 47.95    |
| <b>Charge</b>            | 2+                                             | <b>Mass error</b>         | 0.002596 |





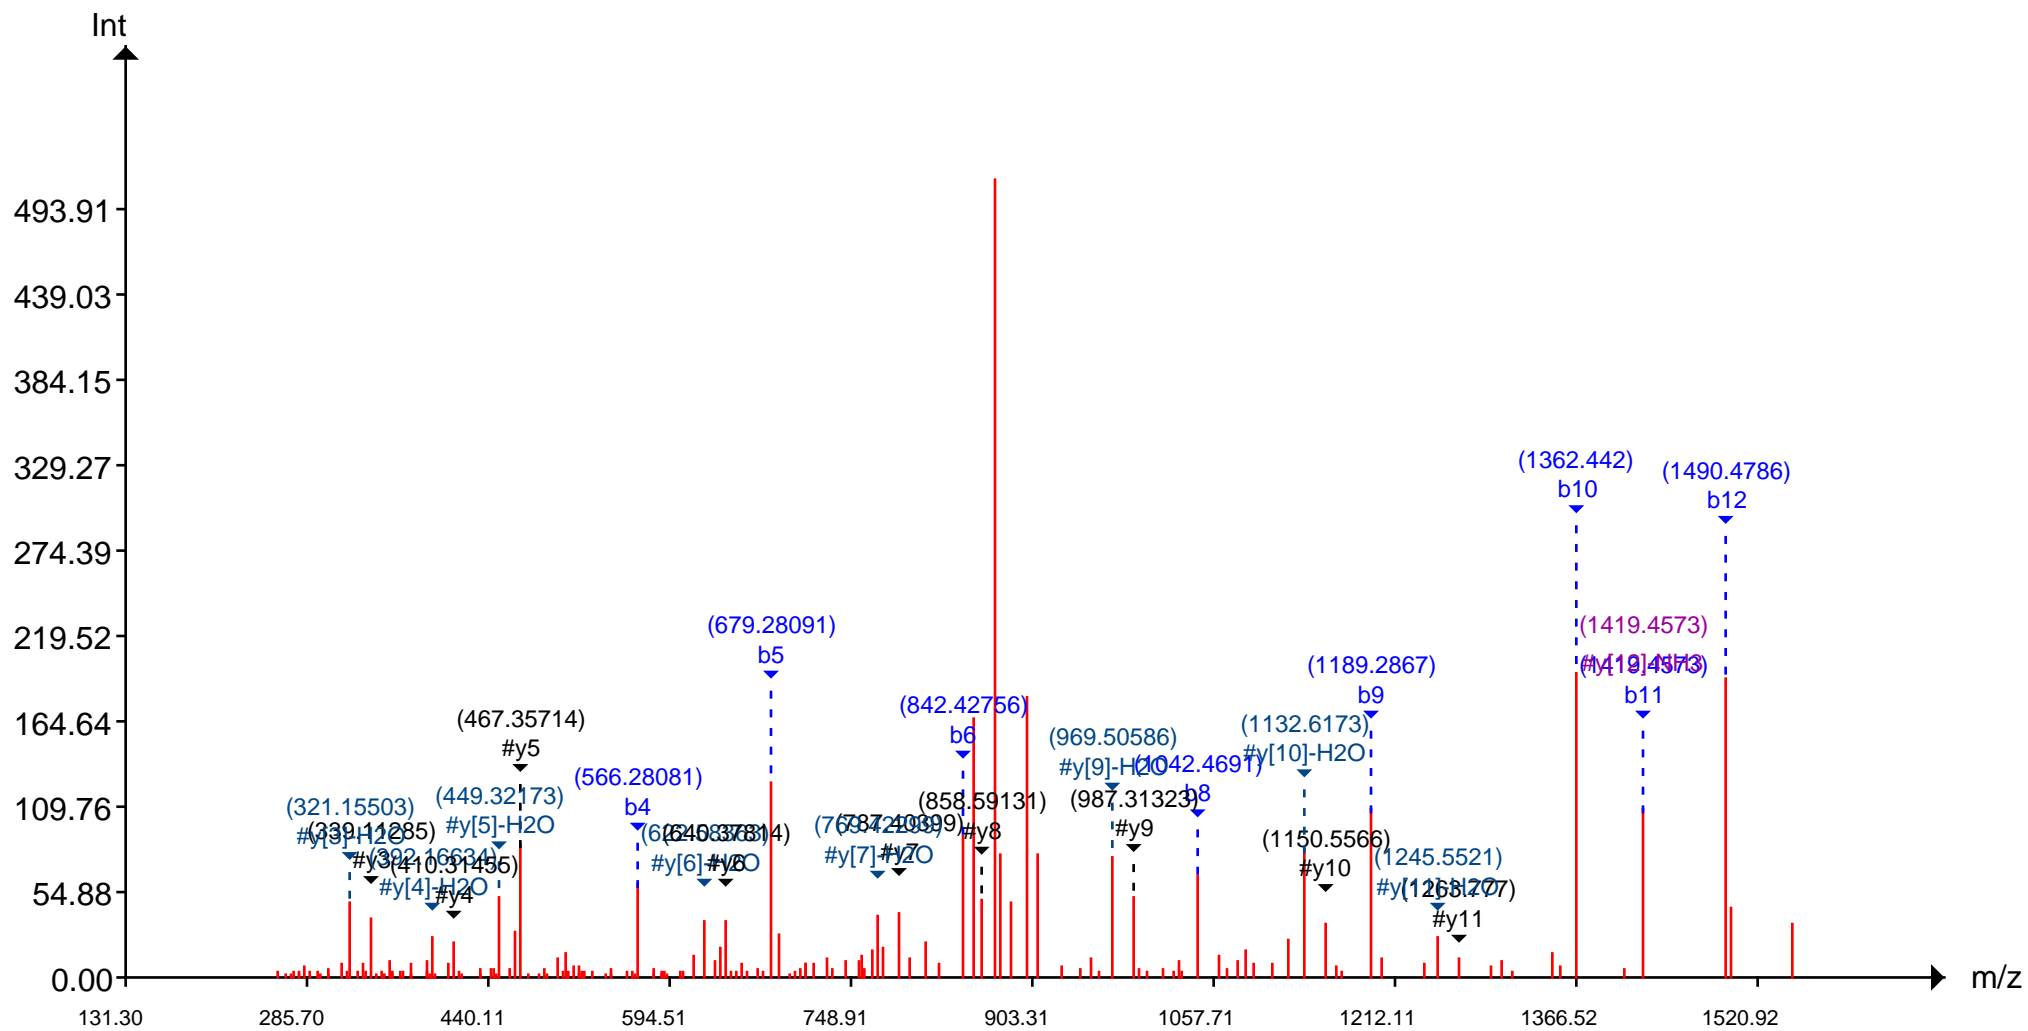

## Info

|                          |                                                      |                           |          |
|--------------------------|------------------------------------------------------|---------------------------|----------|
| <b>Modified Sequence</b> | AcD3-FAEK<AcD3K*>LYEAM<Mox*>K<AcD3K*>GAGTR<C13>-COOH | <b>Ion score</b>          | 58.38    |
| <b>Protein</b>           | P10107                                               | <b>Confidence level</b>   | 99.00%   |
| <b>Precursor m/z</b>     | 914.98286                                            | <b>Identity Threshold</b> | 48.12    |
| <b>Charge</b>            | 2+                                                   | <b>Mass error</b>         | 0.002926 |

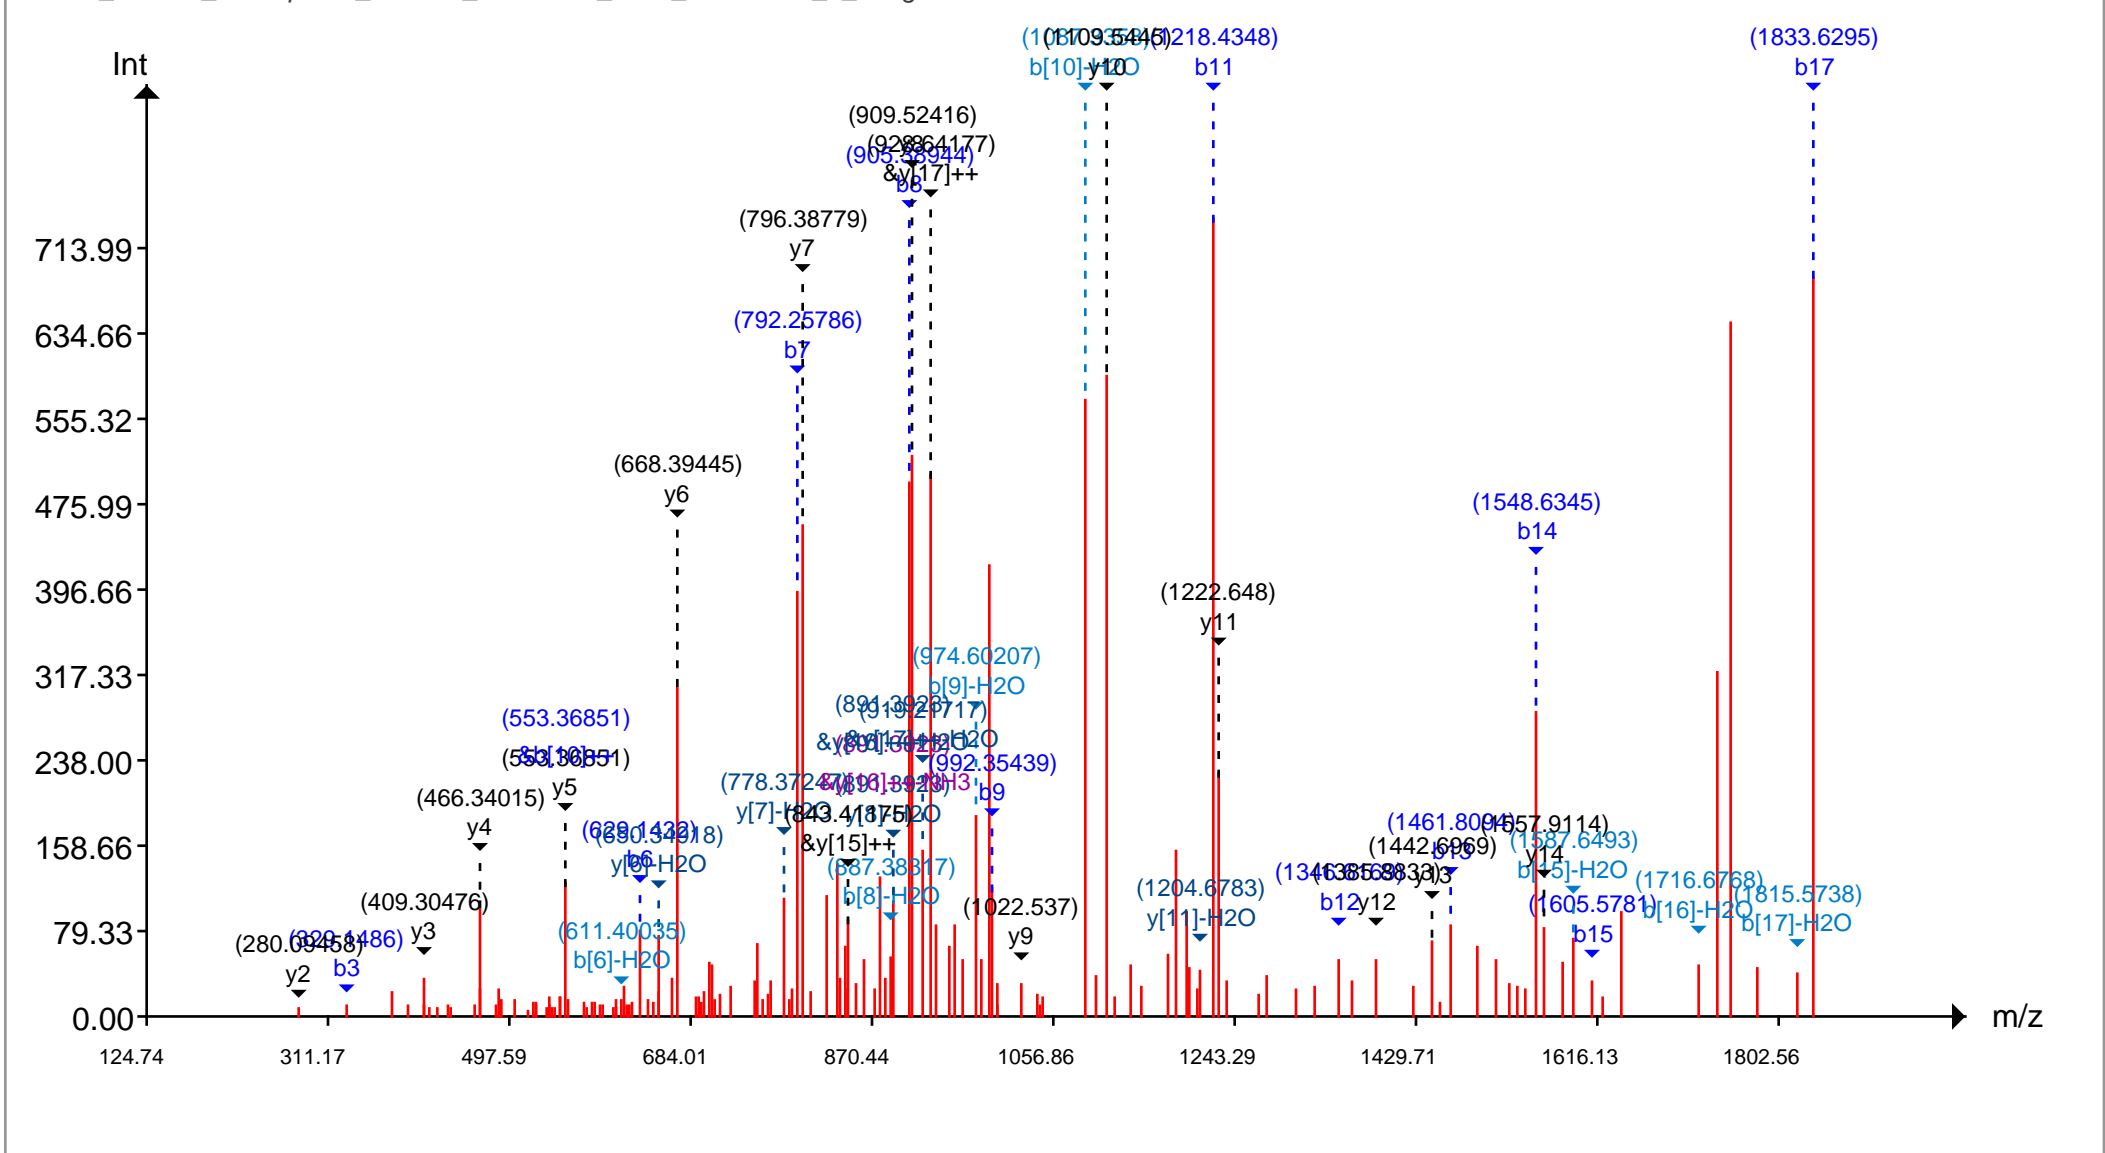

## Info

**Modified Sequence** AcD3-IGIQDGYLSLLQDSGEVR<C13>-COOH

**Ion score** 95.96

**Protein** P63242

**Confidence level** 99.00%

**Precursor m/z** 1007.5356

**Identity Threshold** 47.90

**Charge** 2+

**Mass error** 0.001304

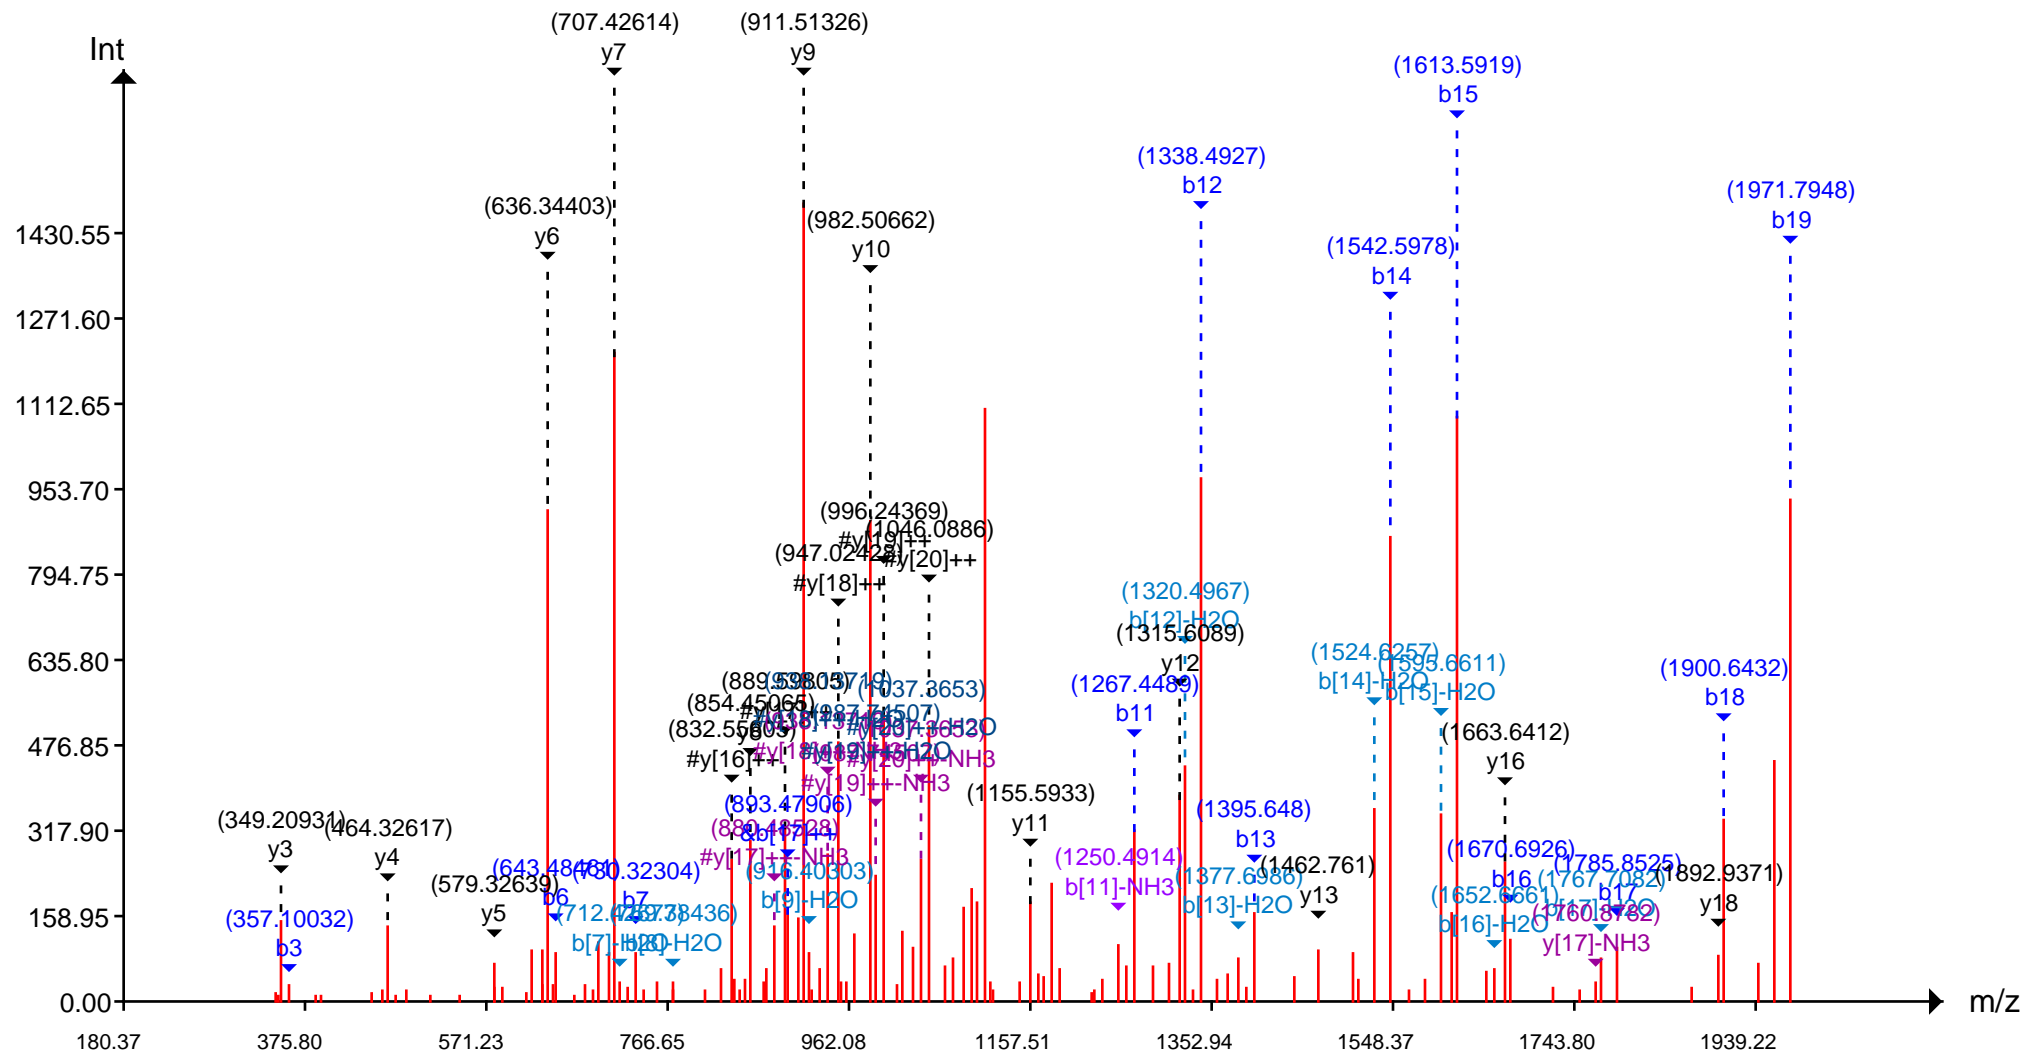

## Info

|                          |                                                          |                           |          |
|--------------------------|----------------------------------------------------------|---------------------------|----------|
| <b>Modified Sequence</b> | AcD3-LVVDNGSGM<Mox*>C<Cmm*>K<AcD3K*>AGFAGDDAPR<C13>-COOH | <b>Ion score</b>          | 102.78   |
| <b>Protein</b>           | P60710                                                   | <b>Confidence level</b>   | 99.00%   |
| <b>Precursor m/z</b>     | 1125.0317                                                | <b>Identity Threshold</b> | 45.83    |
| <b>Charge</b>            | 2+                                                       | <b>Mass error</b>         | 0.002156 |

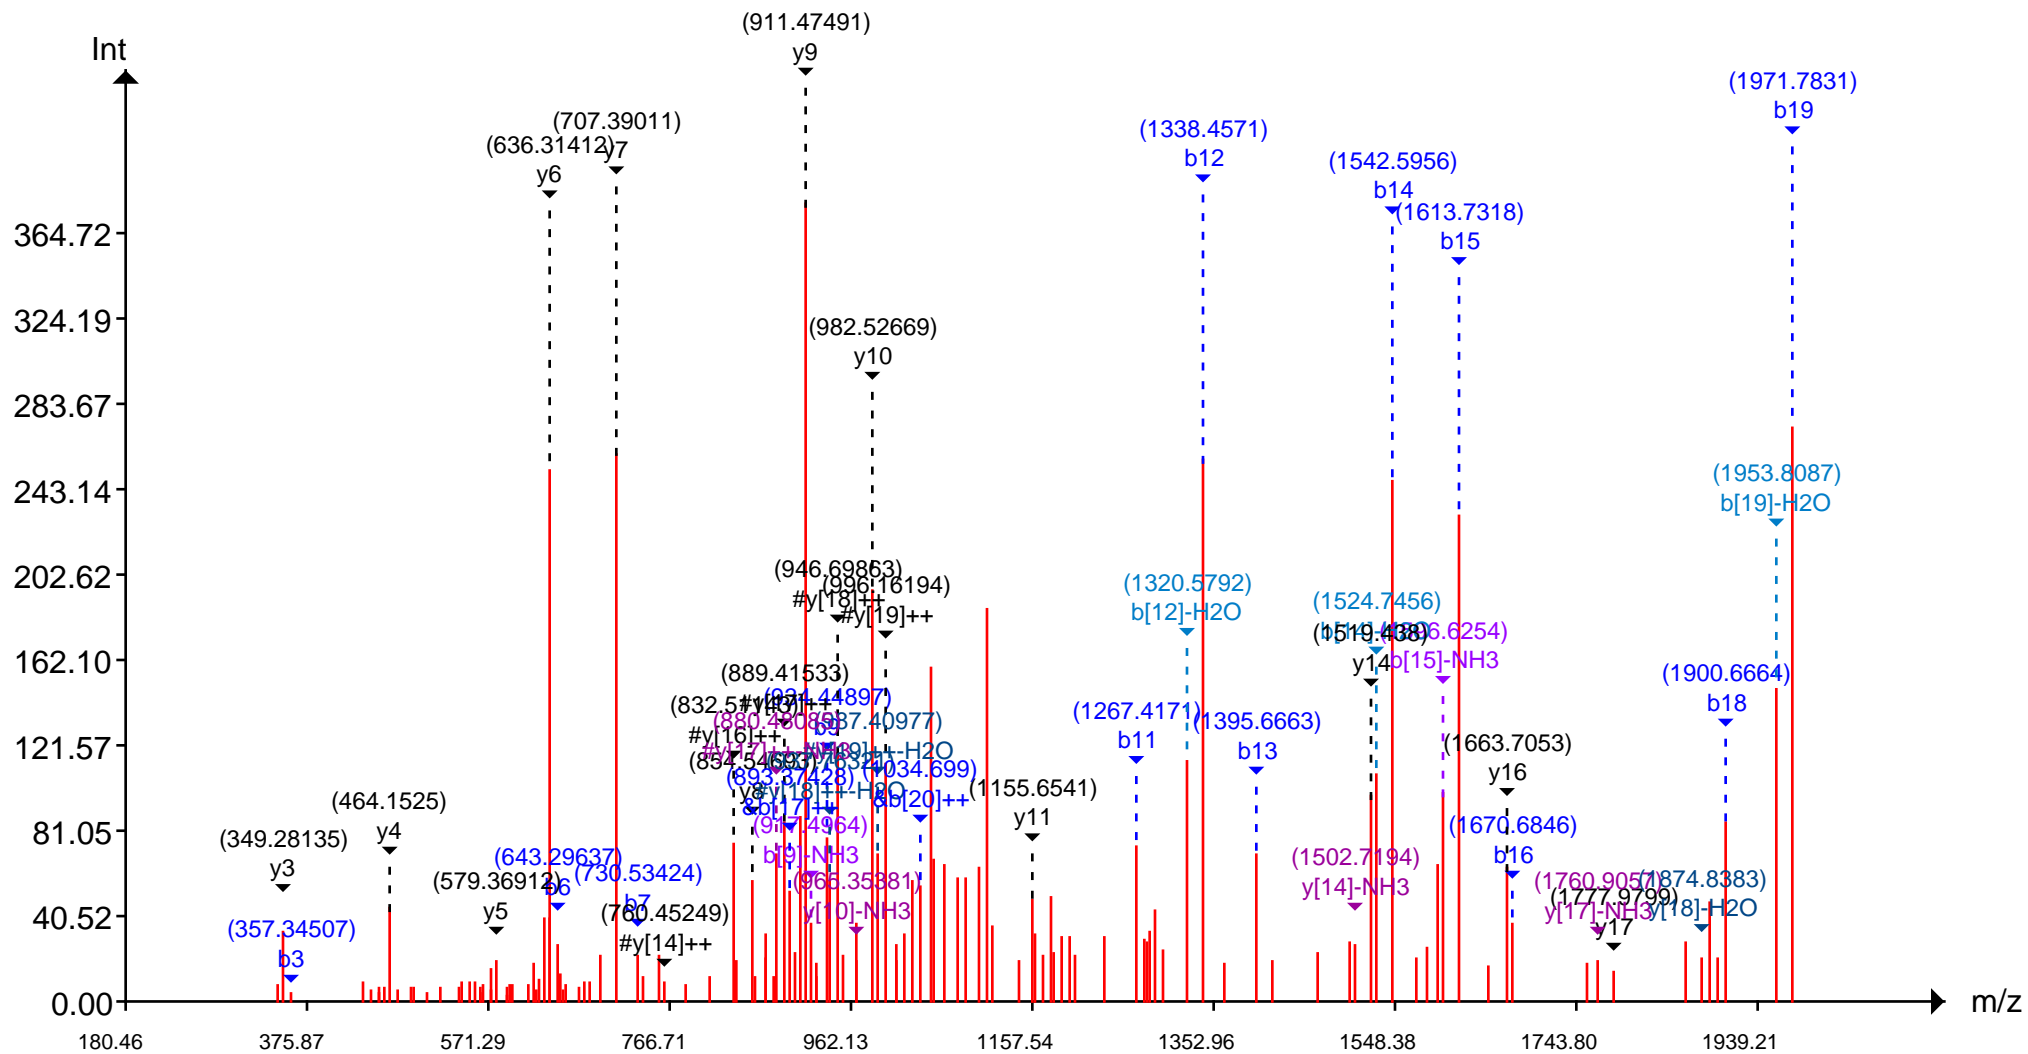

## Info

|                          |                                                          |                           |          |
|--------------------------|----------------------------------------------------------|---------------------------|----------|
| <b>Modified Sequence</b> | AcD3-LVVDNGSGM<Mox*>C<Cmm*>K<AcD3K*>AGFAGDDAPR<C13>-COOH | <b>Ion score</b>          | 77.5     |
| <b>Protein</b>           | P60710                                                   | <b>Confidence level</b>   | 99.00%   |
| <b>Precursor m/z</b>     | 1125.0321                                                | <b>Identity Threshold</b> | 45.87    |
| <b>Charge</b>            | 2+                                                       | <b>Mass error</b>         | 0.002956 |

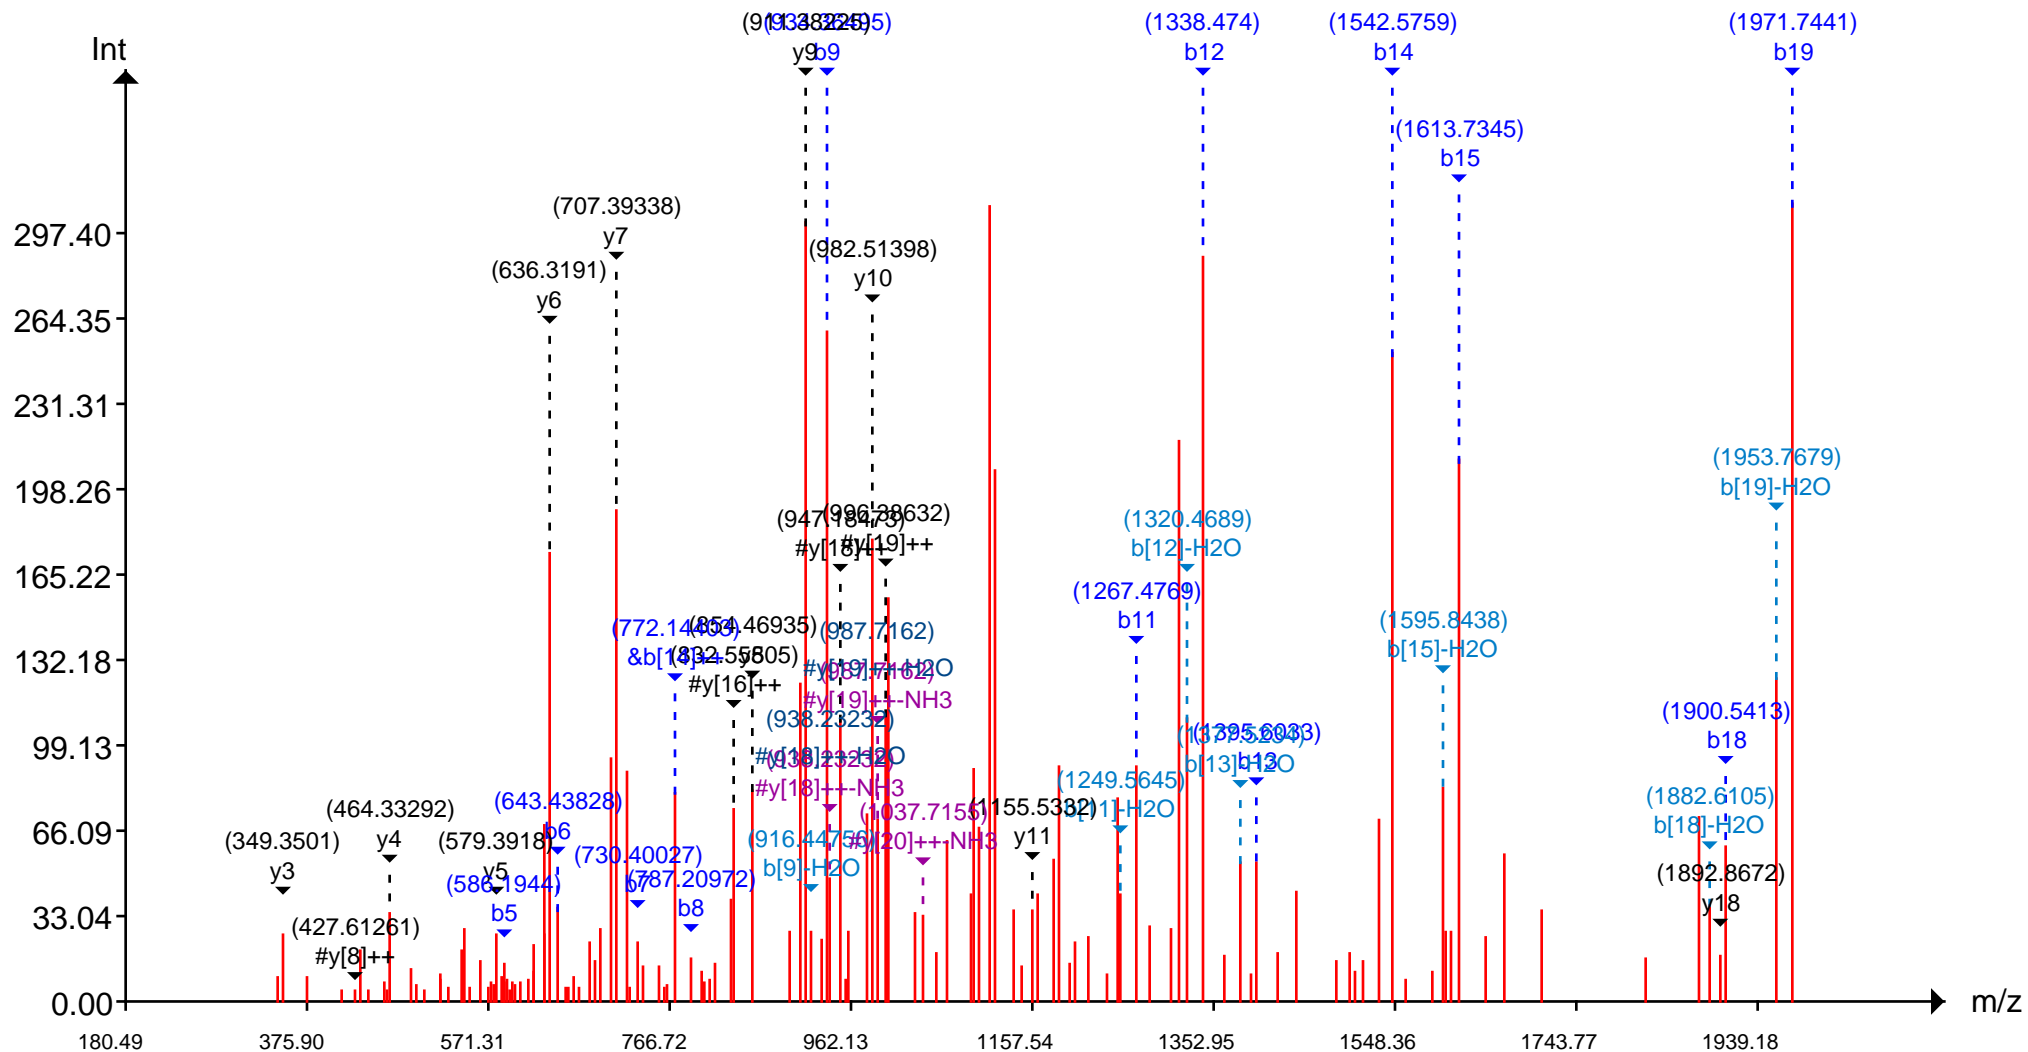

## Info

|                          |                                                          |                           |          |
|--------------------------|----------------------------------------------------------|---------------------------|----------|
| <b>Modified Sequence</b> | AcD3-LVVDNGSGM<Mox*>C<Cmm*>K<AcD3K*>AGFAGDDAPR<C13>-COOH | <b>Ion score</b>          | 53.26    |
| <b>Protein</b>           | P60710                                                   | <b>Confidence level</b>   | 99.00%   |
| <b>Precursor m/z</b>     | 1125.032                                                 | <b>Identity Threshold</b> | 45.84    |
| <b>Charge</b>            | 2+                                                       | <b>Mass error</b>         | 0.002756 |

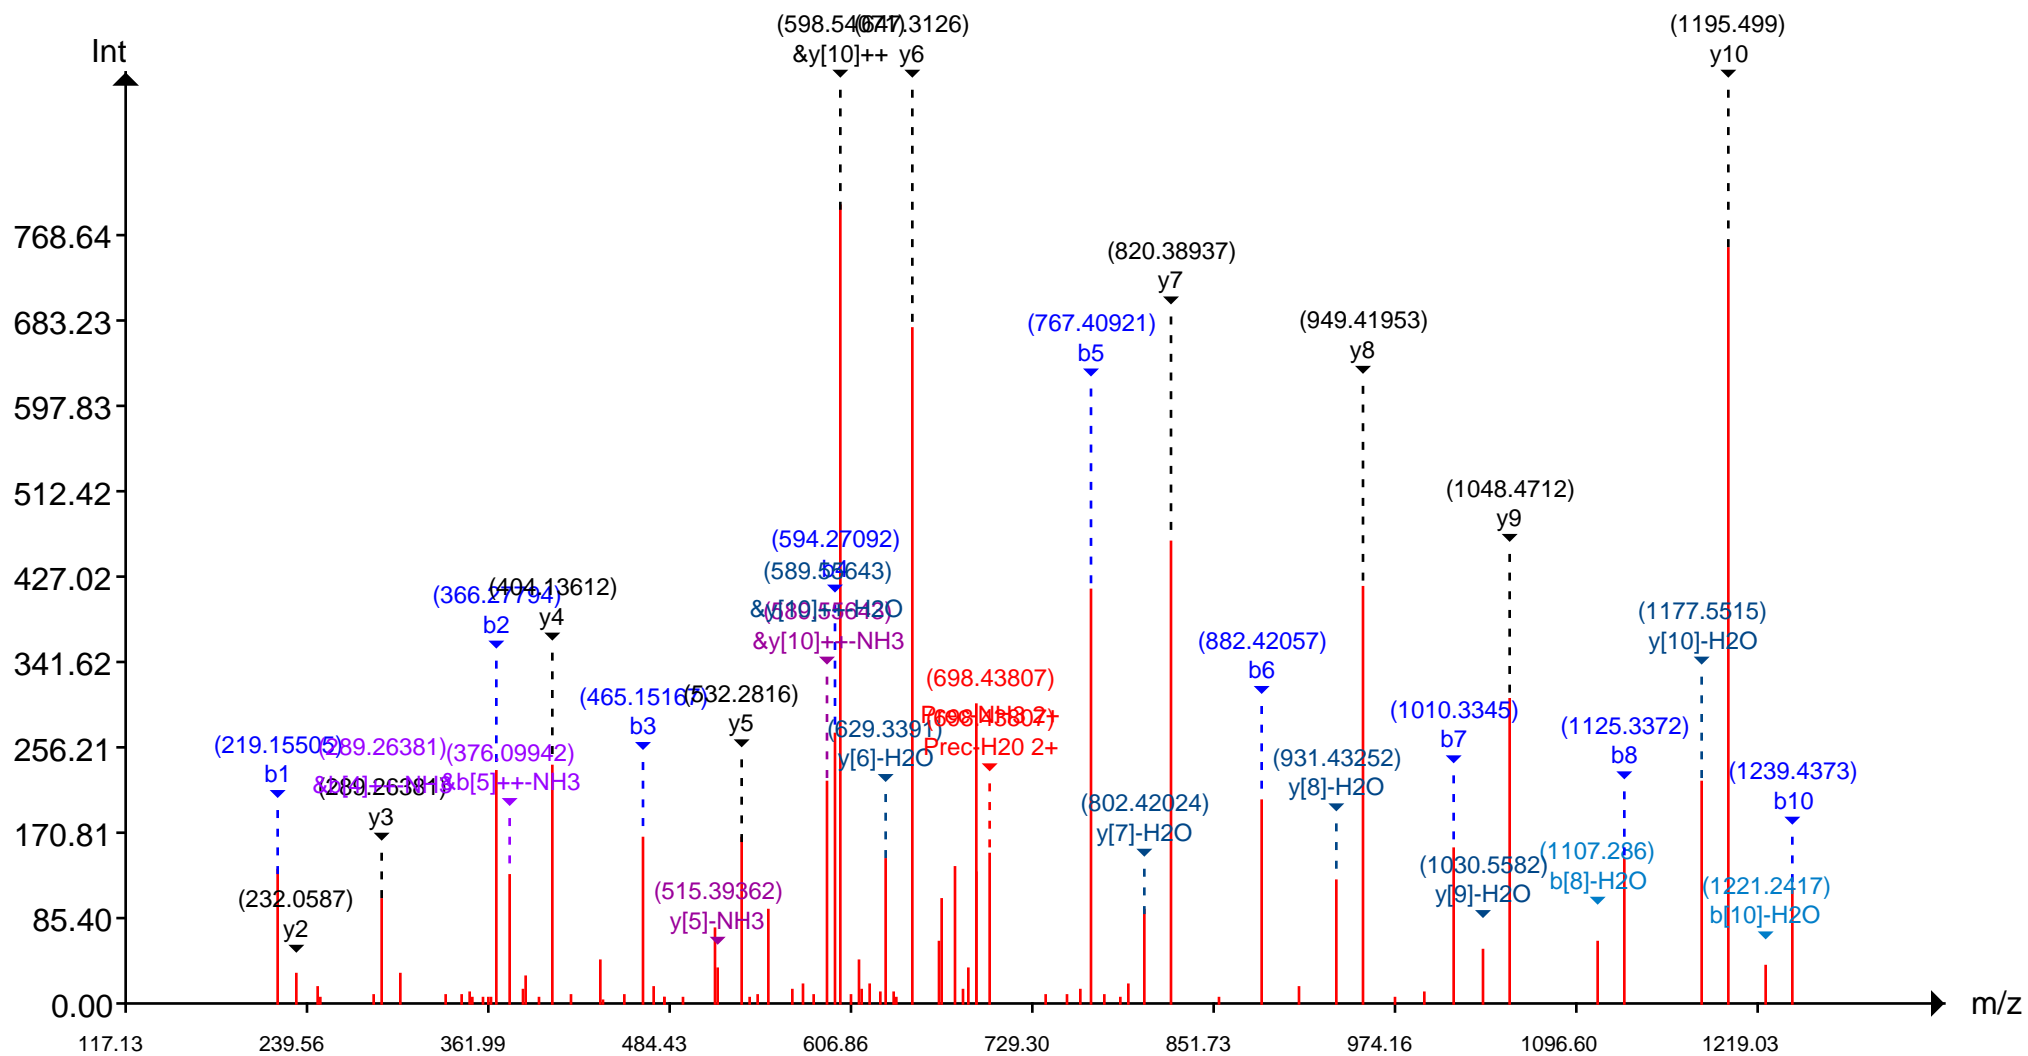

## Info

|                          |                                             |                           |          |
|--------------------------|---------------------------------------------|---------------------------|----------|
| <b>Modified Sequence</b> | AcD3-K<AcD3K*>M<Mox*>VEK<AcD3K*>DQDGGR-COOH | <b>Ion score</b>          | 86.37    |
| <b>Protein</b>           | Q9CZX8                                      | <b>Confidence level</b>   | 99.00%   |
| <b>Precursor m/z</b>     | 707.35404                                   | <b>Identity Threshold</b> | 47.65    |
| <b>Charge</b>            | 2+                                          | <b>Mass error</b>         | 0.001939 |

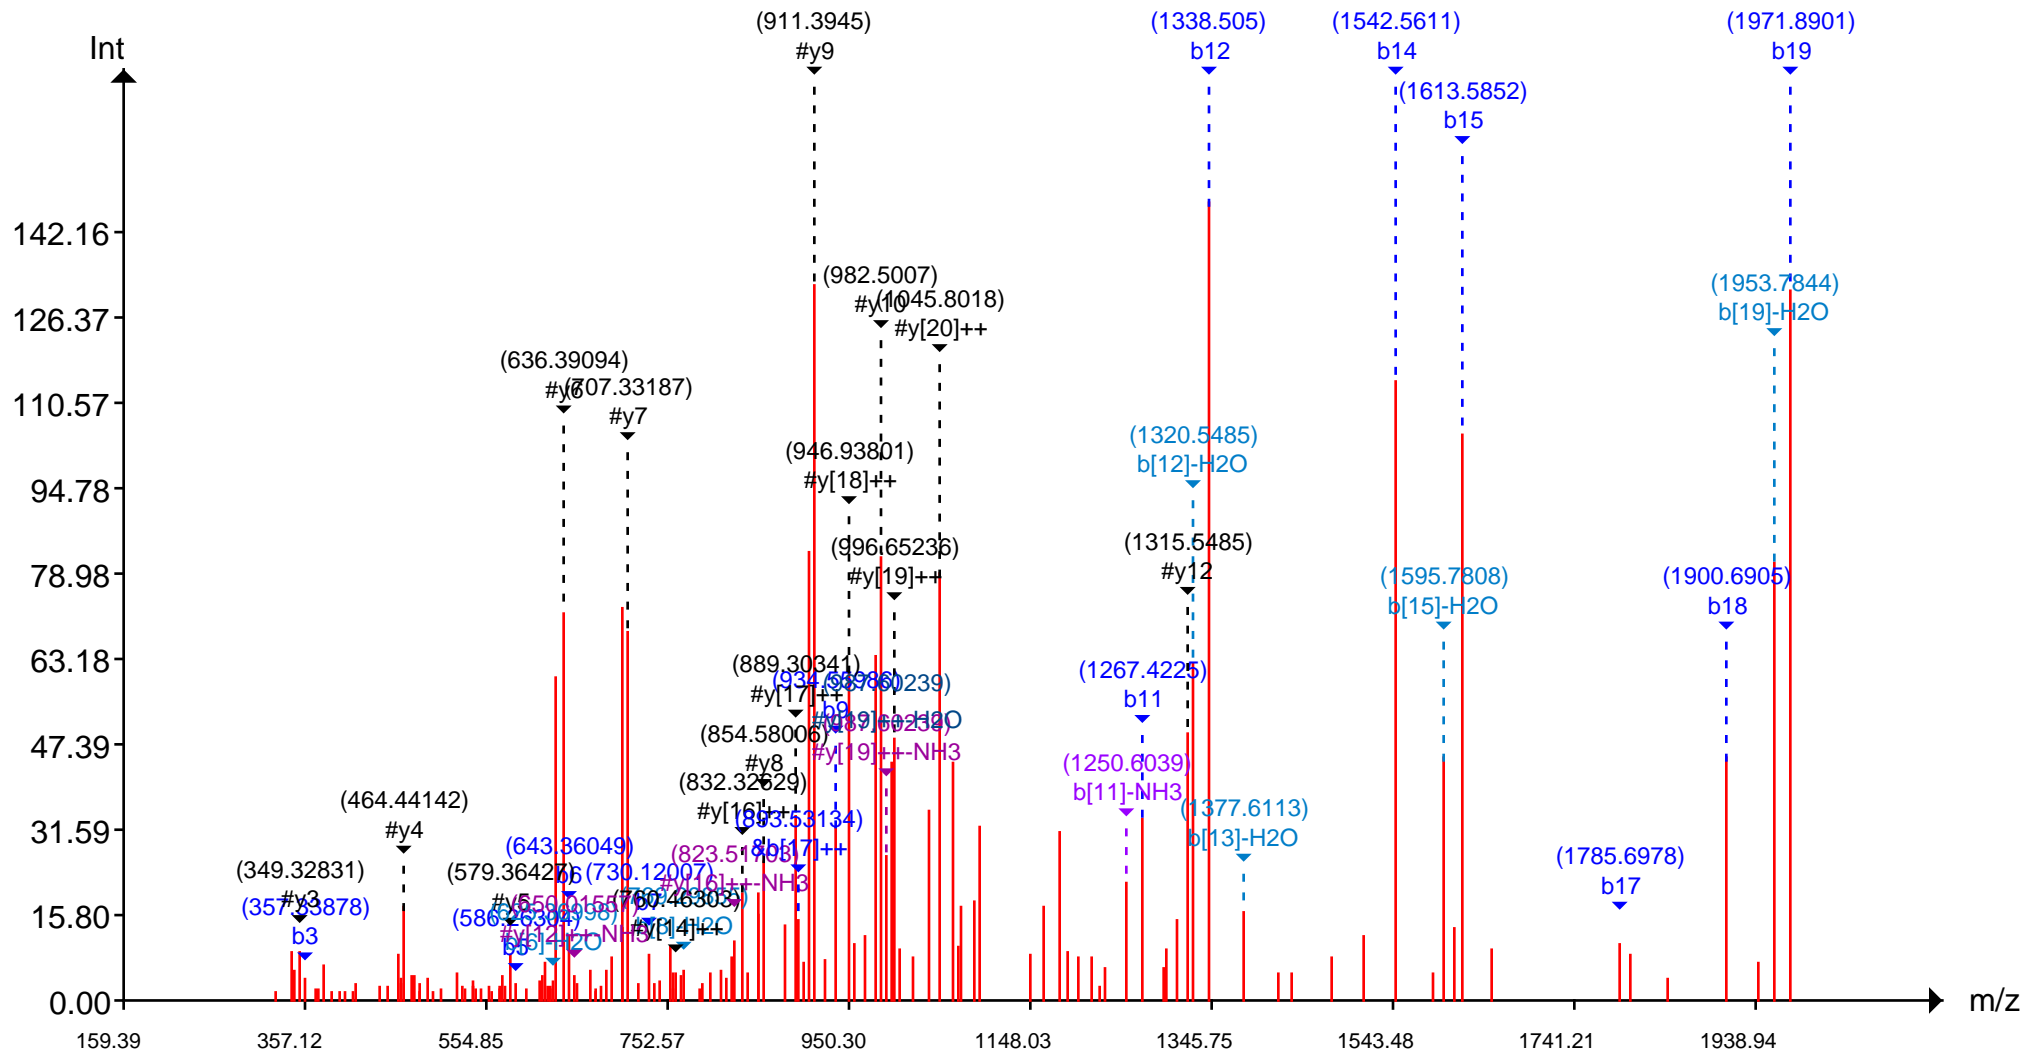

## Info

|                          |                                                          |                           |          |
|--------------------------|----------------------------------------------------------|---------------------------|----------|
| <b>Modified Sequence</b> | AcD3-LVVDNGSGM<Mox*>C<Cmm*>K<AcD3K*>AGFAGDDAPR<C13>-COOH | <b>Ion score</b>          | 51.91    |
| <b>Protein</b>           | P60710                                                   | <b>Confidence level</b>   | 99.00%   |
| <b>Precursor m/z</b>     | 1125.0323                                                | <b>Identity Threshold</b> | 45.87    |
| <b>Charge</b>            | 2+                                                       | <b>Mass error</b>         | 0.003356 |

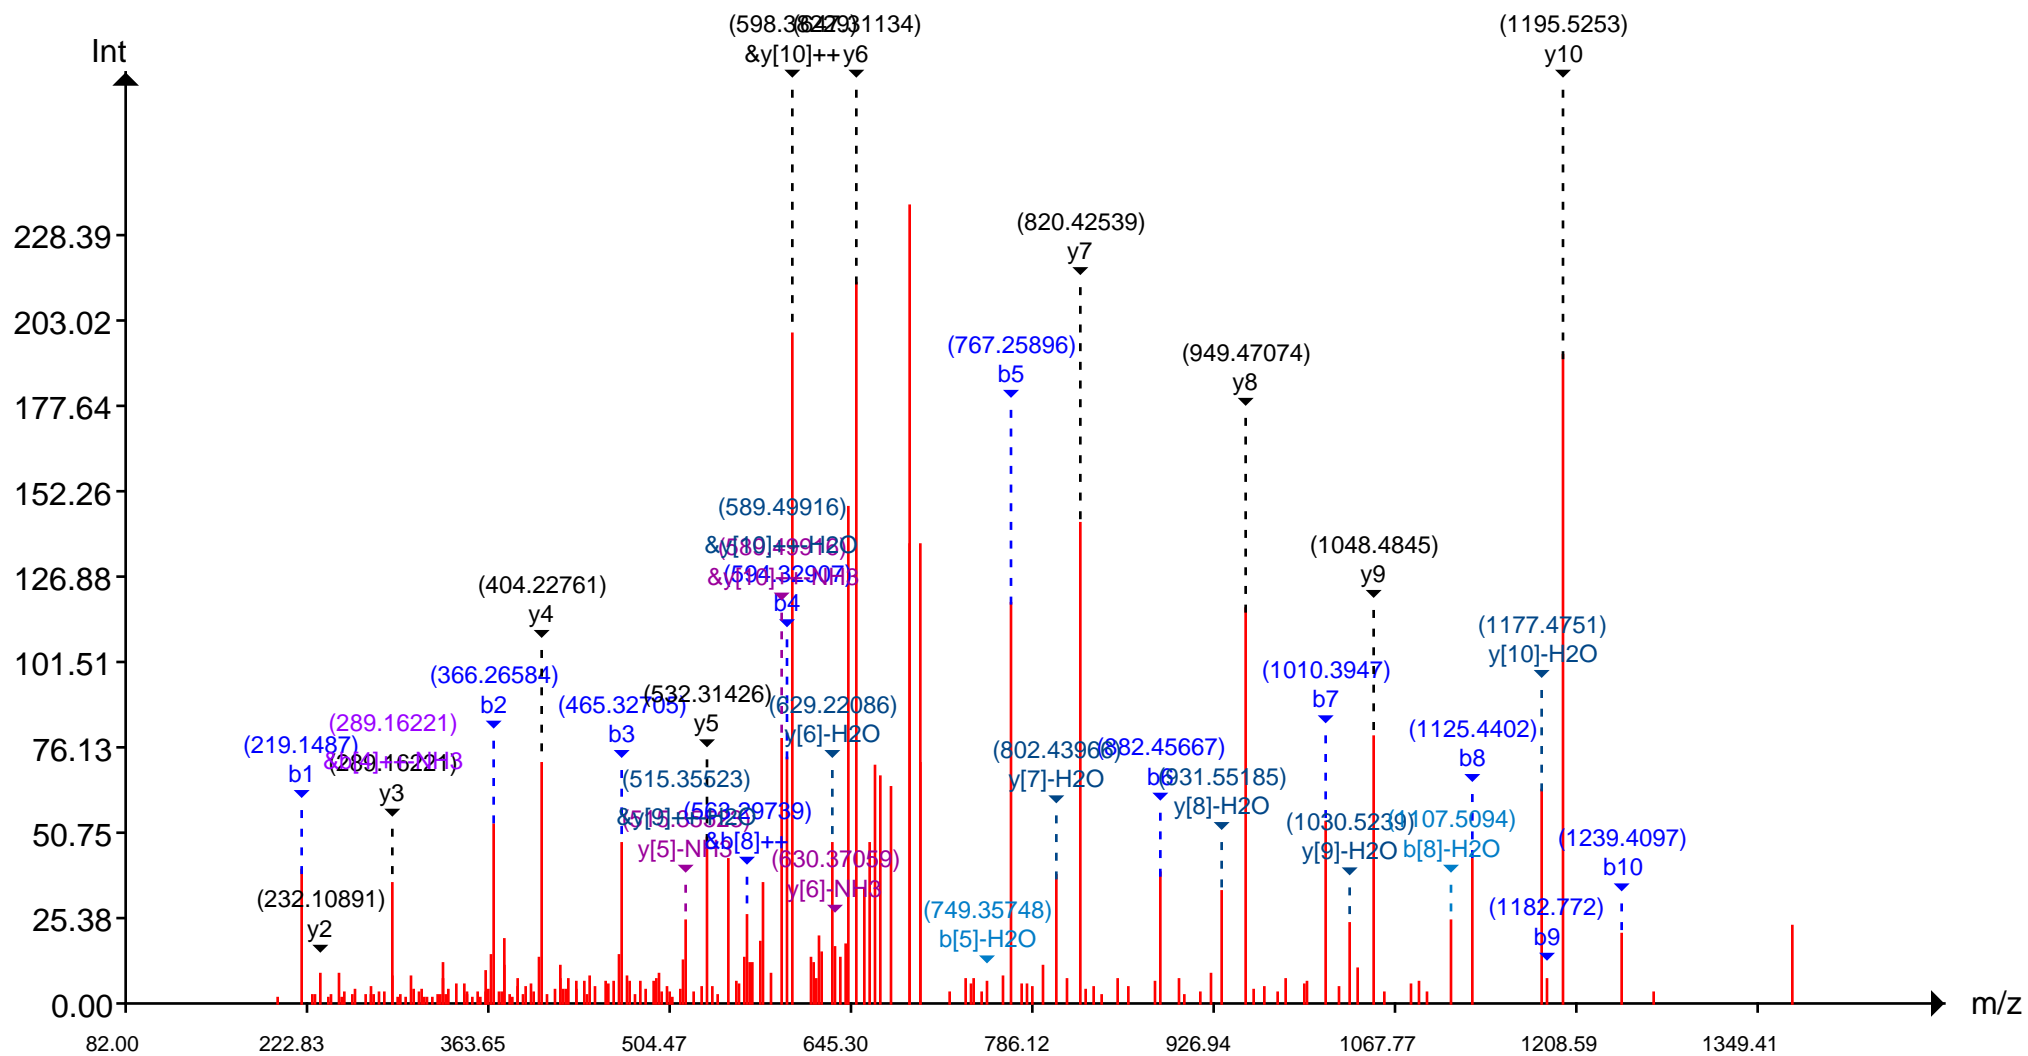

## Info

|                          |                                             |                           |         |
|--------------------------|---------------------------------------------|---------------------------|---------|
| <b>Modified Sequence</b> | AcD3-K<AcD3K*>M<Mox*>VEK<AcD3K*>DQDGGR-COOH | <b>Ion score</b>          | 70.1    |
| <b>Protein</b>           | Q9CZX8                                      | <b>Confidence level</b>   | 99.00%  |
| <b>Precursor m/z</b>     | 707.3534                                    | <b>Identity Threshold</b> | 47.51   |
| <b>Charge</b>            | 2+                                          | <b>Mass error</b>         | 6.59E-4 |



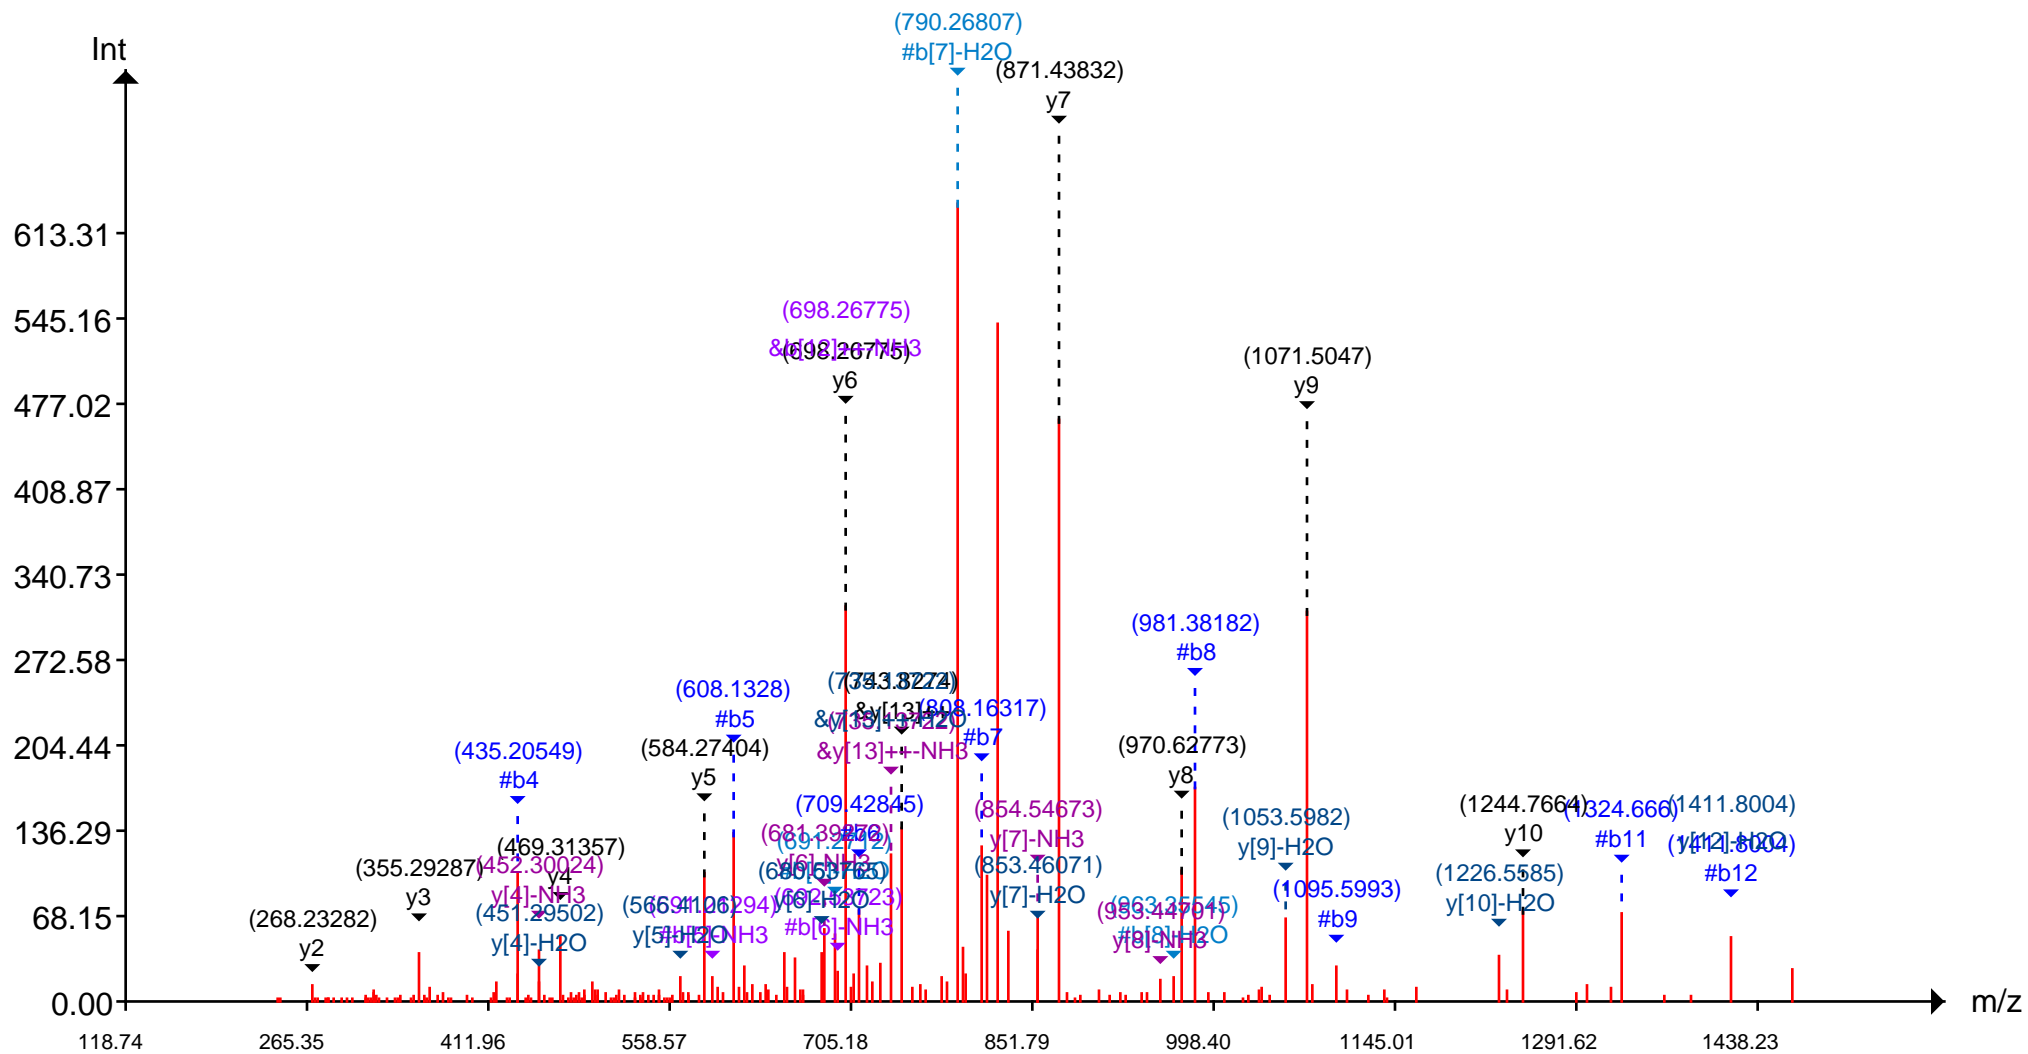

## Info

|                          |                                               |                           |        |
|--------------------------|-----------------------------------------------|---------------------------|--------|
| <b>Modified Sequence</b> | AcD3-FGNAK<AcD3K*>TVK<AcD3K*>NDNSSR<C13>-COOH | <b>Ion score</b>          | 78.37  |
| <b>Protein</b>           | Q61879, O08638, Q6URW6, Q8VDD5                | <b>Confidence level</b>   | 99.00% |
| <b>Precursor m/z</b>     | 839.94371                                     | <b>Identity Threshold</b> | 48.14  |
| <b>Charge</b>            | 2+                                            | <b>Mass error</b>         | 8.1E-5 |

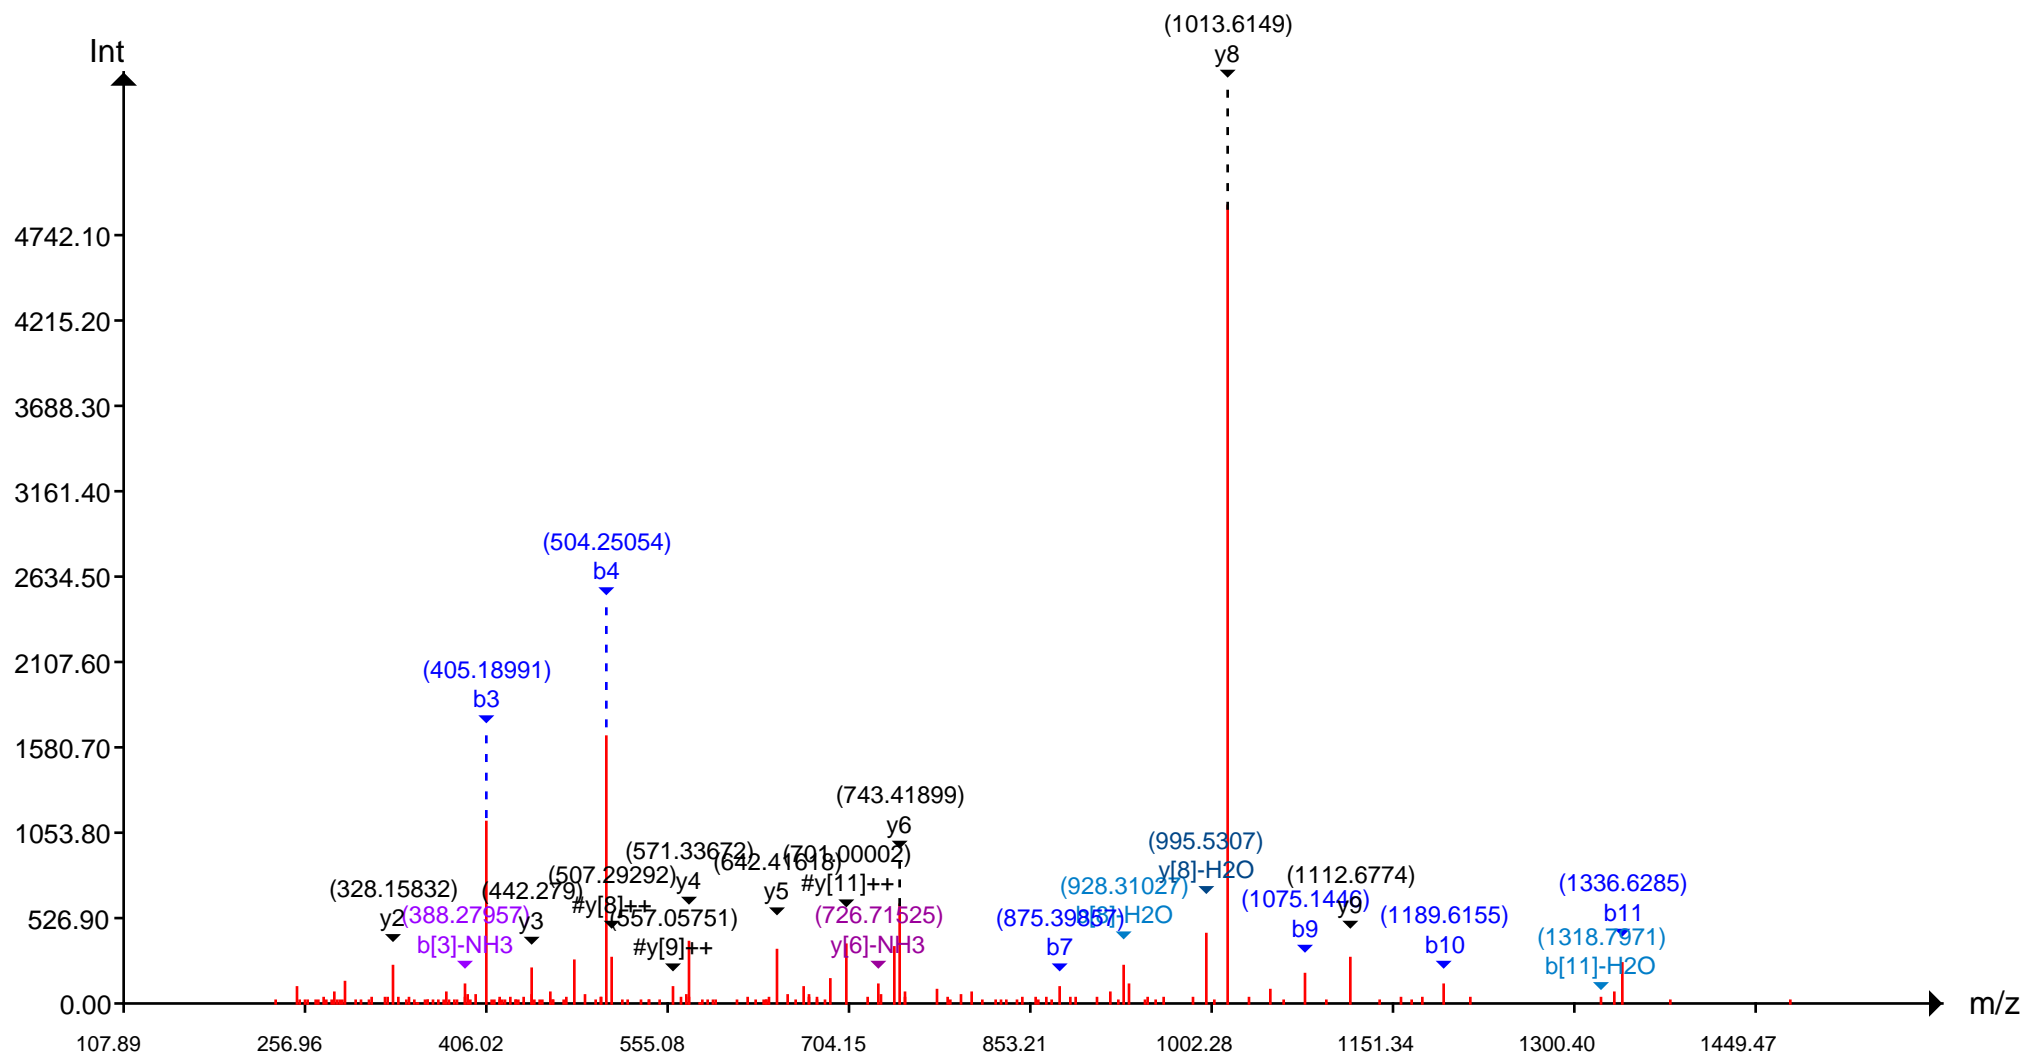

## Info

**Modified Sequence** AcD3-ADK<AcD3K\*>VPK<AcD3K\*>TAENFR<C13>-COOH

**Ion score** 48.76

**Protein** P17742

**Confidence level** 99.00%

**Precursor m/z** 758.9248

**Identity Threshold** 47.20

**Charge** 2+

**Mass error** 0.00117

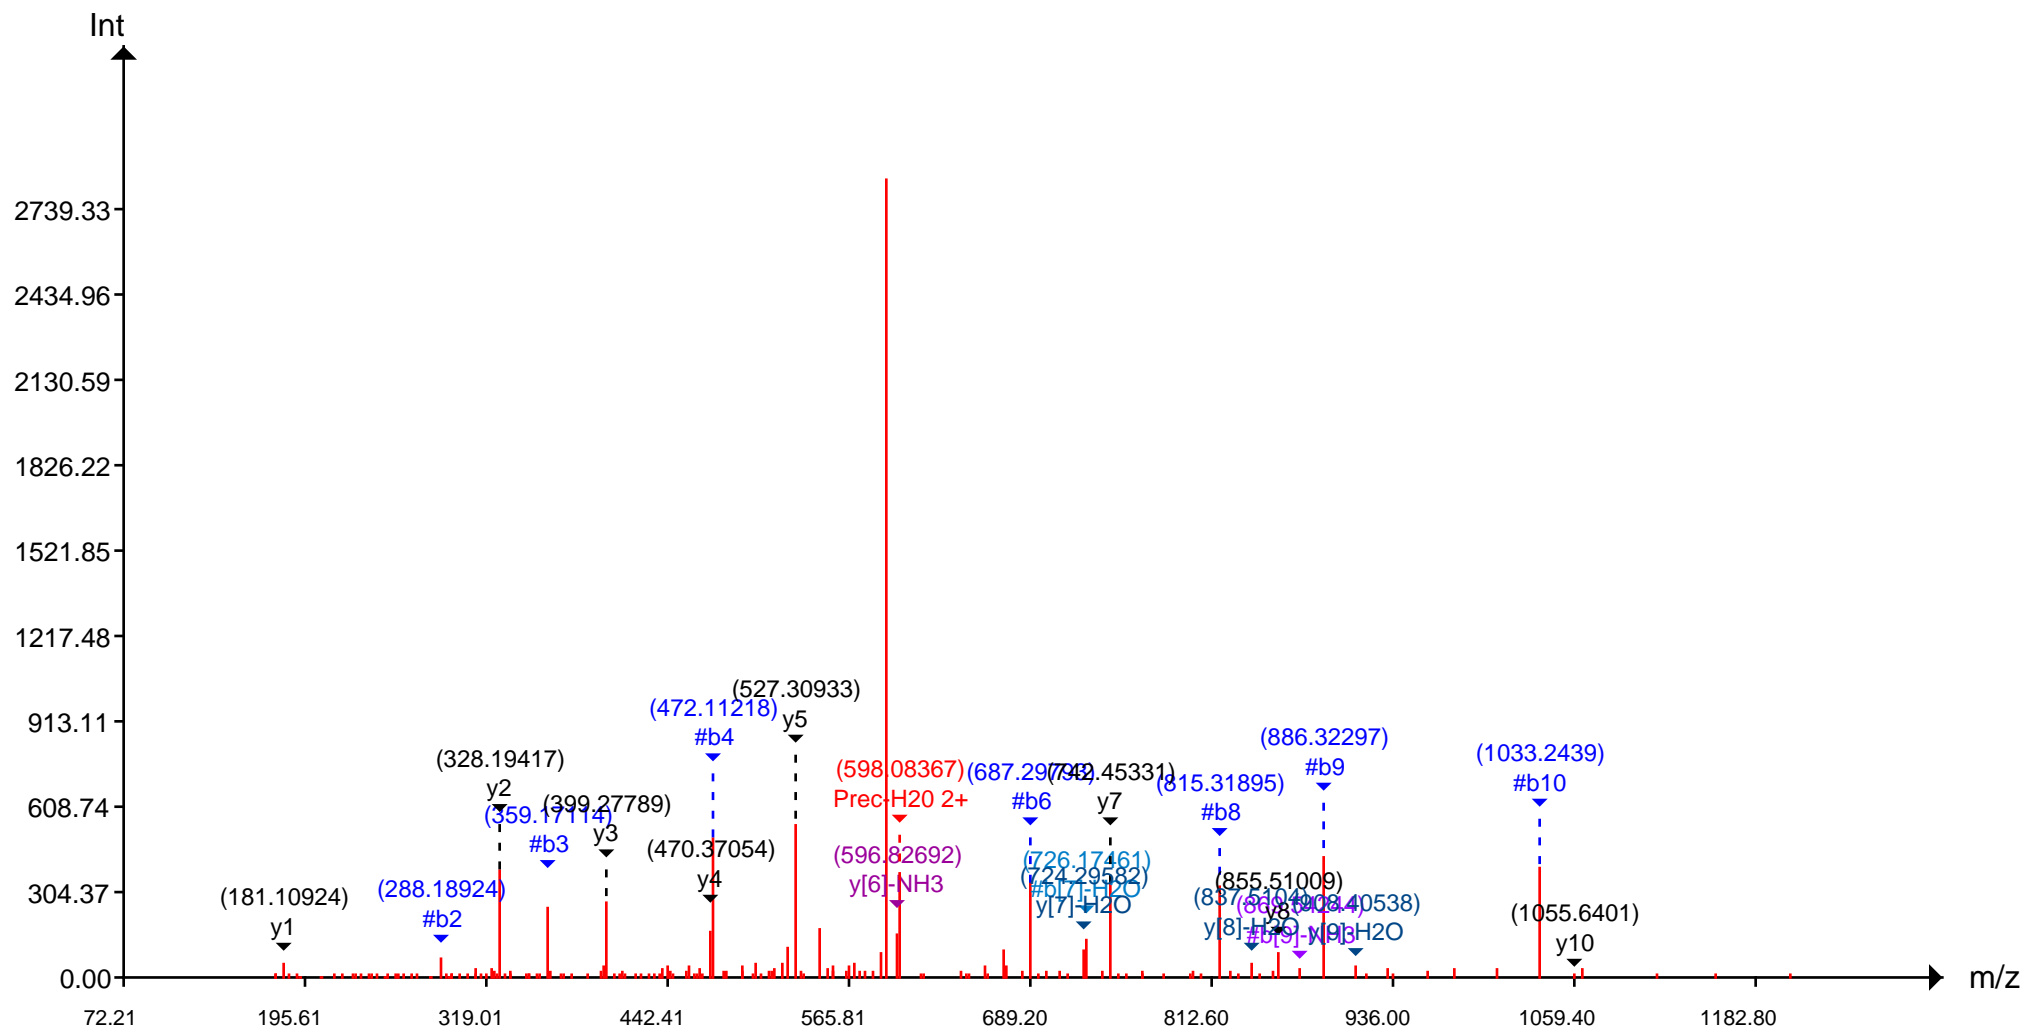

## Info

**Modified Sequence** AcD3-LEALQSGAAFR<C13>-COOH

**Ion score** 55.51

**Protein** O08808, O70566, Q9Z207

**Confidence level** 99.00%

**Precursor m/z** 607.33894

**Identity Threshold** 47.49

**Charge** 2+

**Mass error** -3.99E-4

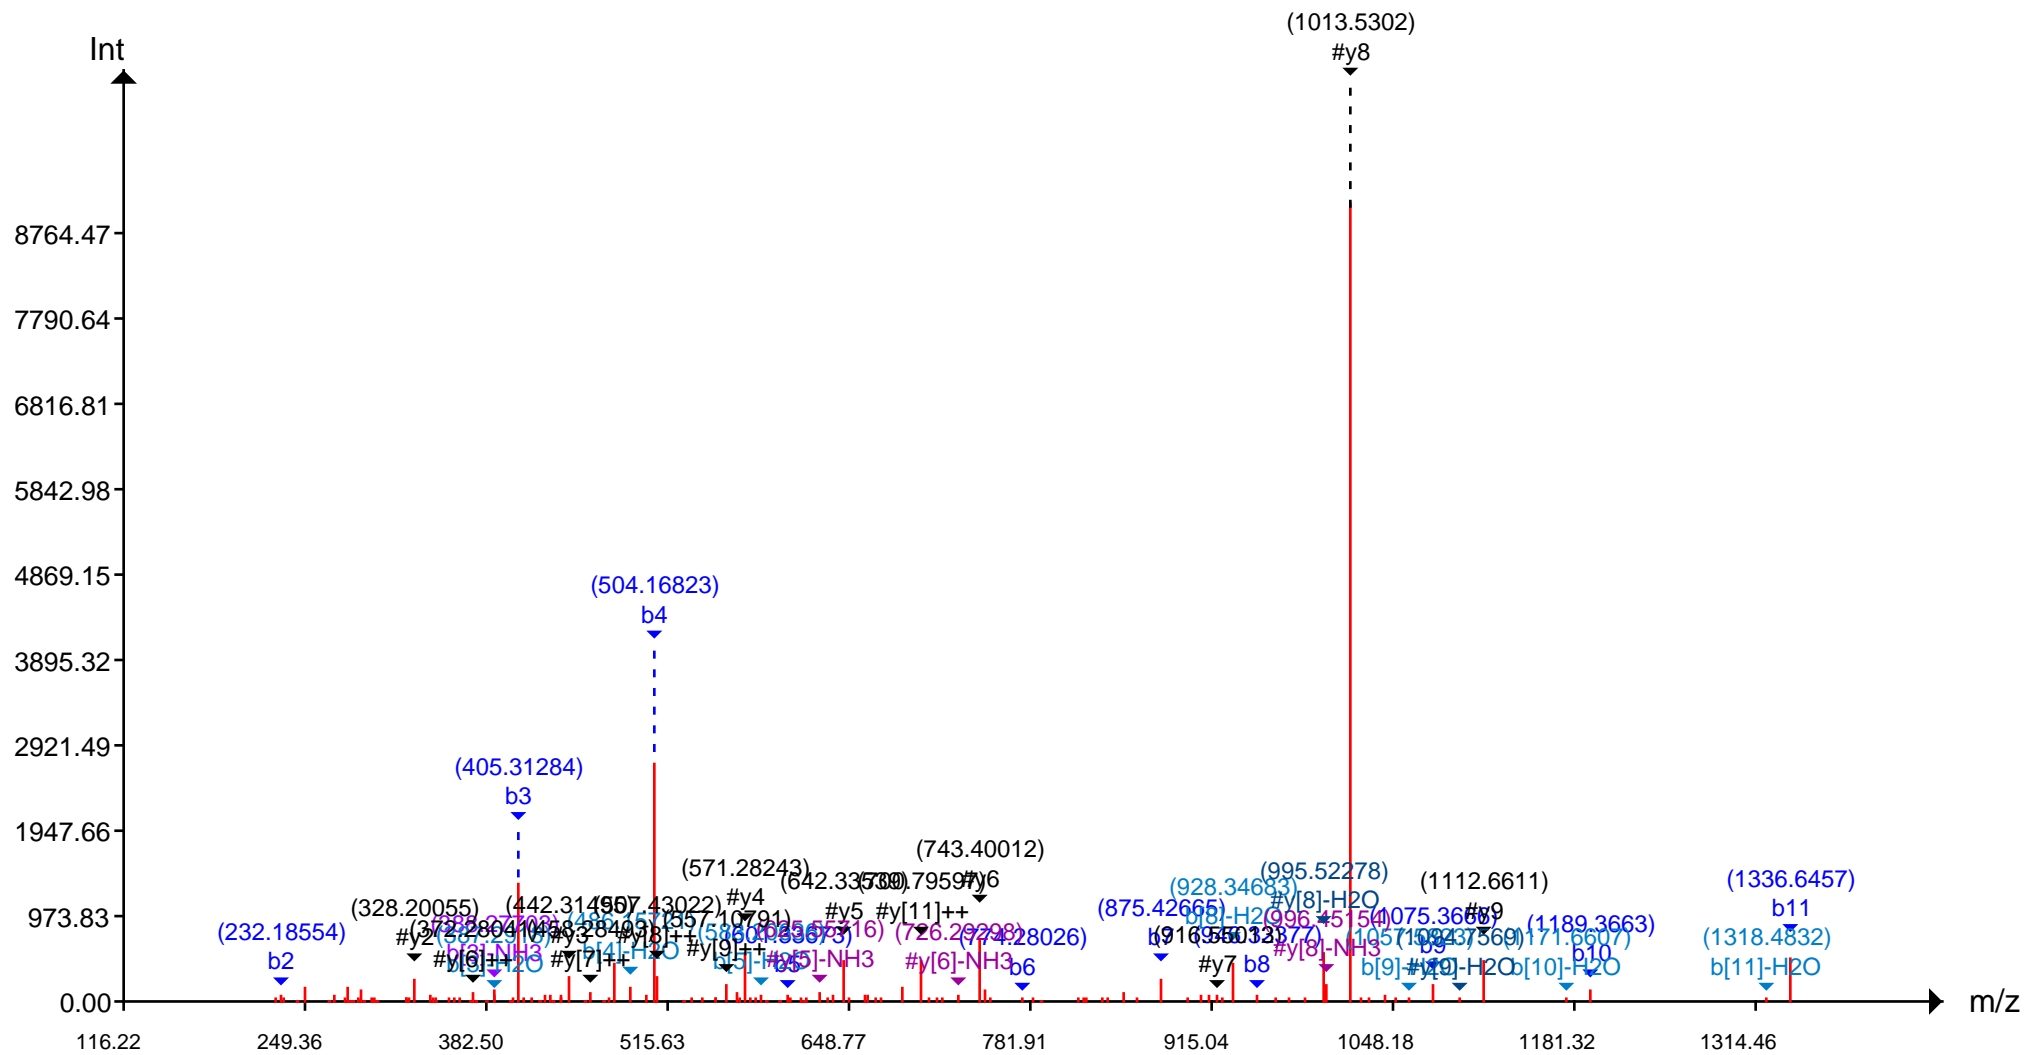

## Info

|                          |                                             |                           |         |
|--------------------------|---------------------------------------------|---------------------------|---------|
| <b>Modified Sequence</b> | AcD3-ADK<AcD3K*>VPK<AcD3K*>TAENFR<C13>-COOH | <b>Ion score</b>          | 67.63   |
| <b>Protein</b>           | P17742                                      | <b>Confidence level</b>   | 99.00%  |
| <b>Precursor m/z</b>     | 758.92525                                   | <b>Identity Threshold</b> | 47.18   |
| <b>Charge</b>            | 2+                                          | <b>Mass error</b>         | 0.00207 |

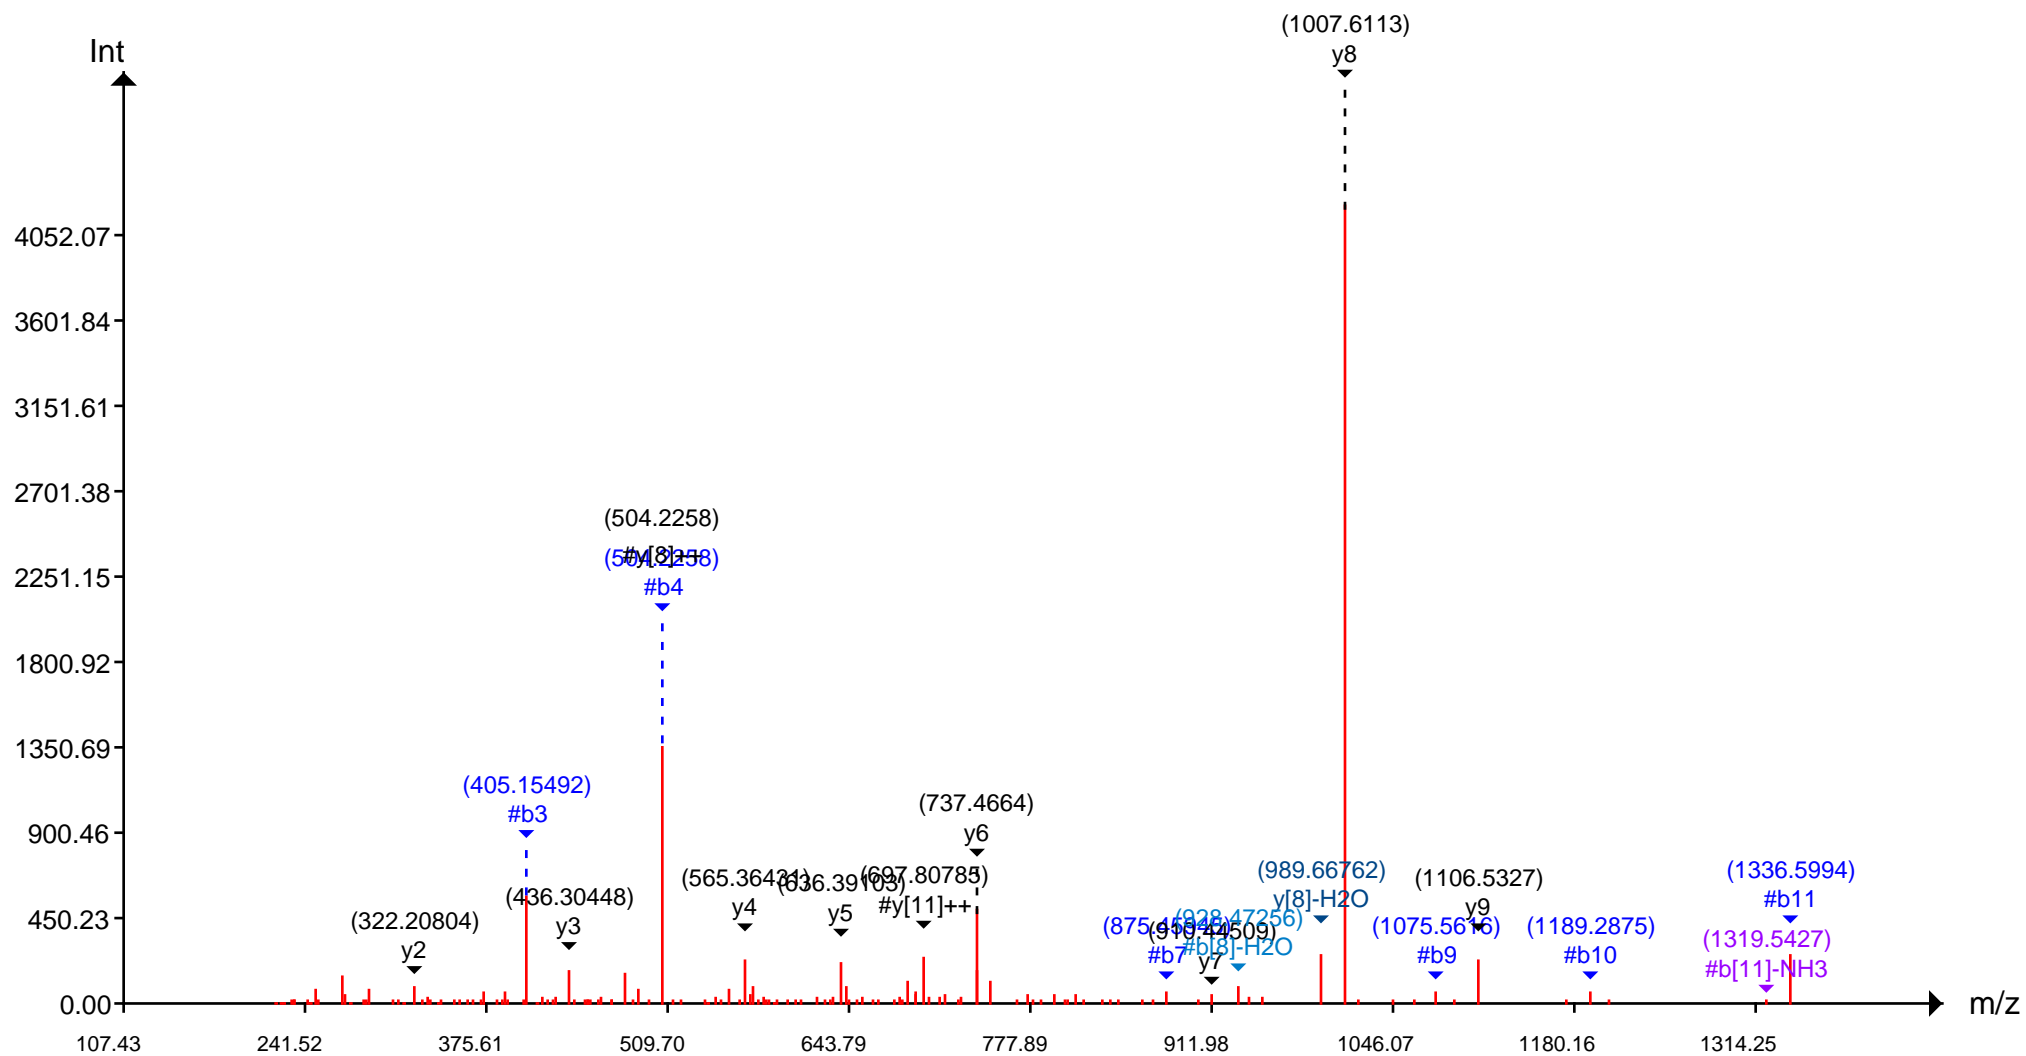

## Info

**Modified Sequence** AcD3-ADK<AcD3K\*>VPK<AcD3K\*>TAENFR-COOH

**Ion score** 66.44

**Protein** P17742

**Confidence level** 99.00%

**Precursor m/z** 755.91523

**Identity Threshold** 47.58

**Charge** 2+

**Mass error** 0.002172

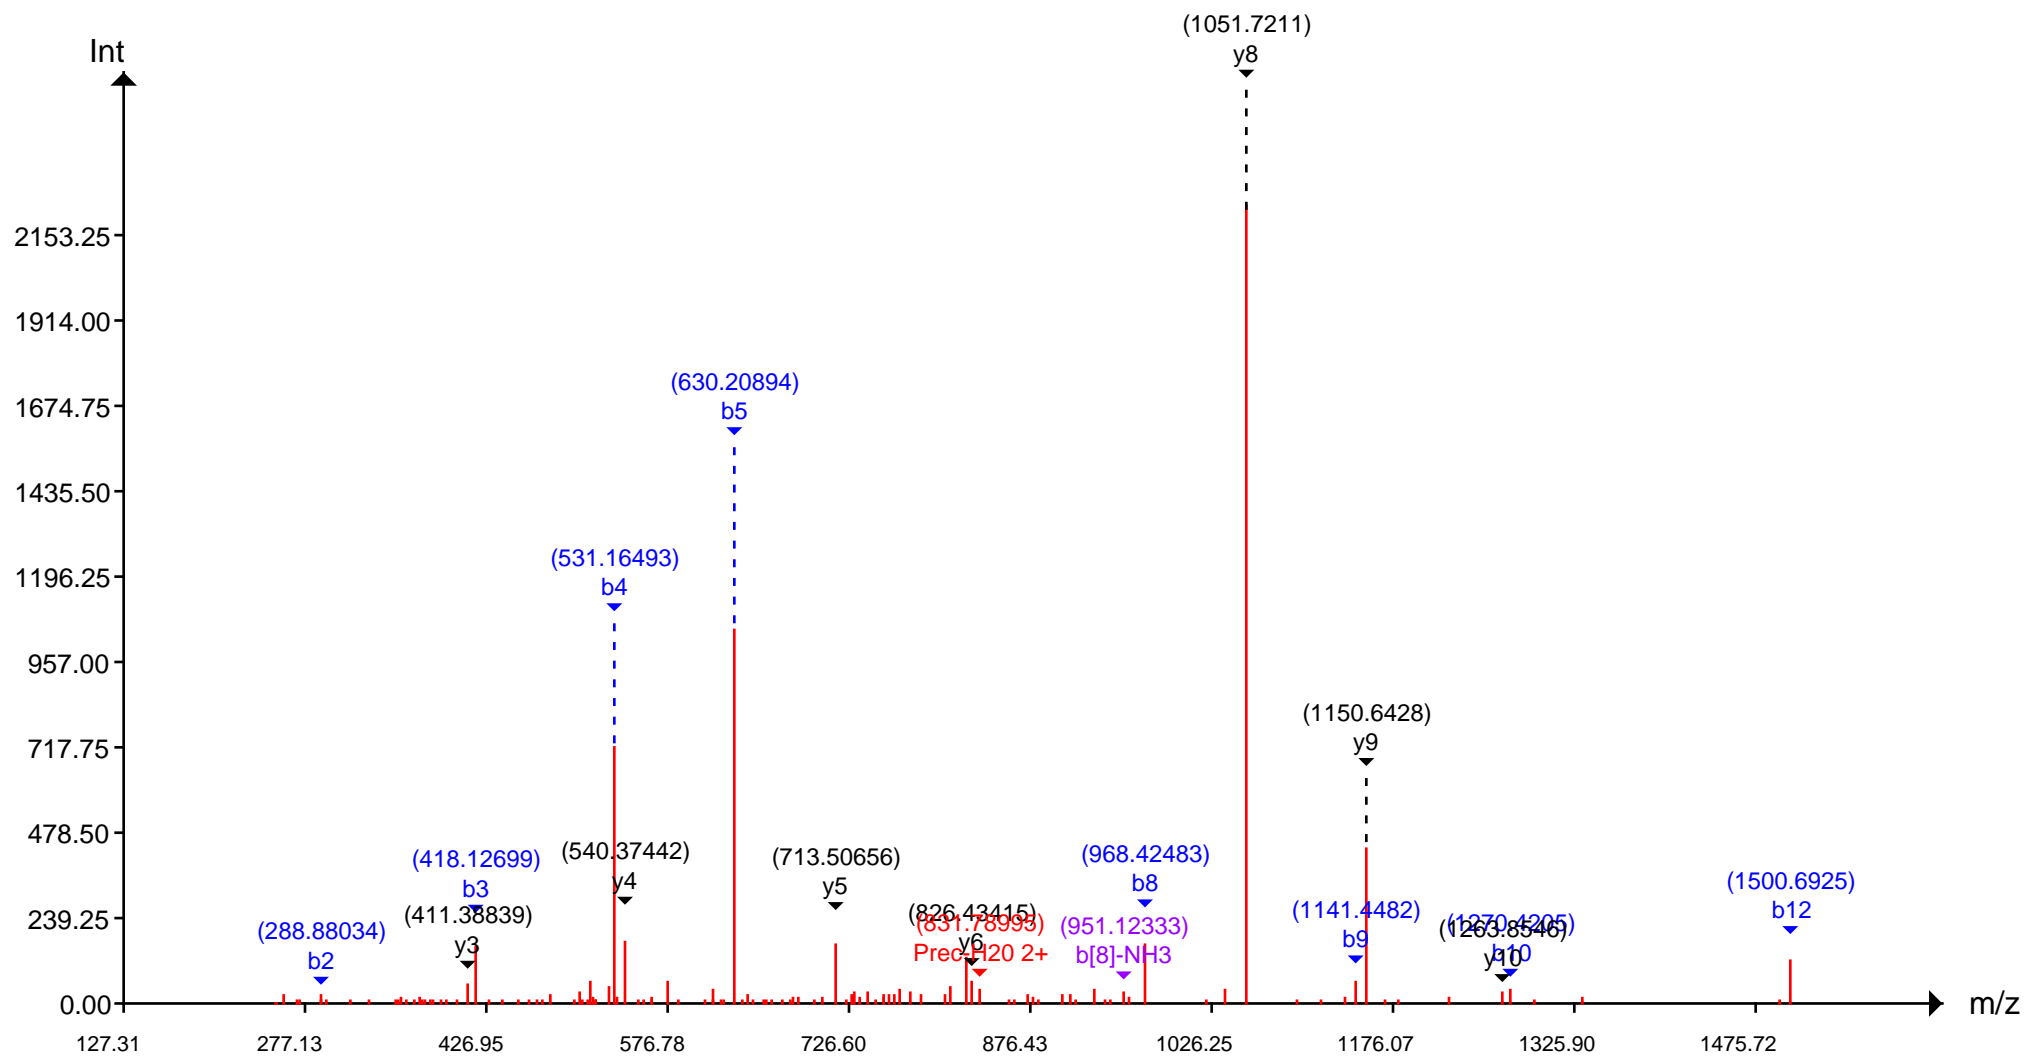

## Info

**Modified Sequence** AcD3-NEEIVPQIK<AcD3K\*>EGK<AcD3K\*>R<C13>-COOH

**Ion score** 62.01

**Protein** Q9DBJ1

**Confidence level** 99.00%

**Precursor m/z** 840.98272

**Identity Threshold** 45.84

**Charge** 2+

**Mass error** 9.37E-4

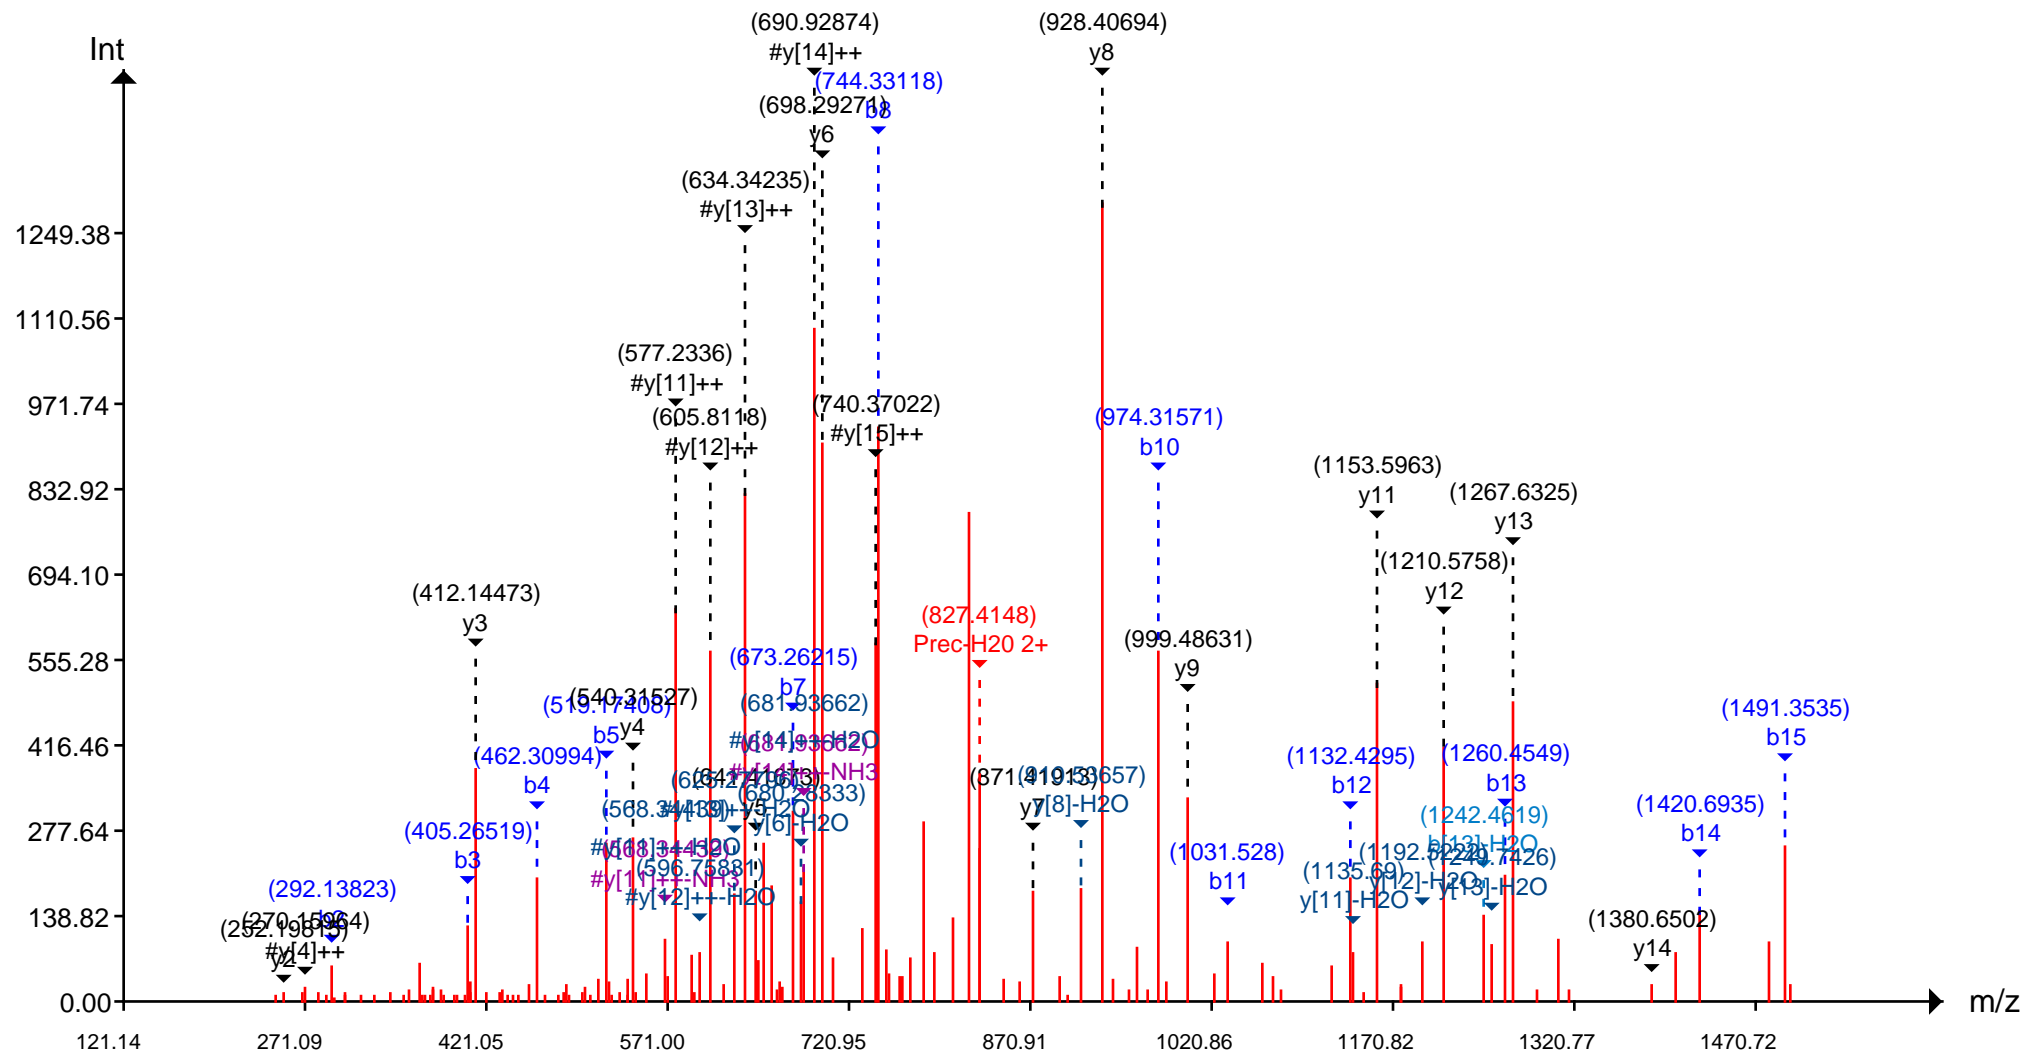

## Info

|                          |                                               |                           |          |
|--------------------------|-----------------------------------------------|---------------------------|----------|
| <b>Modified Sequence</b> | AcD3-FVLGGPGAGK<AcD3K*>GTQC<Cmm*>AR<C13>-COOH | <b>Ion score</b>          | 104.99   |
| <b>Protein</b>           | Q9DBP5                                        | <b>Confidence level</b>   | 99.00%   |
| <b>Precursor m/z</b>     | 836.44703                                     | <b>Identity Threshold</b> | 48.01    |
| <b>Charge</b>            | 2+                                            | <b>Mass error</b>         | 0.001807 |

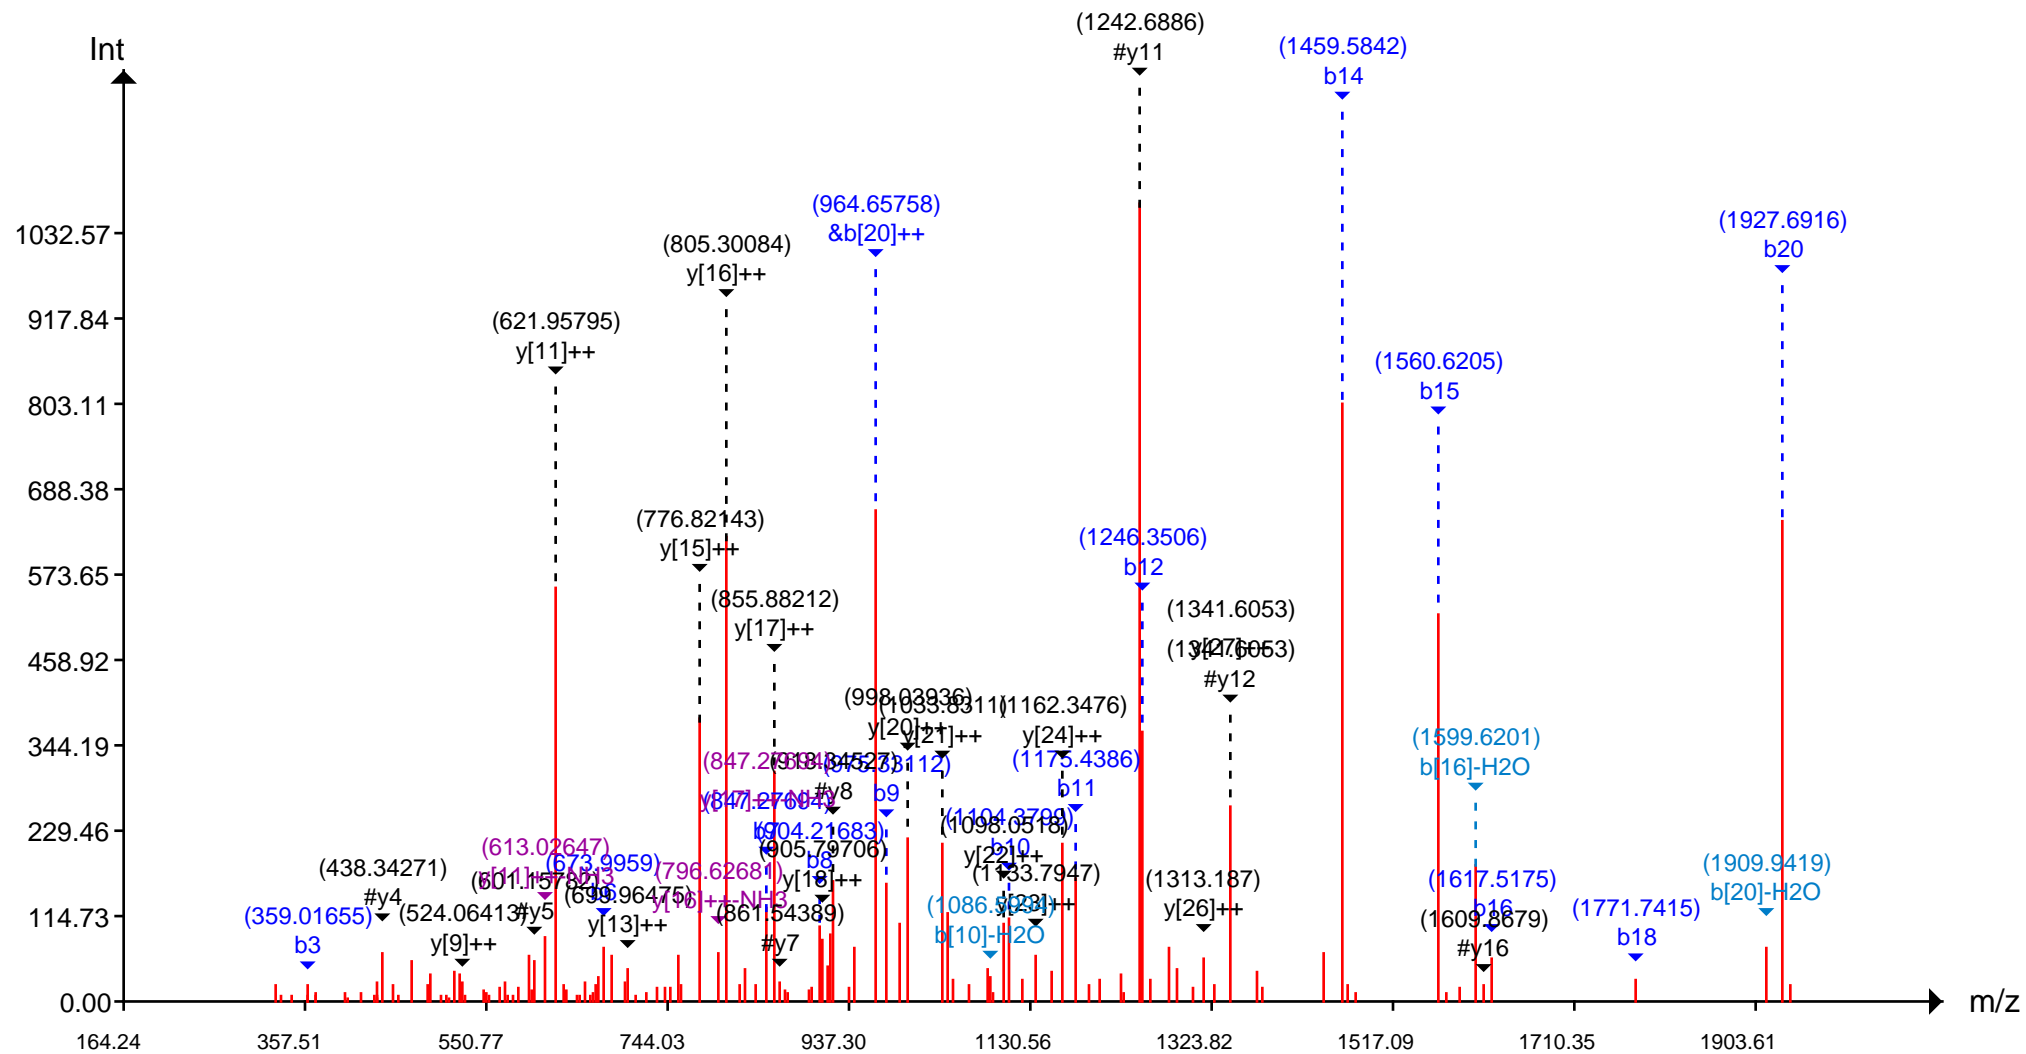

## Info

|                          |                                                                |                           |          |
|--------------------------|----------------------------------------------------------------|---------------------------|----------|
| <b>Modified Sequence</b> | AcD3-DVVEGEK<AcD3K*>GAEAANVTGPGGVPVQGSK<AcD3K*>YAADR<C13>-COOH | <b>Ion score</b>          | 83.26    |
| <b>Protein</b>           | P62960                                                         | <b>Confidence level</b>   | 99.00%   |
| <b>Precursor m/z</b>     | 1057.2077                                                      | <b>Identity Threshold</b> | 47.40    |
| <b>Charge</b>            | 3+                                                             | <b>Mass error</b>         | 0.003173 |



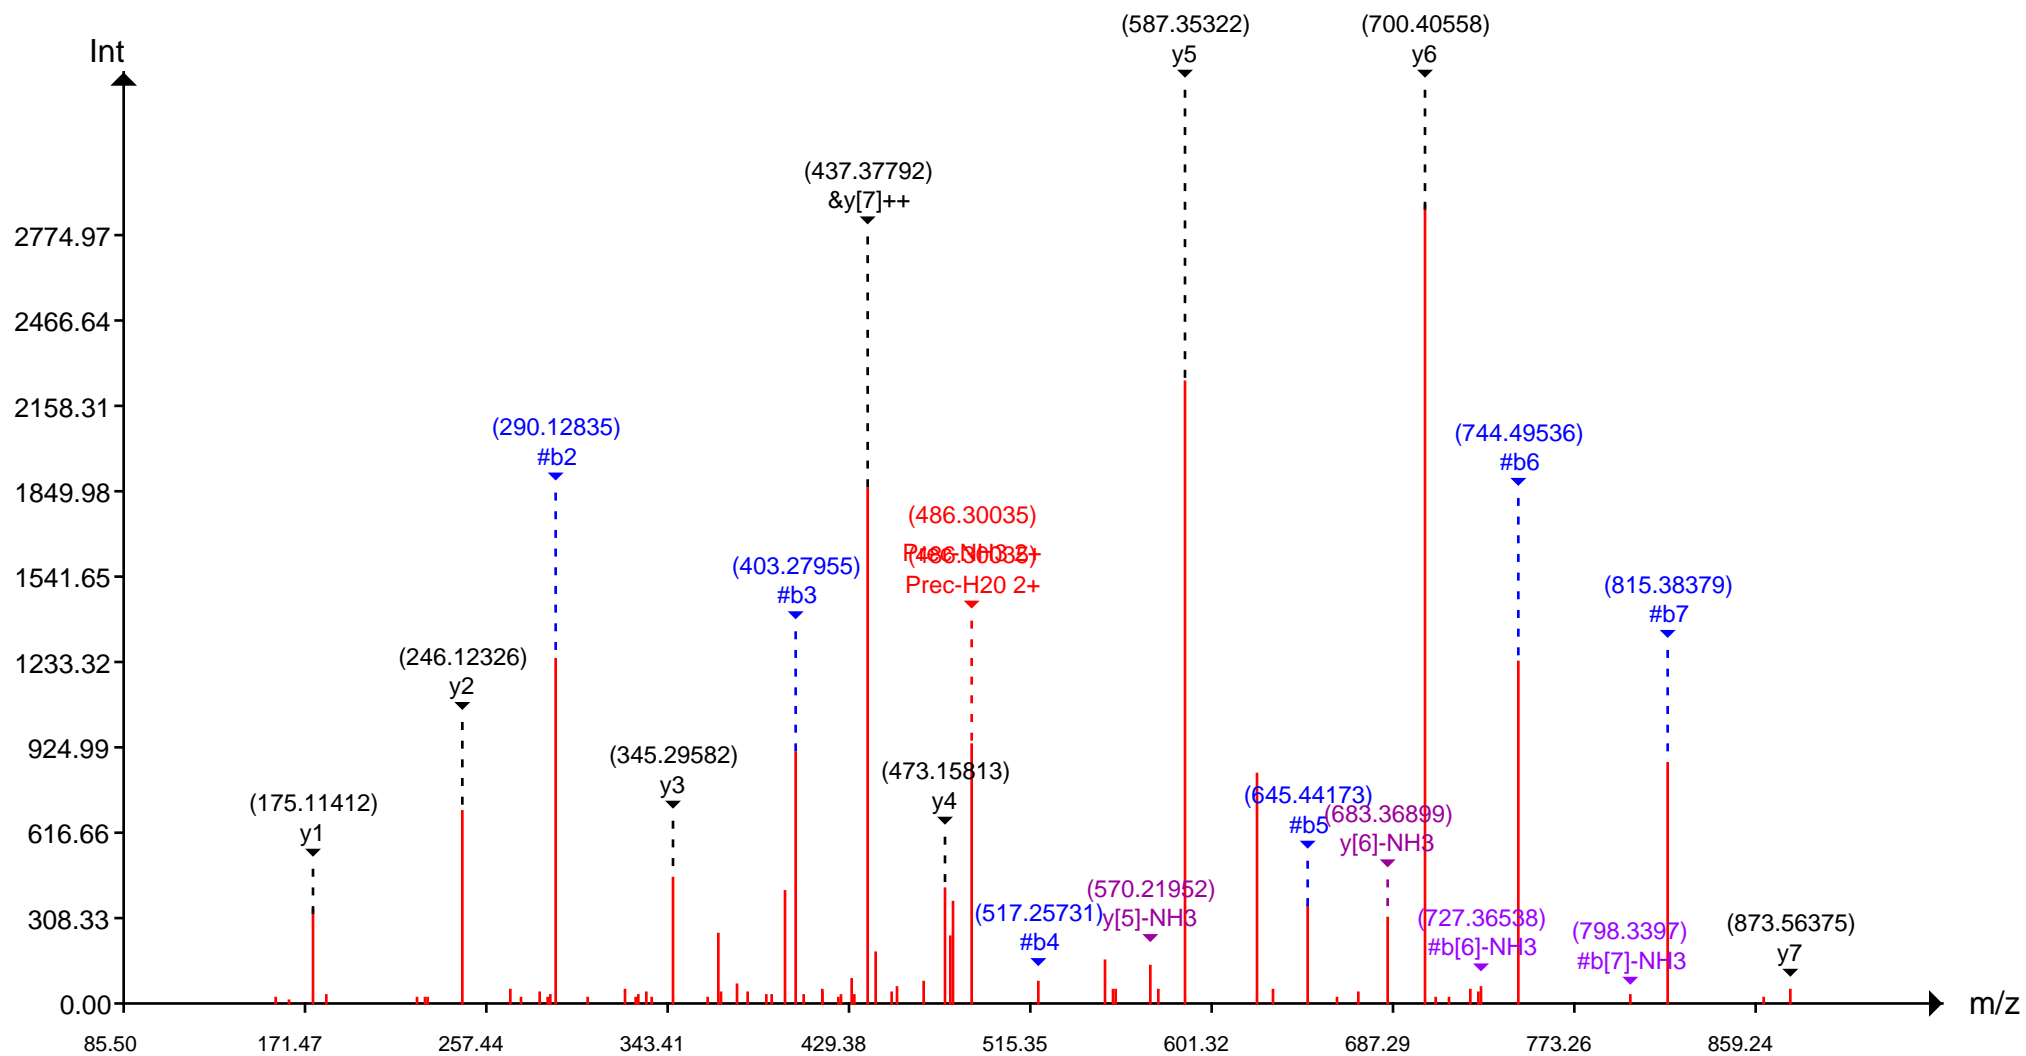

## Info

**Modified Sequence** AcD3-AK<AcD3K\*>LNQVAR-COOH

**Ion score** 65.39

**Protein** P60335

**Confidence level** 99.00%

**Precursor m/z** 495.30364

**Identity Threshold** 44.72

**Charge** 2+

**Mass error** -8.85E-4

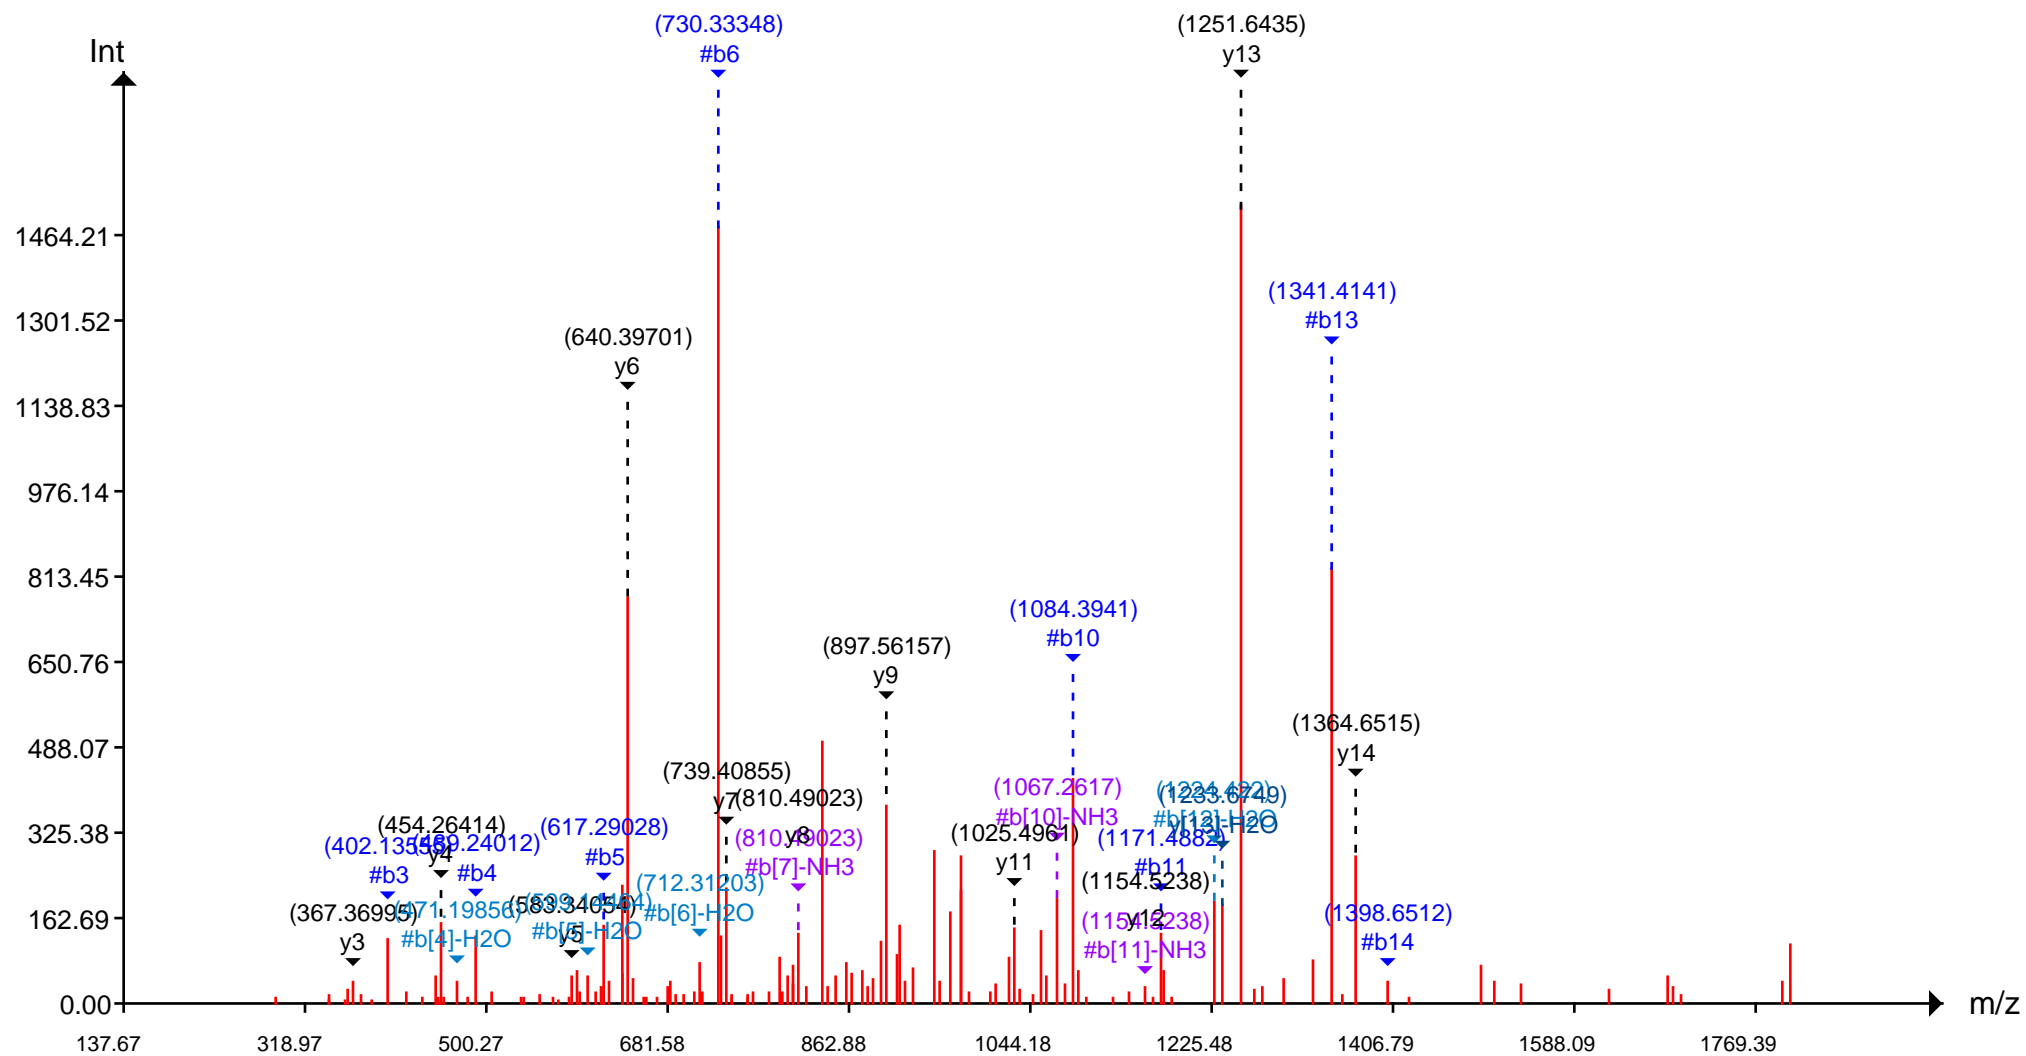

## Info

|                          |                                    |                           |          |
|--------------------------|------------------------------------|---------------------------|----------|
| <b>Modified Sequence</b> | AcD3-DQLSQLPEGASAVGESSVR<C13>-COOH | <b>Ion score</b>          | 65.89    |
| <b>Protein</b>           | Q921W0                             | <b>Confidence level</b>   | 99.00%   |
| <b>Precursor m/z</b>     | 991.0054                           | <b>Identity Threshold</b> | 47.97    |
| <b>Charge</b>            | 2+                                 | <b>Mass error</b>         | 0.002779 |

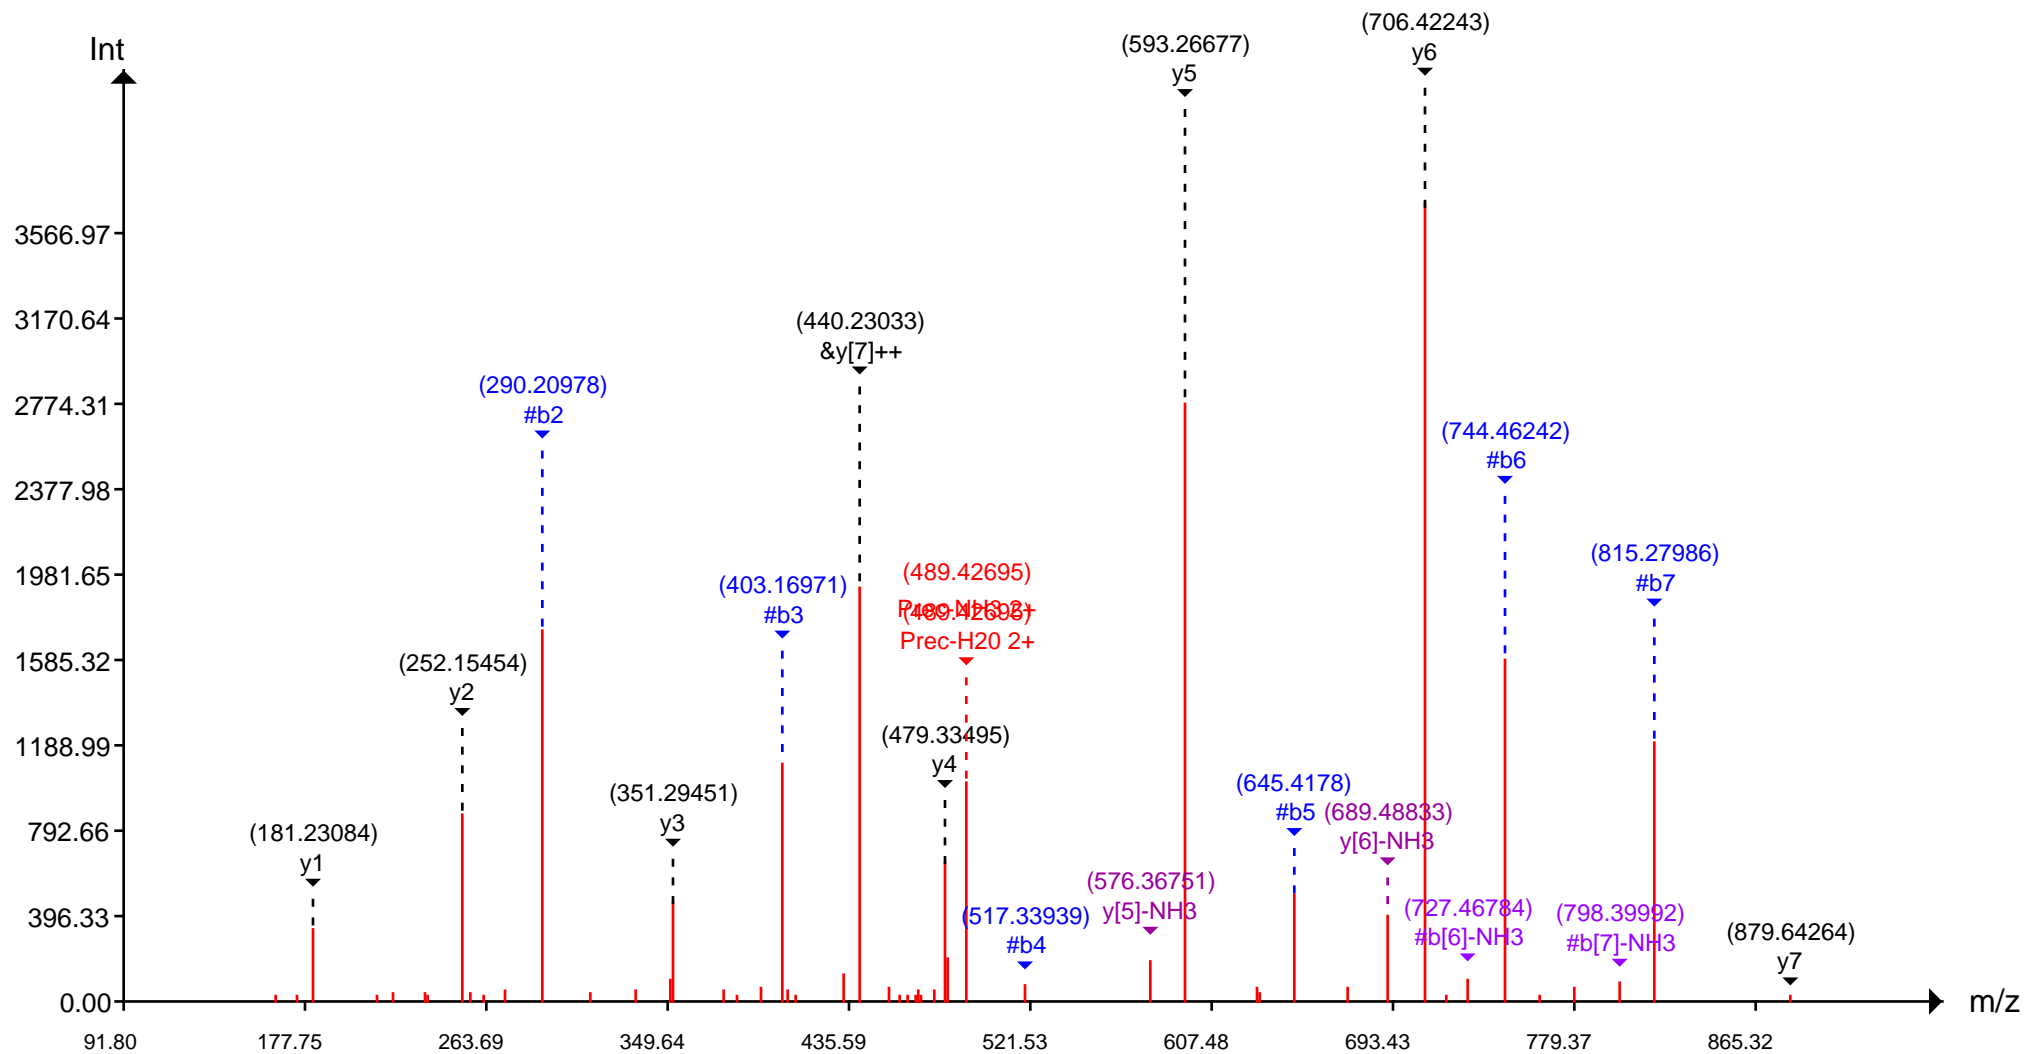

## Info

**Modified Sequence** AcD3-AK<AcD3K\*>LNQVAR<C13>-COOH

**Ion score** 72.82

**Protein** P60335

**Confidence level** 99.00%

**Precursor m/z** 498.3135

**Identity Threshold** 43.31

**Charge** 2+

**Mass error** -0.001306

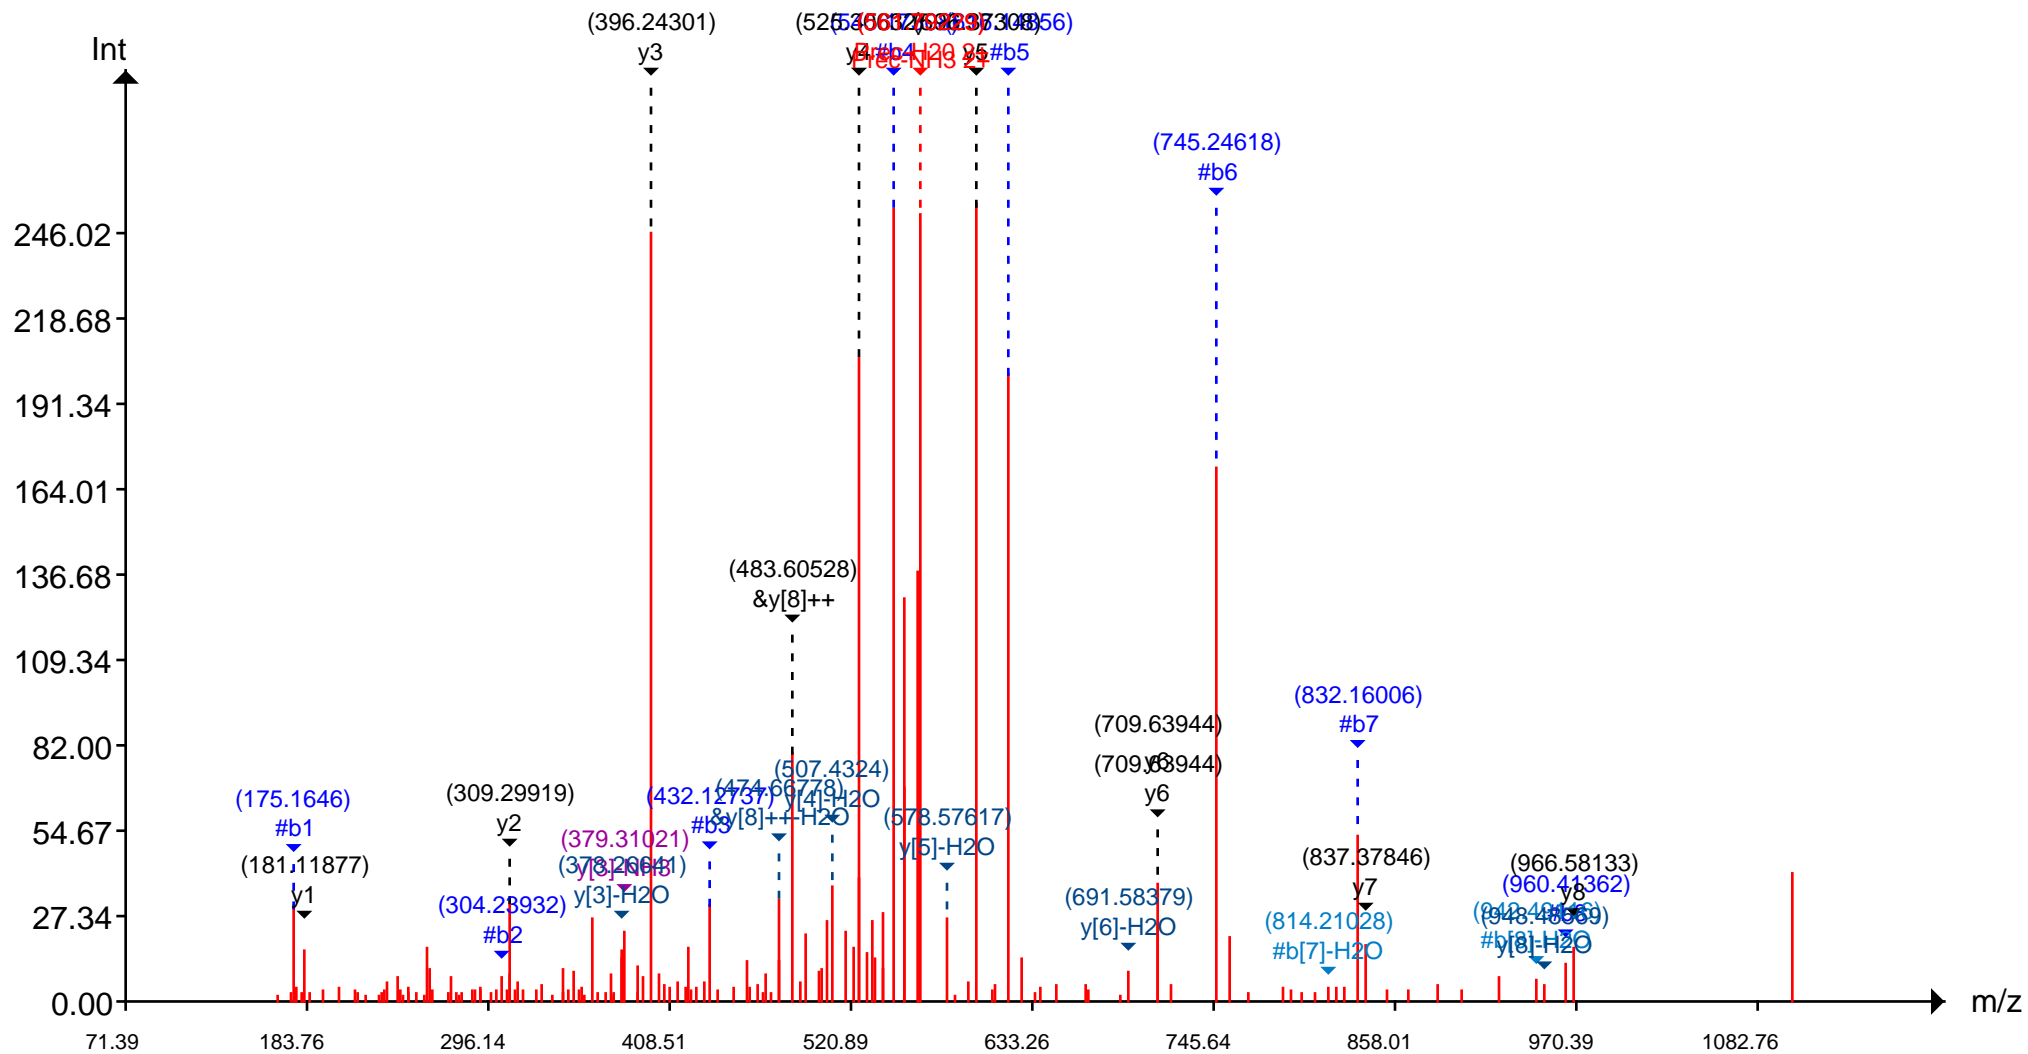

## Info

|                          |                          |                           |         |
|--------------------------|--------------------------|---------------------------|---------|
| <b>Modified Sequence</b> | AcD3-EEQLAESQR<C13>-COOH | <b>Ion score</b>          | 69.91   |
| <b>Protein</b>           | Q3UZ39                   | <b>Confidence level</b>   | 99.00%  |
| <b>Precursor m/z</b>     | 570.78689                | <b>Identity Threshold</b> | 47.17   |
| <b>Charge</b>            | 2+                       | <b>Mass error</b>         | -8.3E-5 |

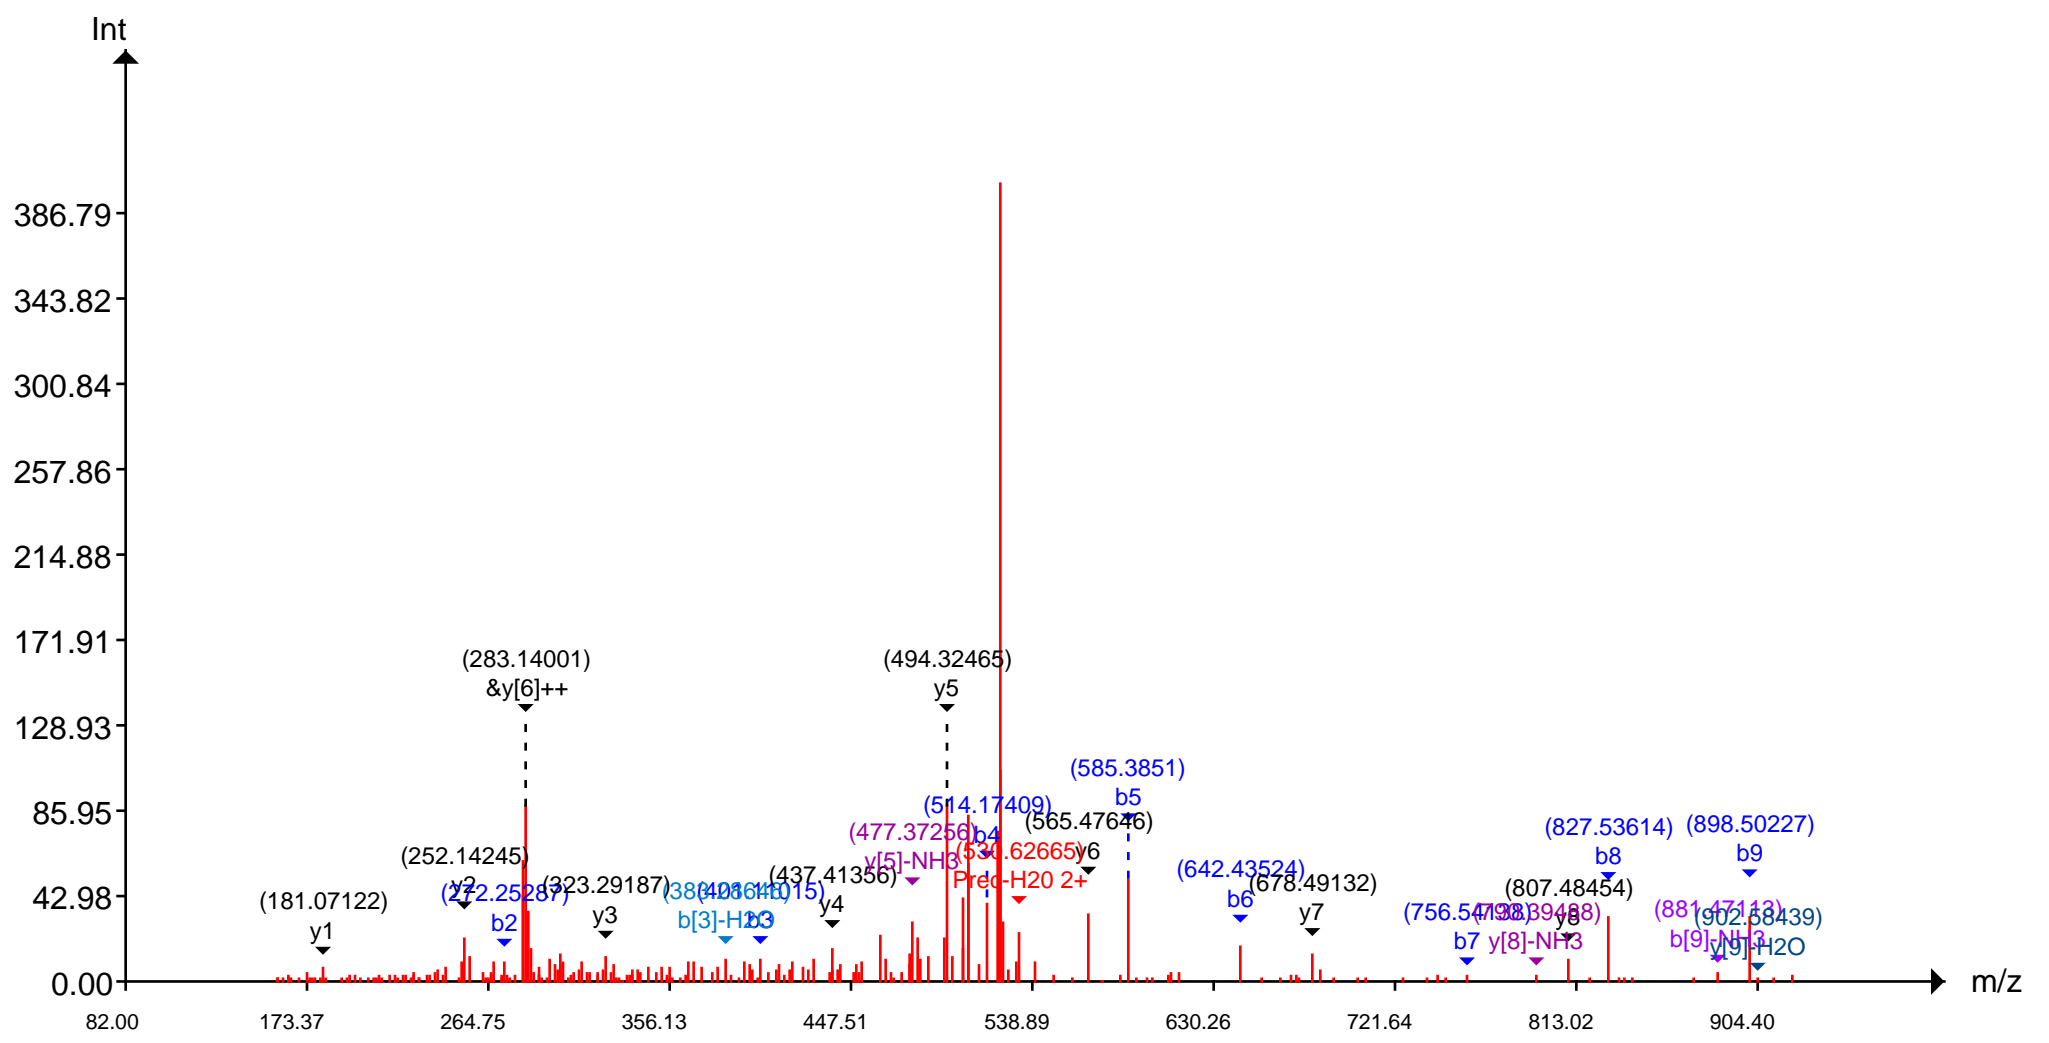

| Info            |                                                                                                |
|-----------------|------------------------------------------------------------------------------------------------|
| <b>Modif...</b> | AcD3-ILELAGNAAR<C13>-COOH                                                                      |
|                 | Q8CGP5, Q8CGP6, Q8CGP7, P22752, Q6GSS7, Q64522, Q64523, Q8BFU2, Q8R1M2, Q8CCK0, P27661, Q9QZQ8 |
|                 | 539.82265                                                                                      |
|                 | 2+                                                                                             |
|                 | Ion score                                                                                      |
|                 | Confidence level                                                                               |
|                 | Identity Threshold                                                                             |
|                 | Mass error                                                                                     |

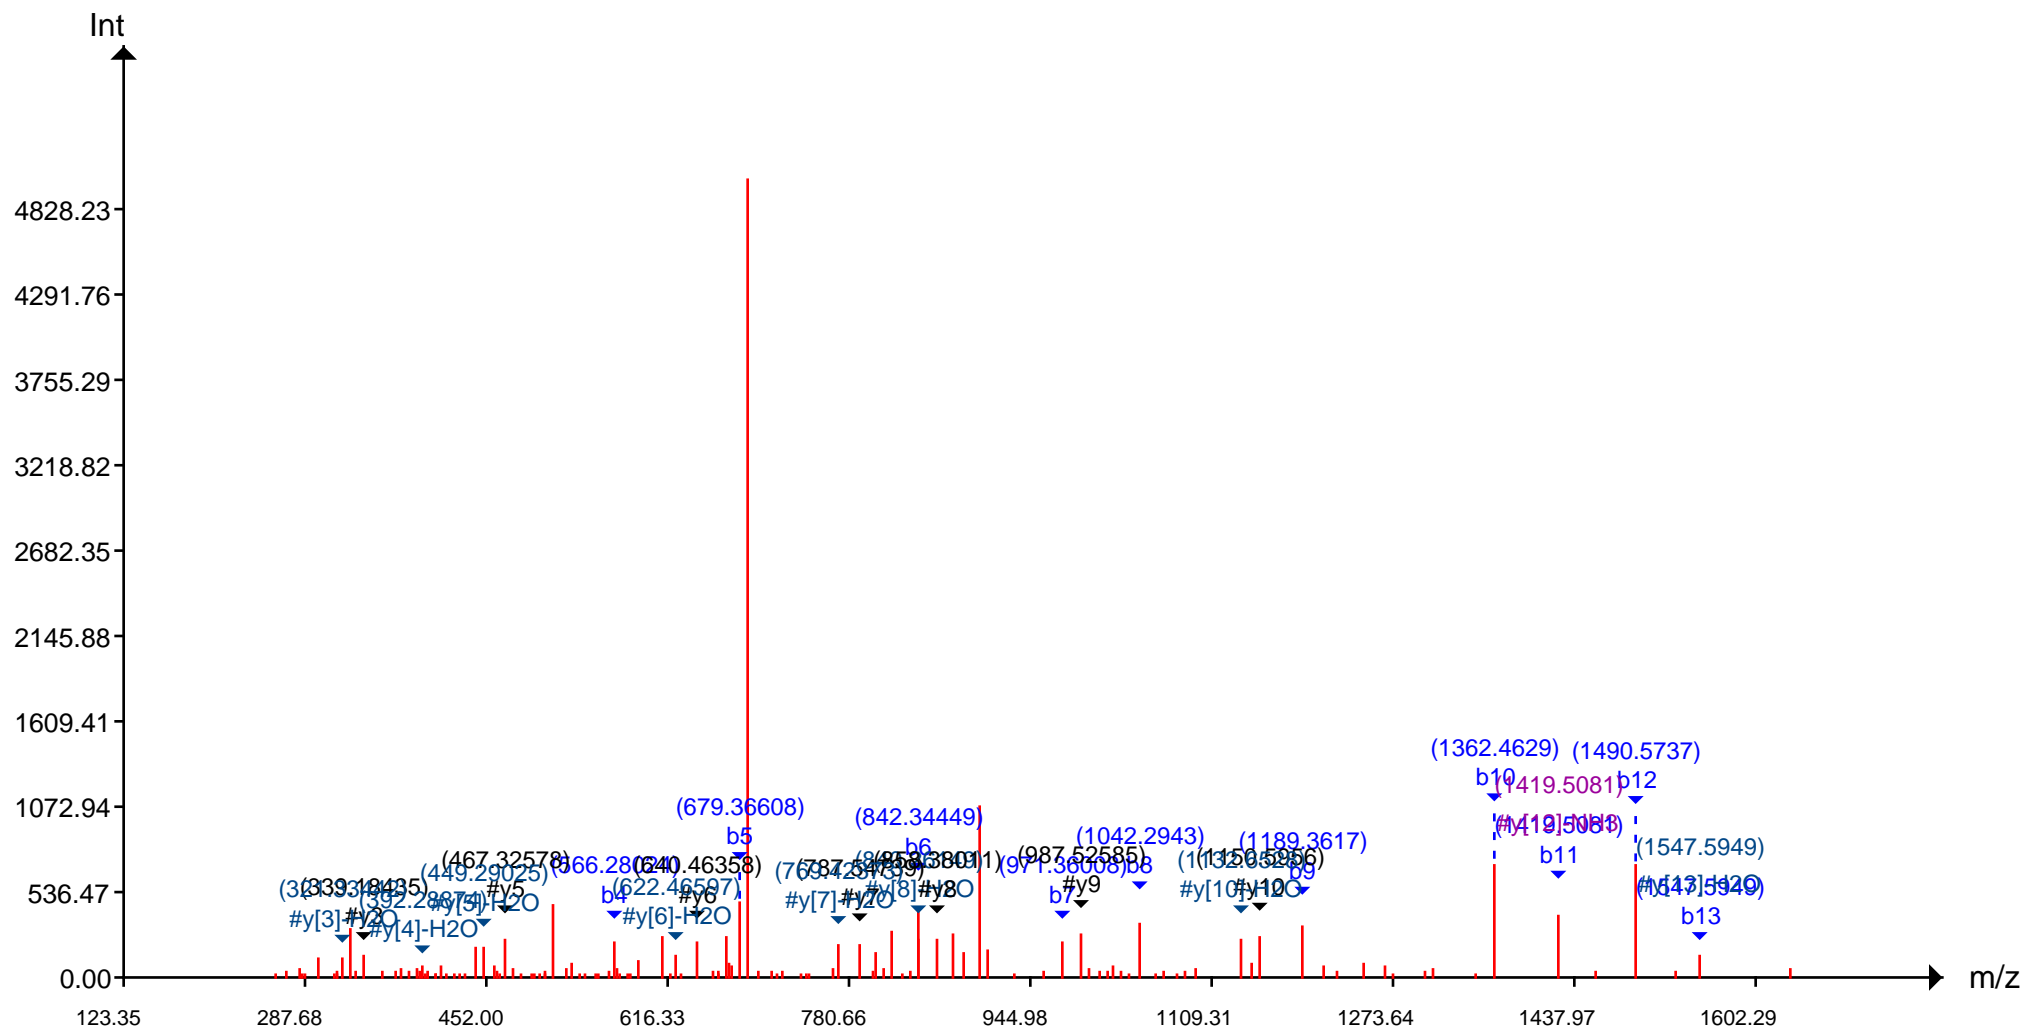

## Info

|                          |                                                      |                           |          |
|--------------------------|------------------------------------------------------|---------------------------|----------|
| <b>Modified Sequence</b> | AcD3-FAEK<AcD3K*>LYEAM<Mox*>K<AcD3K*>GAGTR<C13>-COOH | <b>Ion score</b>          | 57.14    |
| <b>Protein</b>           | P10107                                               | <b>Confidence level</b>   | 99.00%   |
| <b>Precursor m/z</b>     | 914.98302                                            | <b>Identity Threshold</b> | 48.12    |
| <b>Charge</b>            | 2+                                                   | <b>Mass error</b>         | 0.003246 |

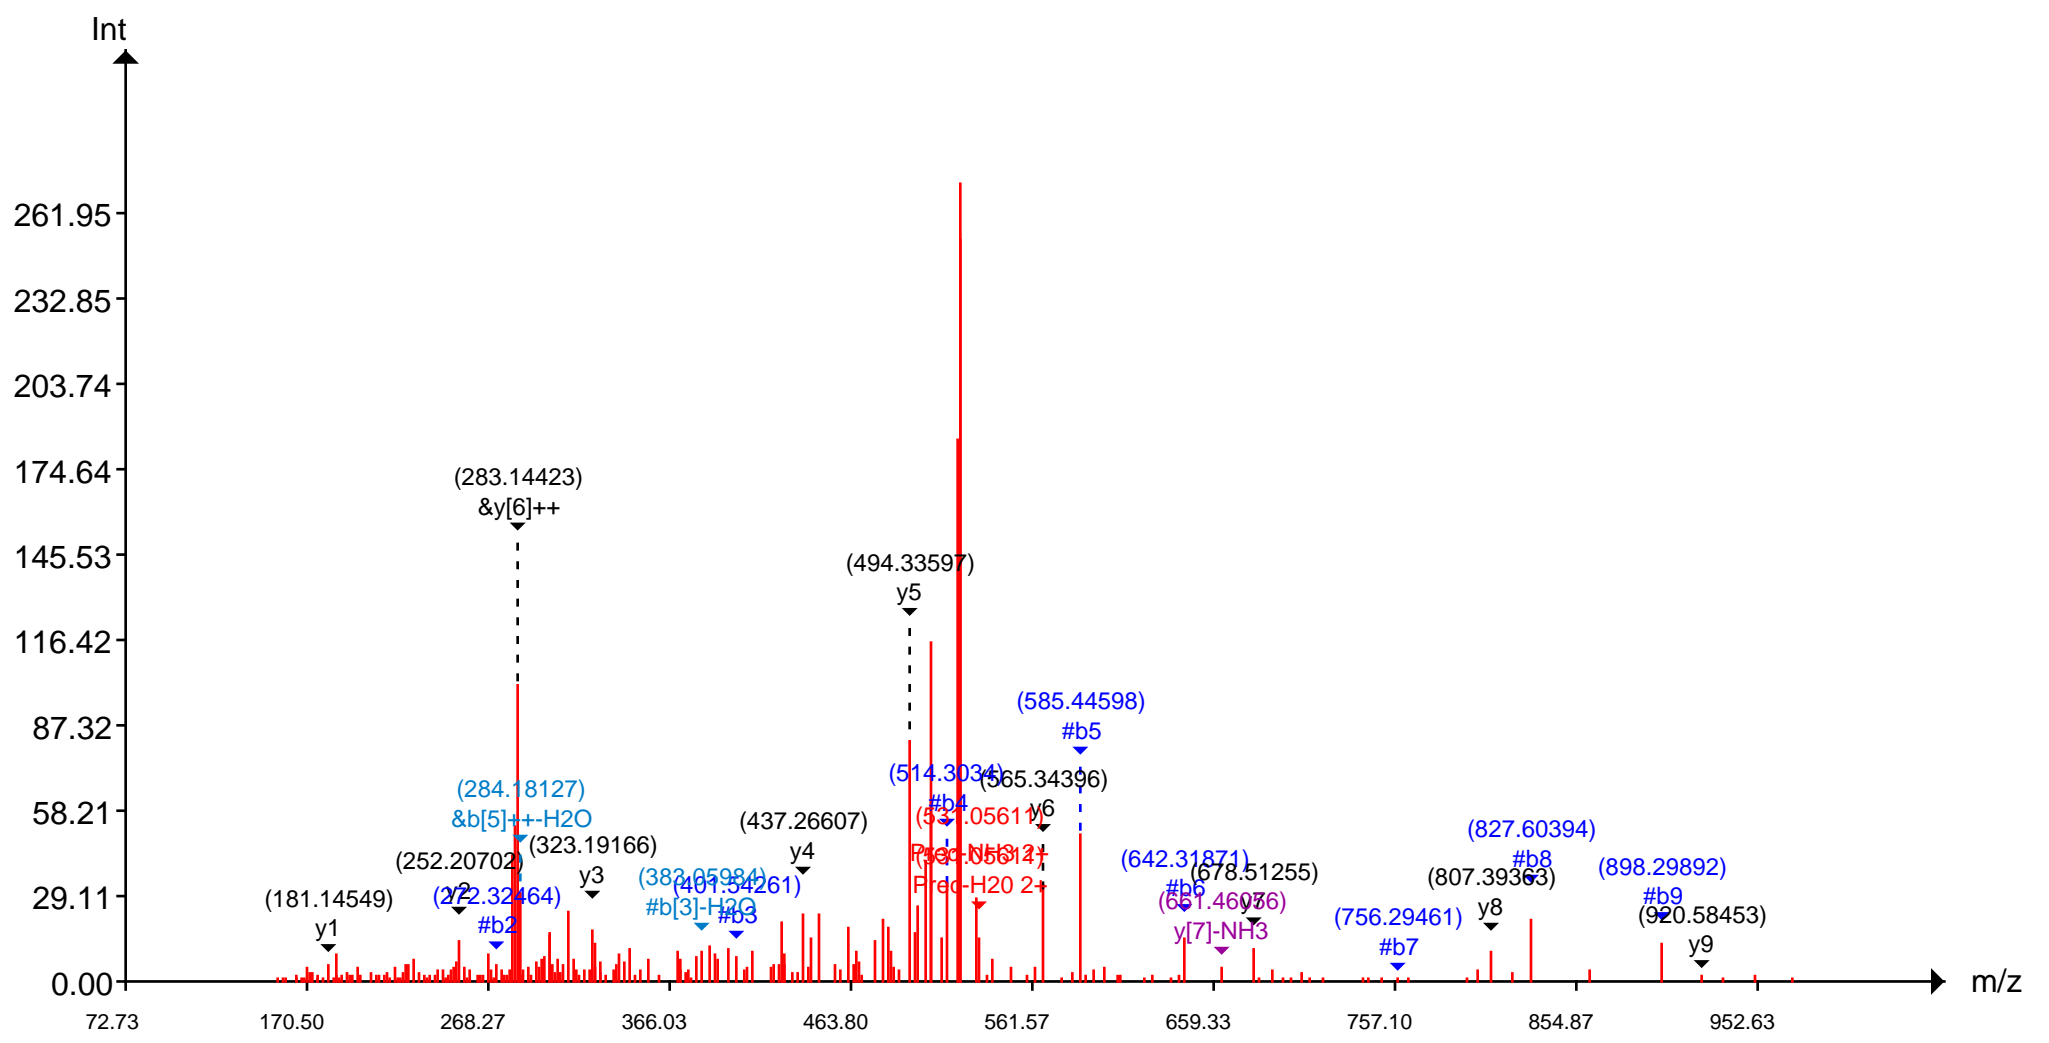

| Info     |                                                                                                | Ion score          |
|----------|------------------------------------------------------------------------------------------------|--------------------|
| Modif... | AcD3-ILELAGNAAR<C13>-COOH                                                                      |                    |
|          | Q8CGP5, Q8CGP6, Q8CGP7, P22752, Q6GSS7, Q64522, Q64523, Q8BFU2, Q8R1M2, Q8CCK0, P27661, Q9QZQ8 | Confidence level   |
|          | 539.82274                                                                                      | Identity Threshold |
|          | 2+                                                                                             | Mass error         |

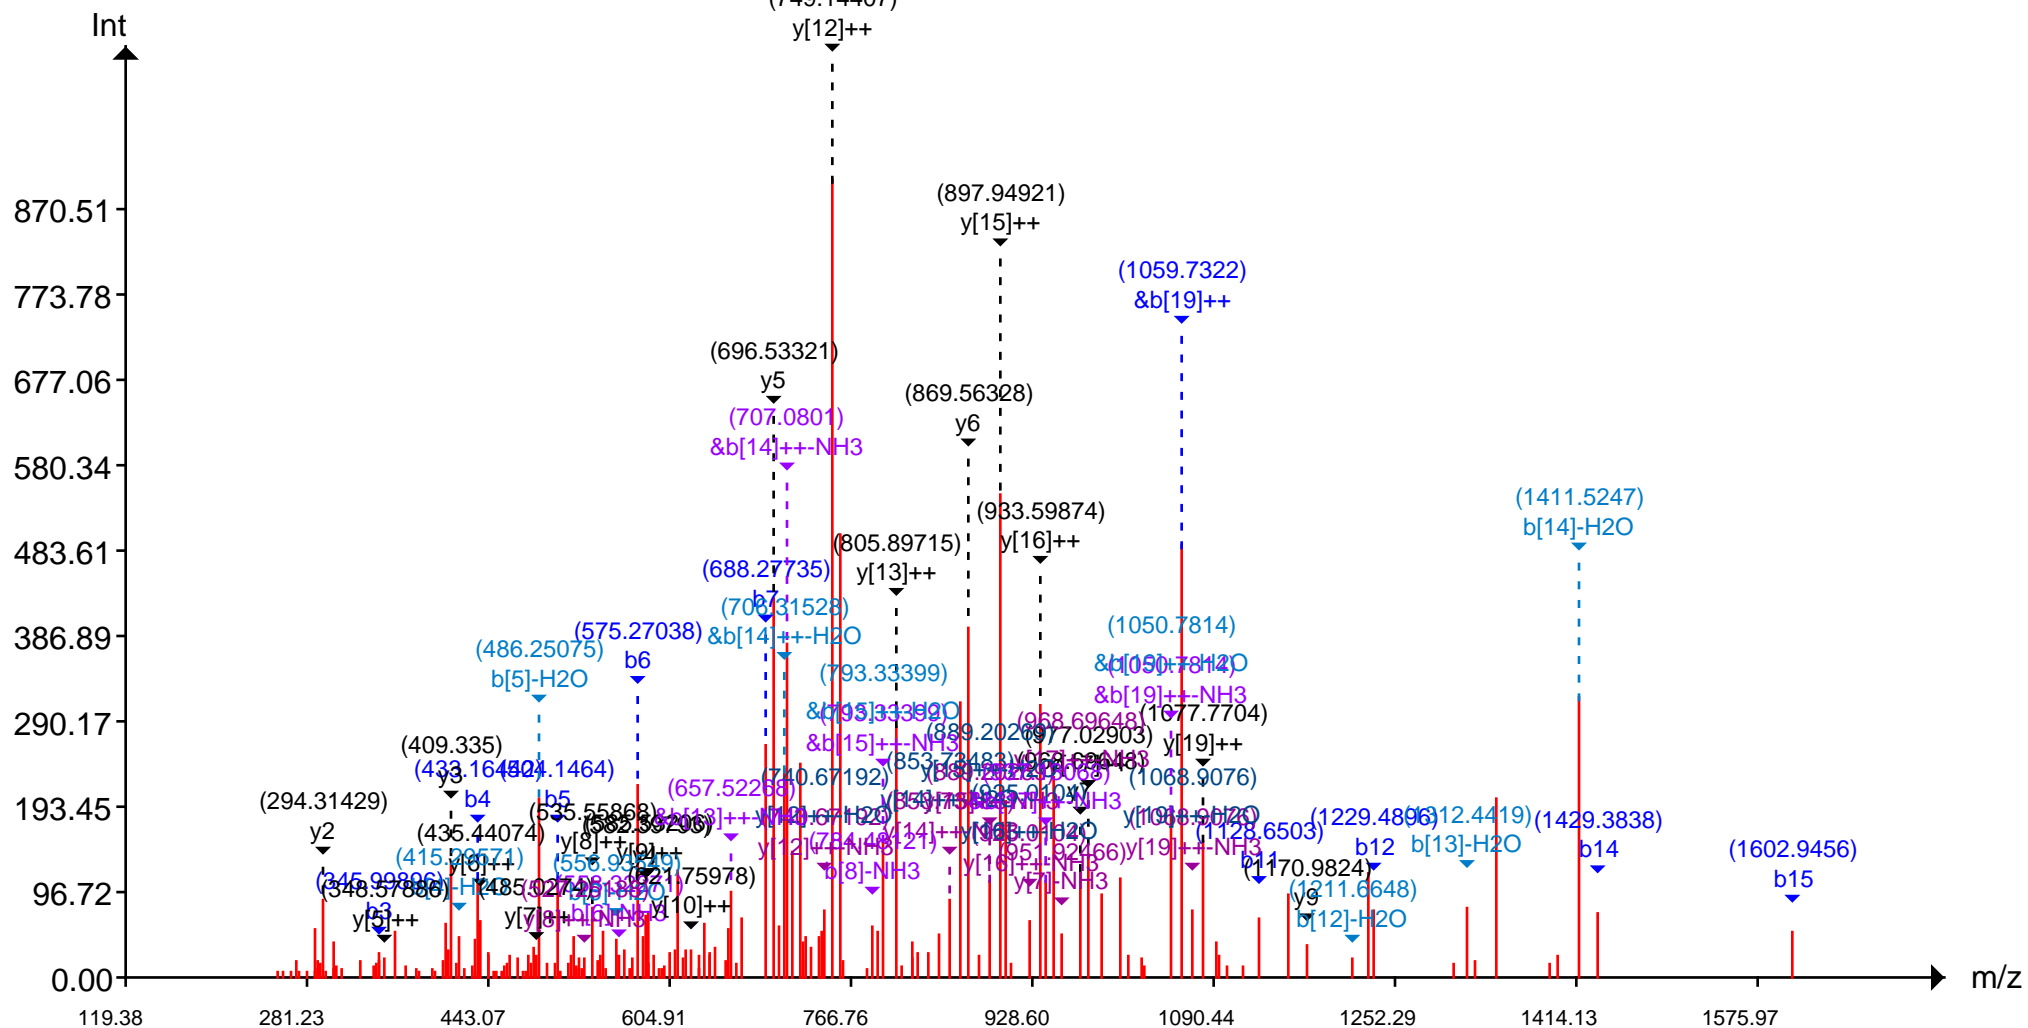

## Info

|                          |                                                     |                           |          |
|--------------------------|-----------------------------------------------------|---------------------------|----------|
| <b>Modified Sequence</b> | AcD3-VSNSAALIQQATTVK<AcD3K*>NK<AcD3K*>DIR<C13>-COOH | <b>Ion score</b>          | 67.12    |
| <b>Protein</b>           | P51410                                              | <b>Confidence level</b>   | 99.00%   |
| <b>Precursor m/z</b>     | 766.77436                                           | <b>Identity Threshold</b> | 44.45    |
| <b>Charge</b>            | 3+                                                  | <b>Mass error</b>         | 0.001615 |



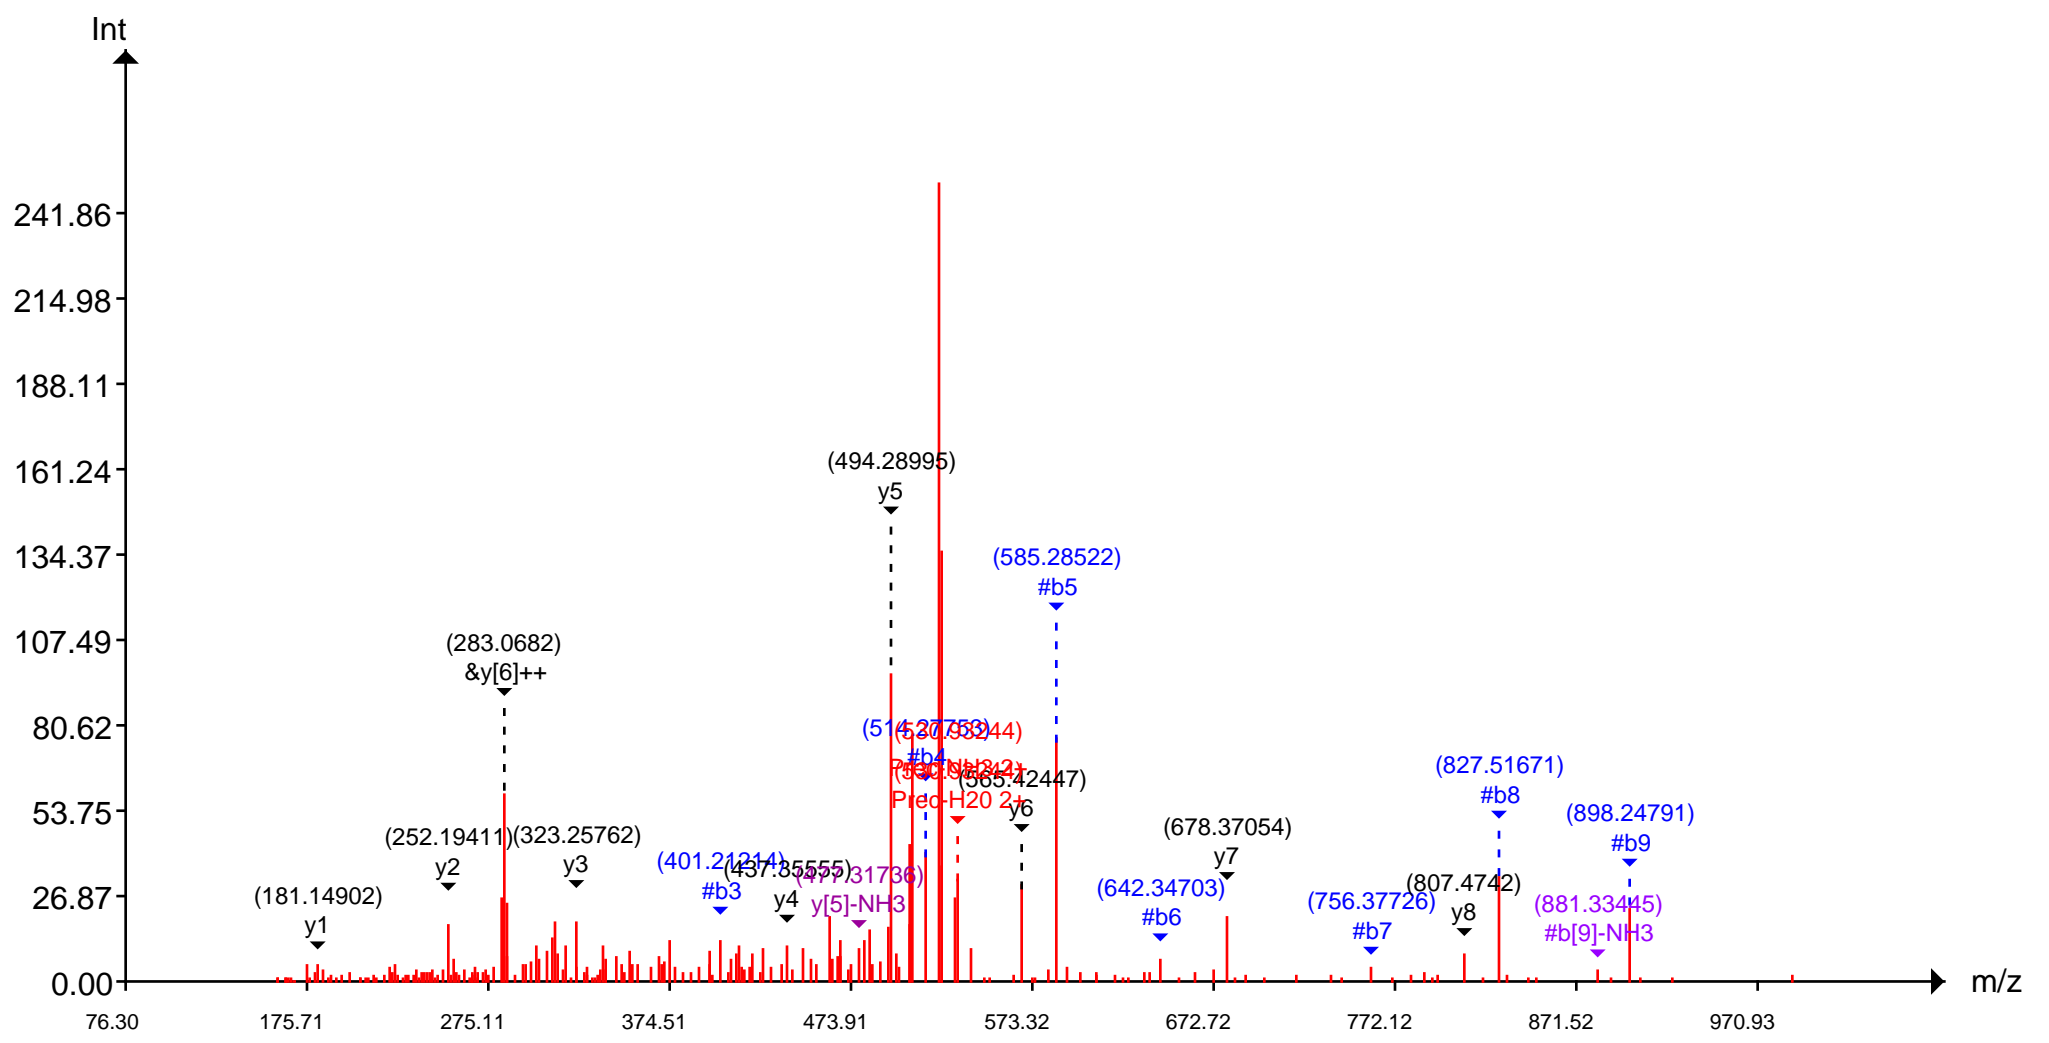

| Info     |                                                                                                | Ion score          |
|----------|------------------------------------------------------------------------------------------------|--------------------|
| Modif... | AcD3-ILELAGNAAR<C13>-COOH                                                                      |                    |
|          | Q8CGP5, Q8CGP6, Q8CGP7, P22752, Q6GSS7, Q64522, Q64523, Q8BFU2, Q8R1M2, Q8CCK0, P27661, Q9QZQ8 | Confidence level   |
|          | 539.82294                                                                                      | Identity Threshold |
|          | 2+                                                                                             | Mass error         |

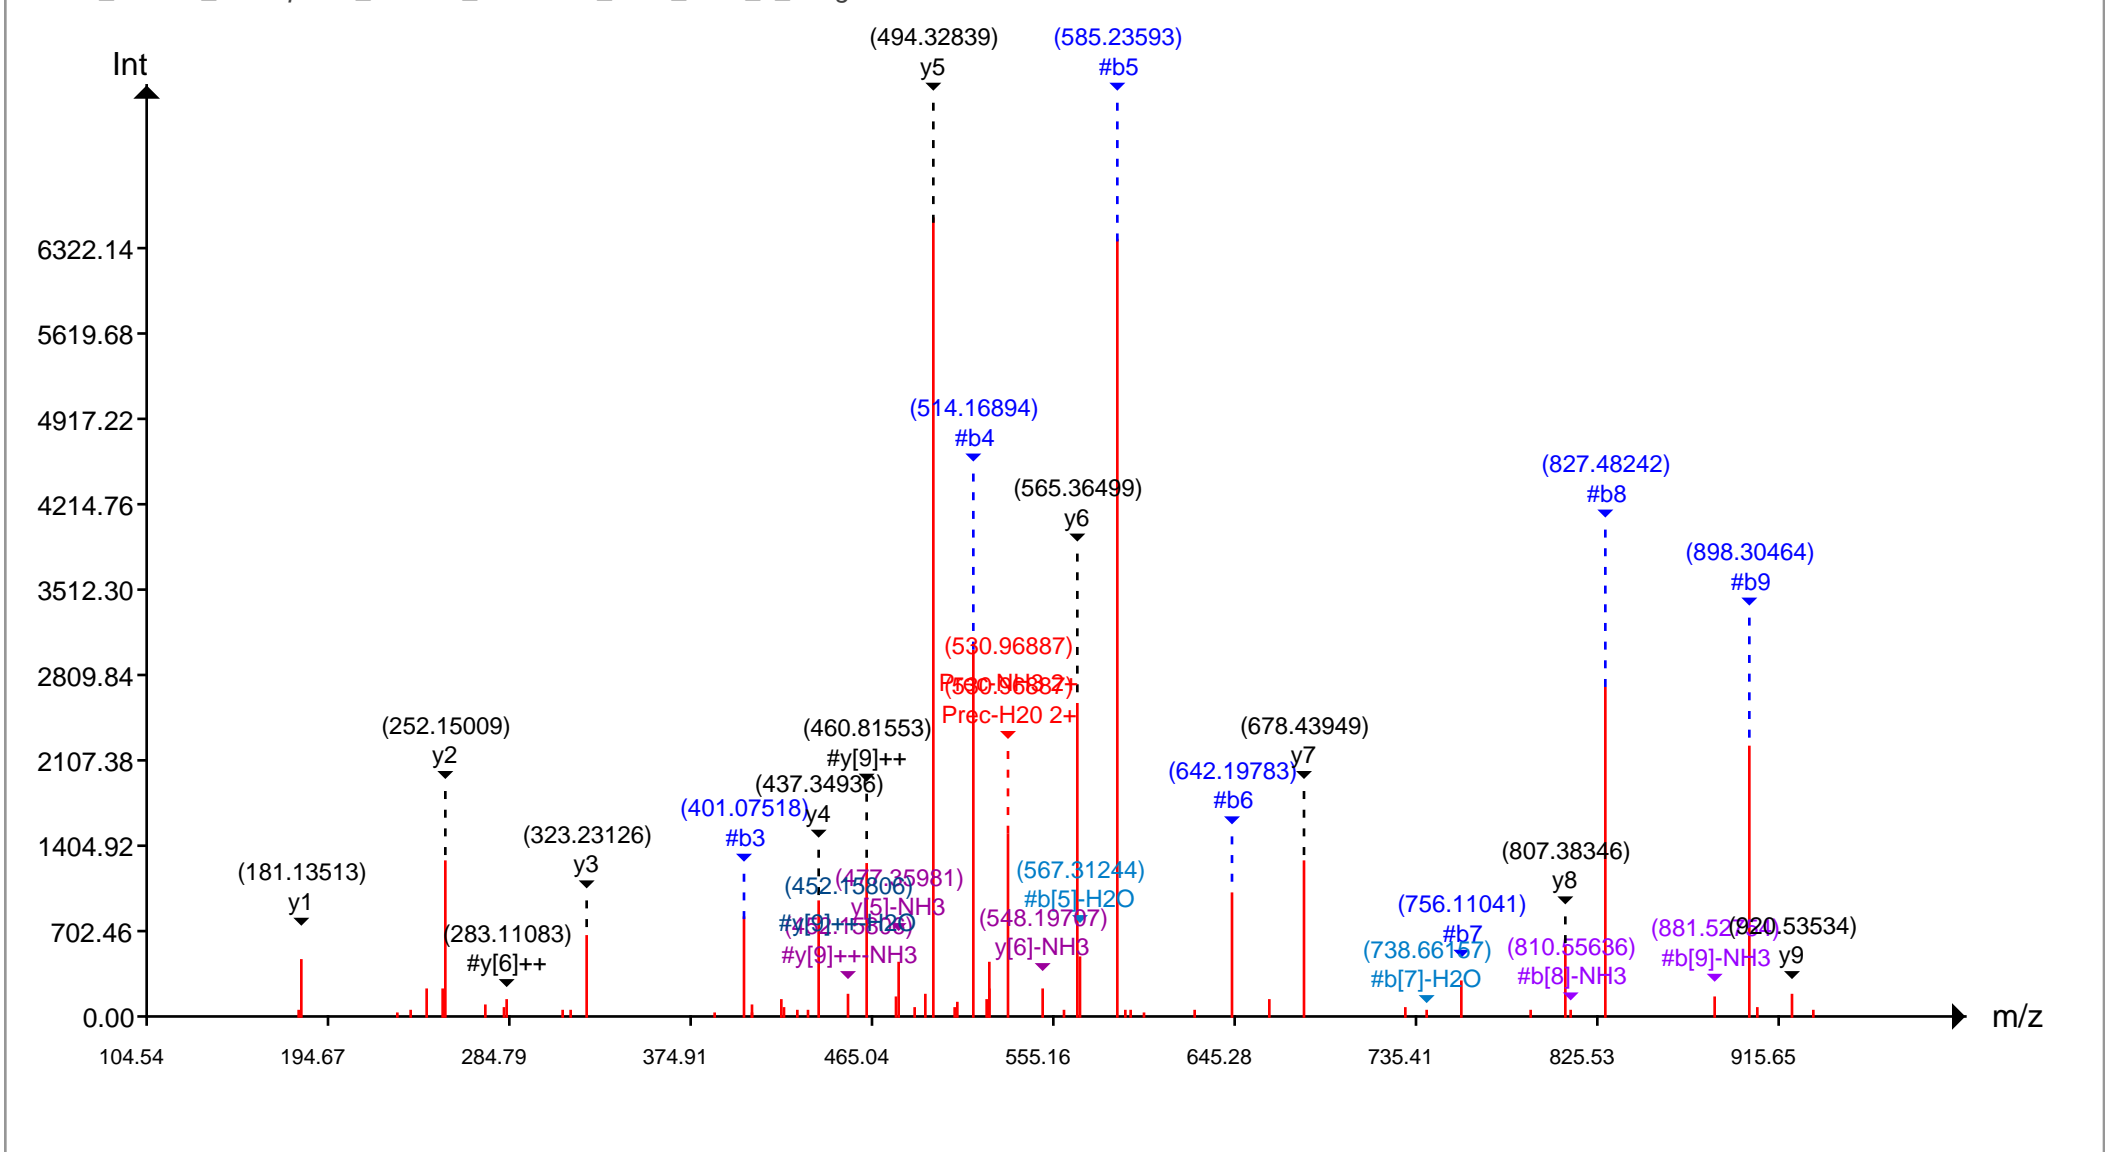

## Info

**Modif...** AcD3-ILELAGNAAR<C13>-COOH

**Ion score**

Q8CGP5, Q8CGP6, Q8CGP7, P22752, Q6GSS7, Q64522, Q64523, Q8BFU2, Q8R1M2, Q8CCK0, P27661, Q9QZQ8

**Confidence level**

539.82304

**Identity Threshold**

2+

**Mass error**

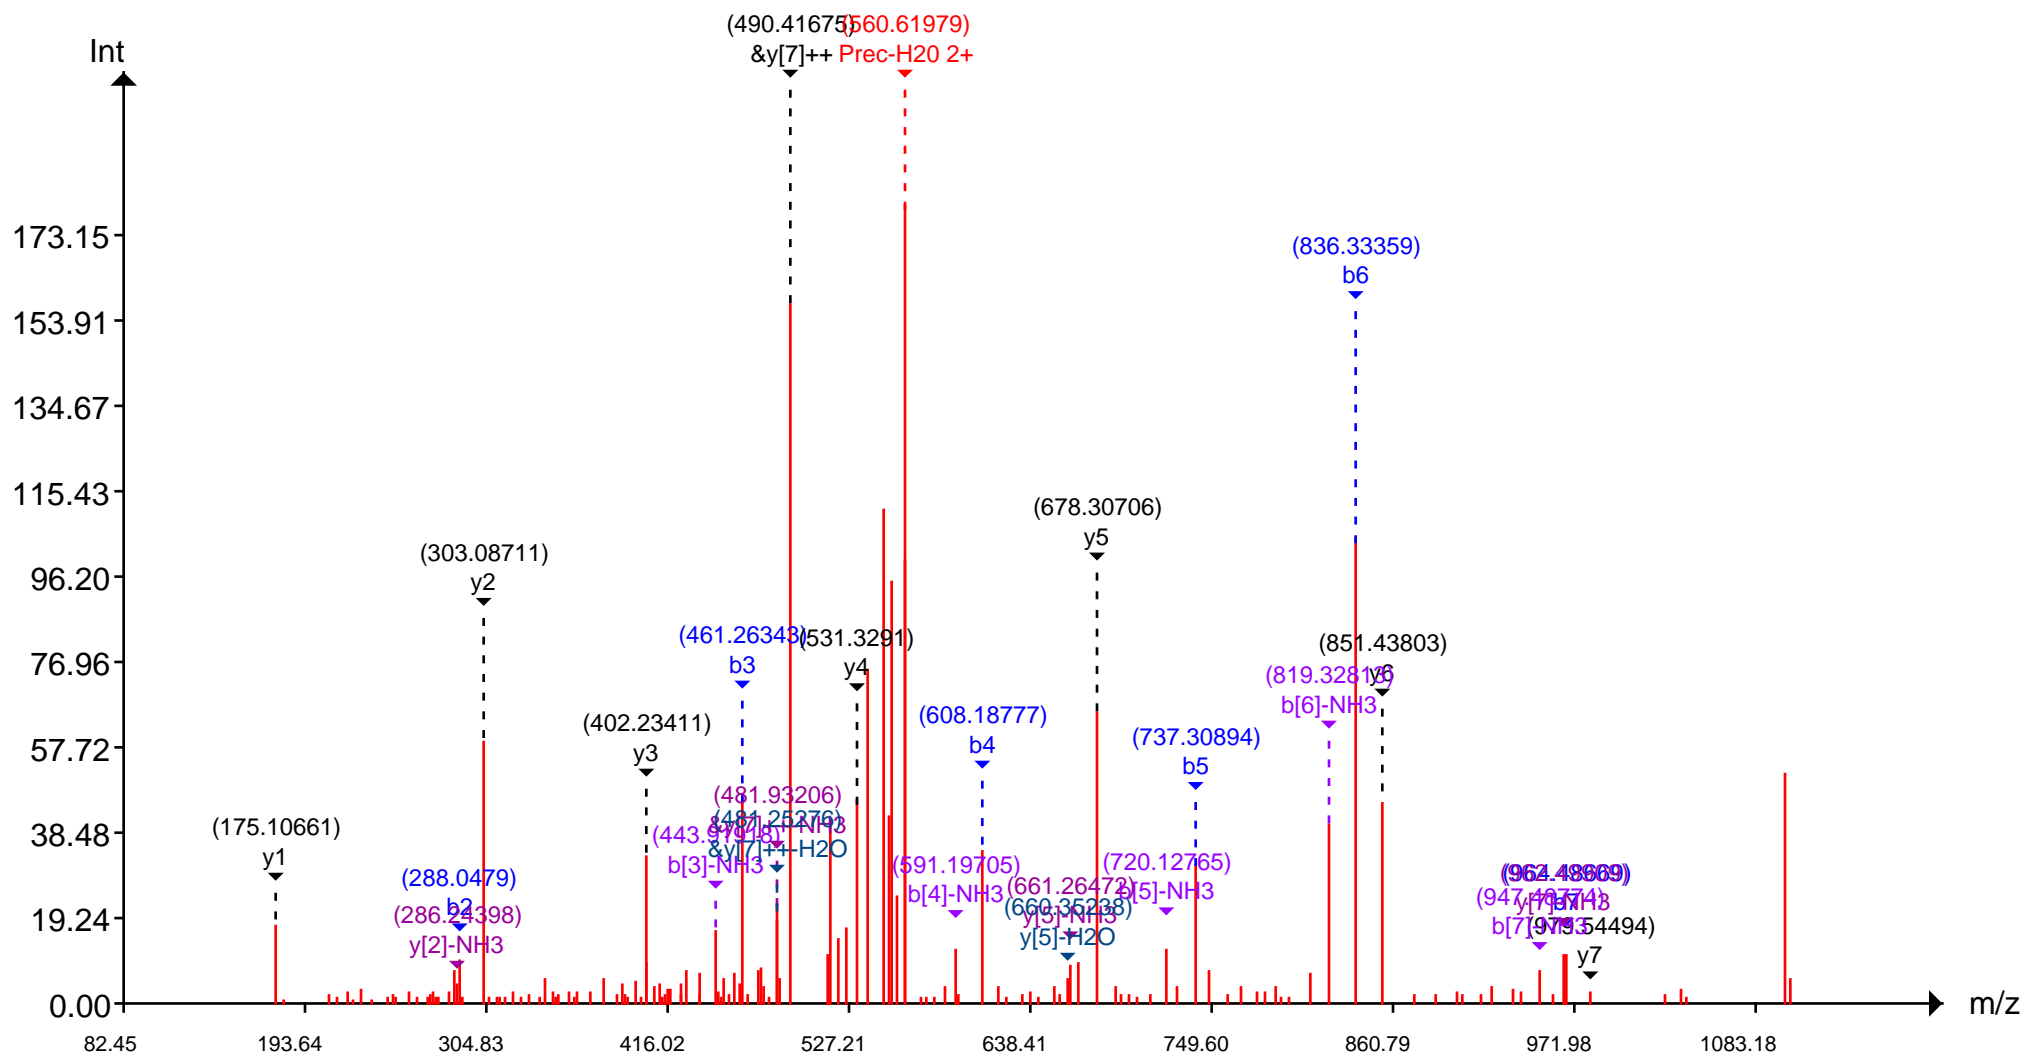

## Info

**Modified Sequence** AcD3-NQK<AcD3K\*>M<Mox\*>EVQR-COOH

**Ion score** 48.38

**Protein** P16675

**Confidence level** 99.00%

**Precursor m/z** 569.79276

**Identity Threshold** 47.80

**Charge** 2+

**Mass error** -9.31E-4

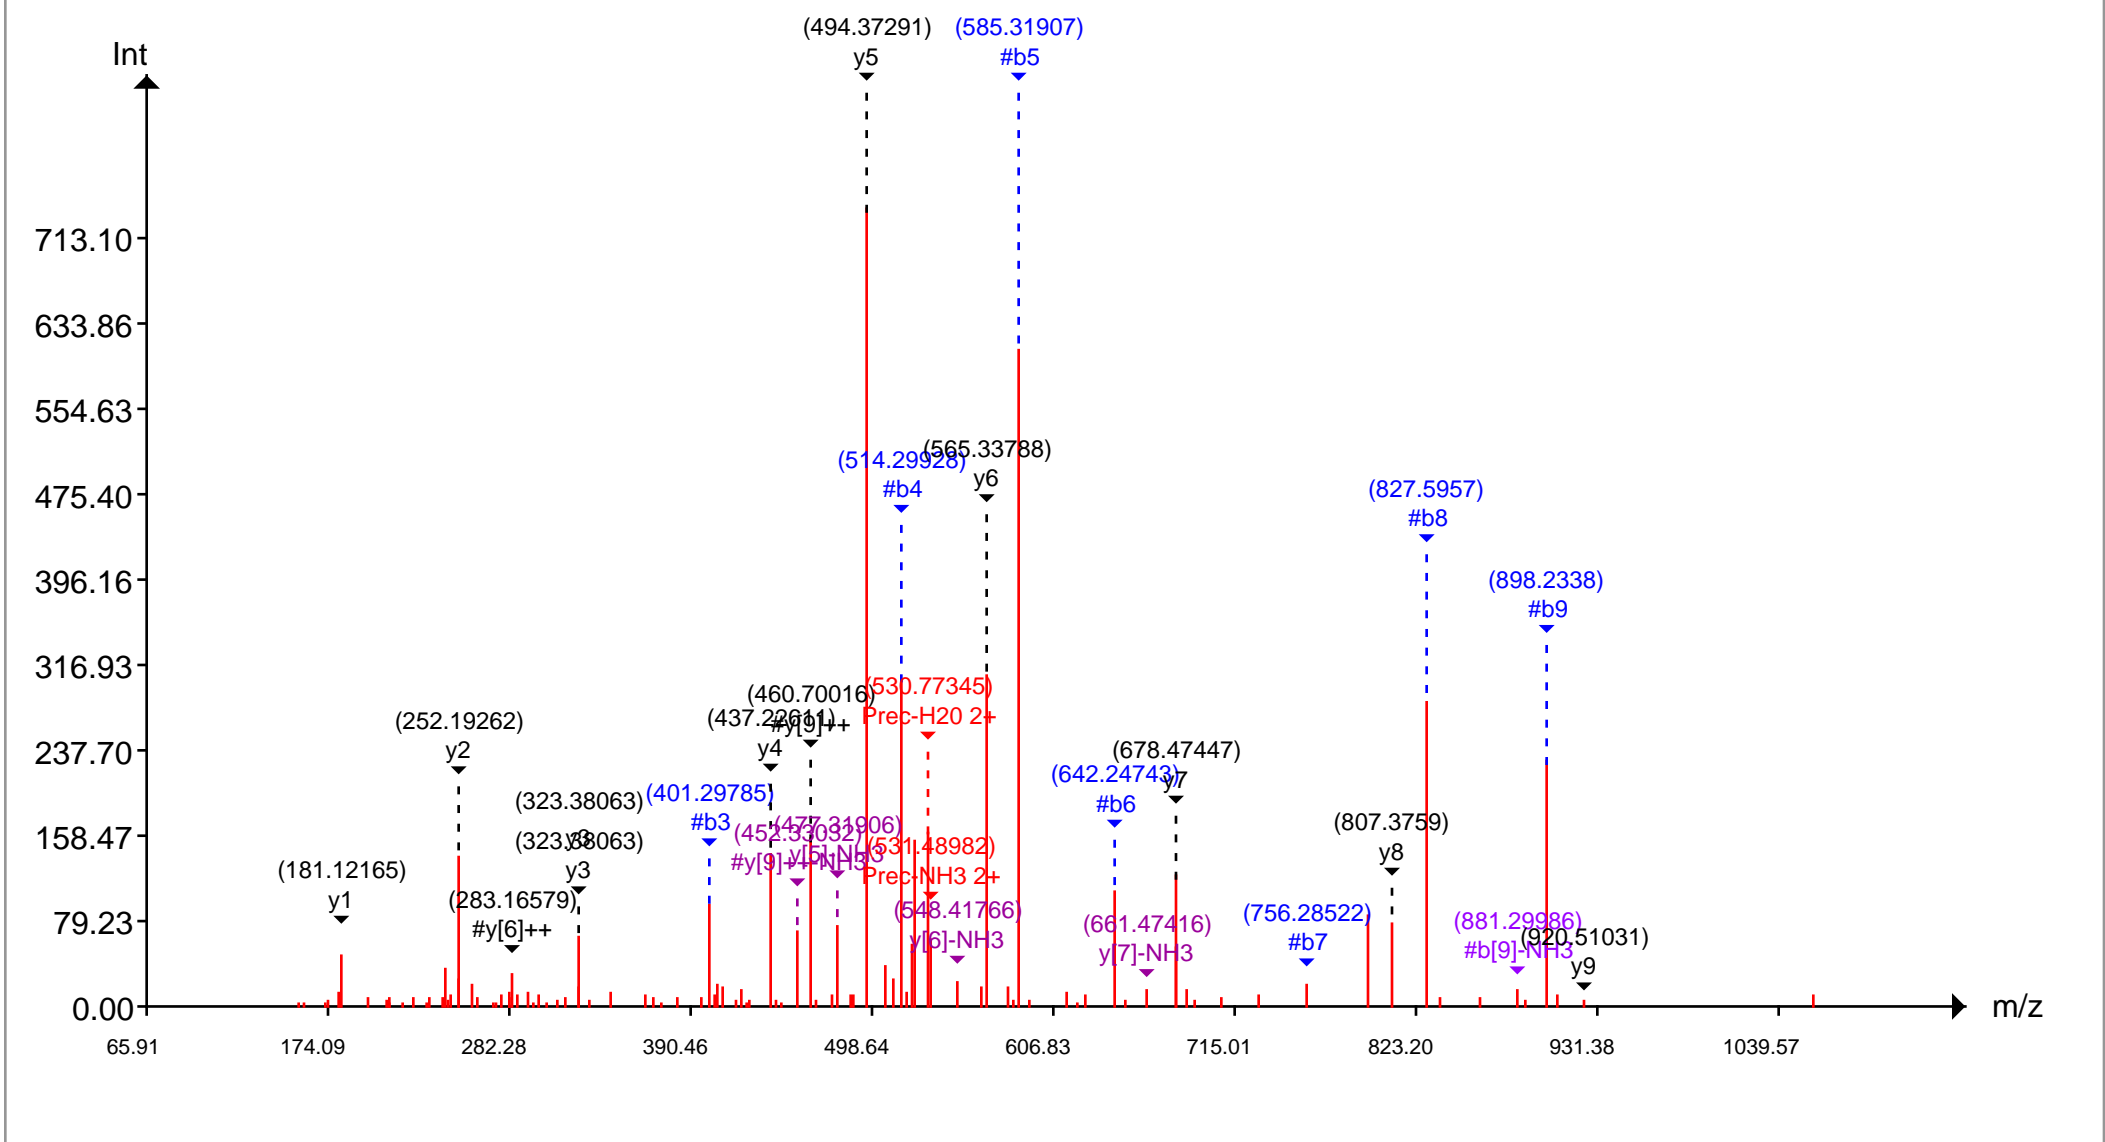

## Info

Modif... AcD3-ILELAGNAAR<C13>-COOH

Ion score

Q8CGP5, Q8CGP6, Q8CGP7, P22752, Q6GSS7, Q64522, Q64523, Q8BFU2, Q8R1M2, Q8CCK0, P27661, Q9QZQ8

Confidence level

539.82303

Identity Threshold

2+

Mass error

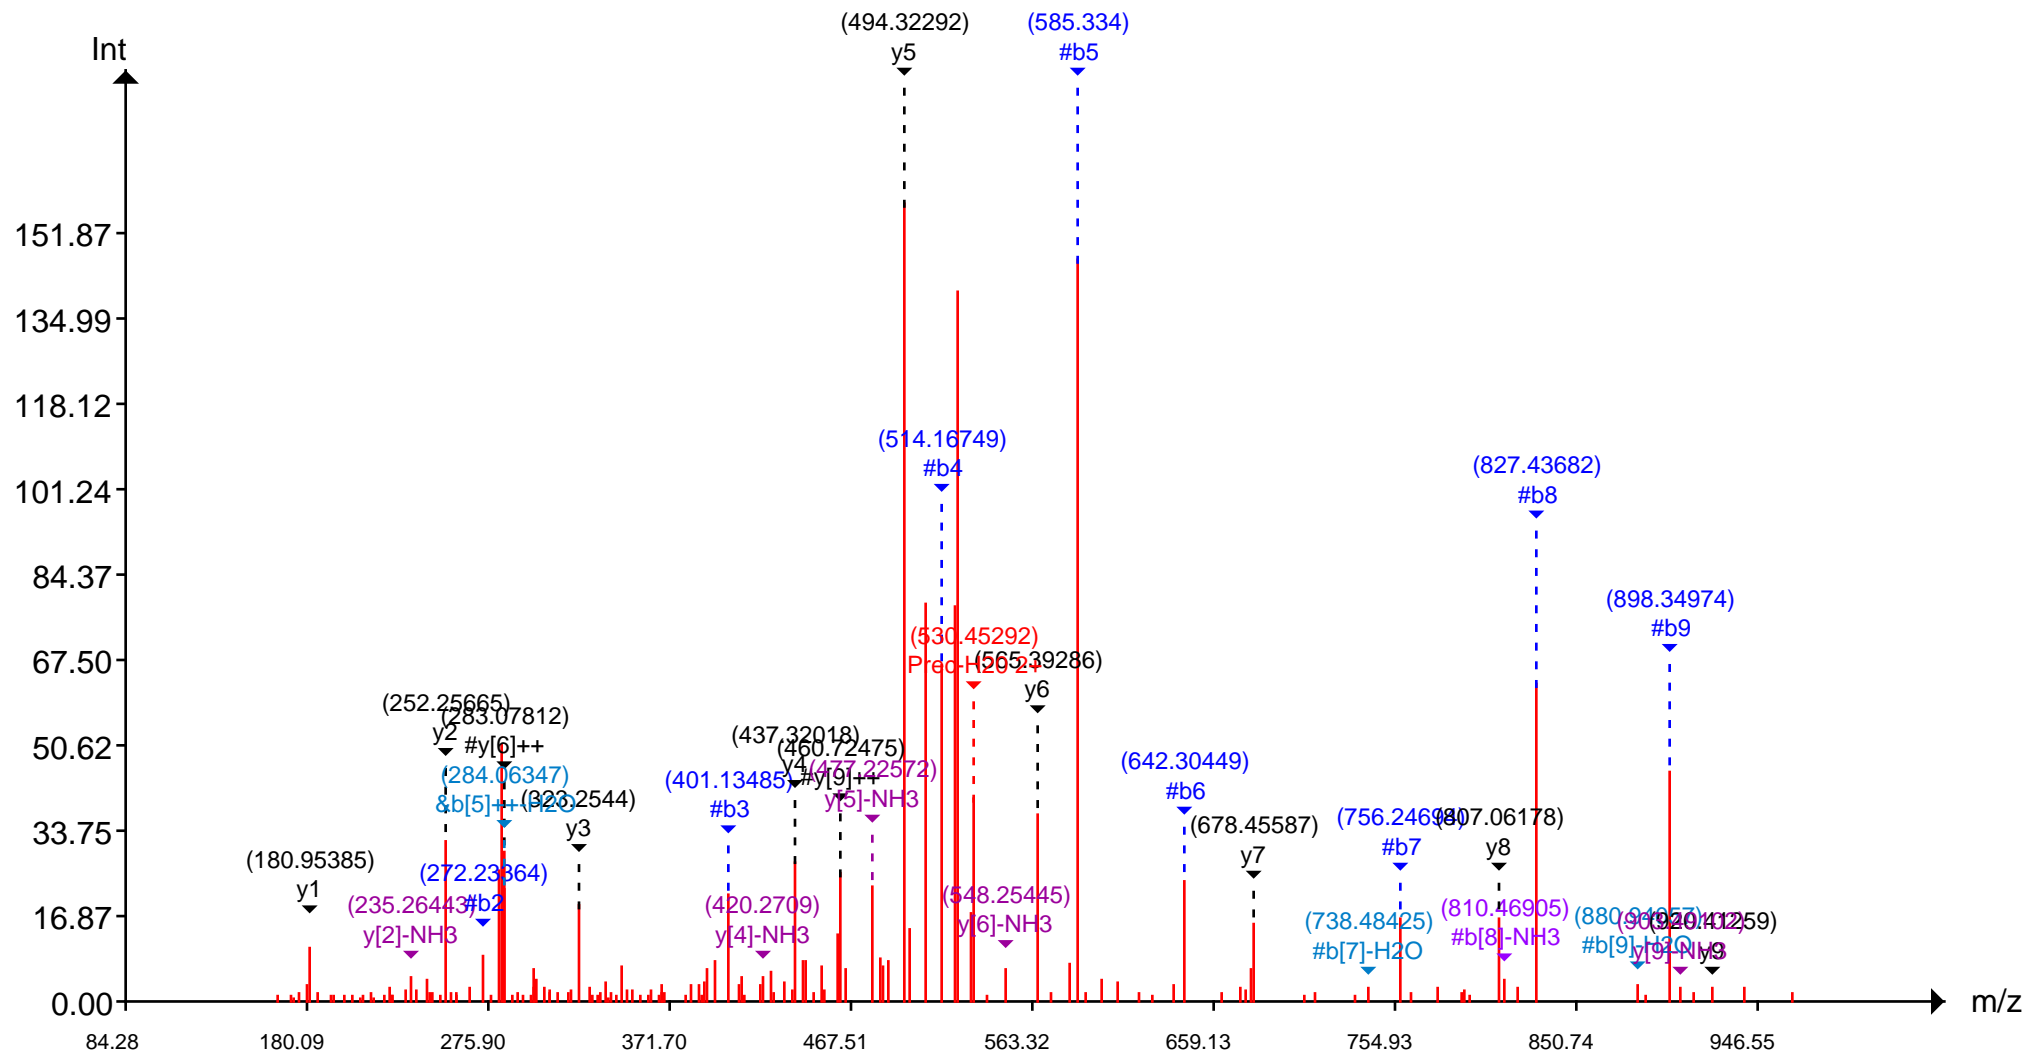

## Info

**Modif...** AcD3-ILELAGNAAR<C13>-COOH

**Ion score**

Q8CGP5, Q8CGP6, Q8CGP7, P22752, Q6GSS7, Q64522, Q64523, Q8BFU2, Q8R1M2, Q8CCK0, P27661, Q9QZQ8

**Confidence level**

**P...** 539.82311

**Identity Threshold**

2+

**Mass error**

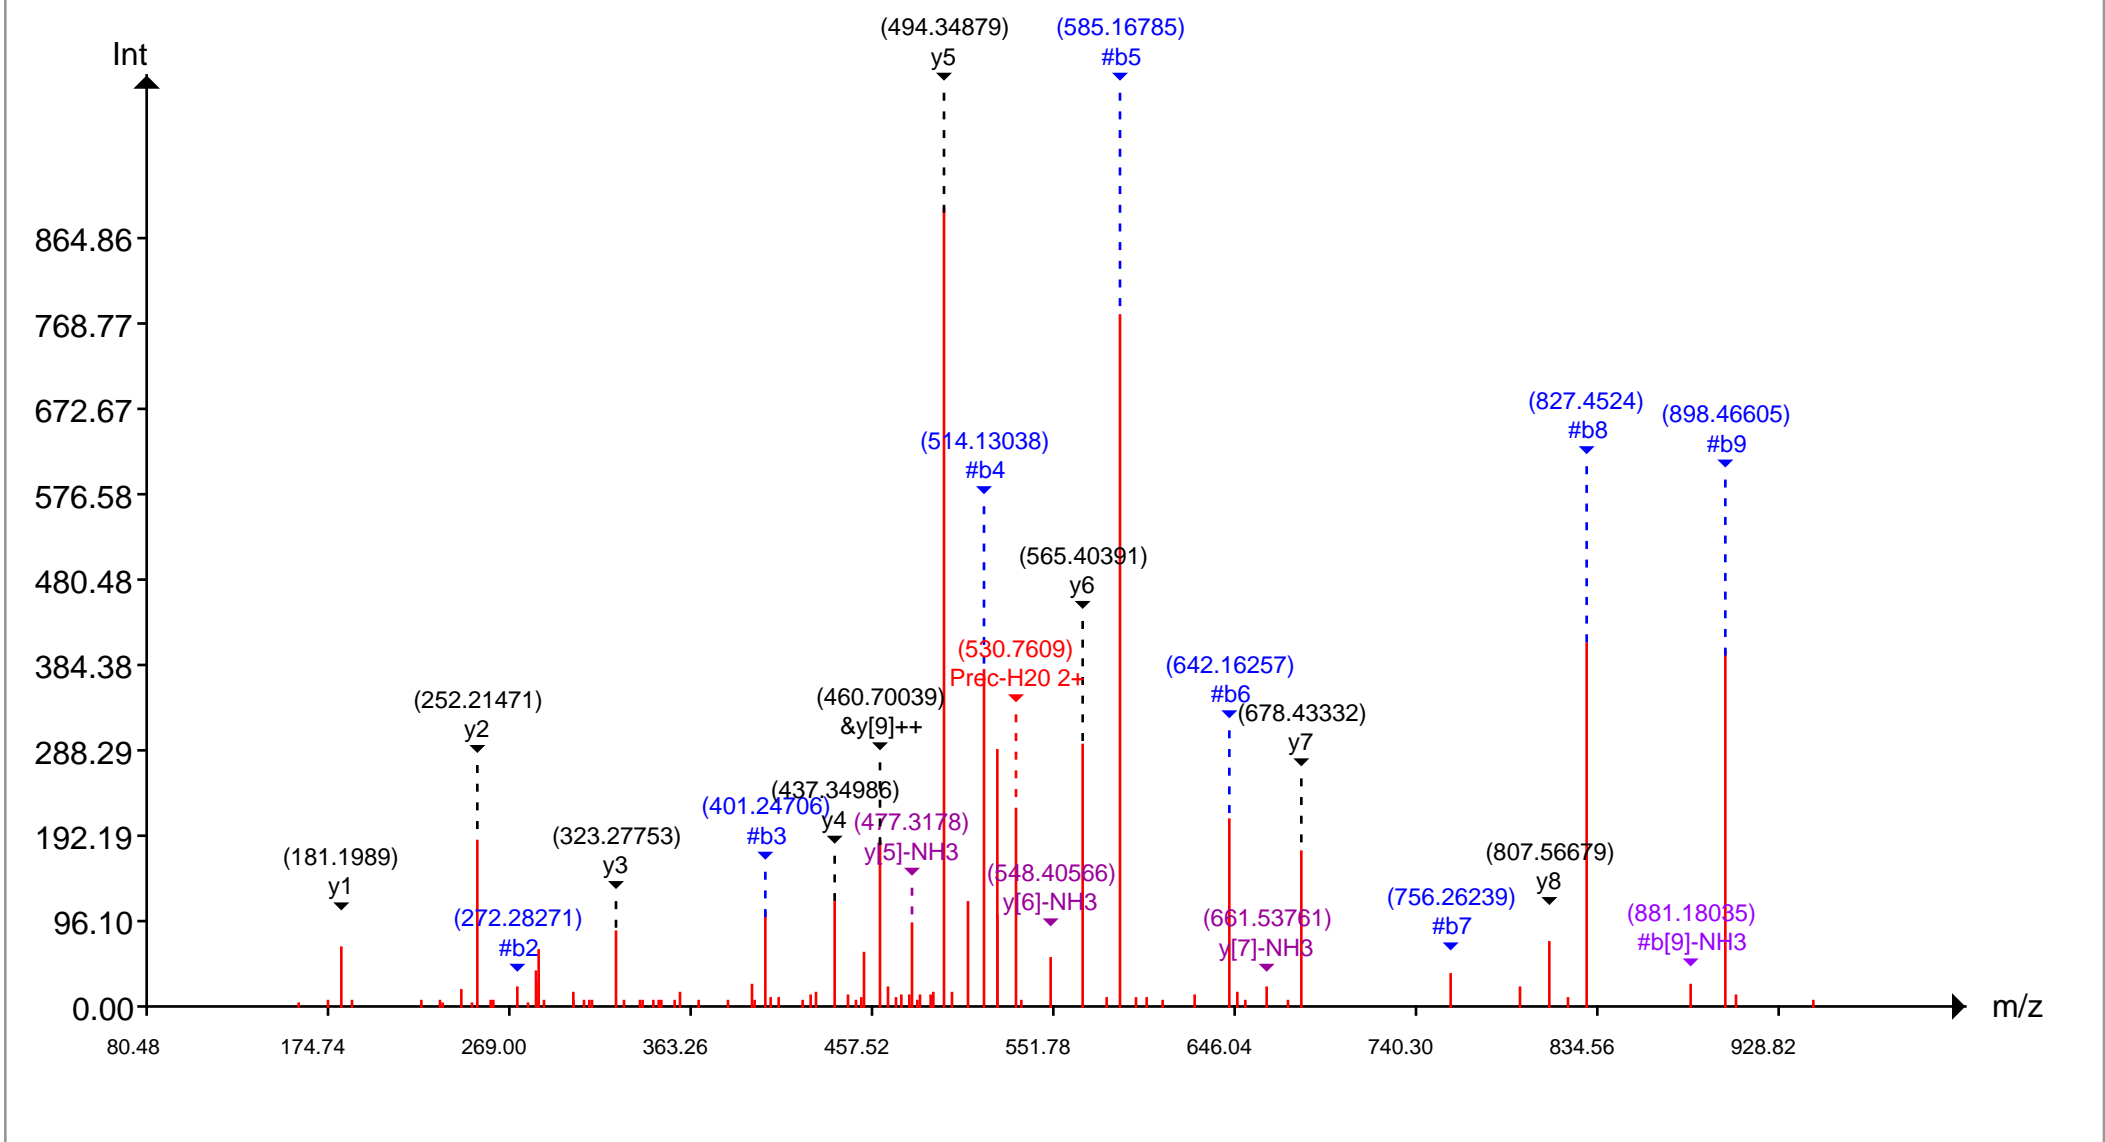

## Info

**Modif...** AcD3-ILELAGNAAR<C13>-COOH

**Ion score**

**Q...** Q8CGP5, Q8CGP6, Q8CGP7, P22752, Q6GSS7, Q64522, Q64523, Q8BFU2, Q8R1M2, Q8CCK0, P27661, Q9QZQ8

**Confidence level**

**P...** 539.82308

**Identity Thresho**

2+

**Mass error**

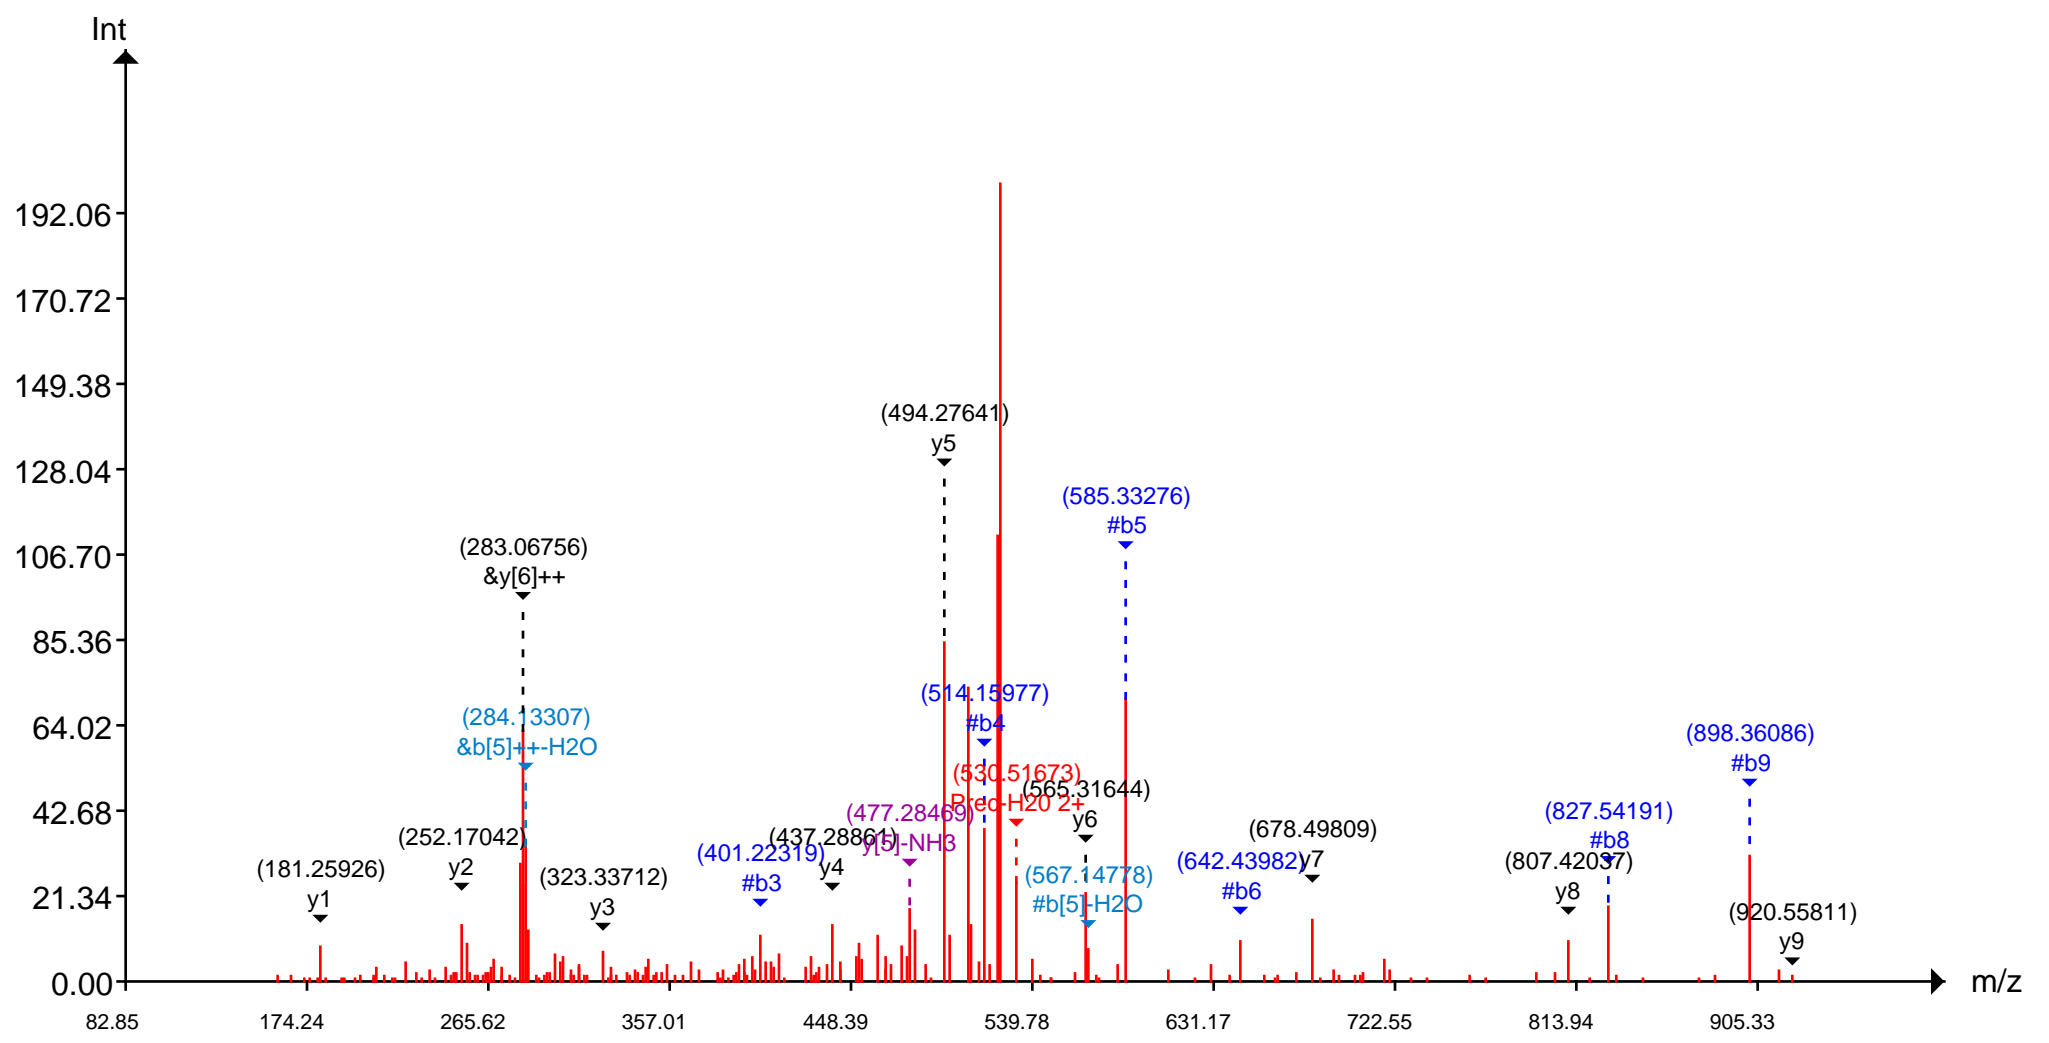

| Info                      |                                                                                                |
|---------------------------|------------------------------------------------------------------------------------------------|
| <b>Modif...</b>           | AcD3-ILELAGNAAR<C13>-COOH                                                                      |
| <b>P...</b>               | 539.82314                                                                                      |
|                           | 2+                                                                                             |
| <b>Ion score</b>          |                                                                                                |
| <b>Confidence level</b>   | Q8CGP5, Q8CGP6, Q8CGP7, P22752, Q6GSS7, Q64522, Q64523, Q8BFU2, Q8R1M2, Q8CCK0, P27661, Q9QZQ8 |
| <b>Identity Threshold</b> |                                                                                                |
| <b>Mass error</b>         |                                                                                                |

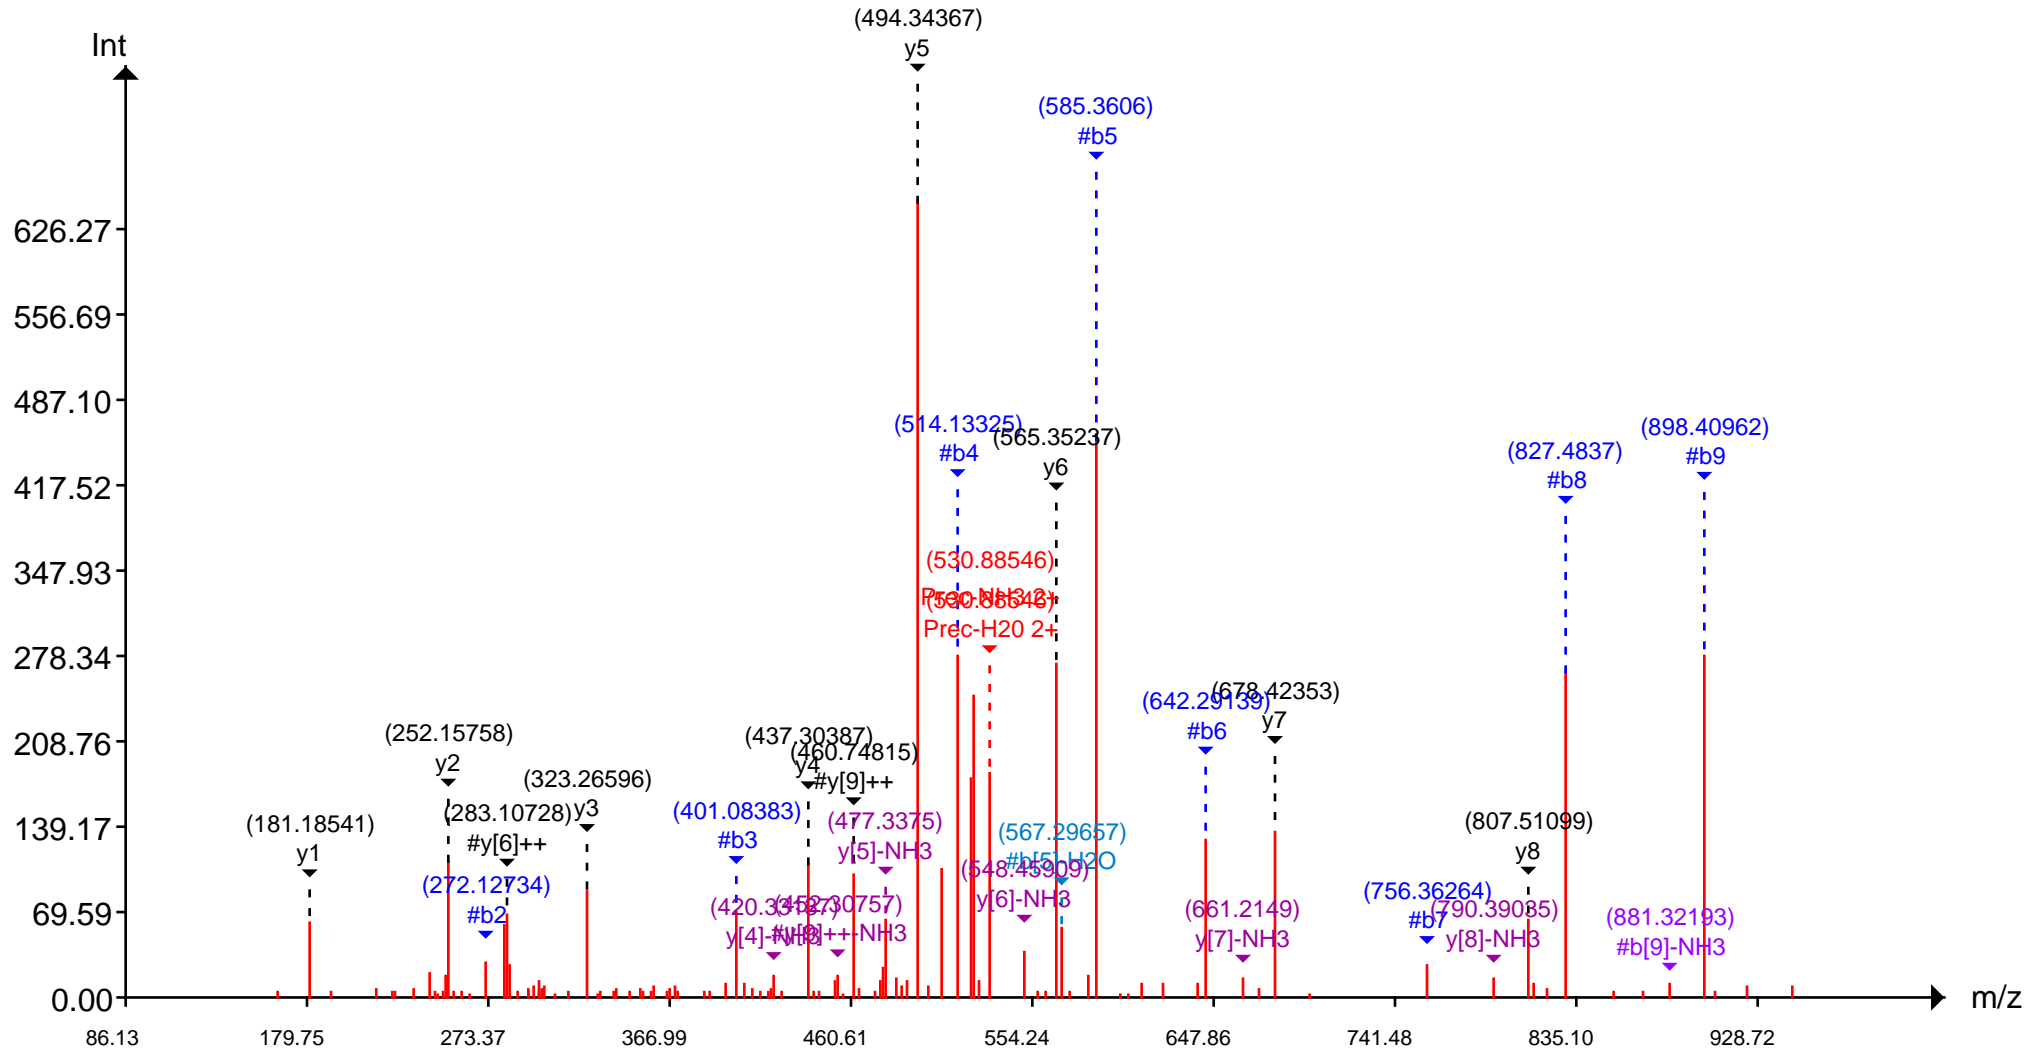

| Info            |                                                                                                |                         |
|-----------------|------------------------------------------------------------------------------------------------|-------------------------|
| <b>Modif...</b> | AcD3-ILELAGNAAR<C13>-COOH                                                                      | <b>Ion score</b>        |
| <b>P...</b>     | Q8CGP5, Q8CGP6, Q8CGP7, P22752, Q6GSS7, Q64522, Q64523, Q8BFU2, Q8R1M2, Q8CCK0, P27661, Q9QZQ8 | <b>Confidence level</b> |
|                 | 539.82311                                                                                      | <b>Identity Thresho</b> |
|                 | 2+                                                                                             | <b>Mass error</b>       |



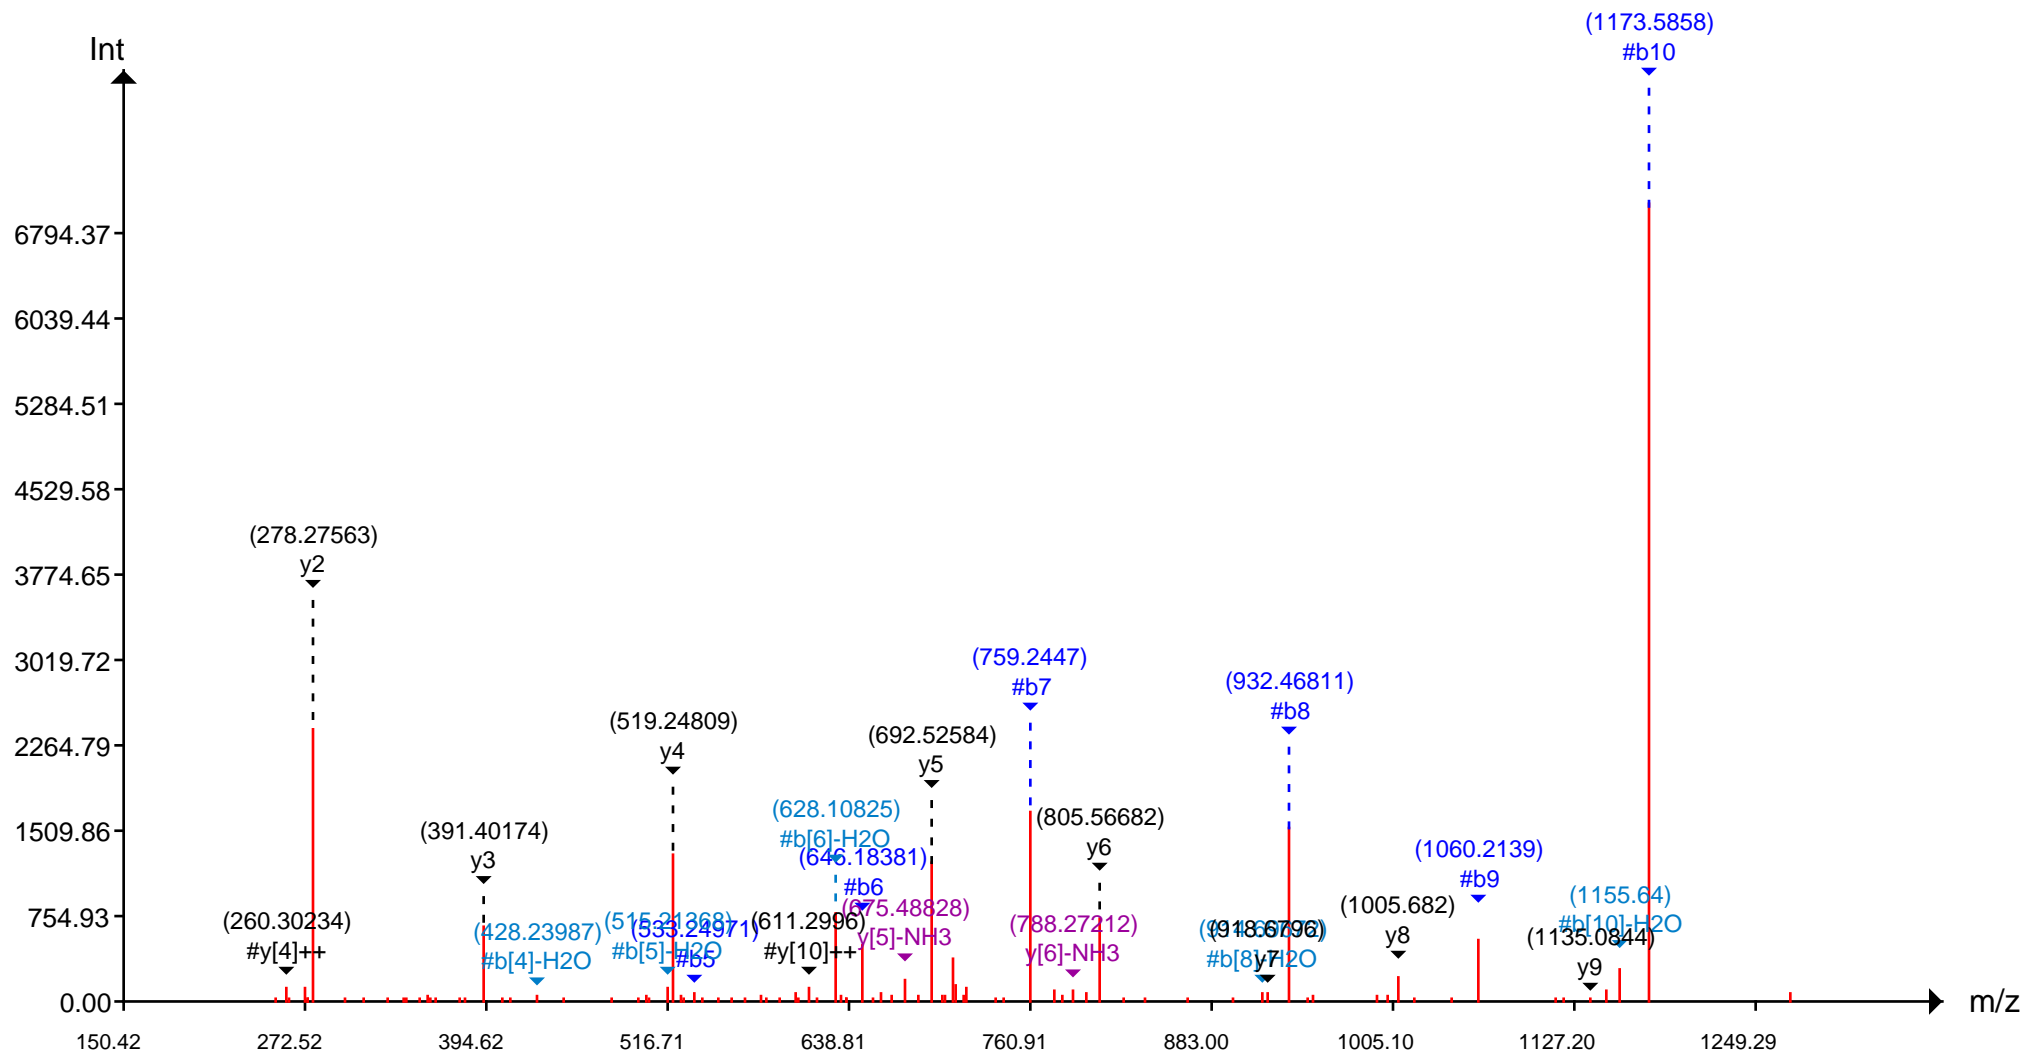

## Info

|                          |                                     |                           |          |
|--------------------------|-------------------------------------|---------------------------|----------|
| <b>Modified Sequence</b> | AcD3-LASESLIK<AcD3K*>QIPR<C13>-COOH | <b>Ion score</b>          | 63.64    |
| <b>Protein</b>           | P53026                              | <b>Confidence level</b>   | 99.00%   |
| <b>Precursor m/z</b>     | 725.94645                           | <b>Identity Threshold</b> | 41.83    |
| <b>Charge</b>            | 2+                                  | <b>Mass error</b>         | 0.001456 |

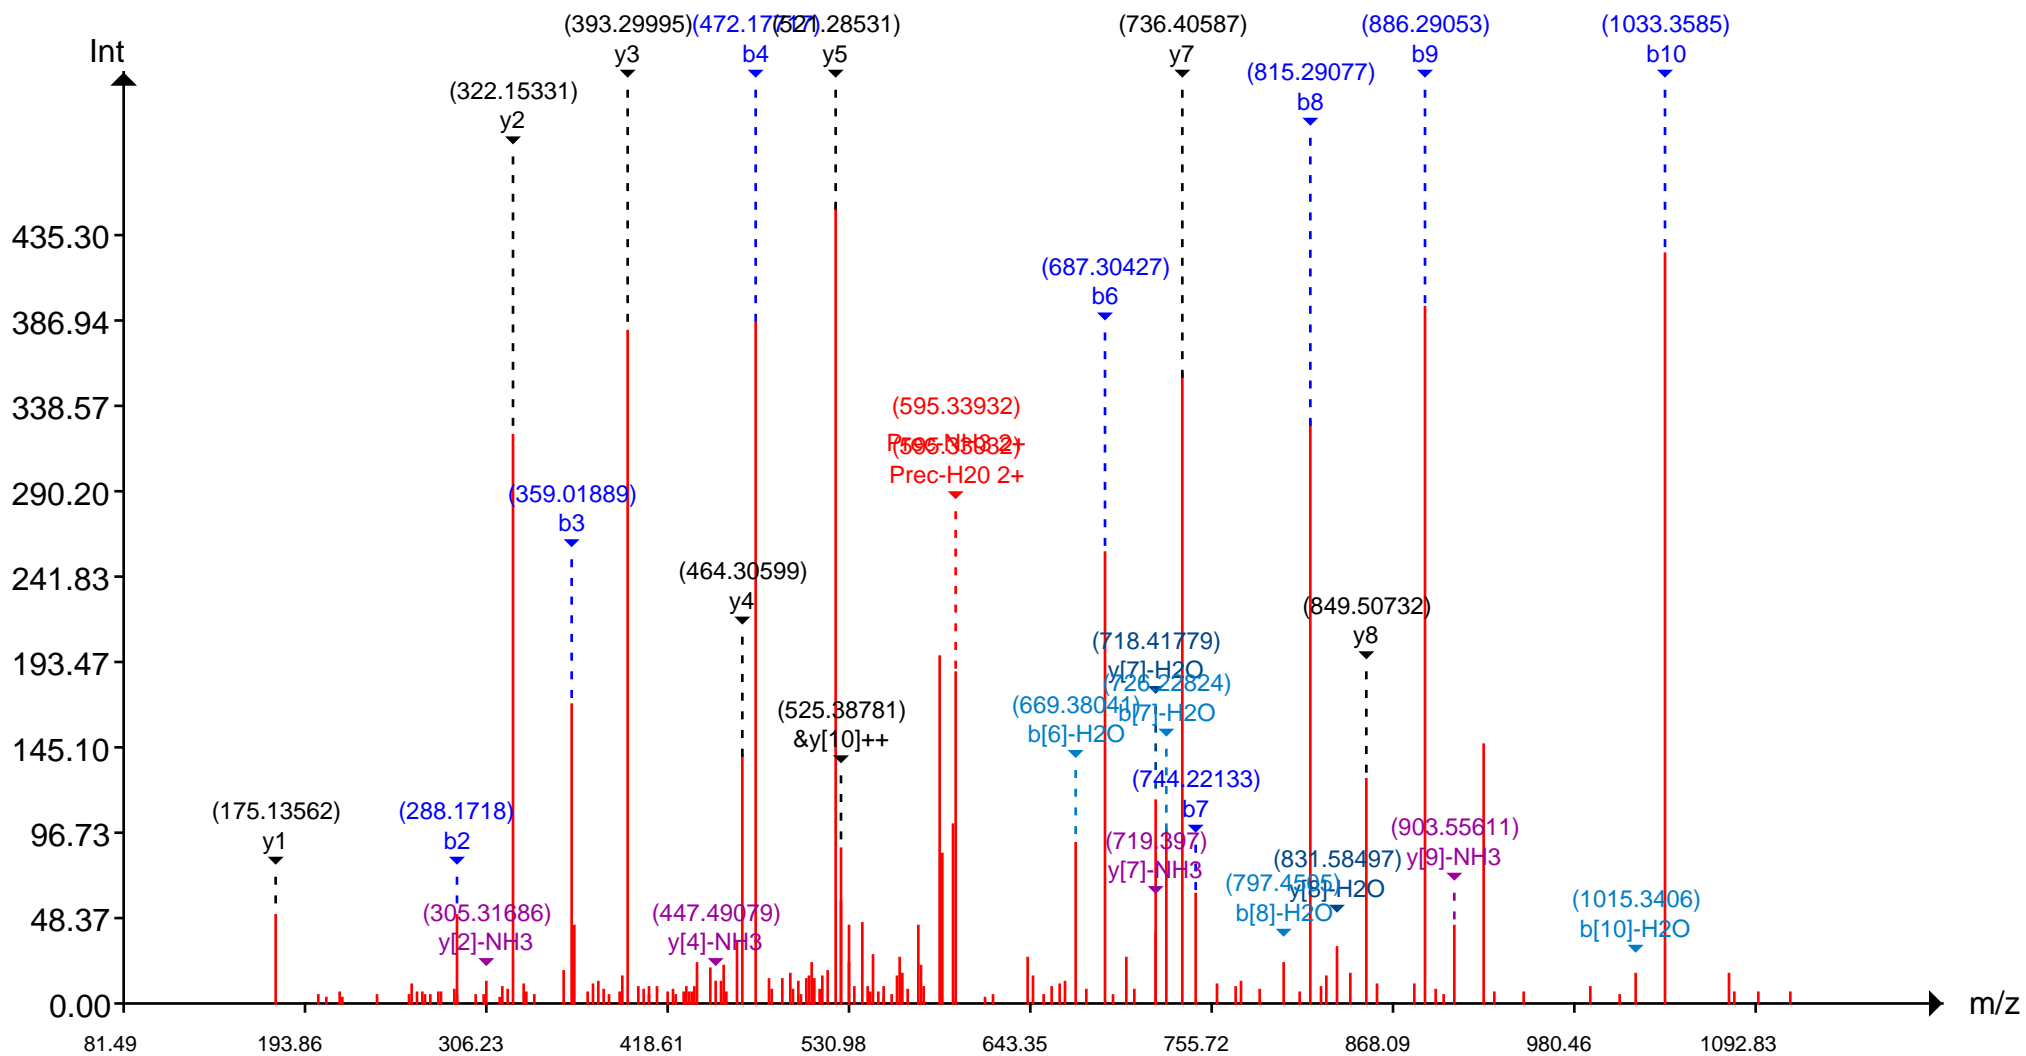

## Info

**Modified Sequence** AcD3-LEALQSGAAFR-COOH

**Protein** O08808, O70566, Q9Z207

**Precursor m/z** 604.32924

**Charge** 2+

**Ion score** 52.97

**Confidence level** 99.00%

**Identity Threshold** 47.98

**Mass error** 3.43E-4

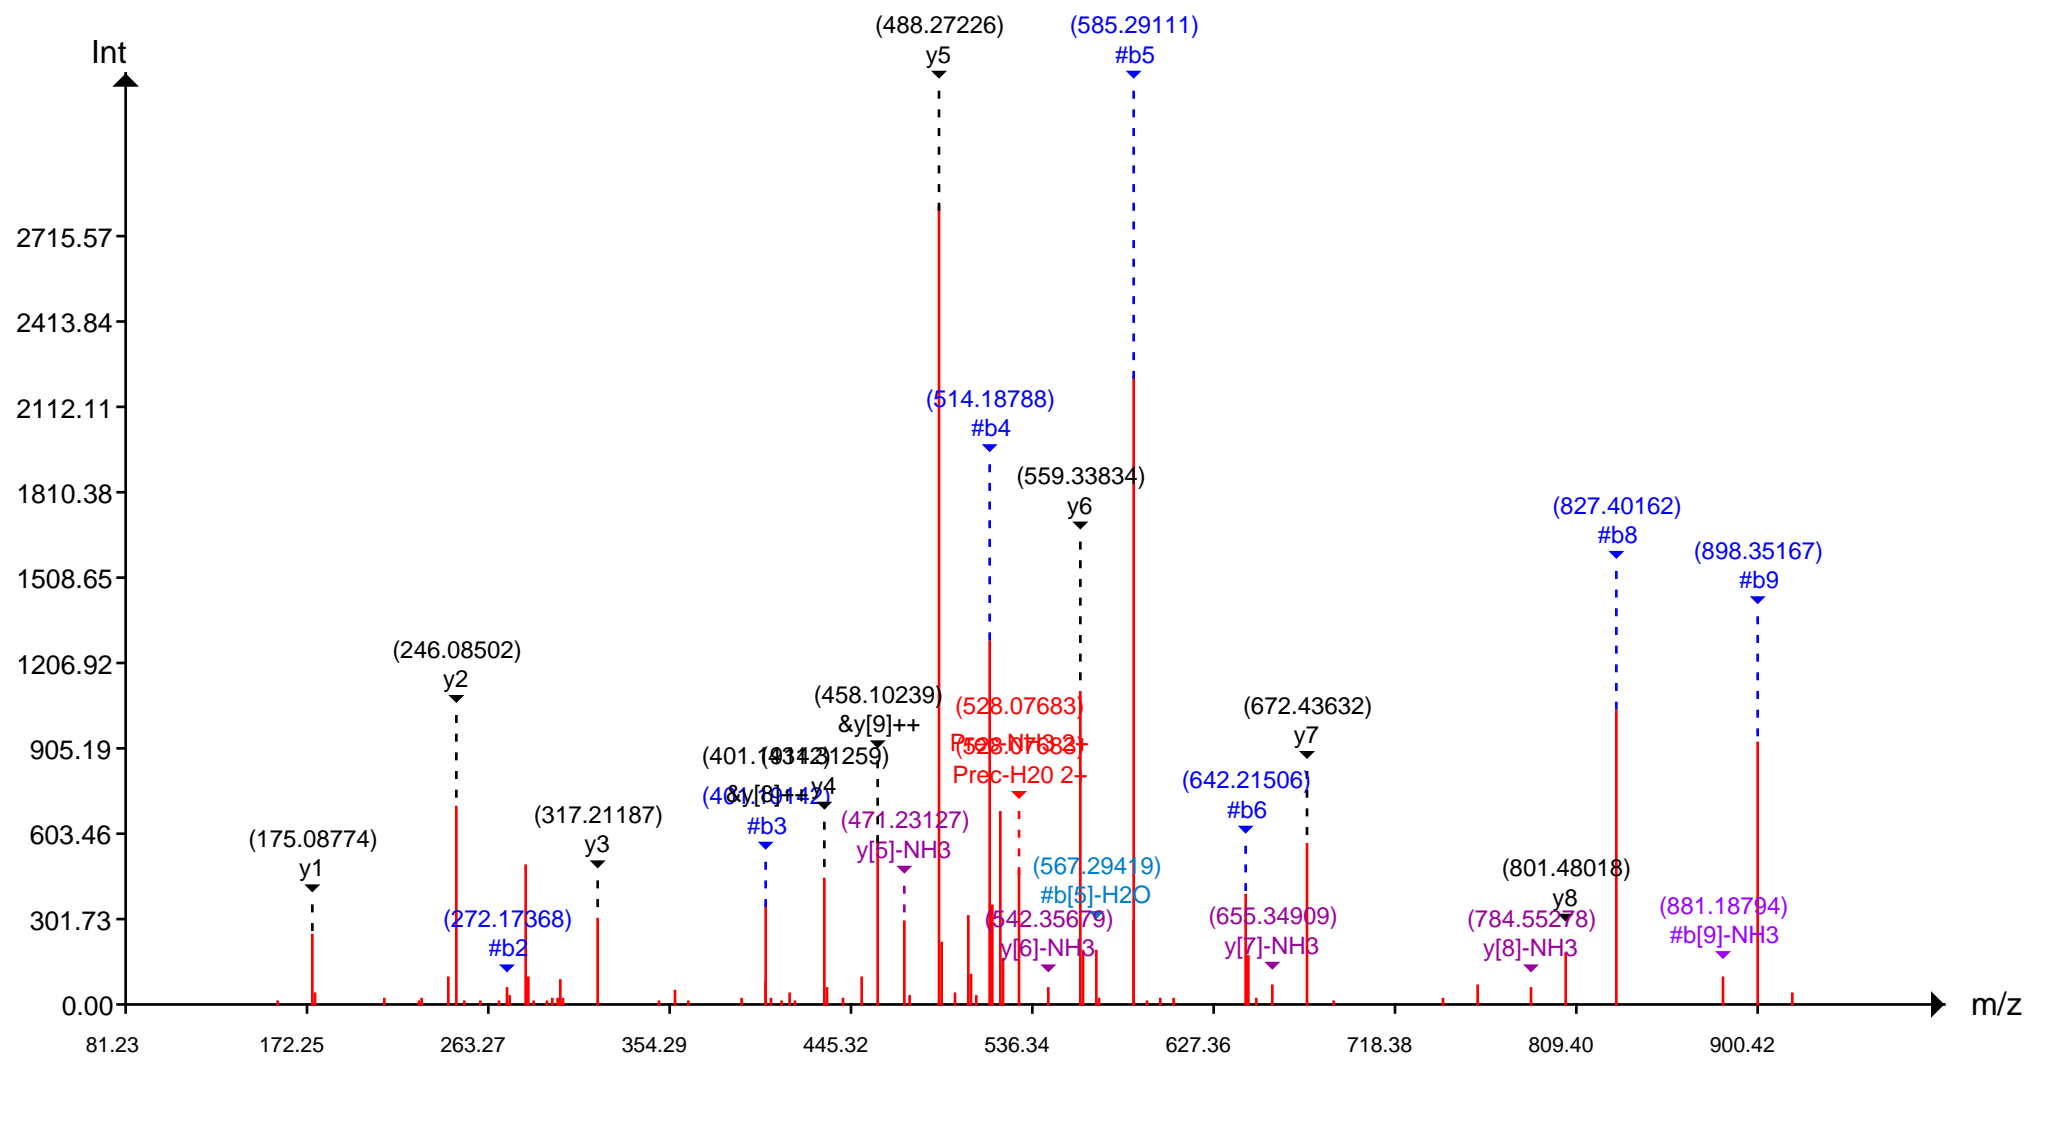

| Info     |                                                                                                | Ion score        |
|----------|------------------------------------------------------------------------------------------------|------------------|
| Modif... | AcD3-ILELAGNAAR-COOH                                                                           |                  |
| P...     | Q8CGP5, Q8CGP6, Q8CGP7, P22752, Q6GSS7, Q64522, Q64523, Q8BFU2, Q8R1M2, Q8CCK0, P27661, Q9QZQ8 | Confidence level |
|          | 536.81328                                                                                      | Identity Thresho |
|          | 2+                                                                                             | Mass error       |

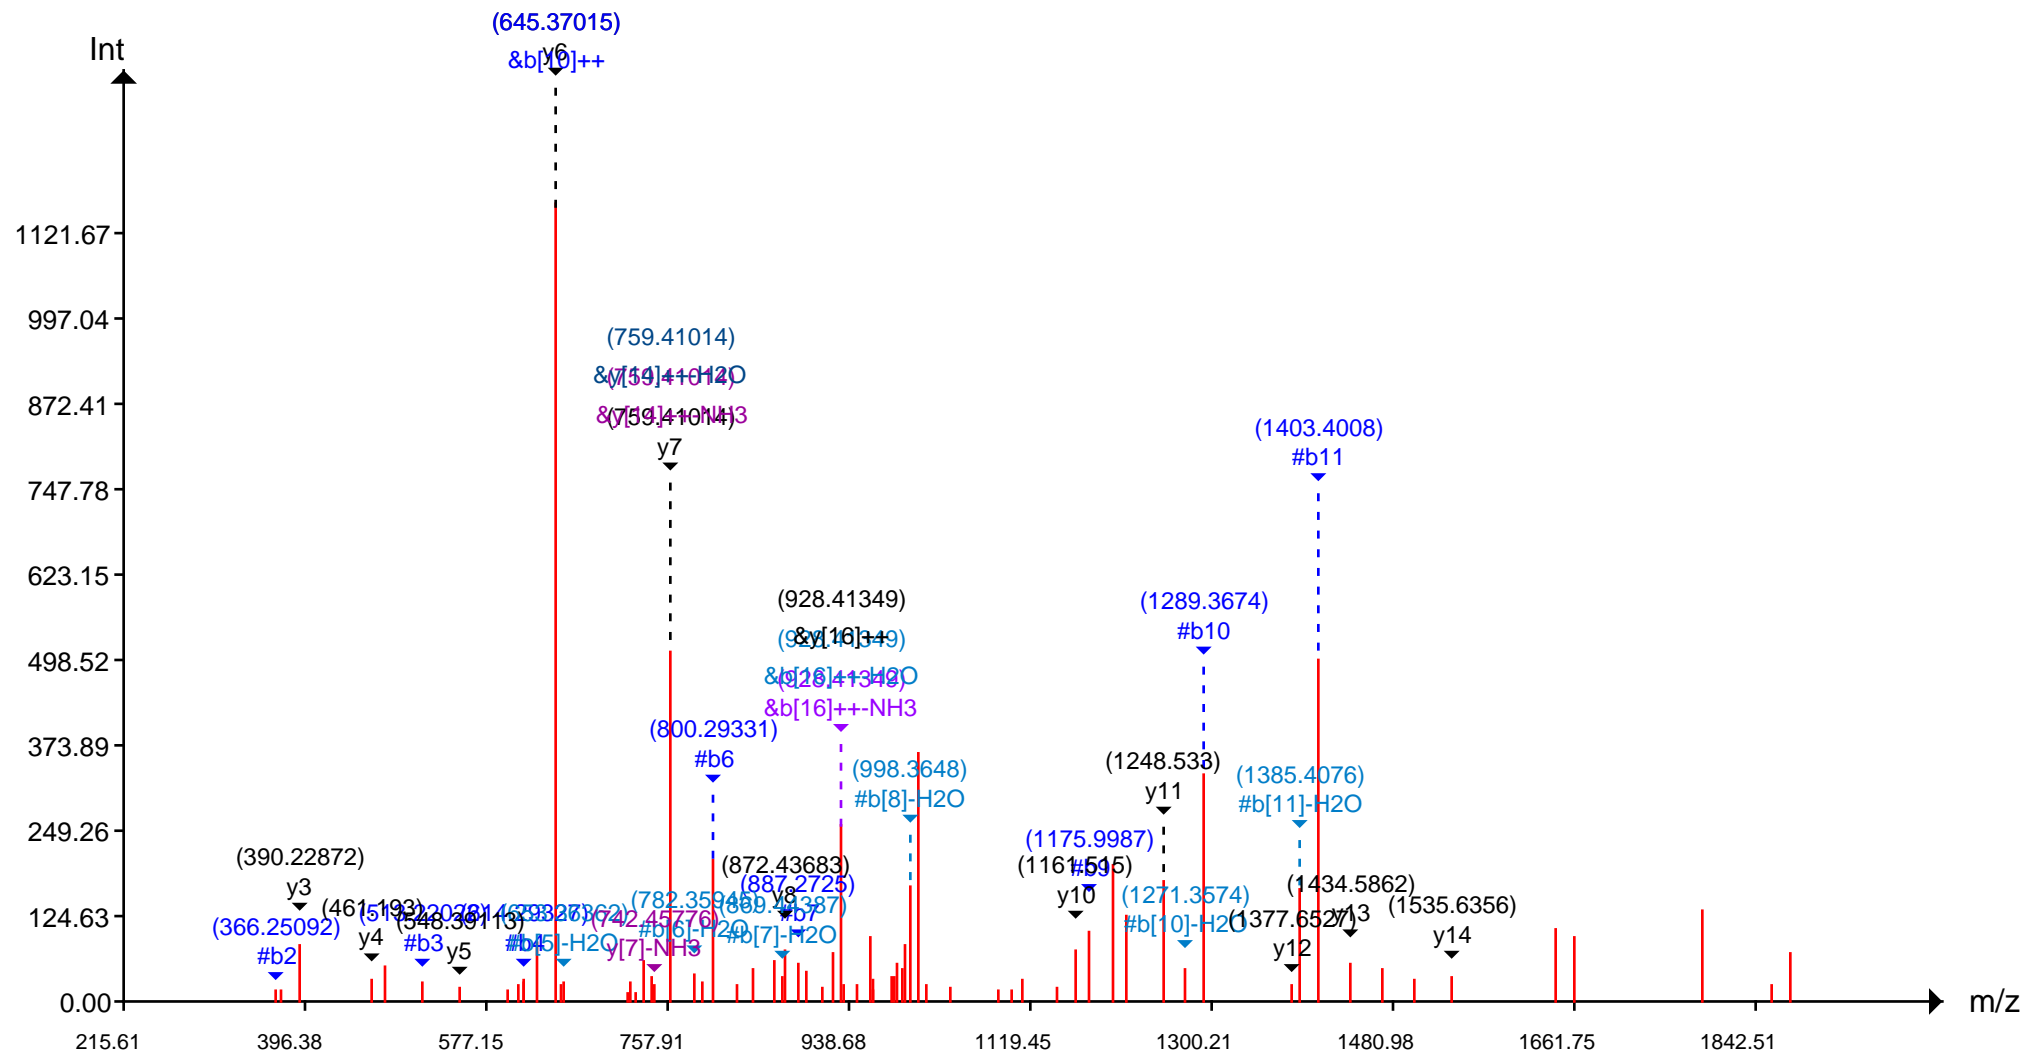

## Info

|                          |                                                 |                           |          |
|--------------------------|-------------------------------------------------|---------------------------|----------|
| <b>Modified Sequence</b> | AcD3-FK<AcD3K*>M<Mox*>TGESEC<Cmm*>LNPSAQSR-COOH | <b>Ion score</b>          | 63.88    |
| <b>Protein</b>           | O54988                                          | <b>Confidence level</b>   | 99.00%   |
| <b>Precursor m/z</b>     | 1024.4714                                       | <b>Identity Threshold</b> | 44.72    |
| <b>Charge</b>            | 2+                                              | <b>Mass error</b>         | 0.002513 |

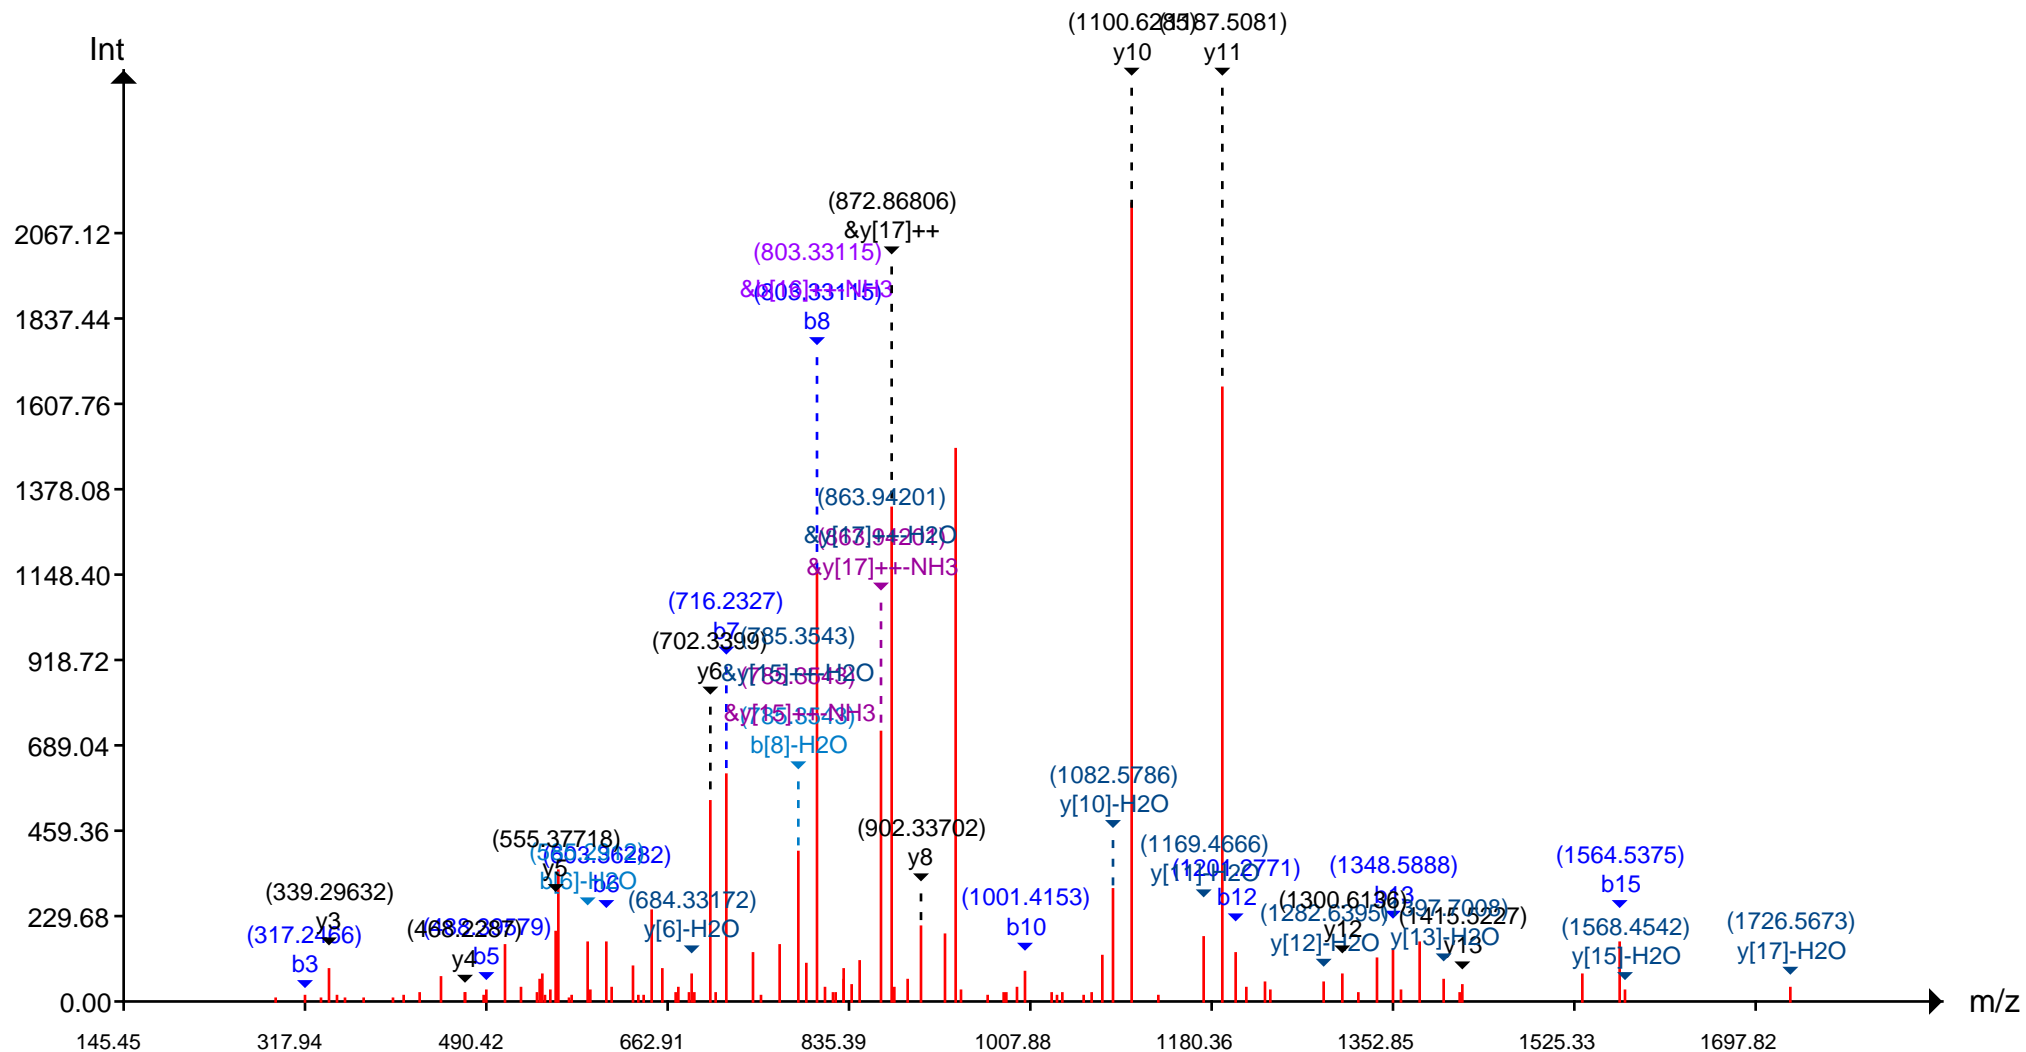

## Info

|                          |                                         |                           |          |
|--------------------------|-----------------------------------------|---------------------------|----------|
| <b>Modified Sequence</b> | AcD3-LGTGNDLSPTTVM<Mox*>SEGTR<C13>-COOH | <b>Ion score</b>          | 60.39    |
| <b>Protein</b>           | Q923D2                                  | <b>Confidence level</b>   | 99.00%   |
| <b>Precursor m/z</b>     | 951.96759                               | <b>Identity Threshold</b> | 47.26    |
| <b>Charge</b>            | 2+                                      | <b>Mass error</b>         | 0.003071 |

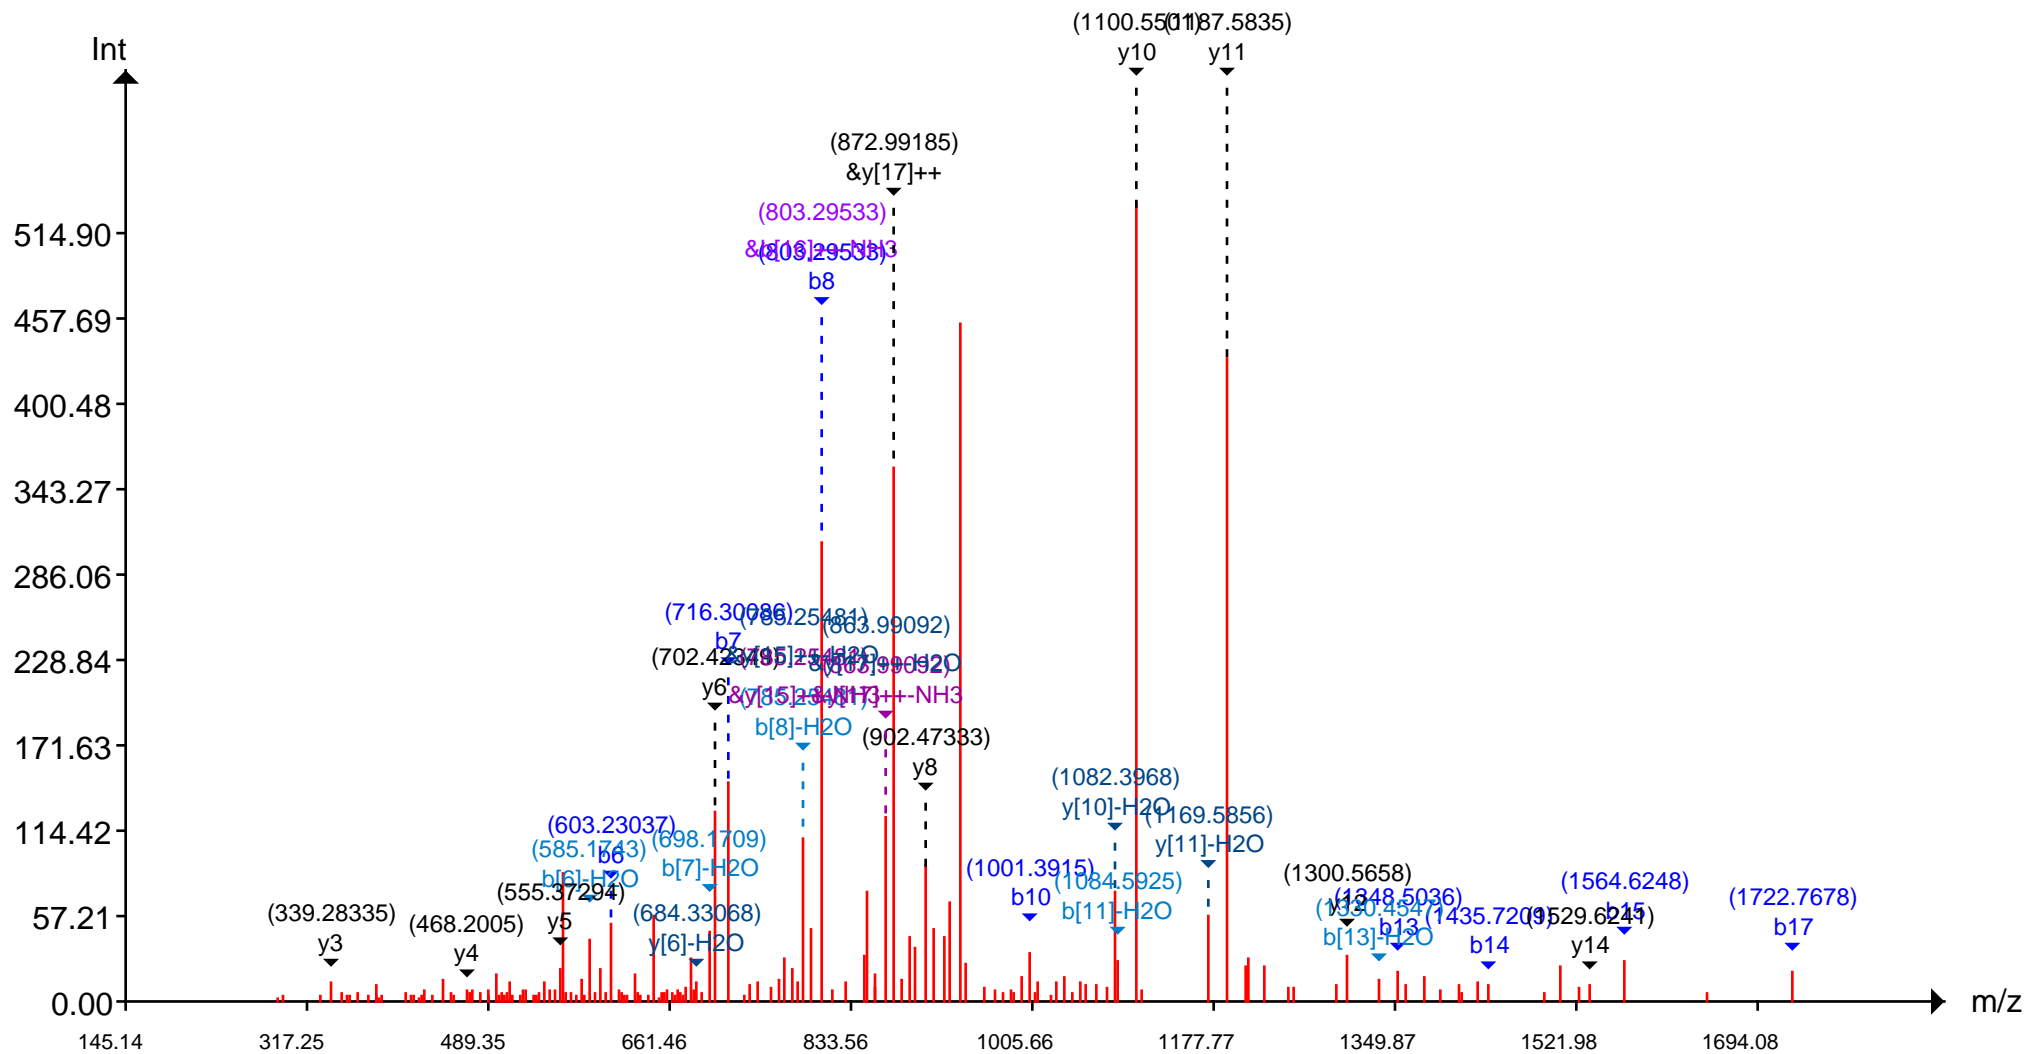

## Info

|                          |                                         |                           |          |
|--------------------------|-----------------------------------------|---------------------------|----------|
| <b>Modified Sequence</b> | AcD3-LGTGNDLSPTTVM<Mox*>SEGTR<C13>-COOH | <b>Ion score</b>          | 53.51    |
| <b>Protein</b>           | Q923D2                                  | <b>Confidence level</b>   | 99.00%   |
| <b>Precursor m/z</b>     | 951.96786                               | <b>Identity Threshold</b> | 47.26    |
| <b>Charge</b>            | 2+                                      | <b>Mass error</b>         | 0.003611 |



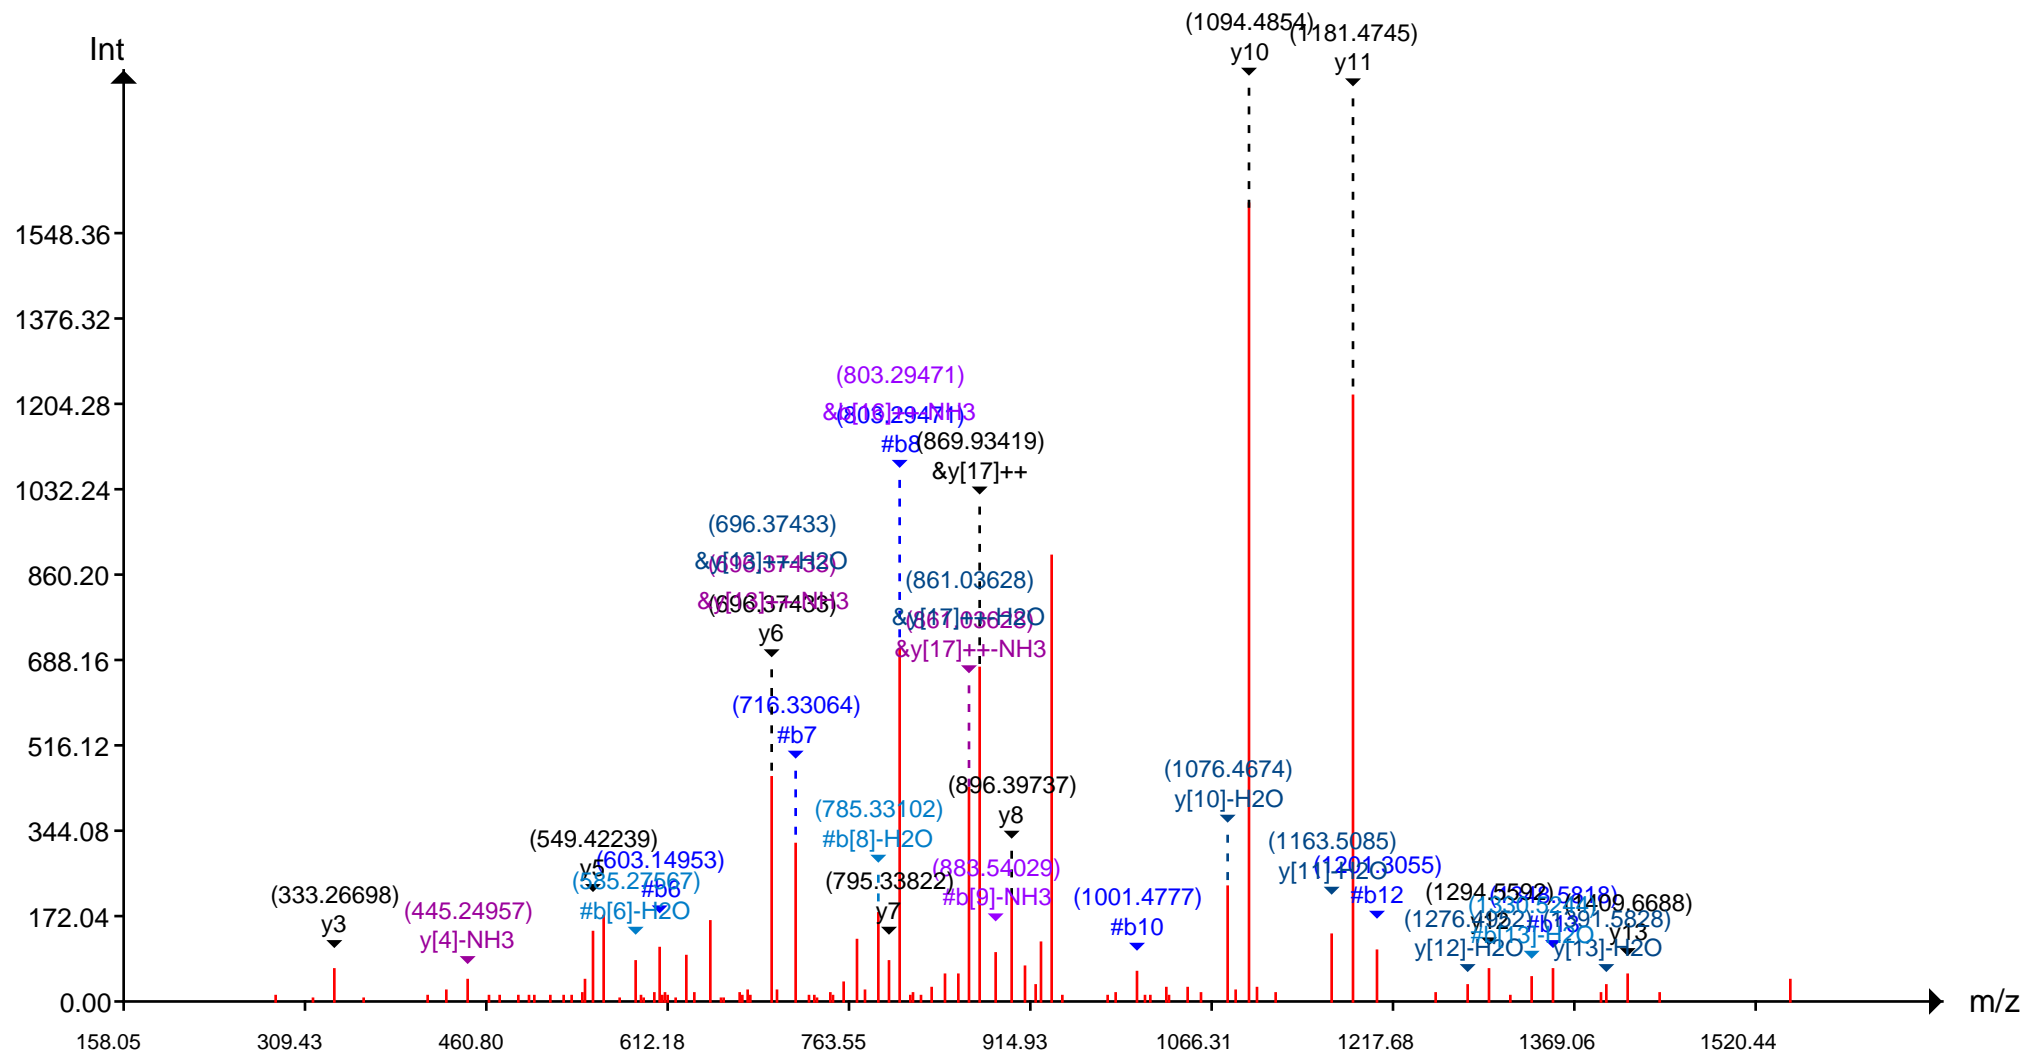

## Info

|                          |                                    |                           |          |
|--------------------------|------------------------------------|---------------------------|----------|
| <b>Modified Sequence</b> | AcD3-LGTGNDLSPTTVM<Mox*>SEGTR-COOH | <b>Ion score</b>          | 58.95    |
| <b>Protein</b>           | Q923D2                             | <b>Confidence level</b>   | 99.00%   |
| <b>Precursor m/z</b>     | 948.95817                          | <b>Identity Threshold</b> | 46.88    |
| <b>Charge</b>            | 2+                                 | <b>Mass error</b>         | 0.004373 |



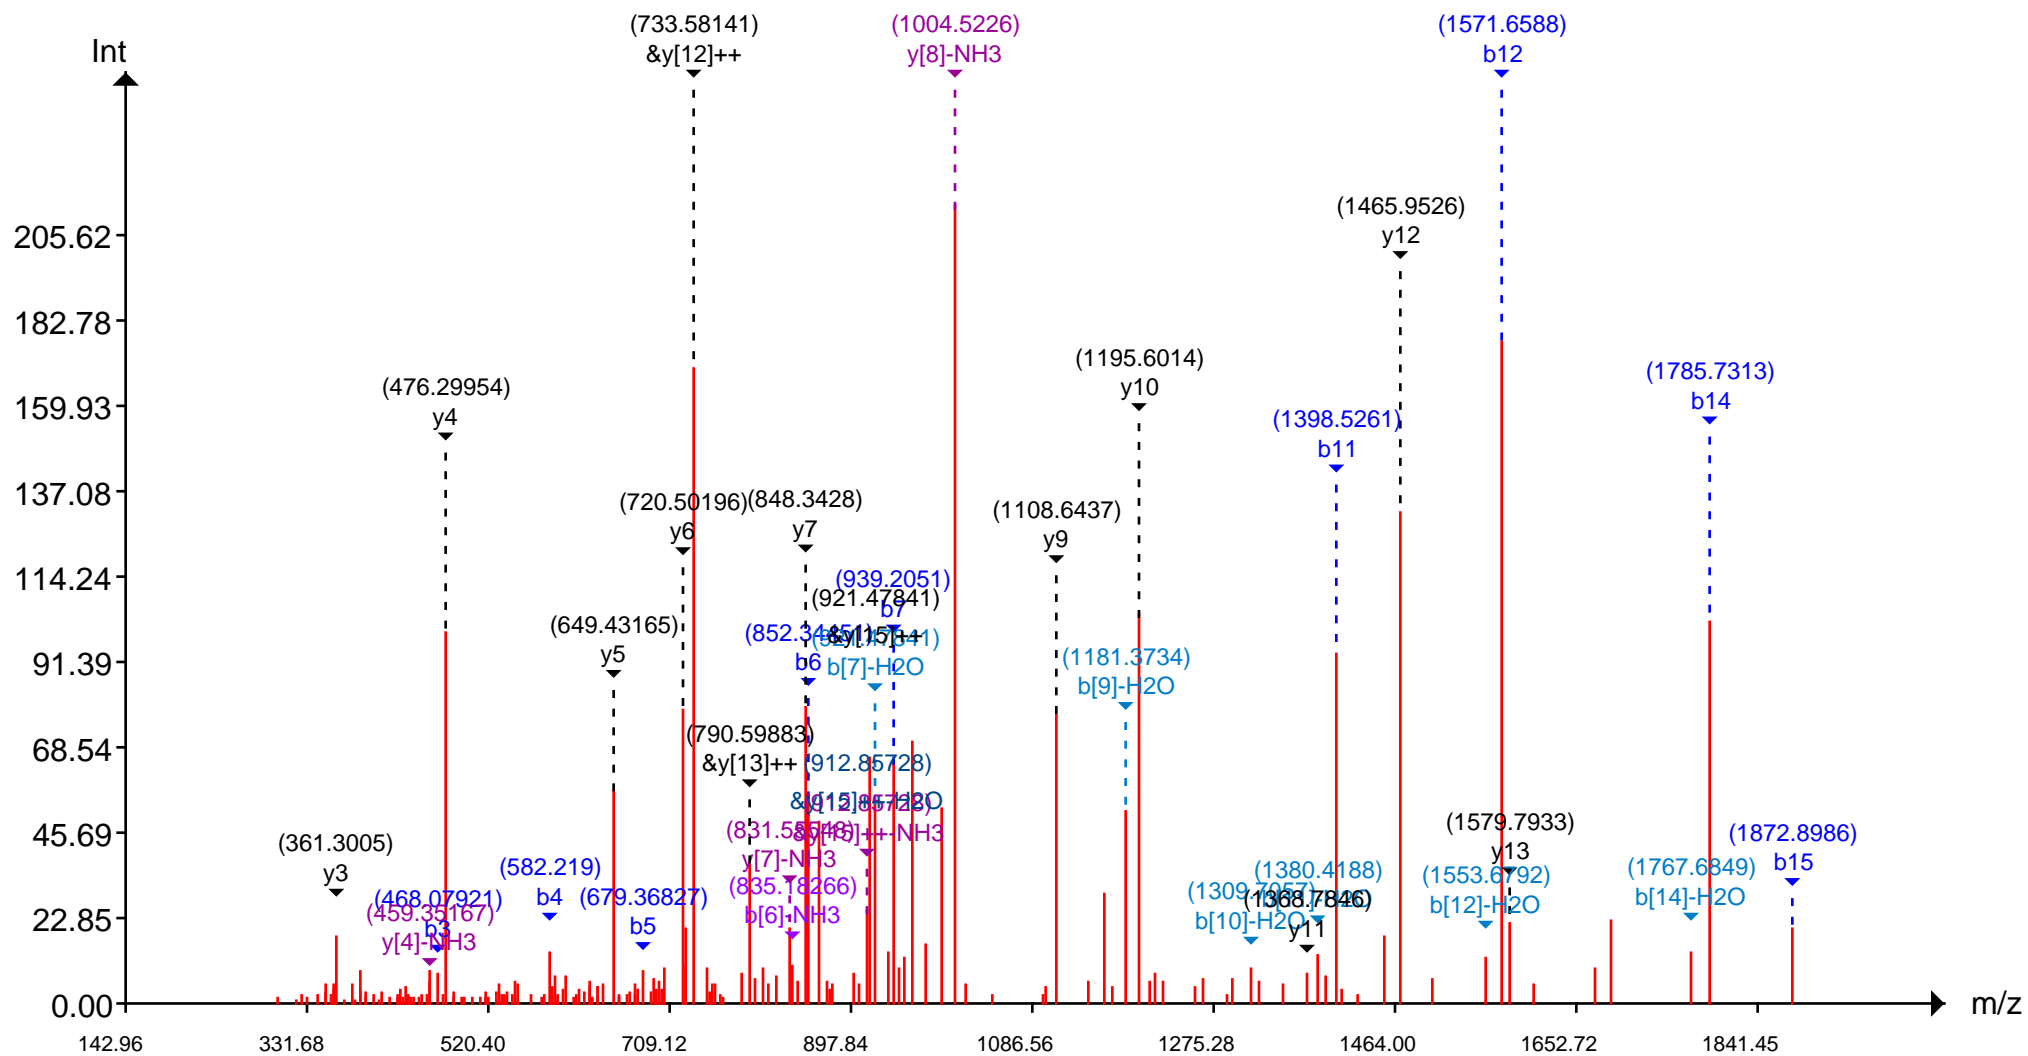

## Info

|                          |                                                          |                           |          |
|--------------------------|----------------------------------------------------------|---------------------------|----------|
| <b>Modified Sequence</b> | AcD3-C<Cmm*>DFNPK<AcD3K*>SSK<AcD3K*>QAK<AcD3K*>DVSR-COOH | <b>Ion score</b>          | 67.67    |
| <b>Protein</b>           | O08585                                                   | <b>Confidence level</b>   | 99.00%   |
| <b>Precursor m/z</b>     | 1024.0205                                                | <b>Identity Threshold</b> | 47.94    |
| <b>Charge</b>            | 2+                                                       | <b>Mass error</b>         | 0.003468 |

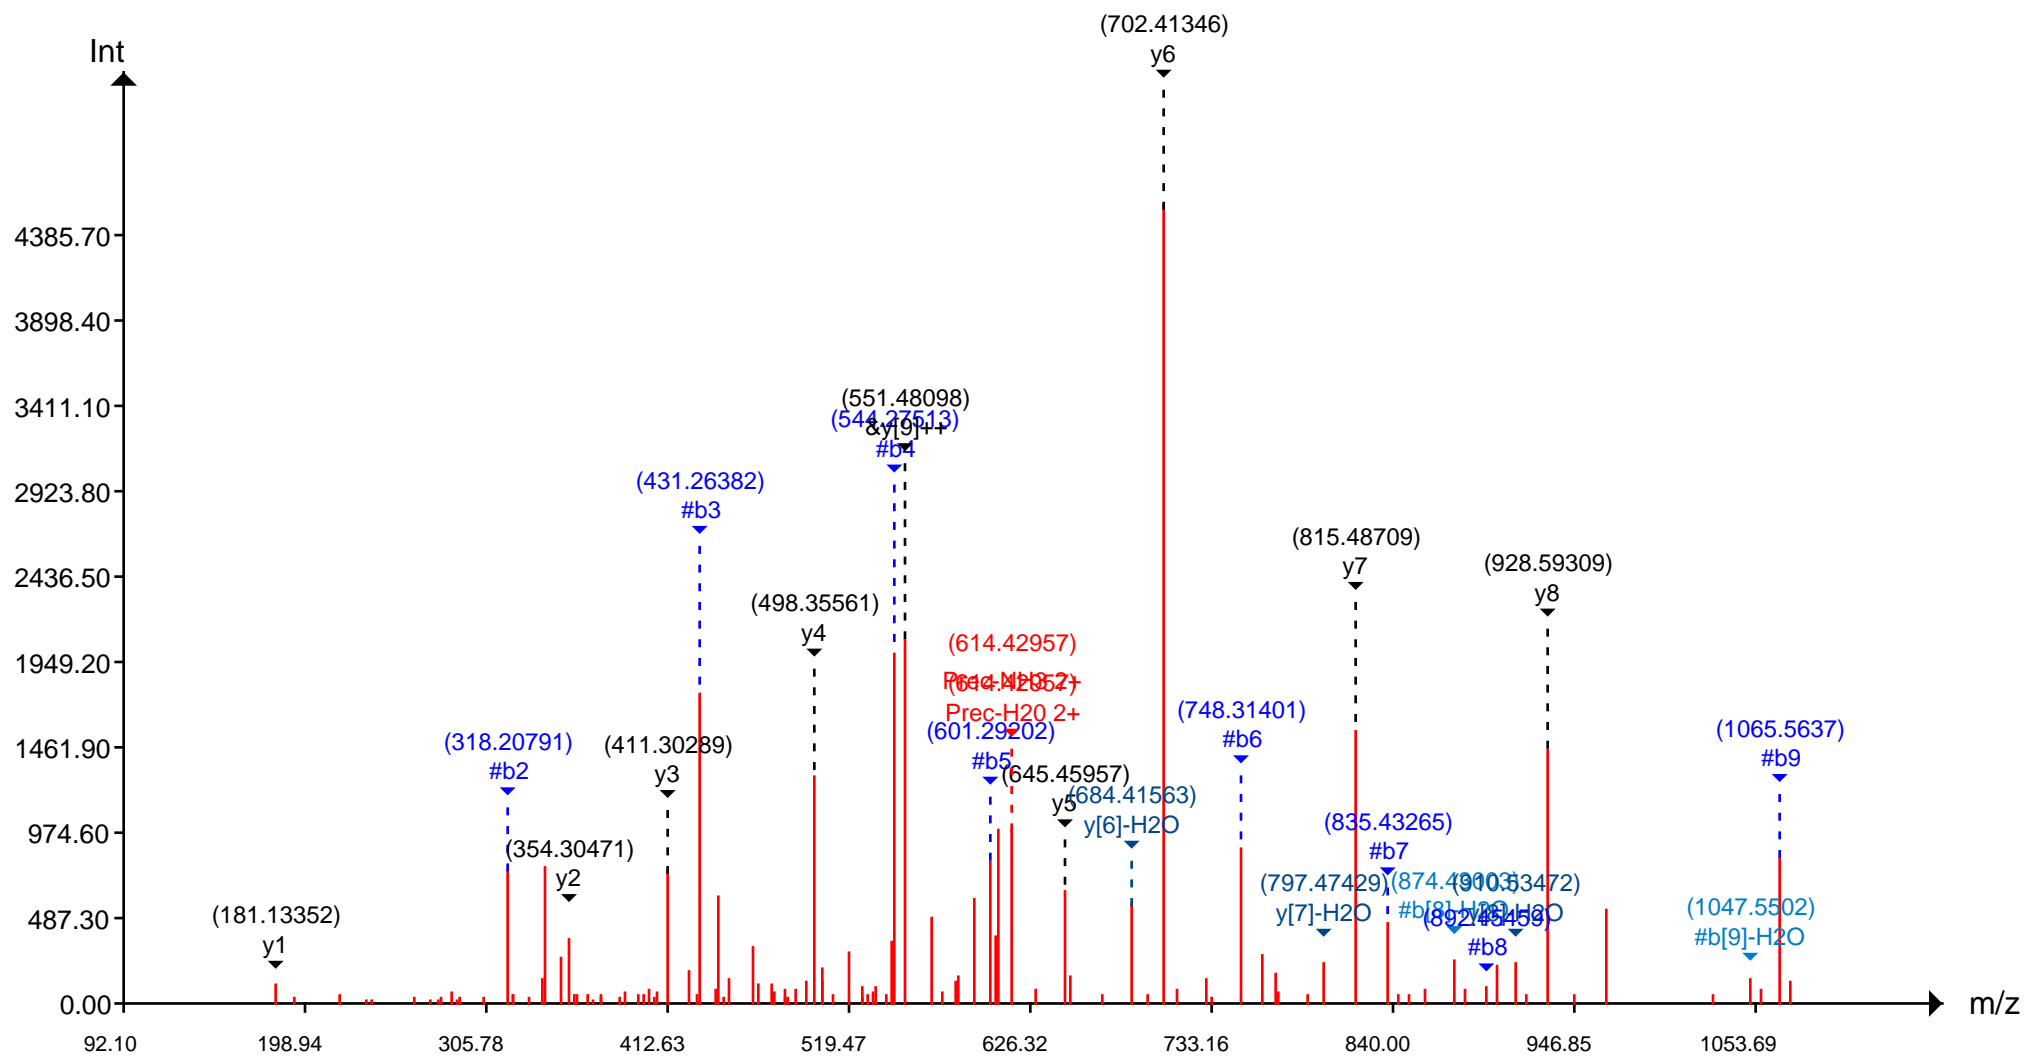

## Info

|                          |                                                 |                           |         |
|--------------------------|-------------------------------------------------|---------------------------|---------|
| <b>Modified Sequence</b> | AcD3-VK<AcD3K*>LLGM<Mox*>SGK<AcD3K*>R<C13>-COOH | <b>Ion score</b>          | 53.4    |
| <b>Protein</b>           | Q61937                                          | <b>Confidence level</b>   | 99.00%  |
| <b>Precursor m/z</b>     | 623.38587                                       | <b>Identity Threshold</b> | 43.11   |
| <b>Charge</b>            | 2+                                              | <b>Mass error</b>         | 3.67E-4 |

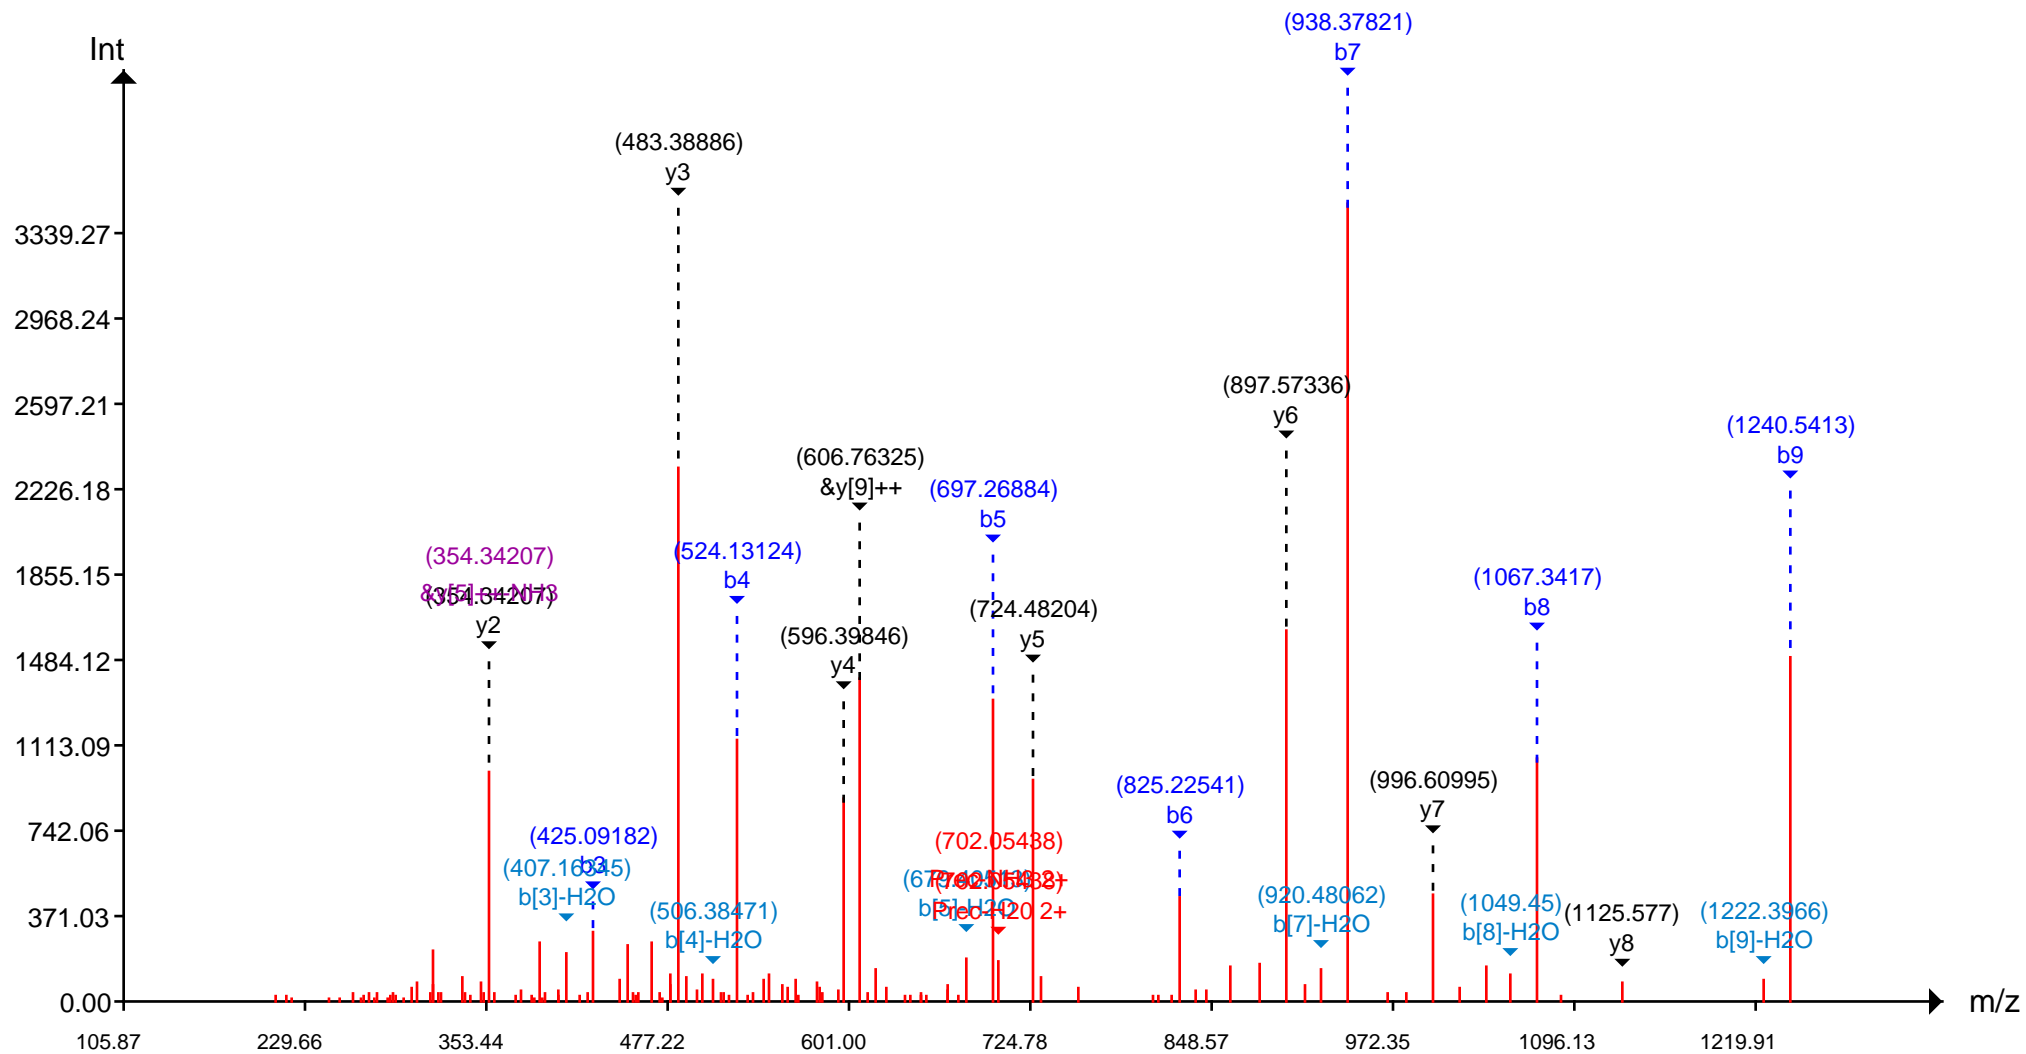

## Info

|                          |                                           |                           |        |
|--------------------------|-------------------------------------------|---------------------------|--------|
| <b>Modified Sequence</b> | AcD3-YSEVK<AcD3K*>QIEK<AcD3K*>R<C13>-COOH | <b>Ion score</b>          | 55.83  |
| <b>Protein</b>           | Q6NZB0                                    | <b>Confidence level</b>   | 99.00% |
| <b>Precursor m/z</b>     | 710.90819                                 | <b>Identity Threshold</b> | 46.33  |
| <b>Charge</b>            | 2+                                        | <b>Mass error</b>         | 3.3E-4 |

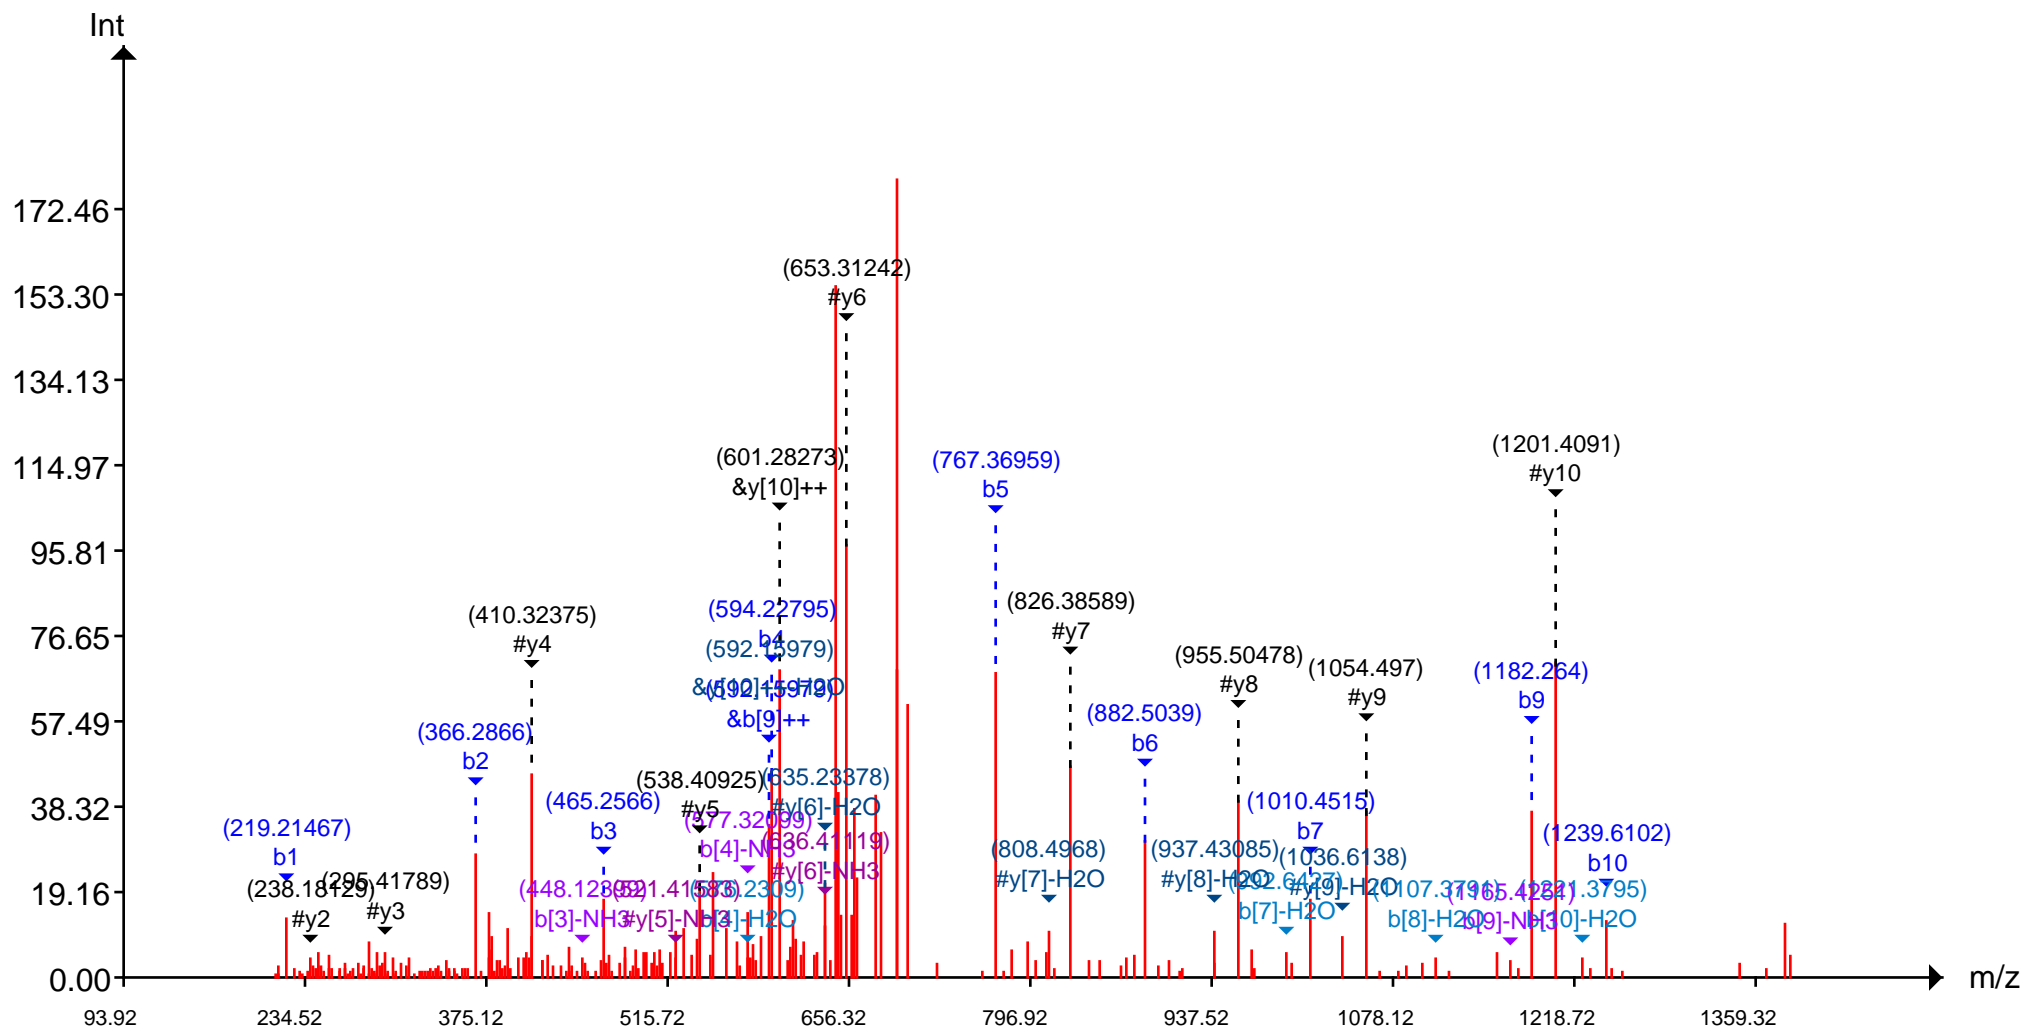

## Info

|                          |                                                  |                           |         |
|--------------------------|--------------------------------------------------|---------------------------|---------|
| <b>Modified Sequence</b> | AcD3-K<AcD3K*>M<Mox*>VEK<AcD3K*>DQDGGR<C13>-COOH | <b>Ion score</b>          | 71.94   |
| <b>Protein</b>           | Q9CZX8                                           | <b>Confidence level</b>   | 99.00%  |
| <b>Precursor m/z</b>     | 710.36325                                        | <b>Identity Threshold</b> | 47.91   |
| <b>Charge</b>            | 2+                                               | <b>Mass error</b>         | 2.17E-4 |

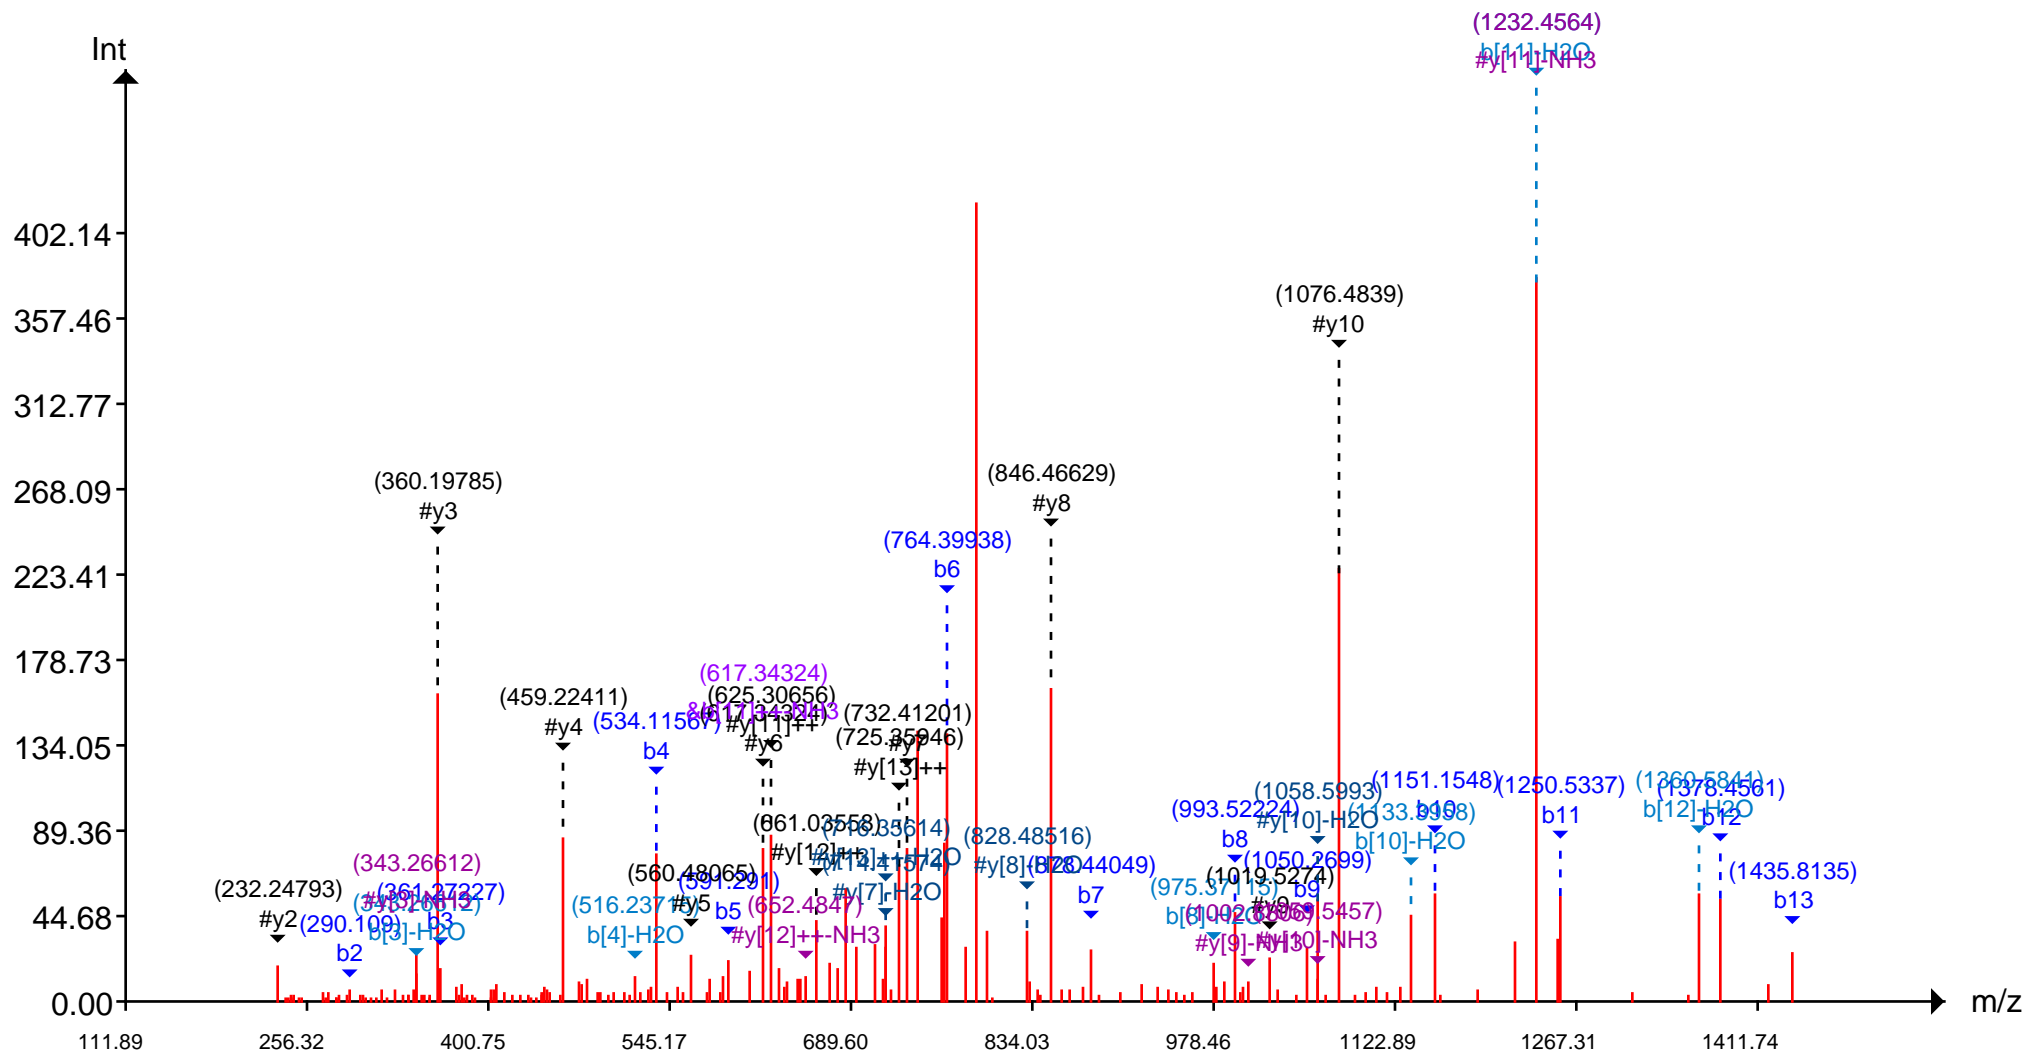

## Info

|                          |                                          |                           |          |
|--------------------------|------------------------------------------|---------------------------|----------|
| <b>Modified Sequence</b> | AcD3-DEAK<AcD3K*>GK<AcD3K*>NDGTVQGR-COOH | <b>Ion score</b>          | 93.81    |
| <b>Protein</b>           | O08788                                   | <b>Confidence level</b>   | 99.00%   |
| <b>Precursor m/z</b>     | 805.4108                                 | <b>Identity Threshold</b> | 47.98    |
| <b>Charge</b>            | 2+                                       | <b>Mass error</b>         | 0.001674 |

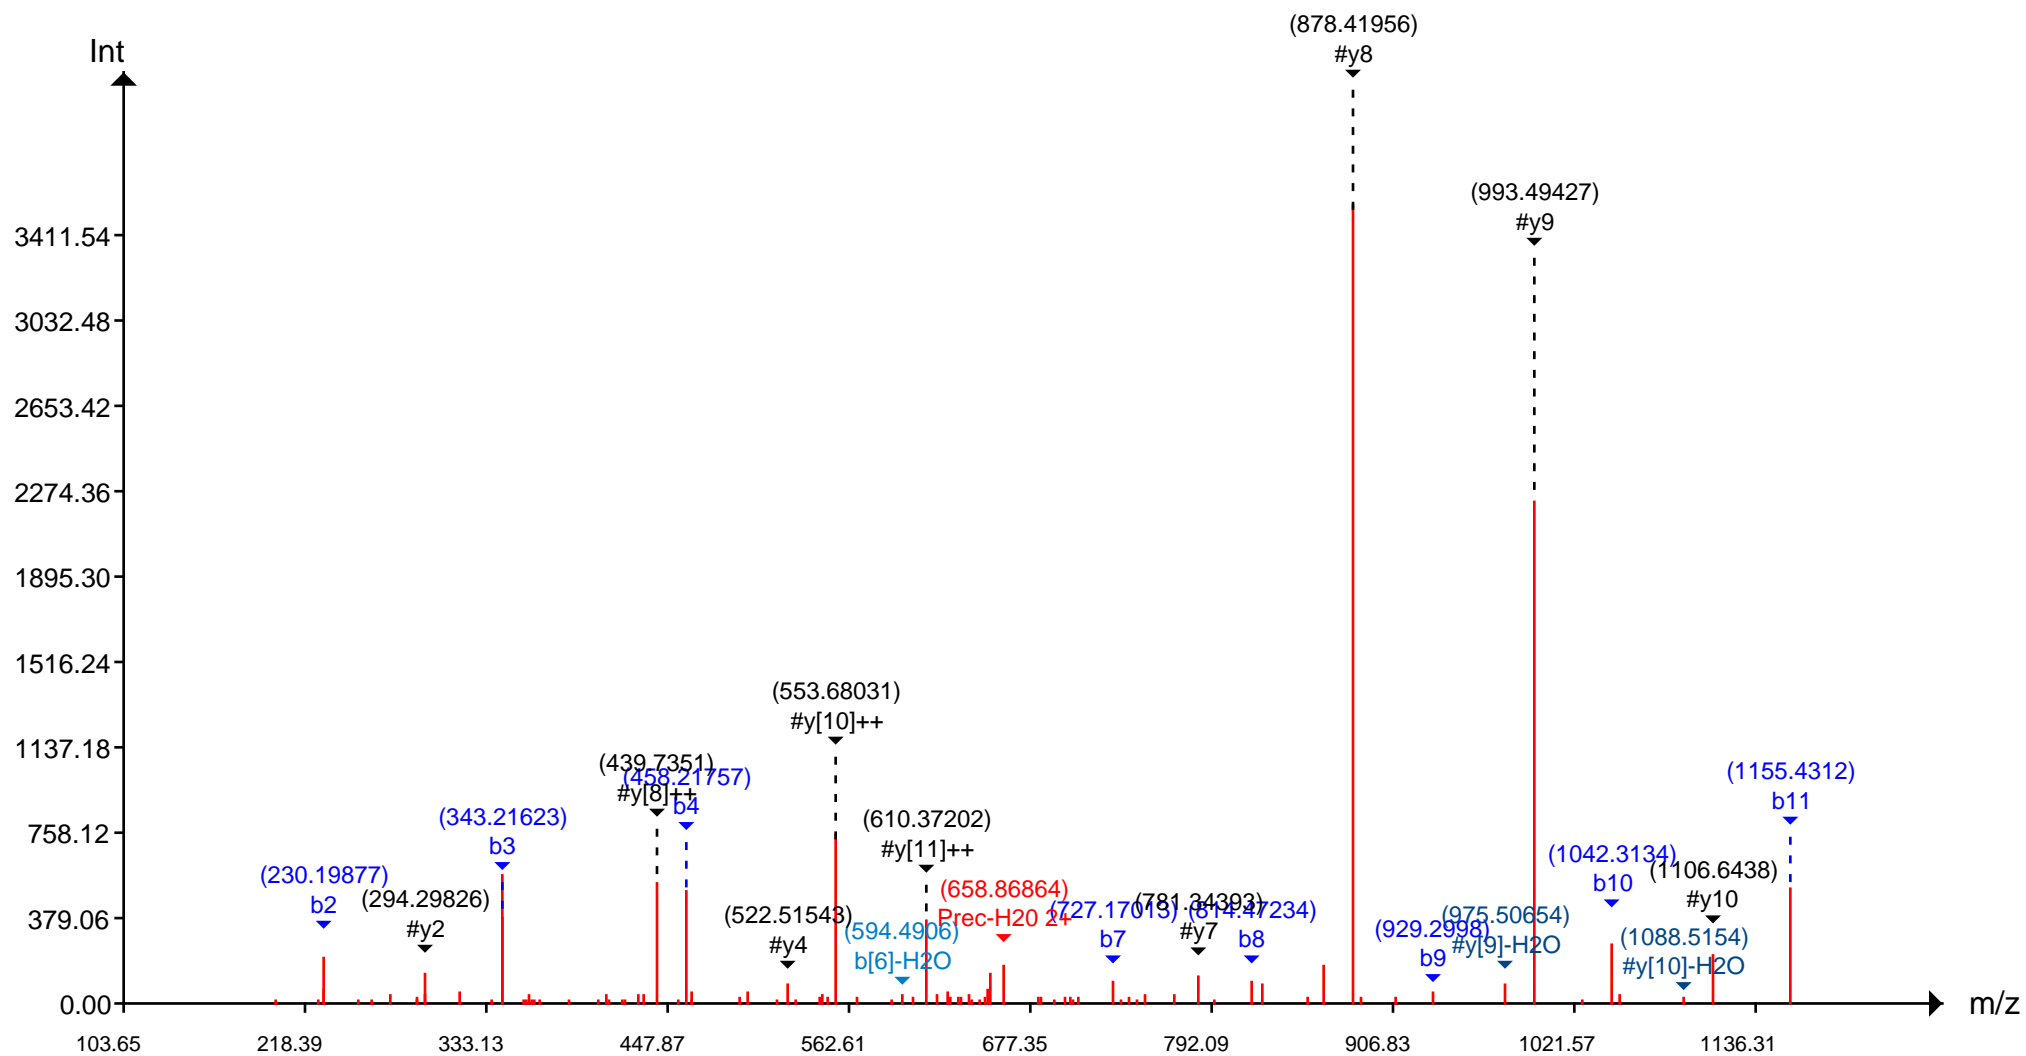

## Info

|                          |                             |                           |         |
|--------------------------|-----------------------------|---------------------------|---------|
| <b>Modified Sequence</b> | AcD3-AIIDPGDSDIIR<C13>-COOH | <b>Ion score</b>          | 64.97   |
| <b>Protein</b>           | P62889                      | <b>Confidence level</b>   | 99.00%  |
| <b>Precursor m/z</b>     | 668.36849                   | <b>Identity Threshold</b> | 47.86   |
| <b>Charge</b>            | 2+                          | <b>Mass error</b>         | 7.79E-4 |



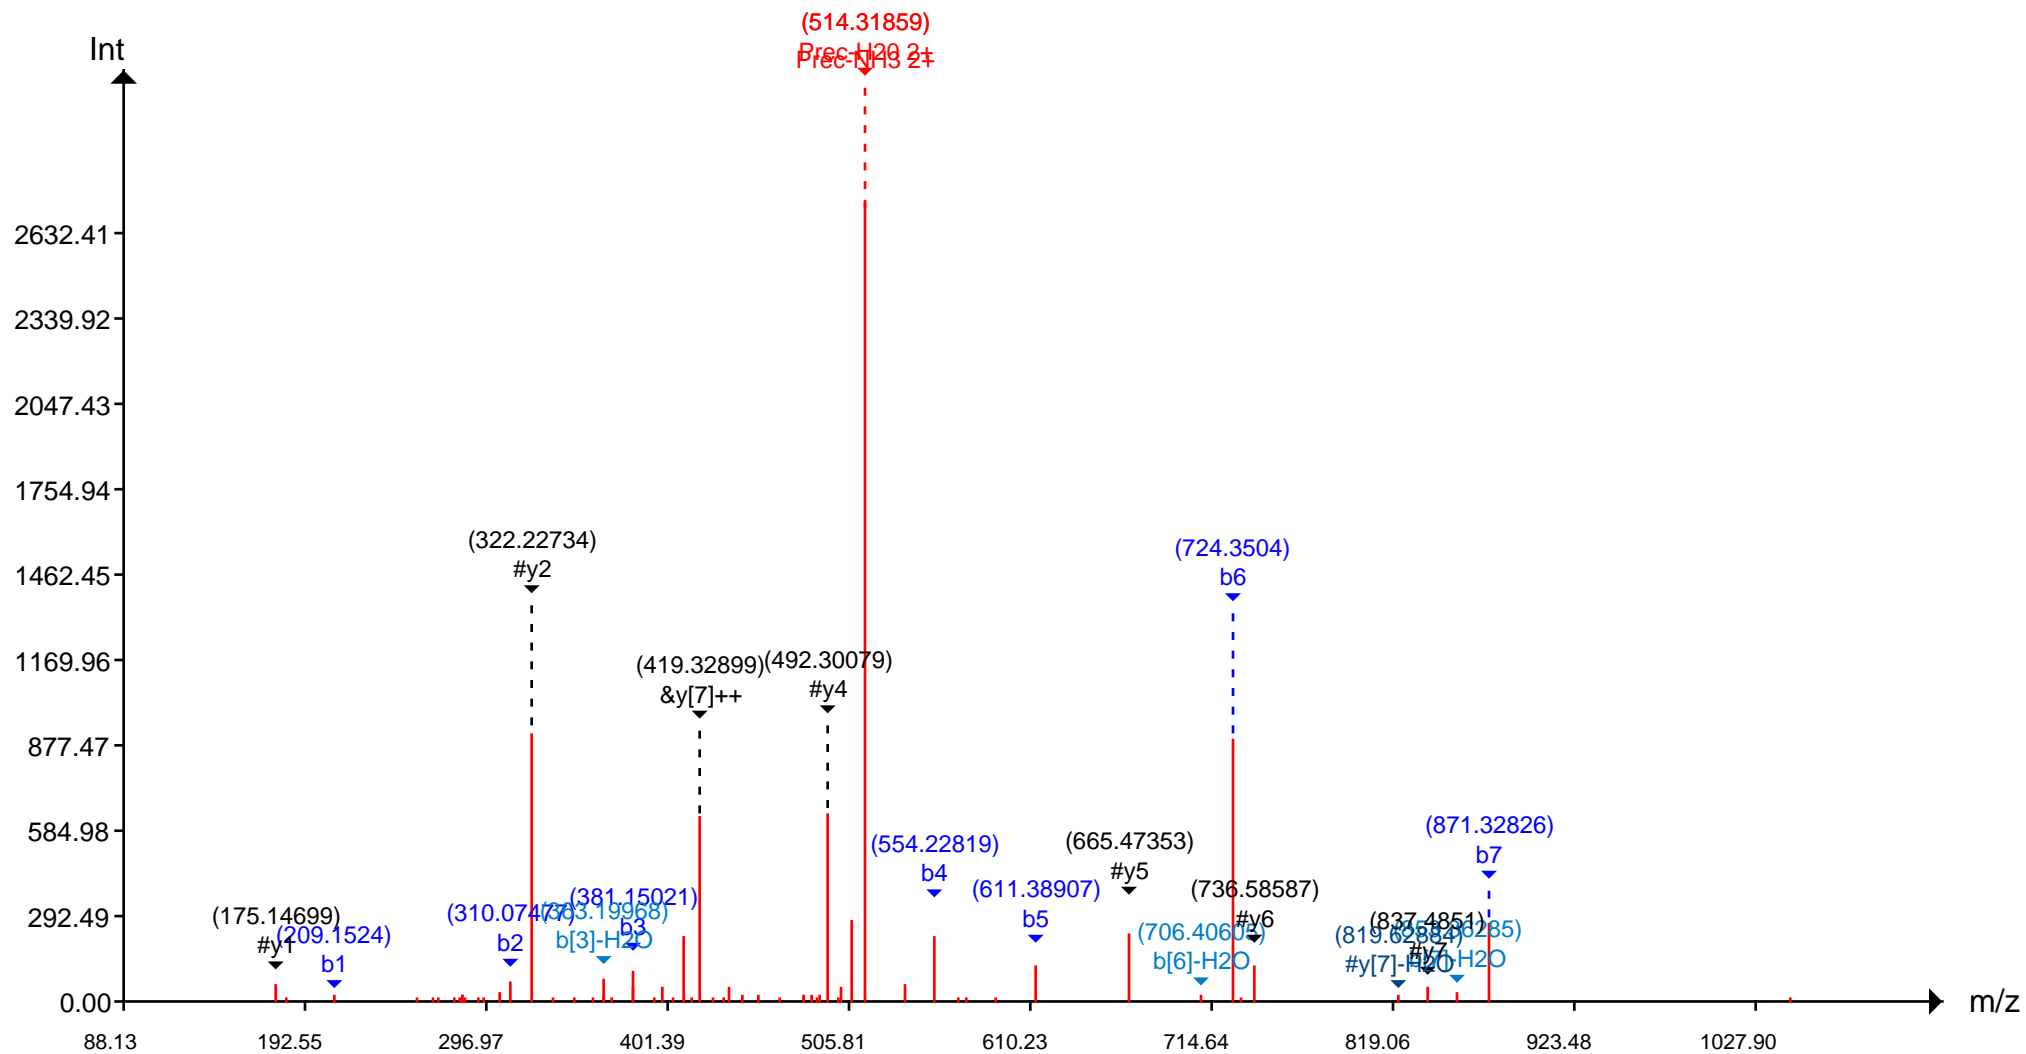

## Info

**Modified Sequence** AcD3-YTAK<AcD3K\*>GLFR-COOH

**Ion score** 58.93

**Protein** P17182, P17183

**Confidence level** 99.00%

**Precursor m/z** 523.30111

**Identity Threshold** 47.13

**Charge** 2+

**Mass error** 1.89E-4



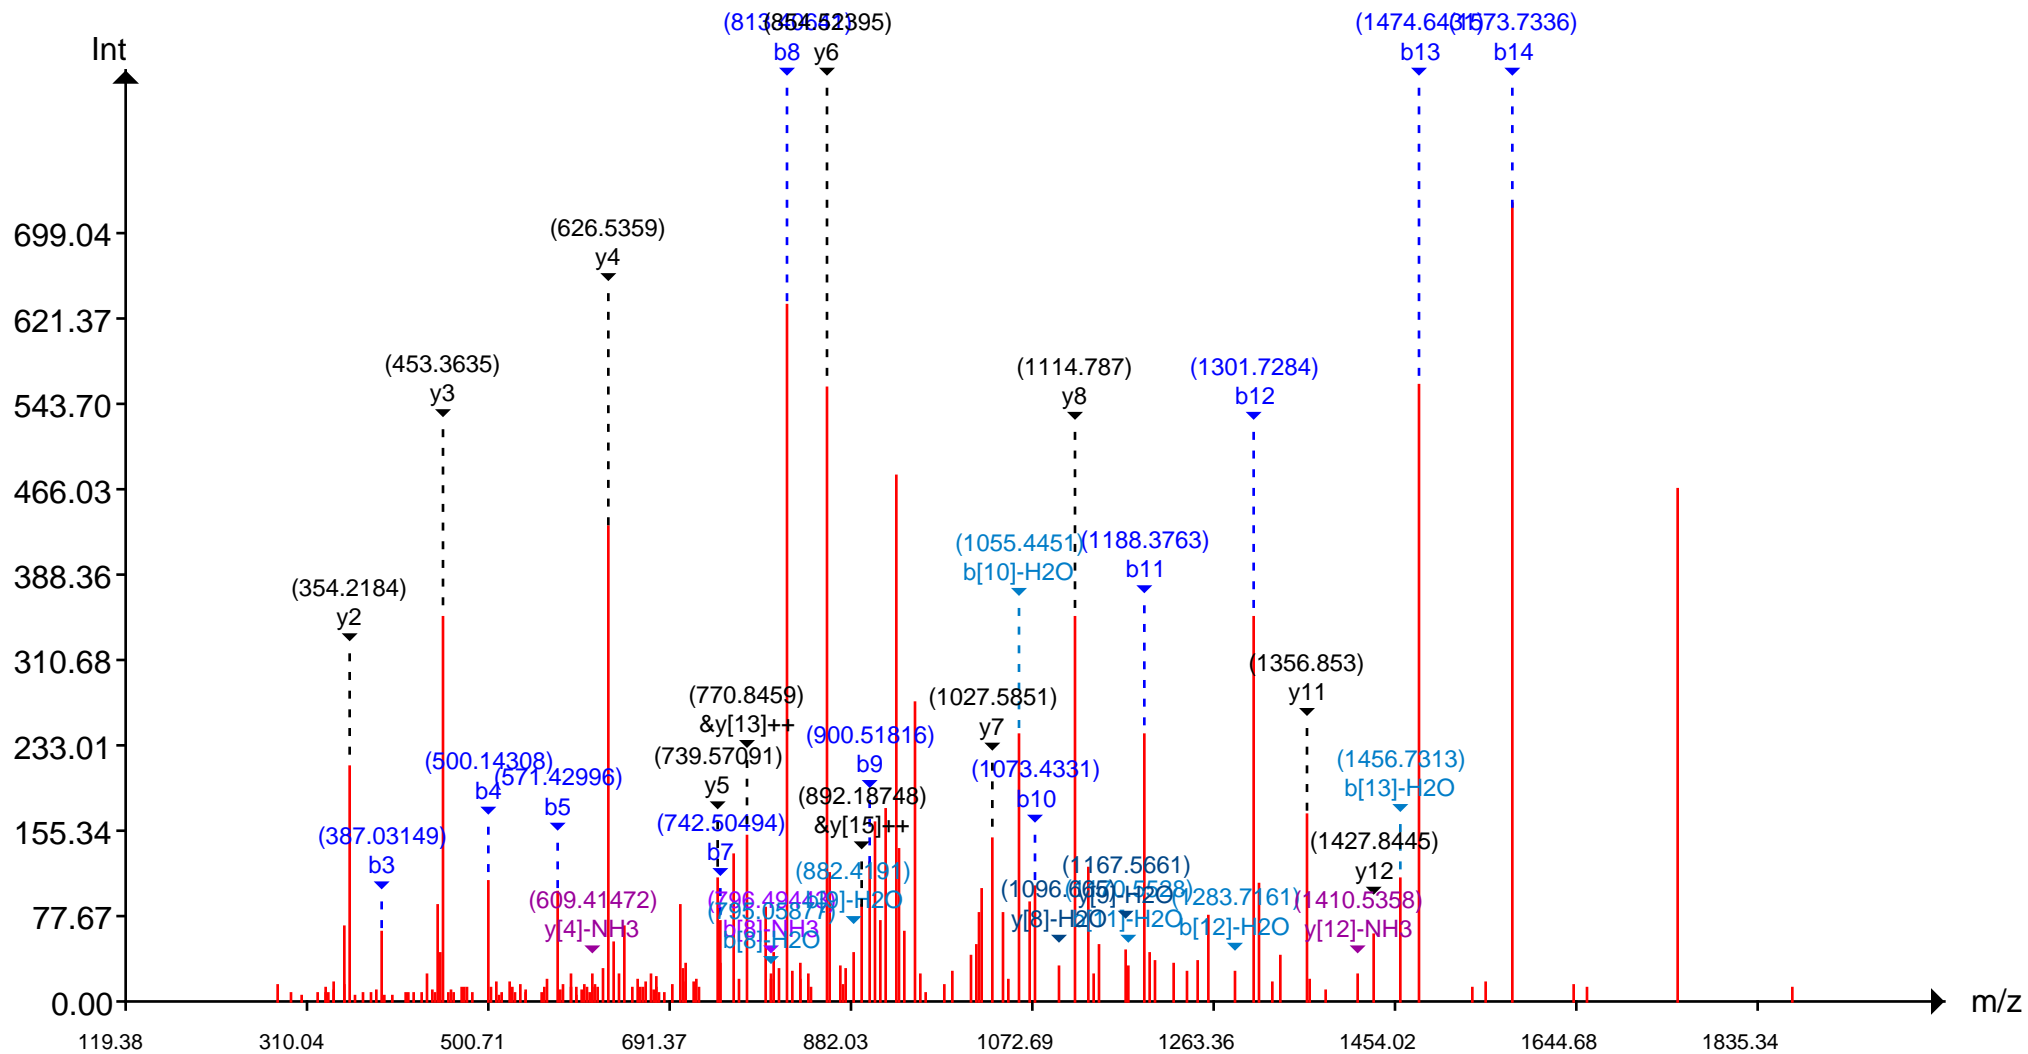

## Info

|                          |                                                         |                           |          |
|--------------------------|---------------------------------------------------------|---------------------------|----------|
| <b>Modified Sequence</b> | AcD3-VLELAGNASK<AcD3K*>DLK<AcD3K*>VK<AcD3K*>R<C13>-COOH | <b>Ion score</b>          | 49.82    |
| <b>Protein</b>           | Q3THW5, P0C0S6                                          | <b>Confidence level</b>   | 99.00%   |
| <b>Precursor m/z</b>     | 964.08977                                               | <b>Identity Threshold</b> | 39.41    |
| <b>Charge</b>            | 2+                                                      | <b>Mass error</b>         | 0.001521 |

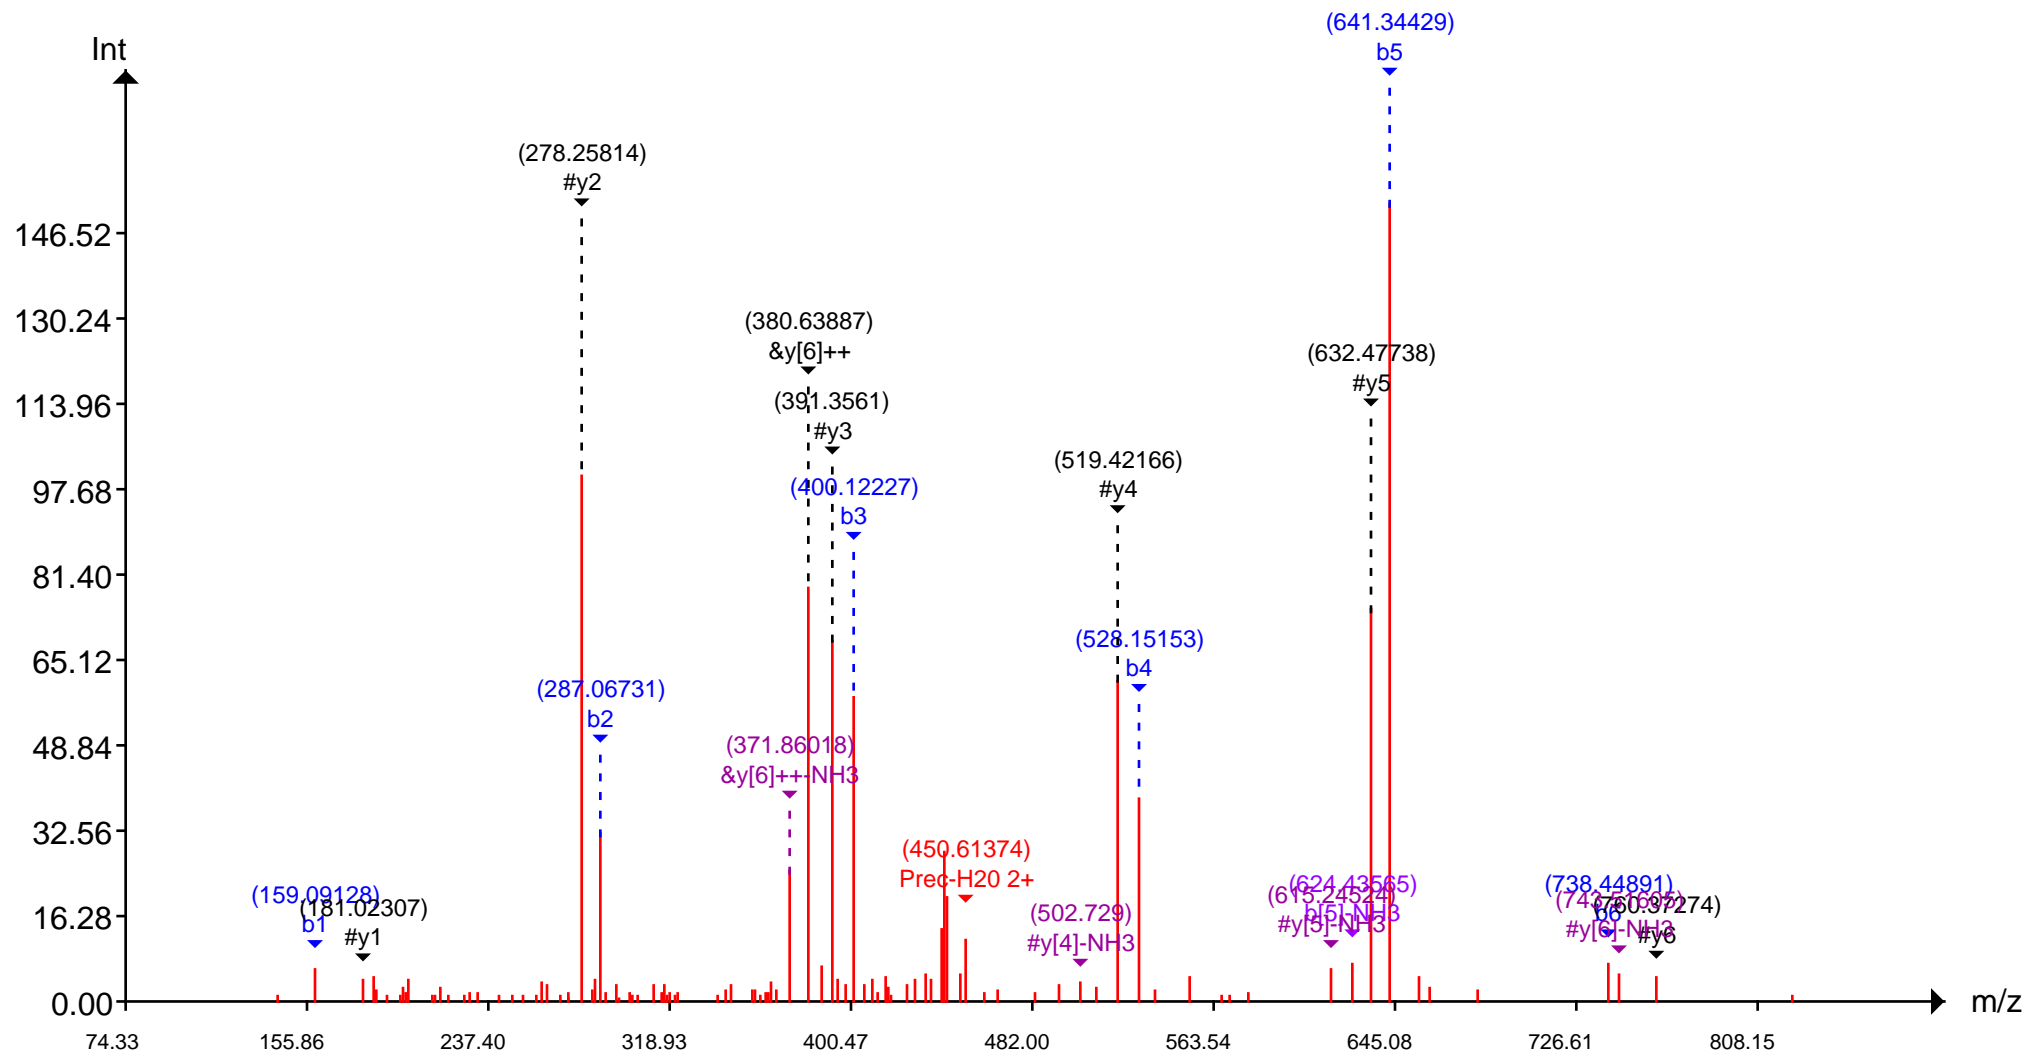

## Info

|                          |                        |                           |         |
|--------------------------|------------------------|---------------------------|---------|
| <b>Modified Sequence</b> | AcD3-LQLQIPR<C13>-COOH | <b>Ion score</b>          | 48.97   |
| <b>Protein</b>           | P97371                 | <b>Confidence level</b>   | 99.00%  |
| <b>Precursor m/z</b>     | 459.79873              | <b>Identity Threshold</b> | 41.63   |
| <b>Charge</b>            | 2+                     | <b>Mass error</b>         | -3.9E-4 |

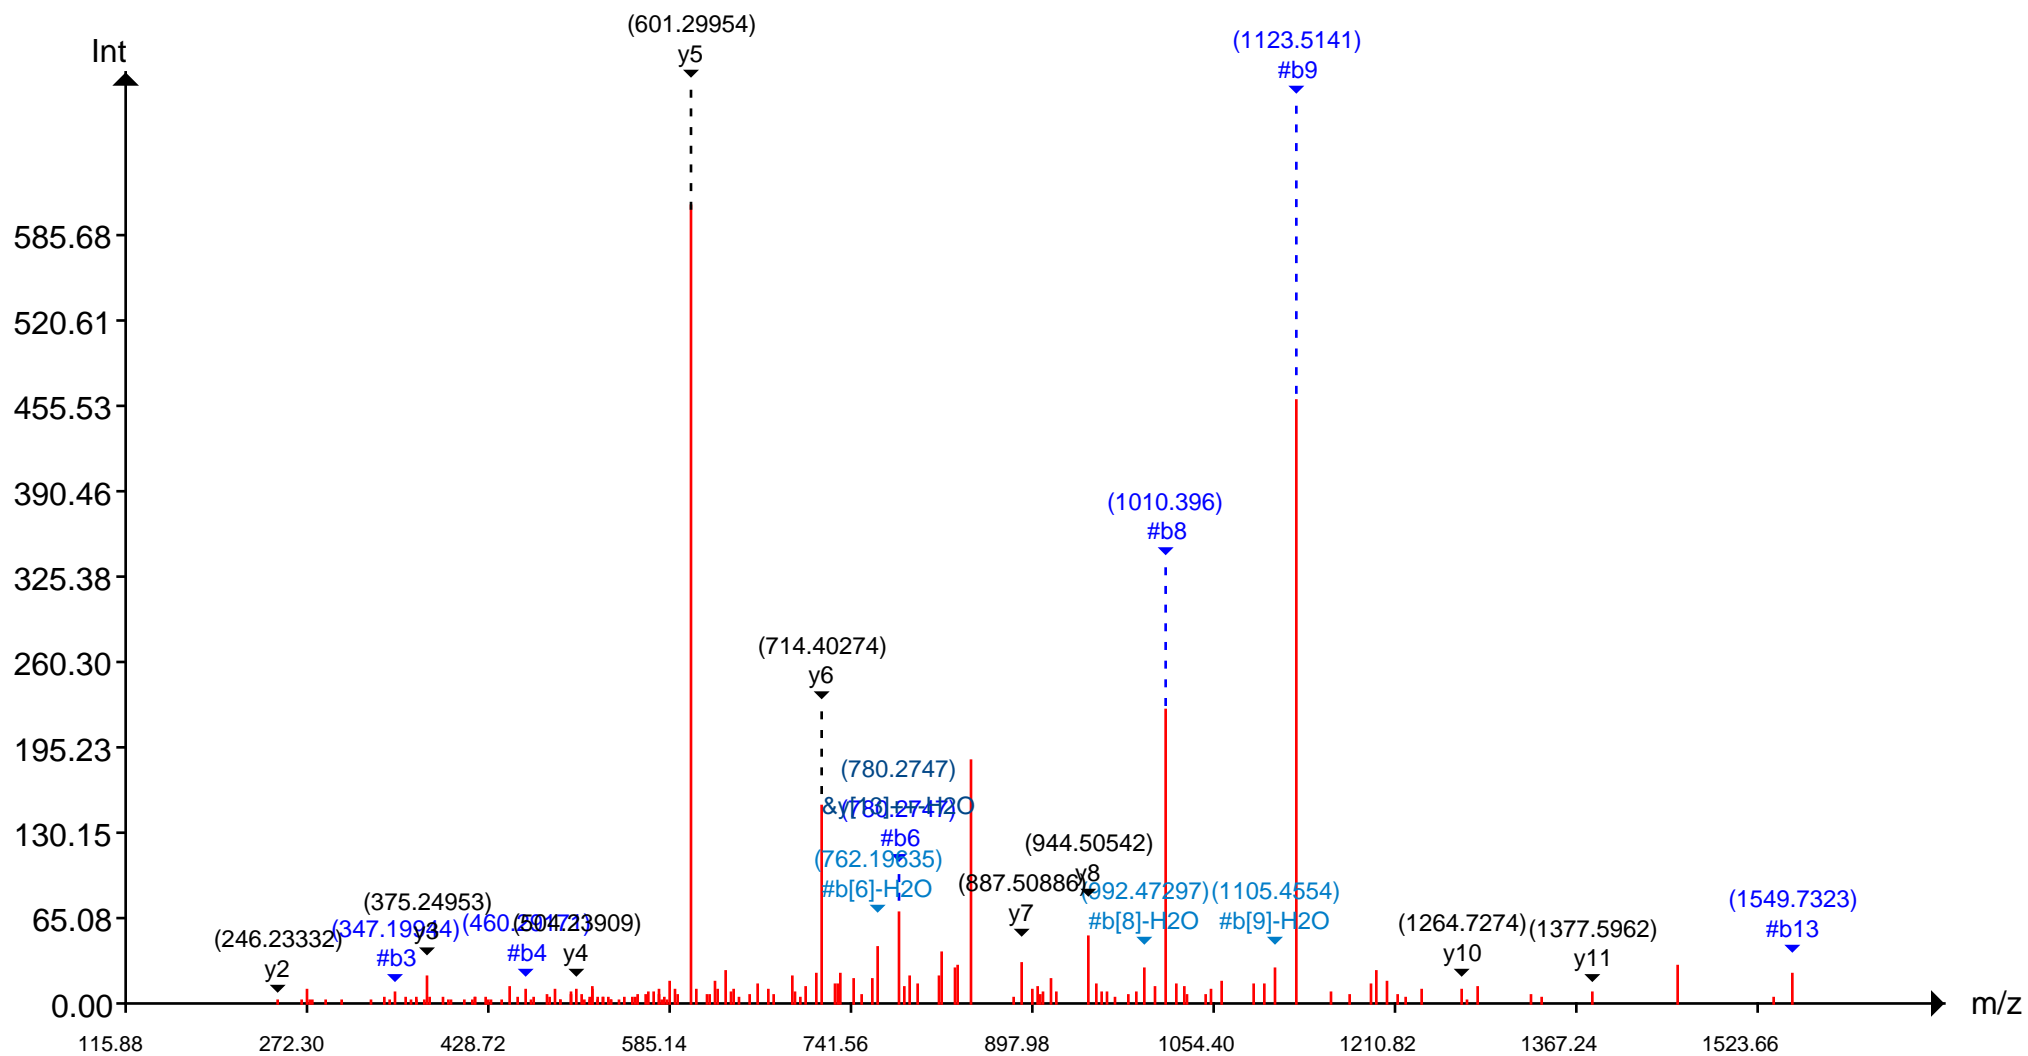

## Info

|                          |                                                |                           |          |
|--------------------------|------------------------------------------------|---------------------------|----------|
| <b>Modified Sequence</b> | AcD3-TEALM<Mox*>K<AcD3K*>GK<AcD3K*>LPPEAR-COOH | <b>Ion score</b>          | 51.45    |
| <b>Protein</b>           | P06745                                         | <b>Confidence level</b>   | 99.00%   |
| <b>Precursor m/z</b>     | 862.46699                                      | <b>Identity Threshold</b> | 47.80    |
| <b>Charge</b>            | 2+                                             | <b>Mass error</b>         | 0.002237 |

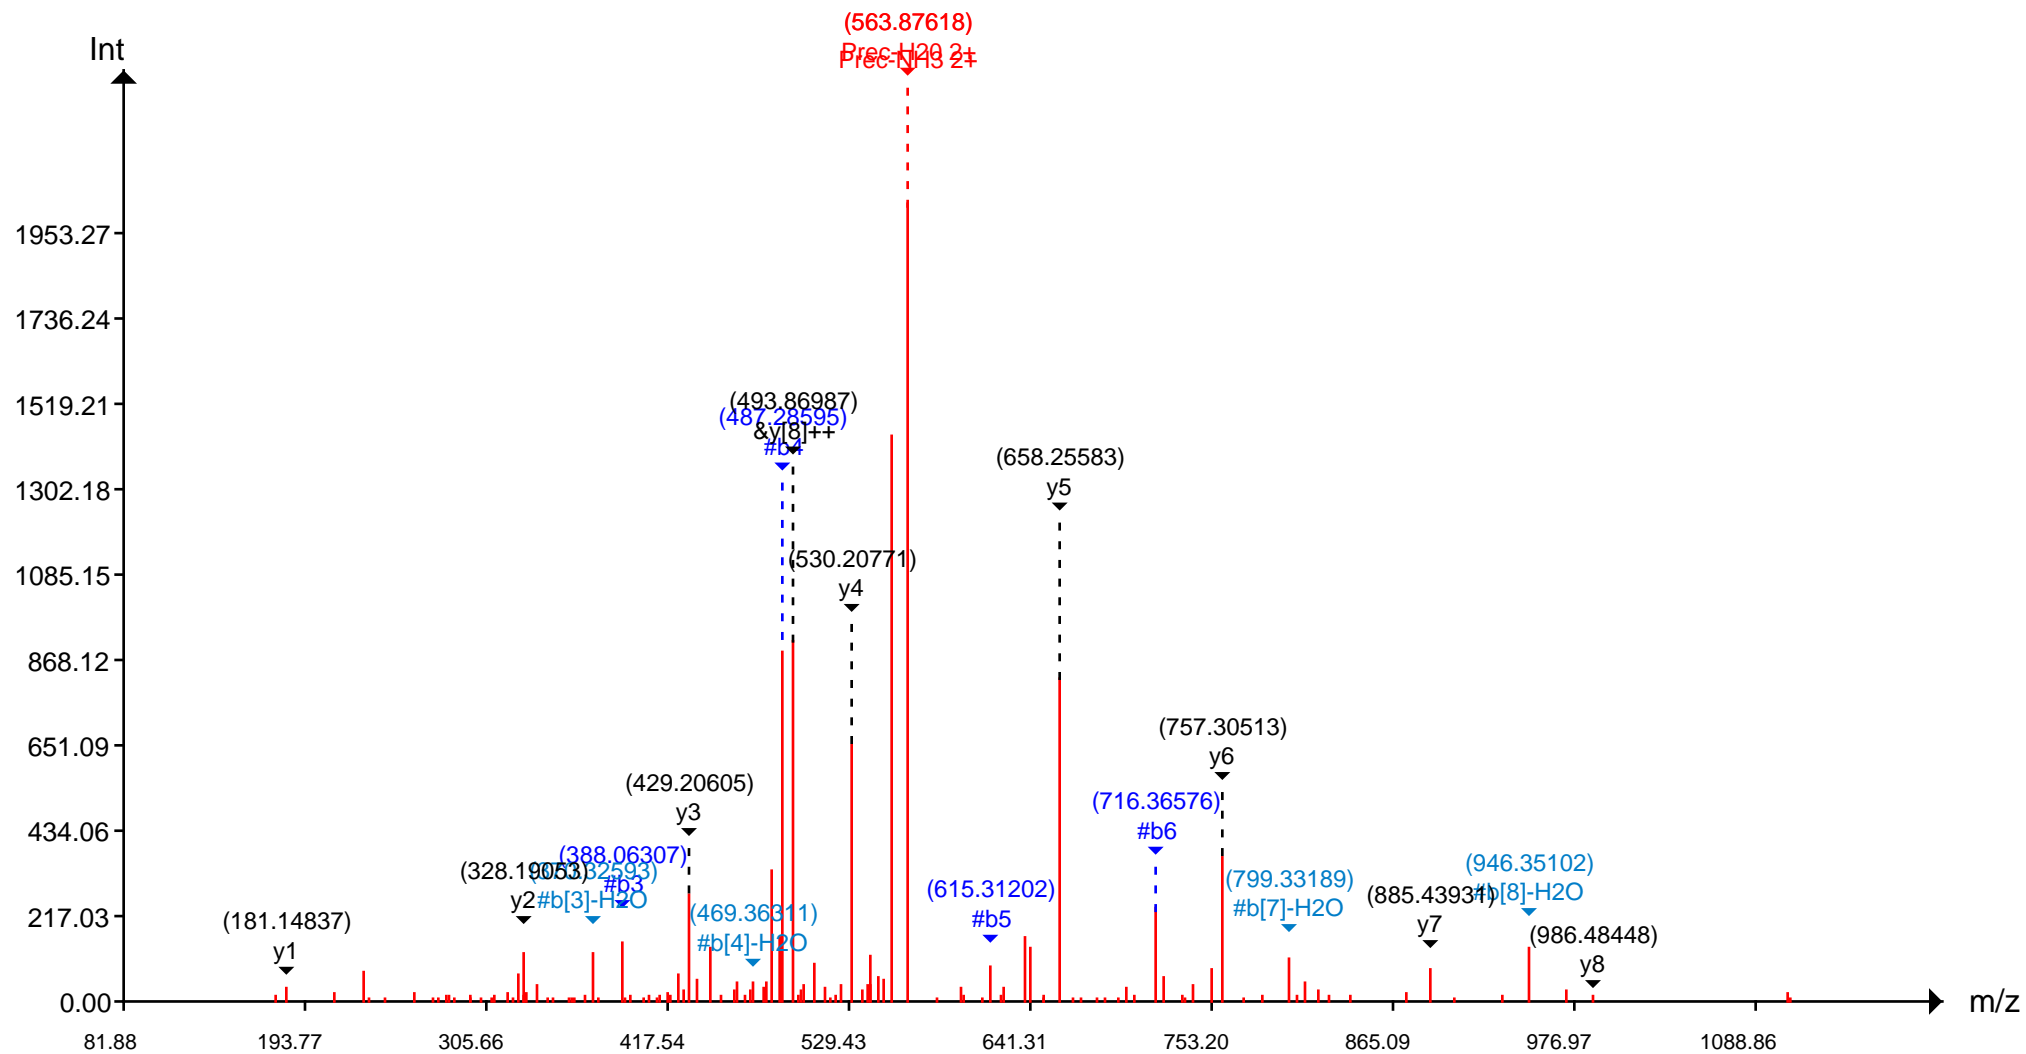

## Info

|                          |                                |                           |          |
|--------------------------|--------------------------------|---------------------------|----------|
| <b>Modified Sequence</b> | AcD3-LTQVQTTM<Mox*>R<C13>-COOH | <b>Ion score</b>          | 54.74    |
| <b>Protein</b>           | Q99KJ8                         | <b>Confidence level</b>   | 99.00%   |
| <b>Precursor m/z</b>     | 572.81168                      | <b>Identity Threshold</b> | 47.87    |
| <b>Charge</b>            | 2+                             | <b>Mass error</b>         | -4.75E-4 |

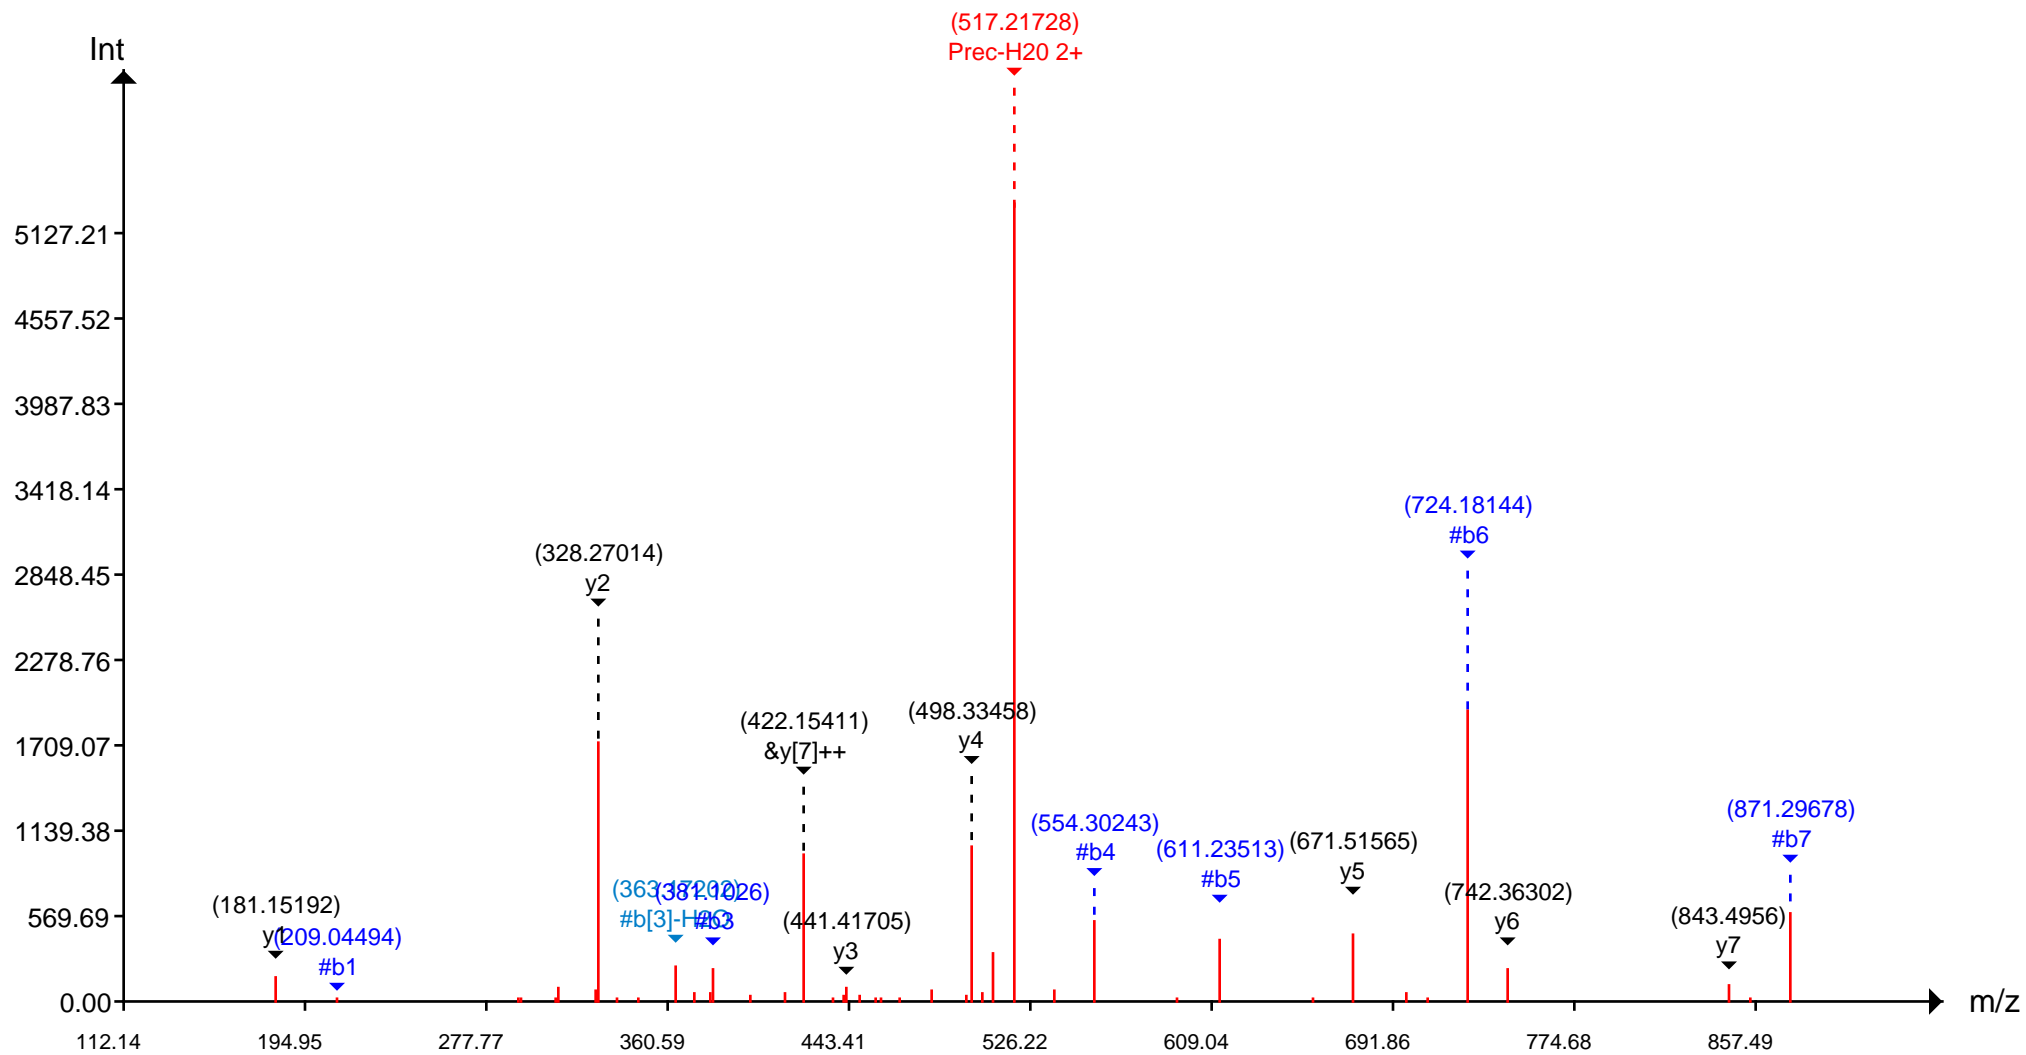

## Info

|                          |                                 |                           |          |
|--------------------------|---------------------------------|---------------------------|----------|
| <b>Modified Sequence</b> | AcD3-YTAK<AcD3K*>GLFR<C13>-COOH | <b>Ion score</b>          | 70.09    |
| <b>Protein</b>           | P17182, P17183                  | <b>Confidence level</b>   | 99.00%   |
| <b>Precursor m/z</b>     | 526.31094                       | <b>Identity Threshold</b> | 46.03    |
| <b>Charge</b>            | 2+                              | <b>Mass error</b>         | -2.92E-4 |

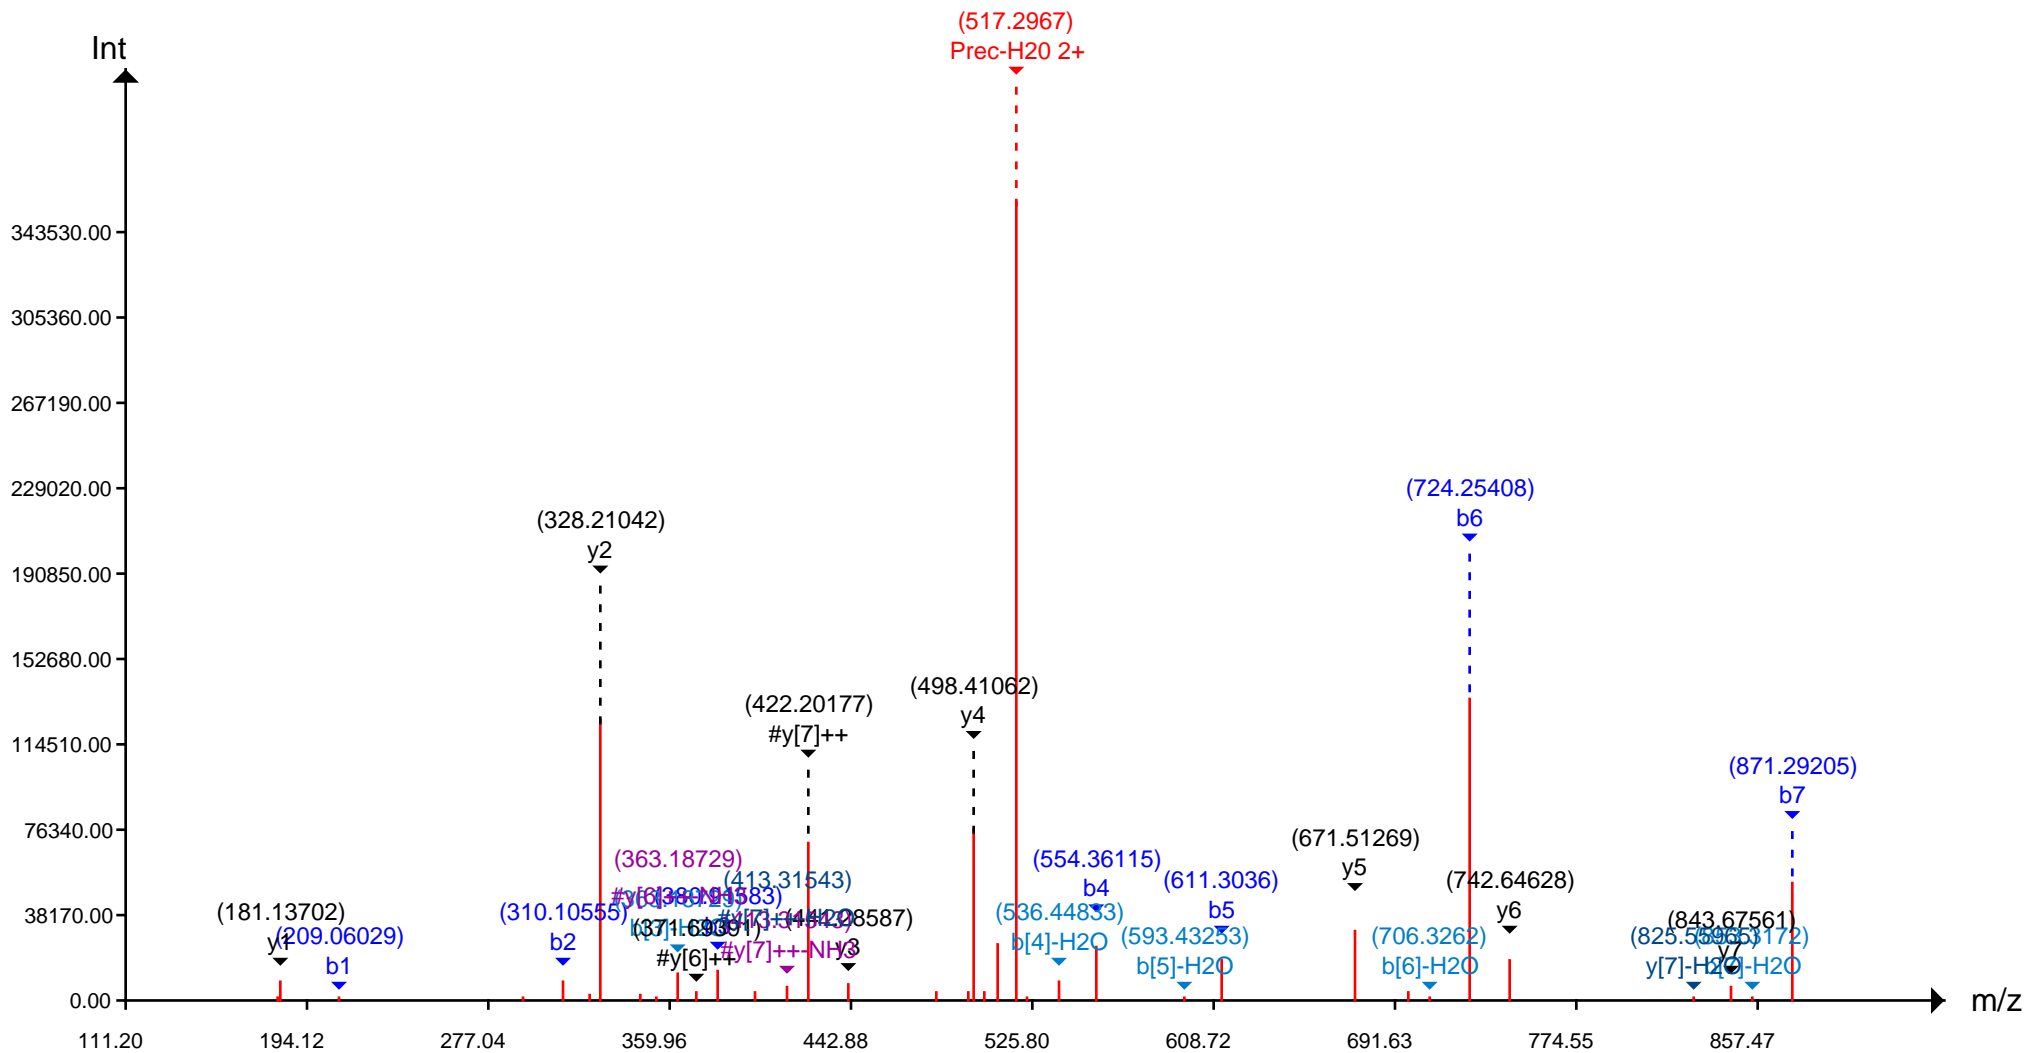

## Info

|                          |                                 |                           |           |
|--------------------------|---------------------------------|---------------------------|-----------|
| <b>Modified Sequence</b> | AcD3-YTAK<AcD3K*>GLFR<C13>-COOH | <b>Ion score</b>          | 69.11     |
| <b>Protein</b>           | P17182, P17183                  | <b>Confidence level</b>   | 99.00%    |
| <b>Precursor m/z</b>     | 526.3103                        | <b>Identity Threshold</b> | 45.99     |
| <b>Charge</b>            | 2+                              | <b>Mass error</b>         | -0.001572 |

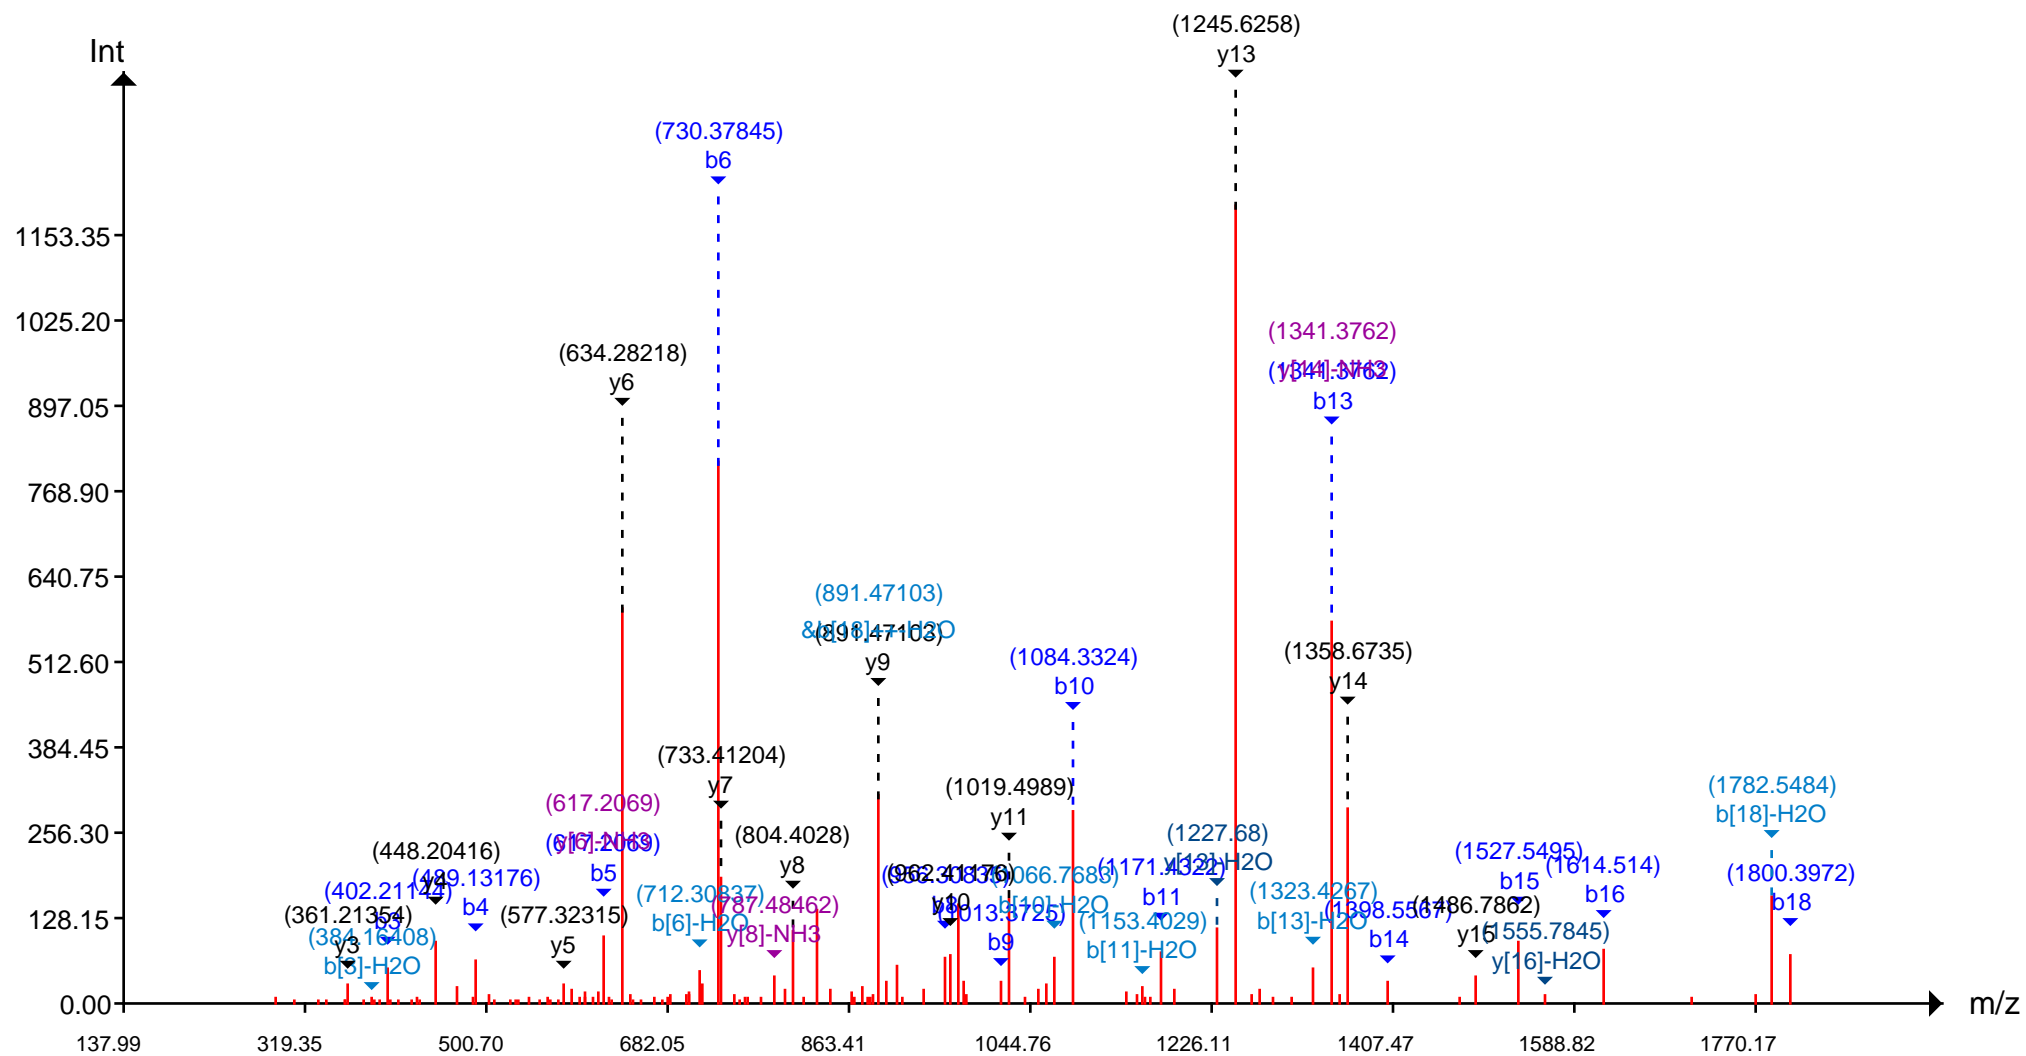

## Info

|                          |                               |                           |        |
|--------------------------|-------------------------------|---------------------------|--------|
| <b>Modified Sequence</b> | AcD3-DQLSQLPEGASAVGESSVR-COOH | <b>Ion score</b>          | 122.16 |
| <b>Protein</b>           | Q921W0                        | <b>Confidence level</b>   | 99.00% |
| <b>Precursor m/z</b>     | 987.99529                     | <b>Identity Threshold</b> | 47.72  |
| <b>Charge</b>            | 2+                            | <b>Mass error</b>         | 0.0027 |

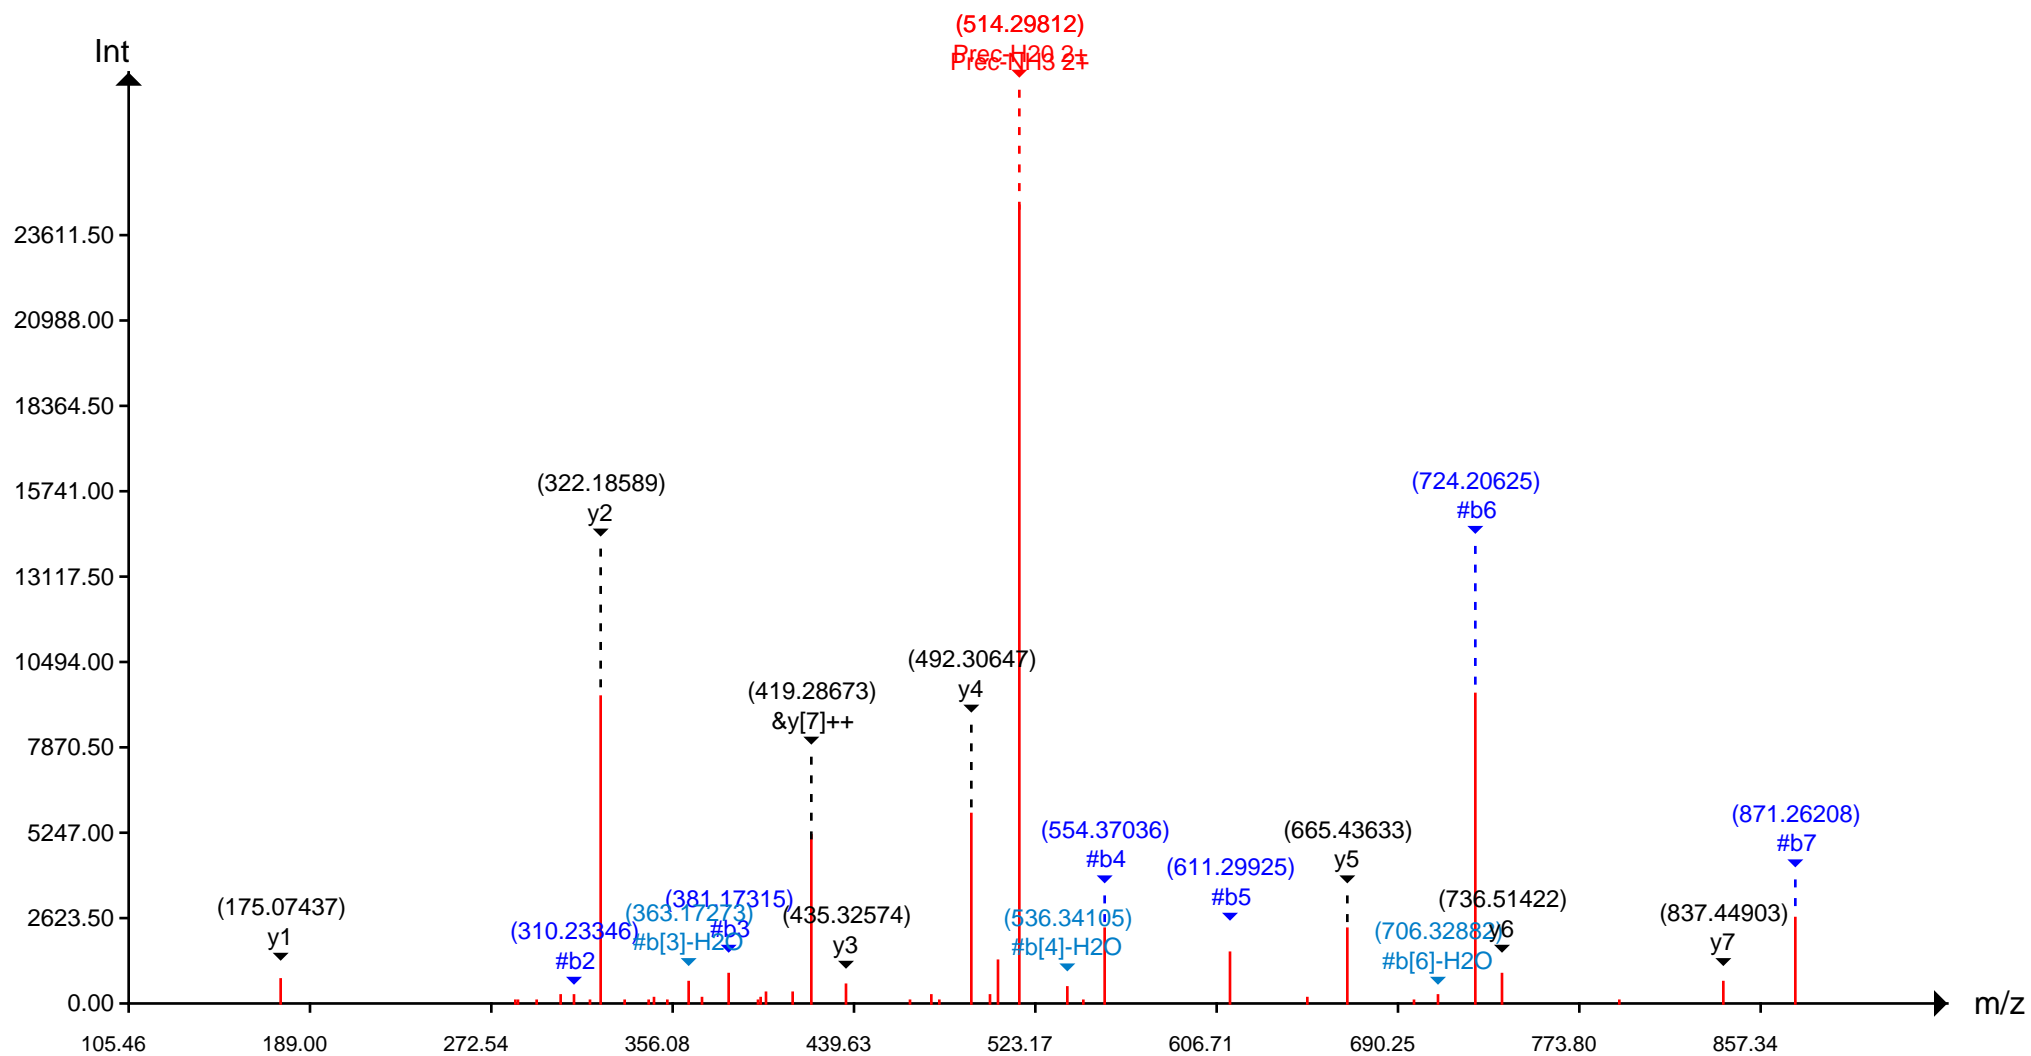

## Info

**Modified Sequence** AcD3-YTAK<AcD3K\*>GLFR-COOH

**Ion score** 64.61

**Protein** P17182, P17183

**Confidence level** 99.00%

**Precursor m/z** 523.30141

**Identity Threshold** 47.15

**Charge** 2+

**Mass error** 7.89E-4



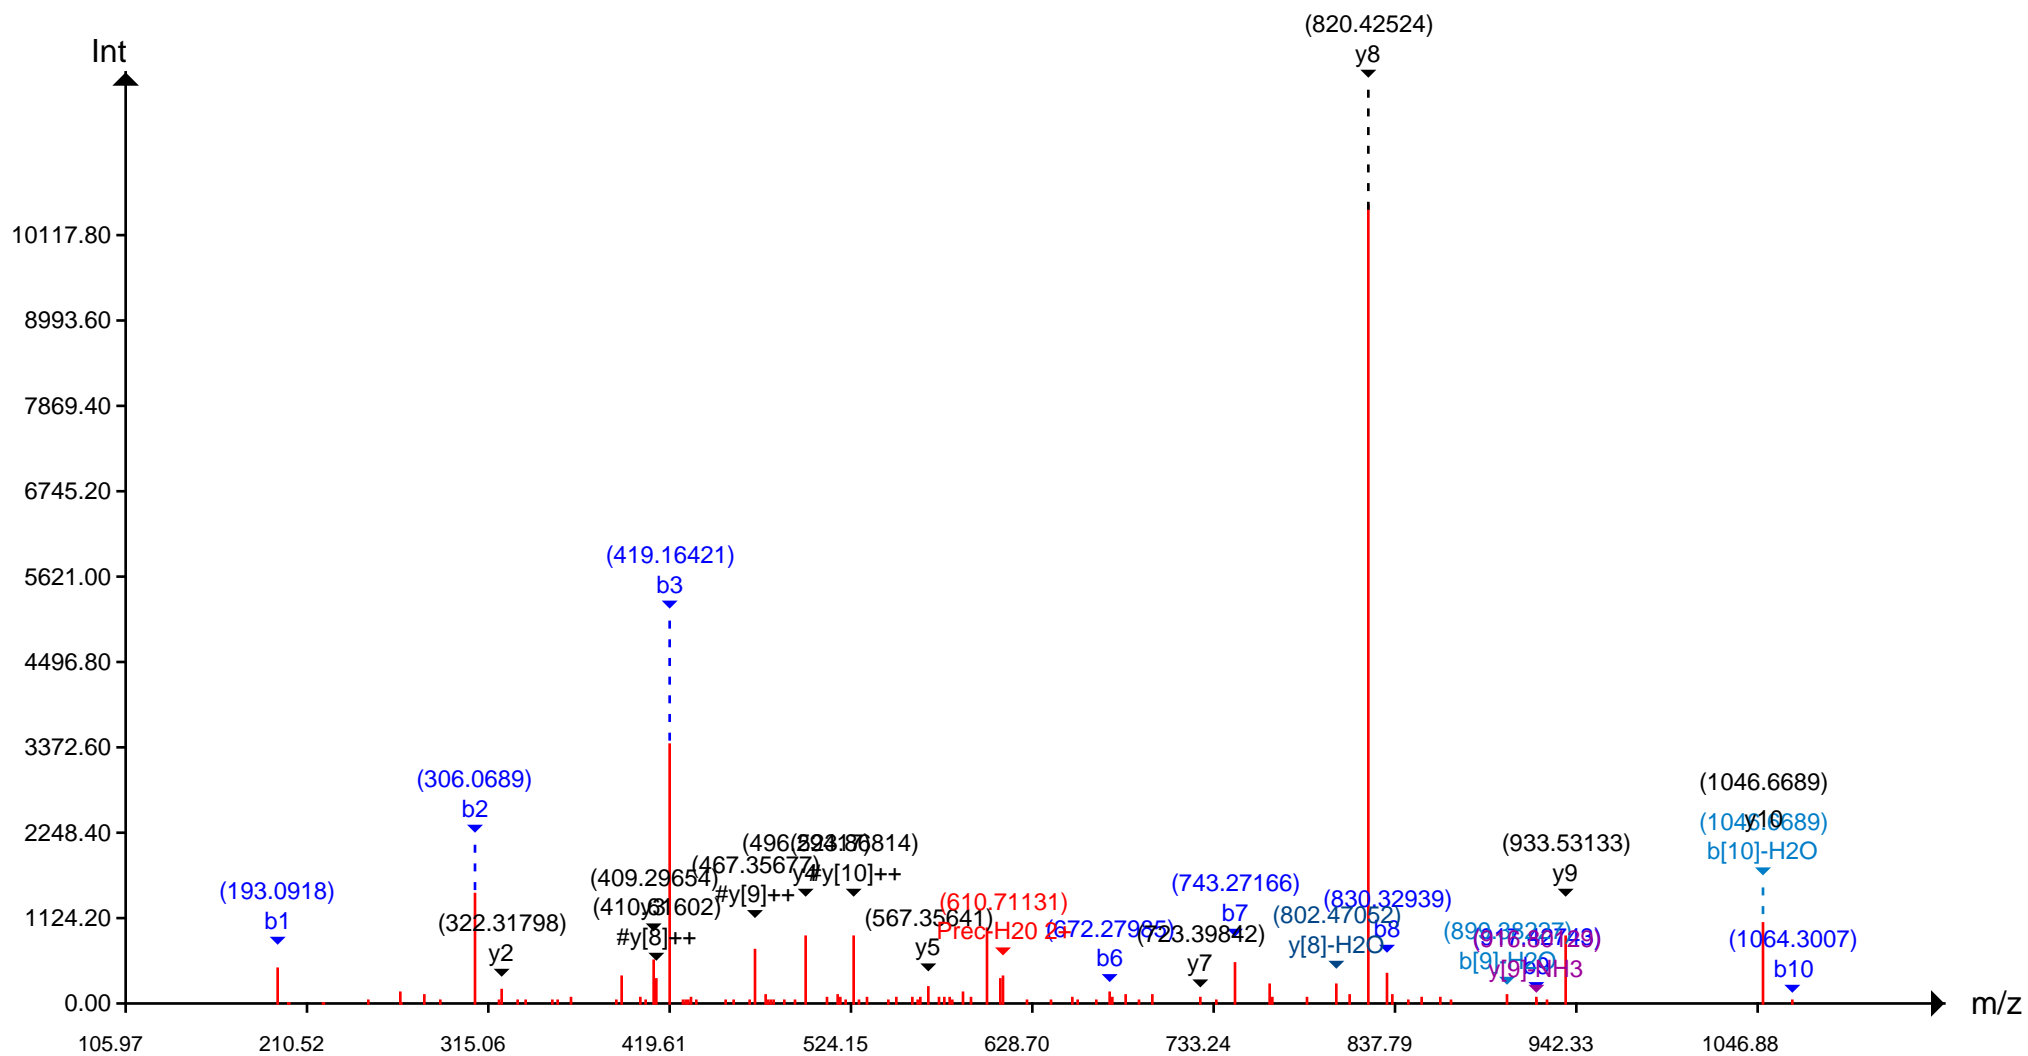

## Info

**Modified Sequence** AcD3-M<Mox\*>ILPVGASSFR-COOH

**Ion score** 65.87

**Protein** P17182

**Confidence level** 99.00%

**Precursor m/z** 619.836

**Identity Threshold** 47.94

**Charge** 2+

**Mass error** 6.33E-4

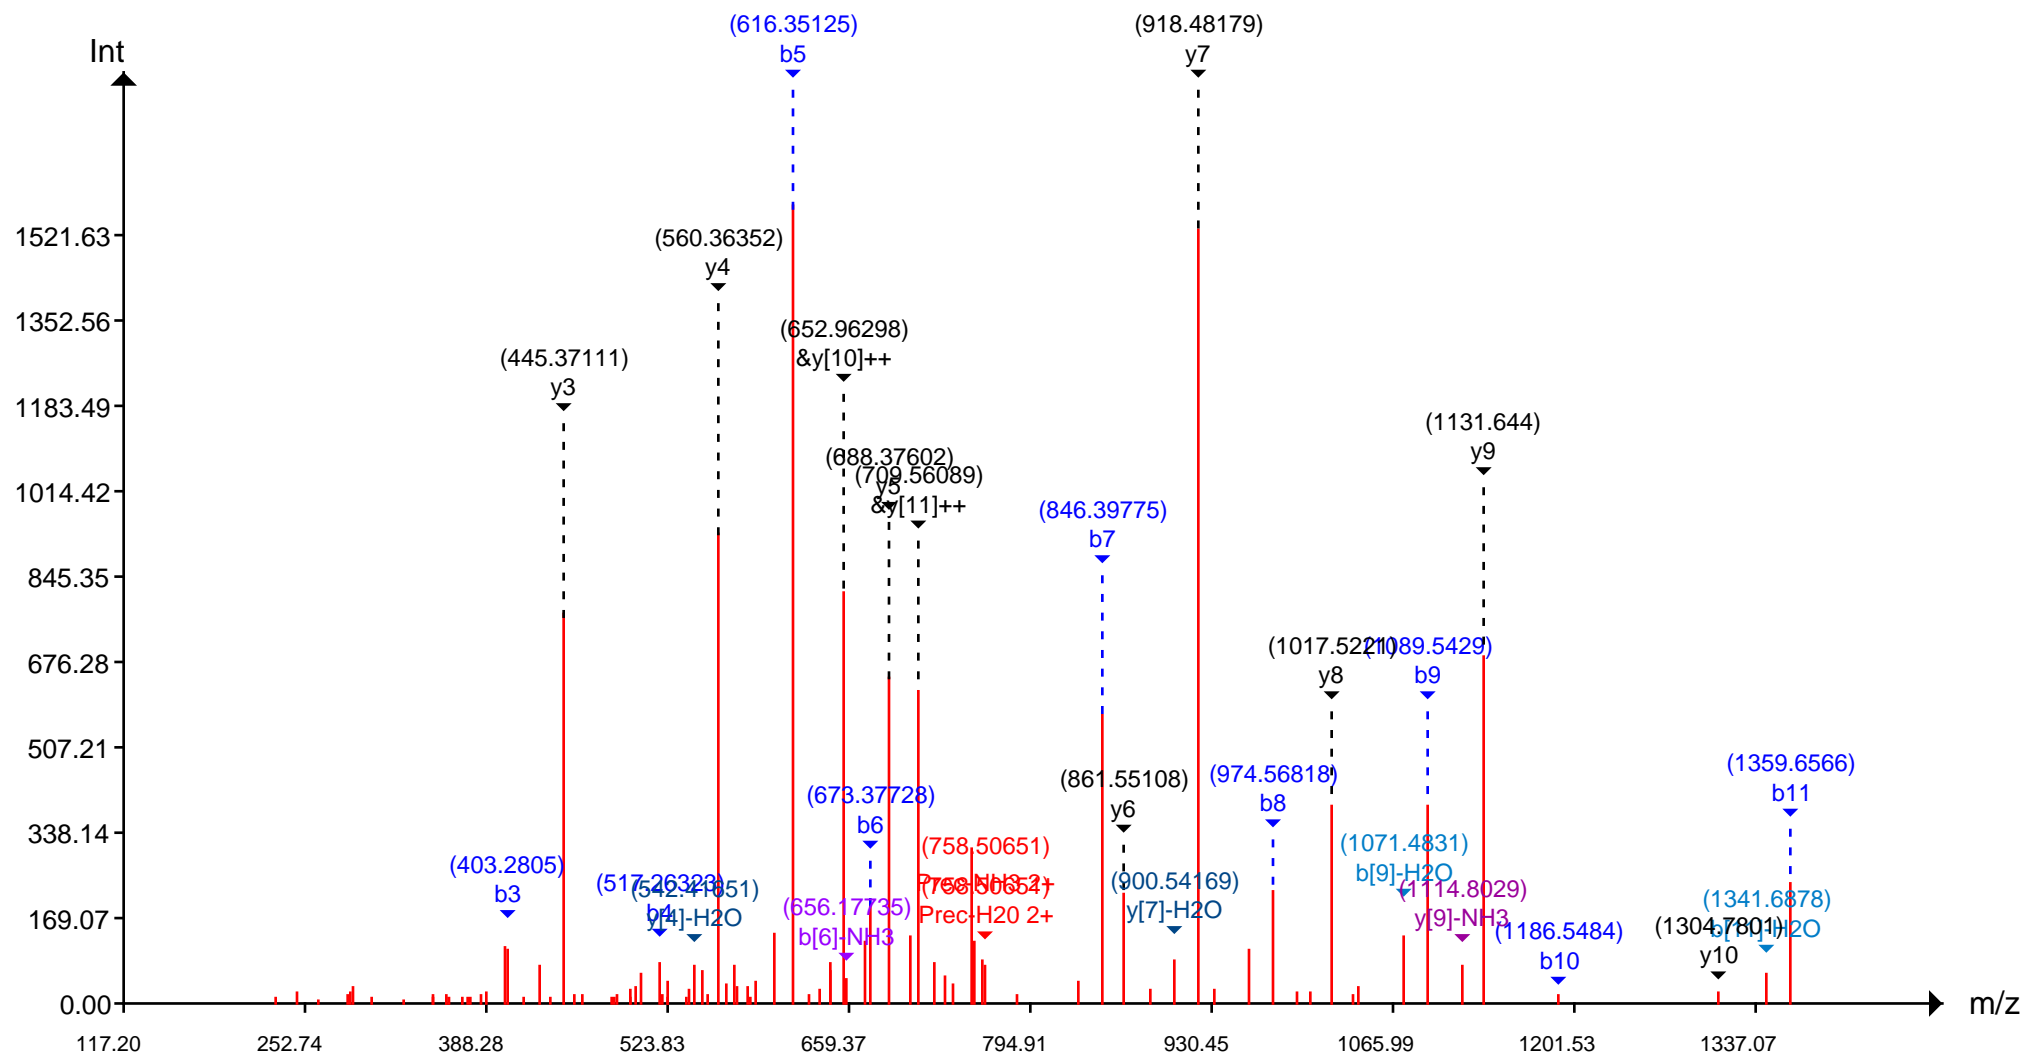

## Info

|                          |                                                |                           |           |
|--------------------------|------------------------------------------------|---------------------------|-----------|
| <b>Modified Sequence</b> | AcD3-AIK<AcD3K*>NVGK<AcD3K*>QDPK<AcD3K*>R-COOH | <b>Ion score</b>          | 72.42     |
| <b>Protein</b>           | O35593                                         | <b>Confidence level</b>   | 99.00%    |
| <b>Precursor m/z</b>     | 767.4599                                       | <b>Identity Threshold</b> | 43.74     |
| <b>Charge</b>            | 2+                                             | <b>Mass error</b>         | -0.001155 |

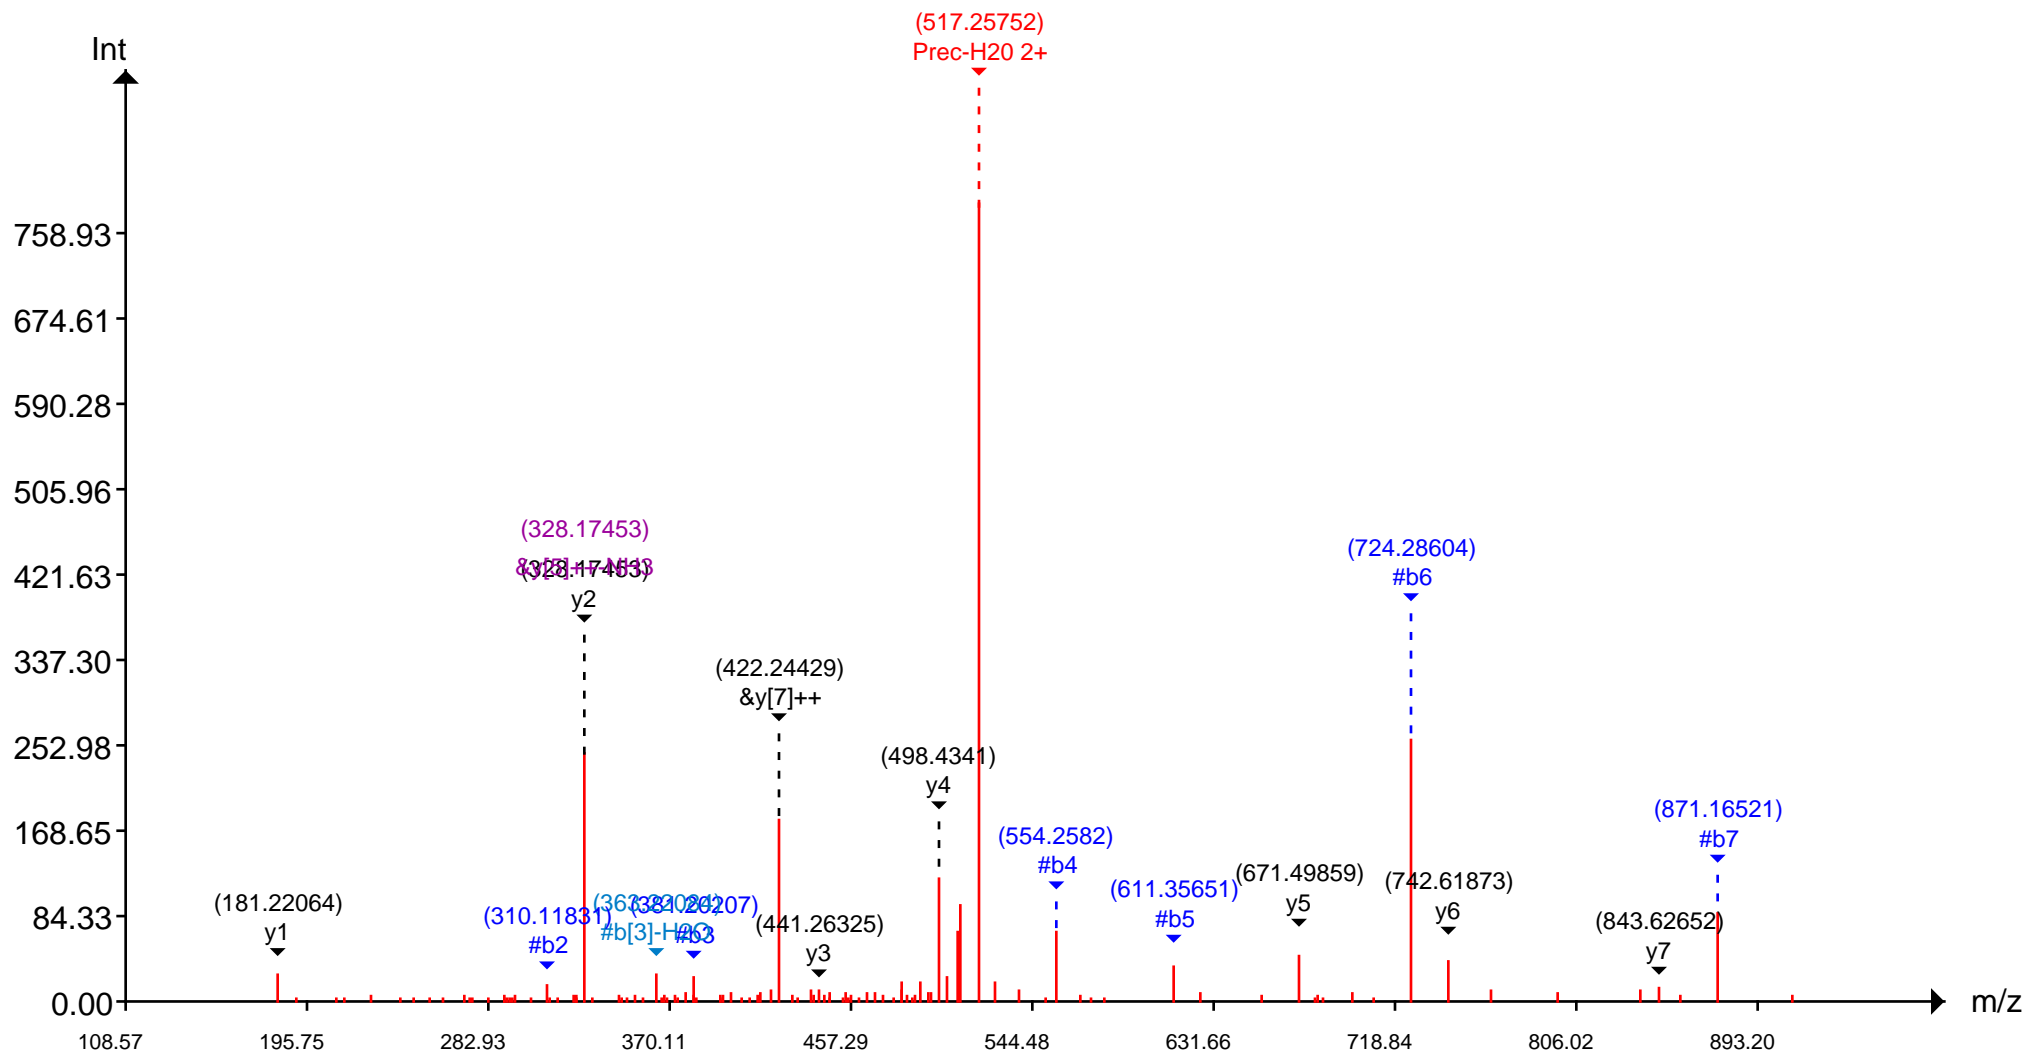

## Info

|                          |                                 |                           |         |
|--------------------------|---------------------------------|---------------------------|---------|
| <b>Modified Sequence</b> | AcD3-YTAK<AcD3K*>GLFR<C13>-COOH | <b>Ion score</b>          | 52.64   |
| <b>Protein</b>           | P17182, P17183                  | <b>Confidence level</b>   | 99.00%  |
| <b>Precursor m/z</b>     | 526.3112                        | <b>Identity Threshold</b> | 45.93   |
| <b>Charge</b>            | 2+                              | <b>Mass error</b>         | 2.28E-4 |



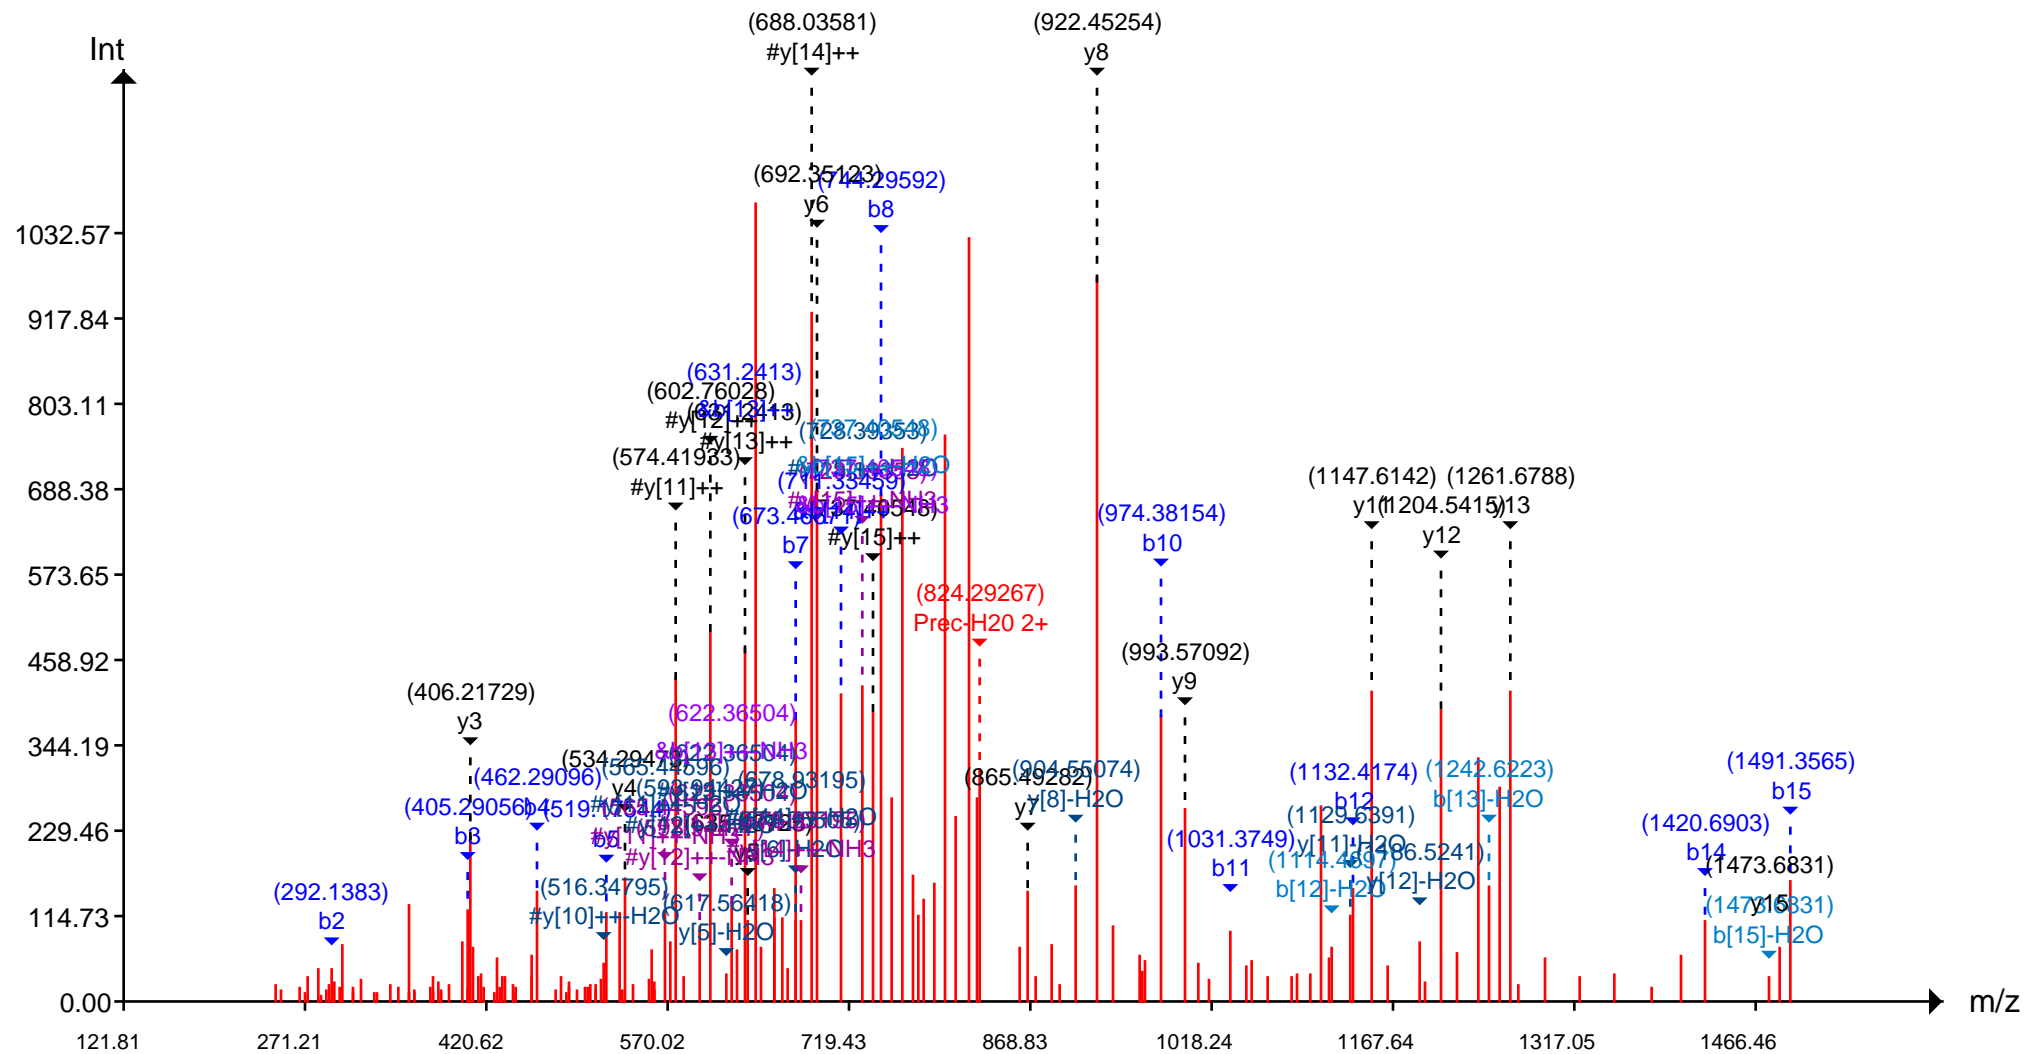

## Info

|                          |                                          |                           |          |
|--------------------------|------------------------------------------|---------------------------|----------|
| <b>Modified Sequence</b> | AcD3-FVLGGPGAGK<AcD3K*>GTQC<Cmm*>AR-COOH | <b>Ion score</b>          | 89.89    |
| <b>Protein</b>           | Q9DBP5                                   | <b>Confidence level</b>   | 99.00%   |
| <b>Precursor m/z</b>     | 833.43709                                | <b>Identity Threshold</b> | 48.17    |
| <b>Charge</b>            | 2+                                       | <b>Mass error</b>         | 0.002069 |

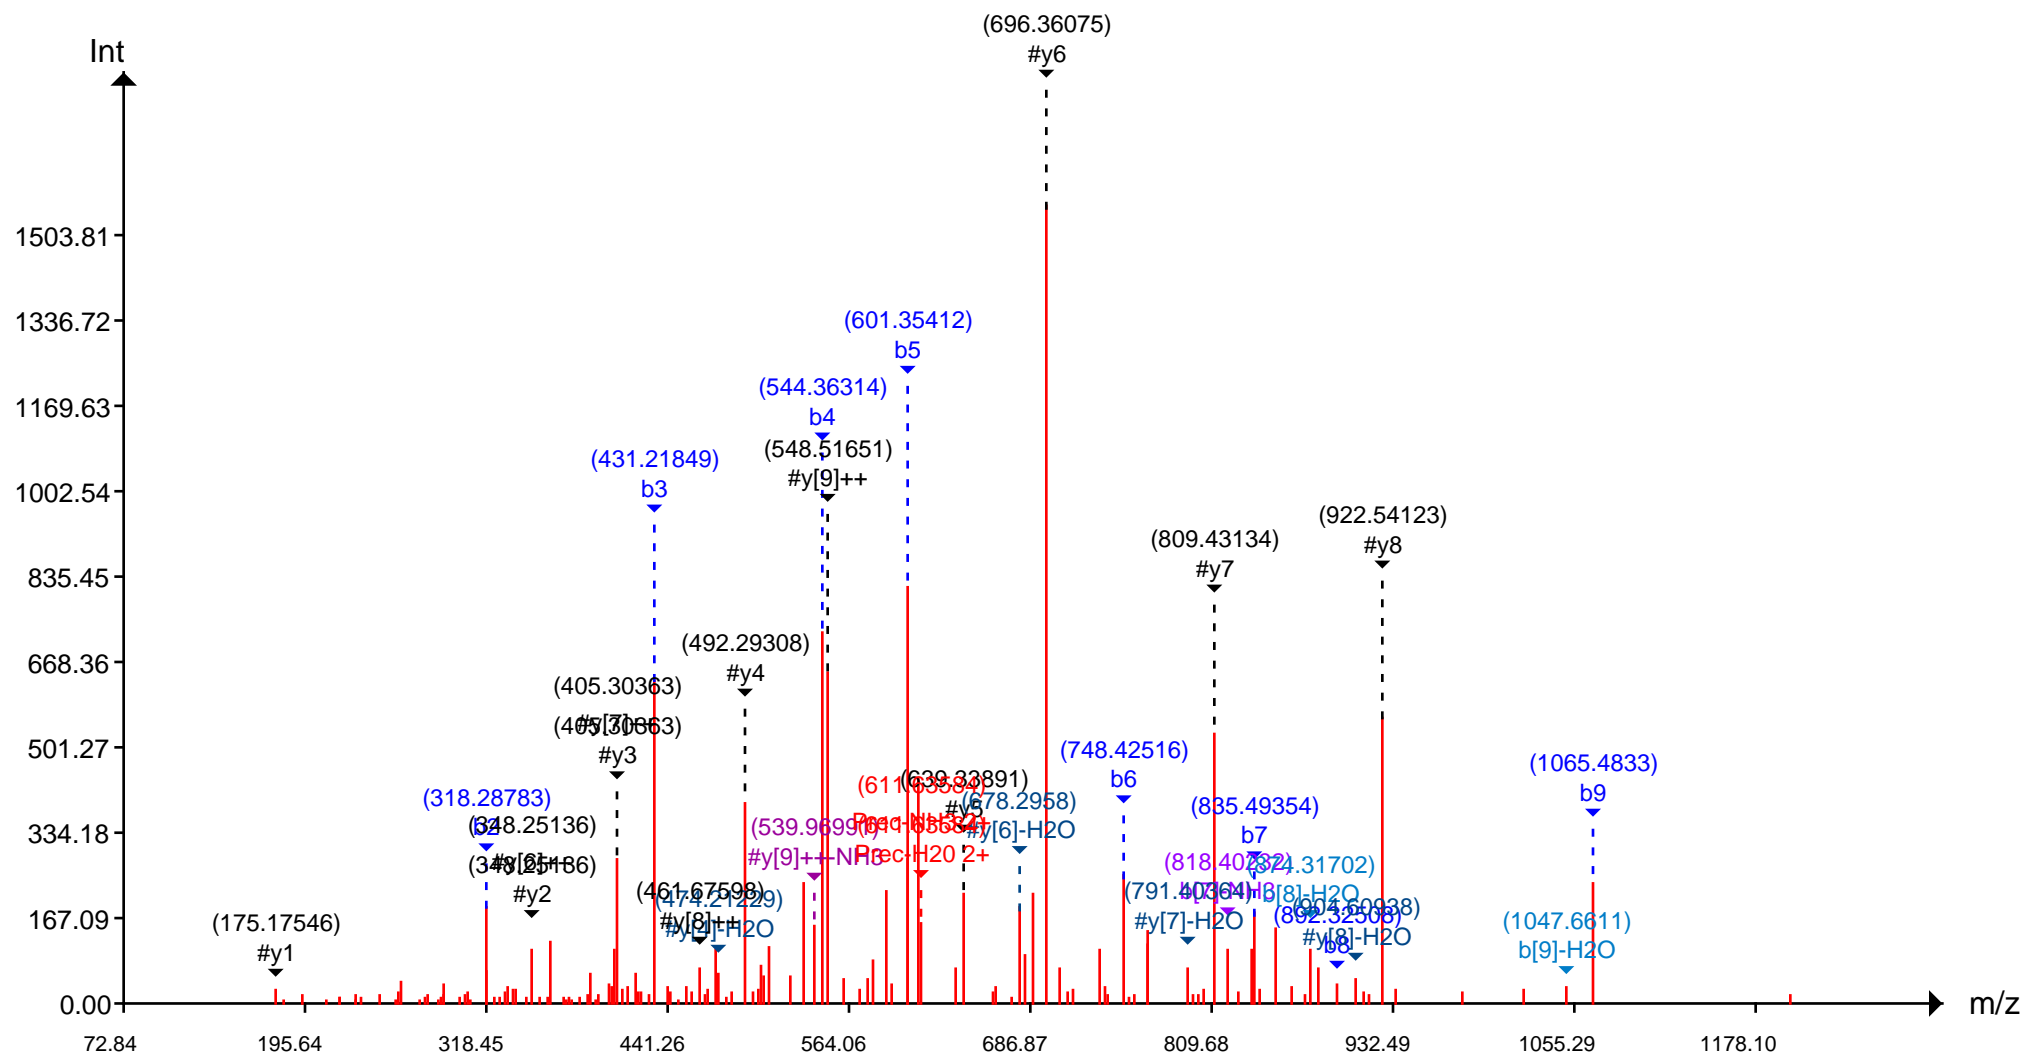

## Info

**Modified Sequence** AcD3-VK<AcD3K\*>LLGM<Mox\*>SGK<AcD3K\*>R-COOH

**Ion score** 55.65

**Protein** Q61937

**Confidence level** 99.00%

**Precursor m/z** 620.37588

**Identity Threshold** 43.96

**Charge** 2+

**Mass error** 5.29E-4

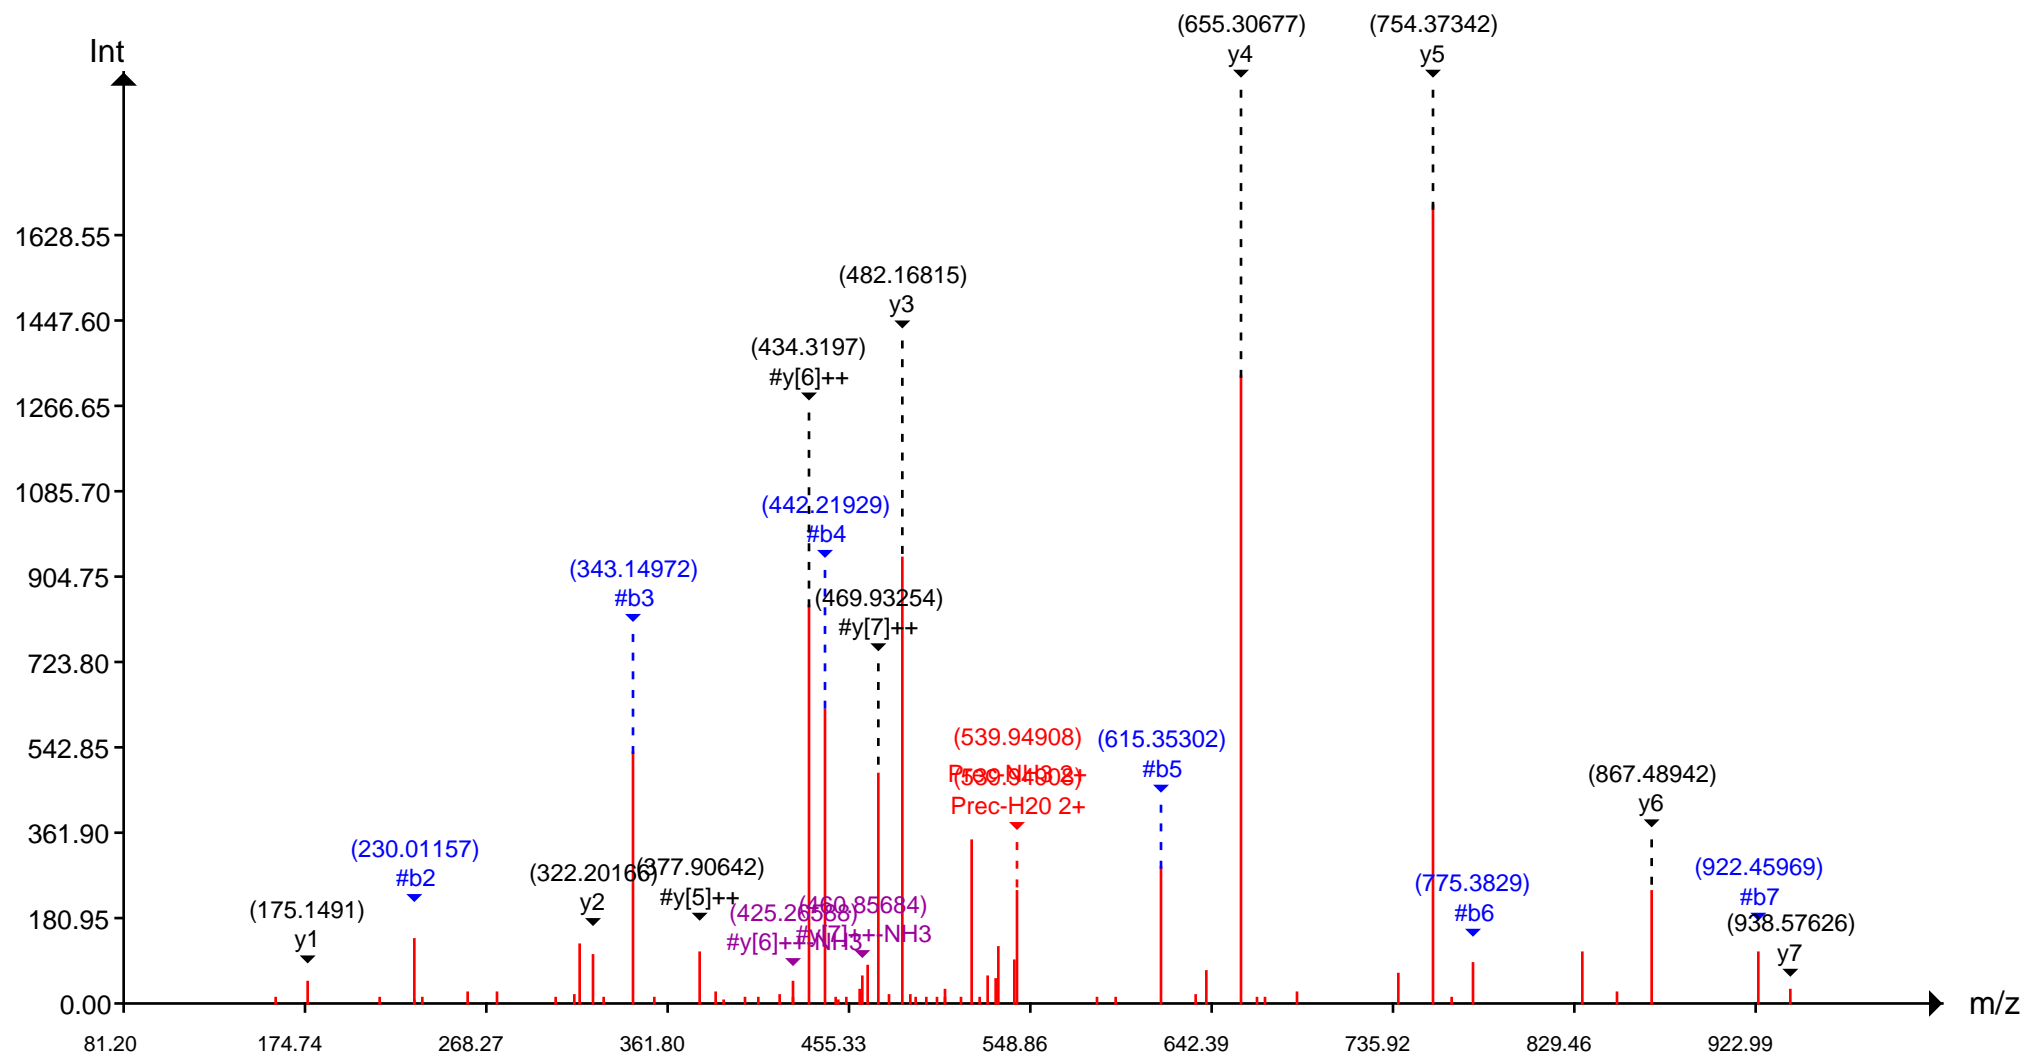

## Info

**Modified Sequence** AcD3-LAIVK<AcD3K\*>C<Cmm\*>M<Mox\*>R-COOH

**Ion score** 55.5

**Protein** P97429

**Confidence level** 99.00%

**Precursor m/z** 548.80993

**Identity Threshold** 47.37

**Charge** 2+

**Mass error** 1.9E-4

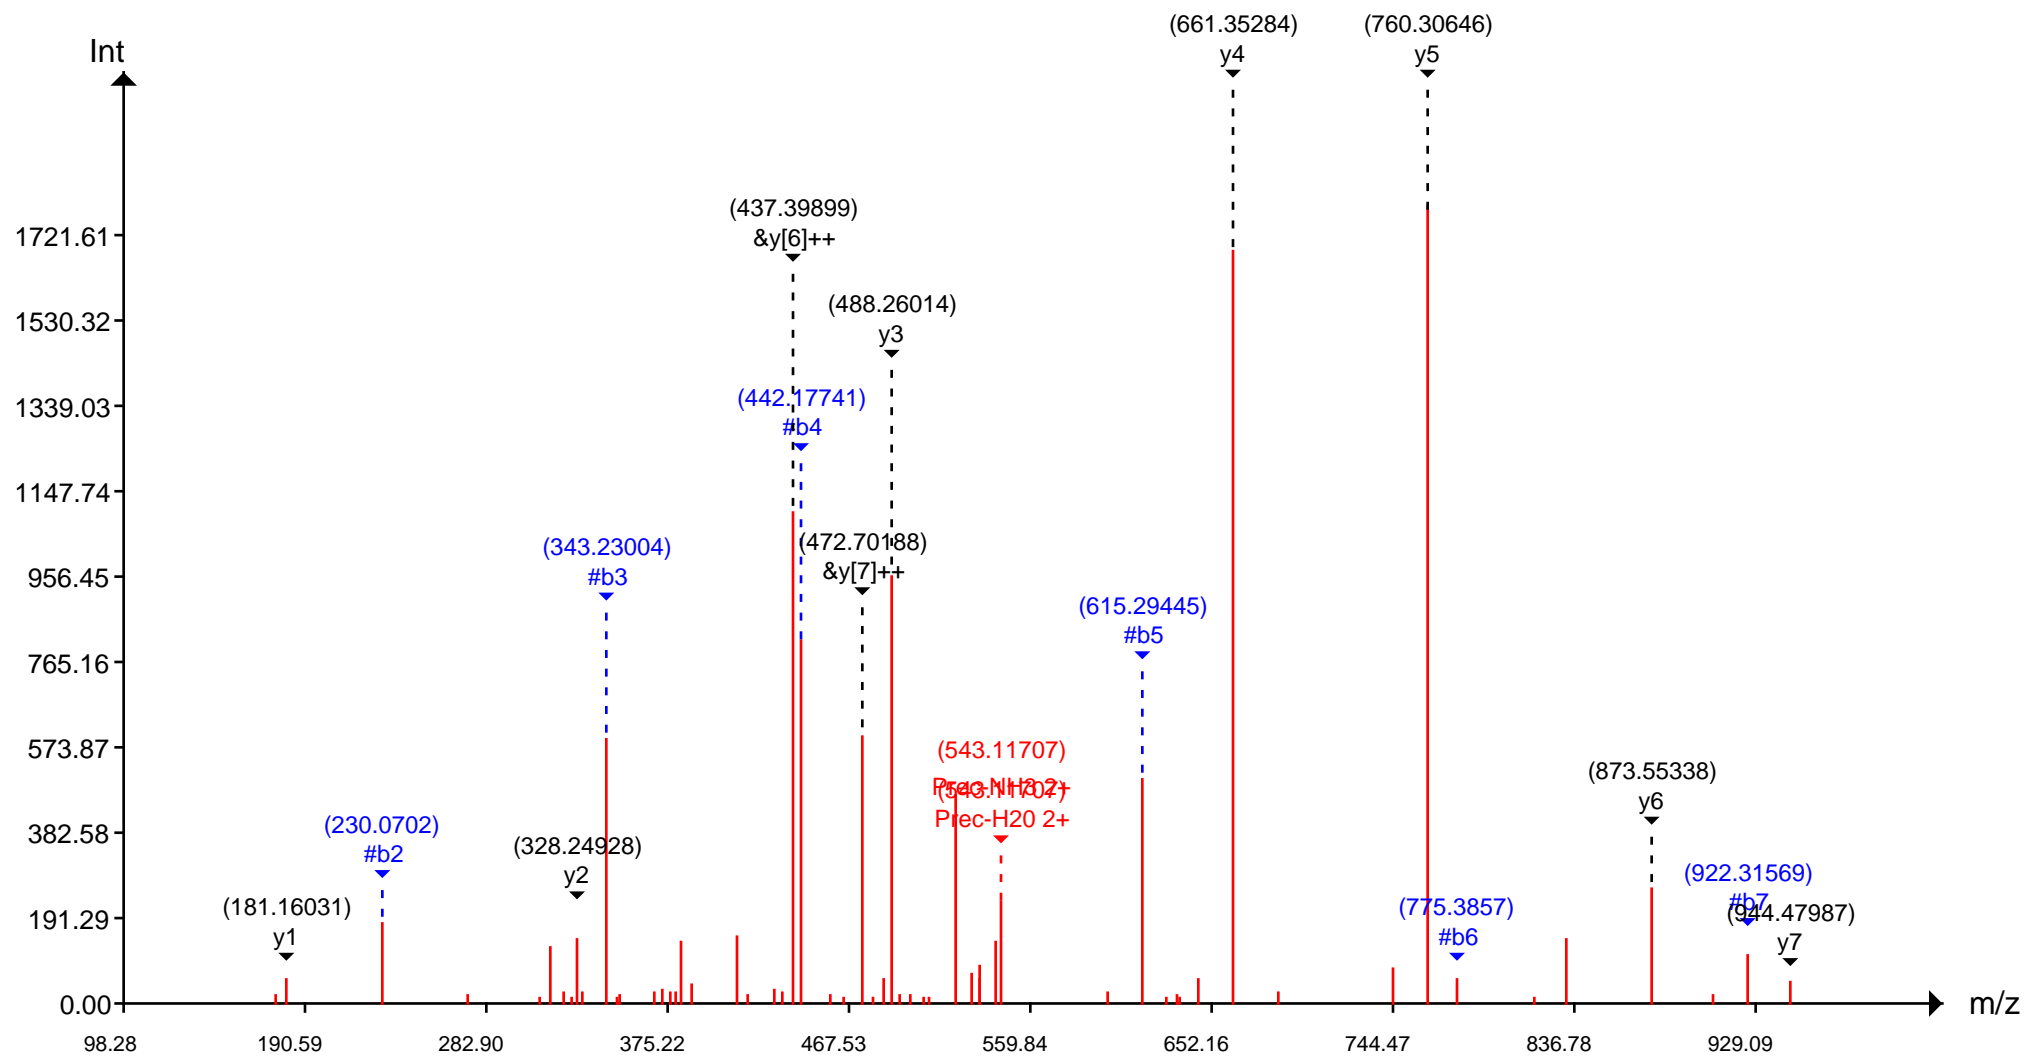

## Info

**Modified Sequence** AcD3-LAIVK<AcD3K\*>C<Cmm\*>M<Mox\*>R<C13>-COOH

**Ion score** 62.82

**Protein** P97429

**Confidence level** 99.00%

**Precursor m/z** 551.82

**Identity Threshold** 46.72

**Charge** 2+

**Mass error** 1.89E-4



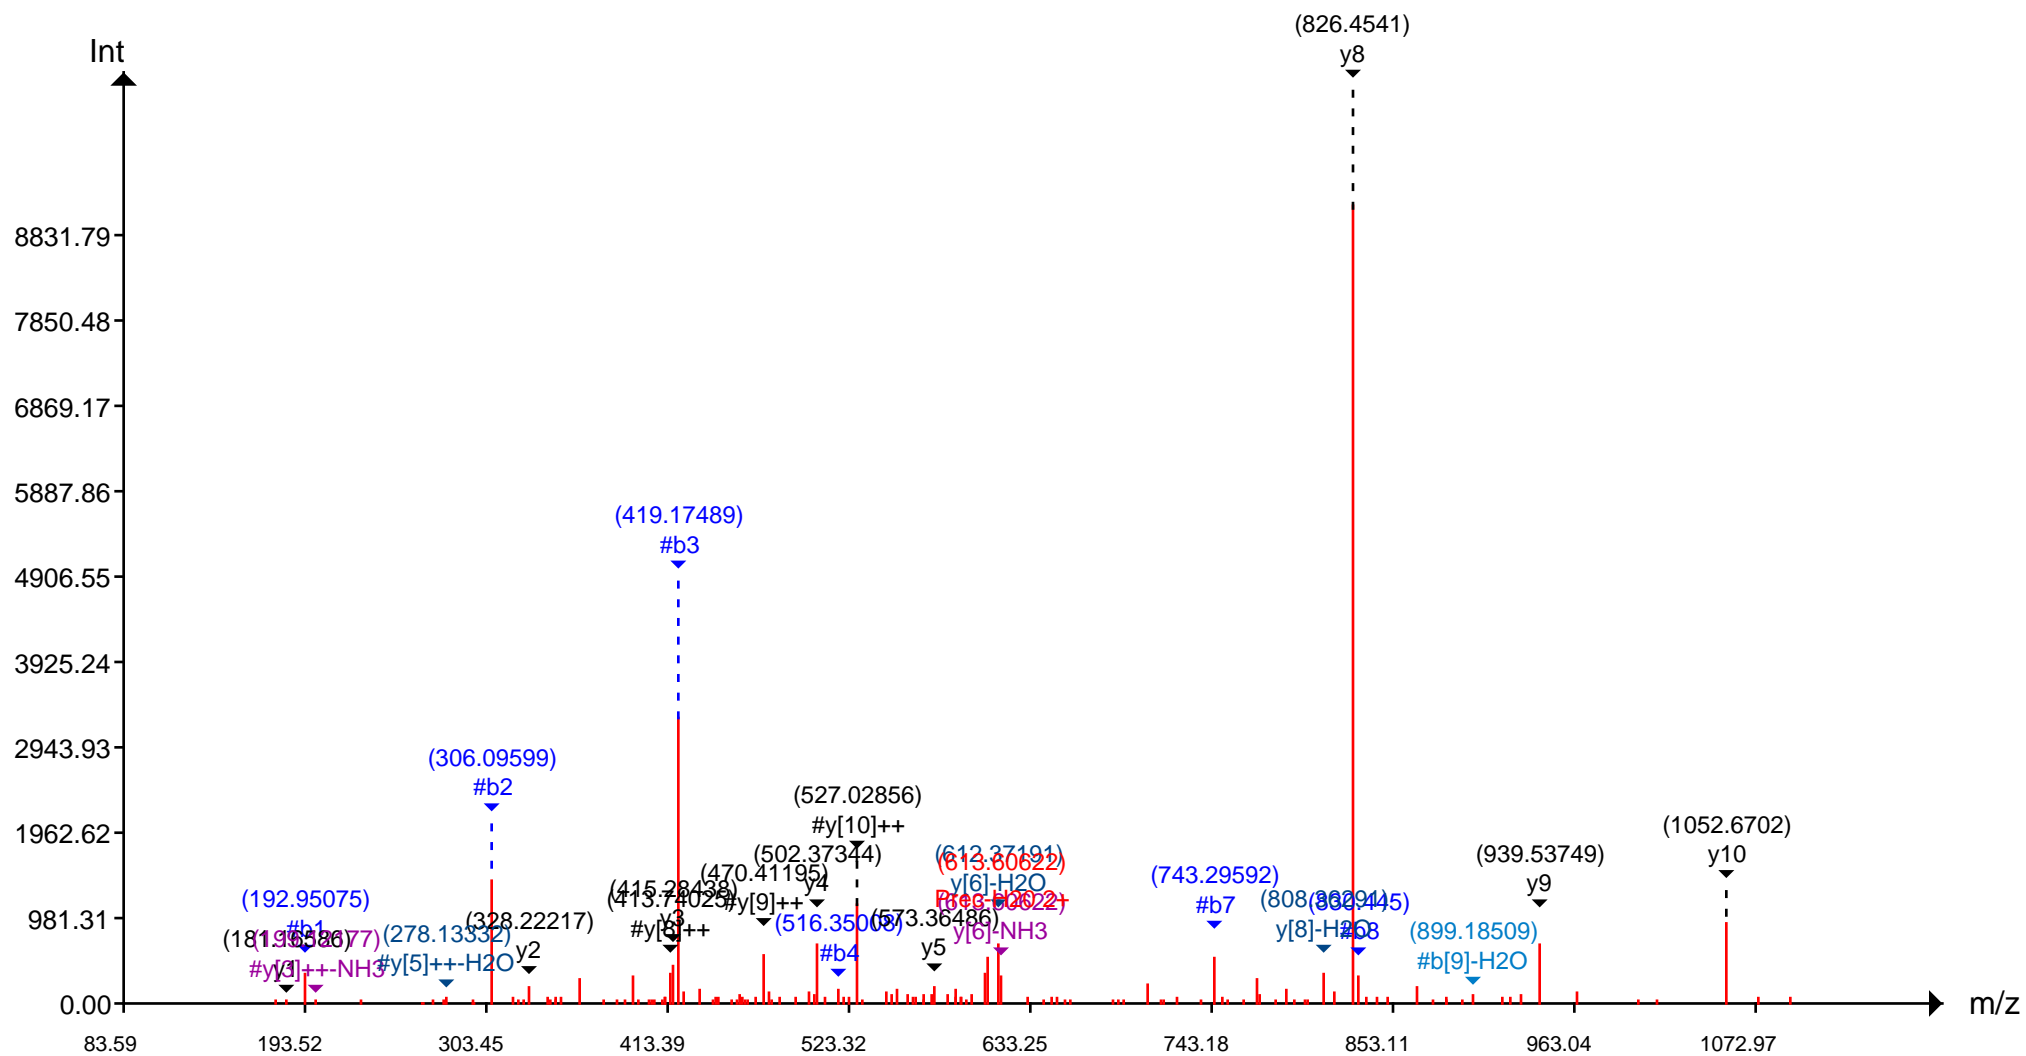

## Info

|                          |                                  |                           |        |
|--------------------------|----------------------------------|---------------------------|--------|
| <b>Modified Sequence</b> | AcD3-M<Mox*>ILPVGASSFR<C13>-COOH | <b>Ion score</b>          | 57.26  |
| <b>Protein</b>           | P17182                           | <b>Confidence level</b>   | 99.00% |
| <b>Precursor m/z</b>     | 622.84576                        | <b>Identity Threshold</b> | 47.59  |
| <b>Charge</b>            | 2+                               | <b>Mass error</b>         | 1.2E-5 |

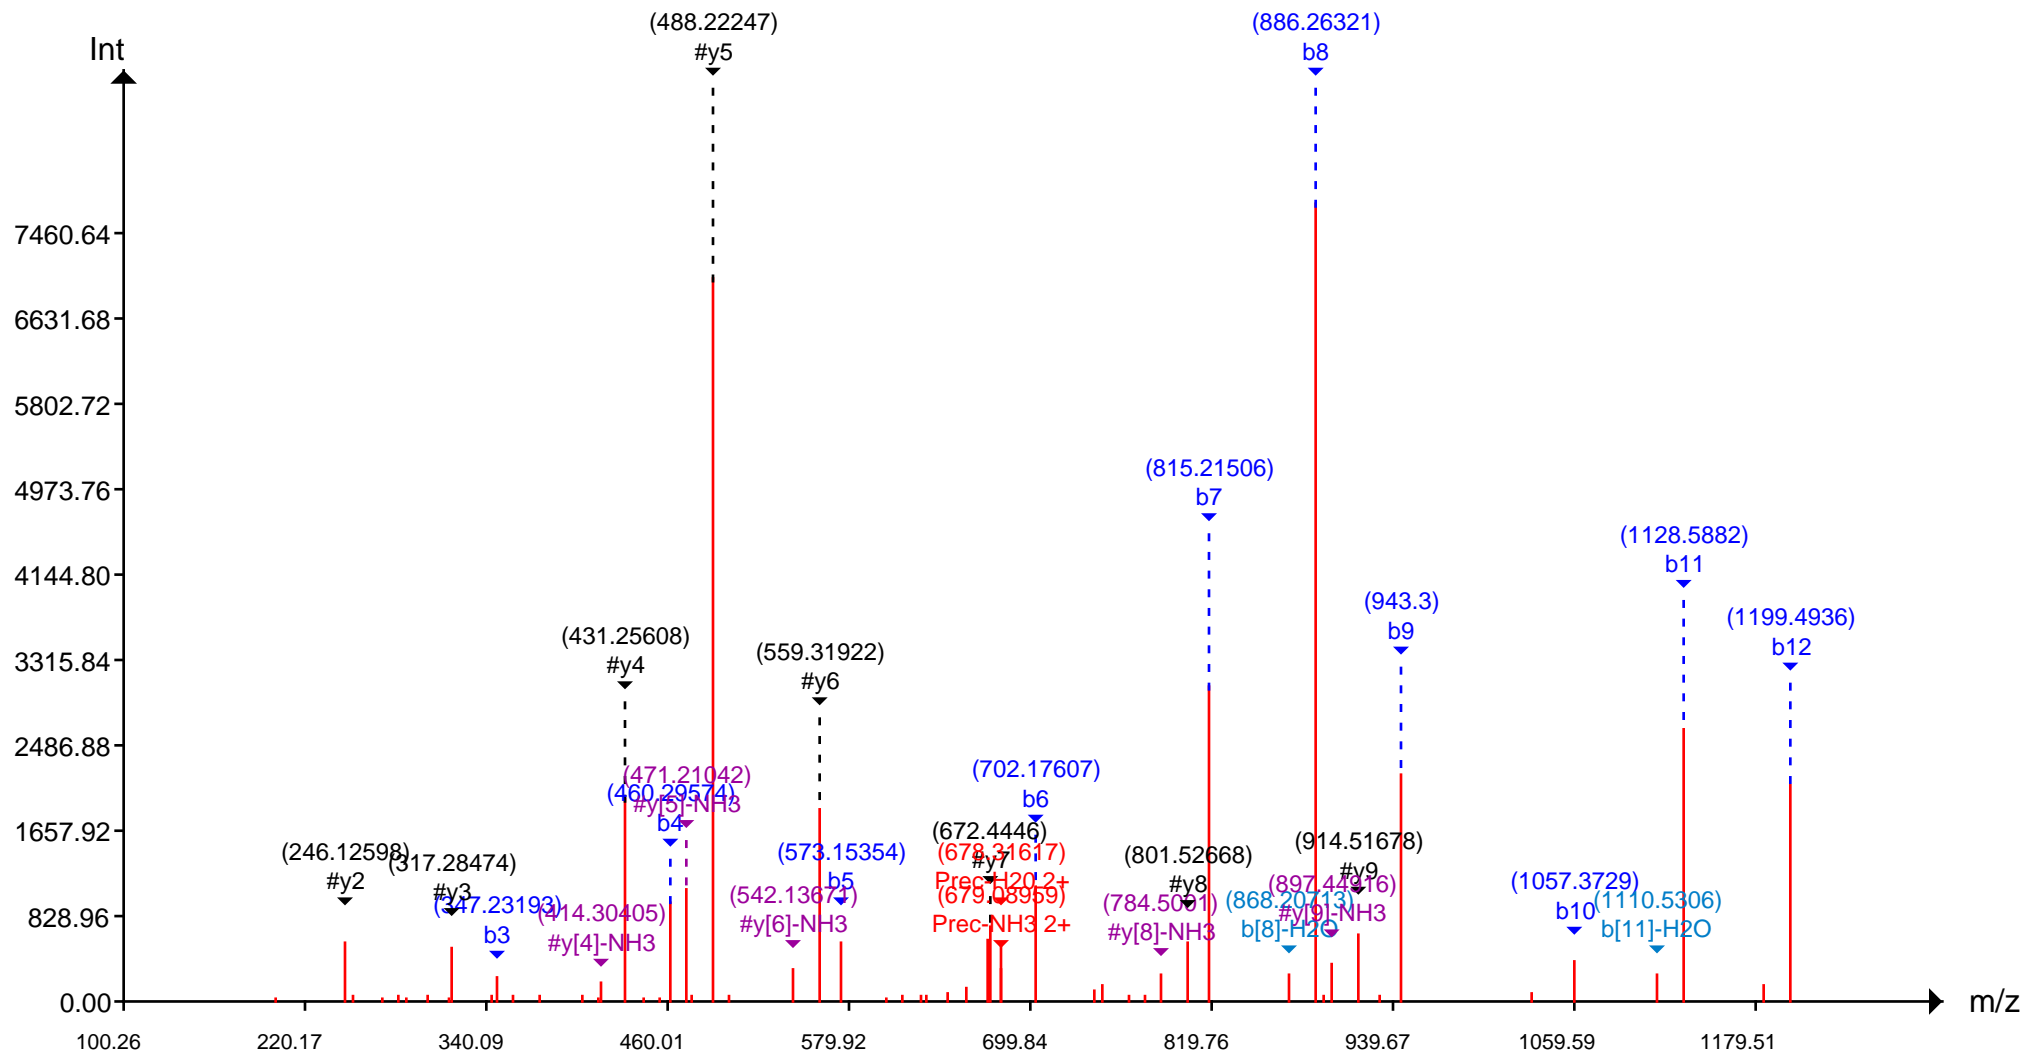

## Info

|              |                                                                                        |                    |    |
|--------------|----------------------------------------------------------------------------------------|--------------------|----|
| Modified ... | AcD3-TAEILELAGNAAR-COOH                                                                | Ion score          | 91 |
|              | Q8CGP5, Q8CGP6, Q8CGP7, P22752, Q6GSS7, Q64522, Q64523, Q8BFU2, Q8R1M2, P27661, Q9QZQ8 | Confidence level   | 99 |
| Prec...      | 687.37849                                                                              | Identity Threshold | 47 |
|              | 2+                                                                                     | Mass error         | 0. |

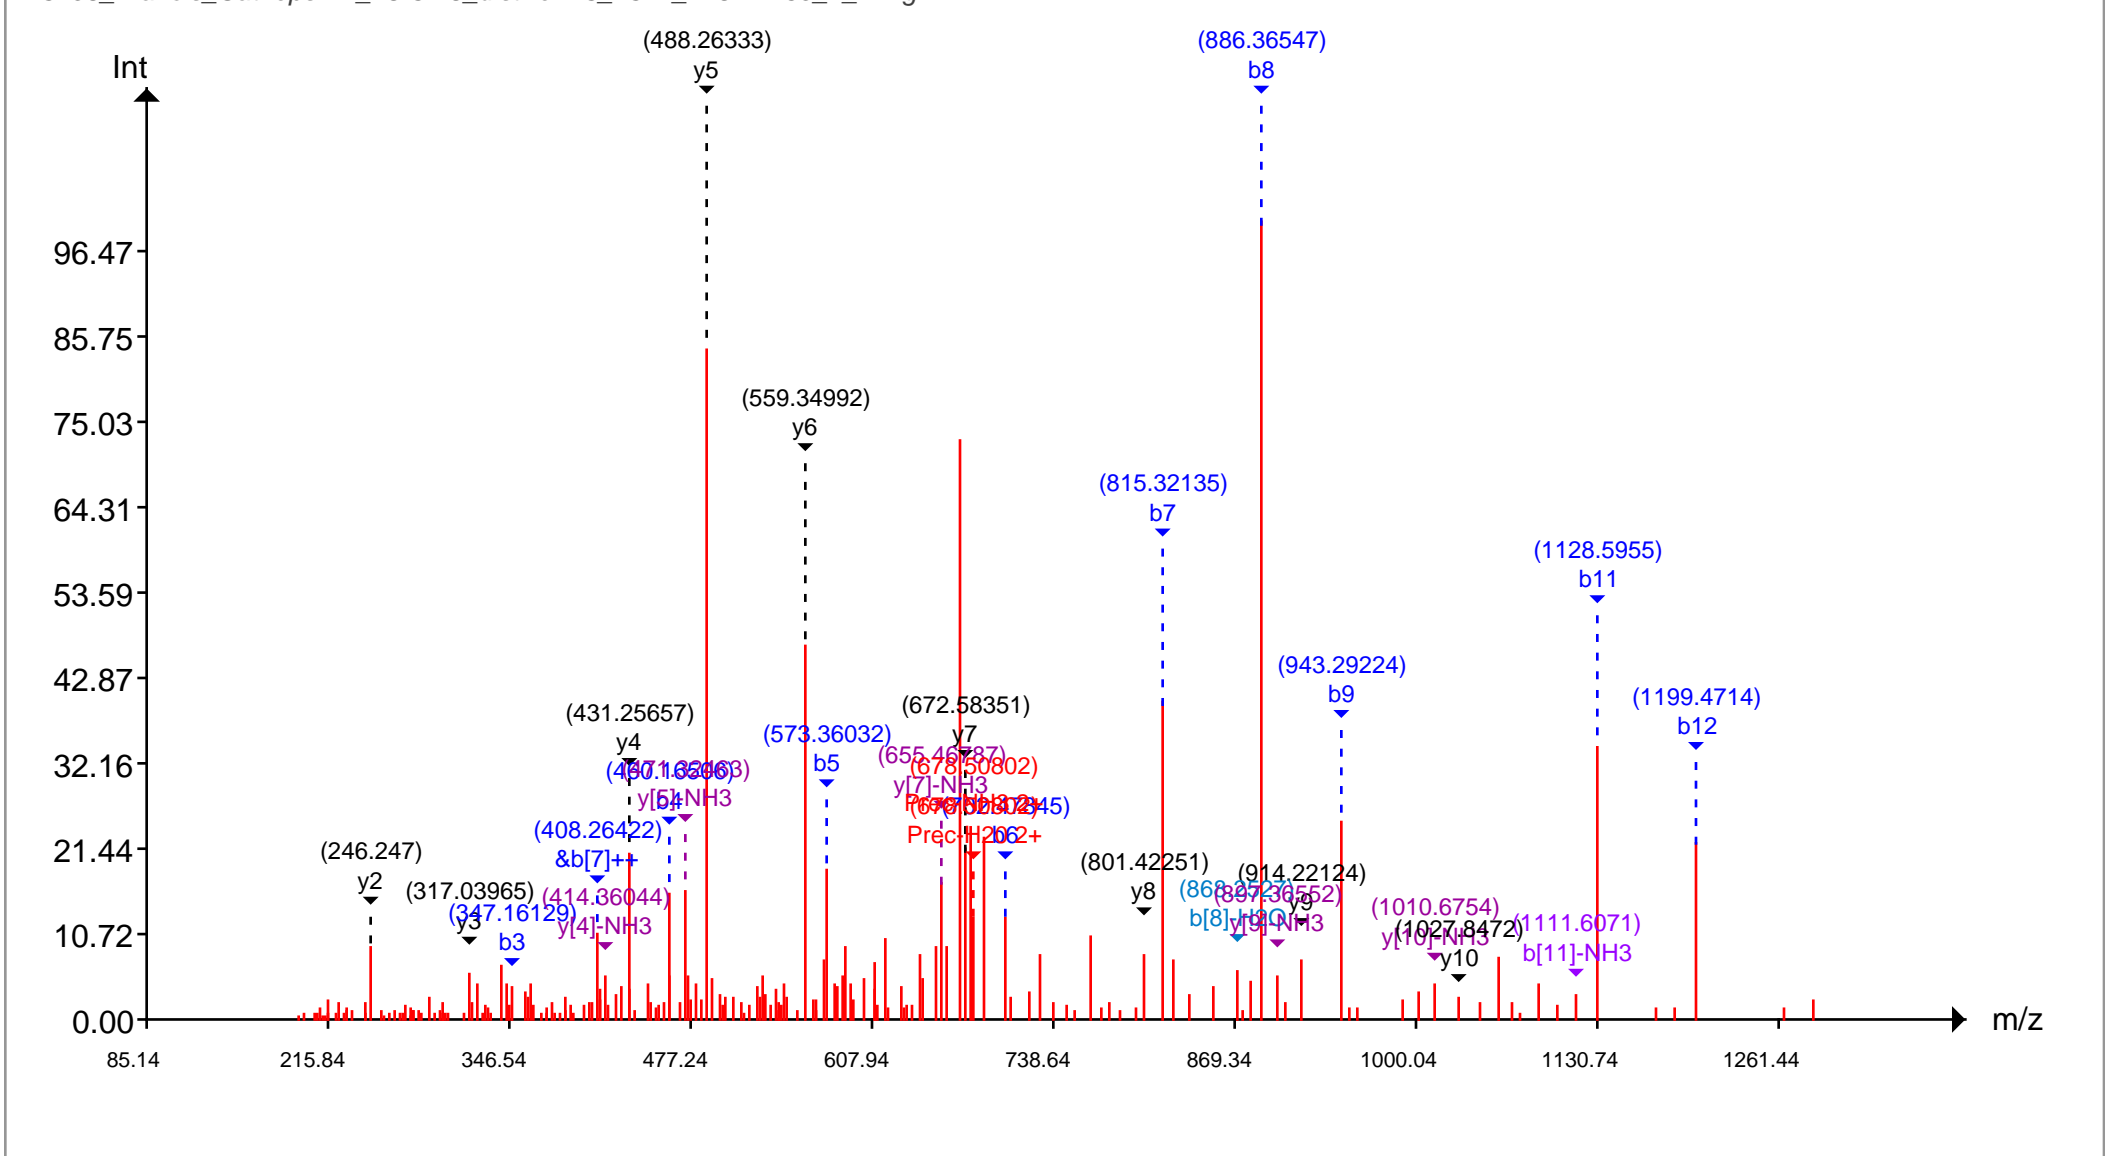

## Info

|              |                                                                                        |                    |    |
|--------------|----------------------------------------------------------------------------------------|--------------------|----|
| Modified ... | AcD3-TAEILELAGNAAR-COOH                                                                | Ion score          | 59 |
|              | Q8CGP5, Q8CGP6, Q8CGP7, P22752, Q6GSS7, Q64522, Q64523, Q8BFU2, Q8R1M2, P27661, Q9QZQ8 | Confidence level   | 99 |
| Prec...      | 687.37766                                                                              | Identity Threshold | 47 |
|              | 2+                                                                                     | Mass error         | 0. |

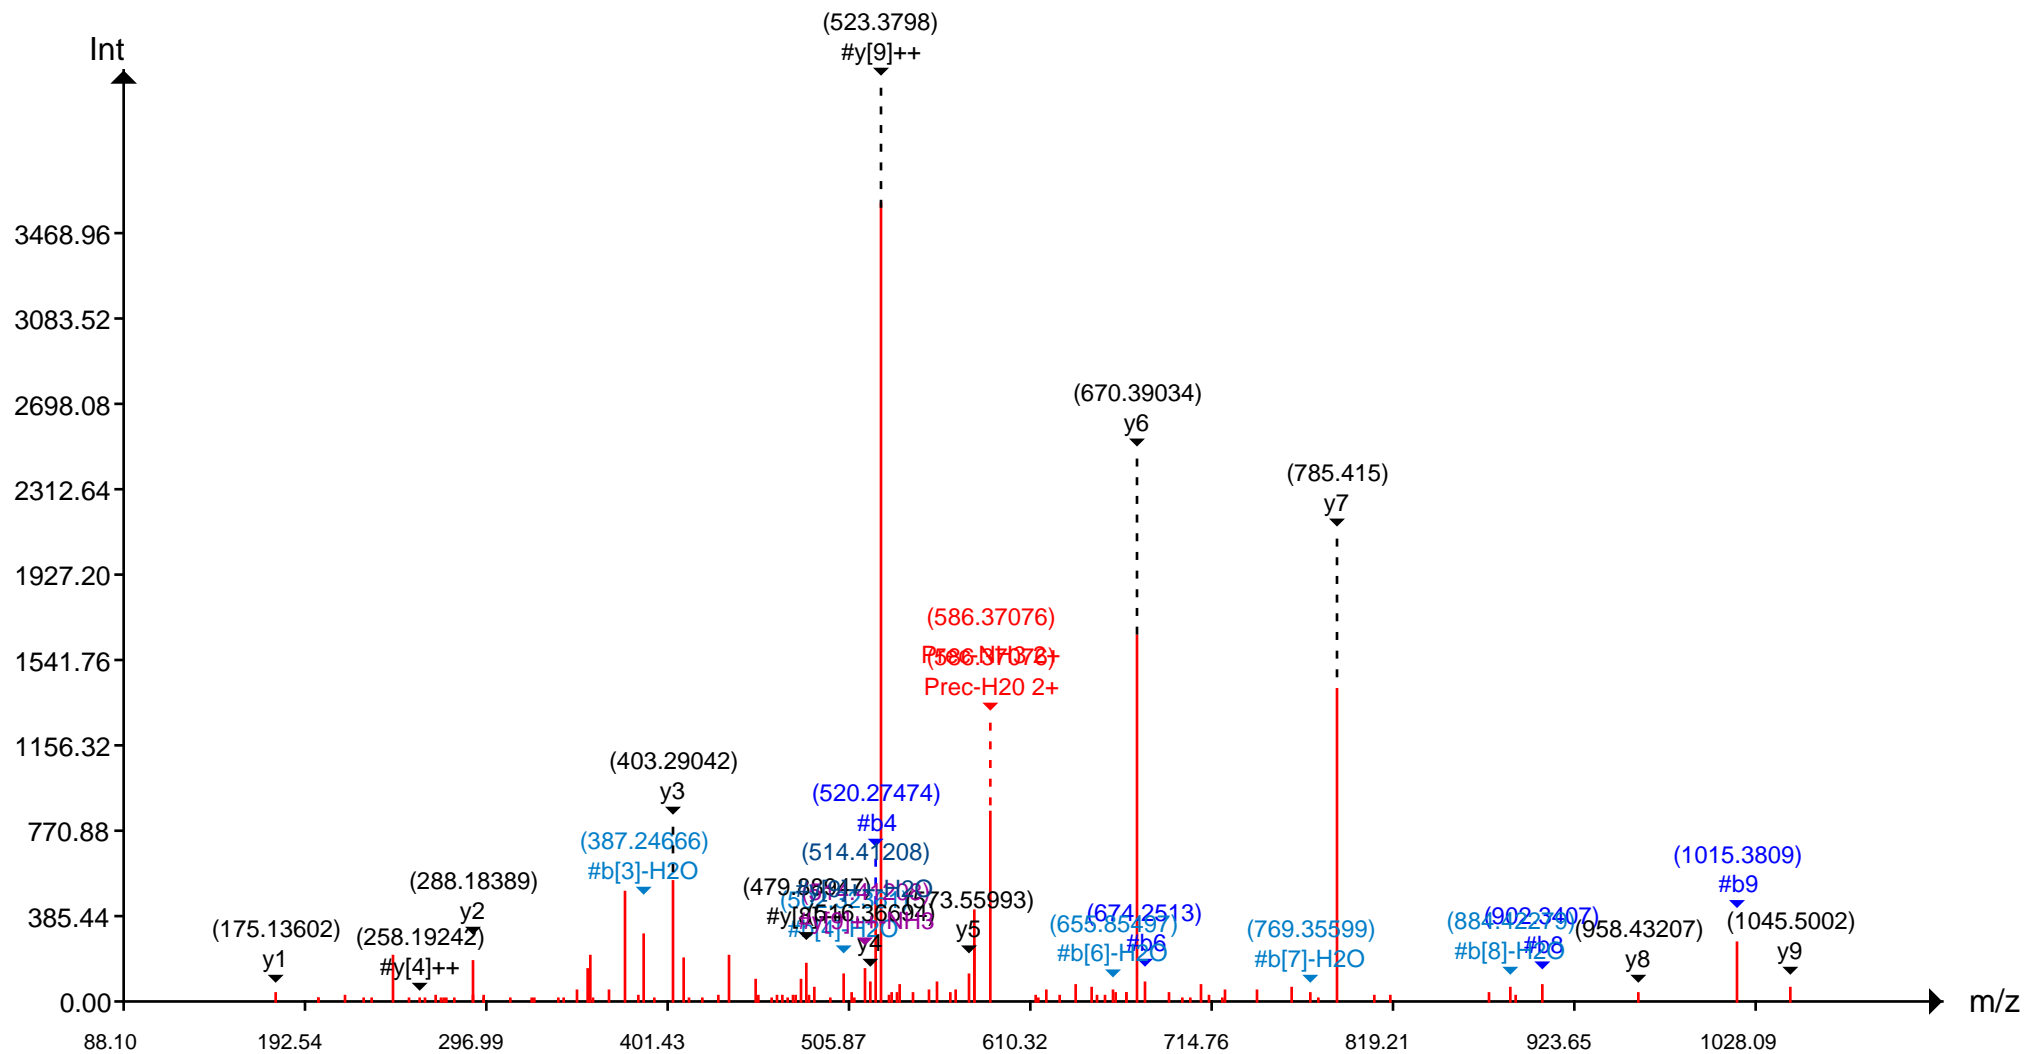

## Info

**Modified Sequence** AcD3-VSK<AcD3K\*>DPGLDLR-COOH

**Ion score** 48.9

**Protein** Q91V76

**Confidence level** 99.00%

**Precursor m/z** 595.33852

**Identity Threshold** 47.44

**Charge** 2+

**Mass error** 3.79E-4

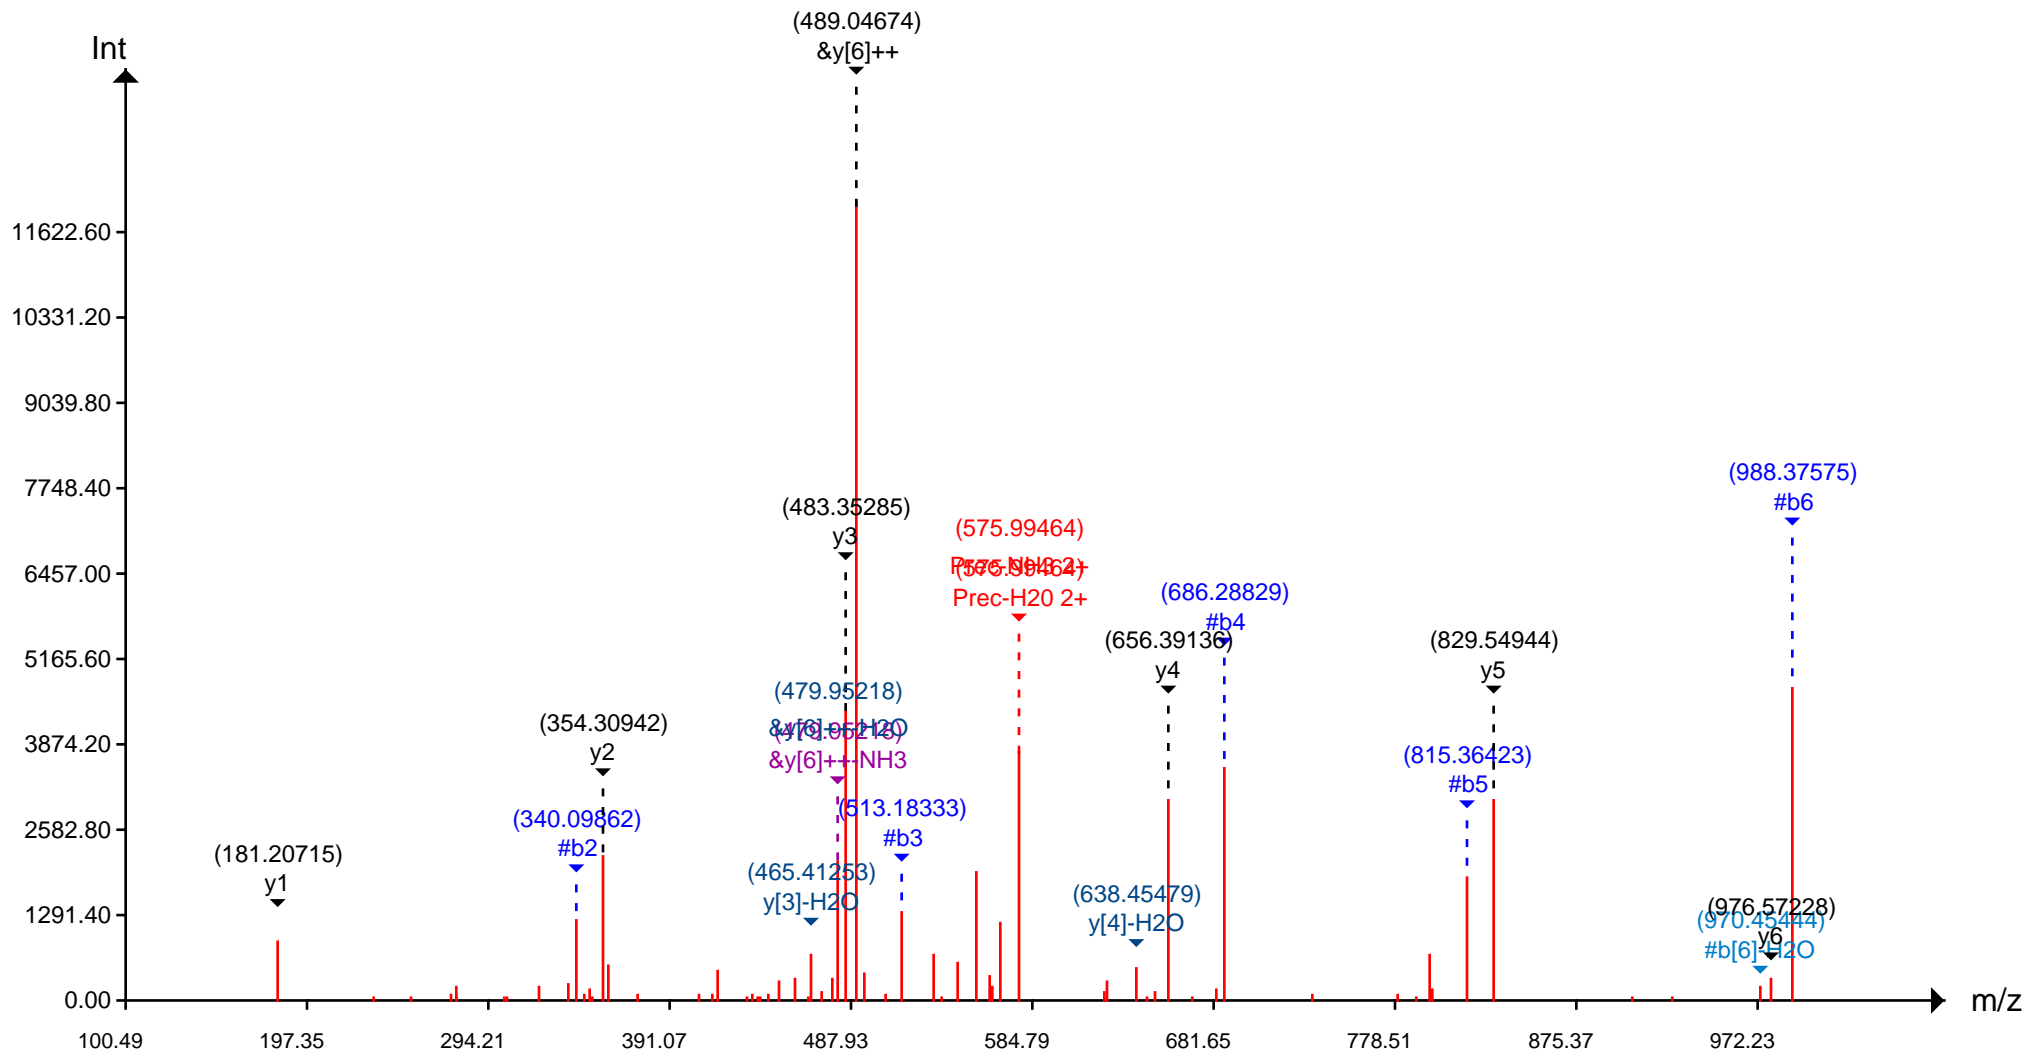

## Info

|                          |                                                      |                           |          |
|--------------------------|------------------------------------------------------|---------------------------|----------|
| <b>Modified Sequence</b> | AcD3-FM<Mox*>K<AcD3K*>K<AcD3K*>EK<AcD3K*>R<C13>-COOH | <b>Ion score</b>          | 51.79    |
| <b>Protein</b>           | P31725                                               | <b>Confidence level</b>   | 99.00%   |
| <b>Precursor m/z</b>     | 584.84835                                            | <b>Identity Threshold</b> | 45.51    |
| <b>Charge</b>            | 2+                                                   | <b>Mass error</b>         | 0.001469 |

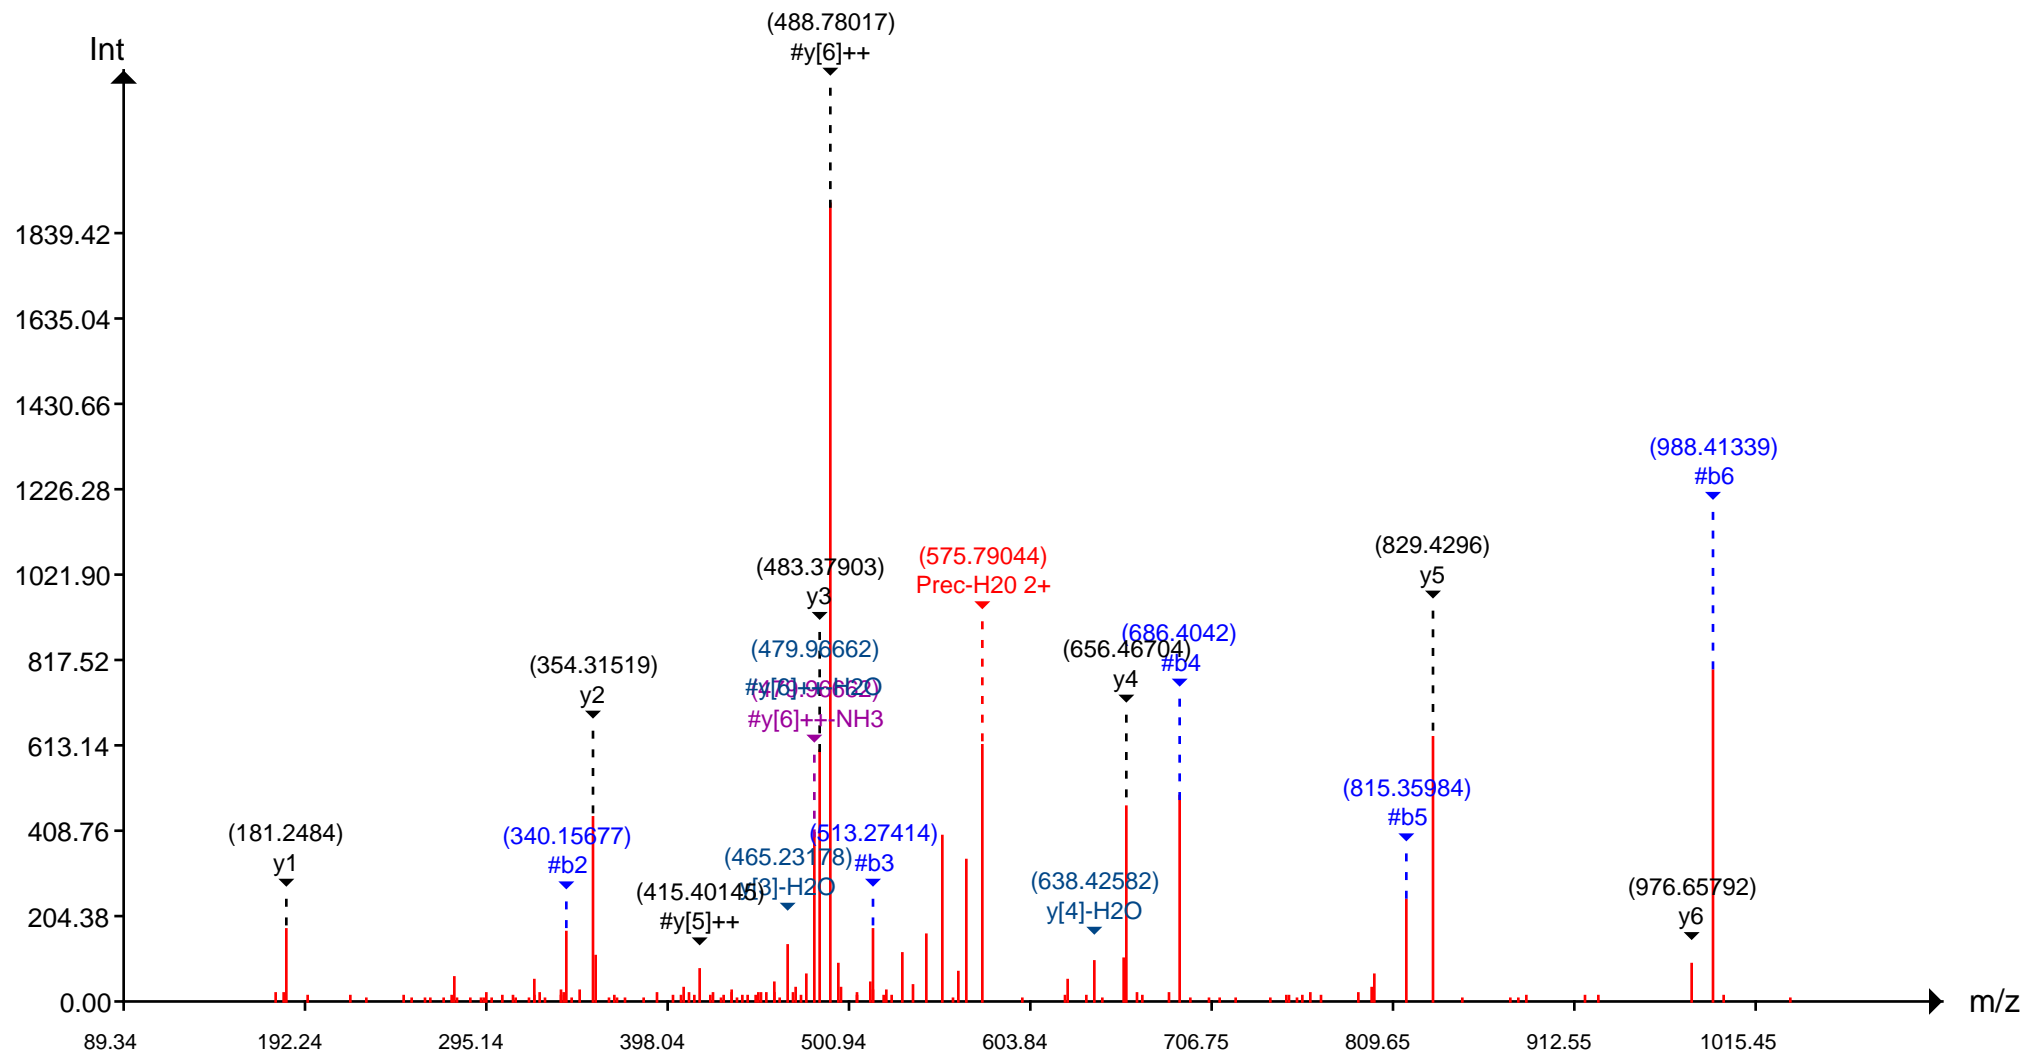

## Info

**Modified Sequence** AcD3-FM<Mox\*>K<AcD3K\*>K<AcD3K\*>EK<AcD3K\*>R<C13>-COOH

**Ion score** 46.53

**Protein** P31725

**Confidence level** 99.00%

**Precursor m/z** 584.84733

**Identity Threshold** 45.68

**Charge** 2+

**Mass error** -5.71E-4

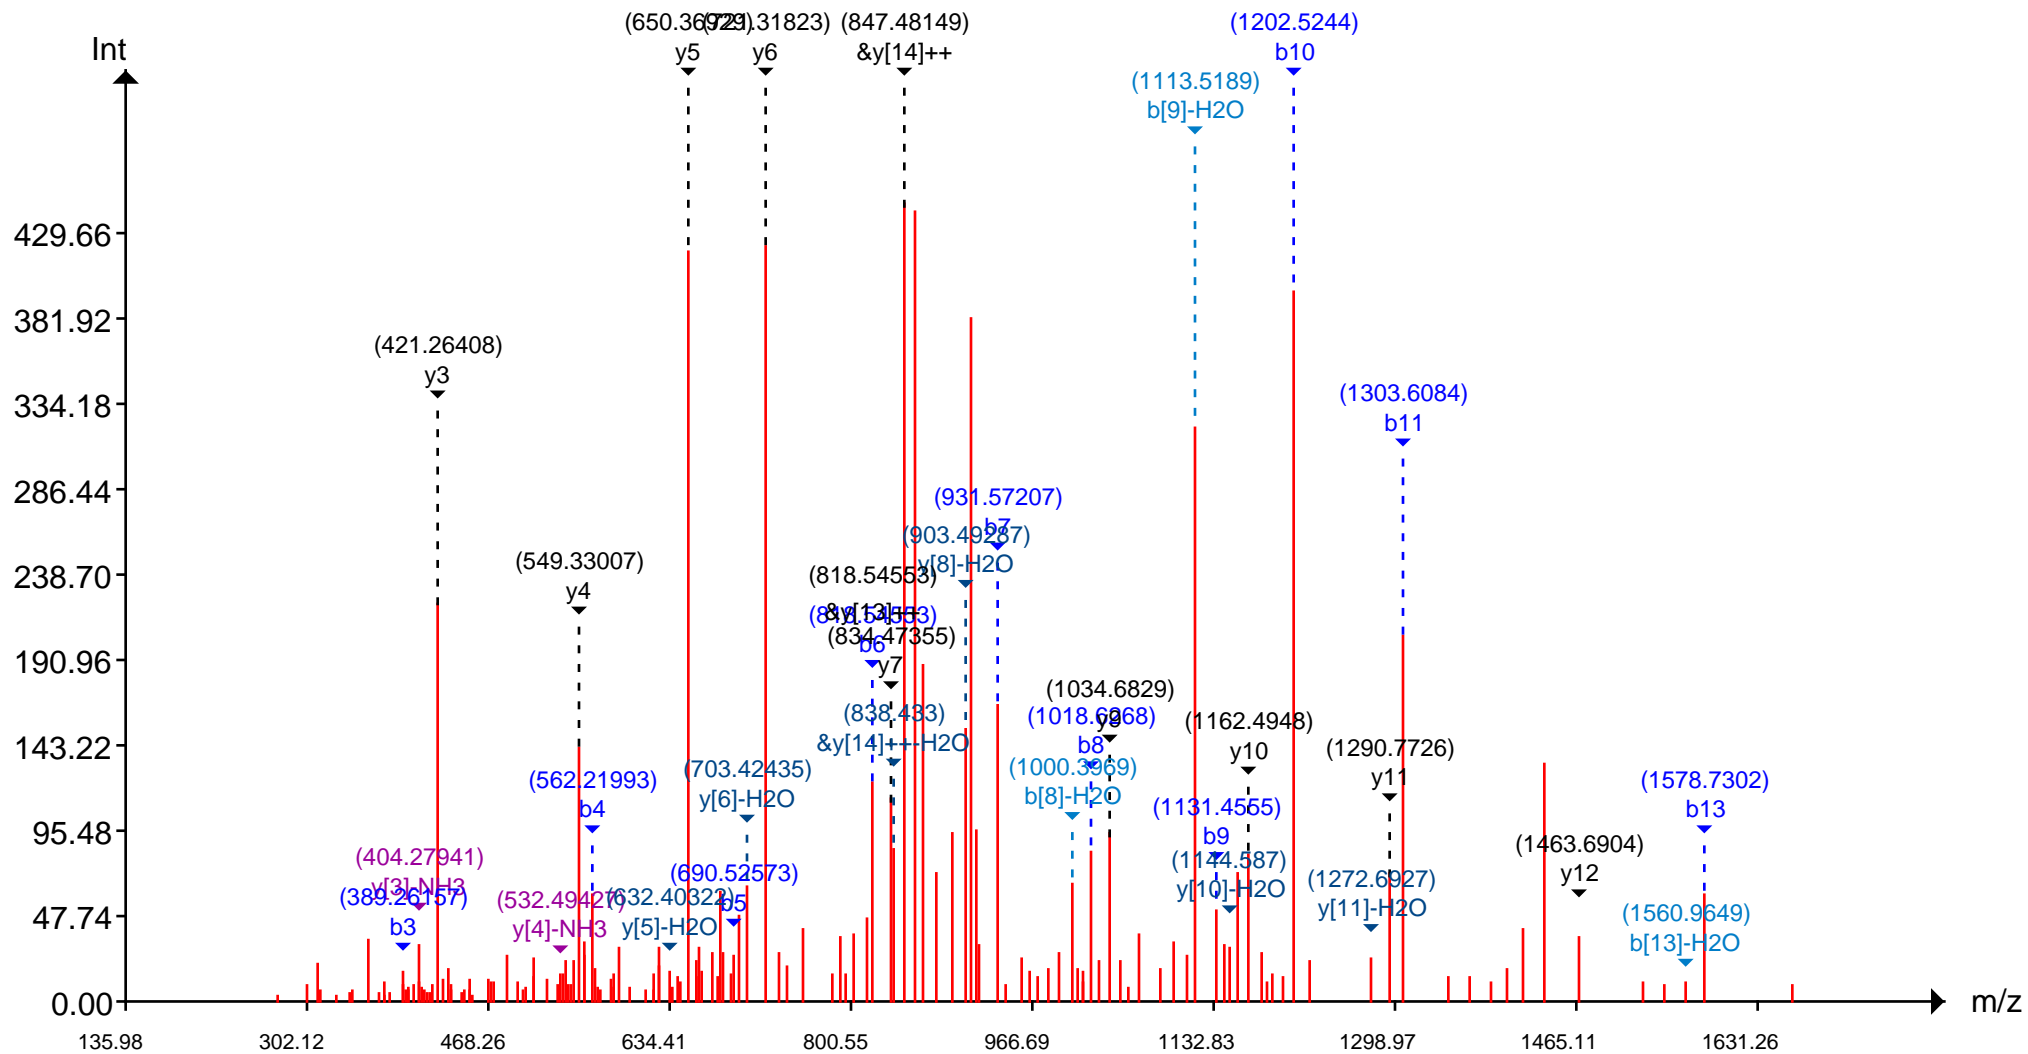

## Info

|                          |                                                 |                           |          |
|--------------------------|-------------------------------------------------|---------------------------|----------|
| <b>Modified Sequence</b> | AcD3-IGK<AcD3K*>K<AcD3K*>QQISLATQM<Mox*>VR-COOH | <b>Ion score</b>          | 50.31    |
| <b>Protein</b>           | P80316                                          | <b>Confidence level</b>   | 99.00%   |
| <b>Precursor m/z</b>     | 926.53798                                       | <b>Identity Threshold</b> | 44.56    |
| <b>Charge</b>            | 2+                                              | <b>Mass error</b>         | 0.001609 |

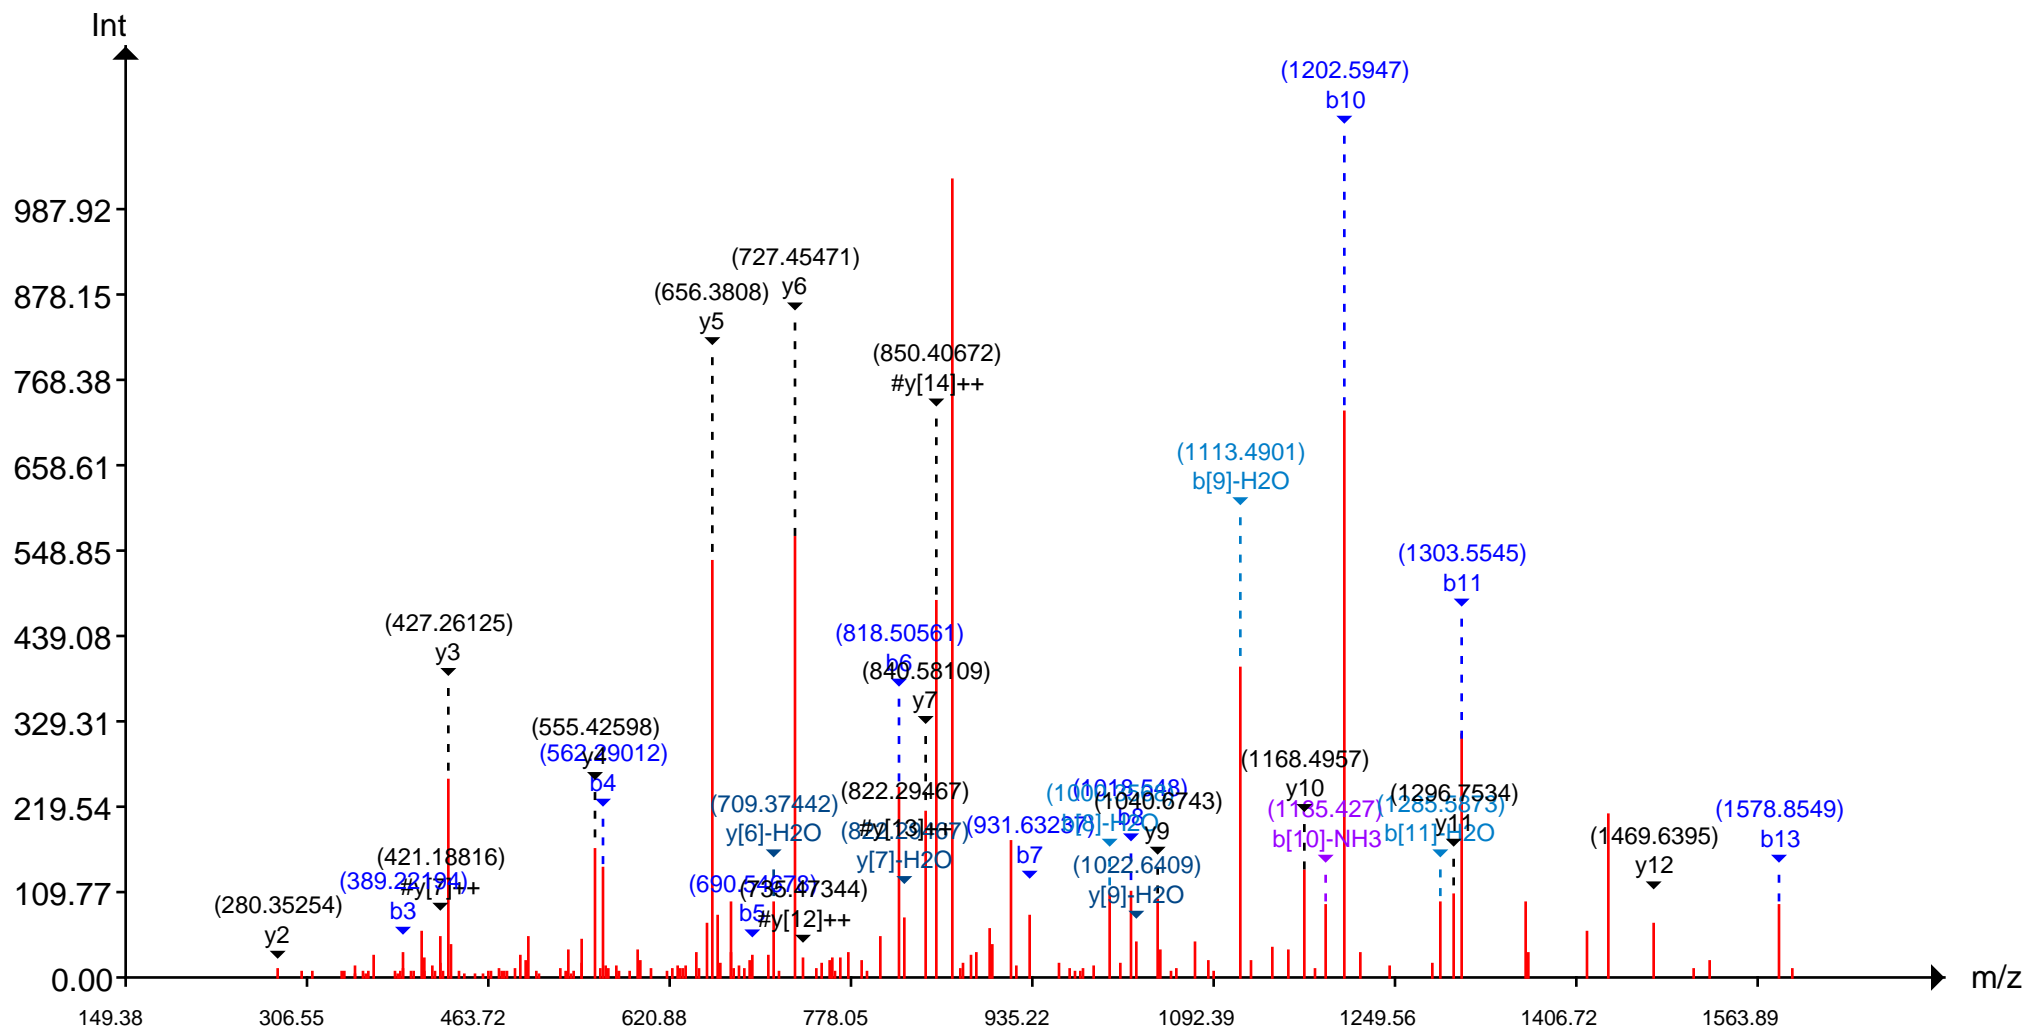

## Info

|                          |                                                      |                           |          |
|--------------------------|------------------------------------------------------|---------------------------|----------|
| <b>Modified Sequence</b> | AcD3-IGK<AcD3K*>K<AcD3K*>QQISLATQM<Mox*>VR<C13>-COOH | <b>Ion score</b>          | 54.84    |
| <b>Protein</b>           | P80316                                               | <b>Confidence level</b>   | 99.00%   |
| <b>Precursor m/z</b>     | 929.54808                                            | <b>Identity Threshold</b> | 43.34    |
| <b>Charge</b>            | 2+                                                   | <b>Mass error</b>         | 0.001667 |



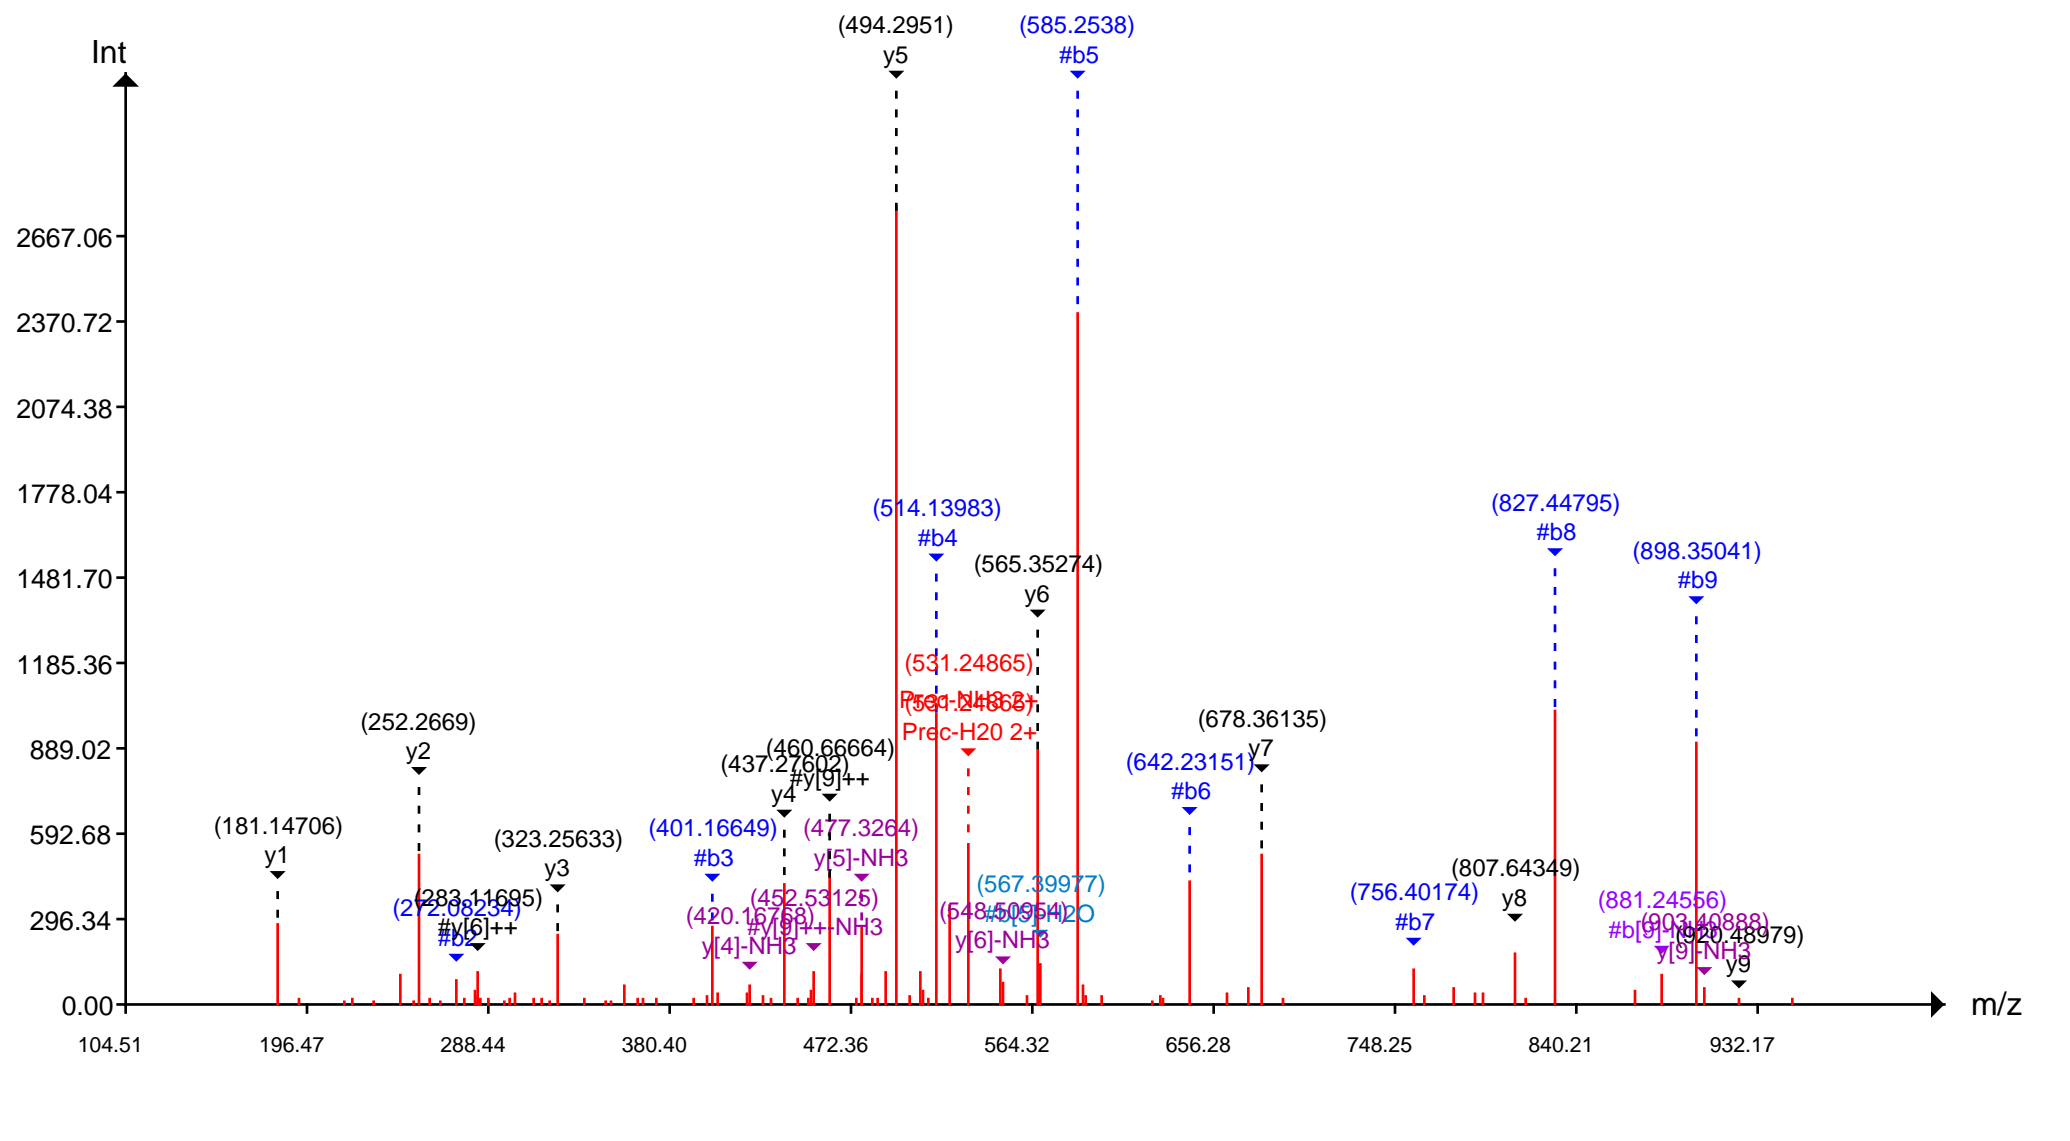

| Info                      |                                                                                                |
|---------------------------|------------------------------------------------------------------------------------------------|
| <b>Modif...</b>           | AcD3-ILELAGNAAR<C13>-COOH                                                                      |
|                           | Q8CGP5, Q8CGP6, Q8CGP7, P22752, Q6GSS7, Q64522, Q64523, Q8BFU2, Q8R1M2, Q8CCK0, P27661, Q9QZQ8 |
|                           | 539.82303                                                                                      |
|                           | 2+                                                                                             |
| <b>Ion score</b>          |                                                                                                |
| <b>Confidence level</b>   |                                                                                                |
| <b>Identity Threshold</b> |                                                                                                |
| <b>Mass error</b>         |                                                                                                |

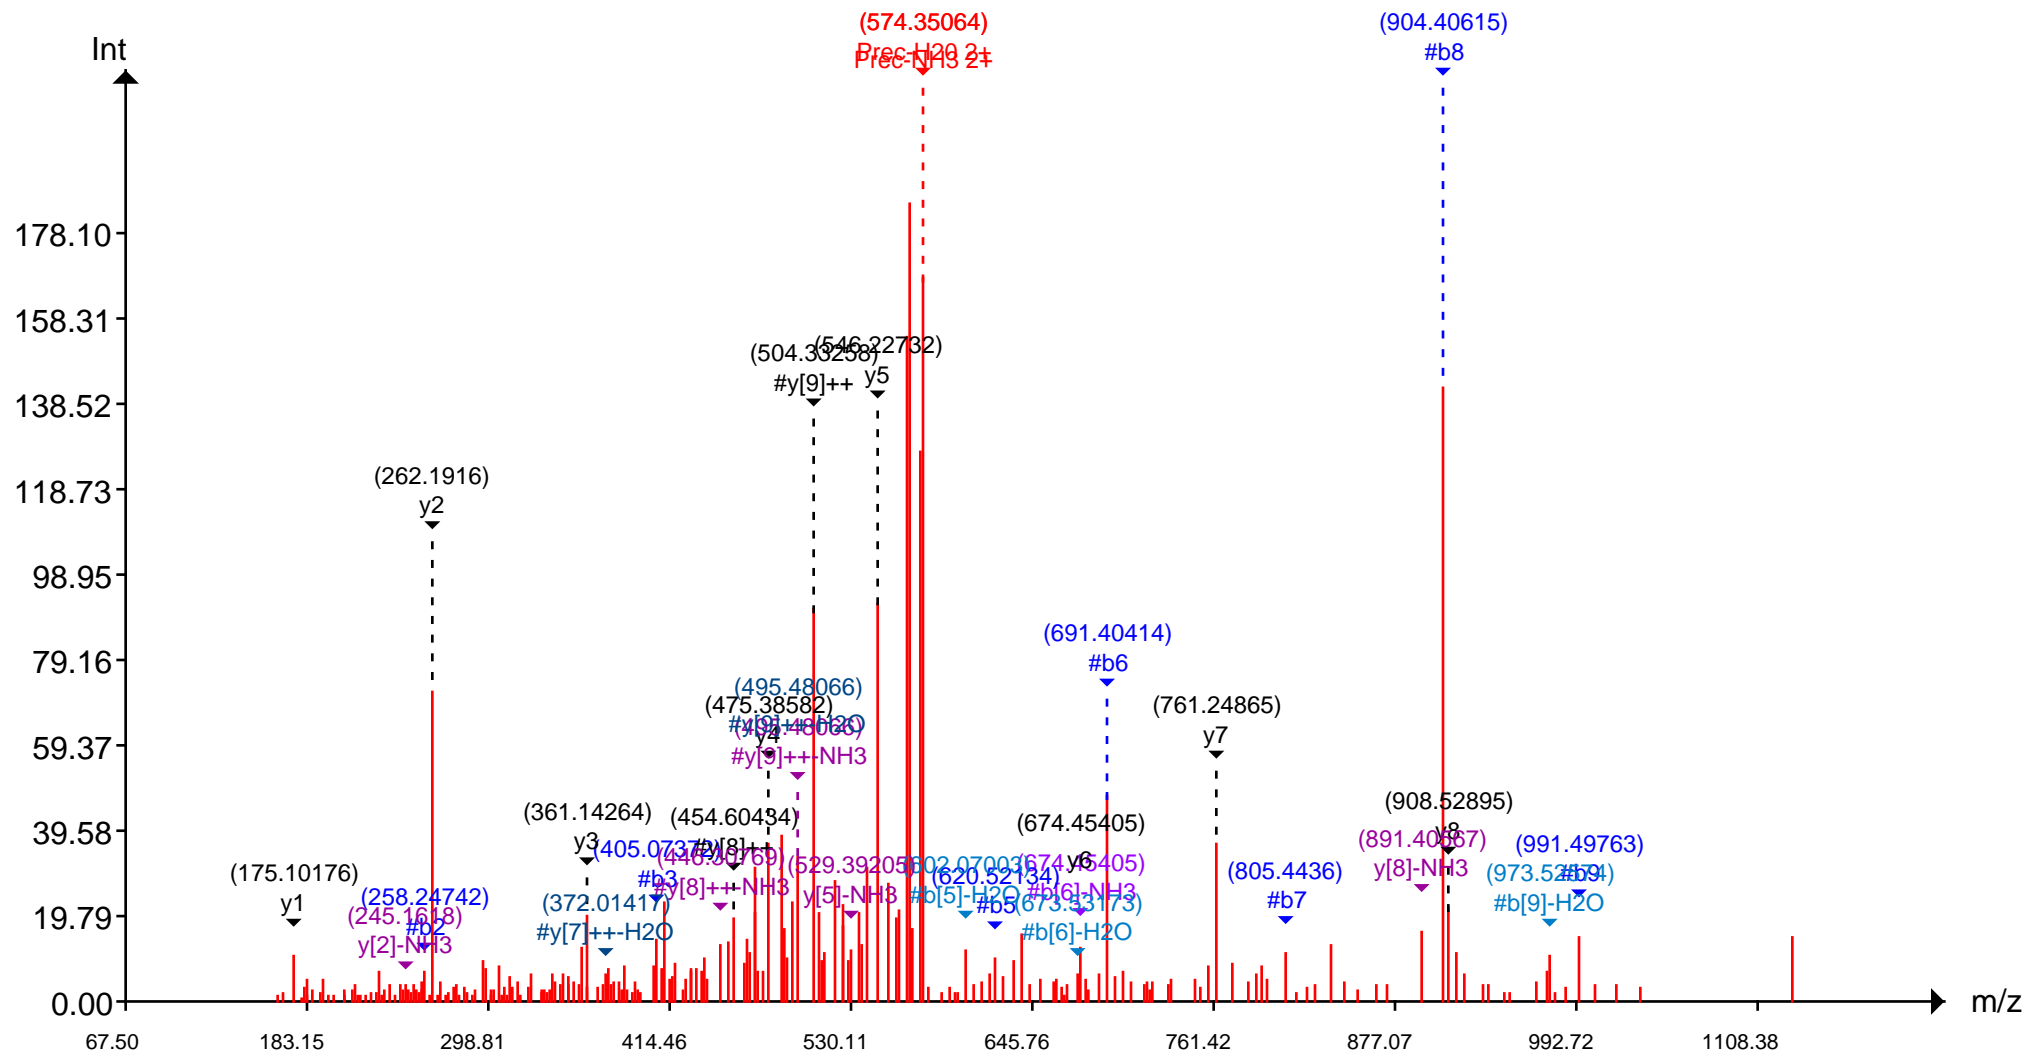

## Info

|                          |                            |                           |          |
|--------------------------|----------------------------|---------------------------|----------|
| <b>Modified Sequence</b> | AcD3-LVM<Mox*>SQANVSR-COOH | <b>Ion score</b>          | 51.37    |
| <b>Protein</b>           | P70670, Q60817             | <b>Confidence level</b>   | 99.00%   |
| <b>Precursor m/z</b>     | 583.30805                  | <b>Identity Threshold</b> | 48.06    |
| <b>Charge</b>            | 2+                         | <b>Mass error</b>         | 0.001527 |

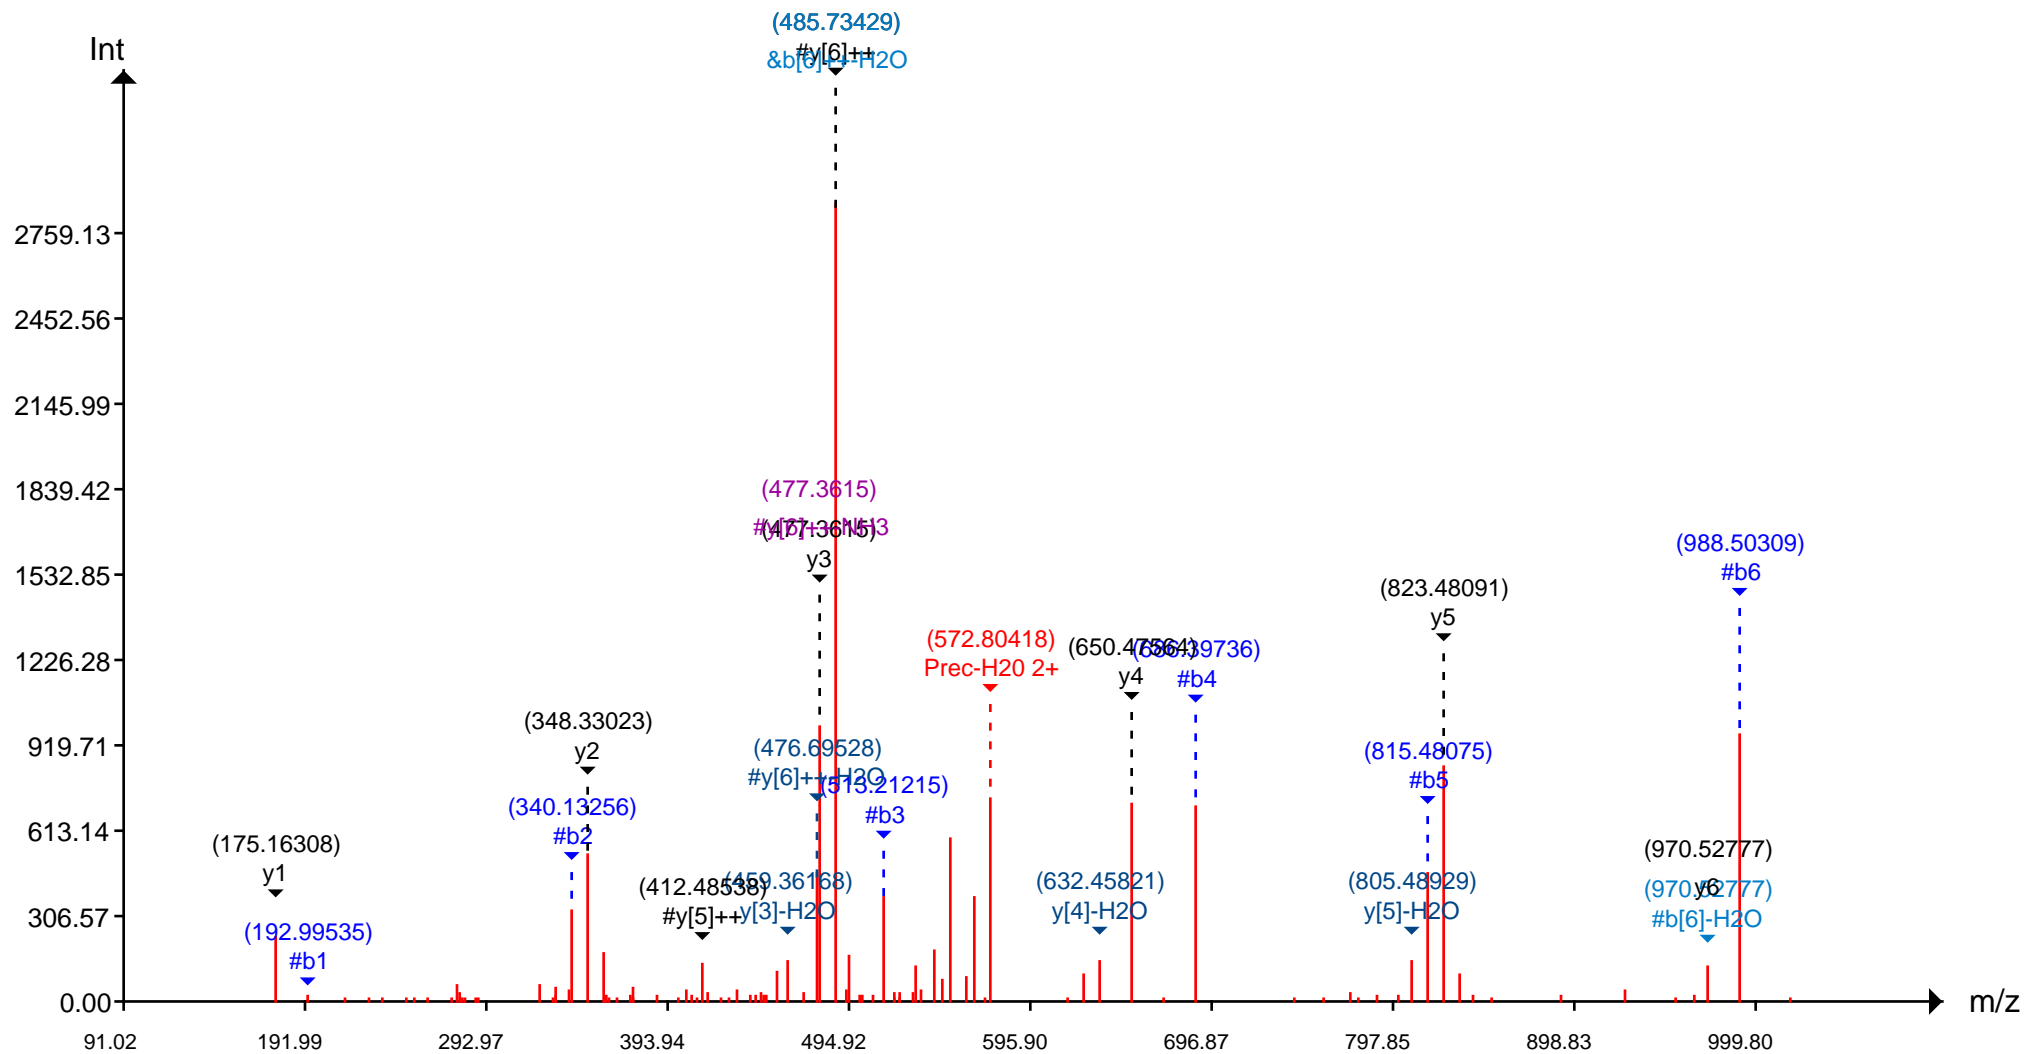

## Info

|                          |                                                 |                           |         |
|--------------------------|-------------------------------------------------|---------------------------|---------|
| <b>Modified Sequence</b> | AcD3-FM<Mox*>K<AcD3K*>K<AcD3K*>EK<AcD3K*>R-COOH | <b>Ion score</b>          | 51.64   |
| <b>Protein</b>           | P31725                                          | <b>Confidence level</b>   | 99.00%  |
| <b>Precursor m/z</b>     | 581.8372                                        | <b>Identity Threshold</b> | 46.60   |
| <b>Charge</b>            | 2+                                              | <b>Mass error</b>         | -6.9E-4 |

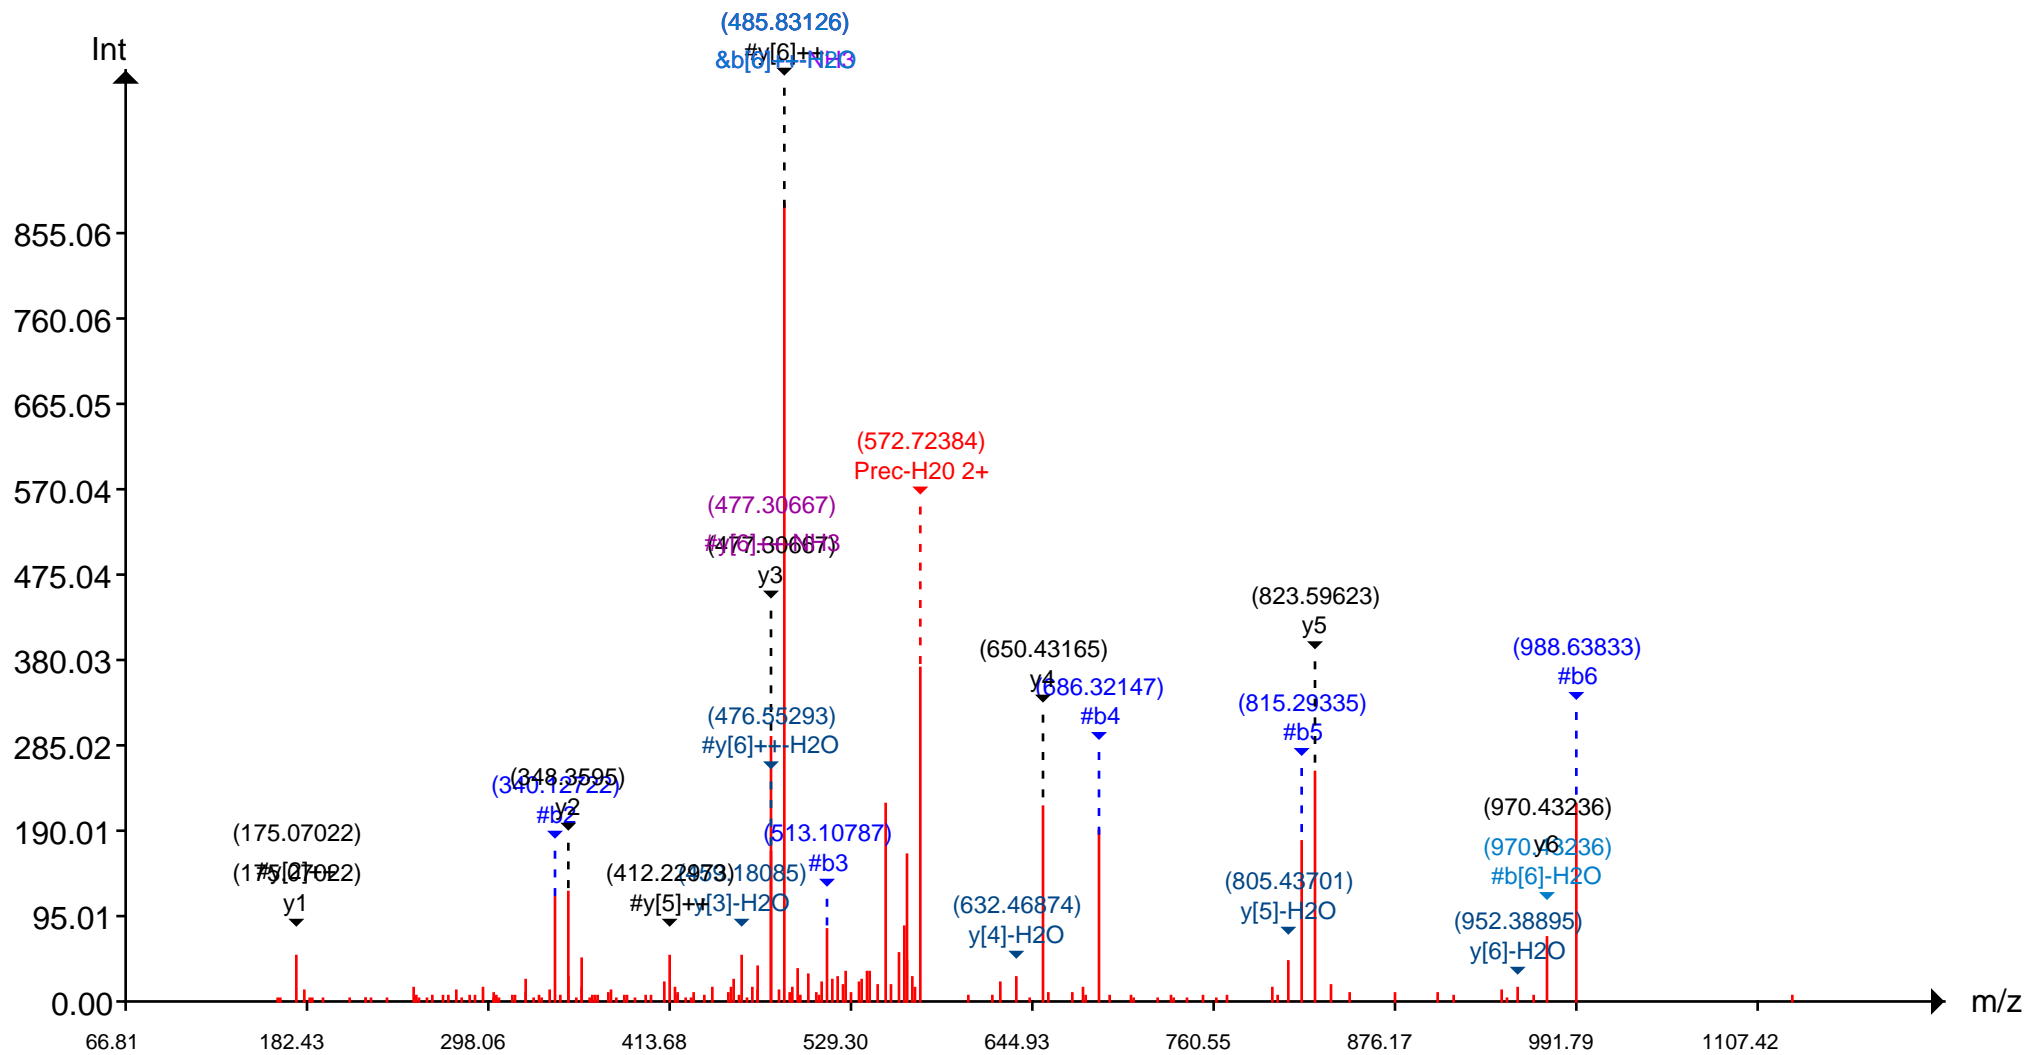

## Info

|                          |                                                 |                           |         |
|--------------------------|-------------------------------------------------|---------------------------|---------|
| <b>Modified Sequence</b> | AcD3-FM<Mox*>K<AcD3K*>K<AcD3K*>EK<AcD3K*>R-COOH | <b>Ion score</b>          | 49.03   |
| <b>Protein</b>           | P31725                                          | <b>Confidence level</b>   | 99.00%  |
| <b>Precursor m/z</b>     | 581.83814                                       | <b>Identity Threshold</b> | 46.65   |
| <b>Charge</b>            | 2+                                              | <b>Mass error</b>         | 0.00119 |

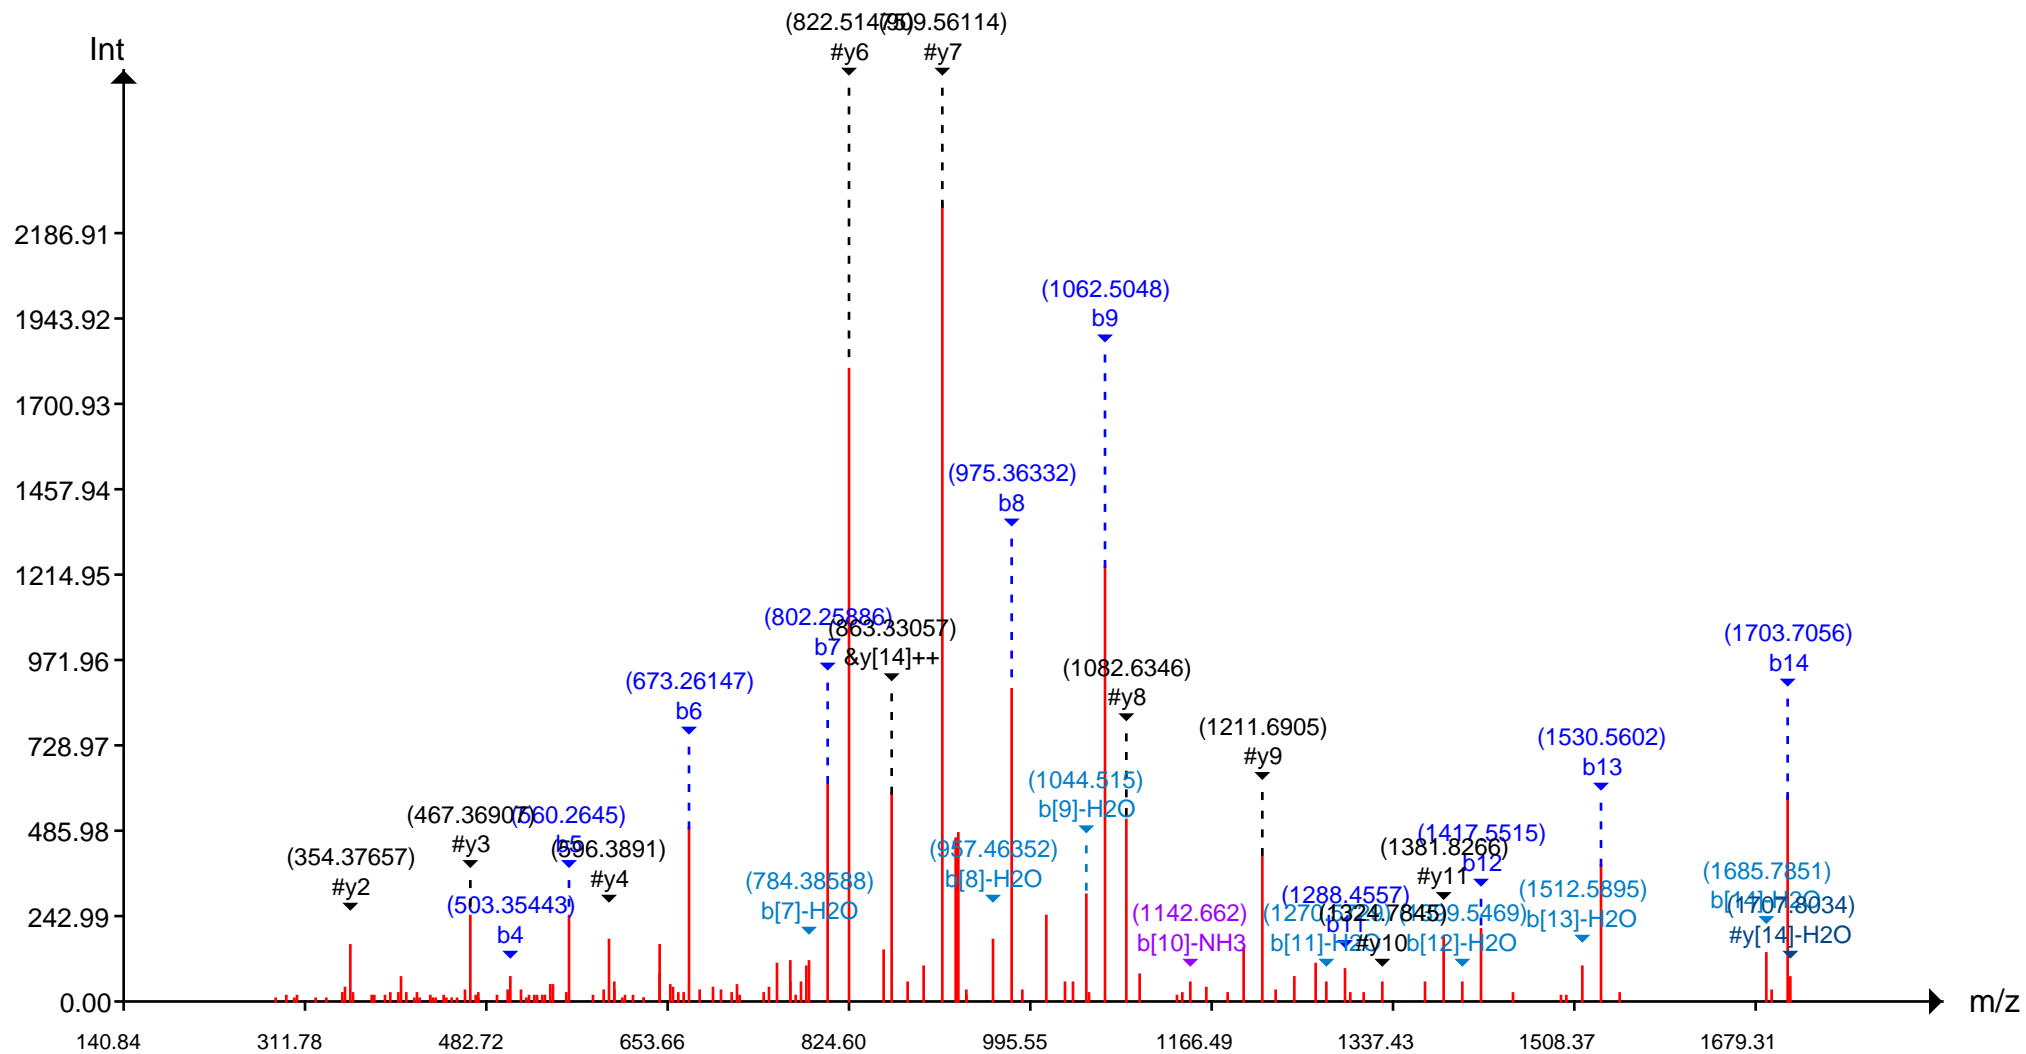

## Info

|                          |                                                |                           |          |
|--------------------------|------------------------------------------------|---------------------------|----------|
| <b>Modified Sequence</b> | AcD3-LTNEGLEK<AcD3K*>SPEEIK<AcD3K*>R<C13>-COOH | <b>Ion score</b>          | 86.2     |
| <b>Protein</b>           | Q99J99                                         | <b>Confidence level</b>   | 99.00%   |
| <b>Precursor m/z</b>     | 942.52322                                      | <b>Identity Threshold</b> | 46.94    |
| <b>Charge</b>            | 2+                                             | <b>Mass error</b>         | 0.002576 |

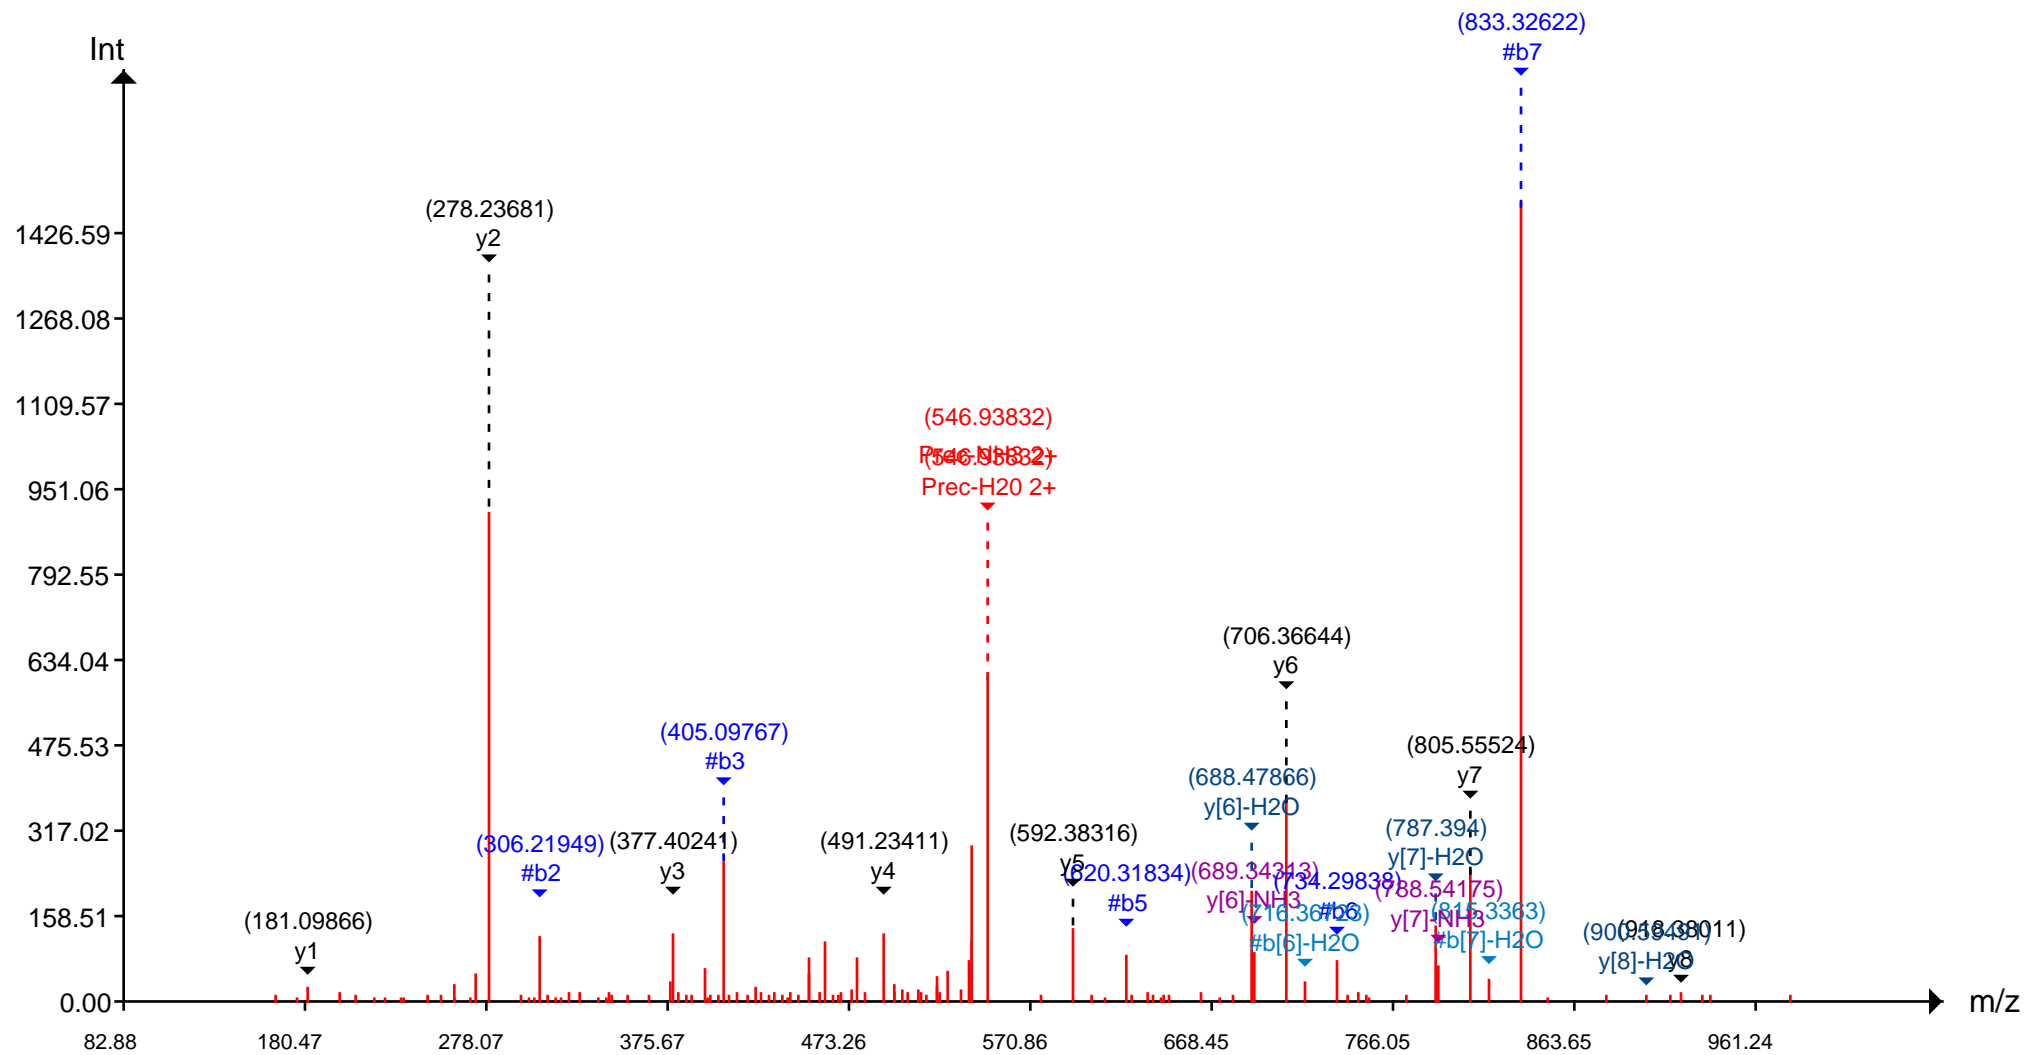

## Info

|                          |                          |                           |         |
|--------------------------|--------------------------|---------------------------|---------|
| <b>Modified Sequence</b> | AcD3-FIVNTNVPR<C13>-COOH | <b>Ion score</b>          | 68.3    |
| <b>Protein</b>           | P34884                   | <b>Confidence level</b>   | 99.00%  |
| <b>Precursor m/z</b>     | 555.8258                 | <b>Identity Threshold</b> | 46.18   |
| <b>Charge</b>            | 2+                       | <b>Mass error</b>         | 2.38E-4 |

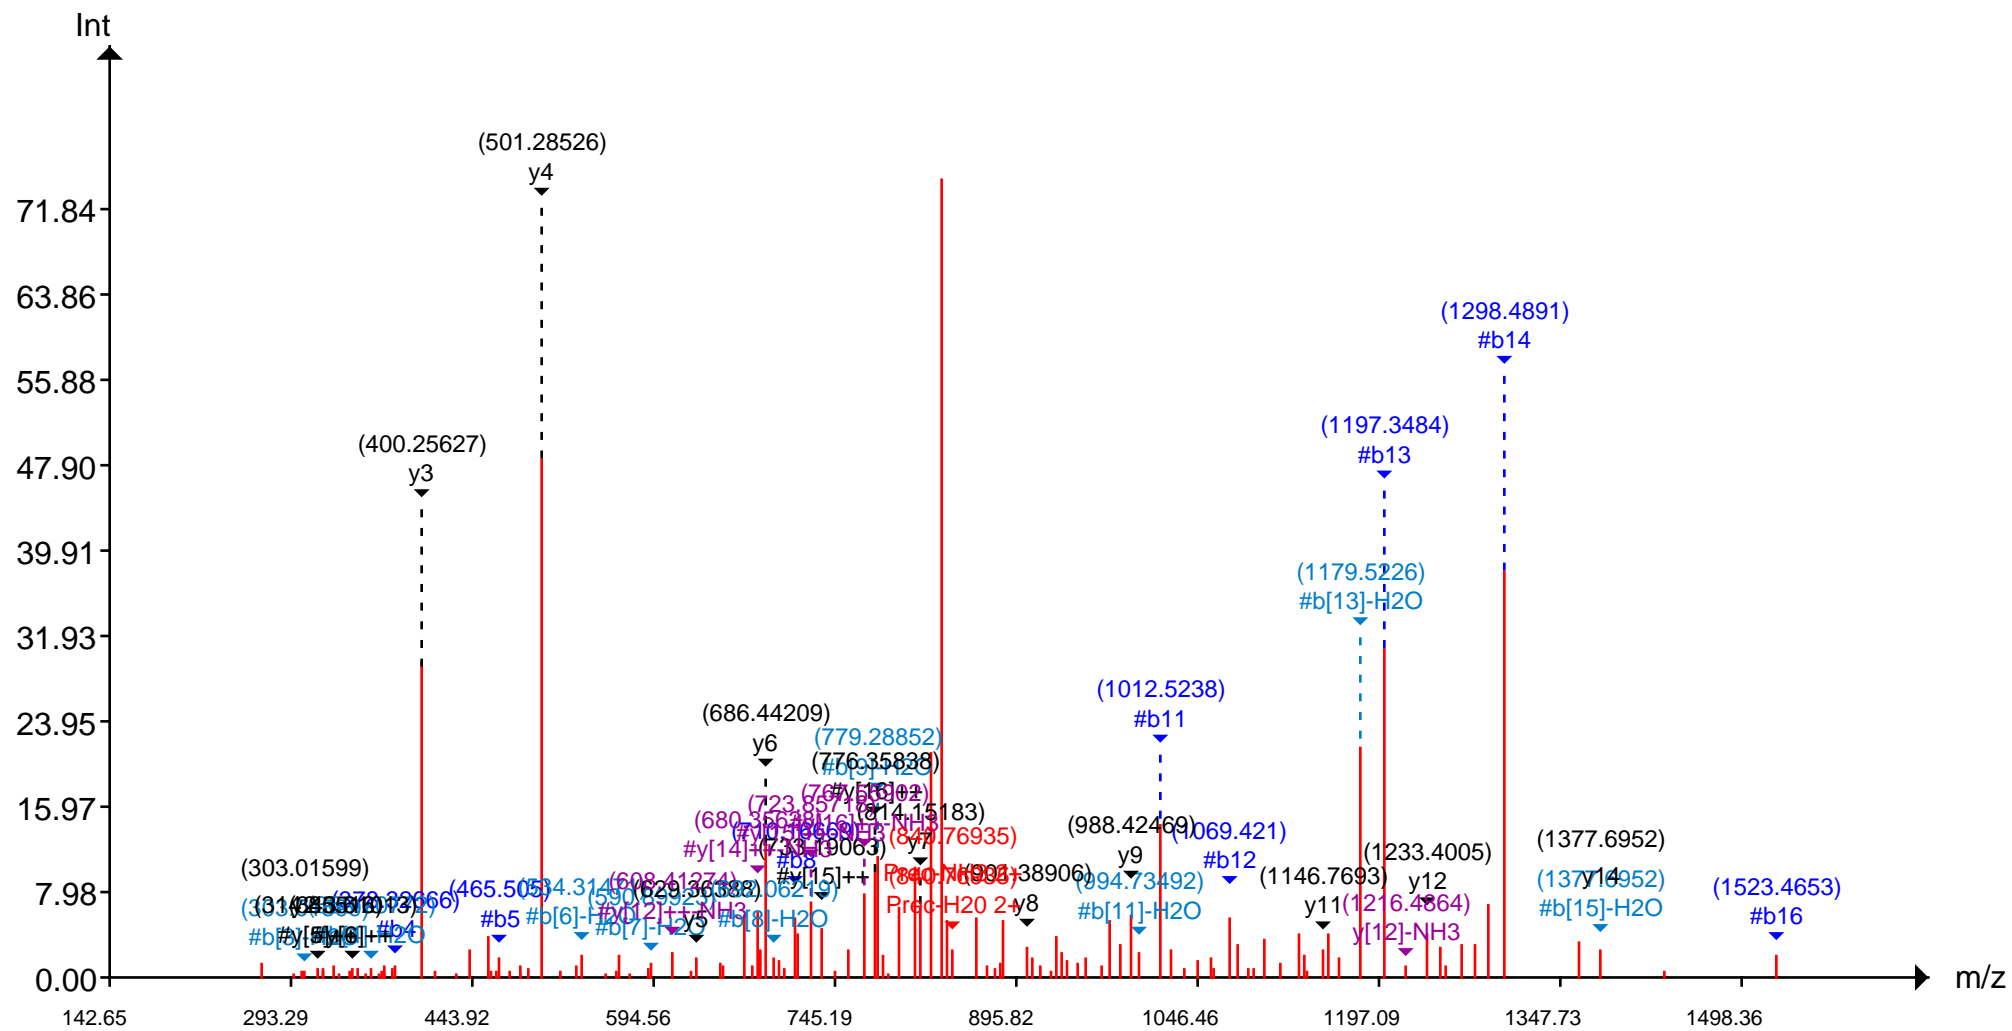

| Info                     |                             |                           |          |
|--------------------------|-----------------------------|---------------------------|----------|
| <b>Modified Sequence</b> | AcD3-TSSGSSGTSSQGQTPQR-COOH | <b>Ion score</b>          | 55.45    |
| <b>Protein</b>           | O89090                      | <b>Confidence level</b>   | 99.00%   |
| <b>Precursor m/z</b>     | 849.3926                    | <b>Identity Threshold</b> | 45.14    |
| <b>Charge</b>            | 2+                          | <b>Mass error</b>         | 0.001468 |

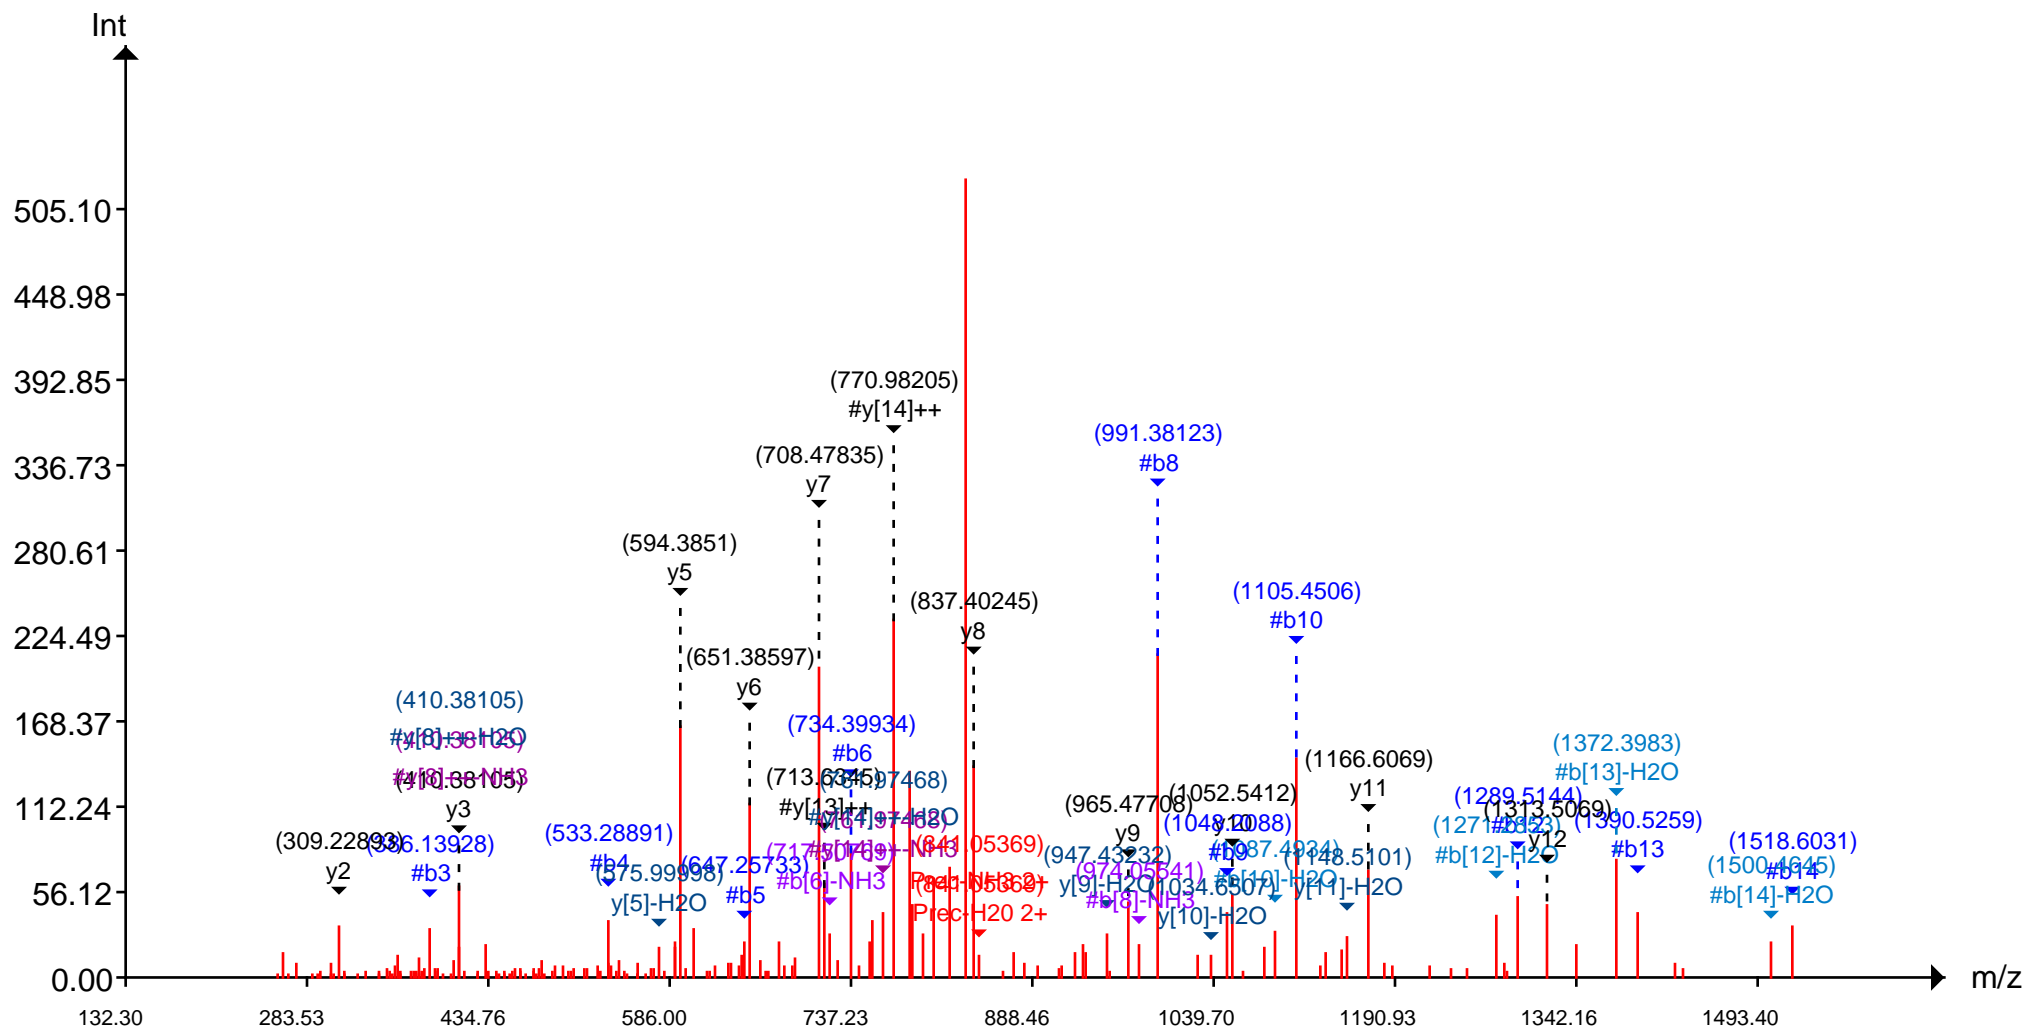

## Info

|                          |                                      |                           |           |
|--------------------------|--------------------------------------|---------------------------|-----------|
| <b>Modified Sequence</b> | AcD3-LNIM<Mox*>NSQEGGPSTQR<C13>-COOH | <b>Ion score</b>          | 75.24     |
| <b>Protein</b>           | P70429                               | <b>Confidence level</b>   | 99.00%    |
| <b>Precursor m/z</b>     | 849.91548                            | <b>Identity Threshold</b> | 47.09     |
| <b>Charge</b>            | 2+                                   | <b>Mass error</b>         | -0.001341 |



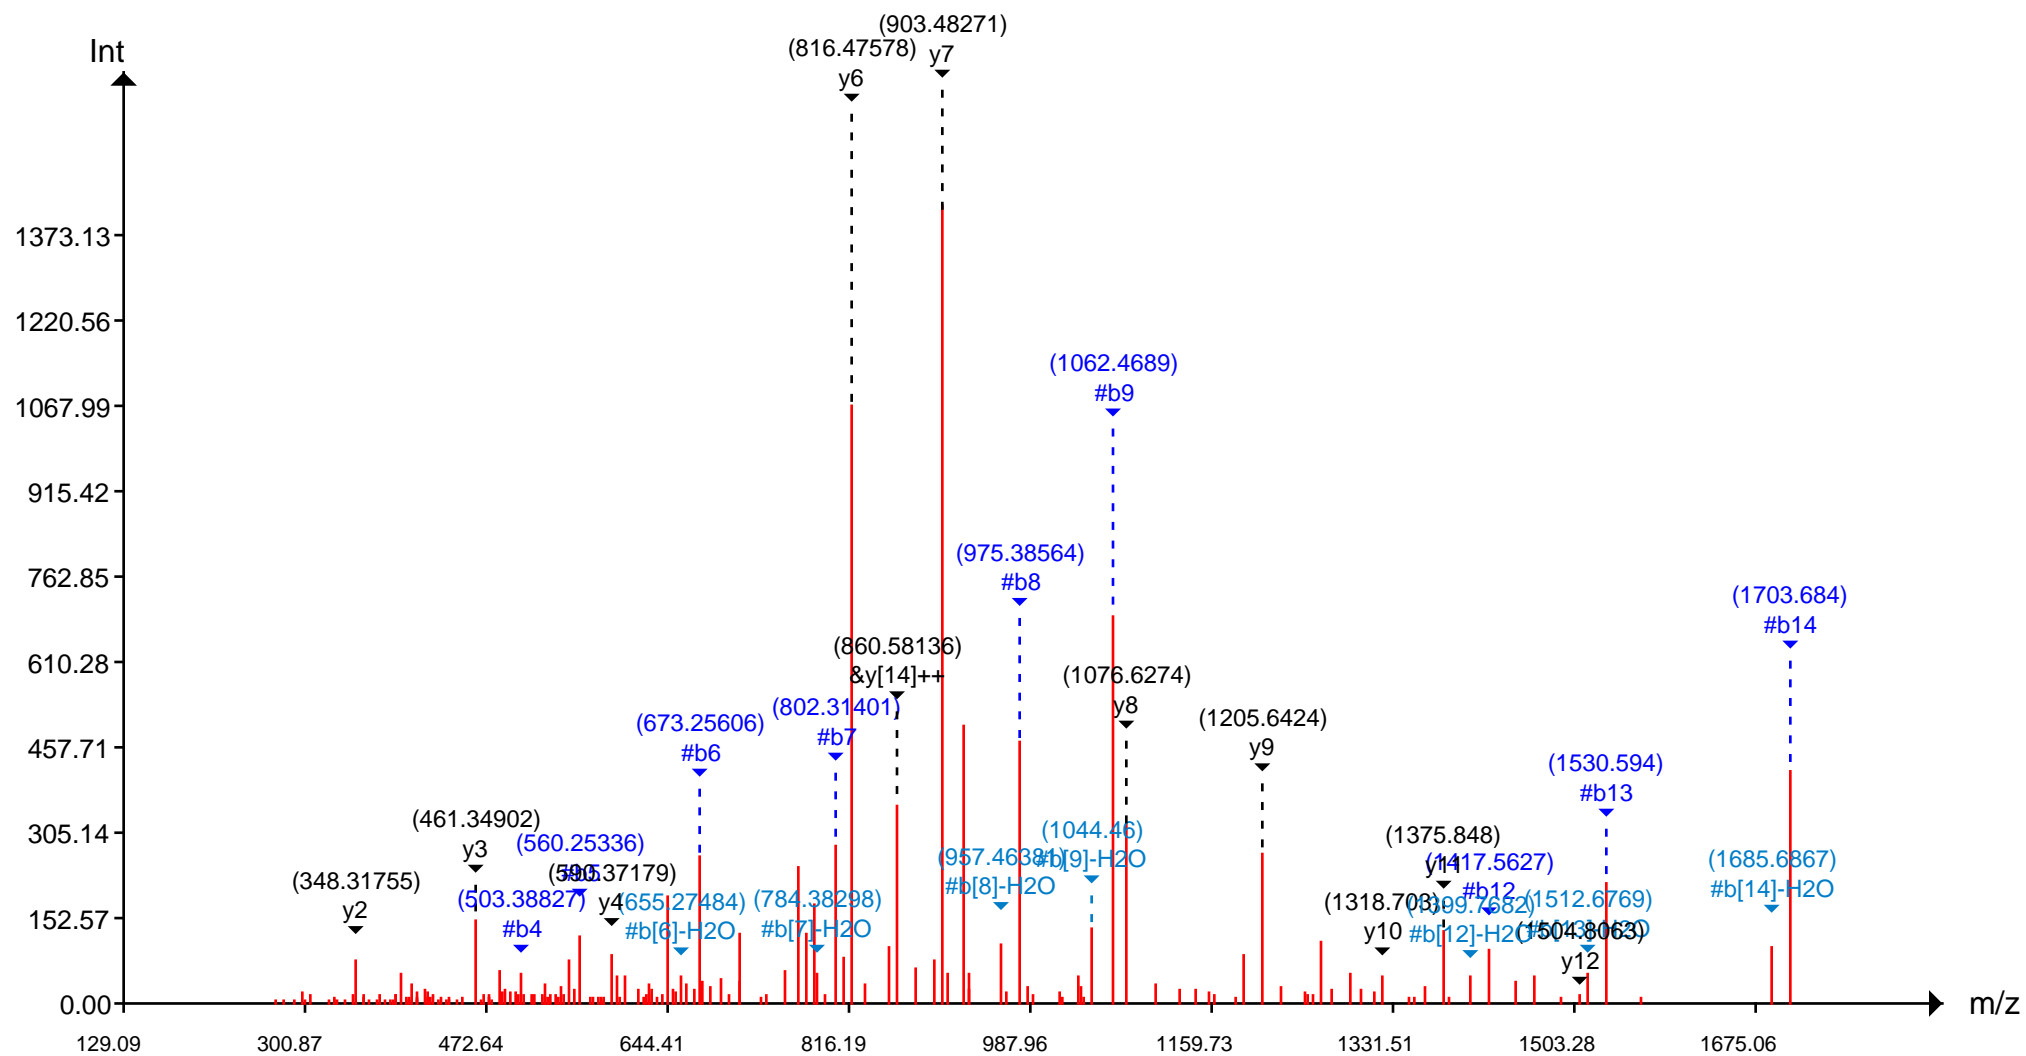

## Info

|                          |                                           |                           |          |
|--------------------------|-------------------------------------------|---------------------------|----------|
| <b>Modified Sequence</b> | AcD3-LTNEGLEK<AcD3K*>SPEEIK<AcD3K*>R-COOH | <b>Ion score</b>          | 66.89    |
| <b>Protein</b>           | Q99J99                                    | <b>Confidence level</b>   | 99.00%   |
| <b>Precursor m/z</b>     | 939.51307                                 | <b>Identity Threshold</b> | 47.51    |
| <b>Charge</b>            | 2+                                        | <b>Mass error</b>         | 0.002417 |

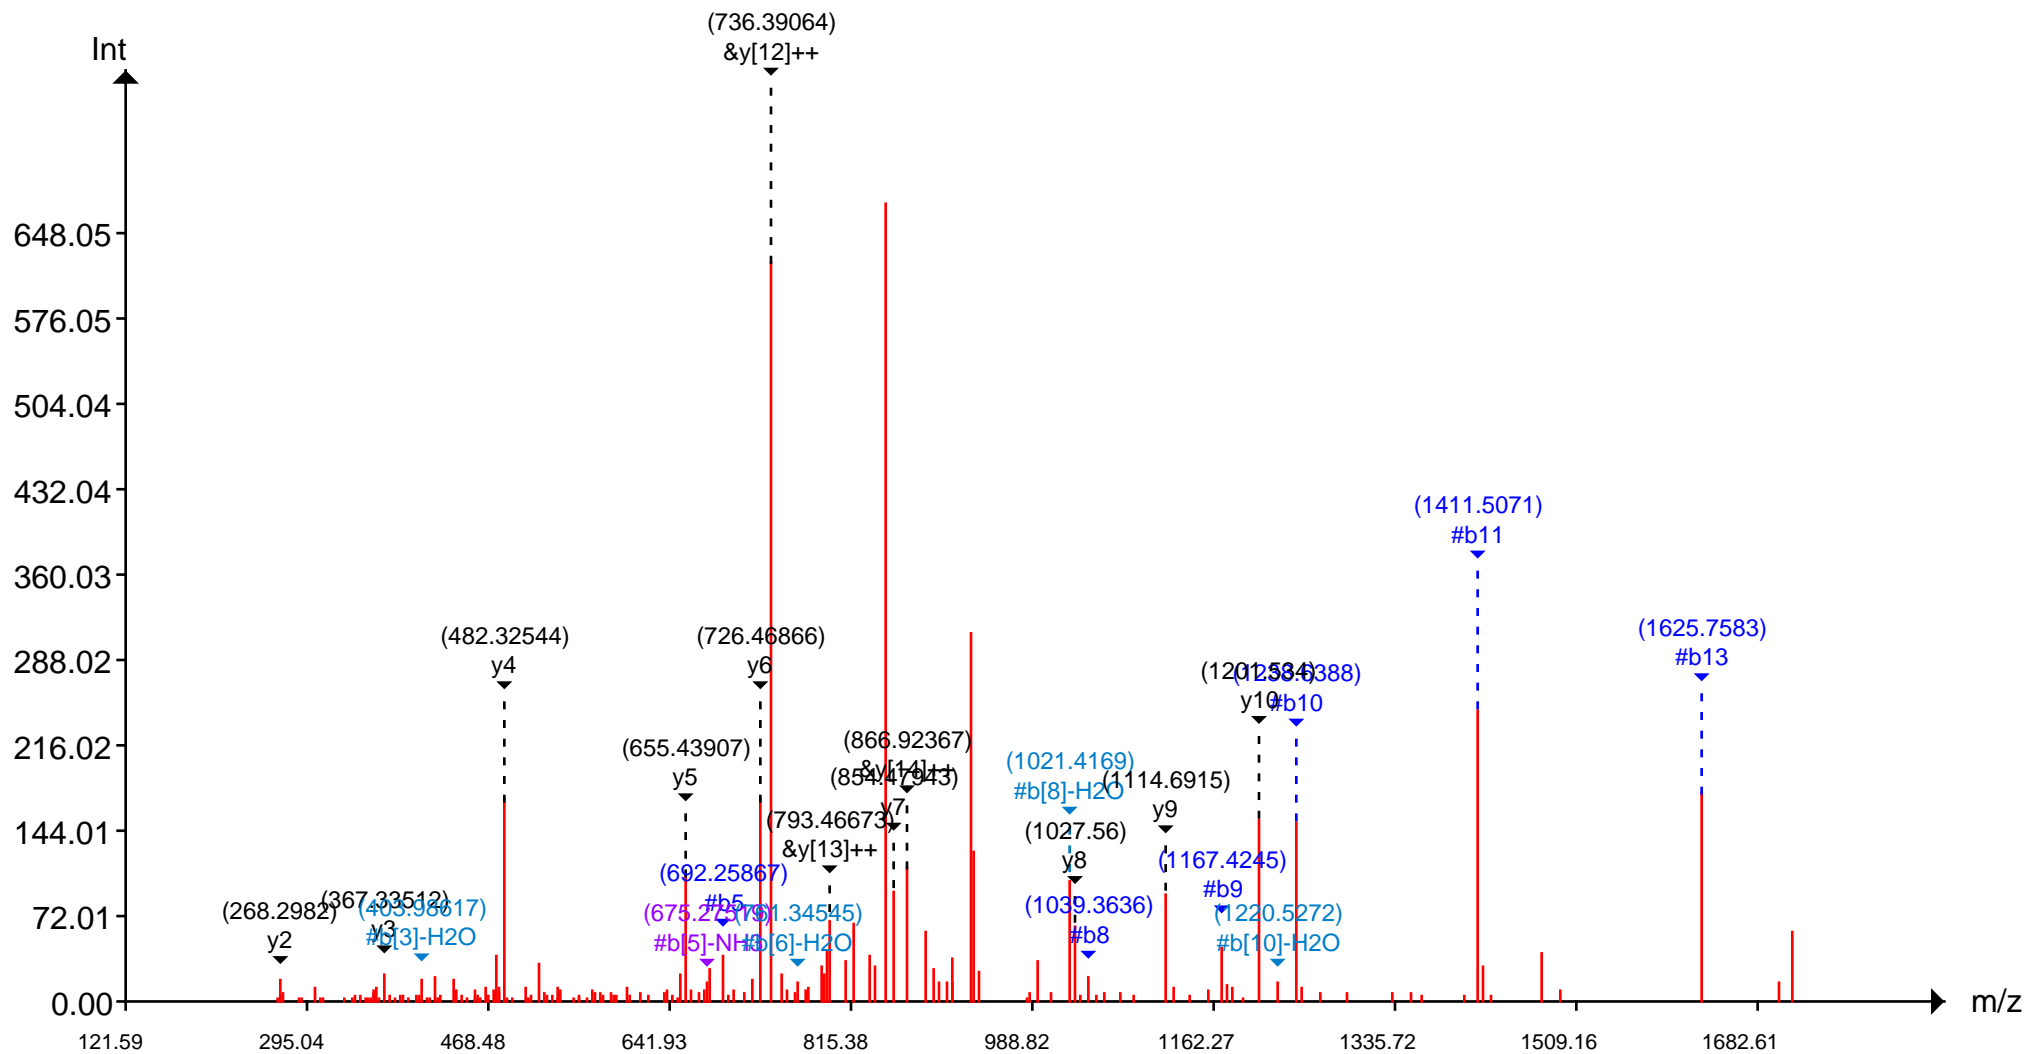

## Info

|                          |                                                        |                           |          |
|--------------------------|--------------------------------------------------------|---------------------------|----------|
| <b>Modified Sequence</b> | AcD3-DFNPK<AcD3K*>SSK<AcD3K*>QAK<AcD3K*>DVSR<C13>-COOH | <b>Ion score</b>          | 48.85    |
| <b>Protein</b>           | O08585                                                 | <b>Confidence level</b>   | 99.00%   |
| <b>Precursor m/z</b>     | 947.01434                                              | <b>Identity Threshold</b> | 47.65    |
| <b>Charge</b>            | 2+                                                     | <b>Mass error</b>         | 0.001662 |

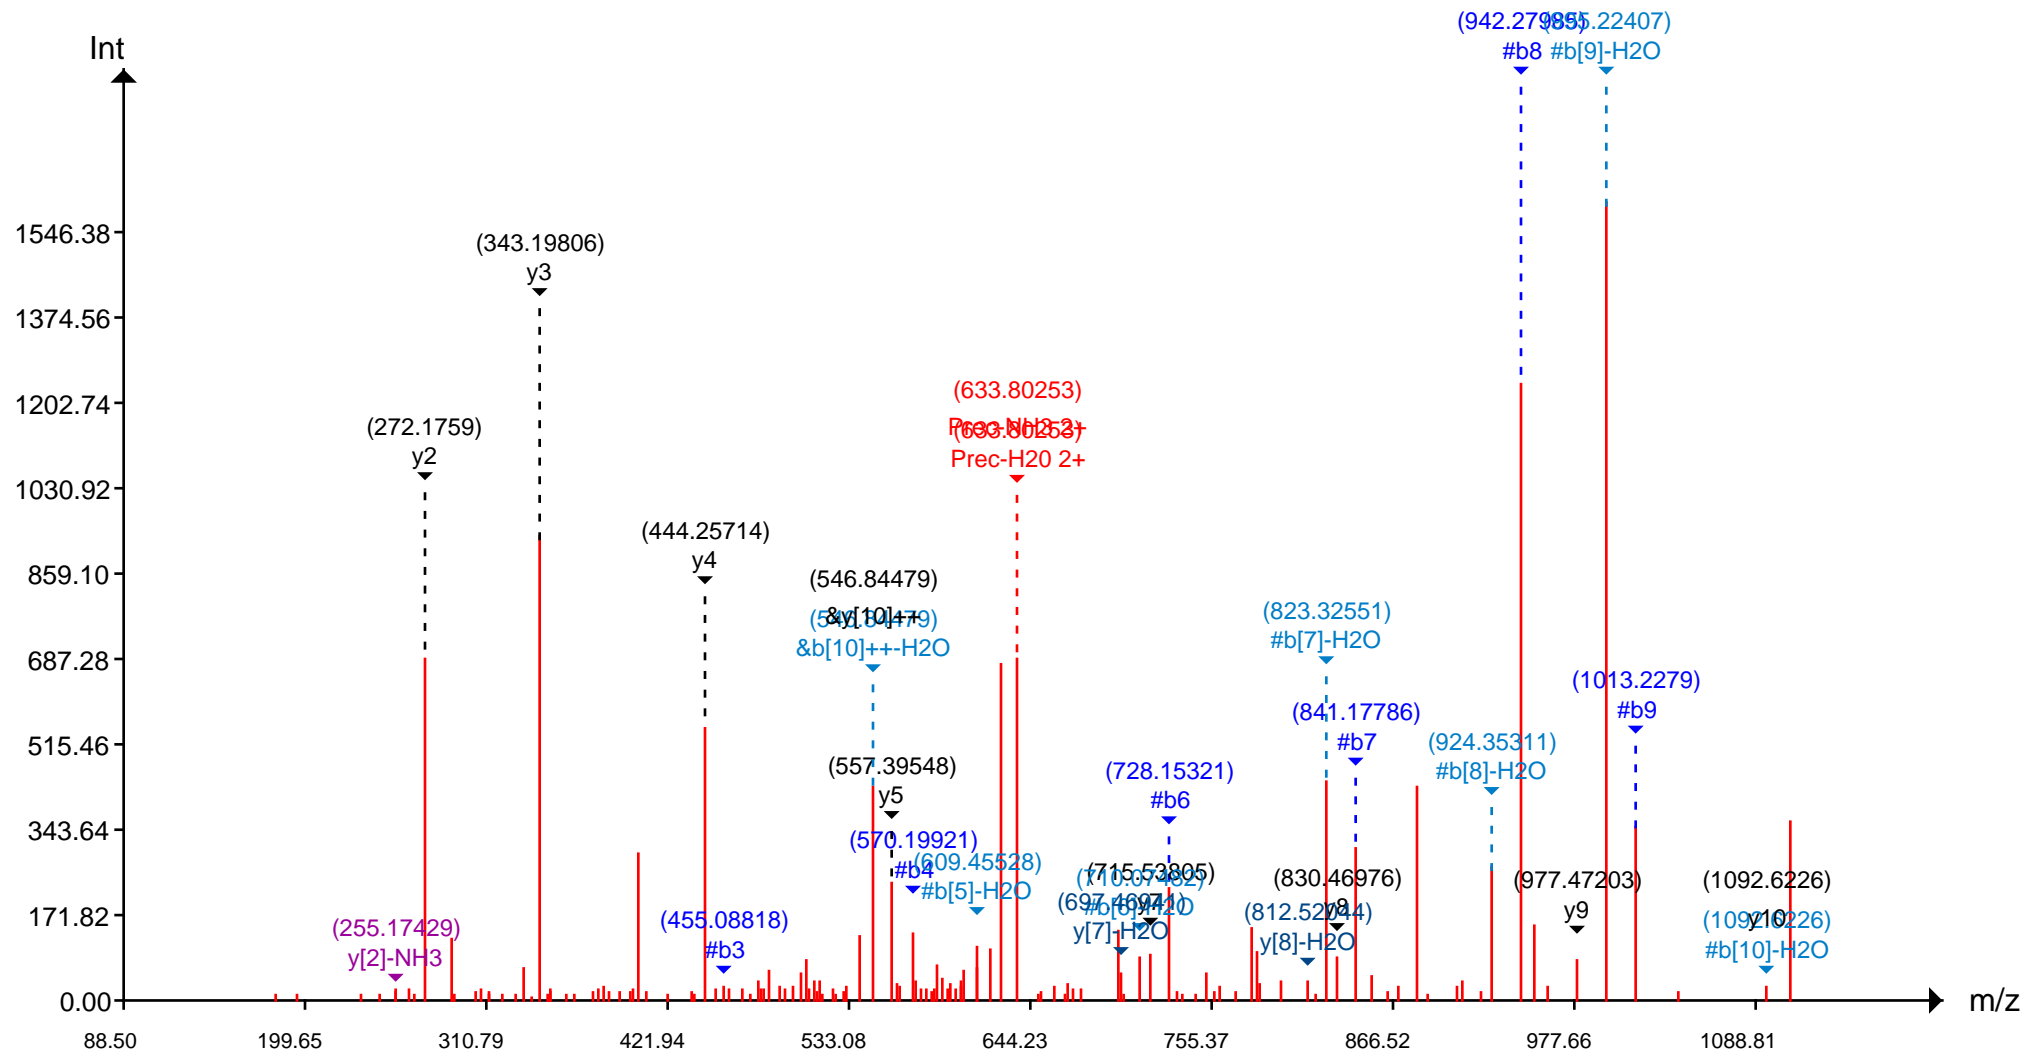

## Info

|                          |                             |                           |          |
|--------------------------|-----------------------------|---------------------------|----------|
| <b>Modified Sequence</b> | AcD3-FDM<Mox*>DGTLTAPR-COOH | <b>Ion score</b>          | 46.6     |
| <b>Protein</b>           | Q9Z2M7                      | <b>Confidence level</b>   | 99.00%   |
| <b>Precursor m/z</b>     | 642.80288                   | <b>Identity Threshold</b> | 45.76    |
| <b>Charge</b>            | 2+                          | <b>Mass error</b>         | 0.001669 |

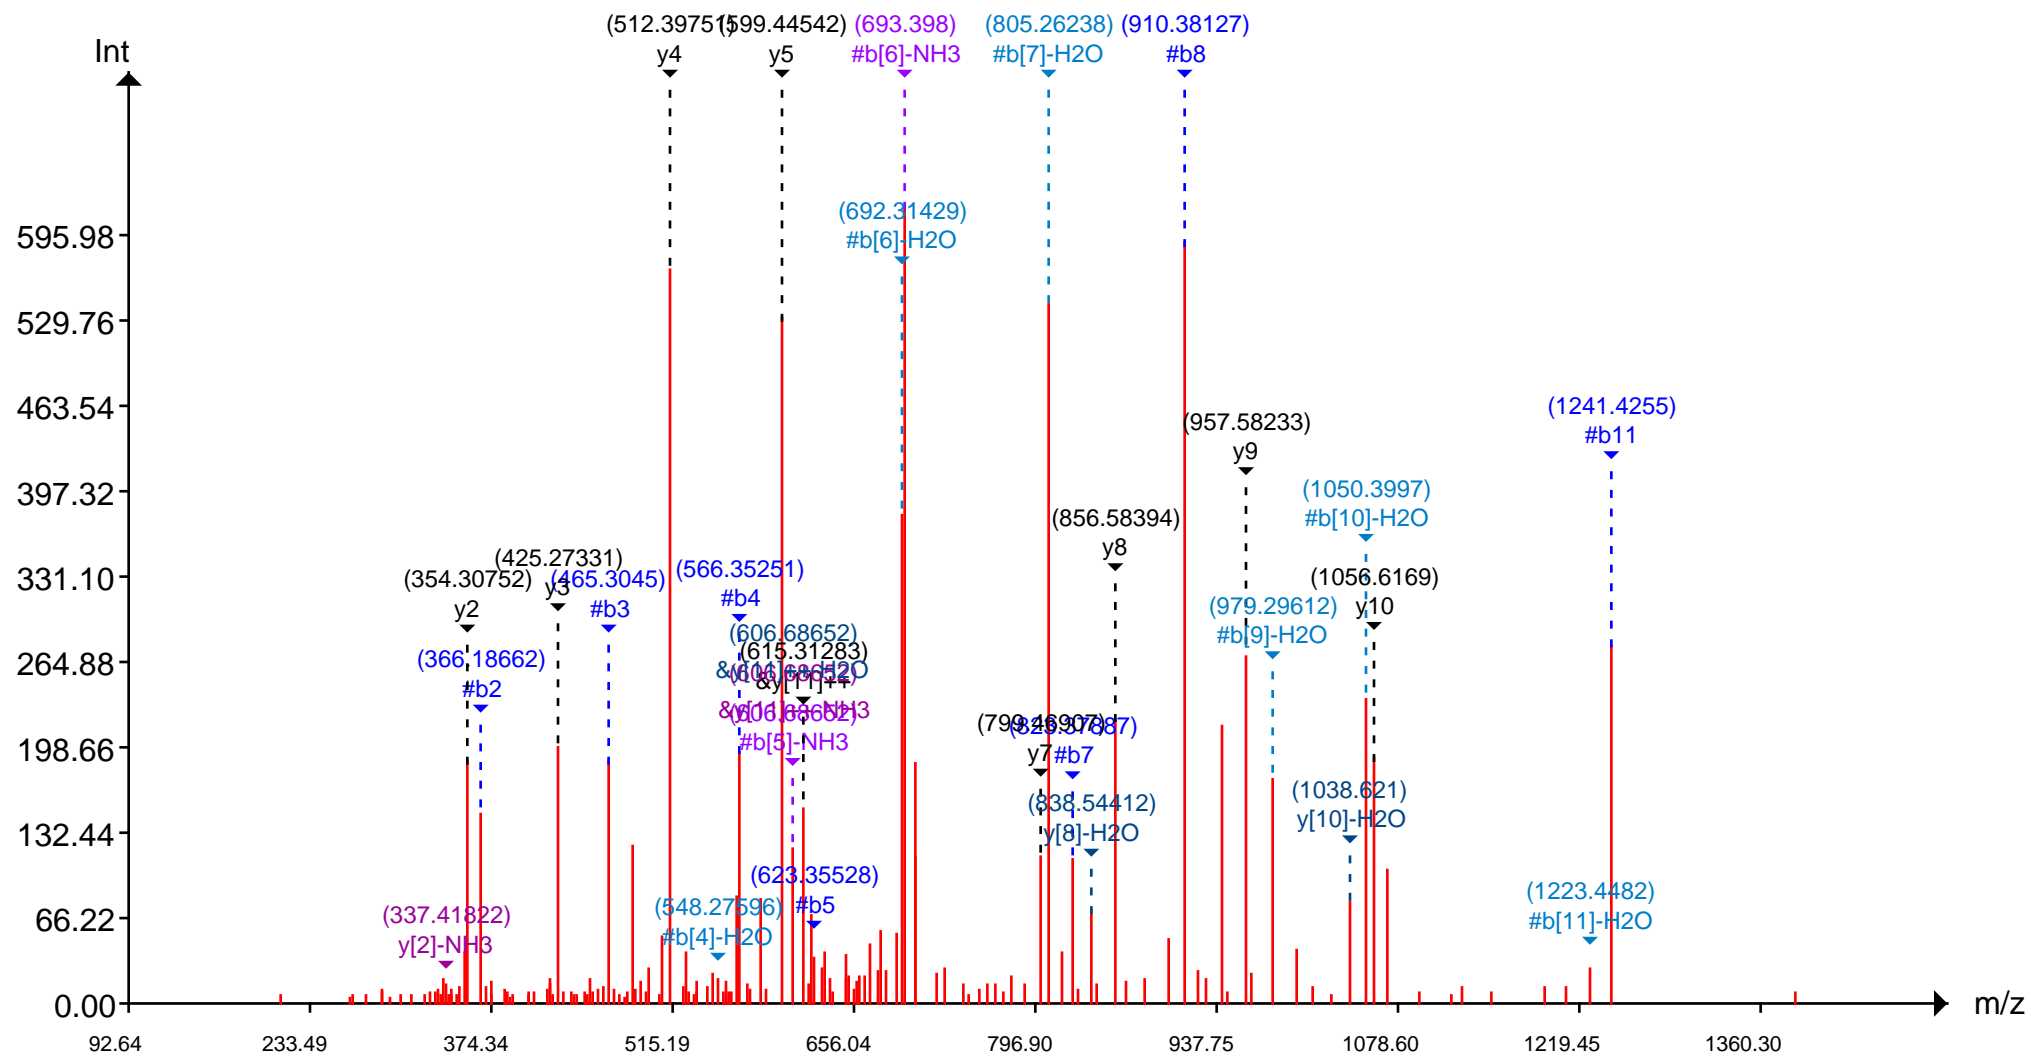

## Info

**Modified Sequence** AcD3-FK<AcD3K\*>VTGSLSSAK<AcD3K\*>R<C13>-COOH

**Ion score** 67.6

**Protein** P39749

**Confidence level** 99.00%

**Precursor m/z** 711.42423

**Identity Threshold** 44.53

**Charge** 2+

**Mass error** 7.48E-4

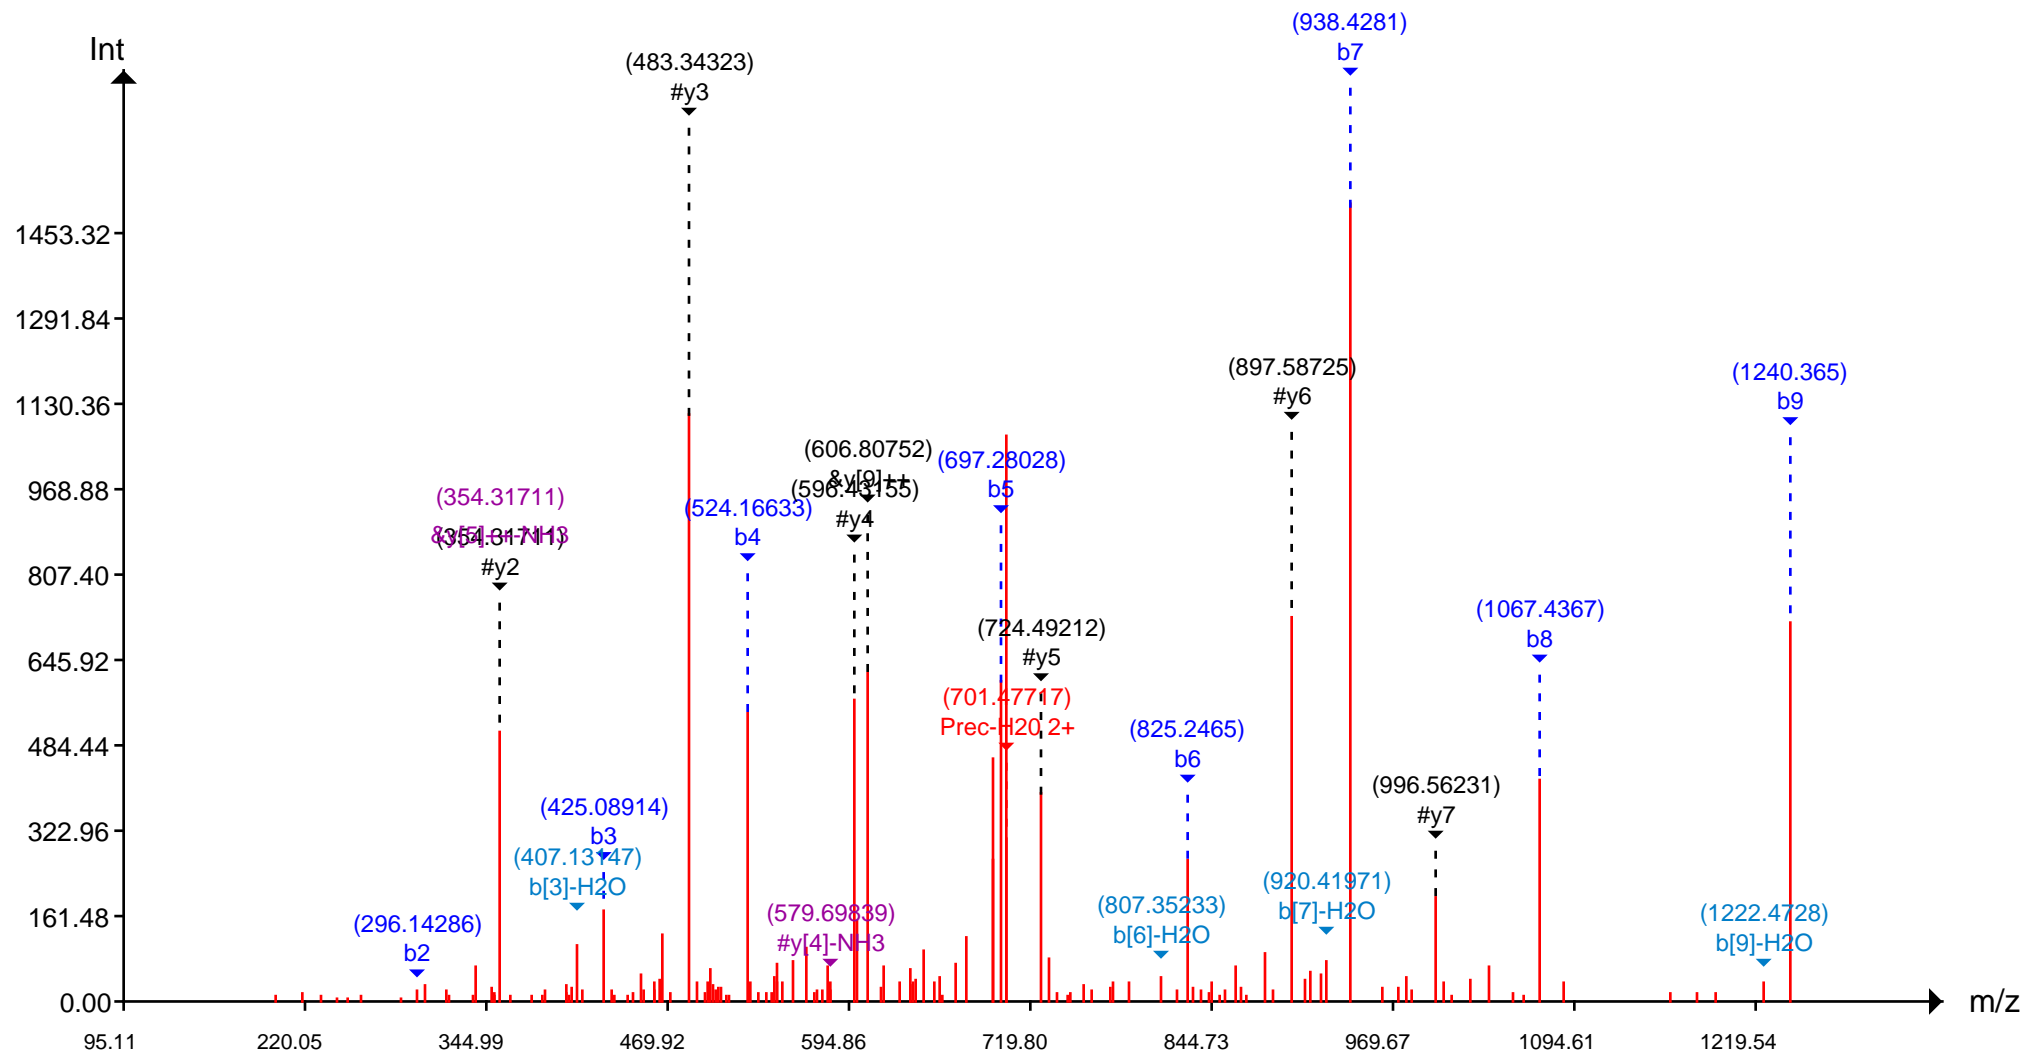

## Info

**Modified Sequence** AcD3-YSEVK<AcD3K\*>QIEK<AcD3K\*>R<C13>-COOH

**Ion score** 61.86

**Protein** Q6NZB0

**Confidence level** 99.00%

**Precursor m/z** 710.90837

**Identity Threshold** 46.28

**Charge** 2+

**Mass error** 6.9E-4

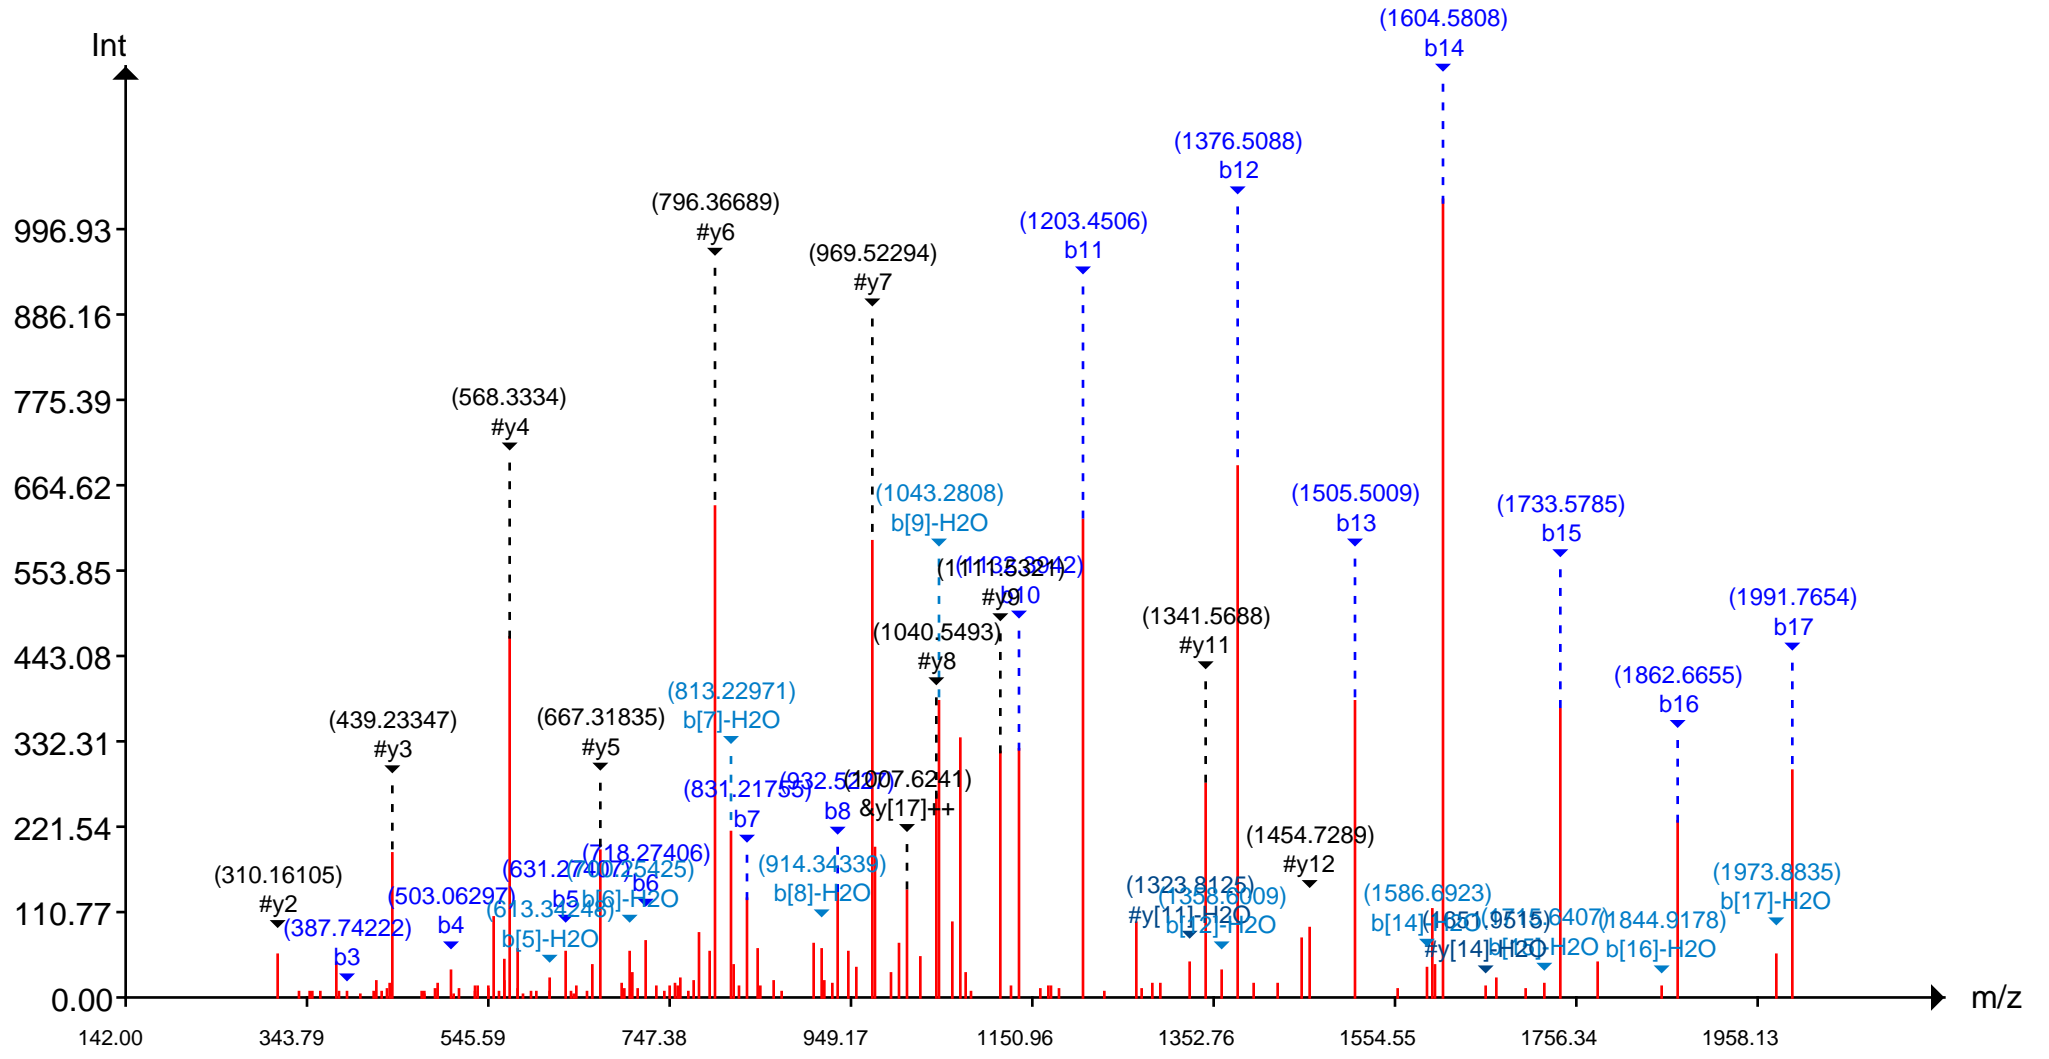

Info

|                          |                                           |                           |          |
|--------------------------|-------------------------------------------|---------------------------|----------|
| <b>Modified Sequence</b> | AcD3-LQTDQSLTEAAK<AcD3K*>EVEEER<C13>-COOH | <b>Ion score</b>          | 99.47    |
| <b>Protein</b>           | Q9Z0E6                                    | <b>Confidence level</b>   | 99.00%   |
| <b>Precursor m/z</b>     | 1086.5489                                 | <b>Identity Threshold</b> | 47.77    |
| <b>Charge</b>            | 2+                                        | <b>Mass error</b>         | 0.002498 |

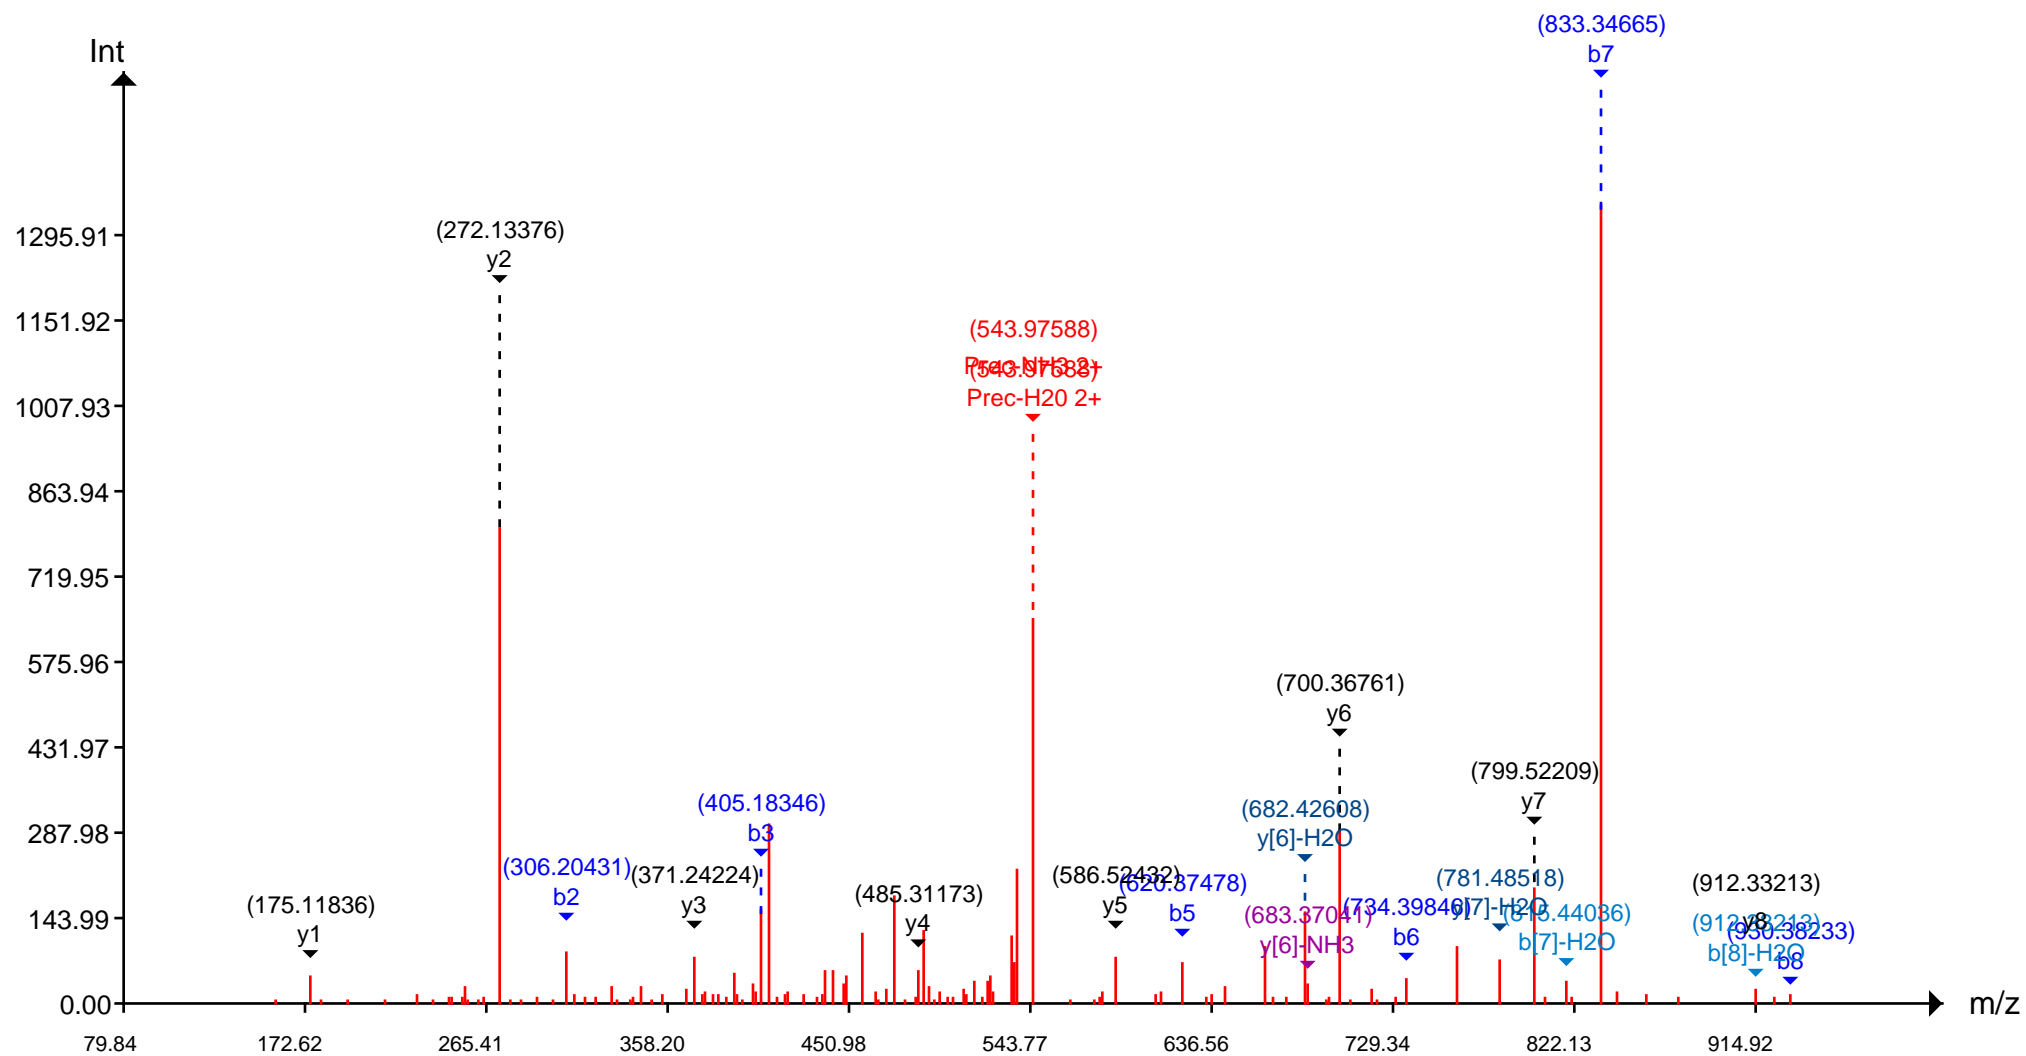

## Info

|                          |                     |                           |         |
|--------------------------|---------------------|---------------------------|---------|
| <b>Modified Sequence</b> | AcD3-FIVNTNVPR-COOH | <b>Ion score</b>          | 55.23   |
| <b>Protein</b>           | P34884              | <b>Confidence level</b>   | 99.00%  |
| <b>Precursor m/z</b>     | 552.81589           | <b>Identity Threshold</b> | 47.33   |
| <b>Charge</b>            | 2+                  | <b>Mass error</b>         | 5.59E-4 |

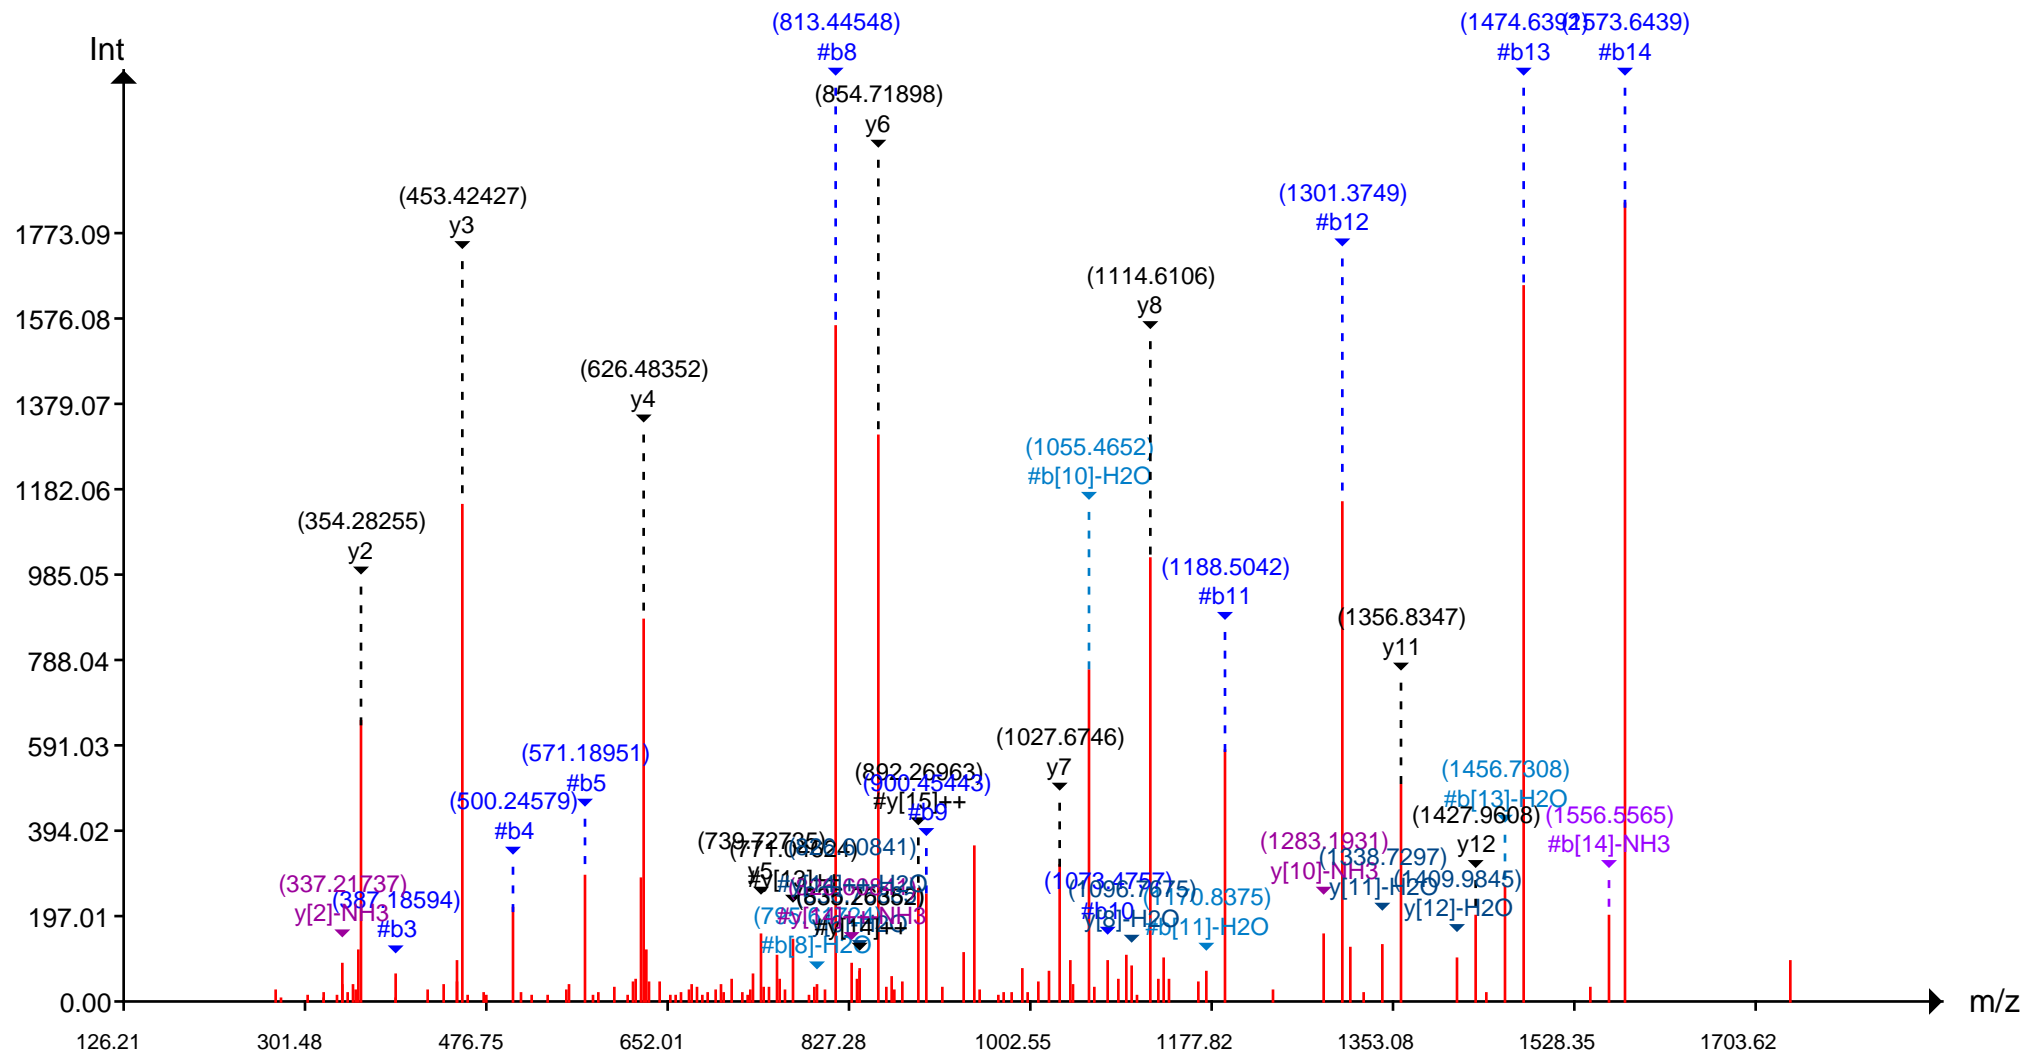

## Info

|                          |                                                         |                           |          |
|--------------------------|---------------------------------------------------------|---------------------------|----------|
| <b>Modified Sequence</b> | AcD3-VLELAGNASK<AcD3K*>DLK<AcD3K*>VK<AcD3K*>R<C13>-COOH | <b>Ion score</b>          | 70.71    |
| <b>Protein</b>           | Q3THW5, P0C0S6                                          | <b>Confidence level</b>   | 99.00%   |
| <b>Precursor m/z</b>     | 964.09064                                               | <b>Identity Threshold</b> | 39.21    |
| <b>Charge</b>            | 2+                                                      | <b>Mass error</b>         | 0.003261 |



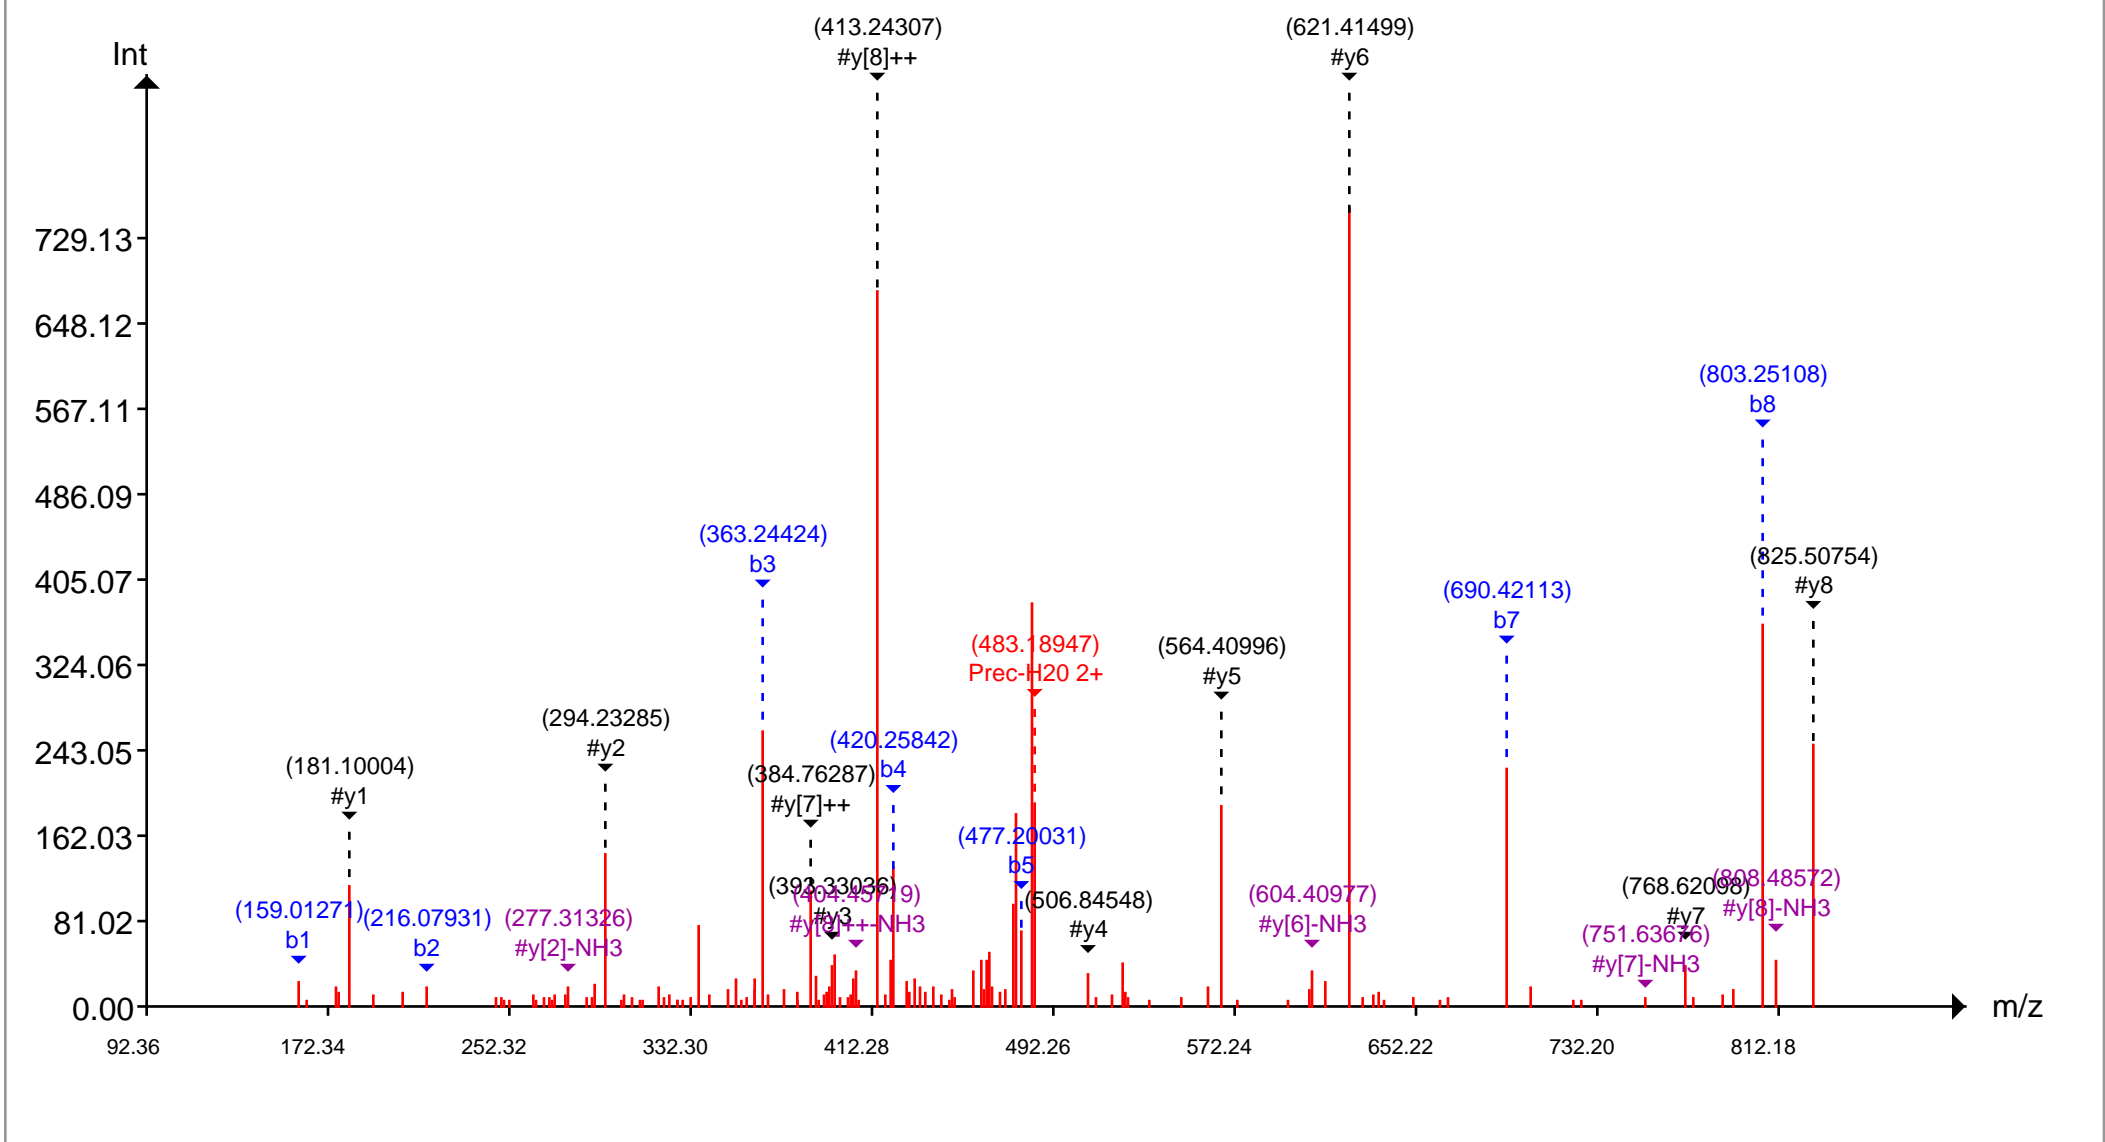

## Info

**Modified Sequence** AcD3-IGFGGNVIR<C13>-COOH

**Protein** Q99LS3

**Precursor m/z** 492.29382

**Charge** 2+

**Ion score** 47.5

**Confidence level** 99.00%

**Identity Threshold** 46.01

**Mass error** -3.98E-4

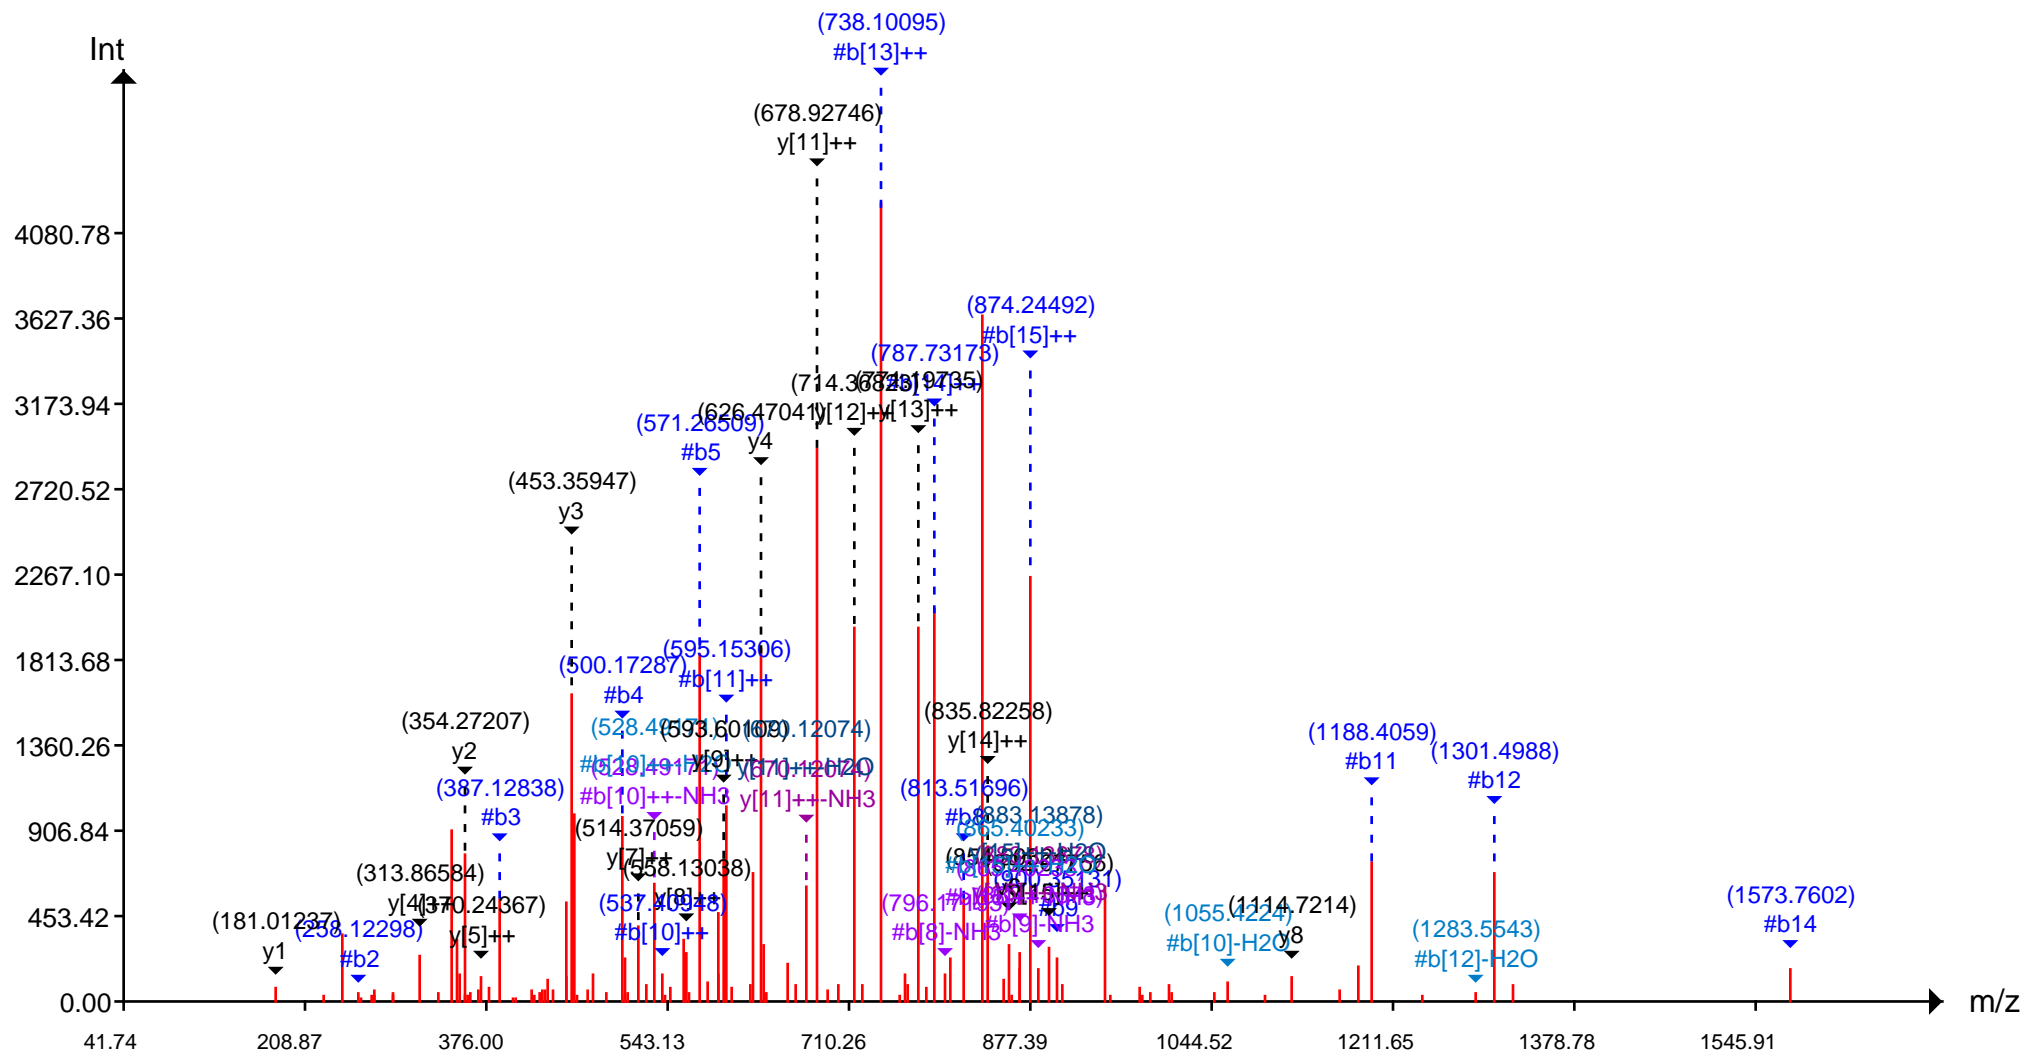

## Info

|                          |                                                         |                           |          |
|--------------------------|---------------------------------------------------------|---------------------------|----------|
| <b>Modified Sequence</b> | AcD3-VLELAGNASK<AcD3K*>DLK<AcD3K*>VK<AcD3K*>R<C13>-COOH | <b>Ion score</b>          | 58.67    |
| <b>Protein</b>           | Q3THW5, P0C0S6                                          | <b>Confidence level</b>   | 99.00%   |
| <b>Precursor m/z</b>     | 643.06234                                               | <b>Identity Threshold</b> | 39.39    |
| <b>Charge</b>            | 3+                                                      | <b>Mass error</b>         | 0.001725 |

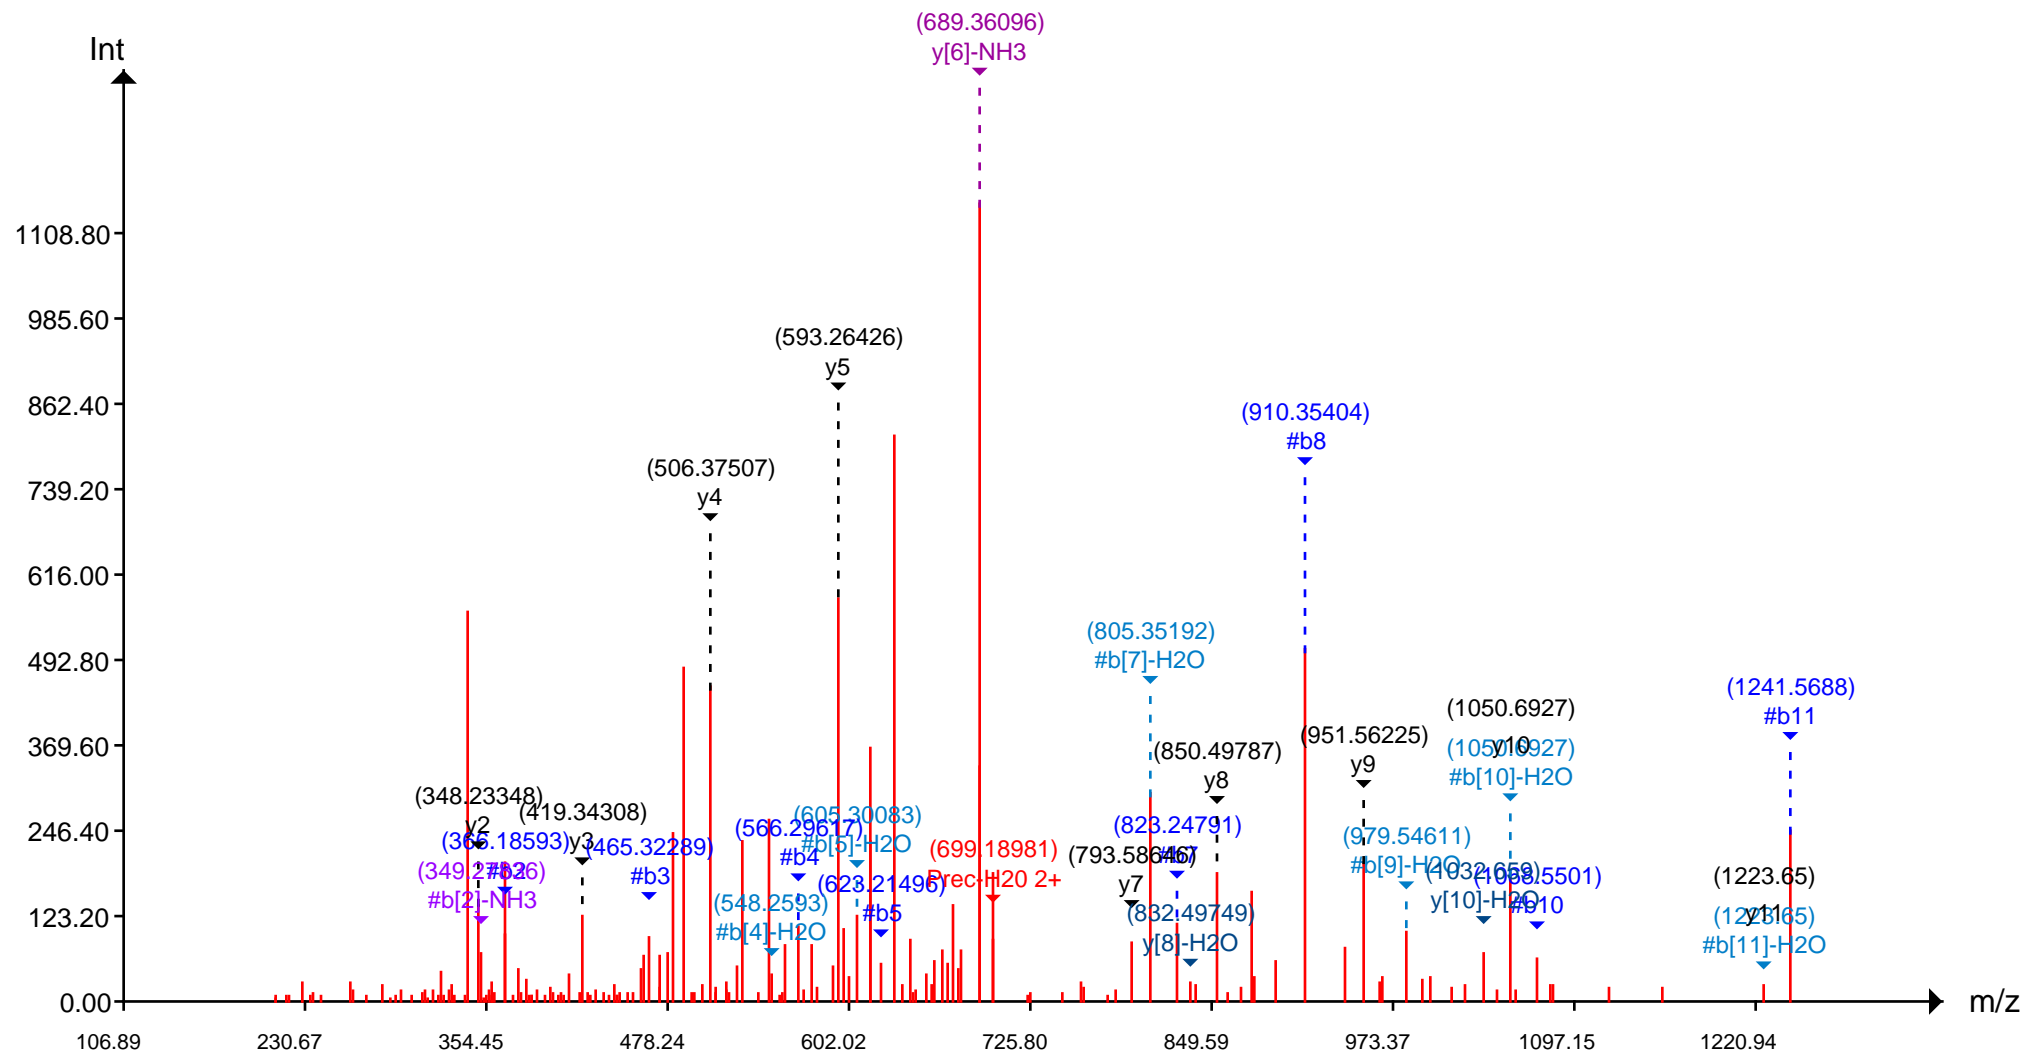

## Info

**Modified Sequence** AcD3-FK<AcD3K\*>VTGSLSSAK<AcD3K\*>R-COOH

**Ion score** 55.45

**Protein** P39749

**Confidence level** 99.00%

**Precursor m/z** 708.41412

**Identity Threshold** 45.67

**Charge** 2+

**Mass error** 6.69E-4

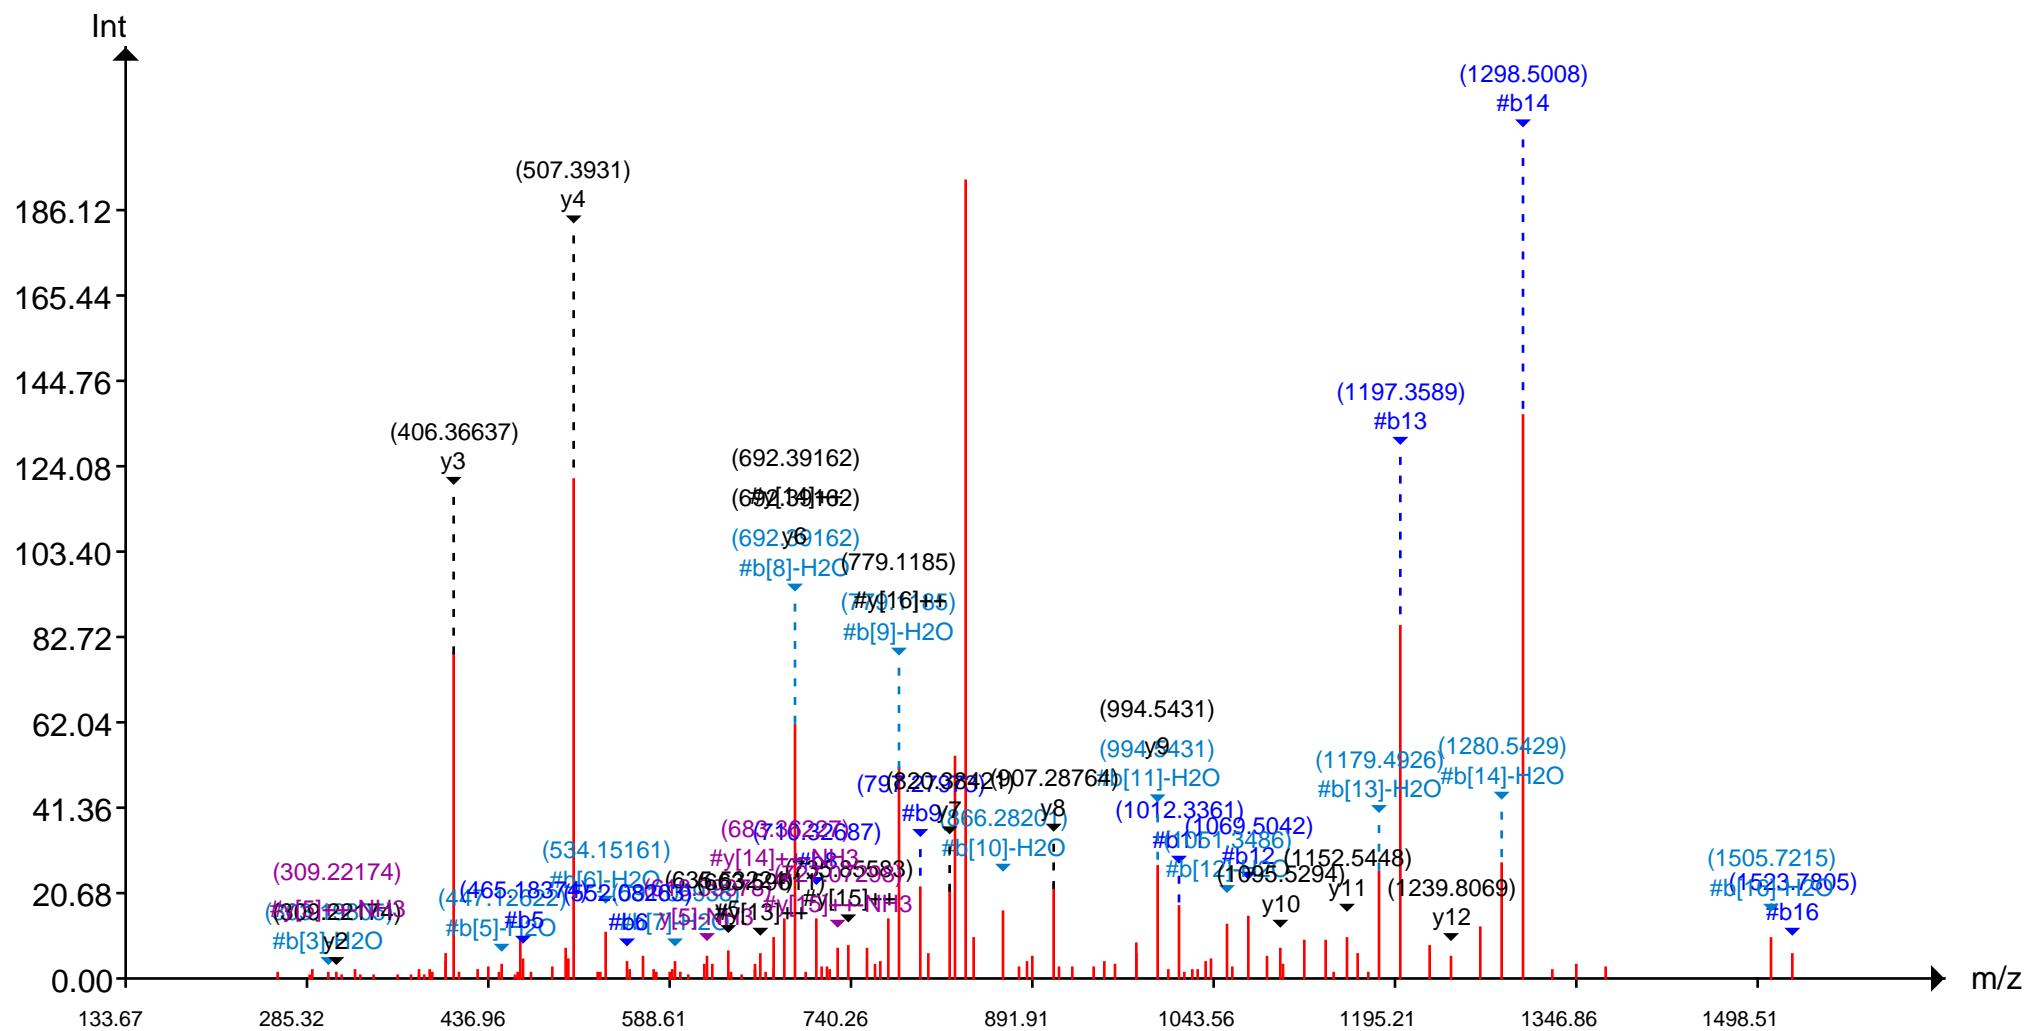

## Info

|                          |                                  |                           |          |
|--------------------------|----------------------------------|---------------------------|----------|
| <b>Modified Sequence</b> | AcD3-TSSGSSGTSSQGQTPQR<C13>-COOH | <b>Ion score</b>          | 74.45    |
| <b>Protein</b>           | O89090                           | <b>Confidence level</b>   | 99.00%   |
| <b>Precursor m/z</b>     | 852.40281                        | <b>Identity Threshold</b> | 46.01    |
| <b>Charge</b>            | 2+                               | <b>Mass error</b>         | 0.001746 |

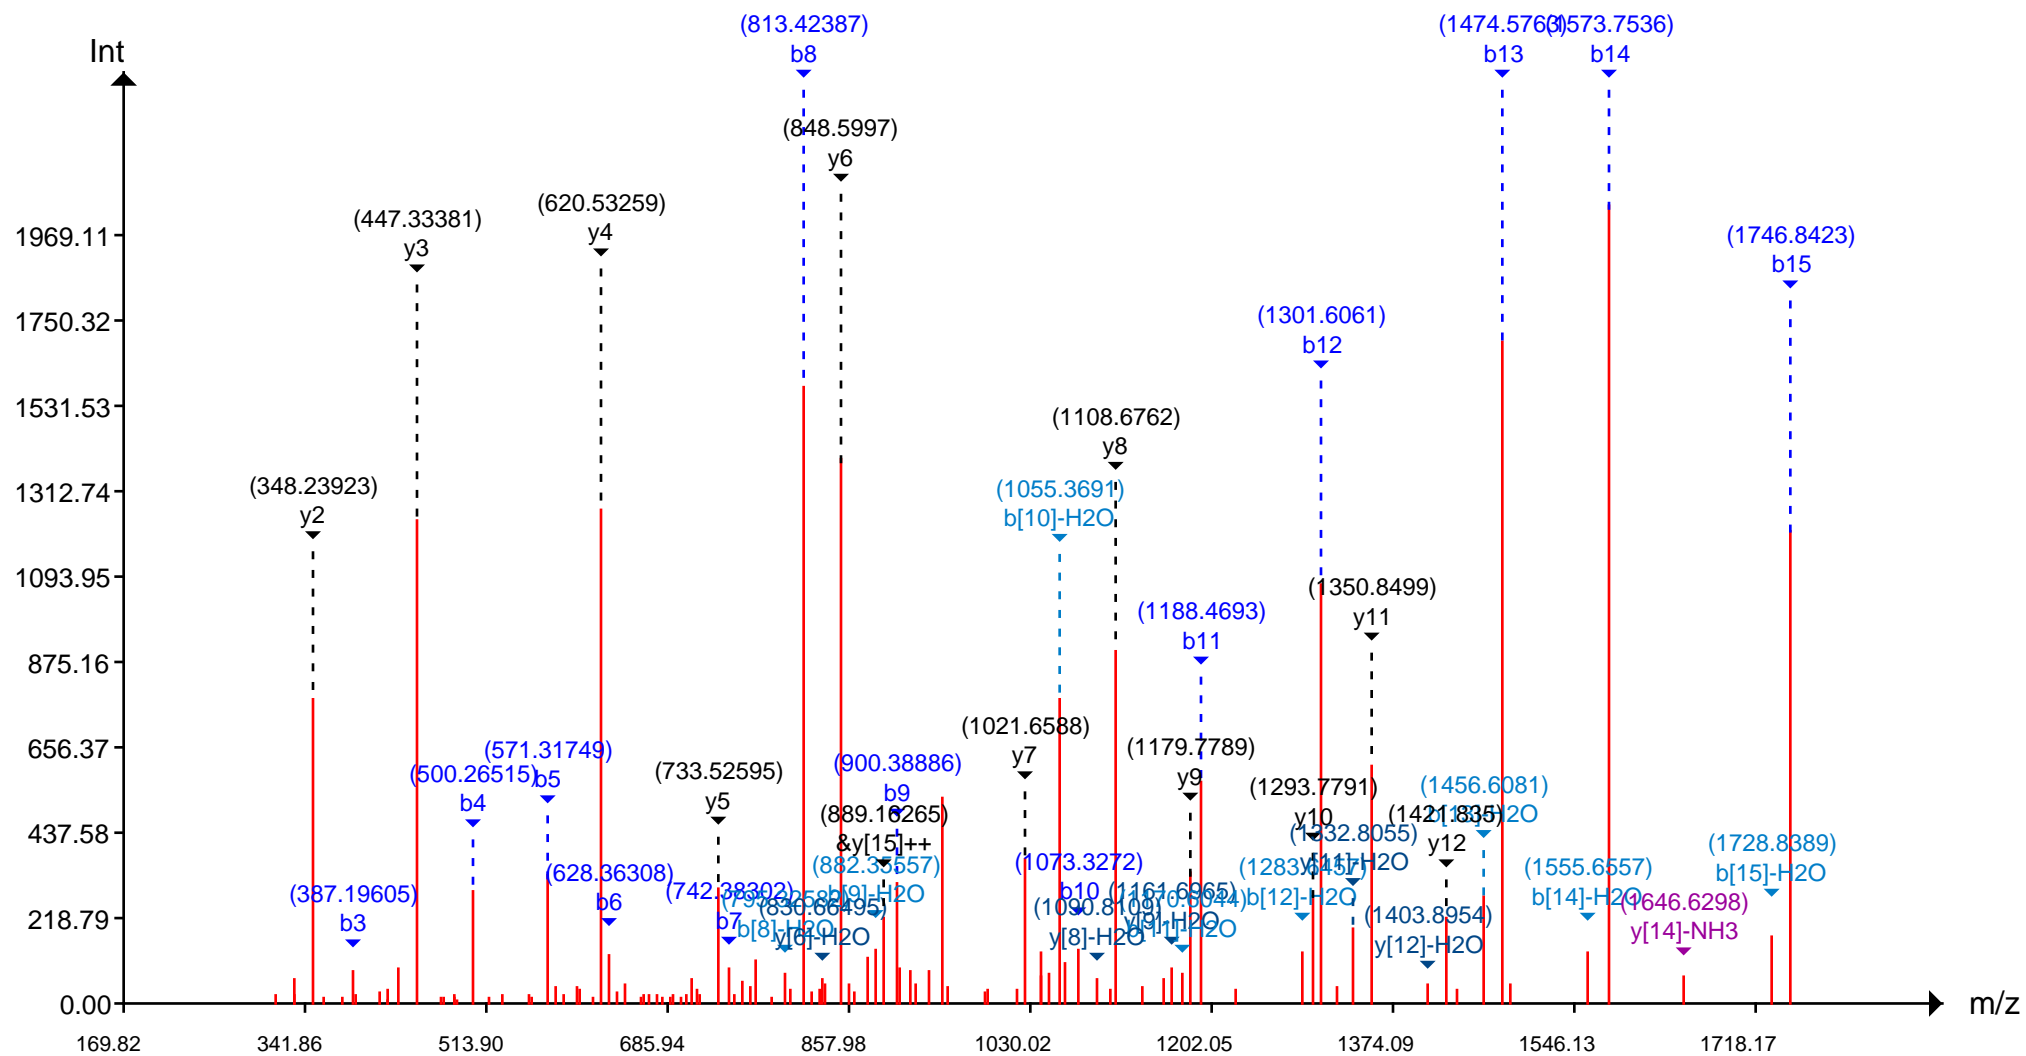

## Info

|                          |                                                    |                           |          |
|--------------------------|----------------------------------------------------|---------------------------|----------|
| <b>Modified Sequence</b> | AcD3-VLELAGNASK<AcD3K*>DLK<AcD3K*>VK<AcD3K*>R-COOH | <b>Ion score</b>          | 105.89   |
| <b>Protein</b>           | Q3THW5, P0C0S6                                     | <b>Confidence level</b>   | 99.00%   |
| <b>Precursor m/z</b>     | 961.08039                                          | <b>Identity Threshold</b> | 41.03    |
| <b>Charge</b>            | 2+                                                 | <b>Mass error</b>         | 0.002902 |

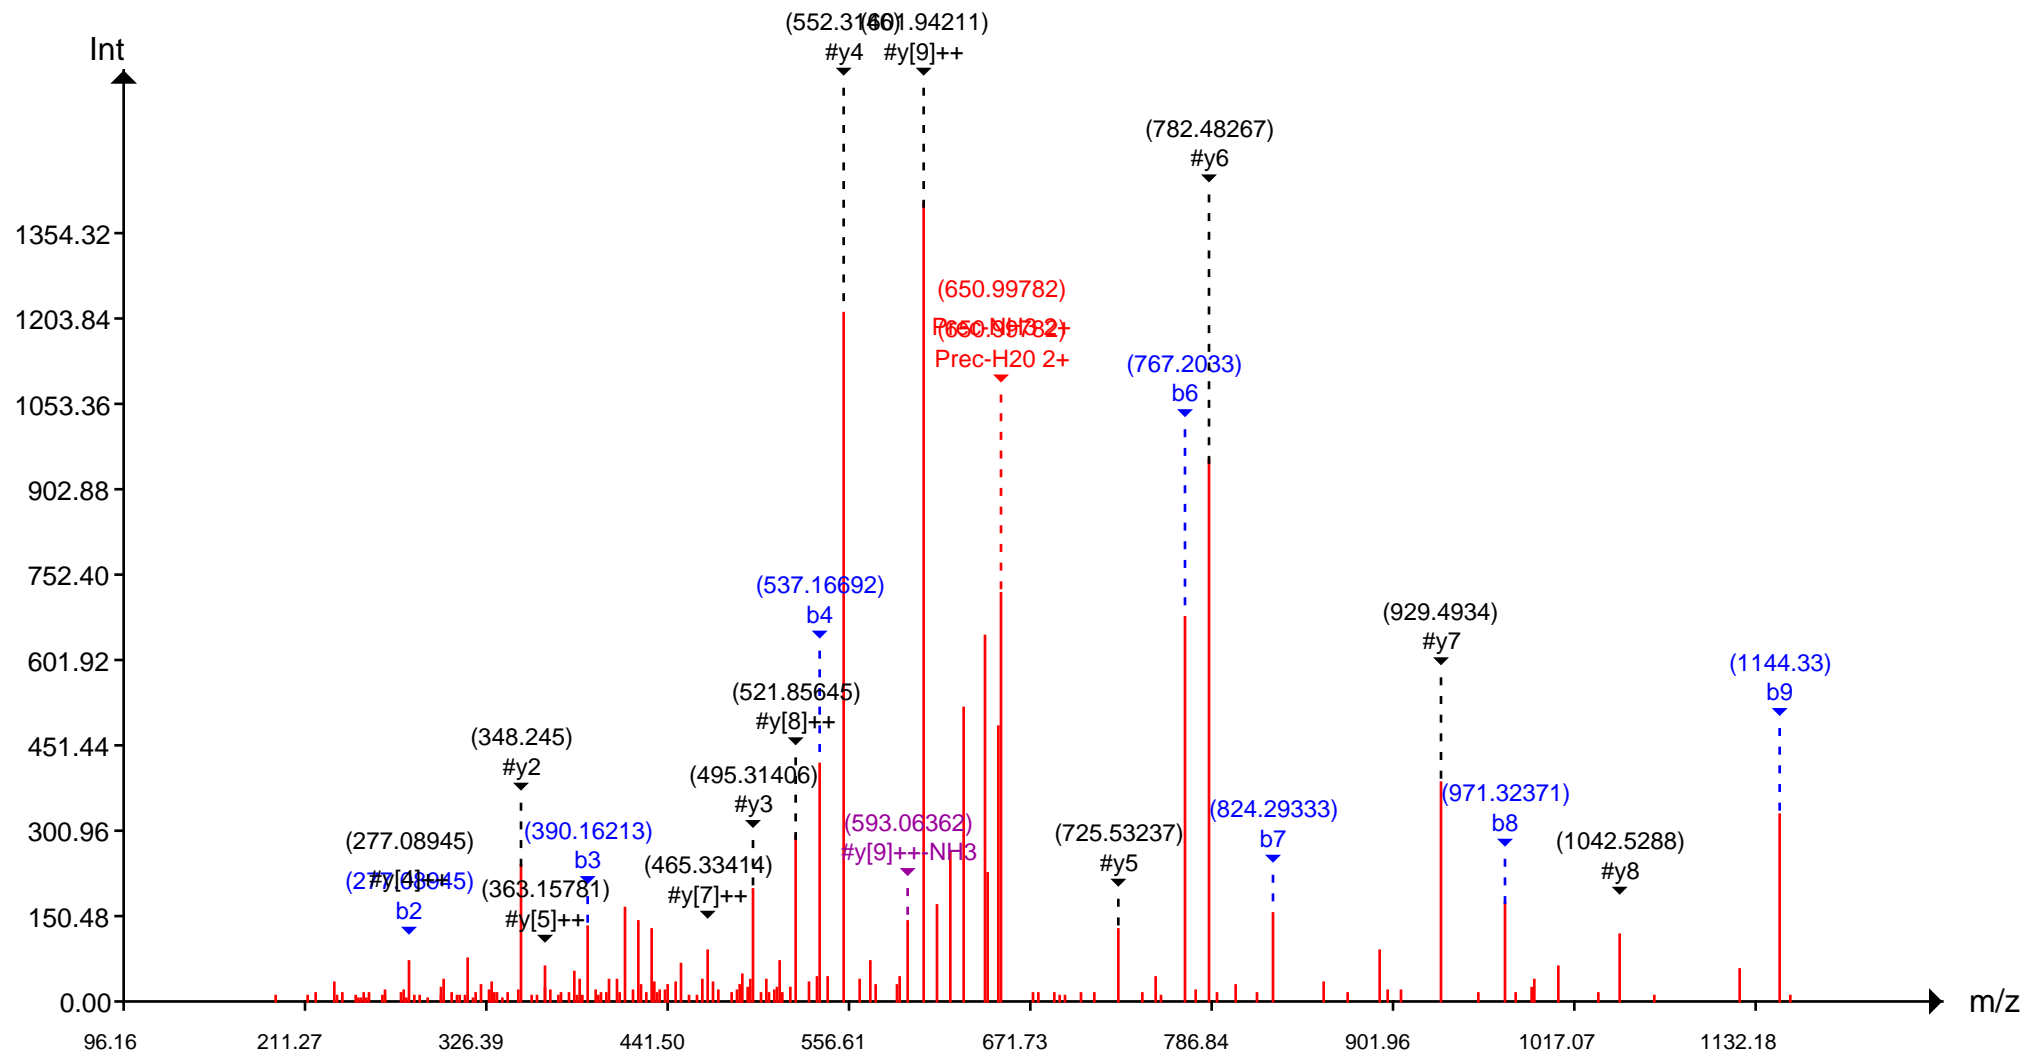

## Info

|                          |                                                        |                           |          |
|--------------------------|--------------------------------------------------------|---------------------------|----------|
| <b>Modified Sequence</b> | AcD3-AC<Cmm*>LM<Mox*>GK<AcD3K*>GM<Mox*>K<AcD3K*>R-COOH | <b>Ion score</b>          | 51.11    |
| <b>Protein</b>           | Q61233                                                 | <b>Confidence level</b>   | 99.00%   |
| <b>Precursor m/z</b>     | 659.83487                                              | <b>Identity Threshold</b> | 47.79    |
| <b>Charge</b>            | 2+                                                     | <b>Mass error</b>         | -1.46E-4 |

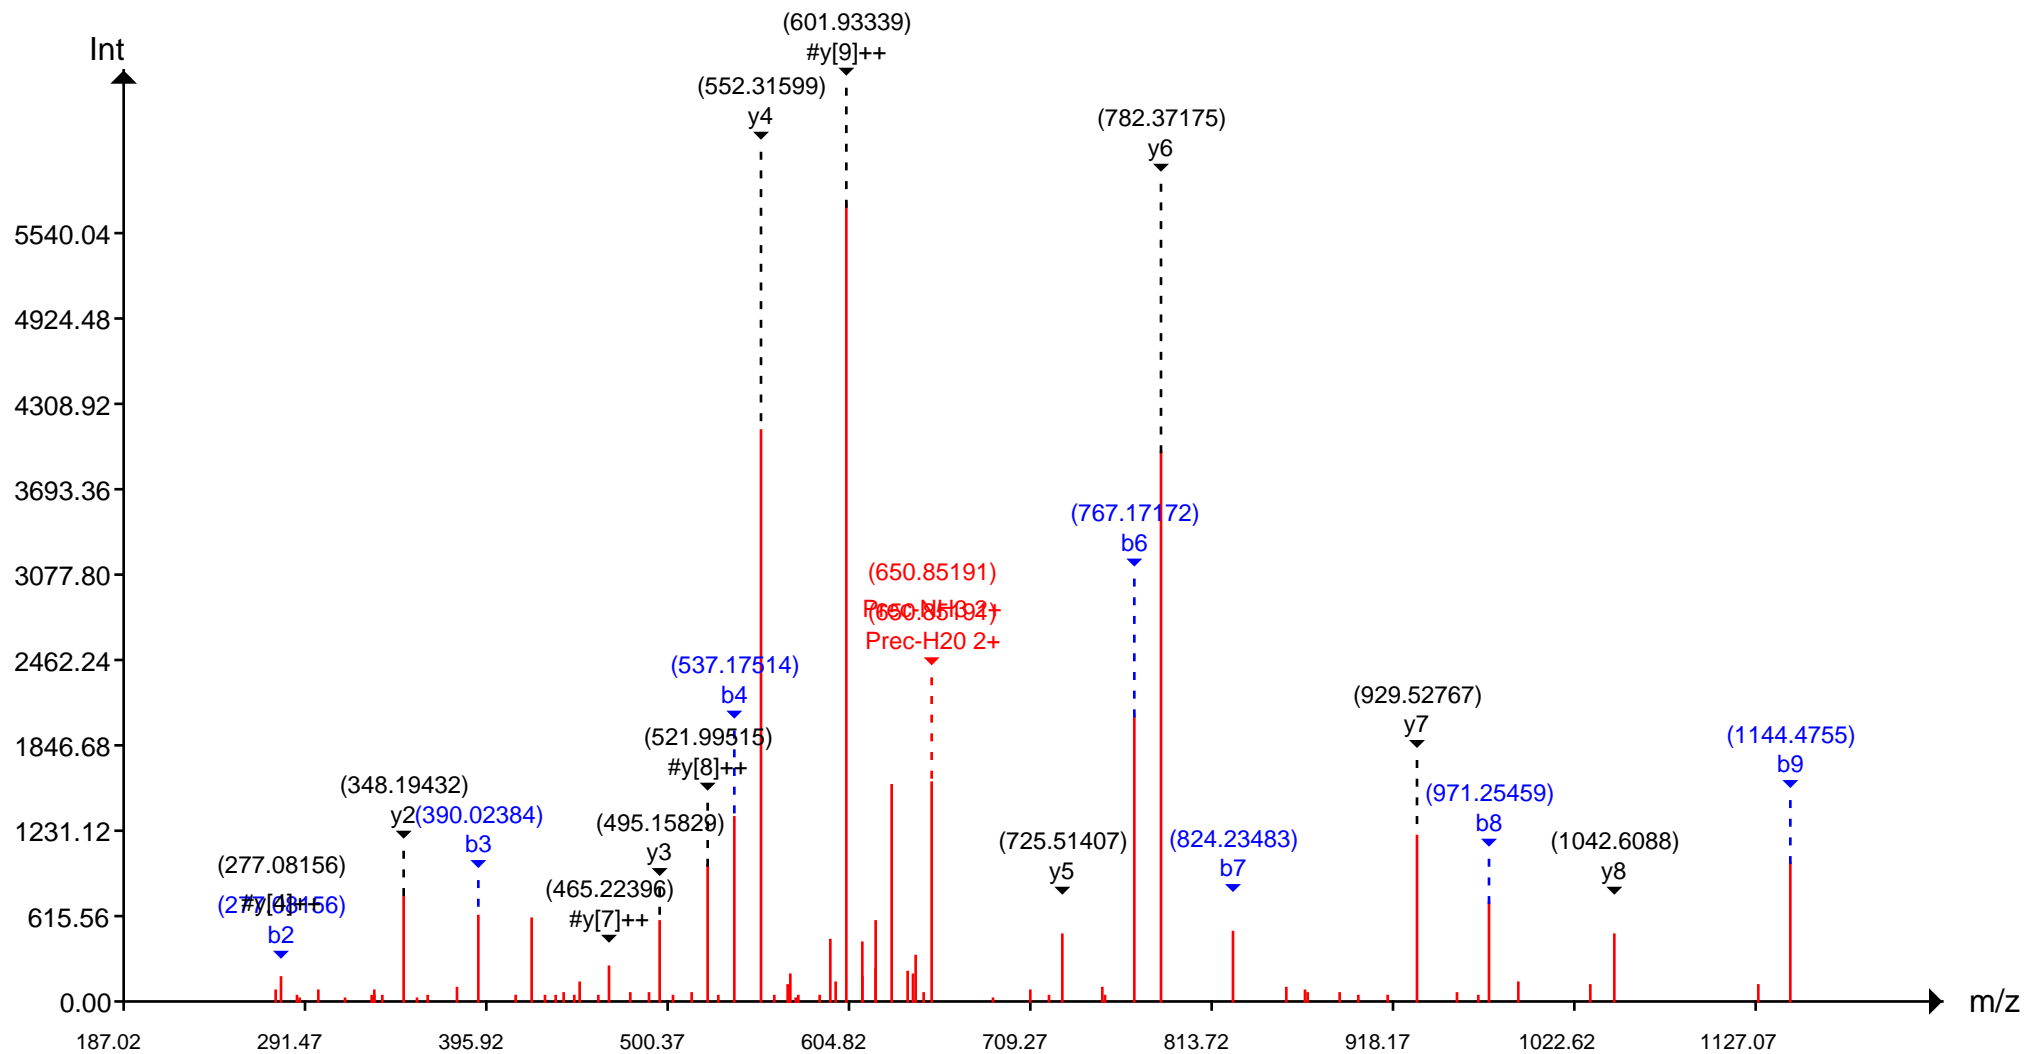

## Info

|                          |                                                        |                           |          |
|--------------------------|--------------------------------------------------------|---------------------------|----------|
| <b>Modified Sequence</b> | AcD3-AC<Cmm*>LM<Mox*>GK<AcD3K*>GM<Mox*>K<AcD3K*>R-COOH | <b>Ion score</b>          | 62.23    |
| <b>Protein</b>           | Q61233                                                 | <b>Confidence level</b>   | 99.00%   |
| <b>Precursor m/z</b>     | 659.83454                                              | <b>Identity Threshold</b> | 47.68    |
| <b>Charge</b>            | 2+                                                     | <b>Mass error</b>         | -8.06E-4 |

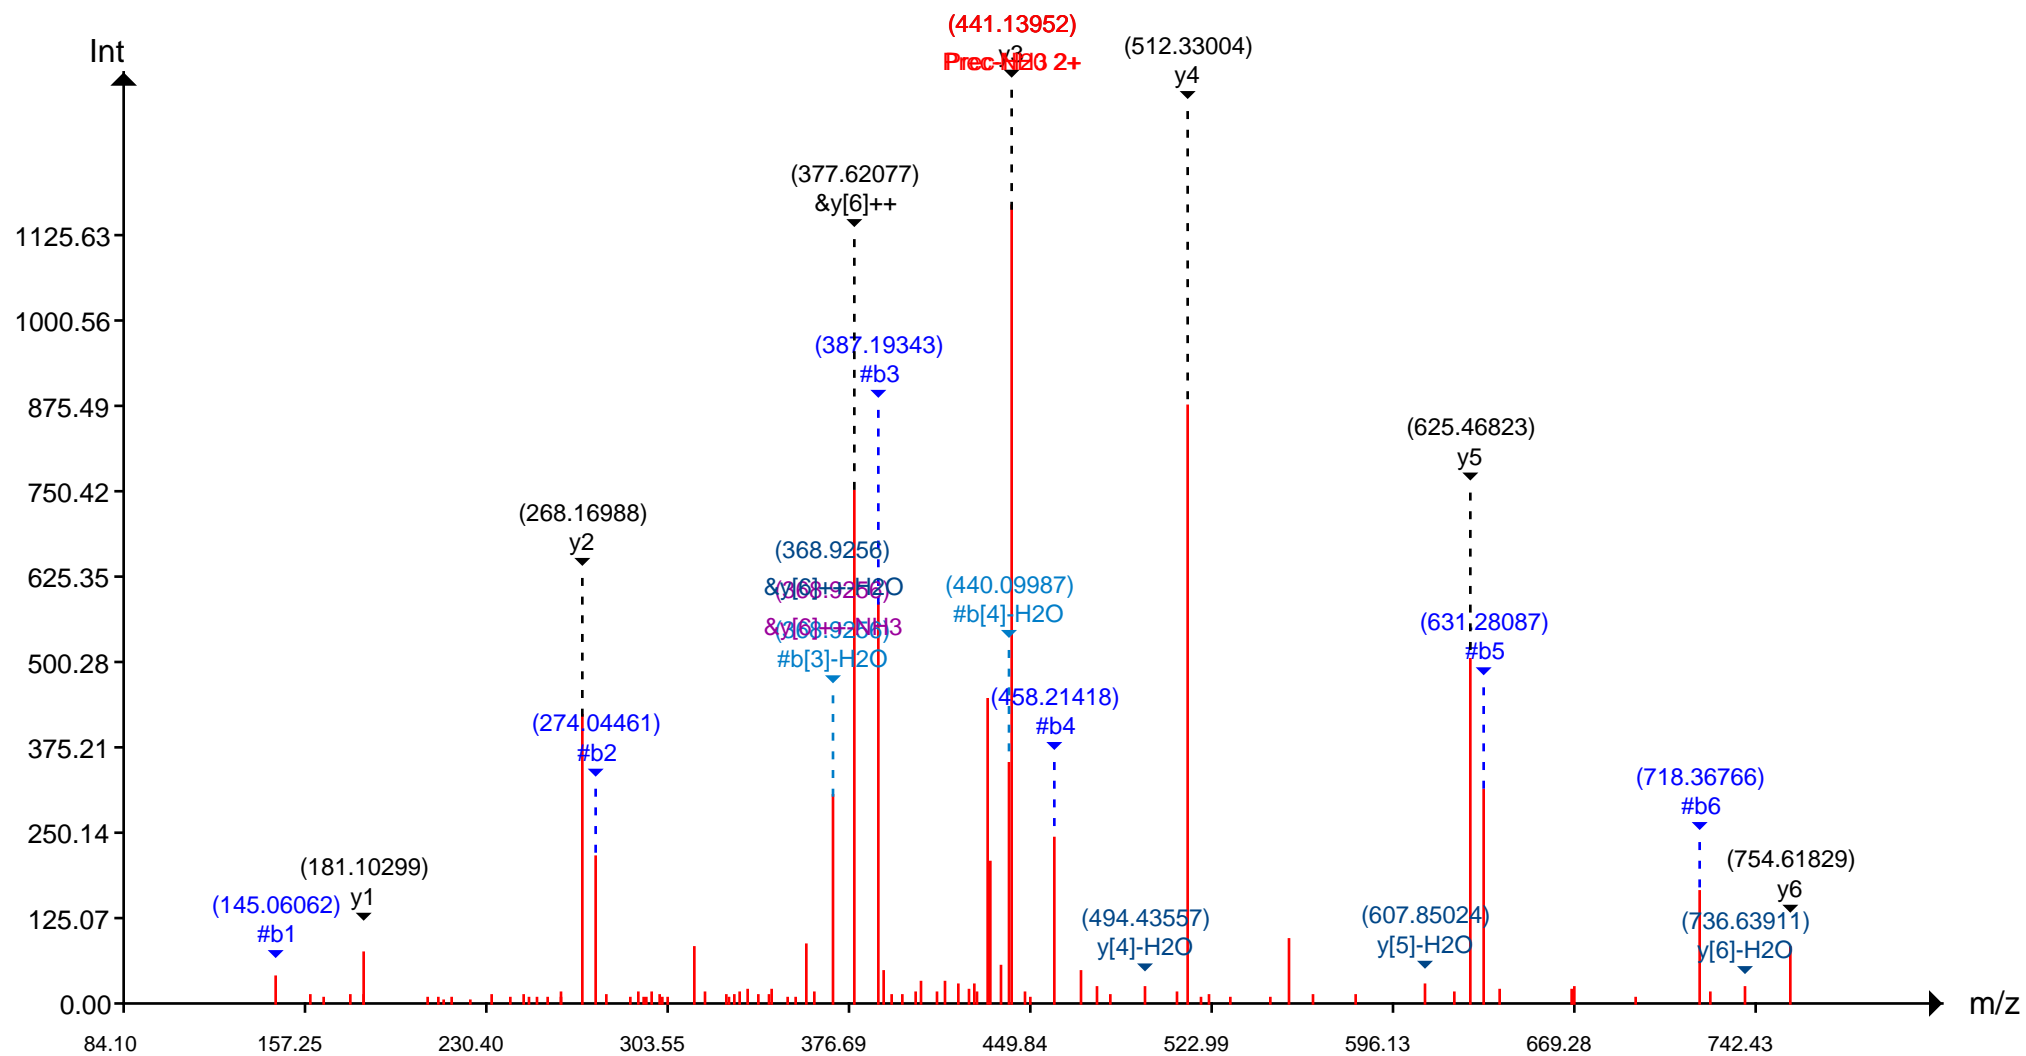

## Info

**Modified Sequence** AcD3-VELAK<AcD3K\*>SR<C13>-COOH

**Ion score** 61.28

**Protein** P06745, Q6GQX2

**Confidence level** 99.00%

**Precursor m/z** 449.78209

**Identity Threshold** 44.03

**Charge** 2+

**Mass error** -1.31E-4



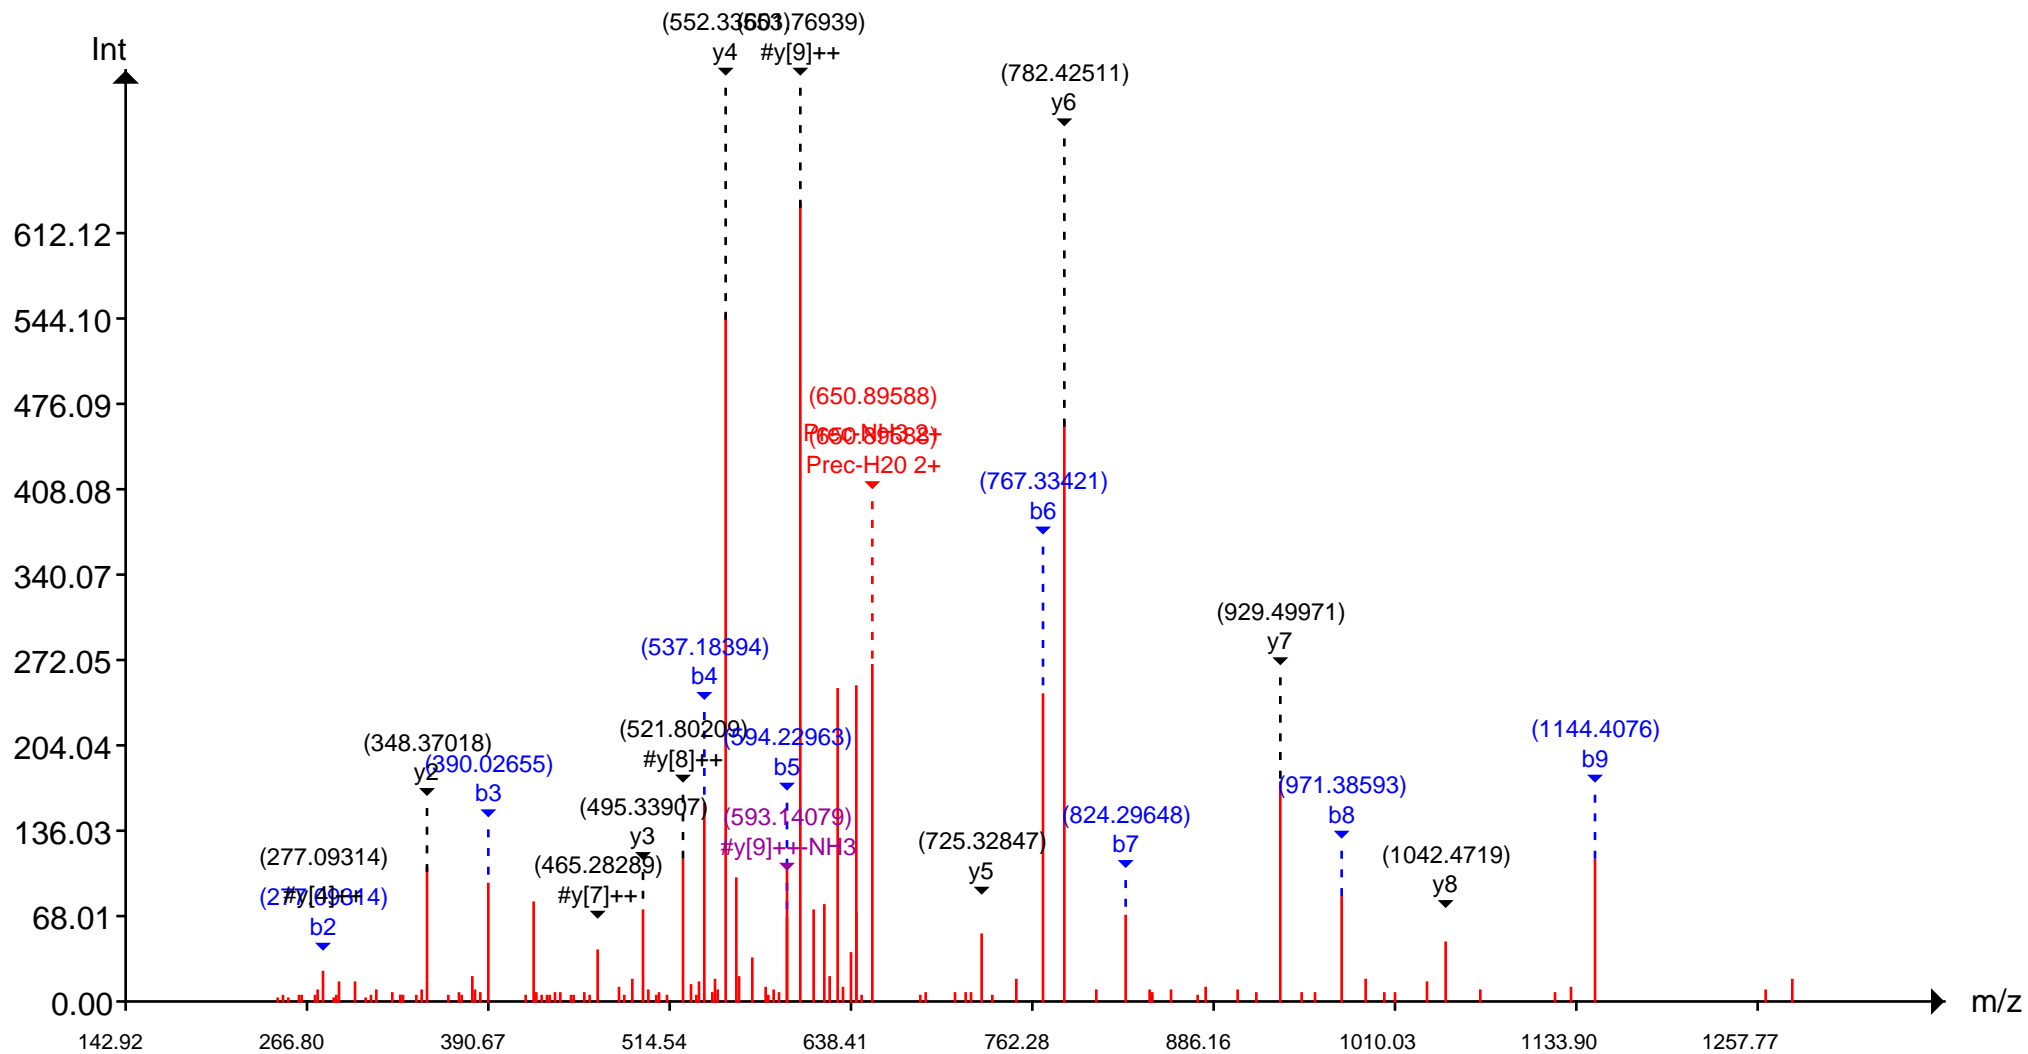

## Info

|                          |                                                        |                           |          |
|--------------------------|--------------------------------------------------------|---------------------------|----------|
| <b>Modified Sequence</b> | AcD3-AC<Cmm*>LM<Mox*>GK<AcD3K*>GM<Mox*>K<AcD3K*>R-COOH | <b>Ion score</b>          | 48.49    |
| <b>Protein</b>           | Q61233                                                 | <b>Confidence level</b>   | 99.00%   |
| <b>Precursor m/z</b>     | 659.83562                                              | <b>Identity Threshold</b> | 47.76    |
| <b>Charge</b>            | 2+                                                     | <b>Mass error</b>         | 0.001354 |

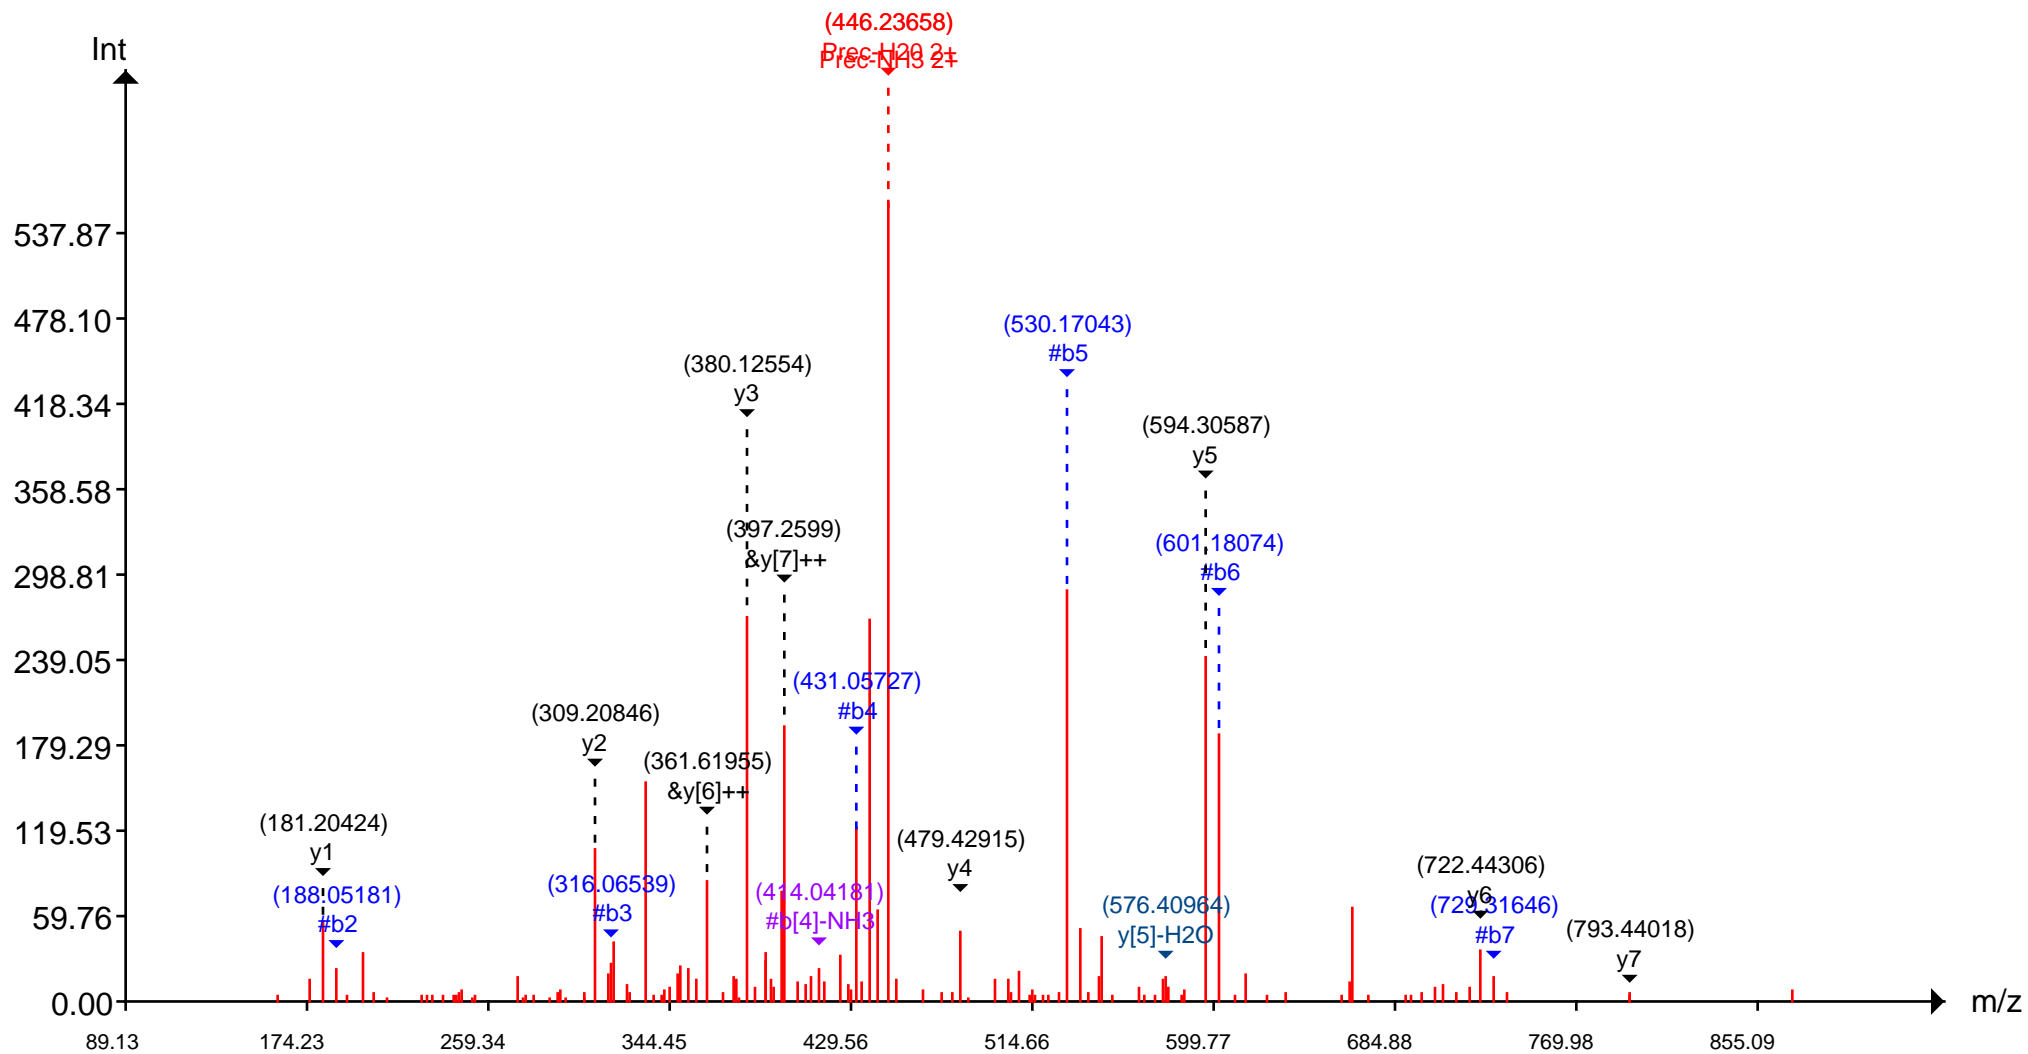

## Info

|                          |                         |                           |          |
|--------------------------|-------------------------|---------------------------|----------|
| <b>Modified Sequence</b> | AcD3-AAQDVAQR<C13>-COOH | <b>Ion score</b>          | 53.19    |
| <b>Protein</b>           | P62264                  | <b>Confidence level</b>   | 99.00%   |
| <b>Precursor m/z</b>     | 455.24969               | <b>Identity Threshold</b> | 47.83    |
| <b>Charge</b>            | 2+                      | <b>Mass error</b>         | -2.18E-4 |

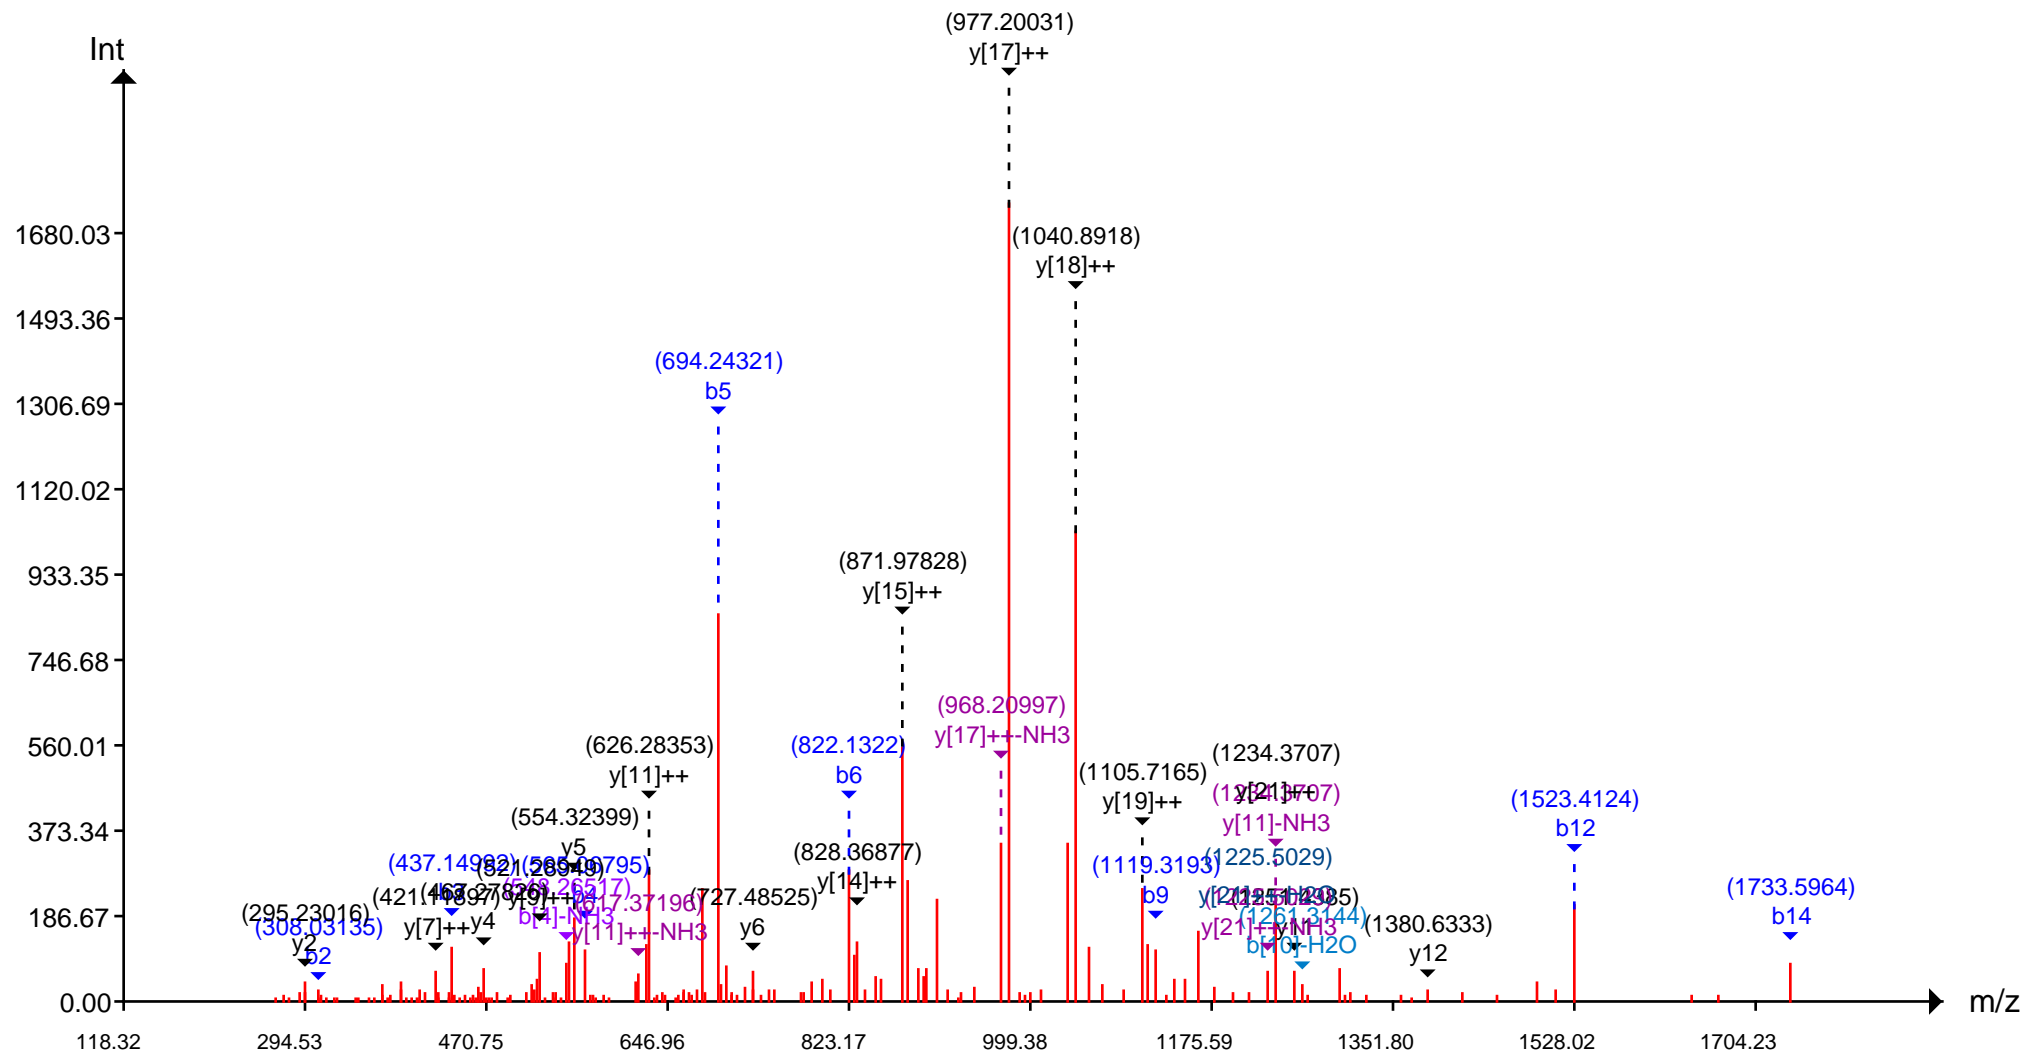

## Info

|                          |                                                     |                           |         |
|--------------------------|-----------------------------------------------------|---------------------------|---------|
| <b>Modified Sequence</b> | AcD3-VYEQQLPSC<Cmm*>DEPILSNK<AcD3K*>SGDNR<C13>-COOH | <b>Ion score</b>          | 49.0    |
| <b>Protein</b>           | P70296                                              | <b>Confidence level</b>   | 99.00%  |
| <b>Precursor m/z</b>     | 925.44356                                           | <b>Identity Threshold</b> | 46.00   |
| <b>Charge</b>            | 3+                                                  | <b>Mass error</b>         | 9.75E-4 |

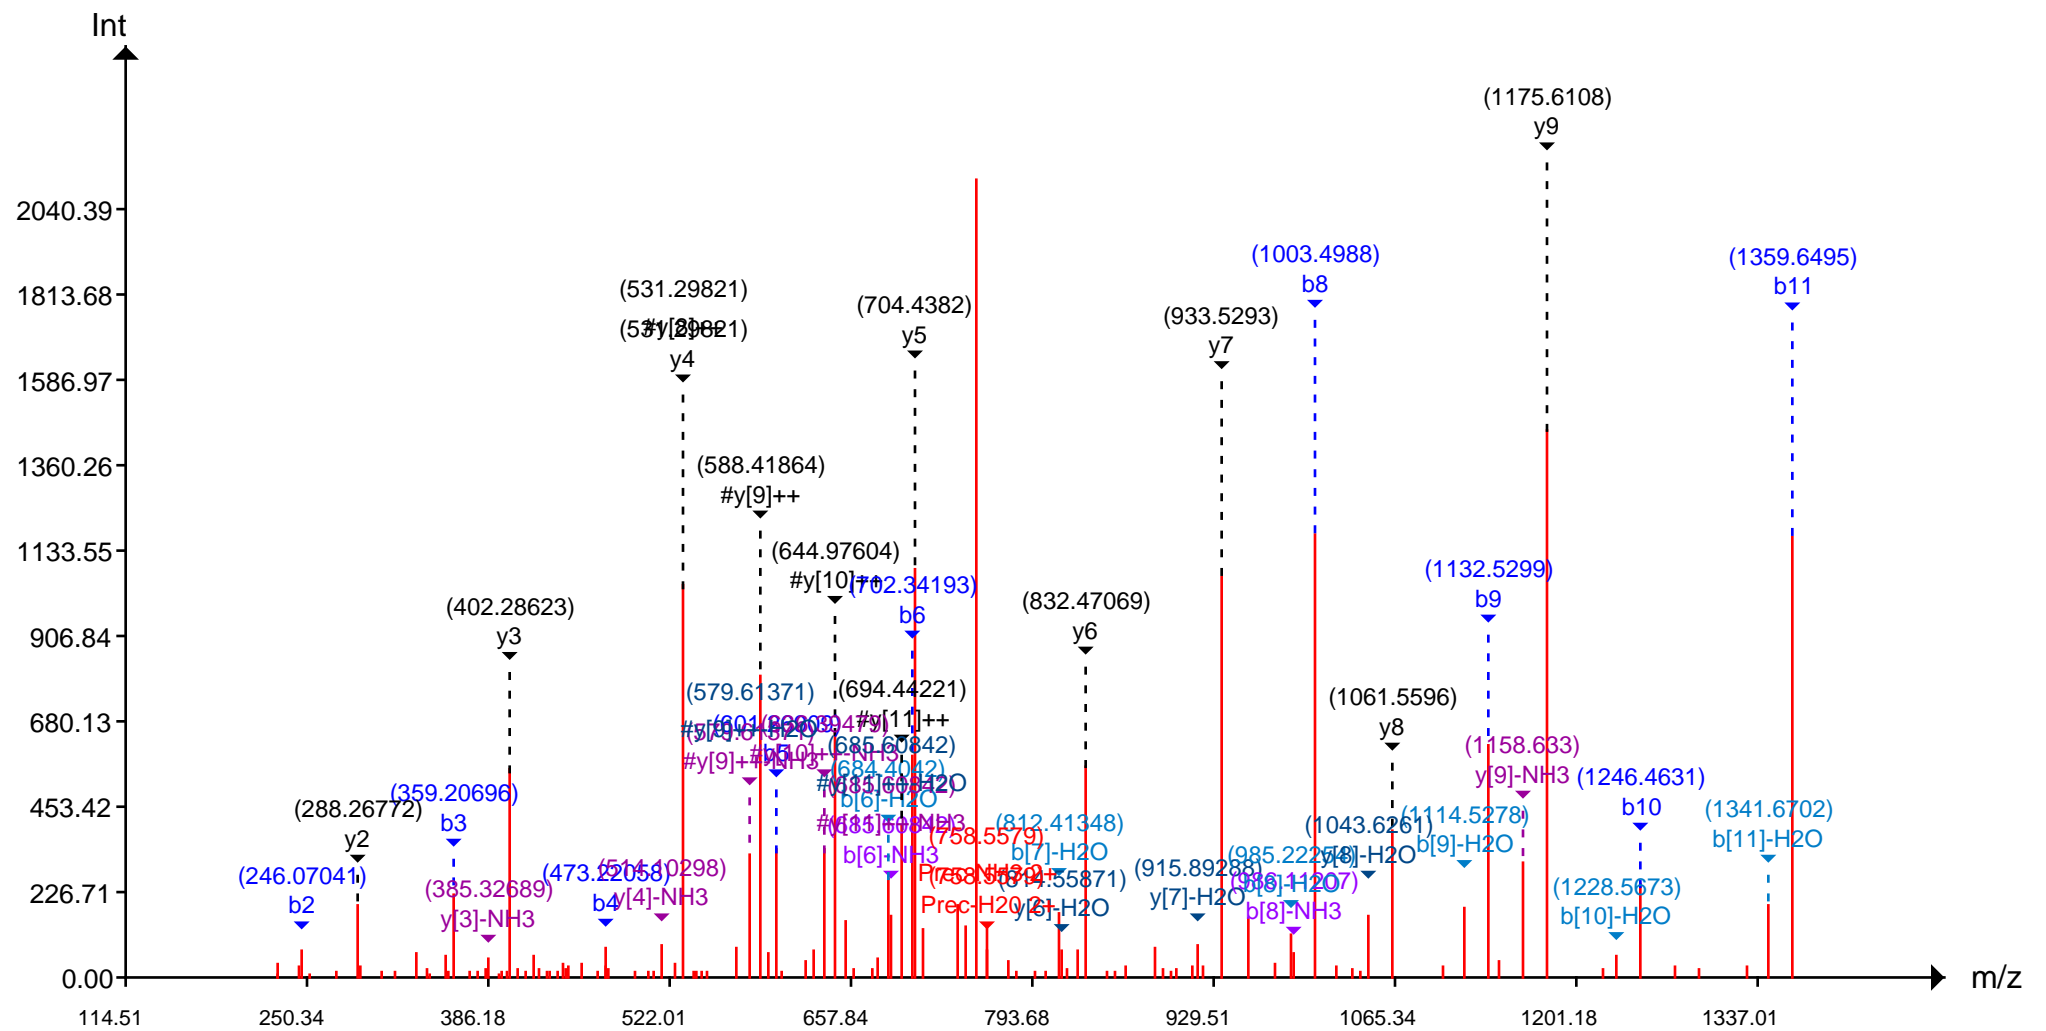

| Info              |                                | Ion score          | 96.67   |
|-------------------|--------------------------------|--------------------|---------|
| Modified Sequence | AcD3-TVINQTQK<AcD3K*>ENLR-COOH | Confidence level   | 99.00%  |
| Protein           | Q6ZWW7                         | Identity Threshold | 47.36   |
| Precursor m/z     | 767.4287                       | Mass error         | -6.3E-5 |
| Charge            | 2+                             |                    |         |

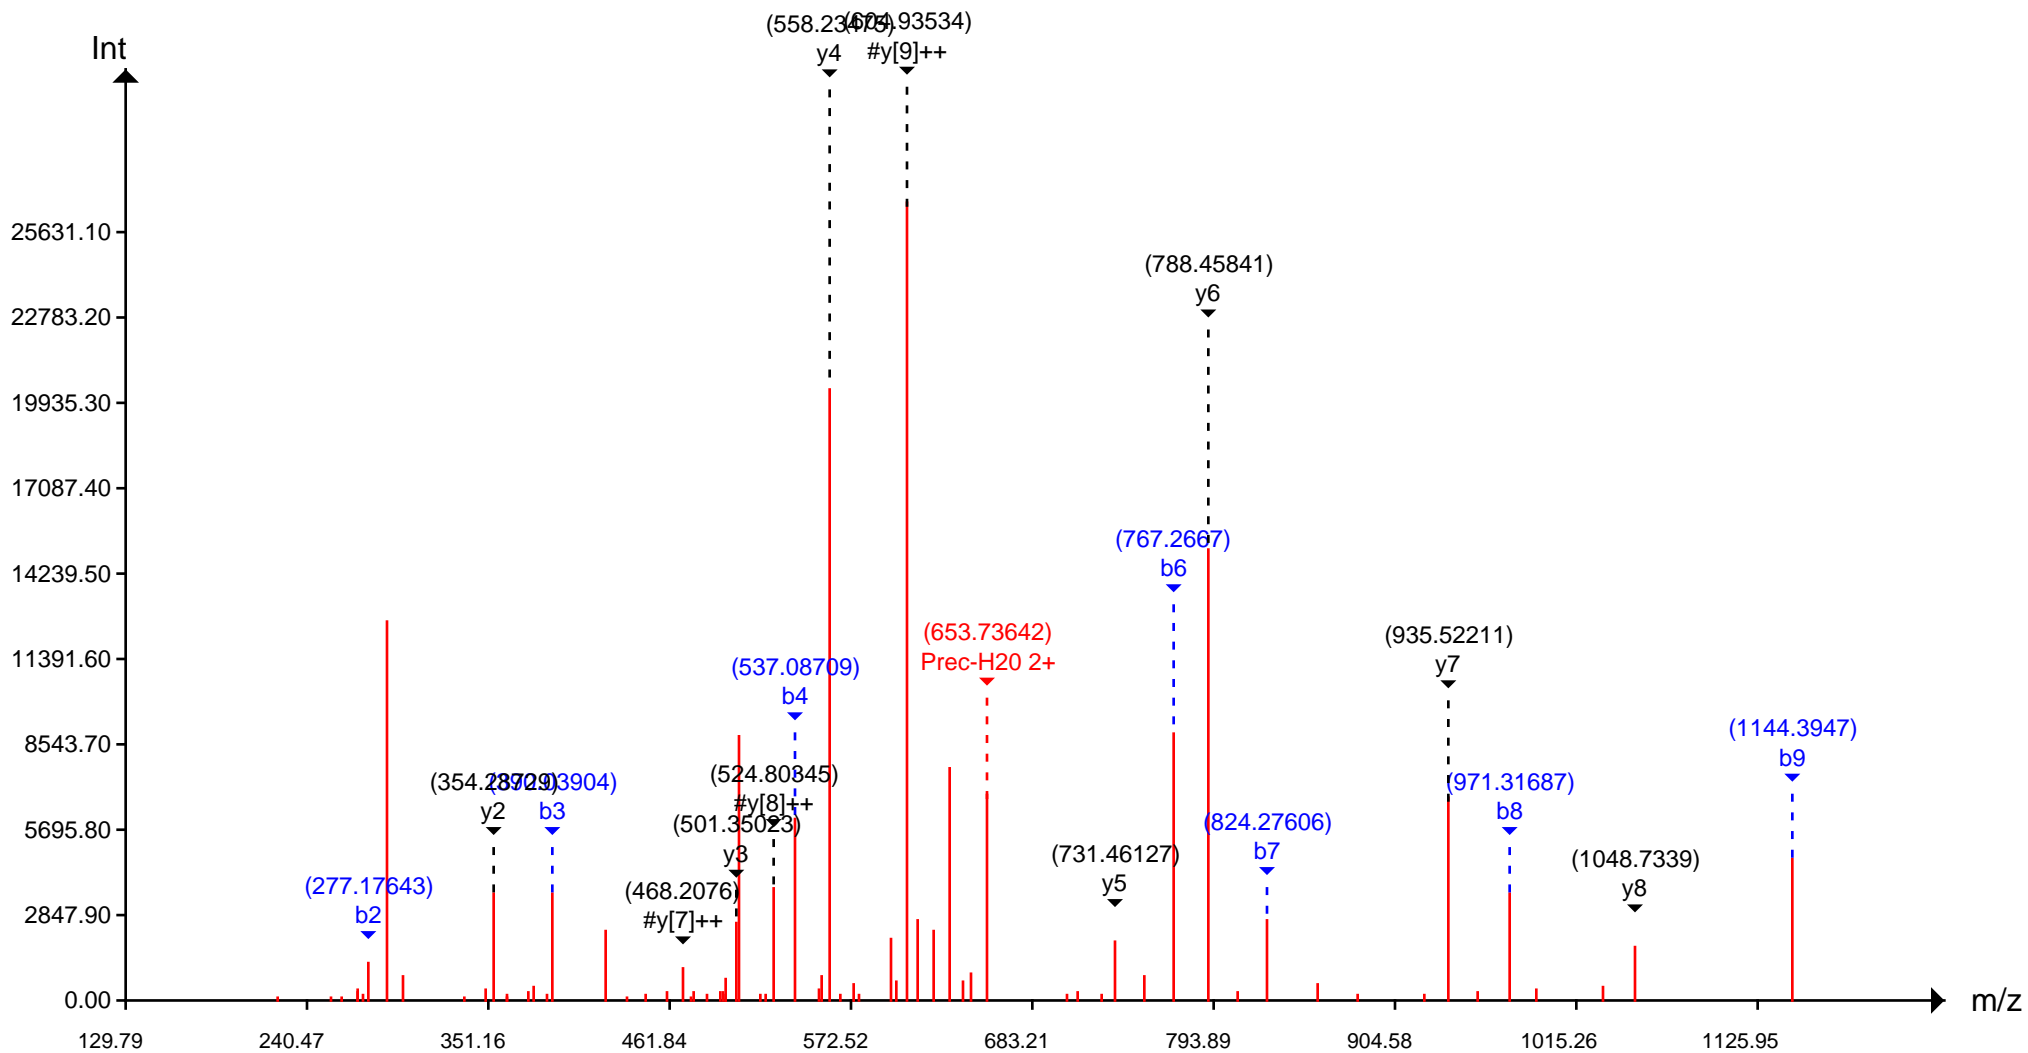

## Info

|                          |                                                             |                           |         |
|--------------------------|-------------------------------------------------------------|---------------------------|---------|
| <b>Modified Sequence</b> | AcD3-AC<Cmm*>LM<Mox*>GK<AcD3K*>GM<Mox*>K<AcD3K*>R<C13>-COOH | <b>Ion score</b>          | 50.35   |
| <b>Protein</b>           | Q61233                                                      | <b>Confidence level</b>   | 99.00%  |
| <b>Precursor m/z</b>     | 662.84532                                                   | <b>Identity Threshold</b> | 47.88   |
| <b>Charge</b>            | 2+                                                          | <b>Mass error</b>         | 6.12E-4 |

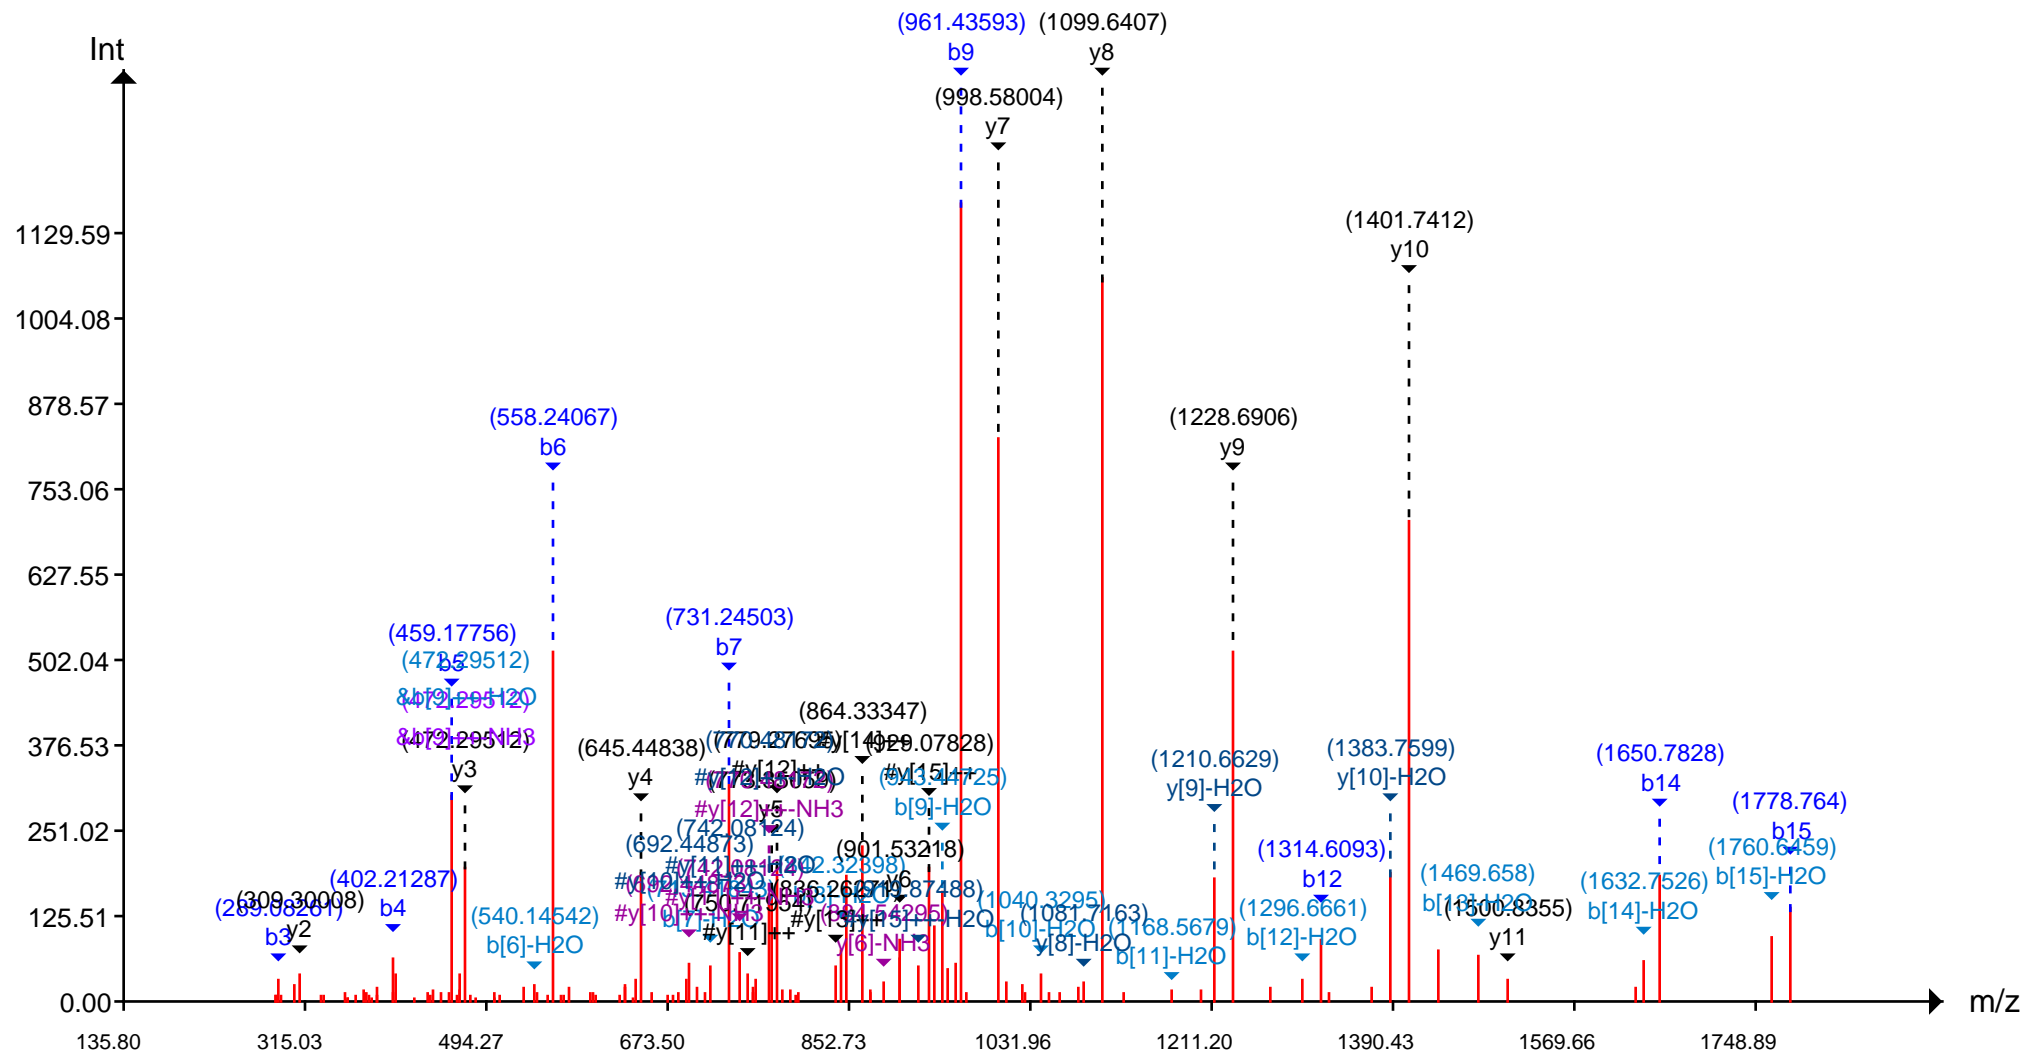

## Info

|                          |                                                 |                           |          |
|--------------------------|-------------------------------------------------|---------------------------|----------|
| <b>Modified Sequence</b> | AcD3-GEGLGVK<AcD3K*>ETPQQK<AcD3K*>YQR<C13>-COOH | <b>Ion score</b>          | 80.19    |
| <b>Protein</b>           | Q99KJ8                                          | <b>Confidence level</b>   | 99.00%   |
| <b>Precursor m/z</b>     | 980.03369                                       | <b>Identity Threshold</b> | 47.45    |
| <b>Charge</b>            | 2+                                              | <b>Mass error</b>         | 0.001345 |

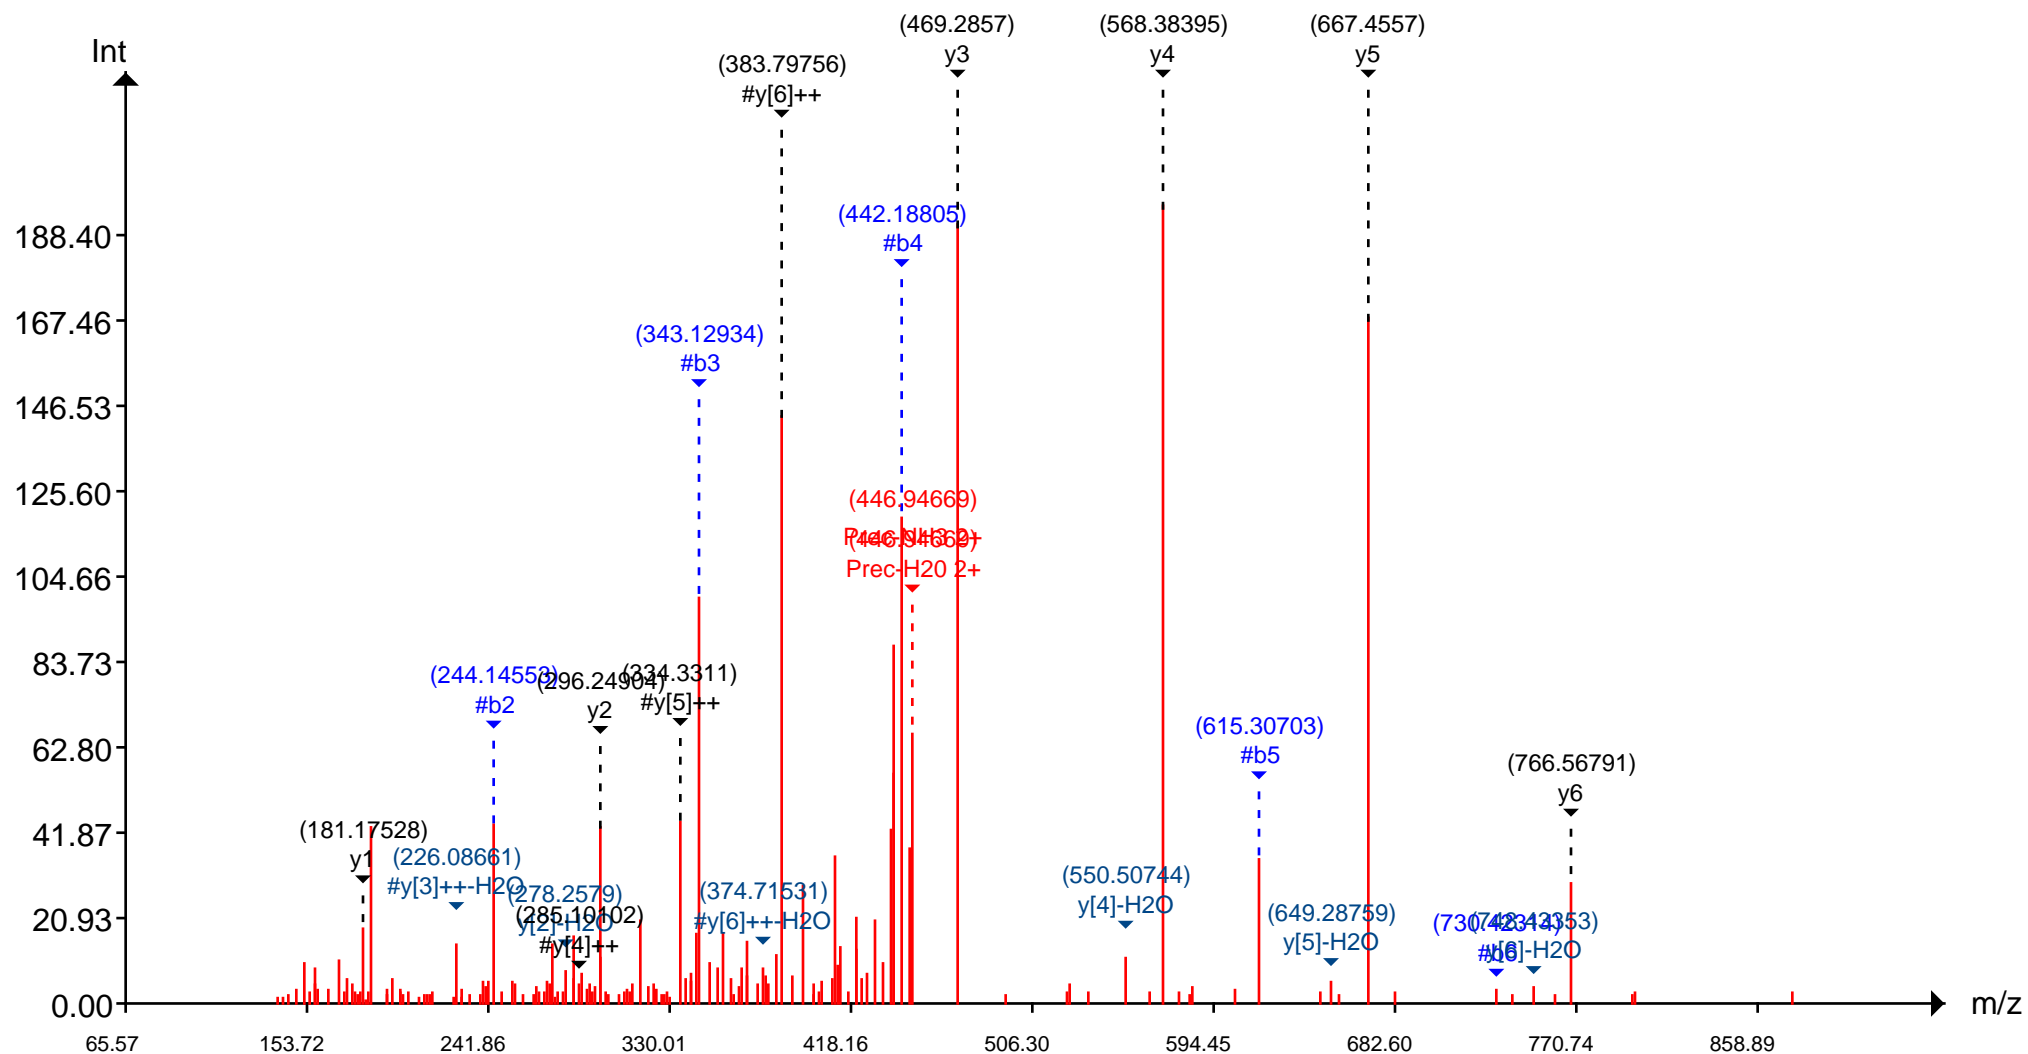

## Info

**Modified Sequence** AcD3-VVVVK<AcD3K\*>DR<C13>-COOH

**Ion score** 53.32

**Protein** P60824, O89086

**Confidence level** 99.00%

**Precursor m/z** 455.79988

**Identity Threshold** 40.79

**Charge** 2+

**Mass error** -9.74E-4

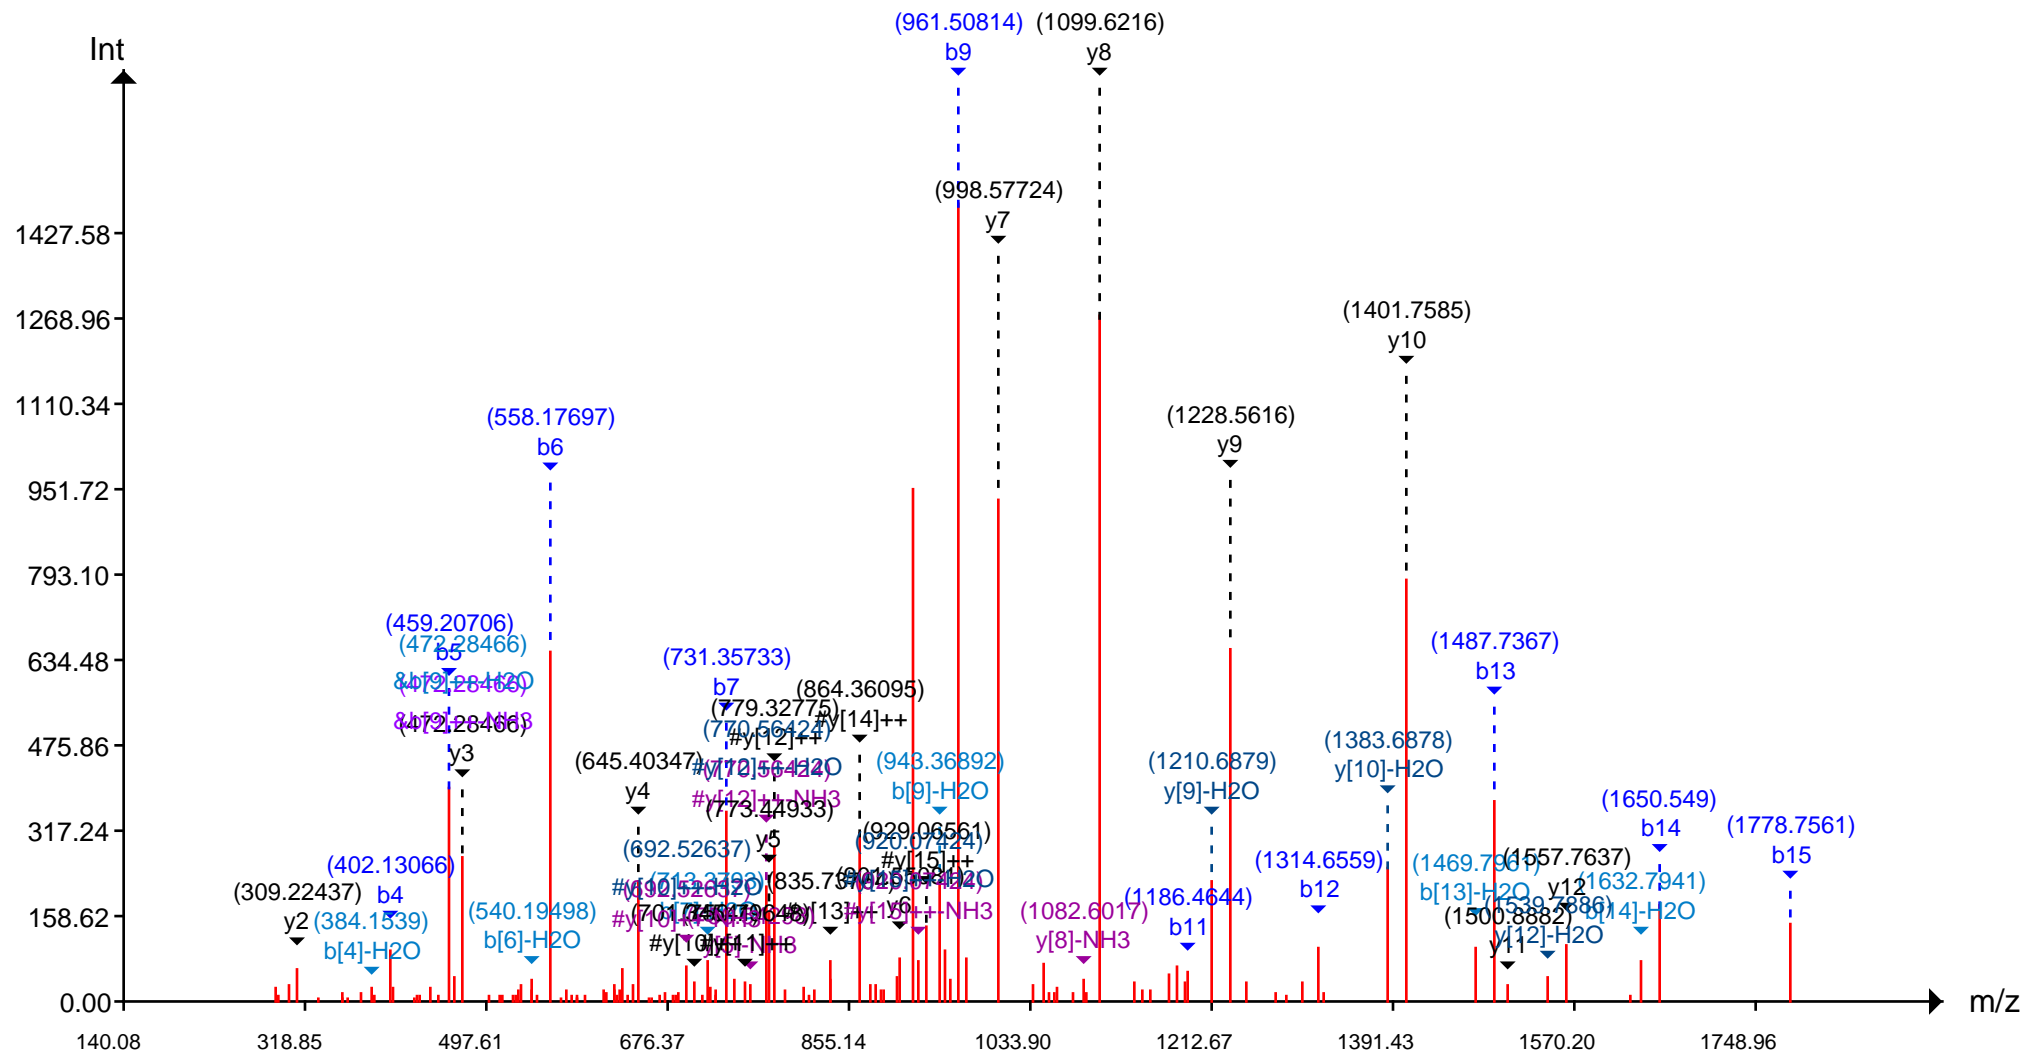

## Info

|                          |                                                 |                           |          |
|--------------------------|-------------------------------------------------|---------------------------|----------|
| <b>Modified Sequence</b> | AcD3-GEGLGVK<AcD3K*>ETPQQK<AcD3K*>YQR<C13>-COOH | <b>Ion score</b>          | 74.95    |
| <b>Protein</b>           | Q99KJ8                                          | <b>Confidence level</b>   | 99.00%   |
| <b>Precursor m/z</b>     | 980.03377                                       | <b>Identity Threshold</b> | 47.46    |
| <b>Charge</b>            | 2+                                              | <b>Mass error</b>         | 0.001505 |



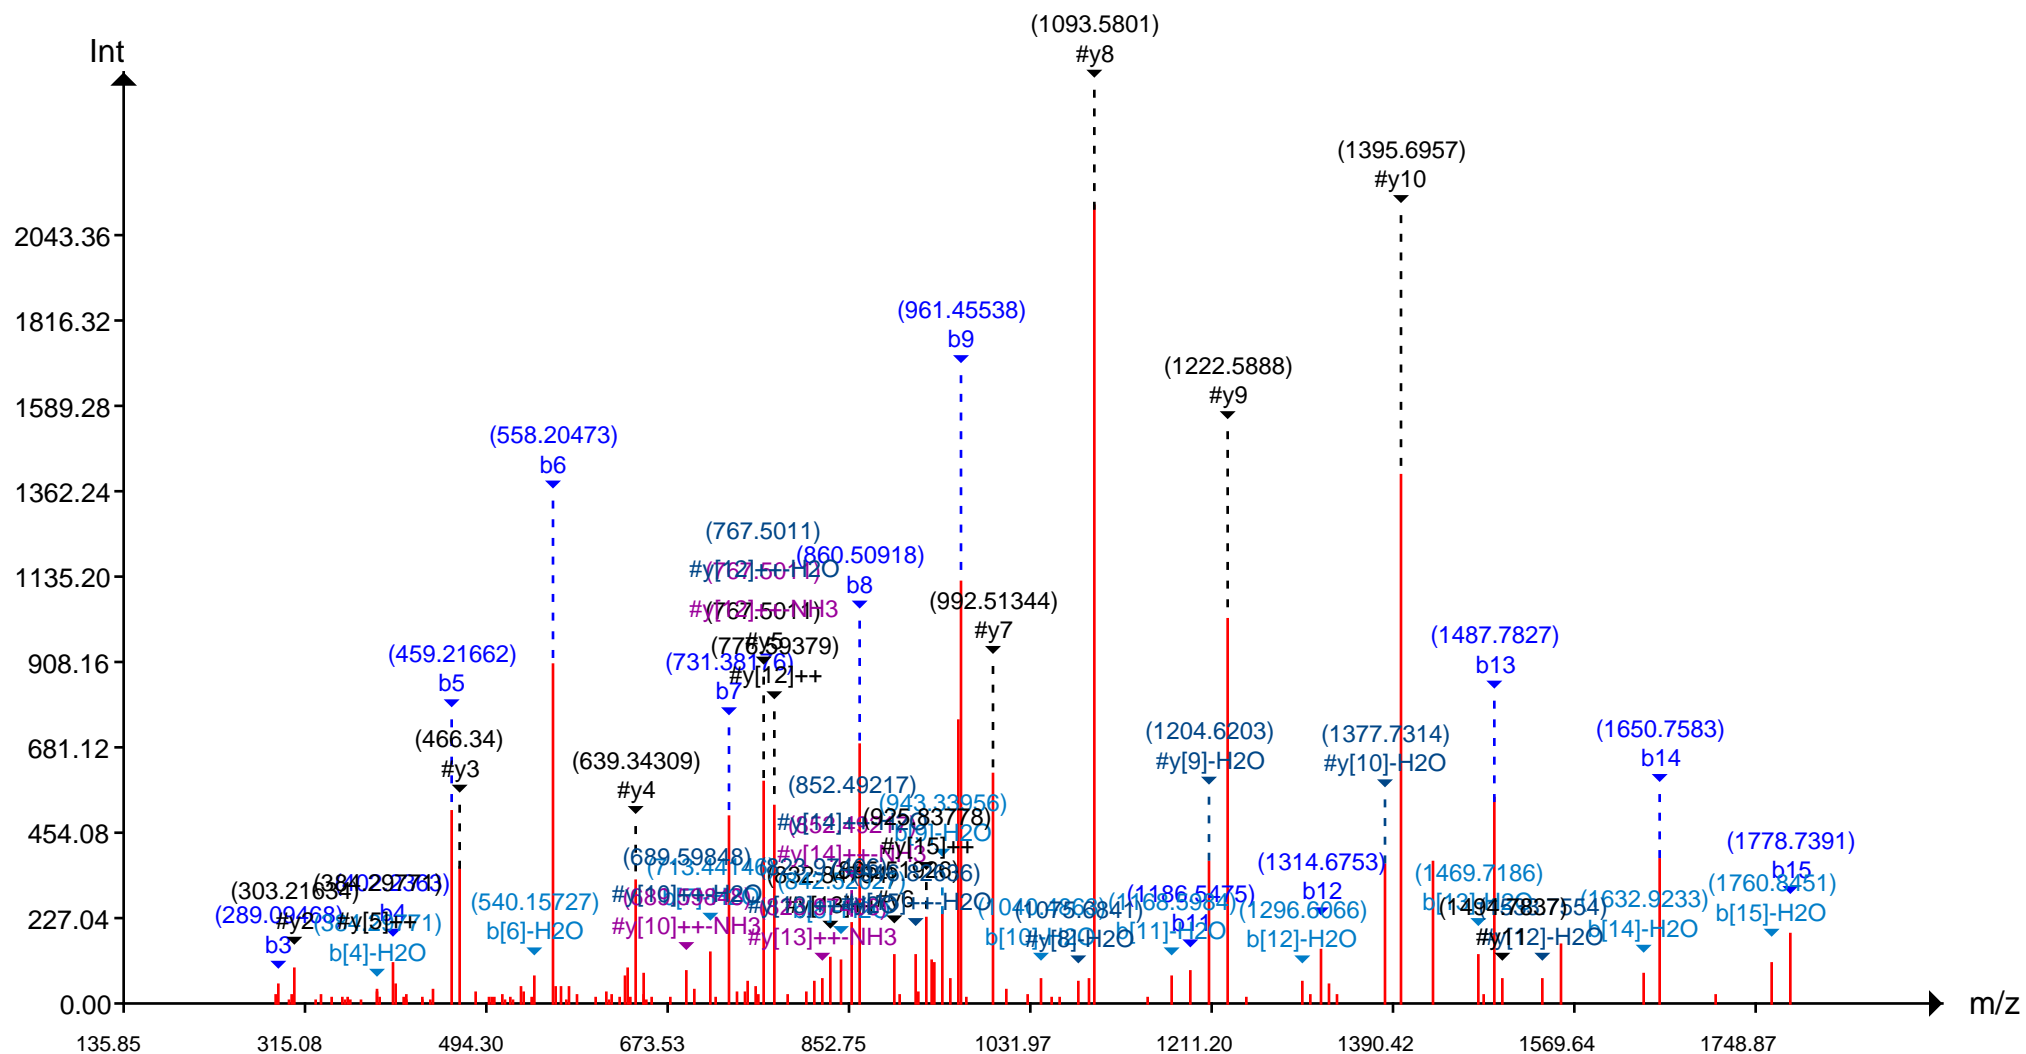

## Info

|                          |                                            |                           |          |
|--------------------------|--------------------------------------------|---------------------------|----------|
| <b>Modified Sequence</b> | AcD3-GEGLGVK<AcD3K*>ETPQQK<AcD3K*>YQR-COOH | <b>Ion score</b>          | 106.66   |
| <b>Protein</b>           | Q99KJ8                                     | <b>Confidence level</b>   | 99.00%   |
| <b>Precursor m/z</b>     | 977.0237                                   | <b>Identity Threshold</b> | 47.75    |
| <b>Charge</b>            | 2+                                         | <b>Mass error</b>         | 0.001506 |

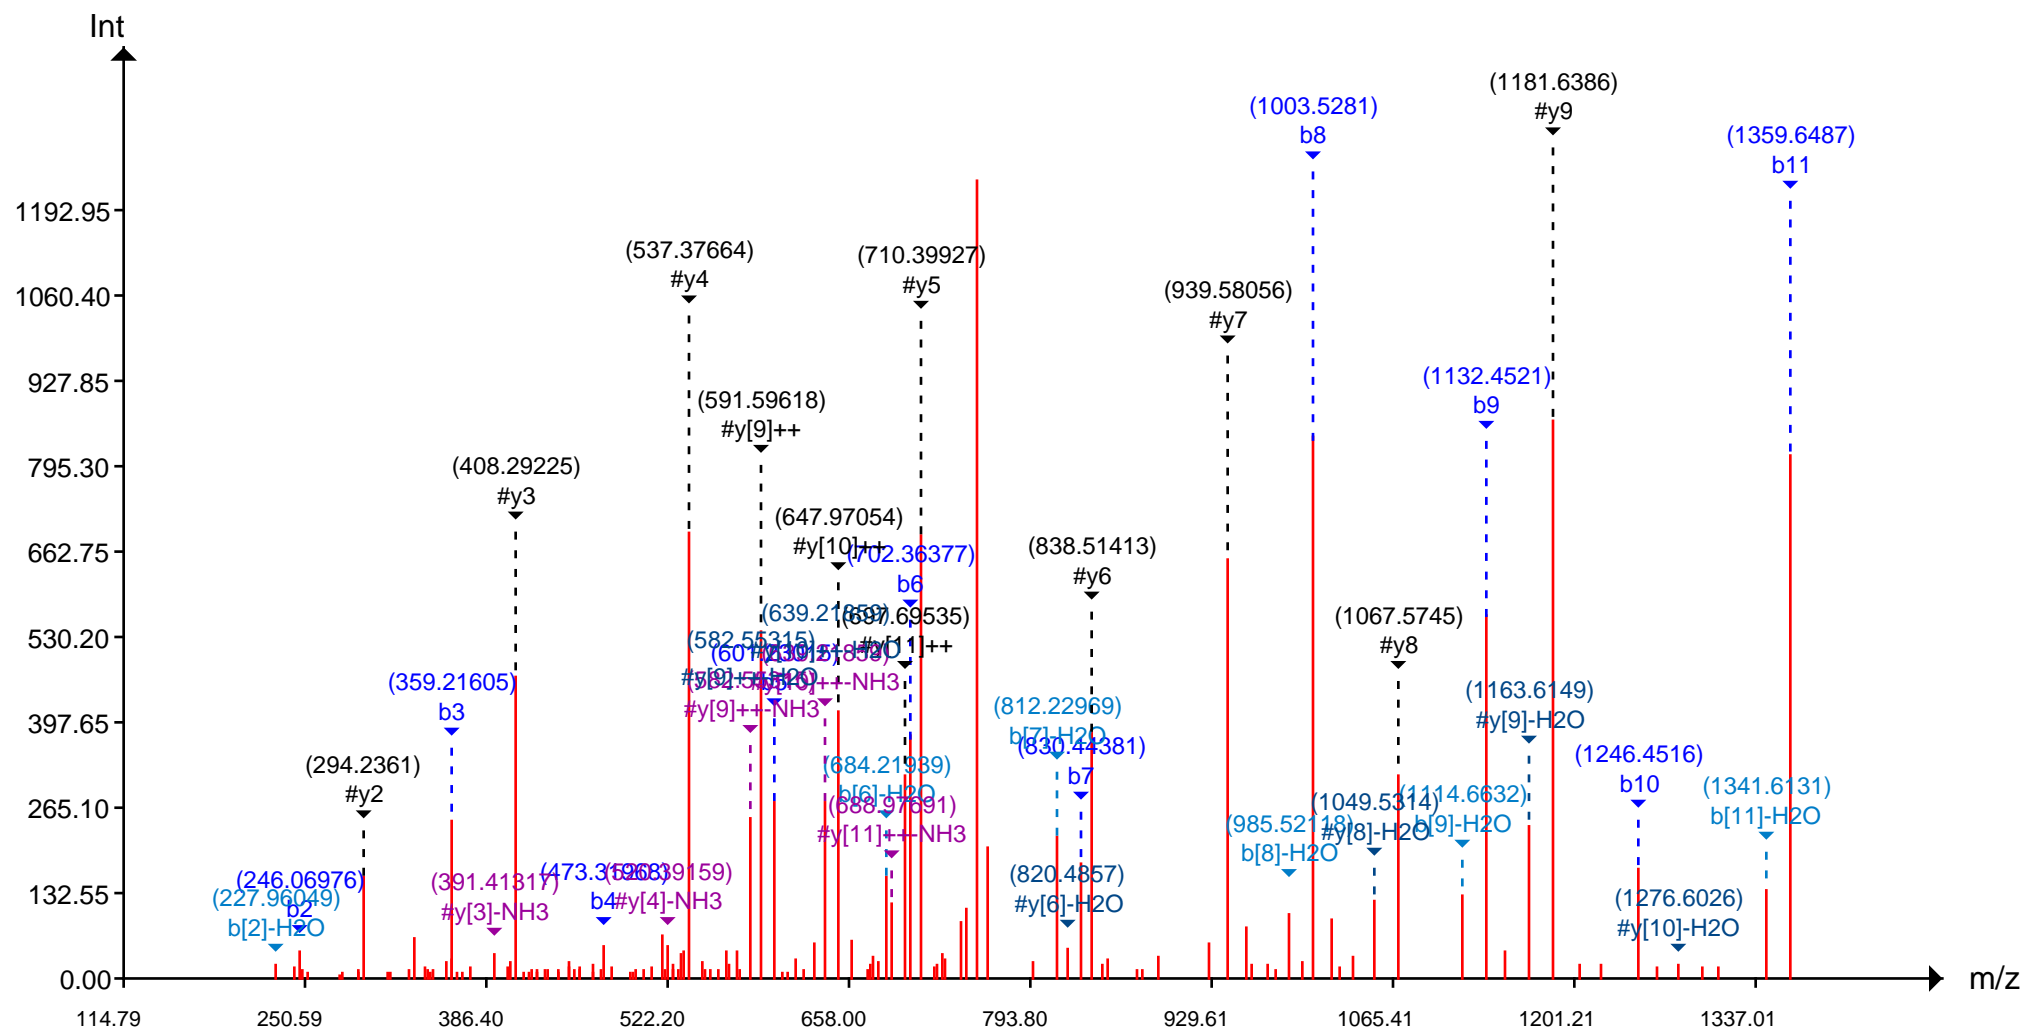

## Info

|                          |                                     |                           |          |
|--------------------------|-------------------------------------|---------------------------|----------|
| <b>Modified Sequence</b> | AcD3-TVINQTQK<AcD3K*>ENLR<C13>-COOH | <b>Ion score</b>          | 93.7     |
| <b>Protein</b>           | Q6ZWW7                              | <b>Confidence level</b>   | 99.00%   |
| <b>Precursor m/z</b>     | 770.43861                           | <b>Identity Threshold</b> | 46.62    |
| <b>Charge</b>            | 2+                                  | <b>Mass error</b>         | -3.84E-4 |

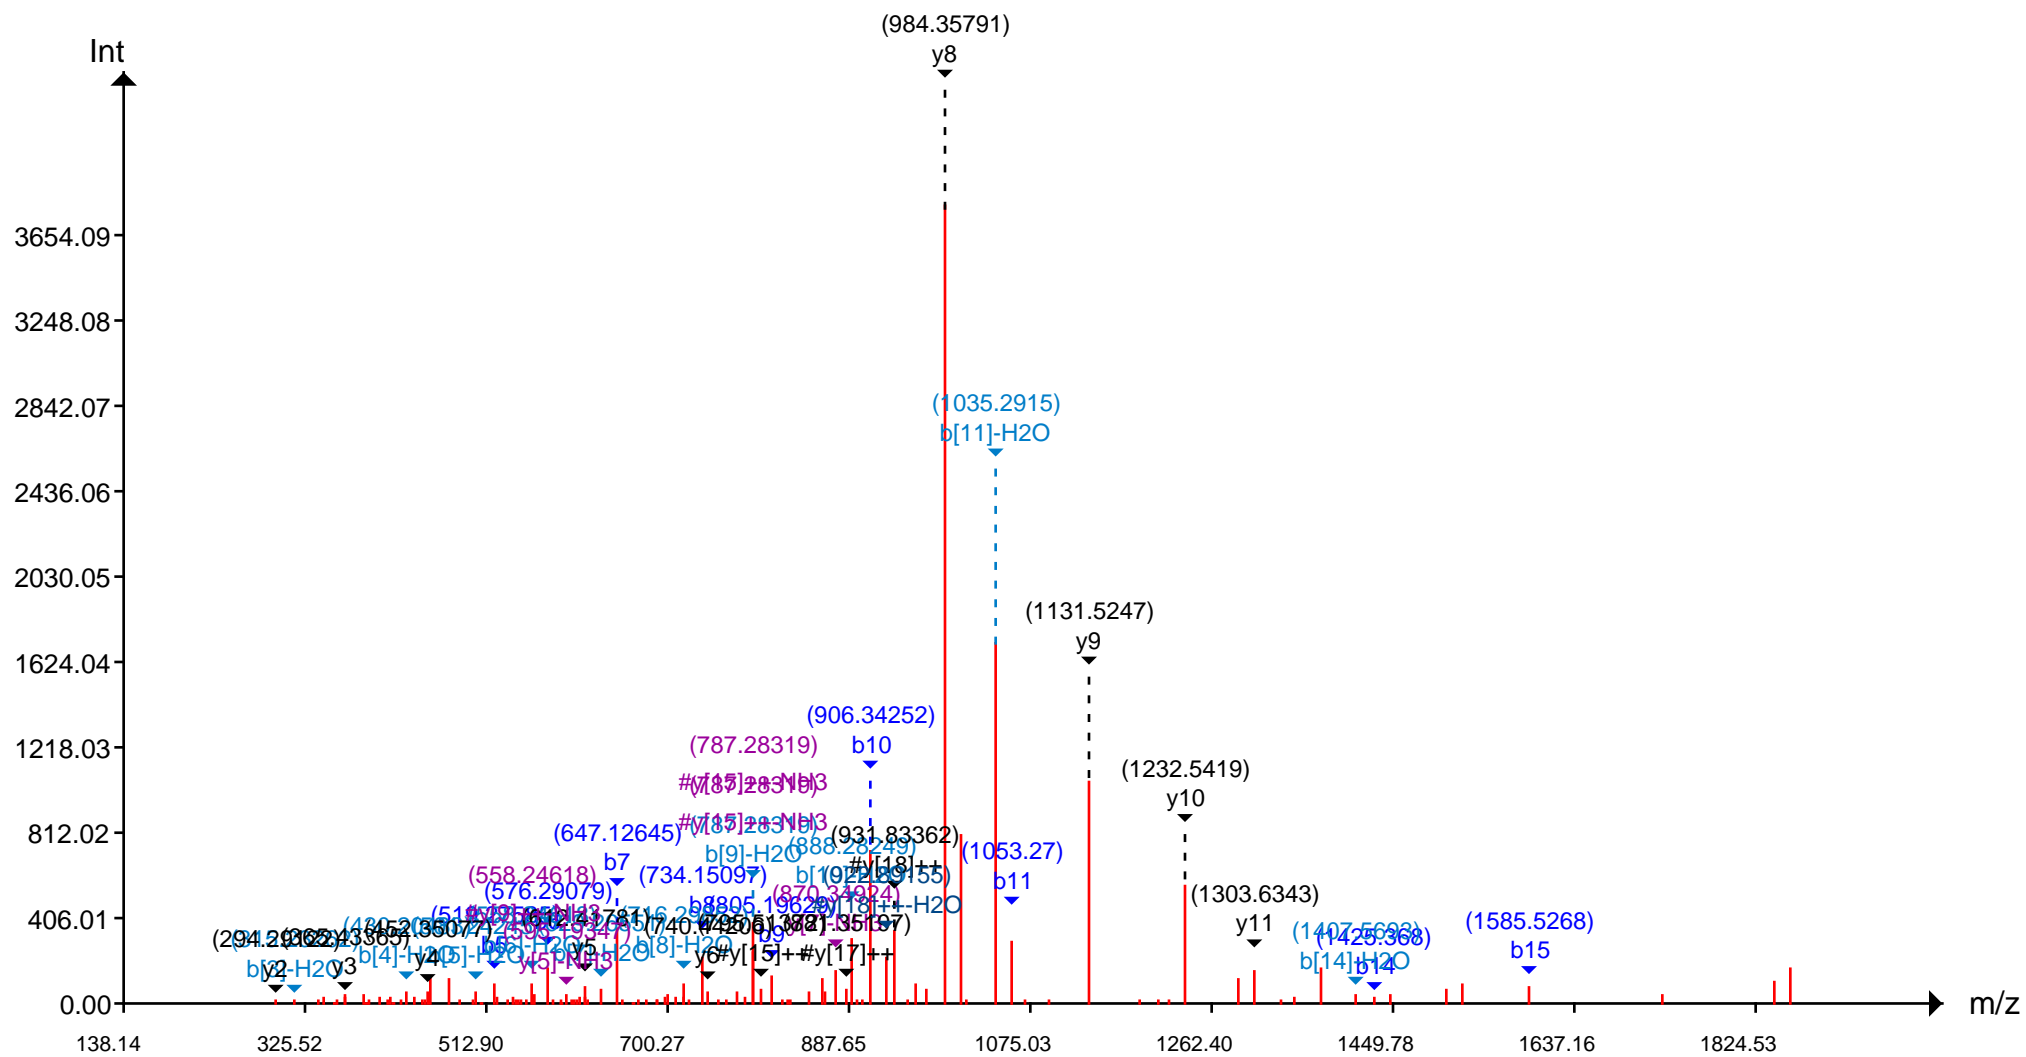

## Info

|                          |                                                |                           |          |
|--------------------------|------------------------------------------------|---------------------------|----------|
| <b>Modified Sequence</b> | AcD3-ETGDAGASATFPM<Mox*>QC<Cmm*>SALR<C13>-COOH | <b>Ion score</b>          | 57.11    |
| <b>Protein</b>           | P63242                                         | <b>Confidence level</b>   | 99.00%   |
| <b>Precursor m/z</b>     | 1018.9635                                      | <b>Identity Threshold</b> | 44.06    |
| <b>Charge</b>            | 2+                                             | <b>Mass error</b>         | 0.001041 |

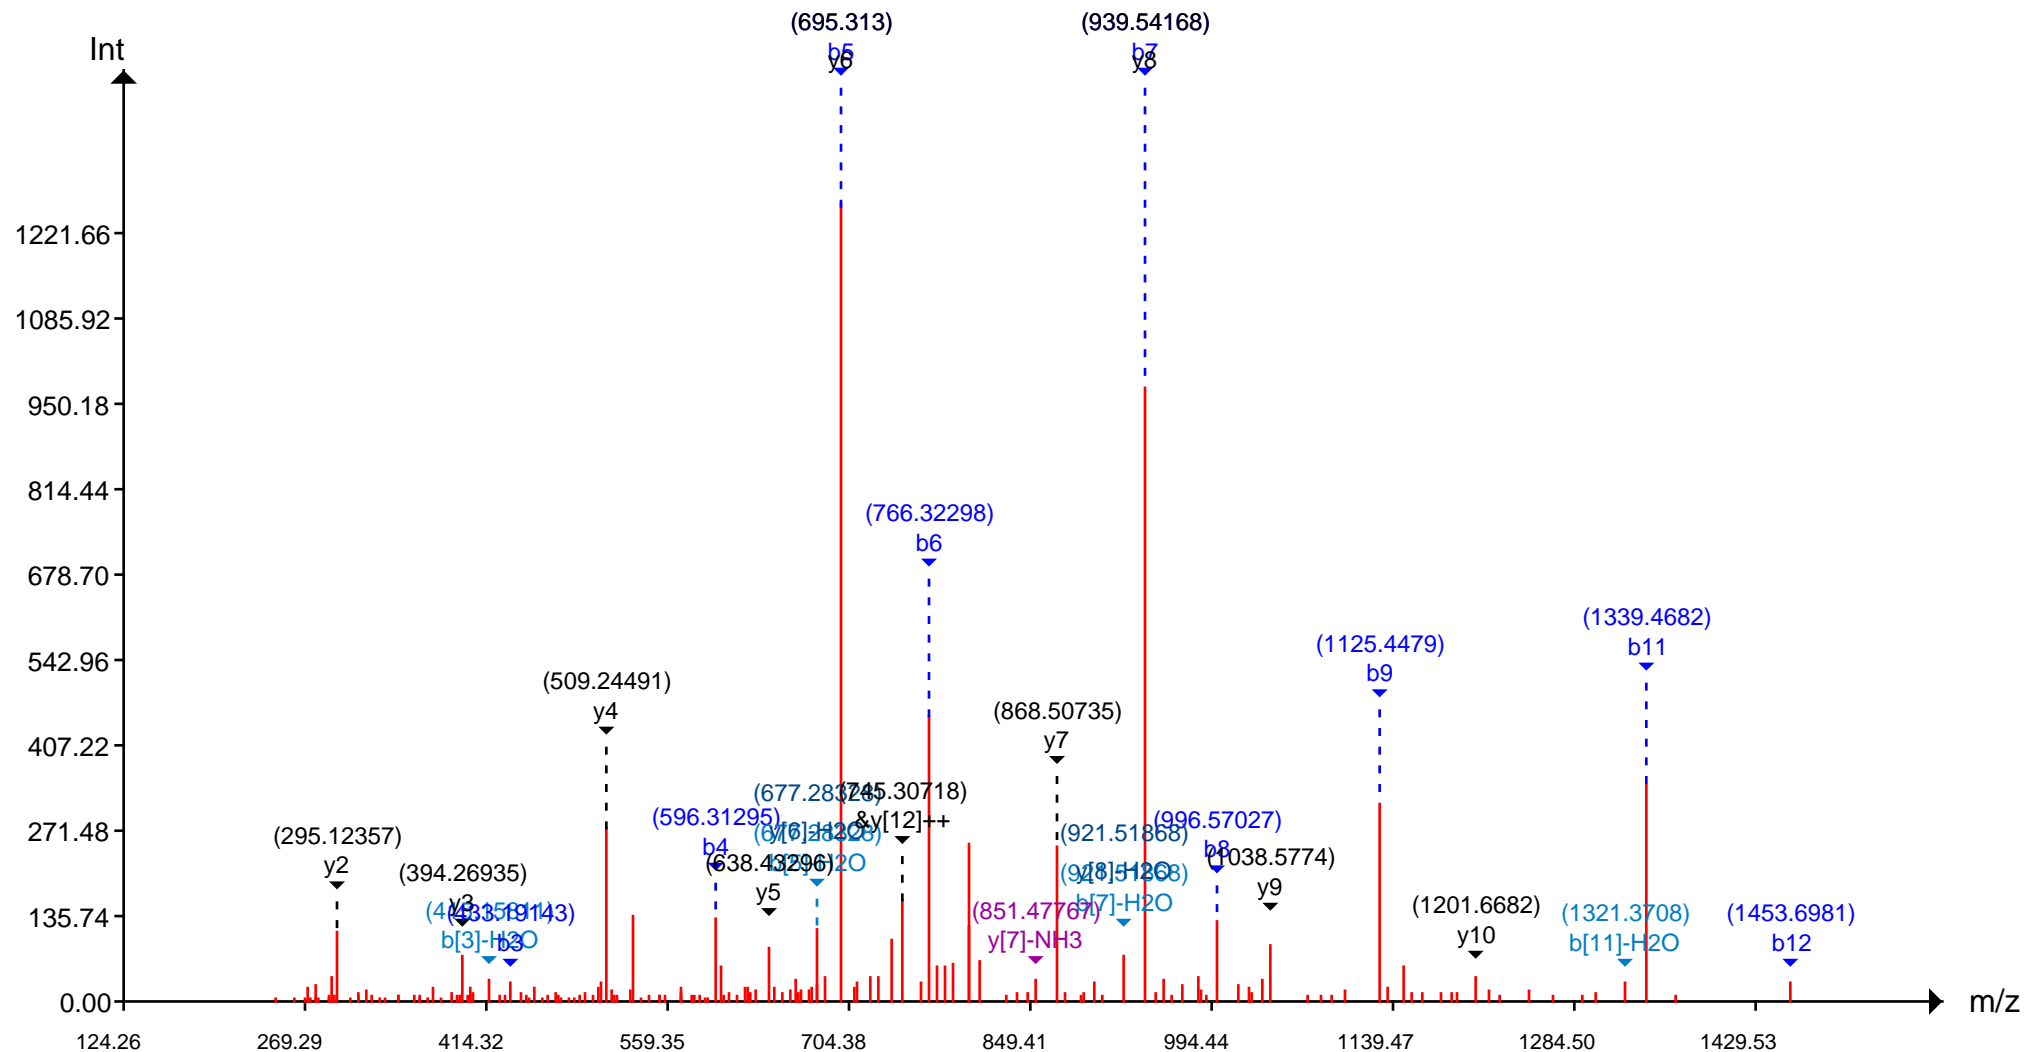

## Info

**Modified Sequence** AcD3-VK<AcD3K\*>DYVAK<AcD3K\*>GEDVNR<C13>-COOH

**Ion score** 83.21

**Protein** P62774

**Confidence level** 99.00%

**Precursor m/z** 817.44659

**Identity Threshold** 47.71

**Charge** 2+

**Mass error** 0.002148

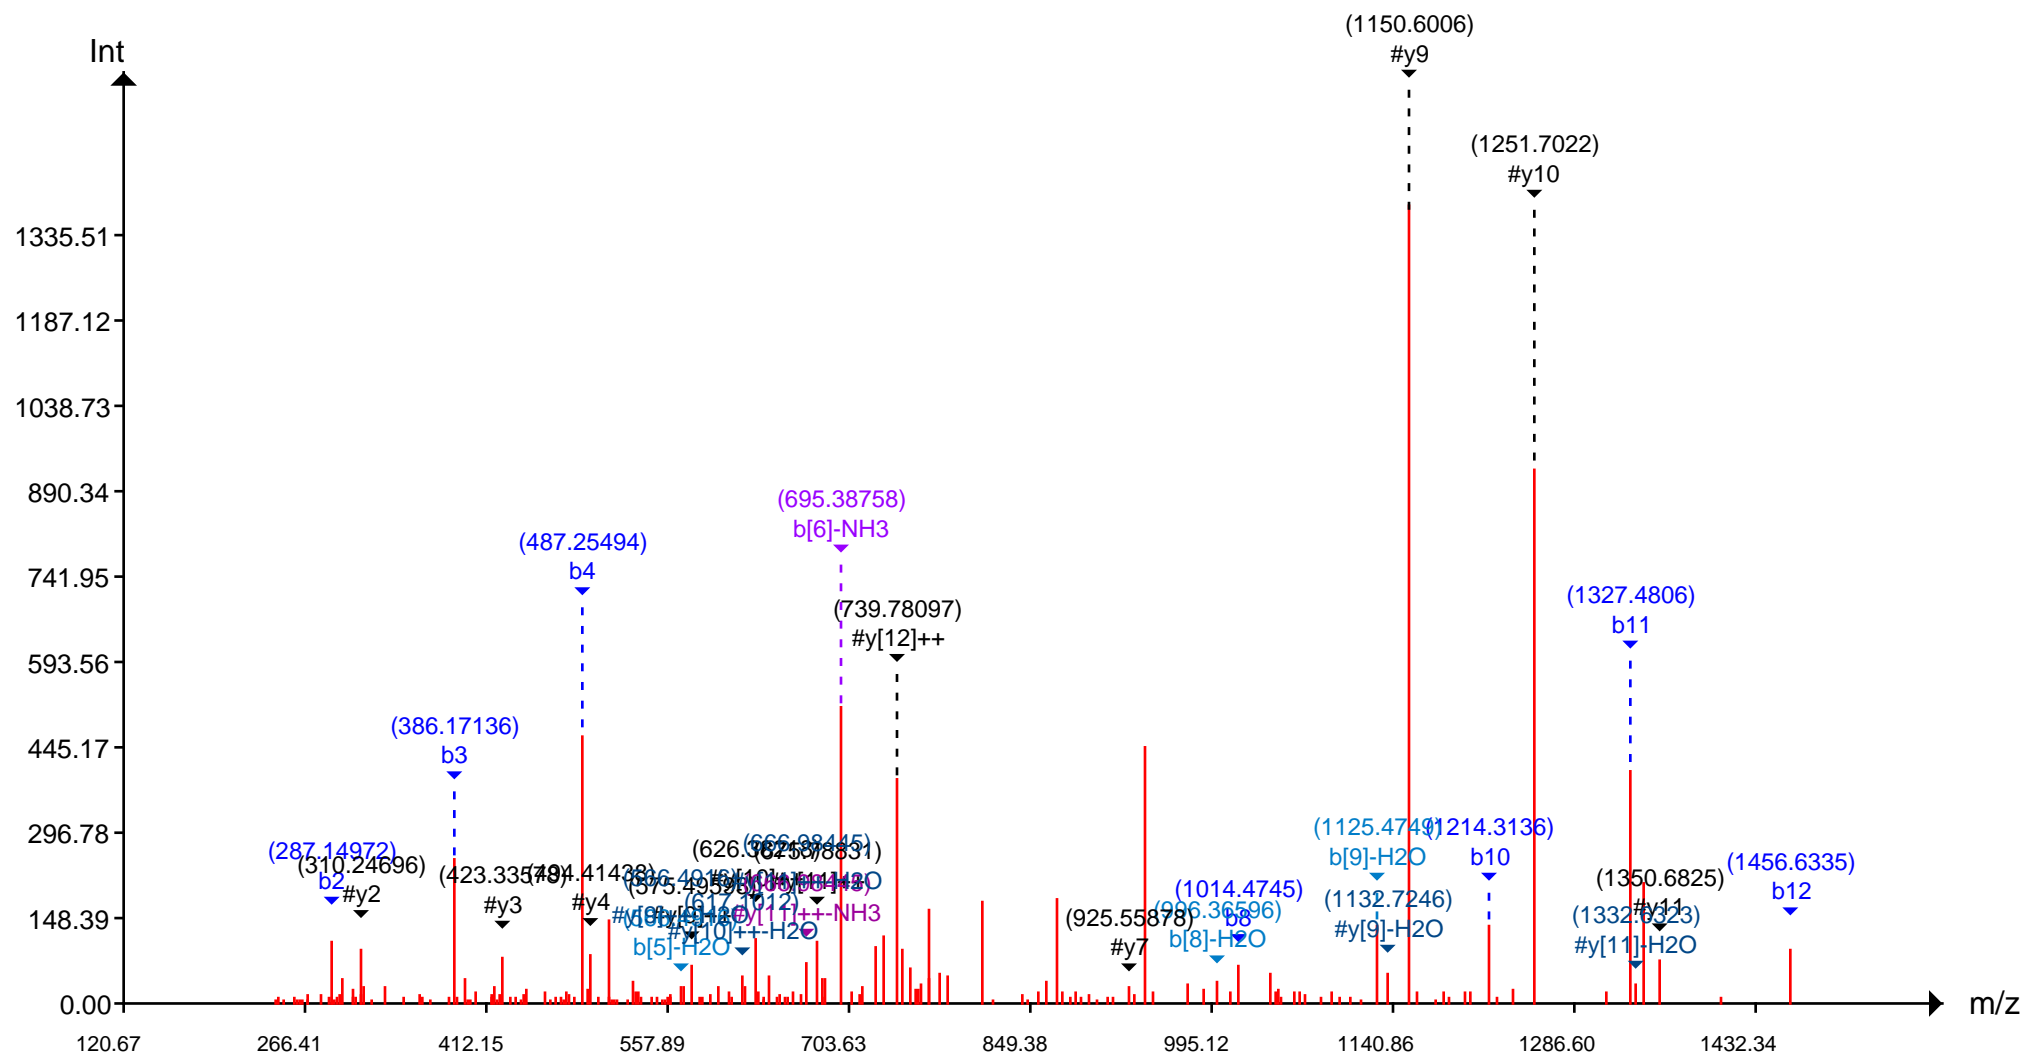

## Info

**Modified Sequence** AcD3-IQVTPQEK<AcD3K\*>EAIER<C13>-COOH

**Ion score** 48.67

**Protein** P54726, P54728

**Confidence level** 99.00%

**Precursor m/z** 818.9607

**Identity Threshold** 46.90

**Charge** 2+

**Mass error** 0.002276

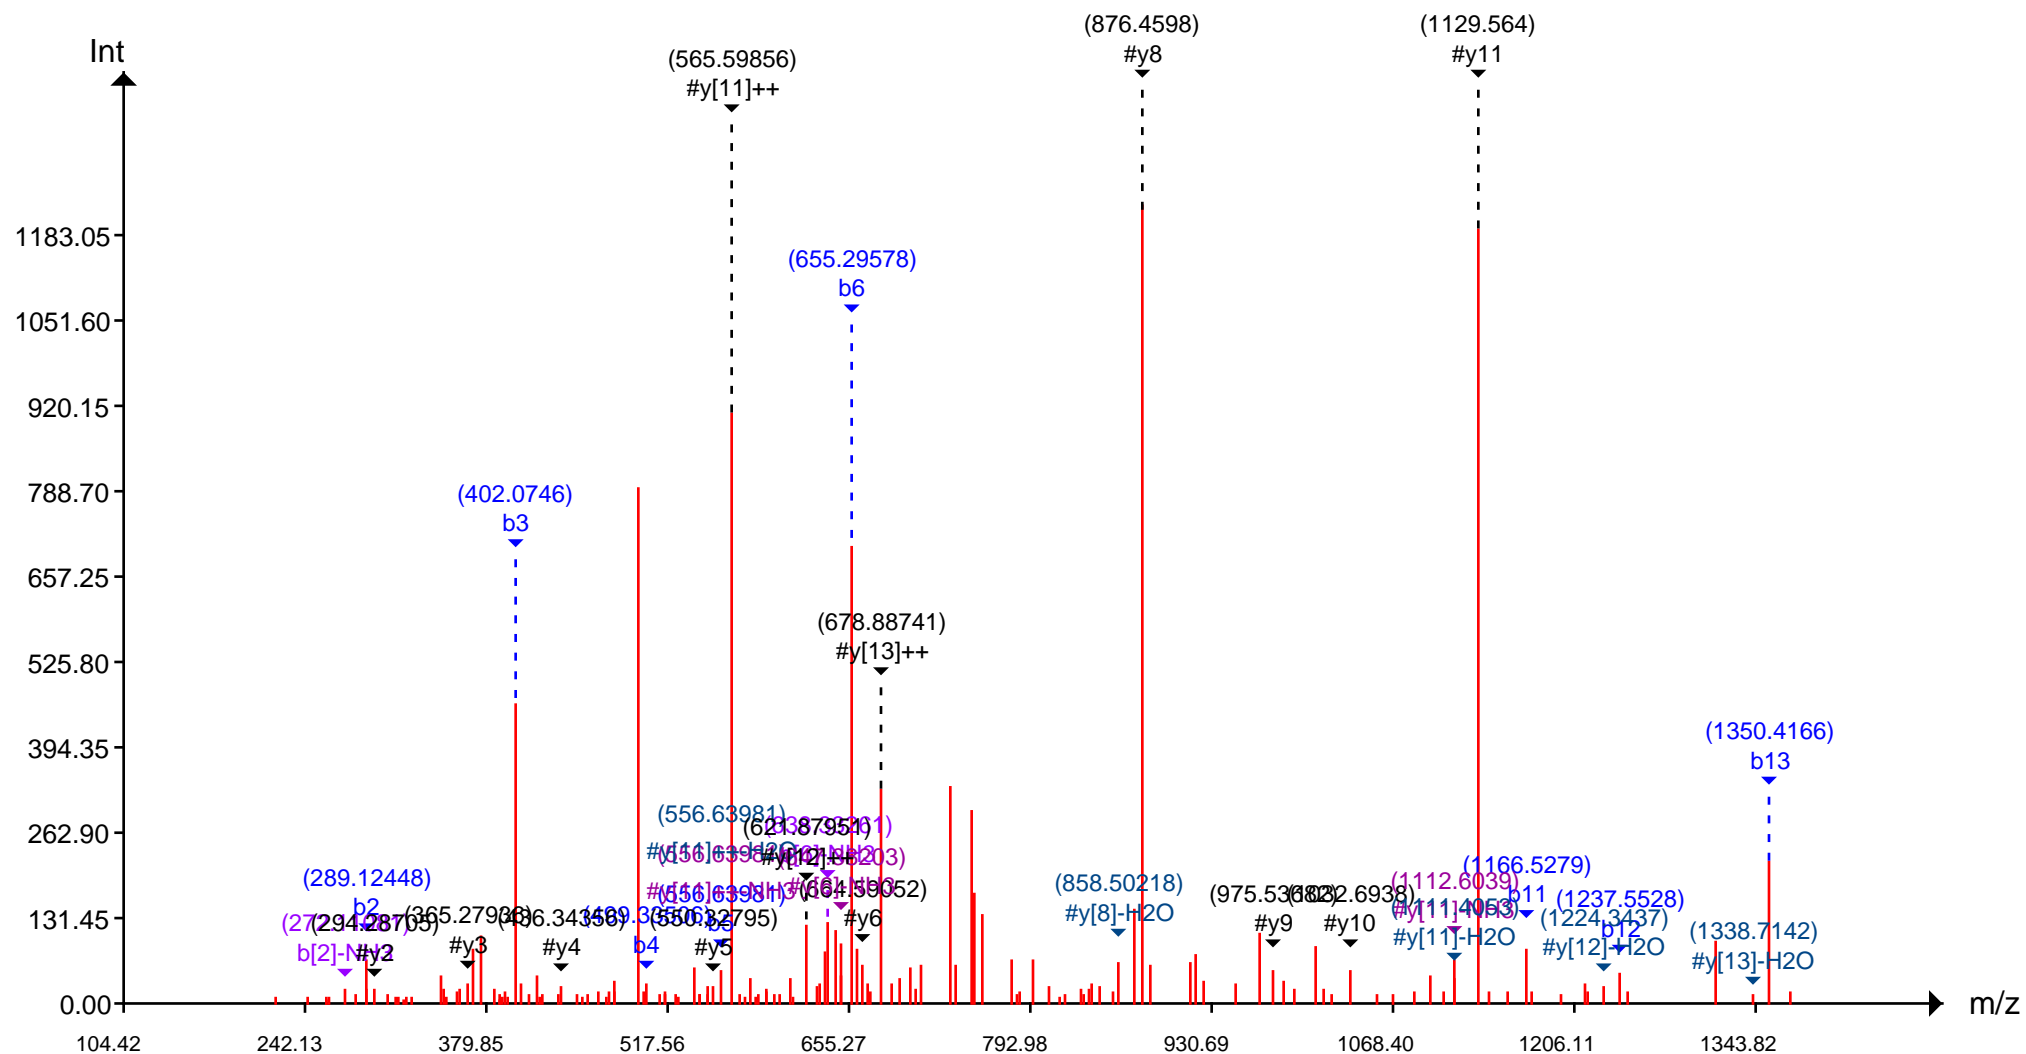

## Info

**Modified Sequence** AcD3-ENLPGVDPNNAAIR<C13>-COOH

**Ion score** 48.76

**Protein** O35226

**Confidence level** 99.00%

**Precursor m/z** 765.90677

**Identity Threshold** 48.15

**Charge** 2+

**Mass error** 0.001732

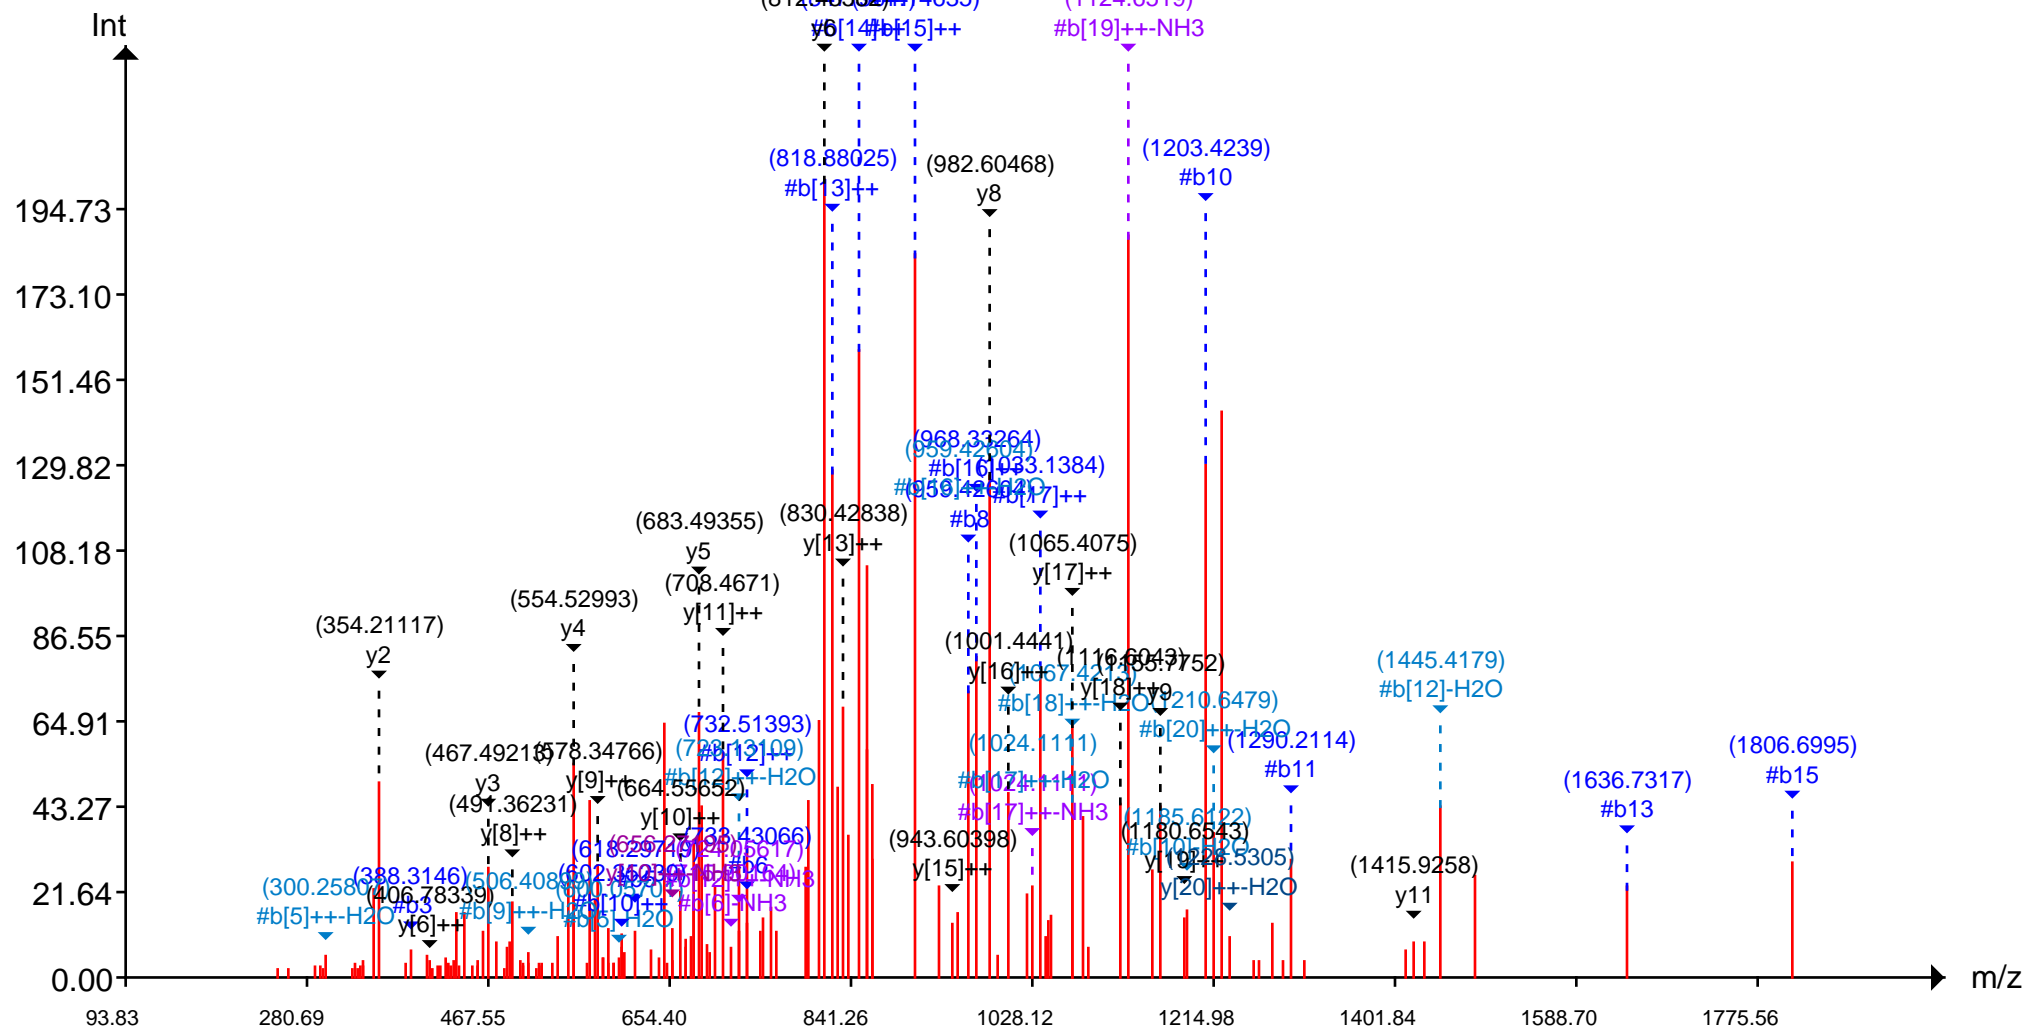

## Info

|                    |                                                                      |                    |          |
|--------------------|----------------------------------------------------------------------|--------------------|----------|
| Modified Sequen... | AcD3-VDQTEDILAK<AcD3K*>SK<AcD3K*>K<AcD3K*>GIEESLK<AcD3K*>R<C13>-COOH | Ion score          | 49.03    |
| Prote...           | Q61425                                                               | Confidence level   | 99.00%   |
| Precursor m...     | 873.49906                                                            | Identity Threshold | 43.99    |
| Char...            | 3+                                                                   | Mass error         | 0.001506 |

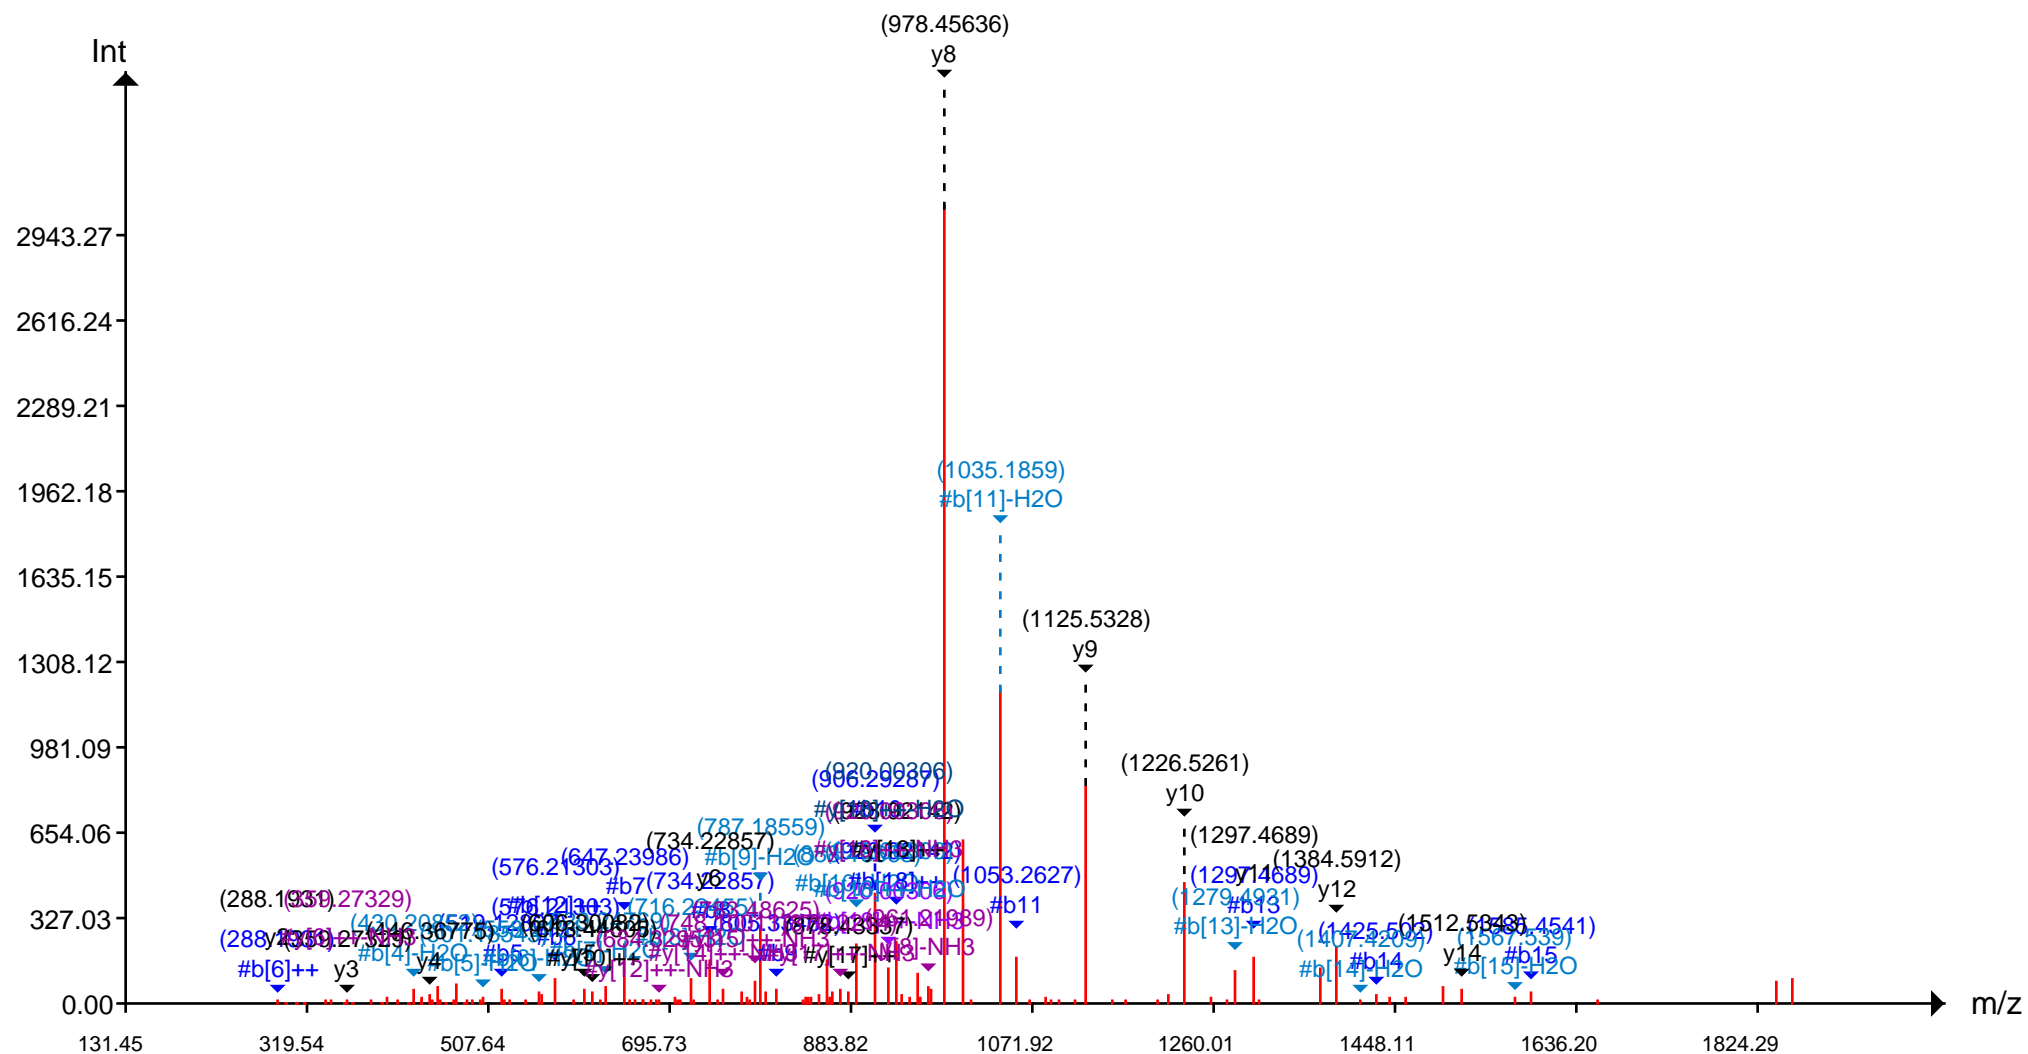

## Info

|                          |                                           |                           |         |
|--------------------------|-------------------------------------------|---------------------------|---------|
| <b>Modified Sequence</b> | AcD3-ETGDAGASATFPM<Mox*>QC<Cmm*>SALR-COOH | <b>Ion score</b>          | 69.95   |
| <b>Protein</b>           | P63242                                    | <b>Confidence level</b>   | 99.00%  |
| <b>Precursor m/z</b>     | 1015.9533                                 | <b>Identity Threshold</b> | 43.08   |
| <b>Charge</b>            | 2+                                        | <b>Mass error</b>         | 7.82E-4 |



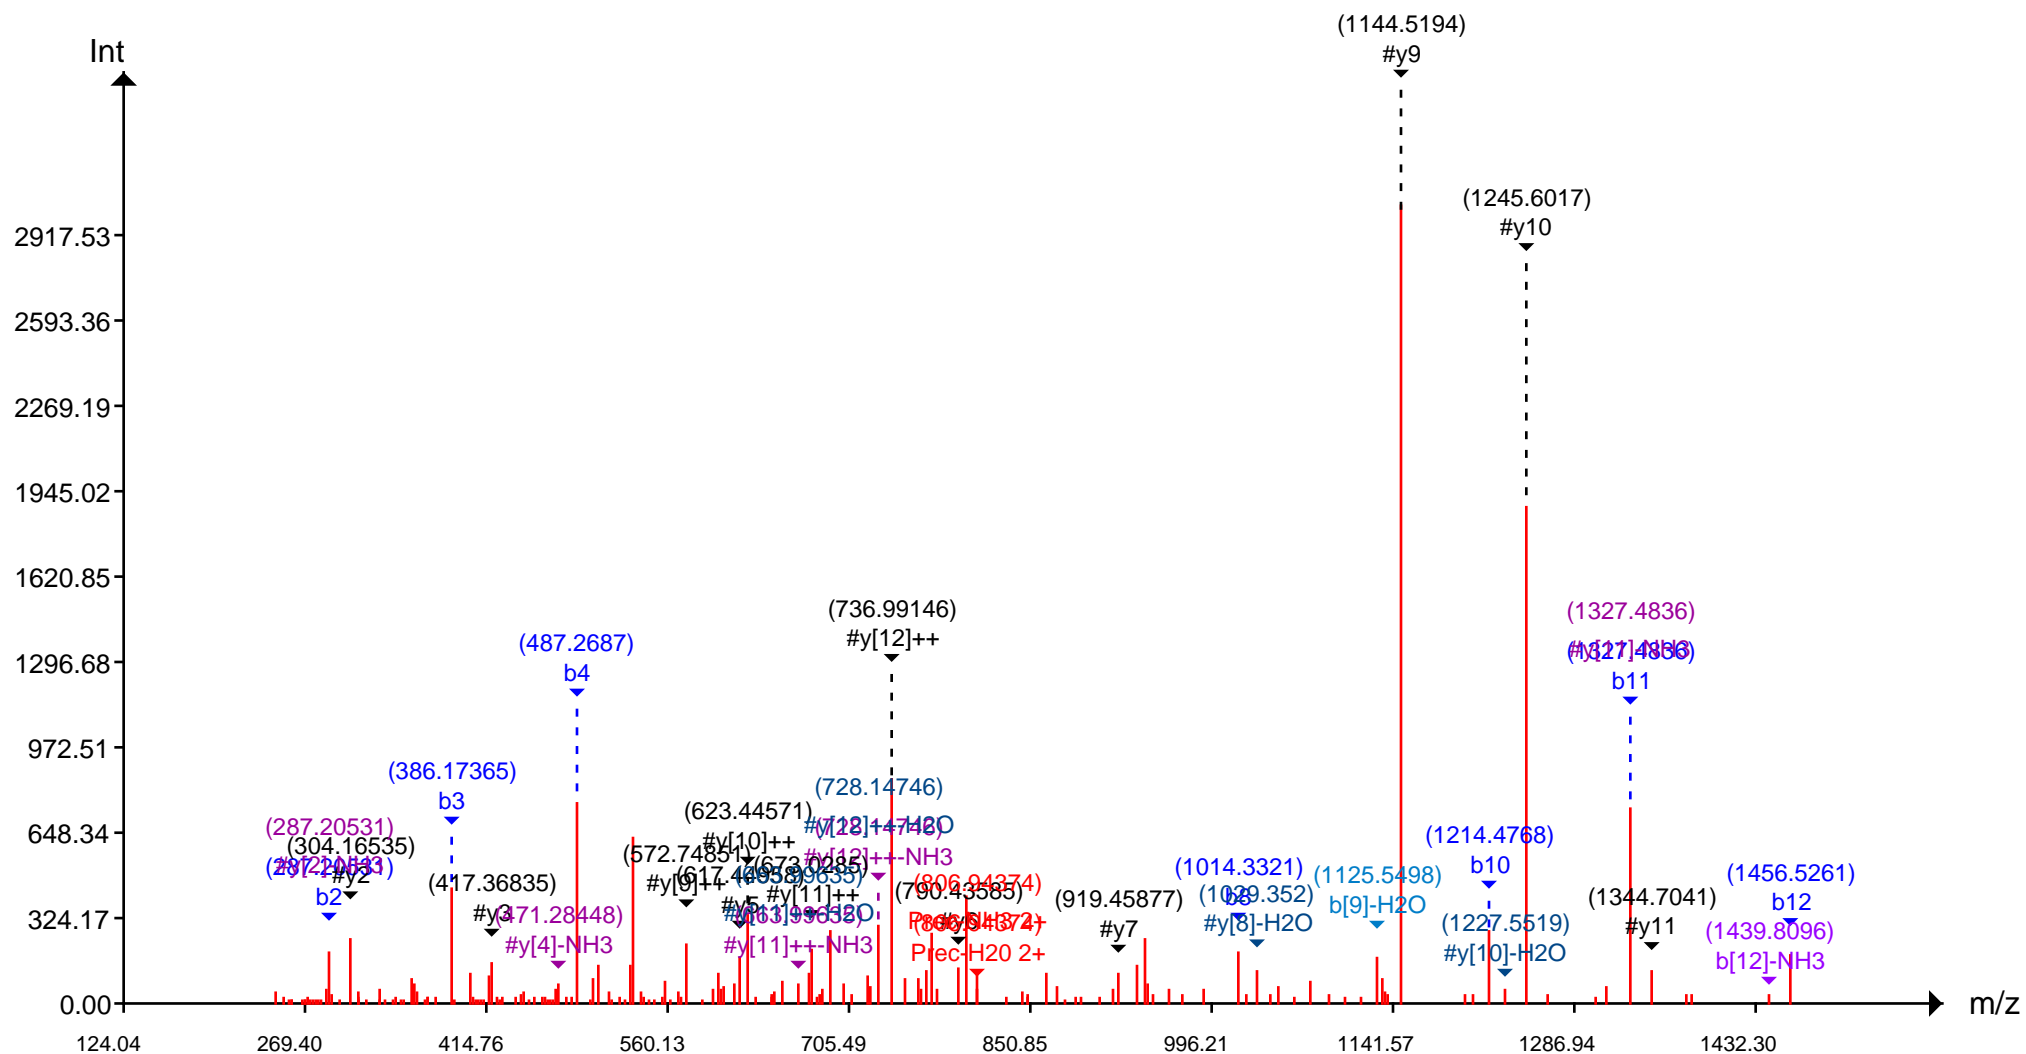

## Info

|                          |                                 |                           |          |
|--------------------------|---------------------------------|---------------------------|----------|
| <b>Modified Sequence</b> | AcD3-IQVTPQEK<AcD3K*>EAIER-COOH | <b>Ion score</b>          | 53.31    |
| <b>Protein</b>           | P54726, P54728                  | <b>Confidence level</b>   | 99.00%   |
| <b>Precursor m/z</b>     | 815.95045                       | <b>Identity Threshold</b> | 47.43    |
| <b>Charge</b>            | 2+                              | <b>Mass error</b>         | 0.001918 |

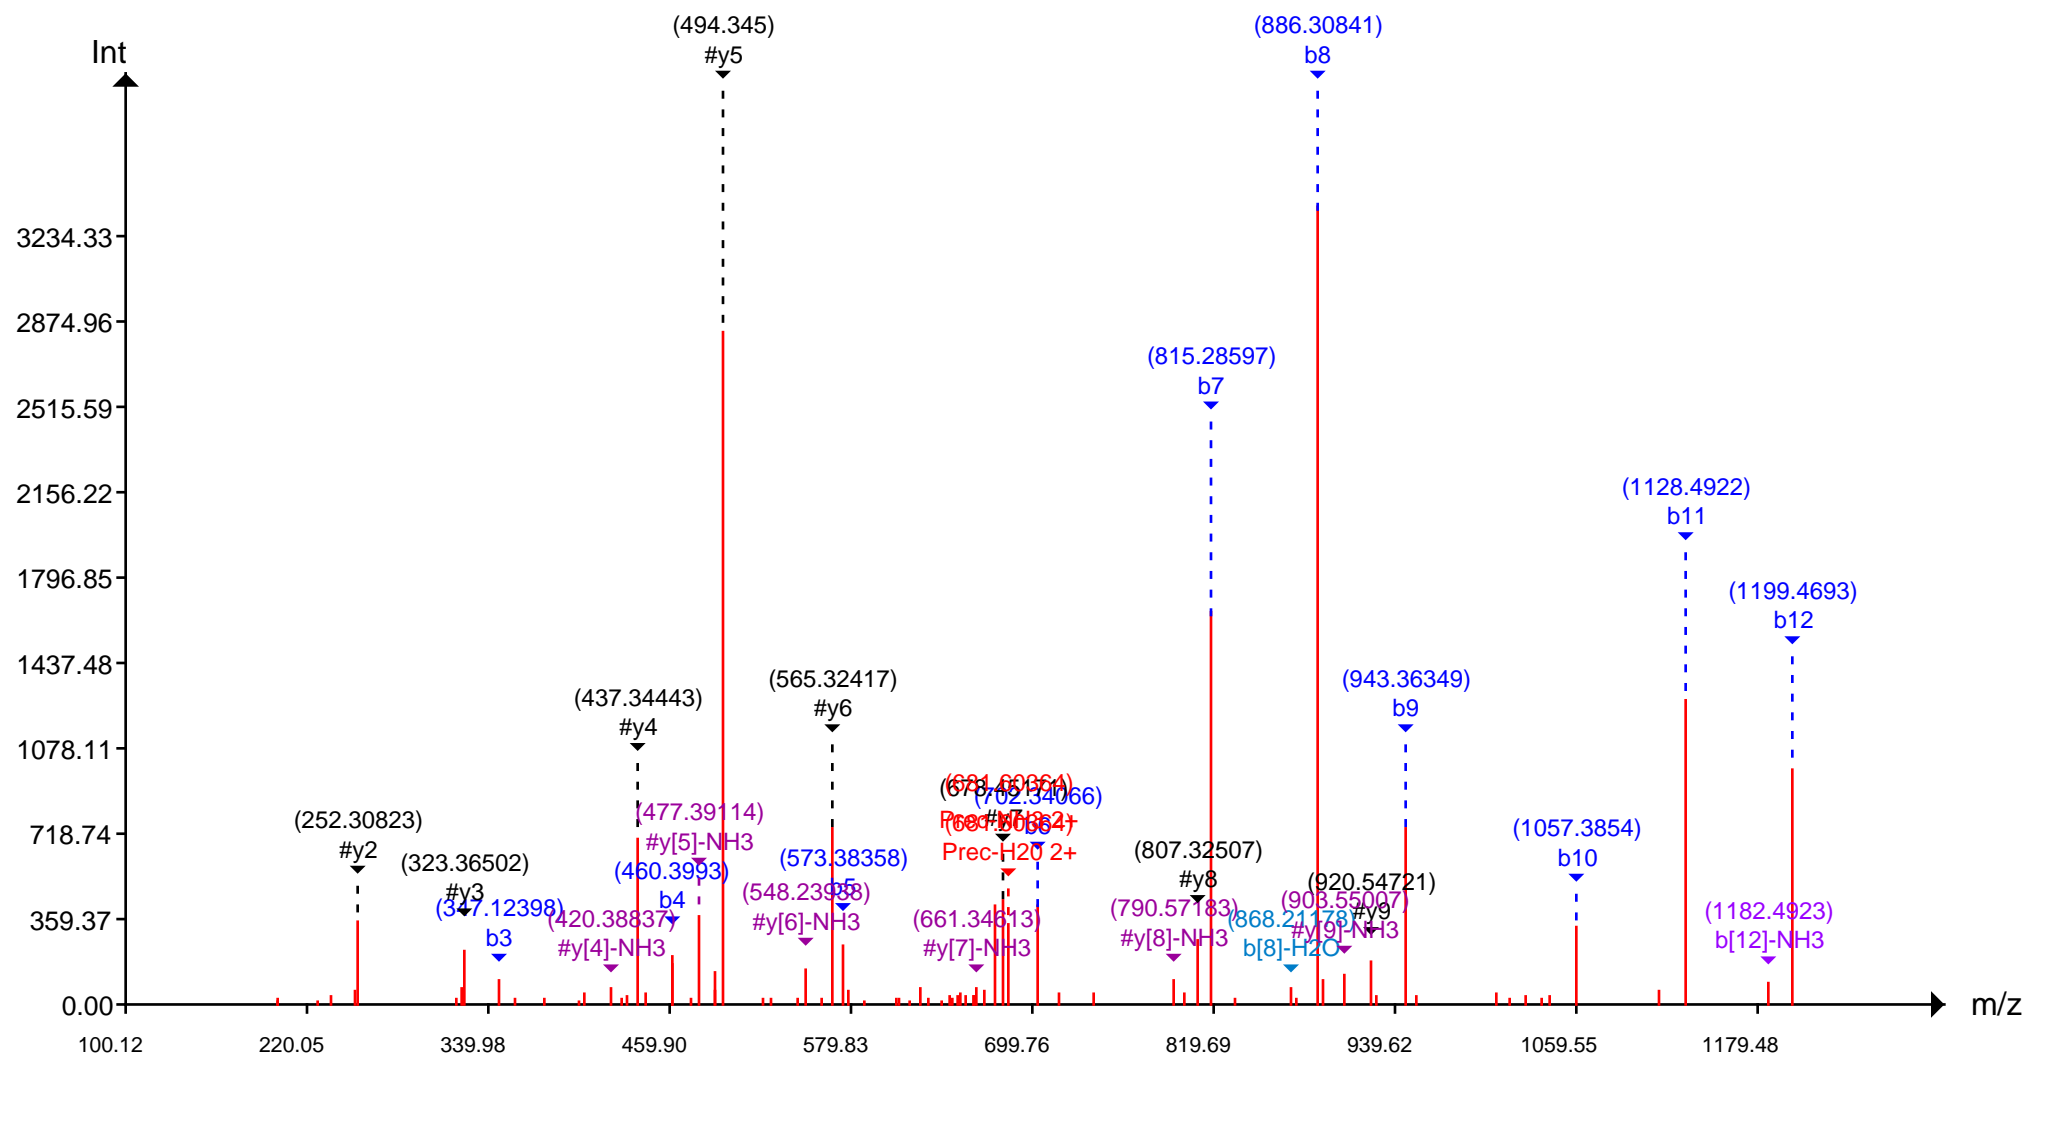

| Info         |                                                                                        |                    |    |
|--------------|----------------------------------------------------------------------------------------|--------------------|----|
| Modified ... | AcD3-TAEILELAGNAAR<C13>-COOH                                                           | Ion score          | 91 |
|              | Q8CGP5, Q8CGP6, Q8CGP7, P22752, Q6GSS7, Q64522, Q64523, Q8BFU2, Q8R1M2, P27661, Q9QZQ8 | Confidence level   | 99 |
| Prec...      | 690.38869                                                                              | Identity Threshold | 47 |
|              | 2+                                                                                     | Mass error         | 0. |

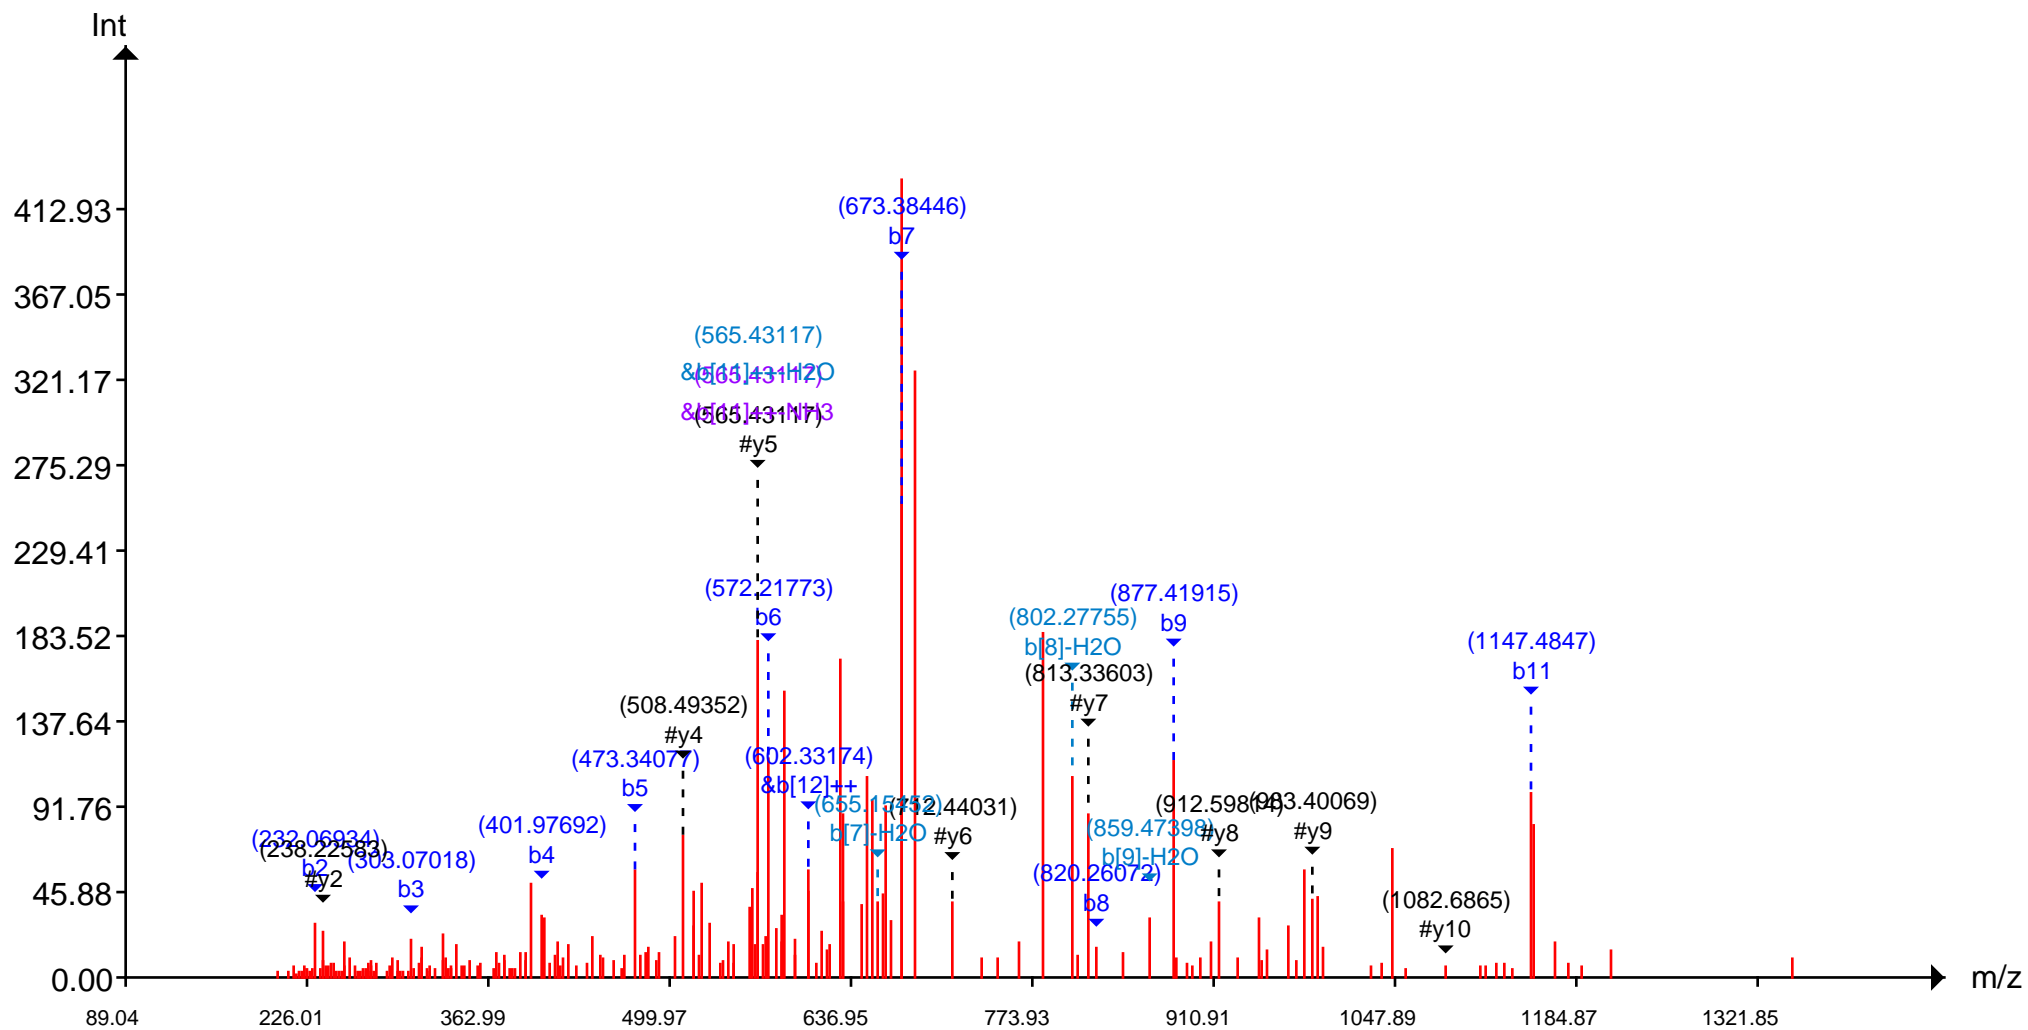

## Info

|                          |                                            |                           |          |
|--------------------------|--------------------------------------------|---------------------------|----------|
| <b>Modified Sequence</b> | AcD3-ADAVAVTM<Mox*>GPK<AcD3K*>GR<C13>-COOH | <b>Ion score</b>          | 49.69    |
| <b>Protein</b>           | P63038                                     | <b>Confidence level</b>   | 99.00%   |
| <b>Precursor m/z</b>     | 692.87654                                  | <b>Identity Threshold</b> | 47.66    |
| <b>Charge</b>            | 2+                                         | <b>Mass error</b>         | -9.28E-4 |

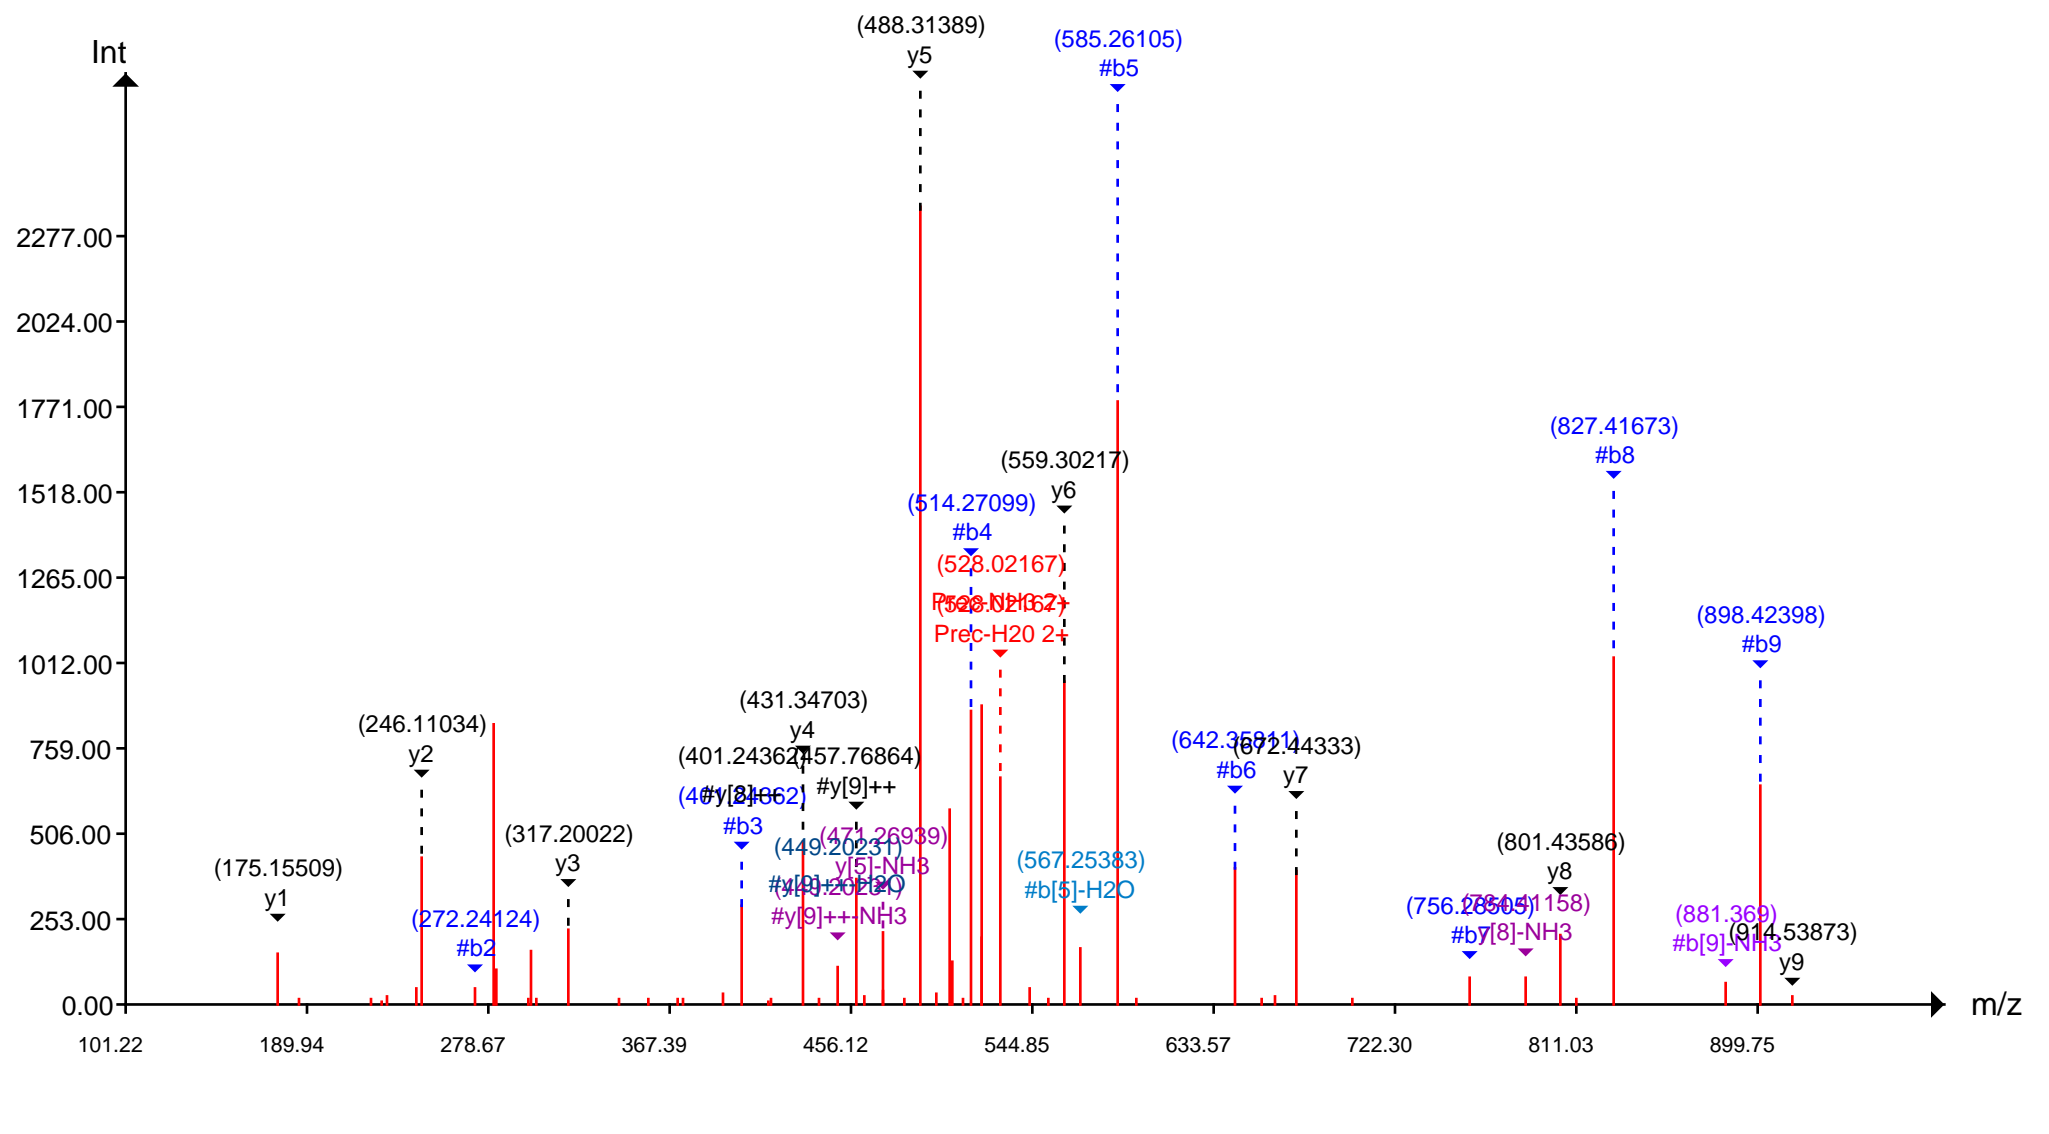

| Info                      |                                                                                                |
|---------------------------|------------------------------------------------------------------------------------------------|
| <b>Modif...</b>           | AcD3-ILELAGNAAR-COOH                                                                           |
| <b>P...</b>               | 536.81322                                                                                      |
|                           | 2+                                                                                             |
| <b>Ion score</b>          |                                                                                                |
| <b>Confidence level</b>   | Q8CGP5, Q8CGP6, Q8CGP7, P22752, Q6GSS7, Q64522, Q64523, Q8BFU2, Q8R1M2, Q8CCK0, P27661, Q9QZQ8 |
| <b>Identity Threshold</b> |                                                                                                |
| <b>Mass error</b>         |                                                                                                |

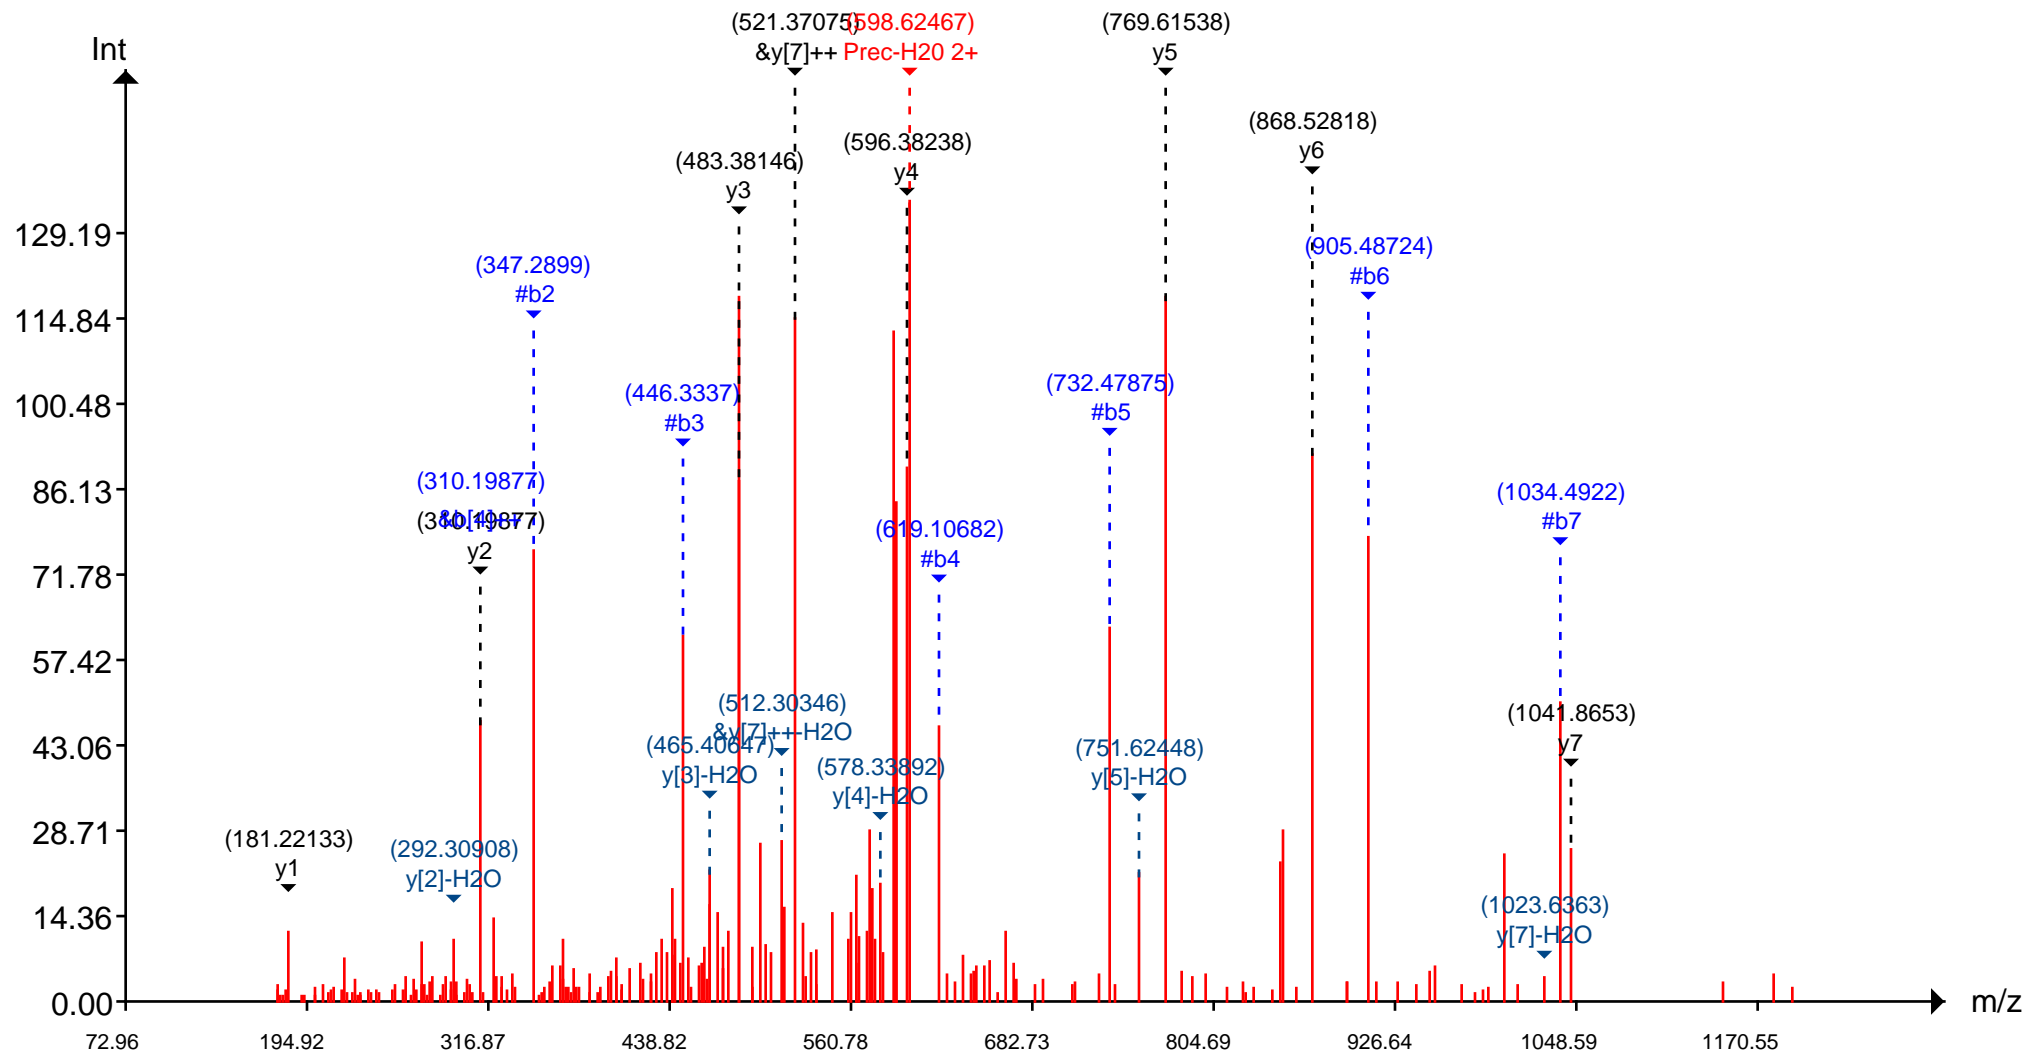

## Info

|                          |                                                 |                           |        |
|--------------------------|-------------------------------------------------|---------------------------|--------|
| <b>Modified Sequence</b> | AcD3-QK<AcD3K*>VK<AcD3K*>LK<AcD3K*>ER<C13>-COOH | <b>Ion score</b>          | 41.19  |
| <b>Protein</b>           | P57784                                          | <b>Confidence level</b>   | 99.00% |
| <b>Precursor m/z</b>     | 607.90128                                       | <b>Identity Threshold</b> | 37.45  |
| <b>Charge</b>            | 2+                                              | <b>Mass error</b>         | 9.0E-5 |

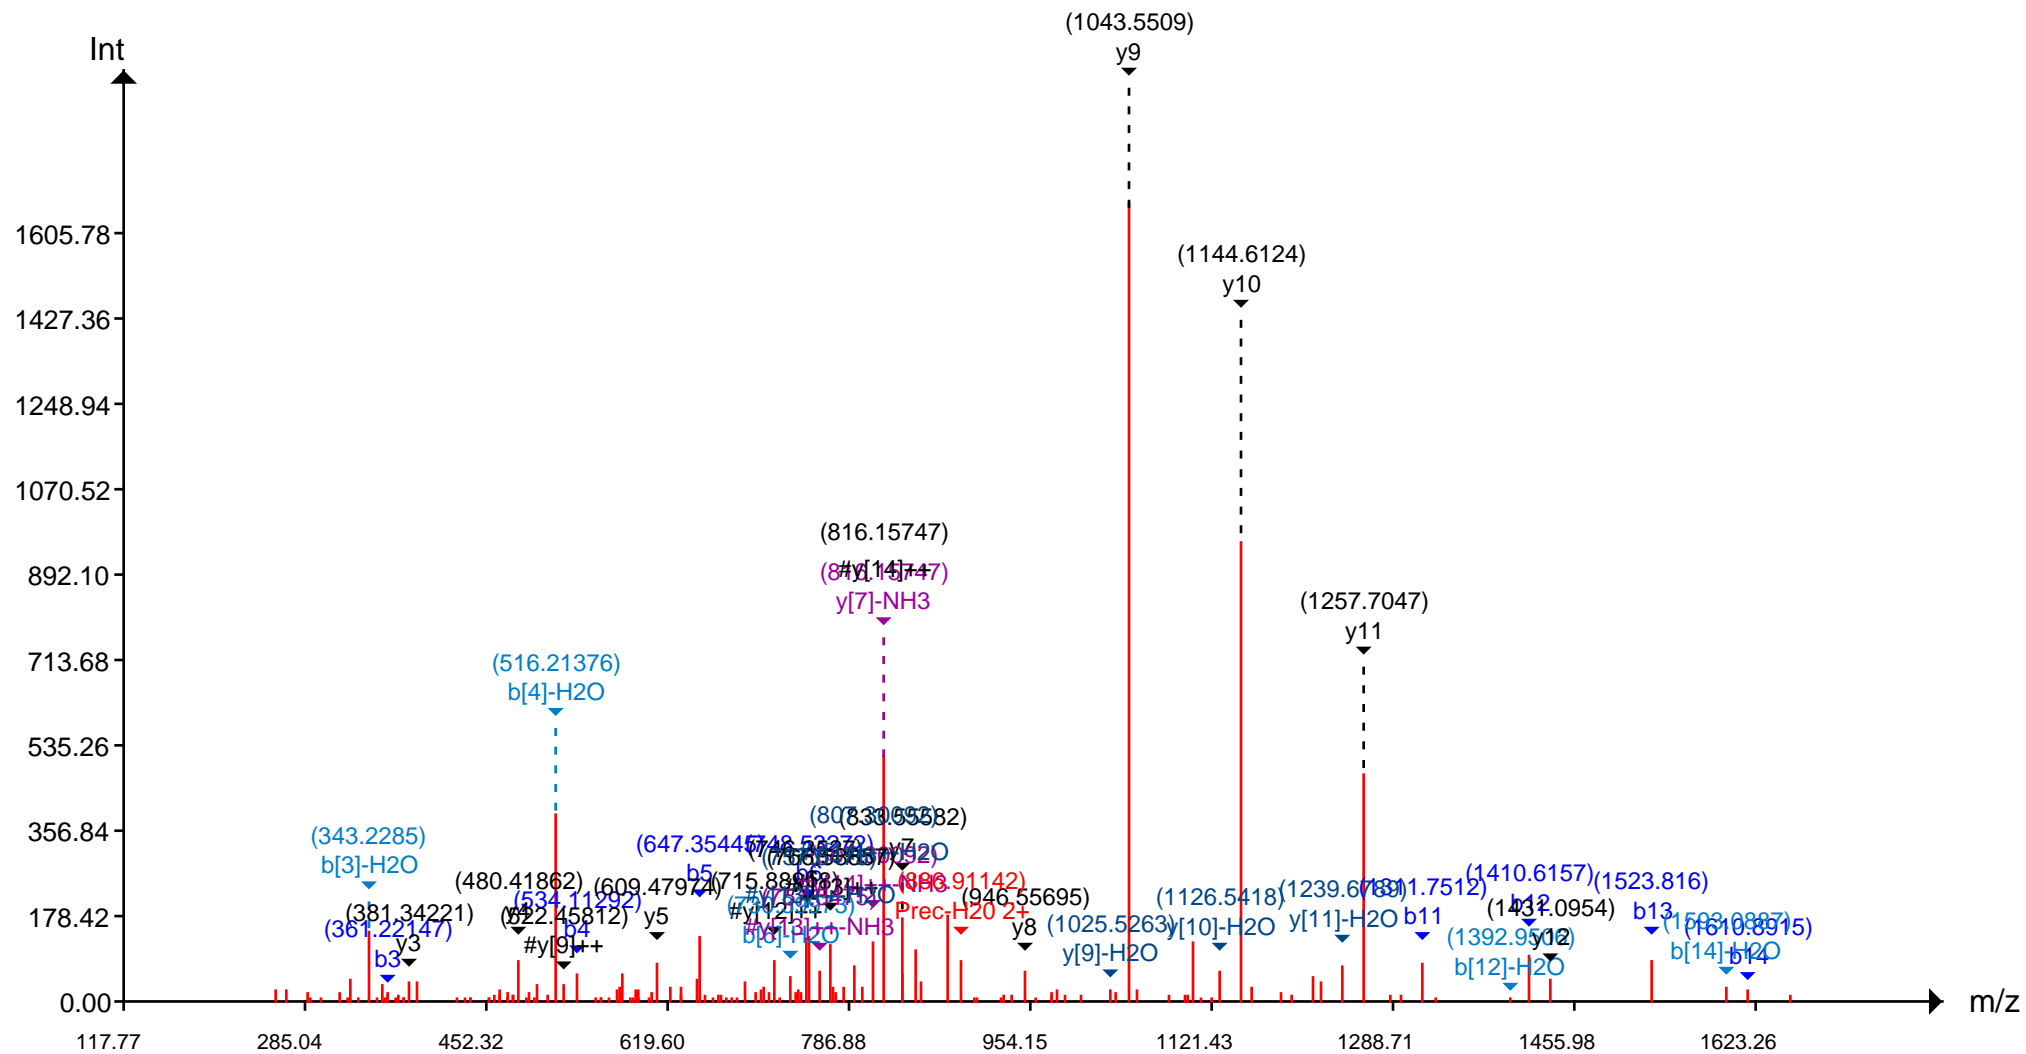

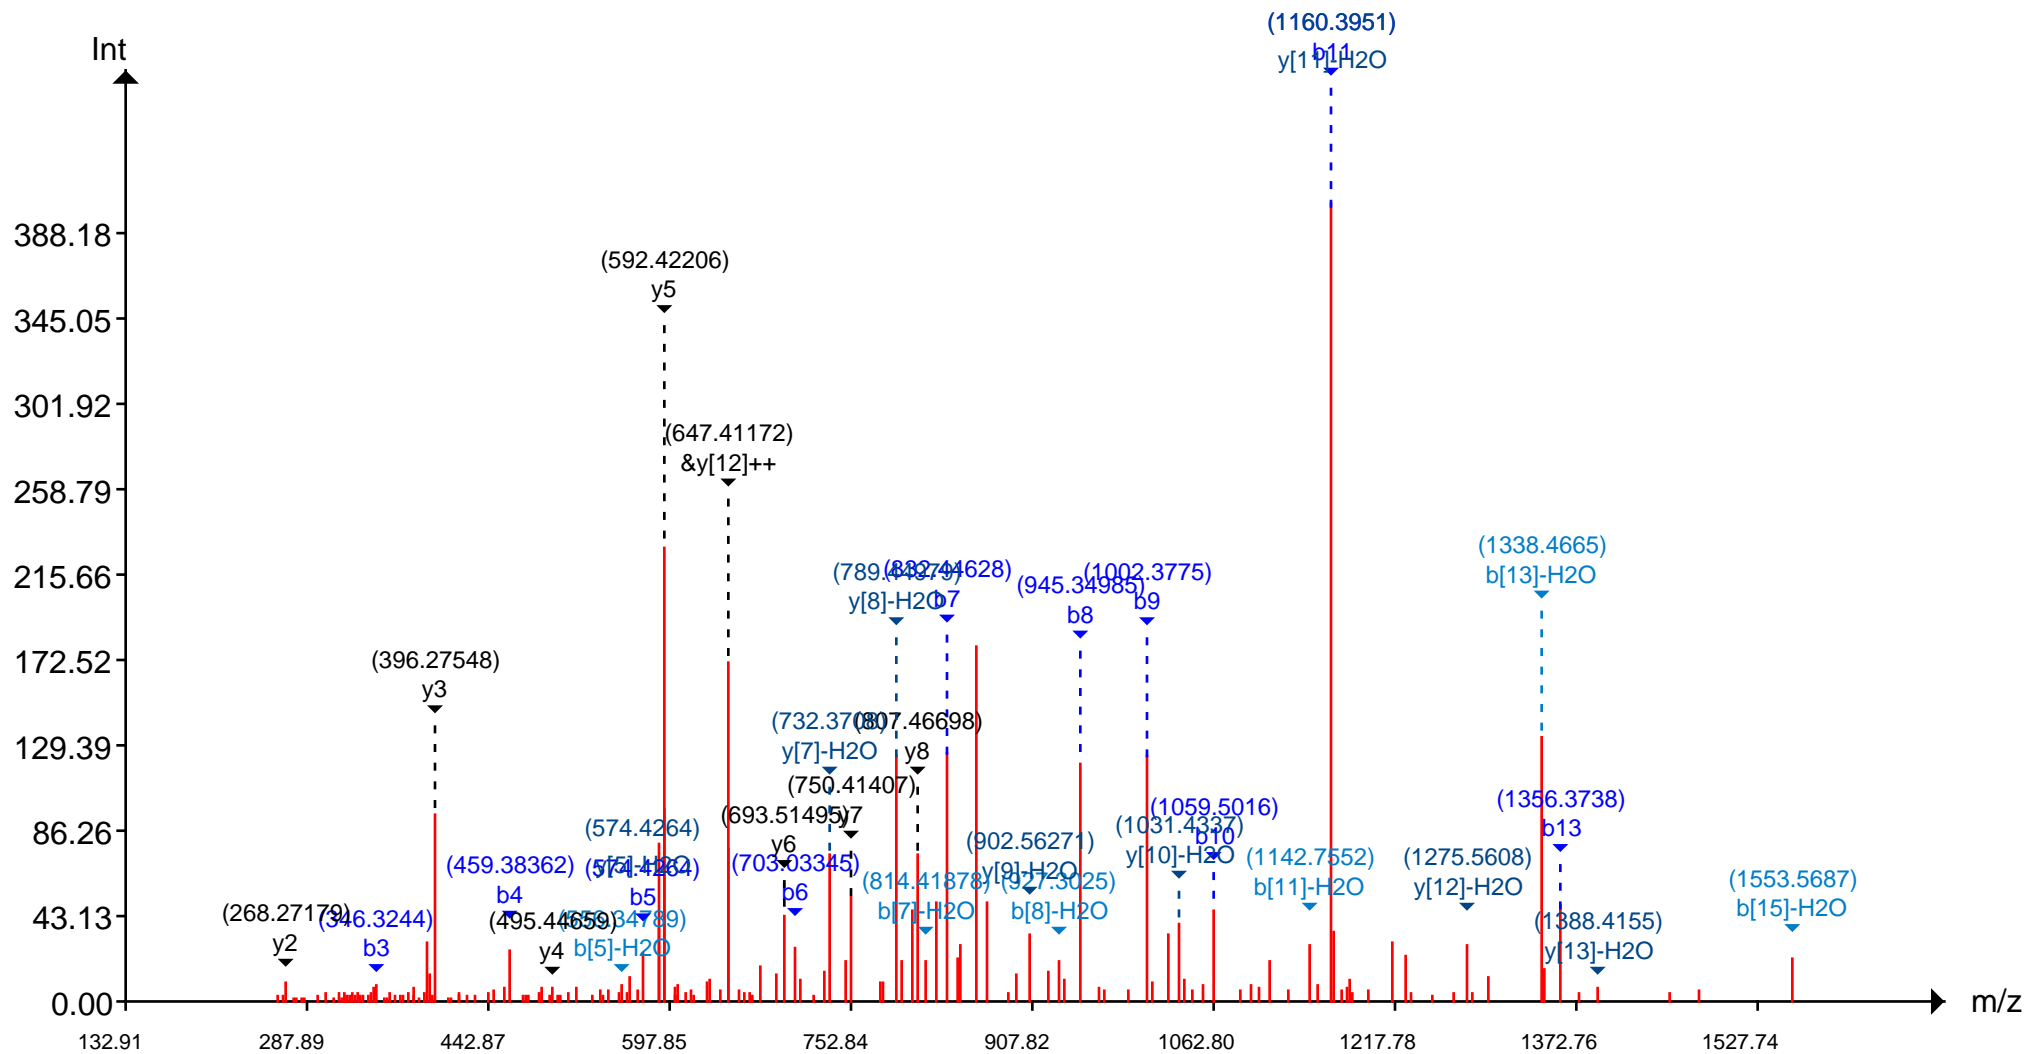

## Info

|                          |                                 |                           |          |
|--------------------------|---------------------------------|---------------------------|----------|
| <b>Modified Sequence</b> | AcD3-TAQLDEELGGTPVQSR<C13>-COOH | <b>Ion score</b>          | 54.72    |
| <b>Protein</b>           | P13020                          | <b>Confidence level</b>   | 99.00%   |
| <b>Precursor m/z</b>     | 876.45184                       | <b>Identity Threshold</b> | 48.08    |
| <b>Charge</b>            | 2+                              | <b>Mass error</b>         | 0.001906 |

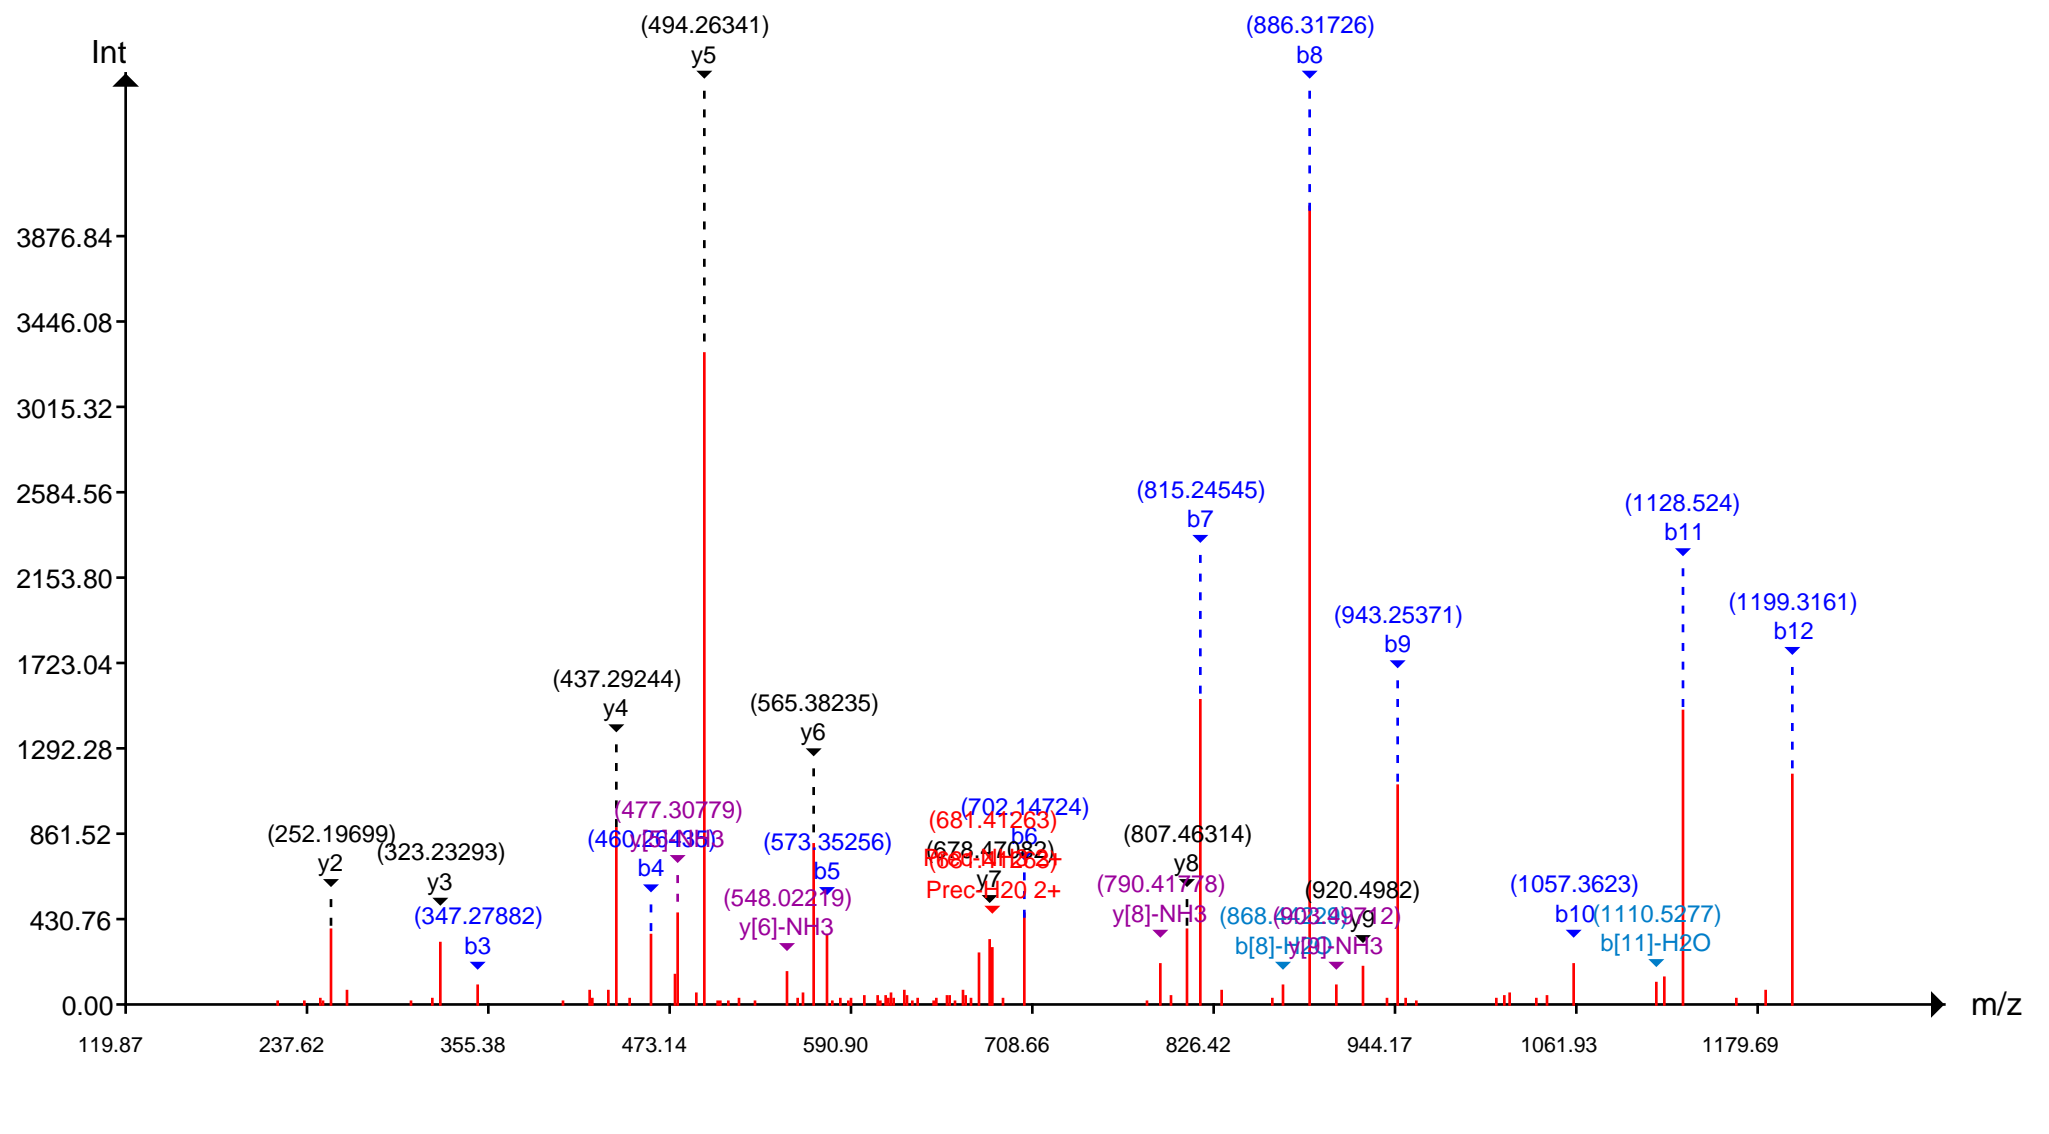

| Info         |                                                                                        |                    |    |
|--------------|----------------------------------------------------------------------------------------|--------------------|----|
| Modified ... | AcD3-TAEILELAGNAAR<C13>-COOH                                                           | Ion score          | 95 |
|              | Q8CGP5, Q8CGP6, Q8CGP7, P22752, Q6GSS7, Q64522, Q64523, Q8BFU2, Q8R1M2, P27661, Q9QZQ8 | Confidence level   | 99 |
| Prec...      | 690.38732                                                                              | Identity Threshold | 47 |
|              | 2+                                                                                     | Mass error         | 0. |



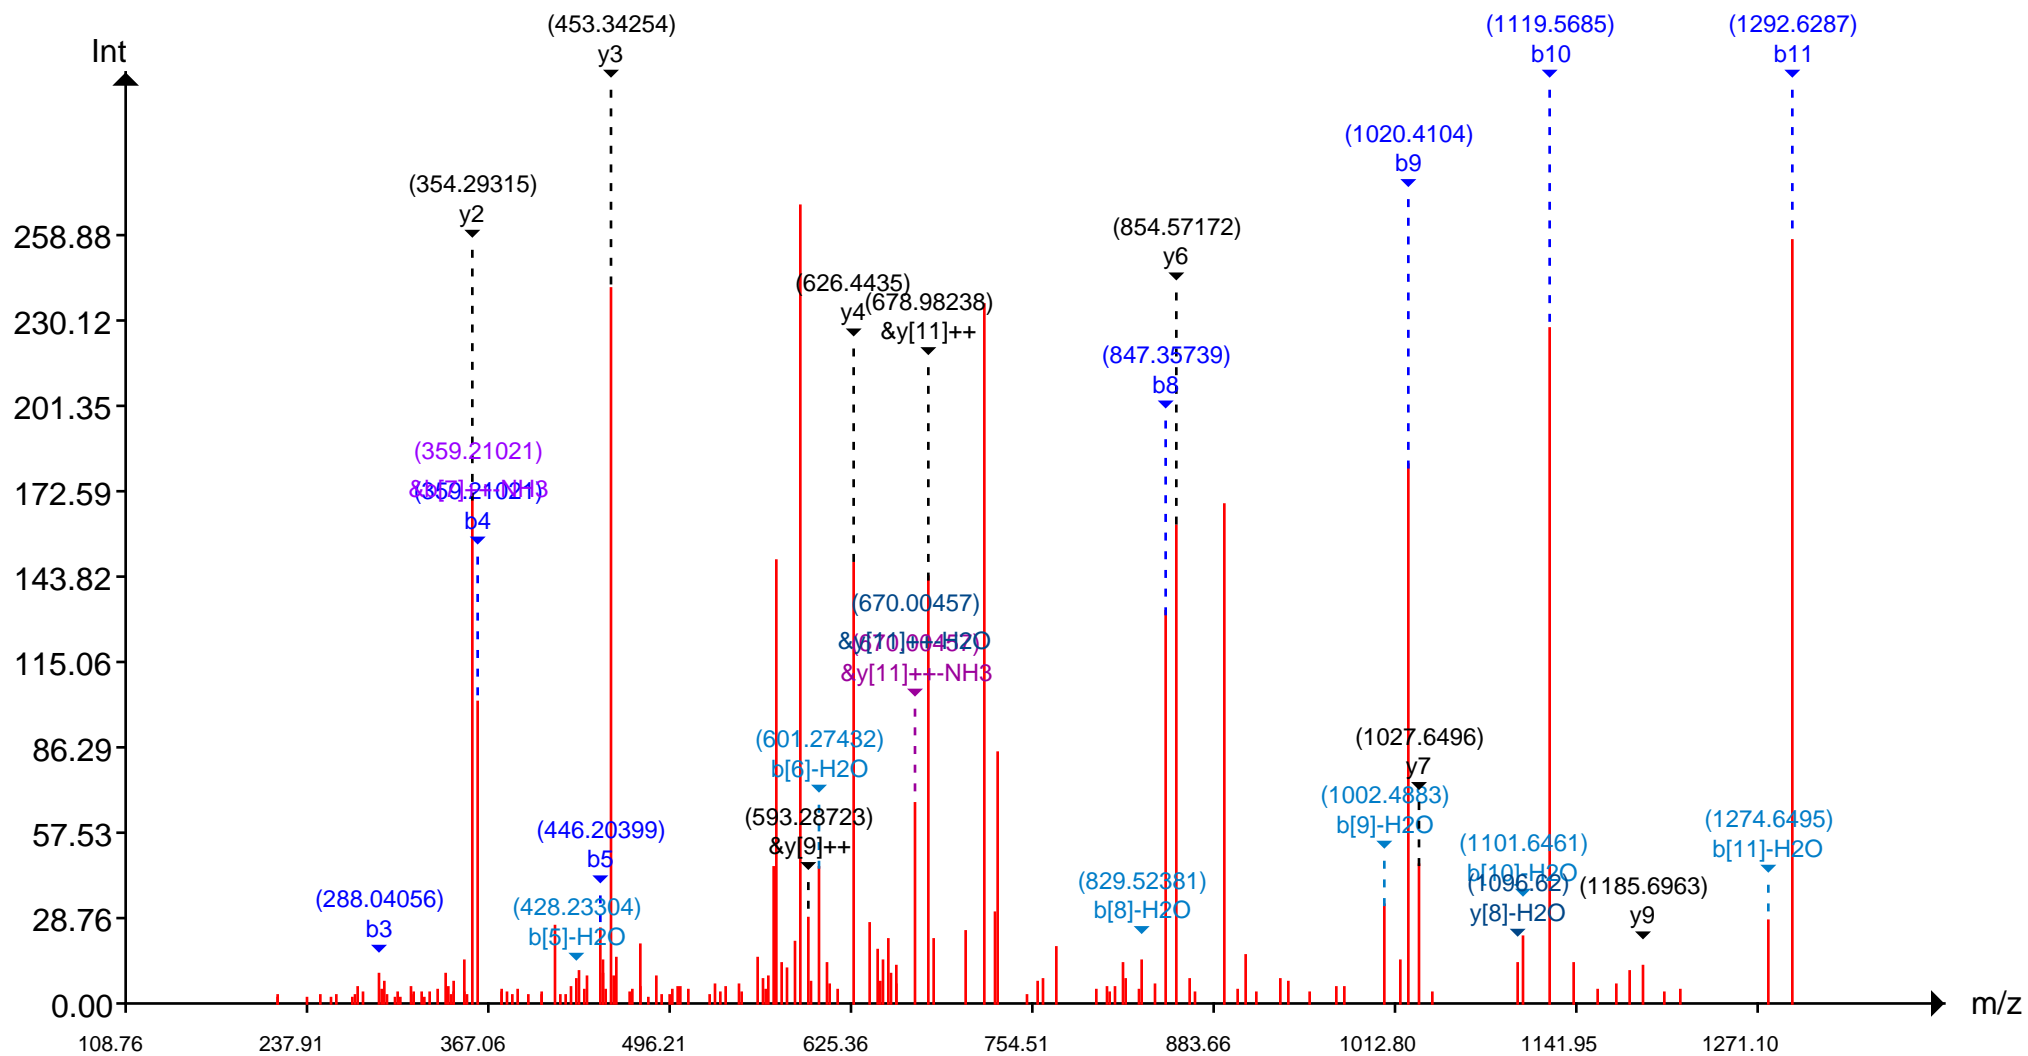

## Info

|                          |                                                     |                           |         |
|--------------------------|-----------------------------------------------------|---------------------------|---------|
| <b>Modified Sequence</b> | AcD3-AGNASK<AcD3K*>DLK<AcD3K*>VK<AcD3K*>R<C13>-COOH | <b>Ion score</b>          | 42.43   |
| <b>Protein</b>           | Q3THW5, P0C0S6                                      | <b>Confidence level</b>   | 99.00%  |
| <b>Precursor m/z</b>     | 736.95032                                           | <b>Identity Threshold</b> | 42.37   |
| <b>Charge</b>            | 2+                                                  | <b>Mass error</b>         | 0.00175 |

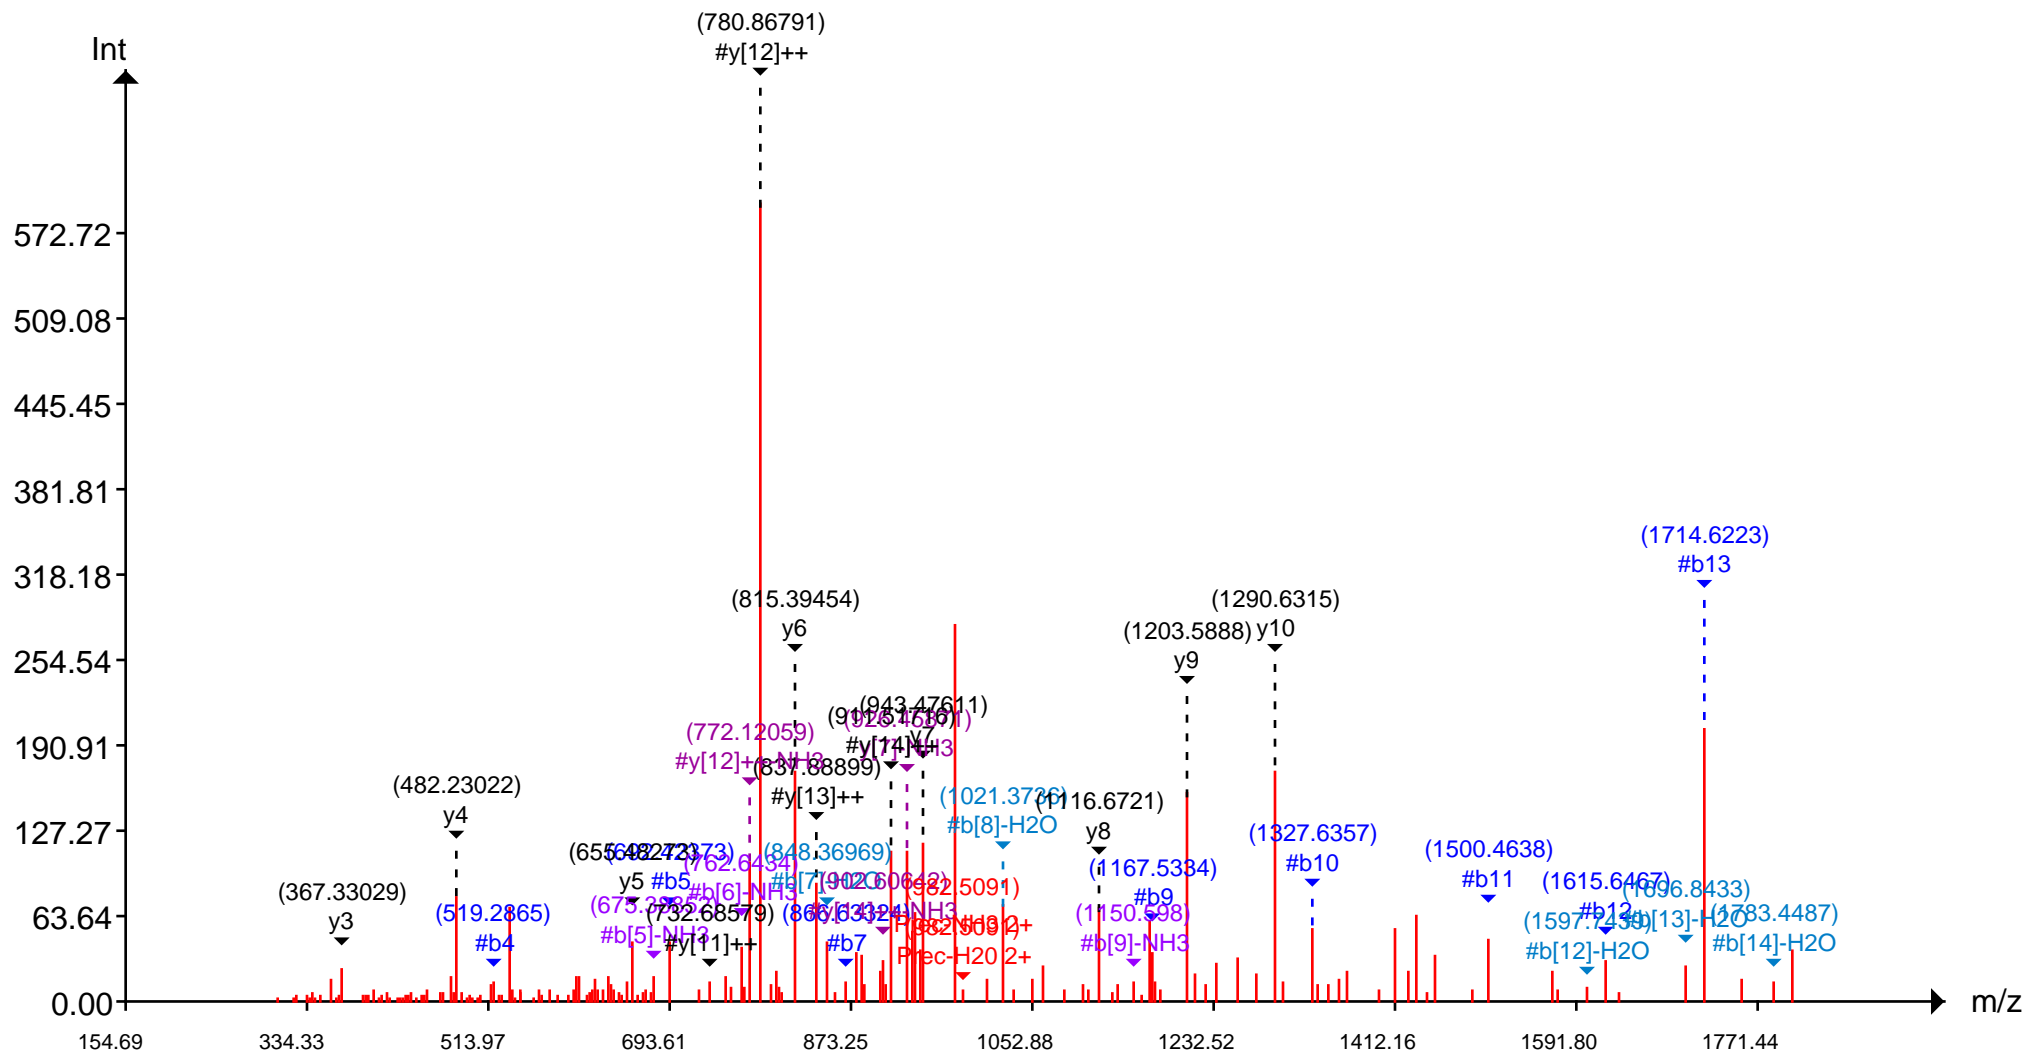

## Info

|                          |                                                              |                           |          |
|--------------------------|--------------------------------------------------------------|---------------------------|----------|
| <b>Modified Sequence</b> | AcD3-DFNPK<AcD3K*>SSK<AcD3K*>QC<Cmm*>K<AcD3K*>DVSR<C13>-COOH | <b>Ion score</b>          | 48.47    |
| <b>Protein</b>           | Q6IRU5                                                       | <b>Confidence level</b>   | 99.00%   |
| <b>Precursor m/z</b>     | 991.51284                                                    | <b>Identity Threshold</b> | 48.07    |
| <b>Charge</b>            | 2+                                                           | <b>Mass error</b>         | 0.005116 |

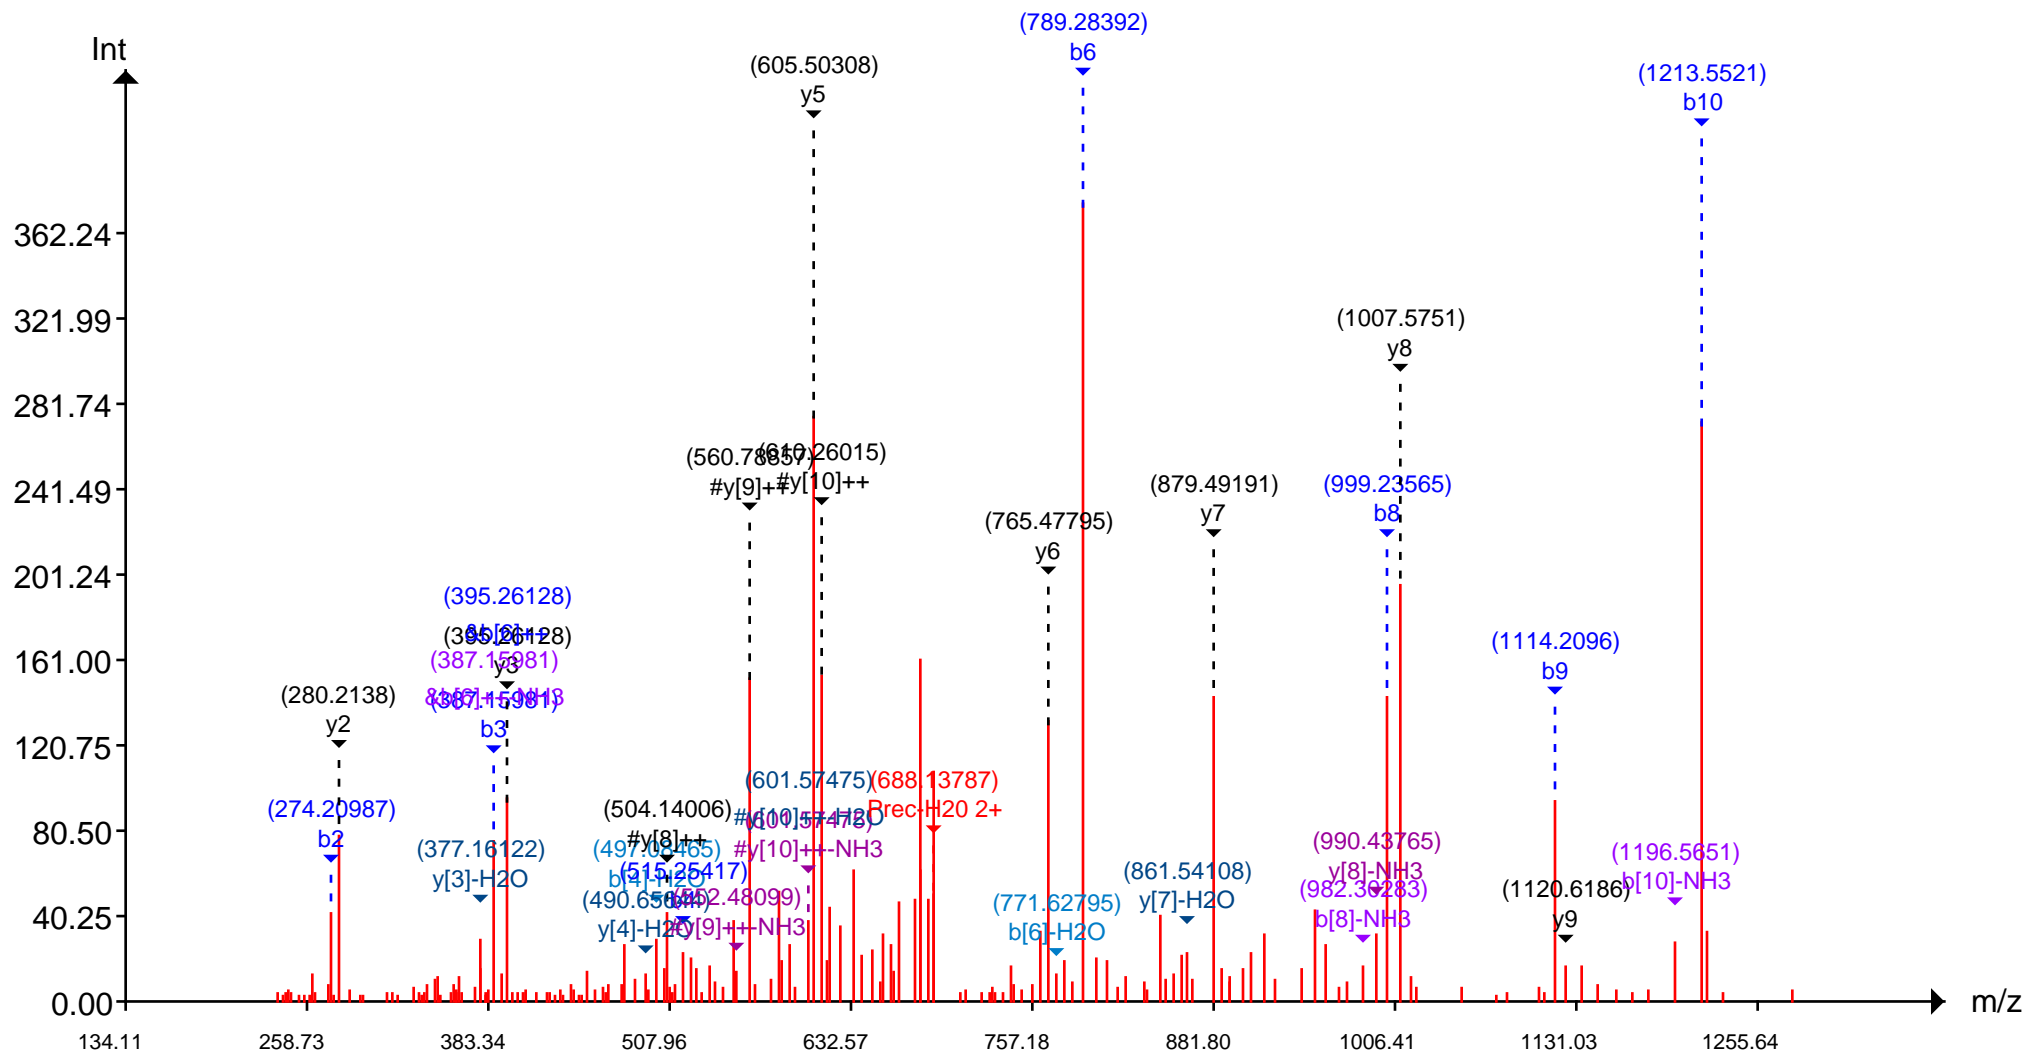

## Info

**Modified Sequence** AcD3-EVIQNC<Cmm\*>PIDVR<C13>-COOH

**Ion score** 56.98

**Protein** Q99JY9

**Confidence level** 99.00%

**Precursor m/z** 697.36812

**Identity Threshold** 48.13

**Charge** 2+

**Mass error** 0.001076

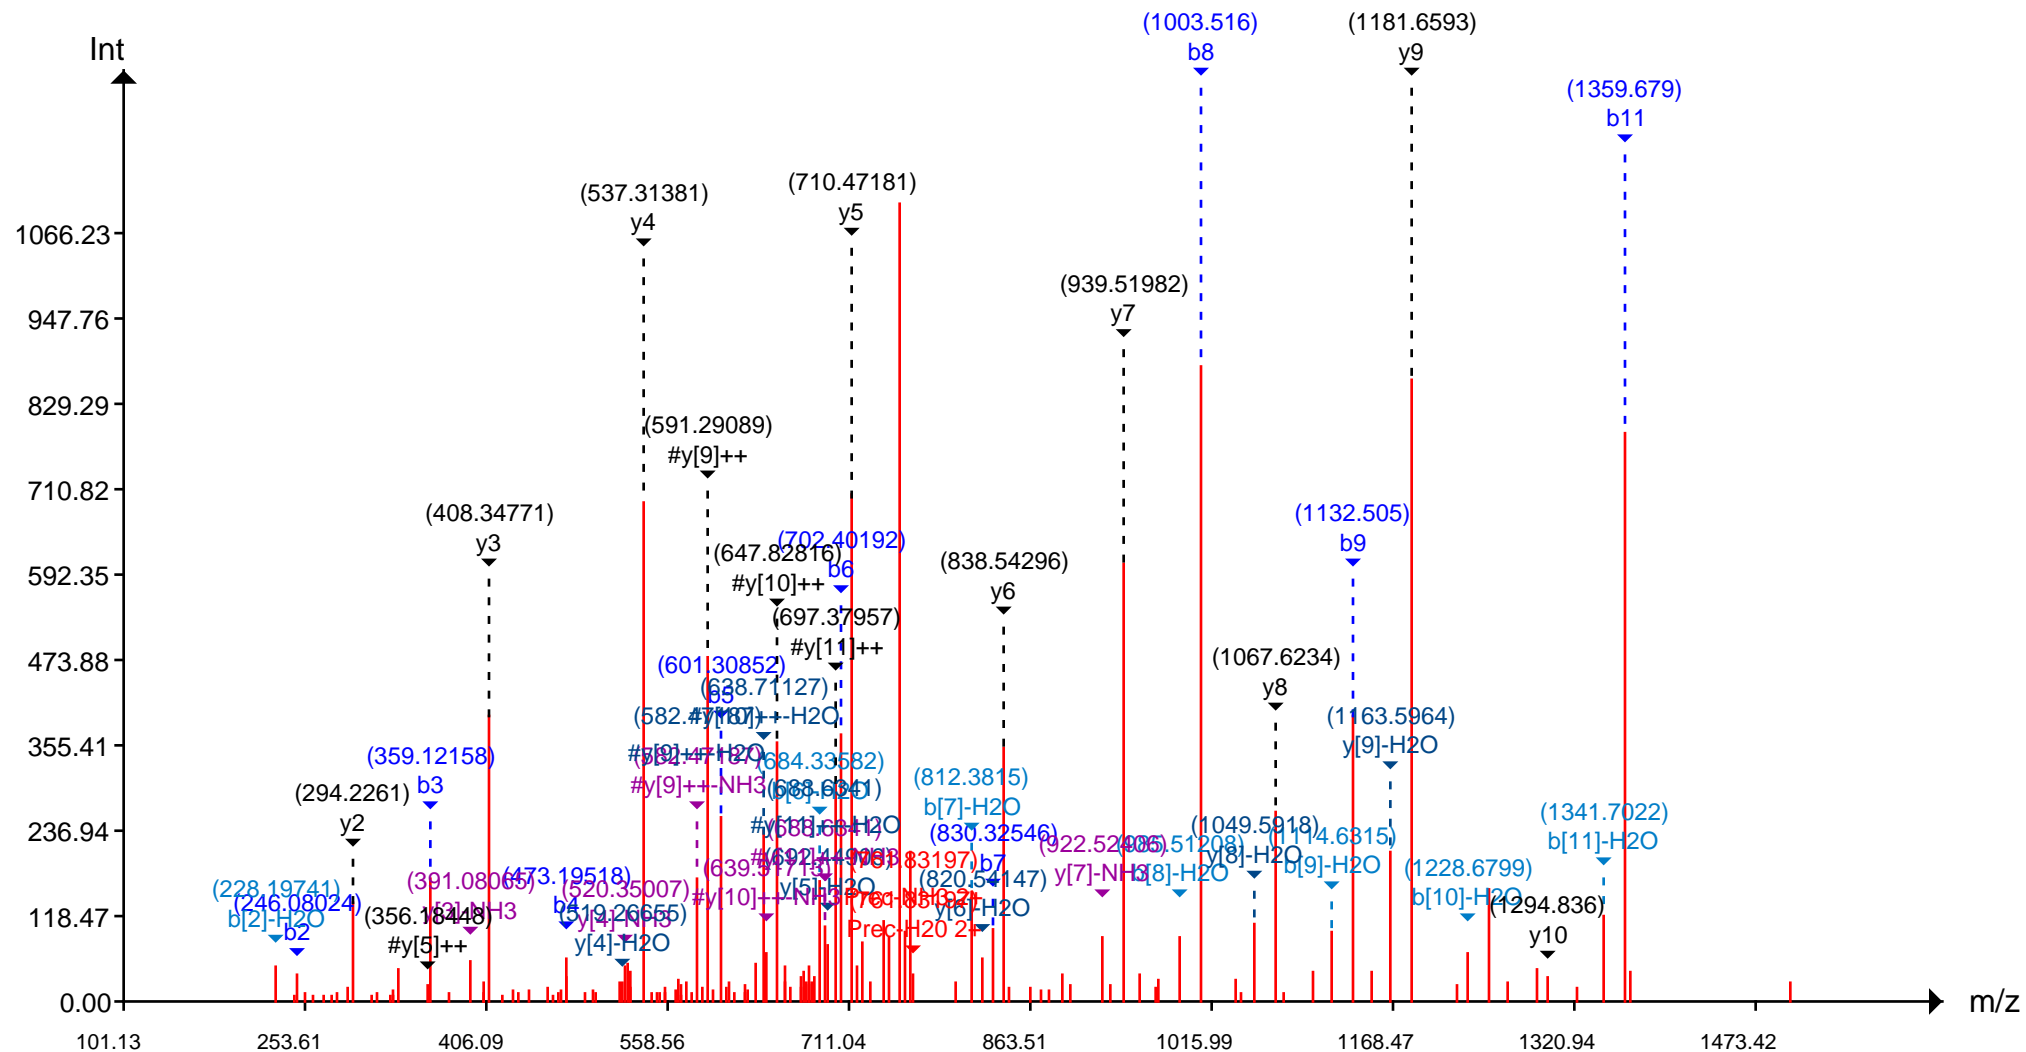

## Info

|                          |                                     |                           |         |
|--------------------------|-------------------------------------|---------------------------|---------|
| <b>Modified Sequence</b> | AcD3-TVINQTQK<AcD3K*>ENLR<C13>-COOH | <b>Ion score</b>          | 80.07   |
| <b>Protein</b>           | Q6ZWW7                              | <b>Confidence level</b>   | 99.00%  |
| <b>Precursor m/z</b>     | 770.43914                           | <b>Identity Threshold</b> | 46.47   |
| <b>Charge</b>            | 2+                                  | <b>Mass error</b>         | 6.76E-4 |

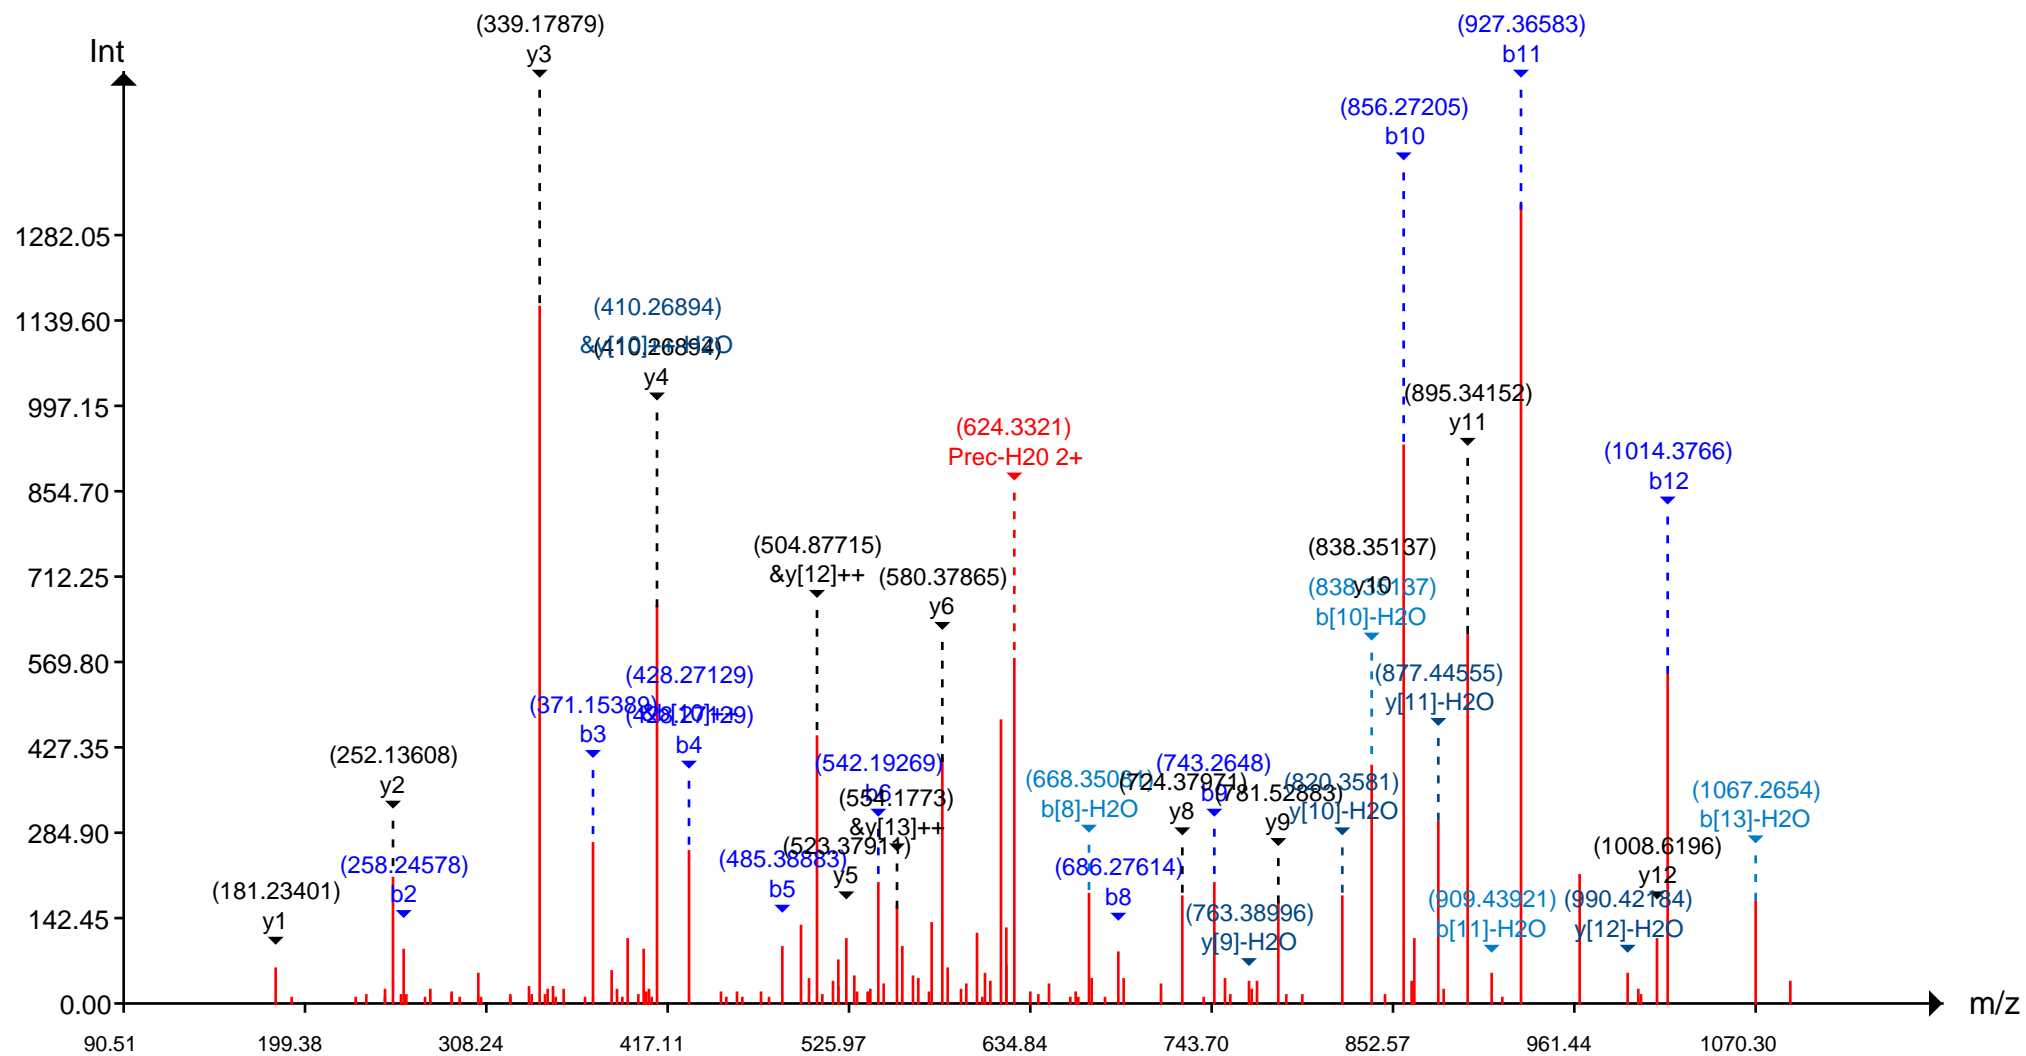

## Info

|                          |                               |                           |        |
|--------------------------|-------------------------------|---------------------------|--------|
| <b>Modified Sequence</b> | AcD3-LVIGGGSGGLASAR<C13>-COOH | <b>Ion score</b>          | 89.35  |
| <b>Protein</b>           | P47791                        | <b>Confidence level</b>   | 99.00% |
| <b>Precursor m/z</b>     | 633.37101                     | <b>Identity Threshold</b> | 45.97  |
| <b>Charge</b>            | 2+                            | <b>Mass error</b>         | 5.1E-5 |

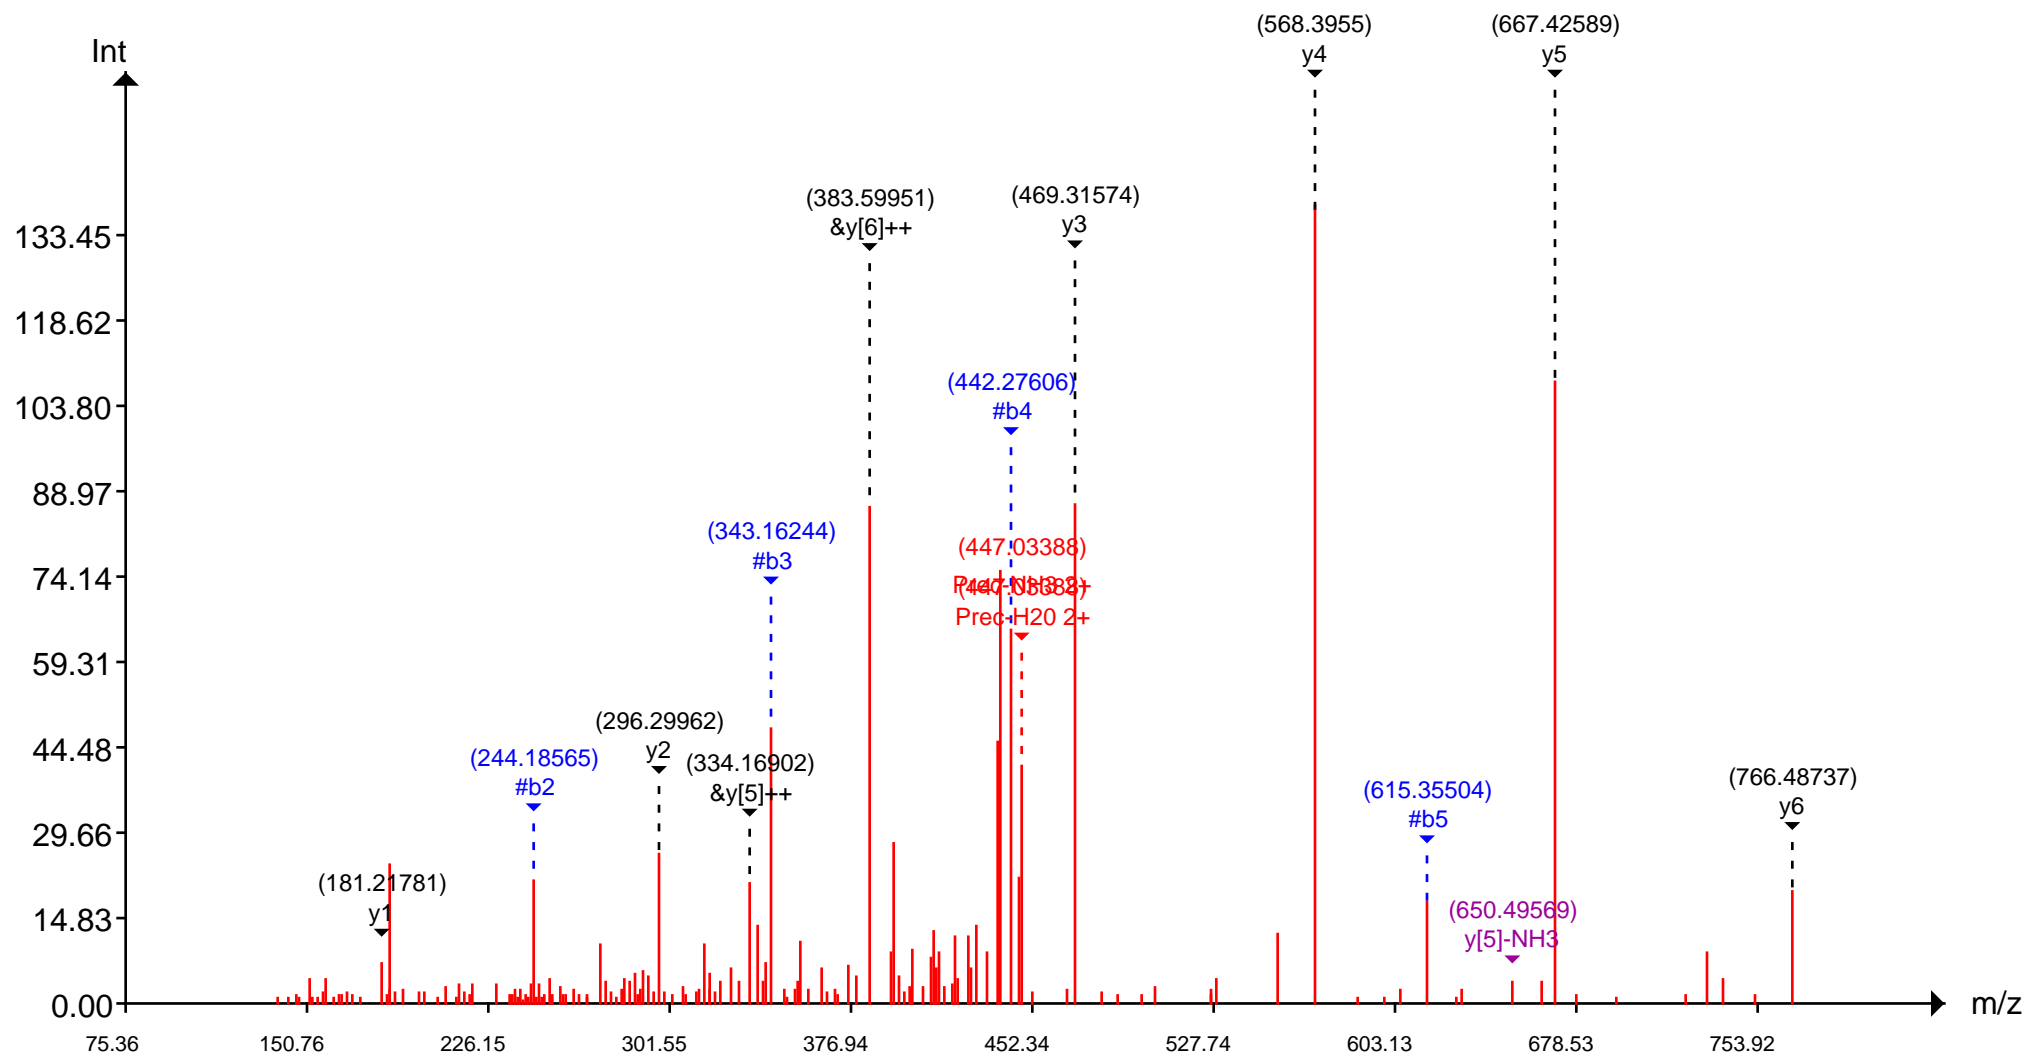

## Info

**Modified Sequence** AcD3-VVVVK<AcD3K\*>DR<C13>-COOH

**Ion score** 50.61

**Protein** P60824, O89086

**Confidence level** 99.00%

**Precursor m/z** 455.80034

**Identity Threshold** 40.89

**Charge** 2+

**Mass error** -5.4E-5

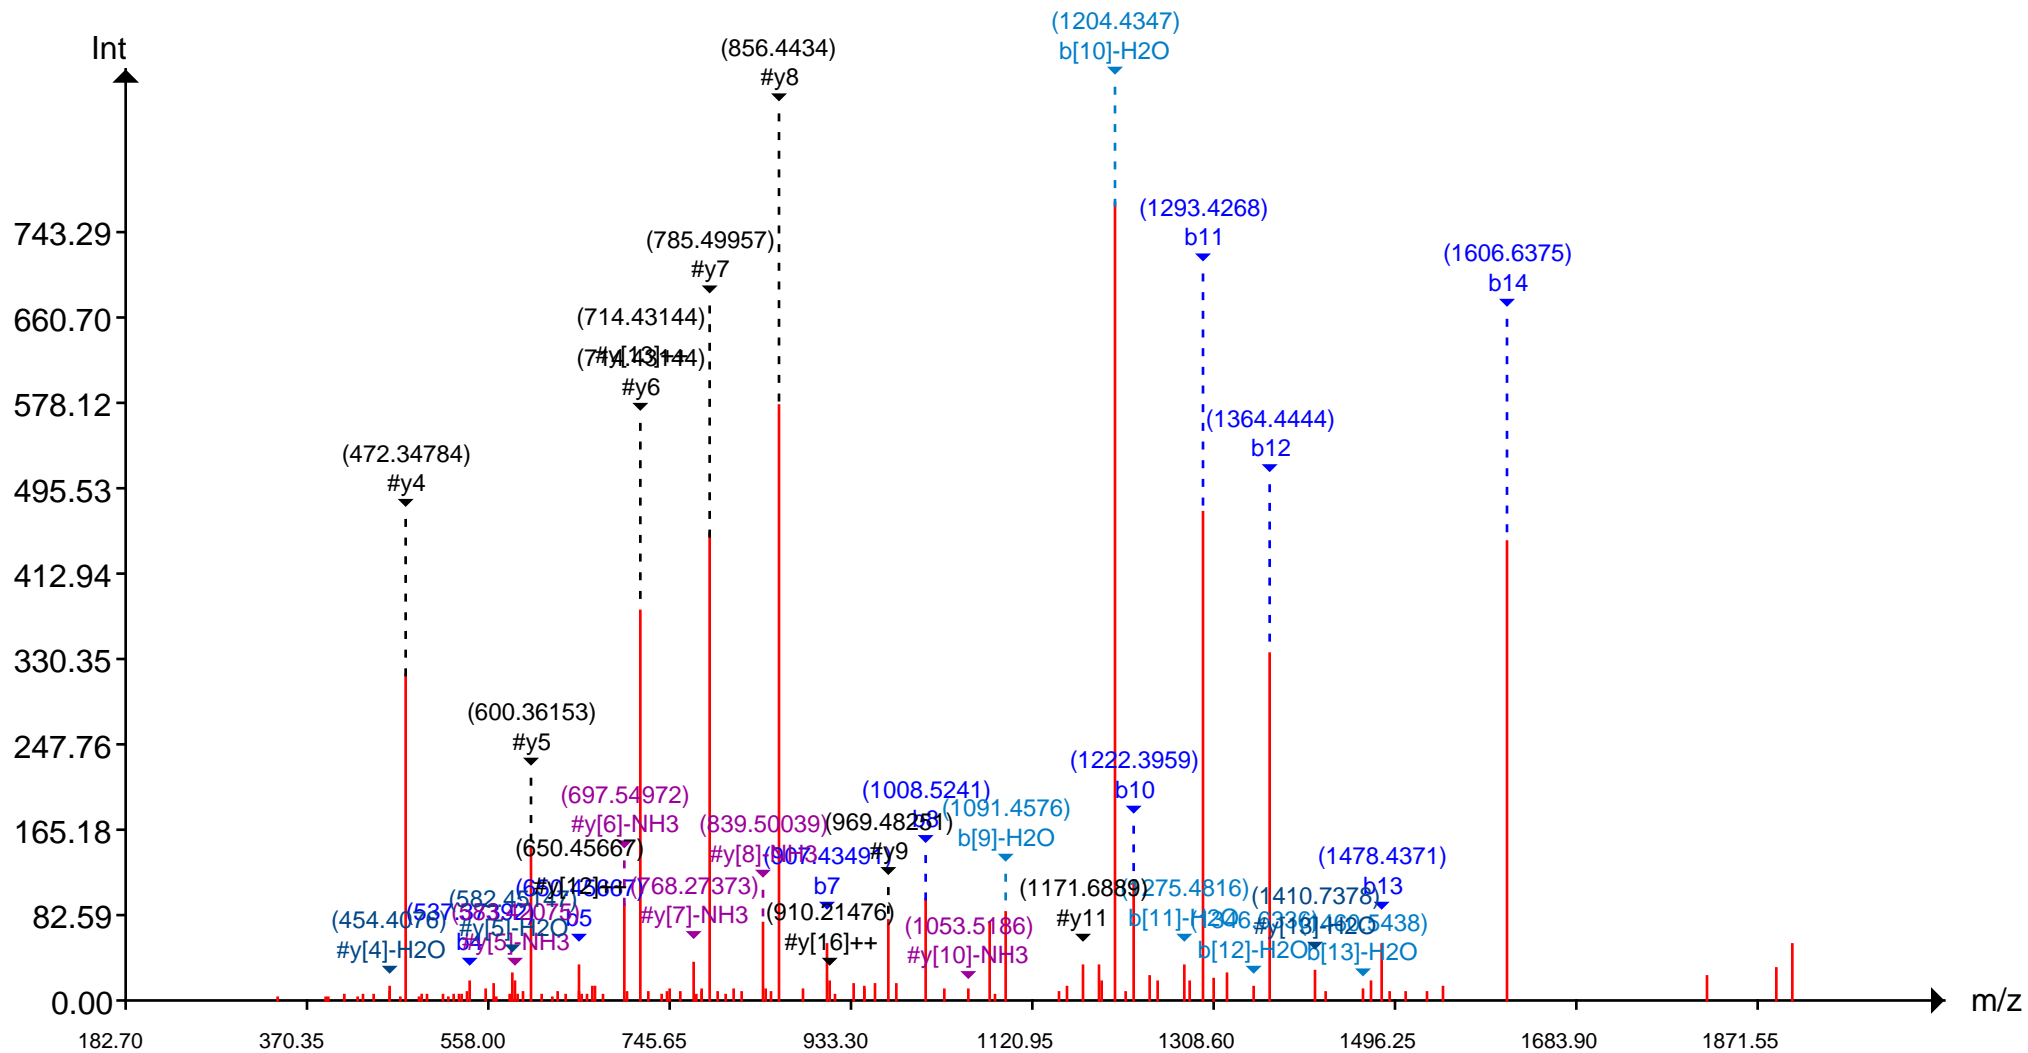

## Info

**Modified Sequence** AcD3-TINYLQETTLAANQPLSR-COOH

**Ion score** 59.83

**Protein** O09159

**Confidence level** 99.00%

**Precursor m/z** 1039.5525

**Identity Threshold** 47.89

**Charge** 2+

**Mass error** 0.002176

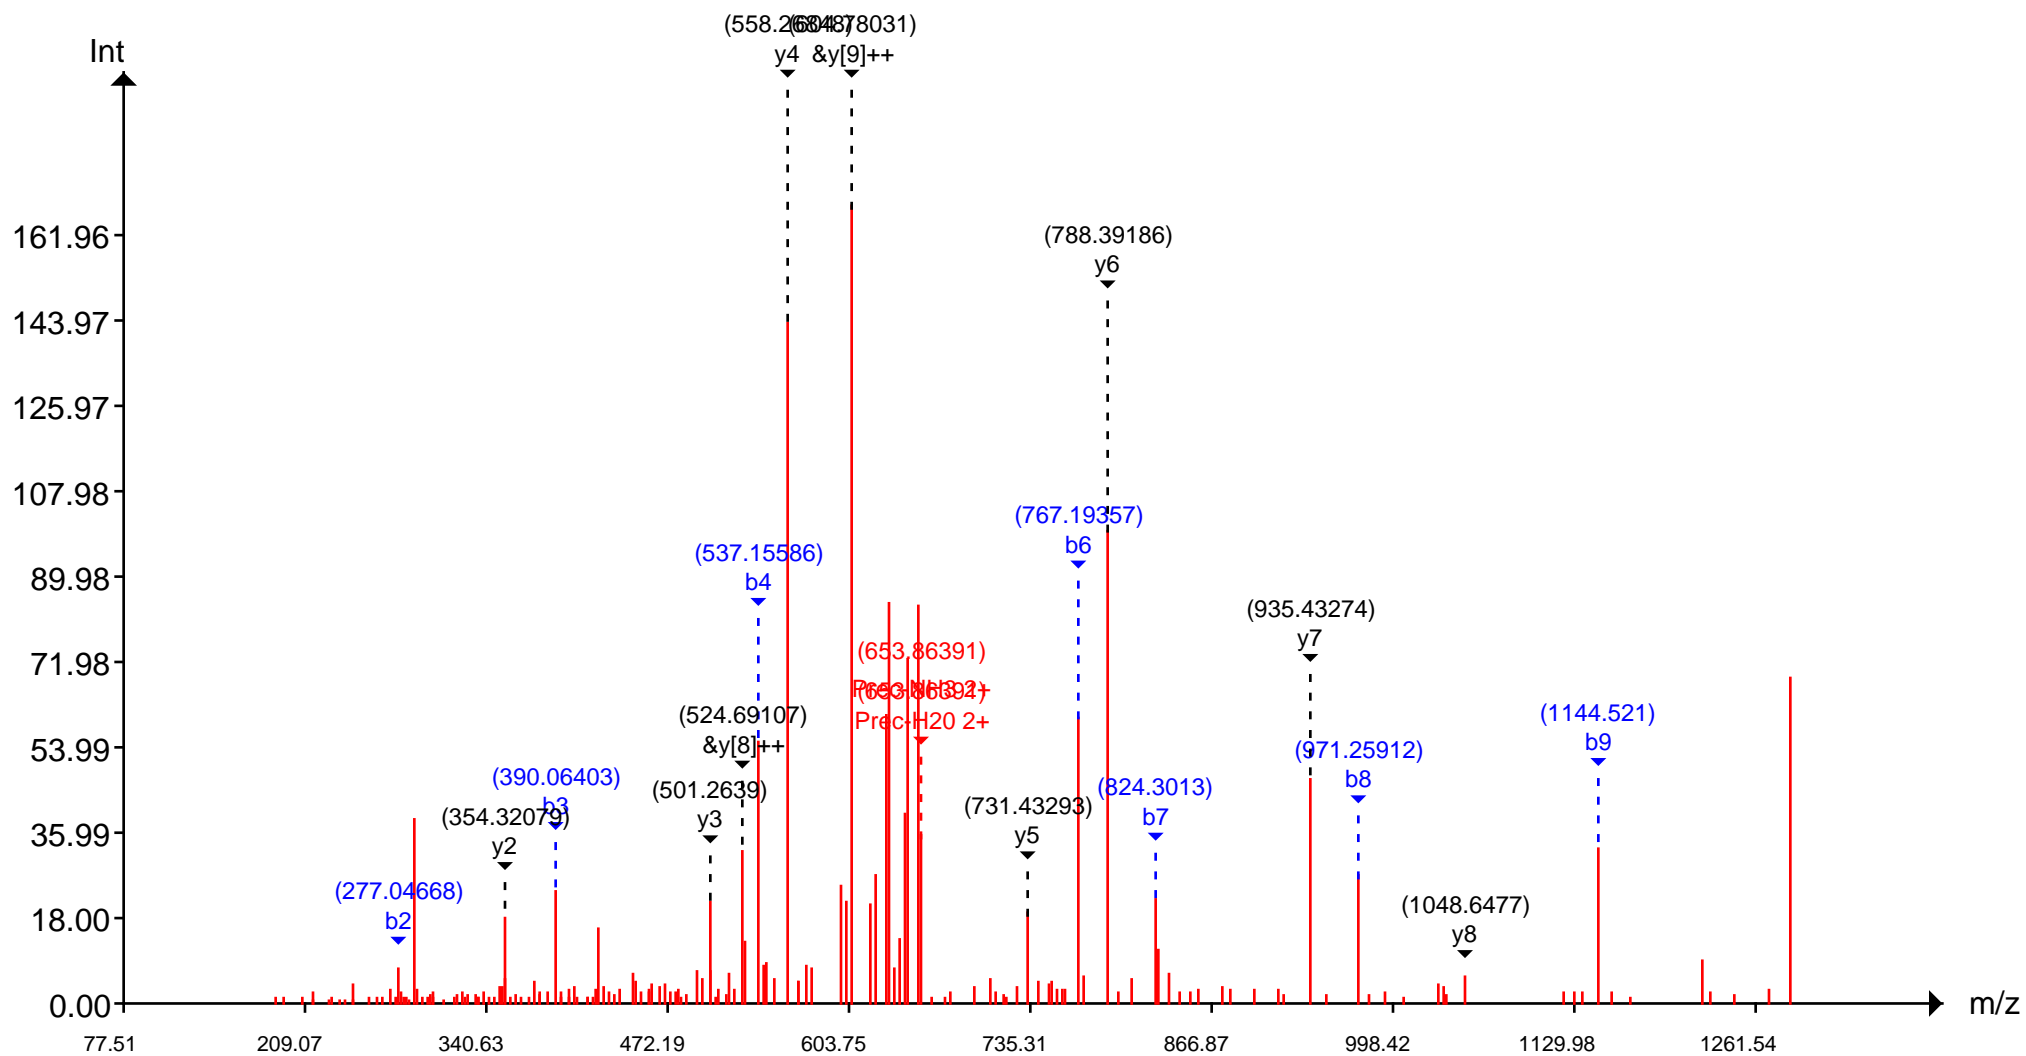

## Info

|                          |                                                             |                           |         |
|--------------------------|-------------------------------------------------------------|---------------------------|---------|
| <b>Modified Sequence</b> | AcD3-AC<Cmm*>LM<Mox*>GK<AcD3K*>GM<Mox*>K<AcD3K*>R<C13>-COOH | <b>Ion score</b>          | 48.11   |
| <b>Protein</b>           | Q61233                                                      | <b>Confidence level</b>   | 99.00%  |
| <b>Precursor m/z</b>     | 662.84511                                                   | <b>Identity Threshold</b> | 47.96   |
| <b>Charge</b>            | 2+                                                          | <b>Mass error</b>         | 1.92E-4 |



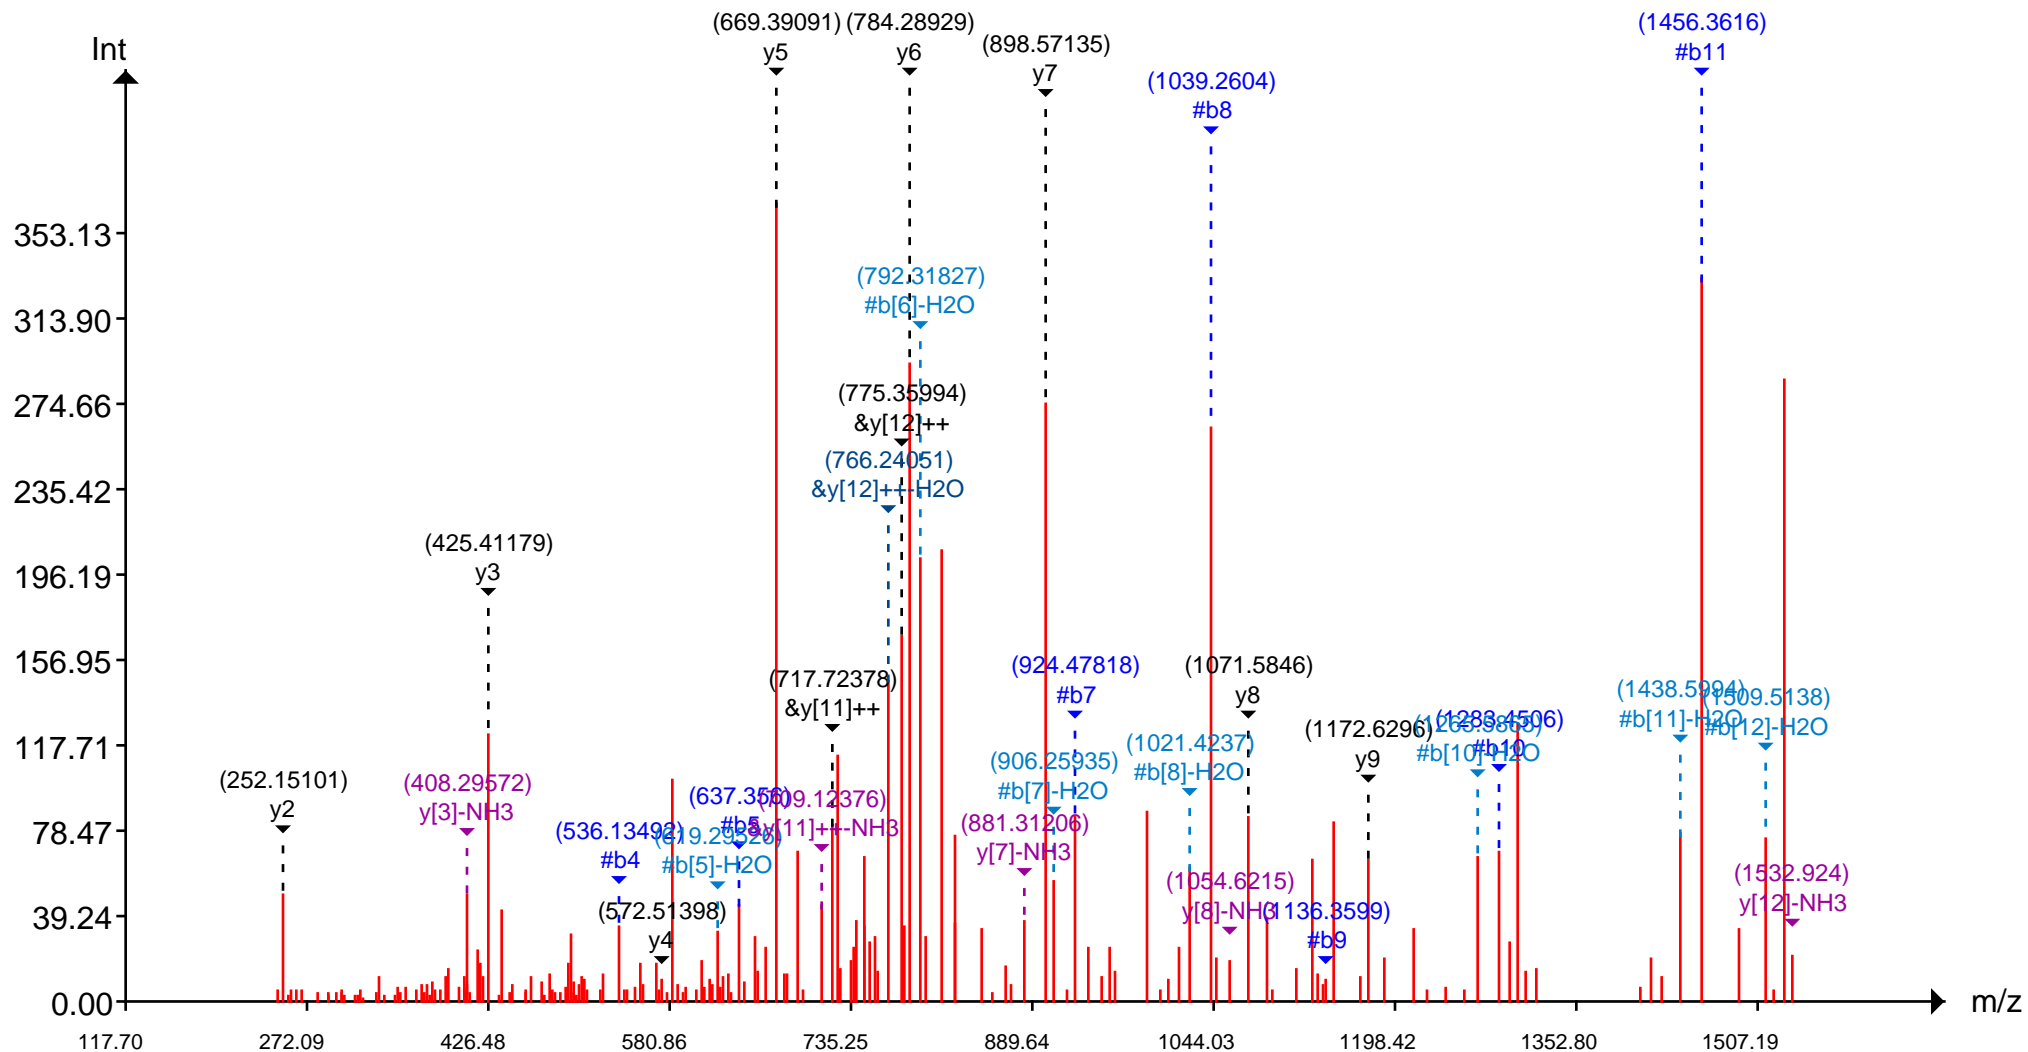

## Info

**Modified Sequence** AcD3-LDDM<Mox\*>TK<AcD3K\*>NDPFK<AcD3K\*>AR<C13>-COOH

**Ion score** 56.84

**Protein** Q62523

**Confidence level** 99.00%

**Precursor m/z** 854.43764

**Identity Threshold** 47.93

**Charge** 2+

**Mass error** 0.001612

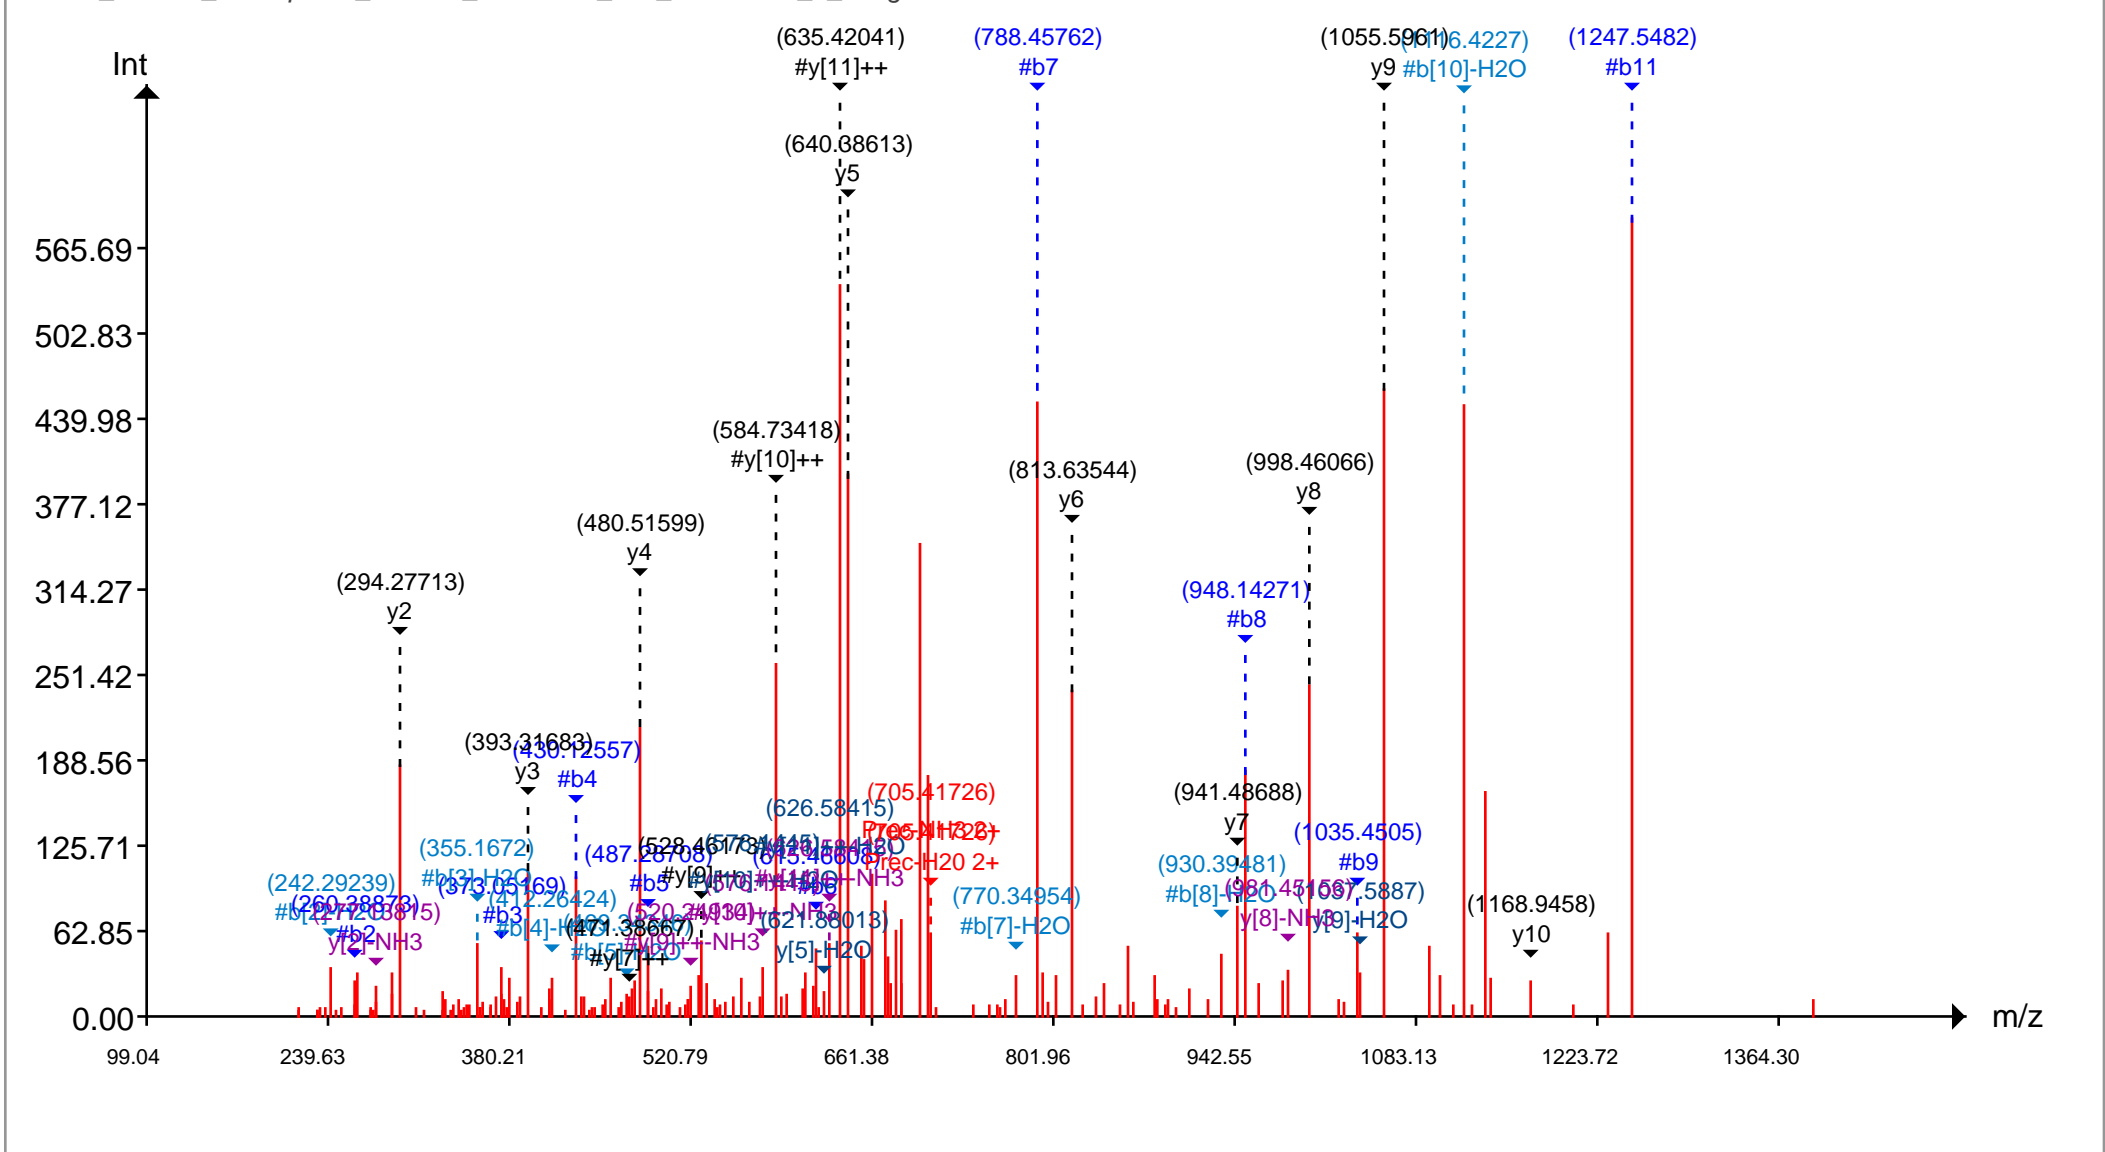

## Info

**Modified Sequence** AcD3-LTLGGQK<AcD3K\*>C<Cmm\*>SVIR<C13>-COOH

**Ion score** 64.27

**Protein** P62962

**Confidence level** 99.00%

**Precursor m/z** 714.41715

**Identity Threshold** 45.44

**Charge** 2+

**Mass error** 0.001709

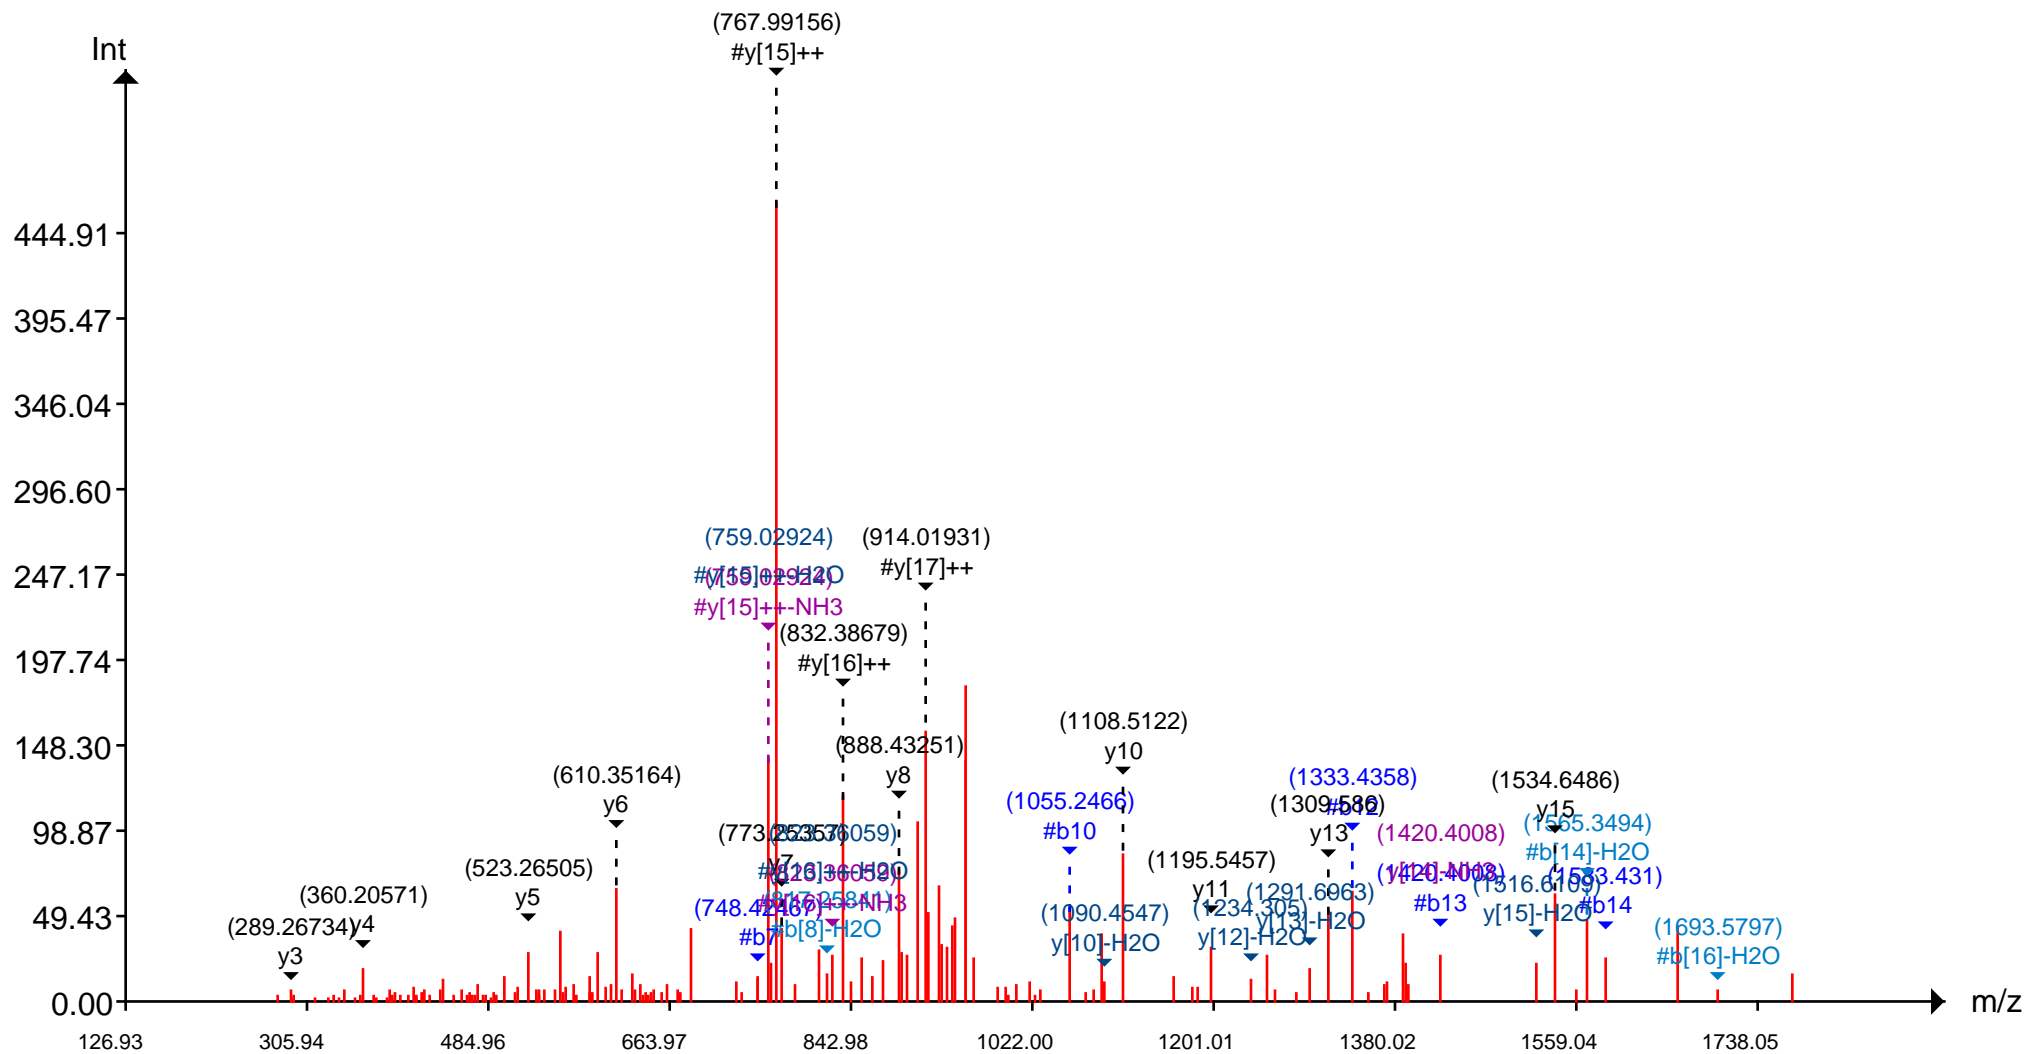

## Info

|                          |                              |                           |          |
|--------------------------|------------------------------|---------------------------|----------|
| <b>Modified Sequence</b> | AcD3-AYEPQGGSGYDYSYAGGR-COOH | <b>Ion score</b>          | 47.67    |
| <b>Protein</b>           | P61979                       | <b>Confidence level</b>   | 99.00%   |
| <b>Precursor m/z</b>     | 971.91874                    | <b>Identity Threshold</b> | 40.93    |
| <b>Charge</b>            | 2+                           | <b>Mass error</b>         | 0.002081 |

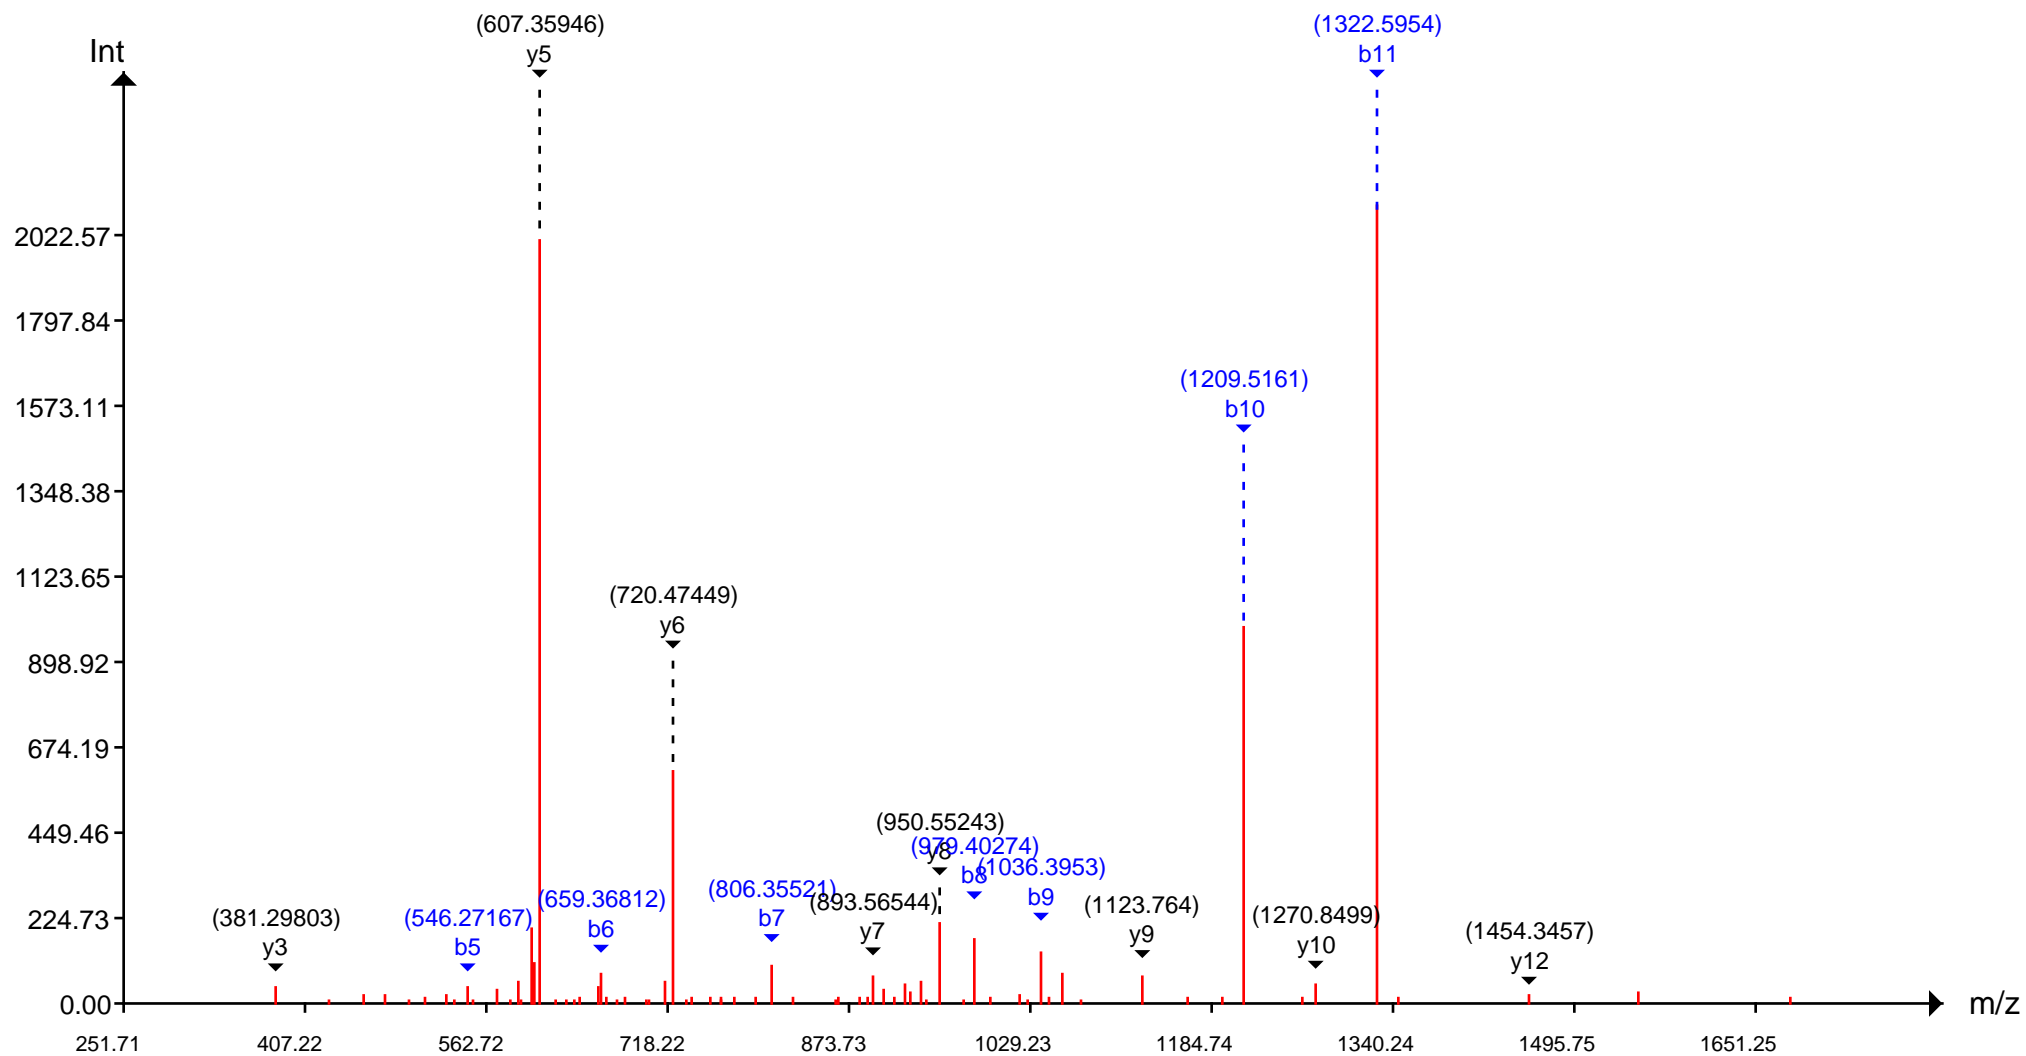

## Info

**Modified Sequence** AcD3-AQTEALM<Mox\*>K<AcD3K\*>GK<AcD3K\*>LPPEAR<C13>-COOH

**Ion score** 55.55

**Protein** P06745

**Confidence level** 99.00%

**Precursor m/z** 965.02521

**Identity Threshold** 47.53

**Charge** 2+

**Mass error** 0.002848

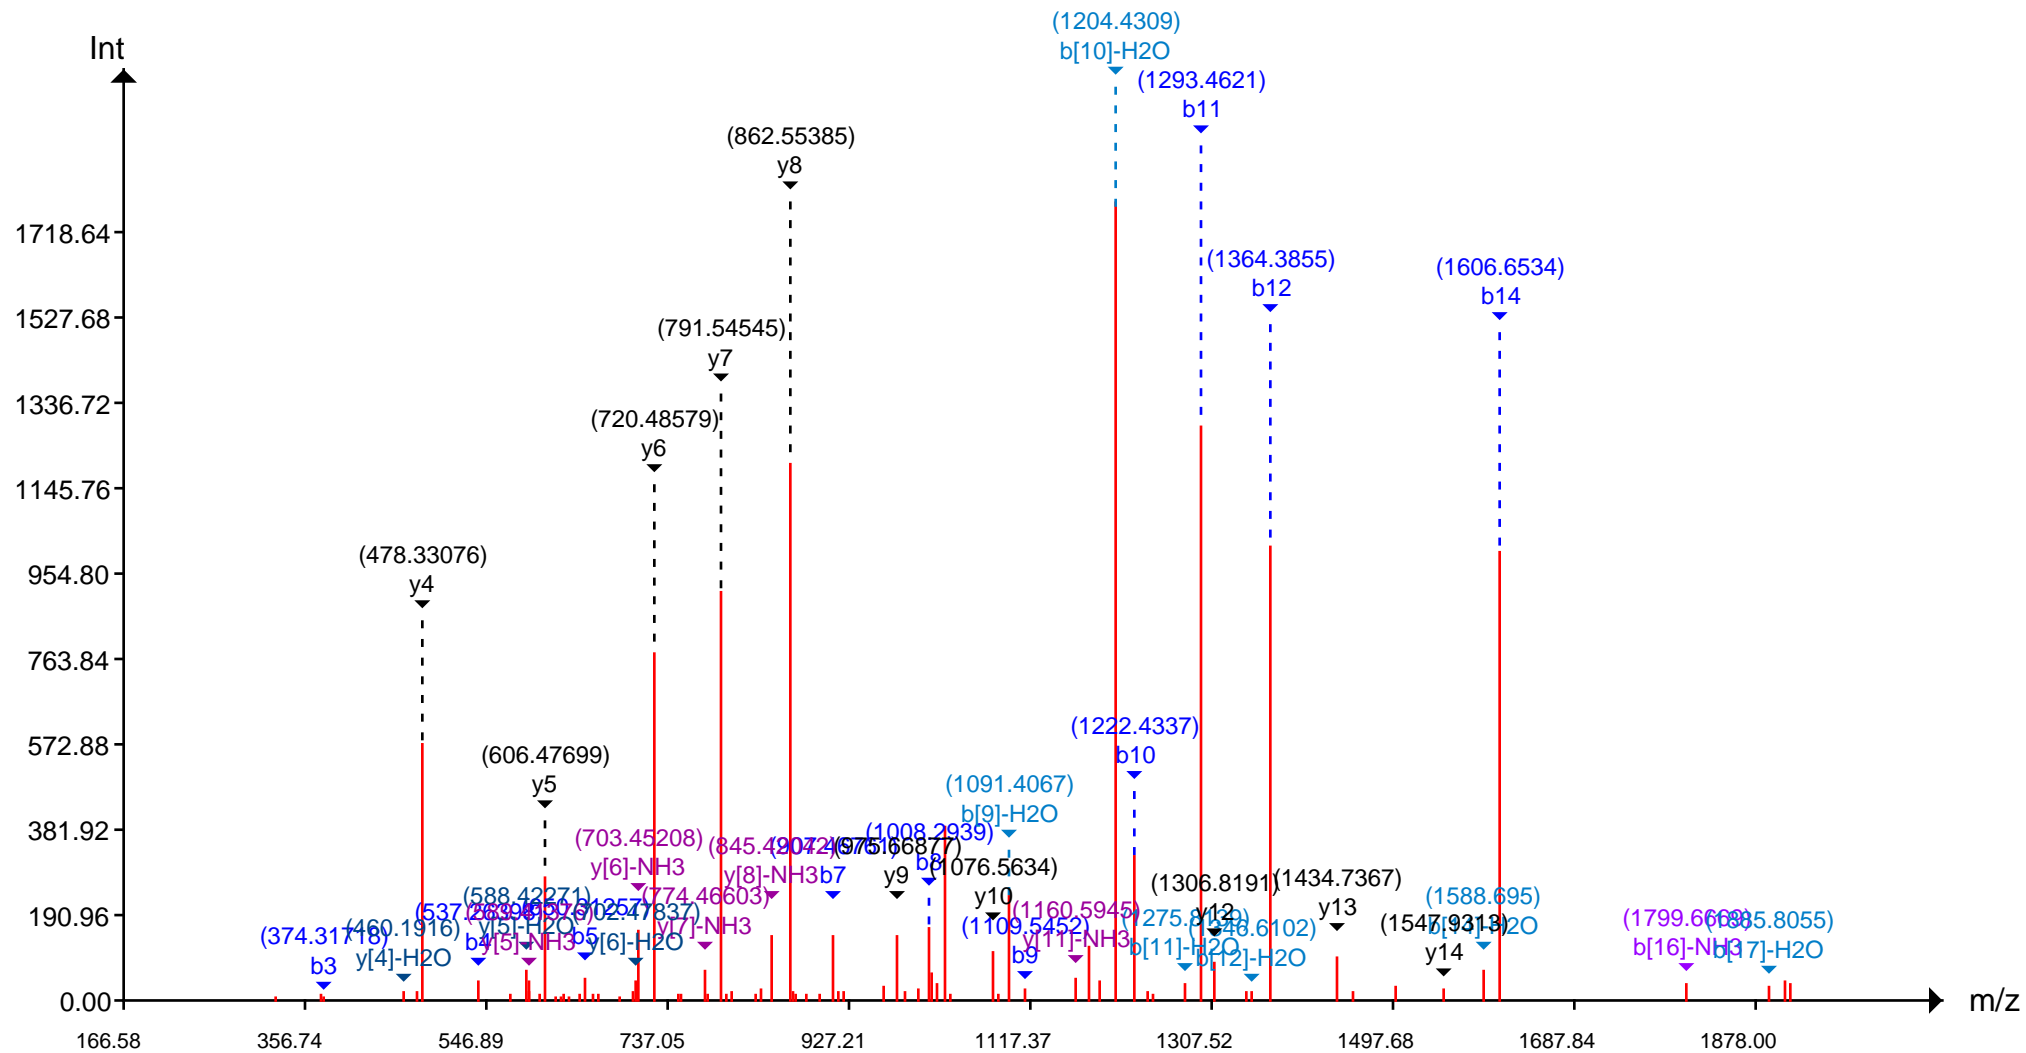

## Info

**Modified Sequence** AcD3-TINYLQETTLAANQPLSR<C13>-COOH

**Ion score** 84.5

**Protein** O09159

**Confidence level** 99.00%

**Precursor m/z** 1042.5627

**Identity Threshold** 47.60

**Charge** 2+

**Mass error** 0.002434



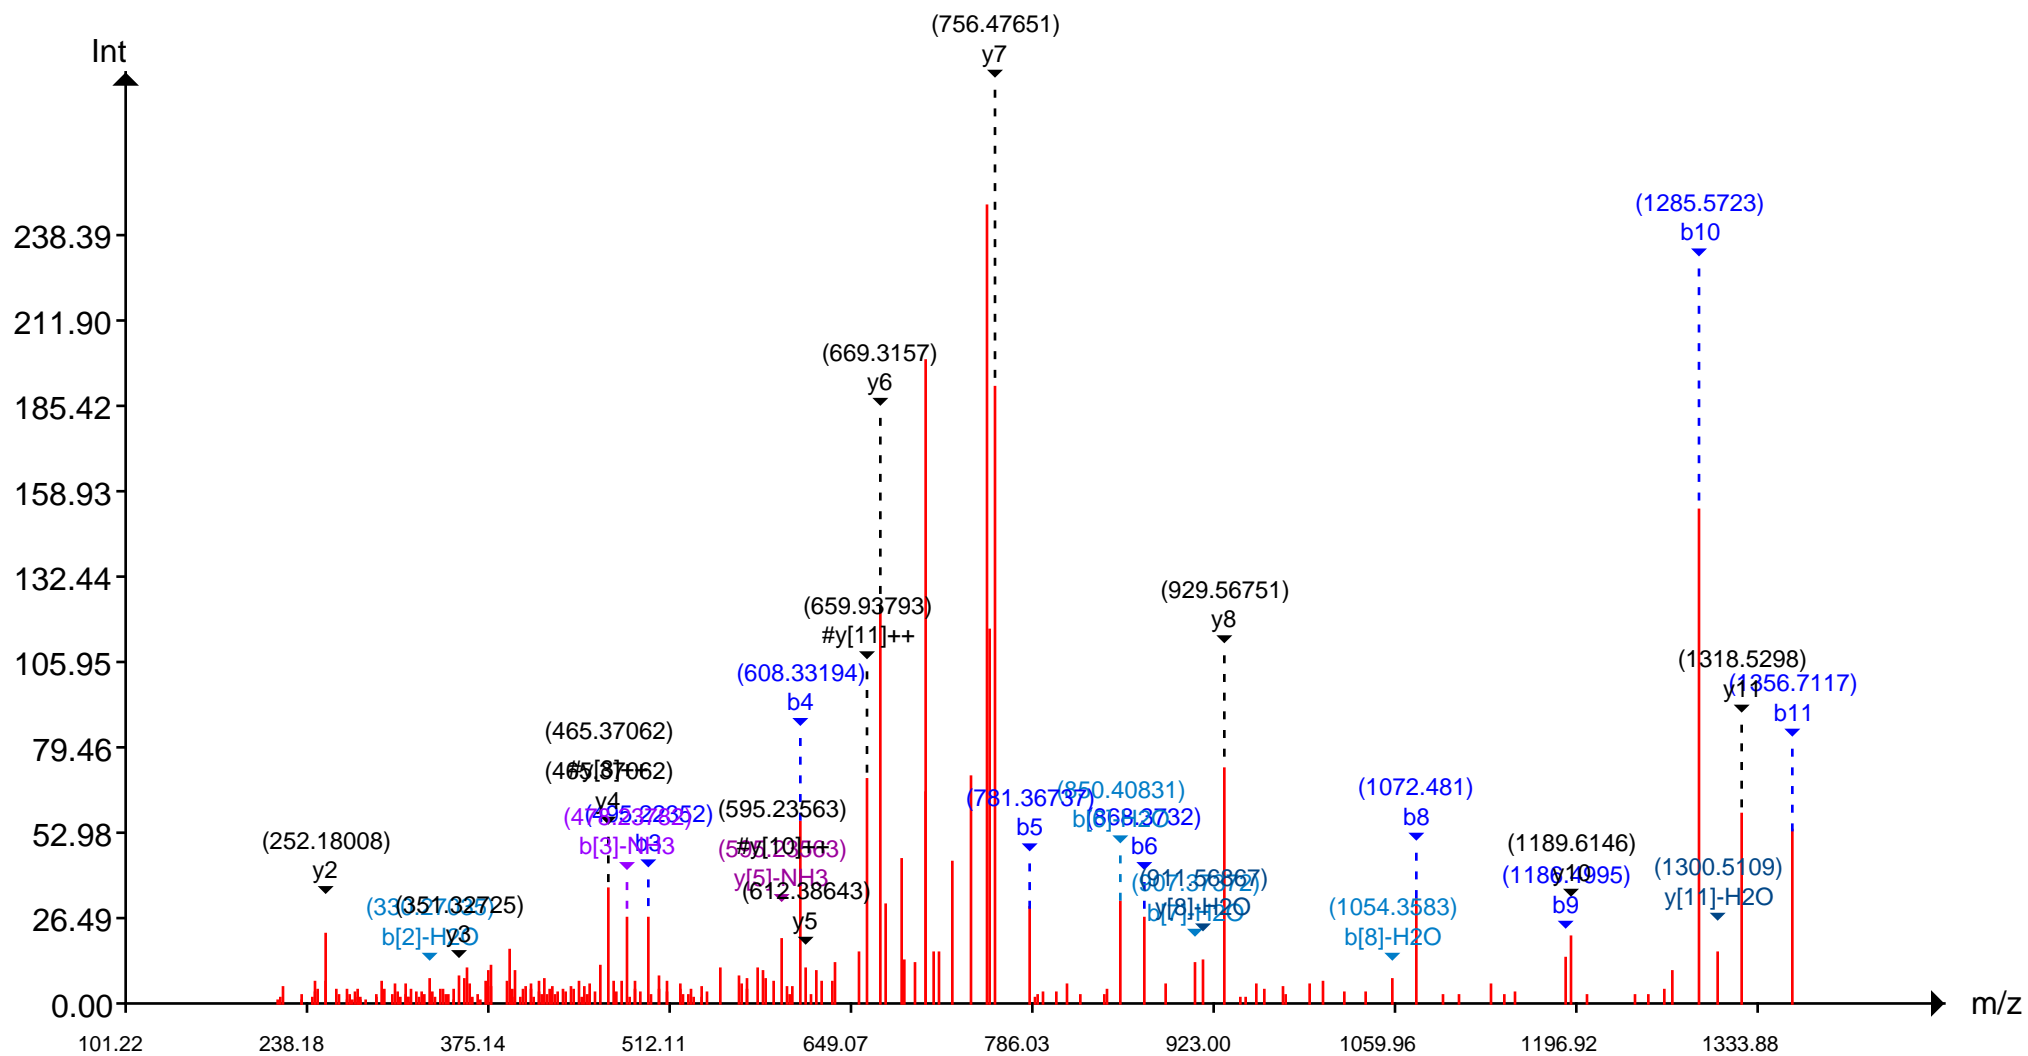

## Info

|                          |                                                         |                           |         |
|--------------------------|---------------------------------------------------------|---------------------------|---------|
| <b>Modified Sequence</b> | AcD3-K<AcD3K*>EM<Mox*>IK<AcD3K*>SGM<Mox*>NVAR<C13>-COOH | <b>Ion score</b>          | 65.19   |
| <b>Protein</b>           | P52480                                                  | <b>Confidence level</b>   | 99.00%  |
| <b>Precursor m/z</b>     | 768.91241                                               | <b>Identity Threshold</b> | 48.05   |
| <b>Charge</b>            | 2+                                                      | <b>Mass error</b>         | 9.57E-4 |

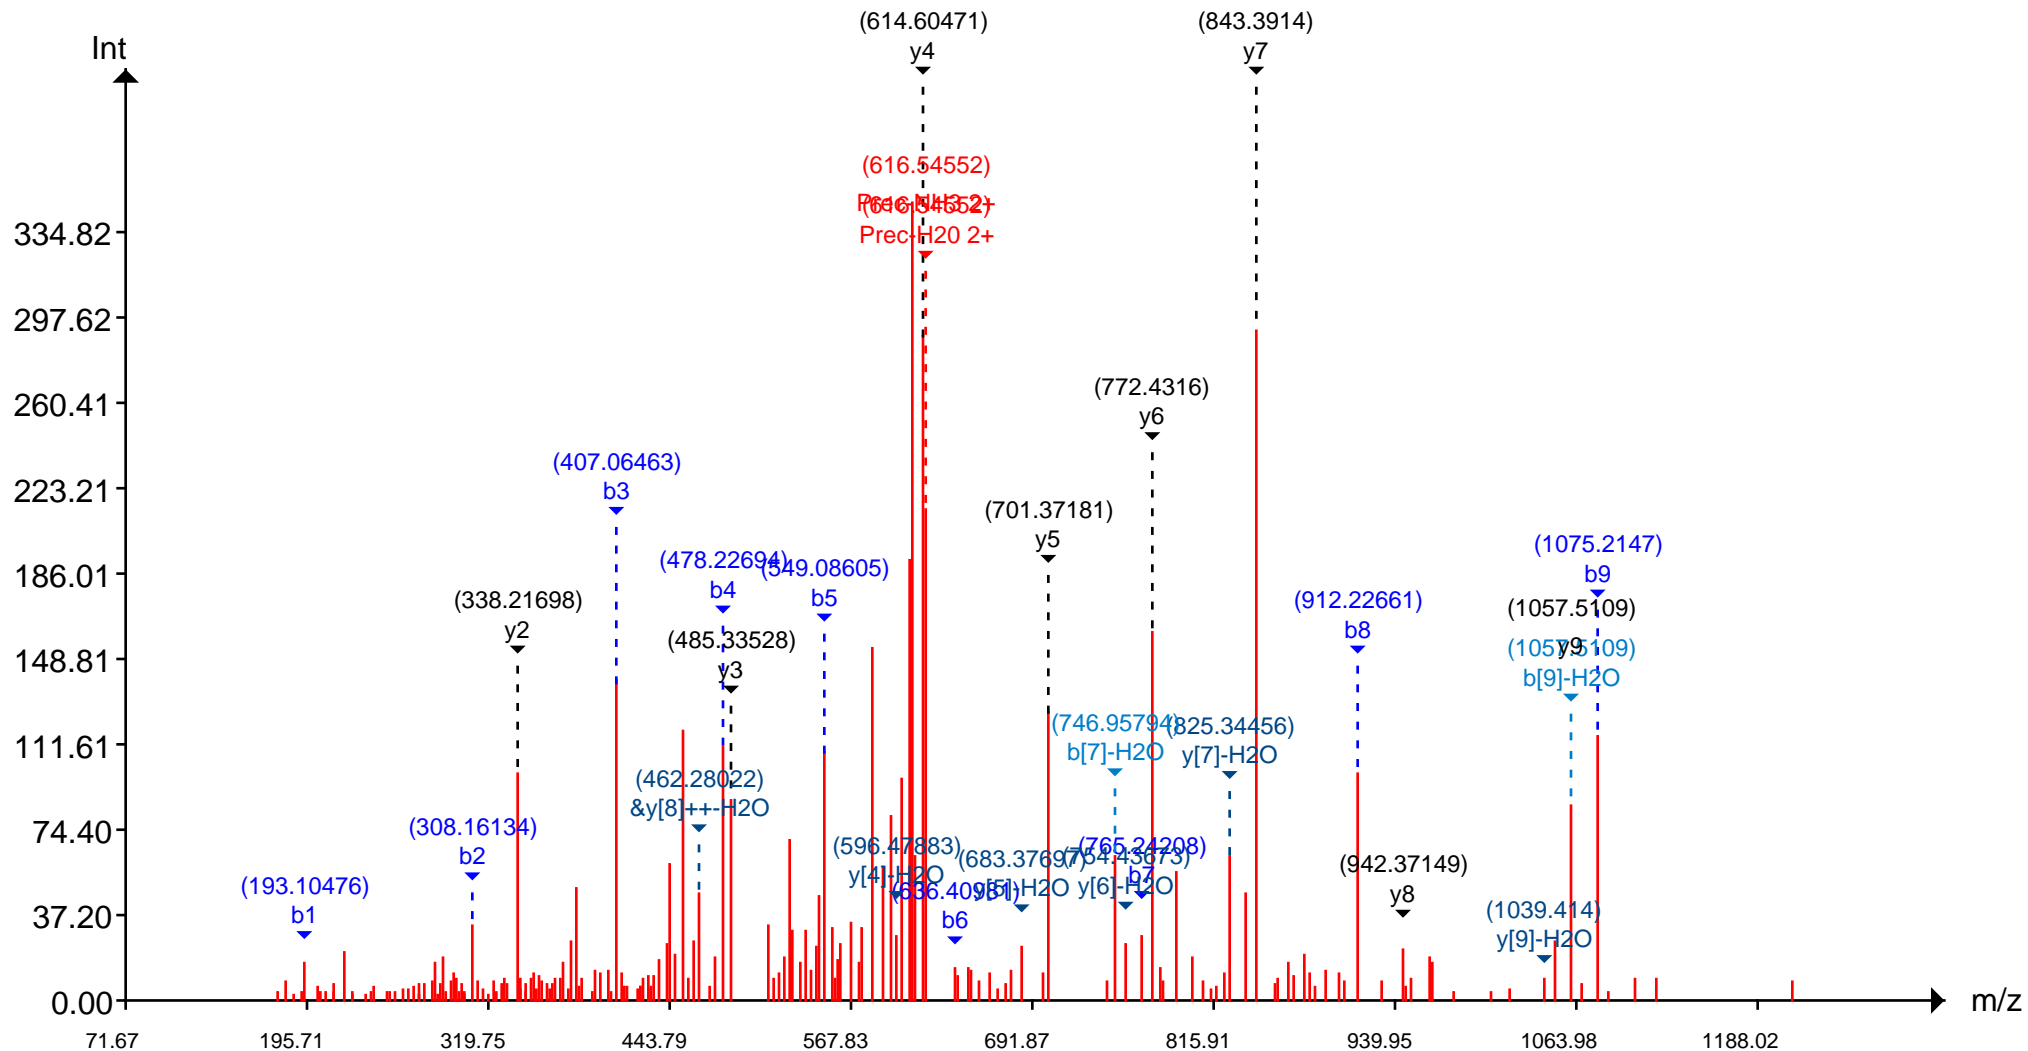

## Info

**Modified Sequence** AcD3-M<Mox\*>DVAASEFYR-COOH

**Ion score** 61.34

**Protein** P17182, P21550, P17183

**Confidence level** 99.00%

**Precursor m/z** 625.28374

**Identity Threshold** 44.23

**Charge** 2+

**Mass error** 5.29E-4



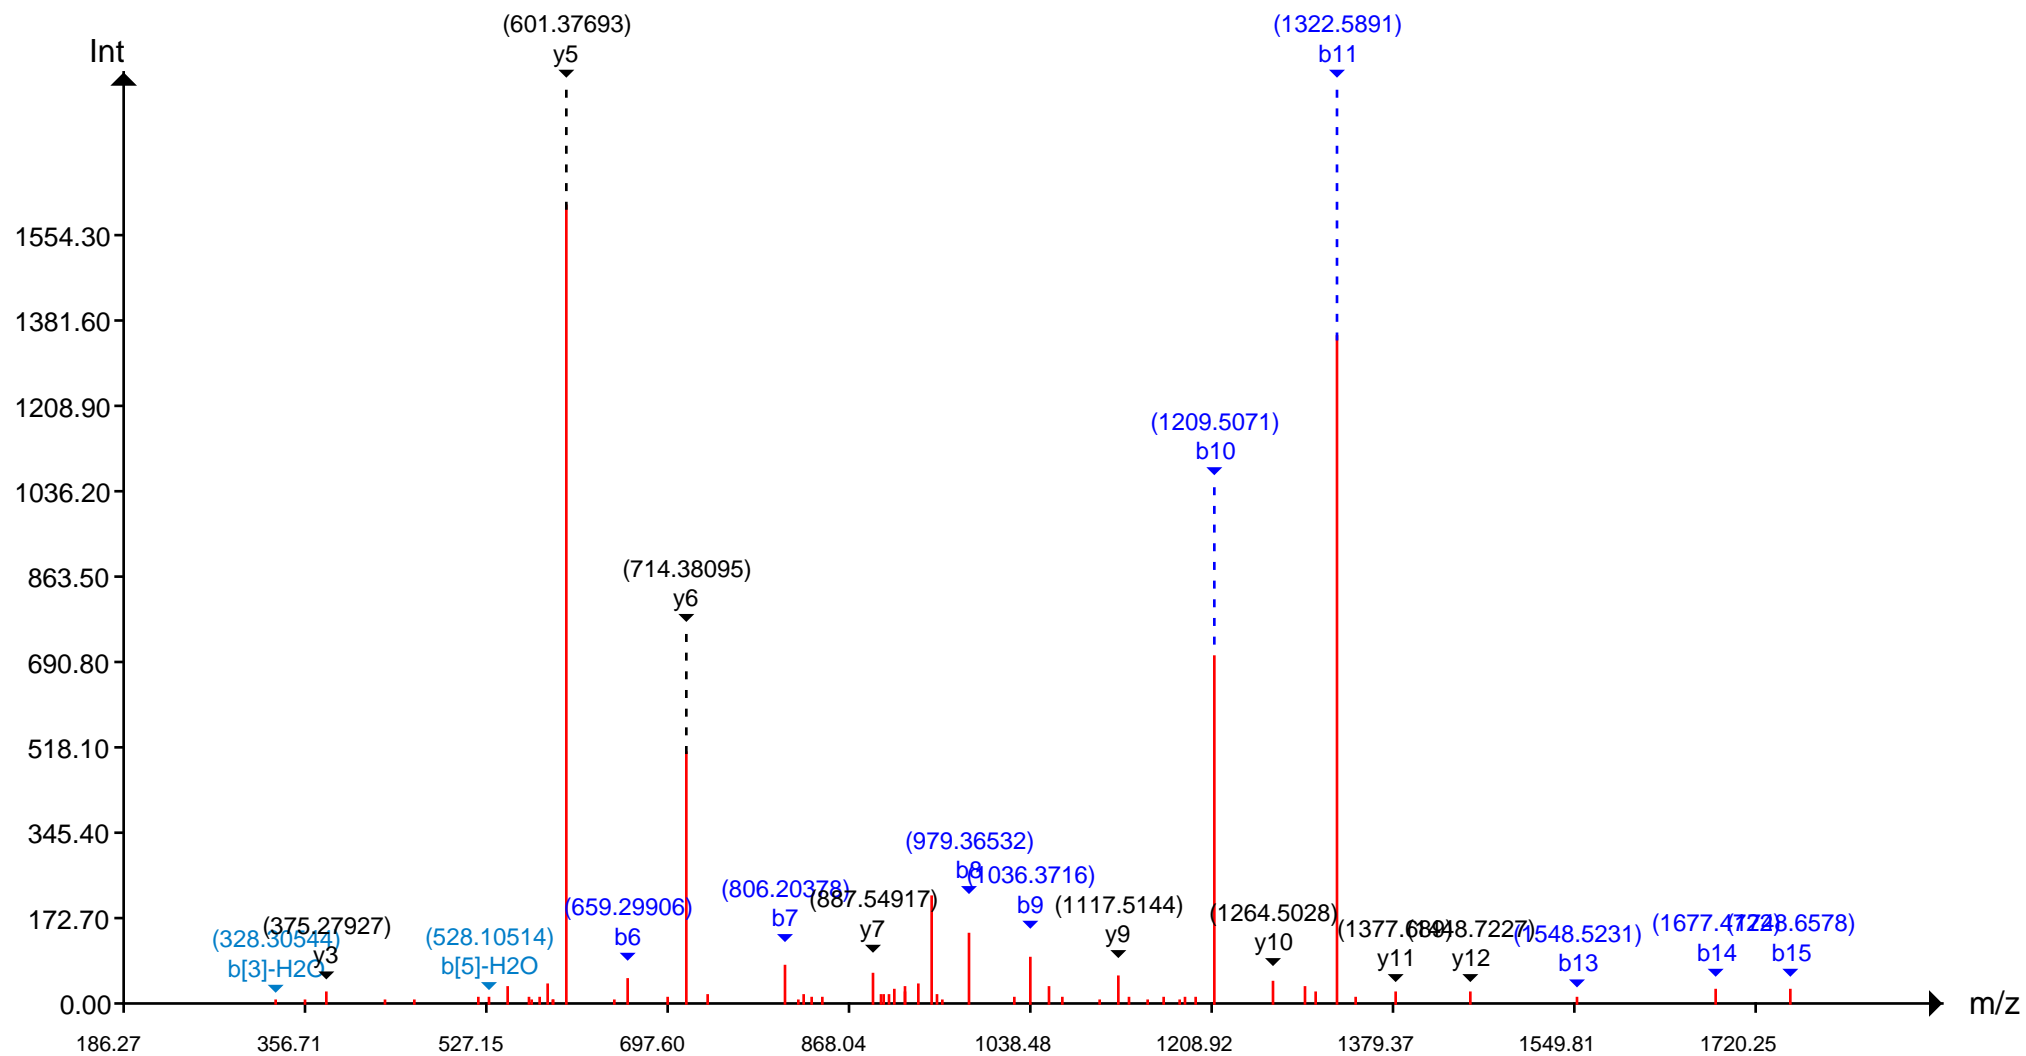

## Info

|                          |                                                  |                           |         |
|--------------------------|--------------------------------------------------|---------------------------|---------|
| <b>Modified Sequence</b> | AcD3-AQTEALM<Mox*>K<AcD3K*>GK<AcD3K*>LPPEAR-COOH | <b>Ion score</b>          | 81.98   |
| <b>Protein</b>           | P06745                                           | <b>Confidence level</b>   | 99.00%  |
| <b>Precursor m/z</b>     | 962.01535                                        | <b>Identity Threshold</b> | 47.91   |
| <b>Charge</b>            | 2+                                               | <b>Mass error</b>         | 0.00327 |

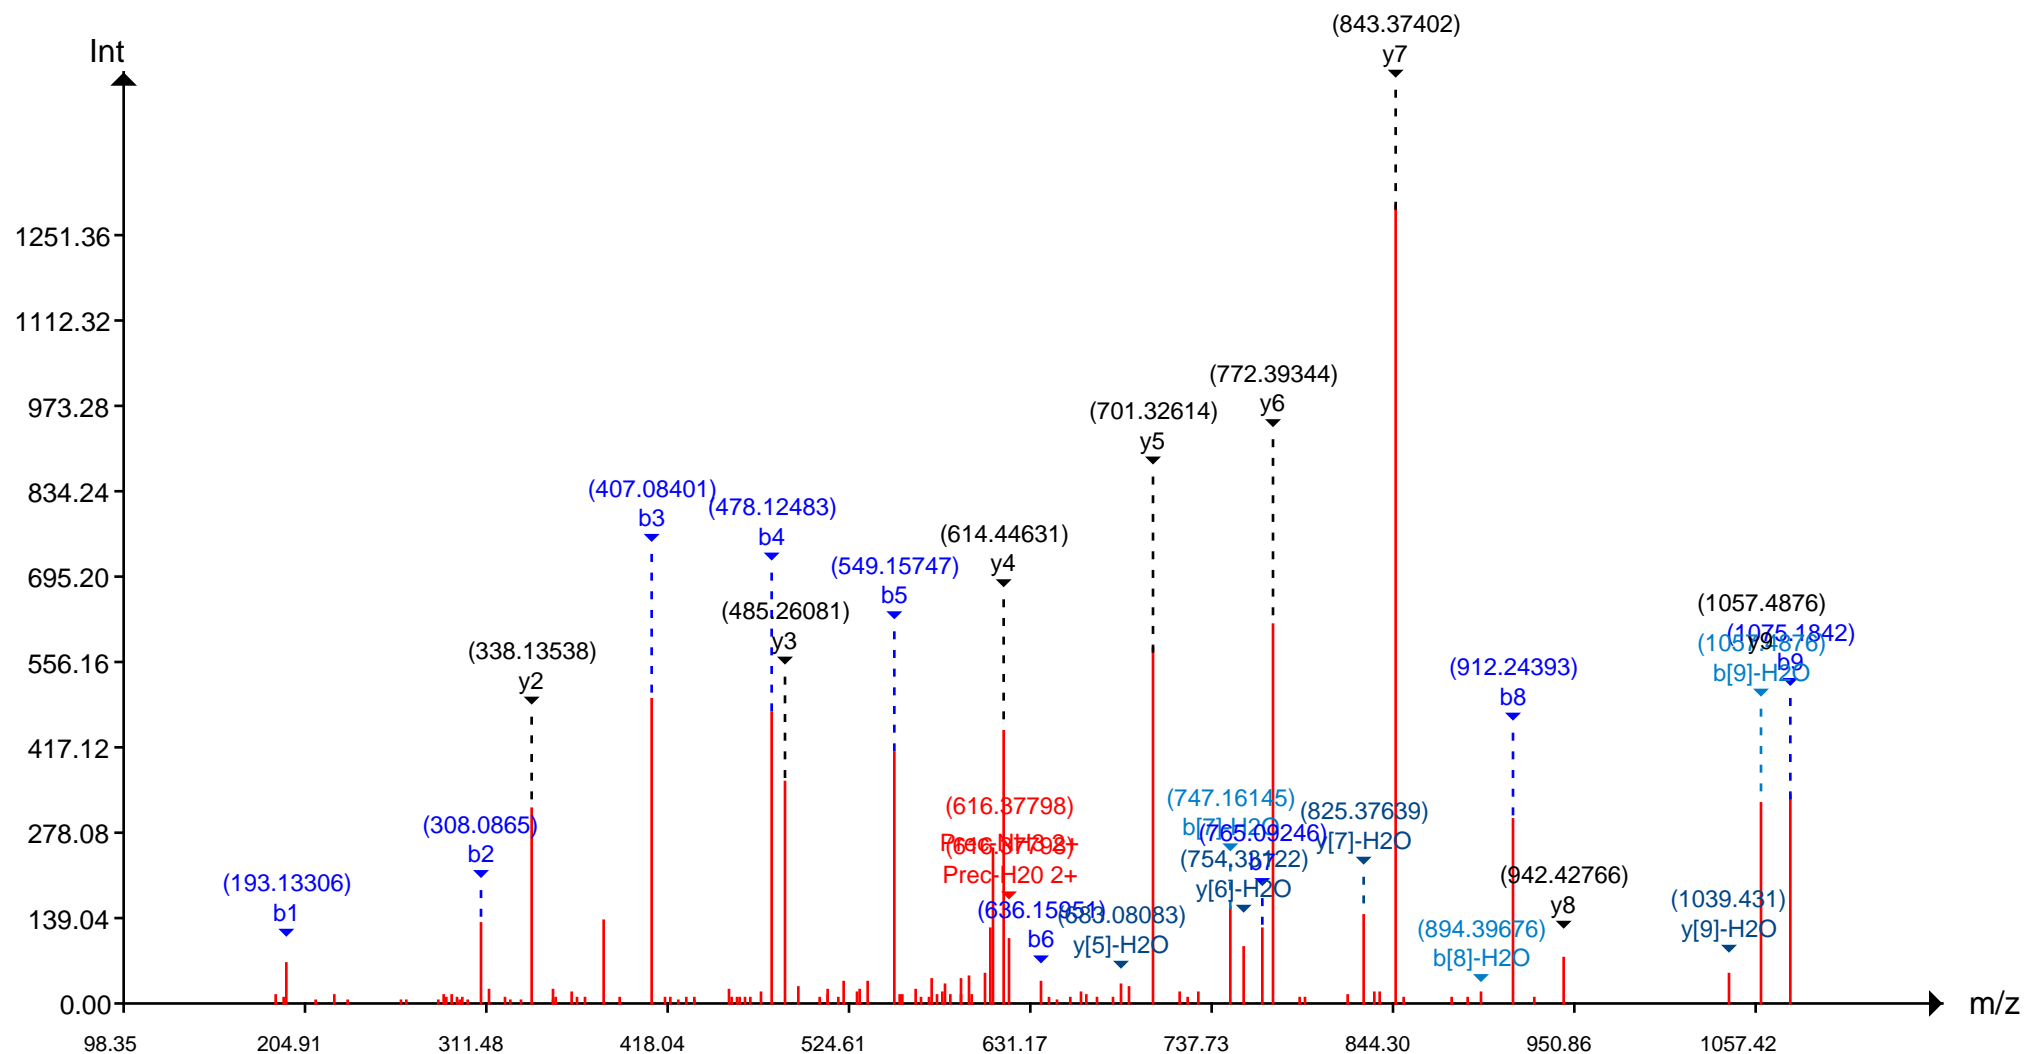

## Info

|                          |                            |                           |          |
|--------------------------|----------------------------|---------------------------|----------|
| <b>Modified Sequence</b> | AcD3-M<Mox*>DVAASEFYR-COOH | <b>Ion score</b>          | 67.85    |
| <b>Protein</b>           | P17182, P21550, P17183     | <b>Confidence level</b>   | 99.00%   |
| <b>Precursor m/z</b>     | 625.28412                  | <b>Identity Threshold</b> | 44.31    |
| <b>Charge</b>            | 2+                         | <b>Mass error</b>         | 0.001289 |

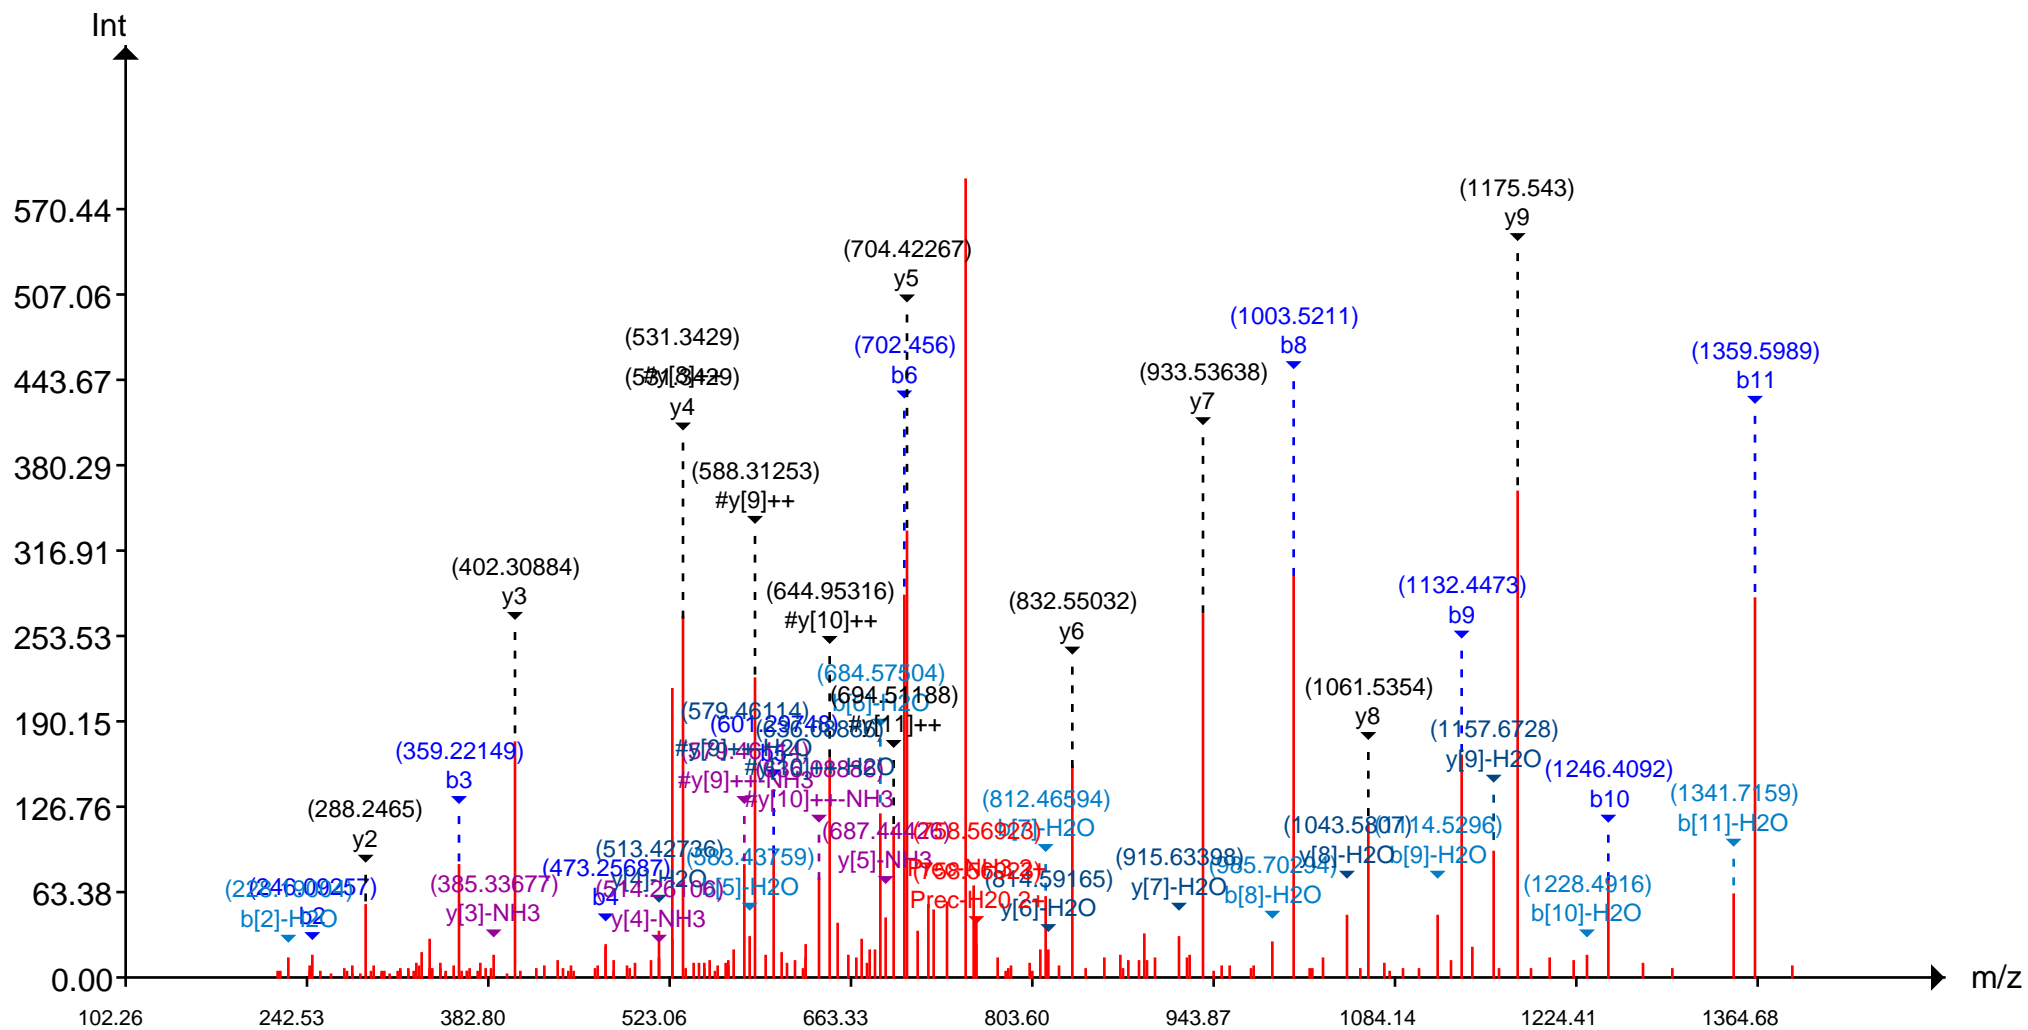

## Info

|                          |                                |                           |         |
|--------------------------|--------------------------------|---------------------------|---------|
| <b>Modified Sequence</b> | AcD3-TVINQTQK<AcD3K*>ENLR-COOH | <b>Ion score</b>          | 88.51   |
| <b>Protein</b>           | Q6ZWW7                         | <b>Confidence level</b>   | 99.00%  |
| <b>Precursor m/z</b>     | 767.42918                      | <b>Identity Threshold</b> | 47.35   |
| <b>Charge</b>            | 2+                             | <b>Mass error</b>         | 8.97E-4 |

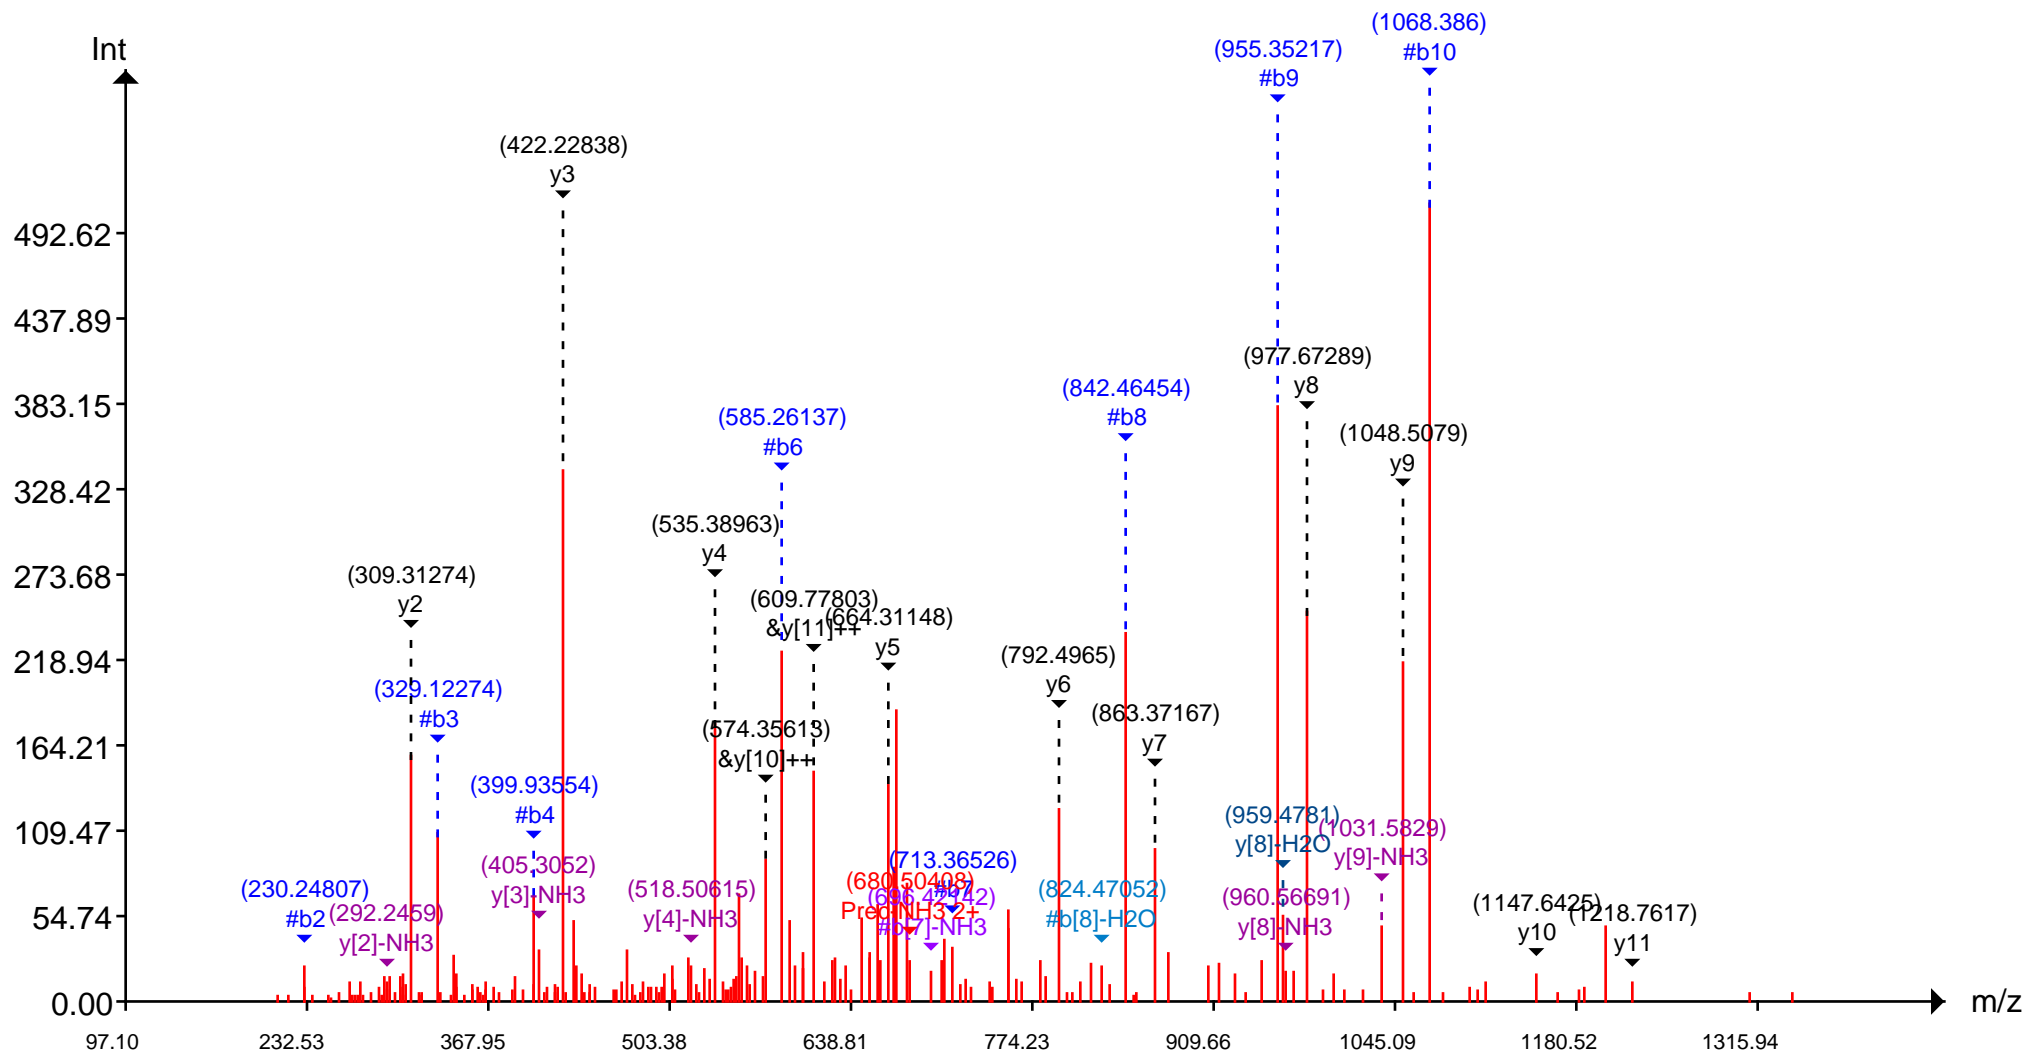

## Info

|                          |                             |                           |         |
|--------------------------|-----------------------------|---------------------------|---------|
| <b>Modified Sequence</b> | AcD3-IAVANAQELLQR<C13>-COOH | <b>Ion score</b>          | 89.84   |
| <b>Protein</b>           | P62075                      | <b>Confidence level</b>   | 99.00%  |
| <b>Precursor m/z</b>     | 688.90551                   | <b>Identity Threshold</b> | 45.42   |
| <b>Charge</b>            | 2+                          | <b>Mass error</b>         | 6.76E-4 |

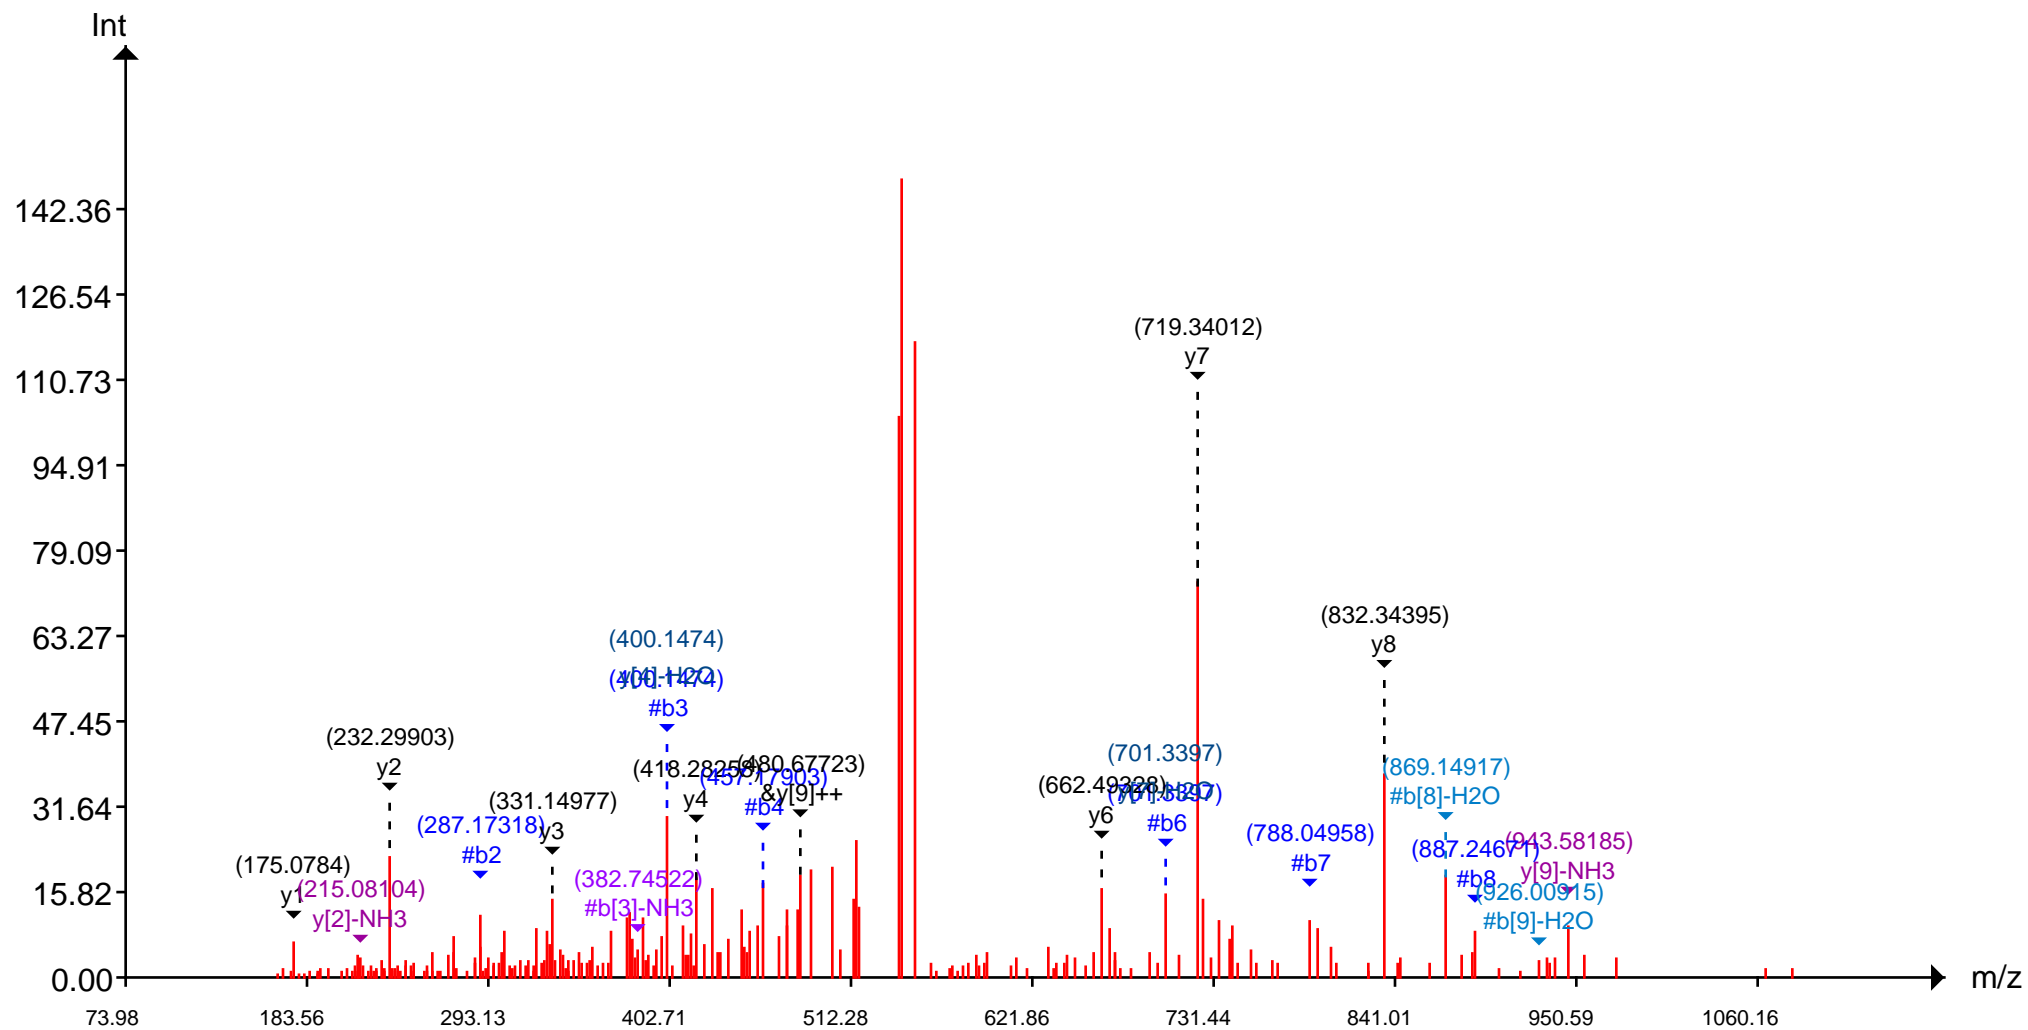

## Info

**Modified Sequence** AcD3-LQIGDESVGR-COOH

**Protein** P24369

**Precursor m/z** 559.79789

**Charge** 2+

**Ion score** 51.42

**Confidence level** 99.00%

**Identity Threshold** 48.09

**Mass error** 5.55E-4

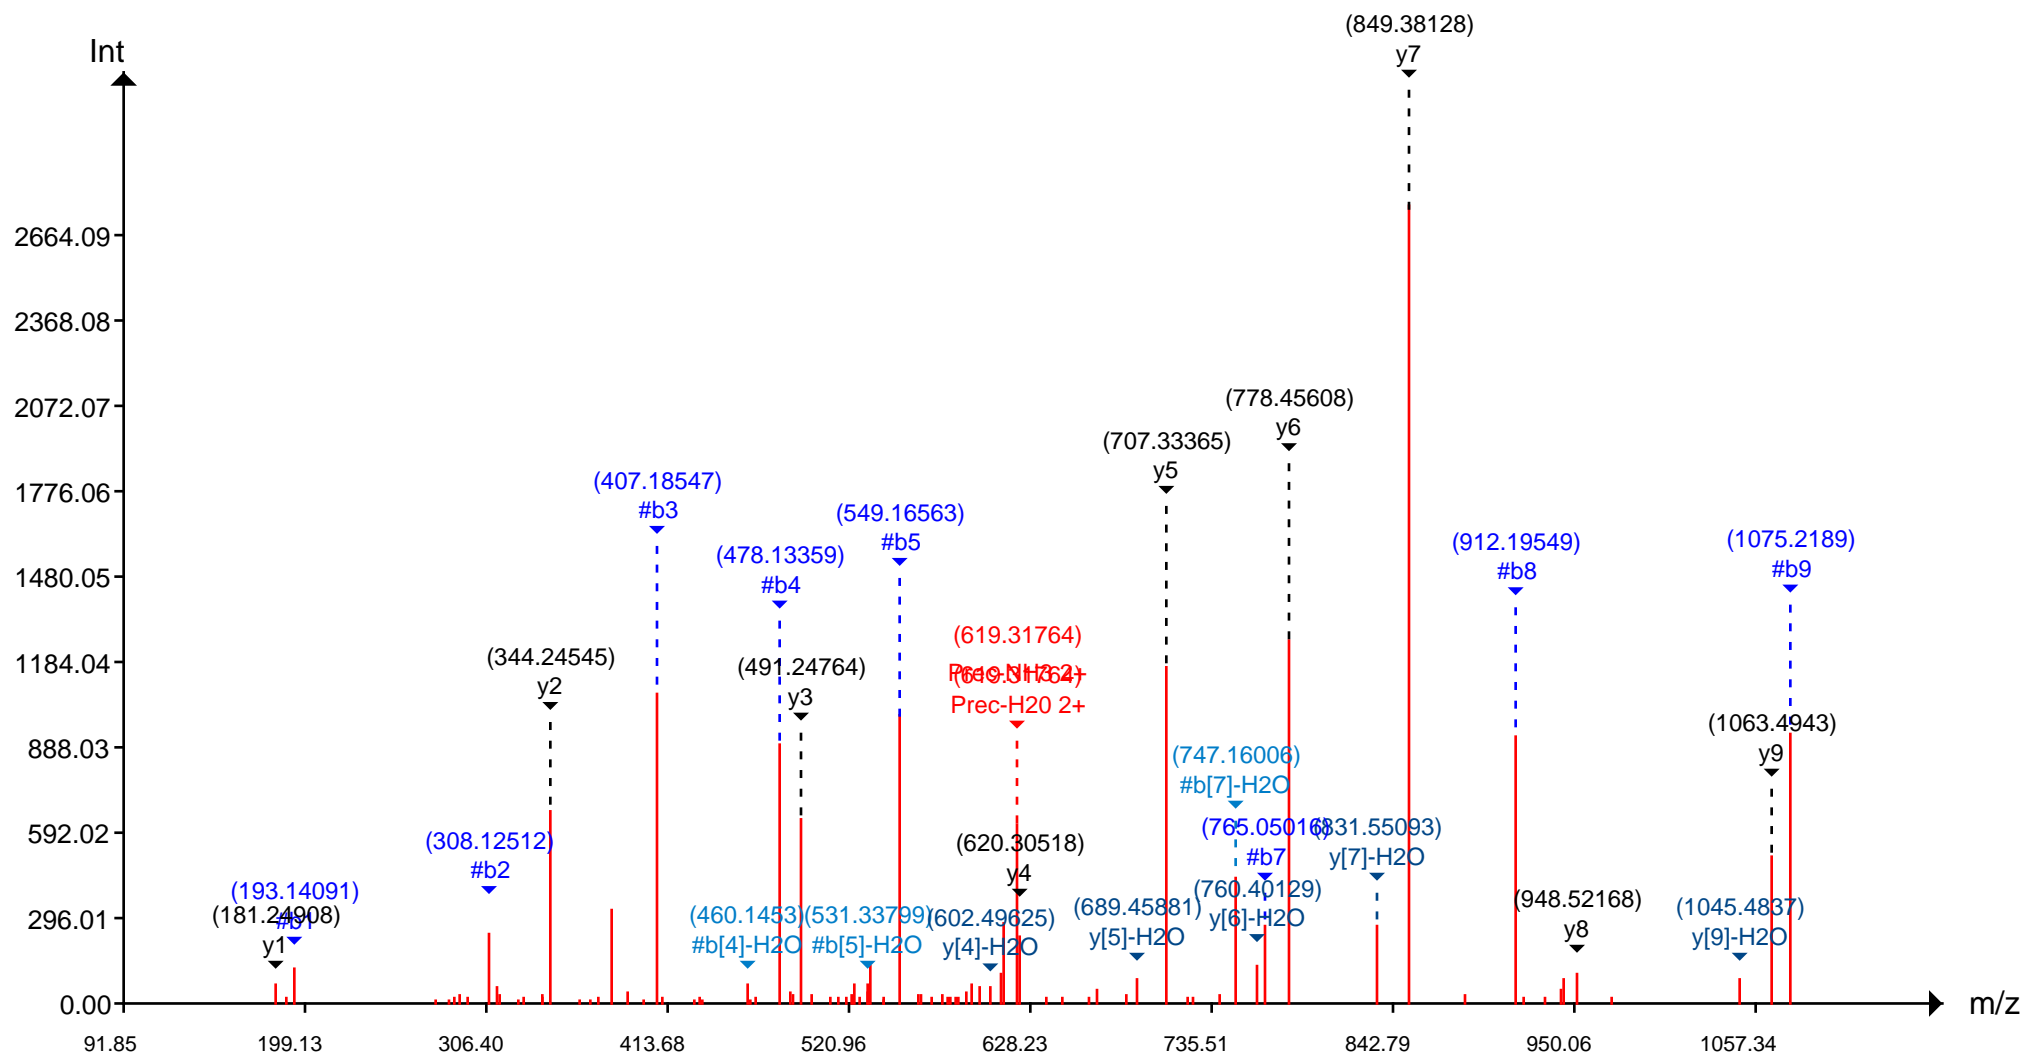

## Info

**Modified Sequence** AcD3-M<Mox\*>DVAASEFYR<C13>-COOH

**Ion score** 84.47

**Protein** P17182, P21550, P17183

**Confidence level** 99.00%

**Precursor m/z** 628.29363

**Identity Threshold** 45.39

**Charge** 2+

**Mass error** 1.68E-4

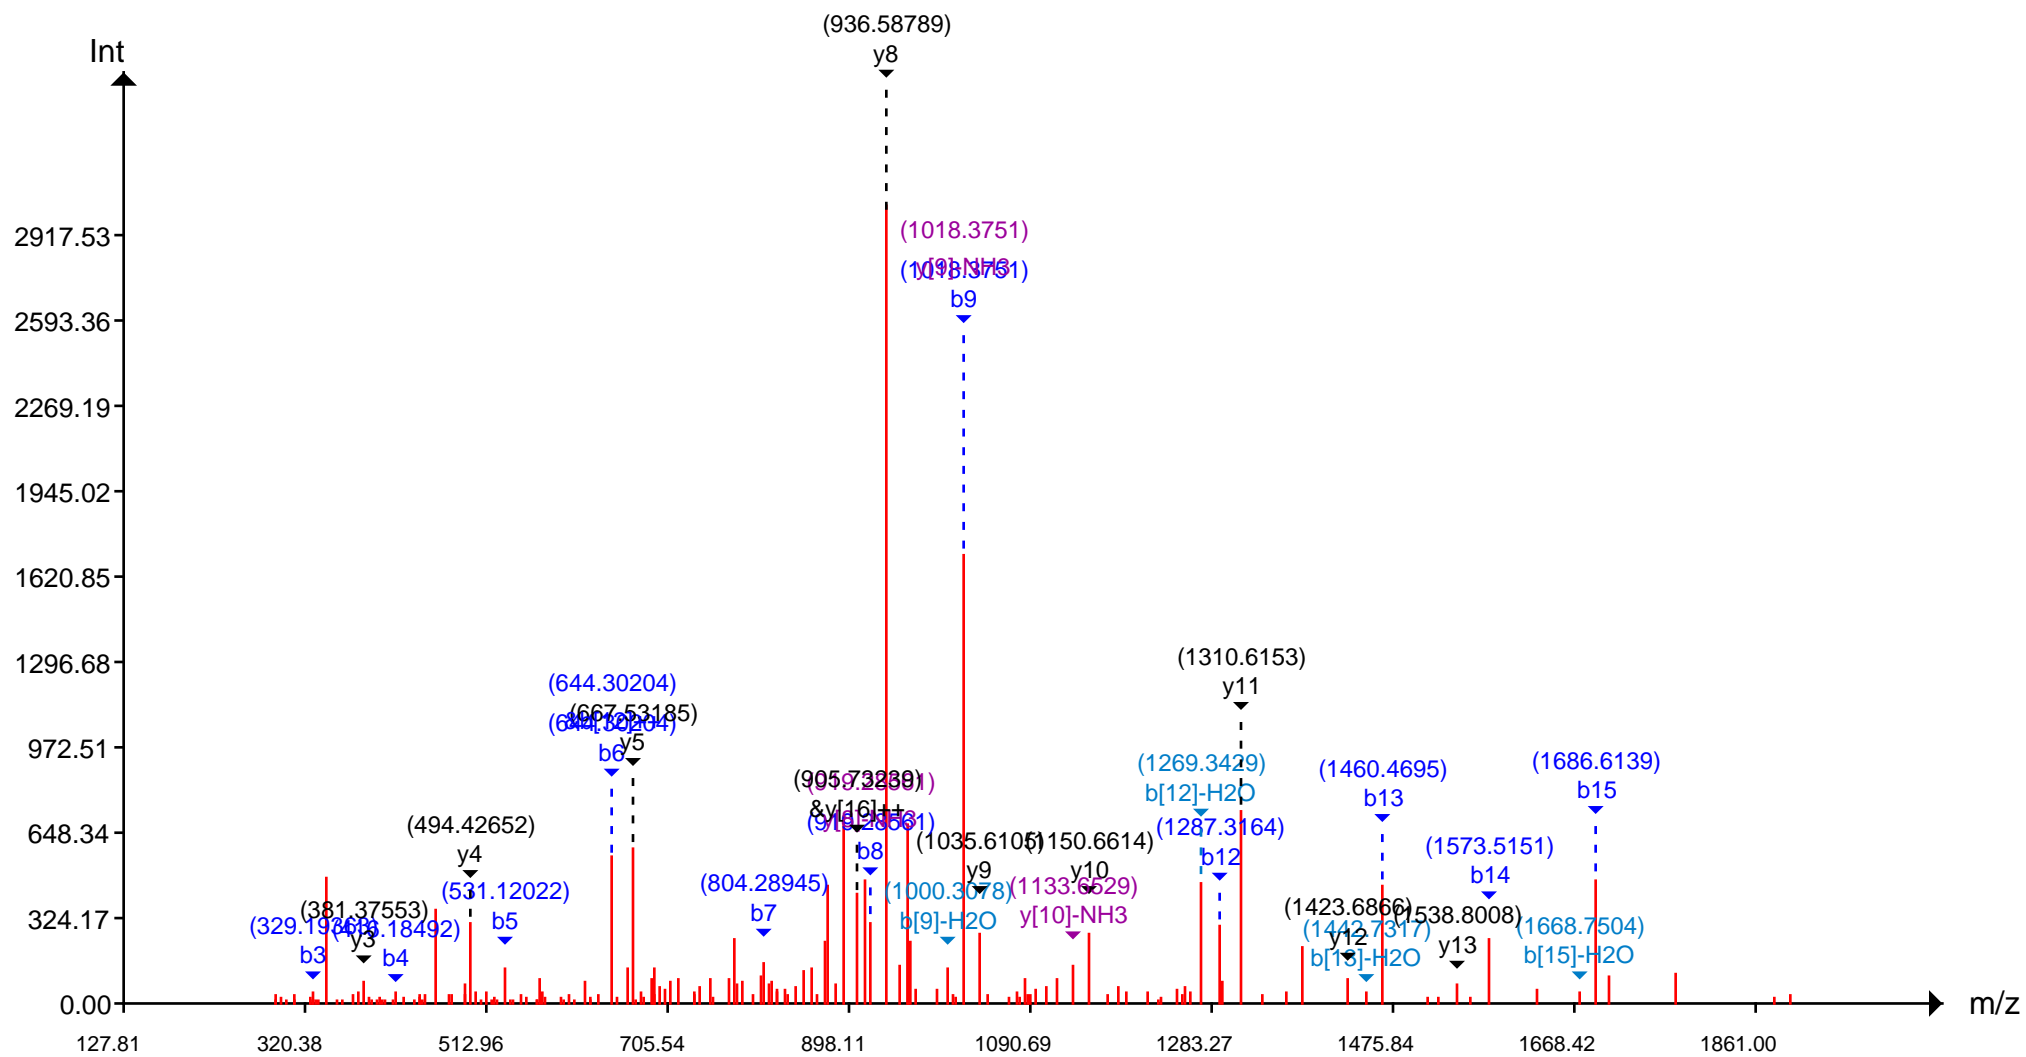

## Info

|                          |                                                |                           |          |
|--------------------------|------------------------------------------------|---------------------------|----------|
| <b>Modified Sequence</b> | AcD3-VALSDIC<Cmm*>DVPTAK<AcD3K*>IISR<C13>-COOH | <b>Ion score</b>          | 56.86    |
| <b>Protein</b>           | Q9CWJ9                                         | <b>Confidence level</b>   | 99.00%   |
| <b>Precursor m/z</b>     | 977.54815                                      | <b>Identity Threshold</b> | 46.44    |
| <b>Charge</b>            | 2+                                             | <b>Mass error</b>         | -1.61E-4 |

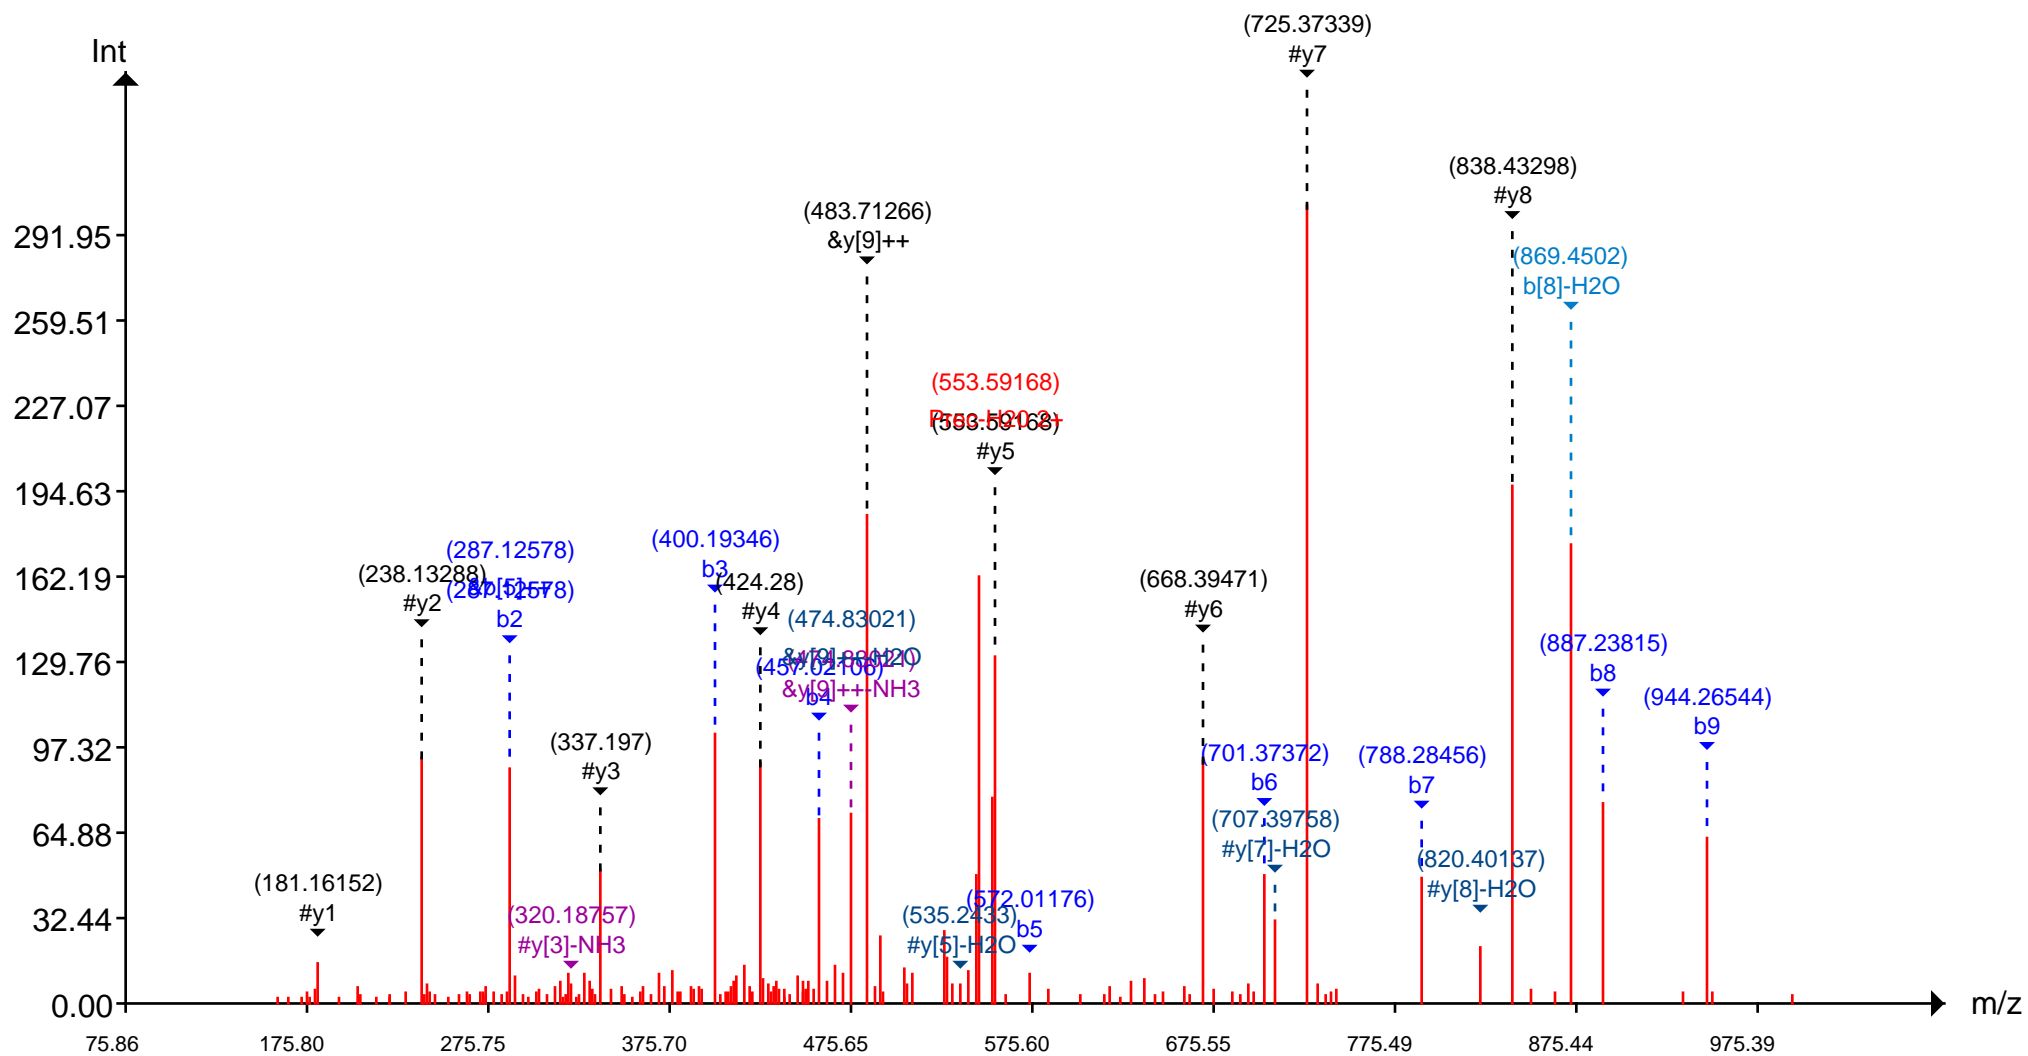

## Info

**Modified Sequence** AcD3-LQIGDESVGR<C13>-COOH

**Ion score** 70.3

**Protein** P24369

**Confidence level** 99.00%

**Precursor m/z** 562.80806

**Identity Threshold** 47.57

**Charge** 2+

**Mass error** 7.53E-4



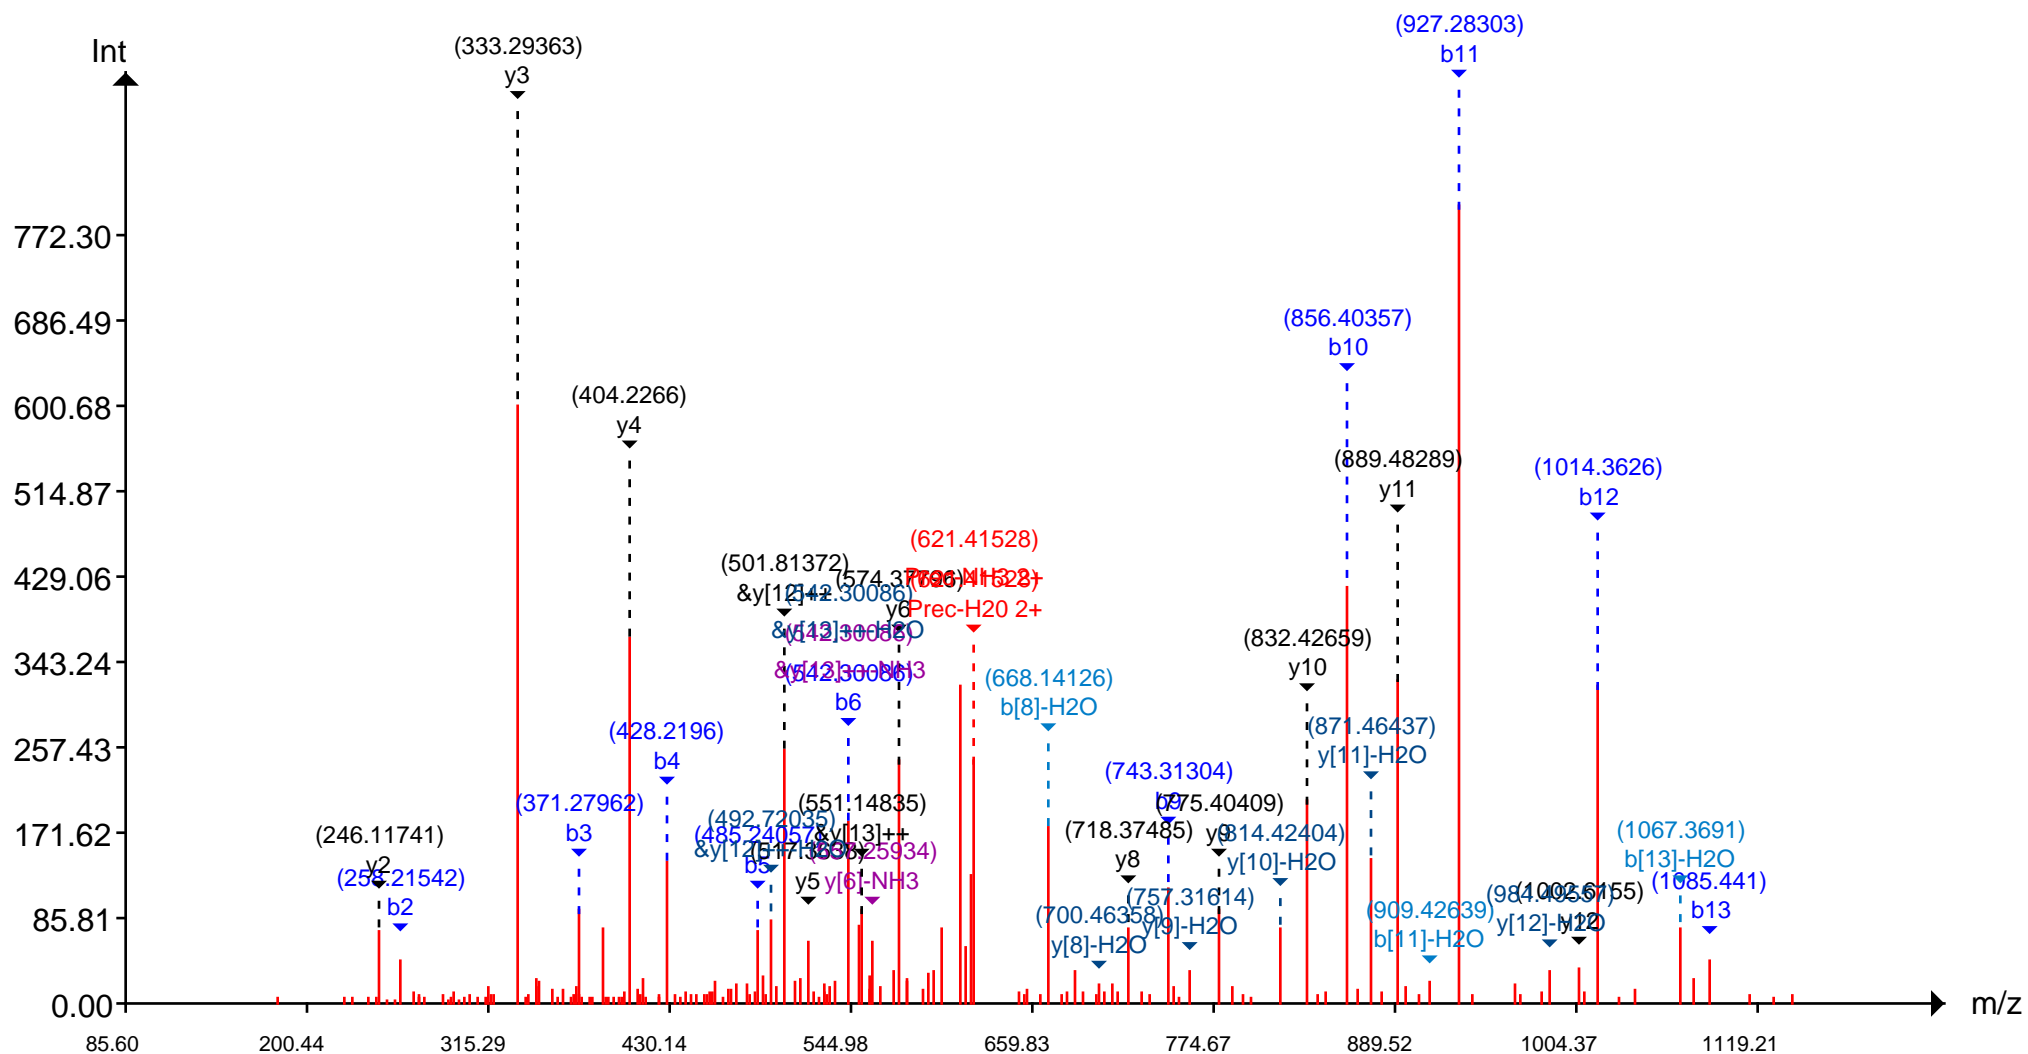

## Info

|                          |                          |                           |         |
|--------------------------|--------------------------|---------------------------|---------|
| <b>Modified Sequence</b> | AcD3-LVIGGGSGGLASAR-COOH | <b>Ion score</b>          | 88.45   |
| <b>Protein</b>           | P47791                   | <b>Confidence level</b>   | 99.00%  |
| <b>Precursor m/z</b>     | 630.36108                | <b>Identity Threshold</b> | 46.98   |
| <b>Charge</b>            | 2+                       | <b>Mass error</b>         | 3.33E-4 |

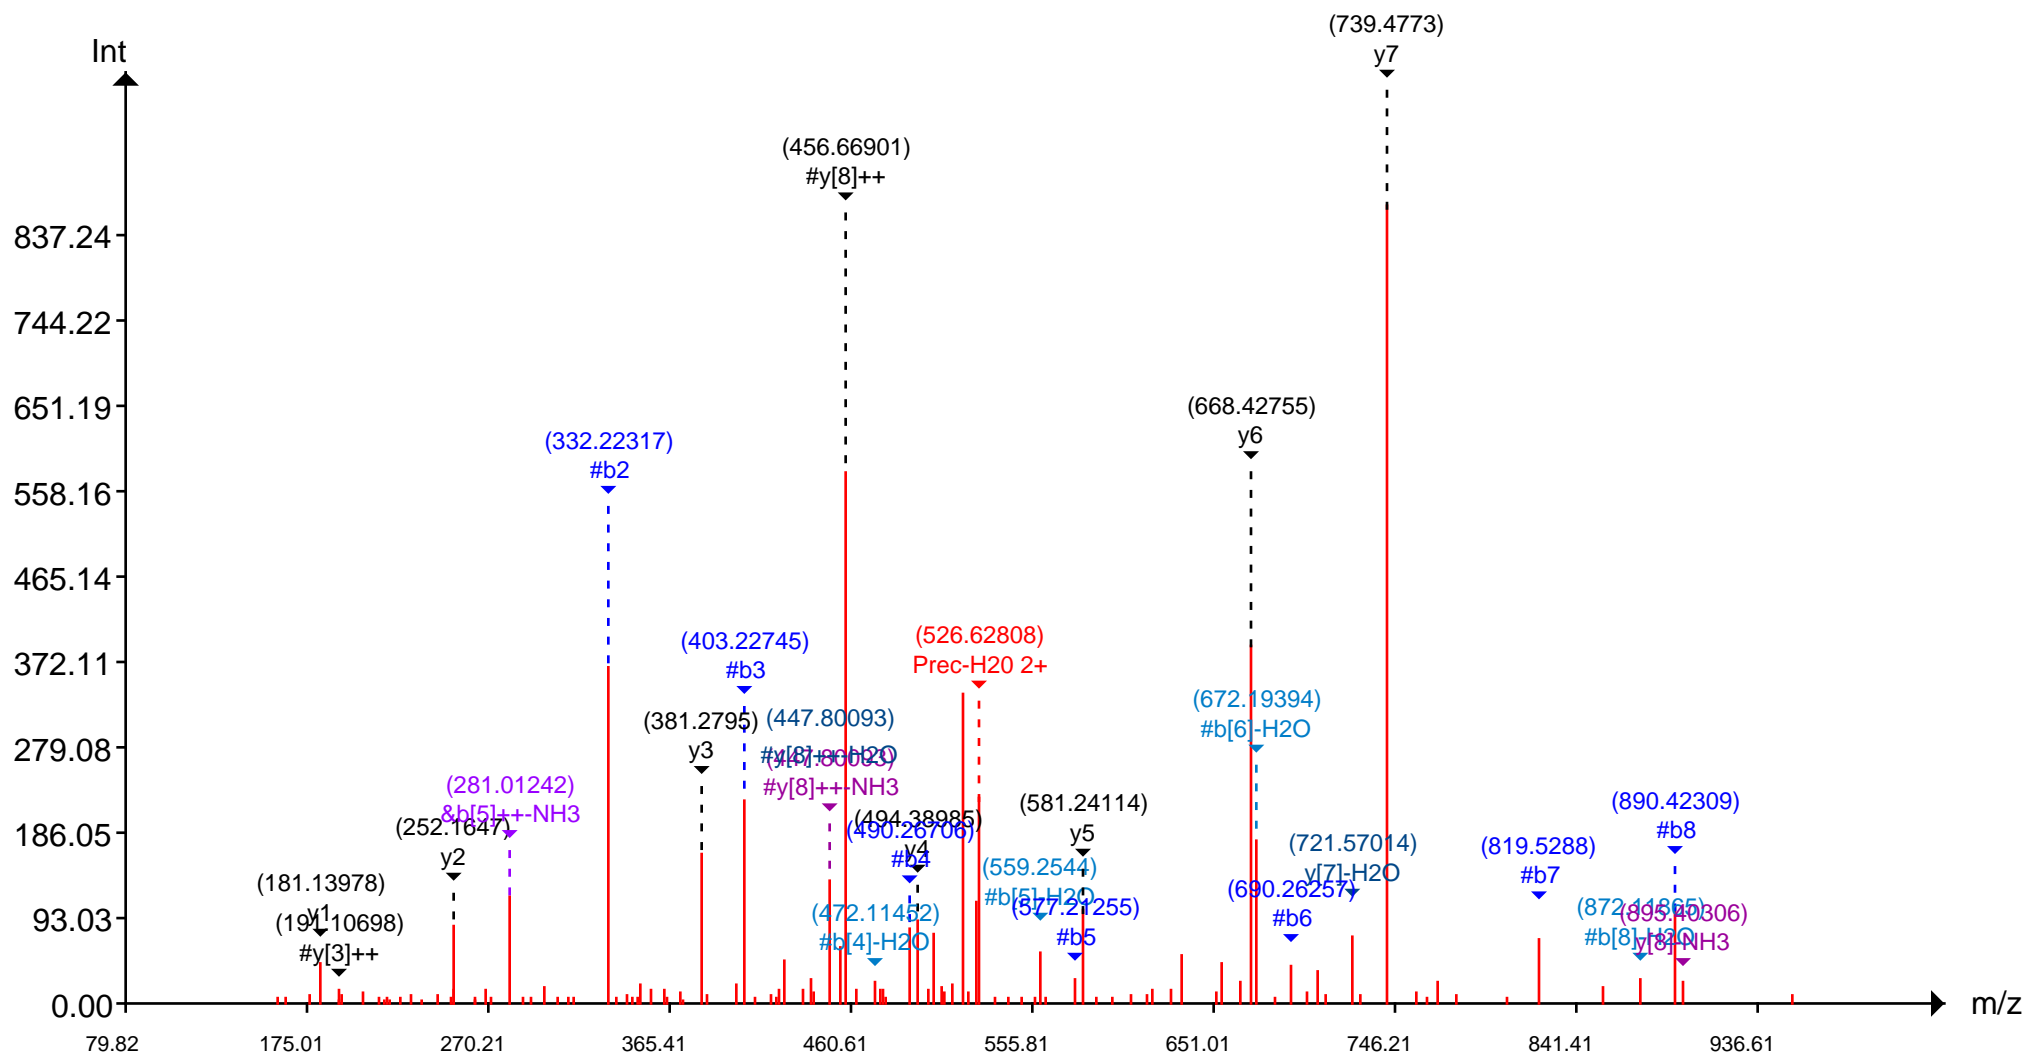

## Info

**Modified Sequence** AcD3-IK<AcD3K\*>ASSIEAR<C13>-COOH

**Ion score** 52.08

**Protein** P57759

**Confidence level** 99.00%

**Precursor m/z** 535.82466

**Identity Threshold** 44.68

**Charge** 2+

**Mass error** 2.31E-4

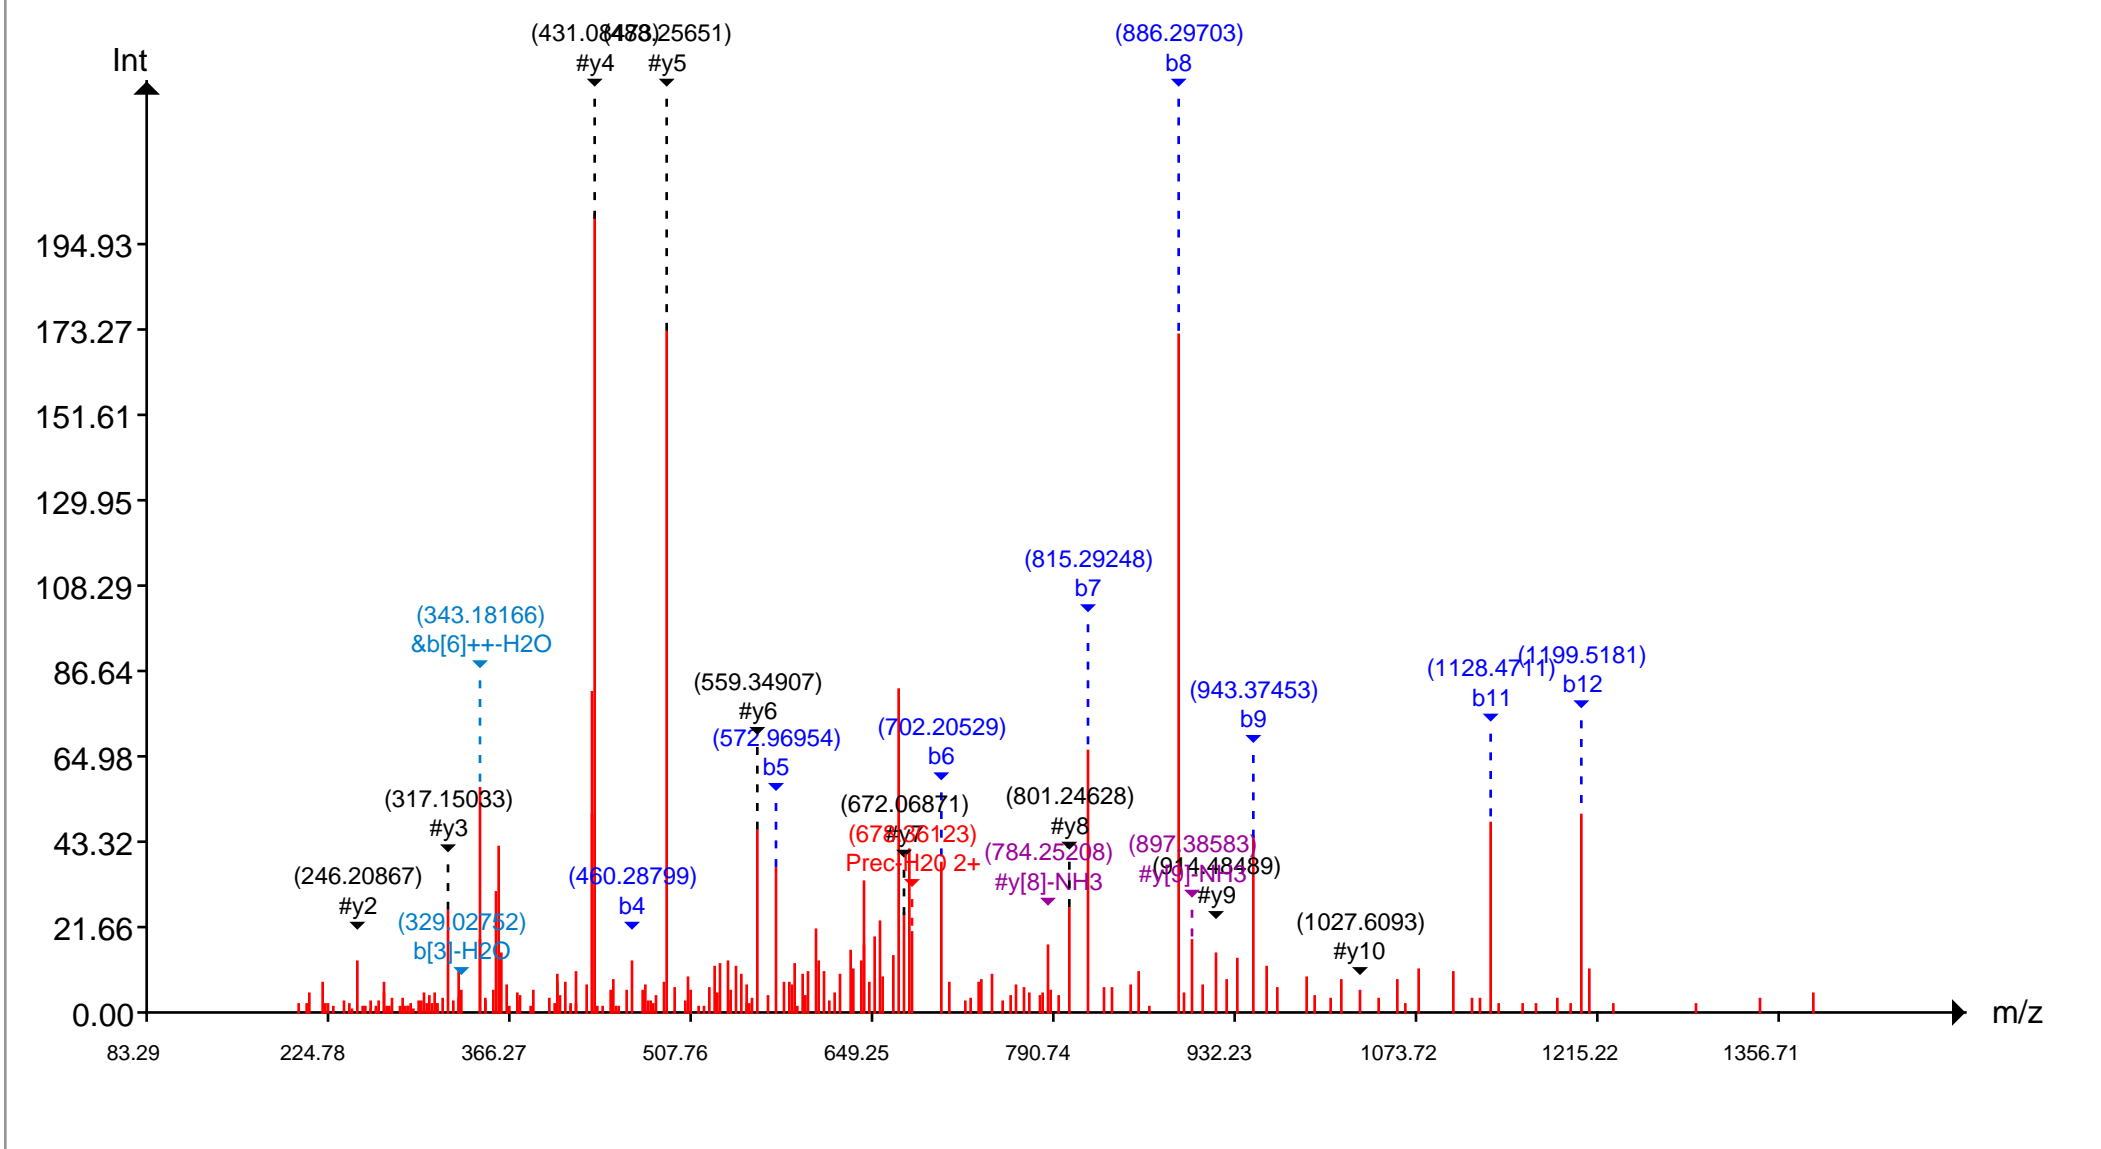

| Info         |                                                                                        |                    |    |
|--------------|----------------------------------------------------------------------------------------|--------------------|----|
| Modified ... | AcD3-TAEILELAGNAAR-COOH                                                                | Ion score          | 47 |
|              | Q8CGP5, Q8CGP6, Q8CGP7, P22752, Q6GSS7, Q64522, Q64523, Q8BFU2, Q8R1M2, P27661, Q9QZQ8 | Confidence level   | 99 |
| Prec...      | 687.37735                                                                              | Identity Threshold | 47 |
|              | 2+                                                                                     | Mass error         | 0. |

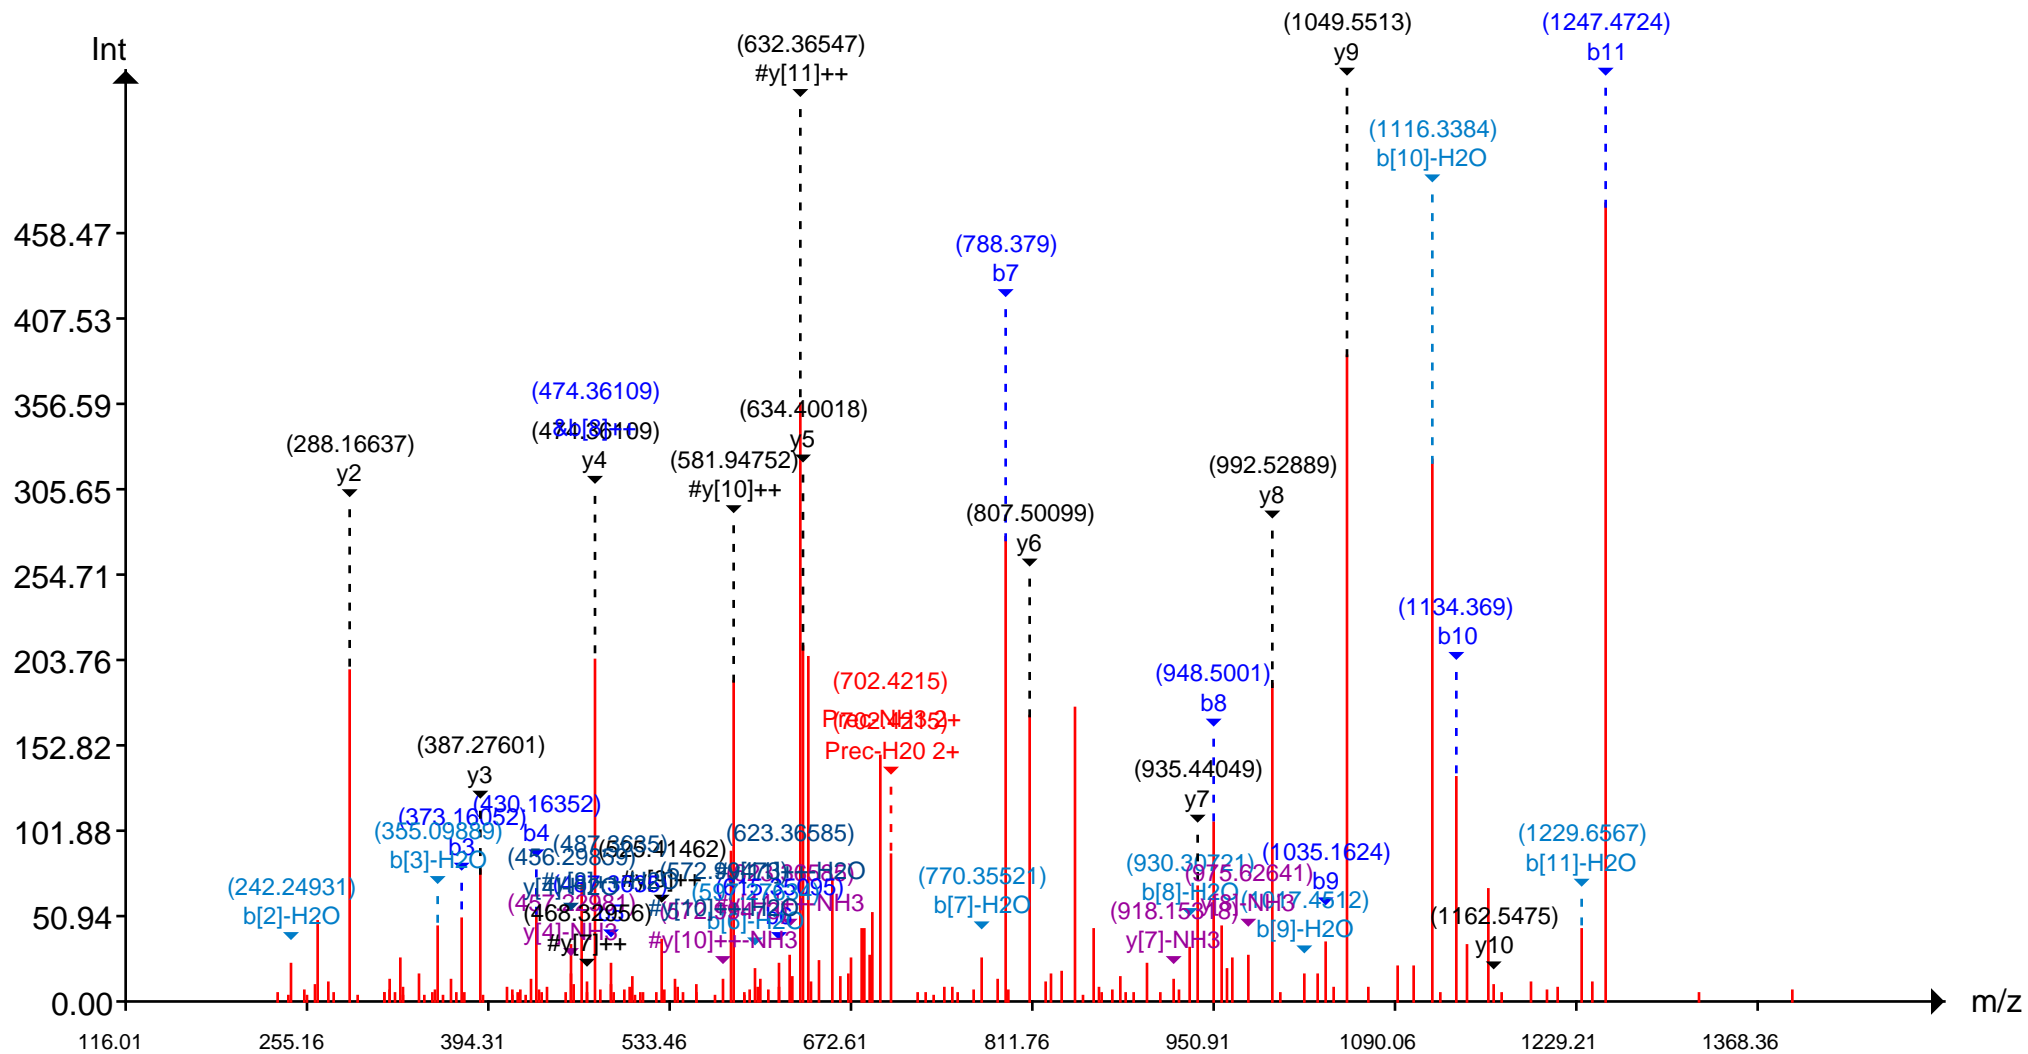

## Info

|                          |                                      |                           |          |
|--------------------------|--------------------------------------|---------------------------|----------|
| <b>Modified Sequence</b> | AcD3-LTLGGQK<AcD3K*>C<Cmm*>SVIR-COOH | <b>Ion score</b>          | 57.82    |
| <b>Protein</b>           | P62962                               | <b>Confidence level</b>   | 99.00%   |
| <b>Precursor m/z</b>     | 711.40726                            | <b>Identity Threshold</b> | 46.70    |
| <b>Charge</b>            | 2+                                   | <b>Mass error</b>         | 0.002071 |

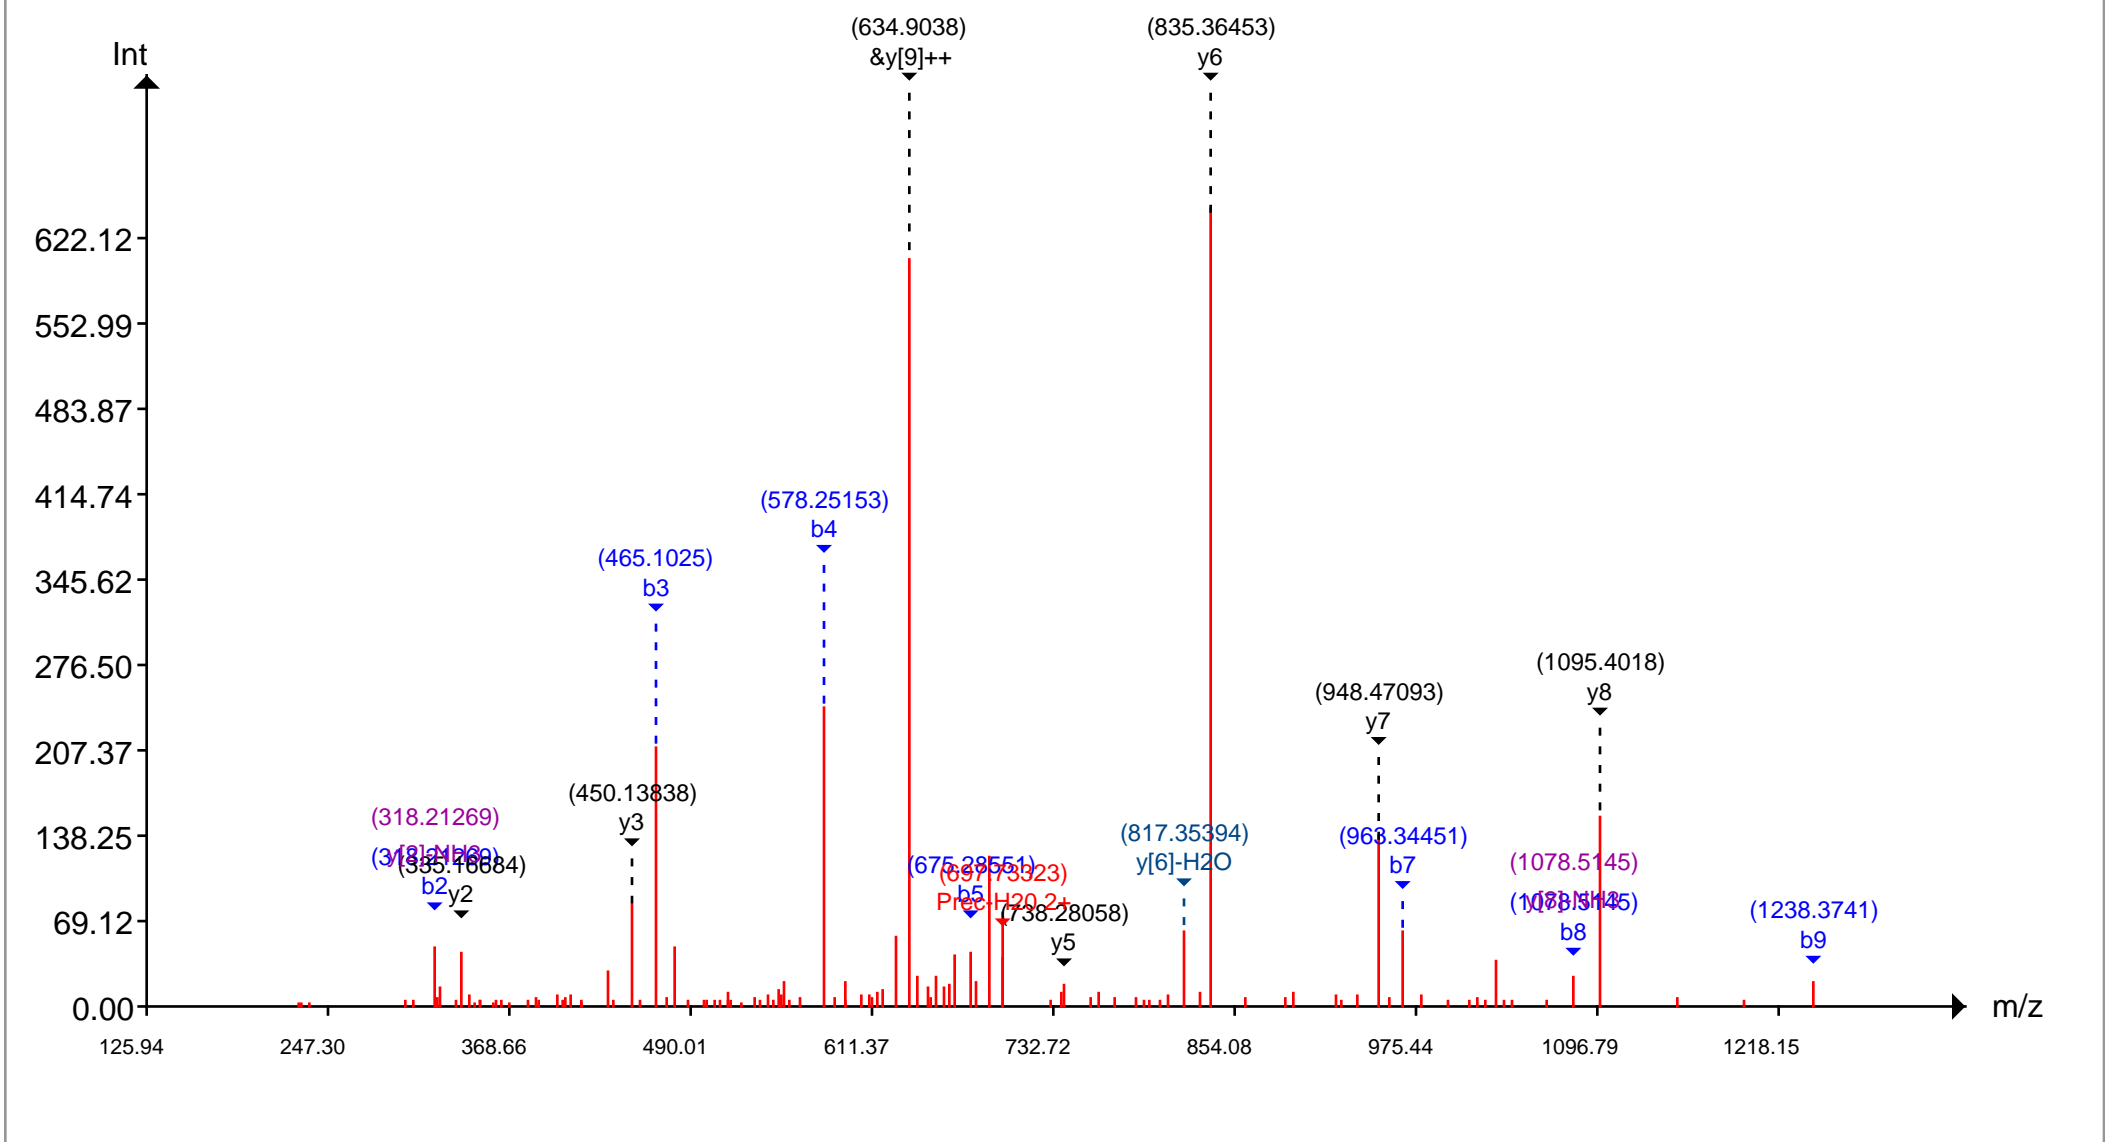

## Info

**Modified Sequence** AcD3-VK<AcD3K\*>M<Mox\*>LPDK<AcD3K\*>DC<Cmm\*>R-COOH

**Ion score** 50.83

**Protein** P18760

**Confidence level** 99.00%

**Precursor m/z** 706.8651

**Identity Threshold** 48.08

**Charge** 2+

**Mass error** 6.82E-4

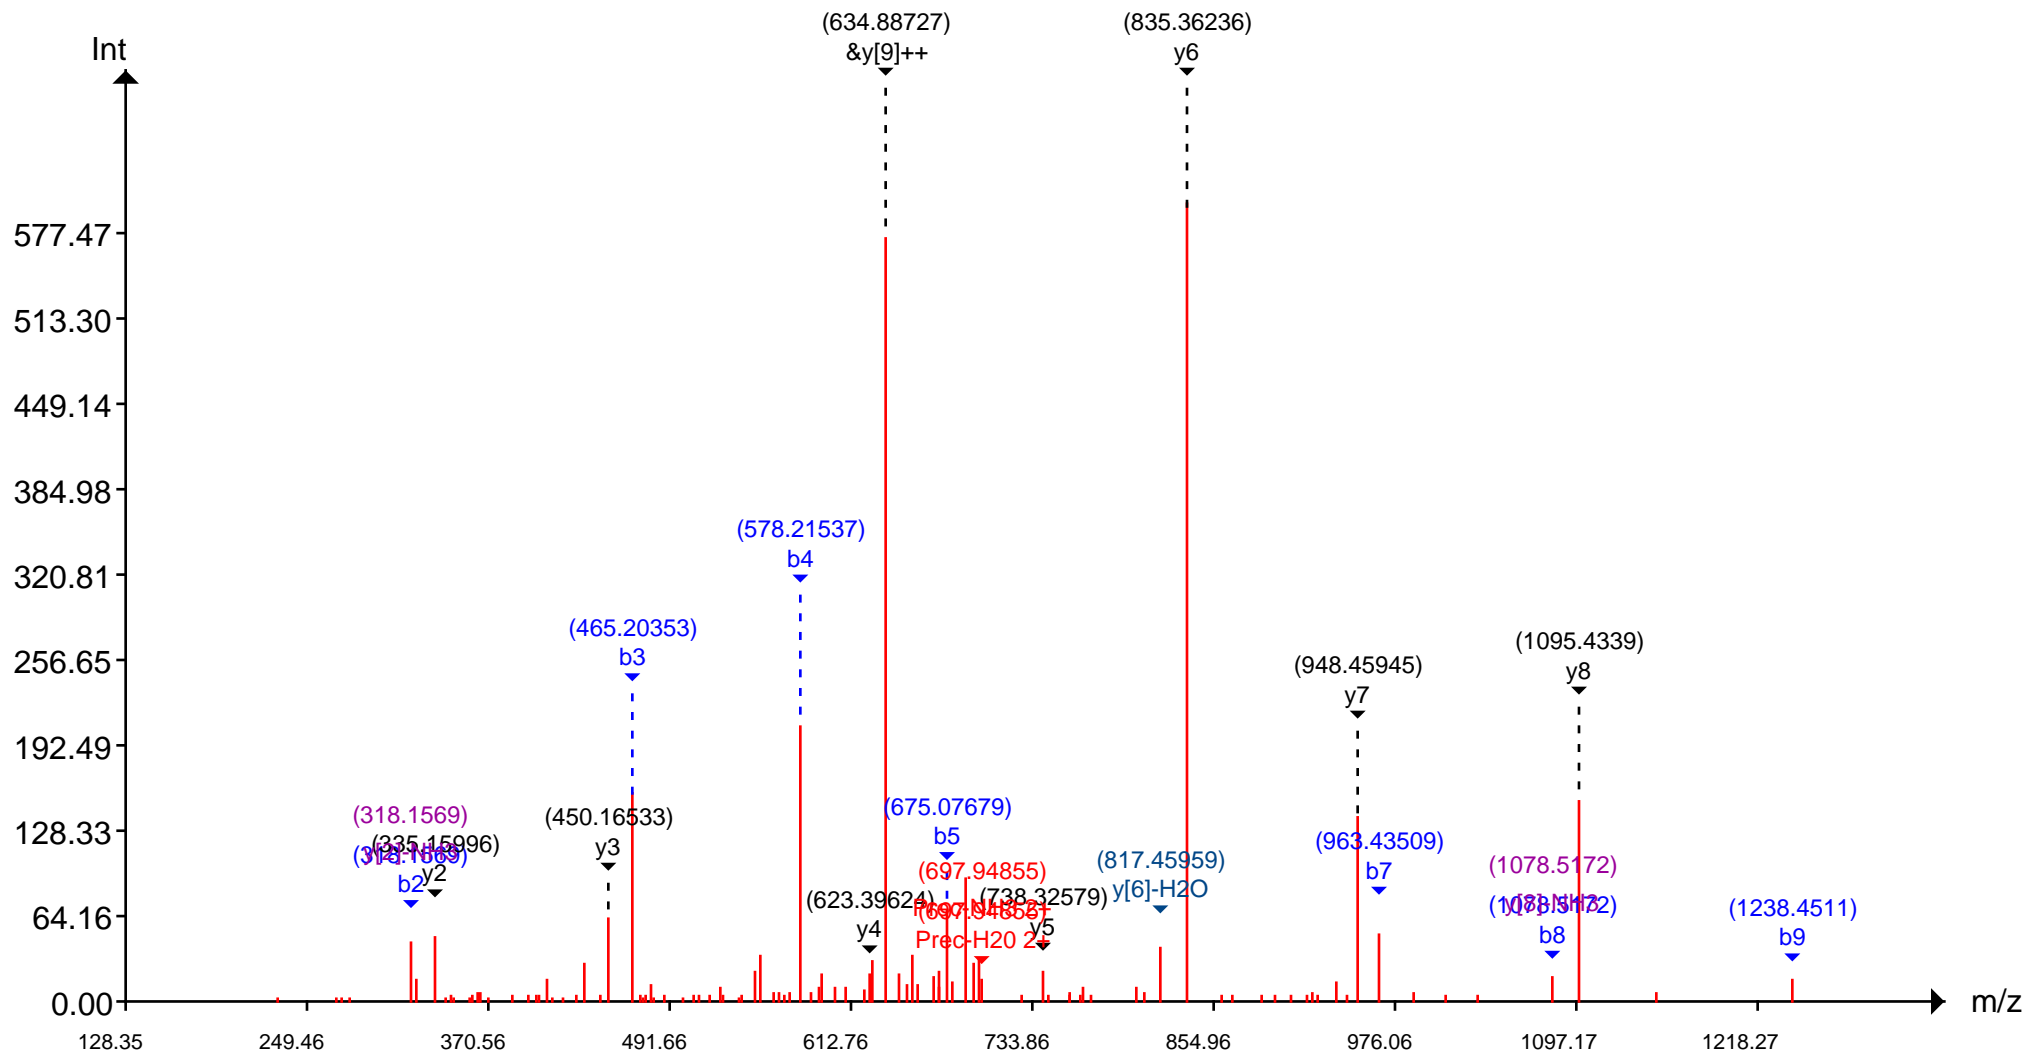

## Info

**Modified Sequence** AcD3-VK<AcD3K\*>M<Mox\*>LPDK<AcD3K\*>DC<Cmm\*>R-COOH

**Ion score** 48.06

**Protein** P18760

**Confidence level** 99.00%

**Precursor m/z** 706.86606

**Identity Threshold** 48.03

**Charge** 2+

**Mass error** 0.002602

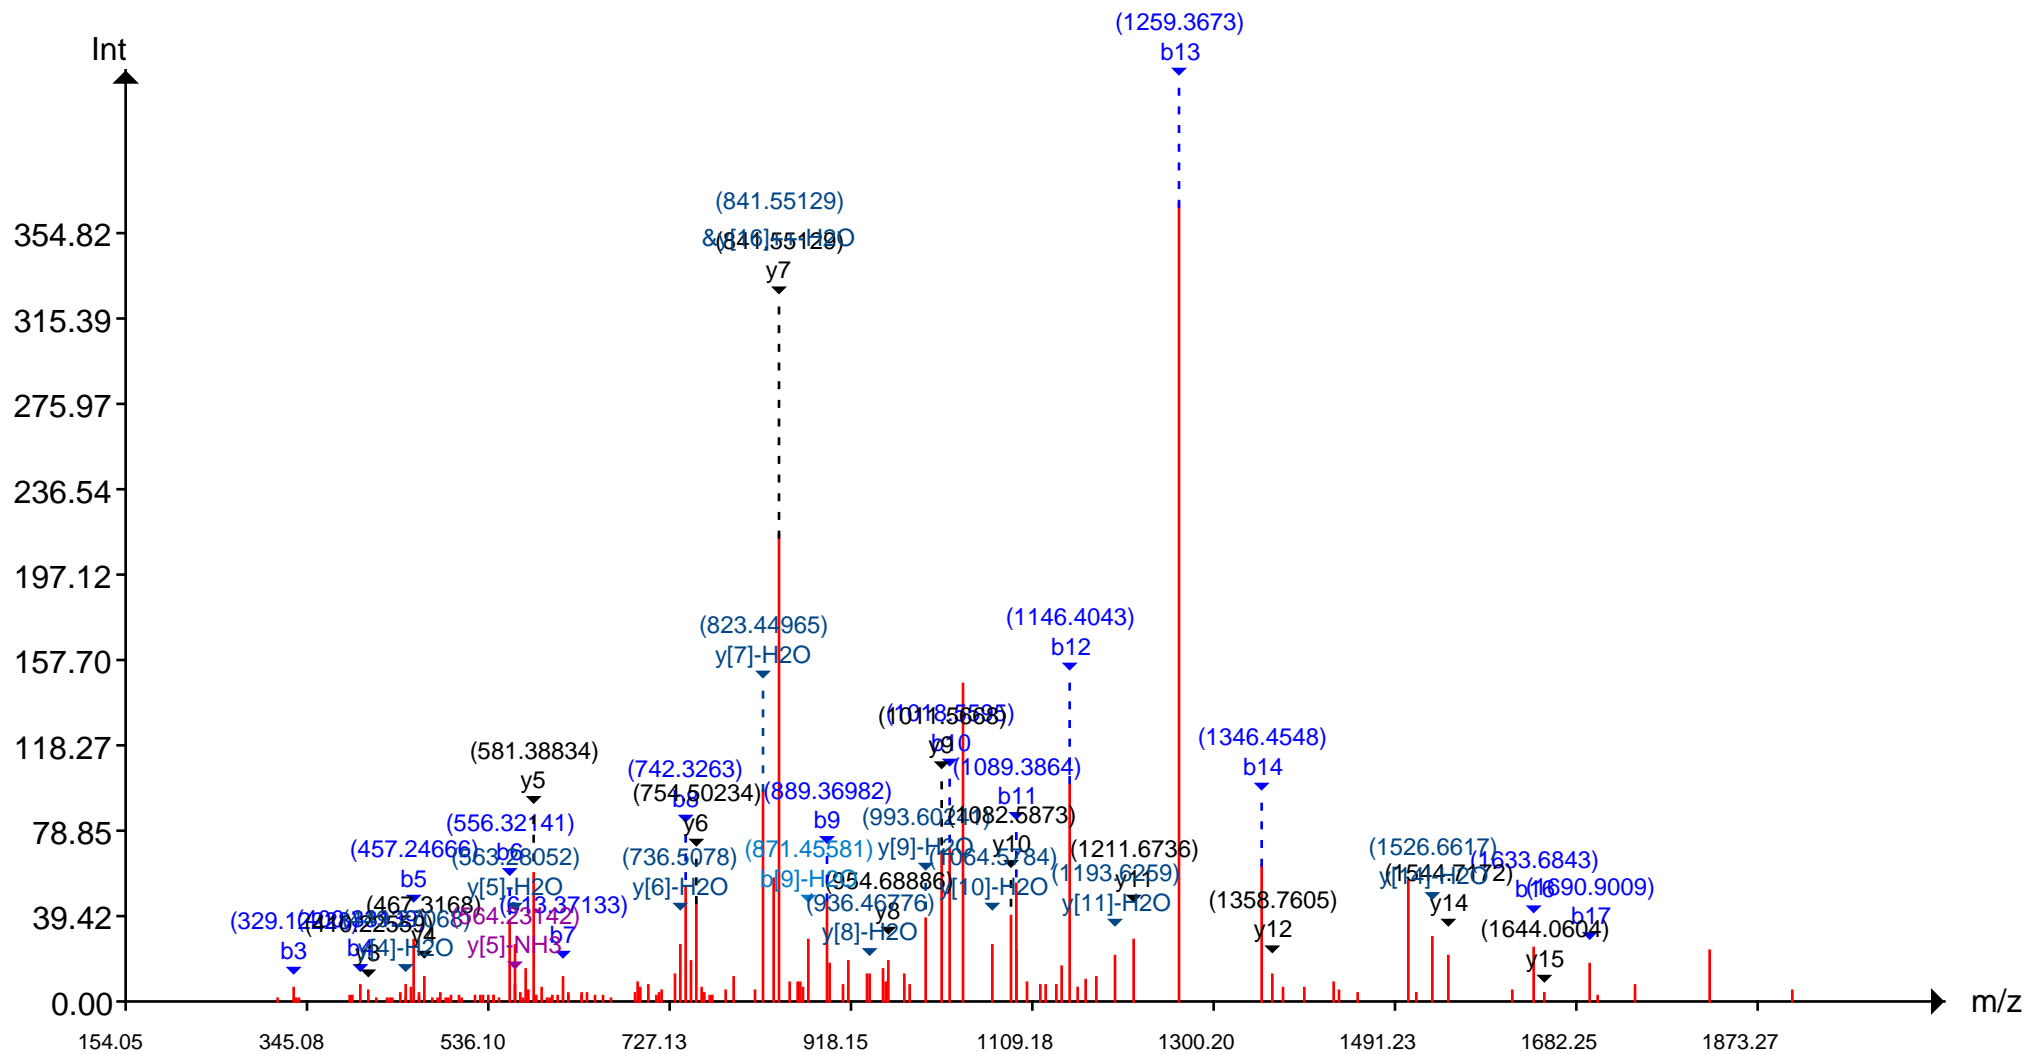

## Info

|                          |                                             |                           |         |
|--------------------------|---------------------------------------------|---------------------------|---------|
| <b>Modified Sequence</b> | AcD3-IVAAGVGEFEAGISK<AcD3K*>NGQTR<C13>-COOH | <b>Ion score</b>          | 107.65  |
| <b>Protein</b>           | P10126, P62631                              | <b>Confidence level</b>   | 99.00%  |
| <b>Precursor m/z</b>     | 1050.5697                                   | <b>Identity Threshold</b> | 47.33   |
| <b>Charge</b>            | 2+                                          | <b>Mass error</b>         | 0.00232 |

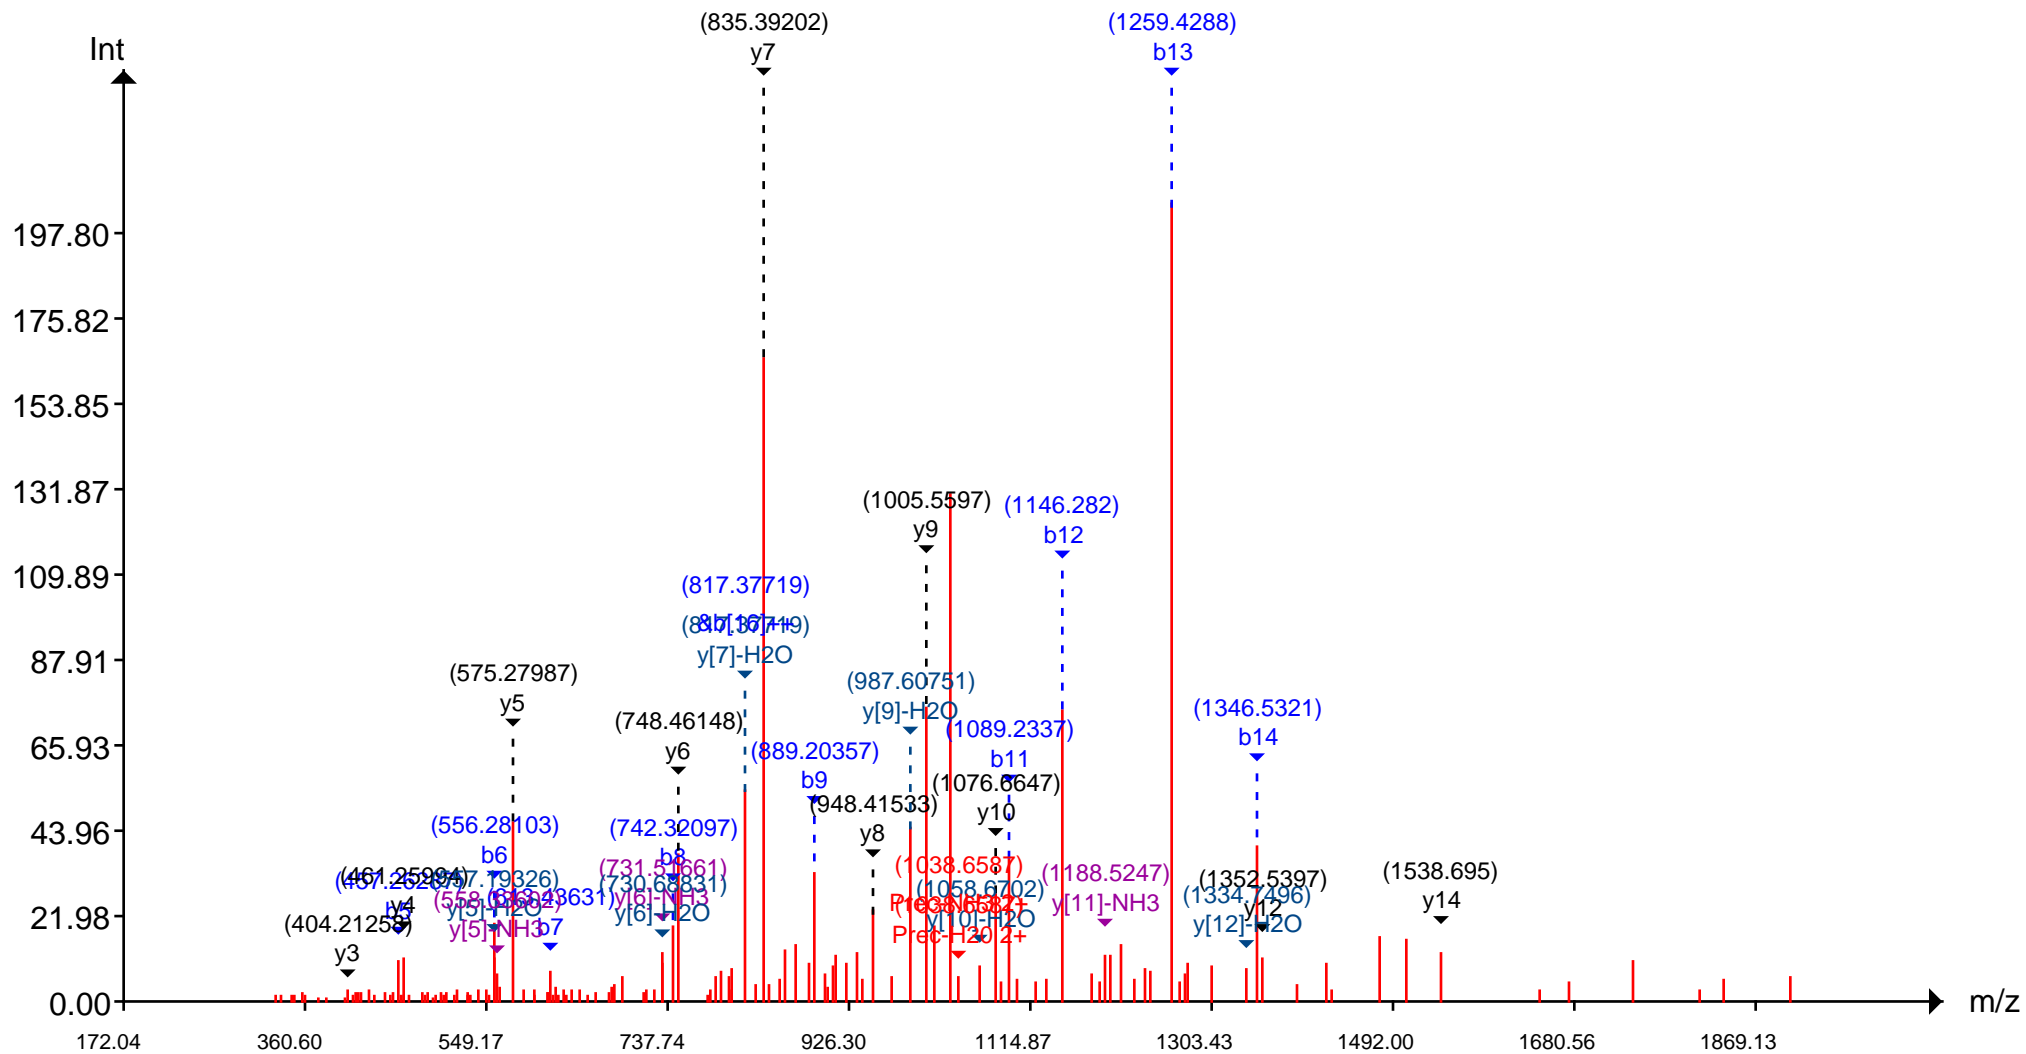

## Info

**Modified Sequence** AcD3-IVAAGVGEFEAGISK<AcD3K\*>NGQTR-COOH

**Ion score** 58.42

**Protein** P10126, P62631

**Confidence level** 99.00%

**Precursor m/z** 1047.5593

**Identity Threshold** 47.79

**Charge** 2+

**Mass error** 0.001662



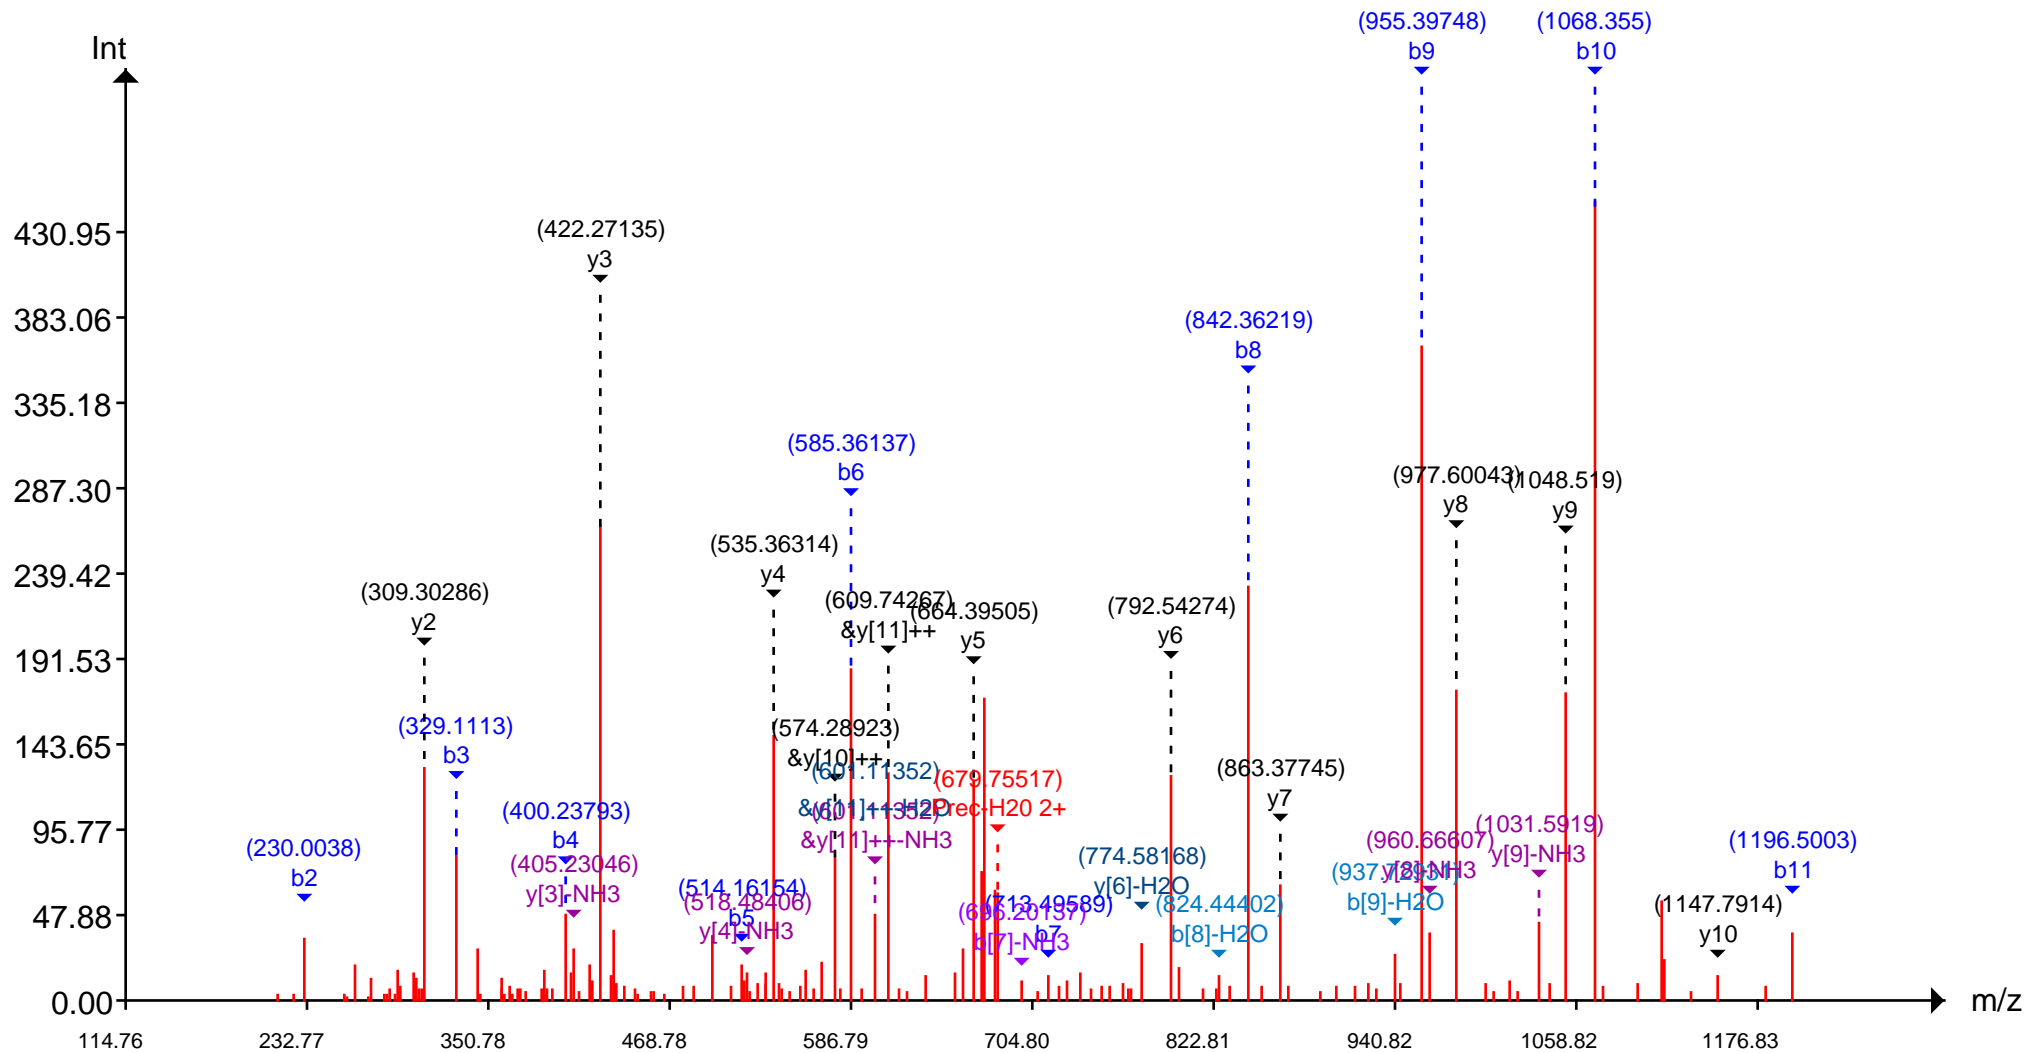

## Info

|                          |                             |                           |         |
|--------------------------|-----------------------------|---------------------------|---------|
| <b>Modified Sequence</b> | AcD3-IAVANAQELLQR<C13>-COOH | <b>Ion score</b>          | 90.28   |
| <b>Protein</b>           | P62075                      | <b>Confidence level</b>   | 99.00%  |
| <b>Precursor m/z</b>     | 688.90555                   | <b>Identity Threshold</b> | 45.42   |
| <b>Charge</b>            | 2+                          | <b>Mass error</b>         | 7.56E-4 |

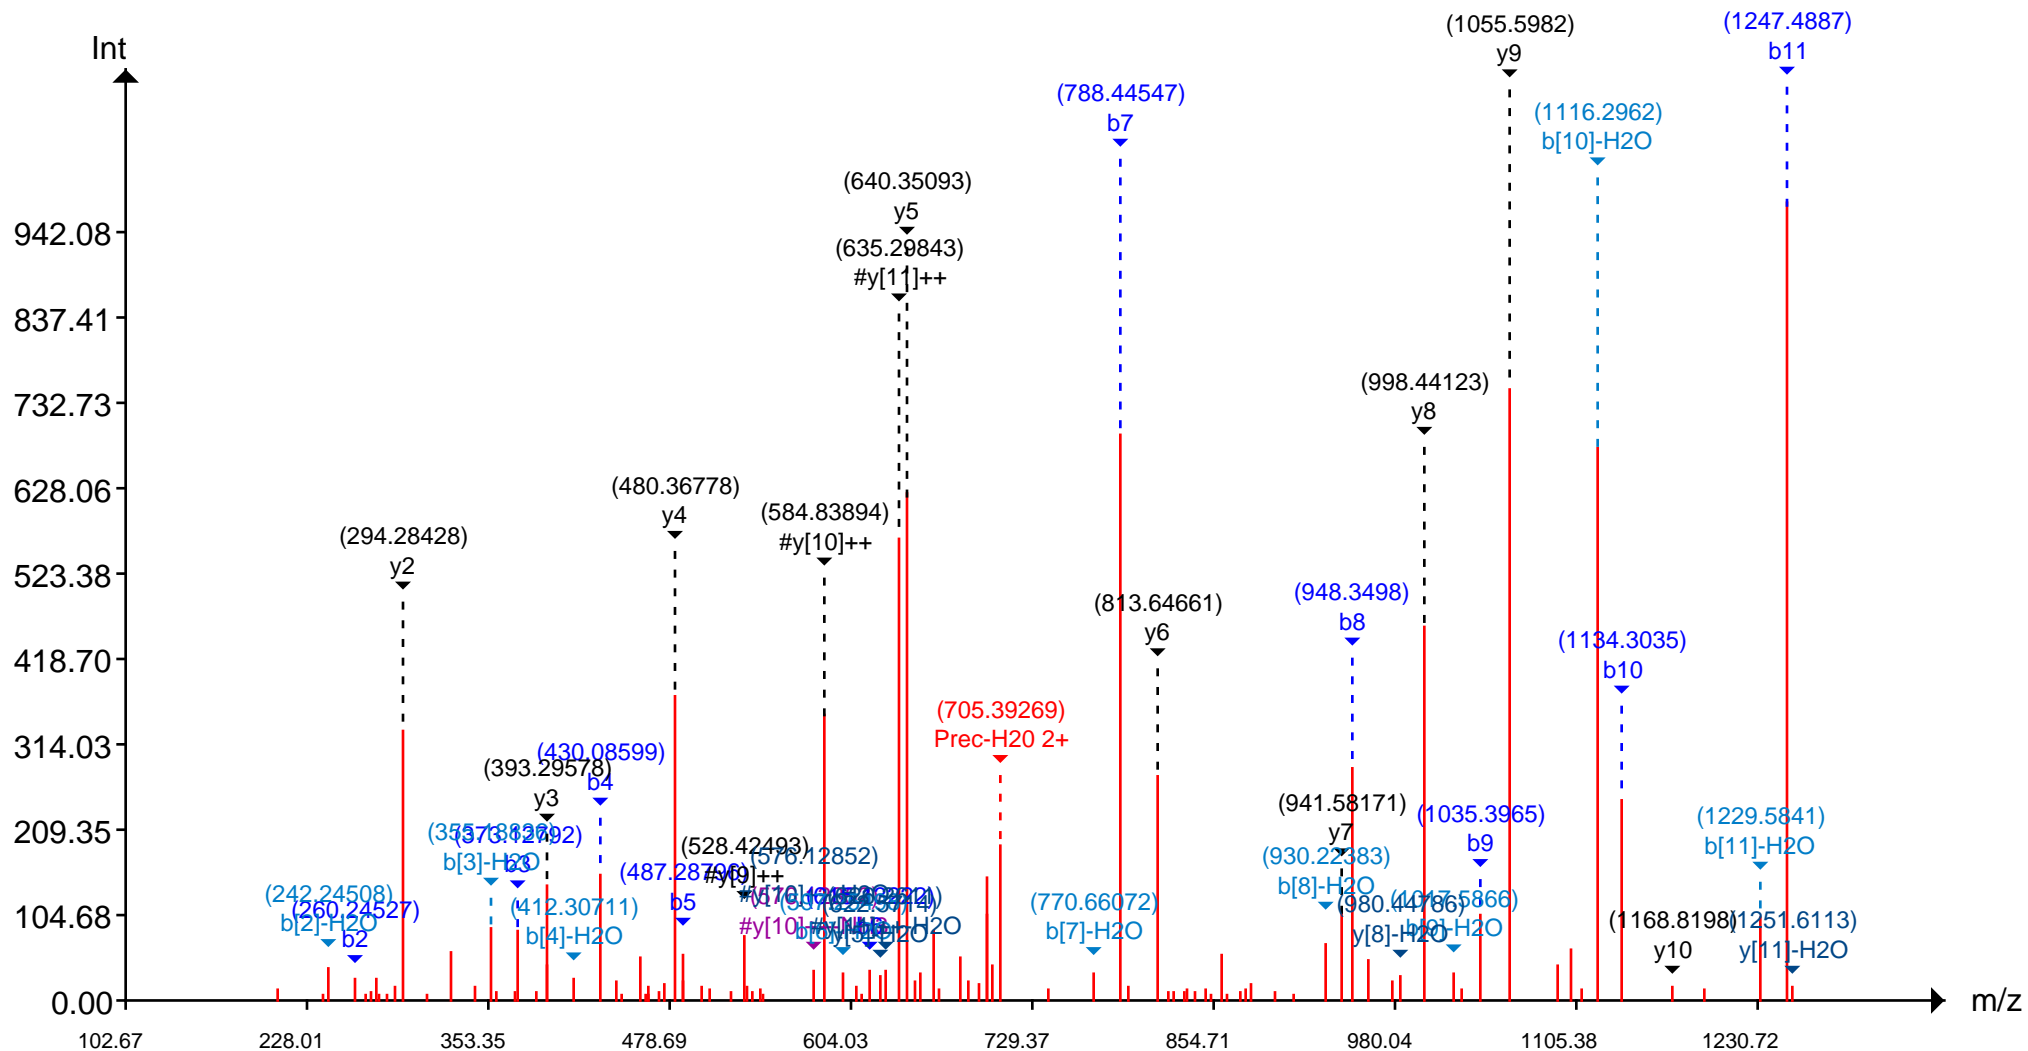

## Info

**Modified Sequence** AcD3-LTLGGQK<AcD3K\*>C<Cmm\*>SVIR<C13>-COOH

**Ion score** 88.44

**Protein** P62962

**Confidence level** 99.00%

**Precursor m/z** 714.4173

**Identity Threshold** 45.44

**Charge** 2+

**Mass error** 0.002009

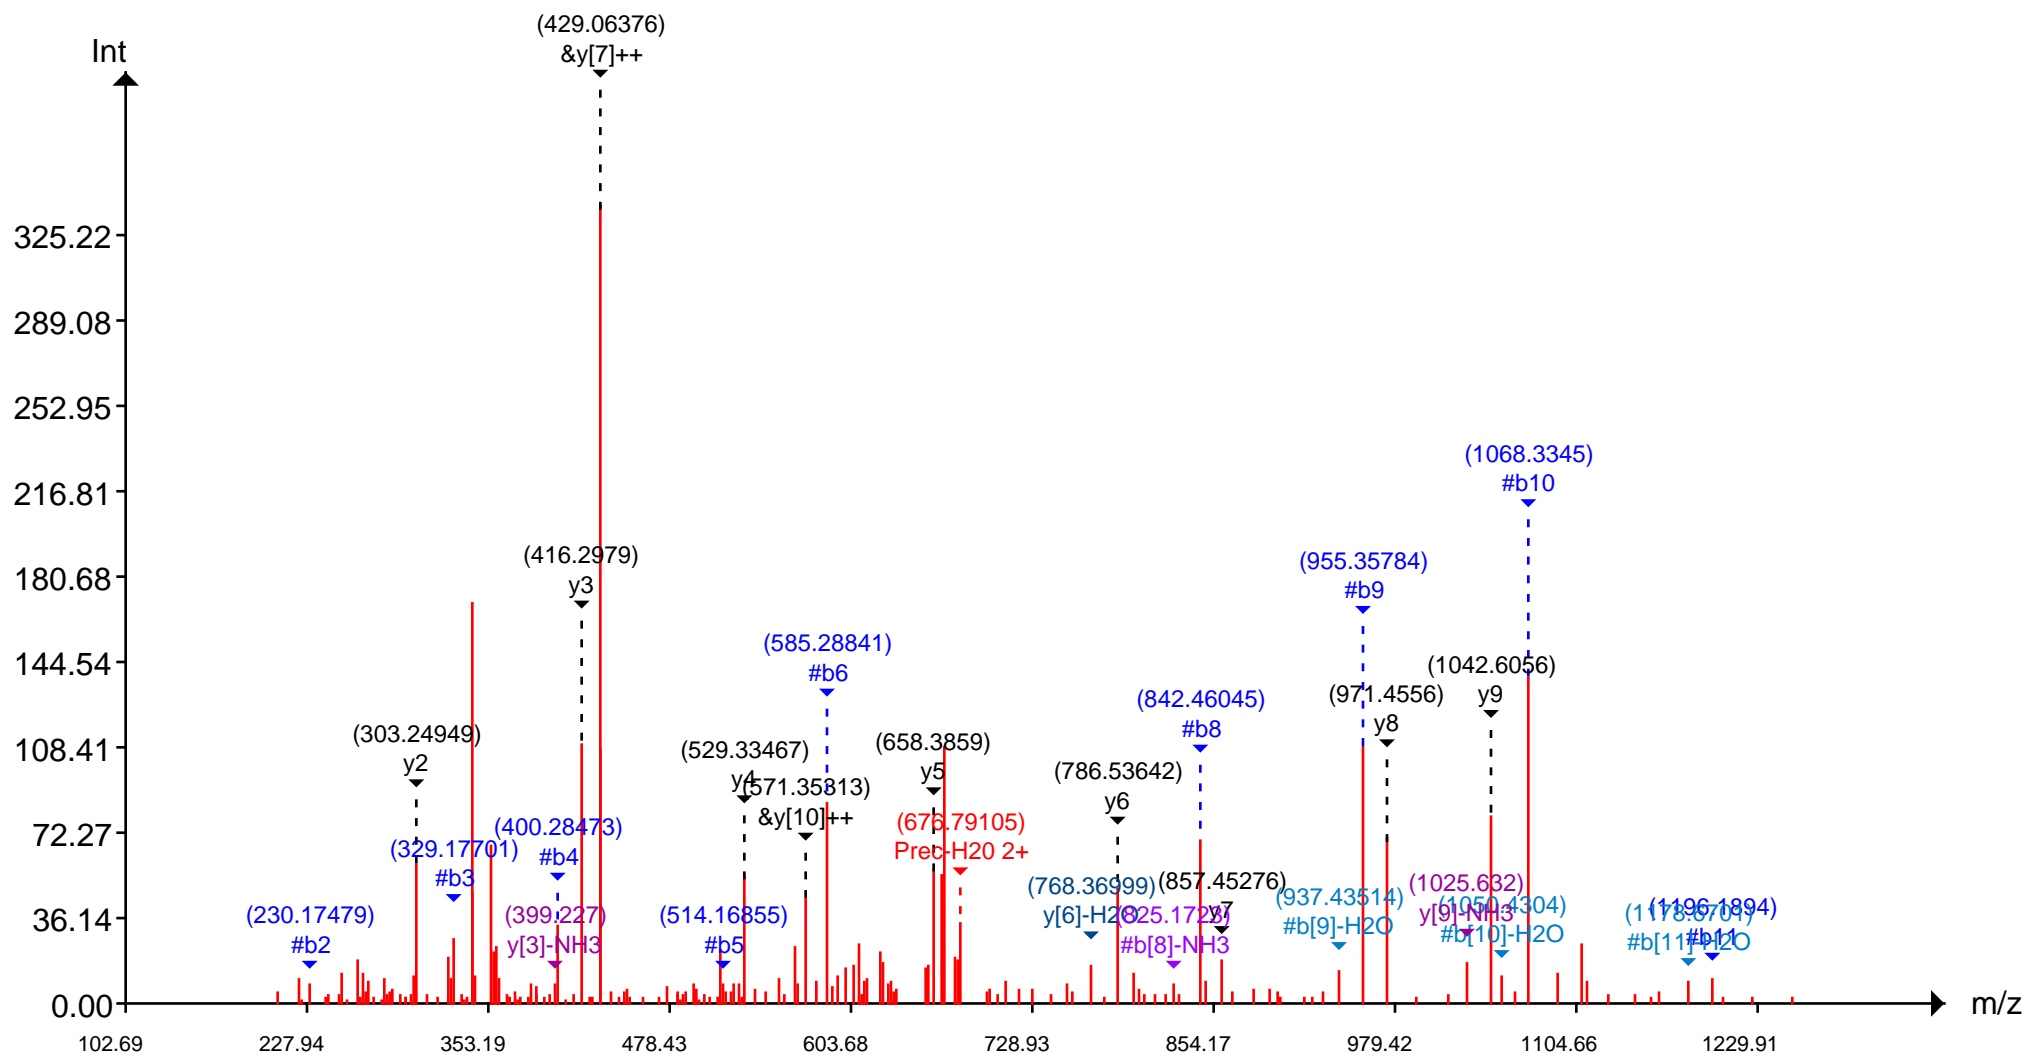

## Info

|                          |                        |                           |         |
|--------------------------|------------------------|---------------------------|---------|
| <b>Modified Sequence</b> | AcD3-IAVANAQELLQR-COOH | <b>Ion score</b>          | 58.18   |
| <b>Protein</b>           | P62075                 | <b>Confidence level</b>   | 99.00%  |
| <b>Precursor m/z</b>     | 685.89543              | <b>Identity Threshold</b> | 46.39   |
| <b>Charge</b>            | 2+                     | <b>Mass error</b>         | 6.58E-4 |

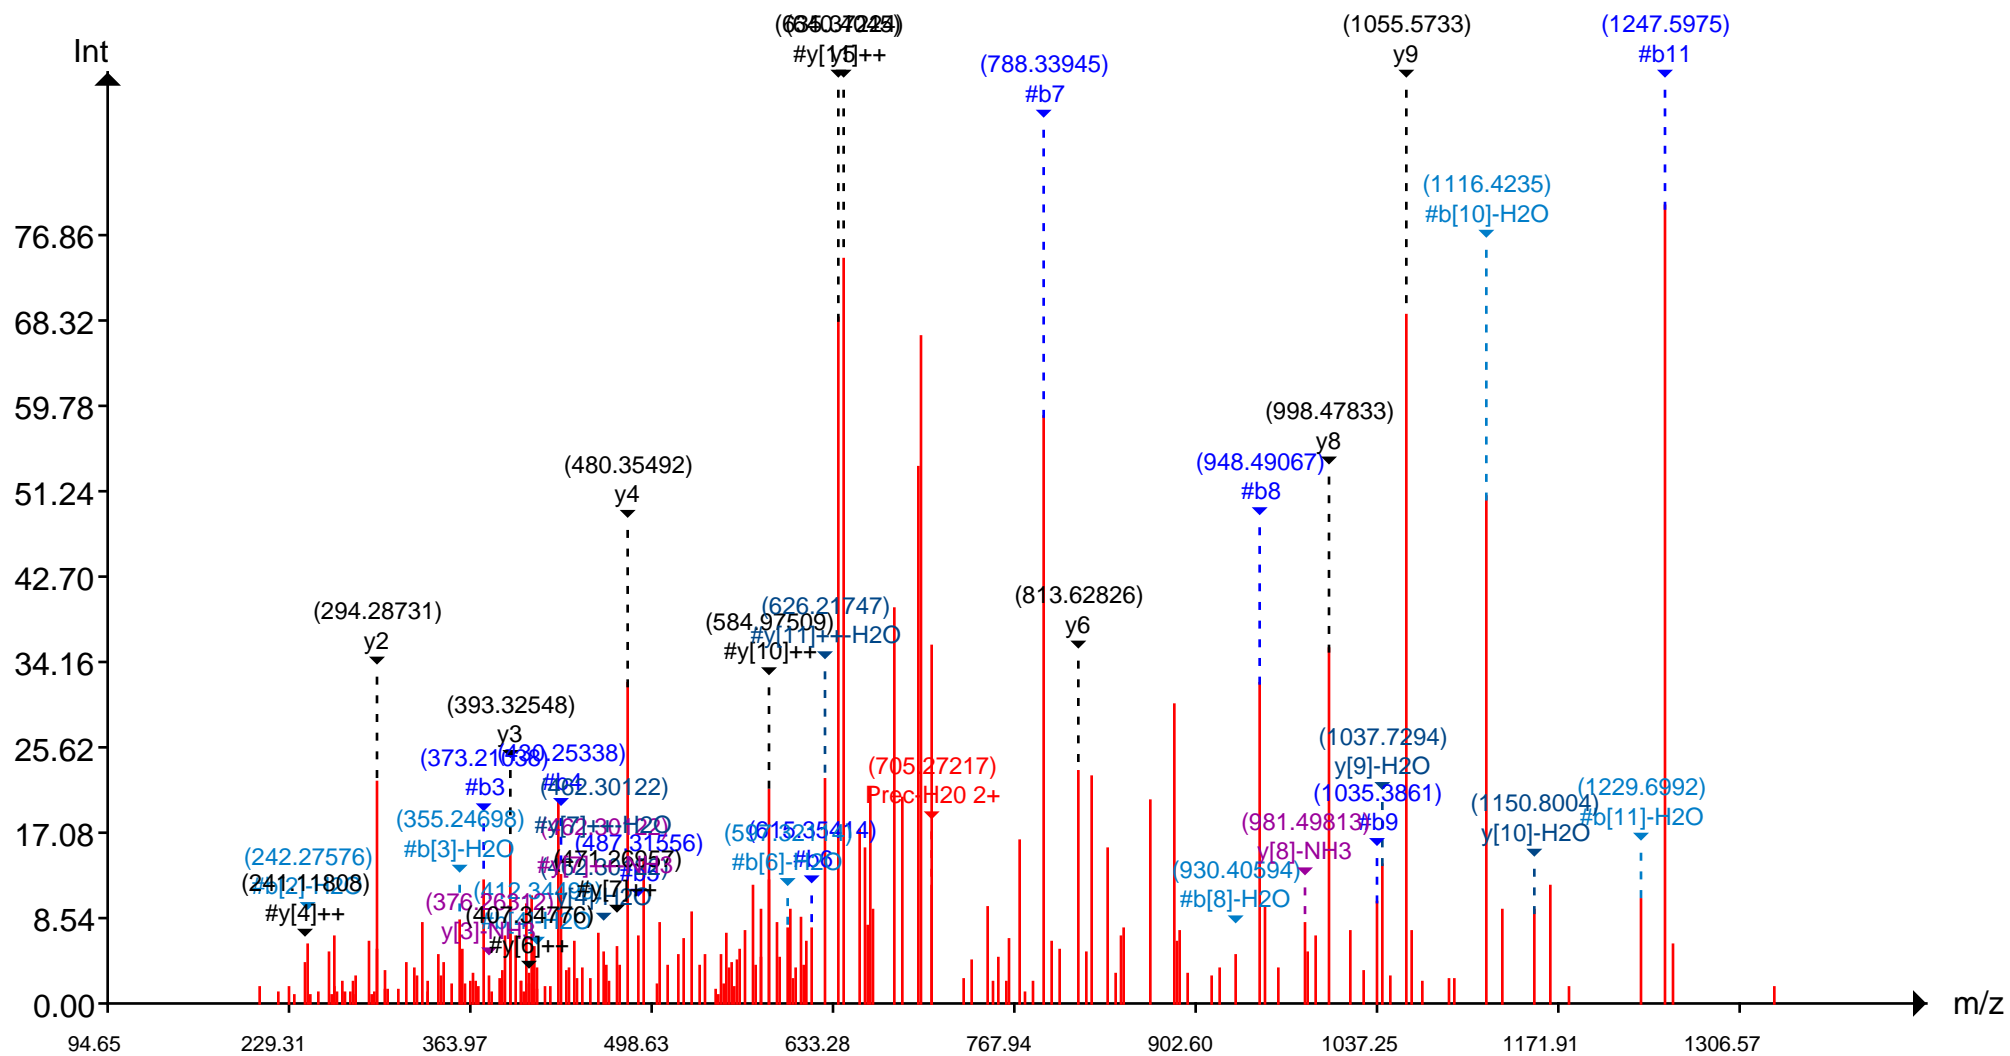

## Info

|                          |                                           |                           |          |
|--------------------------|-------------------------------------------|---------------------------|----------|
| <b>Modified Sequence</b> | AcD3-LTLGGQK<AcD3K*>C<Cmm*>SVIR<C13>-COOH | <b>Ion score</b>          | 49.26    |
| <b>Protein</b>           | P62962                                    | <b>Confidence level</b>   | 99.00%   |
| <b>Precursor m/z</b>     | 714.41731                                 | <b>Identity Threshold</b> | 45.44    |
| <b>Charge</b>            | 2+                                        | <b>Mass error</b>         | 0.002029 |

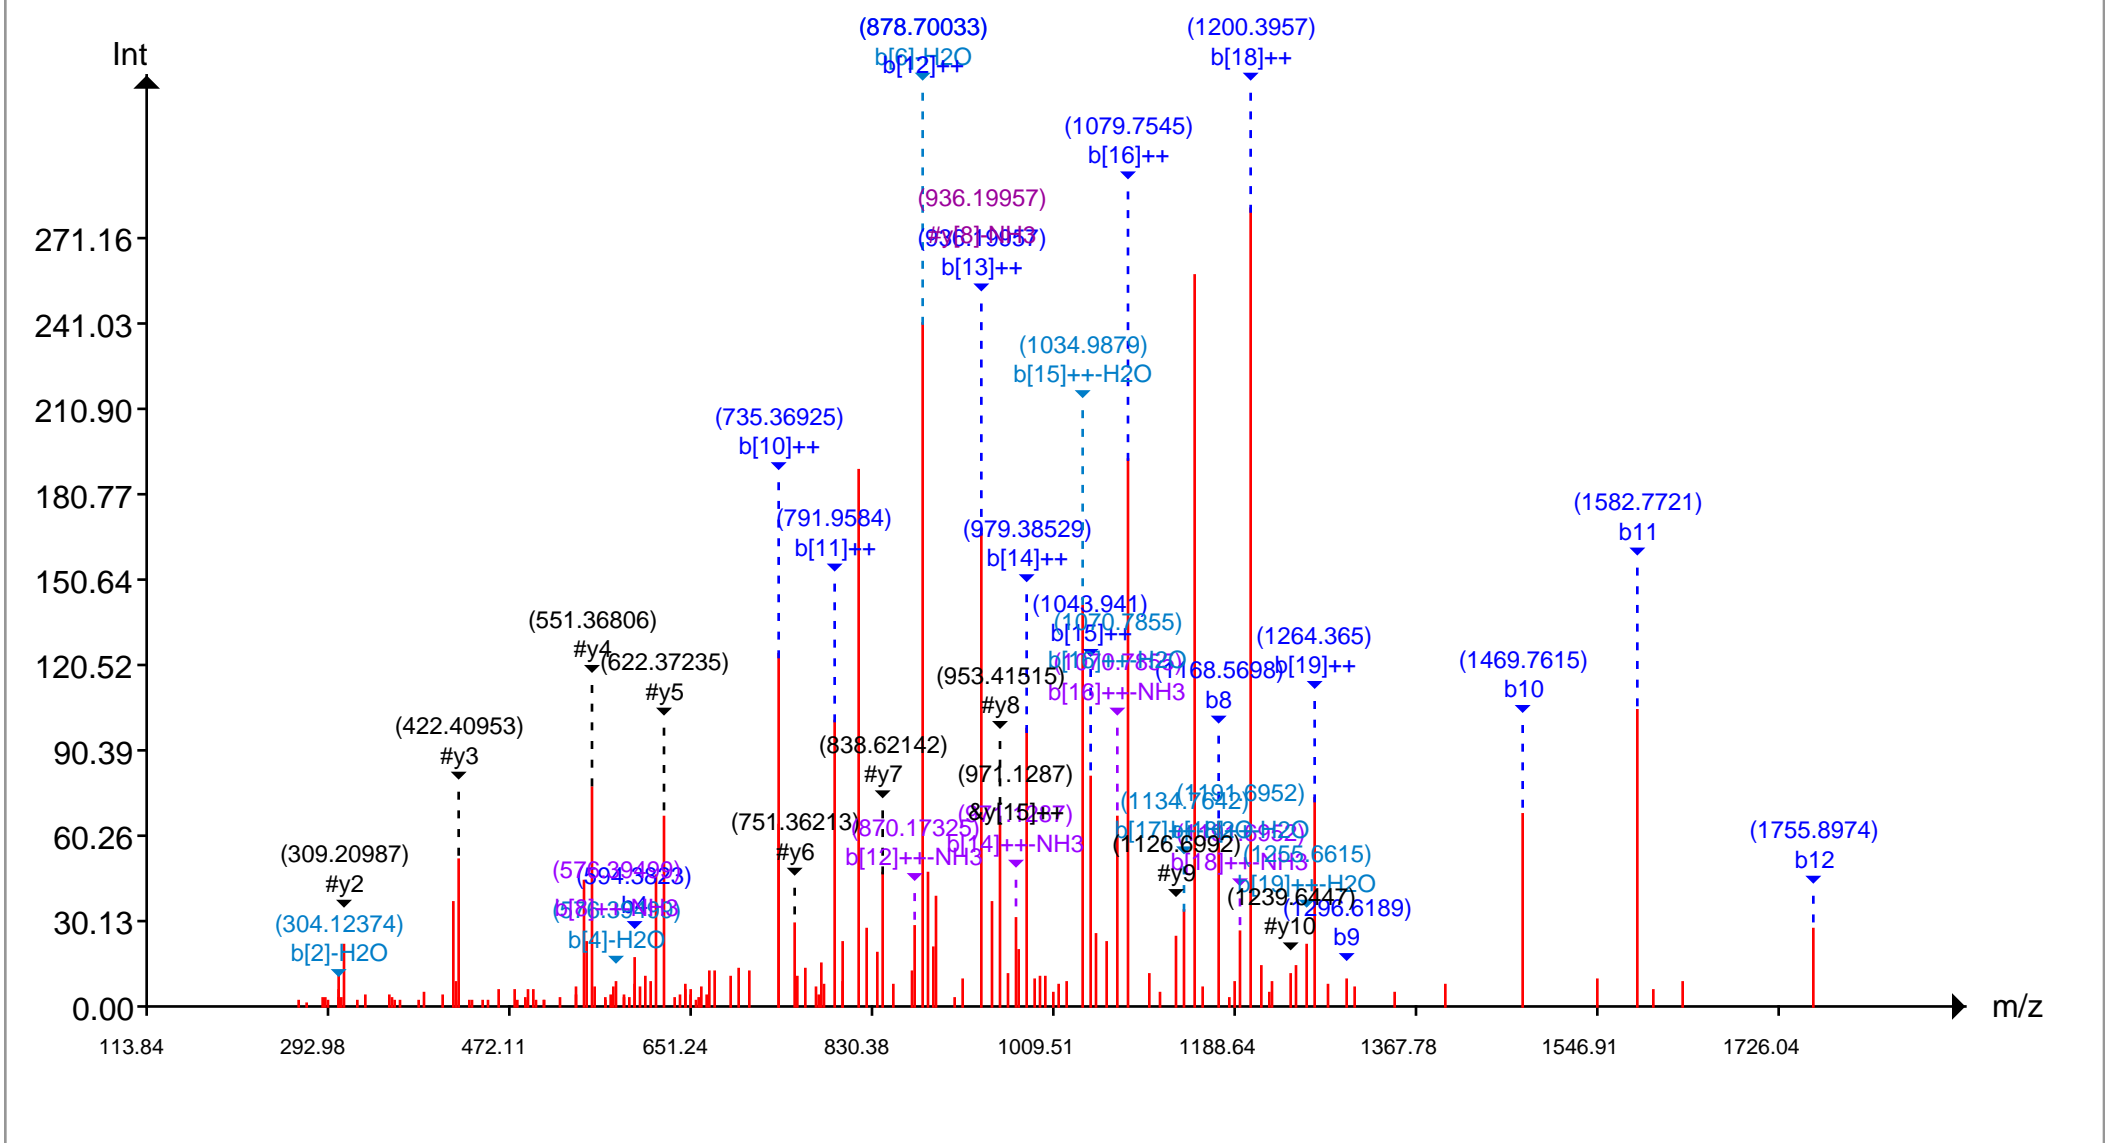

## Info

|            |                                                                                   |                    |
|------------|-----------------------------------------------------------------------------------|--------------------|
| Modifie... | AcD3-EM<Mox*>K<AcD3K*>VK<AcD3K*>EK<AcD3K*>VQK<AcD3K*>LK<AcD3K*>DSEAELQR<C13>-COOH | Ion score          |
|            | O55131                                                                            | Confidence level   |
| Pre...     | 903.51078                                                                         | Identity Threshold |
|            | 3+                                                                                | Mass error         |

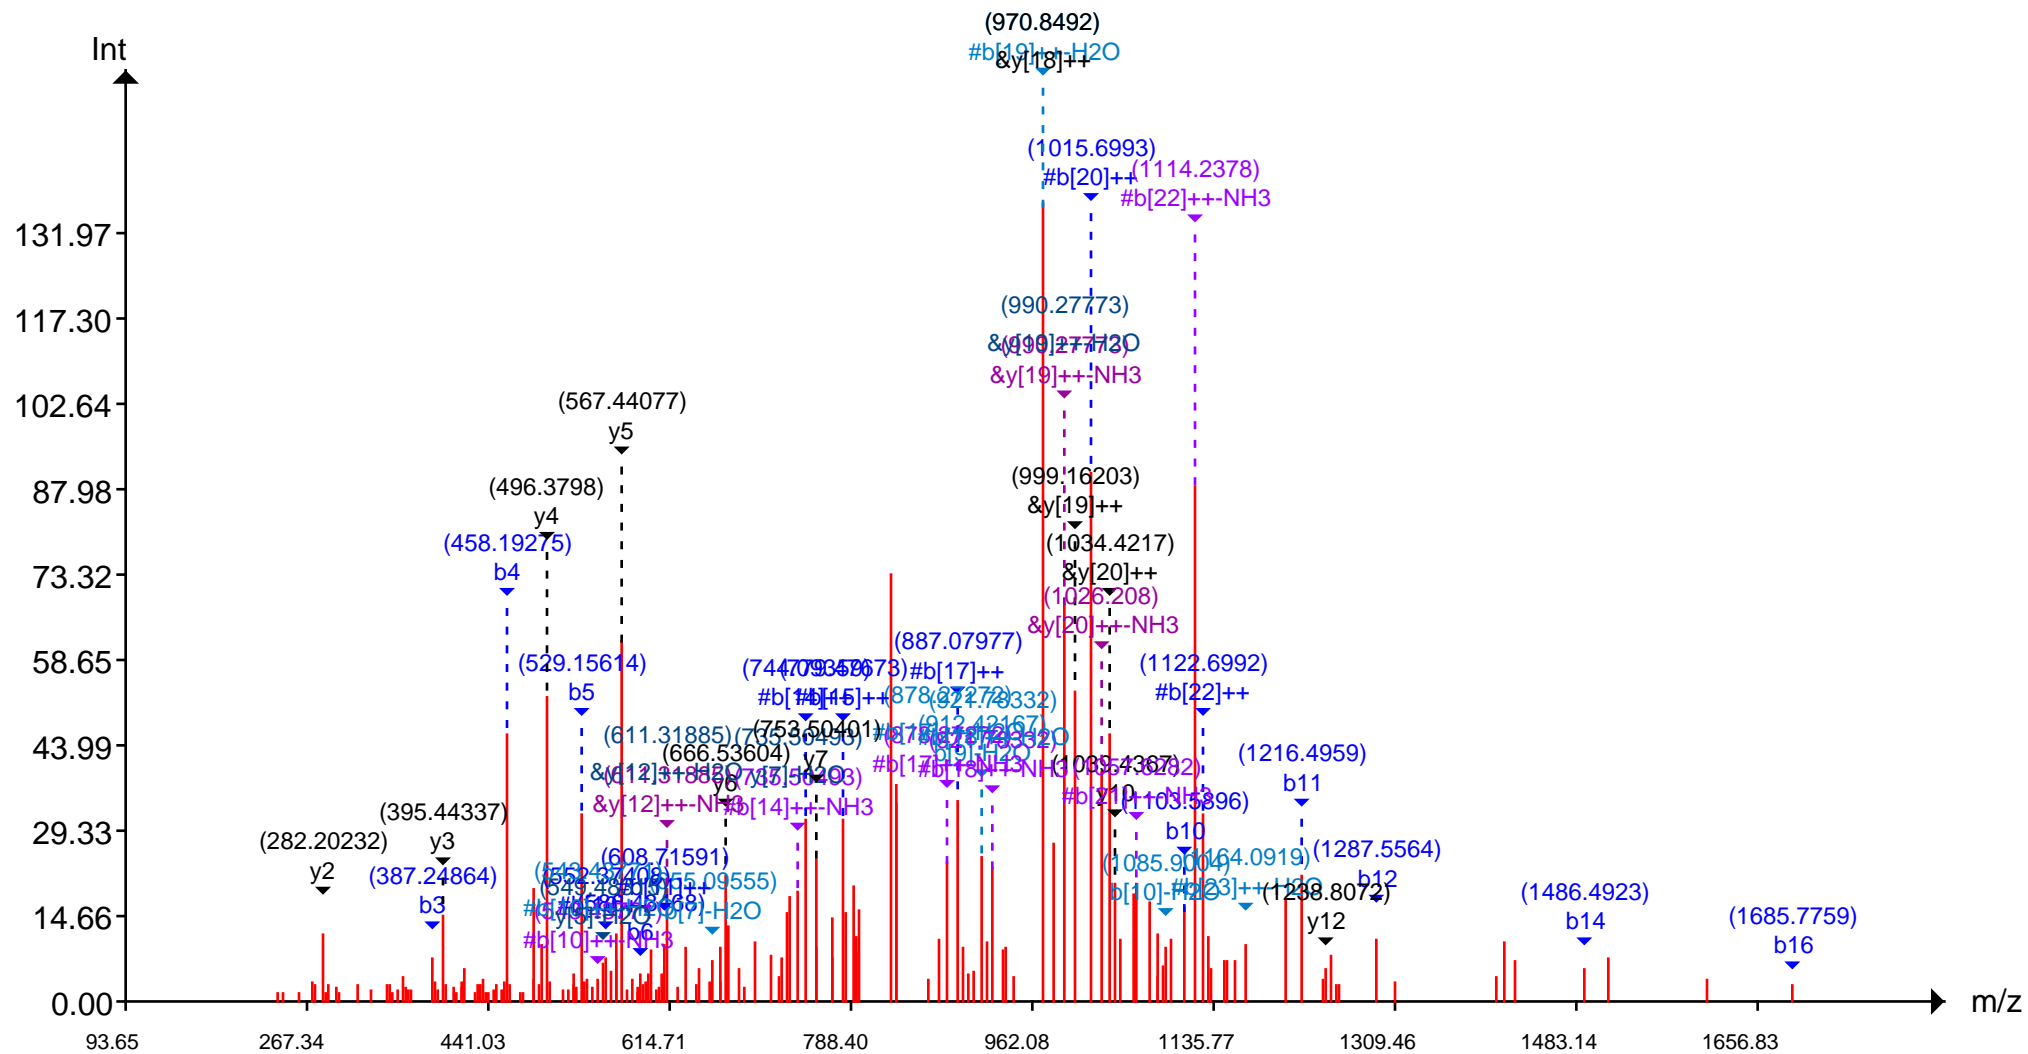

## Info

|                          |                                                 |                           |          |
|--------------------------|-------------------------------------------------|---------------------------|----------|
| <b>Modified Sequence</b> | AcD3-VQNAAGSQEK<AcD3K*>LAQAAQSSVATITR<C13>-COOH | <b>Ion score</b>          | 48.1     |
| <b>Protein</b>           | P26039                                          | <b>Confidence level</b>   | 99.00%   |
| <b>Precursor m/z</b>     | 842.45699                                       | <b>Identity Threshold</b> | 47.11    |
| <b>Charge</b>            | 3+                                              | <b>Mass error</b>         | 0.003225 |

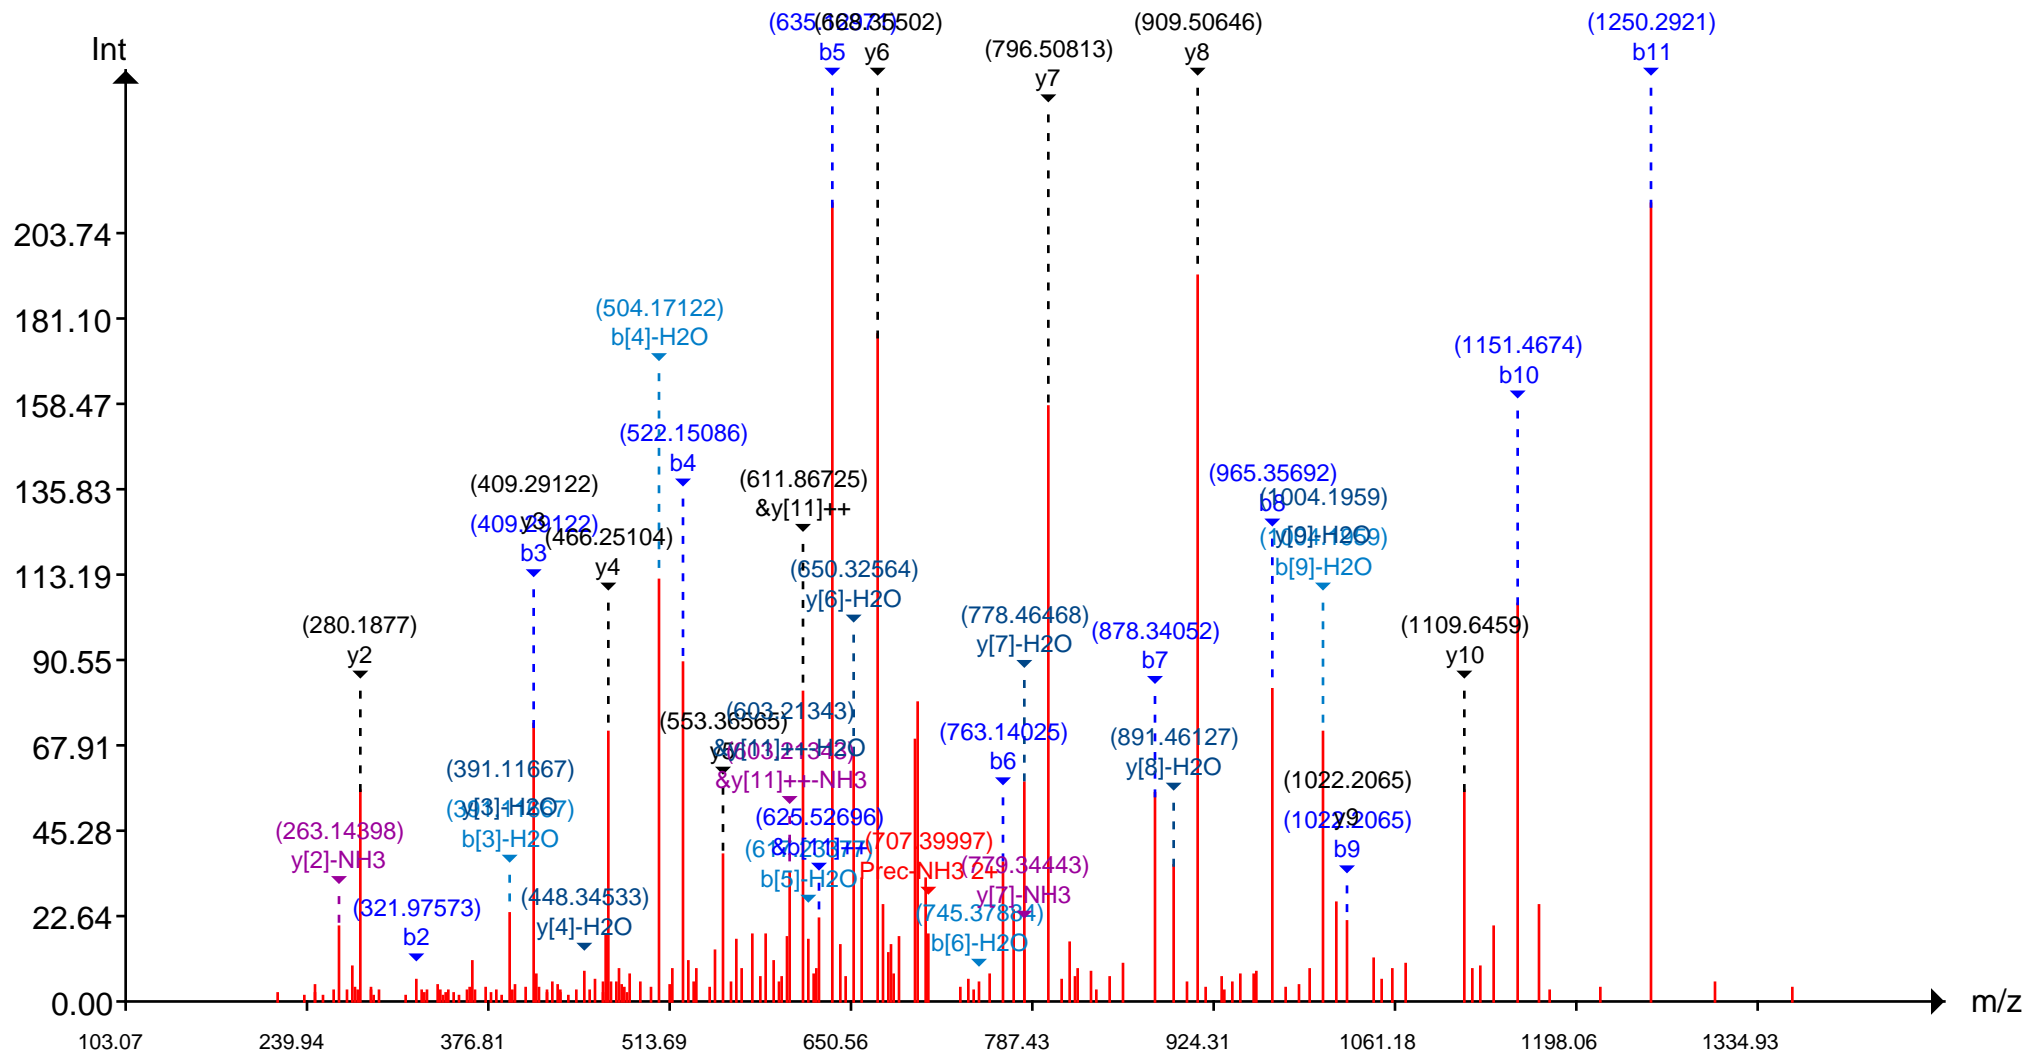

## Info

**Modified Sequence** AcD3-YLSLLQDSGEVR<C13>-COOH

**Ion score** 82.26

**Protein** P63242

**Confidence level** 99.00%

**Precursor m/z** 715.88726

**Identity Threshold** 47.84

**Charge** 2+

**Mass error** 0.001209

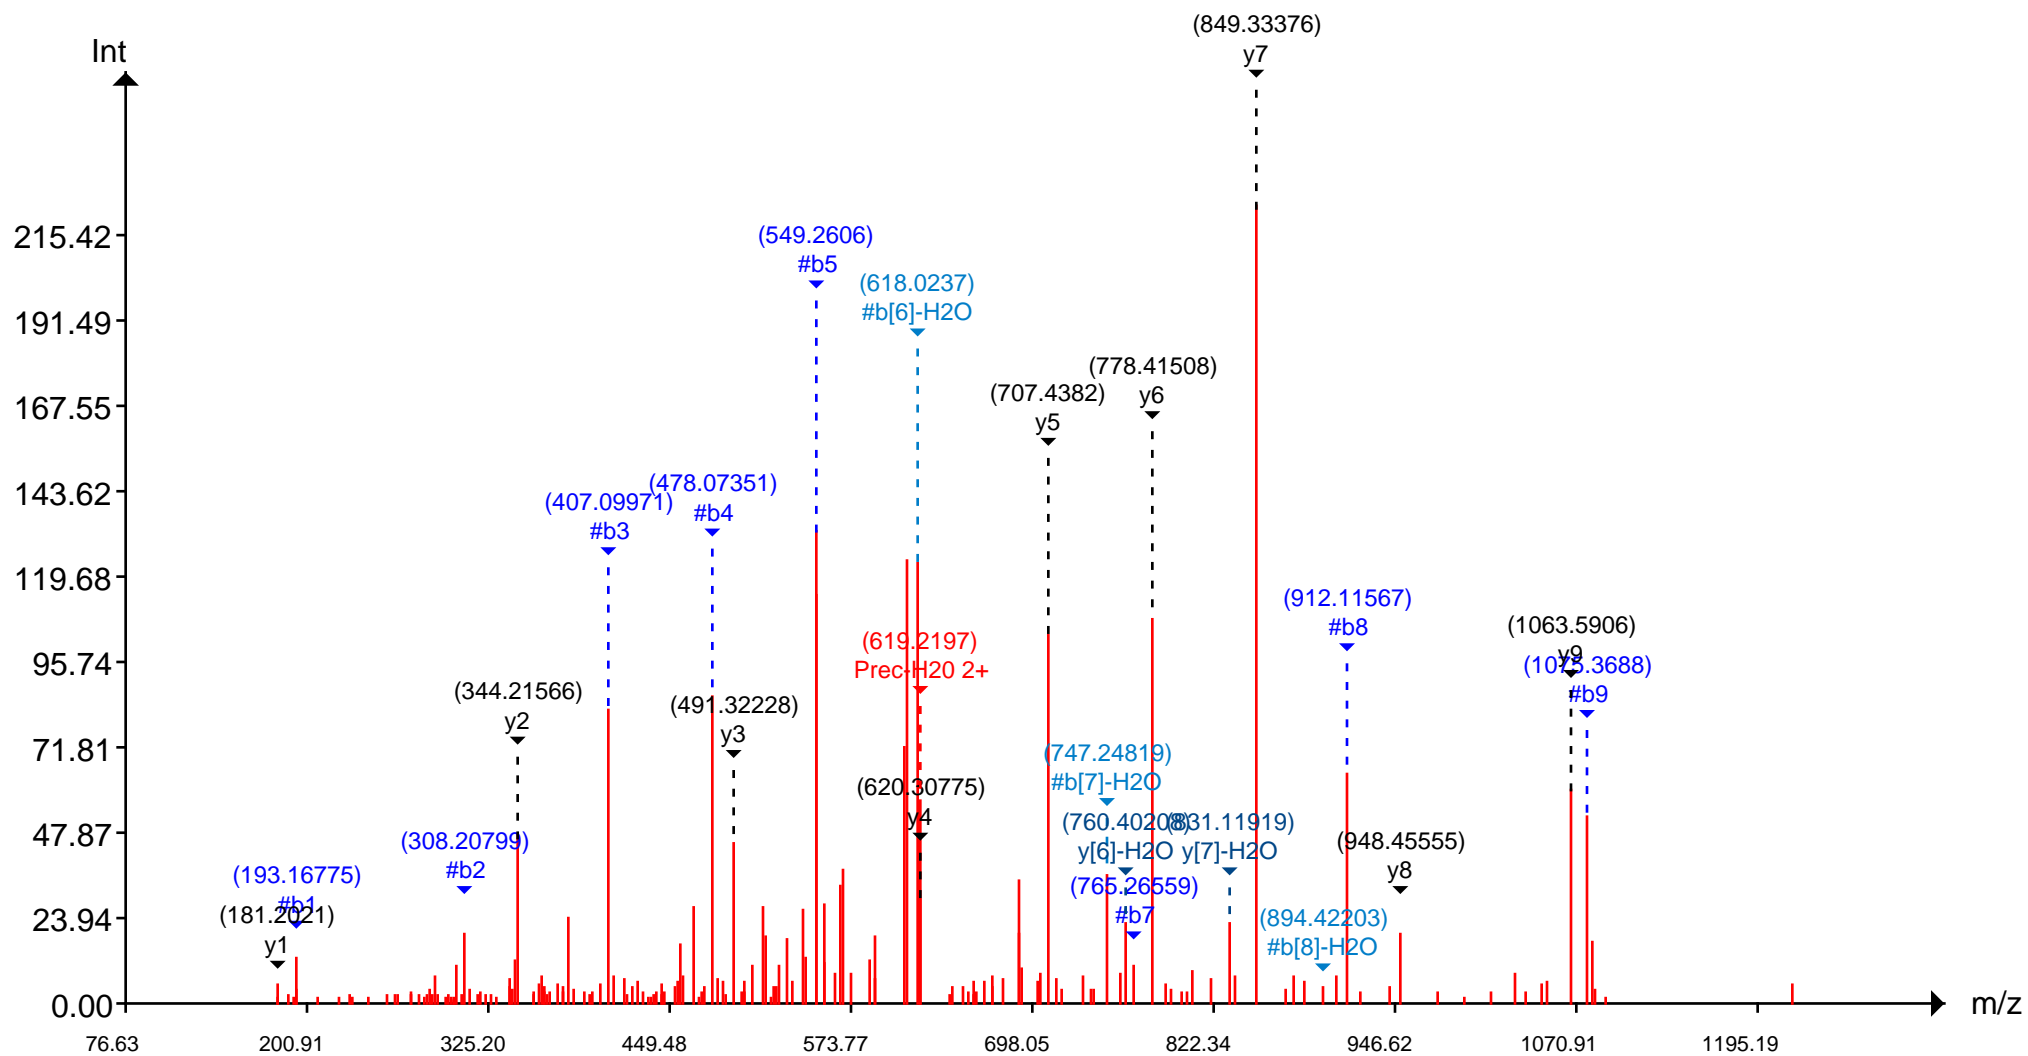

## Info

**Modified Sequence** AcD3-M<Mox\*>DVAASEFYR<C13>-COOH

**Ion score** 57.43

**Protein** P17182, P21550, P17183

**Confidence level** 99.00%

**Precursor m/z** 628.29389

**Identity Threshold** 45.52

**Charge** 2+

**Mass error** 6.88E-4



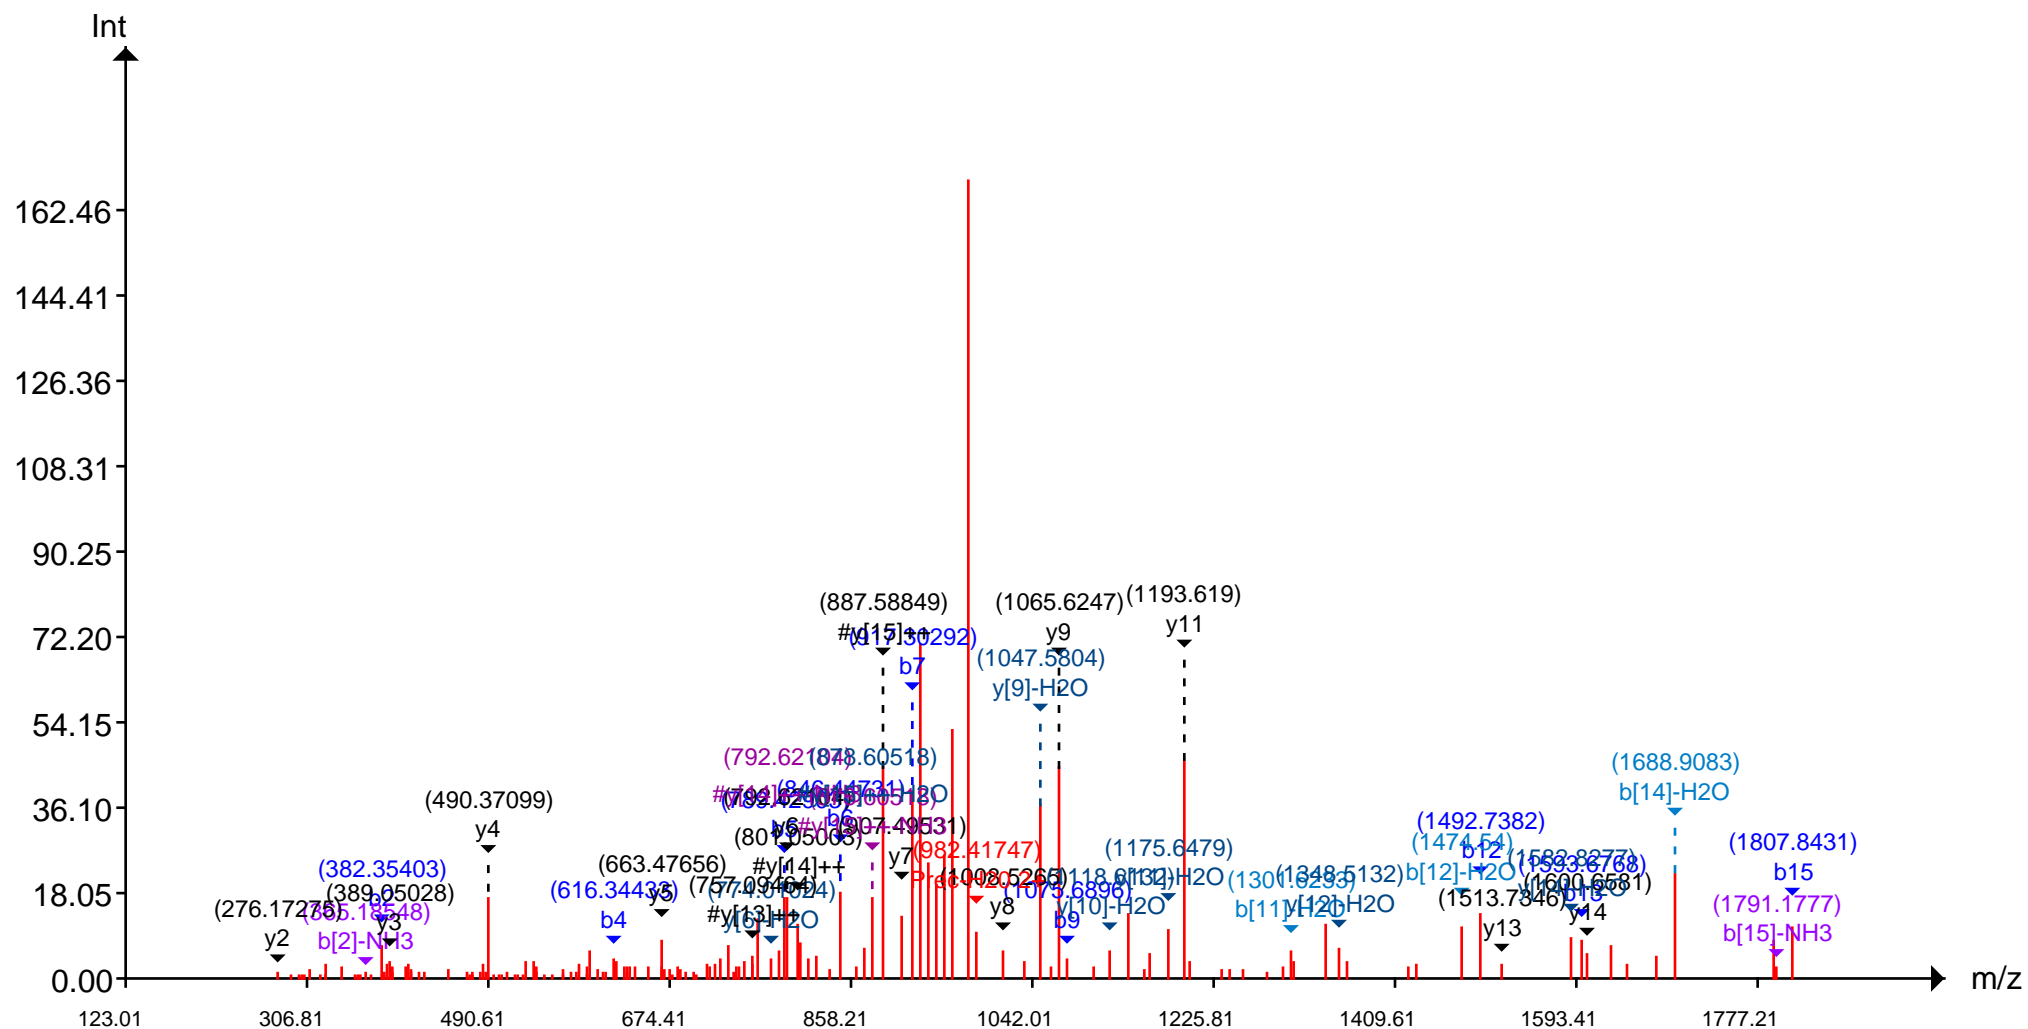

## Info

|                          |                                                          |                           |          |
|--------------------------|----------------------------------------------------------|---------------------------|----------|
| <b>Modified Sequence</b> | AcD3-YK<AcD3K*>SM<Mox*>K<AcD3K*>GAGTDEK<AcD3K*>TLTR-COOH | <b>Ion score</b>          | 59.93    |
| <b>Protein</b>           | P14824                                                   | <b>Confidence level</b>   | 99.00%   |
| <b>Precursor m/z</b>     | 991.51968                                                | <b>Identity Threshold</b> | 48.06    |
| <b>Charge</b>            | 2+                                                       | <b>Mass error</b>         | 0.003232 |





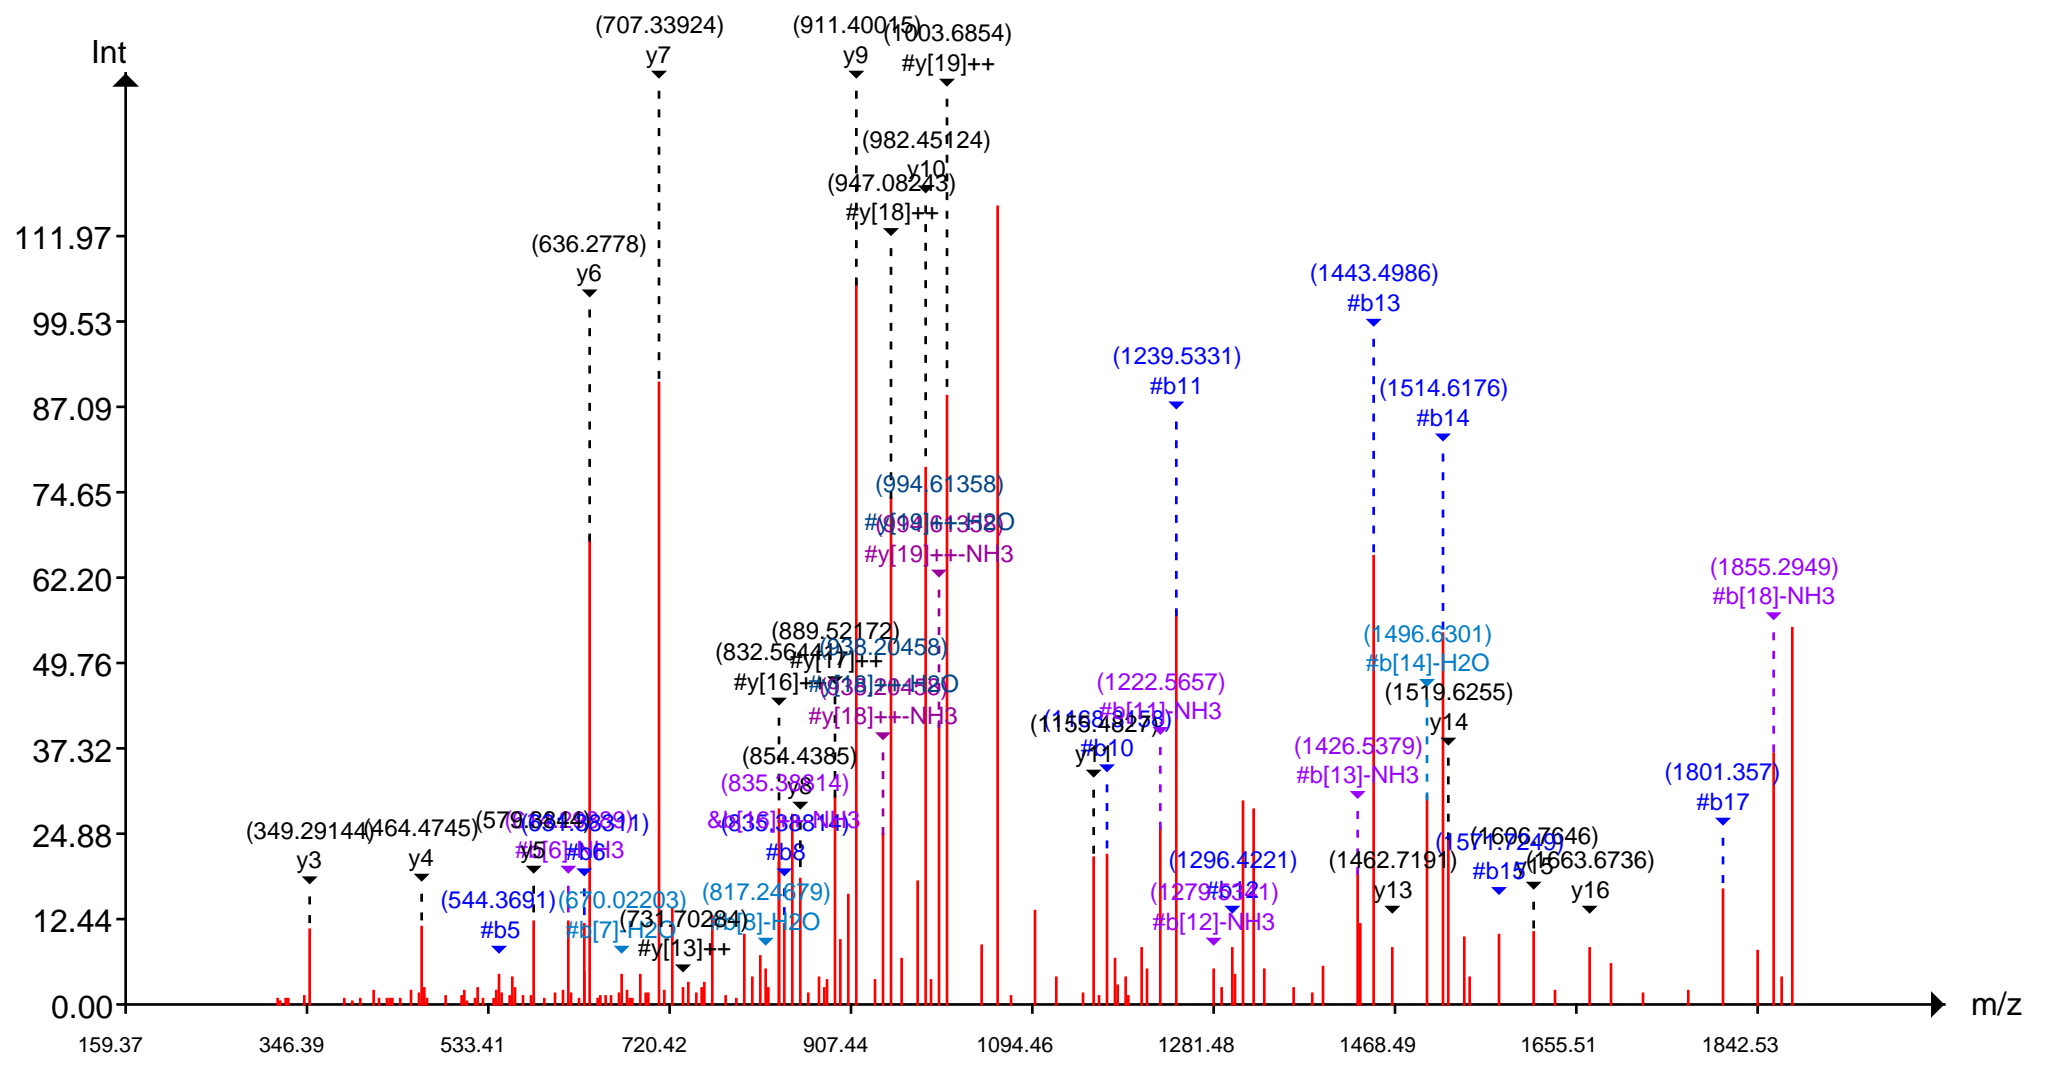

| Info                     |                                                         |                           |          |
|--------------------------|---------------------------------------------------------|---------------------------|----------|
| <b>Modified Sequence</b> | AcD3-VIDNGSGM<Mox*>C<Cmm*>K<AcD3K*>AGFAGDDAPR<C13>-COOH | <b>Ion score</b>          | 77.1     |
| <b>Protein</b>           | P63260                                                  | <b>Confidence level</b>   | 99.00%   |
| <b>Precursor m/z</b>     | 1075.4984                                               | <b>Identity Threshold</b> | 45.05    |
| <b>Charge</b>            | 2+                                                      | <b>Mass error</b>         | 0.003977 |

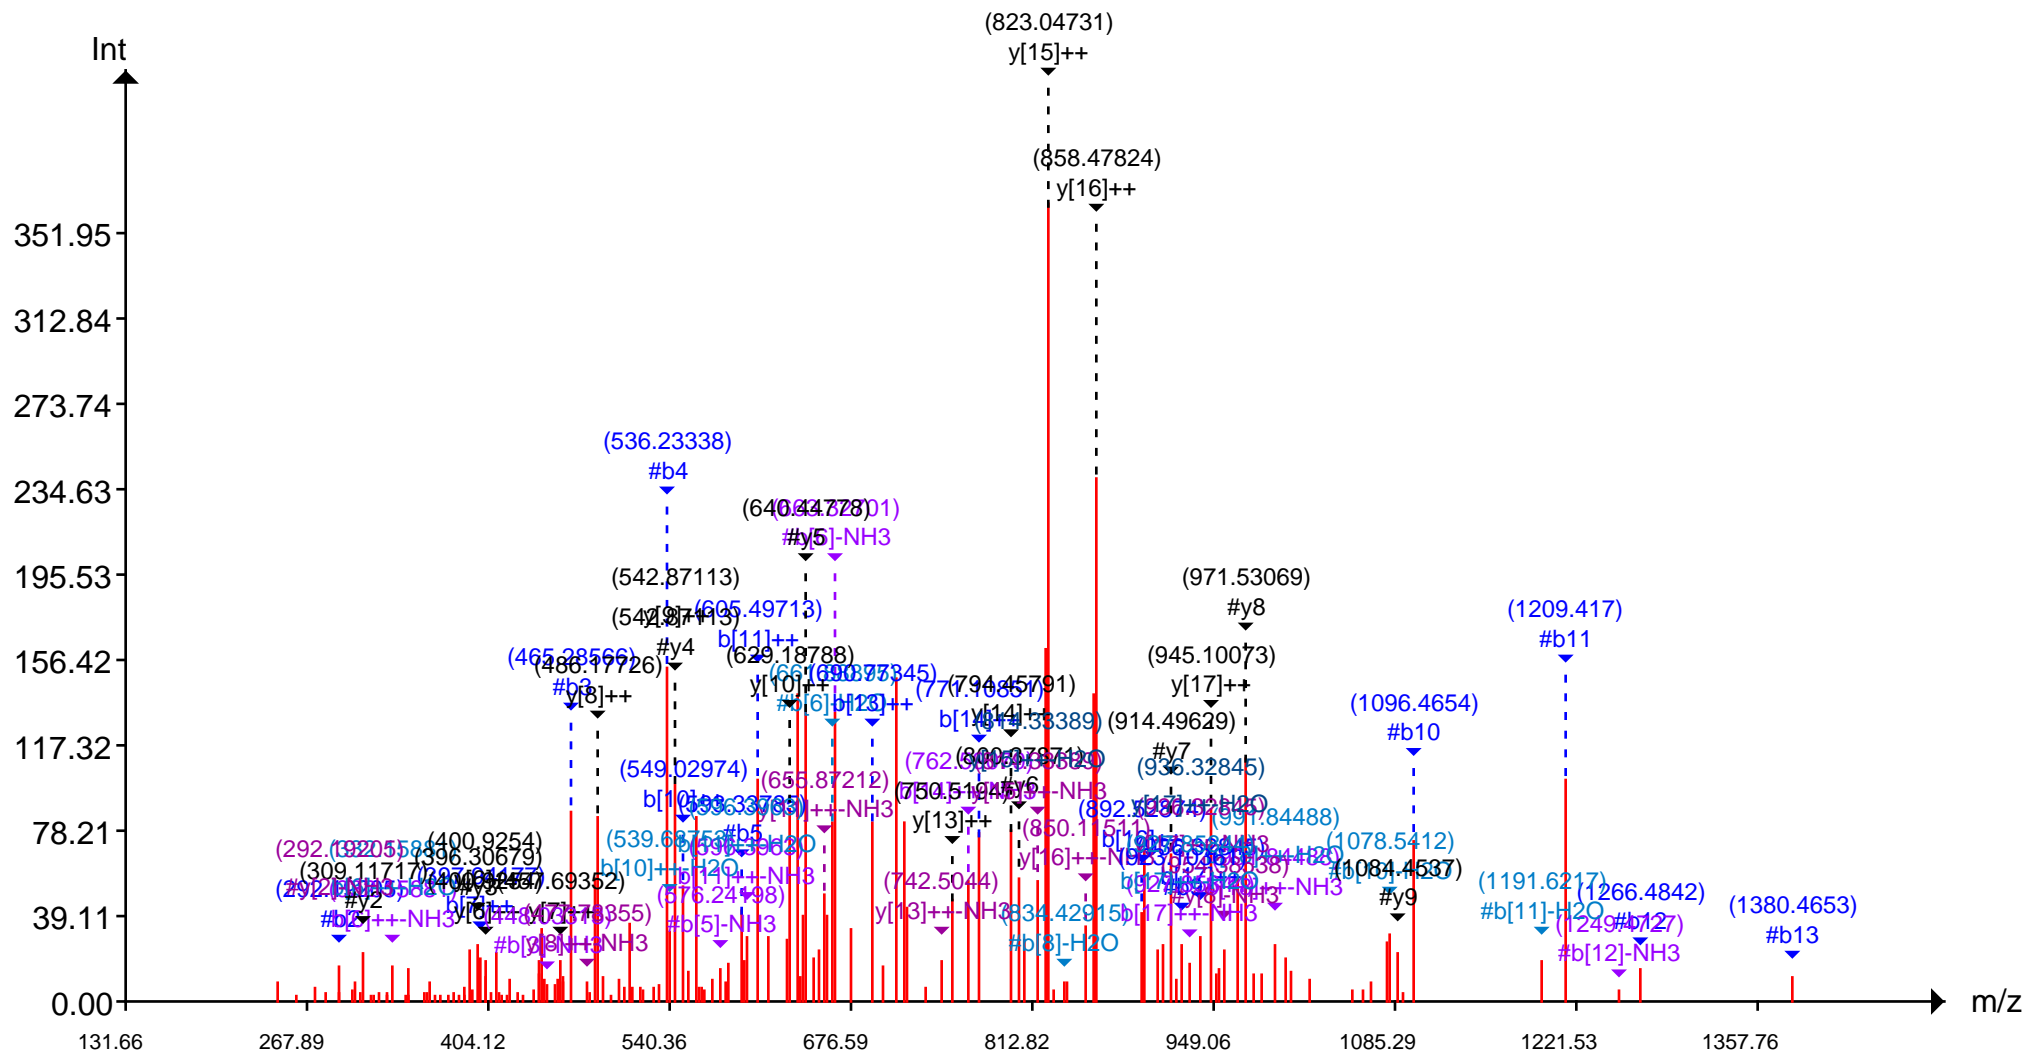

## Info

|                          |                                                          |                           |         |
|--------------------------|----------------------------------------------------------|---------------------------|---------|
| <b>Modified Sequence</b> | AcD3-FVK<AcD3K*>AGSDGAK<AcD3K*>IGNC<Cmm*>PFSQR<C13>-COOH | <b>Ion score</b>          | 56.77   |
| <b>Protein</b>           | Q9Z1Q5                                                   | <b>Confidence level</b>   | 99.00%  |
| <b>Precursor m/z</b>     | 727.37866                                                | <b>Identity Threshold</b> | 48.07   |
| <b>Charge</b>            | 3+                                                       | <b>Mass error</b>         | 3.67E-4 |

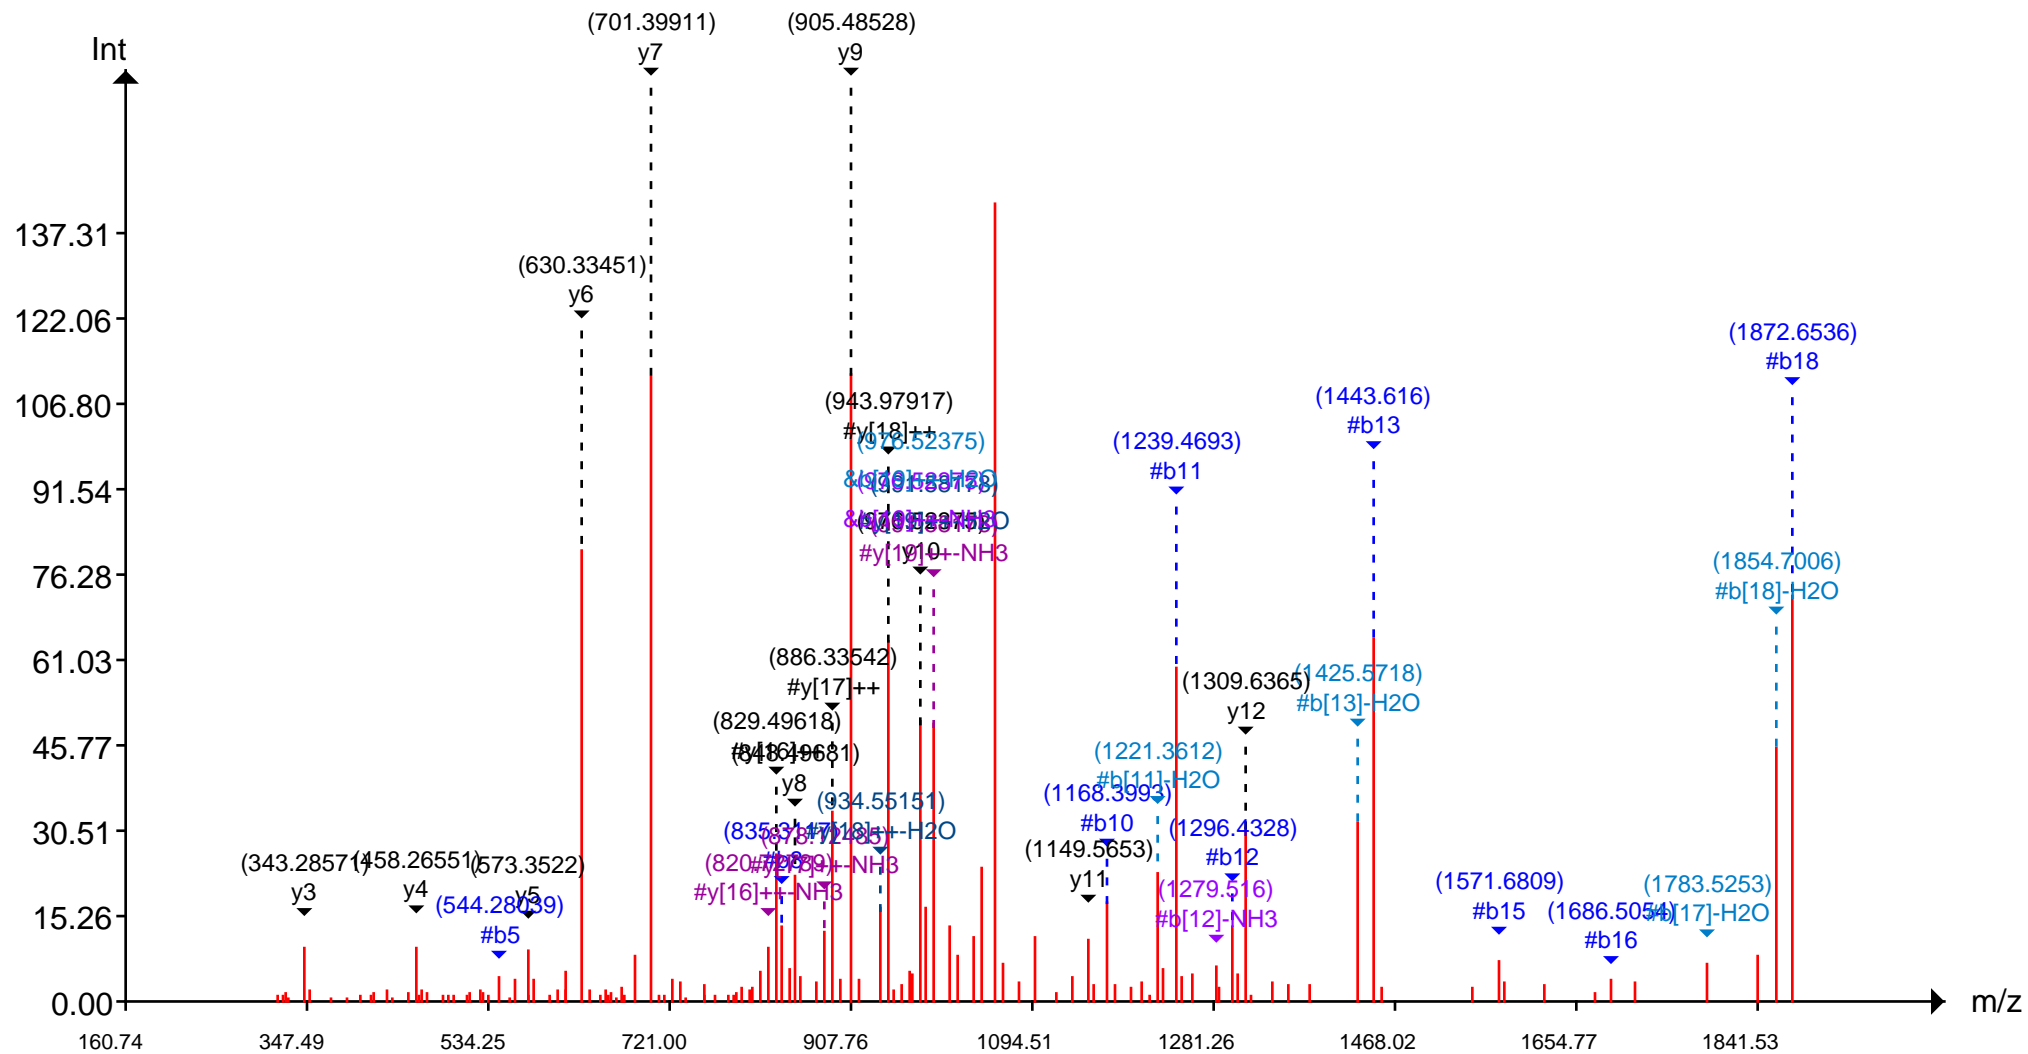

## Info

|                          |                                                    |                           |          |
|--------------------------|----------------------------------------------------|---------------------------|----------|
| <b>Modified Sequence</b> | AcD3-VIDNGSGM<Mox*>C<Cmm*>K<AcD3K*>AGFAGDDAPR-COOH | <b>Ion score</b>          | 63.58    |
| <b>Protein</b>           | P63260                                             | <b>Confidence level</b>   | 99.00%   |
| <b>Precursor m/z</b>     | 1072.4883                                          | <b>Identity Threshold</b> | 44.11    |
| <b>Charge</b>            | 2+                                                 | <b>Mass error</b>         | 0.003918 |

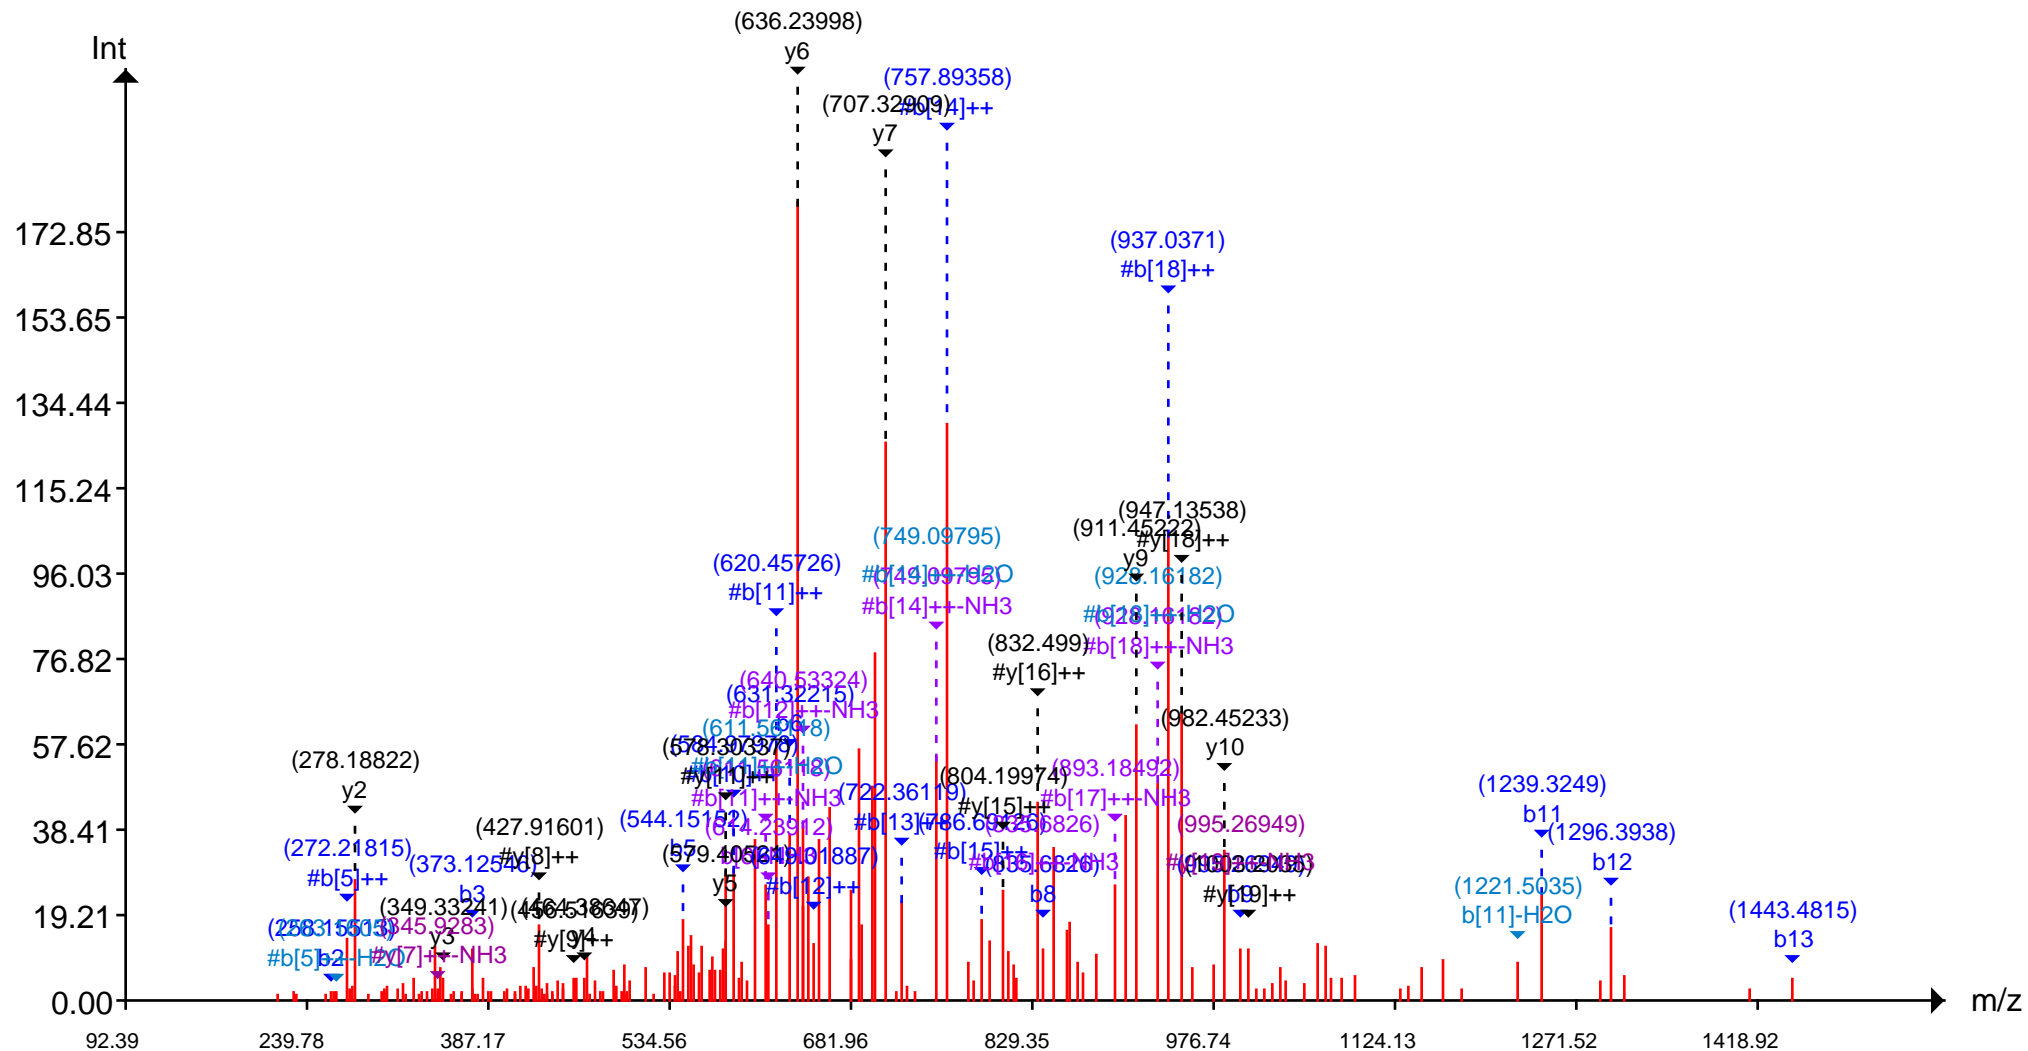

## Info

|                          |                                                         |                           |          |
|--------------------------|---------------------------------------------------------|---------------------------|----------|
| <b>Modified Sequence</b> | AcD3-VIDNGSGM<Mox*>C<Cmm*>K<AcD3K*>AGFAGDDAPR<C13>-COOH | <b>Ion score</b>          | 46.91    |
| <b>Protein</b>           | P63260                                                  | <b>Confidence level</b>   | 99.00%   |
| <b>Precursor m/z</b>     | 717.3339                                                | <b>Identity Threshold</b> | 44.94    |
| <b>Charge</b>            | 3+                                                      | <b>Mass error</b>         | 0.001601 |

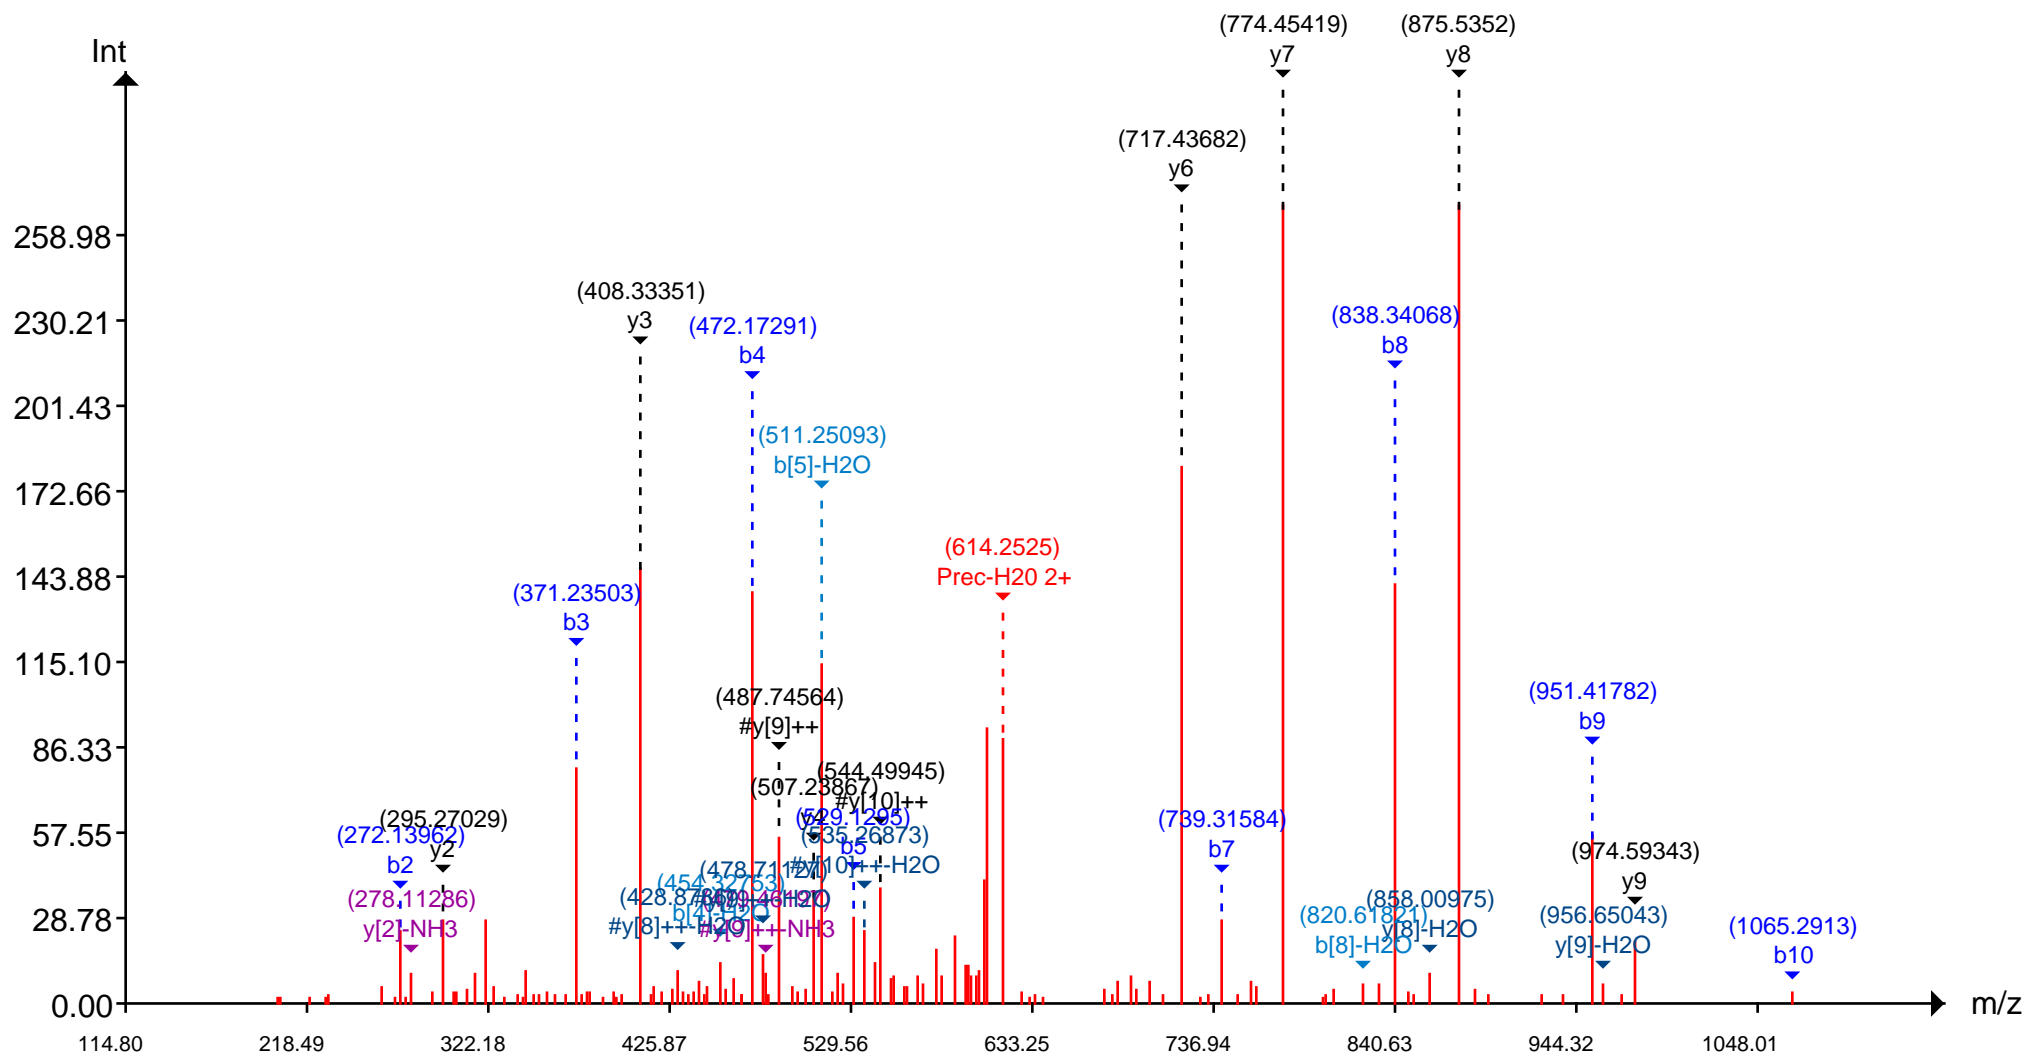

## Info

|                          |                            |                           |        |
|--------------------------|----------------------------|---------------------------|--------|
| <b>Modified Sequence</b> | AcD3-LLVTGPLVINR<C13>-COOH | <b>Ion score</b>          | 67.14  |
| <b>Protein</b>           | P47911                     | <b>Confidence level</b>   | 99.00% |
| <b>Precursor m/z</b>     | 623.40721                  | <b>Identity Threshold</b> | 37.90  |
| <b>Charge</b>            | 2+                         | <b>Mass error</b>         | 7.5E-4 |





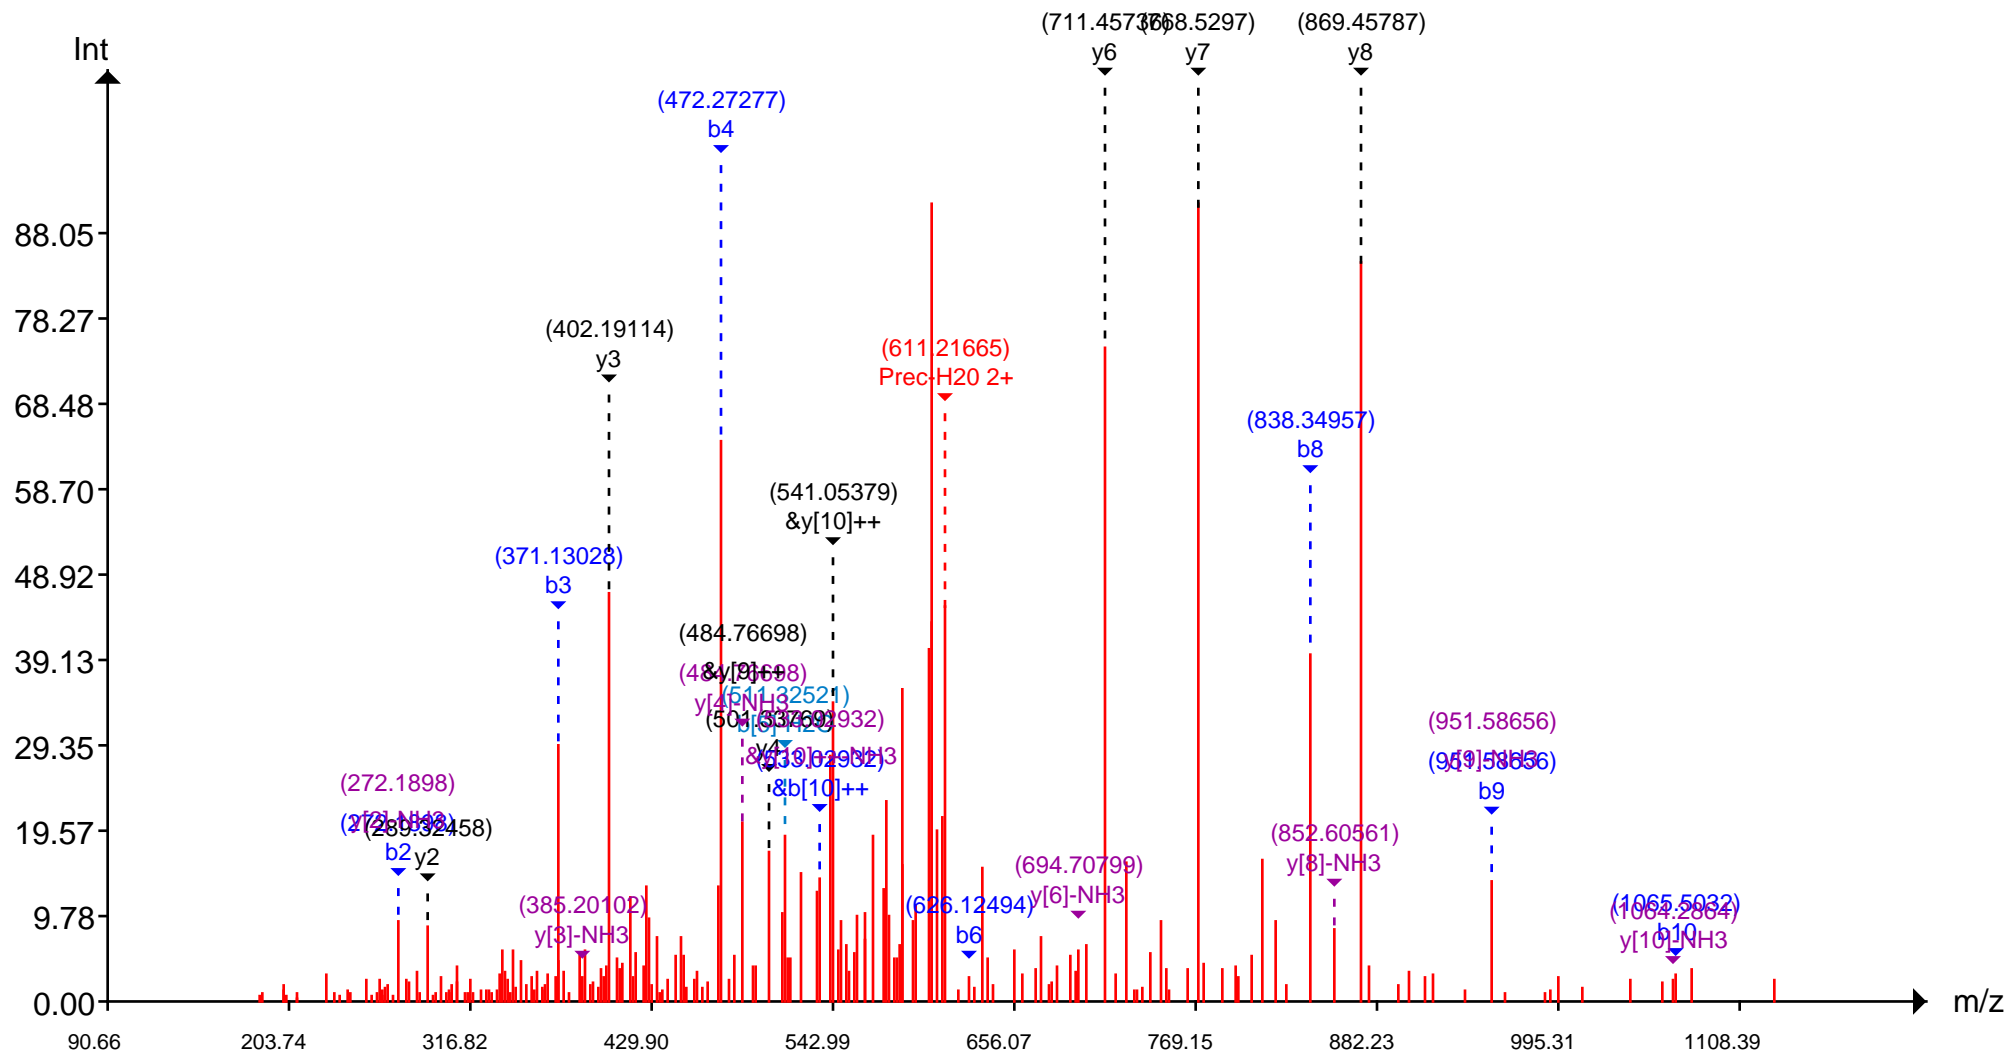

## Info

|                          |                      |                           |         |
|--------------------------|----------------------|---------------------------|---------|
| <b>Modified Sequence</b> | AcD3-LLVTGPLVNR-COOH | <b>Ion score</b>          | 41.51   |
| <b>Protein</b>           | P47911               | <b>Confidence level</b>   | 99.00%  |
| <b>Precursor m/z</b>     | 620.39705            | <b>Identity Threshold</b> | 39.10   |
| <b>Charge</b>            | 2+                   | <b>Mass error</b>         | 5.72E-4 |

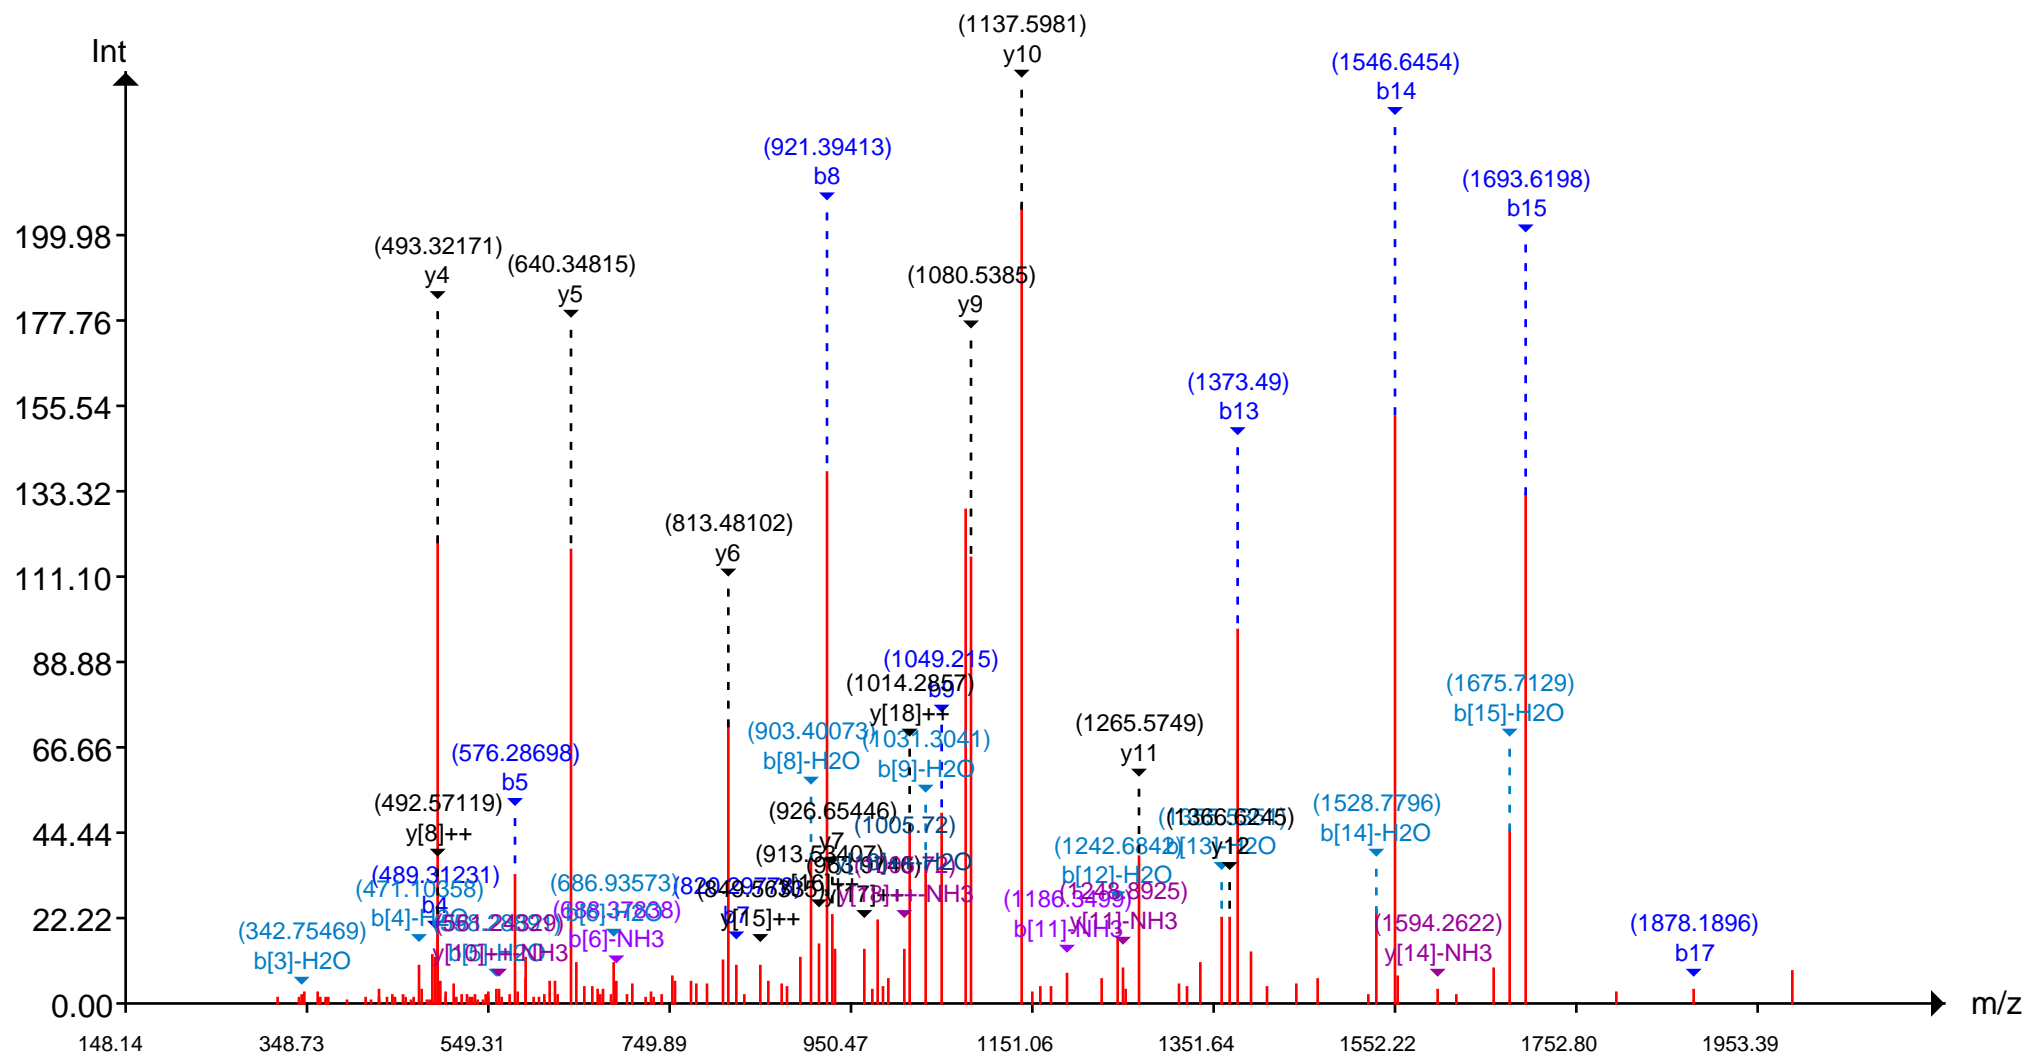

## Info

|                          |                                                  |                           |          |
|--------------------------|--------------------------------------------------|---------------------------|----------|
| <b>Modified Sequence</b> | AcD3-LTTQSEDTQGPKLK<AcD3K*>M<Mox*>PSQR<C13>-COOH | <b>Ion score</b>          | 52.71    |
| <b>Protein</b>           | O54824                                           | <b>Confidence level</b>   | 99.00%   |
| <b>Precursor m/z</b>     | 1093.5537                                        | <b>Identity Threshold</b> | 47.82    |
| <b>Charge</b>            | 2+                                               | <b>Mass error</b>         | 0.002928 |

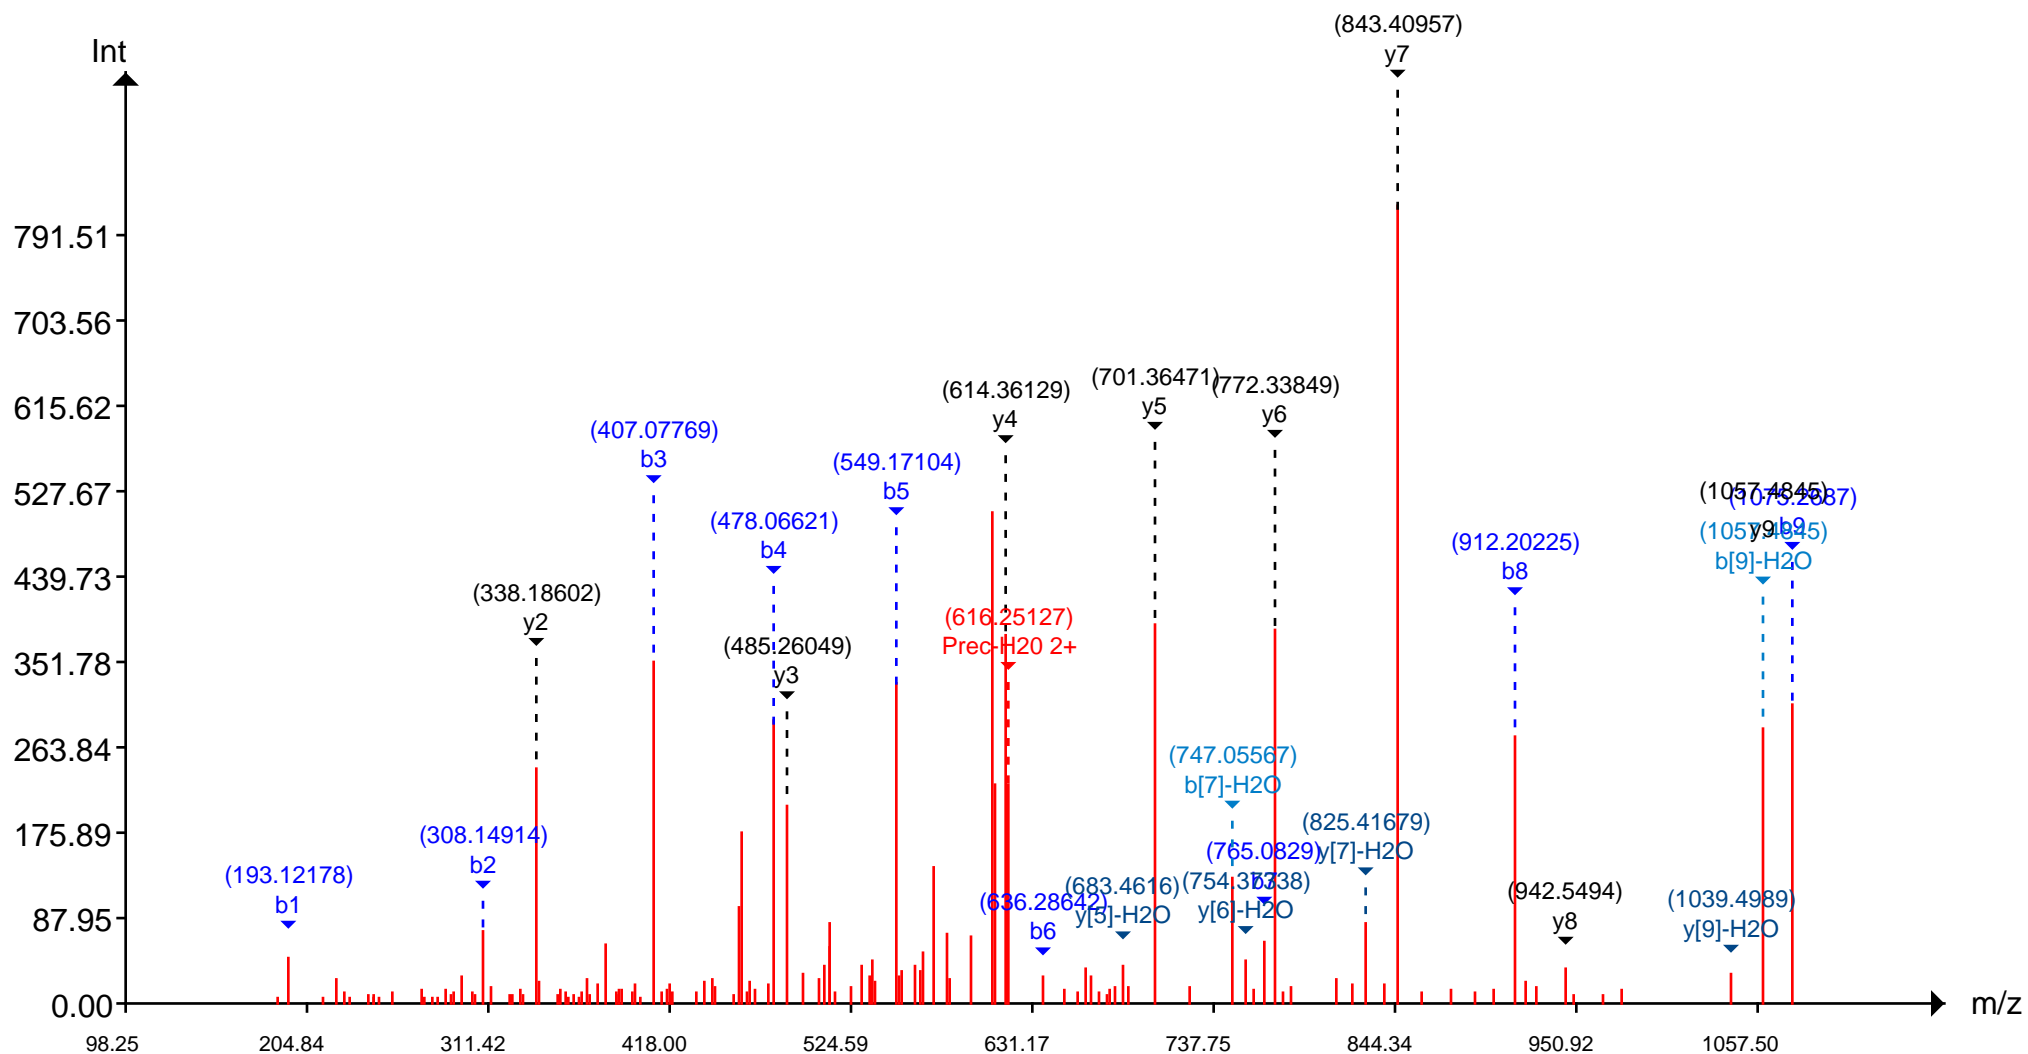

## Info

**Modified Sequence** AcD3-M<Mox\*>DVAASEFYR-COOH

**Ion score** 68.39

**Protein** P17182, P21550, P17183

**Confidence level** 99.00%

**Precursor m/z** 625.28381

**Identity Threshold** 44.16

**Charge** 2+

**Mass error** 6.69E-4

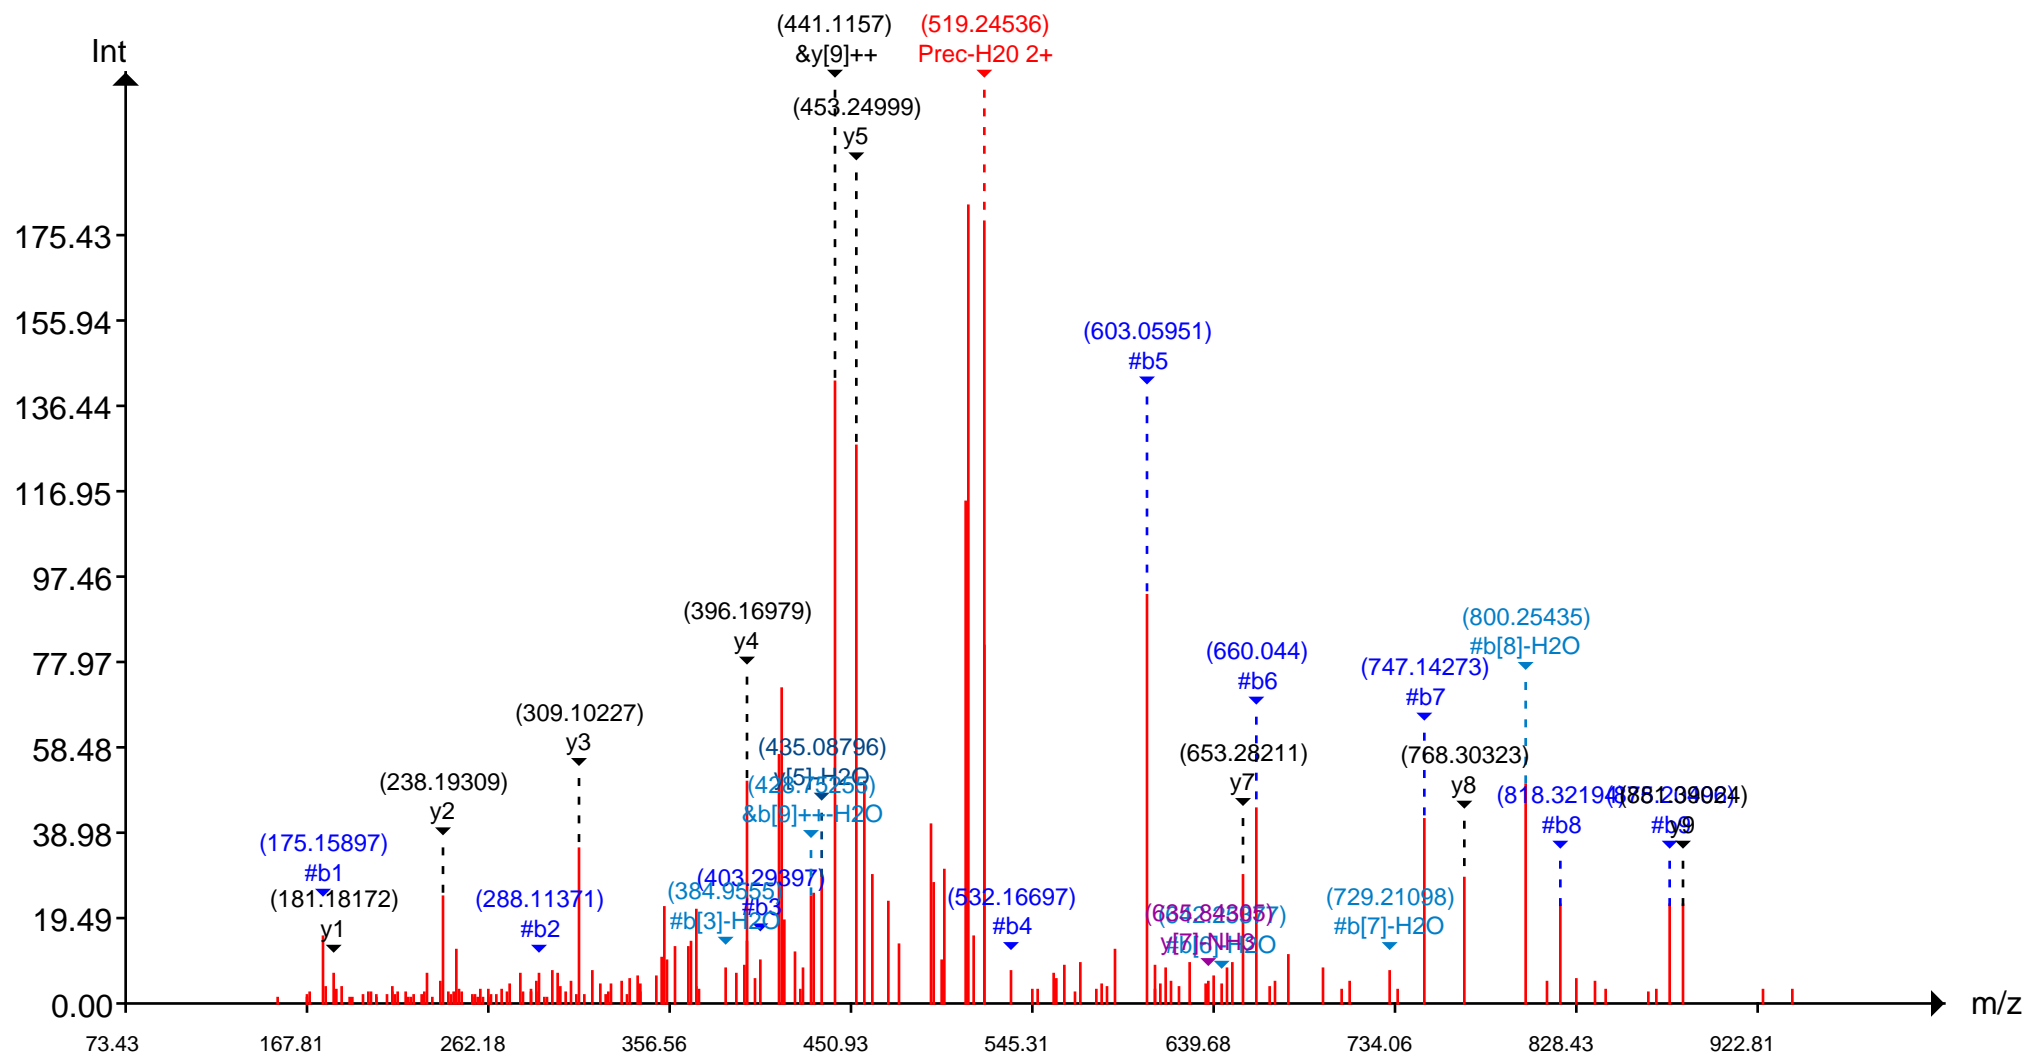

## Info

|                          |                           |                           |        |
|--------------------------|---------------------------|---------------------------|--------|
| <b>Modified Sequence</b> | AcD3-ELDEAGSAGR<C13>-COOH | <b>Ion score</b>          | 53.61  |
| <b>Protein</b>           | Q9QZK7                    | <b>Confidence level</b>   | 99.00% |
| <b>Precursor m/z</b>     | 528.26059                 | <b>Identity Threshold</b> | 46.69  |
| <b>Charge</b>            | 2+                        | <b>Mass error</b>         | 6.7E-5 |



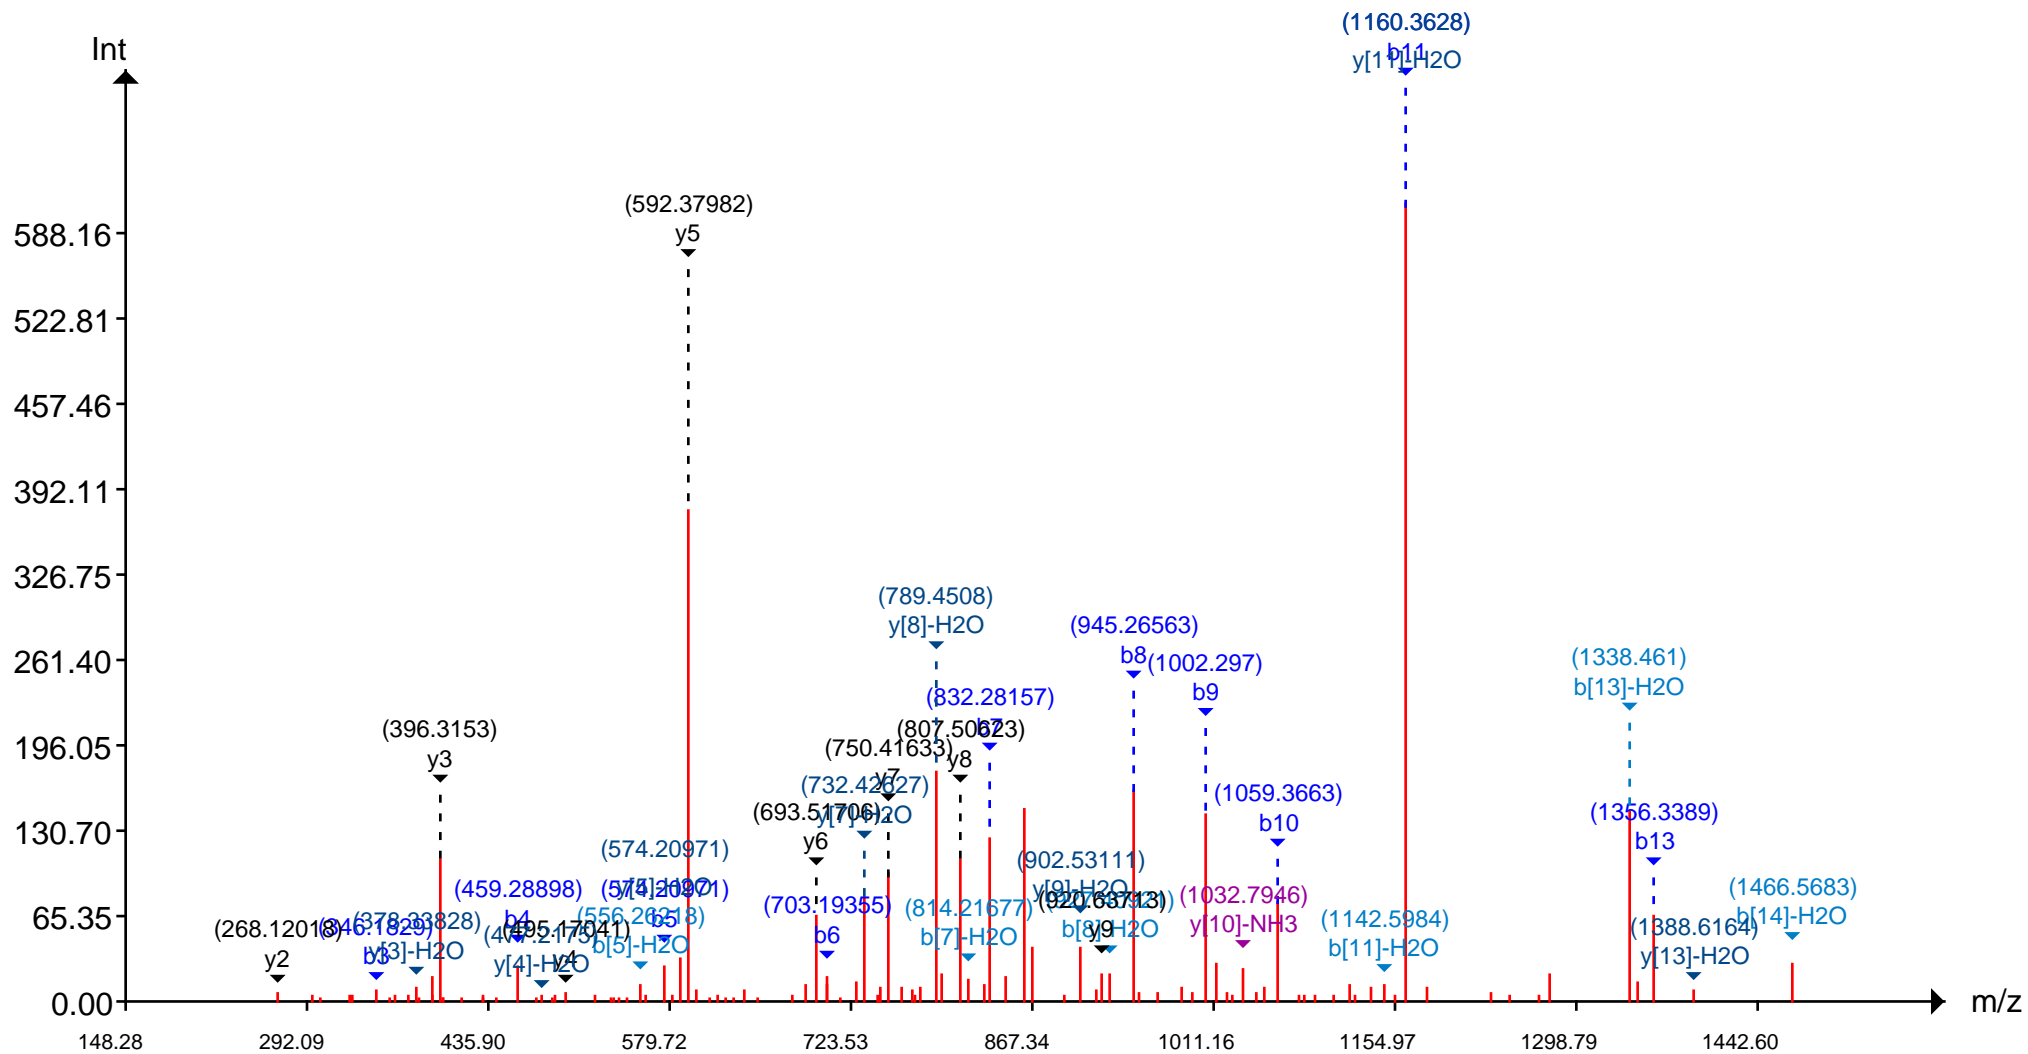

## Info

|                          |                                 |                           |          |
|--------------------------|---------------------------------|---------------------------|----------|
| <b>Modified Sequence</b> | AcD3-TAQLDEELGGTPVQSR<C13>-COOH | <b>Ion score</b>          | 74.72    |
| <b>Protein</b>           | P13020                          | <b>Confidence level</b>   | 99.00%   |
| <b>Precursor m/z</b>     | 876.45205                       | <b>Identity Threshold</b> | 47.99    |
| <b>Charge</b>            | 2+                              | <b>Mass error</b>         | 0.002326 |

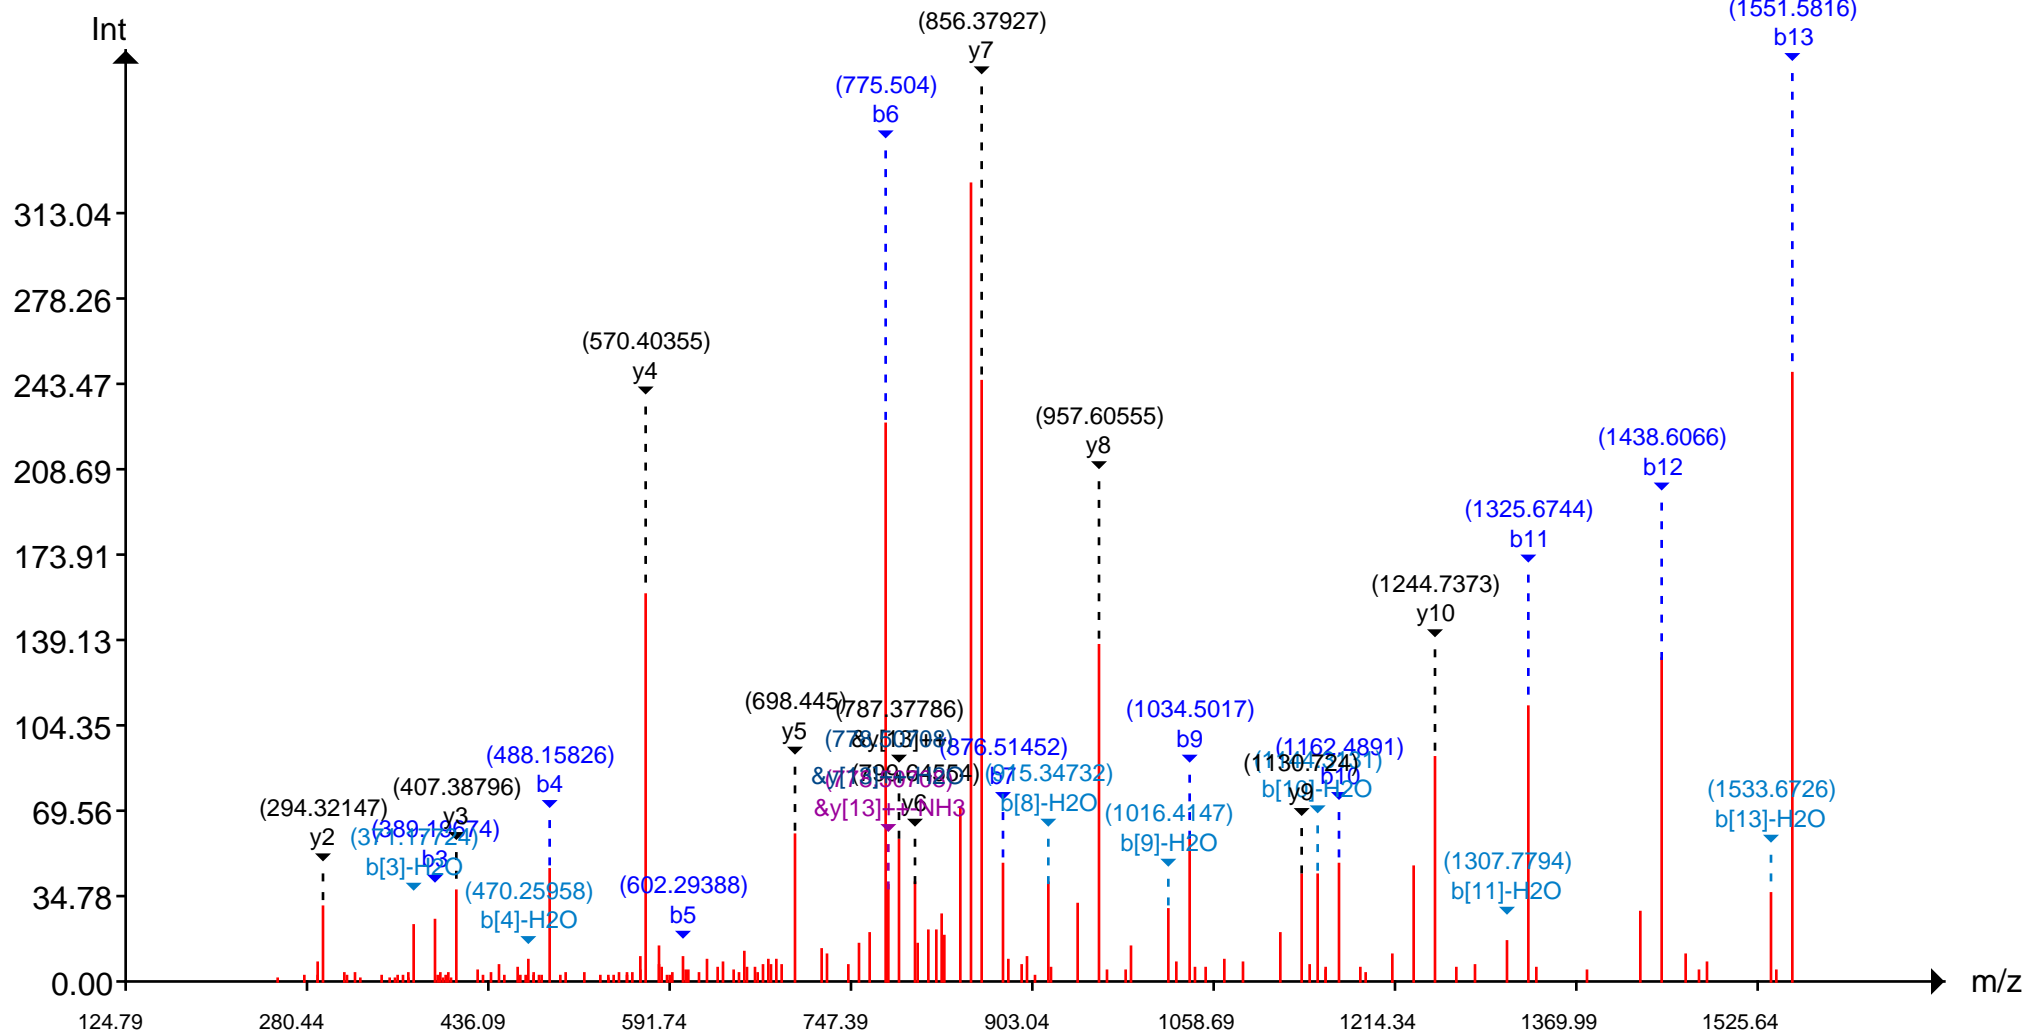

## Info

**Modified Sequence** AcD3-LTEVNK<AcD3K\*>TGTQYLLR<C13>-COOH

**Ion score** 82.17

**Protein** Q60854

**Confidence level** 99.00%

**Precursor m/z** 866.49739

**Identity Threshold** 45.65

**Charge** 2+

**Mass error** 0.00214



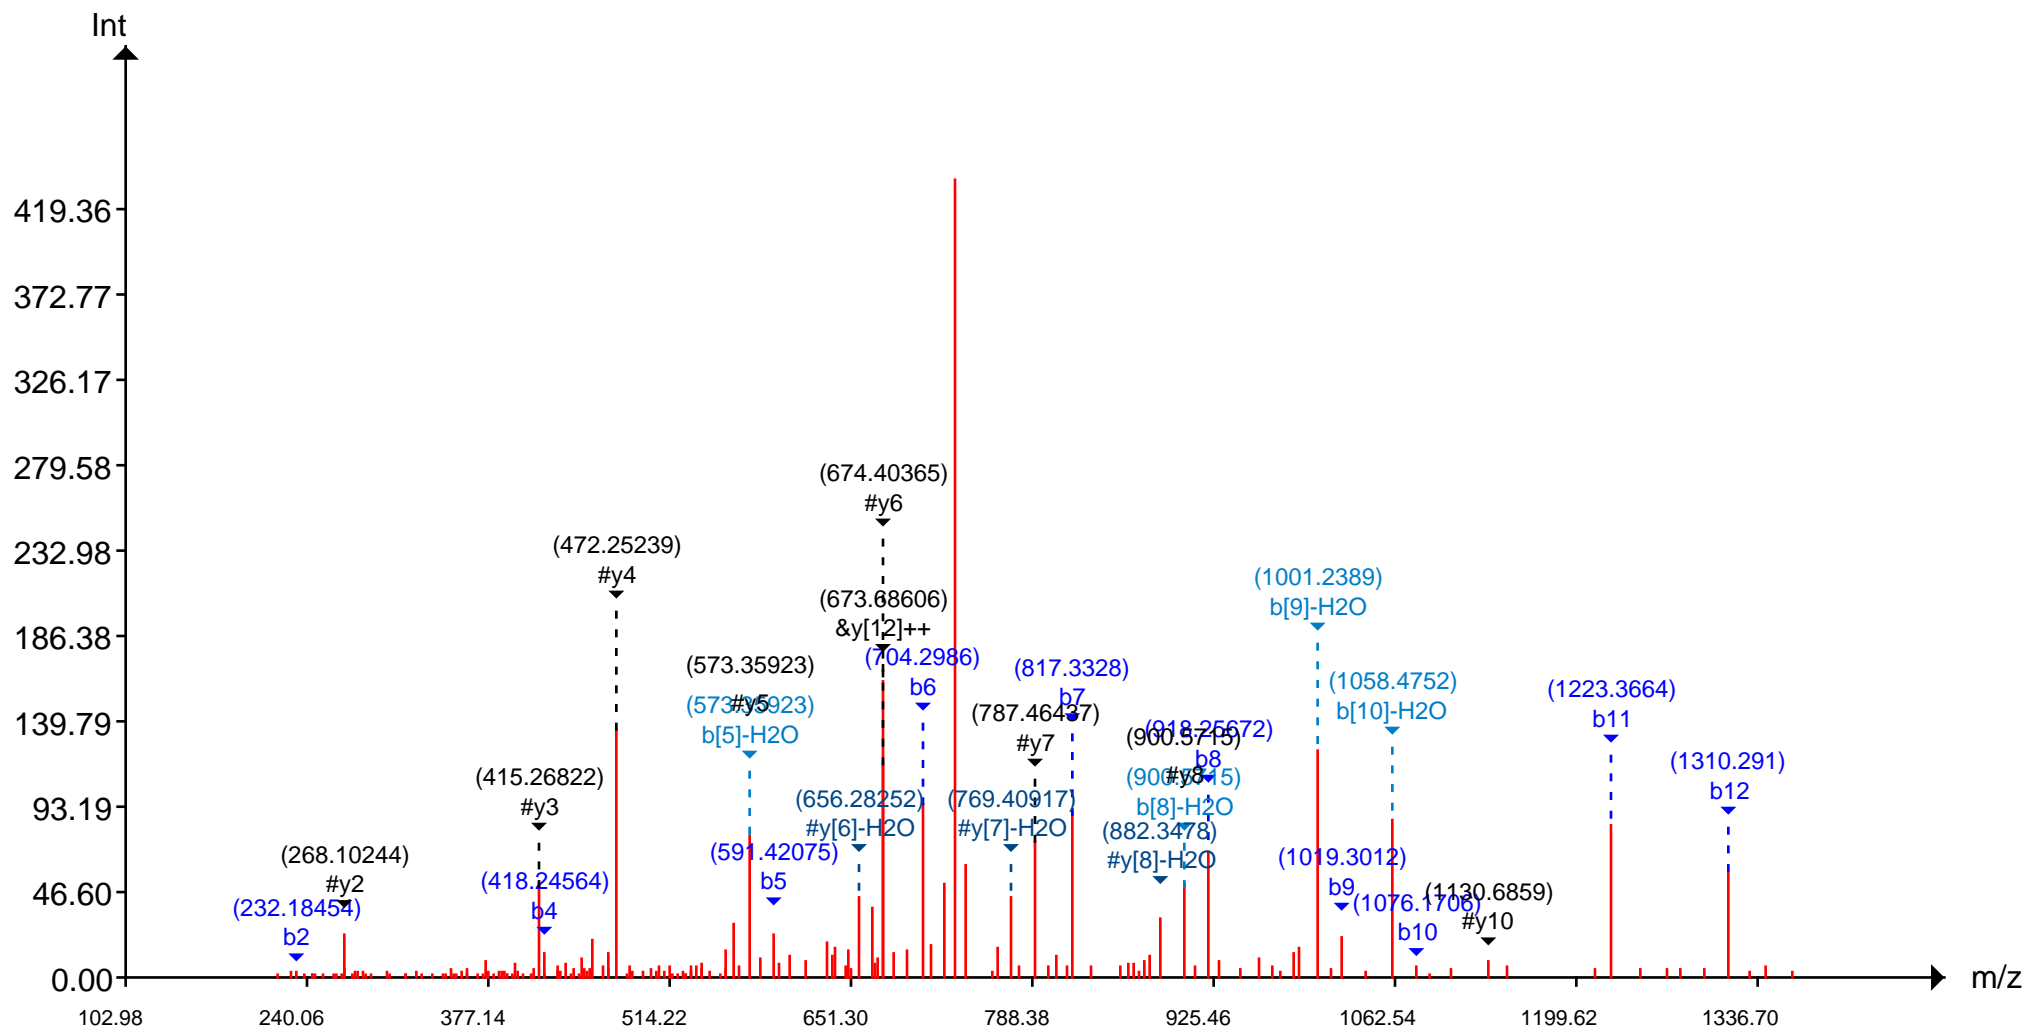

## Info

**Modified Sequence** AcD3-VSEGK<AcD3K\*>ILTTGFSR<C13>-COOH

**Ion score** 66.42

**Protein** O89053

**Confidence level** 99.00%

**Precursor m/z** 745.92491

**Identity Threshold** 46.51

**Charge** 2+

**Mass error** -1.96E-4

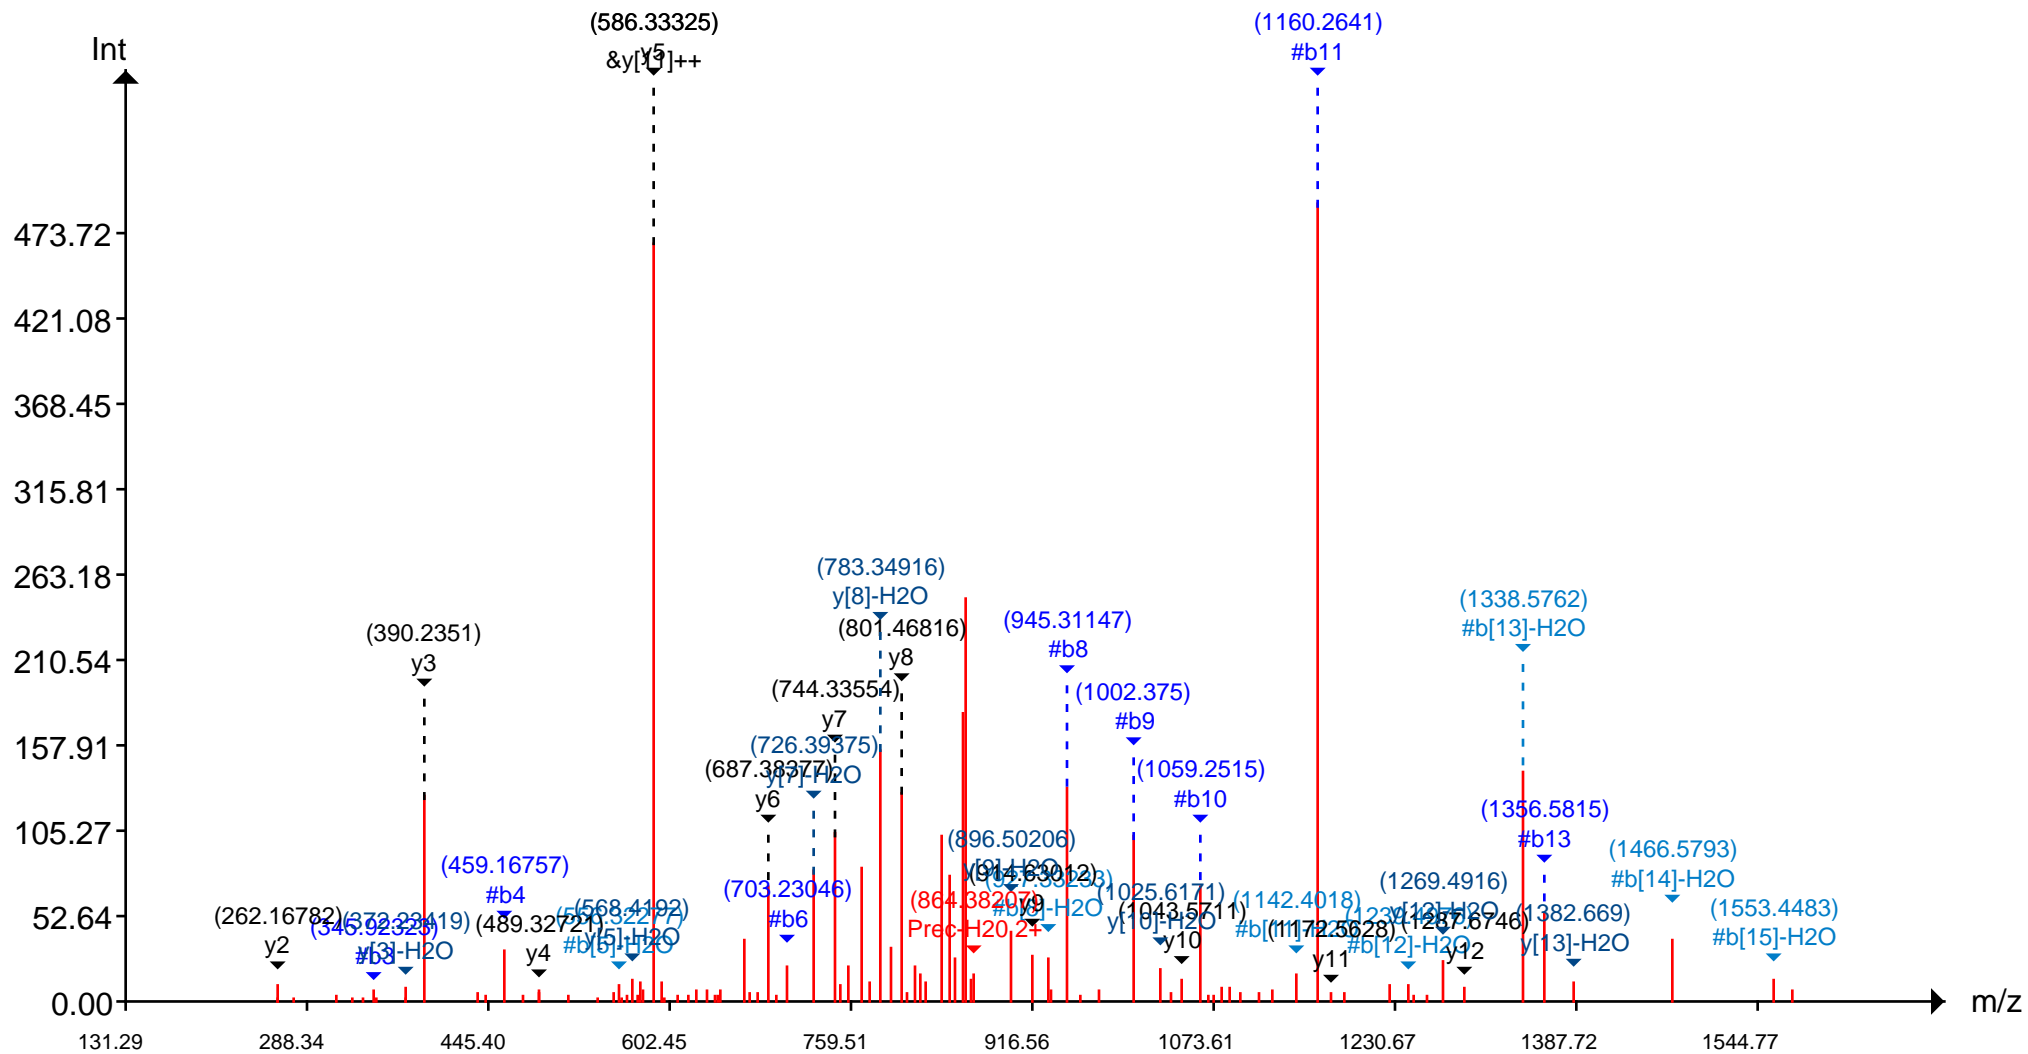

## Info

|                          |                            |                           |          |
|--------------------------|----------------------------|---------------------------|----------|
| <b>Modified Sequence</b> | AcD3-TAQLDEELGGTPVQSR-COOH | <b>Ion score</b>          | 83.91    |
| <b>Protein</b>           | P13020                     | <b>Confidence level</b>   | 99.00%   |
| <b>Precursor m/z</b>     | 873.44195                  | <b>Identity Threshold</b> | 47.93    |
| <b>Charge</b>            | 2+                         | <b>Mass error</b>         | 0.002267 |

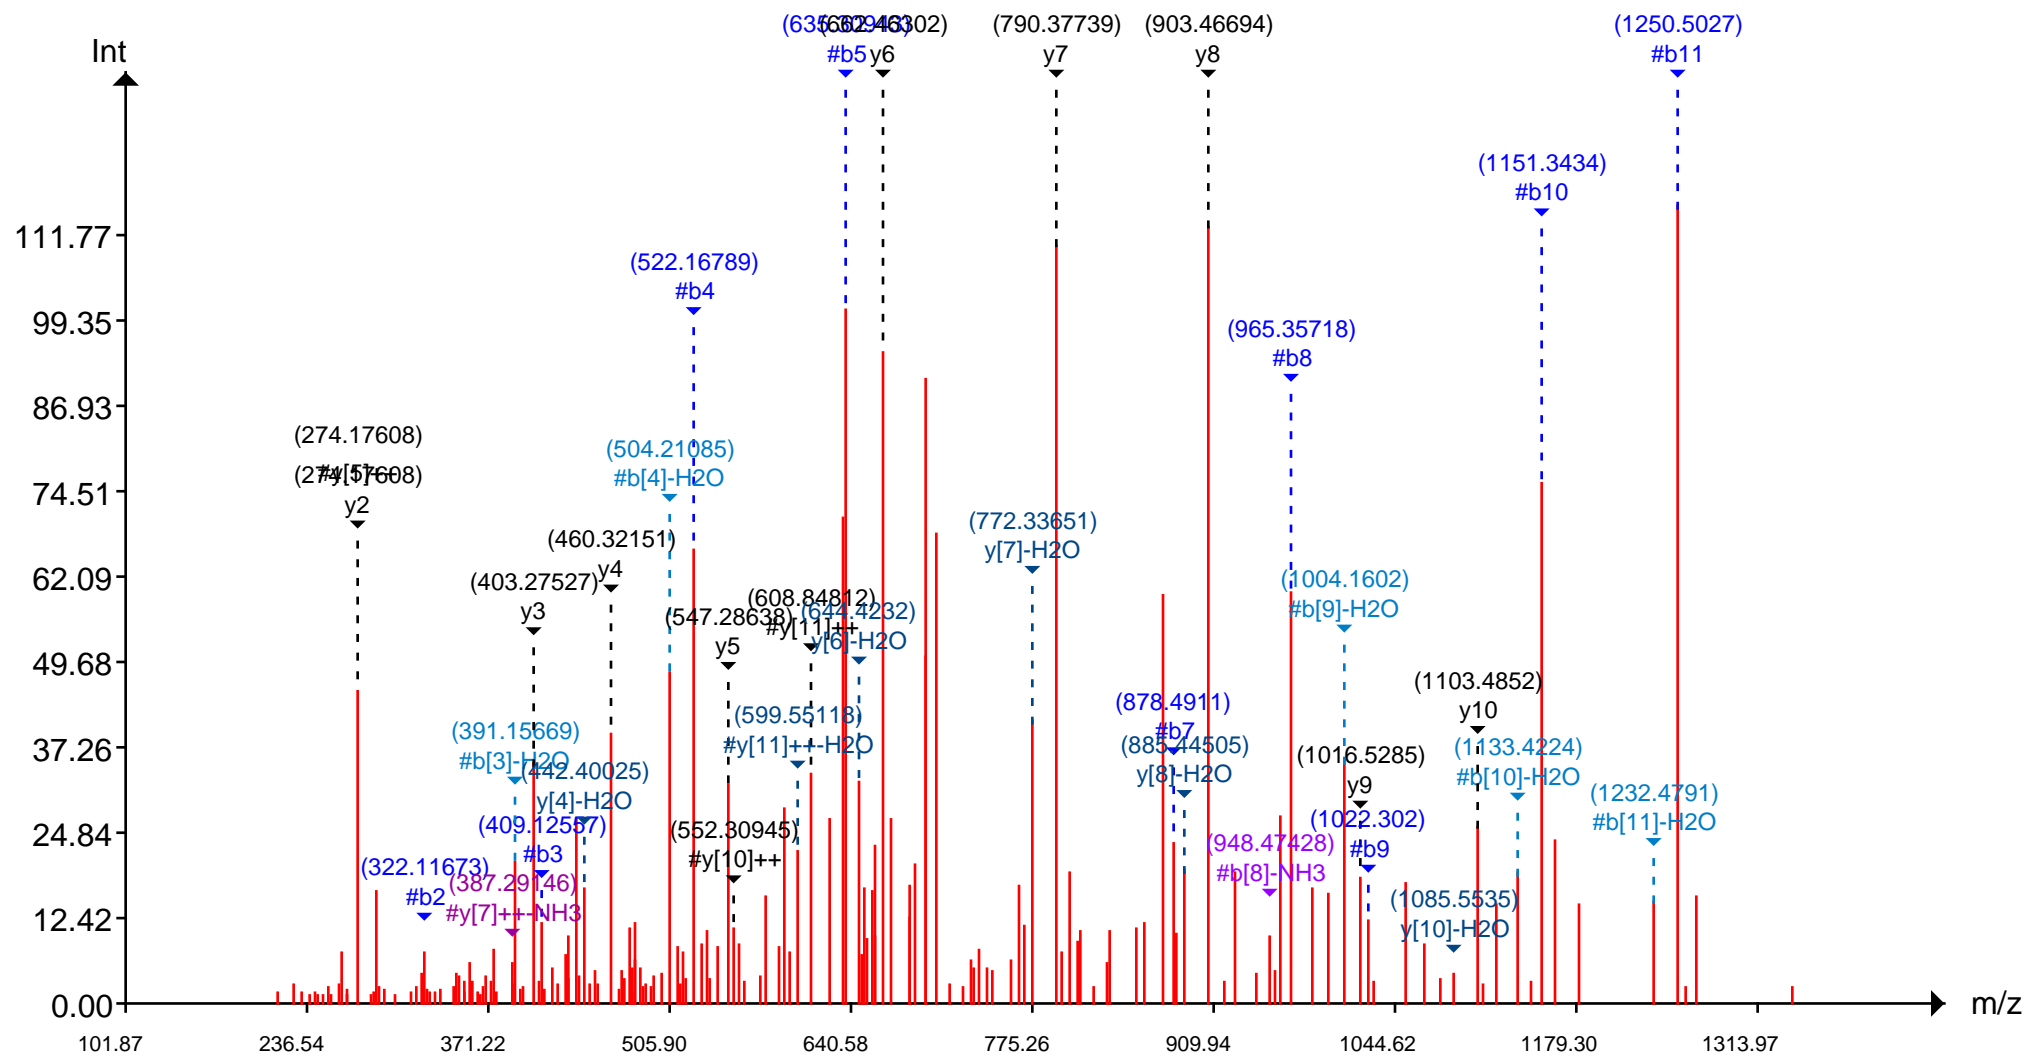

## Info

|                          |                        |                           |          |
|--------------------------|------------------------|---------------------------|----------|
| <b>Modified Sequence</b> | AcD3-YLSLLQDSGEVR-COOH | <b>Ion score</b>          | 69.8     |
| <b>Protein</b>           | P63242                 | <b>Confidence level</b>   | 99.00%   |
| <b>Precursor m/z</b>     | 712.87725              | <b>Identity Threshold</b> | 48.03    |
| <b>Charge</b>            | 2+                     | <b>Mass error</b>         | 0.001331 |

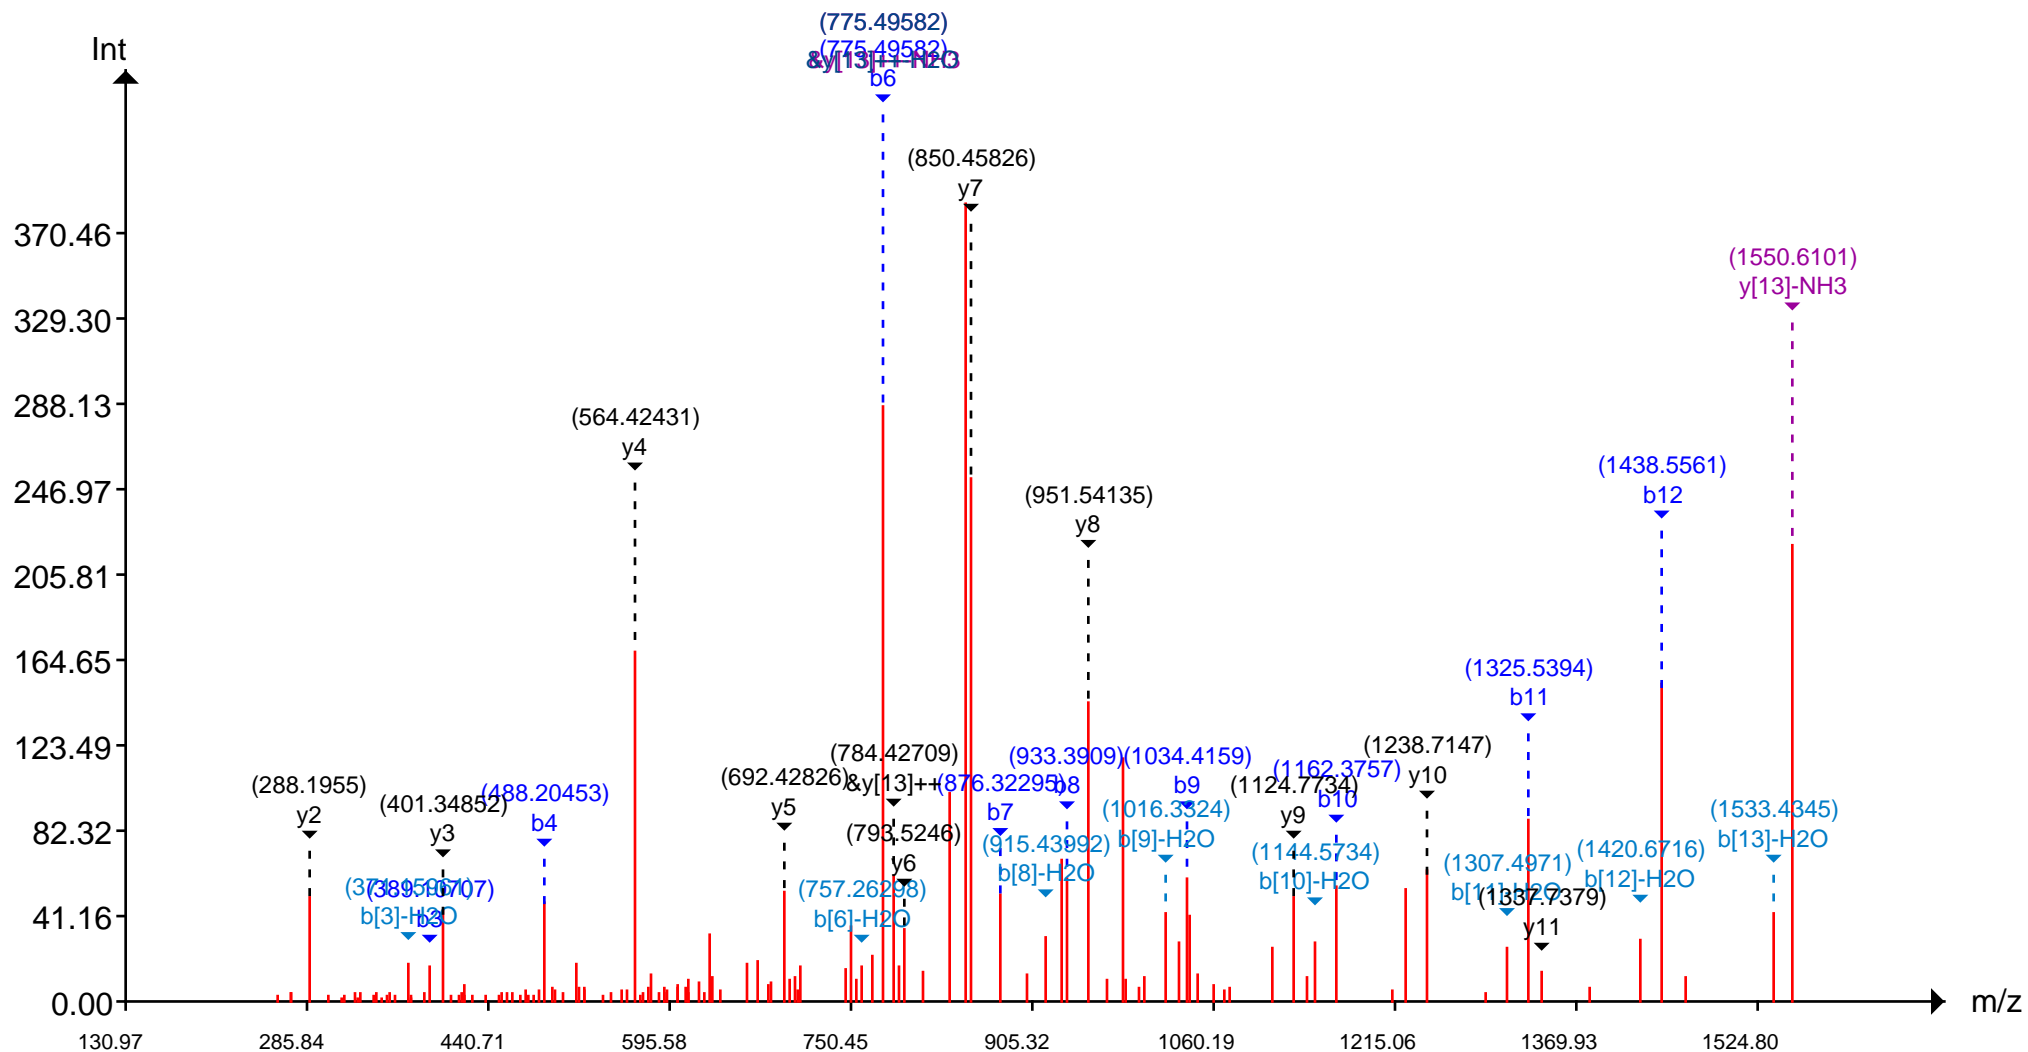

## Info

|                          |                                  |                           |          |
|--------------------------|----------------------------------|---------------------------|----------|
| <b>Modified Sequence</b> | AcD3-LTEVNK<AcD3K*>TGTQYLLR-COOH | <b>Ion score</b>          | 65.59    |
| <b>Protein</b>           | Q60854                           | <b>Confidence level</b>   | 99.00%   |
| <b>Precursor m/z</b>     | 863.48714                        | <b>Identity Threshold</b> | 46.55    |
| <b>Charge</b>            | 2+                               | <b>Mass error</b>         | 0.001781 |

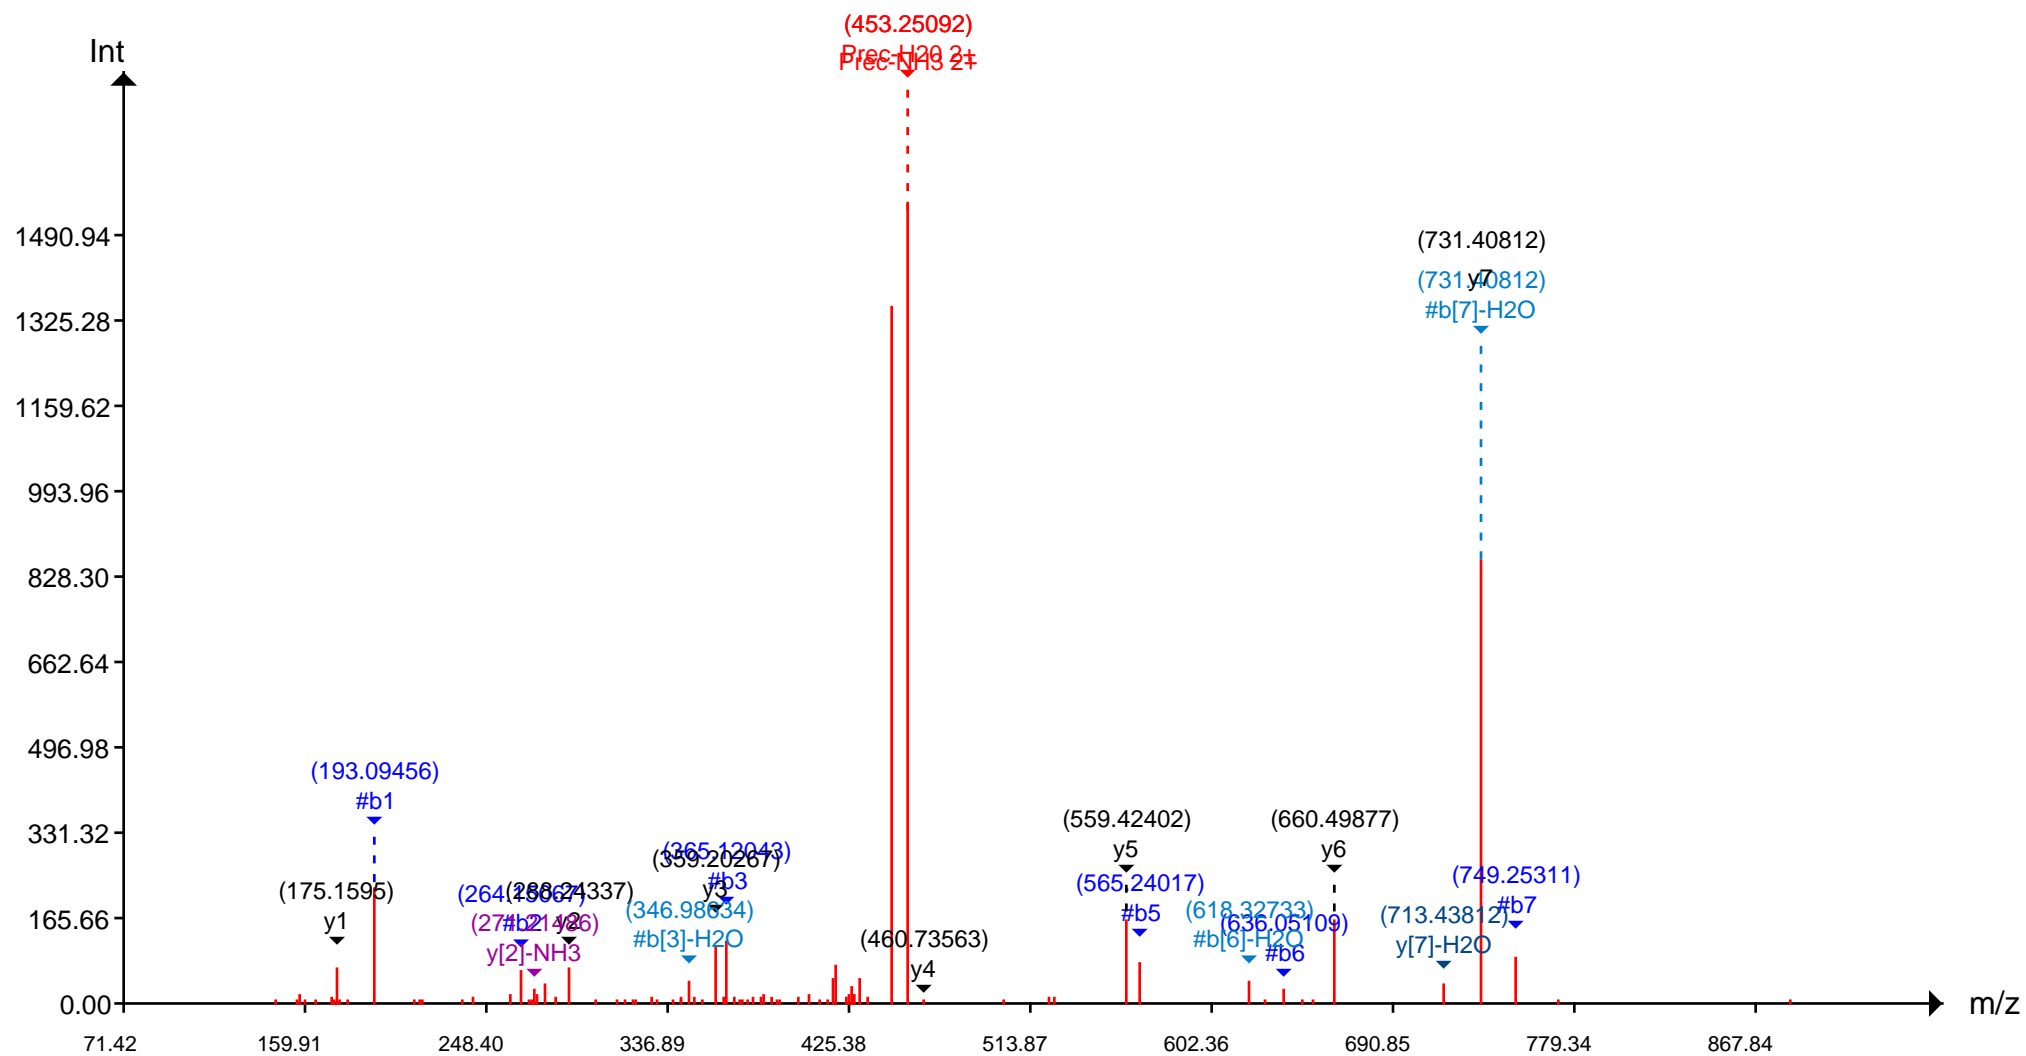

## Info

**Modified Sequence** AcD3-M<Mox\*>ATVTALR-COOH

**Ion score** 55.43

**Protein** P05064, P05063

**Confidence level** 99.00%

**Precursor m/z** 462.25618

**Identity Threshold** 47.82

**Charge** 2+

**Mass error** -7.12E-4

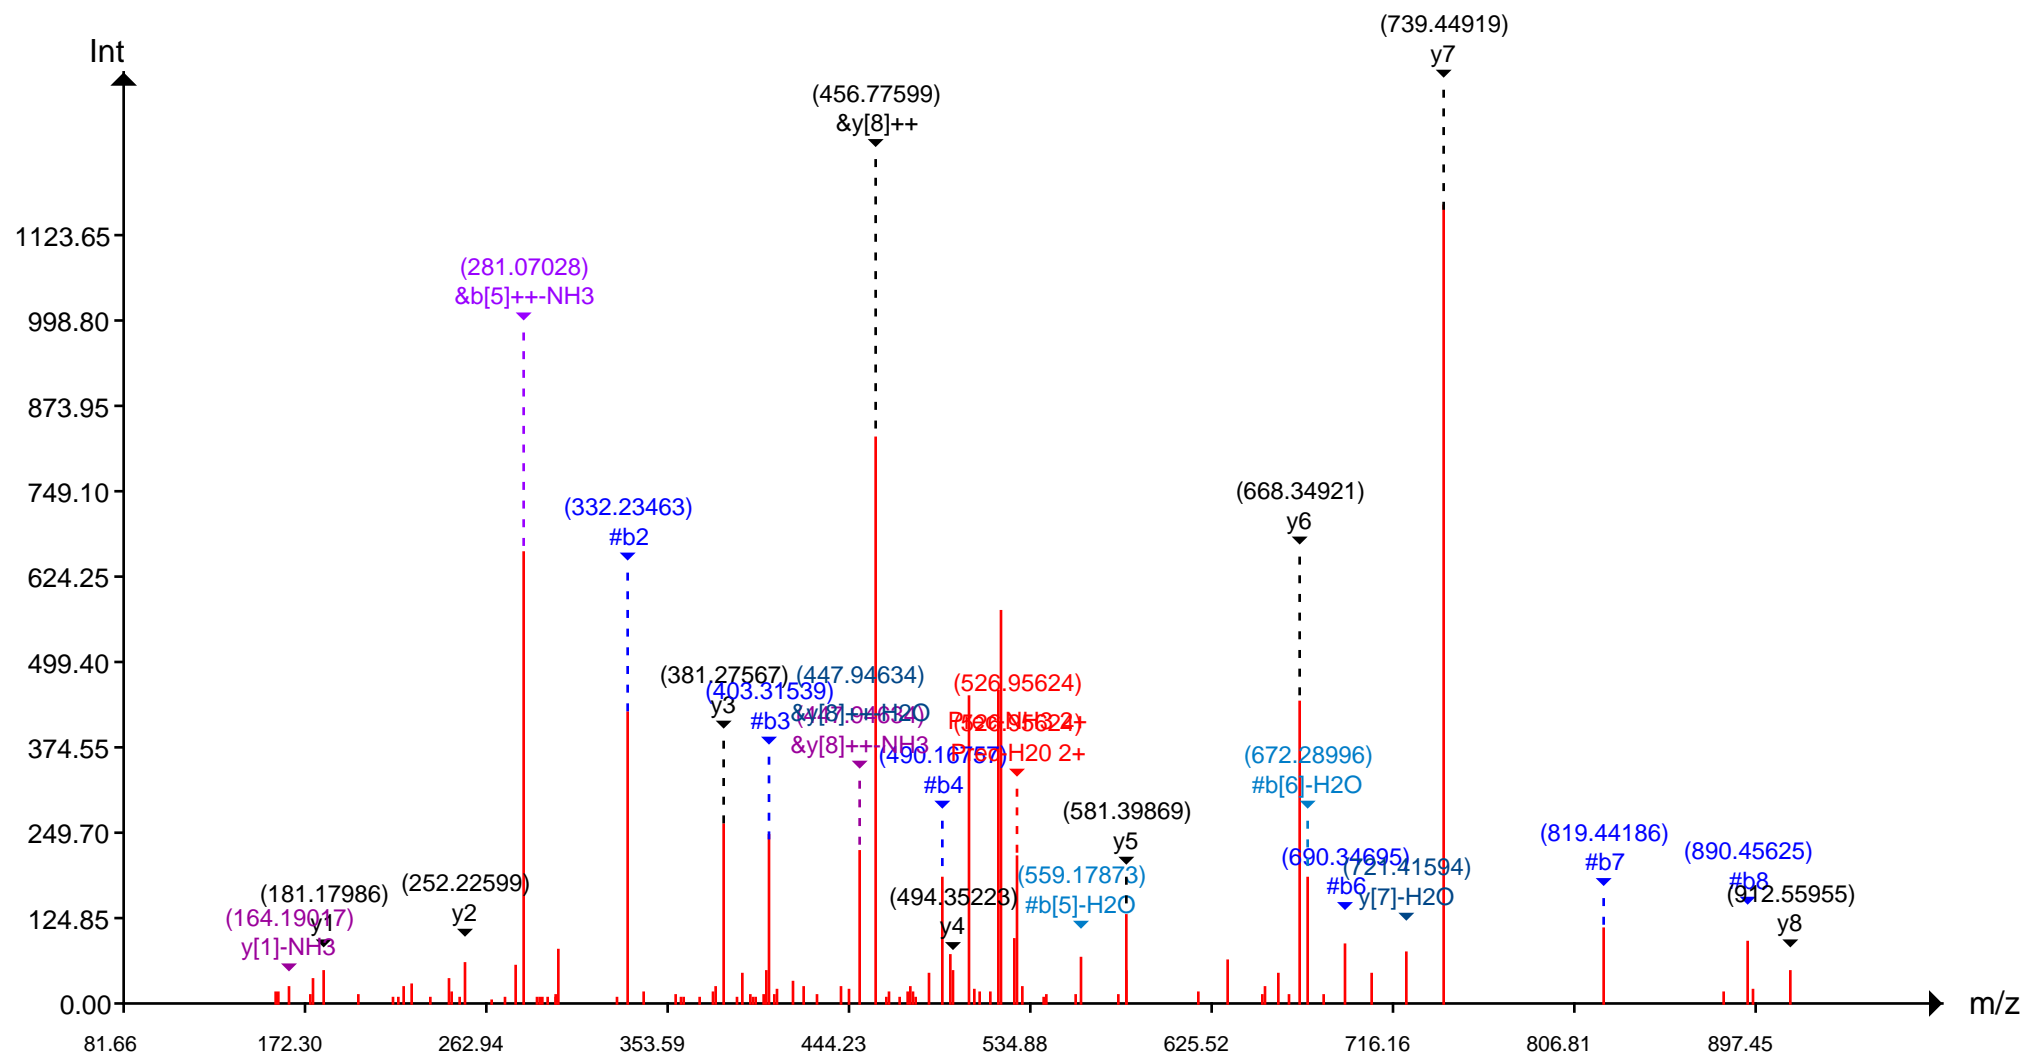

## Info

|                          |                                  |                           |          |
|--------------------------|----------------------------------|---------------------------|----------|
| <b>Modified Sequence</b> | AcD3-IK<AcD3K*>ASSIEAR<C13>-COOH | <b>Ion score</b>          | 68.53    |
| <b>Protein</b>           | P57759                           | <b>Confidence level</b>   | 99.00%   |
| <b>Precursor m/z</b>     | 535.82438                        | <b>Identity Threshold</b> | 44.70    |
| <b>Charge</b>            | 2+                               | <b>Mass error</b>         | -3.29E-4 |

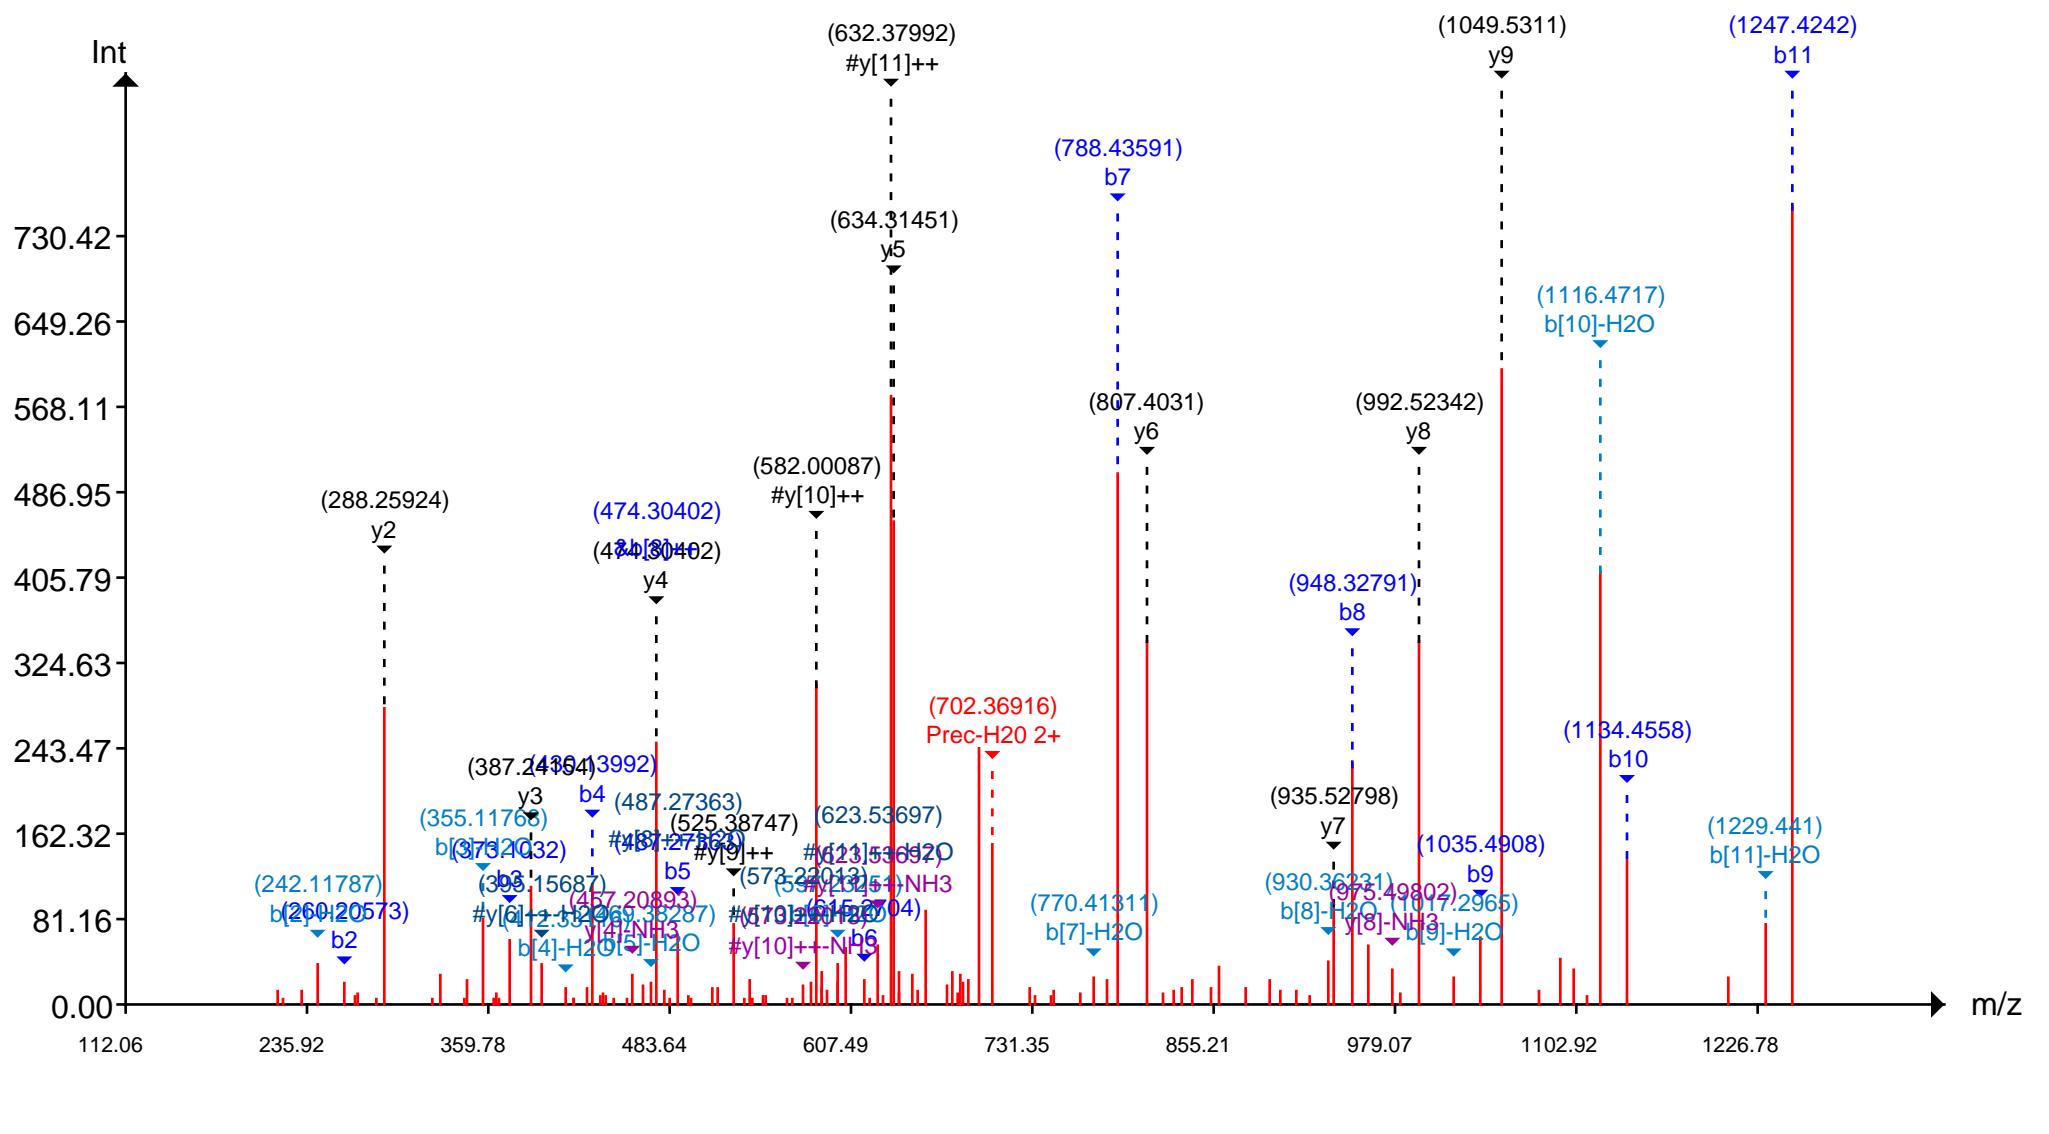

| Info                     |                                      |                           |          |
|--------------------------|--------------------------------------|---------------------------|----------|
| <b>Modified Sequence</b> | AcD3-LTLGGQK<AcD3K*>C<Cmm*>SVIR-COOH | <b>Ion score</b>          | 81.62    |
| <b>Protein</b>           | P62962                               | <b>Confidence level</b>   | 99.00%   |
| <b>Precursor m/z</b>     | 711.4068                             | <b>Identity Threshold</b> | 46.68    |
| <b>Charge</b>            | 2+                                   | <b>Mass error</b>         | 0.001151 |

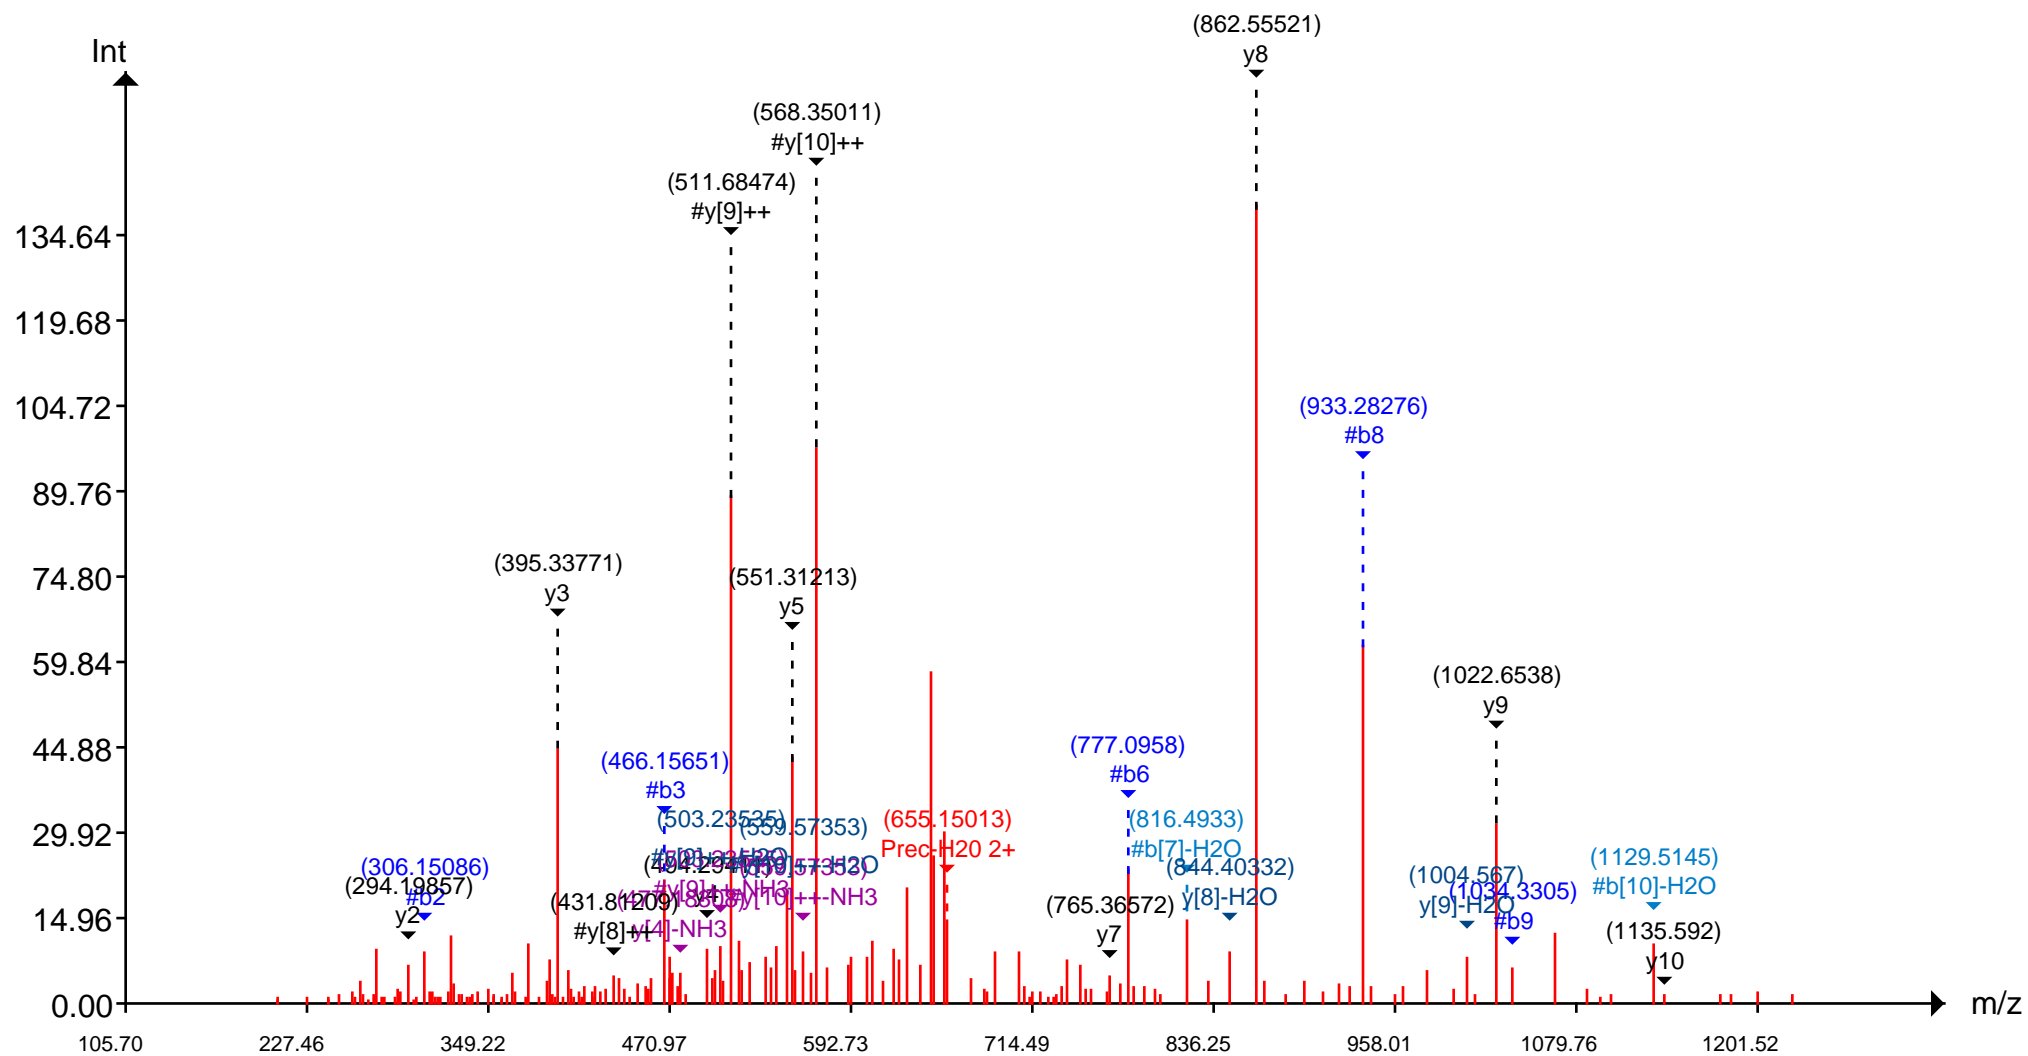

## Info

|                          |                                  |                           |          |
|--------------------------|----------------------------------|---------------------------|----------|
| <b>Modified Sequence</b> | AcD3-FIC<Cmm*>PLTGVTLR<C13>-COOH | <b>Ion score</b>          | 46.97    |
| <b>Protein</b>           | Q99PL6                           | <b>Confidence level</b>   | 99.00%   |
| <b>Precursor m/z</b>     | 664.38302                        | <b>Identity Threshold</b> | 46.28    |
| <b>Charge</b>            | 2+                               | <b>Mass error</b>         | 0.001015 |



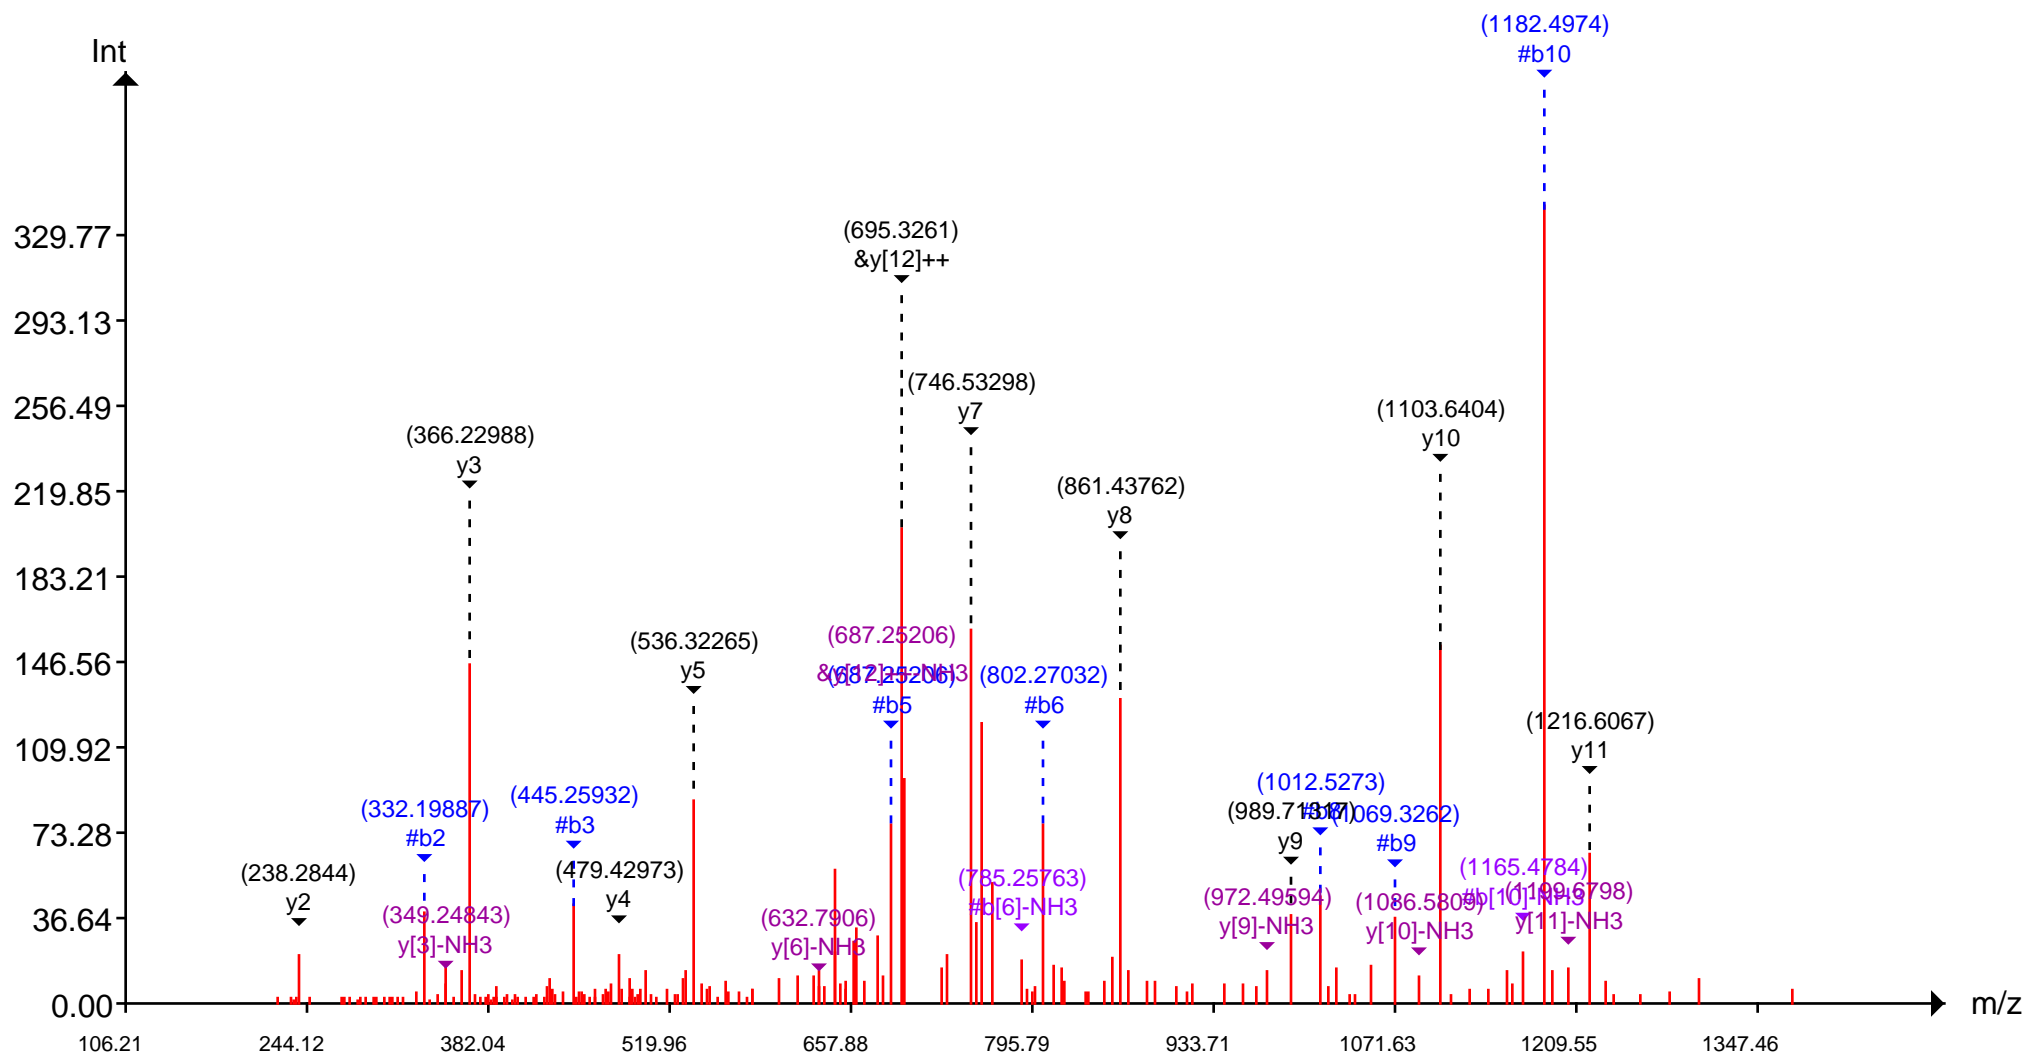

## Info

**Modified Sequence** AcD3-IK<AcD3K\*>INQDPLGIQGR<C13>-COOH

**Ion score** 66.17

**Protein** Q9QWR8

**Confidence level** 99.00%

**Precursor m/z** 774.45994

**Identity Threshold** 44.18

**Charge** 2+

**Mass error** 8.02E-4

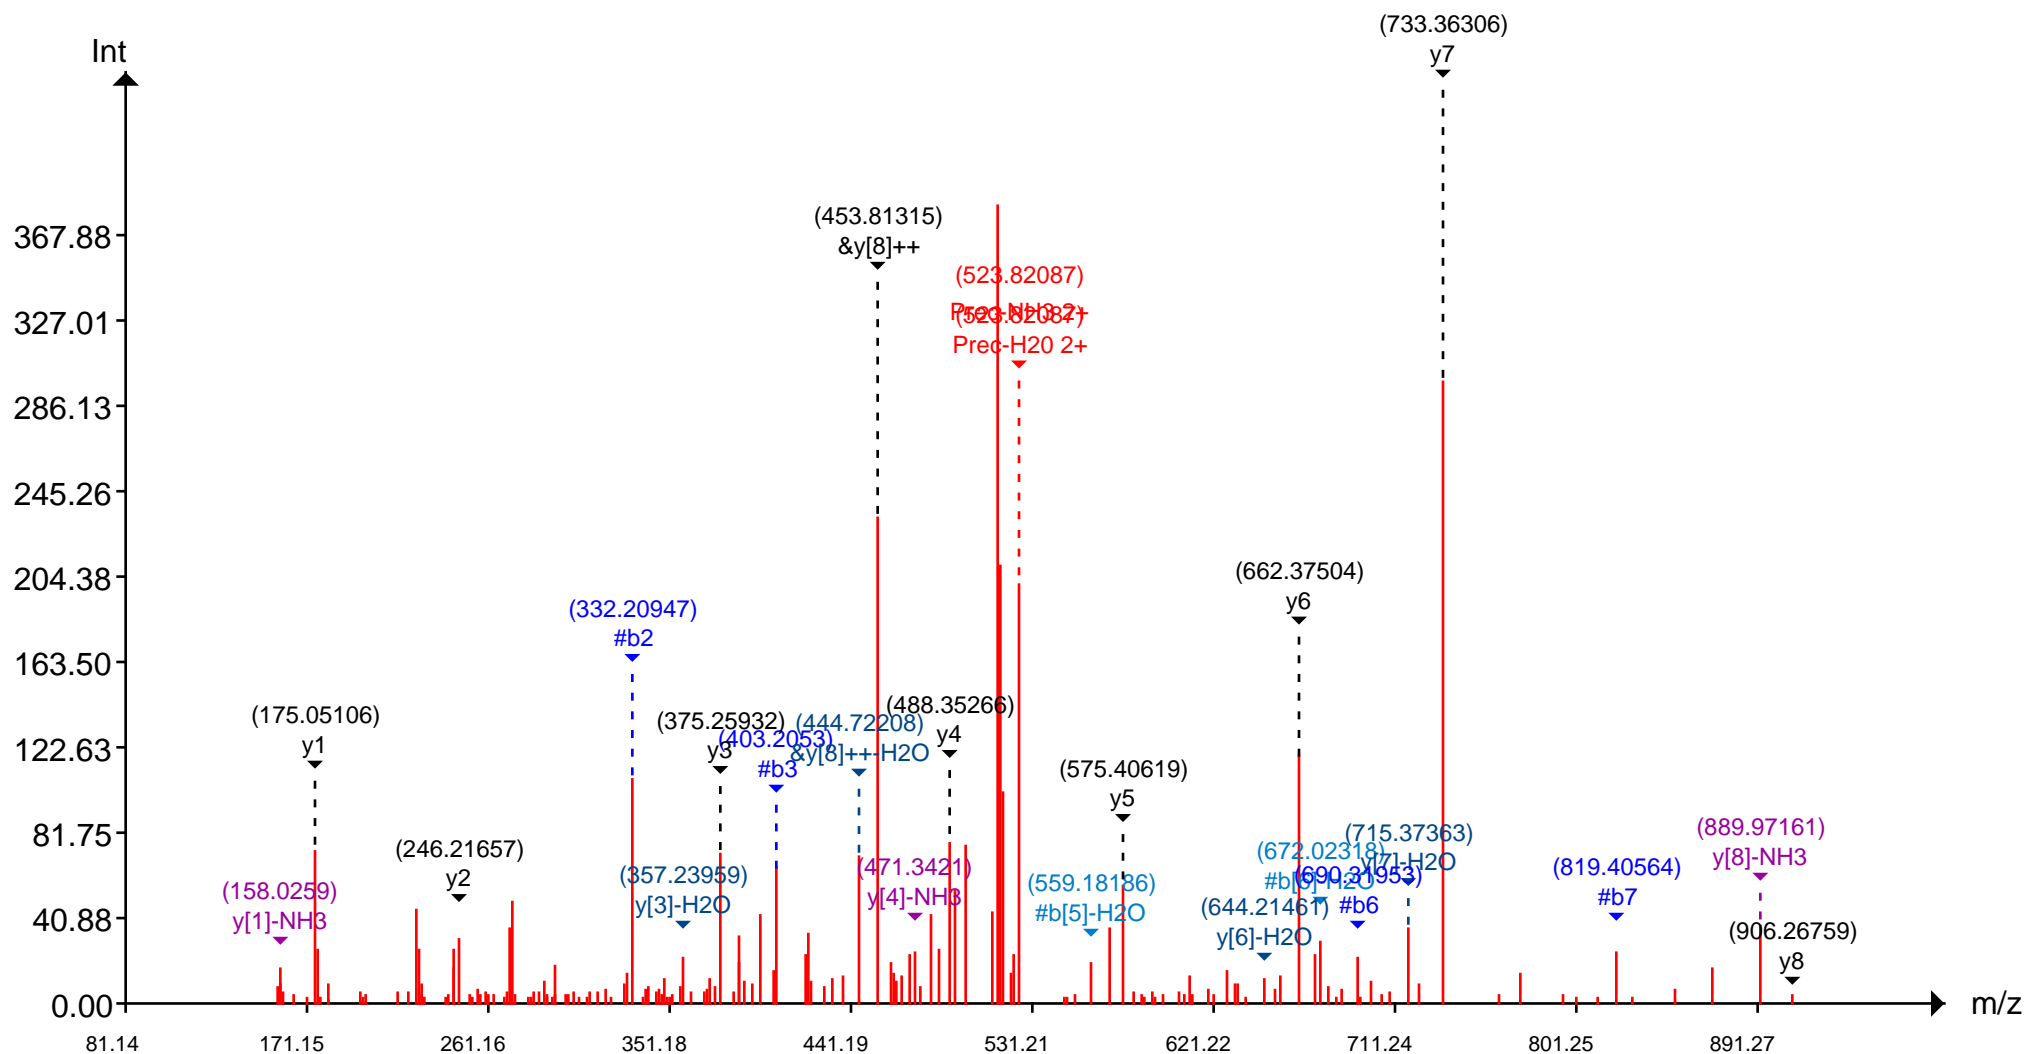

## Info

|                          |                             |                           |          |
|--------------------------|-----------------------------|---------------------------|----------|
| <b>Modified Sequence</b> | AcD3-IK<AcD3K*>ASSIEAR-COOH | <b>Ion score</b>          | 50.18    |
| <b>Protein</b>           | P57759                      | <b>Confidence level</b>   | 99.00%   |
| <b>Precursor m/z</b>     | 532.81598                   | <b>Identity Threshold</b> | 45.99    |
| <b>Charge</b>            | 2+                          | <b>Mass error</b>         | 0.003013 |

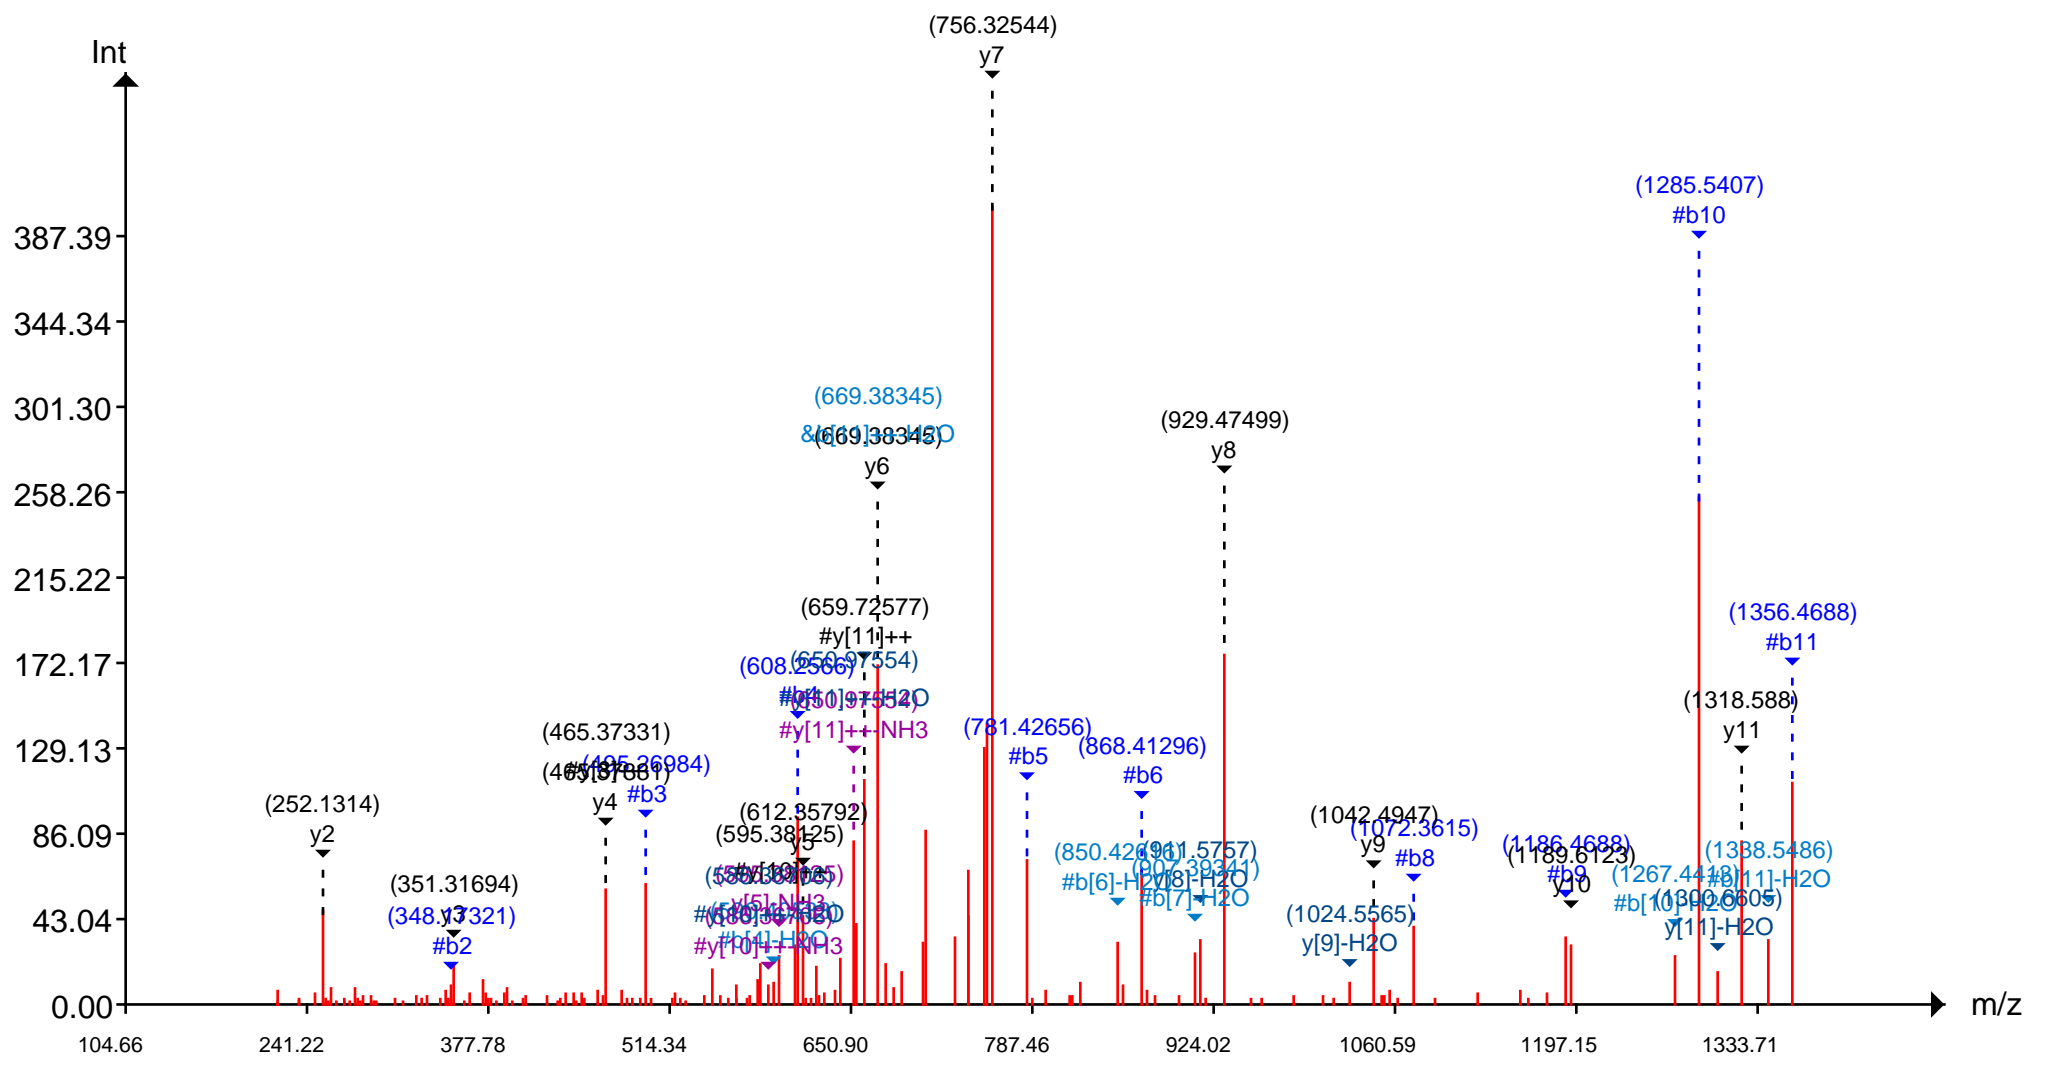

| Info                     |                                                         |                           |         |
|--------------------------|---------------------------------------------------------|---------------------------|---------|
| <b>Modified Sequence</b> | AcD3-K<AcD3K*>EM<Mox*>IK<AcD3K*>SGM<Mox*>NVAR<C13>-COOH | <b>Ion score</b>          | 98.12   |
| <b>Protein</b>           | P52480                                                  | <b>Confidence level</b>   | 99.00%  |
| <b>Precursor m/z</b>     | 768.91209                                               | <b>Identity Threshold</b> | 48.07   |
| <b>Charge</b>            | 2+                                                      | <b>Mass error</b>         | 3.17E-4 |

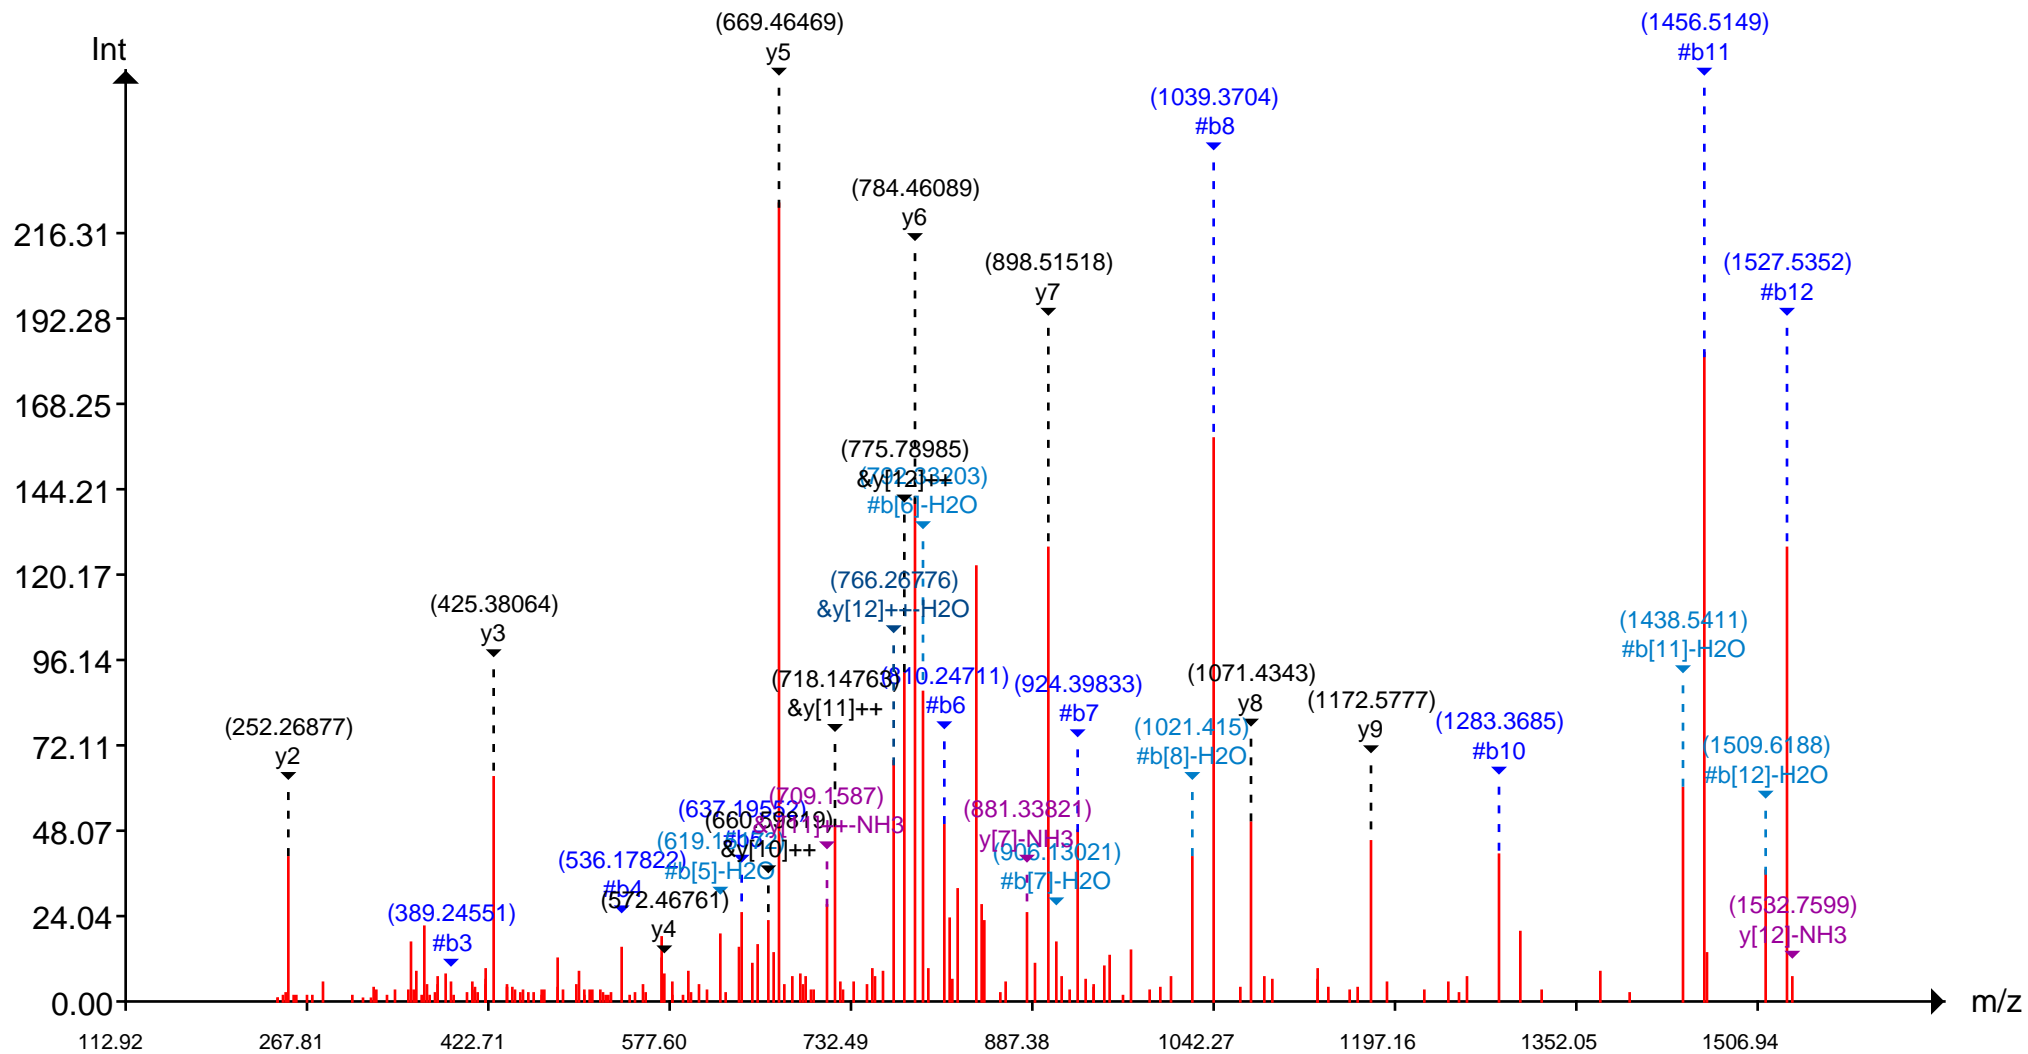

## Info

|                          |                                                    |                           |          |
|--------------------------|----------------------------------------------------|---------------------------|----------|
| <b>Modified Sequence</b> | AcD3-LDDM<Mox*>TK<AcD3K*>NDPFK<AcD3K*>AR<C13>-COOH | <b>Ion score</b>          | 67.85    |
| <b>Protein</b>           | Q62523                                             | <b>Confidence level</b>   | 99.00%   |
| <b>Precursor m/z</b>     | 854.43757                                          | <b>Identity Threshold</b> | 47.93    |
| <b>Charge</b>            | 2+                                                 | <b>Mass error</b>         | 0.001472 |



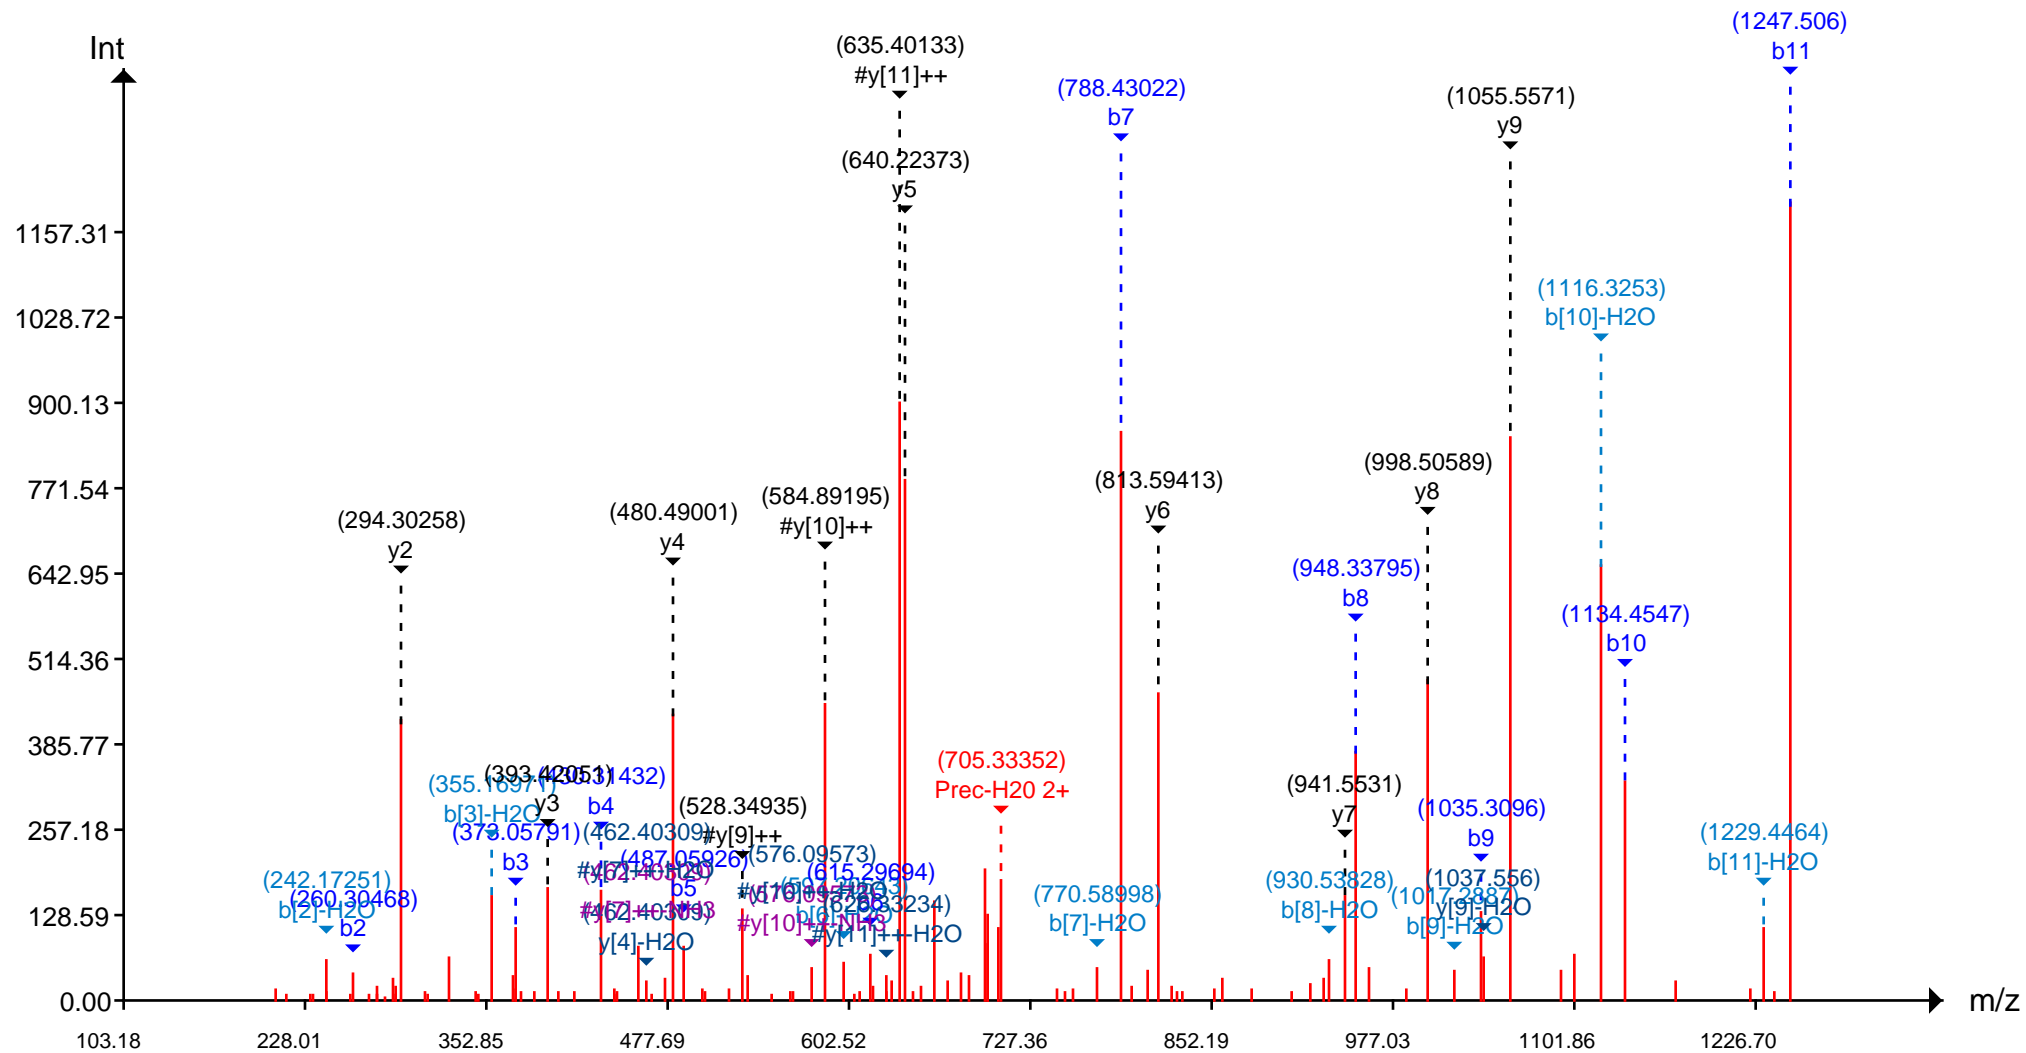

## Info

|                          |                                           |                           |         |
|--------------------------|-------------------------------------------|---------------------------|---------|
| <b>Modified Sequence</b> | AcD3-LTLGGQK<AcD3K*>C<Cmm*>SVIR<C13>-COOH | <b>Ion score</b>          | 79.04   |
| <b>Protein</b>           | P62962                                    | <b>Confidence level</b>   | 99.00%  |
| <b>Precursor m/z</b>     | 714.41674                                 | <b>Identity Threshold</b> | 45.51   |
| <b>Charge</b>            | 2+                                        | <b>Mass error</b>         | 8.89E-4 |

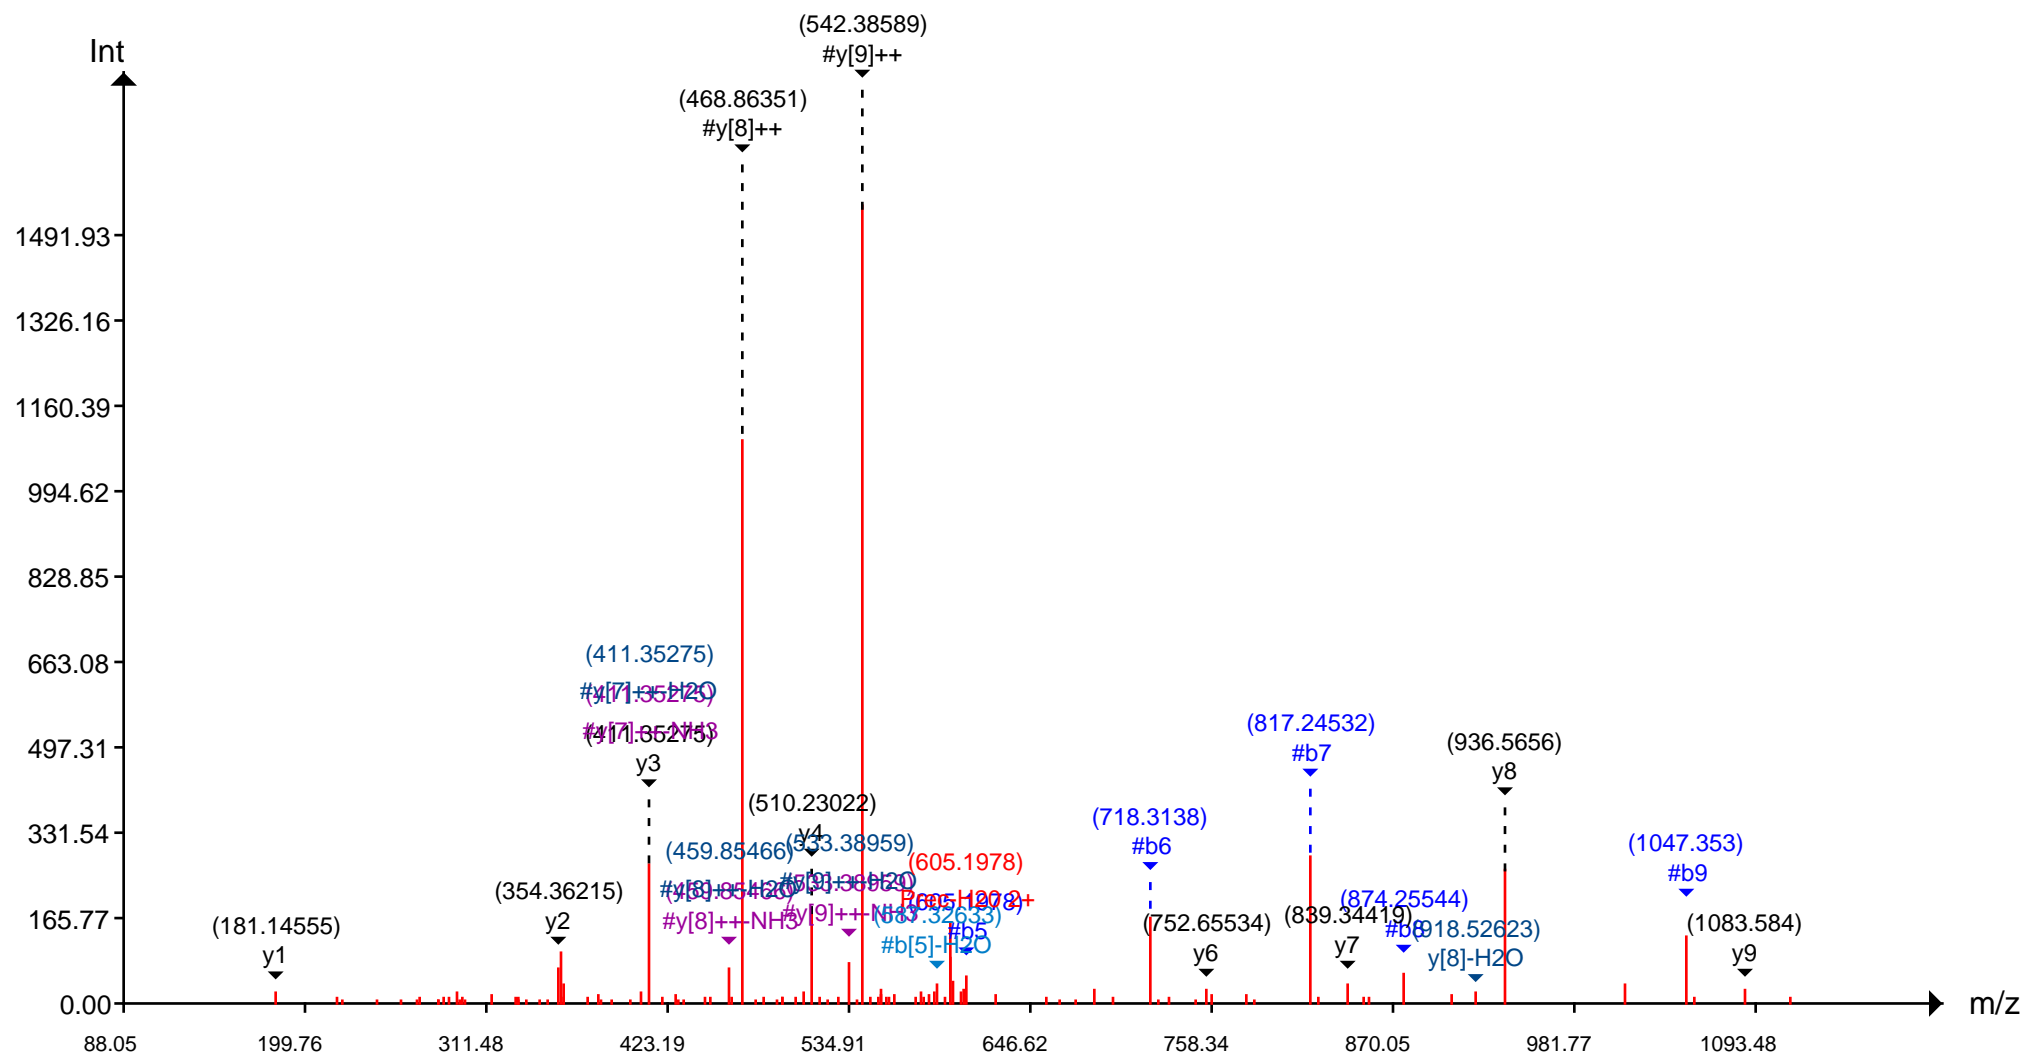

## Info

**Modified Sequence** AcD3-VFPSEIVGK<AcD3K\*>R<C13>-COOH

**Ion score** 60.46

**Protein** P62082

**Confidence level** 99.00%

**Precursor m/z** 614.36936

**Identity Threshold** 44.61

**Charge** 2+

**Mass error** 4.44E-4

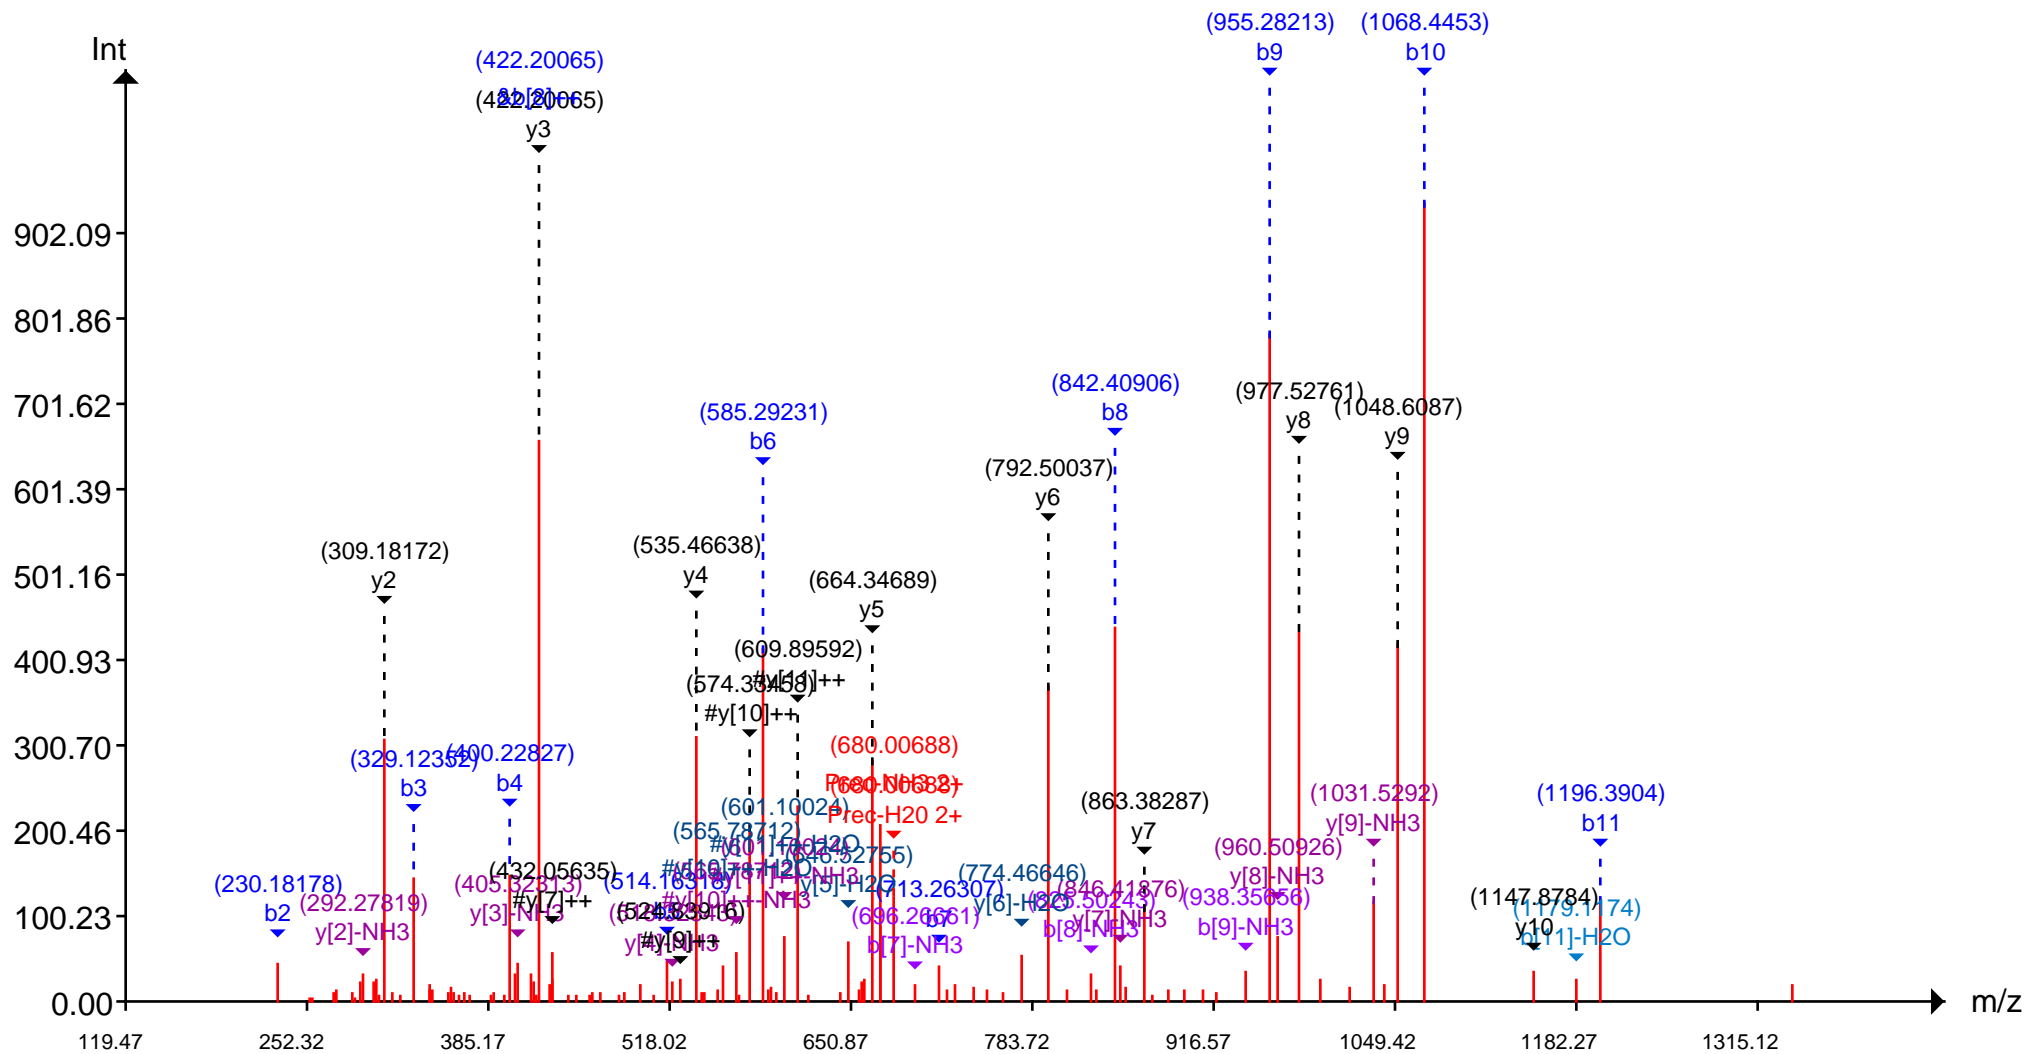

## Info

**Modified Sequence** AcD3-IAVANAQELLQR<C13>-COOH

**Ion score** 95.45

**Protein** P62075

**Confidence level** 99.00%

**Precursor m/z** 688.90549

**Identity Threshold** 45.39

**Charge** 2+

**Mass error** 6.36E-4



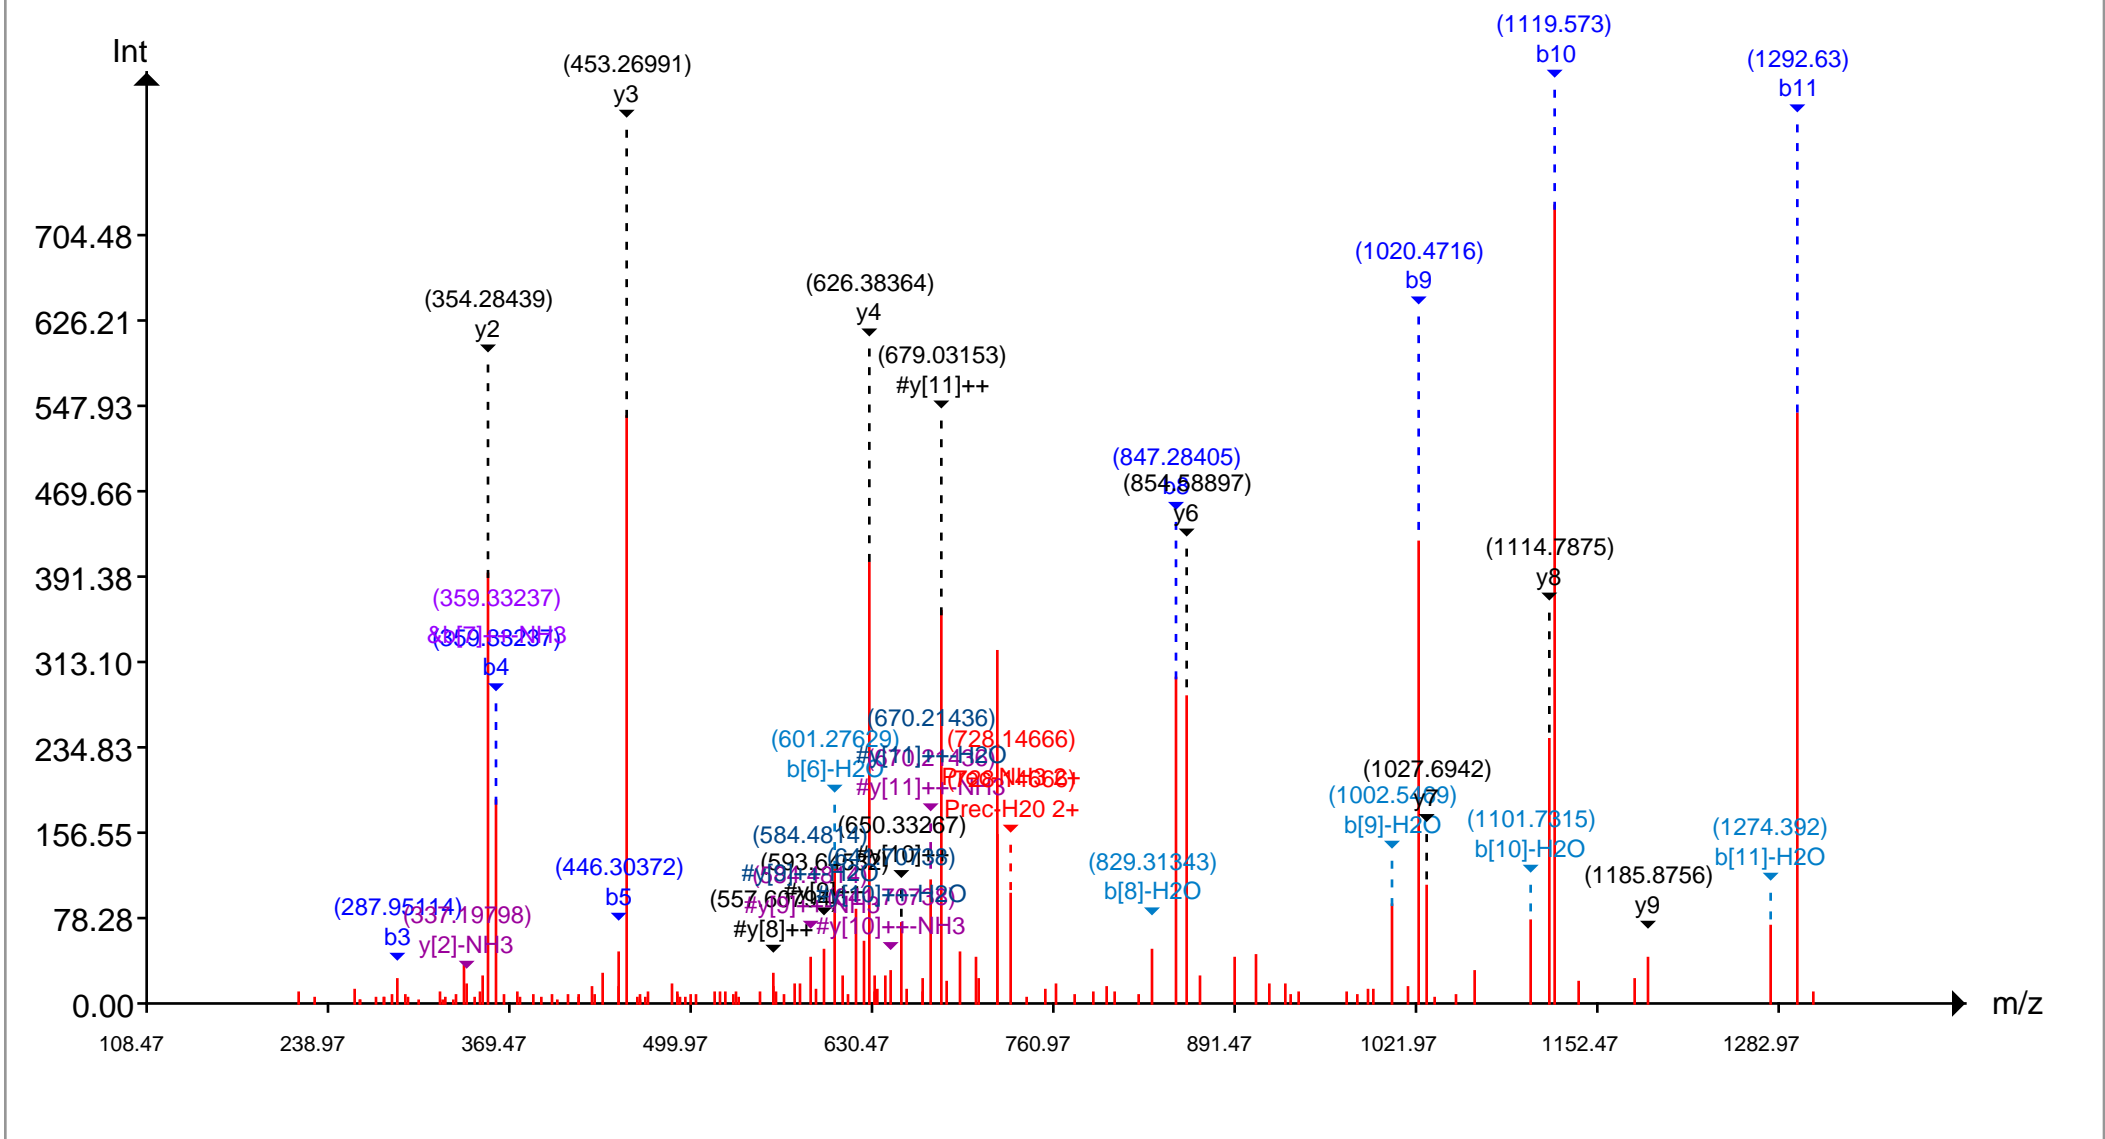

## Info

**Modified Sequence** AcD3-AGNASK<AcD3K\*>DLK<AcD3K\*>VK<AcD3K\*>R<C13>-COOH

**Ion score** 67.51

**Protein** Q3THW5, P0C0S6

**Confidence level** 99.00%

**Precursor m/z** 736.95017

**Identity Threshold** 42.40

**Charge** 2+

**Mass error** 0.00145

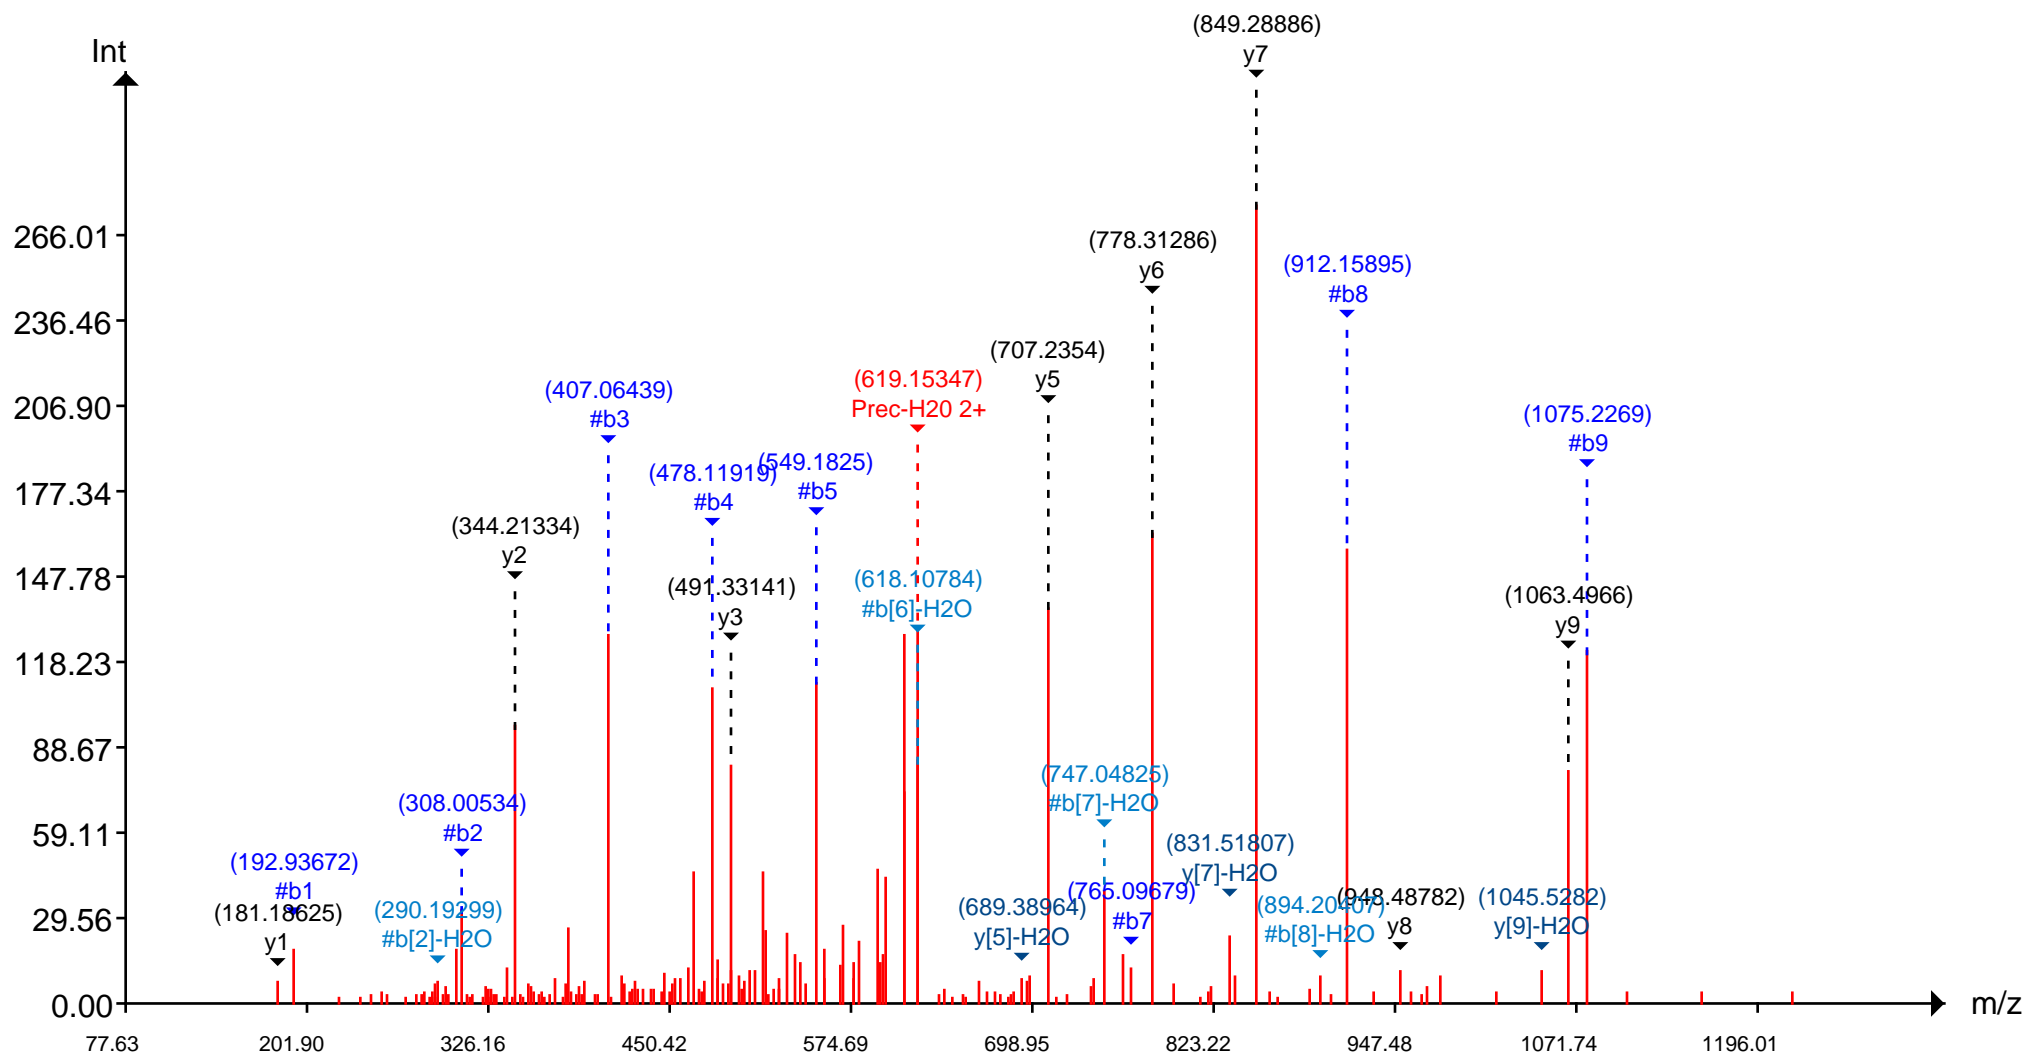

## Info

|                          |                                 |                           |         |
|--------------------------|---------------------------------|---------------------------|---------|
| <b>Modified Sequence</b> | AcD3-M<Mox*>DVAASEFYR<C13>-COOH | <b>Ion score</b>          | 68.87   |
| <b>Protein</b>           | P17182, P21550, P17183          | <b>Confidence level</b>   | 99.00%  |
| <b>Precursor m/z</b>     | 628.29374                       | <b>Identity Threshold</b> | 45.46   |
| <b>Charge</b>            | 2+                              | <b>Mass error</b>         | 3.88E-4 |

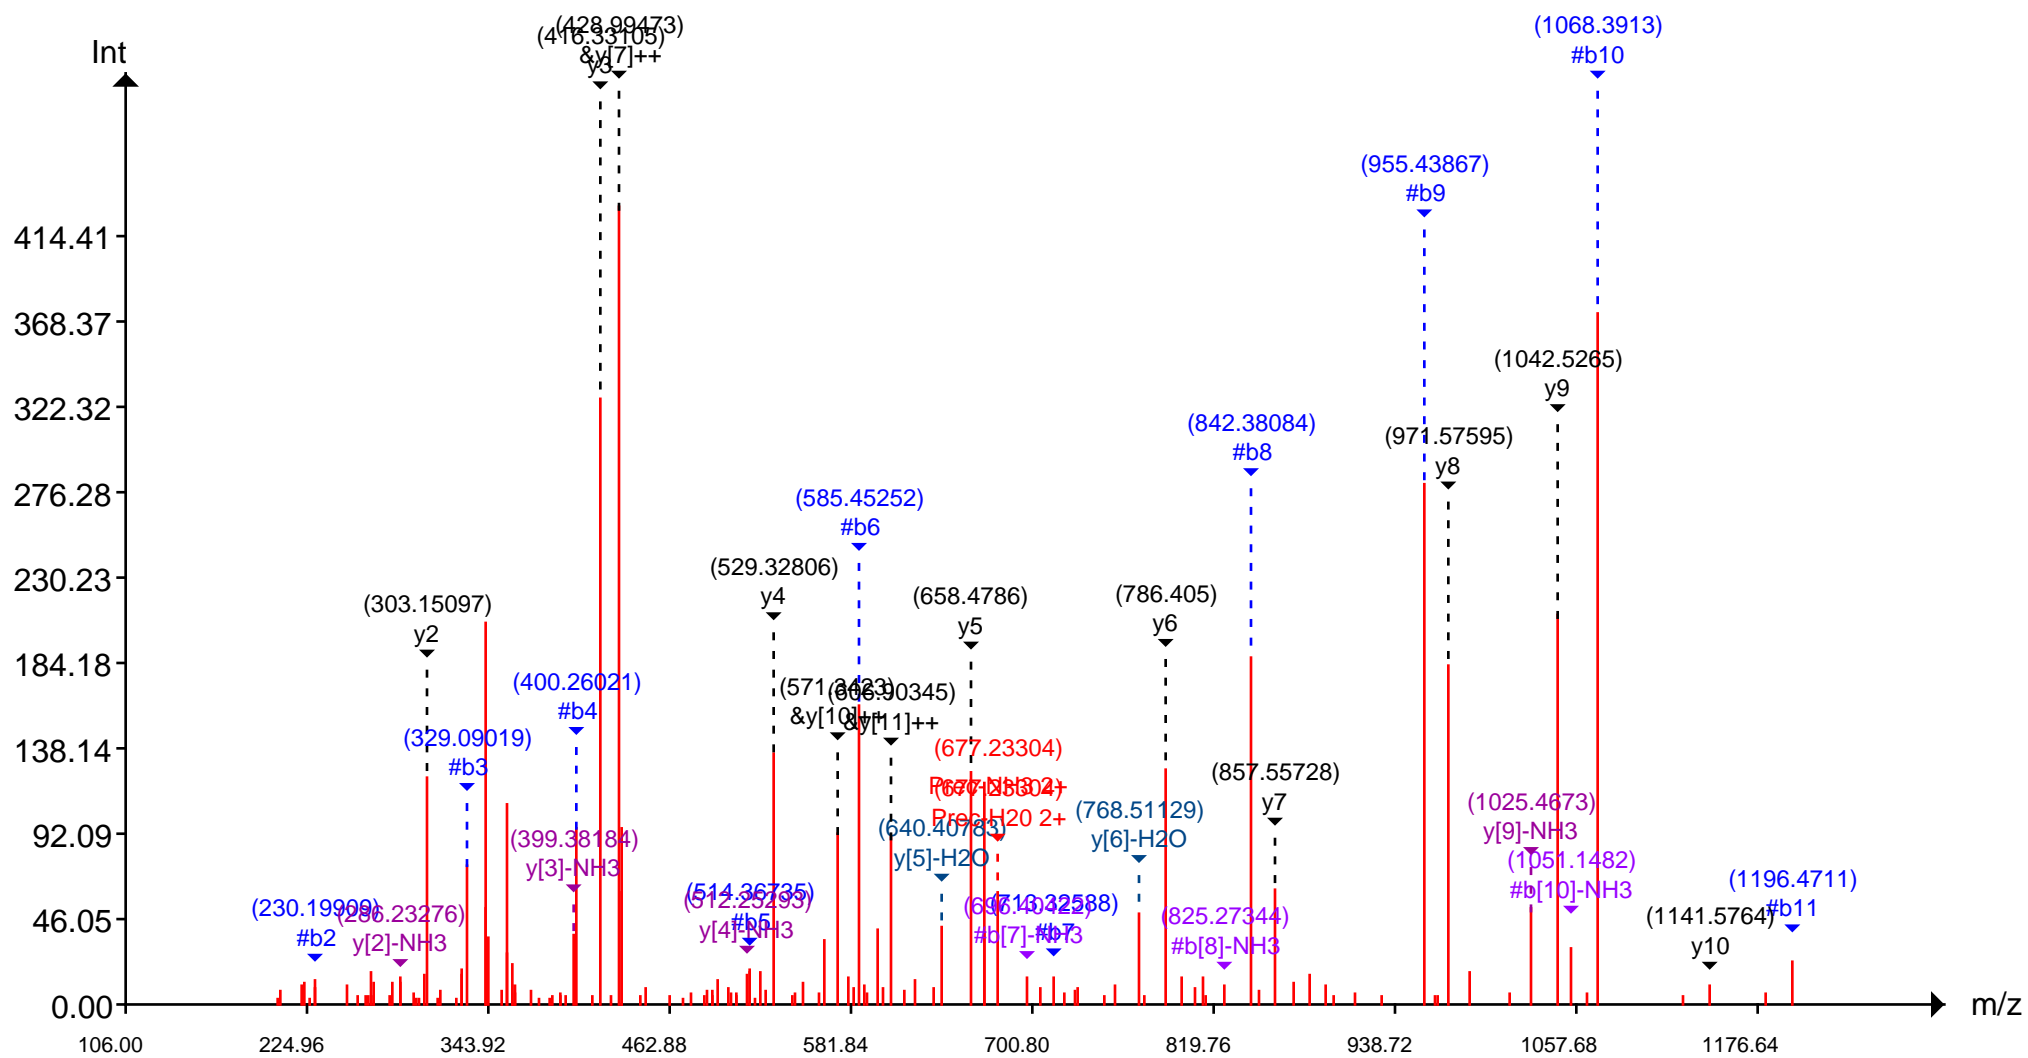

## Info

|                          |                        |                           |         |
|--------------------------|------------------------|---------------------------|---------|
| <b>Modified Sequence</b> | AcD3-IAVANAQELLQR-COOH | <b>Ion score</b>          | 78.97   |
| <b>Protein</b>           | P62075                 | <b>Confidence level</b>   | 99.00%  |
| <b>Precursor m/z</b>     | 685.89545              | <b>Identity Threshold</b> | 46.38   |
| <b>Charge</b>            | 2+                     | <b>Mass error</b>         | 6.98E-4 |

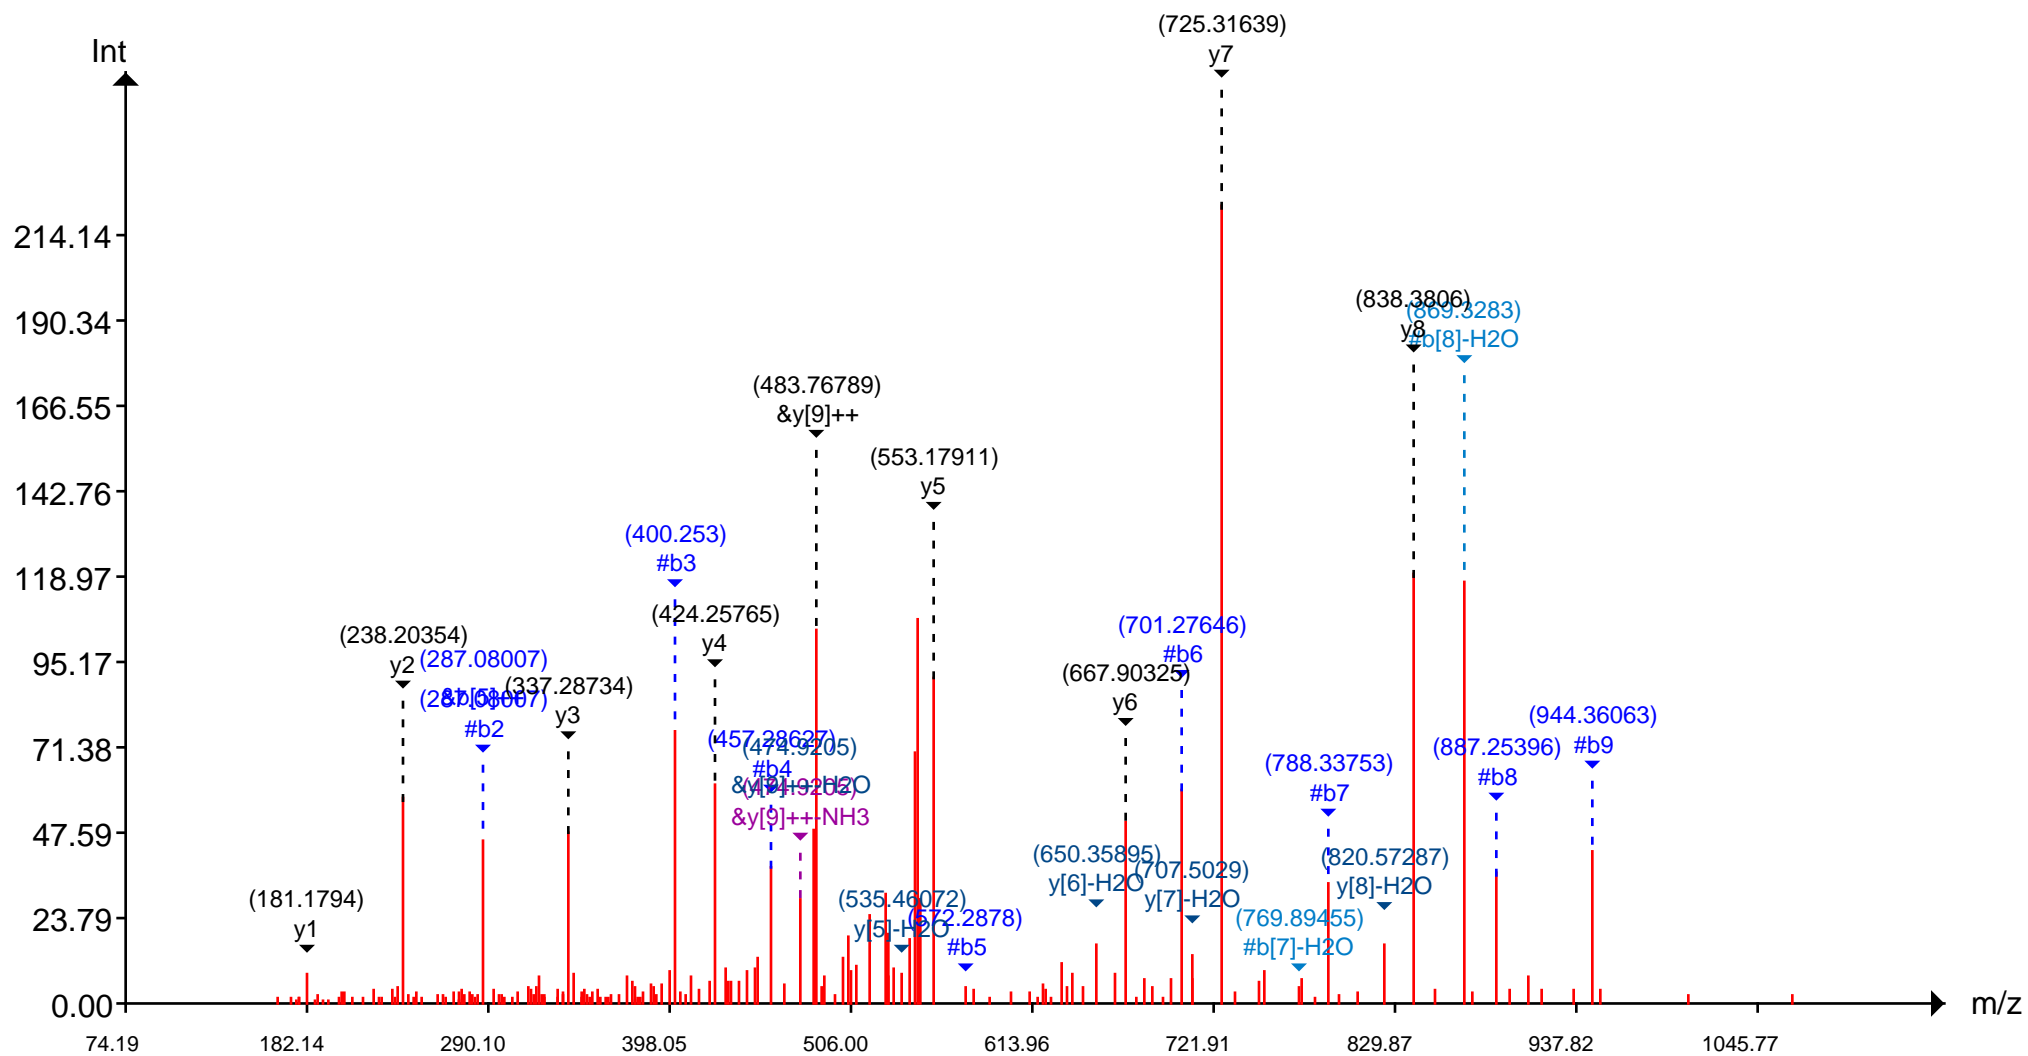

## Info

**Modified Sequence** AcD3-LQIGDESVGR<C13>-COOH

**Ion score** 65.09

**Protein** P24369

**Confidence level** 99.00%

**Precursor m/z** 562.80787

**Identity Threshold** 47.56

**Charge** 2+

**Mass error** 3.73E-4

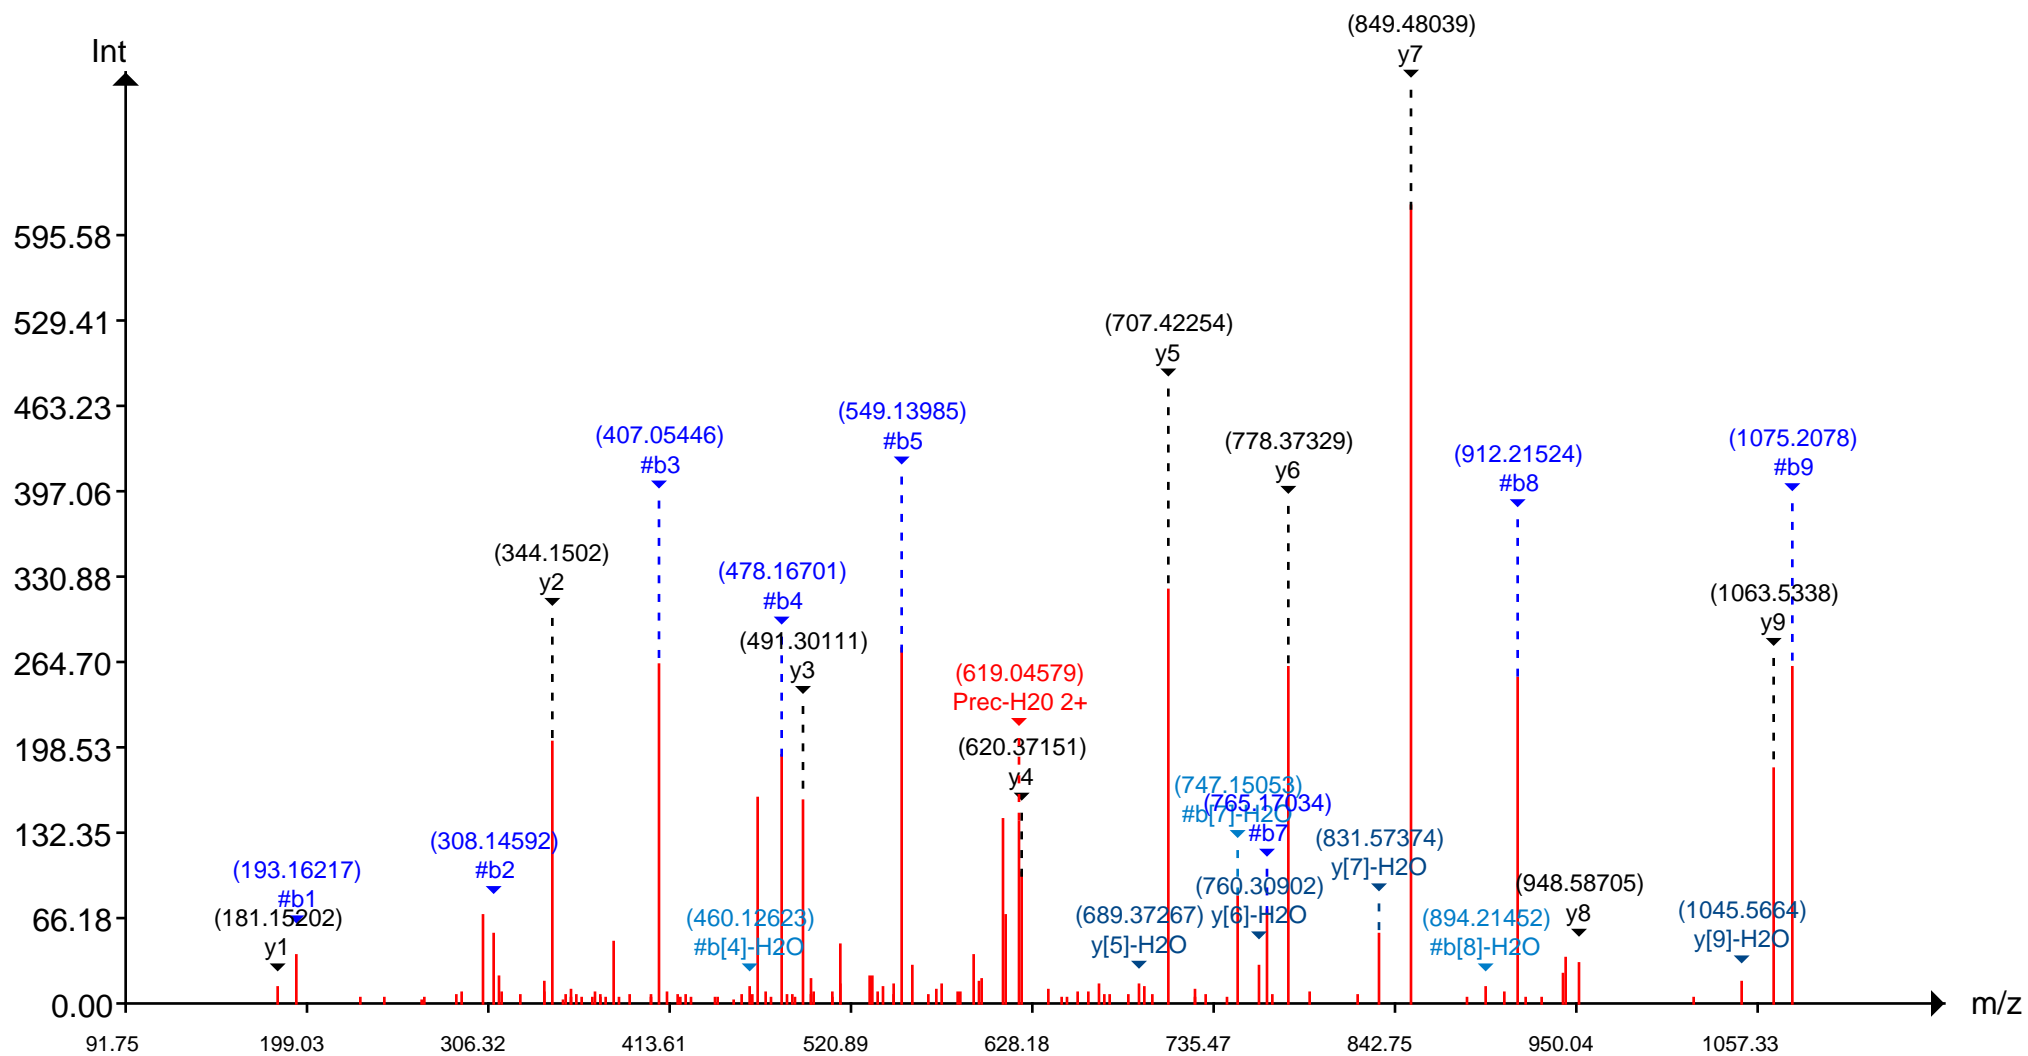

## Info

**Modified Sequence** AcD3-M<Mox\*>DVAASEFYR<C13>-COOH

**Ion score** 76.1

**Protein** P17182, P21550, P17183

**Confidence level** 99.00%

**Precursor m/z** 628.29379

**Identity Threshold** 45.46

**Charge** 2+

**Mass error** 4.88E-4

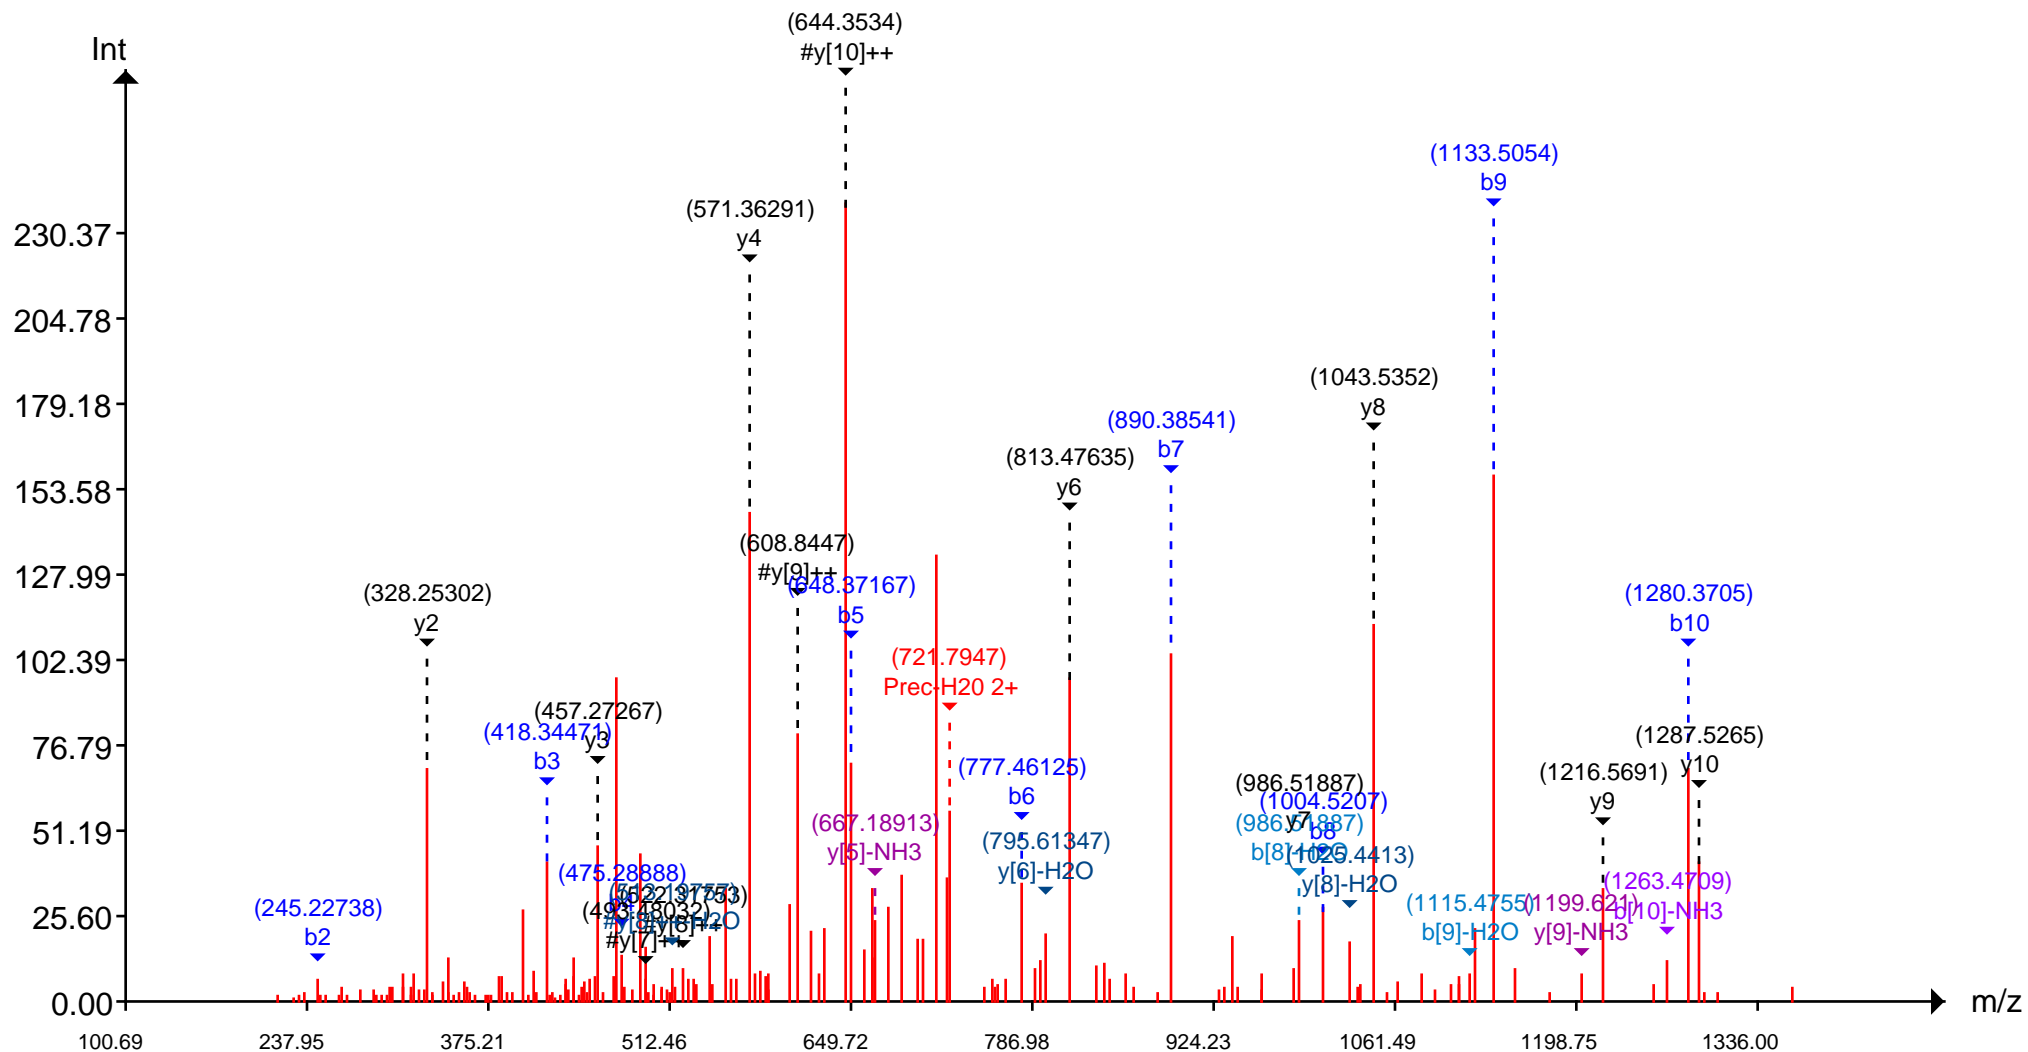

## Info

**Modified Sequence** AcD3-QAK<AcD3K\*>GK<AcD3K\*>ELNEFR<C13>-COOH

**Ion score** 52.5

**Protein** O70591

**Confidence level** 99.00%

**Precursor m/z** 730.91206

**Identity Threshold** 47.02

**Charge** 2+

**Mass error** 0.00192

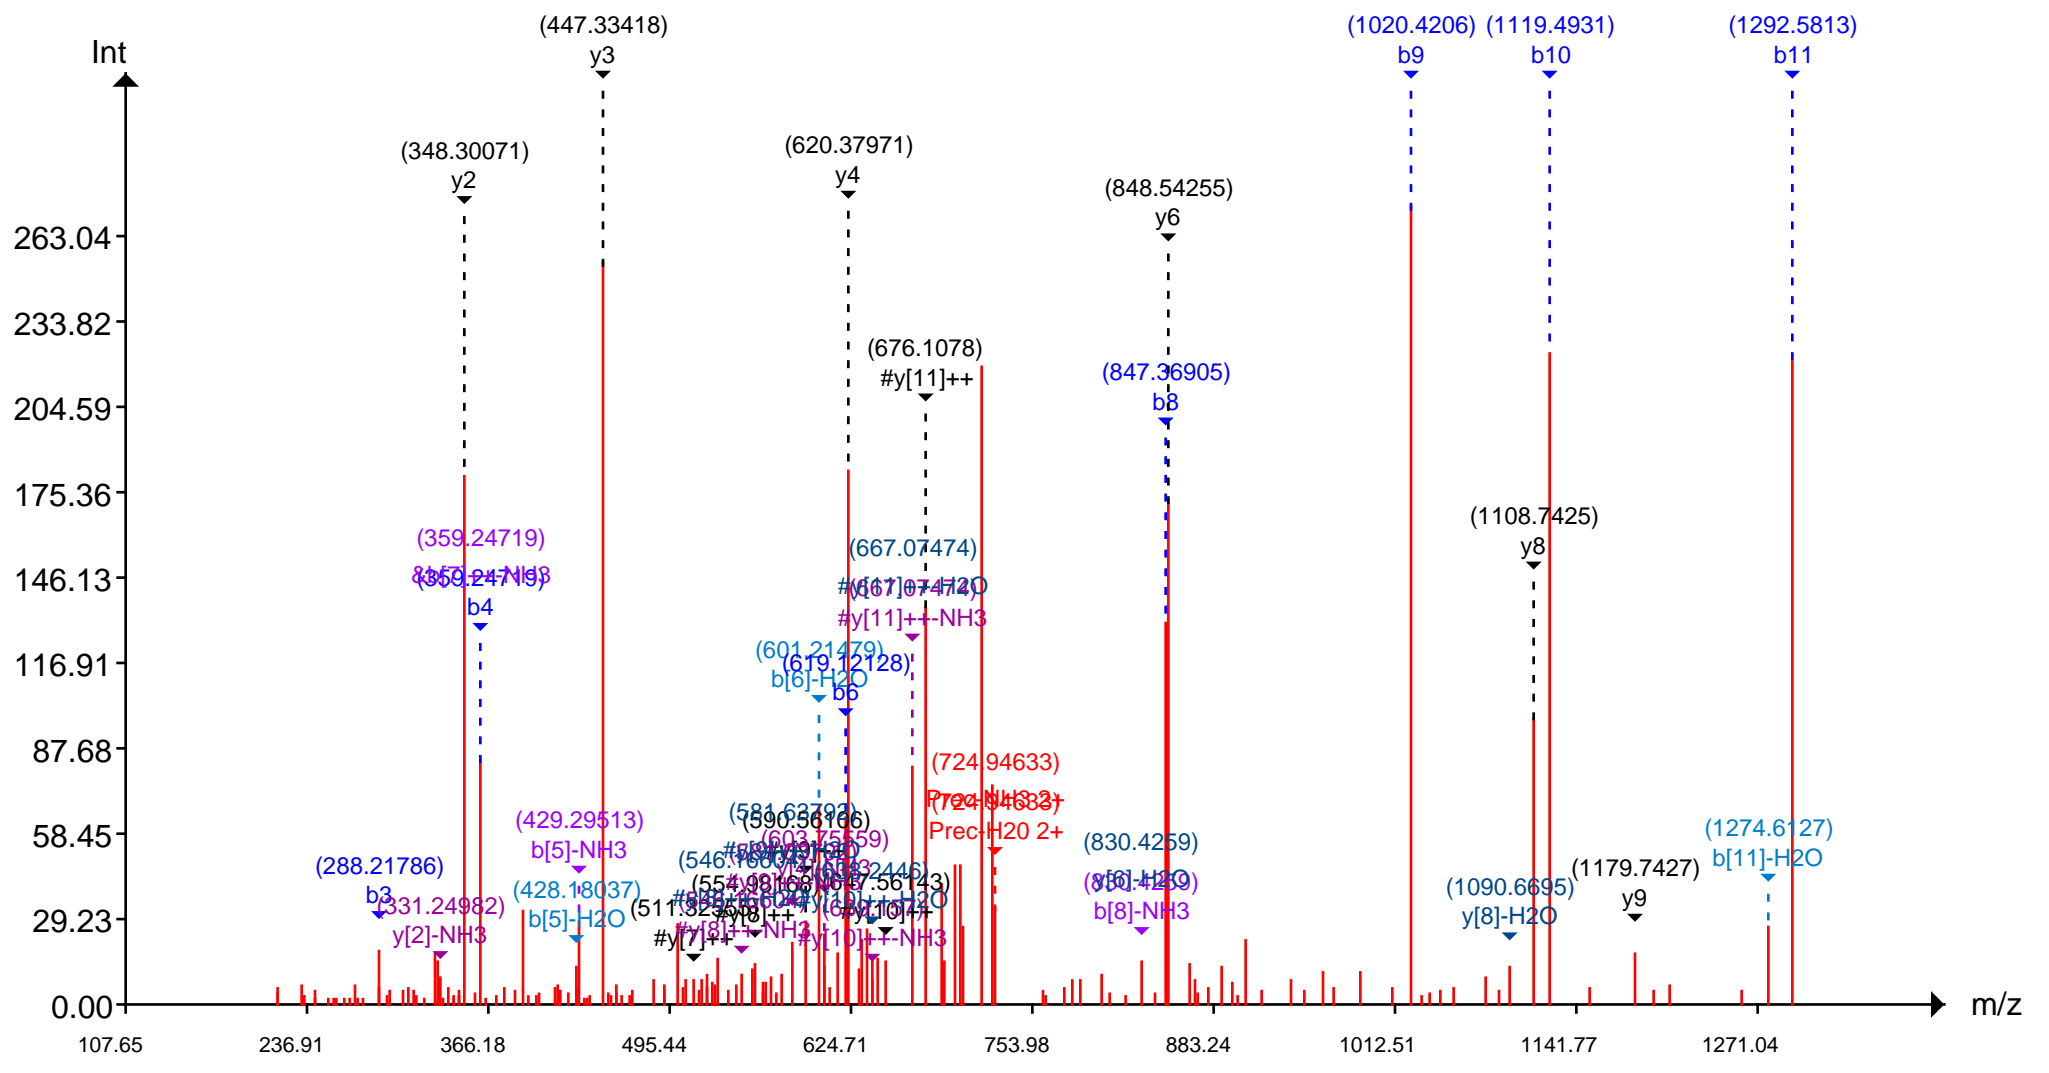

| Info                     |                                                |                           |          |
|--------------------------|------------------------------------------------|---------------------------|----------|
| <b>Modified Sequence</b> | AcD3-AGNASK<AcD3K*>DLK<AcD3K*>VK<AcD3K*>R-COOH | <b>Ion score</b>          | 52.3     |
| <b>Protein</b>           | Q3THW5, P0C0S6                                 | <b>Confidence level</b>   | 99.00%   |
| <b>Precursor m/z</b>     | 733.9403                                       | <b>Identity Threshold</b> | 43.79    |
| <b>Charge</b>            | 2+                                             | <b>Mass error</b>         | 0.001851 |

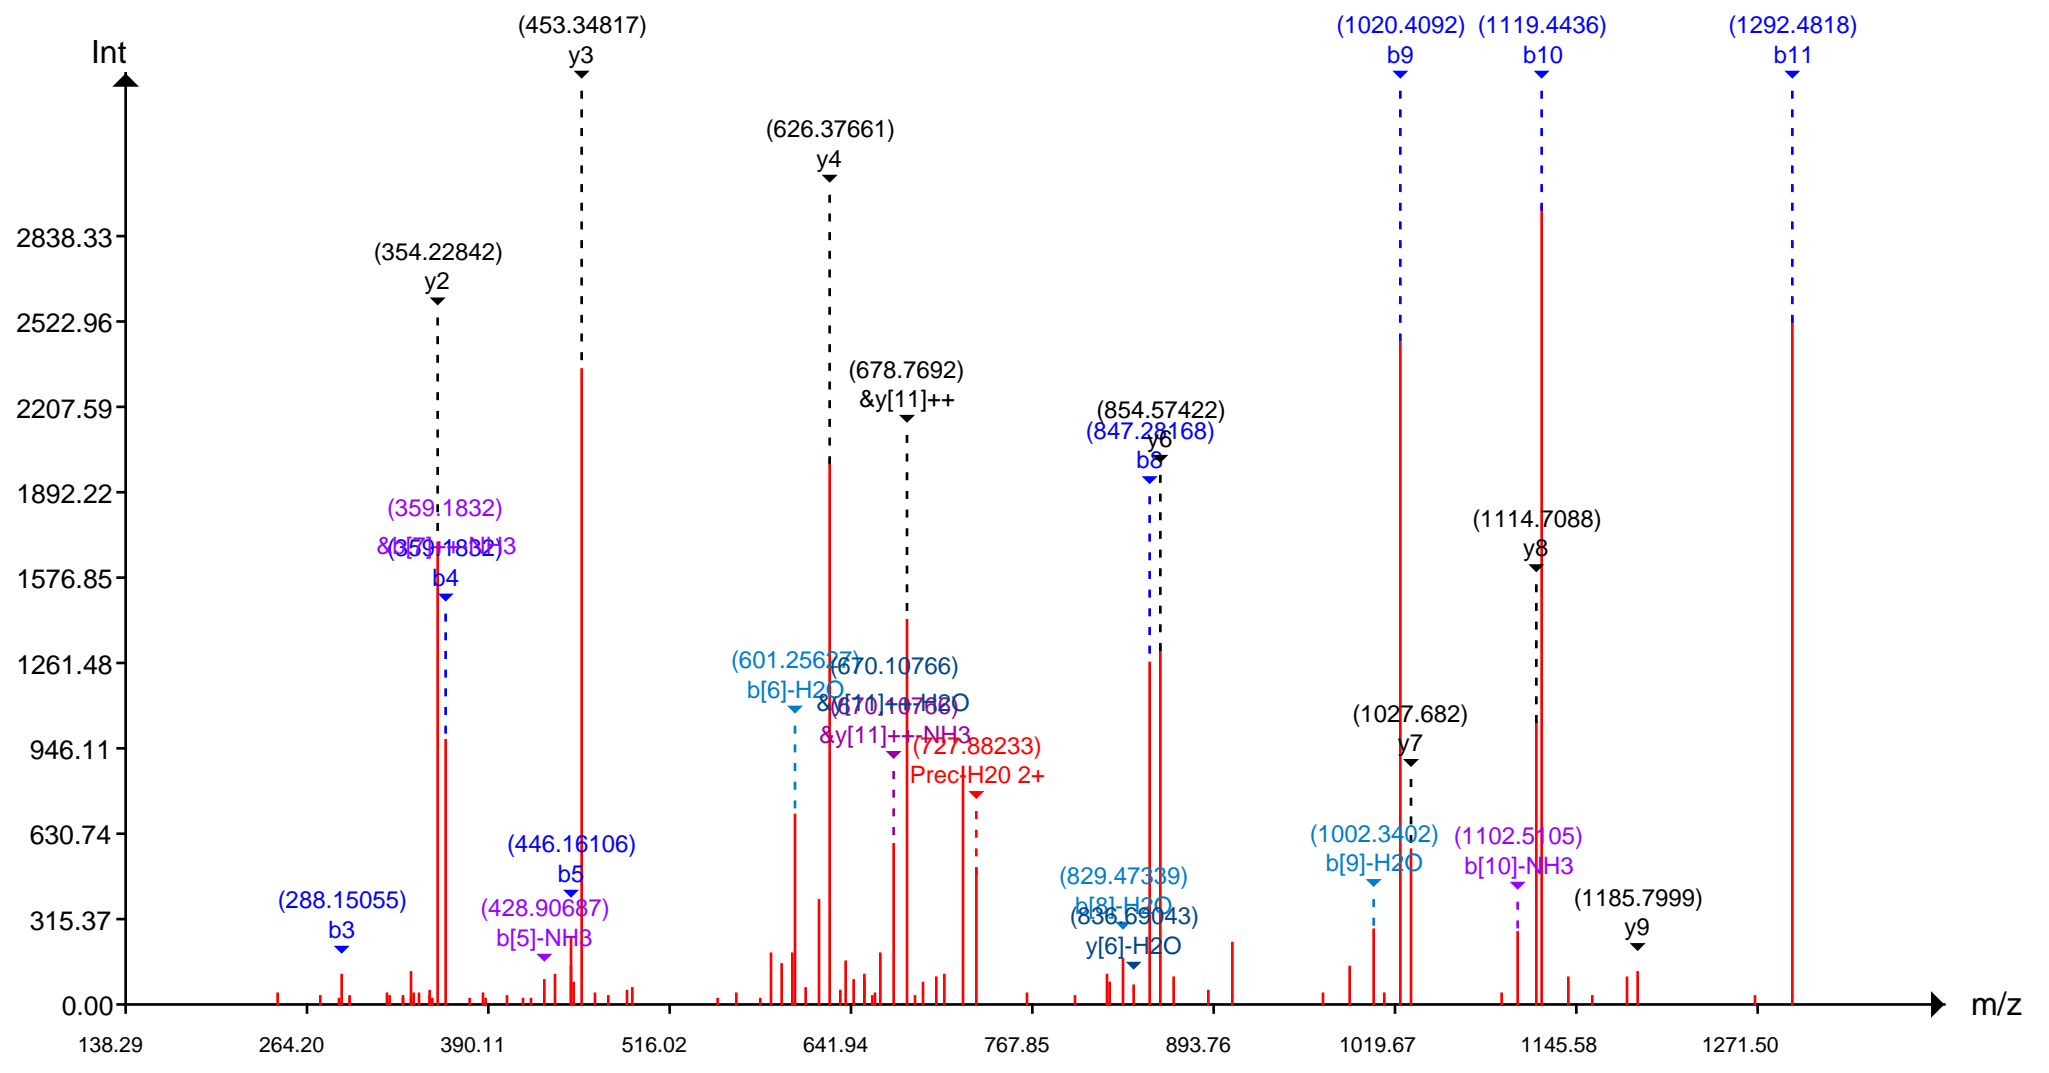

| Info                     |                                                     |                           |         |
|--------------------------|-----------------------------------------------------|---------------------------|---------|
| <b>Modified Sequence</b> | AcD3-AGNASK<AcD3K*>DLK<AcD3K*>VK<AcD3K*>R<C13>-COOH | <b>Ion score</b>          | 61.34   |
| <b>Protein</b>           | Q3THW5, P0C0S6                                      | <b>Confidence level</b>   | 99.00%  |
| <b>Precursor m/z</b>     | 736.94906                                           | <b>Identity Threshold</b> | 42.68   |
| <b>Charge</b>            | 2+                                                  | <b>Mass error</b>         | -7.7E-4 |



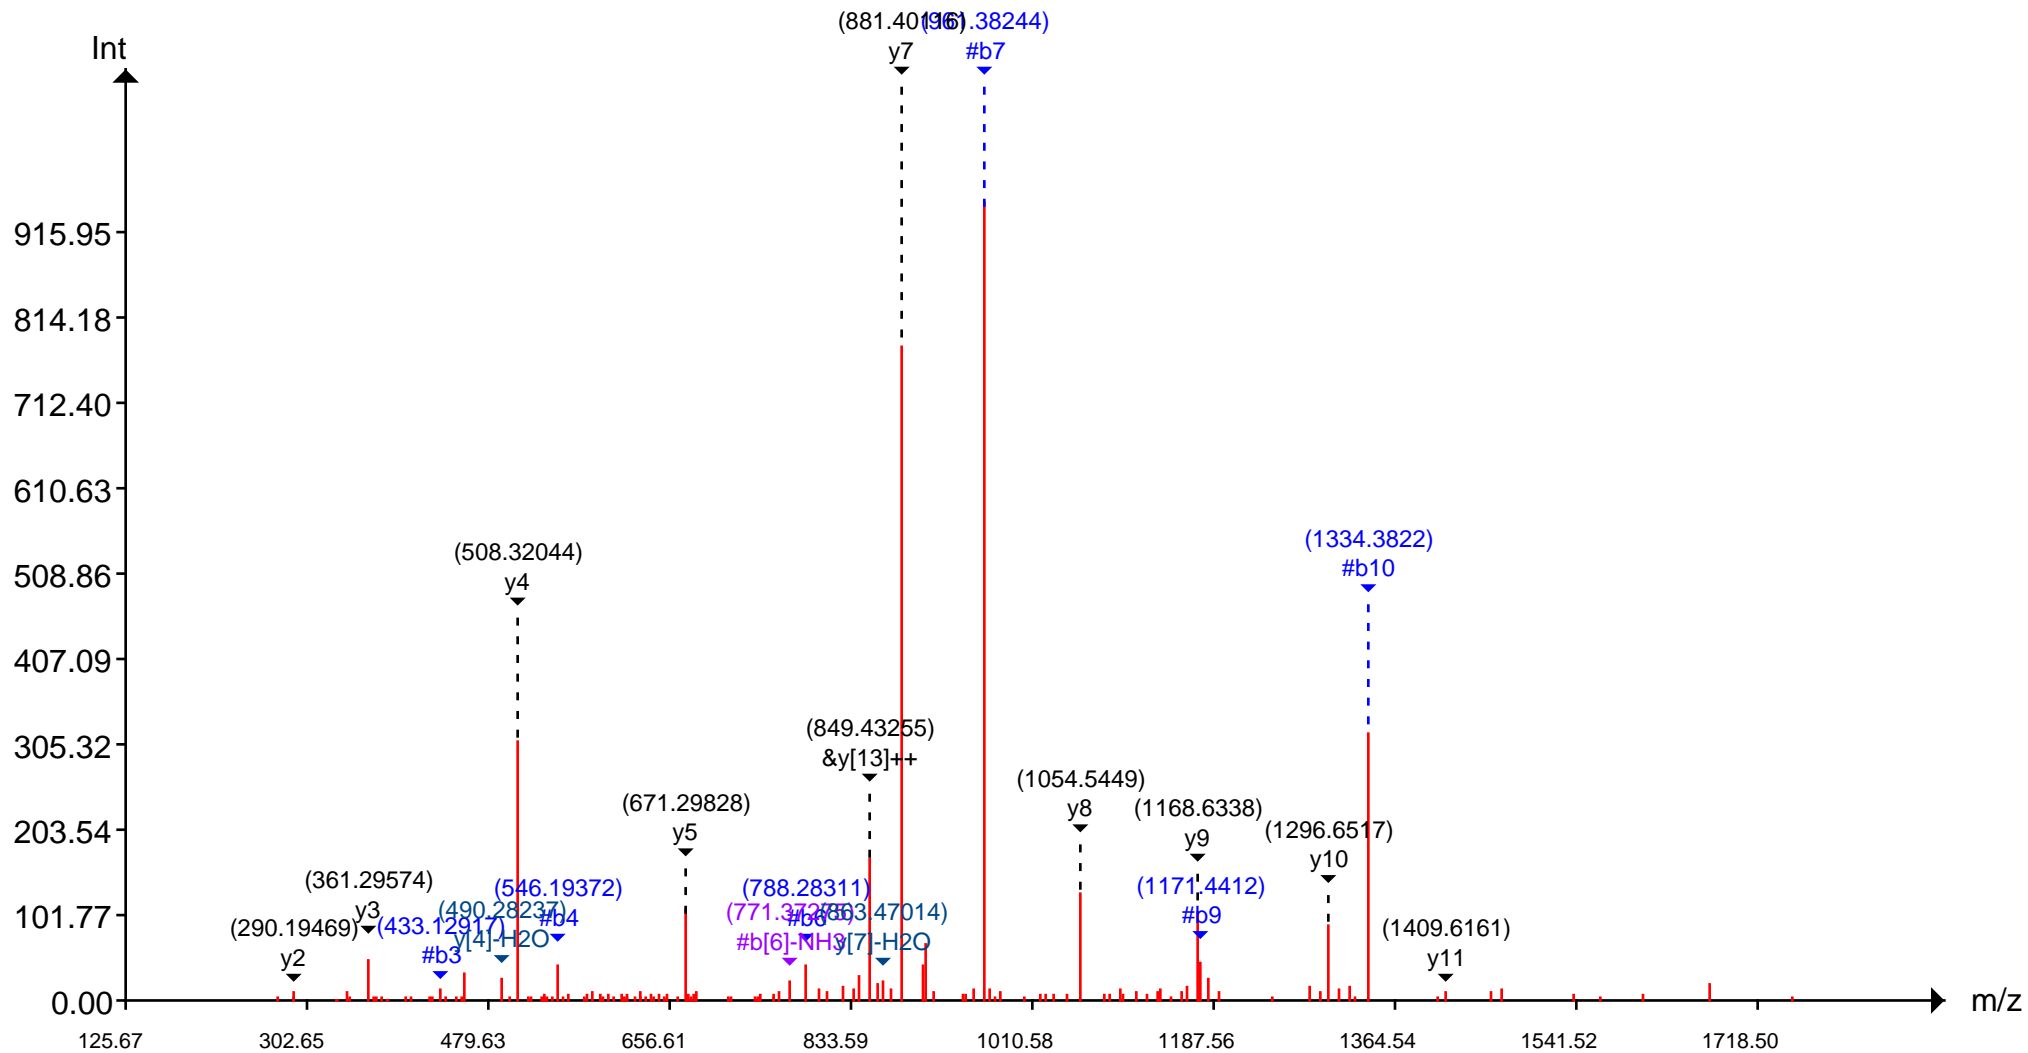

## Info

|                          |                                        |                           |          |
|--------------------------|----------------------------------------|---------------------------|----------|
| <b>Modified Sequence</b> | AcD3-VQC<Cmm*>IQNK<AcD3K*>PLYFADR-COOH | <b>Ion score</b>          | 56.58    |
| <b>Protein</b>           | P07356                                 | <b>Confidence level</b>   | 99.00%   |
| <b>Precursor m/z</b>     | 921.47898                              | <b>Identity Threshold</b> | 48.02    |
| <b>Charge</b>            | 2+                                     | <b>Mass error</b>         | 0.002154 |

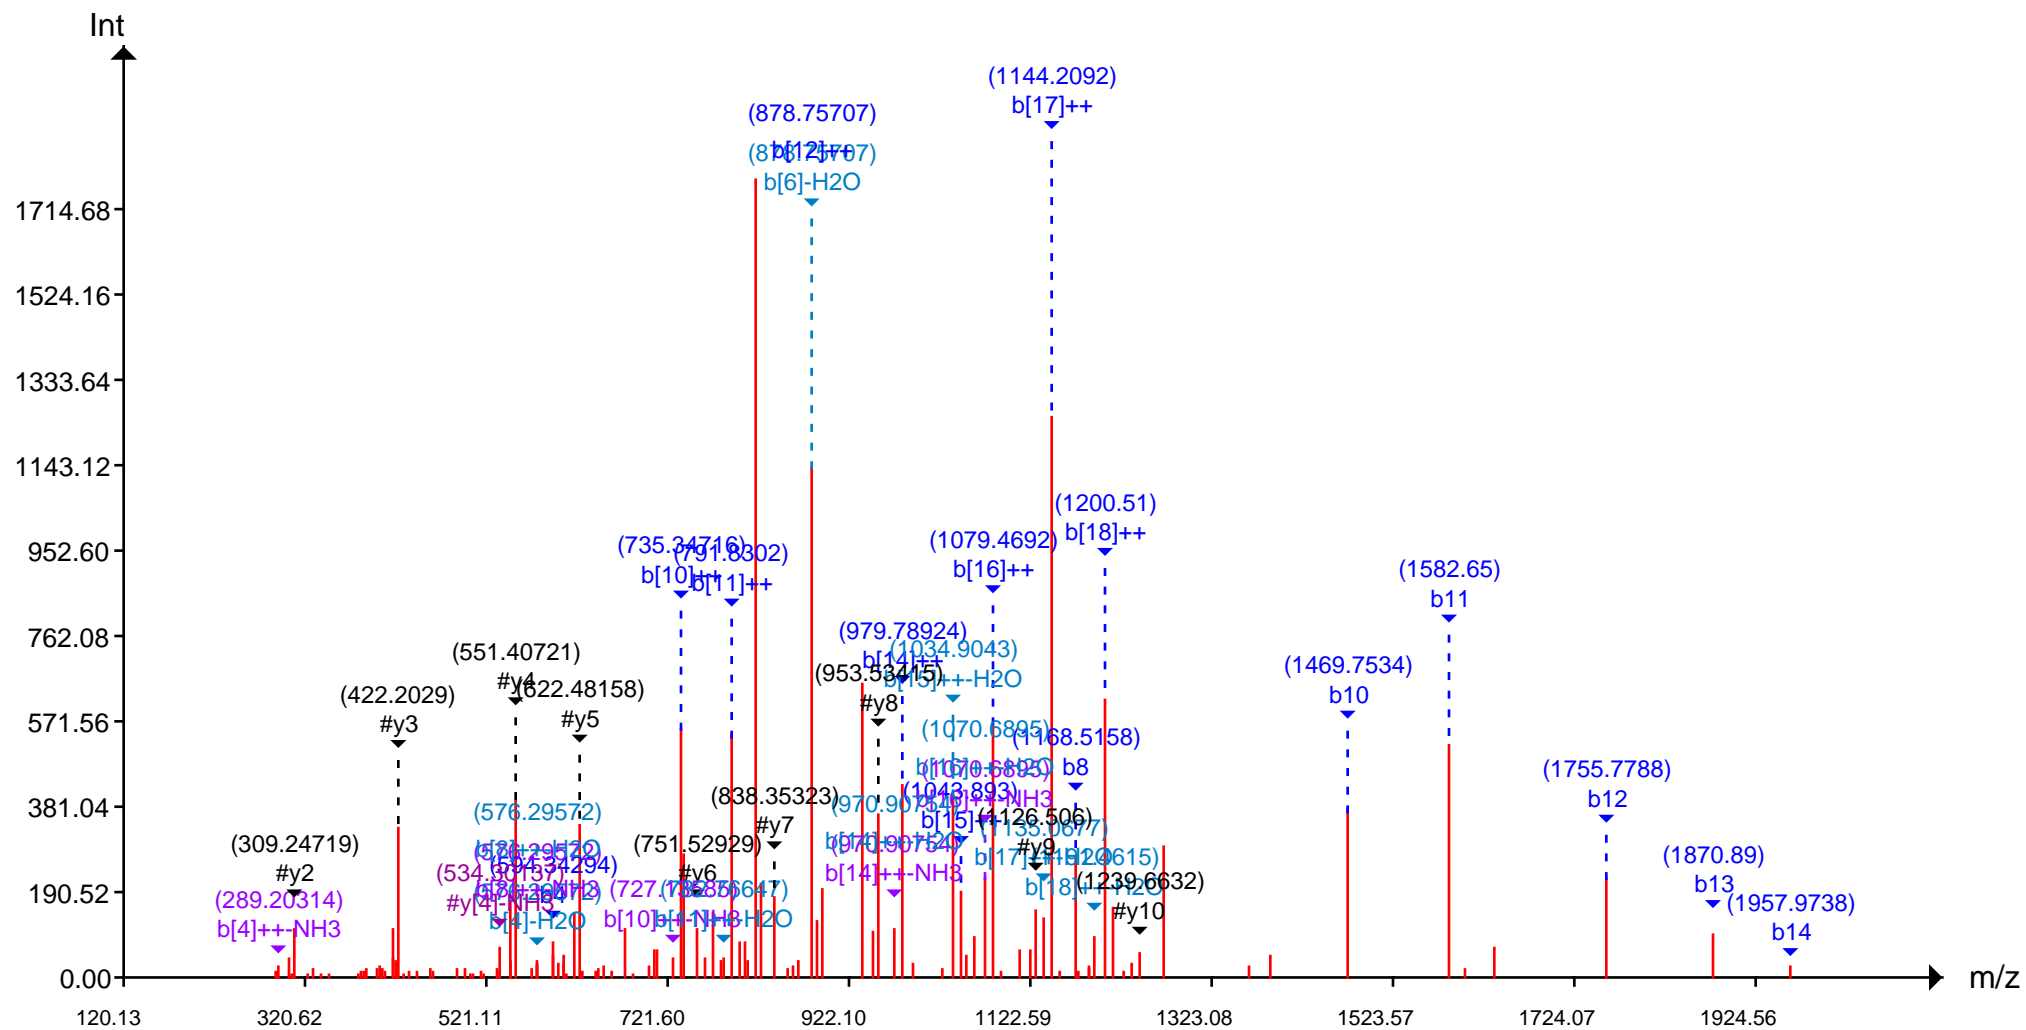

## Info

|            |                                                                                   |                    |
|------------|-----------------------------------------------------------------------------------|--------------------|
| Modifie... | AcD3-EM<Mox*>K<AcD3K*>VK<AcD3K*>EK<AcD3K*>VQK<AcD3K*>LK<AcD3K*>DSEAELQR<C13>-COOH | Ion score          |
|            | O55131                                                                            | Confidence level   |
| Pre...     | 903.51047                                                                         | Identity Threshold |
|            | 3+                                                                                | Mass error         |

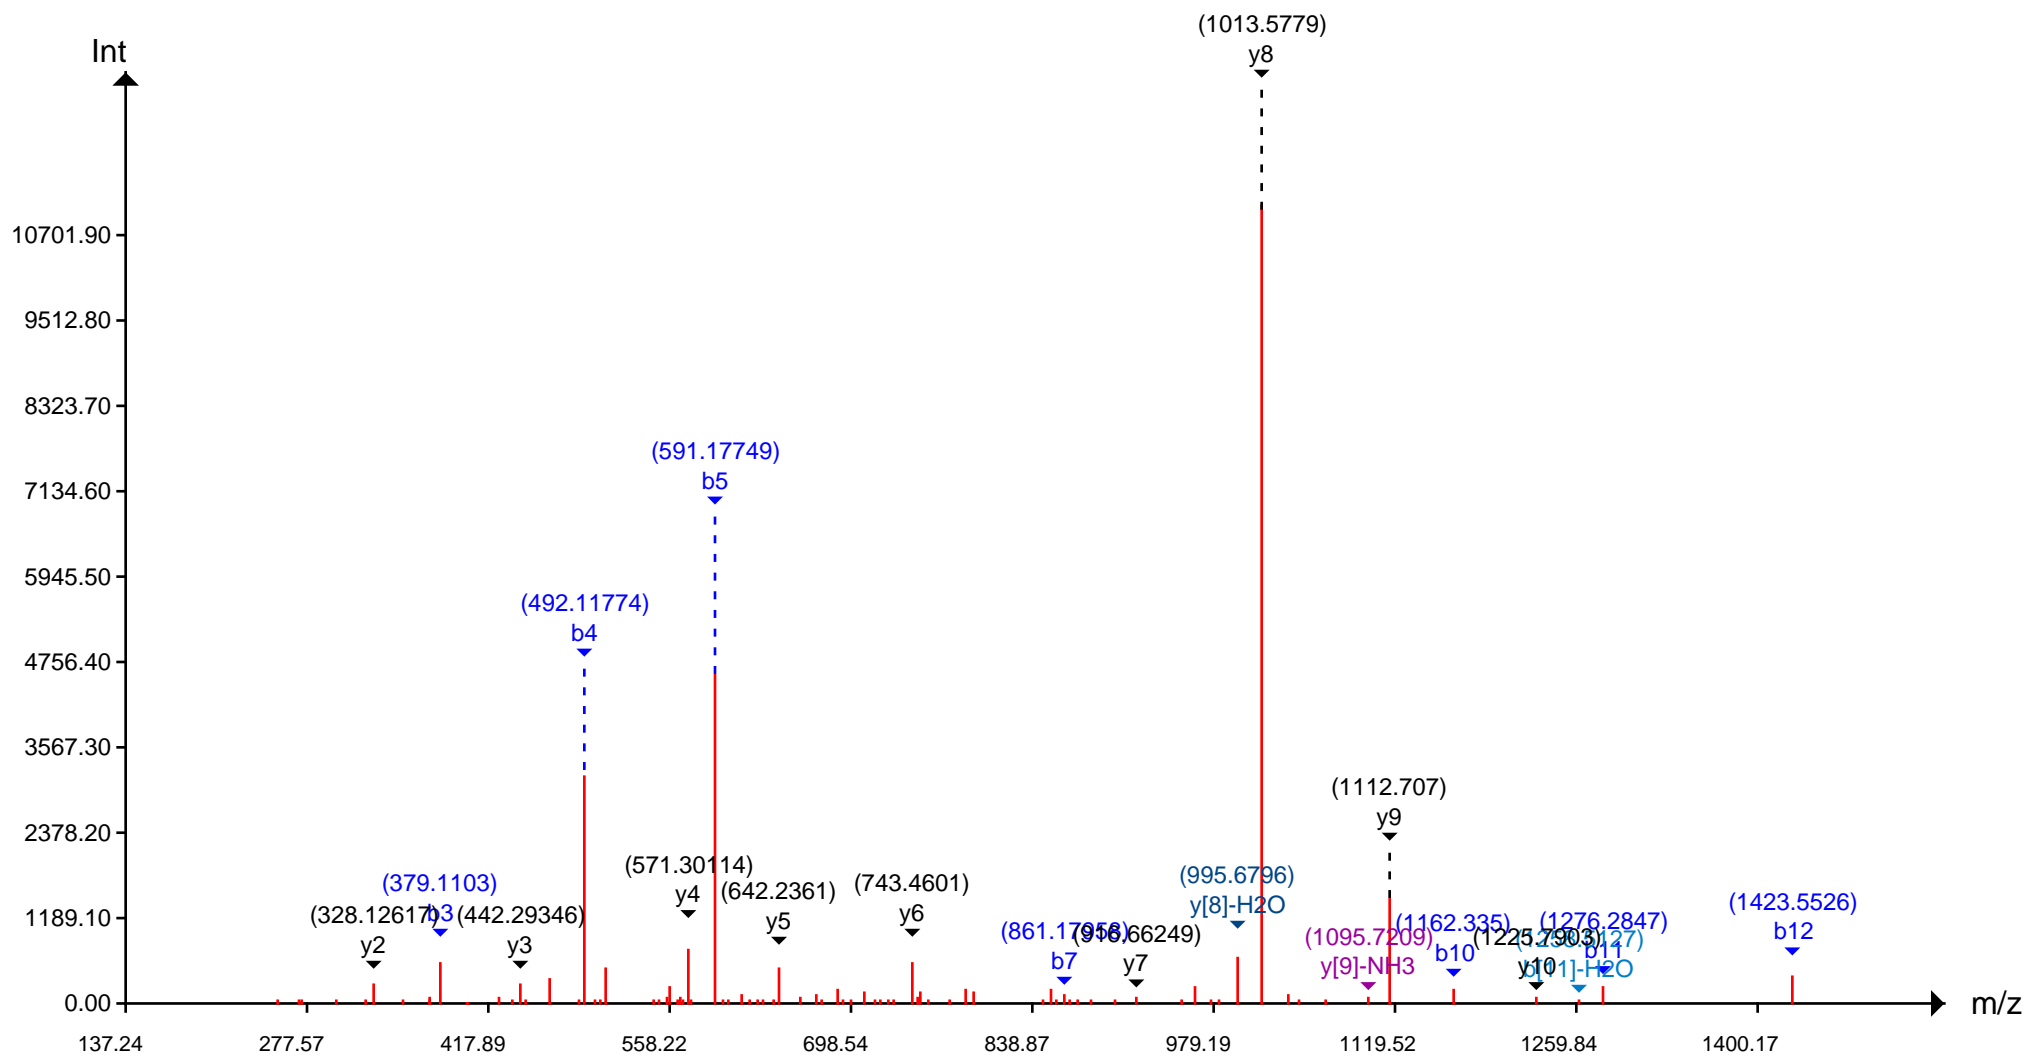

## Info

|                          |                                      |                           |          |
|--------------------------|--------------------------------------|---------------------------|----------|
| <b>Modified Sequence</b> | AcD3-FADIVPK<AcD3K*>TAENFR<C13>-COOH | <b>Ion score</b>          | 71.83    |
| <b>Protein</b>           | Q9CR16                               | <b>Confidence level</b>   | 99.00%   |
| <b>Precursor m/z</b>     | 802.43935                            | <b>Identity Threshold</b> | 47.69    |
| <b>Charge</b>            | 2+                                   | <b>Mass error</b>         | 0.002148 |

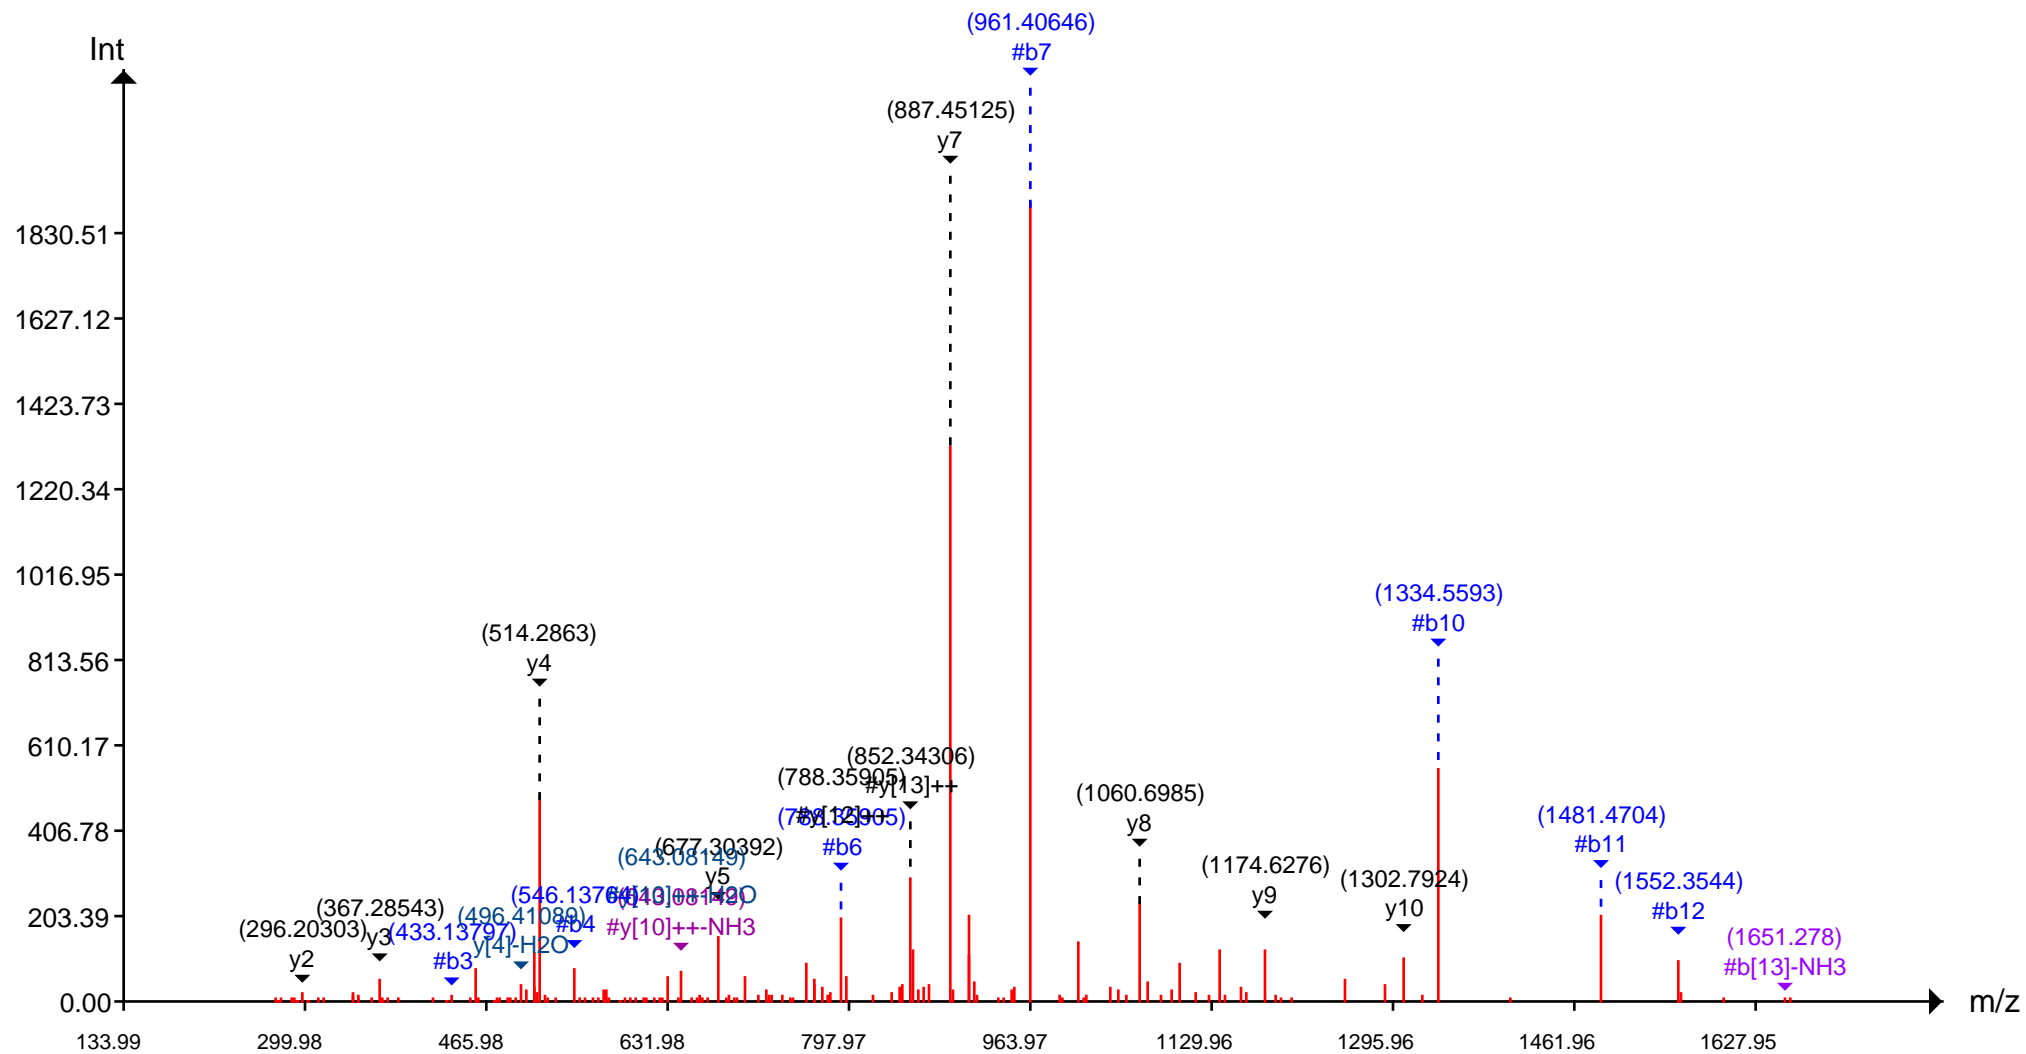

## Info

|                          |                                             |                           |          |
|--------------------------|---------------------------------------------|---------------------------|----------|
| <b>Modified Sequence</b> | AcD3-VQC<Cmm*>IQNK<AcD3K*>PLYFADR<C13>-COOH | <b>Ion score</b>          | 51.51    |
| <b>Protein</b>           | P07356                                      | <b>Confidence level</b>   | 99.00%   |
| <b>Precursor m/z</b>     | 924.48891                                   | <b>Identity Threshold</b> | 48.04    |
| <b>Charge</b>            | 2+                                          | <b>Mass error</b>         | 0.001873 |

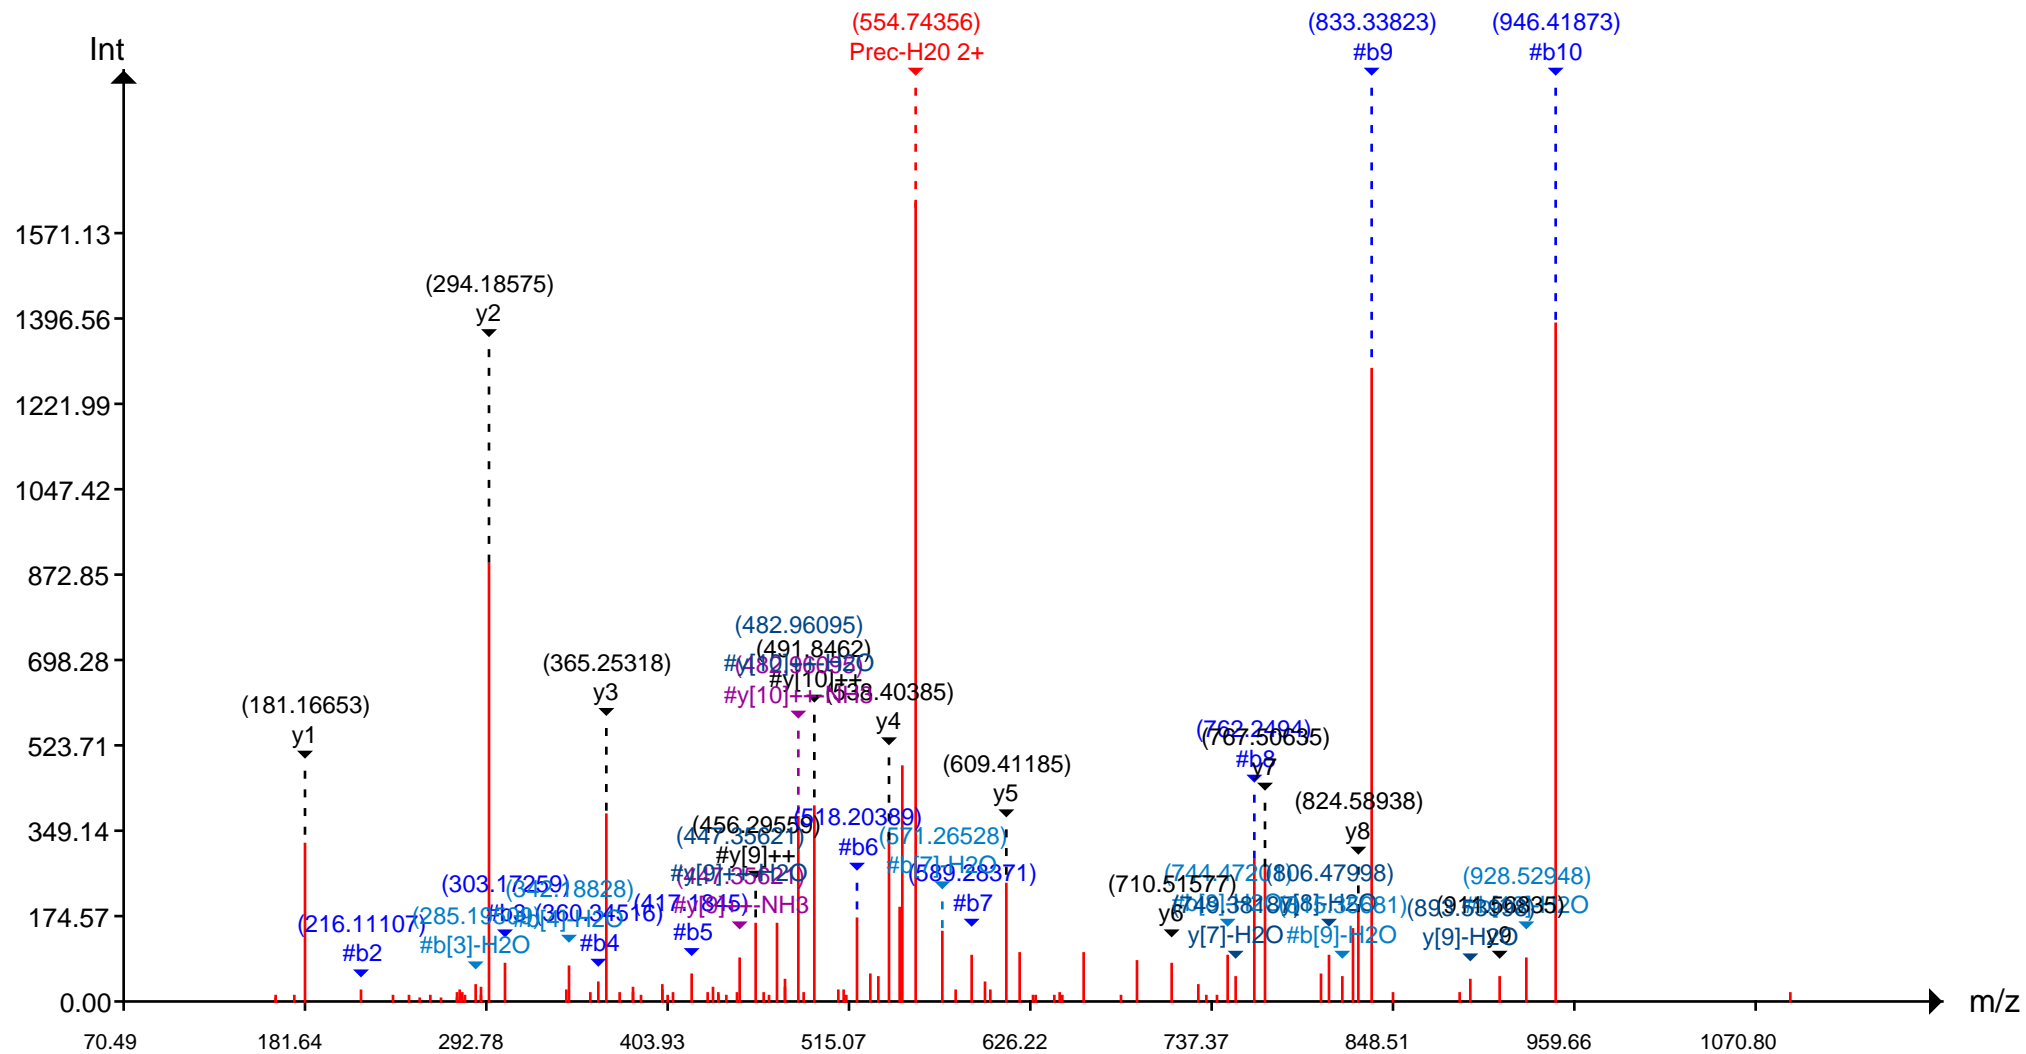

## Info

|                          |                                    |                           |          |
|--------------------------|------------------------------------|---------------------------|----------|
| <b>Modified Sequence</b> | AcD3-VASGGTAK<AcD3K*>AIR<C13>-COOH | <b>Ion score</b>          | 76.4     |
| <b>Protein</b>           | Q9CWJ9                             | <b>Confidence level</b>   | 99.00%   |
| <b>Precursor m/z</b>     | 563.84288                          | <b>Identity Threshold</b> | 44.89    |
| <b>Charge</b>            | 2+                                 | <b>Mass error</b>         | -8.04E-4 |

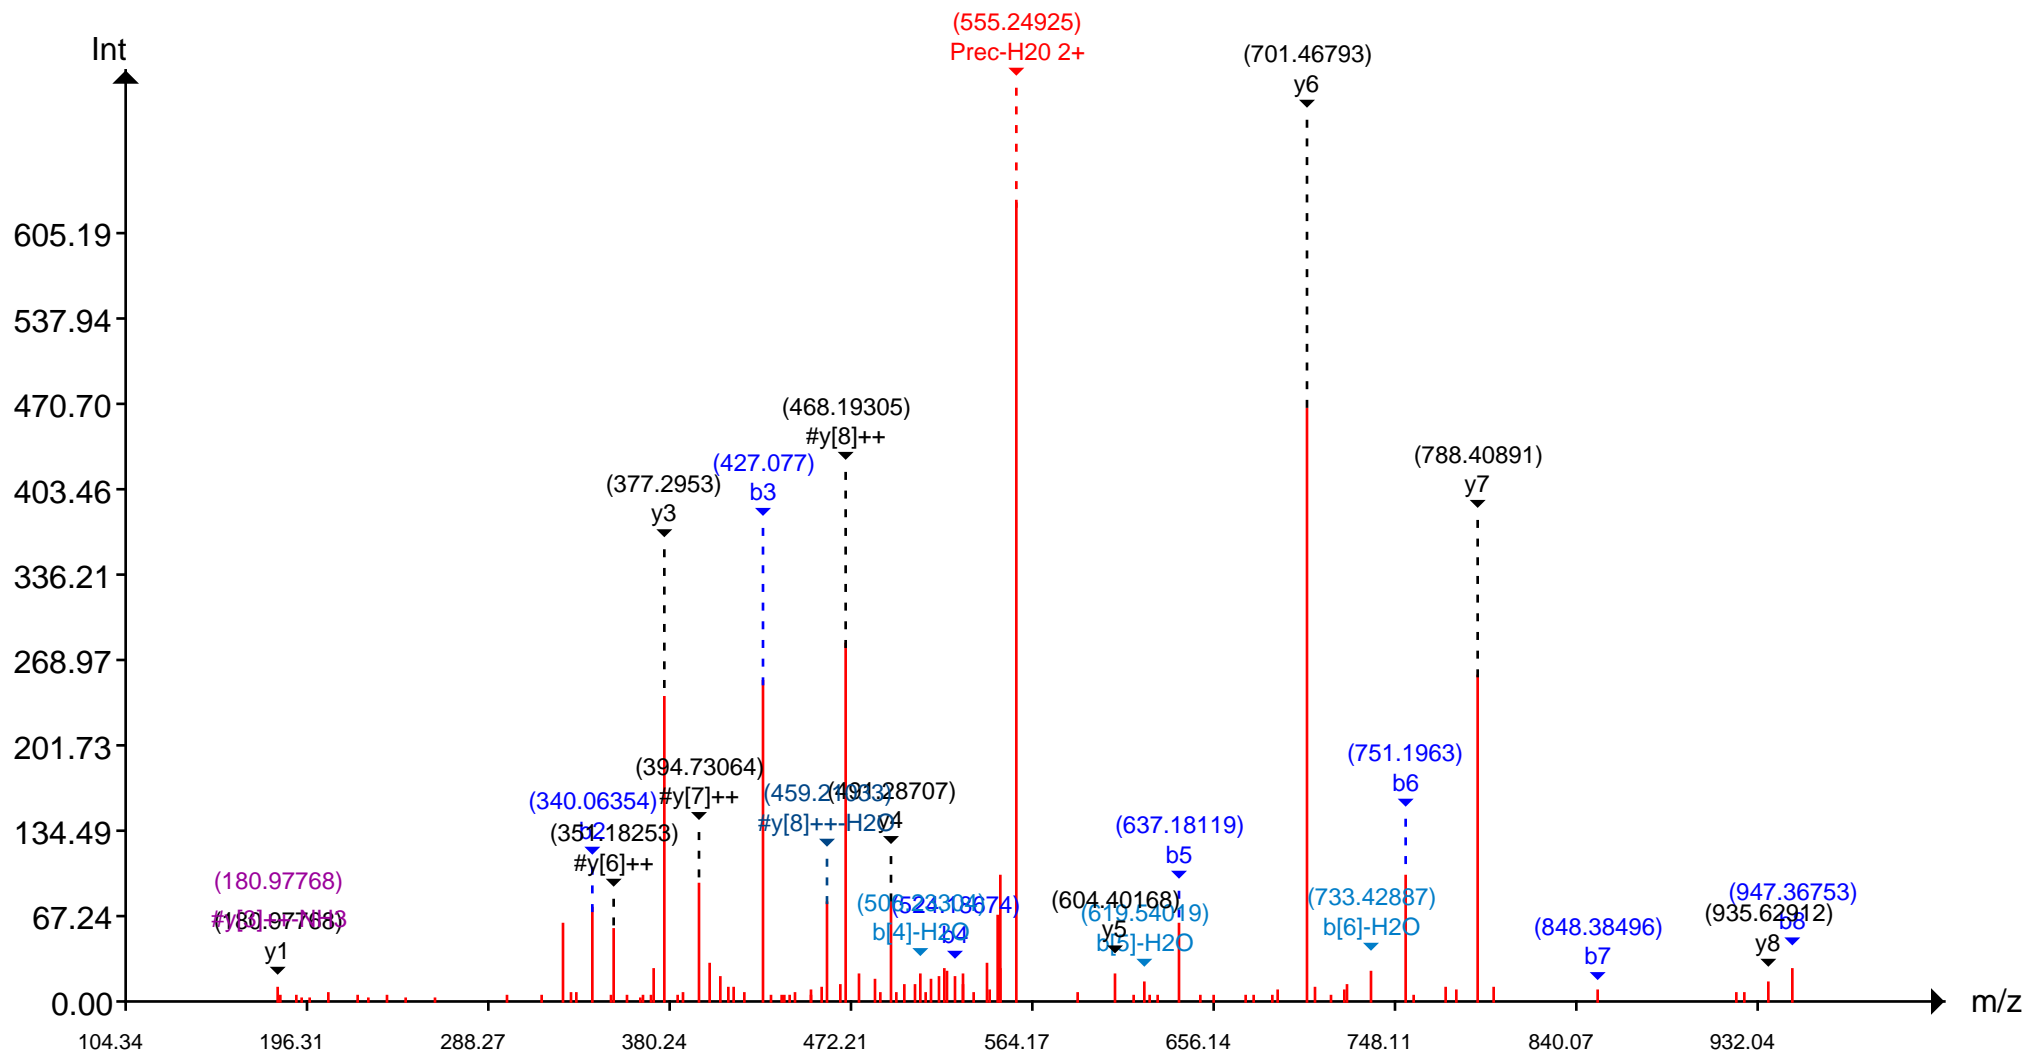

## Info

|                          |                          |                           |         |
|--------------------------|--------------------------|---------------------------|---------|
| <b>Modified Sequence</b> | AcD3-FFSPLNPVR<C13>-COOH | <b>Ion score</b>          | 59.41   |
| <b>Protein</b>           | O35737, Q9Z2X1           | <b>Confidence level</b>   | 99.00%  |
| <b>Precursor m/z</b>     | 564.32273                | <b>Identity Threshold</b> | 46.87   |
| <b>Charge</b>            | 2+                       | <b>Mass error</b>         | -8.9E-5 |

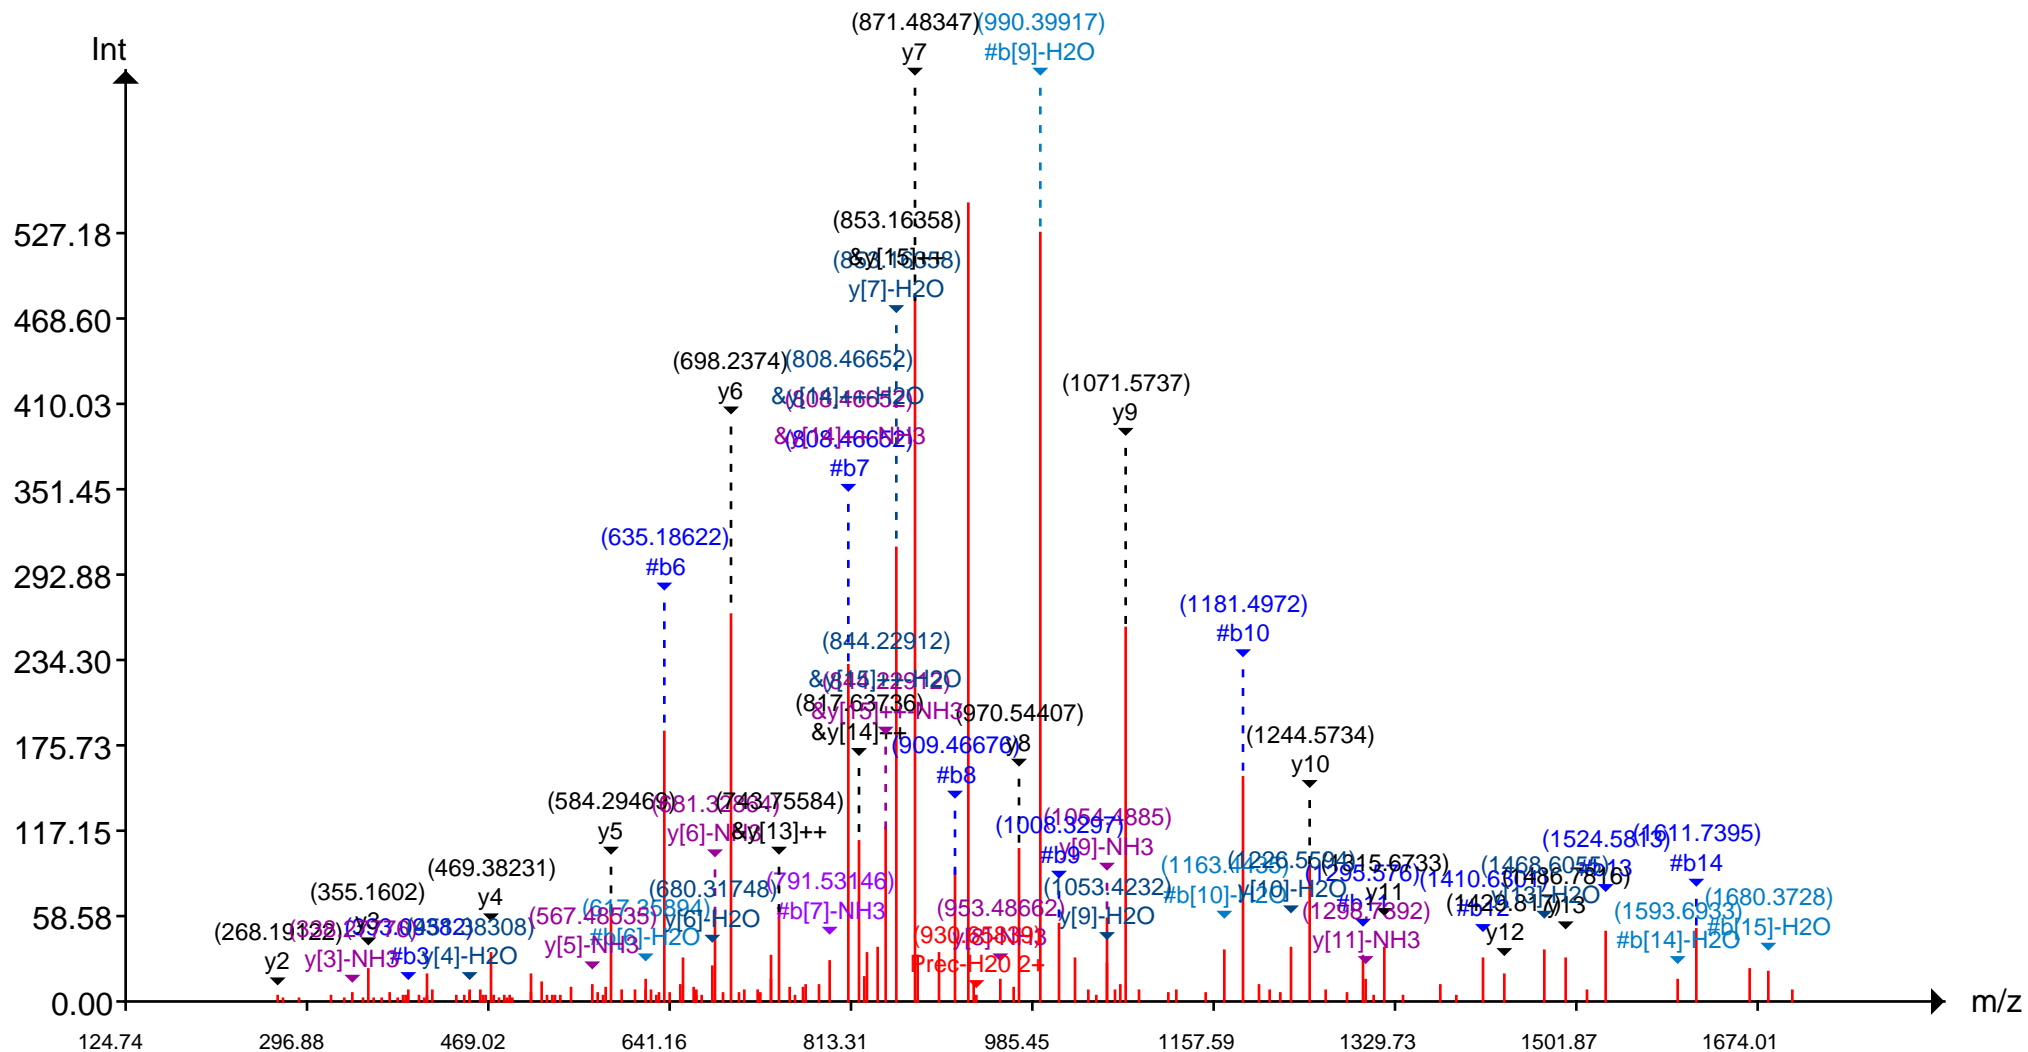

## Info

|                          |                                                 |                           |          |
|--------------------------|-------------------------------------------------|---------------------------|----------|
| <b>Modified Sequence</b> | AcD3-EAFGNAK<AcD3K*>TVK<AcD3K*>NDNSSR<C13>-COOH | <b>Ion score</b>          | 103.86   |
| <b>Protein</b>           | O08638, Q6URW6, Q8VDD5                          | <b>Confidence level</b>   | 99.00%   |
| <b>Precursor m/z</b>     | 939.9842                                        | <b>Identity Threshold</b> | 48.09    |
| <b>Charge</b>            | 2+                                              | <b>Mass error</b>         | 0.001364 |

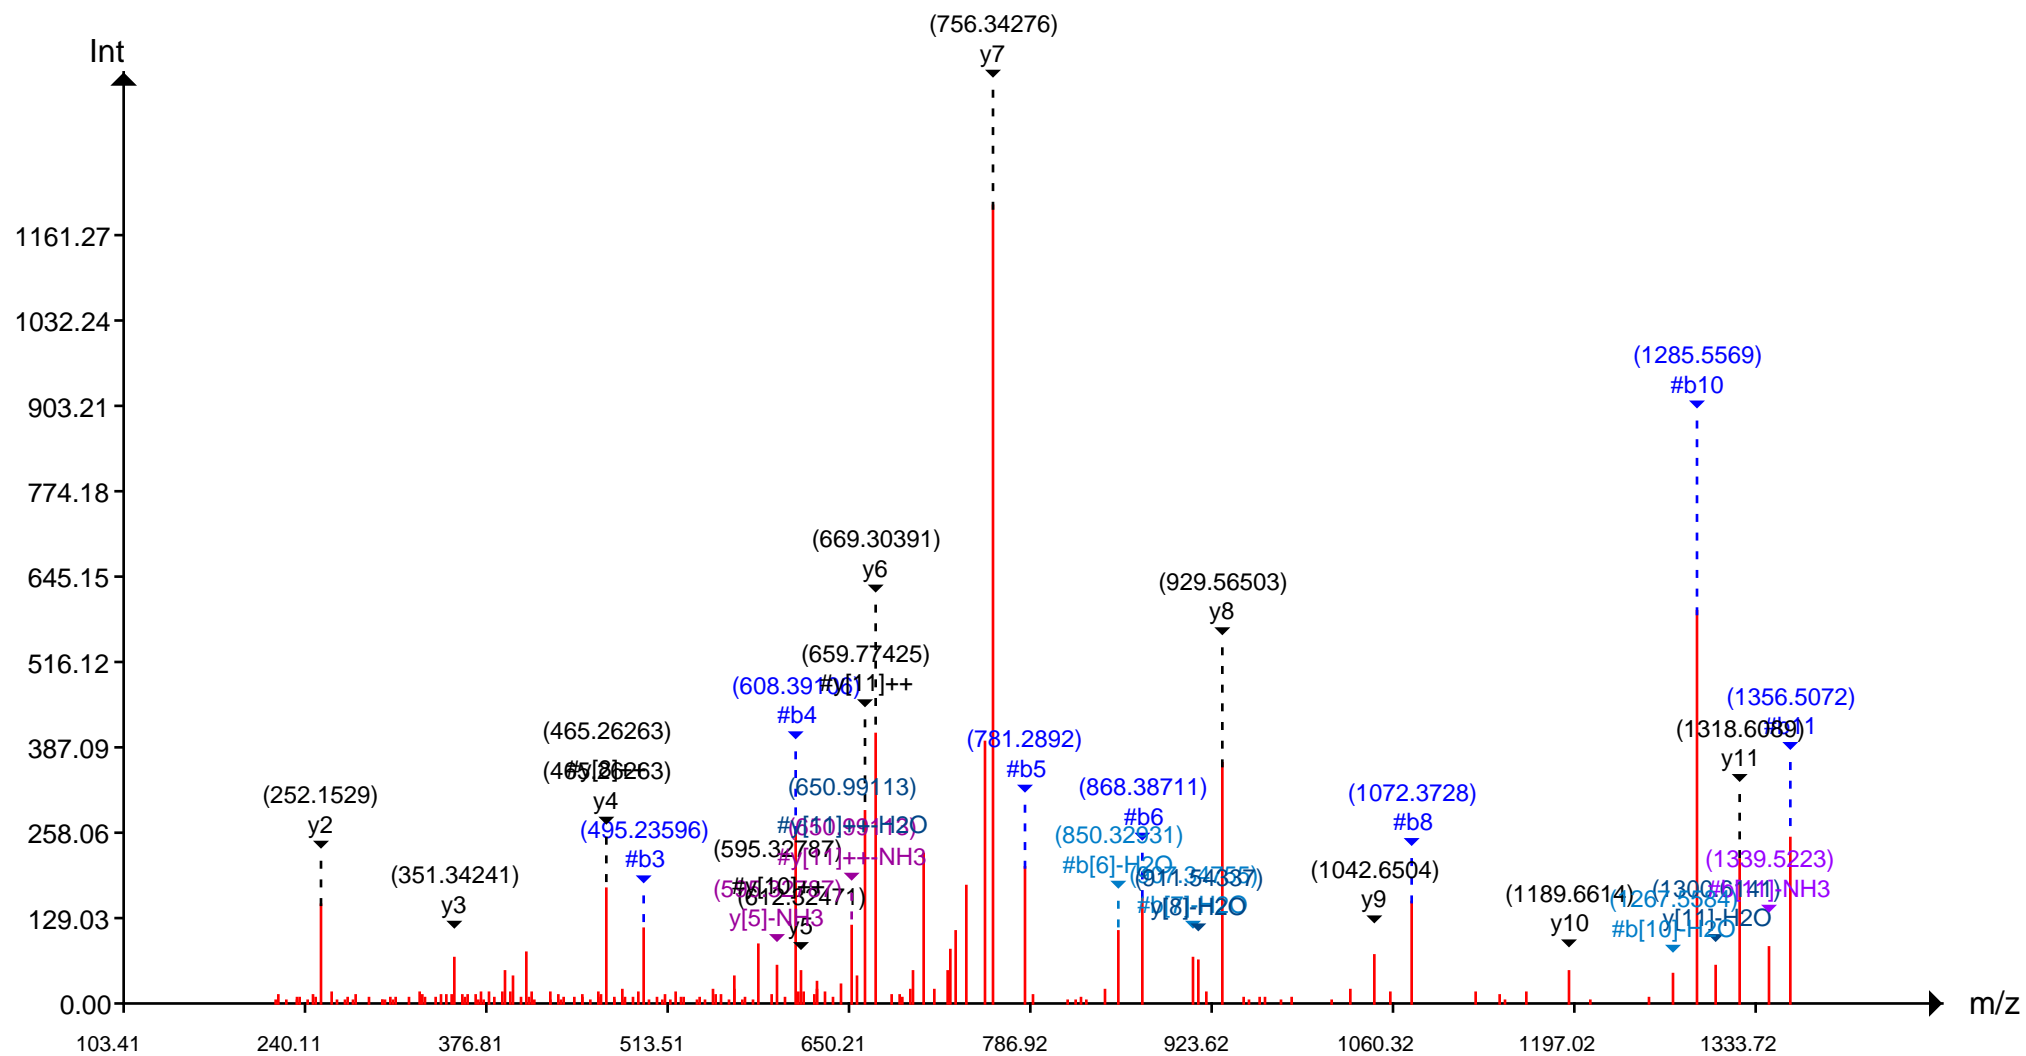

## Info

|                          |                                                         |                           |          |
|--------------------------|---------------------------------------------------------|---------------------------|----------|
| <b>Modified Sequence</b> | AcD3-K<AcD3K*>EM<Mox*>IK<AcD3K*>SGM<Mox*>NVAR<C13>-COOH | <b>Ion score</b>          | 75.24    |
| <b>Protein</b>           | P52480                                                  | <b>Confidence level</b>   | 99.00%   |
| <b>Precursor m/z</b>     | 768.91148                                               | <b>Identity Threshold</b> | 48.00    |
| <b>Charge</b>            | 2+                                                      | <b>Mass error</b>         | -9.03E-4 |





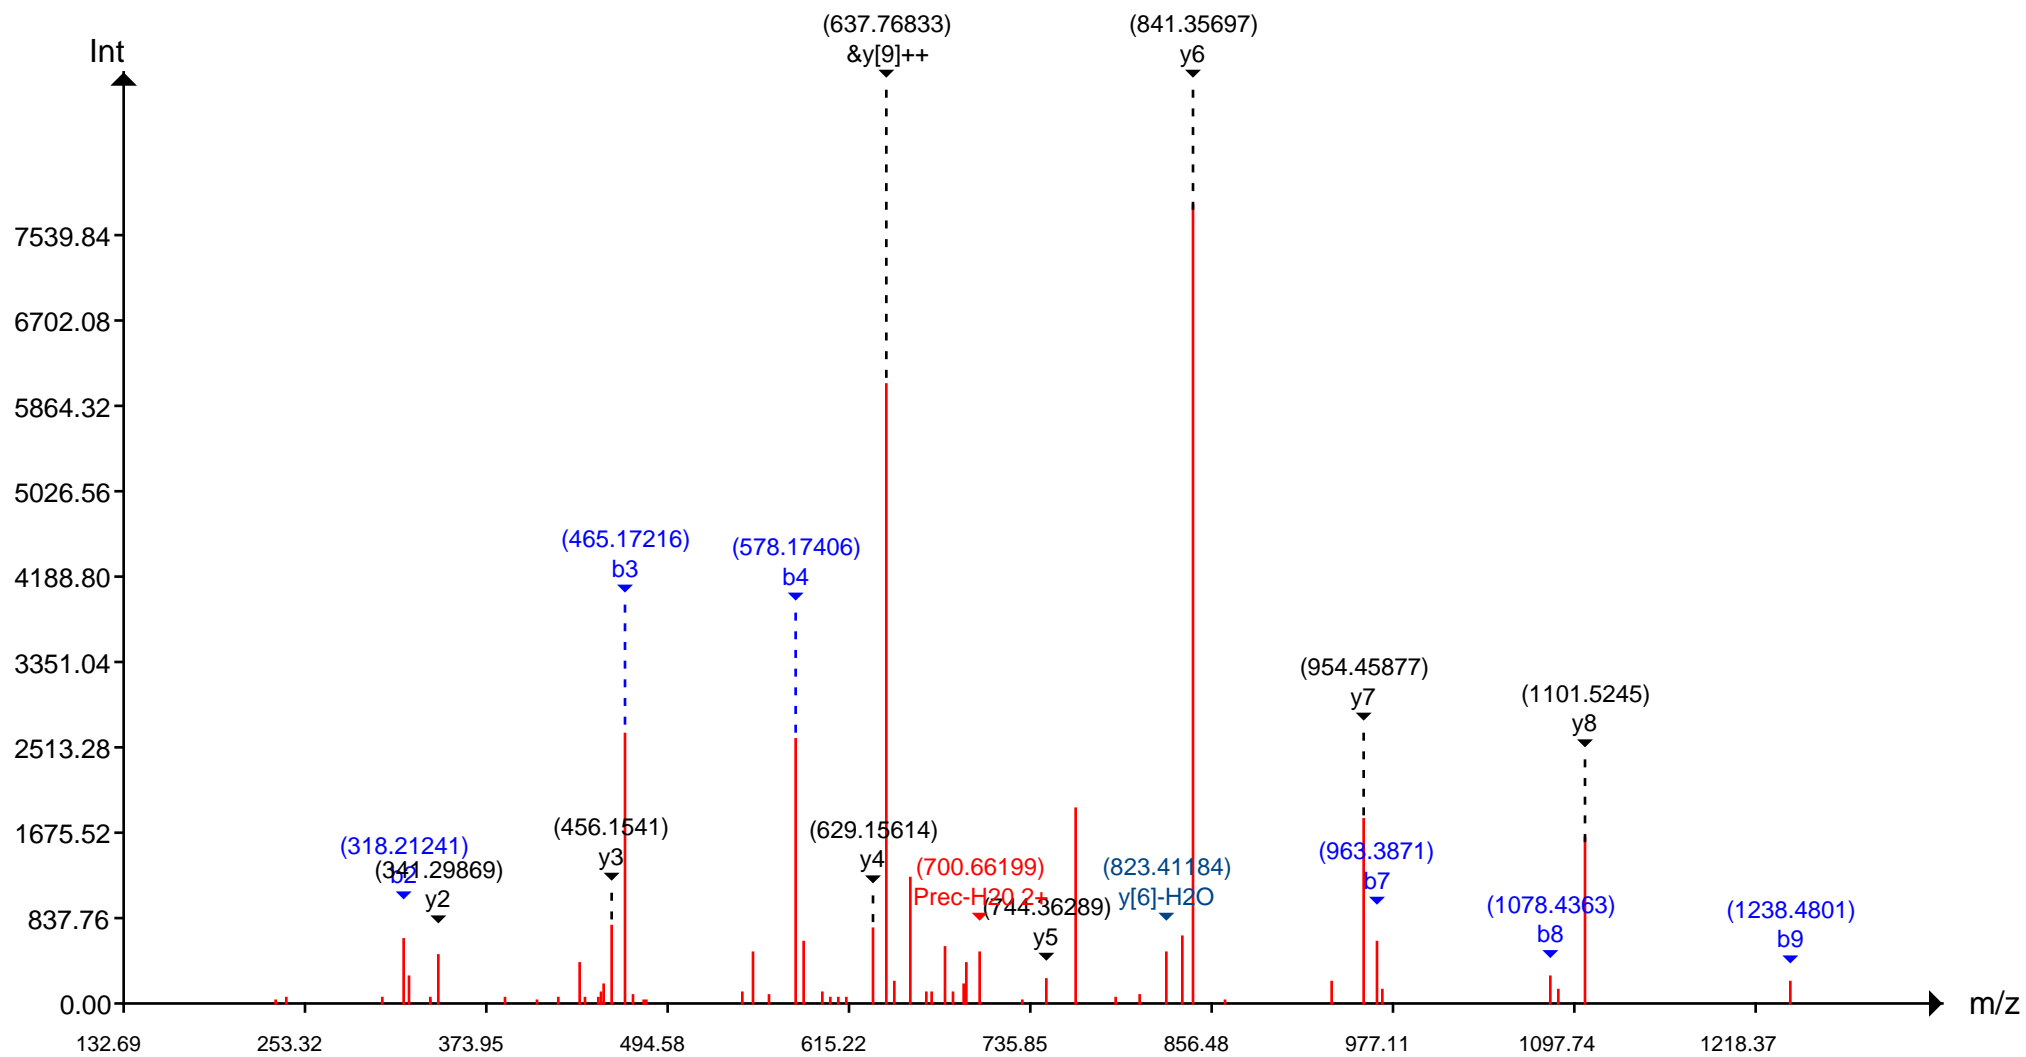

## Info

**Modified Sequence** AcD3-VK<AcD3K\*>M<Mox\*>LPDK<AcD3K\*>DC<Cmm\*>R<C13>-COOH

**Ion score** 50.34

**Protein** P18760

**Confidence level** 99.00%

**Precursor m/z** 709.87428

**Identity Threshold** 48.22

**Charge** 2+

**Mass error** -0.001099

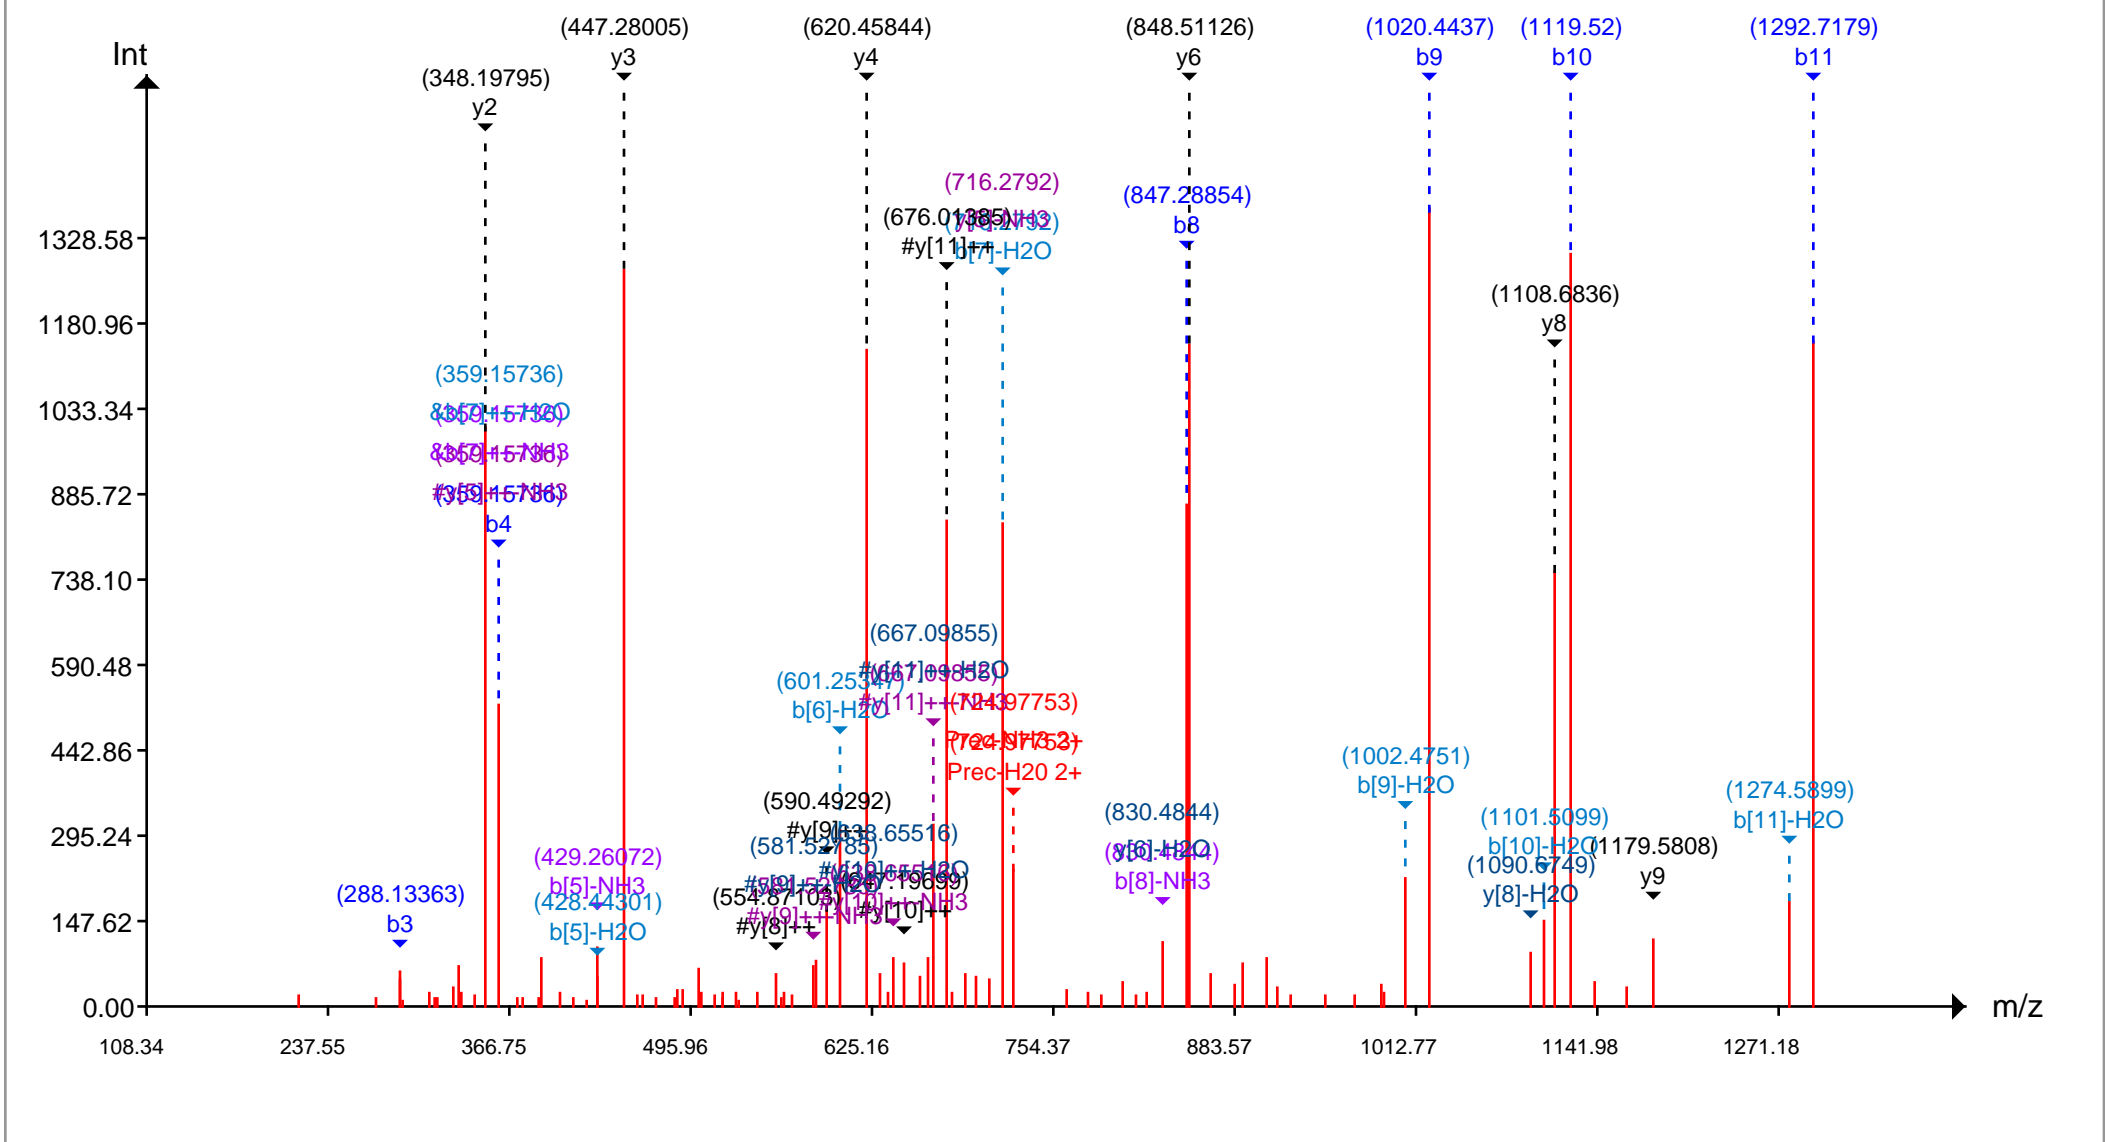

## Info

**Modified Sequence** AcD3-AGNASK<AcD3K\*>DLK<AcD3K\*>VK<AcD3K\*>R-COOH

**Ion score** 56.14

**Protein** Q3THW5, P0C0S6

**Confidence level** 99.00%

**Precursor m/z** 733.93919

**Identity Threshold** 43.99

**Charge** 2+

**Mass error** -3.69E-4

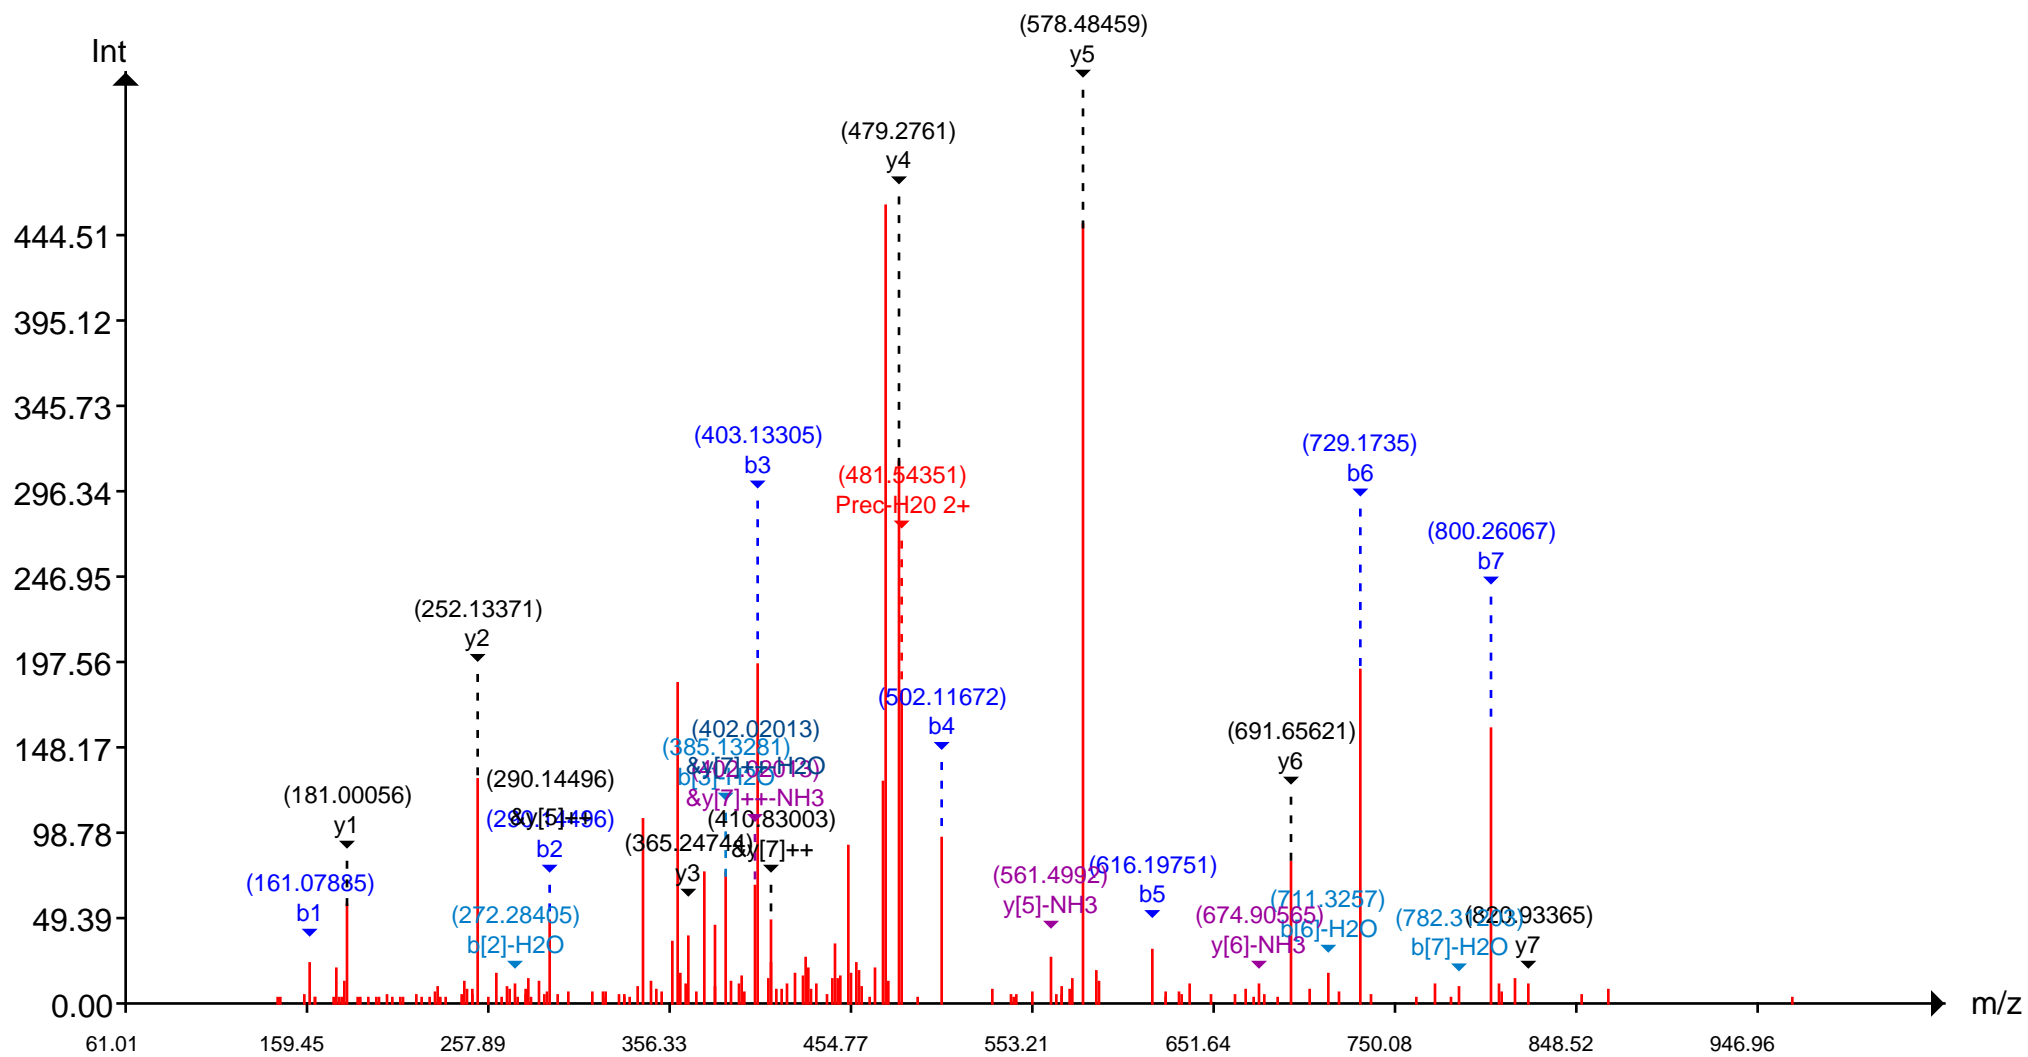

## Info

|                          |                         |                           |          |
|--------------------------|-------------------------|---------------------------|----------|
| <b>Modified Sequence</b> | AcD3-DEIVNIAR<C13>-COOH | <b>Ion score</b>          | 48.11    |
| <b>Protein</b>           | P35979                  | <b>Confidence level</b>   | 99.00%   |
| <b>Precursor m/z</b>     | 490.78086               | <b>Identity Threshold</b> | 47.26    |
| <b>Charge</b>            | 2+                      | <b>Mass error</b>         | -1.34E-4 |

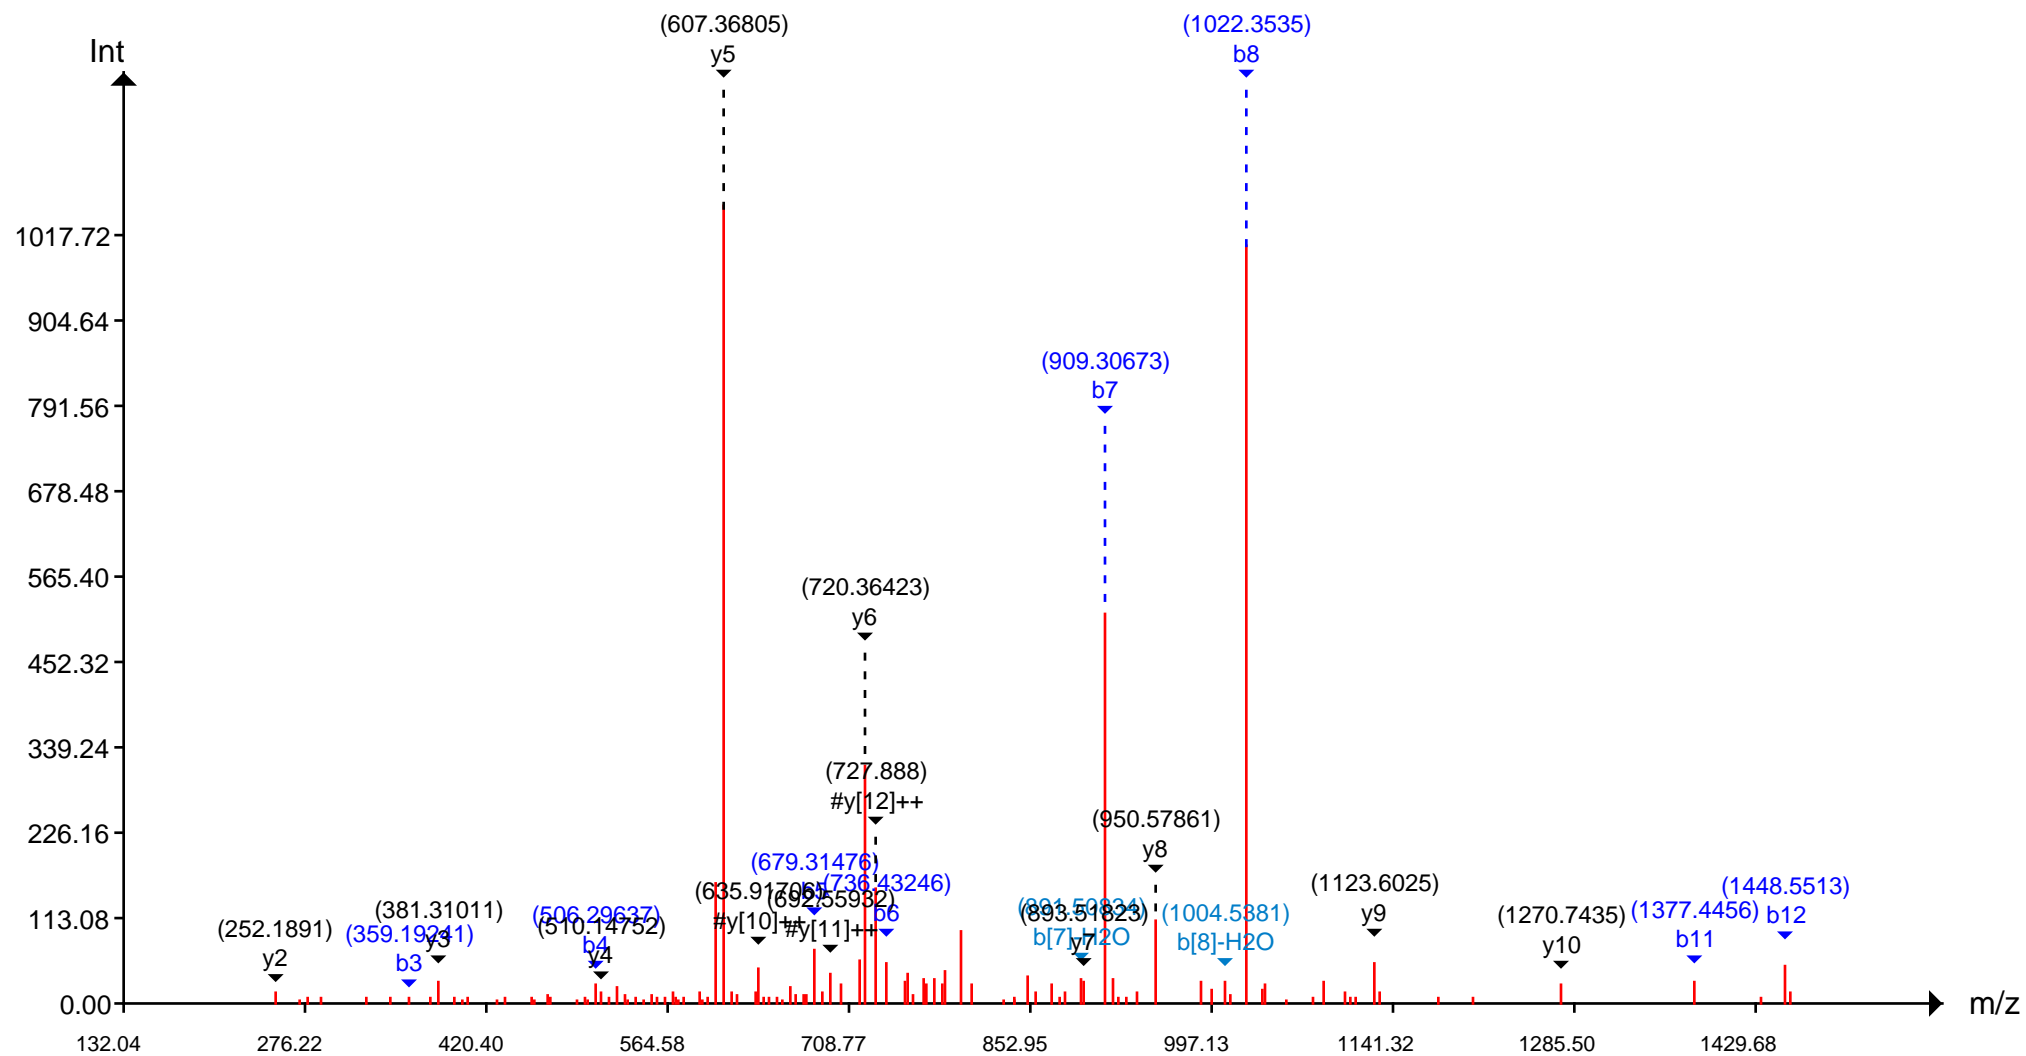

## Info

|                          |                                                    |                           |         |
|--------------------------|----------------------------------------------------|---------------------------|---------|
| <b>Modified Sequence</b> | AcD3-EALM<Mox*>K<AcD3K*>GK<AcD3K*>LPEEAR<C13>-COOH | <b>Ion score</b>          | 48.94   |
| <b>Protein</b>           | P06745                                             | <b>Confidence level</b>   | 99.00%  |
| <b>Precursor m/z</b>     | 814.95306                                          | <b>Identity Threshold</b> | 47.25   |
| <b>Charge</b>            | 2+                                                 | <b>Mass error</b>         | 0.00192 |

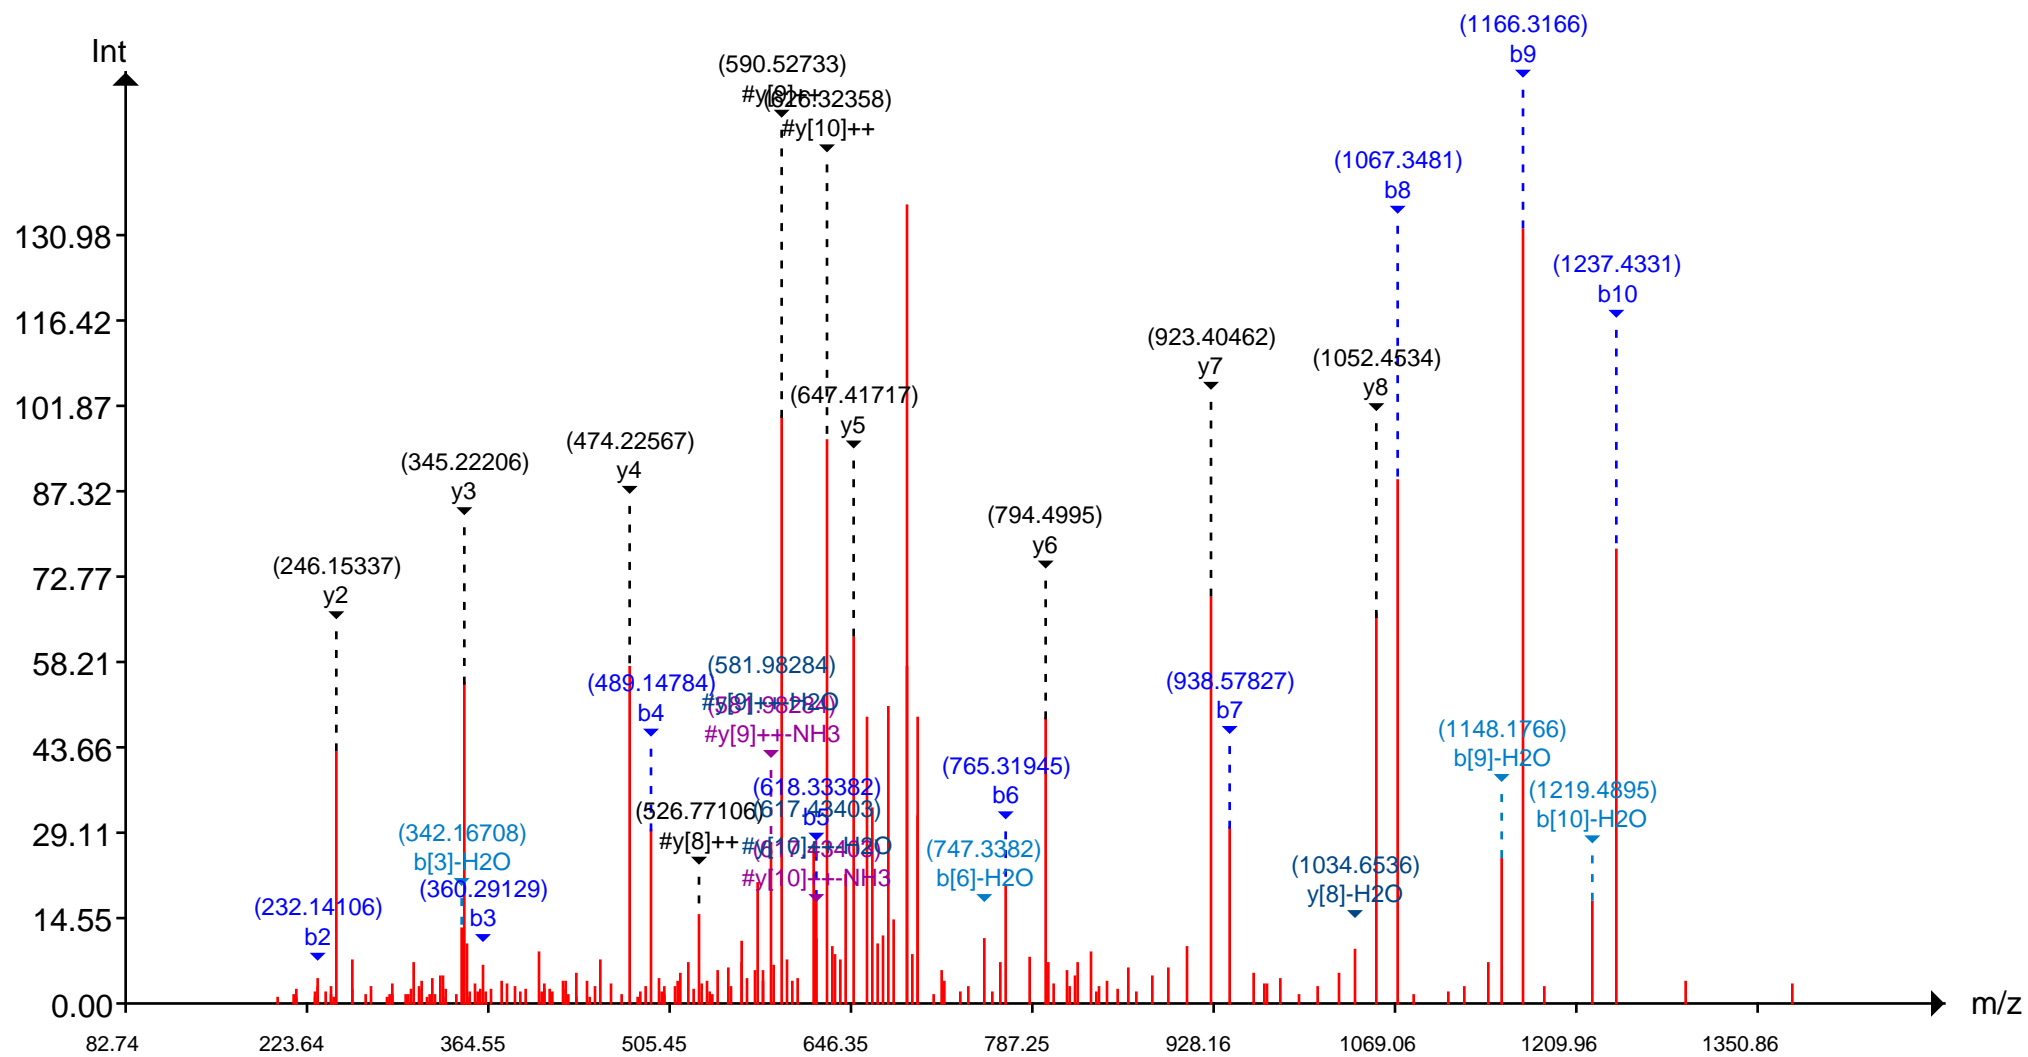

## Info

**Modified Sequence** AcD3-DAQEEM<Mox\*>K<AcD3K\*>EVAR-COOH

**Ion score** 54.42

**Protein** Q8CGC7

**Confidence level** 99.00%

**Precursor m/z** 706.33612

**Identity Threshold** 46.17

**Charge** 2+

**Mass error** 9.5E-4

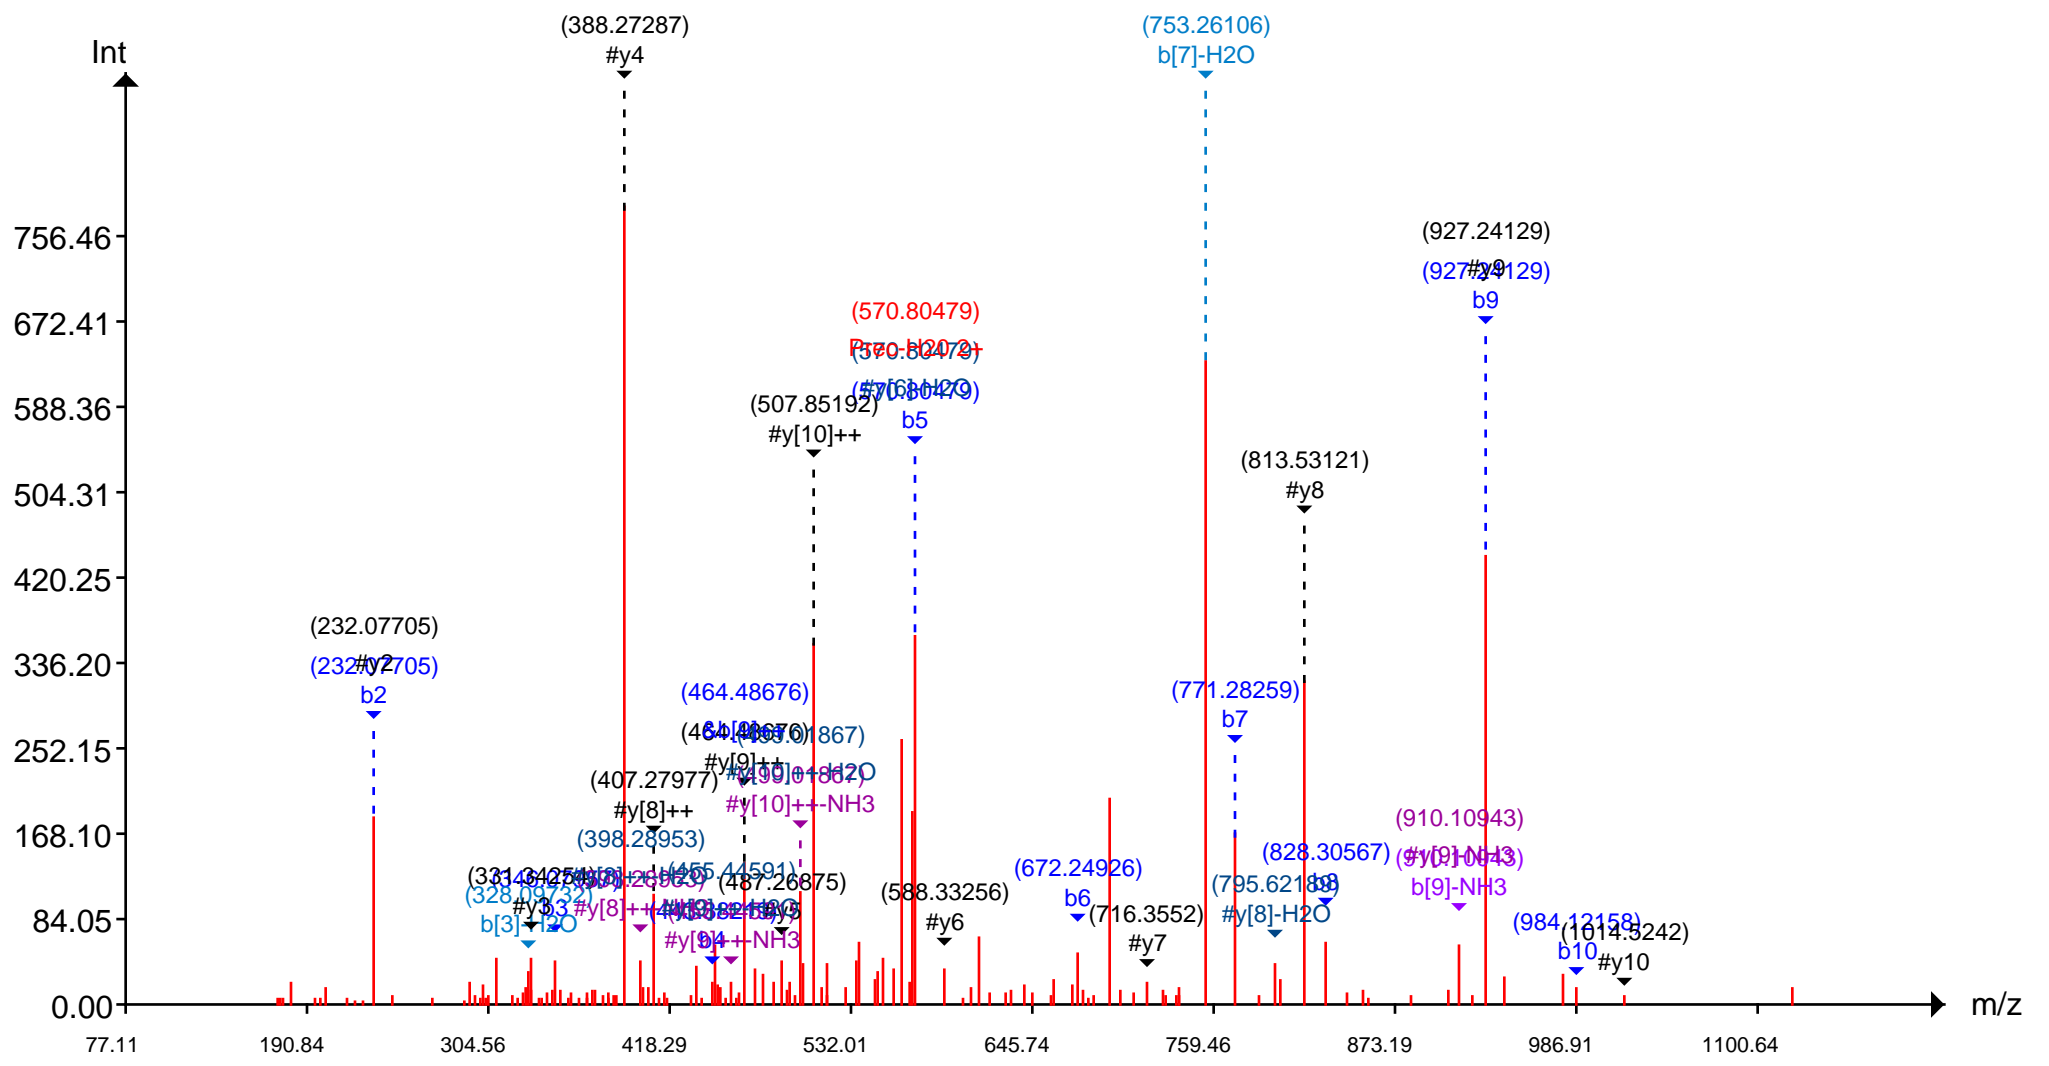

Info

|                          |                       |                           |           |
|--------------------------|-----------------------|---------------------------|-----------|
| <b>Modified Sequence</b> | AcD3-VSNPQTVGVGR-COOH | <b>Ion score</b>          | 55.49     |
| <b>Protein</b>           | O70492                | <b>Confidence level</b>   | 99.00%    |
| <b>Precursor m/z</b>     | 579.81838             | <b>Identity Threshold</b> | 47.82     |
| <b>Charge</b>            | 2+                    | <b>Mass error</b>         | -0.001022 |

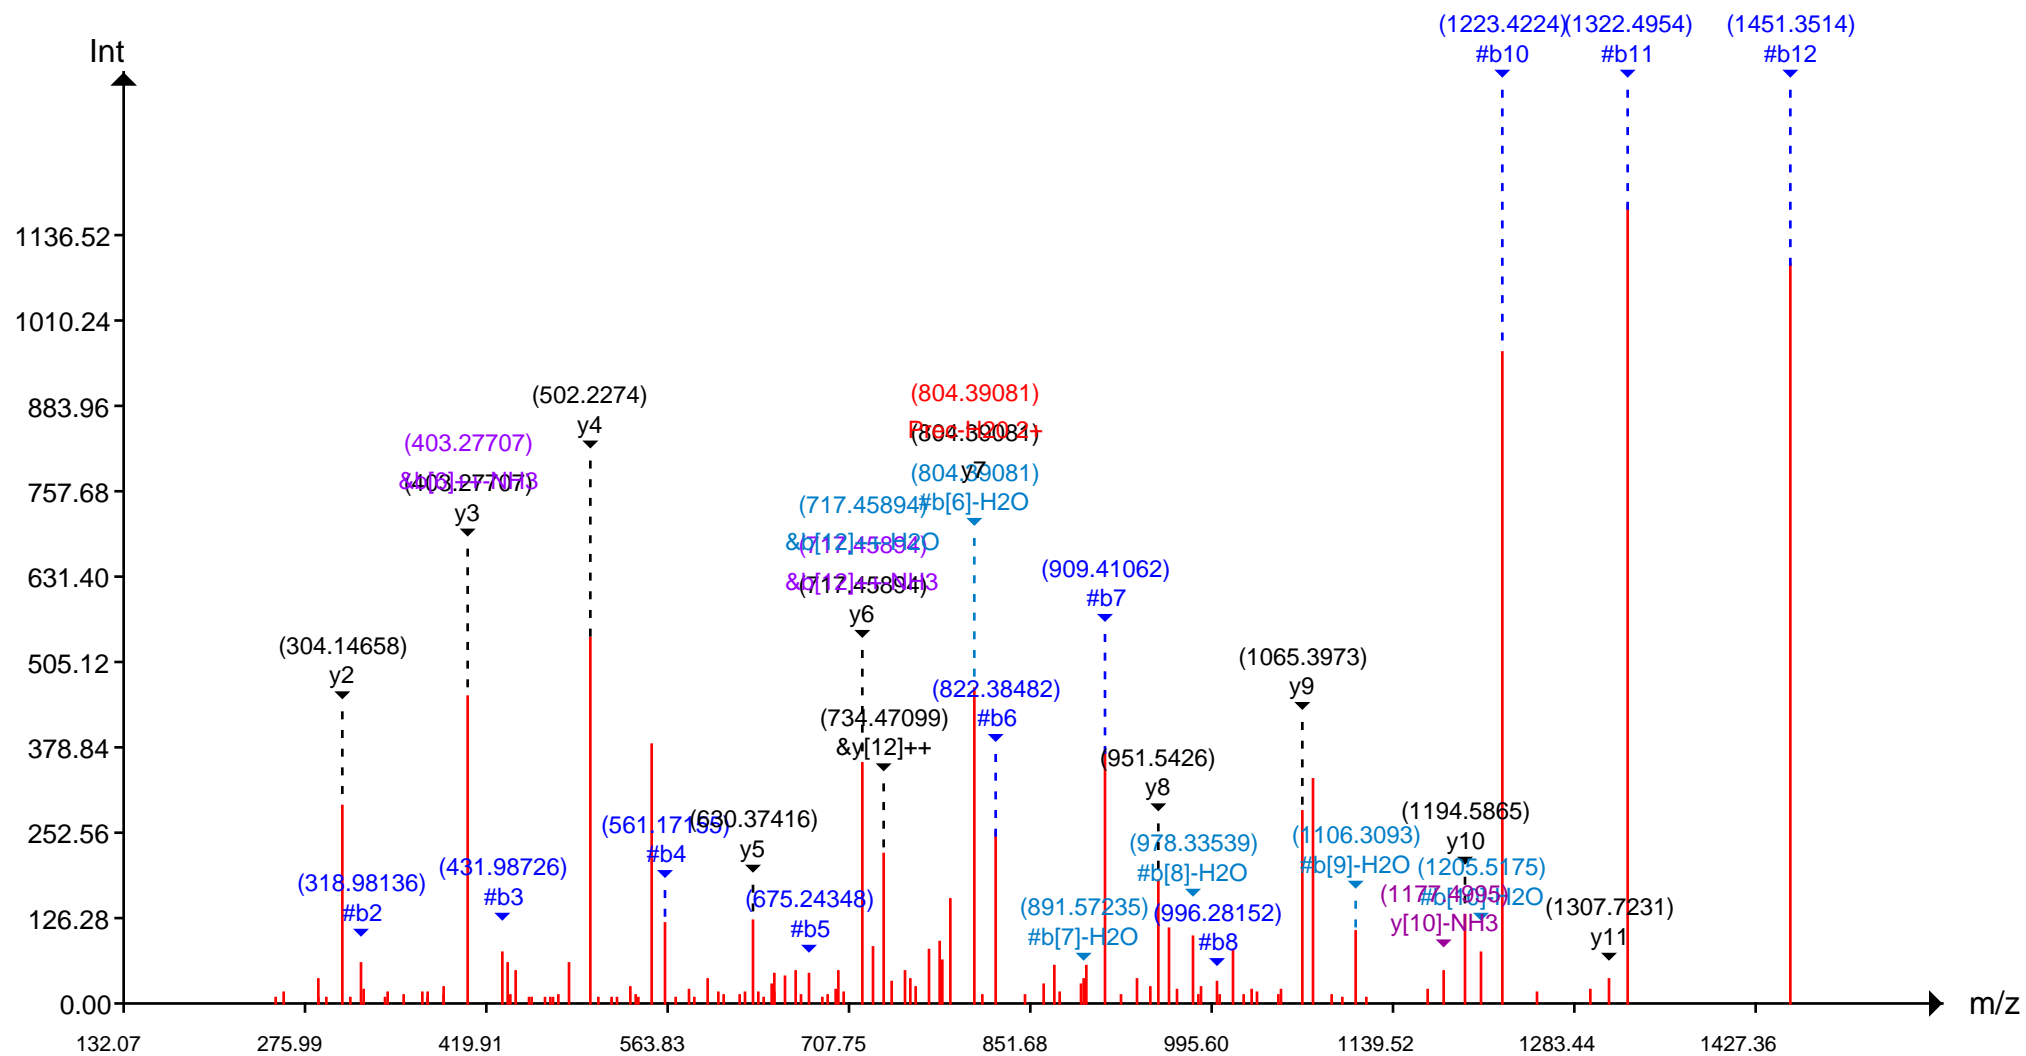

## Info

|                          |                               |                           |          |
|--------------------------|-------------------------------|---------------------------|----------|
| <b>Modified Sequence</b> | AcD3-LC<Cmm*>LENFSSQVVER-COOH | <b>Ion score</b>          | 92.47    |
| <b>Protein</b>           | P59999                        | <b>Confidence level</b>   | 99.00%   |
| <b>Precursor m/z</b>     | 813.40693                     | <b>Identity Threshold</b> | 47.57    |
| <b>Charge</b>            | 2+                            | <b>Mass error</b>         | 0.003486 |



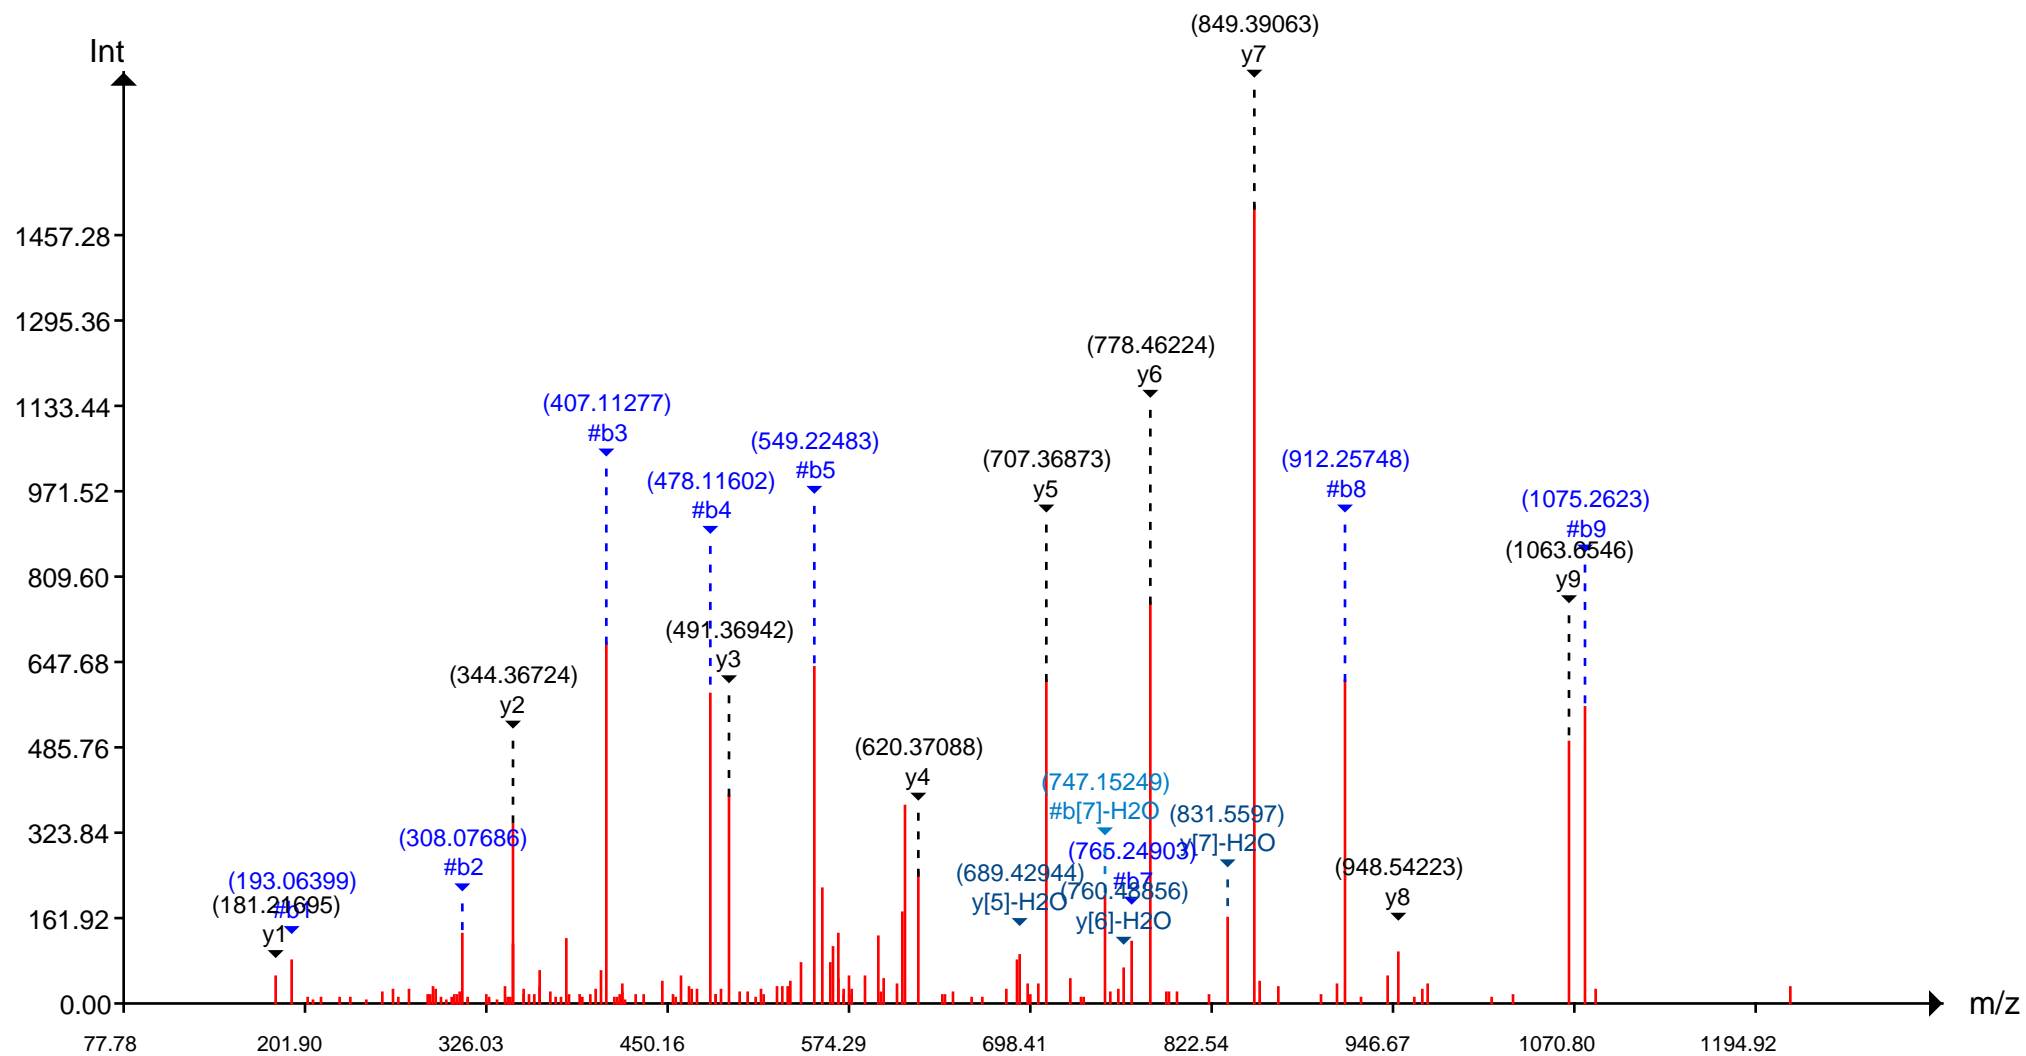

## Info

**Modified Sequence** AcD3-M<Mox\*>DVAASEFYR<C13>-COOH

**Ion score** 93.2

**Protein** P17182, P21550, P17183

**Confidence level** 99.00%

**Precursor m/z** 628.29377

**Identity Threshold** 45.46

**Charge** 2+

**Mass error** 4.48E-4

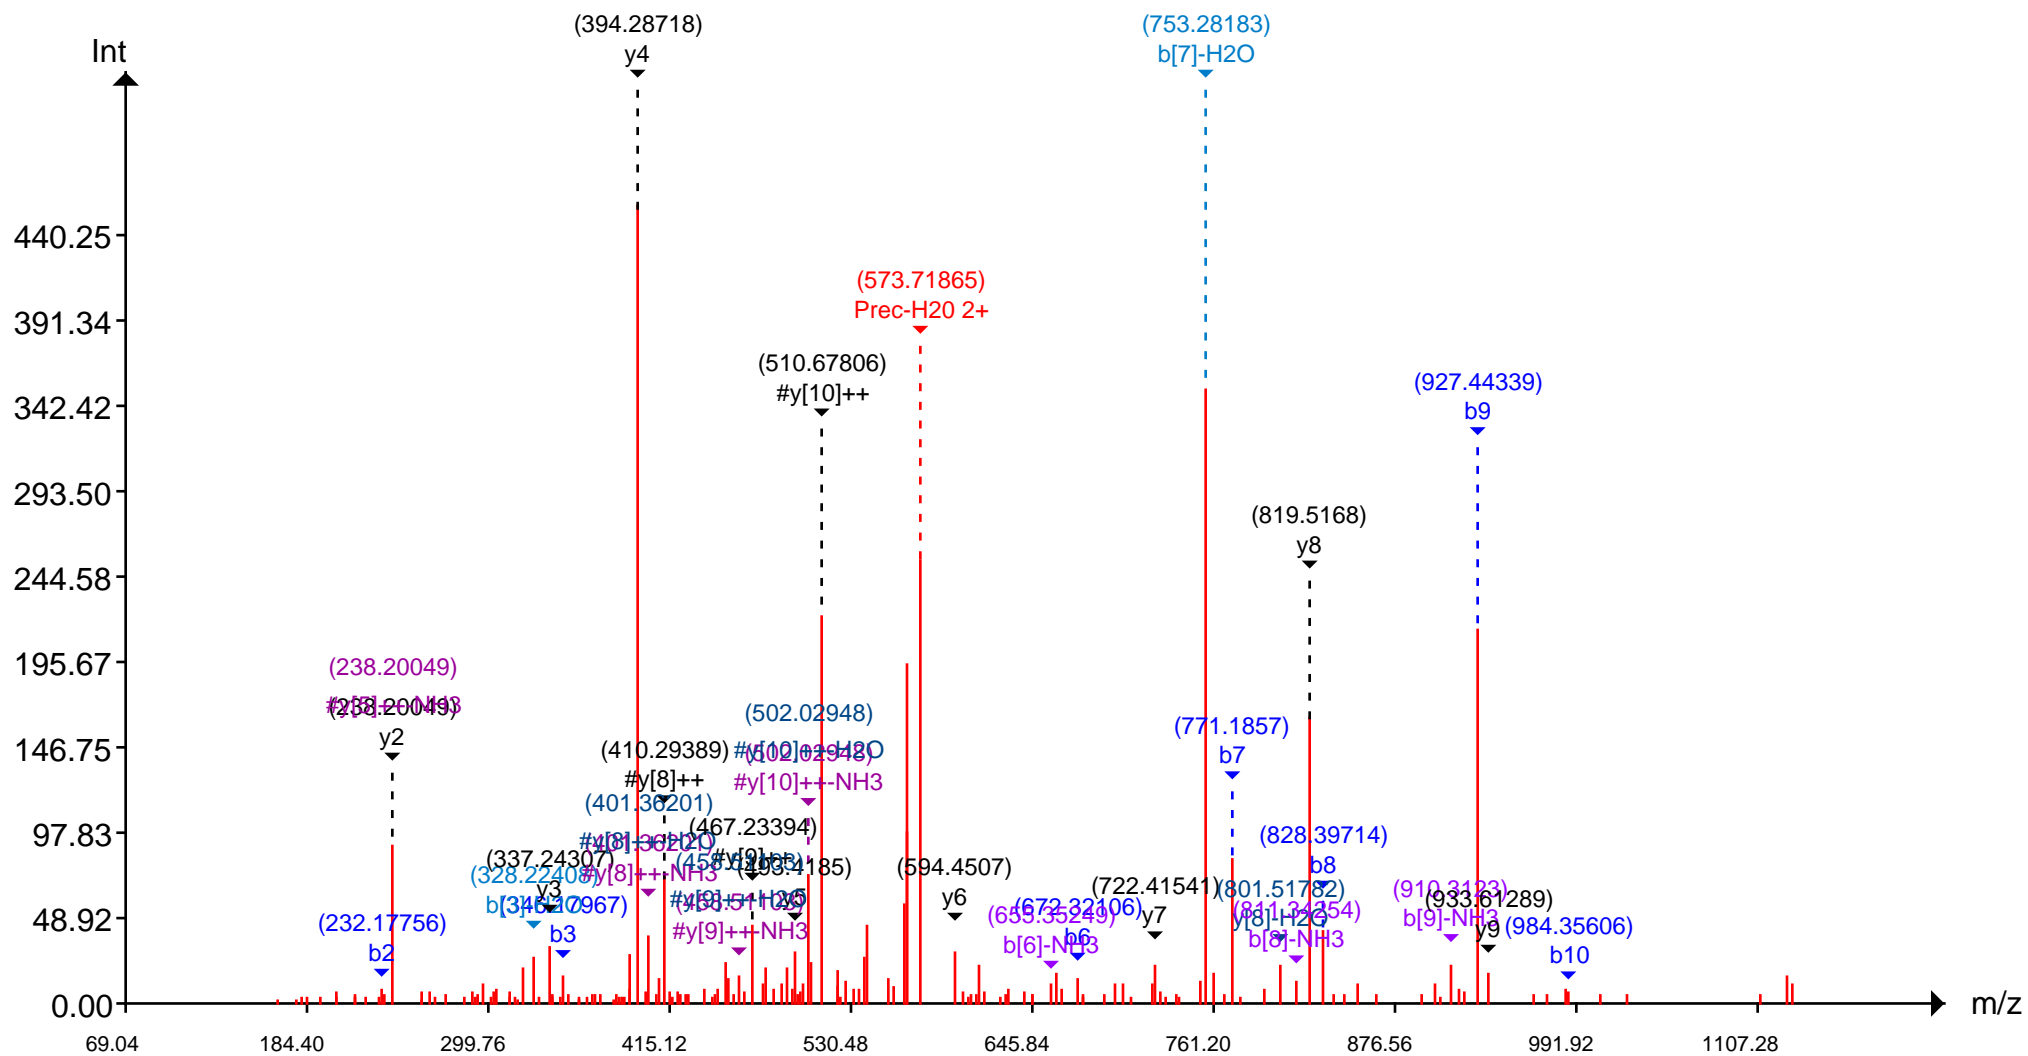

## Info

**Modified Sequence** AcD3-VSNPQTVGVGR<C13>-COOH

**Ion score** 53.63

**Protein** O70492

**Confidence level** 99.00%

**Precursor m/z** 582.82842

**Identity Threshold** 47.56

**Charge** 2+

**Mass error** -0.001084

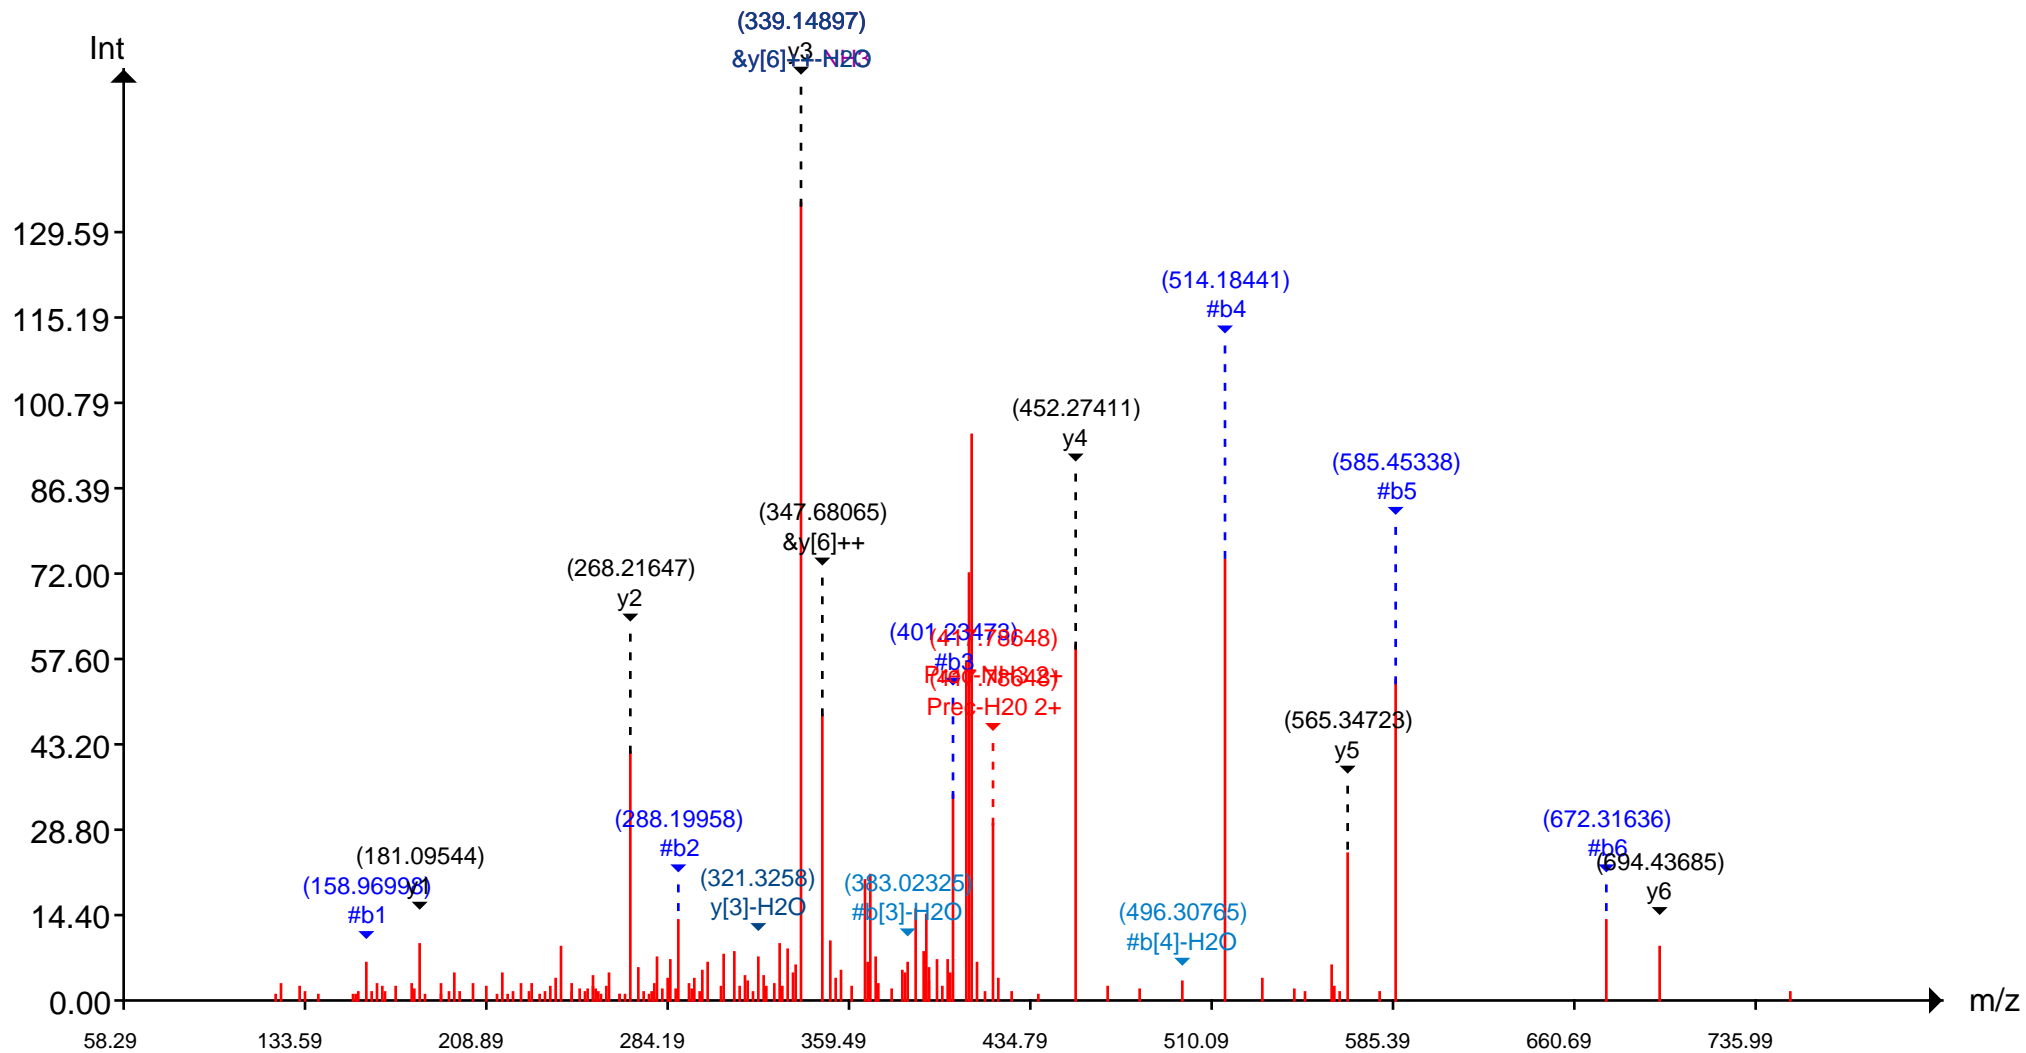

## Info

|                          |                                |                           |         |
|--------------------------|--------------------------------|---------------------------|---------|
| <b>Modified Sequence</b> | AcD3-IEILASR<C13>-COOH         | <b>Ion score</b>          | 63.06   |
| <b>Protein</b>           | Q9QZ10, P97429, P14824, O35640 | <b>Confidence level</b>   | 99.00%  |
| <b>Precursor m/z</b>     | 426.76982                      | <b>Identity Threshold</b> | 42.85   |
| <b>Charge</b>            | 2+                             | <b>Mass error</b>         | -1.3E-5 |

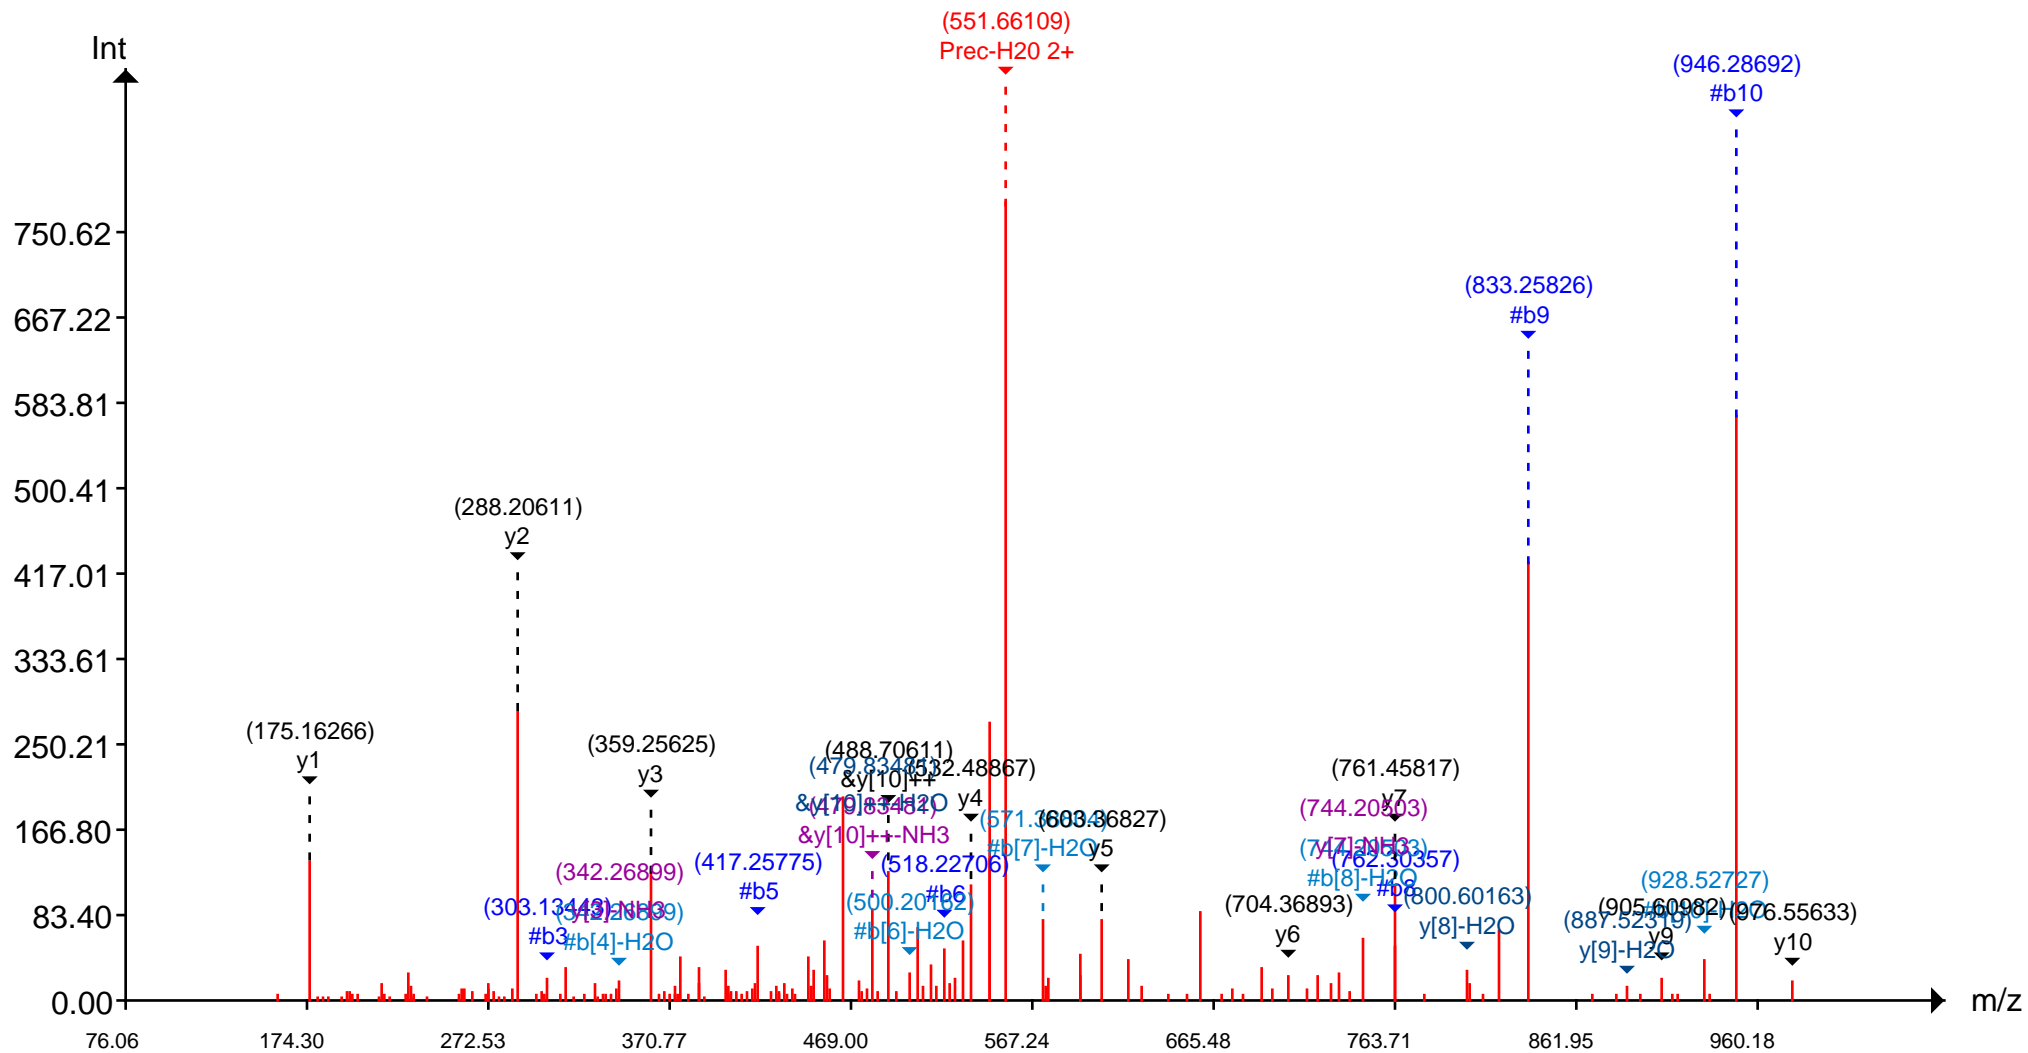

## Info

|                          |                               |                           |          |
|--------------------------|-------------------------------|---------------------------|----------|
| <b>Modified Sequence</b> | AcD3-VASGGTAK<AcD3K*>AIR-COOH | <b>Ion score</b>          | 54.32    |
| <b>Protein</b>           | Q9CWJ9                        | <b>Confidence level</b>   | 99.00%   |
| <b>Precursor m/z</b>     | 560.83308                     | <b>Identity Threshold</b> | 46.04    |
| <b>Charge</b>            | 2+                            | <b>Mass error</b>         | -2.63E-4 |

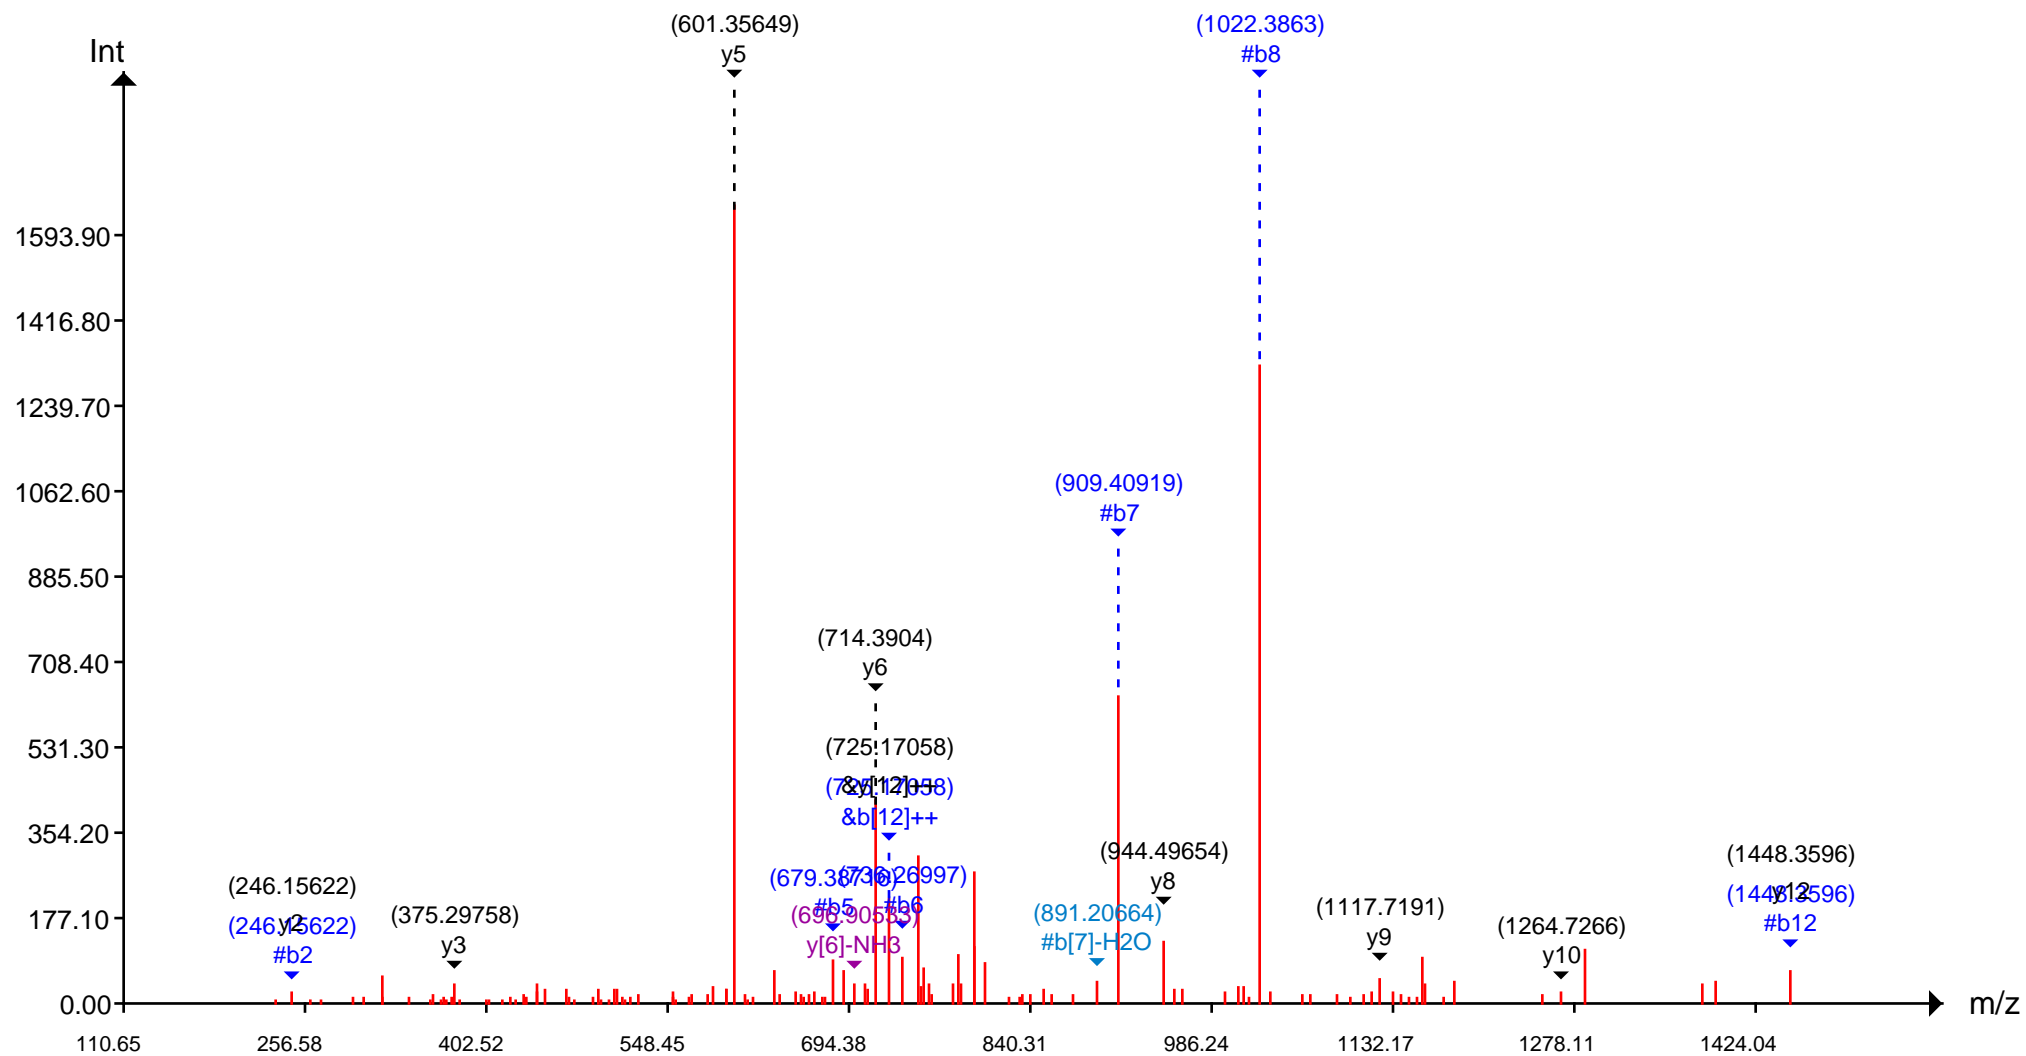

## Info

|                          |                                               |                           |          |
|--------------------------|-----------------------------------------------|---------------------------|----------|
| <b>Modified Sequence</b> | AcD3-EALM<Mox*>K<AcD3K*>GK<AcD3K*>LPEEAR-COOH | <b>Ion score</b>          | 48.67    |
| <b>Protein</b>           | P06745                                        | <b>Confidence level</b>   | 99.00%   |
| <b>Precursor m/z</b>     | 811.94298                                     | <b>Identity Threshold</b> | 47.73    |
| <b>Charge</b>            | 2+                                            | <b>Mass error</b>         | 0.001901 |

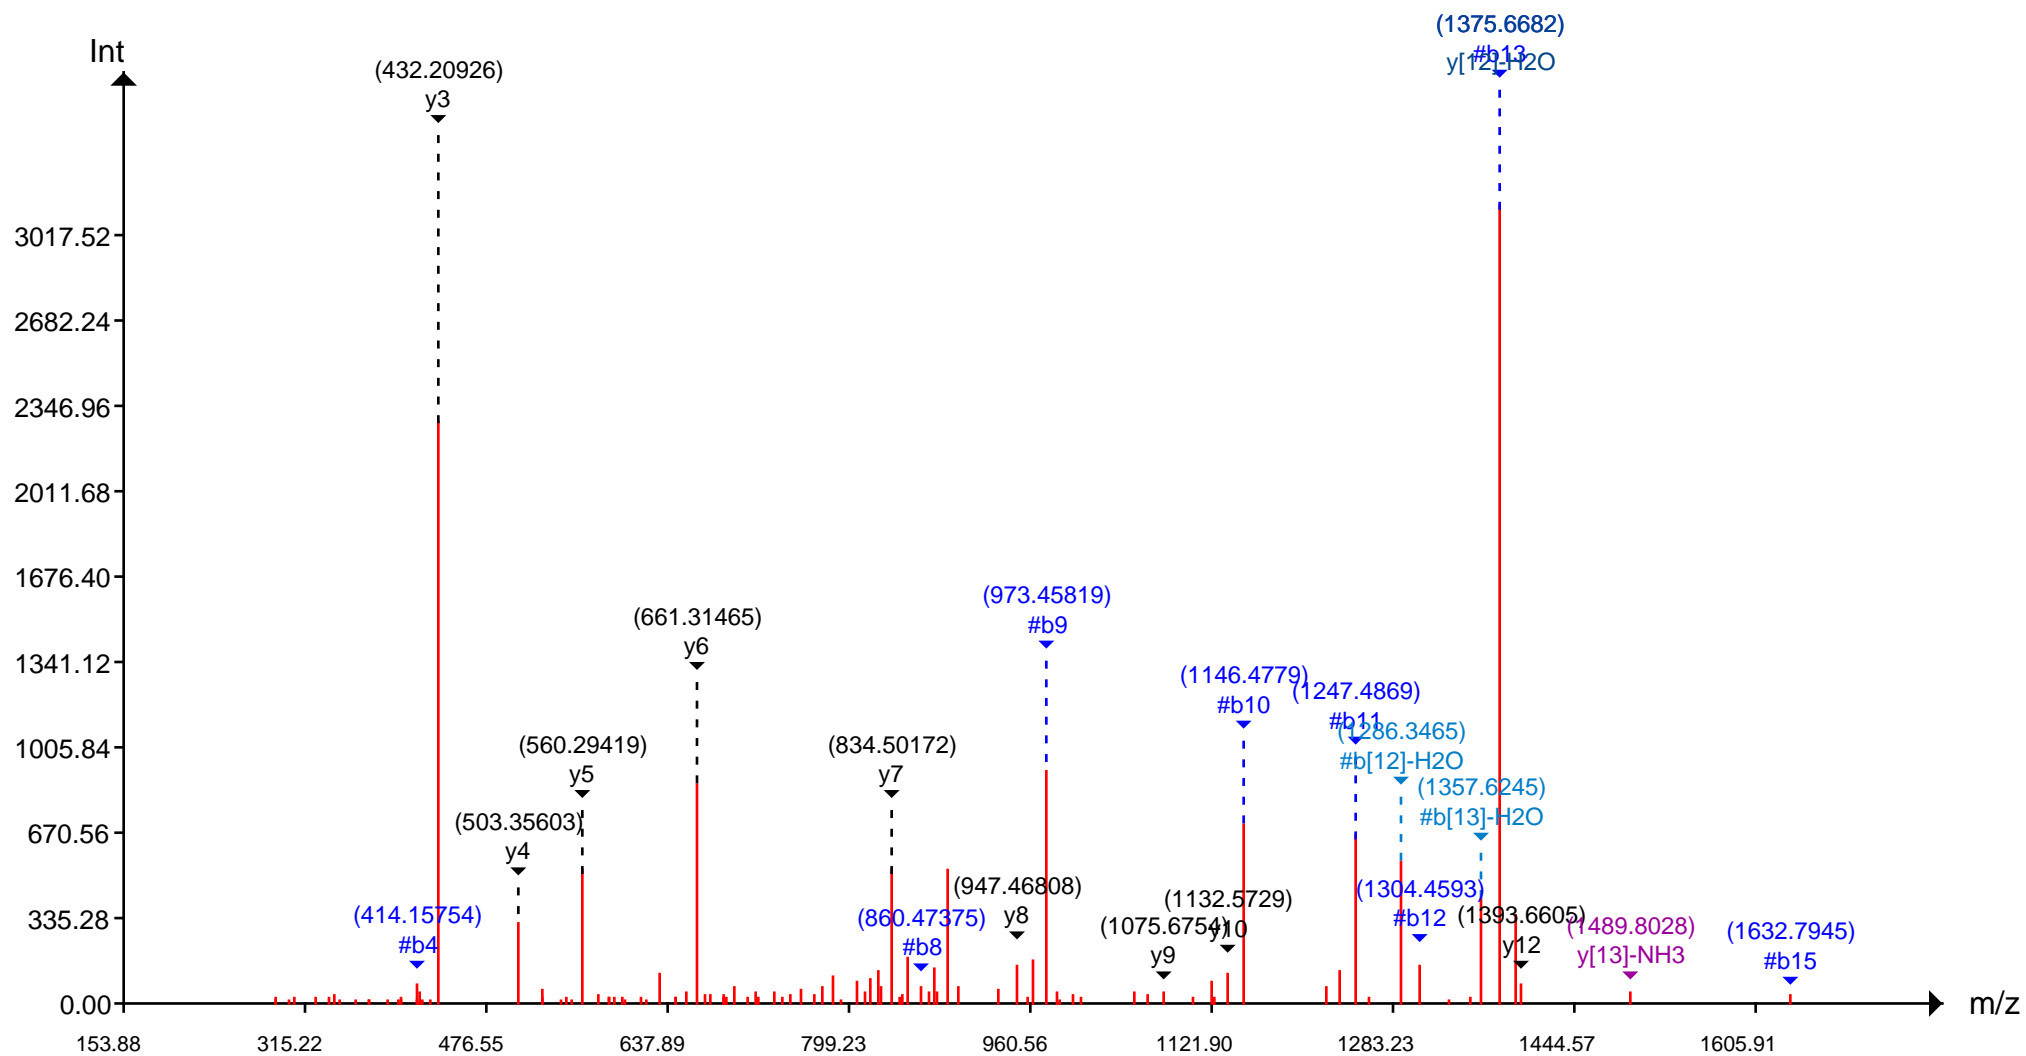

## Info

|                          |                                                |                           |          |
|--------------------------|------------------------------------------------|---------------------------|----------|
| <b>Modified Sequence</b> | AcD3-VVGLC<Cmm*>TGQIK<AcD3K*>TGAPC<Cmm*>R-COOH | <b>Ion score</b>          | 58.21    |
| <b>Protein</b>           | P17182, P21550, P17183                         | <b>Confidence level</b>   | 99.00%   |
| <b>Precursor m/z</b>     | 903.9781                                       | <b>Identity Threshold</b> | 48.03    |
| <b>Charge</b>            | 2+                                             | <b>Mass error</b>         | 0.001737 |

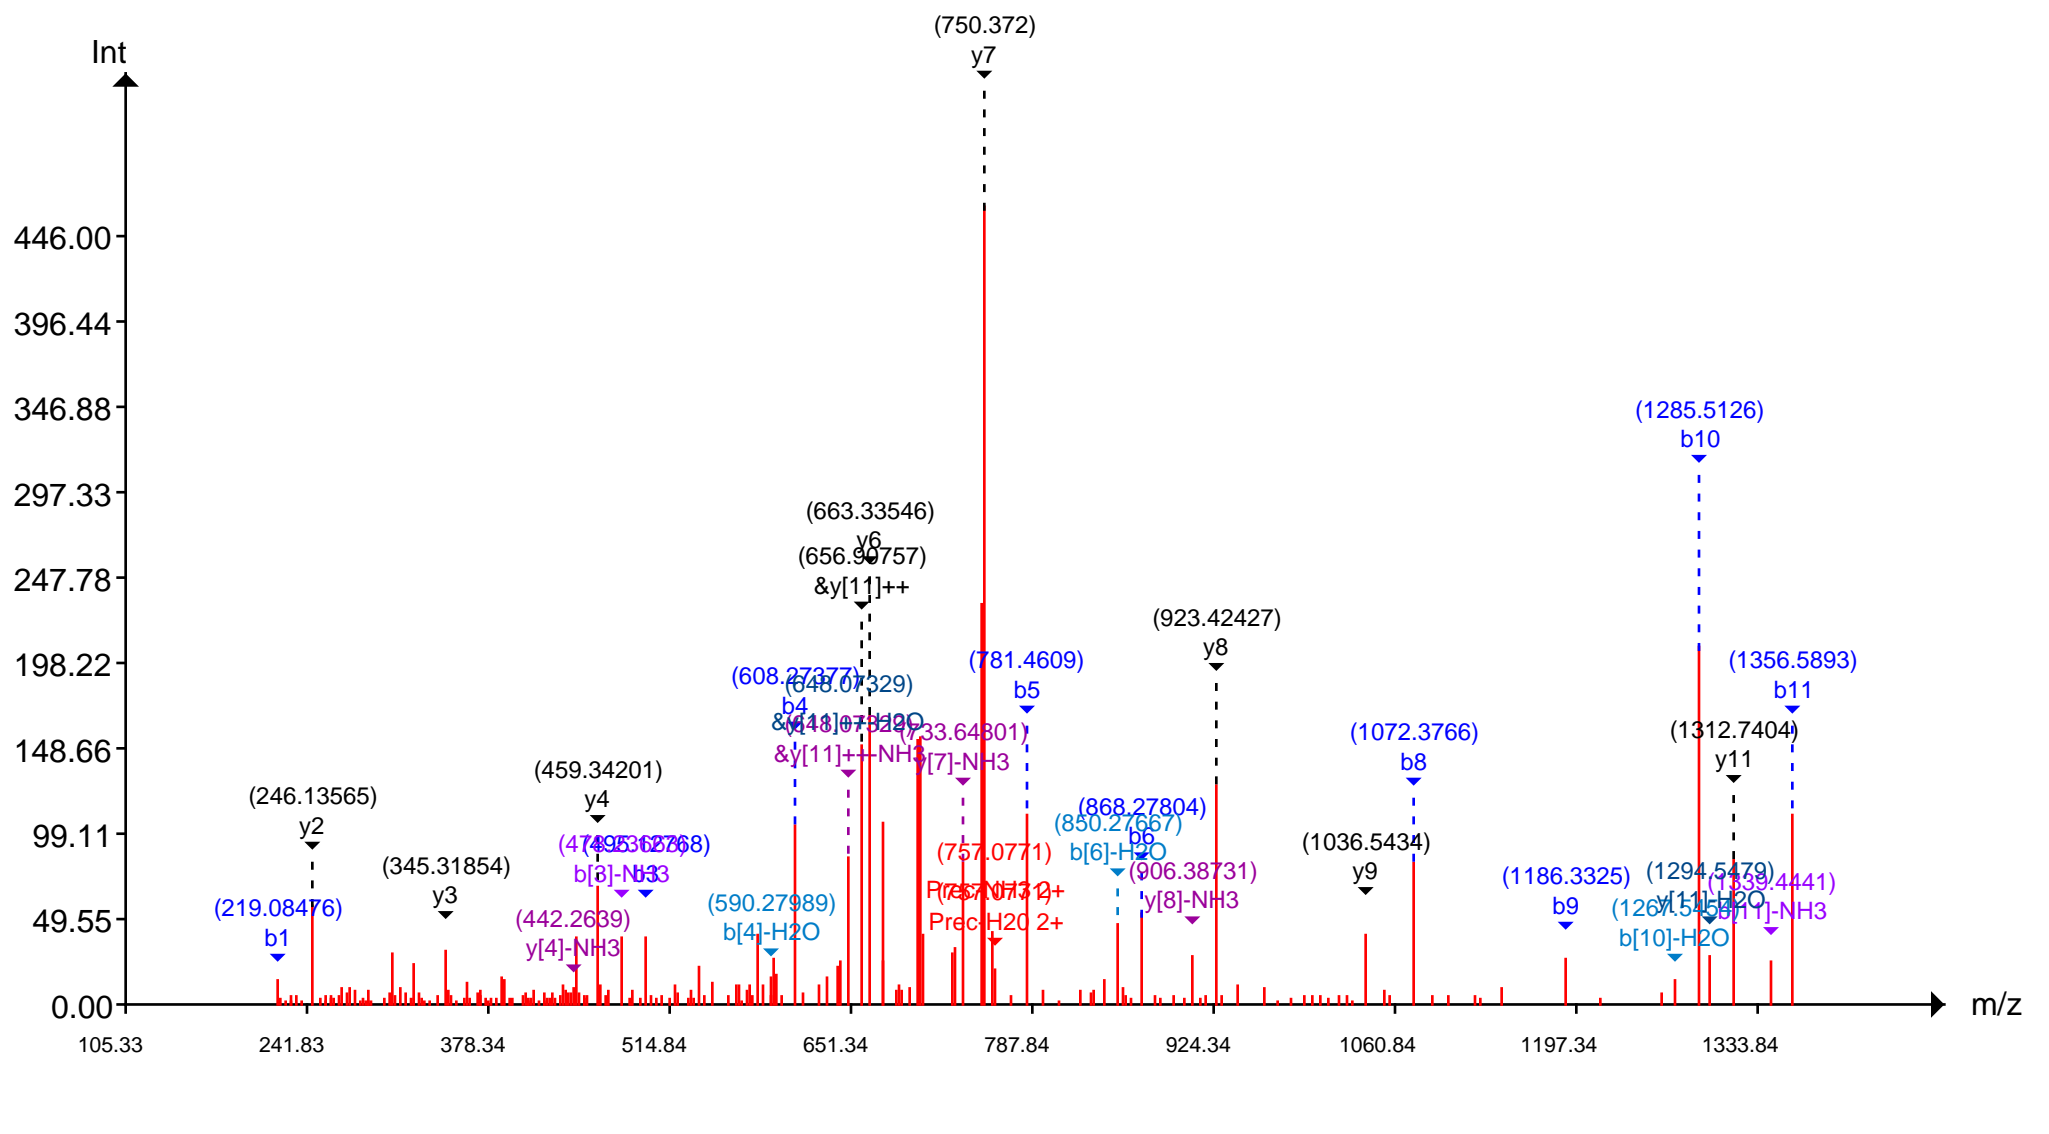

| Info                     |                                                    |                           |         |
|--------------------------|----------------------------------------------------|---------------------------|---------|
| <b>Modified Sequence</b> | AcD3-K<AcD3K*>EM<Mox*>IK<AcD3K*>SGM<Mox*>NVAR-COOH | <b>Ion score</b>          | 66.67   |
| <b>Protein</b>           | P52480                                             | <b>Confidence level</b>   | 99.00%  |
| <b>Precursor m/z</b>     | 765.902                                            | <b>Identity Threshold</b> | 48.12   |
| <b>Charge</b>            | 2+                                                 | <b>Mass error</b>         | 2.79E-4 |

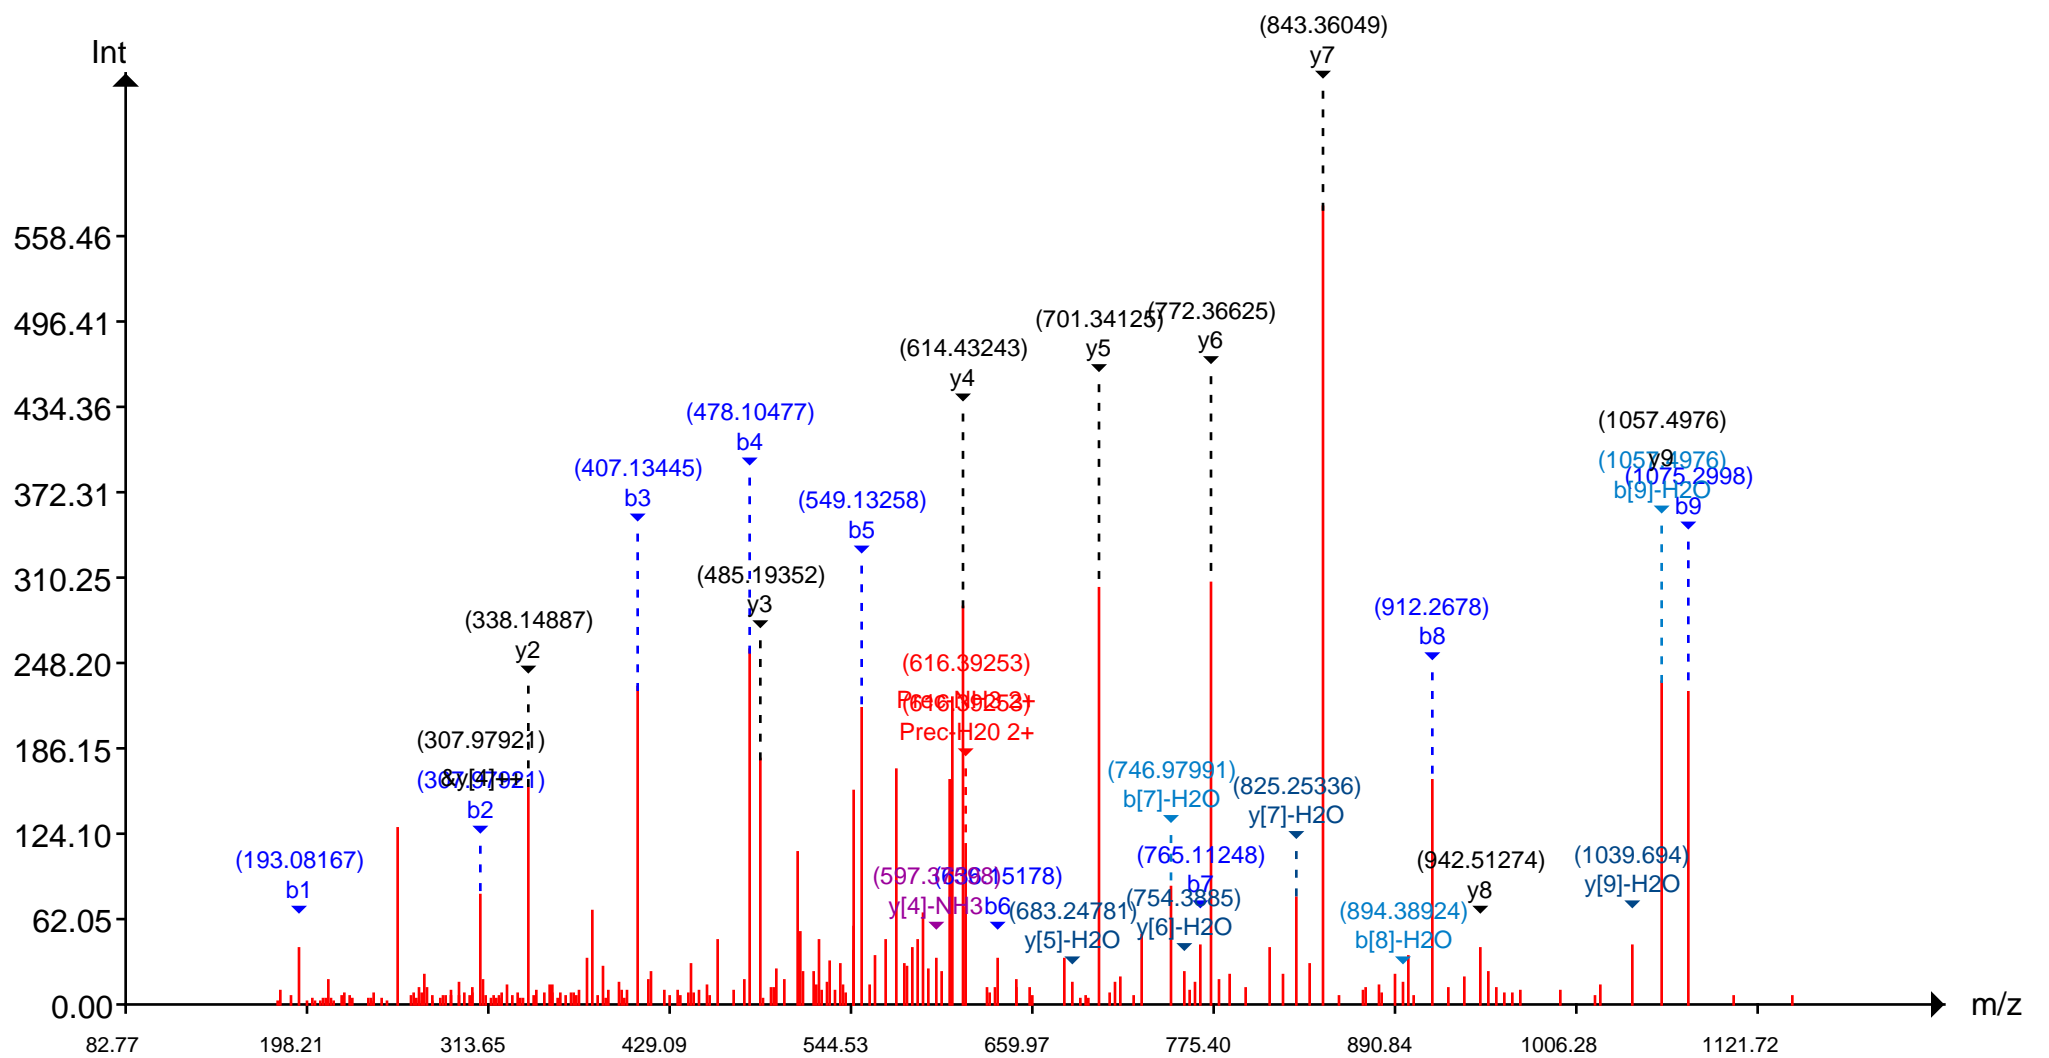

| Info                     |                            | Ion score                 | 77.7    |
|--------------------------|----------------------------|---------------------------|---------|
| <b>Modified Sequence</b> | AcD3-M<Mox*>DVAASEFYR-COOH | <b>Confidence level</b>   | 99.00%  |
| <b>Protein</b>           | P17182, P21550, P17183     | <b>Identity Threshold</b> | 44.28   |
| <b>Precursor m/z</b>     | 625.28393                  | <b>Mass error</b>         | 9.09E-4 |
| <b>Charge</b>            | 2+                         |                           |         |



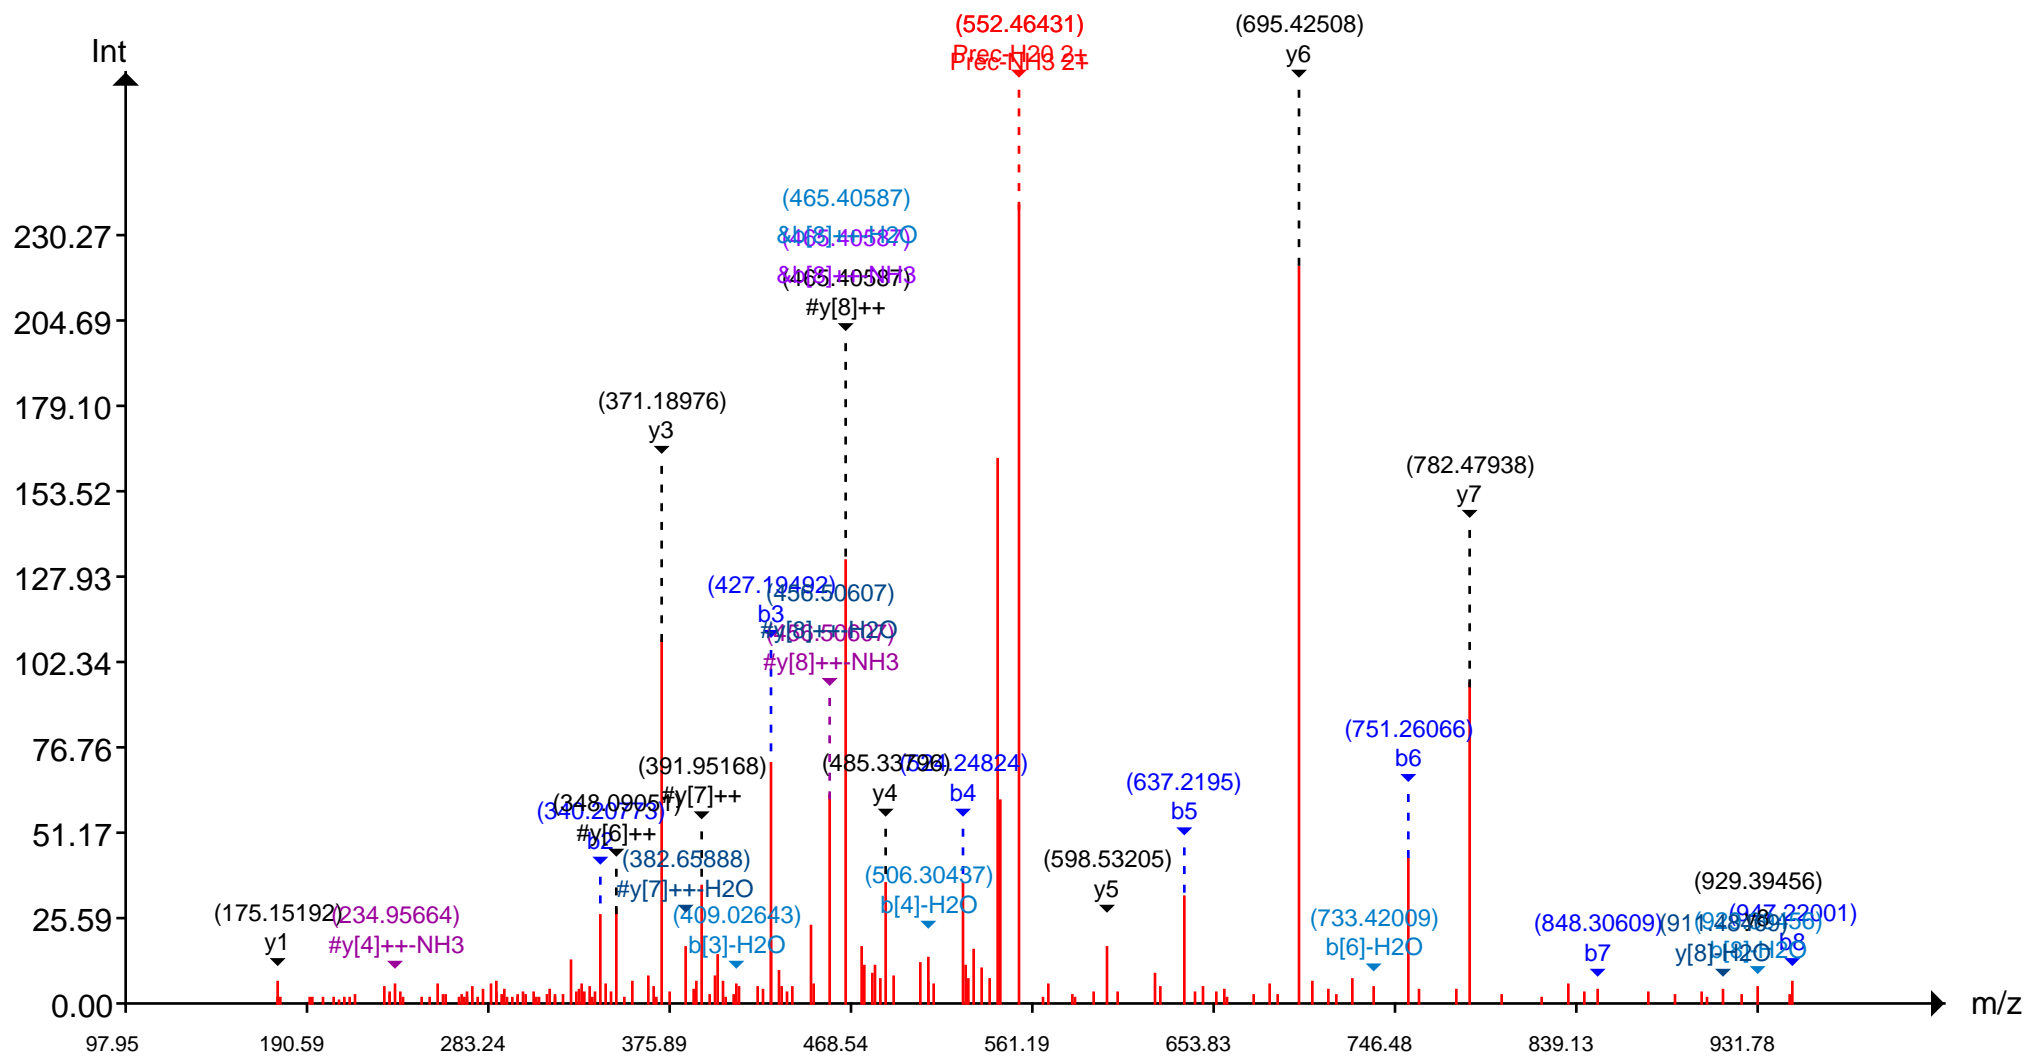

## Info

|                          |                     |                           |         |
|--------------------------|---------------------|---------------------------|---------|
| <b>Modified Sequence</b> | AcD3-FFSPLNPVR-COOH | <b>Ion score</b>          | 55.14   |
| <b>Protein</b>           | O35737, Q9Z2X1      | <b>Confidence level</b>   | 99.00%  |
| <b>Precursor m/z</b>     | 561.31281           | <b>Identity Threshold</b> | 47.60   |
| <b>Charge</b>            | 2+                  | <b>Mass error</b>         | 2.13E-4 |



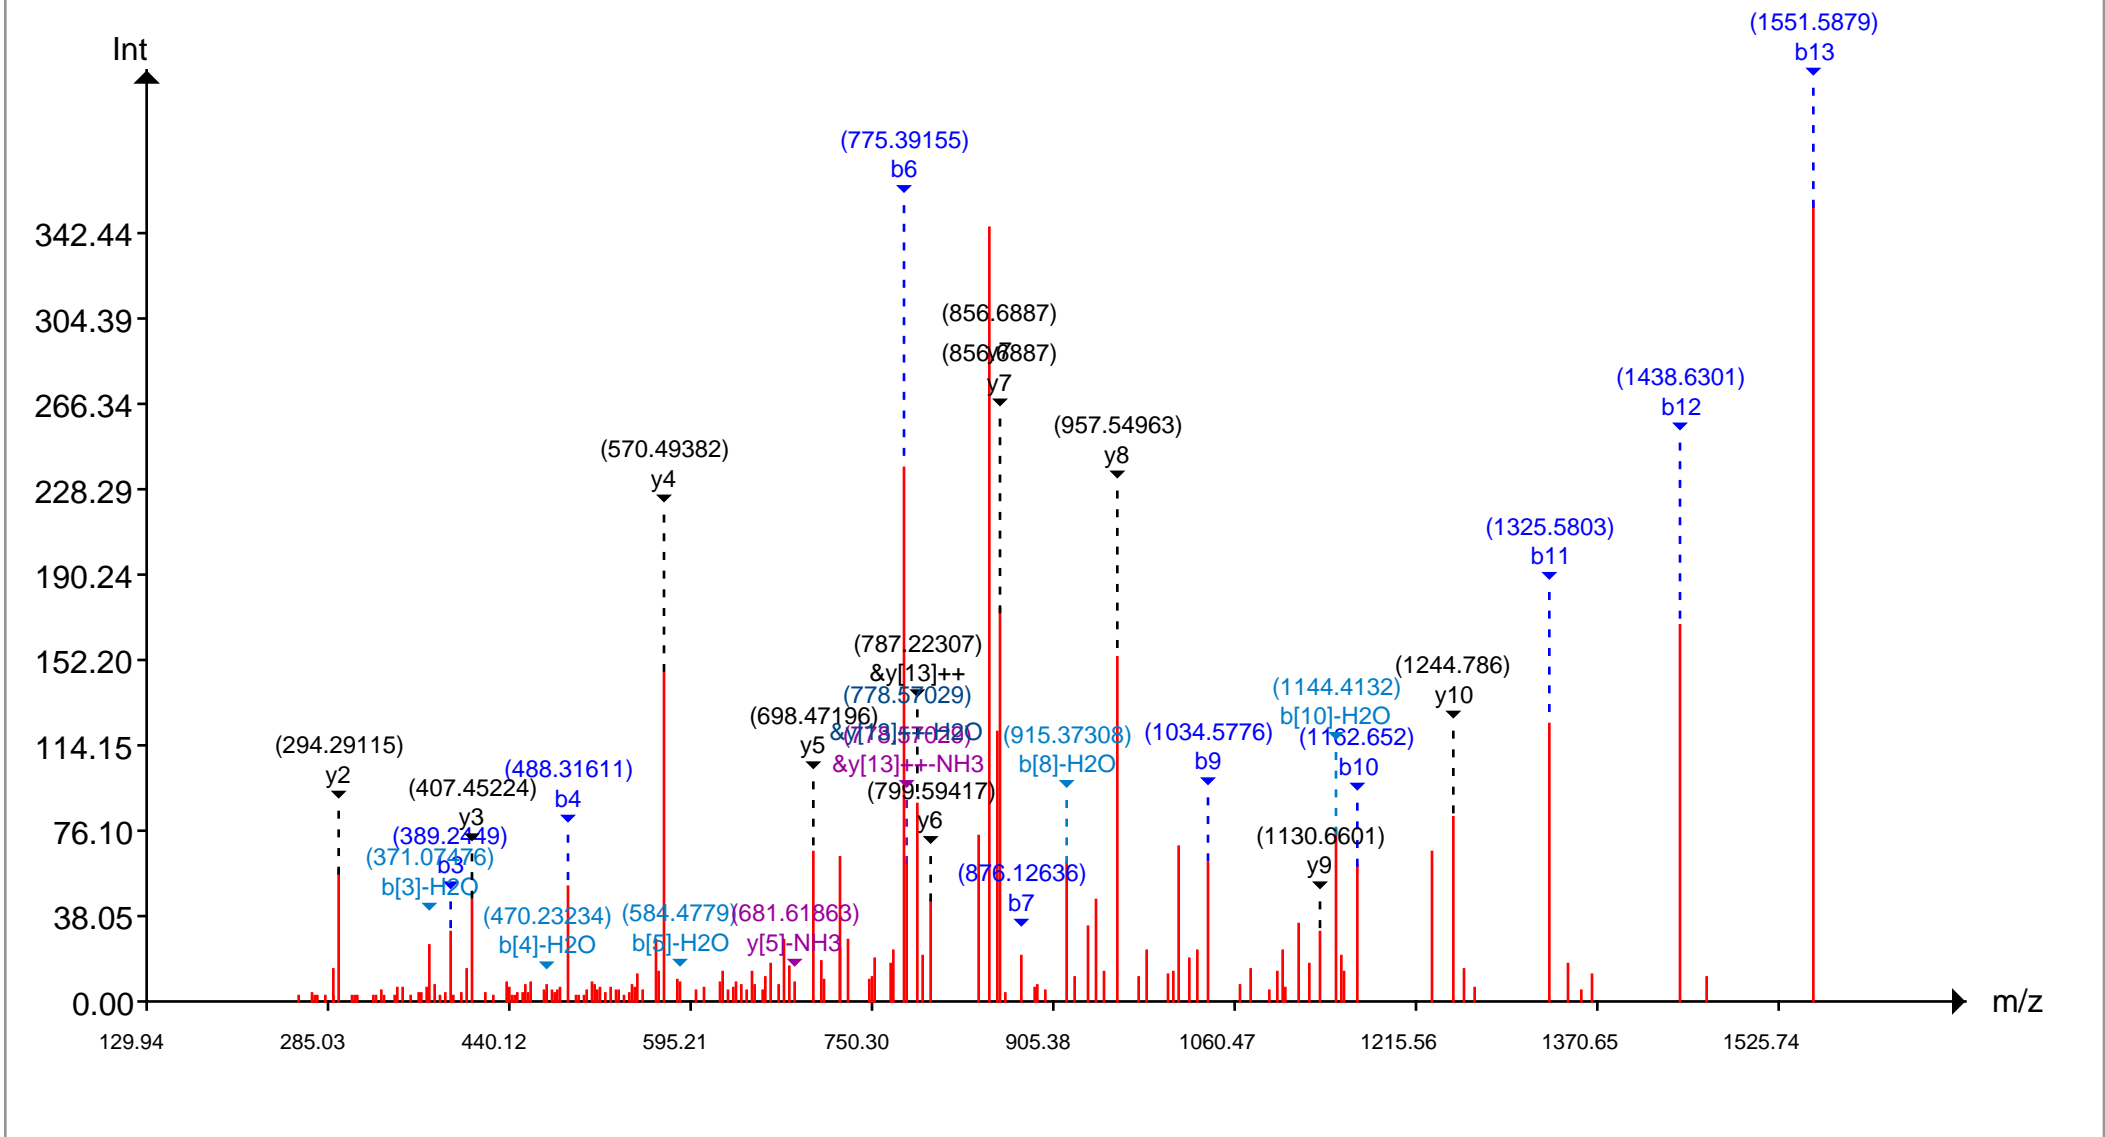

## Info

|                          |                                       |                           |        |
|--------------------------|---------------------------------------|---------------------------|--------|
| <b>Modified Sequence</b> | AcD3-LTEVNK<AcD3K*>TGTQYLLR<C13>-COOH | <b>Ion score</b>          | 60.13  |
| <b>Protein</b>           | Q60854                                | <b>Confidence level</b>   | 99.00% |
| <b>Precursor m/z</b>     | 866.49658                             | <b>Identity Threshold</b> | 45.82  |
| <b>Charge</b>            | 2+                                    | <b>Mass error</b>         | 5.2E-4 |

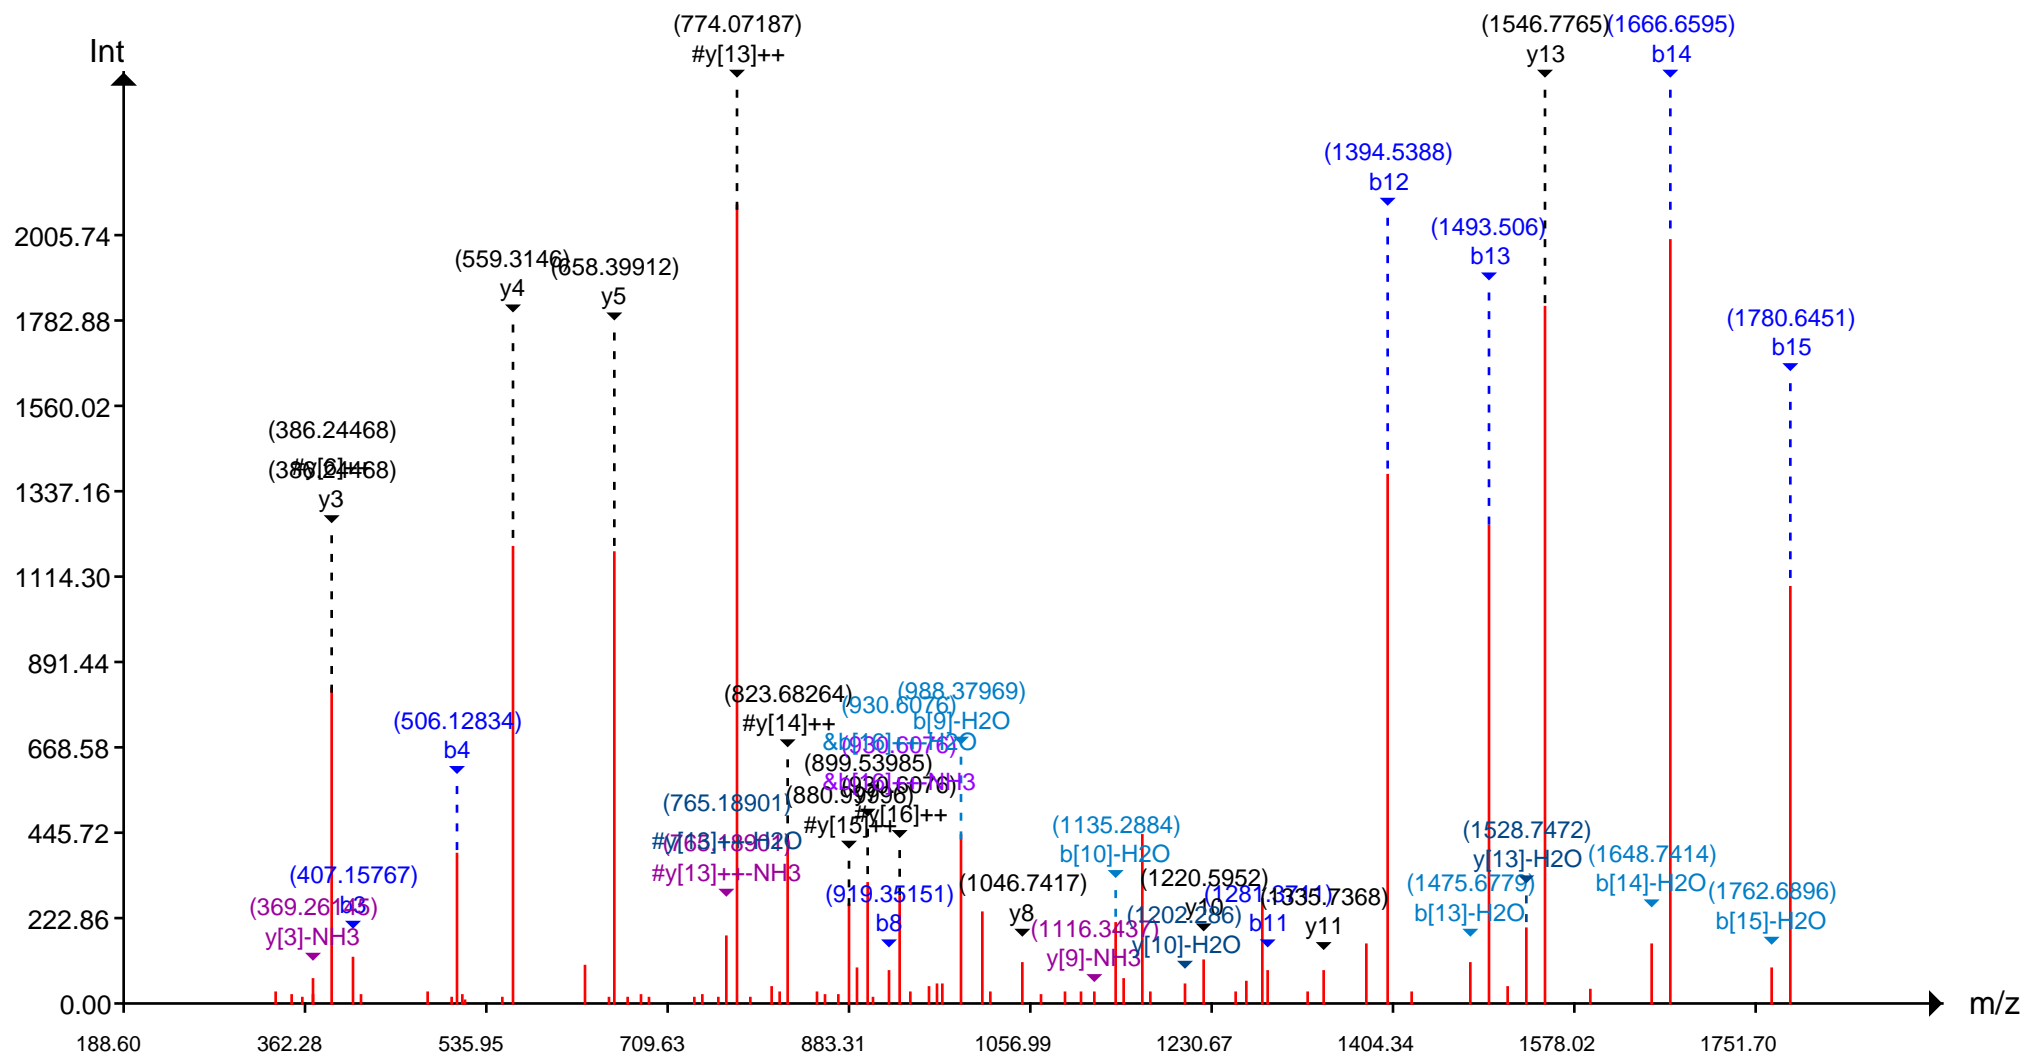

## Info

|                          |                                     |                           |          |
|--------------------------|-------------------------------------|---------------------------|----------|
| <b>Modified Sequence</b> | AcD3-FVDVPNDSSFQIVK<AcD3K*>NPR-COOH | <b>Ion score</b>          | 58.3     |
| <b>Protein</b>           | Q61176                              | <b>Confidence level</b>   | 99.00%   |
| <b>Precursor m/z</b>     | 1026.5386                           | <b>Identity Threshold</b> | 48.00    |
| <b>Charge</b>            | 2+                                  | <b>Mass error</b>         | 0.003169 |

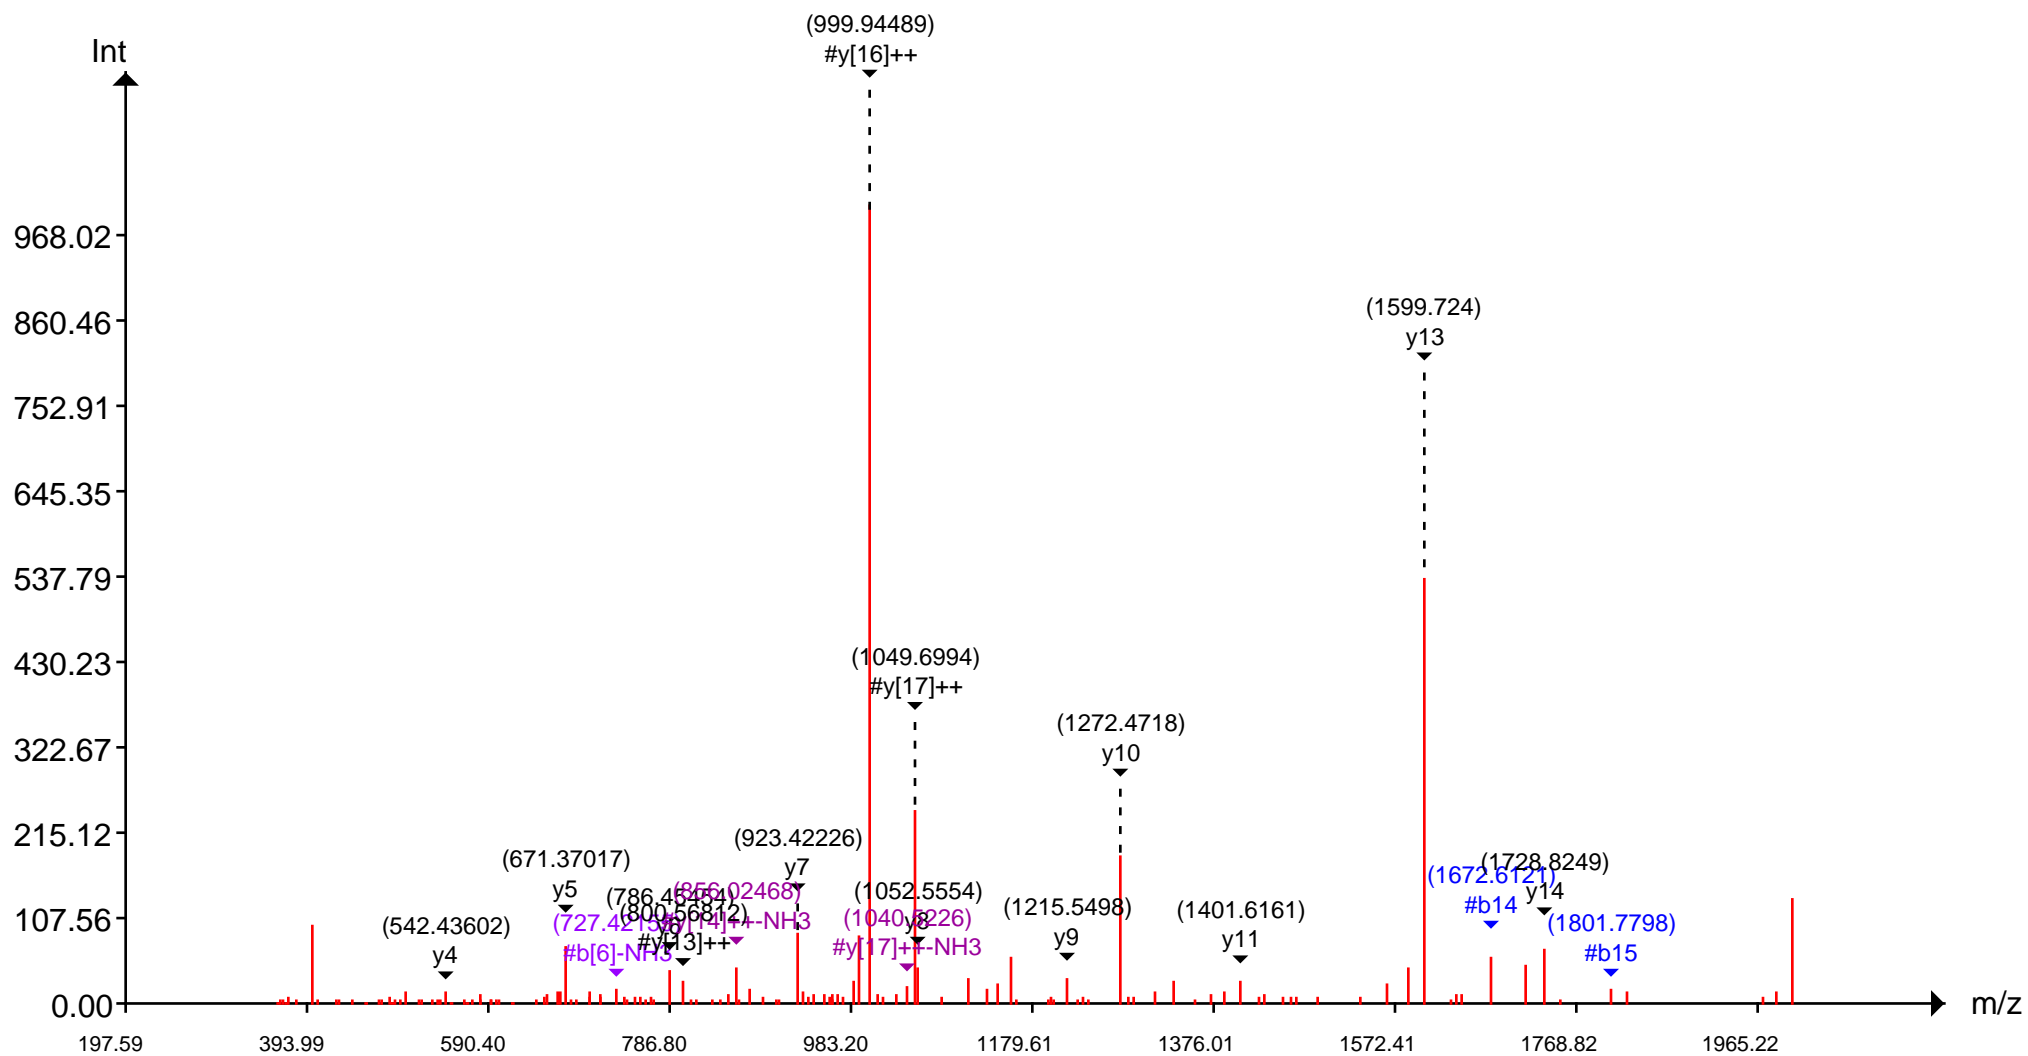

## Info

**Modified Sequence** AcD3-AEVPK<AcD3K\*>EPTEGYEHDETFLR<C13>-COOH

**Ion score** 51.67

**Protein** Q9DCG9

**Confidence level** 99.00%

**Precursor m/z** 1172.0738

**Identity Threshold** 47.08

**Charge** 2+

**Mass error** 0.004996

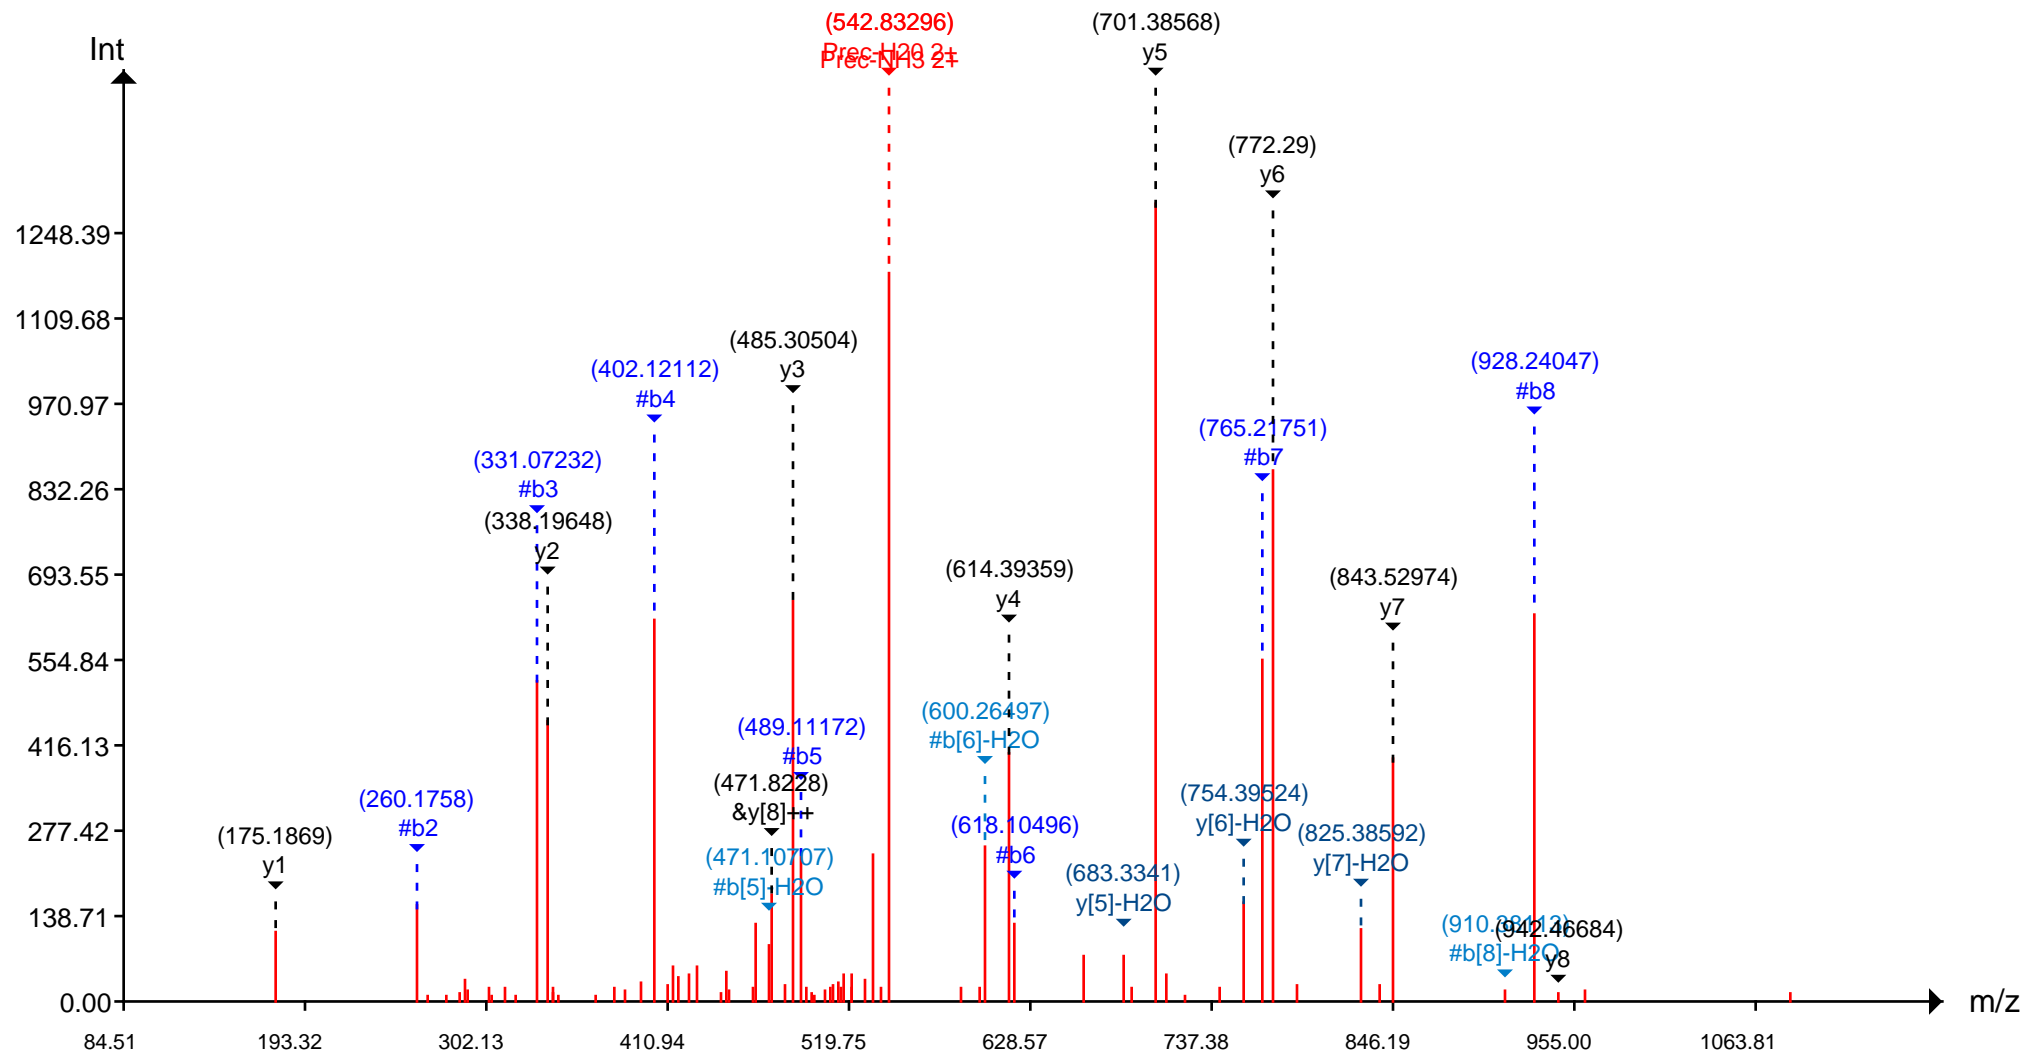

## Info

|                          |                        |                           |         |
|--------------------------|------------------------|---------------------------|---------|
| <b>Modified Sequence</b> | AcD3-DVAASEFYR-COOH    | <b>Ion score</b>          | 66.57   |
| <b>Protein</b>           | P17182, P21550, P17183 | <b>Confidence level</b>   | 99.00%  |
| <b>Precursor m/z</b>     | 551.76574              | <b>Identity Threshold</b> | 46.19   |
| <b>Charge</b>            | 2+                     | <b>Mass error</b>         | -7.0E-5 |

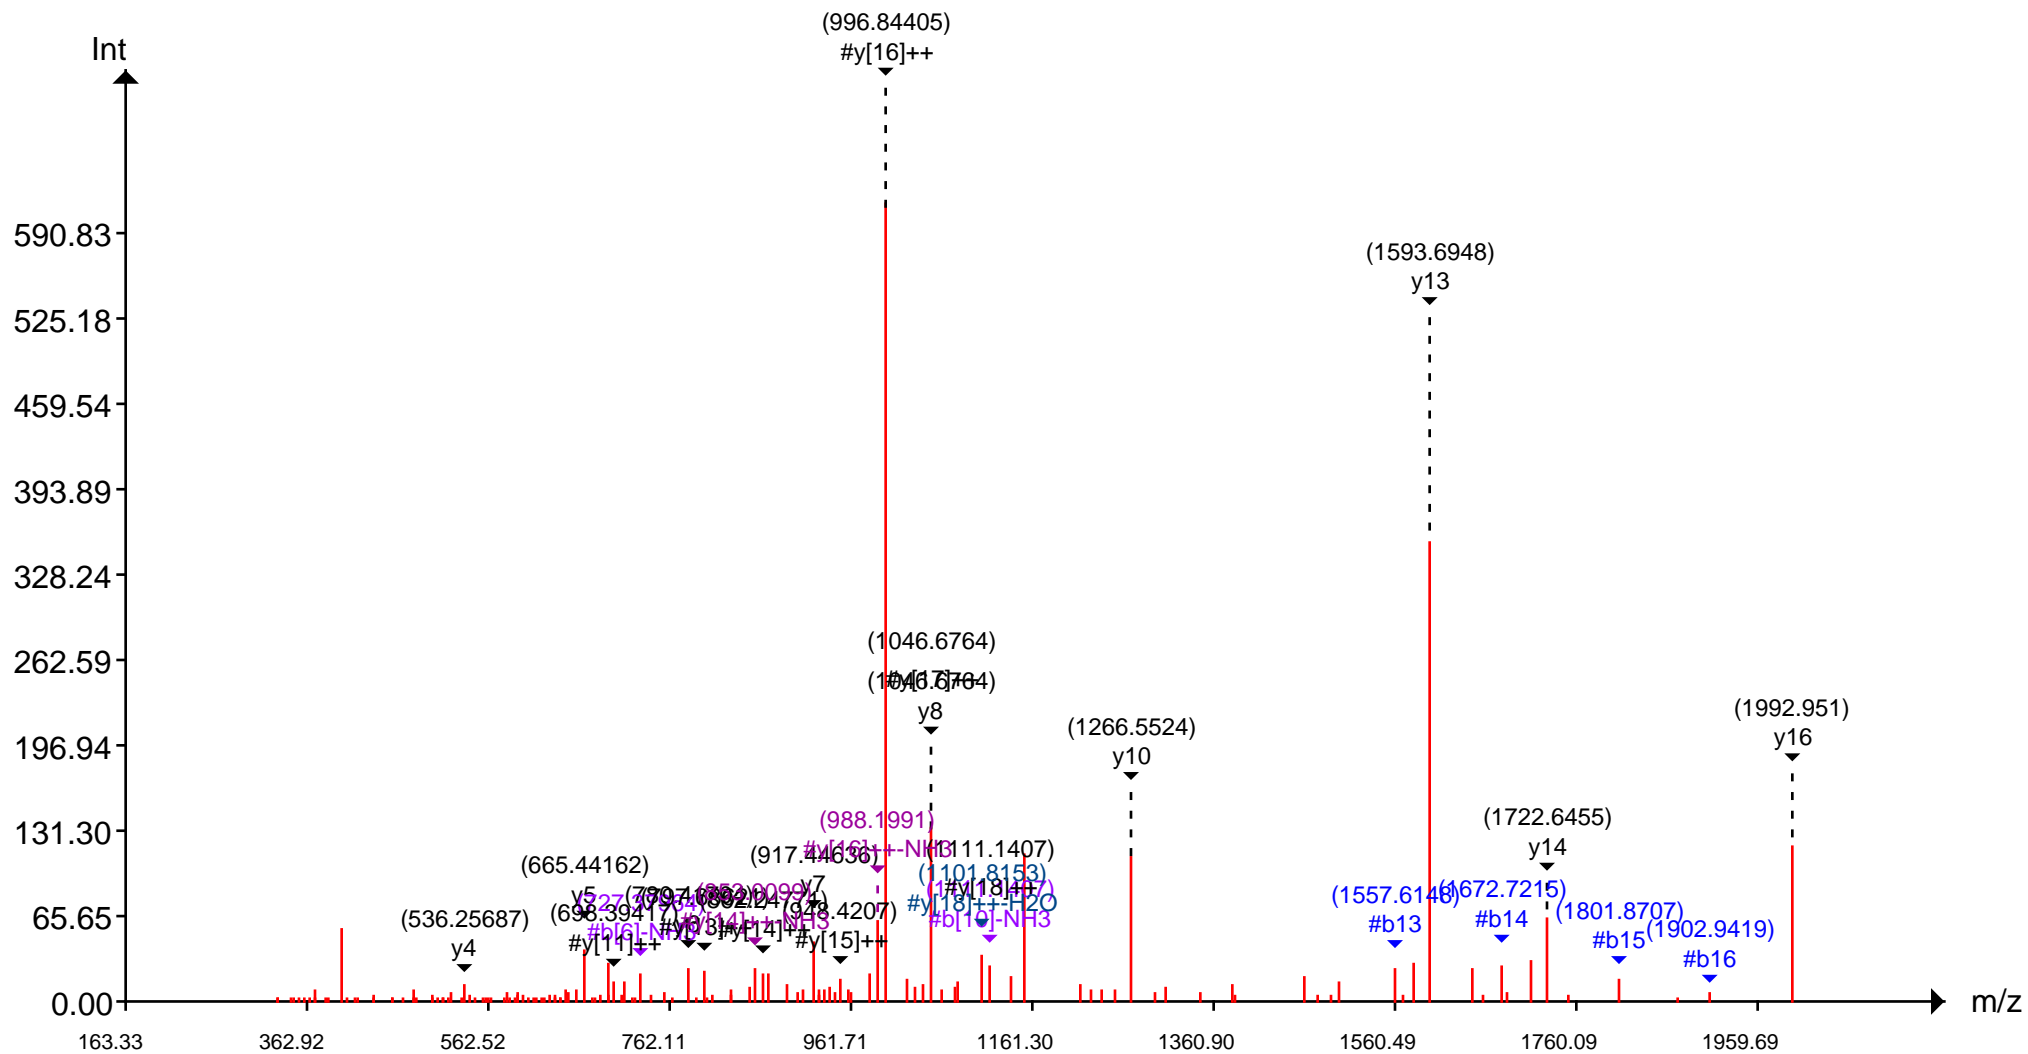

## Info

**Modified Sequence** AcD3-AEVPK<AcD3K\*>EPTEGYEHDETFLR-COOH

**Ion score** 68.55

**Protein** Q9DCG9

**Confidence level** 99.00%

**Precursor m/z** 1169.063

**Identity Threshold** 46.66

**Charge** 2+

**Mass error** 0.003538

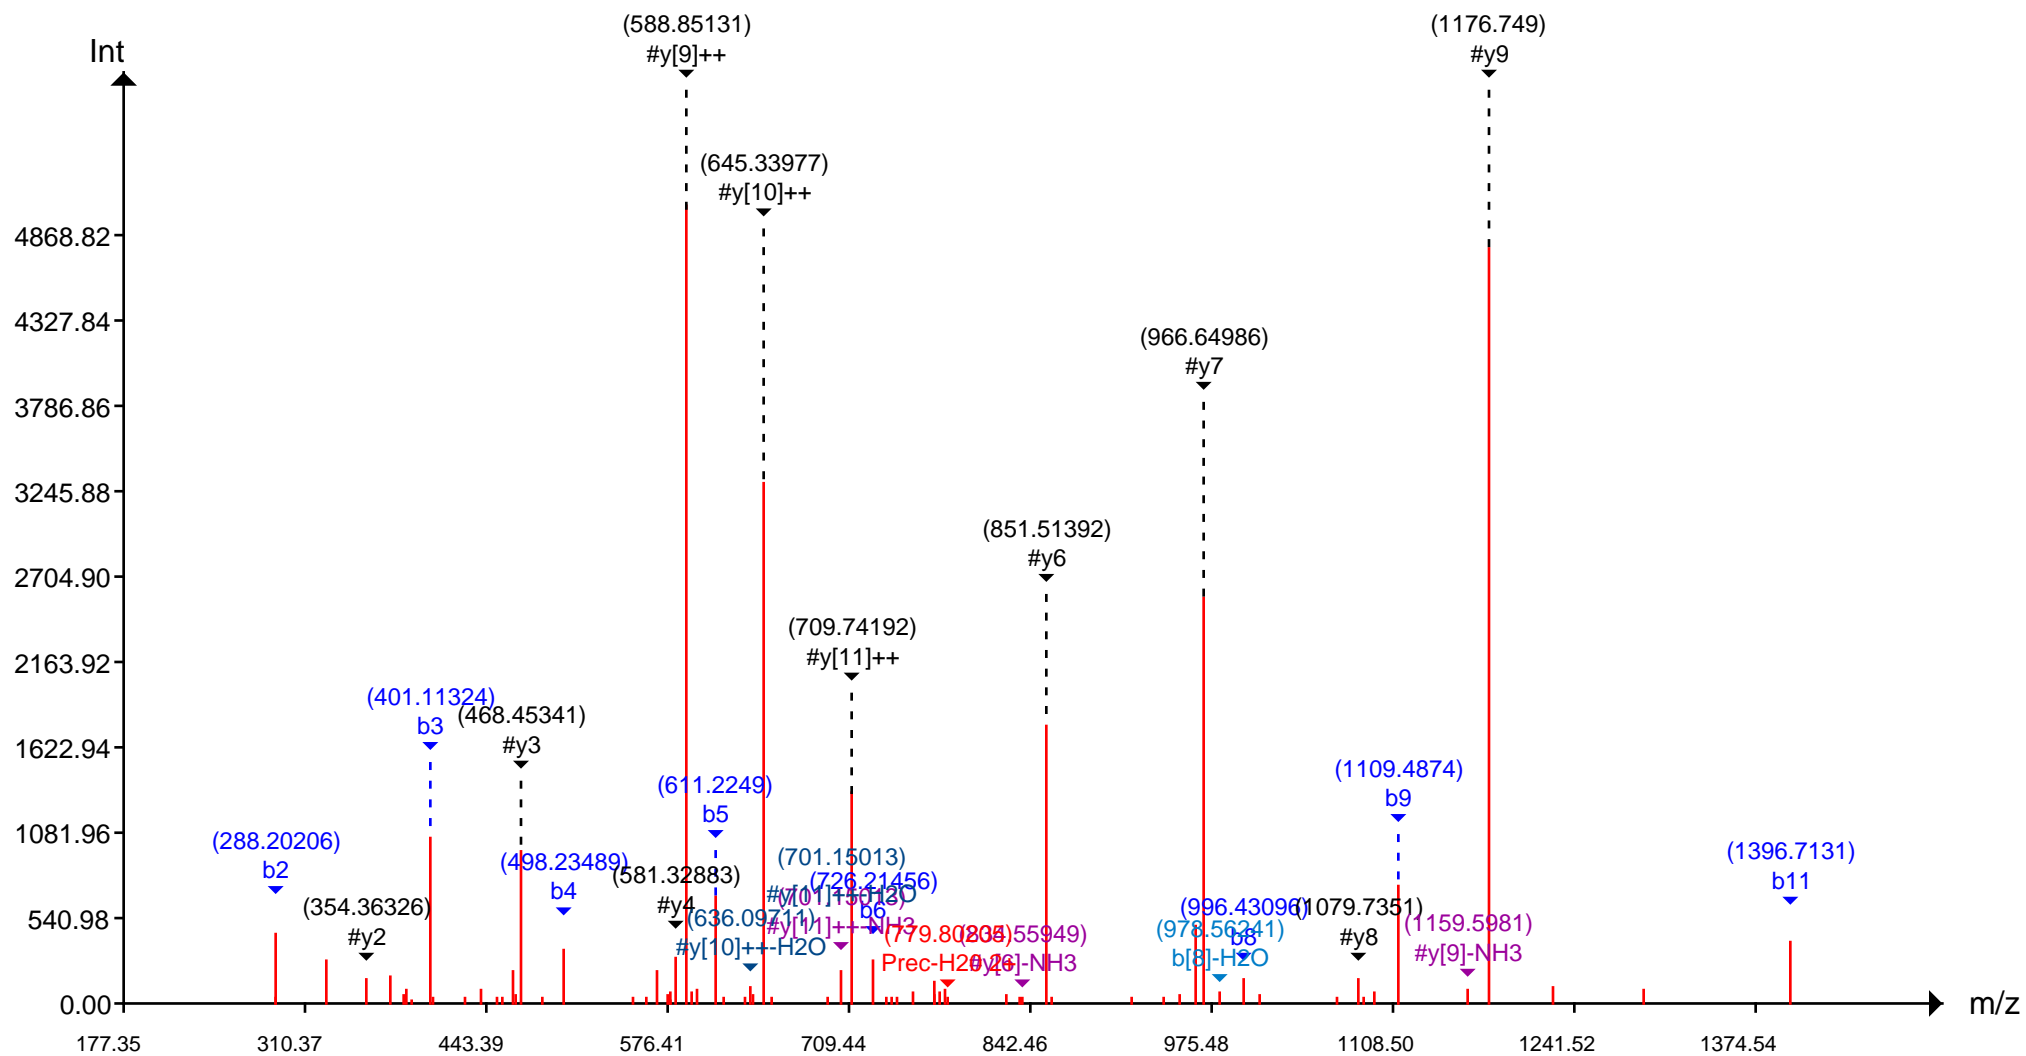

## Info

|                          |                                             |                           |          |
|--------------------------|---------------------------------------------|---------------------------|----------|
| <b>Modified Sequence</b> | AcD3-IELPIDPK<AcD3K*>LNK<AcD3K*>R<C13>-COOH | <b>Ion score</b>          | 57.92    |
| <b>Protein</b>           | Q99020                                      | <b>Confidence level</b>   | 99.00%   |
| <b>Precursor m/z</b>     | 788.9907                                    | <b>Identity Threshold</b> | 39.78    |
| <b>Charge</b>            | 2+                                          | <b>Mass error</b>         | 0.002706 |





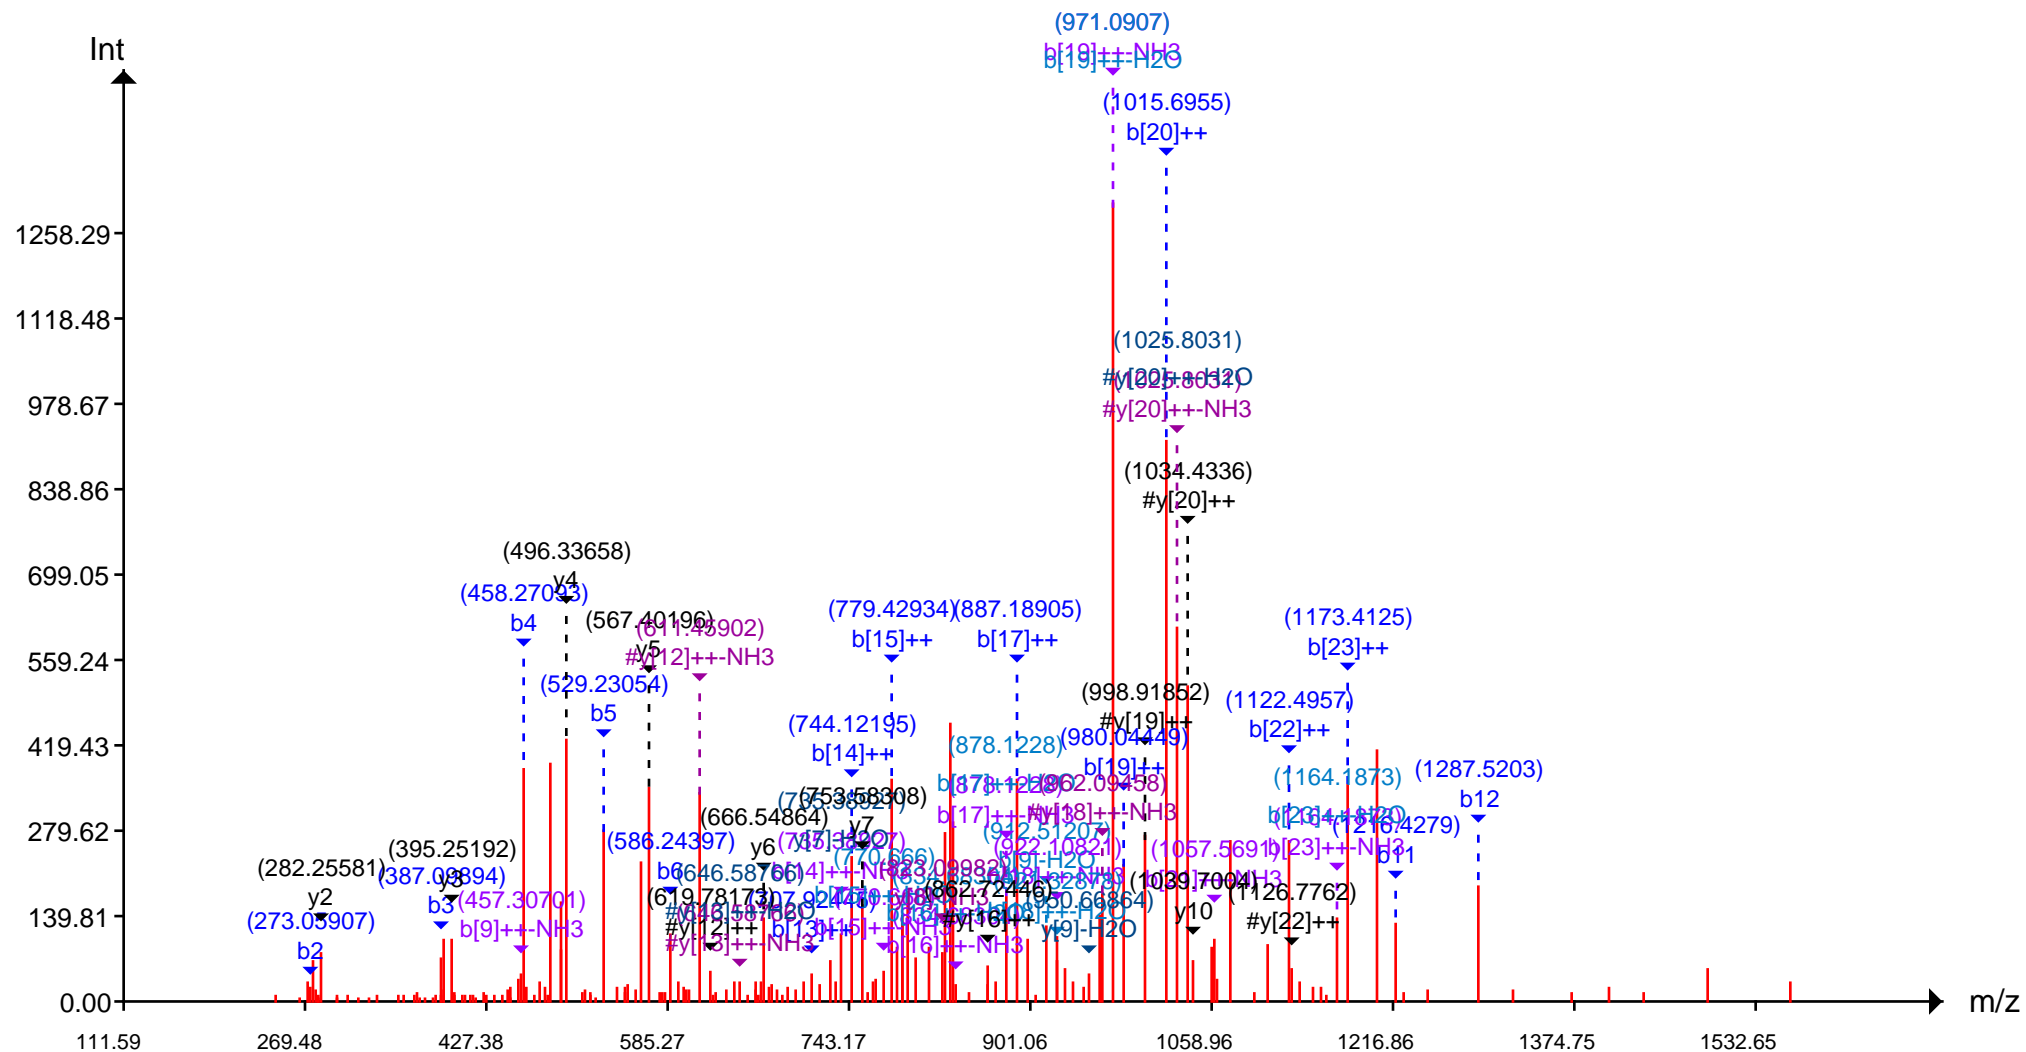

## Info

|                          |                                                 |                           |          |
|--------------------------|-------------------------------------------------|---------------------------|----------|
| <b>Modified Sequence</b> | AcD3-VQNAAGSQEK<AcD3K*>LAQAAQSSVATITR<C13>-COOH | <b>Ion score</b>          | 48.41    |
| <b>Protein</b>           | P26039                                          | <b>Confidence level</b>   | 99.00%   |
| <b>Precursor m/z</b>     | 842.45666                                       | <b>Identity Threshold</b> | 47.14    |
| <b>Charge</b>            | 3+                                              | <b>Mass error</b>         | 0.002235 |

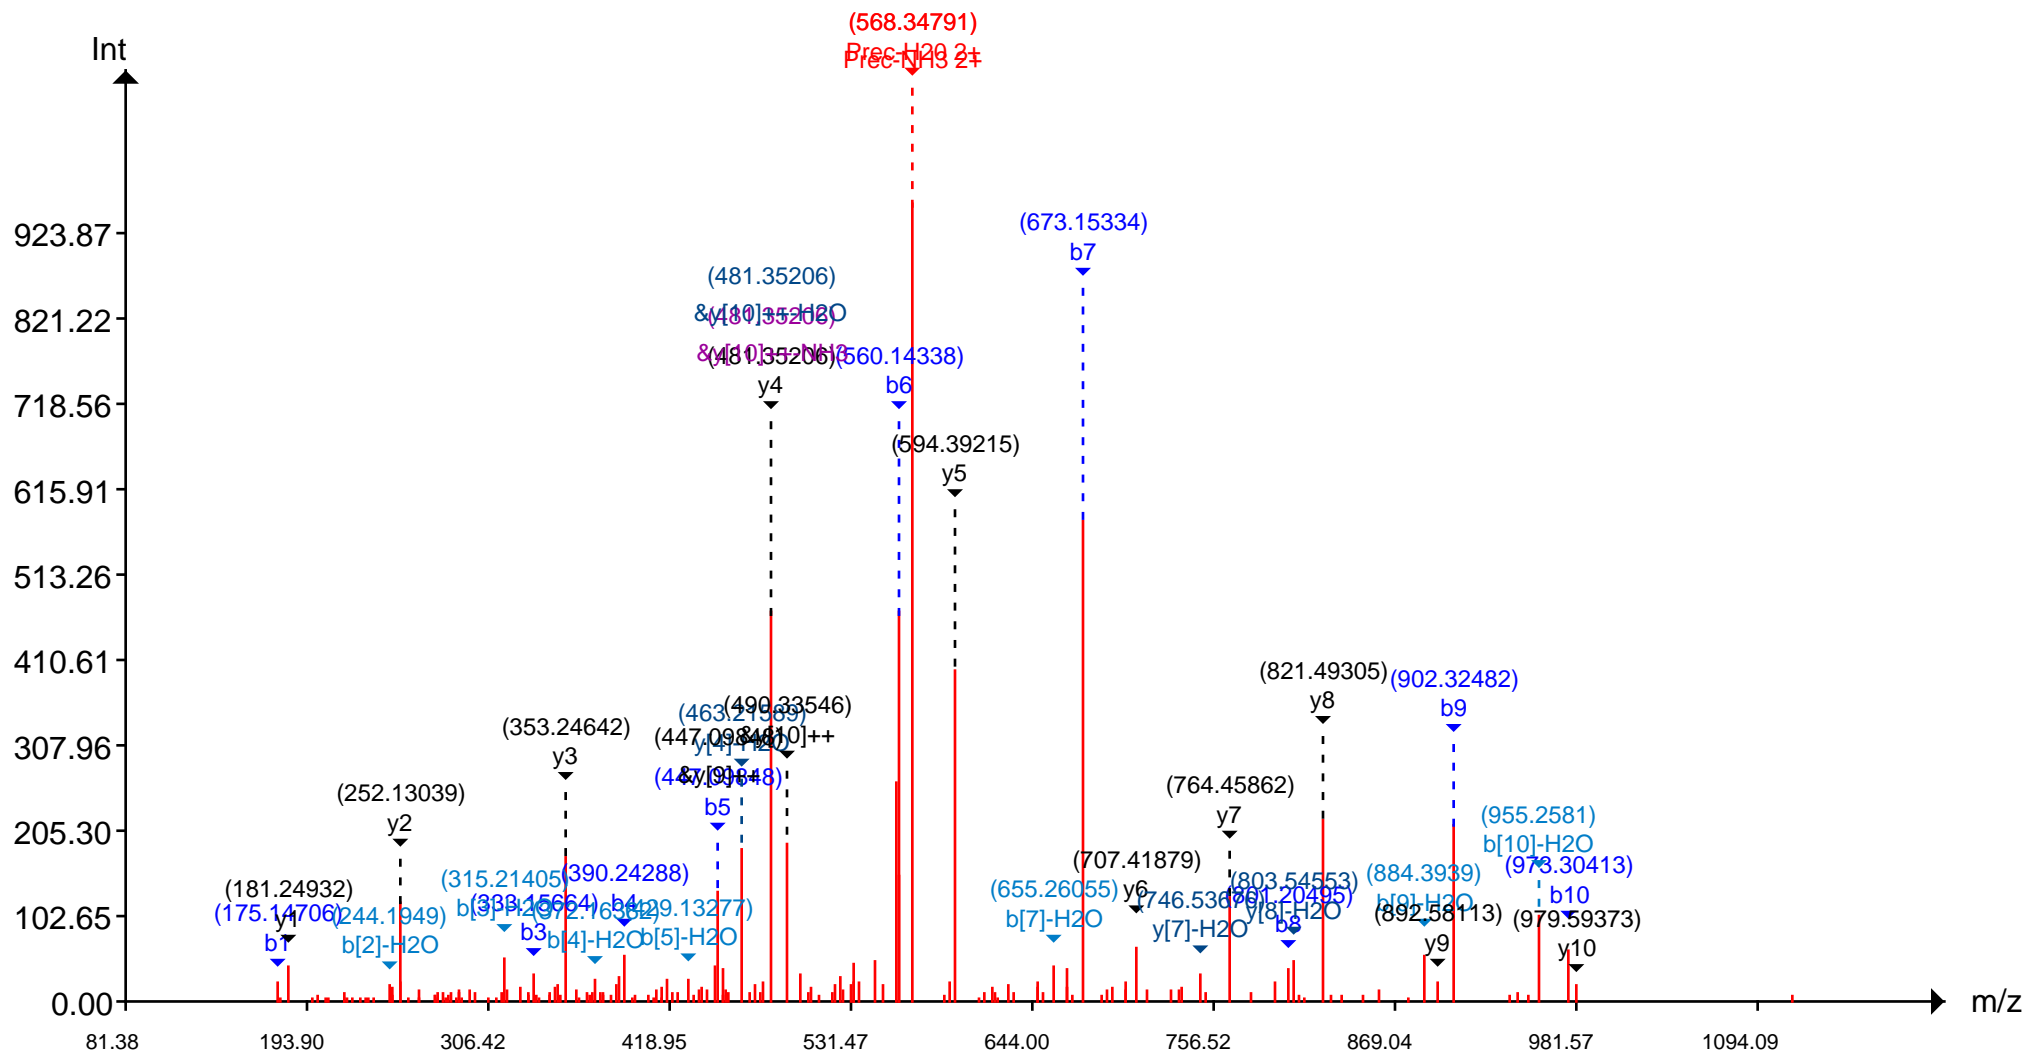

## Info

**Modified Sequence** AcD3-ESAGGLIQTAR<C13>-COOH

**Ion score** 97.19

**Protein** P26039

**Confidence level** 99.00%

**Precursor m/z** 577.32044

**Identity Threshold** 47.64

**Charge** 2+

**Mass error** -0.001022

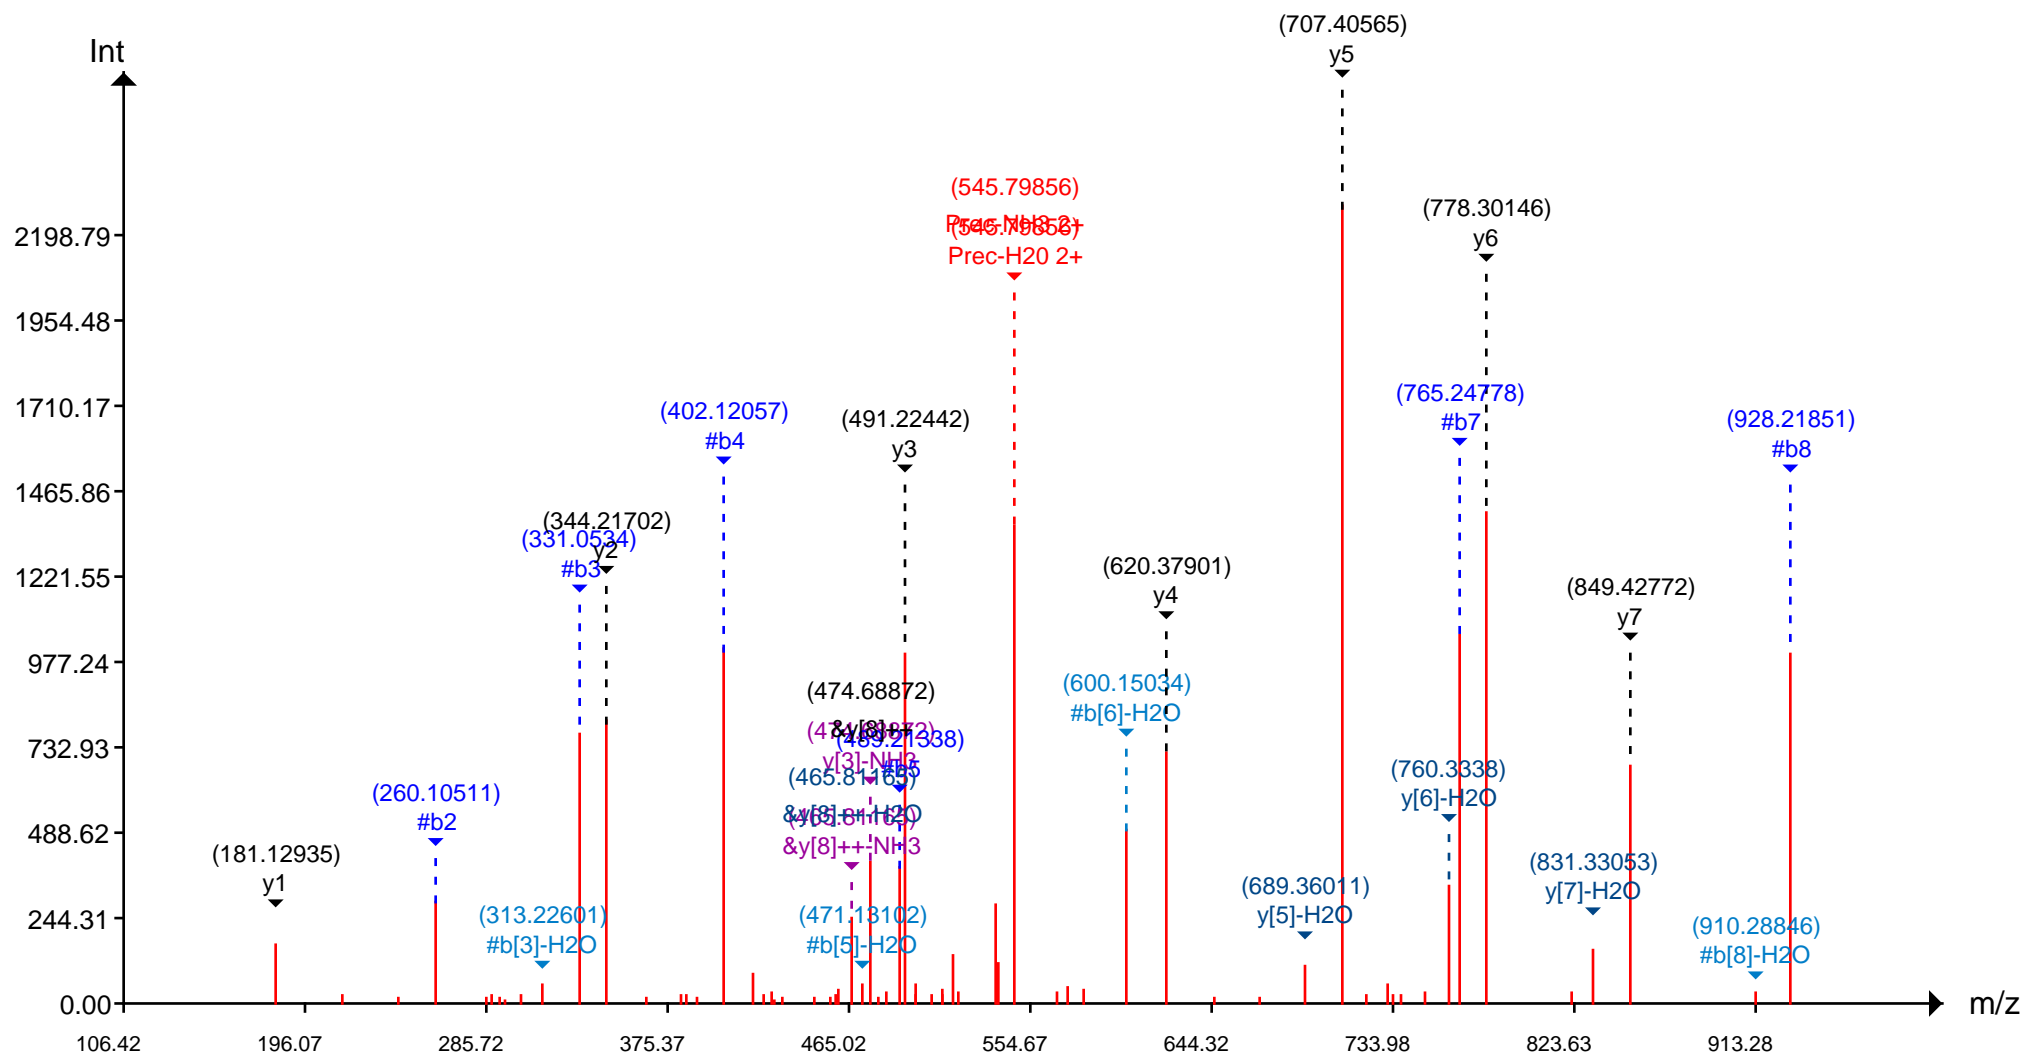

## Info

|                          |                          |                           |        |
|--------------------------|--------------------------|---------------------------|--------|
| <b>Modified Sequence</b> | AcD3-DVAASEFYR<C13>-COOH | <b>Ion score</b>          | 74.1   |
| <b>Protein</b>           | P17182, P21550, P17183   | <b>Confidence level</b>   | 99.00% |
| <b>Precursor m/z</b>     | 554.77588                | <b>Identity Threshold</b> | 47.07  |
| <b>Charge</b>            | 2+                       | <b>Mass error</b>         | 6.8E-5 |

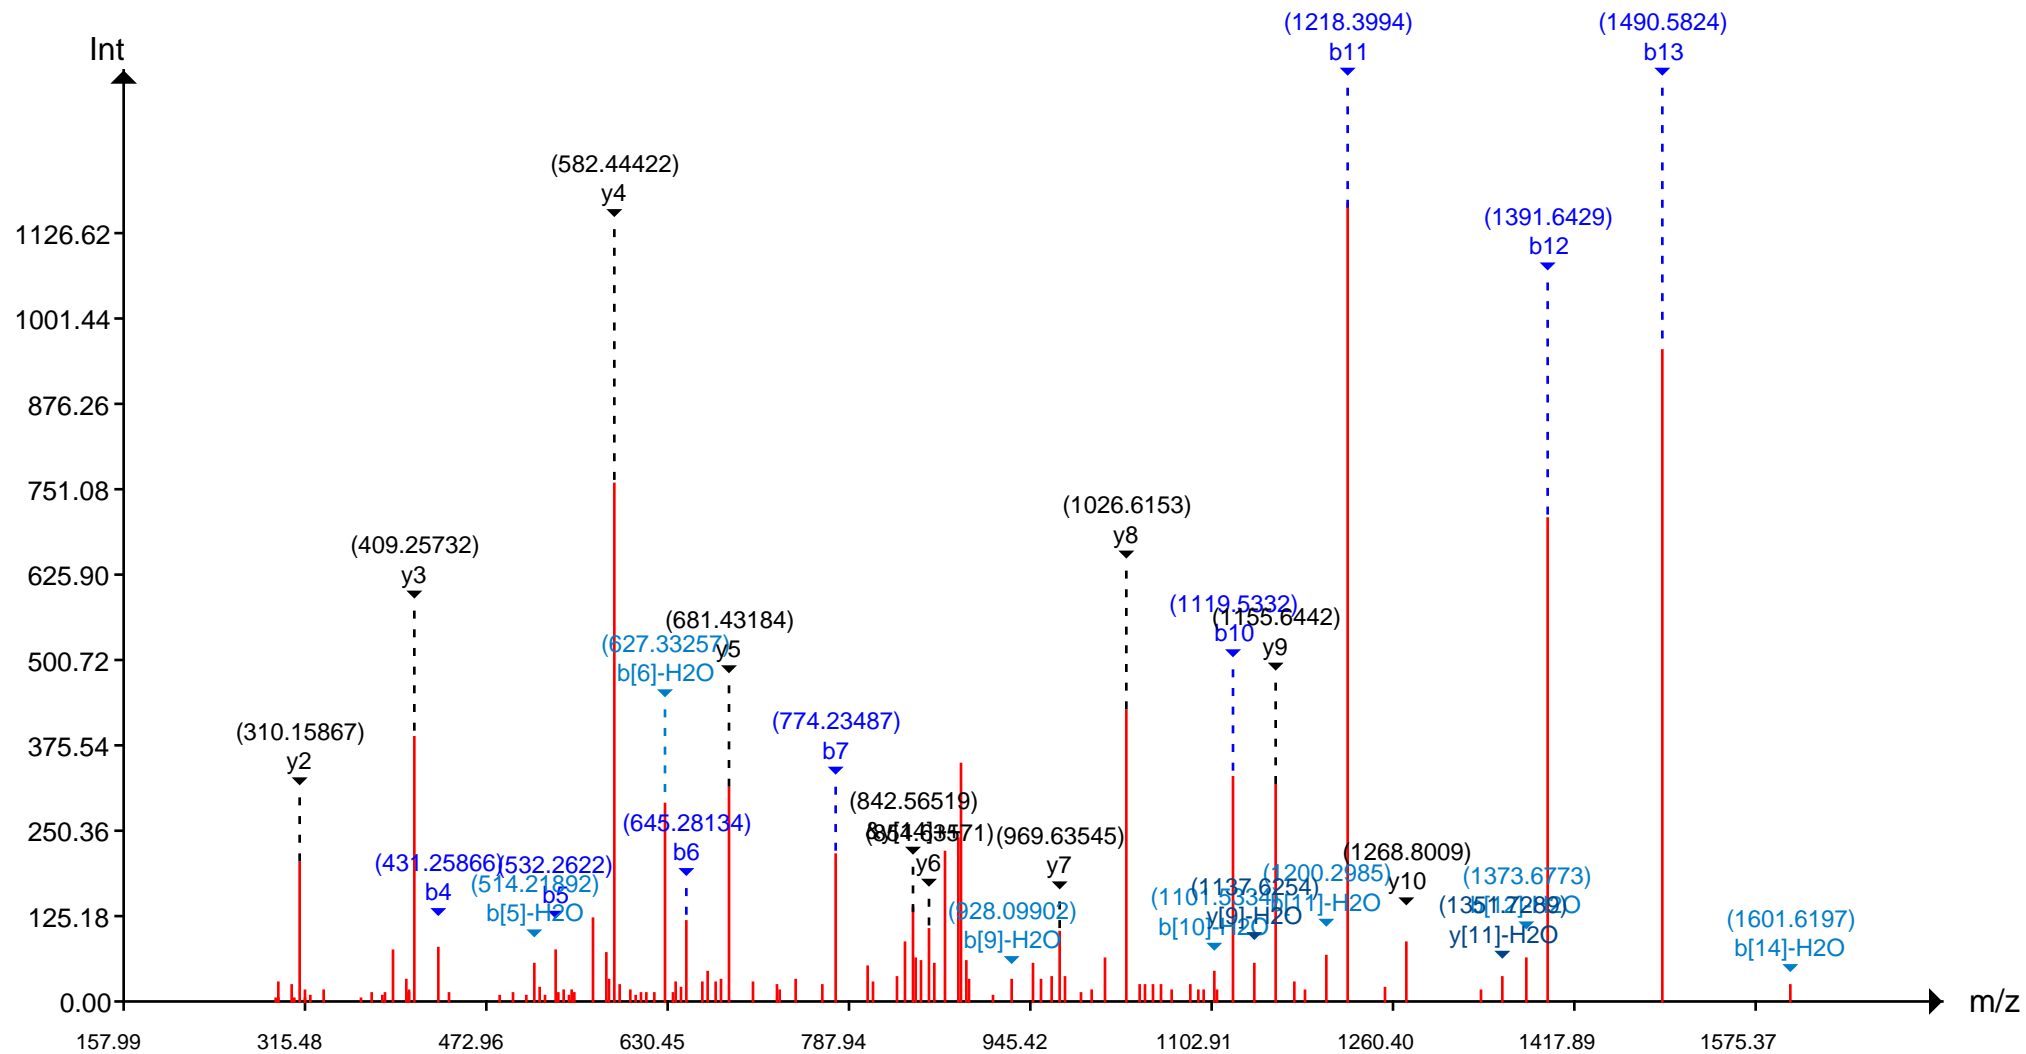

## Info

|                          |                                                |                           |          |
|--------------------------|------------------------------------------------|---------------------------|----------|
| <b>Modified Sequence</b> | AcD3-ASQVTLEGDK<AcD3K*>VK<AcD3K*>VER<C13>-COOH | <b>Ion score</b>          | 68.85    |
| <b>Protein</b>           | Q9DCW4                                         | <b>Confidence level</b>   | 99.00%   |
| <b>Precursor m/z</b>     | 900.51212                                      | <b>Identity Threshold</b> | 46.10    |
| <b>Charge</b>            | 2+                                             | <b>Mass error</b>         | 0.001464 |

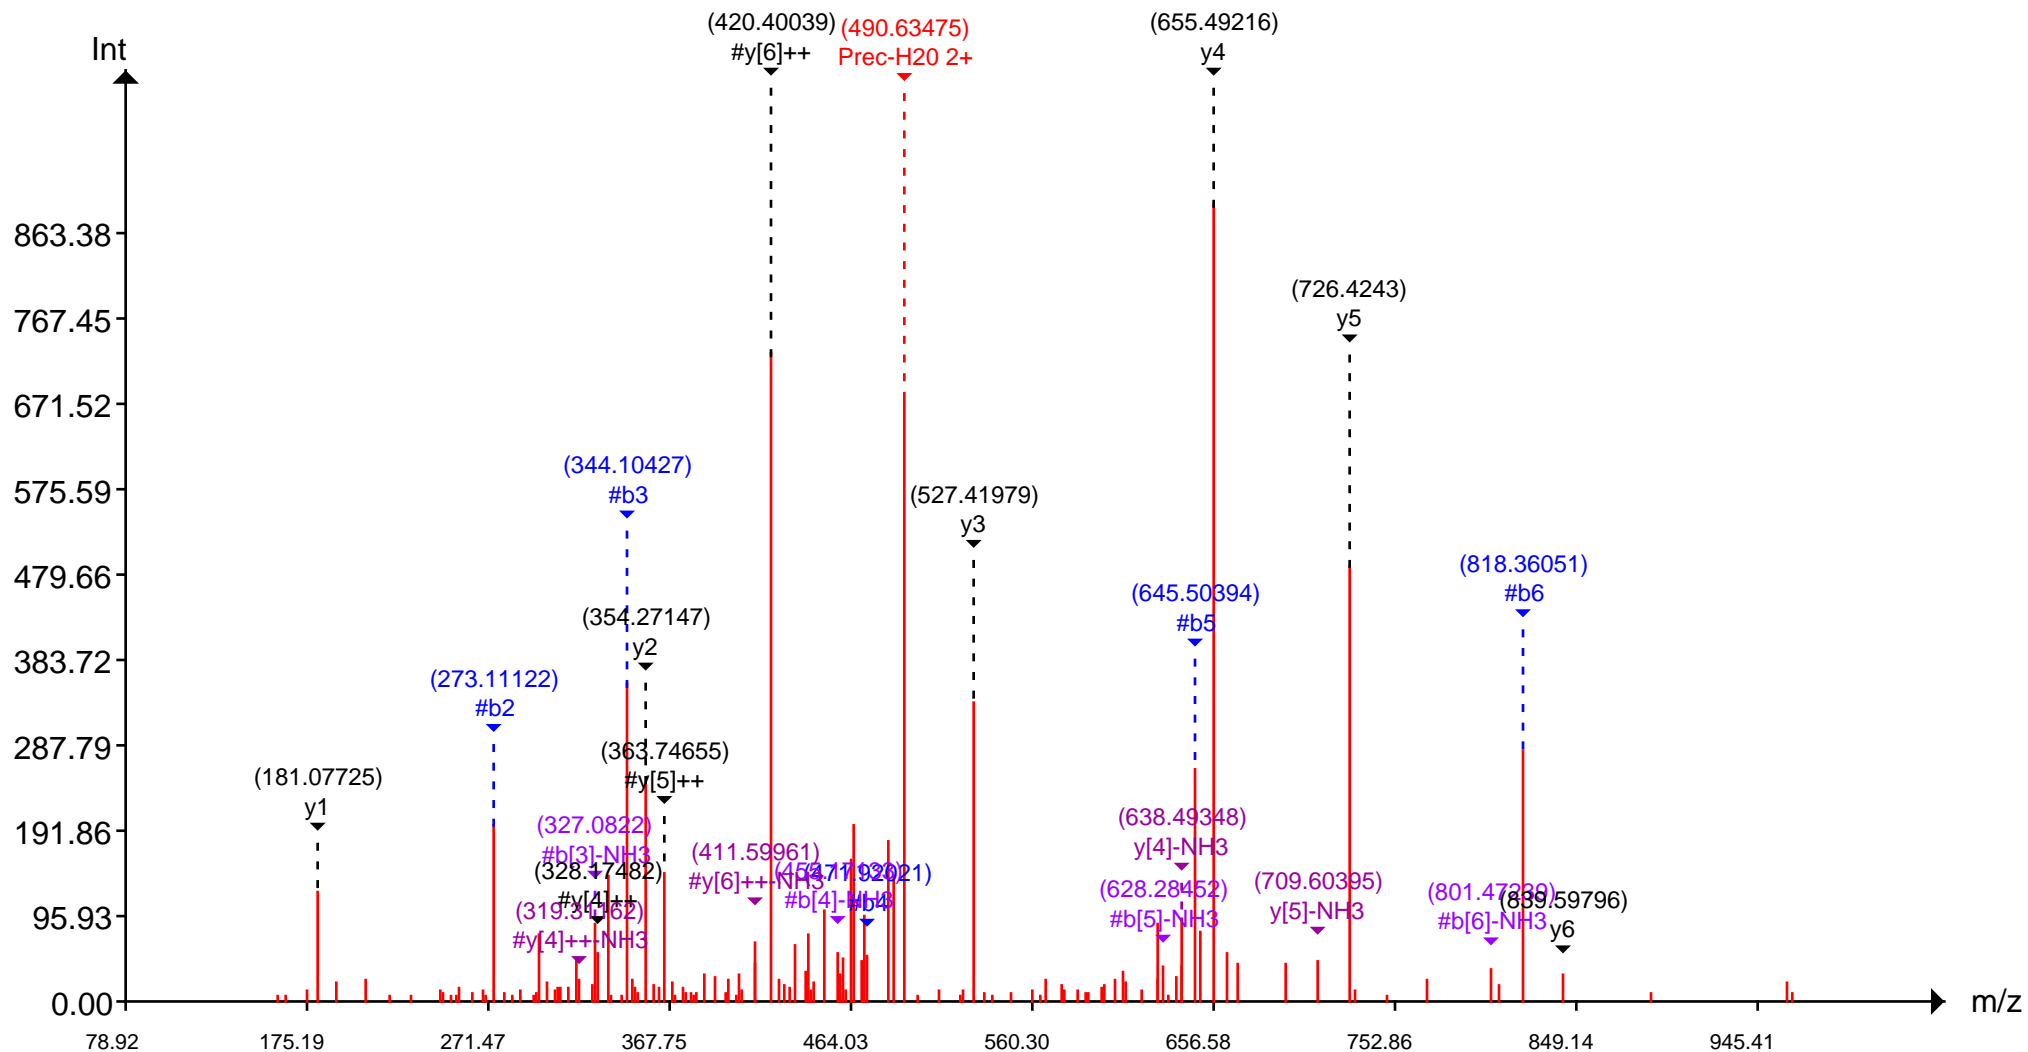

## Info

|                          |                                        |                           |          |
|--------------------------|----------------------------------------|---------------------------|----------|
| <b>Modified Sequence</b> | AcD3-NLAQK<AcD3K*>K<AcD3K*>R<C13>-COOH | <b>Ion score</b>          | 43.2     |
| <b>Protein</b>           | P61759                                 | <b>Confidence level</b>   | 99.00%   |
| <b>Precursor m/z</b>     | 499.82338                              | <b>Identity Threshold</b> | 40.67    |
| <b>Charge</b>            | 2+                                     | <b>Mass error</b>         | -3.76E-4 |

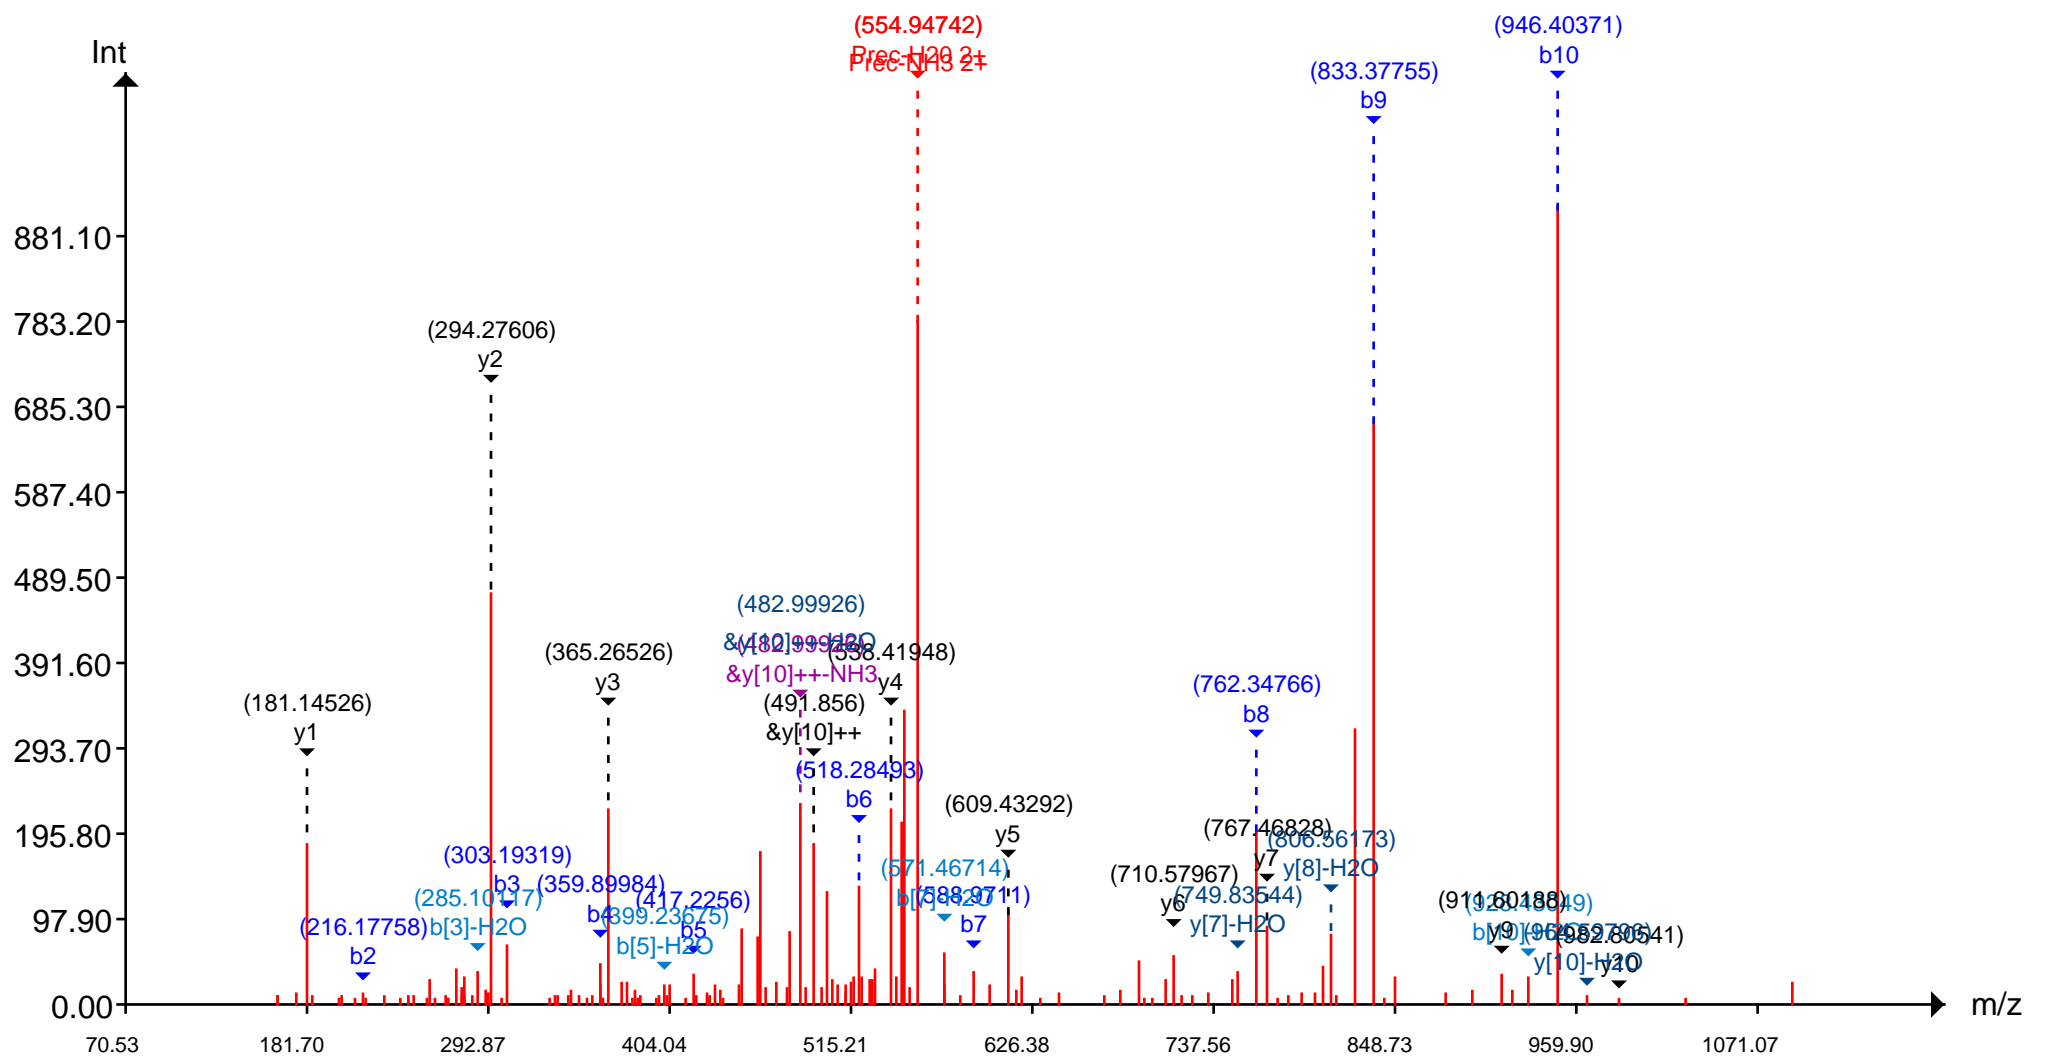

| Info                     |                                    |                           |        |
|--------------------------|------------------------------------|---------------------------|--------|
| <b>Modified Sequence</b> | AcD3-VASGGTAK<AcD3K*>AIR<C13>-COOH | <b>Ion score</b>          | 74.98  |
| <b>Protein</b>           | Q9CWJ9                             | <b>Confidence level</b>   | 99.00% |
| <b>Precursor m/z</b>     | 563.84333                          | <b>Identity Threshold</b> | 44.51  |
| <b>Charge</b>            | 2+                                 | <b>Mass error</b>         | 9.6E-5 |

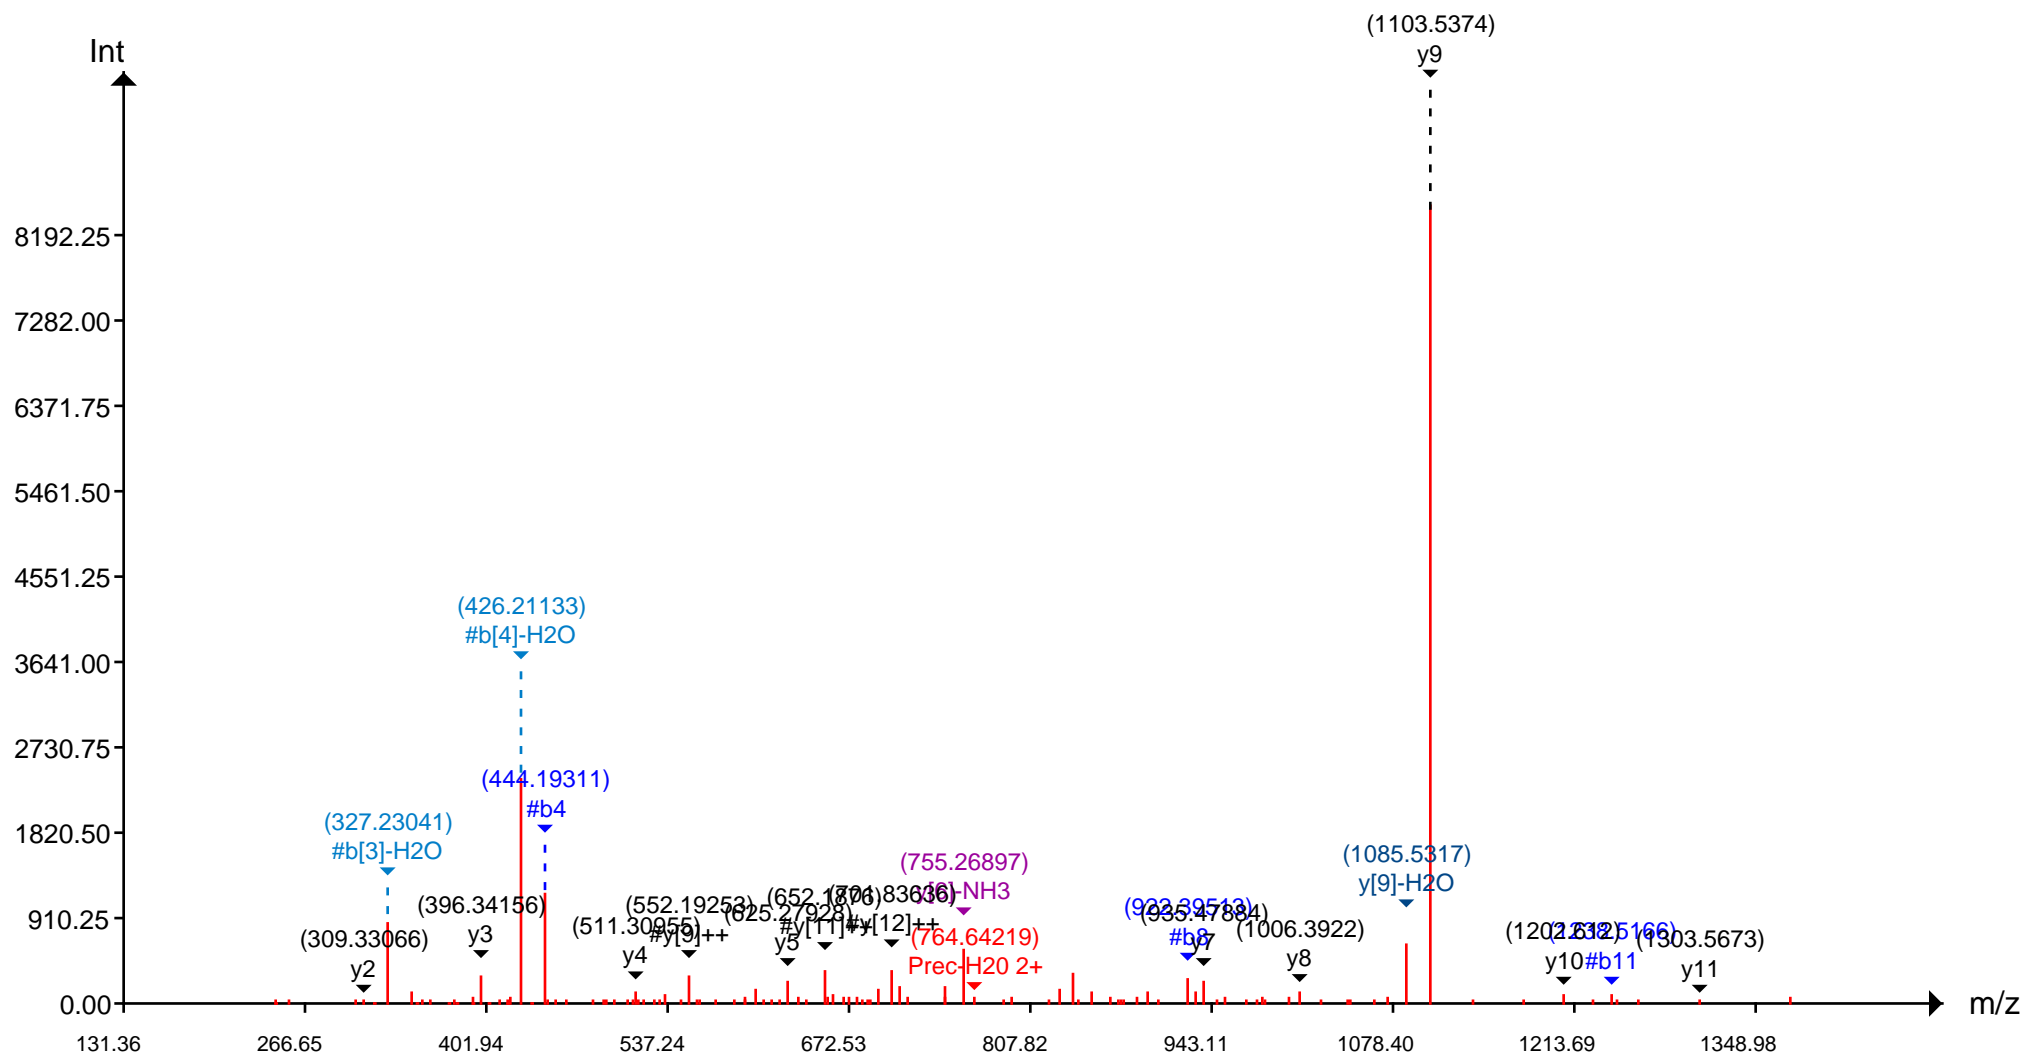

## Info

**Modified Sequence** AcD3-VVTVPAYFNDSQR<C13>-COOH

**Ion score** 82.23

**Protein** P63017

**Confidence level** 99.00%

**Precursor m/z** 773.90562

**Identity Threshold** 48.09

**Charge** 2+

**Mass error** 4.54E-4



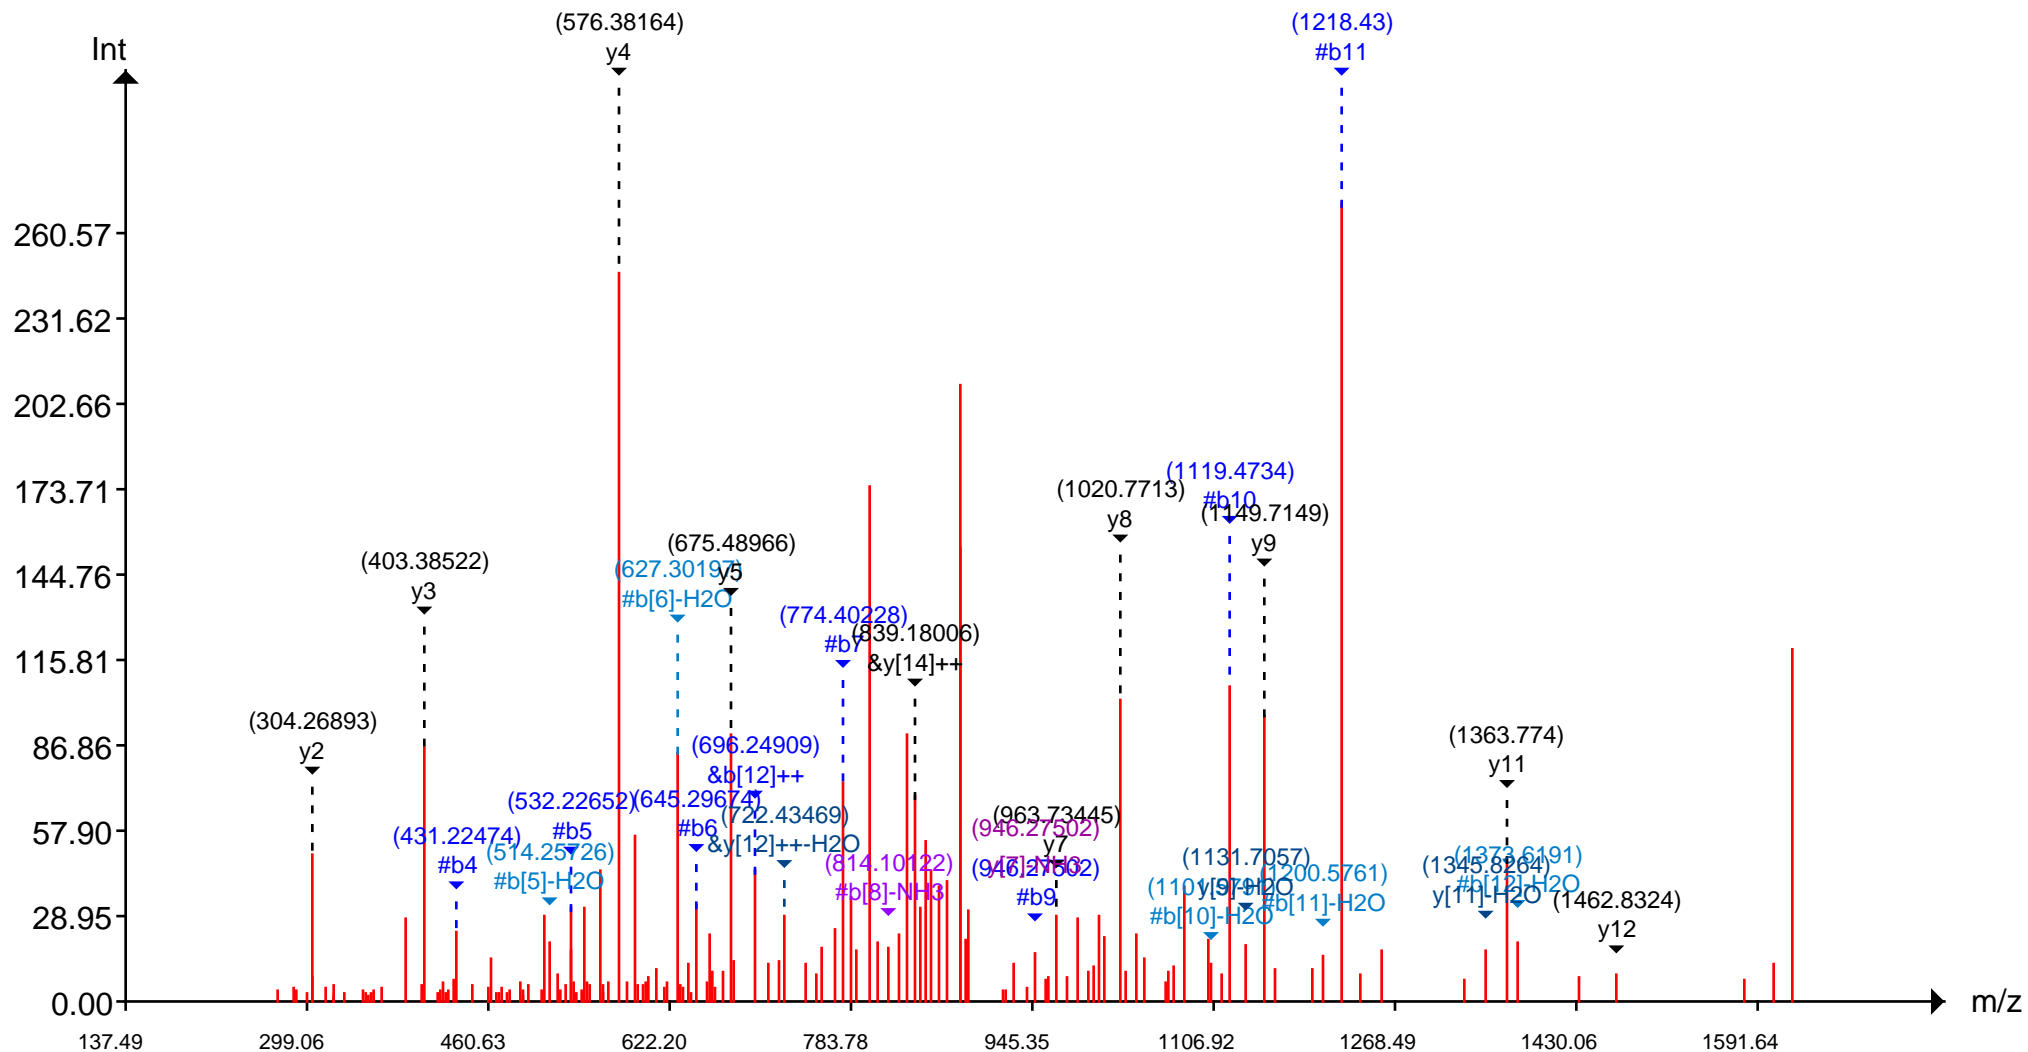

## Info

**Modified Sequence** AcD3-ASQVTLEGDK<AcD3K\*>VK<AcD3K\*>VER-COOH

**Ion score** 51.4

**Protein** Q9DCW4

**Confidence level** 99.00%

**Precursor m/z** 897.50201

**Identity Threshold** 46.83

**Charge** 2+

**Mass error** 0.001385

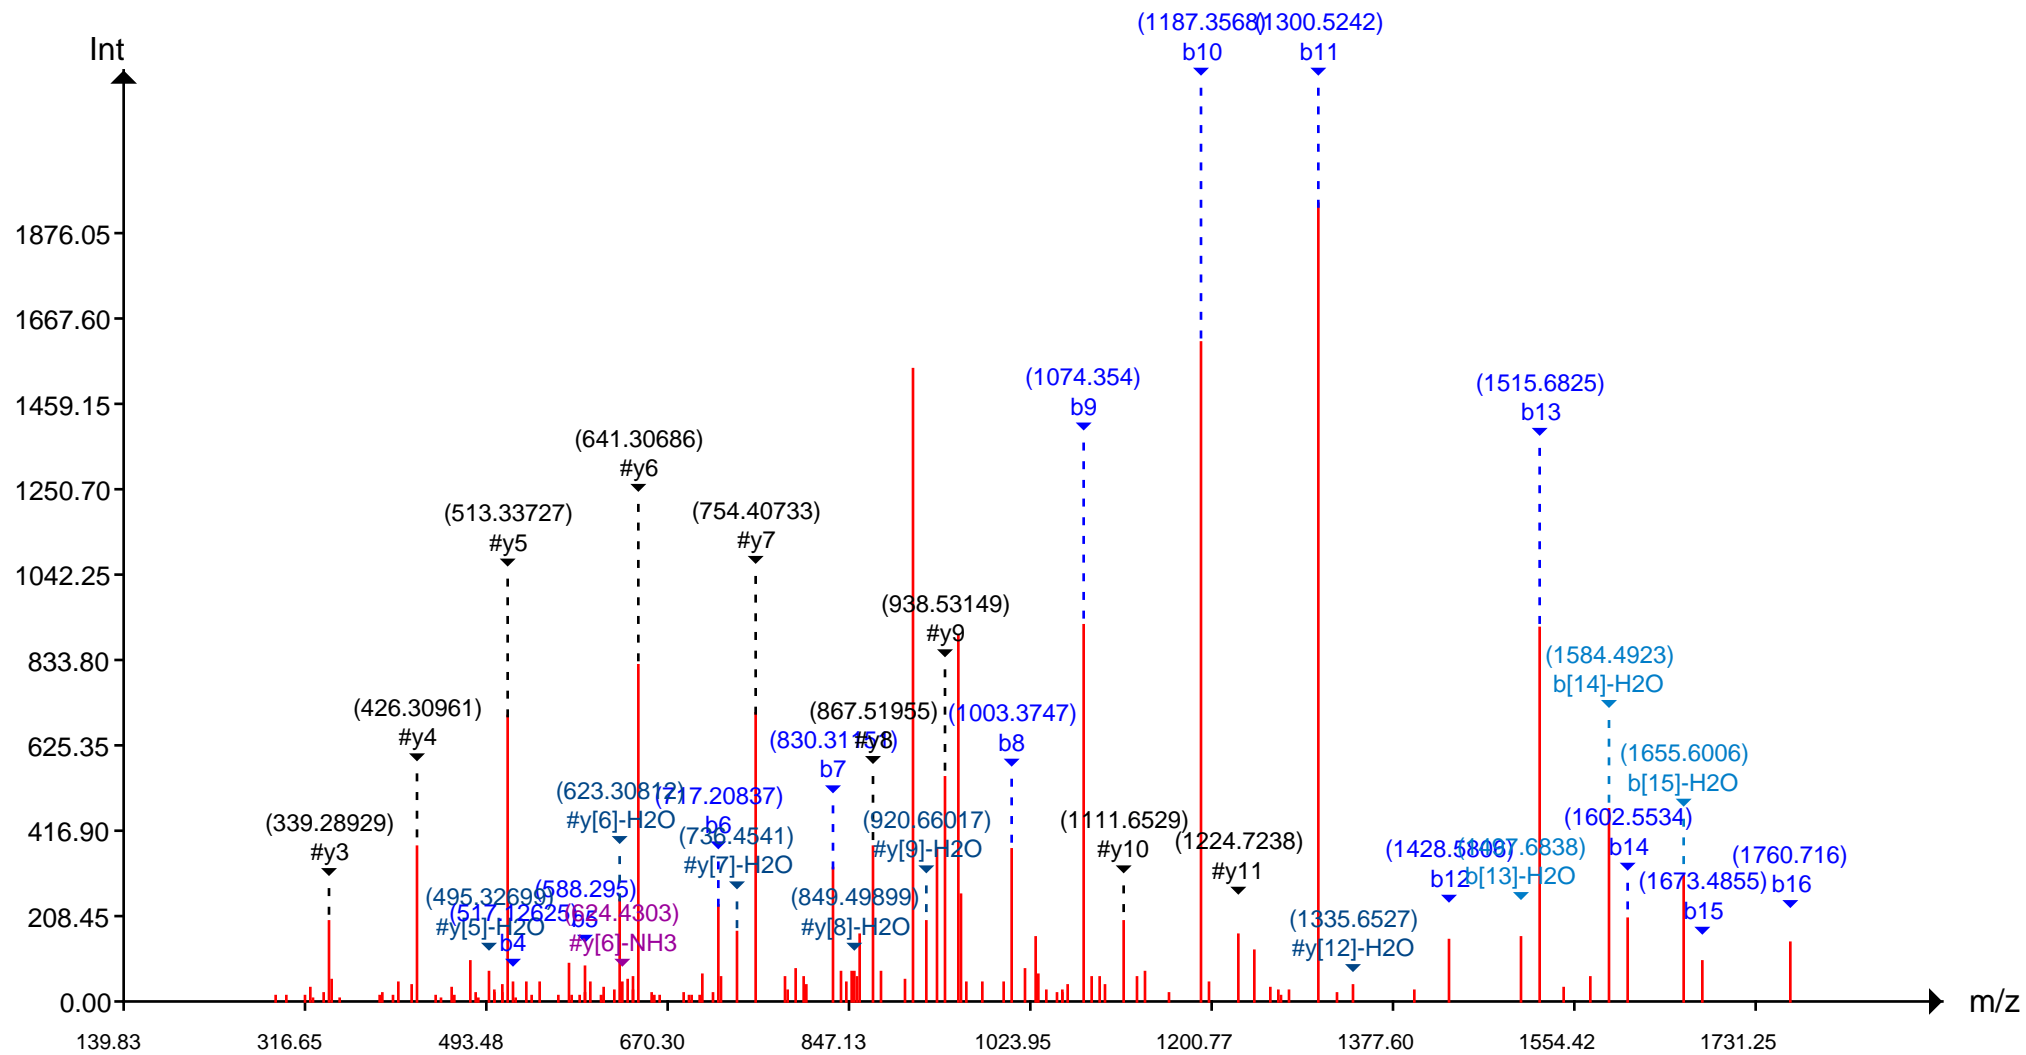

## Info

|                          |                                          |                           |          |
|--------------------------|------------------------------------------|---------------------------|----------|
| <b>Modified Sequence</b> | AcD3-EVQDAELK<AcD3K*>ALLQSSASR<C13>-COOH | <b>Ion score</b>          | 96.06    |
| <b>Protein</b>           | P50580                                   | <b>Confidence level</b>   | 99.00%   |
| <b>Precursor m/z</b>     | 971.02987                                | <b>Identity Threshold</b> | 47.44    |
| <b>Charge</b>            | 2+                                       | <b>Mass error</b>         | 0.002341 |

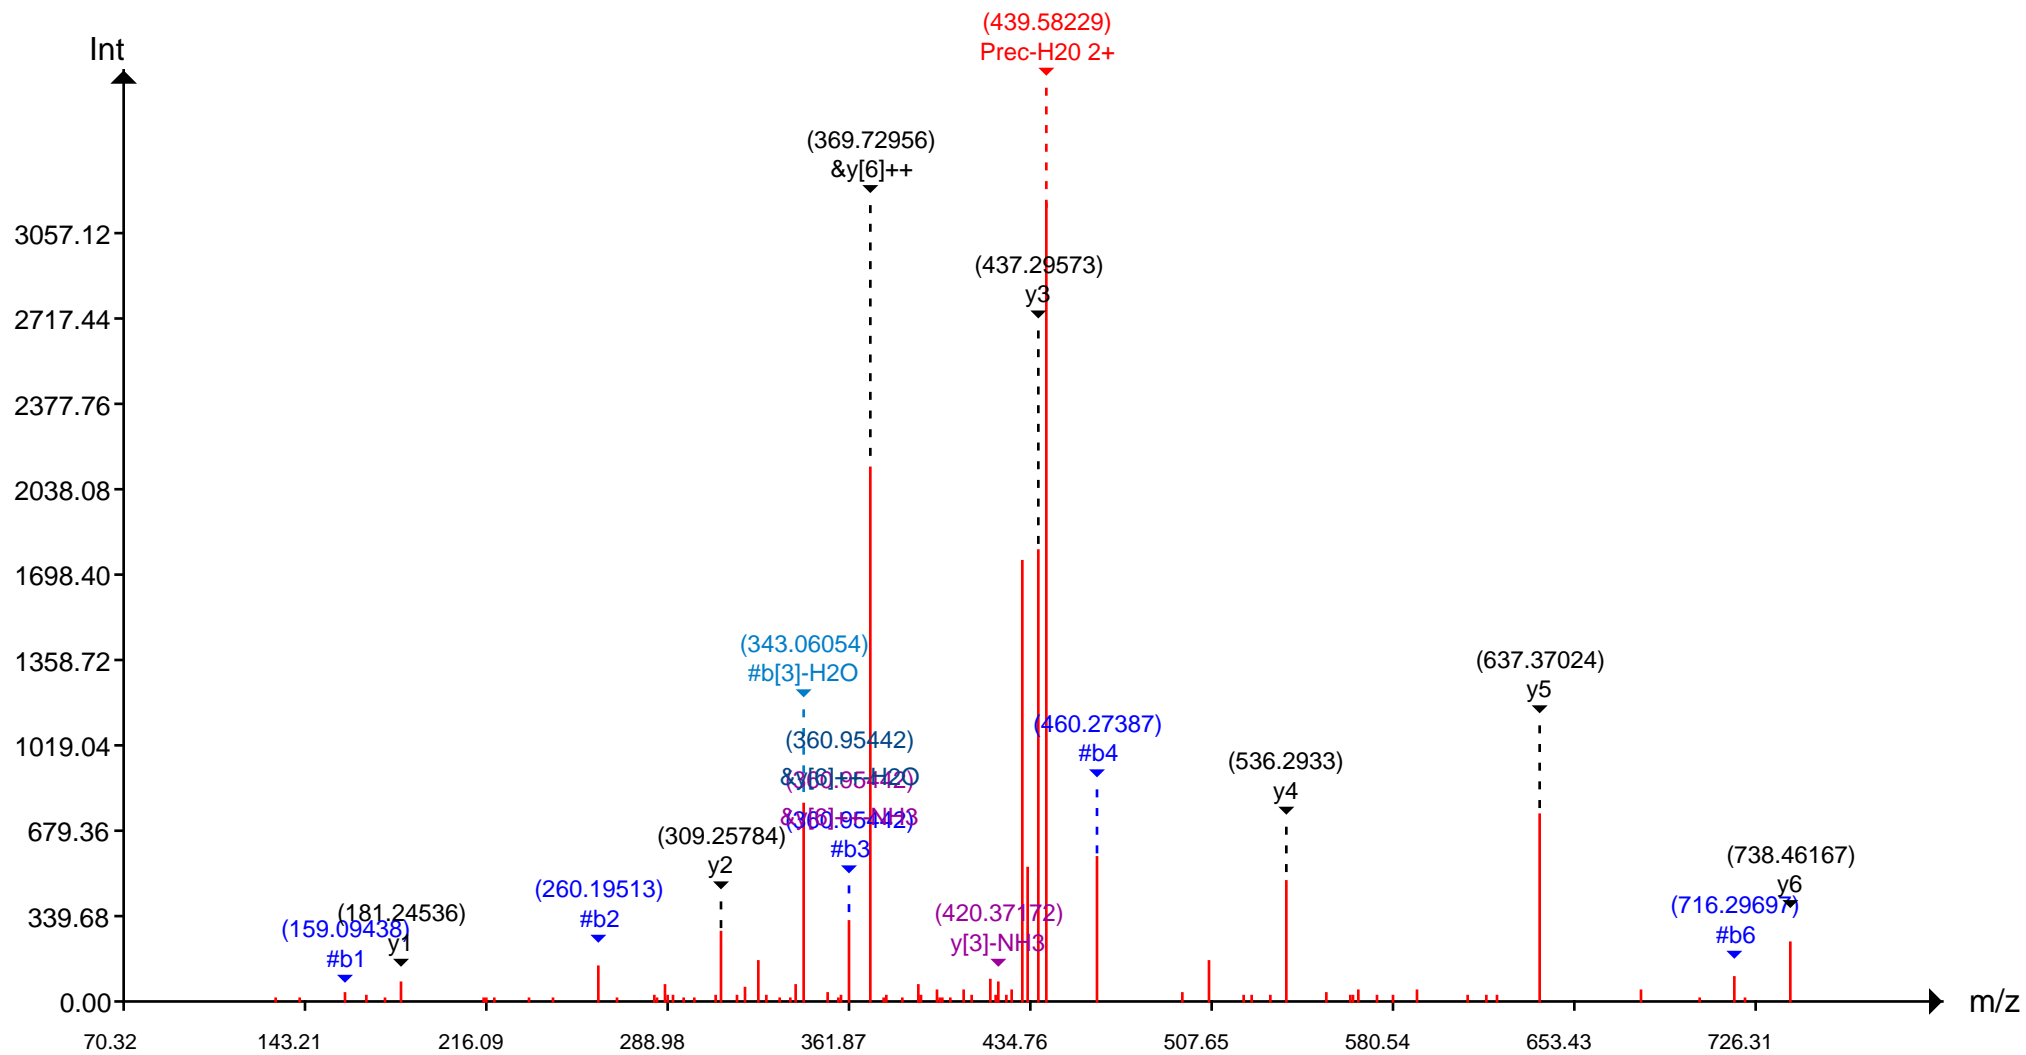

## Info

**Modified Sequence** AcD3-ITTVQQR<C13>-COOH

**Ion score** 51.27

**Protein** P14152

**Confidence level** 99.00%

**Precursor m/z** 448.77021

**Identity Threshold** 45.71

**Charge** 2+

**Mass error** -3.31E-4

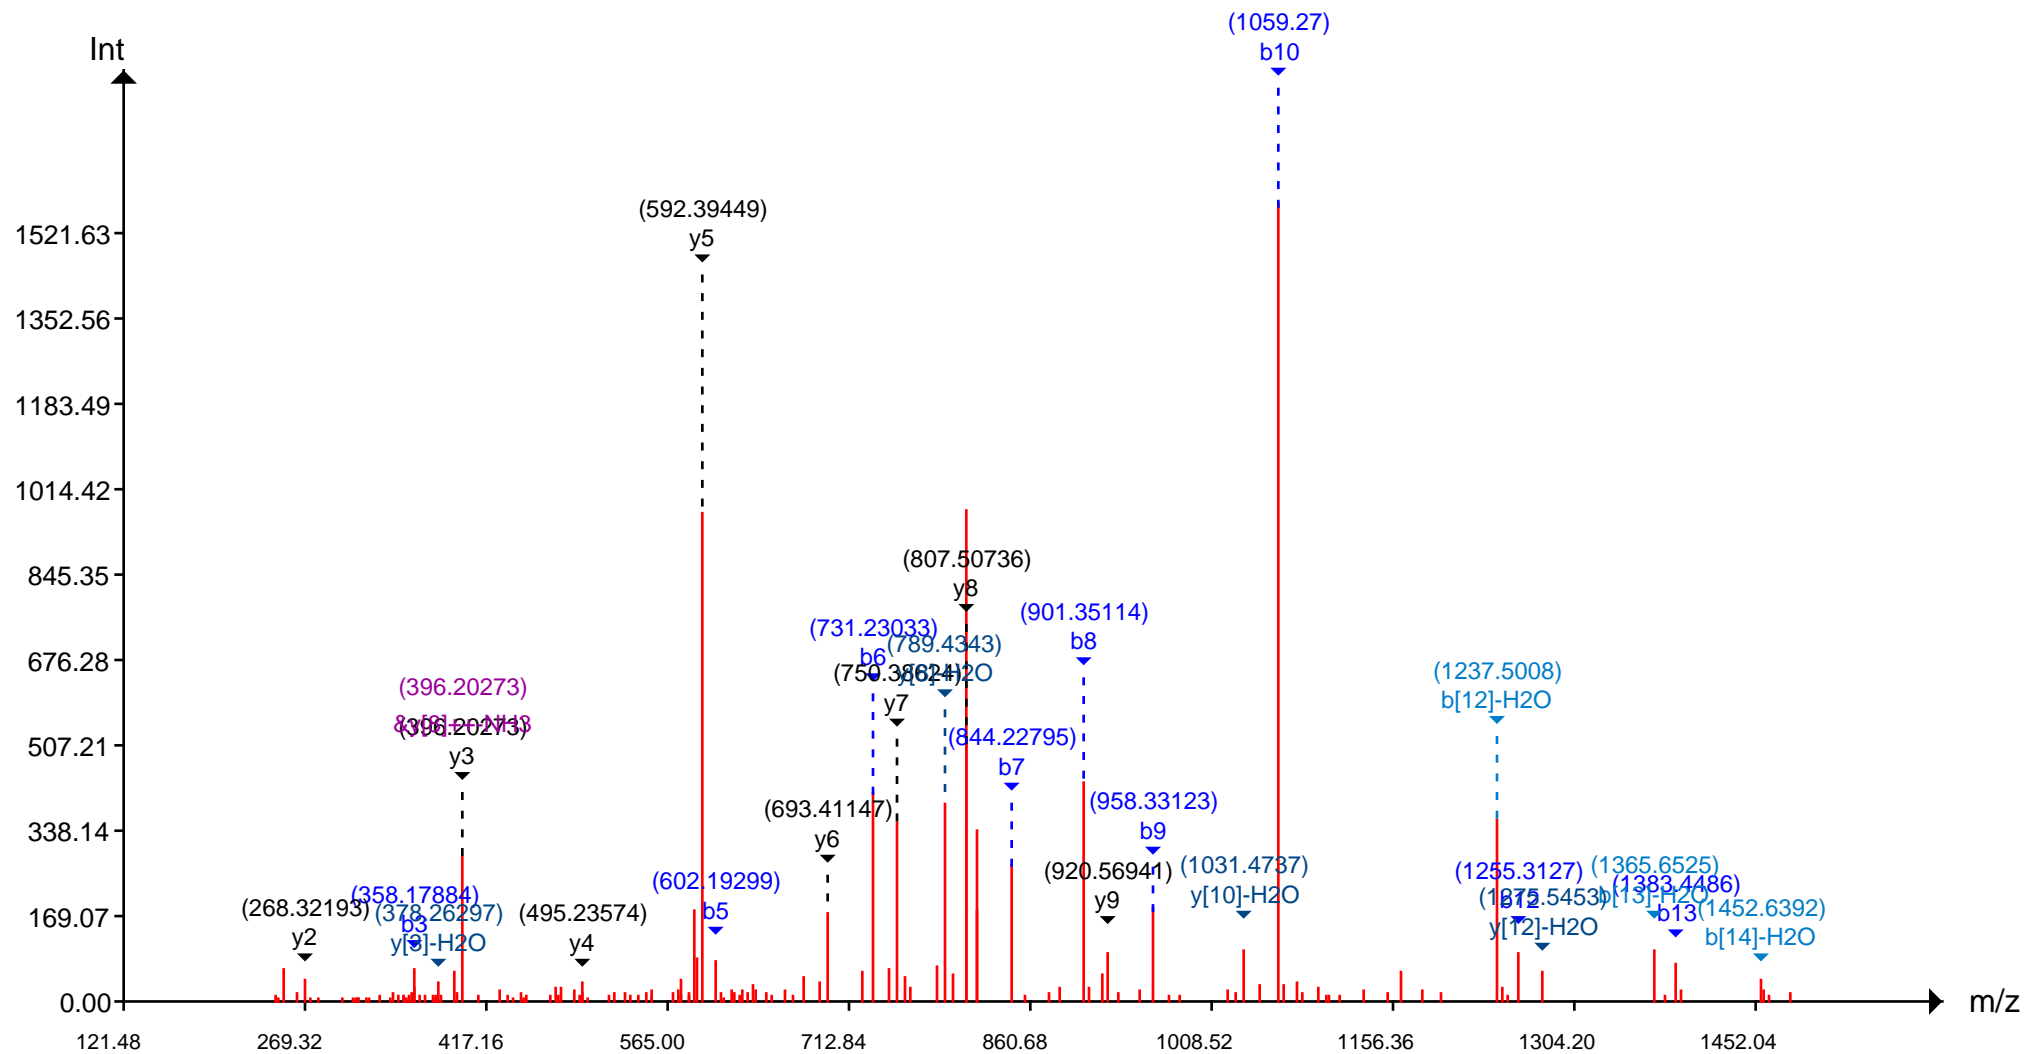

## Info

**Modified Sequence** AcD3-AQLDEELGGTPVQSR<C13>-COOH

**Ion score** 58.32

**Protein** P13020

**Confidence level** 99.00%

**Precursor m/z** 825.92768

**Identity Threshold** 48.13

**Charge** 2+

**Mass error** 0.001269

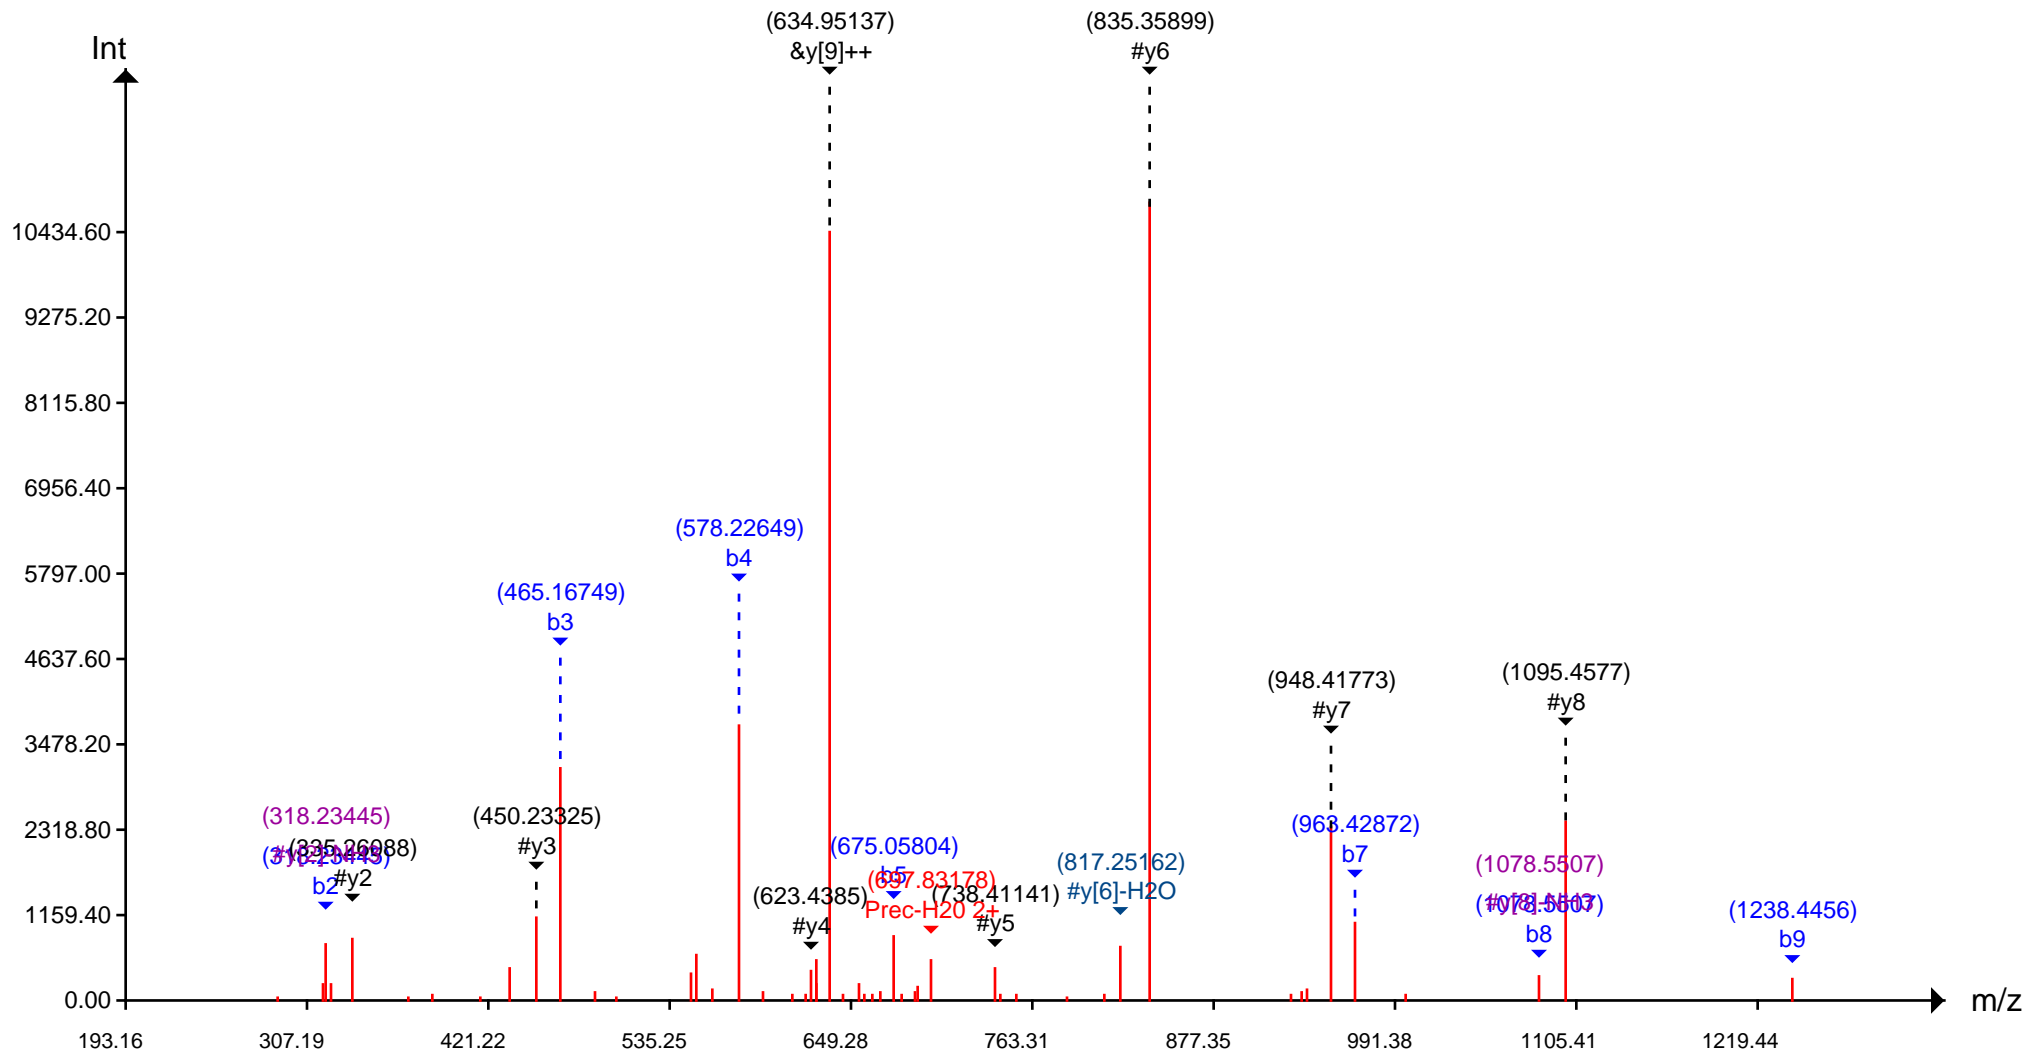

## Info

|                          |                                                  |                           |          |
|--------------------------|--------------------------------------------------|---------------------------|----------|
| <b>Modified Sequence</b> | AcD3-VK<AcD3K*>M<Mox*>LPDK<AcD3K*>DC<Cmm*>R-COOH | <b>Ion score</b>          | 58.81    |
| <b>Protein</b>           | P18760                                           | <b>Confidence level</b>   | 99.00%   |
| <b>Precursor m/z</b>     | 706.86526                                        | <b>Identity Threshold</b> | 48.05    |
| <b>Charge</b>            | 2+                                               | <b>Mass error</b>         | 0.001002 |

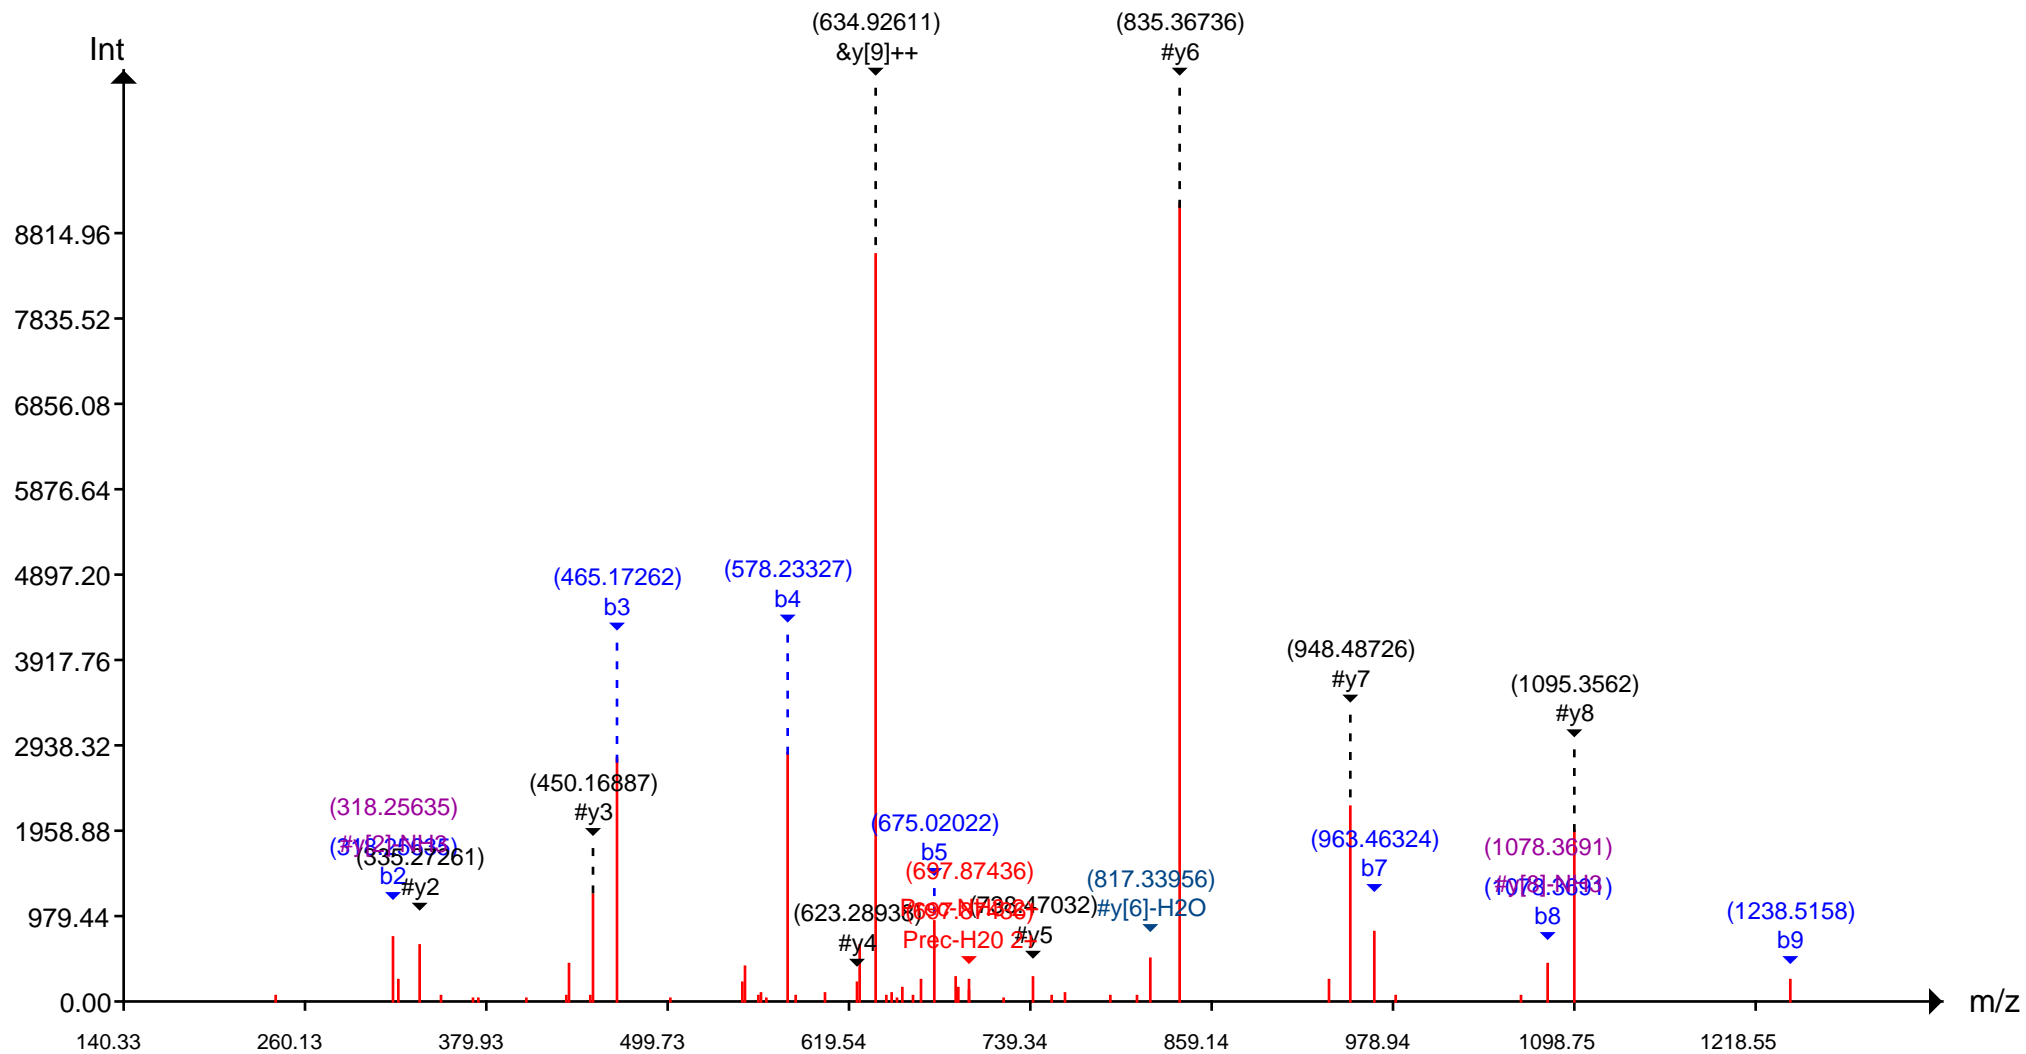

## Info

**Modified Sequence** AcD3-VK<AcD3K\*>M<Mox\*>LPDK<AcD3K\*>DC<Cmm\*>R-COOH

**Ion score** 61.83

**Protein** P18760

**Confidence level** 99.00%

**Precursor m/z** 706.86556

**Identity Threshold** 47.97

**Charge** 2+

**Mass error** 0.001602

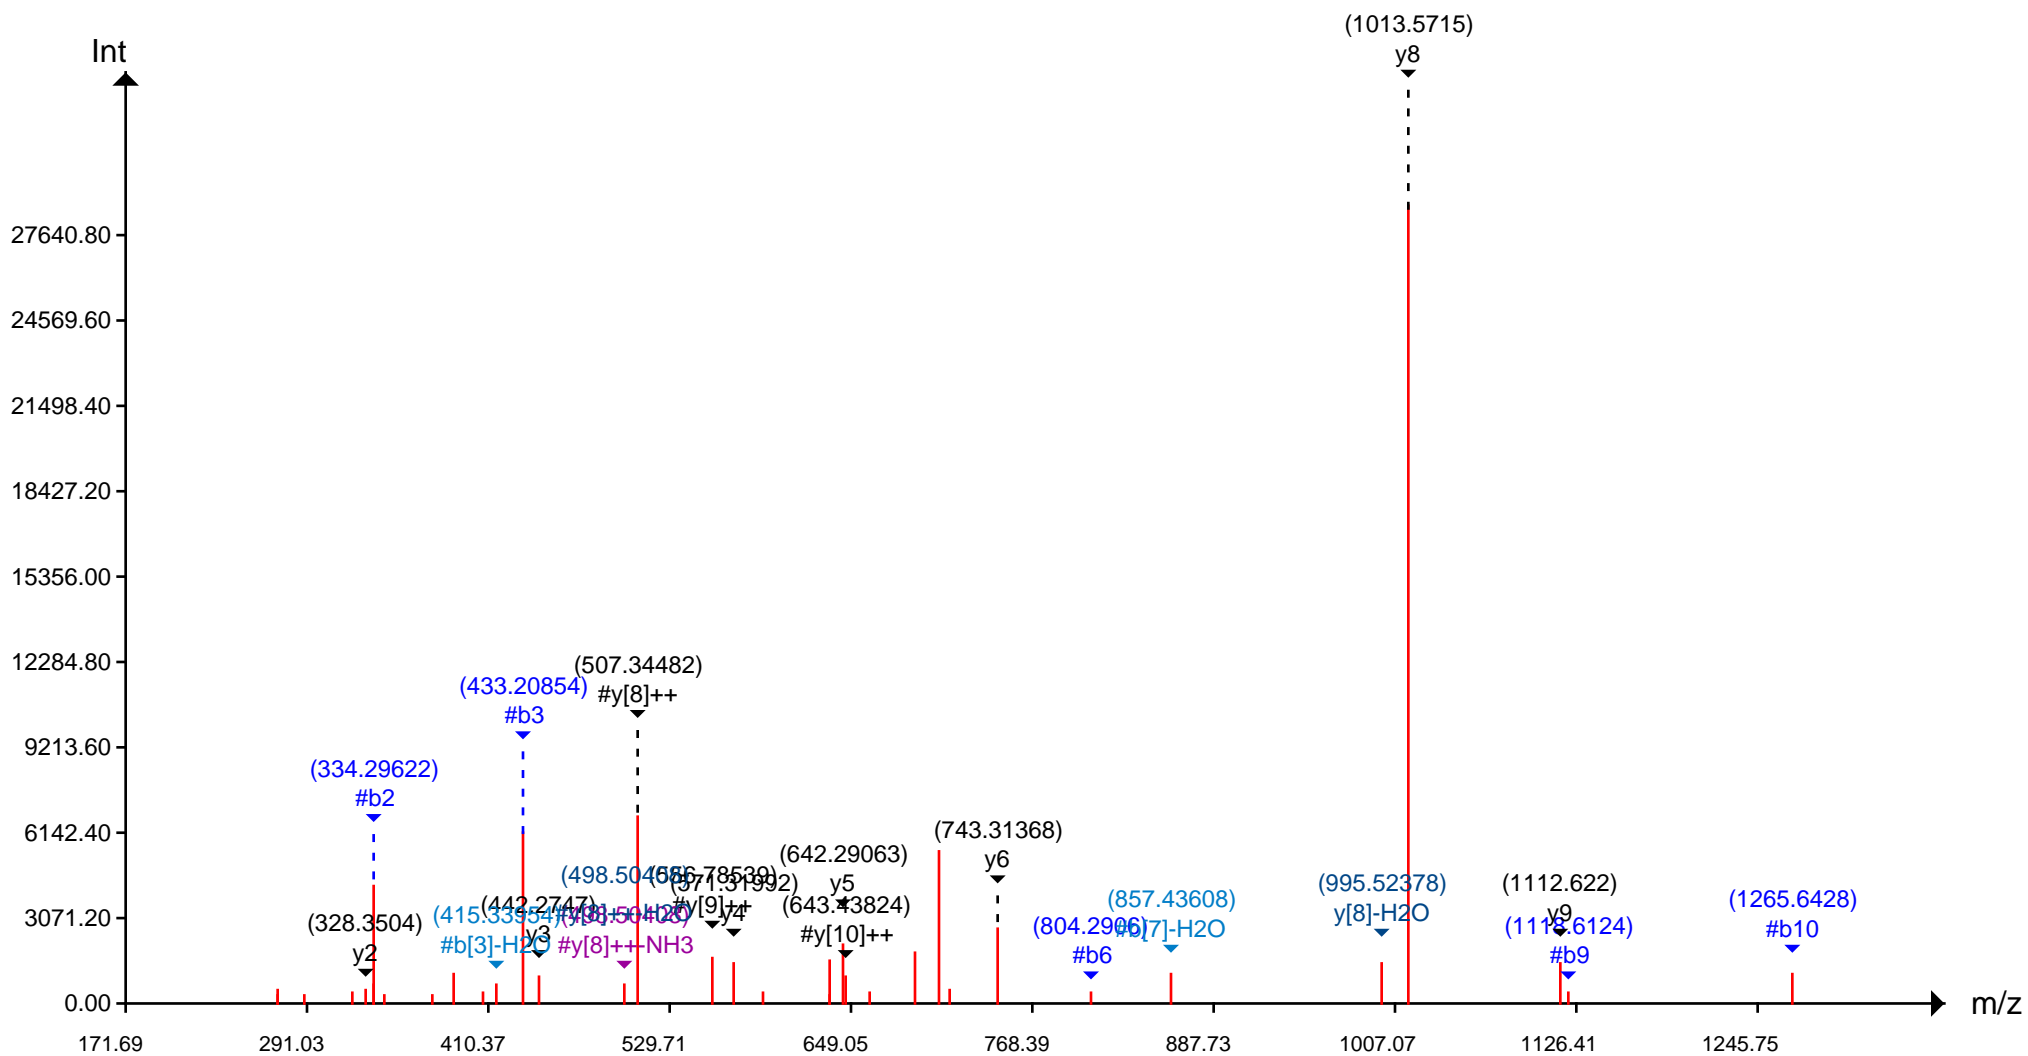

## Info

**Modified Sequence** AcD3-DK<AcD3K\*>VPK<AcD3K\*>TAENFR<C13>-COOH

**Ion score** 58.15

**Protein** P17742

**Confidence level** 99.00%

**Precursor m/z** 723.40464

**Identity Threshold** 47.28

**Charge** 2+

**Mass error** -0.00204

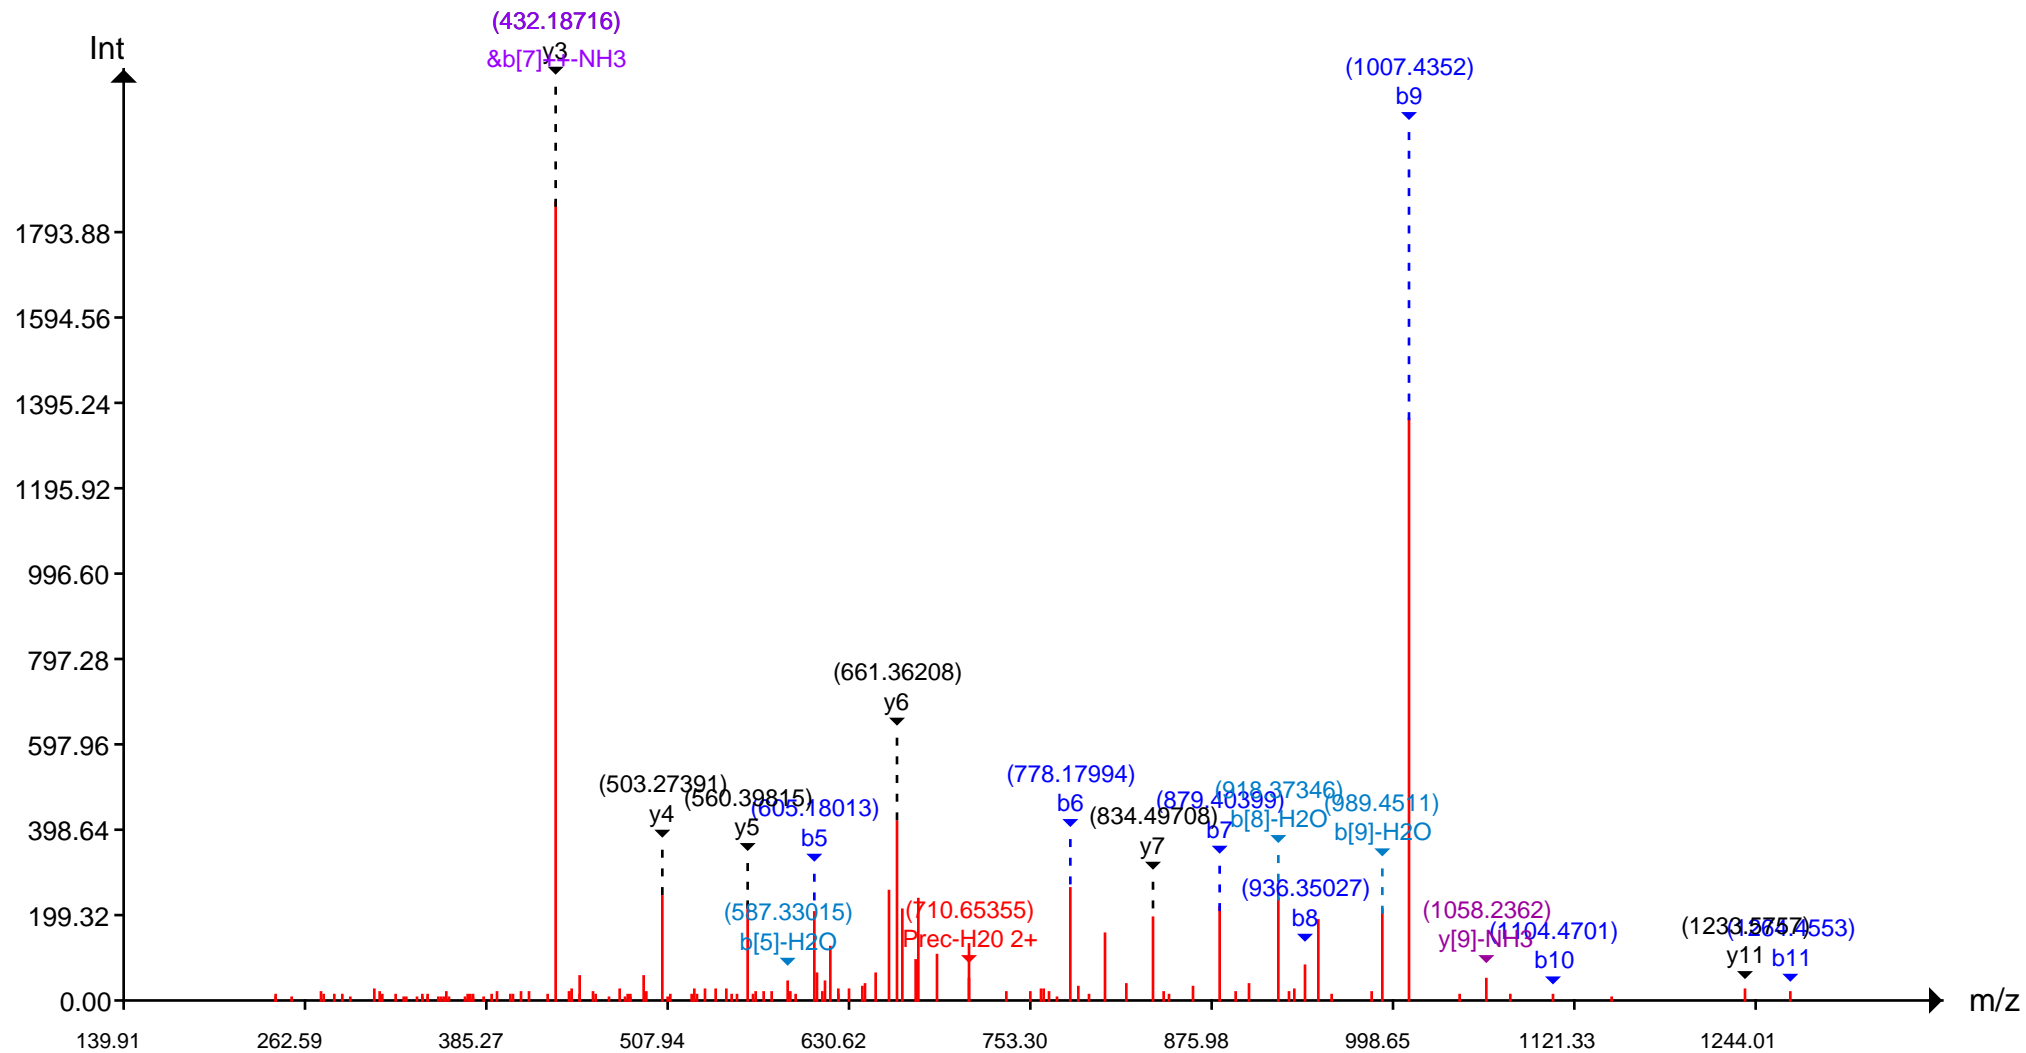

## Info

|                          |                                            |                           |          |
|--------------------------|--------------------------------------------|---------------------------|----------|
| <b>Modified Sequence</b> | AcD3-C<Cmm*>TGQIK<AcD3K*>TGAPC<Cmm*>R-COOH | <b>Ion score</b>          | 54.44    |
| <b>Protein</b>           | P17182, P21550, P17183                     | <b>Confidence level</b>   | 99.00%   |
| <b>Precursor m/z</b>     | 719.85721                                  | <b>Identity Threshold</b> | 47.44    |
| <b>Charge</b>            | 2+                                         | <b>Mass error</b>         | 0.002328 |



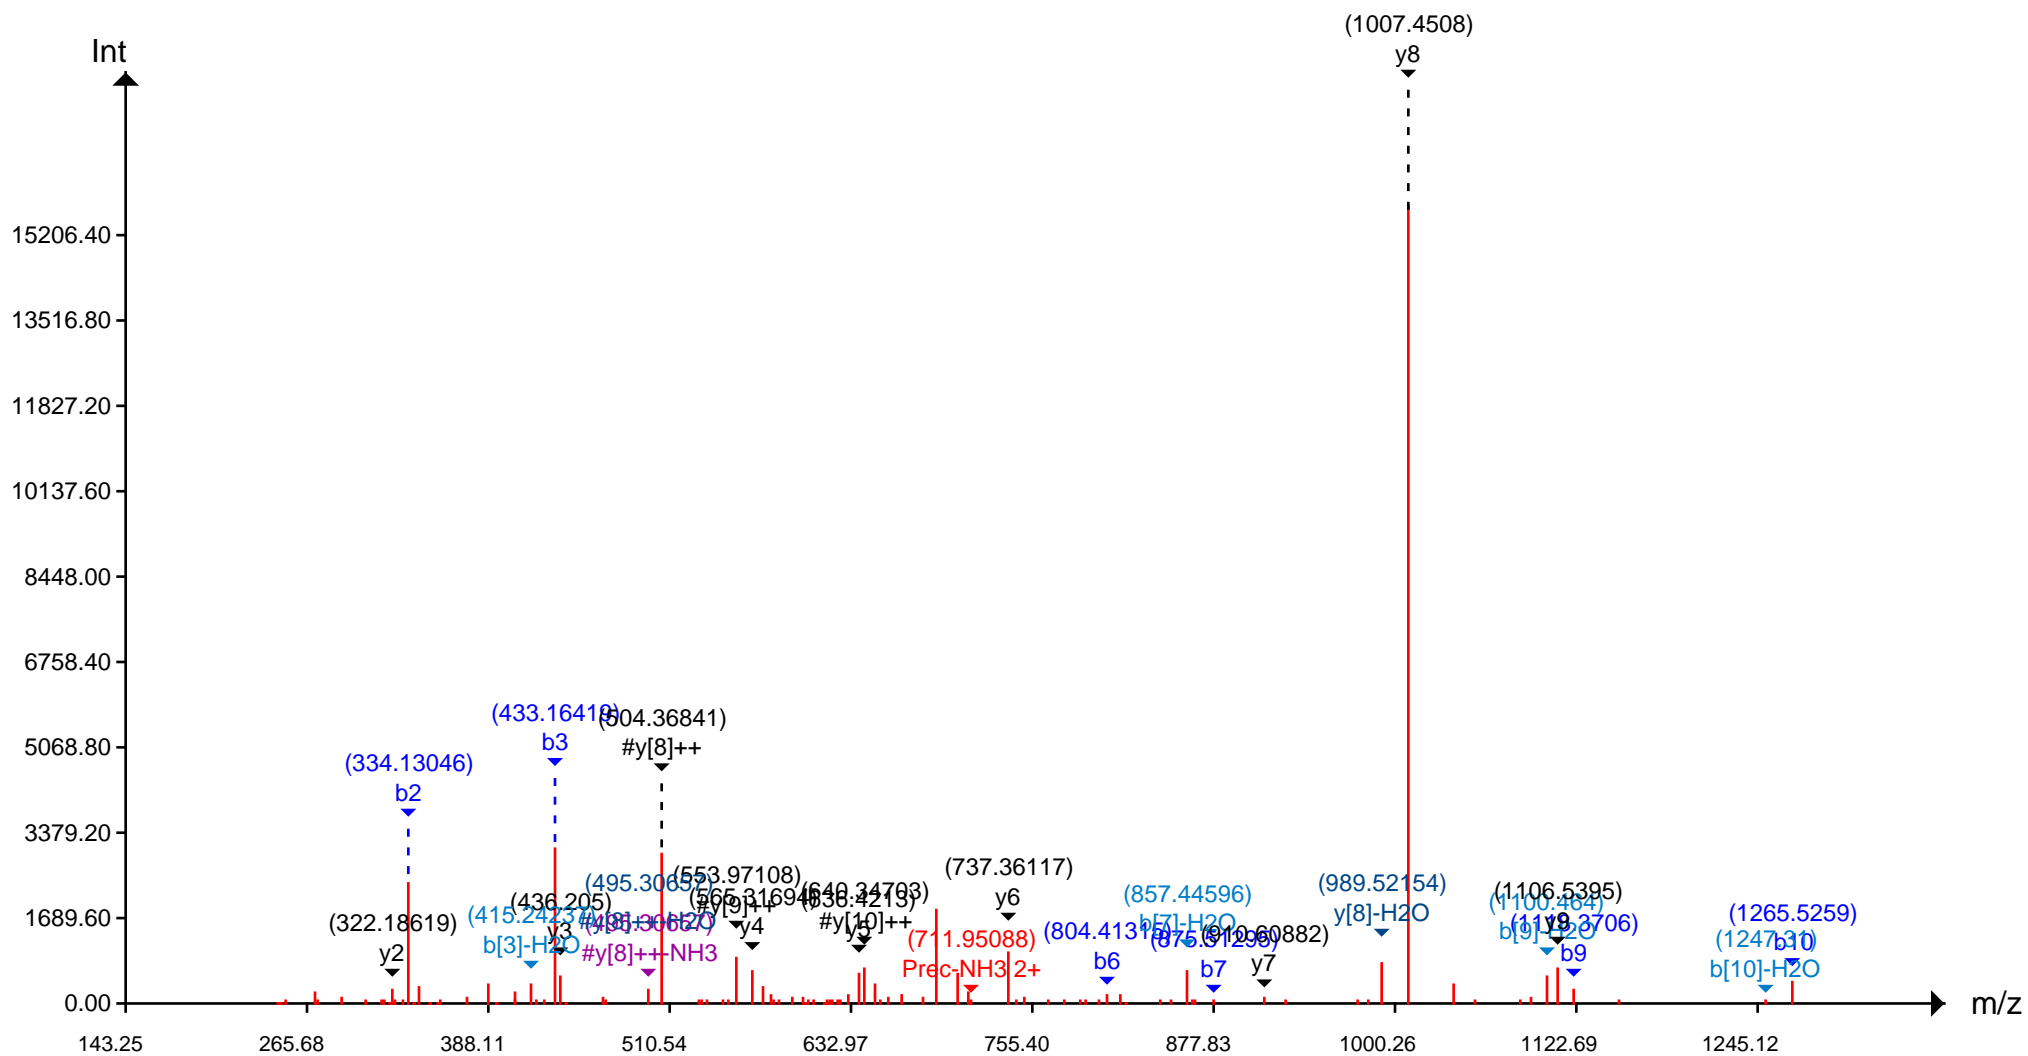

## Info

**Modified Sequence** AcD3-DK<AcD3K\*>VPK<AcD3K\*>TAENFR-COOH

**Ion score** 60.08

**Protein** P17742

**Confidence level** 99.00%

**Precursor m/z** 720.39488

**Identity Threshold** 47.71

**Charge** 2+

**Mass error** -0.001419

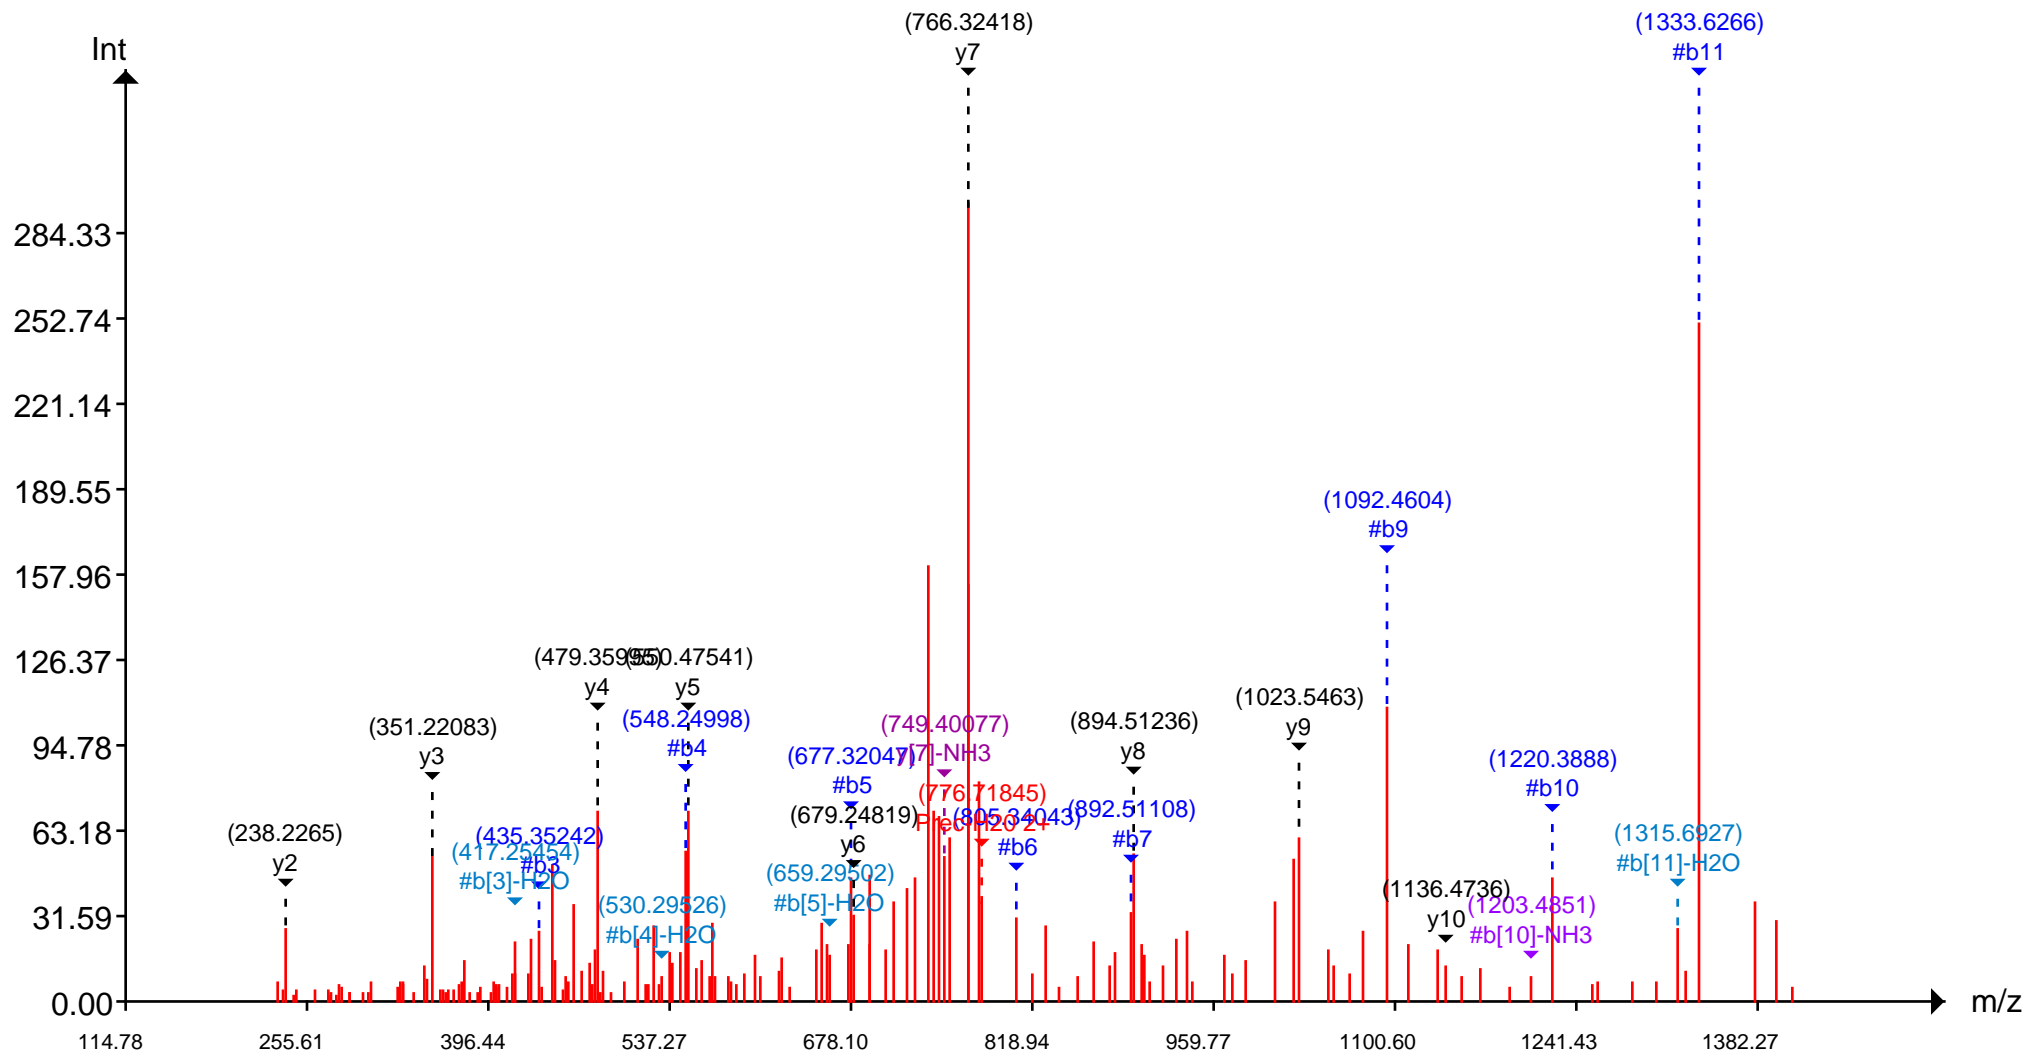

## Info

|                          |                                      |                           |        |
|--------------------------|--------------------------------------|---------------------------|--------|
| <b>Modified Sequence</b> | AcD3-SEK<AcD3K*>LEQSEAQLGR<C13>-COOH | <b>Ion score</b>          | 61.89  |
| <b>Protein</b>           | O35864                               | <b>Confidence level</b>   | 99.00% |
| <b>Precursor m/z</b>     | 785.91879                            | <b>Identity Threshold</b> | 48.09  |
| <b>Charge</b>            | 2+                                   | <b>Mass error</b>         | 0.0018 |

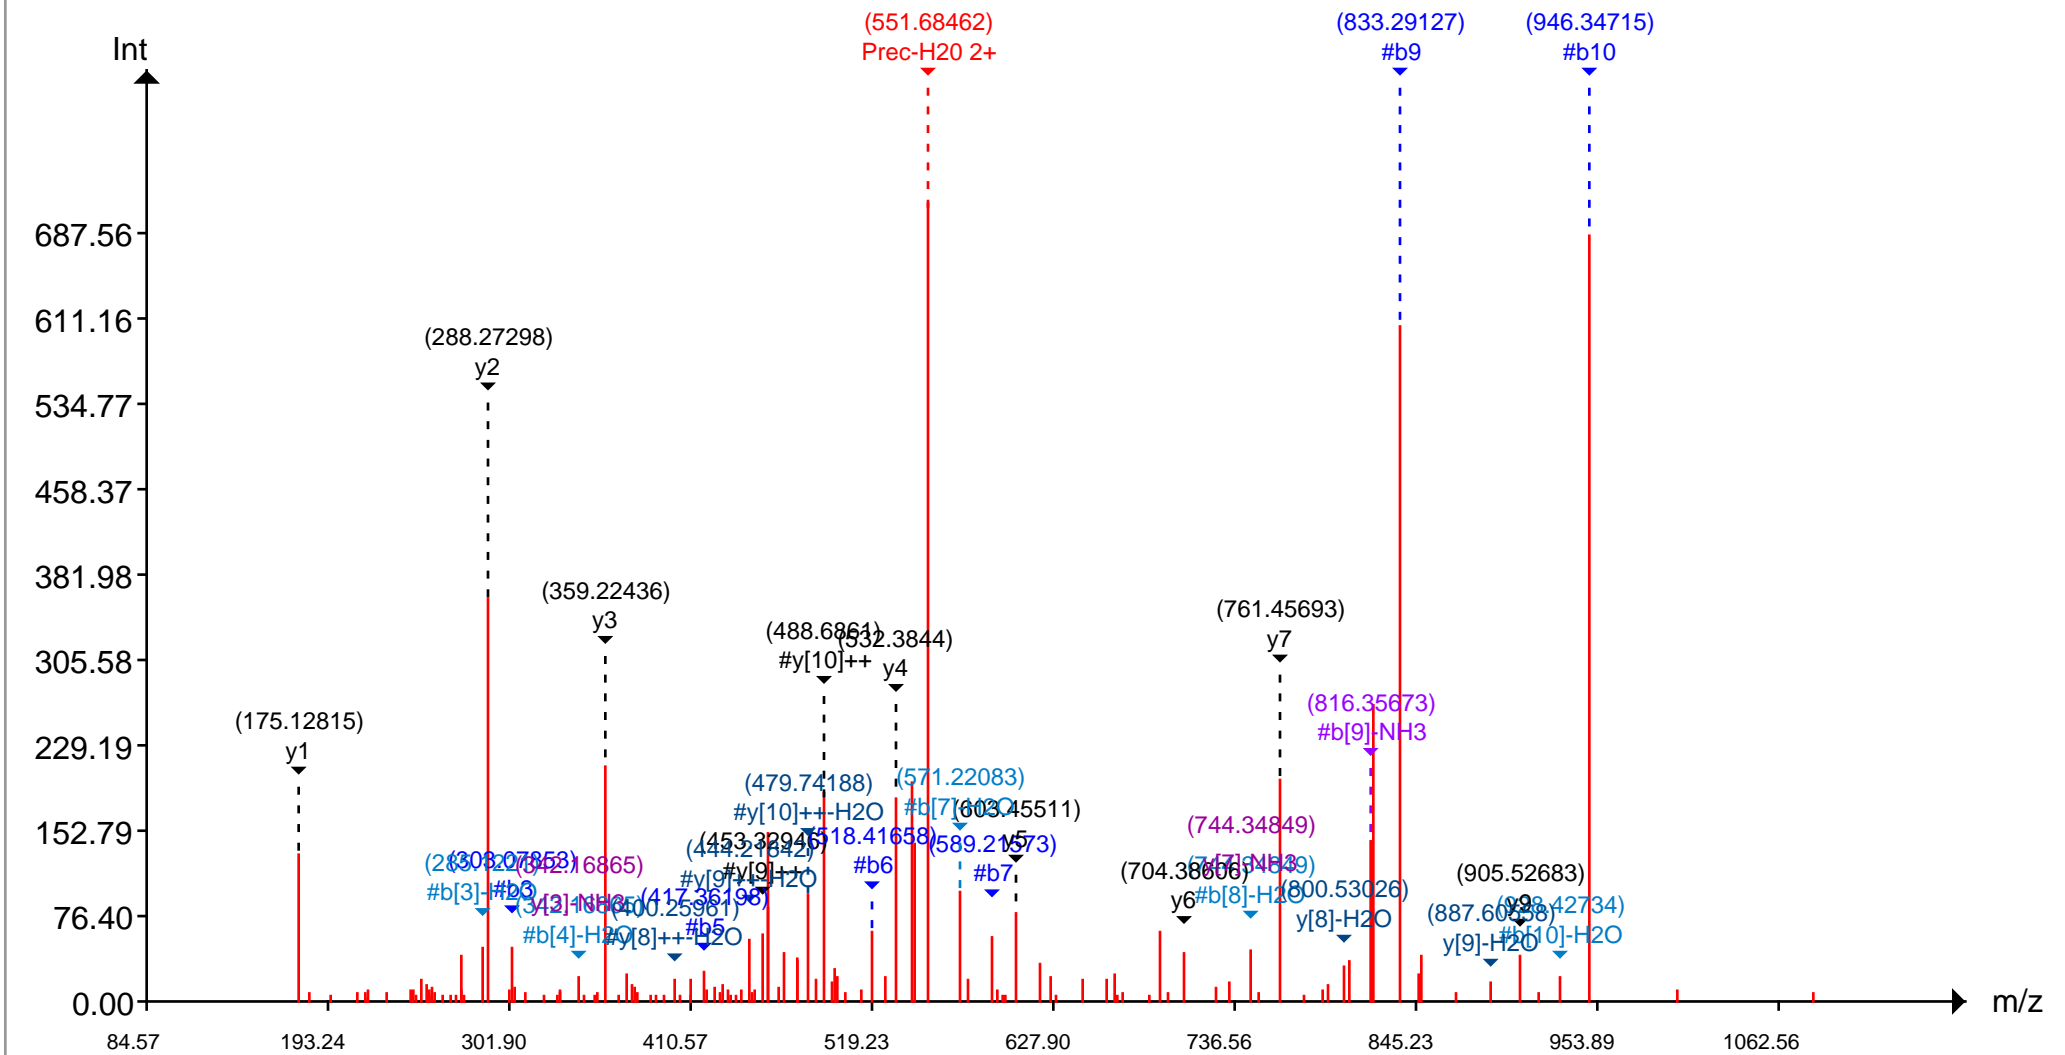

## Info

**Modified Sequence** AcD3-VASGGTAK<AcD3K\*>AIR-COOH

**Ion score** 56.09

**Protein** Q9CWJ9

**Confidence level** 99.00%

**Precursor m/z** 560.8335

**Identity Threshold** 45.90

**Charge** 2+

**Mass error** 5.77E-4

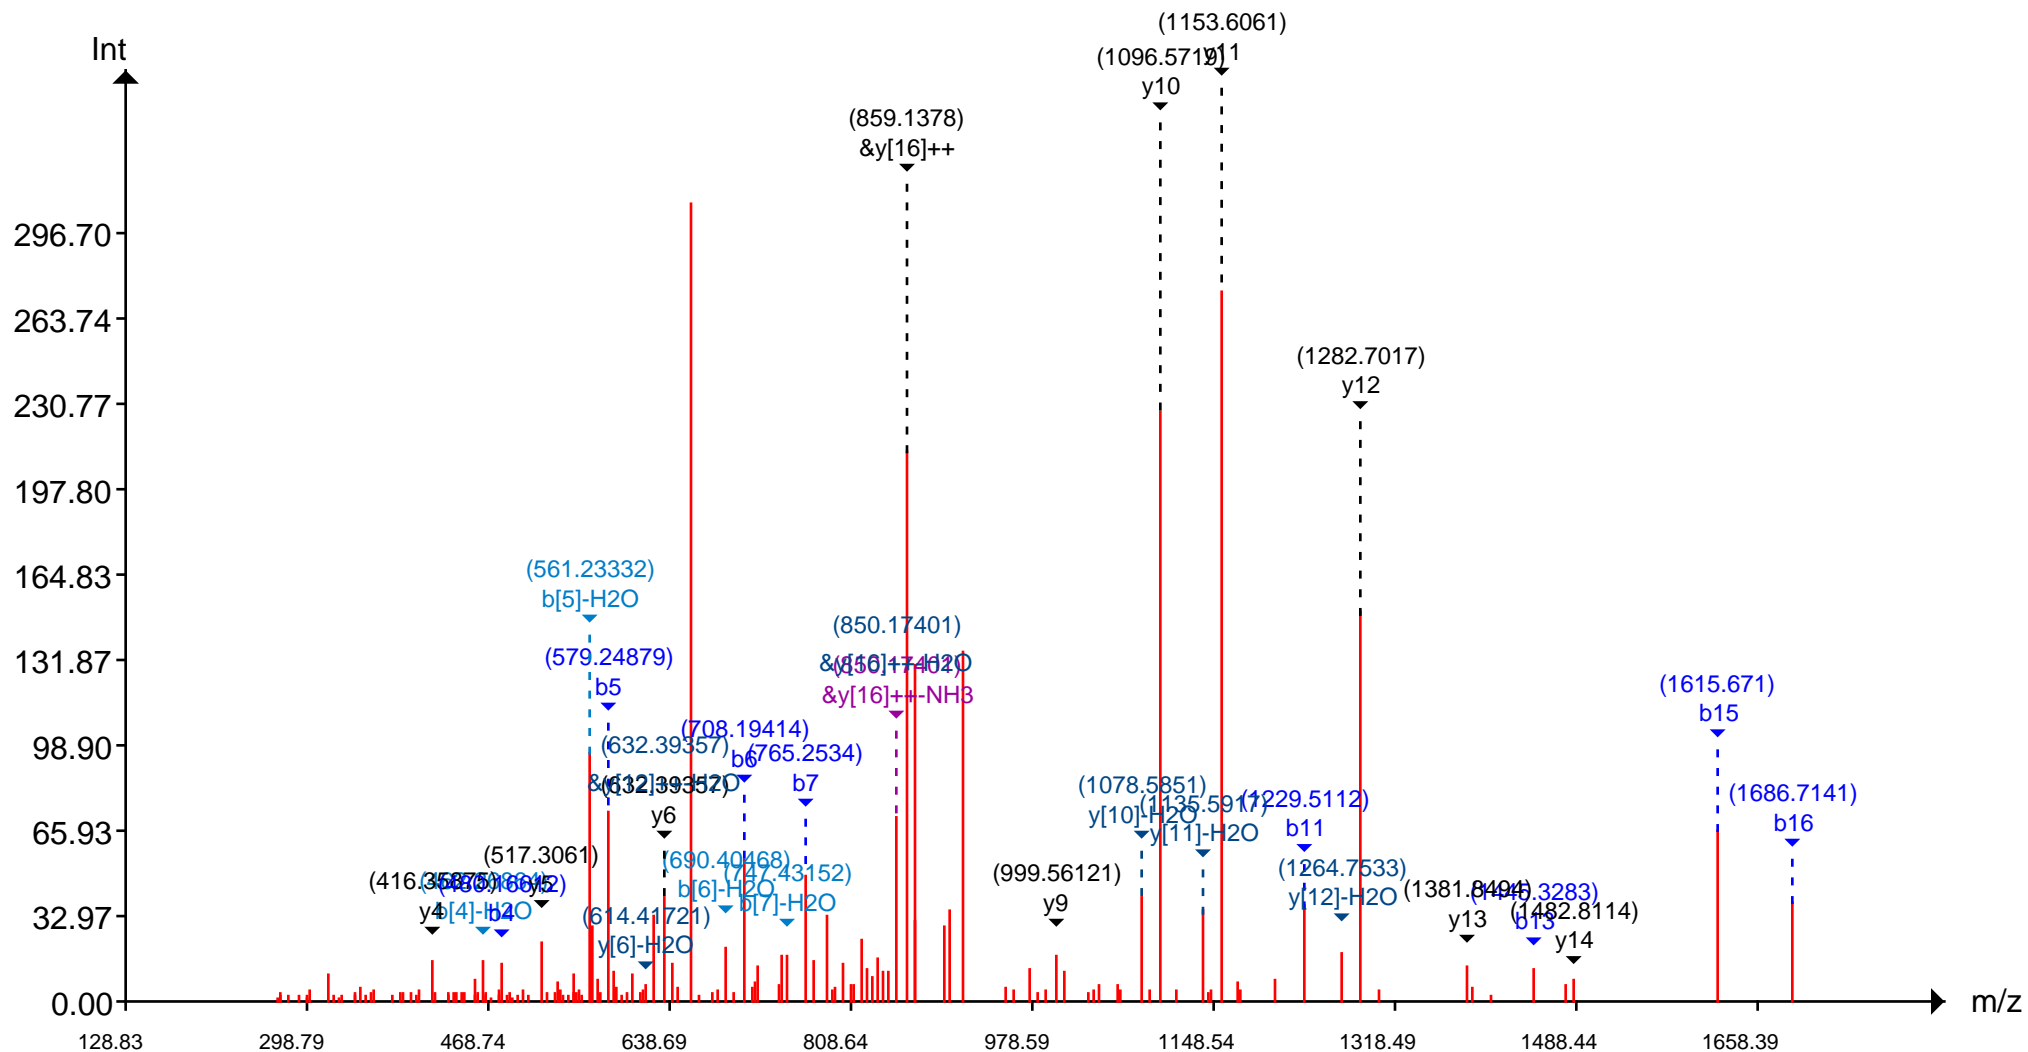

## Info

|                          |                                           |                           |          |
|--------------------------|-------------------------------------------|---------------------------|----------|
| <b>Modified Sequence</b> | AcD3-VSM<Mox*>TVEGPPPK<AcD3K*>DTGIAR-COOH | <b>Ion score</b>          | 54.45    |
| <b>Protein</b>           | P27048, P63163                            | <b>Confidence level</b>   | 99.00%   |
| <b>Precursor m/z</b>     | 930.98666                                 | <b>Identity Threshold</b> | 48.09    |
| <b>Charge</b>            | 2+                                        | <b>Mass error</b>         | 0.001783 |

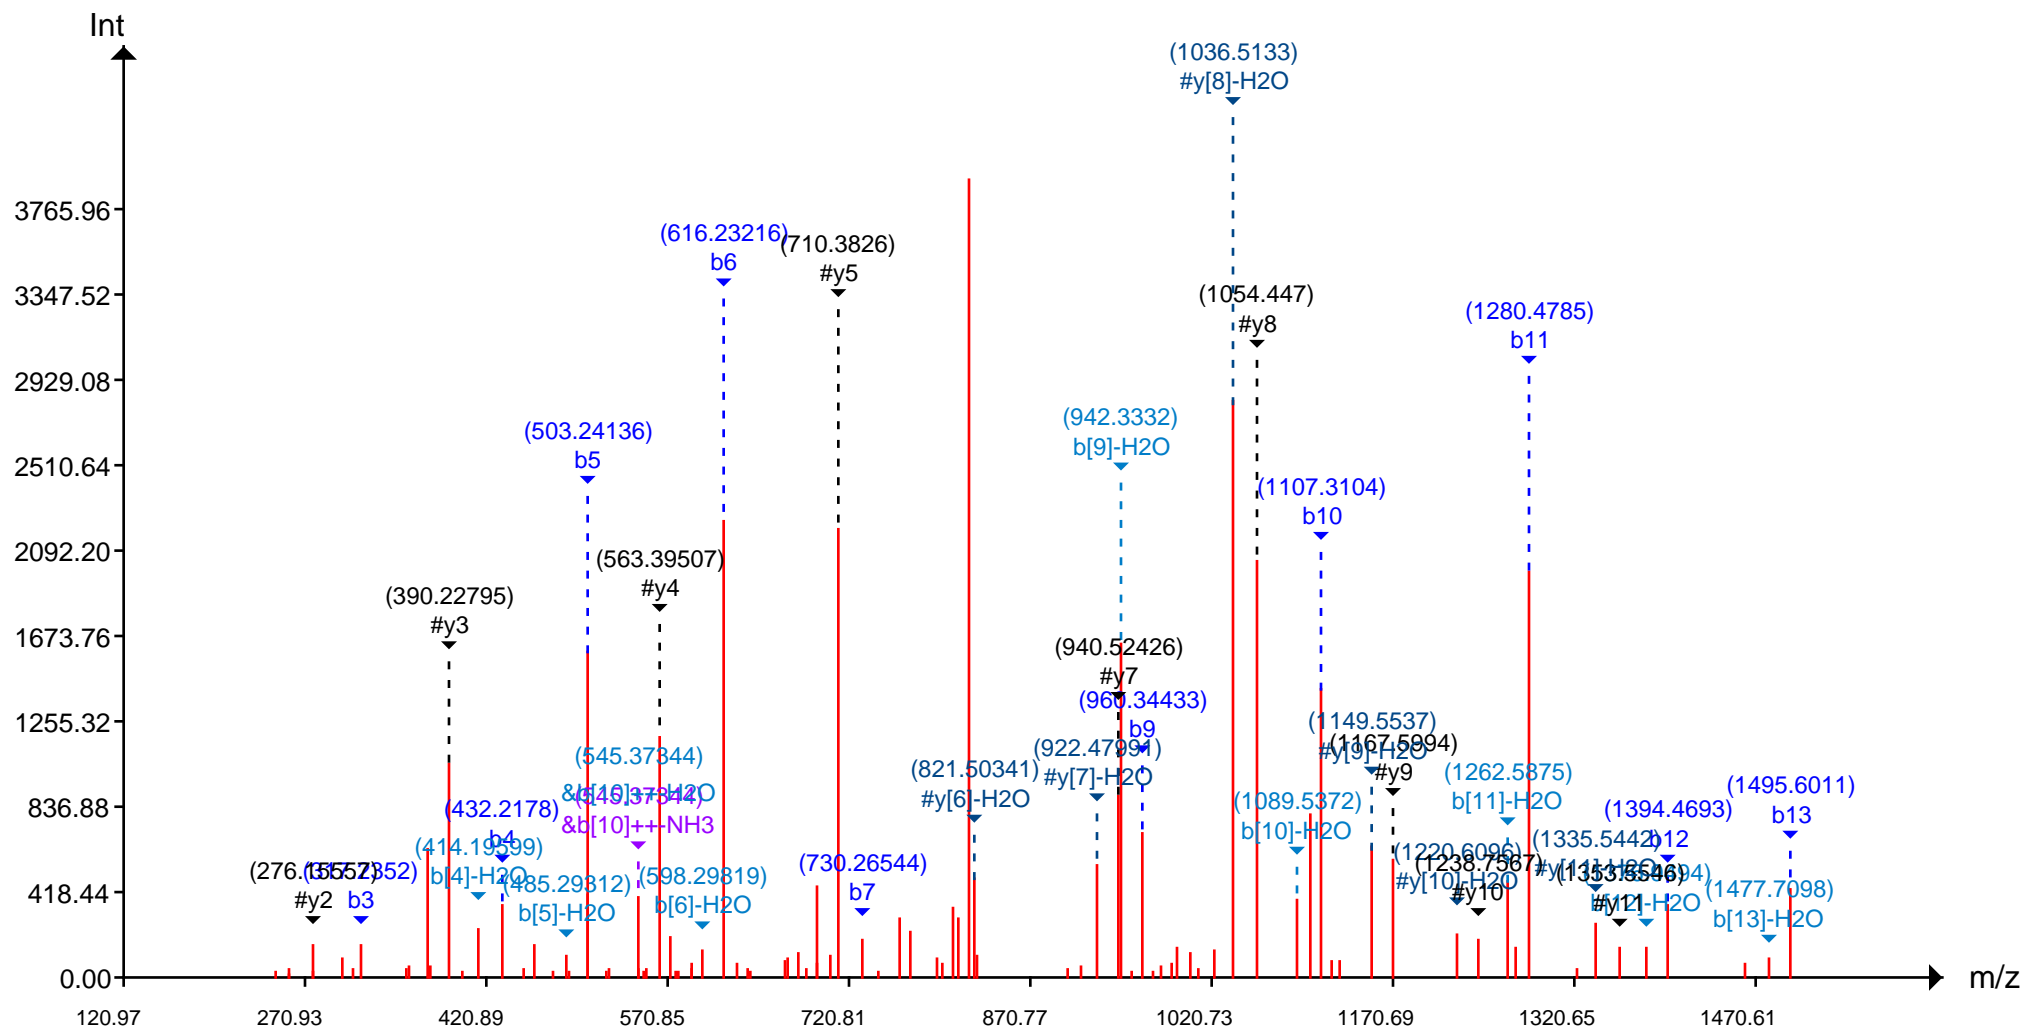

## Info

|                          |                                  |                           |        |
|--------------------------|----------------------------------|---------------------------|--------|
| <b>Modified Sequence</b> | AcD3-SLADAINTEFK<AcD3K*>NTR-COOH | <b>Ion score</b>          | 87.45  |
| <b>Protein</b>           | P20152                           | <b>Confidence level</b>   | 99.00% |
| <b>Precursor m/z</b>     | 835.4381                         | <b>Identity Threshold</b> | 48.17  |
| <b>Charge</b>            | 2+                               | <b>Mass error</b>         | 0.0027 |

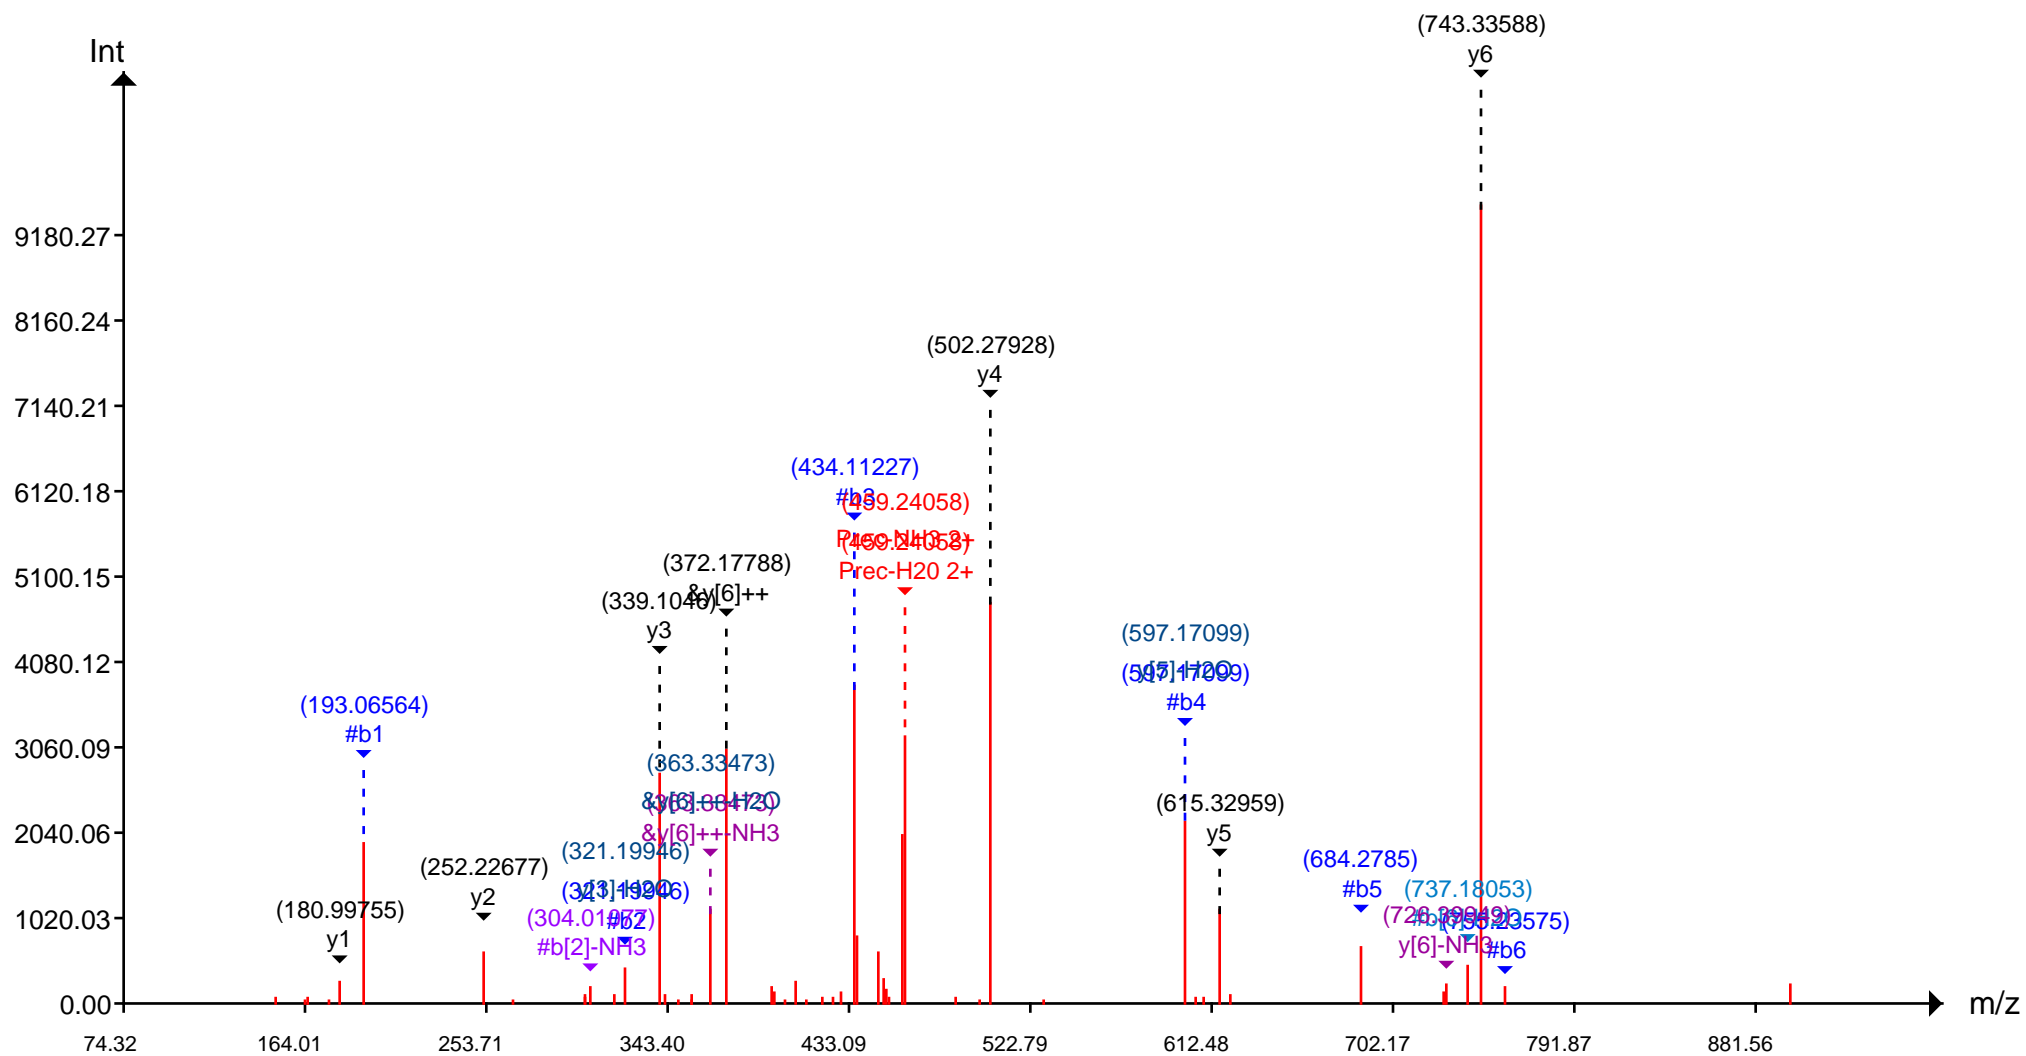

## Info

**Modified Sequence** AcD3-M<Mox\*>QLYSAR<C13>-COOH

**Ion score** 55.08

**Protein** P62843

**Confidence level** 99.00%

**Precursor m/z** 468.24238

**Identity Threshold** 47.37

**Charge** 2+

**Mass error** -0.001487

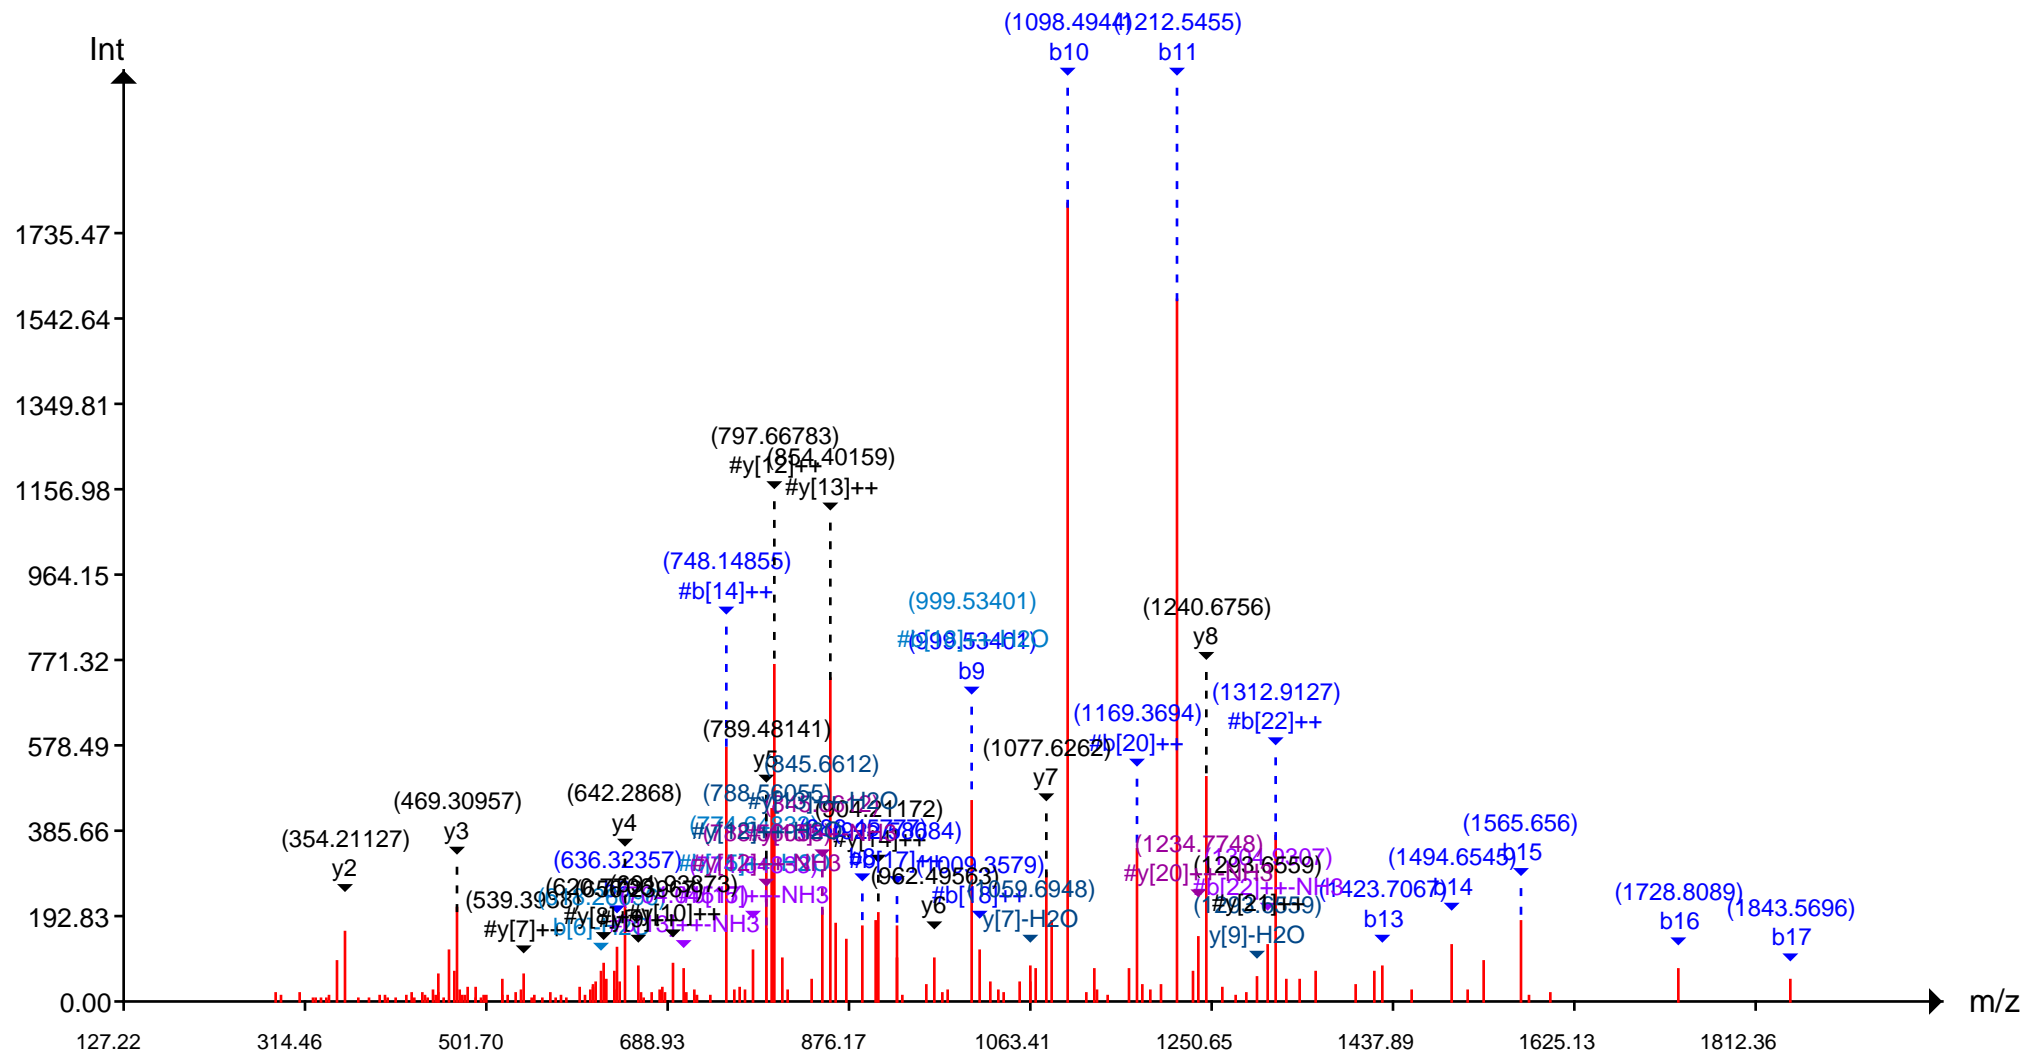

## Info

|                          |                                                                 |                           |          |
|--------------------------|-----------------------------------------------------------------|---------------------------|----------|
| <b>Modified Sequence</b> | AcD3-SSTSVEHIIIVNPAAAYDK<AcD3K*>FK<AcD3K*>DK<AcD3K*>R<C13>-COOH | <b>Ion score</b>          | 63.83    |
| <b>Protein</b>           | Q99KJ8                                                          | <b>Confidence level</b>   | 99.00%   |
| <b>Precursor m/z</b>     | 935.83627                                                       | <b>Identity Threshold</b> | 47.17    |
| <b>Charge</b>            | 3+                                                              | <b>Mass error</b>         | 0.004011 |

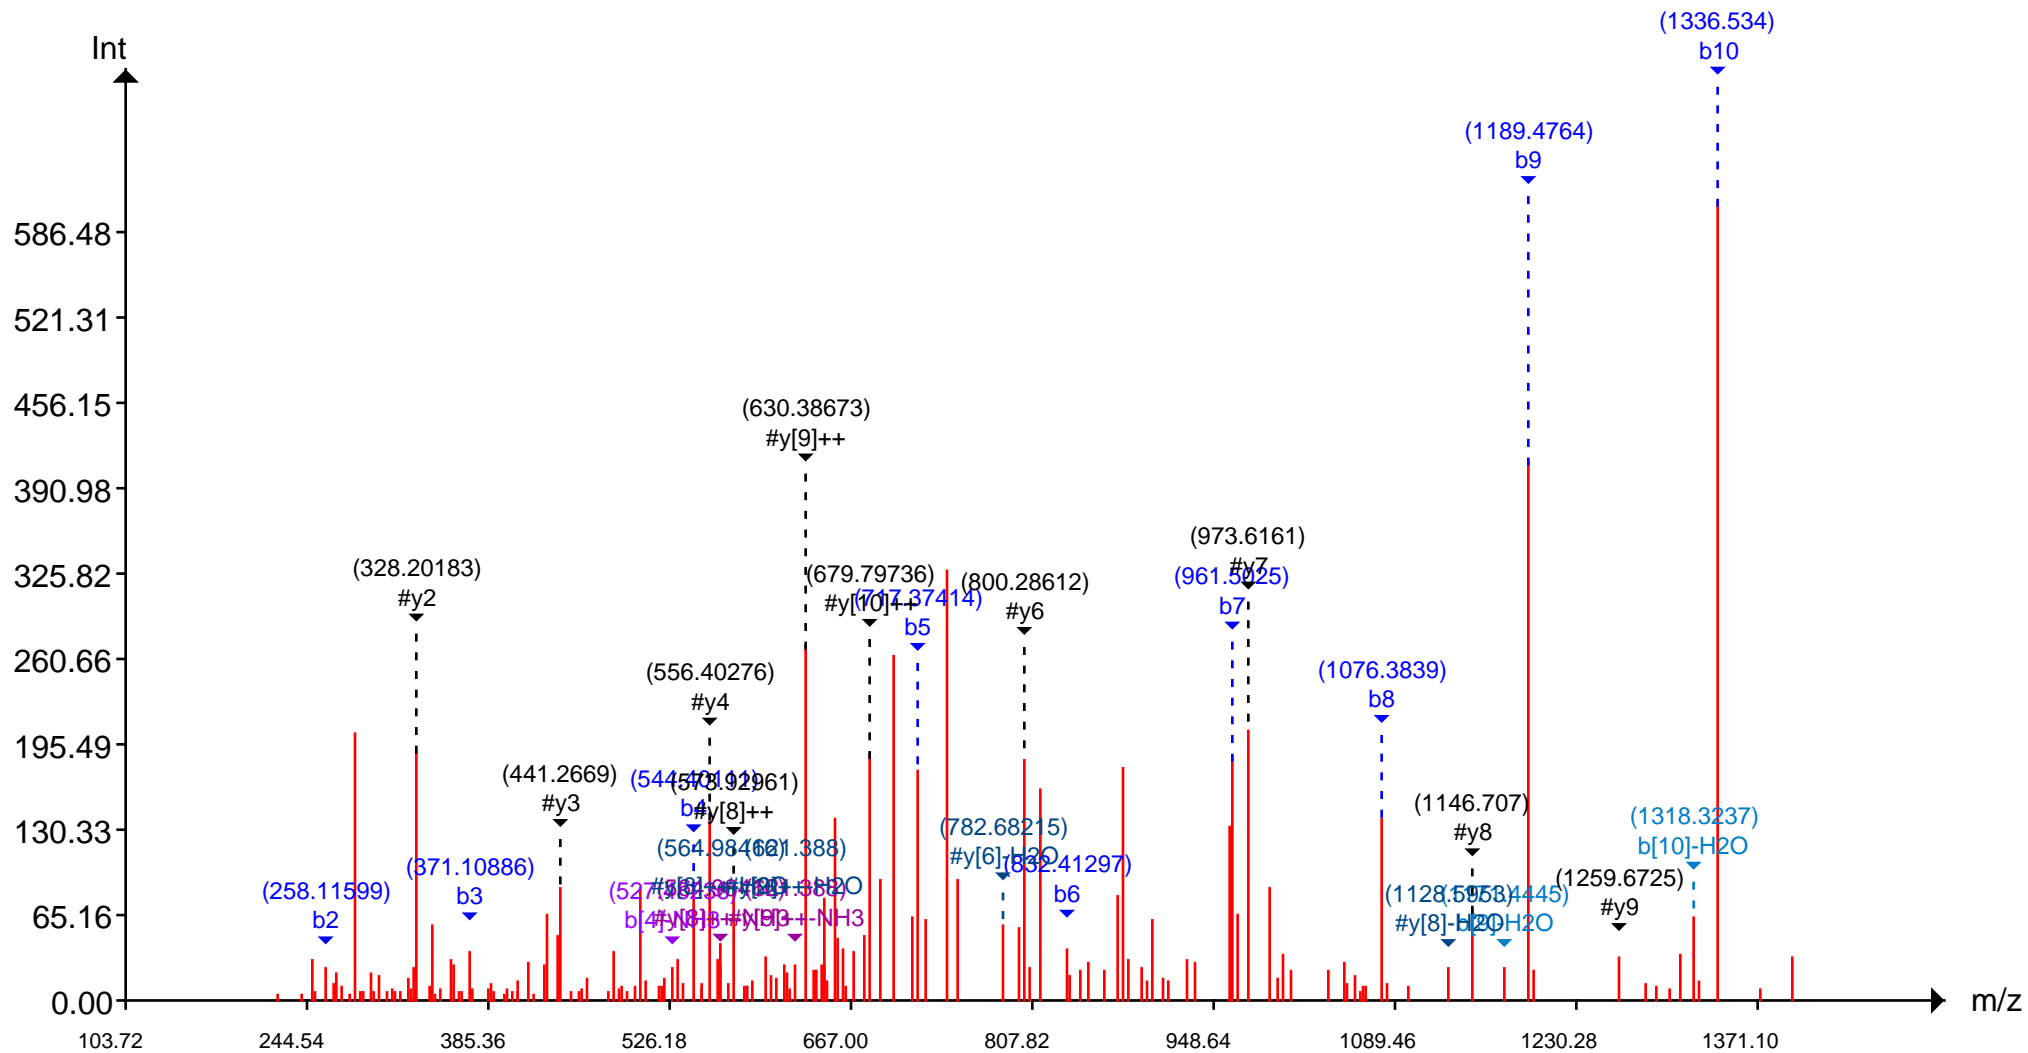

## Info

**Modified Sequence** AcD3-LVLK<AcD3K\*>K<AcD3K\*>DEDLFR<C13>-COOH

**Ion score** 48.13

**Protein** O54962

**Confidence level** 99.00%

**Precursor m/z** 758.95592

**Identity Threshold** 43.50

**Charge** 2+

**Mass error** 0.001872



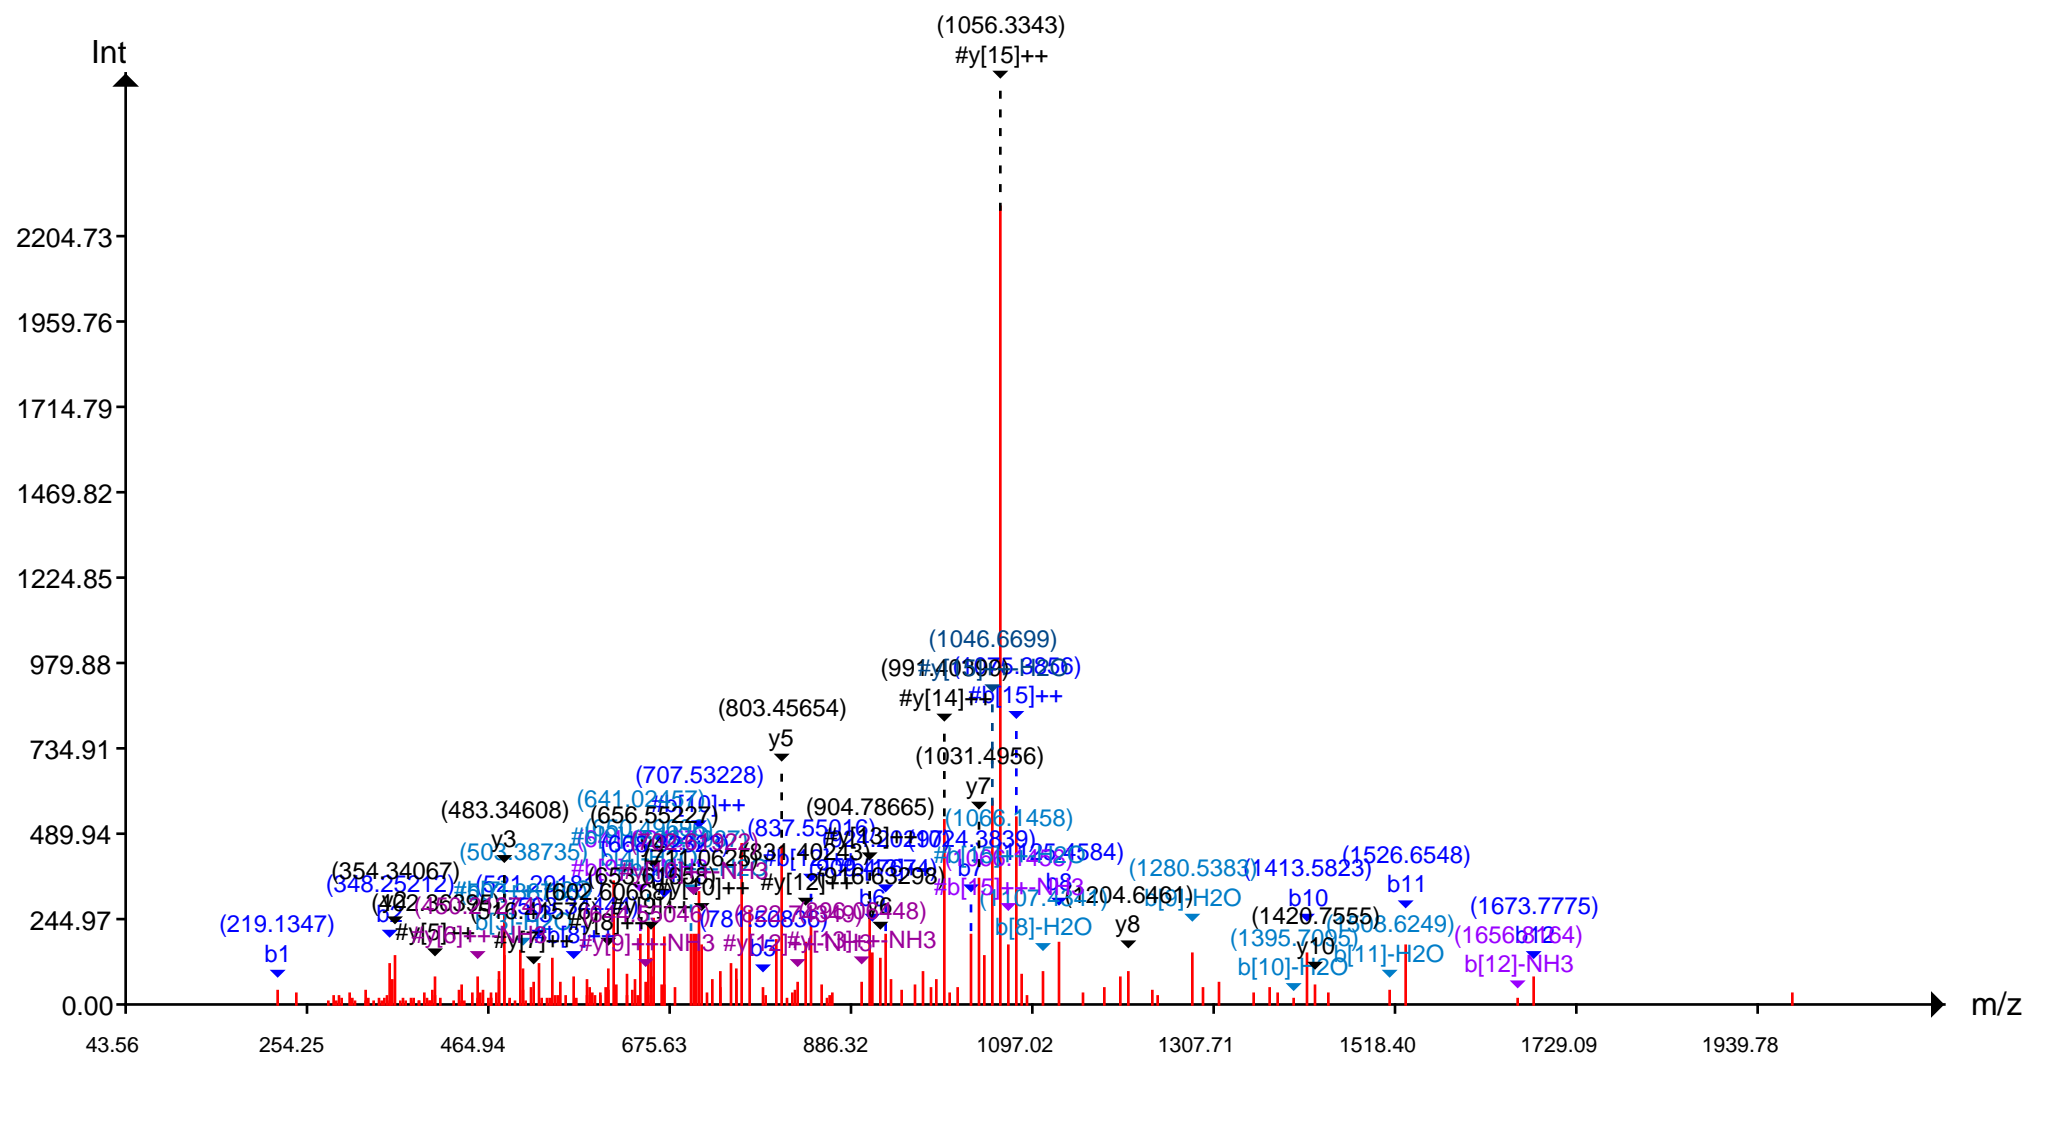

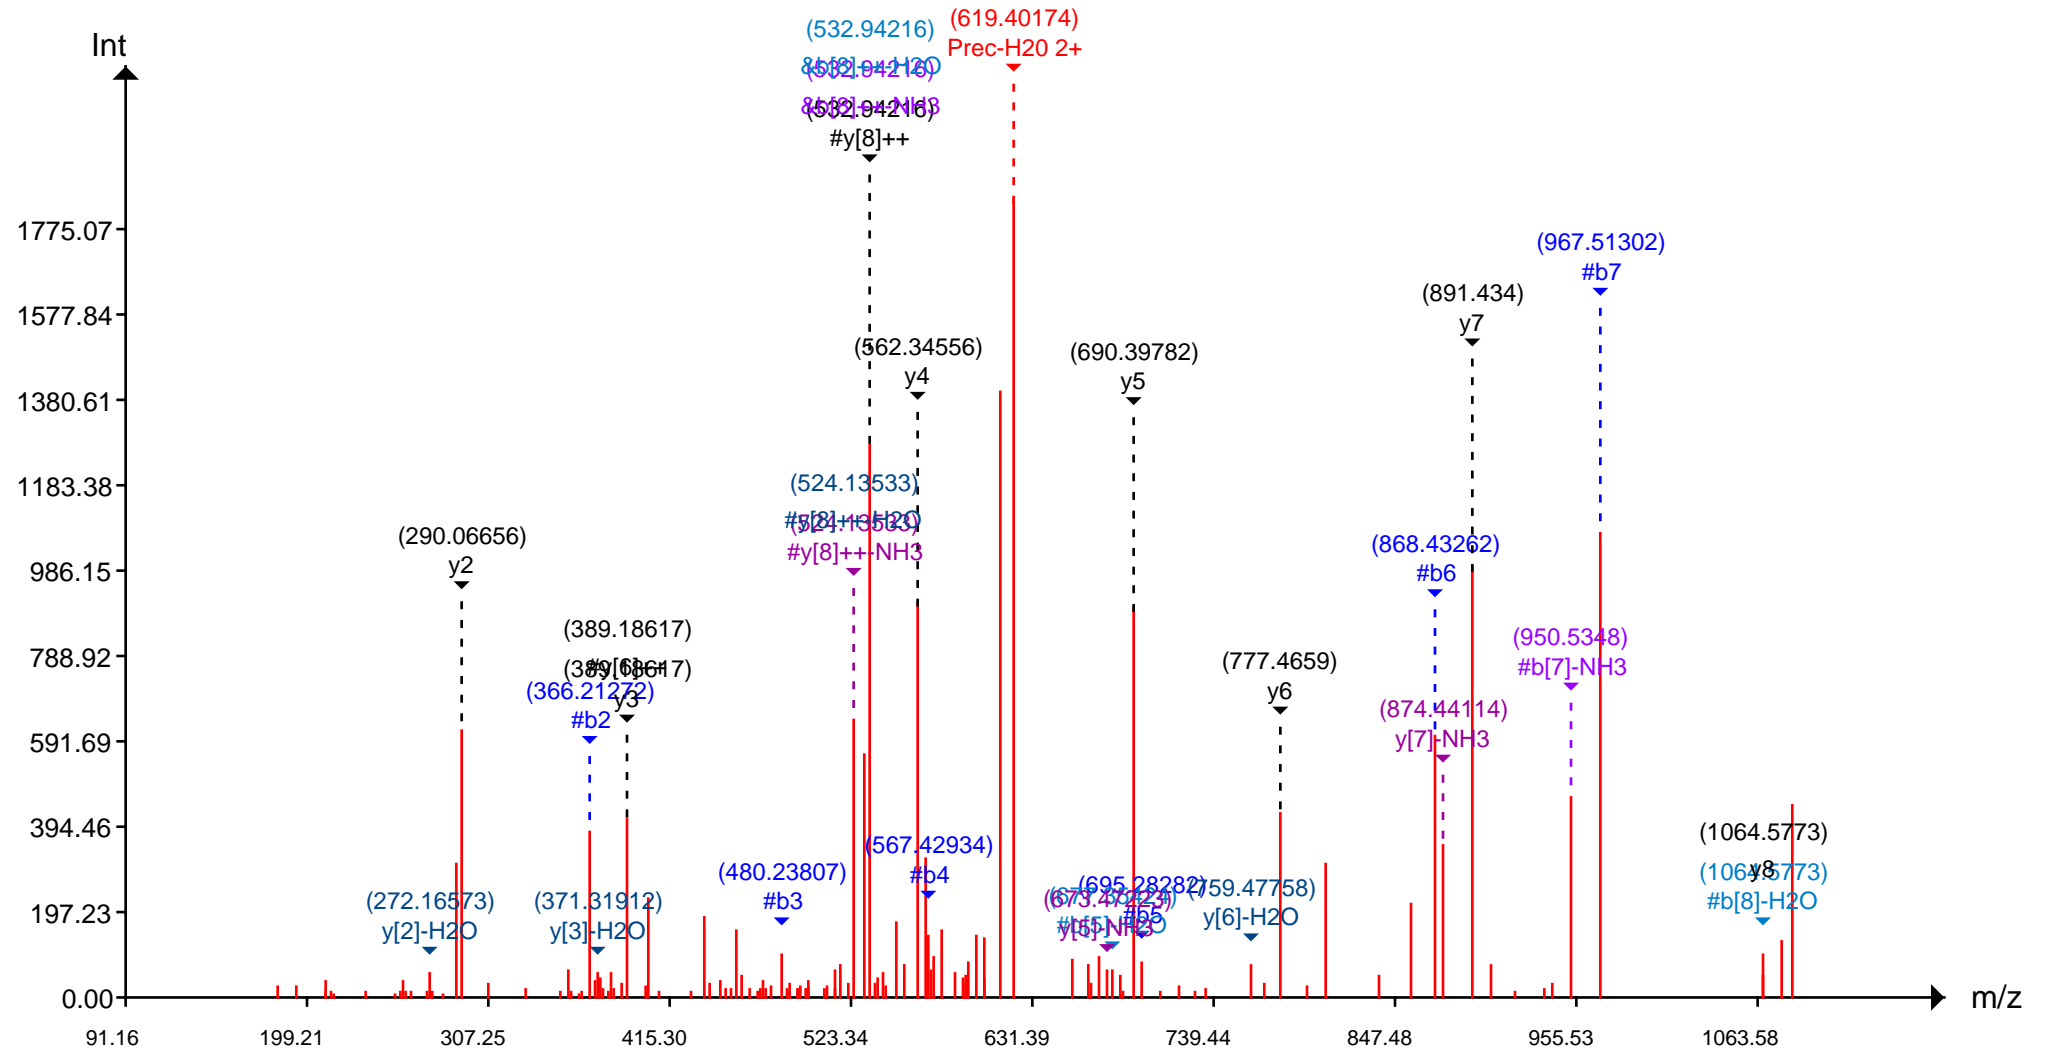

| Info                     |                                     |                           |          |
|--------------------------|-------------------------------------|---------------------------|----------|
| <b>Modified Sequence</b> | AcD3-FK<AcD3K*>NSQK<AcD3K*>VDR-COOH | <b>Ion score</b>          | 56.29    |
| <b>Protein</b>           | Q9CQM9                              | <b>Confidence level</b>   | 99.00%   |
| <b>Precursor m/z</b>     | 628.84966                           | <b>Identity Threshold</b> | 47.43    |
| <b>Charge</b>            | 2+                                  | <b>Mass error</b>         | -0.00232 |

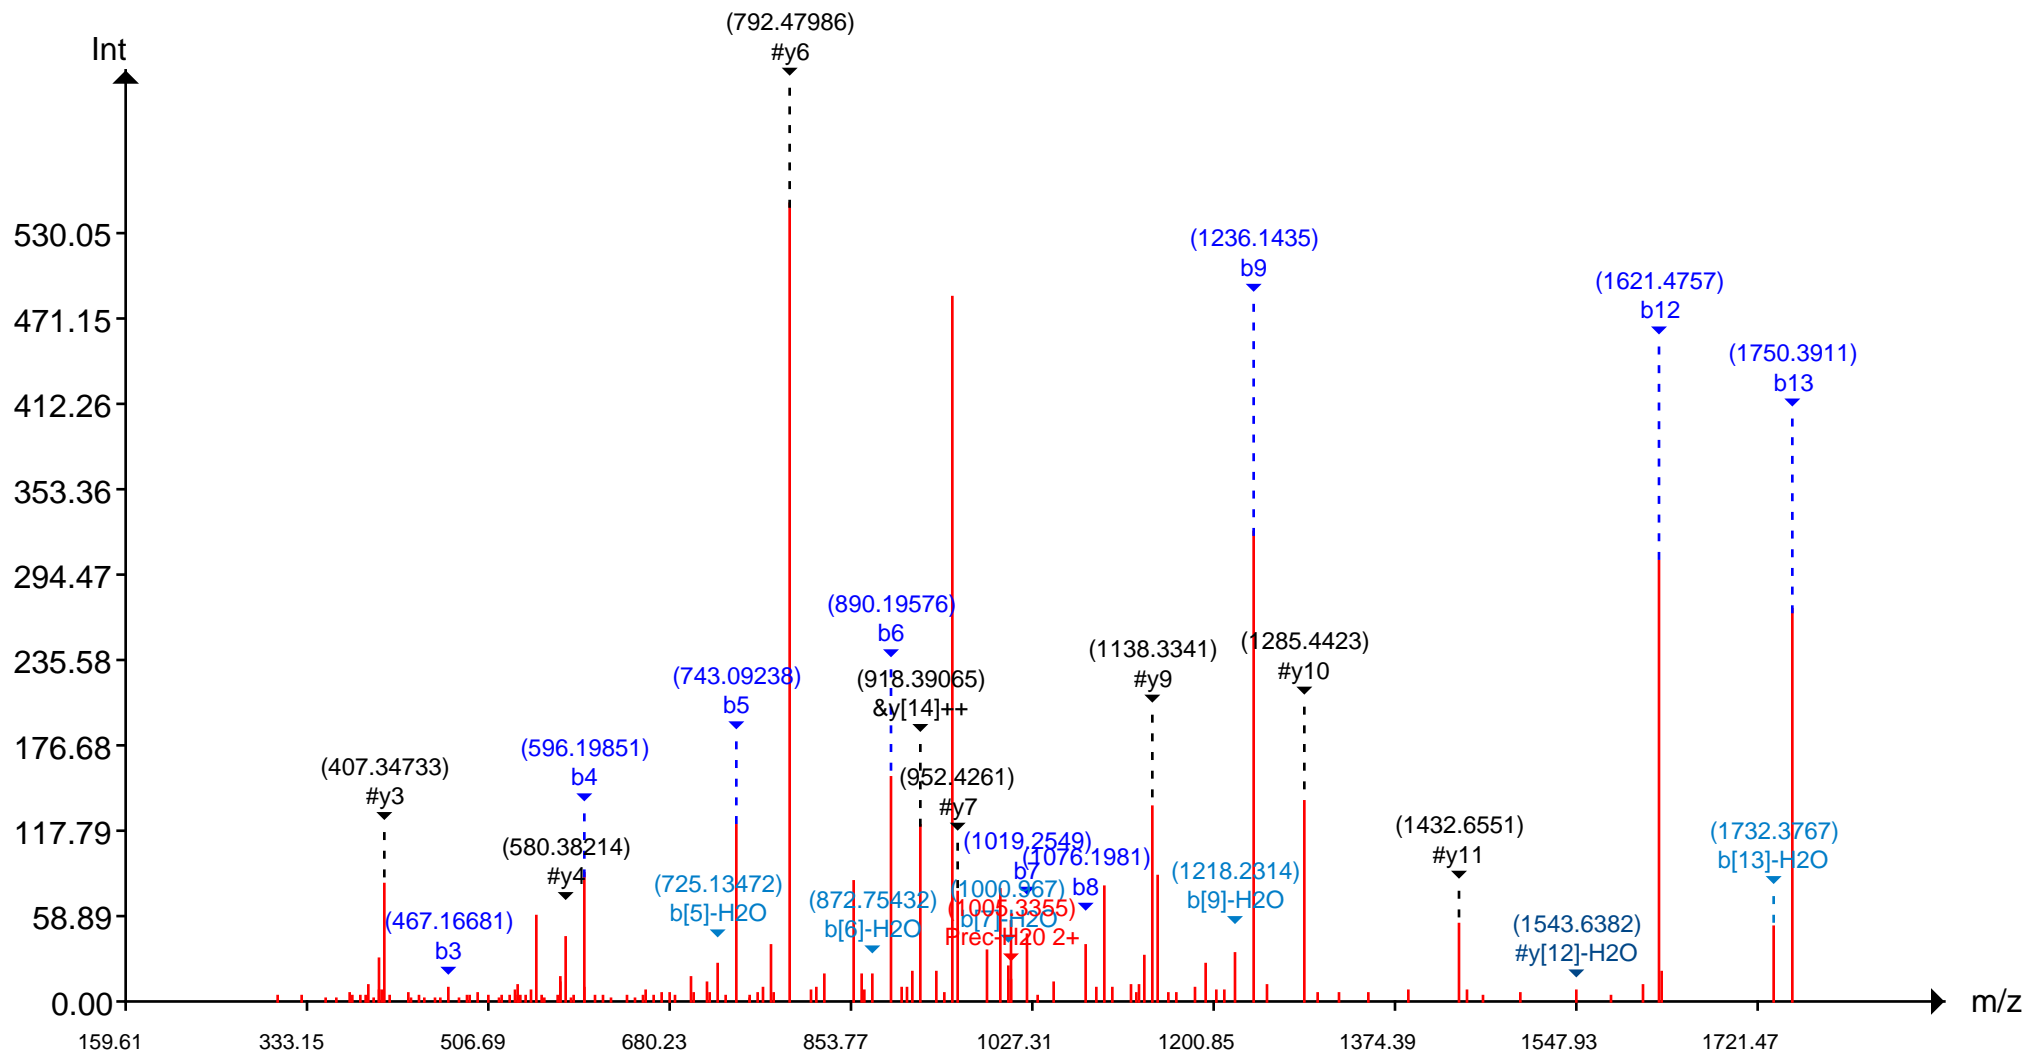

## Info

|                          |                                                          |                           |          |
|--------------------------|----------------------------------------------------------|---------------------------|----------|
| <b>Modified Sequence</b> | AcD3-M<Mox*>C<Cmm*>NEFFEGC<Cmm*>PDK<AcD3K*>EPR<C13>-COOH | <b>Ion score</b>          | 40.88    |
| <b>Protein</b>           | P07091                                                   | <b>Confidence level</b>   | 99.00%   |
| <b>Precursor m/z</b>     | 1014.4304                                                | <b>Identity Threshold</b> | 39.75    |
| <b>Charge</b>            | 2+                                                       | <b>Mass error</b>         | 0.002513 |

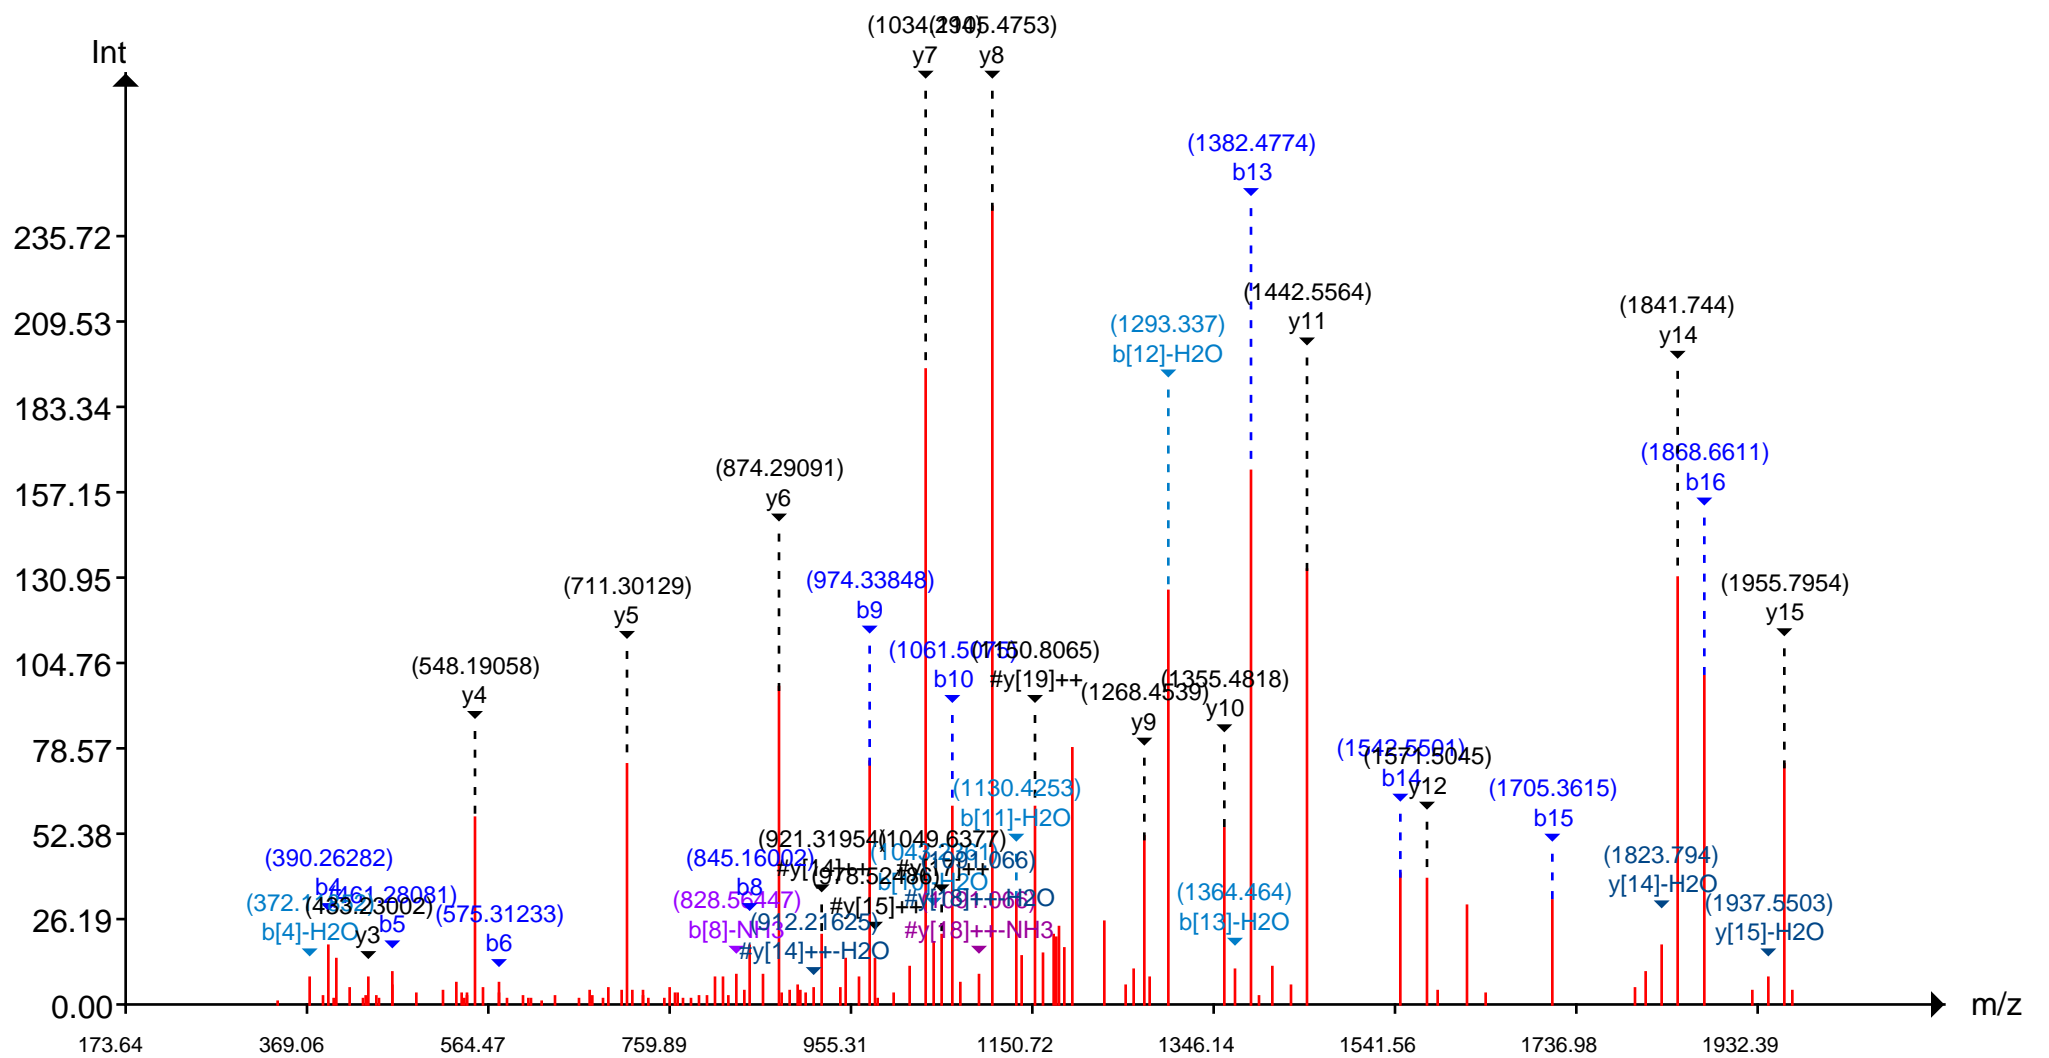

| Info                     |                                              |                           |         |
|--------------------------|----------------------------------------------|---------------------------|---------|
| <b>Modified Sequence</b> | AcD3-ATTAANPK<AcD3K*>ESSYAC<Cmm*>YYDEER-COOH | <b>Ion score</b>          | 96.54   |
| <b>Protein</b>           | O89017                                       | <b>Confidence level</b>   | 99.00%  |
| <b>Precursor m/z</b>     | 1208.5297                                    | <b>Identity Threshold</b> | 41.32   |
| <b>Charge</b>            | 2+                                           | <b>Mass error</b>         | 5.52E-4 |

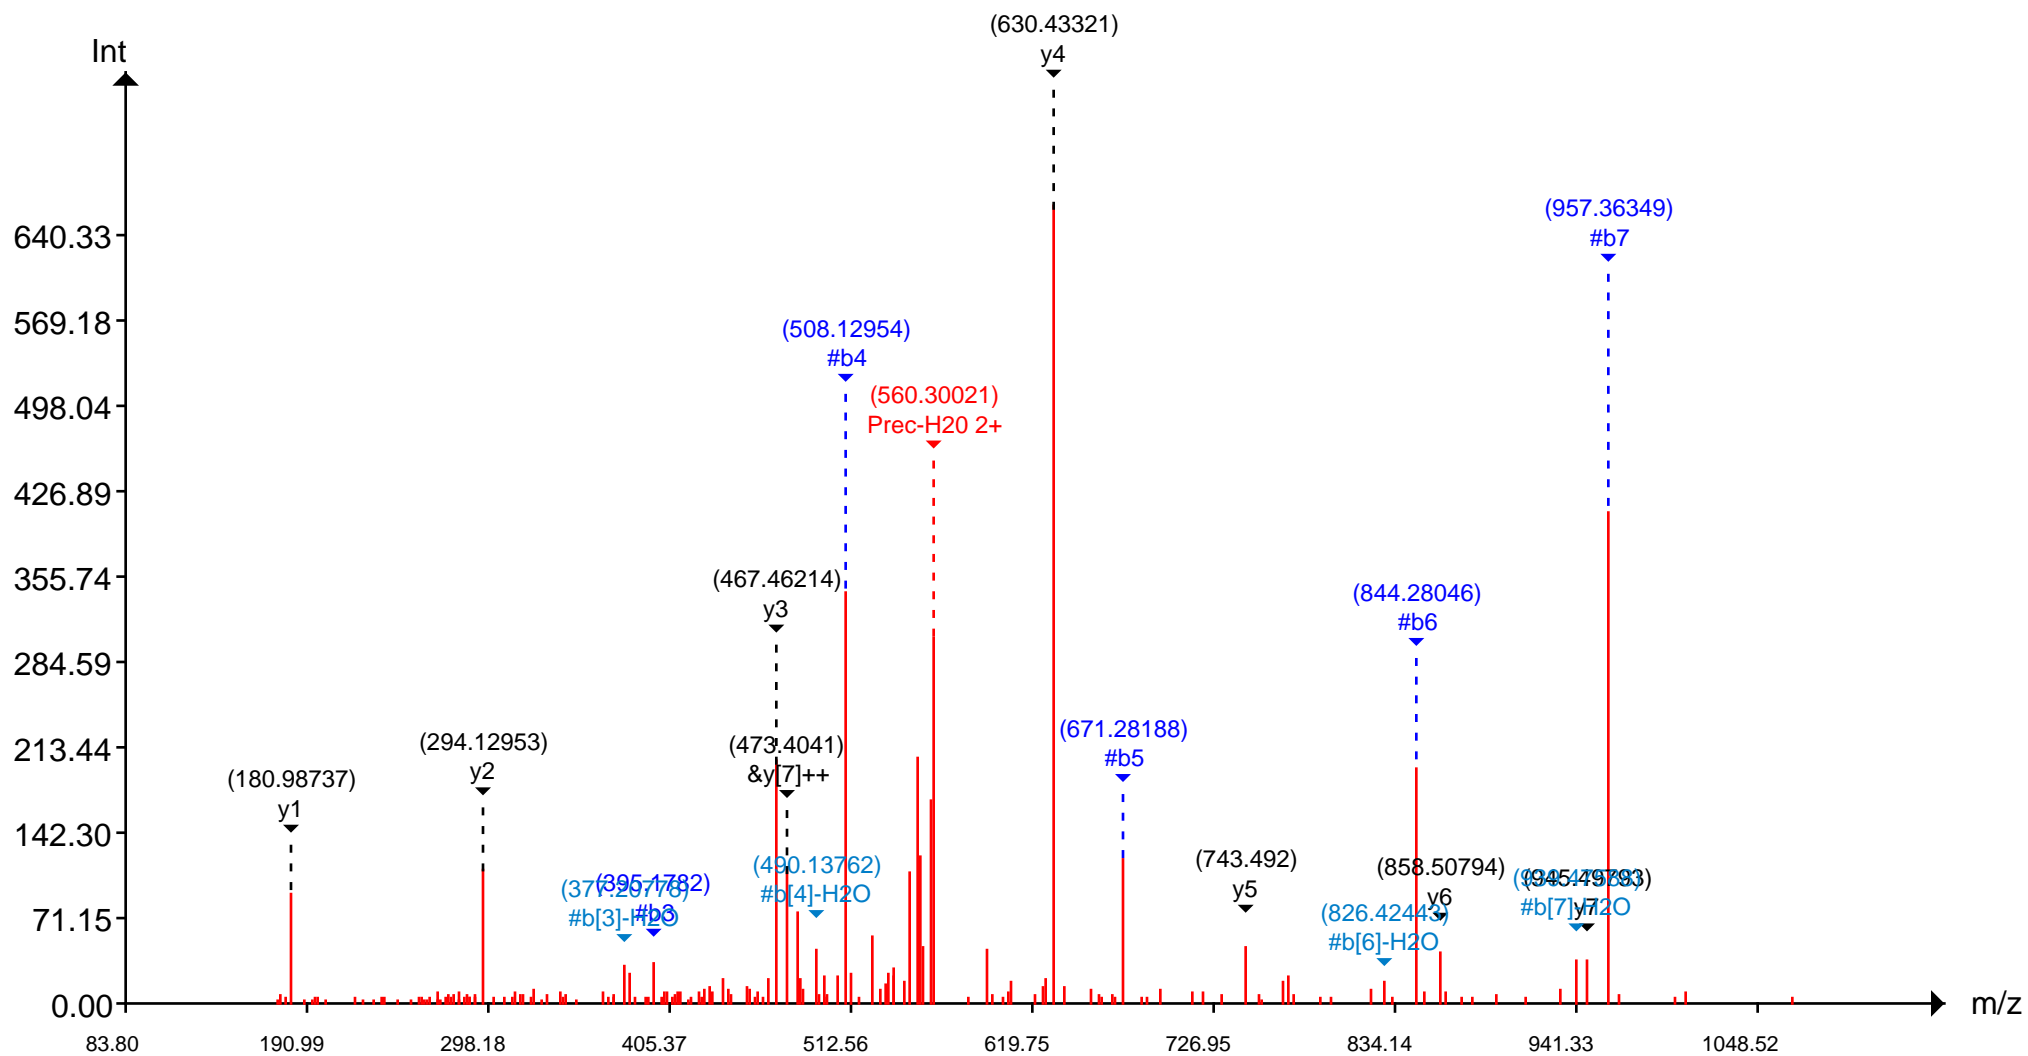

## Info

**Modified Sequence** AcD3-FSDIYK<AcD3K\*>IR<C13>-COOH

**Ion score** 55.02

**Protein** P63028

**Confidence level** 99.00%

**Precursor m/z** 569.32933

**Identity Threshold** 46.39

**Charge** 2+

**Mass error** -2.86E-4

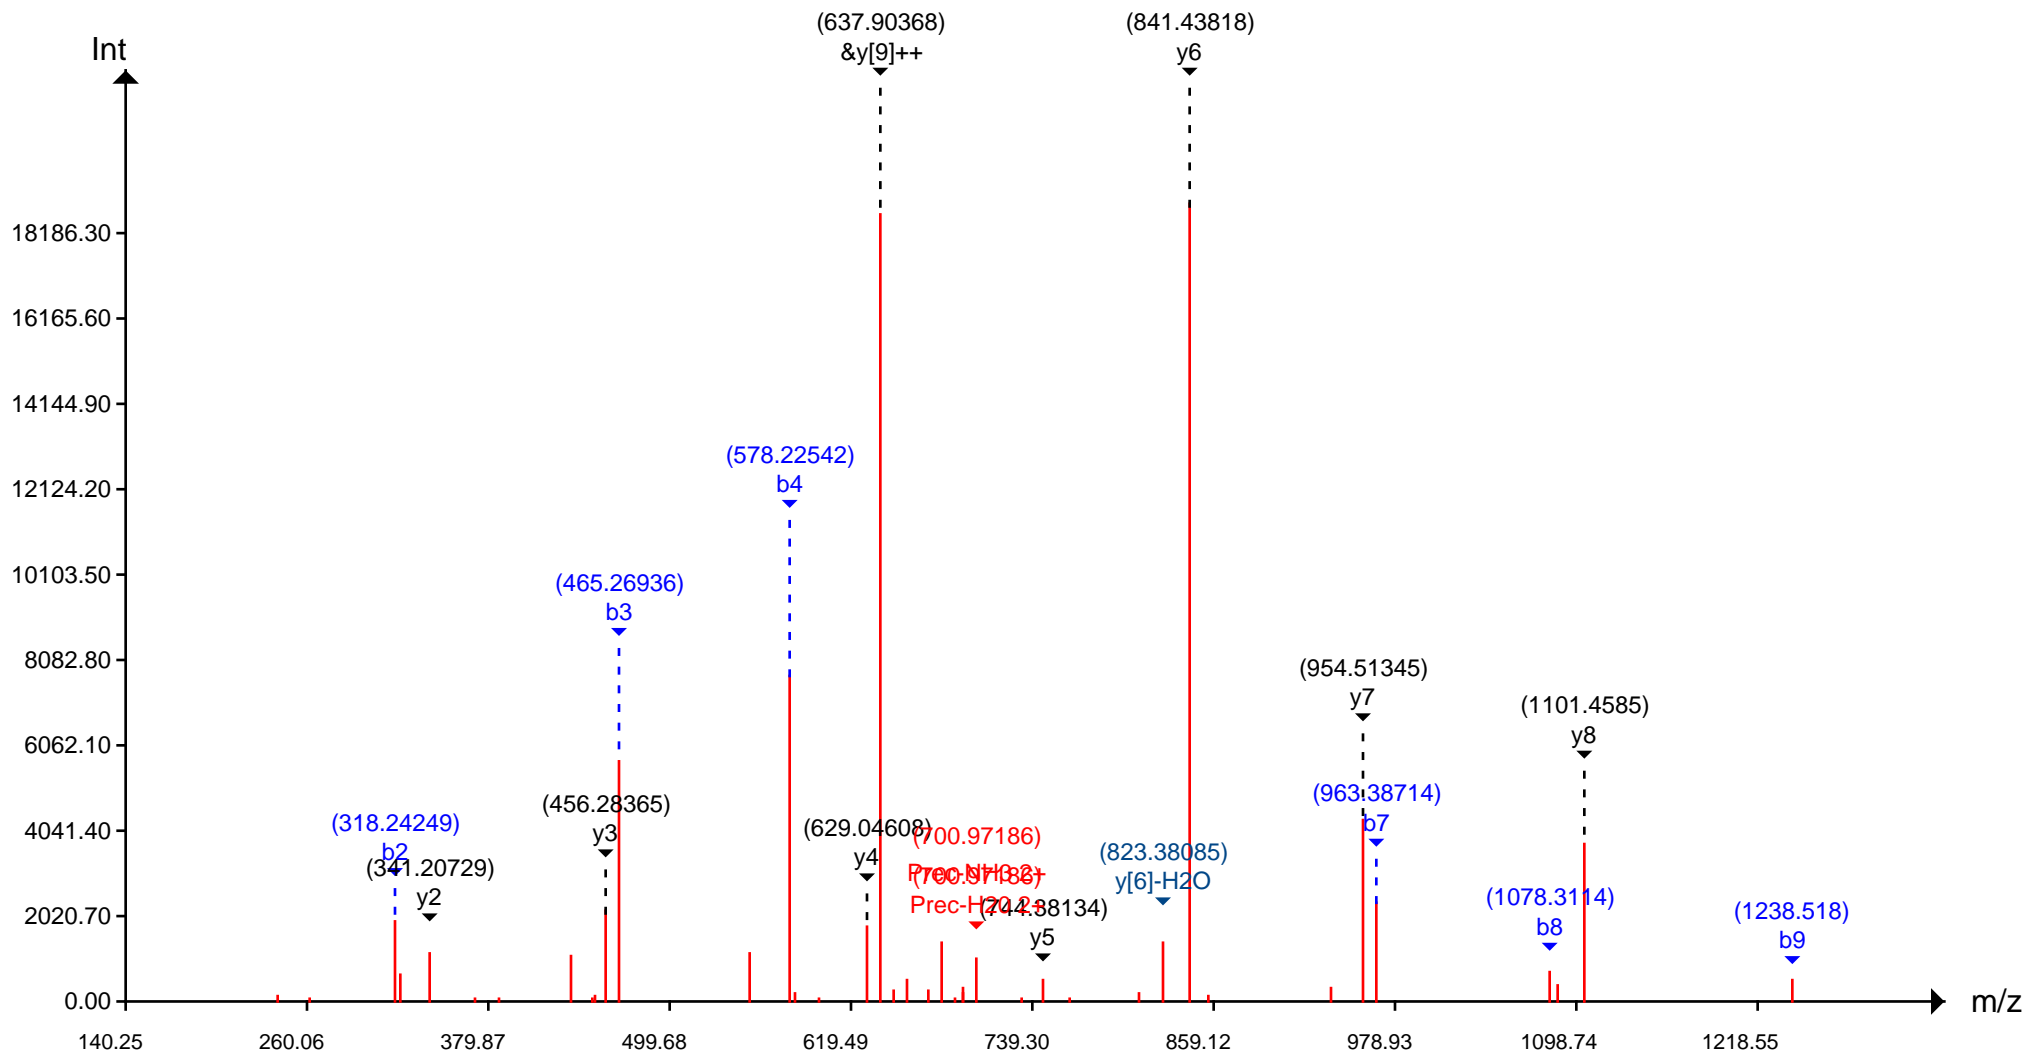

## Info

|                          |                                                       |                           |         |
|--------------------------|-------------------------------------------------------|---------------------------|---------|
| <b>Modified Sequence</b> | AcD3-VK<AcD3K*>M<Mox*>LPDK<AcD3K*>DC<Cmm*>R<C13>-COOH | <b>Ion score</b>          | 48.59   |
| <b>Protein</b>           | P18760                                                | <b>Confidence level</b>   | 99.00%  |
| <b>Precursor m/z</b>     | 709.875                                               | <b>Identity Threshold</b> | 48.16   |
| <b>Charge</b>            | 2+                                                    | <b>Mass error</b>         | 3.41E-4 |

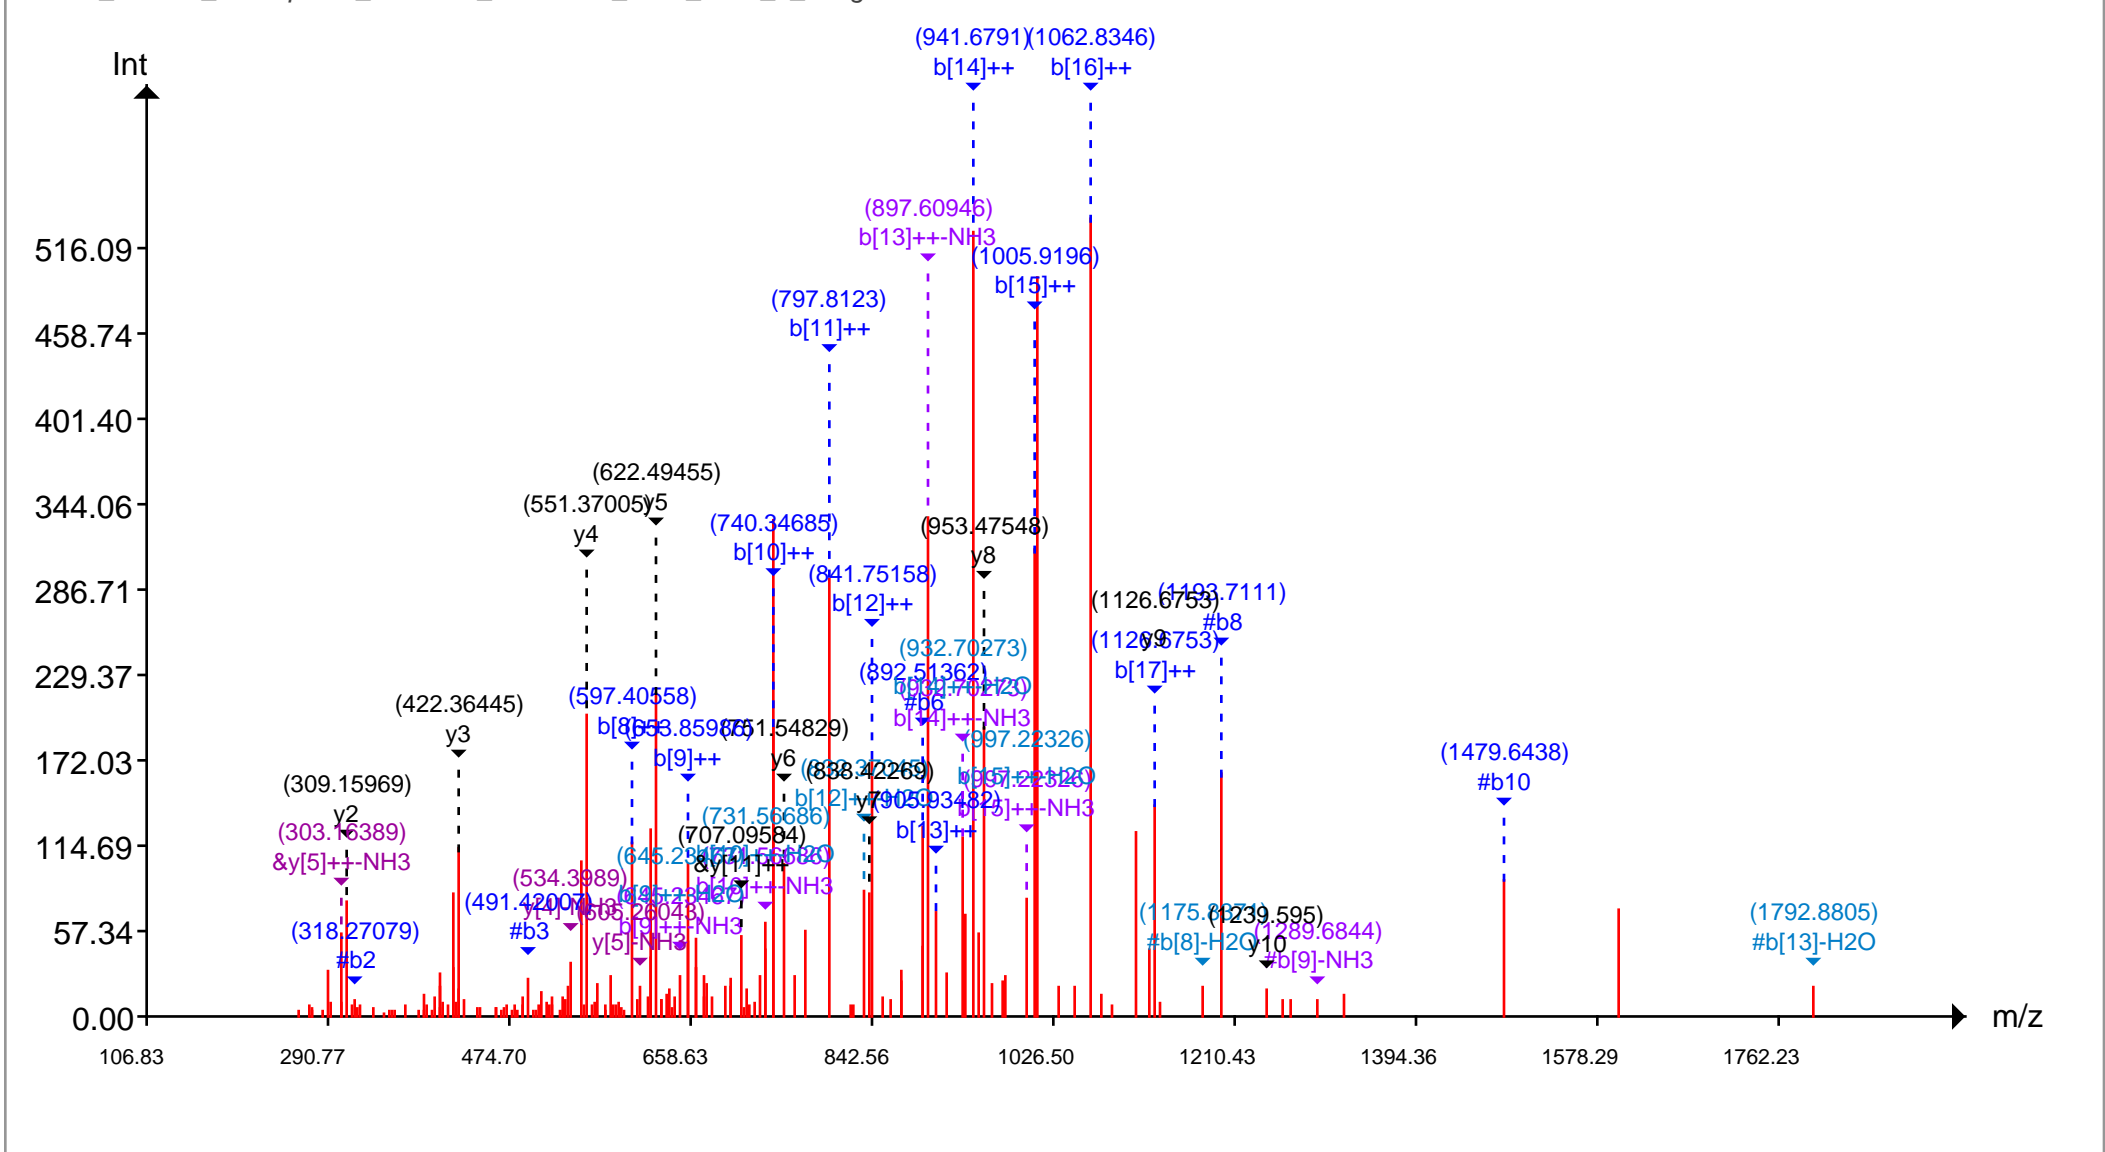

## Info

|                 |                                                                           |                    |       |
|-----------------|---------------------------------------------------------------------------|--------------------|-------|
| Modified Seq... | AcD3-K<AcD3K*>VK<AcD3K*>EK<AcD3K*>VQK<AcD3K*>LK<AcD3K*>DSEAELQR<C13>-COOH | Ion score          | 54.18 |
| P...            | O55131                                                                    | Confidence level   | 99.00 |
| Precurso...     | 811.4845                                                                  | Identity Threshold | 40.27 |
| C...            | 3+                                                                        | Mass error         | 0.002 |

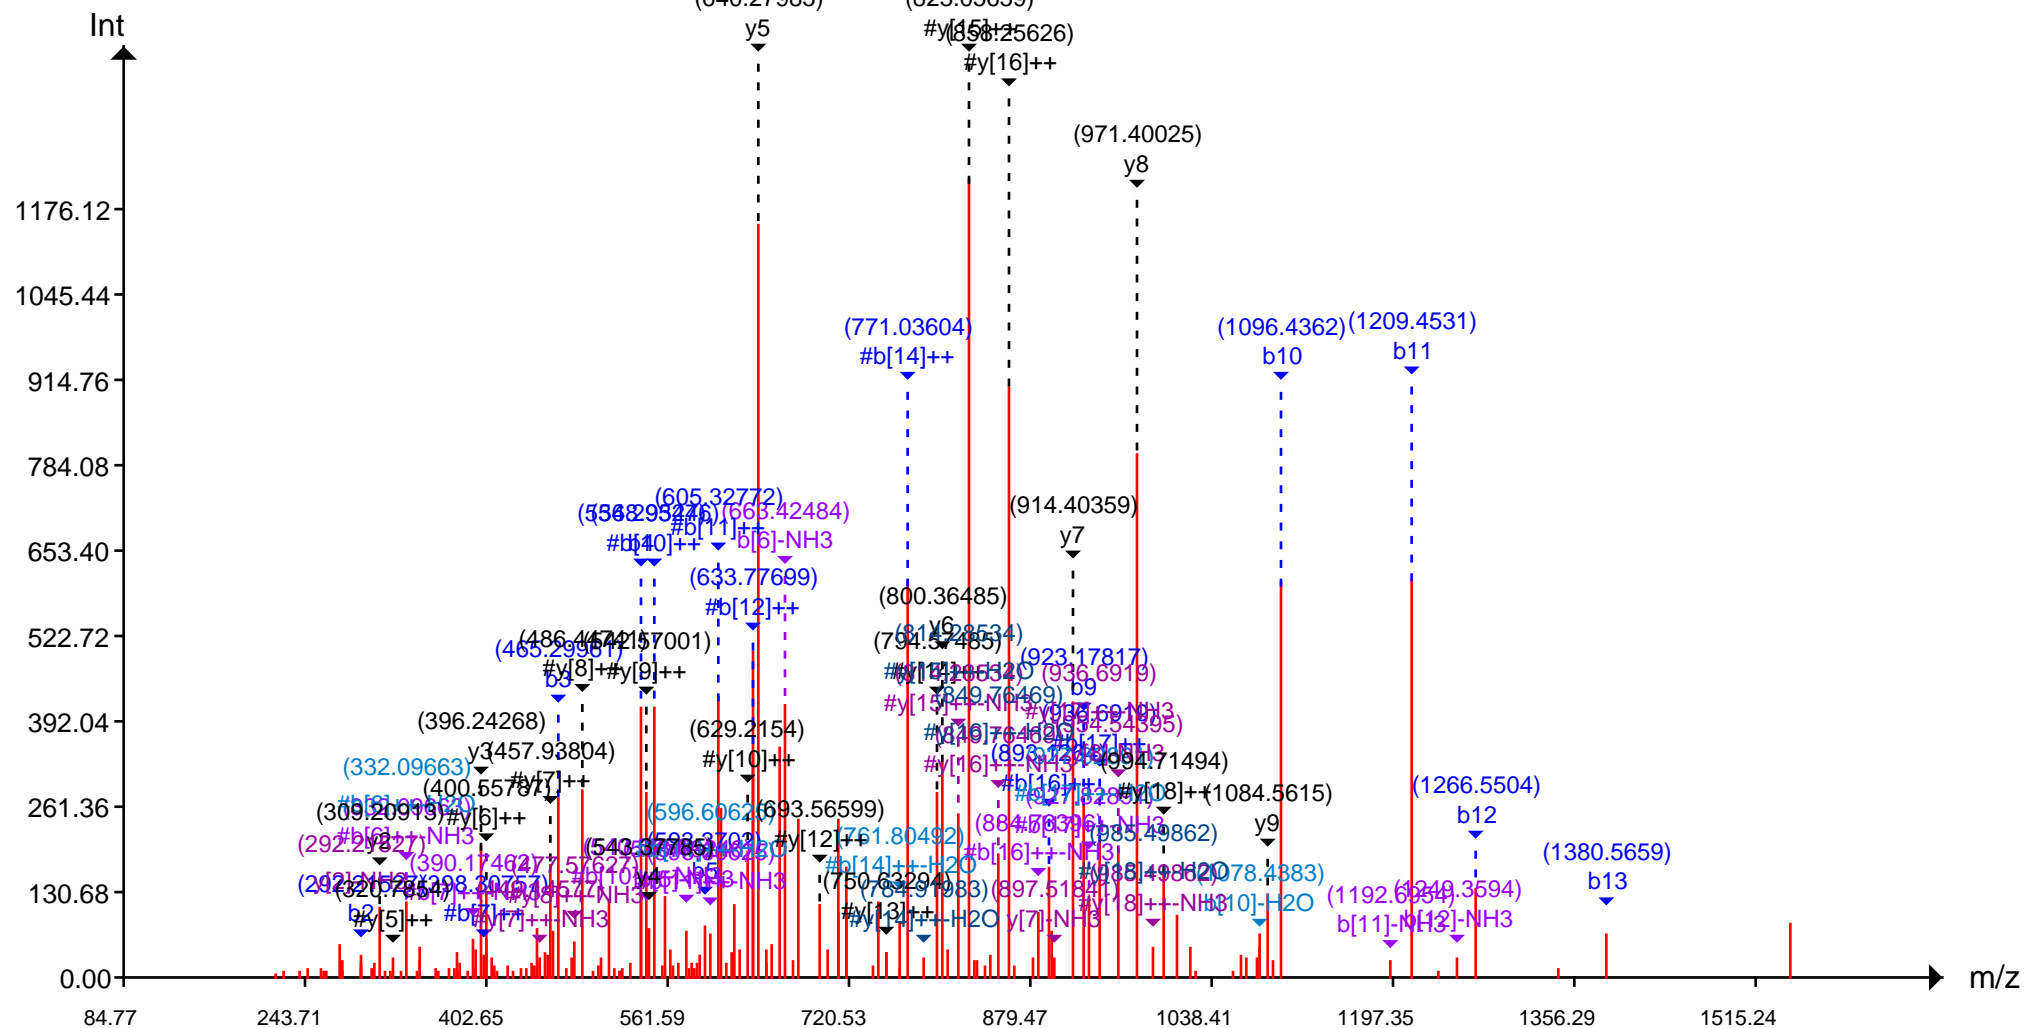

## Info

|                          |                                                          |                           |          |
|--------------------------|----------------------------------------------------------|---------------------------|----------|
| <b>Modified Sequence</b> | AcD3-FVK<AcD3K*>AGSDGAK<AcD3K*>IGNC<Cmm*>PFSQR<C13>-COOH | <b>Ion score</b>          | 69.11    |
| <b>Protein</b>           | Q9Z1Q5                                                   | <b>Confidence level</b>   | 99.00%   |
| <b>Precursor m/z</b>     | 727.37904                                                | <b>Identity Threshold</b> | 48.04    |
| <b>Charge</b>            | 3+                                                       | <b>Mass error</b>         | 0.001507 |



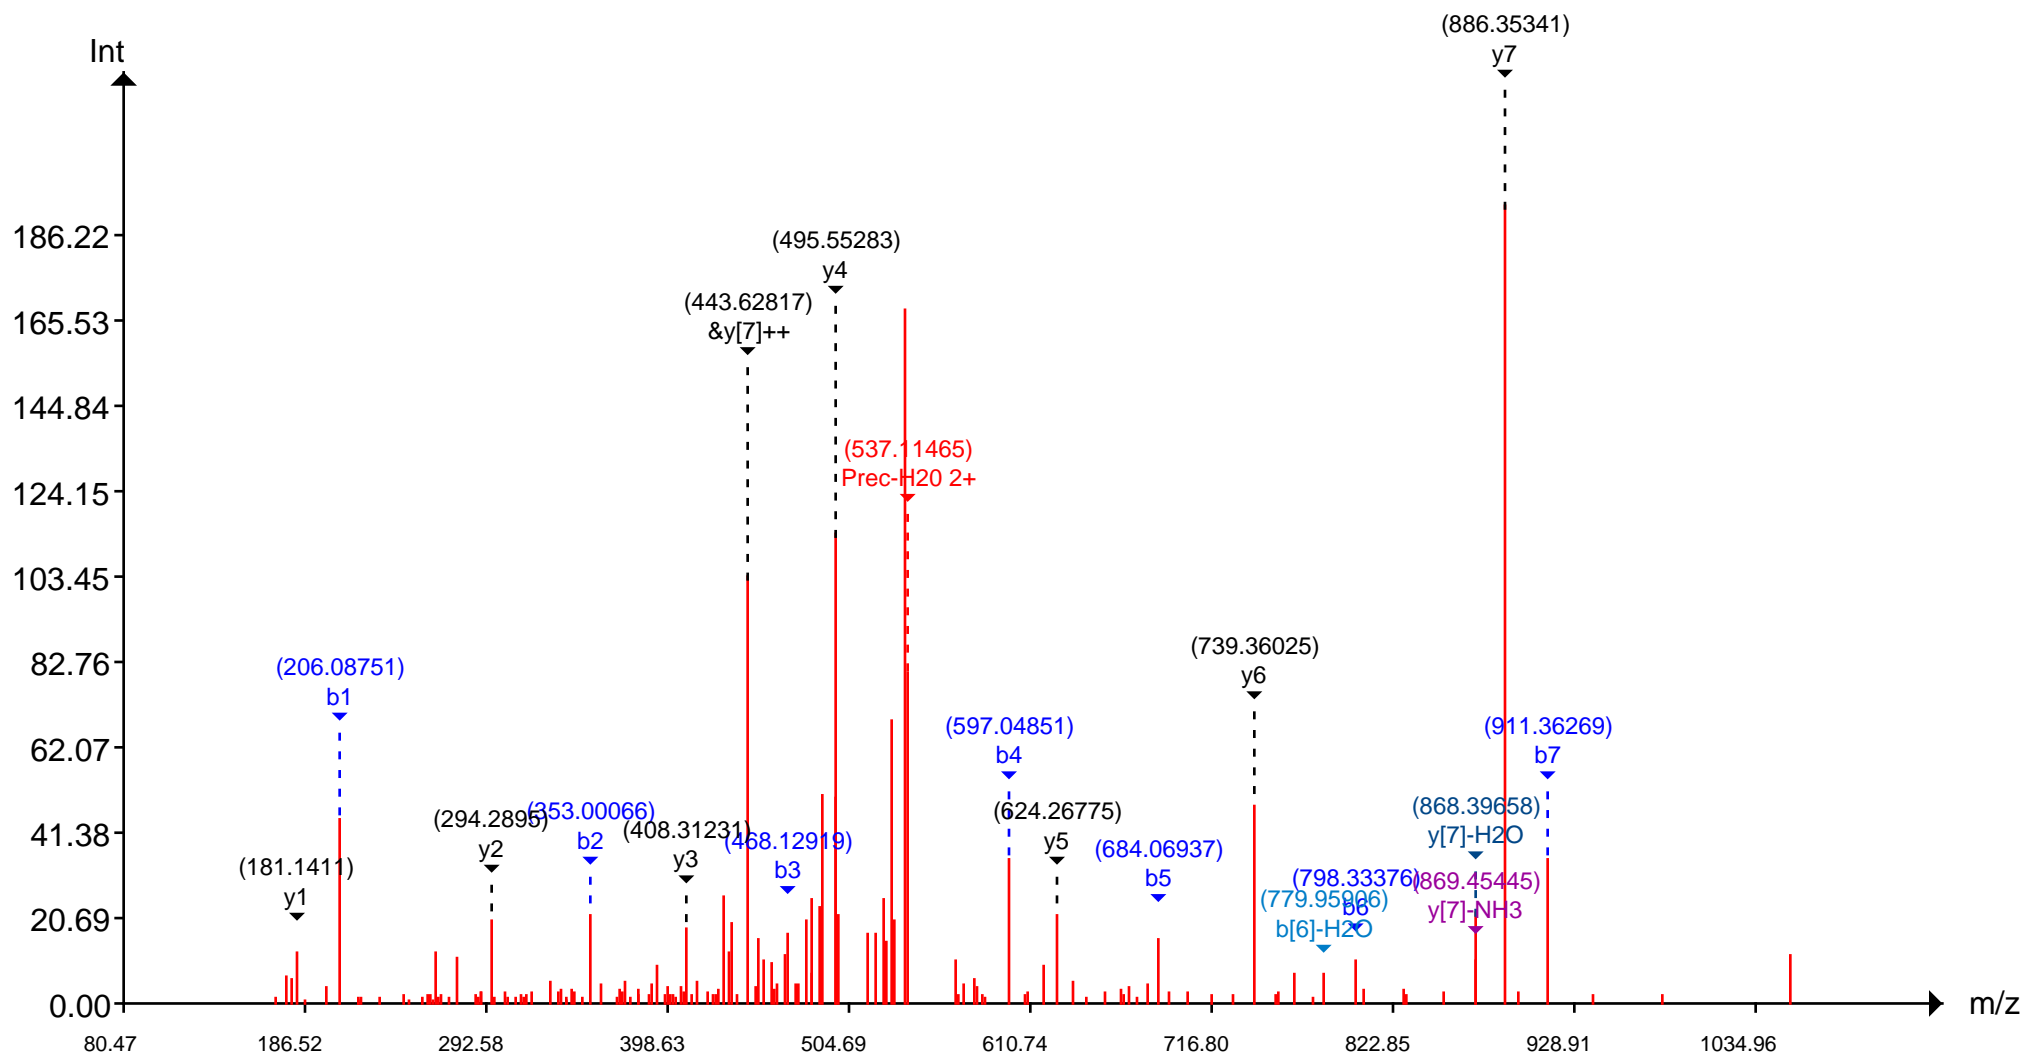

## Info

**Modified Sequence** AcD3-C<Cmm\*>M<Mox\*>DESNLR<C13>-COOH

**Ion score** 51.62

**Protein** Q9D358

**Confidence level** 99.00%

**Precursor m/z** 546.2346

**Identity Threshold** 41.51

**Charge** 2+

**Mass error** -0.001147

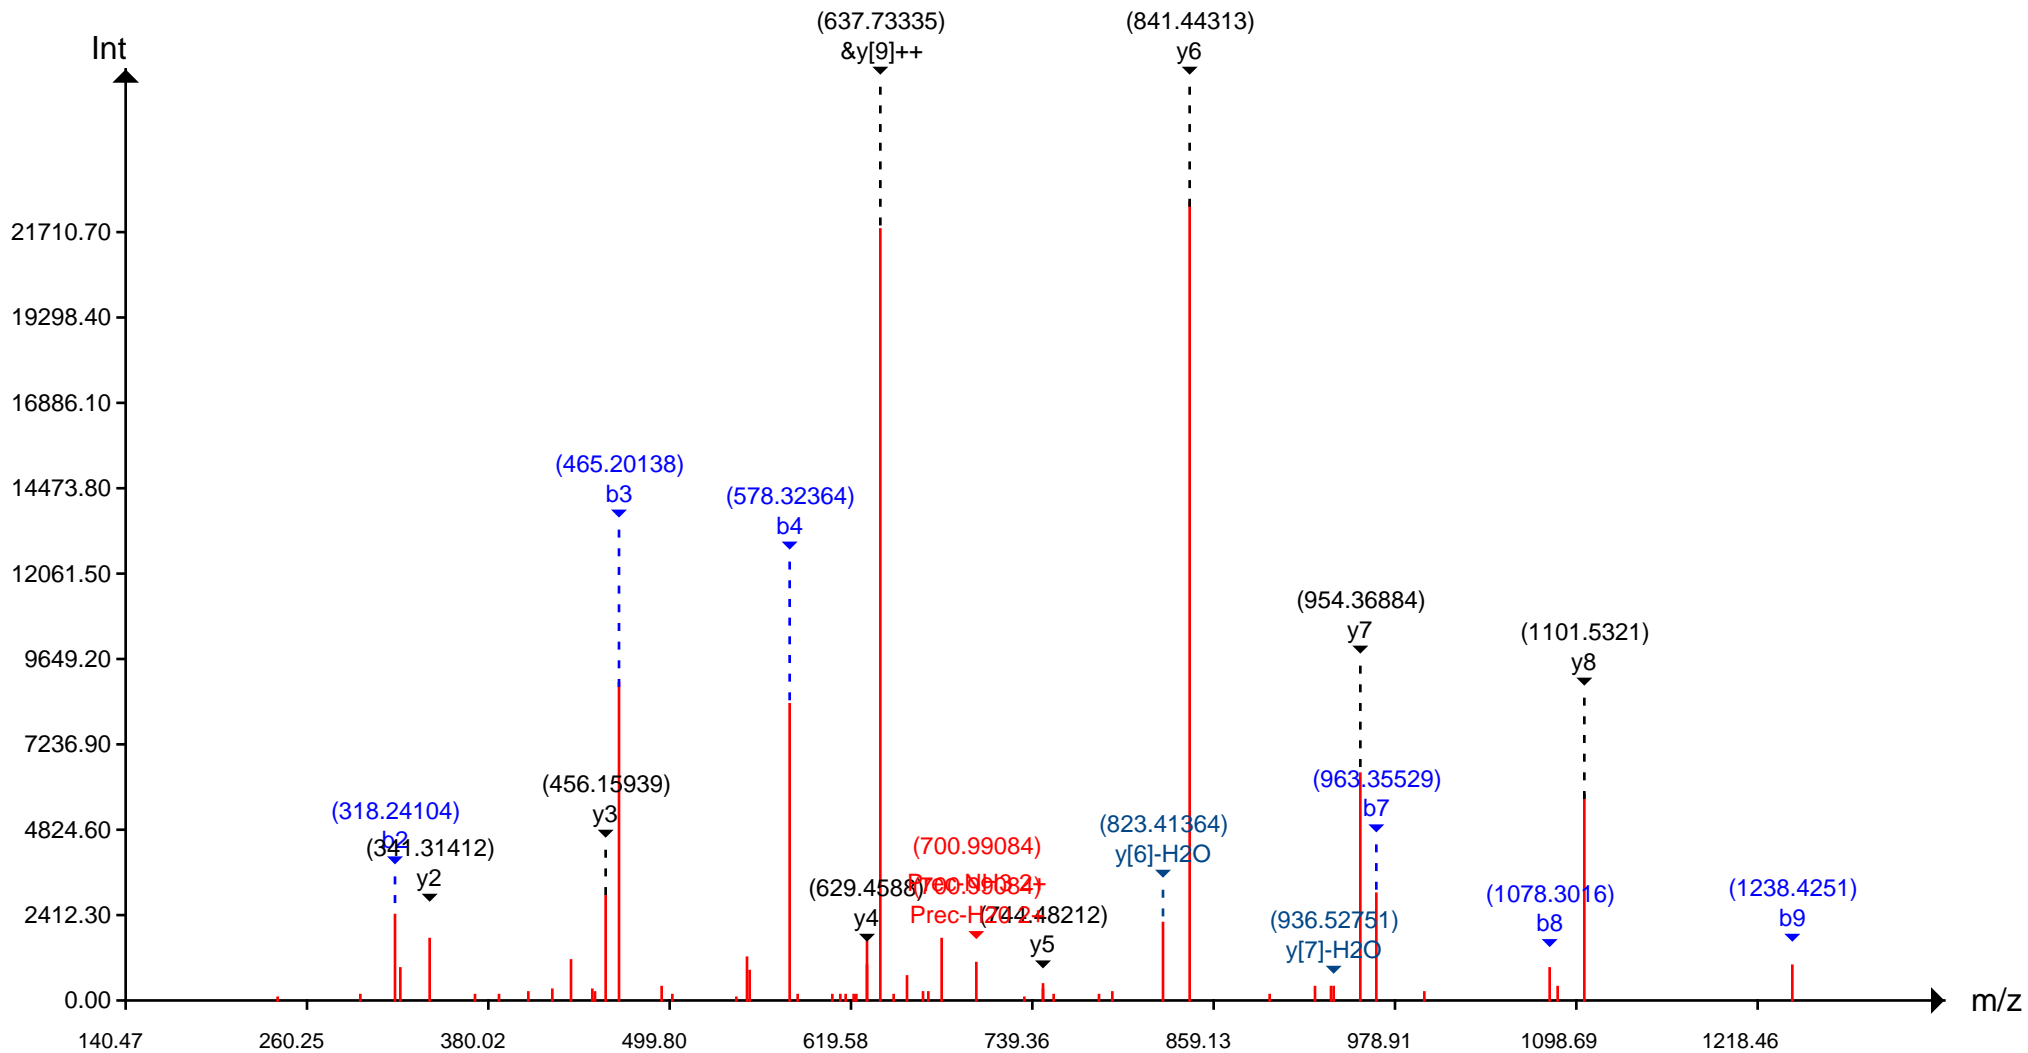

## Info

|                          |                                                       |                           |        |
|--------------------------|-------------------------------------------------------|---------------------------|--------|
| <b>Modified Sequence</b> | AcD3-VK<AcD3K*>M<Mox*>LPDK<AcD3K*>DC<Cmm*>R<C13>-COOH | <b>Ion score</b>          | 53.9   |
| <b>Protein</b>           | P18760                                                | <b>Confidence level</b>   | 99.00% |
| <b>Precursor m/z</b>     | 709.87486                                             | <b>Identity Threshold</b> | 48.15  |
| <b>Charge</b>            | 2+                                                    | <b>Mass error</b>         | 6.1E-5 |

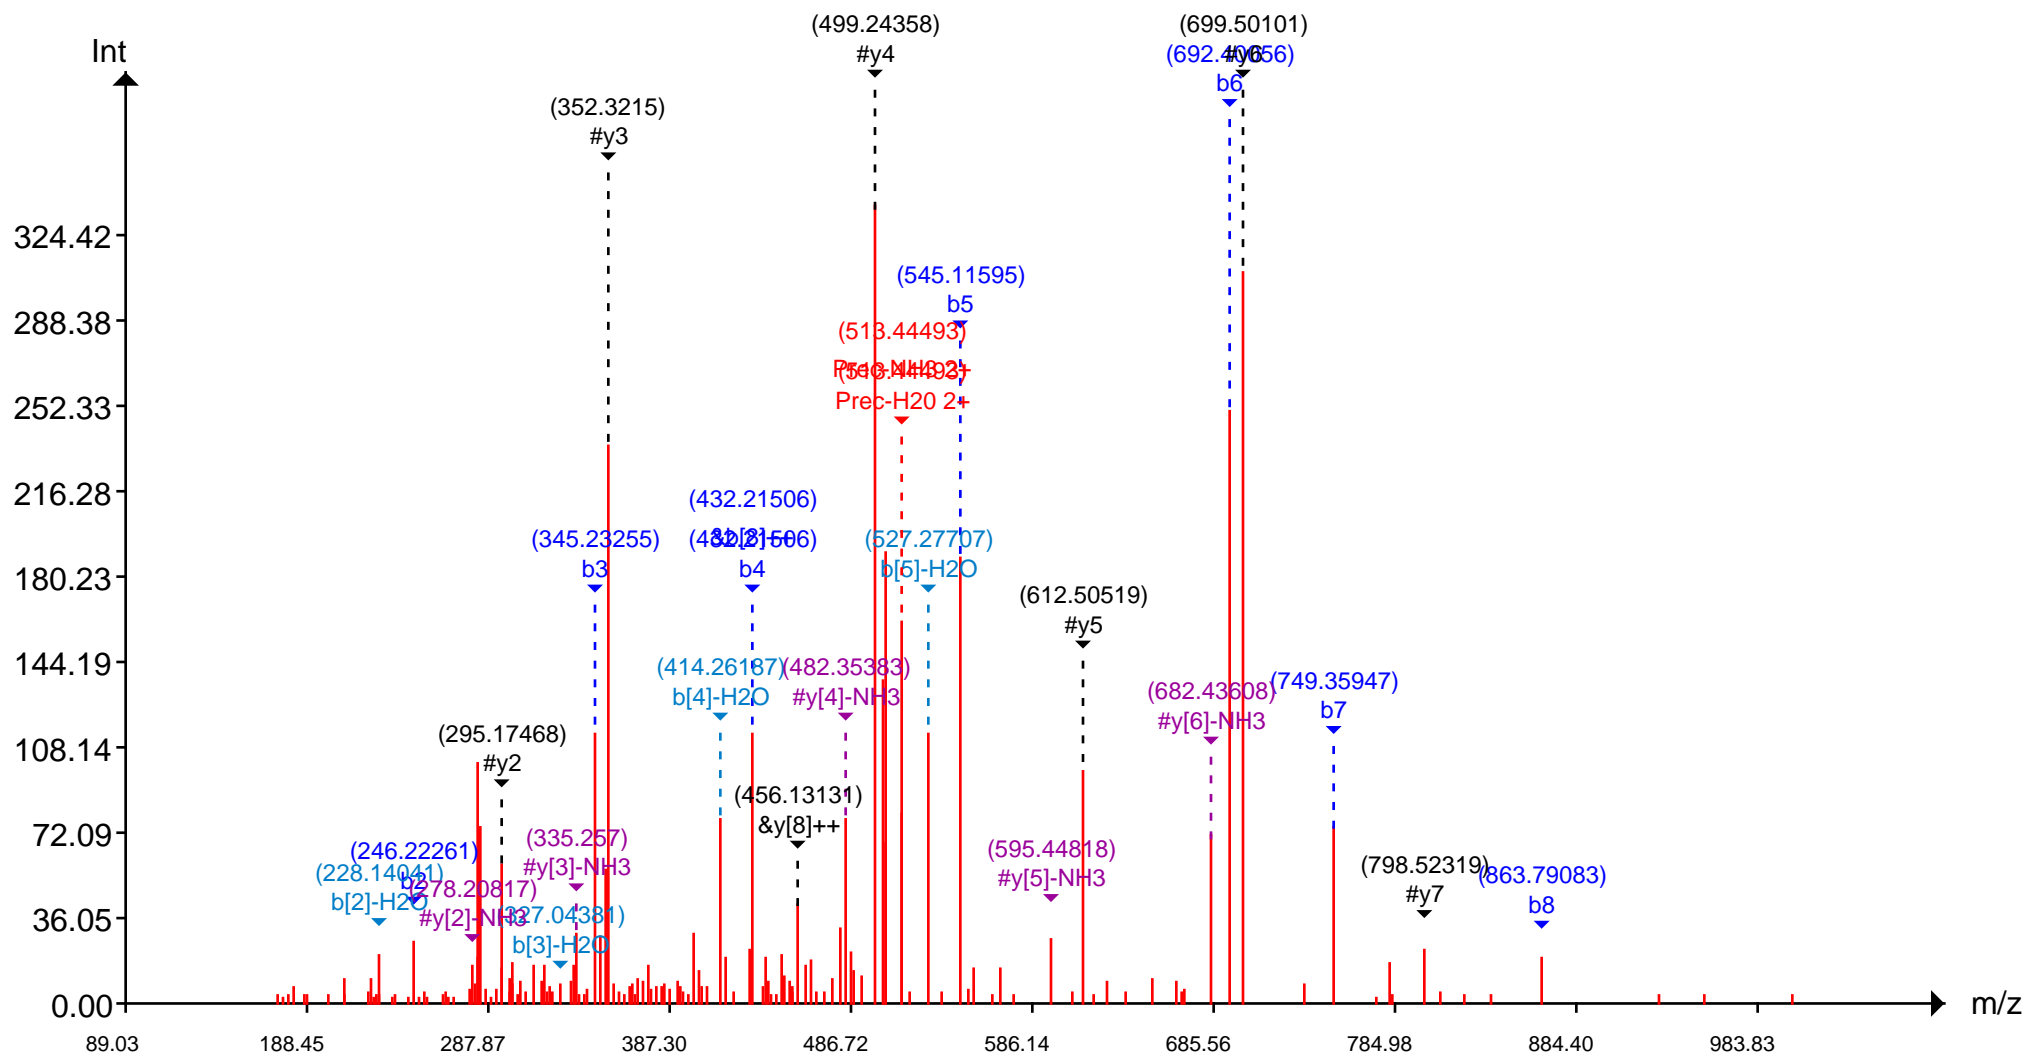

## Info

|                          |                          |                           |          |
|--------------------------|--------------------------|---------------------------|----------|
| <b>Modified Sequence</b> | AcD3-SLVSLFGNR<C13>-COOH | <b>Ion score</b>          | 56.38    |
| <b>Protein</b>           | P99029                   | <b>Confidence level</b>   | 99.00%   |
| <b>Precursor m/z</b>     | 522.30434                | <b>Identity Threshold</b> | 46.87    |
| <b>Charge</b>            | 2+                       | <b>Mass error</b>         | -4.76E-4 |

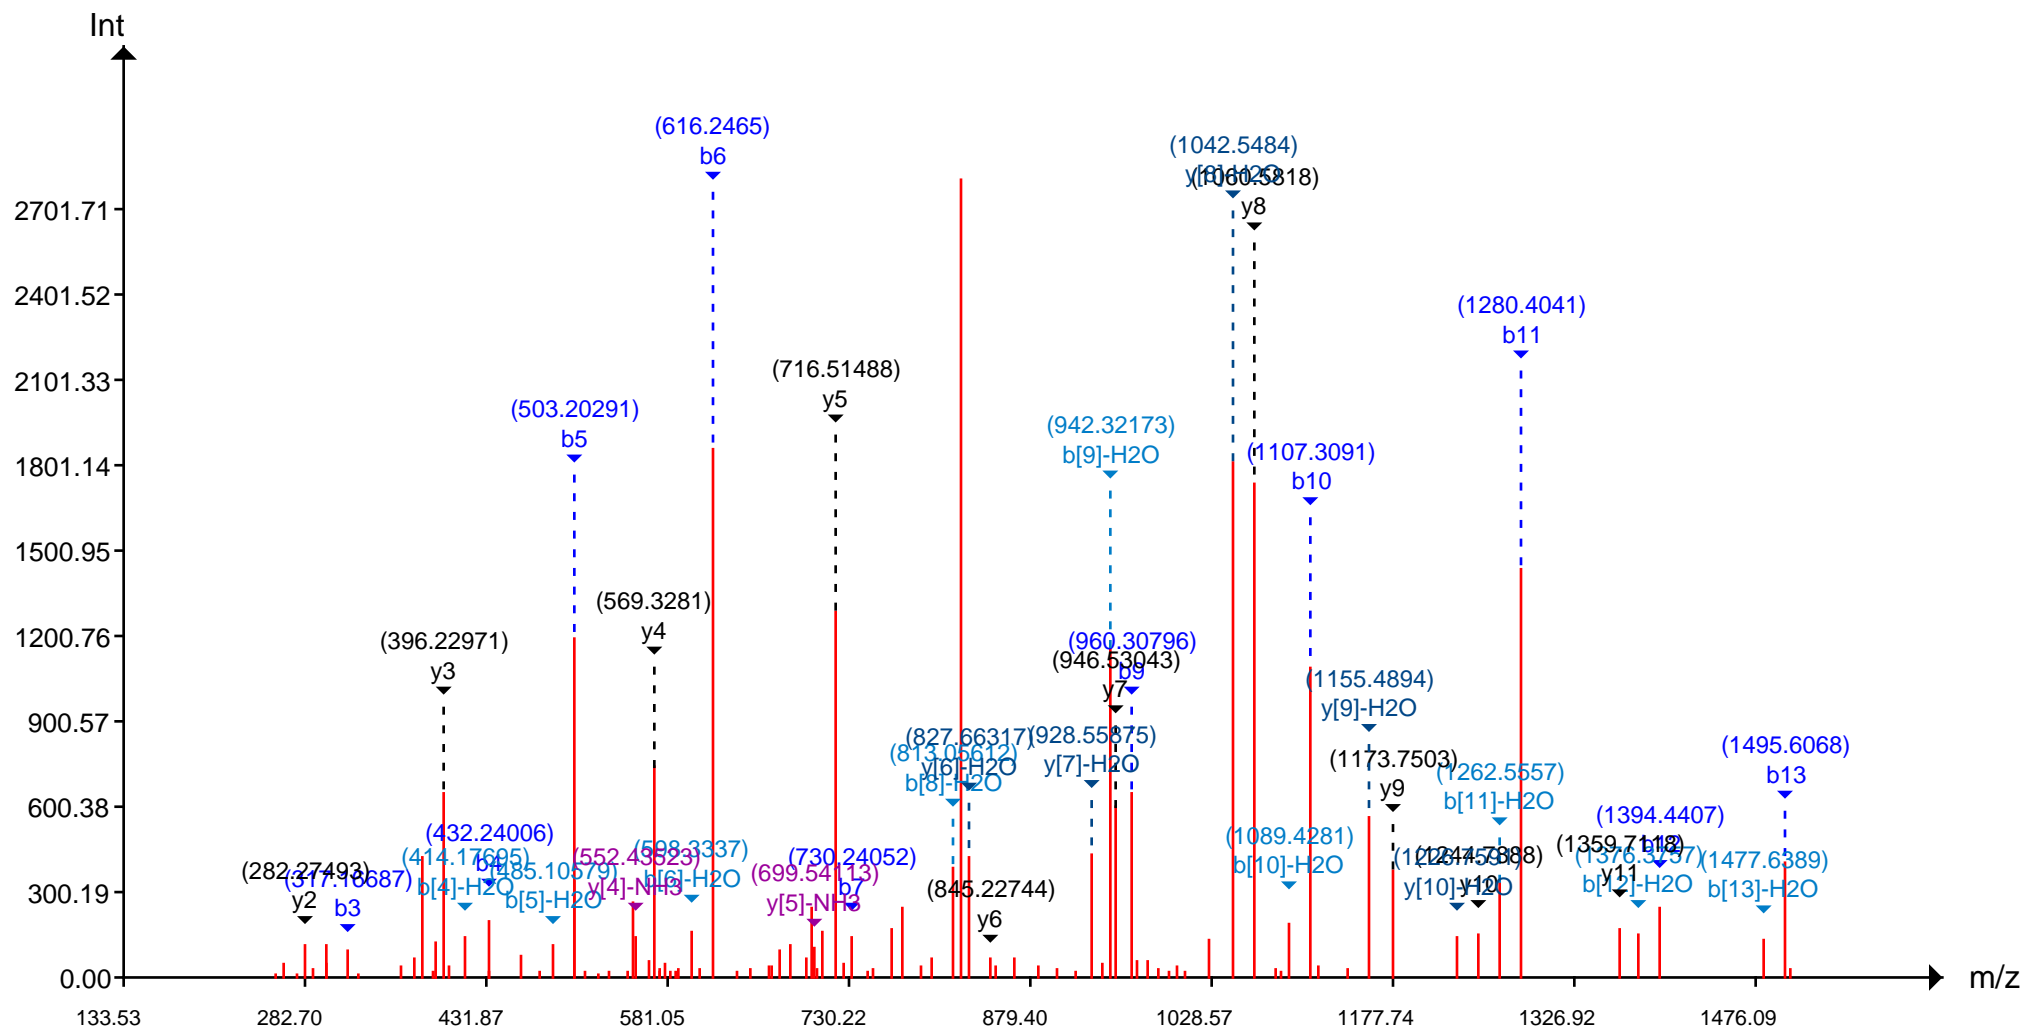

## Info

**Modified Sequence** AcD3-SLADAINTEFK<AcD3K\*>NTR<C13>-COOH

**Ion score** 87.57

**Protein** P20152

**Confidence level** 99.00%

**Precursor m/z** 838.44821

**Identity Threshold** 48.01

**Charge** 2+

**Mass error** 0.002779

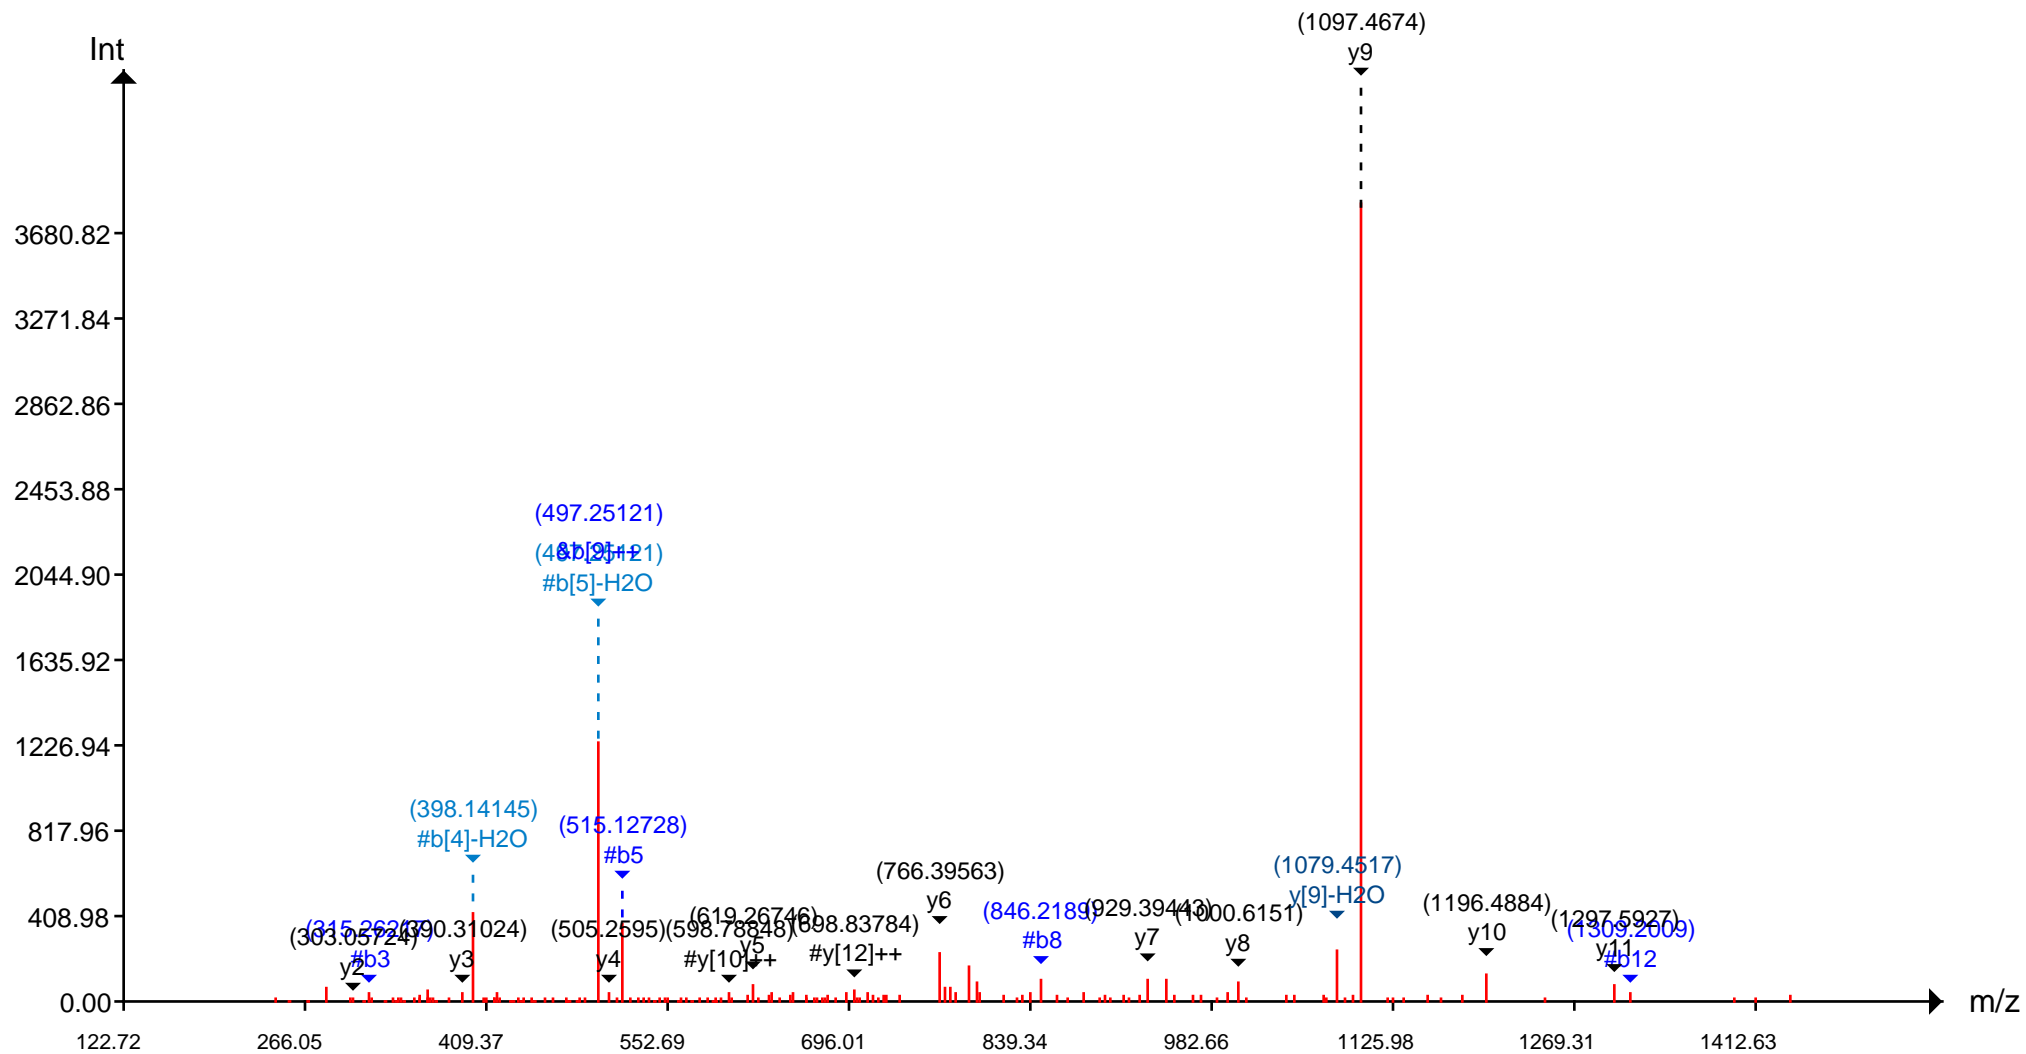

## Info

|                          |                          |                           |          |
|--------------------------|--------------------------|---------------------------|----------|
| <b>Modified Sequence</b> | AcD3-AVVTVPAYFNDSQR-COOH | <b>Ion score</b>          | 67.51    |
| <b>Protein</b>           | P63017                   | <b>Confidence level</b>   | 99.00%   |
| <b>Precursor m/z</b>     | 806.41473                | <b>Identity Threshold</b> | 48.09    |
| <b>Charge</b>            | 2+                       | <b>Mass error</b>         | 0.001706 |

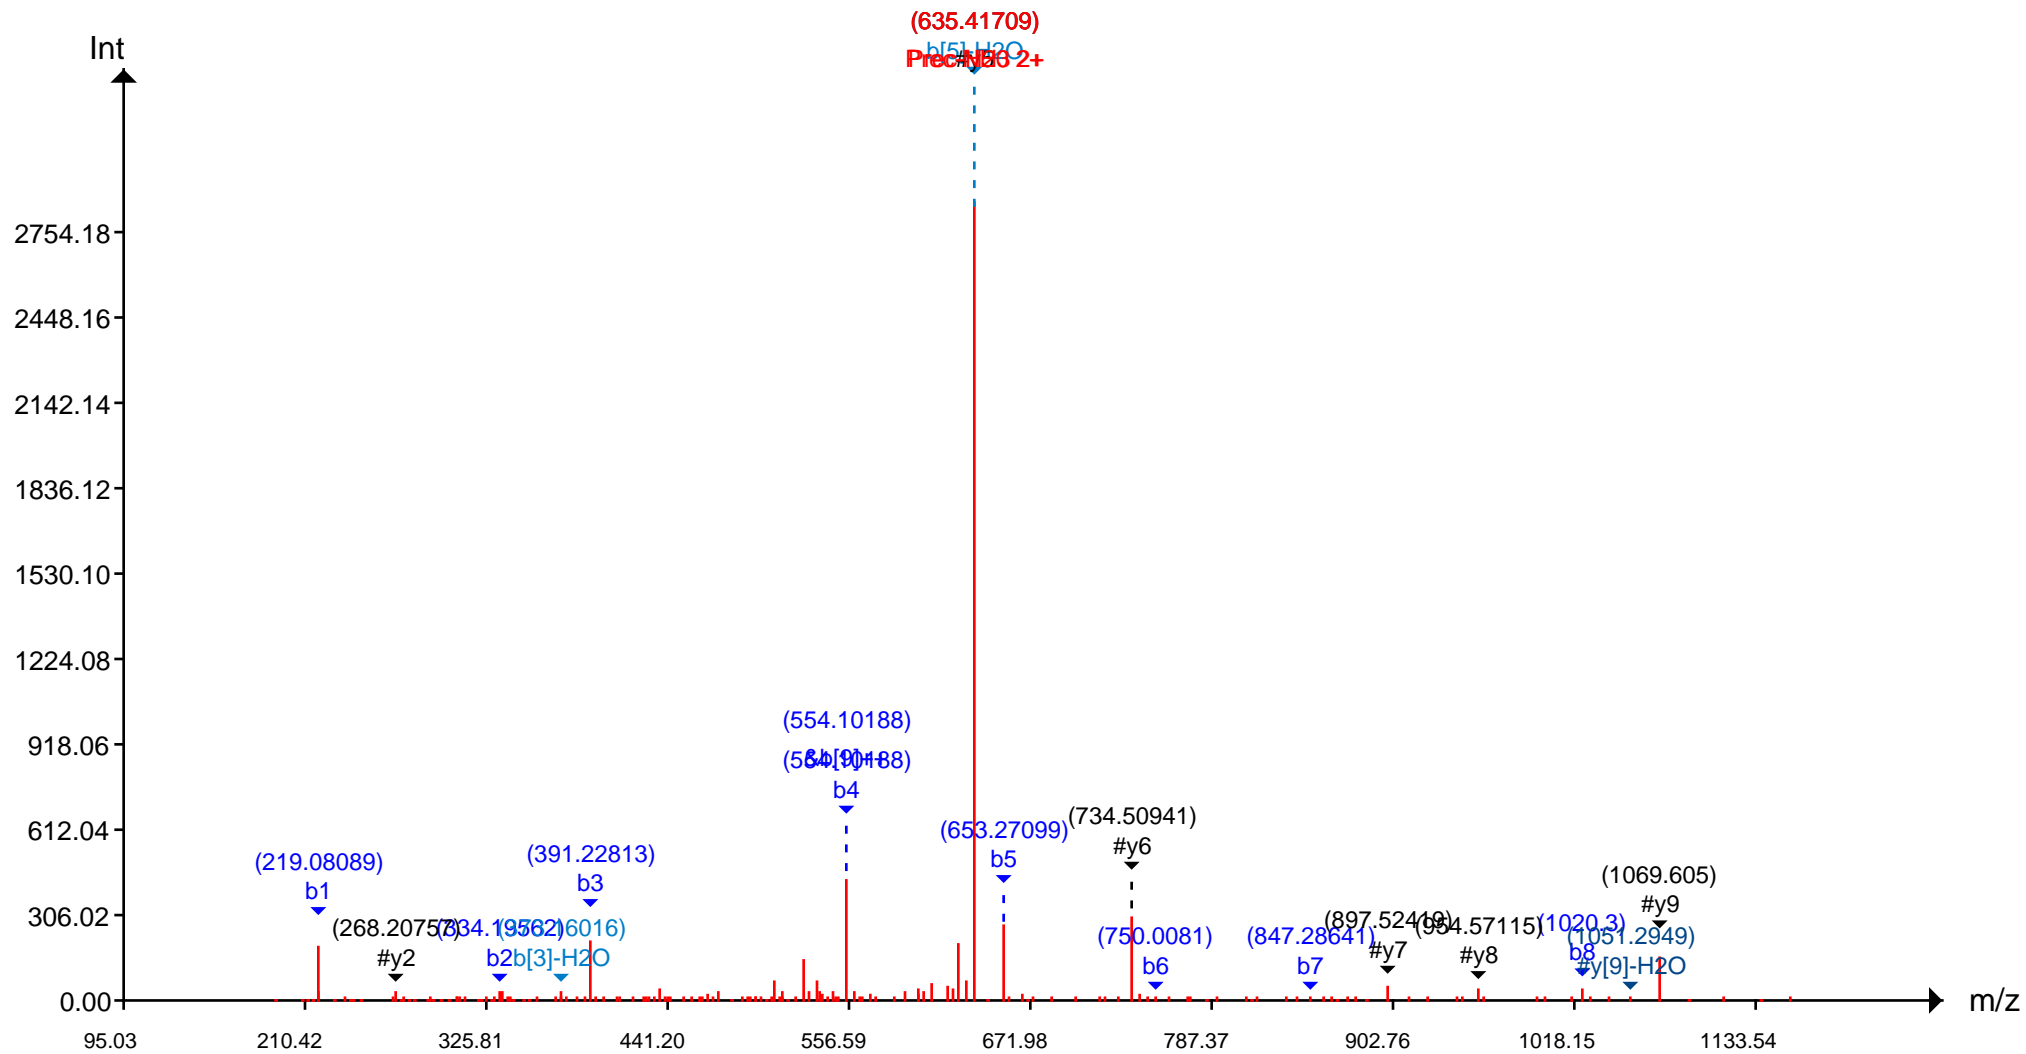

## Info

**Modified Sequence** AcD3-K<AcD3K\*>DGYVPPK<AcD3K\*>SR<C13>-COOH

**Ion score** 54.92

**Protein** O89053

**Confidence level** 99.00%

**Precursor m/z** 644.37167

**Identity Threshold** 46.64

**Charge** 2+

**Mass error** 0.001157

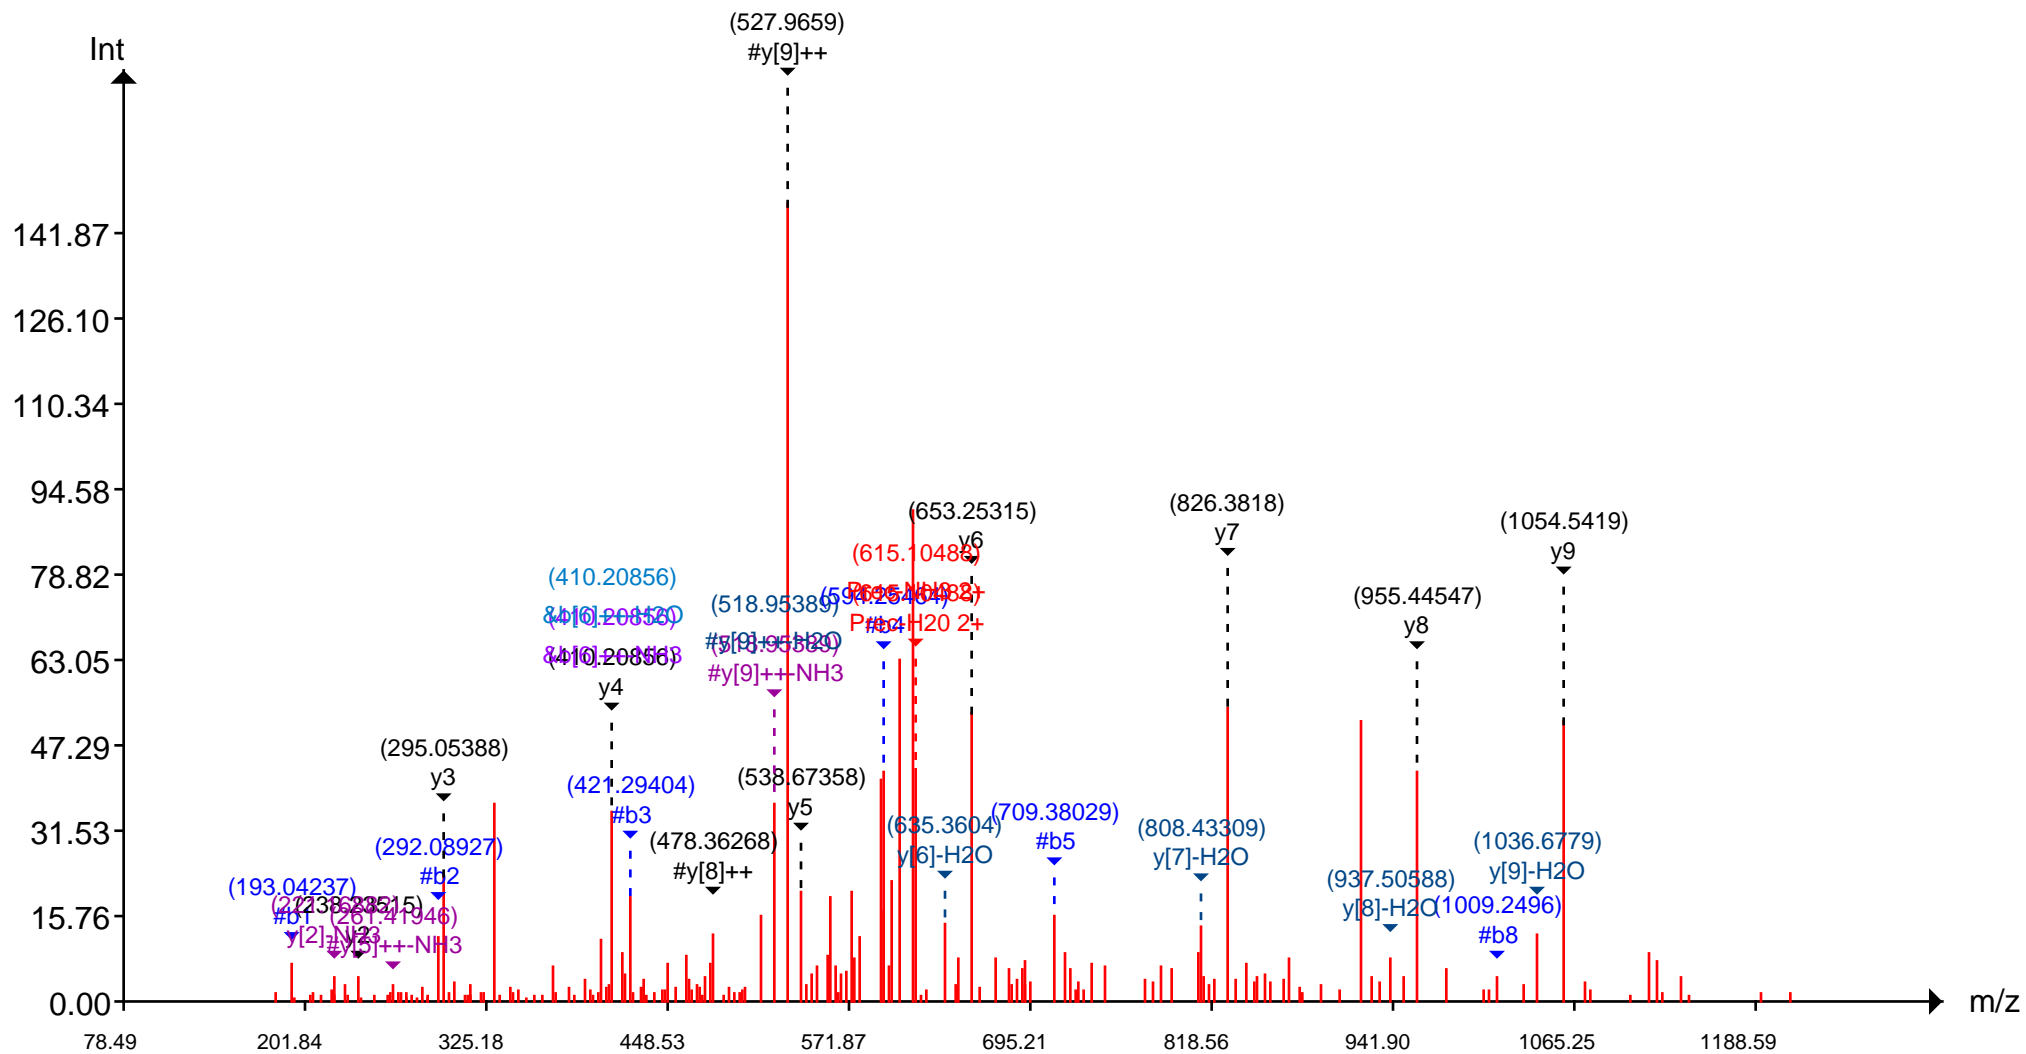

## Info

**Modified Sequence** AcD3-M<Mox\*>VEK<AcD3K\*>DQDGGR<C13>-COOH

**Ion score** 54.8

**Protein** Q9CZX8

**Confidence level** 99.00%

**Precursor m/z** 623.80087

**Identity Threshold** 46.40

**Charge** 2+

**Mass error** -1.84E-4

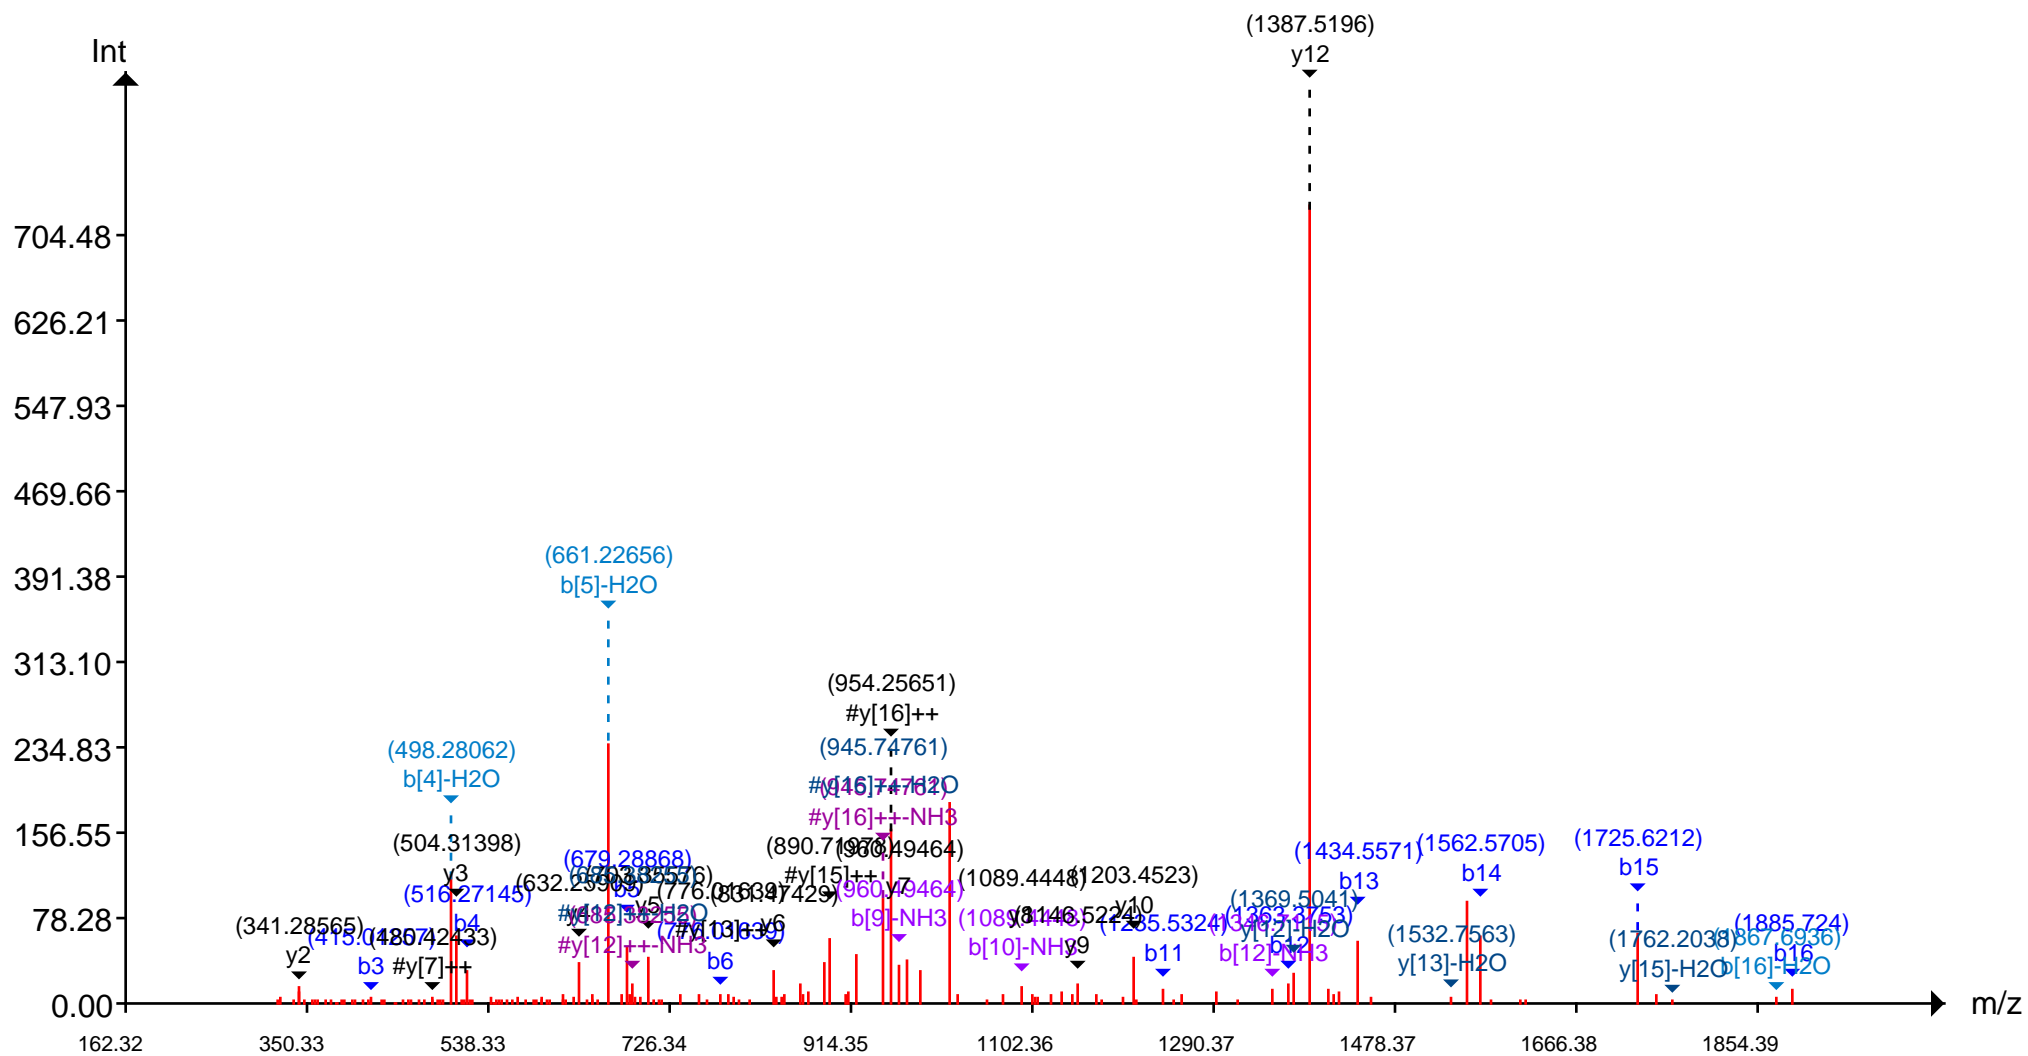

## Info

|                          |                                        |                           |          |
|--------------------------|----------------------------------------|---------------------------|----------|
| <b>Modified Sequence</b> | AcD3-IQQTYPSSGEEQAQYC<Cmm*>R<C13>-COOH | <b>Ion score</b>          | 59.22    |
| <b>Protein</b>           | Q9WU78                                 | <b>Confidence level</b>   | 99.00%   |
| <b>Precursor m/z</b>     | 1033.4757                              | <b>Identity Threshold</b> | 44.61    |
| <b>Charge</b>            | 2+                                     | <b>Mass error</b>         | 0.002278 |



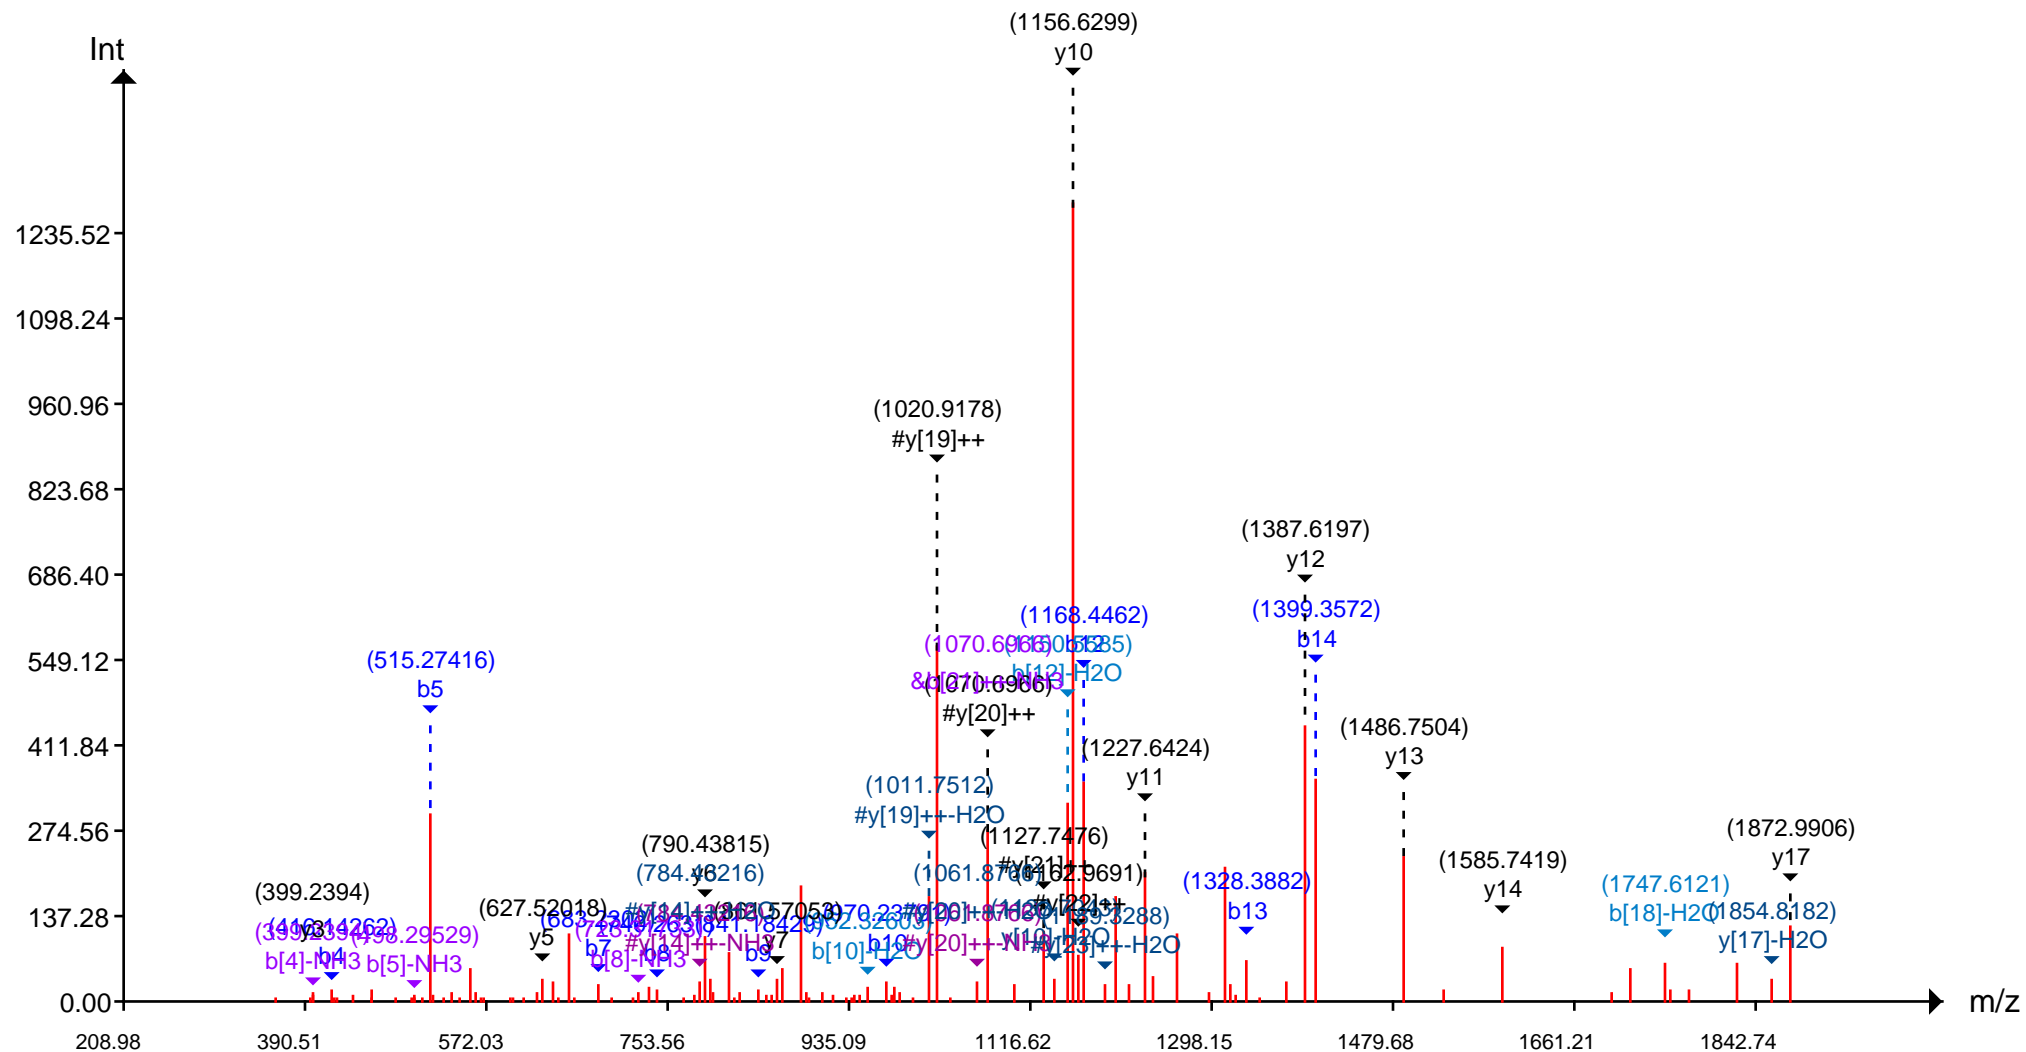

## Info

|                          |                                               |                           |          |
|--------------------------|-----------------------------------------------|---------------------------|----------|
| <b>Modified Sequence</b> | AcD3-NAANVPAGTEVVC<Cmm*>APPTAYIDFAR<C13>-COOH | <b>Ion score</b>          | 54.71    |
| <b>Protein</b>           | P17751                                        | <b>Confidence level</b>   | 99.00%   |
| <b>Precursor m/z</b>     | 1278.1417                                     | <b>Identity Threshold</b> | 47.70    |
| <b>Charge</b>            | 2+                                            | <b>Mass error</b>         | 0.002765 |

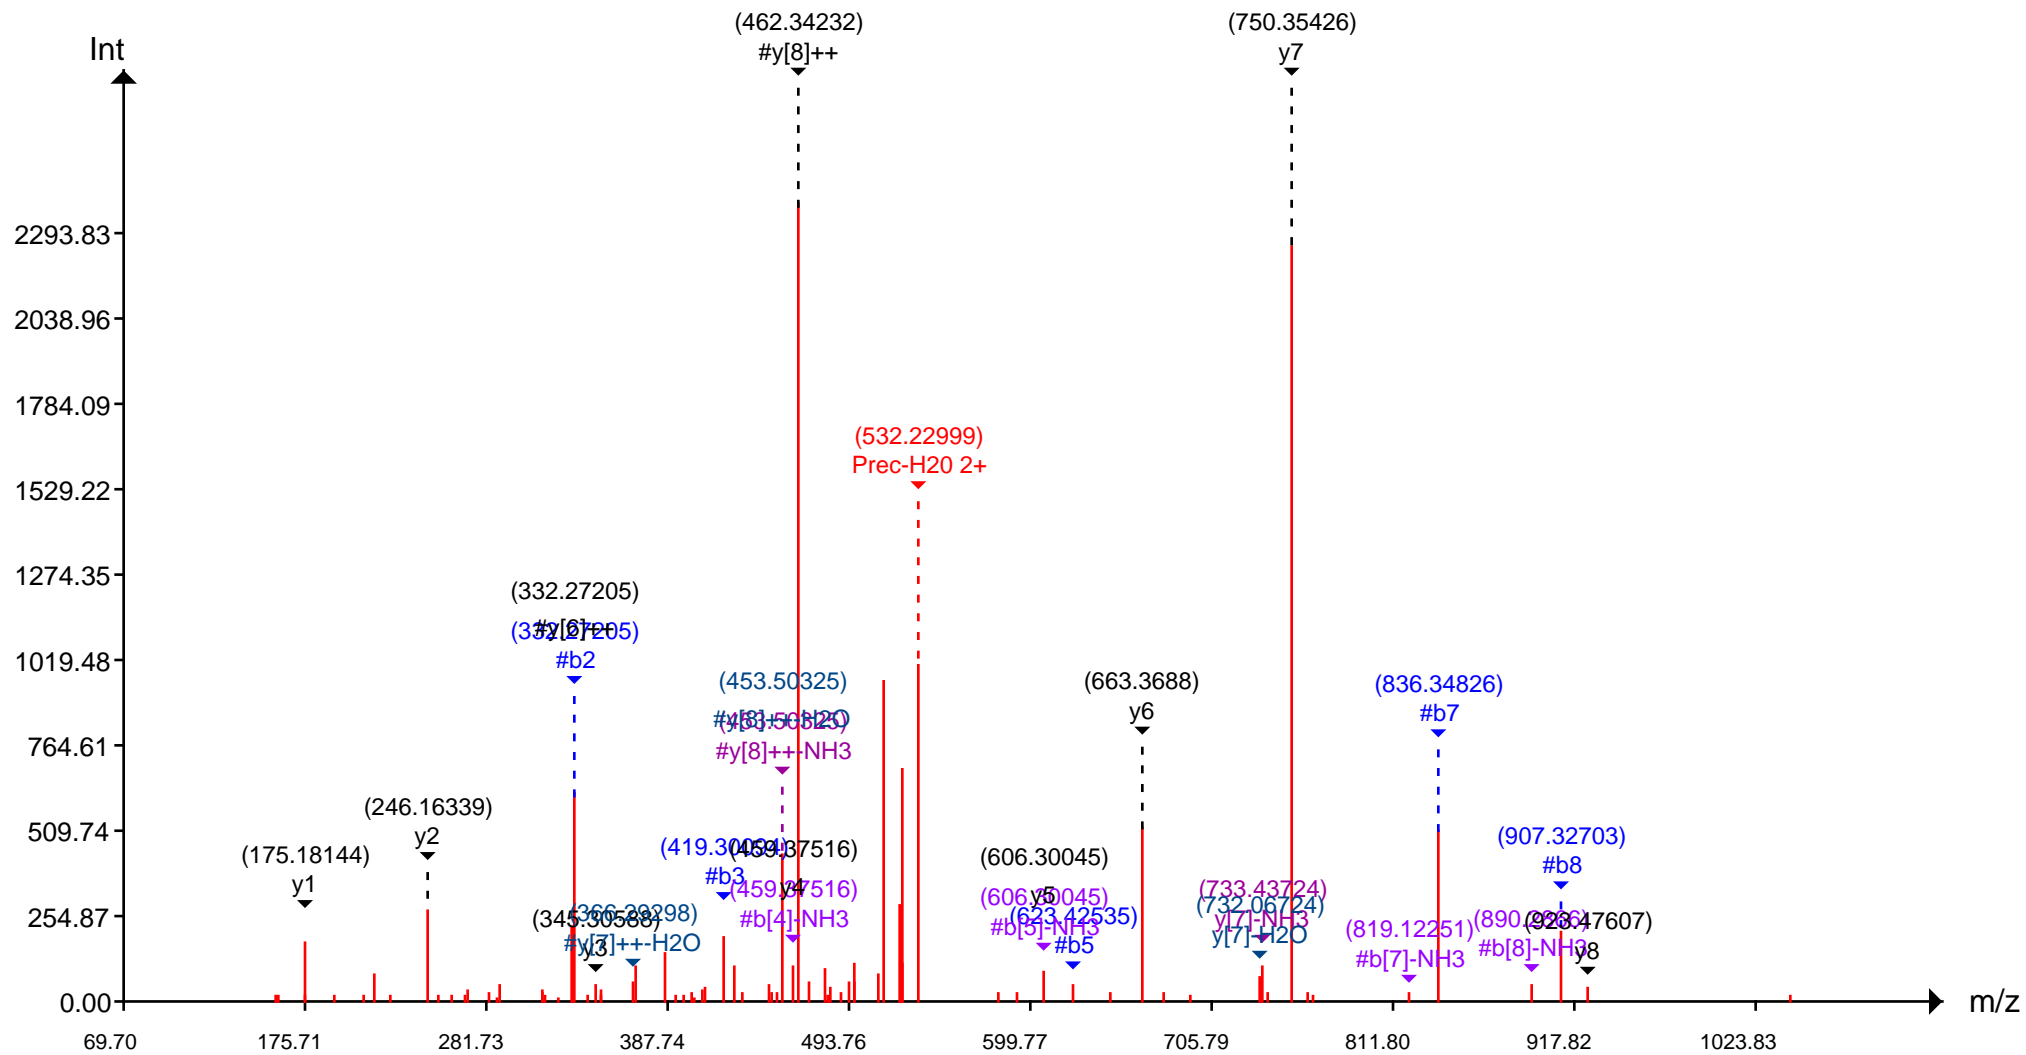

## Info

|                          |                                   |                           |        |
|--------------------------|-----------------------------------|---------------------------|--------|
| <b>Modified Sequence</b> | AcD3-IK<AcD3K*>SGM<Mox*>NVAR-COOH | <b>Ion score</b>          | 48.67  |
| <b>Protein</b>           | P52480                            | <b>Confidence level</b>   | 99.00% |
| <b>Precursor m/z</b>     | 541.30071                         | <b>Identity Threshold</b> | 47.67  |
| <b>Charge</b>            | 2+                                | <b>Mass error</b>         | 4.5E-5 |

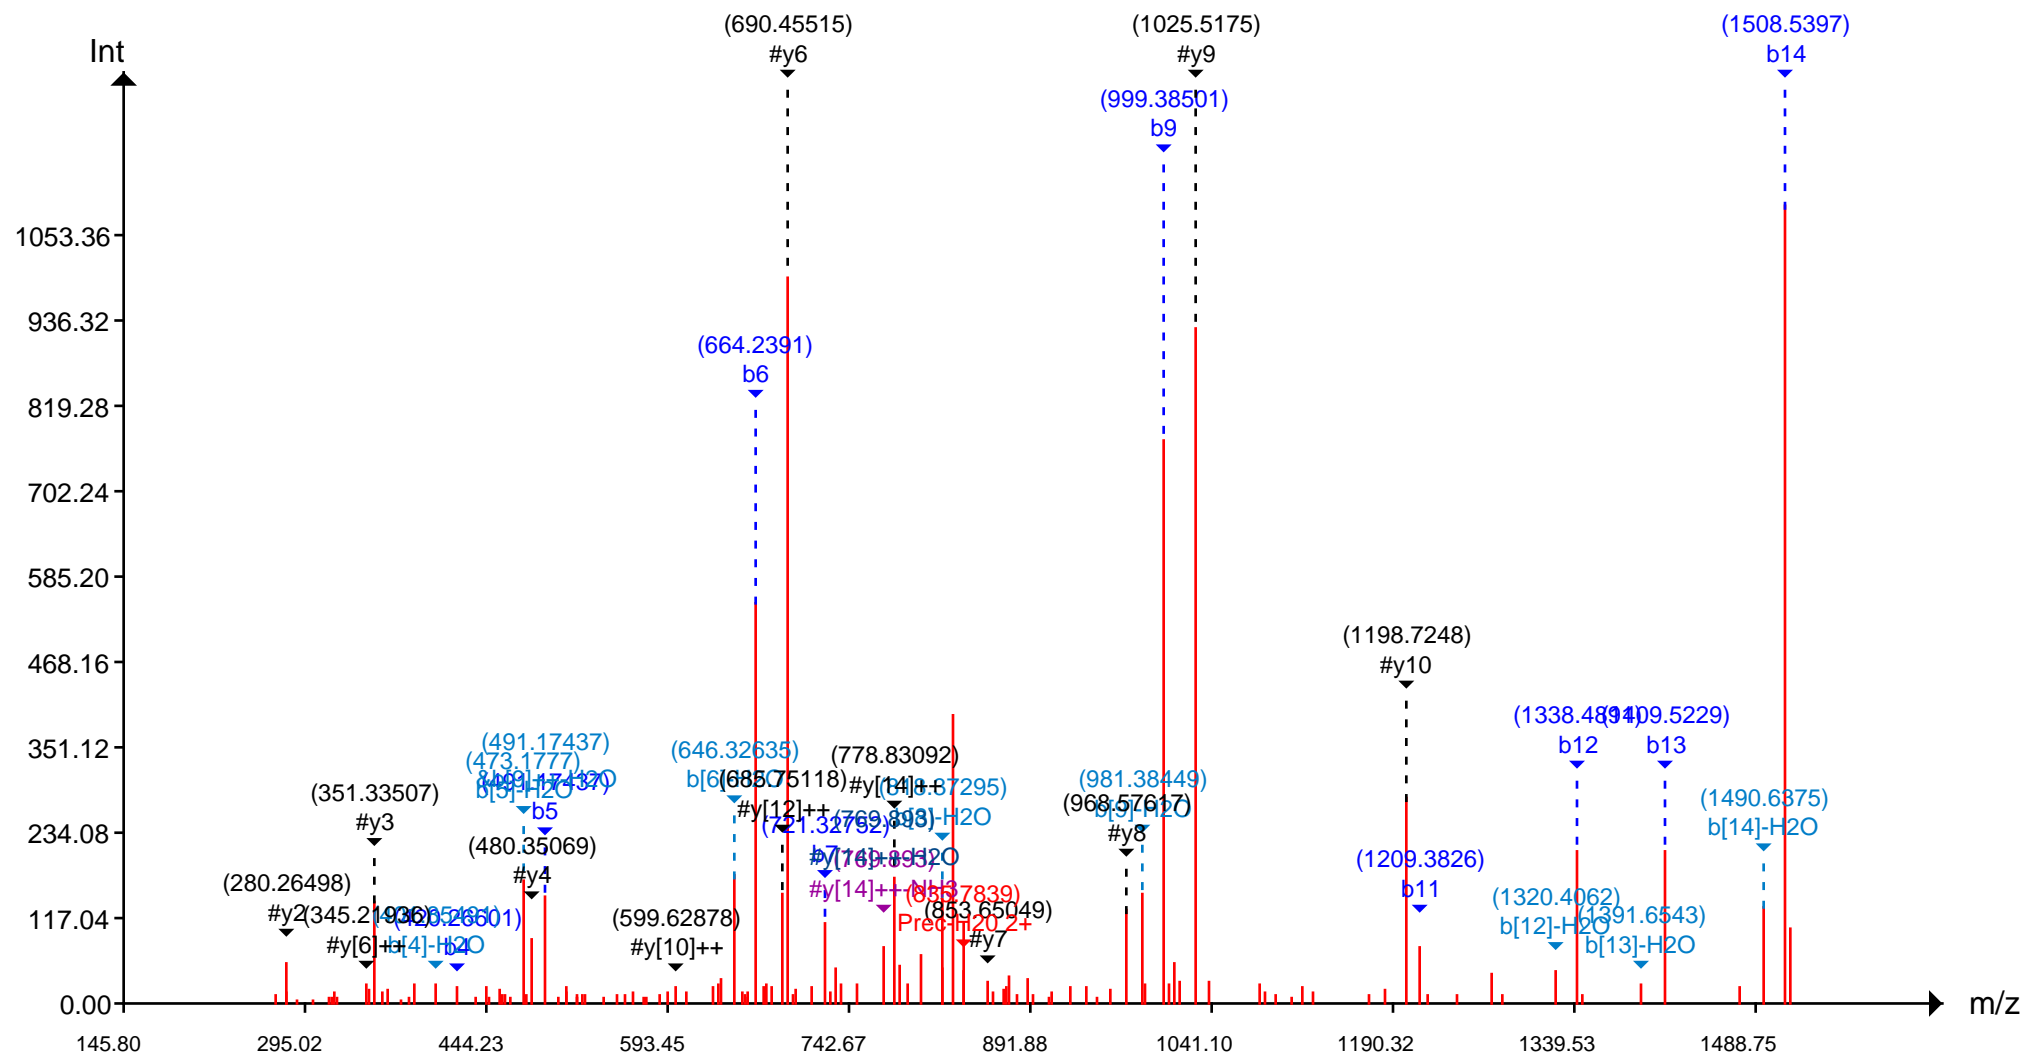

## Info

**Modified Sequence** AcD3-SGETAK<AcD3K\*>GDYPLEAVR<C13>-COOH

**Ion score** 64.58

**Protein** P52480

**Confidence level** 99.00%

**Precursor m/z** 844.93978

**Identity Threshold** 48.05

**Charge** 2+

**Mass error** 0.001895

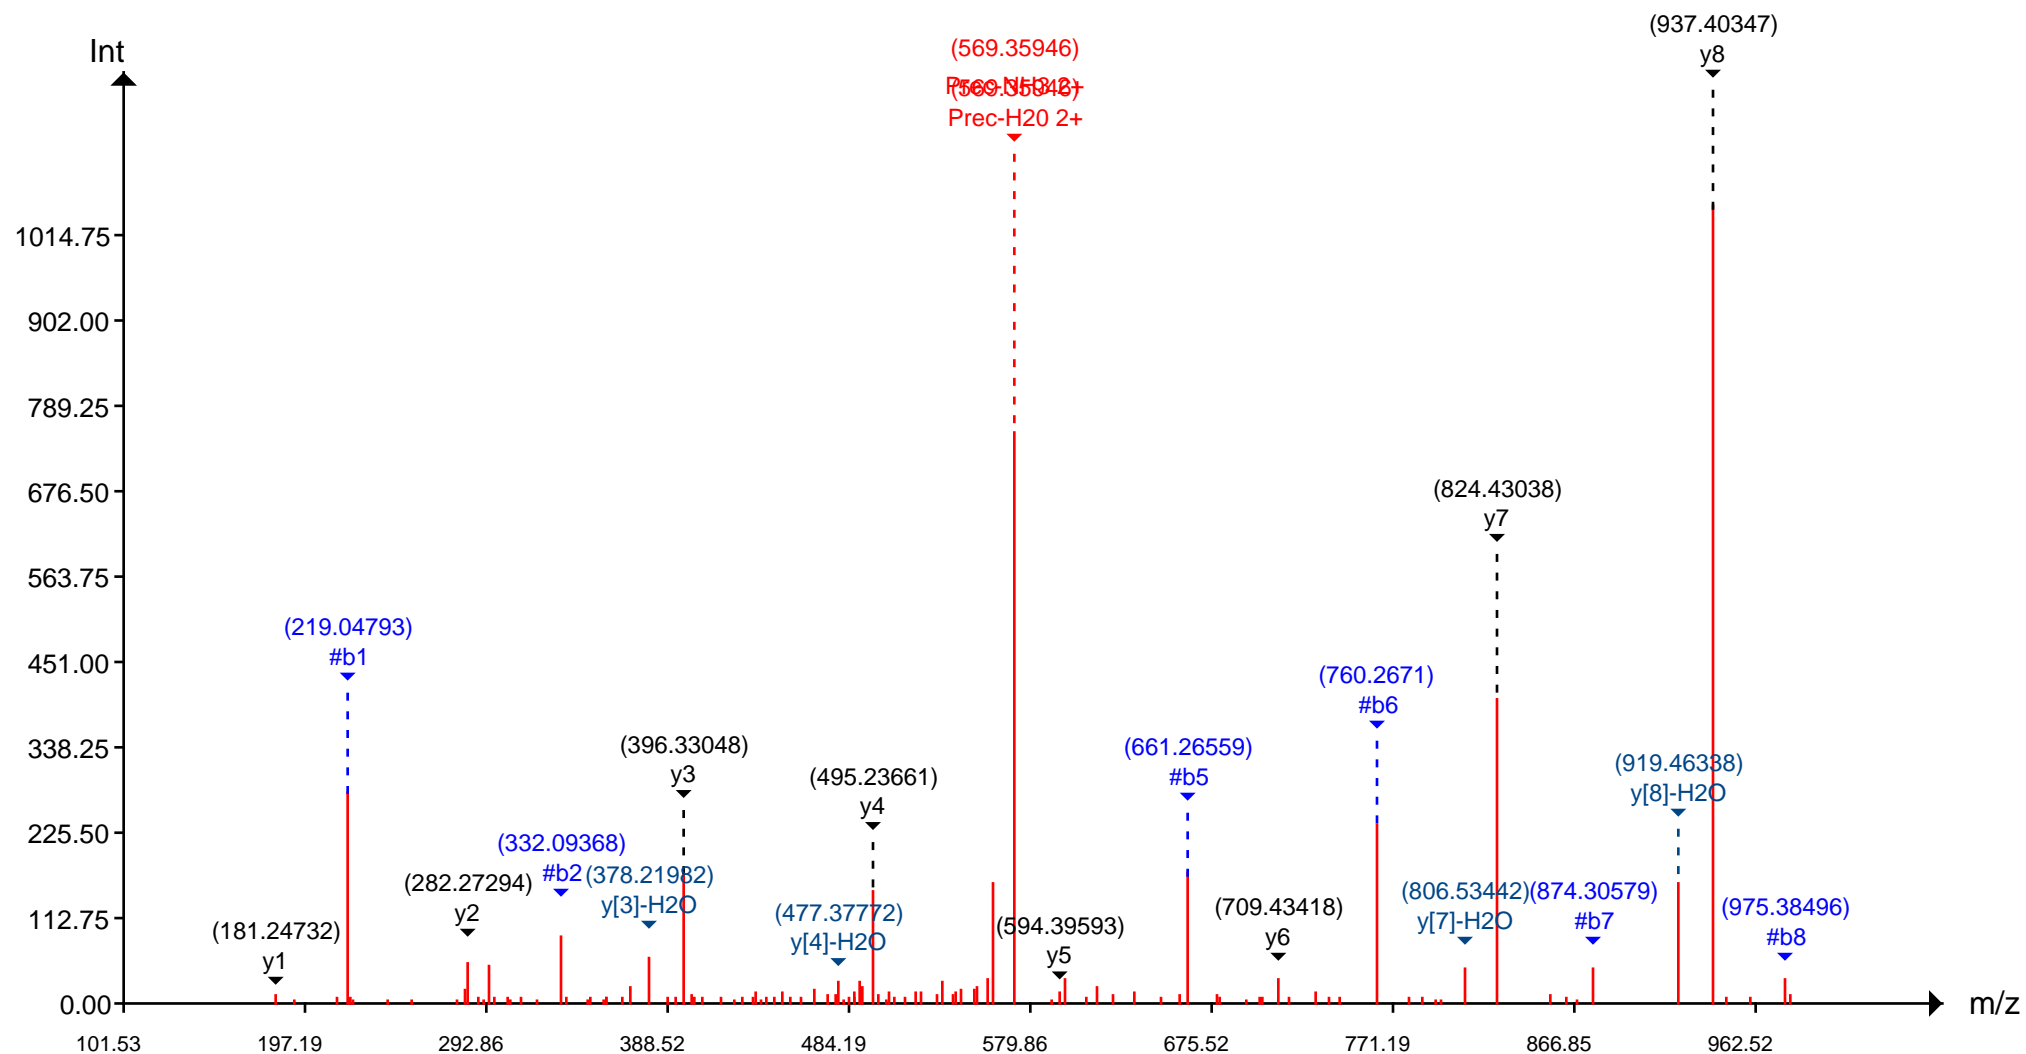

## Info

**Modified Sequence** AcD3-K<AcD3K\*>IDDVVNTR<C13>-COOH

**Ion score** 56.32

**Protein** P80315

**Confidence level** 99.00%

**Precursor m/z** 578.33293

**Identity Threshold** 46.51

**Charge** 2+

**Mass error** 3.53E-4

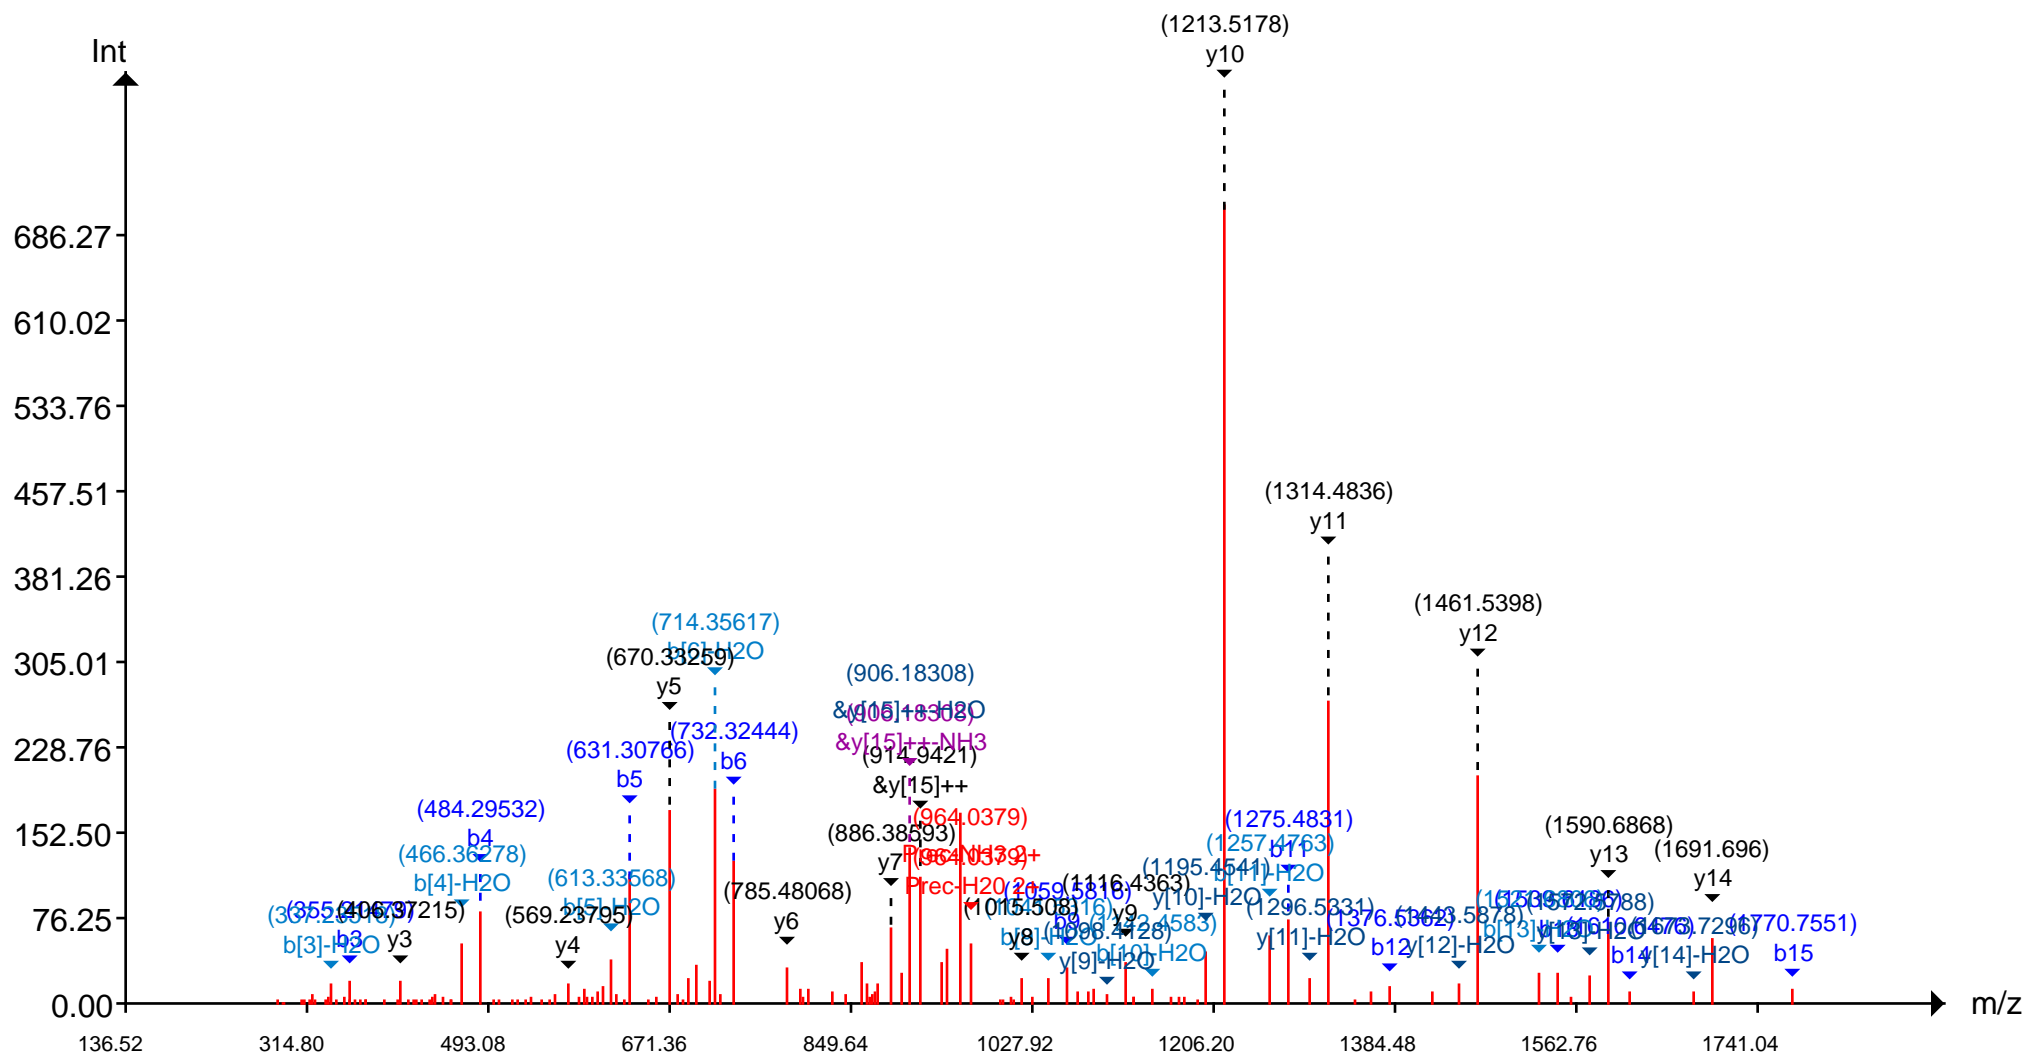

## Info

|                          |                                 |                           |          |
|--------------------------|---------------------------------|---------------------------|----------|
| <b>Modified Sequence</b> | AcD3-AHTEFTPTEPTYAC<Cmm*>R-COOH | <b>Ion score</b>          | 104.22   |
| <b>Protein</b>           | P01887                          | <b>Confidence level</b>   | 99.00%   |
| <b>Precursor m/z</b>     | 972.92818                       | <b>Identity Threshold</b> | 42.34    |
| <b>Charge</b>            | 2+                              | <b>Mass error</b>         | 0.001918 |

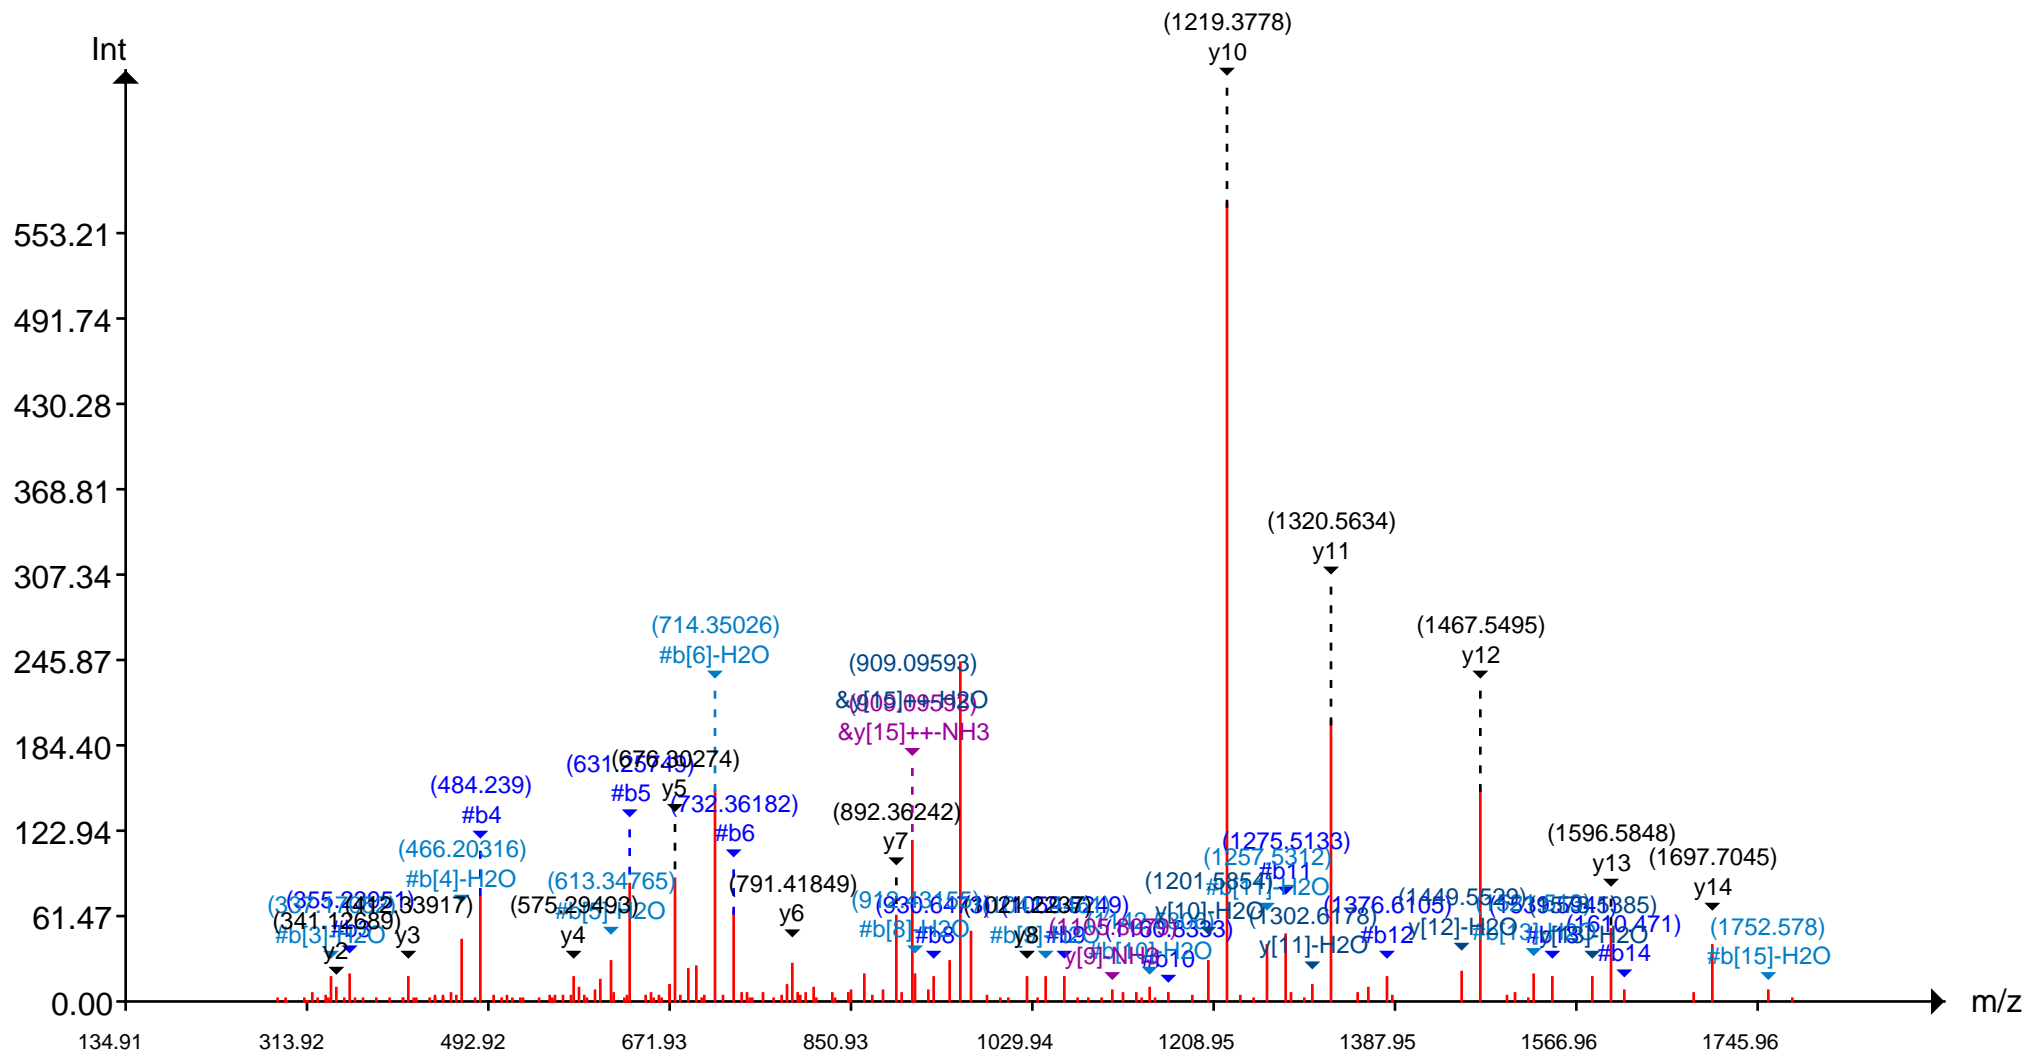

## Info

|                          |                                       |                           |          |
|--------------------------|---------------------------------------|---------------------------|----------|
| <b>Modified Sequence</b> | AcD3-AHTEFTPTETDTYAC<Cmm*>R<C13>-COOH | <b>Ion score</b>          | 109.37   |
| <b>Protein</b>           | P01887                                | <b>Confidence level</b>   | 99.00%   |
| <b>Precursor m/z</b>     | 975.9389                              | <b>Identity Threshold</b> | 43.42    |
| <b>Charge</b>            | 2+                                    | <b>Mass error</b>         | 0.003217 |



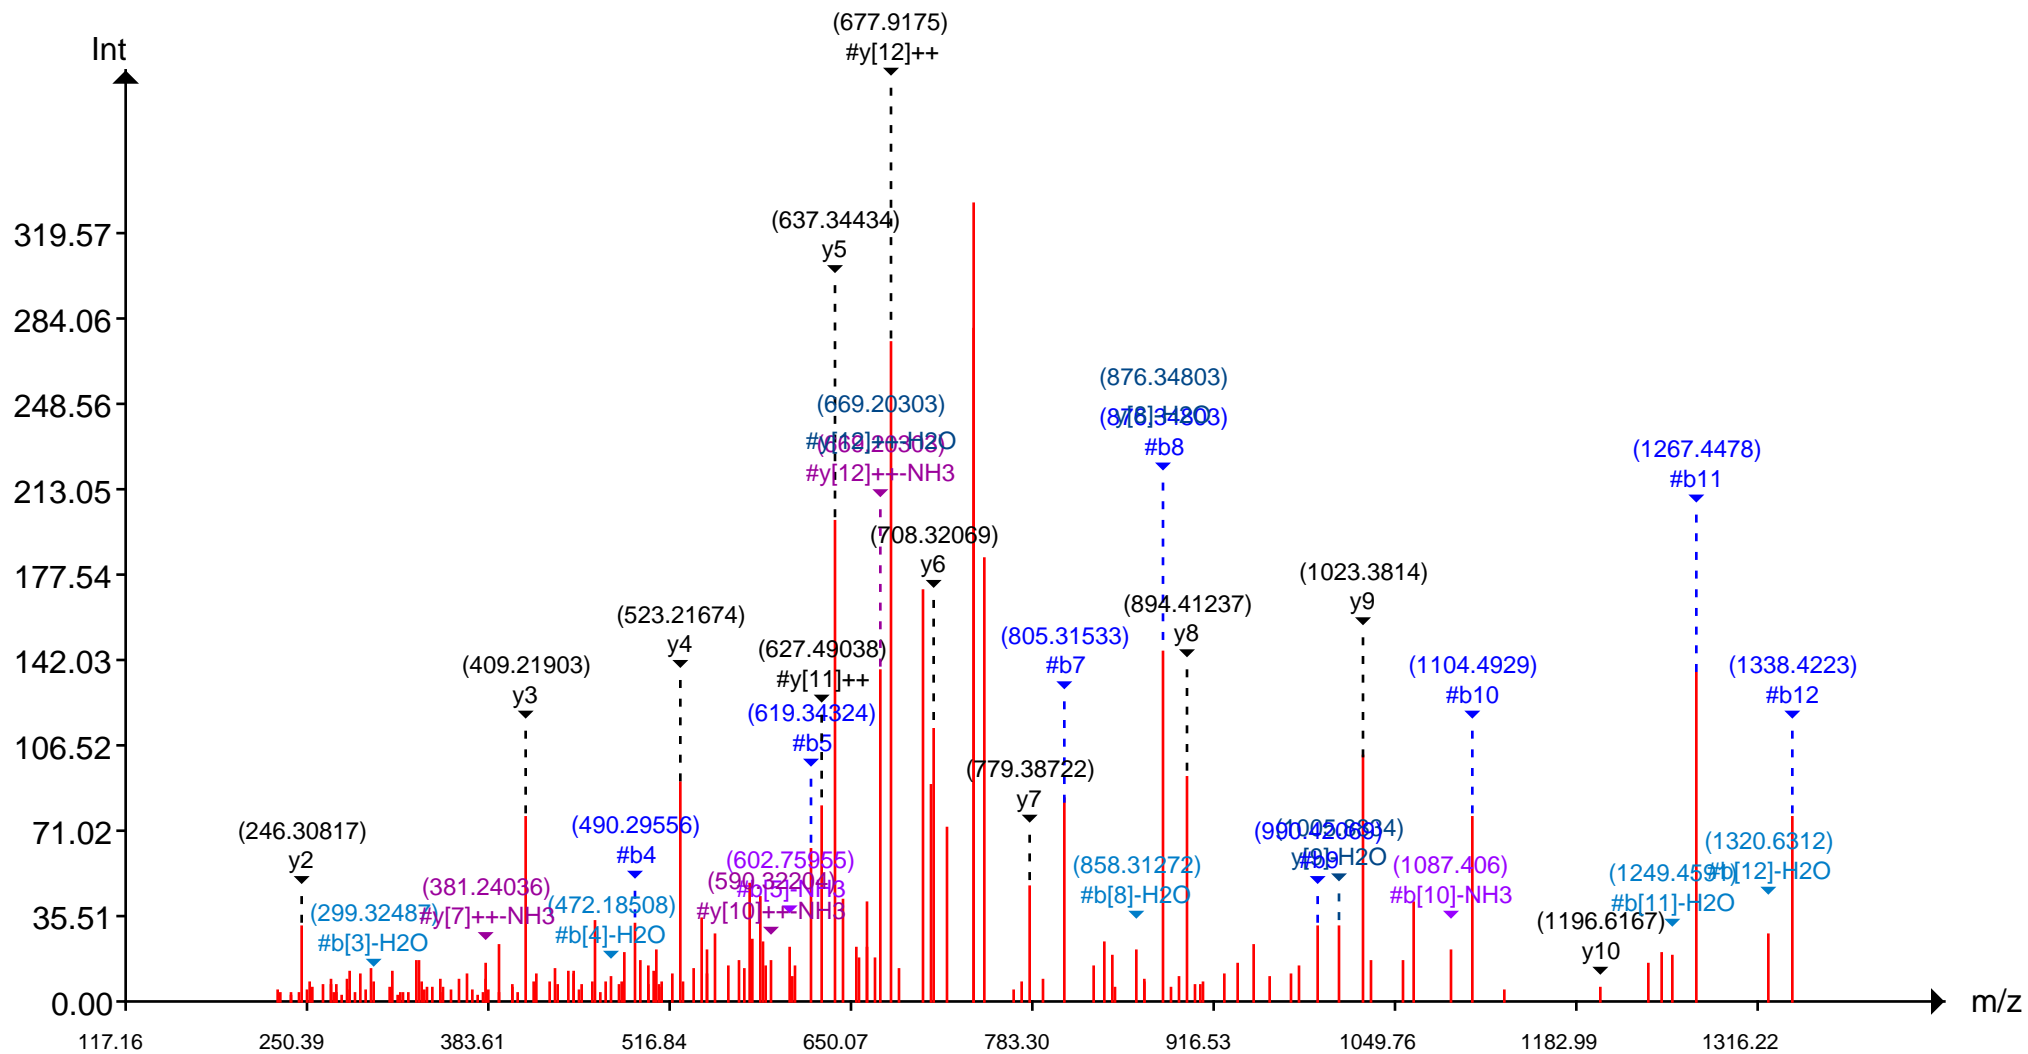

## Info

|                          |                                                |                           |          |
|--------------------------|------------------------------------------------|---------------------------|----------|
| <b>Modified Sequence</b> | AcD3-ITGK<AcD3K*>EDAANNYAR-COOH                | <b>Ion score</b>          | 52.43    |
| <b>Protein</b>           | P68369, P05213, P68373, P05214, P68368, Q9JJZ2 | <b>Confidence level</b>   | 99.00%   |
| <b>Precursor m/z</b>     | 756.88279                                      | <b>Identity Threshold</b> | 47.85    |
| <b>Charge</b>            | 2+                                             | <b>Mass error</b>         | 0.002371 |



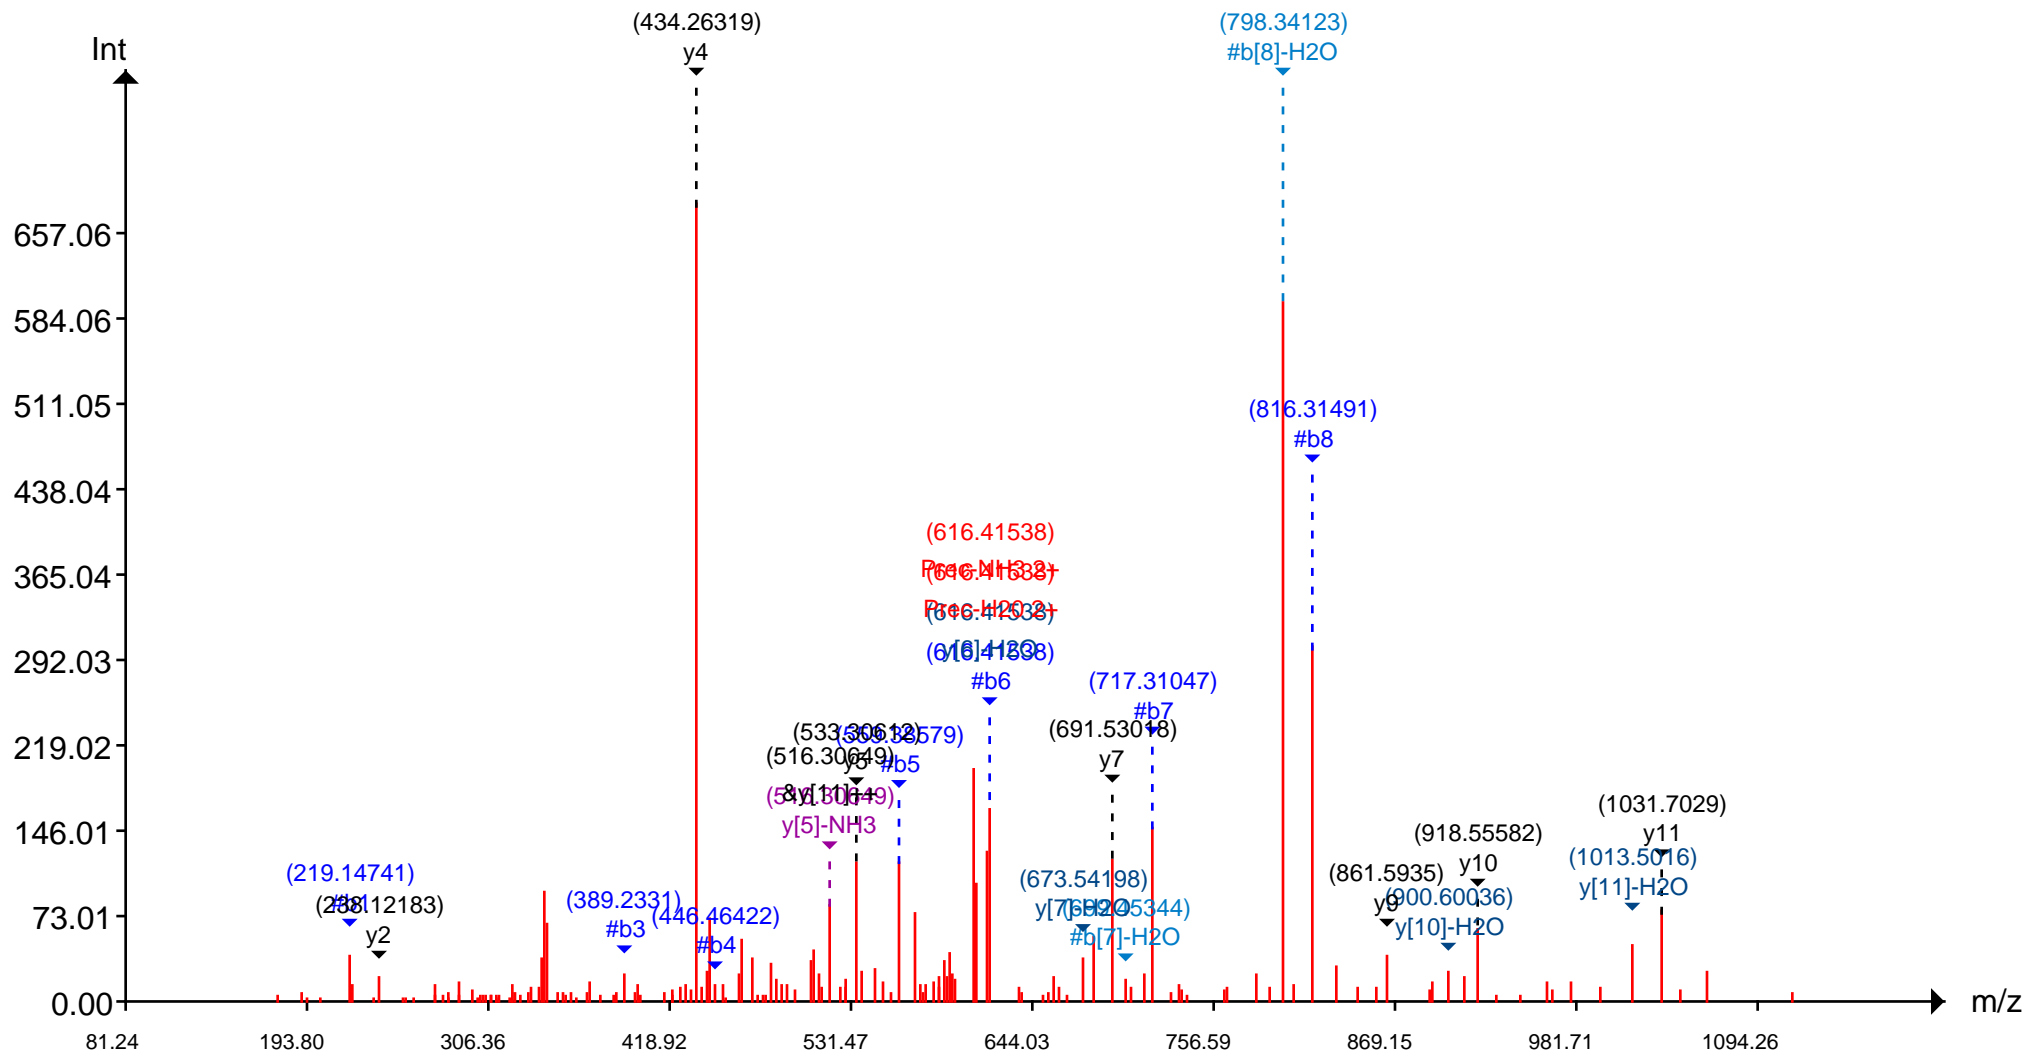

## Info

|                          |                                     |                           |         |
|--------------------------|-------------------------------------|---------------------------|---------|
| <b>Modified Sequence</b> | AcD3-K<AcD3K*>IGGIGTVPVGR<C13>-COOH | <b>Ion score</b>          | 44.48   |
| <b>Protein</b>           | P10126, P62631                      | <b>Confidence level</b>   | 99.00%  |
| <b>Precursor m/z</b>     | 625.39615                           | <b>Identity Threshold</b> | 40.67   |
| <b>Charge</b>            | 2+                                  | <b>Mass error</b>         | 9.08E-4 |



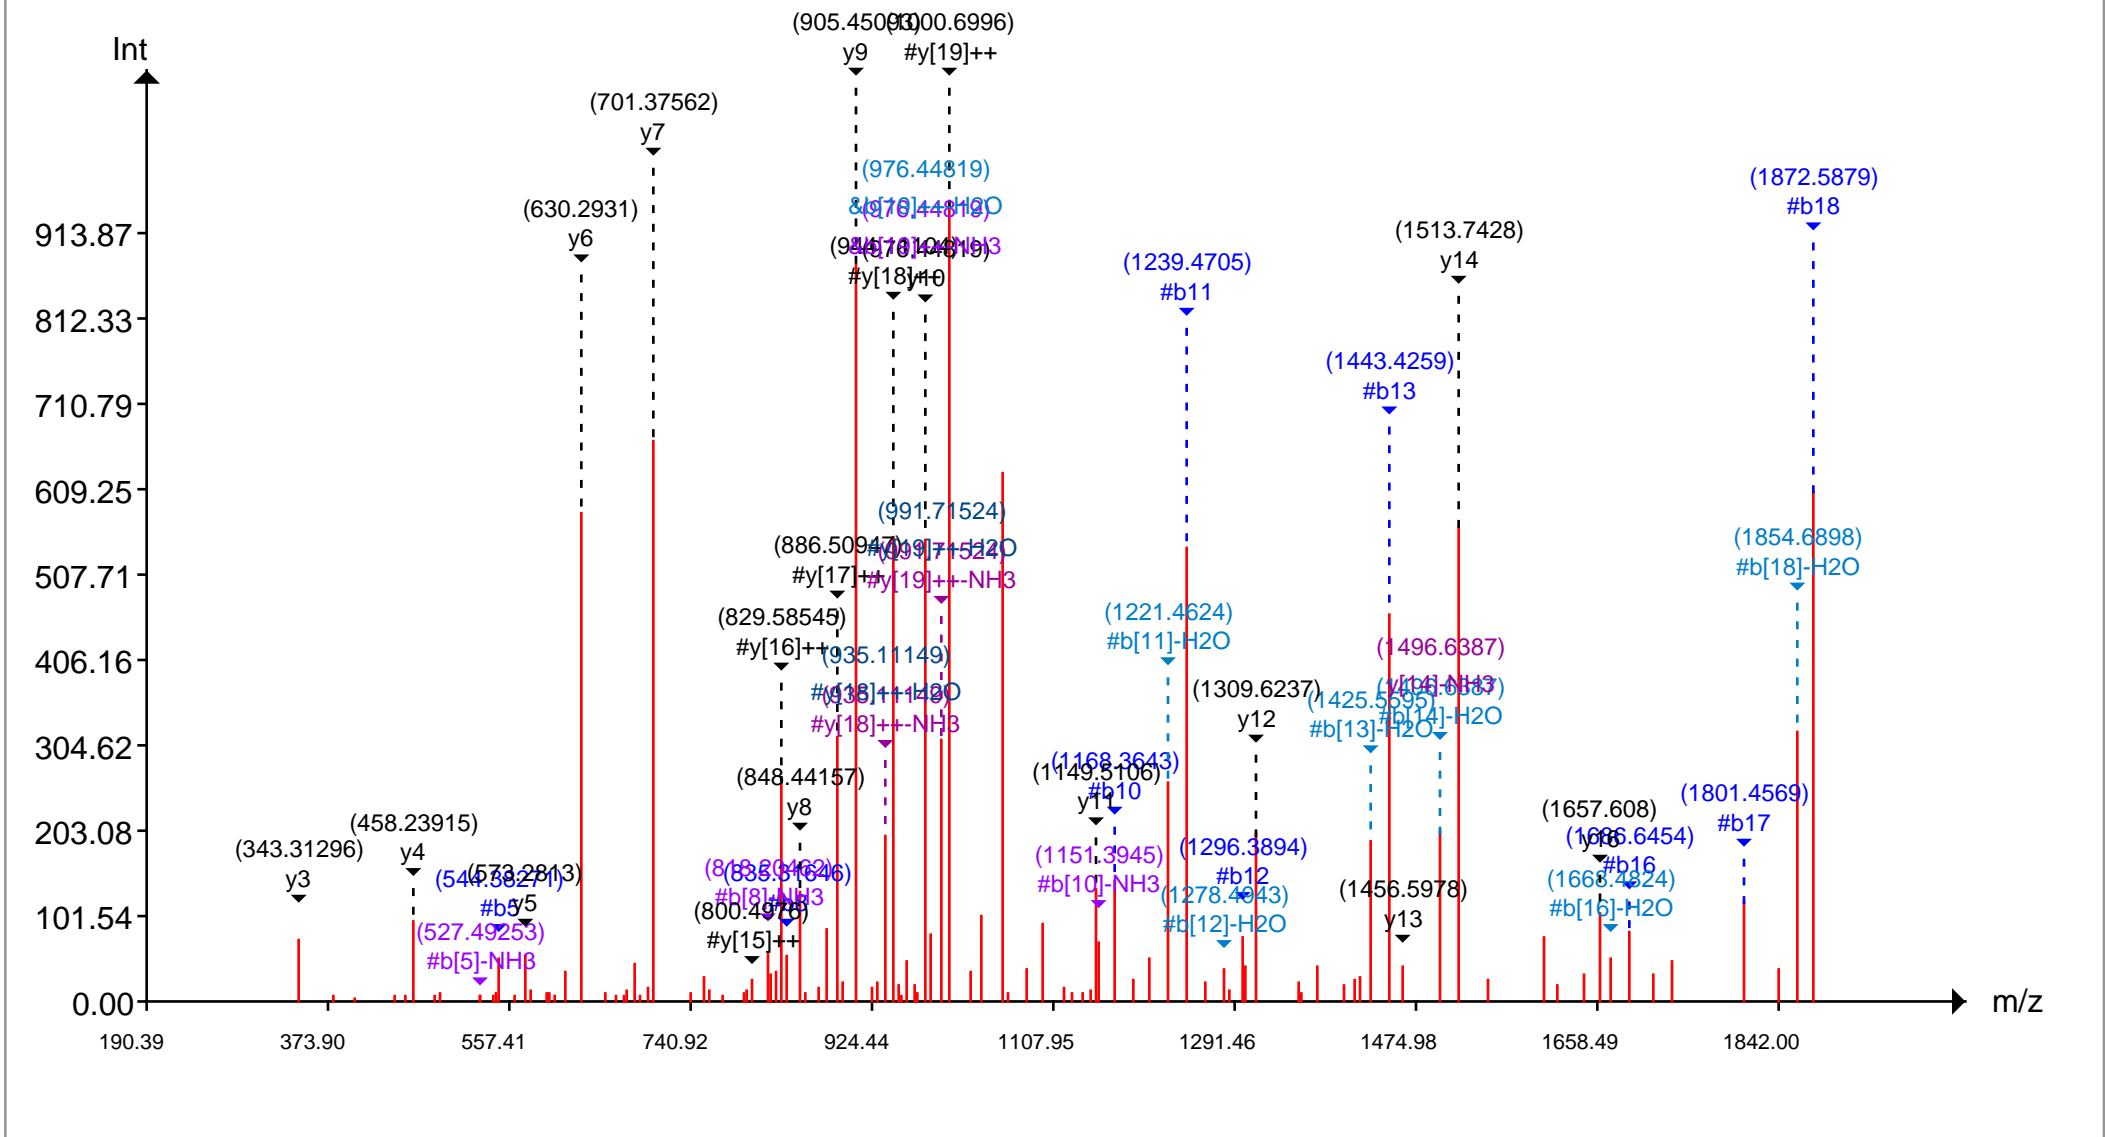

## Info

|                          |                                                    |                           |          |
|--------------------------|----------------------------------------------------|---------------------------|----------|
| <b>Modified Sequence</b> | AcD3-VIDNGSGM<Mox*>C<Cmm*>K<AcD3K*>AGFAGDDAPR-COOH | <b>Ion score</b>          | 93.05    |
| <b>Protein</b>           | P63260                                             | <b>Confidence level</b>   | 99.00%   |
| <b>Precursor m/z</b>     | 1072.4876                                          | <b>Identity Threshold</b> | 44.00    |
| <b>Charge</b>            | 2+                                                 | <b>Mass error</b>         | 0.002518 |

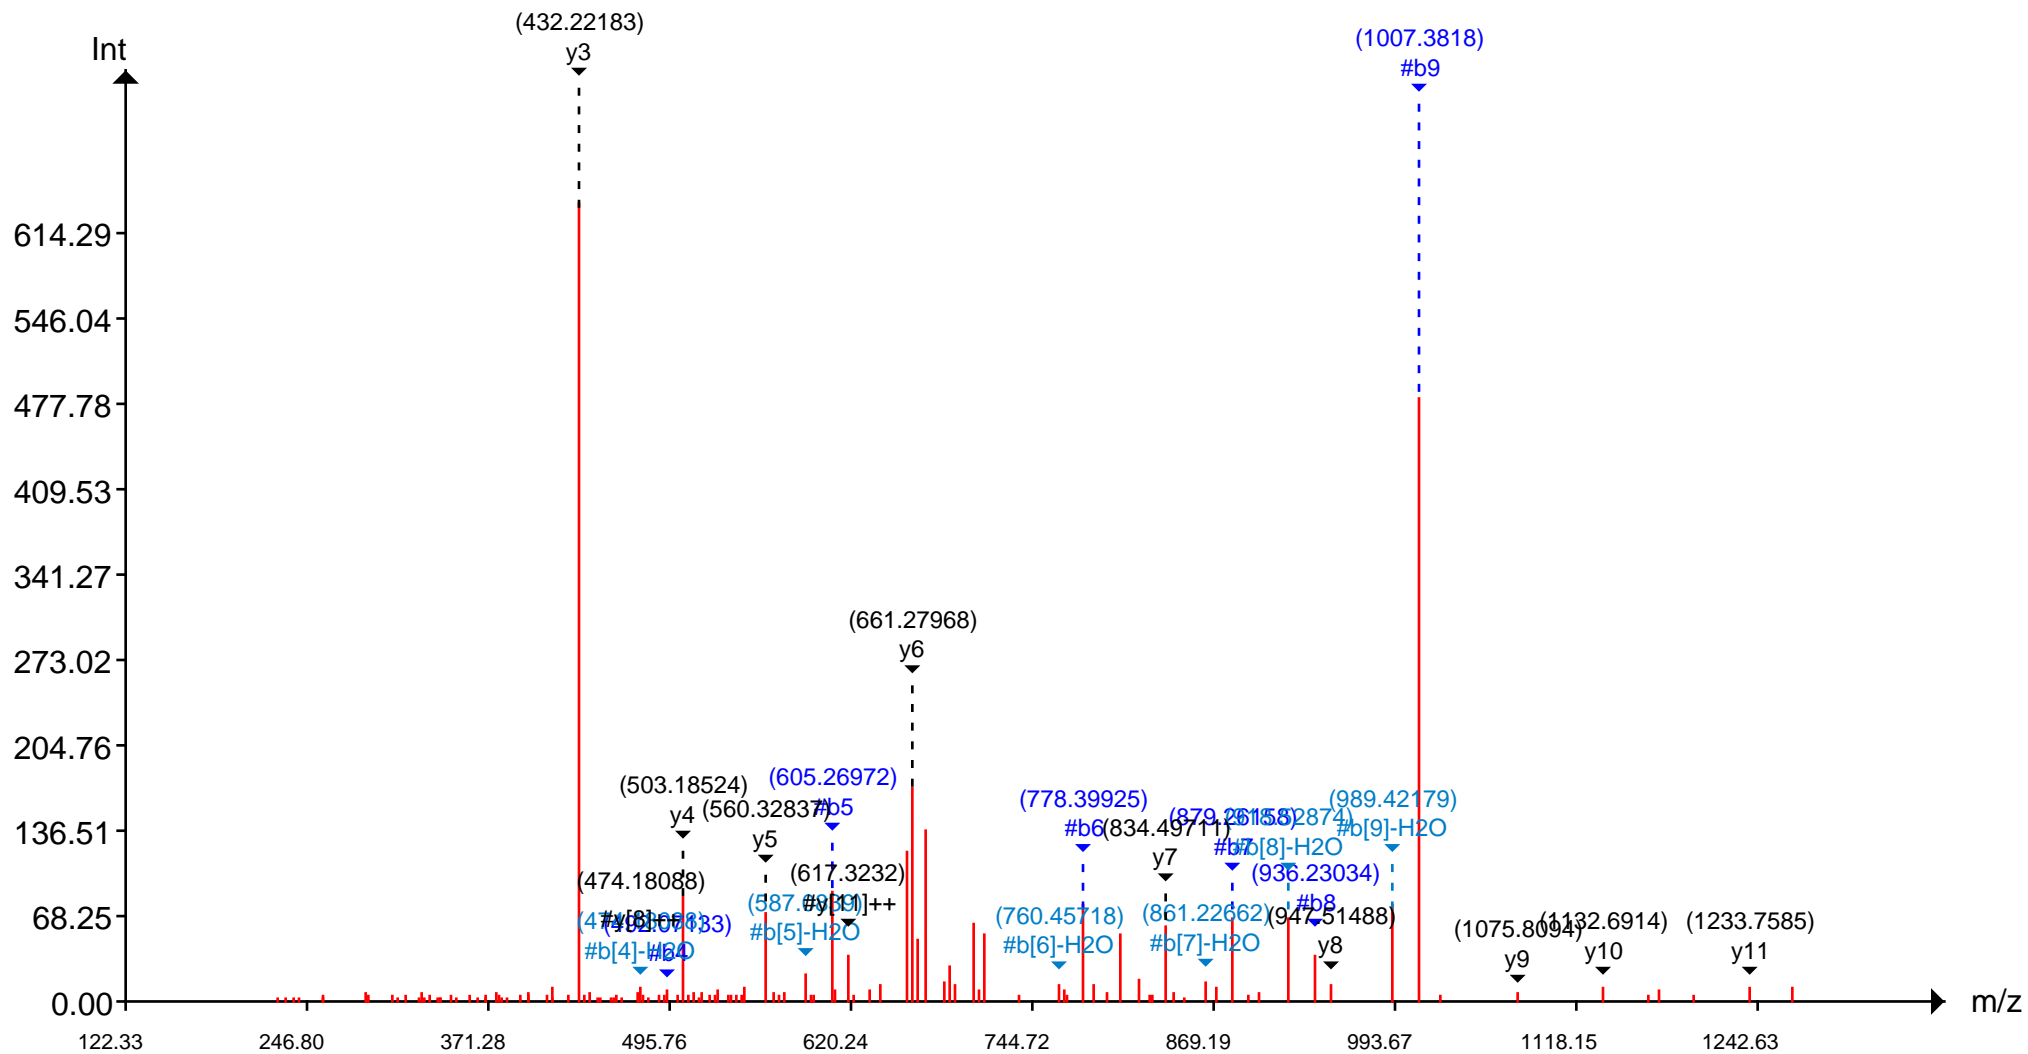

## Info

|                          |                                            |                           |         |
|--------------------------|--------------------------------------------|---------------------------|---------|
| <b>Modified Sequence</b> | AcD3-C<Cmm*>TGQIK<AcD3K*>TGAPC<Cmm*>R-COOH | <b>Ion score</b>          | 61.58   |
| <b>Protein</b>           | P17182, P21550, P17183                     | <b>Confidence level</b>   | 99.00%  |
| <b>Precursor m/z</b>     | 719.8565                                   | <b>Identity Threshold</b> | 47.45   |
| <b>Charge</b>            | 2+                                         | <b>Mass error</b>         | 9.08E-4 |

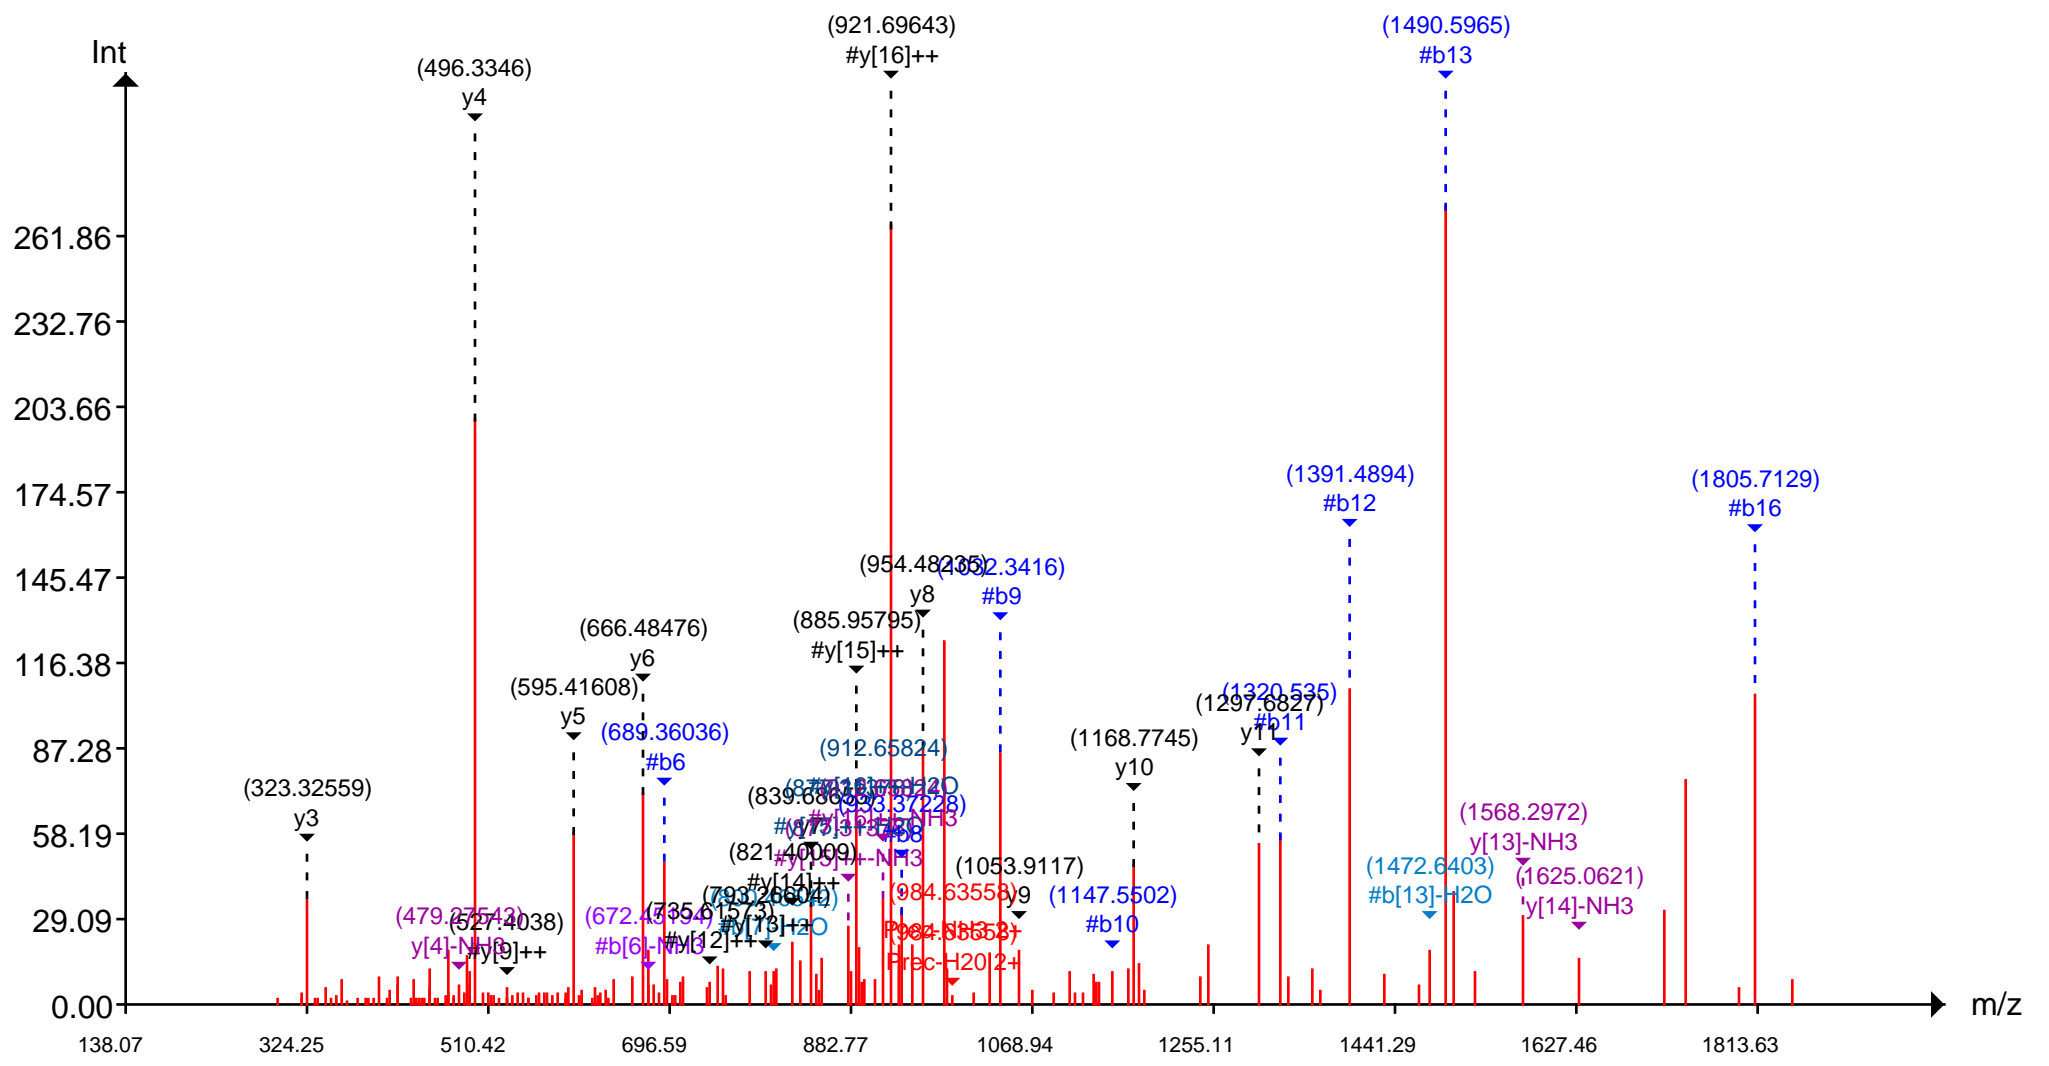

Info

|                          |                                                          |                           |          |
|--------------------------|----------------------------------------------------------|---------------------------|----------|
| <b>Modified Sequence</b> | AcD3-VAEGNK<AcD3K*>EDVDK<AcD3K*>AVK<AcD3K*>AAR<C13>-COOH | <b>Ion score</b>          | 47.28    |
| <b>Protein</b>           | P47738                                                   | <b>Confidence level</b>   | 99.00%   |
| <b>Precursor m/z</b>     | 993.55433                                                | <b>Identity Threshold</b> | 46.51    |
| <b>Charge</b>            | 2+                                                       | <b>Mass error</b>         | 0.002677 |

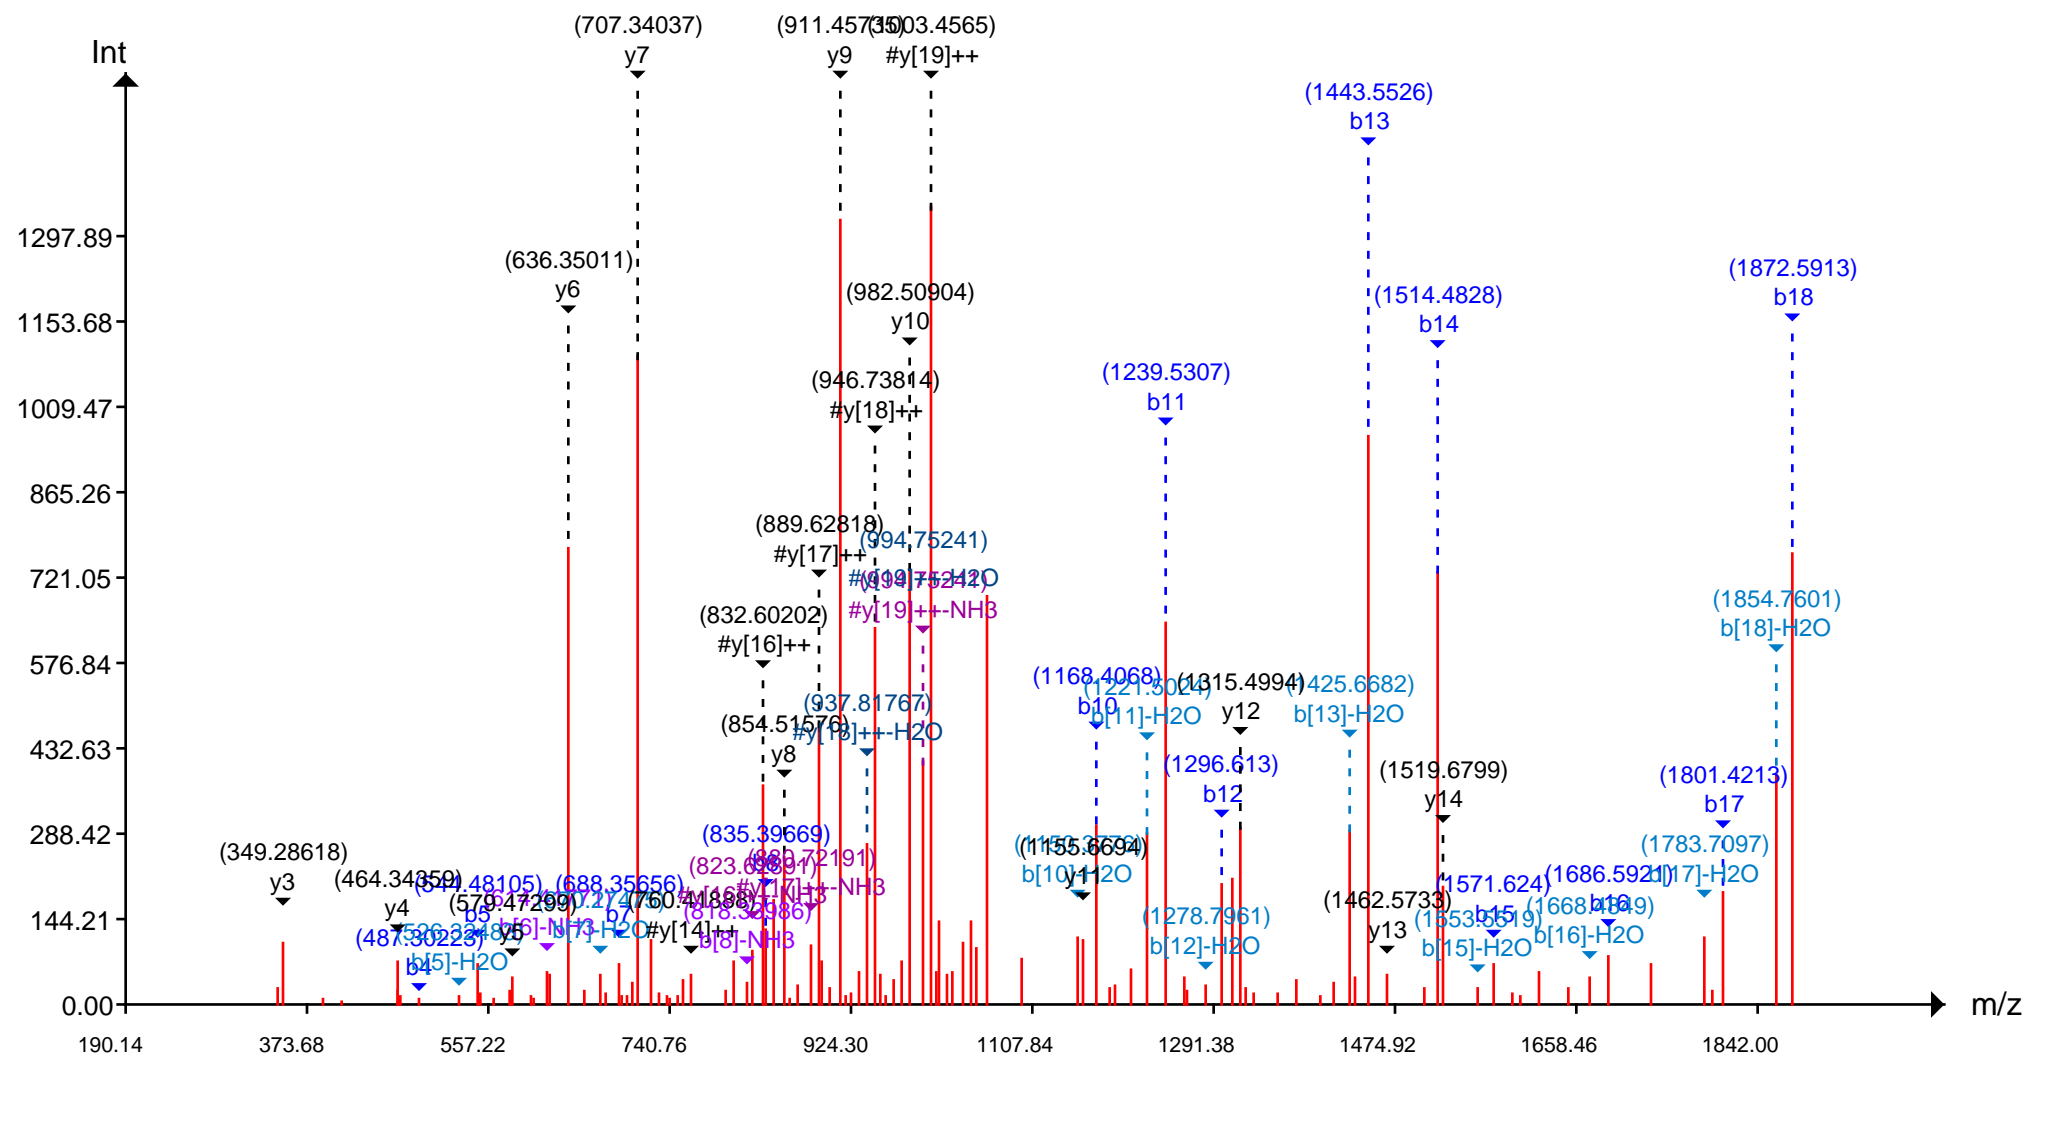

| Info                     |                                                         |                           |          |
|--------------------------|---------------------------------------------------------|---------------------------|----------|
| <b>Modified Sequence</b> | AcD3-VIDNGSGM<Mox*>C<Cmm*>K<AcD3K*>AGFAGDDAPR<C13>-COOH | <b>Ion score</b>          | 92.63    |
| <b>Protein</b>           | P63260                                                  | <b>Confidence level</b>   | 99.00%   |
| <b>Precursor m/z</b>     | 1075.4977                                               | <b>Identity Threshold</b> | 45.01    |
| <b>Charge</b>            | 2+                                                      | <b>Mass error</b>         | 0.002577 |

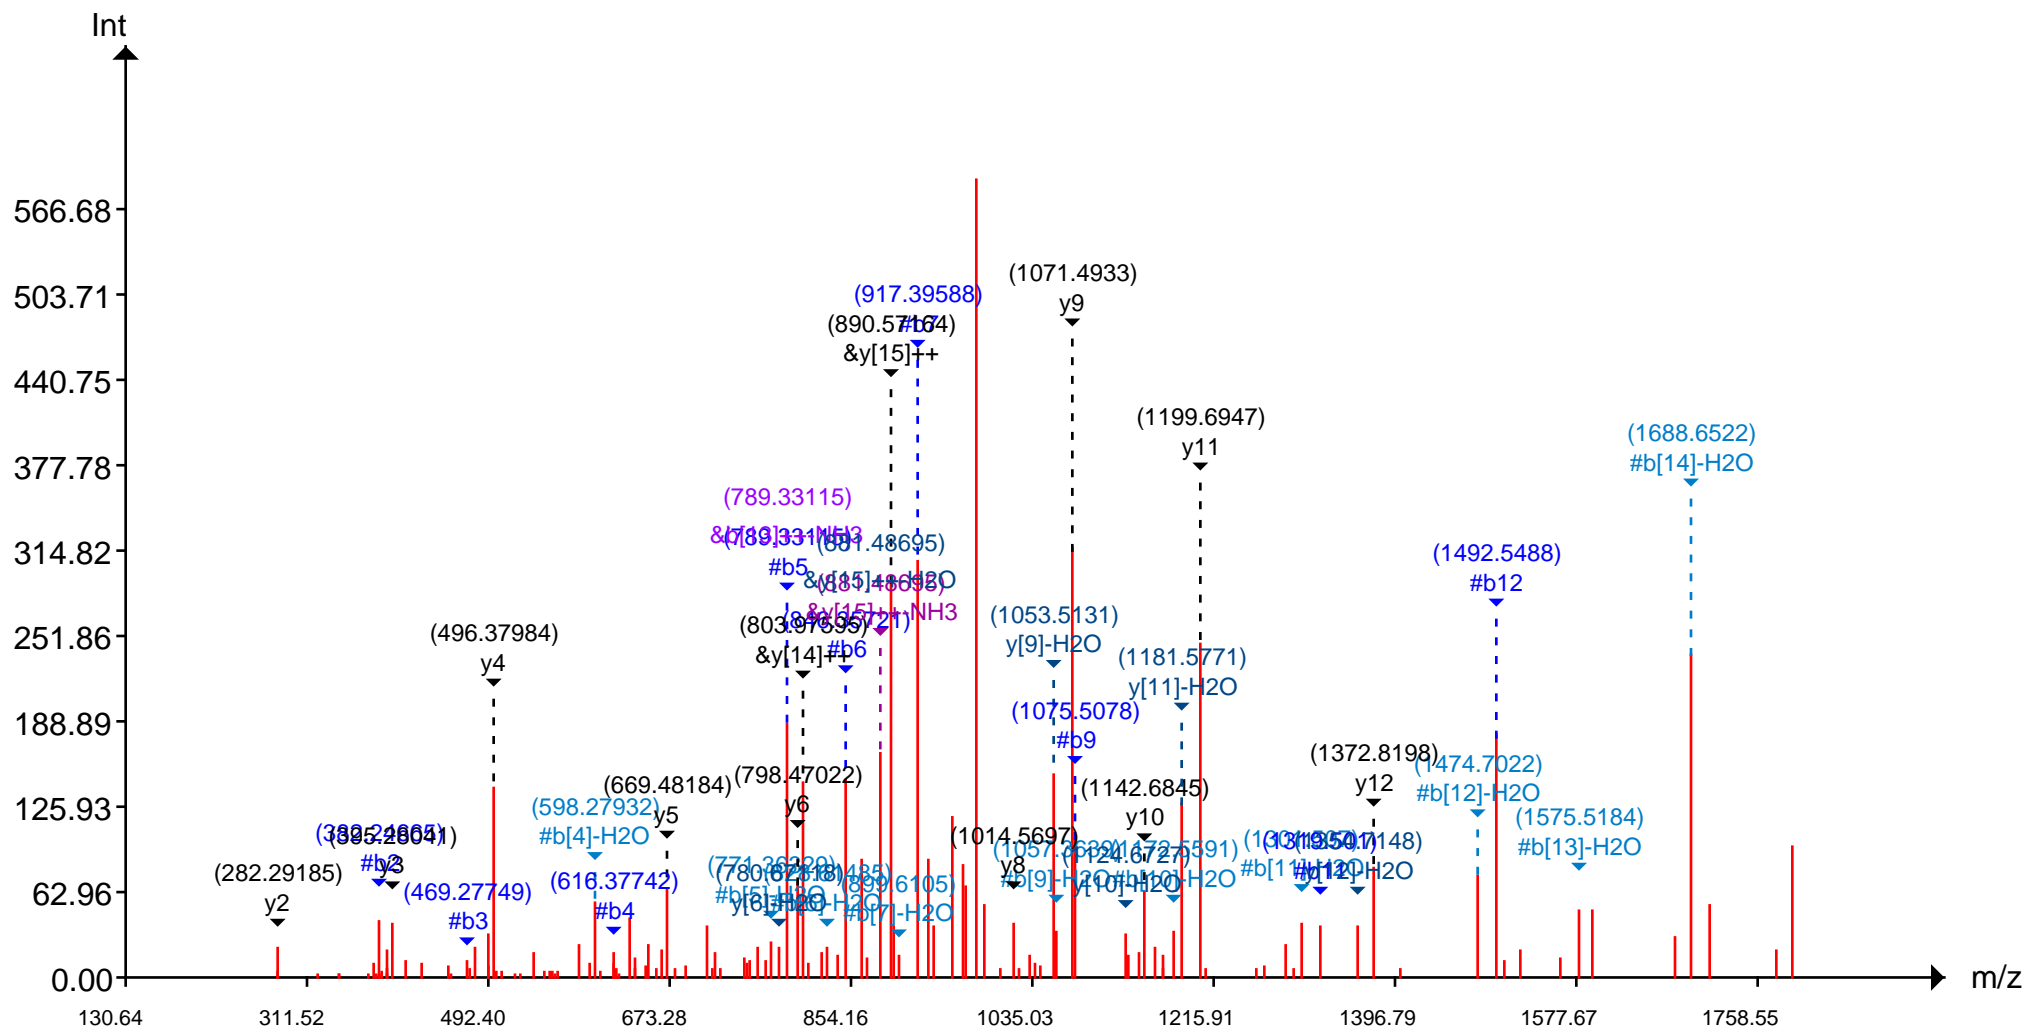

## Info

|                          |                                                               |                           |        |
|--------------------------|---------------------------------------------------------------|---------------------------|--------|
| <b>Modified Sequence</b> | AcD3-YK<AcD3K*>SM<Mox*>K<AcD3K*>GAGTDEK<AcD3K*>TLTR<C13>-COOH | <b>Ion score</b>          | 56.56  |
| <b>Protein</b>           | P14824                                                        | <b>Confidence level</b>   | 99.00% |
| <b>Precursor m/z</b>     | 994.52863                                                     | <b>Identity Threshold</b> | 47.93  |
| <b>Charge</b>            | 2+                                                            | <b>Mass error</b>         | 9.9E-4 |

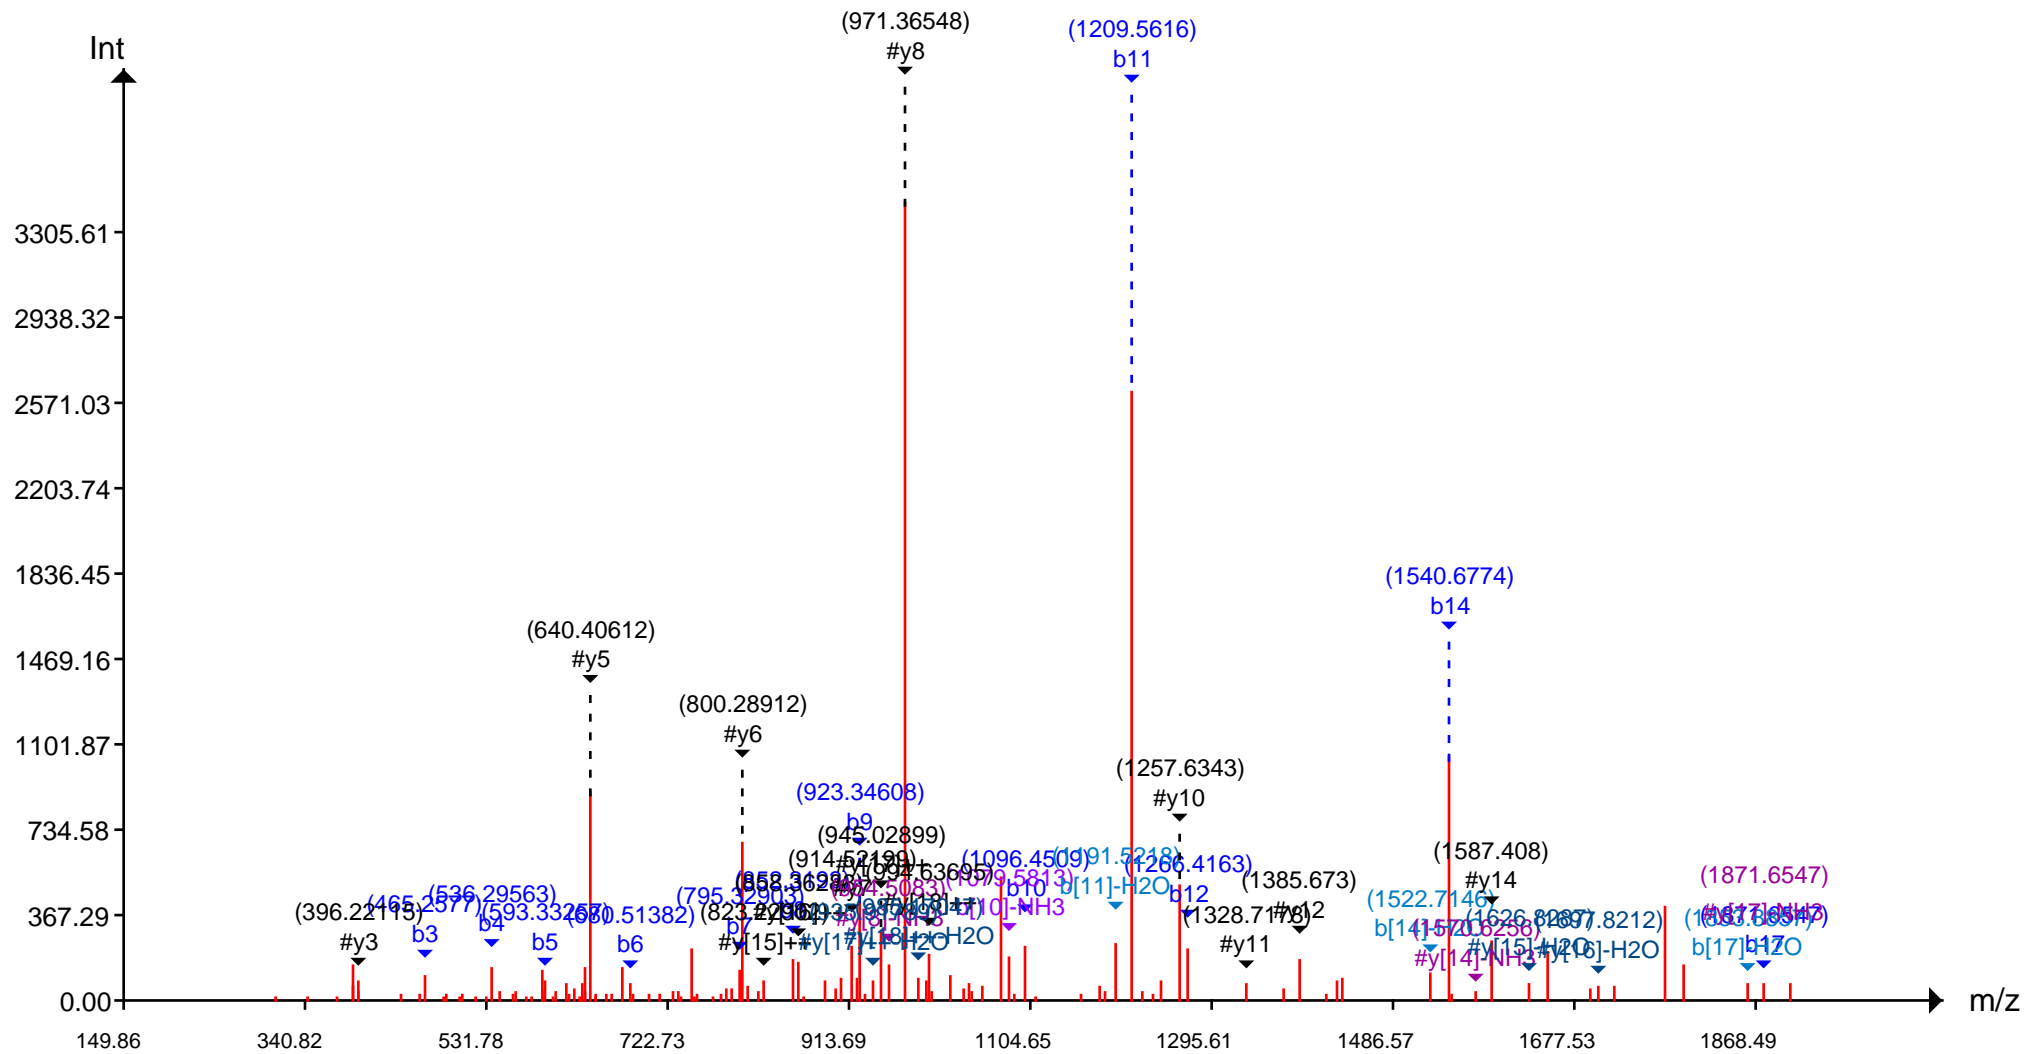

## Info

|                          |                                                          |                           |          |
|--------------------------|----------------------------------------------------------|---------------------------|----------|
| <b>Modified Sequence</b> | AcD3-FVK<AcD3K*>AGSDGAK<AcD3K*>IGNC<Cmm*>PFSQR<C13>-COOH | <b>Ion score</b>          | 72.65    |
| <b>Protein</b>           | Q9Z1Q5                                                   | <b>Confidence level</b>   | 99.00%   |
| <b>Precursor m/z</b>     | 1090.5653                                                | <b>Identity Threshold</b> | 48.07    |
| <b>Charge</b>            | 2+                                                       | <b>Mass error</b>         | 0.002263 |



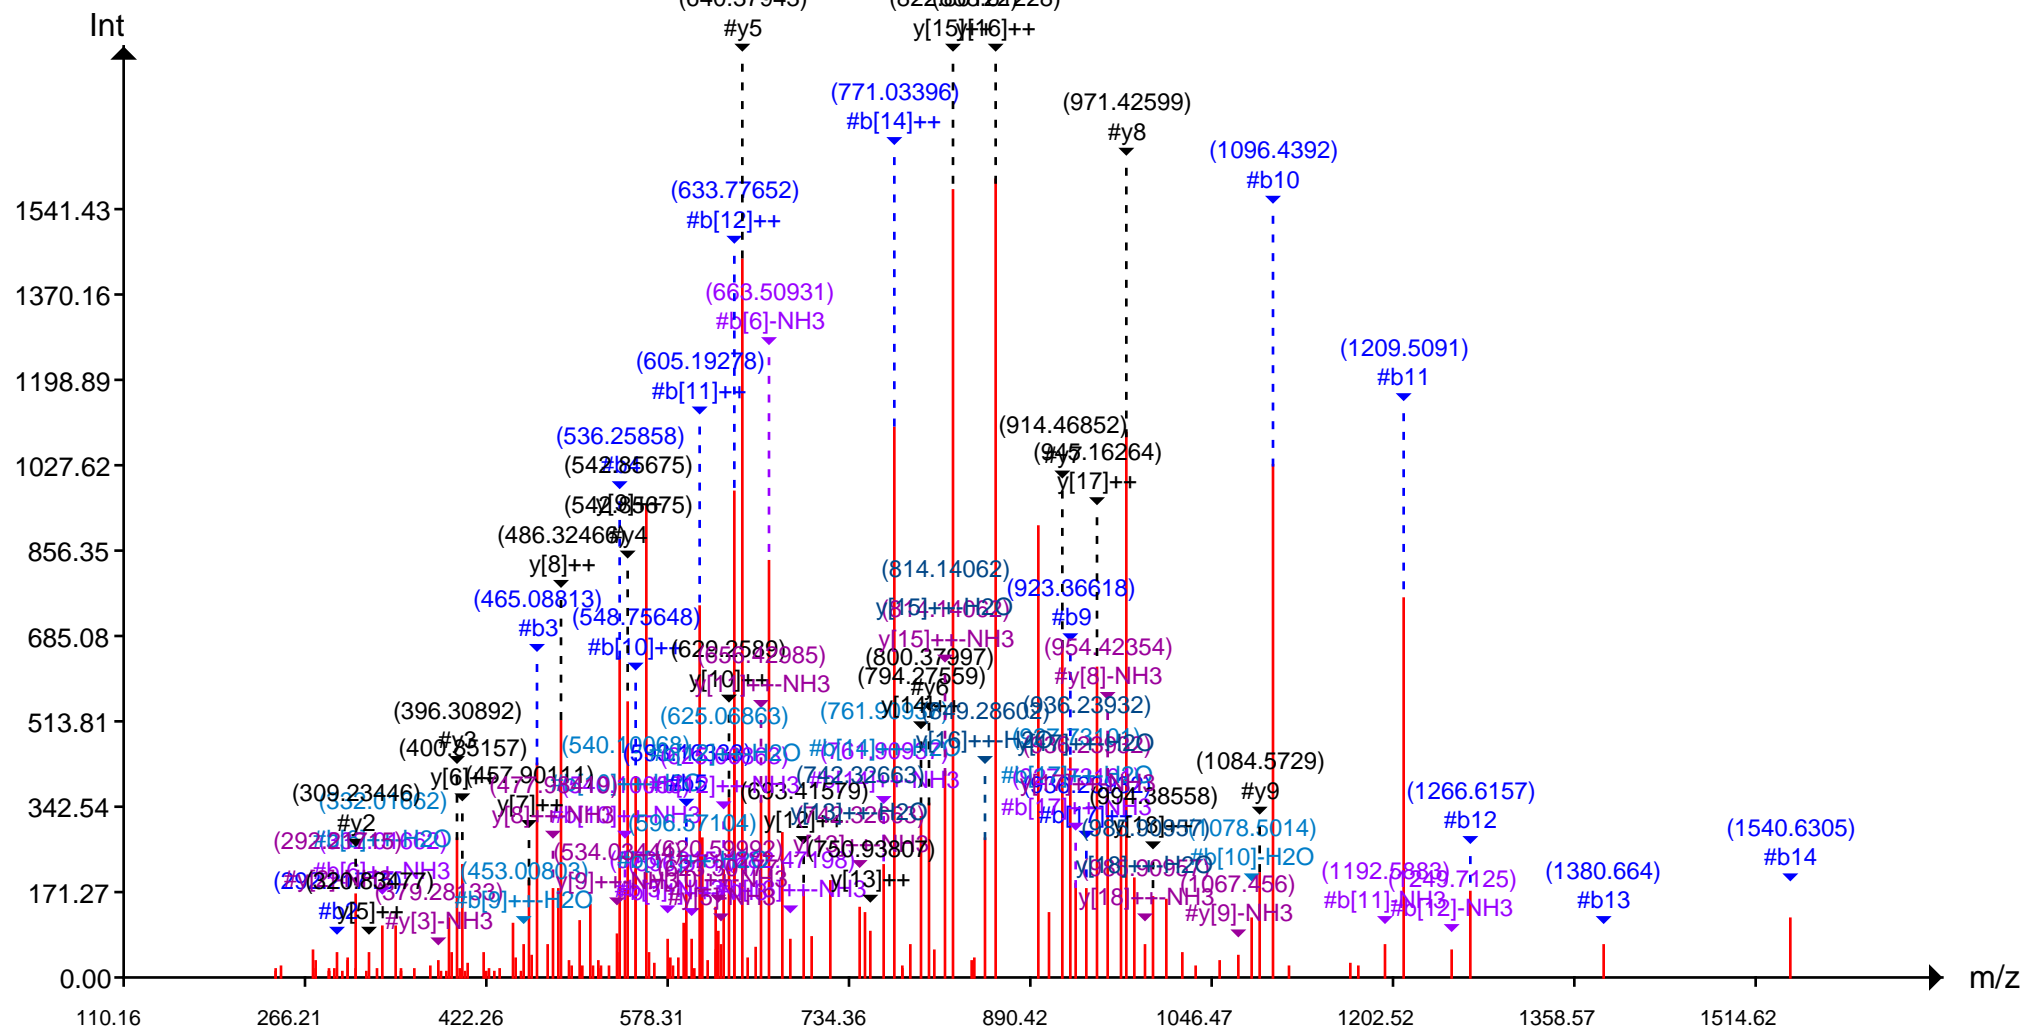

## Info

|                          |                                                          |                           |          |
|--------------------------|----------------------------------------------------------|---------------------------|----------|
| <b>Modified Sequence</b> | AcD3-FVK<AcD3K*>AGSDGAK<AcD3K*>IGNC<Cmm*>PFSQR<C13>-COOH | <b>Ion score</b>          | 81.68    |
| <b>Protein</b>           | Q9Z1Q5                                                   | <b>Confidence level</b>   | 99.00%   |
| <b>Precursor m/z</b>     | 727.37893                                                | <b>Identity Threshold</b> | 48.03    |
| <b>Charge</b>            | 3+                                                       | <b>Mass error</b>         | 0.001177 |

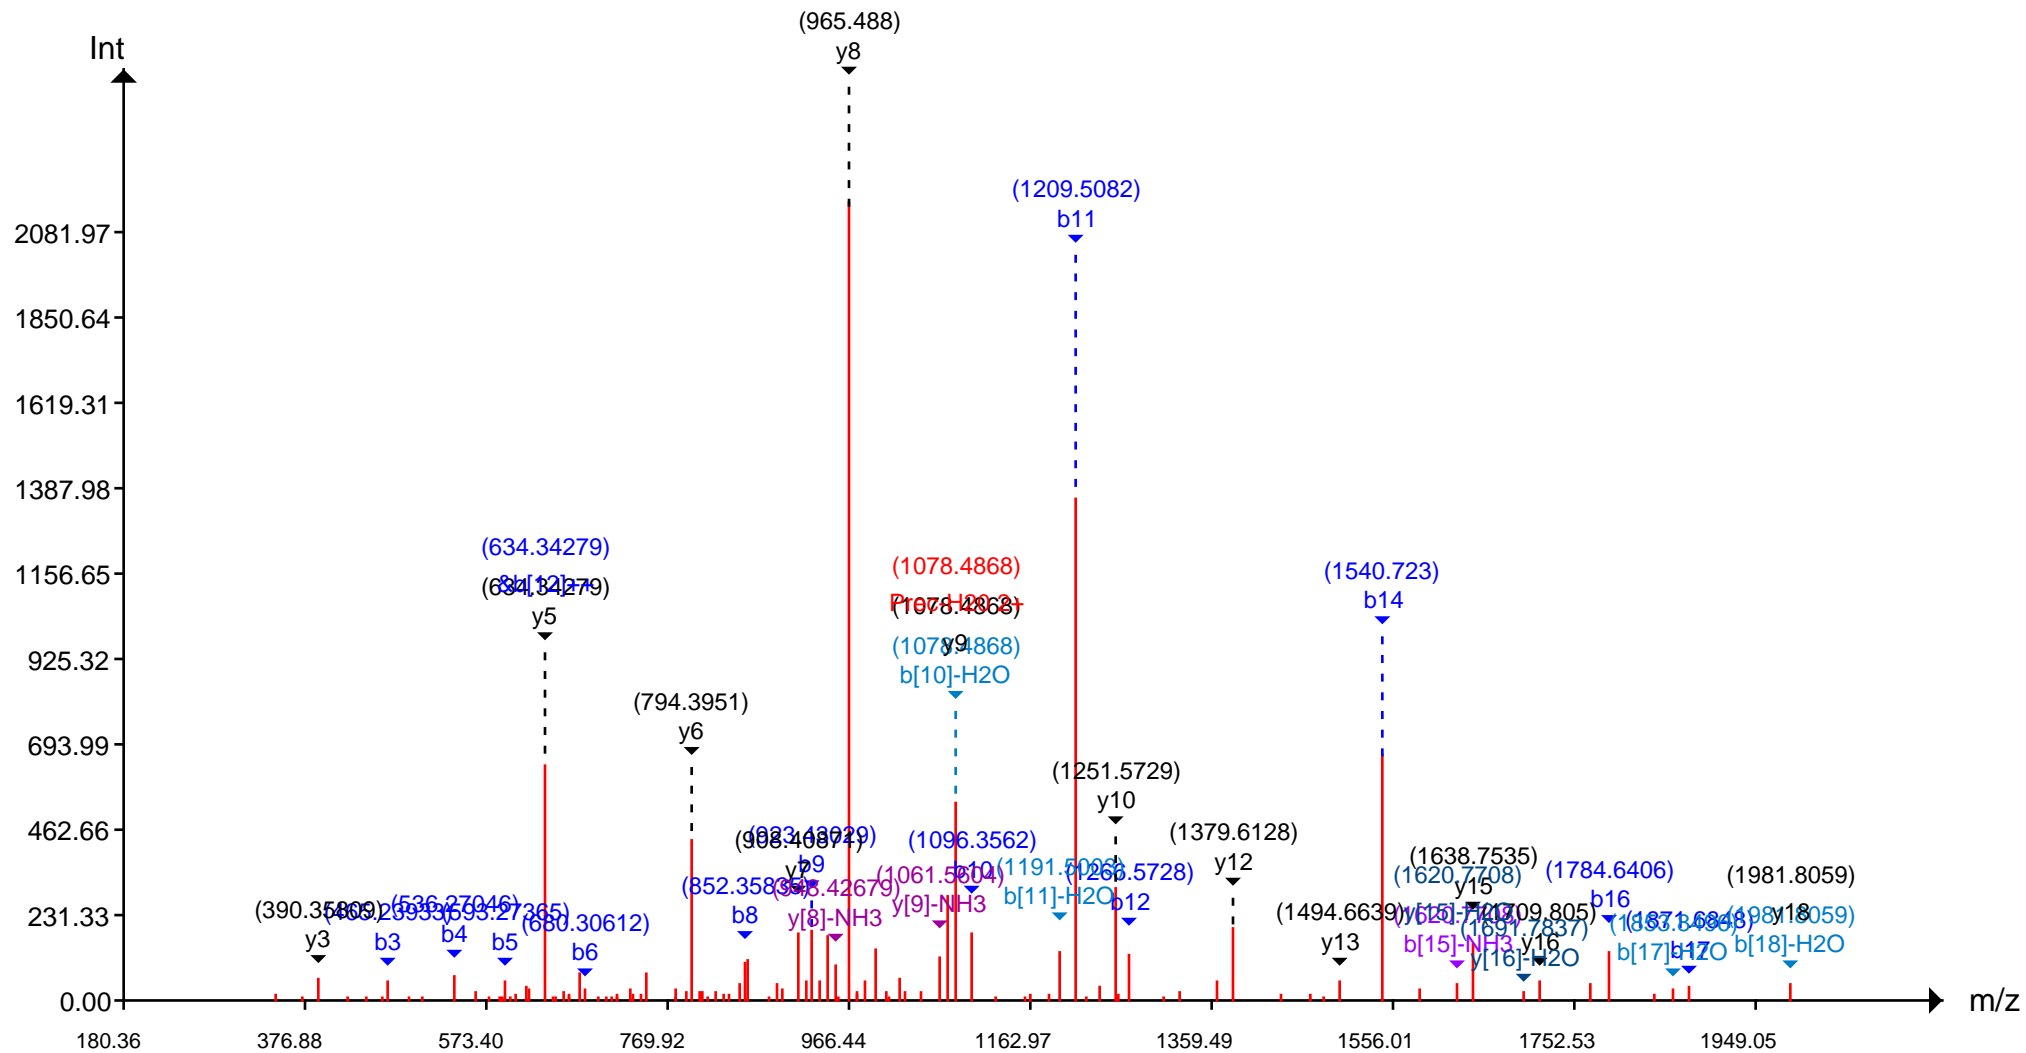

## Info

|                          |                                                     |                           |          |
|--------------------------|-----------------------------------------------------|---------------------------|----------|
| <b>Modified Sequence</b> | AcD3-FVK<AcD3K*>AGSDGAK<AcD3K*>IGNC<Cmm*>PFSQR-COOH | <b>Ion score</b>          | 116.66   |
| <b>Protein</b>           | Q9Z1Q5                                              | <b>Confidence level</b>   | 99.00%   |
| <b>Precursor m/z</b>     | 1087.5556                                           | <b>Identity Threshold</b> | 47.90    |
| <b>Charge</b>            | 2+                                                  | <b>Mass error</b>         | 0.003005 |

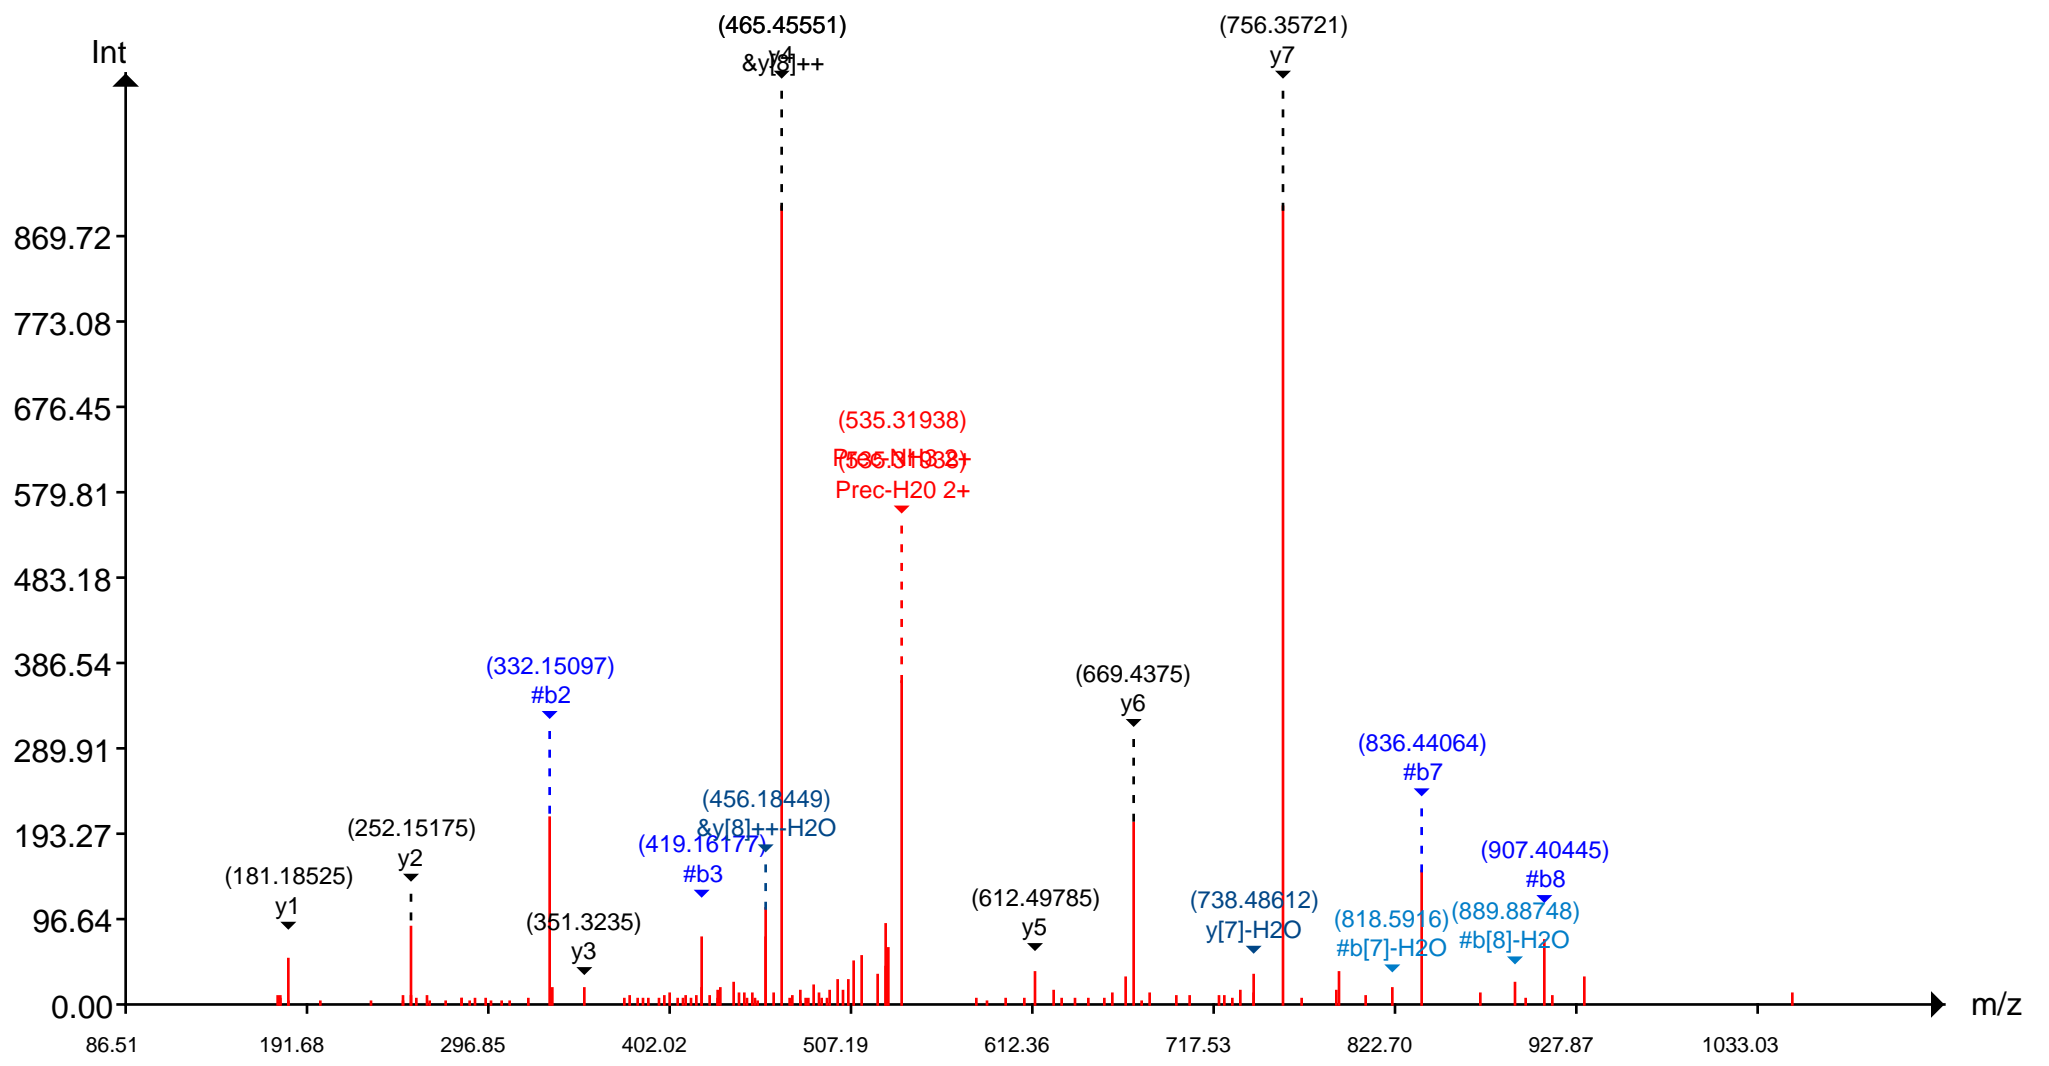

Info

|                          |                                        |                           |         |
|--------------------------|----------------------------------------|---------------------------|---------|
| <b>Modified Sequence</b> | AcD3-IK<AcD3K*>SGM<Mox*>NVAR<C13>-COOH | <b>Ion score</b>          | 60.13   |
| <b>Protein</b>           | P52480                                 | <b>Confidence level</b>   | 99.00%  |
| <b>Precursor m/z</b>     | 544.31121                              | <b>Identity Threshold</b> | 47.07   |
| <b>Charge</b>            | 2+                                     | <b>Mass error</b>         | 9.04E-4 |

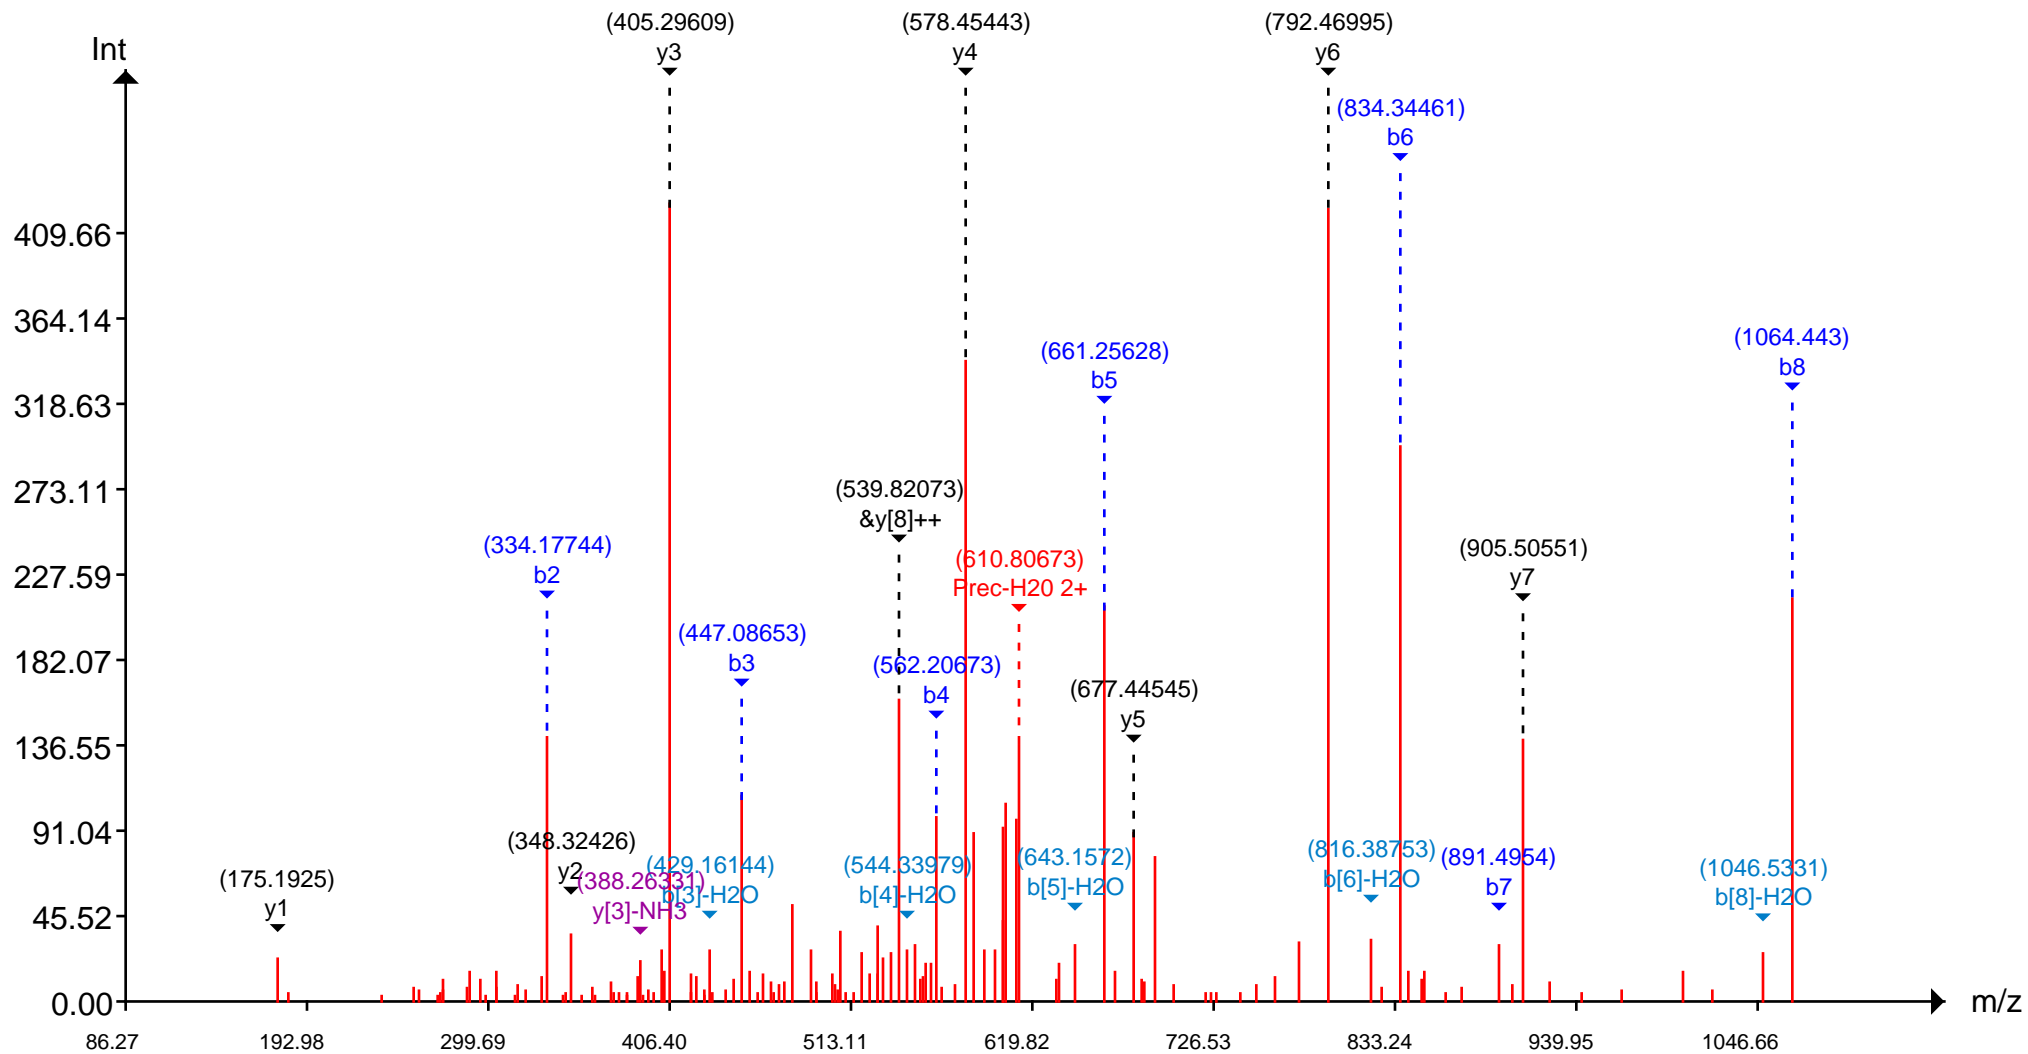

## Info

|                          |                                             |                           |          |
|--------------------------|---------------------------------------------|---------------------------|----------|
| <b>Modified Sequence</b> | AcD3-DK<AcD3K*>LDVK<AcD3K*>GK<AcD3K*>R-COOH | <b>Ion score</b>          | 68.24    |
| <b>Protein</b>           | P09411                                      | <b>Confidence level</b>   | 99.00%   |
| <b>Precursor m/z</b>     | 619.87894                                   | <b>Identity Threshold</b> | 43.15    |
| <b>Charge</b>            | 2+                                          | <b>Mass error</b>         | 0.001354 |

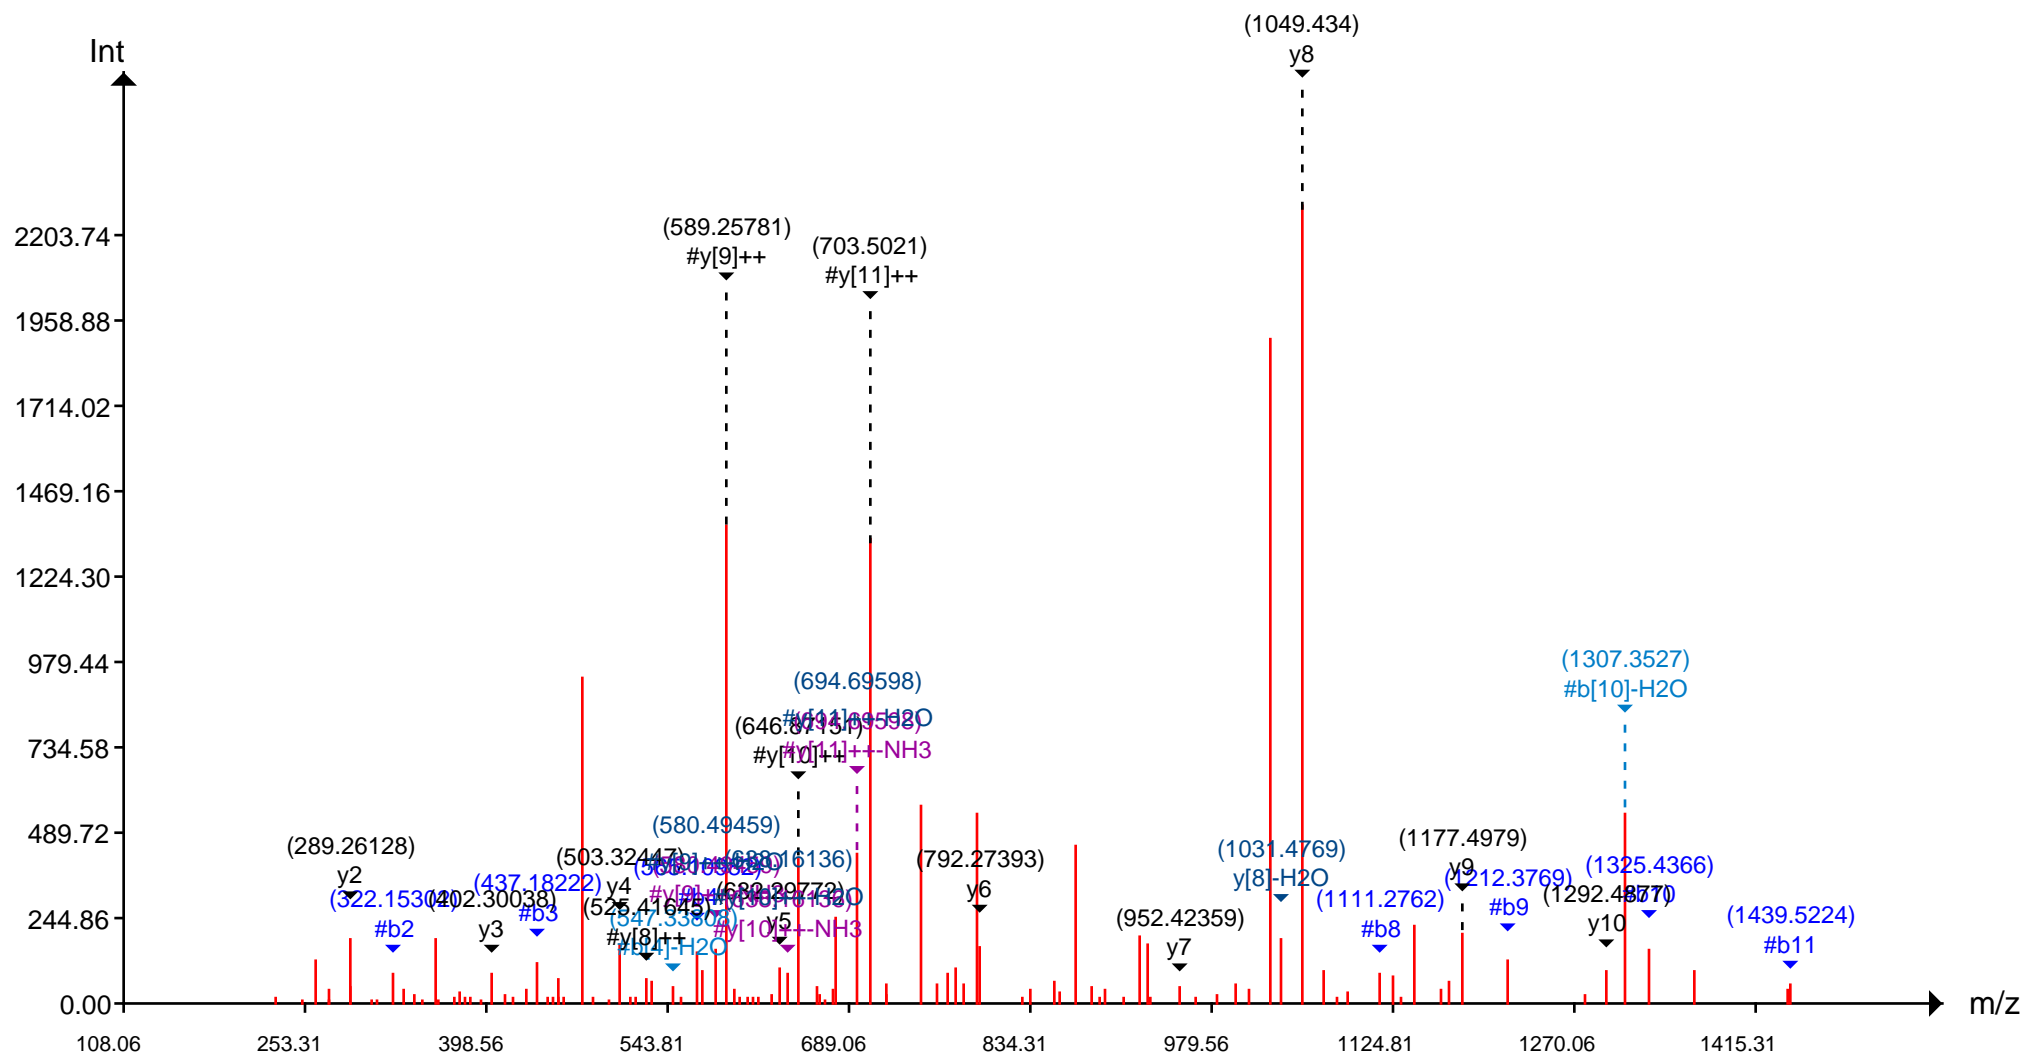

## Info

|                          |                                    |                           |          |
|--------------------------|------------------------------------|---------------------------|----------|
| <b>Modified Sequence</b> | AcD3-YLDQPC<Cmm*>C<Cmm*>ETINR-COOH | <b>Ion score</b>          | 48.69    |
| <b>Protein</b>           | Q61598                             | <b>Confidence level</b>   | 99.00%   |
| <b>Precursor m/z</b>     | 807.36085                          | <b>Identity Threshold</b> | 43.52    |
| <b>Charge</b>            | 2+                                 | <b>Mass error</b>         | 0.001856 |

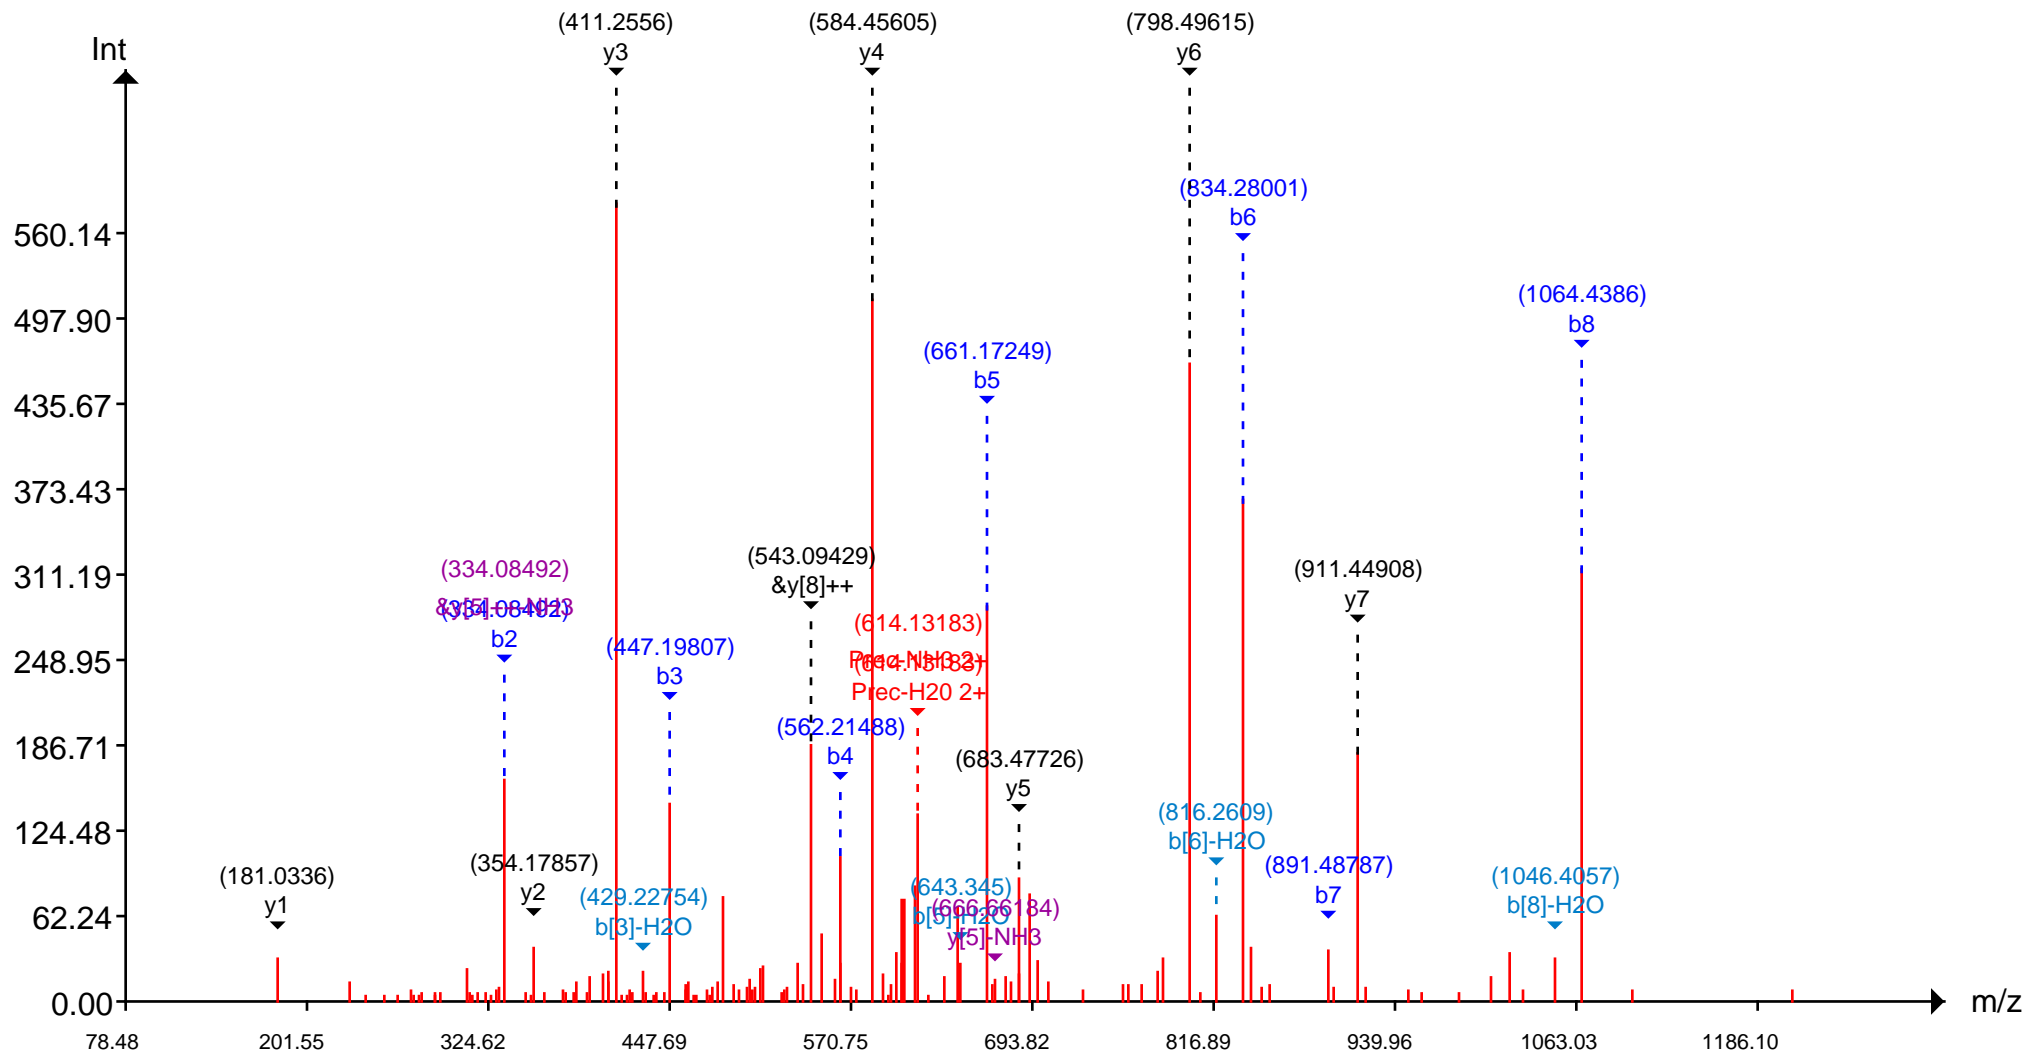

## Info

|                          |                                                  |                           |         |
|--------------------------|--------------------------------------------------|---------------------------|---------|
| <b>Modified Sequence</b> | AcD3-DK<AcD3K*>LDVK<AcD3K*>GK<AcD3K*>R<C13>-COOH | <b>Ion score</b>          | 55.62   |
| <b>Protein</b>           | P09411                                           | <b>Confidence level</b>   | 99.00%  |
| <b>Precursor m/z</b>     | 622.8887                                         | <b>Identity Threshold</b> | 42.35   |
| <b>Charge</b>            | 2+                                               | <b>Mass error</b>         | 7.33E-4 |

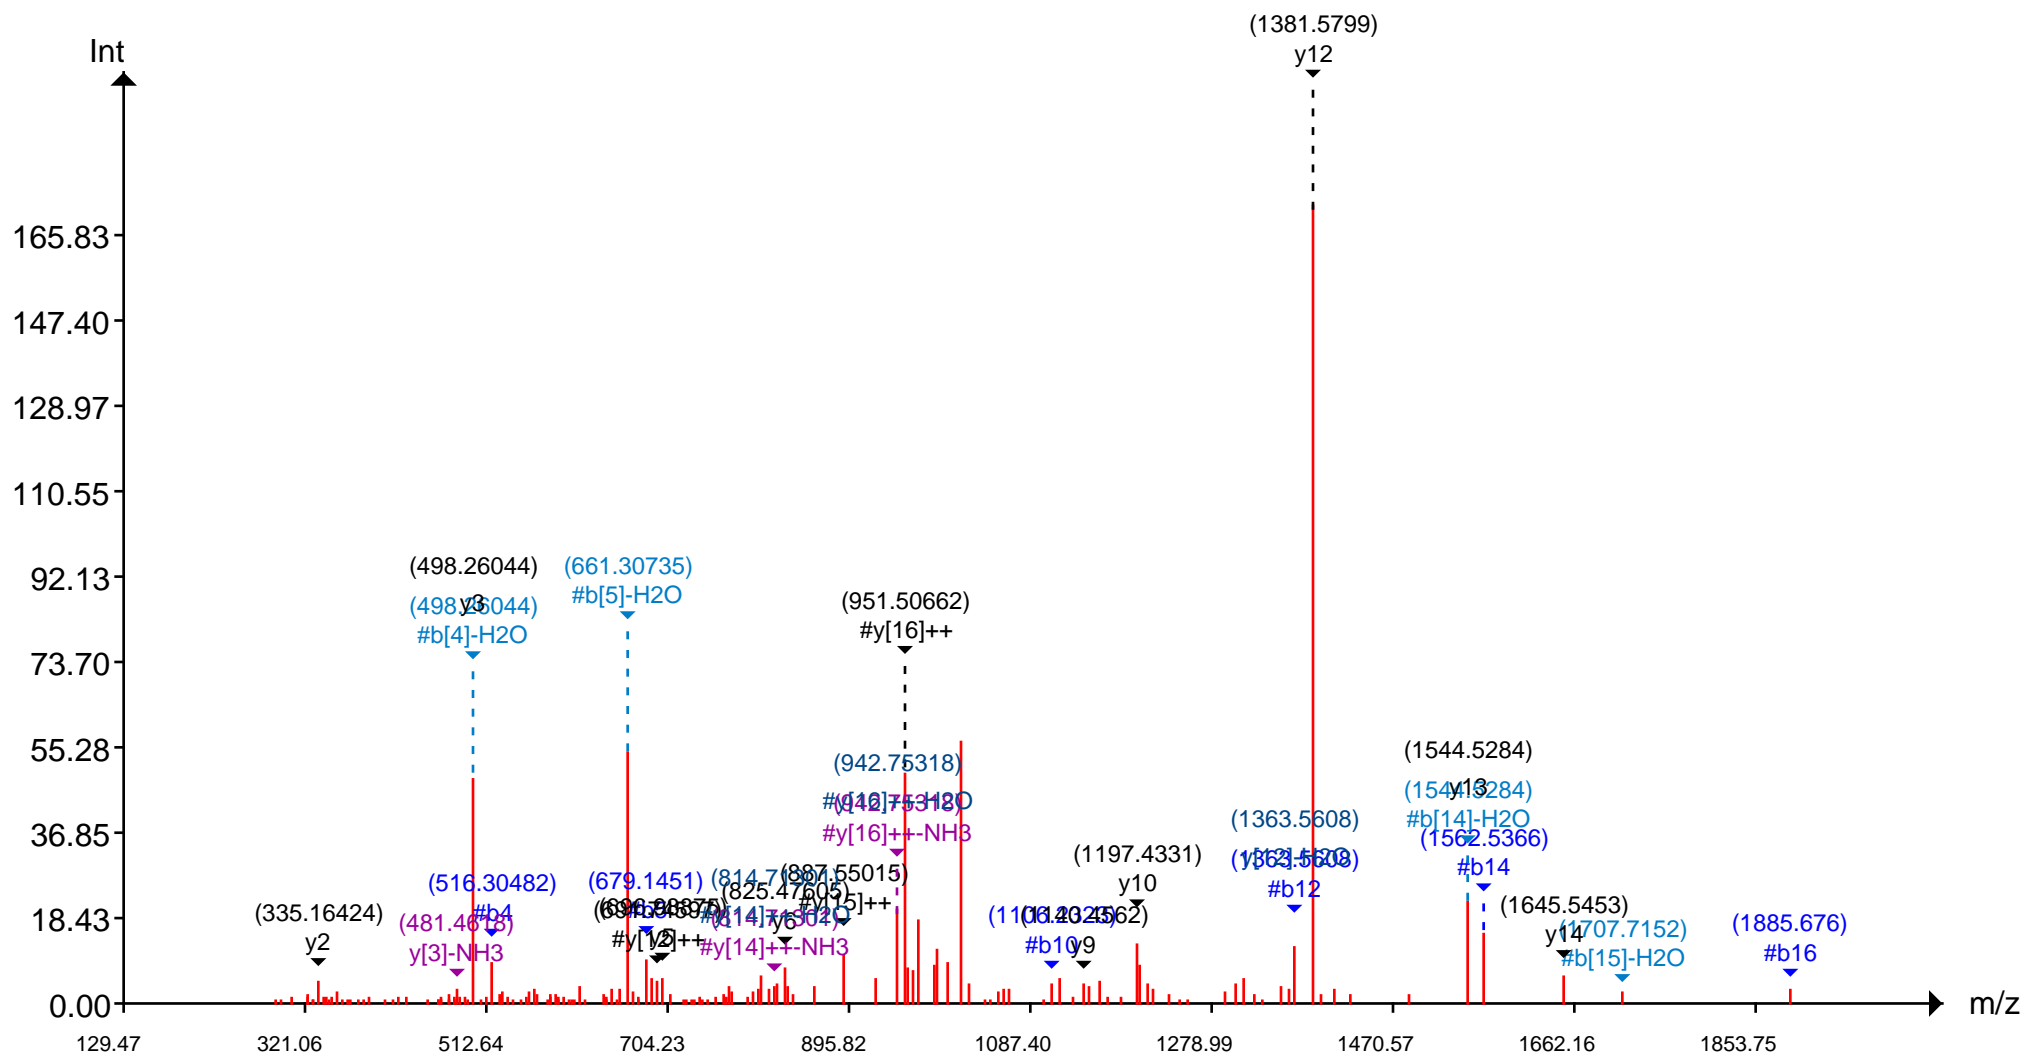

## Info

**Modified Sequence** AcD3-IQQTYPGGEEQAQYC<Cmm\*>R-COOH

**Ion score** 53.93

**Protein** Q9WU78

**Confidence level** 99.00%

**Precursor m/z** 1030.4642

**Identity Threshold** 43.56

**Charge** 2+

**Mass error** -5.81E-4

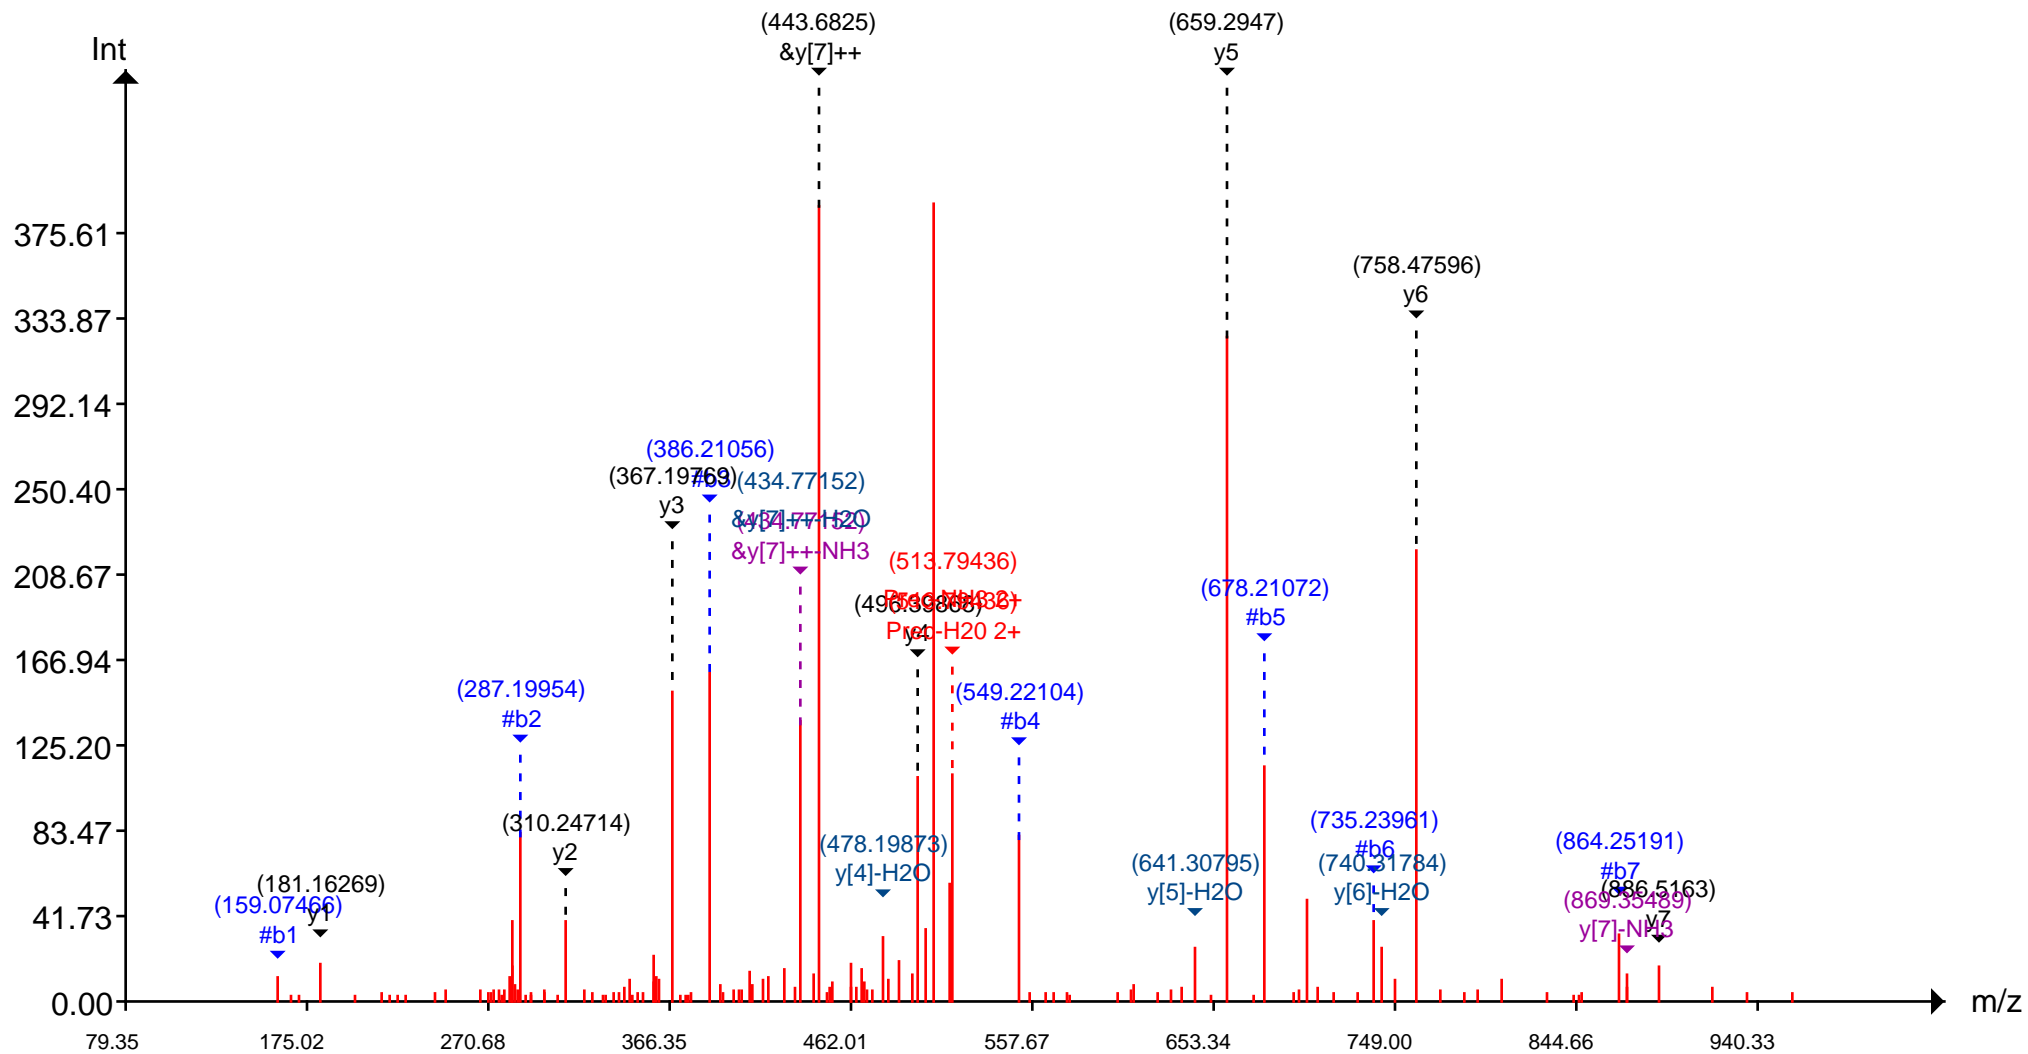

## Info

|                          |                                |                           |         |
|--------------------------|--------------------------------|---------------------------|---------|
| <b>Modified Sequence</b> | AcD3-IQVYEGER<C13>-COOH        | <b>Ion score</b>          | 52.88   |
| <b>Protein</b>           | Q61696, P17879, P16627, P63017 | <b>Confidence level</b>   | 99.00%  |
| <b>Precursor m/z</b>     | 522.77847                      | <b>Identity Threshold</b> | 47.89   |
| <b>Charge</b>            | 2+                             | <b>Mass error</b>         | 1.67E-4 |



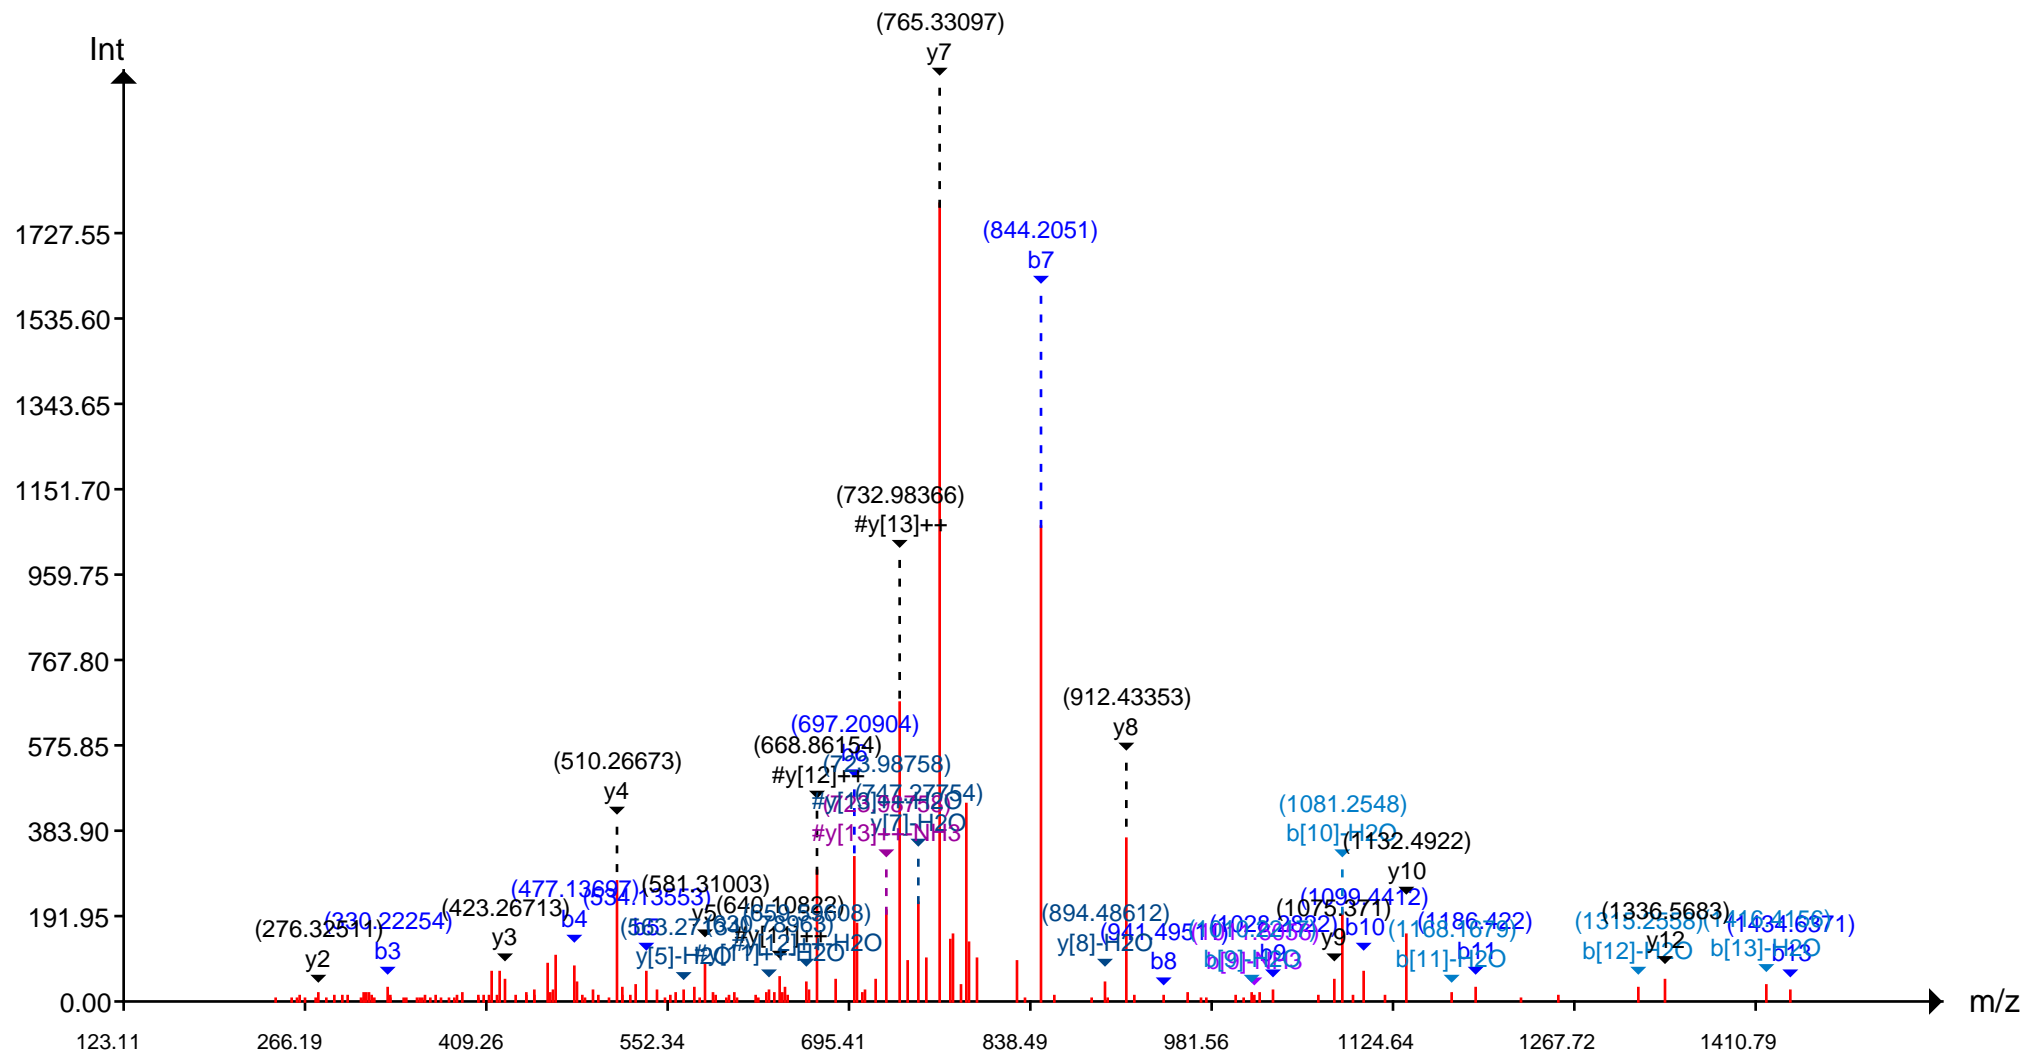

## Info

**Modified Sequence** AcD3-VQGM<Mox\*>GYM<Mox\*>PSASM<Mox\*>TR-COOH

**Ion score** 75.29

**Protein** Q62433

**Confidence level** 99.00%

**Precursor m/z** 804.84957

**Identity Threshold** 41.84

**Charge** 2+

**Mass error** 0.002459

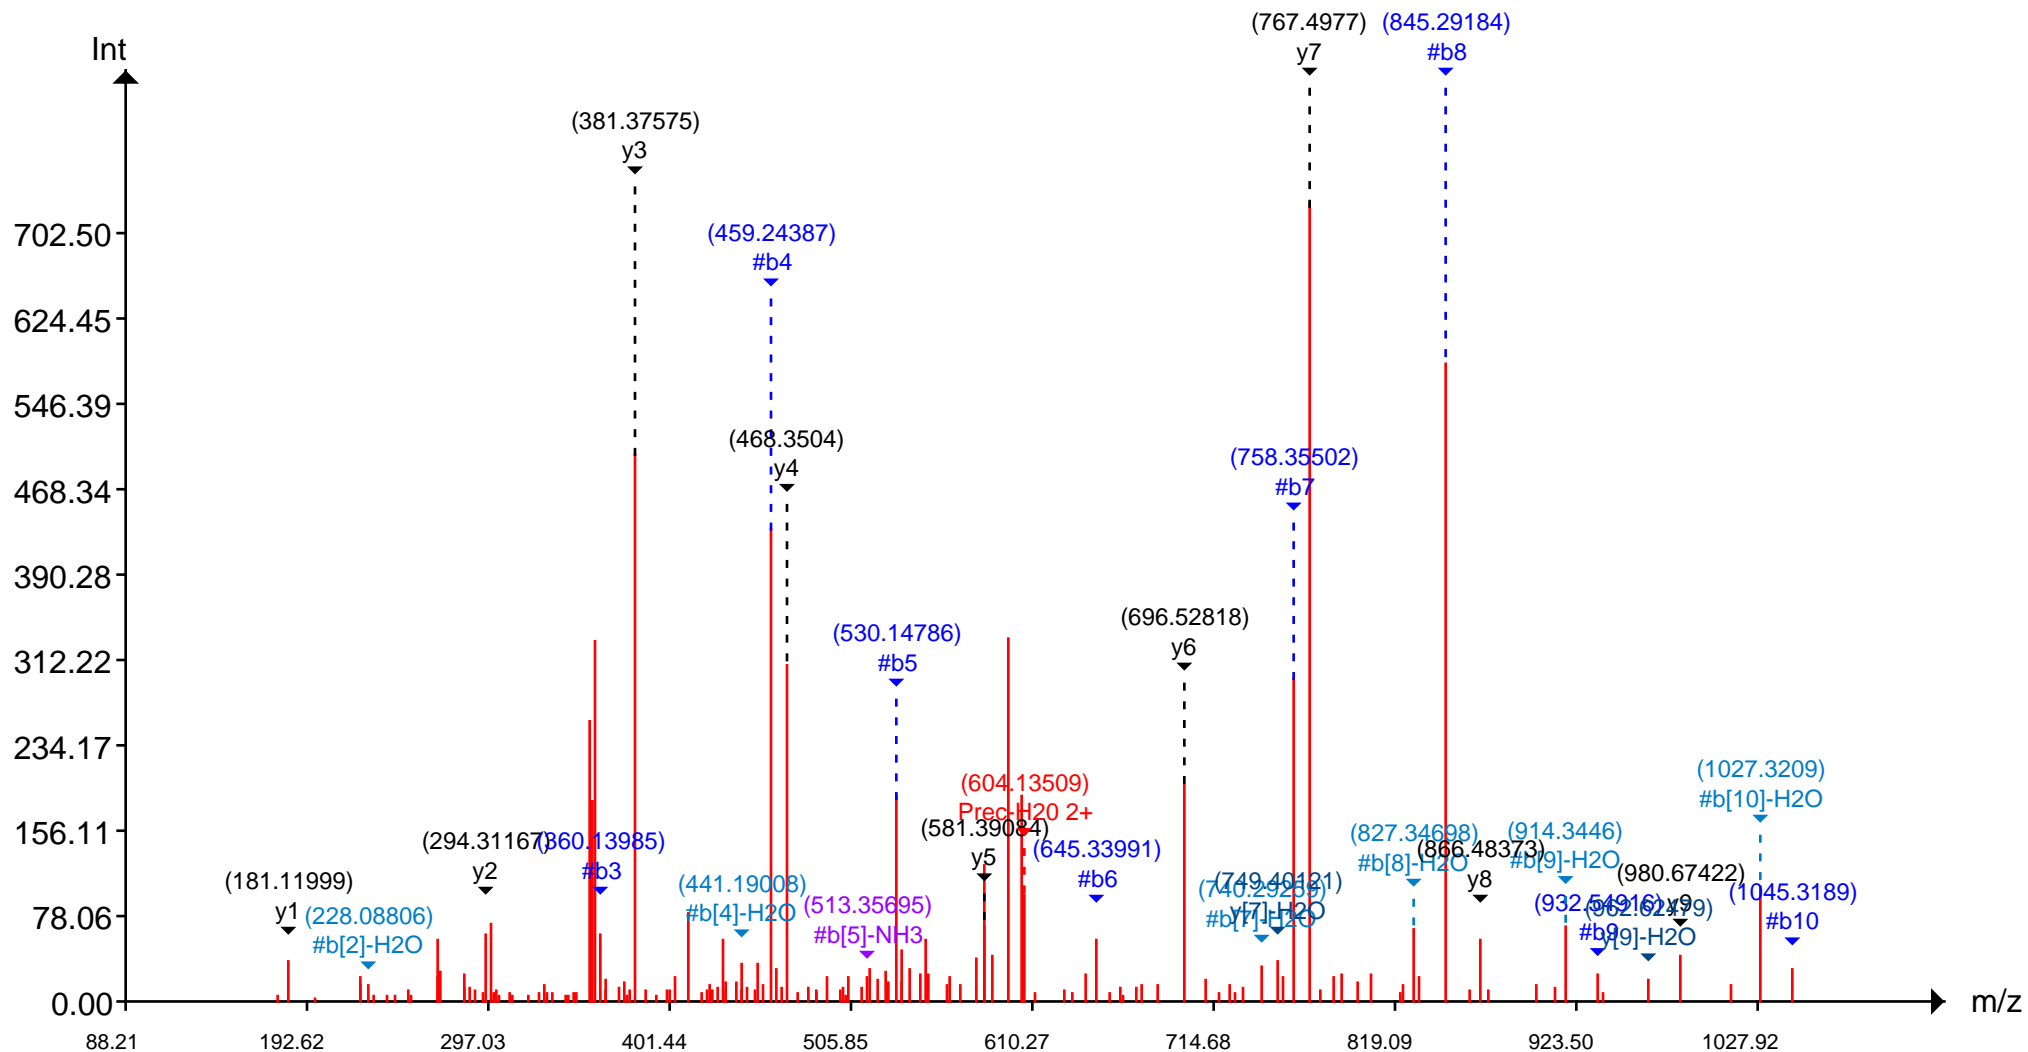

## Info

|                          |                            |                           |         |
|--------------------------|----------------------------|---------------------------|---------|
| <b>Modified Sequence</b> | AcD3-SLNVADLSSLR<C13>-COOH | <b>Ion score</b>          | 57.47   |
| <b>Protein</b>           | P97372                     | <b>Confidence level</b>   | 99.00%  |
| <b>Precursor m/z</b>     | 613.35003                  | <b>Identity Threshold</b> | 46.75   |
| <b>Charge</b>            | 2+                         | <b>Mass error</b>         | 6.48E-4 |

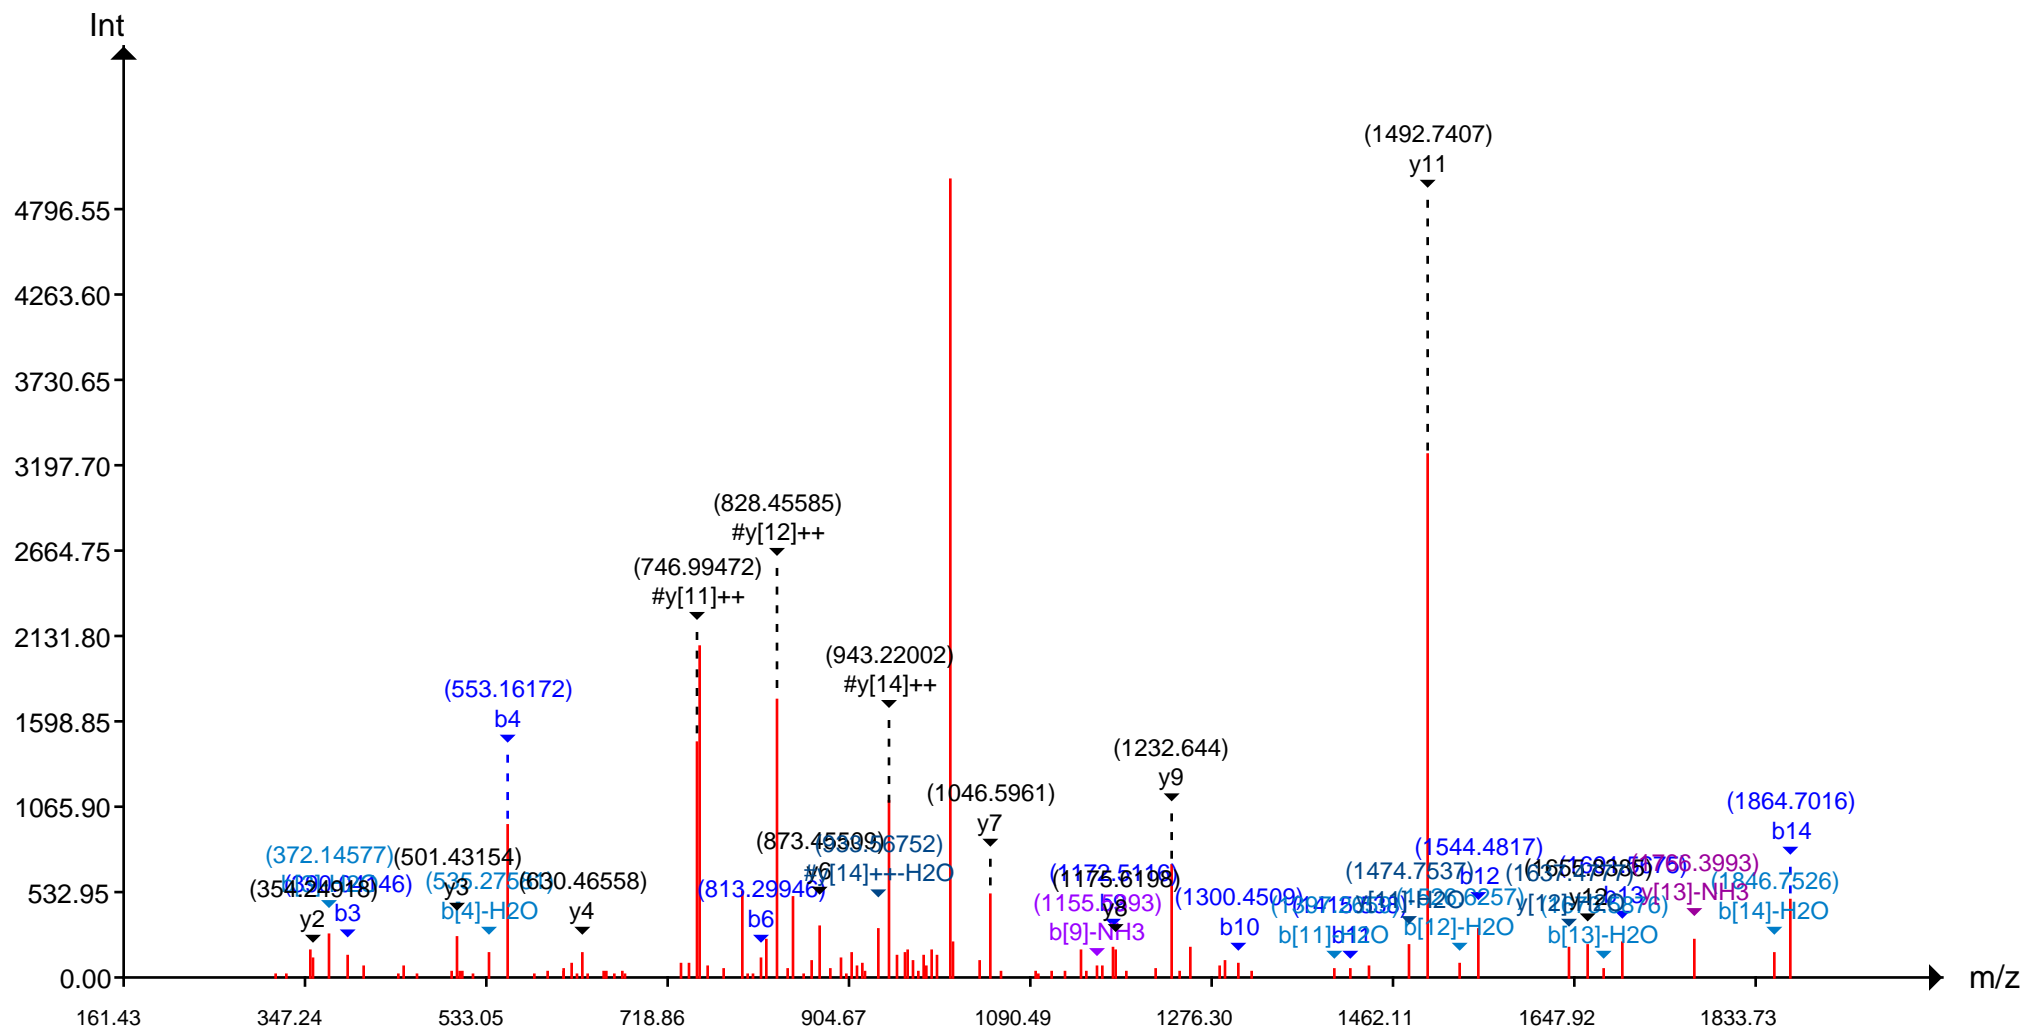

## Info

|                          |                                                |                           |          |
|--------------------------|------------------------------------------------|---------------------------|----------|
| <b>Modified Sequence</b> | AcD3-DTQYPYGEK<AcD3K*>QDEFK<AcD3K*>R<C13>-COOH | <b>Ion score</b>          | 57.52    |
| <b>Protein</b>           | P57759                                         | <b>Confidence level</b>   | 99.00%   |
| <b>Precursor m/z</b>     | 1023.0015                                      | <b>Identity Threshold</b> | 47.34    |
| <b>Charge</b>            | 2+                                             | <b>Mass error</b>         | 0.005324 |

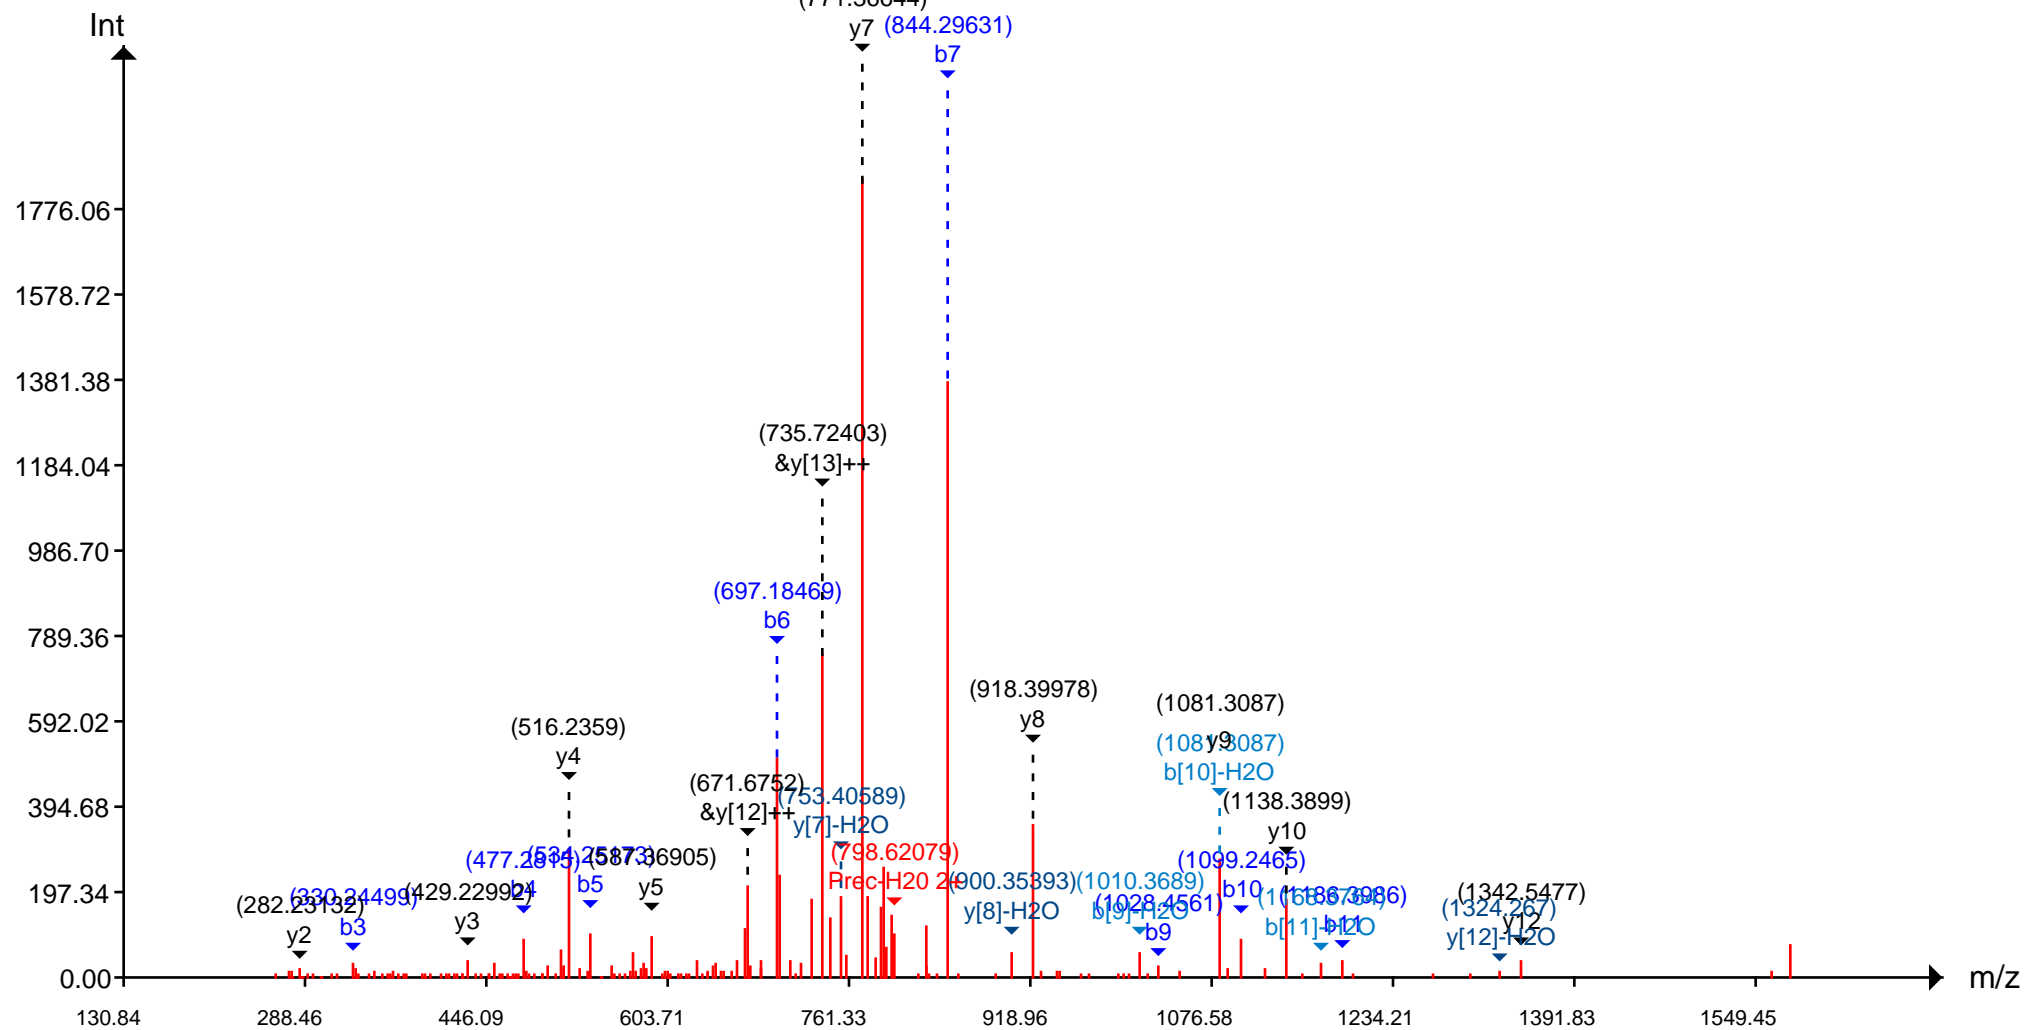

## Info

|                          |                                                 |                           |          |
|--------------------------|-------------------------------------------------|---------------------------|----------|
| <b>Modified Sequence</b> | AcD3-VQGM<Mox*>GYM<Mox*>PSASM<Mox*>TR<C13>-COOH | <b>Ion score</b>          | 62.49    |
| <b>Protein</b>           | Q62433                                          | <b>Confidence level</b>   | 99.00%   |
| <b>Precursor m/z</b>     | 807.85917                                       | <b>Identity Threshold</b> | 43.16    |
| <b>Charge</b>            | 2+                                              | <b>Mass error</b>         | 0.001517 |

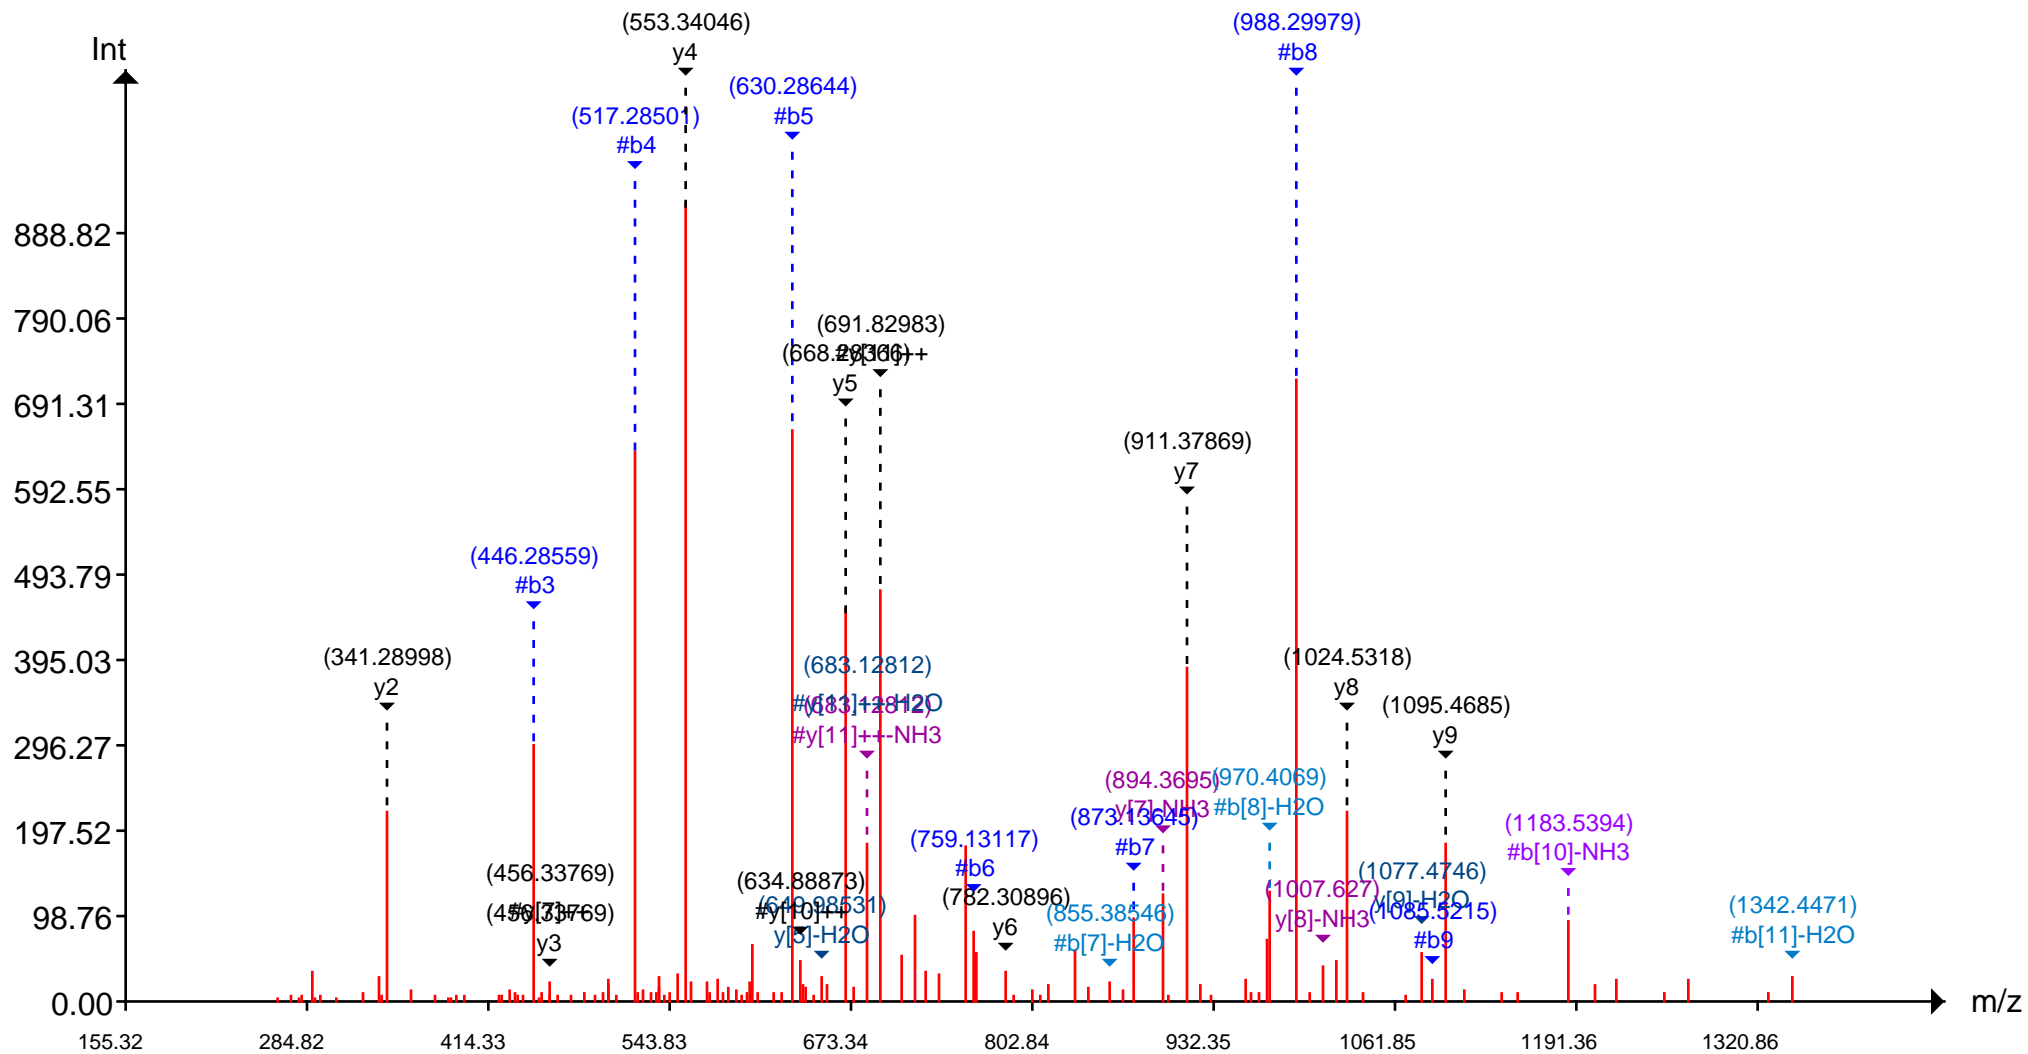

## Info

**Modified Sequence** AcD3-INK<AcD3K\*>ALENDPDC<Cmm\*>R<C13>-COOH

**Ion score** 66.18

**Protein** Q61233, Q99K51

**Confidence level** 99.00%

**Precursor m/z** 770.88617

**Identity Threshold** 47.68

**Charge** 2+

**Mass error** 0.001257

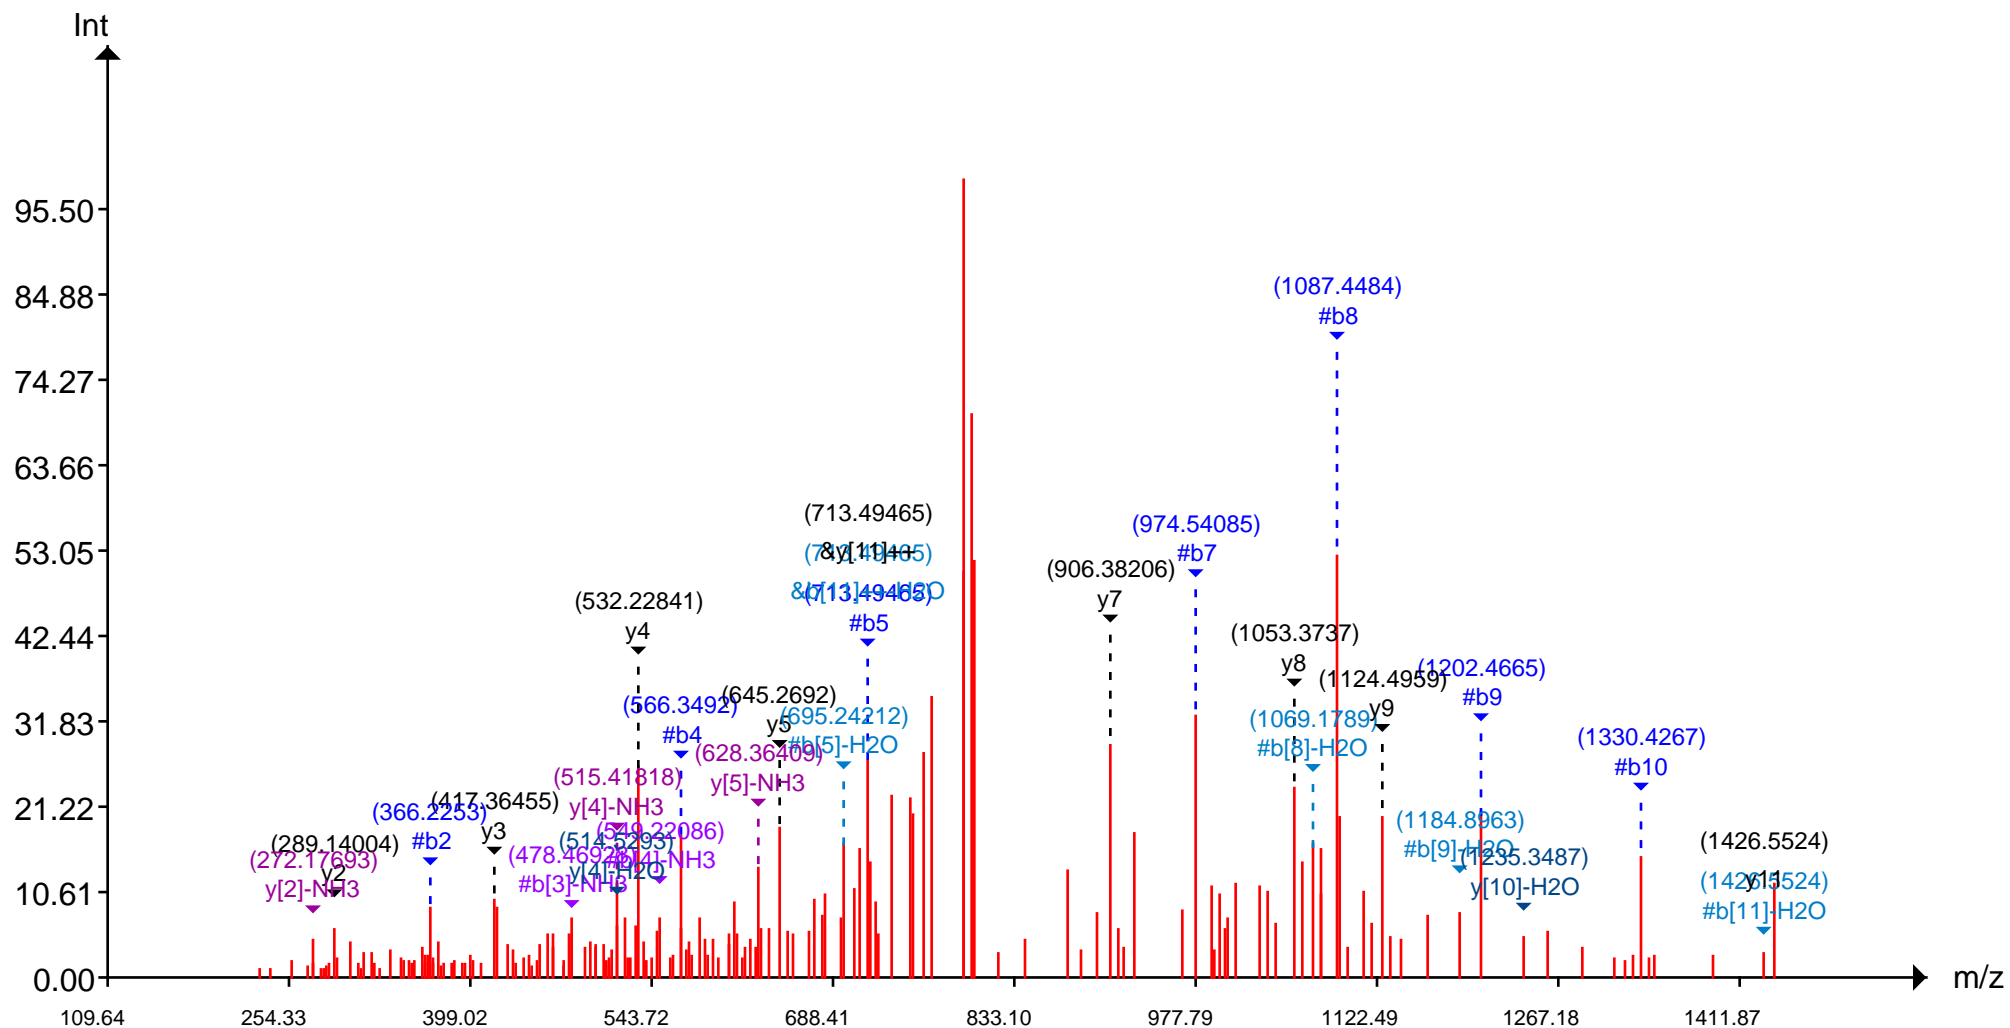

## Info

|                          |                                      |                           |          |
|--------------------------|--------------------------------------|---------------------------|----------|
| <b>Modified Sequence</b> | AcD3-FK<AcD3K*>EAFNM<Mox*>IDQNR-COOH | <b>Ion score</b>          | 48.22    |
| <b>Protein</b>           | Q3THE2, Q9CQ19                       | <b>Confidence level</b>   | 99.00%   |
| <b>Precursor m/z</b>     | 809.89459                            | <b>Identity Threshold</b> | 46.99    |
| <b>Charge</b>            | 2+                                   | <b>Mass error</b>         | 0.001847 |

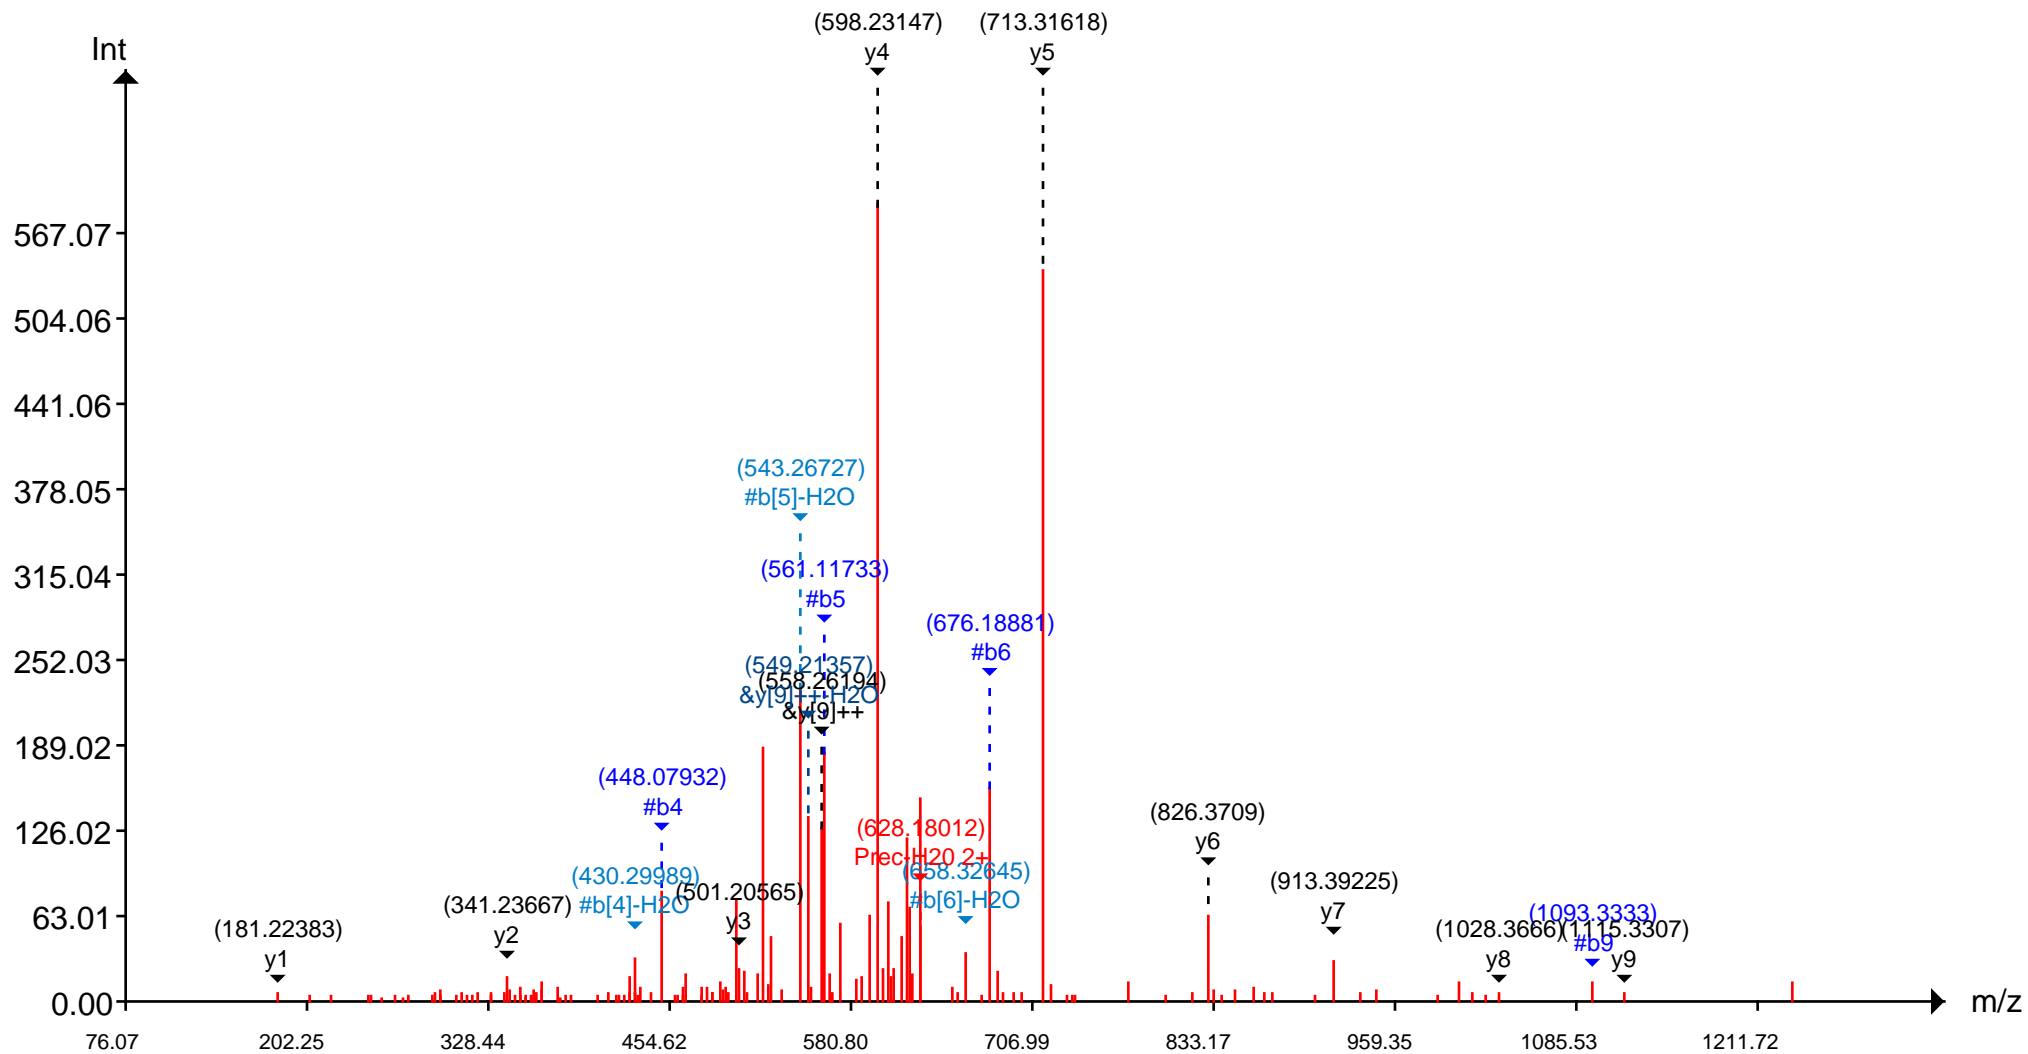

## Info

|                          |                                       |                           |         |
|--------------------------|---------------------------------------|---------------------------|---------|
| <b>Modified Sequence</b> | AcD3-ISDSLDPC<Cmm*>C<Cmm*>R<C13>-COOH | <b>Ion score</b>          | 59.73   |
| <b>Protein</b>           | Q61753                                | <b>Confidence level</b>   | 99.00%  |
| <b>Precursor m/z</b>     | 637.28832                             | <b>Identity Threshold</b> | 43.98   |
| <b>Charge</b>            | 2+                                    | <b>Mass error</b>         | 7.48E-4 |

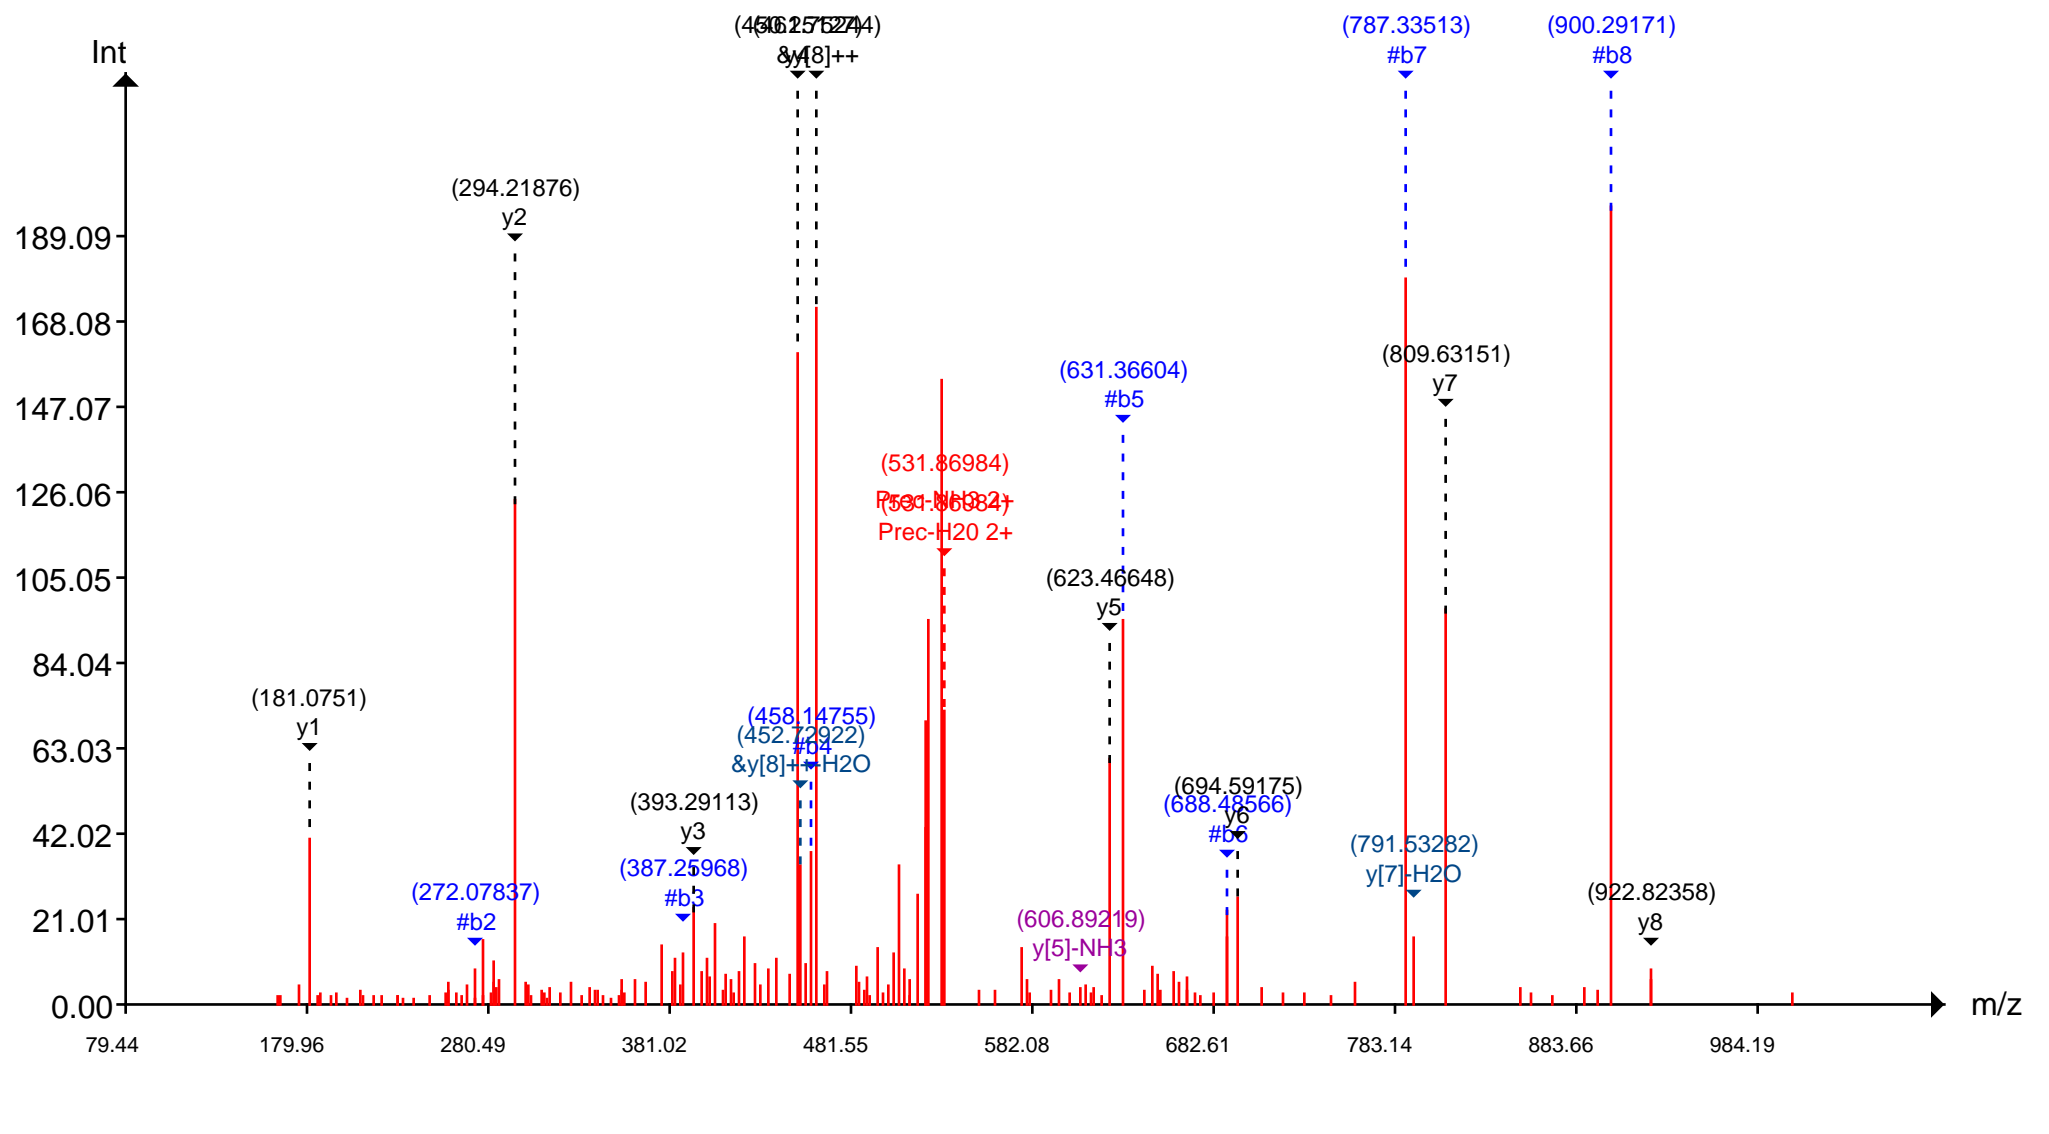

| Info                     |                                  |                           |           |
|--------------------------|----------------------------------|---------------------------|-----------|
| <b>Modified Sequence</b> | AcD3-IIDAK<AcD3K*>GVLR<C13>-COOH | <b>Ion score</b>          | 59.24     |
| <b>Protein</b>           | Q61171                           | <b>Confidence level</b>   | 99.00%    |
| <b>Precursor m/z</b>     | 540.85249                        | <b>Identity Threshold</b> | 39.19     |
| <b>Charge</b>            | 2+                               | <b>Mass error</b>         | -0.001253 |



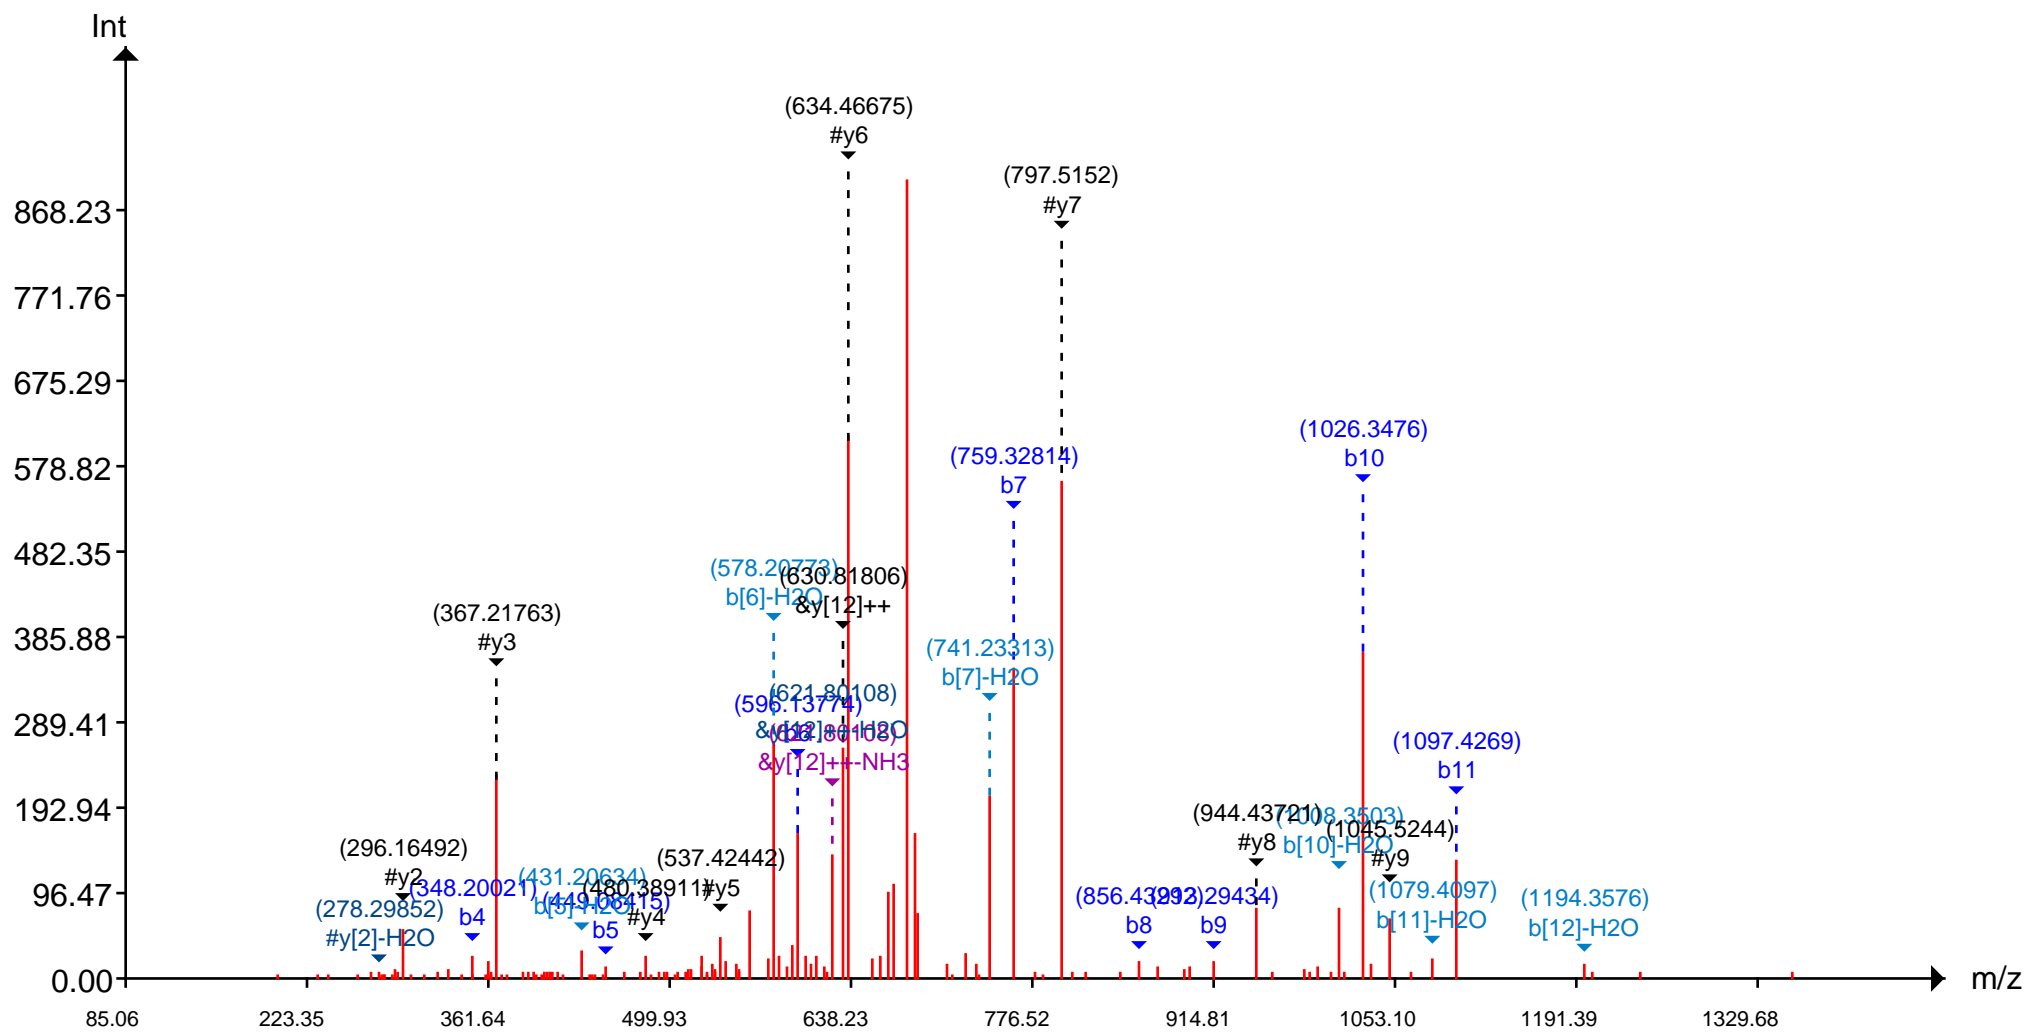

## Info

|                          |                                                |                           |         |
|--------------------------|------------------------------------------------|---------------------------|---------|
| <b>Modified Sequence</b> | AcD3-SGGTTM<Mox*>YPGIADR<C13>-COOH             | <b>Ion score</b>          | 58.84   |
| <b>Protein</b>           | P62737, P60710, P68033, P63260, P63268, P68134 | <b>Confidence level</b>   | 99.00%  |
| <b>Precursor m/z</b>     | 696.83363                                      | <b>Identity Threshold</b> | 46.52   |
| <b>Charge</b>            | 2+                                             | <b>Mass error</b>         | 1.05E-4 |

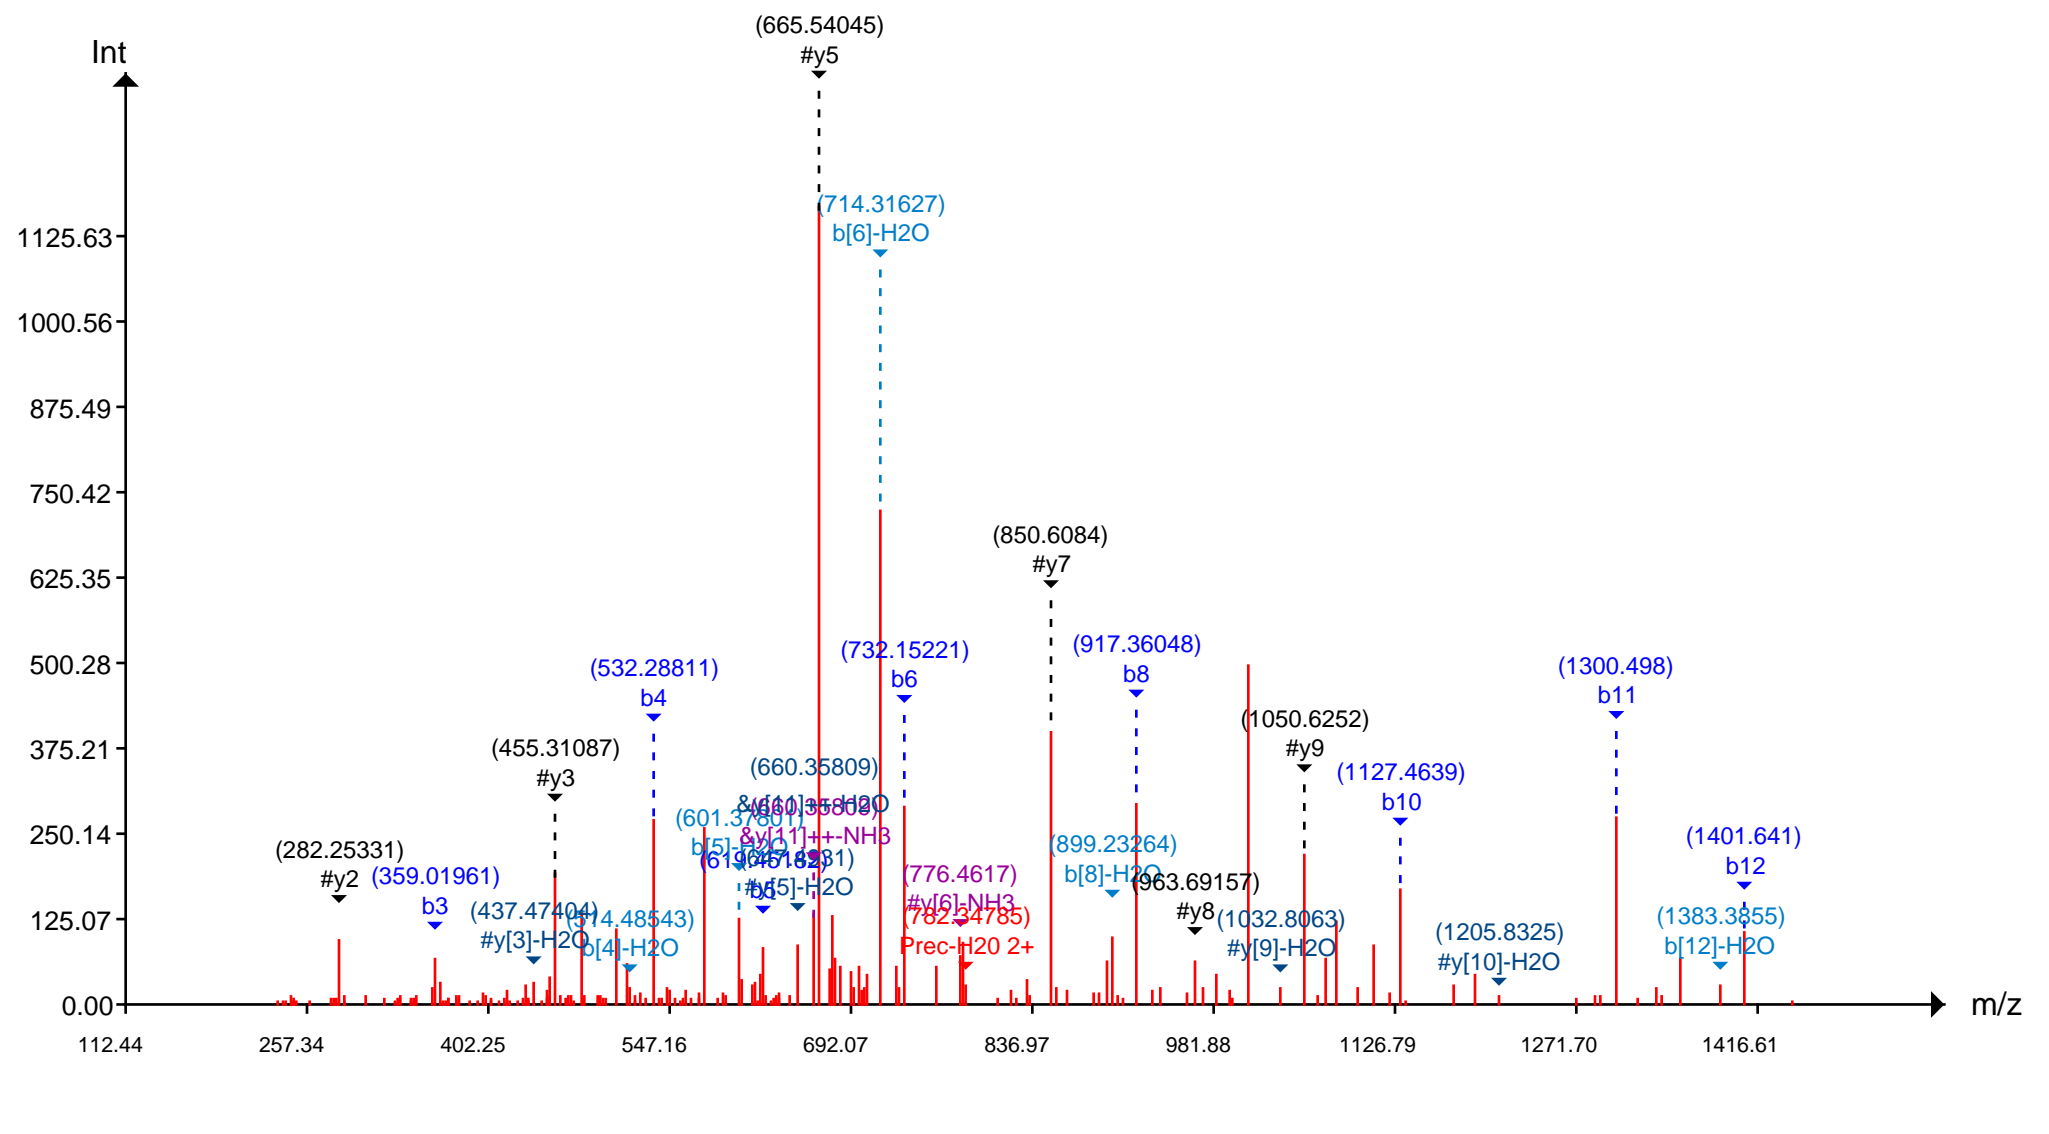

| Info                     |                                              |                           |          |
|--------------------------|----------------------------------------------|---------------------------|----------|
| <b>Modified Sequence</b> | AcD3-AELK<AcD3K*>SLGQPIK<AcD3K*>TR<C13>-COOH | <b>Ion score</b>          | 44.74    |
| <b>Protein</b>           | Q61316                                       | <b>Confidence level</b>   | 99.00%   |
| <b>Precursor m/z</b>     | 791.48527                                    | <b>Identity Threshold</b> | 41.45    |
| <b>Charge</b>            | 2+                                           | <b>Mass error</b>         | 0.001673 |

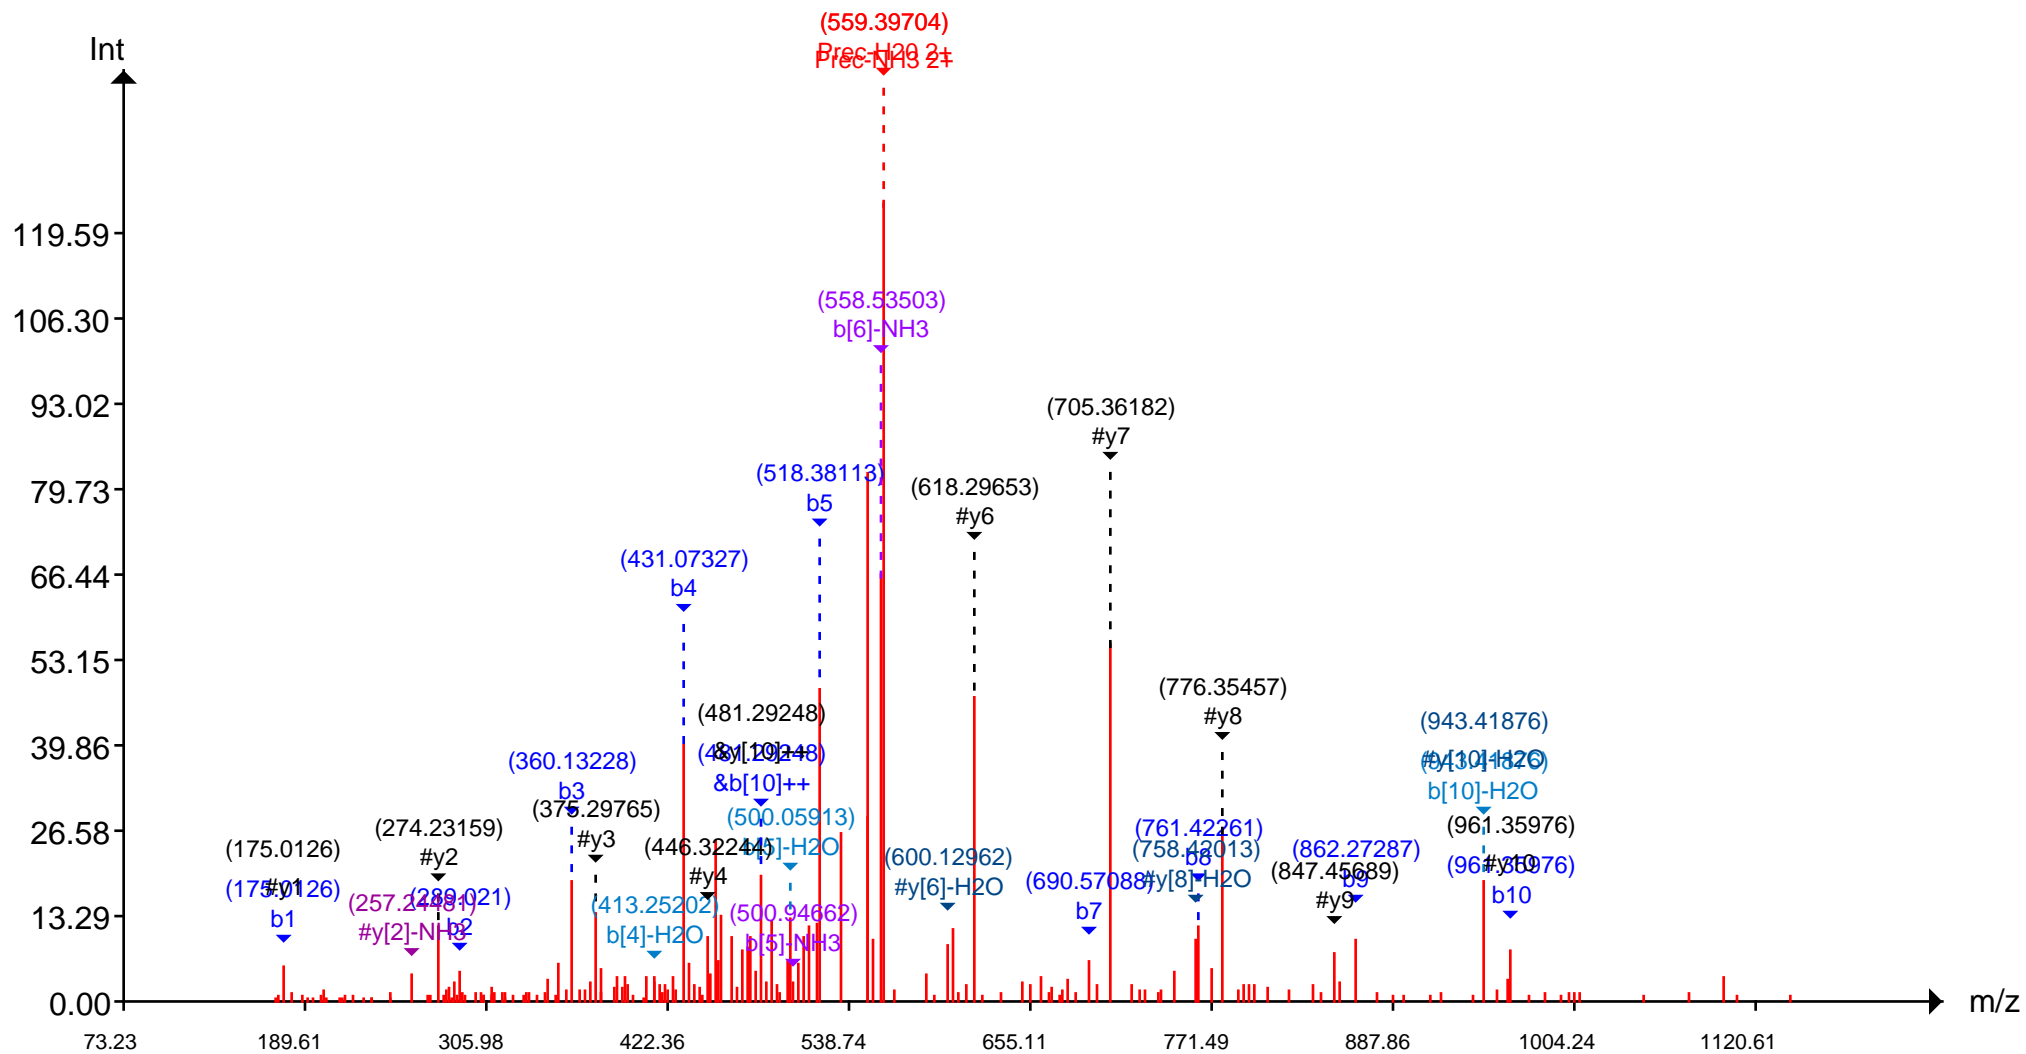

## Info

|                          |                       |                           |         |
|--------------------------|-----------------------|---------------------------|---------|
| <b>Modified Sequence</b> | AcD3-ENAASGDATVR-COOH | <b>Ion score</b>          | 63.03   |
| <b>Protein</b>           | Q9CSU0                | <b>Confidence level</b>   | 99.00%  |
| <b>Precursor m/z</b>     | 568.2748              | <b>Identity Threshold</b> | 46.56   |
| <b>Charge</b>            | 2+                    | <b>Mass error</b>         | 6.09E-4 |

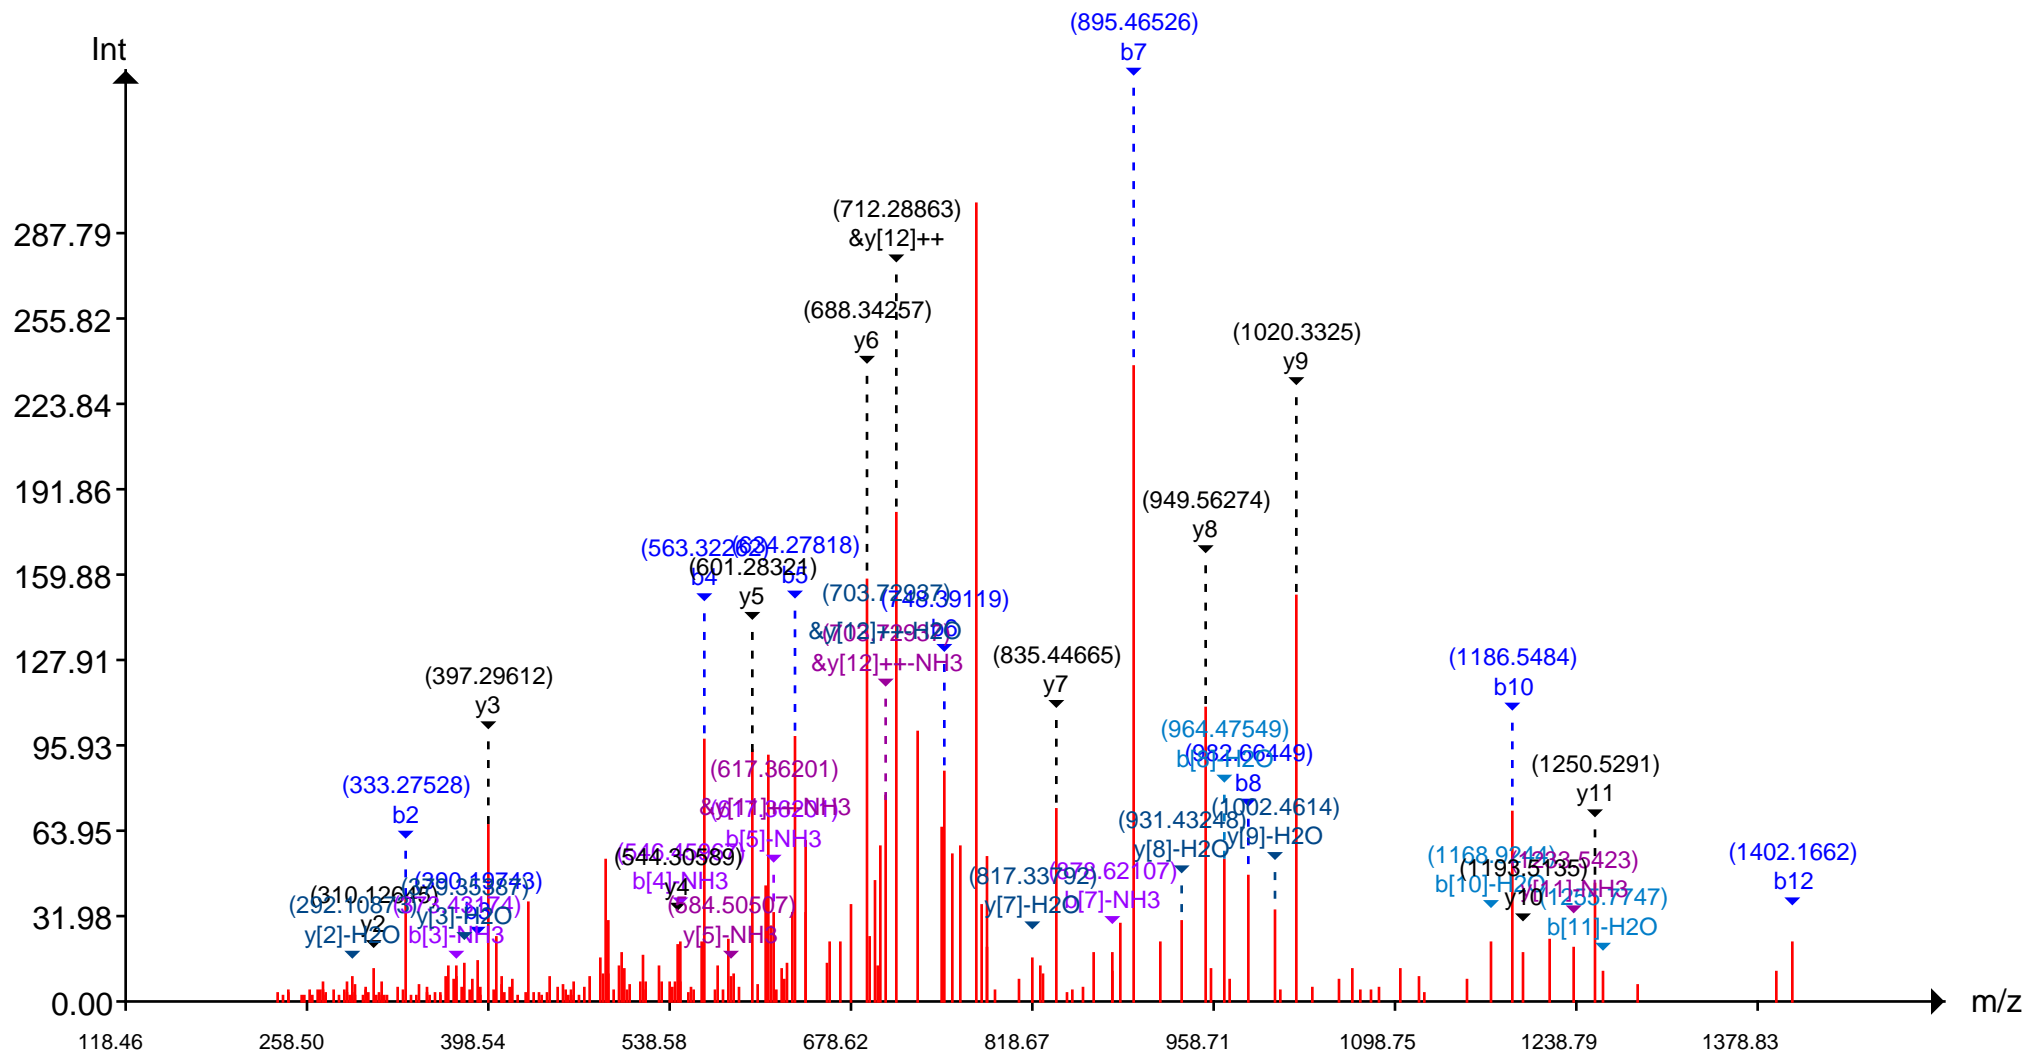

## Info

|                          |                                                    |                           |          |
|--------------------------|----------------------------------------------------|---------------------------|----------|
| <b>Modified Sequence</b> | AcD3-NK<AcD3K*>GK<AcD3K*>ANFSGM<Mox*>SER<C13>-COOH | <b>Ion score</b>          | 54.2     |
| <b>Protein</b>           | P12388                                             | <b>Confidence level</b>   | 99.00%   |
| <b>Precursor m/z</b>     | 791.90095                                          | <b>Identity Threshold</b> | 47.80    |
| <b>Charge</b>            | 2+                                                 | <b>Mass error</b>         | 0.001078 |

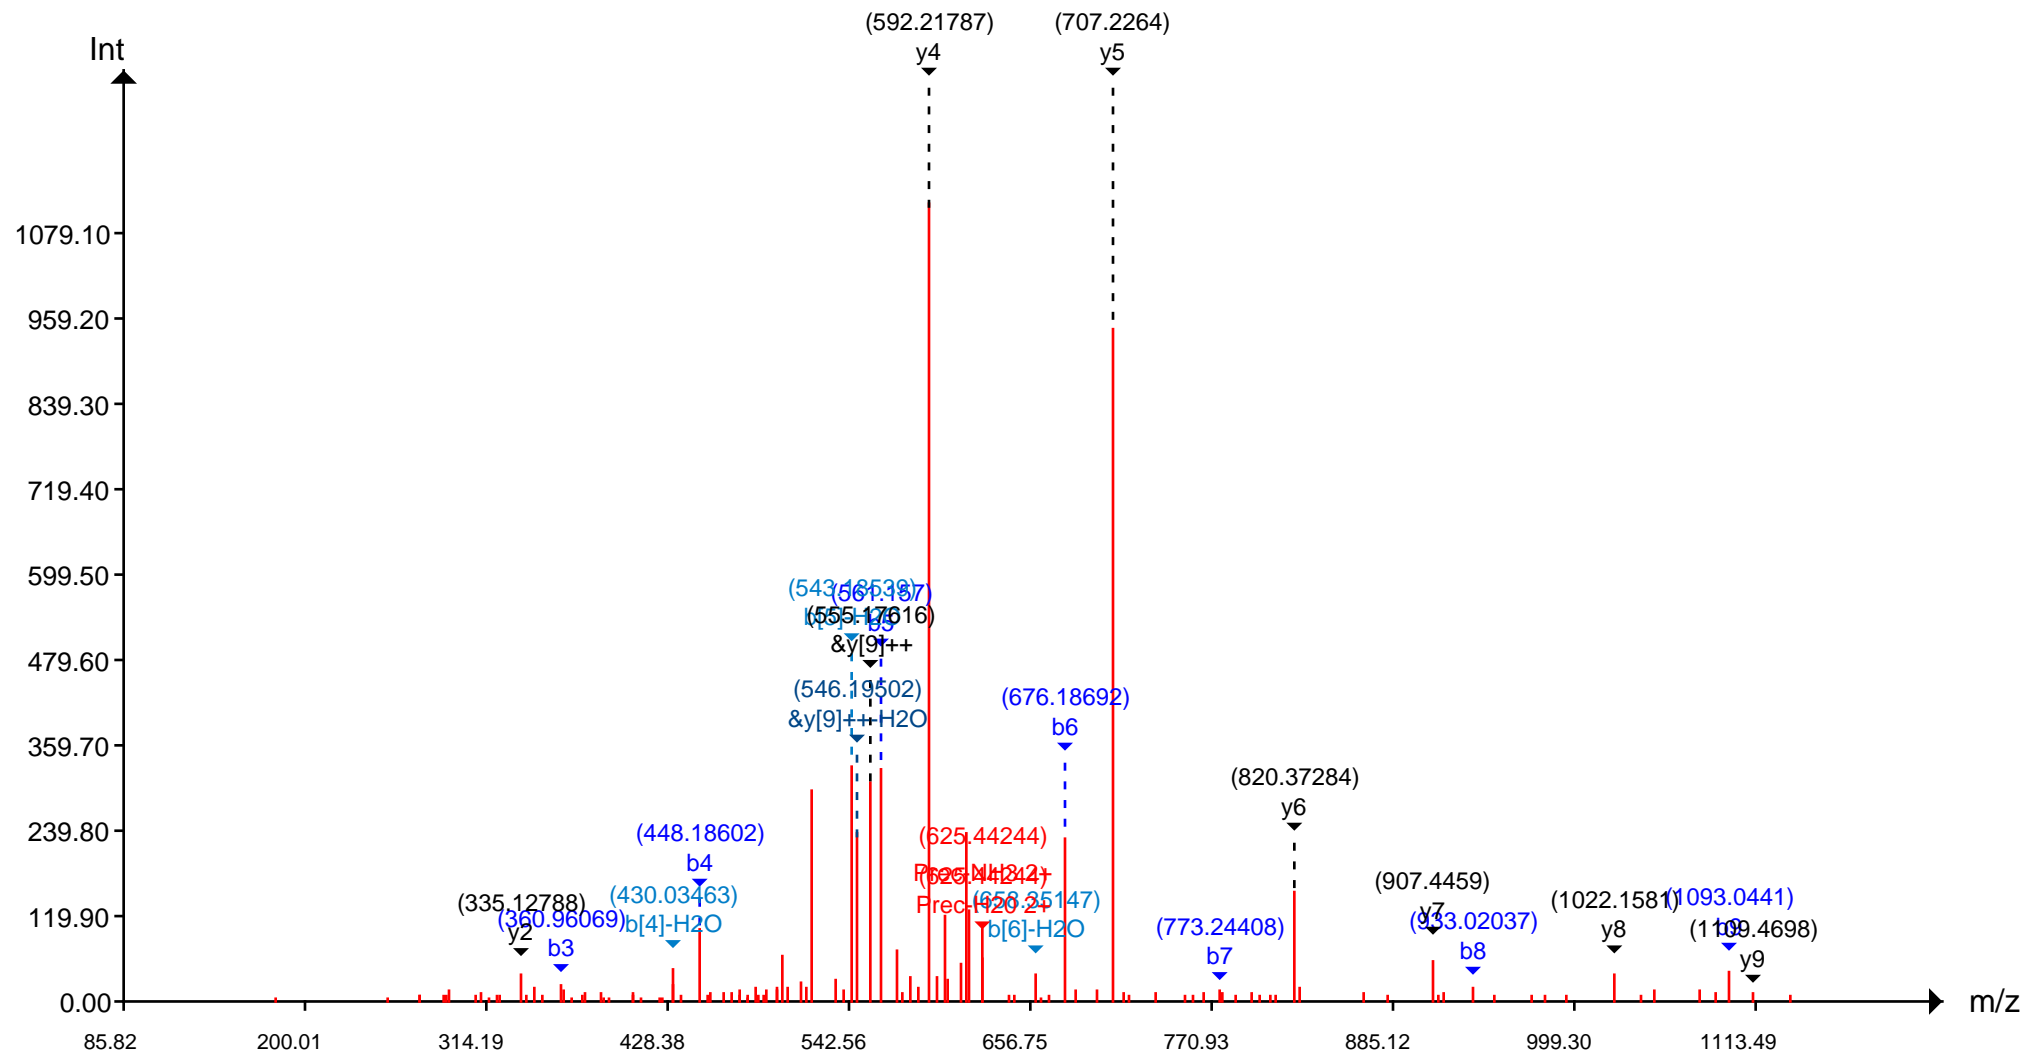

## Info

|                          |                                   |                           |         |
|--------------------------|-----------------------------------|---------------------------|---------|
| <b>Modified Sequence</b> | AcD3-ISDSLDPCC<Cmm*>C<Cmm*>R-COOH | <b>Ion score</b>          | 66.45   |
| <b>Protein</b>           | Q61753                            | <b>Confidence level</b>   | 99.00%  |
| <b>Precursor m/z</b>     | 634.27807                         | <b>Identity Threshold</b> | 42.83   |
| <b>Charge</b>            | 2+                                | <b>Mass error</b>         | 3.89E-4 |

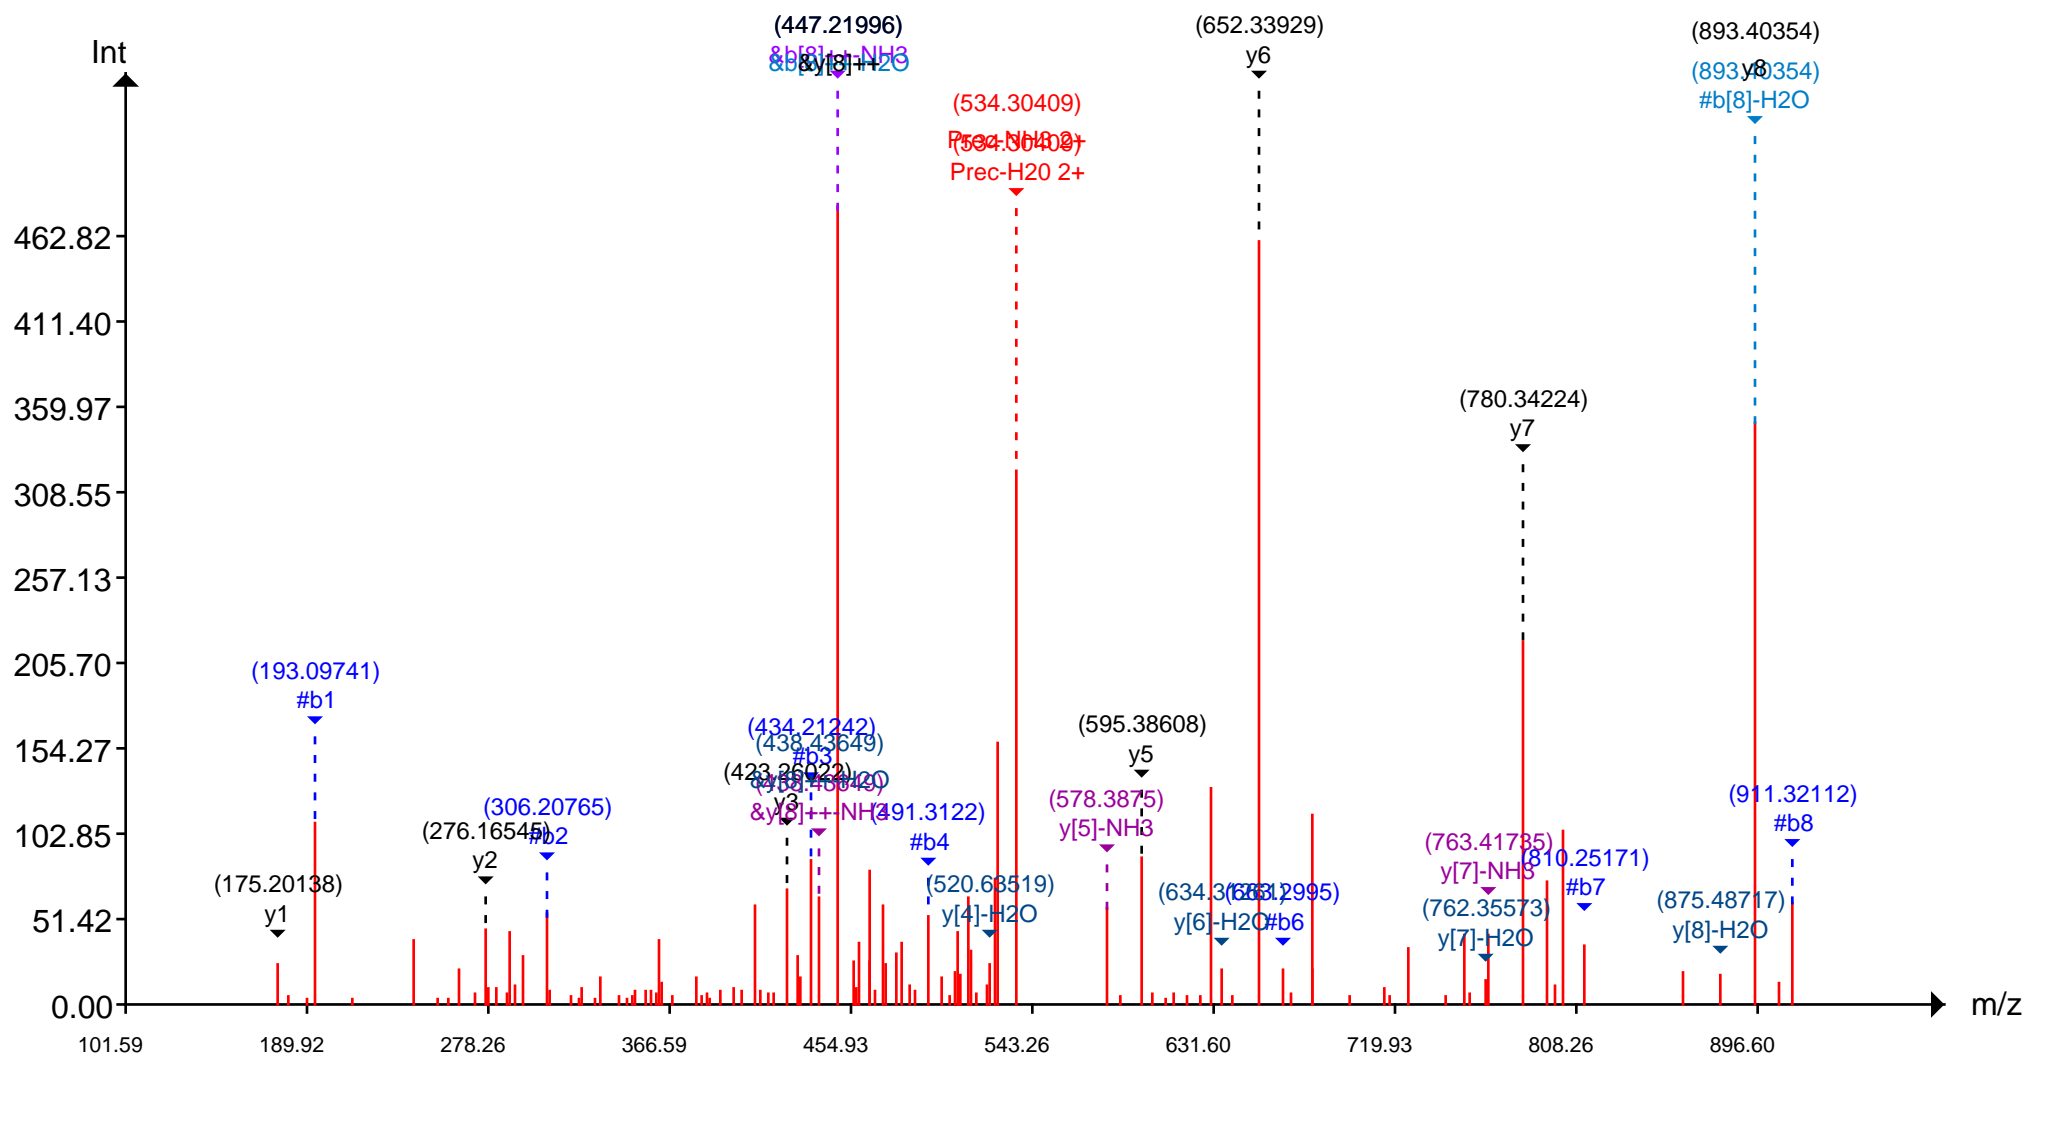

| Info                     |                           | Ion score                 | 46.35    |
|--------------------------|---------------------------|---------------------------|----------|
| <b>Modified Sequence</b> | AcD3-M<Mox*>IQGGDFTR-COOH | <b>Confidence level</b>   | 99.00%   |
| <b>Protein</b>           | P24369                    | <b>Identity Threshold</b> | 45.97    |
| <b>Precursor m/z</b>     | 543.25941                 | <b>Mass error</b>         | -8.13E-4 |
| <b>Charge</b>            | 2+                        |                           |          |

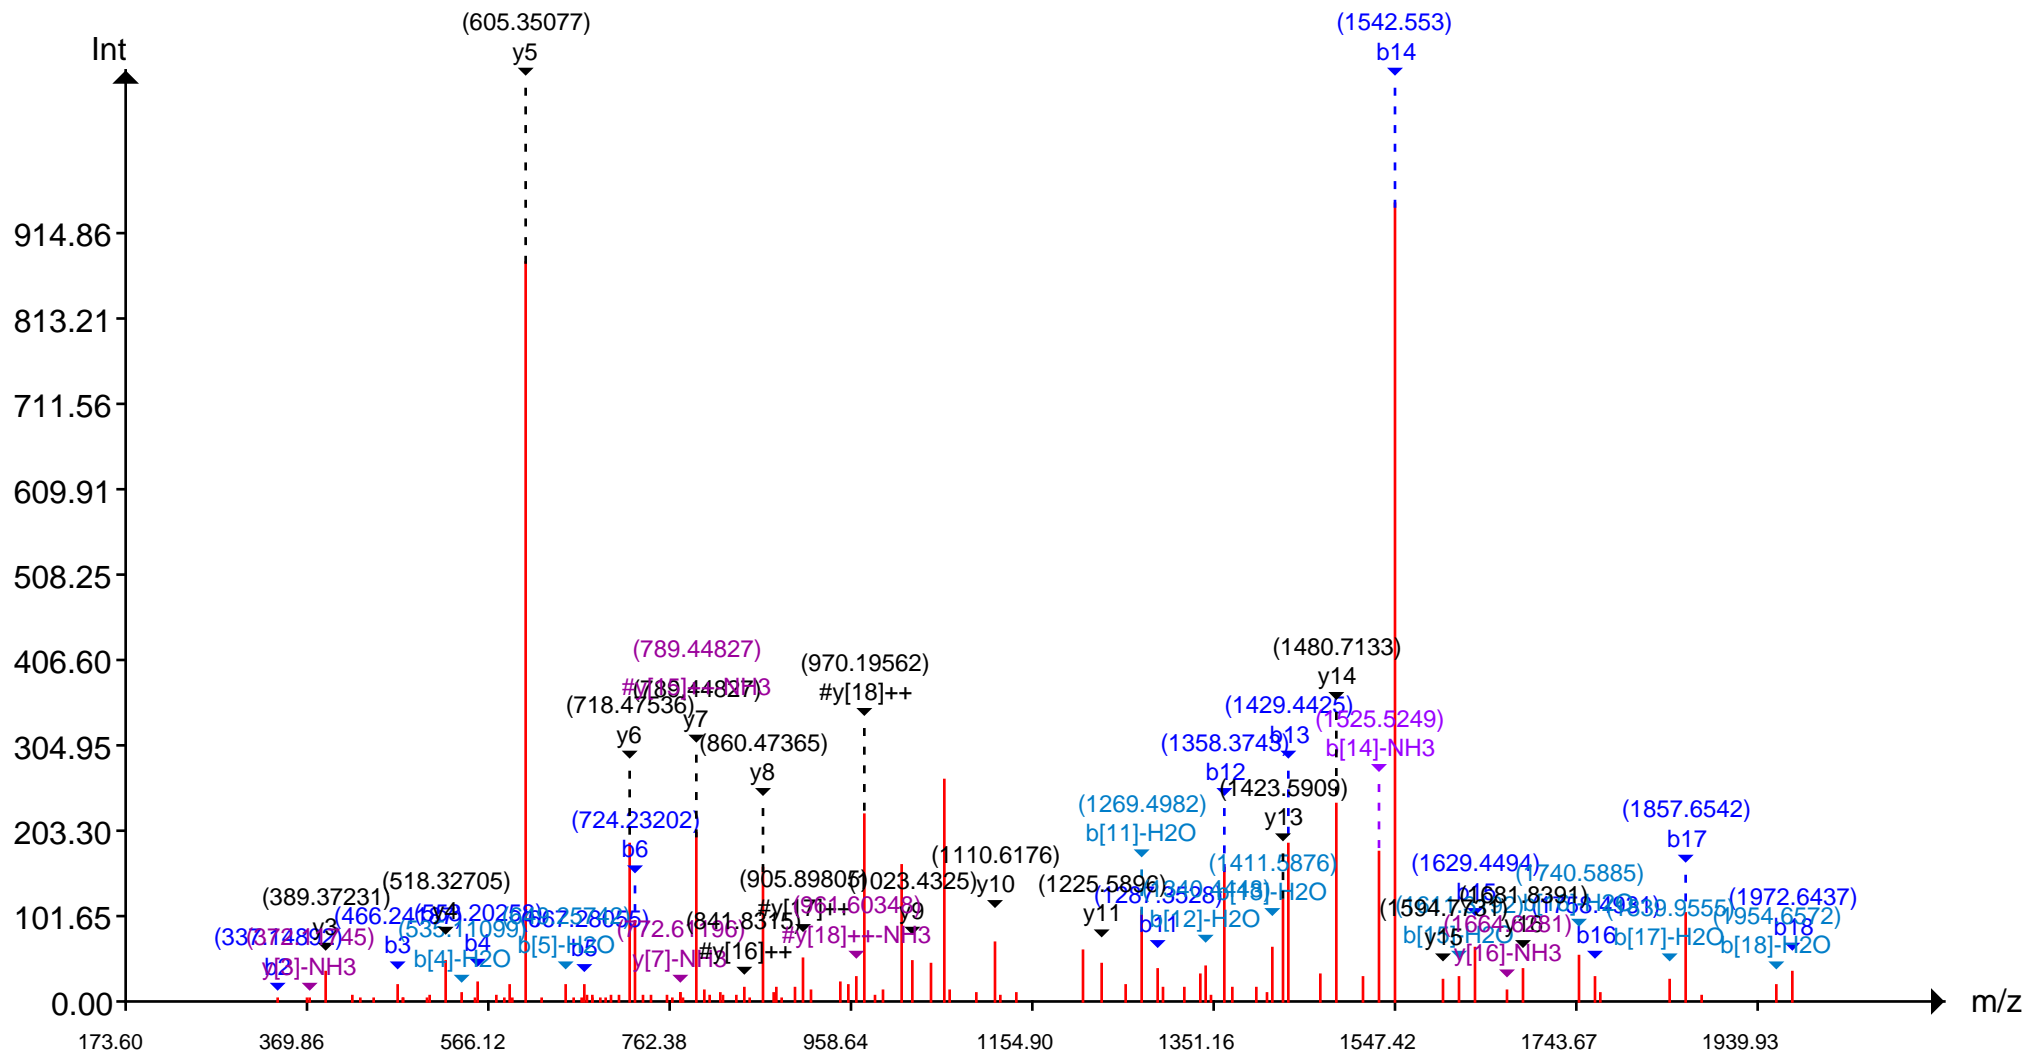

## Info

|                          |                               |                           |          |
|--------------------------|-------------------------------|---------------------------|----------|
| <b>Modified Sequence</b> | AcD3-YQESNGPTDSYAAISEVDR-COOH | <b>Ion score</b>          | 120.61   |
| <b>Protein</b>           | O08585                        | <b>Confidence level</b>   | 99.00%   |
| <b>Precursor m/z</b>     | 1073.9857                     | <b>Identity Threshold</b> | 43.82    |
| <b>Charge</b>            | 2+                            | <b>Mass error</b>         | 0.003876 |

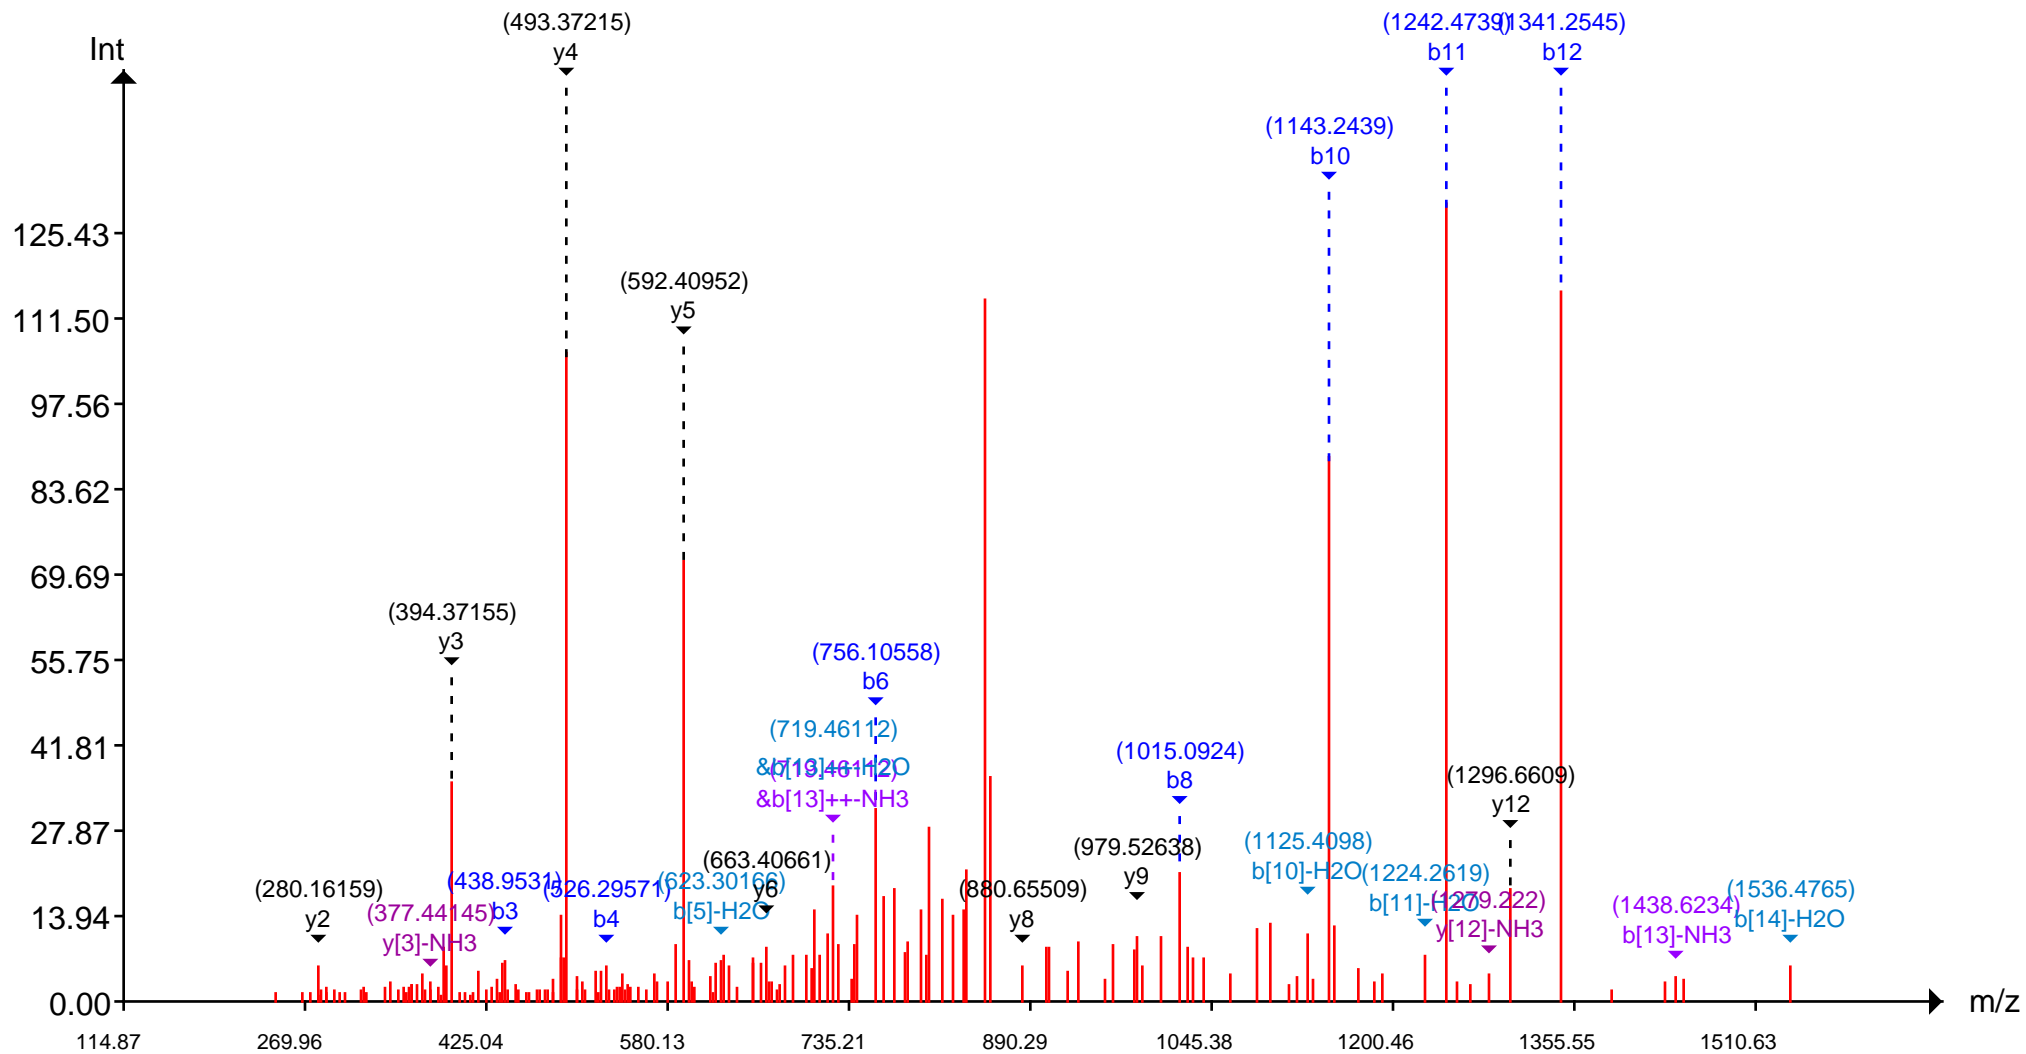

## Info

**Modified Sequence** AcD3-DDYSDDVC<Cmm\*>GAVVNVR<C13>-COOH

**Ion score** 49.65

**Protein** P63073

**Confidence level** 99.00%

**Precursor m/z** 867.89339

**Identity Threshold** 44.09

**Charge** 2+

**Mass error** 0.002056



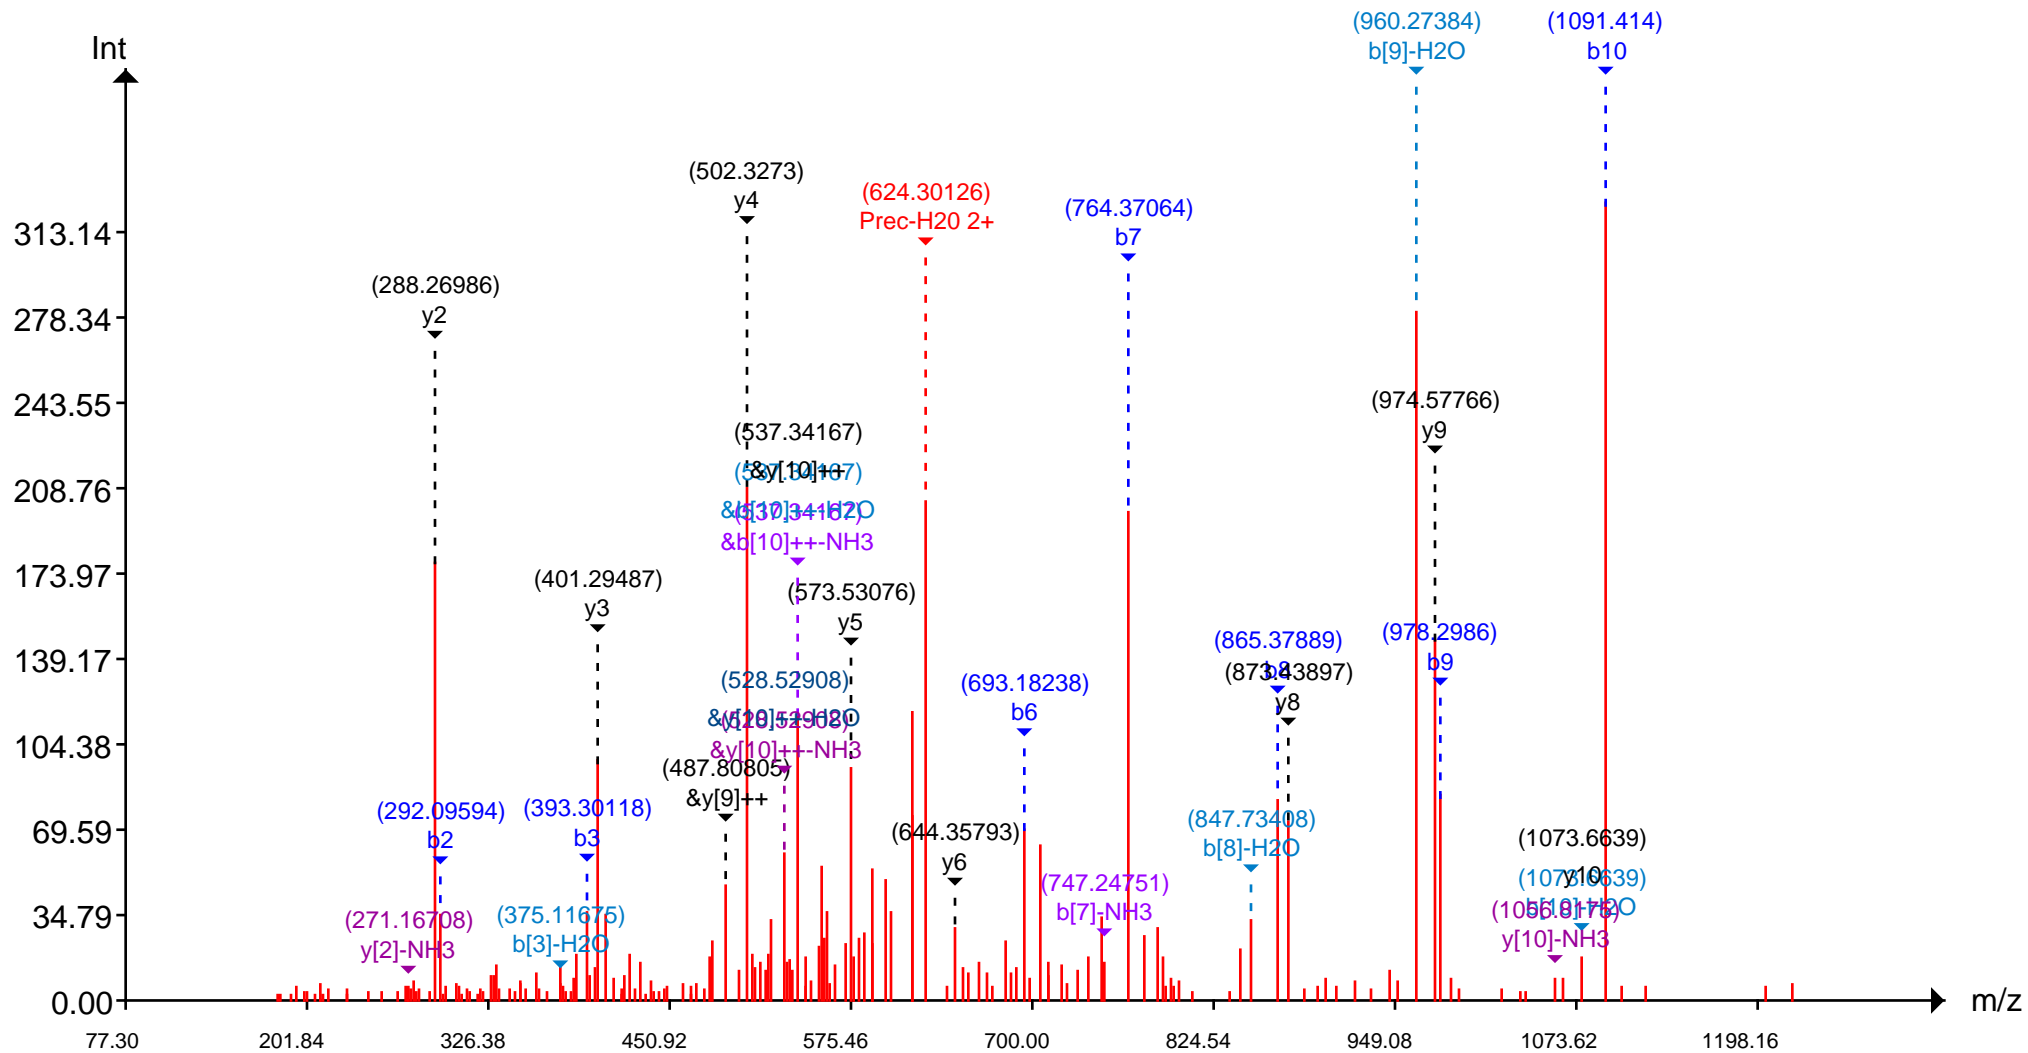

## Info

|                          |                       |                           |          |
|--------------------------|-----------------------|---------------------------|----------|
| <b>Modified Sequence</b> | AcD3-FVTNDAATILR-COOH | <b>Ion score</b>          | 53.26    |
| <b>Protein</b>           | P42932                | <b>Confidence level</b>   | 99.00%   |
| <b>Precursor m/z</b>     | 633.34995             | <b>Identity Threshold</b> | 47.63    |
| <b>Charge</b>            | 2+                    | <b>Mass error</b>         | -1.23E-4 |

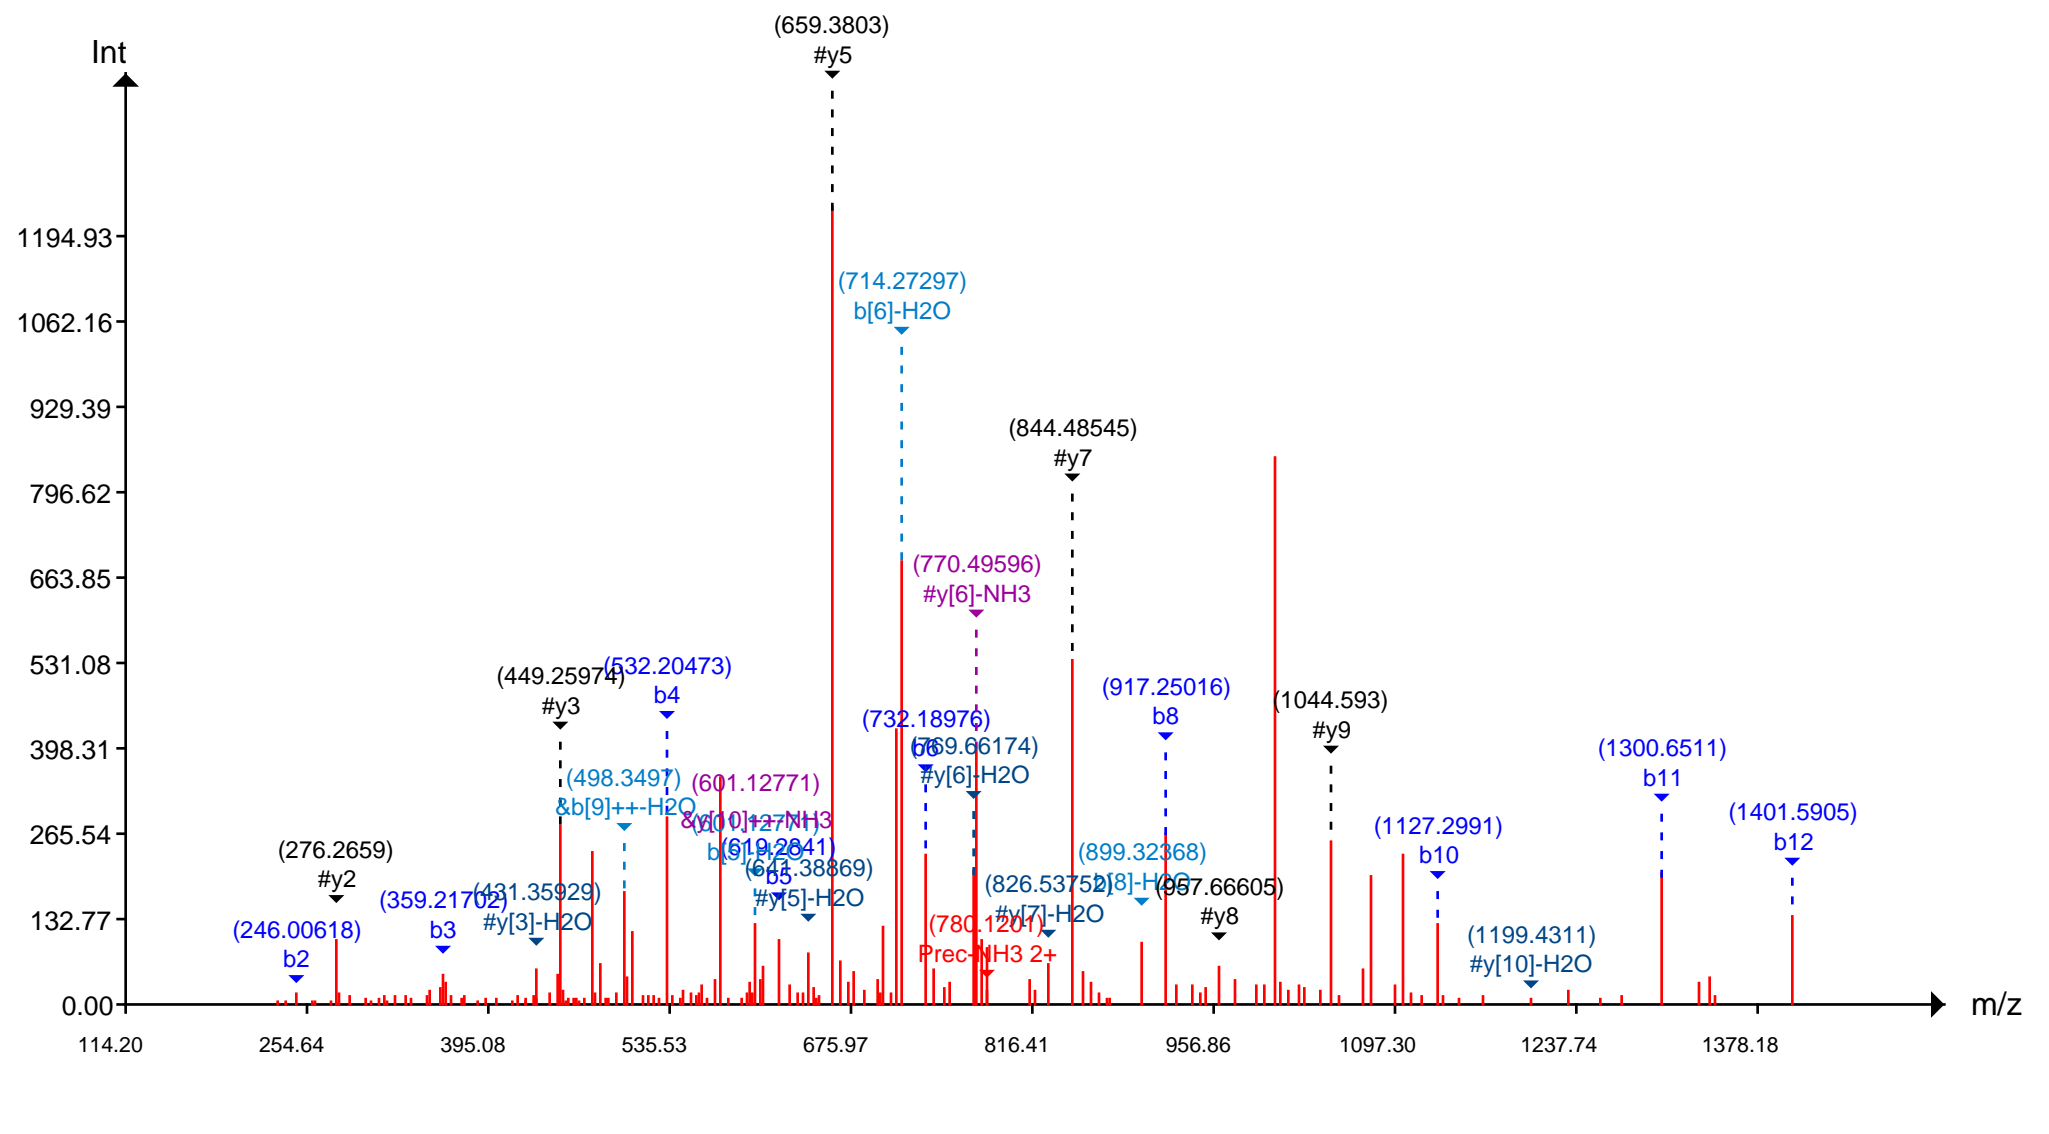

| Info                     |                                         |                           |          |
|--------------------------|-----------------------------------------|---------------------------|----------|
| <b>Modified Sequence</b> | AcD3-AELK<AcD3K*>SLGQPIK<AcD3K*>TR-COOH | <b>Ion score</b>          | 46.26    |
| <b>Protein</b>           | Q61316                                  | <b>Confidence level</b>   | 99.00%   |
| <b>Precursor m/z</b>     | 788.47511                               | <b>Identity Threshold</b> | 43.03    |
| <b>Charge</b>            | 2+                                      | <b>Mass error</b>         | 0.001494 |

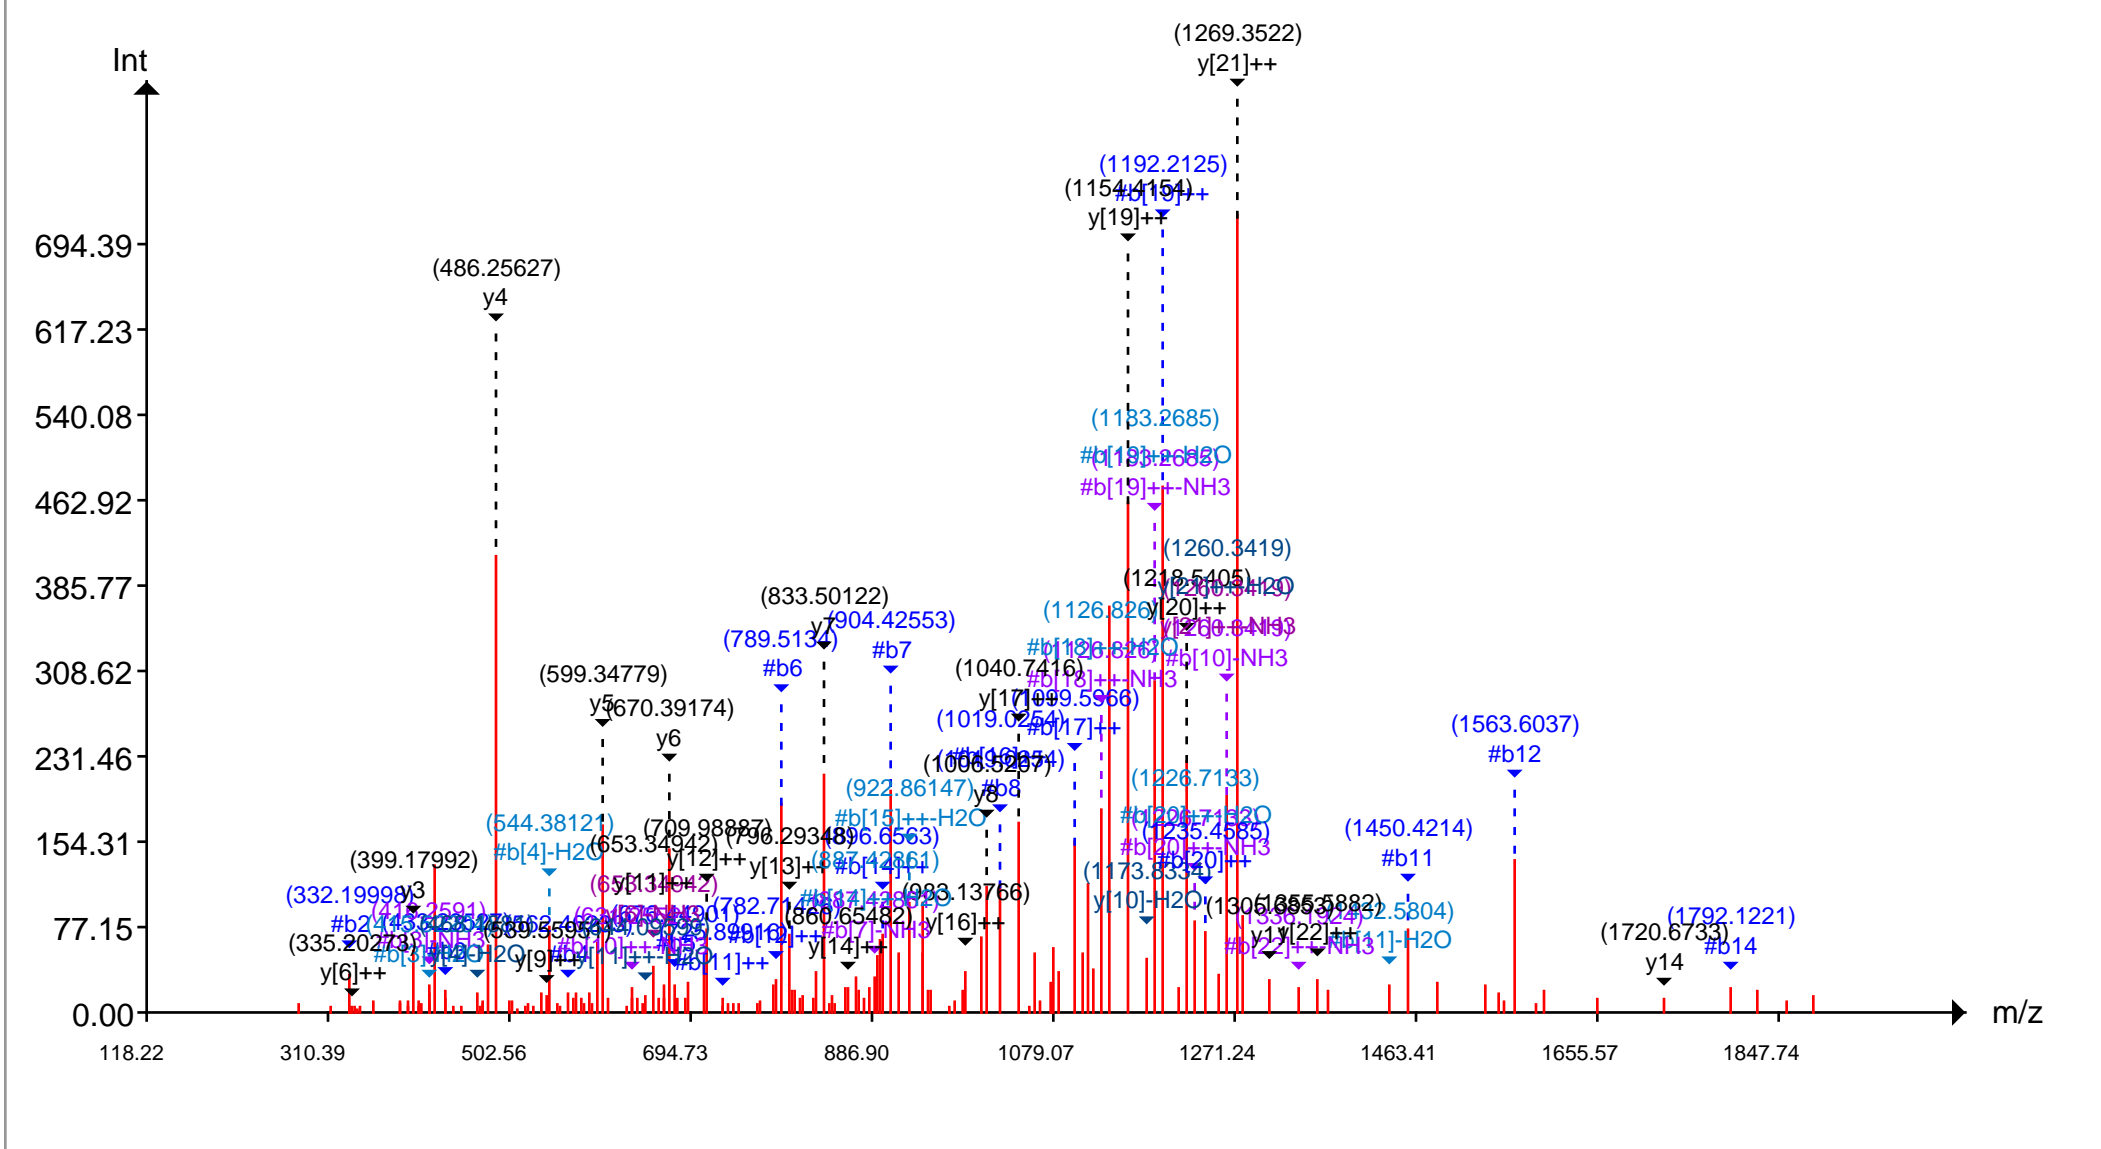

| Info               |                                                                      |                    |          |
|--------------------|----------------------------------------------------------------------|--------------------|----------|
| Modified Sequen... | AcD3-LK<AcD3K*>TENLDDEEK<AcD3K*>LNNAK<AcD3K*>YAISM<Mox*>AR<C13>-COOH | Ion score          | 58.71    |
| Prot...            | Q61233                                                               | Confidence level   | 99.00%   |
| Precursor m...     | 956.83175                                                            | Identity Threshold | 47.59    |
| Char...            | 3+                                                                   | Mass error         | 0.002719 |

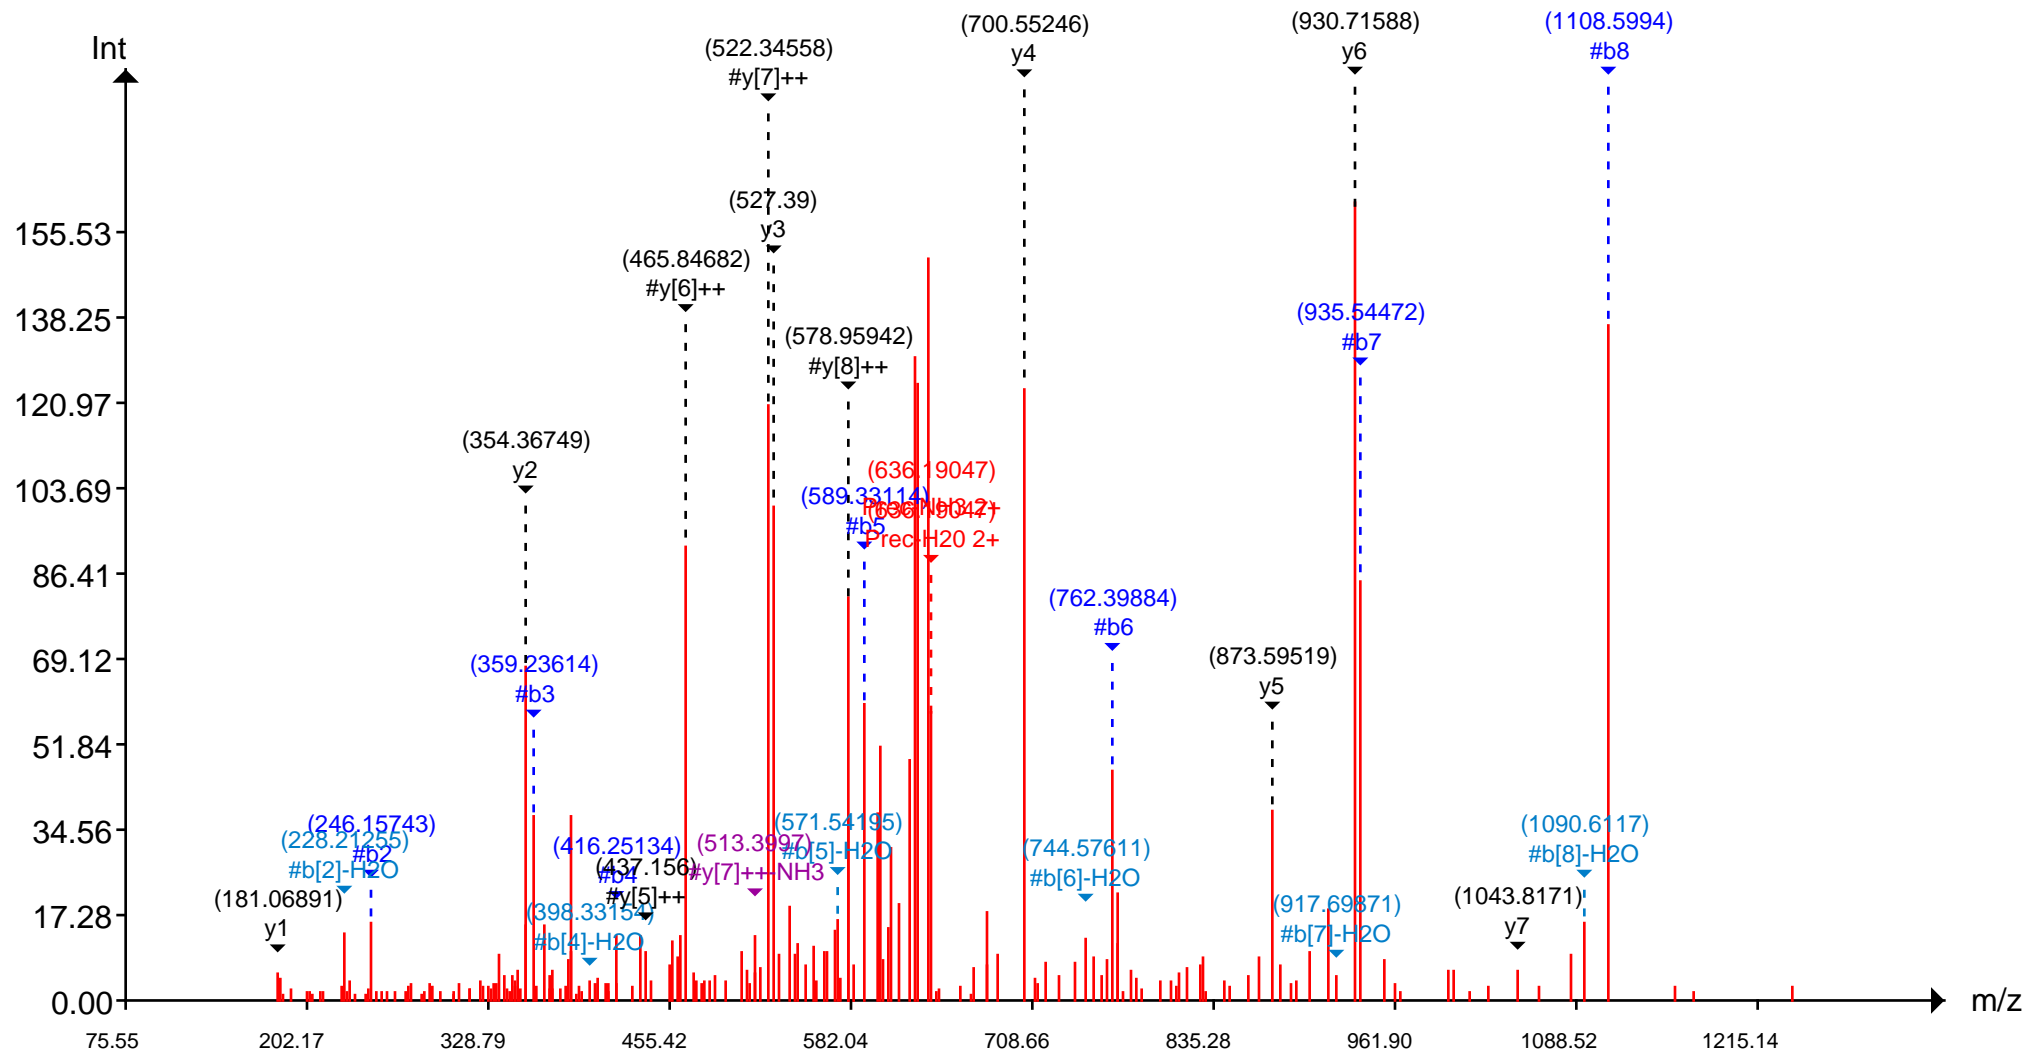

## Info

|                          |                                                          |                           |         |
|--------------------------|----------------------------------------------------------|---------------------------|---------|
| <b>Modified Sequence</b> | AcD3-SLLGK<AcD3K*>K<AcD3K*>K<AcD3K*>K<AcD3K*>R<C13>-COOH | <b>Ion score</b>          | 43.05   |
| <b>Protein</b>           | P51410                                                   | <b>Confidence level</b>   | 99.00%  |
| <b>Precursor m/z</b>     | 644.94776                                                | <b>Identity Threshold</b> | 29.30   |
| <b>Charge</b>            | 2+                                                       | <b>Mass error</b>         | 7.19E-4 |

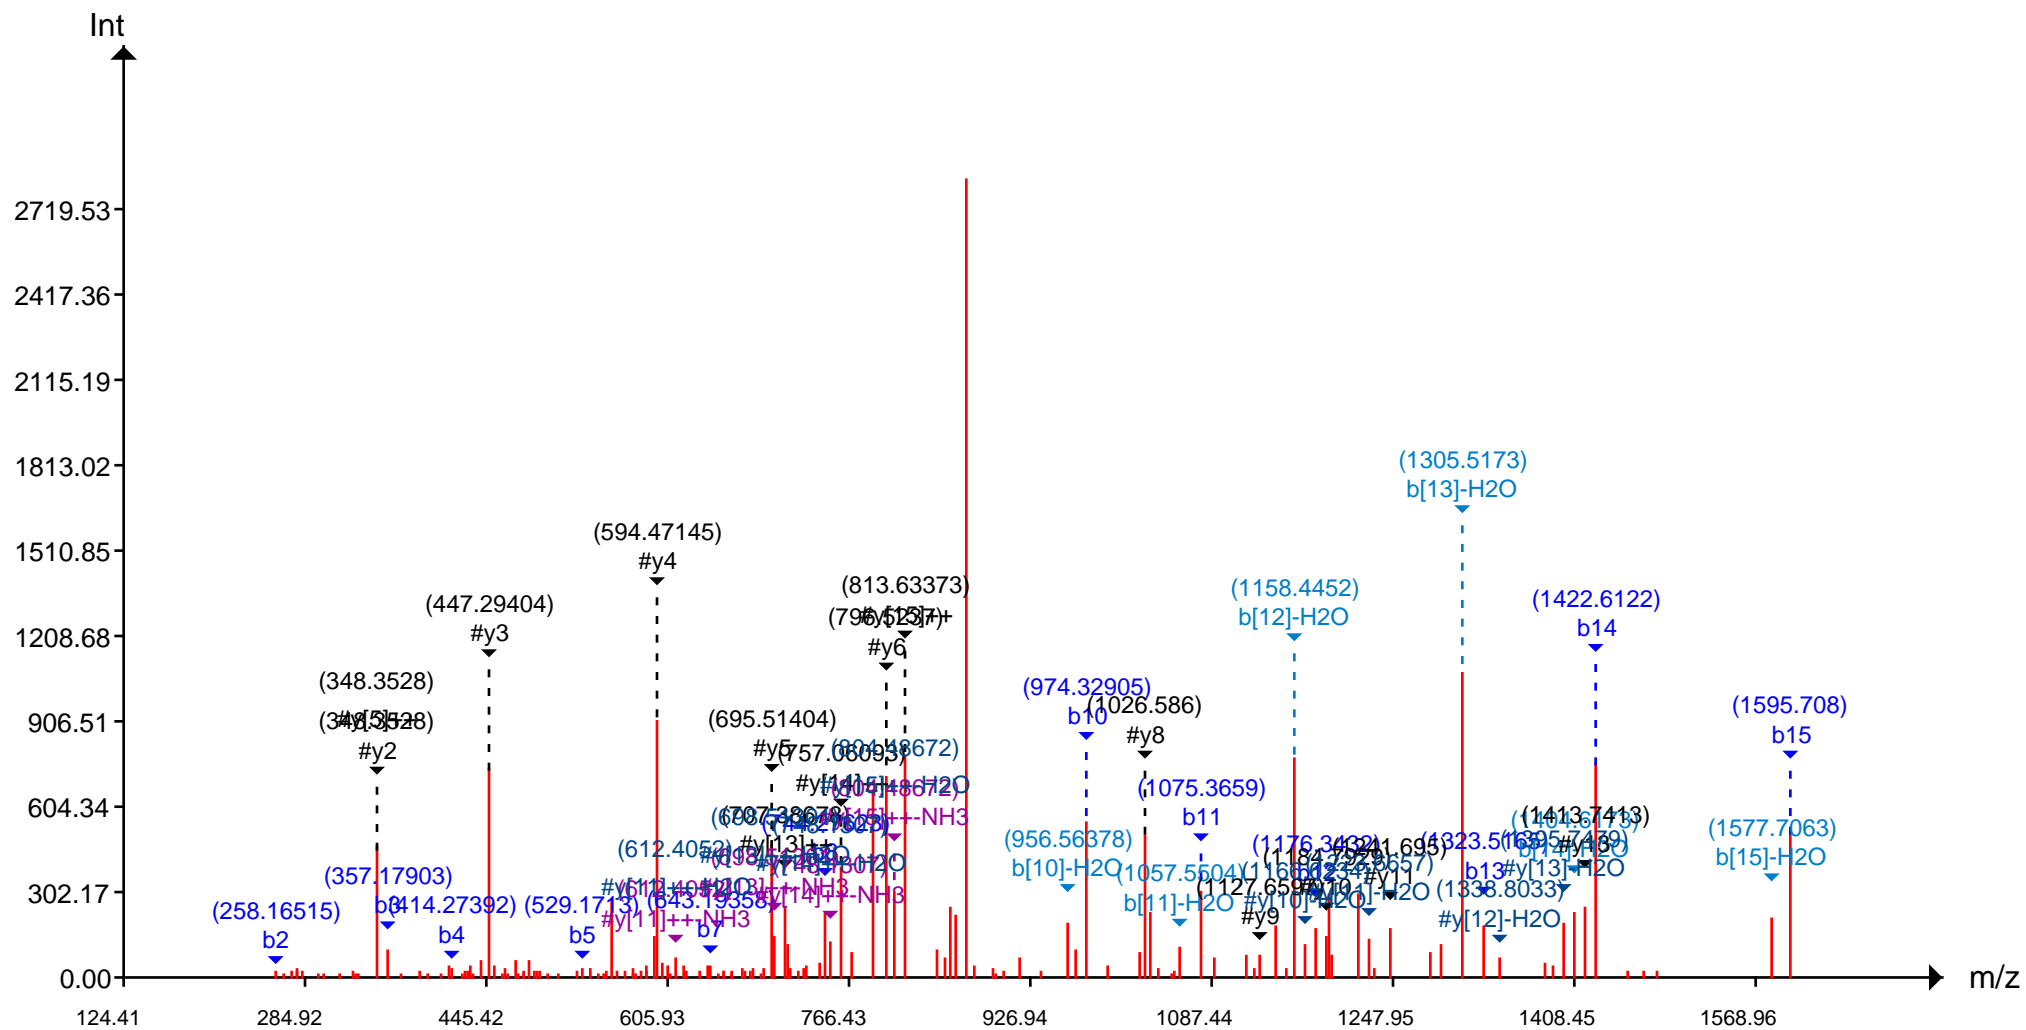

## Info

|                          |                                            |                           |          |
|--------------------------|--------------------------------------------|---------------------------|----------|
| <b>Modified Sequence</b> | AcD3-VLVGDGGTgk<AcD3K*>TTFVK<AcD3K*>R-COOH | <b>Ion score</b>          | 71.49    |
| <b>Protein</b>           | P62827                                     | <b>Confidence level</b>   | 99.00%   |
| <b>Precursor m/z</b>     | 885.51063                                  | <b>Identity Threshold</b> | 45.34    |
| <b>Charge</b>            | 2+                                         | <b>Mass error</b>         | 0.003321 |

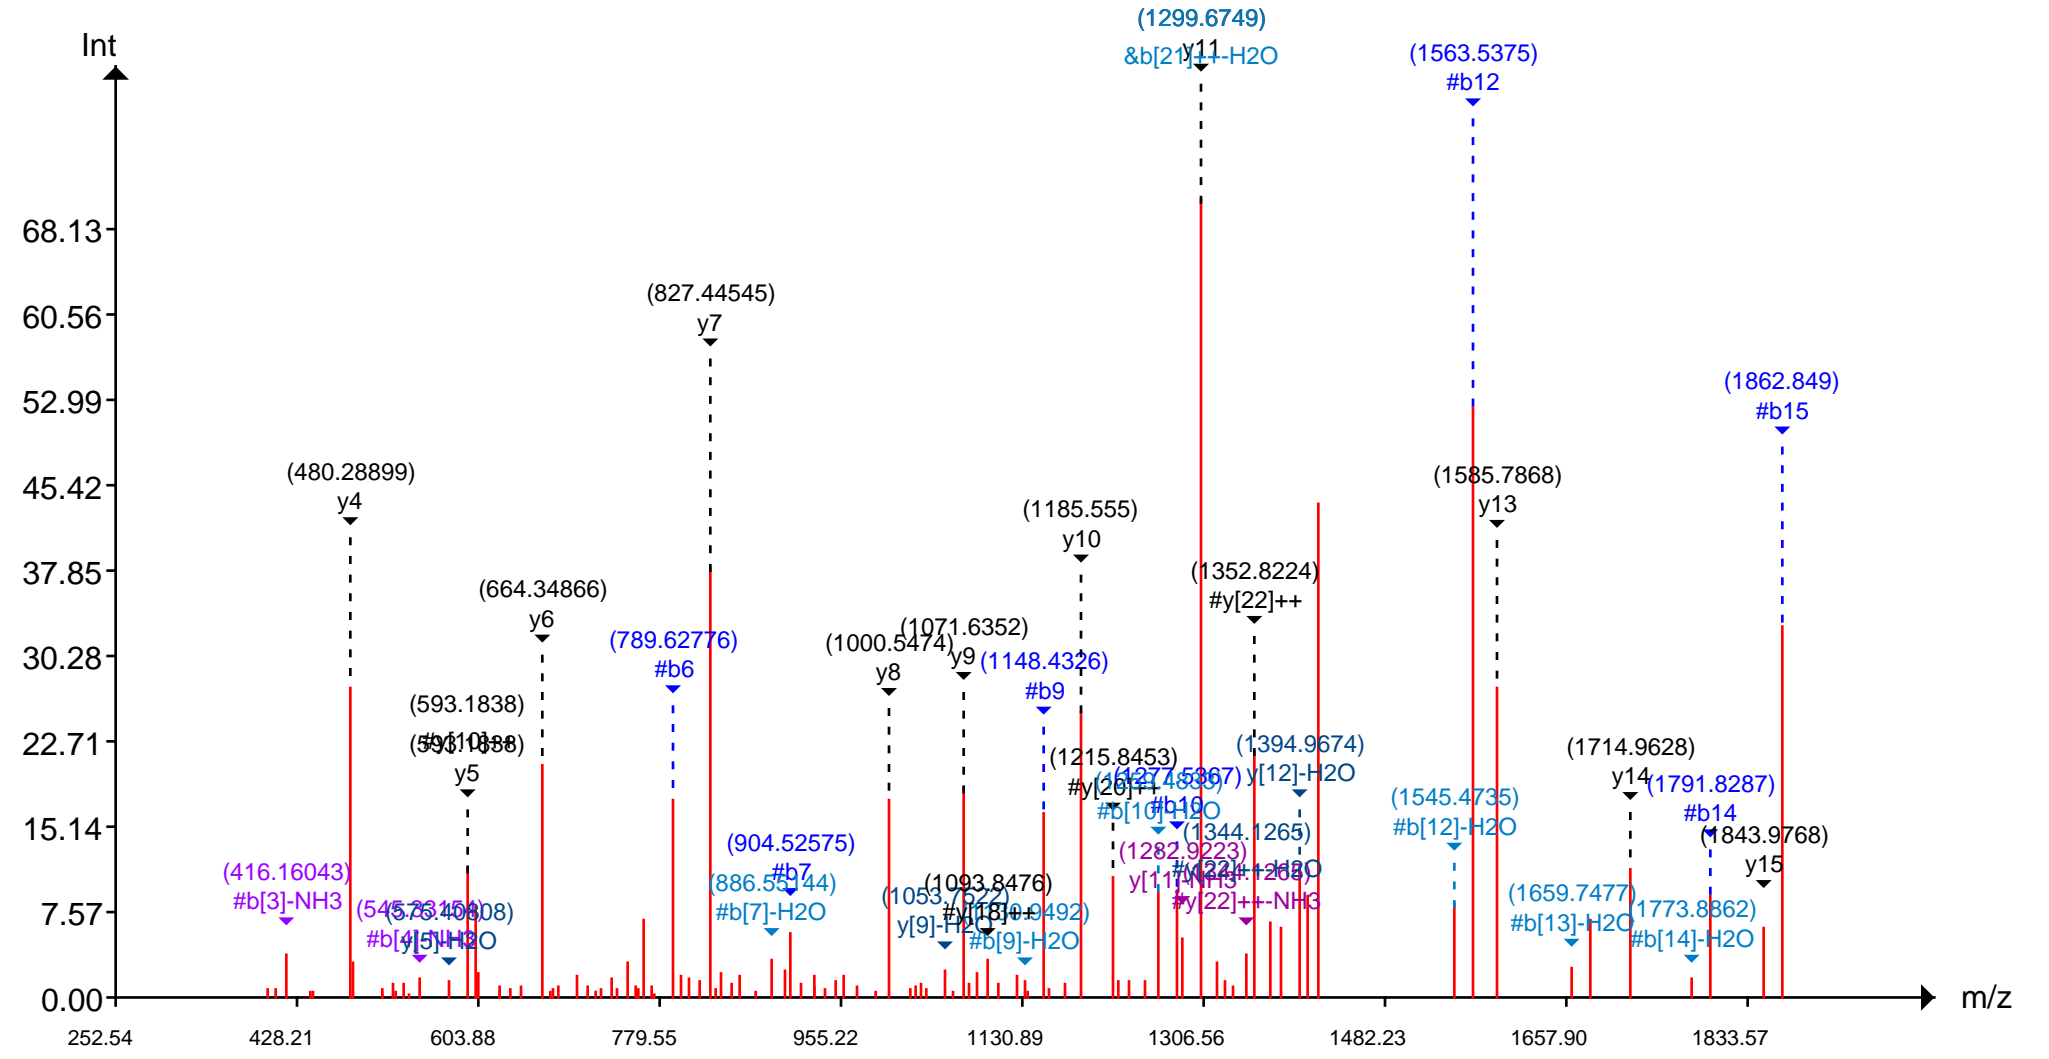

Info

|                          |                                                                 |                           |          |
|--------------------------|-----------------------------------------------------------------|---------------------------|----------|
| <b>Modified Sequence</b> | AcD3-LK<AcD3K*>TENLDDEEK<AcD3K*>LNNAK<AcD3K*>YAISM<Mox*>AR-COOH | <b>Ion score</b>          | 86.75    |
| <b>Protein</b>           | Q61233                                                          | <b>Confidence level</b>   | 99.00%   |
| <b>Precursor m/z</b>     | 1431.7338                                                       | <b>Identity Threshold</b> | 47.74    |
| <b>Charge</b>            | 2+                                                              | <b>Mass error</b>         | 0.002486 |

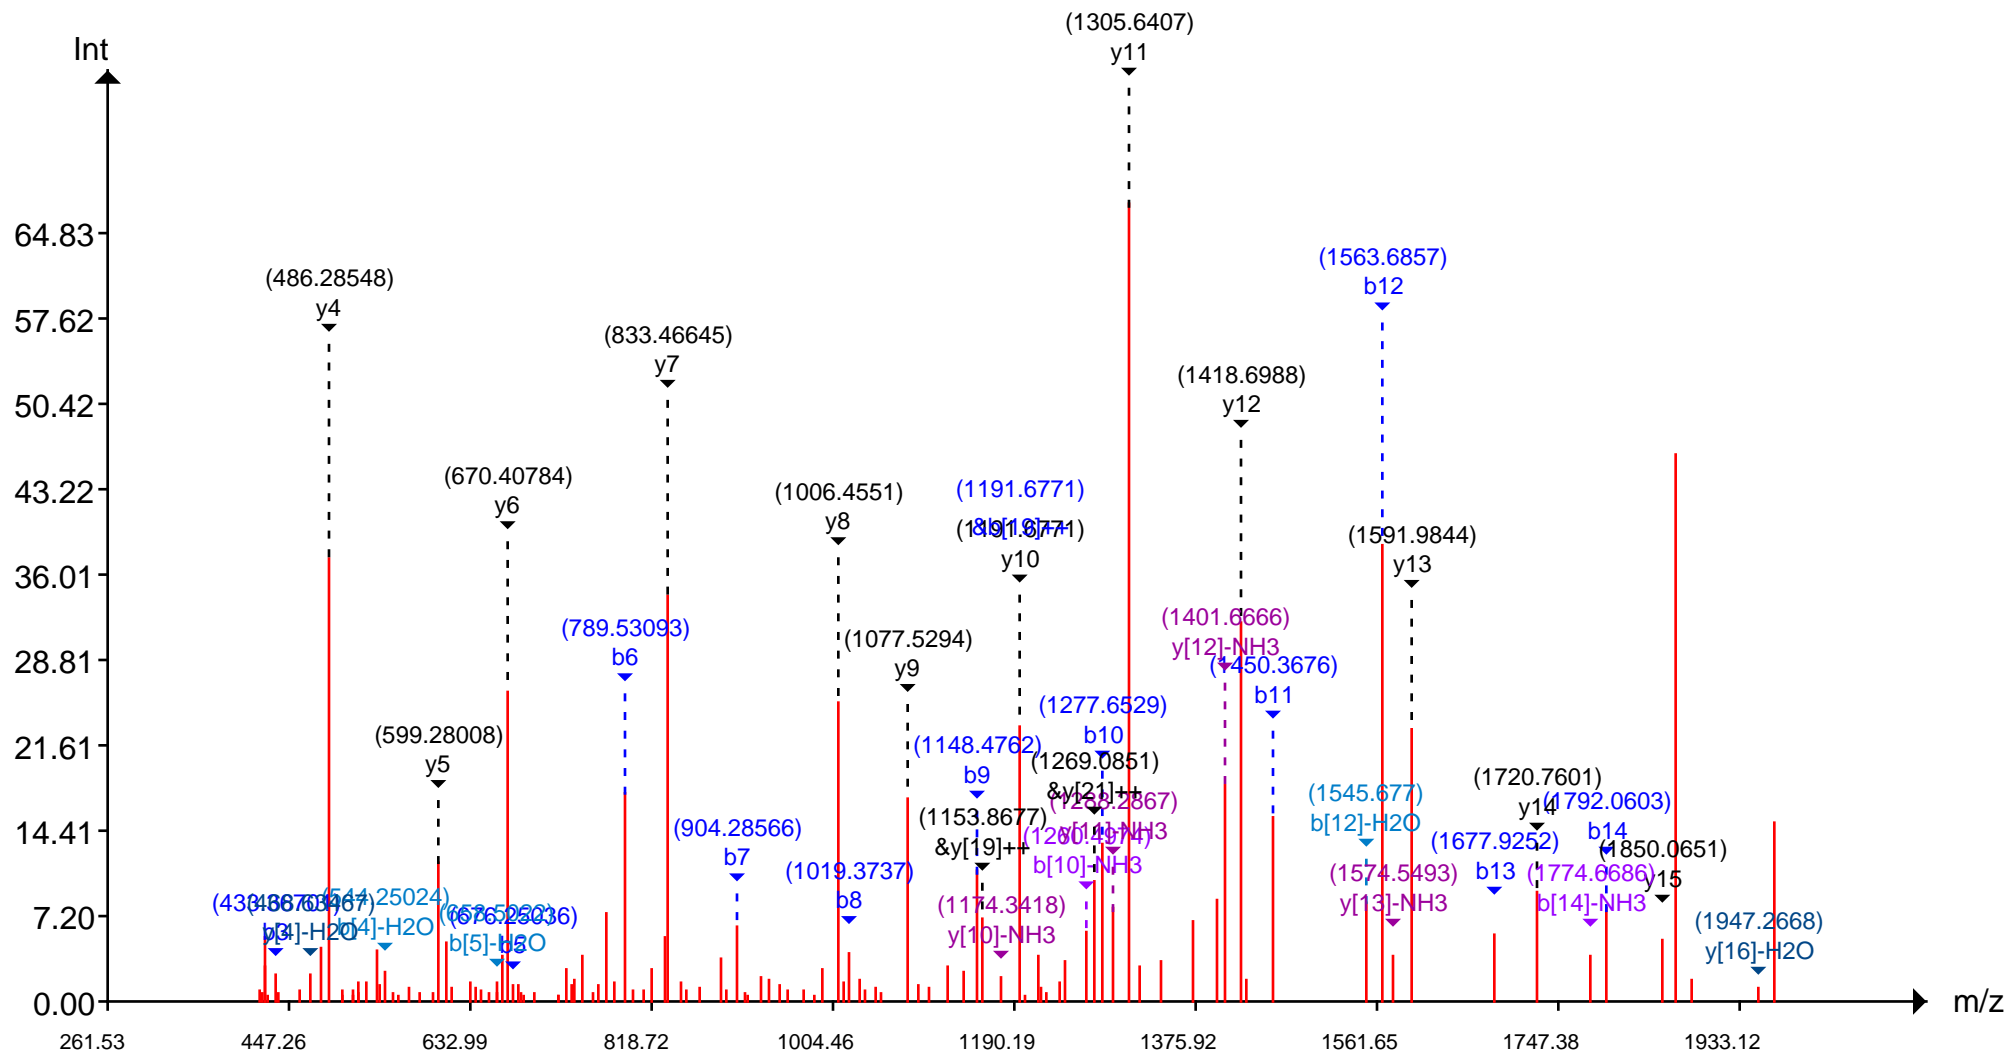

## Info

|                    |                                                                      |                    |          |
|--------------------|----------------------------------------------------------------------|--------------------|----------|
| Modified Sequen... | AcD3-LK<AcD3K*>TENLDDEEK<AcD3K*>LNNAK<AcD3K*>YAISM<Mox*>AR<C13>-COOH | Ion score          | 90.47    |
| Prot...            | Q61233                                                               | Confidence level   | 99.00%   |
| Precursor m...     | 1434.7437                                                            | Identity Threshold | 47.59    |
| Char...            | 2+                                                                   | Mass error         | 0.002145 |

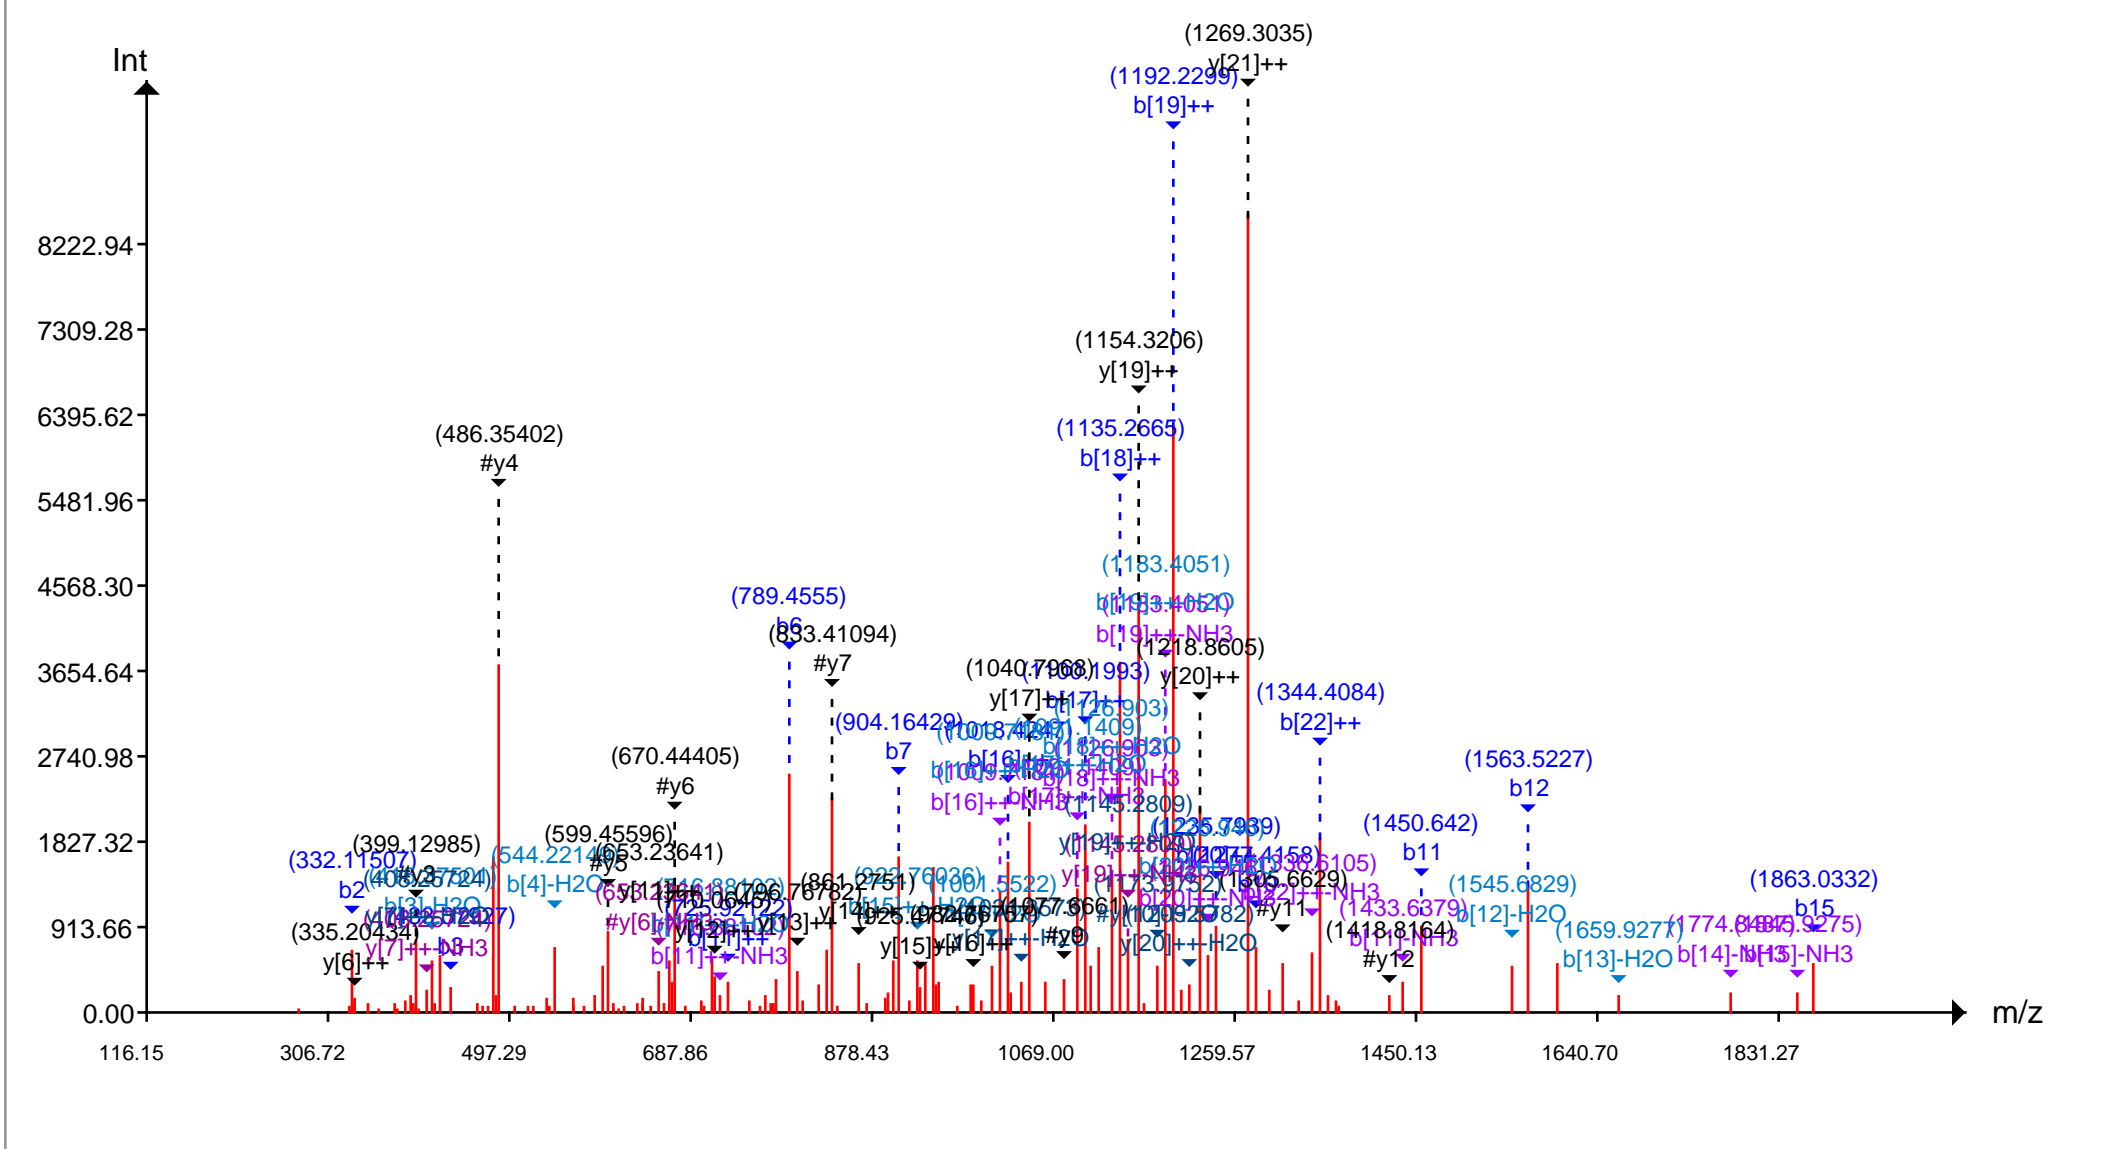

| Info               |                                                                      |                    |          |
|--------------------|----------------------------------------------------------------------|--------------------|----------|
| Modified Sequen... | AcD3-LK<AcD3K*>TENLDDEEK<AcD3K*>LNNAK<AcD3K*>YAISM<Mox*>AR<C13>-COOH | Ion score          | 64.75    |
| Prot...            | Q61233                                                               | Confidence level   | 99.00%   |
| Precursor m...     | 956.83167                                                            | Identity Threshold | 47.60    |
| Char...            | 3+                                                                   | Mass error         | 0.002479 |



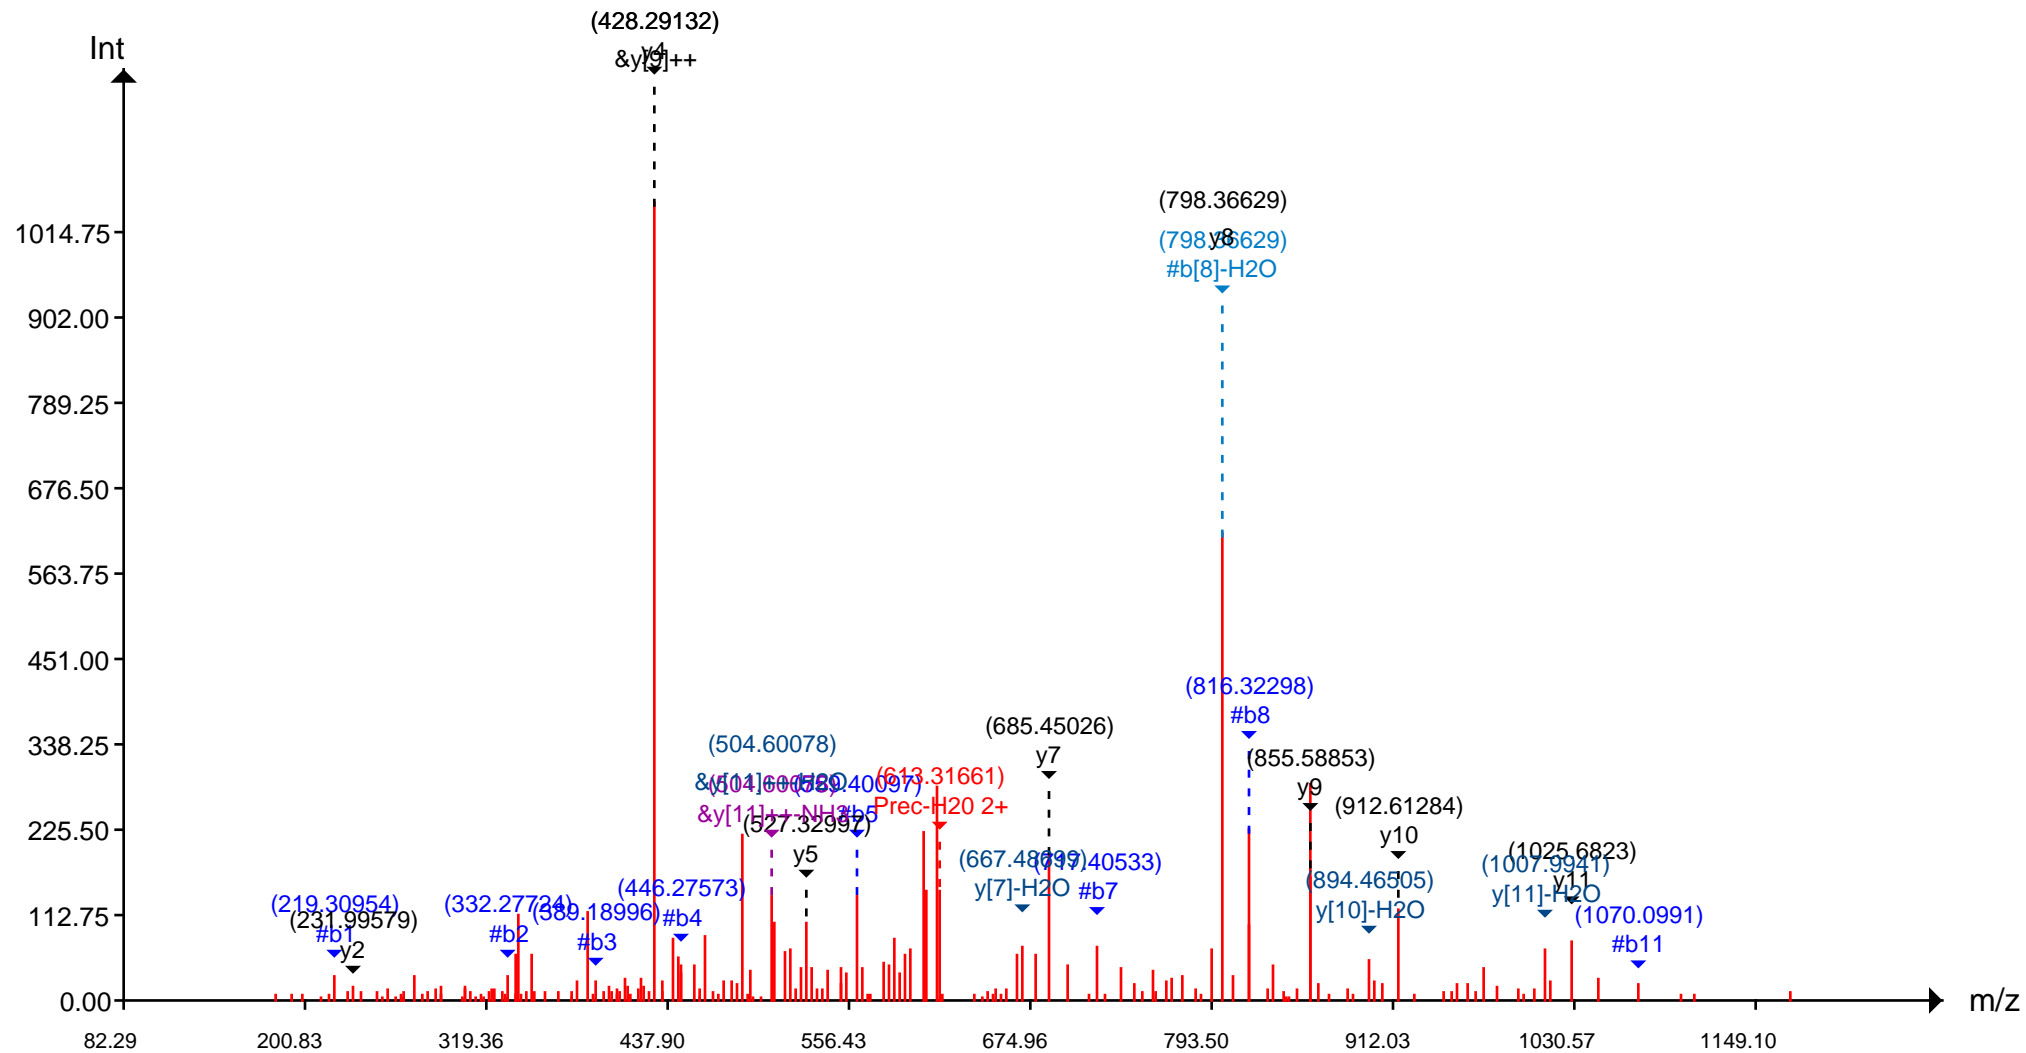

## Info

**Modified Sequence** AcD3-K<AcD3K\*>IGGIGTVPVGR-COOH

**Ion score** 45.5

**Protein** P10126, P62631

**Confidence level** 99.00%

**Precursor m/z** 622.38613

**Identity Threshold** 42.64

**Charge** 2+

**Mass error** 0.001009

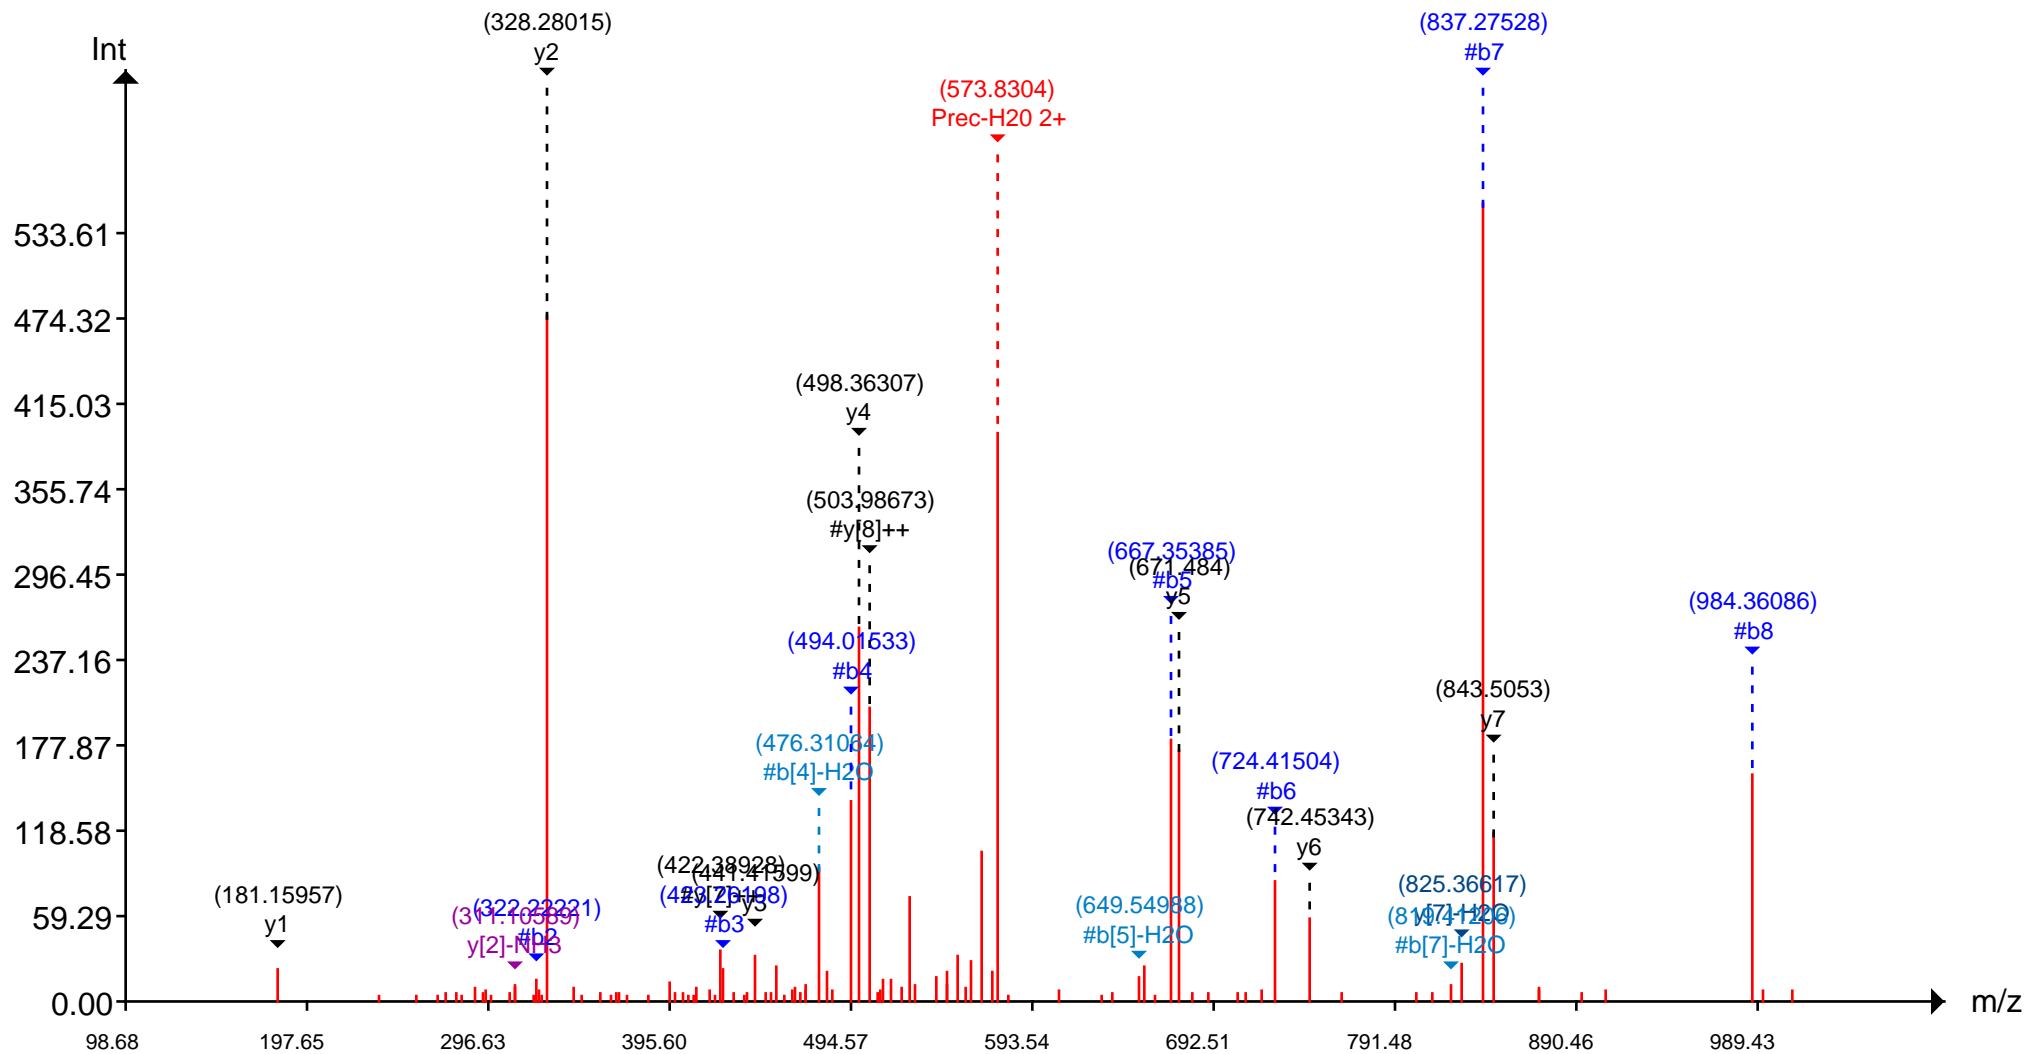

## Info

**Modified Sequence** AcD3-LYTAK<AcD3K\*>GLFR<C13>-COOH

**Ion score** 51.94

**Protein** P17182, P17183

**Confidence level** 99.00%

**Precursor m/z** 582.85345

**Identity Threshold** 44.24

**Charge** 2+

**Mass error** 6.67E-4

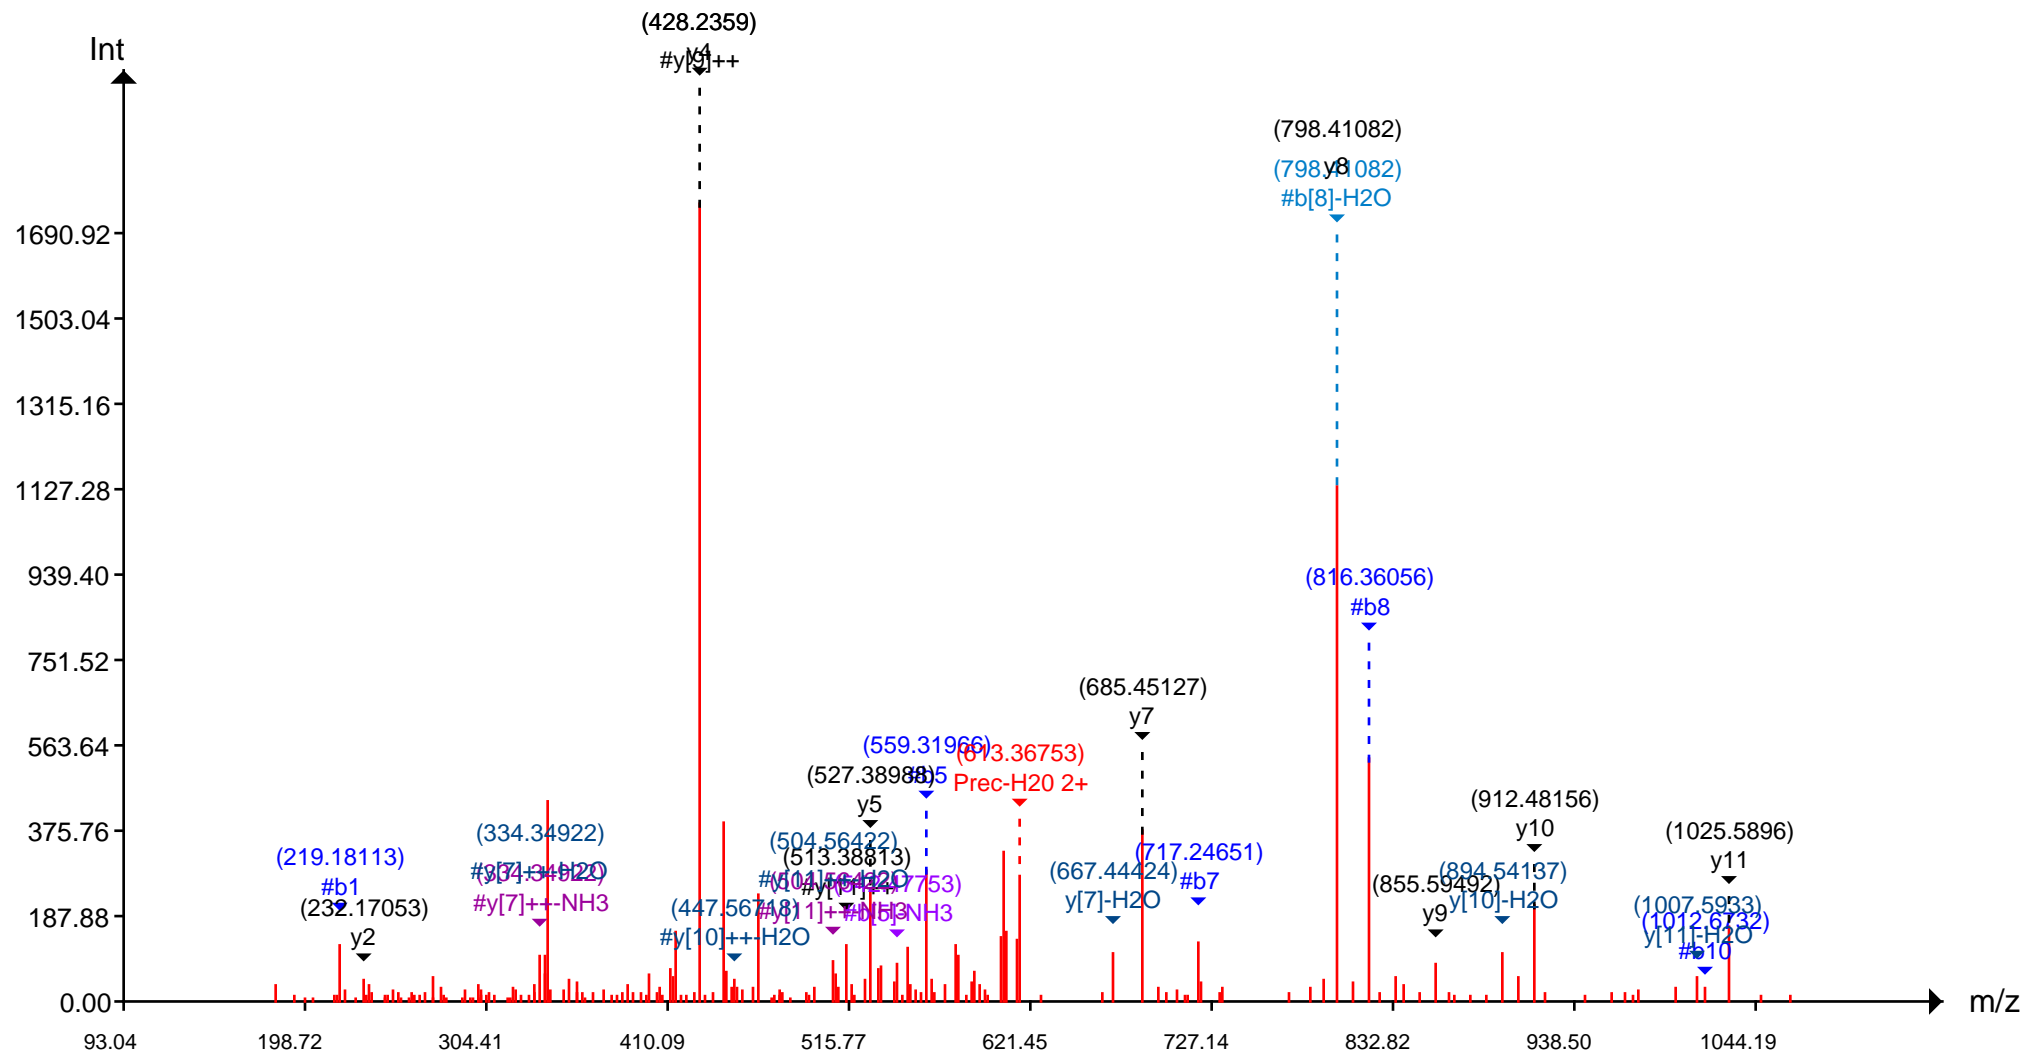

## Info

|                          |                                |                           |           |
|--------------------------|--------------------------------|---------------------------|-----------|
| <b>Modified Sequence</b> | AcD3-K<AcD3K*>IGGIGTVPVGR-COOH | <b>Ion score</b>          | 65.1      |
| <b>Protein</b>           | P10126, P62631                 | <b>Confidence level</b>   | 99.00%    |
| <b>Precursor m/z</b>     | 622.38511                      | <b>Identity Threshold</b> | 42.78     |
| <b>Charge</b>            | 2+                             | <b>Mass error</b>         | -0.001031 |

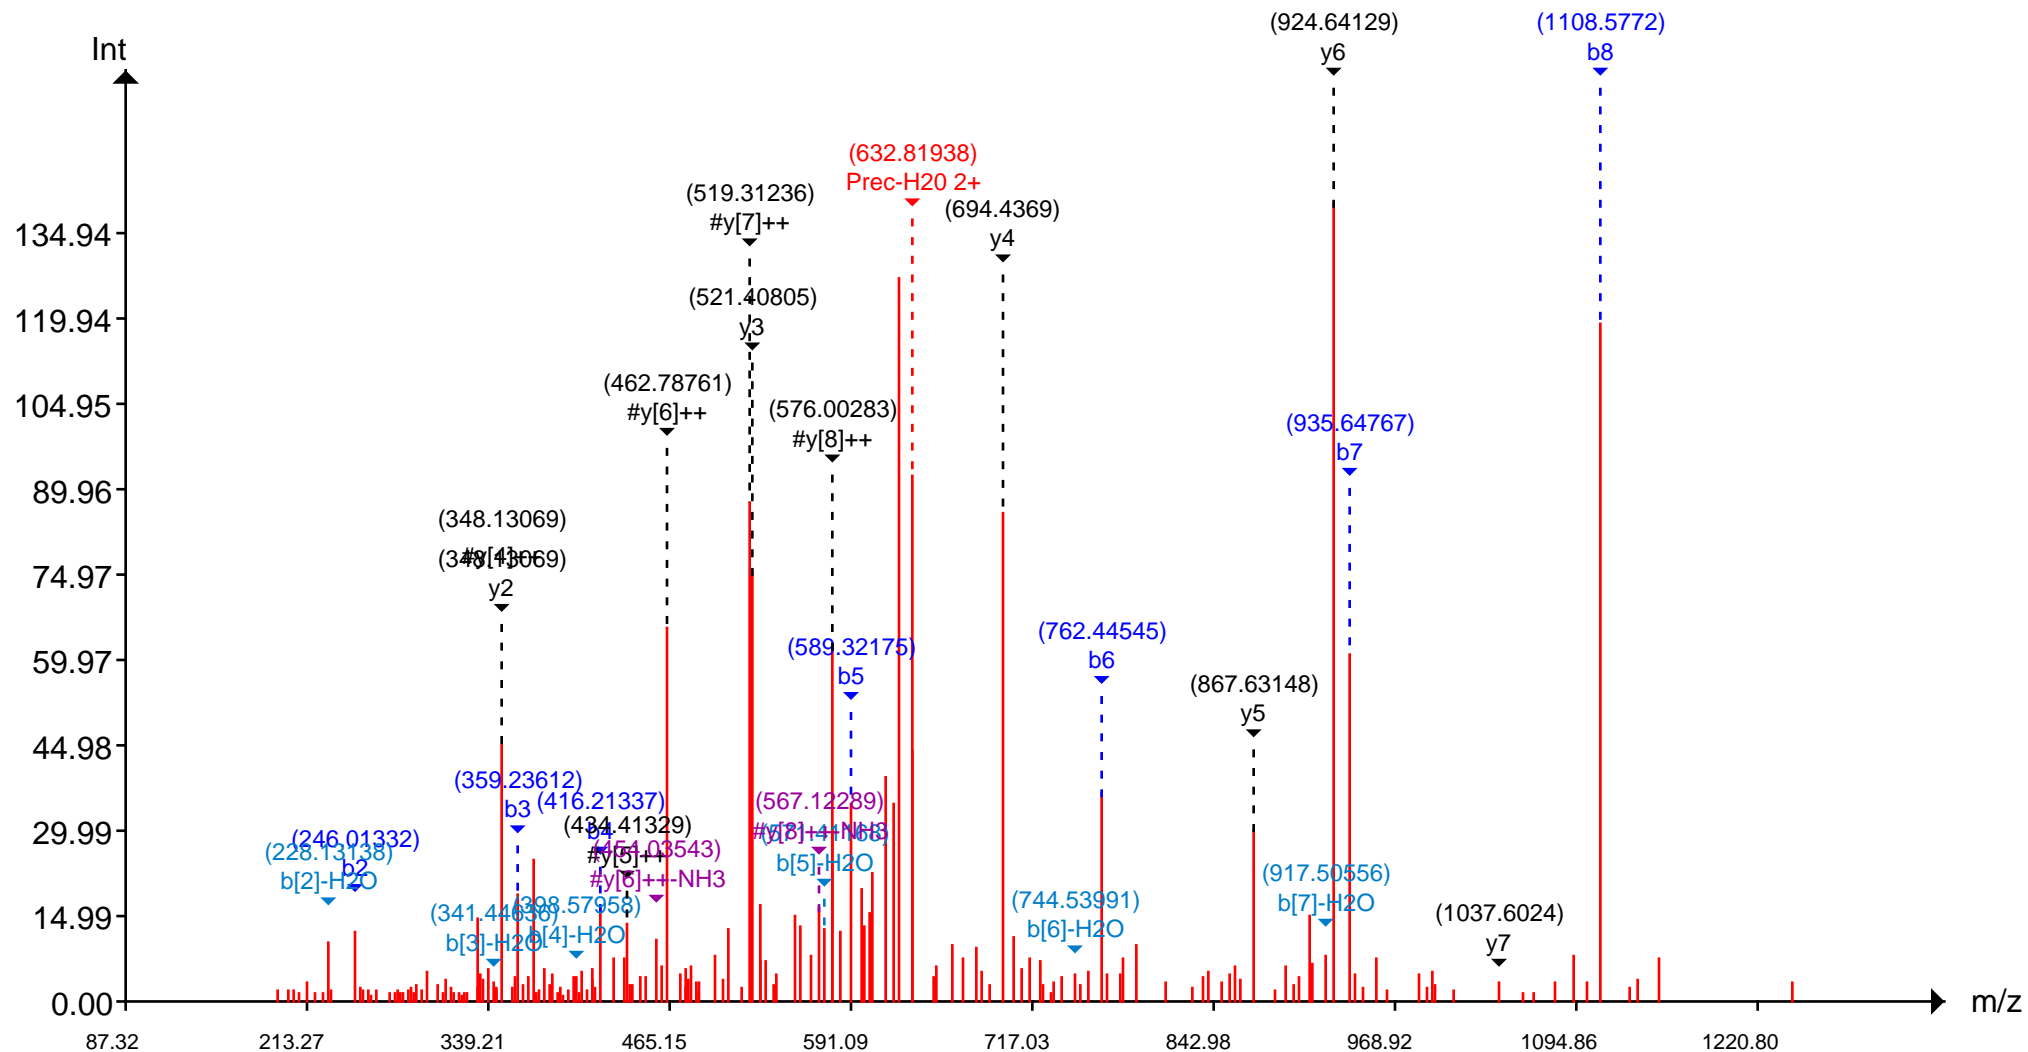

## Info

|                          |                                                     |                           |         |
|--------------------------|-----------------------------------------------------|---------------------------|---------|
| <b>Modified Sequence</b> | AcD3-SLLGK<AcD3K*>K<AcD3K*>K<AcD3K*>K<AcD3K*>R-COOH | <b>Ion score</b>          | 44.81   |
| <b>Protein</b>           | P51410                                              | <b>Confidence level</b>   | 99.00%  |
| <b>Precursor m/z</b>     | 641.93754                                           | <b>Identity Threshold</b> | 31.01   |
| <b>Charge</b>            | 2+                                                  | <b>Mass error</b>         | 4.21E-4 |

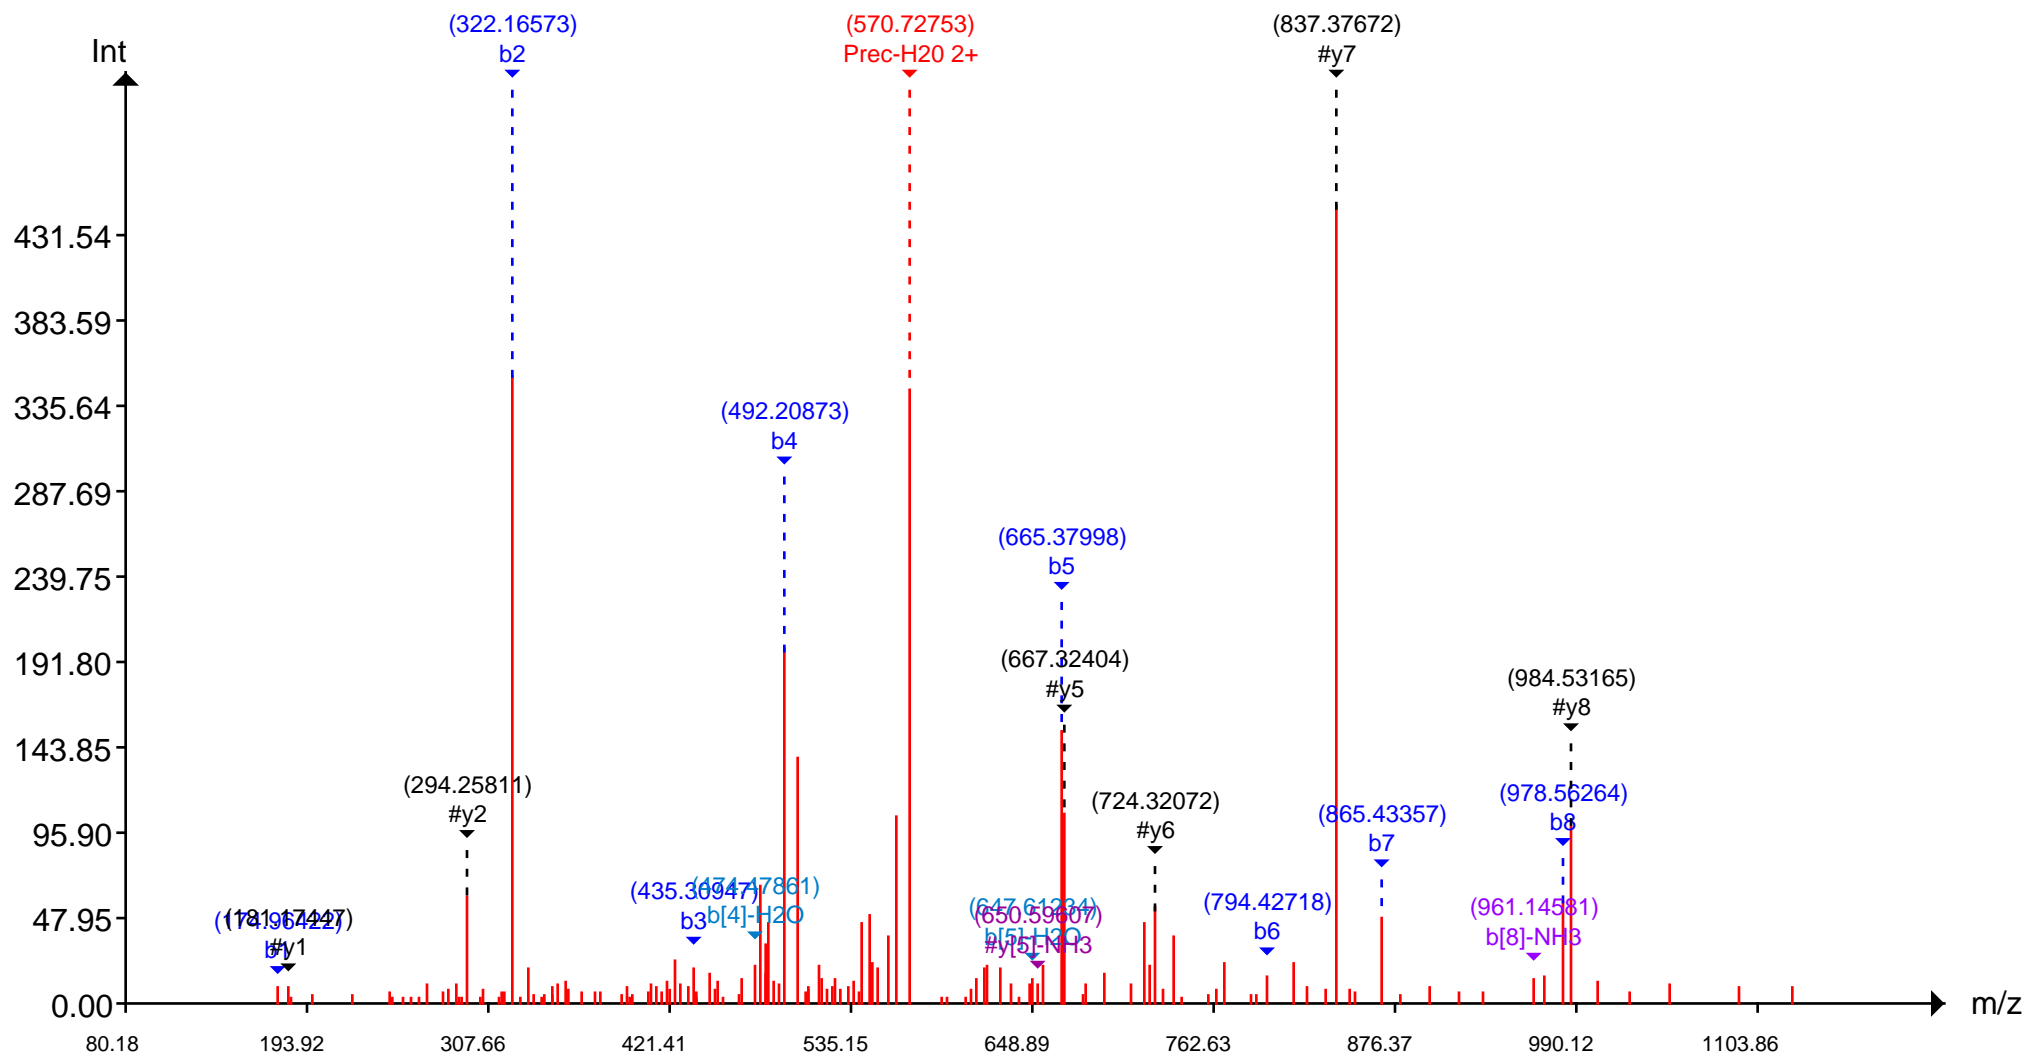

## Info

|                          |                                  |                           |         |
|--------------------------|----------------------------------|---------------------------|---------|
| <b>Modified Sequence</b> | AcD3-EFIGK<AcD3K*>EAIR<C13>-COOH | <b>Ion score</b>          | 49.75   |
| <b>Protein</b>           | Q8K448                           | <b>Confidence level</b>   | 99.00%  |
| <b>Precursor m/z</b>     | 579.84274                        | <b>Identity Threshold</b> | 46.05   |
| <b>Charge</b>            | 2+                               | <b>Mass error</b>         | 0.00508 |

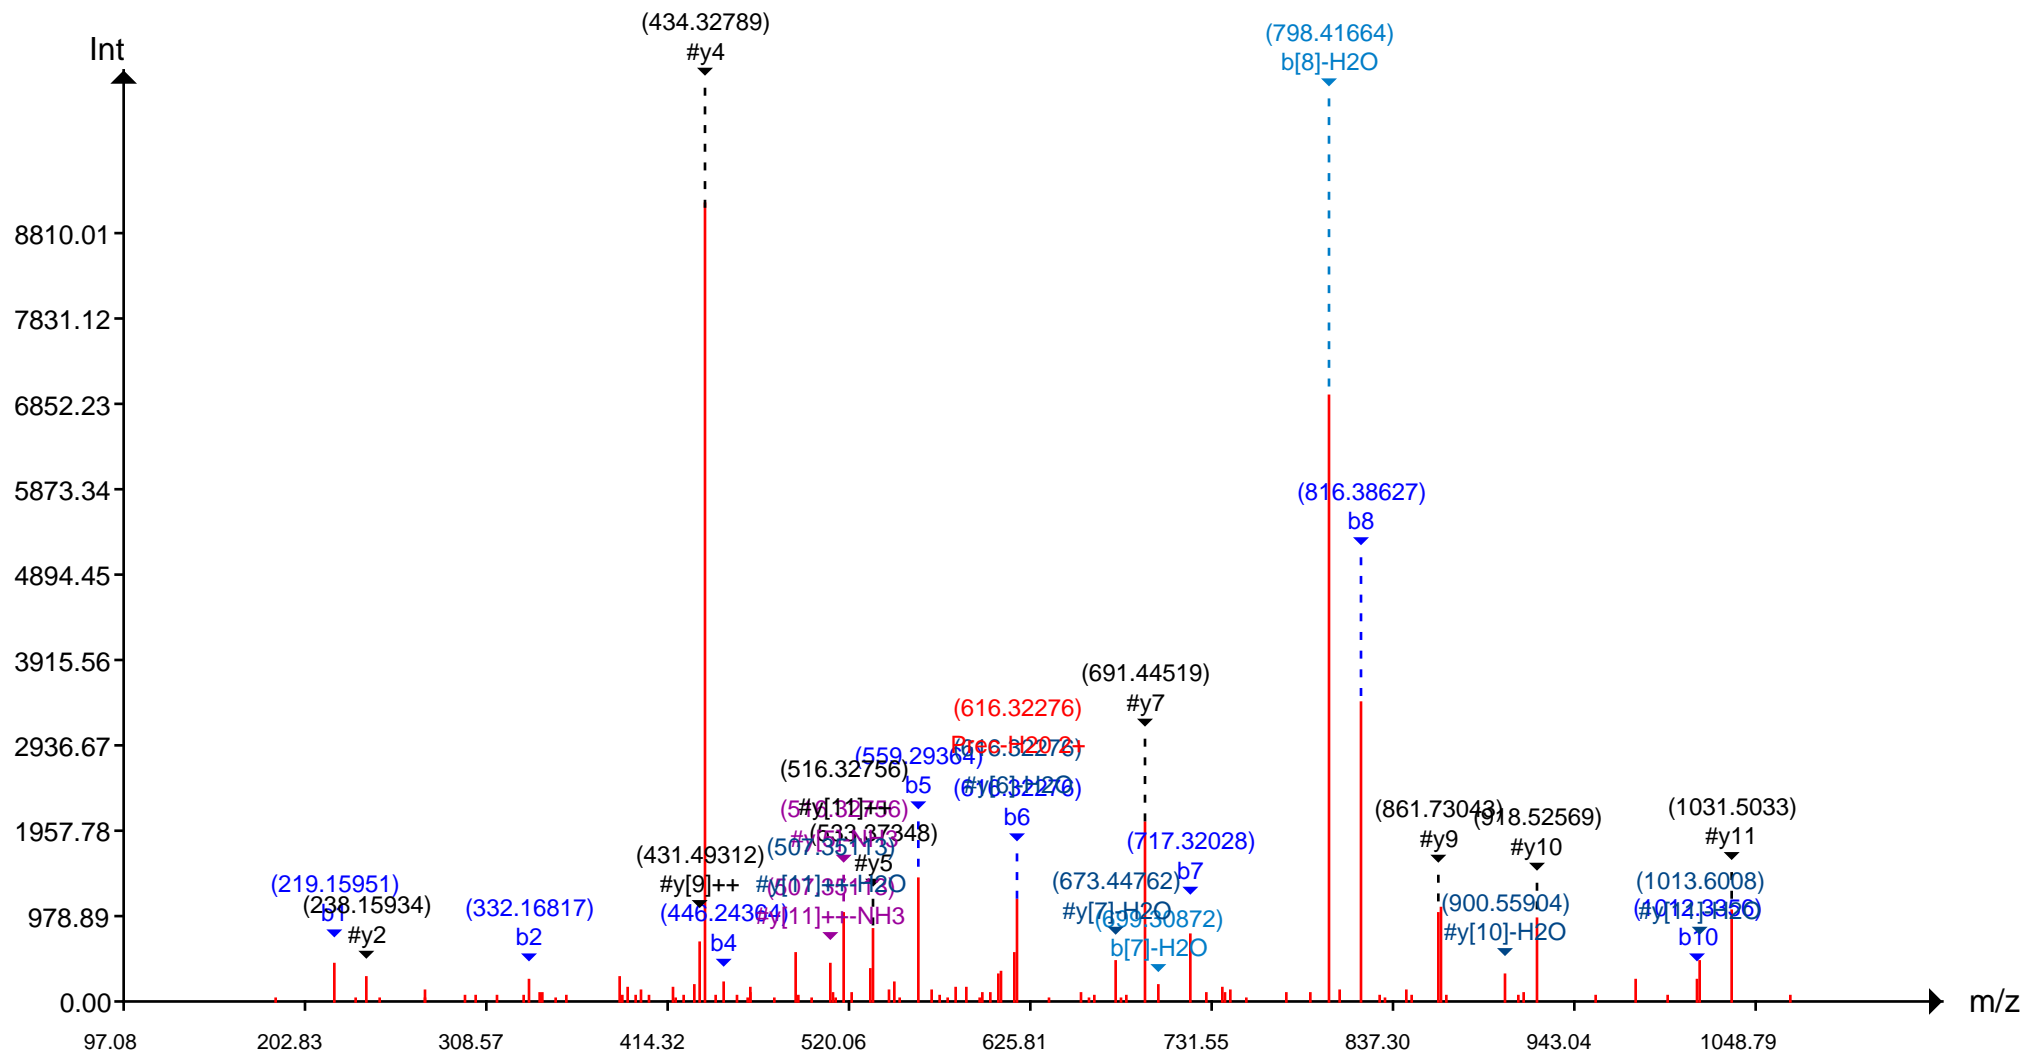

## Info

**Modified Sequence** AcD3-K<AcD3K\*>IGGIGTVPVGR<C13>-COOH

**Ion score** 58.64

**Protein** P10126, P62631

**Confidence level** 99.00%

**Precursor m/z** 625.39557

**Identity Threshold** 40.69

**Charge** 2+

**Mass error** -2.52E-4

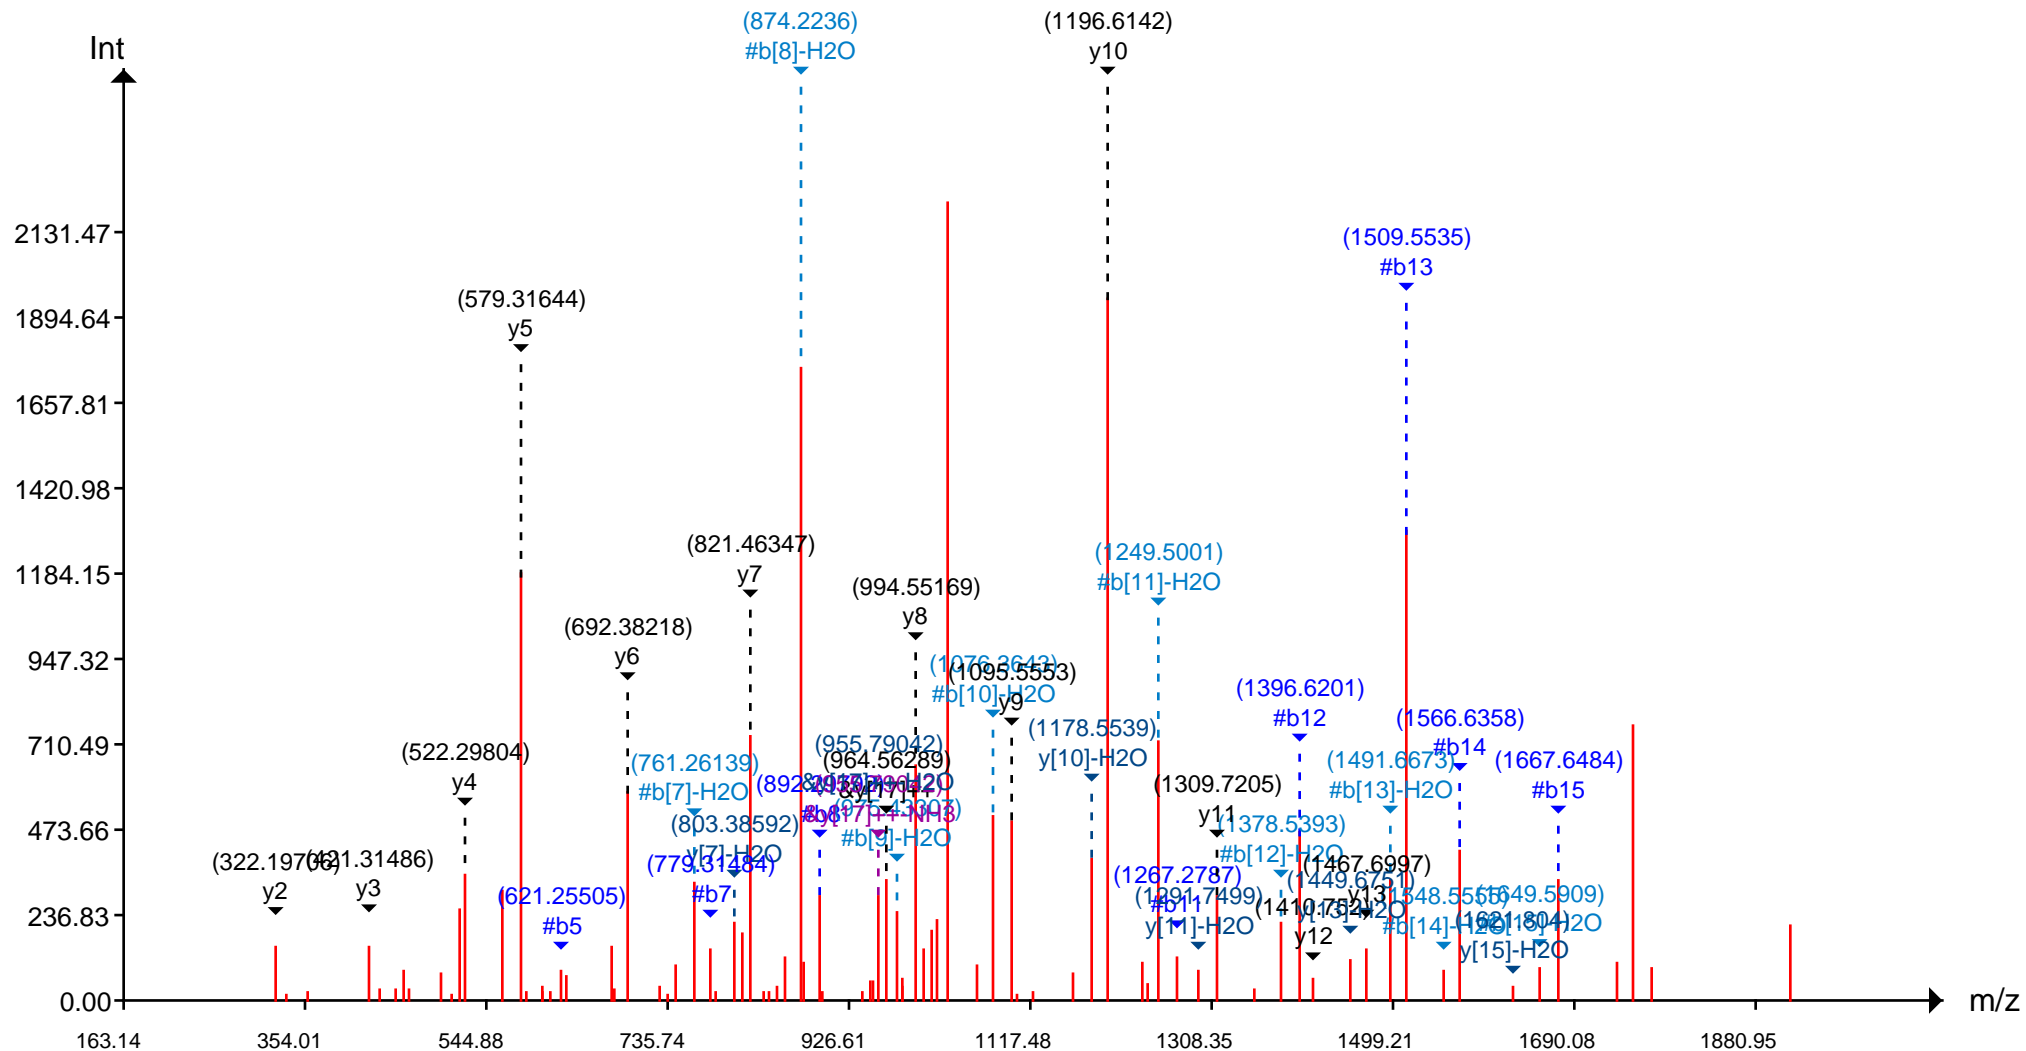

## Info

|                          |                                                    |                           |          |
|--------------------------|----------------------------------------------------|---------------------------|----------|
| <b>Modified Sequence</b> | AcD3-DK<AcD3K*>DGDGTITTK<AcD3K*>ELGTVM<Mox*>R-COOH | <b>Ion score</b>          | 93.05    |
| <b>Protein</b>           | P62204                                             | <b>Confidence level</b>   | 99.00%   |
| <b>Precursor m/z</b>     | 1044.529                                           | <b>Identity Threshold</b> | 47.74    |
| <b>Charge</b>            | 2+                                                 | <b>Mass error</b>         | 0.003165 |

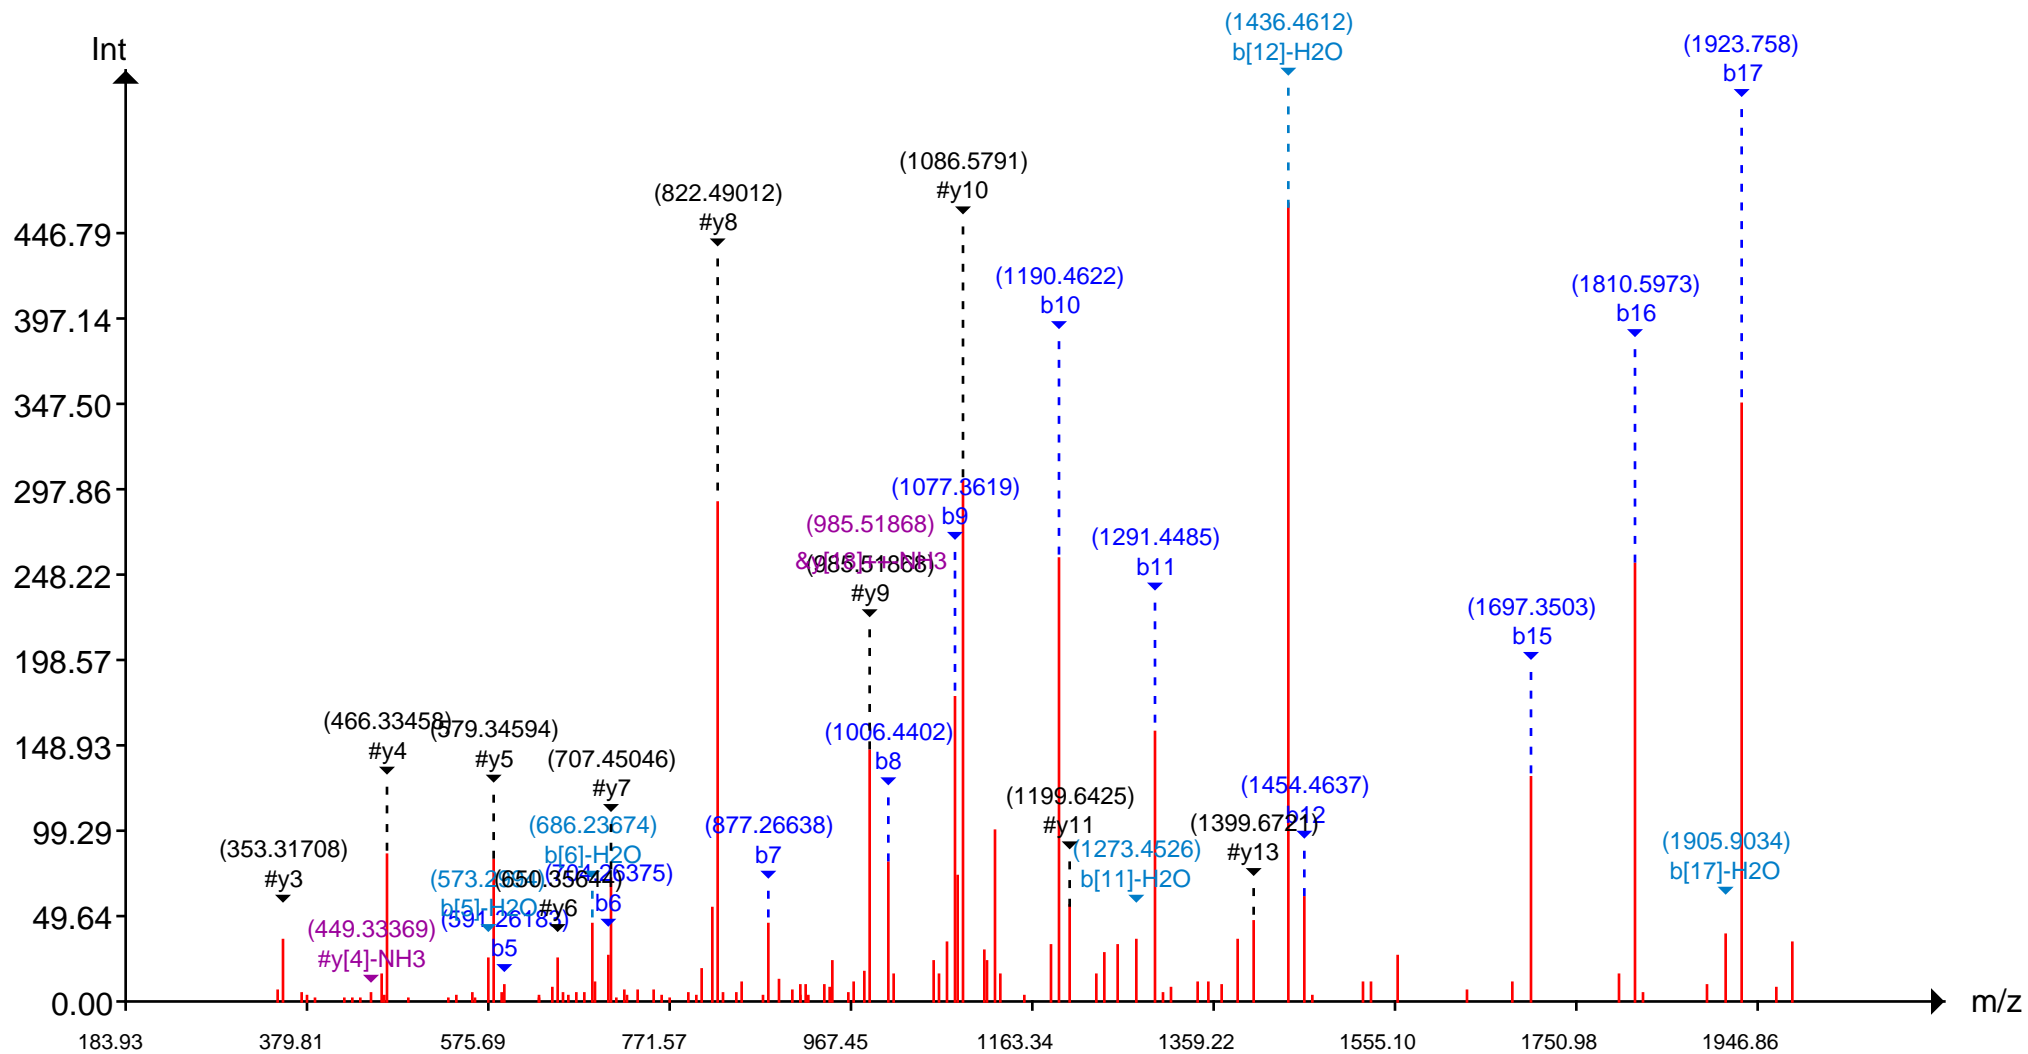

## Info

**Modified Sequence** AcD3-DEVDSLK<AcD3K\*>EALTYDGALLGDR<C13>-COOH

**Ion score** 70.26

**Protein** Q9WUK2

**Confidence level** 99.00%

**Precursor m/z** 1138.5808

**Identity Threshold** 47.91

**Charge** 2+

**Mass error** 0.003676





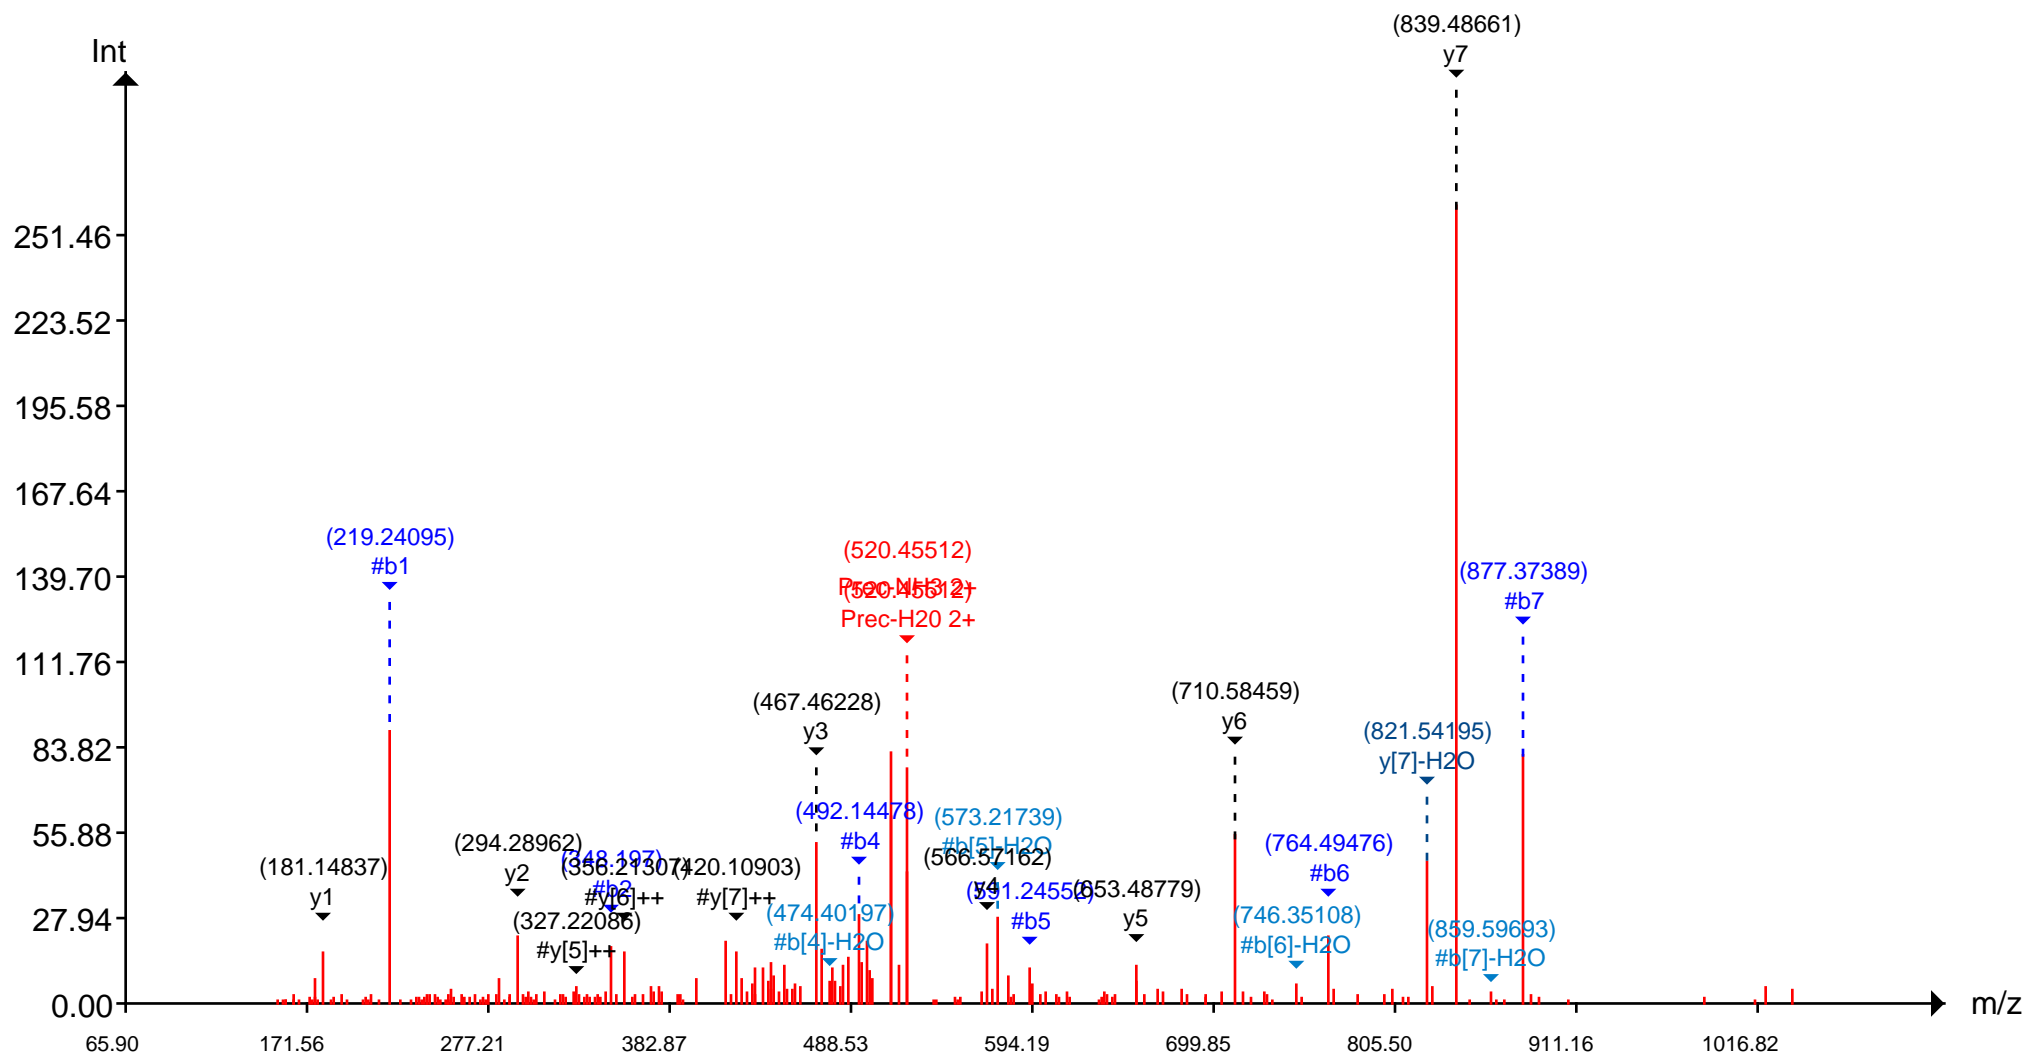

## Info

**Modified Sequence** AcD3-K<AcD3K\*>EGSVK<AcD3K\*>LR<C13>-COOH

**Ion score** 46.43

**Protein** Q9JLQ0

**Confidence level** 99.00%

**Precursor m/z** 529.33626

**Identity Threshold** 42.67

**Charge** 2+

**Mass error** -5.1E-4

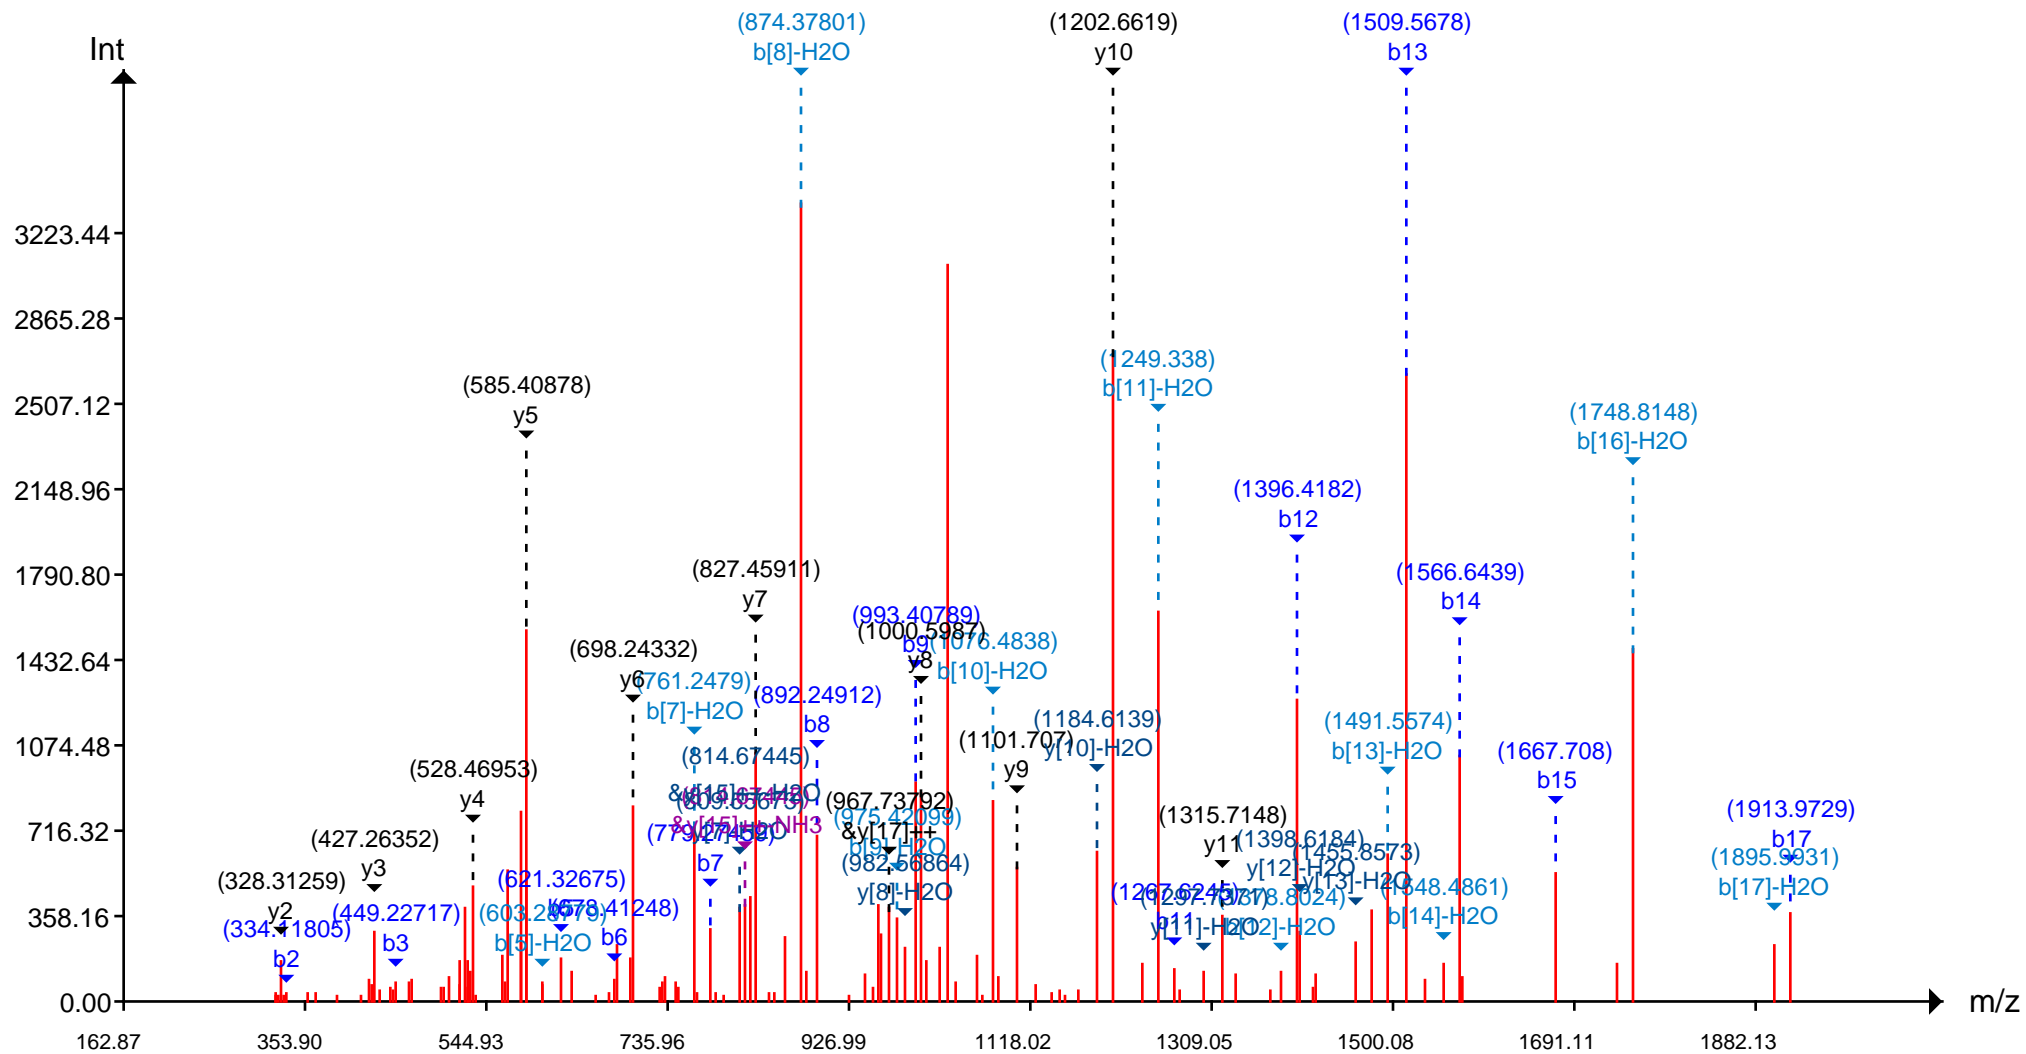

## Info

|                          |                                                         |                           |          |
|--------------------------|---------------------------------------------------------|---------------------------|----------|
| <b>Modified Sequence</b> | AcD3-DK<AcD3K*>DGDGTITTK<AcD3K*>ELGTVM<Mox*>R<C13>-COOH | <b>Ion score</b>          | 69.86    |
| <b>Protein</b>           | P62204                                                  | <b>Confidence level</b>   | 99.00%   |
| <b>Precursor m/z</b>     | 1047.5382                                               | <b>Identity Threshold</b> | 47.99    |
| <b>Charge</b>            | 2+                                                      | <b>Mass error</b>         | 0.001423 |

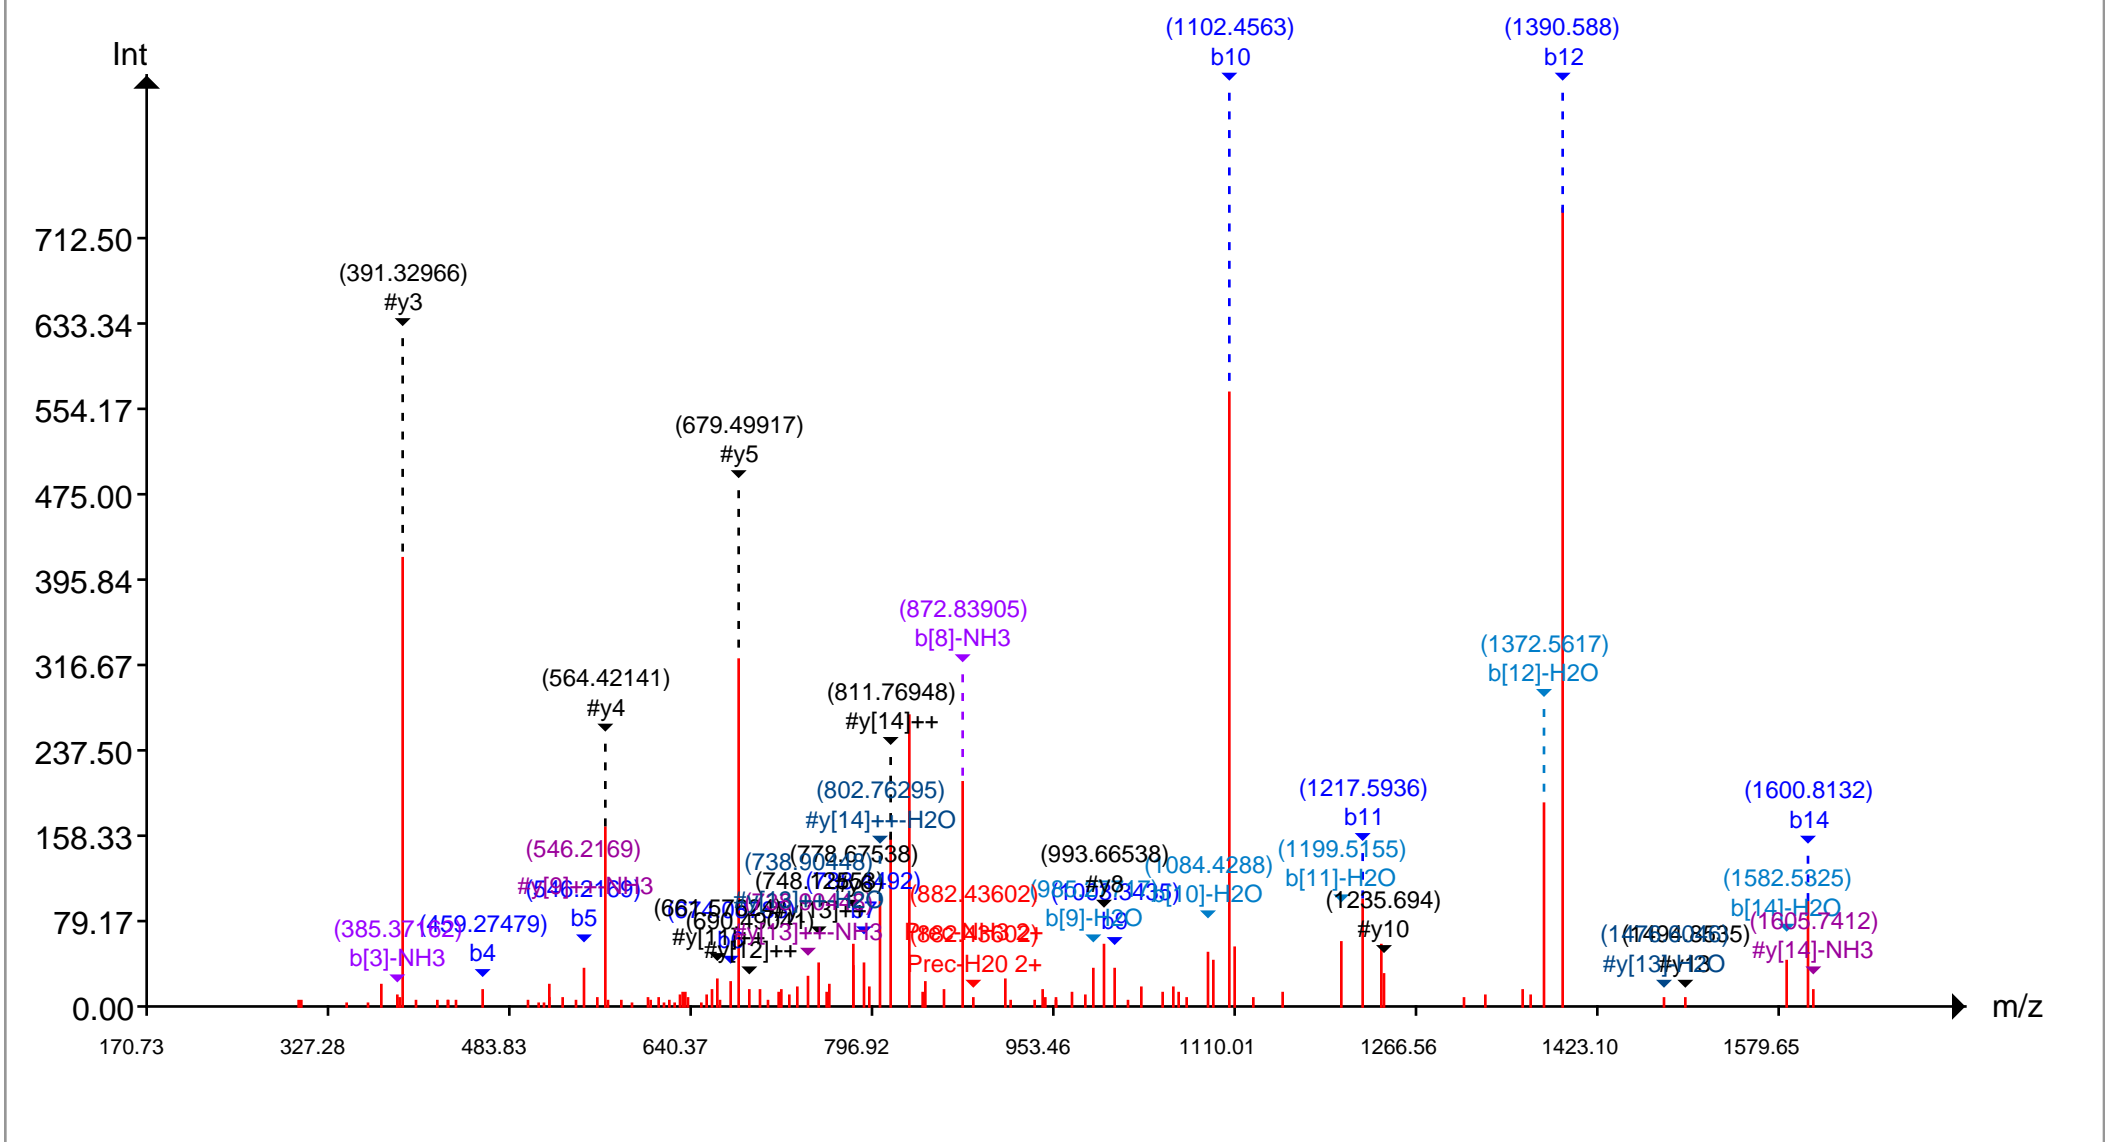

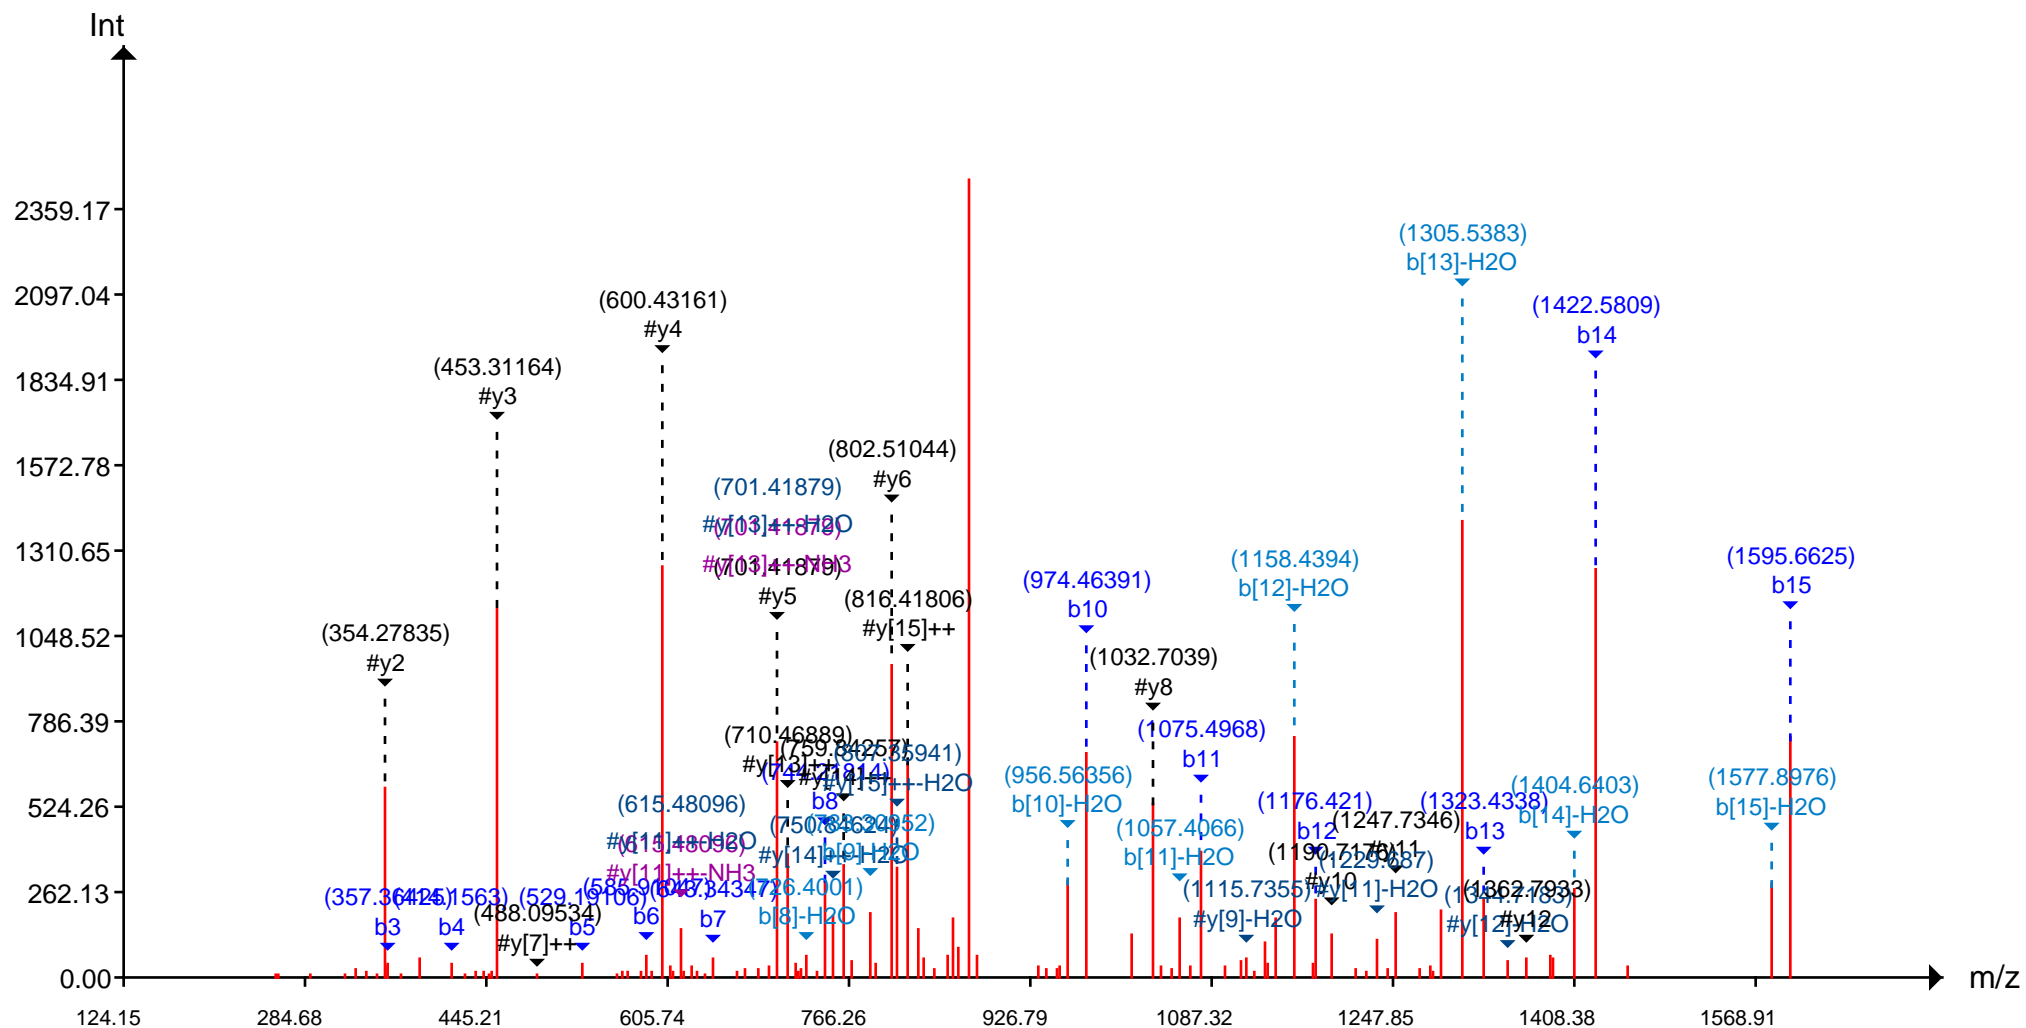

## Info

|                          |                                                 |                           |          |
|--------------------------|-------------------------------------------------|---------------------------|----------|
| <b>Modified Sequence</b> | AcD3-VLVGDGGTgk<AcD3K*>TTFVK<AcD3K*>R<C13>-COOH | <b>Ion score</b>          | 102.74   |
| <b>Protein</b>           | P62827                                          | <b>Confidence level</b>   | 99.00%   |
| <b>Precursor m/z</b>     | 888.52044                                       | <b>Identity Threshold</b> | 44.36    |
| <b>Charge</b>            | 2+                                              | <b>Mass error</b>         | 0.002799 |

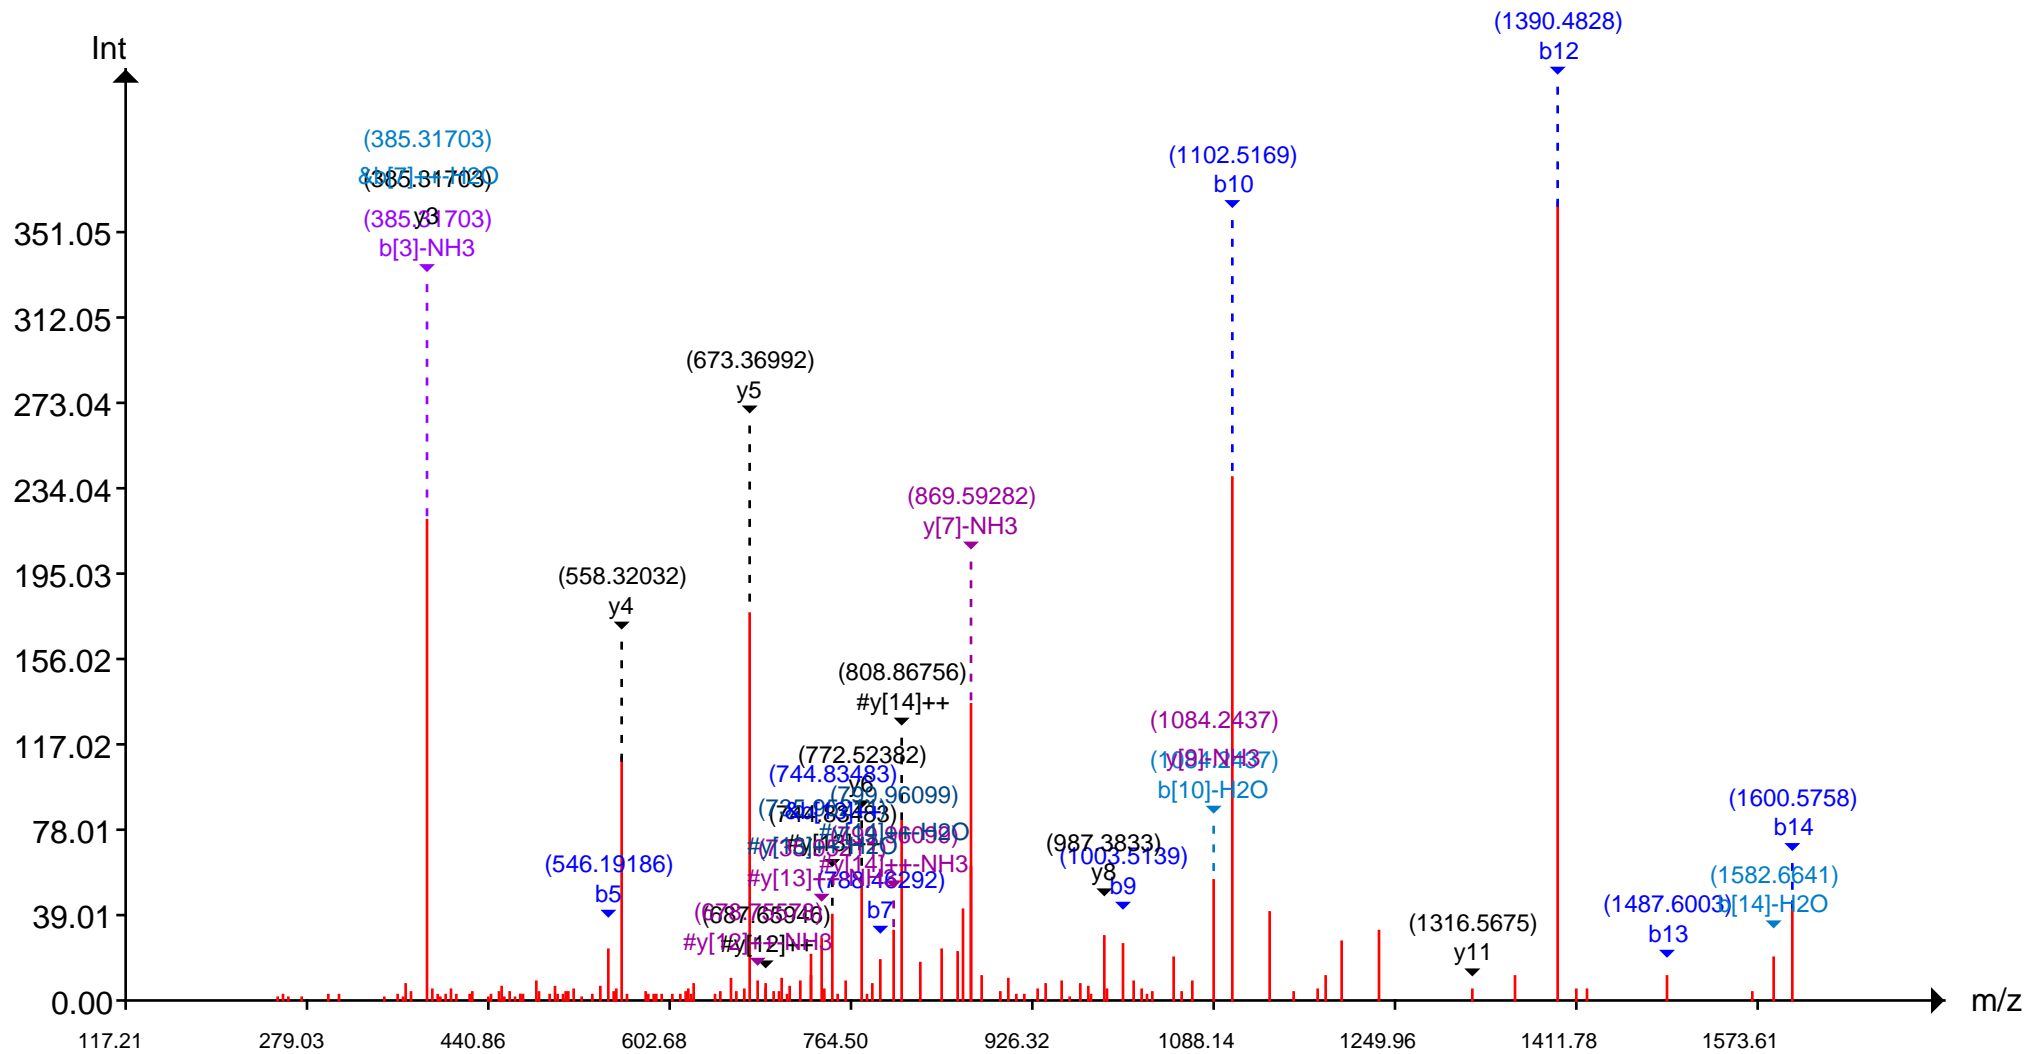

## Info

**Modified Sequence** AcD3-IQDGSQNTNVDK<AcD3K\*>PLR-COOH

**Ion score** 49.63

**Protein** Q3U0V1

**Confidence level** 99.00%

**Precursor m/z** 887.96501

**Identity Threshold** 48.13

**Charge** 2+

**Mass error** 0.002672



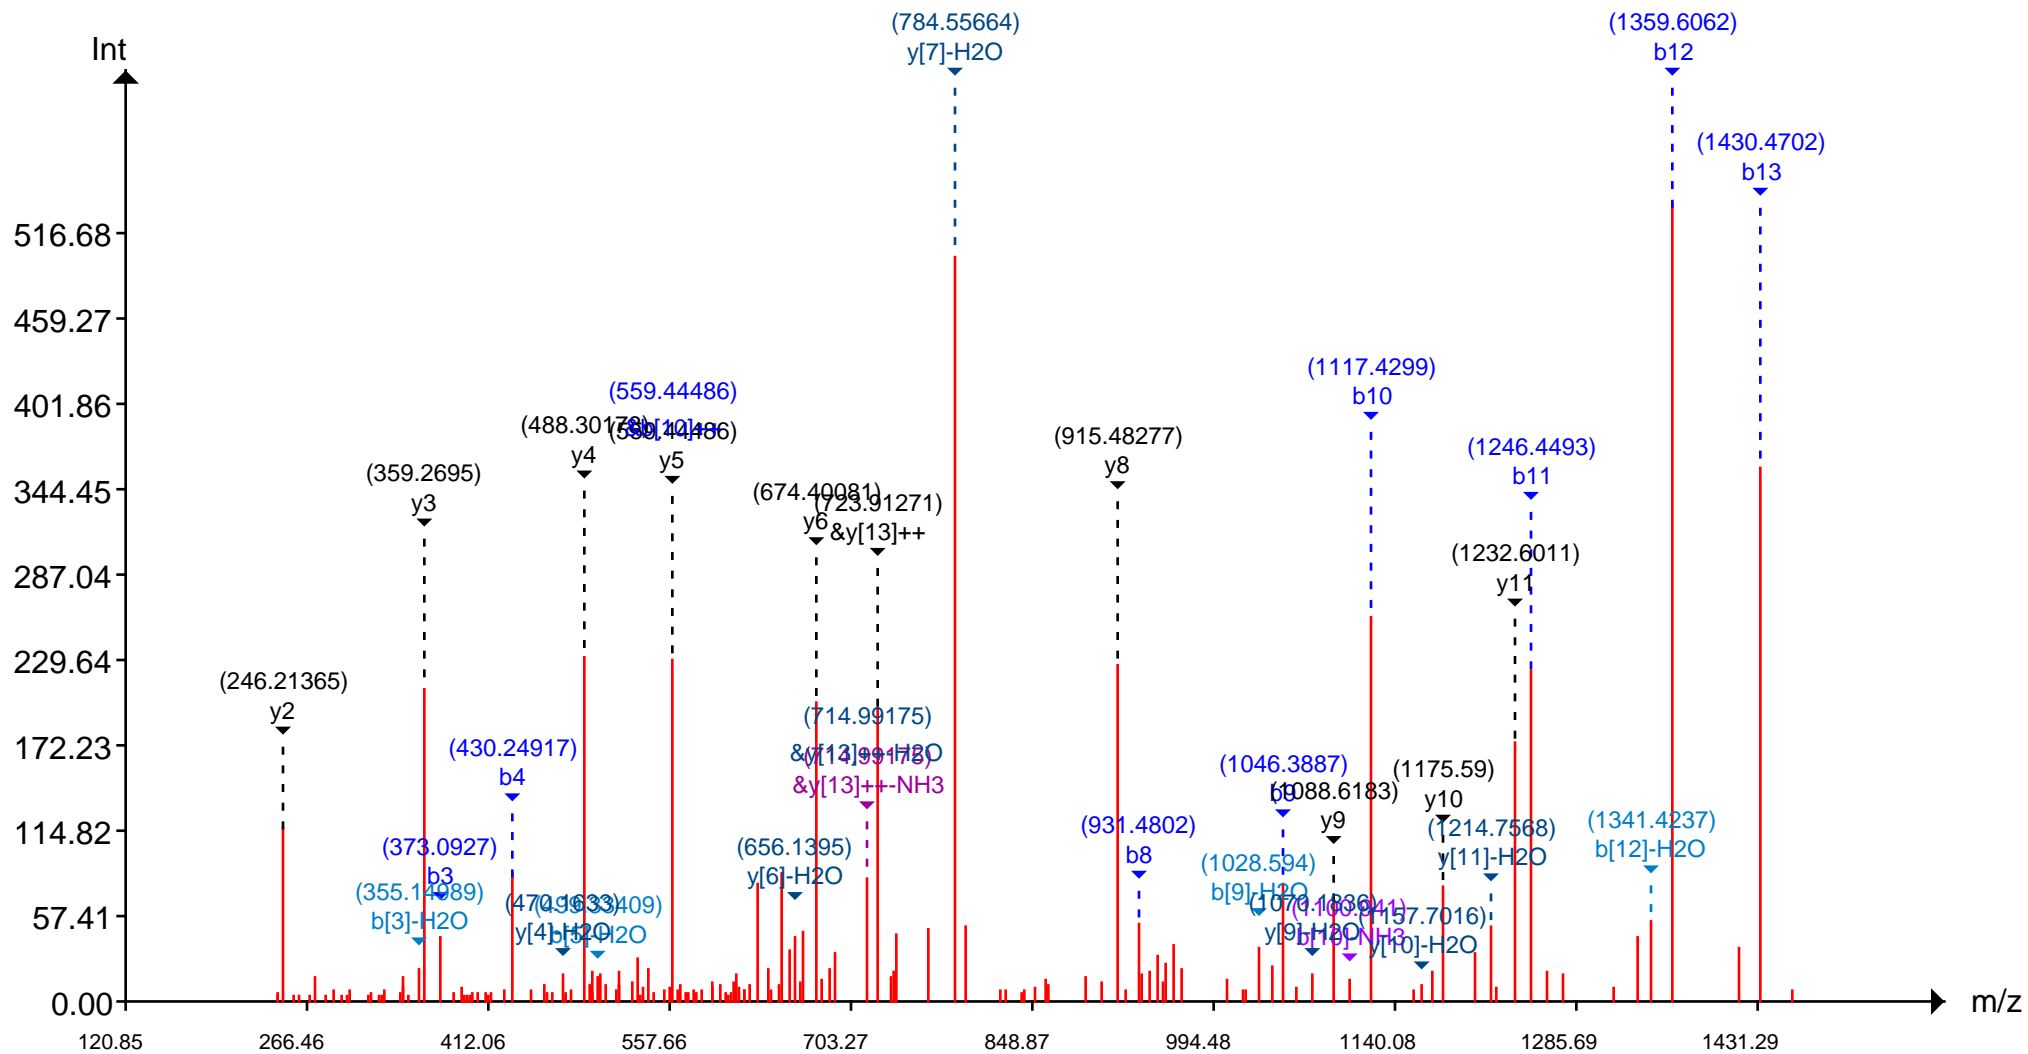

## Info

**Modified Sequence** AcD3-LTIGSK<AcD3K\*>LQDAEIAR-COOH

**Ion score** 62.54

**Protein** P14069

**Confidence level** 99.00%

**Precursor m/z** 802.96074

**Identity Threshold** 46.03

**Charge** 2+

**Mass error** 0.001761



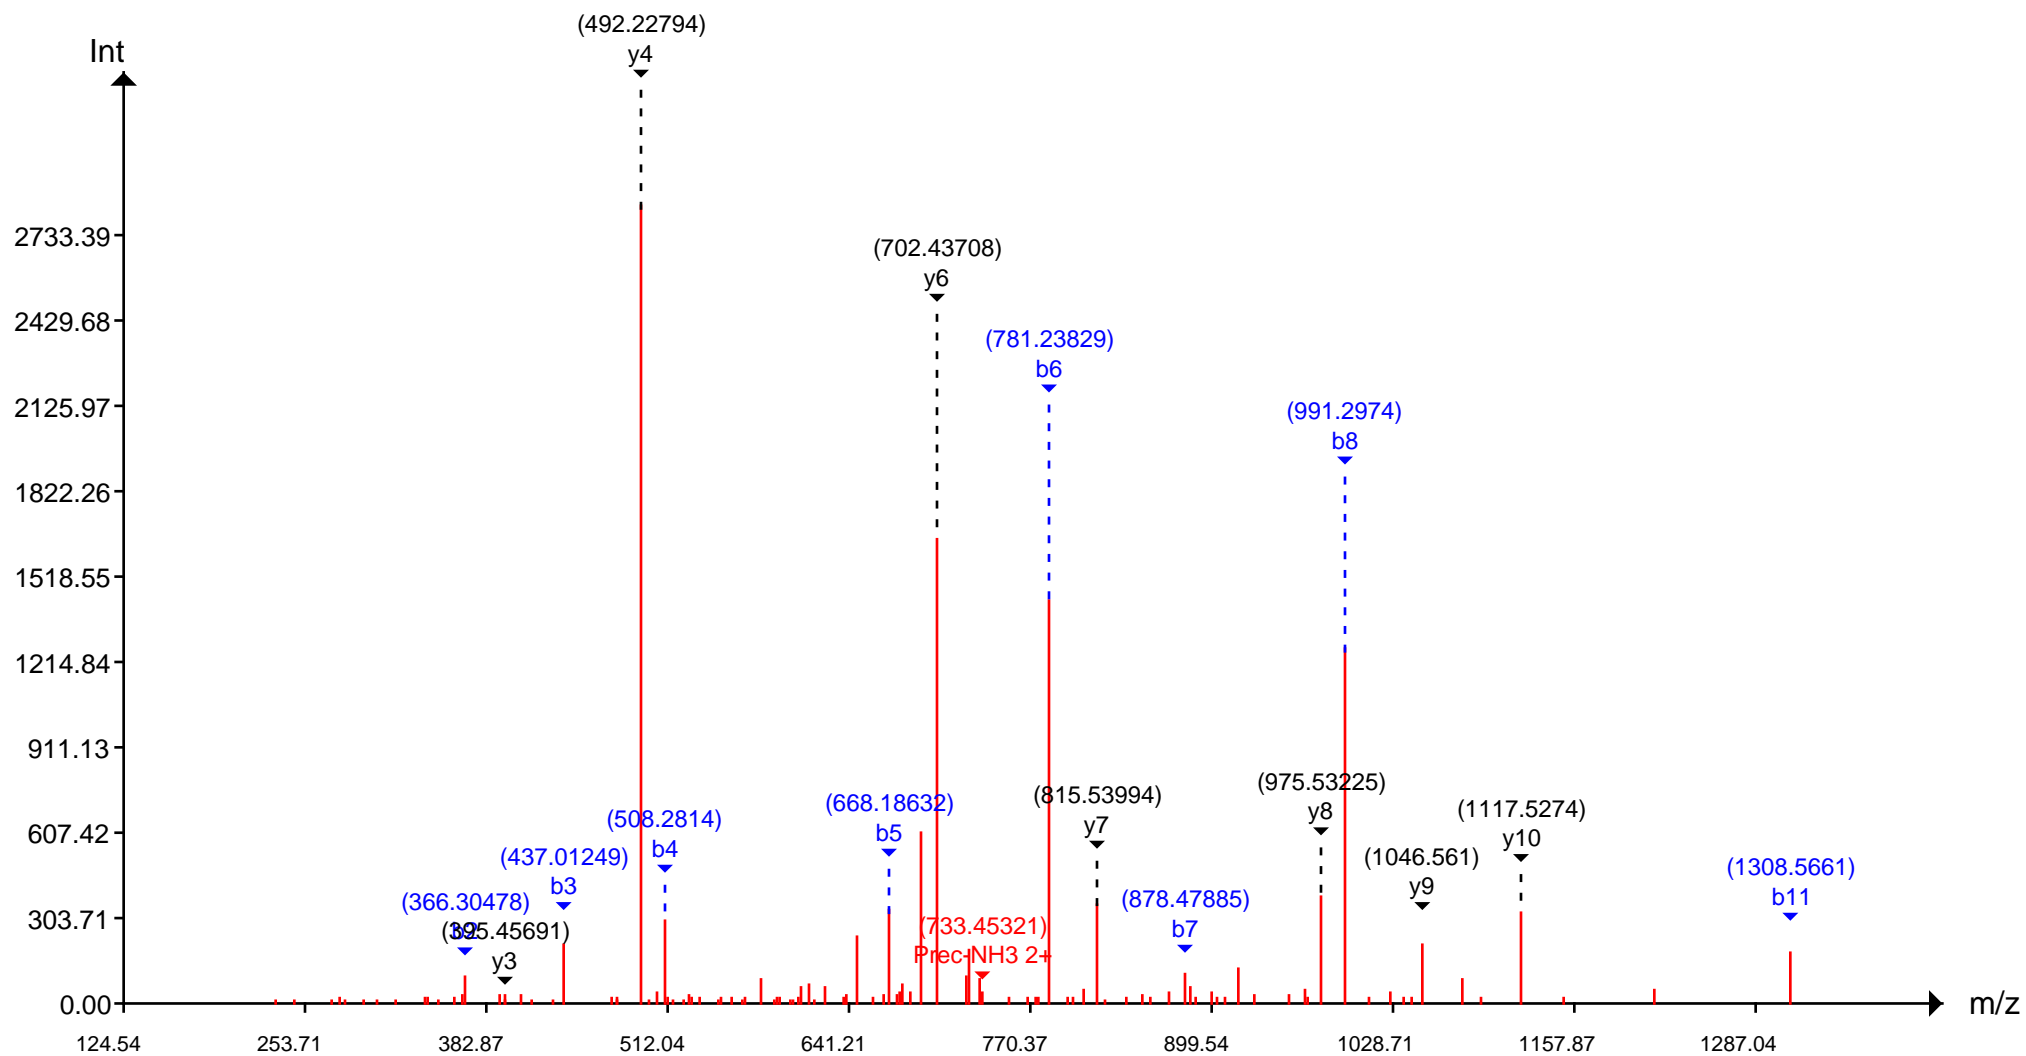

## Info

**Modified Sequence** AcD3-FK<AcD3K\*>AAC<Cmm\*>LPLPGYR-COOH

**Ion score** 53.75

**Protein** Q61233

**Confidence level** 99.00%

**Precursor m/z** 741.90653

**Identity Threshold** 47.78

**Charge** 2+

**Mass error** 0.001358

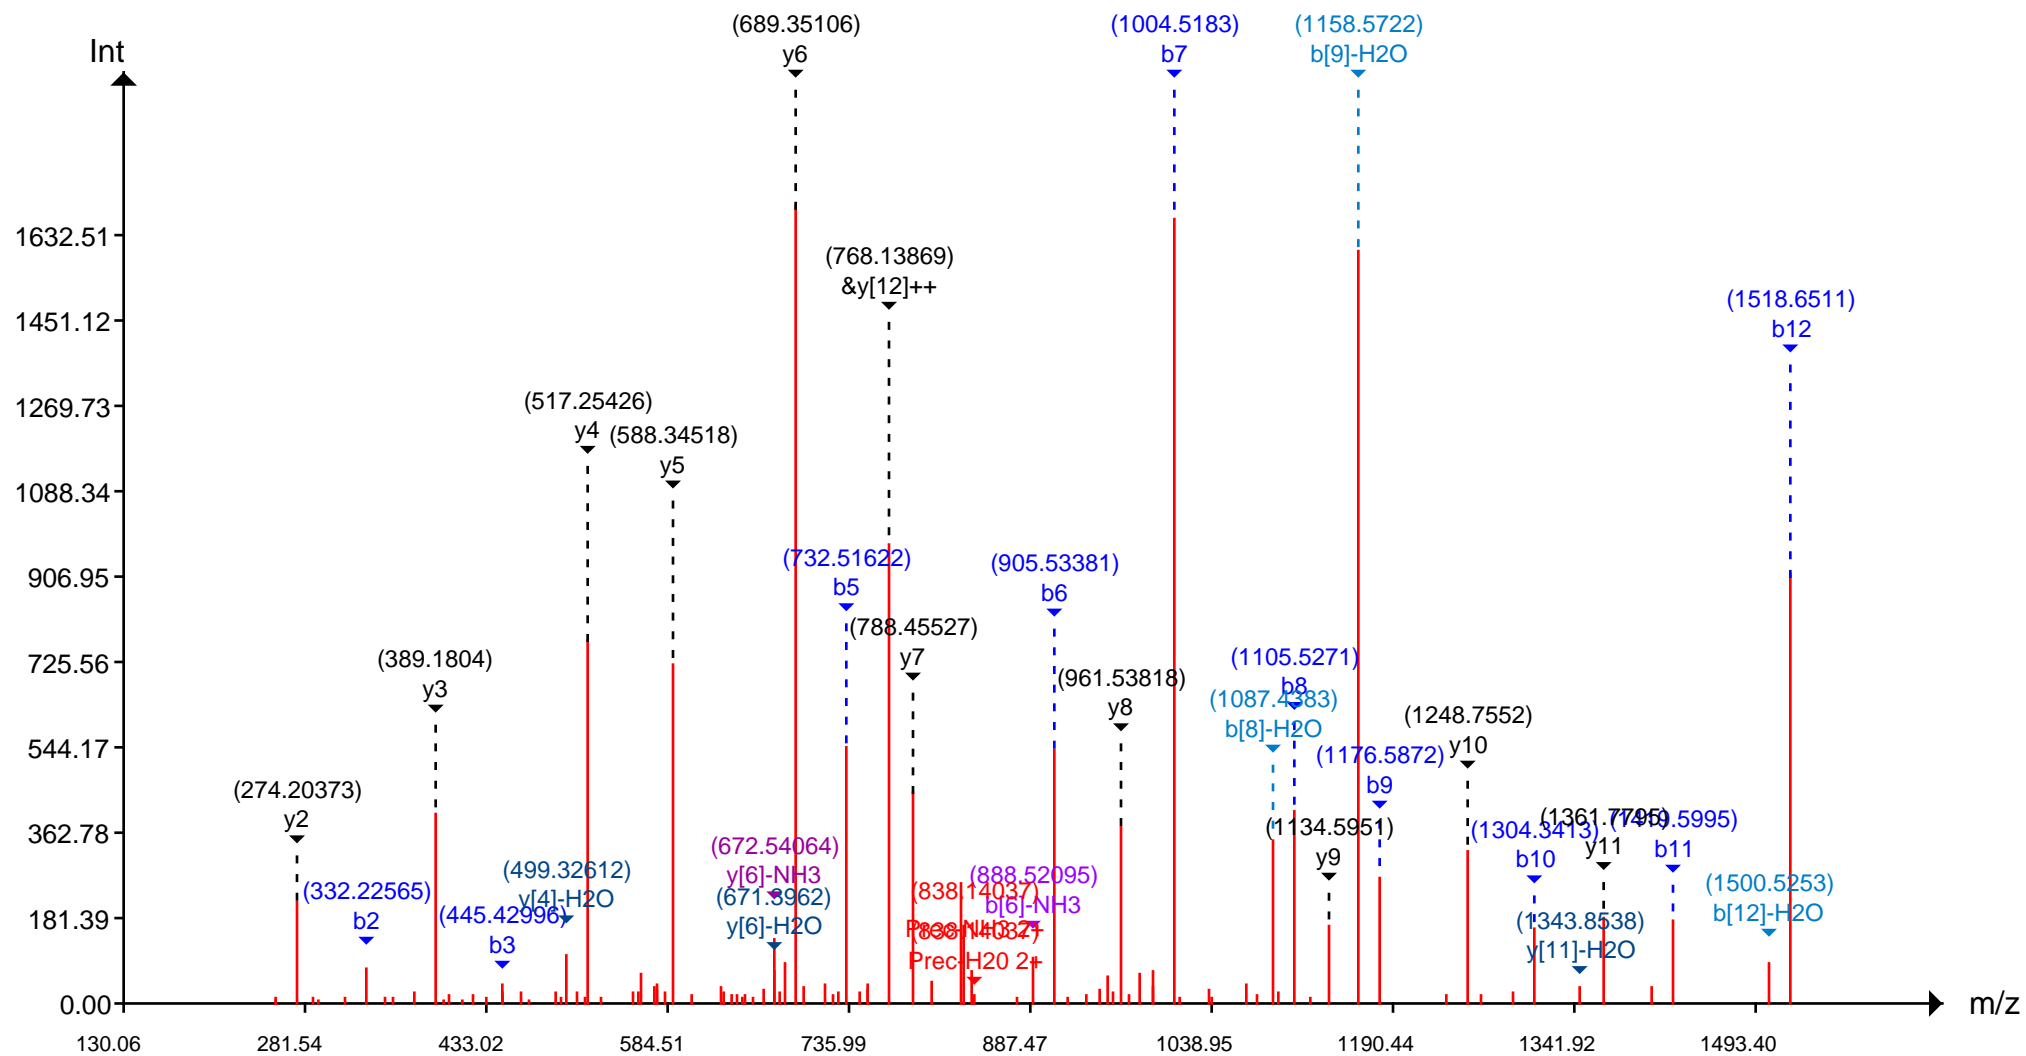

## Info

|                          |                                                 |                           |          |
|--------------------------|-------------------------------------------------|---------------------------|----------|
| <b>Modified Sequence</b> | AcD3-LK<AcD3K*>LNK<AcD3K*>K<AcD3K*>VTAQDVR-COOH | <b>Ion score</b>          | 95.0     |
| <b>Protein</b>           | P26041                                          | <b>Confidence level</b>   | 99.00%   |
| <b>Precursor m/z</b>     | 847.02432                                       | <b>Identity Threshold</b> | 39.48    |
| <b>Charge</b>            | 2+                                              | <b>Mass error</b>         | 0.001755 |

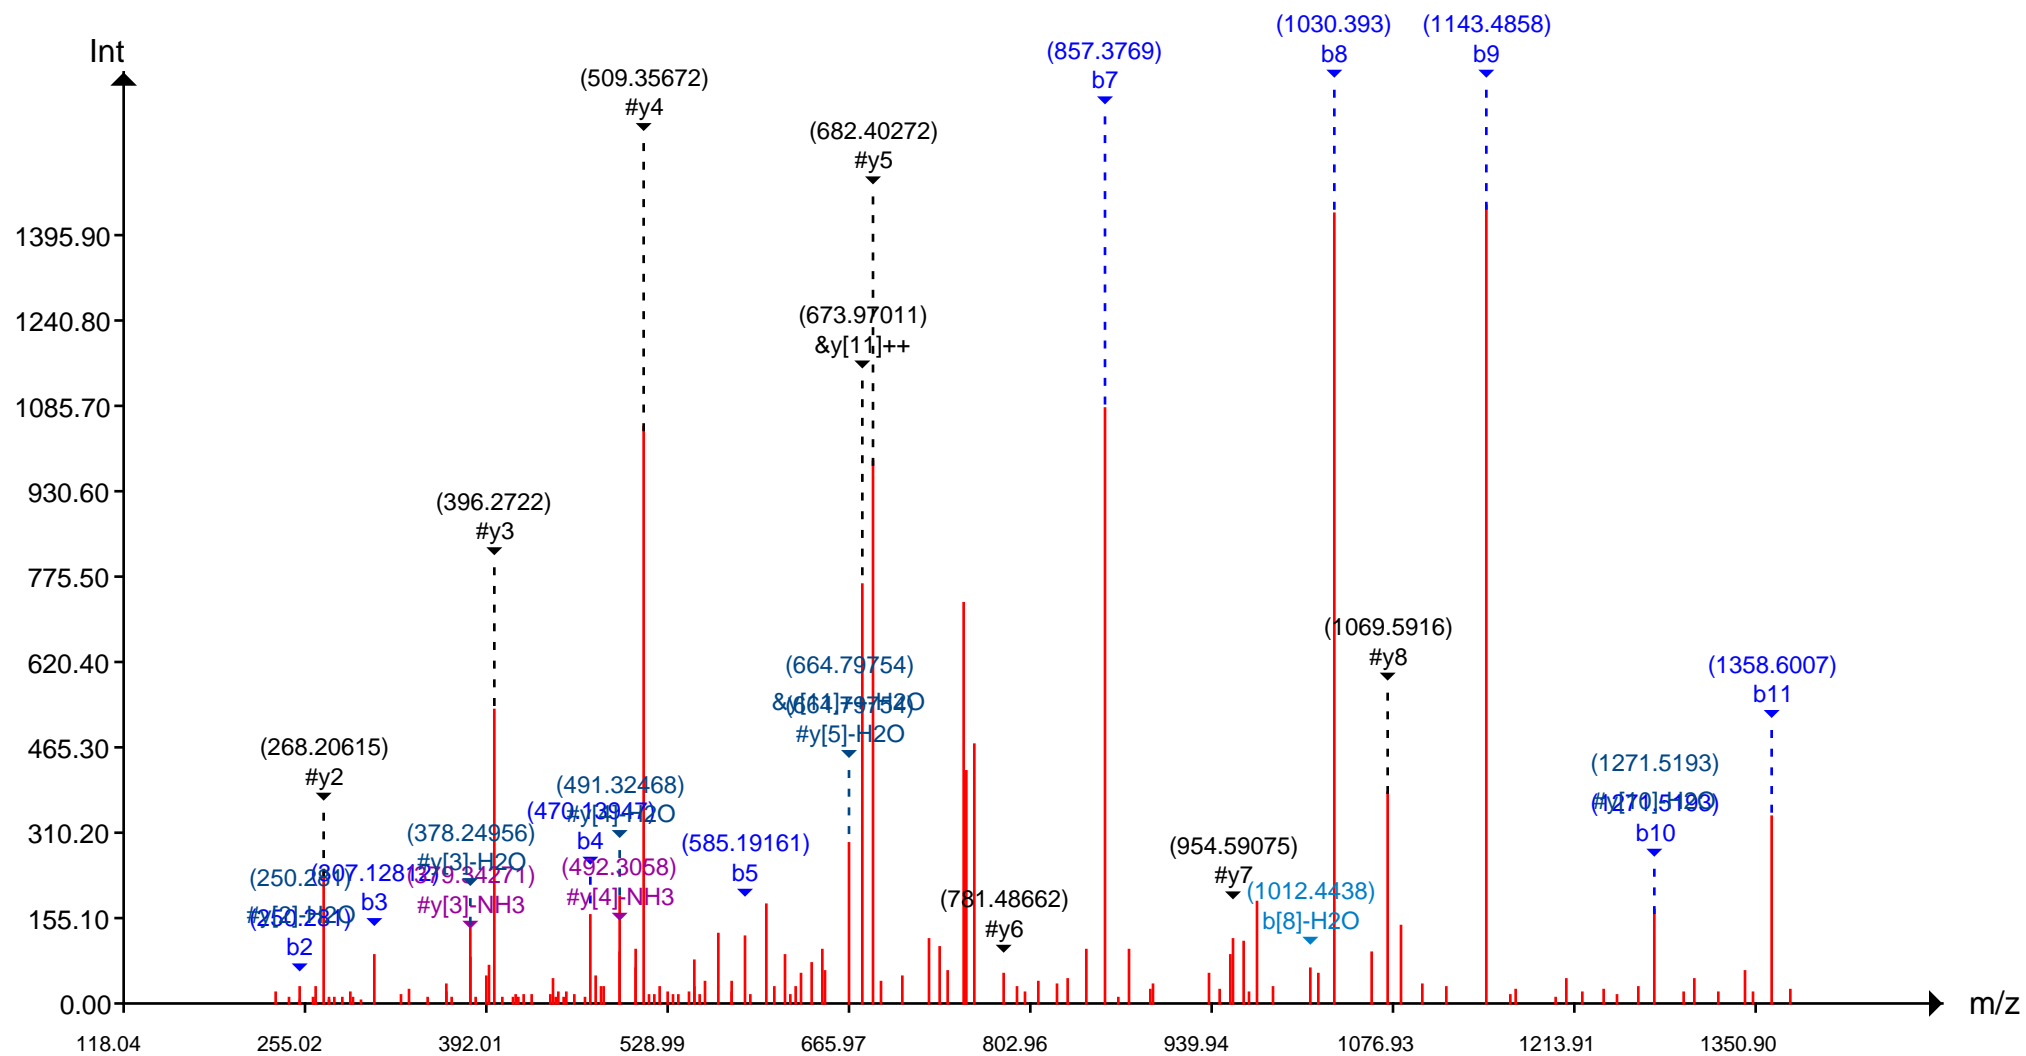

## Info

|                          |                                             |                           |          |
|--------------------------|---------------------------------------------|---------------------------|----------|
| <b>Modified Sequence</b> | AcD3-FGGYDK<AcD3K*>VK<AcD3K*>LQSR<C13>-COOH | <b>Ion score</b>          | 58.05    |
| <b>Protein</b>           | Q62465                                      | <b>Confidence level</b>   | 99.00%   |
| <b>Precursor m/z</b>     | 769.9351                                    | <b>Identity Threshold</b> | 46.90    |
| <b>Charge</b>            | 2+                                          | <b>Mass error</b>         | 0.001018 |

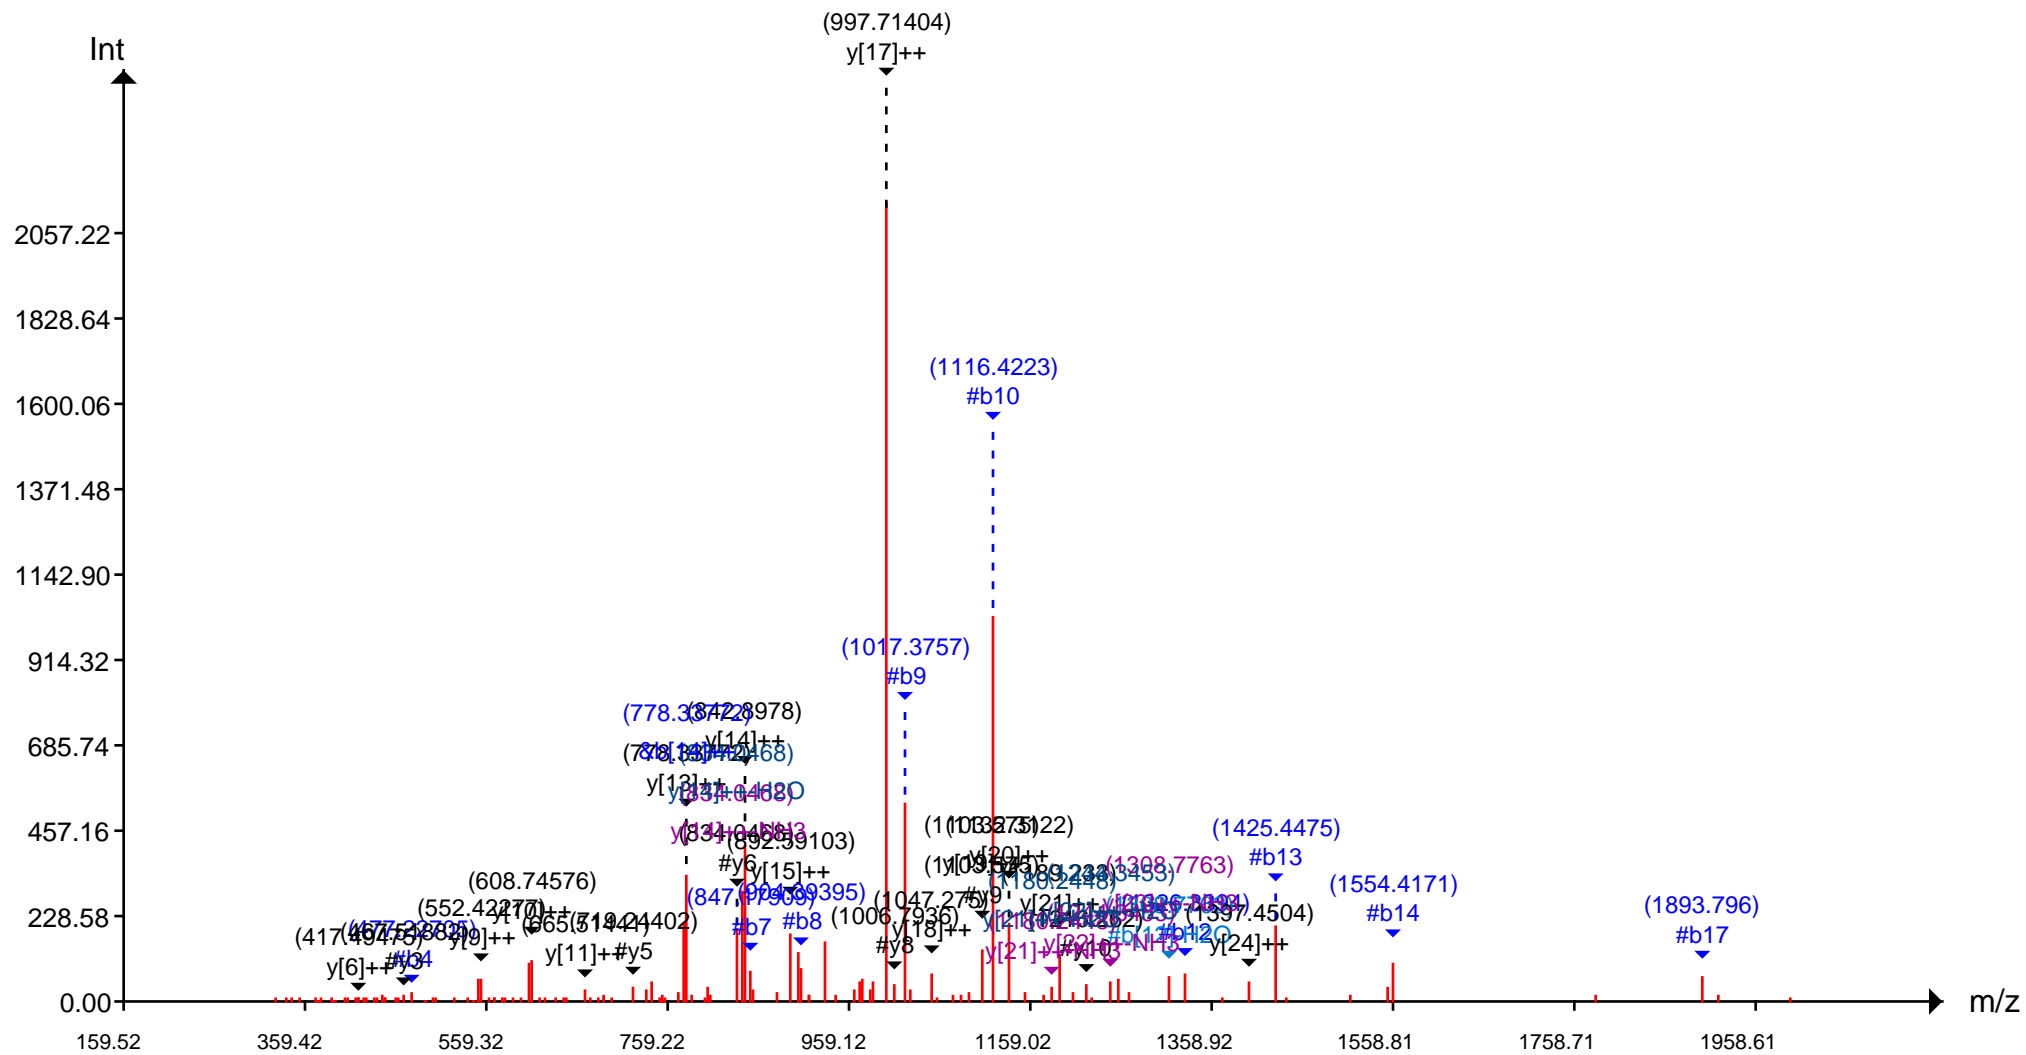

## Info

|                          |                                                          |                           |          |
|--------------------------|----------------------------------------------------------|---------------------------|----------|
| <b>Modified Sequence</b> | AcD3-ASIC<Cmm*>QQNGIVPIVEPEILPDGDHDLK<AcD3K*>R<C13>-COOH | <b>Ion score</b>          | 70.48    |
| <b>Protein</b>           | P05064, P05063                                           | <b>Confidence level</b>   | 99.00%   |
| <b>Precursor m/z</b>     | 1037.2123                                                | <b>Identity Threshold</b> | 47.17    |
| <b>Charge</b>            | 3+                                                       | <b>Mass error</b>         | 0.002279 |

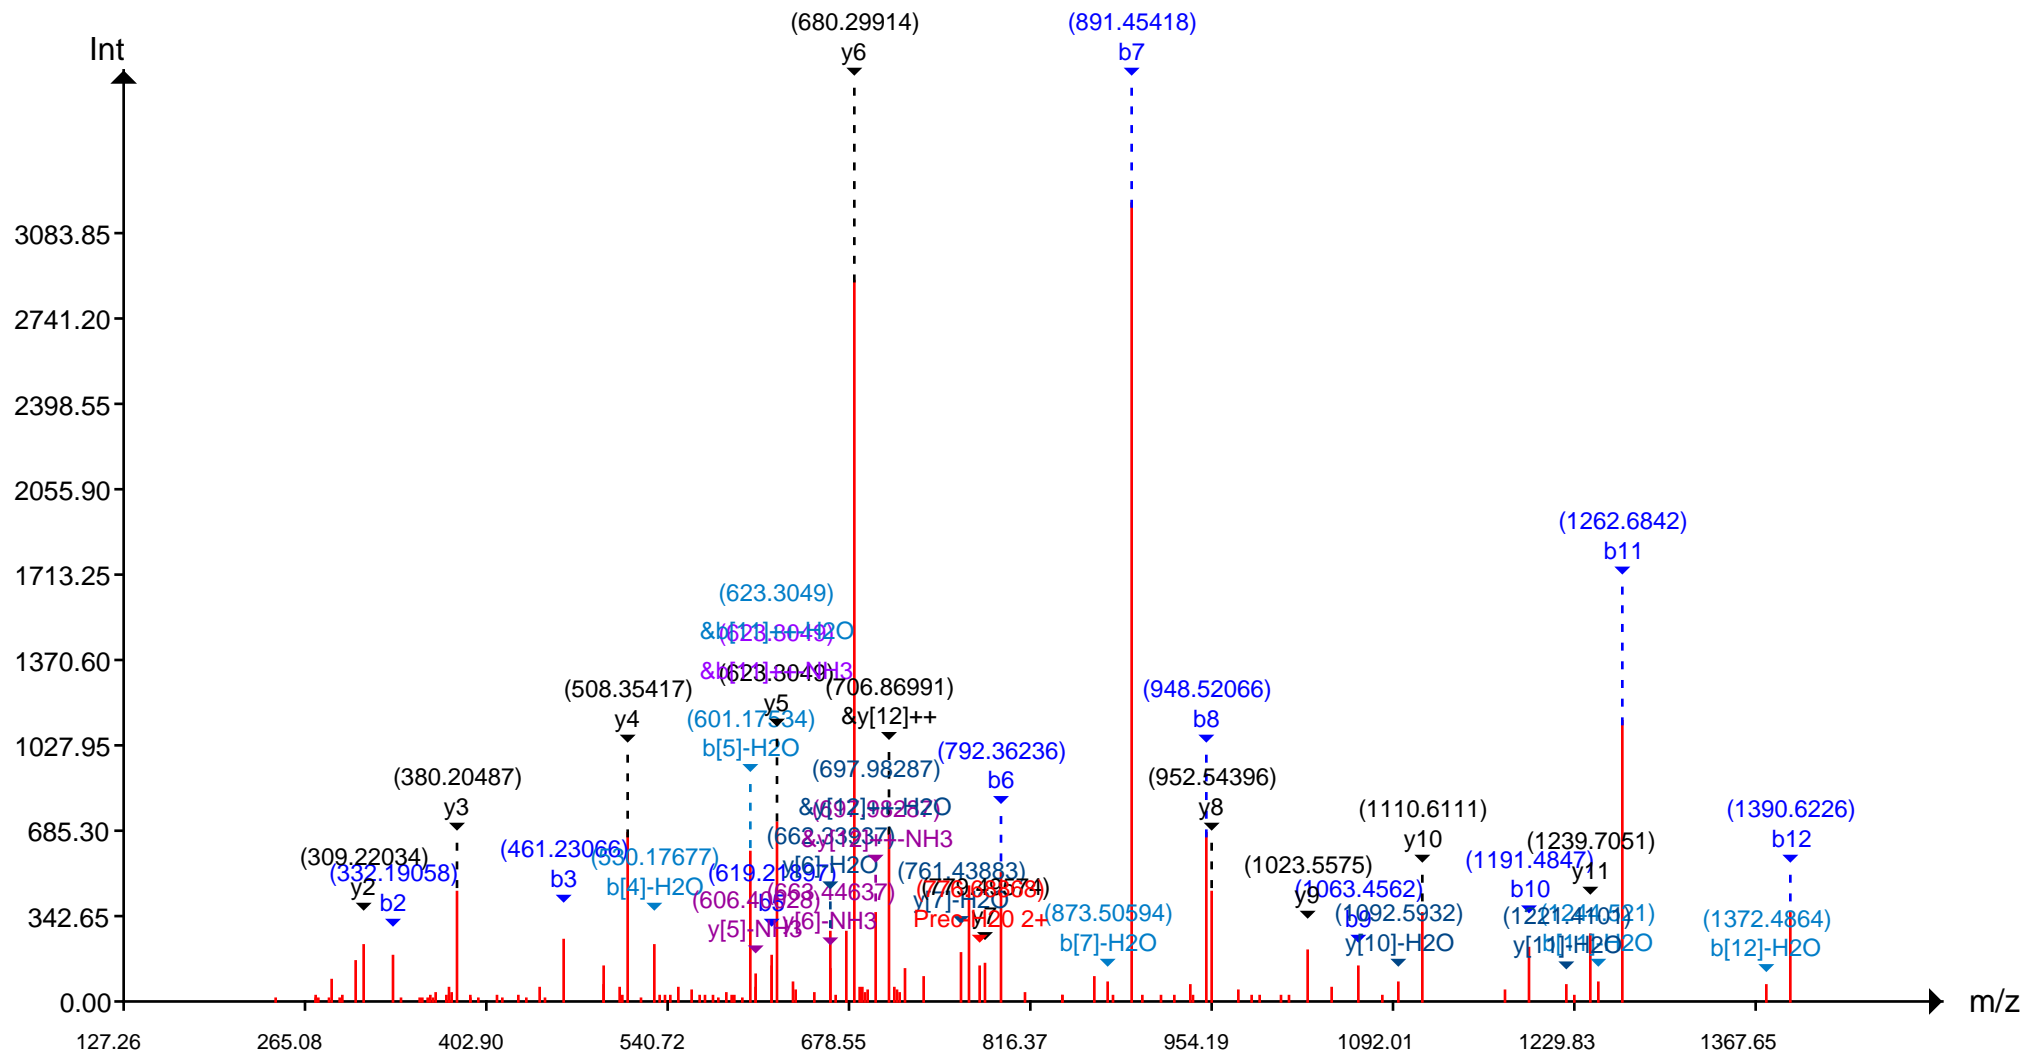

## Info

|                          |                                              |                           |          |
|--------------------------|----------------------------------------------|---------------------------|----------|
| <b>Modified Sequence</b> | AcD3-IK<AcD3K*>ESAK<AcD3K*>VGDAQQR<C13>-COOH | <b>Ion score</b>          | 94.02    |
| <b>Protein</b>           | Q99JY9                                       | <b>Confidence level</b>   | 99.00%   |
| <b>Precursor m/z</b>     | 785.94629                                    | <b>Identity Threshold</b> | 46.55    |
| <b>Charge</b>            | 2+                                           | <b>Mass error</b>         | 0.001227 |

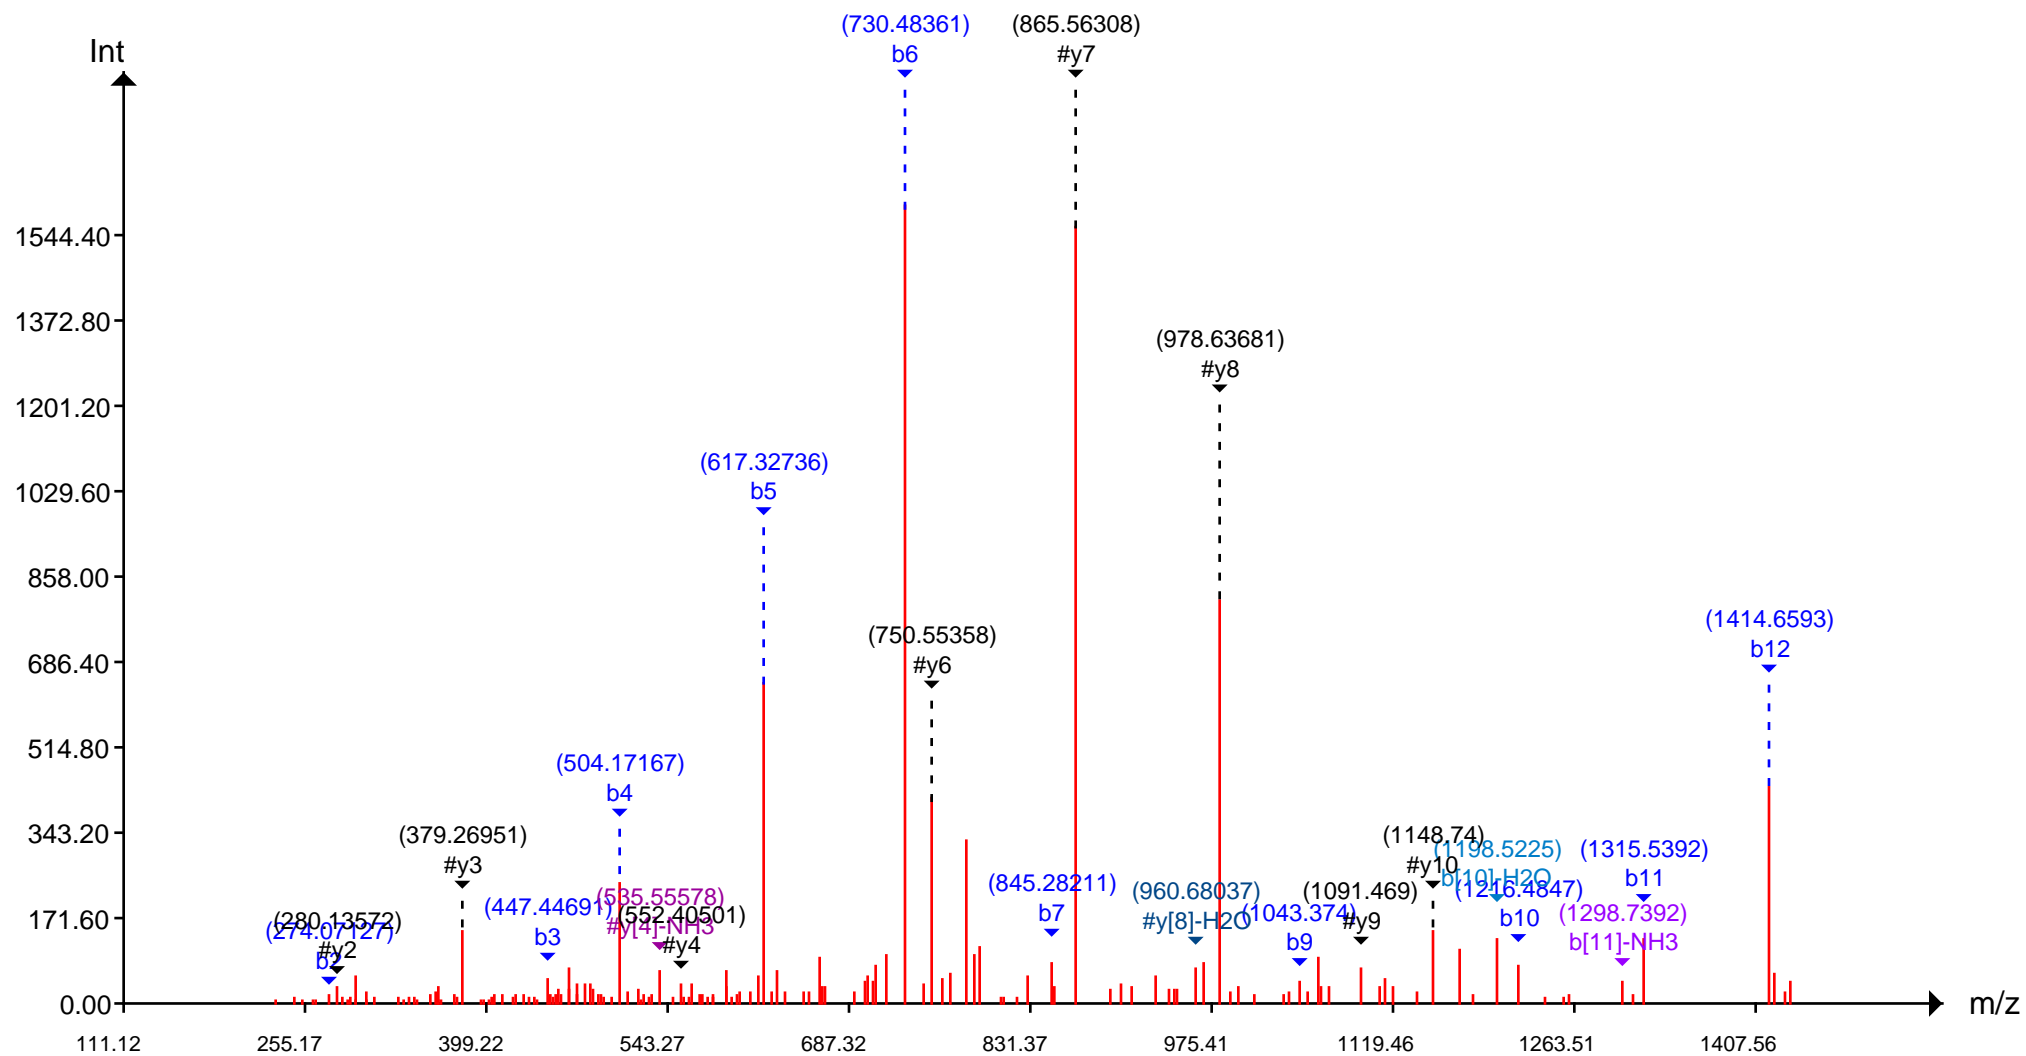

## Info

|                          |                                              |                           |          |
|--------------------------|----------------------------------------------|---------------------------|----------|
| <b>Modified Sequence</b> | AcD3-VEK<AcD3K*>GIIDPTK<AcD3K*>VVR<C13>-COOH | <b>Ion score</b>          | 55.74    |
| <b>Protein</b>           | P63038                                       | <b>Confidence level</b>   | 99.00%   |
| <b>Precursor m/z</b>     | 797.99519                                    | <b>Identity Threshold</b> | 40.04    |
| <b>Charge</b>            | 2+                                           | <b>Mass error</b>         | 0.001081 |

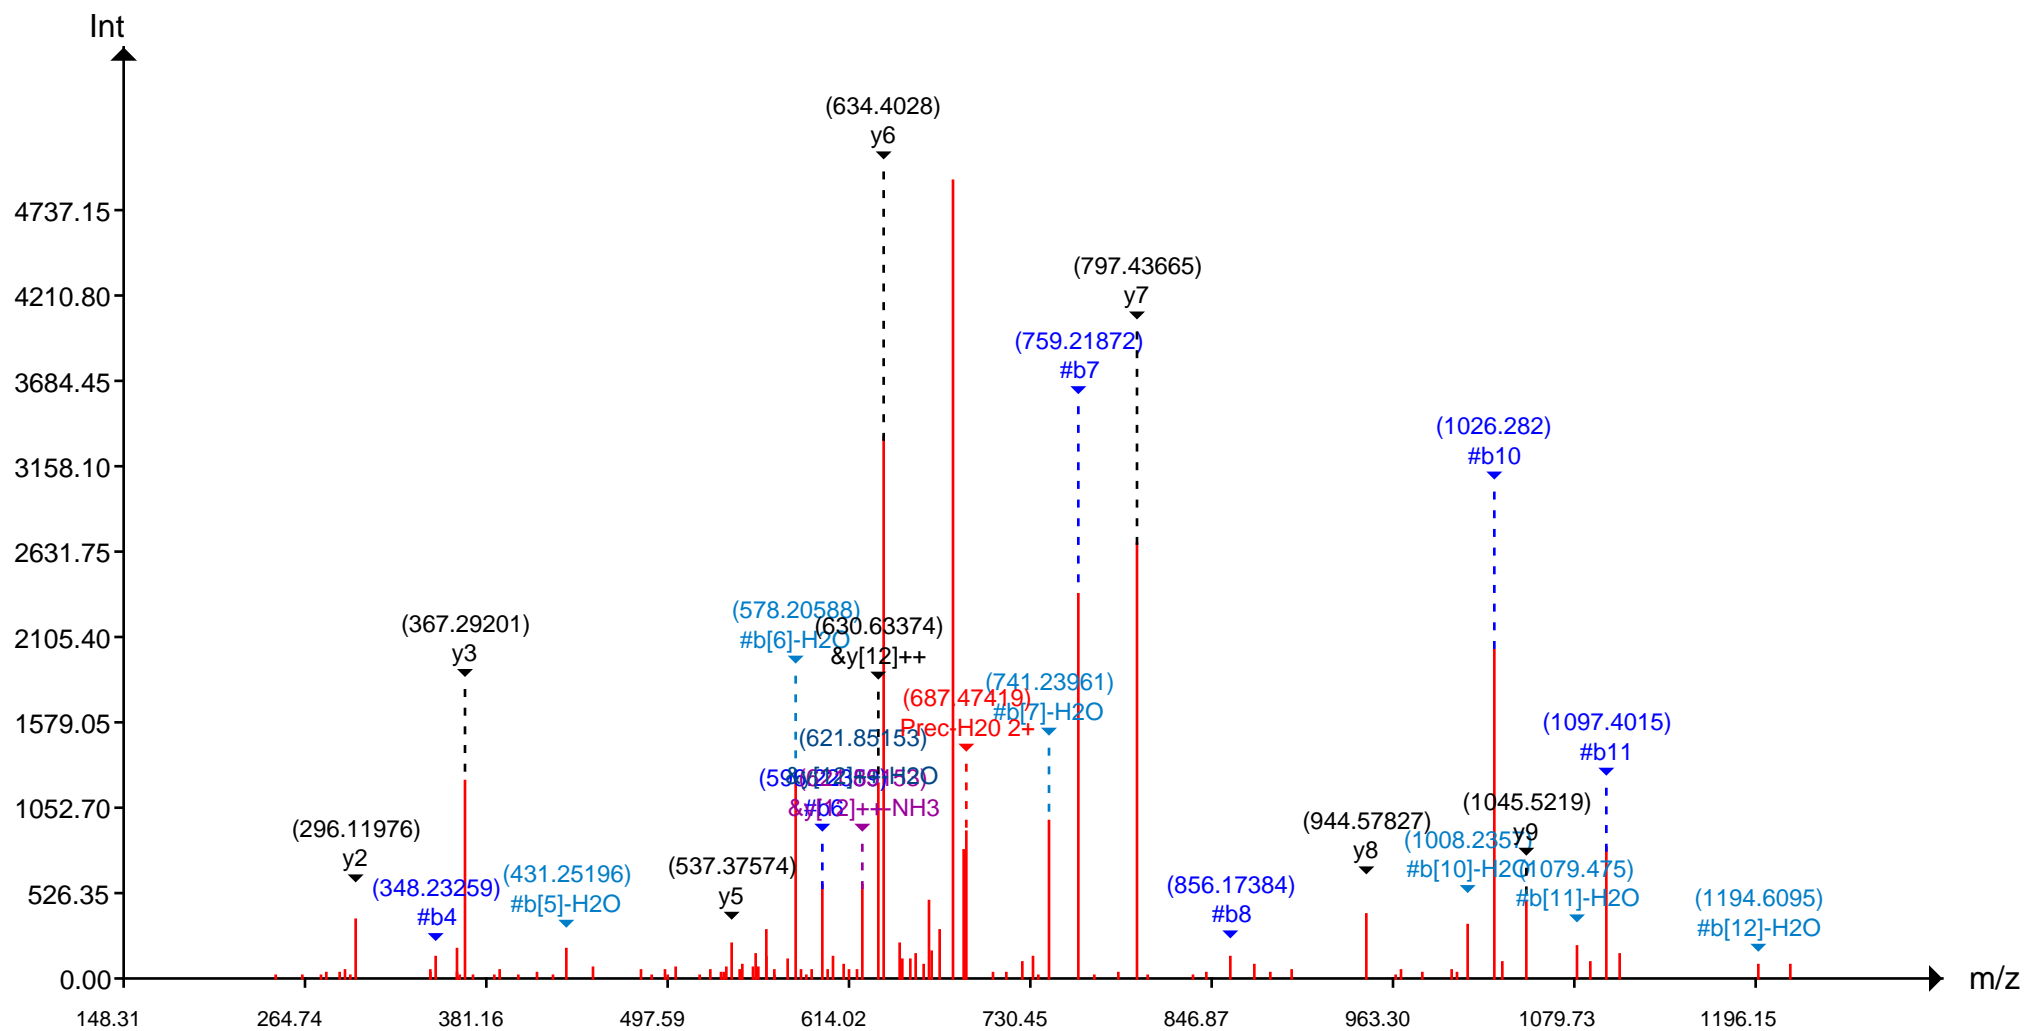

## Info

|                          |                                                |                           |          |
|--------------------------|------------------------------------------------|---------------------------|----------|
| <b>Modified Sequence</b> | AcD3-SGGTTM<Mox*>YPGIADR<C13>-COOH             | <b>Ion score</b>          | 58.25    |
| <b>Protein</b>           | P62737, P60710, P68033, P63260, P63268, P68134 | <b>Confidence level</b>   | 99.00%   |
| <b>Precursor m/z</b>     | 696.83345                                      | <b>Identity Threshold</b> | 46.40    |
| <b>Charge</b>            | 2+                                             | <b>Mass error</b>         | -2.55E-4 |

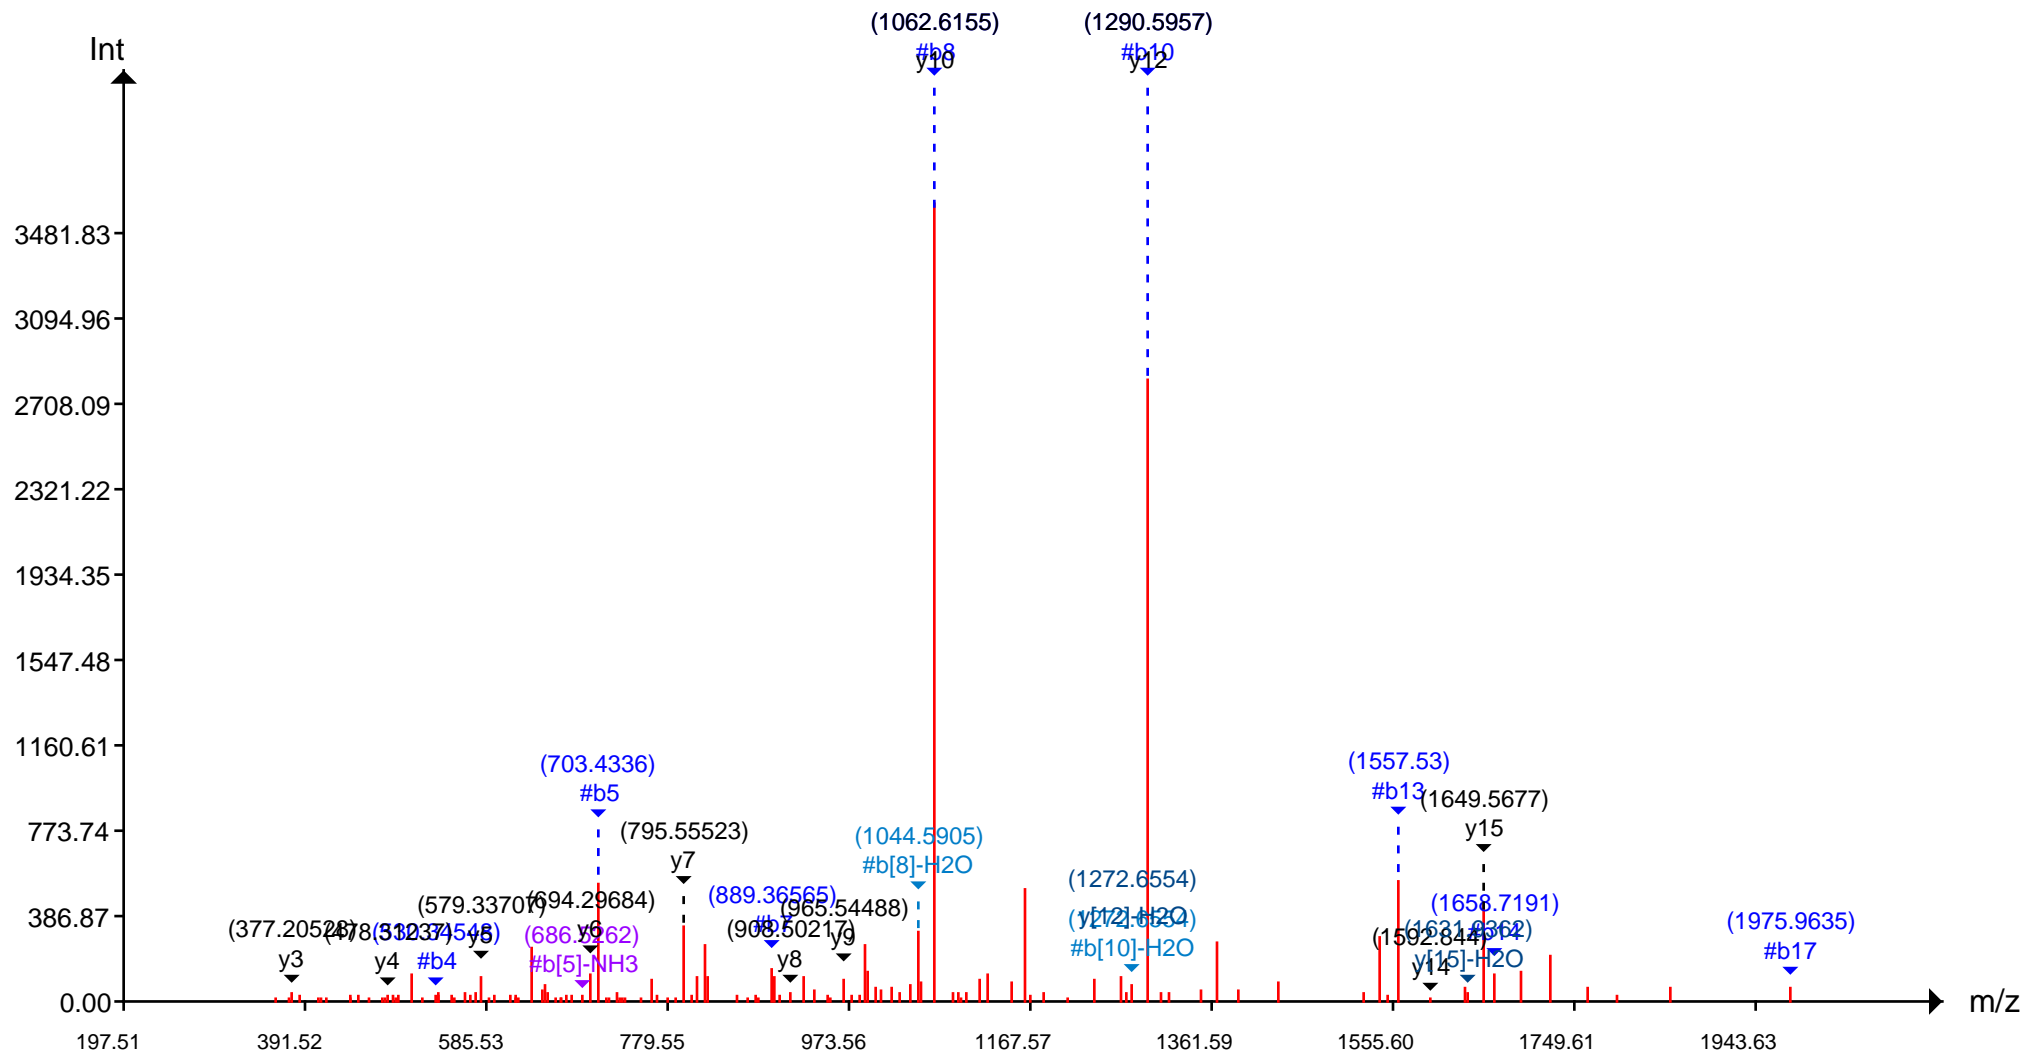

## Info

|                          |                                                             |                           |          |
|--------------------------|-------------------------------------------------------------|---------------------------|----------|
| <b>Modified Sequence</b> | AcD3-VIVK<AcD3K*>K<AcD3K*>GEK<AcD3K*>DIPGLTDTTVPR<C13>-COOH | <b>Ion score</b>          | 44.35    |
| <b>Protein</b>           | P62754                                                      | <b>Confidence level</b>   | 99.00%   |
| <b>Precursor m/z</b>     | 1176.6987                                                   | <b>Identity Threshold</b> | 40.72    |
| <b>Charge</b>            | 2+                                                          | <b>Mass error</b>         | 0.003133 |





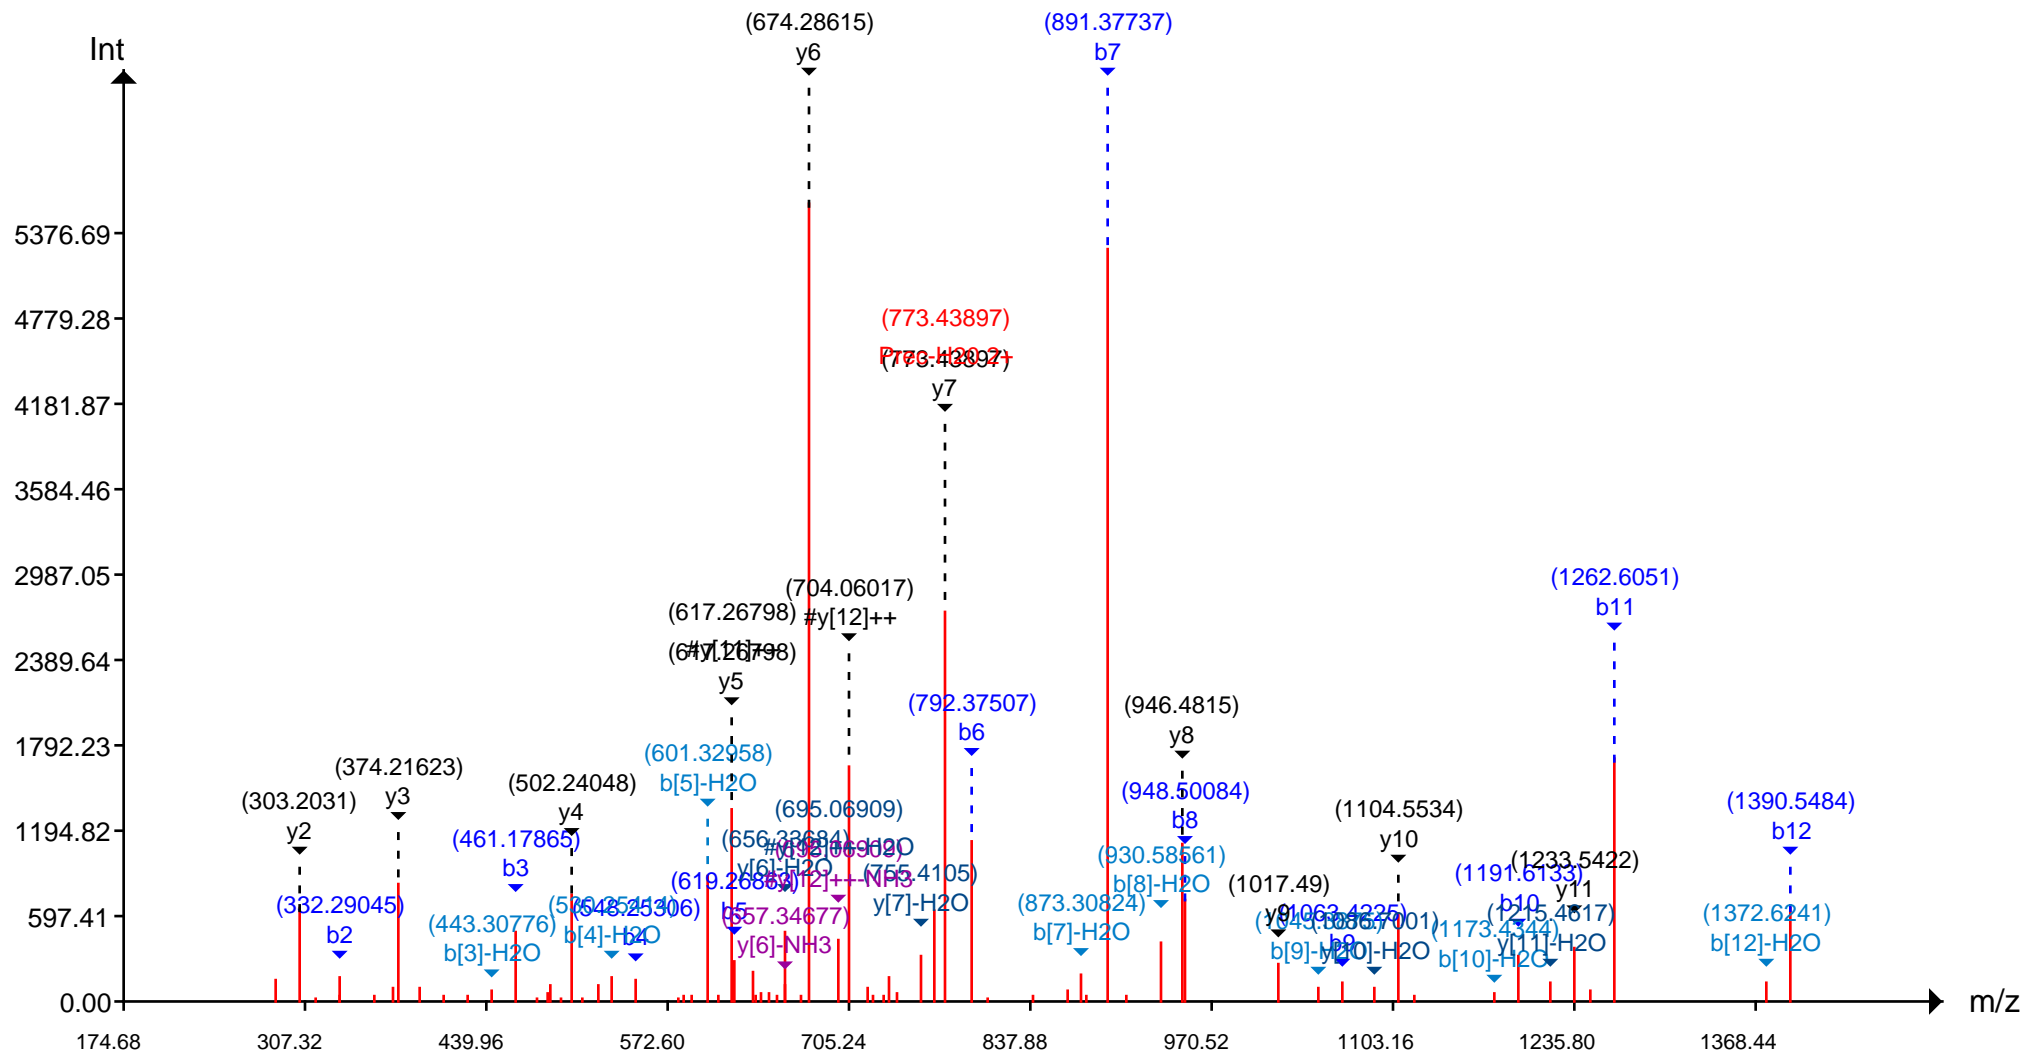

## Info

|                          |                                         |                           |          |
|--------------------------|-----------------------------------------|---------------------------|----------|
| <b>Modified Sequence</b> | AcD3-IK<AcD3K*>ESAK<AcD3K*>VGDQAQR-COOH | <b>Ion score</b>          | 110.15   |
| <b>Protein</b>           | Q99JY9                                  | <b>Confidence level</b>   | 99.00%   |
| <b>Precursor m/z</b>     | 782.93627                               | <b>Identity Threshold</b> | 47.37    |
| <b>Charge</b>            | 2+                                      | <b>Mass error</b>         | 0.001329 |

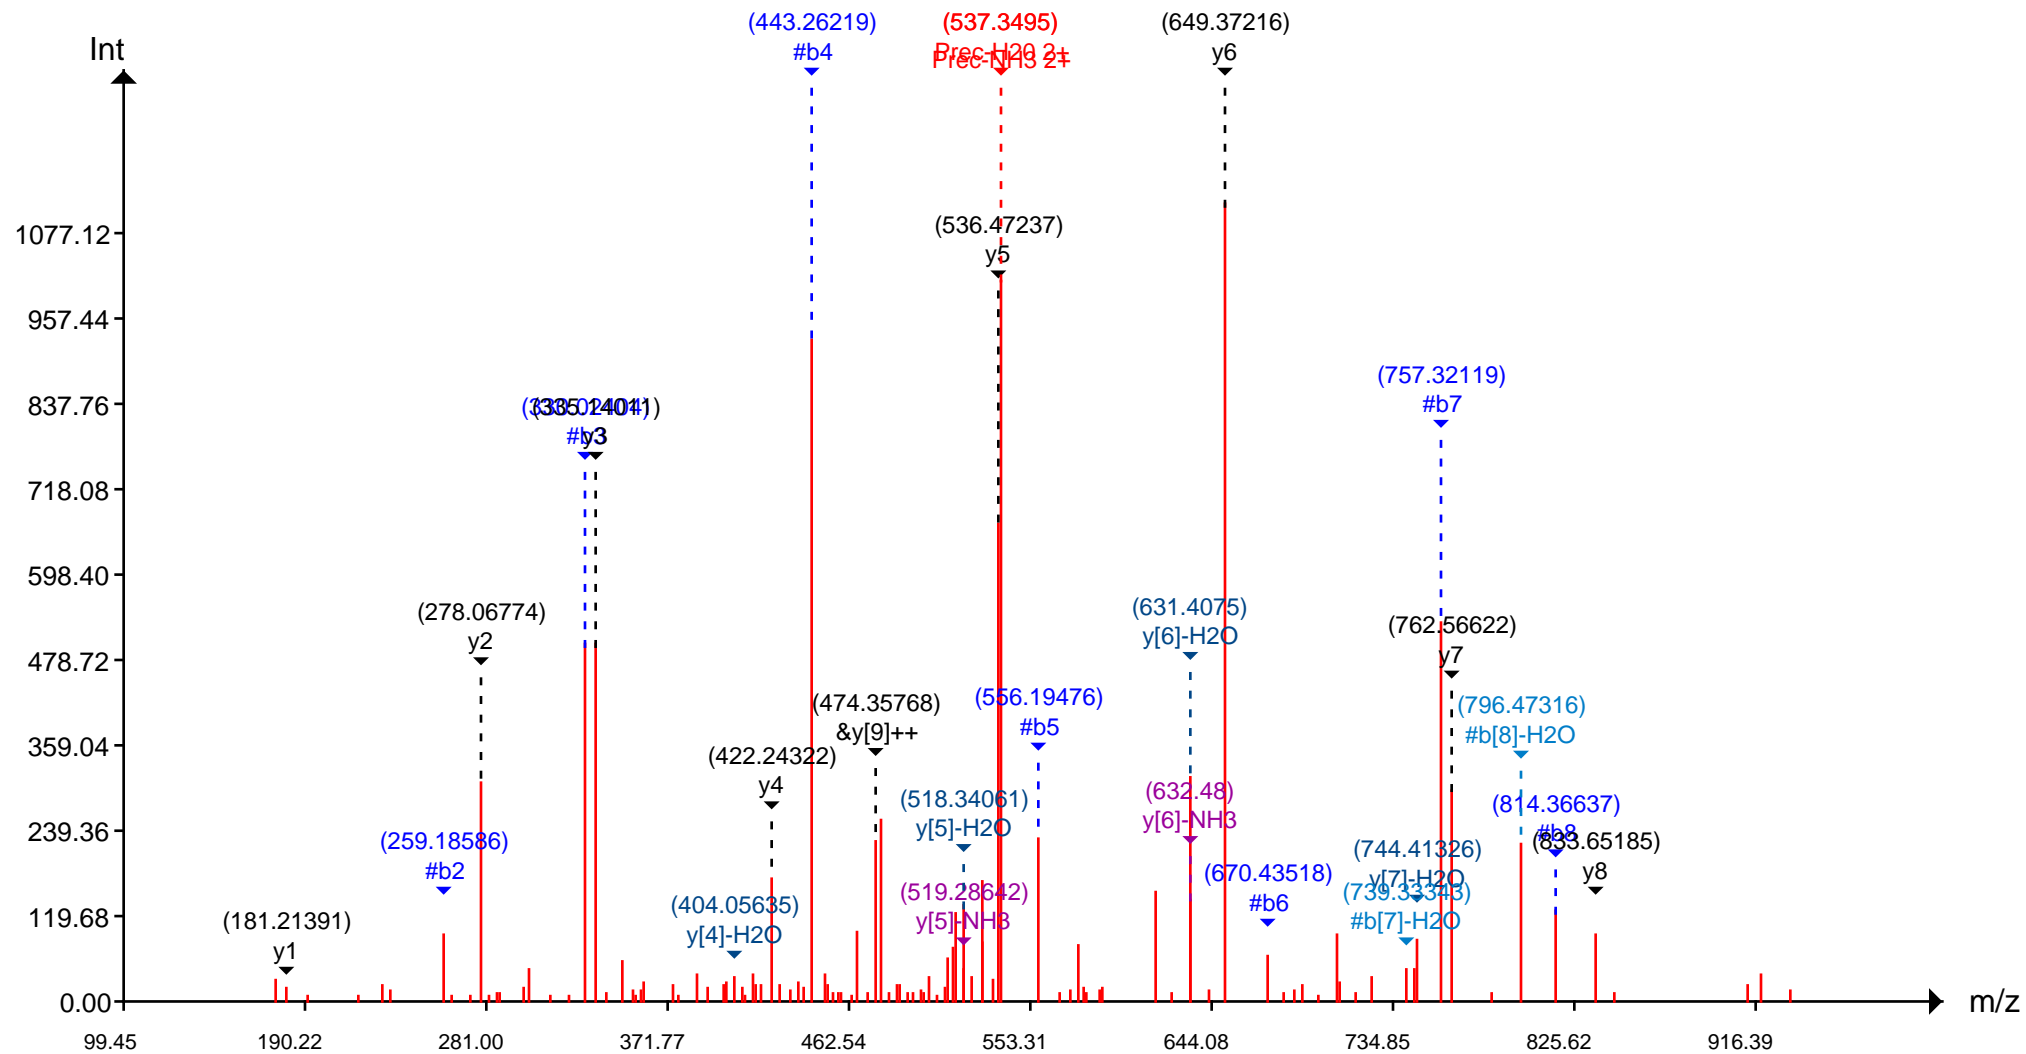

## Info

|                          |                           |                           |         |
|--------------------------|---------------------------|---------------------------|---------|
| <b>Modified Sequence</b> | AcD3-VNAIINSGPR<C13>-COOH | <b>Ion score</b>          | 61.93   |
| <b>Protein</b>           | P97461                    | <b>Confidence level</b>   | 99.00%  |
| <b>Precursor m/z</b>     | 546.32082                 | <b>Identity Threshold</b> | 46.28   |
| <b>Charge</b>            | 2+                        | <b>Mass error</b>         | 1.35E-4 |

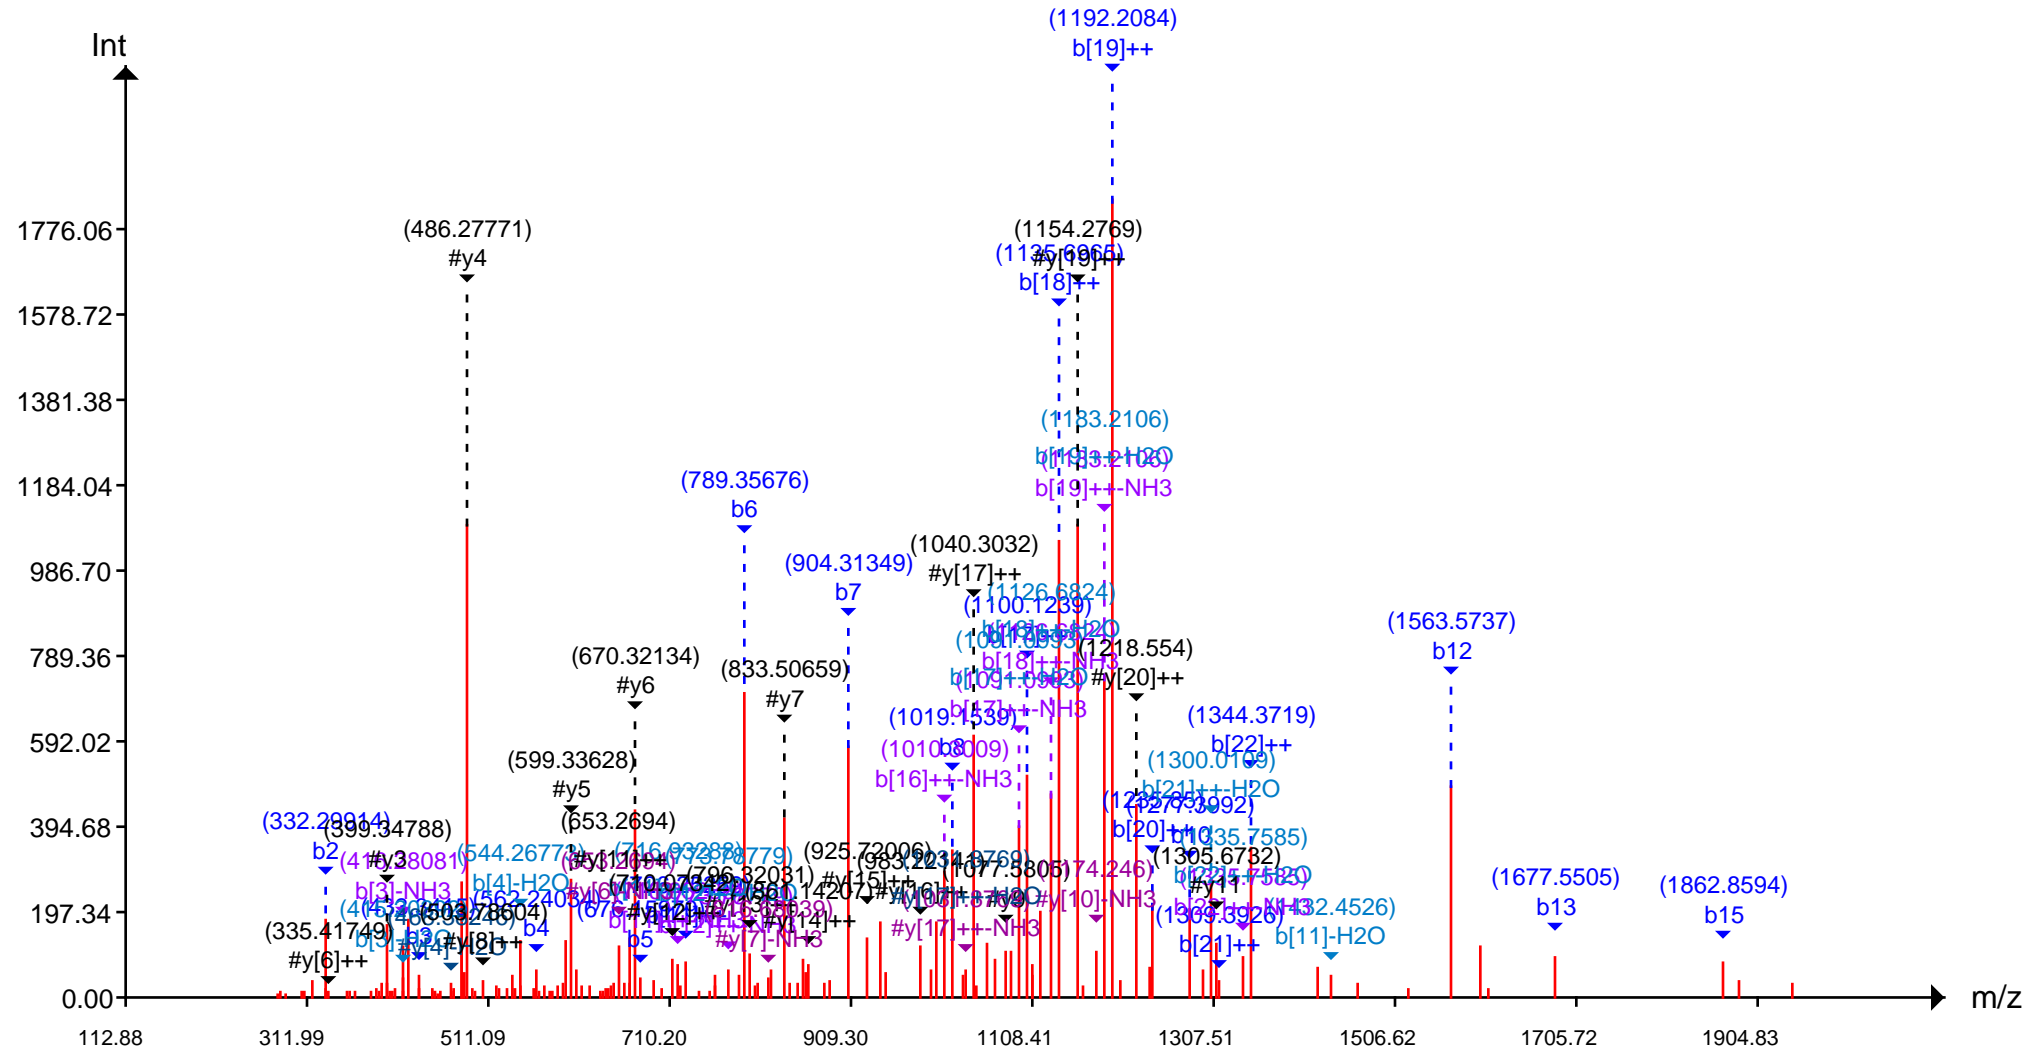

## Info

|                    |                                                                      |                    |          |
|--------------------|----------------------------------------------------------------------|--------------------|----------|
| Modified Sequen... | AcD3-LK<AcD3K*>TENLDDEEK<AcD3K*>LNNAK<AcD3K*>YAISM<Mox*>AR<C13>-COOH | Ion score          | 65.92    |
| Prot...            | Q61233                                                               | Confidence level   | 99.00%   |
| Precursor m...     | 956.83189                                                            | Identity Threshold | 47.60    |
| Char...            | 3+                                                                   | Mass error         | 0.003139 |

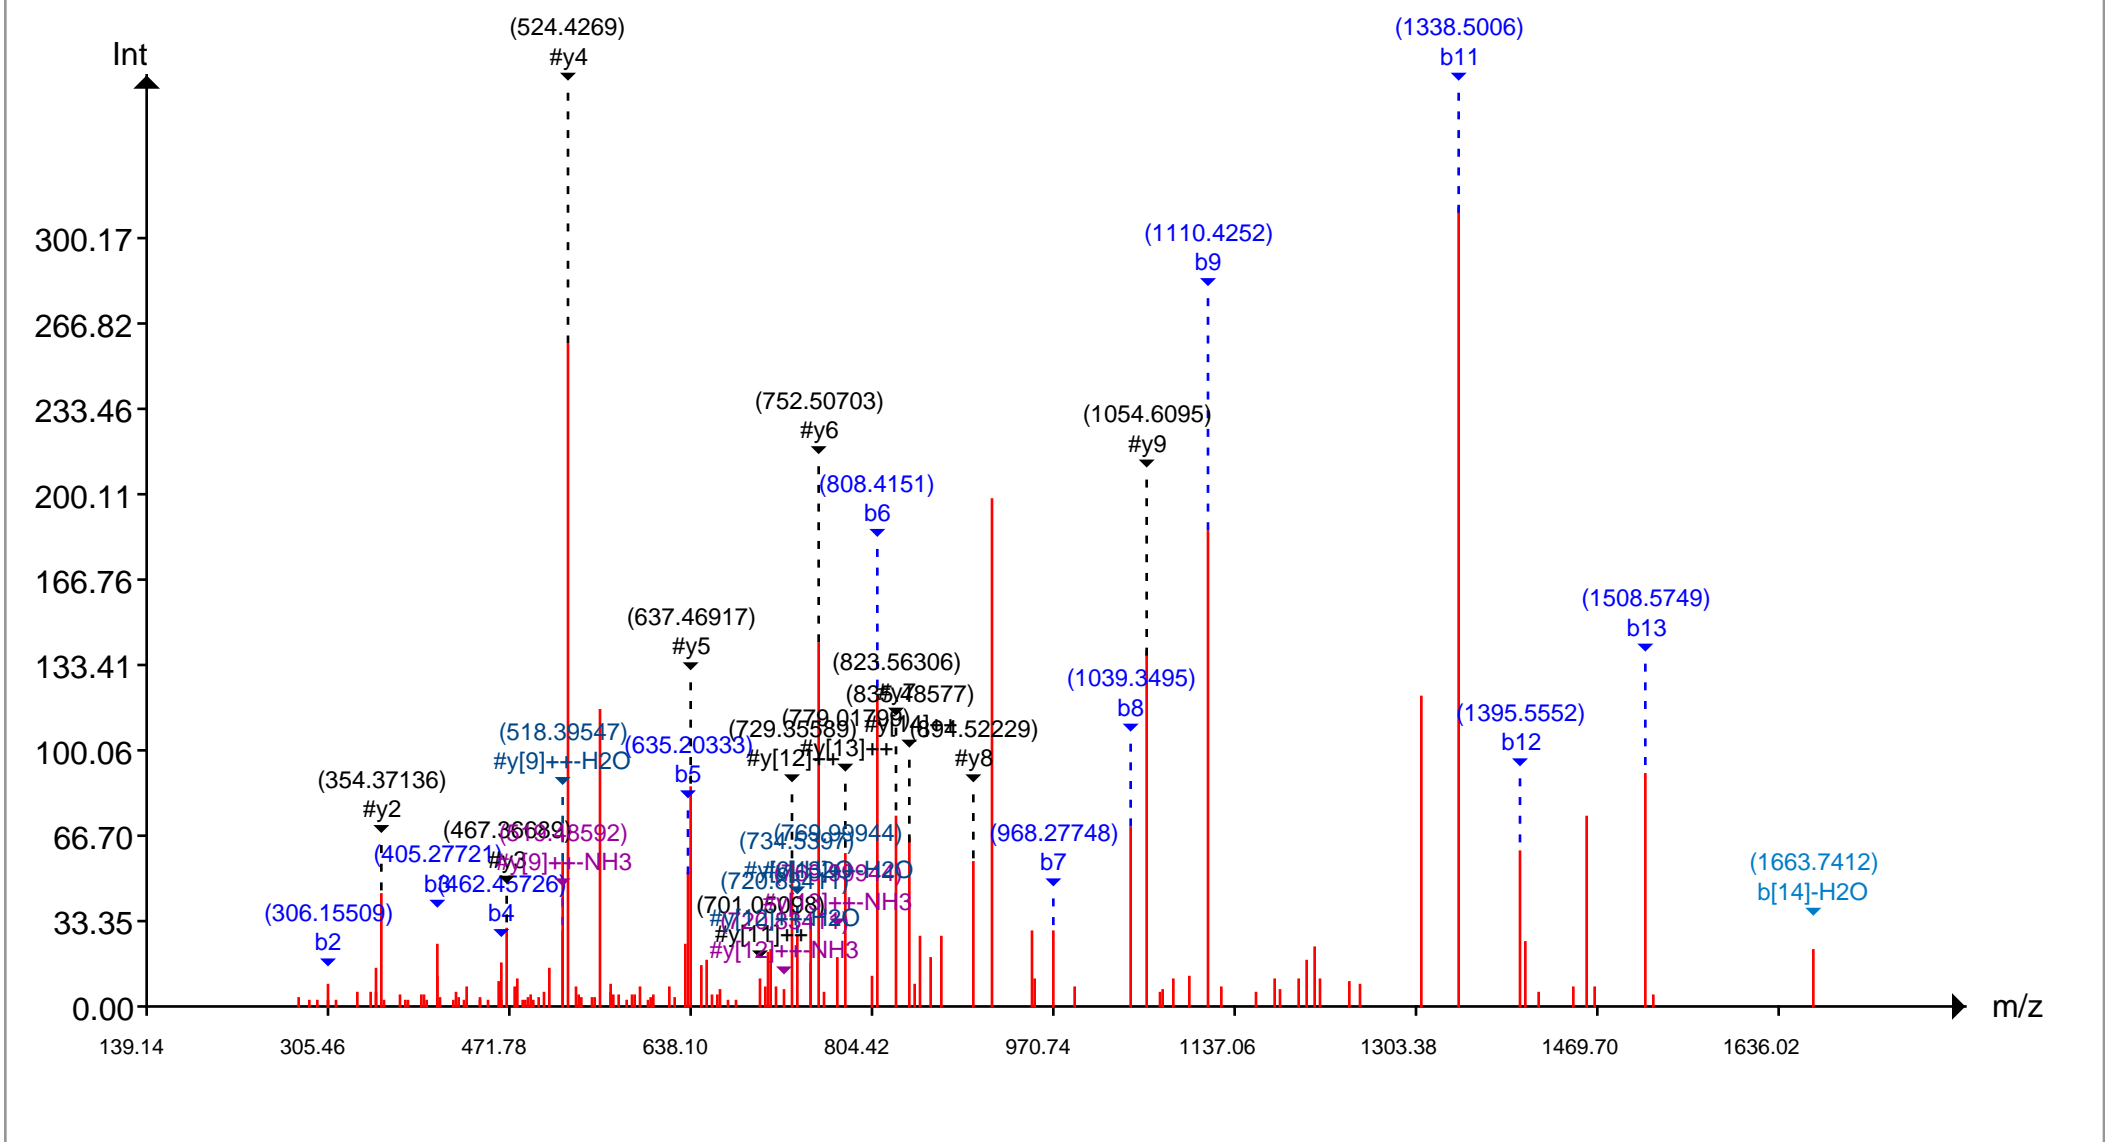

## Info

|                          |                                                                    |                           |          |
|--------------------------|--------------------------------------------------------------------|---------------------------|----------|
| <b>Modified Sequence</b> | AcD3-M<Mox*>IVGK<AcD3K*>K<AcD3K*>C<Cmm*>AADLGLK<AcD3K*>R<C13>-COOH | <b>Ion score</b>          | 78.56    |
| <b>Protein</b>           | P70349                                                             | <b>Confidence level</b>   | 99.00%   |
| <b>Precursor m/z</b>     | 931.54046                                                          | <b>Identity Threshold</b> | 44.74    |
| <b>Charge</b>            | 2+                                                                 | <b>Mass error</b>         | 0.001335 |



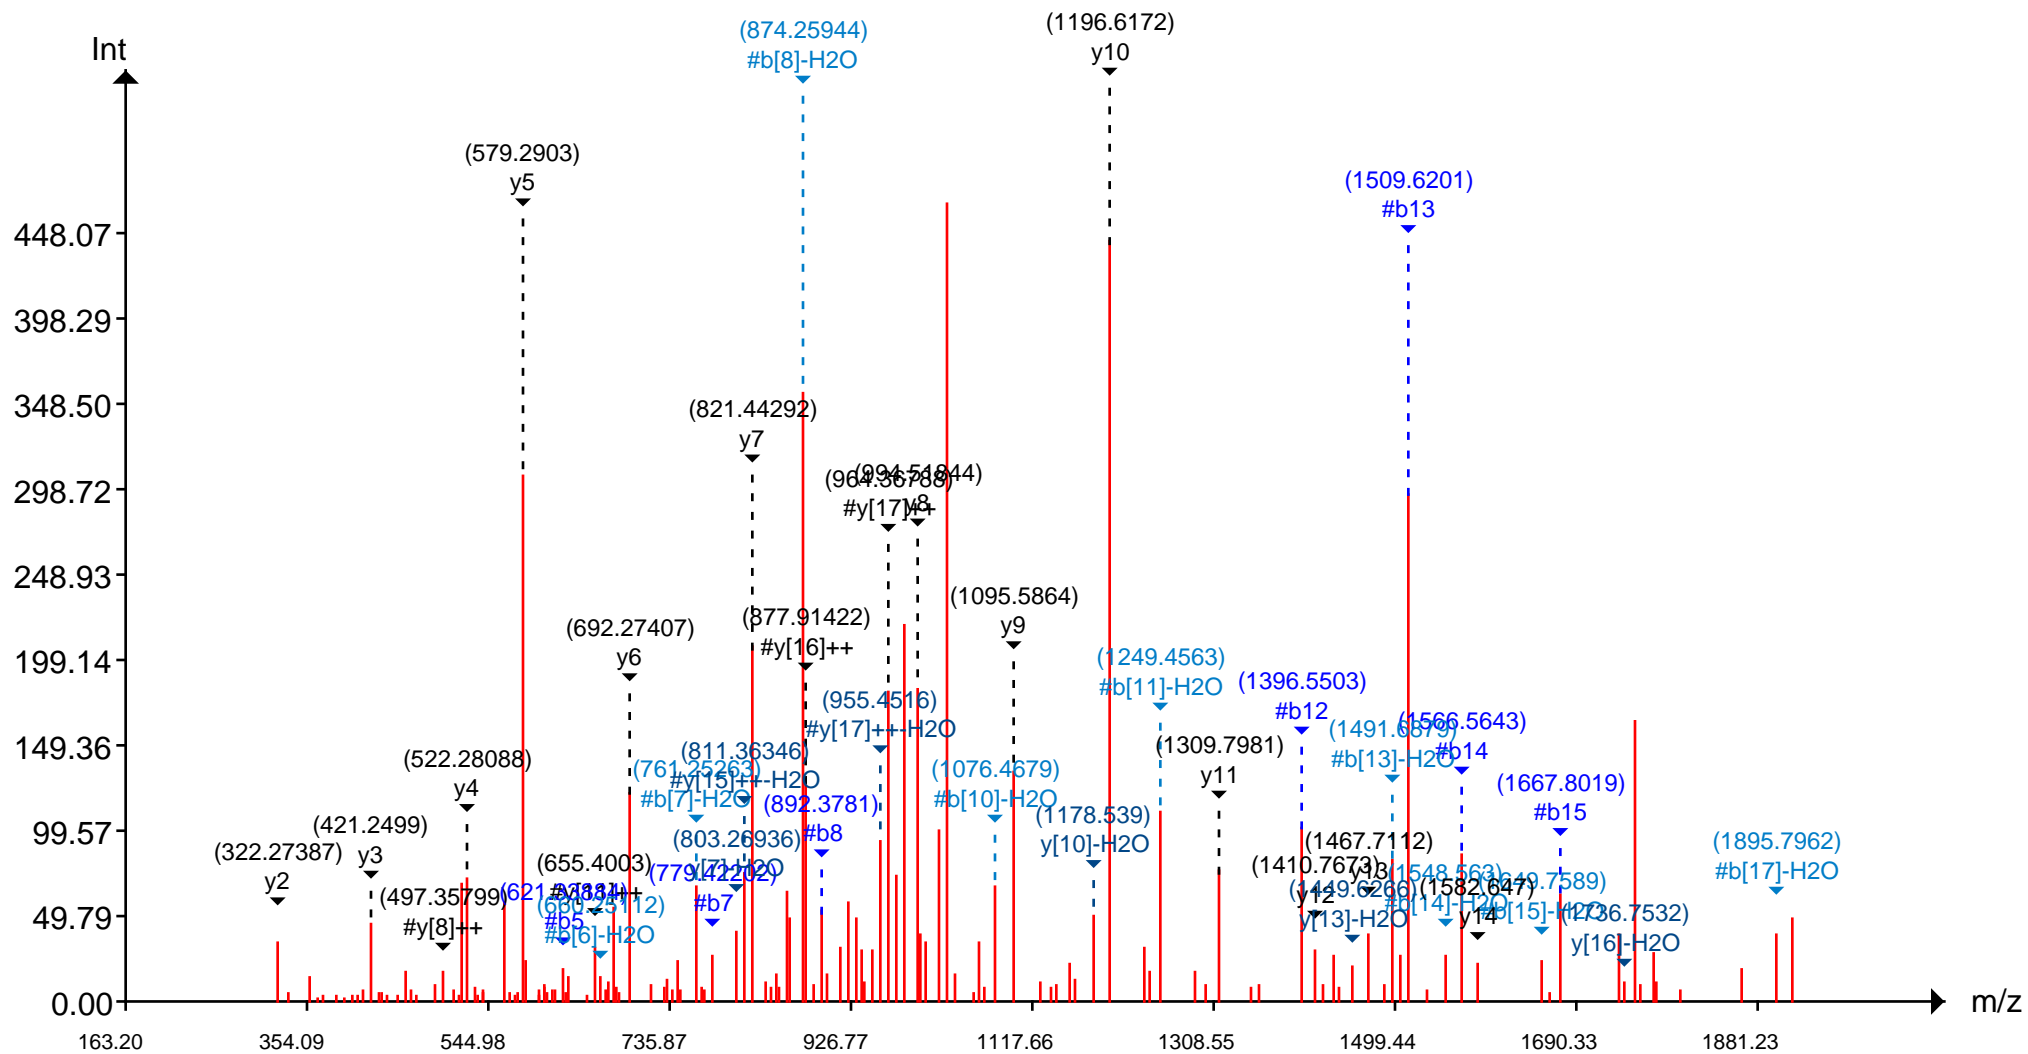

## Info

|                          |                                                    |                           |          |
|--------------------------|----------------------------------------------------|---------------------------|----------|
| <b>Modified Sequence</b> | AcD3-DK<AcD3K*>DGDGTITTK<AcD3K*>ELGTVM<Mox*>R-COOH | <b>Ion score</b>          | 98.04    |
| <b>Protein</b>           | P62204                                             | <b>Confidence level</b>   | 99.00%   |
| <b>Precursor m/z</b>     | 1044.528                                           | <b>Identity Threshold</b> | 47.75    |
| <b>Charge</b>            | 2+                                                 | <b>Mass error</b>         | 0.001165 |

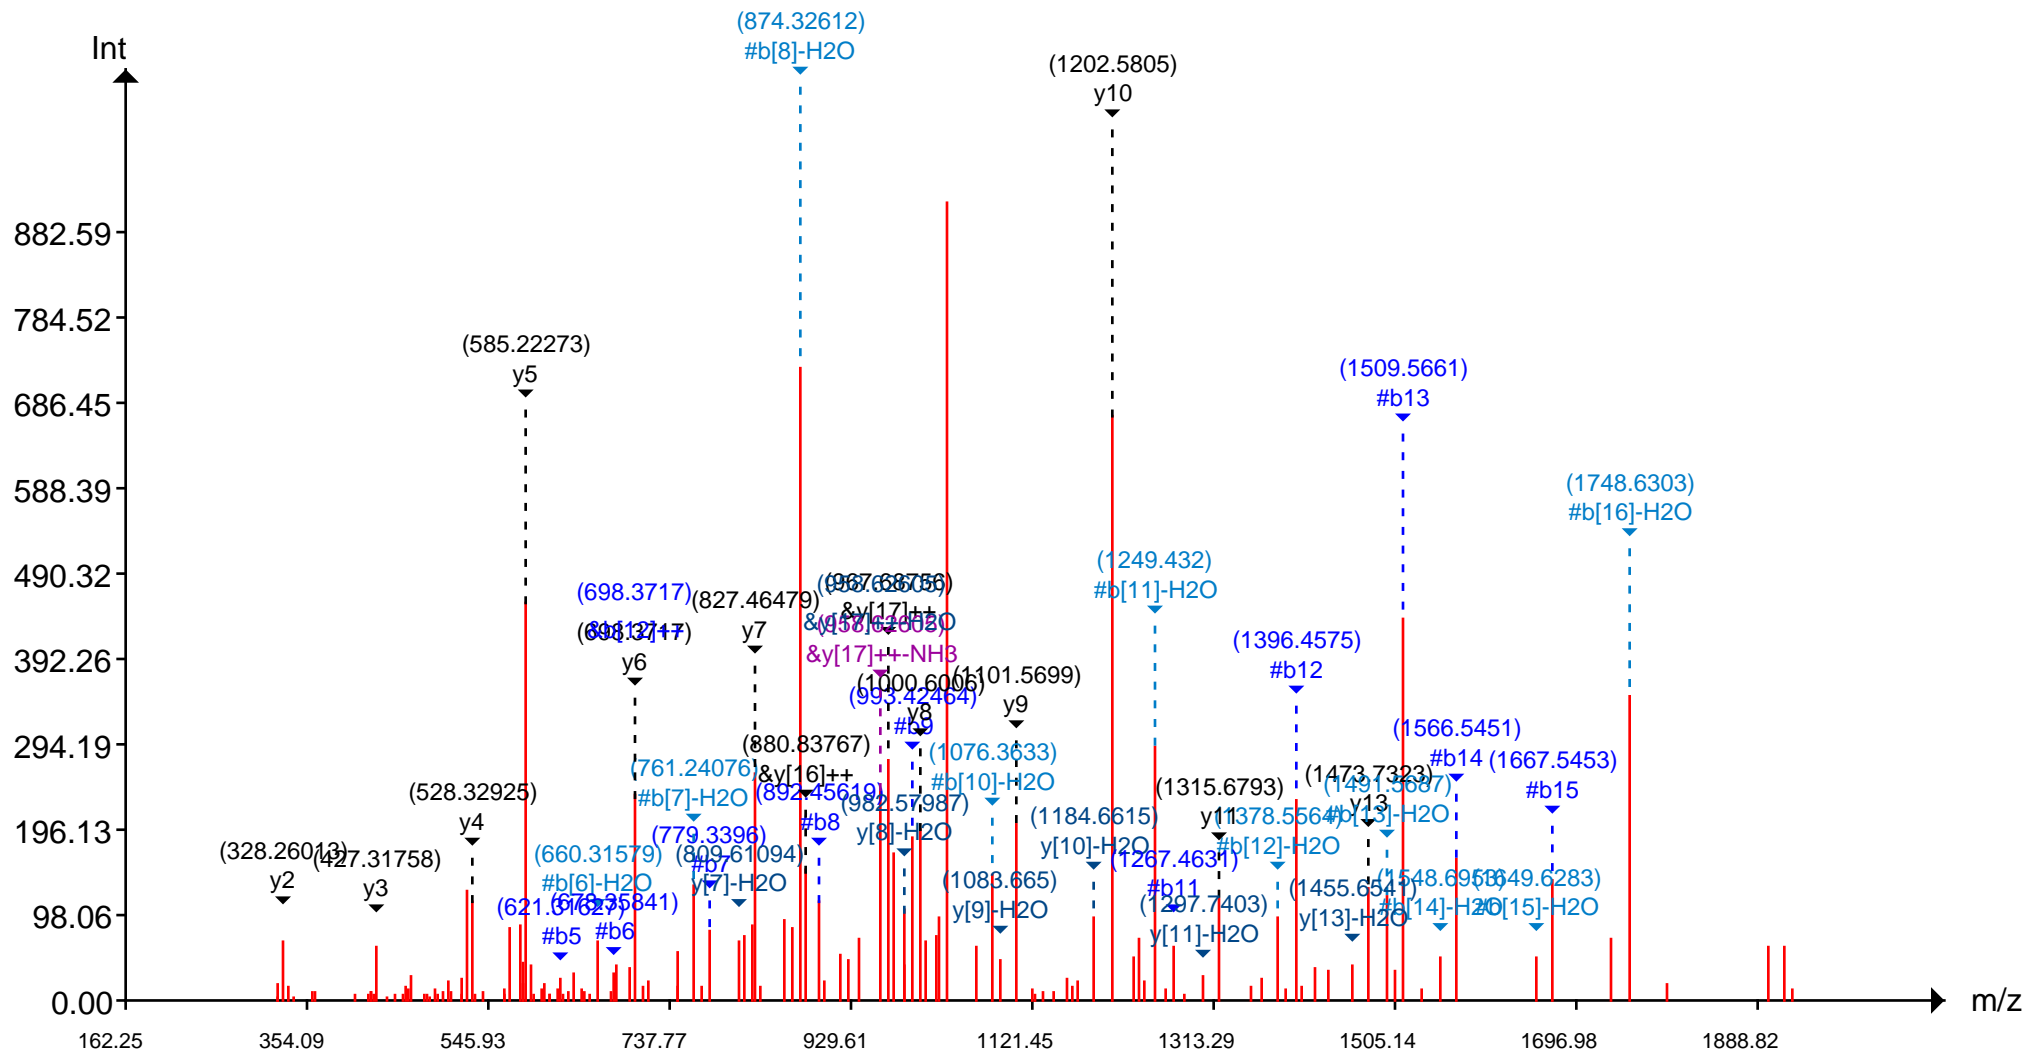

## Info

|                          |                                                         |                           |          |
|--------------------------|---------------------------------------------------------|---------------------------|----------|
| <b>Modified Sequence</b> | AcD3-DK<AcD3K*>DGDGTITTK<AcD3K*>ELGTVM<Mox*>R<C13>-COOH | <b>Ion score</b>          | 80.53    |
| <b>Protein</b>           | P62204                                                  | <b>Confidence level</b>   | 99.00%   |
| <b>Precursor m/z</b>     | 1047.5386                                               | <b>Identity Threshold</b> | 47.98    |
| <b>Charge</b>            | 2+                                                      | <b>Mass error</b>         | 0.002223 |



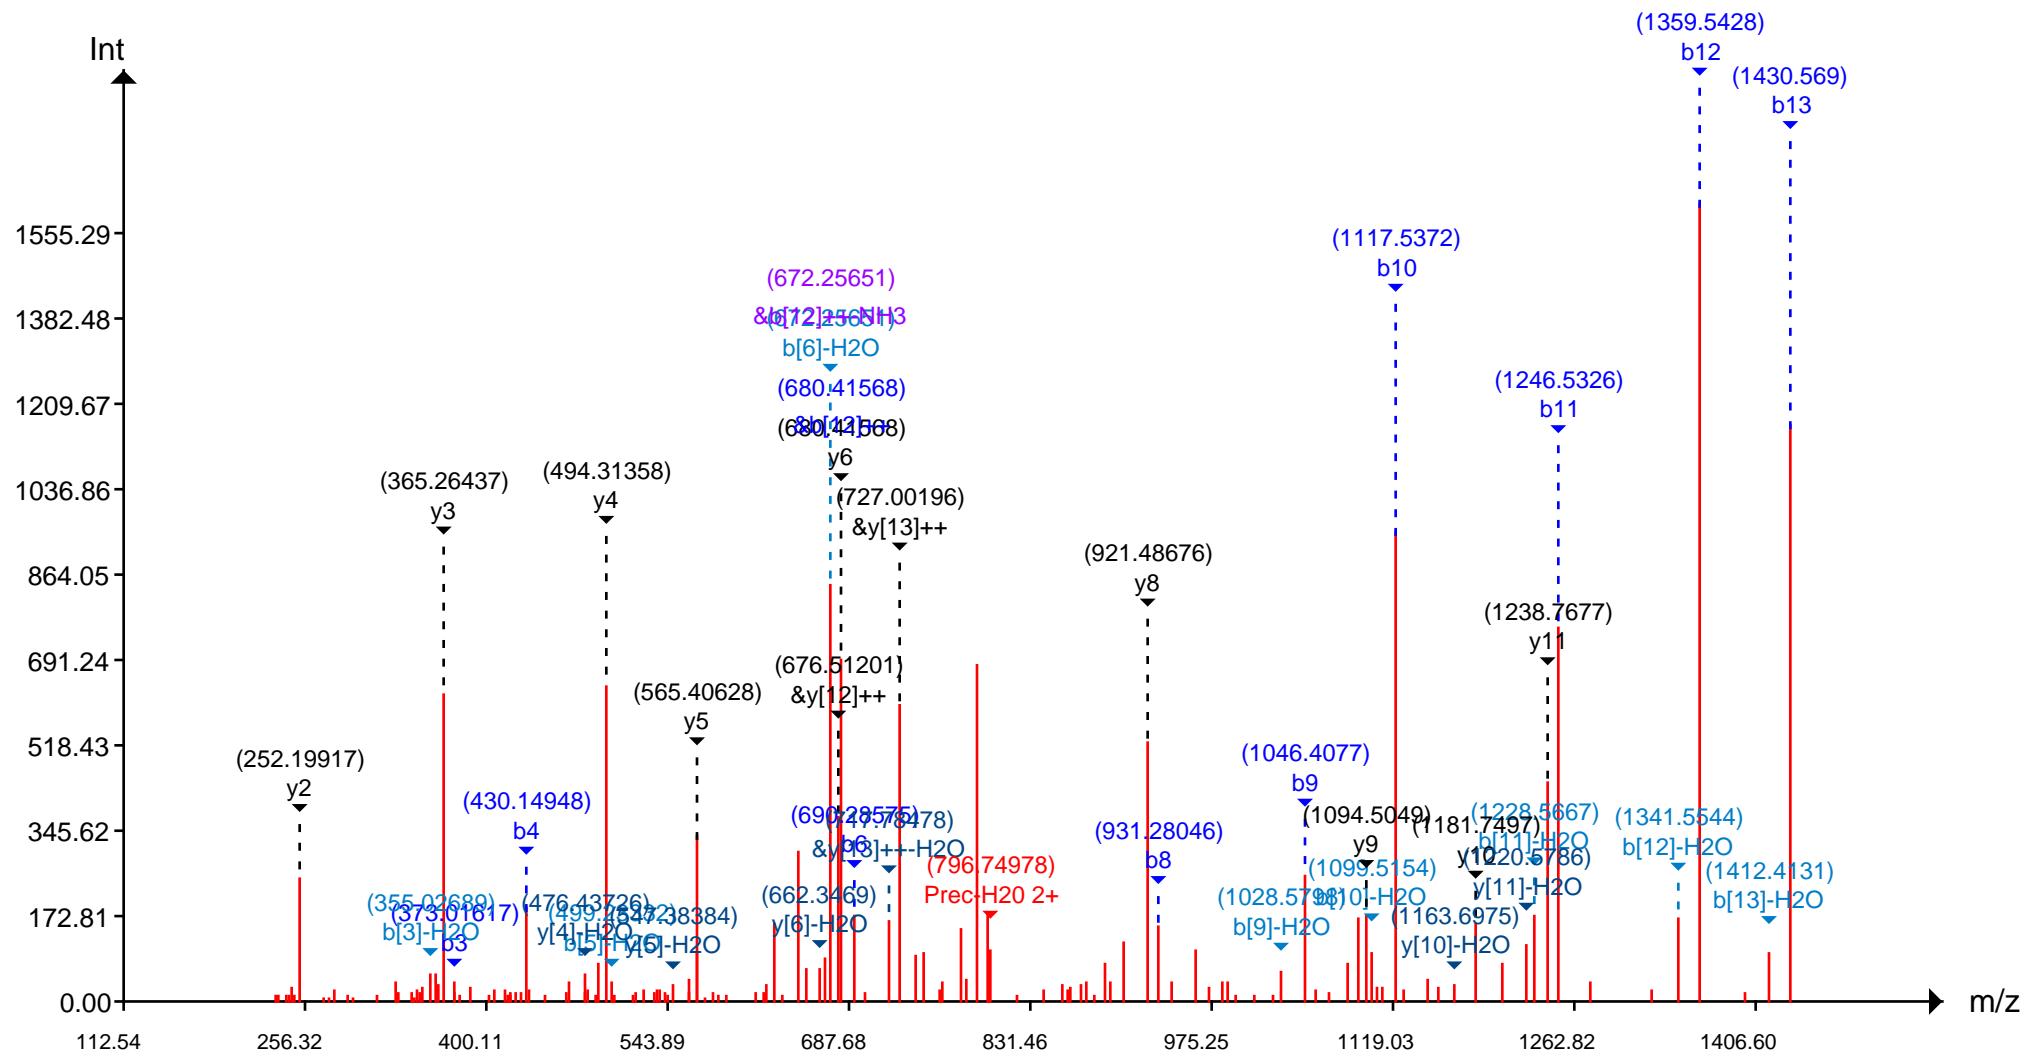

## Info

|                          |                                       |                           |         |
|--------------------------|---------------------------------------|---------------------------|---------|
| <b>Modified Sequence</b> | AcD3-LTIGSK<AcD3K*>LQDAEIAR<C13>-COOH | <b>Ion score</b>          | 67.59   |
| <b>Protein</b>           | P14069                                | <b>Confidence level</b>   | 99.00%  |
| <b>Precursor m/z</b>     | 805.97067                             | <b>Identity Threshold</b> | 45.07   |
| <b>Charge</b>            | 2+                                    | <b>Mass error</b>         | 0.00148 |

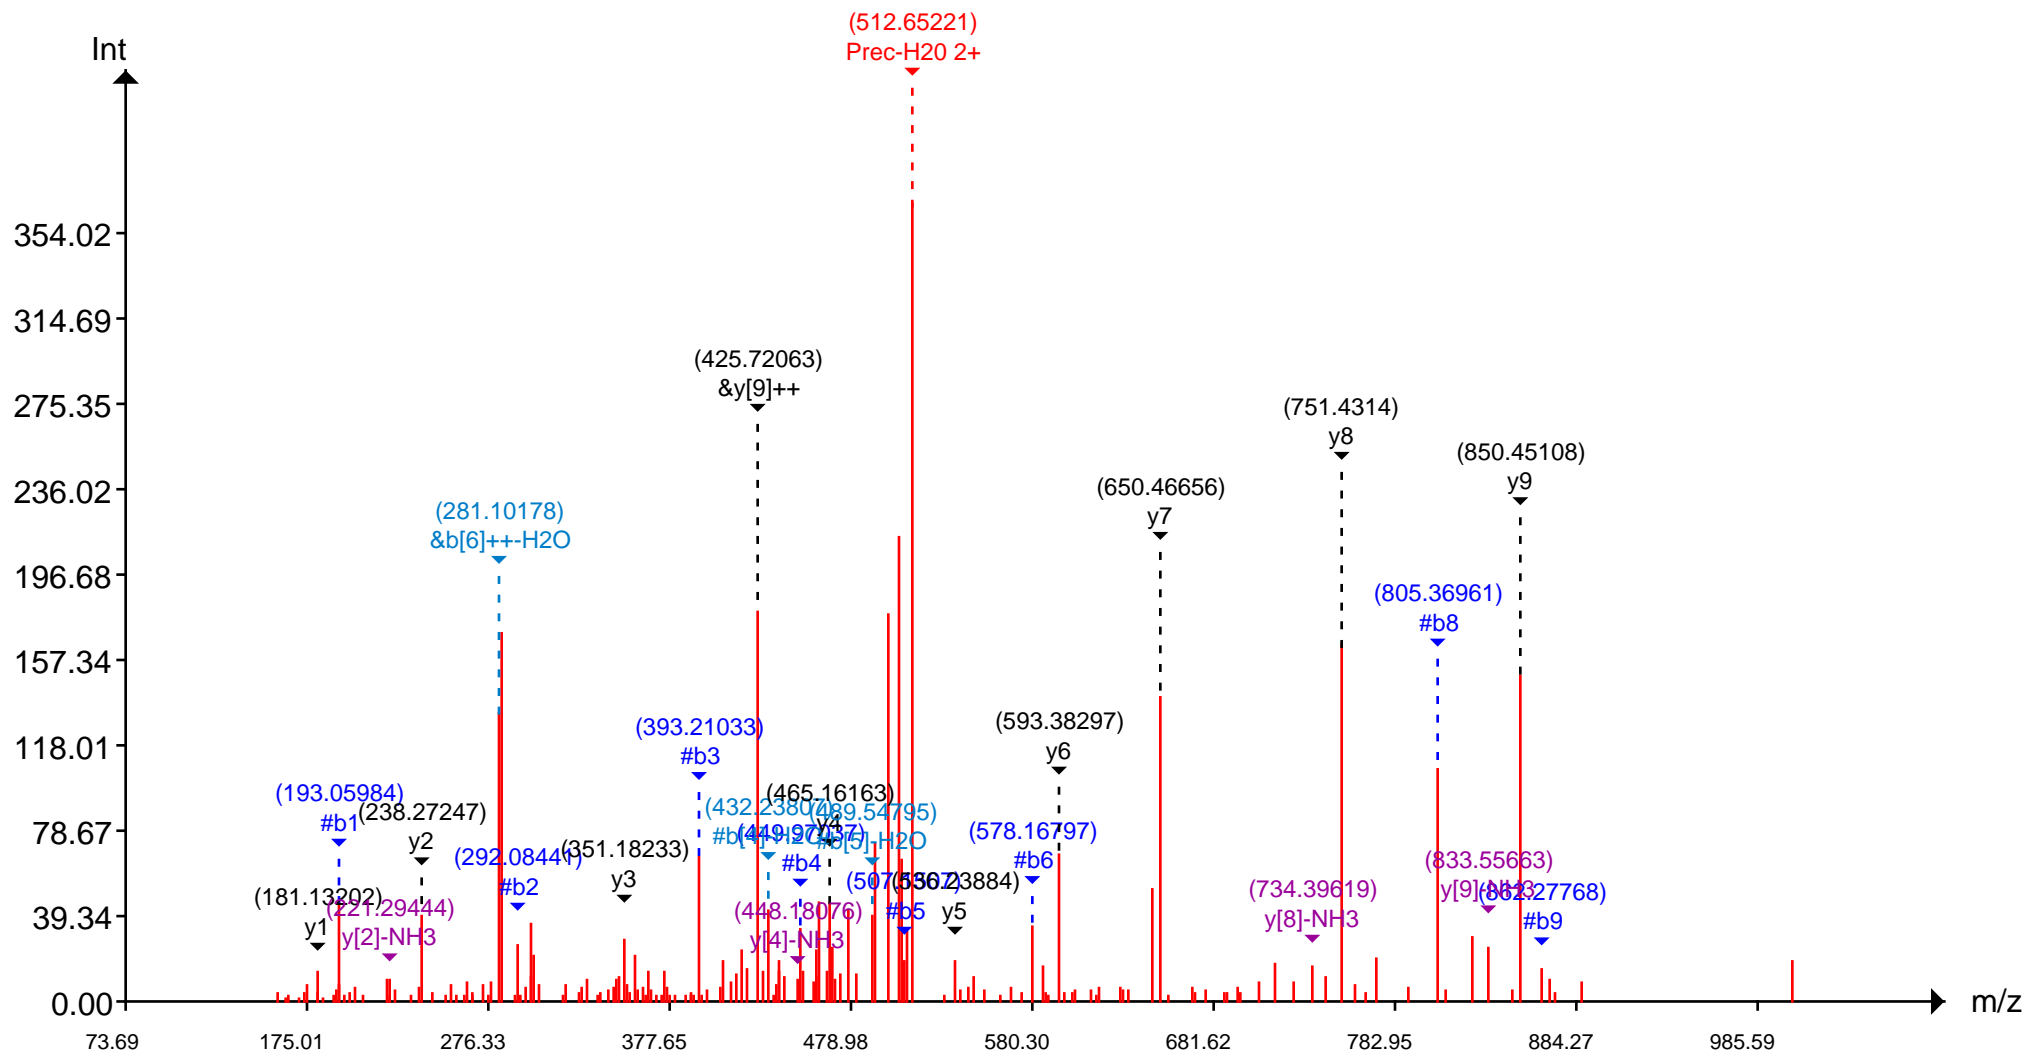

## Info

**Modified Sequence** AcD3-M<Mox\*>VTGGANLGR<C13>-COOH

**Ion score** 47.77

**Protein** P62702

**Confidence level** 99.00%

**Precursor m/z** 521.77814

**Identity Threshold** 47.59

**Charge** 2+

**Mass error** 5.29E-4

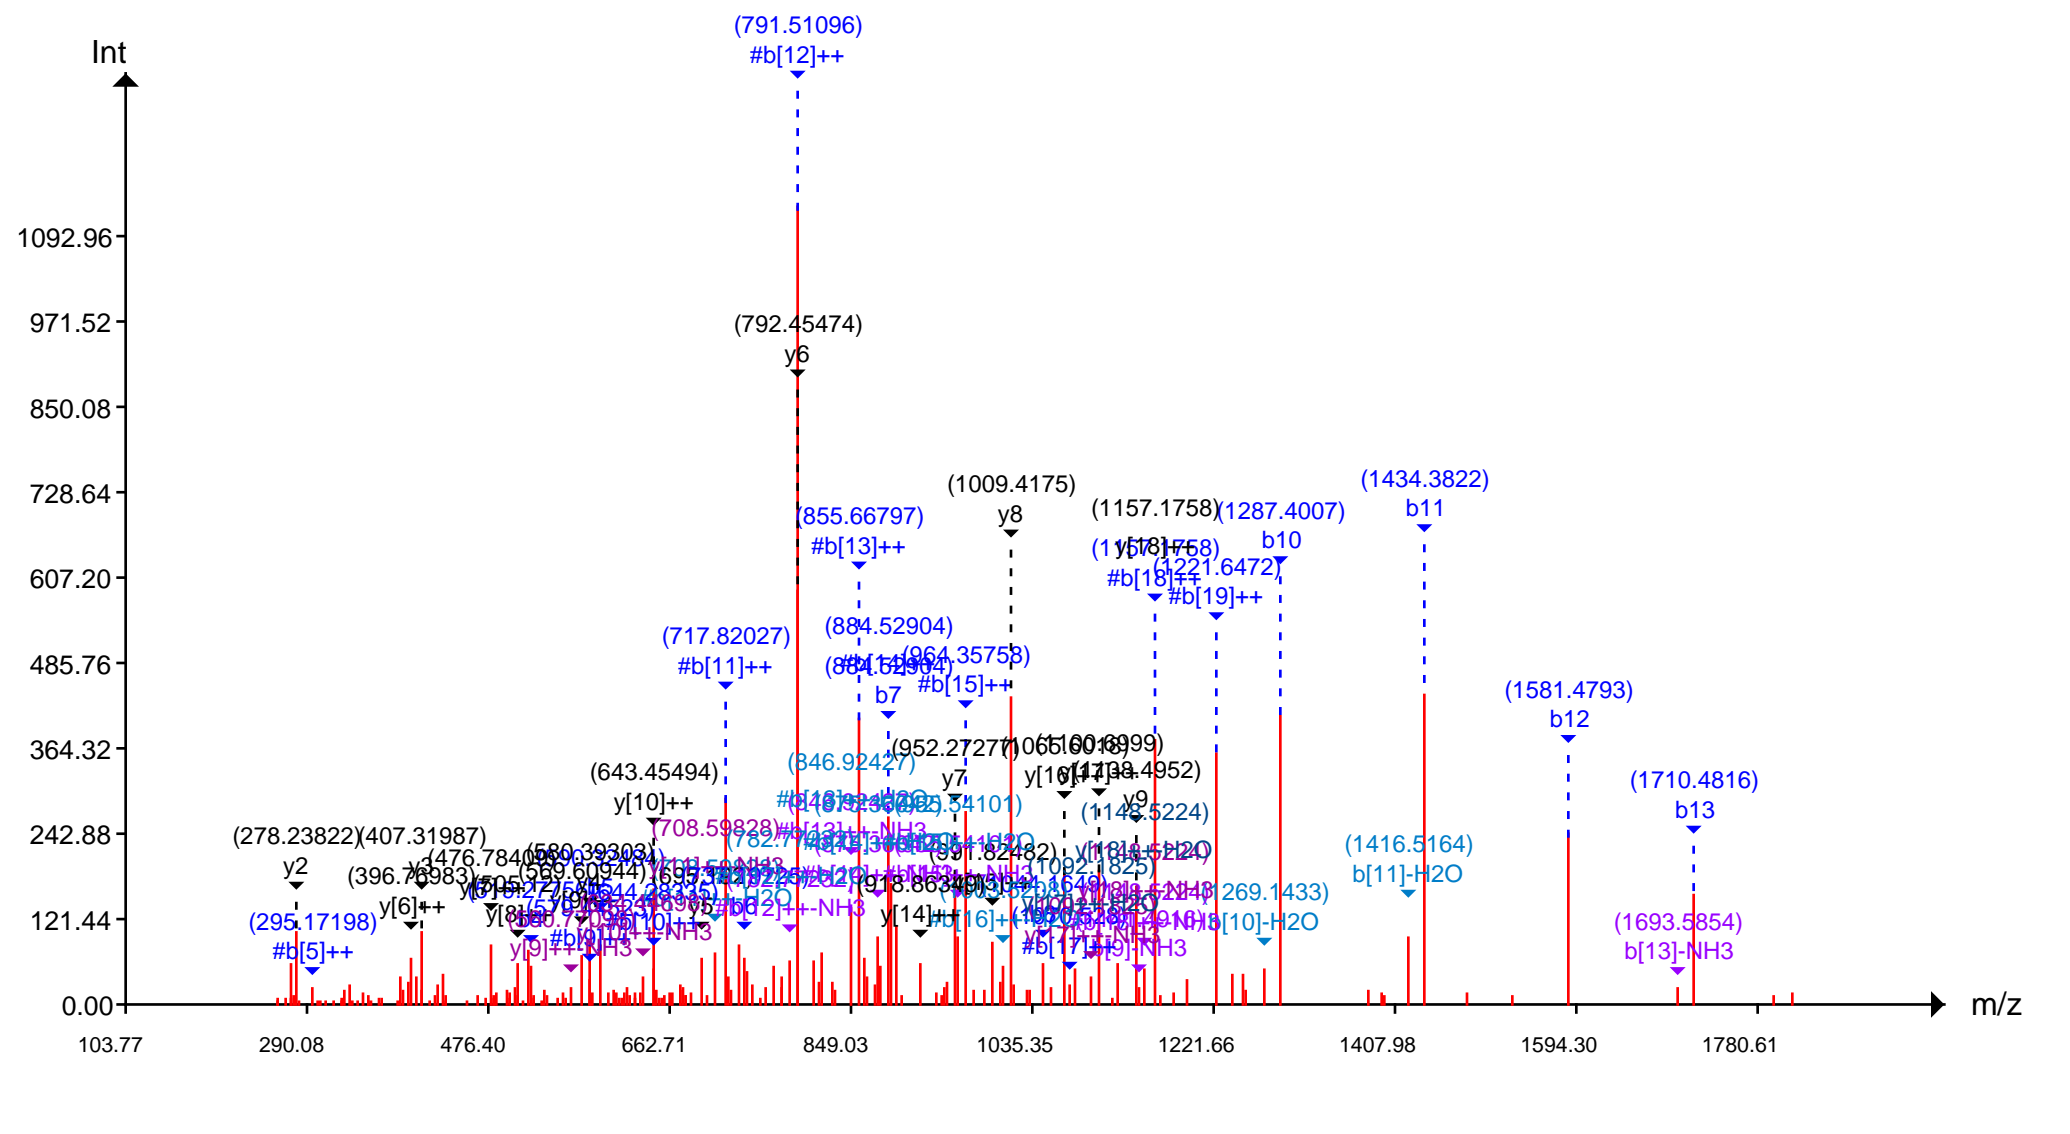

| Info          |                                                                            |                    |     |
|---------------|----------------------------------------------------------------------------|--------------------|-----|
| Modified S... | AcD3-LSC<Cmm*>IAM<Mox*>M<Mox*>C<Cmm*>NEFFEGC<Cmm*>PDK<AcD3K*>EPR<C13>-COOH | Ion score          | 59  |
|               | P07091                                                                     | Confidence level   | 99  |
| Precu...      | 907.0569                                                                   | Identity Threshold | 39  |
|               | 3+                                                                         | Mass error         | 0.0 |

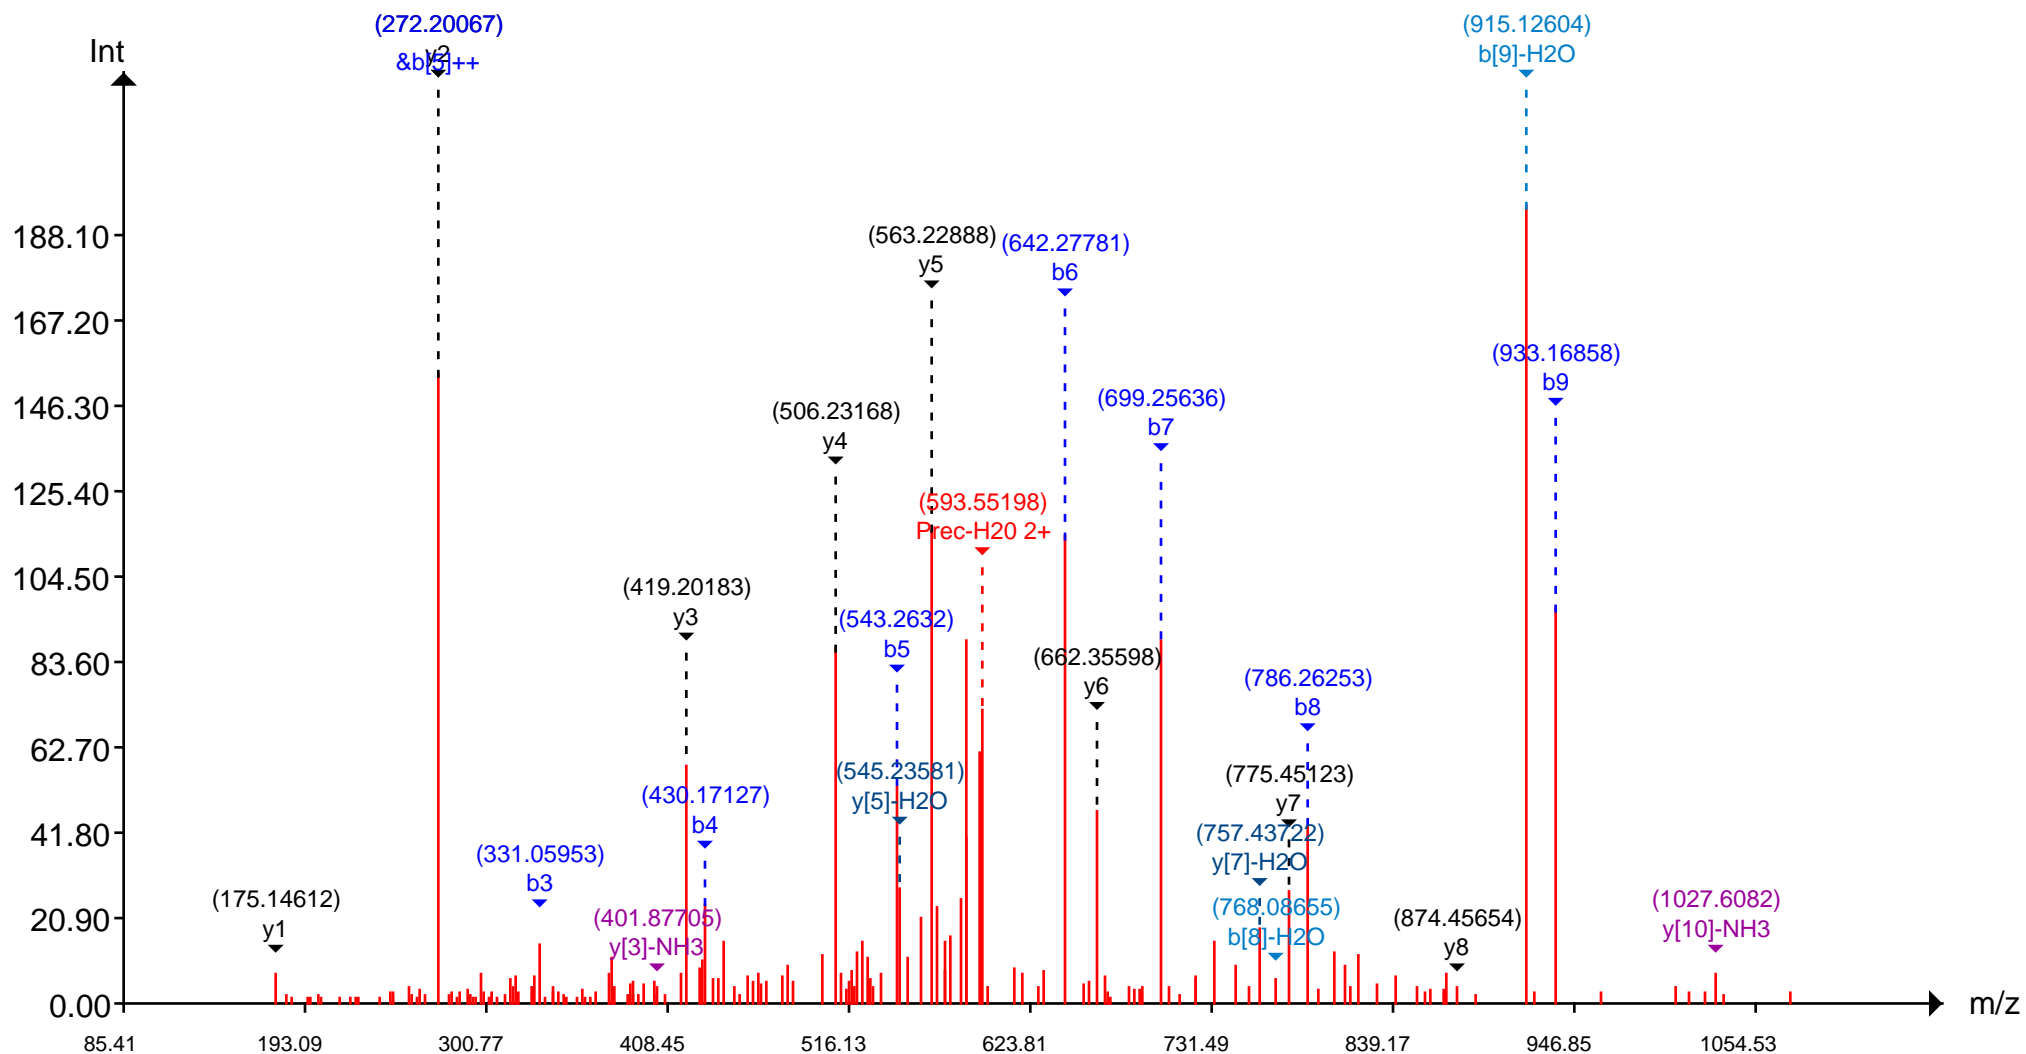

## Info

**Modified Sequence** AcD3-DVAVLVGSM<Mox\*>PR-COOH

**Ion score** 57.19

**Protein** P14152

**Confidence level** 99.00%

**Precursor m/z** 602.82549

**Identity Threshold** 48.22

**Charge** 2+

**Mass error** 3.35E-4

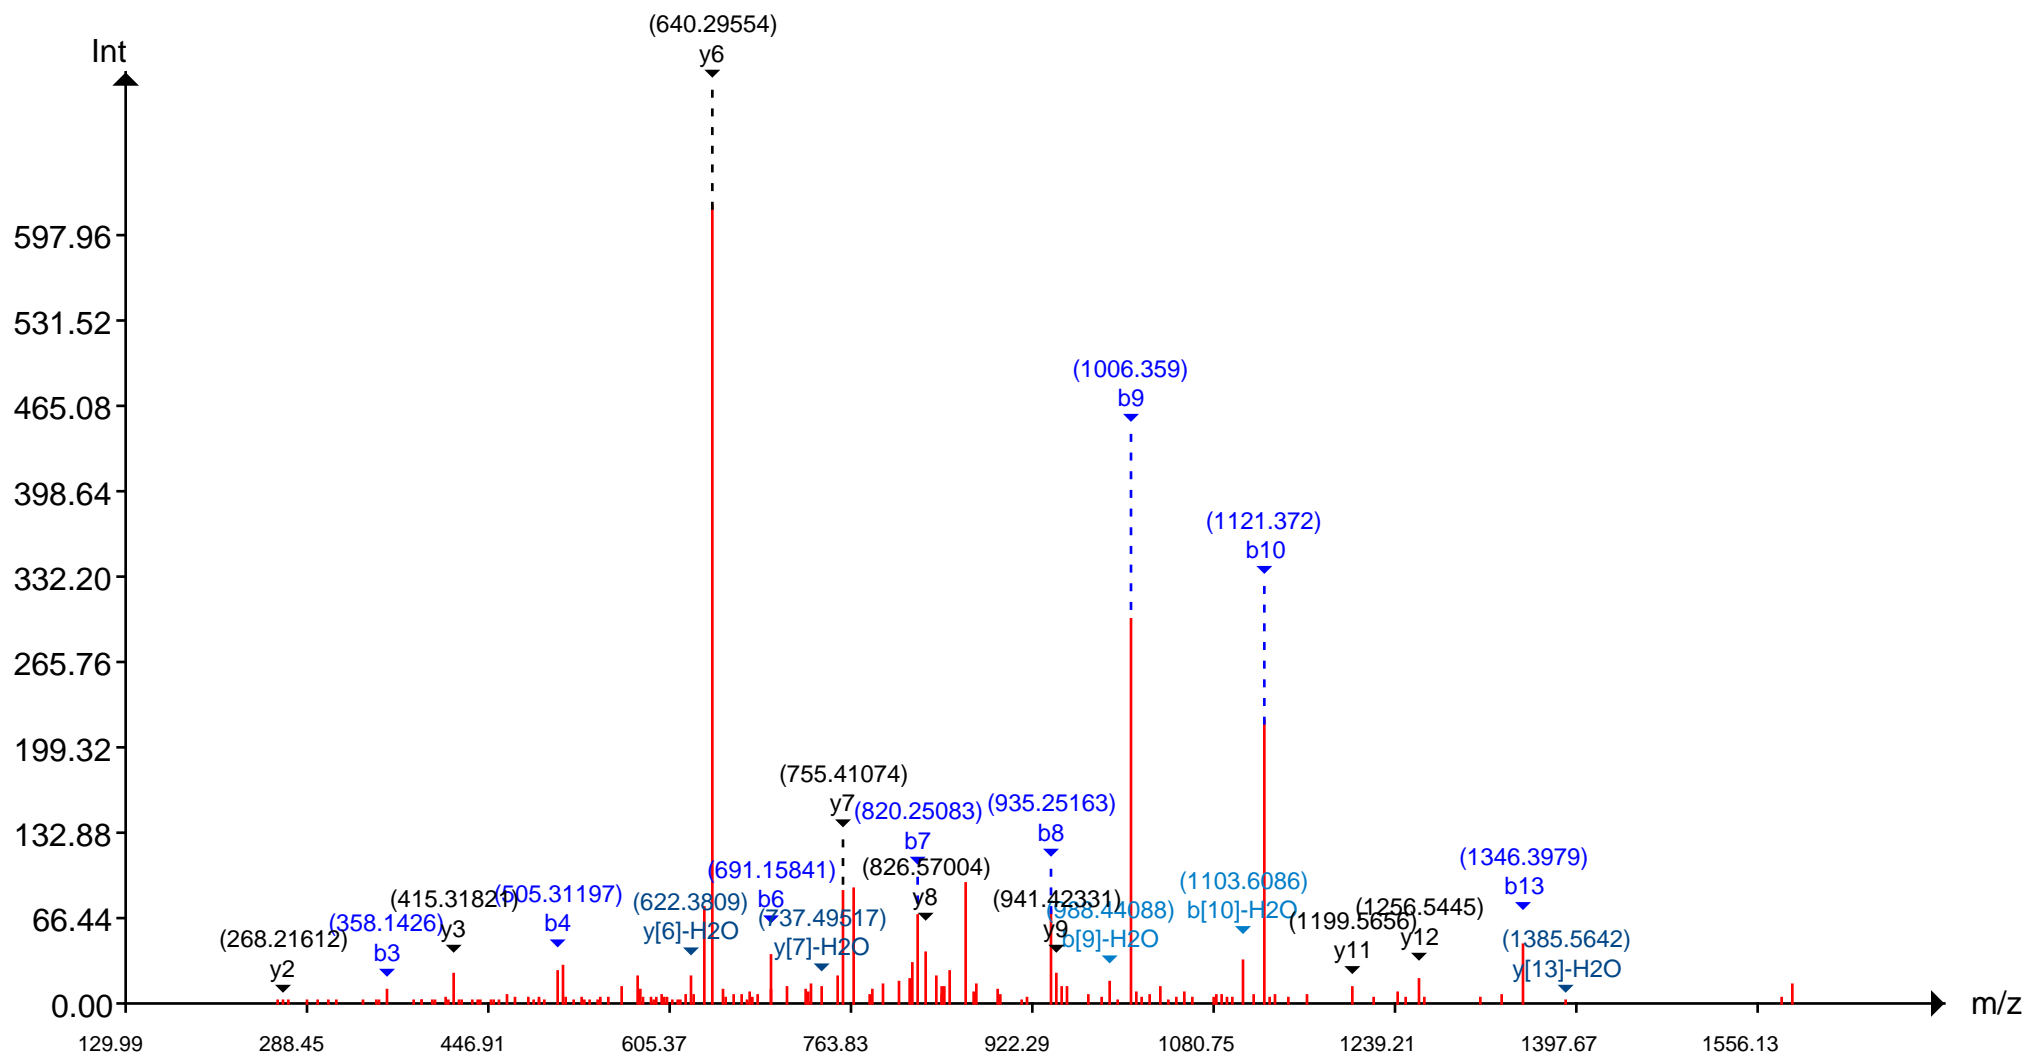

## Info

**Modified Sequence** AcD3-ALQFG EEDADPGAM<Mox\*>SR<C13>-COOH

**Ion score** 59.47

**Protein** Q9Z2U1

**Confidence level** 99.00%

**Precursor m/z** 880.90138

**Identity Threshold** 44.26

**Charge** 2+

**Mass error** 0.002426

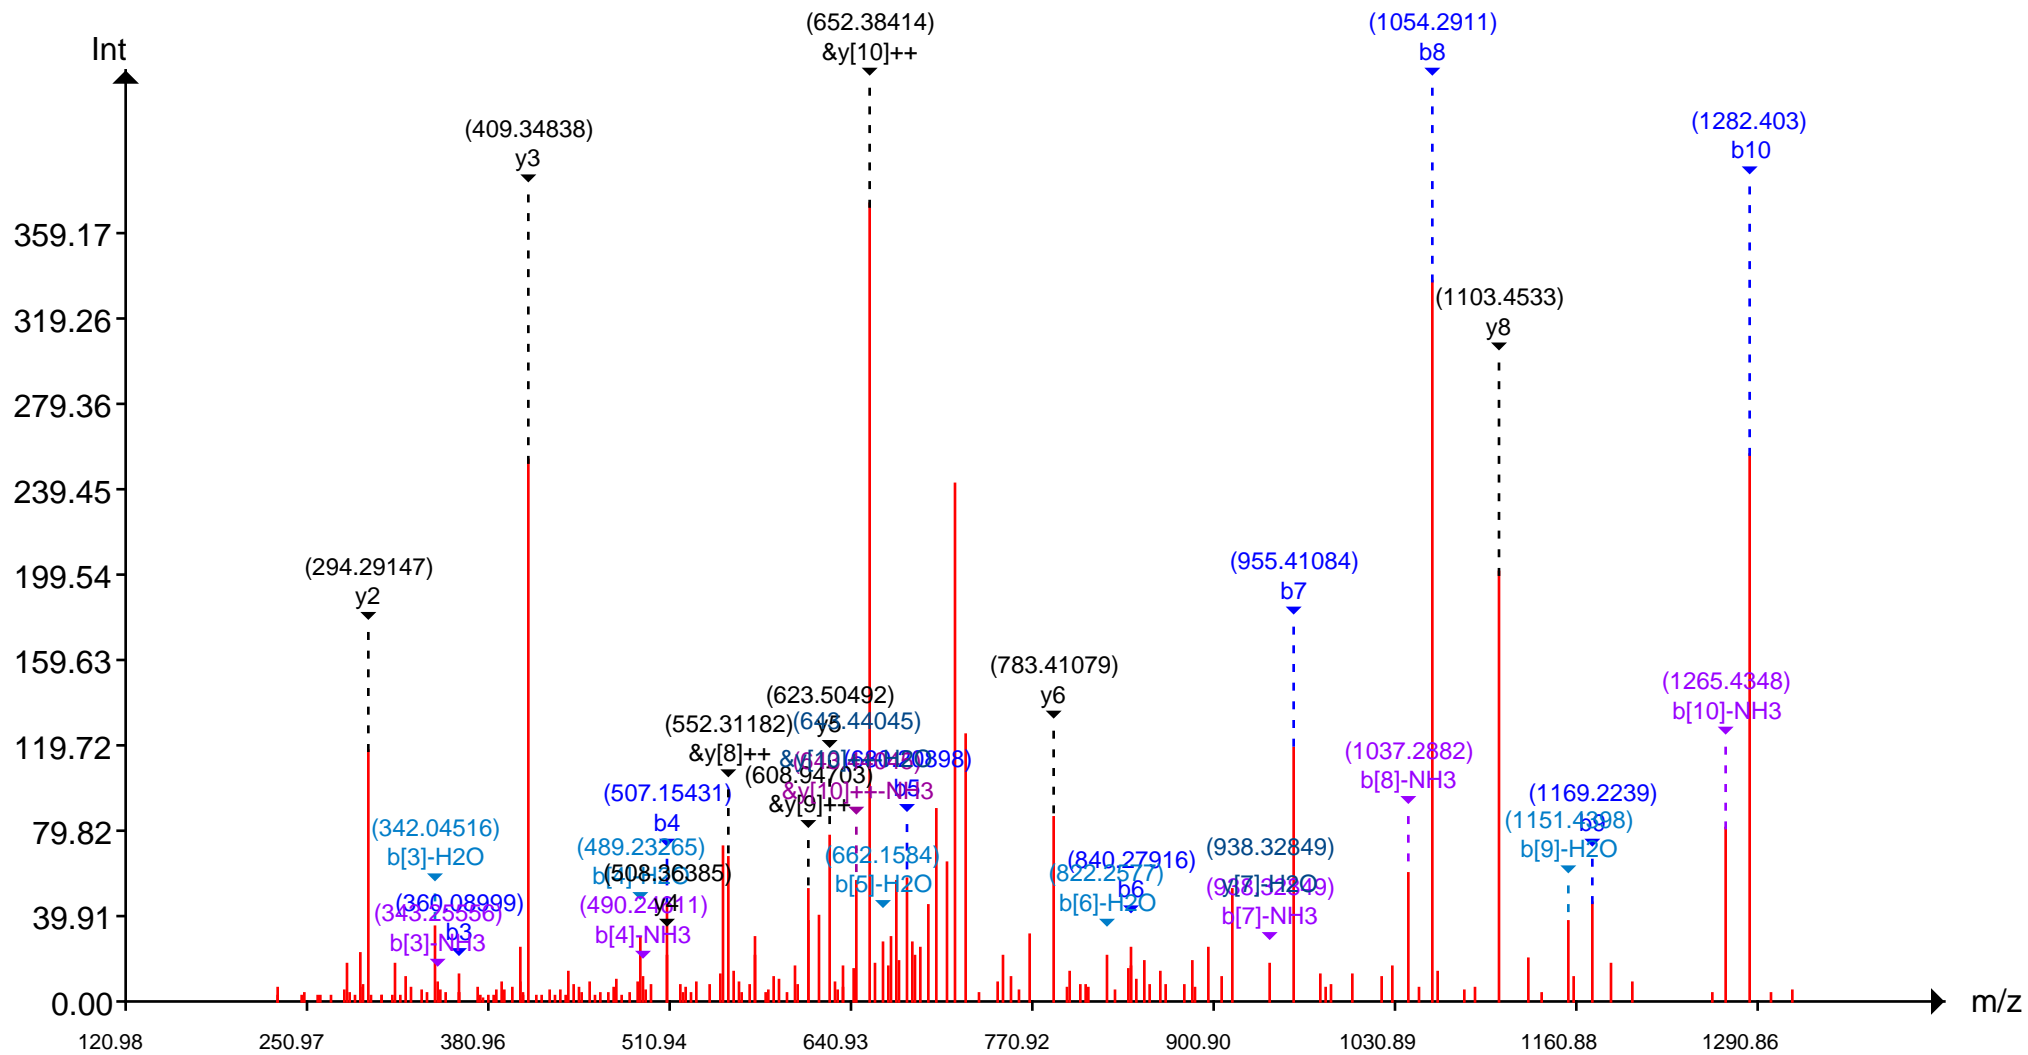

## Info

|                          |                                                 |                           |          |
|--------------------------|-------------------------------------------------|---------------------------|----------|
| <b>Modified Sequence</b> | AcD3-NSIM<Mox*>K<AcD3K*>C<Cmm*>DVIDIR<C13>-COOH | <b>Ion score</b>          | 49.52    |
| <b>Protein</b>           | Q8BFZ3, P60710, P63260                          | <b>Confidence level</b>   | 99.00%   |
| <b>Precursor m/z</b>     | 731.86637                                       | <b>Identity Threshold</b> | 47.59    |
| <b>Charge</b>            | 2+                                              | <b>Mass error</b>         | 0.001193 |

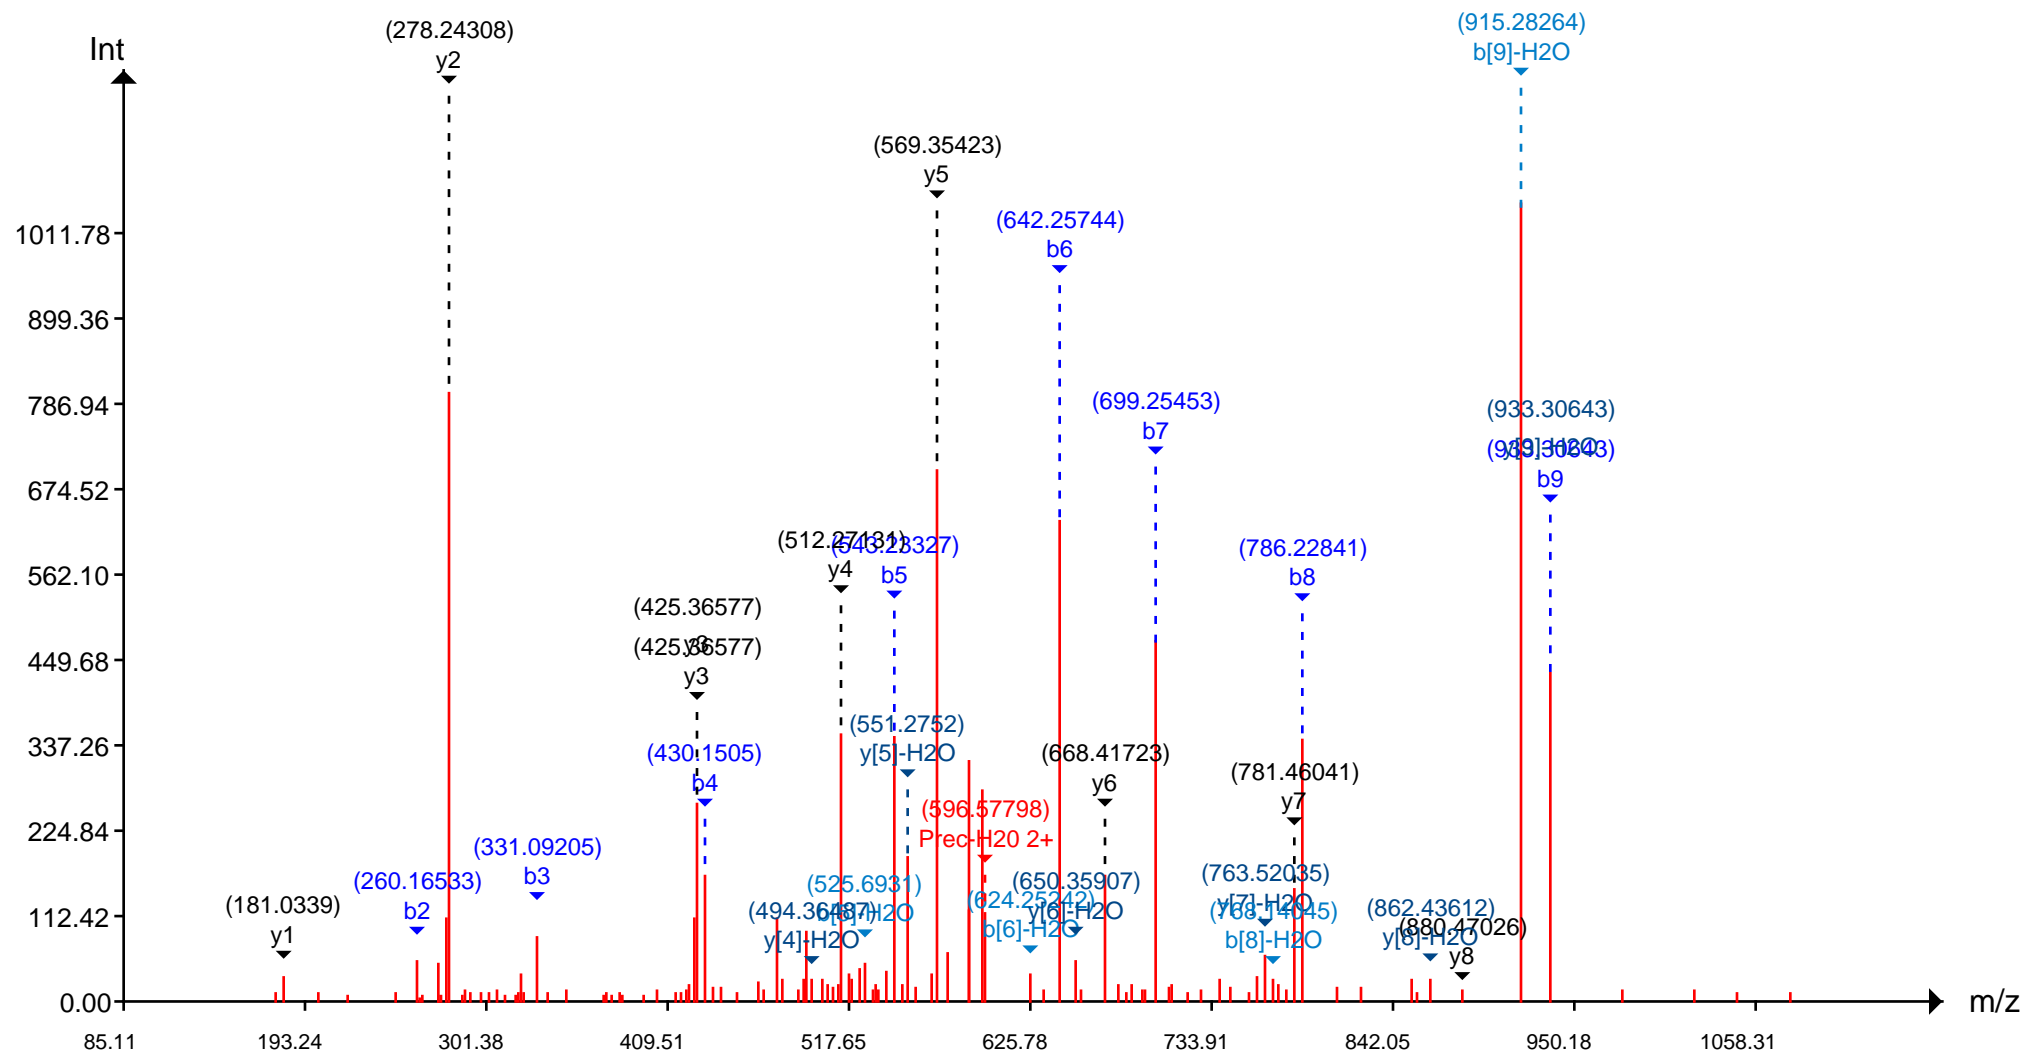

## Info

**Modified Sequence** AcD3-DVAVLVGSM<Mox\*>PR<C13>-COOH

**Ion score** 62.47

**Protein** P14152

**Confidence level** 99.00%

**Precursor m/z** 605.83552

**Identity Threshold** 47.52

**Charge** 2+

**Mass error** 2.53E-4

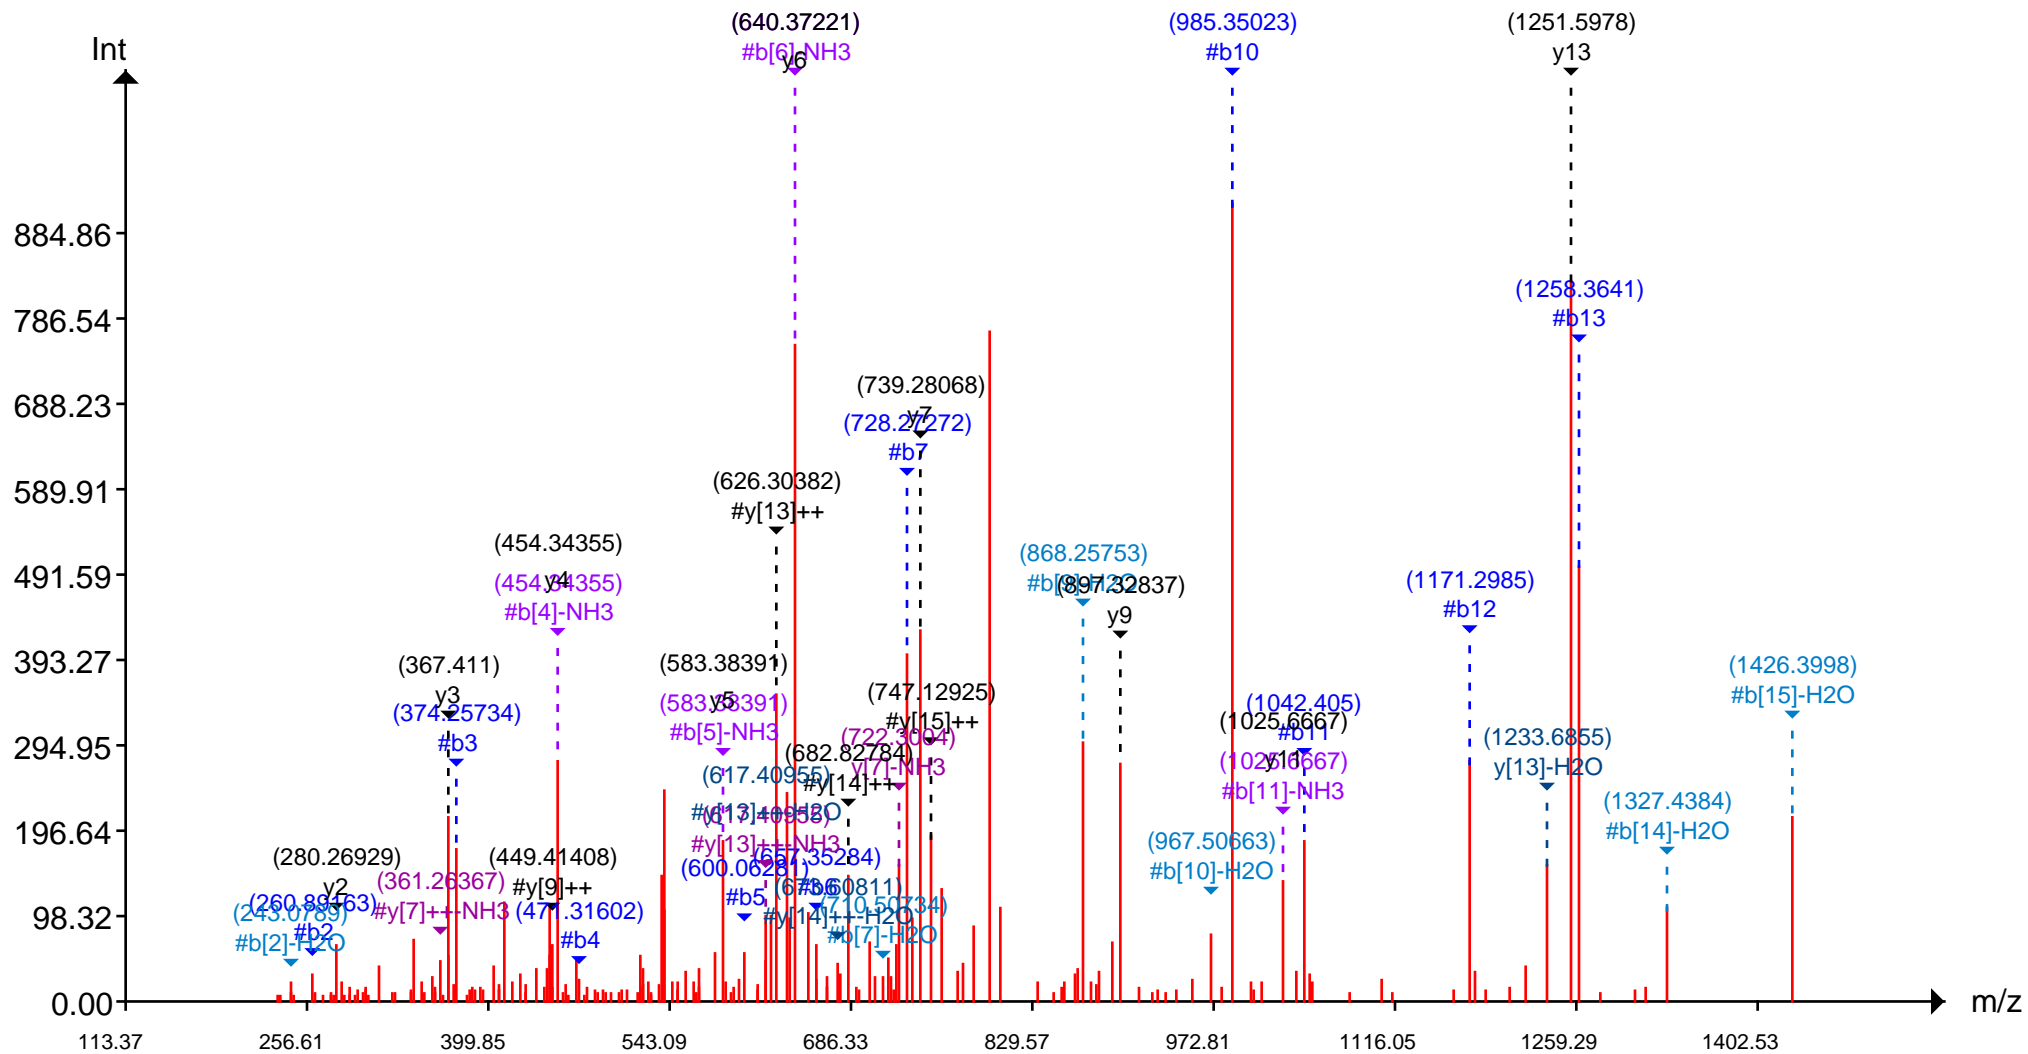

## Info

|                          |                                 |                           |          |
|--------------------------|---------------------------------|---------------------------|----------|
| <b>Modified Sequence</b> | AcD3-SQLPEGASAVGESSVR<C13>-COOH | <b>Ion score</b>          | 65.01    |
| <b>Protein</b>           | Q921W0                          | <b>Confidence level</b>   | 99.00%   |
| <b>Precursor m/z</b>     | 812.9198                        | <b>Identity Threshold</b> | 48.01    |
| <b>Charge</b>            | 2+                              | <b>Mass error</b>         | 0.001165 |



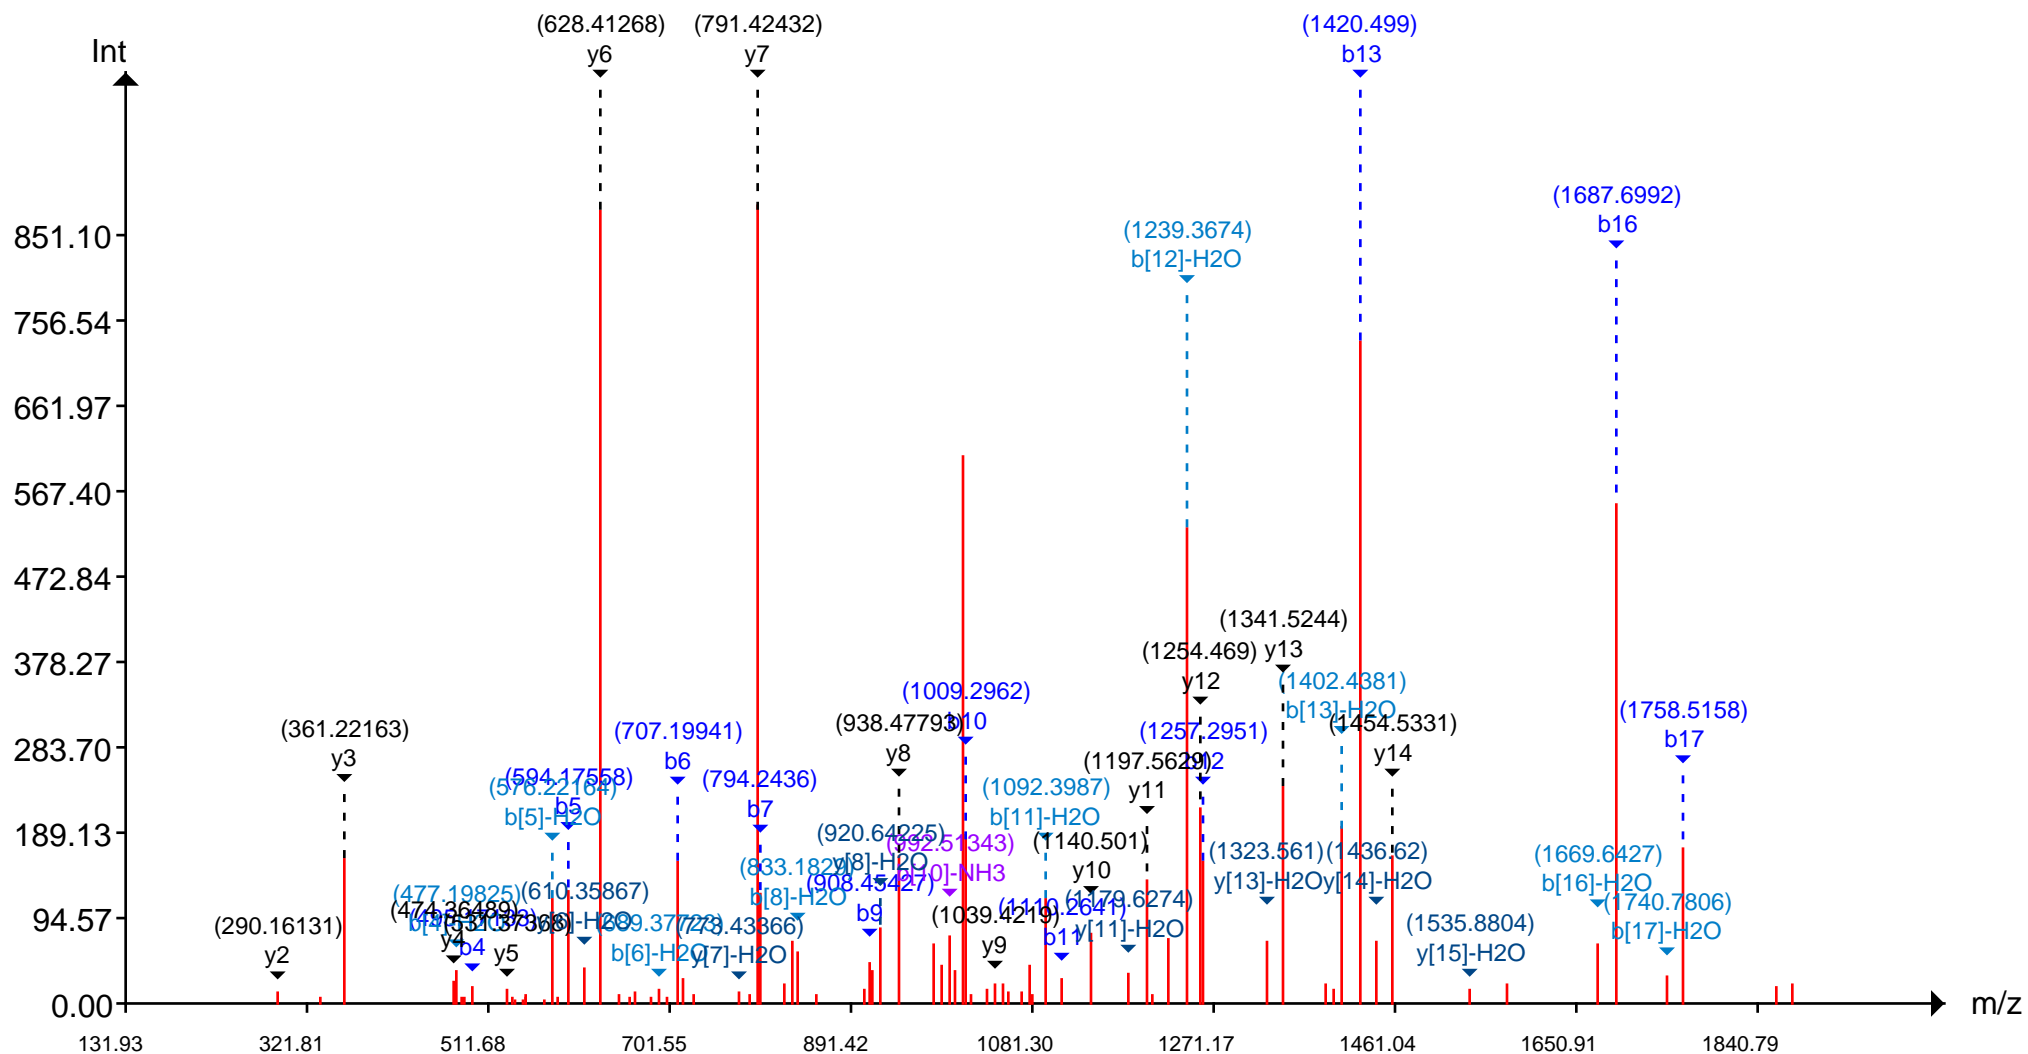

## Info

|                          |                                     |                           |          |
|--------------------------|-------------------------------------|---------------------------|----------|
| <b>Modified Sequence</b> | AcD3-YANTVLSGGTTM<Mox*>YPGIADR-COOH | <b>Ion score</b>          | 98.86    |
| <b>Protein</b>           | P60710, P63260                      | <b>Confidence level</b>   | 99.00%   |
| <b>Precursor m/z</b>     | 1024.4963                           | <b>Identity Threshold</b> | 47.01    |
| <b>Charge</b>            | 2+                                  | <b>Mass error</b>         | 0.002065 |

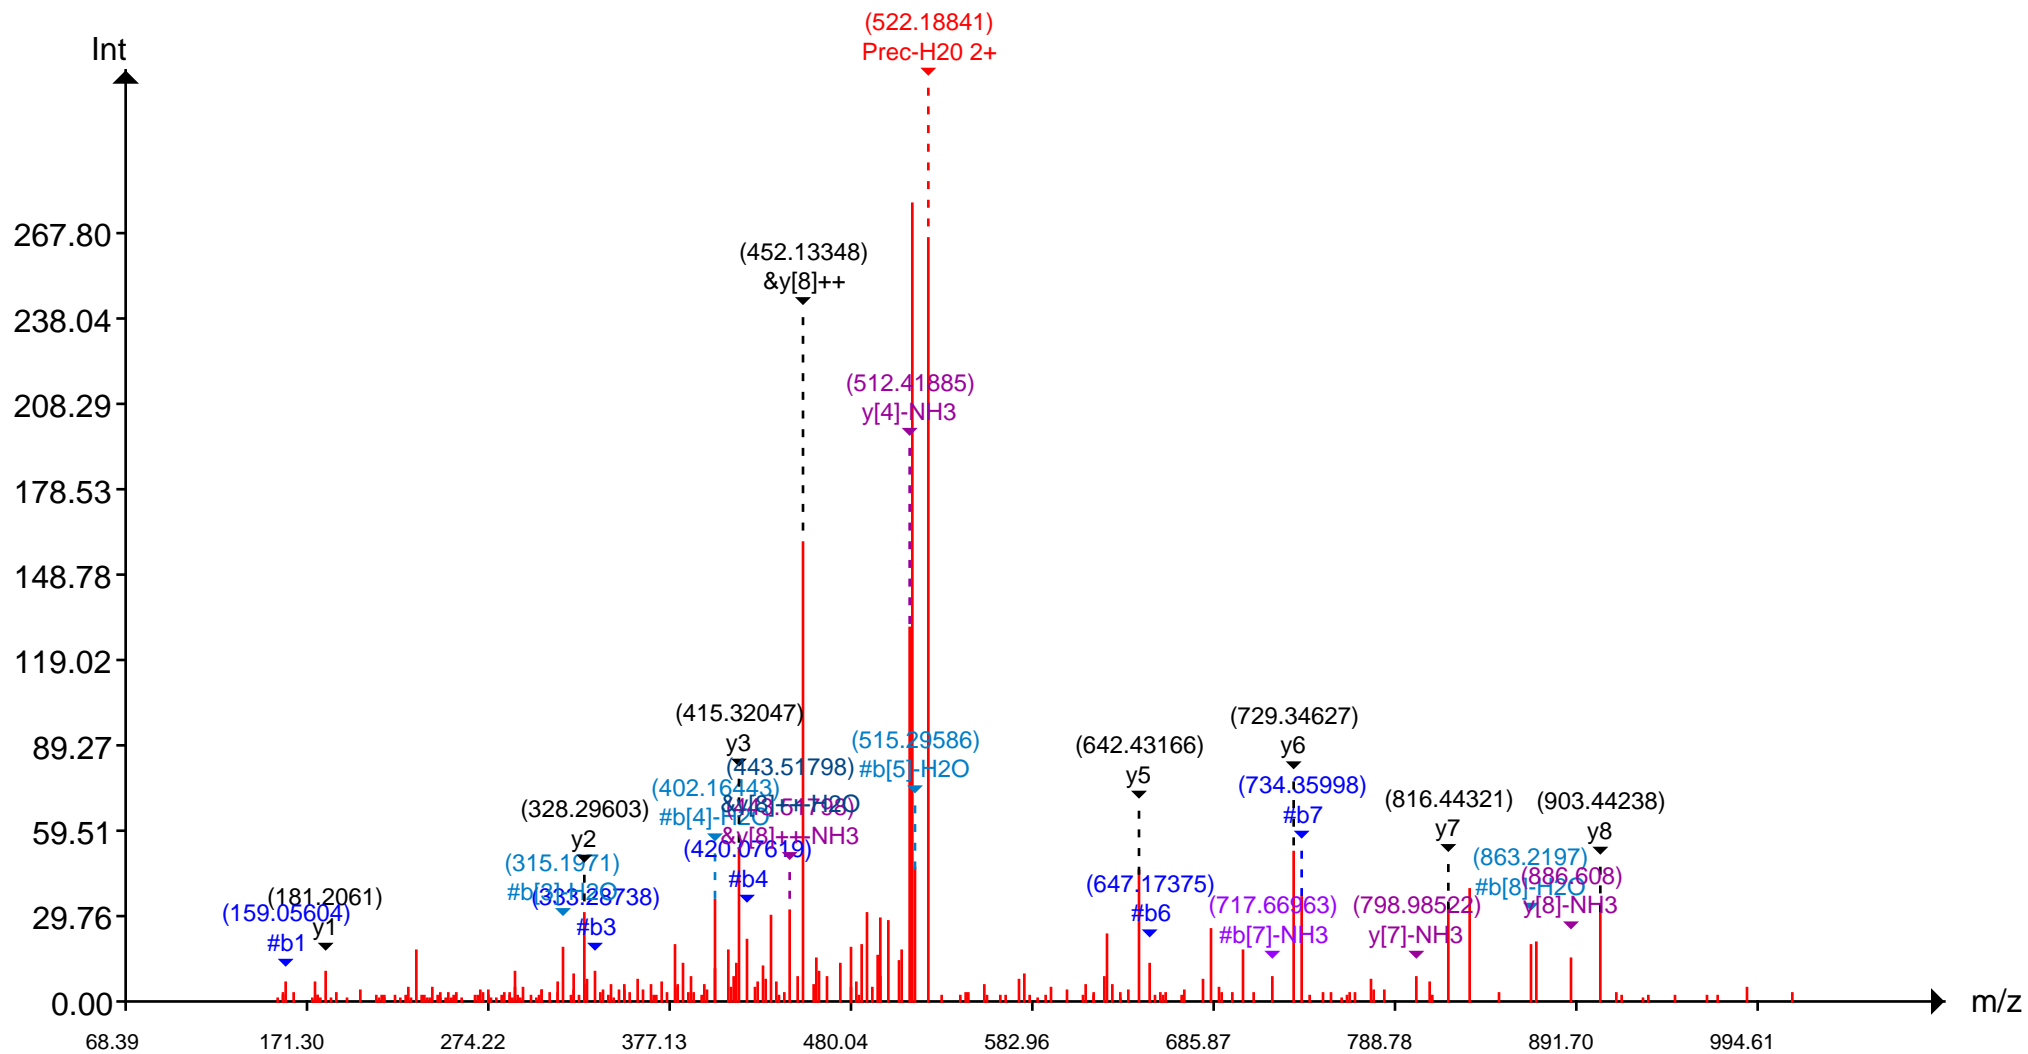

## Info

|                          |                          |                           |         |
|--------------------------|--------------------------|---------------------------|---------|
| <b>Modified Sequence</b> | AcD3-ISSSLNSFR<C13>-COOH | <b>Ion score</b>          | 51.52   |
| <b>Protein</b>           | Q9D1E6                   | <b>Confidence level</b>   | 99.00%  |
| <b>Precursor m/z</b>     | 531.29188                | <b>Identity Threshold</b> | 48.14   |
| <b>Charge</b>            | 2+                       | <b>Mass error</b>         | 4.37E-4 |

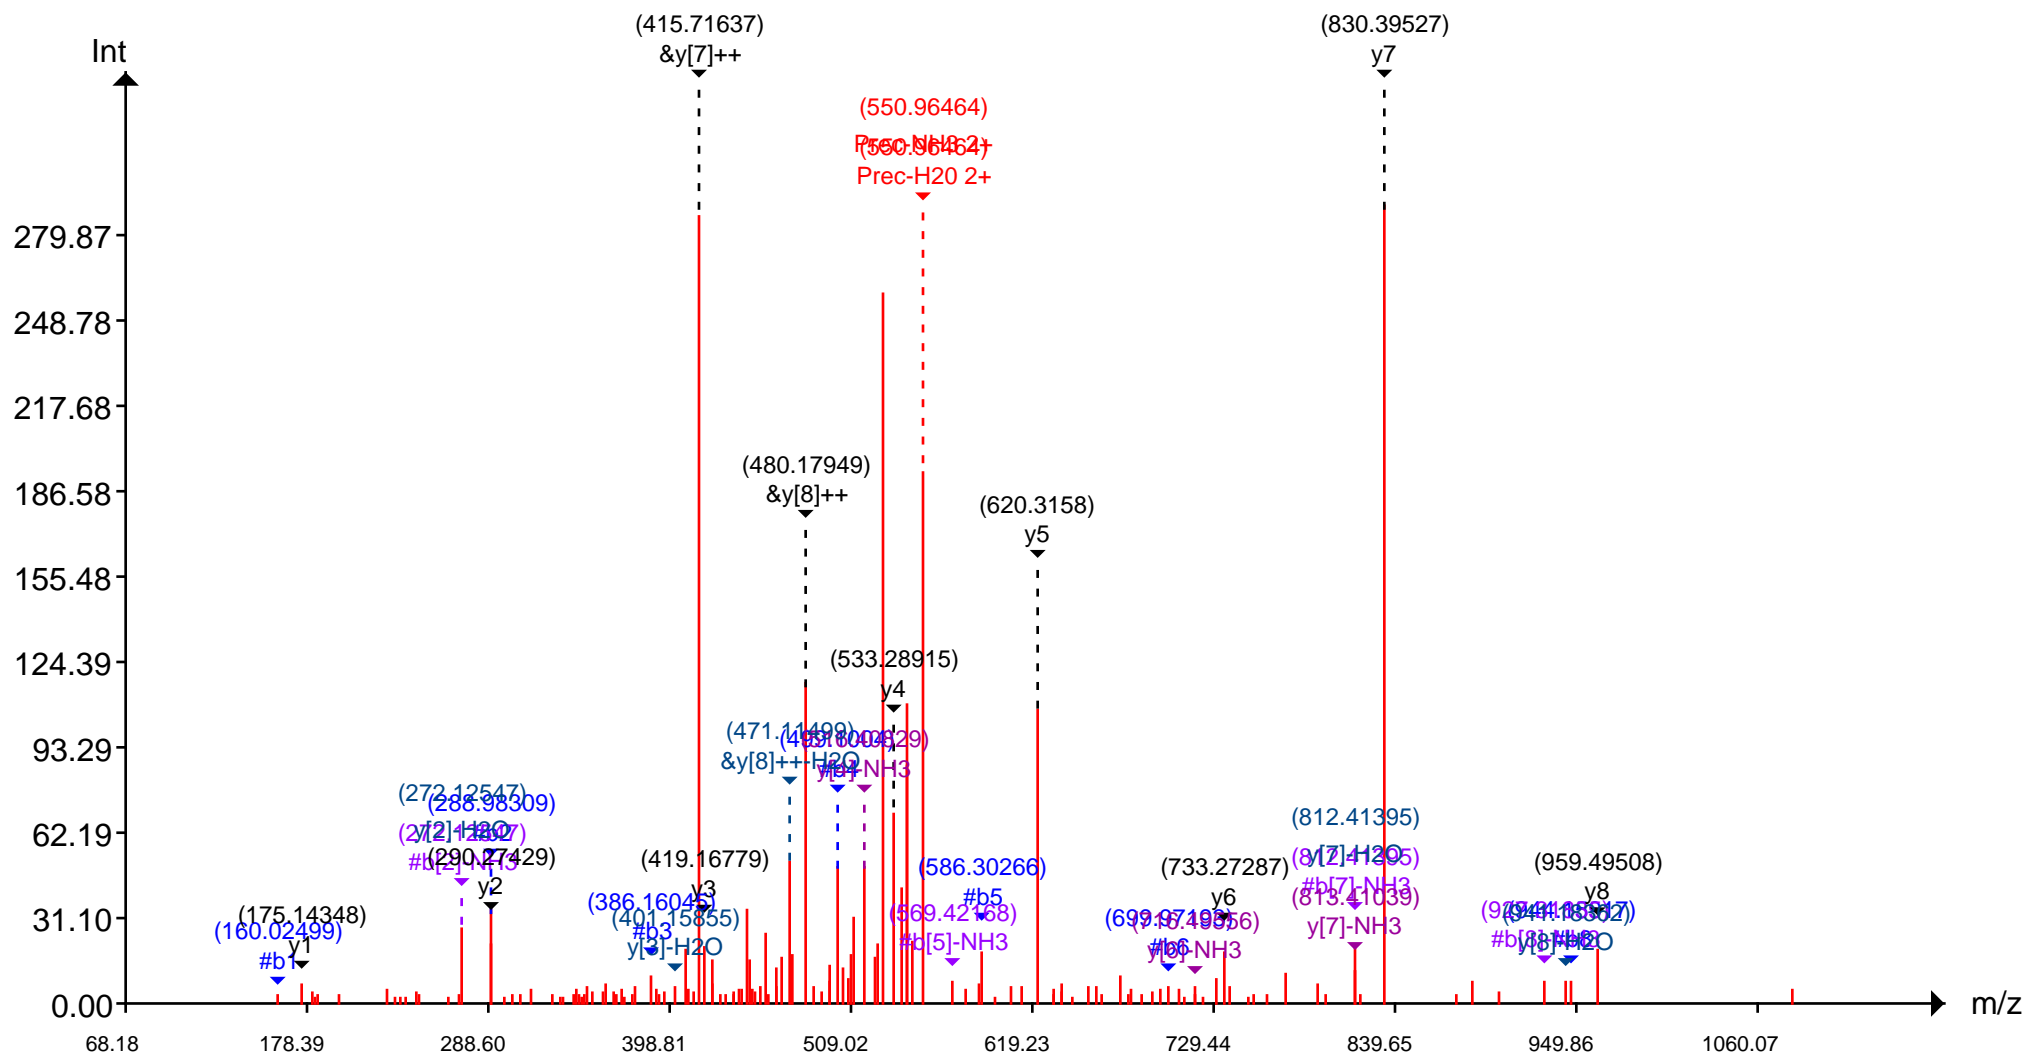

## Info

|                          |                     |                           |          |
|--------------------------|---------------------|---------------------------|----------|
| <b>Modified Sequence</b> | AcD3-NEPLSNEDR-COOH | <b>Ion score</b>          | 46.16    |
| <b>Protein</b>           | P68510              | <b>Confidence level</b>   | 99.00%   |
| <b>Precursor m/z</b>     | 559.76111           | <b>Identity Threshold</b> | 45.49    |
| <b>Charge</b>            | 2+                  | <b>Mass error</b>         | -2.06E-4 |

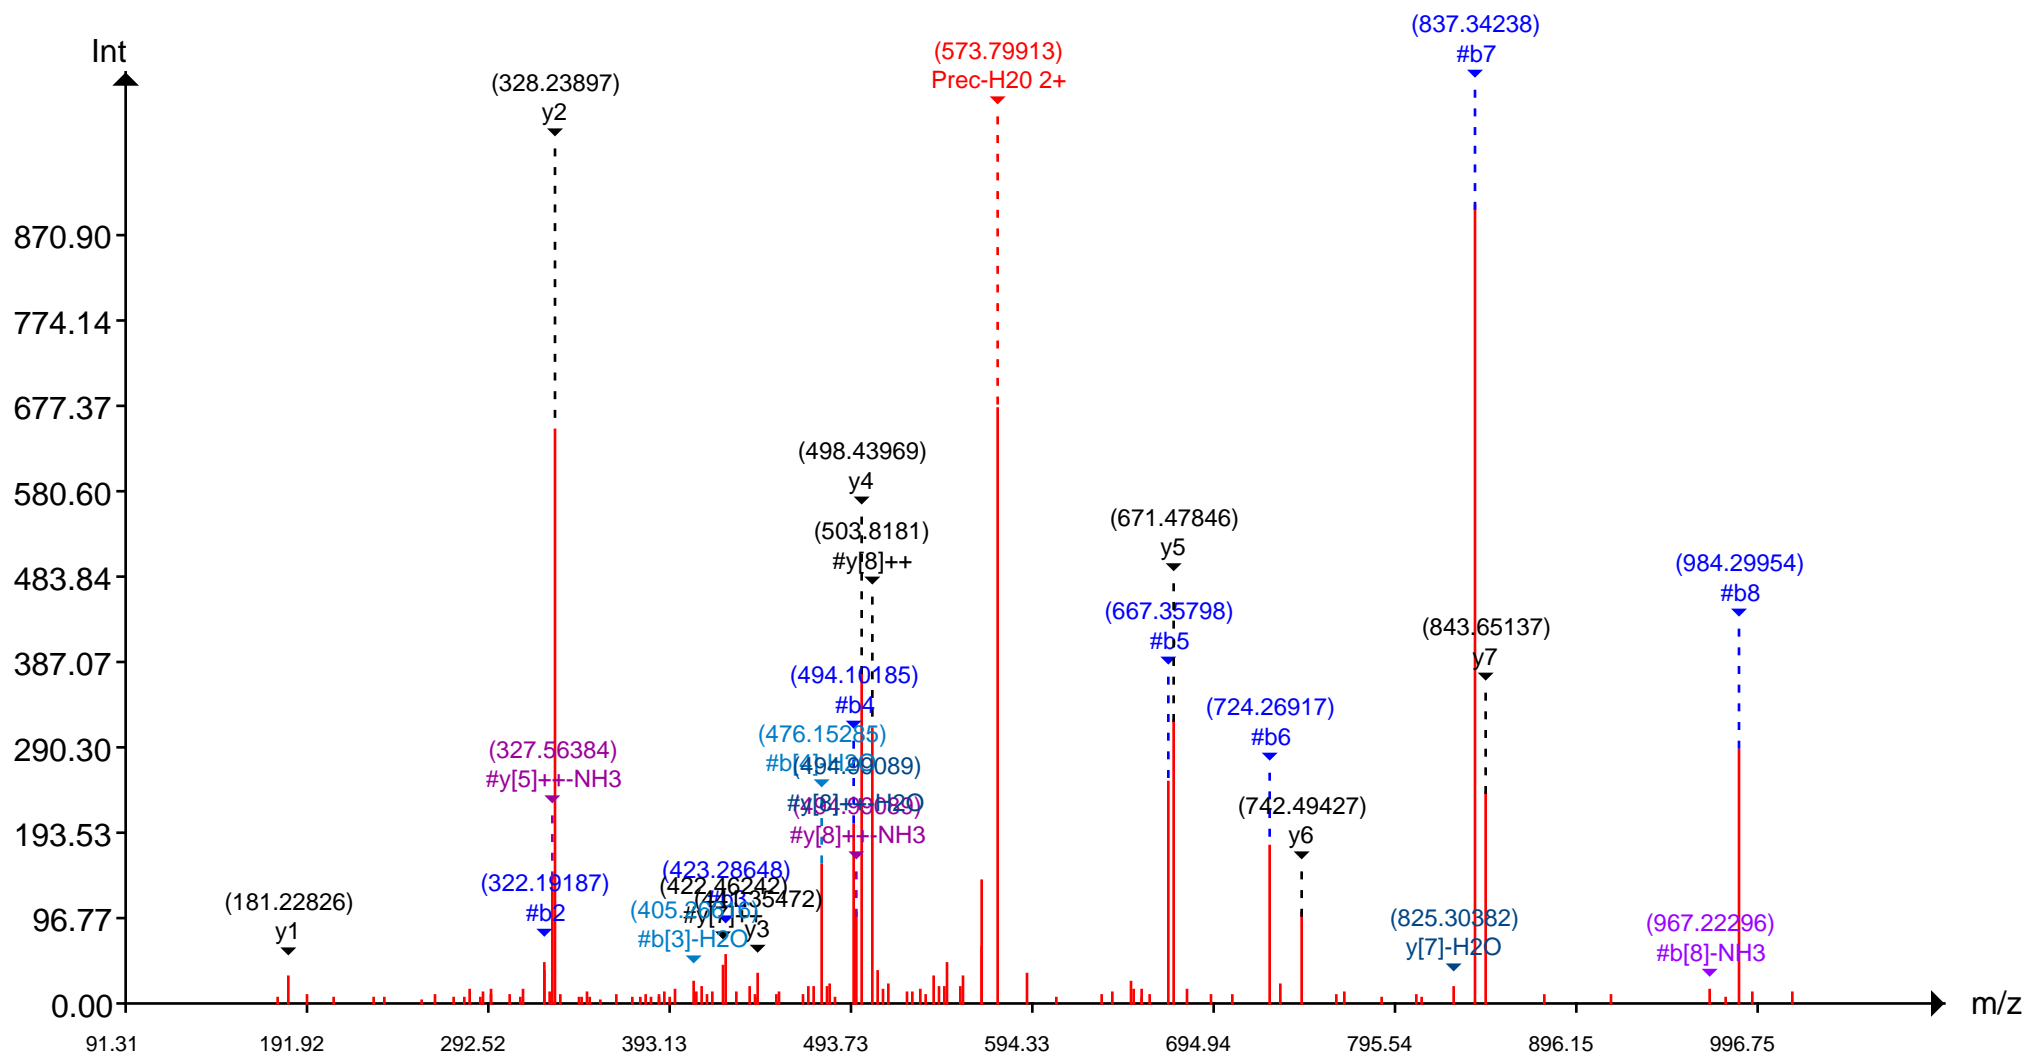

## Info

**Modified Sequence** AcD3-LYTAK<AcD3K\*>GLFR<C13>-COOH

**Ion score** 52.18

**Protein** P17182, P17183

**Confidence level** 99.00%

**Precursor m/z** 582.85319

**Identity Threshold** 44.25

**Charge** 2+

**Mass error** 1.47E-4

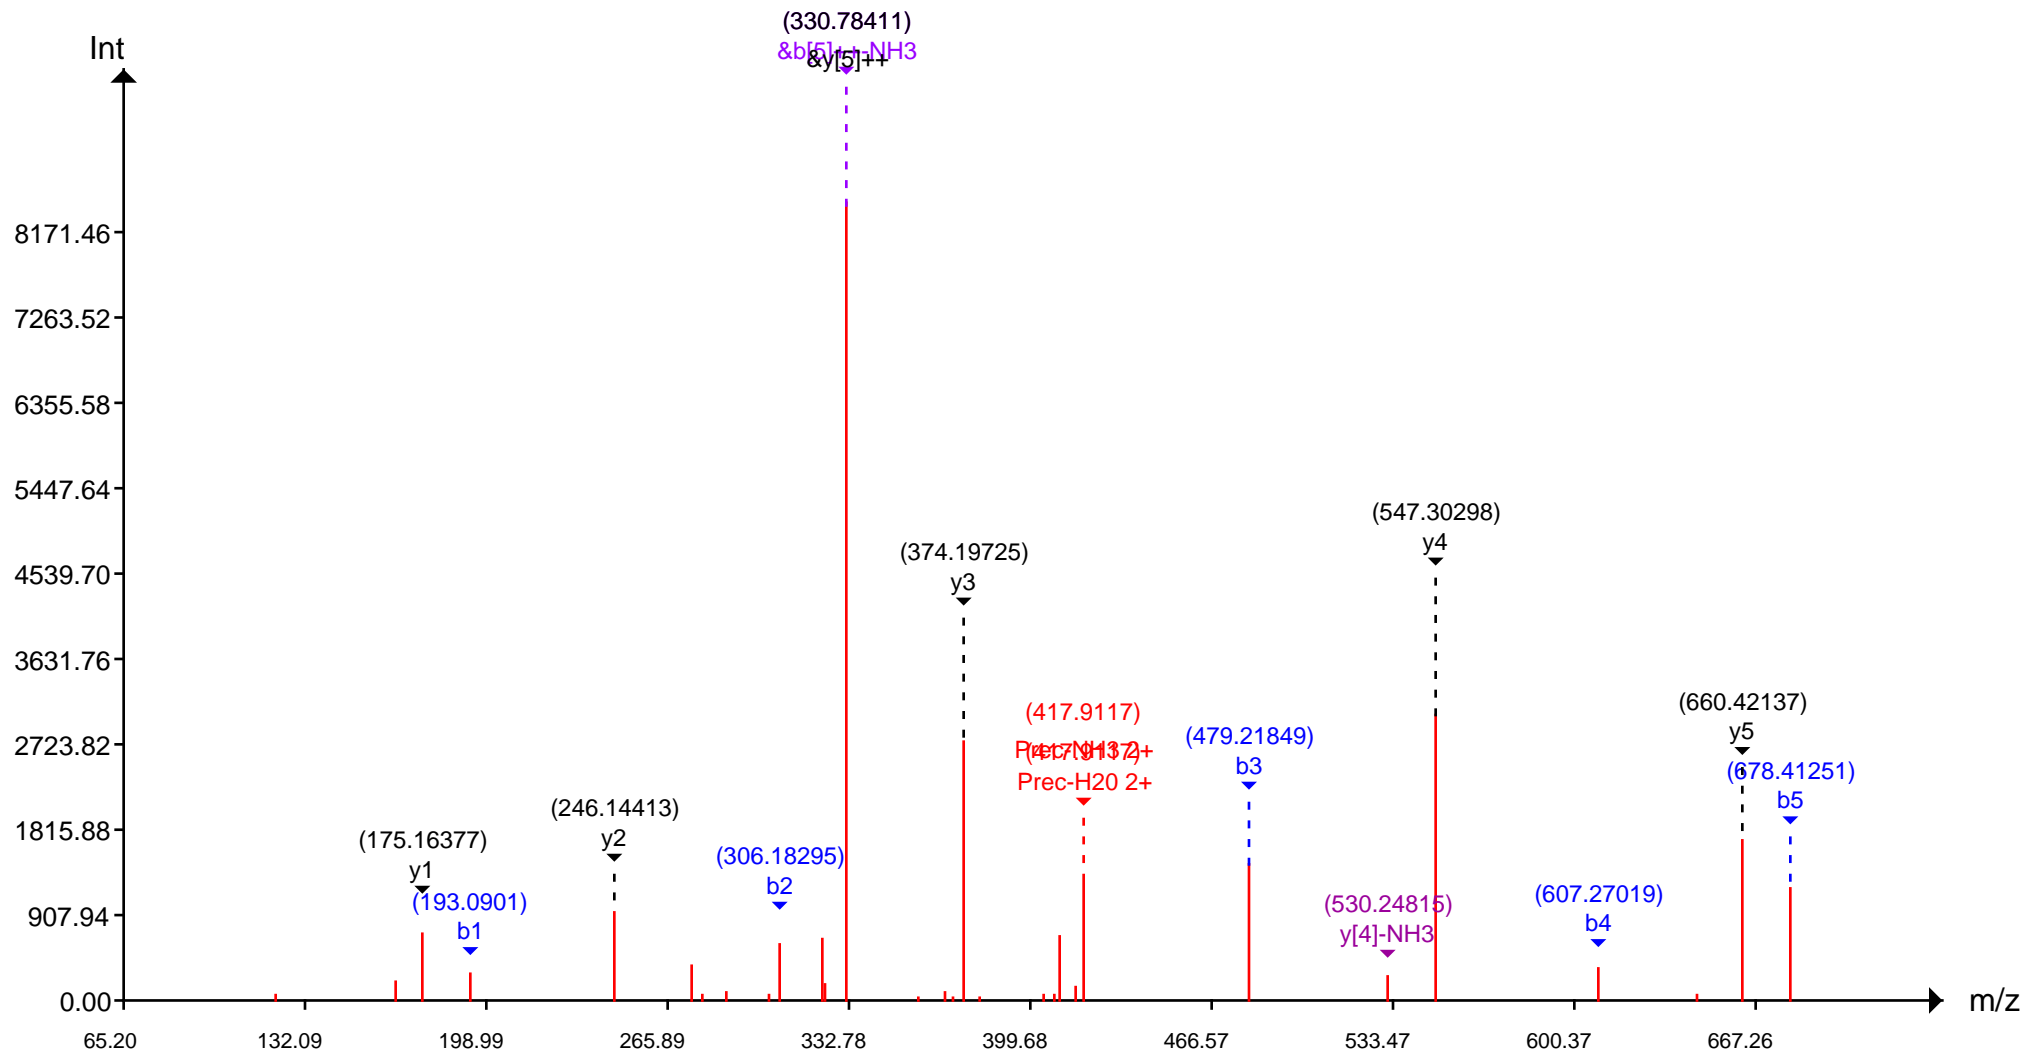

## Info

**Modified Sequence** AcD3-FLK<AcD3K\*>QAR-COOH

**Ion score** 58.31

**Protein** P10107

**Confidence level** 99.00%

**Precursor m/z** 426.76296

**Identity Threshold** 44.30

**Charge** 2+

**Mass error** -0.002212

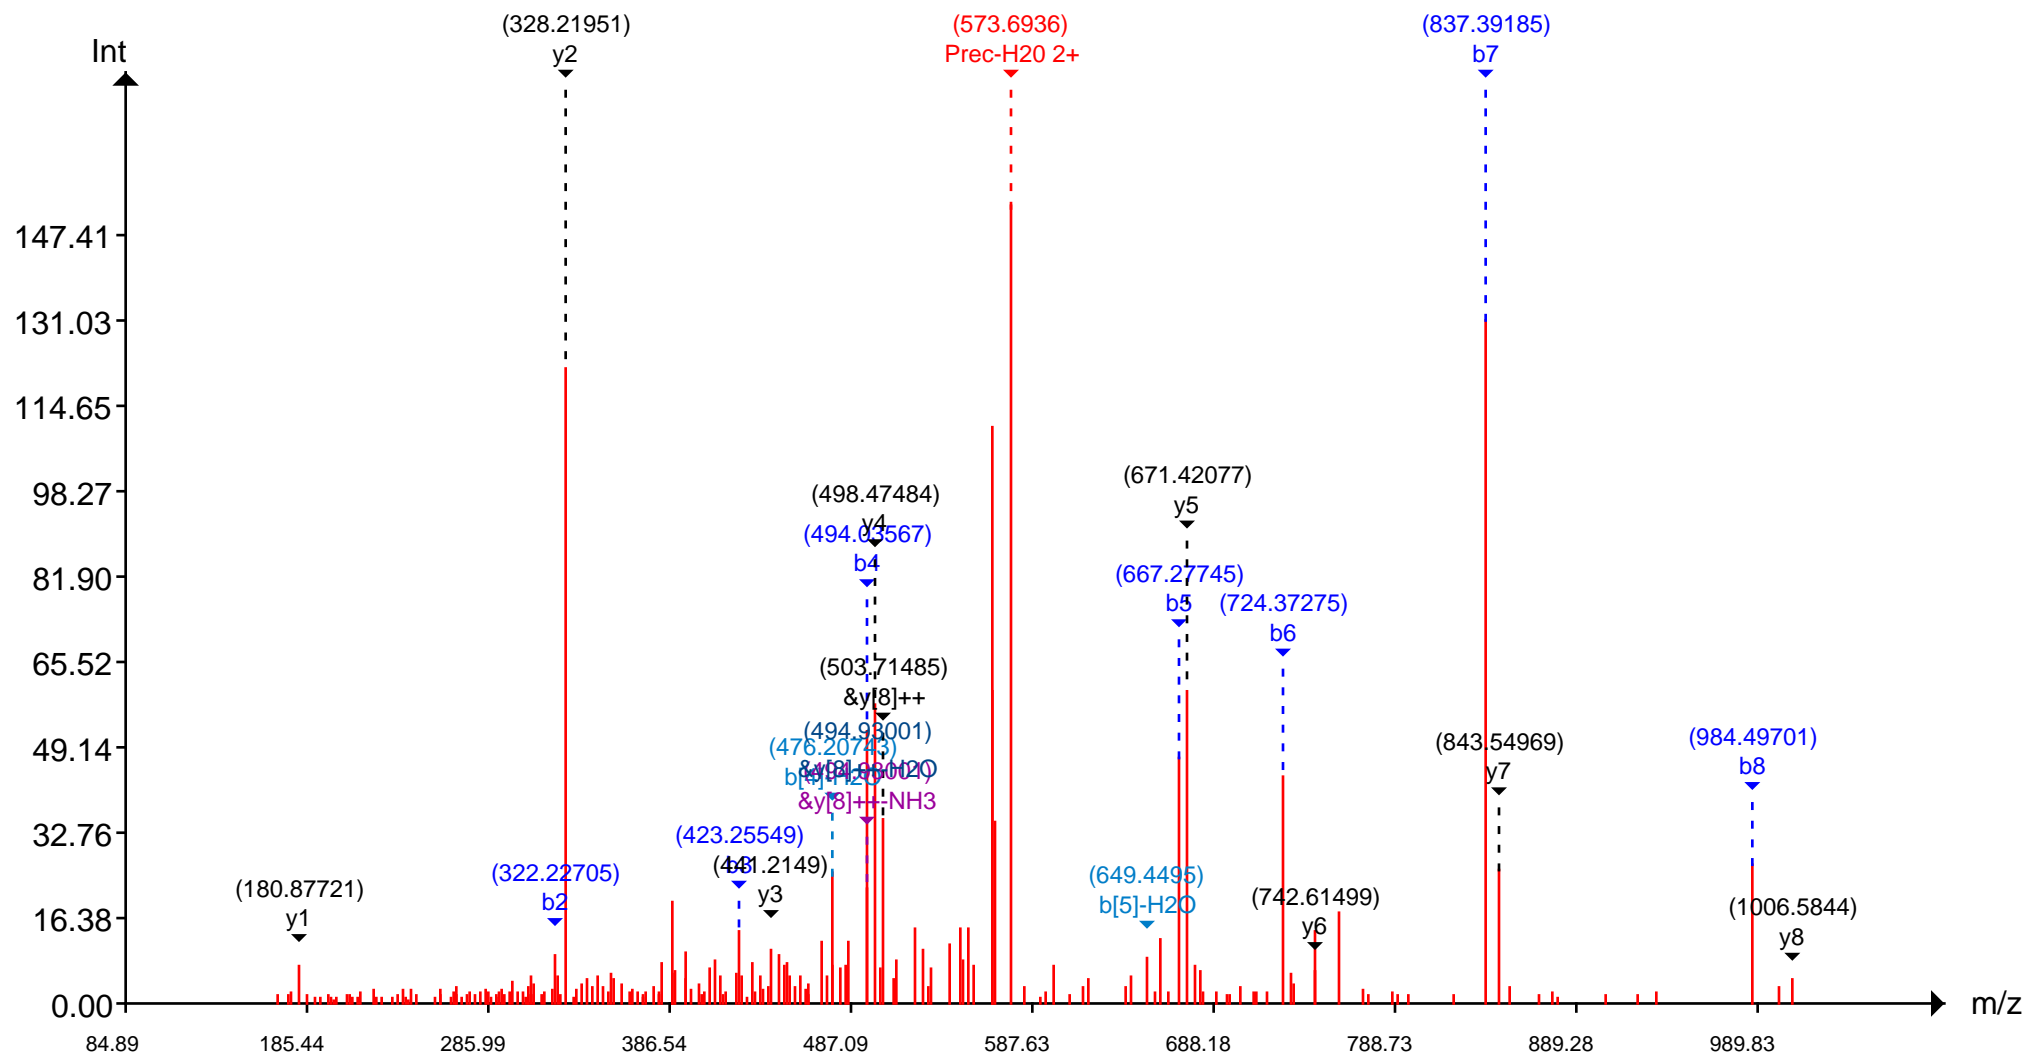

## Info

**Modified Sequence** AcD3-LYTAK<AcD3K\*>GLFR<C13>-COOH

**Ion score** 46.63

**Protein** P17182, P17183

**Confidence level** 99.00%

**Precursor m/z** 582.85344

**Identity Threshold** 44.24

**Charge** 2+

**Mass error** 6.47E-4

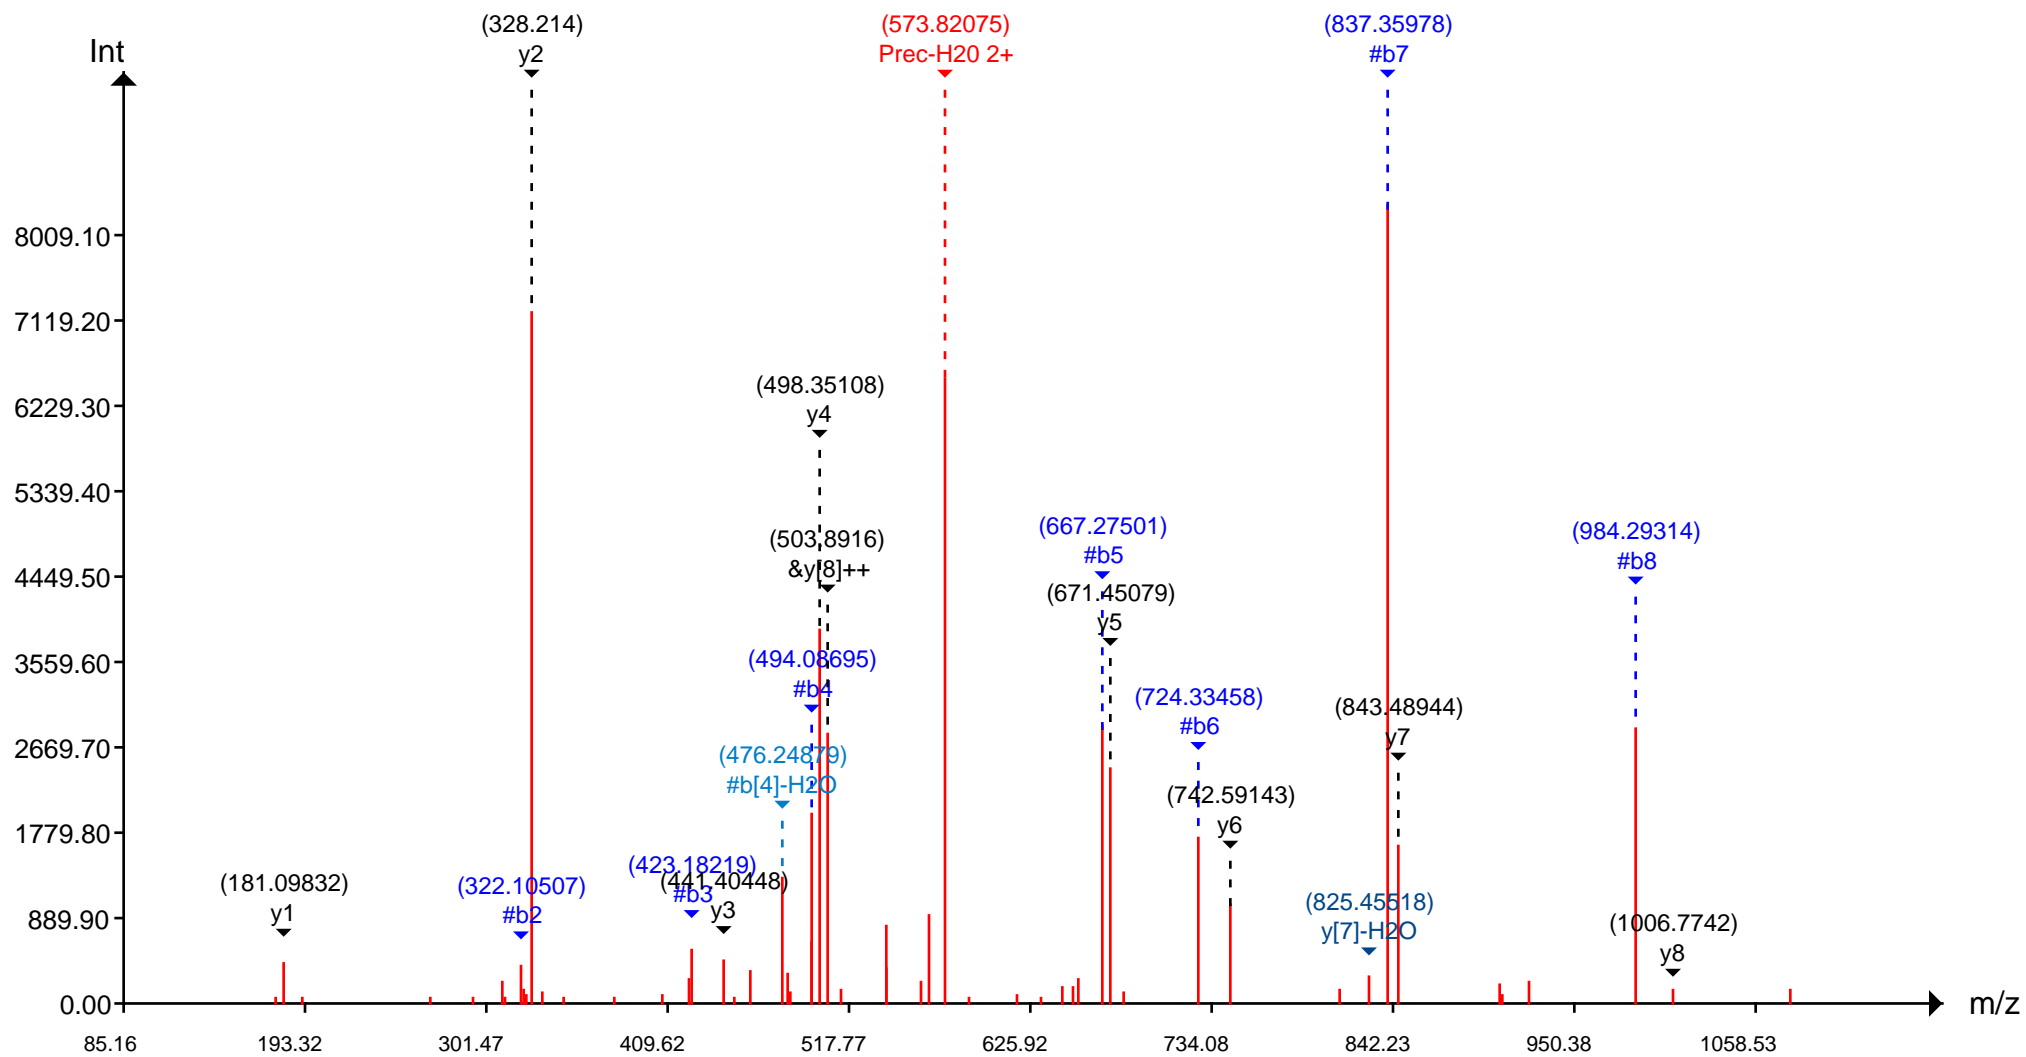

## Info

**Modified Sequence** AcD3-LYTAK<AcD3K\*>GLFR<C13>-COOH

**Ion score** 71.43

**Protein** P17182, P17183

**Confidence level** 99.00%

**Precursor m/z** 582.8532

**Identity Threshold** 44.23

**Charge** 2+

**Mass error** 1.67E-4

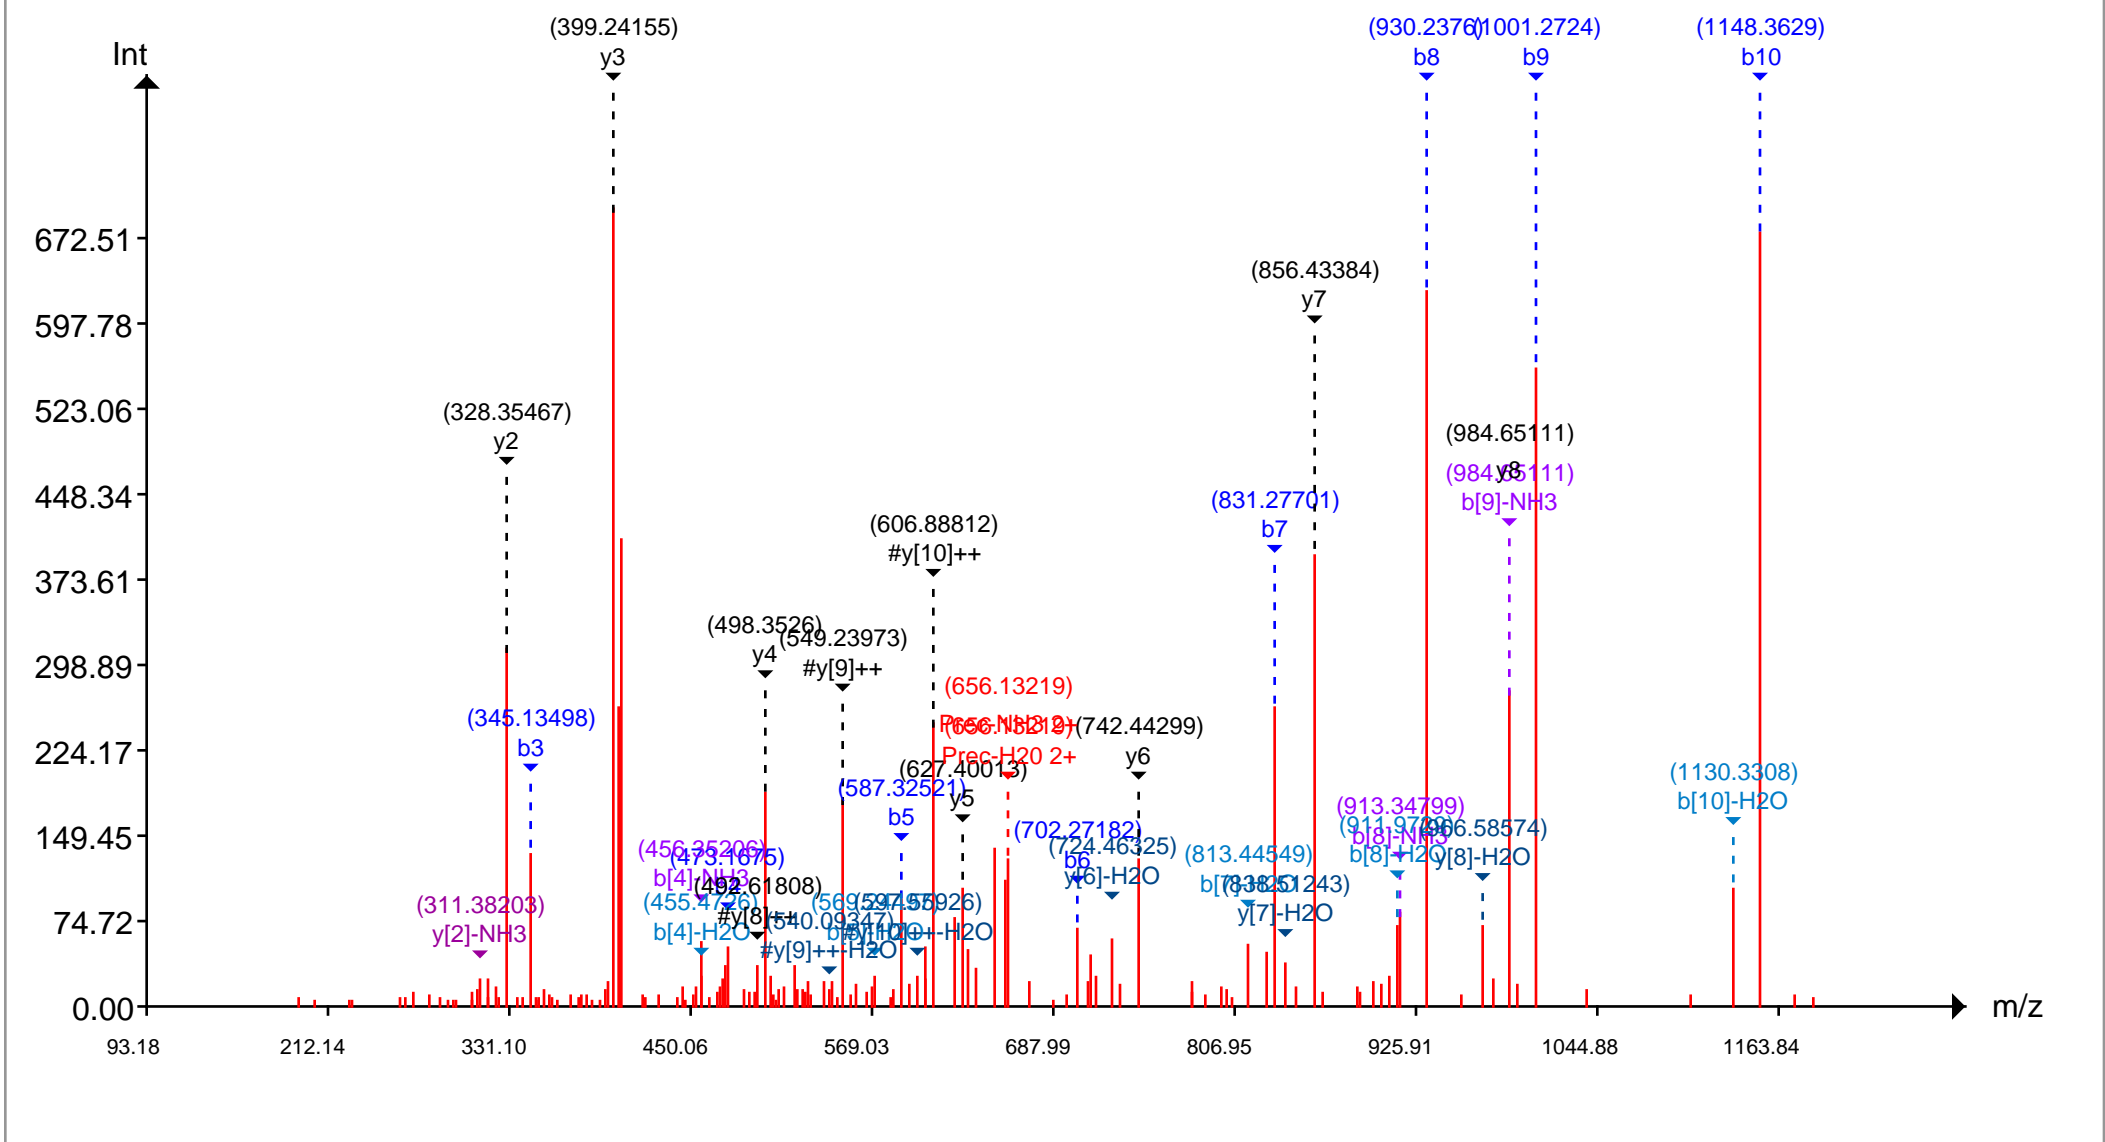

## Info

**Modified Sequence** AcD3-ADLQNDEVAFR<C13>-COOH

**Ion score** 58.32

**Protein** P97351

**Confidence level** 99.00%

**Precursor m/z** 664.83471

**Identity Threshold** 47.47

**Charge** 2+

**Mass error** 5.71E-4



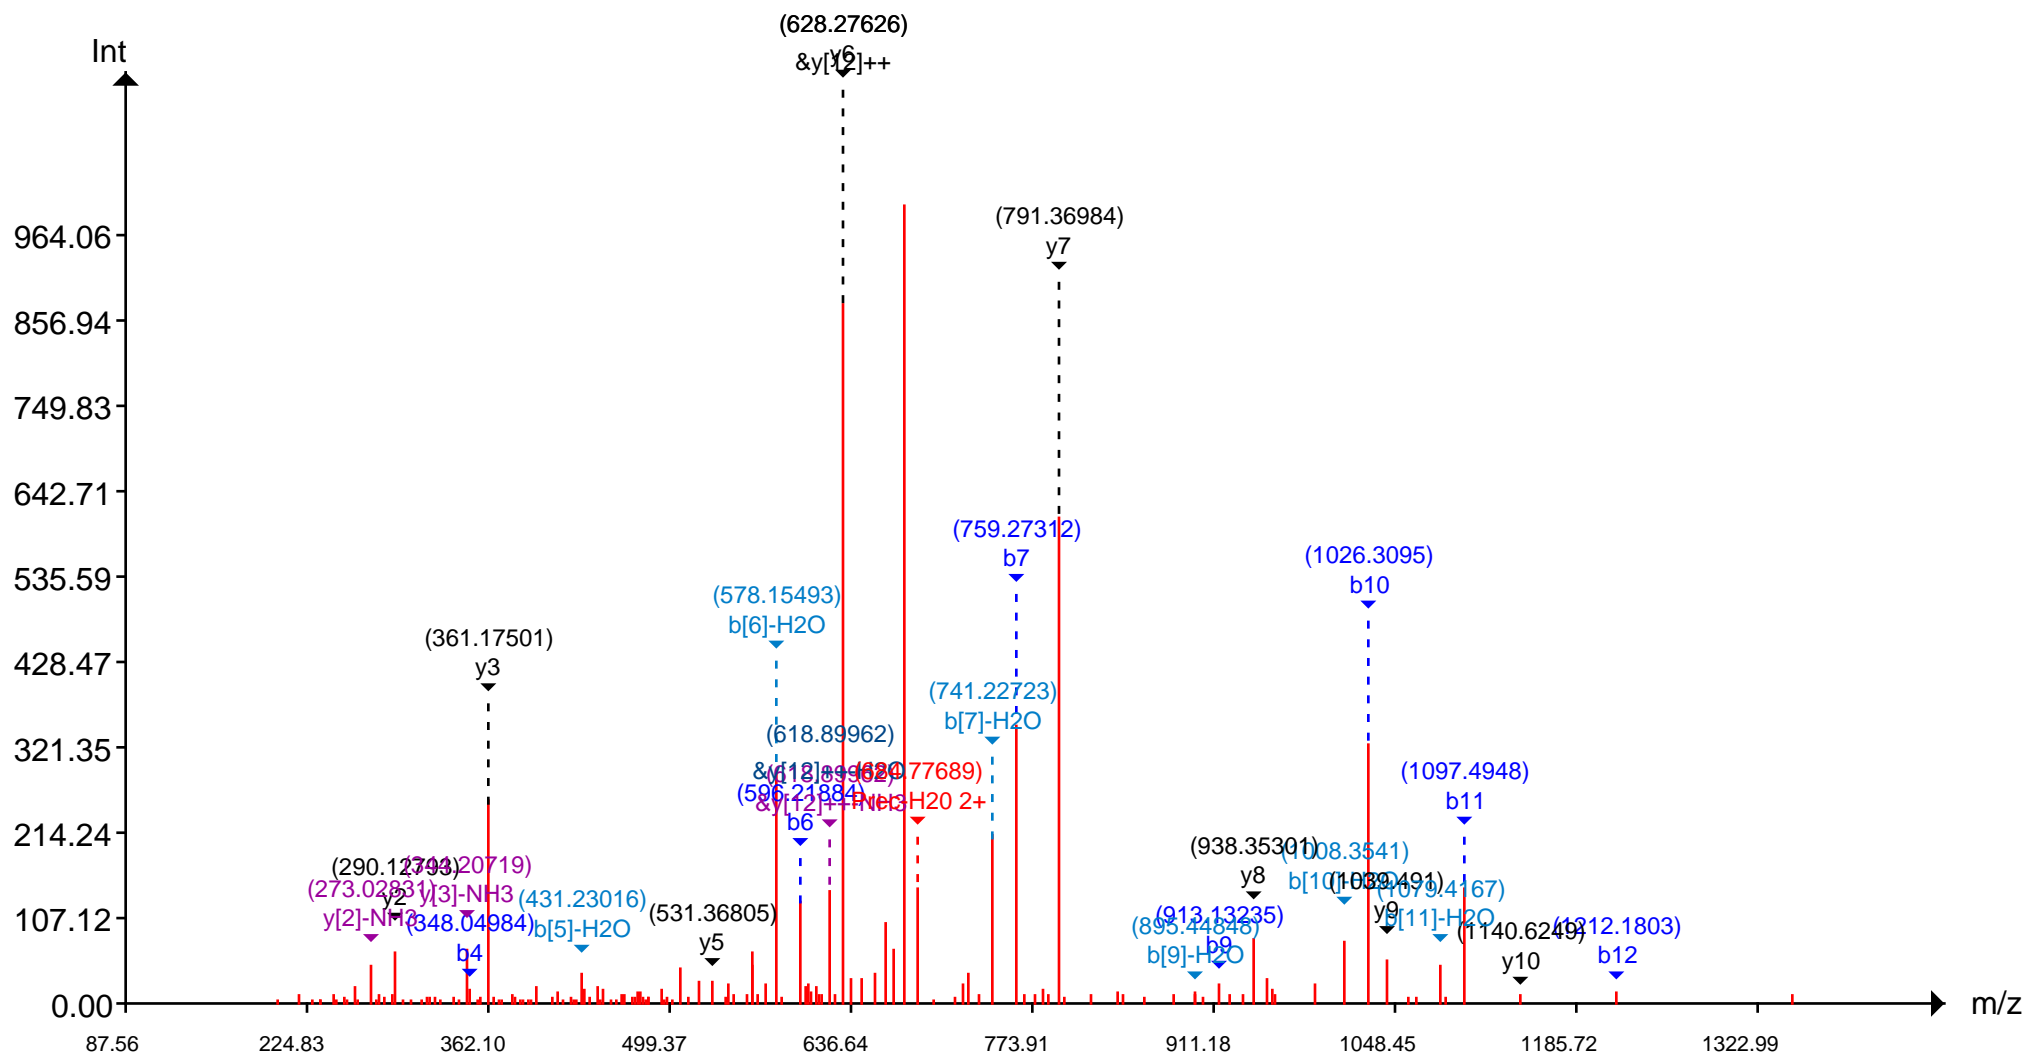

## Info

|                          |                                                |                           |          |
|--------------------------|------------------------------------------------|---------------------------|----------|
| <b>Modified Sequence</b> | AcD3-SGGTTM<Mox*>YPGIADR-COOH                  | <b>Ion score</b>          | 50.38    |
| <b>Protein</b>           | P62737, P60710, P68033, P63260, P63268, P68134 | <b>Confidence level</b>   | 99.00%   |
| <b>Precursor m/z</b>     | 693.82336                                      | <b>Identity Threshold</b> | 45.32    |
| <b>Charge</b>            | 2+                                             | <b>Mass error</b>         | -2.94E-4 |

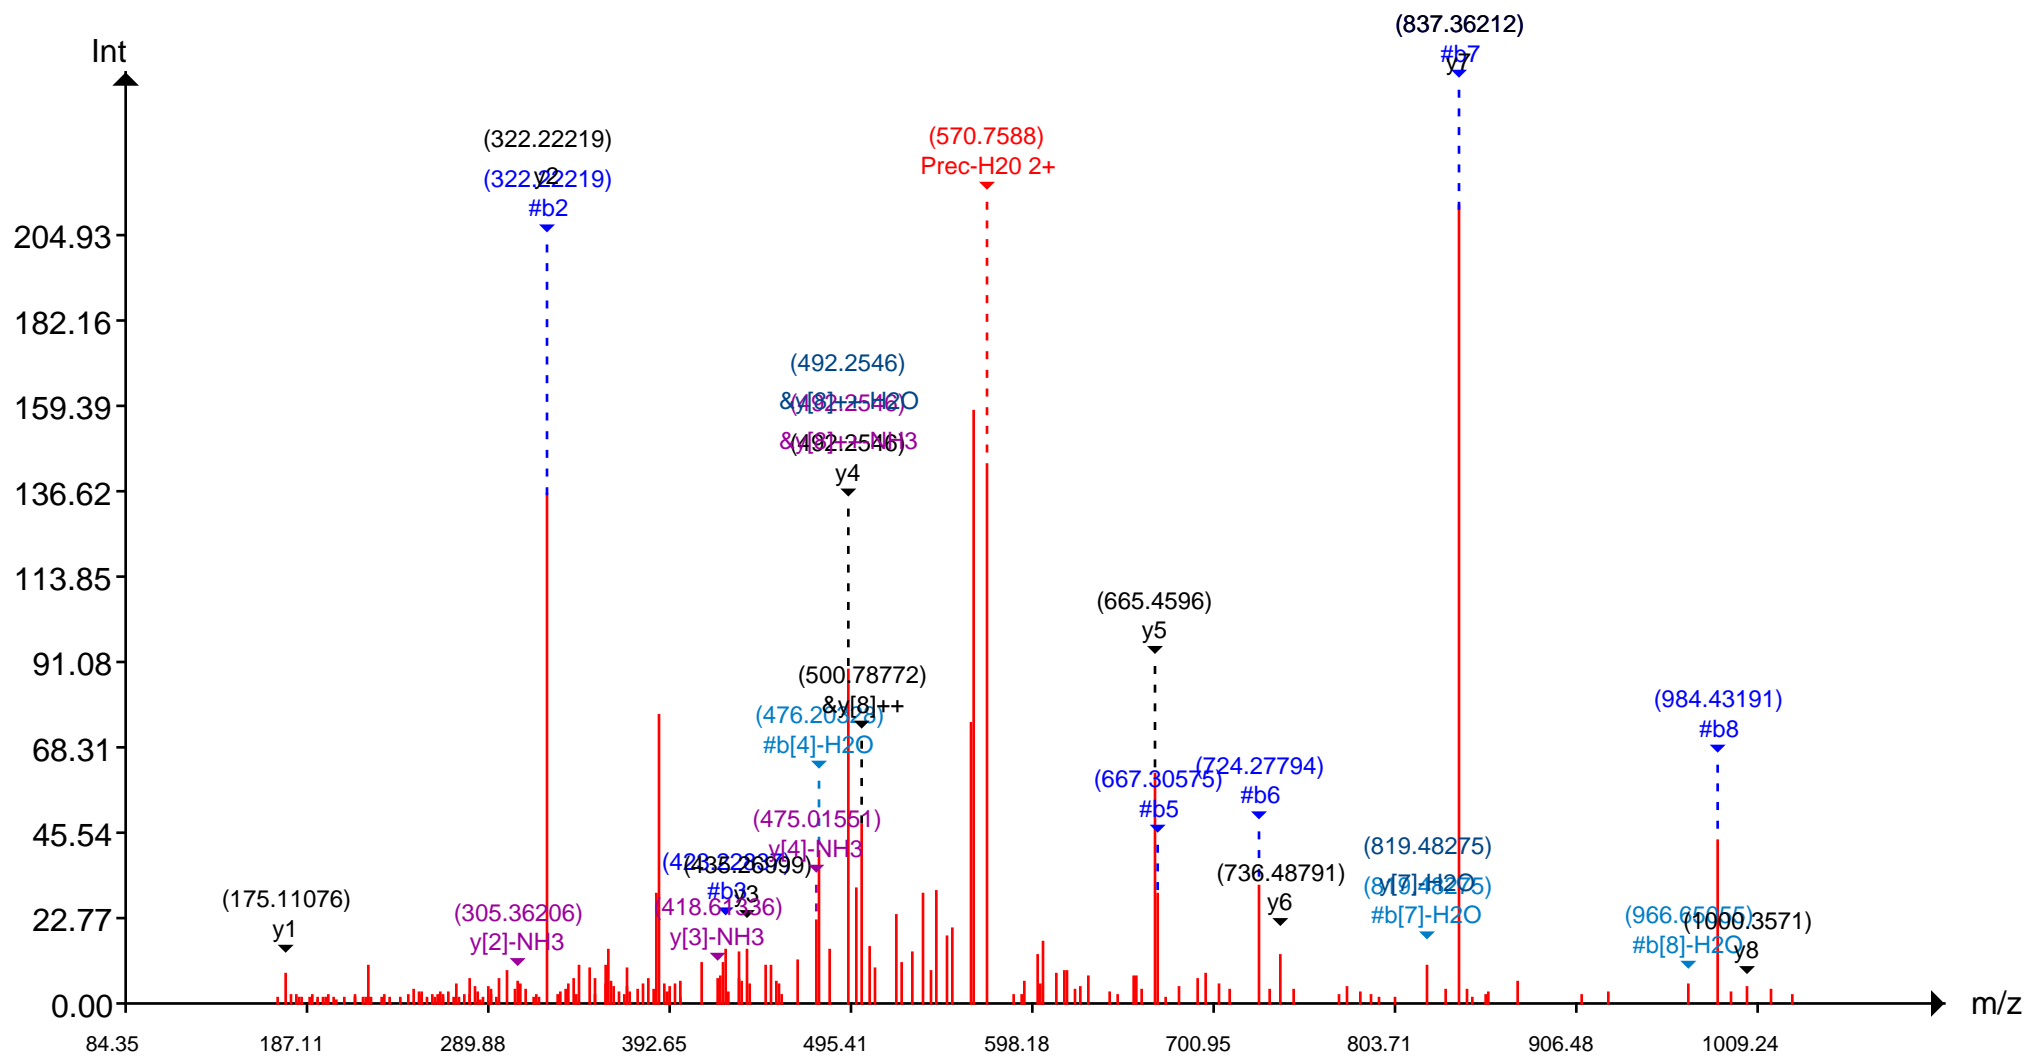

## Info

**Modified Sequence** AcD3-LYTAK<AcD3K\*>GLFR-COOH

**Ion score** 50.86

**Protein** P17182, P17183

**Confidence level** 99.00%

**Precursor m/z** 579.8431

**Identity Threshold** 45.95

**Charge** 2+

**Mass error** 1.09E-4

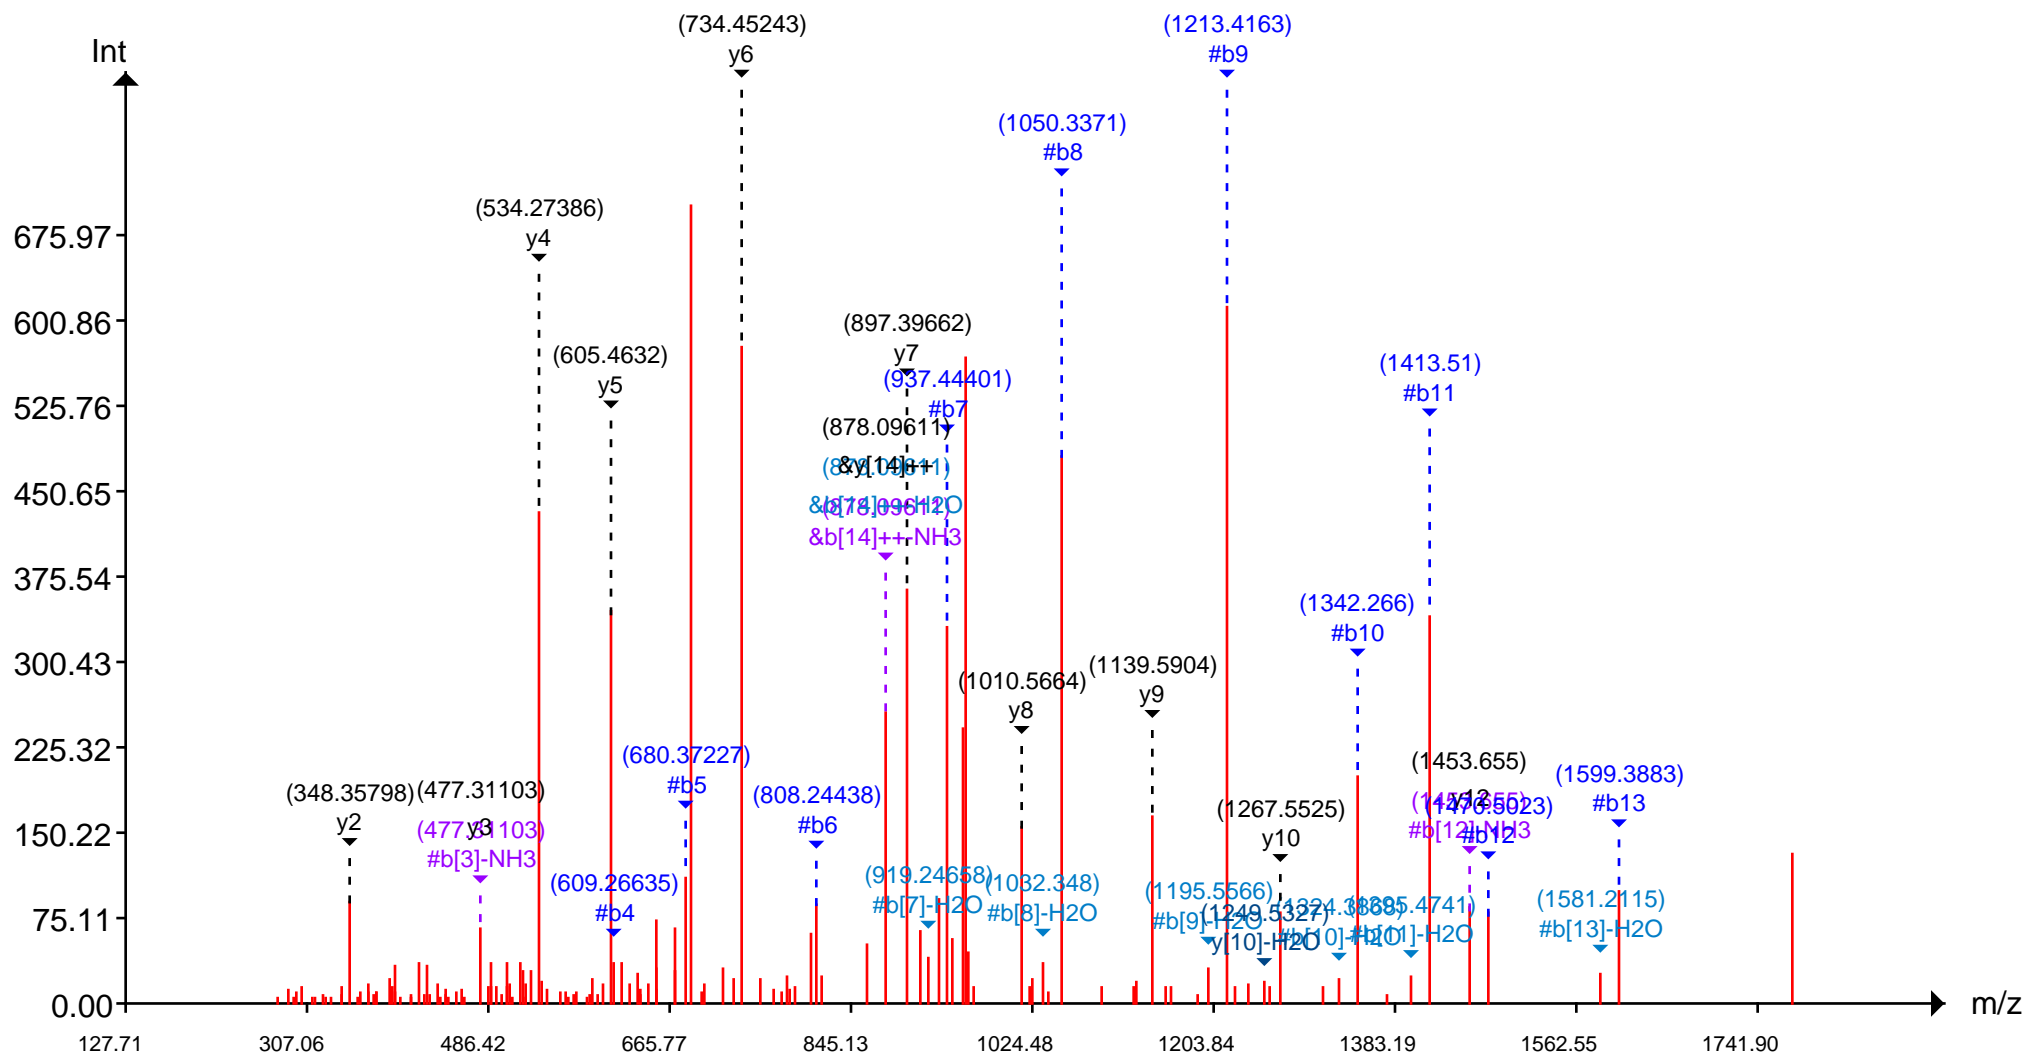

## Info

|                          |                                                 |                           |          |
|--------------------------|-------------------------------------------------|---------------------------|----------|
| <b>Modified Sequence</b> | AcD3-M<Mox*>K<AcD3K*>QDAQELYEAGEK<AcD3K*>R-COOH | <b>Ion score</b>          | 72.01    |
| <b>Protein</b>           | P97429                                          | <b>Confidence level</b>   | 99.00%   |
| <b>Precursor m/z</b>     | 973.97848                                       | <b>Identity Threshold</b> | 47.28    |
| <b>Charge</b>            | 2+                                              | <b>Mass error</b>         | 0.002299 |

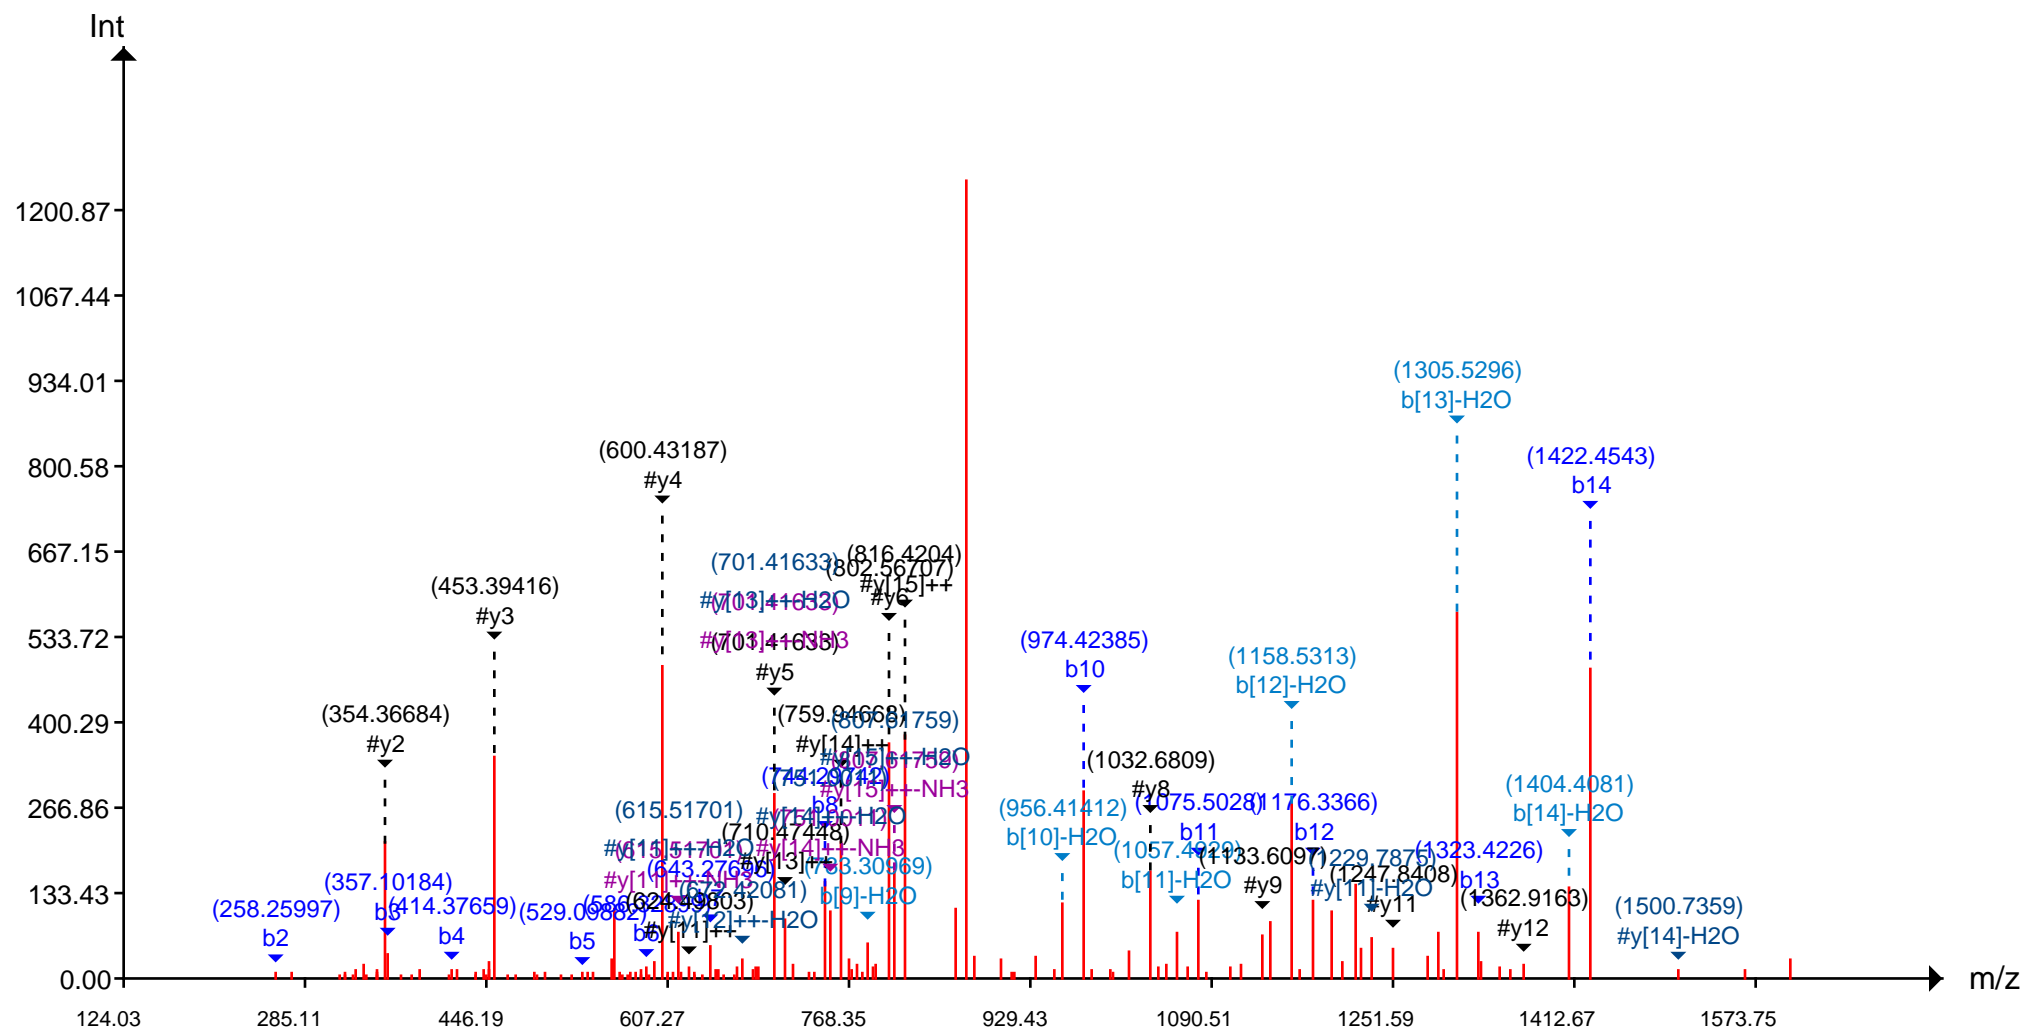

## Info

|                          |                                                 |                           |          |
|--------------------------|-------------------------------------------------|---------------------------|----------|
| <b>Modified Sequence</b> | AcD3-VLVGDGGTgk<AcD3K*>TTFVK<AcD3K*>R<C13>-COOH | <b>Ion score</b>          | 65.66    |
| <b>Protein</b>           | P62827                                          | <b>Confidence level</b>   | 99.00%   |
| <b>Precursor m/z</b>     | 888.5198                                        | <b>Identity Threshold</b> | 44.46    |
| <b>Charge</b>            | 2+                                              | <b>Mass error</b>         | 0.001519 |

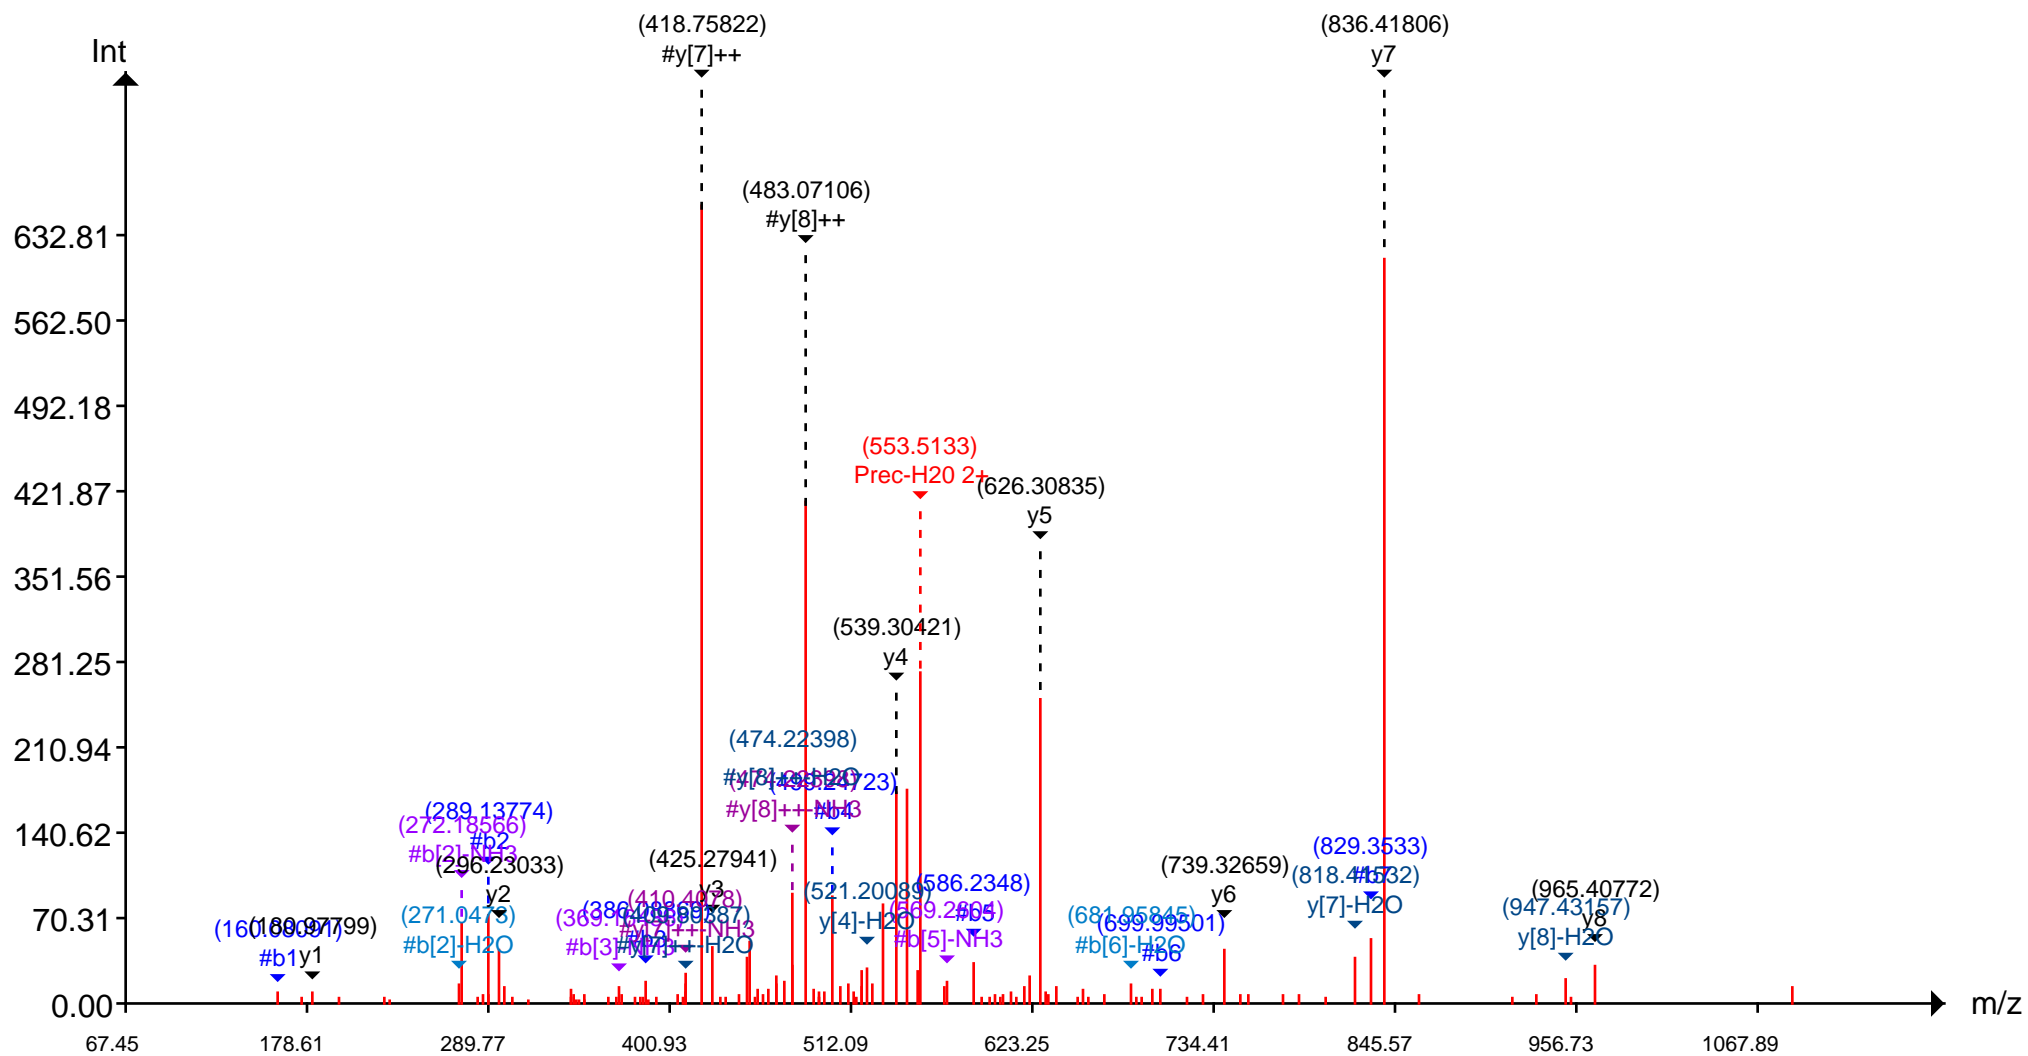

## Info

|                          |                          |                           |         |
|--------------------------|--------------------------|---------------------------|---------|
| <b>Modified Sequence</b> | AcD3-NEPLSNEDR<C13>-COOH | <b>Ion score</b>          | 60.29   |
| <b>Protein</b>           | P68510                   | <b>Confidence level</b>   | 99.00%  |
| <b>Precursor m/z</b>     | 562.77149                | <b>Identity Threshold</b> | 46.44   |
| <b>Charge</b>            | 2+                       | <b>Mass error</b>         | 4.13E-4 |



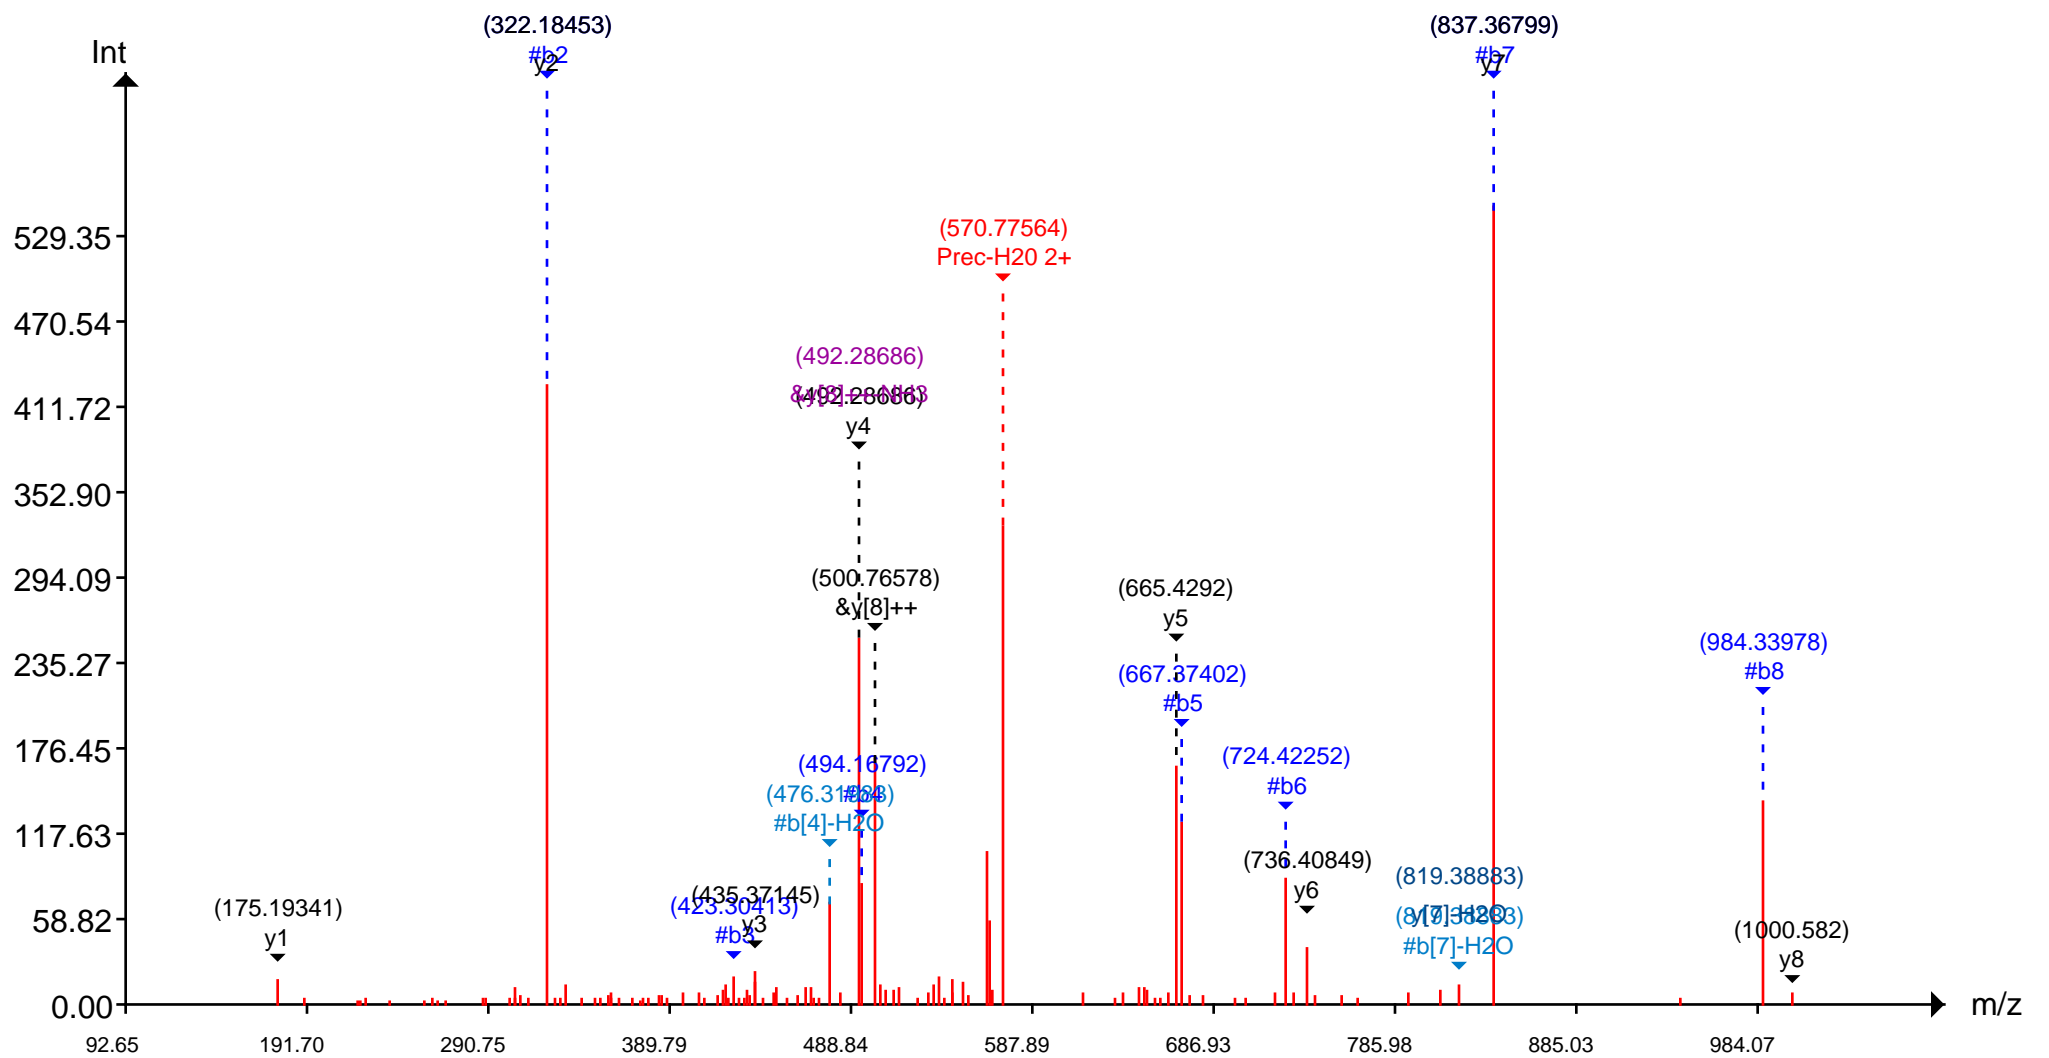

Info

|                          |                             |                           |         |
|--------------------------|-----------------------------|---------------------------|---------|
| <b>Modified Sequence</b> | AcD3-LYTAK<AcD3K*>GLFR-COOH | <b>Ion score</b>          | 73.81   |
| <b>Protein</b>           | P17182, P17183              | <b>Confidence level</b>   | 99.00%  |
| <b>Precursor m/z</b>     | 579.84338                   | <b>Identity Threshold</b> | 45.90   |
| <b>Charge</b>            | 2+                          | <b>Mass error</b>         | 6.69E-4 |

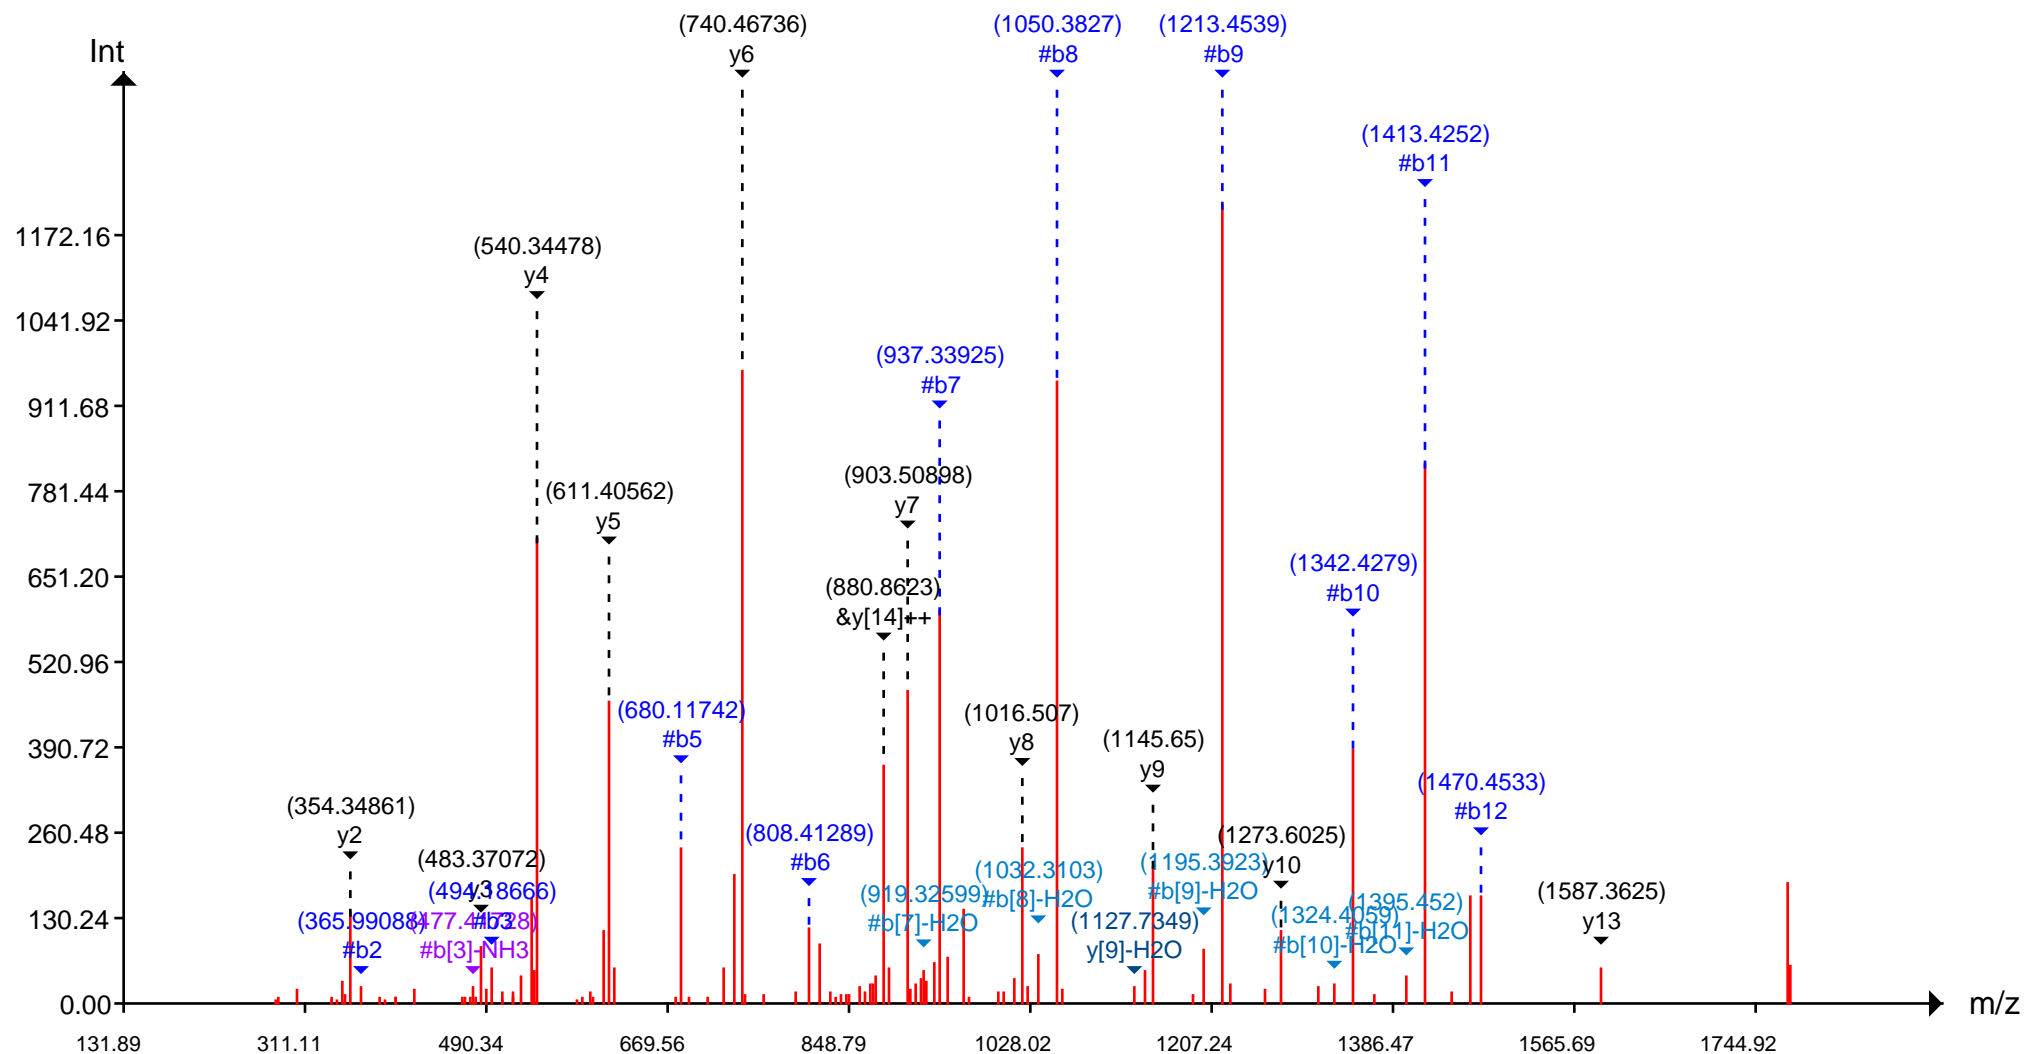

## Info

|                          |                                                      |                           |          |
|--------------------------|------------------------------------------------------|---------------------------|----------|
| <b>Modified Sequence</b> | AcD3-M<Mox*>K<AcD3K*>QDAQELYEAGEK<AcD3K*>R<C13>-COOH | <b>Ion score</b>          | 68.95    |
| <b>Protein</b>           | P97429                                               | <b>Confidence level</b>   | 99.00%   |
| <b>Precursor m/z</b>     | 976.98839                                            | <b>Identity Threshold</b> | 47.76    |
| <b>Charge</b>            | 2+                                                   | <b>Mass error</b>         | 0.001977 |



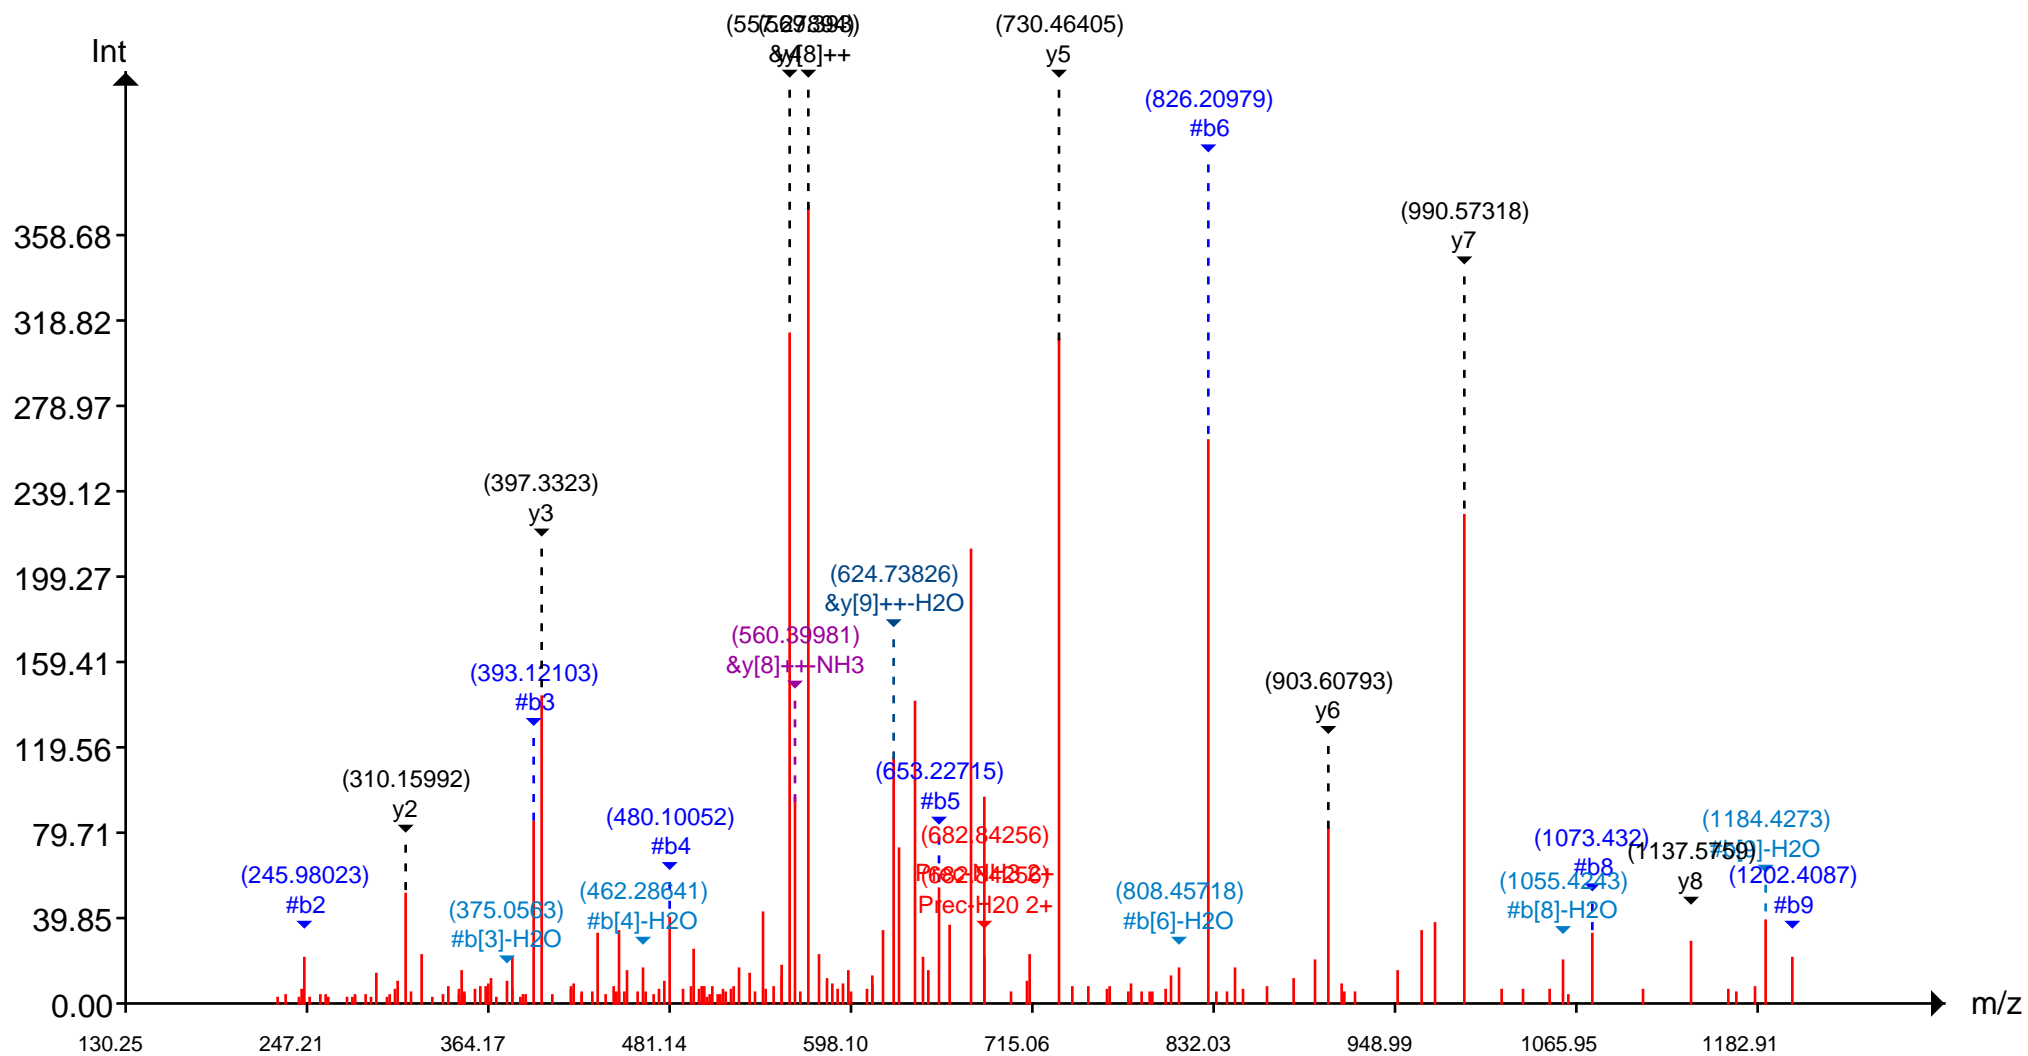

## Info

**Modified Sequence** AcD3-AEFSK<AcD3K\*>K<AcD3K\*>C<Cmm\*>SER<C13>-COOH

**Ion score** 54.87

**Protein** P30681, O54879

**Confidence level** 99.00%

**Precursor m/z** 691.85542

**Identity Threshold** 47.77

**Charge** 2+

**Mass error** 9.6E-4

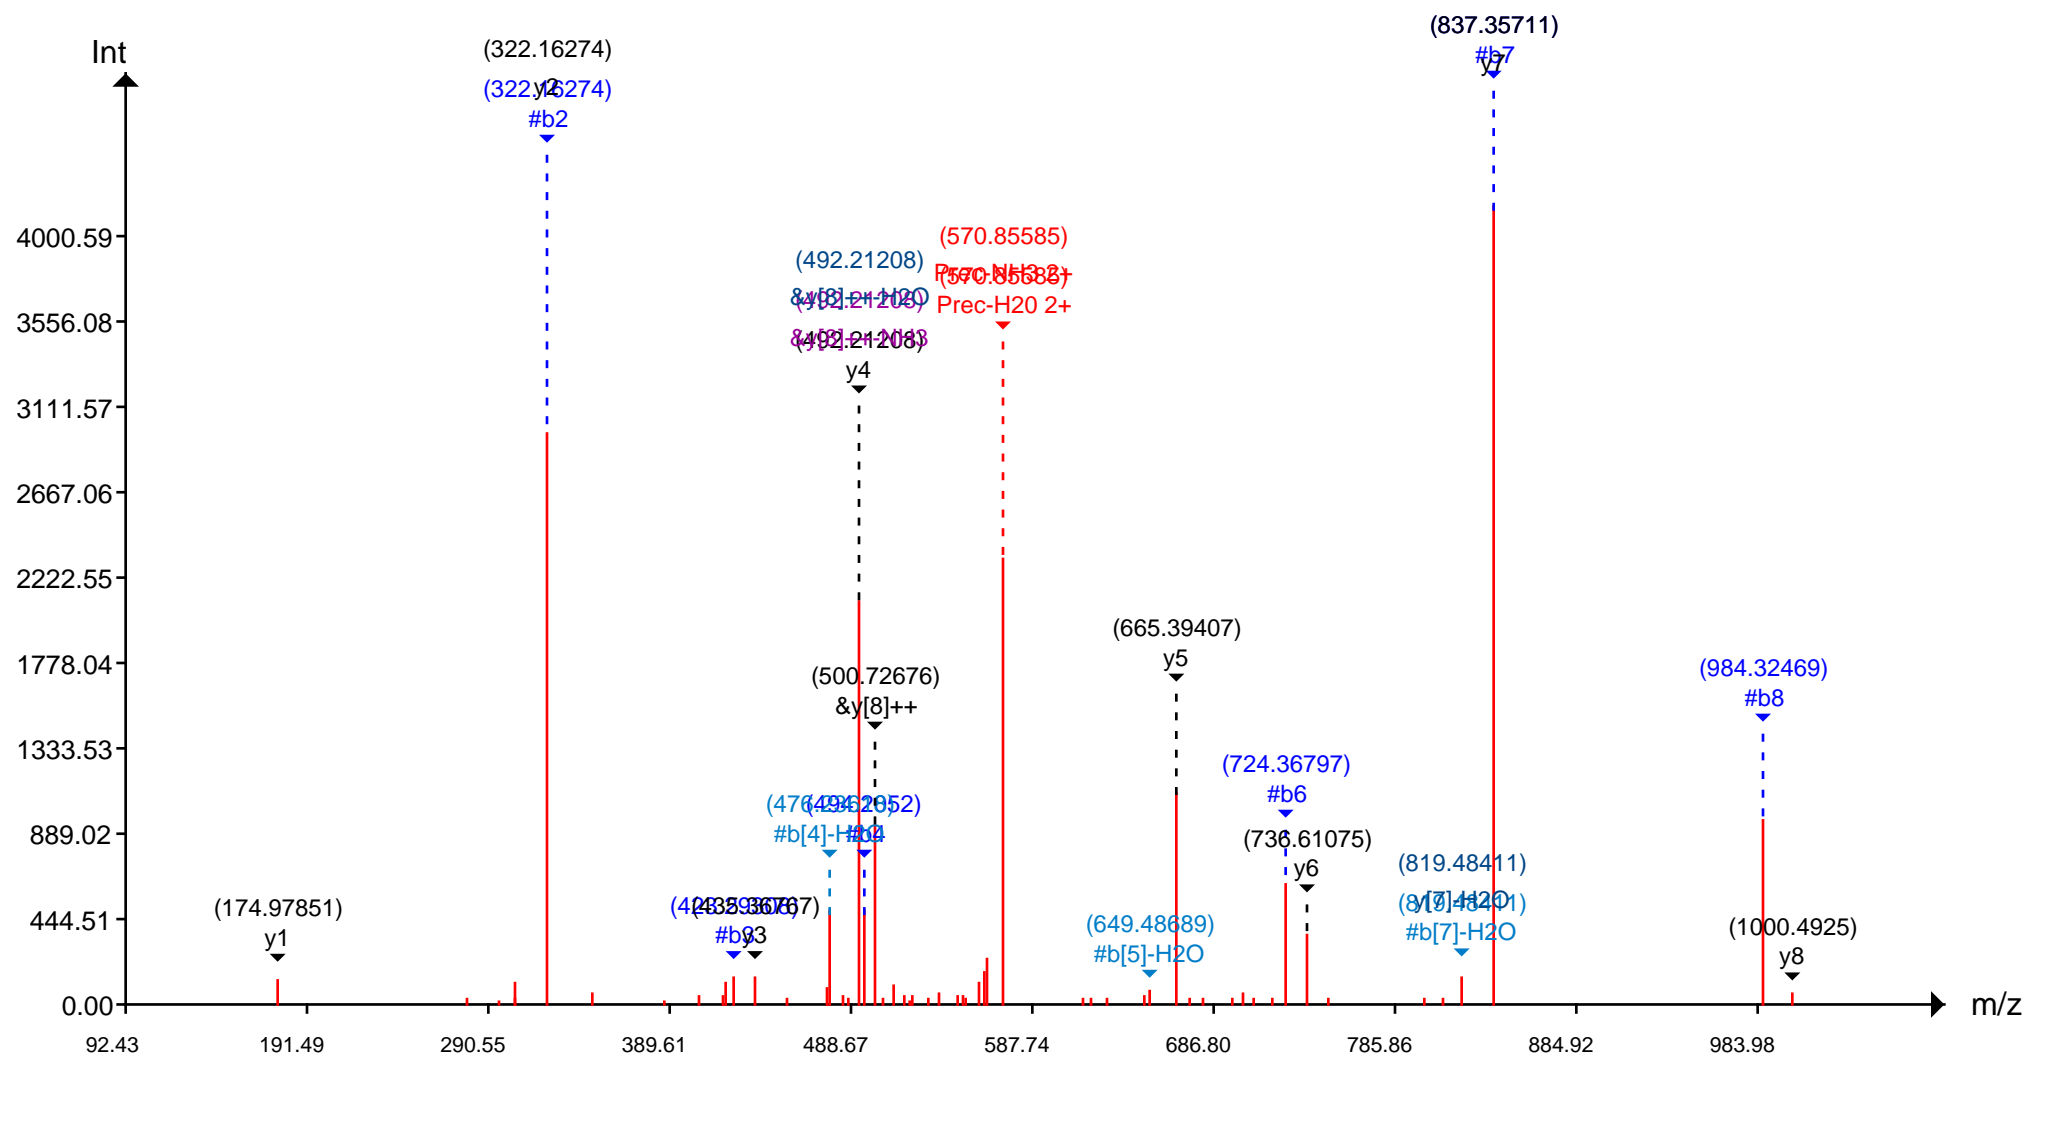

| Info                     |                             |                           |         |
|--------------------------|-----------------------------|---------------------------|---------|
| <b>Modified Sequence</b> | AcD3-LYTAK<AcD3K*>GLFR-COOH | <b>Ion score</b>          | 81.41   |
| <b>Protein</b>           | P17182, P17183              | <b>Confidence level</b>   | 99.00%  |
| <b>Precursor m/z</b>     | 579.84354                   | <b>Identity Threshold</b> | 45.90   |
| <b>Charge</b>            | 2+                          | <b>Mass error</b>         | 9.89E-4 |

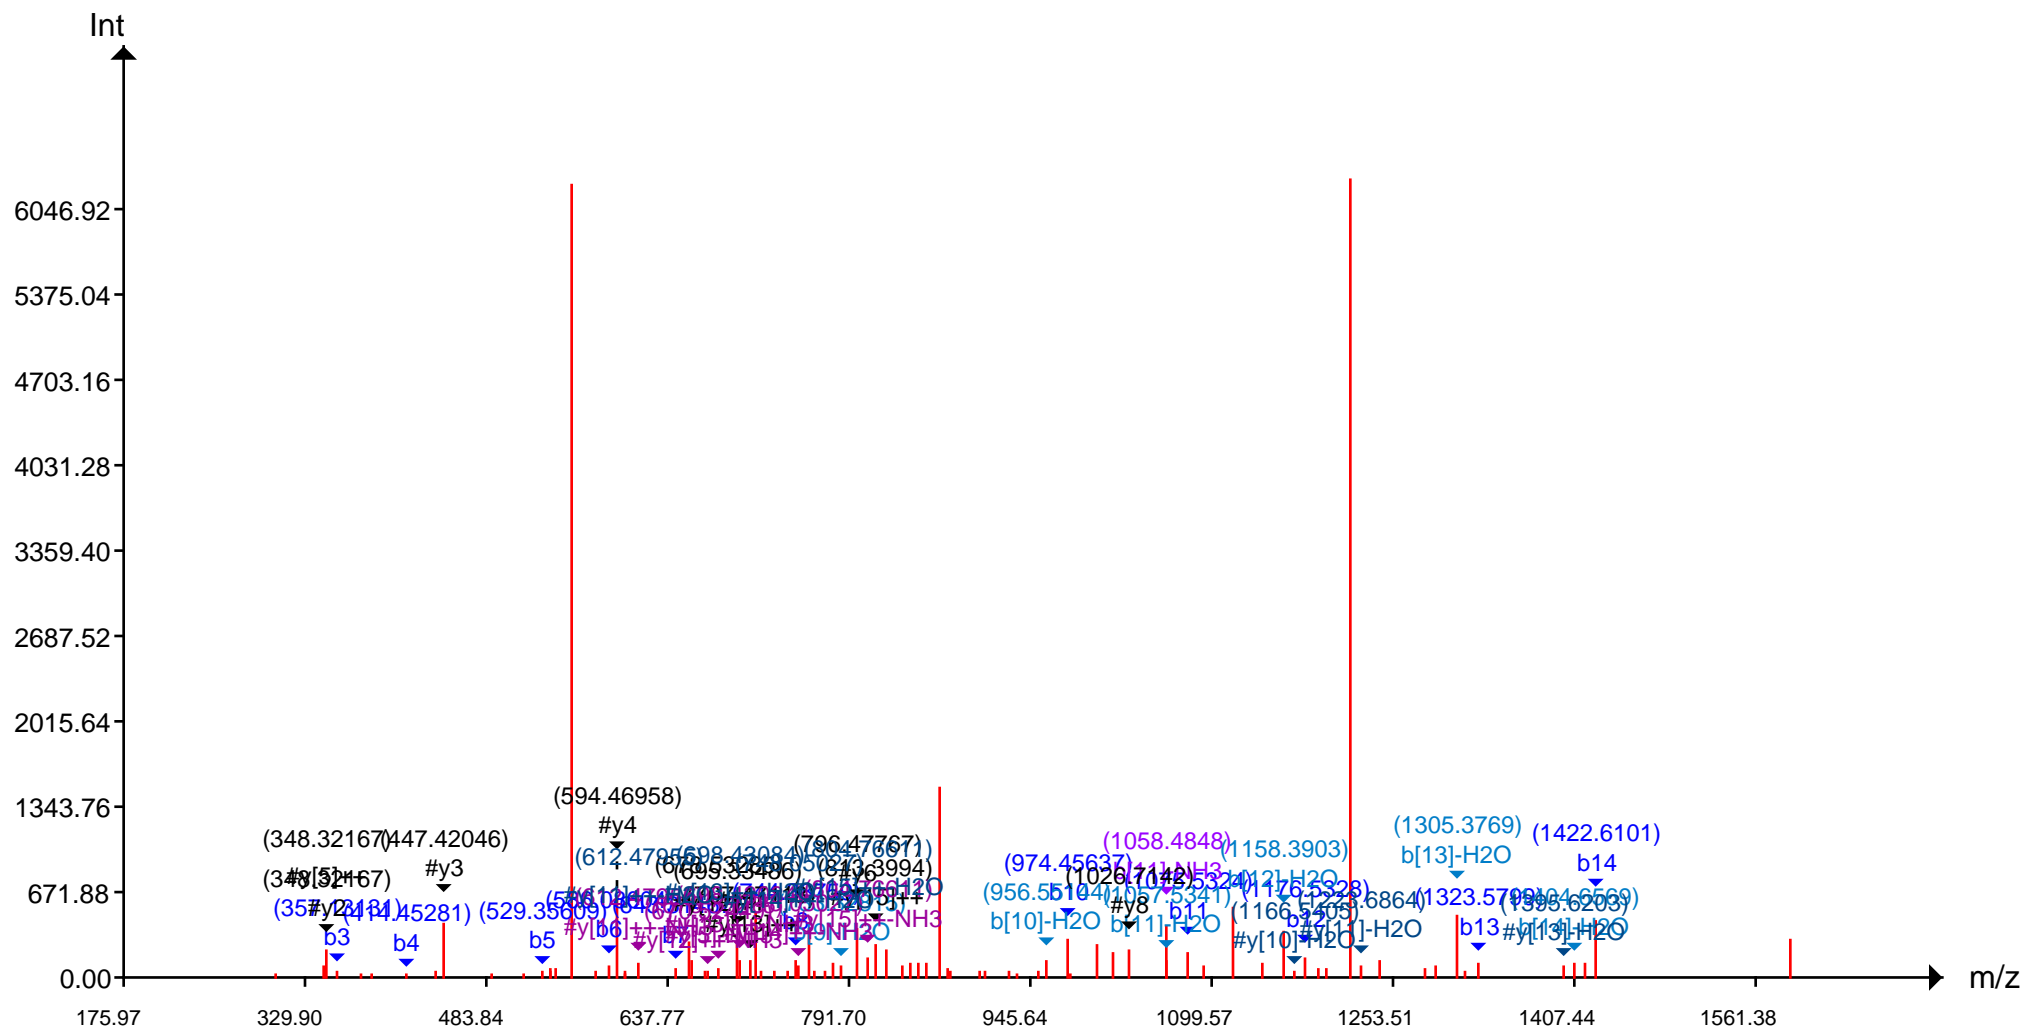

## Info

|                          |                                             |                           |          |
|--------------------------|---------------------------------------------|---------------------------|----------|
| <b>Modified Sequence</b> | AcD3-VLVGDGGTGTK<AcD3K*>TTFVK<AcD3K*>R-COOH | <b>Ion score</b>          | 53.11    |
| <b>Protein</b>           | P62827                                      | <b>Confidence level</b>   | 99.00%   |
| <b>Precursor m/z</b>     | 885.51123                                   | <b>Identity Threshold</b> | 45.17    |
| <b>Charge</b>            | 2+                                          | <b>Mass error</b>         | 0.004521 |

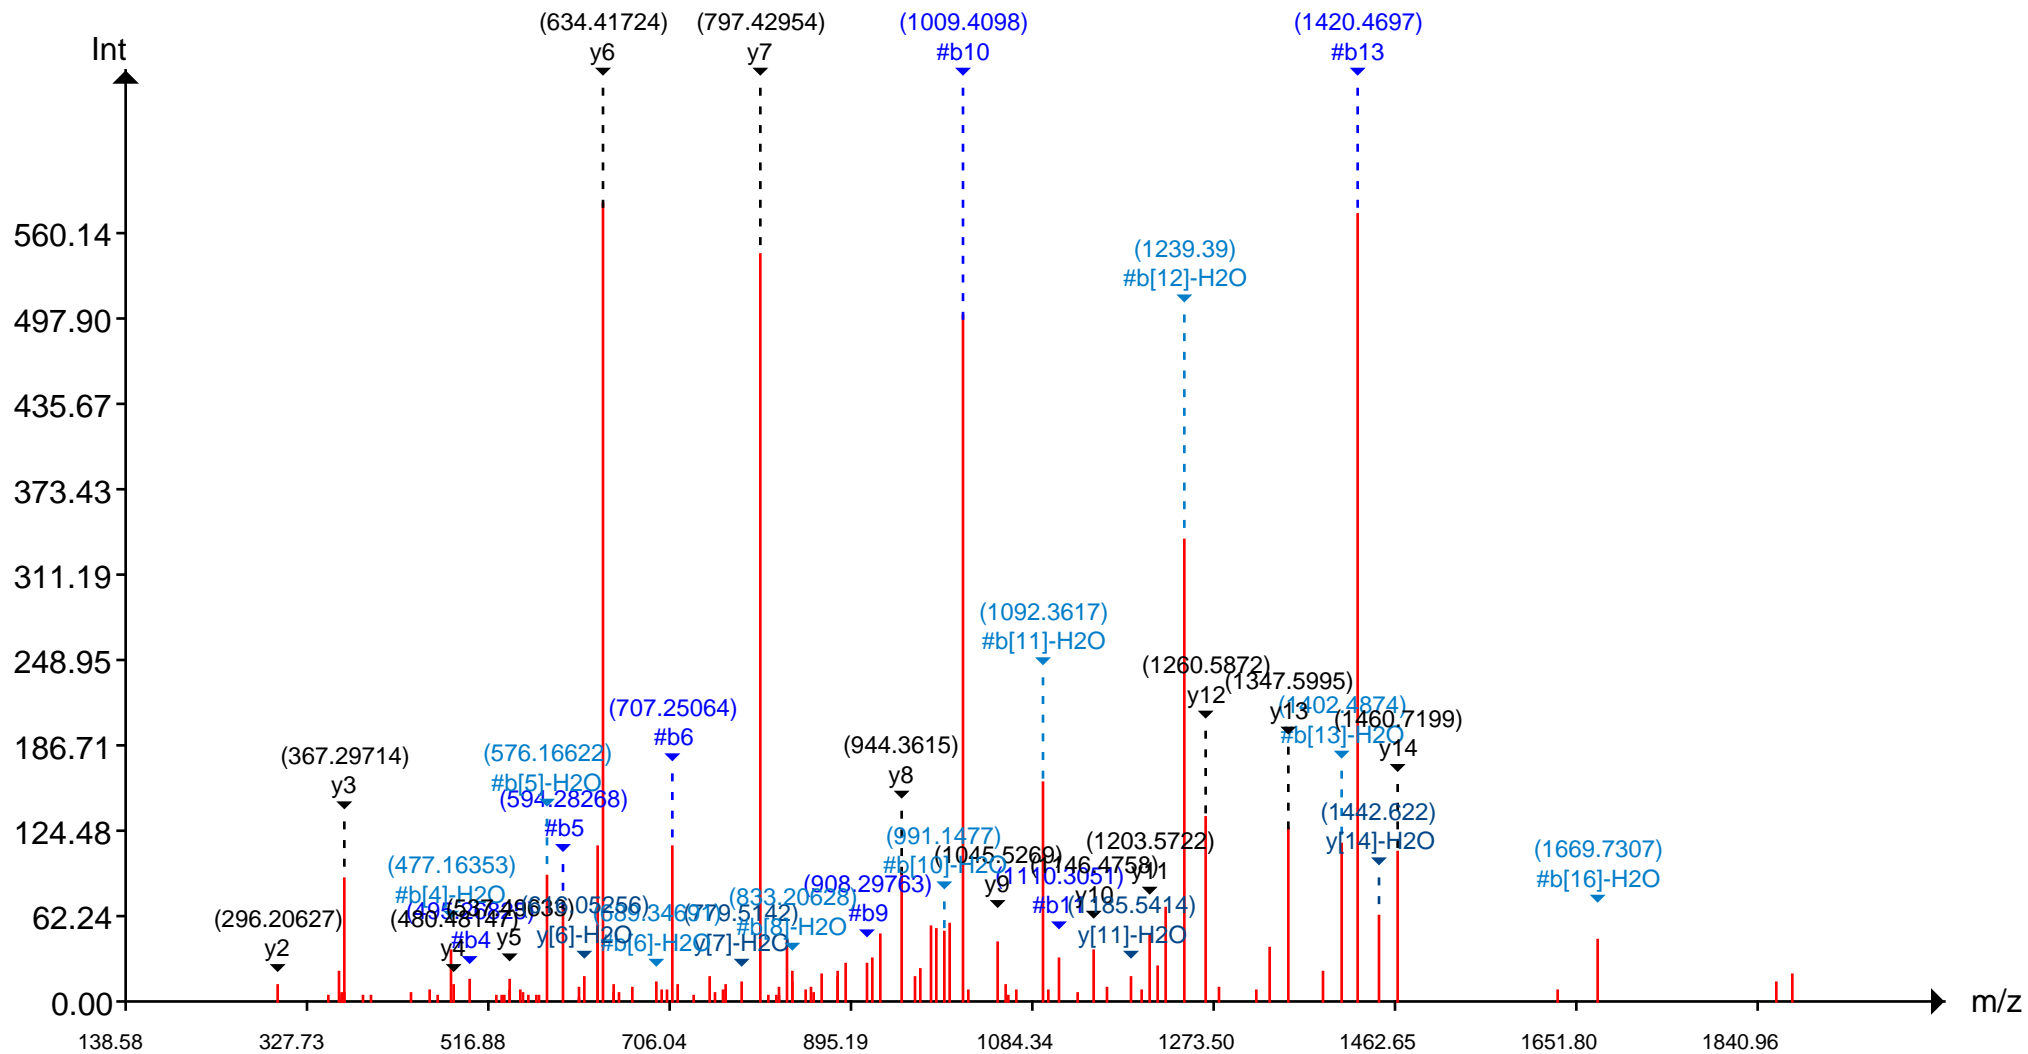

## Info

|                          |                                          |                           |          |
|--------------------------|------------------------------------------|---------------------------|----------|
| <b>Modified Sequence</b> | AcD3-YANTVLSGGTTM<Mox*>YPGIADR<C13>-COOH | <b>Ion score</b>          | 89.49    |
| <b>Protein</b>           | P60710, P63260                           | <b>Confidence level</b>   | 99.00%   |
| <b>Precursor m/z</b>     | 1027.5064                                | <b>Identity Threshold</b> | 47.46    |
| <b>Charge</b>            | 2+                                       | <b>Mass error</b>         | 0.002124 |

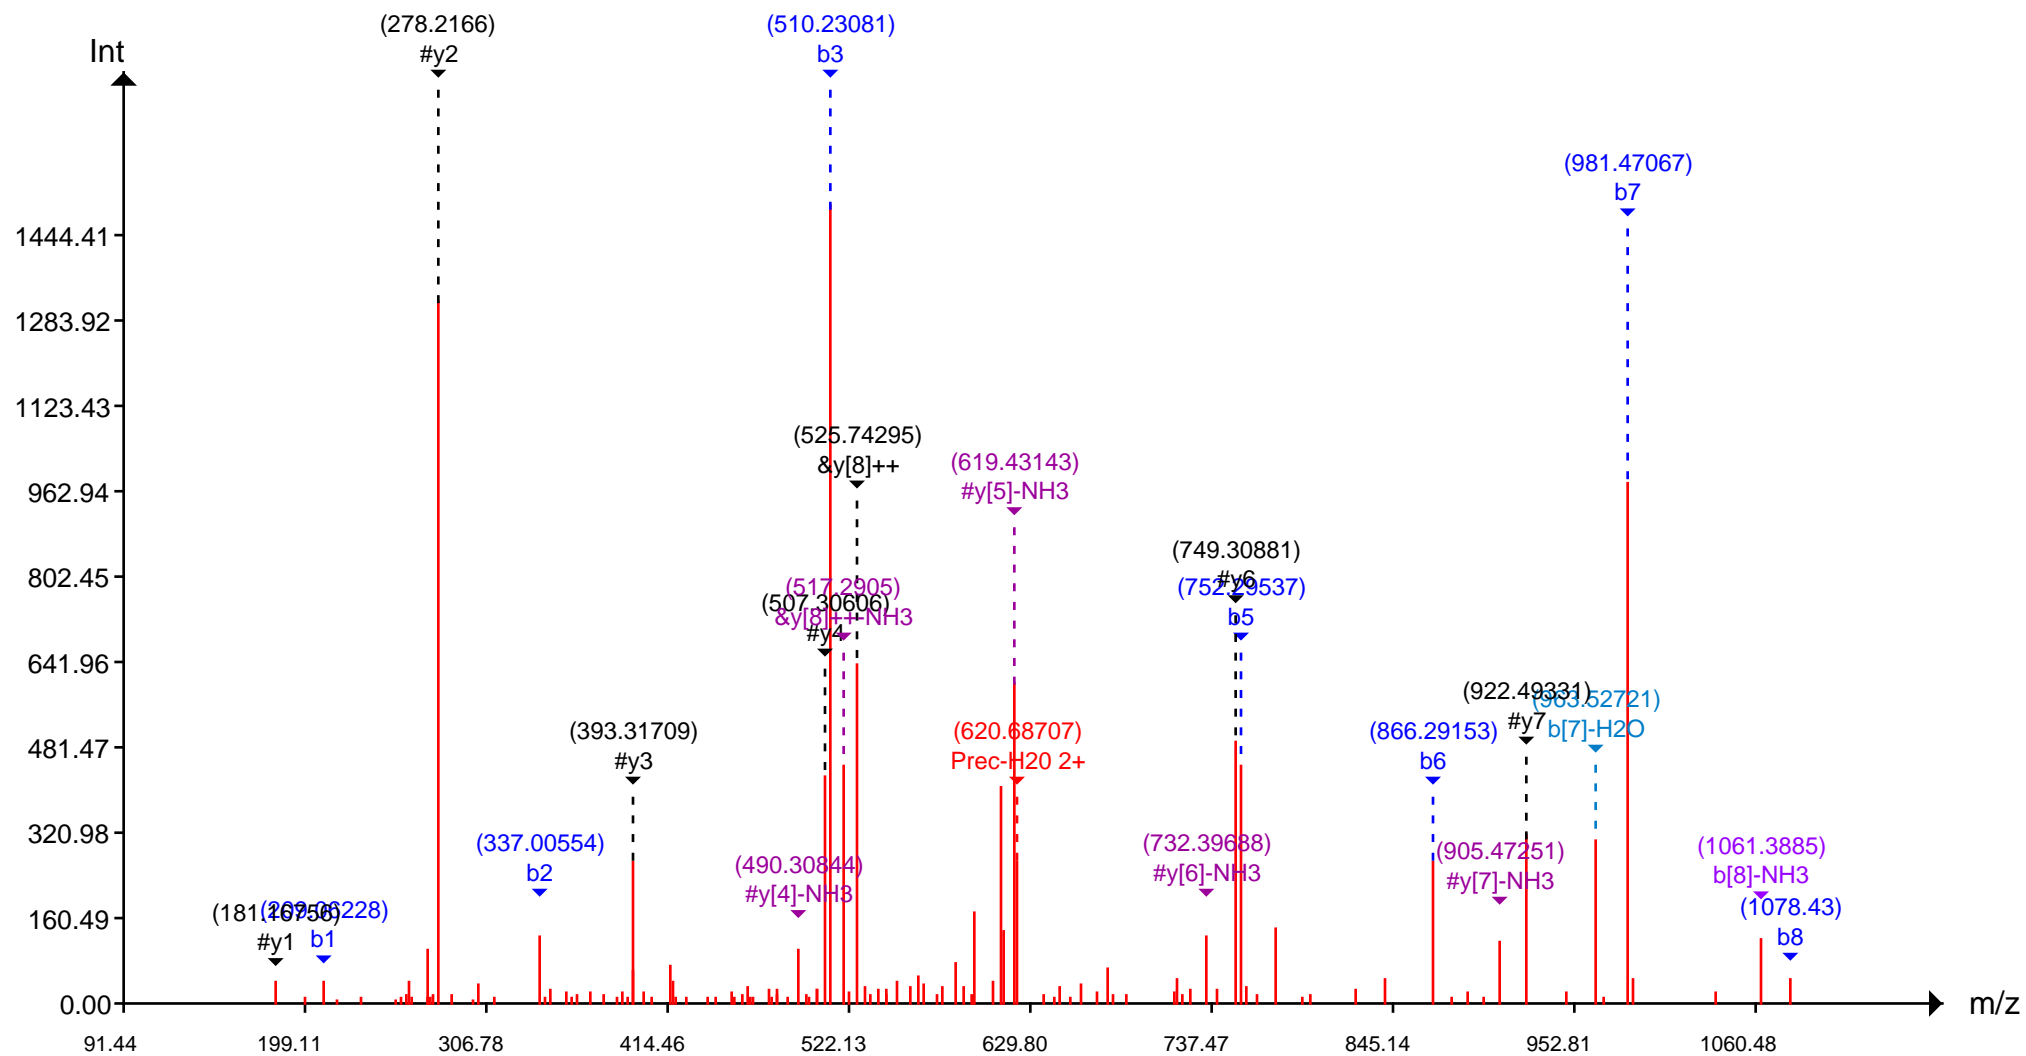

## Info

|                          |                                  |                           |         |
|--------------------------|----------------------------------|---------------------------|---------|
| <b>Modified Sequence</b> | AcD3-YQK<AcD3K*>LENDPR<C13>-COOH | <b>Ion score</b>          | 48.51   |
| <b>Protein</b>           | Q60864                           | <b>Confidence level</b>   | 99.00%  |
| <b>Precursor m/z</b>     | 629.8363                         | <b>Identity Threshold</b> | 47.89   |
| <b>Charge</b>            | 2+                               | <b>Mass error</b>         | 0.00131 |

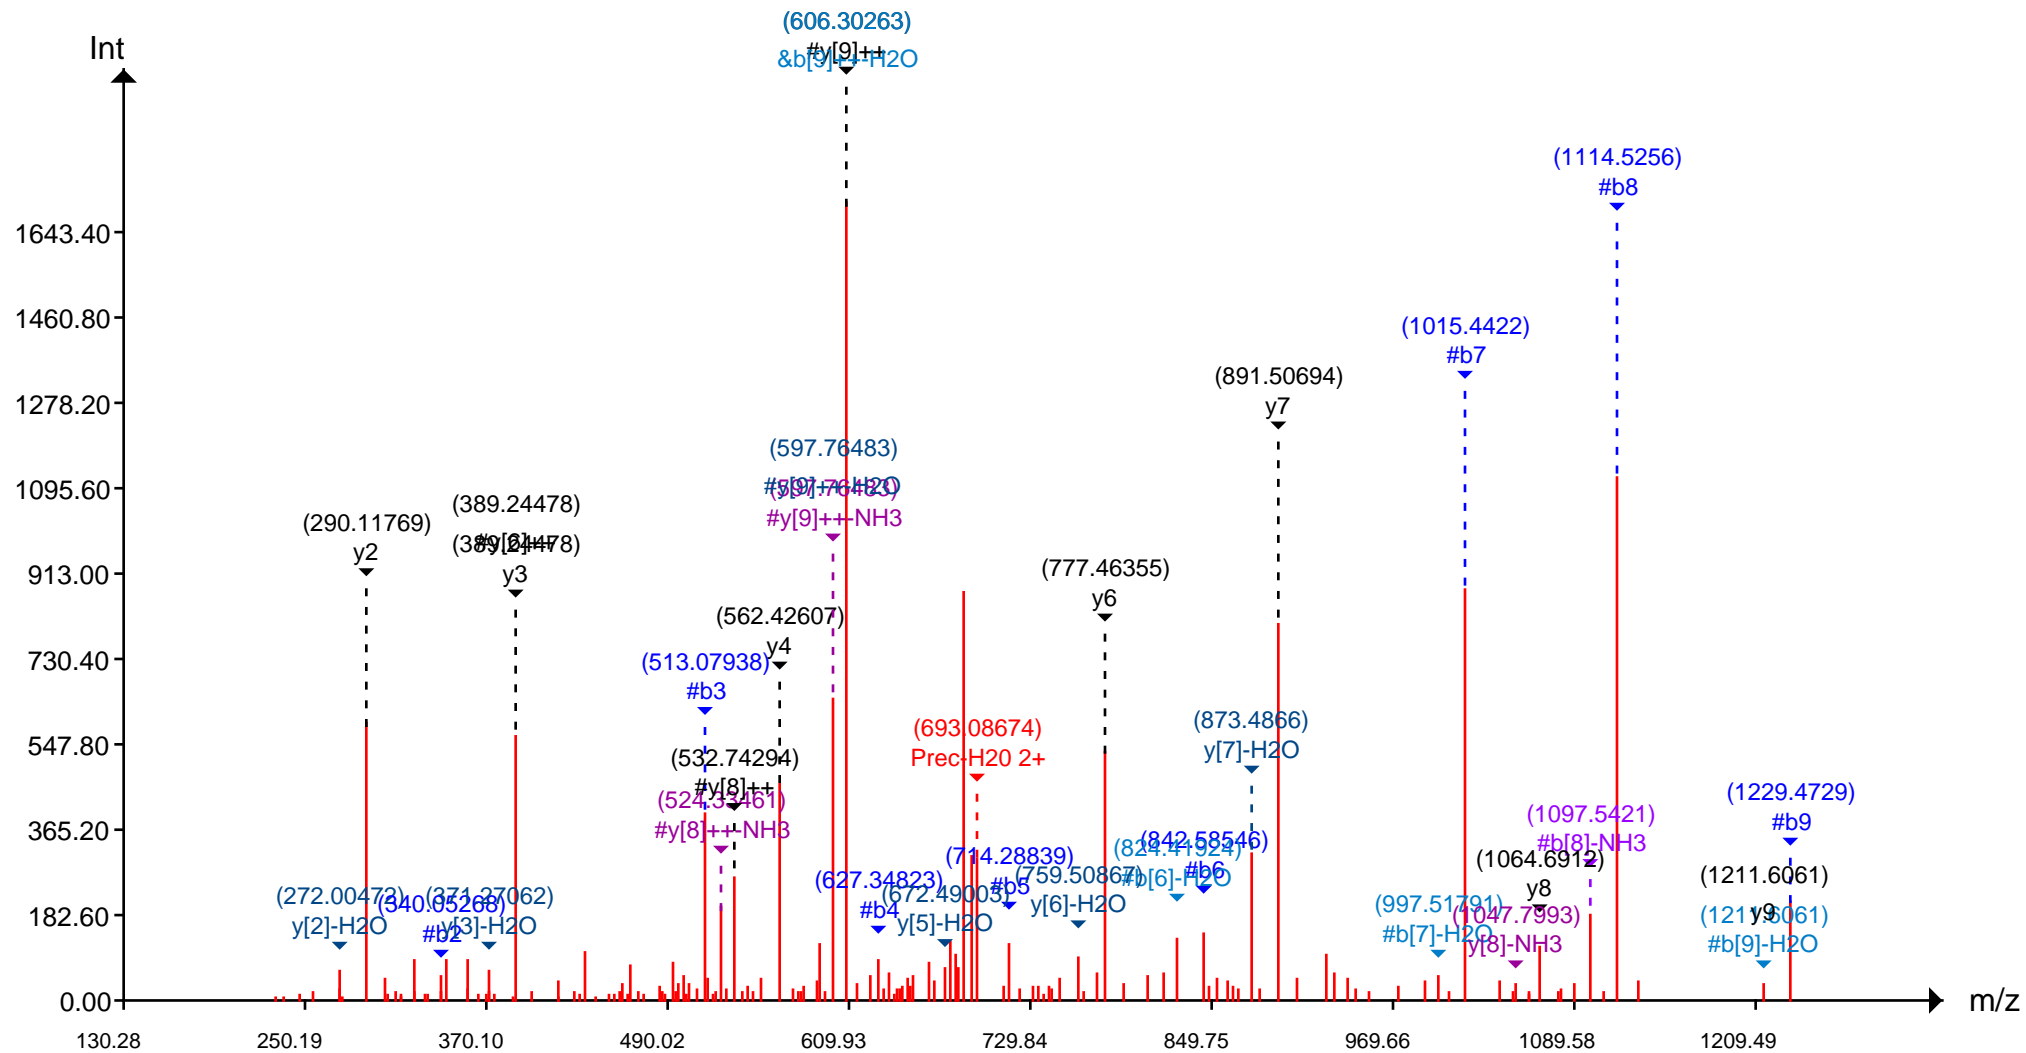

## Info

|                          |                                      |                           |        |
|--------------------------|--------------------------------------|---------------------------|--------|
| <b>Modified Sequence</b> | AcD3-FFK<AcD3K*>NSQK<AcD3K*>VDR-COOH | <b>Ion score</b>          | 52.96  |
| <b>Protein</b>           | Q9CQM9                               | <b>Confidence level</b>   | 99.00% |
| <b>Precursor m/z</b>     | 702.38551                            | <b>Identity Threshold</b> | 47.91  |
| <b>Charge</b>            | 2+                                   | <b>Mass error</b>         | 9.6E-4 |

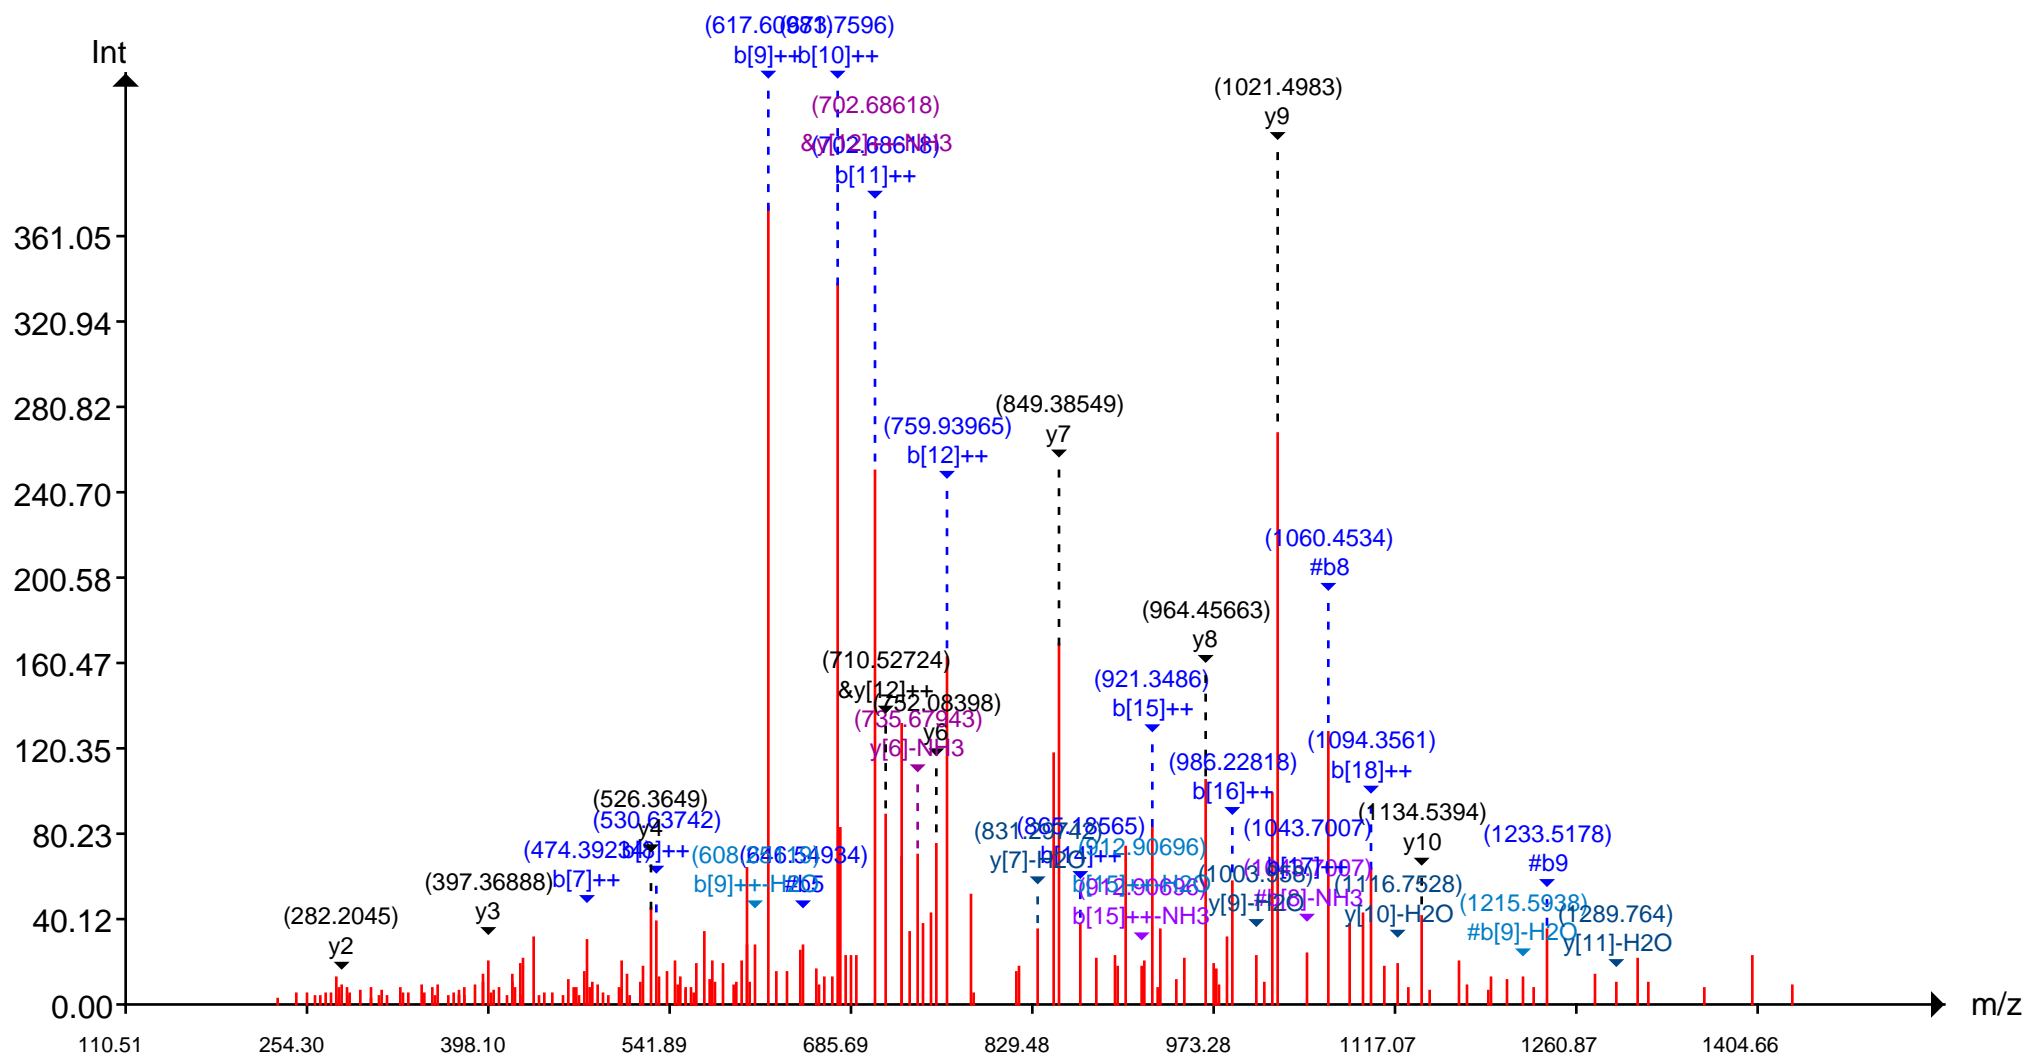

## Info

|                          |                                                            |                           |          |
|--------------------------|------------------------------------------------------------|---------------------------|----------|
| <b>Modified Sequence</b> | AcD3-VVK<AcD3K*>QTQK<AcD3K*>IK<AcD3K*>LGDPLLEDTR<C13>-COOH | <b>Ion score</b>          | 49.62    |
| <b>Protein</b>           | Q9JLJ2                                                     | <b>Confidence level</b>   | 99.00%   |
| <b>Precursor m/z</b>     | 789.80502                                                  | <b>Identity Threshold</b> | 40.40    |
| <b>Charge</b>            | 3+                                                         | <b>Mass error</b>         | 0.002638 |

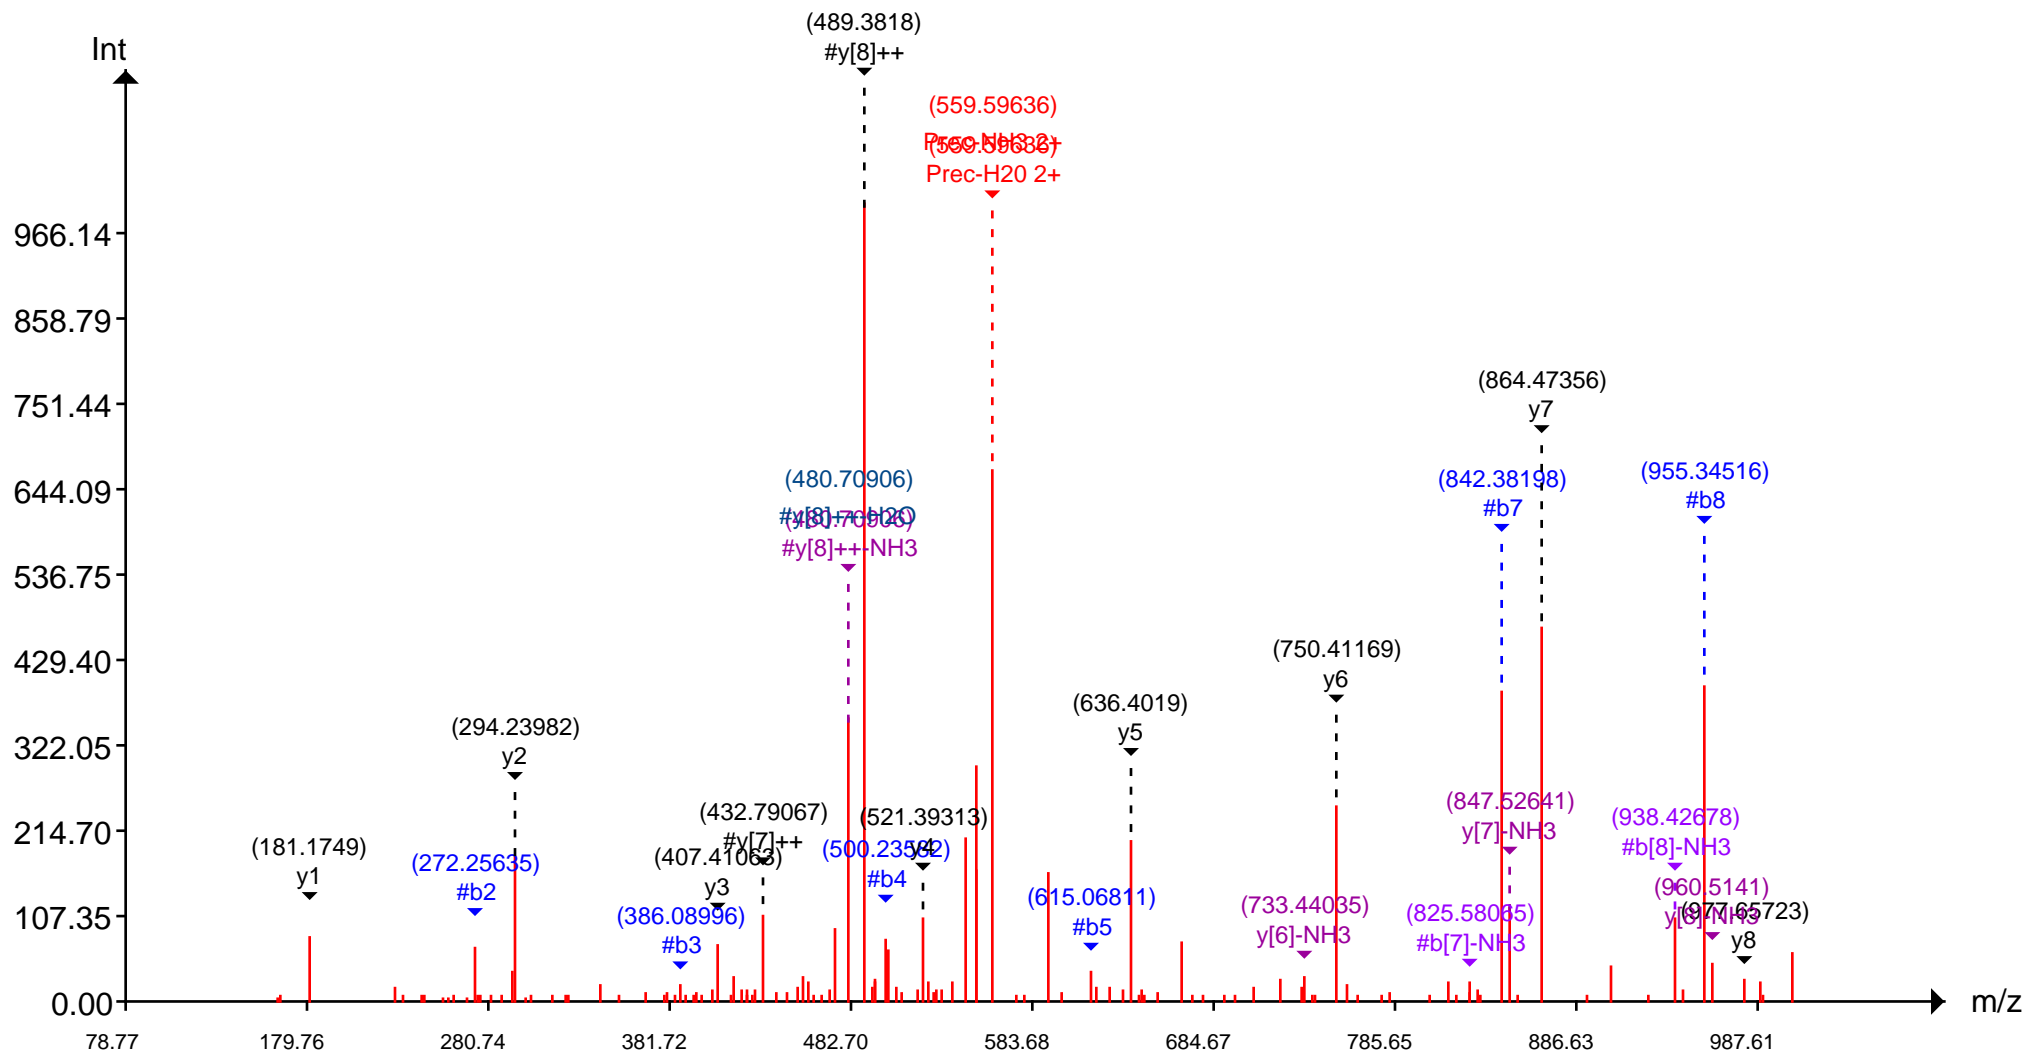

## Info

|                          |                          |                           |          |
|--------------------------|--------------------------|---------------------------|----------|
| <b>Modified Sequence</b> | AcD3-LLNNDNLLR<C13>-COOH | <b>Ion score</b>          | 57.59    |
| <b>Protein</b>           | P47753, P47754           | <b>Confidence level</b>   | 99.00%   |
| <b>Precursor m/z</b>     | 568.33355                | <b>Identity Threshold</b> | 46.26    |
| <b>Charge</b>            | 2+                       | <b>Mass error</b>         | -6.04E-4 |



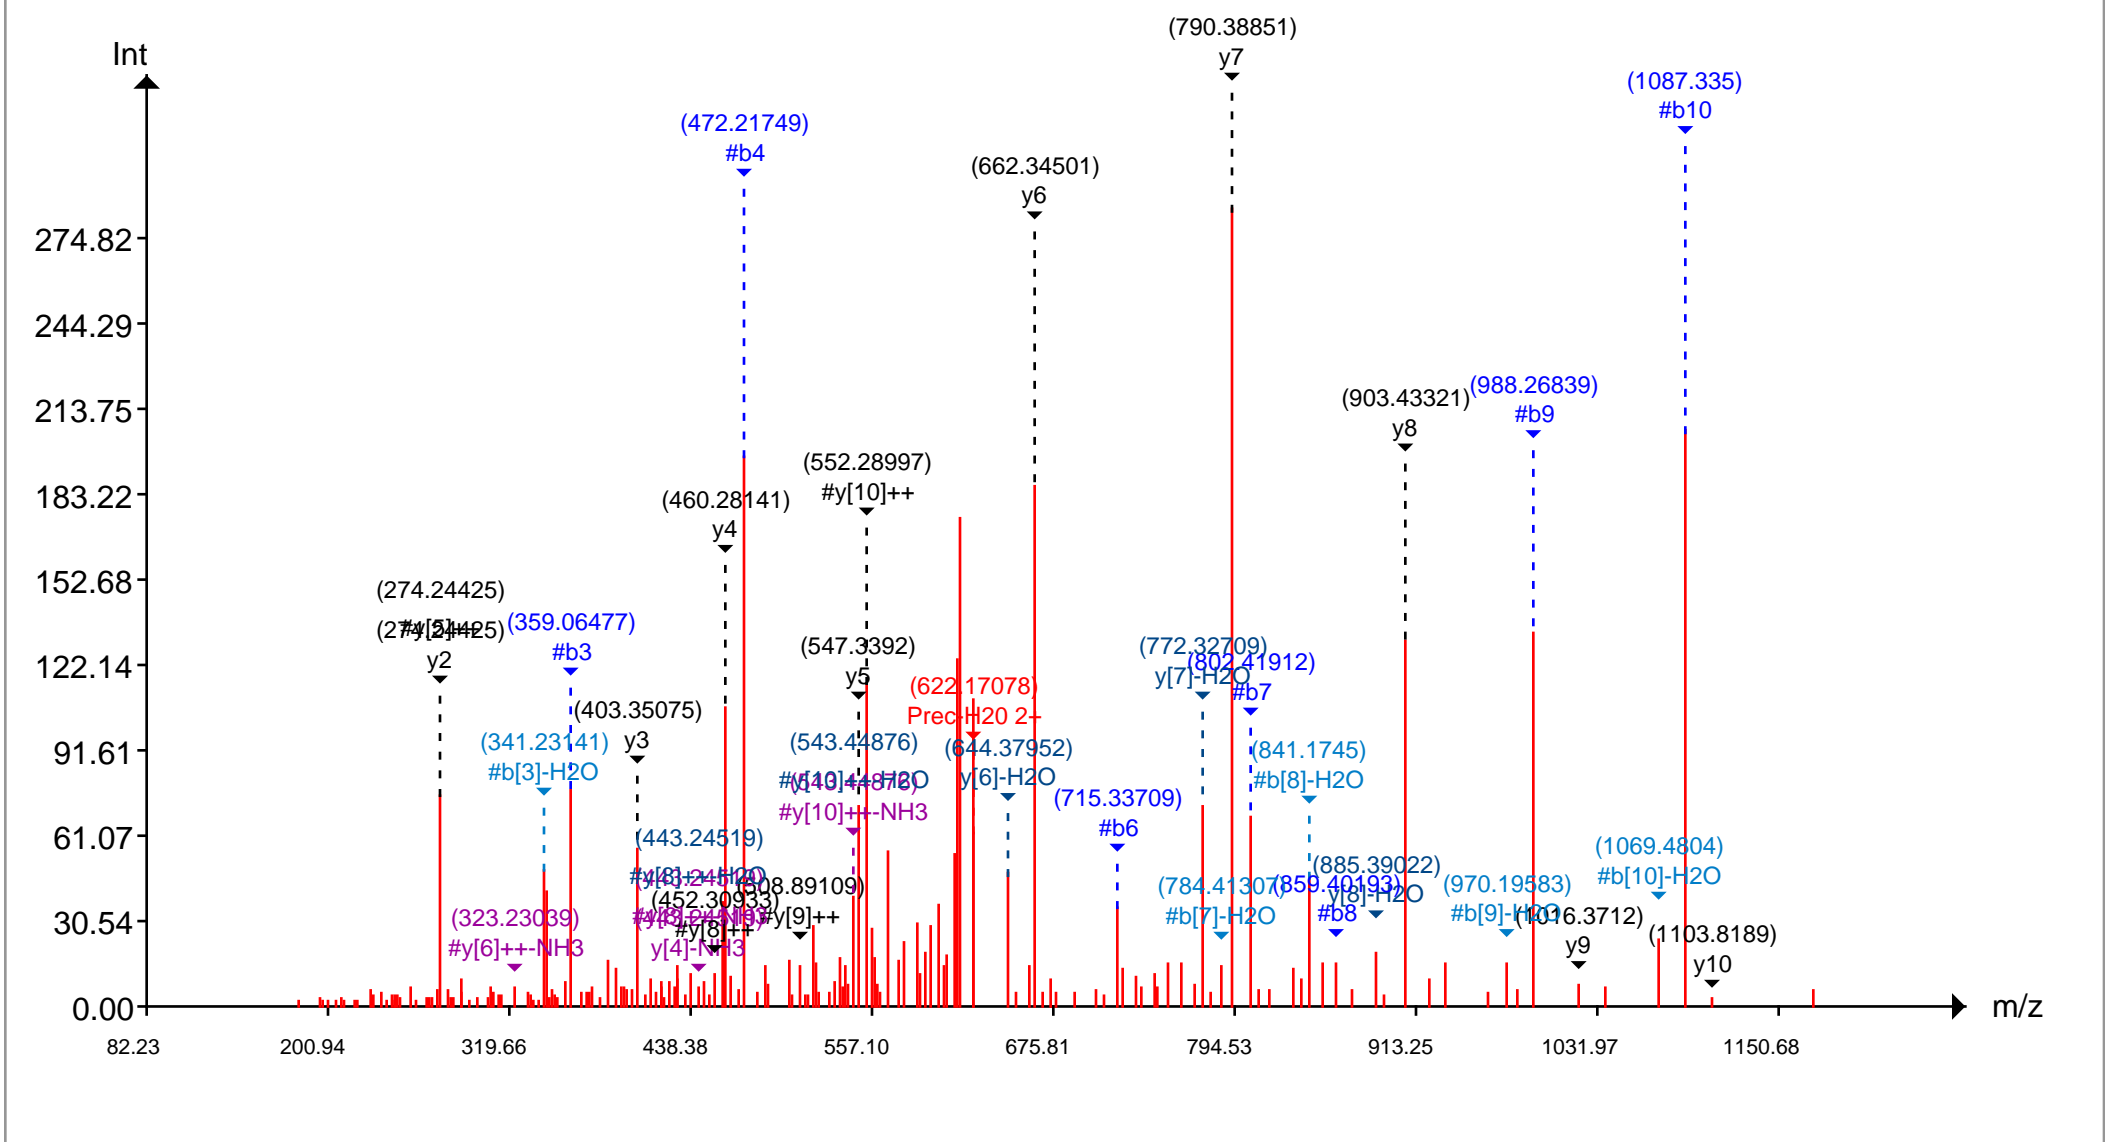

## Info

**Modified Sequence** AcD3-LSLLQDSGEVR-COOH

**Ion score** 76.21

**Protein** P63242

**Confidence level** 99.00%

**Precursor m/z** 631.34525

**Identity Threshold** 47.93

**Charge** 2+

**Mass error** 6.55E-4

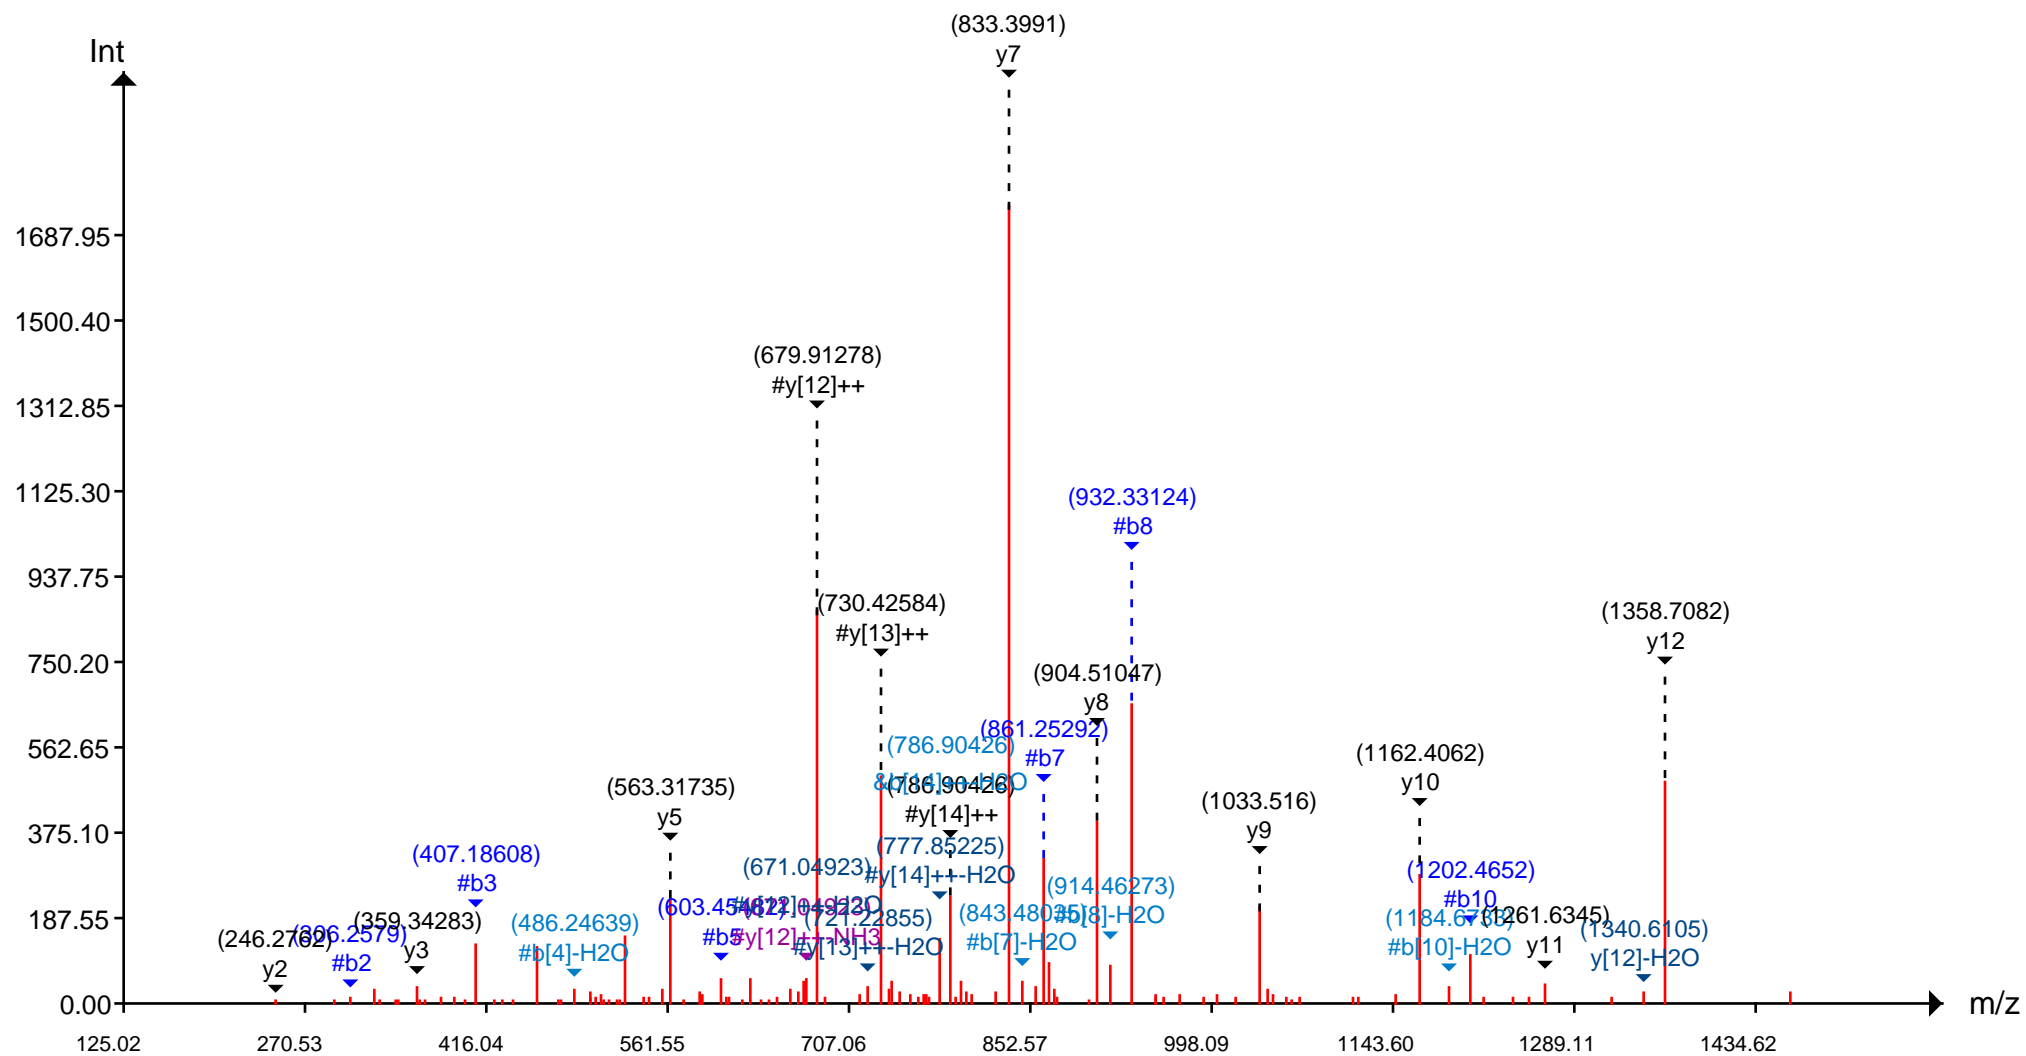

## Info

**Modified Sequence** AcD3-FLTPVEEAPK<AcD3K\*>GM<MoX\*>LAR-COOH

**Ion score** 62.27

**Protein** Q61599

**Confidence level** 99.00%

**Precursor m/z** 882.97832

**Identity Threshold** 47.95

**Charge** 2+

**Mass error** 0.002238

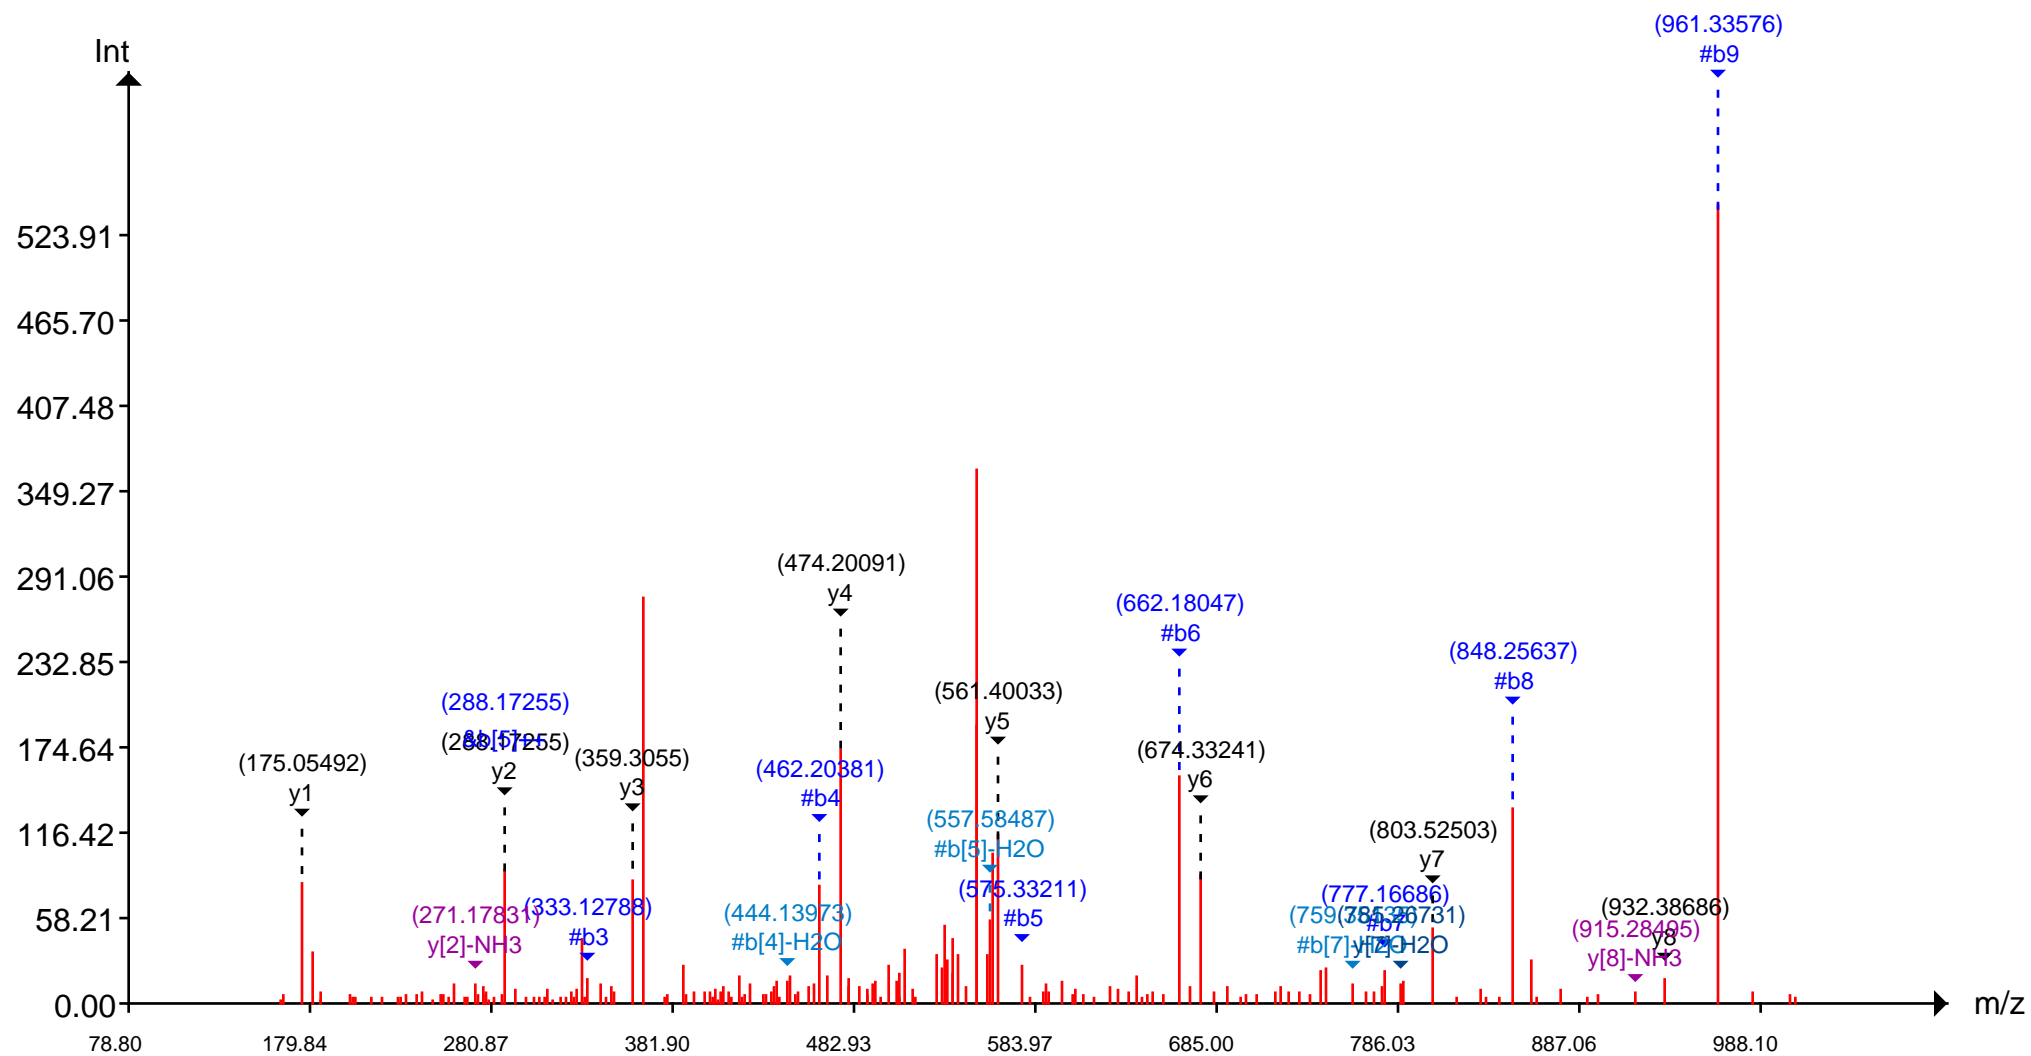

## Info

|                          |                      |                           |         |
|--------------------------|----------------------|---------------------------|---------|
| <b>Modified Sequence</b> | AcD3-SAEEISDAIR-COOH | <b>Ion score</b>          | 50.64   |
| <b>Protein</b>           | Q9JHU4               | <b>Confidence level</b>   | 99.00%  |
| <b>Precursor m/z</b>     | 568.28719            | <b>Identity Threshold</b> | 47.70   |
| <b>Charge</b>            | 2+                   | <b>Mass error</b>         | 2.58E-4 |

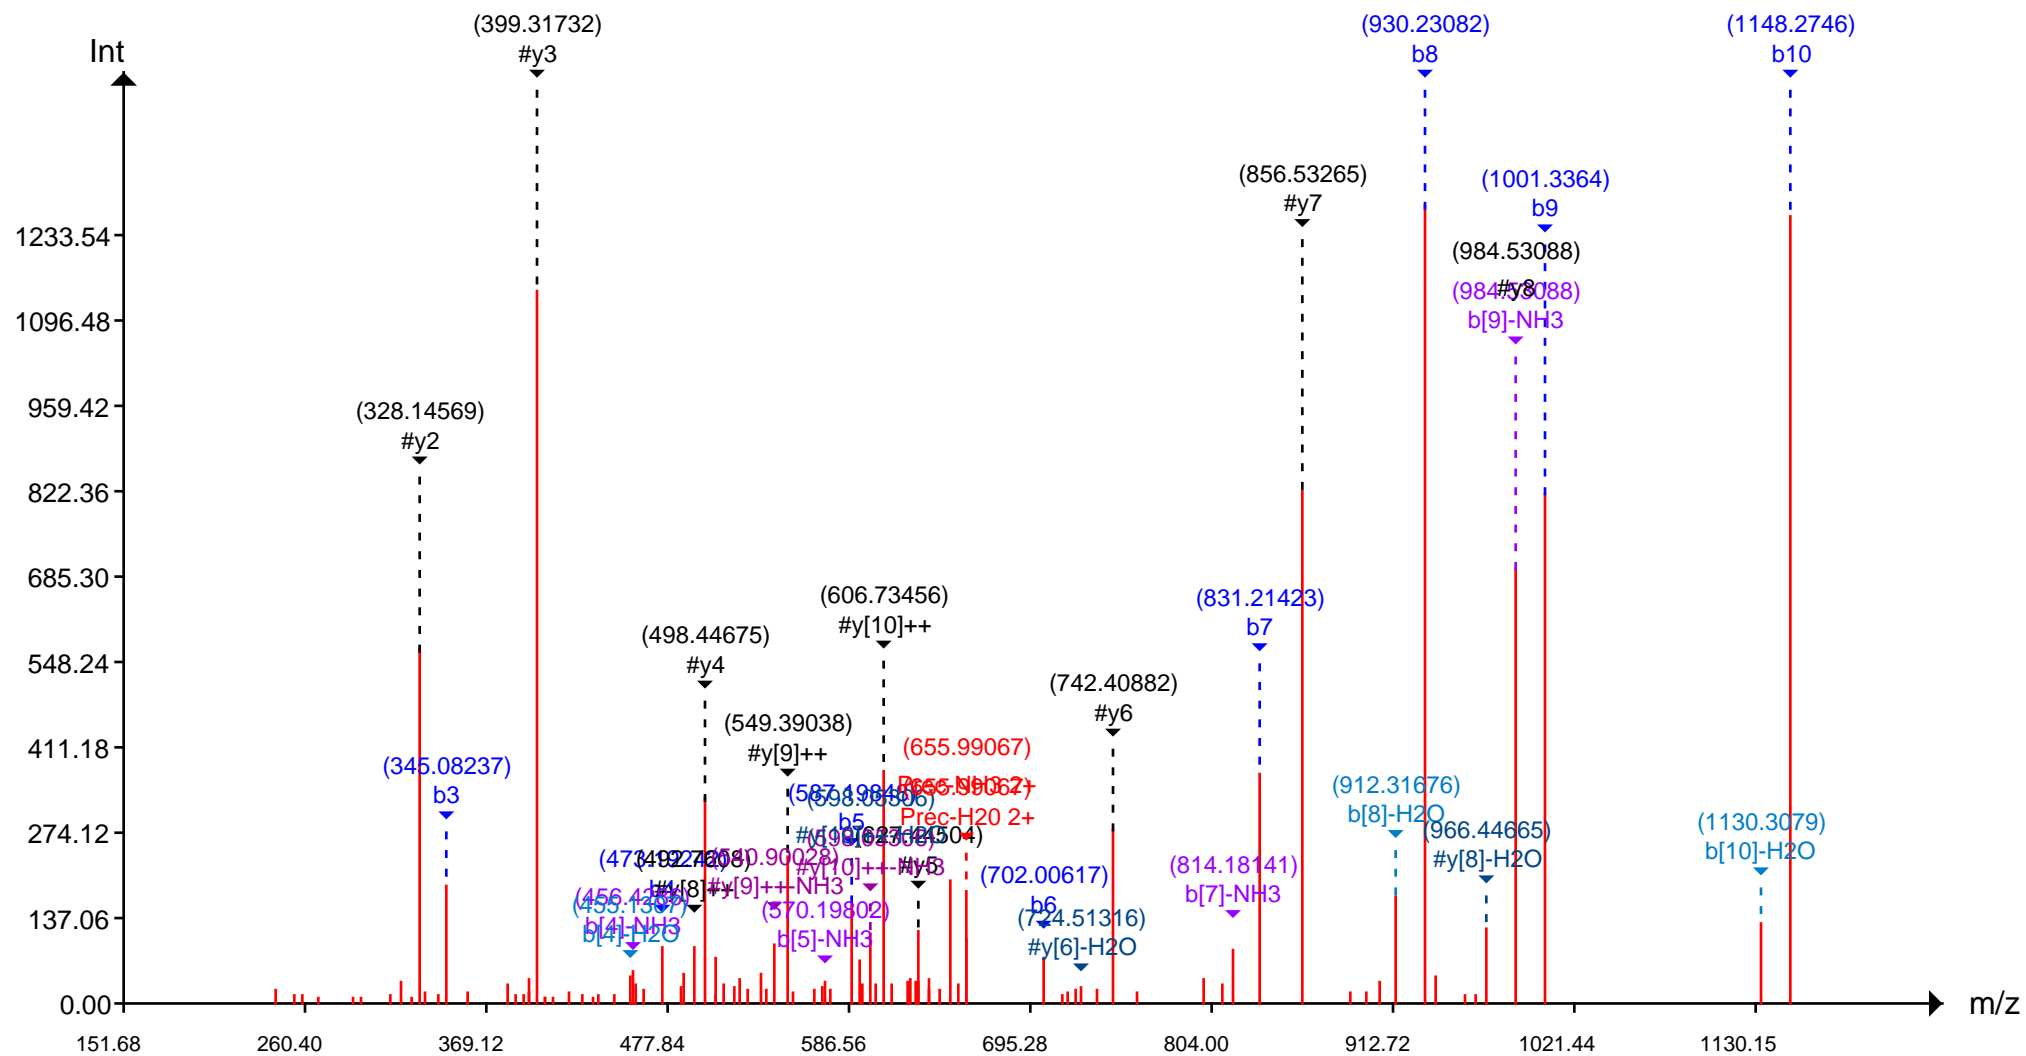

## Info

**Modified Sequence** AcD3-ADLQNDEVAFR<C13>-COOH

**Ion score** 62.01

**Protein** P97351

**Confidence level** 99.00%

**Precursor m/z** 664.83475

**Identity Threshold** 47.44

**Charge** 2+

**Mass error** 6.51E-4

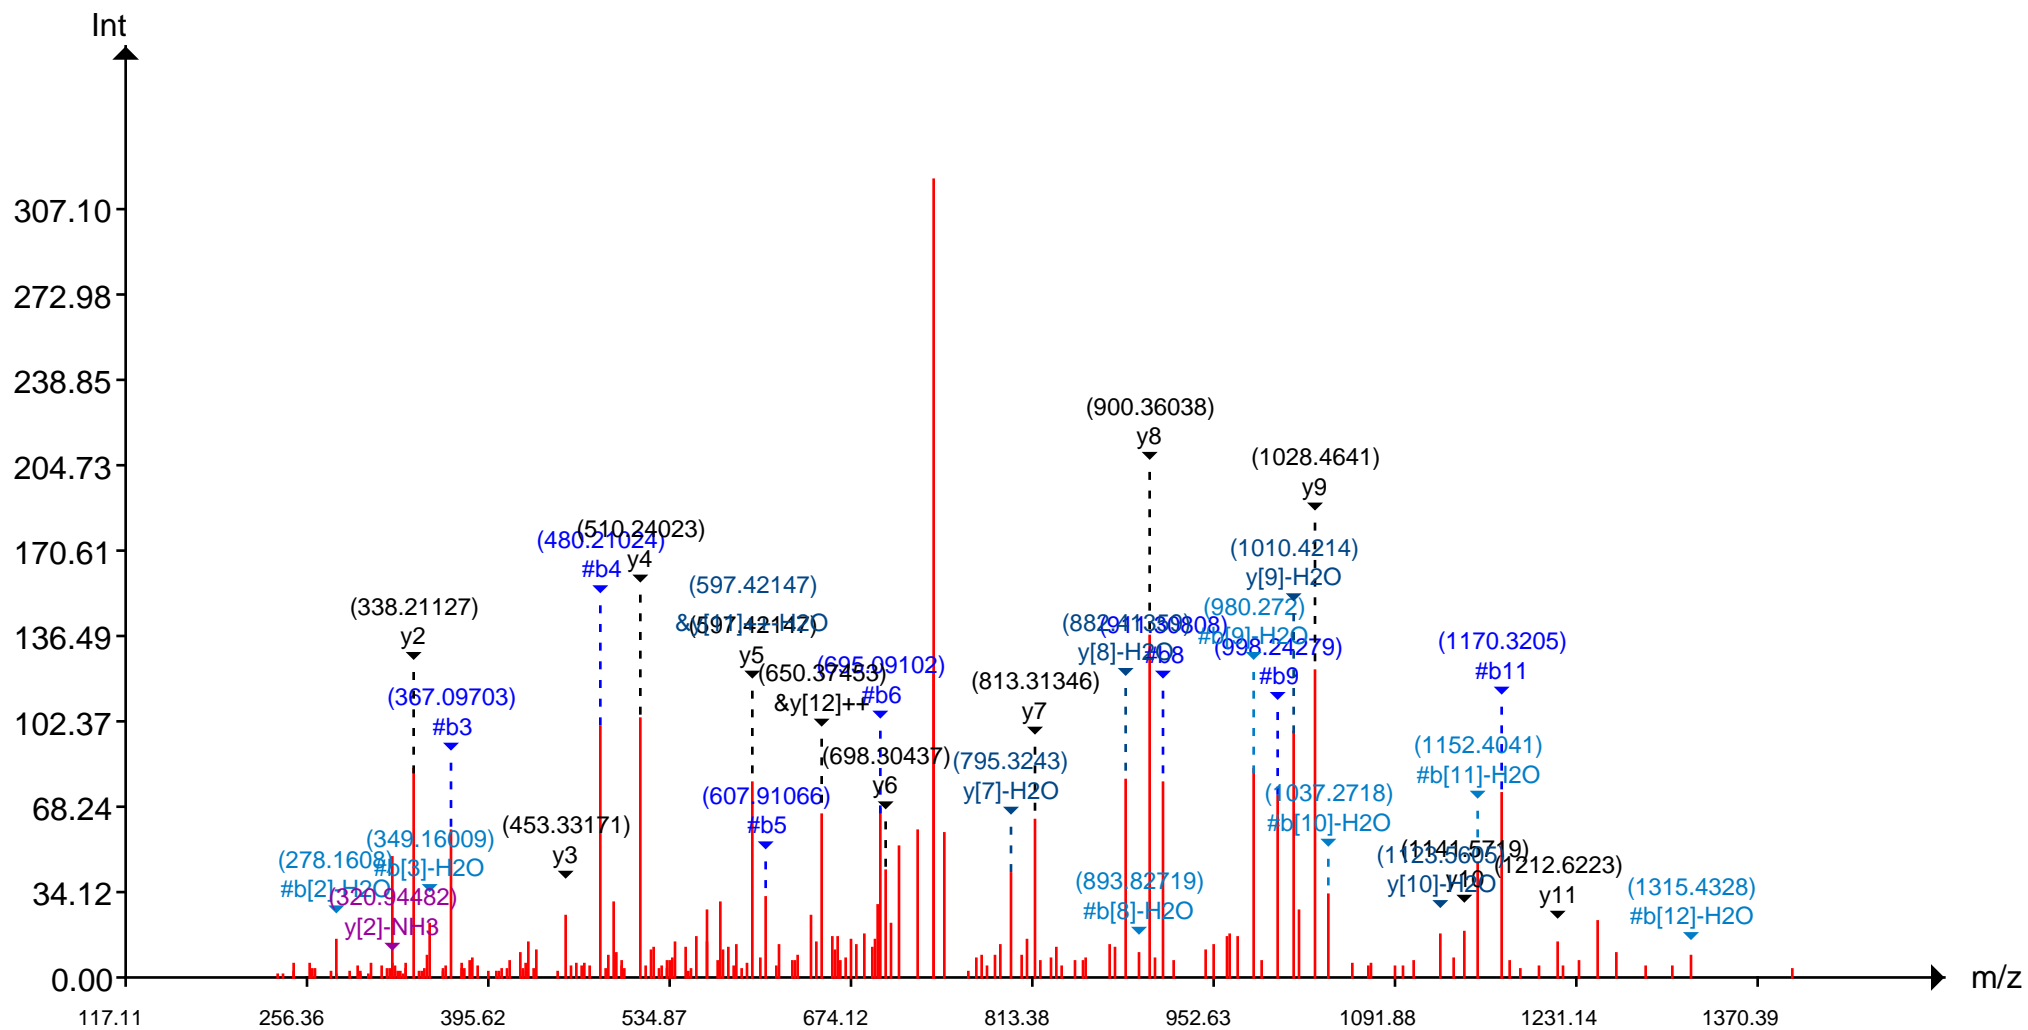

## Info

|                          |                         |                           |          |
|--------------------------|-------------------------|---------------------------|----------|
| <b>Modified Sequence</b> | AcD3-YSAIQSDTSGDYR-COOH | <b>Ion score</b>          | 63.51    |
| <b>Protein</b>           | O35639                  | <b>Confidence level</b>   | 99.00%   |
| <b>Precursor m/z</b>     | 754.3411                | <b>Identity Threshold</b> | 44.02    |
| <b>Charge</b>            | 2+                      | <b>Mass error</b>         | 0.001068 |

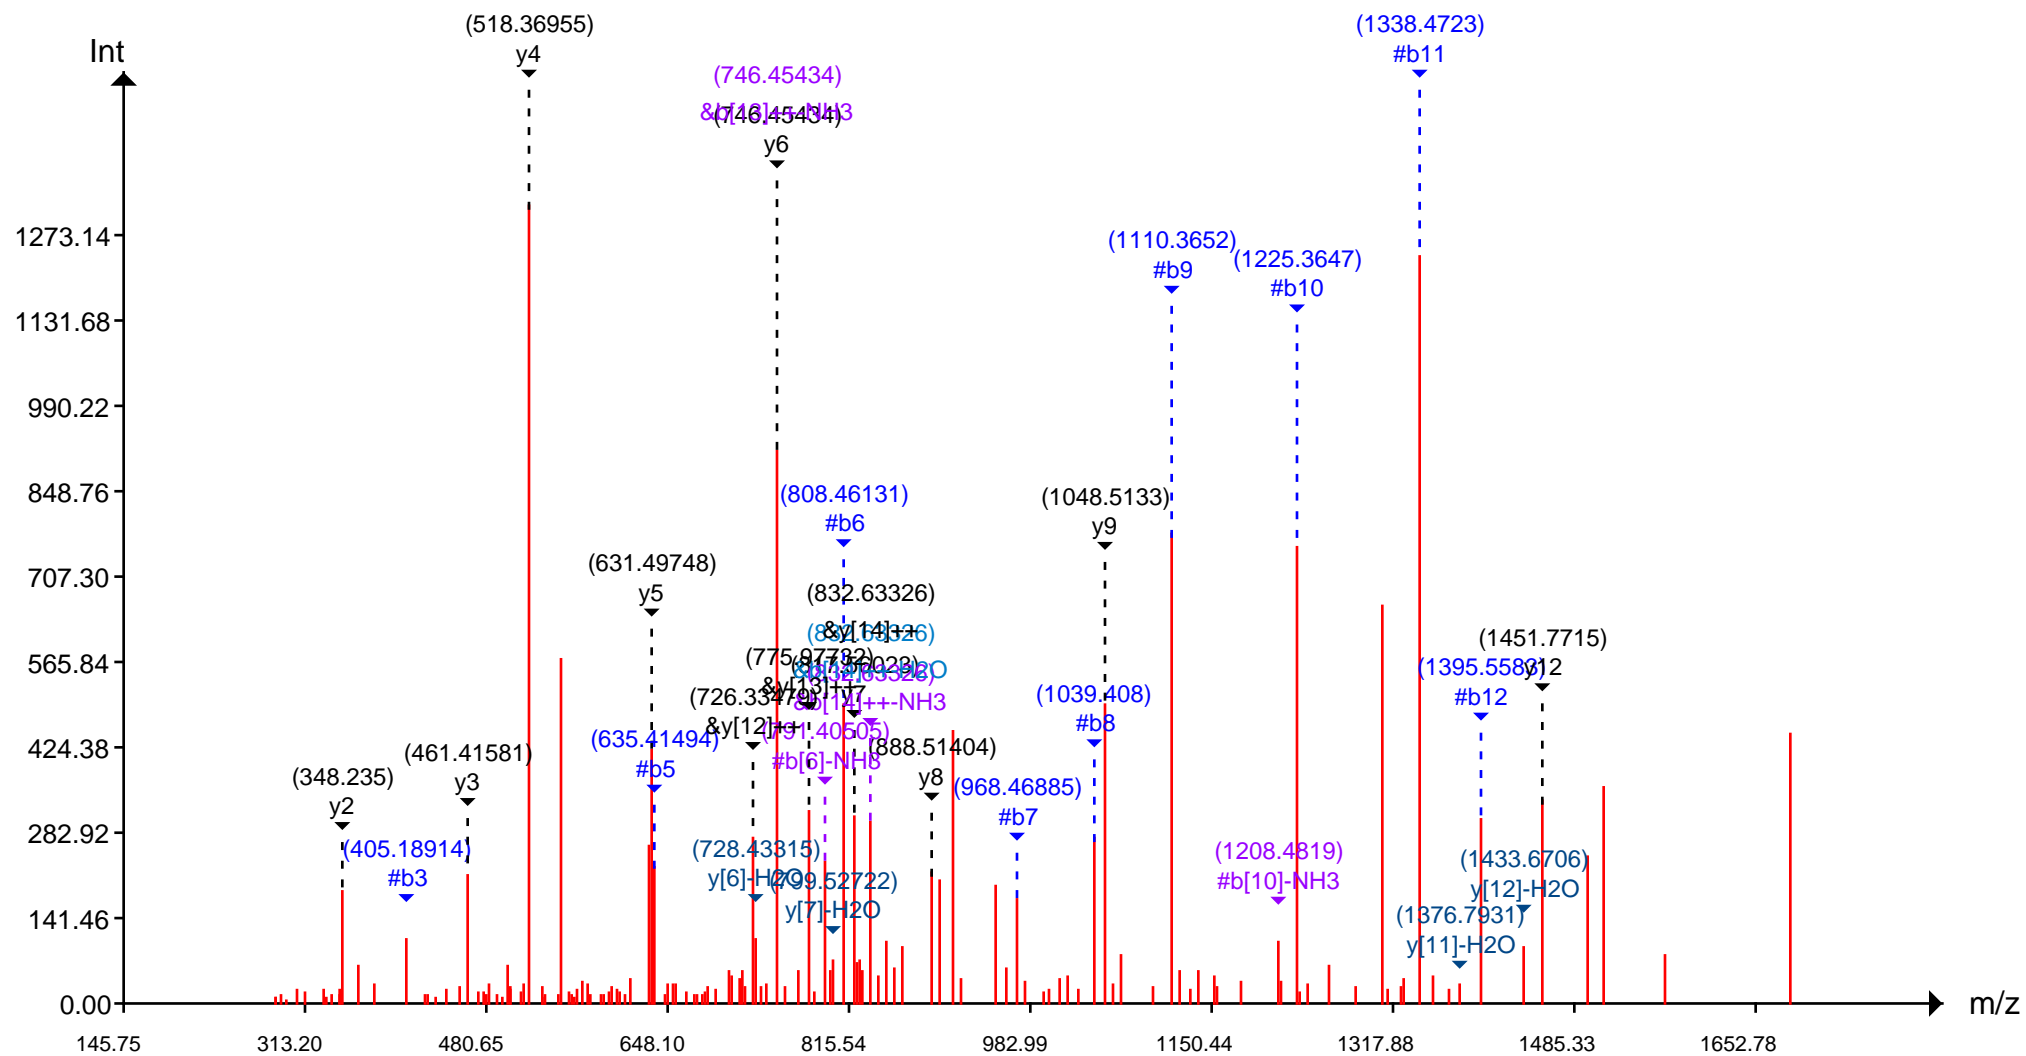

## Info

|                          |                                                               |                           |          |
|--------------------------|---------------------------------------------------------------|---------------------------|----------|
| <b>Modified Sequence</b> | AcD3-M<Mox*>IVGK<AcD3K*>K<AcD3K*>C<Cmm*>AADLGLK<AcD3K*>R-COOH | <b>Ion score</b>          | 63.14    |
| <b>Protein</b>           | P70349                                                        | <b>Confidence level</b>   | 99.00%   |
| <b>Precursor m/z</b>     | 928.53049                                                     | <b>Identity Threshold</b> | 45.52    |
| <b>Charge</b>            | 2+                                                            | <b>Mass error</b>         | 0.001537 |

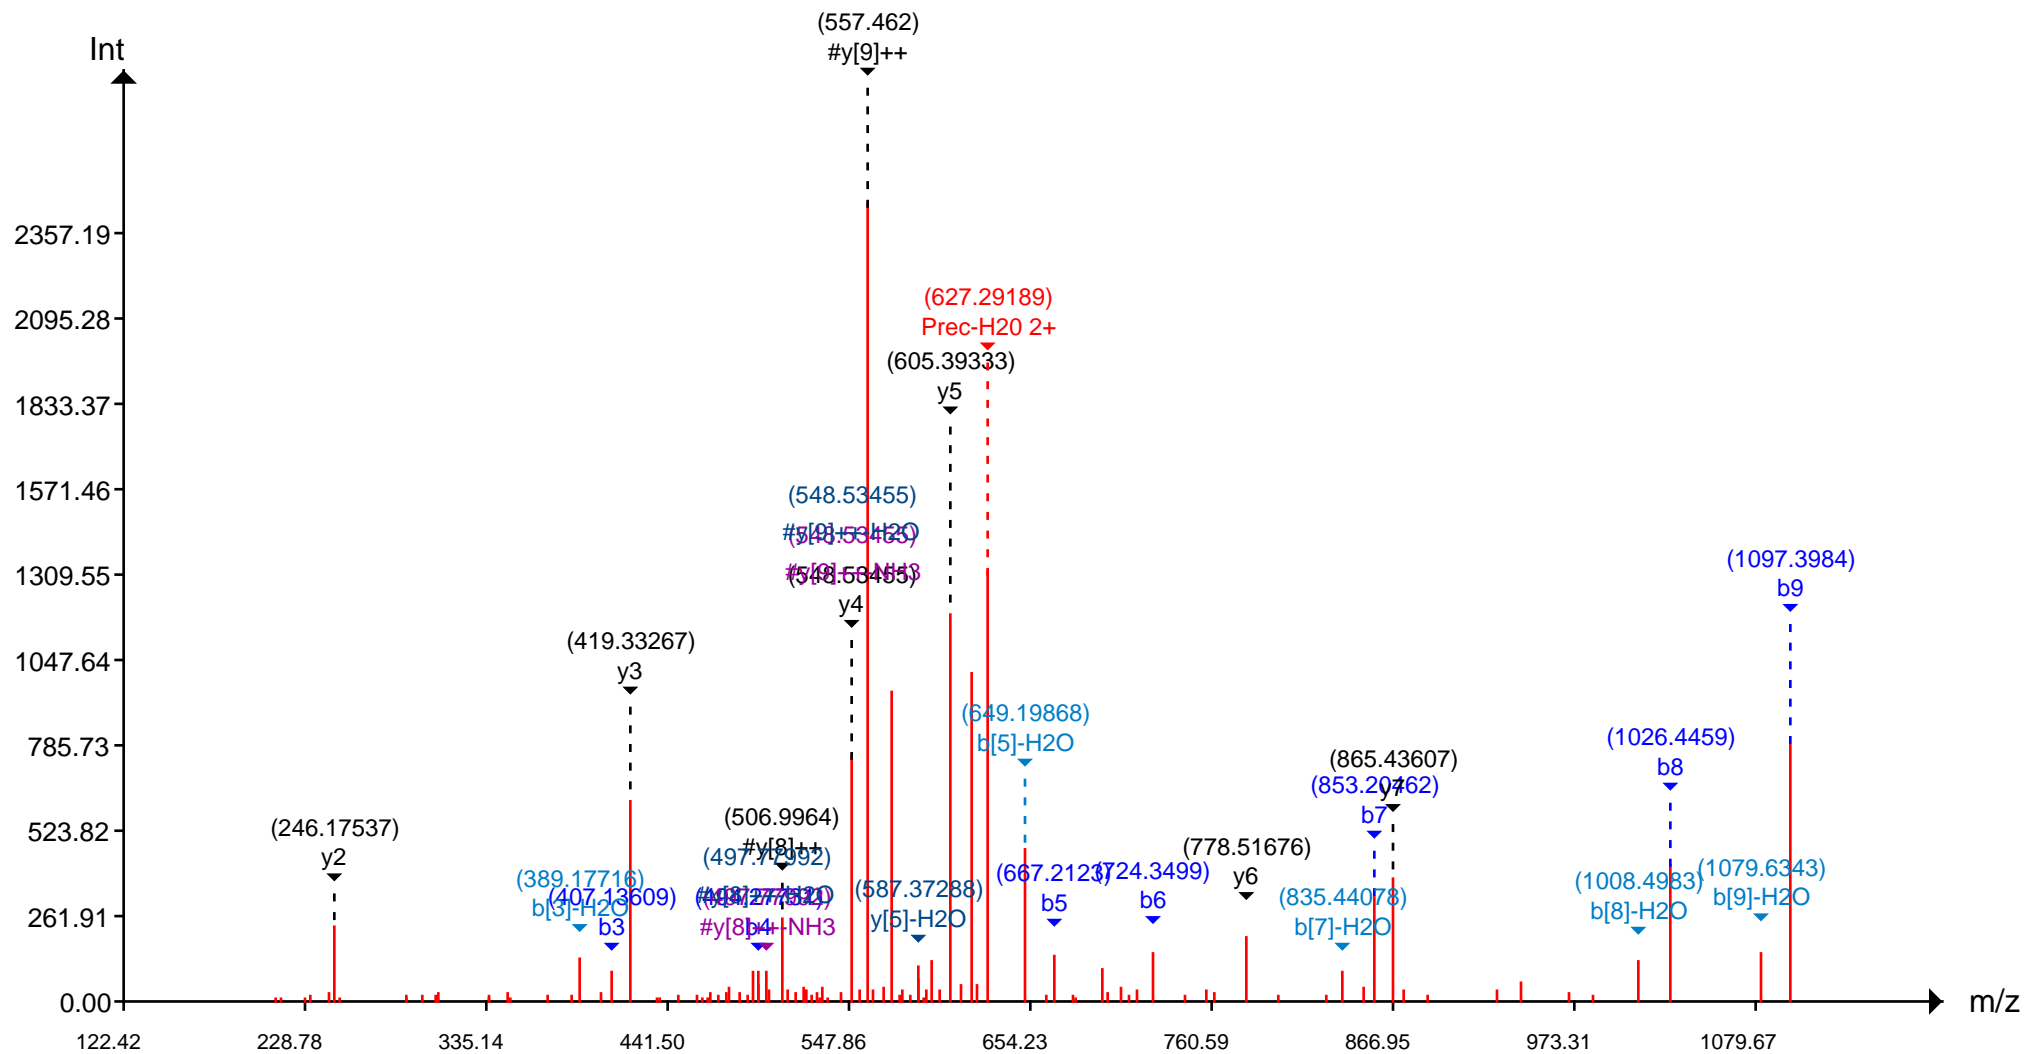

## Info

|                          |                                            |                           |          |
|--------------------------|--------------------------------------------|---------------------------|----------|
| <b>Modified Sequence</b> | AcD3-LTM<Mox*>SK<AcD3K*>GEK<AcD3K*>AR-COOH | <b>Ion score</b>          | 49.47    |
| <b>Protein</b>           | Q62446                                     | <b>Confidence level</b>   | 99.00%   |
| <b>Precursor m/z</b>     | 636.35289                                  | <b>Identity Threshold</b> | 47.58    |
| <b>Charge</b>            | 2+                                         | <b>Mass error</b>         | 0.001119 |

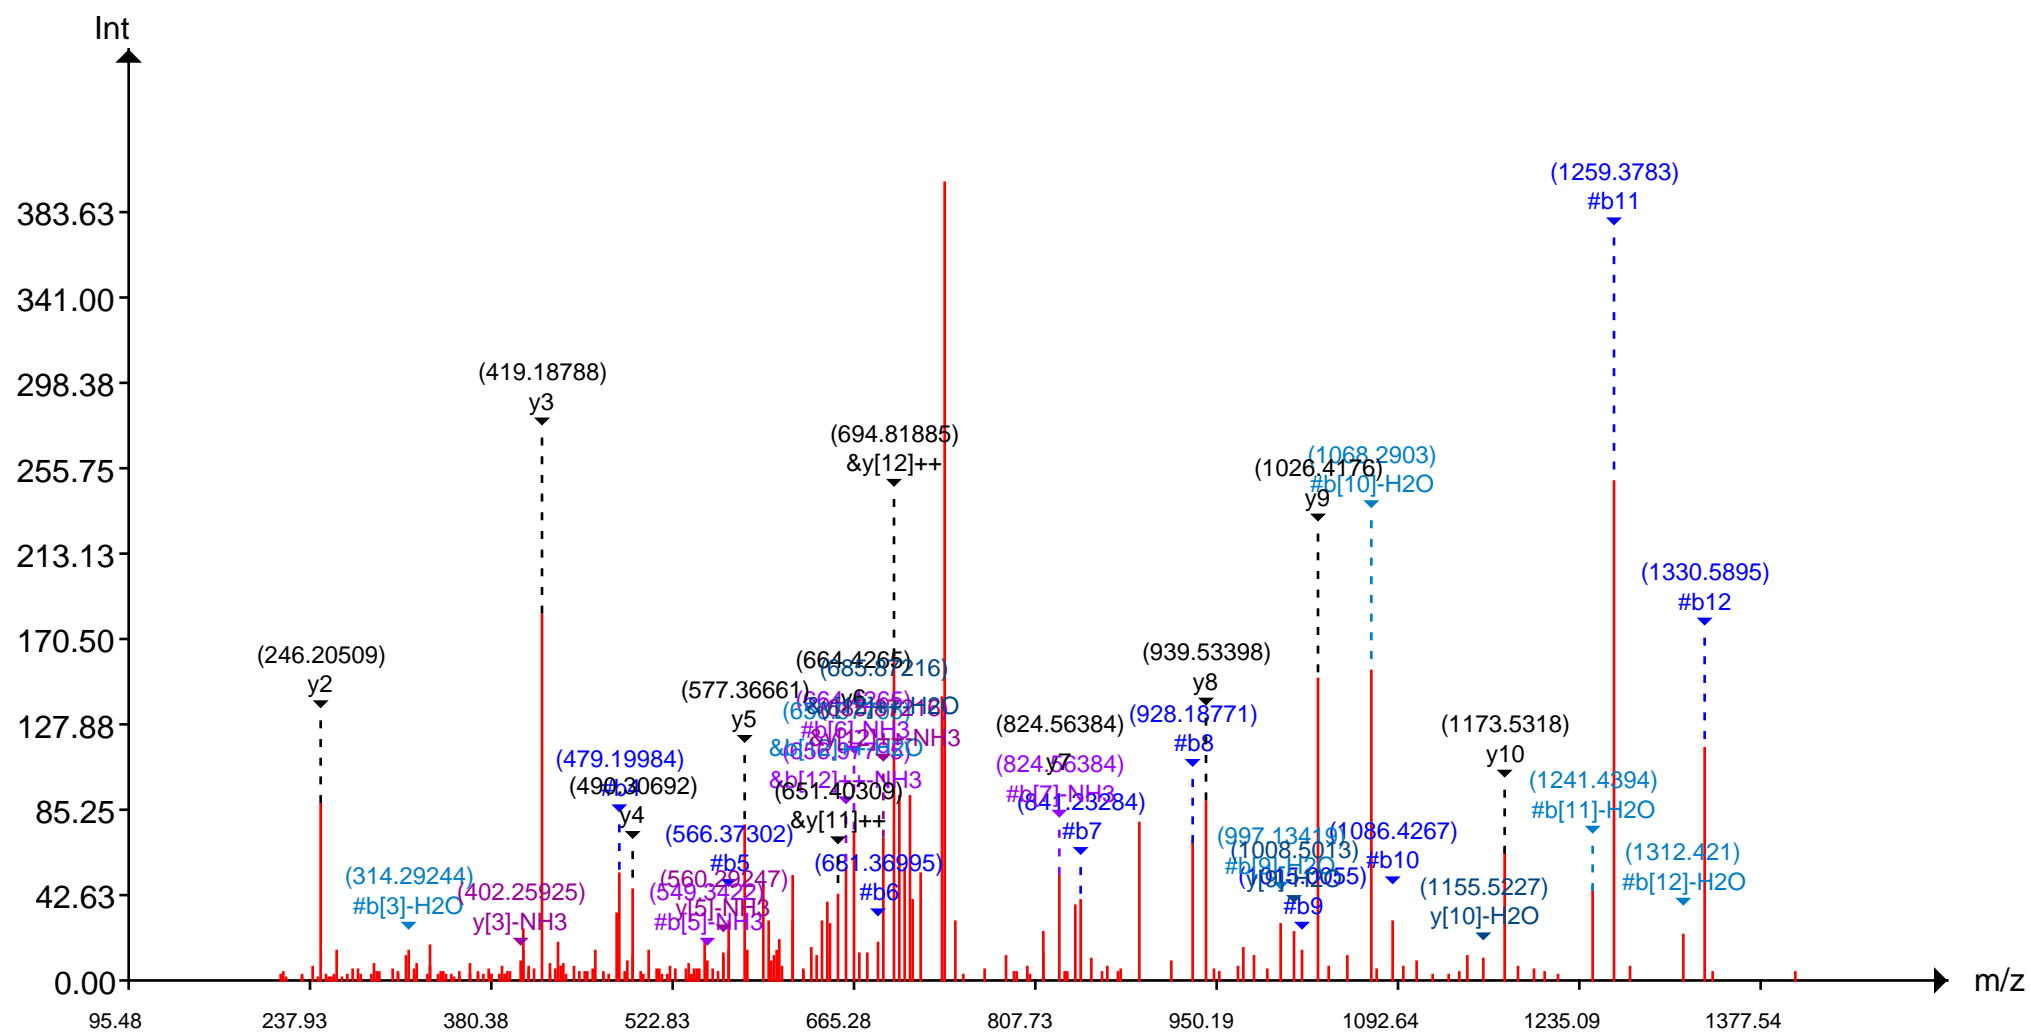

## Info

|                          |                                       |                           |         |
|--------------------------|---------------------------------------|---------------------------|---------|
| <b>Modified Sequence</b> | AcD3-ASQFSDC<Cmm*>SSAK<AcD3K*>AR-COOH | <b>Ion score</b>          | 53.82   |
| <b>Protein</b>           | Q9QUR7                                | <b>Confidence level</b>   | 99.00%  |
| <b>Precursor m/z</b>     | 752.85248                             | <b>Identity Threshold</b> | 45.67   |
| <b>Charge</b>            | 2+                                    | <b>Mass error</b>         | 9.55E-4 |



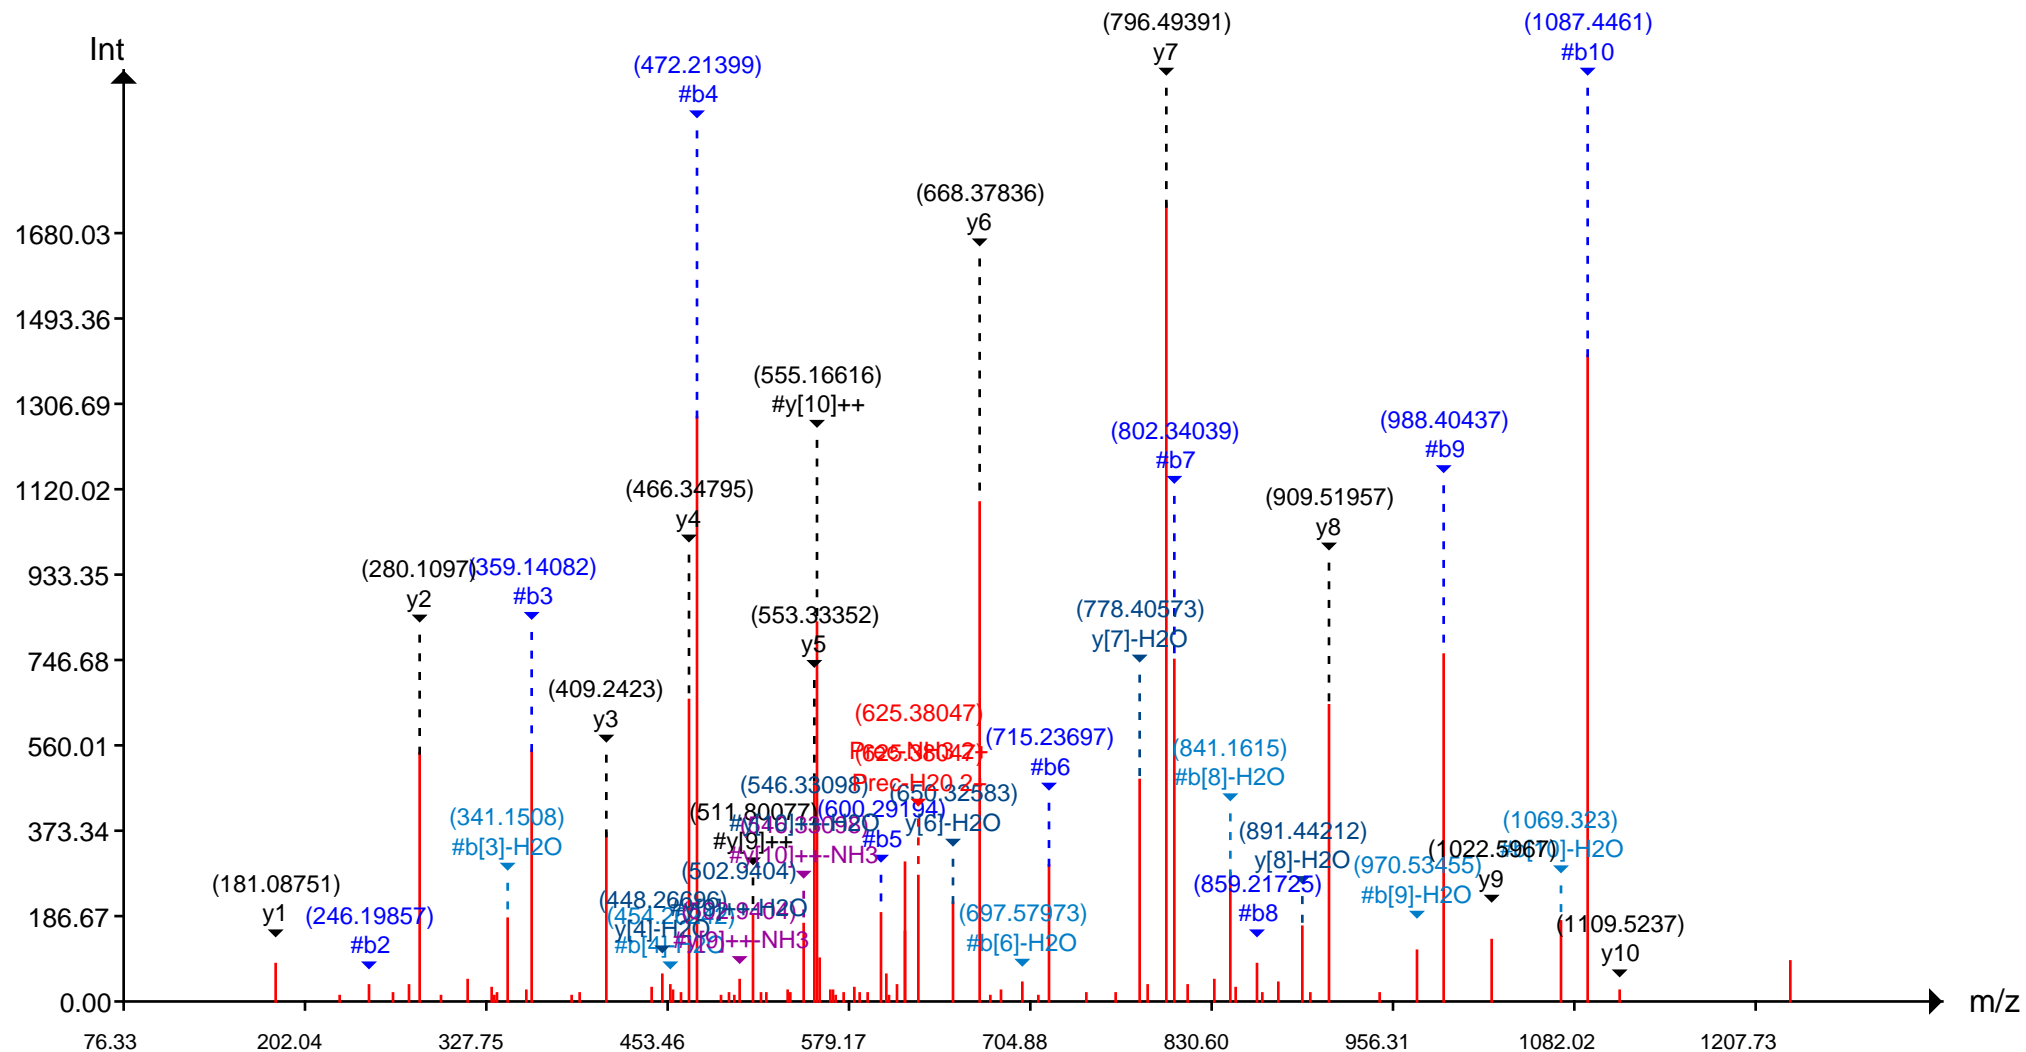

## Info

|                          |                             |                           |         |
|--------------------------|-----------------------------|---------------------------|---------|
| <b>Modified Sequence</b> | AcD3-LSELLQDSGEVR<C13>-COOH | <b>Ion score</b>          | 102.33  |
| <b>Protein</b>           | P63242                      | <b>Confidence level</b>   | 99.00%  |
| <b>Precursor m/z</b>     | 634.35529                   | <b>Identity Threshold</b> | 47.19   |
| <b>Charge</b>            | 2+                          | <b>Mass error</b>         | 5.93E-4 |

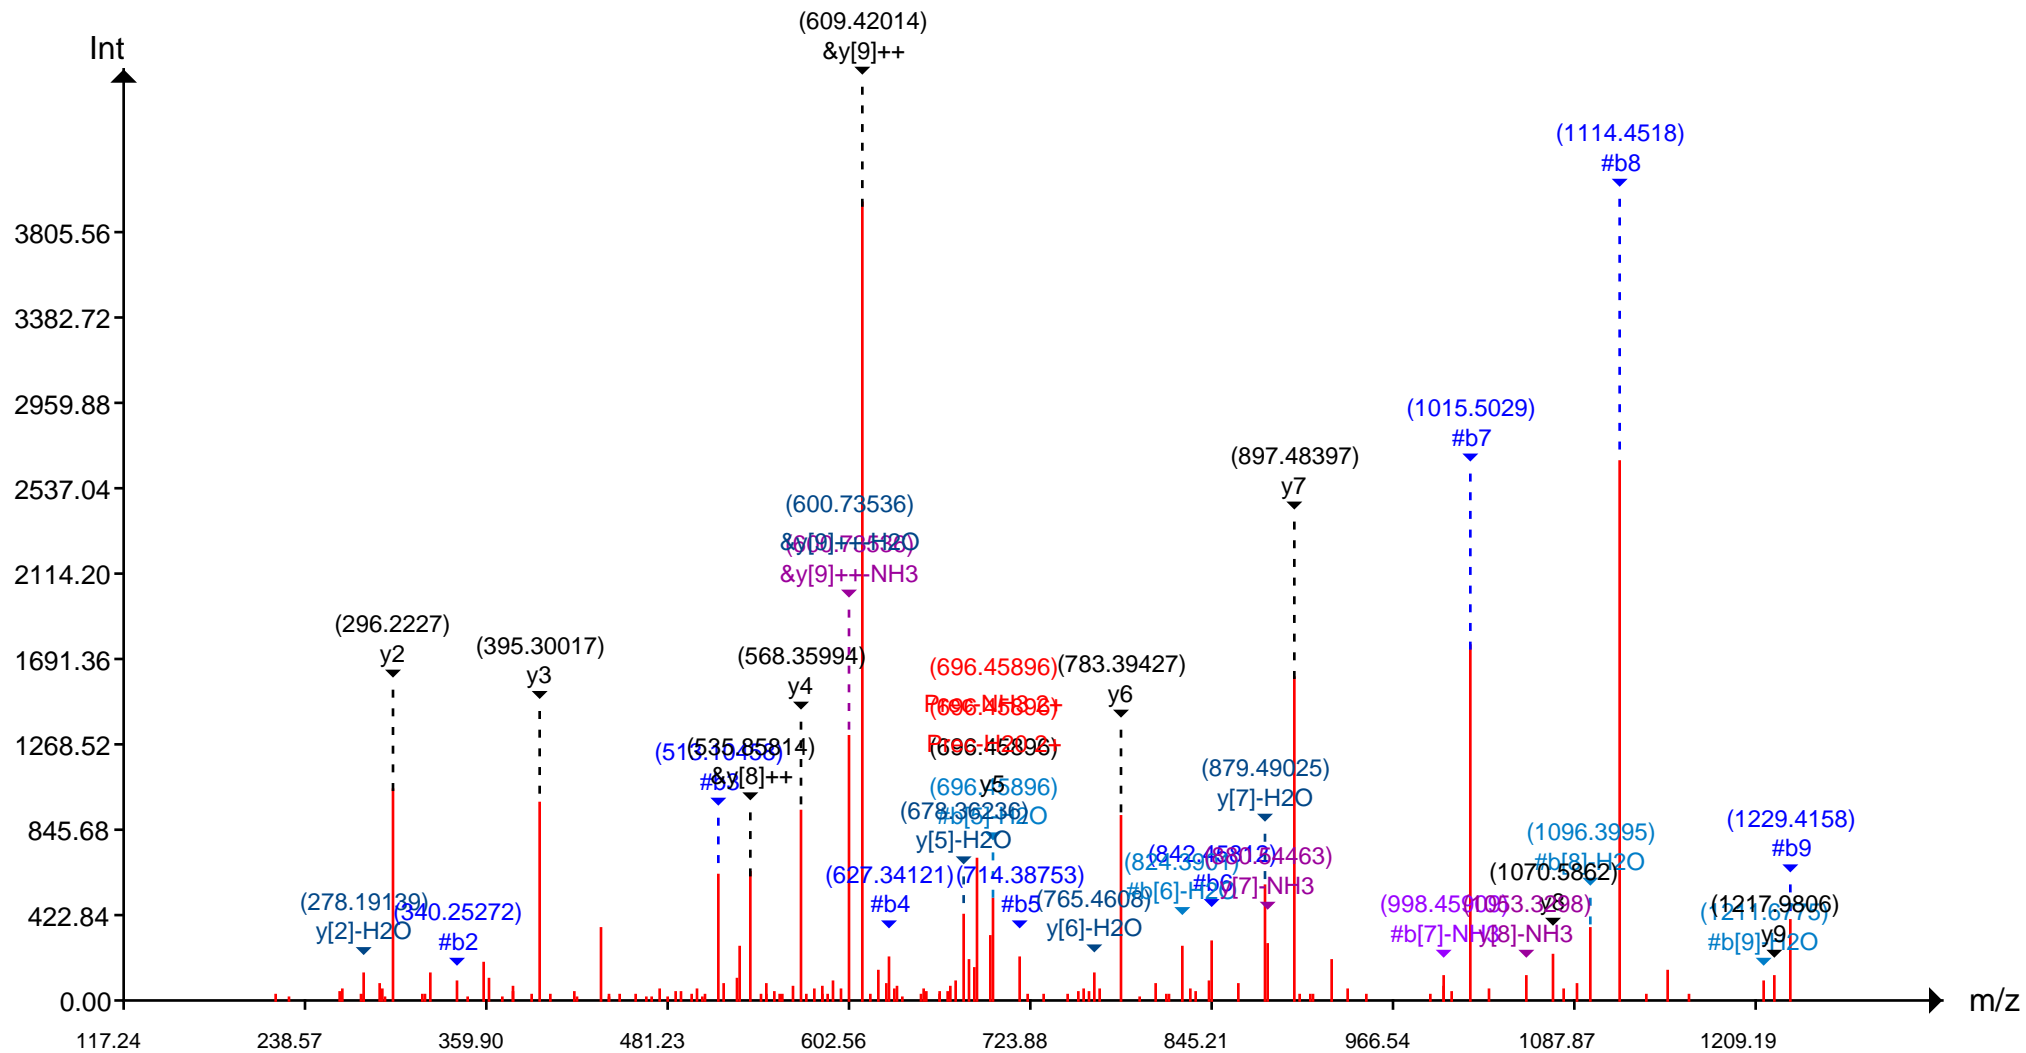

## Info

|                          |                                           |                           |          |
|--------------------------|-------------------------------------------|---------------------------|----------|
| <b>Modified Sequence</b> | AcD3-FFK<AcD3K*>NSQK<AcD3K*>VDR<C13>-COOH | <b>Ion score</b>          | 60.69    |
| <b>Protein</b>           | Q9CQM9                                    | <b>Confidence level</b>   | 99.00%   |
| <b>Precursor m/z</b>     | 705.39582                                 | <b>Identity Threshold</b> | 47.32    |
| <b>Charge</b>            | 2+                                        | <b>Mass error</b>         | 0.001438 |

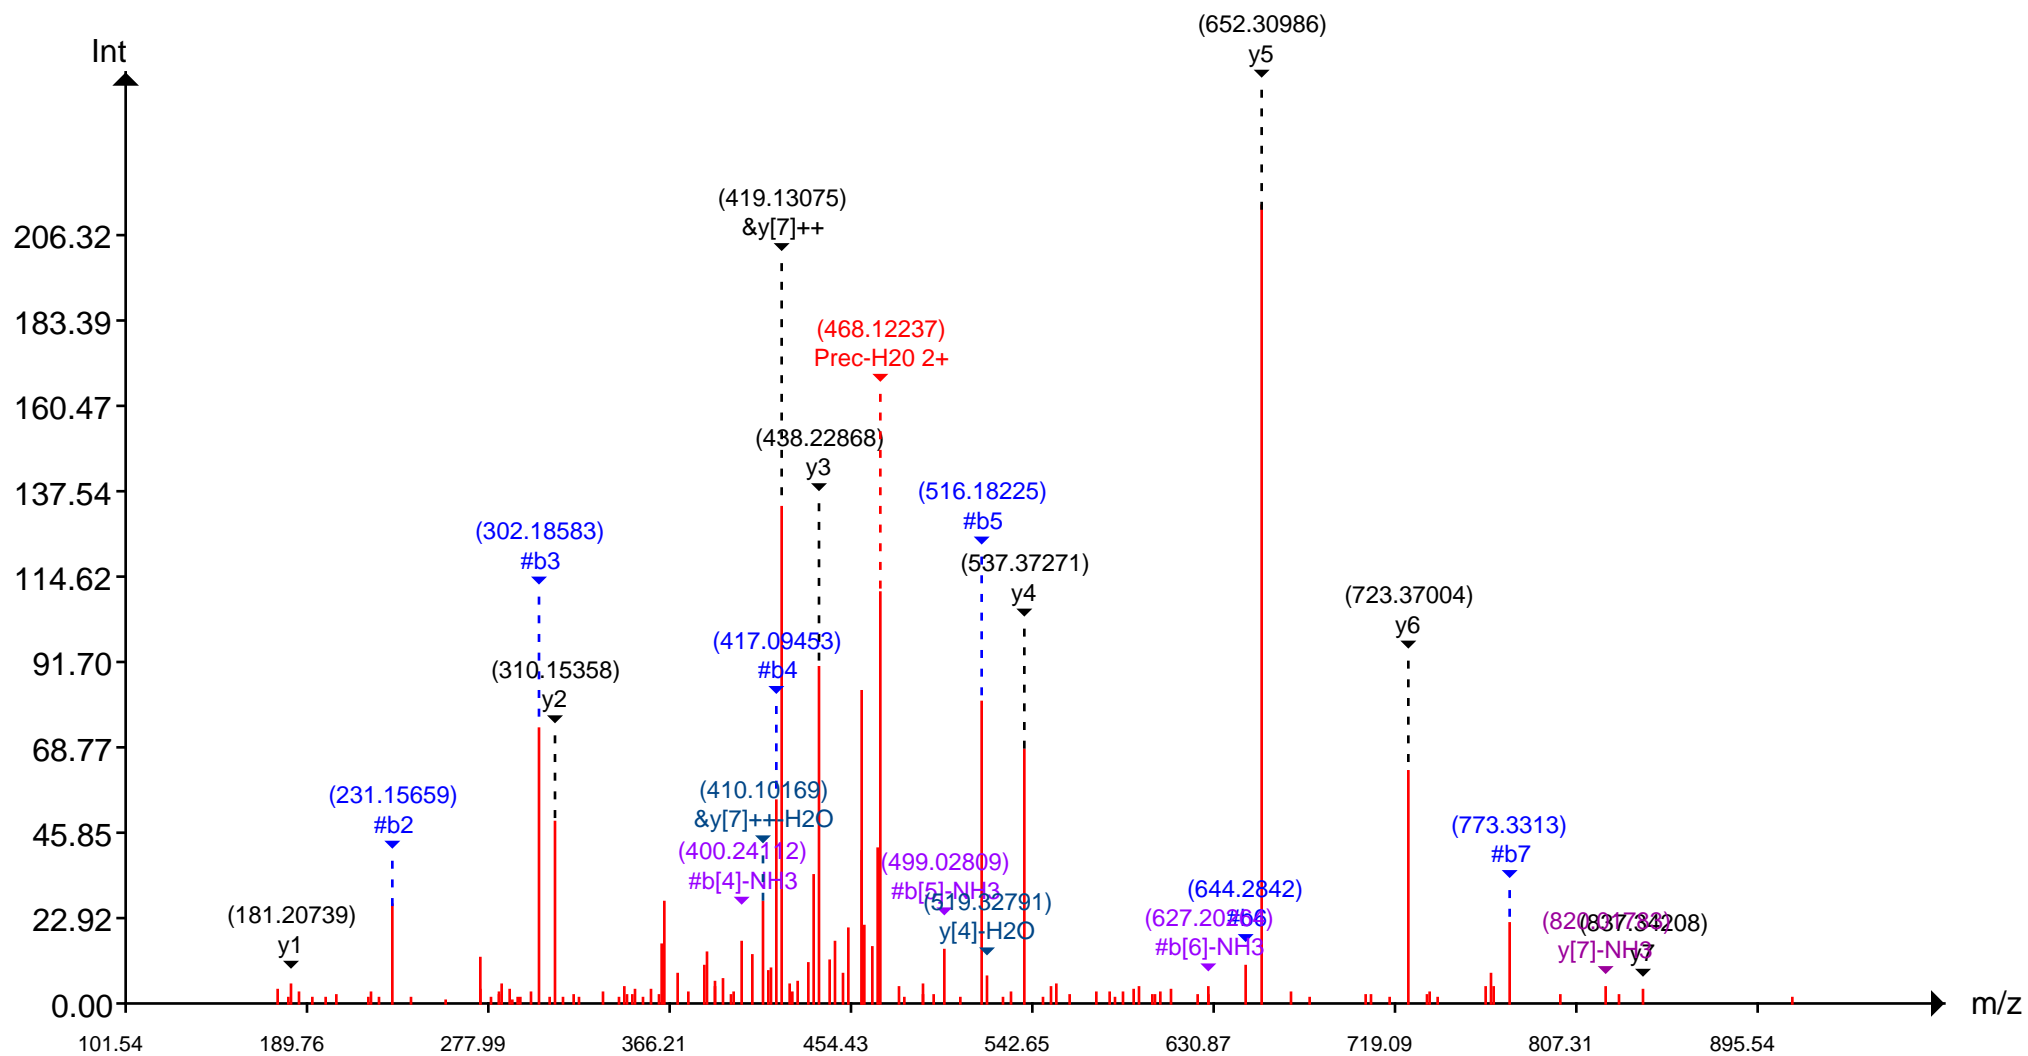

## Info

|                          |                         |                           |         |
|--------------------------|-------------------------|---------------------------|---------|
| <b>Modified Sequence</b> | AcD3-ANADVQER<C13>-COOH | <b>Ion score</b>          | 56.37   |
| <b>Protein</b>           | Q9JKV1                  | <b>Confidence level</b>   | 99.00%  |
| <b>Precursor m/z</b>     | 477.24471               | <b>Identity Threshold</b> | 47.39   |
| <b>Charge</b>            | 2+                      | <b>Mass error</b>         | -1.0E-6 |

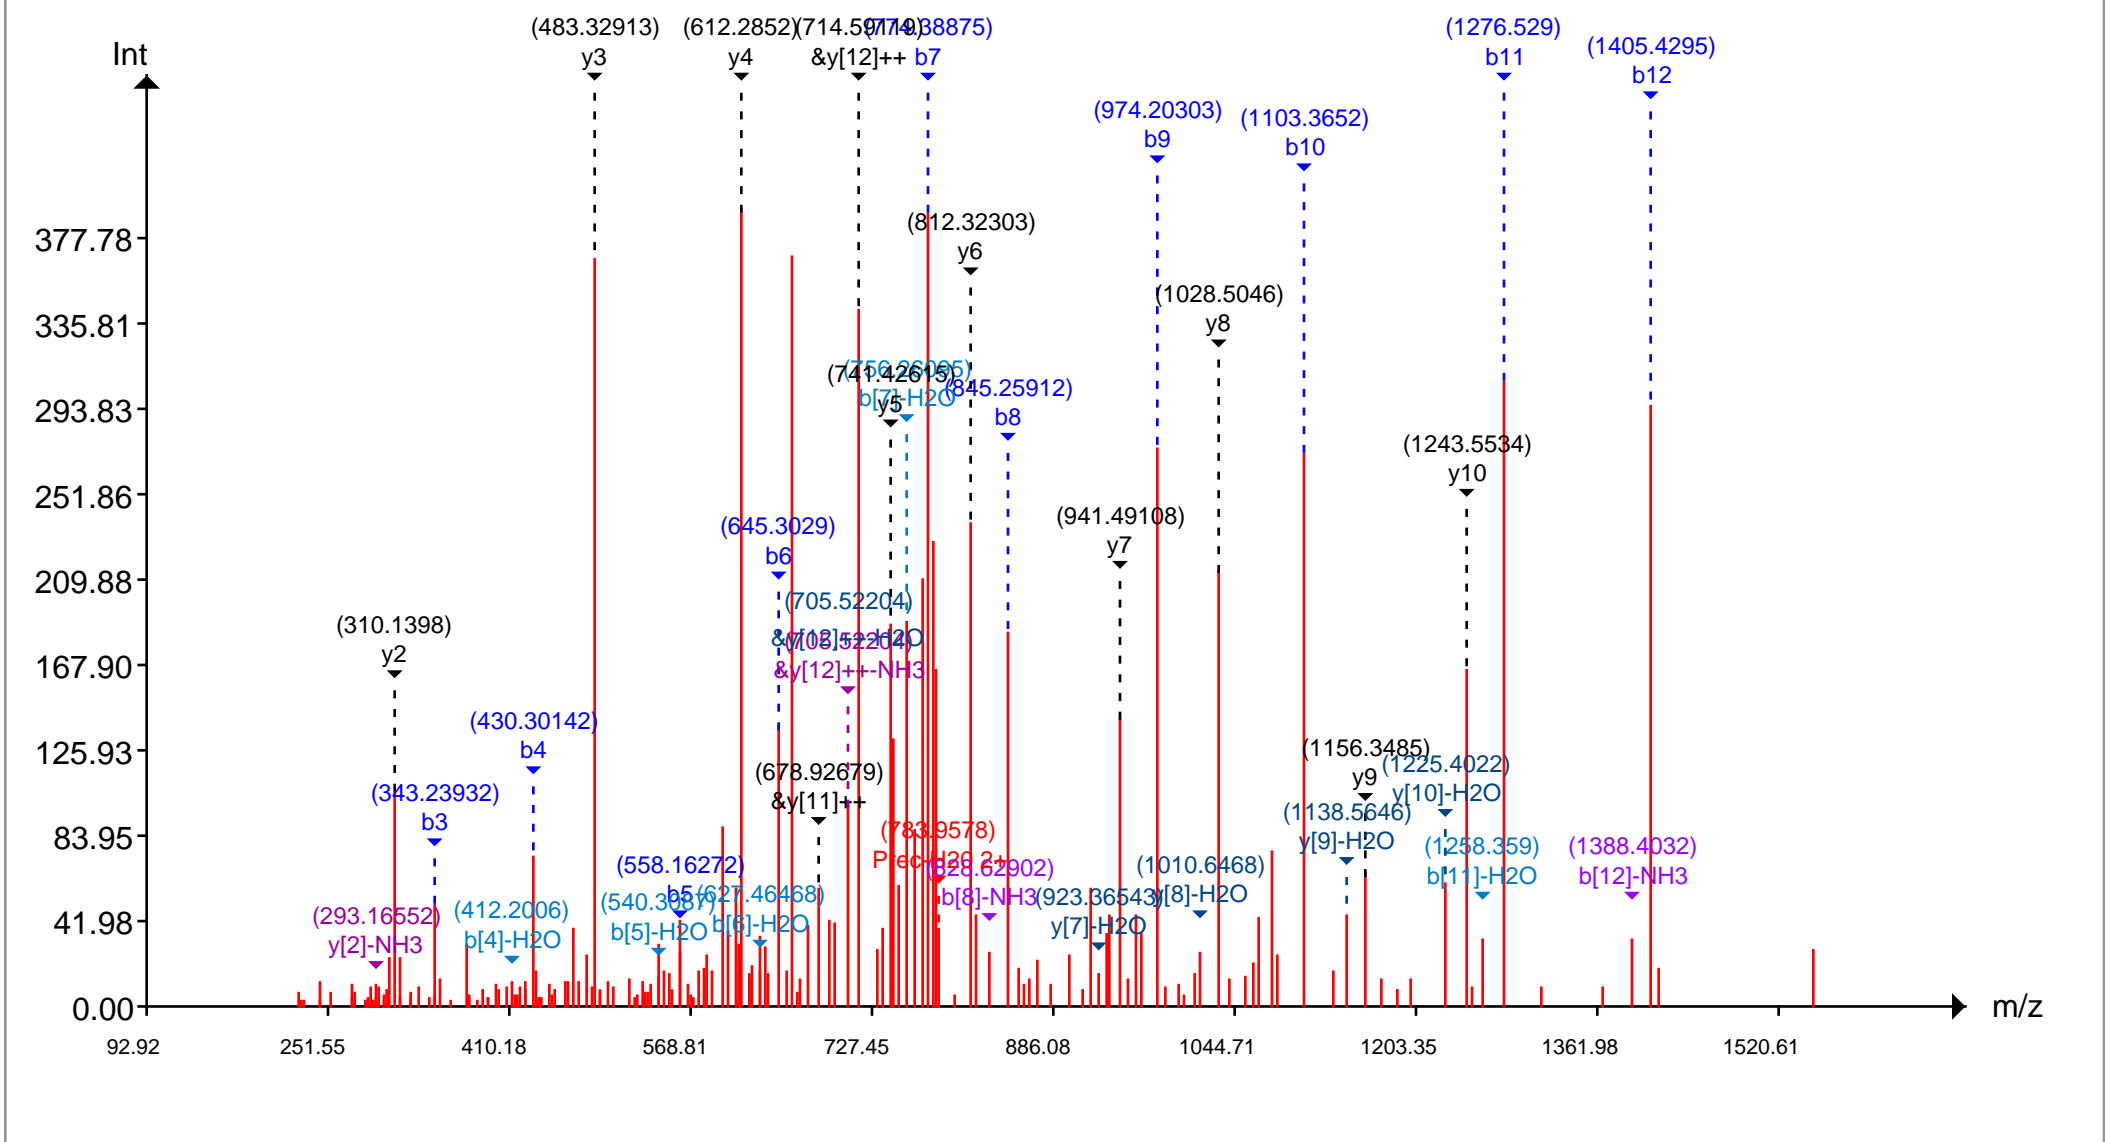

## Info

|                          |                                     |                           |        |
|--------------------------|-------------------------------------|---------------------------|--------|
| <b>Modified Sequence</b> | AcD3-LALSQSEAEK<AcD3K*>ER<C13>-COOH | <b>Ion score</b>          | 72.06  |
| <b>Protein</b>           | Q99LI8                              | <b>Confidence level</b>   | 99.00% |
| <b>Precursor m/z</b>     | 793.41772                           | <b>Identity Threshold</b> | 48.13  |
| <b>Charge</b>            | 2+                                  | <b>Mass error</b>         | 1.1E-5 |

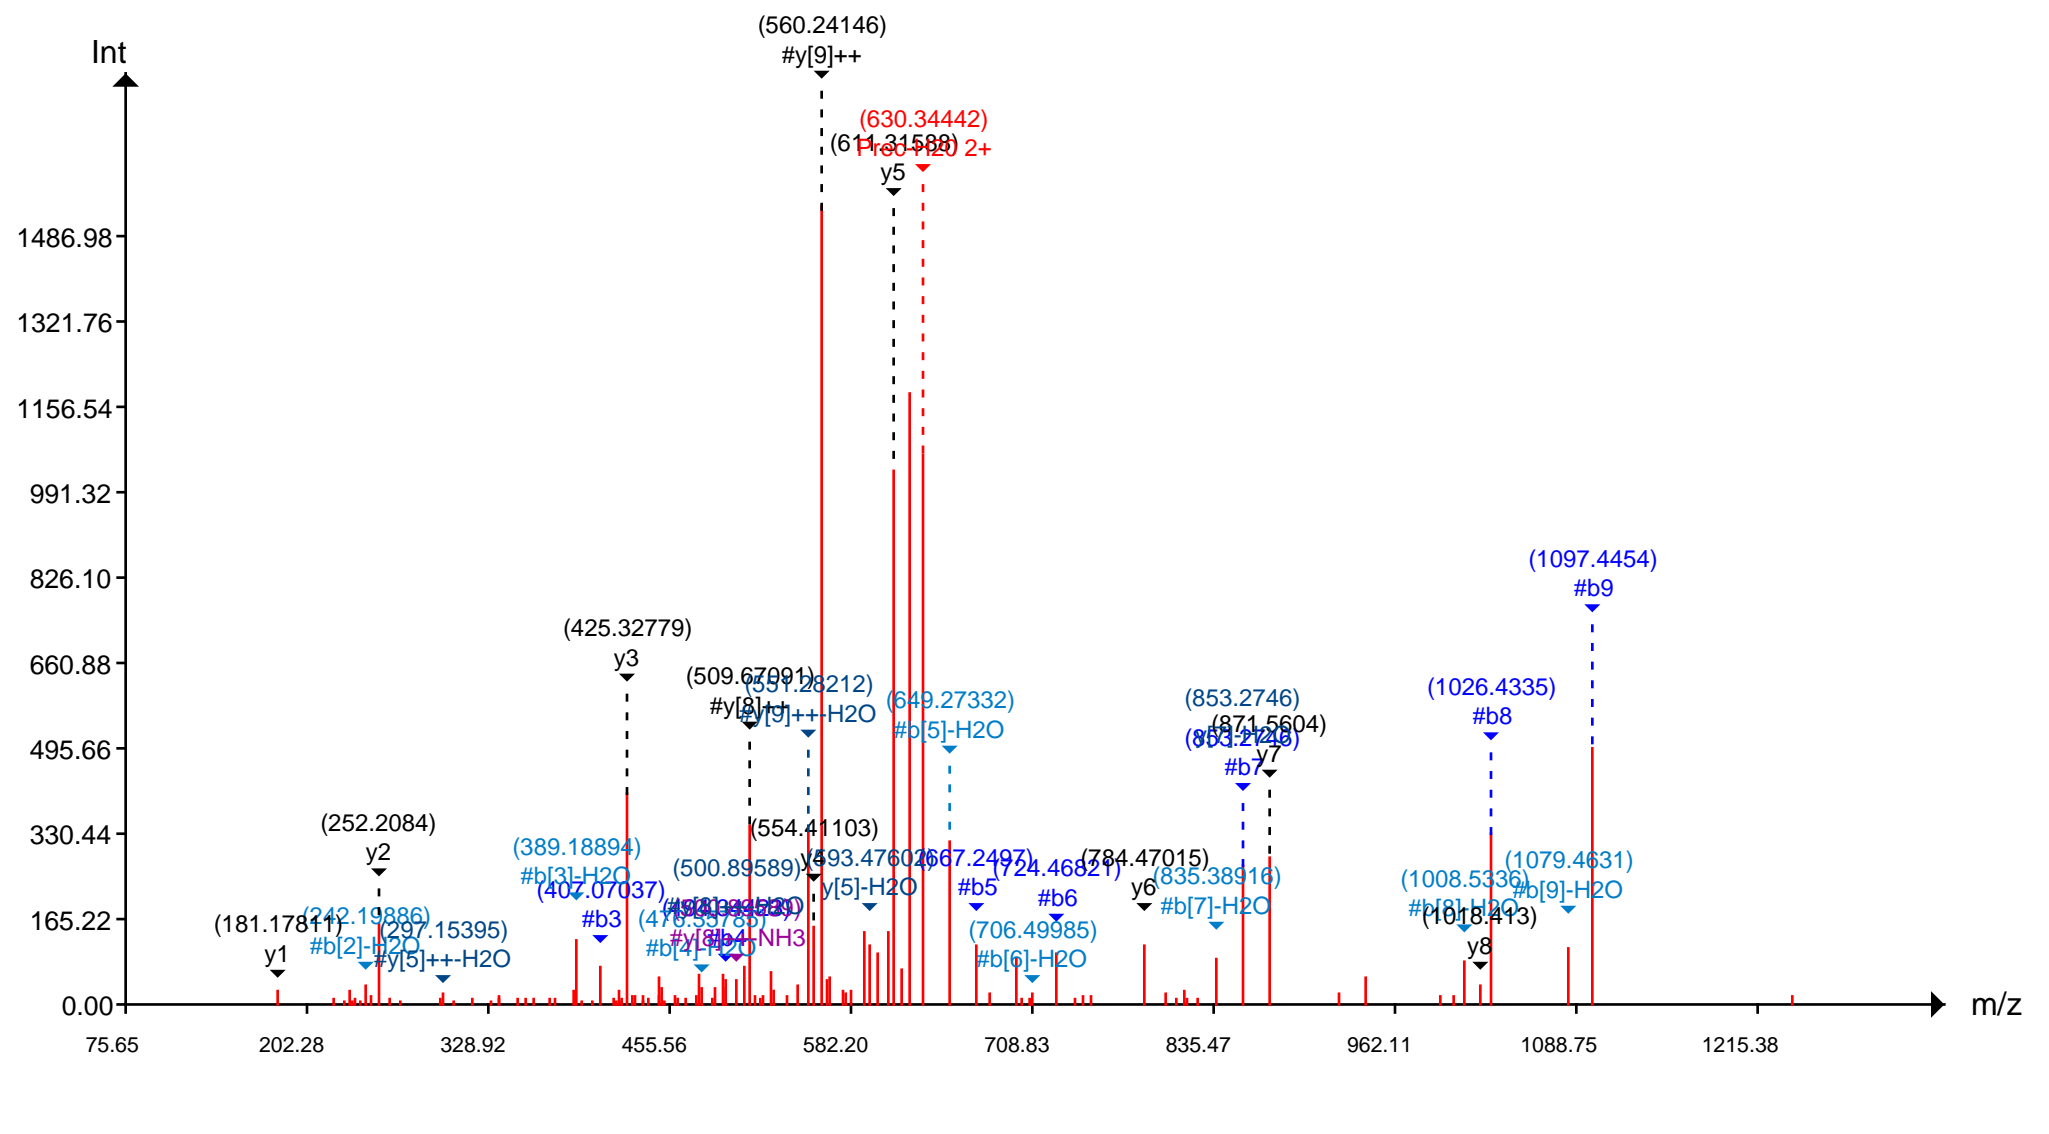

| Info                     |                                                 |                           |         |
|--------------------------|-------------------------------------------------|---------------------------|---------|
| <b>Modified Sequence</b> | AcD3-LTM<Mox*>SK<AcD3K*>GEK<AcD3K*>AR<C13>-COOH | <b>Ion score</b>          | 60.44   |
| <b>Protein</b>           | Q62446                                          | <b>Confidence level</b>   | 99.00%  |
| <b>Precursor m/z</b>     | 639.36286                                       | <b>Identity Threshold</b> | 47.32   |
| <b>Charge</b>            | 2+                                              | <b>Mass error</b>         | 9.17E-4 |

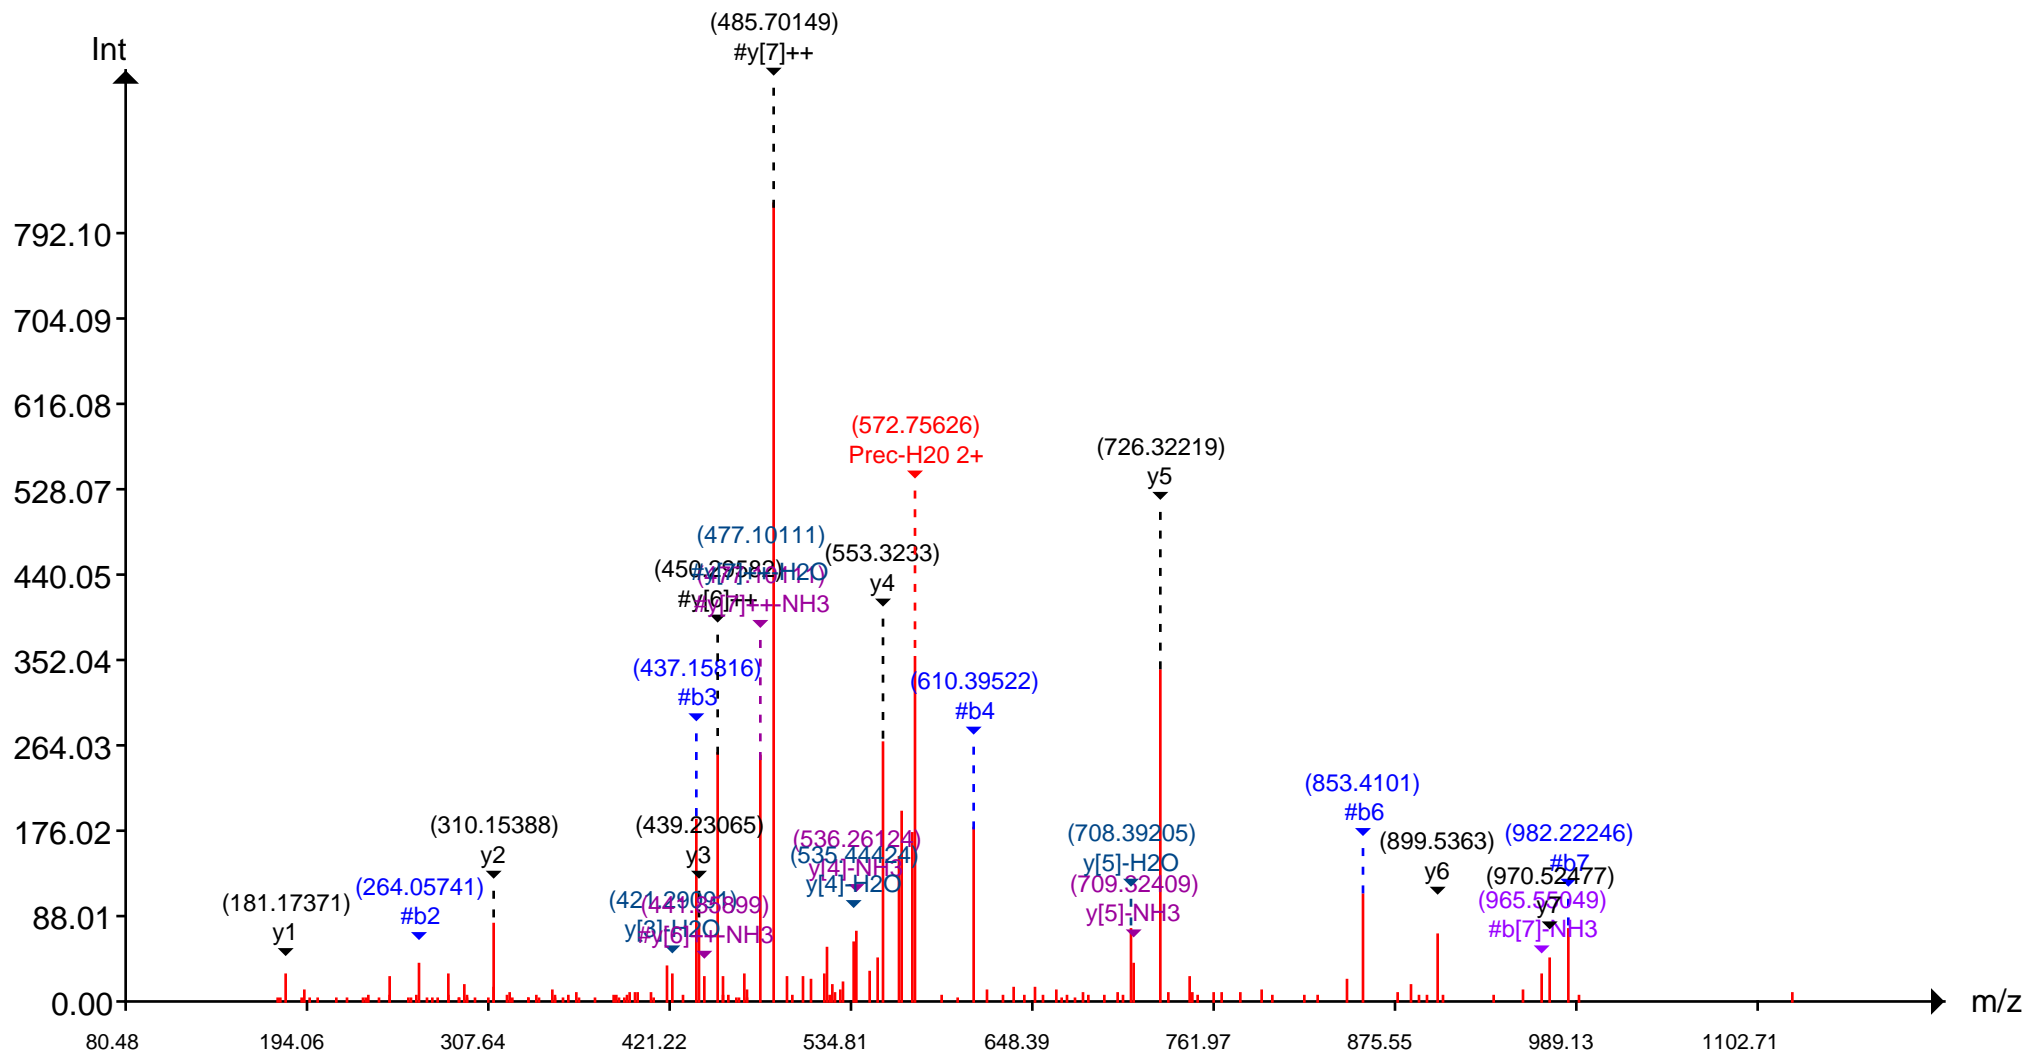

## Info

**Modified Sequence** AcD3-FAK<AcD3K\*>K<AcD3K\*>NEER<C13>-COOH

**Ion score** 51.49

**Protein** P32067

**Confidence level** 99.00%

**Precursor m/z** 581.82882

**Identity Threshold** 47.46

**Charge** 2+

**Mass error** -4.51E-4

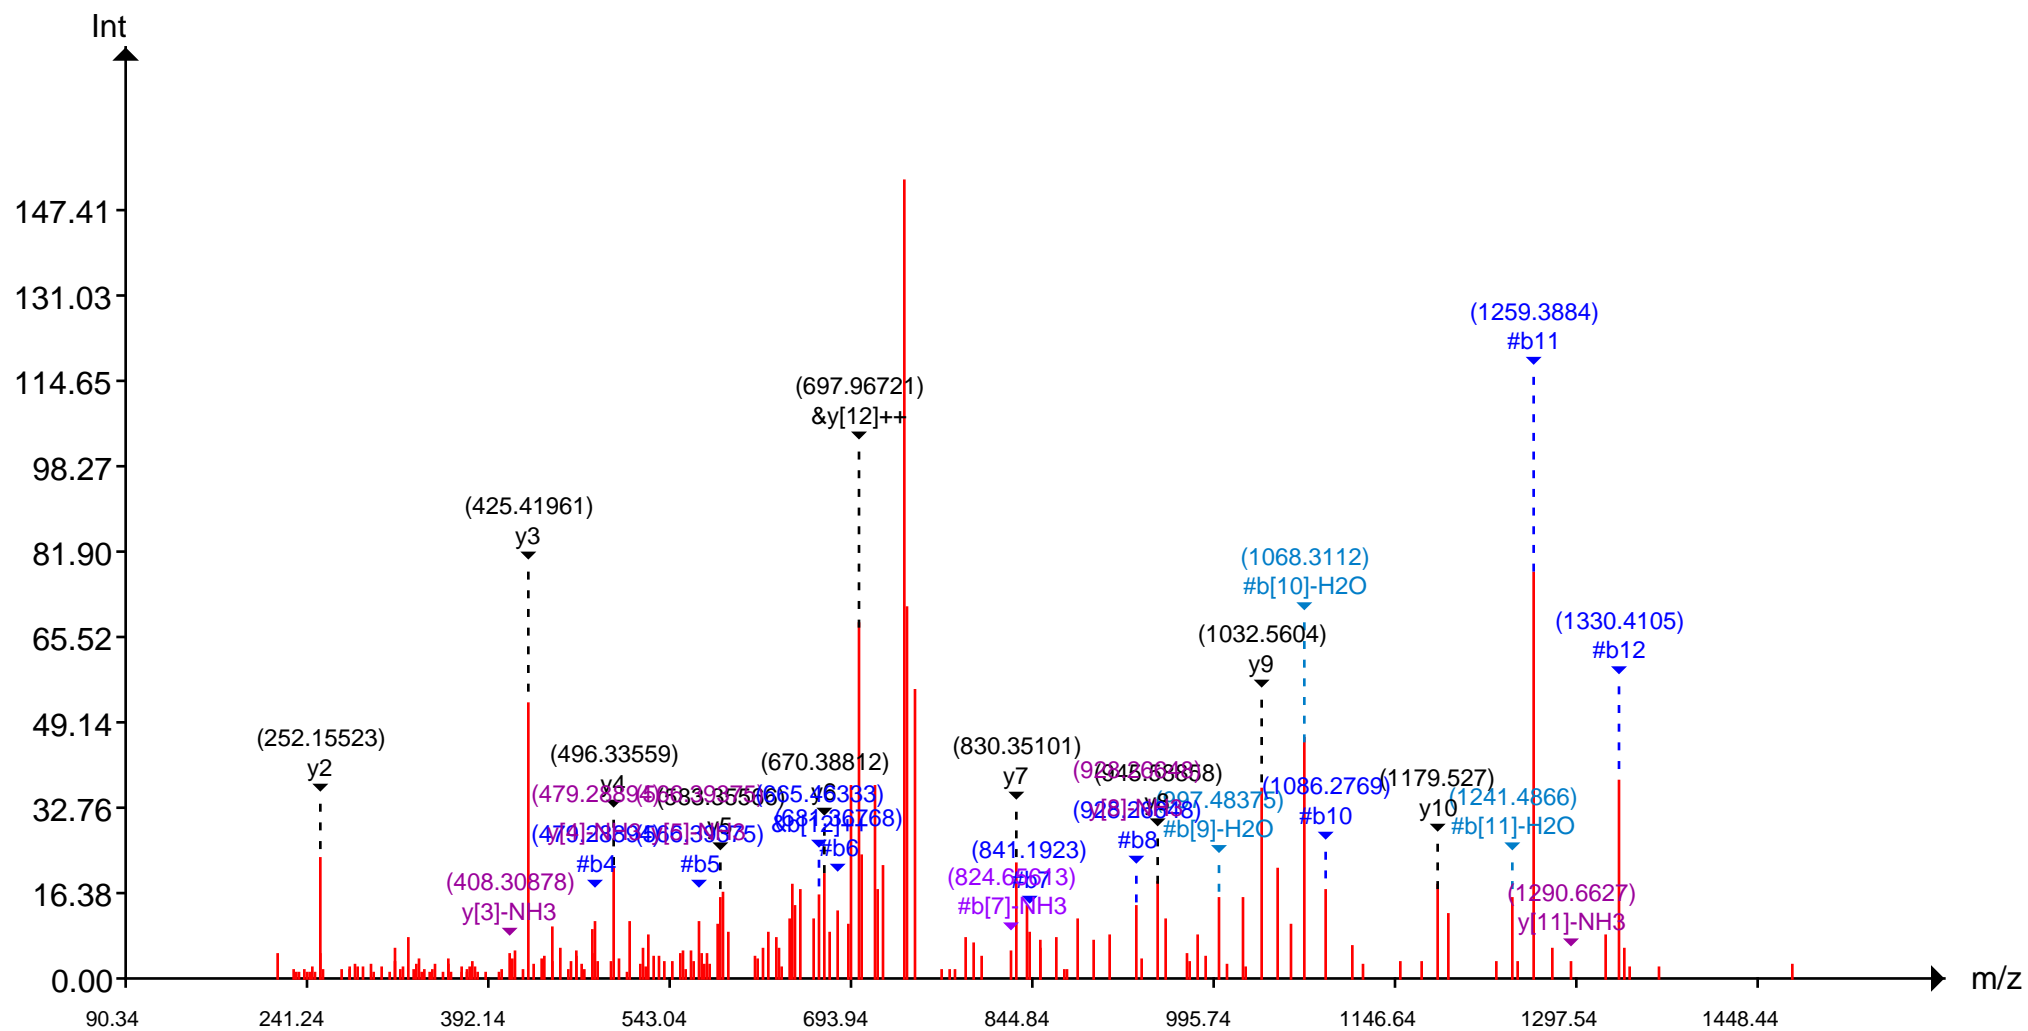

## Info

|                          |                                            |                           |          |
|--------------------------|--------------------------------------------|---------------------------|----------|
| <b>Modified Sequence</b> | AcD3-ASQFSDC<Cmm*>SSAK<AcD3K*>AR<C13>-COOH | <b>Ion score</b>          | 49.87    |
| <b>Protein</b>           | Q9QUR7                                     | <b>Confidence level</b>   | 99.00%   |
| <b>Precursor m/z</b>     | 755.8619                                   | <b>Identity Threshold</b> | 46.45    |
| <b>Charge</b>            | 2+                                         | <b>Mass error</b>         | -3.47E-4 |

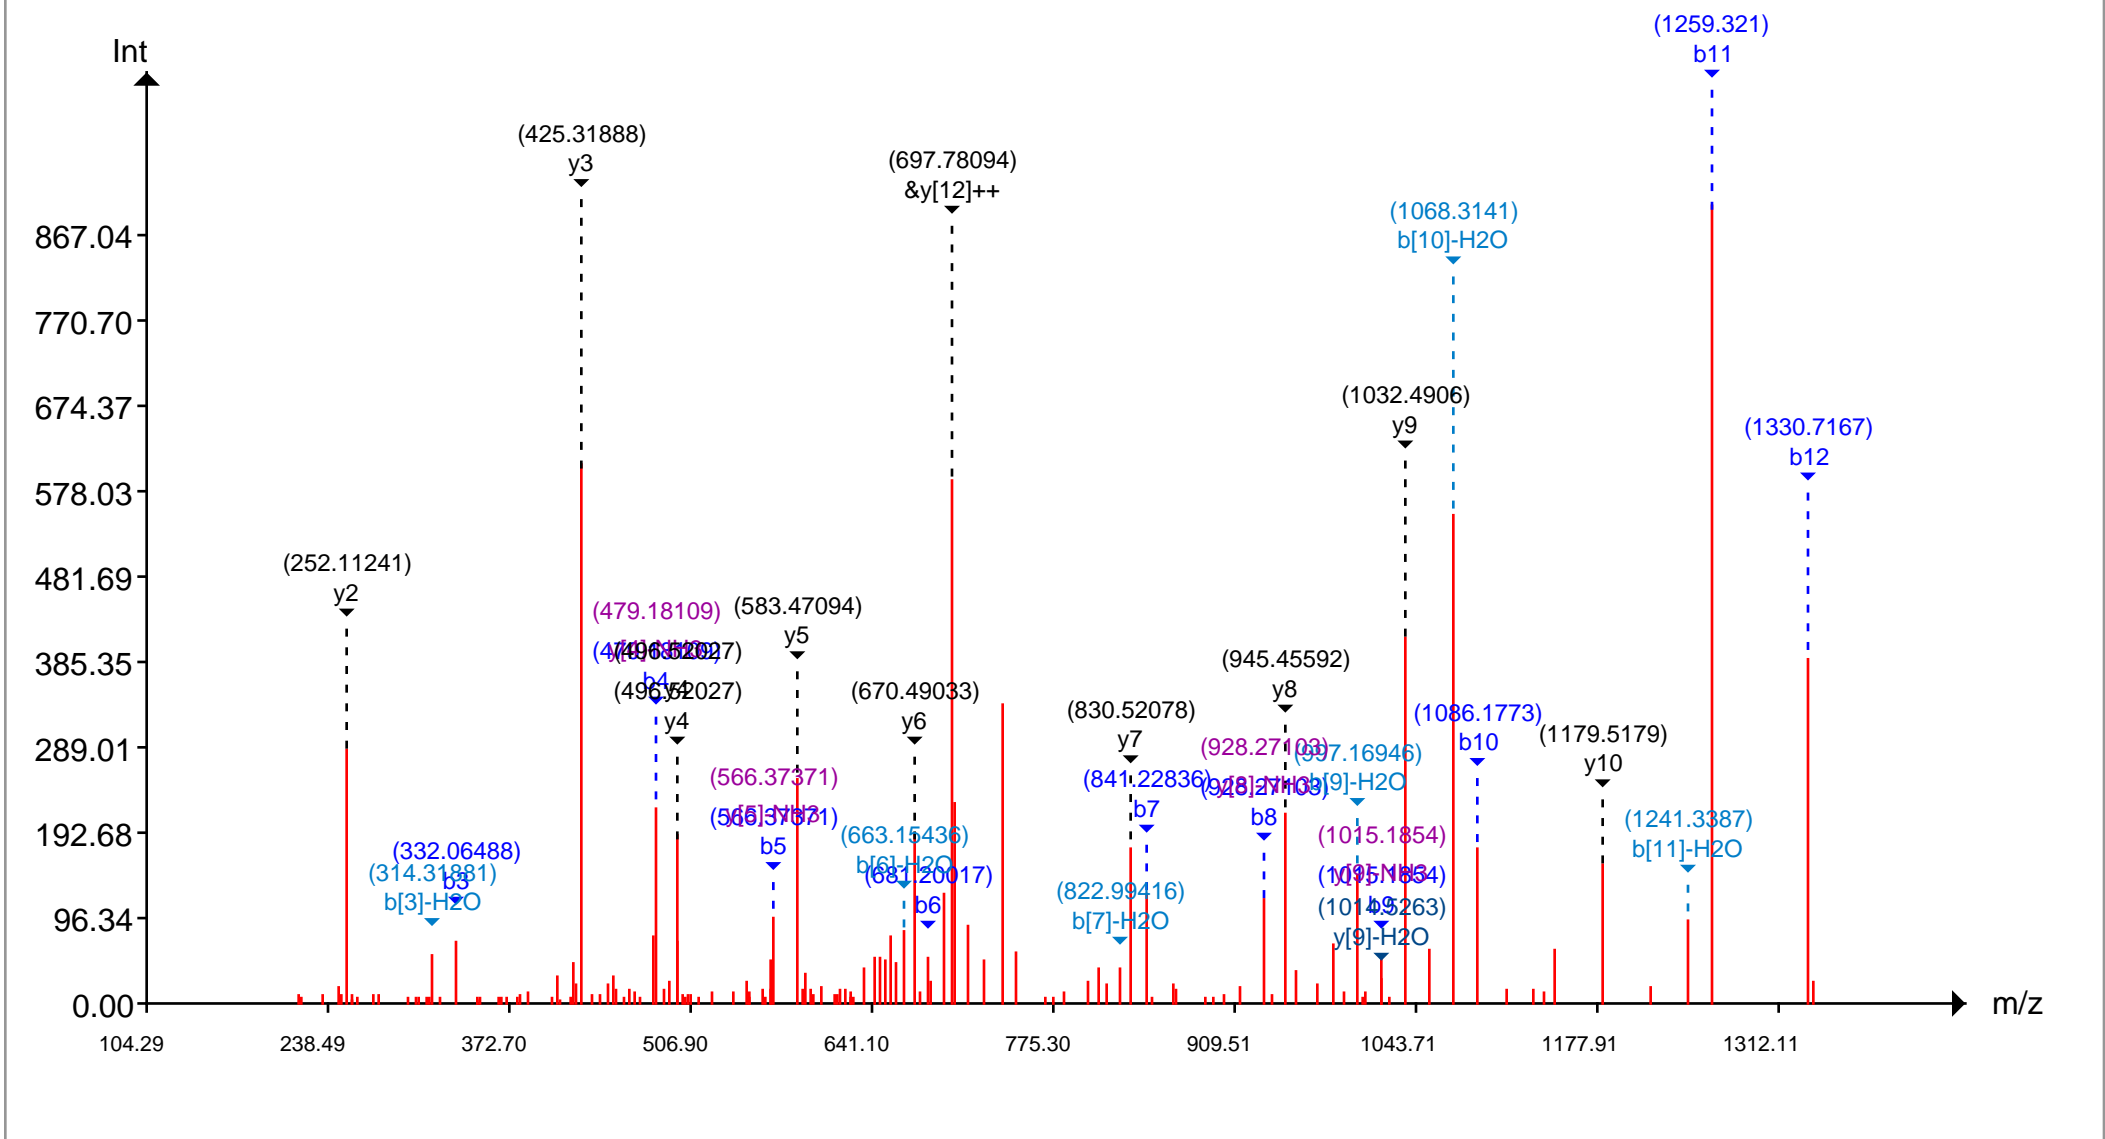

## Info

**Modified Sequence** AcD3-ASQFSDC<Cmm\*>SSAK<AcD3K\*>AR<C13>-COOH

**Ion score** 69.93

**Protein** Q9QUR7

**Confidence level** 99.00%

**Precursor m/z** 755.86214

**Identity Threshold** 46.49

**Charge** 2+

**Mass error** 1.33E-4



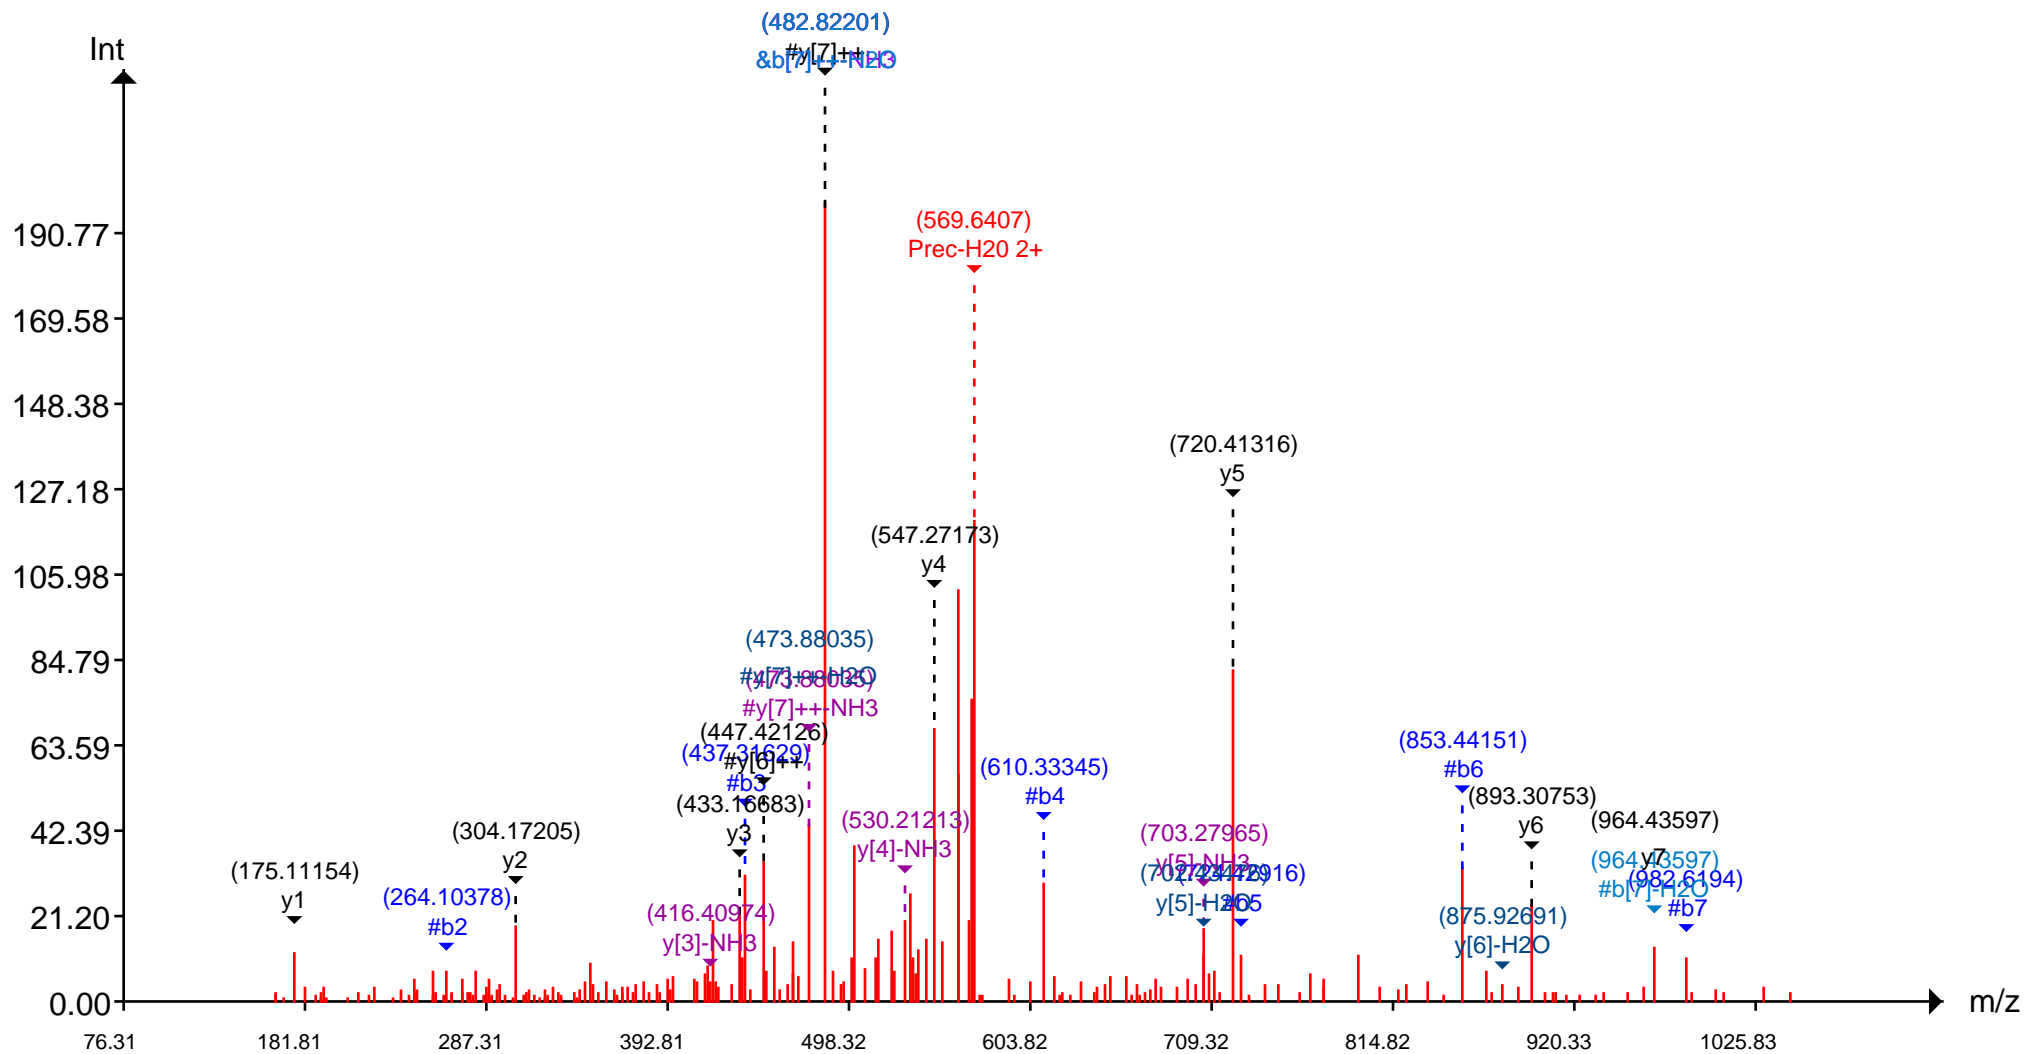

## Info

**Modified Sequence** AcD3-FAK<AcD3K\*>K<AcD3K\*>NEER-COOH

**Ion score** 48.43

**Protein** P32067

**Confidence level** 99.00%

**Precursor m/z** 578.81899

**Identity Threshold** 47.60

**Charge** 2+

**Mass error** 3.0E-5

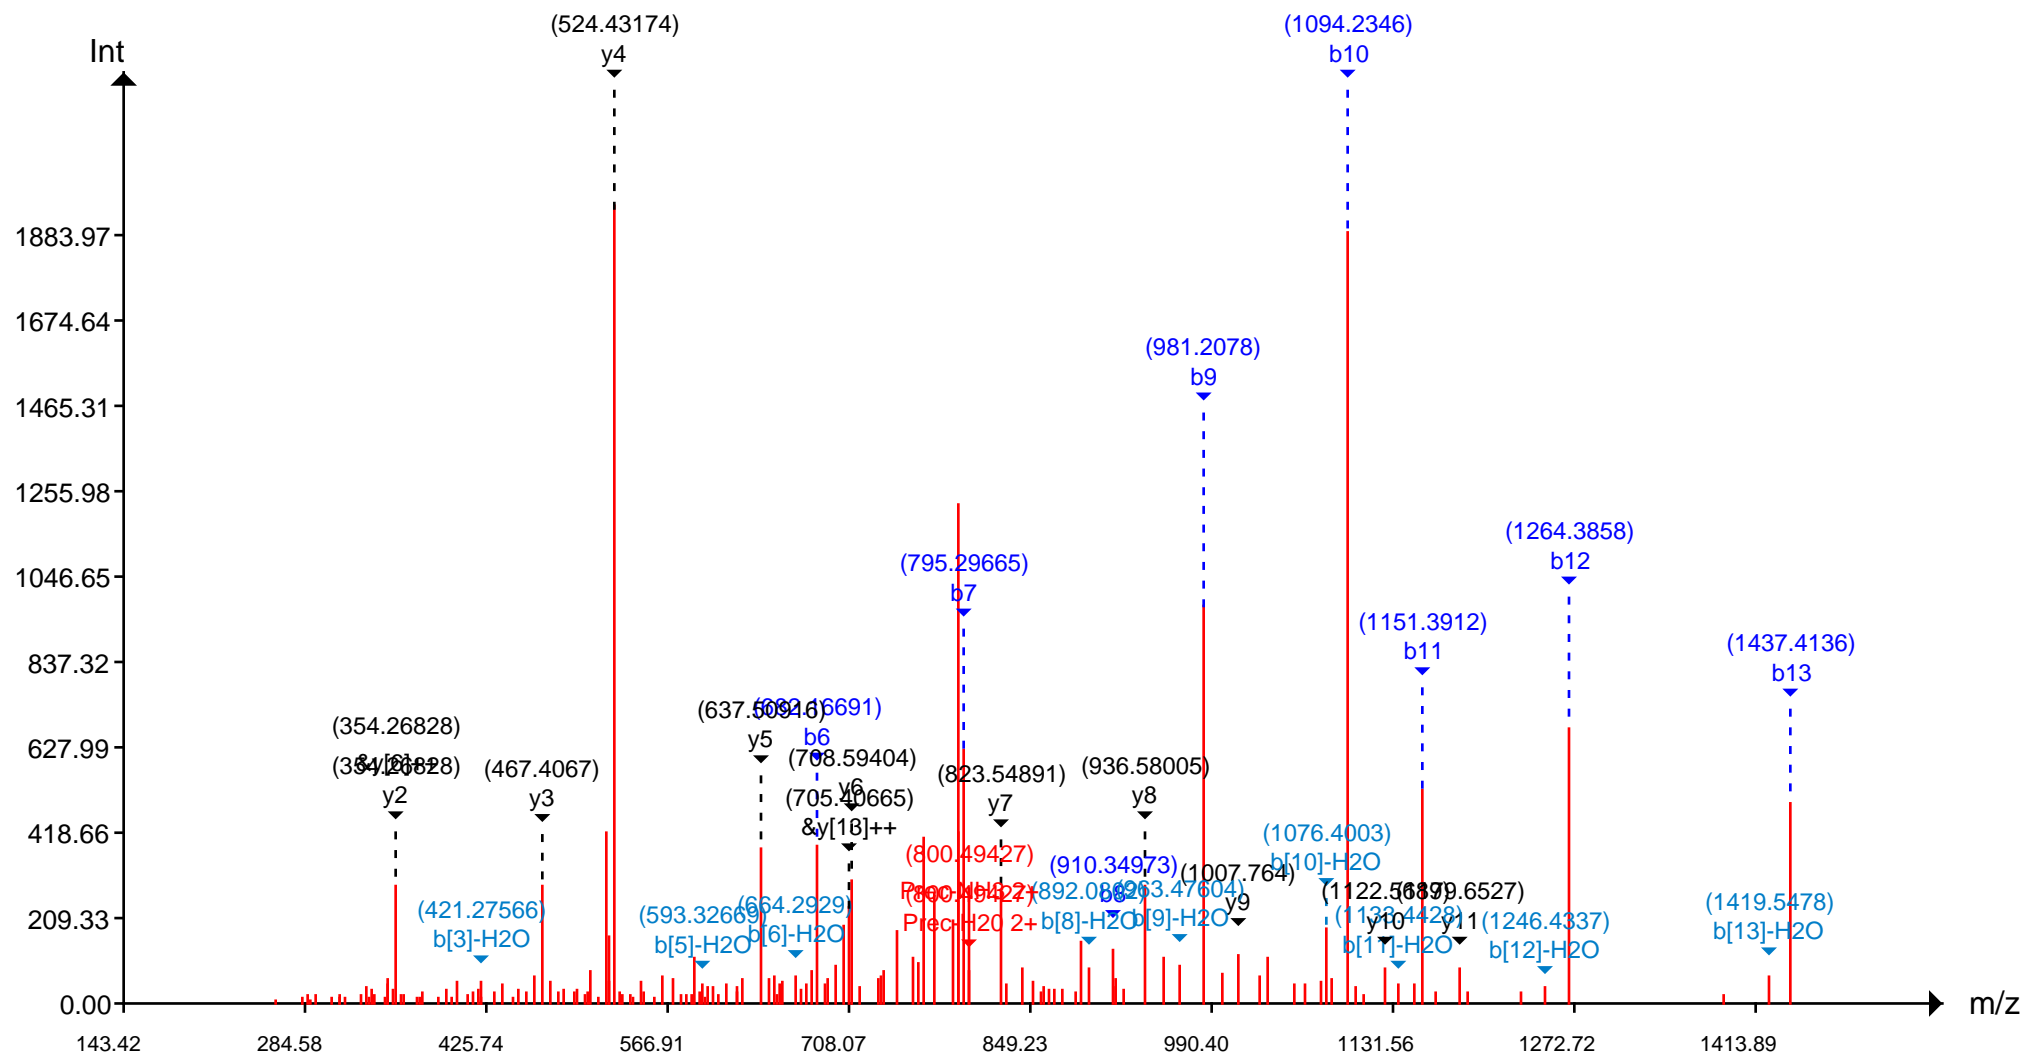

## Info

|                          |                                       |                           |          |
|--------------------------|---------------------------------------|---------------------------|----------|
| <b>Modified Sequence</b> | AcD3-YTEGDALDALGLK<AcD3K*>R<C13>-COOH | <b>Ion score</b>          | 71.18    |
| <b>Protein</b>           | P62876                                | <b>Confidence level</b>   | 99.00%   |
| <b>Precursor m/z</b>     | 809.43958                             | <b>Identity Threshold</b> | 47.82    |
| <b>Charge</b>            | 2+                                    | <b>Mass error</b>         | 0.002227 |

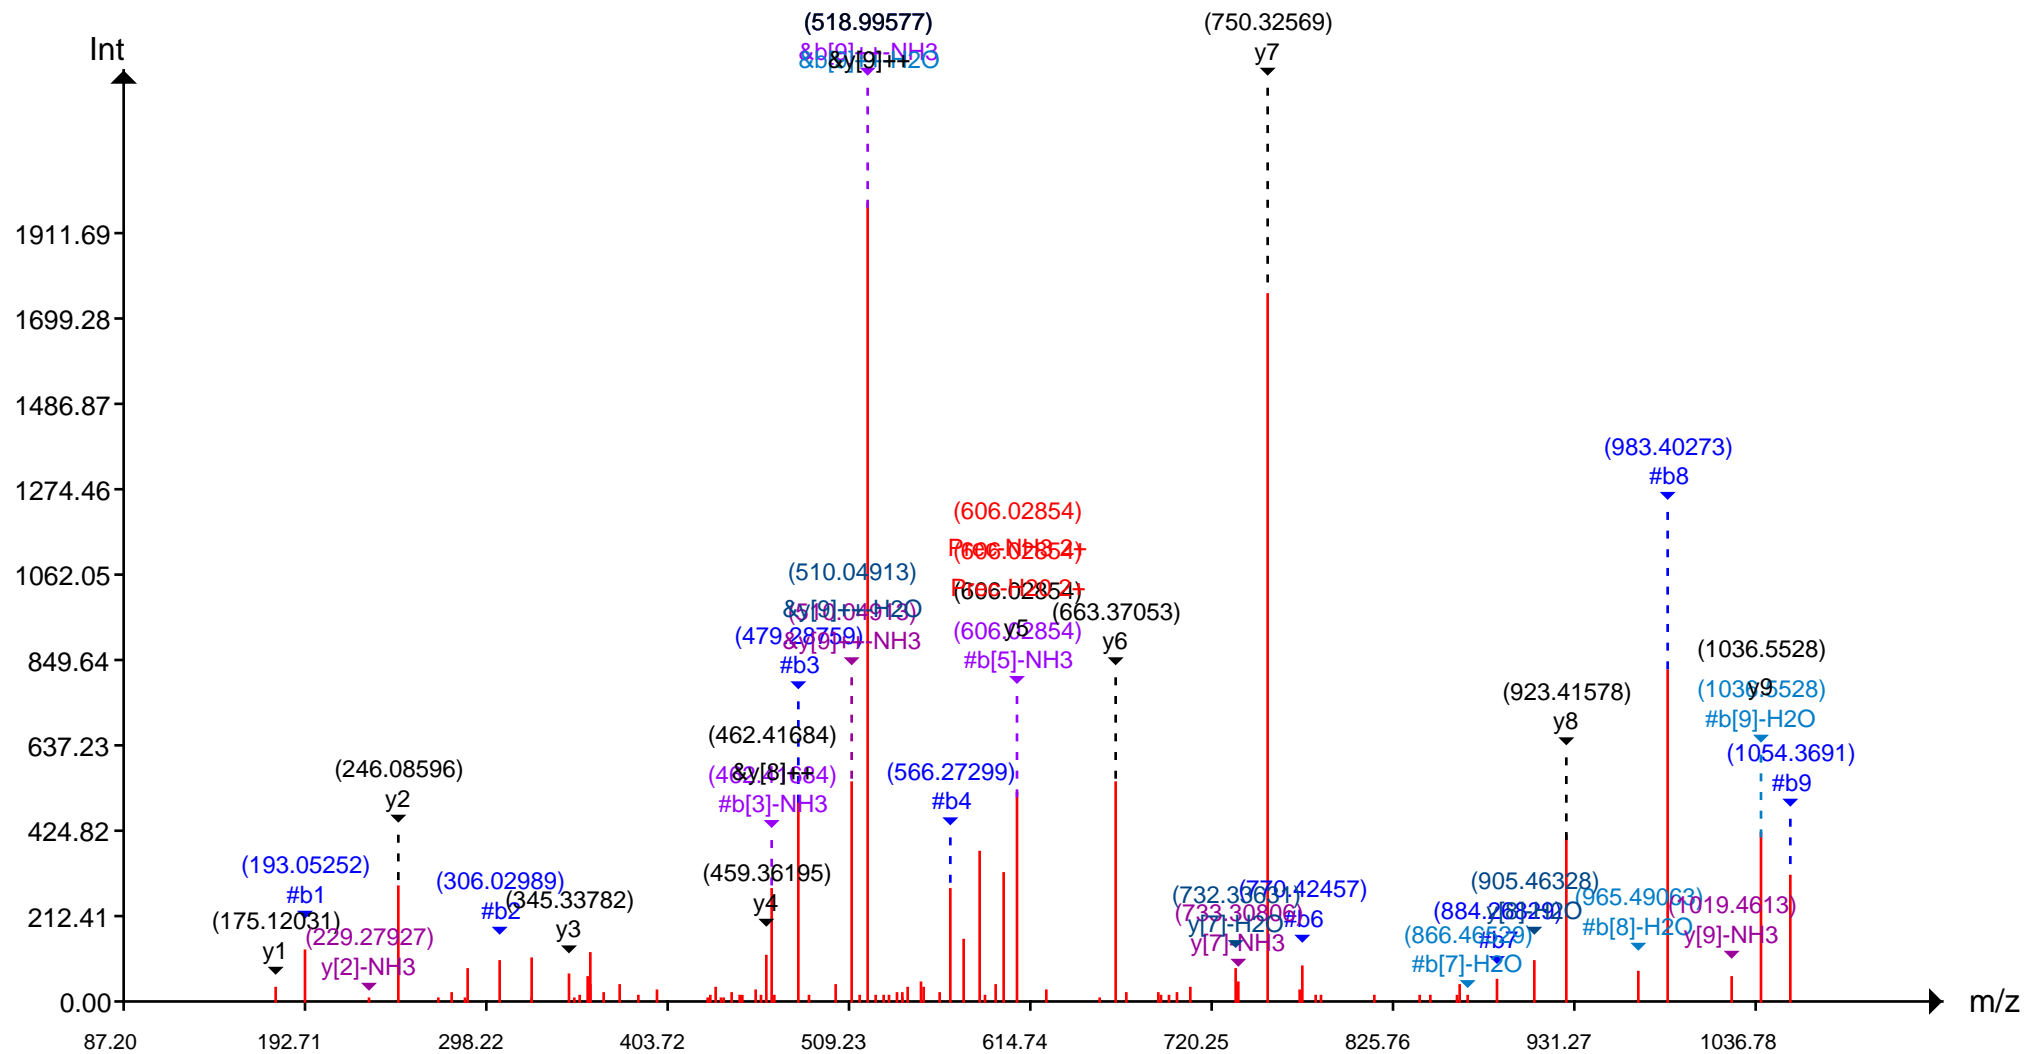

## Info

|                          |                                          |                           |         |
|--------------------------|------------------------------------------|---------------------------|---------|
| <b>Modified Sequence</b> | AcD3-M<Mox*>IK<AcD3K*>SGM<Mox*>NVAR-COOH | <b>Ion score</b>          | 72.38   |
| <b>Protein</b>           | P52480                                   | <b>Confidence level</b>   | 99.00%  |
| <b>Precursor m/z</b>     | 614.81871                                | <b>Identity Threshold</b> | 47.81   |
| <b>Charge</b>            | 2+                                       | <b>Mass error</b>         | 6.45E-4 |

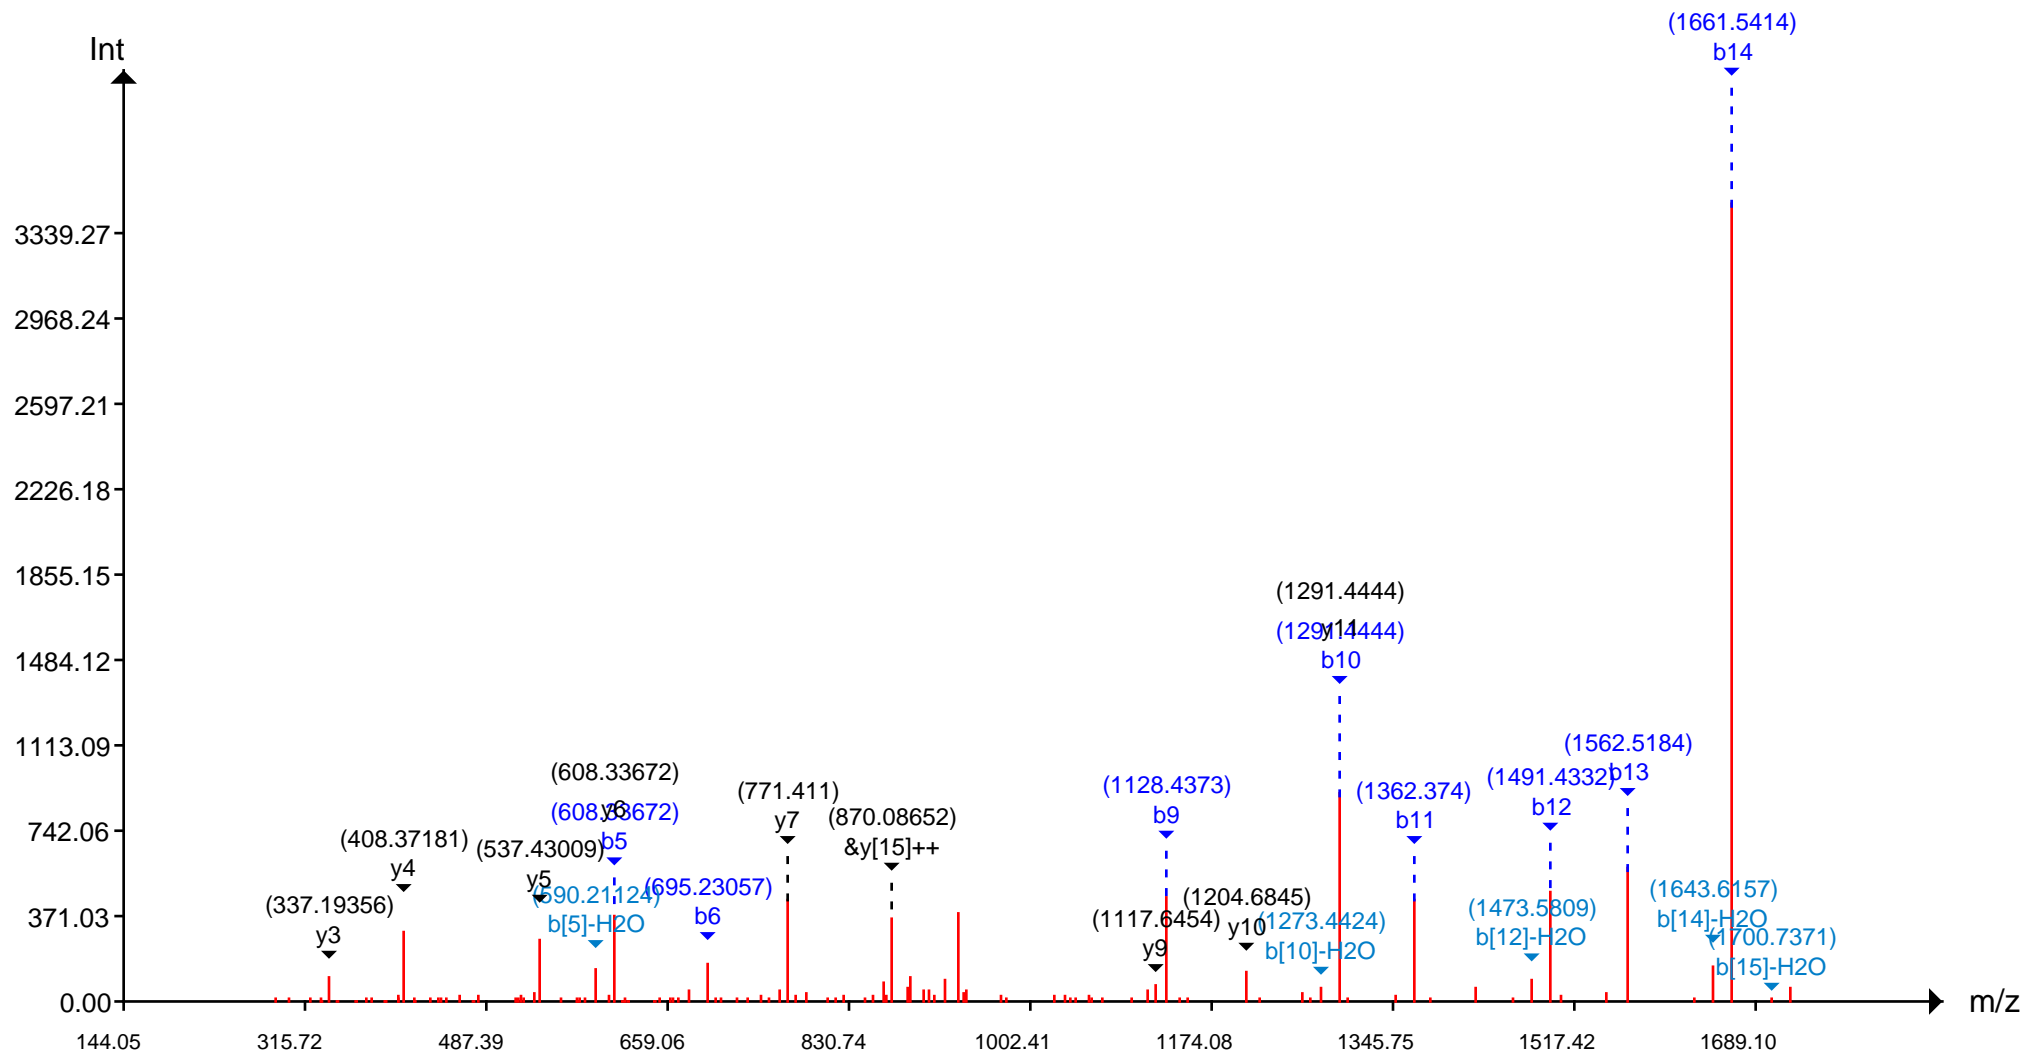

## Info

|                          |                                                       |                           |          |
|--------------------------|-------------------------------------------------------|---------------------------|----------|
| <b>Modified Sequence</b> | AcD3-DC<Cmm*>GTESSK<AcD3K*>K<AcD3K*>YAEAVGR<C13>-COOH | <b>Ion score</b>          | 59.95    |
| <b>Protein</b>           | P09411                                                | <b>Confidence level</b>   | 99.00%   |
| <b>Precursor m/z</b>     | 949.96477                                             | <b>Identity Threshold</b> | 47.11    |
| <b>Charge</b>            | 2+                                                    | <b>Mass error</b>         | 0.001658 |

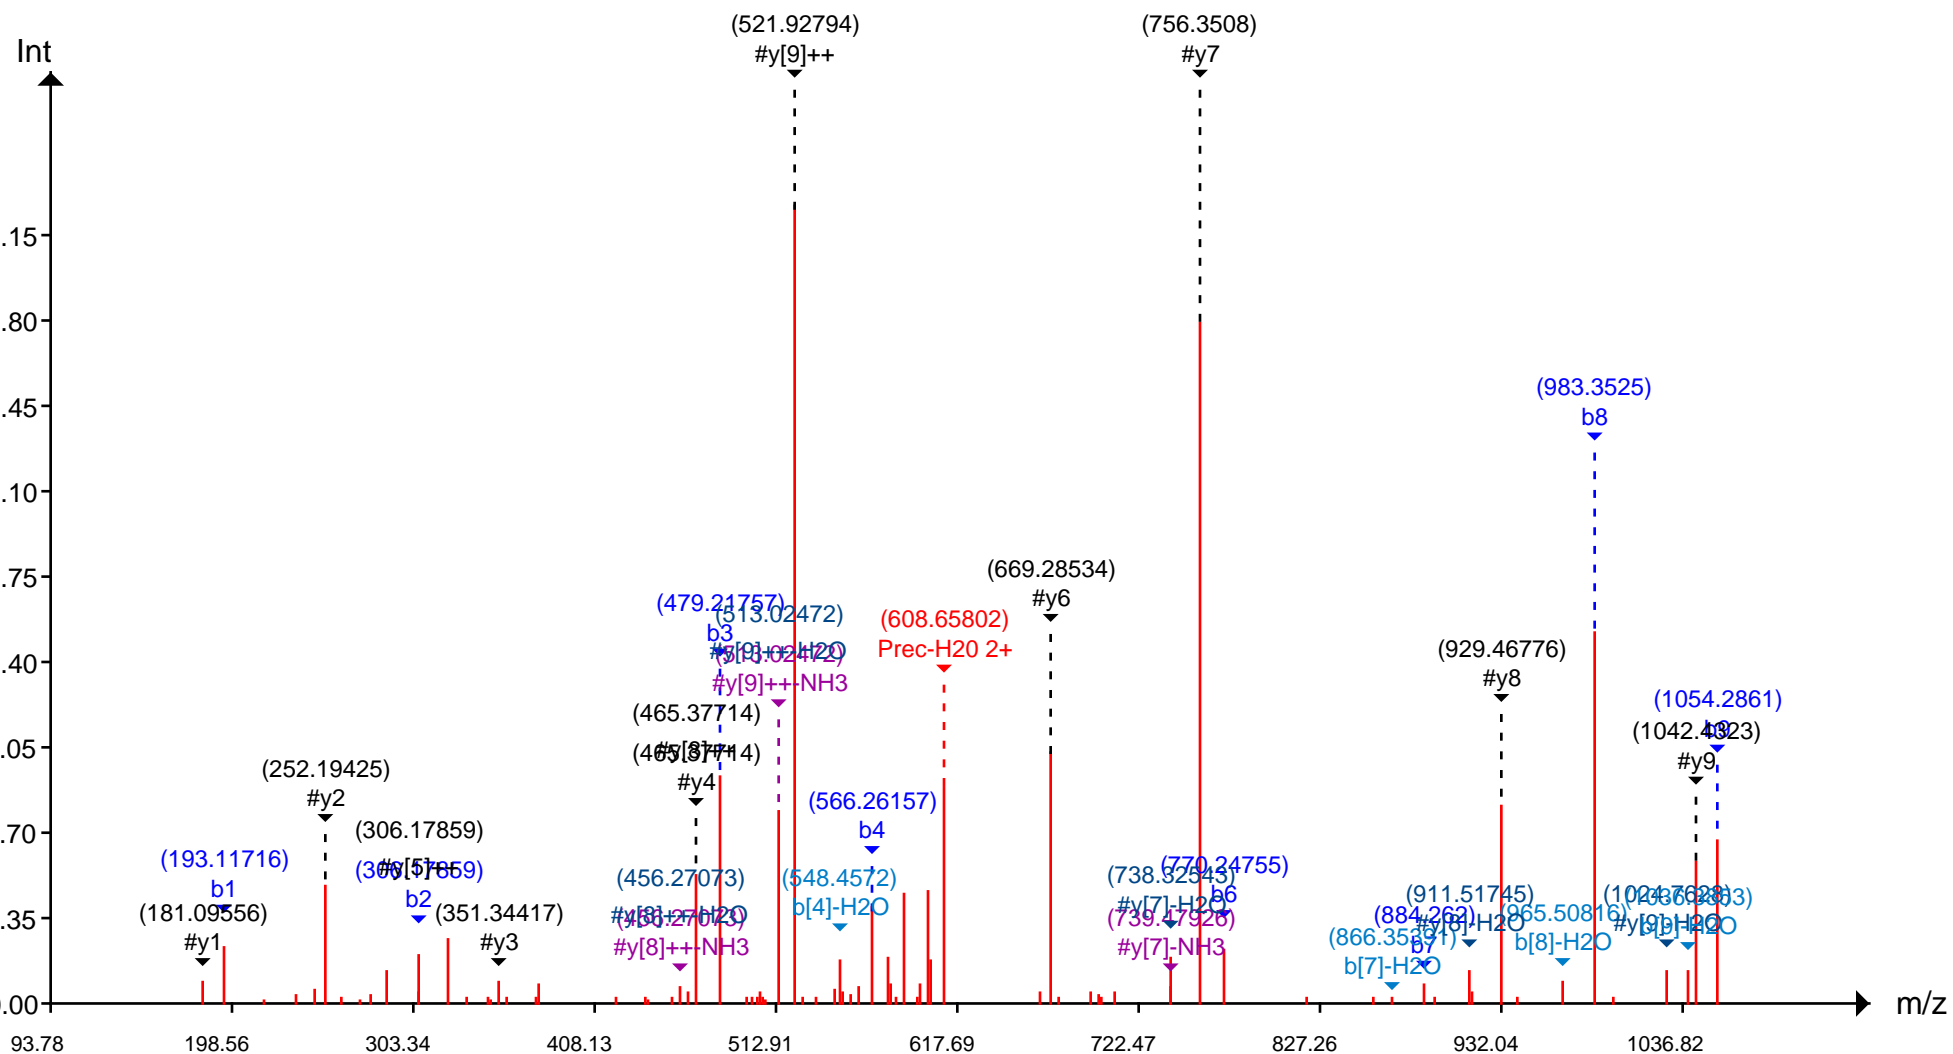

## Info

**Modified Sequence** AcD3-M<Mox\*>IK<AcD3K\*>SGM<Mox\*>NVAR<C13>-COOH

**Ion score** 63.95

**Protein** P52480

**Confidence level** 99.00%

**Precursor m/z** 617.82854

**Identity Threshold** 48.14

**Charge** 2+

**Mass error** 1.63E-4

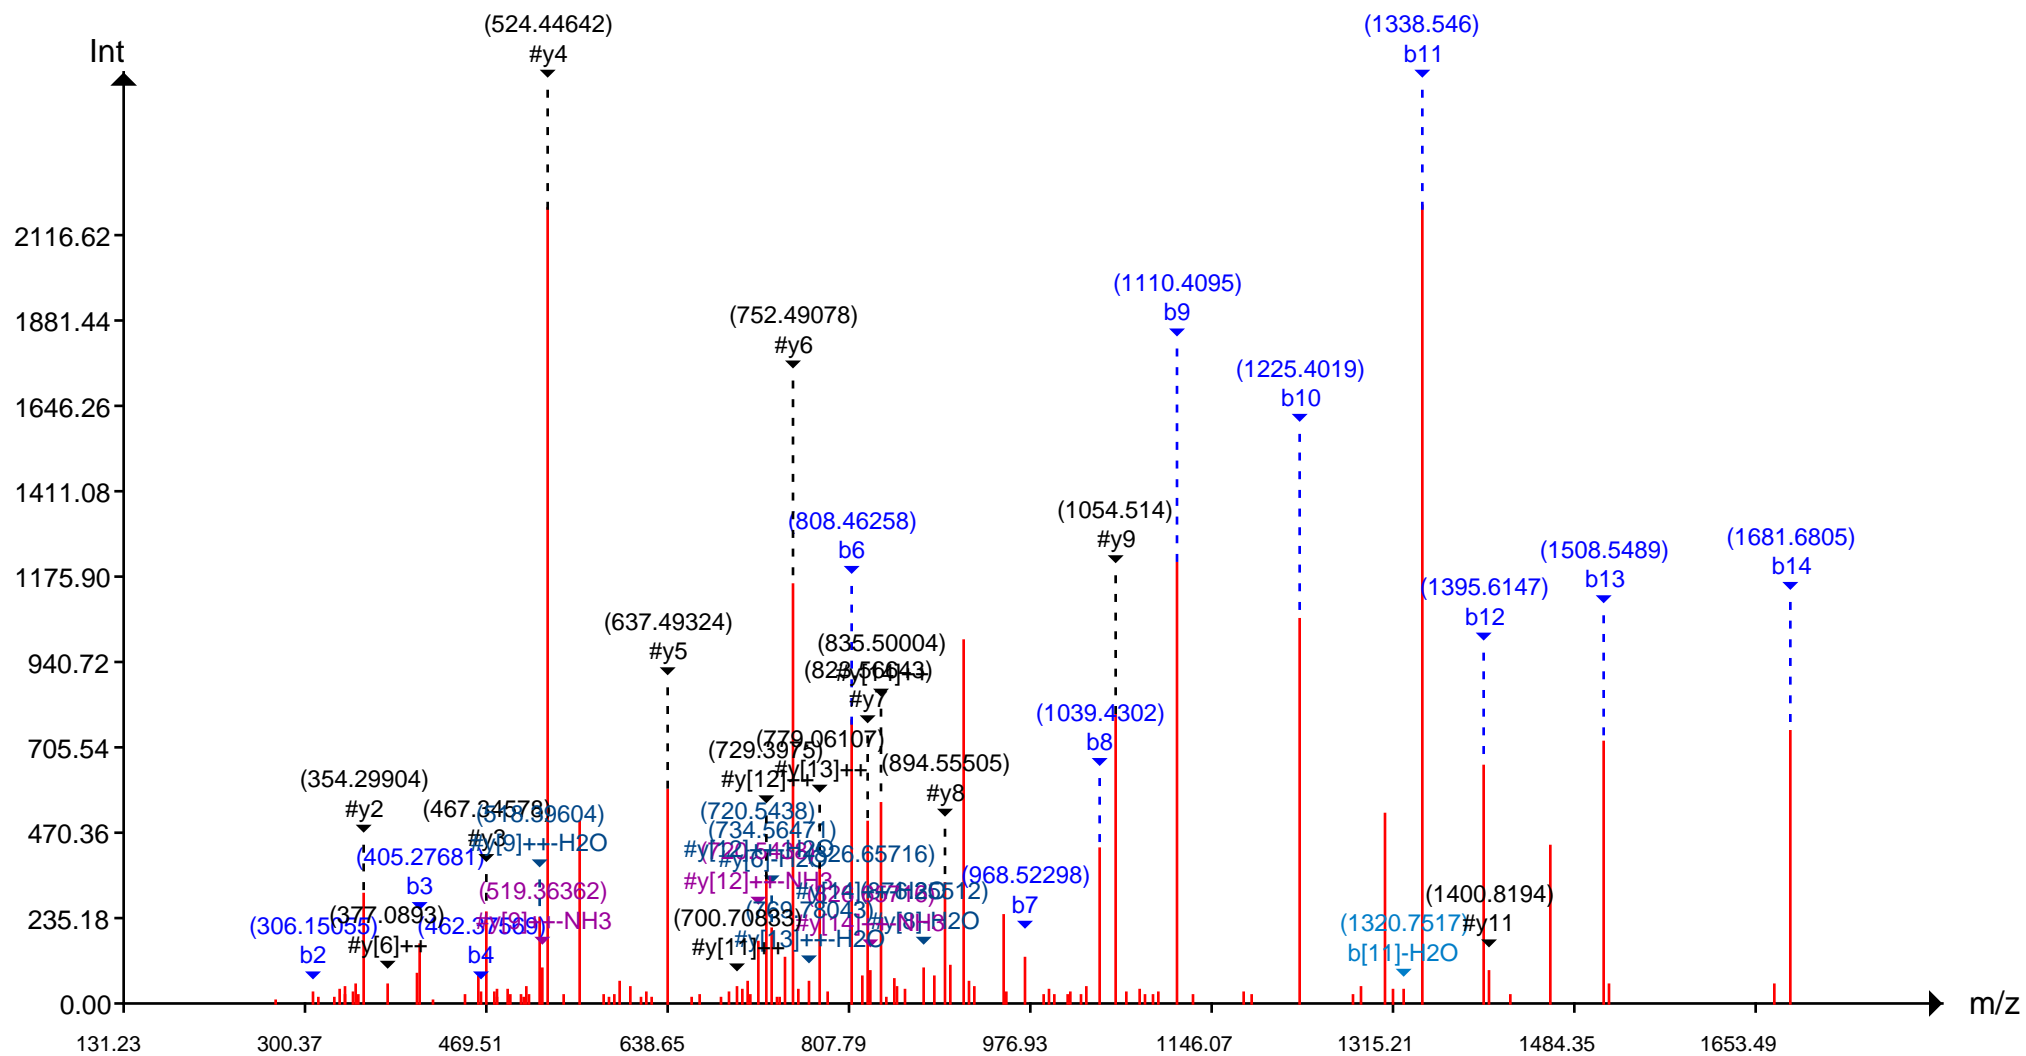

## Info

|                          |                                                                    |                           |         |
|--------------------------|--------------------------------------------------------------------|---------------------------|---------|
| <b>Modified Sequence</b> | AcD3-M<Mox*>IVGK<AcD3K*>K<AcD3K*>C<Cmm*>AADLGLK<AcD3K*>R<C13>-COOH | <b>Ion score</b>          | 69.33   |
| <b>Protein</b>           | P70349                                                             | <b>Confidence level</b>   | 99.00%  |
| <b>Precursor m/z</b>     | 931.54029                                                          | <b>Identity Threshold</b> | 44.73   |
| <b>Charge</b>            | 2+                                                                 | <b>Mass error</b>         | 9.95E-4 |

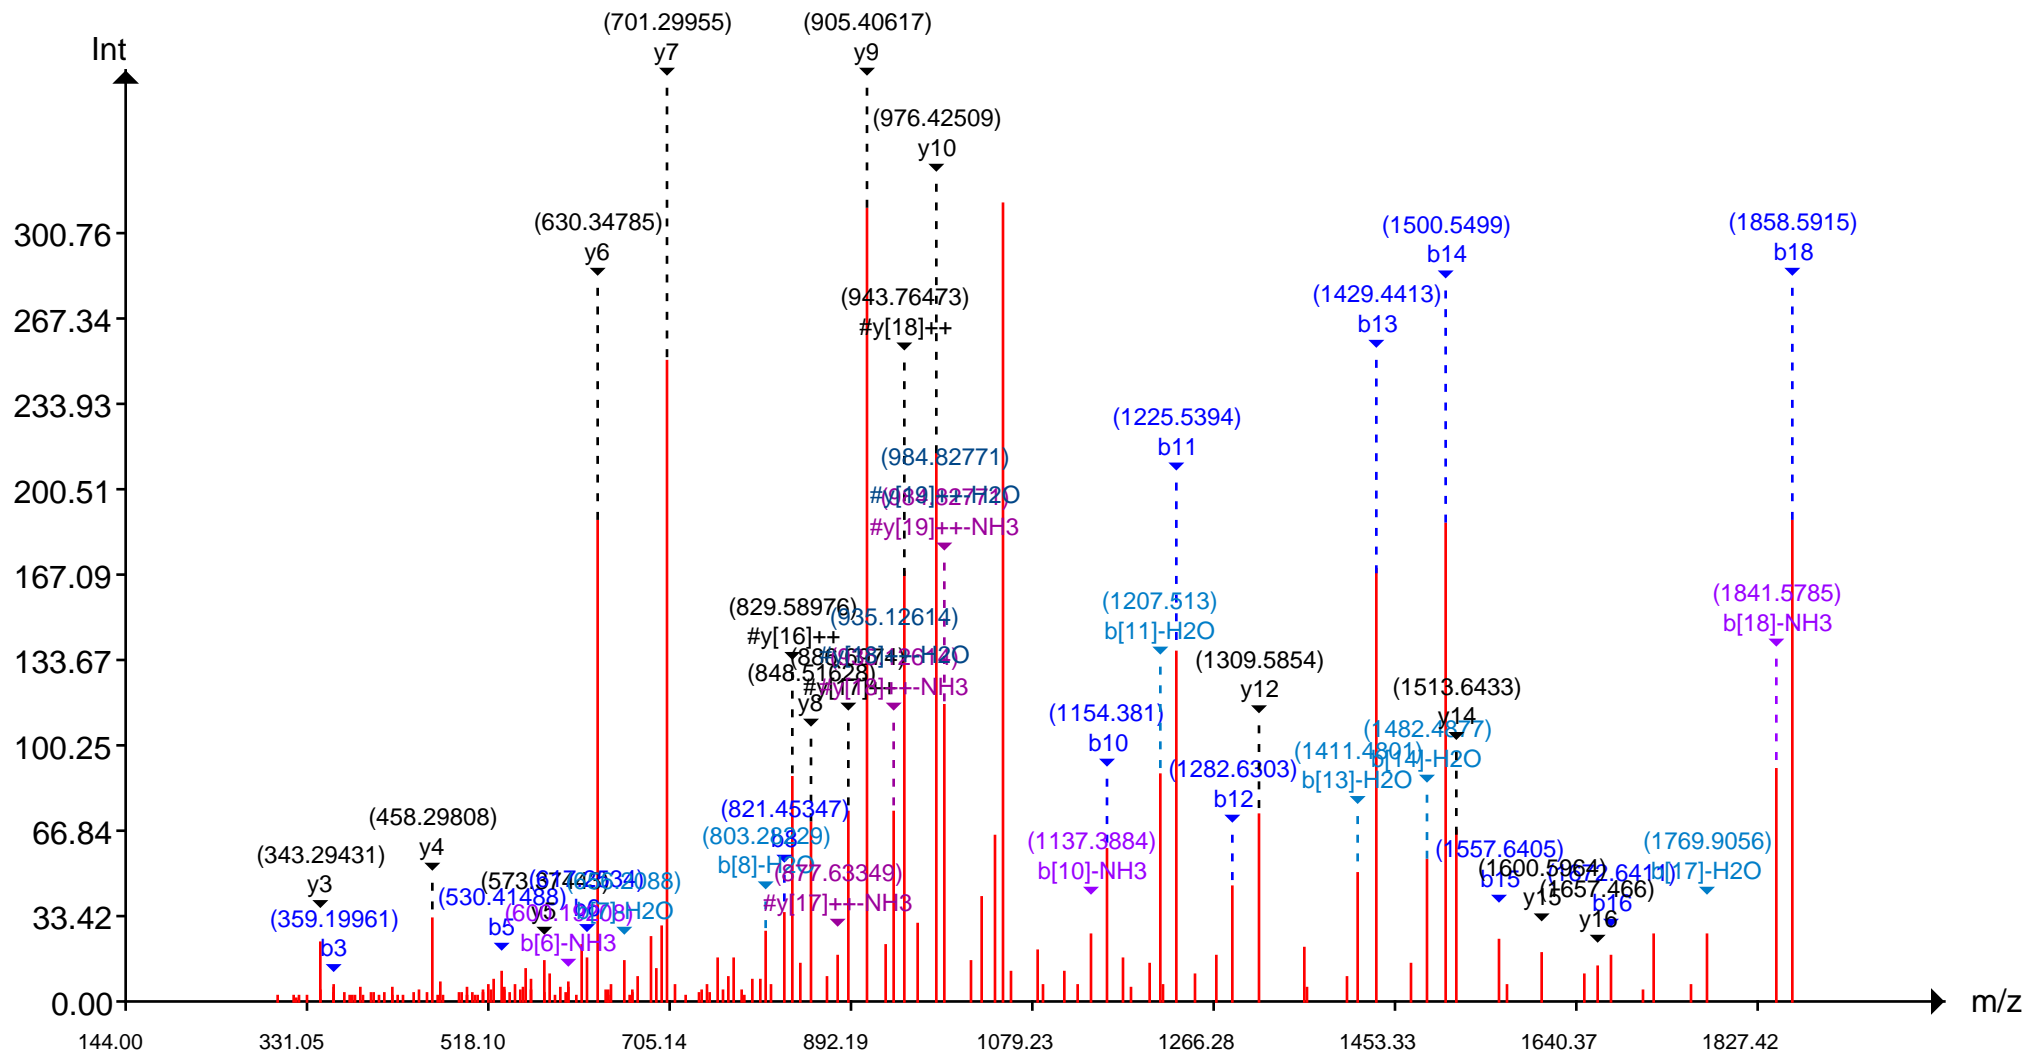

## Info

|                          |                                                    |                           |          |
|--------------------------|----------------------------------------------------|---------------------------|----------|
| <b>Modified Sequence</b> | AcD3-VVDNGSGM<Mox*>C<Cmm*>K<AcD3K*>AGFAGDDAPR-COOH | <b>Ion score</b>          | 92.22    |
| <b>Protein</b>           | P60710                                             | <b>Confidence level</b>   | 99.00%   |
| <b>Precursor m/z</b>     | 1065.4799                                          | <b>Identity Threshold</b> | 43.52    |
| <b>Charge</b>            | 2+                                                 | <b>Mass error</b>         | 0.002758 |

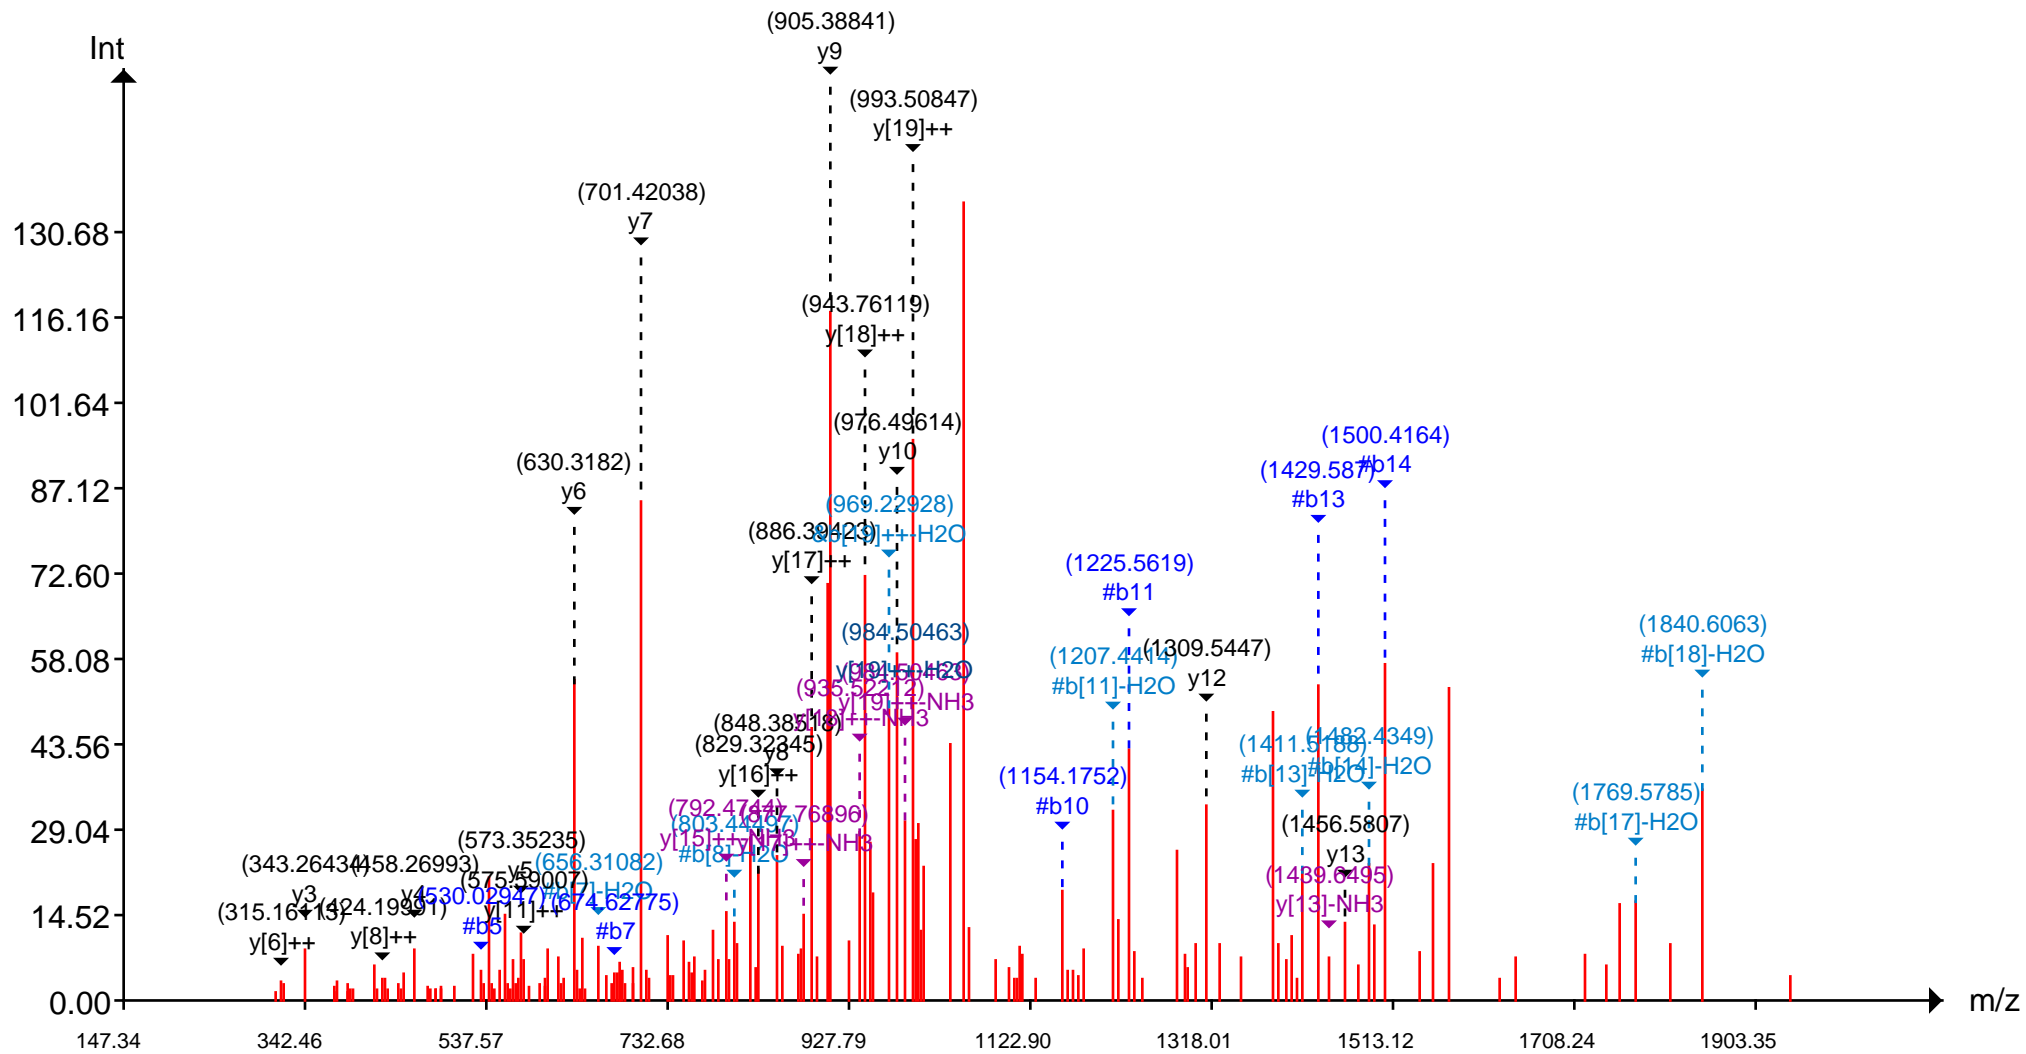

## Info

|                          |                                                    |                           |          |
|--------------------------|----------------------------------------------------|---------------------------|----------|
| <b>Modified Sequence</b> | AcD3-VVDNGSGM<Mox*>C<Cmm*>K<AcD3K*>AGFAGDDAPR-COOH | <b>Ion score</b>          | 48.19    |
| <b>Protein</b>           | P60710                                             | <b>Confidence level</b>   | 99.00%   |
| <b>Precursor m/z</b>     | 1065.4794                                          | <b>Identity Threshold</b> | 43.45    |
| <b>Charge</b>            | 2+                                                 | <b>Mass error</b>         | 0.001758 |



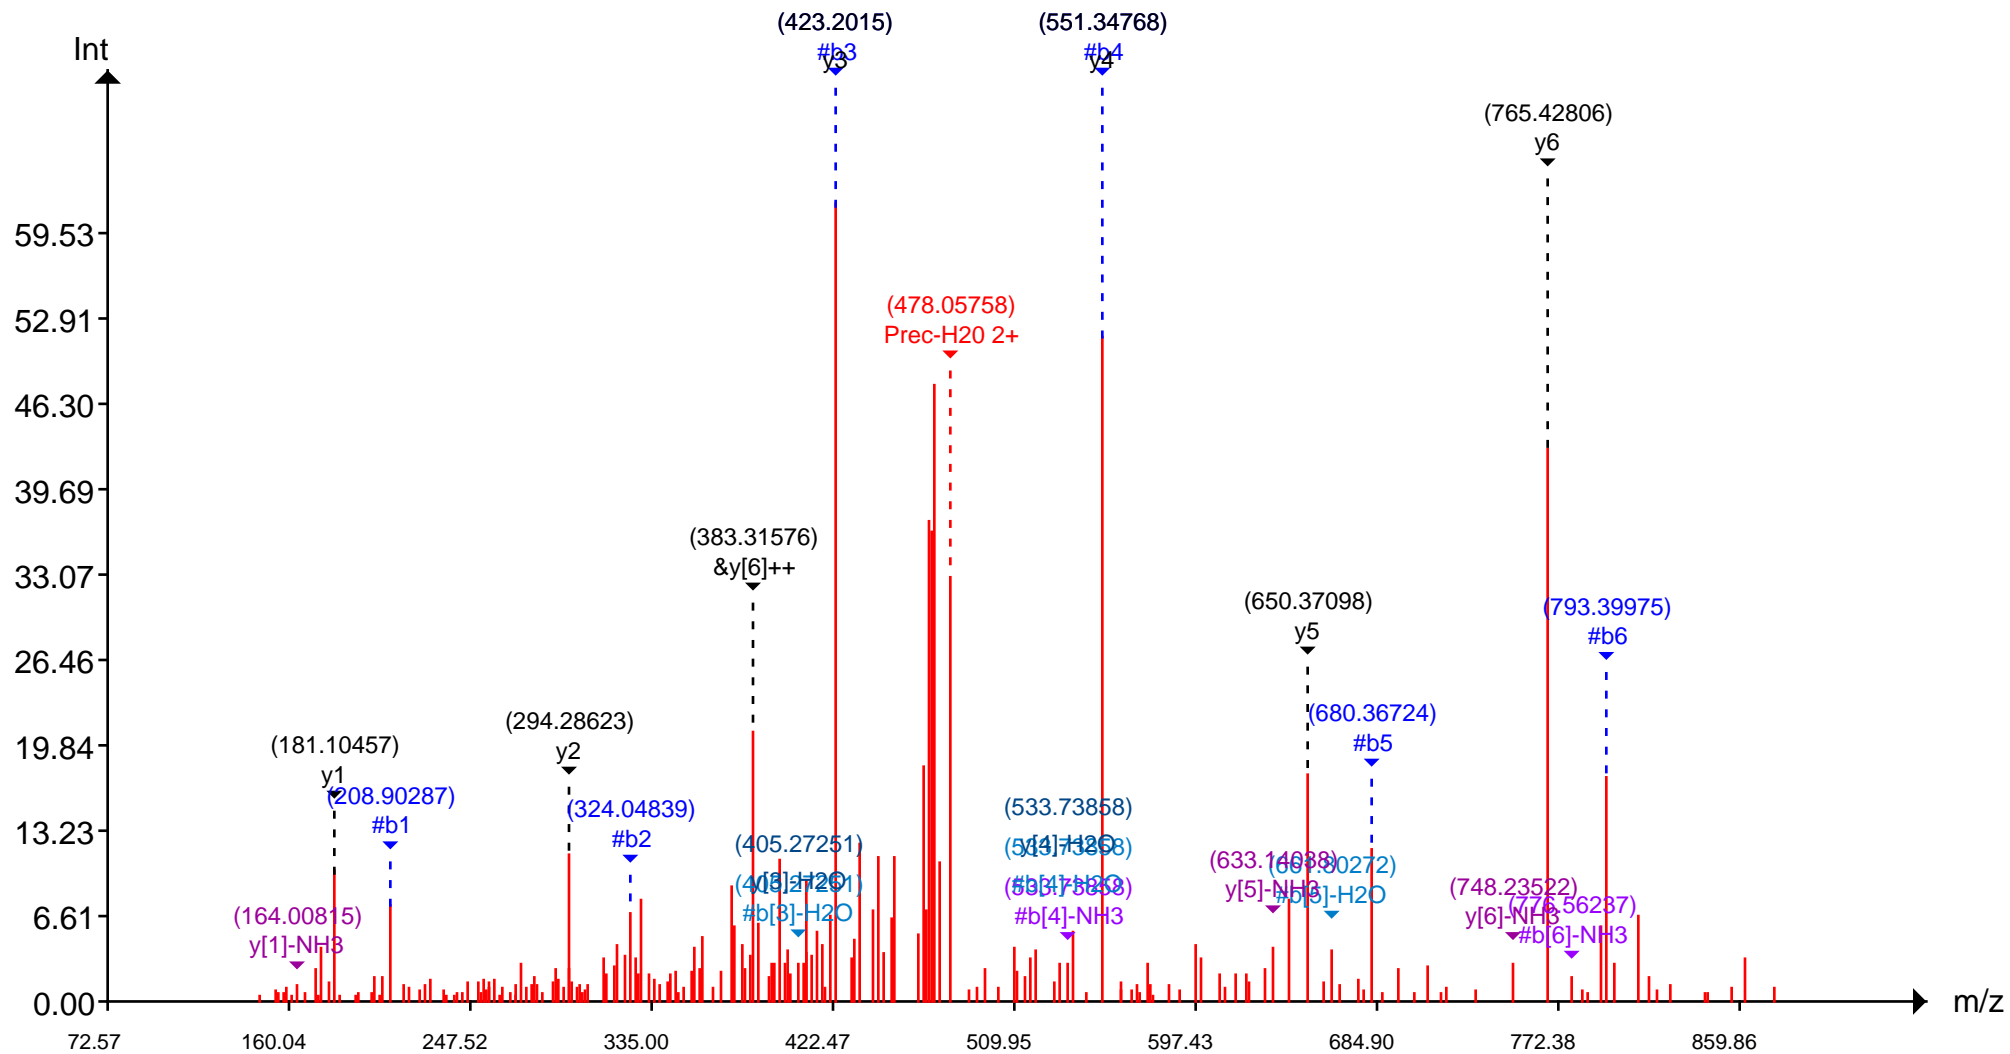

## Info

**Modified Sequence** AcD3-YDVQELR<C13>-COOH

**Ion score** 52.39

**Protein** P97429

**Confidence level** 99.00%

**Precursor m/z** 487.25924

**Identity Threshold** 47.72

**Charge** 2+

**Mass error** -0.001184

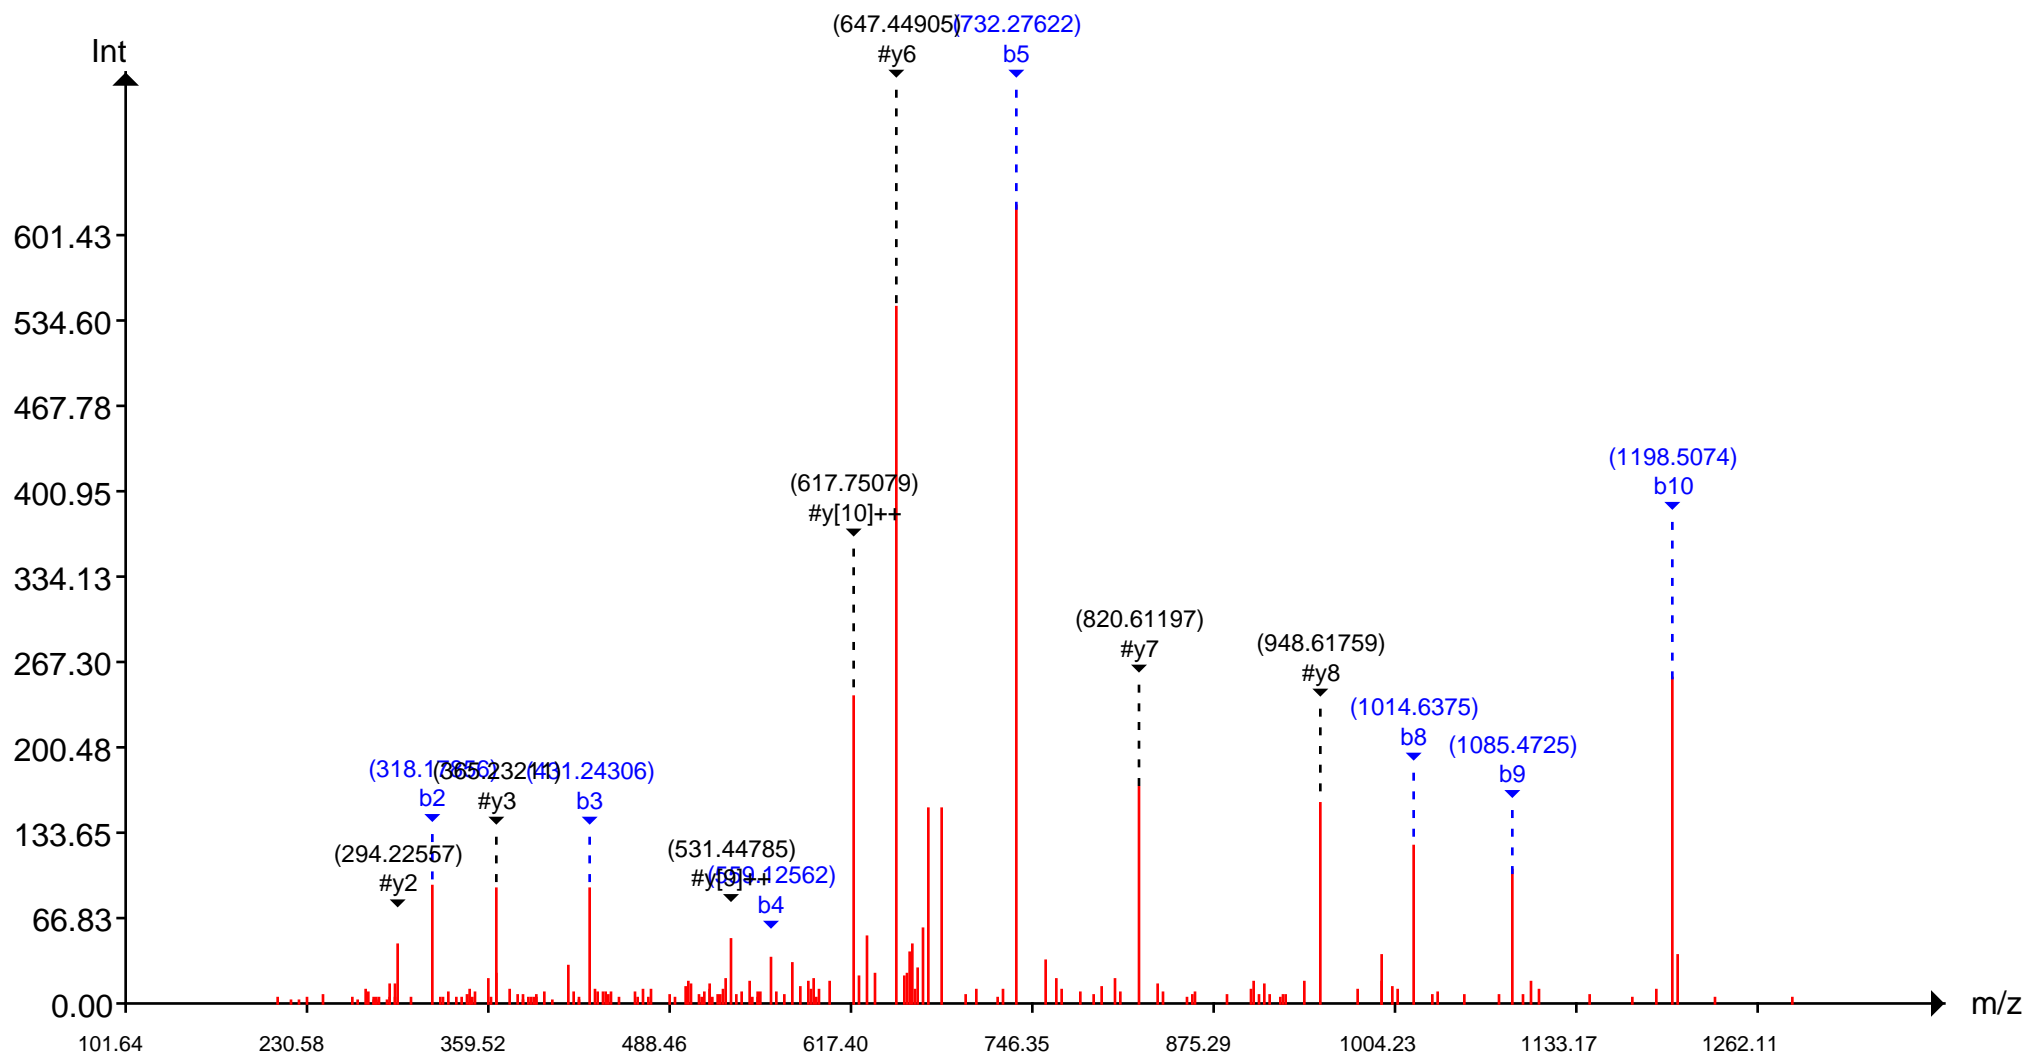

## Info

|                          |                                            |                           |          |
|--------------------------|--------------------------------------------|---------------------------|----------|
| <b>Modified Sequence</b> | AcD3-VK<AcD3K*>LQK<AcD3K*>PNAAIR<C13>-COOH | <b>Ion score</b>          | 48.62    |
| <b>Protein</b>           | Q99L47                                     | <b>Confidence level</b>   | 99.00%   |
| <b>Precursor m/z</b>     | 689.94542                                  | <b>Identity Threshold</b> | 37.28    |
| <b>Charge</b>            | 2+                                         | <b>Mass error</b>         | 0.001349 |

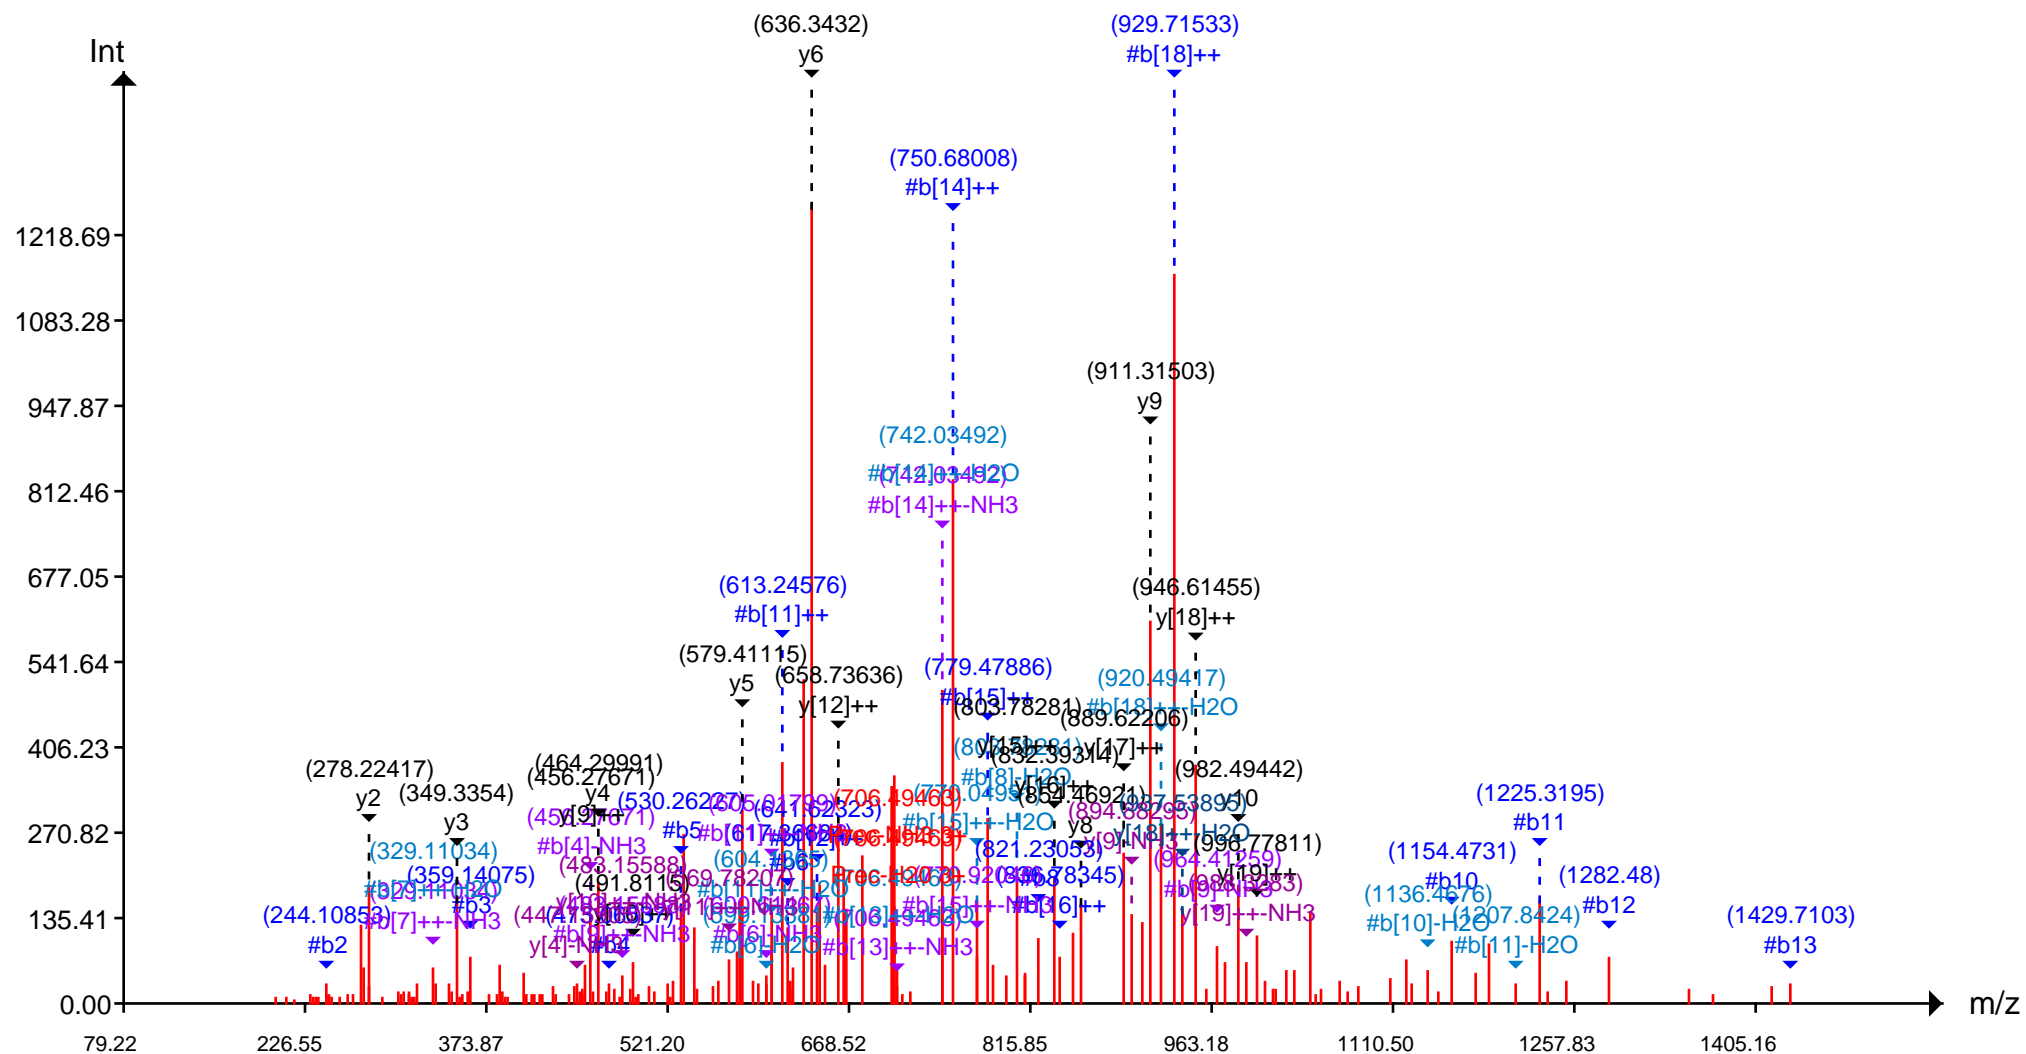

## Info

|                          |                                                         |                           |         |
|--------------------------|---------------------------------------------------------|---------------------------|---------|
| <b>Modified Sequence</b> | AcD3-VVDNGSGM<Mox*>C<Cmm*>K<AcD3K*>AGFAGDDAPR<C13>-COOH | <b>Ion score</b>          | 49.96   |
| <b>Protein</b>           | P60710                                                  | <b>Confidence level</b>   | 99.00%  |
| <b>Precursor m/z</b>     | 712.66152                                               | <b>Identity Threshold</b> | 44.21   |
| <b>Charge</b>            | 3+                                                      | <b>Mass error</b>         | 1.01E-4 |

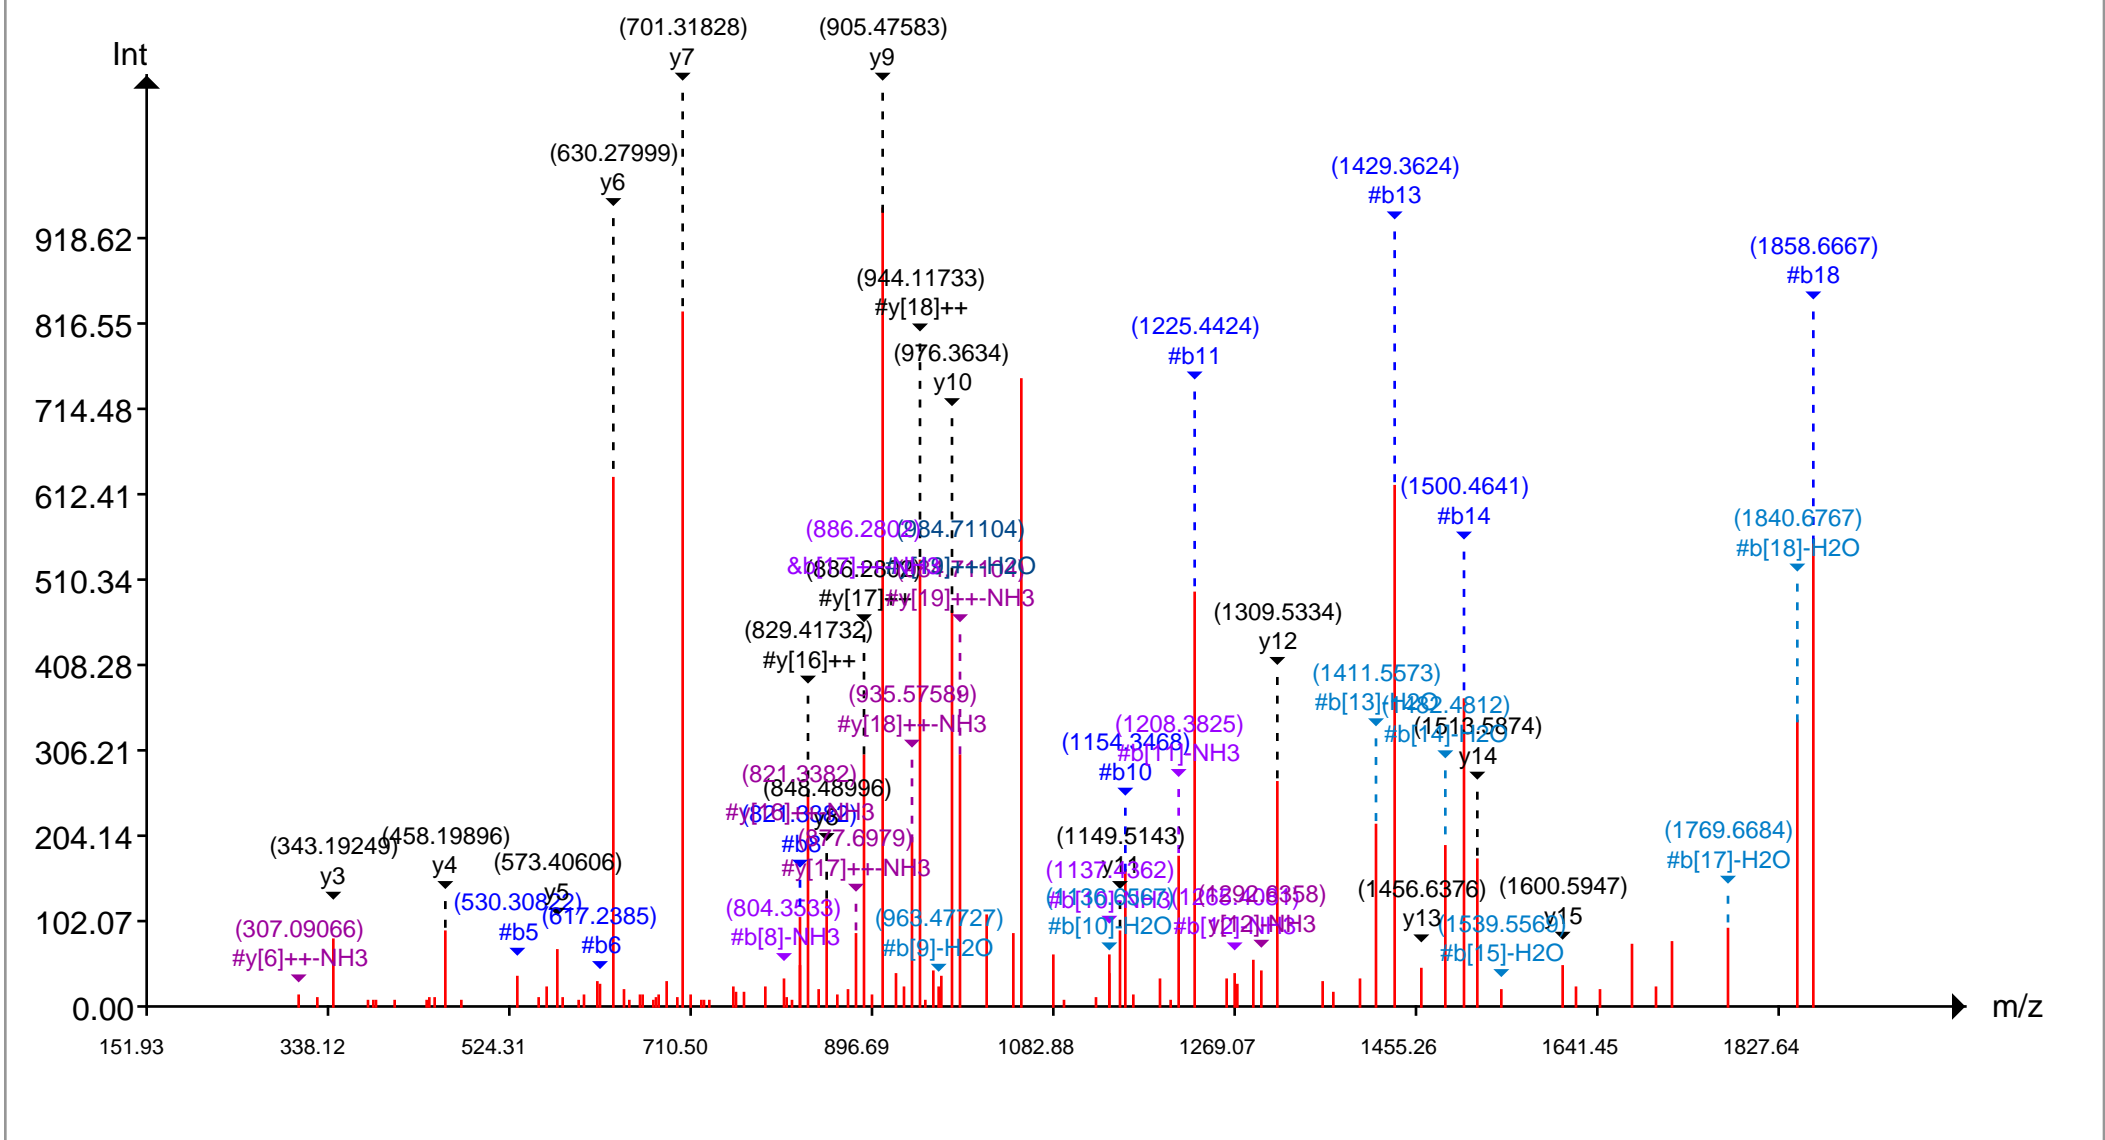

## Info

|                          |                                                    |                           |          |
|--------------------------|----------------------------------------------------|---------------------------|----------|
| <b>Modified Sequence</b> | AcD3-VVDNGSGM<Mox*>C<Cmm*>K<AcD3K*>AGFAGDDAPR-COOH | <b>Ion score</b>          | 88.53    |
| <b>Protein</b>           | P60710                                             | <b>Confidence level</b>   | 99.00%   |
| <b>Precursor m/z</b>     | 1065.4802                                          | <b>Identity Threshold</b> | 43.55    |
| <b>Charge</b>            | 2+                                                 | <b>Mass error</b>         | 0.003358 |

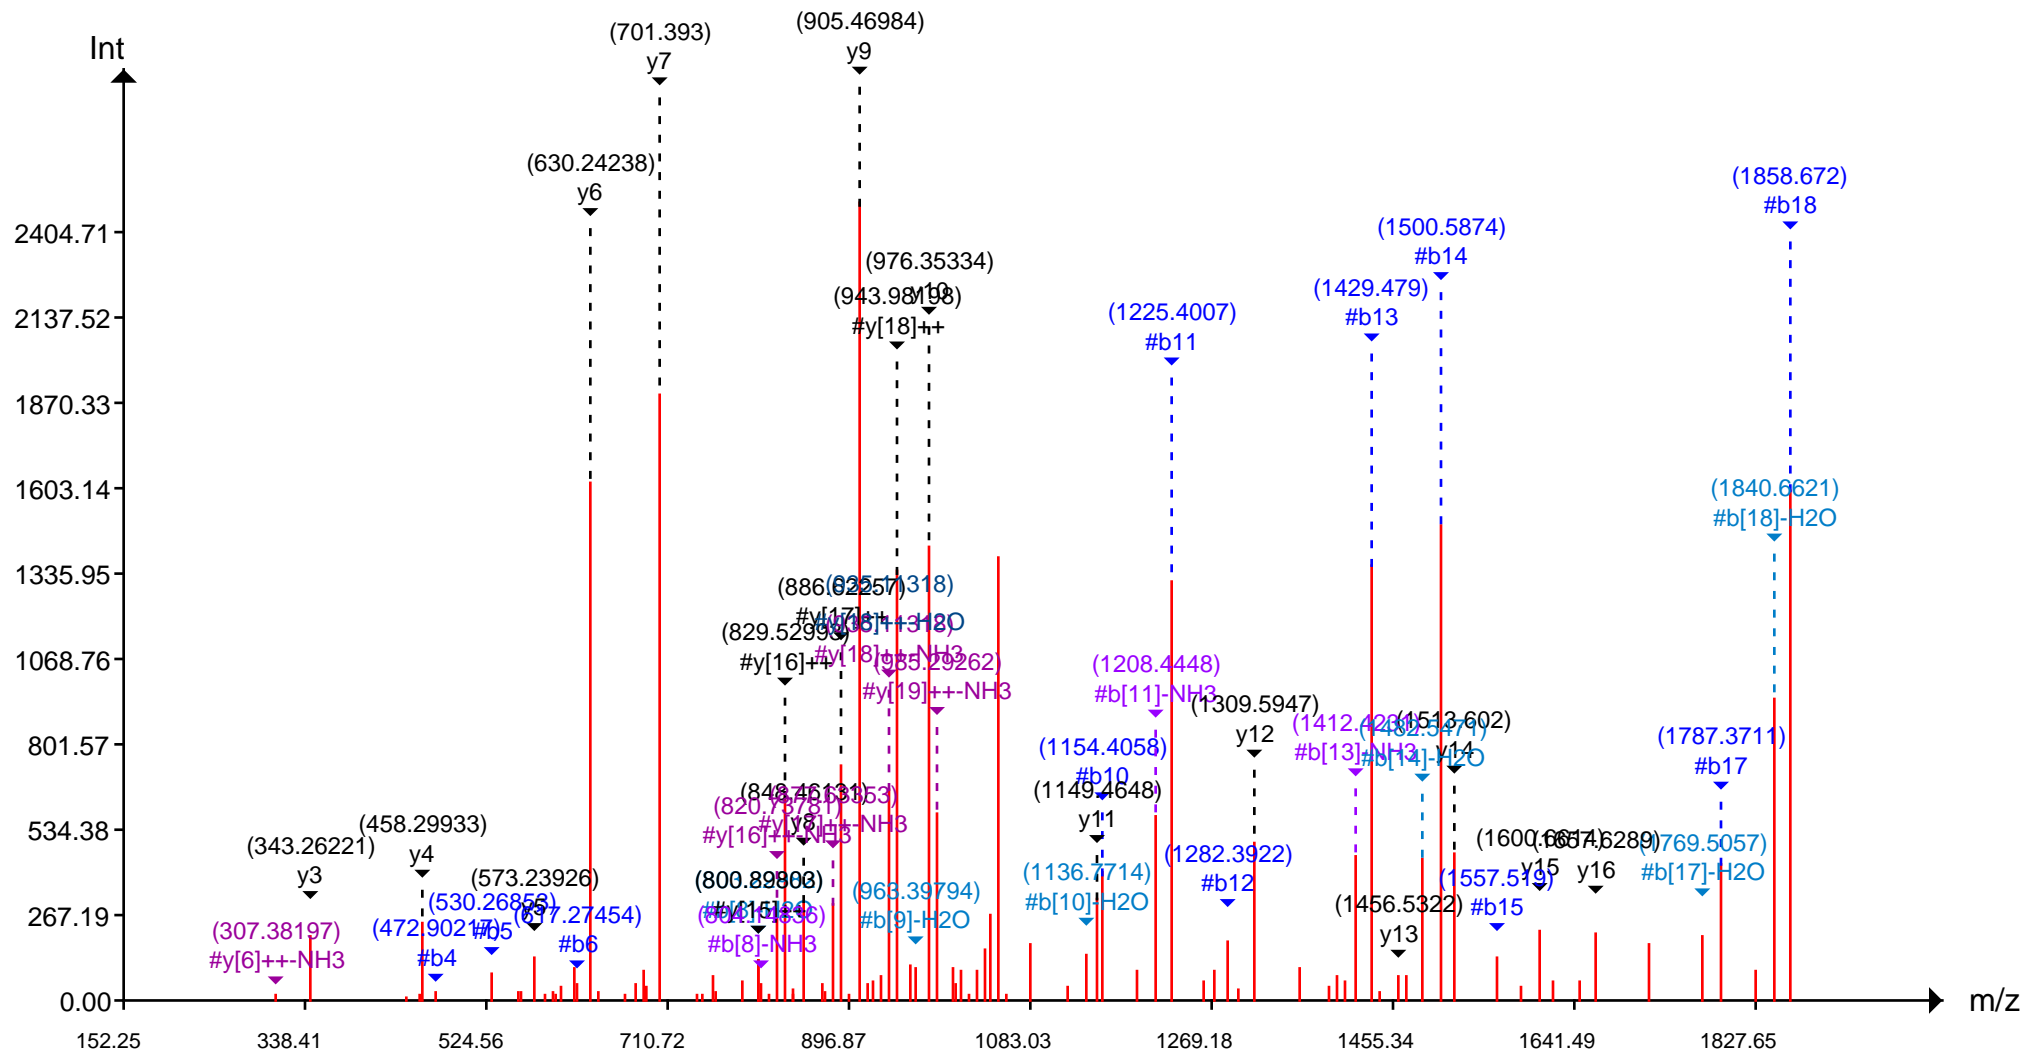

## Info

|                          |                                                    |                           |          |
|--------------------------|----------------------------------------------------|---------------------------|----------|
| <b>Modified Sequence</b> | AcD3-VVDNGSGM<Mox*>C<Cmm*>K<AcD3K*>AGFAGDDAPR-COOH | <b>Ion score</b>          | 113.99   |
| <b>Protein</b>           | P60710                                             | <b>Confidence level</b>   | 99.00%   |
| <b>Precursor m/z</b>     | 1065.4803                                          | <b>Identity Threshold</b> | 43.54    |
| <b>Charge</b>            | 2+                                                 | <b>Mass error</b>         | 0.003558 |

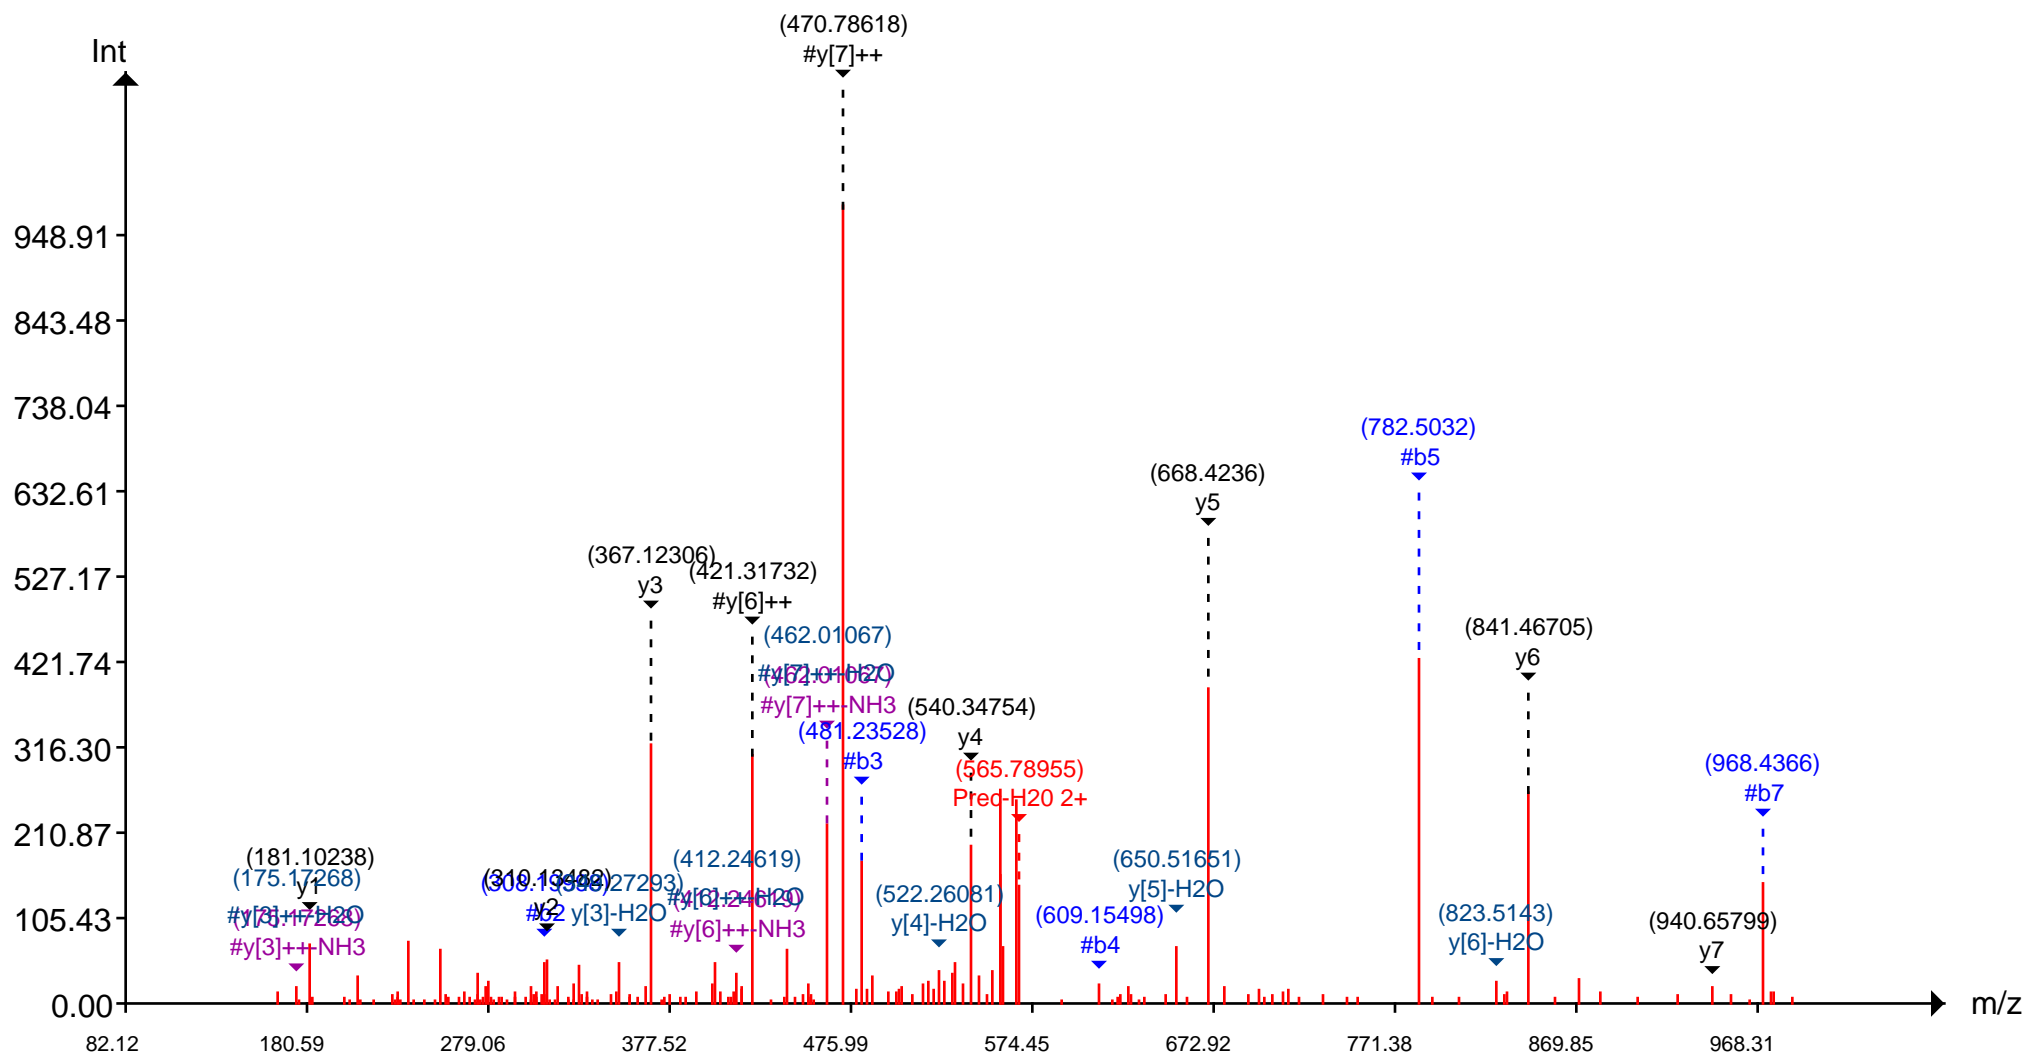

## Info

**Modified Sequence** AcD3-YVK<AcD3K\*>QK<AcD3K\*>GER<C13>-COOH

**Protein** P26039

**Precursor m/z** 574.83927

**Charge** 2+

**Ion score** 47.61

**Confidence level** 99.00%

**Identity Threshold** 46.31

**Mass error** -3.03E-4

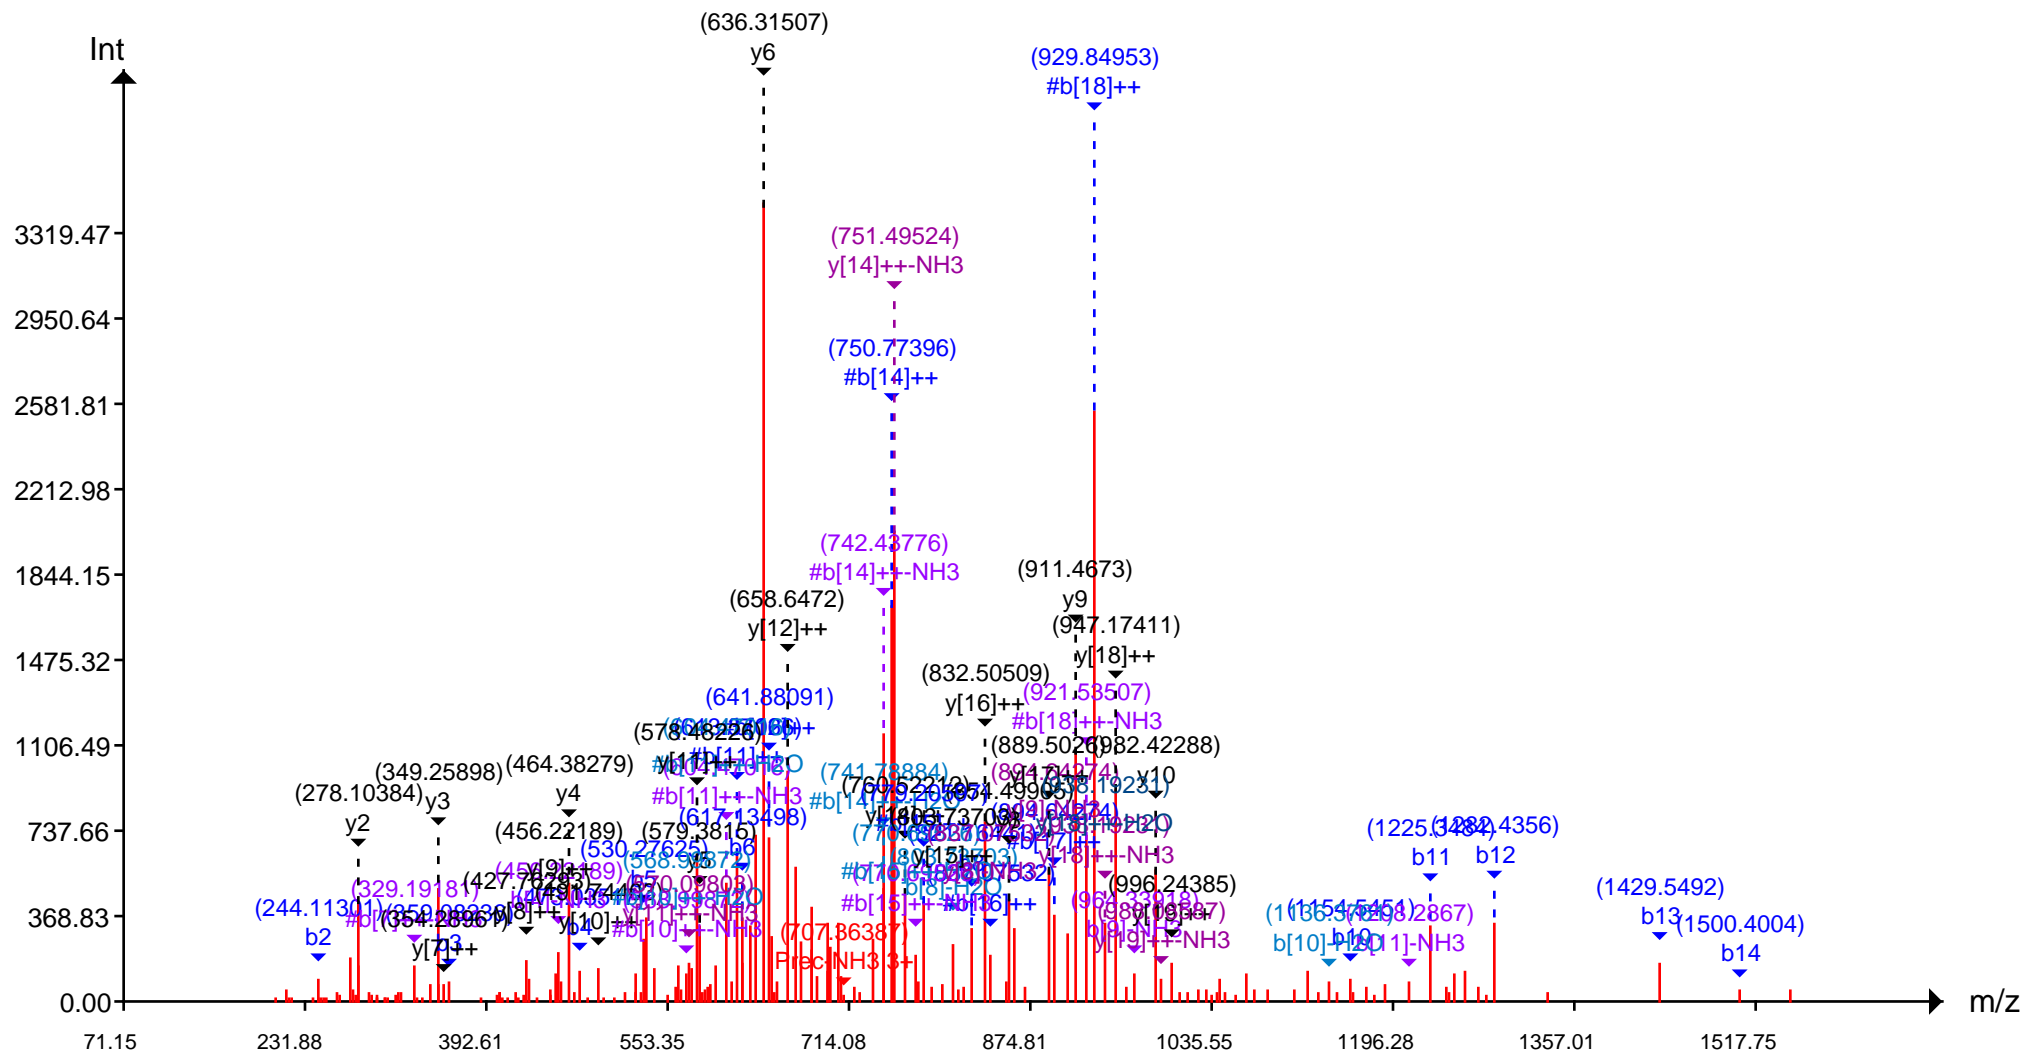

## Info

|                          |                                                         |                           |          |
|--------------------------|---------------------------------------------------------|---------------------------|----------|
| <b>Modified Sequence</b> | AcD3-VVDNGSGM<Mox*>C<Cmm*>K<AcD3K*>AGFAGDDAPR<C13>-COOH | <b>Ion score</b>          | 74.11    |
| <b>Protein</b>           | P60710                                                  | <b>Confidence level</b>   | 99.00%   |
| <b>Precursor m/z</b>     | 712.66197                                               | <b>Identity Threshold</b> | 44.26    |
| <b>Charge</b>            | 3+                                                      | <b>Mass error</b>         | 0.001451 |

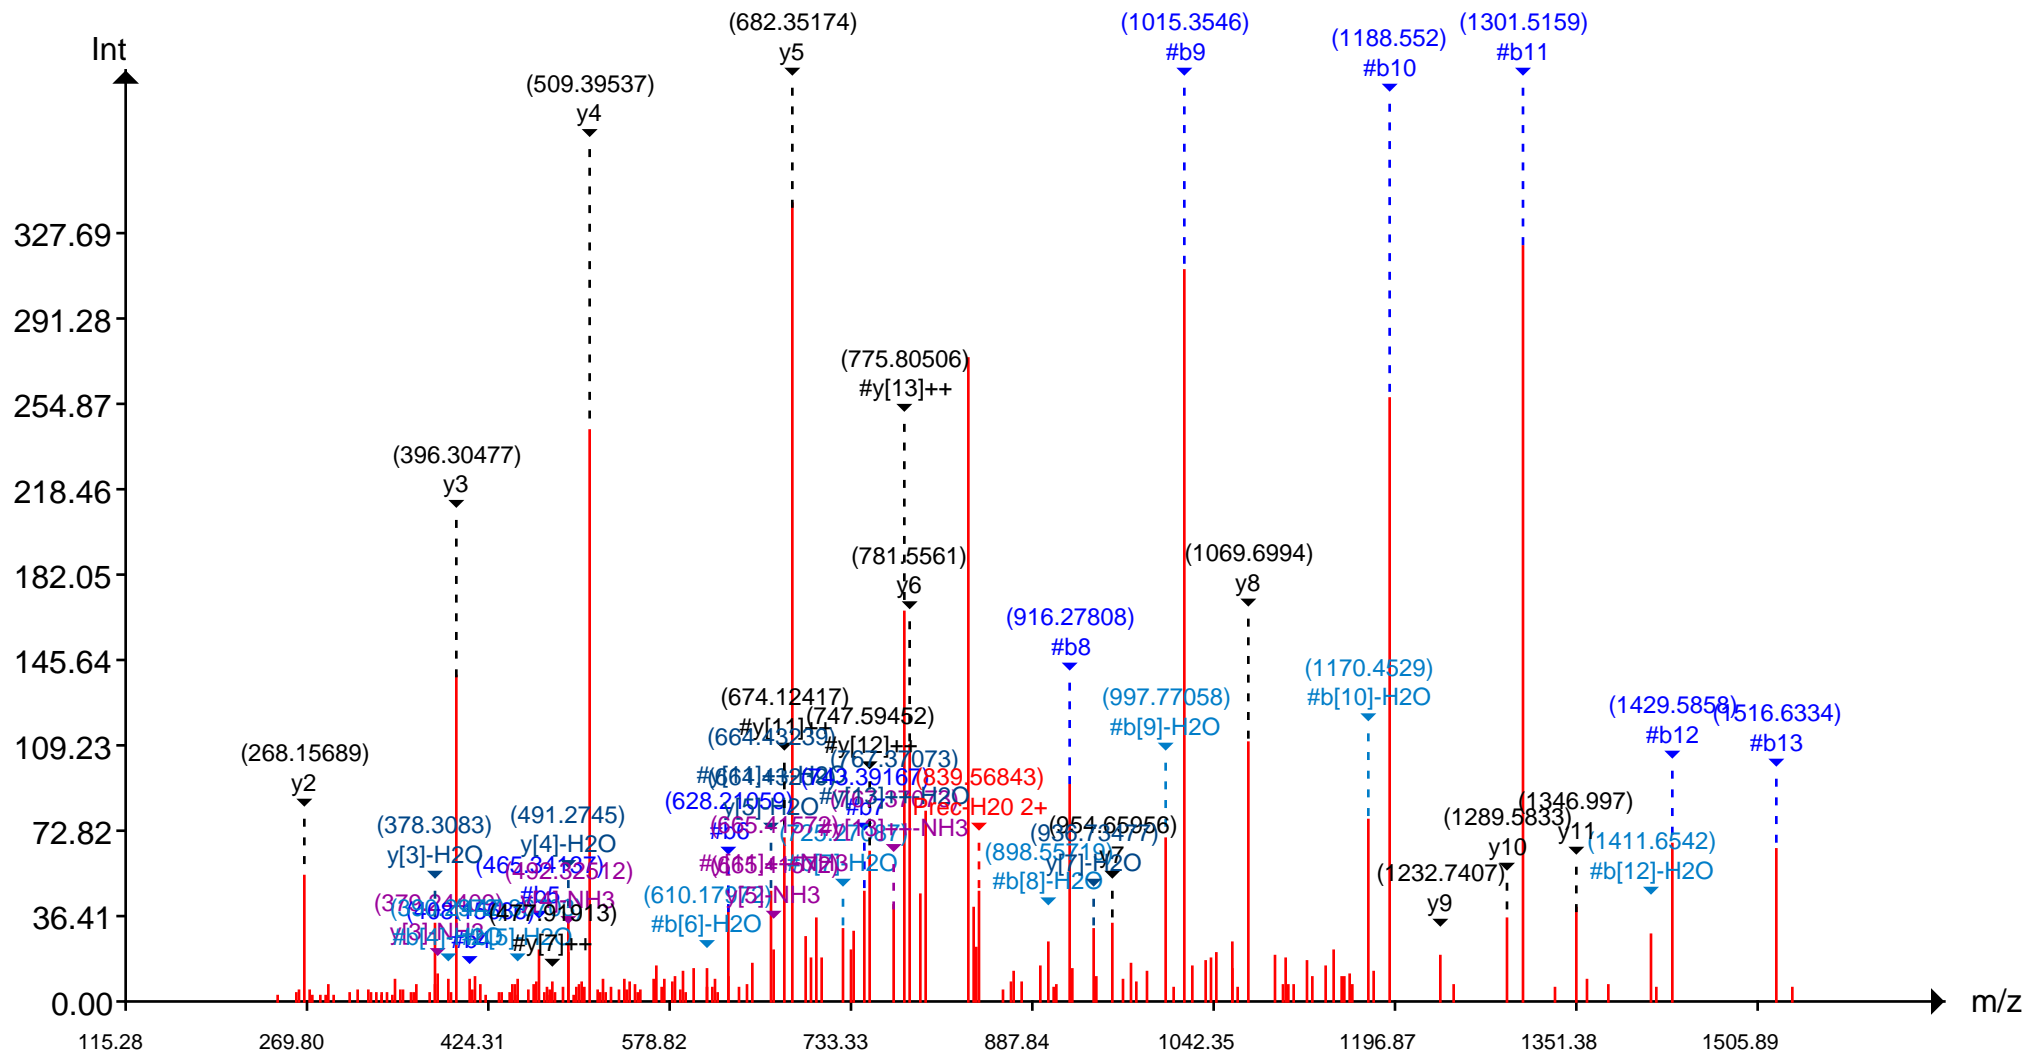

## Info

|                          |                                               |                           |          |
|--------------------------|-----------------------------------------------|---------------------------|----------|
| <b>Modified Sequence</b> | AcD3-TGFGGYDK<AcD3K*>VK<AcD3K*>LQSR<C13>-COOH | <b>Ion score</b>          | 81.89    |
| <b>Protein</b>           | Q62465                                        | <b>Confidence level</b>   | 99.00%   |
| <b>Precursor m/z</b>     | 848.97029                                     | <b>Identity Threshold</b> | 47.34    |
| <b>Charge</b>            | 2+                                            | <b>Mass error</b>         | 0.002246 |



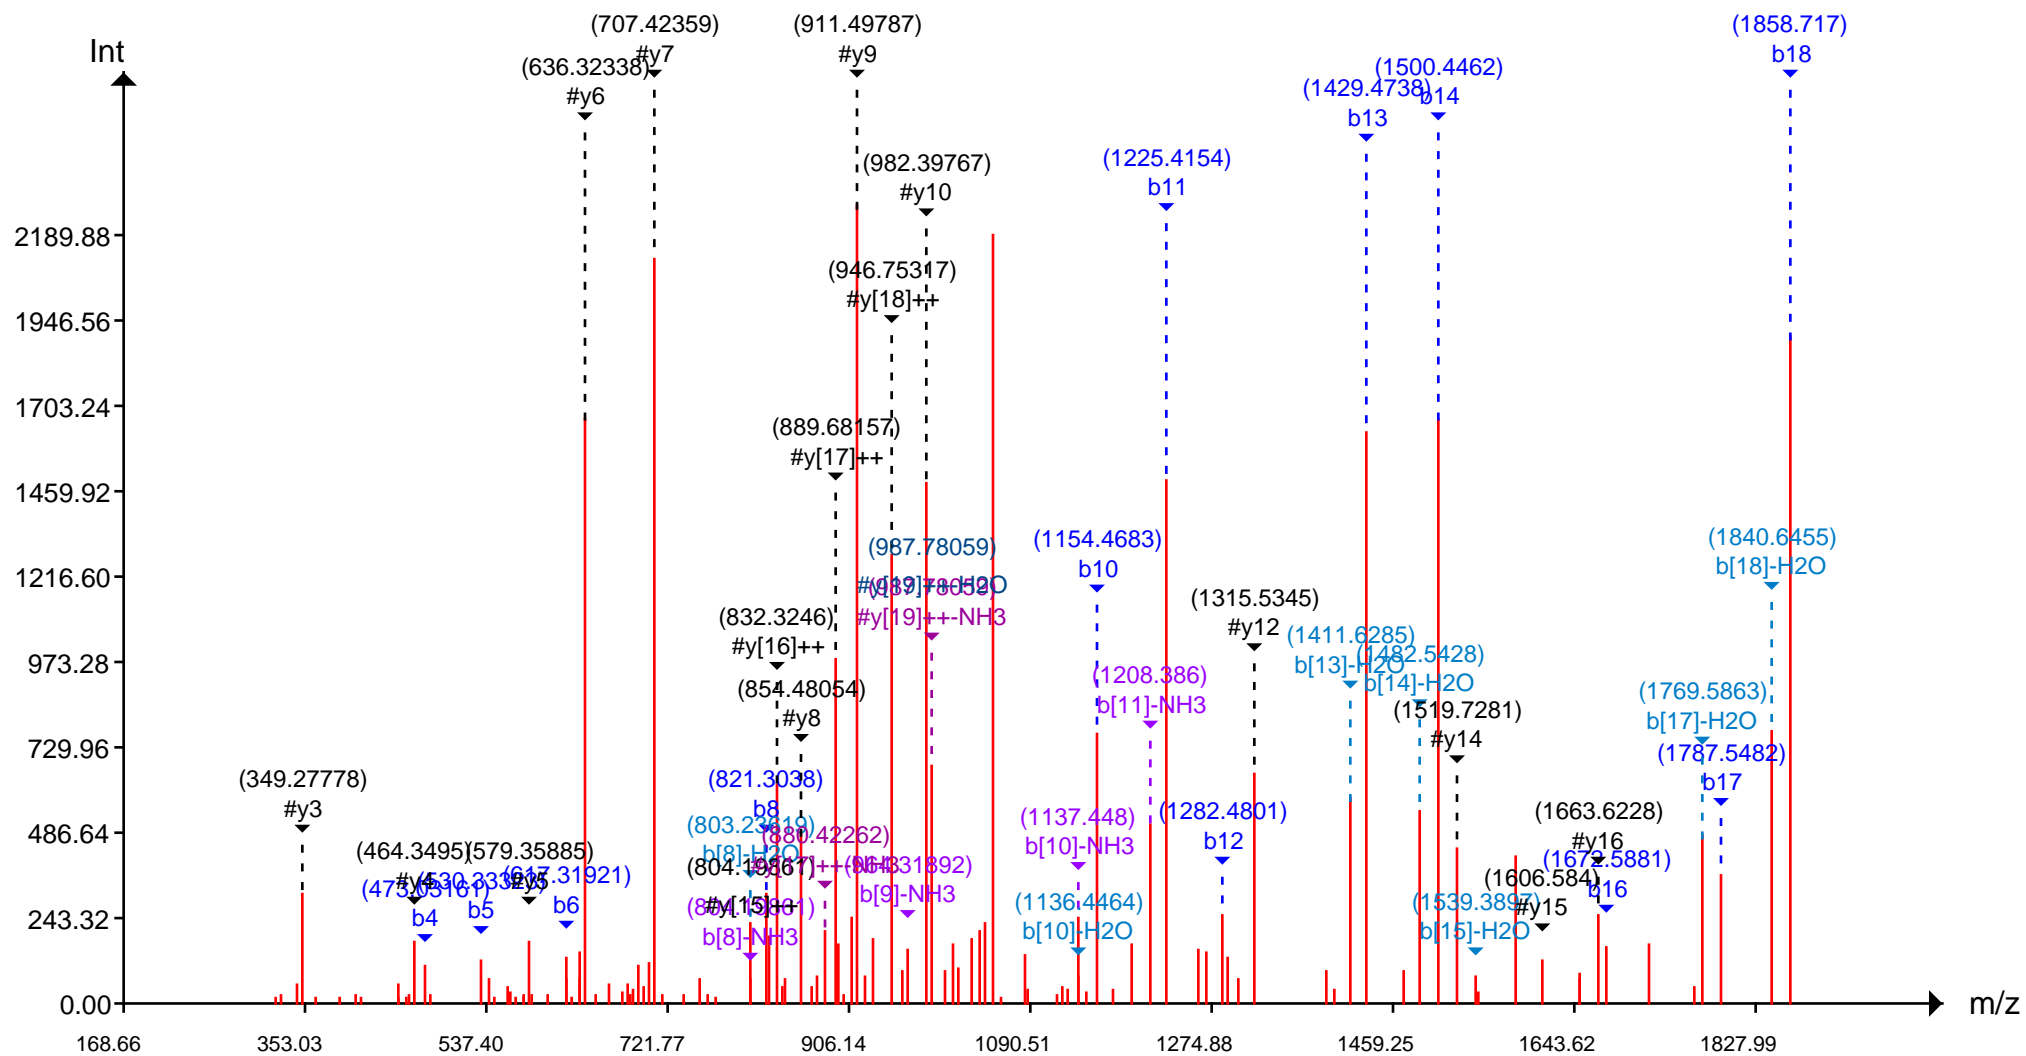

## Info

|                          |                                                         |                           |          |
|--------------------------|---------------------------------------------------------|---------------------------|----------|
| <b>Modified Sequence</b> | AcD3-VVDNGSGM<Mox*>C<Cmm*>K<AcD3K*>AGFAGDDAPR<C13>-COOH | <b>Ion score</b>          | 95.84    |
| <b>Protein</b>           | P60710                                                  | <b>Confidence level</b>   | 99.00%   |
| <b>Precursor m/z</b>     | 1068.4893                                               | <b>Identity Threshold</b> | 44.25    |
| <b>Charge</b>            | 2+                                                      | <b>Mass error</b>         | 0.001417 |

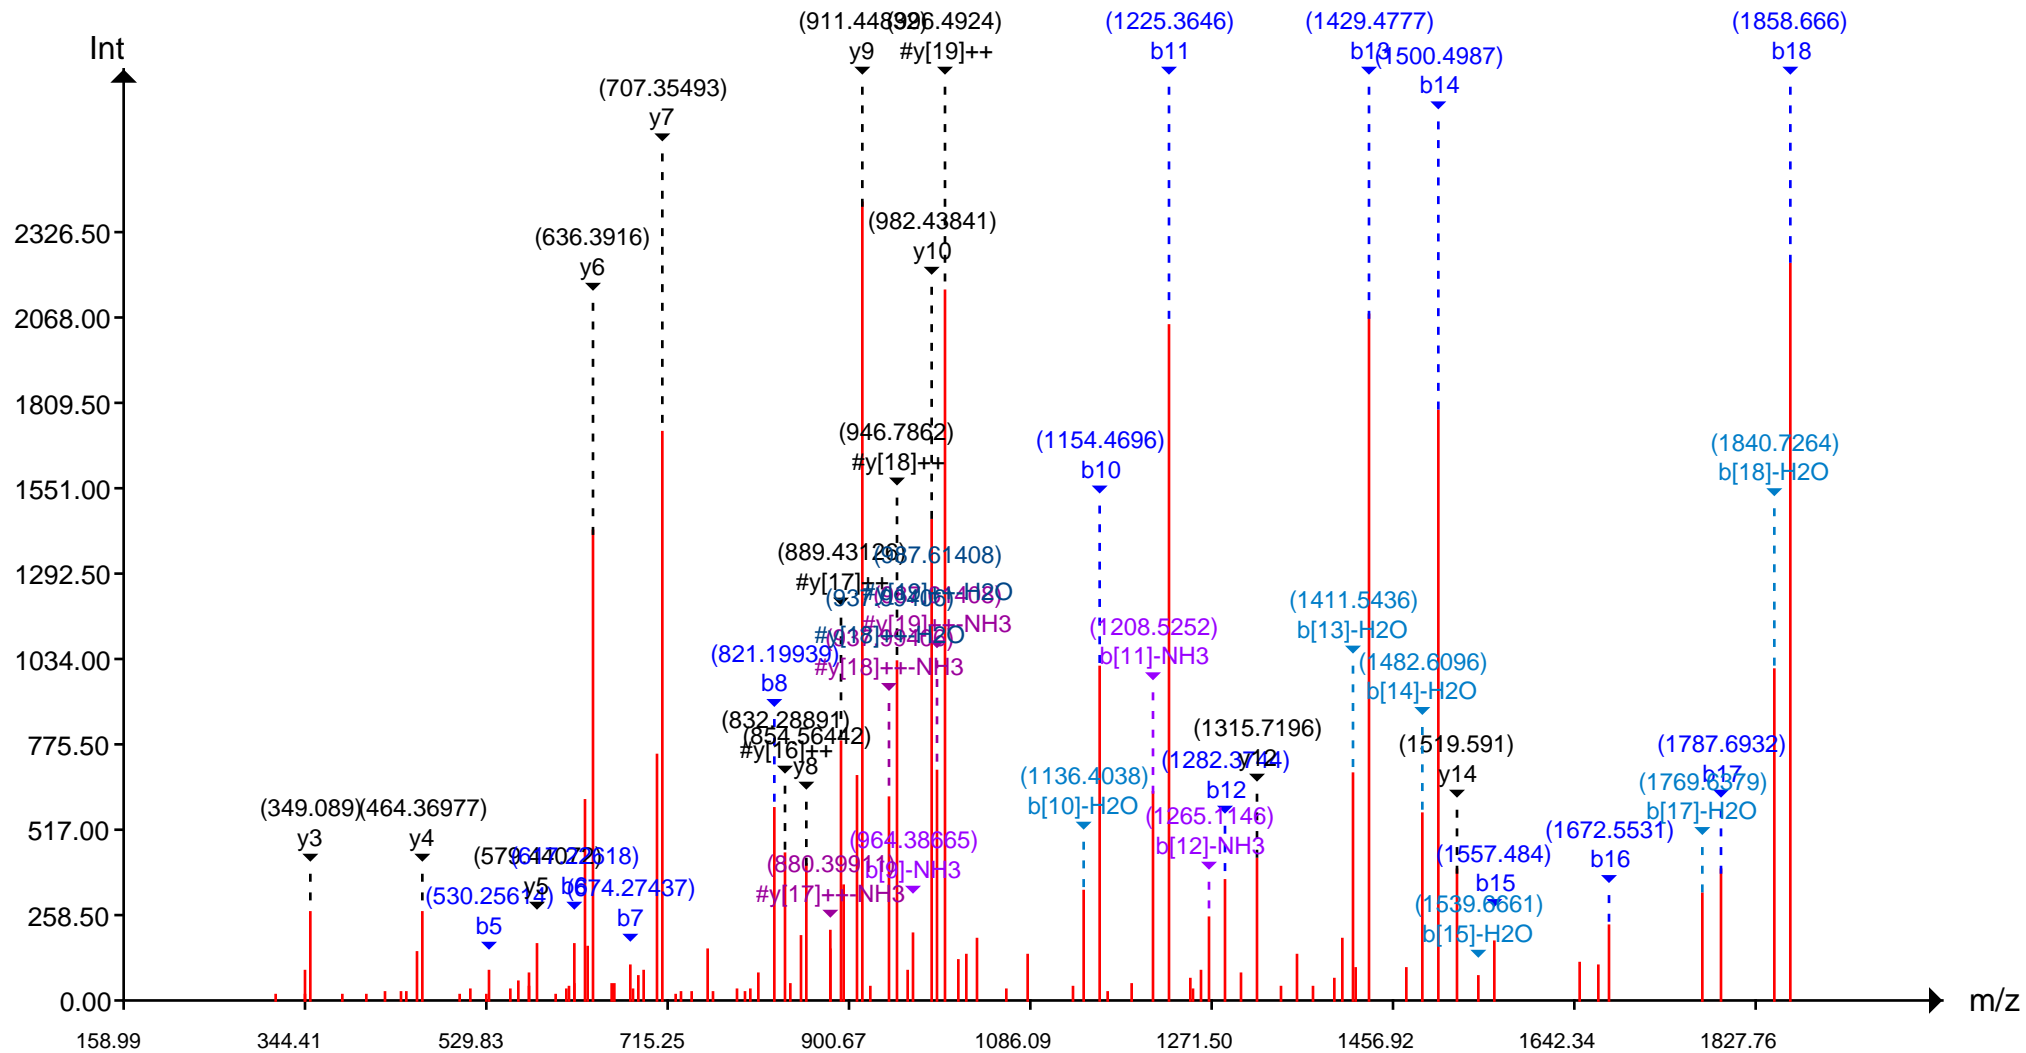

## Info

|                          |                                                         |                           |          |
|--------------------------|---------------------------------------------------------|---------------------------|----------|
| <b>Modified Sequence</b> | AcD3-VVDNGSGM<Mox*>C<Cmm*>K<AcD3K*>AGFAGDDAPR<C13>-COOH | <b>Ion score</b>          | 84.72    |
| <b>Protein</b>           | P60710                                                  | <b>Confidence level</b>   | 99.00%   |
| <b>Precursor m/z</b>     | 1068.4899                                               | <b>Identity Threshold</b> | 44.40    |
| <b>Charge</b>            | 2+                                                      | <b>Mass error</b>         | 0.002617 |

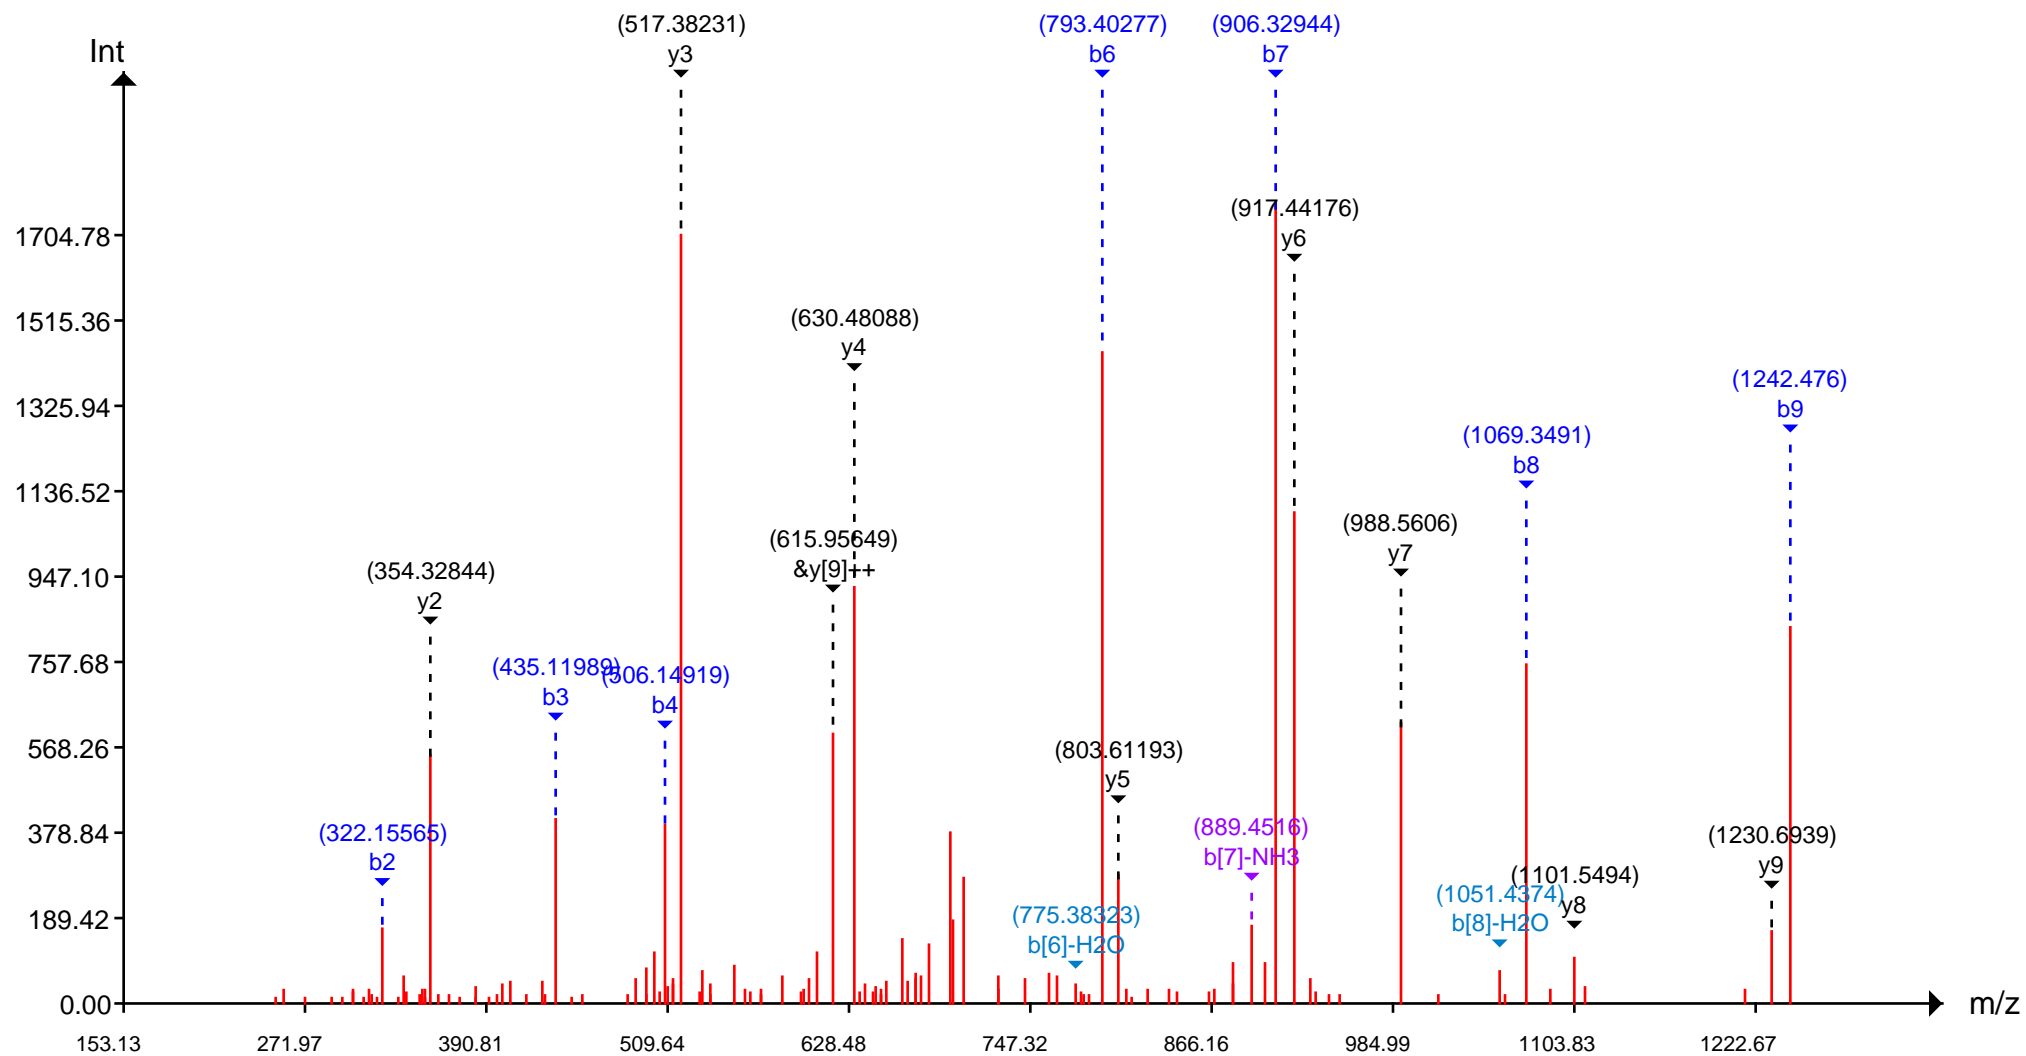

## Info

|                          |                                                 |                           |          |
|--------------------------|-------------------------------------------------|---------------------------|----------|
| <b>Modified Sequence</b> | AcD3-M<Mox*>ELANK<AcD3K*>IYK<AcD3K*>R<C13>-COOH | <b>Ion score</b>          | 73.51    |
| <b>Protein</b>           | Q920E5                                          | <b>Confidence level</b>   | 99.00%   |
| <b>Precursor m/z</b>     | 711.90765                                       | <b>Identity Threshold</b> | 46.45    |
| <b>Charge</b>            | 2+                                              | <b>Mass error</b>         | 0.001371 |

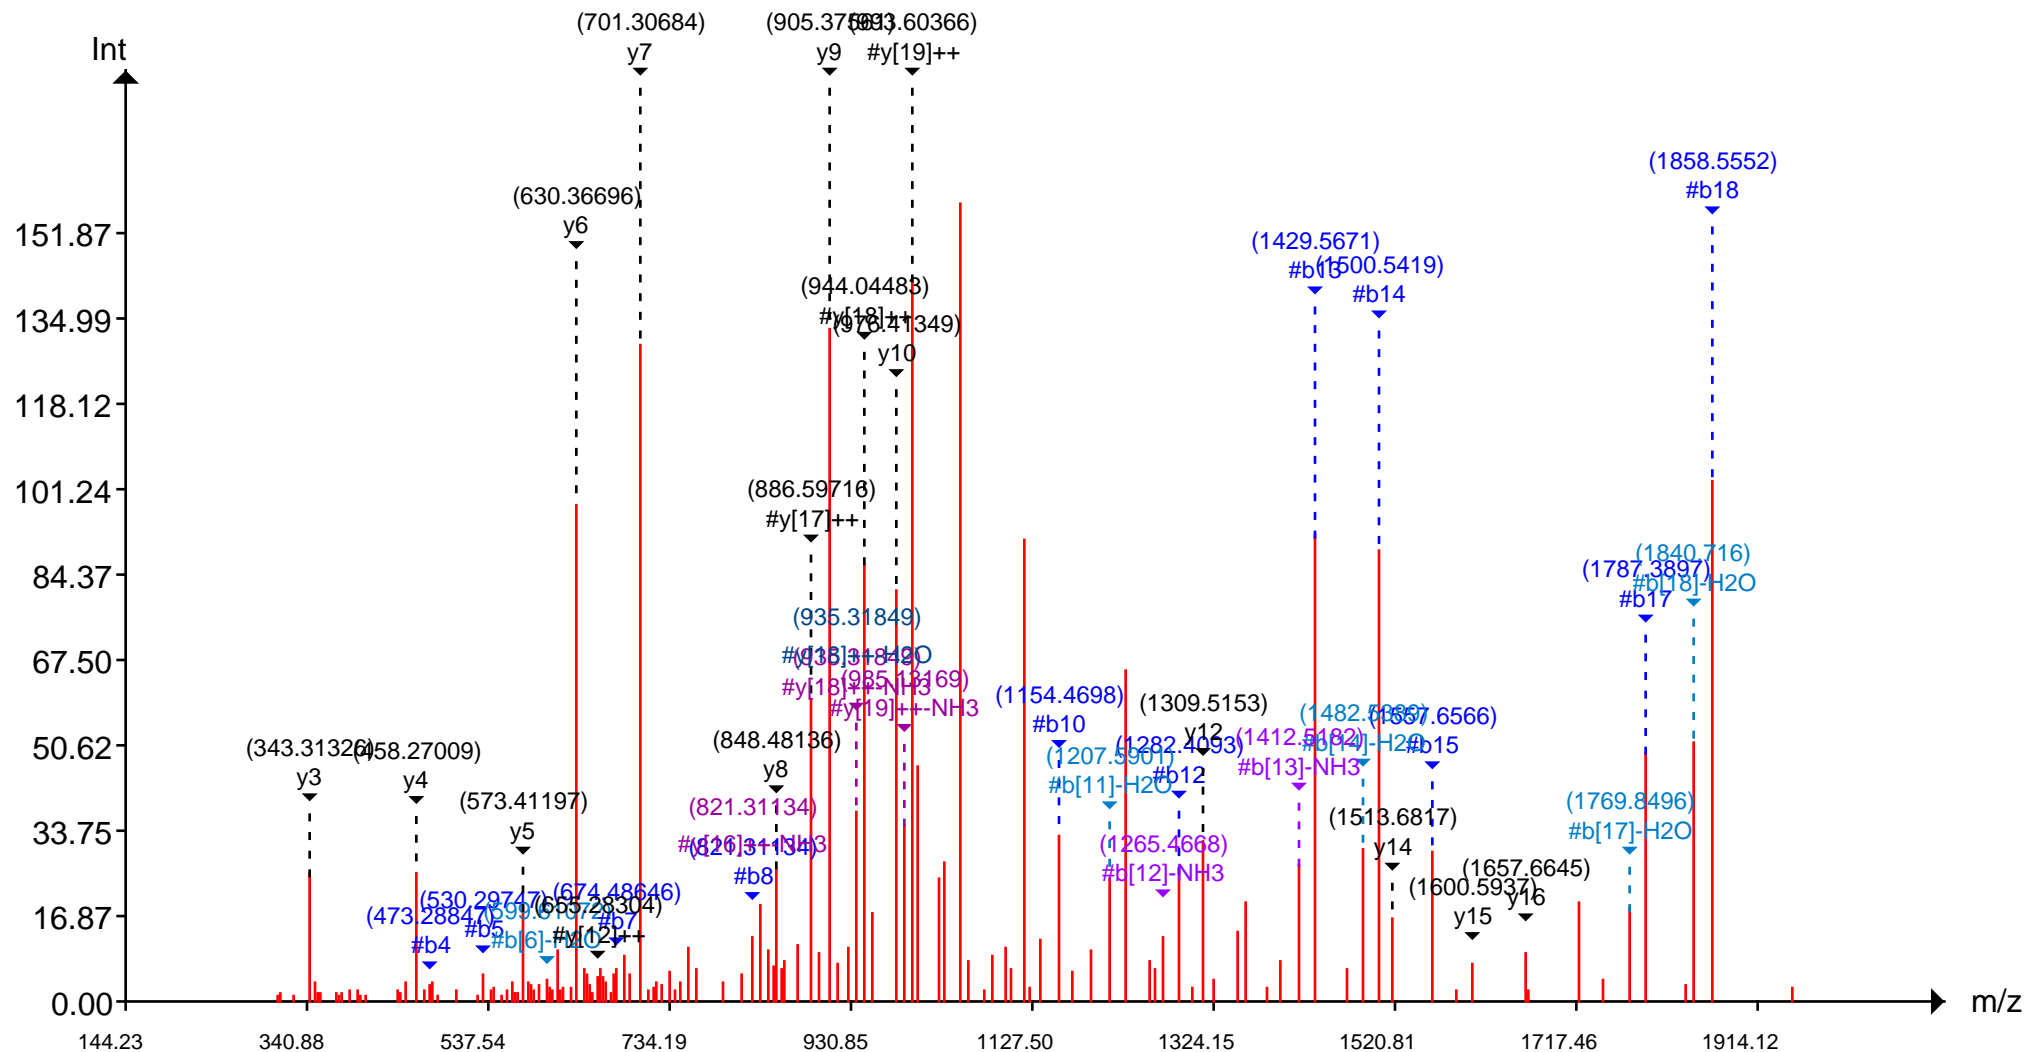

## Info

|                          |                                                    |                           |          |
|--------------------------|----------------------------------------------------|---------------------------|----------|
| <b>Modified Sequence</b> | AcD3-VVDNGSGM<Mox*>C<Cmm*>K<AcD3K*>AGFAGDDAPR-COOH | <b>Ion score</b>          | 81.46    |
| <b>Protein</b>           | P60710                                             | <b>Confidence level</b>   | 99.00%   |
| <b>Precursor m/z</b>     | 1065.4798                                          | <b>Identity Threshold</b> | 43.52    |
| <b>Charge</b>            | 2+                                                 | <b>Mass error</b>         | 0.002558 |

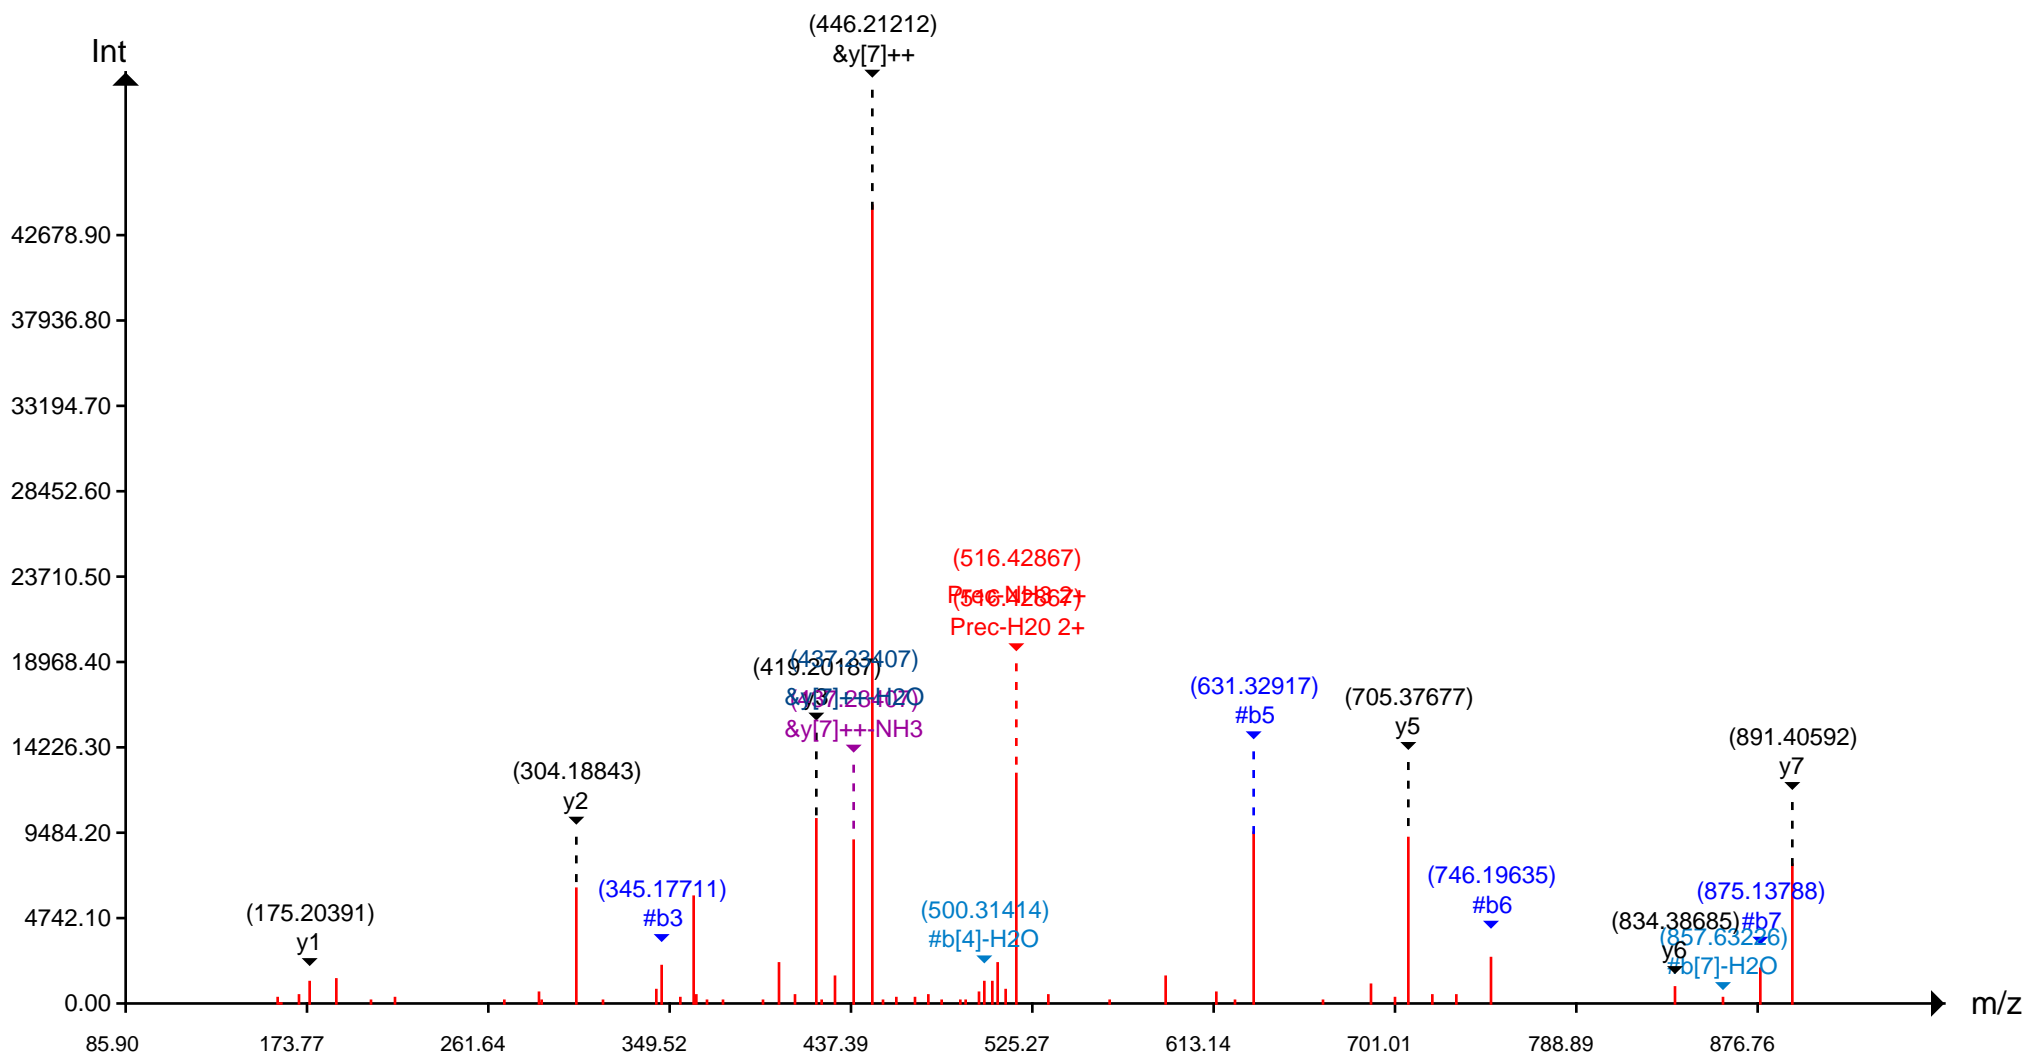

## Info

**Modified Sequence** AcD3-IGEK<AcD3K\*>LDER-COOH

**Ion score** 50.57

**Protein** P17751

**Confidence level** 99.00%

**Precursor m/z** 525.29114

**Identity Threshold** 47.73

**Charge** 2+

**Mass error** 6.05E-4

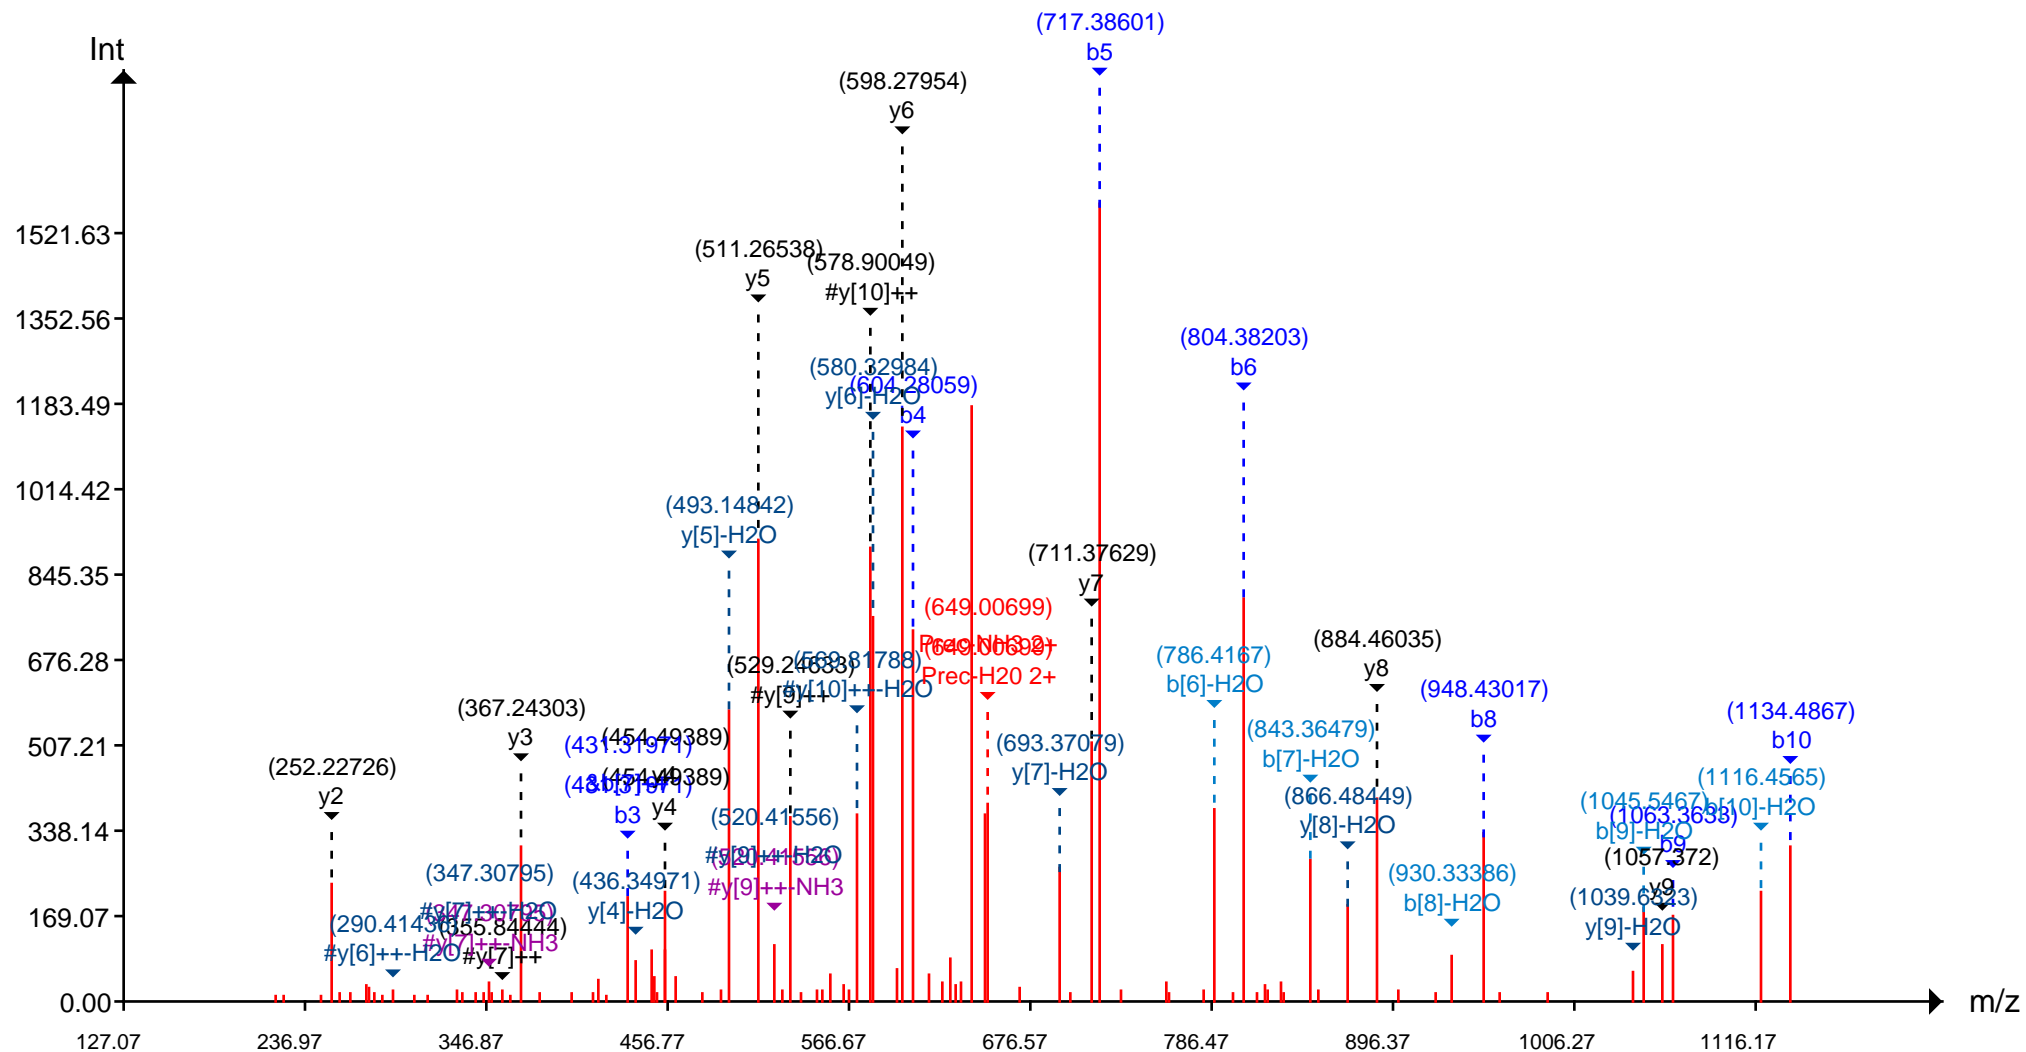

## Info

|                          |                                            |                           |         |
|--------------------------|--------------------------------------------|---------------------------|---------|
| <b>Modified Sequence</b> | AcD3-LVK<AcD3K*>K<AcD3K*>ISGSDAR<C13>-COOH | <b>Ion score</b>          | 64.74   |
| <b>Protein</b>           | P18654                                     | <b>Confidence level</b>   | 99.00%  |
| <b>Precursor m/z</b>     | 657.90565                                  | <b>Identity Threshold</b> | 42.87   |
| <b>Charge</b>            | 2+                                         | <b>Mass error</b>         | 7.12E-4 |

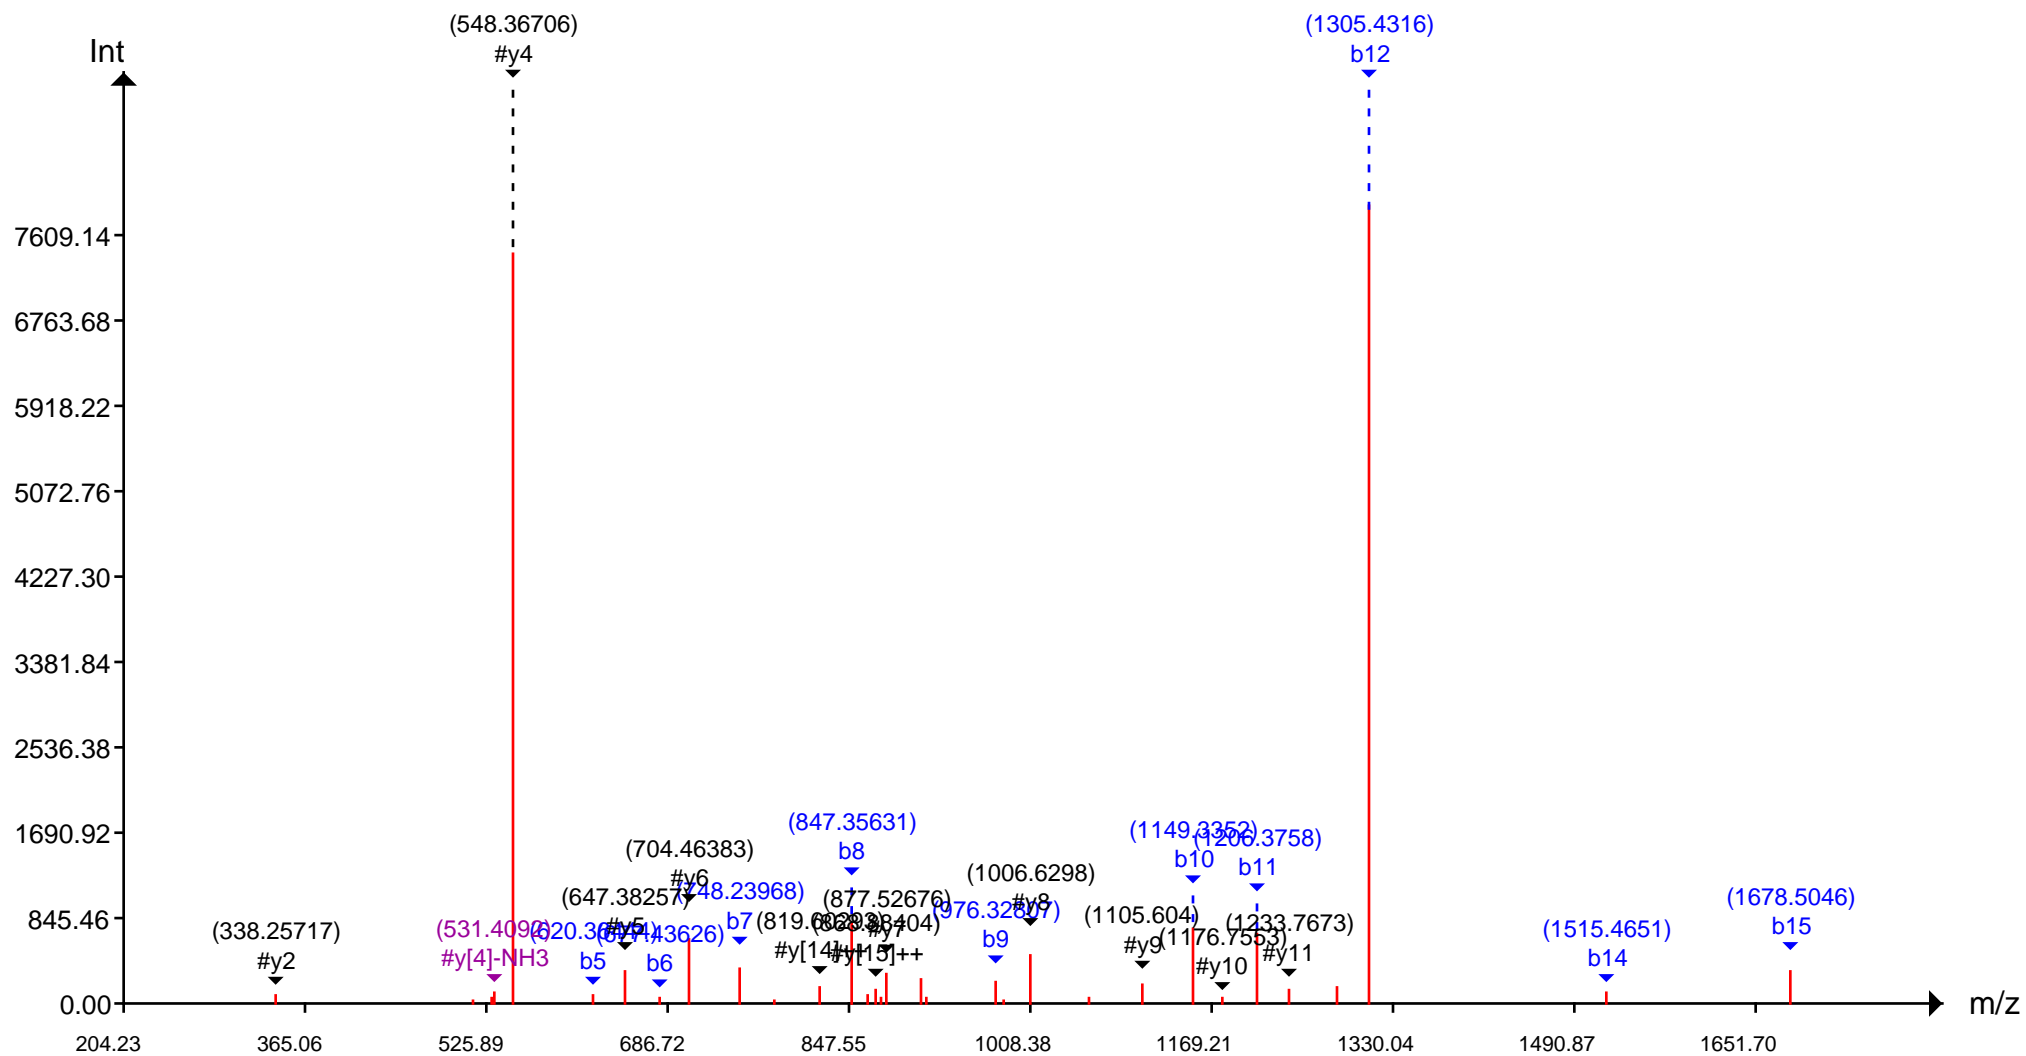

## Info

|                          |                                                  |                           |          |
|--------------------------|--------------------------------------------------|---------------------------|----------|
| <b>Modified Sequence</b> | AcD3-AVC<Cmm*>K<AcD3K*>AGAVEK<AcD3K*>GVPLYR-COOH | <b>Ion score</b>          | 82.21    |
| <b>Protein</b>           | P17182                                           | <b>Confidence level</b>   | 99.00%   |
| <b>Precursor m/z</b>     | 927.01964                                        | <b>Identity Threshold</b> | 46.51    |
| <b>Charge</b>            | 2+                                               | <b>Mass error</b>         | 0.002038 |

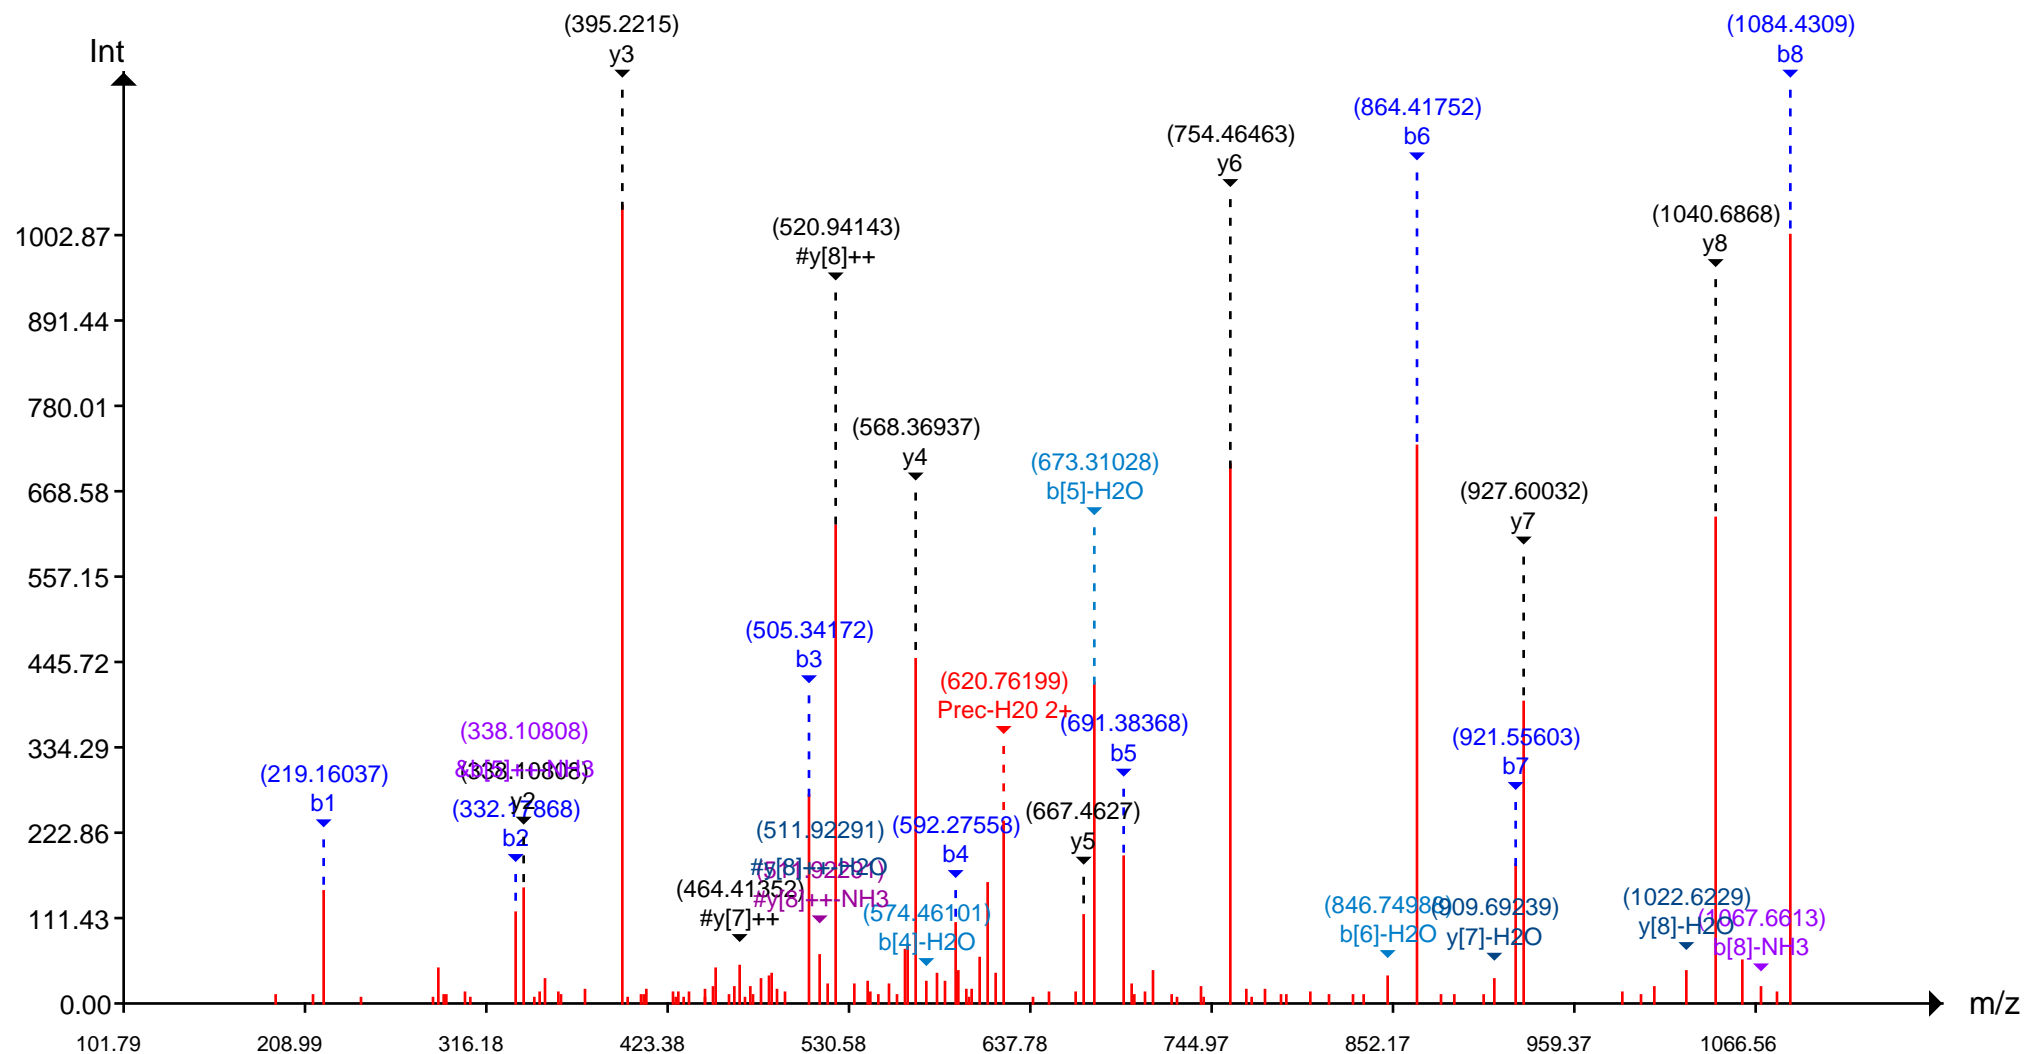

## Info

**Modified Sequence** AcD3-K<AcD3K\*>LK<AcD3K\*>SVK<AcD3K\*>GYR-COOH

**Ion score** 65.58

**Protein** P21981

**Confidence level** 99.00%

**Precursor m/z** 629.89923

**Identity Threshold** 41.29

**Charge** 2+

**Mass error** 4.76E-4



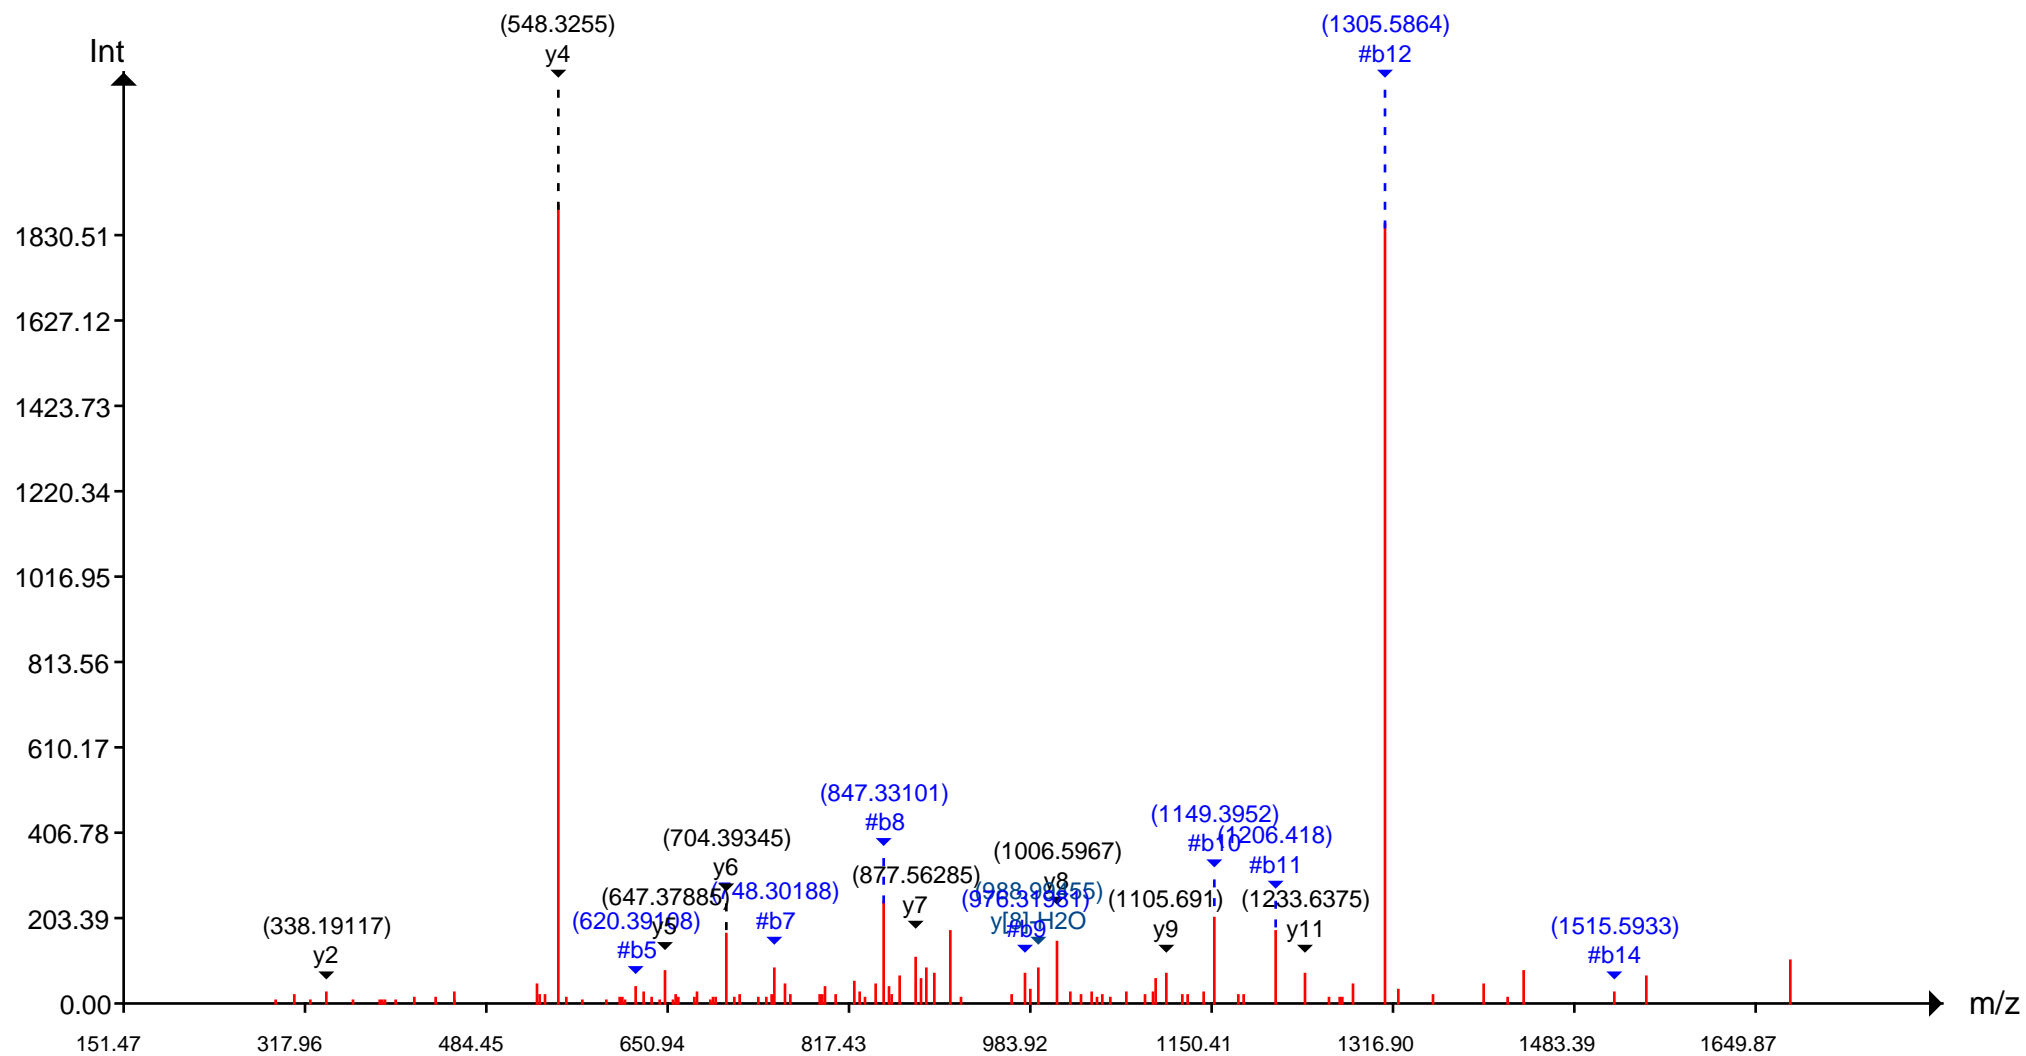

## Info

|                          |                                                  |                           |          |
|--------------------------|--------------------------------------------------|---------------------------|----------|
| <b>Modified Sequence</b> | AcD3-AVC<Cmm*>K<AcD3K*>AGAVEK<AcD3K*>GVPLYR-COOH | <b>Ion score</b>          | 51.84    |
| <b>Protein</b>           | P17182                                           | <b>Confidence level</b>   | 99.00%   |
| <b>Precursor m/z</b>     | 927.01989                                        | <b>Identity Threshold</b> | 46.54    |
| <b>Charge</b>            | 2+                                               | <b>Mass error</b>         | 0.002538 |

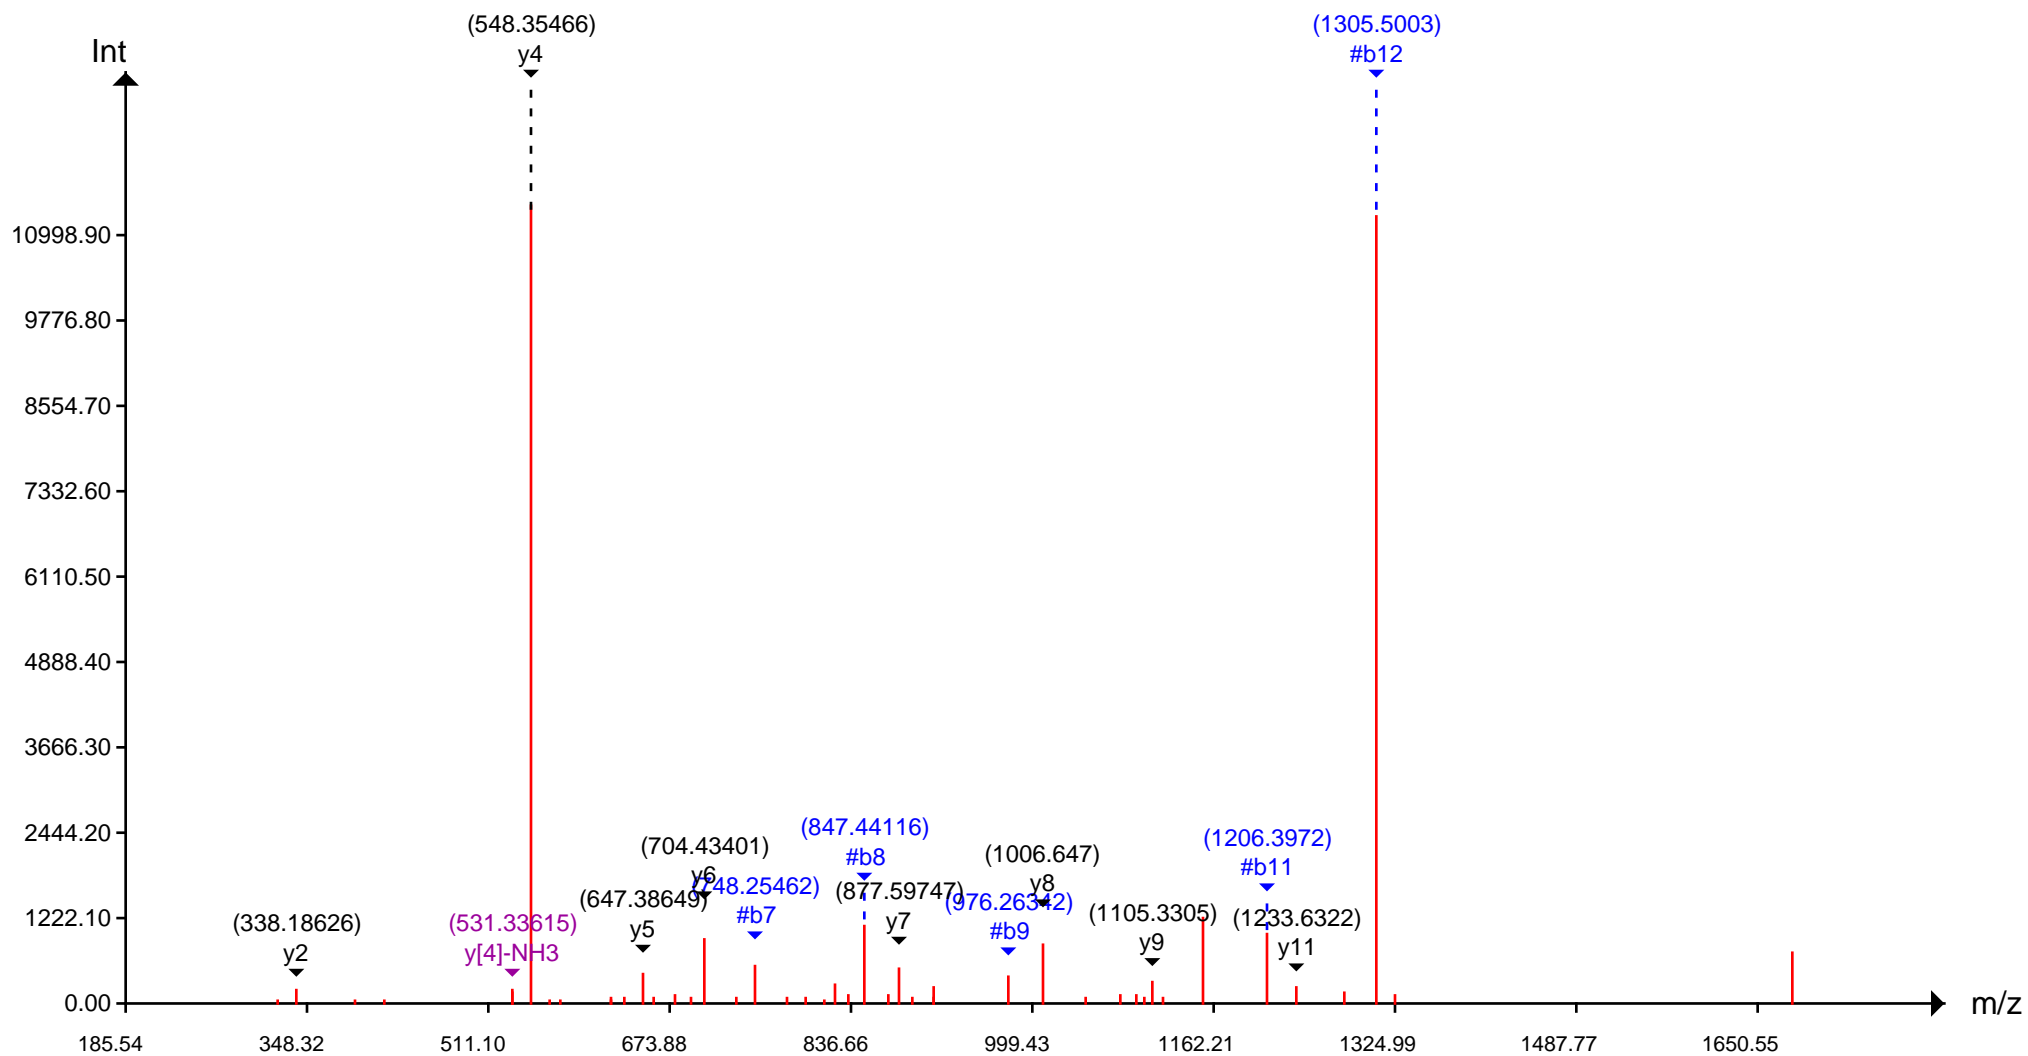

## Info

|                          |                                                  |                           |          |
|--------------------------|--------------------------------------------------|---------------------------|----------|
| <b>Modified Sequence</b> | AcD3-AVC<Cmm*>K<AcD3K*>AGAVEK<AcD3K*>GVPLYR-COOH | <b>Ion score</b>          | 59.58    |
| <b>Protein</b>           | P17182                                           | <b>Confidence level</b>   | 99.00%   |
| <b>Precursor m/z</b>     | 927.02014                                        | <b>Identity Threshold</b> | 46.57    |
| <b>Charge</b>            | 2+                                               | <b>Mass error</b>         | 0.003038 |

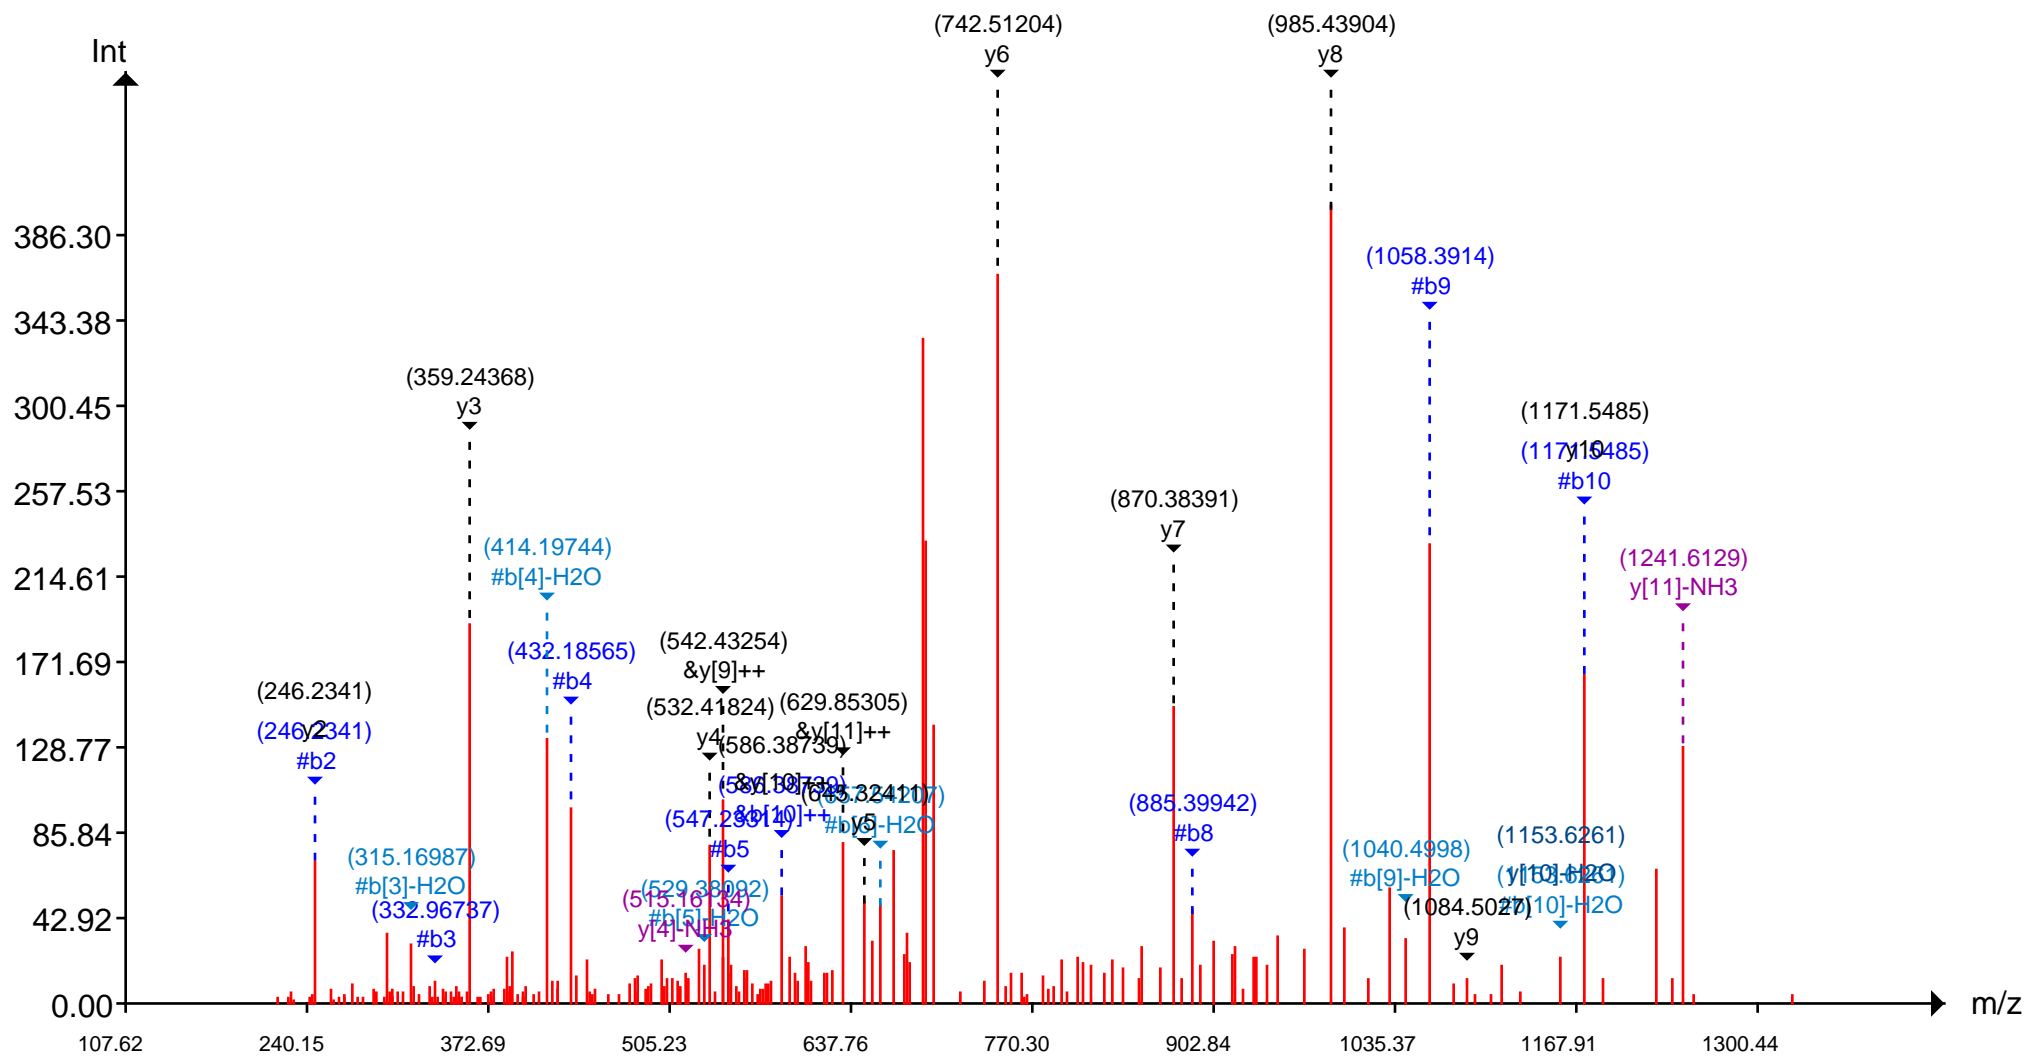

## Info

**Modified Sequence** AcD3-LSSVDQPLK<AcD3K\*>IAR-COOH

**Ion score** 45.96

**Protein** P47757

**Confidence level** 99.00%

**Precursor m/z** 708.92069

**Identity Threshold** 44.70

**Charge** 2+

**Mass error** 0.001358

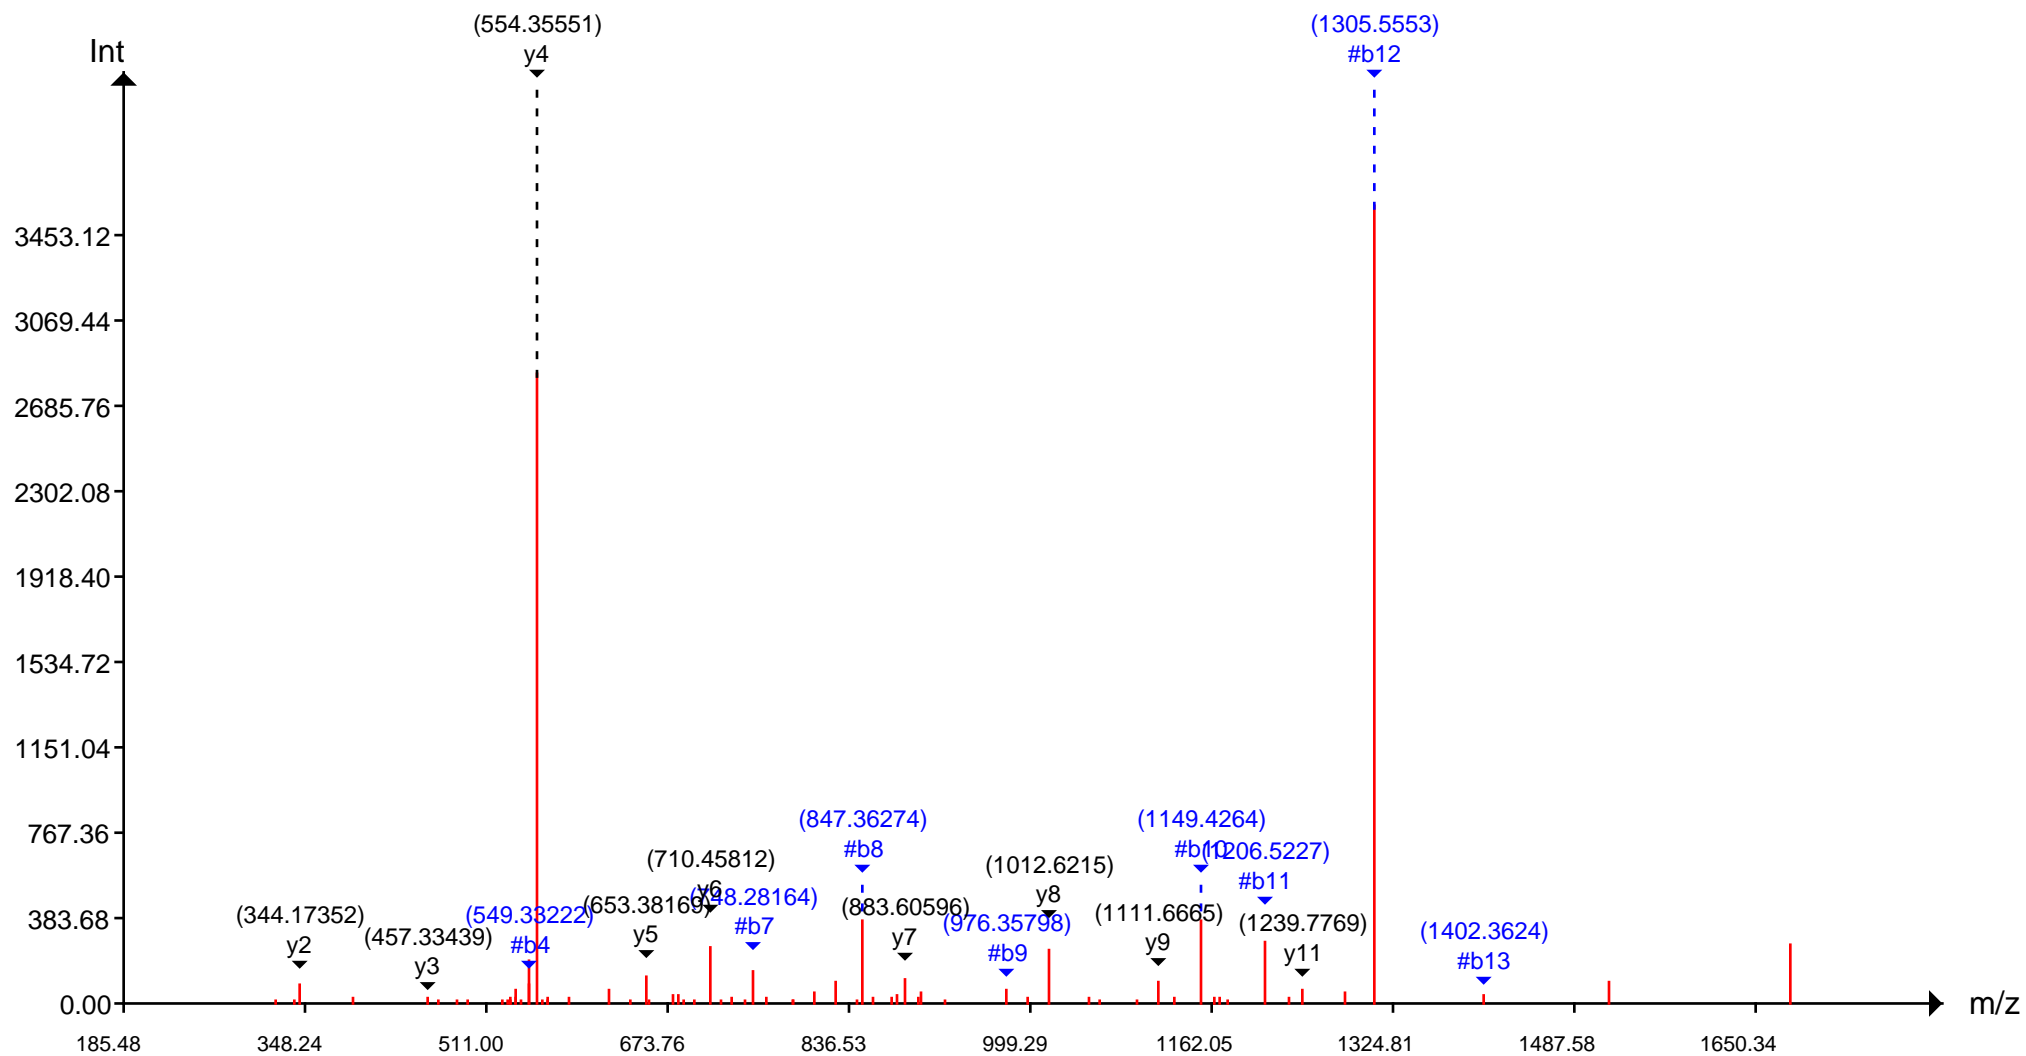

## Info

|                          |                                                       |                           |          |
|--------------------------|-------------------------------------------------------|---------------------------|----------|
| <b>Modified Sequence</b> | AcD3-AVC<Cmm*>K<AcD3K*>AGAVEK<AcD3K*>GVPLYR<C13>-COOH | <b>Ion score</b>          | 71.34    |
| <b>Protein</b>           | P17182                                                | <b>Confidence level</b>   | 99.00%   |
| <b>Precursor m/z</b>     | 930.03009                                             | <b>Identity Threshold</b> | 45.69    |
| <b>Charge</b>            | 2+                                                    | <b>Mass error</b>         | 0.002797 |

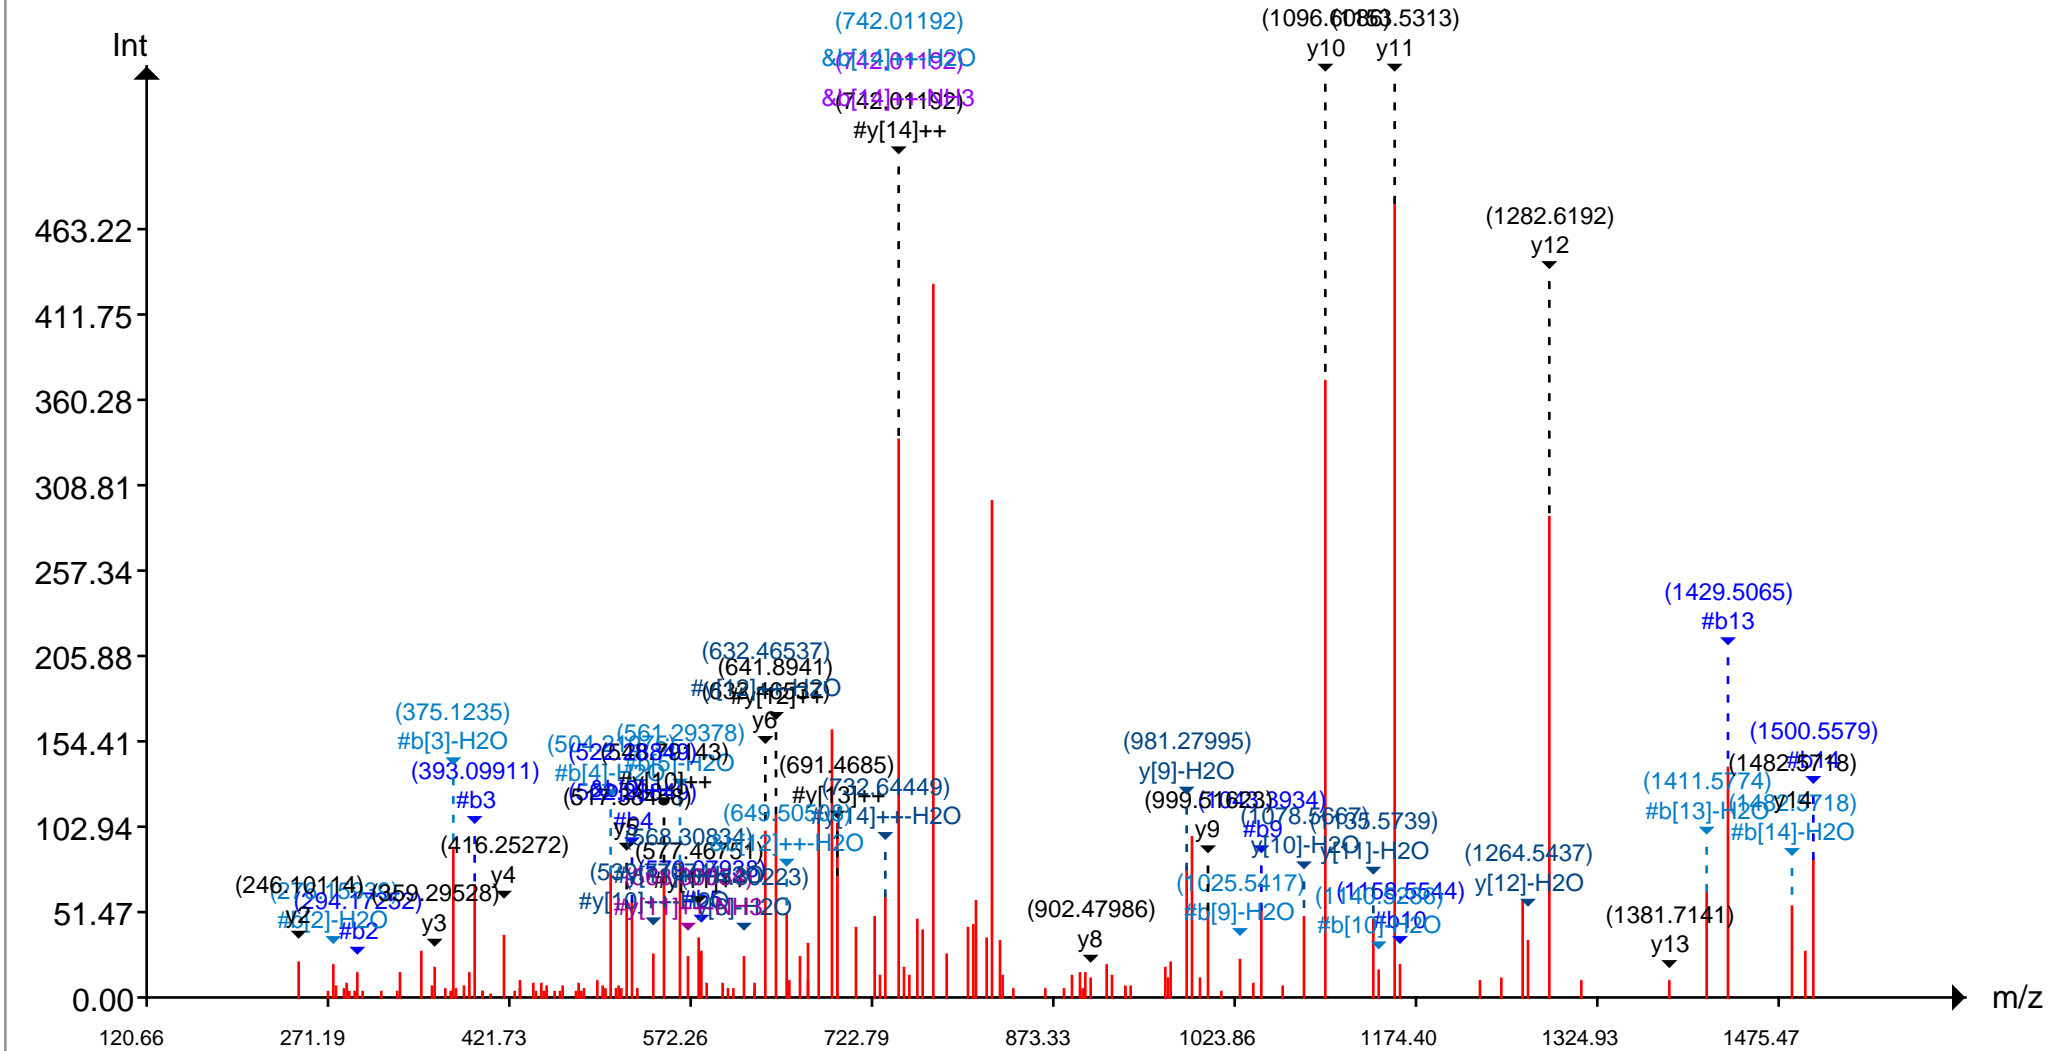

## Info

|                          |                                        |                           |         |
|--------------------------|----------------------------------------|---------------------------|---------|
| <b>Modified Sequence</b> | AcD3-M<Mox*>TVEGPPP<AcD3K*>DTGIAR-COOH | <b>Ion score</b>          | 80.96   |
| <b>Protein</b>           | P27048, P63163                         | <b>Confidence level</b>   | 99.00%  |
| <b>Precursor m/z</b>     | 837.93593                              | <b>Identity Threshold</b> | 48.05   |
| <b>Charge</b>            | 2+                                     | <b>Mass error</b>         | 7.71E-4 |

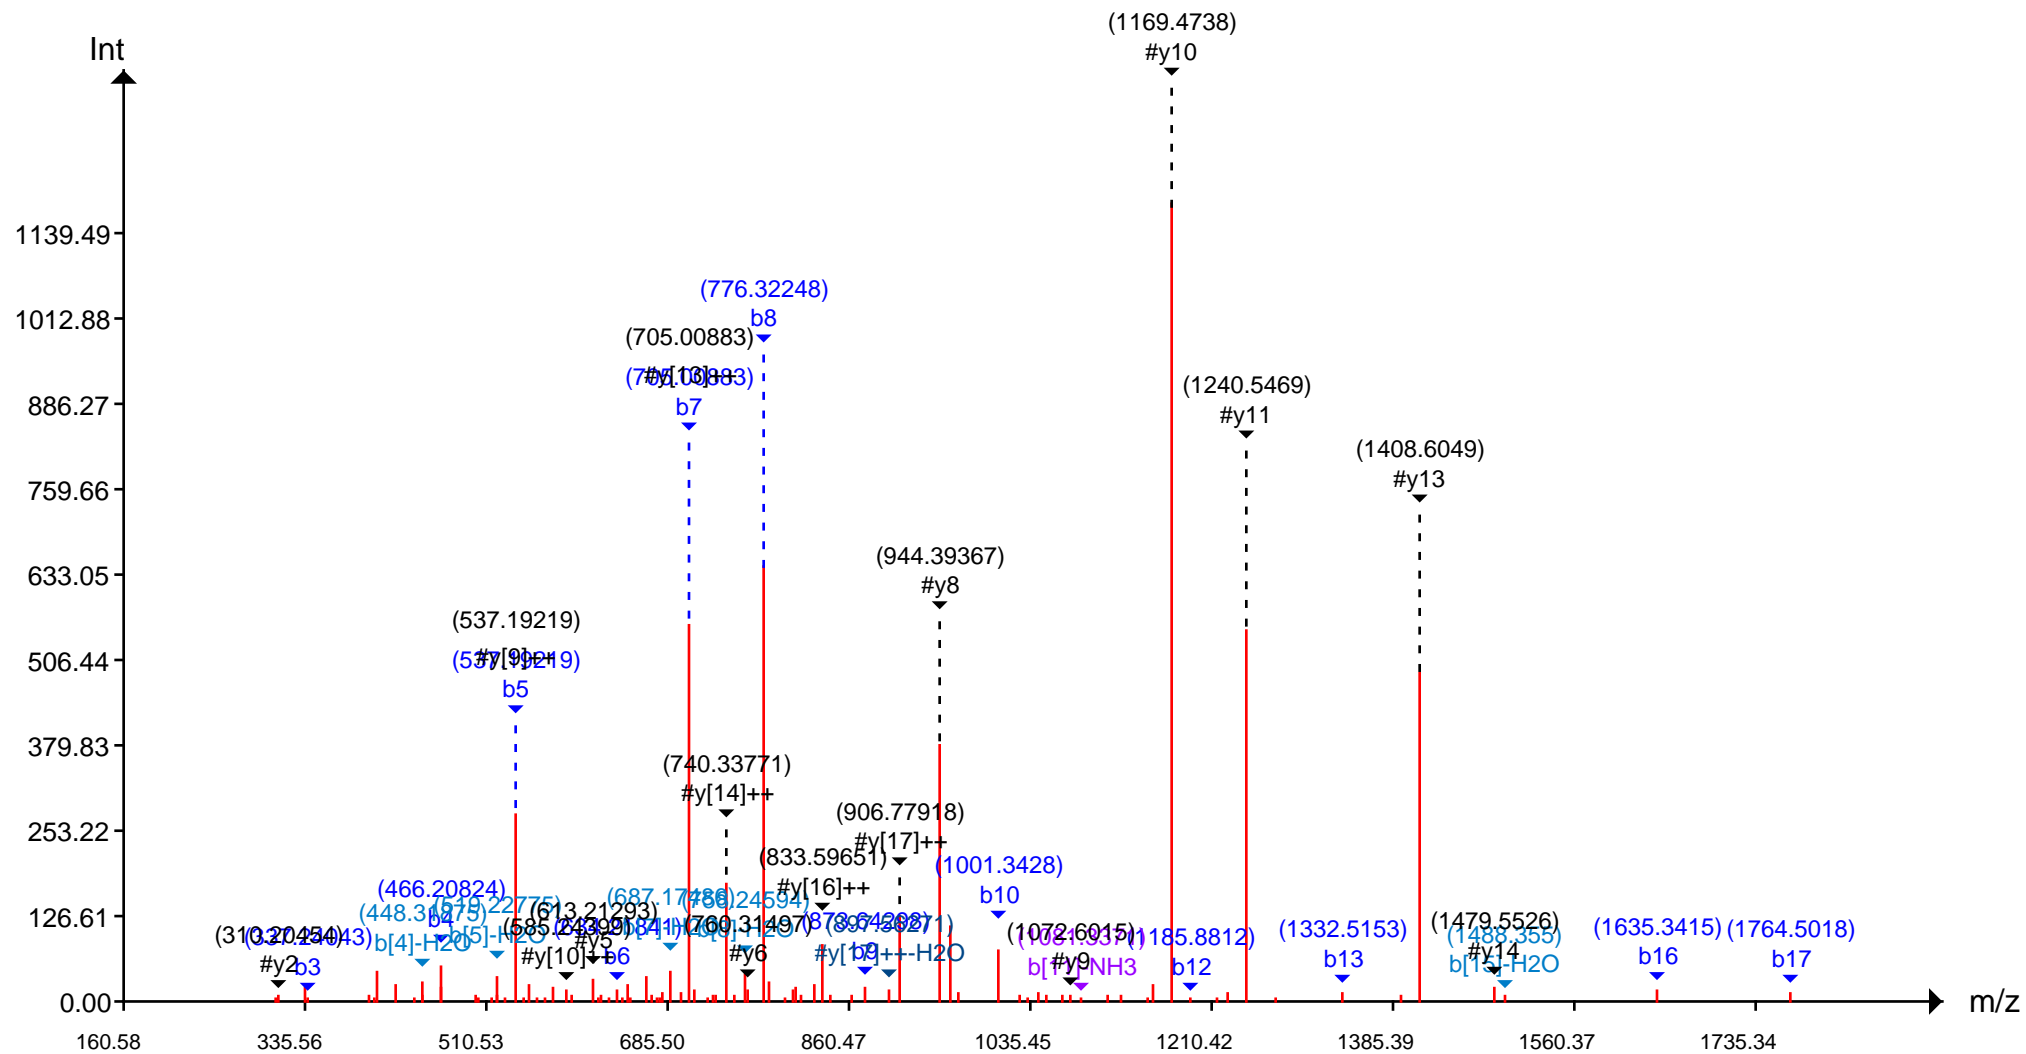

## Info

|                          |                                         |                           |          |
|--------------------------|-----------------------------------------|---------------------------|----------|
| <b>Modified Sequence</b> | AcD3-SFGEAPAAPQPSM<Mox*>SSEER<C13>-COOH | <b>Ion score</b>          | 74.2     |
| <b>Protein</b>           | Q9R062                                  | <b>Confidence level</b>   | 99.00%   |
| <b>Precursor m/z</b>     | 972.94308                               | <b>Identity Threshold</b> | 44.07    |
| <b>Charge</b>            | 2+                                      | <b>Mass error</b>         | 0.001048 |

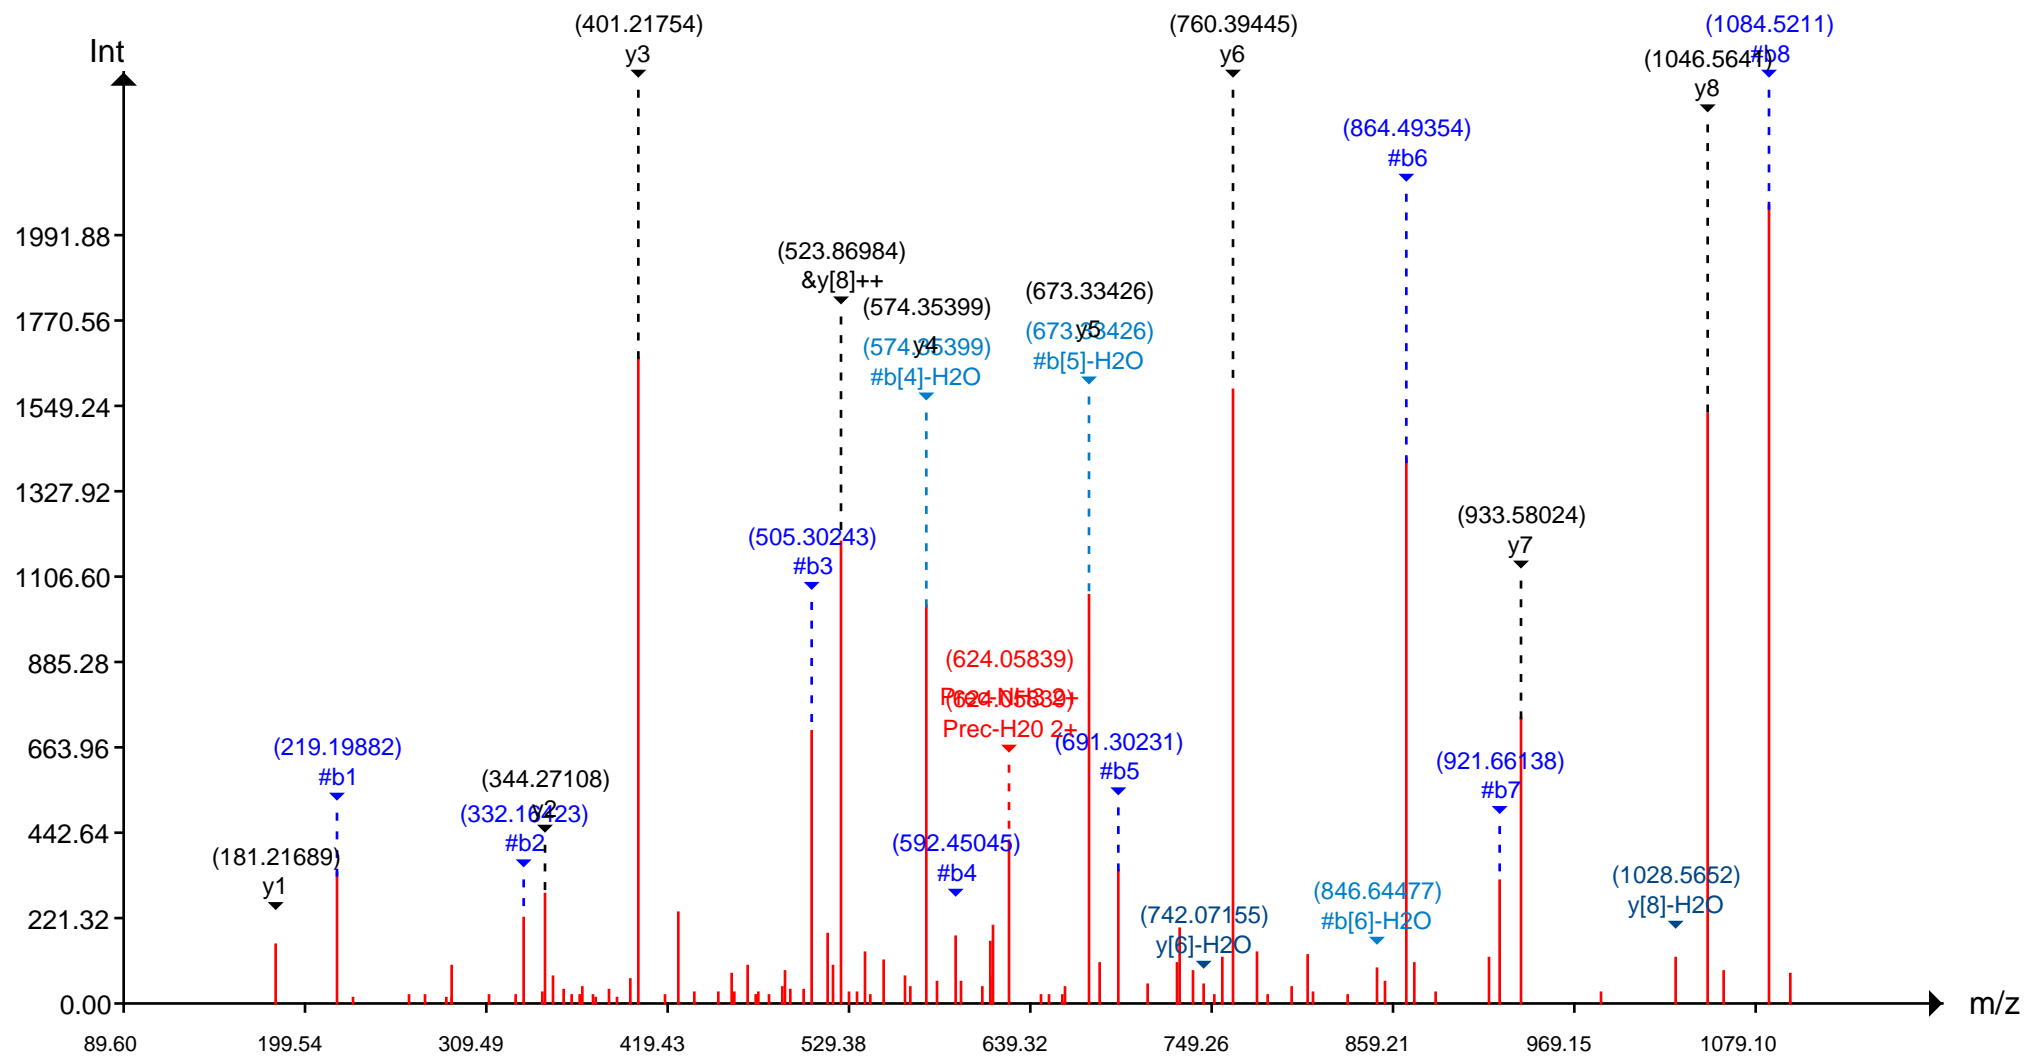

## Info

|                          |                                                  |                           |         |
|--------------------------|--------------------------------------------------|---------------------------|---------|
| <b>Modified Sequence</b> | AcD3-K<AcD3K*>LK<AcD3K*>SVK<AcD3K*>GYR<C13>-COOH | <b>Ion score</b>          | 69.44   |
| <b>Protein</b>           | P21981                                           | <b>Confidence level</b>   | 99.00%  |
| <b>Precursor m/z</b>     | 632.90928                                        | <b>Identity Threshold</b> | 38.53   |
| <b>Charge</b>            | 2+                                               | <b>Mass error</b>         | 4.34E-4 |

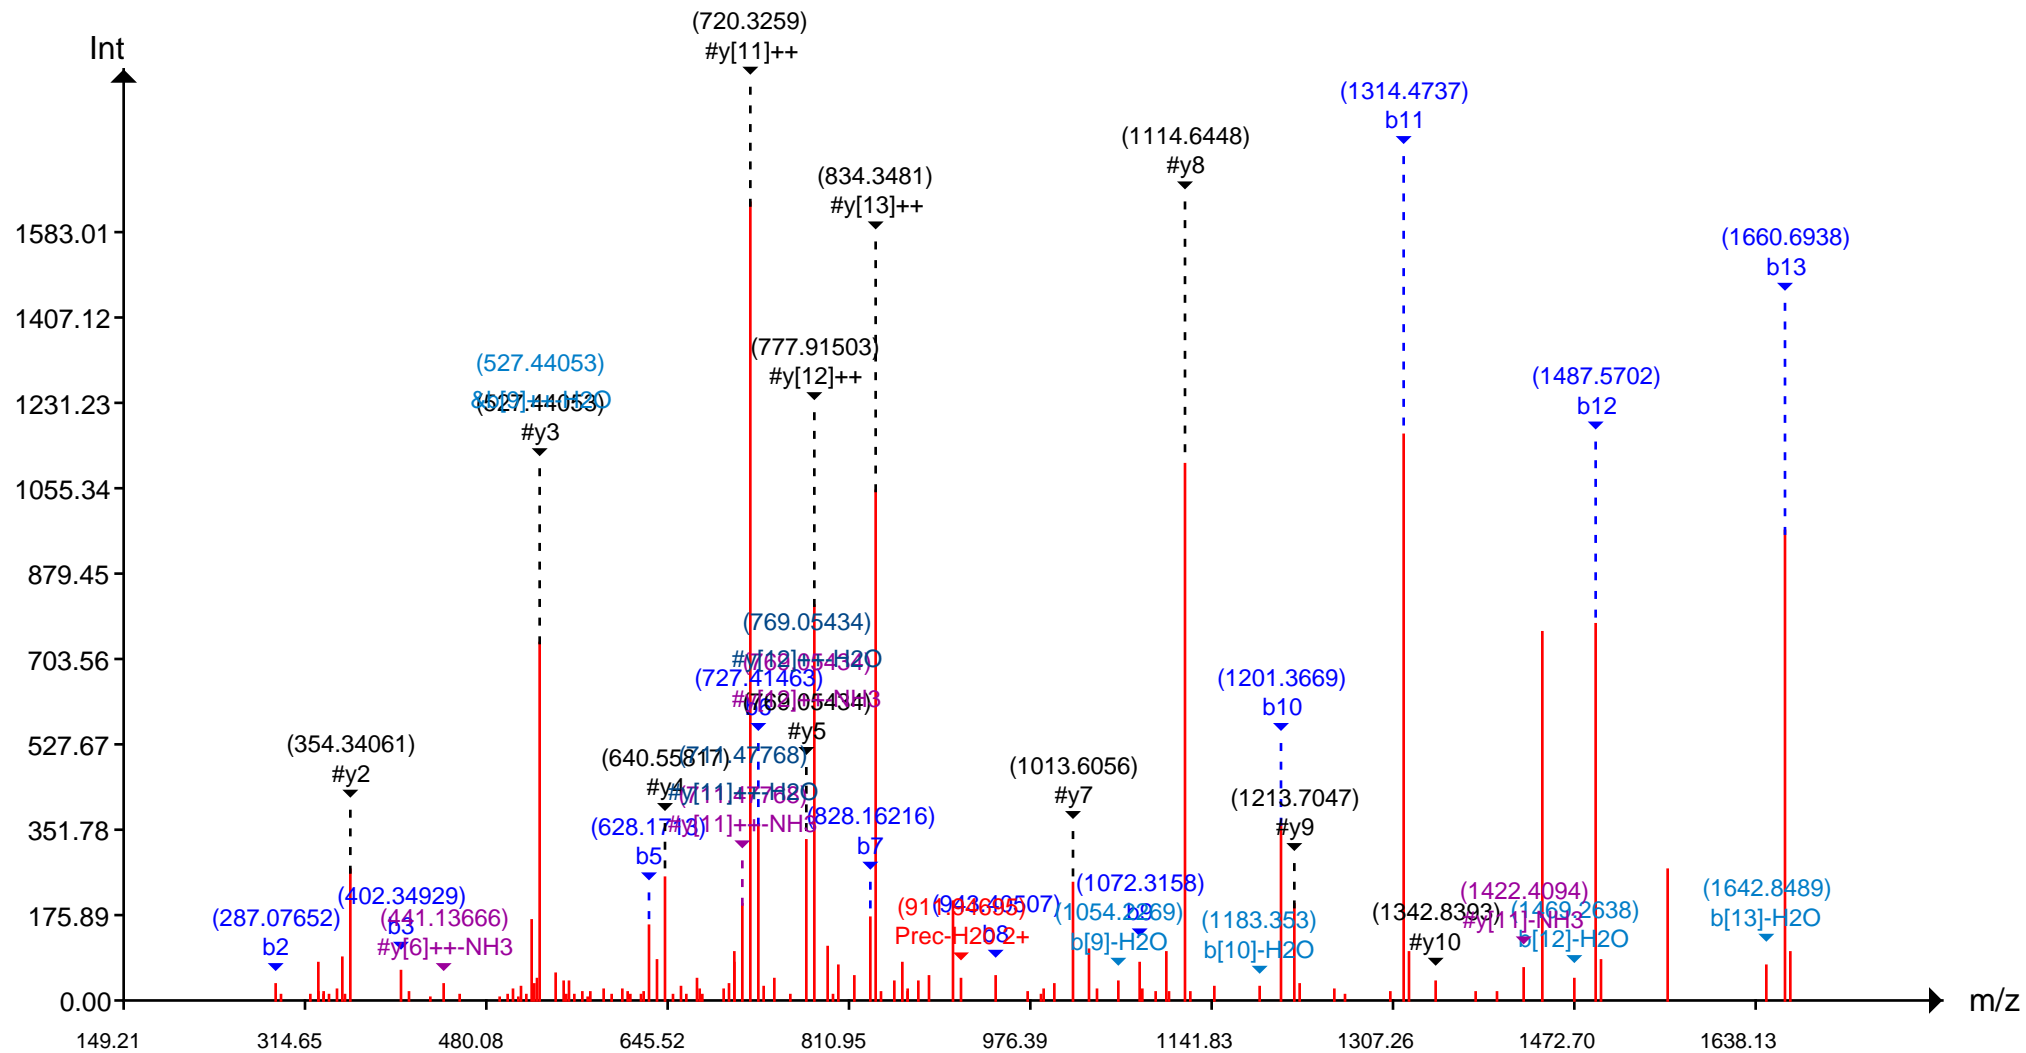

## Info

**Modified Sequence** AcD3-QIDPEVTDEEIK<AcD3K\*>K<AcD3K\*>R<C13>-COOH

**Ion score** 67.52

**Protein** Q6NZB0

**Confidence level** 99.00%

**Precursor m/z** 921.00137

**Identity Threshold** 47.57

**Charge** 2+

**Mass error** 0.001051



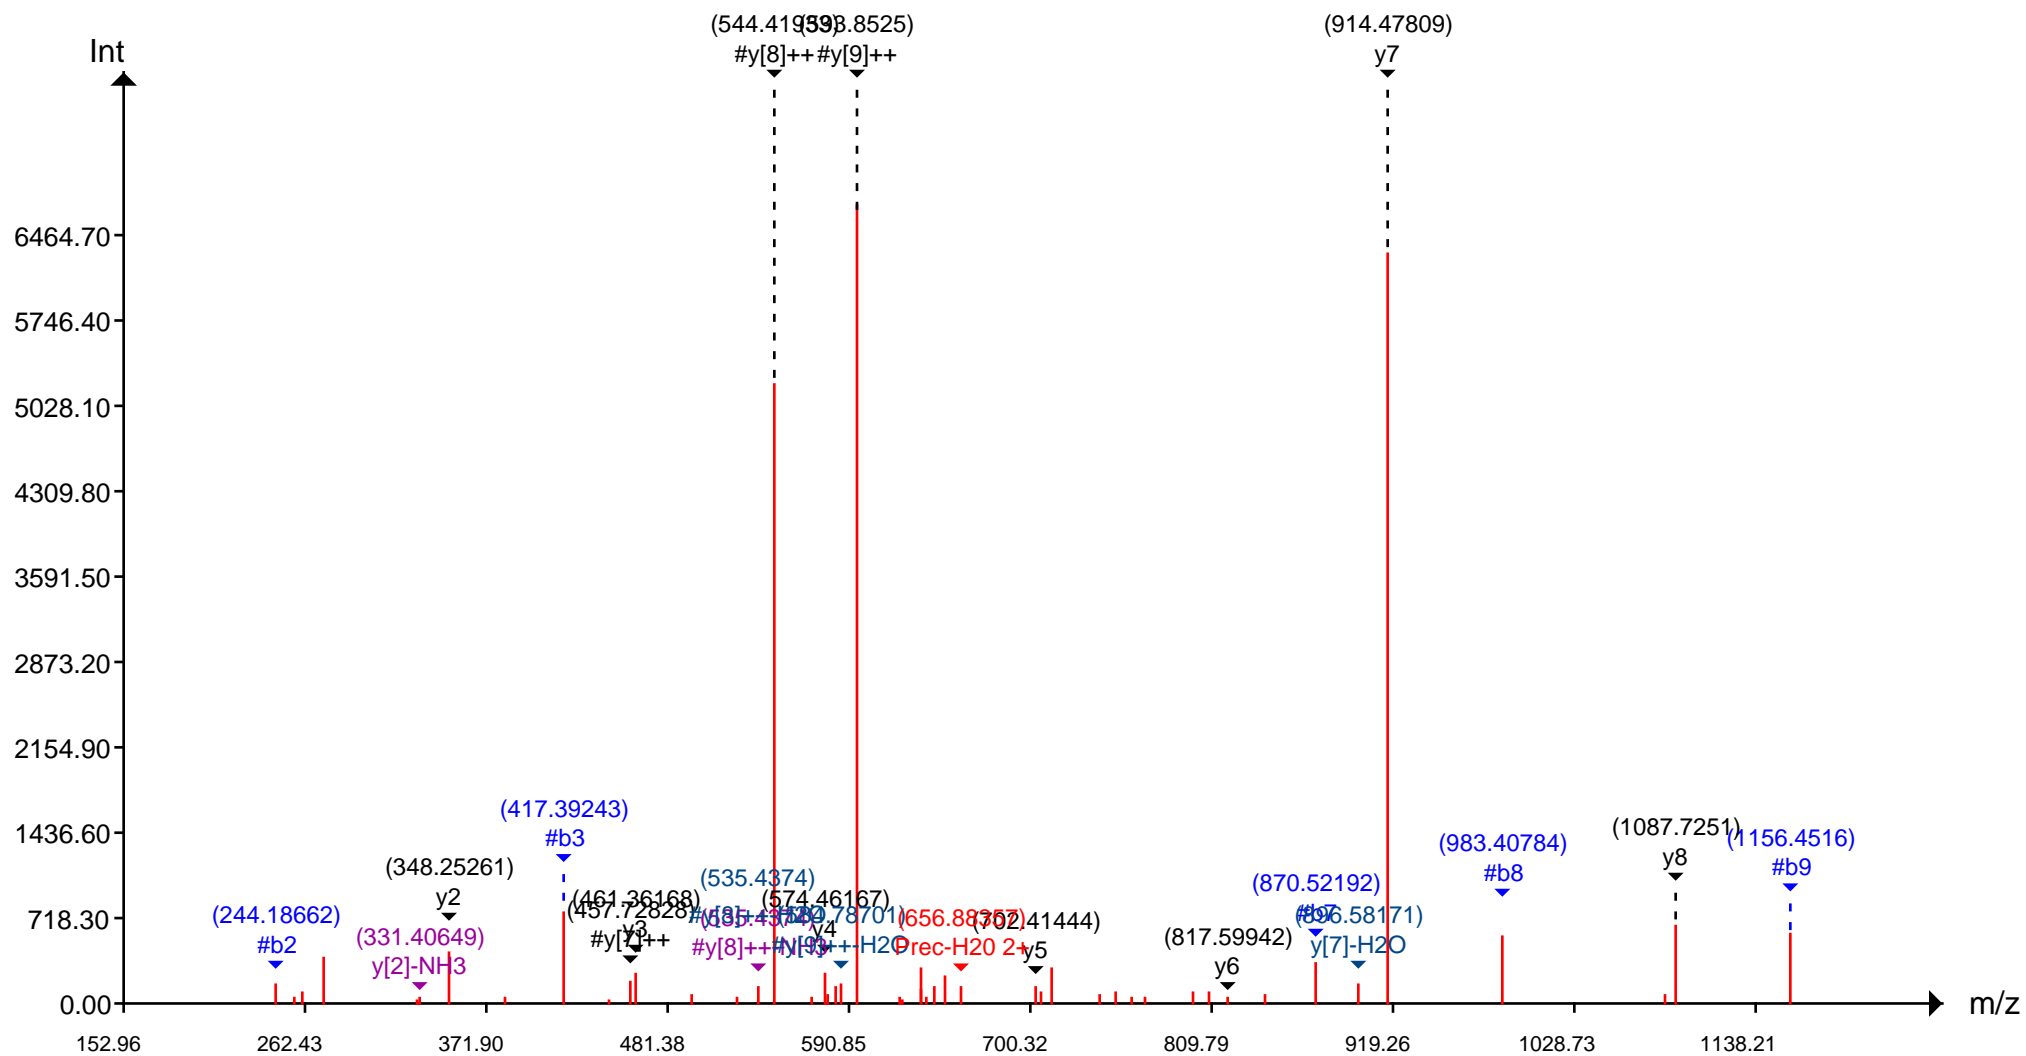

## Info

|                          |                                      |                           |          |
|--------------------------|--------------------------------------|---------------------------|----------|
| <b>Modified Sequence</b> | AcD3-VVK<AcD3K*>PDQLIK<AcD3K*>R-COOH | <b>Ion score</b>          | 42.26    |
| <b>Protein</b>           | Q91V92                               | <b>Confidence level</b>   | 99.00%   |
| <b>Precursor m/z</b>     | 665.92467                            | <b>Identity Threshold</b> | 39.25    |
| <b>Charge</b>            | 2+                                   | <b>Mass error</b>         | 0.001765 |

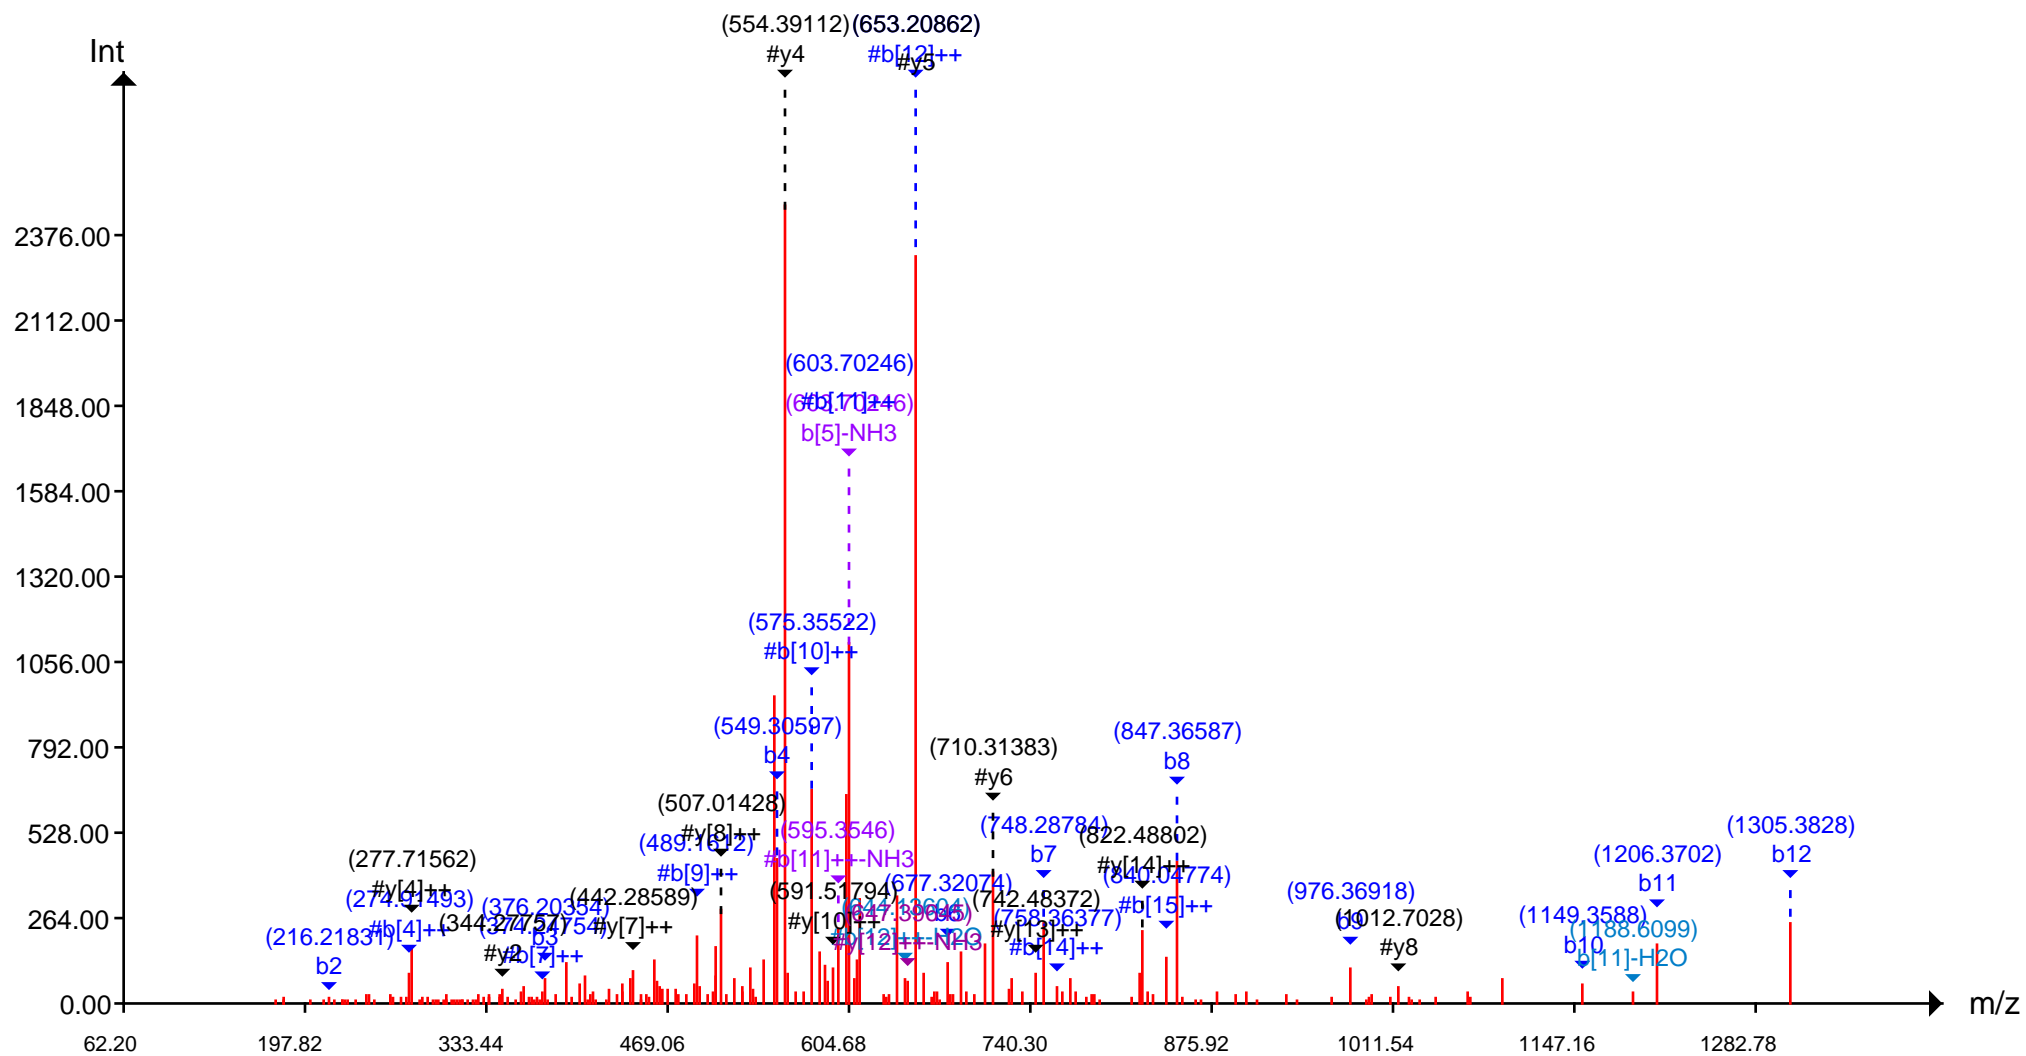

## Info

|                          |                                                       |                           |          |
|--------------------------|-------------------------------------------------------|---------------------------|----------|
| <b>Modified Sequence</b> | AcD3-AVC<Cmm*>K<AcD3K*>AGAVEK<AcD3K*>GVPLYR<C13>-COOH | <b>Ion score</b>          | 55.53    |
| <b>Protein</b>           | P17182                                                | <b>Confidence level</b>   | 99.00%   |
| <b>Precursor m/z</b>     | 620.3548                                              | <b>Identity Threshold</b> | 45.86    |
| <b>Charge</b>            | 3+                                                    | <b>Mass error</b>         | -2.59E-4 |

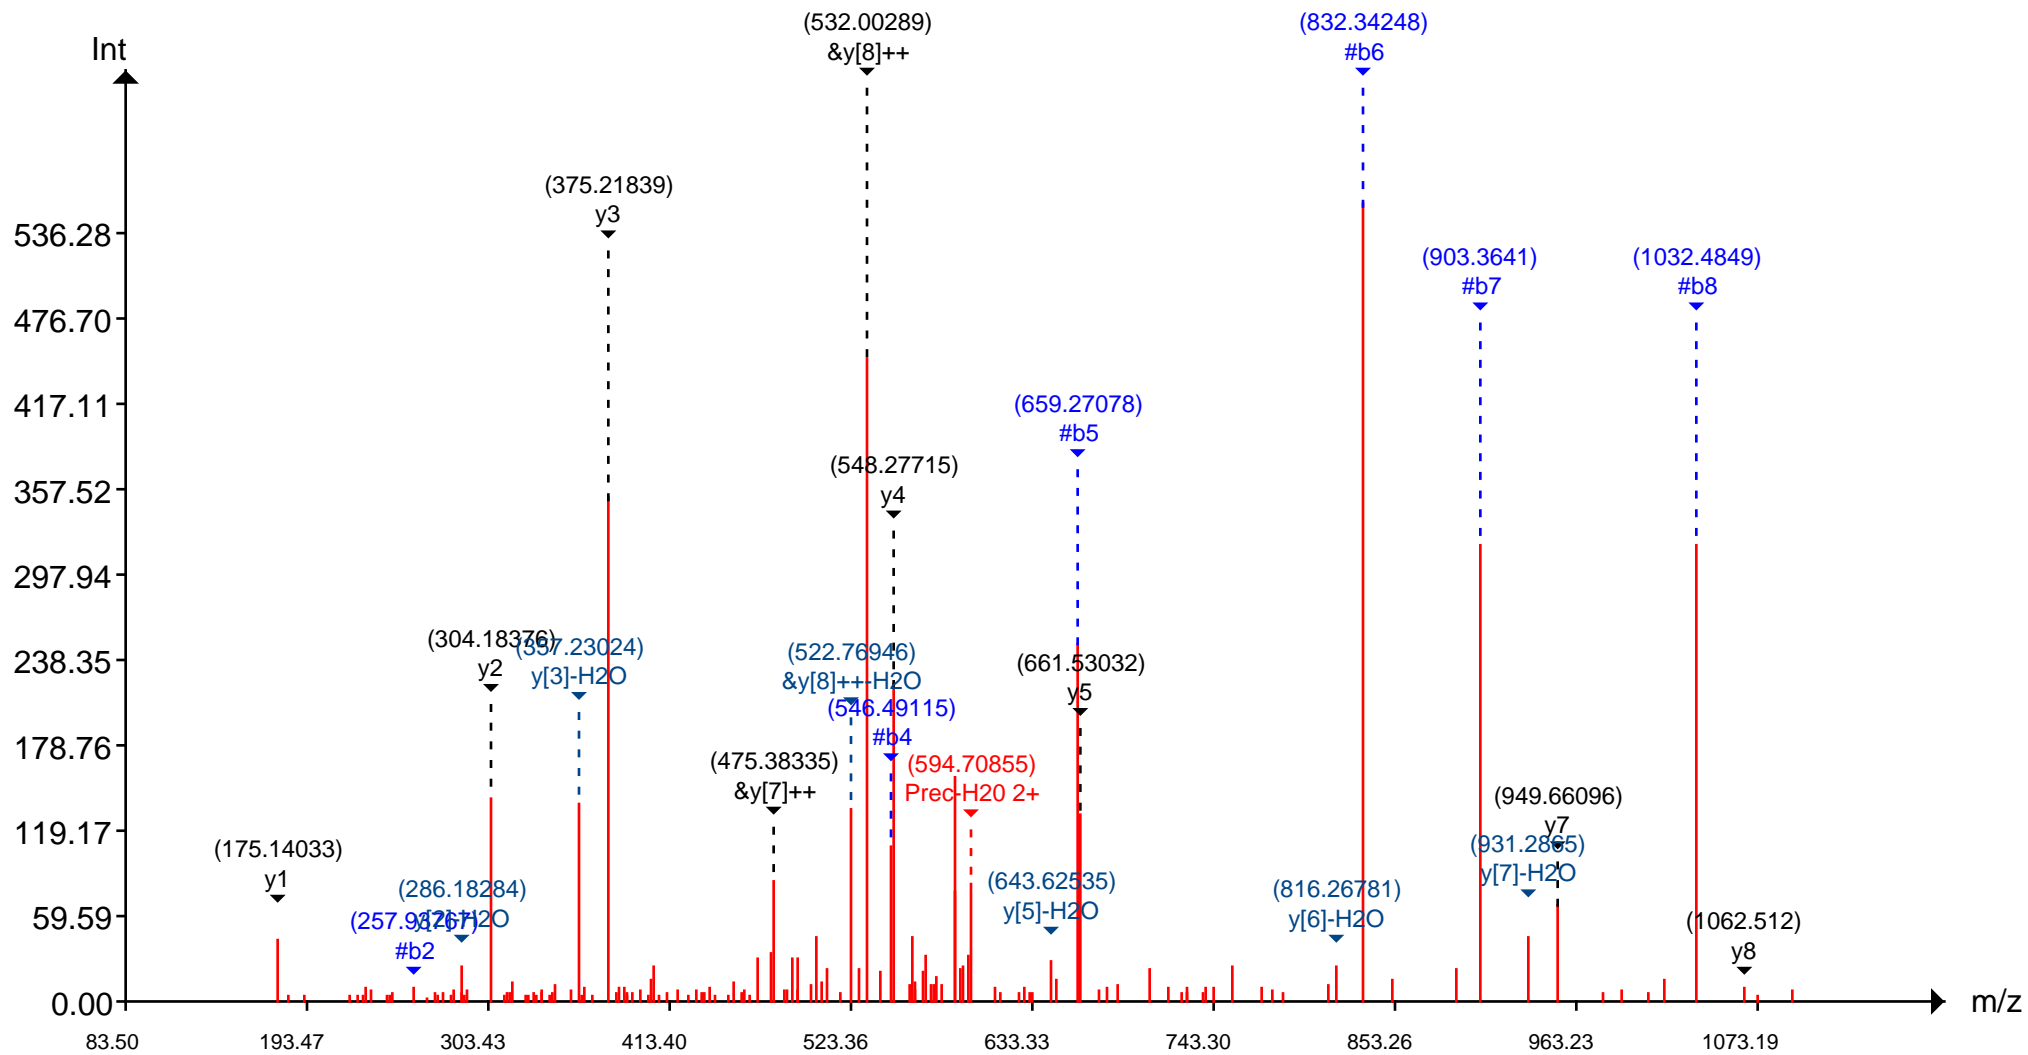

## Info

**Modified Sequence** AcD3-VLDK<AcD3K\*>LK<AcD3K\*>AER-COOH

**Ion score** 50.26

**Protein** P10126, P62631

**Confidence level** 99.00%

**Precursor m/z** 603.87411

**Identity Threshold** 42.56

**Charge** 2+

**Mass error** 7.12E-4

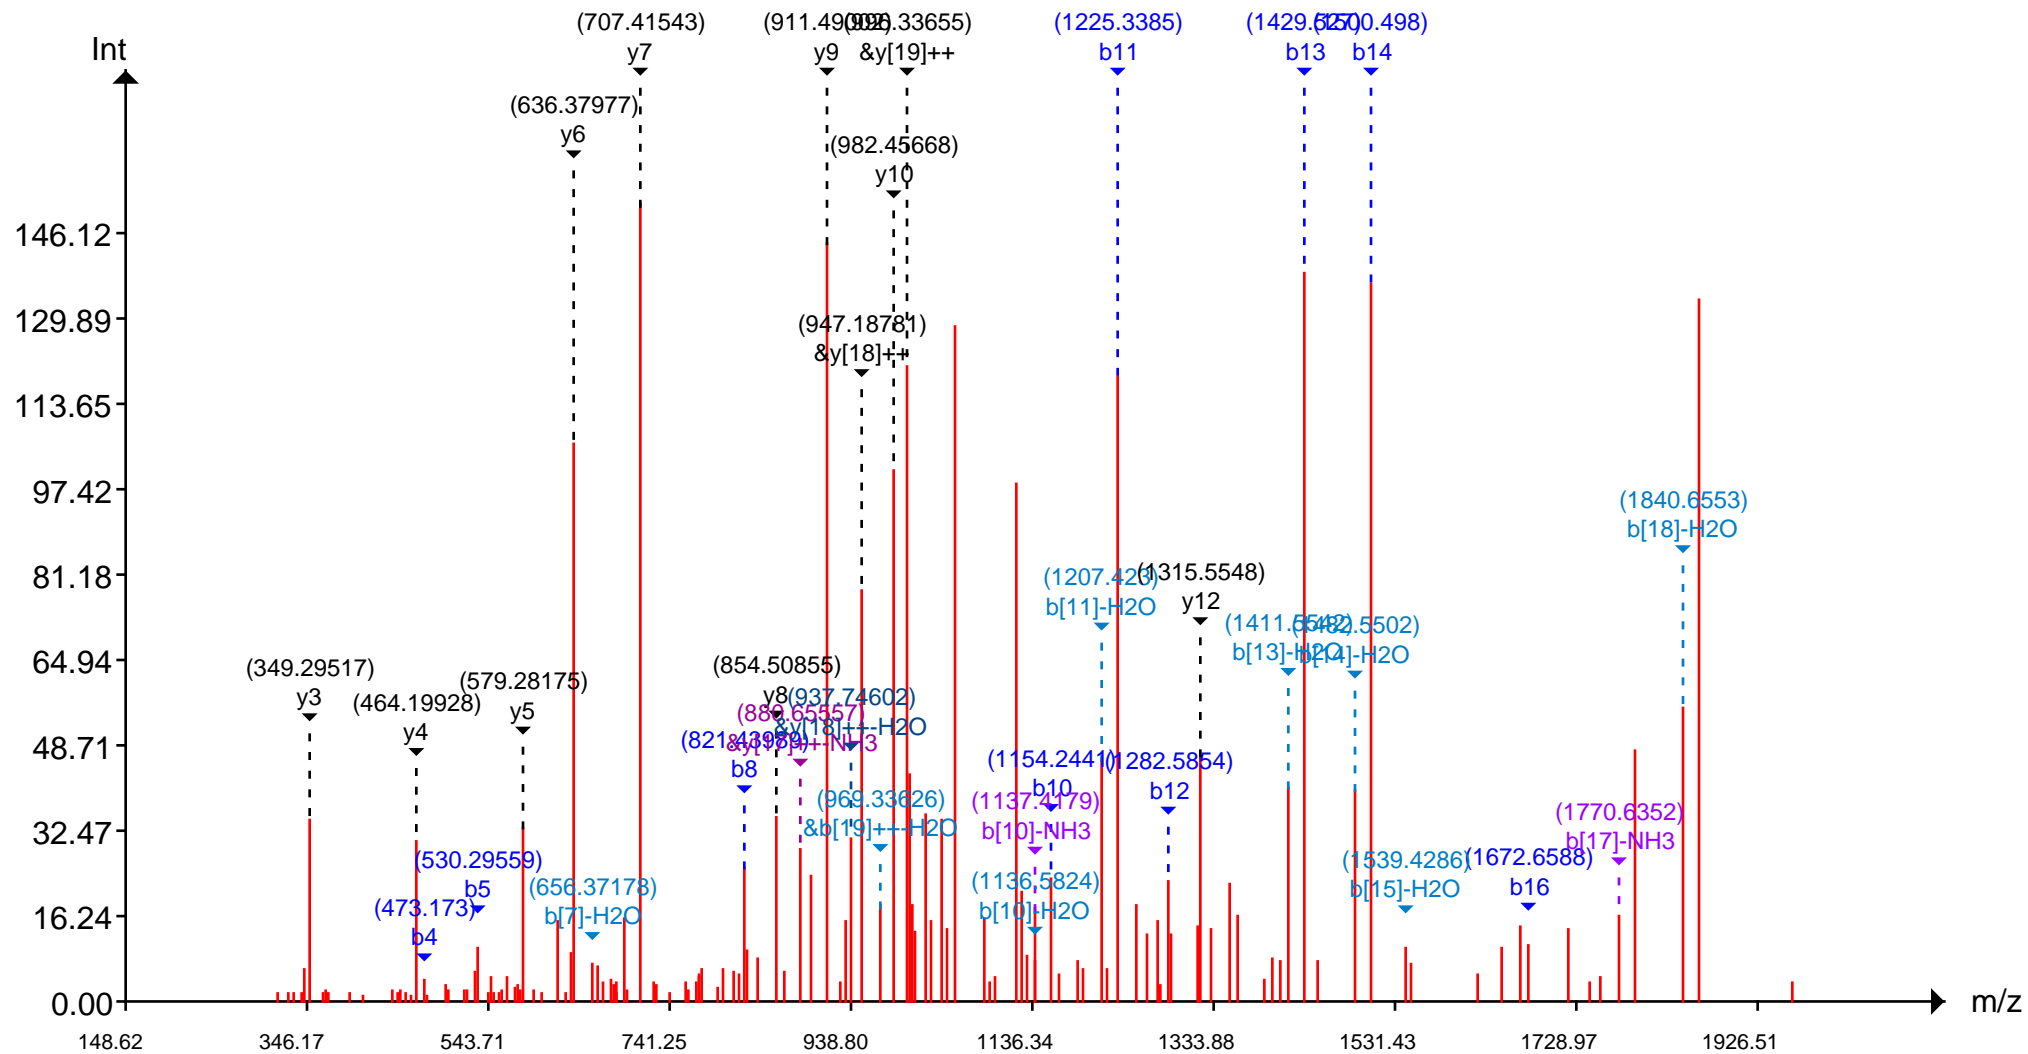

## Info

|                          |                                                         |                           |          |
|--------------------------|---------------------------------------------------------|---------------------------|----------|
| <b>Modified Sequence</b> | AcD3-VVDNGSGM<Mox*>C<Cmm*>K<AcD3K*>AGFAGDDAPR<C13>-COOH | <b>Ion score</b>          | 60.27    |
| <b>Protein</b>           | P60710                                                  | <b>Confidence level</b>   | 99.00%   |
| <b>Precursor m/z</b>     | 1068.4892                                               | <b>Identity Threshold</b> | 44.27    |
| <b>Charge</b>            | 2+                                                      | <b>Mass error</b>         | 0.001217 |

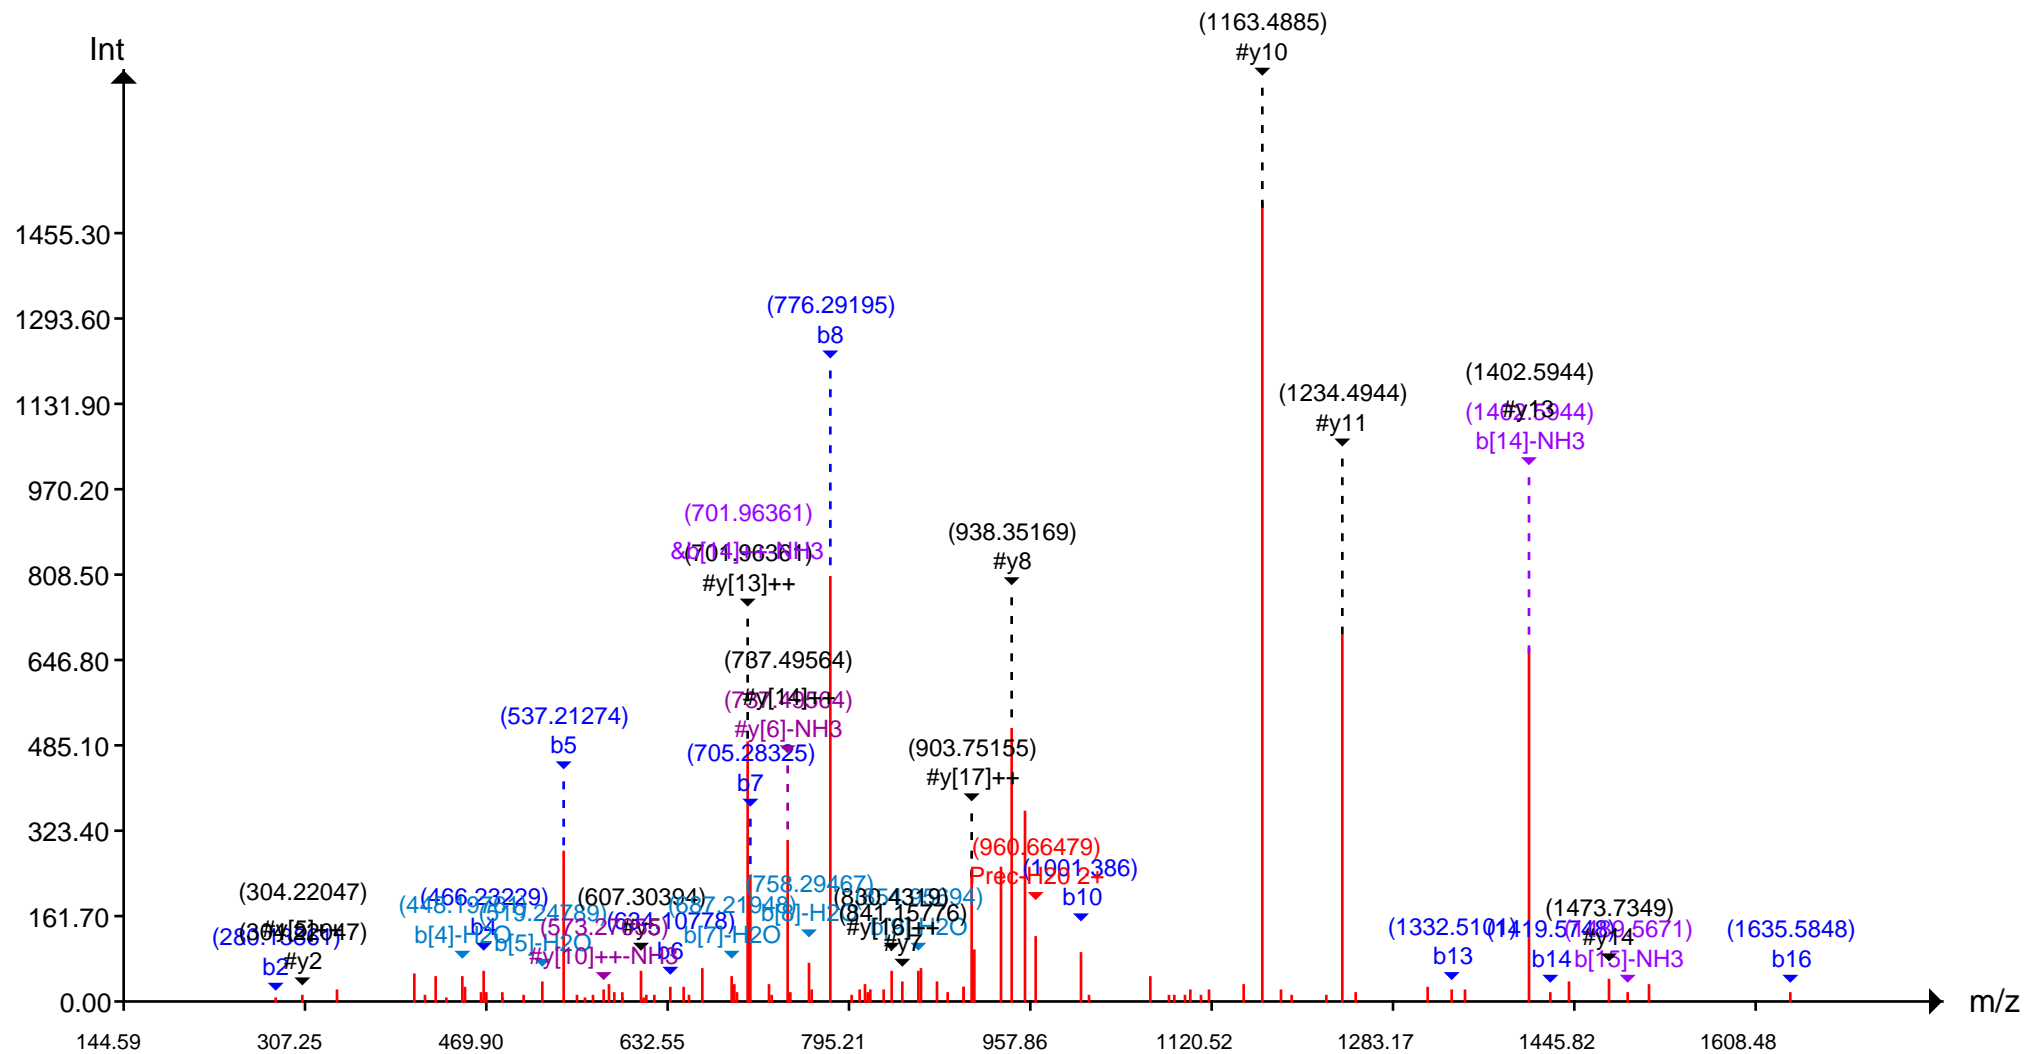

## Info

|                          |                                    |                           |         |
|--------------------------|------------------------------------|---------------------------|---------|
| <b>Modified Sequence</b> | AcD3-SFGEAPAAPQPSM<Mox*>SSEER-COOH | <b>Ion score</b>          | 60.27   |
| <b>Protein</b>           | Q9R062                             | <b>Confidence level</b>   | 99.00%  |
| <b>Precursor m/z</b>     | 969.93326                          | <b>Identity Threshold</b> | 43.12   |
| <b>Charge</b>            | 2+                                 | <b>Mass error</b>         | 0.00155 |

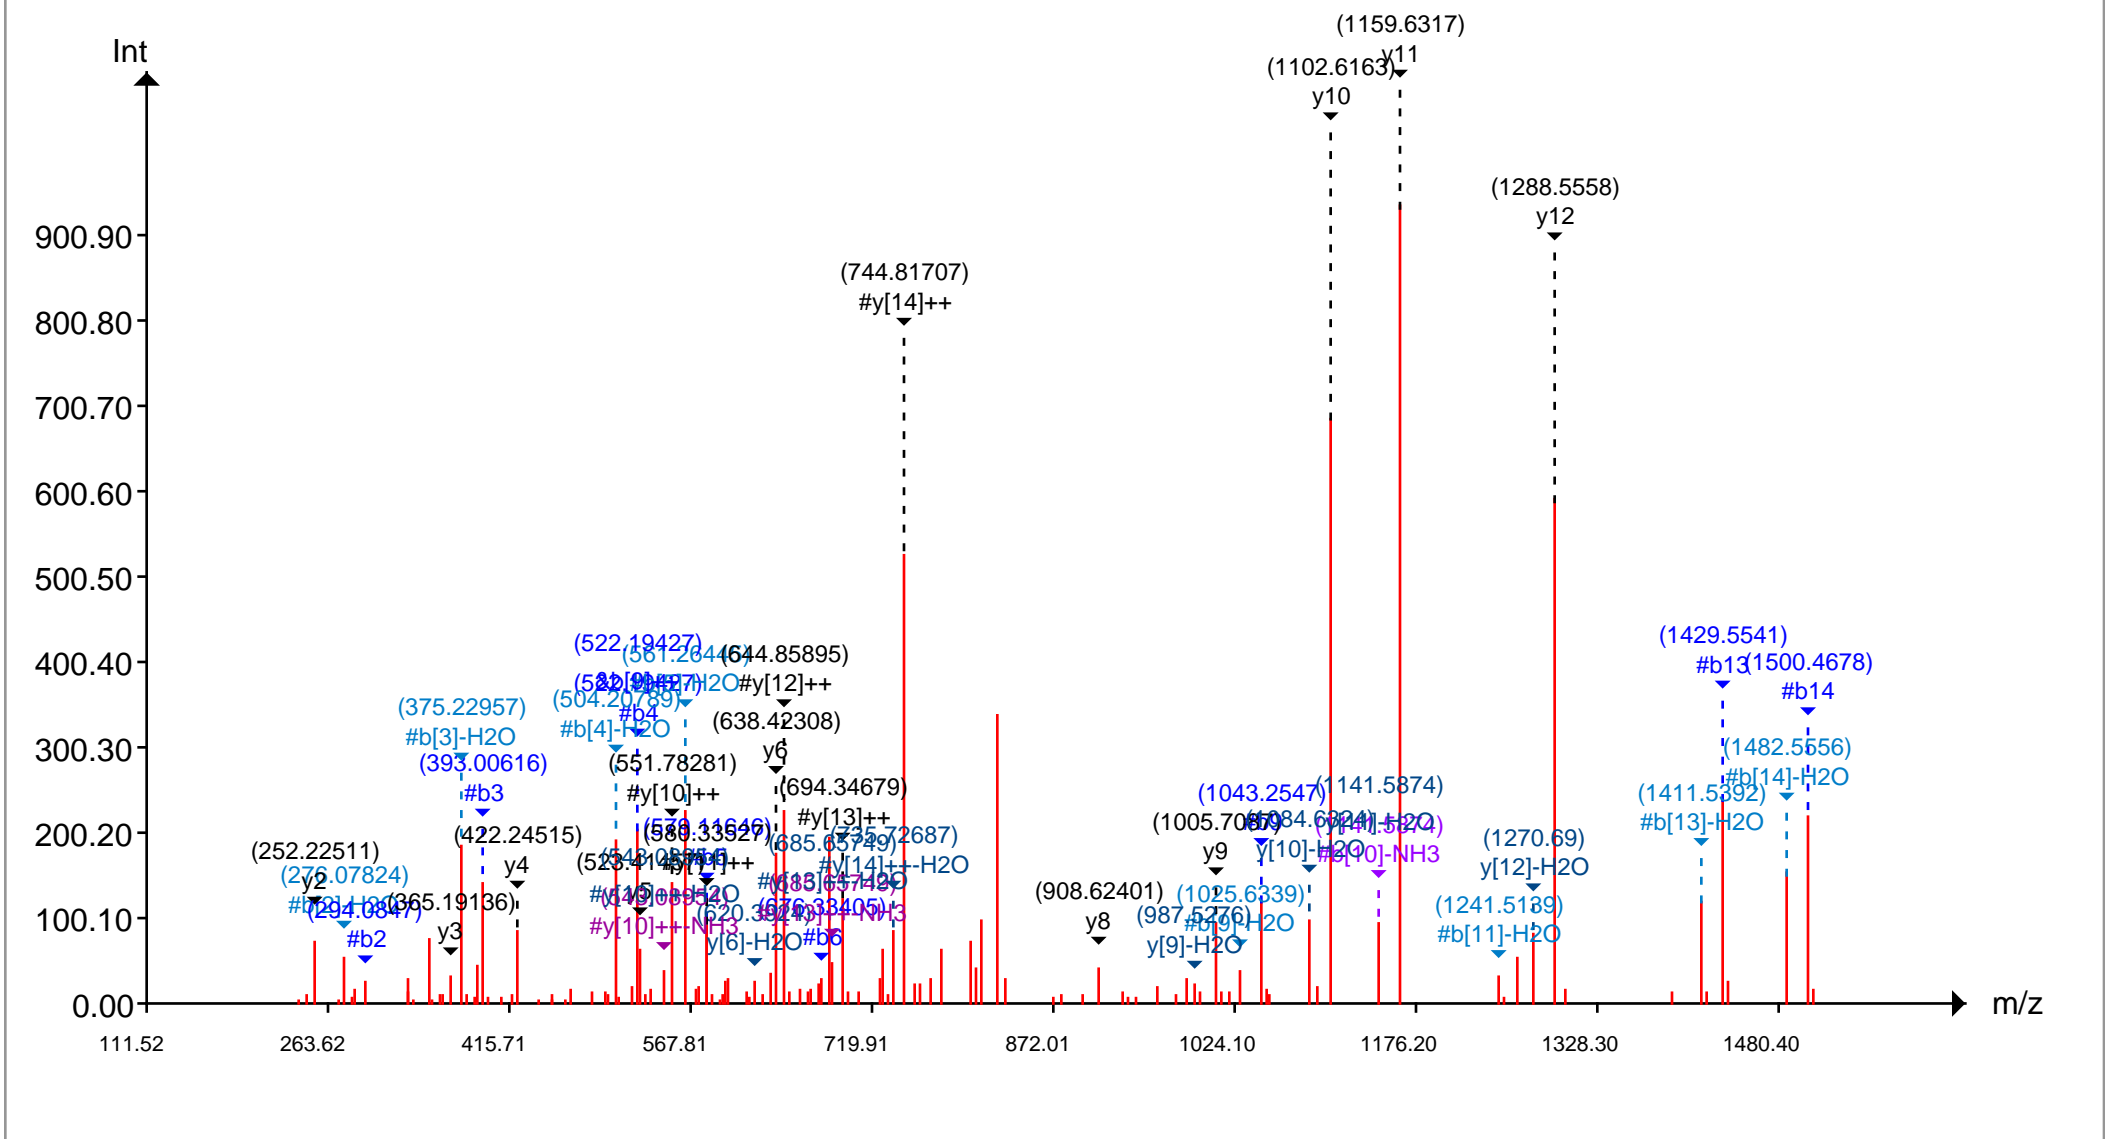

## Info

**Modified Sequence** AcD3-M<Mox\*>TVEGPPPK<AcD3K\*>DTGIAR<C13>-COOH

**Ion score** 72.56

**Protein** P27048, P63163

**Confidence level** 99.00%

**Precursor m/z** 840.94601

**Identity Threshold** 48.06

**Charge** 2+

**Mass error** 7.9E-4

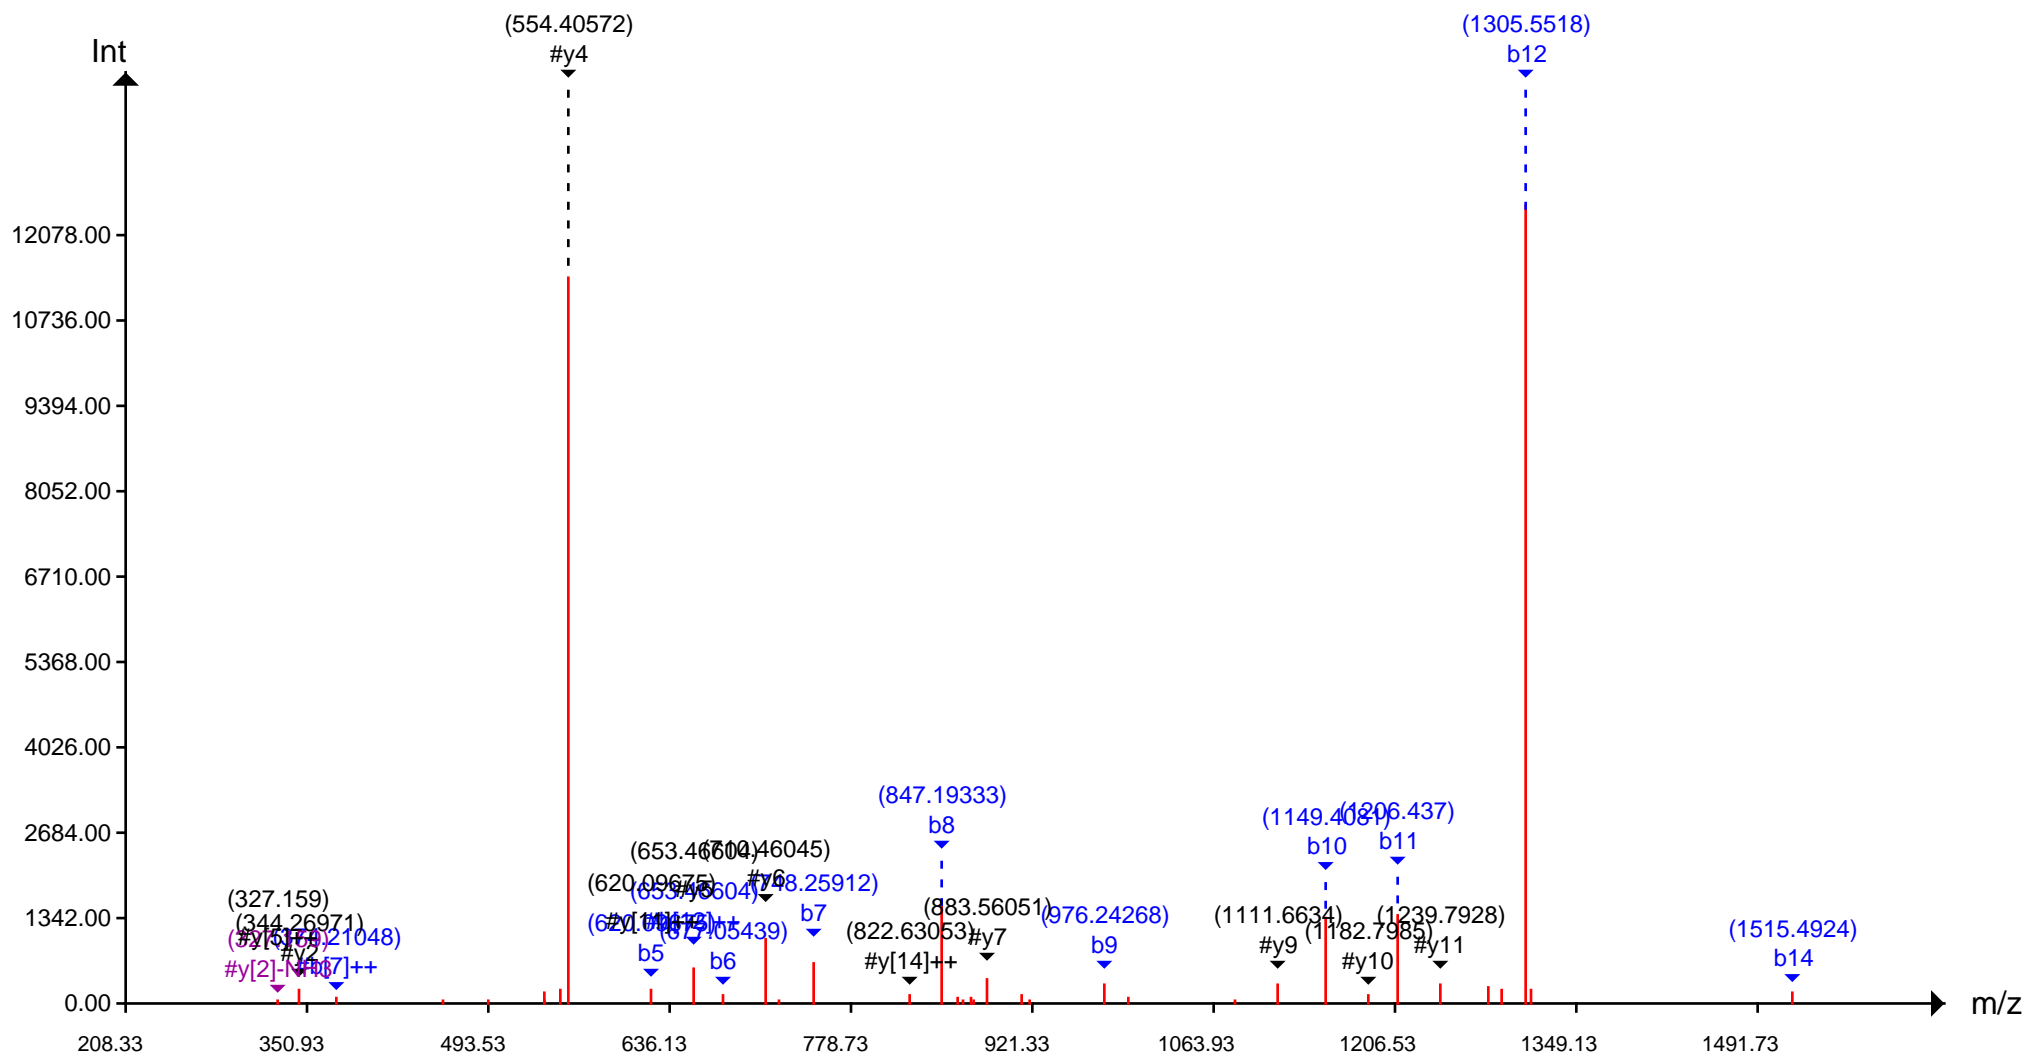

## Info

|                          |                                                       |                           |          |
|--------------------------|-------------------------------------------------------|---------------------------|----------|
| <b>Modified Sequence</b> | AcD3-AVC<Cmm*>K<AcD3K*>AGAVEK<AcD3K*>GVPLYR<C13>-COOH | <b>Ion score</b>          | 70.17    |
| <b>Protein</b>           | P17182                                                | <b>Confidence level</b>   | 99.00%   |
| <b>Precursor m/z</b>     | 930.02947                                             | <b>Identity Threshold</b> | 45.80    |
| <b>Charge</b>            | 2+                                                    | <b>Mass error</b>         | 0.001557 |

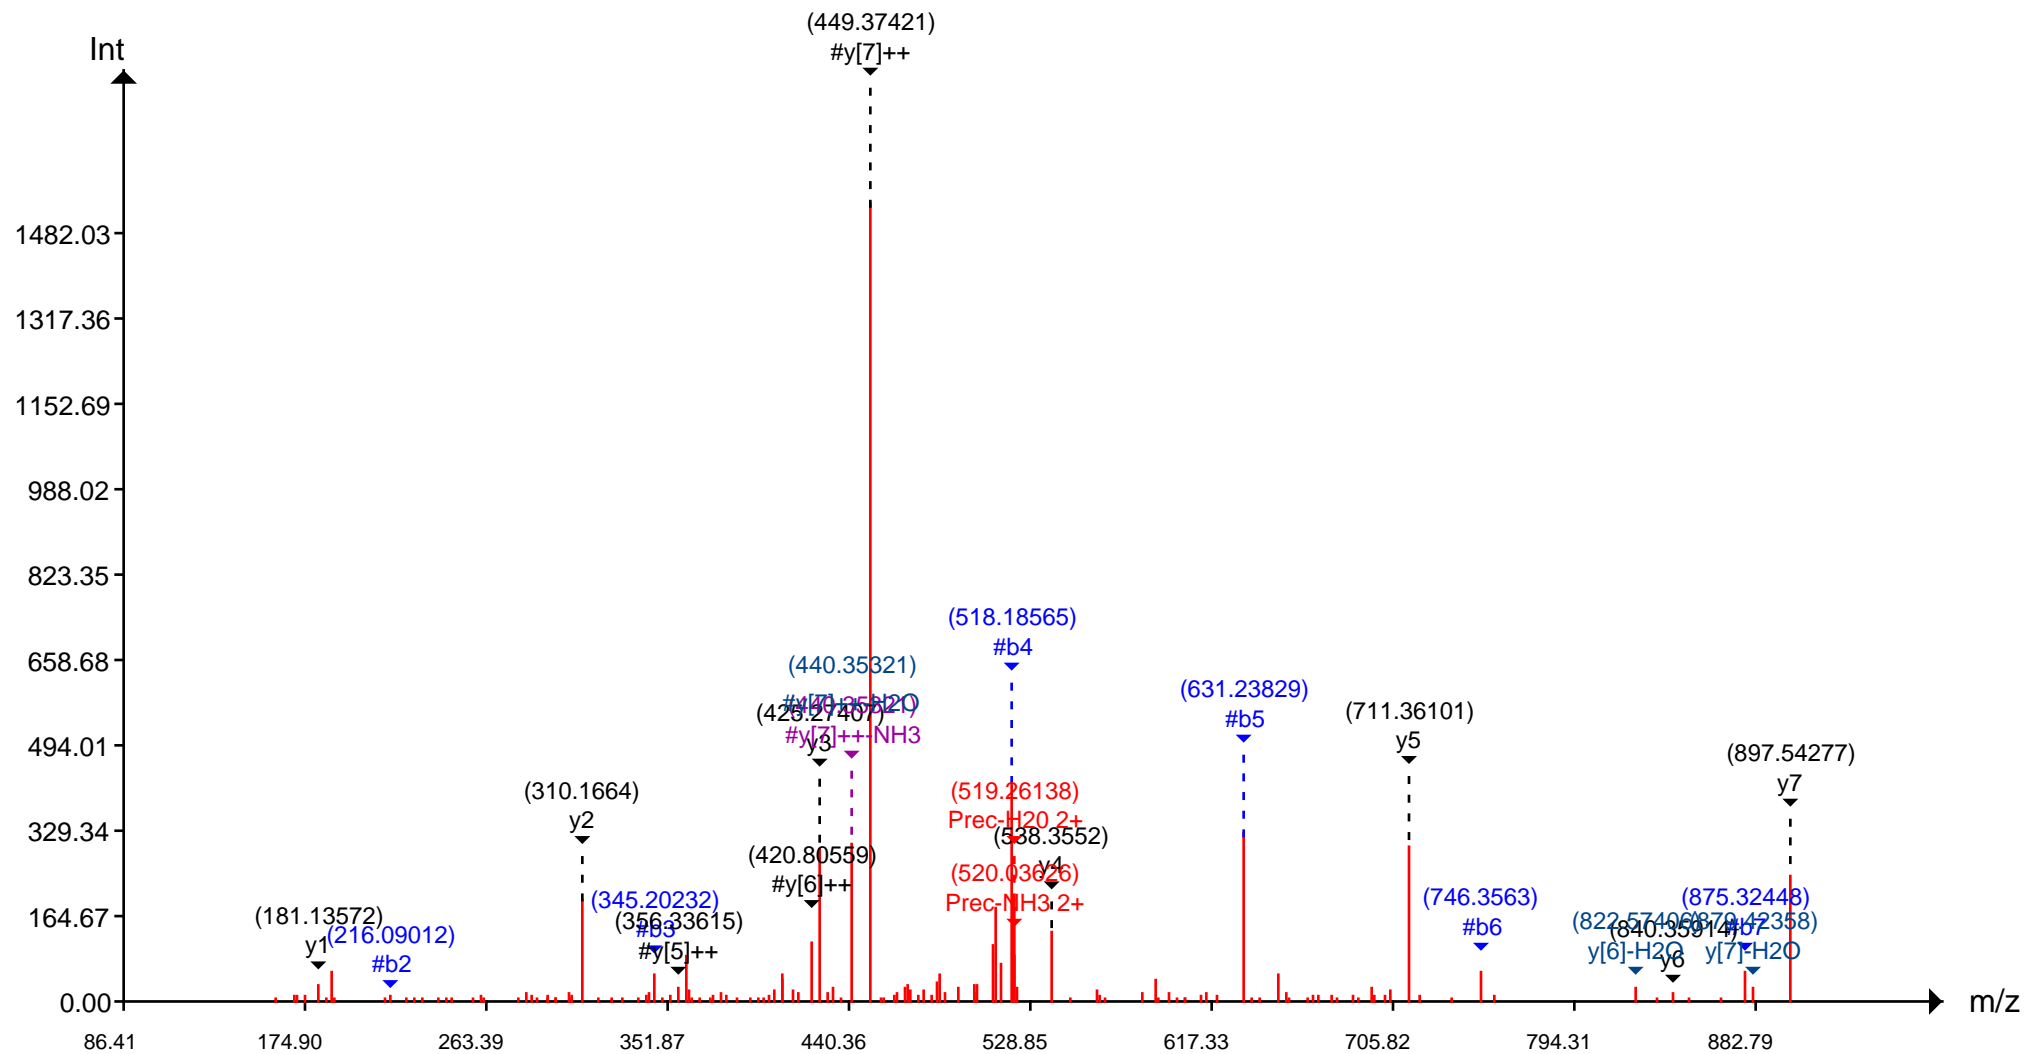

## Info

|                          |                                 |                           |         |
|--------------------------|---------------------------------|---------------------------|---------|
| <b>Modified Sequence</b> | AcD3-IGEK<AcD3K*>LDER<C13>-COOH | <b>Ion score</b>          | 52.09   |
| <b>Protein</b>           | P17751                          | <b>Confidence level</b>   | 99.00%  |
| <b>Precursor m/z</b>     | 528.30097                       | <b>Identity Threshold</b> | 47.18   |
| <b>Charge</b>            | 2+                              | <b>Mass error</b>         | 1.23E-4 |



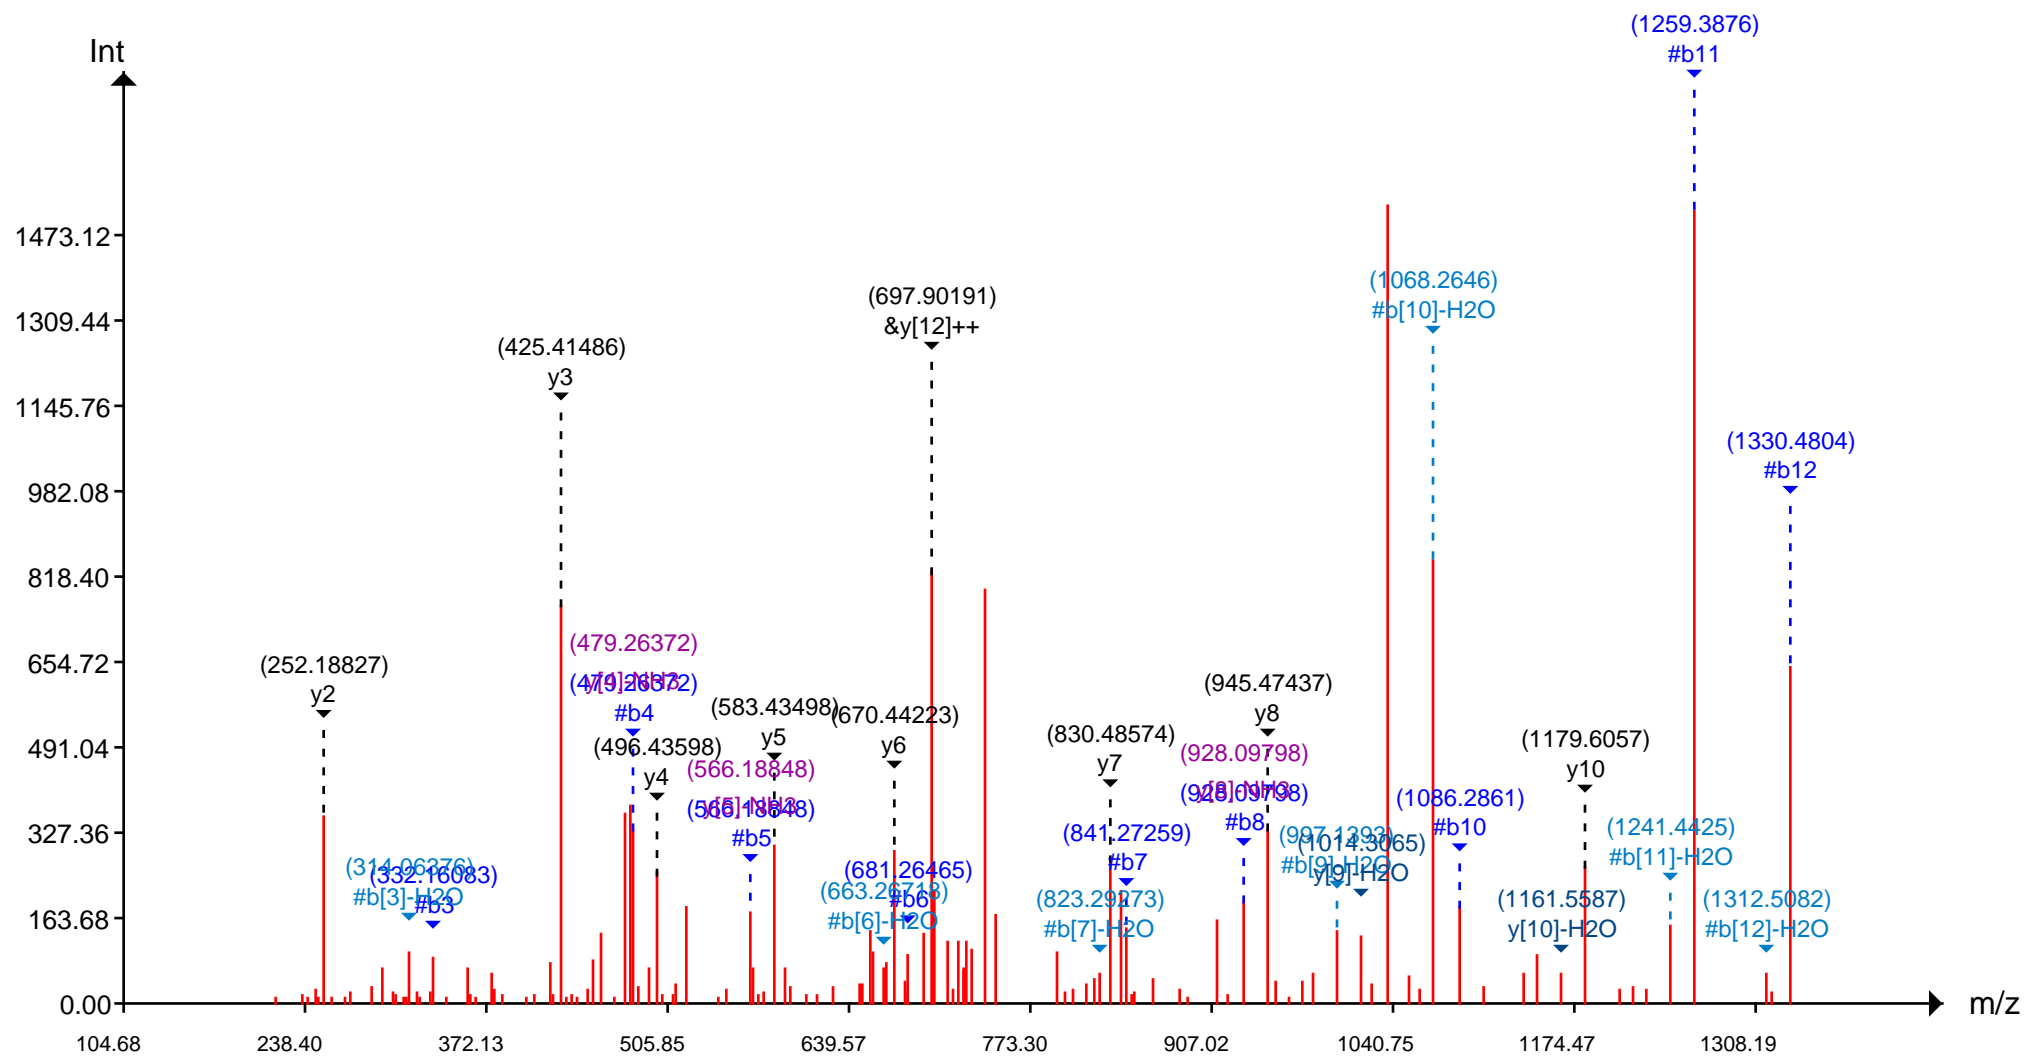

## Info

|                          |                                            |                           |         |
|--------------------------|--------------------------------------------|---------------------------|---------|
| <b>Modified Sequence</b> | AcD3-ASQFSDC<Cmm*>SSAK<AcD3K*>AR<C13>-COOH | <b>Ion score</b>          | 47.93   |
| <b>Protein</b>           | Q9QUR7                                     | <b>Confidence level</b>   | 99.00%  |
| <b>Precursor m/z</b>     | 755.8623                                   | <b>Identity Threshold</b> | 46.49   |
| <b>Charge</b>            | 2+                                         | <b>Mass error</b>         | 4.53E-4 |

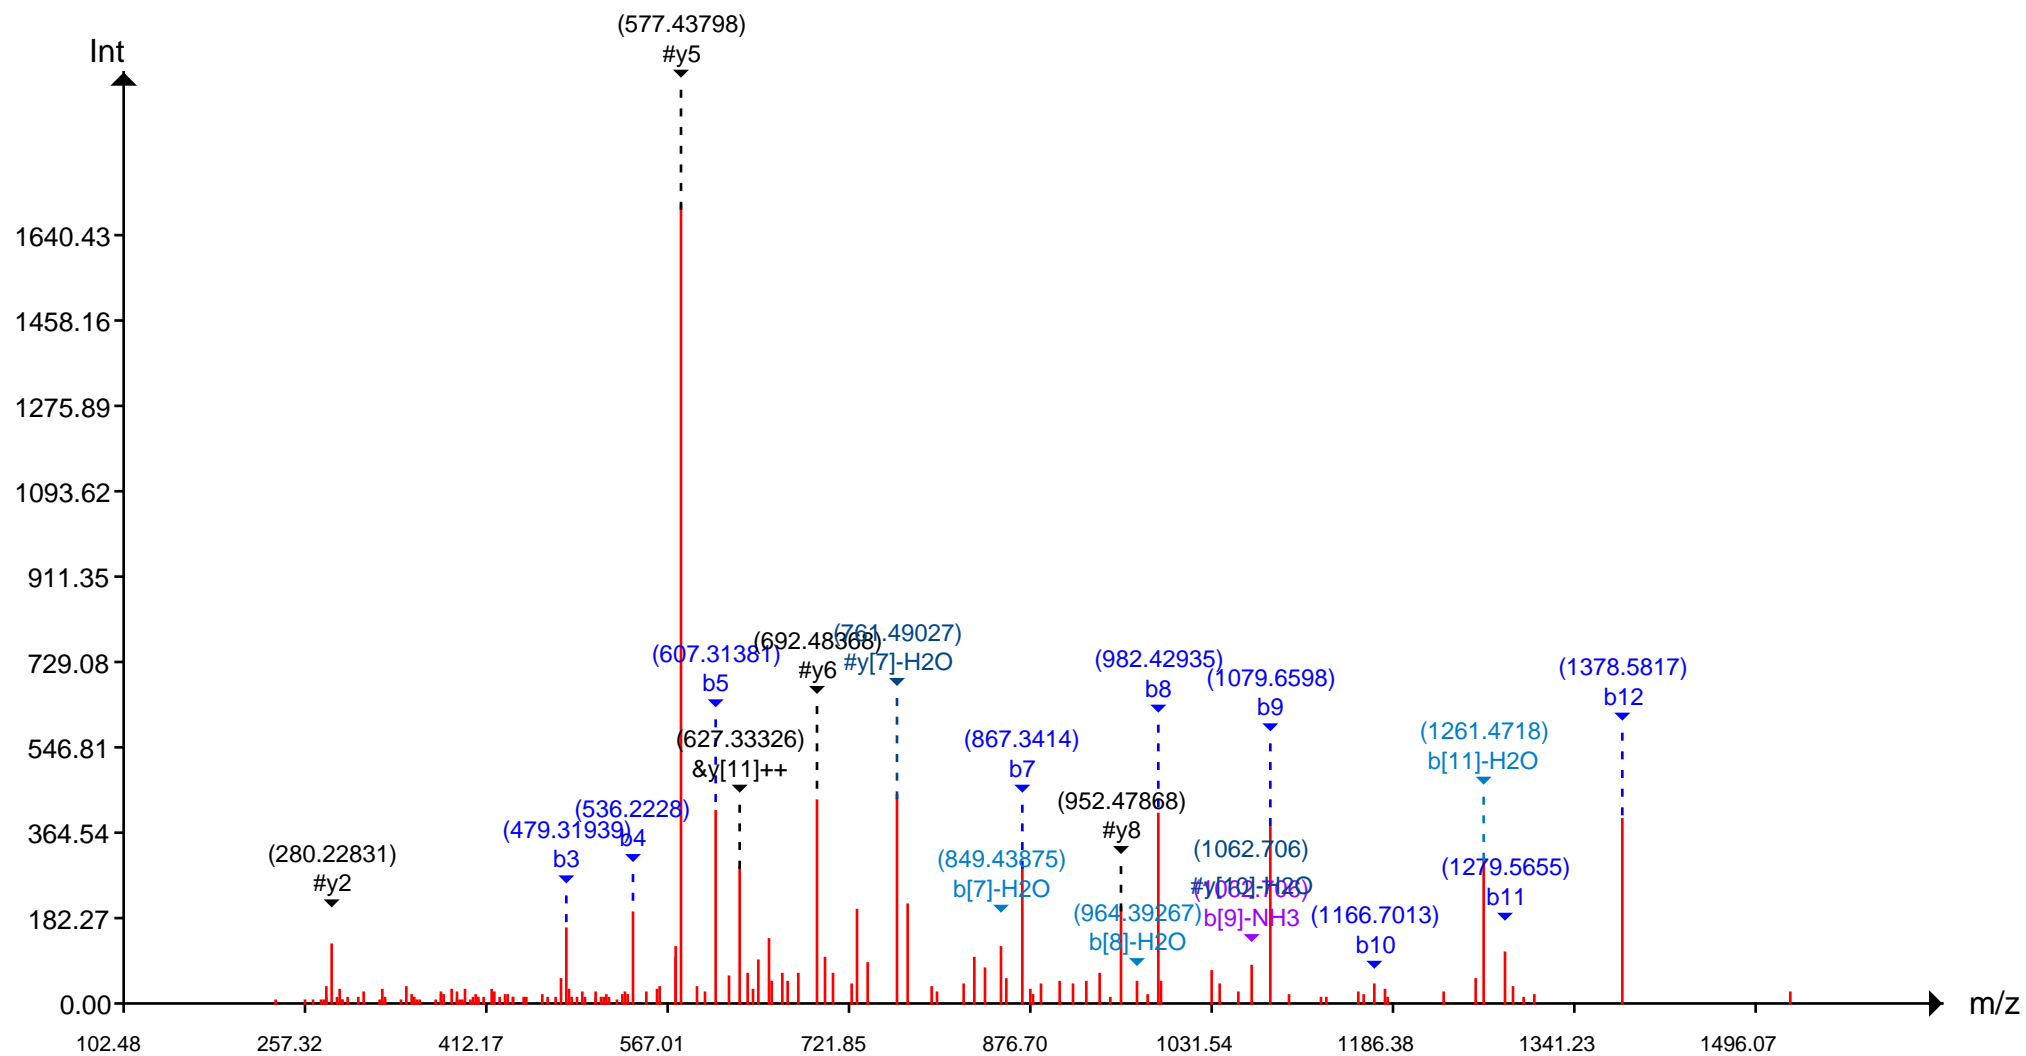

## Info

|                          |                                              |                           |          |
|--------------------------|----------------------------------------------|---------------------------|----------|
| <b>Modified Sequence</b> | AcD3-FIK<AcD3K*>GAK<AcD3K*>SDPSIVR<C13>-COOH | <b>Ion score</b>          | 56.8     |
| <b>Protein</b>           | P62748                                       | <b>Confidence level</b>   | 99.00%   |
| <b>Precursor m/z</b>     | 779.96691                                    | <b>Identity Threshold</b> | 43.61    |
| <b>Charge</b>            | 2+                                           | <b>Mass error</b>         | 0.002047 |

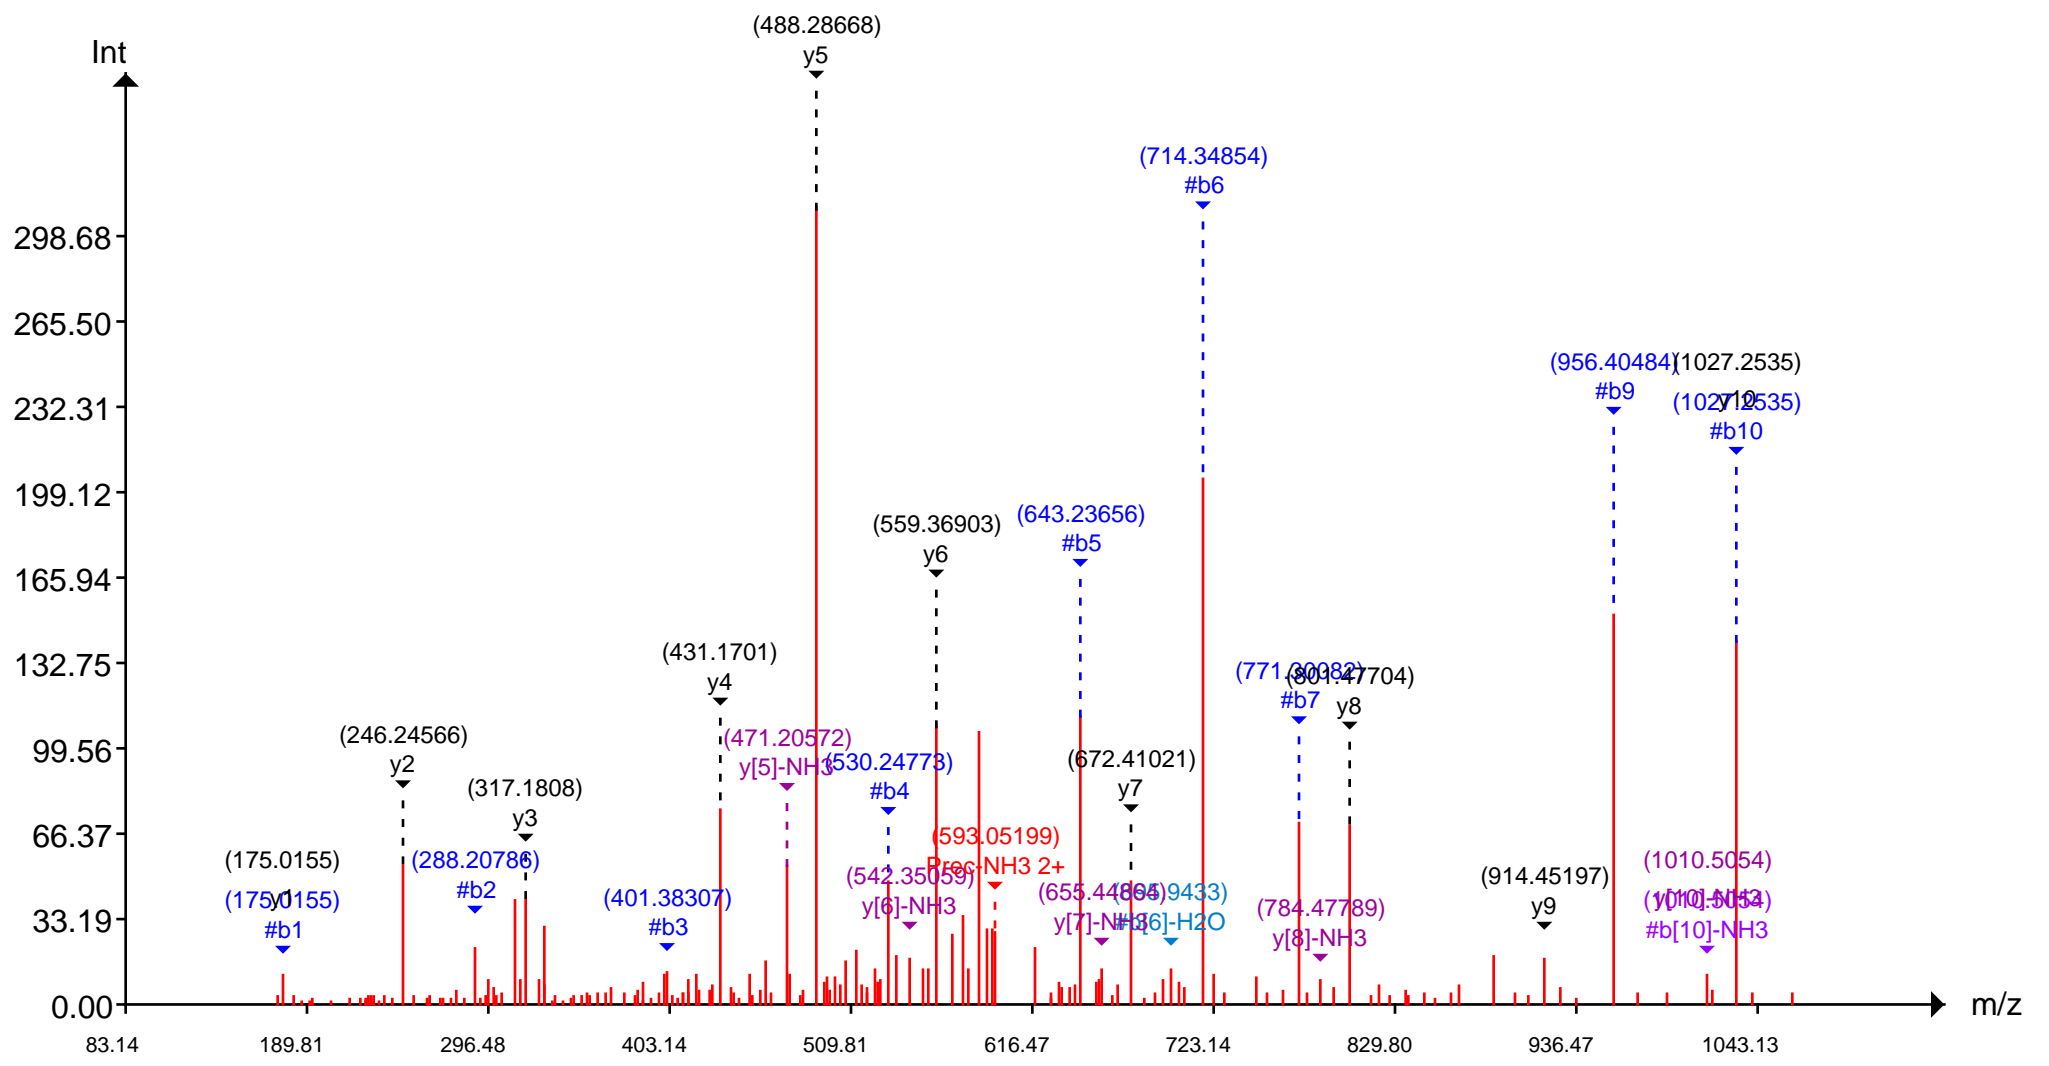

| Info    |                                                                                                |
|---------|------------------------------------------------------------------------------------------------|
| Modi... | AcD3-EILELAGNAAR-COOH                                                                          |
|         | Q8CGP5, Q8CGP6, Q8CGP7, P22752, Q6GSS7, Q64522, Q64523, Q8BFU2, Q8R1M2, Q8CCK0, P27661, Q9QZQ8 |
|         | 601.3352                                                                                       |
|         | 2+                                                                                             |
|         | Ion score                                                                                      |
|         | Confidence level                                                                               |
|         | Identity Threshold                                                                             |
|         | Mass error                                                                                     |

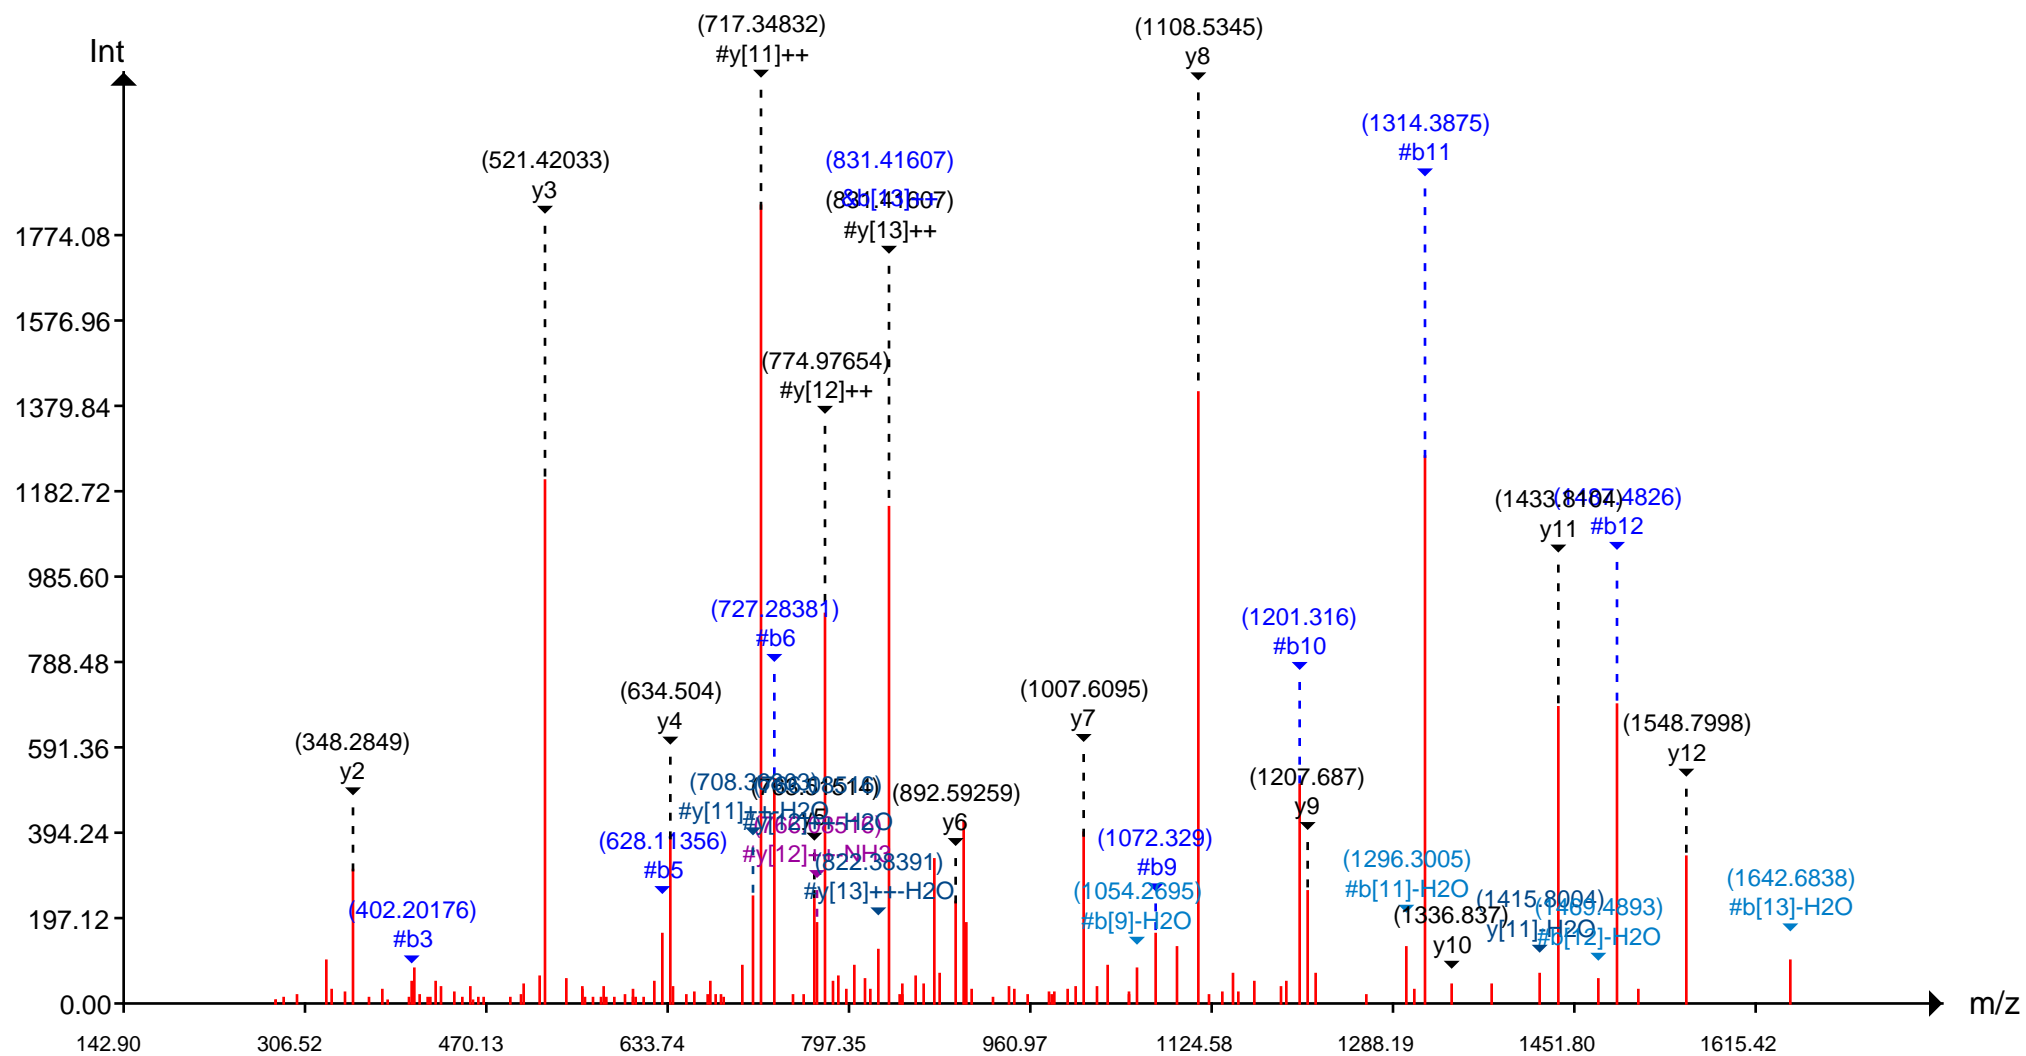

## Info

**Modified Sequence** AcD3-QIDPEVTDEEIK<AcD3K\*>K<AcD3K\*>R-COOH

**Ion score** 77.21

**Protein** Q6NZB0

**Confidence level** 99.00%

**Precursor m/z** 917.9916

**Identity Threshold** 47.98

**Charge** 2+

**Mass error** 0.001653

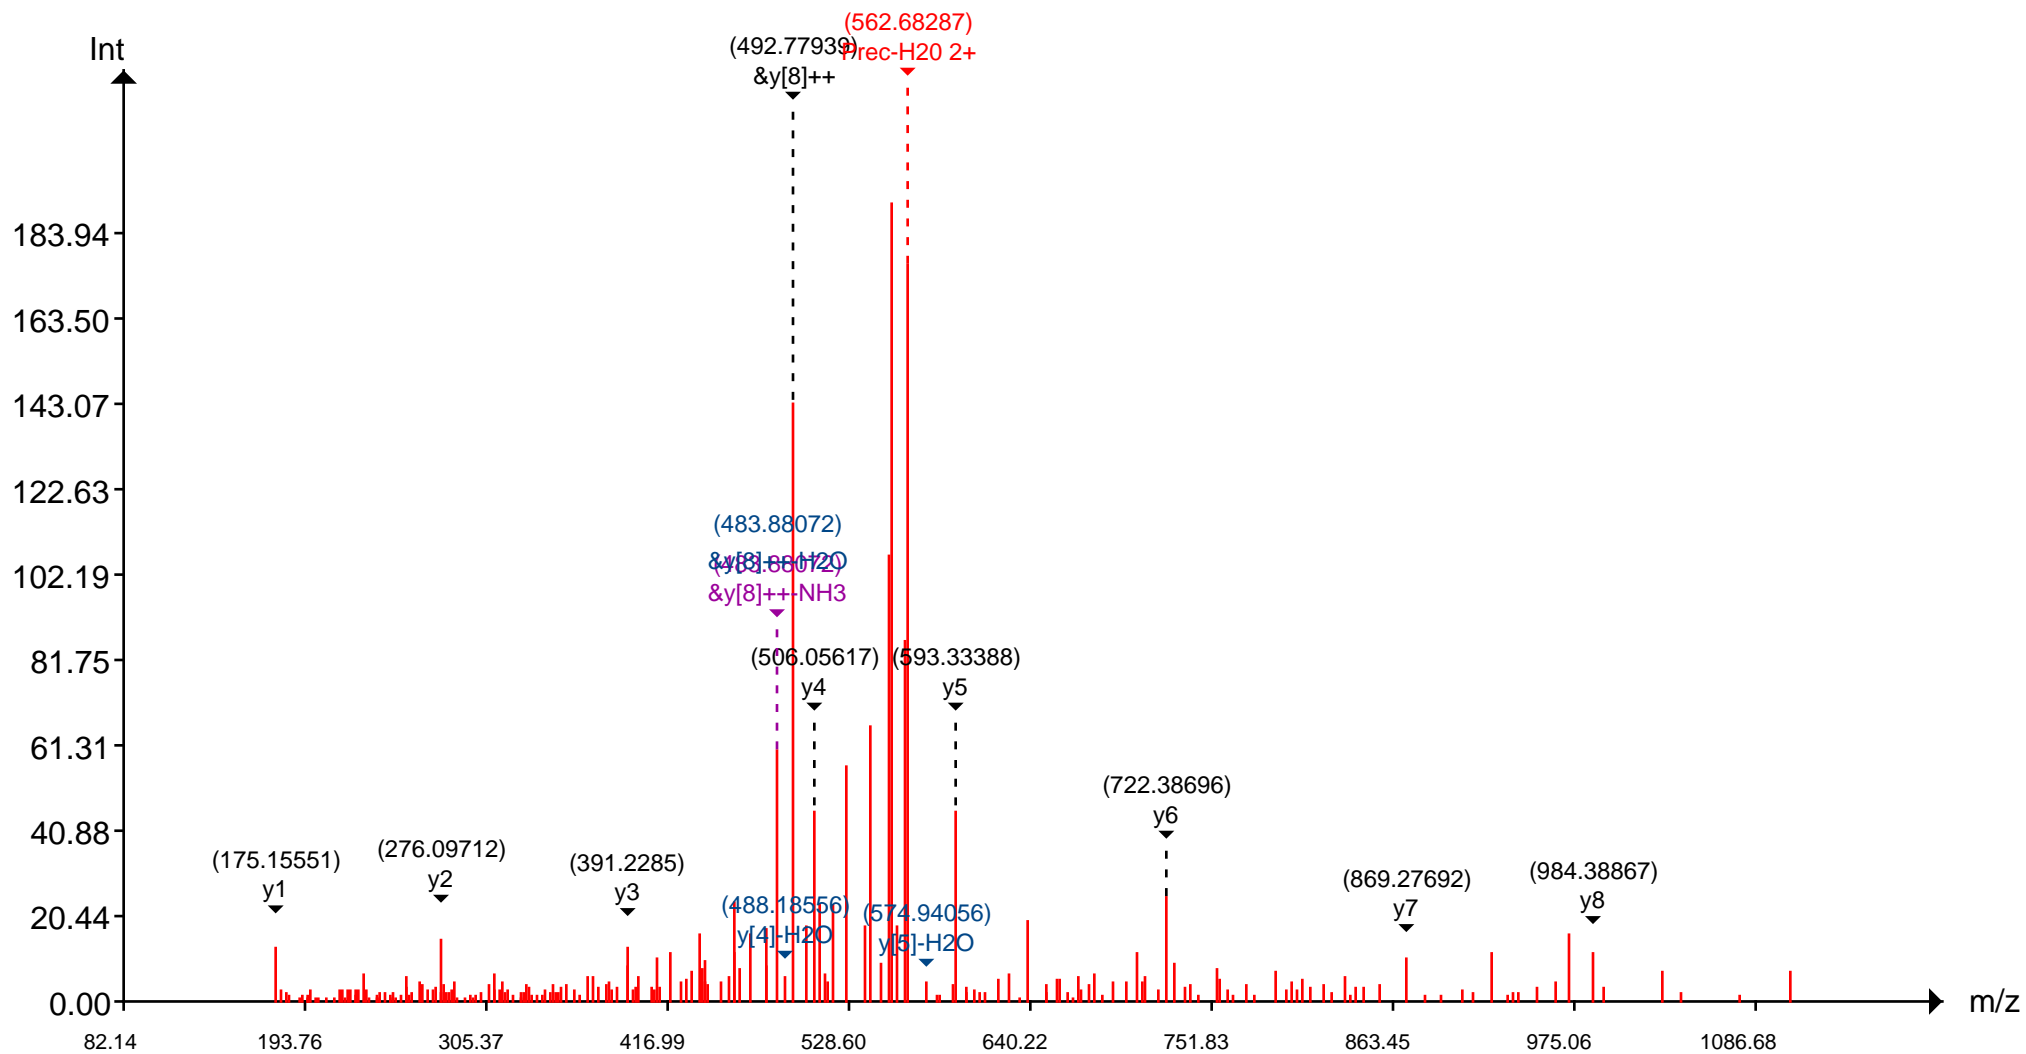

## Info

|                          |                           |                           |         |
|--------------------------|---------------------------|---------------------------|---------|
| <b>Modified Sequence</b> | AcD3-LDM<Mox*>ESDDTR-COOH | <b>Ion score</b>          | 40.85   |
| <b>Protein</b>           | Q62084                    | <b>Confidence level</b>   | 99.00%  |
| <b>Precursor m/z</b>     | 571.73927                 | <b>Identity Threshold</b> | 40.28   |
| <b>Charge</b>            | 2+                        | <b>Mass error</b>         | 3.34E-4 |

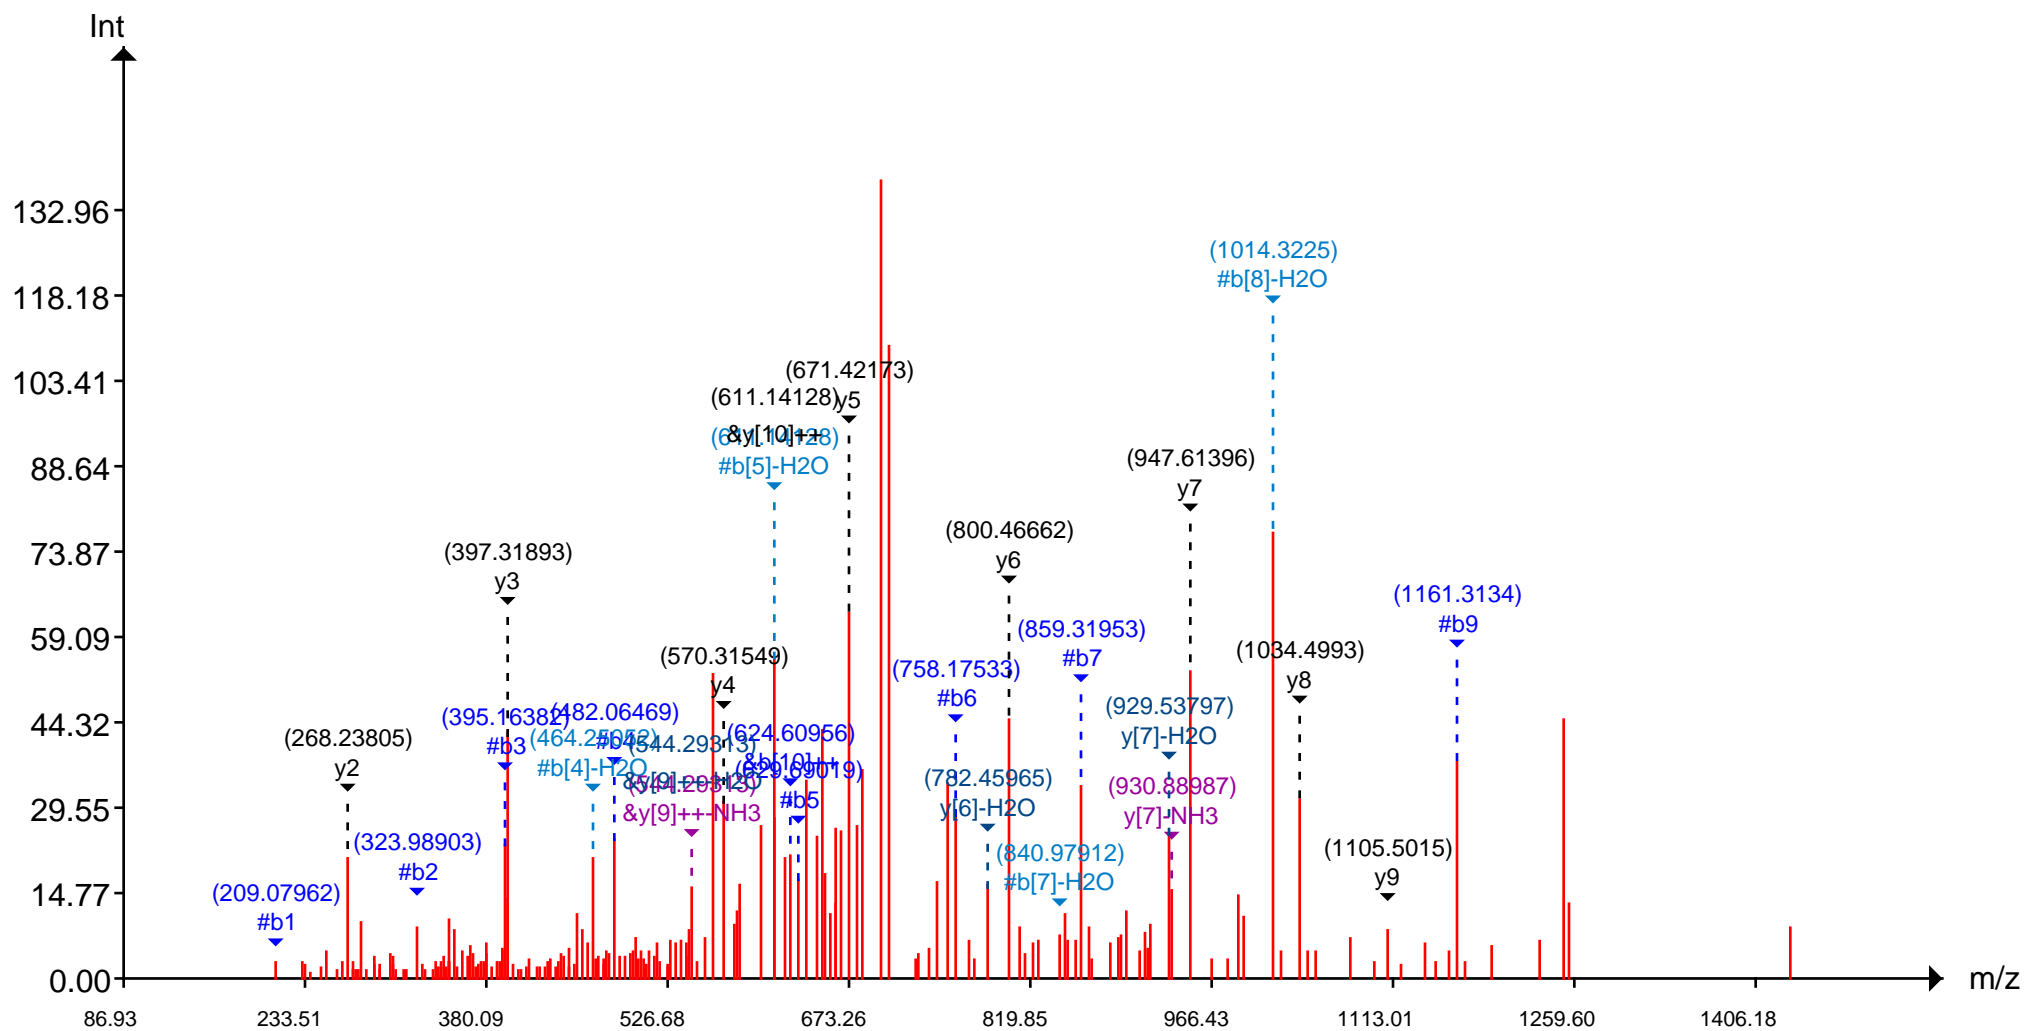

## Info

|                          |                                    |                           |         |
|--------------------------|------------------------------------|---------------------------|---------|
| <b>Modified Sequence</b> | AcD3-YDASFETK<AcD3K*>ESR<C13>-COOH | <b>Ion score</b>          | 49.7    |
| <b>Protein</b>           | Q9R0P5                             | <b>Confidence level</b>   | 99.00%  |
| <b>Precursor m/z</b>     | 714.84694                          | <b>Identity Threshold</b> | 46.77   |
| <b>Charge</b>            | 2+                                 | <b>Mass error</b>         | 0.00106 |

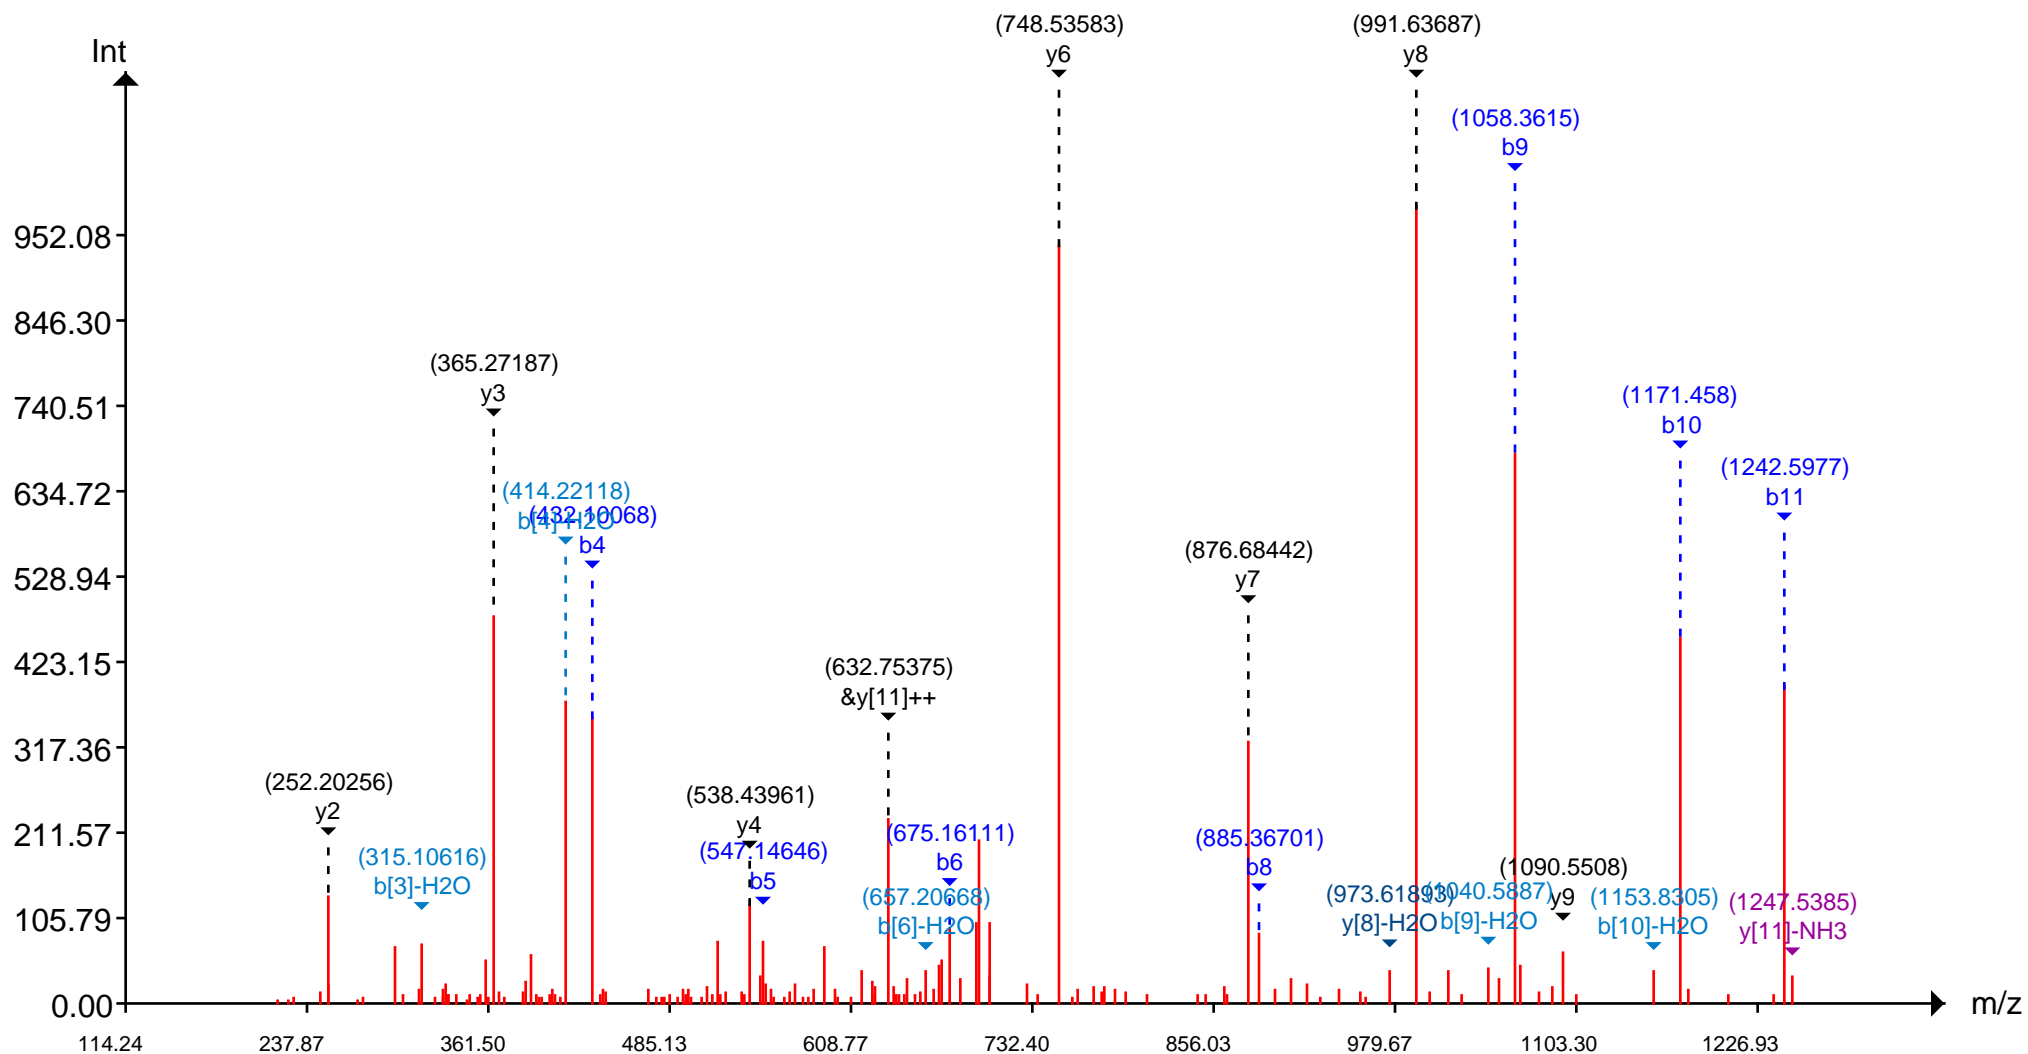

## Info

**Modified Sequence** AcD3-LSSVDQPLK<AcD3K\*>IAR<C13>-COOH

**Ion score** 64.92

**Protein** P47757

**Confidence level** 99.00%

**Precursor m/z** 711.93065

**Identity Threshold** 43.34

**Charge** 2+

**Mass error** 0.001136

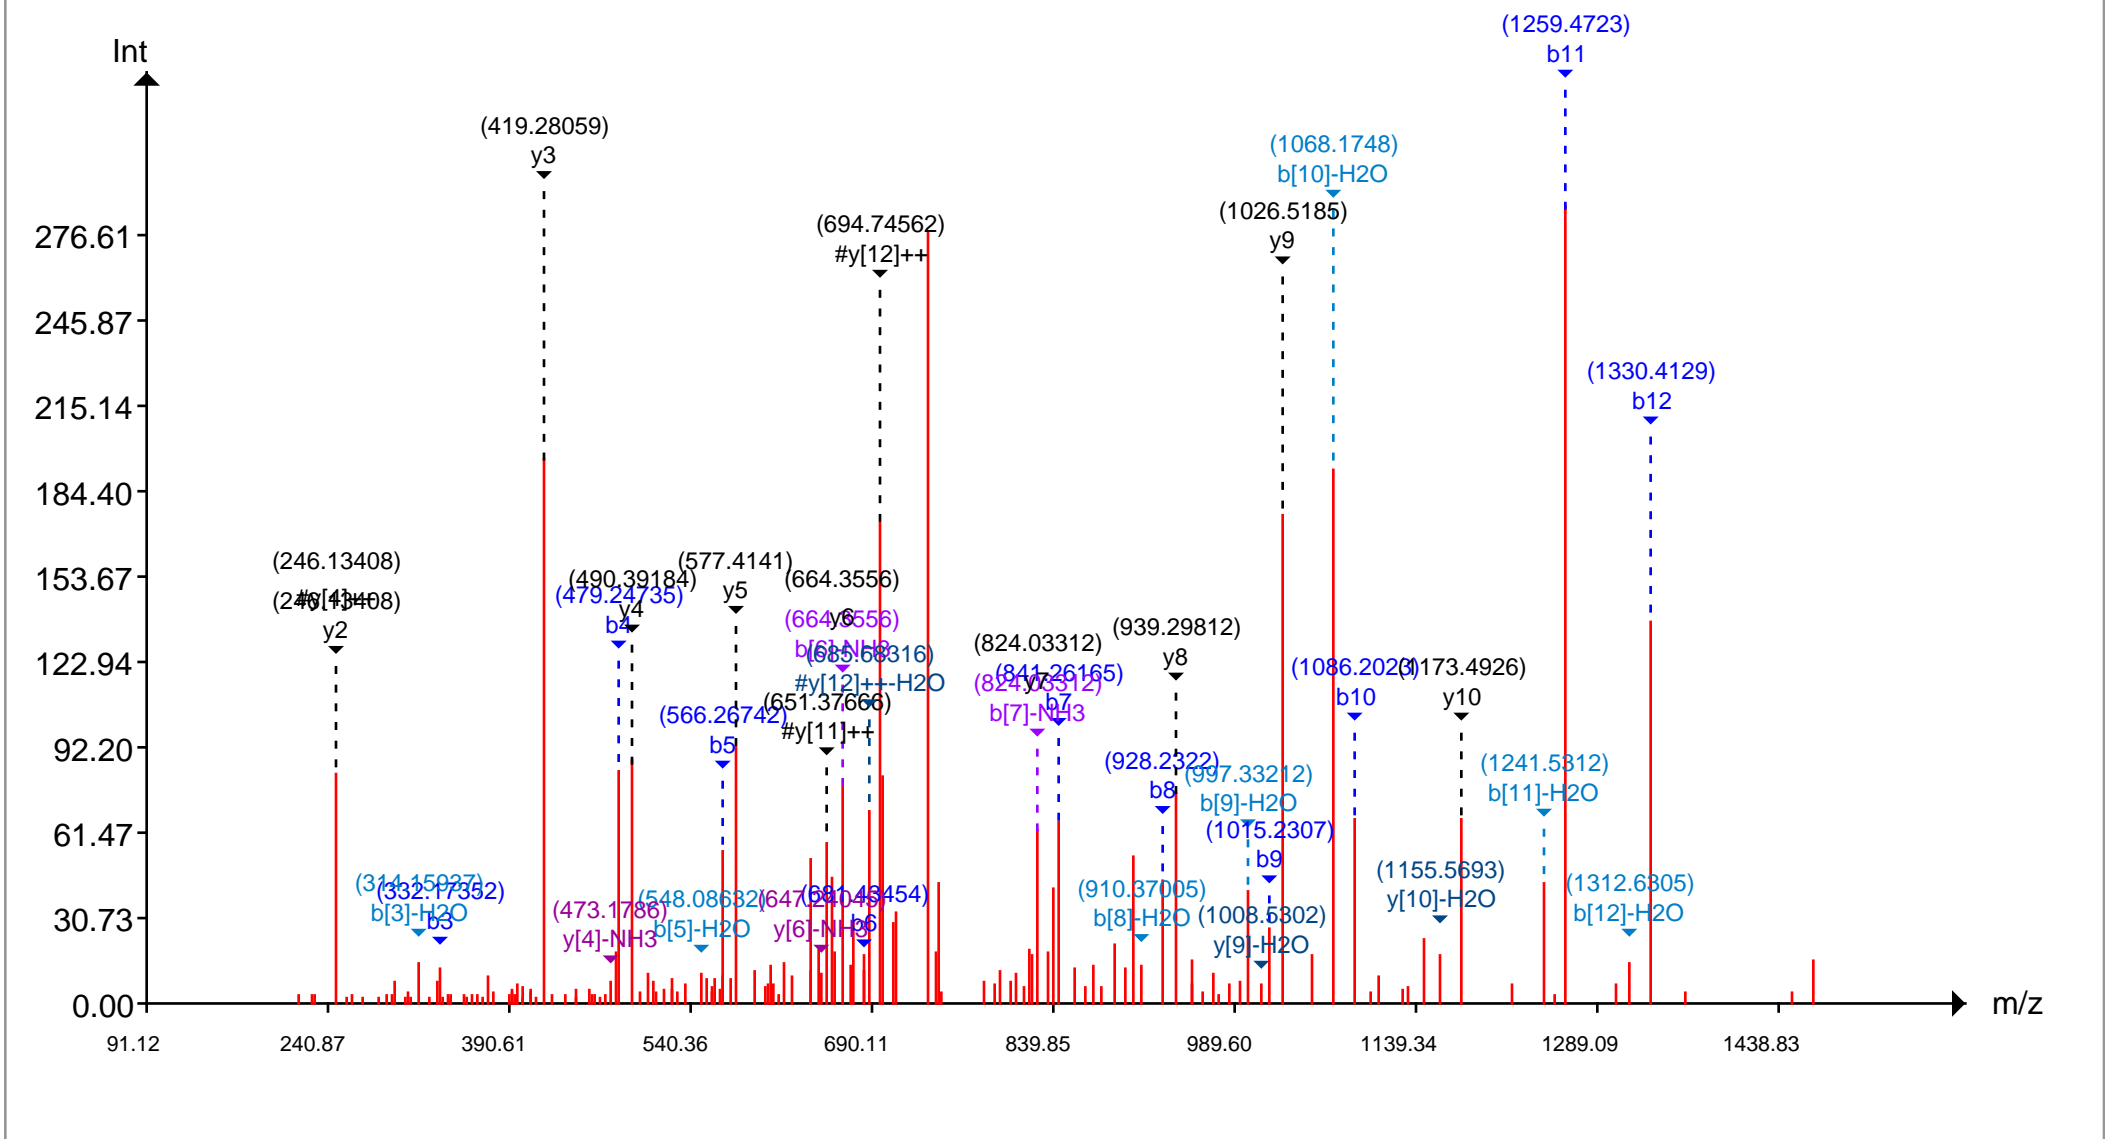

## Info

**Modified Sequence** AcD3-ASQFSDC<Cmm\*>SSAK<AcD3K\*>AR-COOH

**Ion score** 66.19

**Protein** Q9QUR7

**Confidence level** 99.00%

**Precursor m/z** 752.85248

**Identity Threshold** 45.67

**Charge** 2+

**Mass error** 9.55E-4



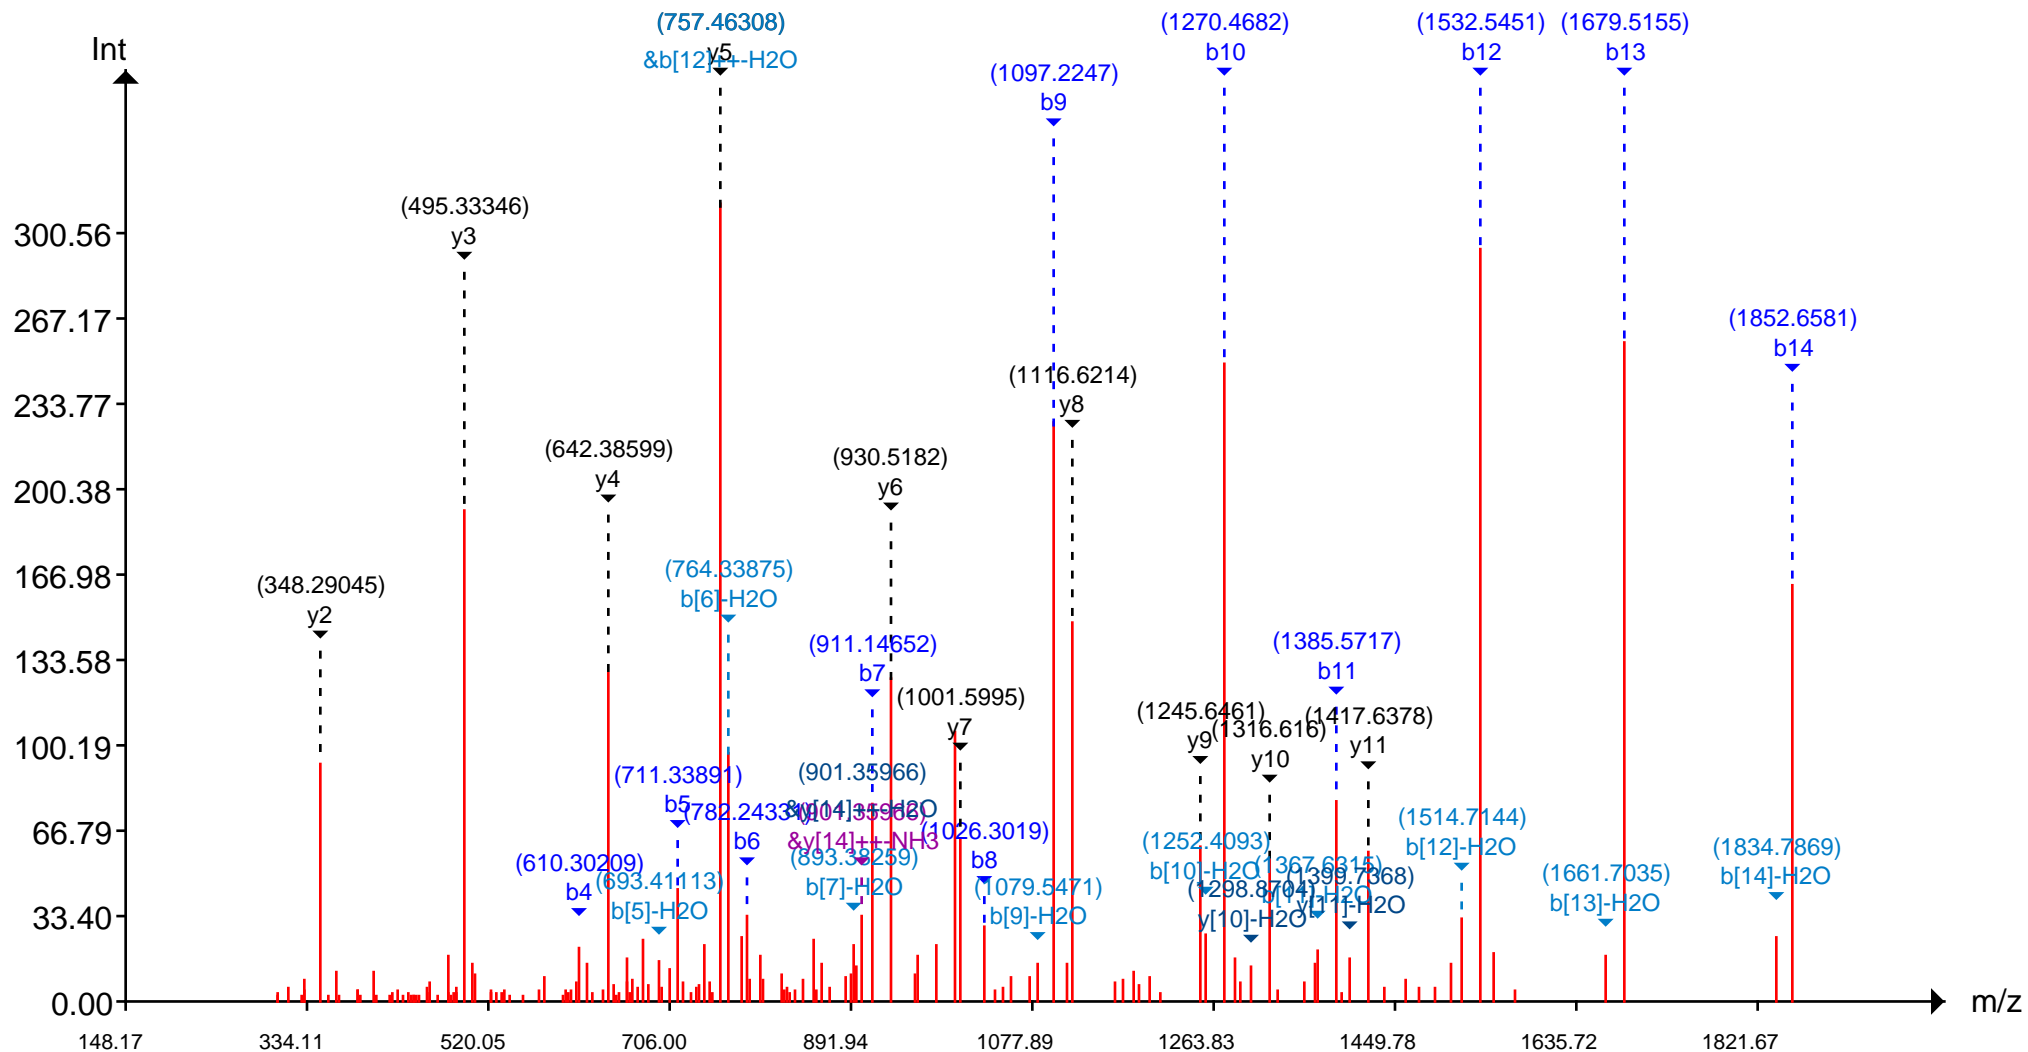

## Info

|                          |                                                   |                           |          |
|--------------------------|---------------------------------------------------|---------------------------|----------|
| <b>Modified Sequence</b> | AcD3-YVEK<AcD3K*>TAEDAK<AcD3K*>DFFK<AcD3K*>R-COOH | <b>Ion score</b>          | 73.85    |
| <b>Protein</b>           | Q9WU28                                            | <b>Confidence level</b>   | 99.00%   |
| <b>Precursor m/z</b>     | 1014.0309                                         | <b>Identity Threshold</b> | 48.09    |
| <b>Charge</b>            | 2+                                                | <b>Mass error</b>         | 0.003562 |

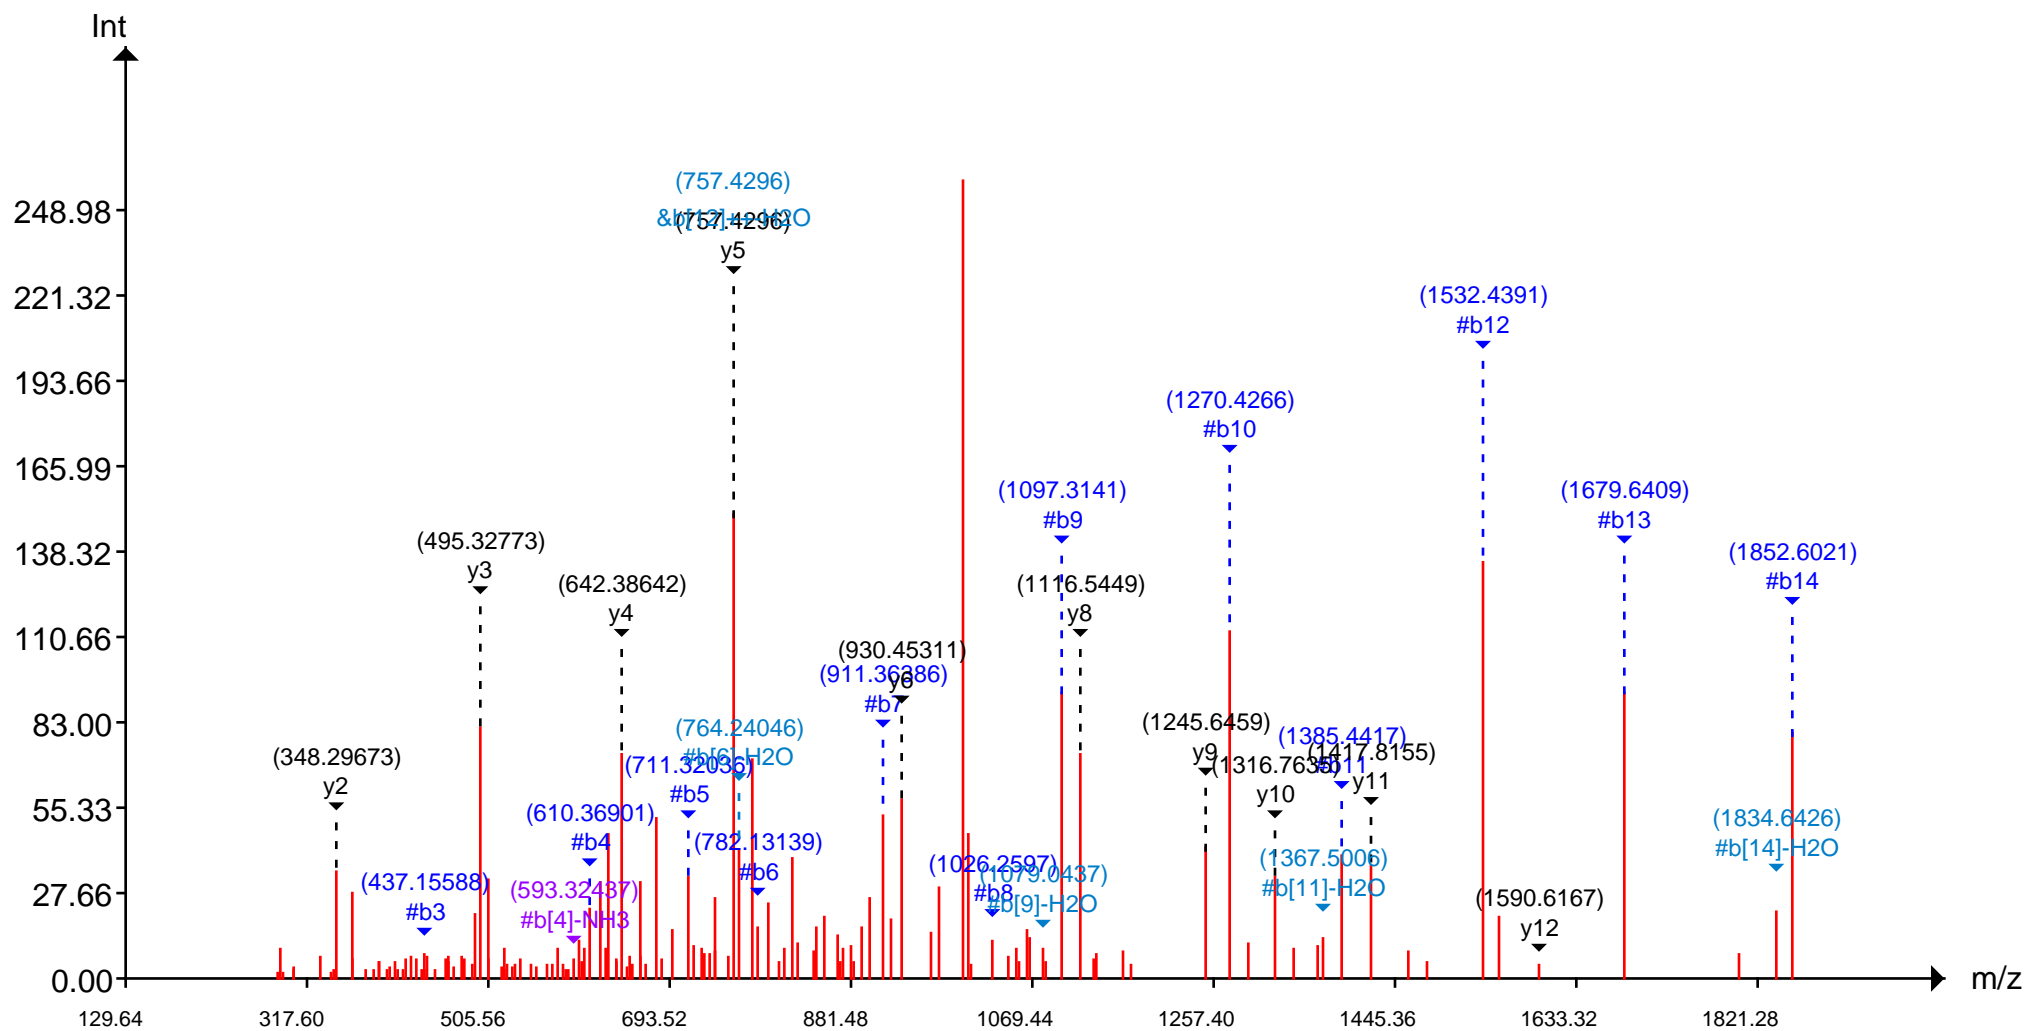

## Info

|                          |                                                   |                           |          |
|--------------------------|---------------------------------------------------|---------------------------|----------|
| <b>Modified Sequence</b> | AcD3-YVEK<AcD3K*>TAEDAK<AcD3K*>DFFK<AcD3K*>R-COOH | <b>Ion score</b>          | 66.43    |
| <b>Protein</b>           | Q9WU28                                            | <b>Confidence level</b>   | 99.00%   |
| <b>Precursor m/z</b>     | 1014.0316                                         | <b>Identity Threshold</b> | 48.09    |
| <b>Charge</b>            | 2+                                                | <b>Mass error</b>         | 0.004962 |

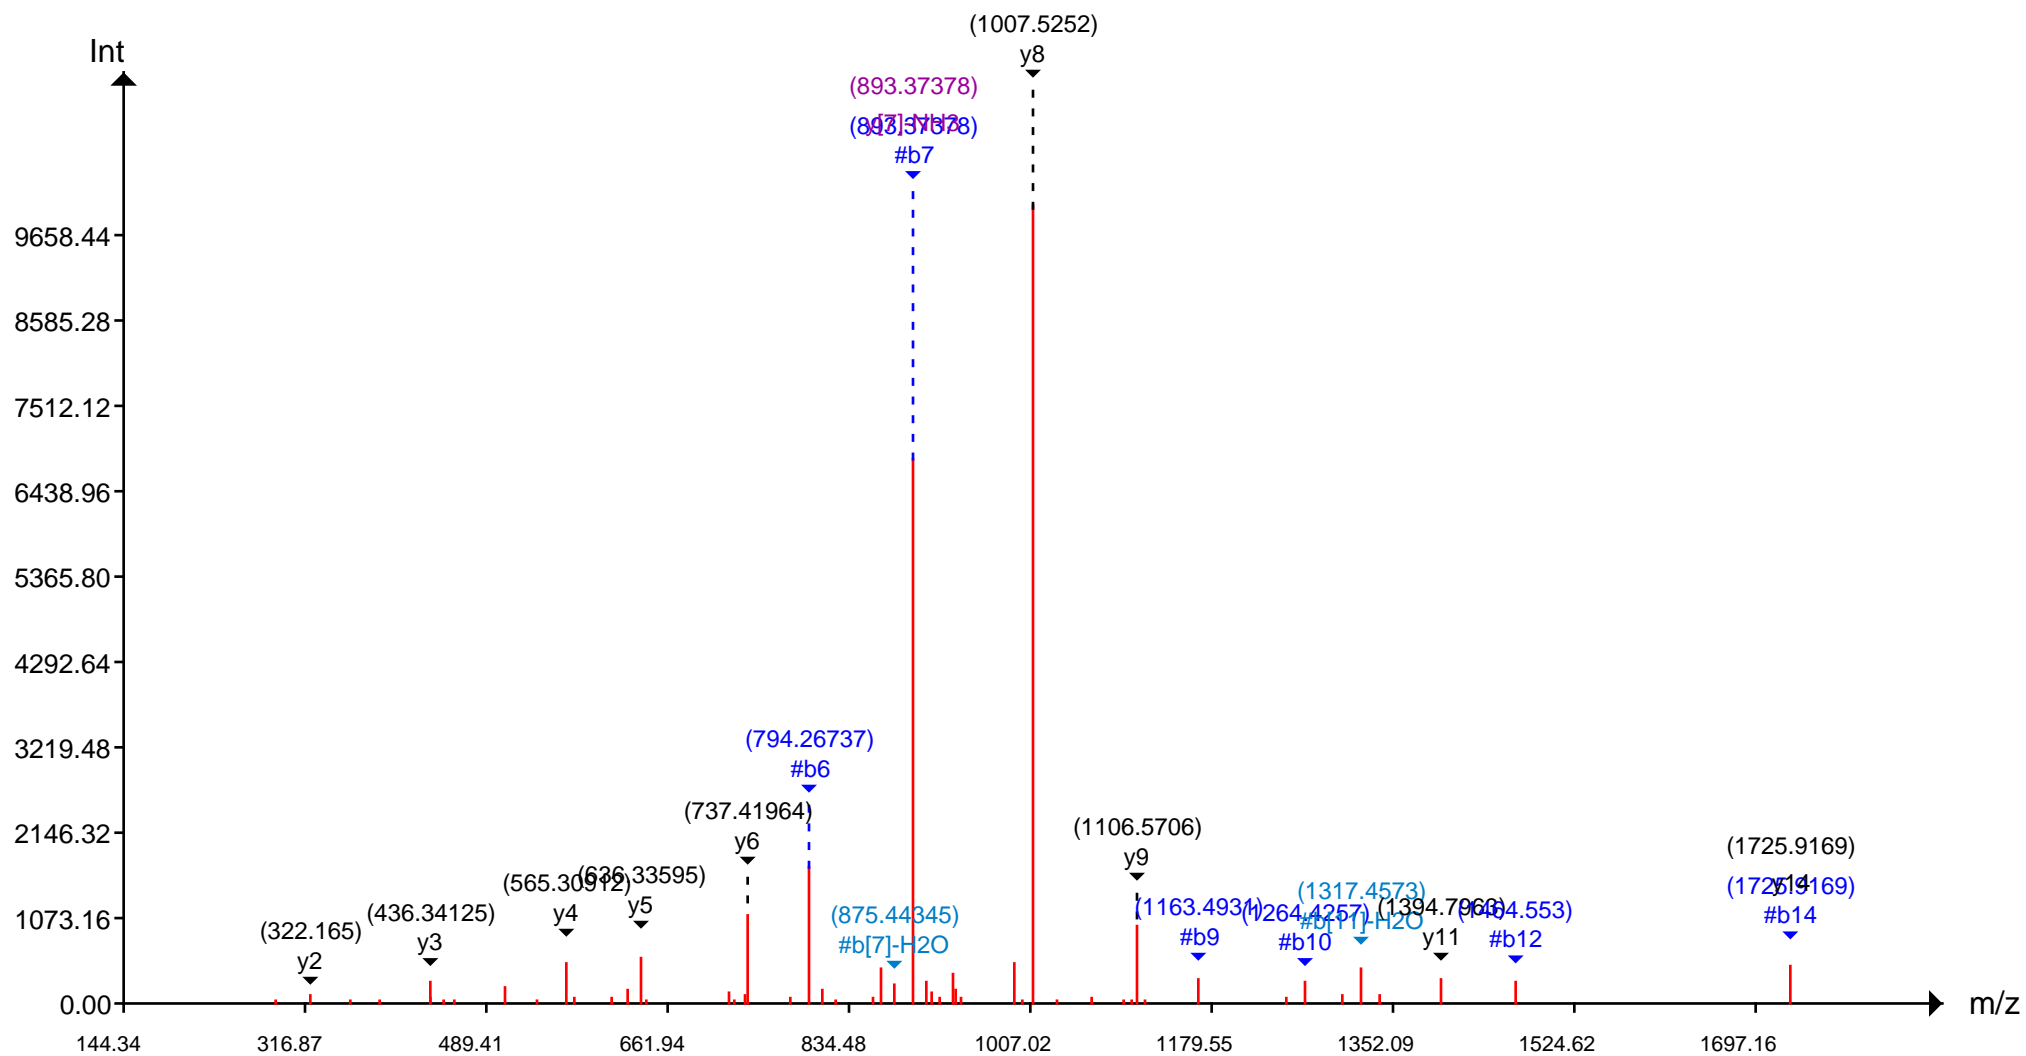

## Info

|                          |                                           |                           |          |
|--------------------------|-------------------------------------------|---------------------------|----------|
| <b>Modified Sequence</b> | AcD3-ELFADK<AcD3K*>VPK<AcD3K*>TAENFR-COOH | <b>Ion score</b>          | 93.26    |
| <b>Protein</b>           | P17742                                    | <b>Confidence level</b>   | 99.00%   |
| <b>Precursor m/z</b>     | 950.51328                                 | <b>Identity Threshold</b> | 47.69    |
| <b>Charge</b>            | 2+                                        | <b>Mass error</b>         | 0.003204 |

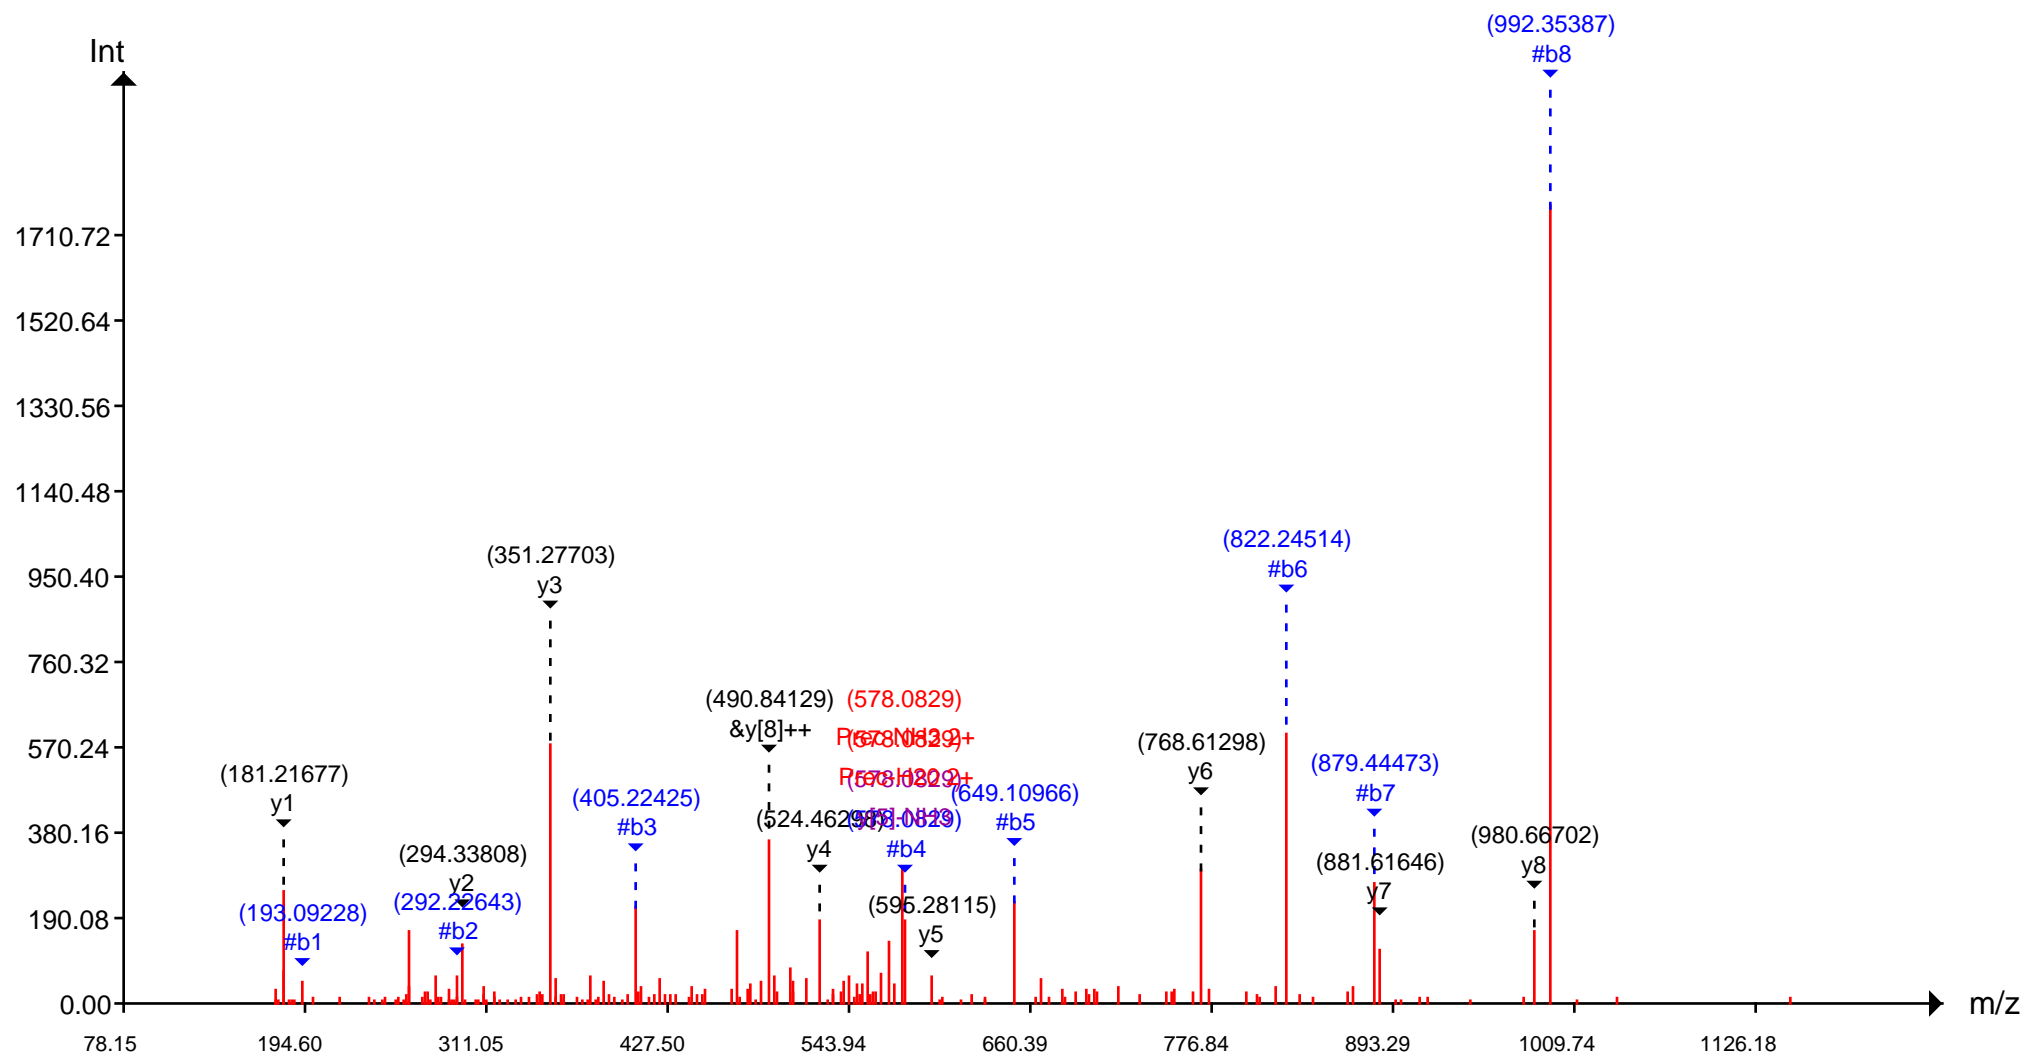

## Info

|                          |                                                |                           |          |
|--------------------------|------------------------------------------------|---------------------------|----------|
| <b>Modified Sequence</b> | AcD3-M<Mox*>VLK<AcD3K*>AK<AcD3K*>GIR<C13>-COOH | <b>Ion score</b>          | 52.86    |
| <b>Protein</b>           | O09131                                         | <b>Confidence level</b>   | 99.00%   |
| <b>Precursor m/z</b>     | 586.87739                                      | <b>Identity Threshold</b> | 40.35    |
| <b>Charge</b>            | 2+                                             | <b>Mass error</b>         | -2.05E-4 |

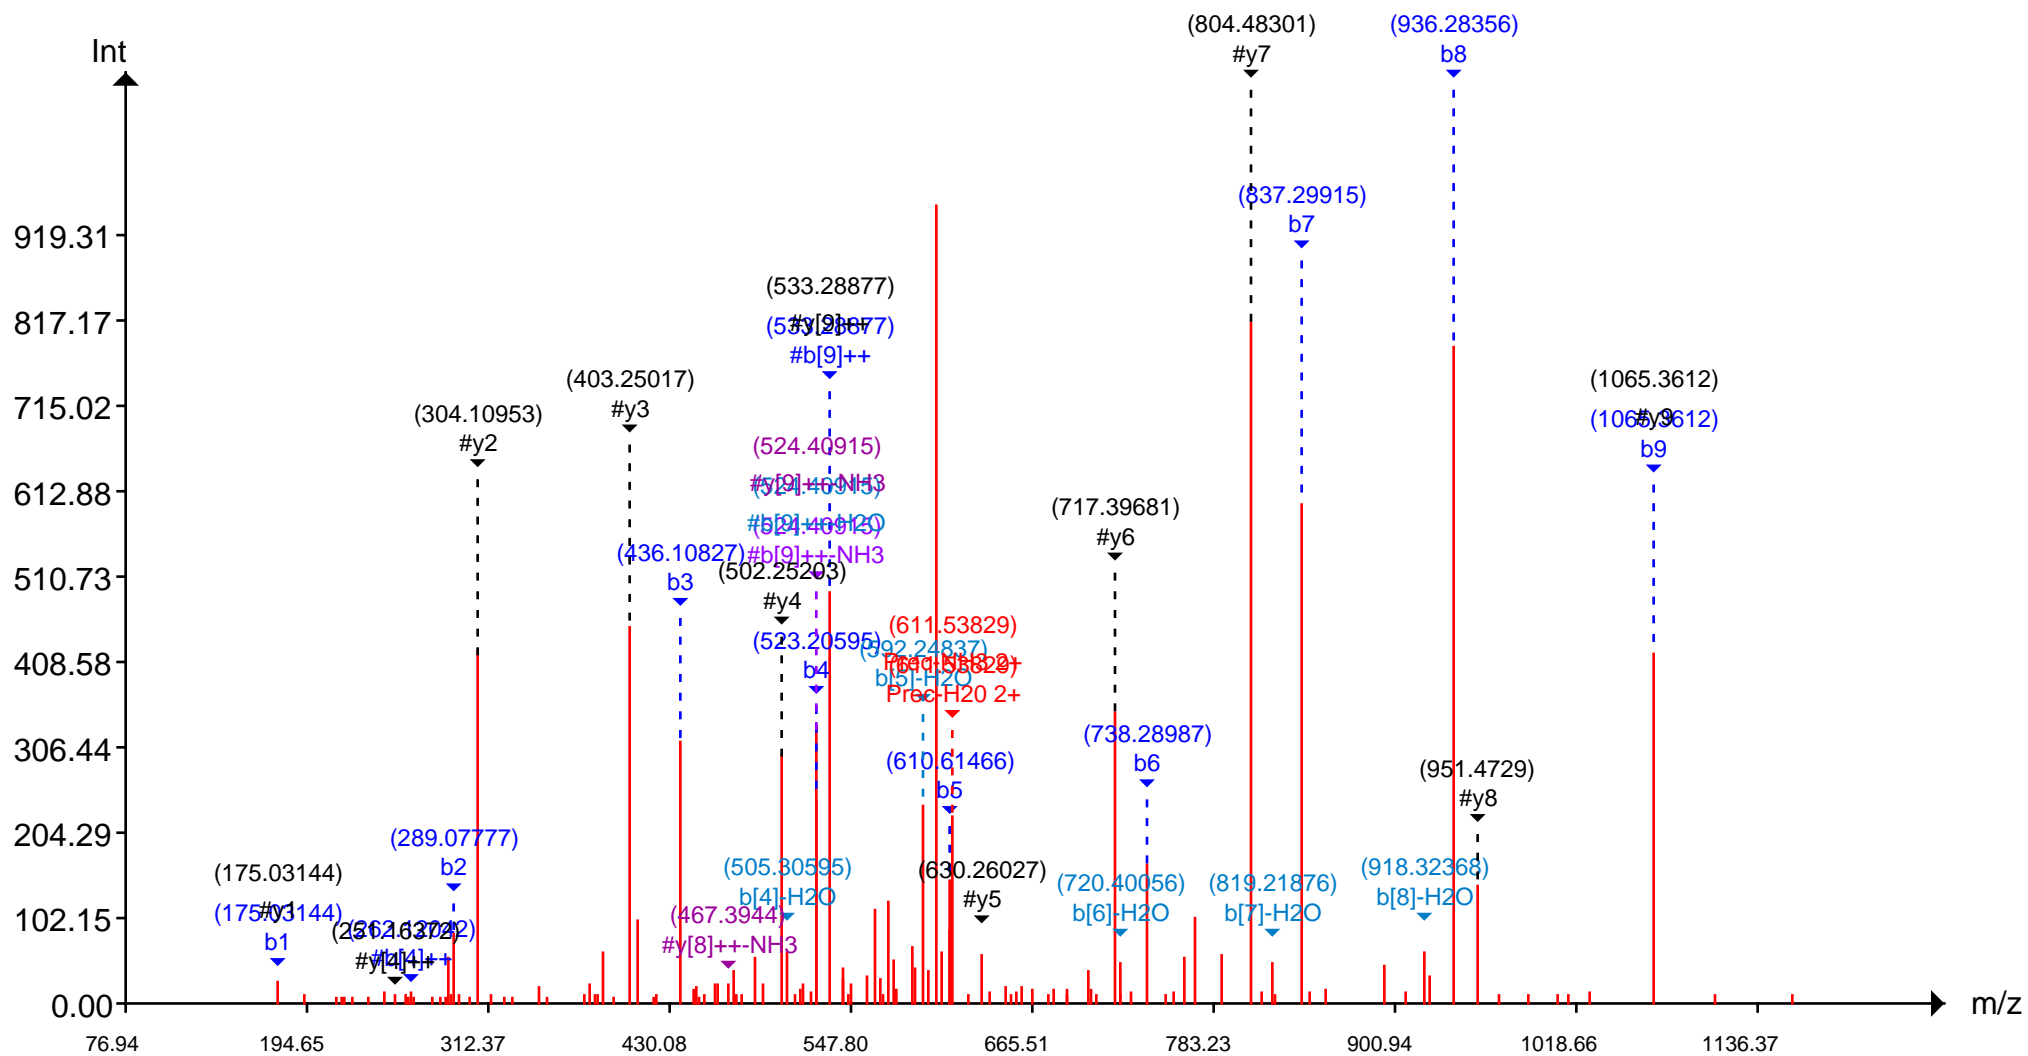

## Info

|                          |                      |                           |         |
|--------------------------|----------------------|---------------------------|---------|
| <b>Modified Sequence</b> | AcD3-ENFSSQVVER-COOH | <b>Ion score</b>          | 72.83   |
| <b>Protein</b>           | P59999               | <b>Confidence level</b>   | 99.00%  |
| <b>Precursor m/z</b>     | 620.3059             | <b>Identity Threshold</b> | 47.22   |
| <b>Charge</b>            | 2+                   | <b>Mass error</b>         | 2.02E-4 |



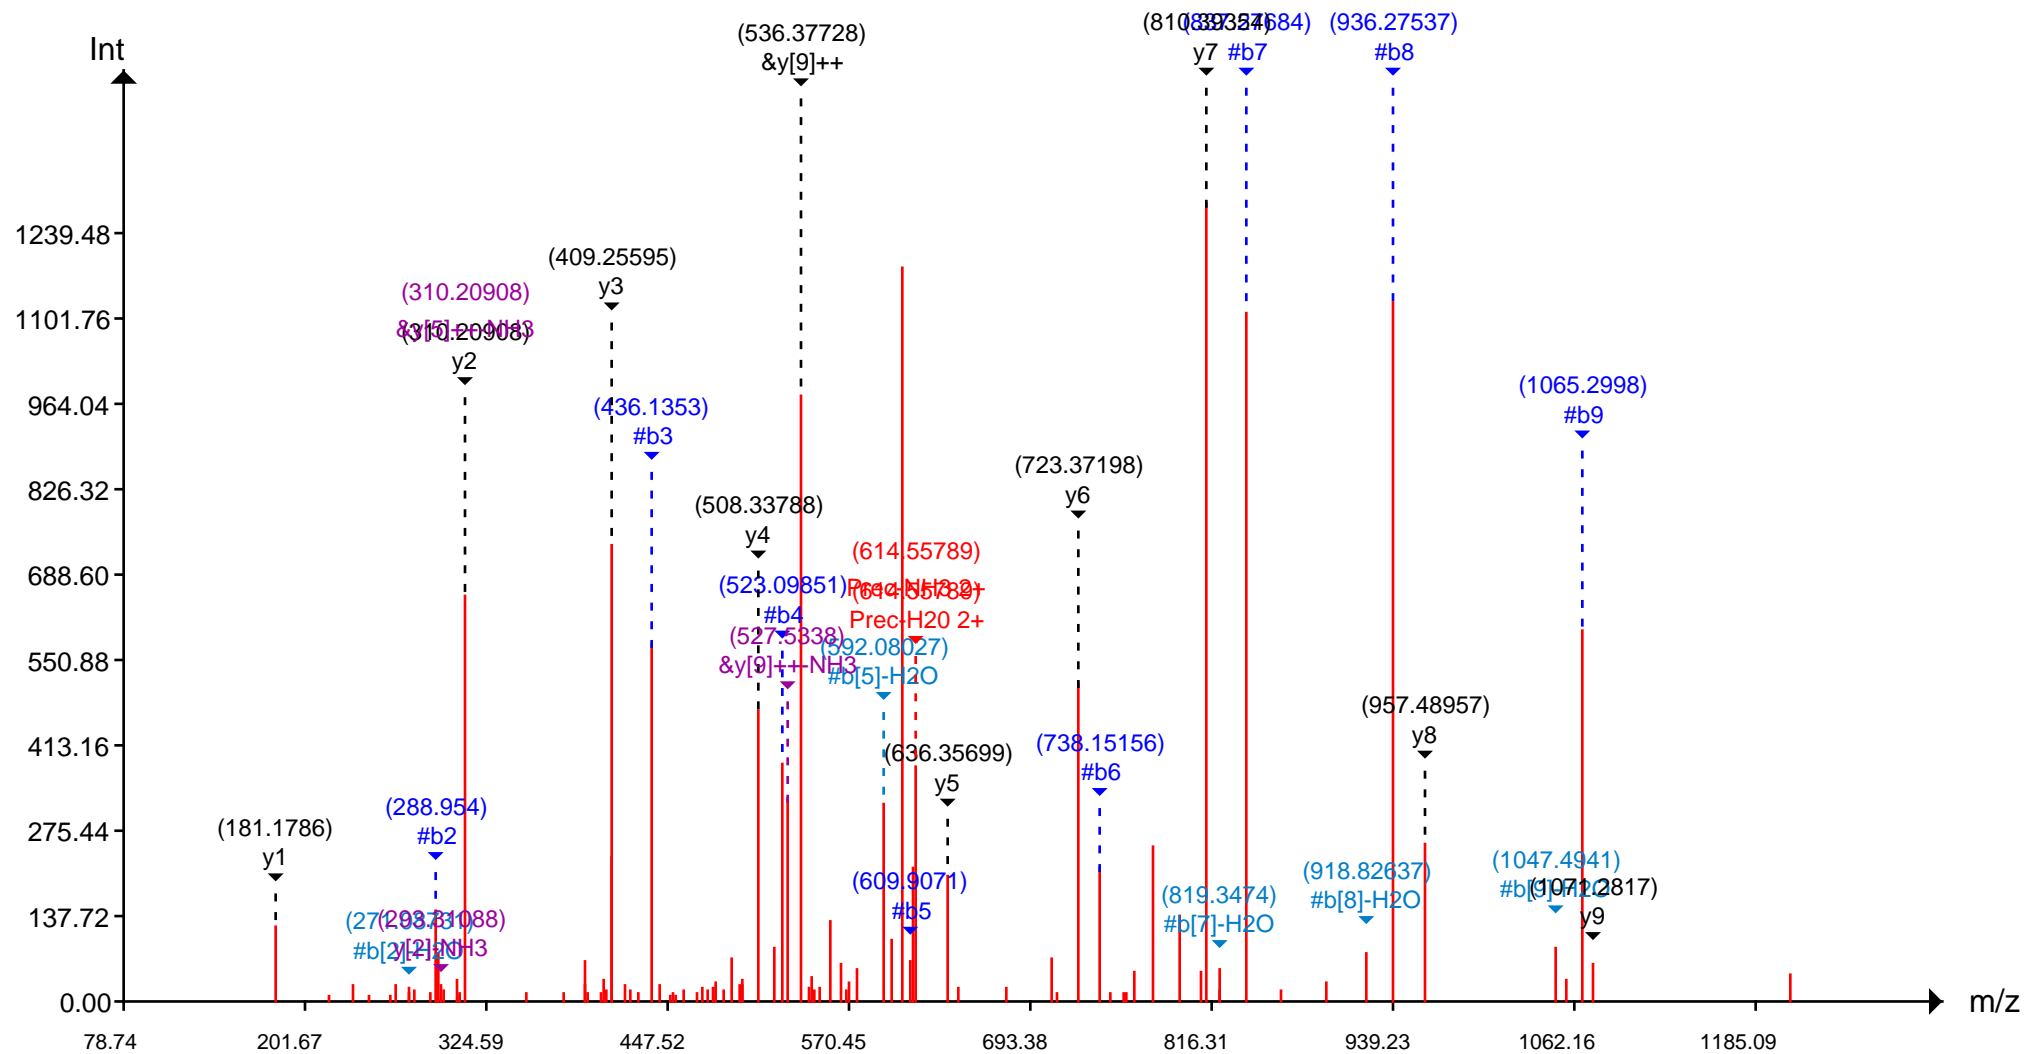

## Info

|                          |                           |                           |        |
|--------------------------|---------------------------|---------------------------|--------|
| <b>Modified Sequence</b> | AcD3-ENFSSQVVER<C13>-COOH | <b>Ion score</b>          | 67.61  |
| <b>Protein</b>           | P59999                    | <b>Confidence level</b>   | 99.00% |
| <b>Precursor m/z</b>     | 623.31596                 | <b>Identity Threshold</b> | 47.52  |
| <b>Charge</b>            | 2+                        | <b>Mass error</b>         | 1.8E-4 |





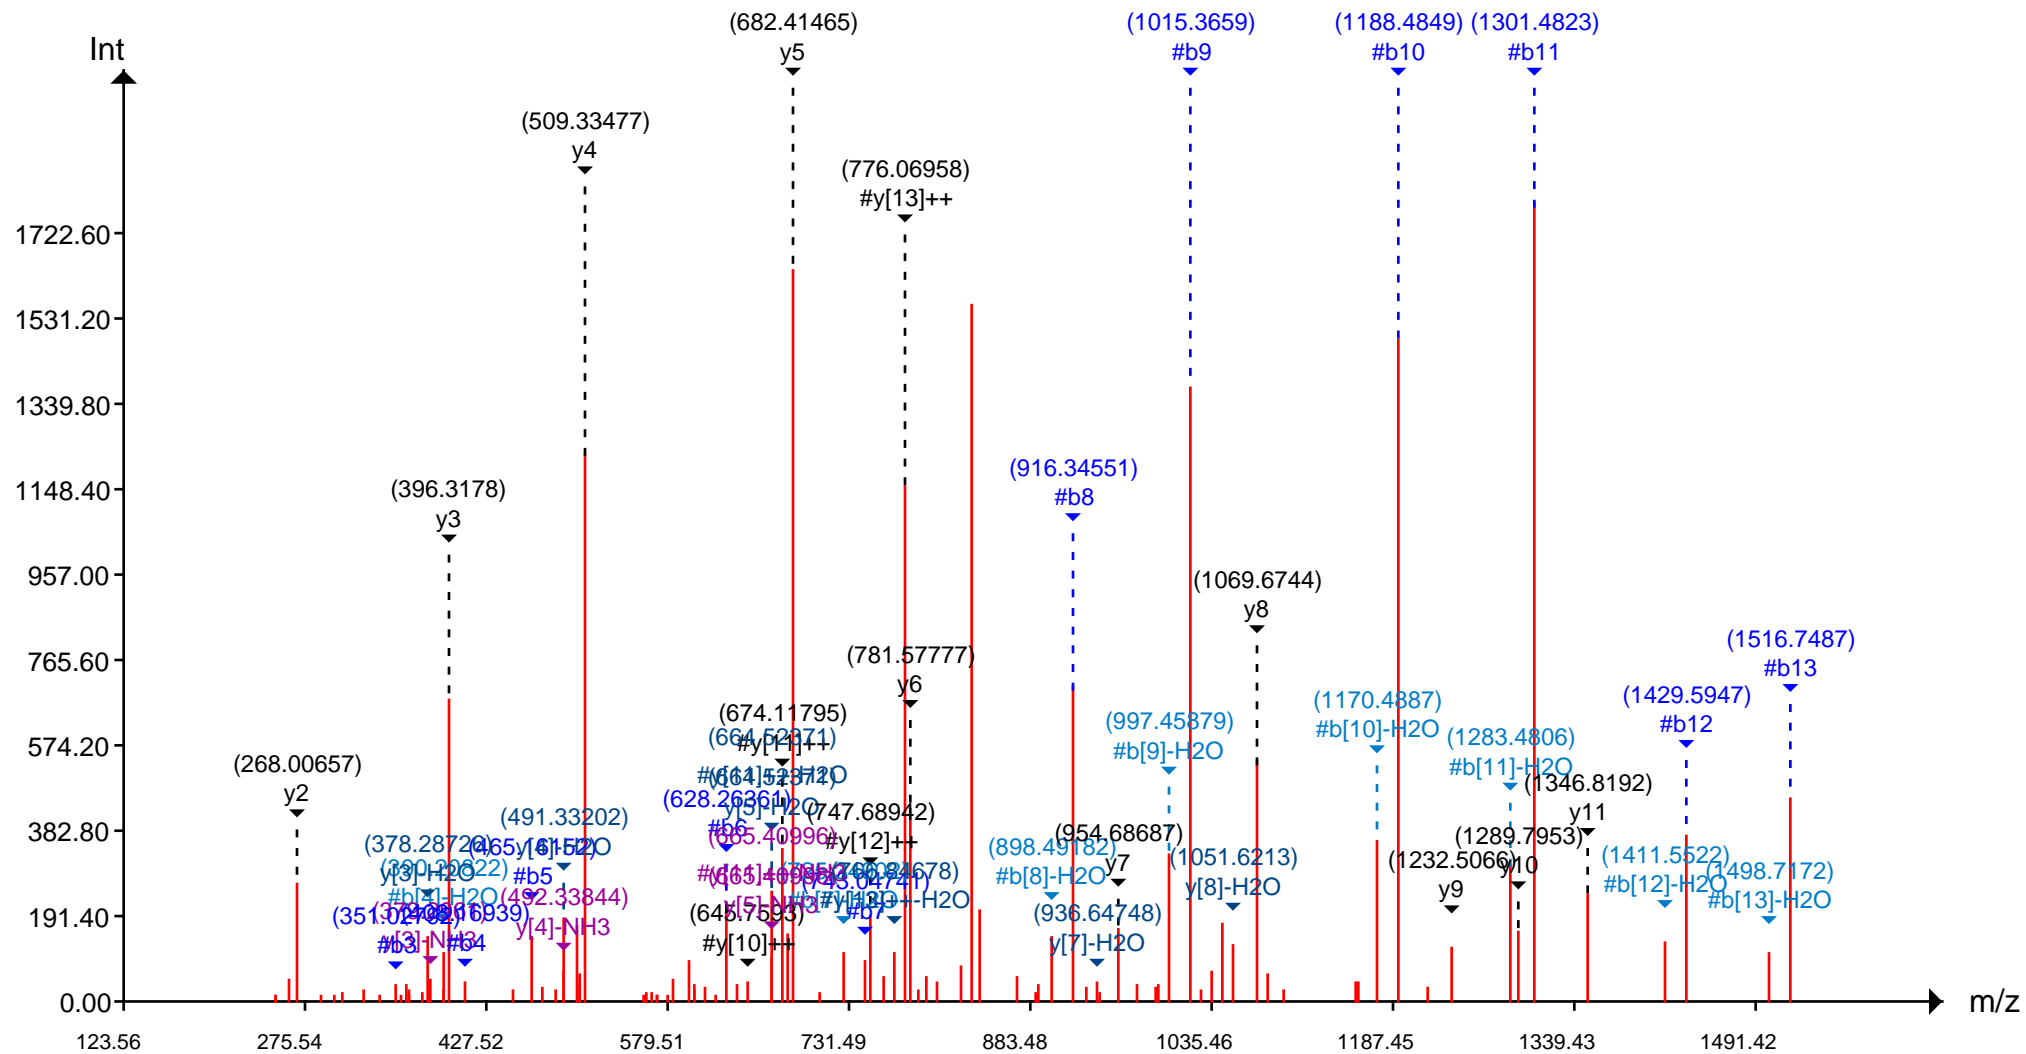

## Info

|                          |                                               |                           |          |
|--------------------------|-----------------------------------------------|---------------------------|----------|
| <b>Modified Sequence</b> | AcD3-TGFGGYDK<AcD3K*>VK<AcD3K*>LQSR<C13>-COOH | <b>Ion score</b>          | 78.01    |
| <b>Protein</b>           | Q62465                                        | <b>Confidence level</b>   | 99.00%   |
| <b>Precursor m/z</b>     | 848.97006                                     | <b>Identity Threshold</b> | 47.25    |
| <b>Charge</b>            | 2+                                            | <b>Mass error</b>         | 0.001786 |

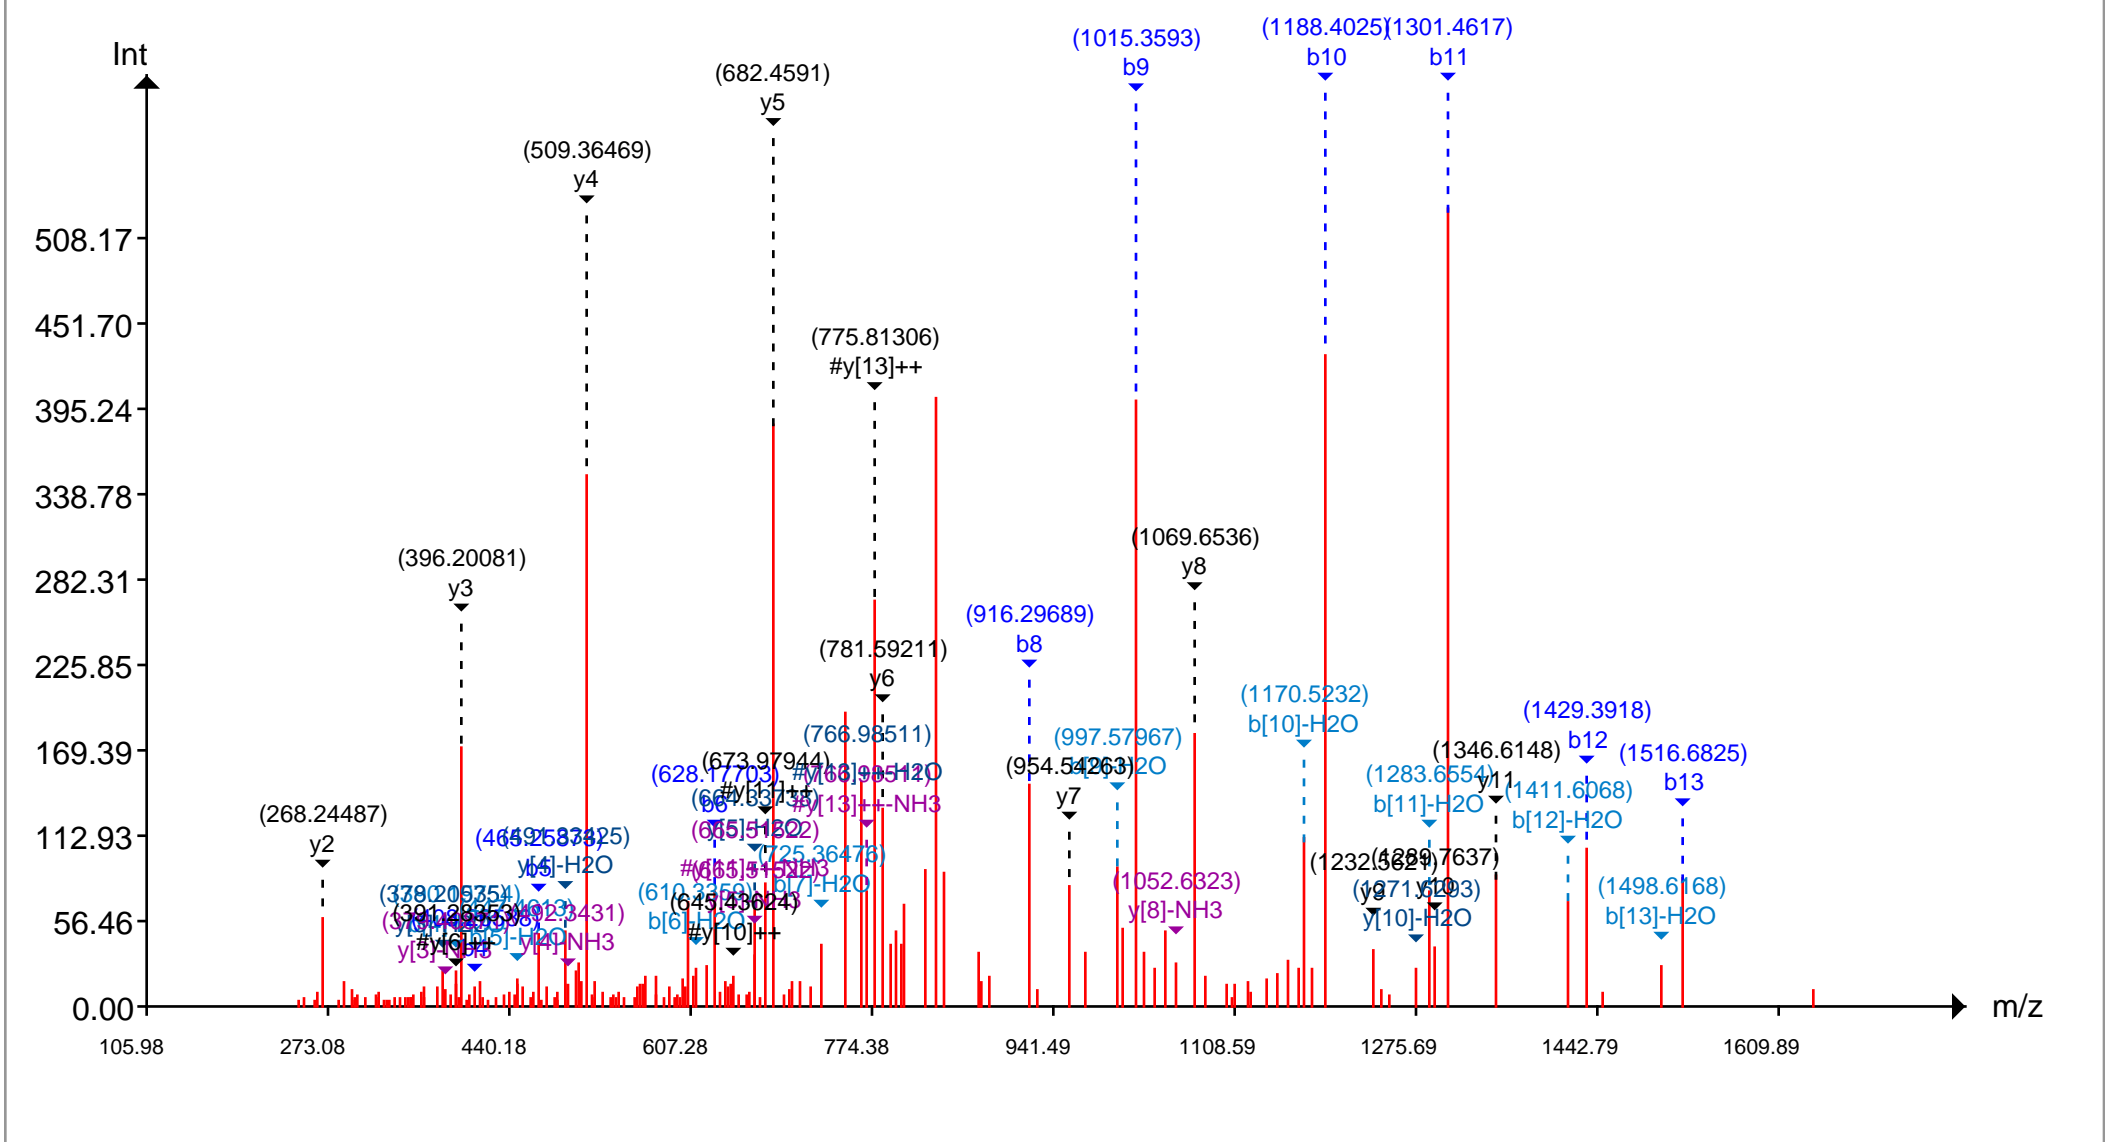

## Info

|                          |                                               |                           |          |
|--------------------------|-----------------------------------------------|---------------------------|----------|
| <b>Modified Sequence</b> | AcD3-TGFGGYDK<AcD3K*>VK<AcD3K*>LQSR<C13>-COOH | <b>Ion score</b>          | 74.46    |
| <b>Protein</b>           | Q62465                                        | <b>Confidence level</b>   | 99.00%   |
| <b>Precursor m/z</b>     | 848.97005                                     | <b>Identity Threshold</b> | 47.25    |
| <b>Charge</b>            | 2+                                            | <b>Mass error</b>         | 0.001766 |

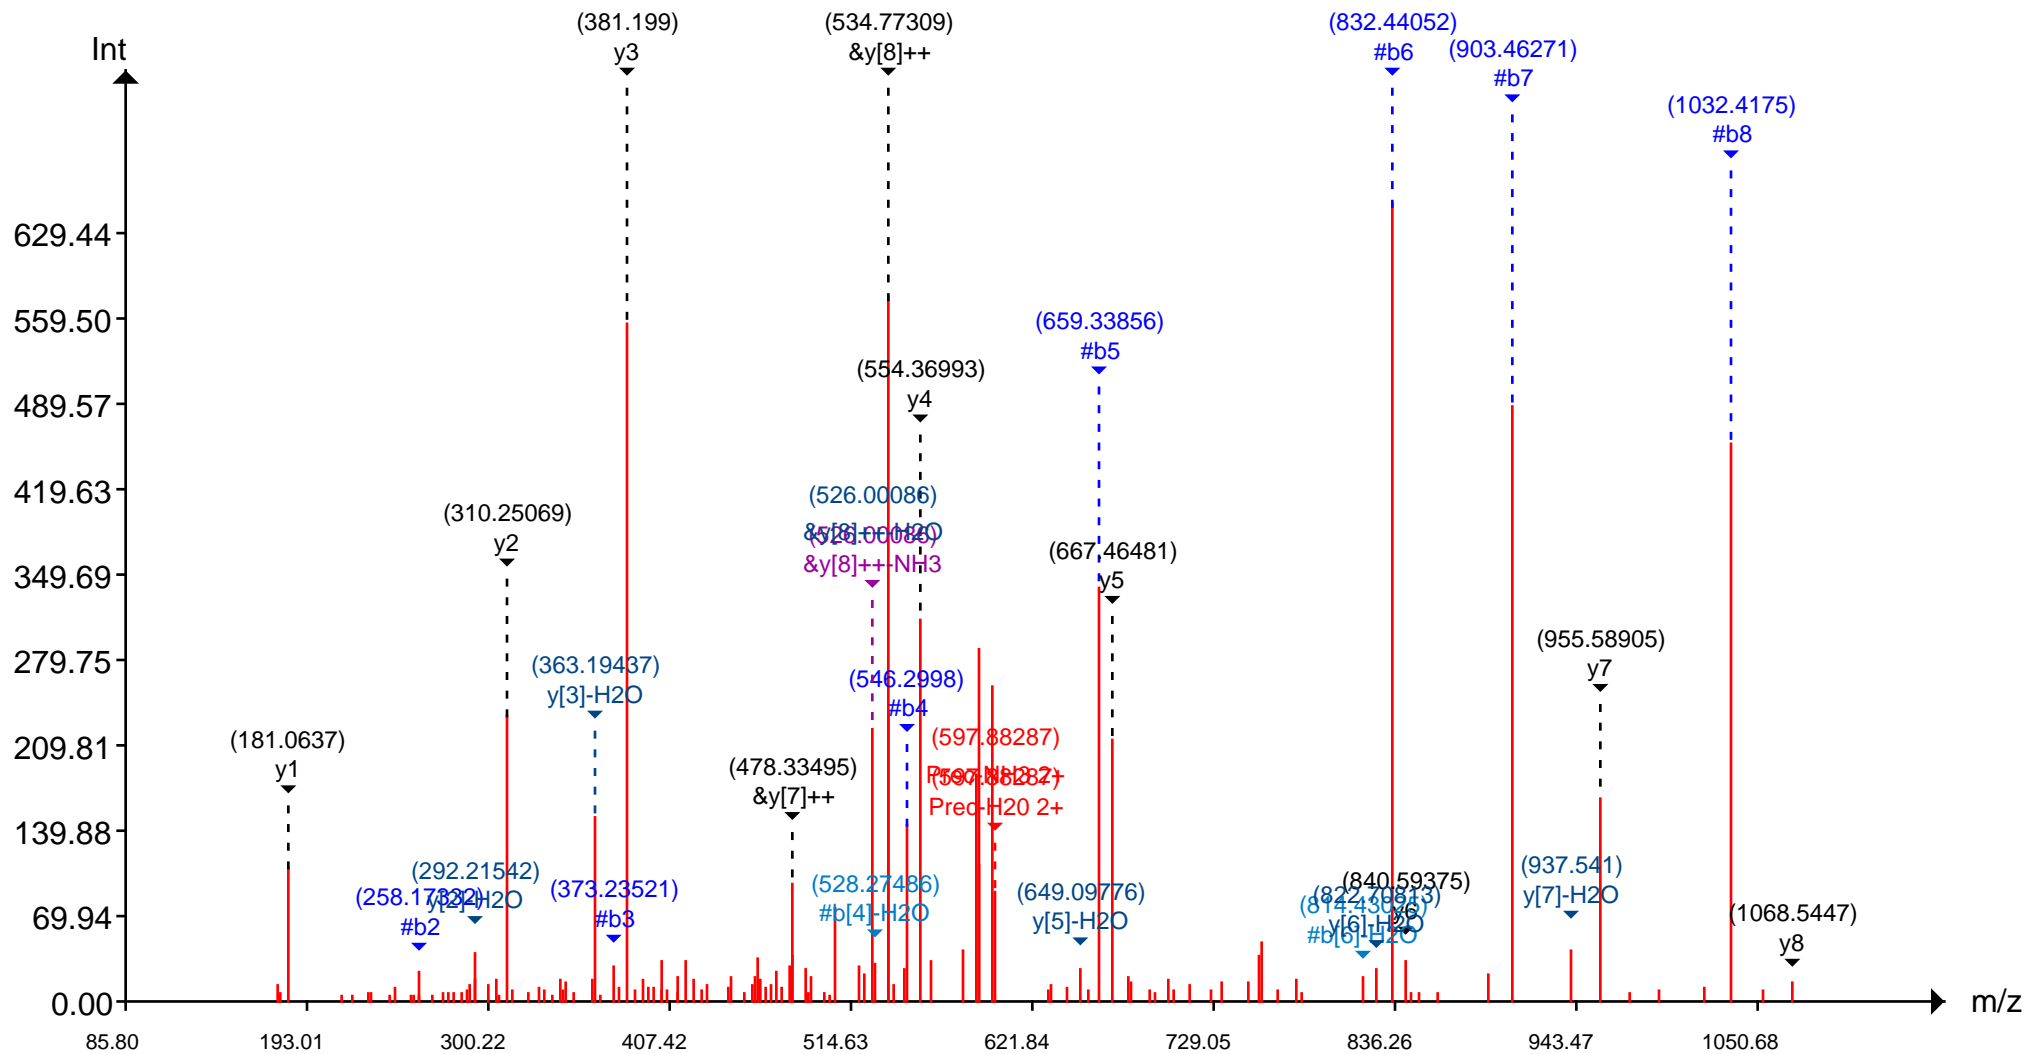

## Info

**Modified Sequence** AcD3-VLDK<AcD3K\*>LK<AcD3K\*>AER<C13>-COOH

**Ion score** 57.41

**Protein** P10126, P62631

**Confidence level** 99.00%

**Precursor m/z** 606.88422

**Identity Threshold** 41.09

**Charge** 2+

**Mass error** 7.9E-4

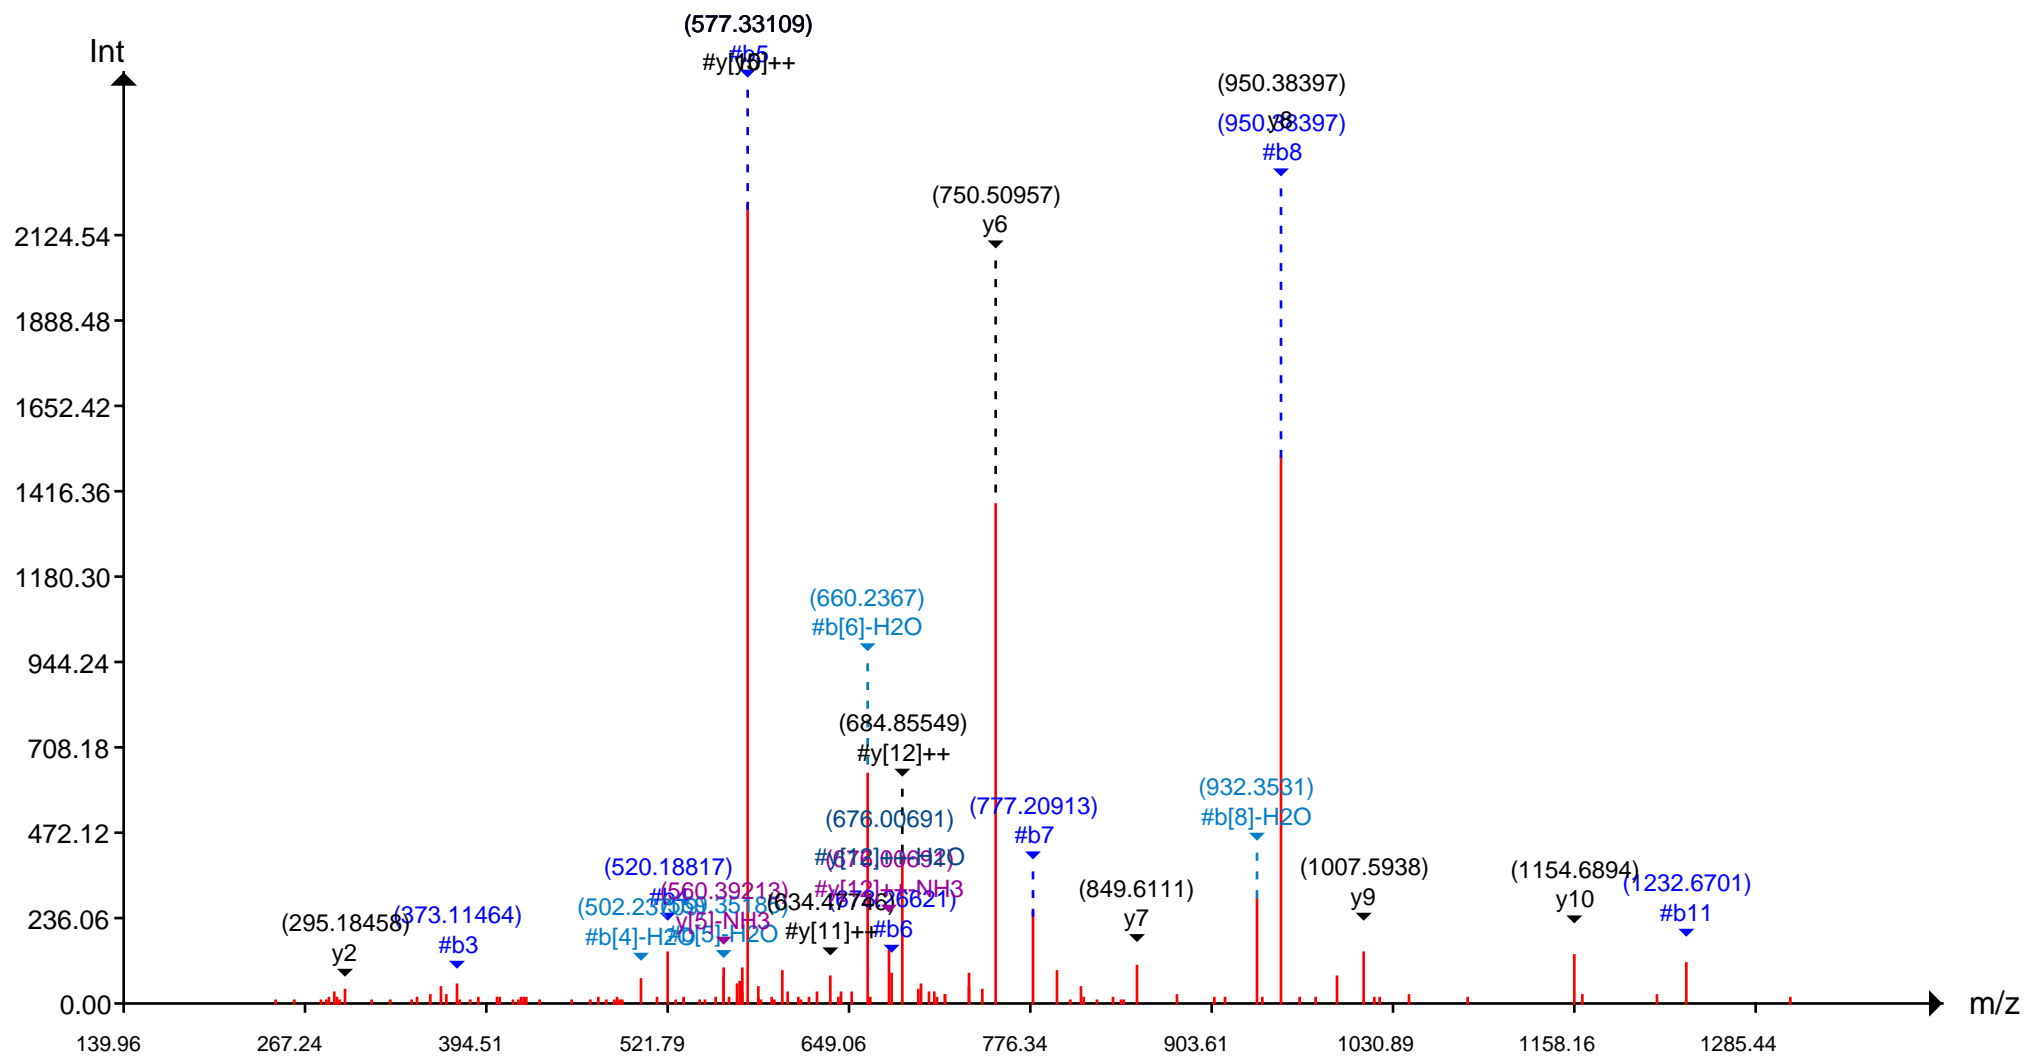

## Info

**Modified Sequence** AcD3-ITIM<Mox\*>GTVK<AcD3K\*>PNANR<C13>-COOH

**Ion score** 57.4

**Protein** P16110

**Confidence level** 99.00%

**Precursor m/z** 763.93261

**Identity Threshold** 46.76

**Charge** 2+

**Mass error** 6.16E-4

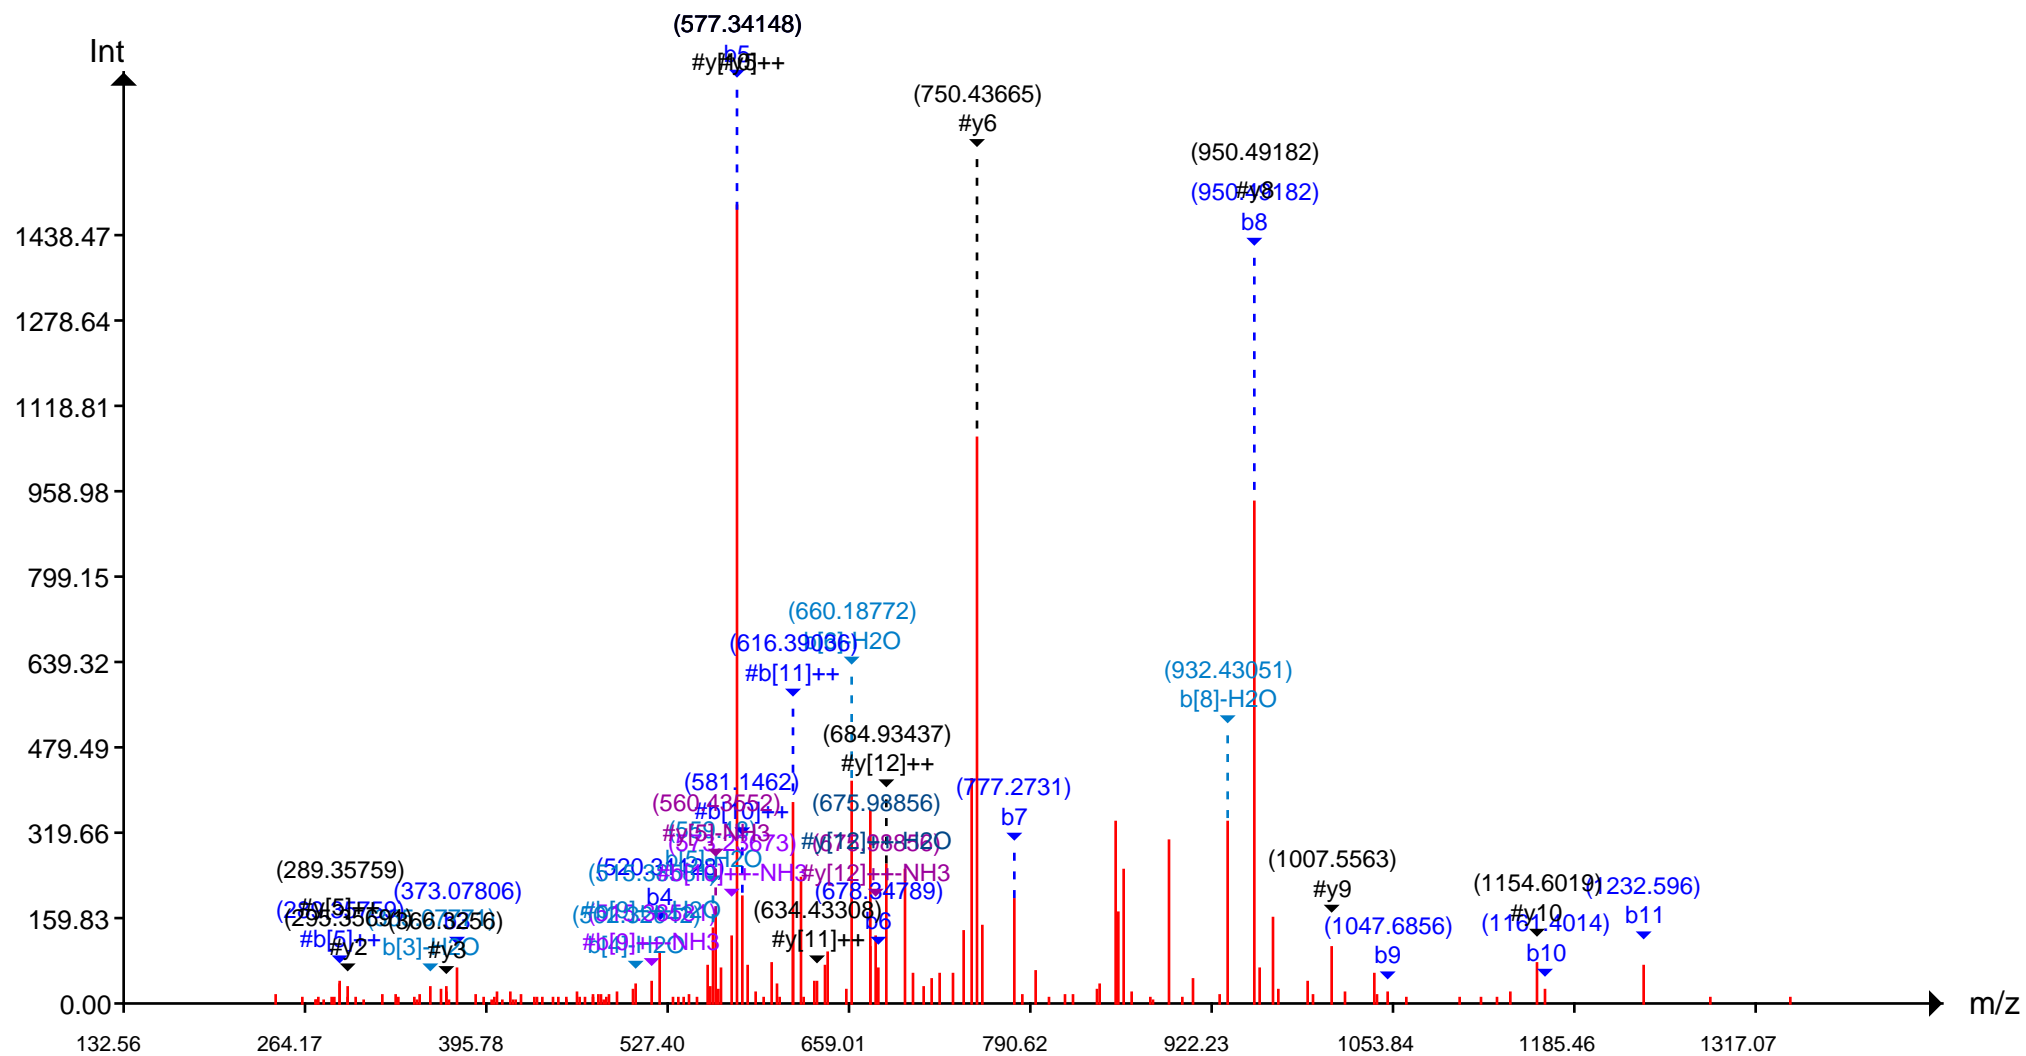

## Info

**Modified Sequence** AcD3-ITIM<Mox\*>GTVK<AcD3K\*>PNANR<C13>-COOH

**Ion score** 58.02

**Protein** P16110

**Confidence level** 99.00%

**Precursor m/z** 763.93322

**Identity Threshold** 46.72

**Charge** 2+

**Mass error** 0.001836

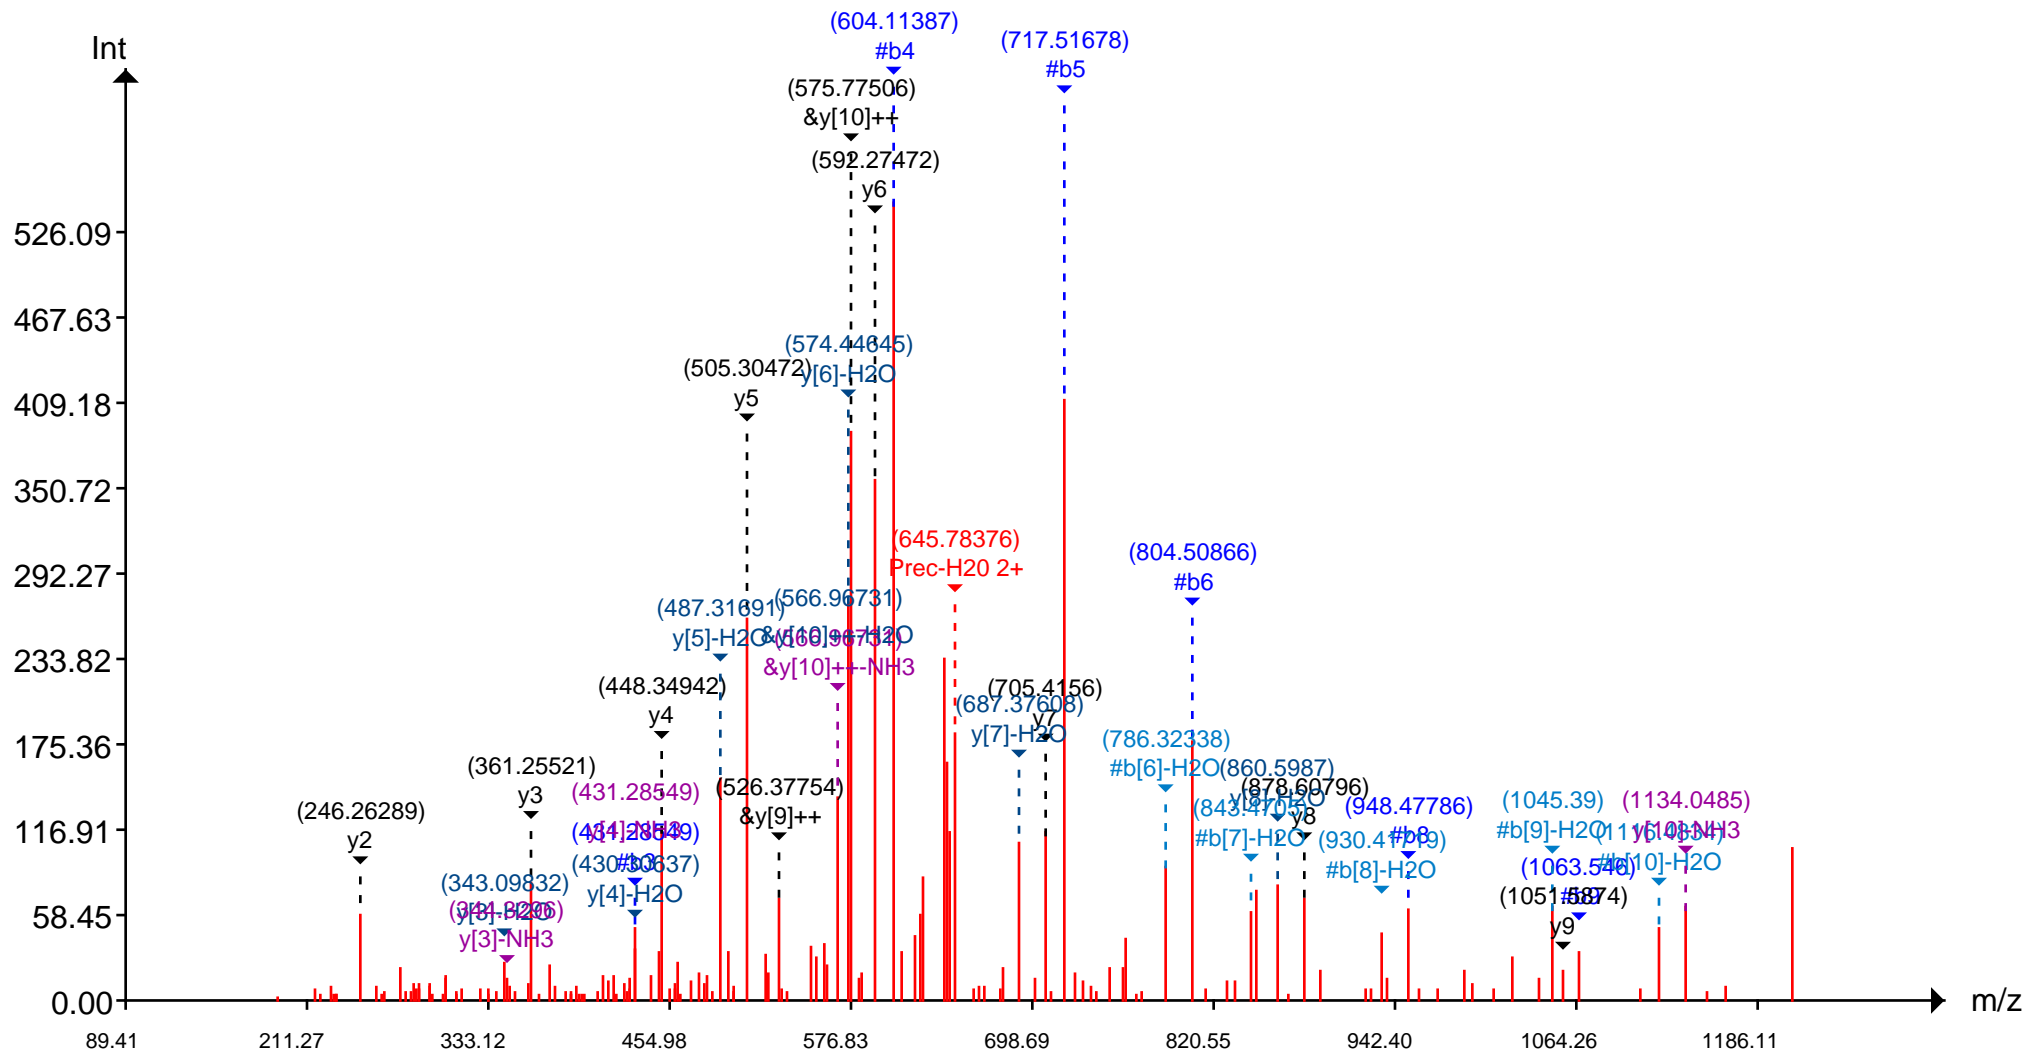

## Info

|                          |                                       |                           |          |
|--------------------------|---------------------------------------|---------------------------|----------|
| <b>Modified Sequence</b> | AcD3-LVK<AcD3K*>K<AcD3K*>ISGSDAR-COOH | <b>Ion score</b>          | 54.62    |
| <b>Protein</b>           | P18654                                | <b>Confidence level</b>   | 99.00%   |
| <b>Precursor m/z</b>     | 654.89589                             | <b>Identity Threshold</b> | 43.94    |
| <b>Charge</b>            | 2+                                    | <b>Mass error</b>         | 0.001334 |

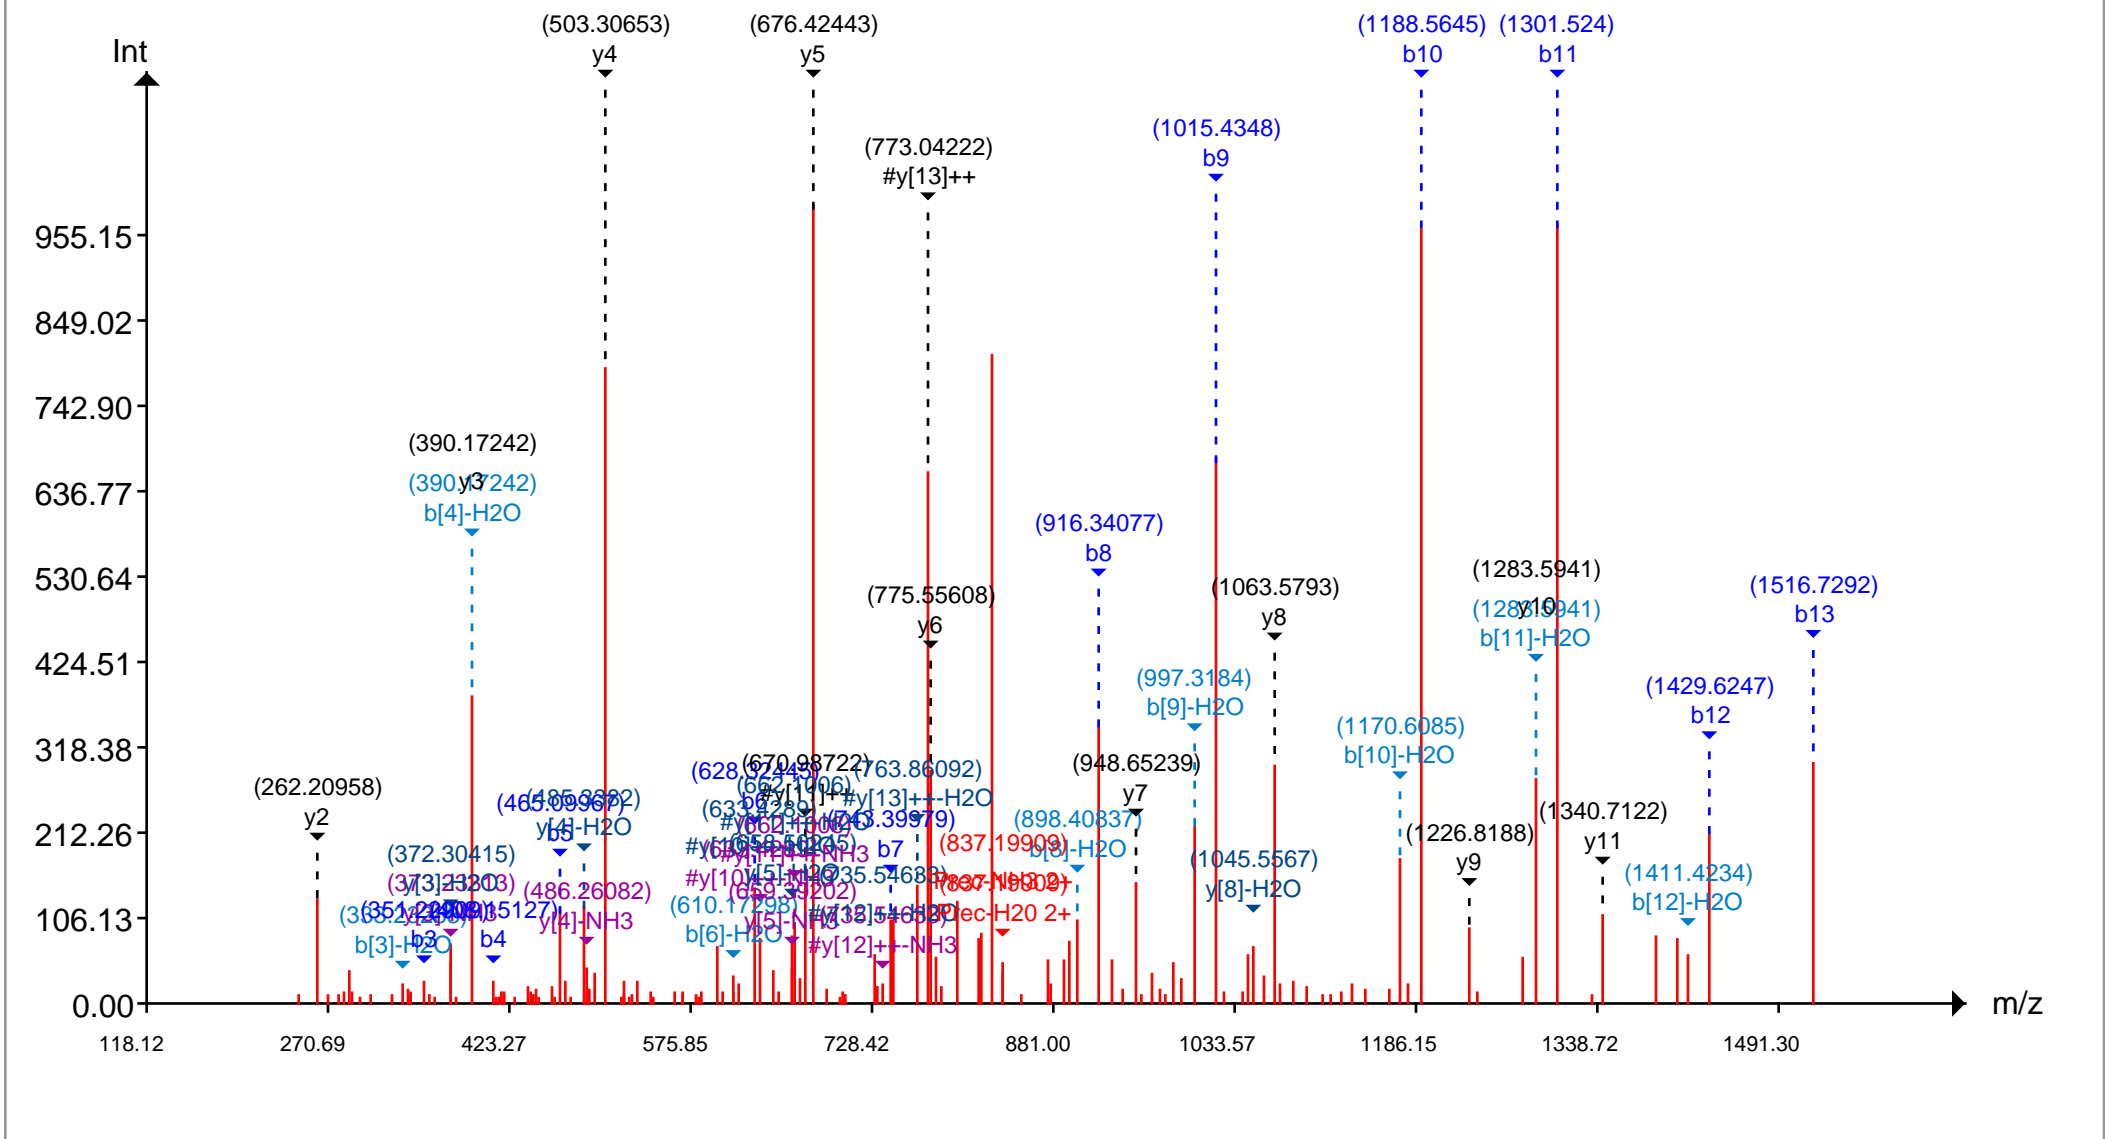

## Info

|                          |                                          |                           |          |
|--------------------------|------------------------------------------|---------------------------|----------|
| <b>Modified Sequence</b> | AcD3-TGFGGYDK<AcD3K*>VK<AcD3K*>LQSR-COOH | <b>Ion score</b>          | 89.42    |
| <b>Protein</b>           | Q62465                                   | <b>Confidence level</b>   | 99.00%   |
| <b>Precursor m/z</b>     | 845.9605                                 | <b>Identity Threshold</b> | 47.63    |
| <b>Charge</b>            | 2+                                       | <b>Mass error</b>         | 0.002807 |

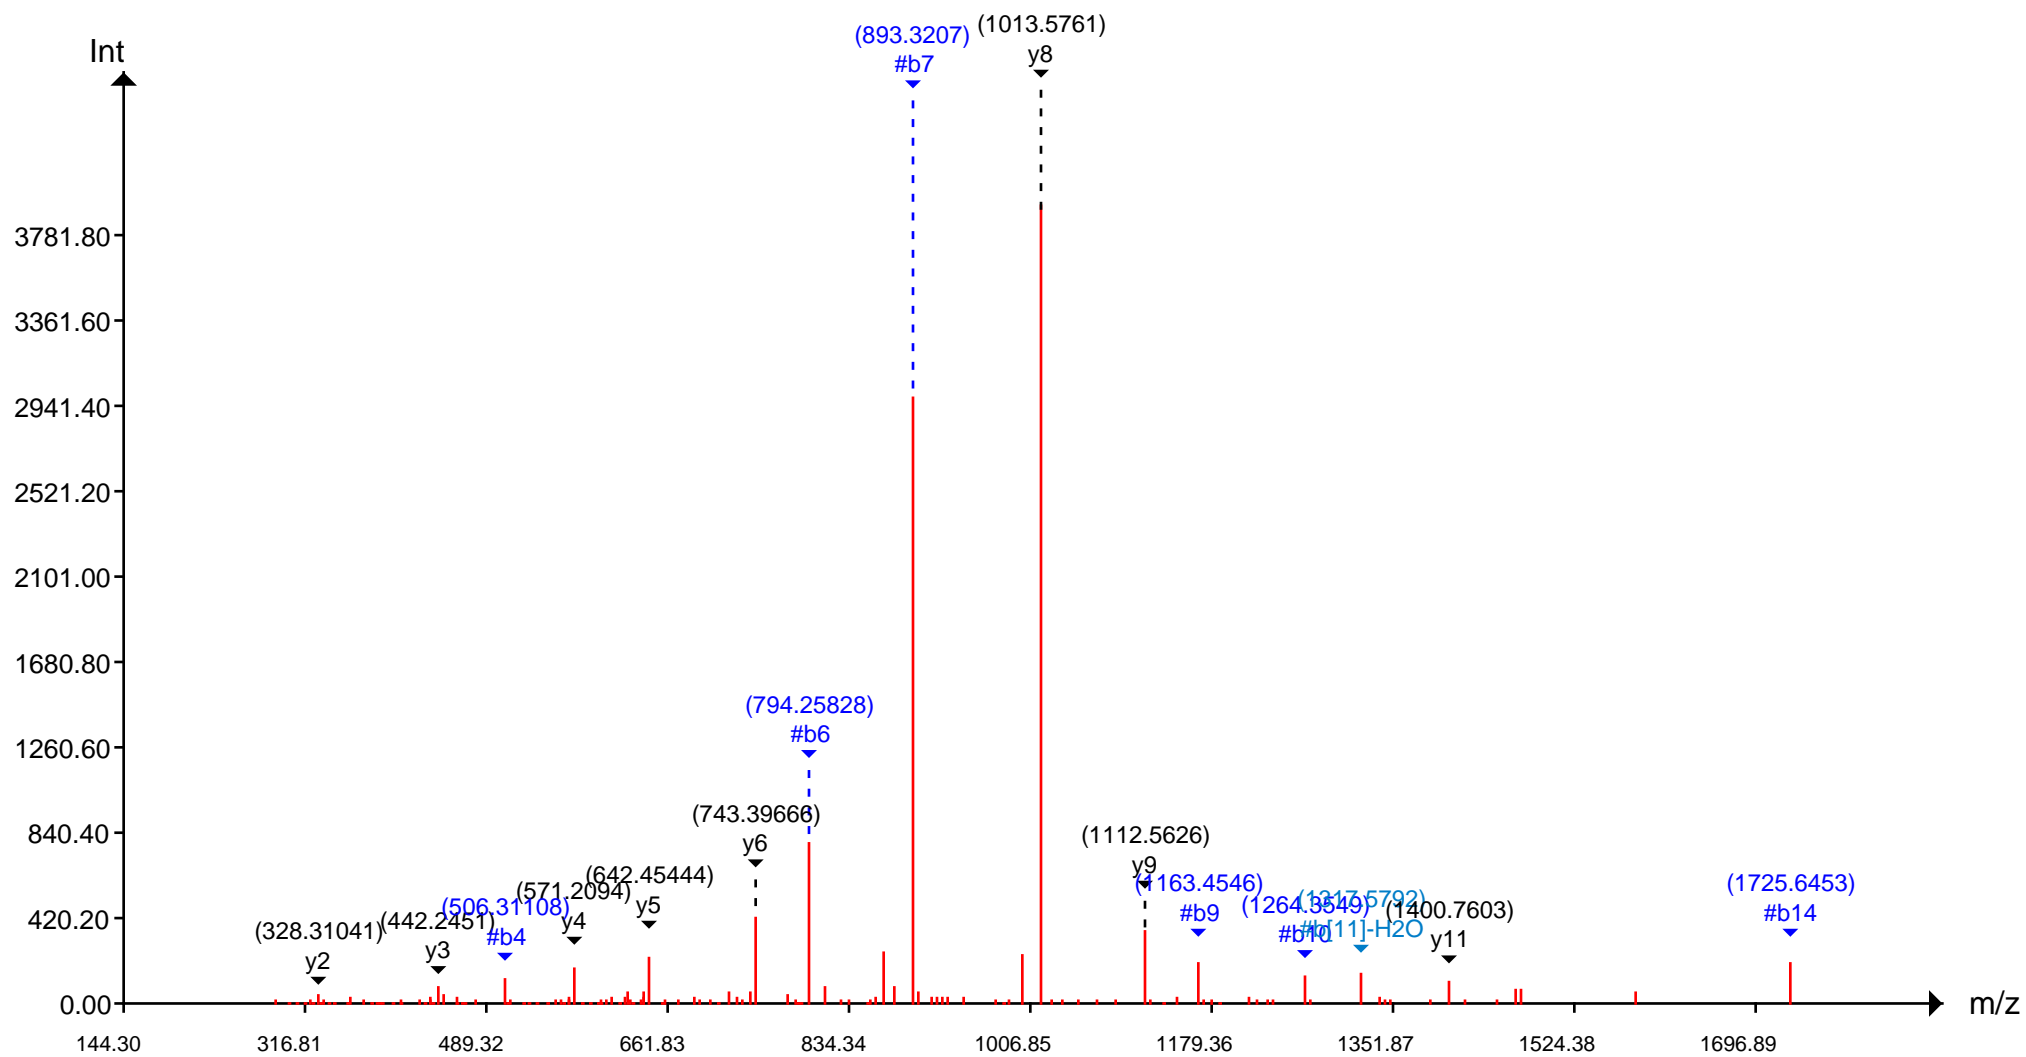

## Info

**Modified Sequence** AcD3-ELFADK<AcD3K\*>VPK<AcD3K\*>TAENFR<C13>-COOH

**Ion score** 74.6

**Protein** P17742

**Confidence level** 99.00%

**Precursor m/z** 953.52363

**Identity Threshold** 47.23

**Charge** 2+

**Mass error** 0.003762



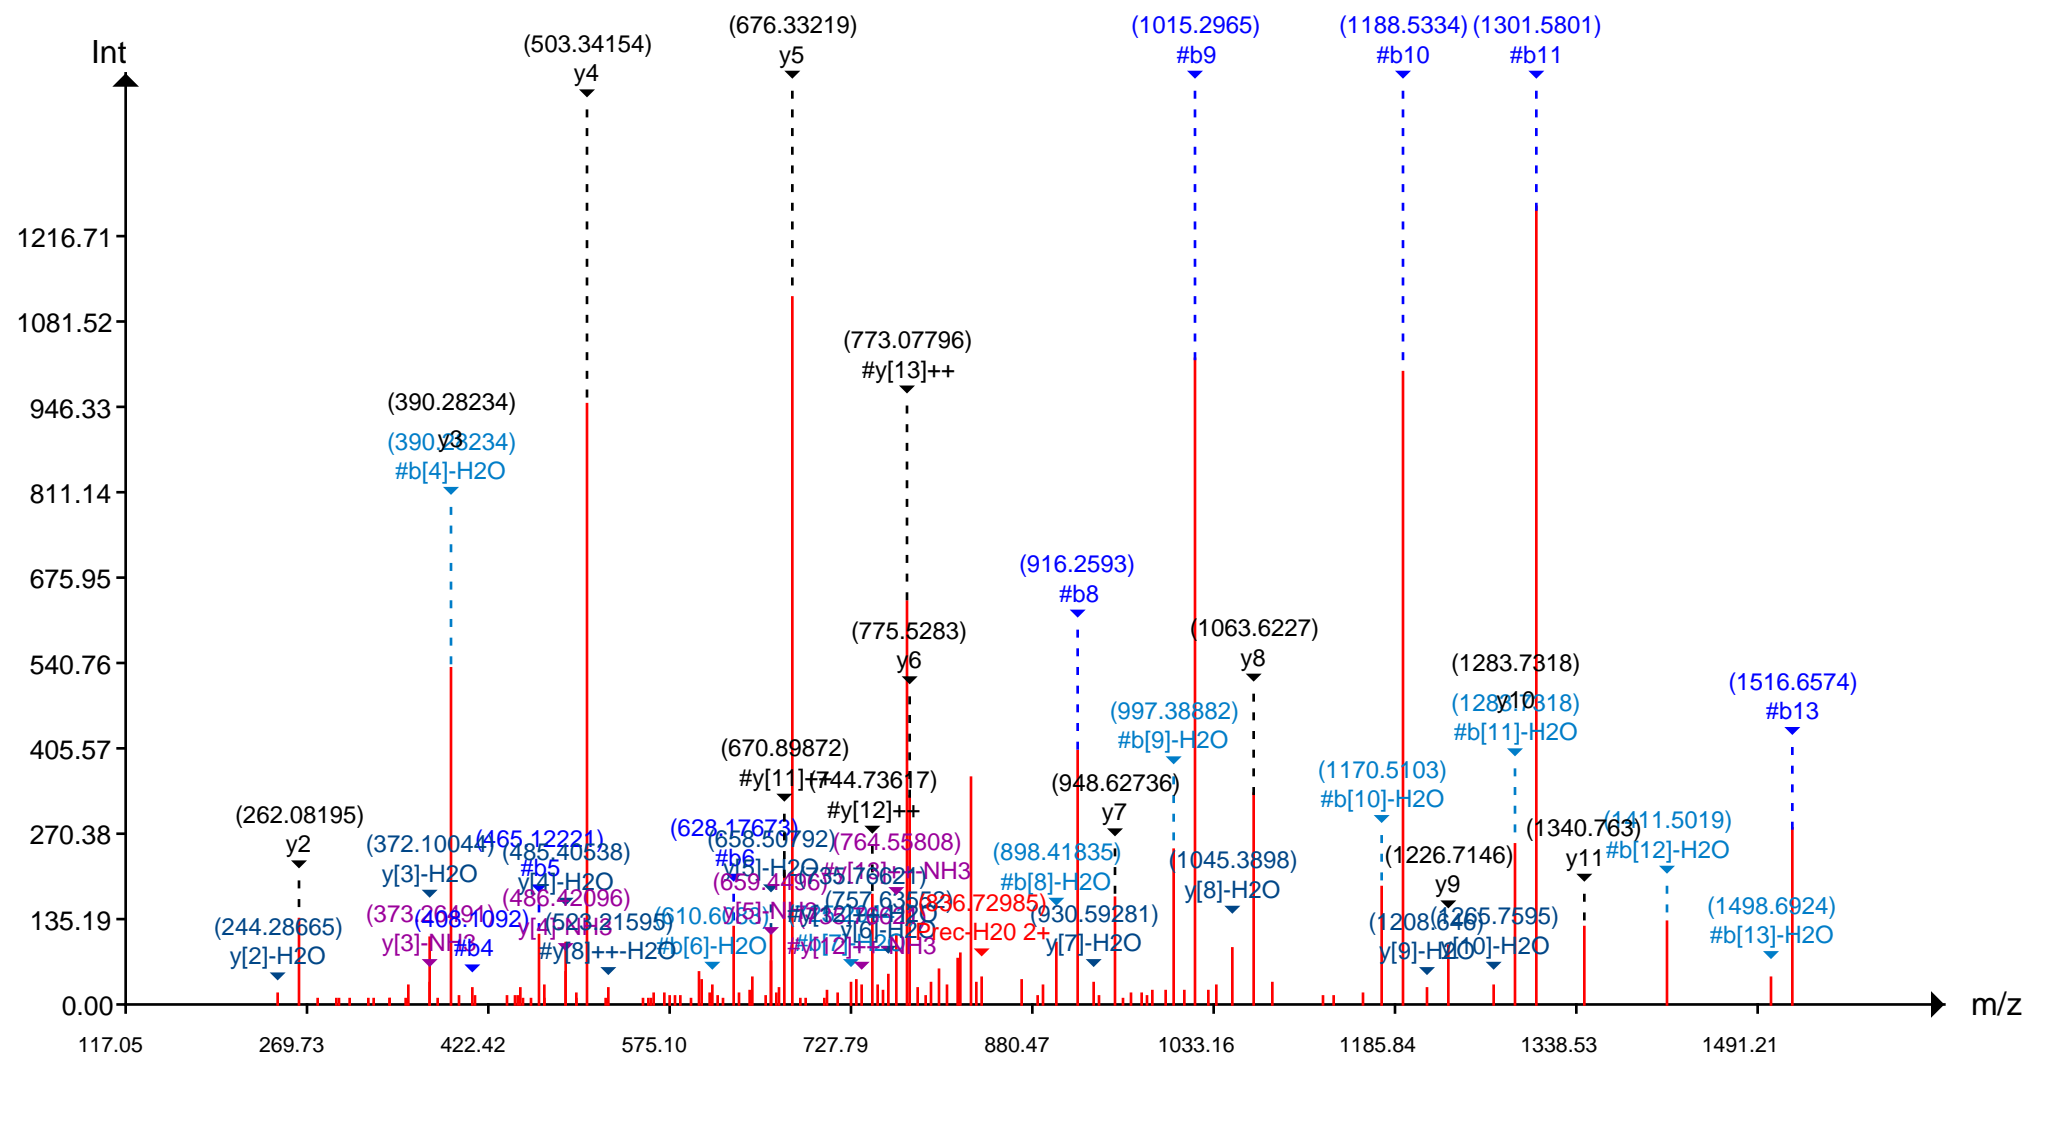

| Info                     |                                          |                           |          |
|--------------------------|------------------------------------------|---------------------------|----------|
| <b>Modified Sequence</b> | AcD3-TGFGGYDK<AcD3K*>VK<AcD3K*>LQSR-COOH | <b>Ion score</b>          | 89.93    |
| <b>Protein</b>           | Q62465                                   | <b>Confidence level</b>   | 99.00%   |
| <b>Precursor m/z</b>     | 845.96018                                | <b>Identity Threshold</b> | 47.66    |
| <b>Charge</b>            | 2+                                       | <b>Mass error</b>         | 0.002167 |

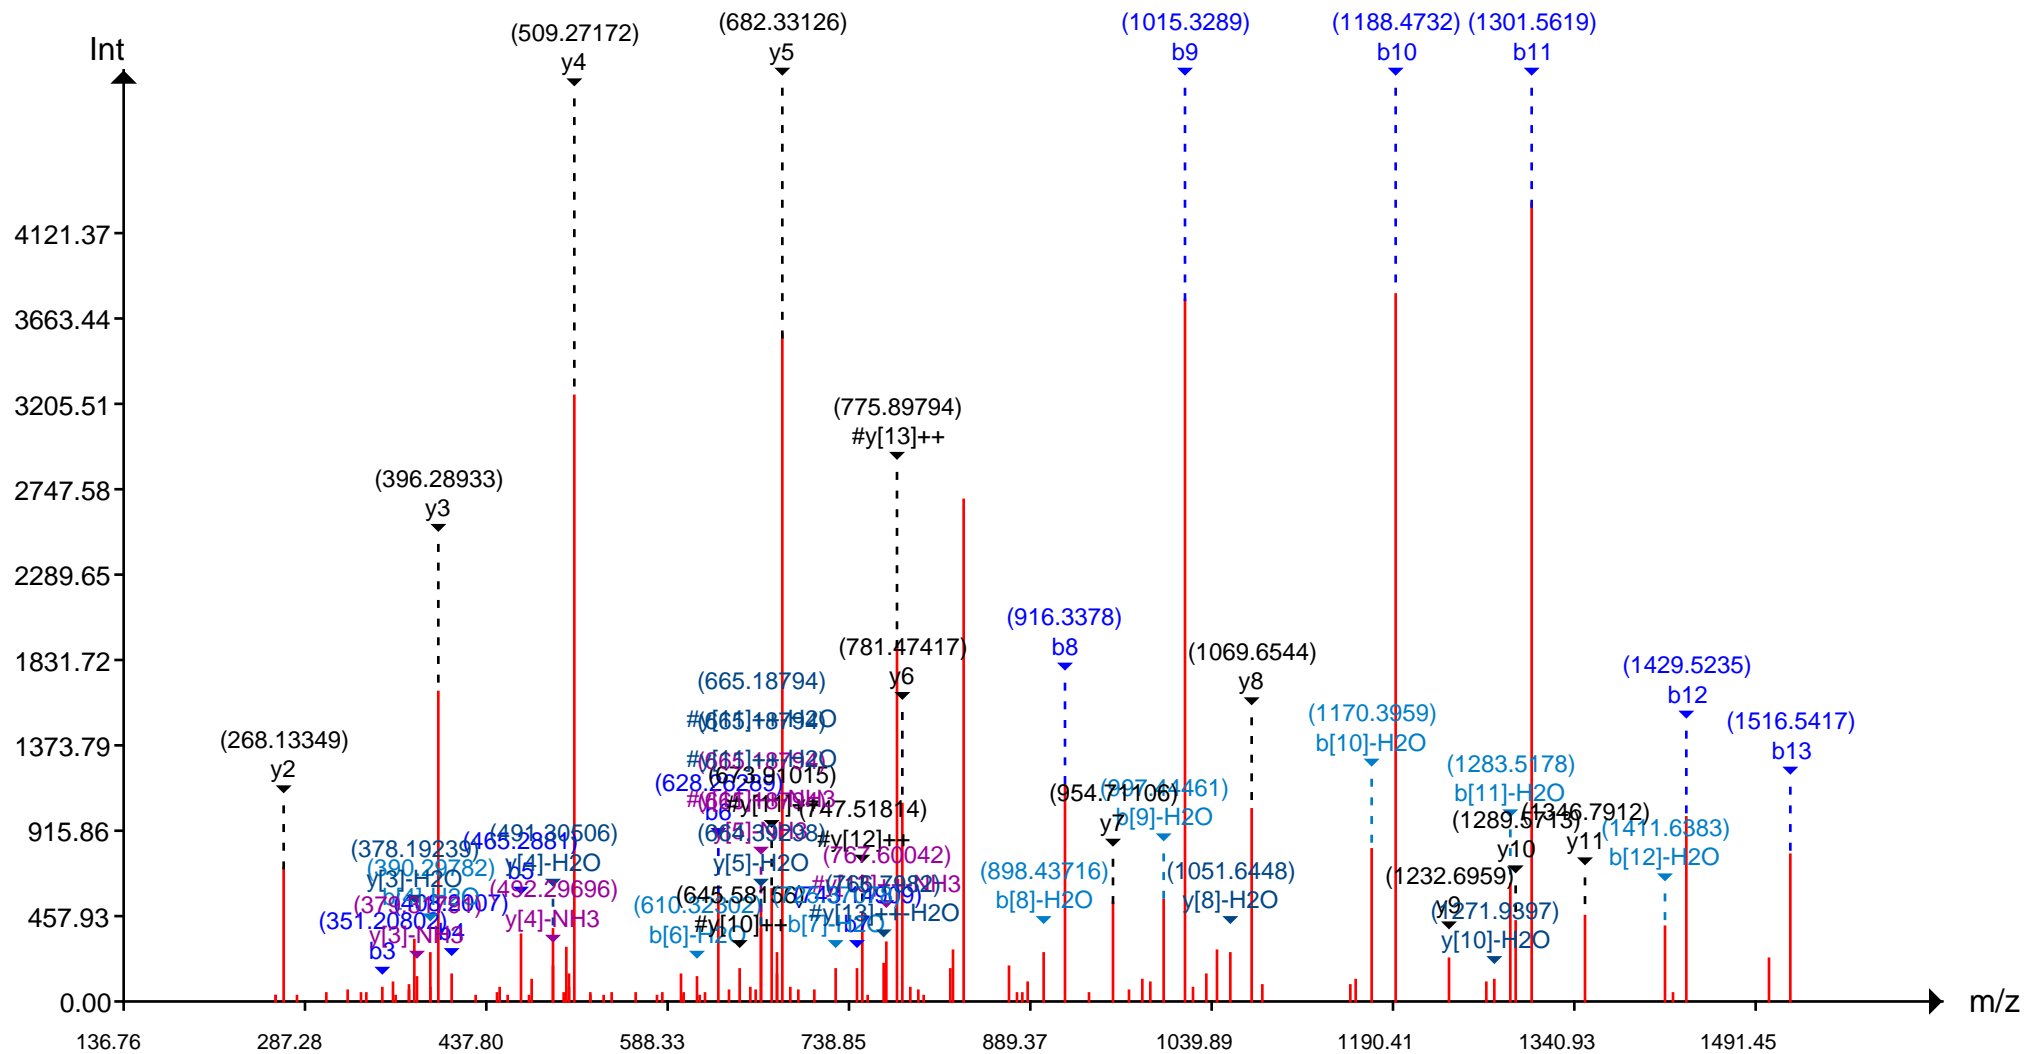

## Info

|                          |                                               |                           |          |
|--------------------------|-----------------------------------------------|---------------------------|----------|
| <b>Modified Sequence</b> | AcD3-TGFGGYDK<AcD3K*>VK<AcD3K*>LQSR<C13>-COOH | <b>Ion score</b>          | 81.99    |
| <b>Protein</b>           | Q62465                                        | <b>Confidence level</b>   | 99.00%   |
| <b>Precursor m/z</b>     | 848.97008                                     | <b>Identity Threshold</b> | 47.25    |
| <b>Charge</b>            | 2+                                            | <b>Mass error</b>         | 0.001826 |

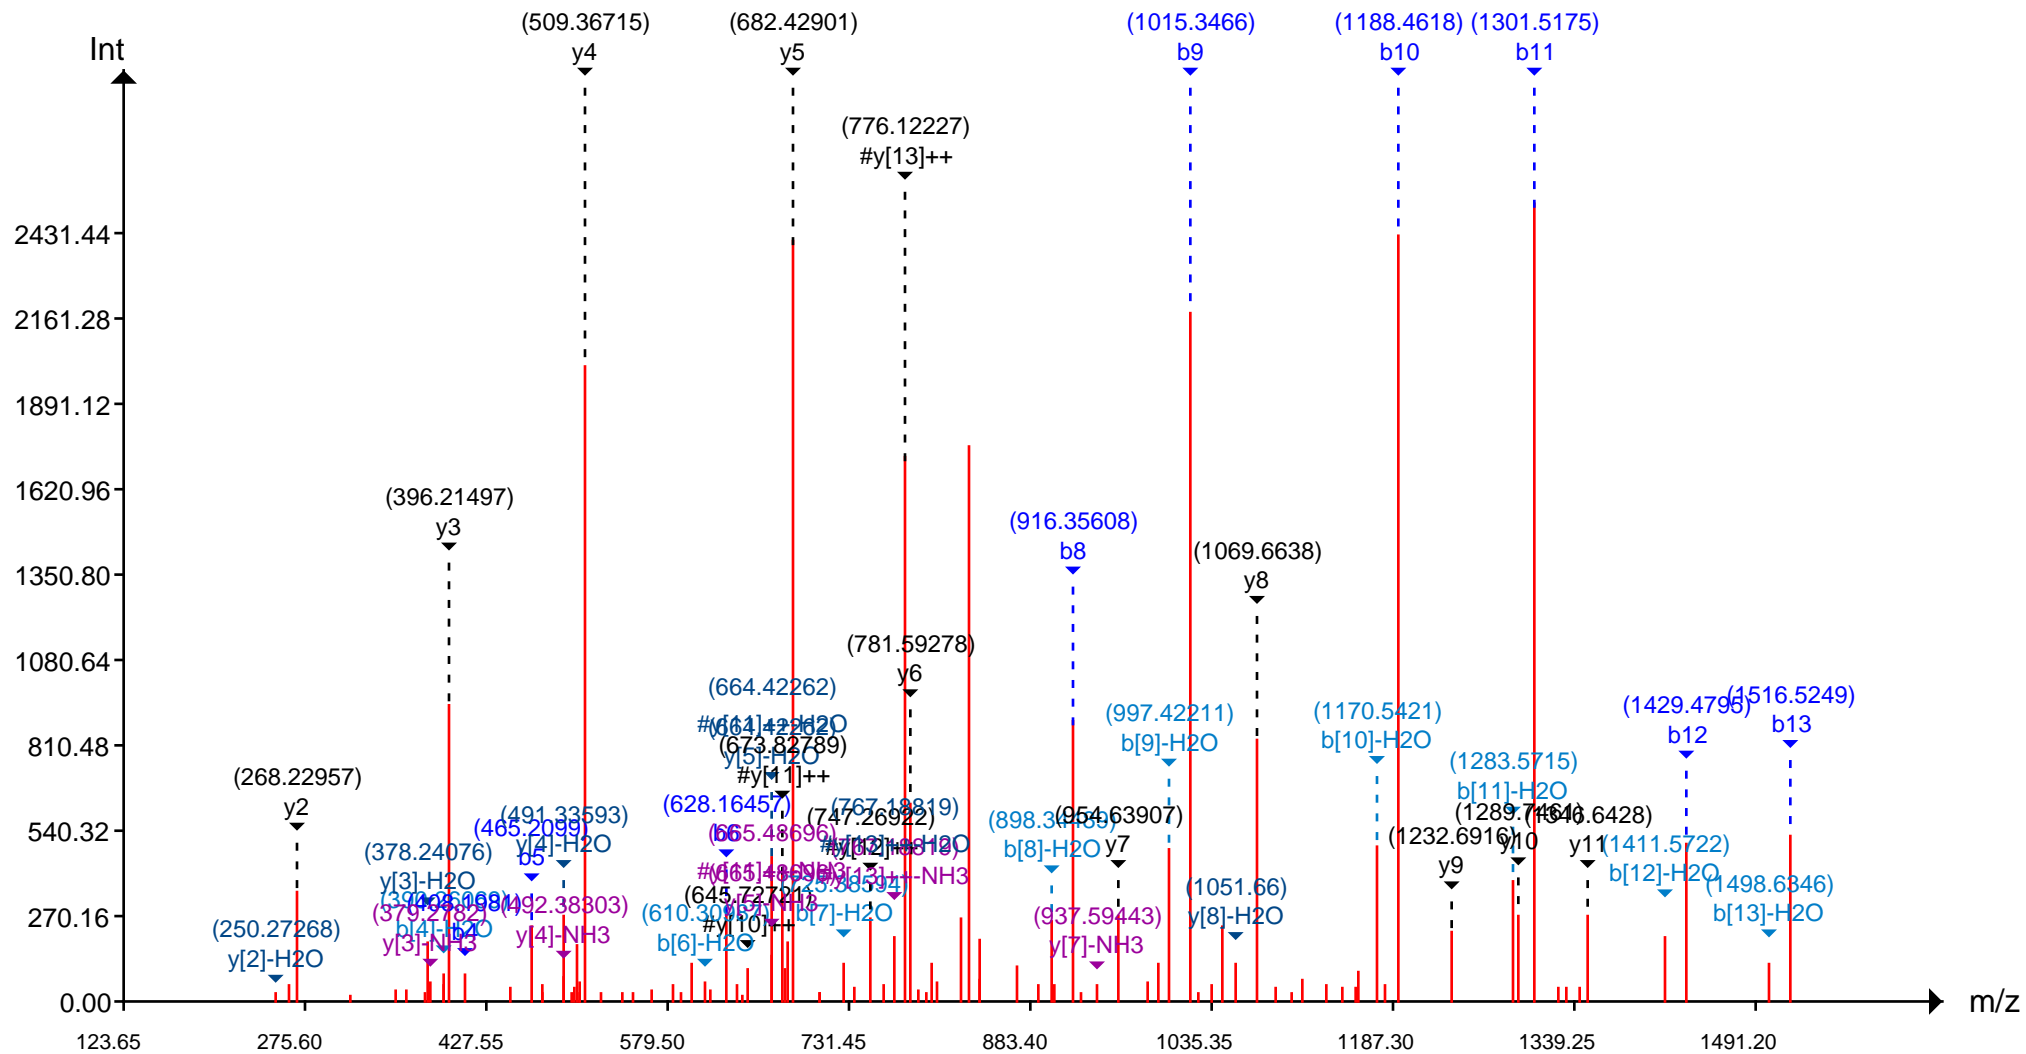

## Info

|                          |                                               |                           |          |
|--------------------------|-----------------------------------------------|---------------------------|----------|
| <b>Modified Sequence</b> | AcD3-TGFGGYDK<AcD3K*>VK<AcD3K*>LQSR<C13>-COOH | <b>Ion score</b>          | 83.66    |
| <b>Protein</b>           | Q62465                                        | <b>Confidence level</b>   | 99.00%   |
| <b>Precursor m/z</b>     | 848.96973                                     | <b>Identity Threshold</b> | 47.30    |
| <b>Charge</b>            | 2+                                            | <b>Mass error</b>         | 0.001126 |

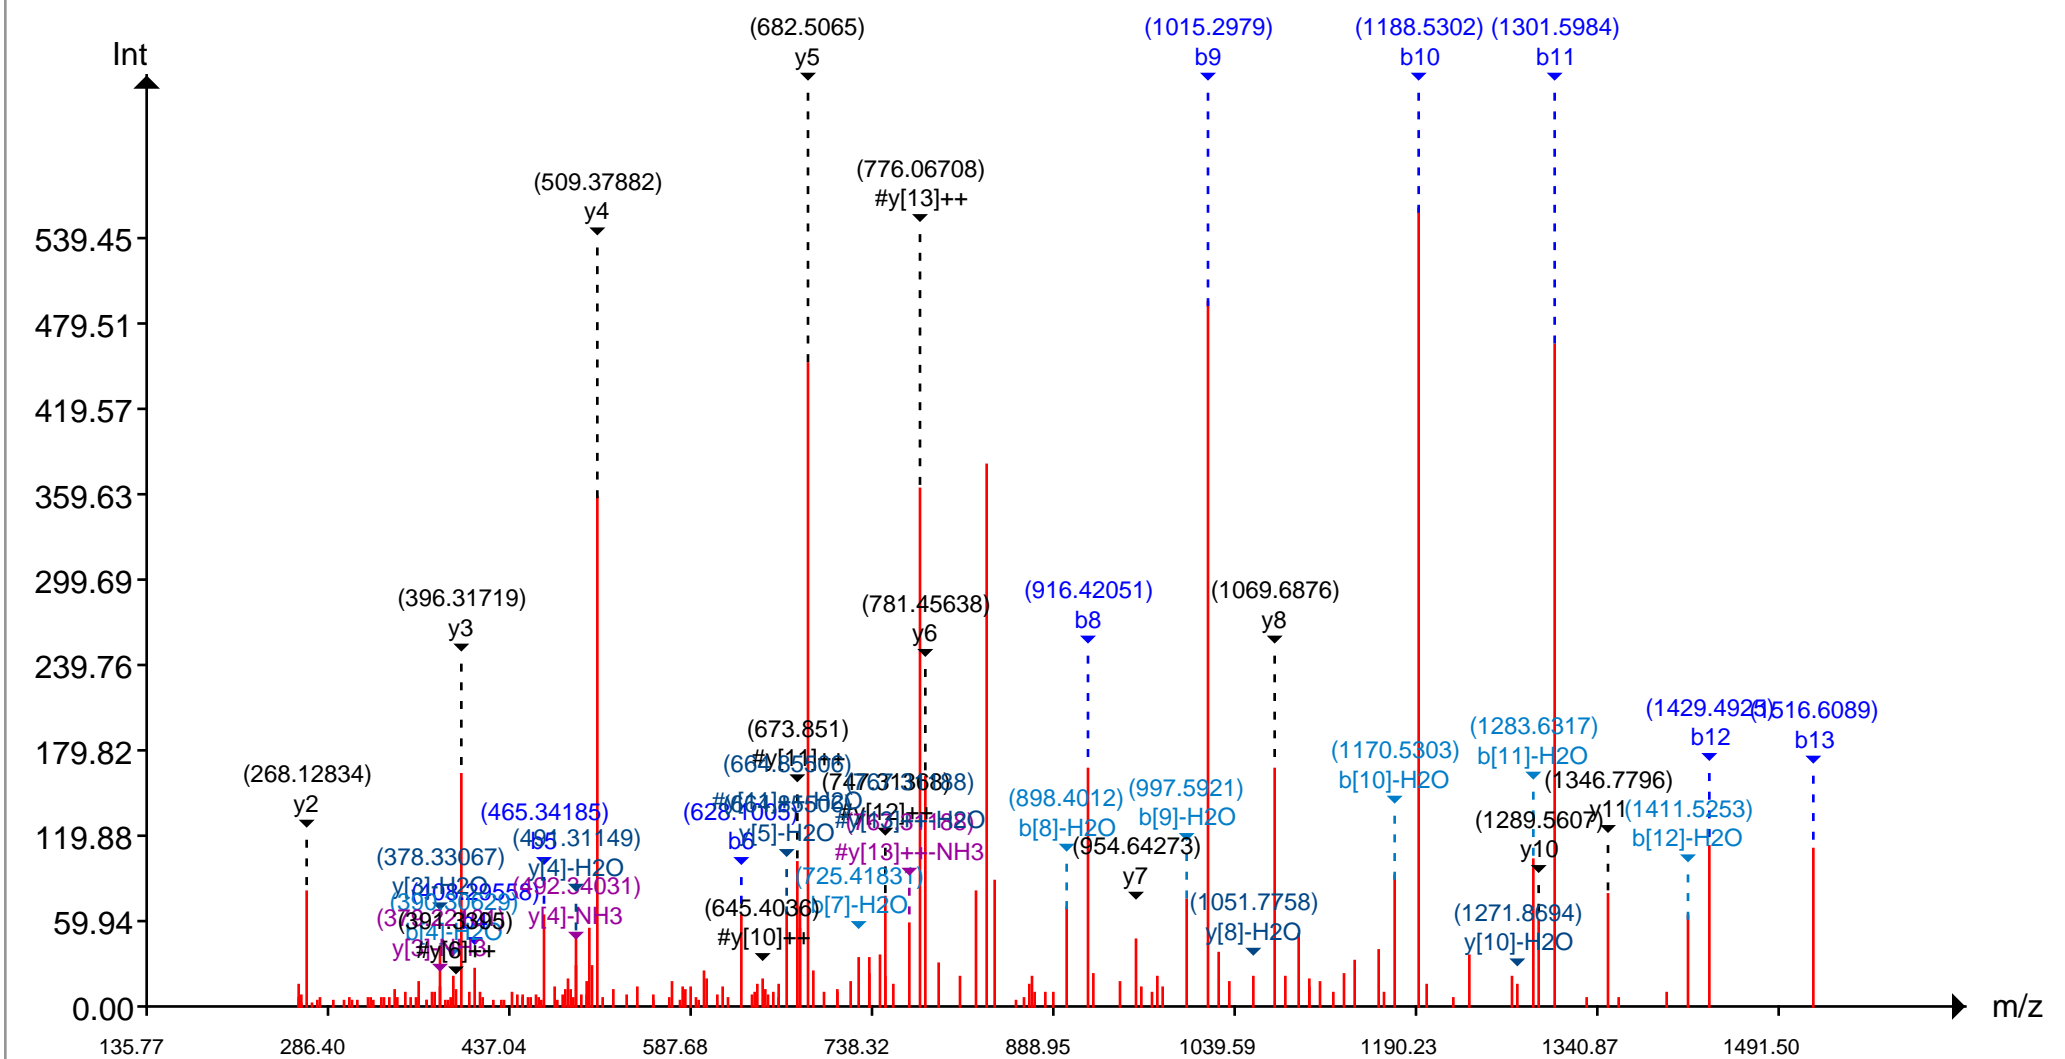

## Info

|                          |                                               |                           |          |
|--------------------------|-----------------------------------------------|---------------------------|----------|
| <b>Modified Sequence</b> | AcD3-TGFGGYDK<AcD3K*>VK<AcD3K*>LQSR<C13>-COOH | <b>Ion score</b>          | 72.31    |
| <b>Protein</b>           | Q62465                                        | <b>Confidence level</b>   | 99.00%   |
| <b>Precursor m/z</b>     | 848.97071                                     | <b>Identity Threshold</b> | 47.28    |
| <b>Charge</b>            | 2+                                            | <b>Mass error</b>         | 0.003086 |

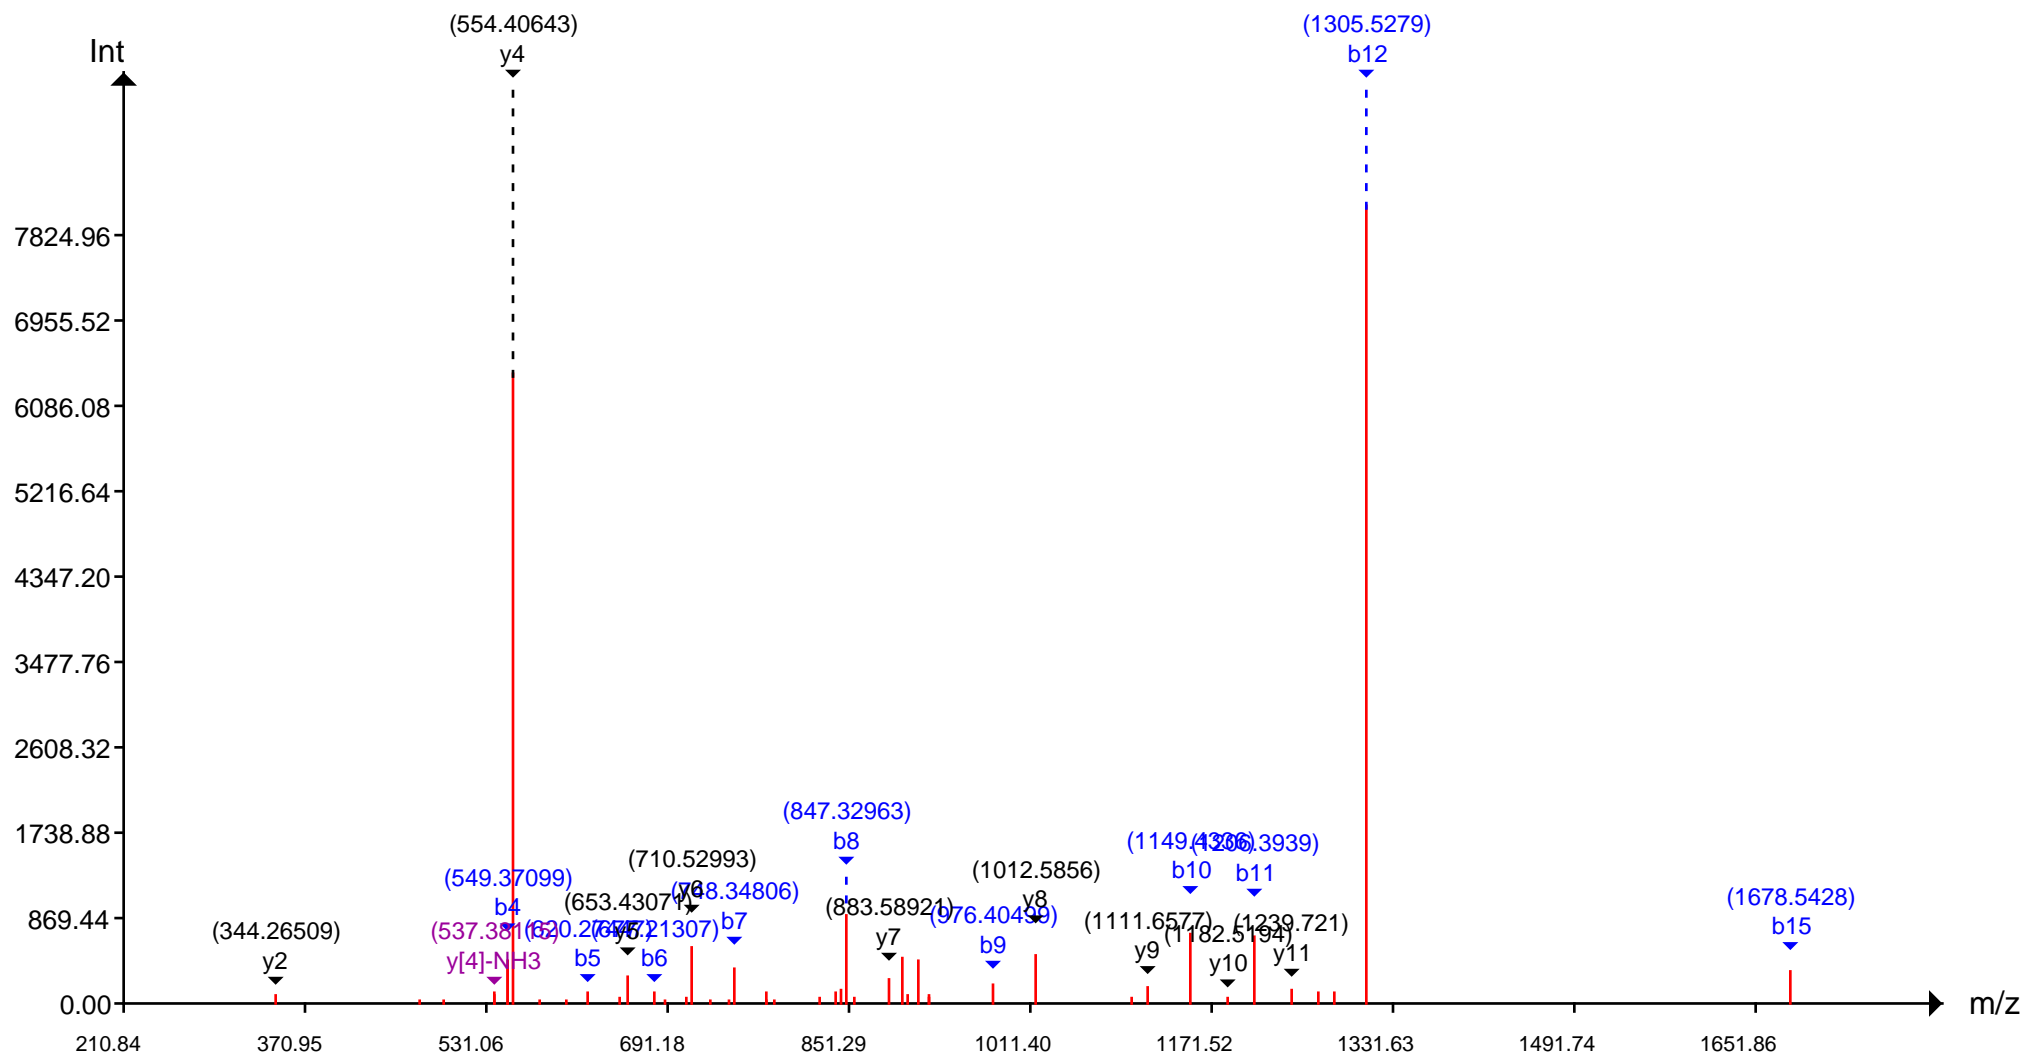

## Info

|                          |                                                       |                           |          |
|--------------------------|-------------------------------------------------------|---------------------------|----------|
| <b>Modified Sequence</b> | AcD3-AVC<Cmm*>K<AcD3K*>AGAVEK<AcD3K*>GVPLYR<C13>-COOH | <b>Ion score</b>          | 70.78    |
| <b>Protein</b>           | P17182                                                | <b>Confidence level</b>   | 99.00%   |
| <b>Precursor m/z</b>     | 930.02982                                             | <b>Identity Threshold</b> | 45.68    |
| <b>Charge</b>            | 2+                                                    | <b>Mass error</b>         | 0.002257 |

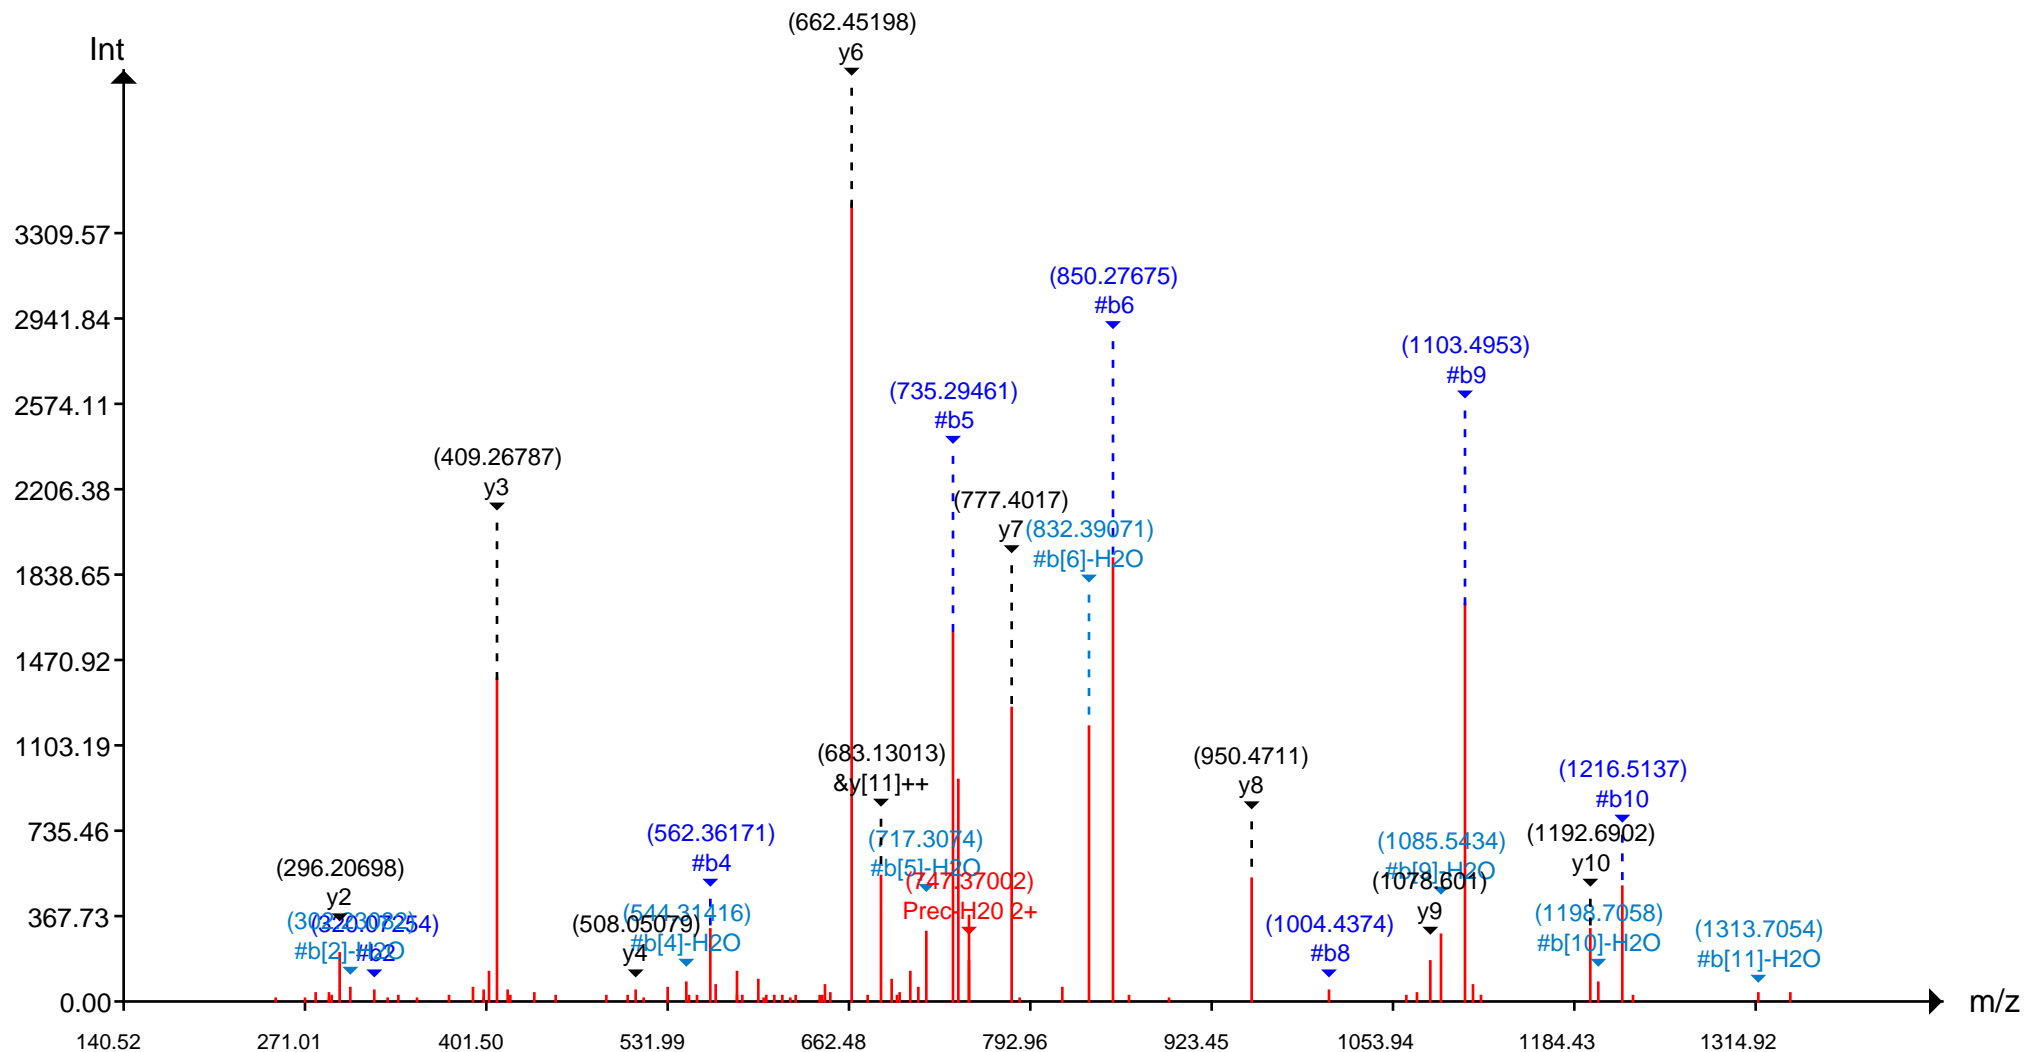

## Info

|                          |                                               |                           |         |
|--------------------------|-----------------------------------------------|---------------------------|---------|
| <b>Modified Sequence</b> | AcD3-TK<AcD3K*>NQK<AcD3K*>DPGVLDLDR<C13>-COOH | <b>Ion score</b>          | 63.62   |
| <b>Protein</b>           | P50543                                        | <b>Confidence level</b>   | 99.00%  |
| <b>Precursor m/z</b>     | 756.42724                                     | <b>Identity Threshold</b> | 46.81   |
| <b>Charge</b>            | 2+                                            | <b>Mass error</b>         | 2.22E-4 |

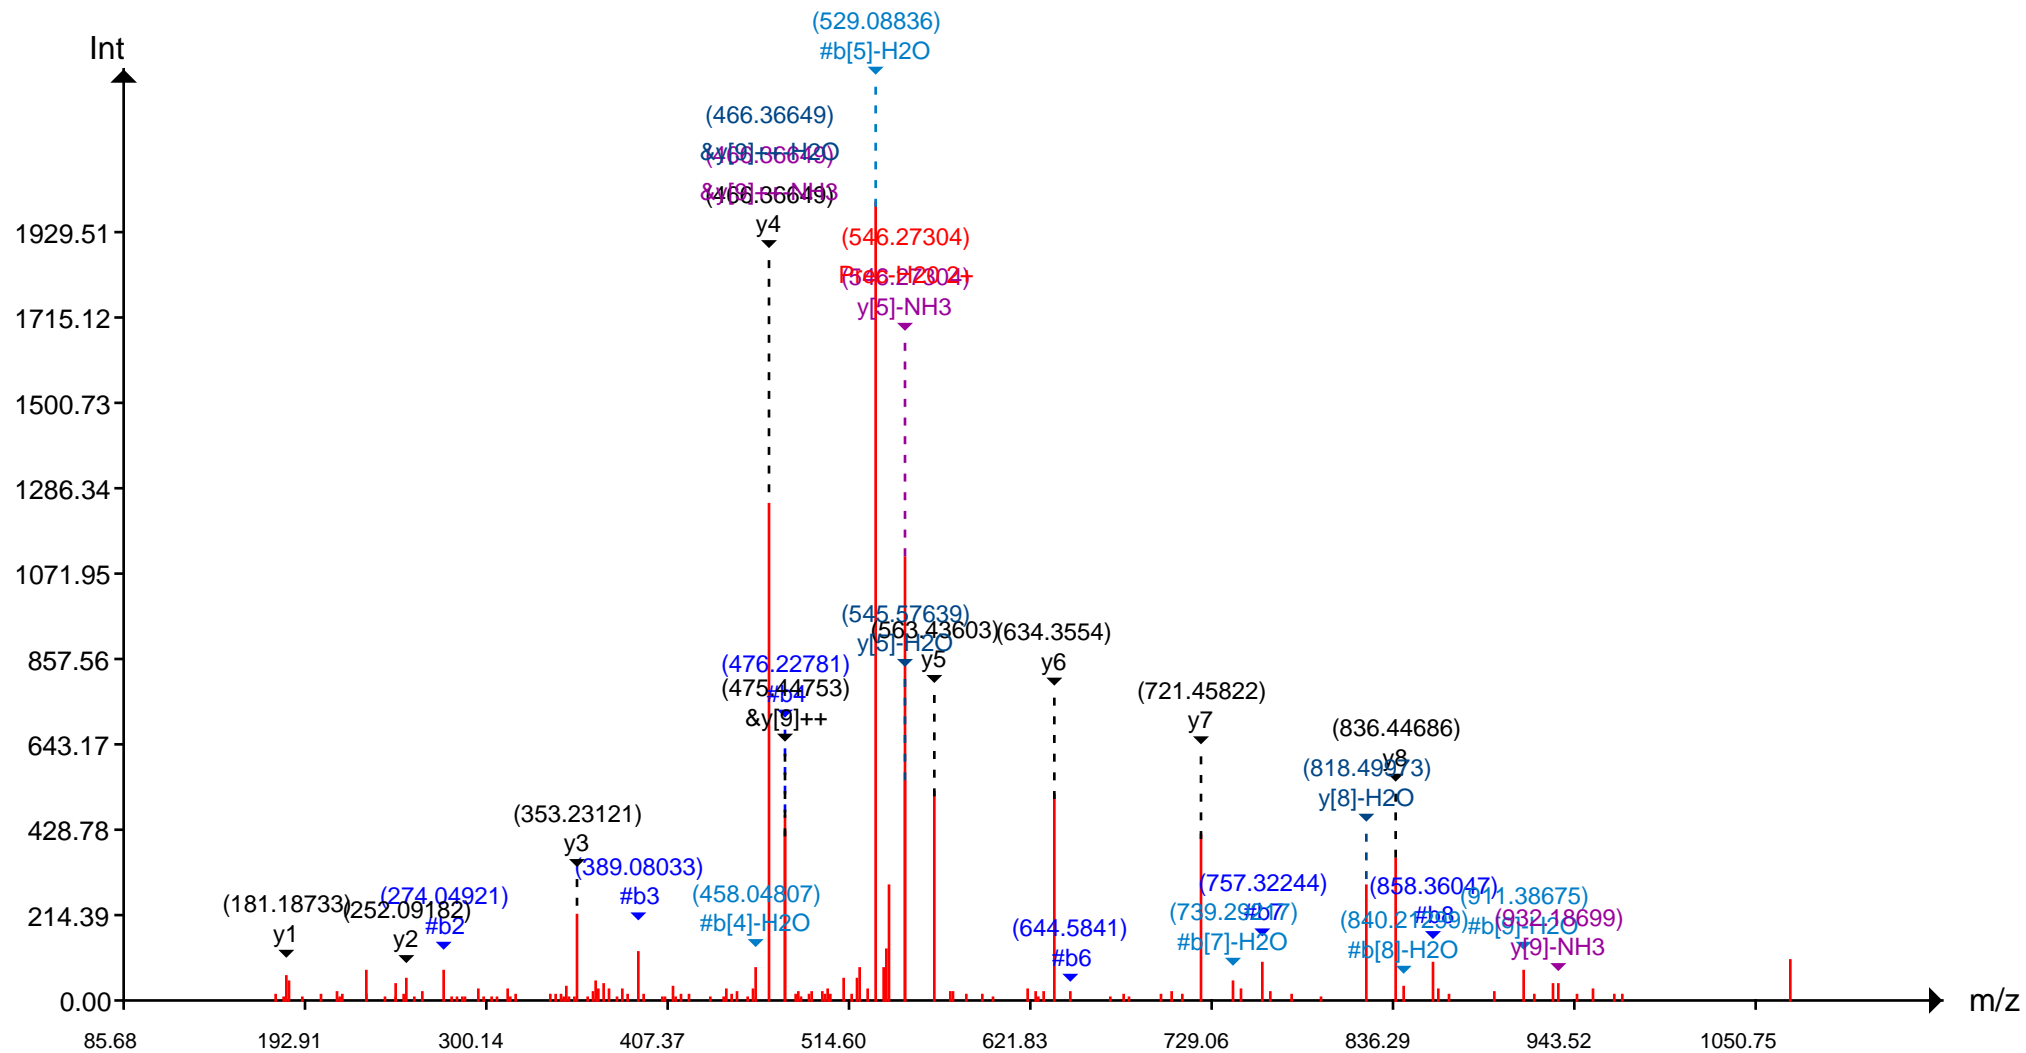

## Info

|                          |                           |                           |          |
|--------------------------|---------------------------|---------------------------|----------|
| <b>Modified Sequence</b> | AcD3-DIDSAPITAR<C13>-COOH | <b>Ion score</b>          | 67.96    |
| <b>Protein</b>           | P52480                    | <b>Confidence level</b>   | 99.00%   |
| <b>Precursor m/z</b>     | 555.3021                  | <b>Identity Threshold</b> | 47.83    |
| <b>Charge</b>            | 2+                        | <b>Mass error</b>         | -2.57E-4 |

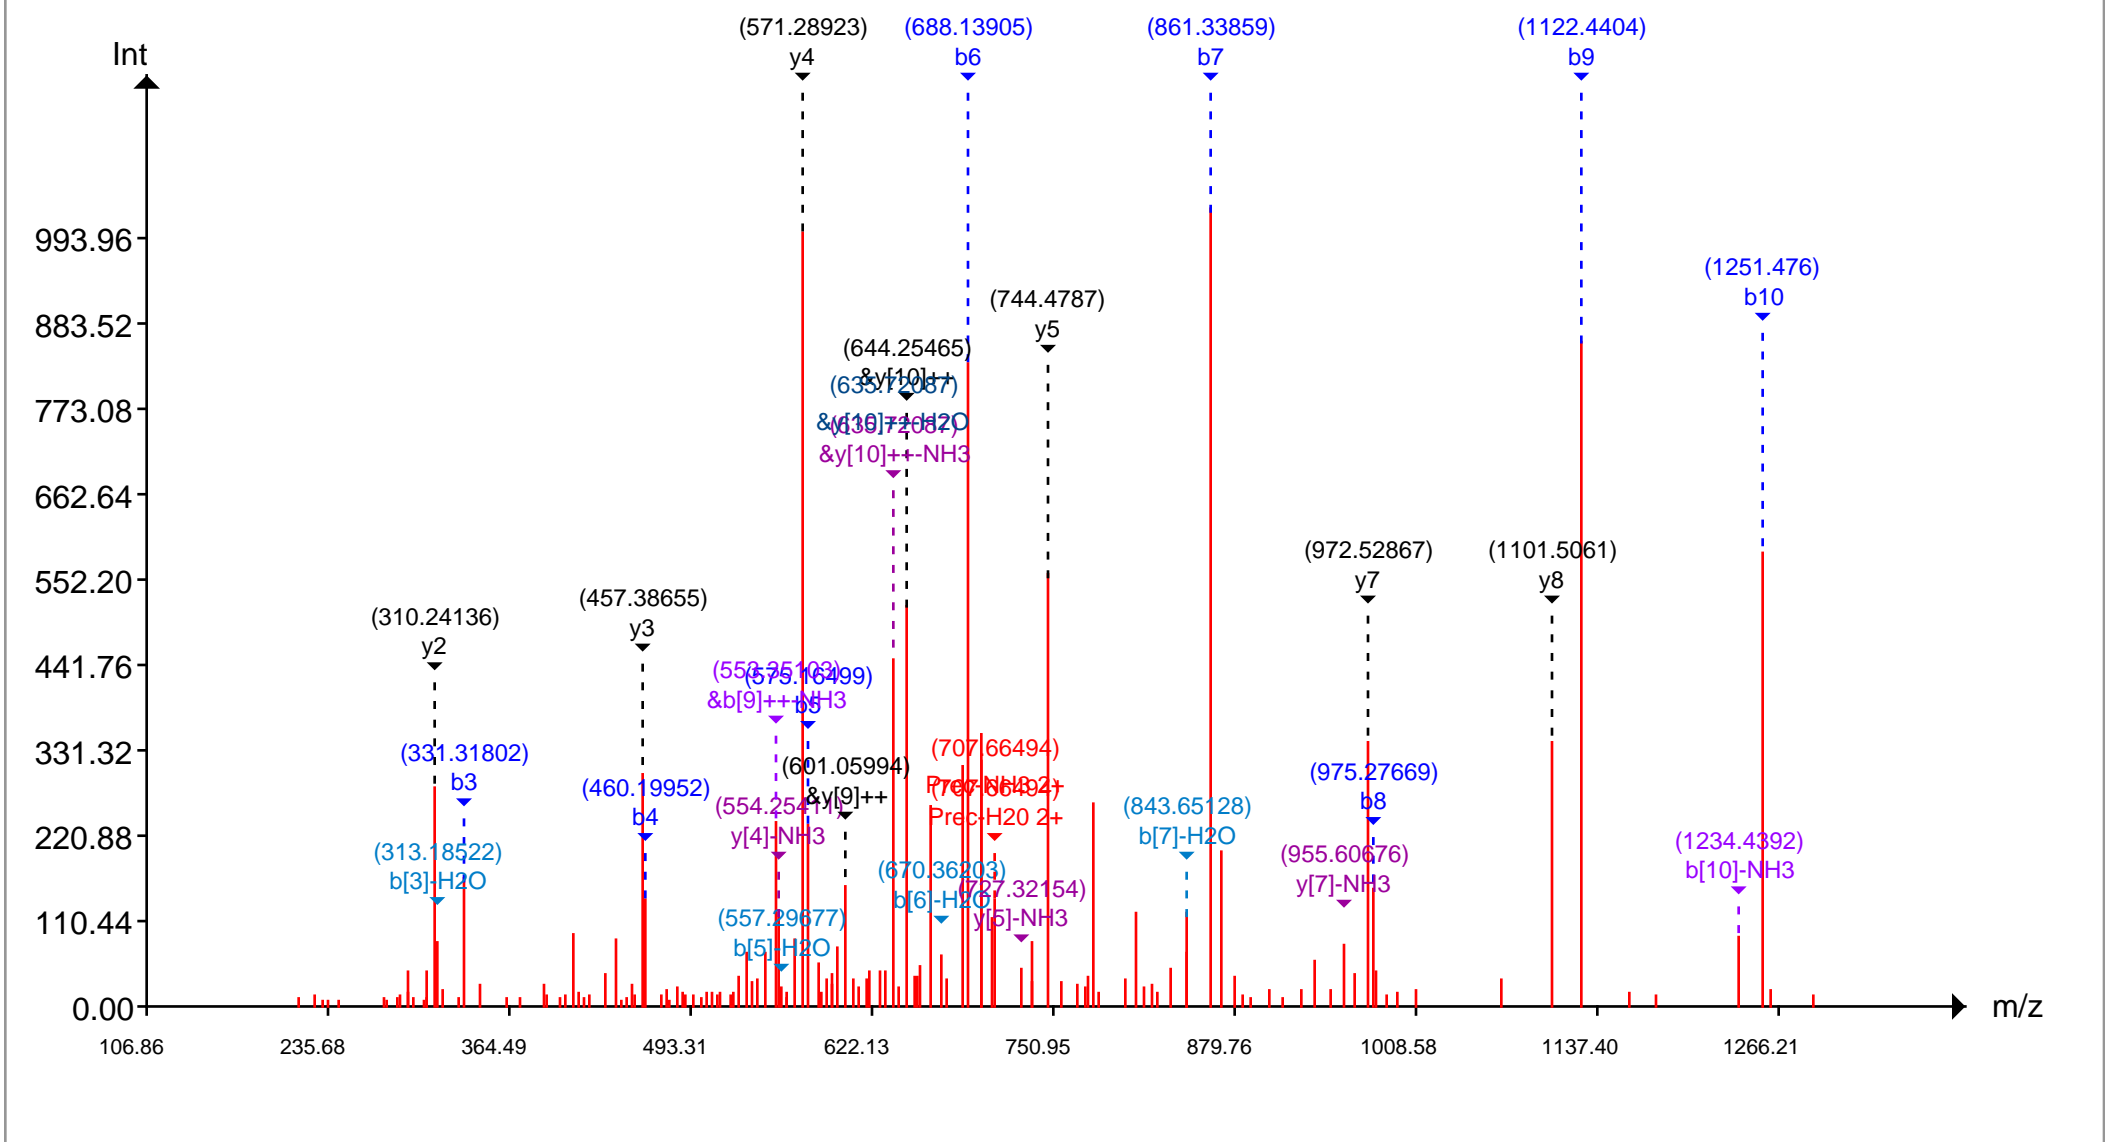

## Info

|                          |                                    |                           |         |
|--------------------------|------------------------------------|---------------------------|---------|
| <b>Modified Sequence</b> | AcD3-VSVEDLK<AcD3K*>NFER<C13>-COOH | <b>Ion score</b>          | 64.28   |
| <b>Protein</b>           | Q9CQ92                             | <b>Confidence level</b>   | 99.00%  |
| <b>Precursor m/z</b>     | 716.38877                          | <b>Identity Threshold</b> | 47.84   |
| <b>Charge</b>            | 2+                                 | <b>Mass error</b>         | 0.00104 |



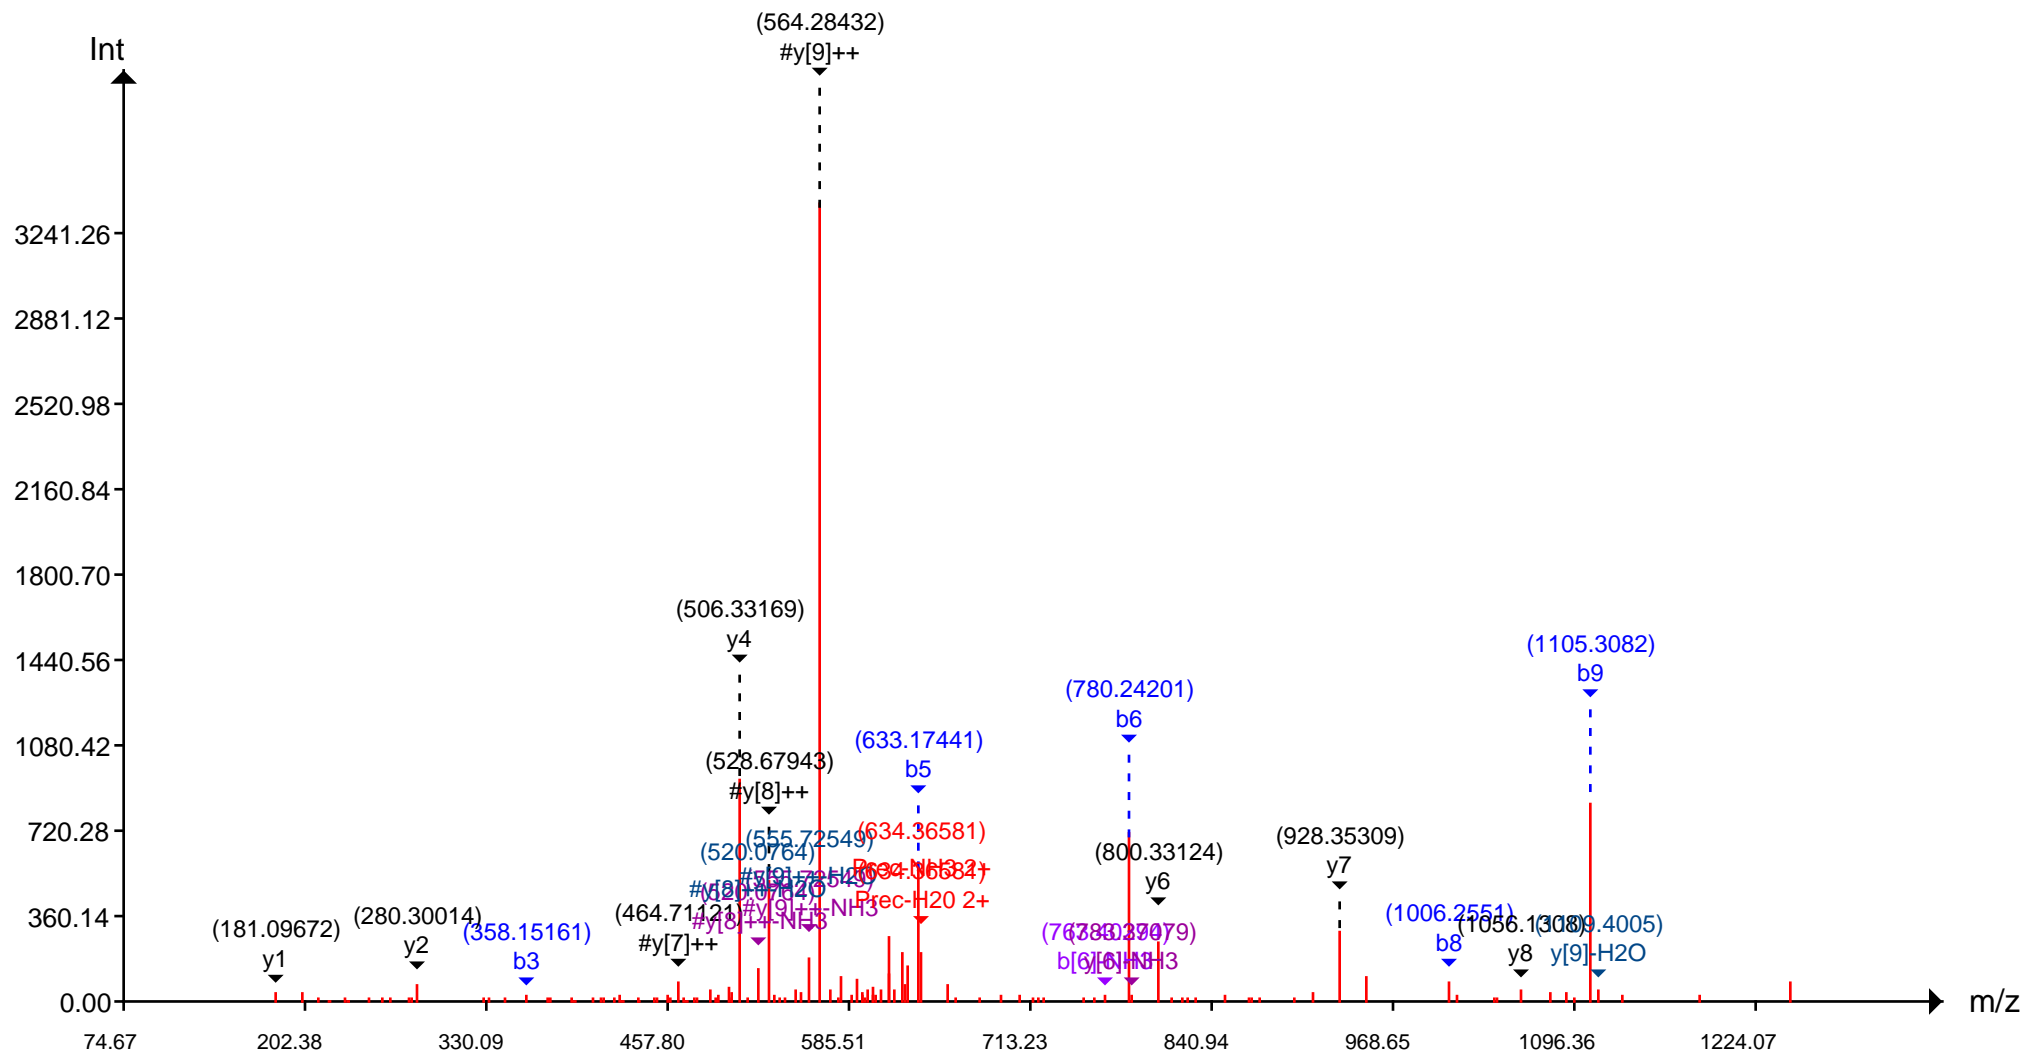

## Info

|                          |                                       |                           |         |
|--------------------------|---------------------------------------|---------------------------|---------|
| <b>Modified Sequence</b> | AcD3-IAQQM<Mox*>M<Mox*>PEVR<C13>-COOH | <b>Ion score</b>          | 48.34   |
| <b>Protein</b>           | P50518                                | <b>Confidence level</b>   | 99.00%  |
| <b>Precursor m/z</b>     | 643.32432                             | <b>Identity Threshold</b> | 47.44   |
| <b>Charge</b>            | 2+                                    | <b>Mass error</b>         | -6.0E-6 |

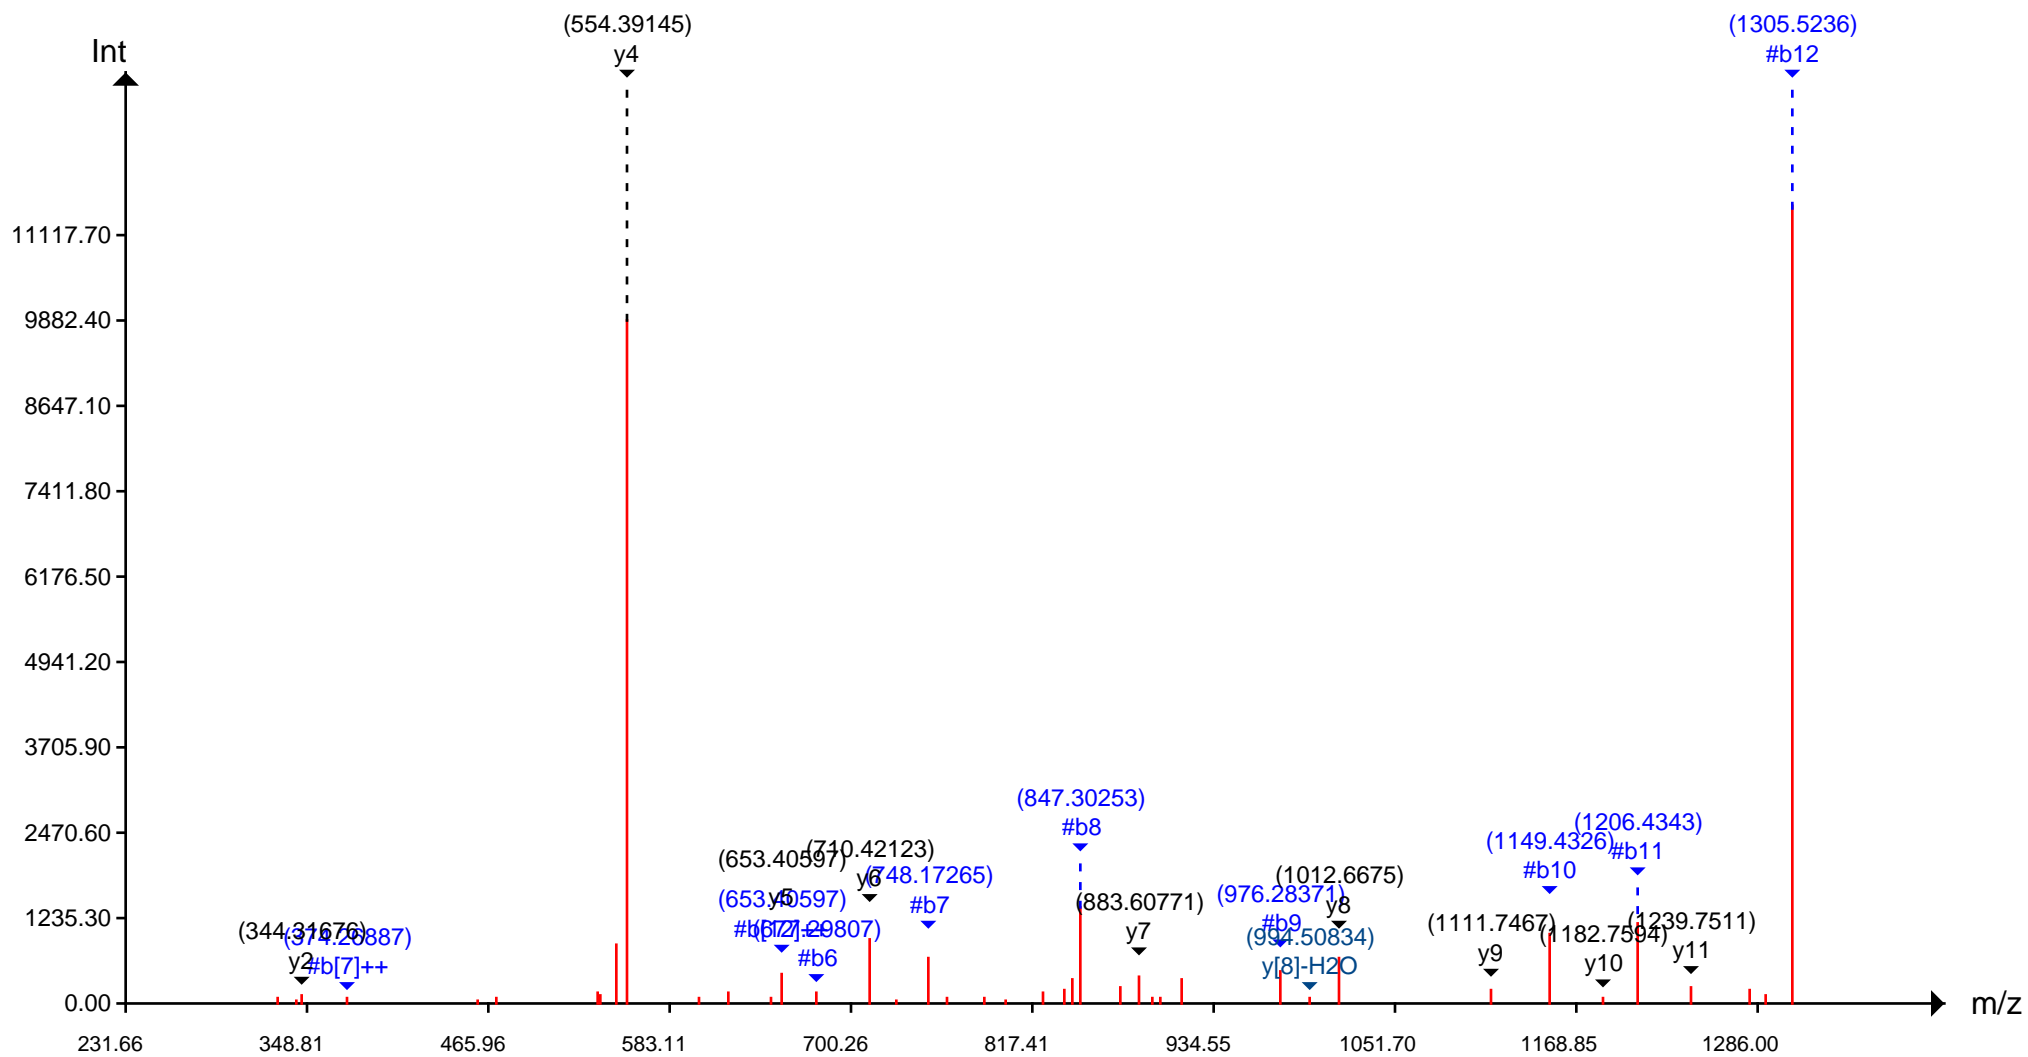

## Info

|                          |                                                       |                           |          |
|--------------------------|-------------------------------------------------------|---------------------------|----------|
| <b>Modified Sequence</b> | AcD3-AVC<Cmm*>K<AcD3K*>AGAVEK<AcD3K*>GVPLYR<C13>-COOH | <b>Ion score</b>          | 65.11    |
| <b>Protein</b>           | P17182                                                | <b>Confidence level</b>   | 99.00%   |
| <b>Precursor m/z</b>     | 930.02842                                             | <b>Identity Threshold</b> | 45.93    |
| <b>Charge</b>            | 2+                                                    | <b>Mass error</b>         | -5.43E-4 |

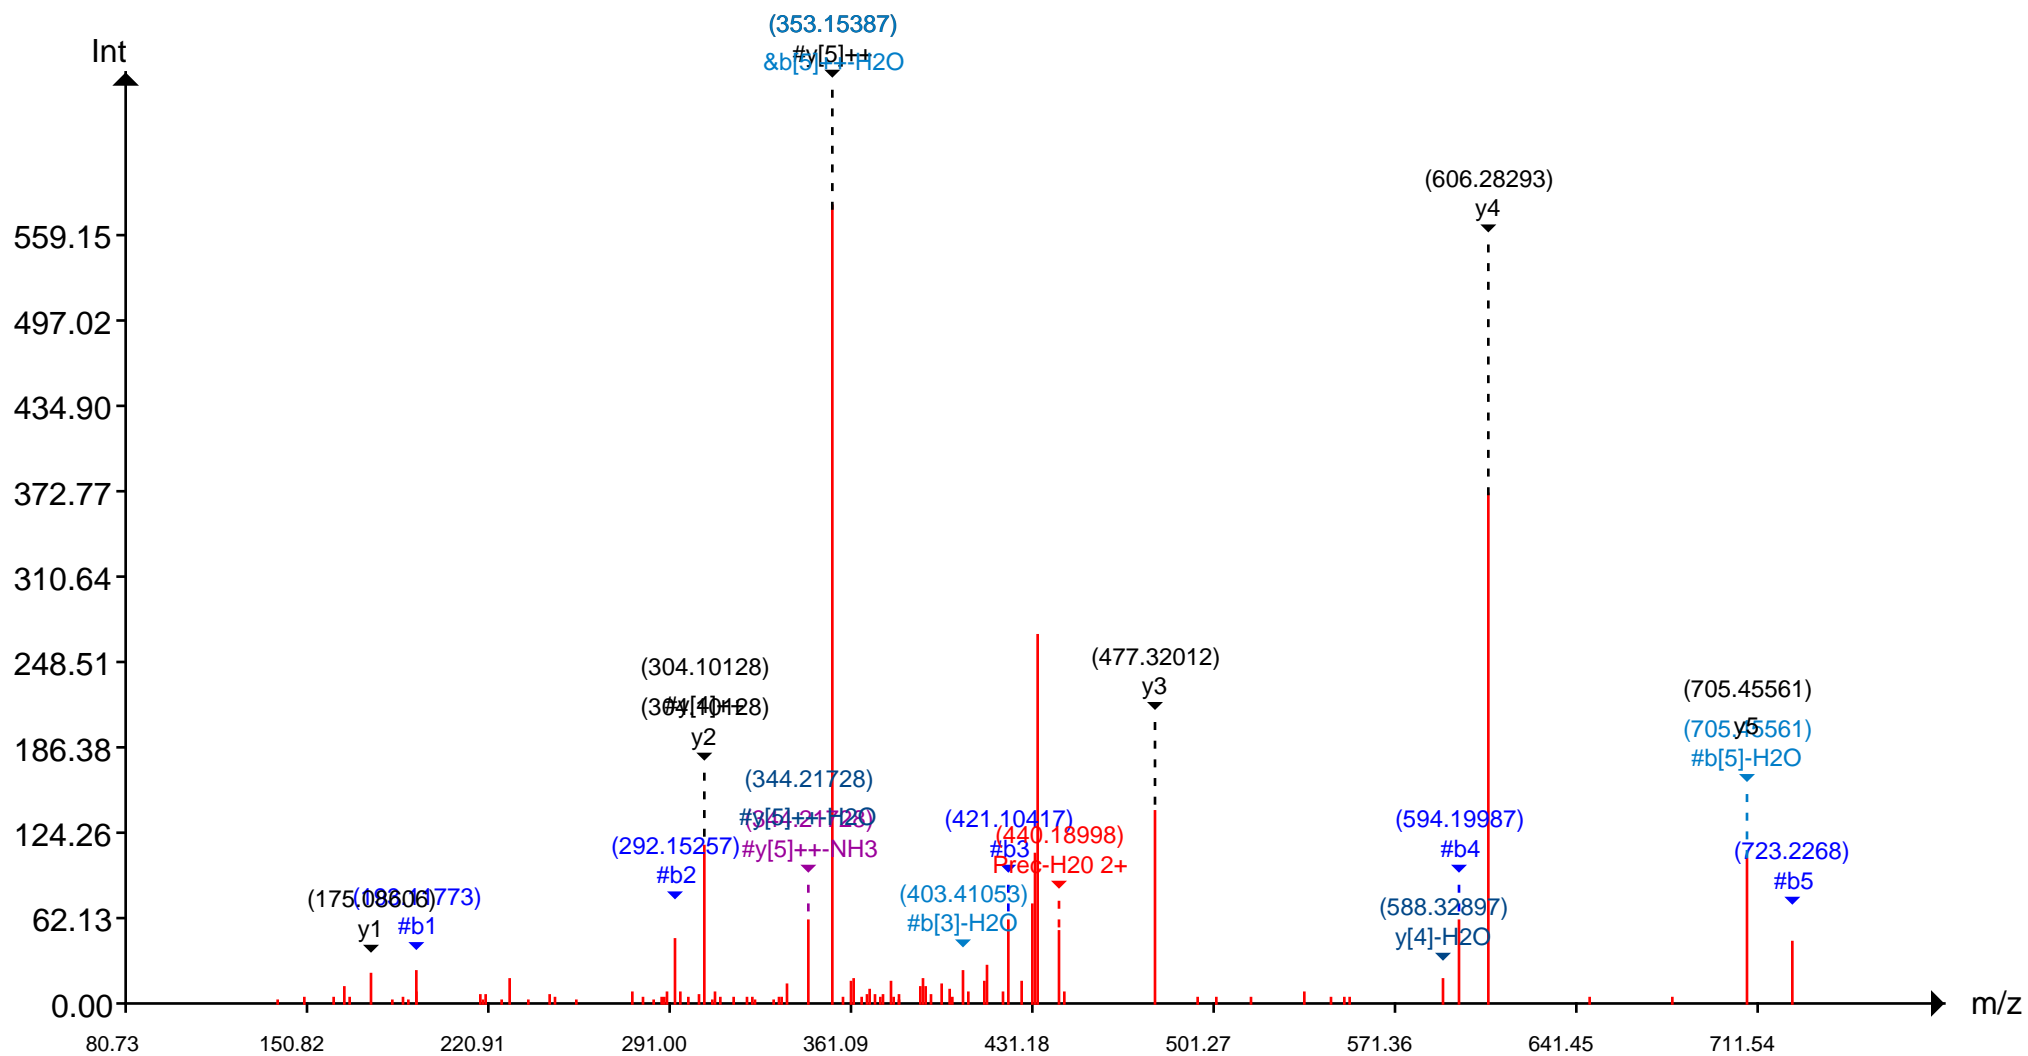

## Info

|                          |                          |                           |        |
|--------------------------|--------------------------|---------------------------|--------|
| <b>Modified Sequence</b> | AcD3-FVEK<AcD3K*>ER-COOH | <b>Ion score</b>          | 48.79  |
| <b>Protein</b>           | P07901, Q9WU62           | <b>Confidence level</b>   | 99.00% |
| <b>Precursor m/z</b>     | 449.251                  | <b>Identity Threshold</b> | 47.61  |
| <b>Charge</b>            | 2+                       | <b>Mass error</b>         | 2.1E-5 |

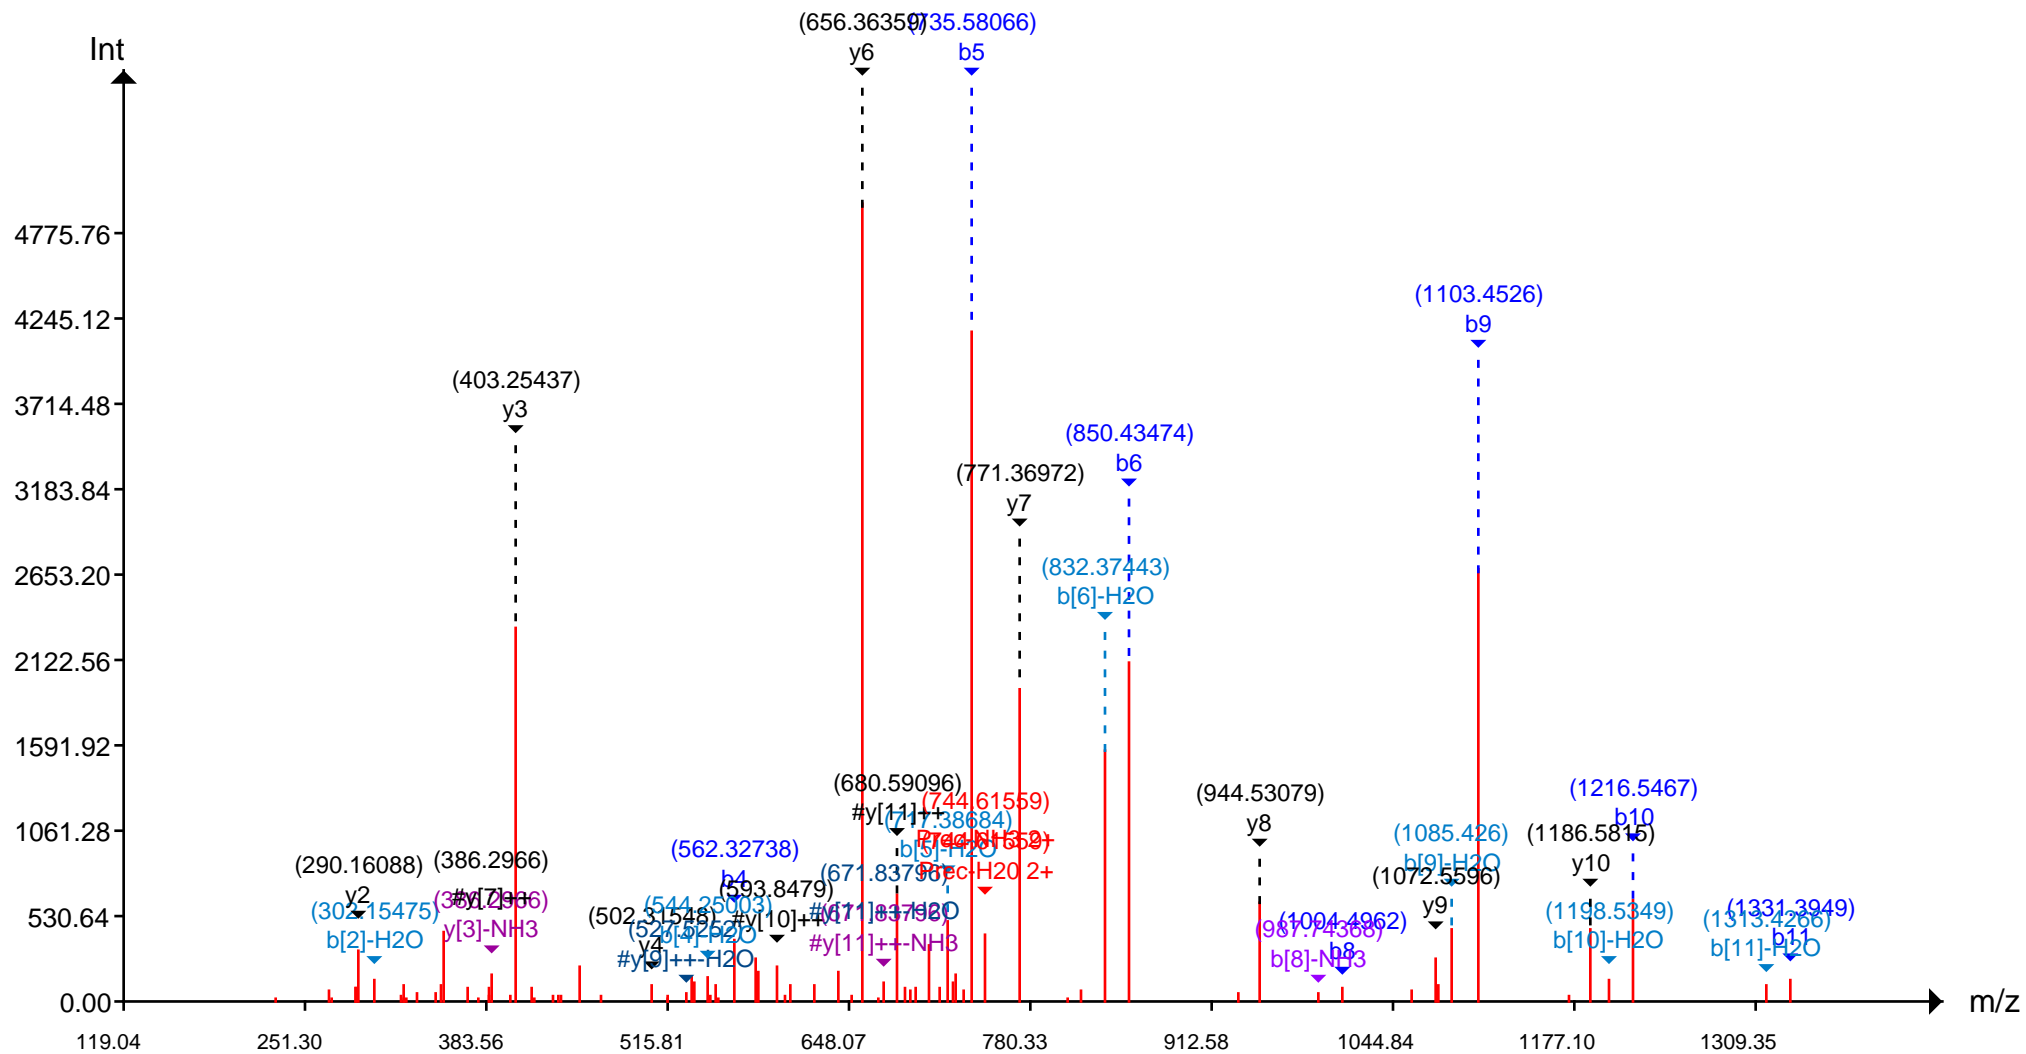

## Info

**Modified Sequence** AcD3-TK<AcD3K\*>NQK<AcD3K\*>DPGVLDLDR-COOH

**Ion score** 70.72

**Protein** P50543

**Confidence level** 99.00%

**Precursor m/z** 753.41527

**Identity Threshold** 47.61

**Charge** 2+

**Mass error** -0.003577

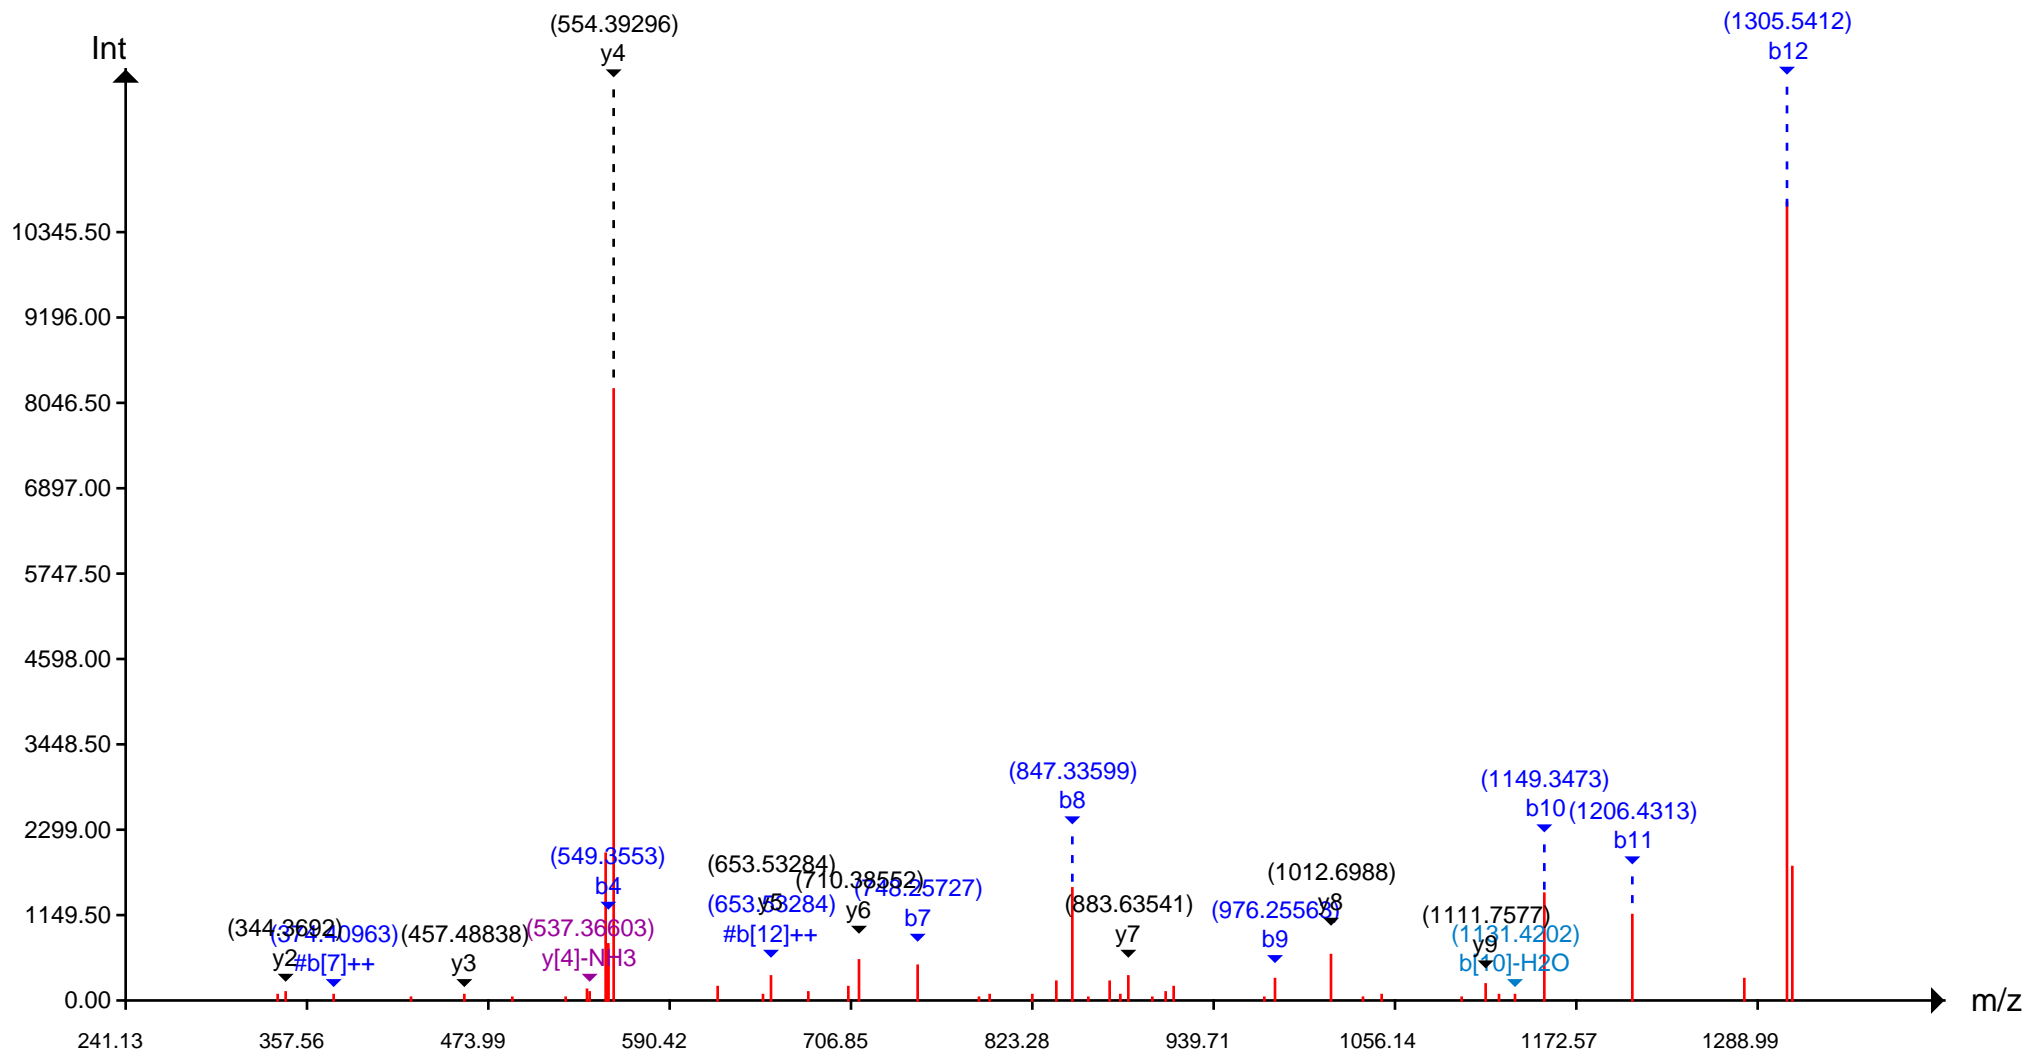

## Info

|                          |                                                       |                           |         |
|--------------------------|-------------------------------------------------------|---------------------------|---------|
| <b>Modified Sequence</b> | AcD3-AVC<Cmm*>K<AcD3K*>AGAVEK<AcD3K*>GVPLYR<C13>-COOH | <b>Ion score</b>          | 53.15   |
| <b>Protein</b>           | P17182                                                | <b>Confidence level</b>   | 99.00%  |
| <b>Precursor m/z</b>     | 930.02882                                             | <b>Identity Threshold</b> | 45.79   |
| <b>Charge</b>            | 2+                                                    | <b>Mass error</b>         | 2.57E-4 |

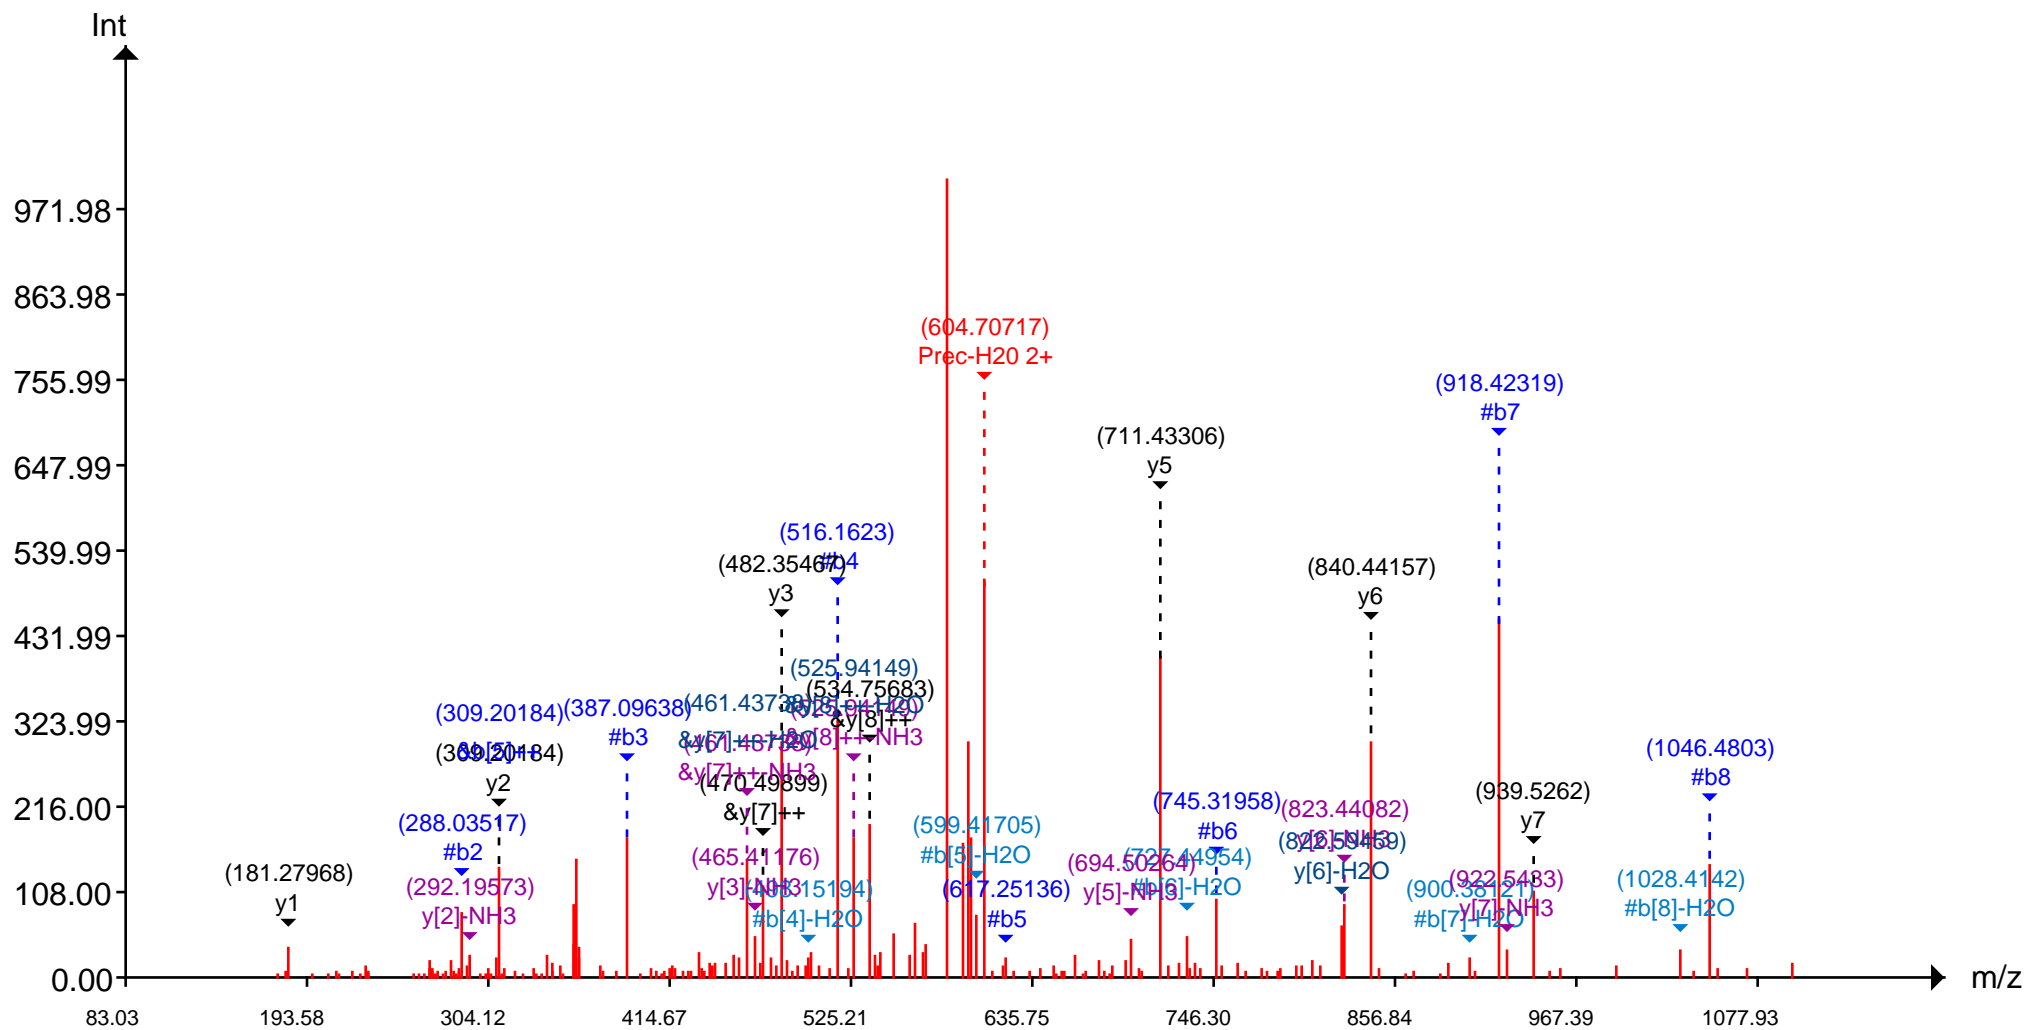

## Info

|                          |                                  |                           |          |
|--------------------------|----------------------------------|---------------------------|----------|
| <b>Modified Sequence</b> | AcD3-IEVETQK<AcD3K*>QR<C13>-COOH | <b>Ion score</b>          | 47.24    |
| <b>Protein</b>           | Q9WVA2                           | <b>Confidence level</b>   | 99.00%   |
| <b>Precursor m/z</b>     | 613.8512                         | <b>Identity Threshold</b> | 46.73    |
| <b>Charge</b>            | 2+                               | <b>Mass error</b>         | -2.01E-4 |

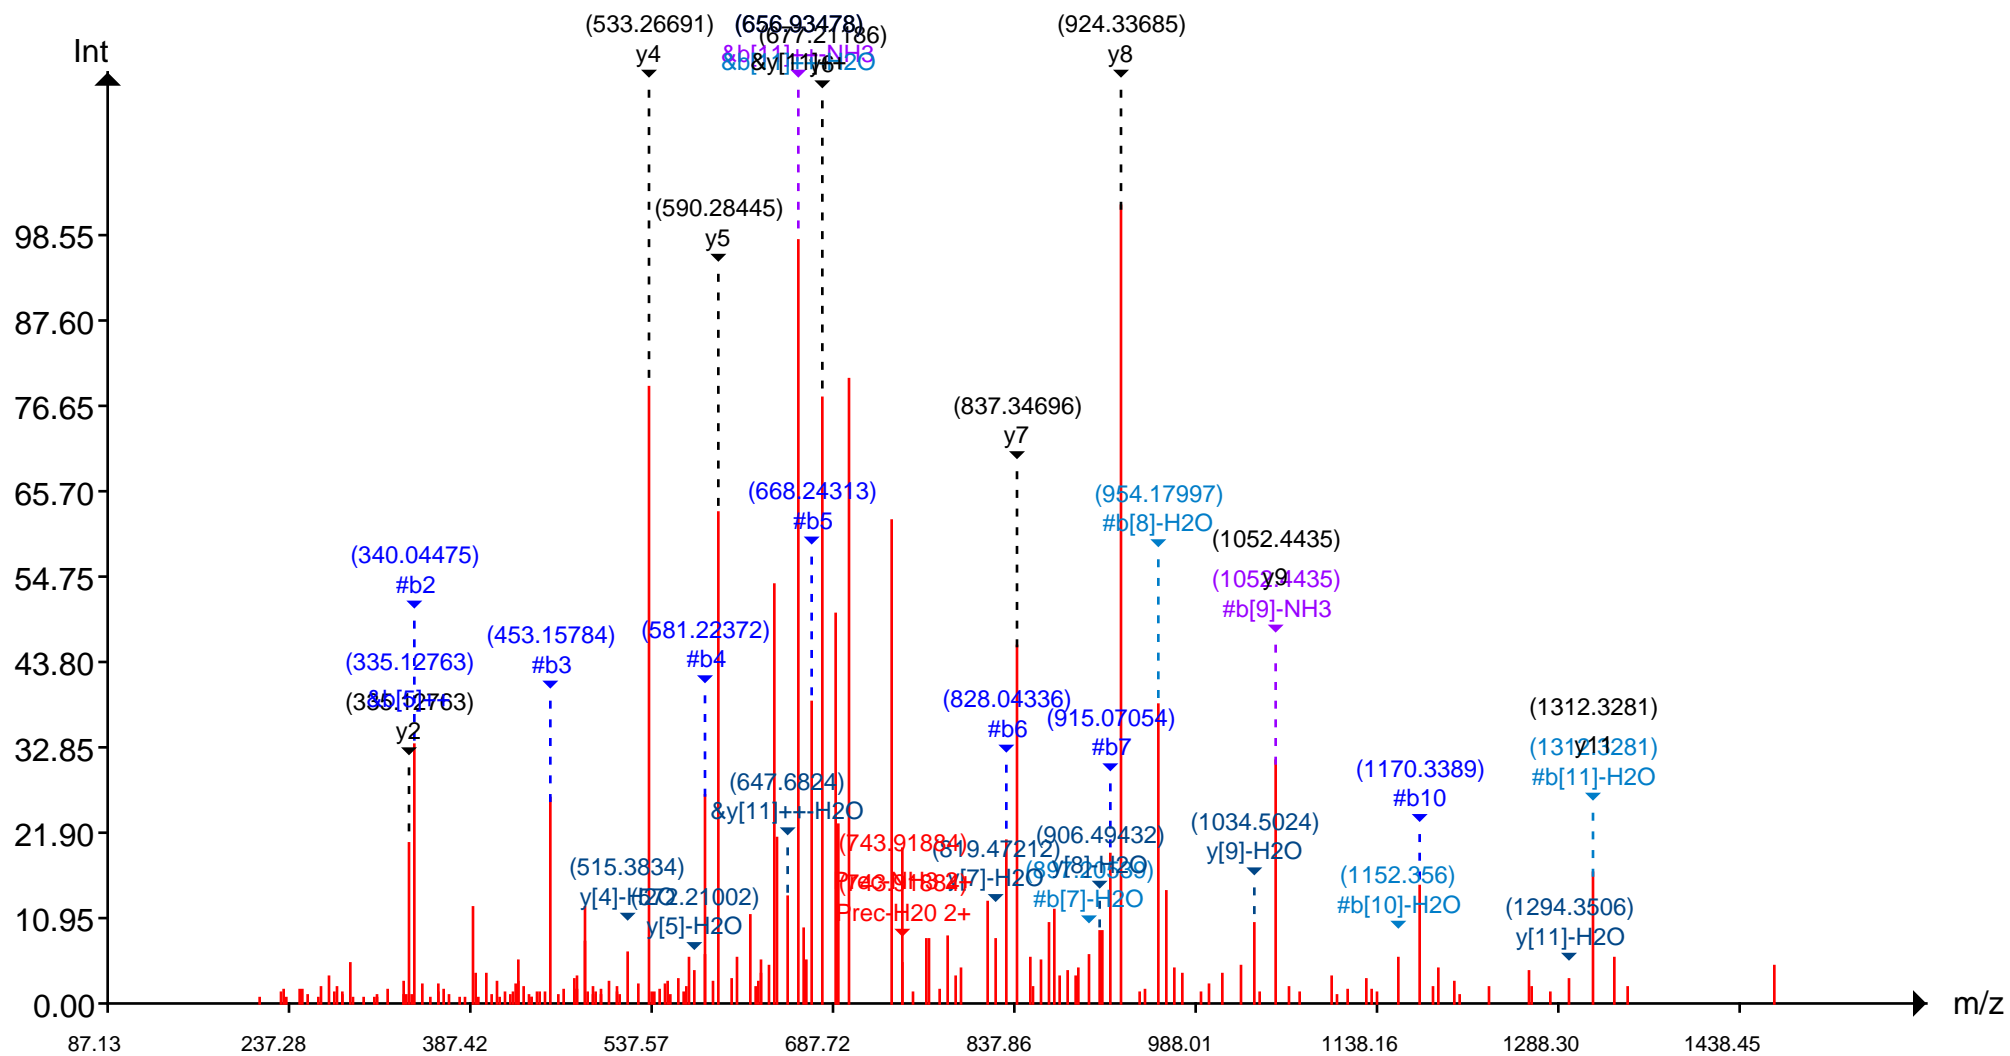

## Info

|                          |                                                |                           |         |
|--------------------------|------------------------------------------------|---------------------------|---------|
| <b>Modified Sequence</b> | AcD3-M<Mox*>M<Mox*>LQSC<Cmm*>SGPTC<Cmm*>R-COOH | <b>Ion score</b>          | 46.78   |
| <b>Protein</b>           | Q8BFR4                                         | <b>Confidence level</b>   | 99.00%  |
| <b>Precursor m/z</b>     | 752.80852                                      | <b>Identity Threshold</b> | 38.12   |
| <b>Charge</b>            | 2+                                             | <b>Mass error</b>         | 7.12E-4 |

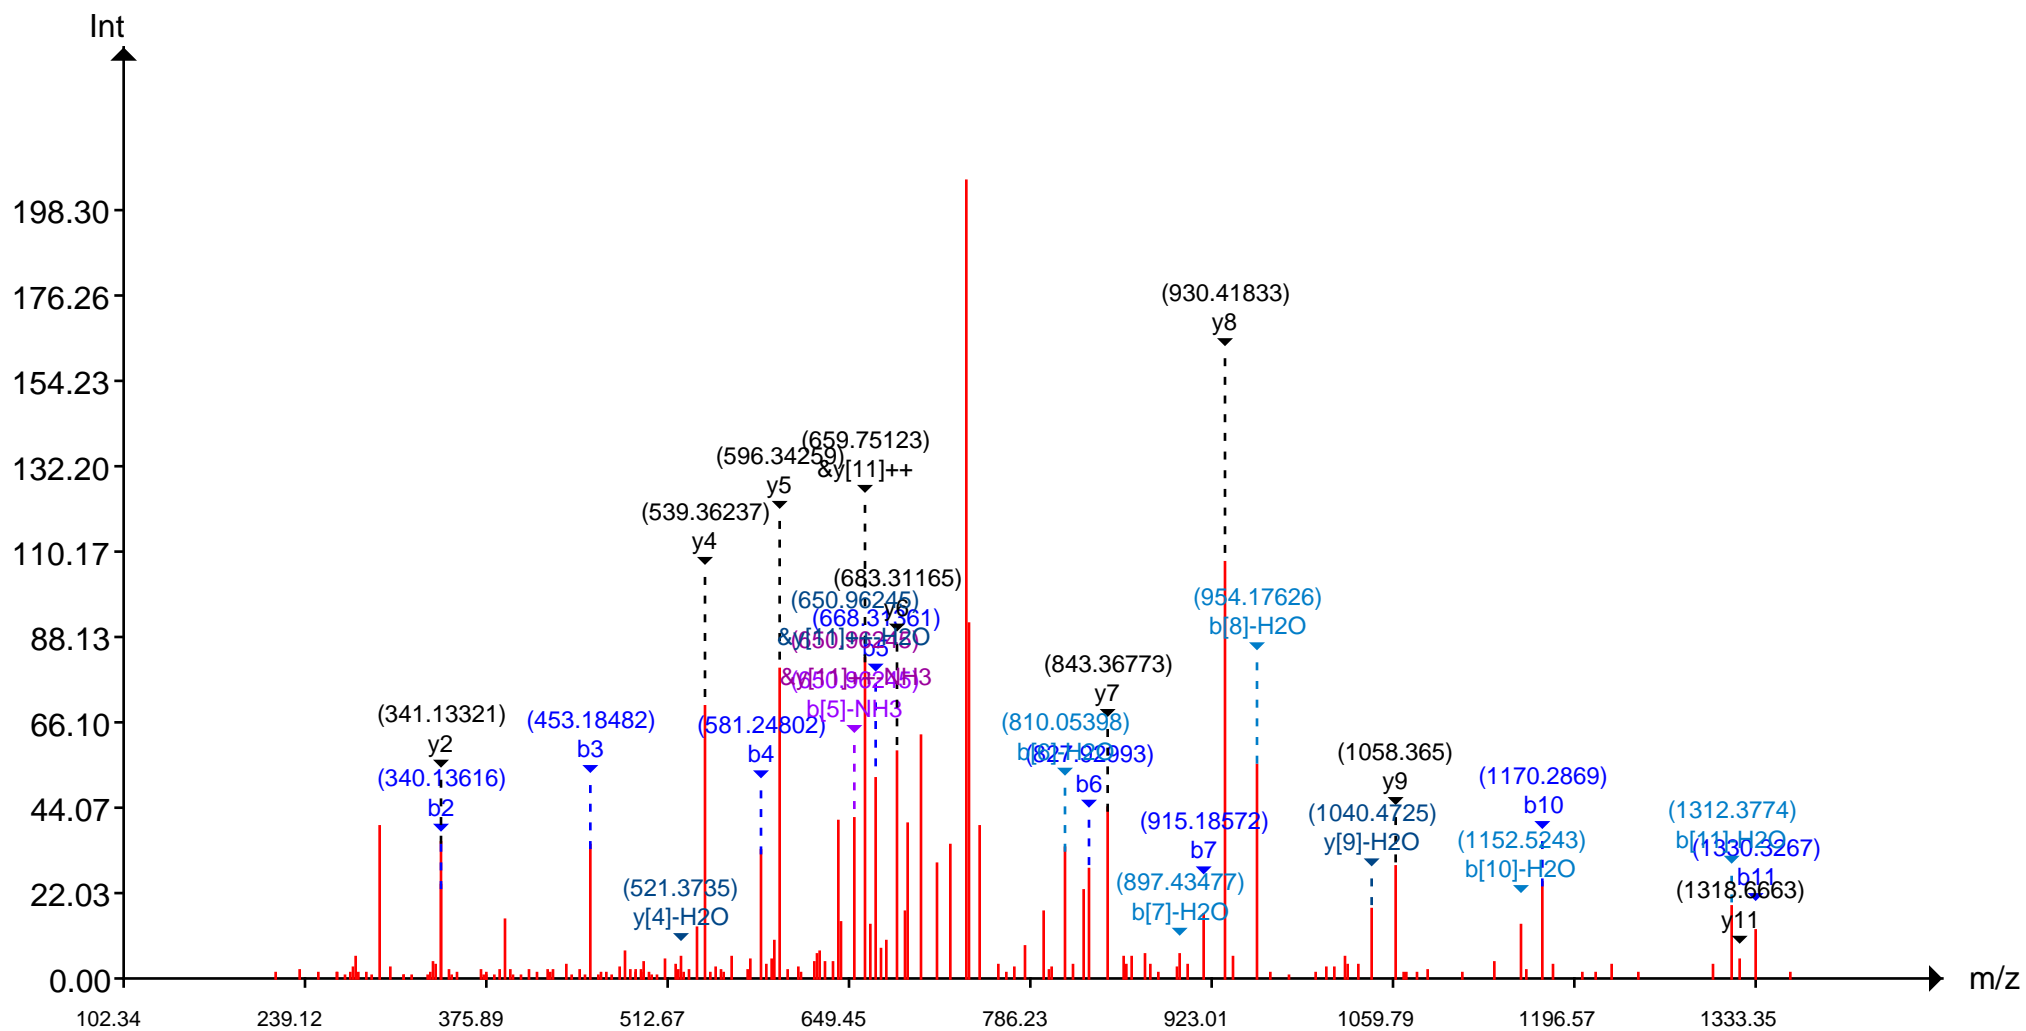

## Info

|                          |                                                     |                           |         |
|--------------------------|-----------------------------------------------------|---------------------------|---------|
| <b>Modified Sequence</b> | AcD3-M<Mox*>M<Mox*>LQSC<Cmm*>SGPTC<Cmm*>R<C13>-COOH | <b>Ion score</b>          | 56.25   |
| <b>Protein</b>           | Q8BFR4                                              | <b>Confidence level</b>   | 99.00%  |
| <b>Precursor m/z</b>     | 755.8189                                            | <b>Identity Threshold</b> | 40.50   |
| <b>Charge</b>            | 2+                                                  | <b>Mass error</b>         | 0.00133 |



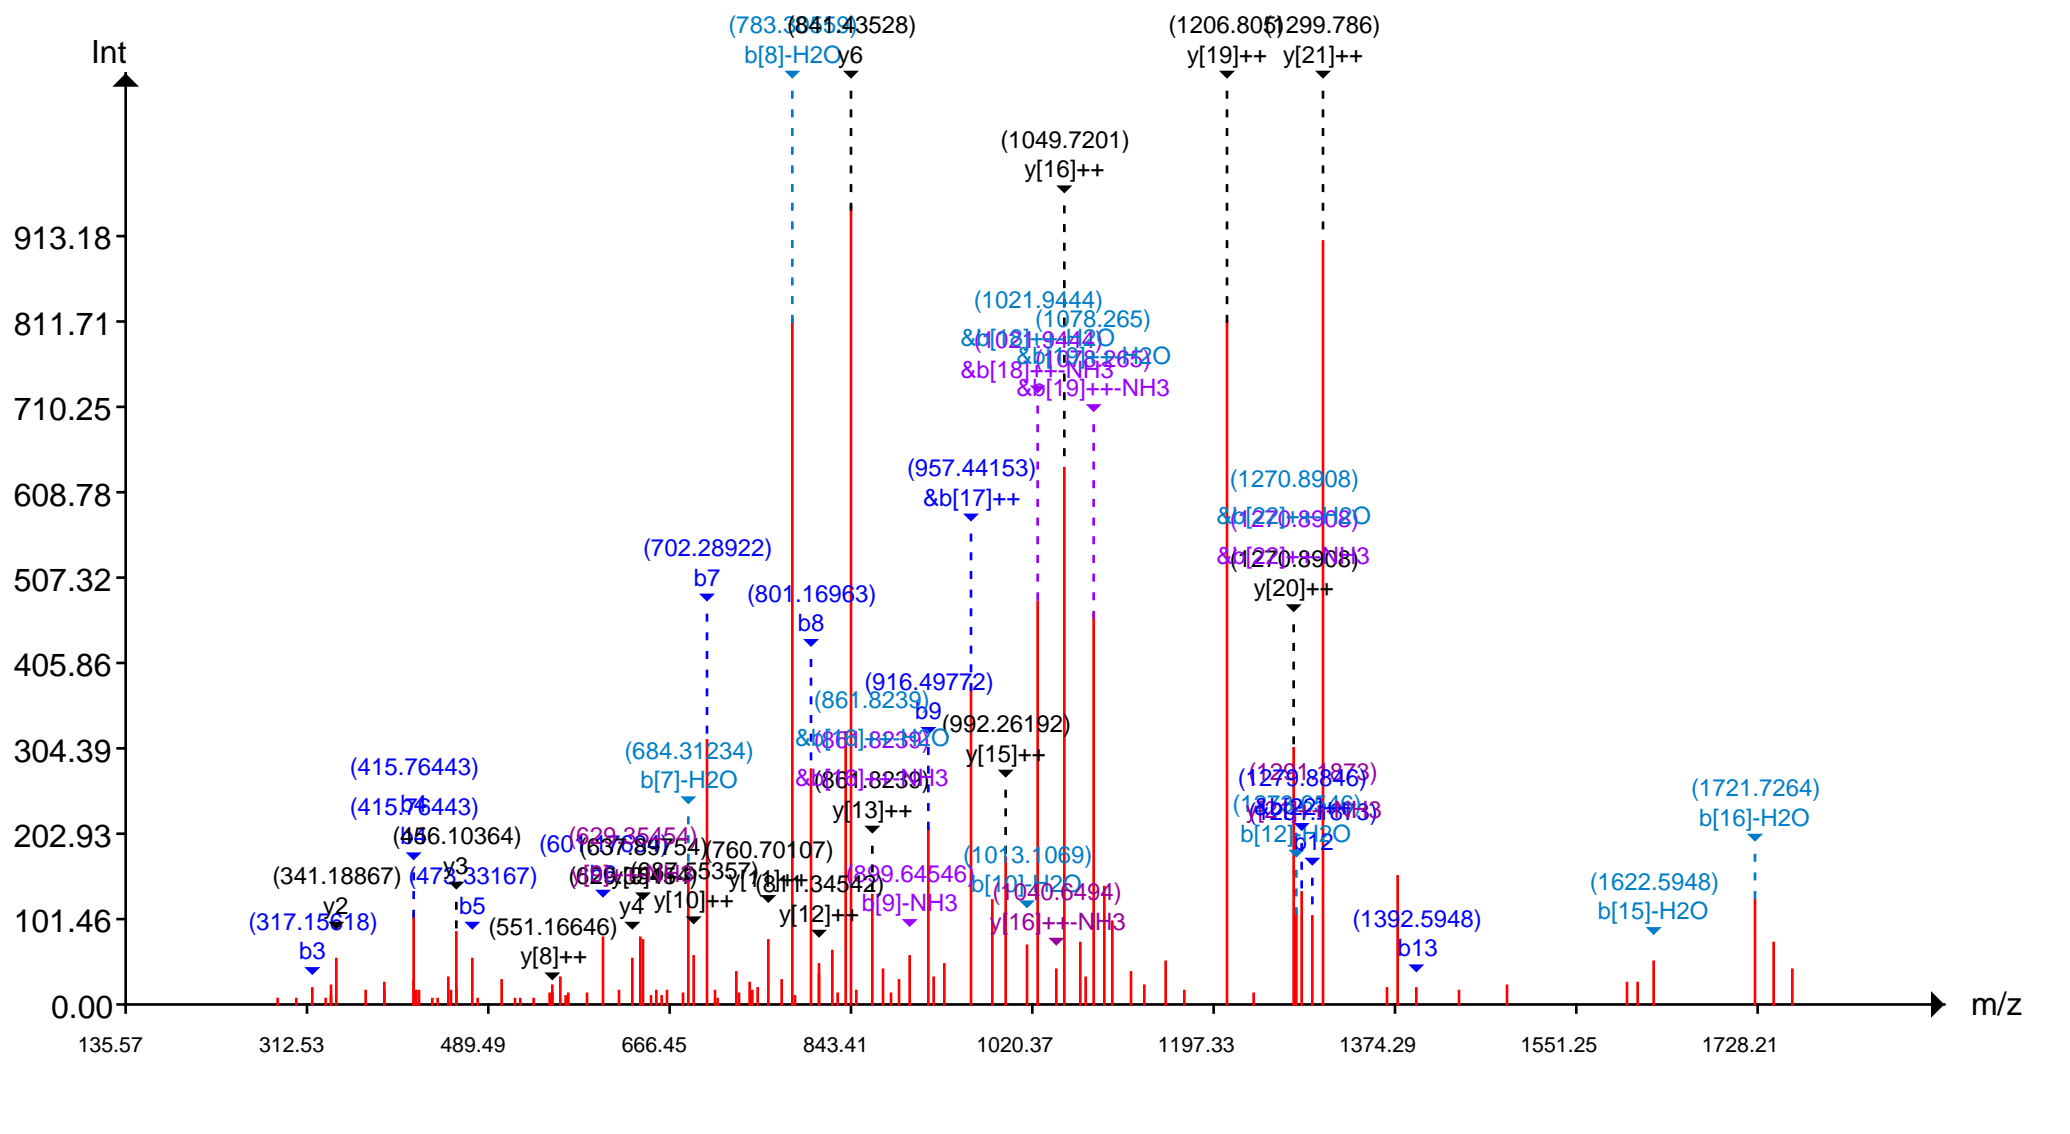

| Info                    |                                                                       |                           |         |
|-------------------------|-----------------------------------------------------------------------|---------------------------|---------|
| <b>Modified Sequ...</b> | AcD3-VGDVGQTVDDPYTTFFVK<AcD3K*>M<Mox*>LPDK<AcD3K*>DC<Cmm*>R<C13>-COOH | <b>Ion score</b>          | 54.81   |
| <b>Pro...</b>           | P18760                                                                | <b>Confidence level</b>   | 99.00%  |
| <b>Precursor ...</b>    | 1005.159                                                              | <b>Identity Threshold</b> | 46.74   |
| <b>Ch...</b>            | 3+                                                                    | <b>Mass error</b>         | 0.00488 |



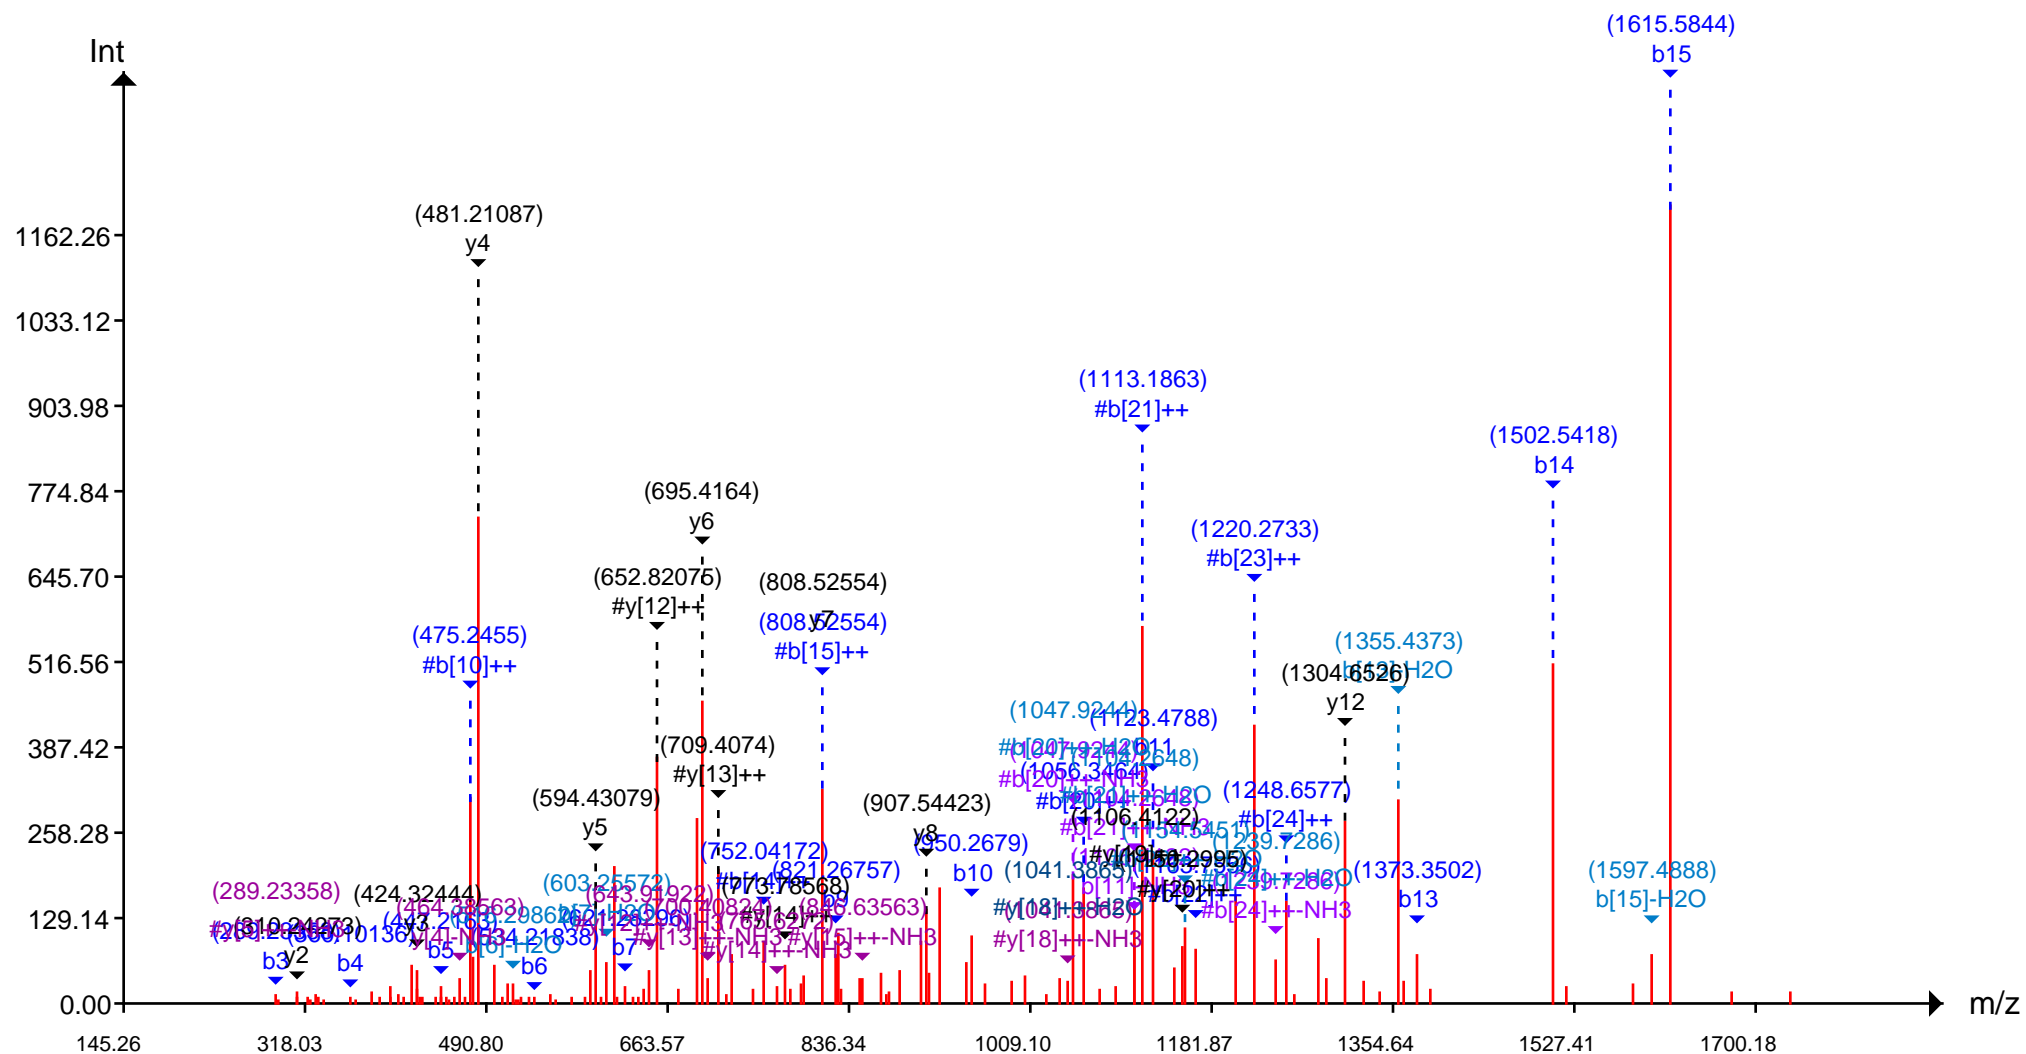

## Info

|                          |                                                    |                           |          |
|--------------------------|----------------------------------------------------|---------------------------|----------|
| <b>Modified Sequence</b> | AcD3-ATAASSSSLEK<AcD3K*>SYELPDGQVITIGNER<C13>-COOH | <b>Ion score</b>          | 47.89    |
| <b>Protein</b>           | P62737, P60710, P68033, P63260, P63268, P68134     | <b>Confidence level</b>   | 99.00%   |
| <b>Precursor m/z</b>     | 973.83213                                          | <b>Identity Threshold</b> | 47.63    |
| <b>Charge</b>            | 3+                                                 | <b>Mass error</b>         | 0.002272 |

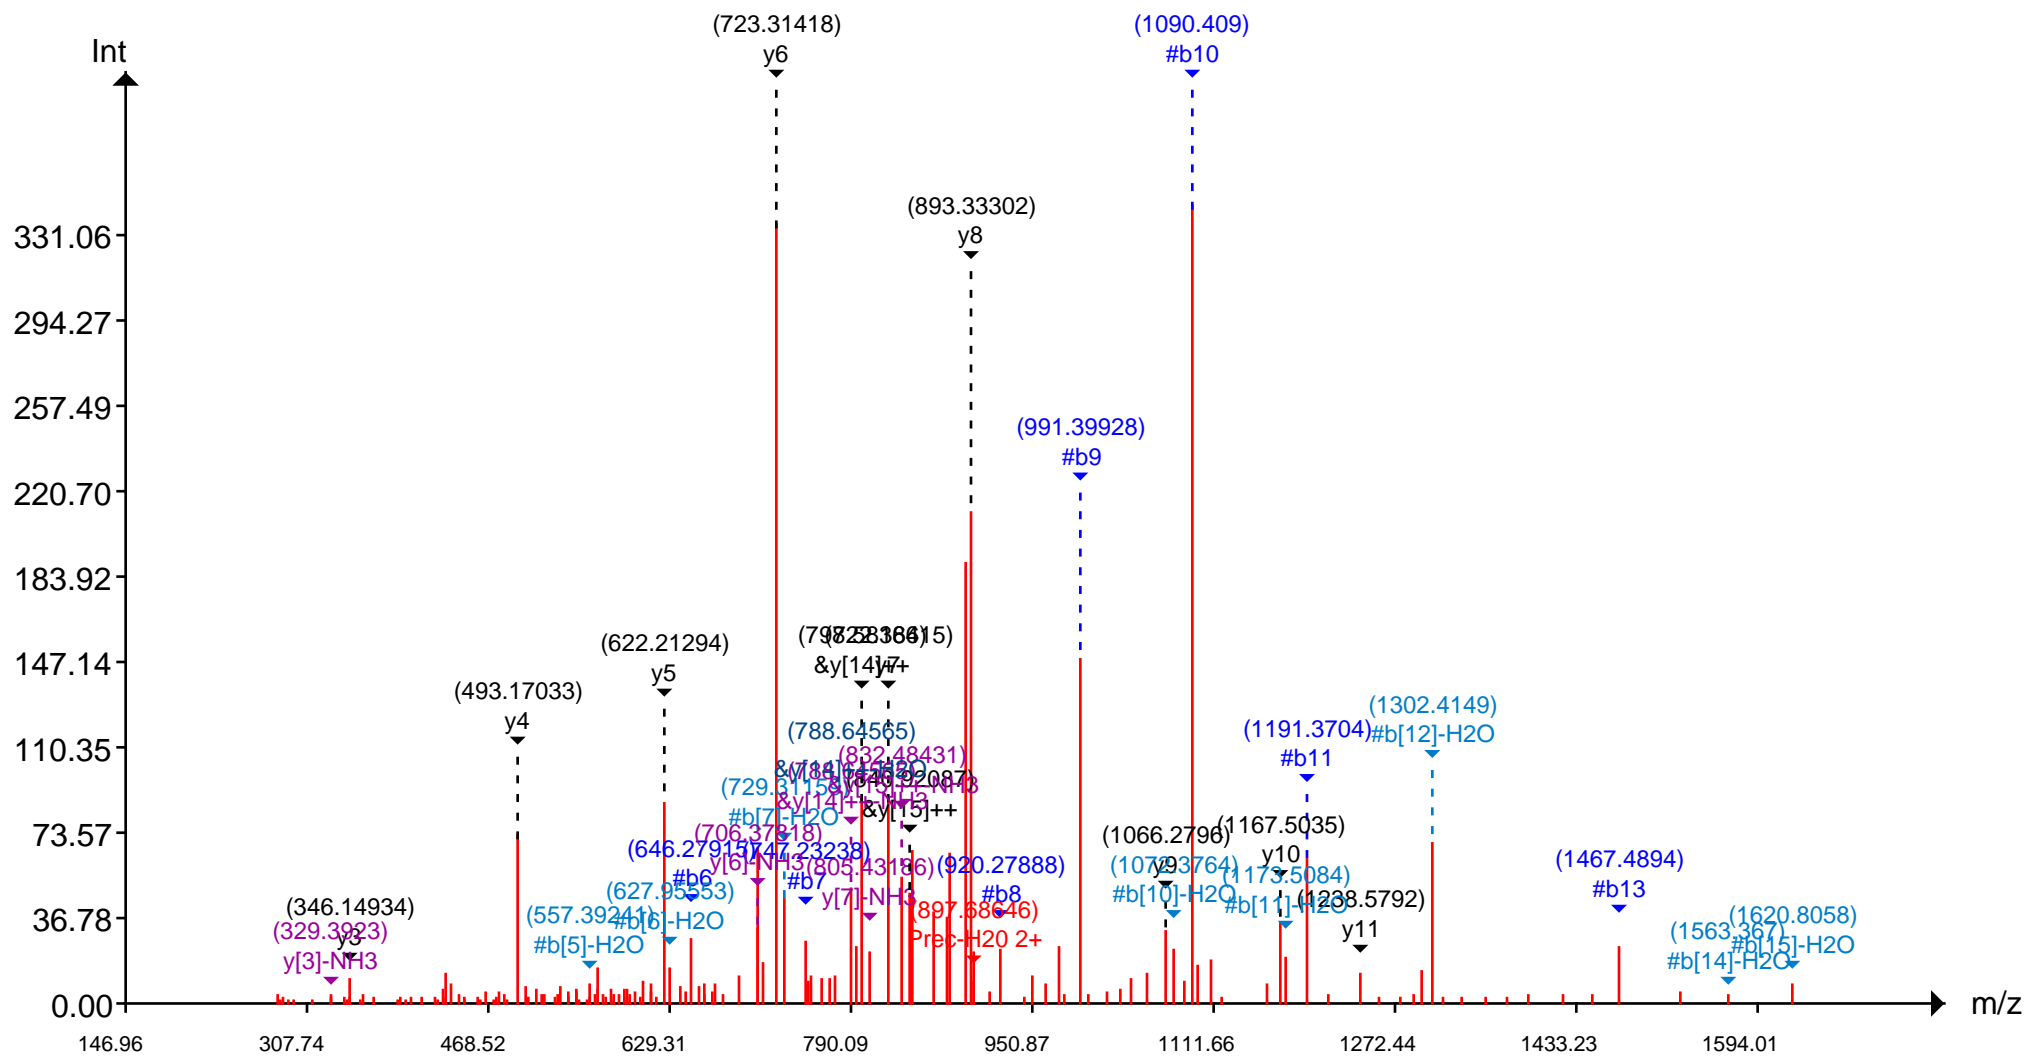

## Info

|                          |                                         |                           |          |
|--------------------------|-----------------------------------------|---------------------------|----------|
| <b>Modified Sequence</b> | AcD3-SSPEATK<AcD3K*>AVTEM<Mox*>NGR-COOH | <b>Ion score</b>          | 68.54    |
| <b>Protein</b>           | P29341                                  | <b>Confidence level</b>   | 99.00%   |
| <b>Precursor m/z</b>     | 906.93239                               | <b>Identity Threshold</b> | 46.45    |
| <b>Charge</b>            | 2+                                      | <b>Mass error</b>         | 0.002434 |

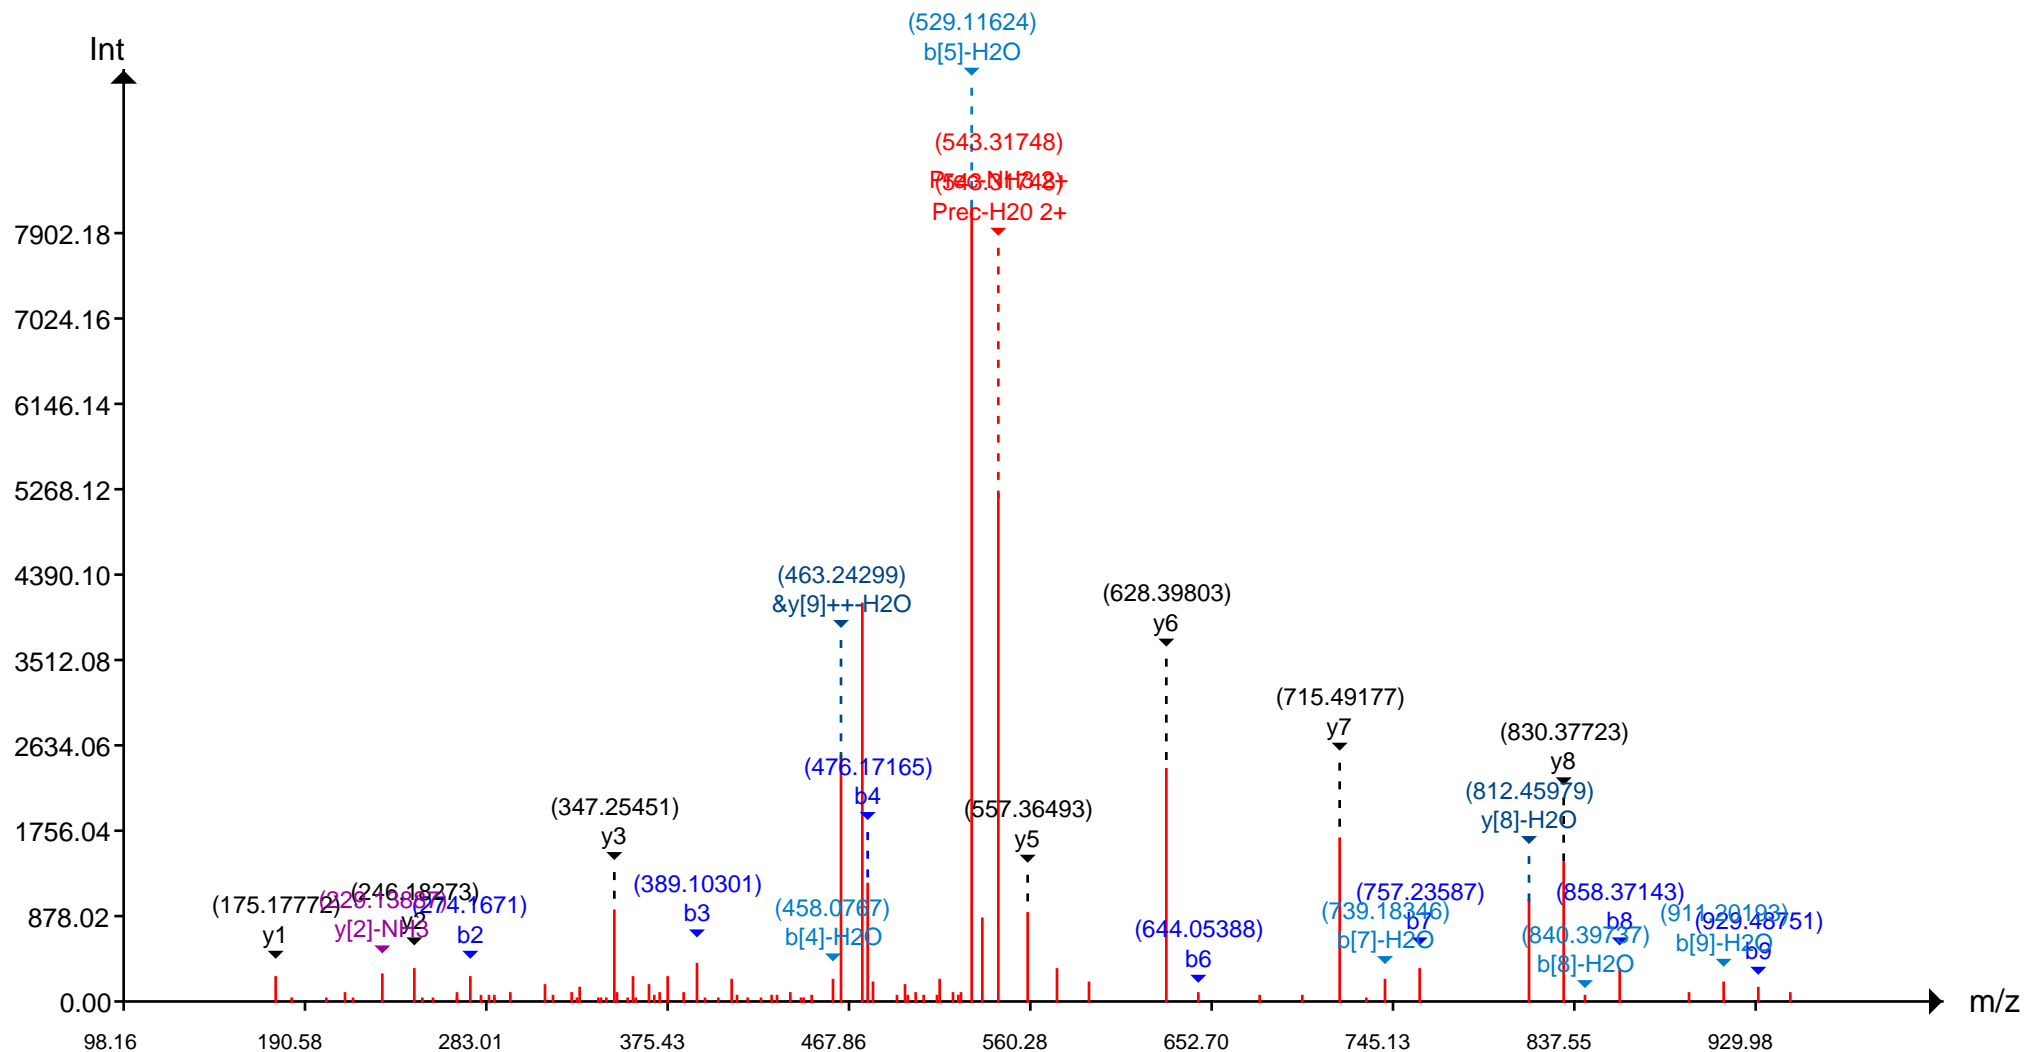

## Info

**Modified Sequence** AcD3-DIDSAPITAR-COOH

**Ion score** 58.8

**Protein** P52480

**Confidence level** 99.00%

**Precursor m/z** 552.29251

**Identity Threshold** 48.07

**Charge** 2+

**Mass error** 7.05E-4

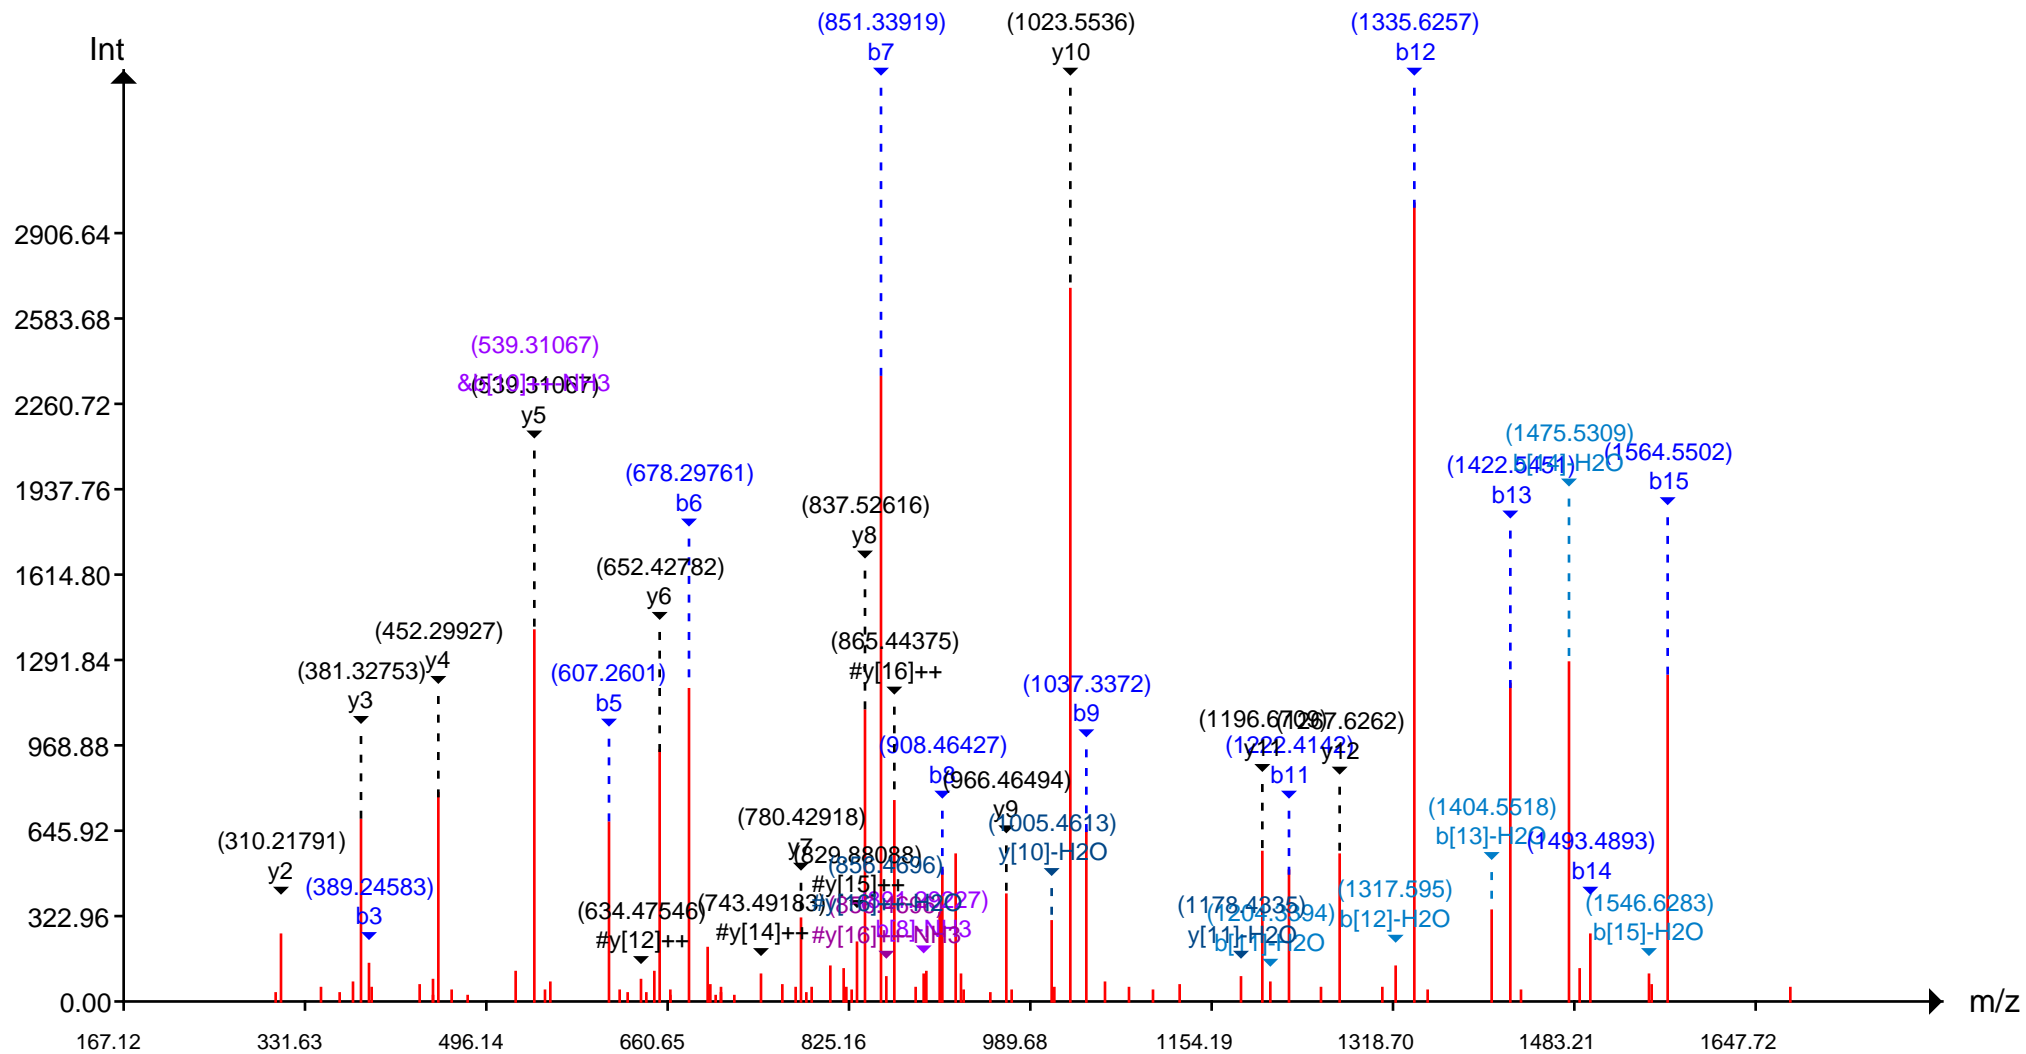

## Info

|                          |                                                  |                           |          |
|--------------------------|--------------------------------------------------|---------------------------|----------|
| <b>Modified Sequence</b> | AcD3-VAK<AcD3K*>FAAK<AcD3K*>GEGQLSAAER<C13>-COOH | <b>Ion score</b>          | 104.29   |
| <b>Protein</b>           | P58252                                           | <b>Confidence level</b>   | 99.00%   |
| <b>Precursor m/z</b>     | 937.52575                                        | <b>Identity Threshold</b> | 46.44    |
| <b>Charge</b>            | 2+                                               | <b>Mass error</b>         | 0.001868 |

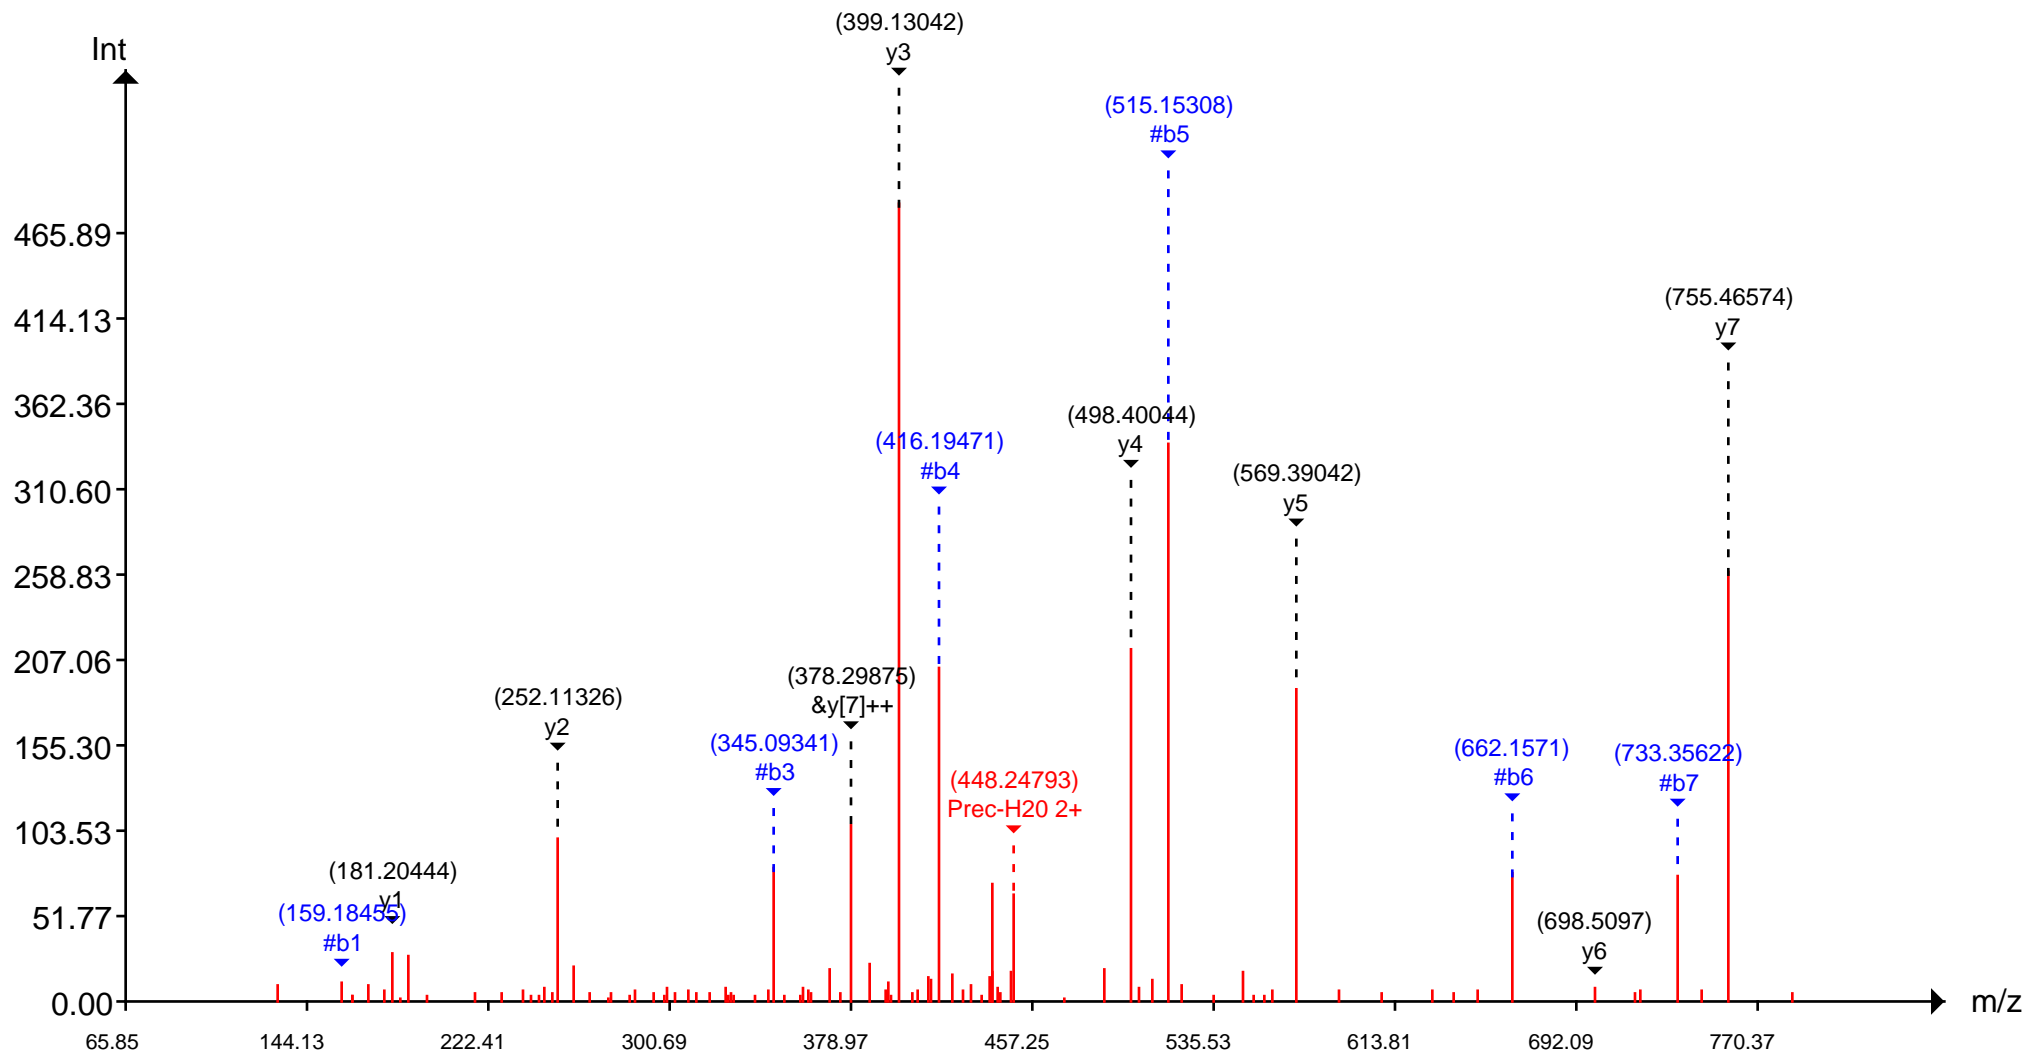

## Info

|                          |                          |                           |         |
|--------------------------|--------------------------|---------------------------|---------|
| <b>Modified Sequence</b> | AcD3-IGEA VFAR<C13>-COOH | <b>Ion score</b>          | 68.01   |
| <b>Protein</b>           | Q9DCD0                   | <b>Confidence level</b>   | 99.00%  |
| <b>Precursor m/z</b>     | 457.26744                | <b>Identity Threshold</b> | 46.71   |
| <b>Charge</b>            | 2+                       | <b>Mass error</b>         | -4.2E-5 |





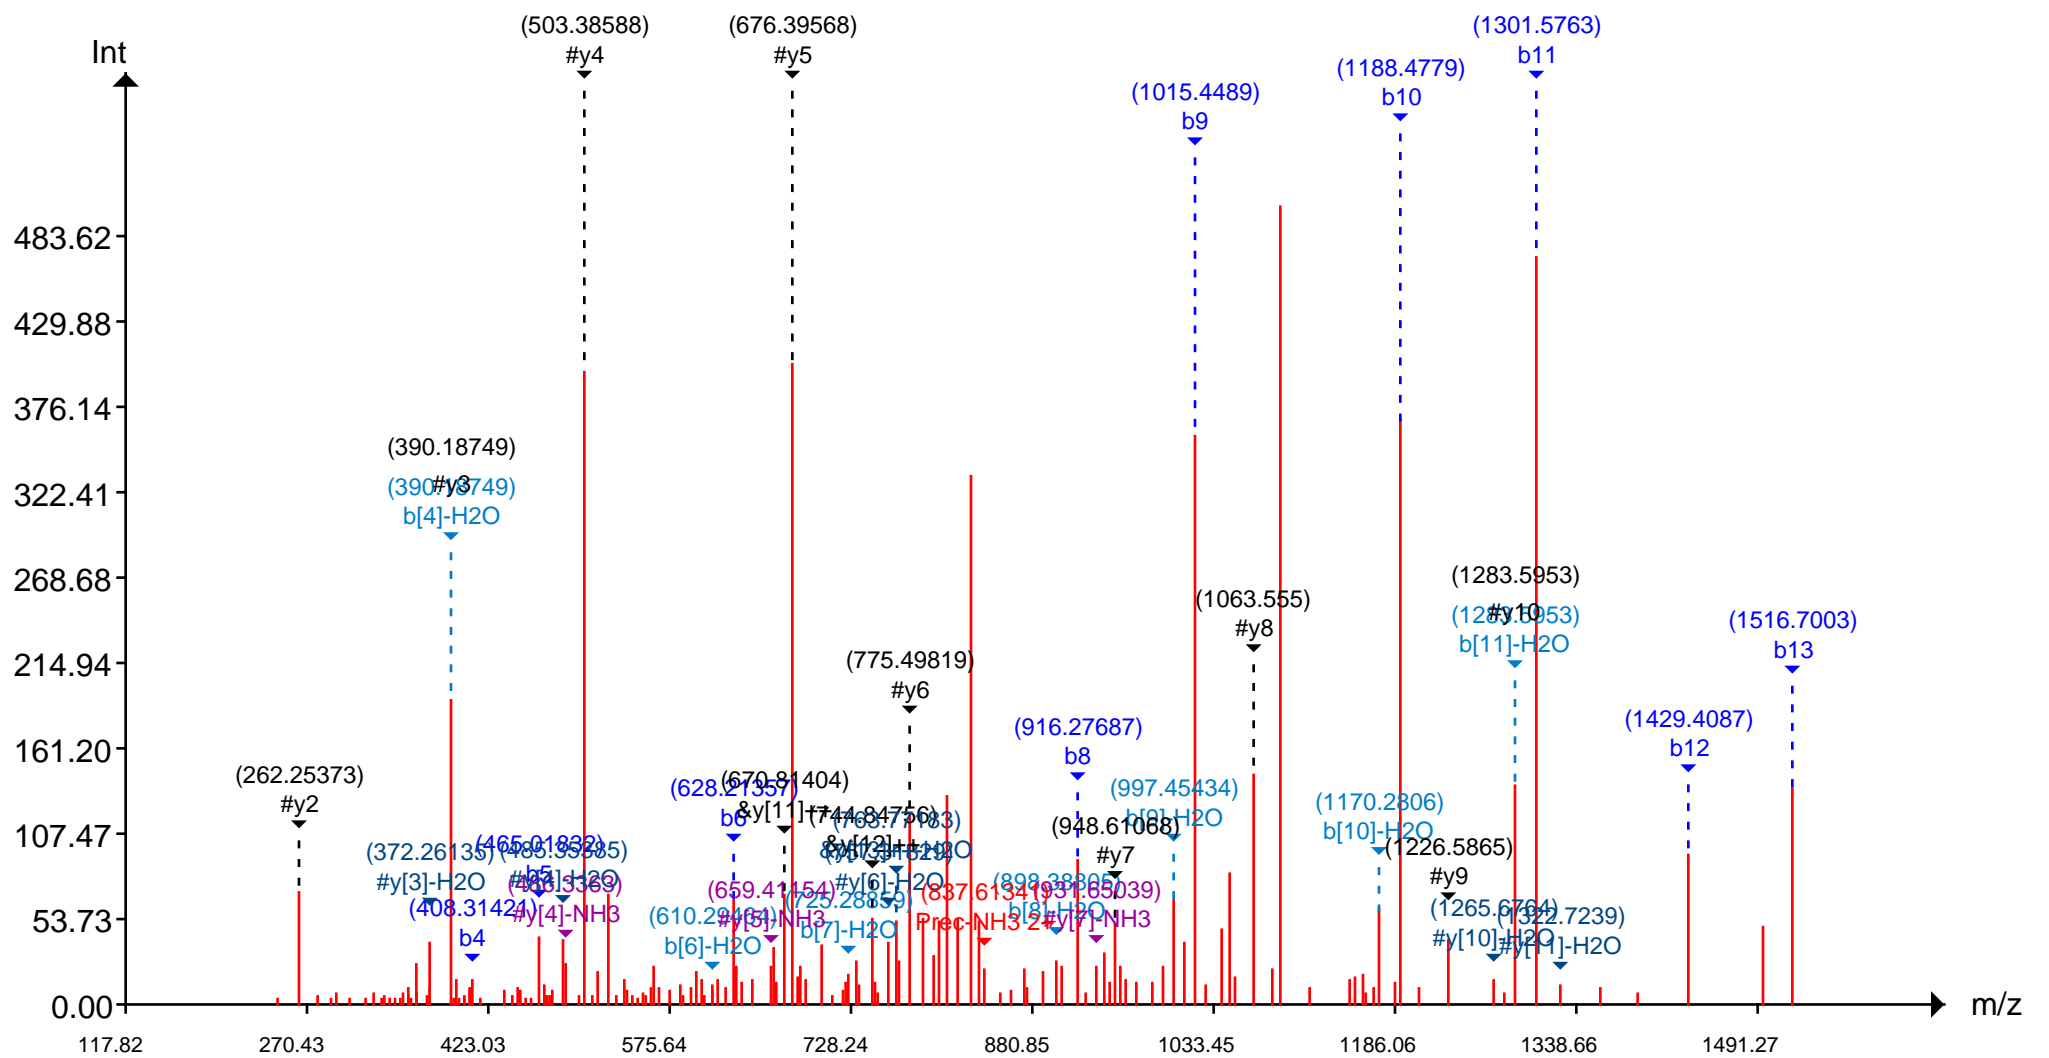

| Info                     |                                          |                           |          |
|--------------------------|------------------------------------------|---------------------------|----------|
| <b>Modified Sequence</b> | AcD3-TGFGGYDK<AcD3K*>VK<AcD3K*>LQSR-COOH | <b>Ion score</b>          | 62.67    |
| <b>Protein</b>           | Q62465                                   | <b>Confidence level</b>   | 99.00%   |
| <b>Precursor m/z</b>     | 845.96089                                | <b>Identity Threshold</b> | 47.58    |
| <b>Charge</b>            | 2+                                       | <b>Mass error</b>         | 0.003587 |

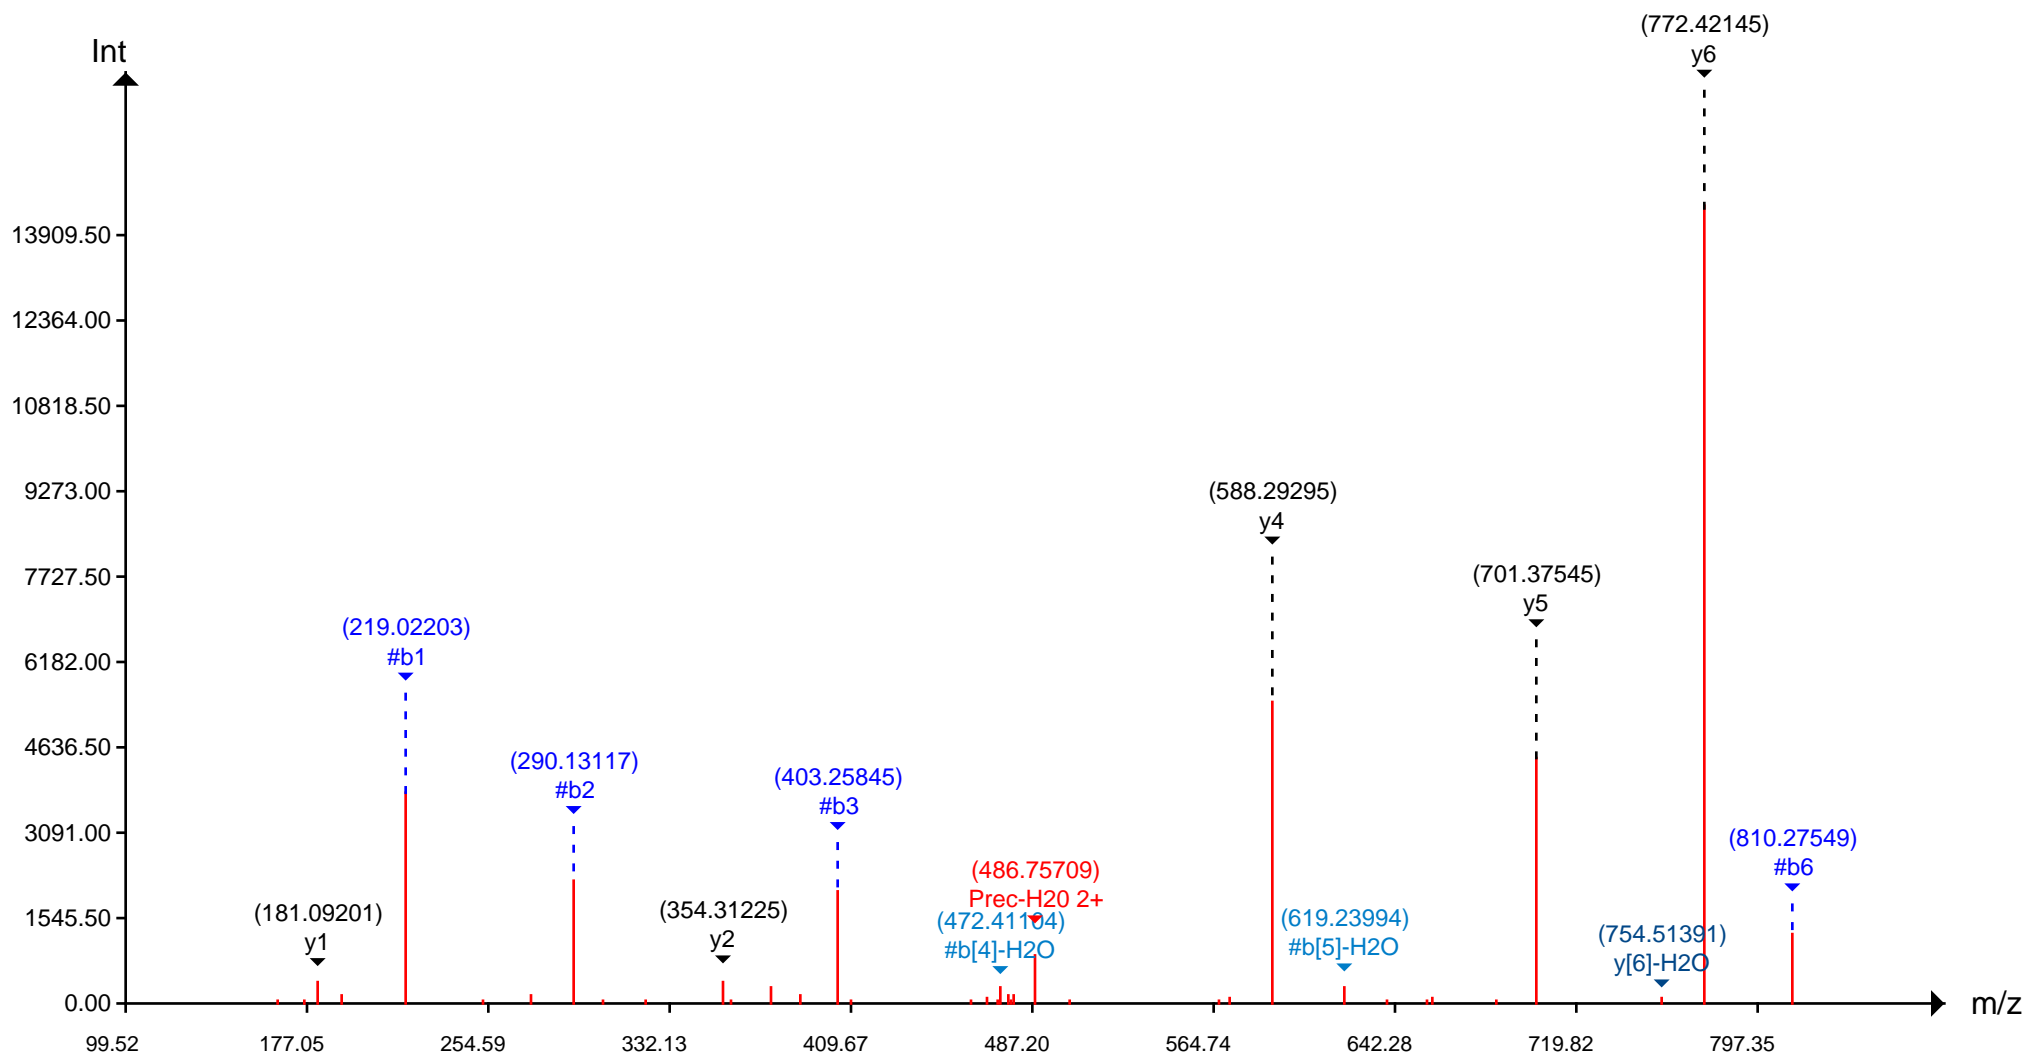

## Info

**Modified Sequence** AcD3-K<AcD3K\*>AISFK<AcD3K\*>R<C13>-COOH

**Ion score** 46.44

**Protein** Q62426

**Confidence level** 99.00%

**Precursor m/z** 495.82282

**Identity Threshold** 41.59

**Charge** 2+

**Mass error** -4.43E-4

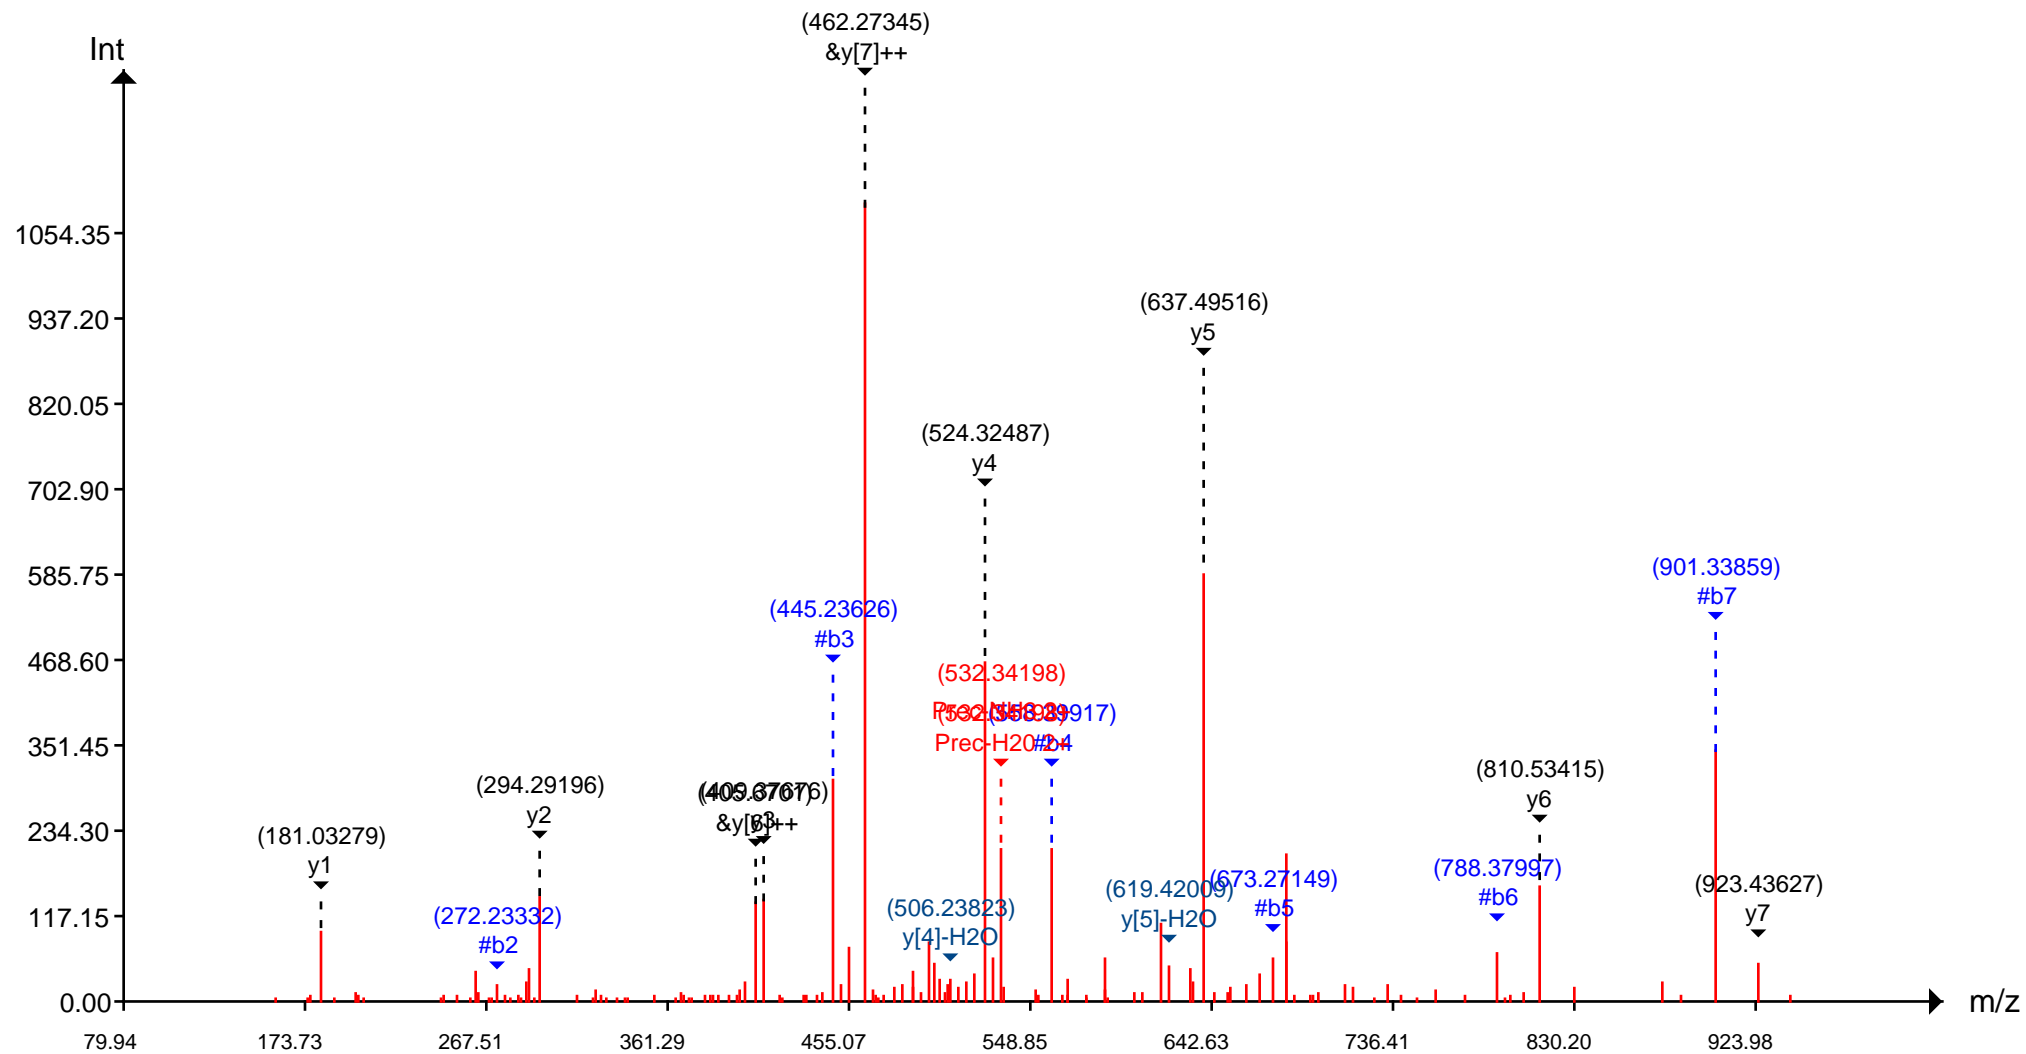

## Info

|                          |                                 |                           |         |
|--------------------------|---------------------------------|---------------------------|---------|
| <b>Modified Sequence</b> | AcD3-ILK<AcD3K*>IDDIR<C13>-COOH | <b>Ion score</b>          | 59.18   |
| <b>Protein</b>           | P80316                          | <b>Confidence level</b>   | 99.00%  |
| <b>Precursor m/z</b>     | 541.3452                        | <b>Identity Threshold</b> | 40.85   |
| <b>Charge</b>            | 2+                              | <b>Mass error</b>         | 1.58E-4 |

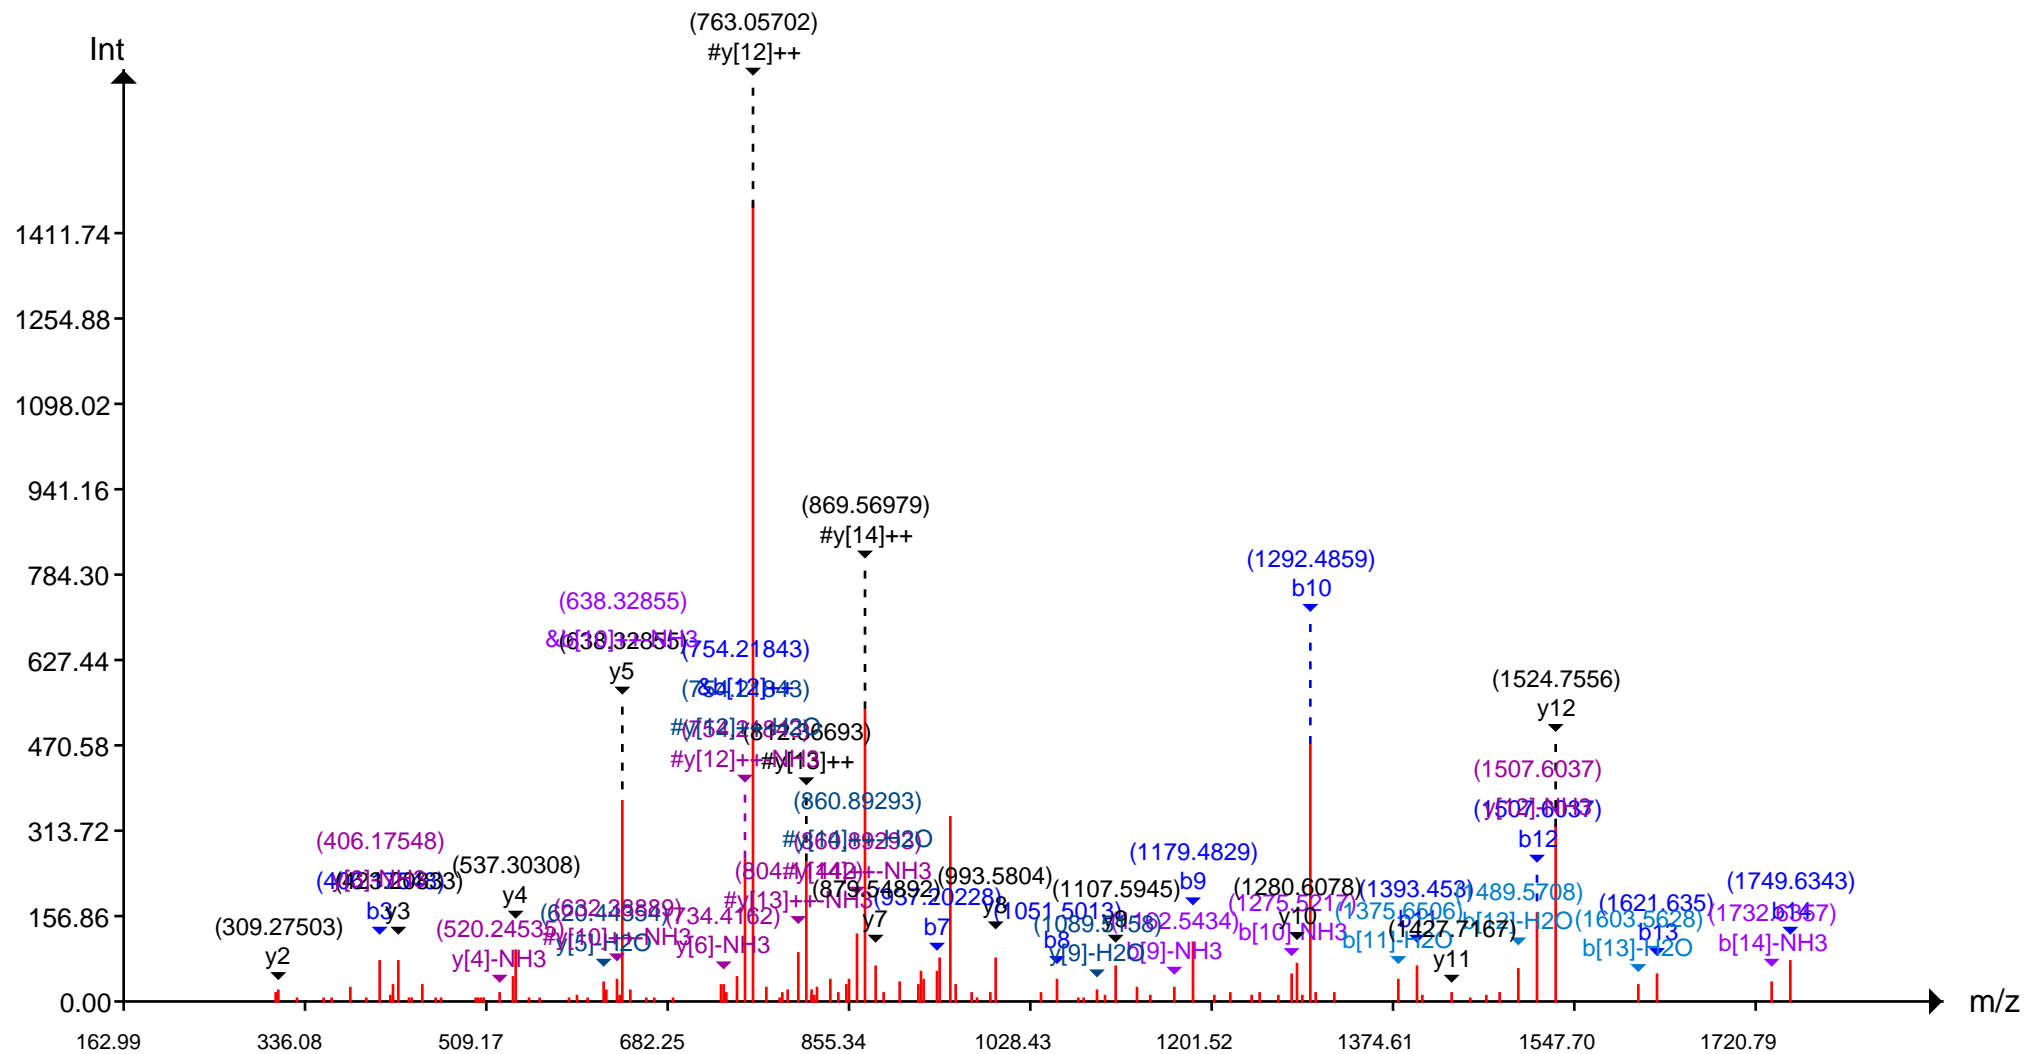

## Info

|                          |                                              |                           |          |
|--------------------------|----------------------------------------------|---------------------------|----------|
| <b>Modified Sequence</b> | AcD3-FNVPM<Mox*>K<AcD3K*>NNQITNNQR<C13>-COOH | <b>Ion score</b>          | 77.23    |
| <b>Protein</b>           | P09411, P09041                               | <b>Confidence level</b>   | 99.00%   |
| <b>Precursor m/z</b>     | 965.49537                                    | <b>Identity Threshold</b> | 48.02    |
| <b>Charge</b>            | 2+                                           | <b>Mass error</b>         | 0.002113 |

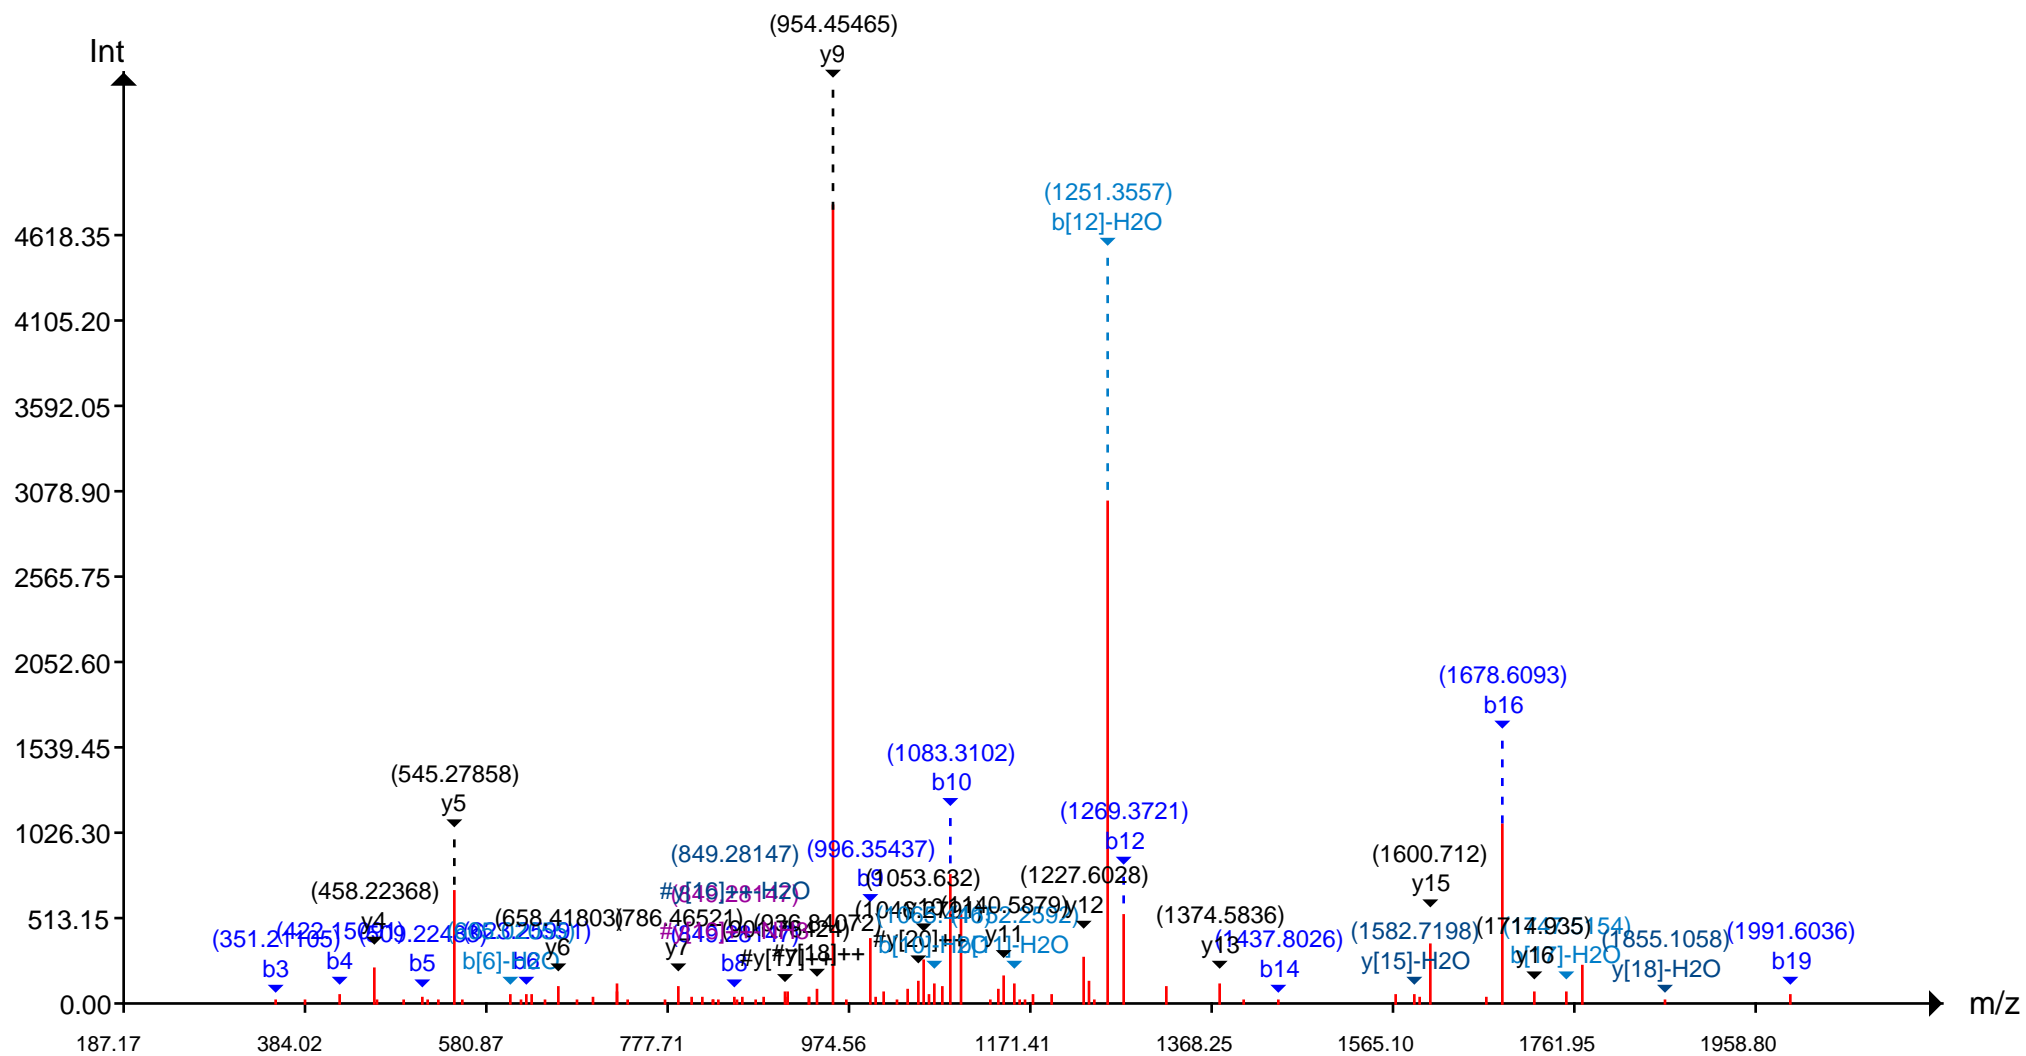

## Info

|                          |                                 |                           |          |
|--------------------------|---------------------------------|---------------------------|----------|
| <b>Modified Sequence</b> | AcD3-SAFASNPEFSSVPAQISPEGR-COOH | <b>Ion score</b>          | 91.71    |
| <b>Protein</b>           | P26039                          | <b>Confidence level</b>   | 99.00%   |
| <b>Precursor m/z</b>     | 1112.0437                       | <b>Identity Threshold</b> | 47.20    |
| <b>Charge</b>            | 2+                              | <b>Mass error</b>         | 0.004565 |

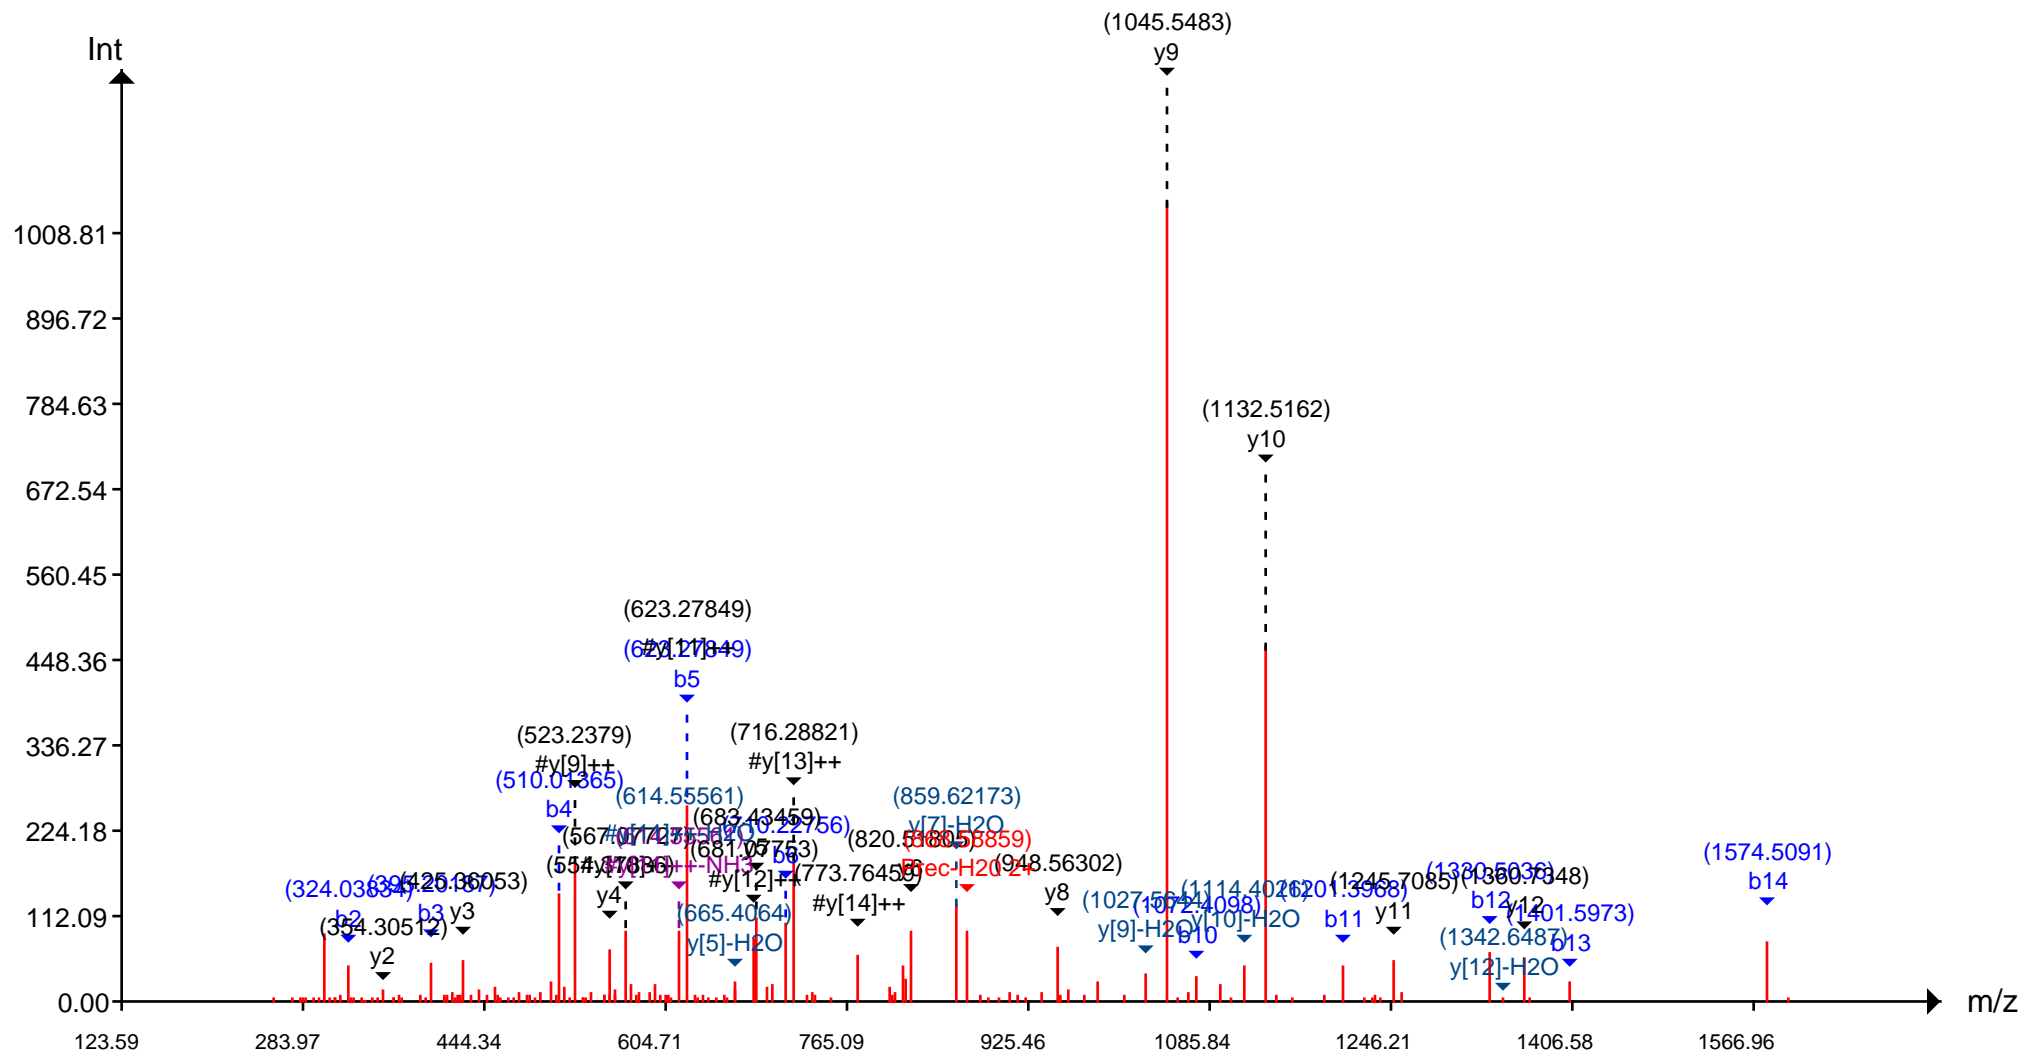

## Info

**Modified Sequence** AcD3-YDADLSPAGHEEAK<AcD3K\*>R<C13>-COOH

**Ion score** 92.72

**Protein** Q9DBJ1

**Confidence level** 99.00%

**Precursor m/z** 877.93231

**Identity Threshold** 47.27

**Charge** 2+

**Mass error** 0.001557

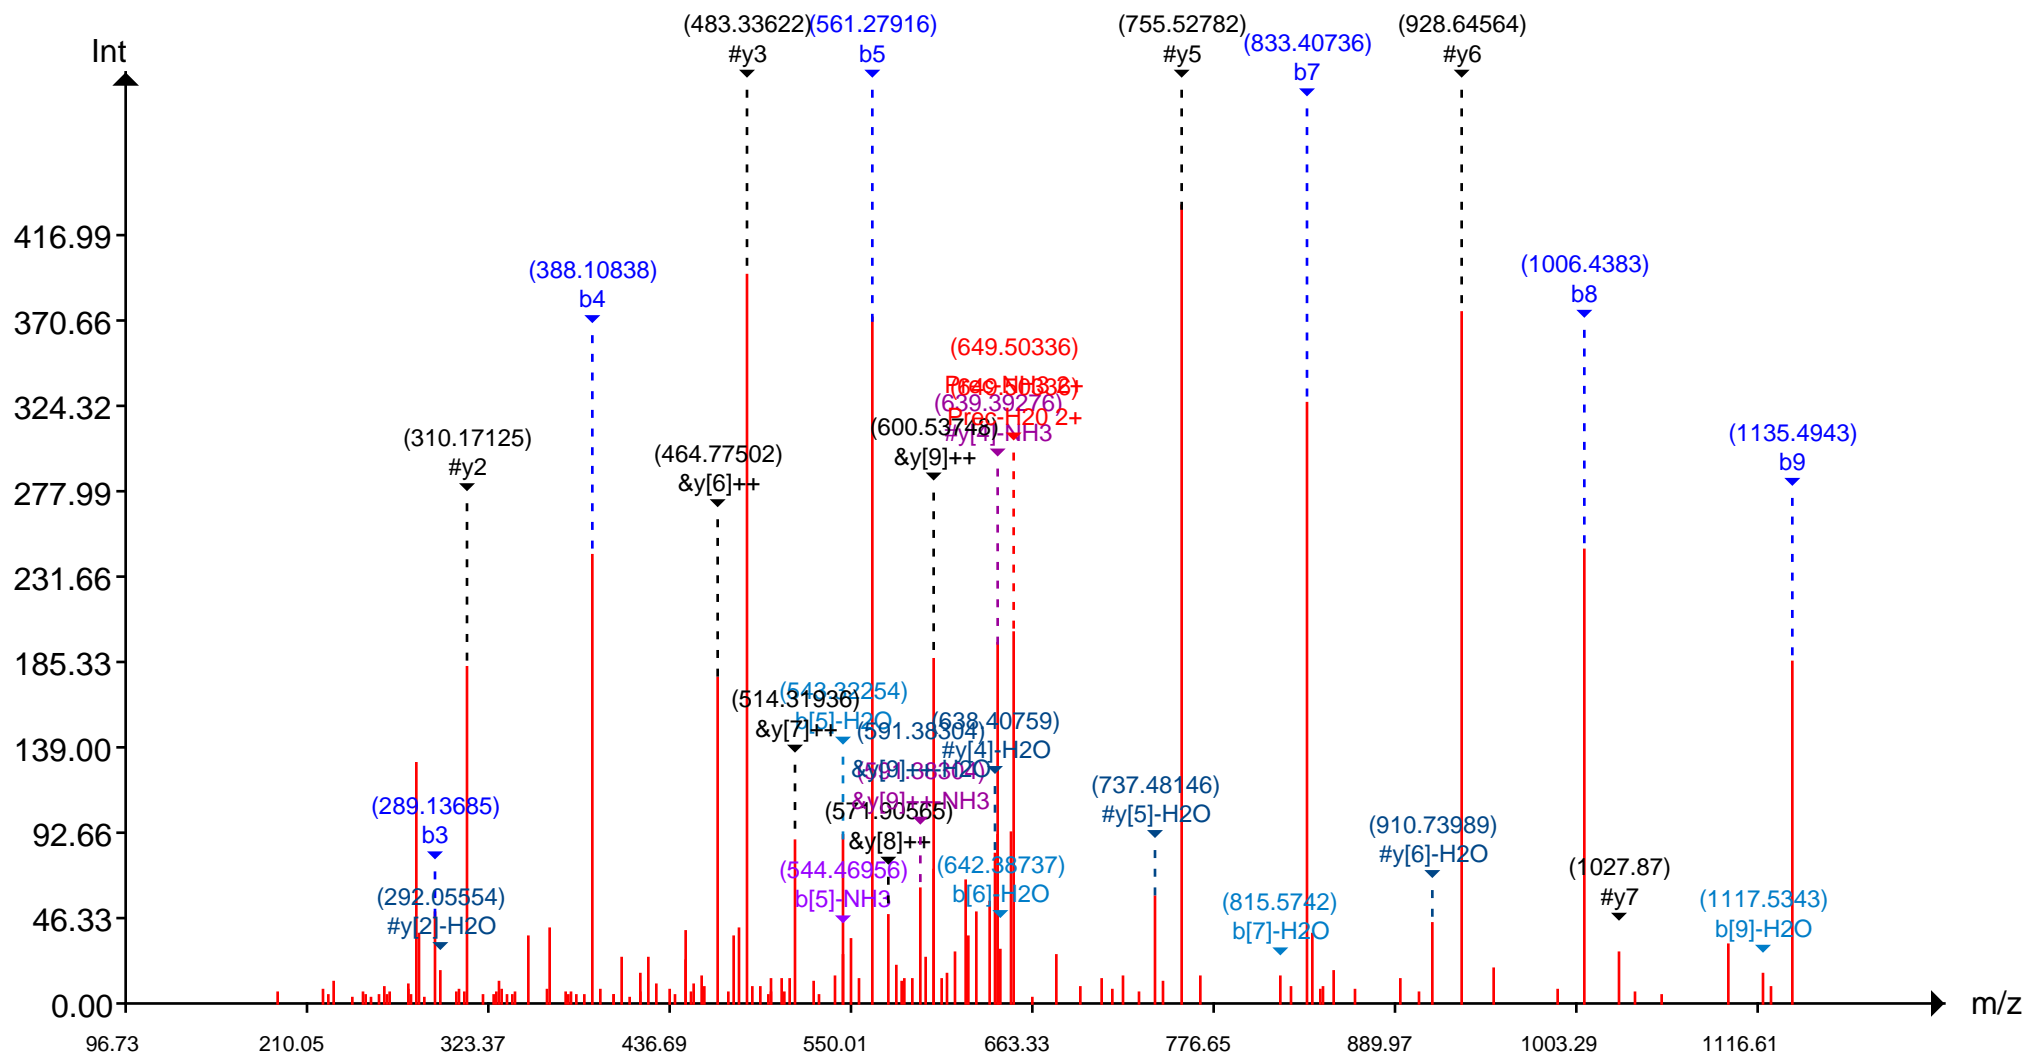

## Info

|                          |                                                   |                           |          |
|--------------------------|---------------------------------------------------|---------------------------|----------|
| <b>Modified Sequence</b> | AcD3-AGDVK<AcD3K*>VK<AcD3K*>K<AcD3K*>ER<C13>-COOH | <b>Ion score</b>          | 45.44    |
| <b>Protein</b>           | Q8K3X4                                            | <b>Confidence level</b>   | 99.00%   |
| <b>Precursor m/z</b>     | 658.40791                                         | <b>Identity Threshold</b> | 42.37    |
| <b>Charge</b>            | 2+                                                | <b>Mass error</b>         | 0.002043 |





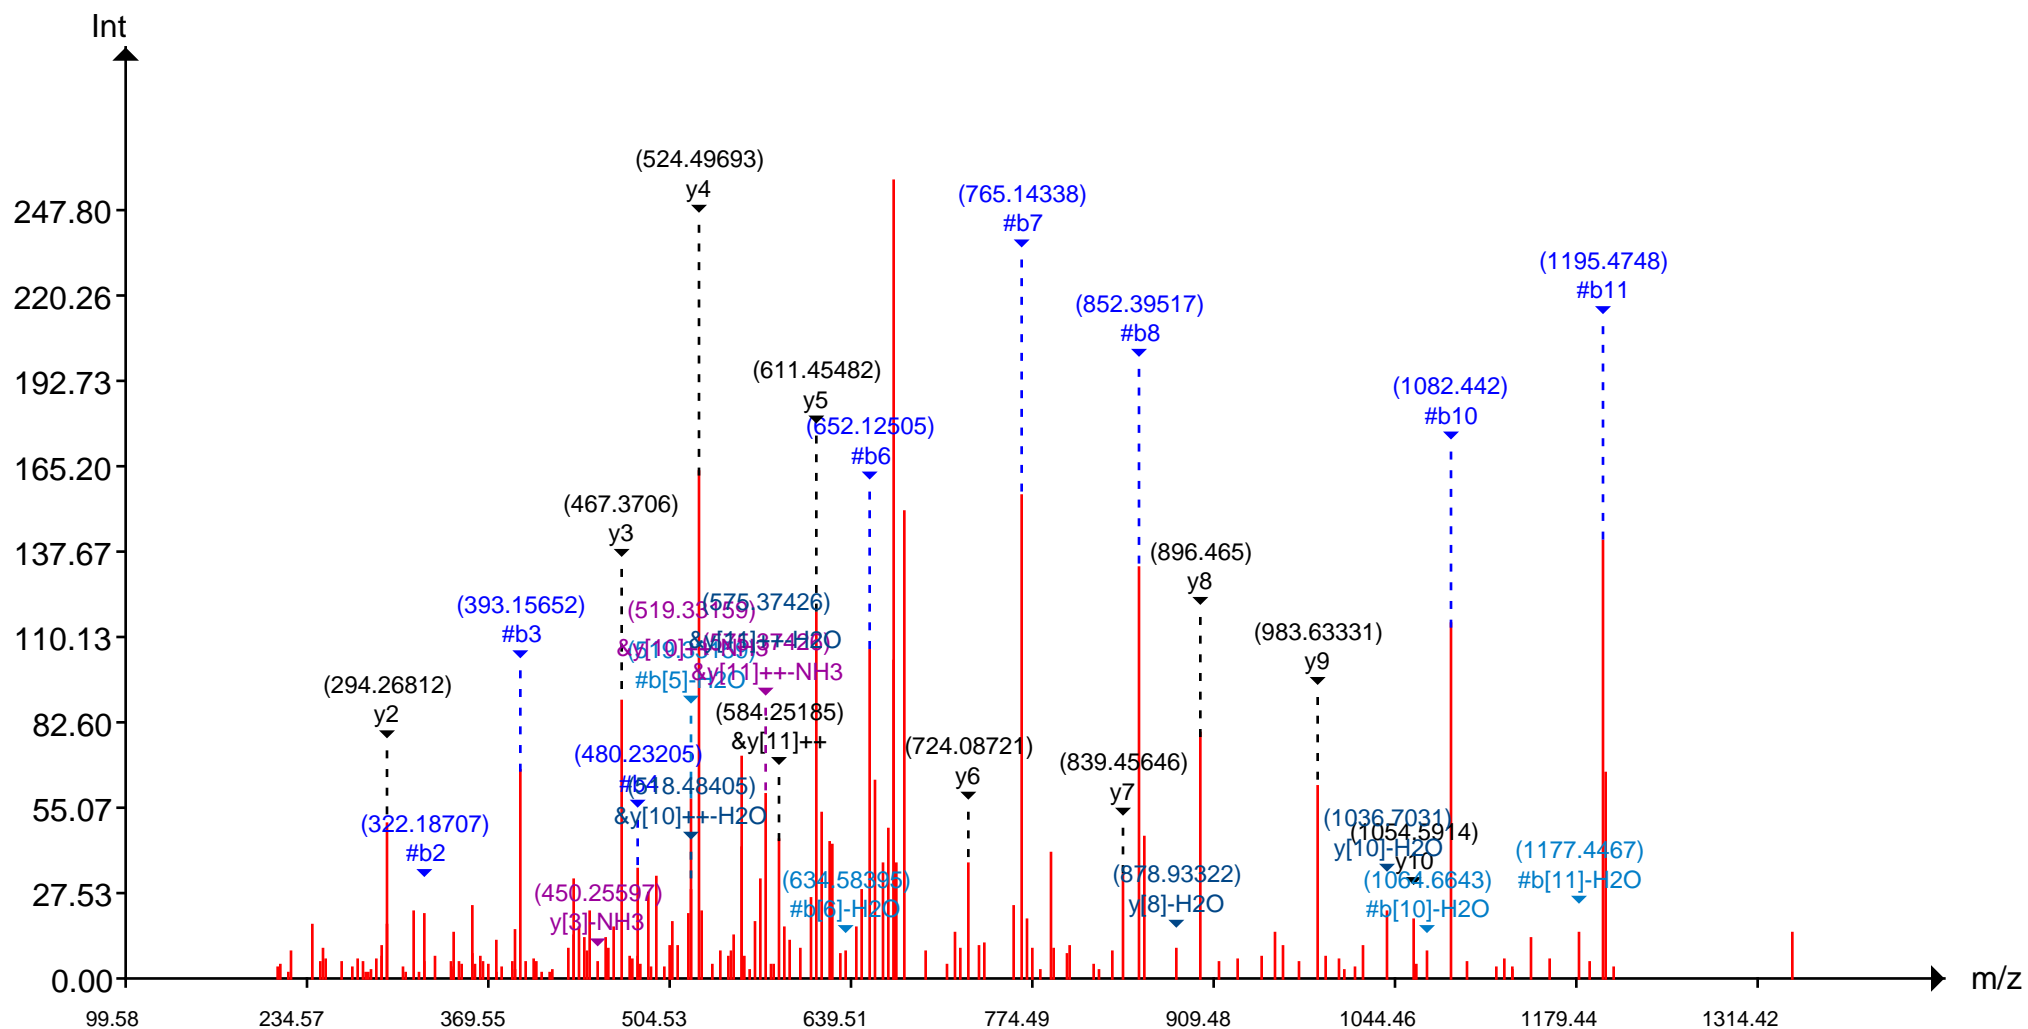

## Info

|                          |                                     |                           |          |
|--------------------------|-------------------------------------|---------------------------|----------|
| <b>Modified Sequence</b> | AcD3-YIASGDISGK<AcD3K*>LR<C13>-COOH | <b>Ion score</b>          | 54.05    |
| <b>Protein</b>           | O88342                              | <b>Confidence level</b>   | 99.00%   |
| <b>Precursor m/z</b>     | 688.39397                           | <b>Identity Threshold</b> | 46.74    |
| <b>Charge</b>            | 2+                                  | <b>Mass error</b>         | 0.001278 |

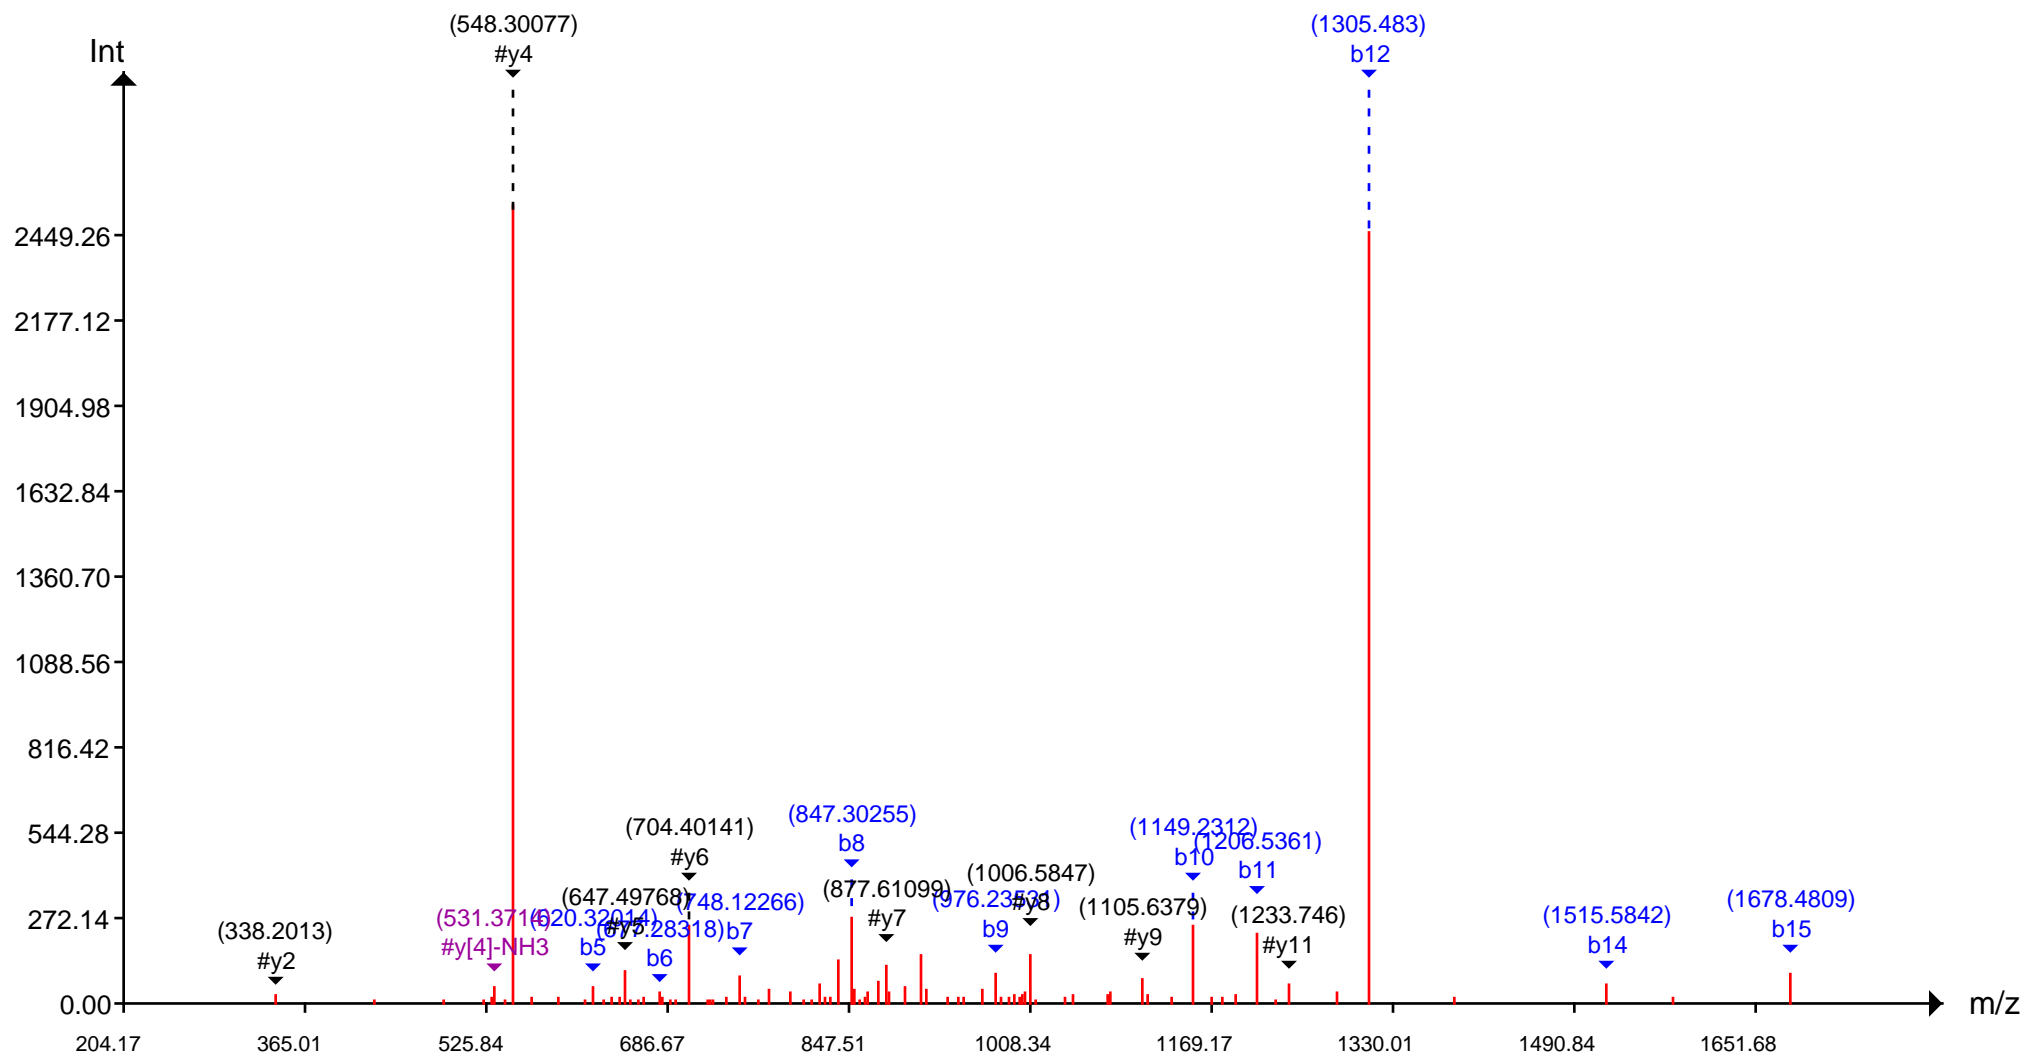

## Info

|                          |                                                  |                           |          |
|--------------------------|--------------------------------------------------|---------------------------|----------|
| <b>Modified Sequence</b> | AcD3-AVC<Cmm*>K<AcD3K*>AGAVEK<AcD3K*>GVPLYR-COOH | <b>Ion score</b>          | 70.65    |
| <b>Protein</b>           | P17182                                           | <b>Confidence level</b>   | 99.00%   |
| <b>Precursor m/z</b>     | 927.01976                                        | <b>Identity Threshold</b> | 46.50    |
| <b>Charge</b>            | 2+                                               | <b>Mass error</b>         | 0.002278 |

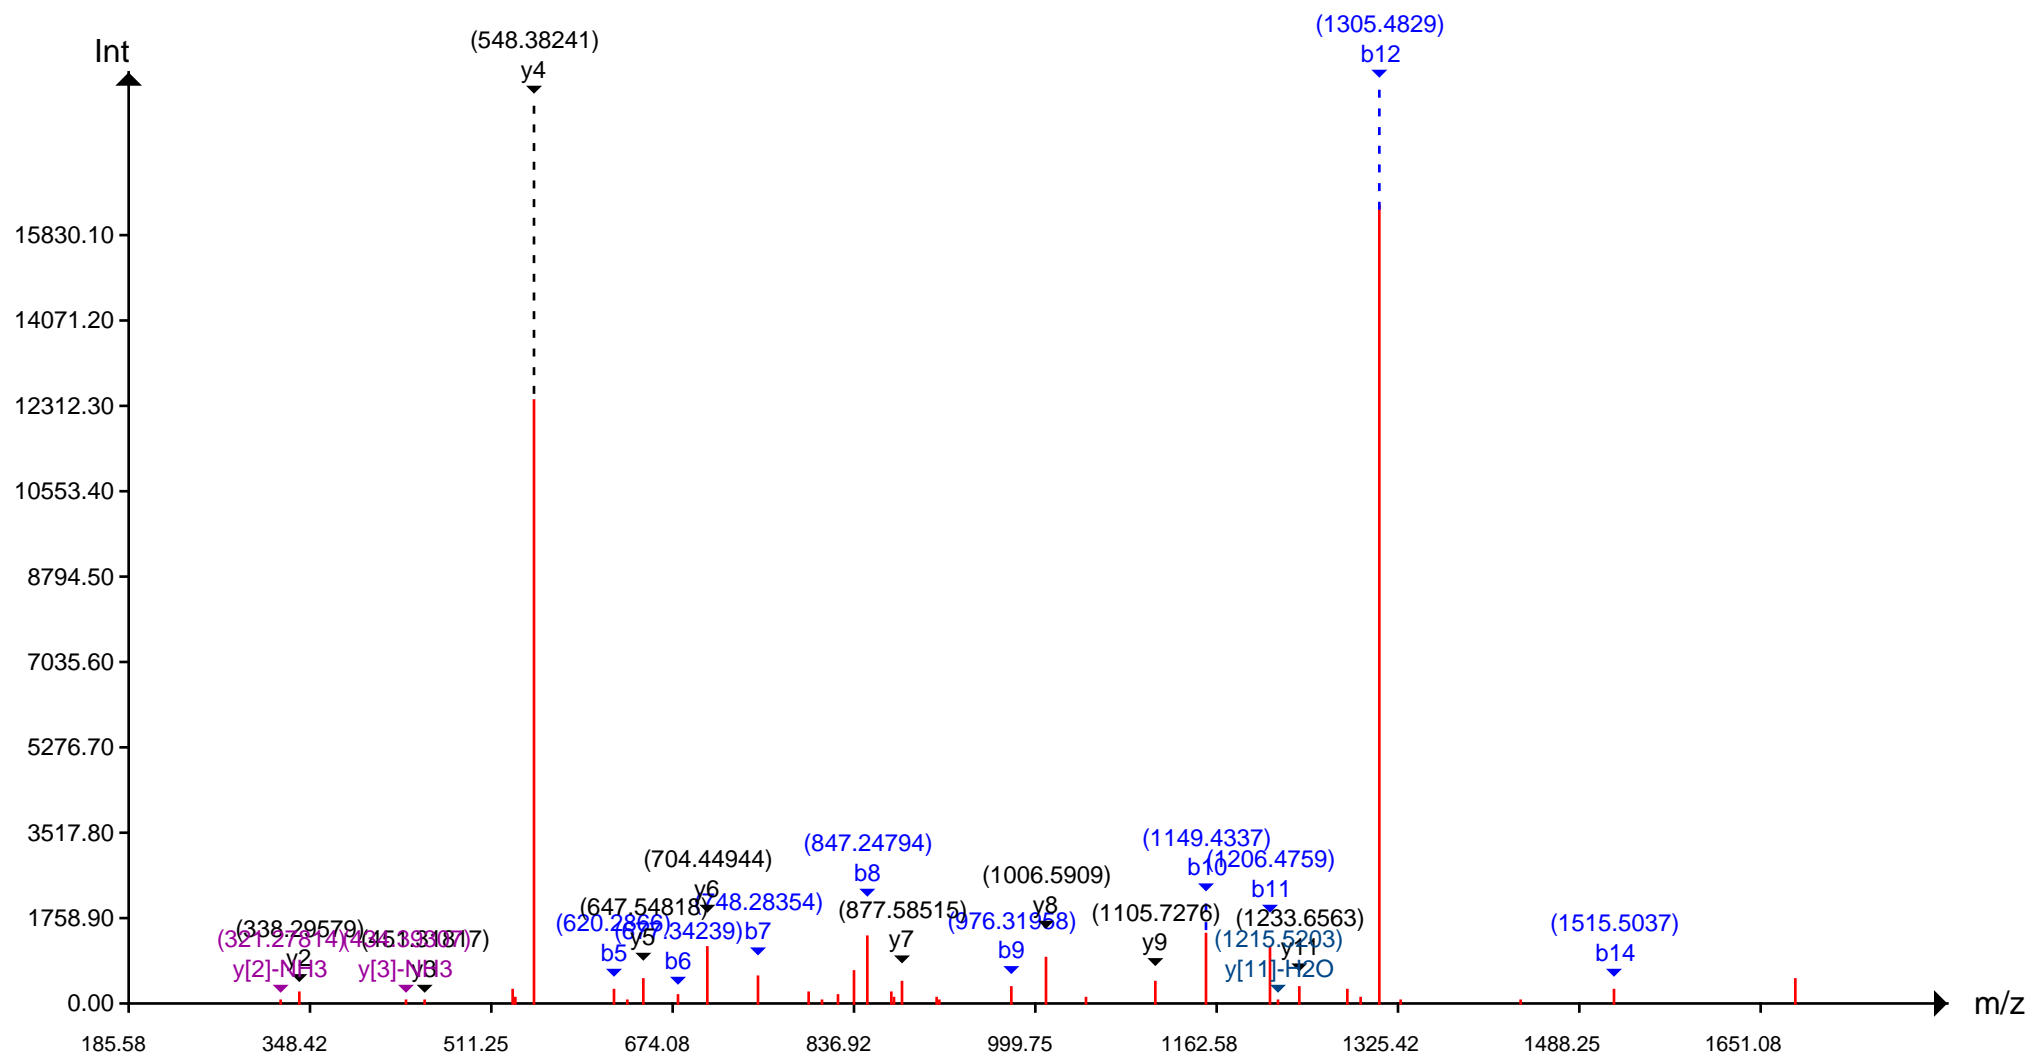

## Info

|                          |                                                  |                           |          |
|--------------------------|--------------------------------------------------|---------------------------|----------|
| <b>Modified Sequence</b> | AcD3-AVC<Cmm*>K<AcD3K*>AGAVEK<AcD3K*>GVPLYR-COOH | <b>Ion score</b>          | 71.88    |
| <b>Protein</b>           | P17182                                           | <b>Confidence level</b>   | 99.00%   |
| <b>Precursor m/z</b>     | 927.01938                                        | <b>Identity Threshold</b> | 46.59    |
| <b>Charge</b>            | 2+                                               | <b>Mass error</b>         | 0.001518 |

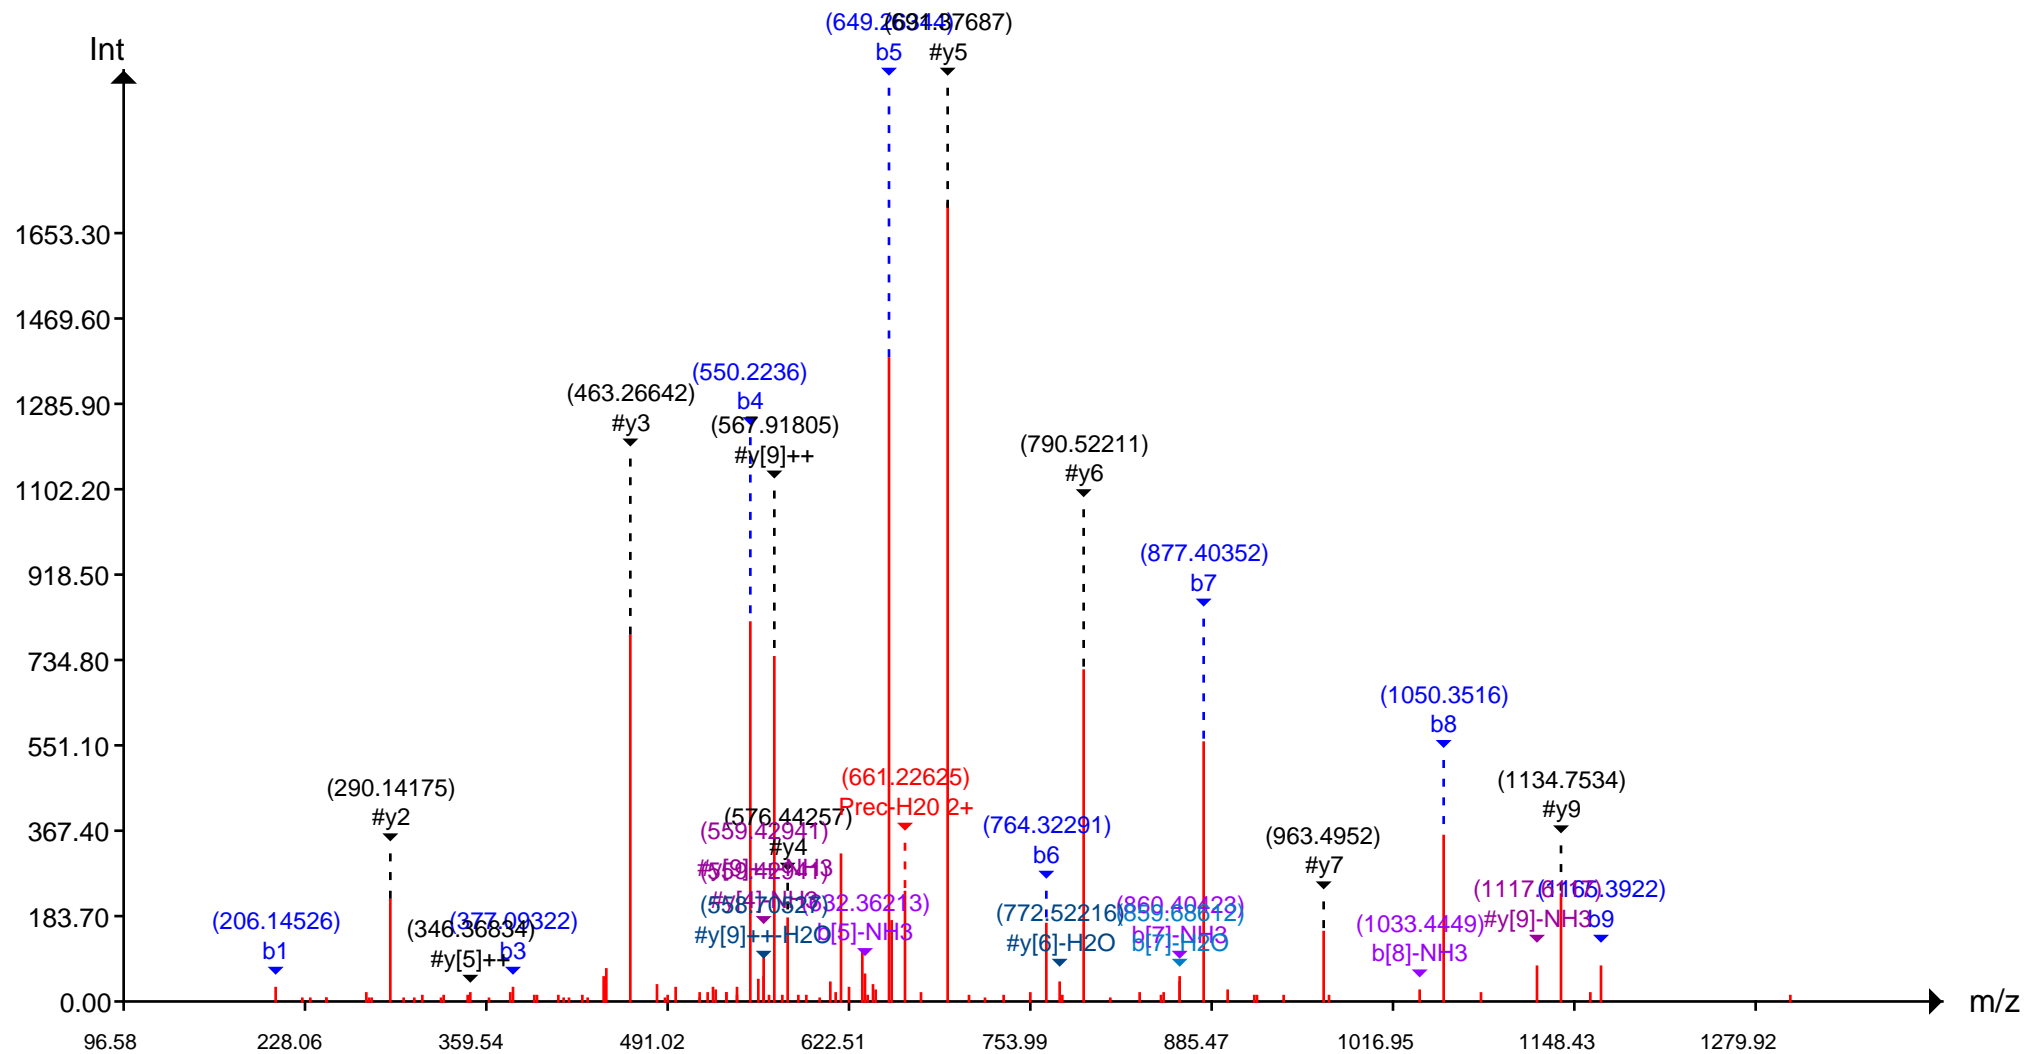

## Info

|                          |                                            |                           |         |
|--------------------------|--------------------------------------------|---------------------------|---------|
| <b>Modified Sequence</b> | AcD3-C<Cmm*>GNK<AcD3K*>VDIK<AcD3K*>DR-COOH | <b>Ion score</b>          | 77.8    |
| <b>Protein</b>           | P62827                                     | <b>Confidence level</b>   | 99.00%  |
| <b>Precursor m/z</b>     | 670.3533                                   | <b>Identity Threshold</b> | 48.05   |
| <b>Charge</b>            | 2+                                         | <b>Mass error</b>         | 8.55E-4 |

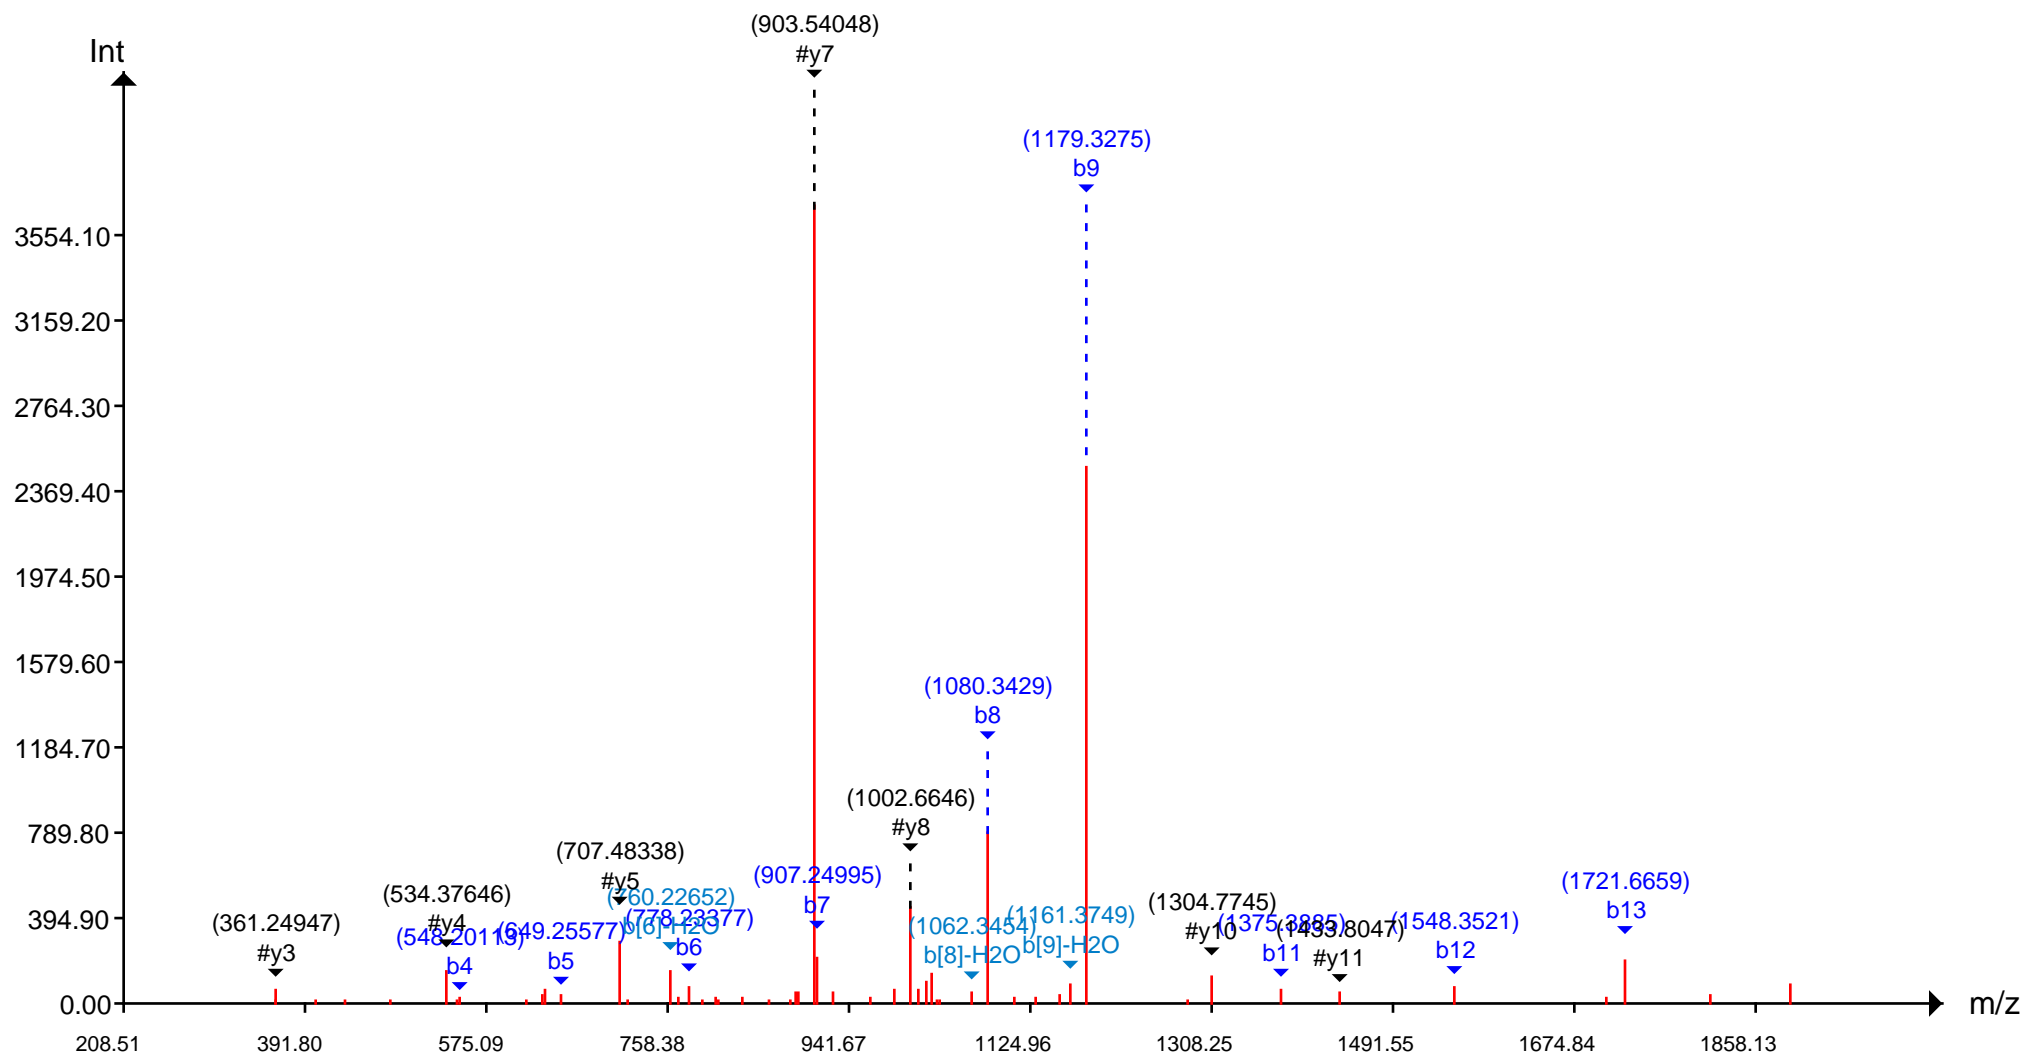

## Info

|                          |                                                    |                           |          |
|--------------------------|----------------------------------------------------|---------------------------|----------|
| <b>Modified Sequence</b> | AcD3-DEEETEEK<AcD3K*>VPVK<AcD3K*>K<AcD3K*>SVR-COOH | <b>Ion score</b>          | 64.88    |
| <b>Protein</b>           | Q61937                                             | <b>Confidence level</b>   | 99.00%   |
| <b>Precursor m/z</b>     | 1041.5544                                          | <b>Identity Threshold</b> | 47.86    |
| <b>Charge</b>            | 2+                                                 | <b>Mass error</b>         | 0.002497 |

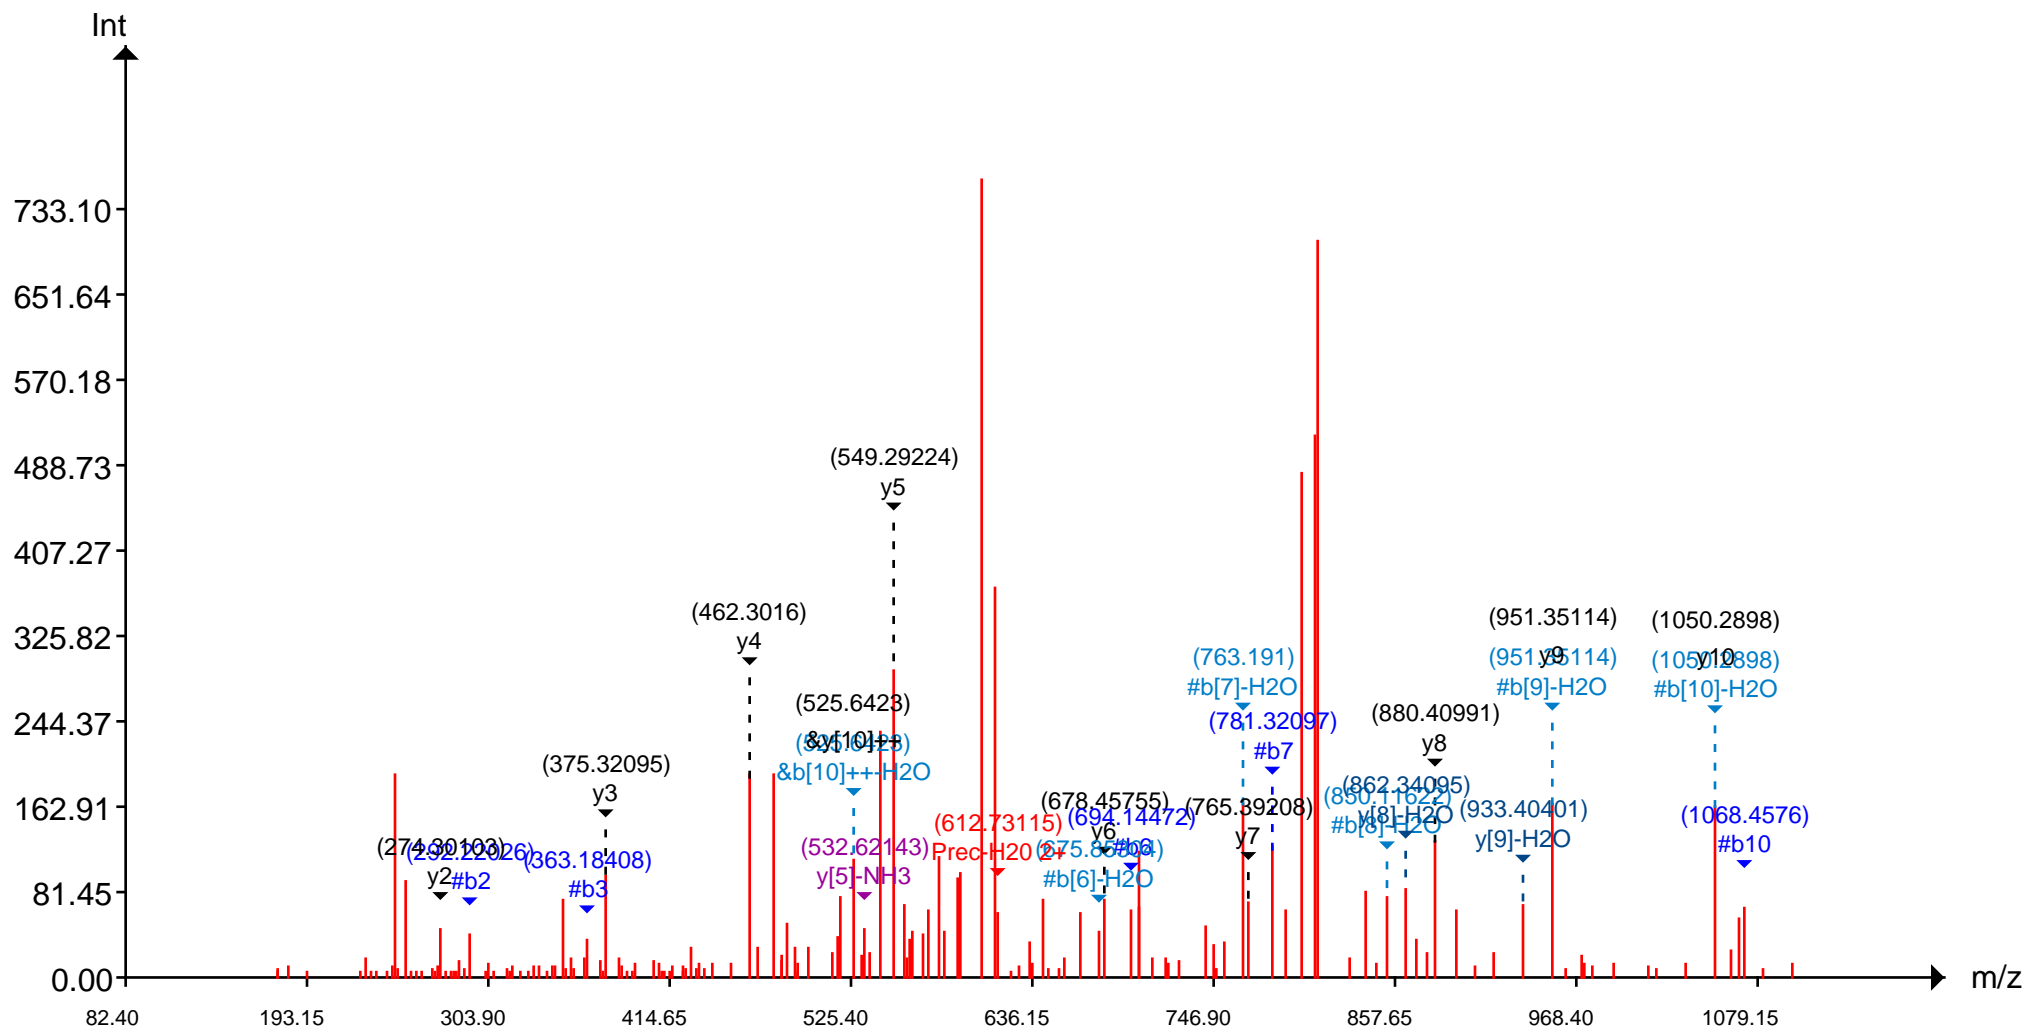

## Info

**Modified Sequence** AcD3-FVADESSTVR-COOH

**Protein** Q8BZW8

**Precursor m/z** 621.80545

**Charge** 2+

**Ion score** 55.34

**Confidence level** 99.00%

**Identity Threshold** 46.78

**Mass error** -3.77E-4

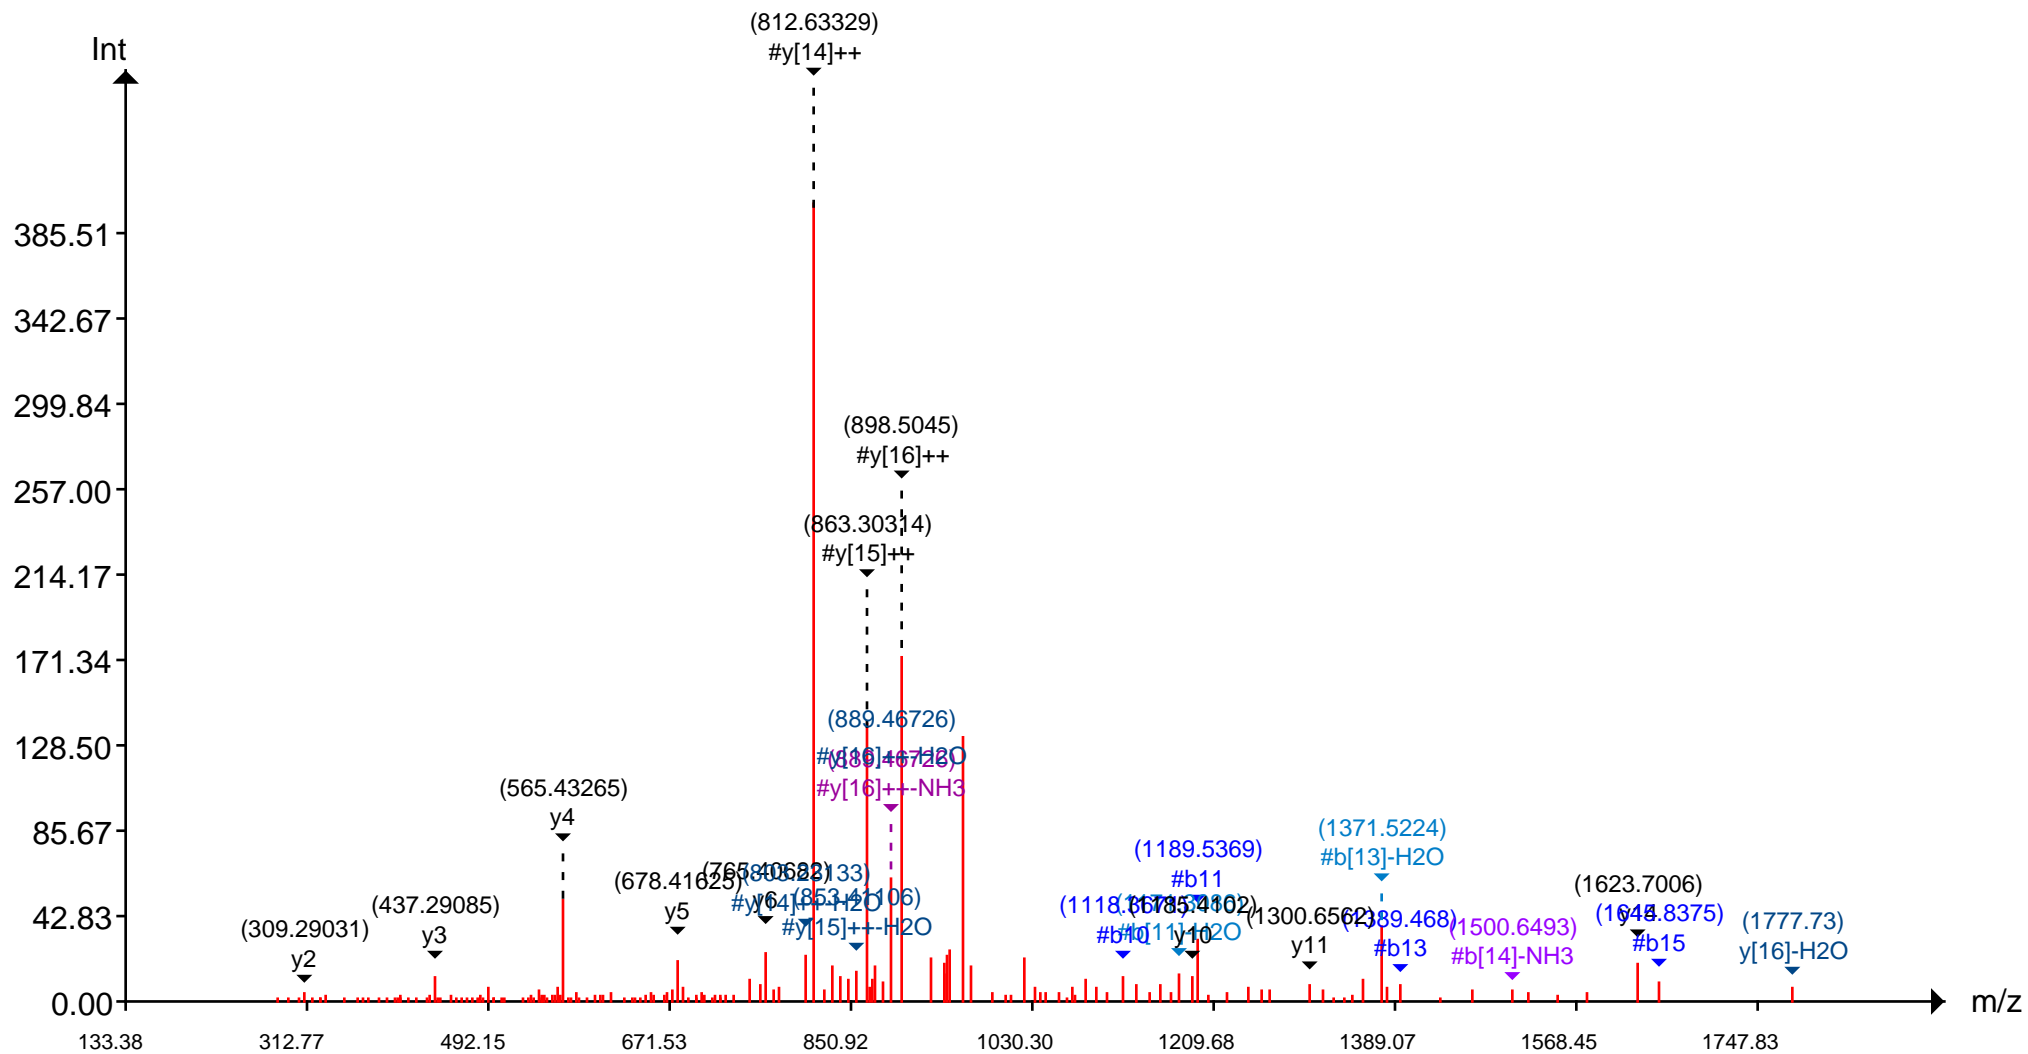

## Info

|                          |                                        |                           |          |
|--------------------------|----------------------------------------|---------------------------|----------|
| <b>Modified Sequence</b> | AcD3-IATPPEDSDM<Mox*>ASLQQQR<C13>-COOH | <b>Ion score</b>          | 49.42    |
| <b>Protein</b>           | Q9DBG5                                 | <b>Confidence level</b>   | 99.00%   |
| <b>Precursor m/z</b>     | 977.4726                               | <b>Identity Threshold</b> | 46.91    |
| <b>Charge</b>            | 2+                                     | <b>Mass error</b>         | 0.002227 |

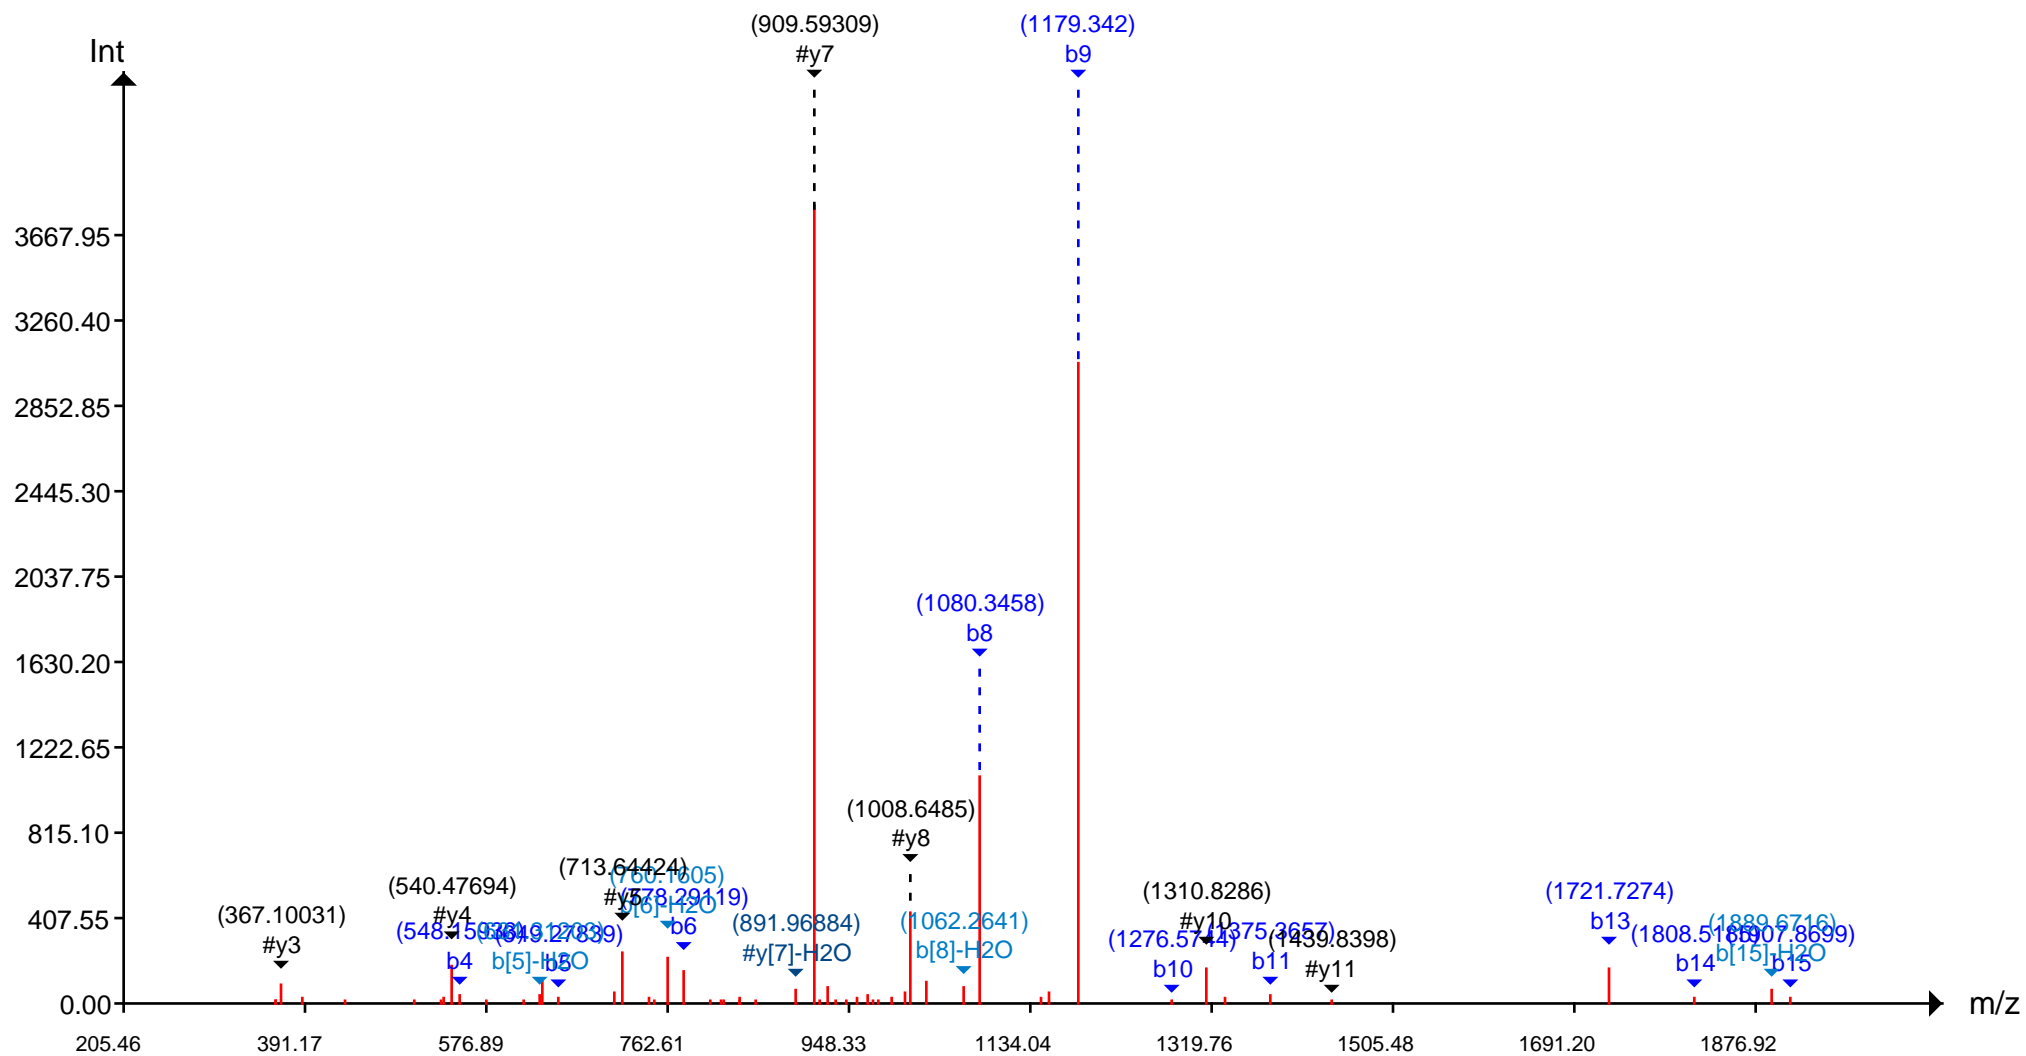

## Info

|                          |                                                         |                           |          |
|--------------------------|---------------------------------------------------------|---------------------------|----------|
| <b>Modified Sequence</b> | AcD3-DEEETEEK<AcD3K*>VPVK<AcD3K*>K<AcD3K*>SVR<C13>-COOH | <b>Ion score</b>          | 68.67    |
| <b>Protein</b>           | Q61937                                                  | <b>Confidence level</b>   | 99.00%   |
| <b>Precursor m/z</b>     | 1044.5642                                               | <b>Identity Threshold</b> | 47.62    |
| <b>Charge</b>            | 2+                                                      | <b>Mass error</b>         | 0.001955 |



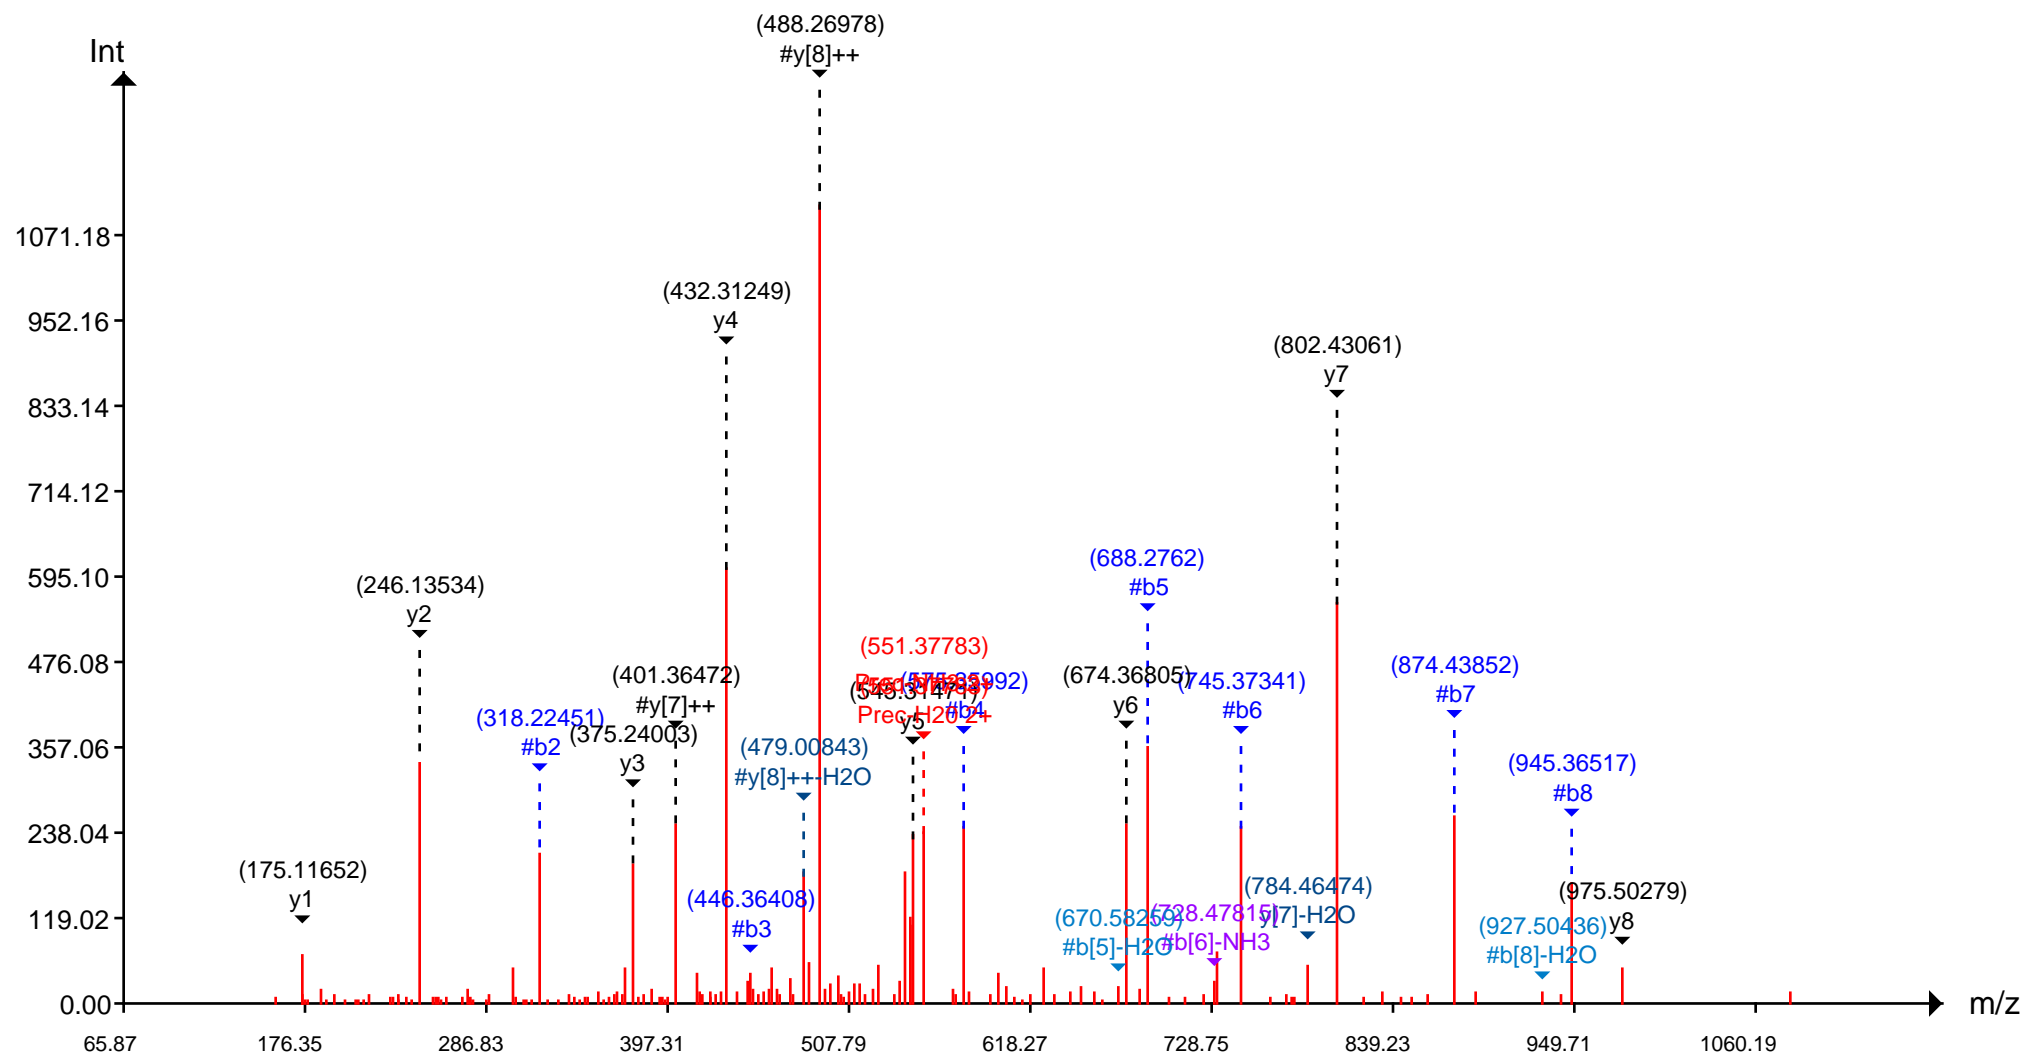

## Info

**Modified Sequence** AcD3-VK<AcD3K\*>QELGEAR-COOH

**Protein** Q03958

**Precursor m/z** 560.31664

**Charge** 2+

**Ion score** 65.74

**Confidence level** 99.00%

**Identity Threshold** 47.35

**Mass error** -0.001496

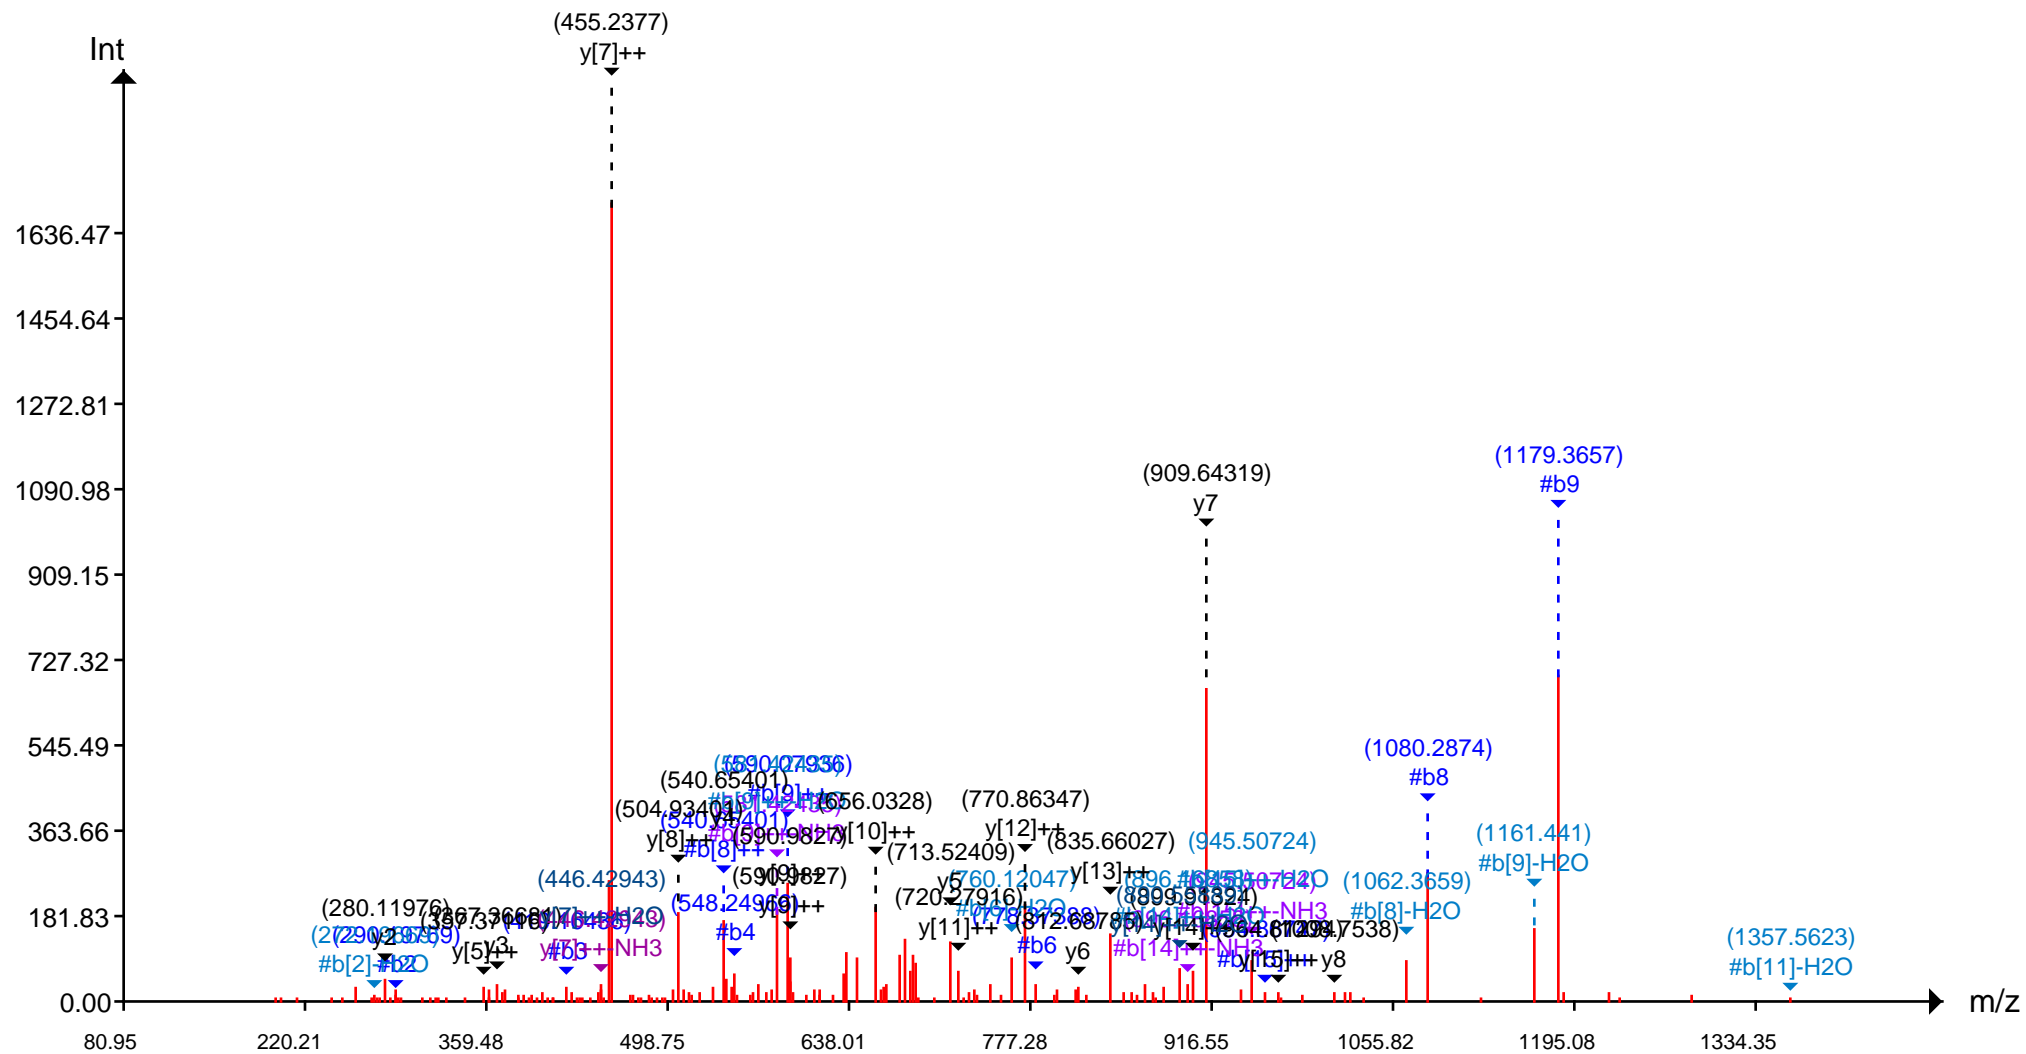

## Info

|                          |                                                         |                           |         |
|--------------------------|---------------------------------------------------------|---------------------------|---------|
| <b>Modified Sequence</b> | AcD3-DEEETEEK<AcD3K*>VPVK<AcD3K*>K<AcD3K*>SVR<C13>-COOH | <b>Ion score</b>          | 62.47   |
| <b>Protein</b>           | Q61937                                                  | <b>Confidence level</b>   | 99.00%  |
| <b>Precursor m/z</b>     | 696.71154                                               | <b>Identity Threshold</b> | 47.64   |
| <b>Charge</b>            | 3+                                                      | <b>Mass error</b>         | 8.99E-4 |

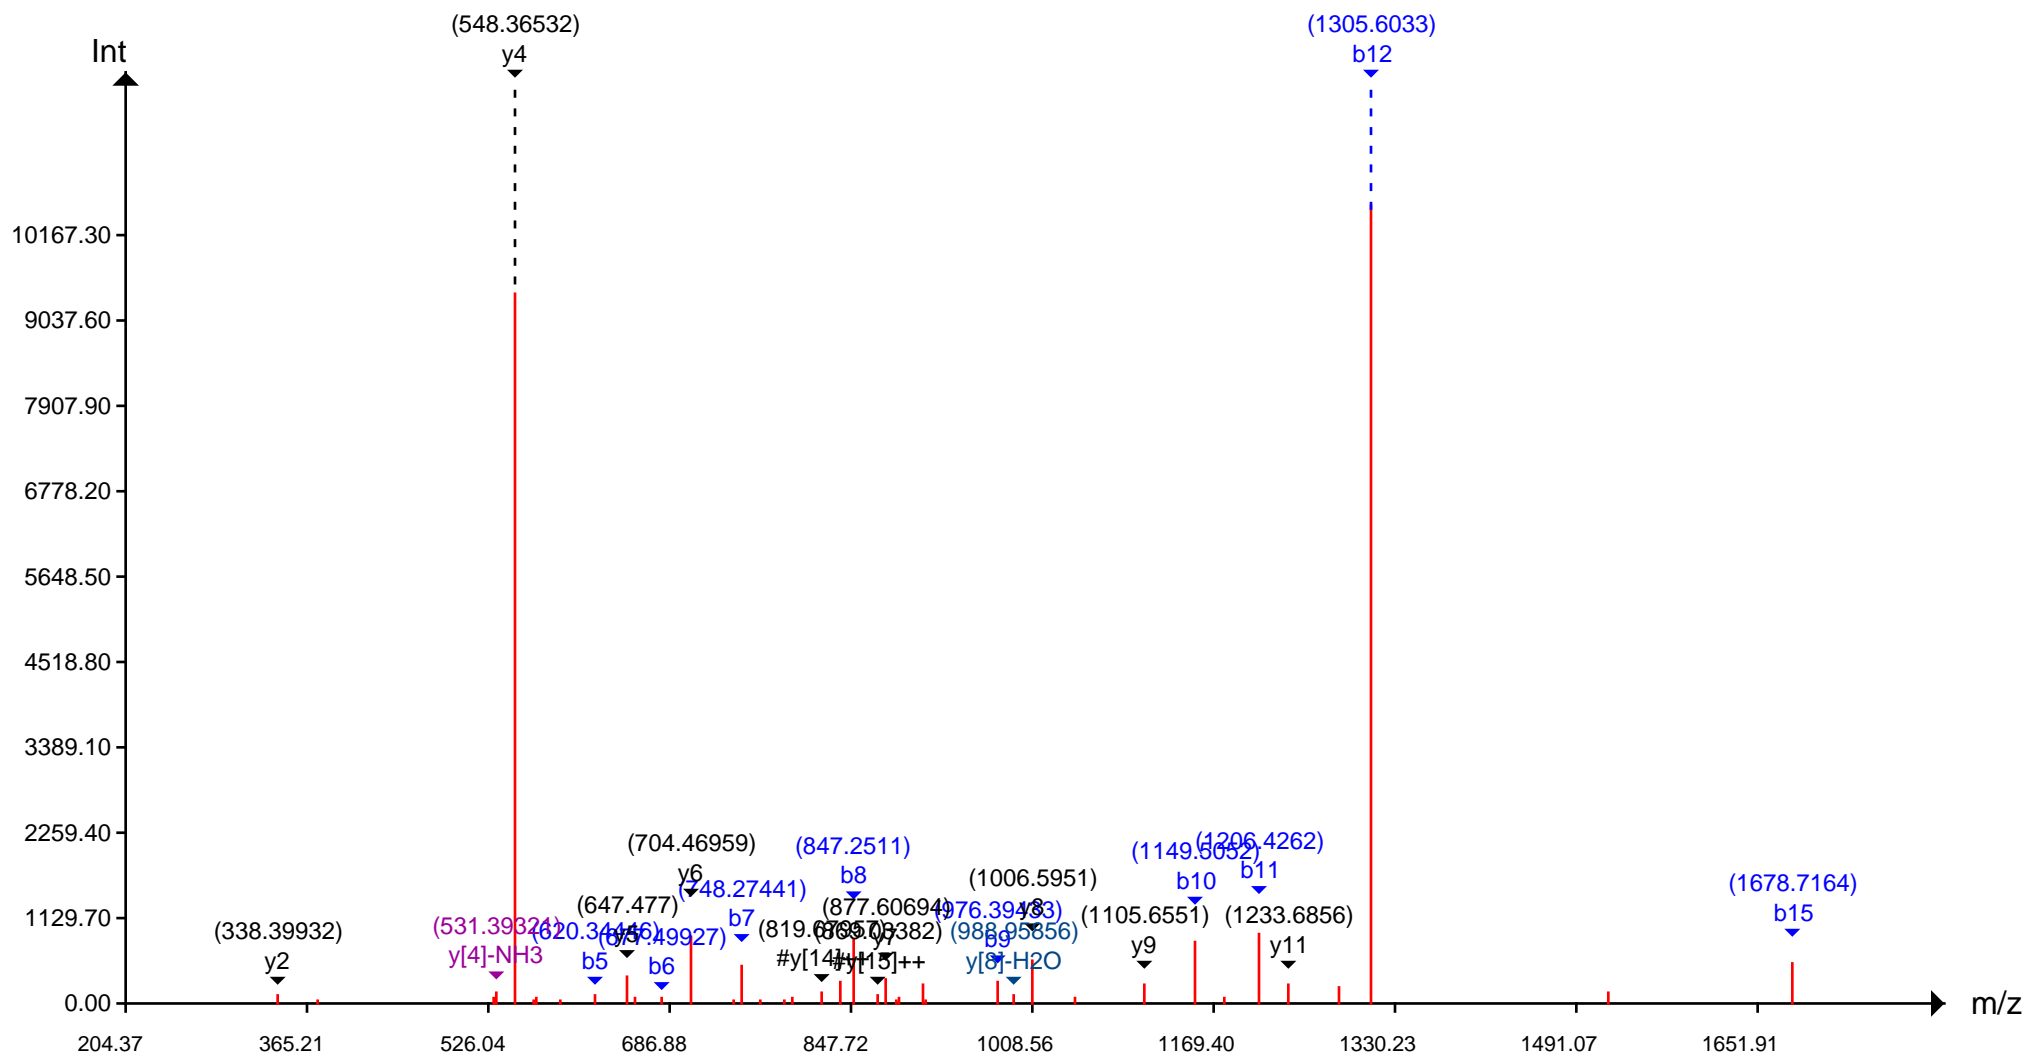

## Info

|                          |                                                  |                           |         |
|--------------------------|--------------------------------------------------|---------------------------|---------|
| <b>Modified Sequence</b> | AcD3-AVC<Cmm*>K<AcD3K*>AGAVEK<AcD3K*>GVPLYR-COOH | <b>Ion score</b>          | 66.99   |
| <b>Protein</b>           | P17182                                           | <b>Confidence level</b>   | 99.00%  |
| <b>Precursor m/z</b>     | 927.01885                                        | <b>Identity Threshold</b> | 46.58   |
| <b>Charge</b>            | 2+                                               | <b>Mass error</b>         | 4.58E-4 |

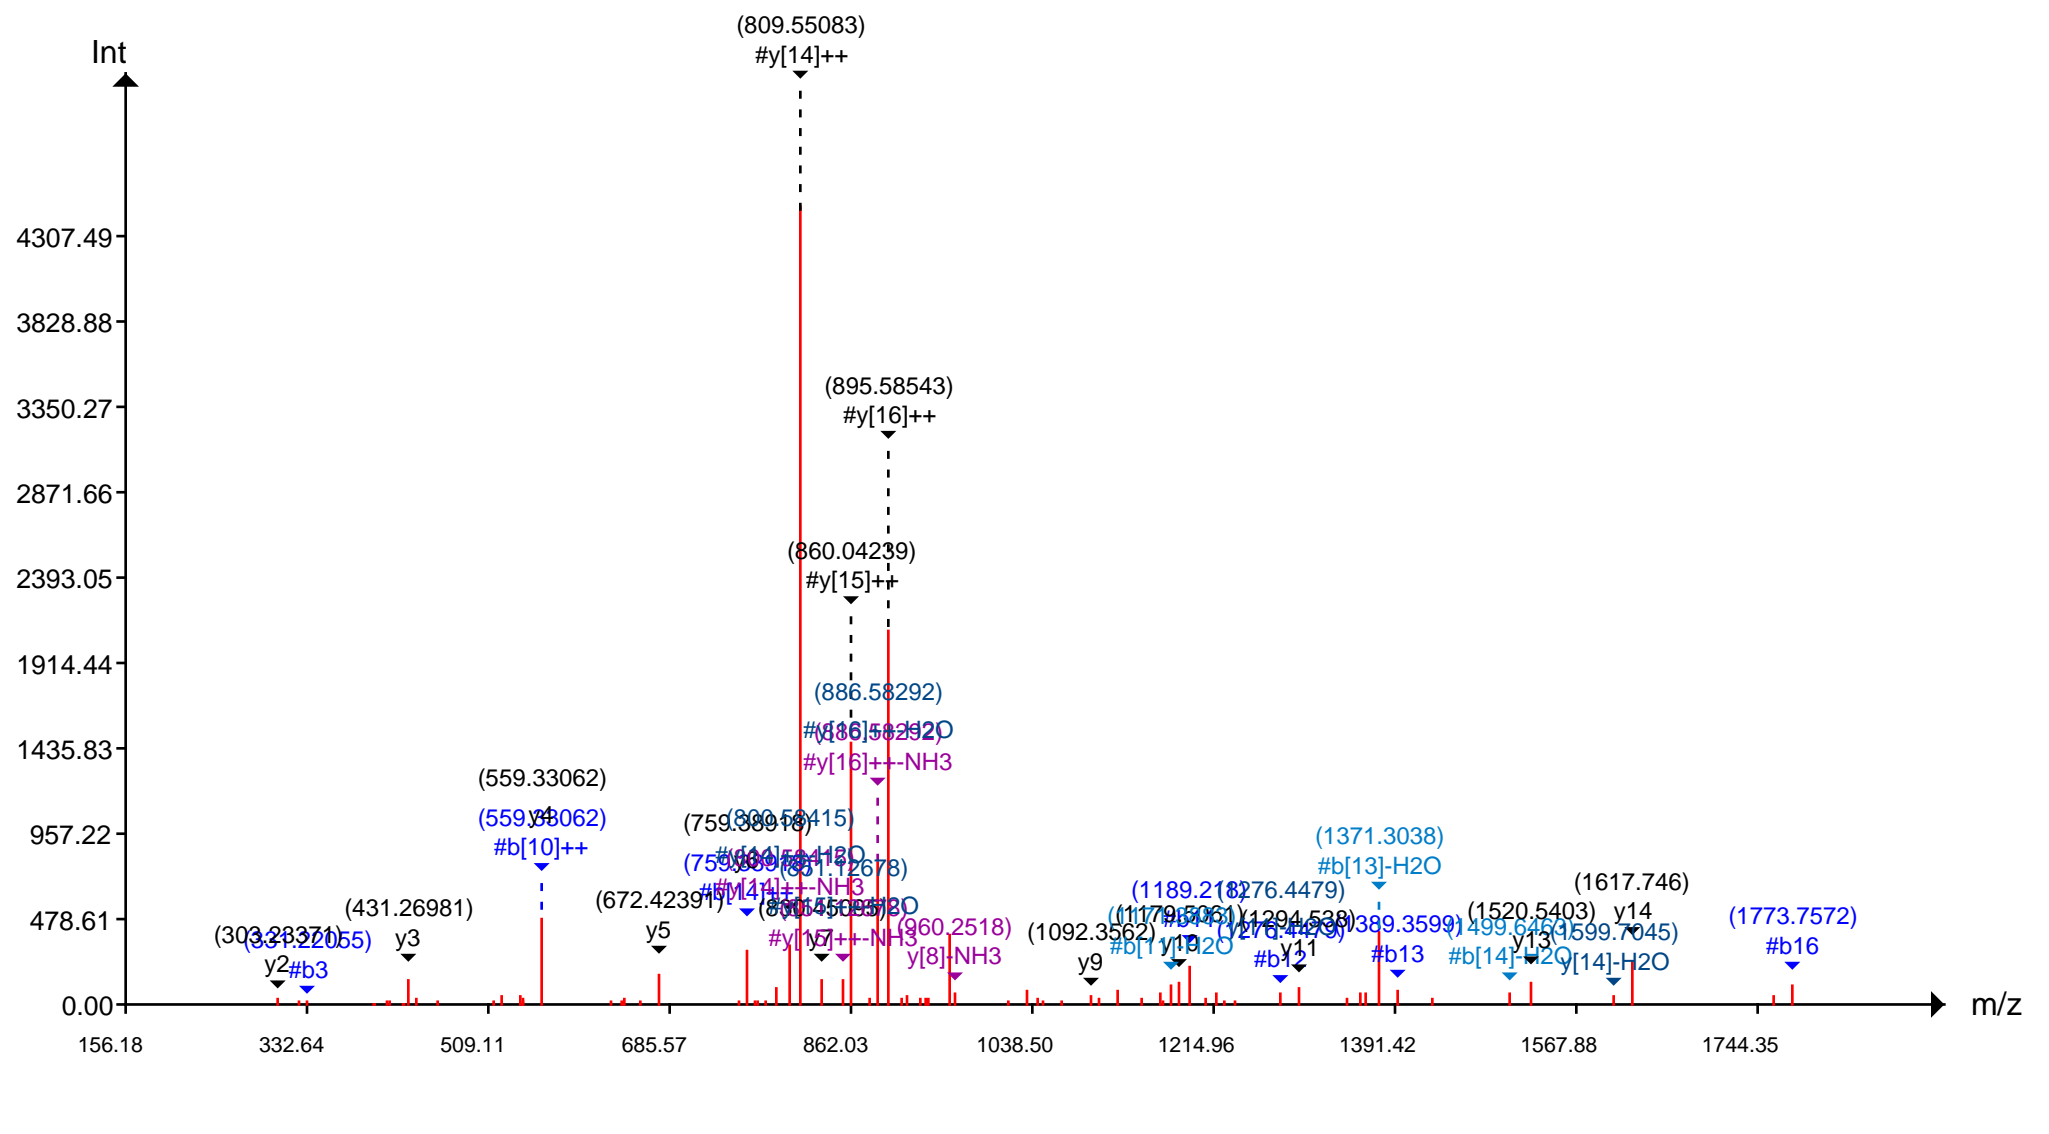

| Info                     |                                   |                           |          |
|--------------------------|-----------------------------------|---------------------------|----------|
| <b>Modified Sequence</b> | AcD3-IATPPEDSDM<Mox*>ASLQQQR-COOH | <b>Ion score</b>          | 82.04    |
| <b>Protein</b>           | Q9DBG5                            | <b>Confidence level</b>   | 99.00%   |
| <b>Precursor m/z</b>     | 974.46256                         | <b>Identity Threshold</b> | 46.09    |
| <b>Charge</b>            | 2+                                | <b>Mass error</b>         | 0.002289 |

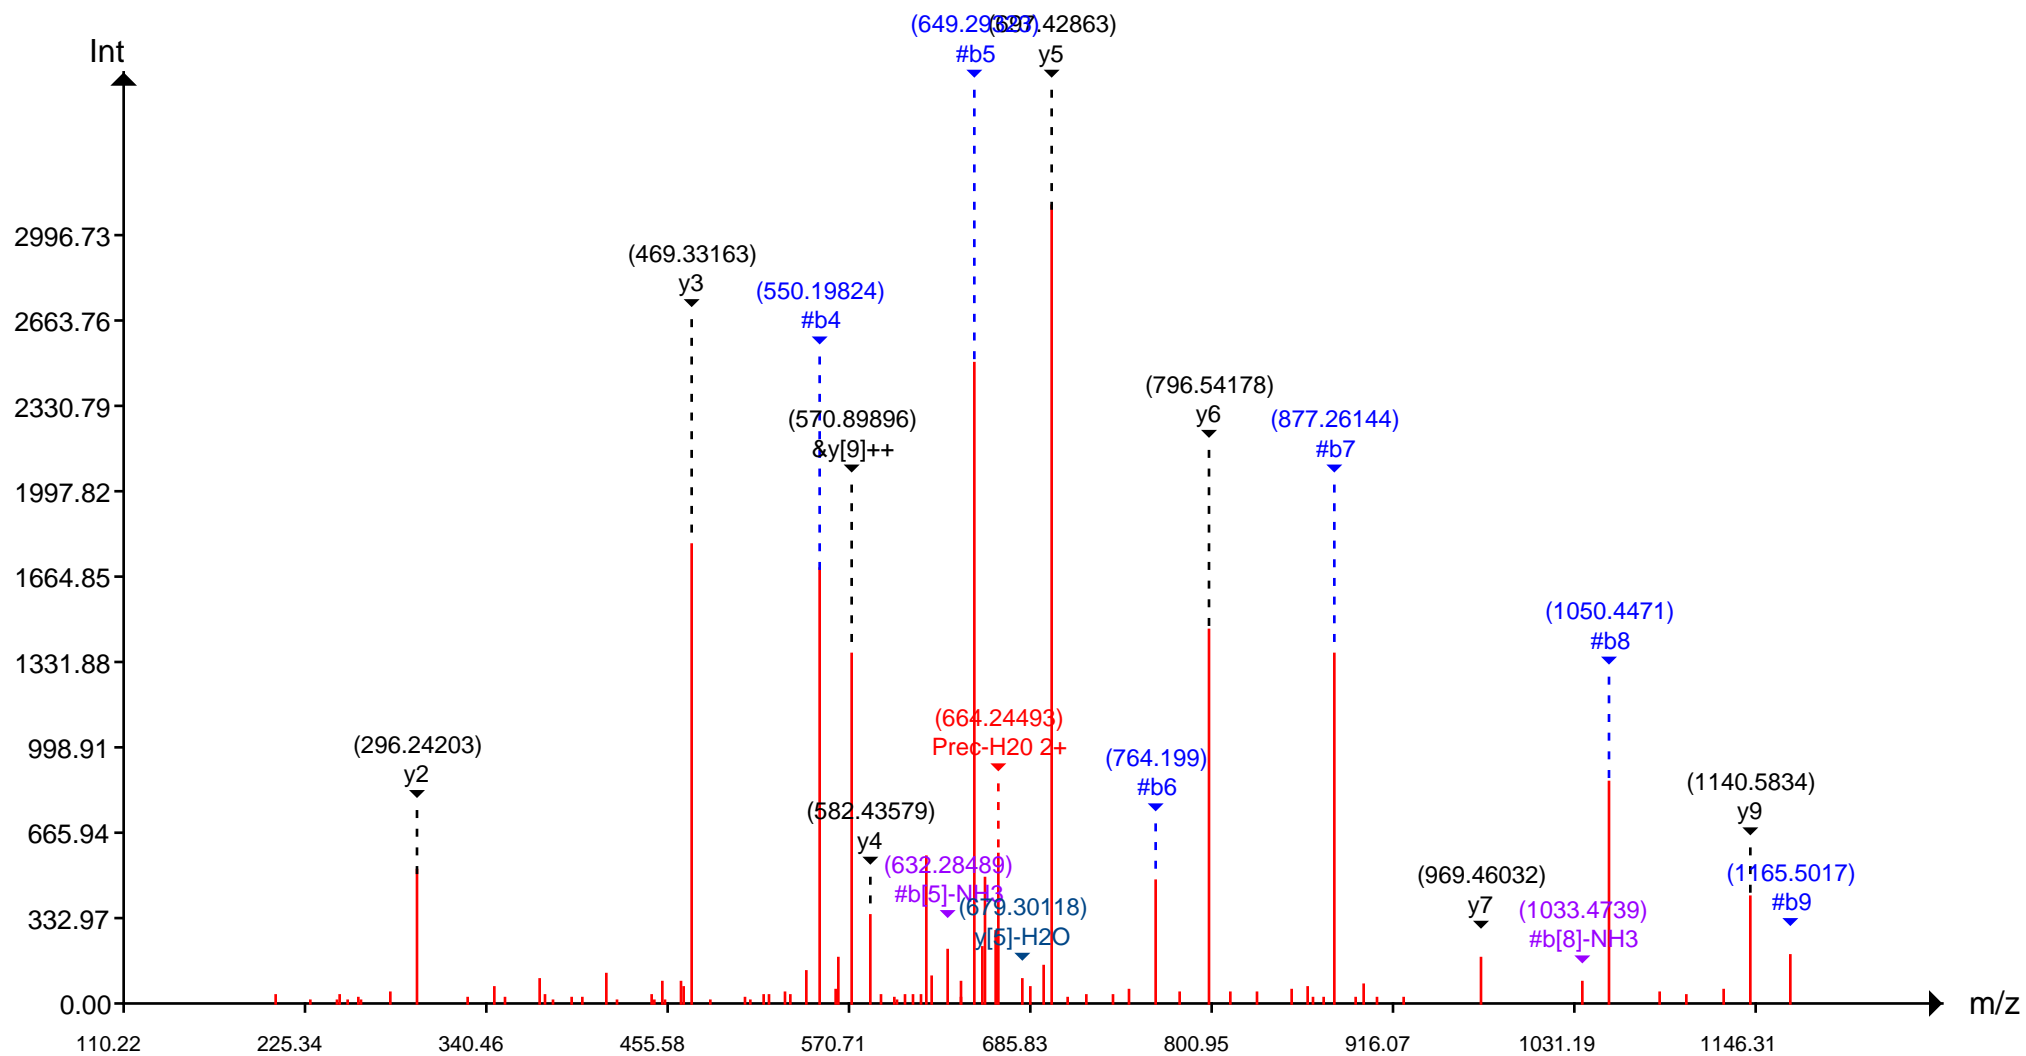

## Info

|                          |                                                 |                           |         |
|--------------------------|-------------------------------------------------|---------------------------|---------|
| <b>Modified Sequence</b> | AcD3-C<Cmm*>GNK<AcD3K*>VDIK<AcD3K*>DR<C13>-COOH | <b>Ion score</b>          | 59.64   |
| <b>Protein</b>           | P62827                                          | <b>Confidence level</b>   | 99.00%  |
| <b>Precursor m/z</b>     | 673.36311                                       | <b>Identity Threshold</b> | 47.87   |
| <b>Charge</b>            | 2+                                              | <b>Mass error</b>         | 3.34E-4 |

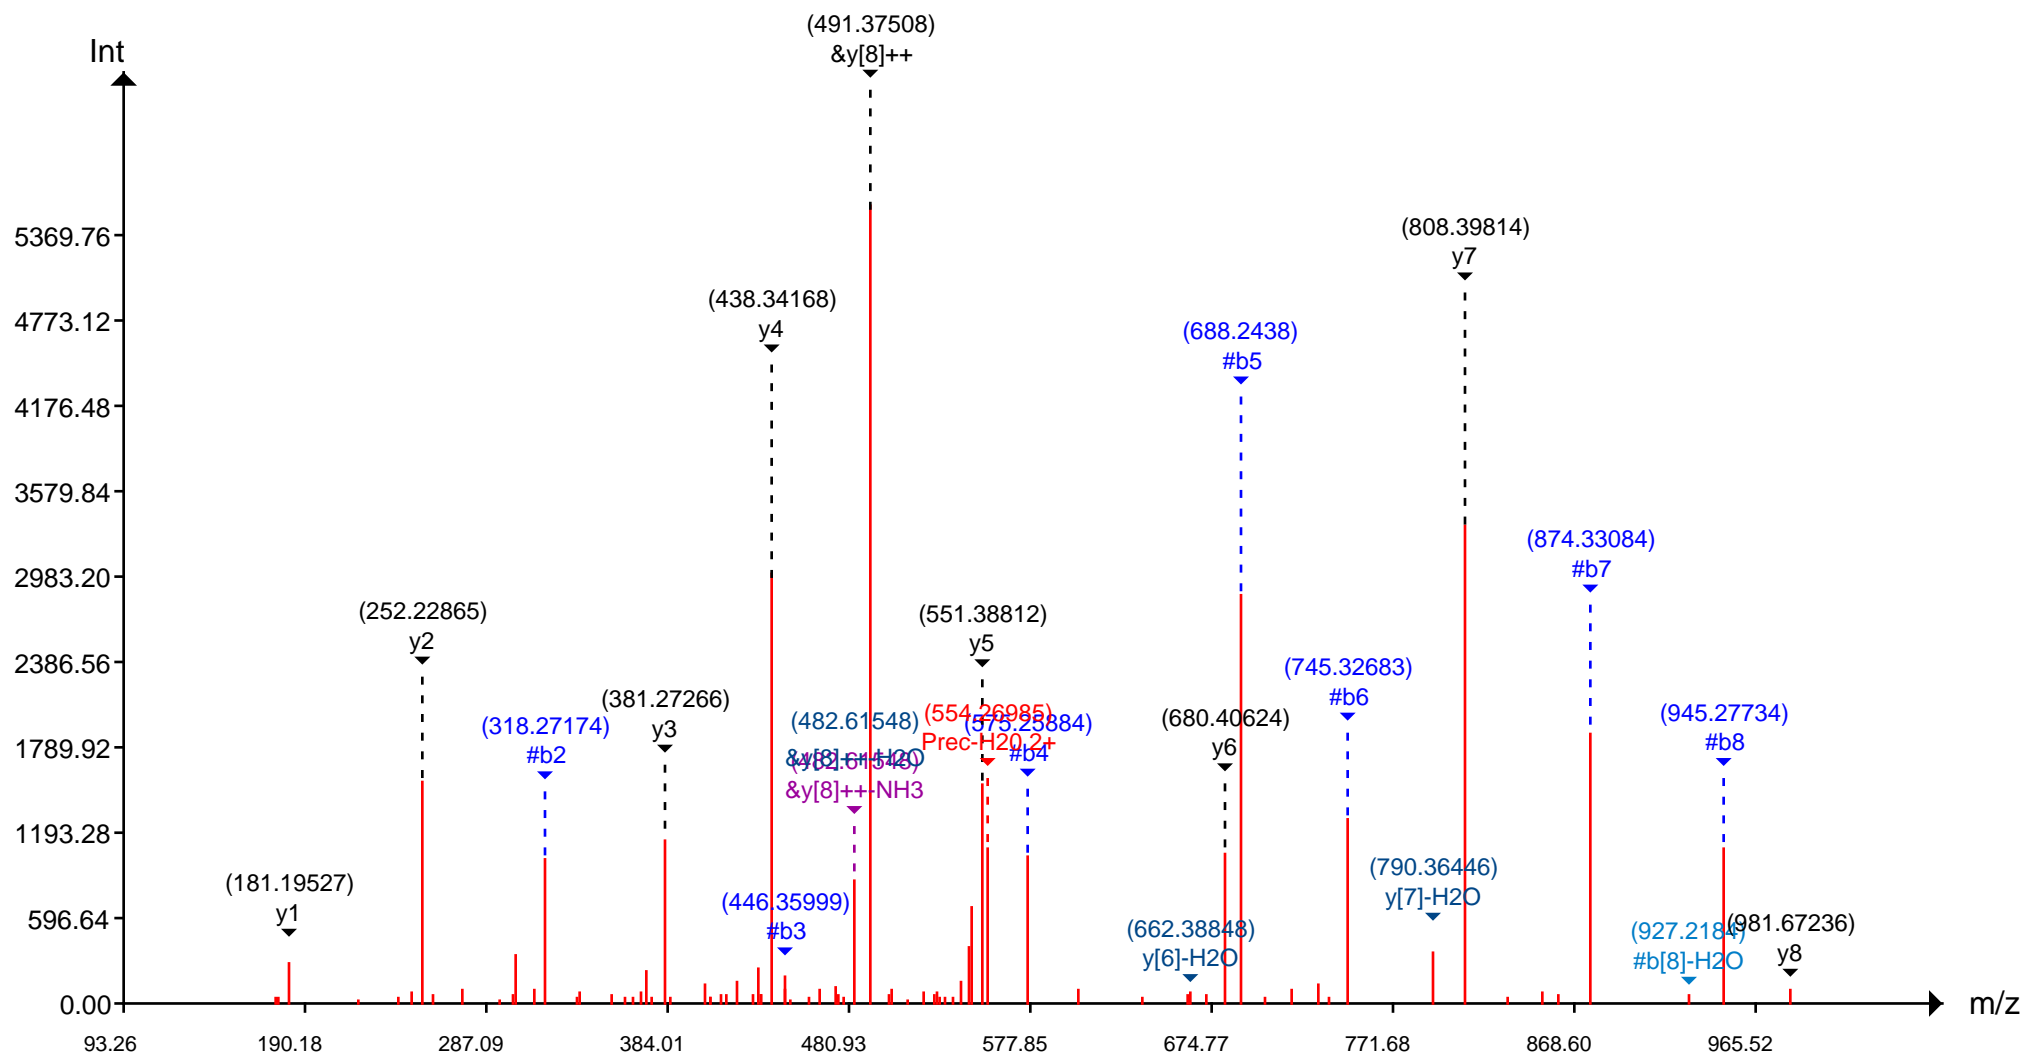

## Info

**Modified Sequence** AcD3-VK<AcD3K\*>QELGEAR<C13>-COOH

**Ion score** 65.85

**Protein** Q03958

**Confidence level** 99.00%

**Precursor m/z** 563.32623

**Identity Threshold** 46.61

**Charge** 2+

**Mass error** -0.002458

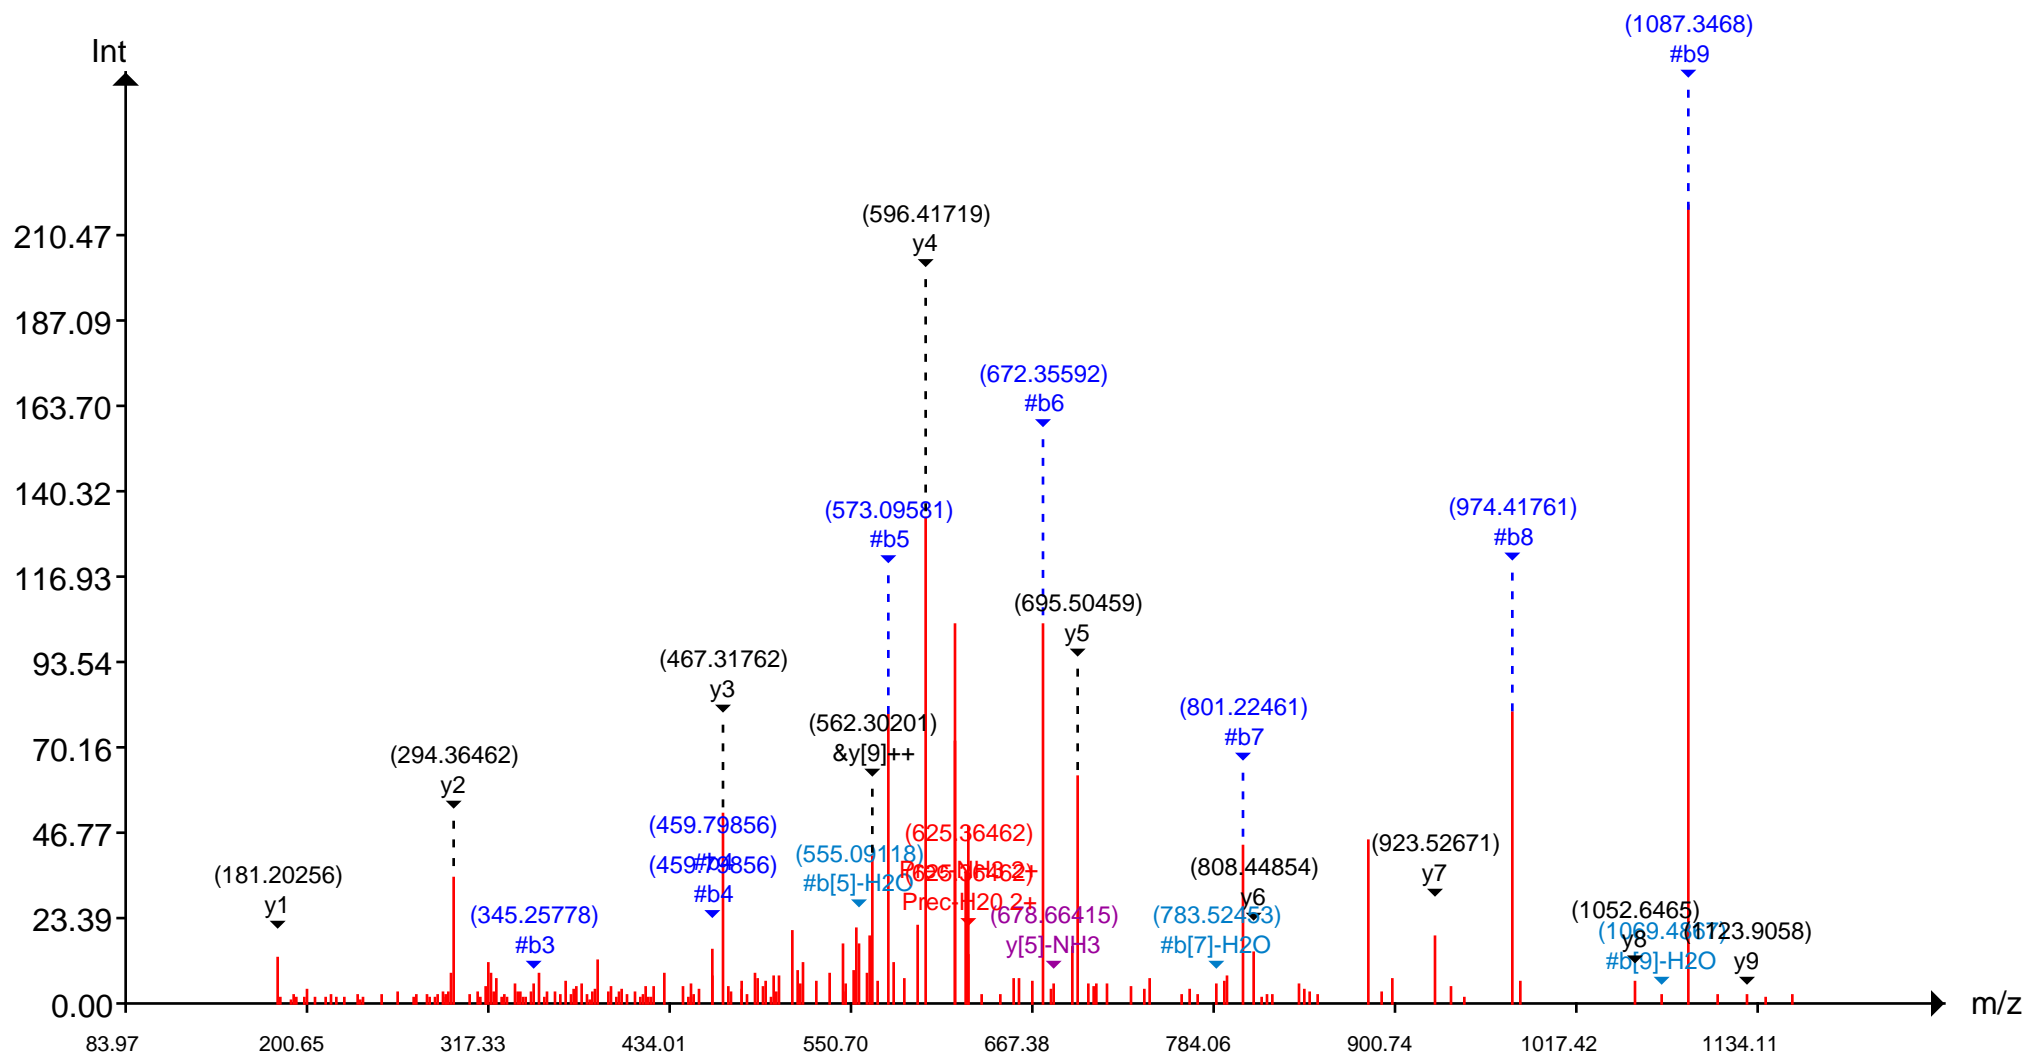

## Info

|                          |                                   |                           |          |
|--------------------------|-----------------------------------|---------------------------|----------|
| <b>Modified Sequence</b> | AcD3-VAEDLVEK<AcD3K*>LR<C13>-COOH | <b>Ion score</b>          | 69.14    |
| <b>Protein</b>           | Q9CQI3                            | <b>Confidence level</b>   | 99.00%   |
| <b>Precursor m/z</b>     | 634.37766                         | <b>Identity Threshold</b> | 45.28    |
| <b>Charge</b>            | 2+                                | <b>Mass error</b>         | 0.001022 |

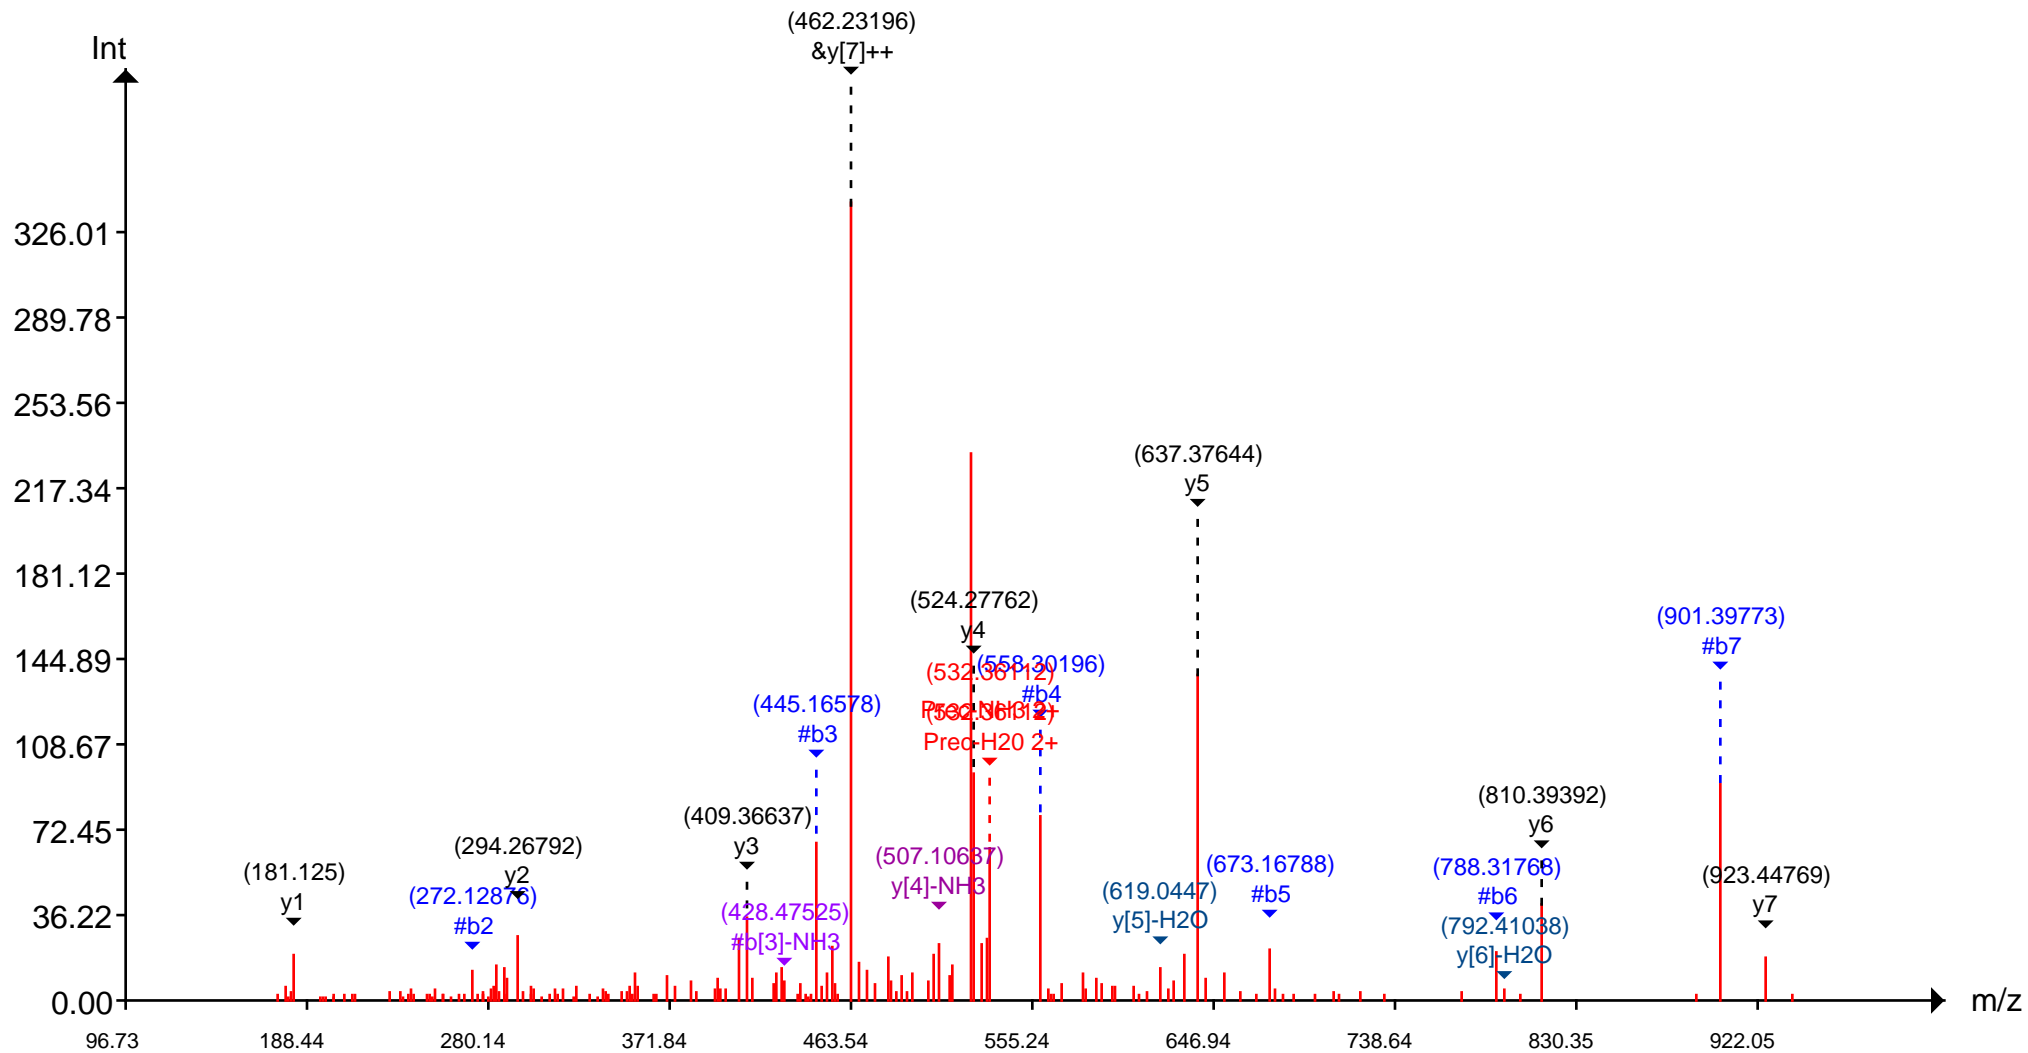

## Info

|                          |                                 |                           |          |
|--------------------------|---------------------------------|---------------------------|----------|
| <b>Modified Sequence</b> | AcD3-ILK<AcD3K*>IDDIR<C13>-COOH | <b>Ion score</b>          | 54.89    |
| <b>Protein</b>           | P80316                          | <b>Confidence level</b>   | 99.00%   |
| <b>Precursor m/z</b>     | 541.34493                       | <b>Identity Threshold</b> | 40.84    |
| <b>Charge</b>            | 2+                              | <b>Mass error</b>         | -3.82E-4 |



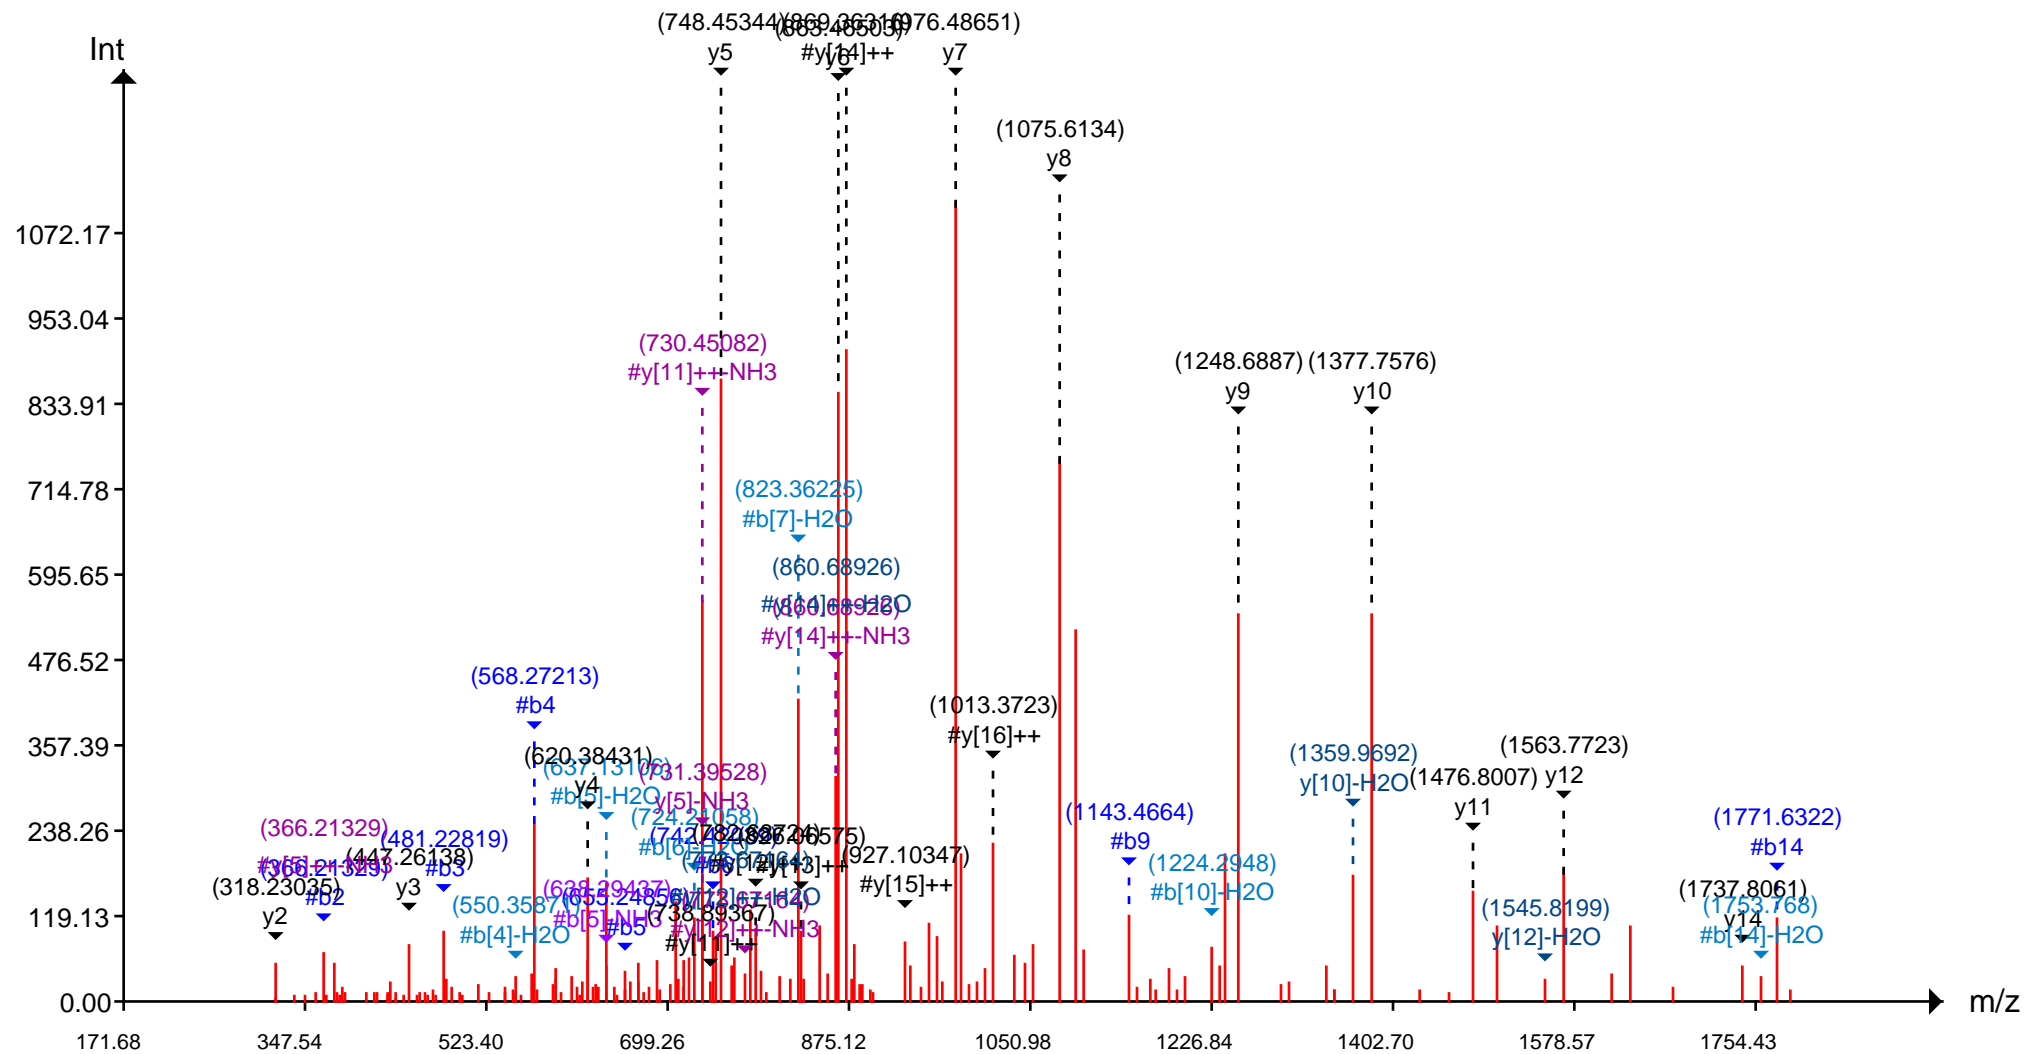

## Info

|                          |                                                          |                           |          |
|--------------------------|----------------------------------------------------------|---------------------------|----------|
| <b>Modified Sequence</b> | AcD3-FK<AcD3K*>DSSSVEK<AcD3K*>VLDQK<AcD3K*>EHR<C13>-COOH | <b>Ion score</b>          | 84.77    |
| <b>Protein</b>           | Q99020                                                   | <b>Confidence level</b>   | 99.00%   |
| <b>Precursor m/z</b>     | 1109.5962                                                | <b>Identity Threshold</b> | 47.59    |
| <b>Charge</b>            | 2+                                                       | <b>Mass error</b>         | 0.001609 |

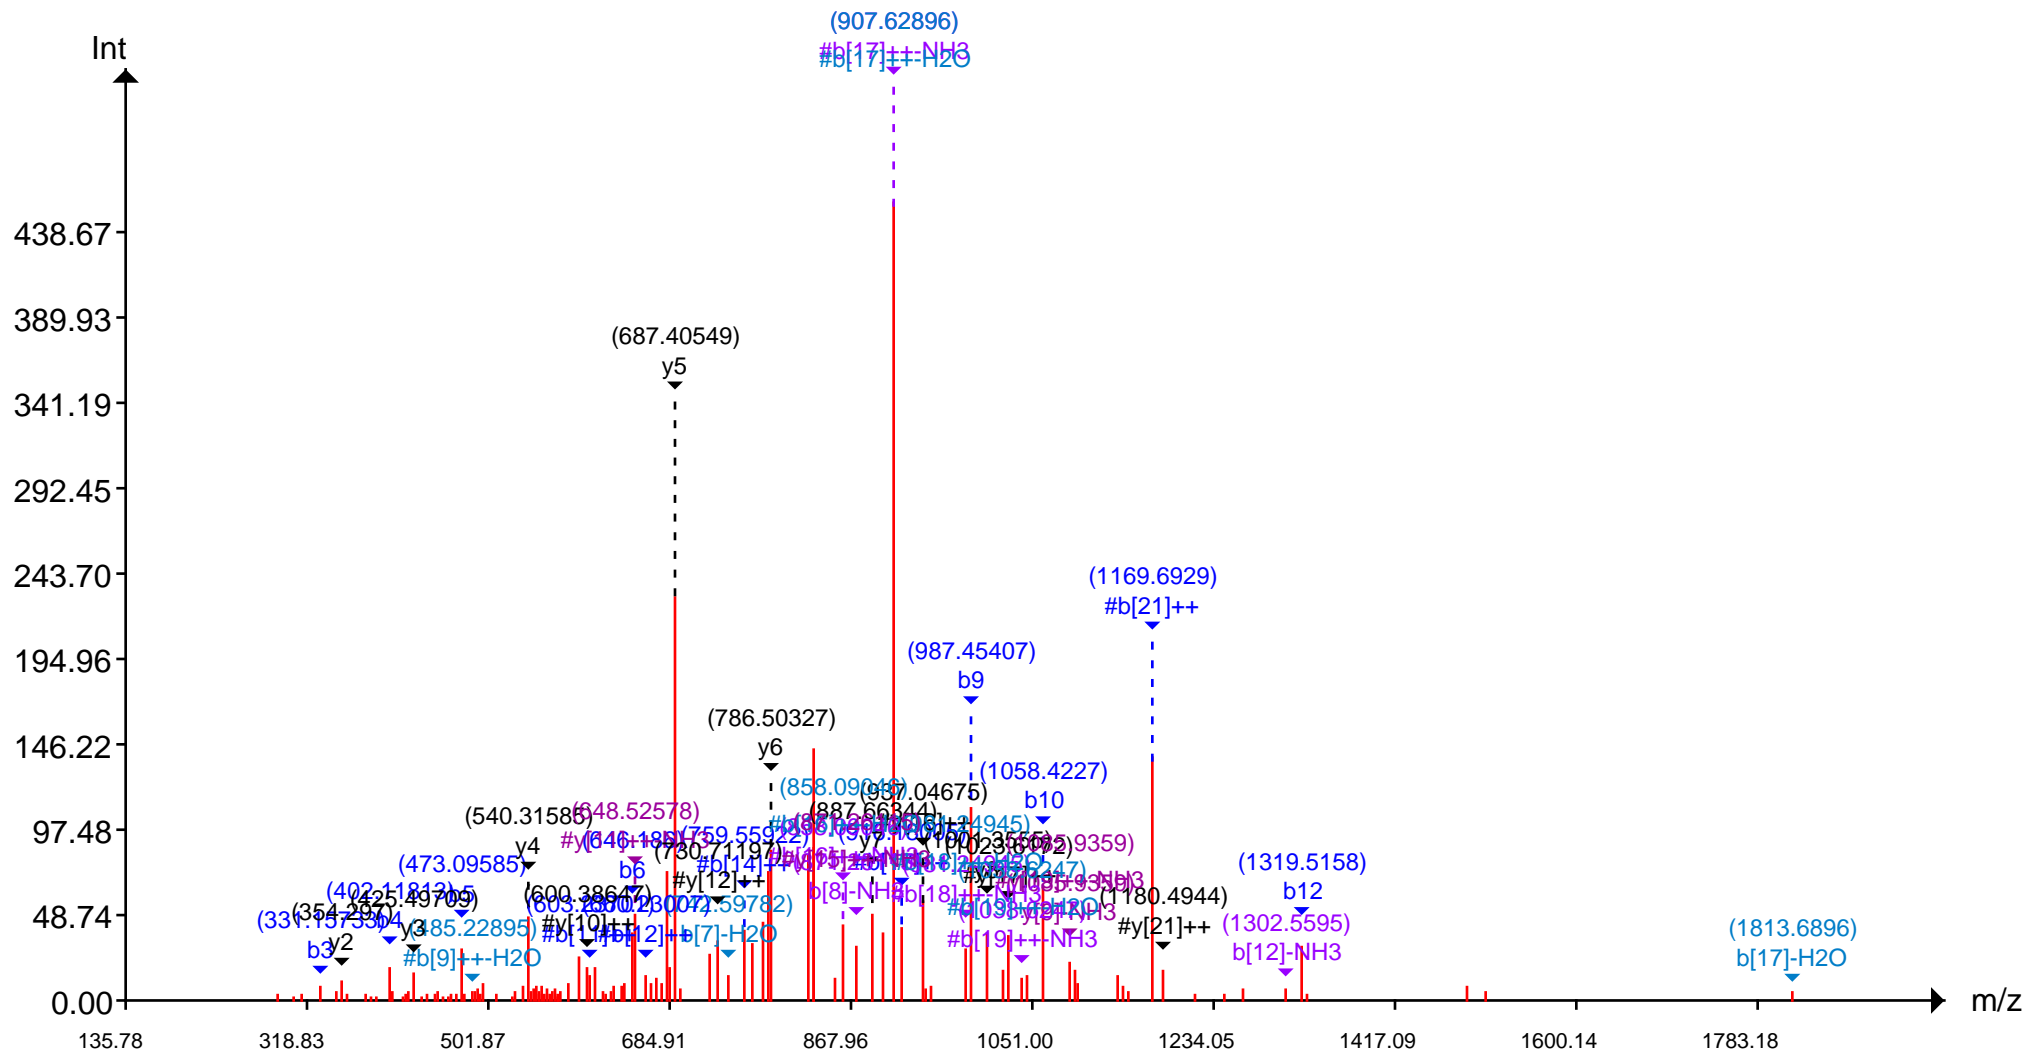

## Info

|                          |                                                              |                           |          |
|--------------------------|--------------------------------------------------------------|---------------------------|----------|
| <b>Modified Sequence</b> | AcD3-IGDAAK<AcD3K*>NQVAM<Mox*>NPTNTVFDAAK<AcD3K*>R<C13>-COOH | <b>Ion score</b>          | 54.47    |
| <b>Protein</b>           | P63017                                                       | <b>Confidence level</b>   | 99.00%   |
| <b>Precursor m/z</b>     | 840.44023                                                    | <b>Identity Threshold</b> | 47.86    |
| <b>Charge</b>            | 3+                                                           | <b>Mass error</b>         | 1.004947 |

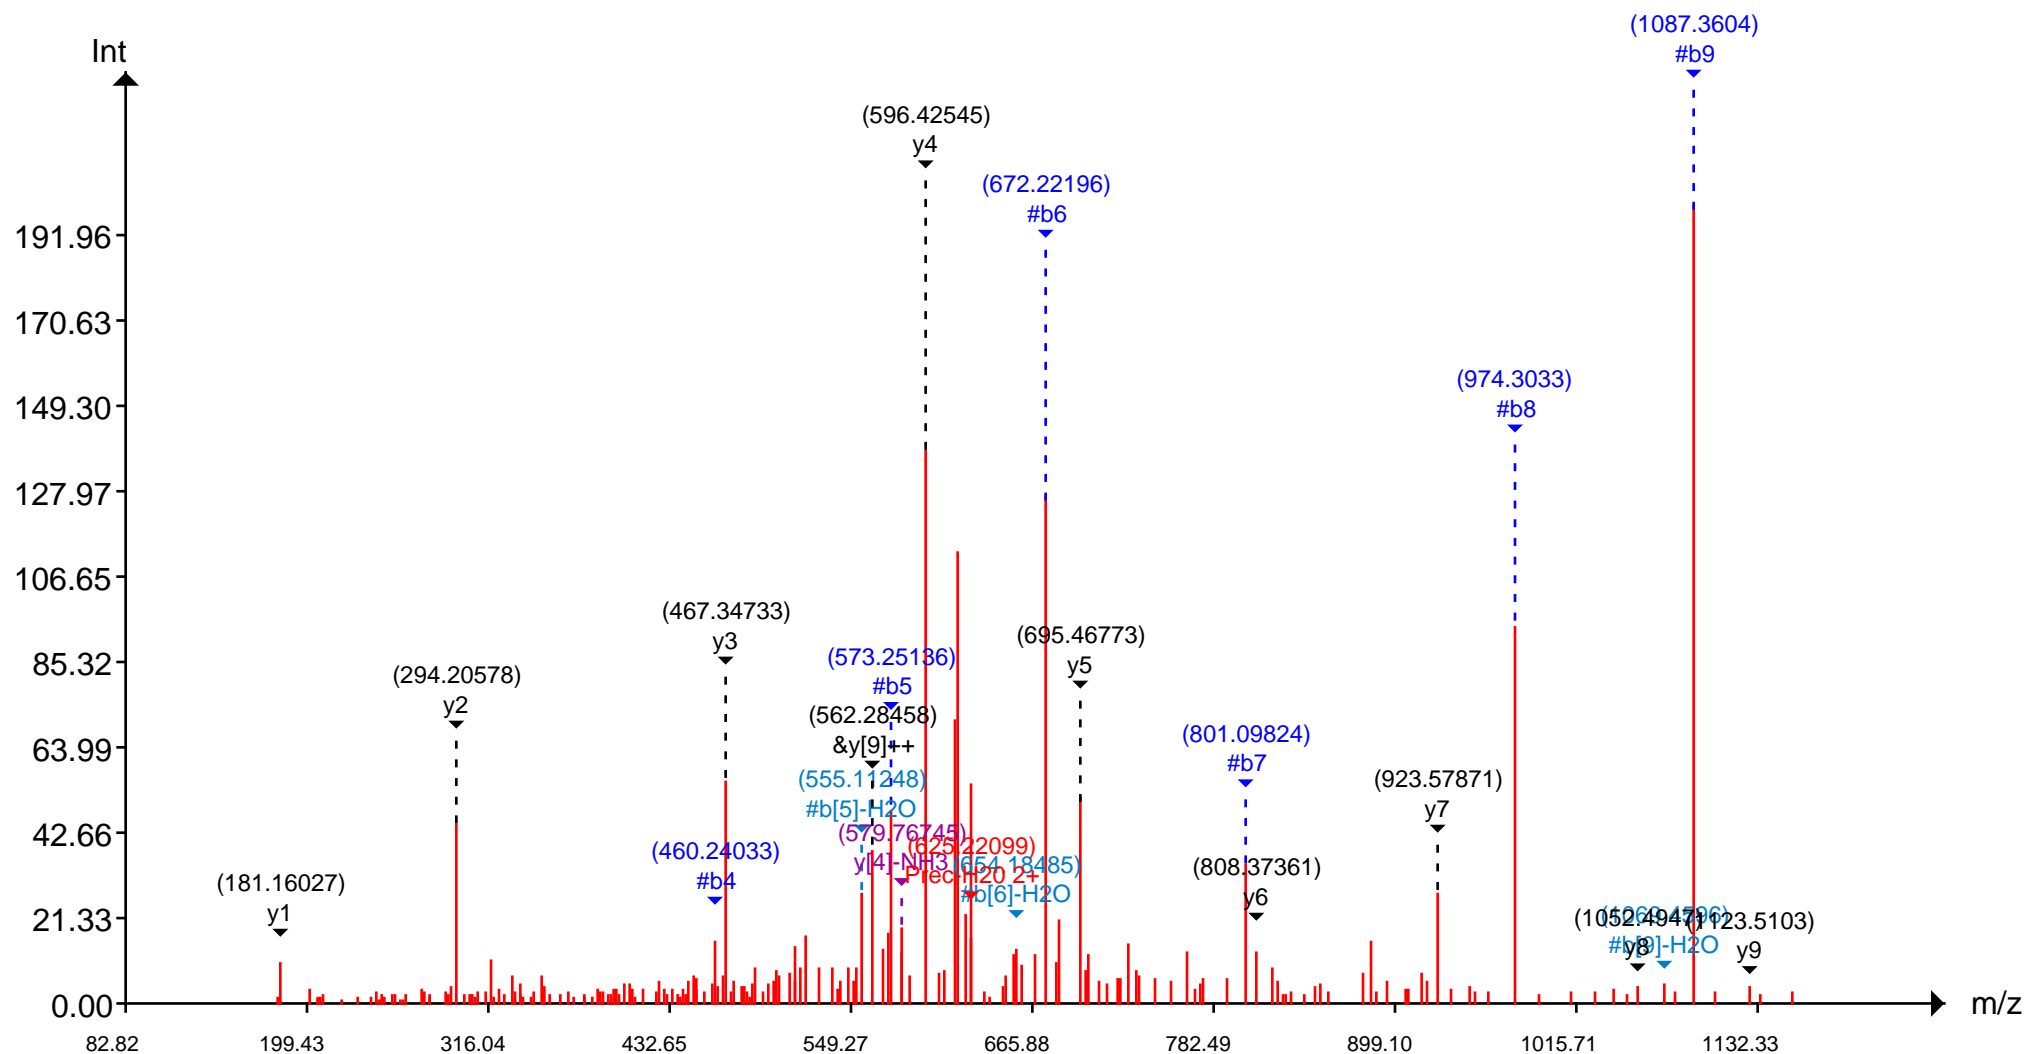

## Info

**Modified Sequence** AcD3-VAEDLVEK<AcD3K\*>LR<C13>-COOH

**Ion score** 84.36

**Protein** Q9CQI3

**Confidence level** 99.00%

**Precursor m/z** 634.37741

**Identity Threshold** 45.45

**Charge** 2+

**Mass error** 5.22E-4

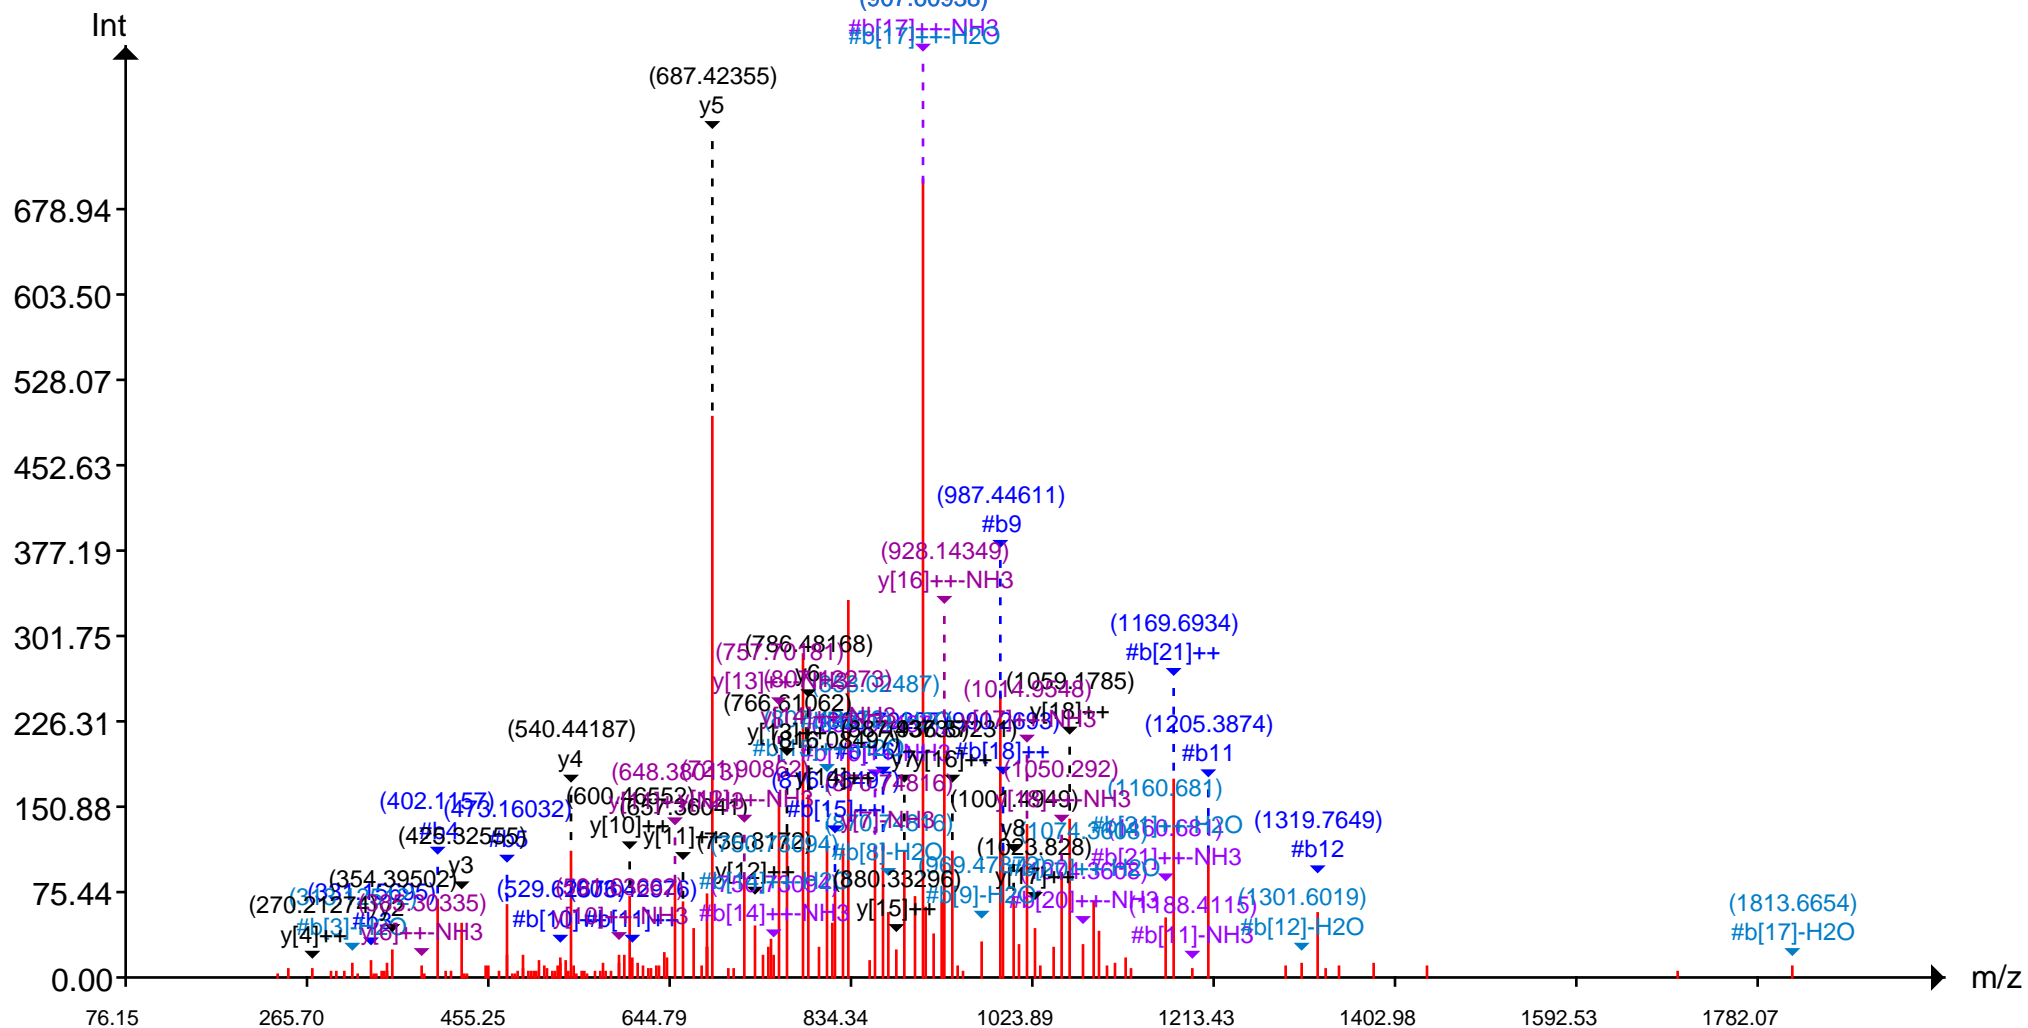

## Info

|                          |                                                              |                           |          |
|--------------------------|--------------------------------------------------------------|---------------------------|----------|
| <b>Modified Sequence</b> | AcD3-IGDAAK<AcD3K*>NQVAM<Mox*>NPTNTVFDAAK<AcD3K*>R<C13>-COOH | <b>Ion score</b>          | 54.75    |
| <b>Protein</b>           | P63017                                                       | <b>Confidence level</b>   | 99.00%   |
| <b>Precursor m/z</b>     | 840.10612                                                    | <b>Identity Threshold</b> | 47.88    |
| <b>Charge</b>            | 3+                                                           | <b>Mass error</b>         | 0.002617 |

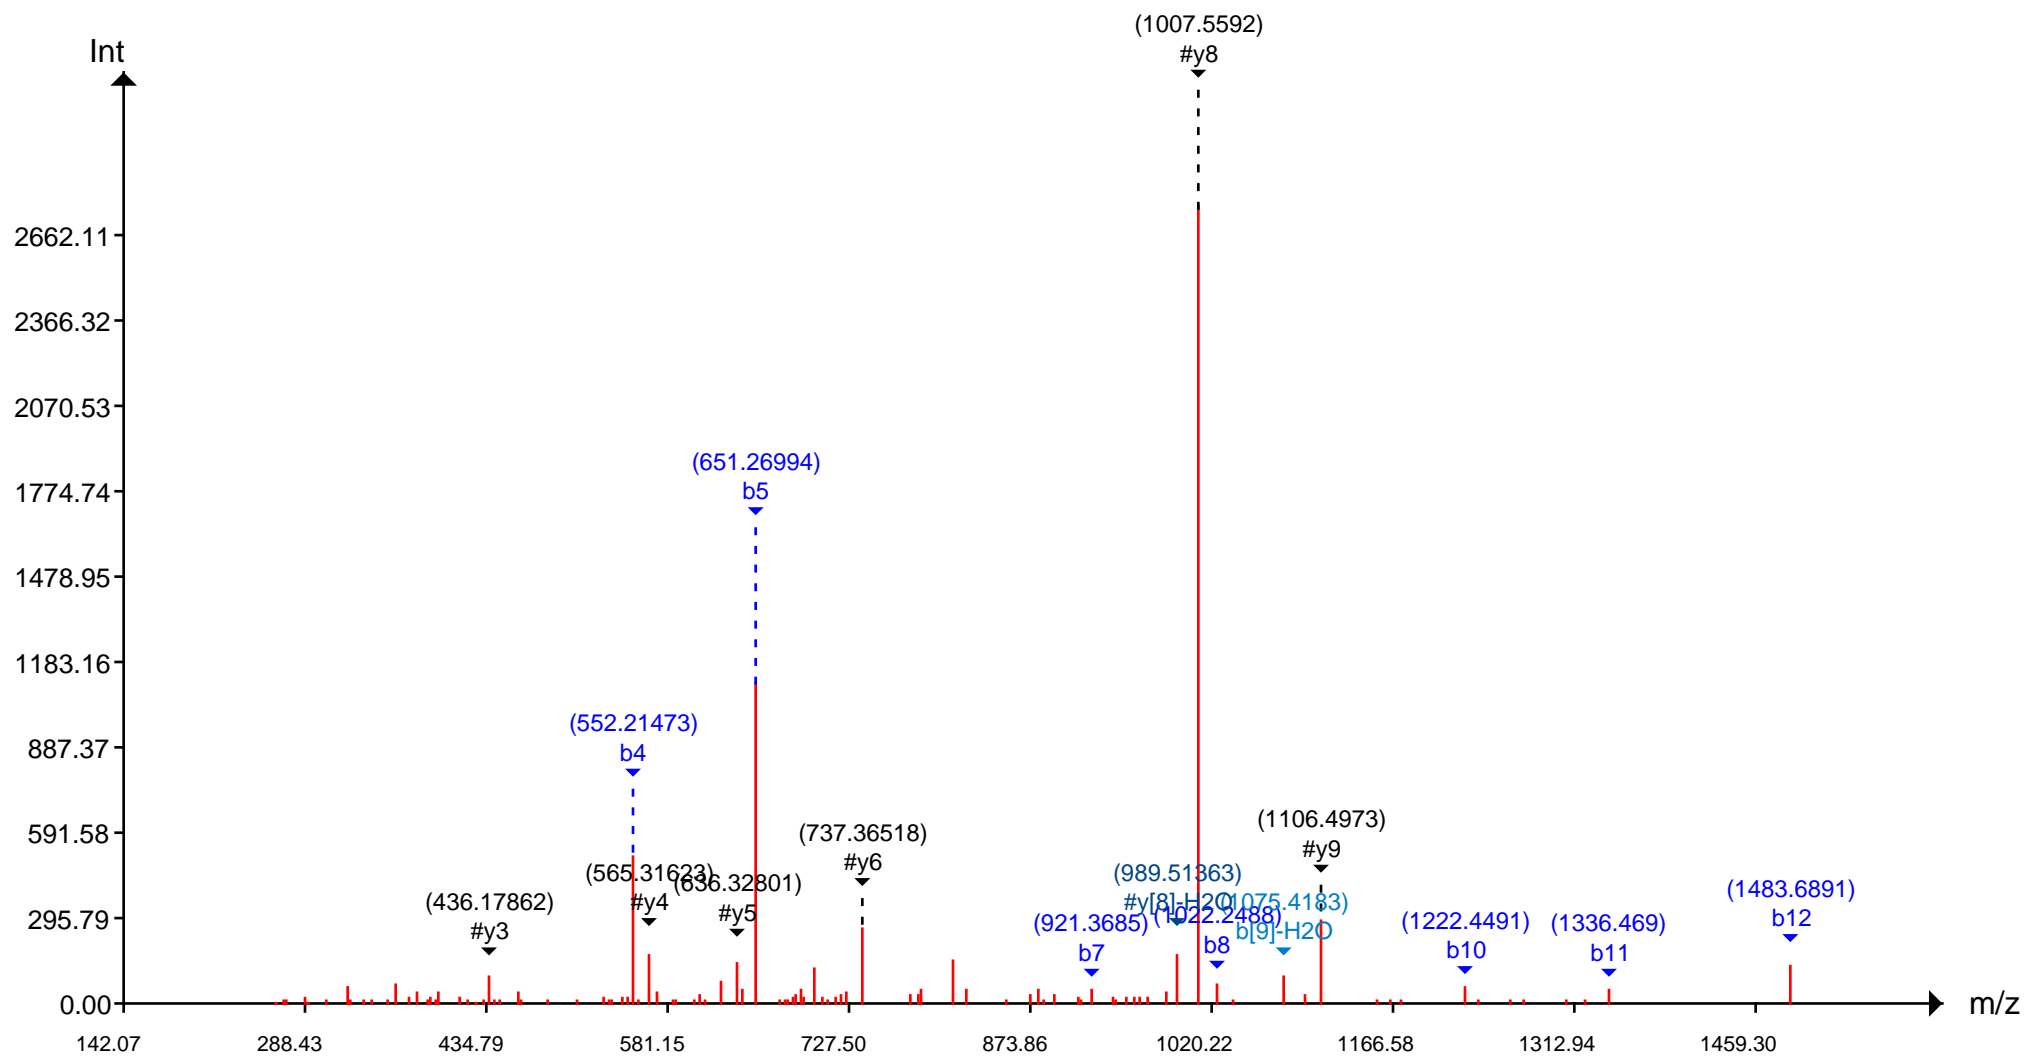

## Info

|                          |                                         |                           |          |
|--------------------------|-----------------------------------------|---------------------------|----------|
| <b>Modified Sequence</b> | AcD3-FADK<AcD3K*>VPK<AcD3K*>TAENFR-COOH | <b>Ion score</b>          | 53.51    |
| <b>Protein</b>           | P17742                                  | <b>Confidence level</b>   | 99.00%   |
| <b>Precursor m/z</b>     | 829.44892                               | <b>Identity Threshold</b> | 47.81    |
| <b>Charge</b>            | 2+                                      | <b>Mass error</b>         | 0.001132 |

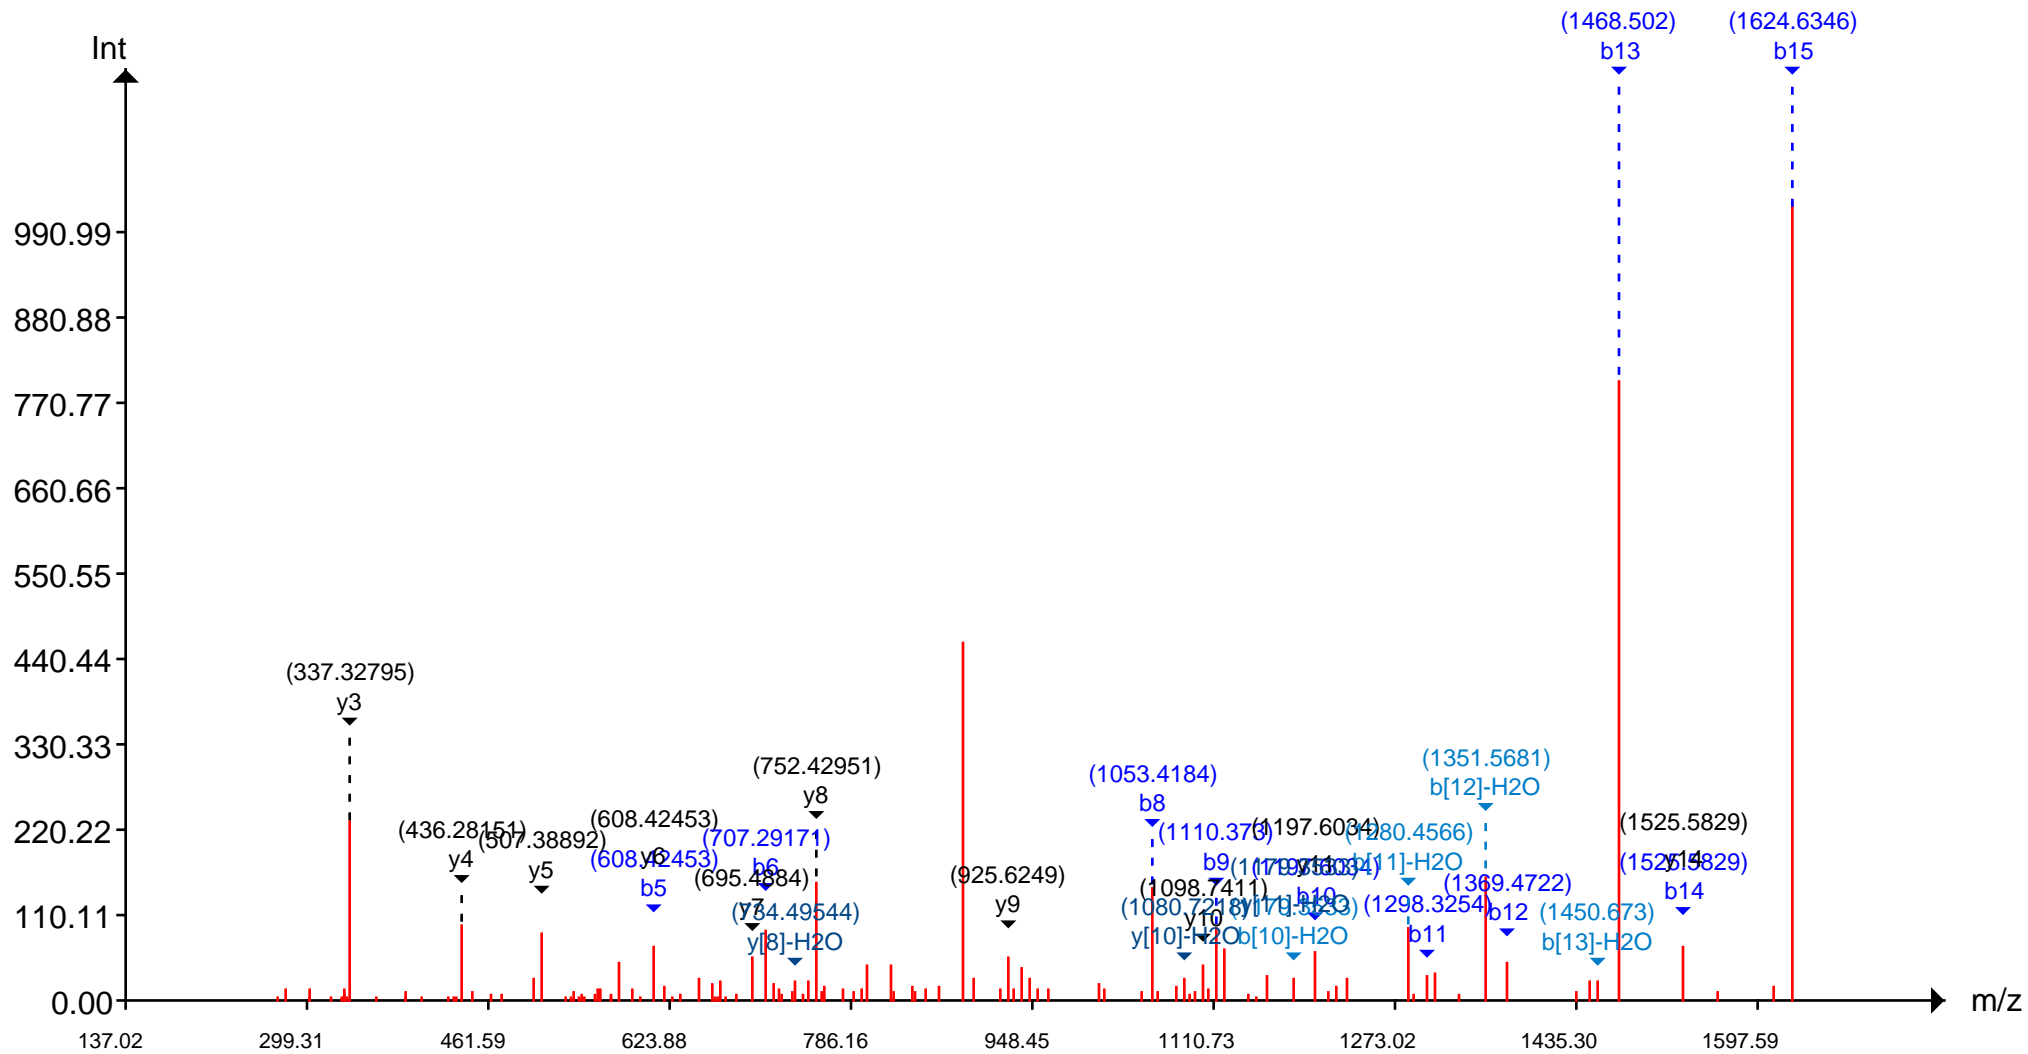

## Info

|                          |                                                 |                           |          |
|--------------------------|-------------------------------------------------|---------------------------|----------|
| <b>Modified Sequence</b> | AcD3-YAQEAVK<AcD3K*>K<AcD3K*>GSTAVGVR<C13>-COOH | <b>Ion score</b>          | 76.72    |
| <b>Protein</b>           | Q9Z2U0                                          | <b>Confidence level</b>   | 99.00%   |
| <b>Precursor m/z</b>     | 903.01551                                       | <b>Identity Threshold</b> | 45.72    |
| <b>Charge</b>            | 2+                                              | <b>Mass error</b>         | 0.002827 |

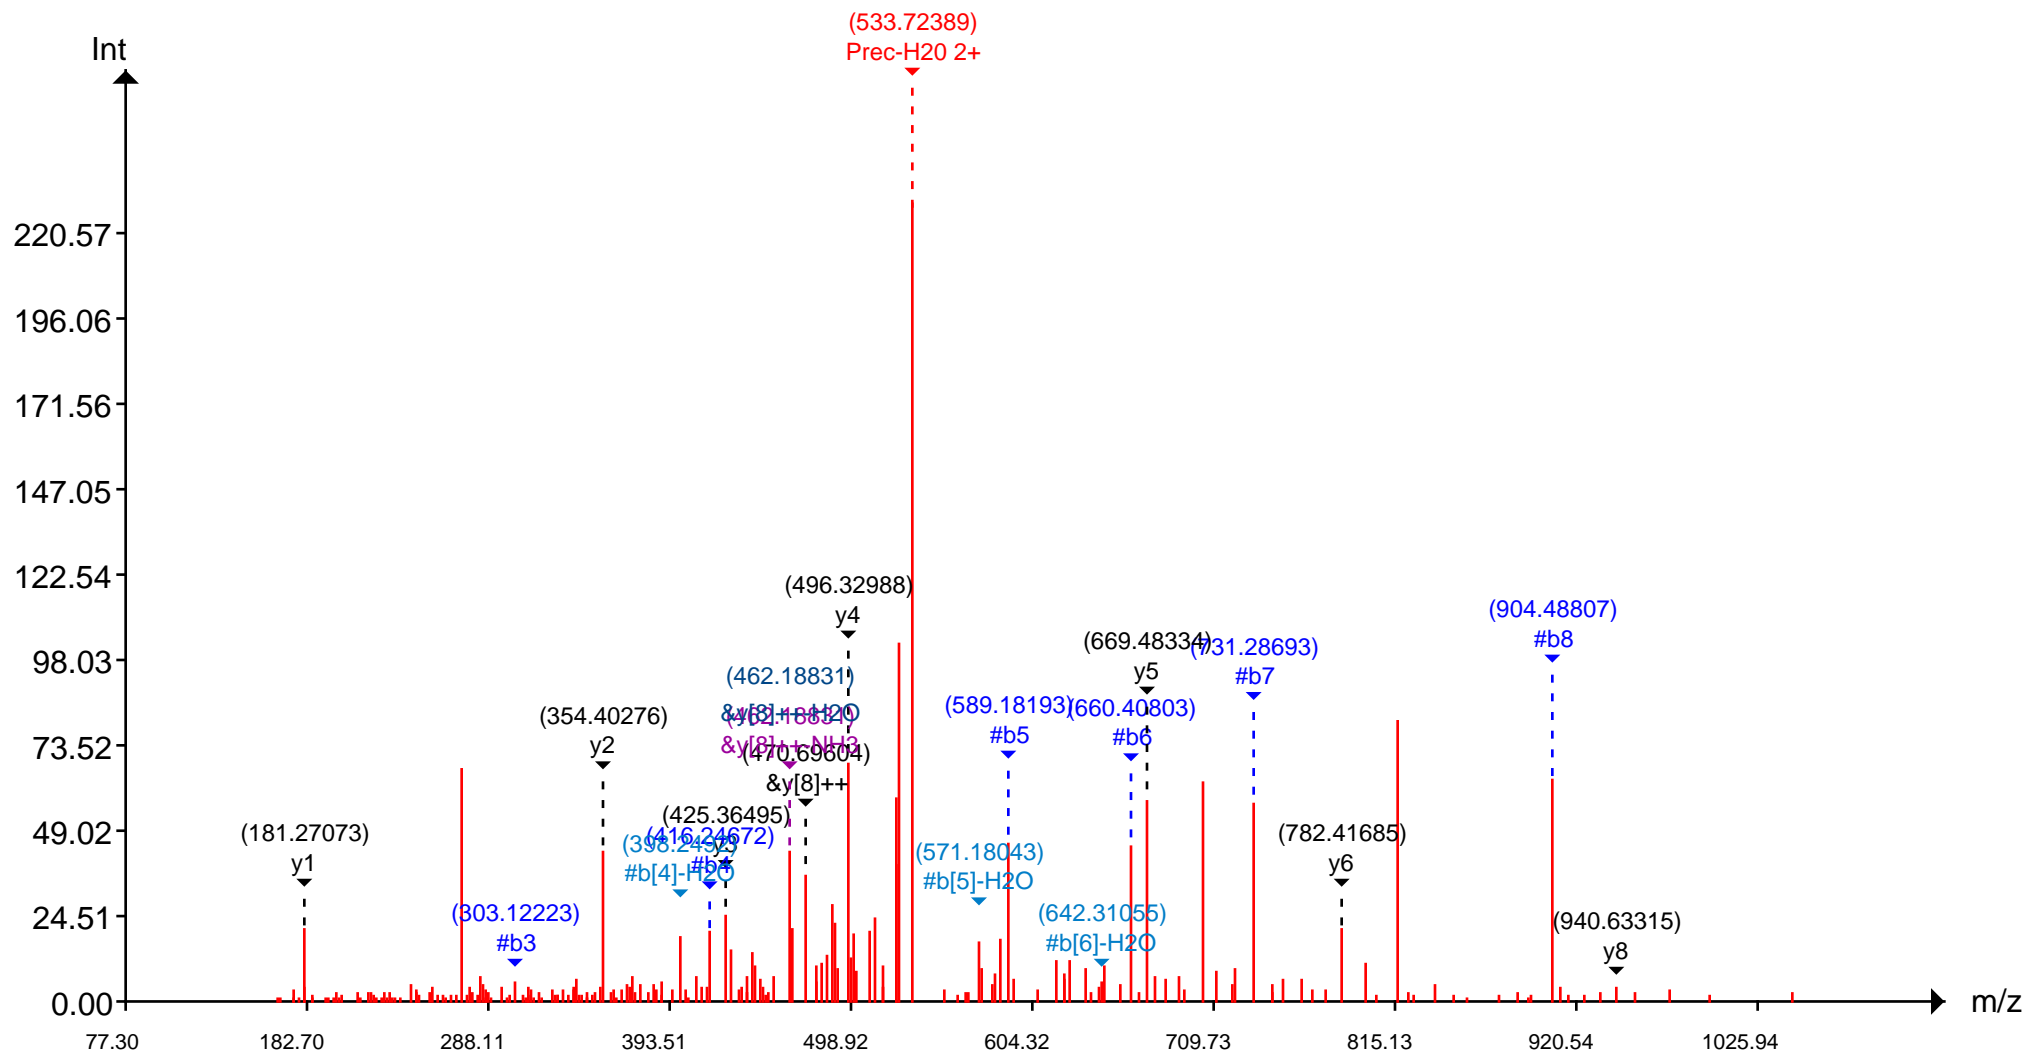

## Info

|                          |                                          |                           |        |
|--------------------------|------------------------------------------|---------------------------|--------|
| <b>Modified Sequence</b> | AcD3-VGTLK<AcD3K*>AAK<AcD3K*>R<C13>-COOH | <b>Ion score</b>          | 43.1   |
| <b>Protein</b>           | Q4KML4                                   | <b>Confidence level</b>   | 99.00% |
| <b>Precursor m/z</b>     | 542.86017                                | <b>Identity Threshold</b> | 38.40  |
| <b>Charge</b>            | 2+                                       | <b>Mass error</b>         | 2.3E-5 |

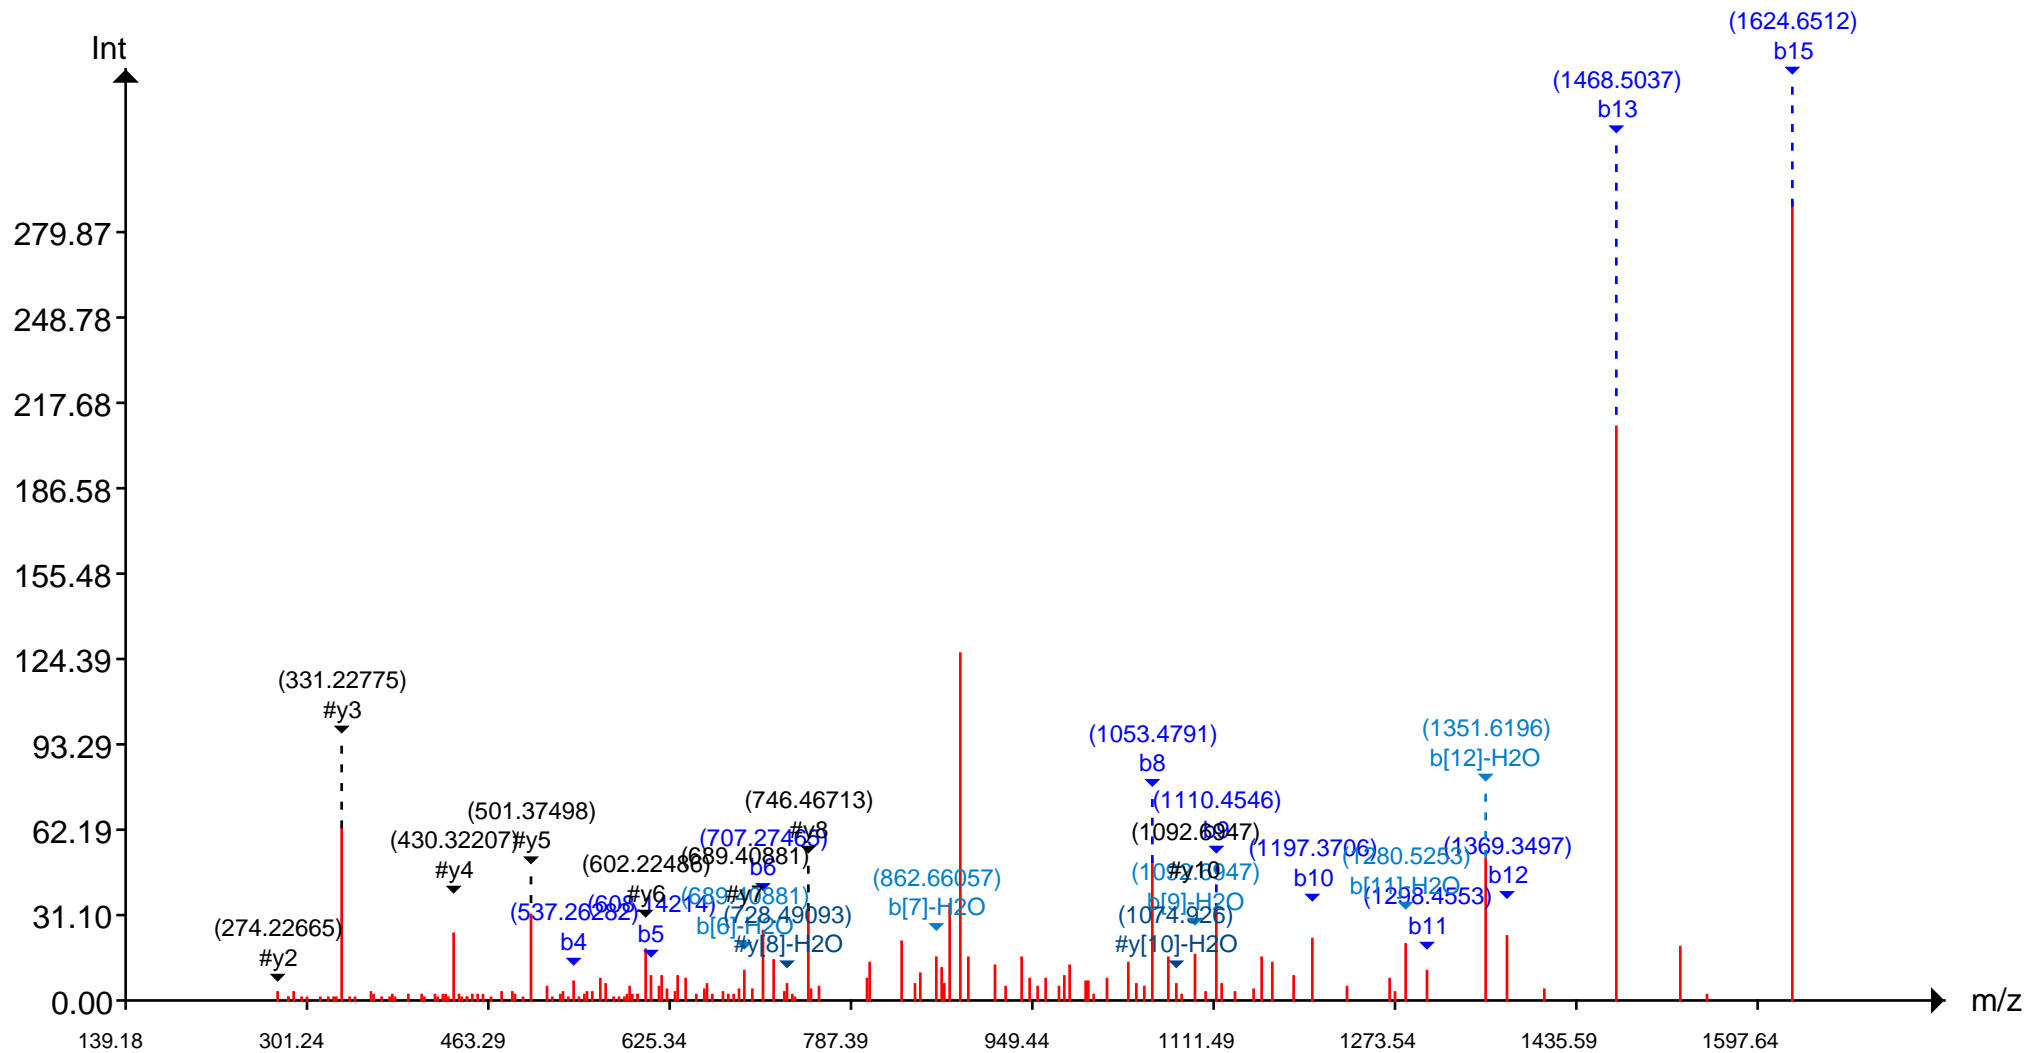

## Info

**Modified Sequence** AcD3-YAQEAVK<AcD3K\*>K<AcD3K\*>GSTAVGVR-COOH

**Ion score** 51.08

**Protein** Q9Z2U0

**Confidence level** 99.00%

**Precursor m/z** 900.00529

**Identity Threshold** 46.60

**Charge** 2+

**Mass error** 0.002528



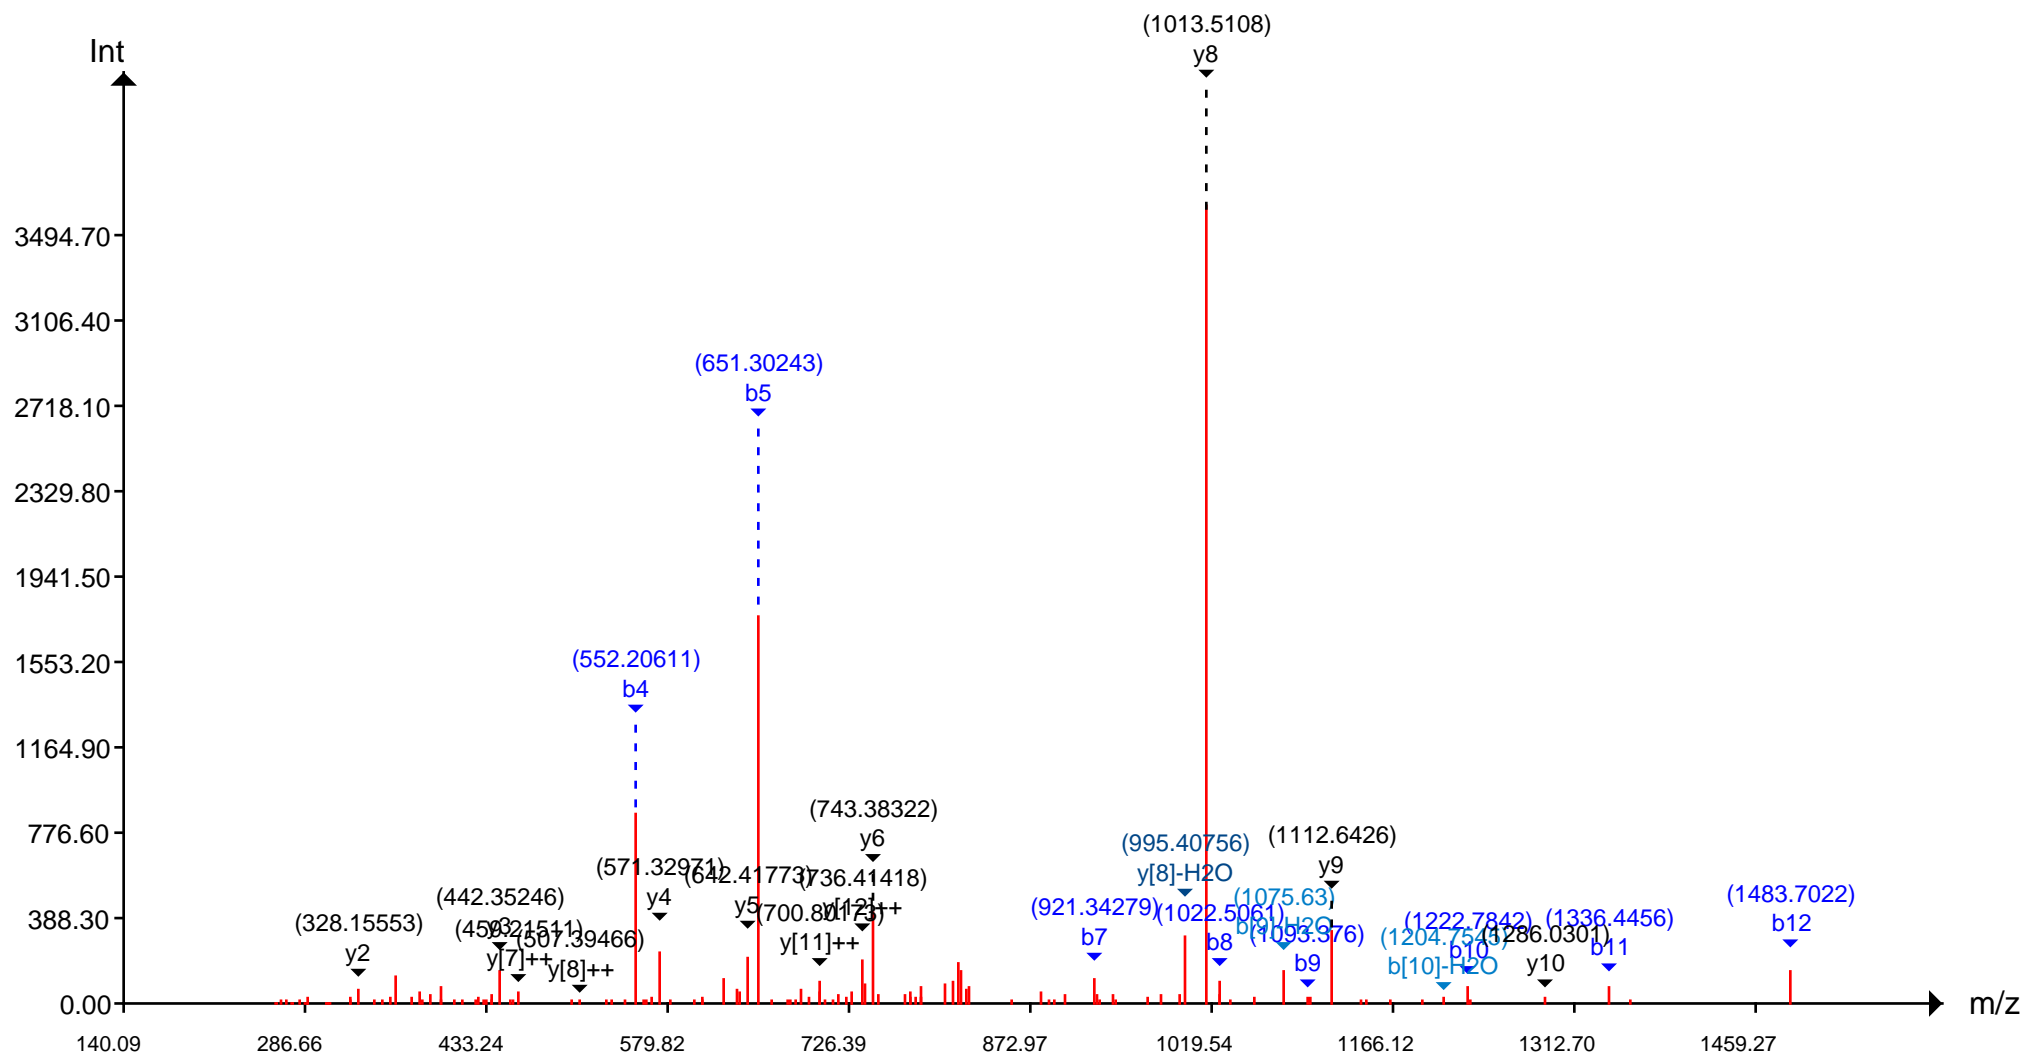

## Info

|                          |                                              |                           |         |
|--------------------------|----------------------------------------------|---------------------------|---------|
| <b>Modified Sequence</b> | AcD3-FADK<AcD3K*>VPK<AcD3K*>TAENFR<C13>-COOH | <b>Ion score</b>          | 62.59   |
| <b>Protein</b>           | P17742                                       | <b>Confidence level</b>   | 99.00%  |
| <b>Precursor m/z</b>     | 832.45937                                    | <b>Identity Threshold</b> | 47.48   |
| <b>Charge</b>            | 2+                                           | <b>Mass error</b>         | 0.00189 |

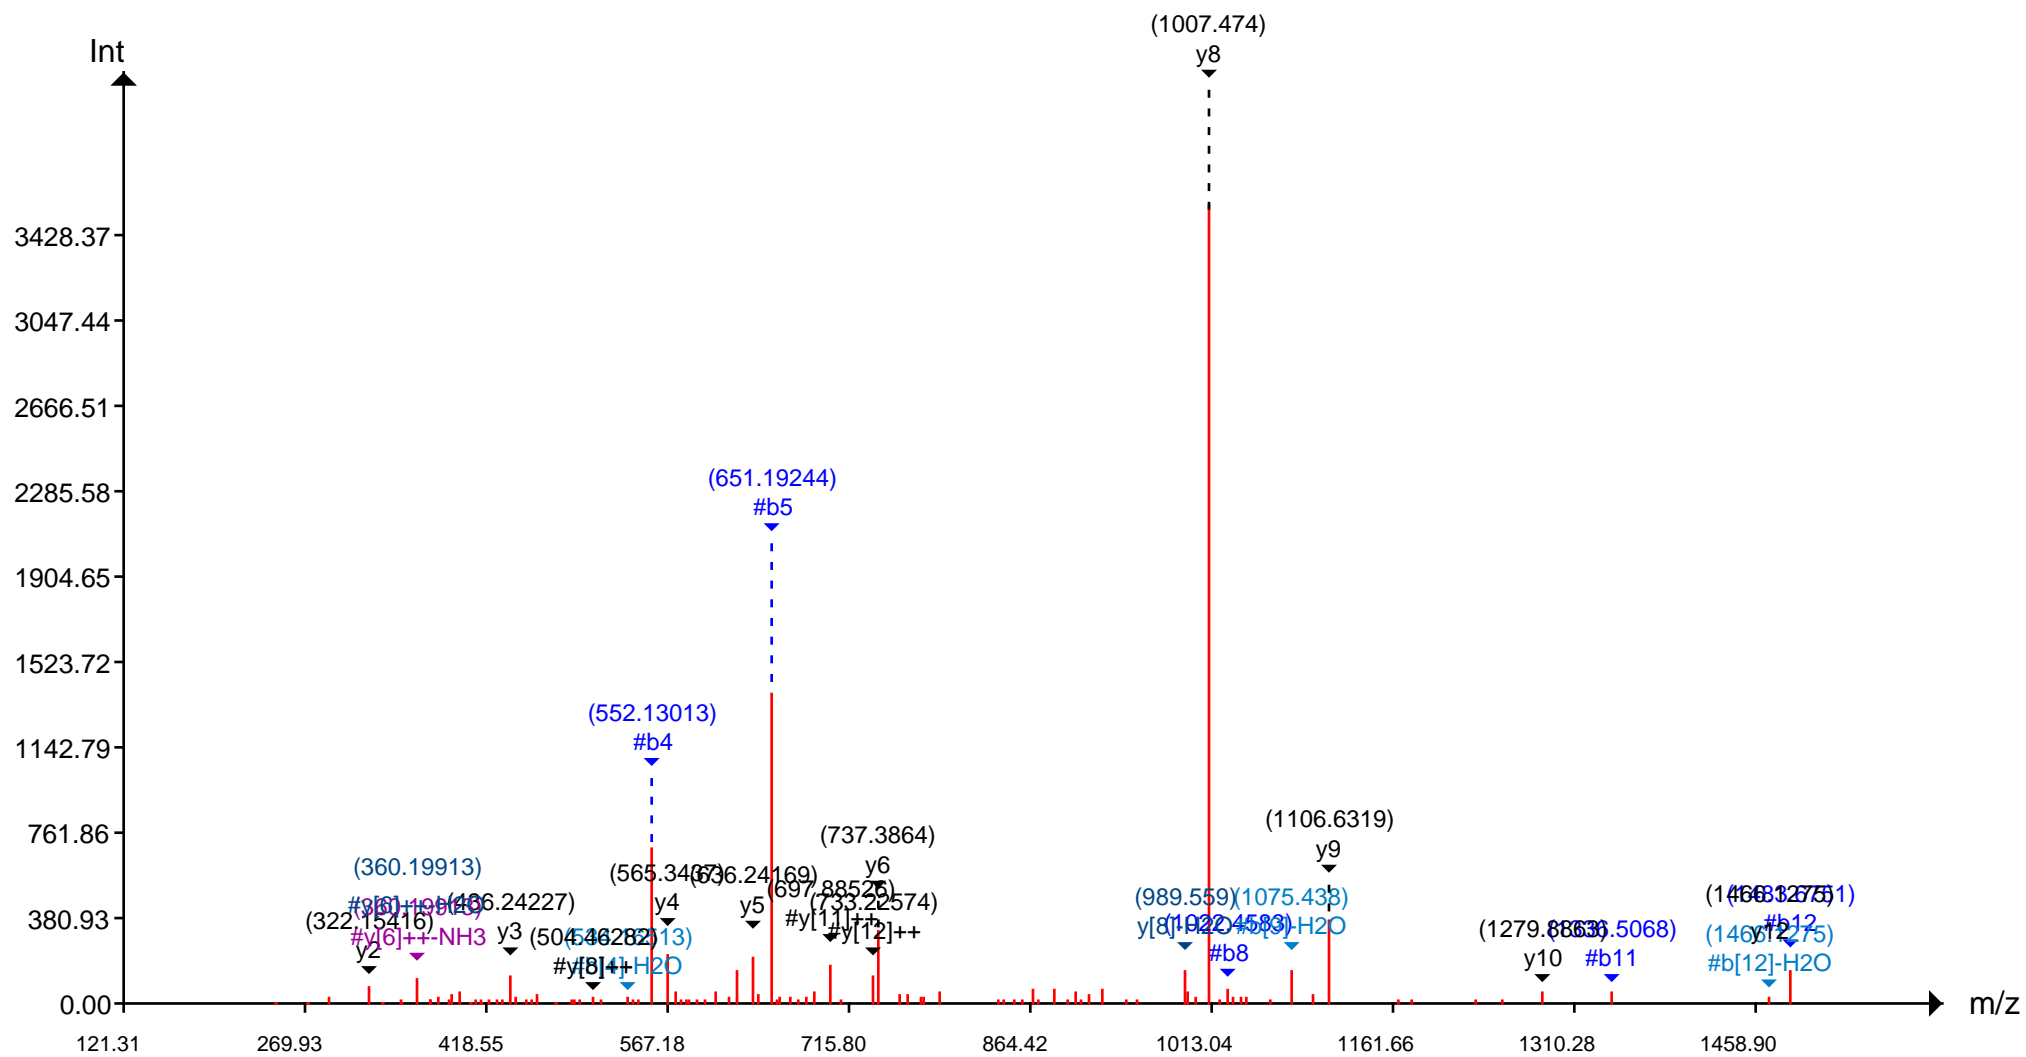

## Info

**Modified Sequence** AcD3-FADK<AcD3K\*>VPK<AcD3K\*>TAENFR-COOH

**Ion score** 58.52

**Protein** P17742

**Confidence level** 99.00%

**Precursor m/z** 829.44962

**Identity Threshold** 47.77

**Charge** 2+

**Mass error** 0.002532

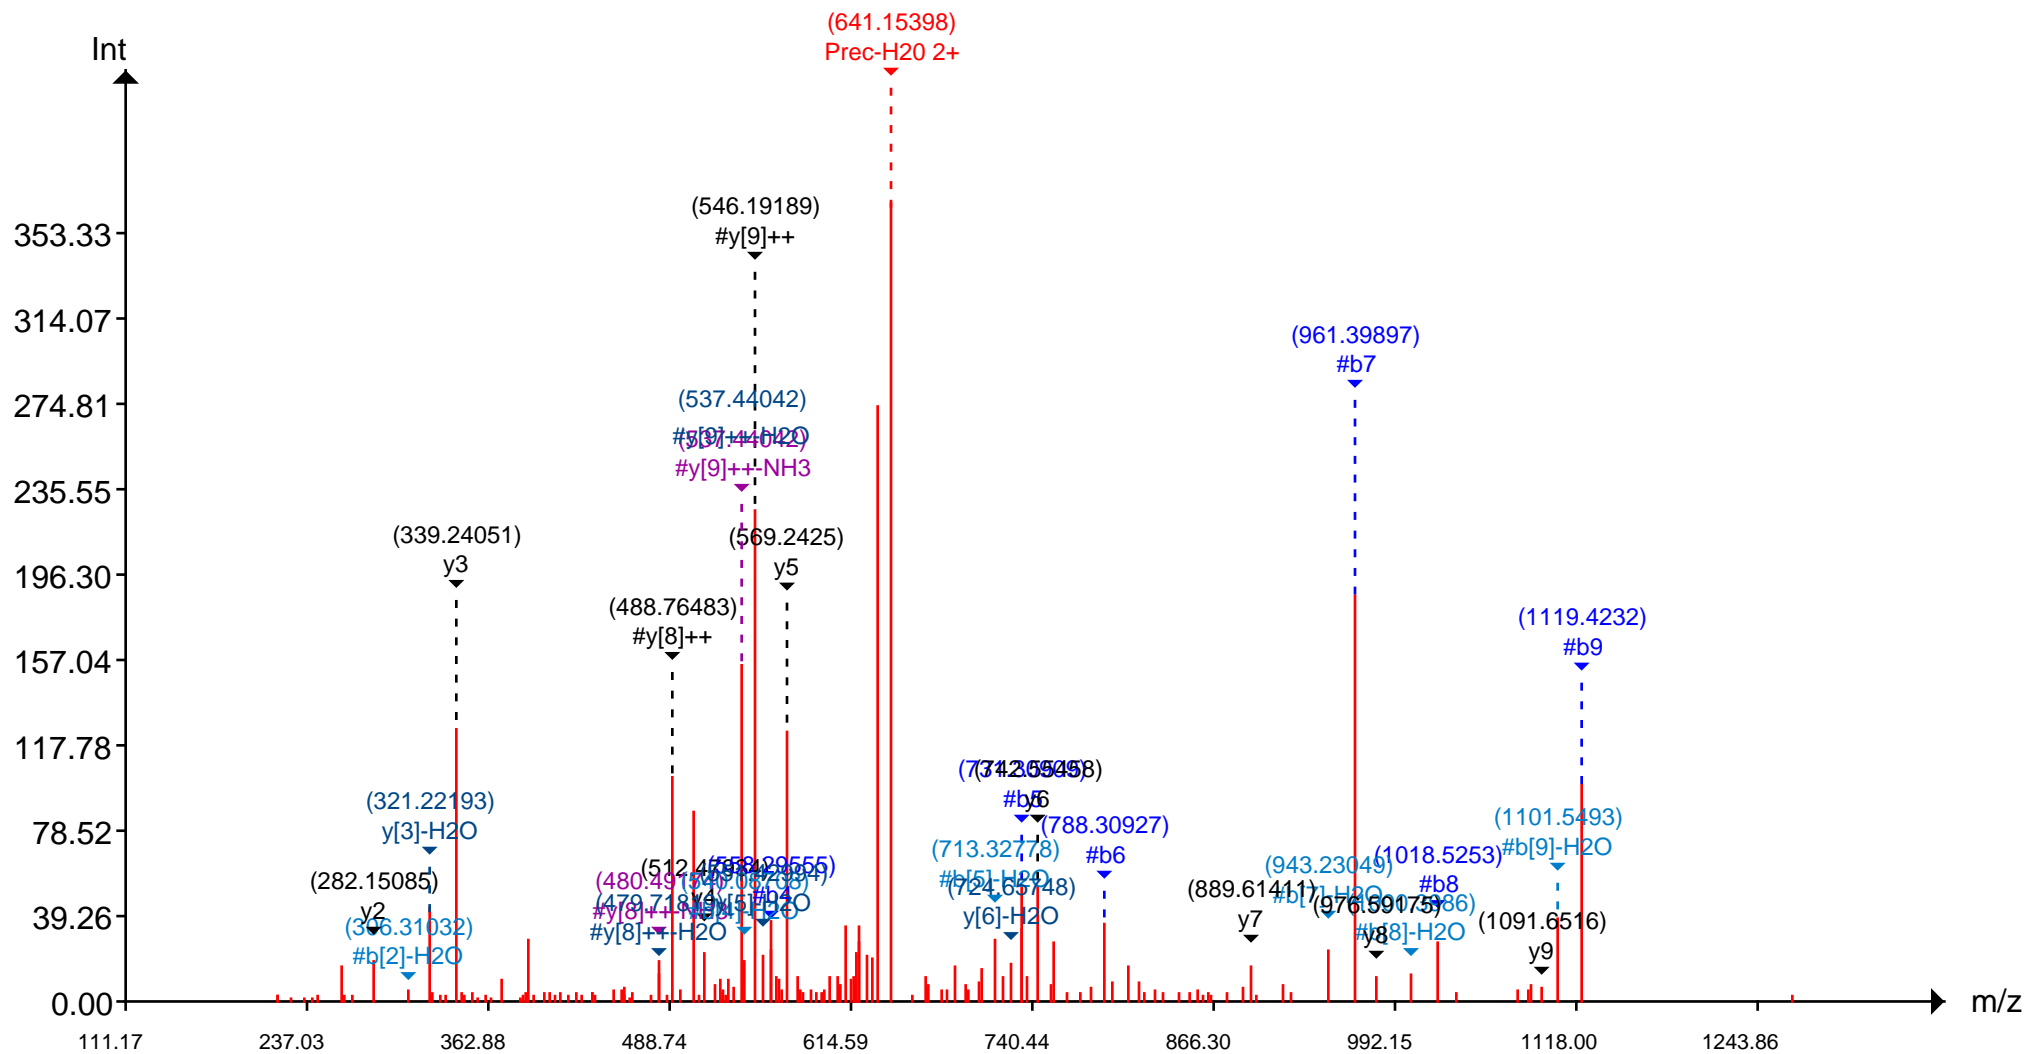

## Info

|                          |                                                 |                           |         |
|--------------------------|-------------------------------------------------|---------------------------|---------|
| <b>Modified Sequence</b> | AcD3-YDSM<Mox*>K<AcD3K*>GK<AcD3K*>GTR<C13>-COOH | <b>Ion score</b>          | 58.78   |
| <b>Protein</b>           | P07356                                          | <b>Confidence level</b>   | 99.00%  |
| <b>Precursor m/z</b>     | 650.33673                                       | <b>Identity Threshold</b> | 47.96   |
| <b>Charge</b>            | 2+                                              | <b>Mass error</b>         | 6.74E-4 |

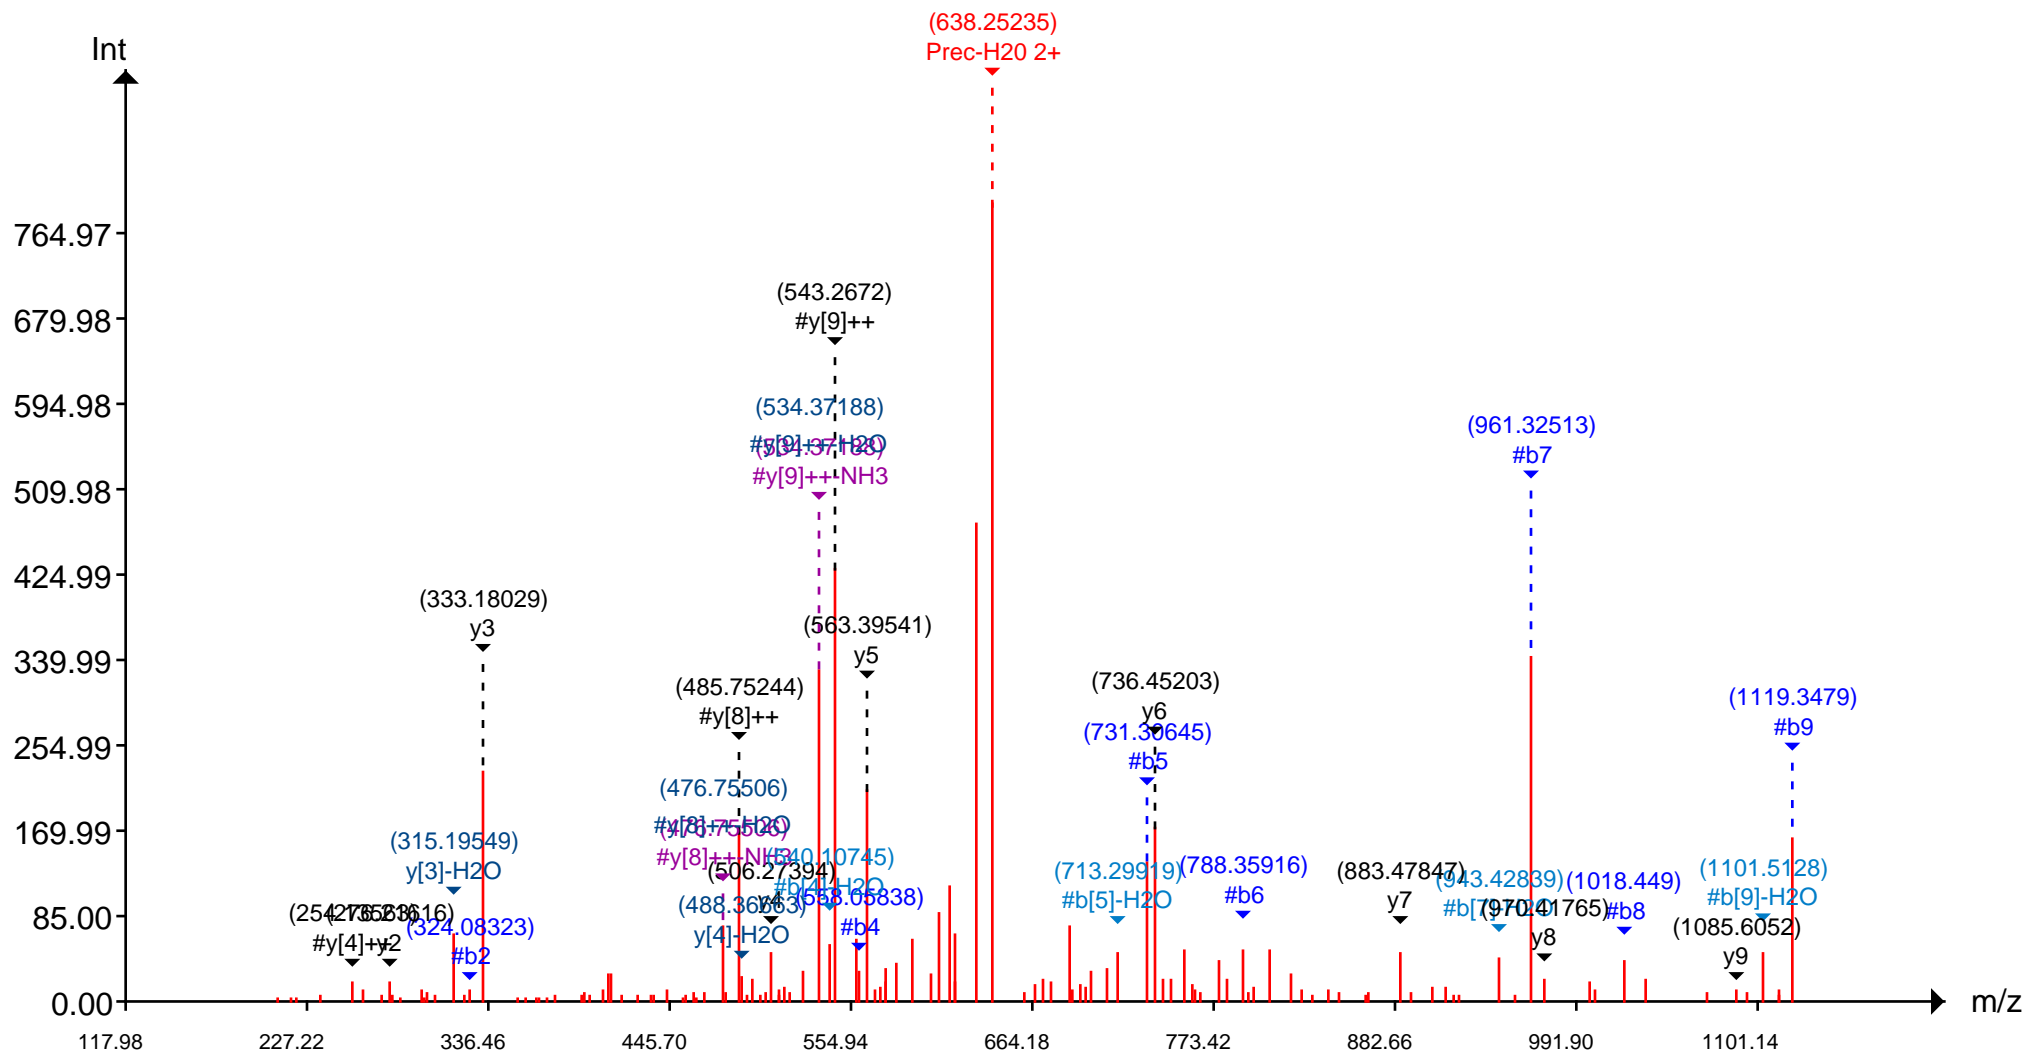

## Info

|                          |                                            |                           |          |
|--------------------------|--------------------------------------------|---------------------------|----------|
| <b>Modified Sequence</b> | AcD3-YDSM<Mox*>K<AcD3K*>GK<AcD3K*>GTR-COOH | <b>Ion score</b>          | 52.81    |
| <b>Protein</b>           | P07356                                     | <b>Confidence level</b>   | 99.00%   |
| <b>Precursor m/z</b>     | 647.3269                                   | <b>Identity Threshold</b> | 47.80    |
| <b>Charge</b>            | 2+                                         | <b>Mass error</b>         | 0.001156 |

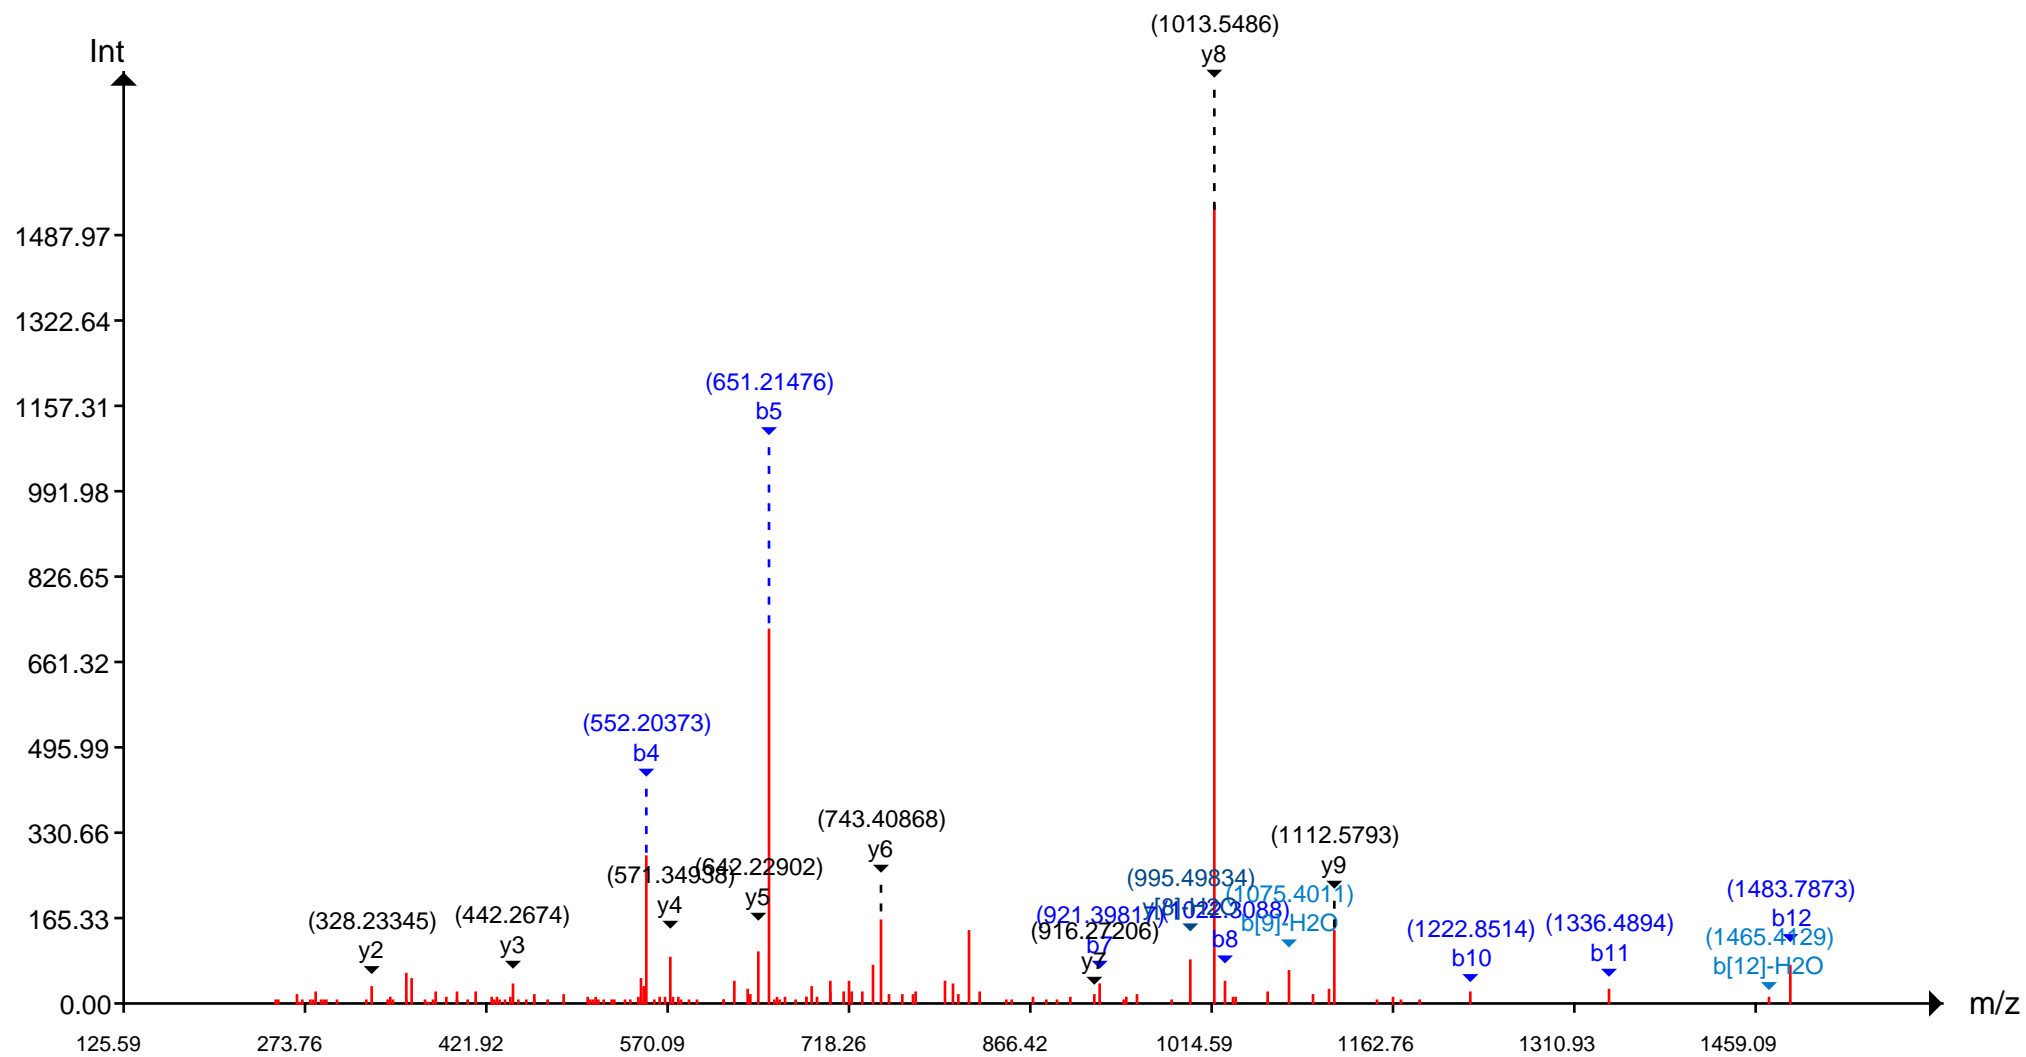

## Info

|                          |                                              |                           |        |
|--------------------------|----------------------------------------------|---------------------------|--------|
| <b>Modified Sequence</b> | AcD3-FADK<AcD3K*>VPK<AcD3K*>TAENFR<C13>-COOH | <b>Ion score</b>          | 50.46  |
| <b>Protein</b>           | P17742                                       | <b>Confidence level</b>   | 99.00% |
| <b>Precursor m/z</b>     | 832.45877                                    | <b>Identity Threshold</b> | 47.57  |
| <b>Charge</b>            | 2+                                           | <b>Mass error</b>         | 6.9E-4 |

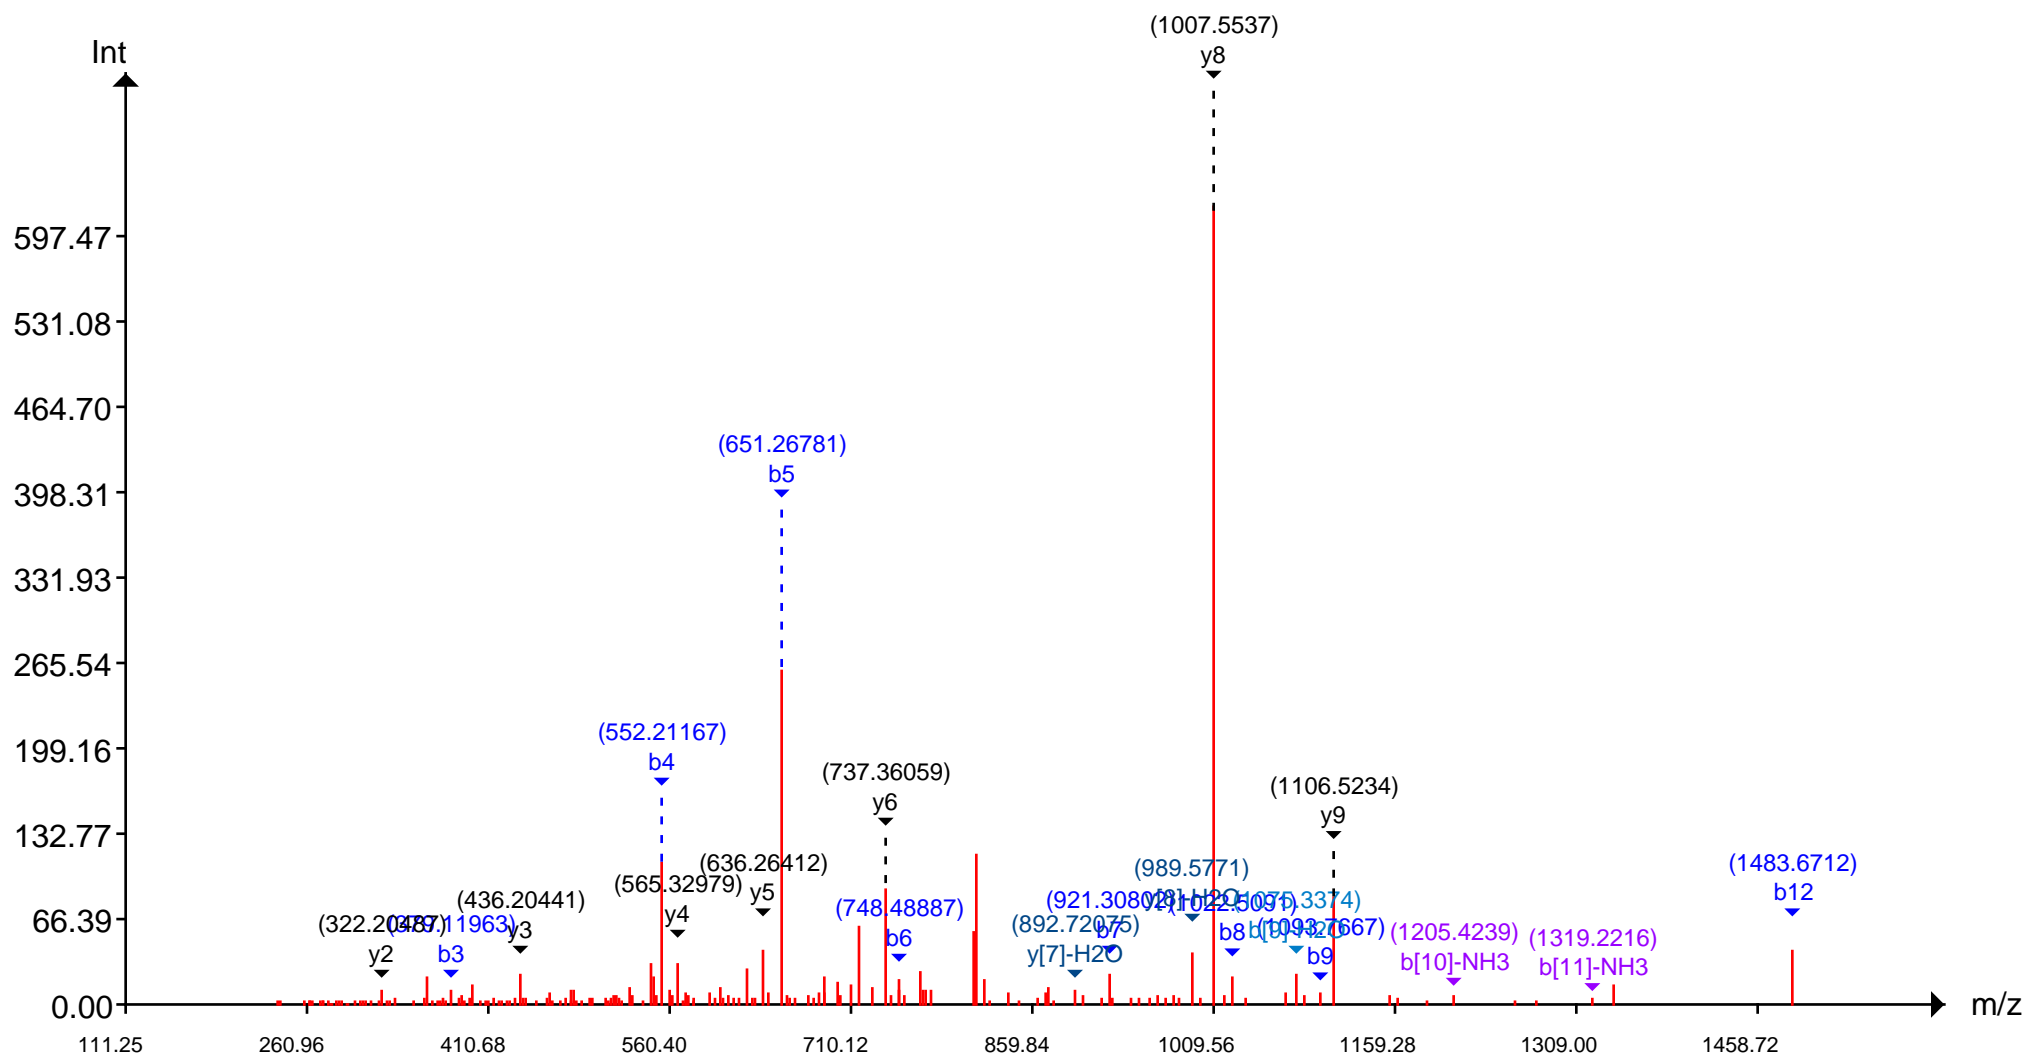

## Info

|                          |                                         |                           |          |
|--------------------------|-----------------------------------------|---------------------------|----------|
| <b>Modified Sequence</b> | AcD3-FADK<AcD3K*>VPK<AcD3K*>TAENFR-COOH | <b>Ion score</b>          | 49.12    |
| <b>Protein</b>           | P17742                                  | <b>Confidence level</b>   | 99.00%   |
| <b>Precursor m/z</b>     | 829.44892                               | <b>Identity Threshold</b> | 47.81    |
| <b>Charge</b>            | 2+                                      | <b>Mass error</b>         | 0.001132 |

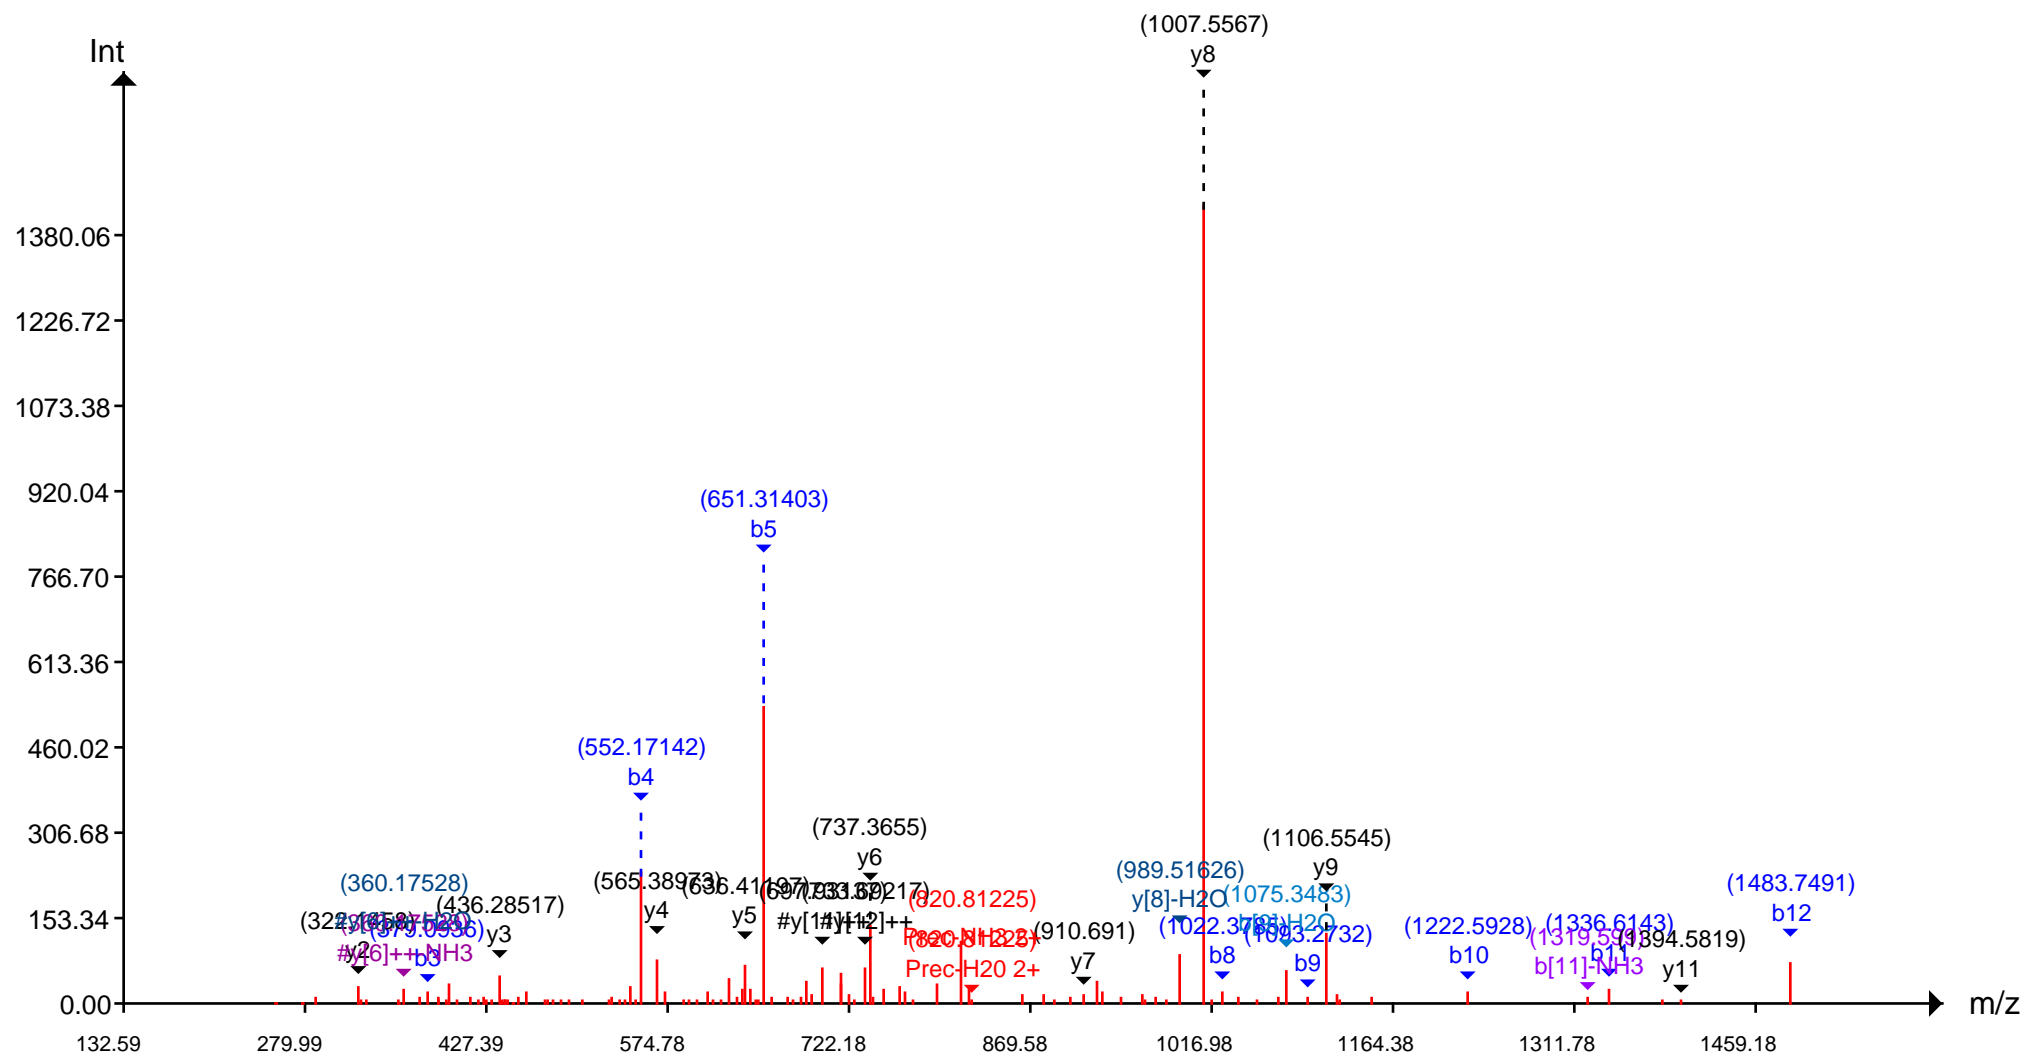

## Info

|                          |                                         |                           |          |
|--------------------------|-----------------------------------------|---------------------------|----------|
| <b>Modified Sequence</b> | AcD3-FADK<AcD3K*>VPK<AcD3K*>TAENFR-COOH | <b>Ion score</b>          | 60.79    |
| <b>Protein</b>           | P17742                                  | <b>Confidence level</b>   | 99.00%   |
| <b>Precursor m/z</b>     | 829.44935                               | <b>Identity Threshold</b> | 47.77    |
| <b>Charge</b>            | 2+                                      | <b>Mass error</b>         | 0.001992 |

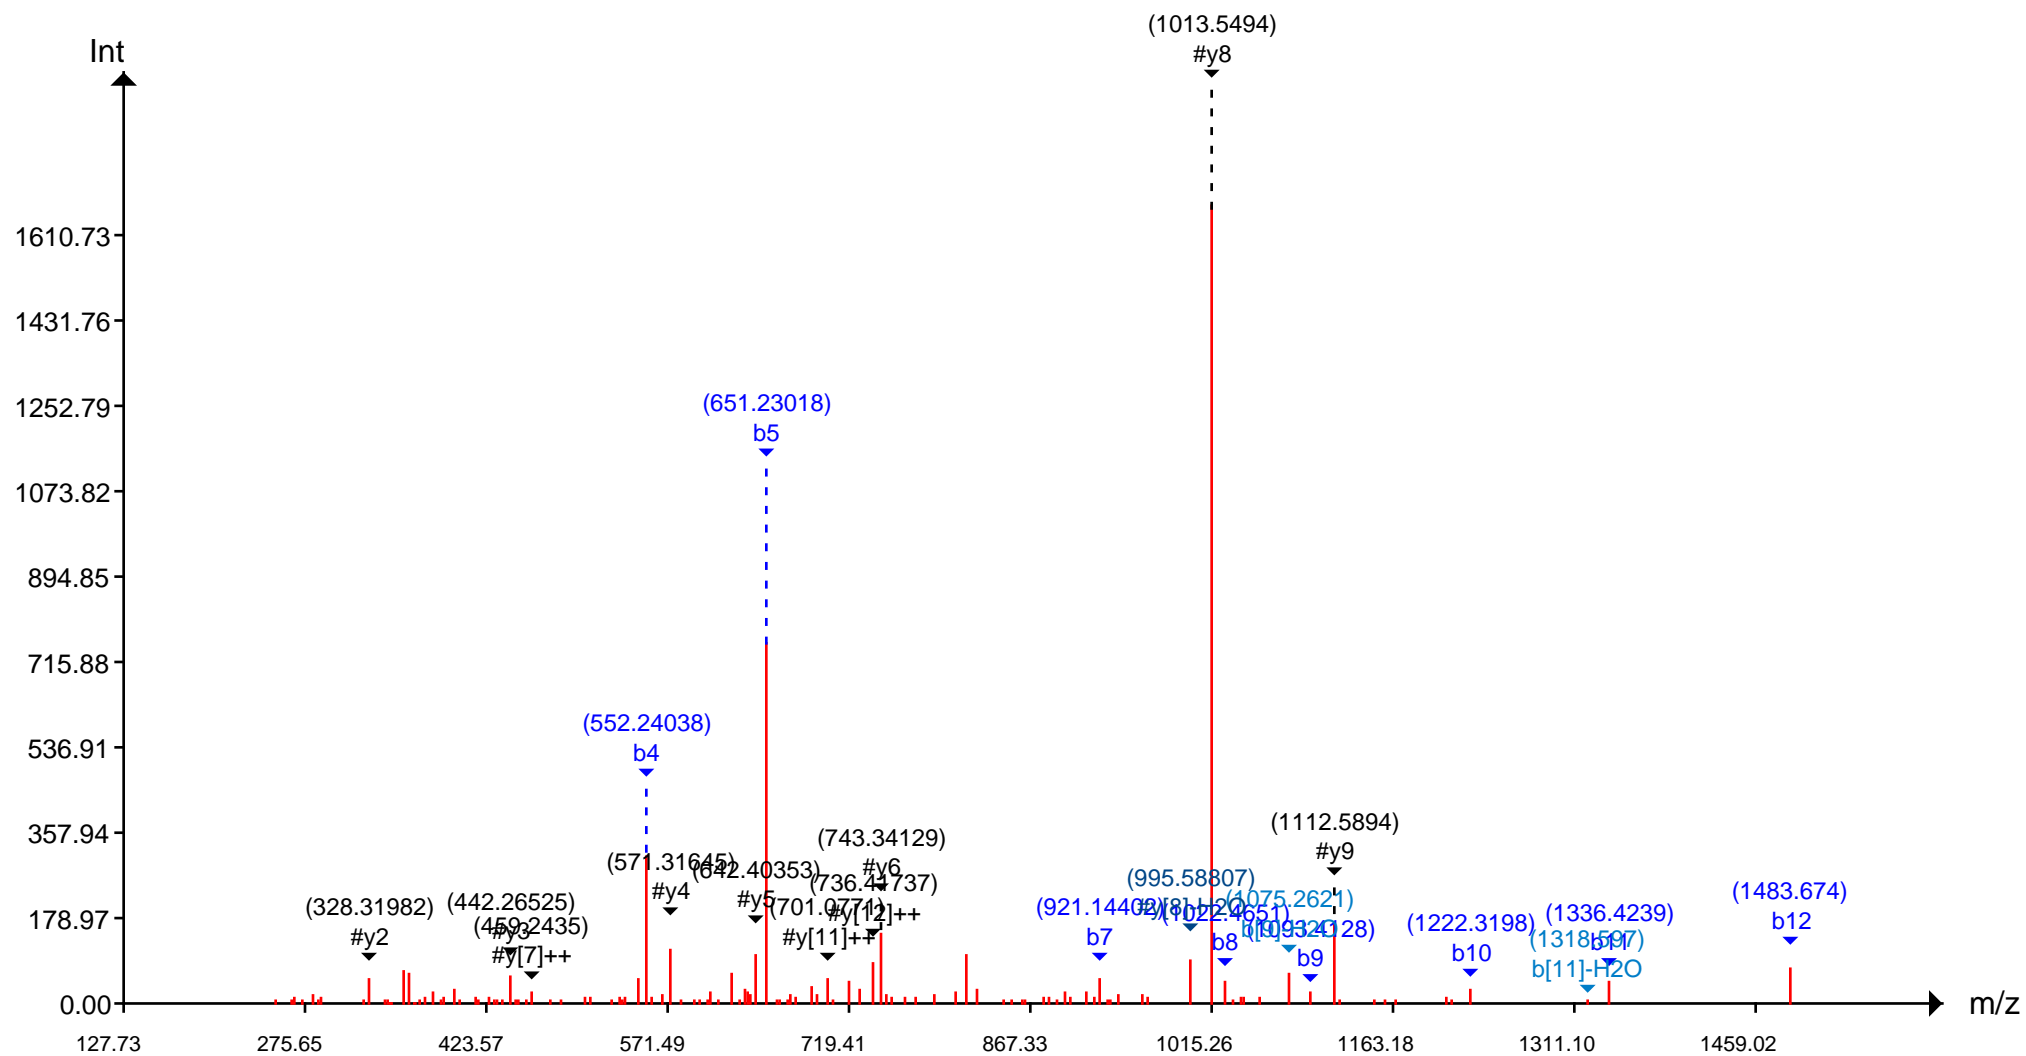

## Info

|                          |                                              |                           |         |
|--------------------------|----------------------------------------------|---------------------------|---------|
| <b>Modified Sequence</b> | AcD3-FADK<AcD3K*>VPK<AcD3K*>TAENFR<C13>-COOH | <b>Ion score</b>          | 50.92   |
| <b>Protein</b>           | P17742                                       | <b>Confidence level</b>   | 99.00%  |
| <b>Precursor m/z</b>     | 832.45916                                    | <b>Identity Threshold</b> | 47.45   |
| <b>Charge</b>            | 2+                                           | <b>Mass error</b>         | 0.00147 |



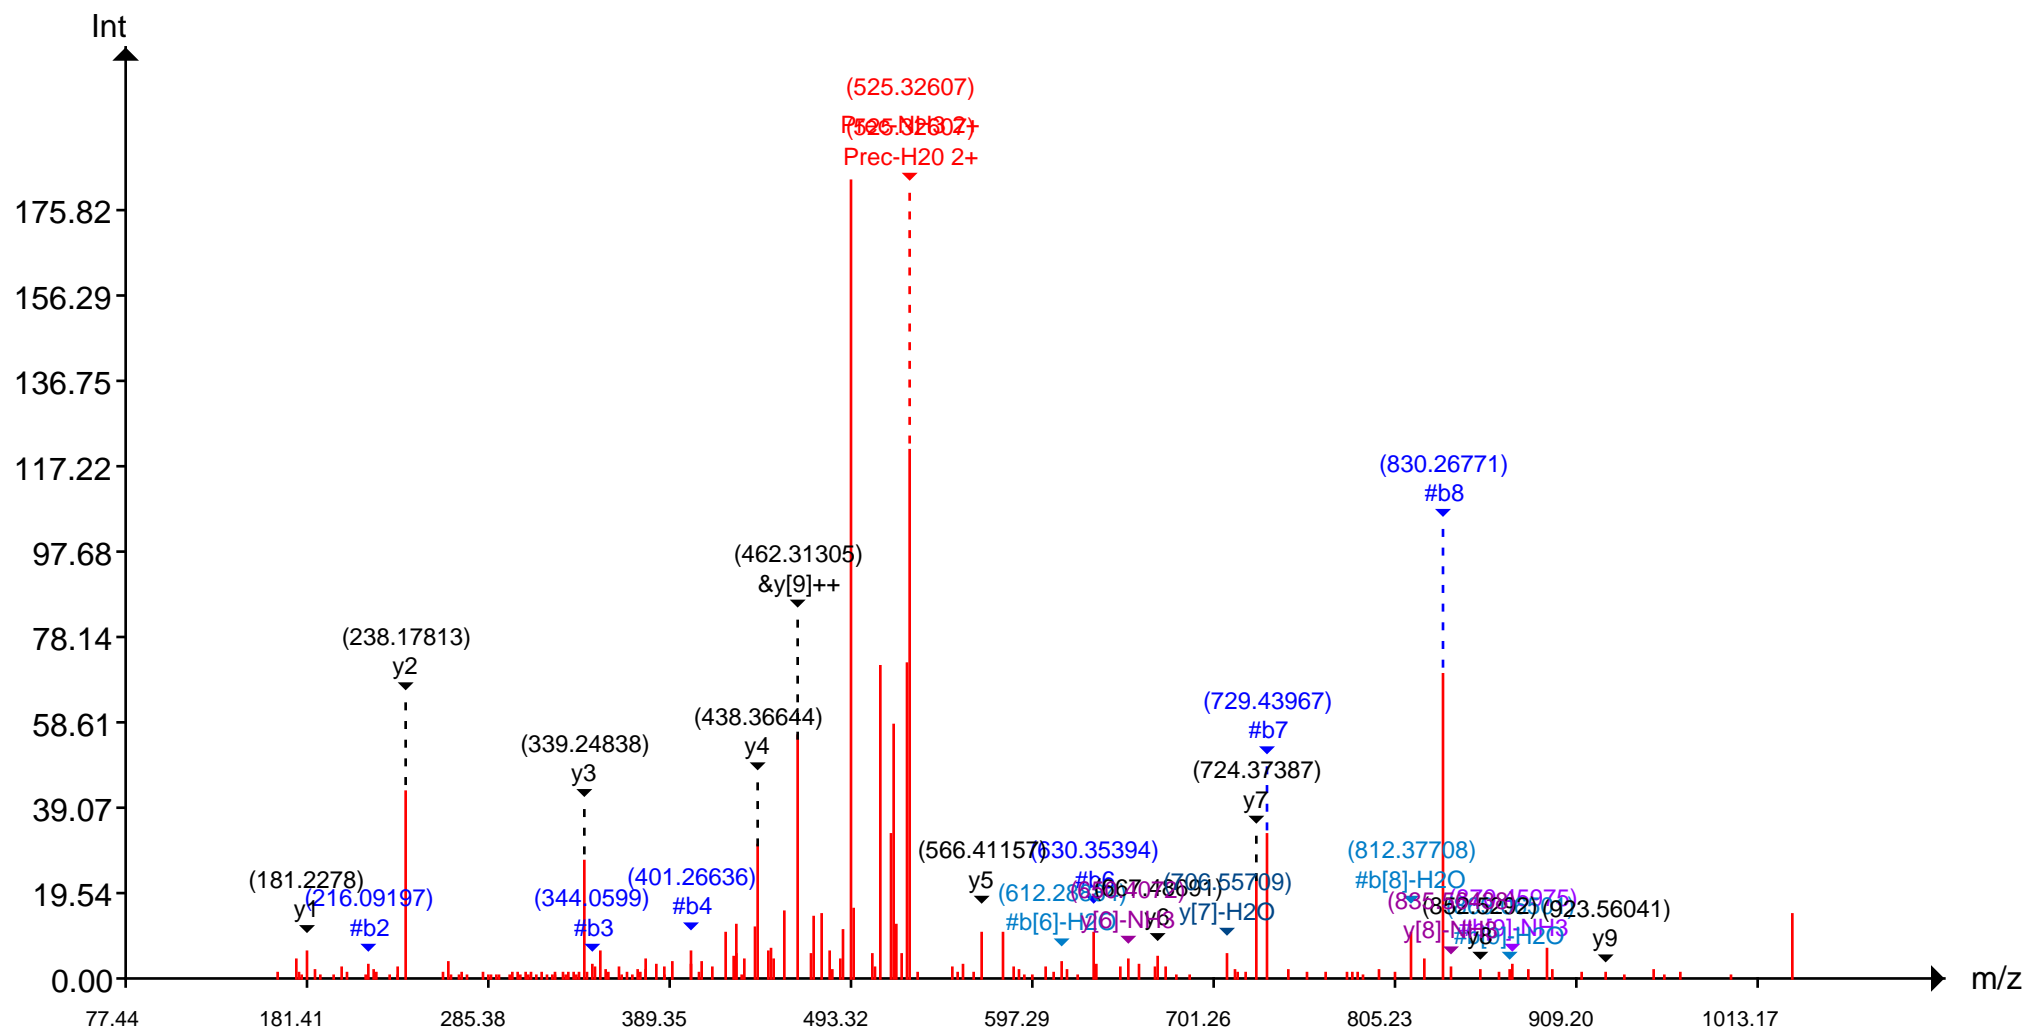

## Info

|                          |                           |                           |          |
|--------------------------|---------------------------|---------------------------|----------|
| <b>Modified Sequence</b> | AcD3-VAQGTQVTGR<C13>-COOH | <b>Ion score</b>          | 50.89    |
| <b>Protein</b>           | P50580                    | <b>Confidence level</b>   | 99.00%   |
| <b>Precursor m/z</b>     | 534.30244                 | <b>Identity Threshold</b> | 47.28    |
| <b>Charge</b>            | 2+                        | <b>Mass error</b>         | -2.79E-4 |

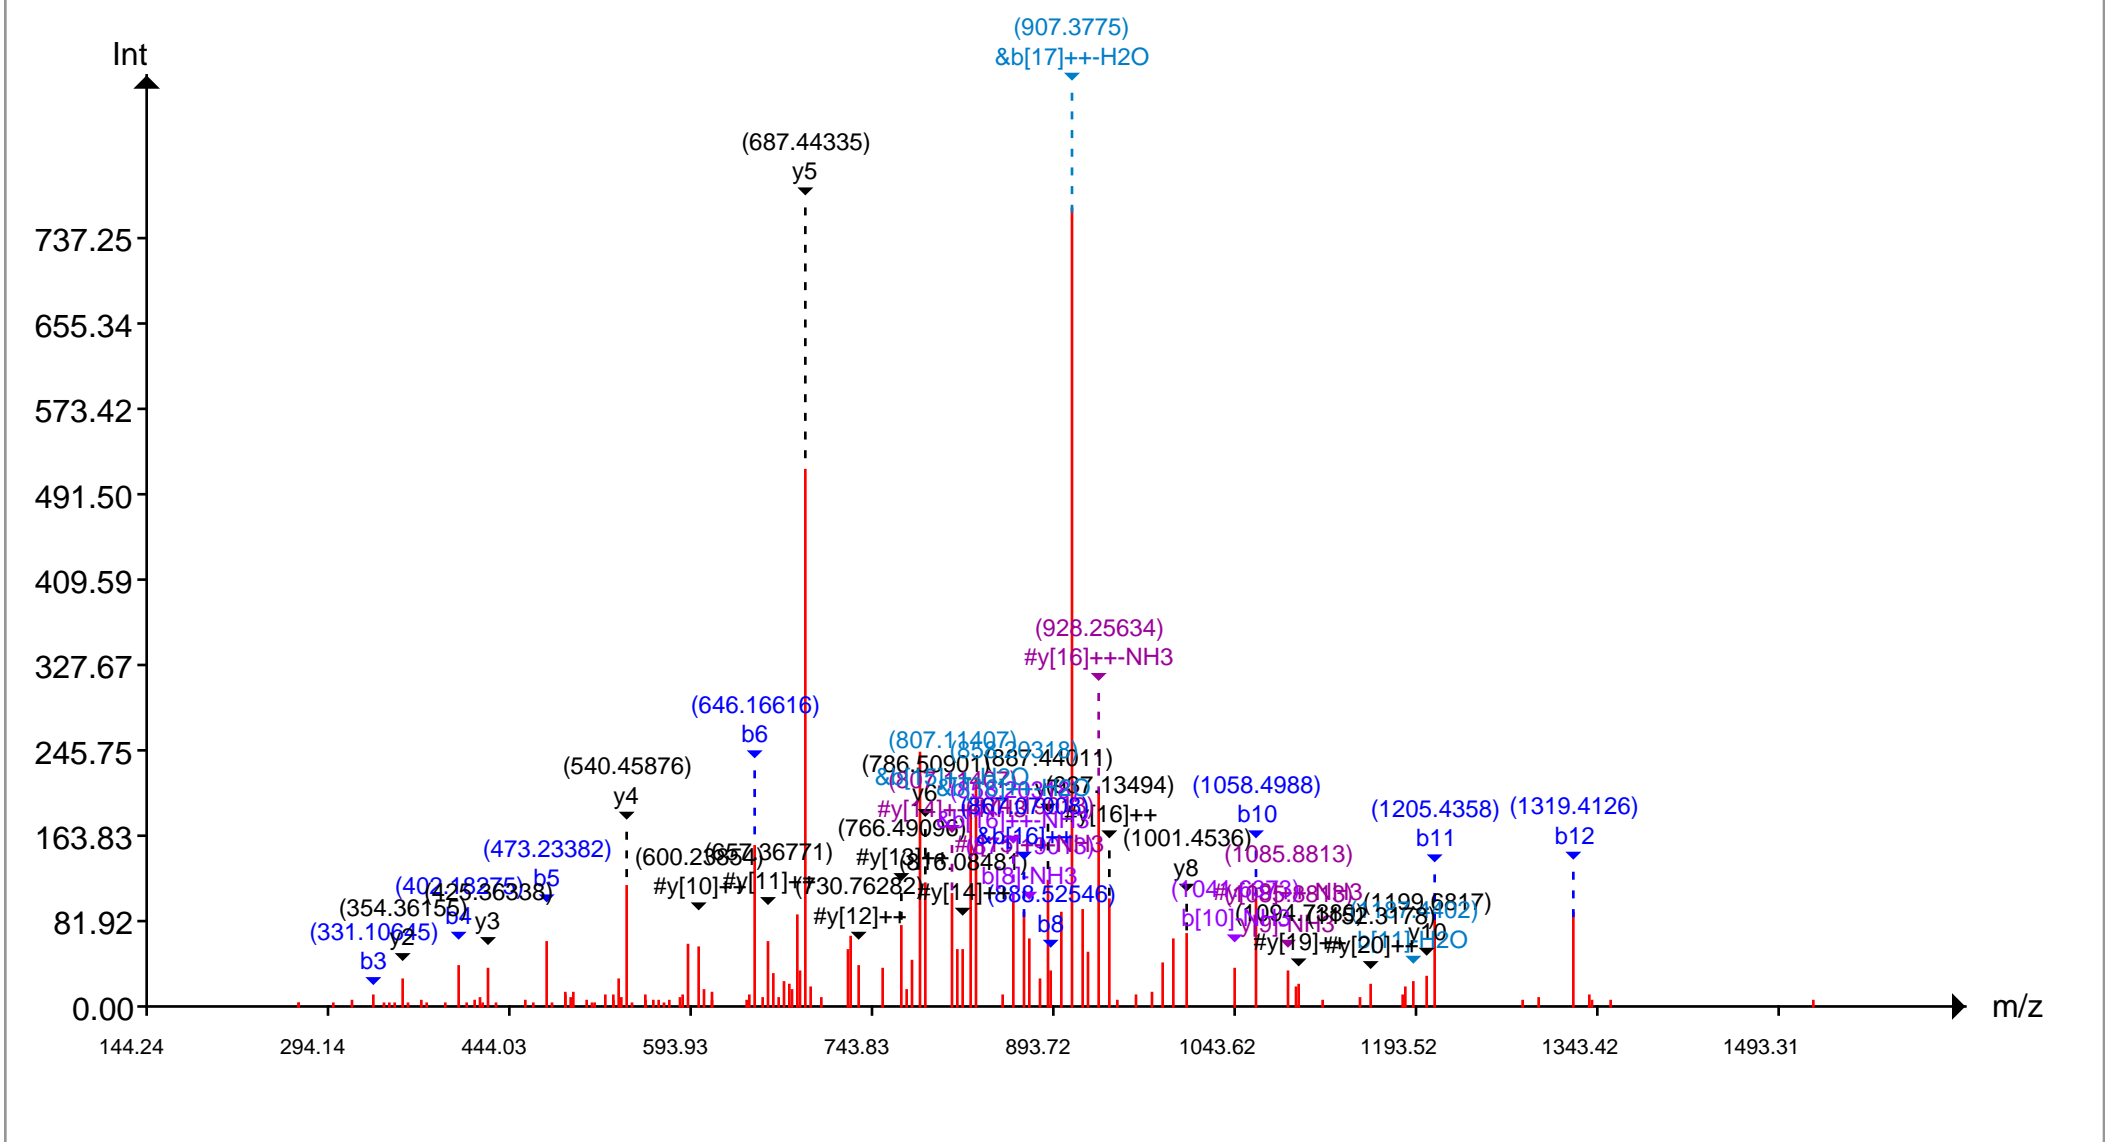

## Info

|                          |                                                              |                           |          |
|--------------------------|--------------------------------------------------------------|---------------------------|----------|
| <b>Modified Sequence</b> | AcD3-IGDAAK<AcD3K*>NQVAM<Mox*>NPTNTVFDAAK<AcD3K*>R<C13>-COOH | <b>Ion score</b>          | 63.0     |
| <b>Protein</b>           | P63017                                                       | <b>Confidence level</b>   | 99.00%   |
| <b>Precursor m/z</b>     | 840.43978                                                    | <b>Identity Threshold</b> | 47.87    |
| <b>Charge</b>            | 3+                                                           | <b>Mass error</b>         | 1.003597 |

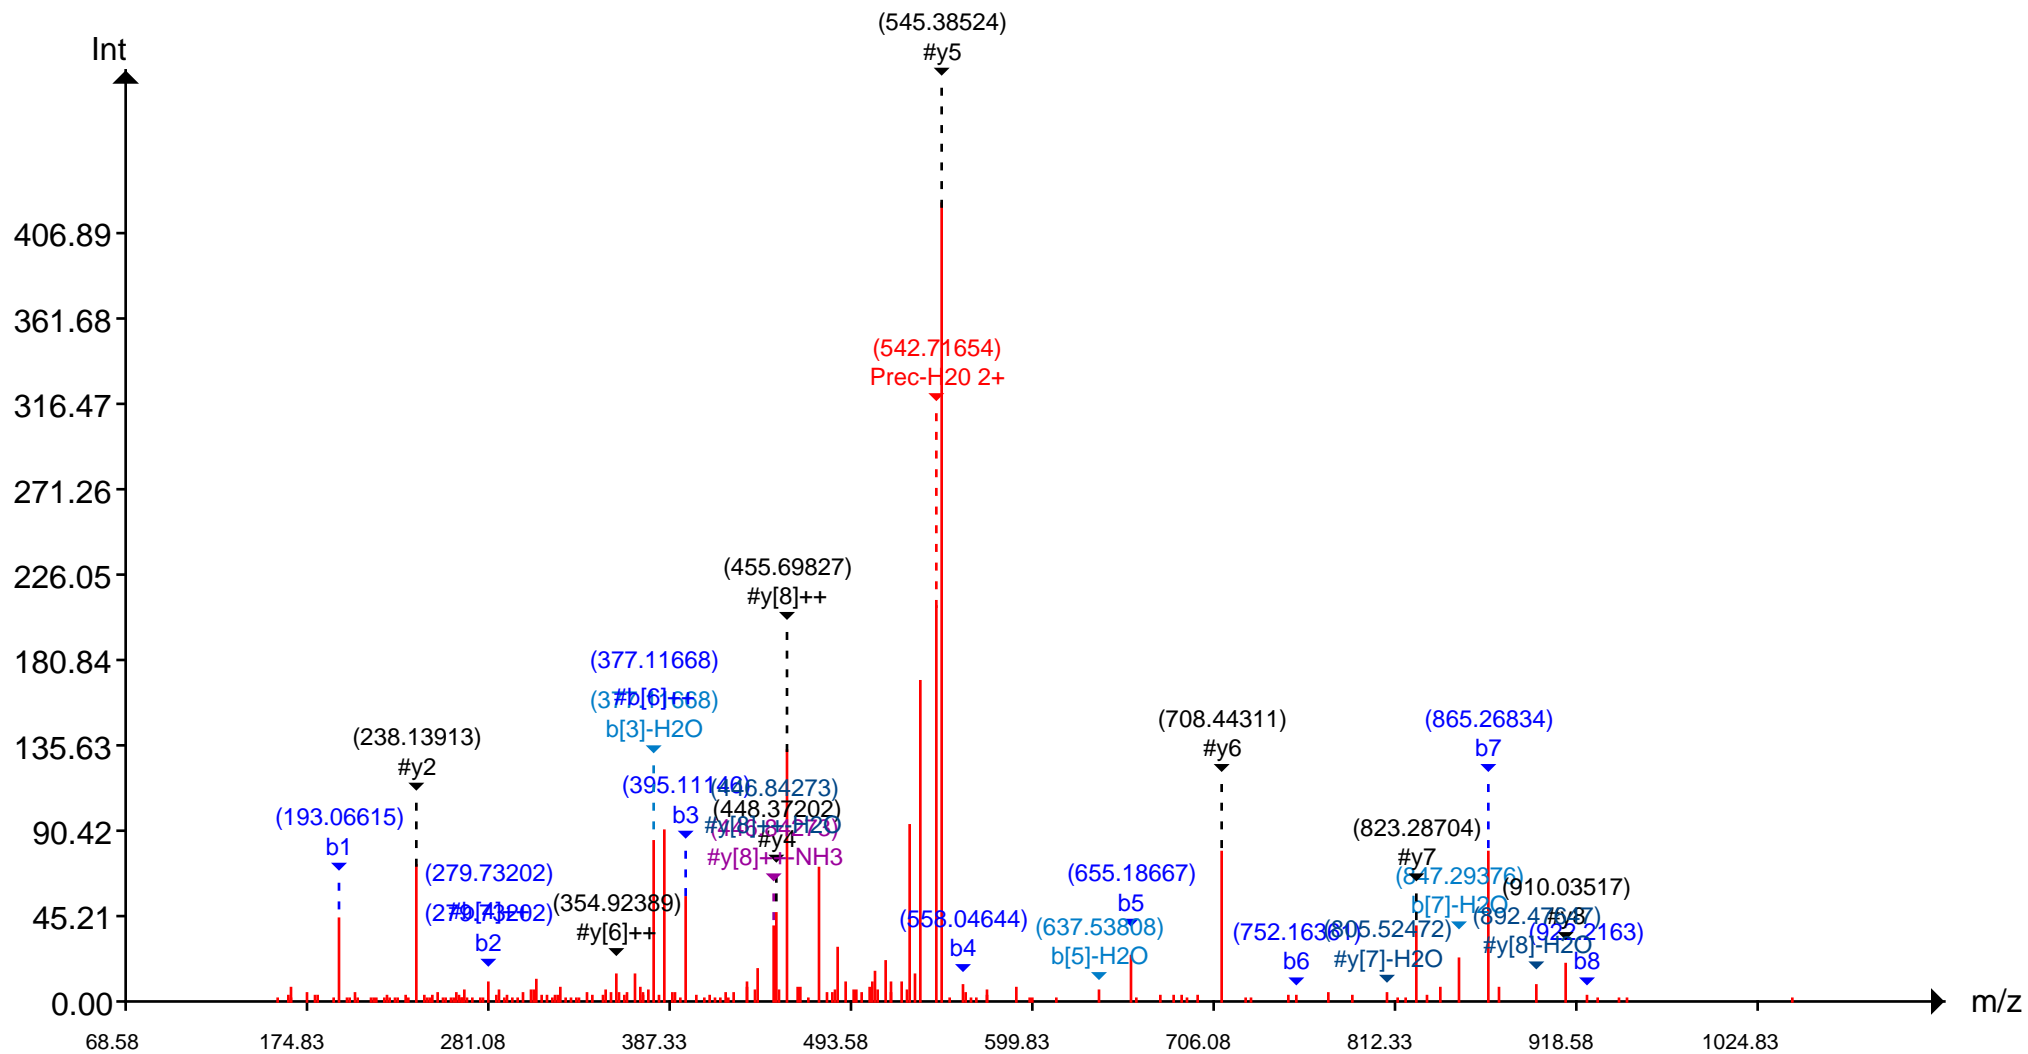

## Info

|                          |                          |                           |         |
|--------------------------|--------------------------|---------------------------|---------|
| <b>Modified Sequence</b> | AcD3-FSDYPPLGR<C13>-COOH | <b>Ion score</b>          | 55.29   |
| <b>Protein</b>           | P10126                   | <b>Confidence level</b>   | 99.00%  |
| <b>Precursor m/z</b>     | 551.78874                | <b>Identity Threshold</b> | 47.66   |
| <b>Charge</b>            | 2+                       | <b>Mass error</b>         | -4.5E-5 |

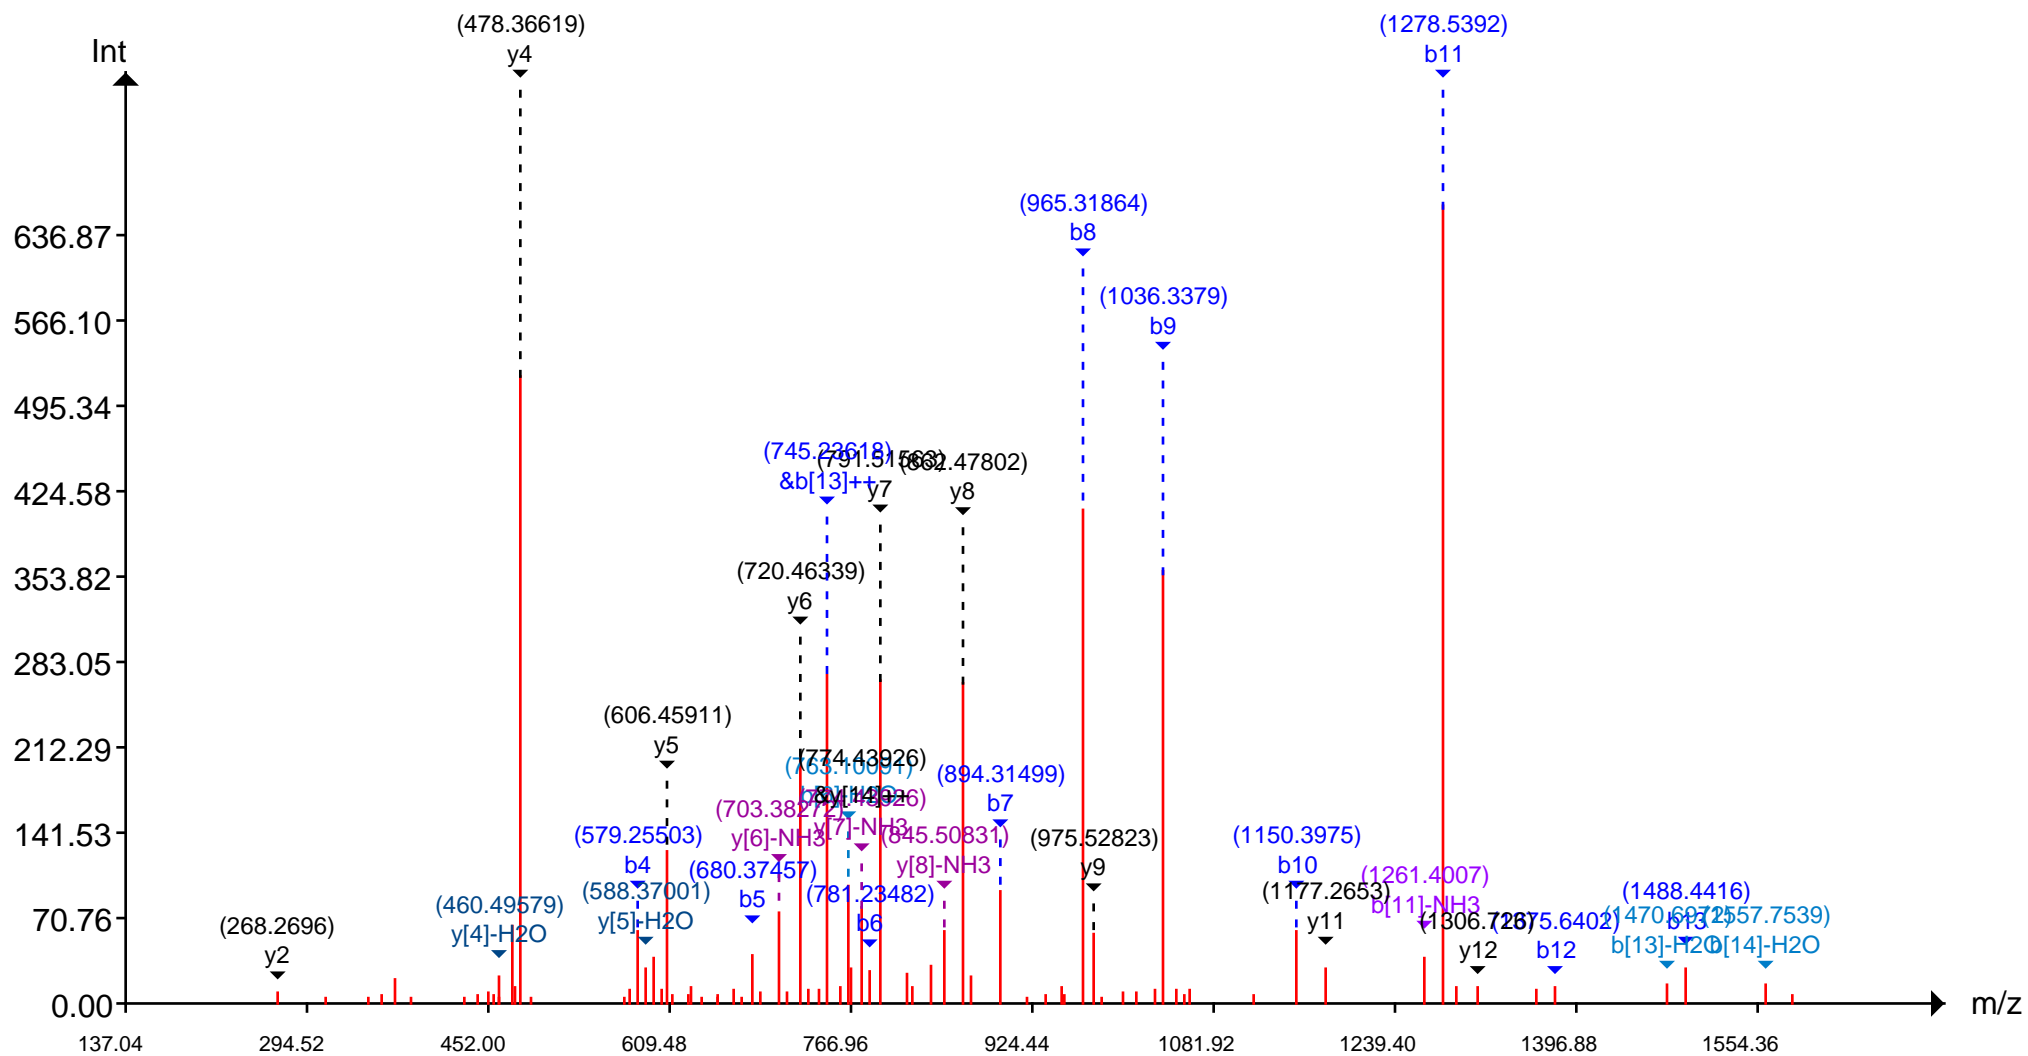

## Info

|                          |                                |                           |          |
|--------------------------|--------------------------------|---------------------------|----------|
| <b>Modified Sequence</b> | AcD3-YLQETTLAANQPLSR<C13>-COOH | <b>Ion score</b>          | 76.19    |
| <b>Protein</b>           | O09159                         | <b>Confidence level</b>   | 99.00%   |
| <b>Precursor m/z</b>     | 878.47506                      | <b>Identity Threshold</b> | 47.83    |
| <b>Charge</b>            | 2+                             | <b>Mass error</b>         | 0.001822 |

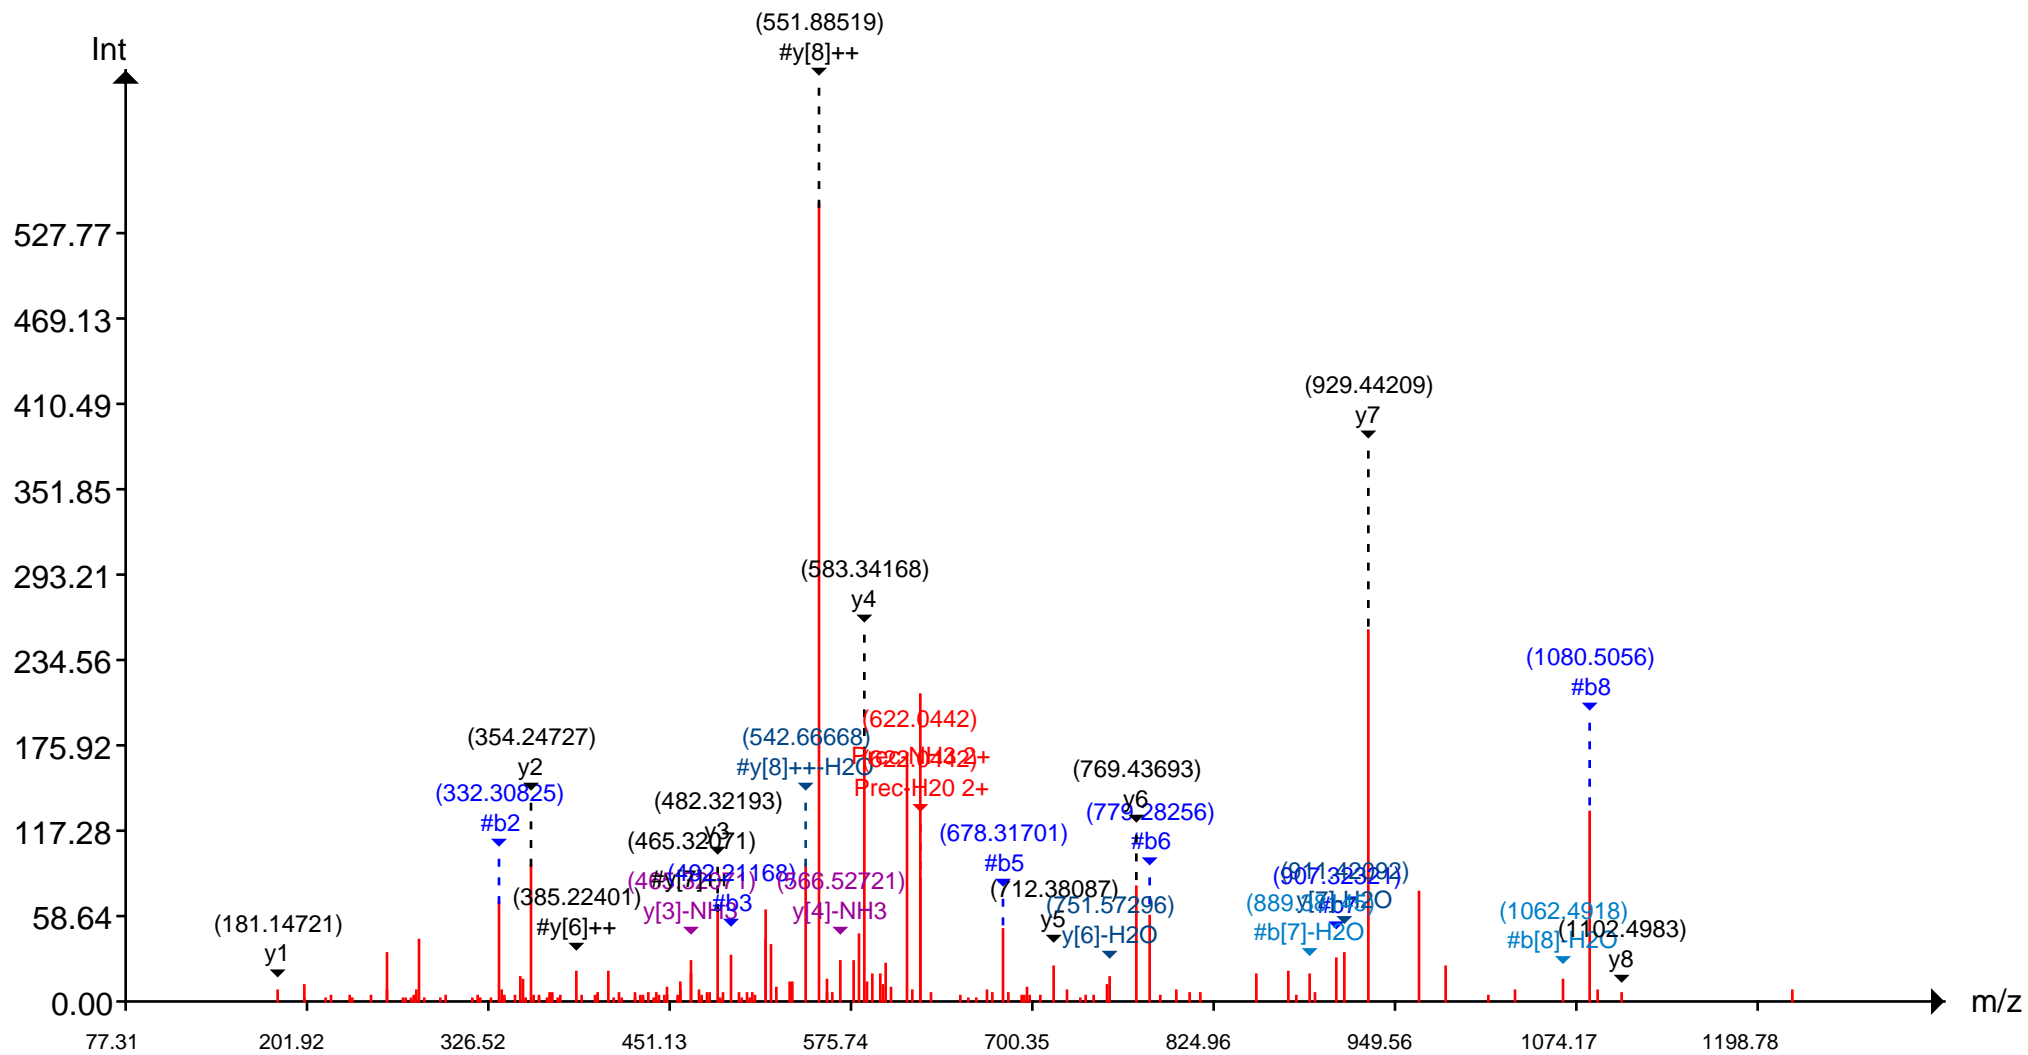

## Info

|                          |                                                |                           |         |
|--------------------------|------------------------------------------------|---------------------------|---------|
| <b>Modified Sequence</b> | AcD3-IK<AcD3K*>C<Cmm*>GETQK<AcD3K*>R<C13>-COOH | <b>Ion score</b>          | 47.82   |
| <b>Protein</b>           | Q9JK48                                         | <b>Confidence level</b>   | 99.00%  |
| <b>Precursor m/z</b>     | 630.85521                                      | <b>Identity Threshold</b> | 47.33   |
| <b>Charge</b>            | 2+                                             | <b>Mass error</b>         | 9.22E-4 |

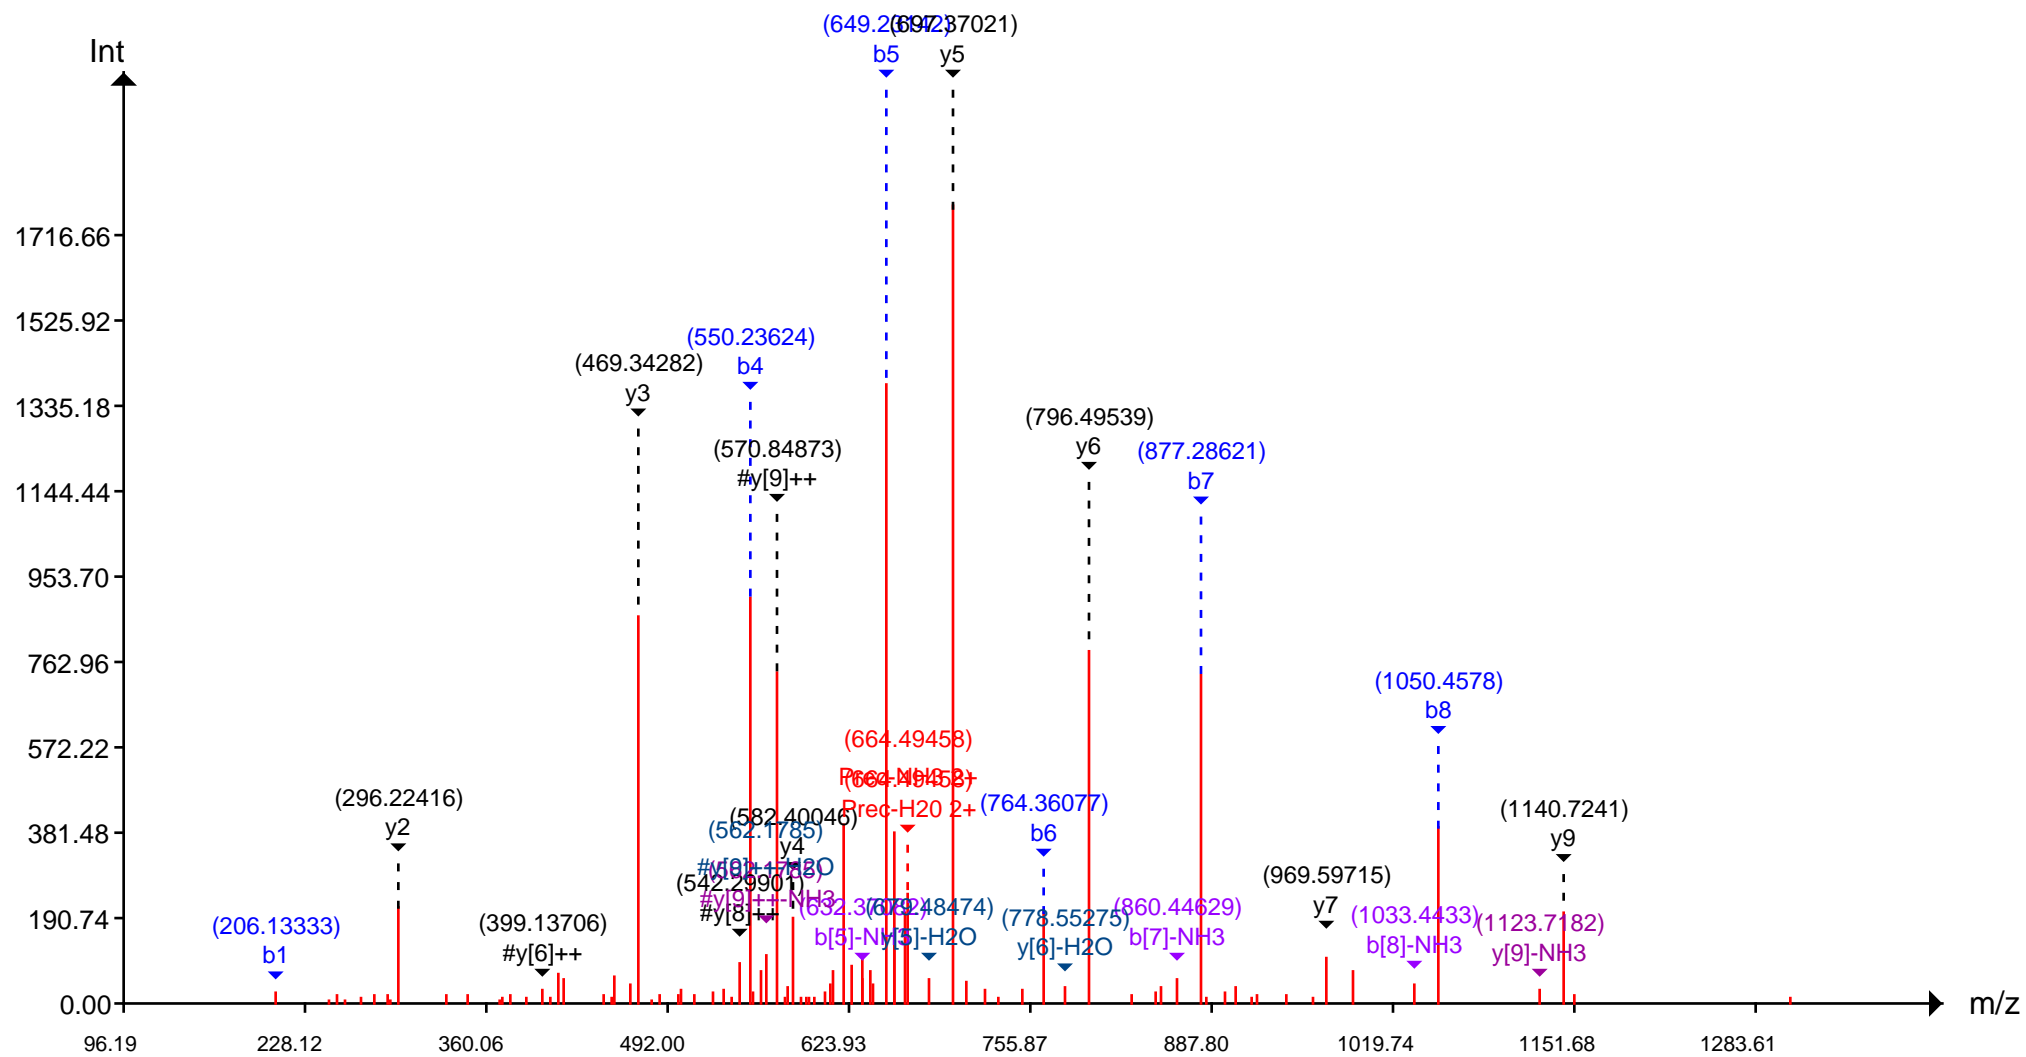

## Info

|                          |                                                 |                           |           |
|--------------------------|-------------------------------------------------|---------------------------|-----------|
| <b>Modified Sequence</b> | AcD3-C<Cmm*>GNK<AcD3K*>VDIK<AcD3K*>DR<C13>-COOH | <b>Ion score</b>          | 53.35     |
| <b>Protein</b>           | P62827                                          | <b>Confidence level</b>   | 99.00%    |
| <b>Precursor m/z</b>     | 673.36228                                       | <b>Identity Threshold</b> | 47.97     |
| <b>Charge</b>            | 2+                                              | <b>Mass error</b>         | -0.001326 |

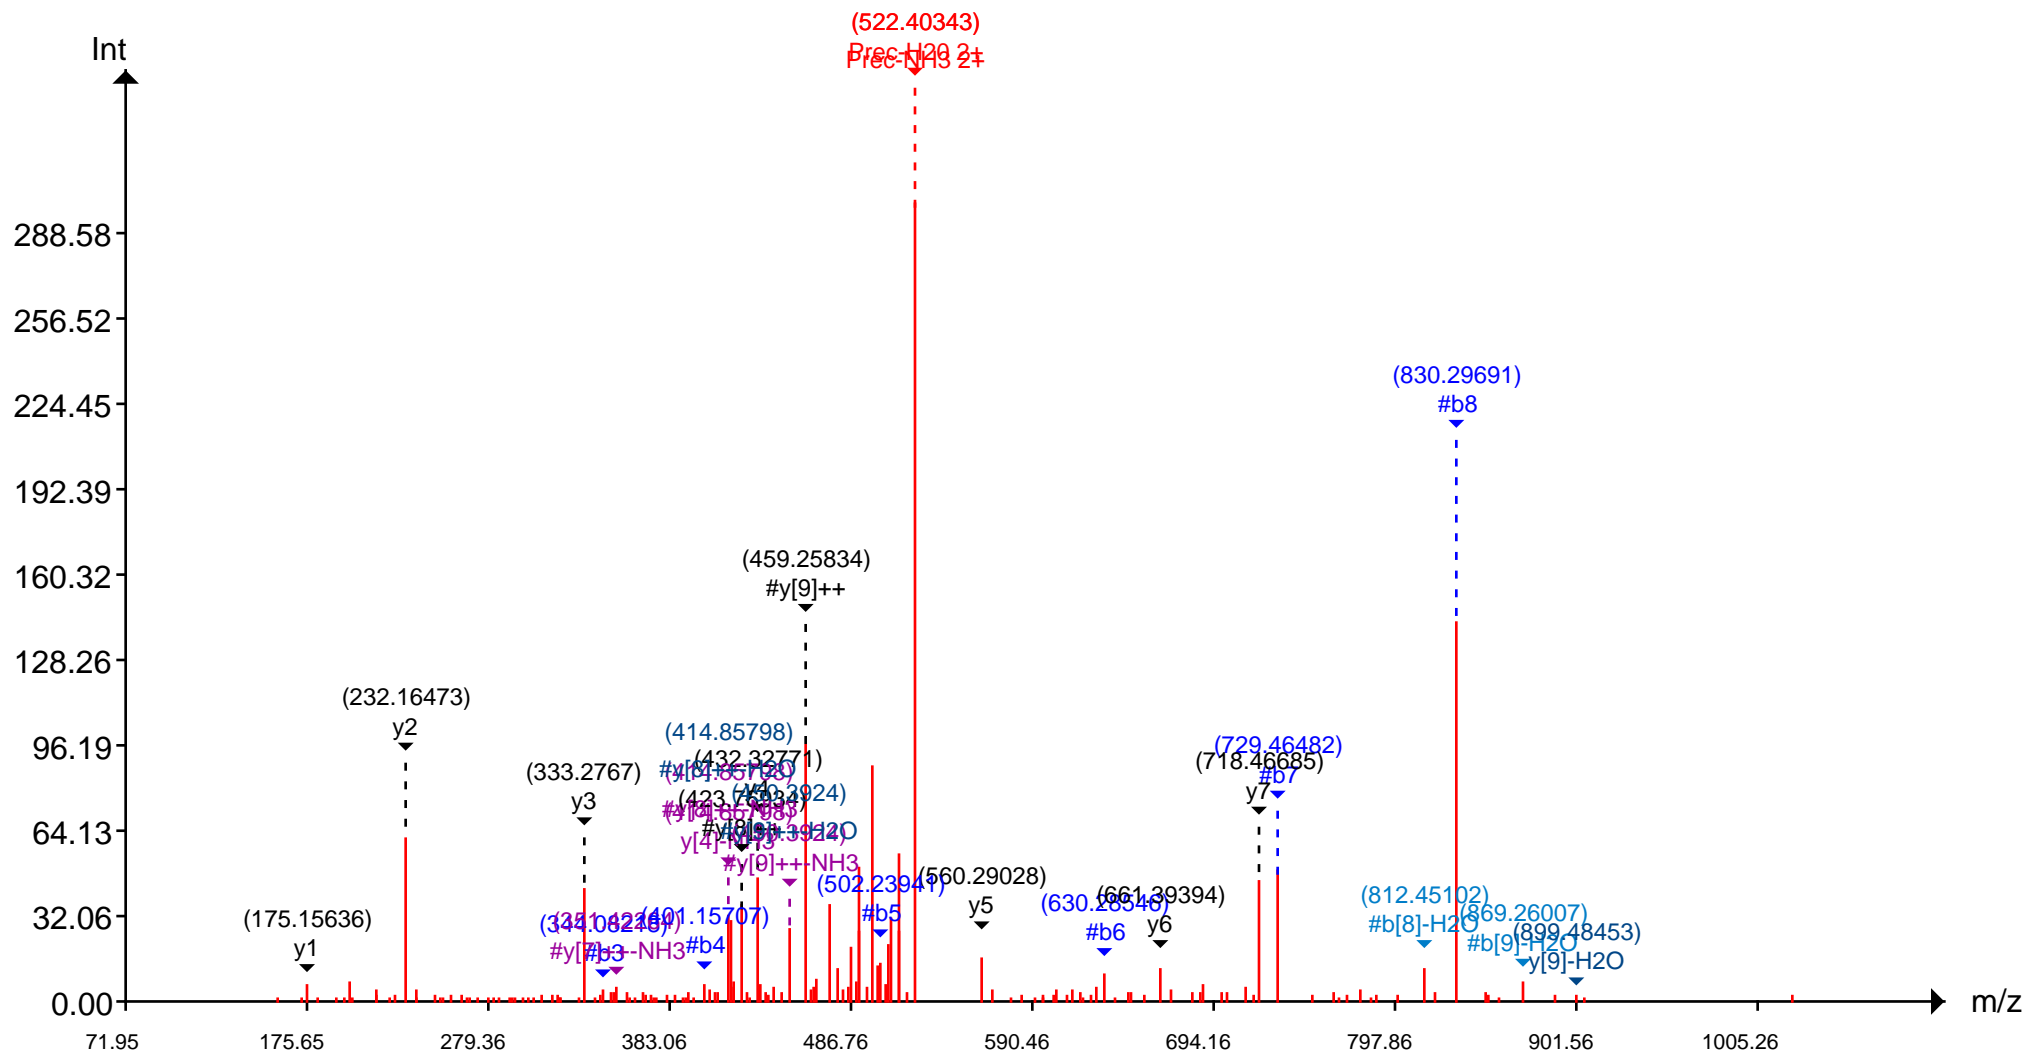

## Info

**Modified Sequence** AcD3-VAQGTQVTGR-COOH

**Protein** P50580

**Precursor m/z** 531.2924

**Charge** 2+

**Ion score** 56.79

**Confidence level** 99.00%

**Identity Threshold** 47.85

**Mass error** -2.17E-4

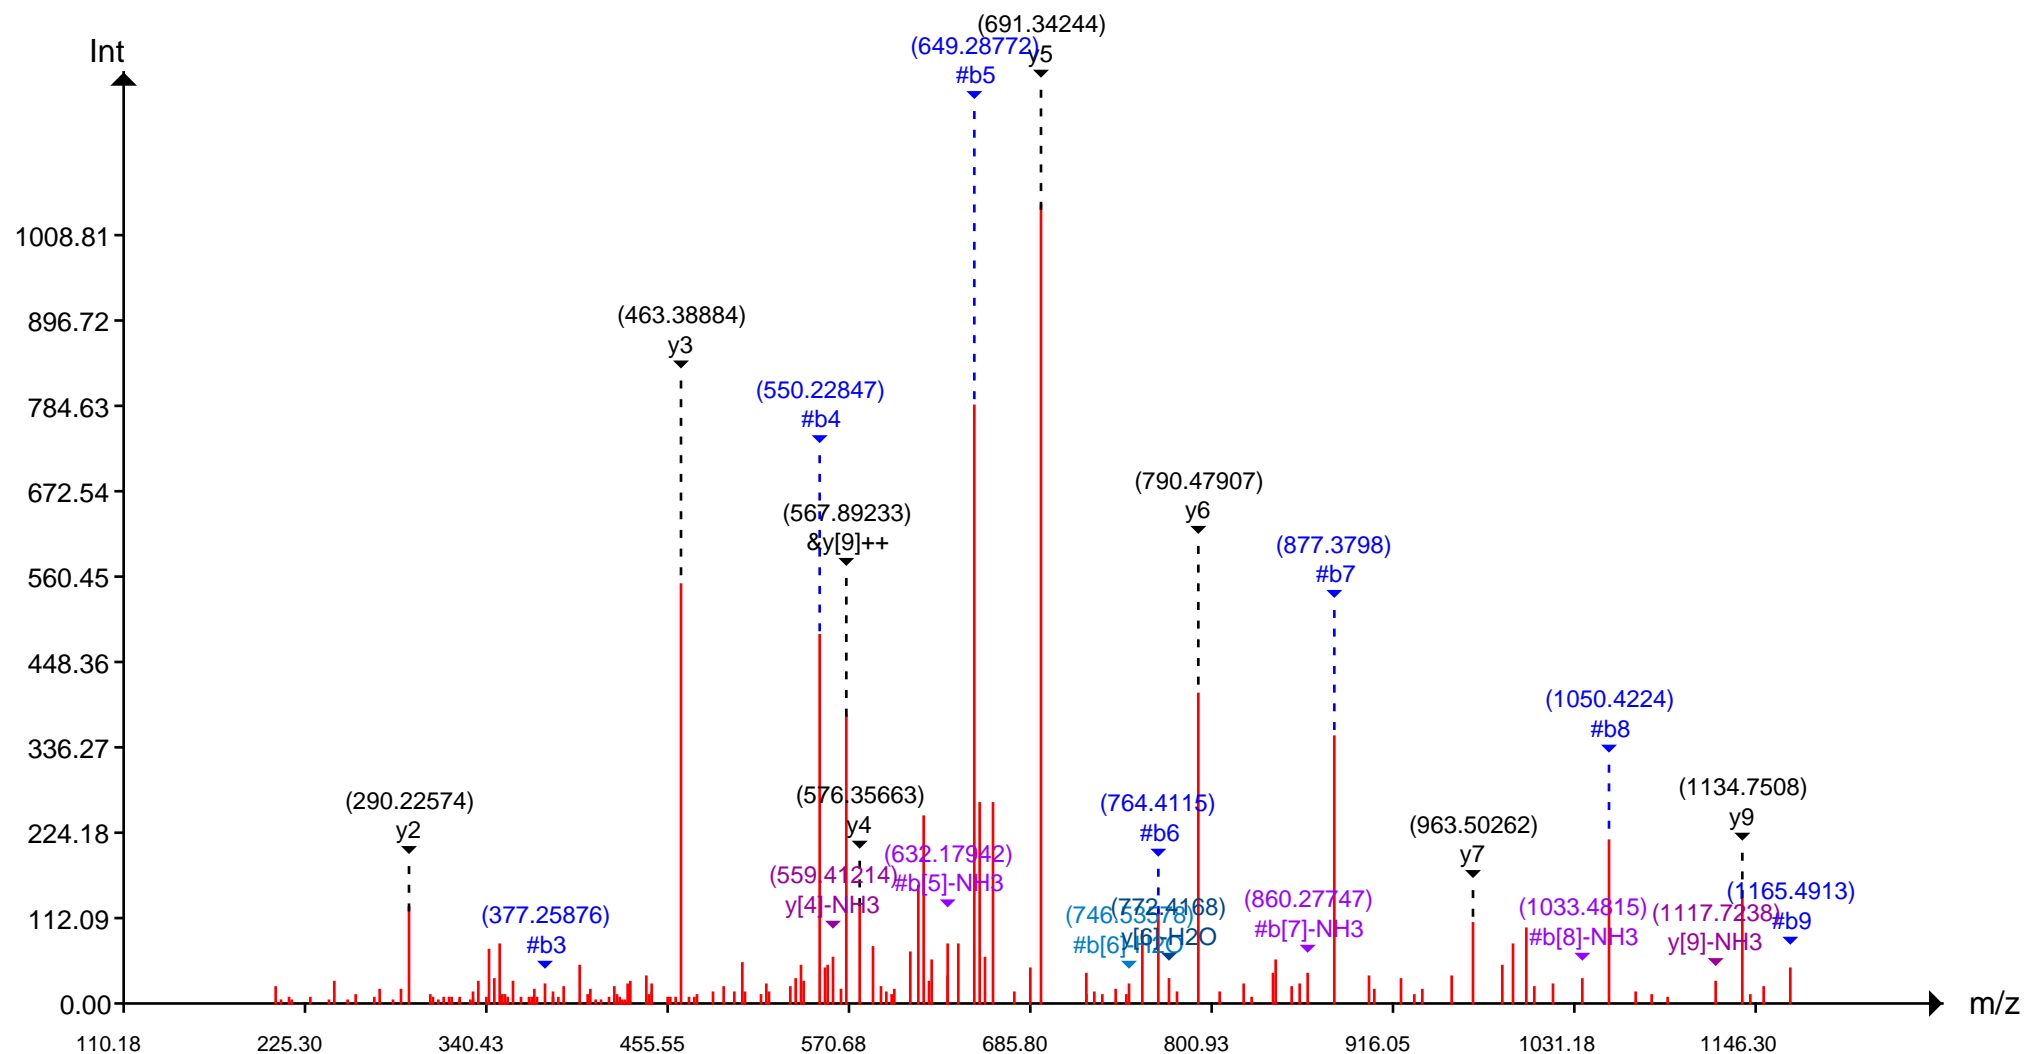

## Info

|                          |                                            |                           |        |
|--------------------------|--------------------------------------------|---------------------------|--------|
| <b>Modified Sequence</b> | AcD3-C<Cmm*>GNK<AcD3K*>VDIK<AcD3K*>DR-COOH | <b>Ion score</b>          | 53.09  |
| <b>Protein</b>           | P62827                                     | <b>Confidence level</b>   | 99.00% |
| <b>Precursor m/z</b>     | 670.35291                                  | <b>Identity Threshold</b> | 47.91  |
| <b>Charge</b>            | 2+                                         | <b>Mass error</b>         | 7.5E-5 |



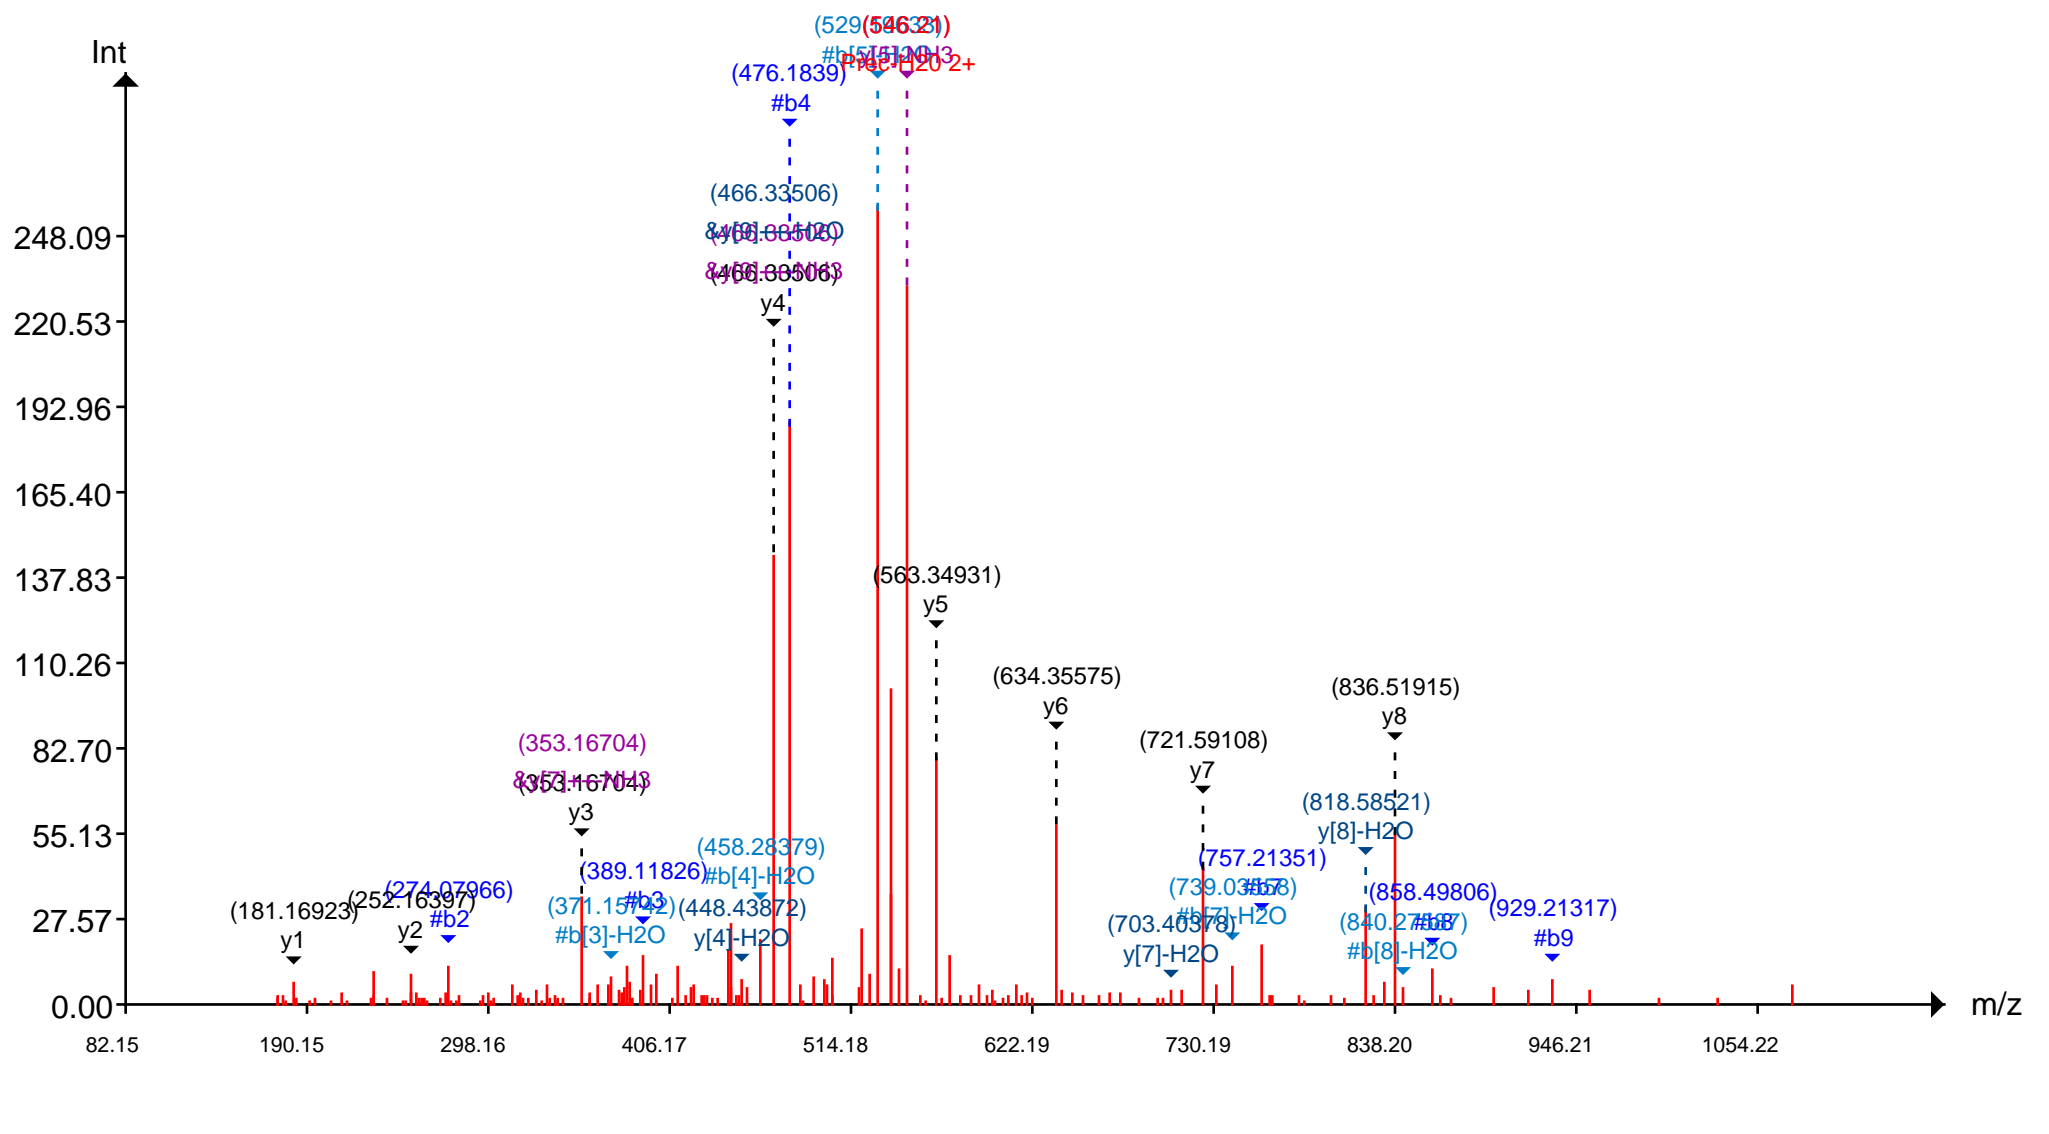

| Info                     |                           |                           |        |
|--------------------------|---------------------------|---------------------------|--------|
| <b>Modified Sequence</b> | AcD3-DIDSAPITAR<C13>-COOH | <b>Ion score</b>          | 56.02  |
| <b>Protein</b>           | P52480                    | <b>Confidence level</b>   | 99.00% |
| <b>Precursor m/z</b>     | 555.30224                 | <b>Identity Threshold</b> | 47.79  |
| <b>Charge</b>            | 2+                        | <b>Mass error</b>         | 2.3E-5 |

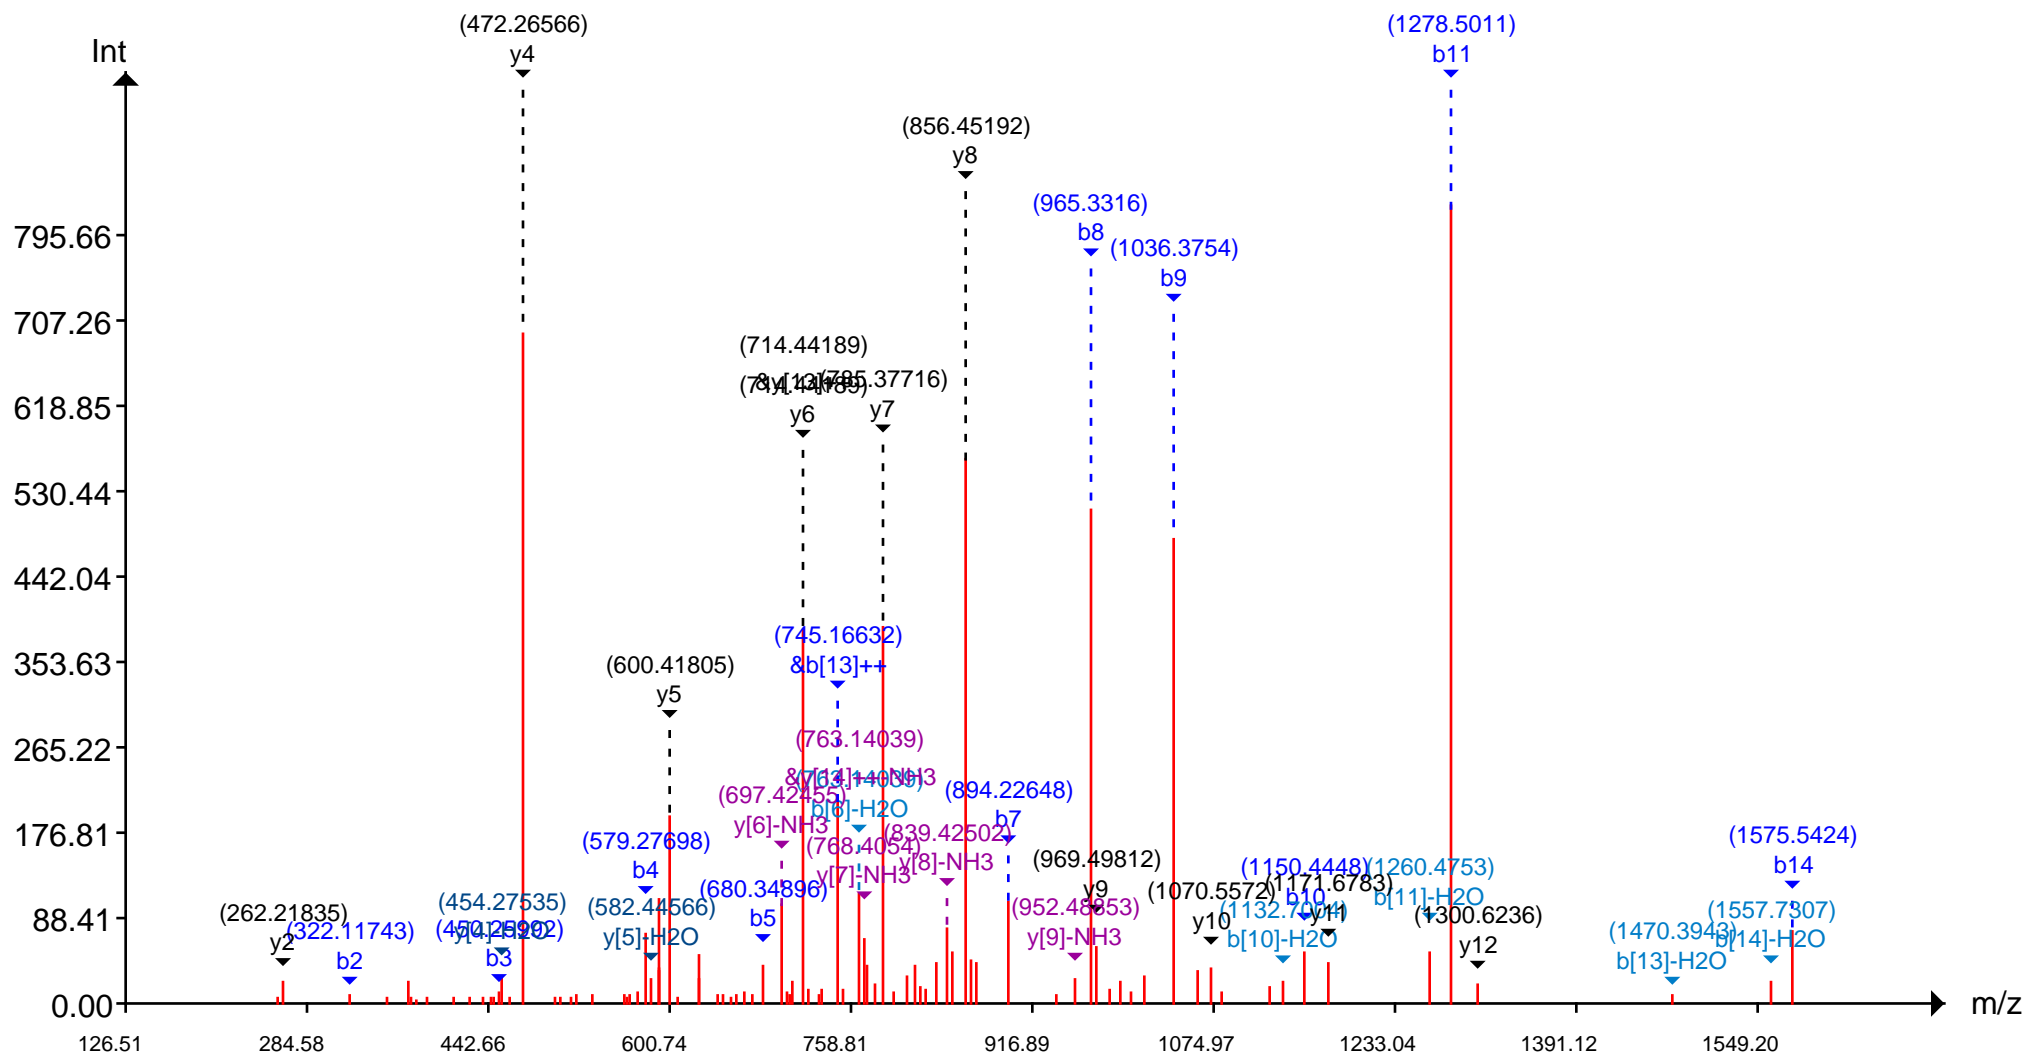

## Info

|                          |                           |                           |          |
|--------------------------|---------------------------|---------------------------|----------|
| <b>Modified Sequence</b> | AcD3-YLQETTLAANQPLSR-COOH | <b>Ion score</b>          | 88.85    |
| <b>Protein</b>           | O09159                    | <b>Confidence level</b>   | 99.00%   |
| <b>Precursor m/z</b>     | 875.46499                 | <b>Identity Threshold</b> | 48.12    |
| <b>Charge</b>            | 2+                        | <b>Mass error</b>         | 0.001823 |

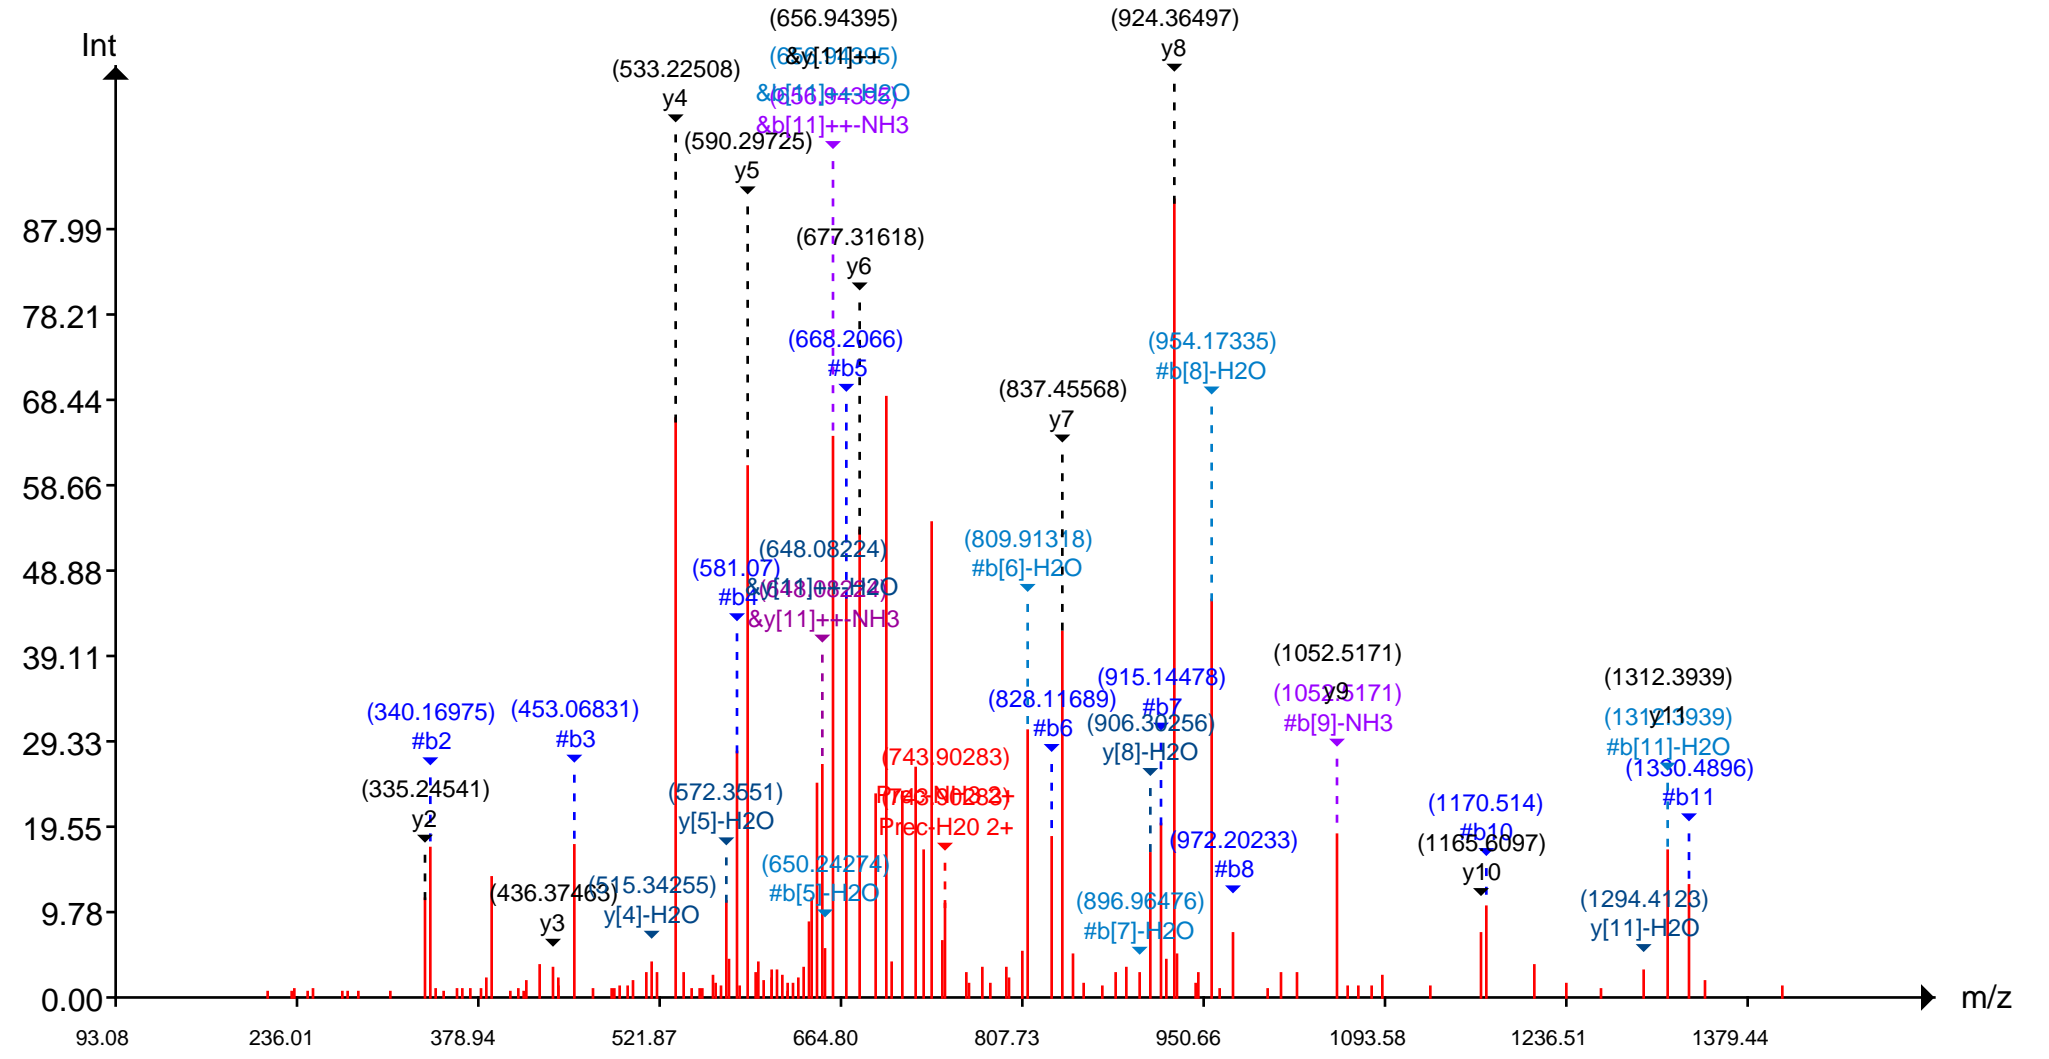

Info

|                          |                                                |                           |          |
|--------------------------|------------------------------------------------|---------------------------|----------|
| <b>Modified Sequence</b> | AcD3-M<Mox*>M<Mox*>LQSC<Cmm*>SGPTC<Cmm*>R-COOH | <b>Ion score</b>          | 76.65    |
| <b>Protein</b>           | Q8BFR4                                         | <b>Confidence level</b>   | 99.00%   |
| <b>Precursor m/z</b>     | 752.80908                                      | <b>Identity Threshold</b> | 38.18    |
| <b>Charge</b>            | 2+                                             | <b>Mass error</b>         | 0.001832 |

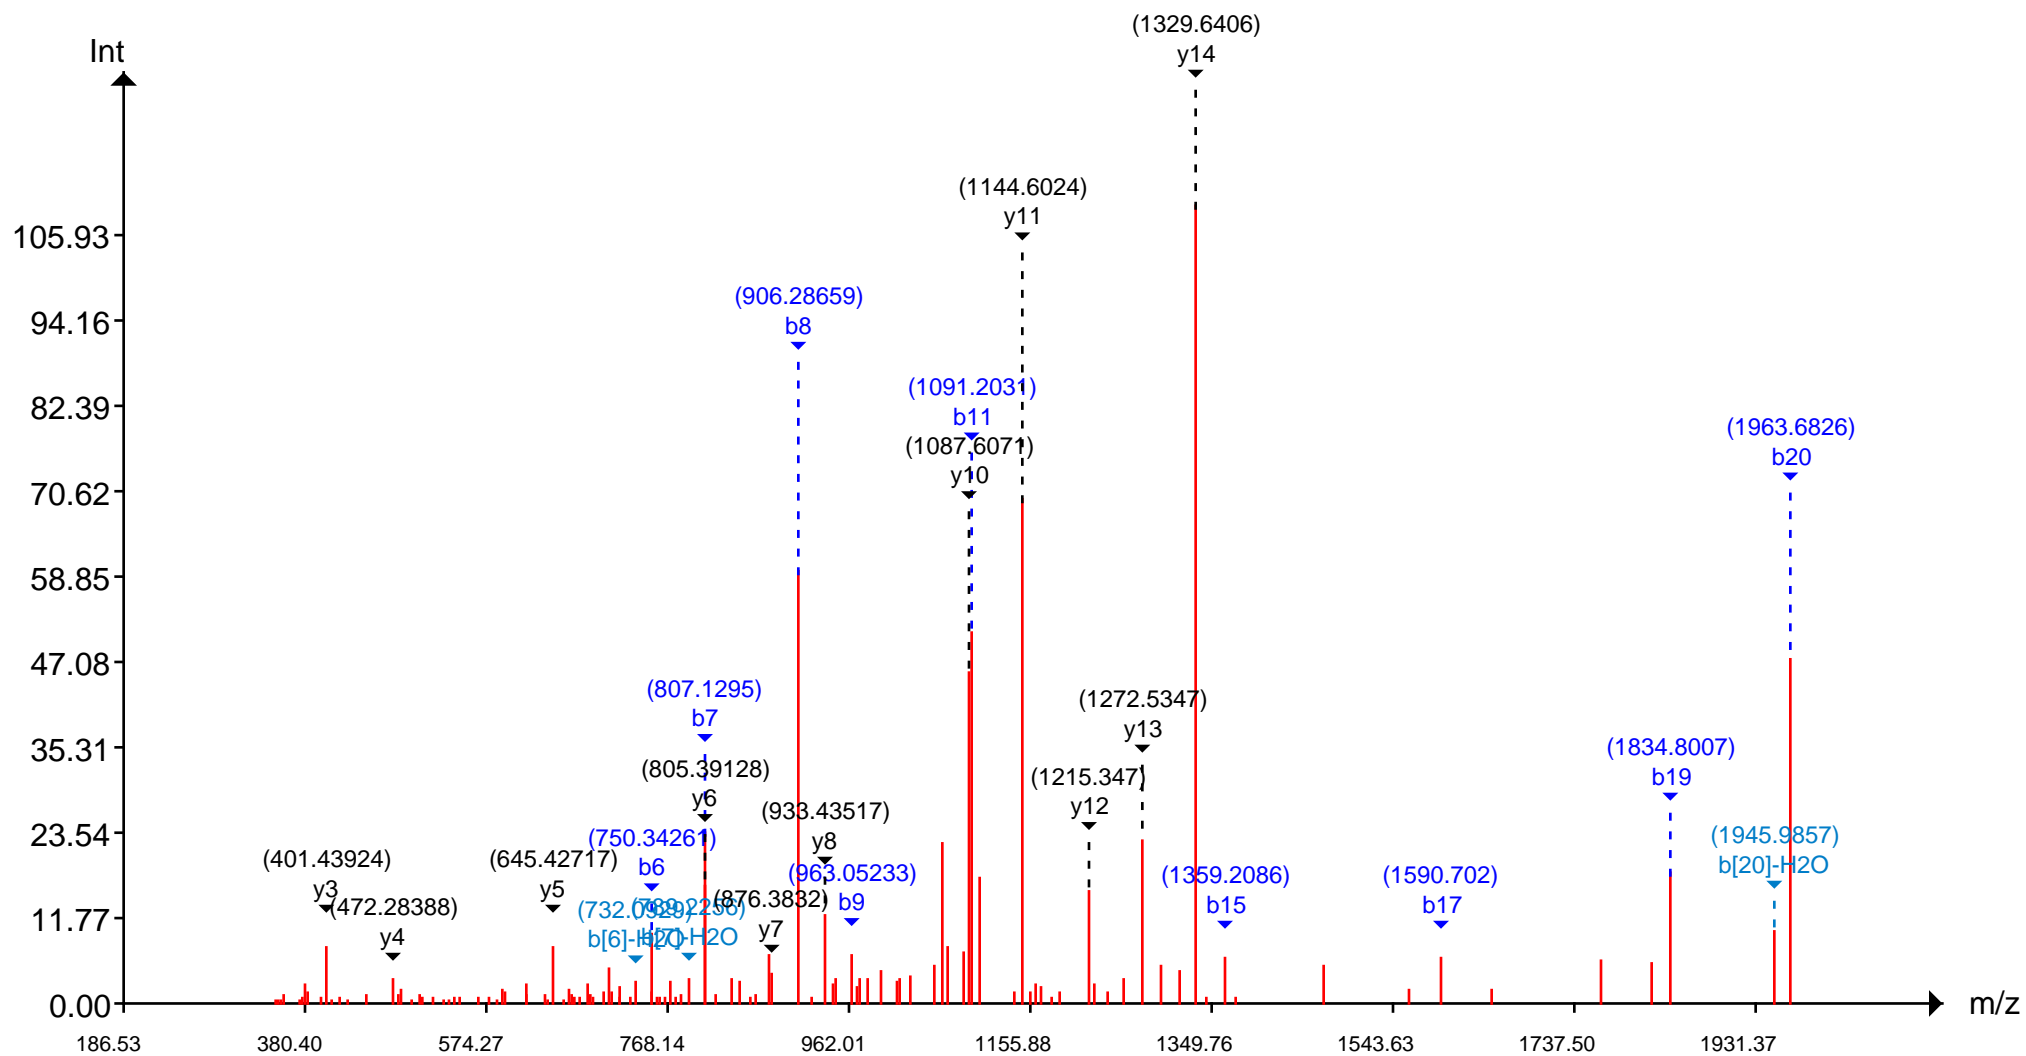

## Info

|                          |                                                      |                           |          |
|--------------------------|------------------------------------------------------|---------------------------|----------|
| <b>Modified Sequence</b> | AcD3-M<Mox*>LEDEAGVGGAGPGGAC<Cmm*>K<AcD3K*>AEPR-COOH | <b>Ion score</b>          | 70.72    |
| <b>Protein</b>           | Q00PI9                                               | <b>Confidence level</b>   | 99.00%   |
| <b>Precursor m/z</b>     | 1118.0197                                            | <b>Identity Threshold</b> | 45.11    |
| <b>Charge</b>            | 2+                                                   | <b>Mass error</b>         | 0.003409 |

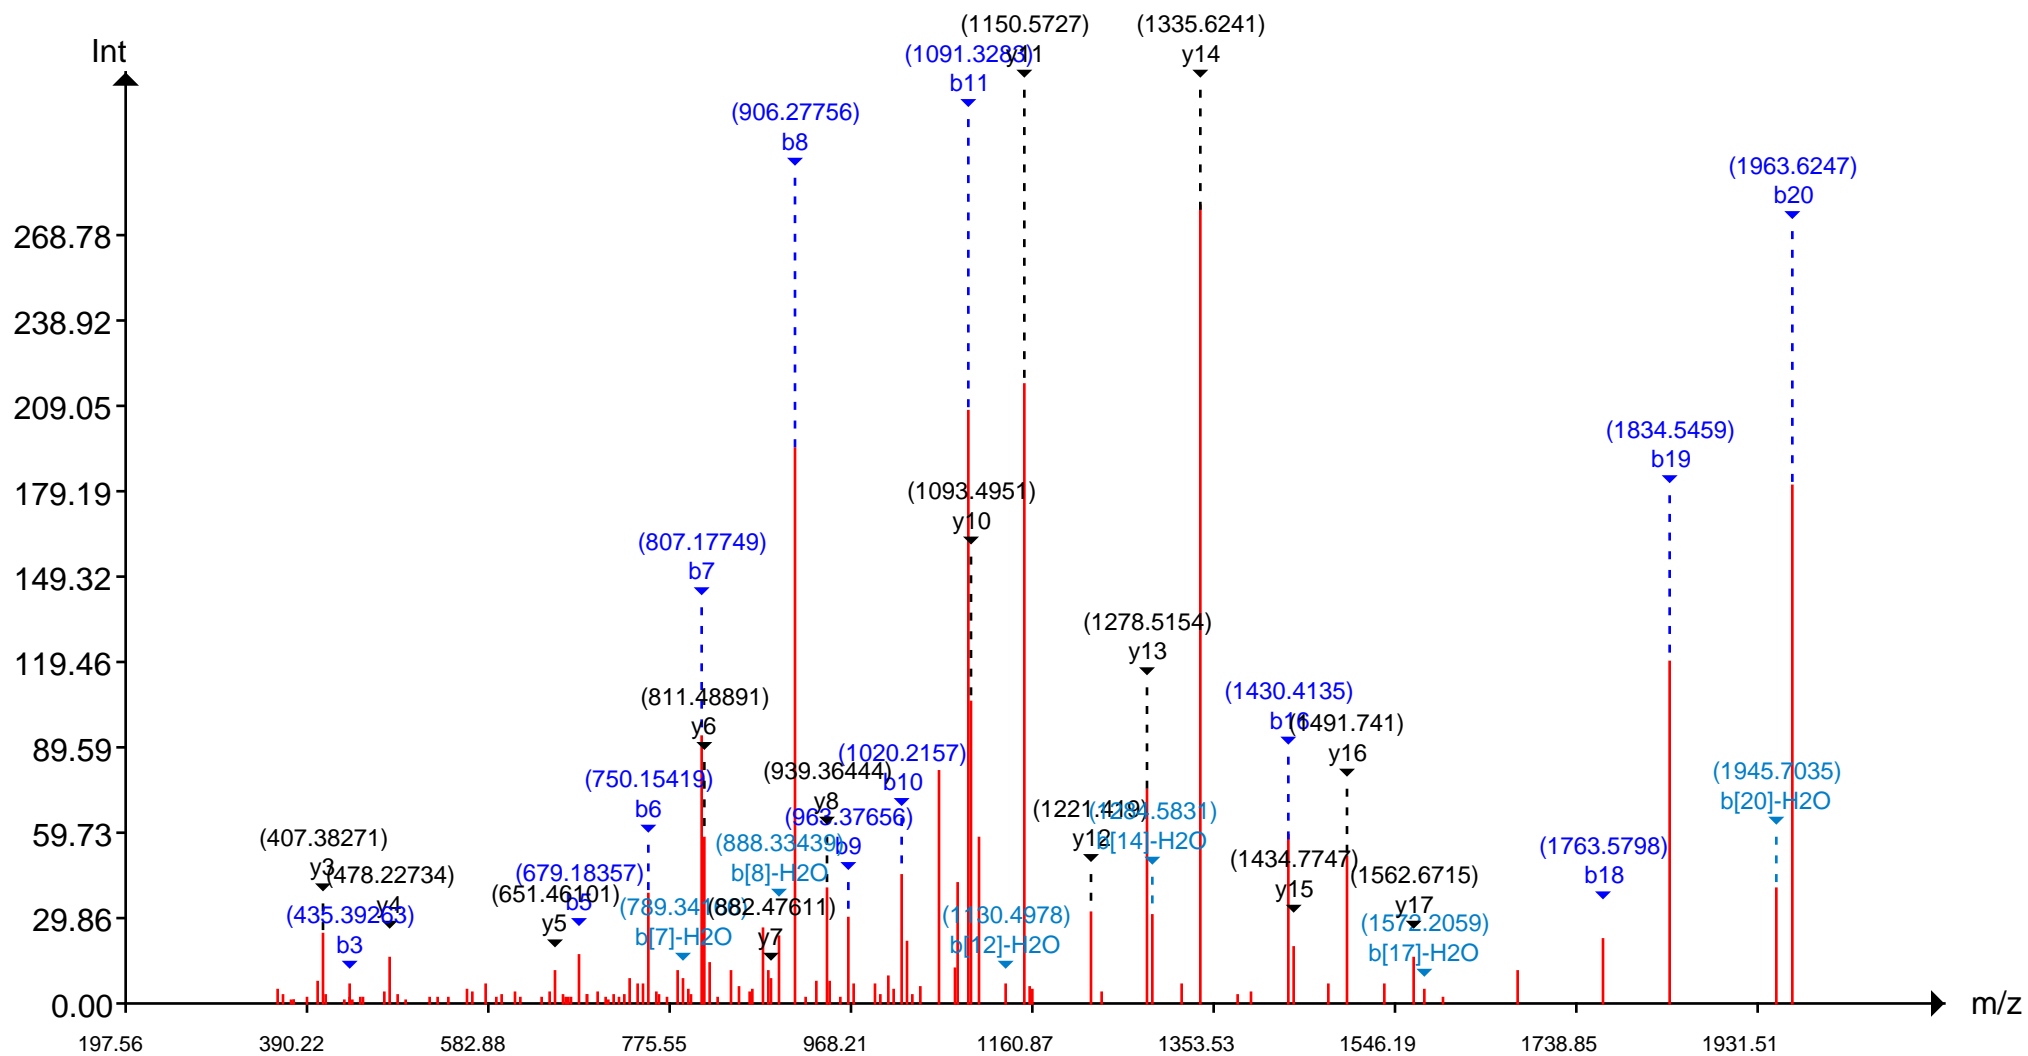

## Info

|                          |                                                           |                           |          |
|--------------------------|-----------------------------------------------------------|---------------------------|----------|
| <b>Modified Sequence</b> | AcD3-M<Mox*>LEDEAGVGGAGPGGAC<Cmm*>K<AcD3K*>AEPR<C13>-COOH | <b>Ion score</b>          | 104.75   |
| <b>Protein</b>           | Q00PI9                                                    | <b>Confidence level</b>   | 99.00%   |
| <b>Precursor m/z</b>     | 1121.0287                                                 | <b>Identity Threshold</b> | 45.91    |
| <b>Charge</b>            | 2+                                                        | <b>Mass error</b>         | 0.001268 |

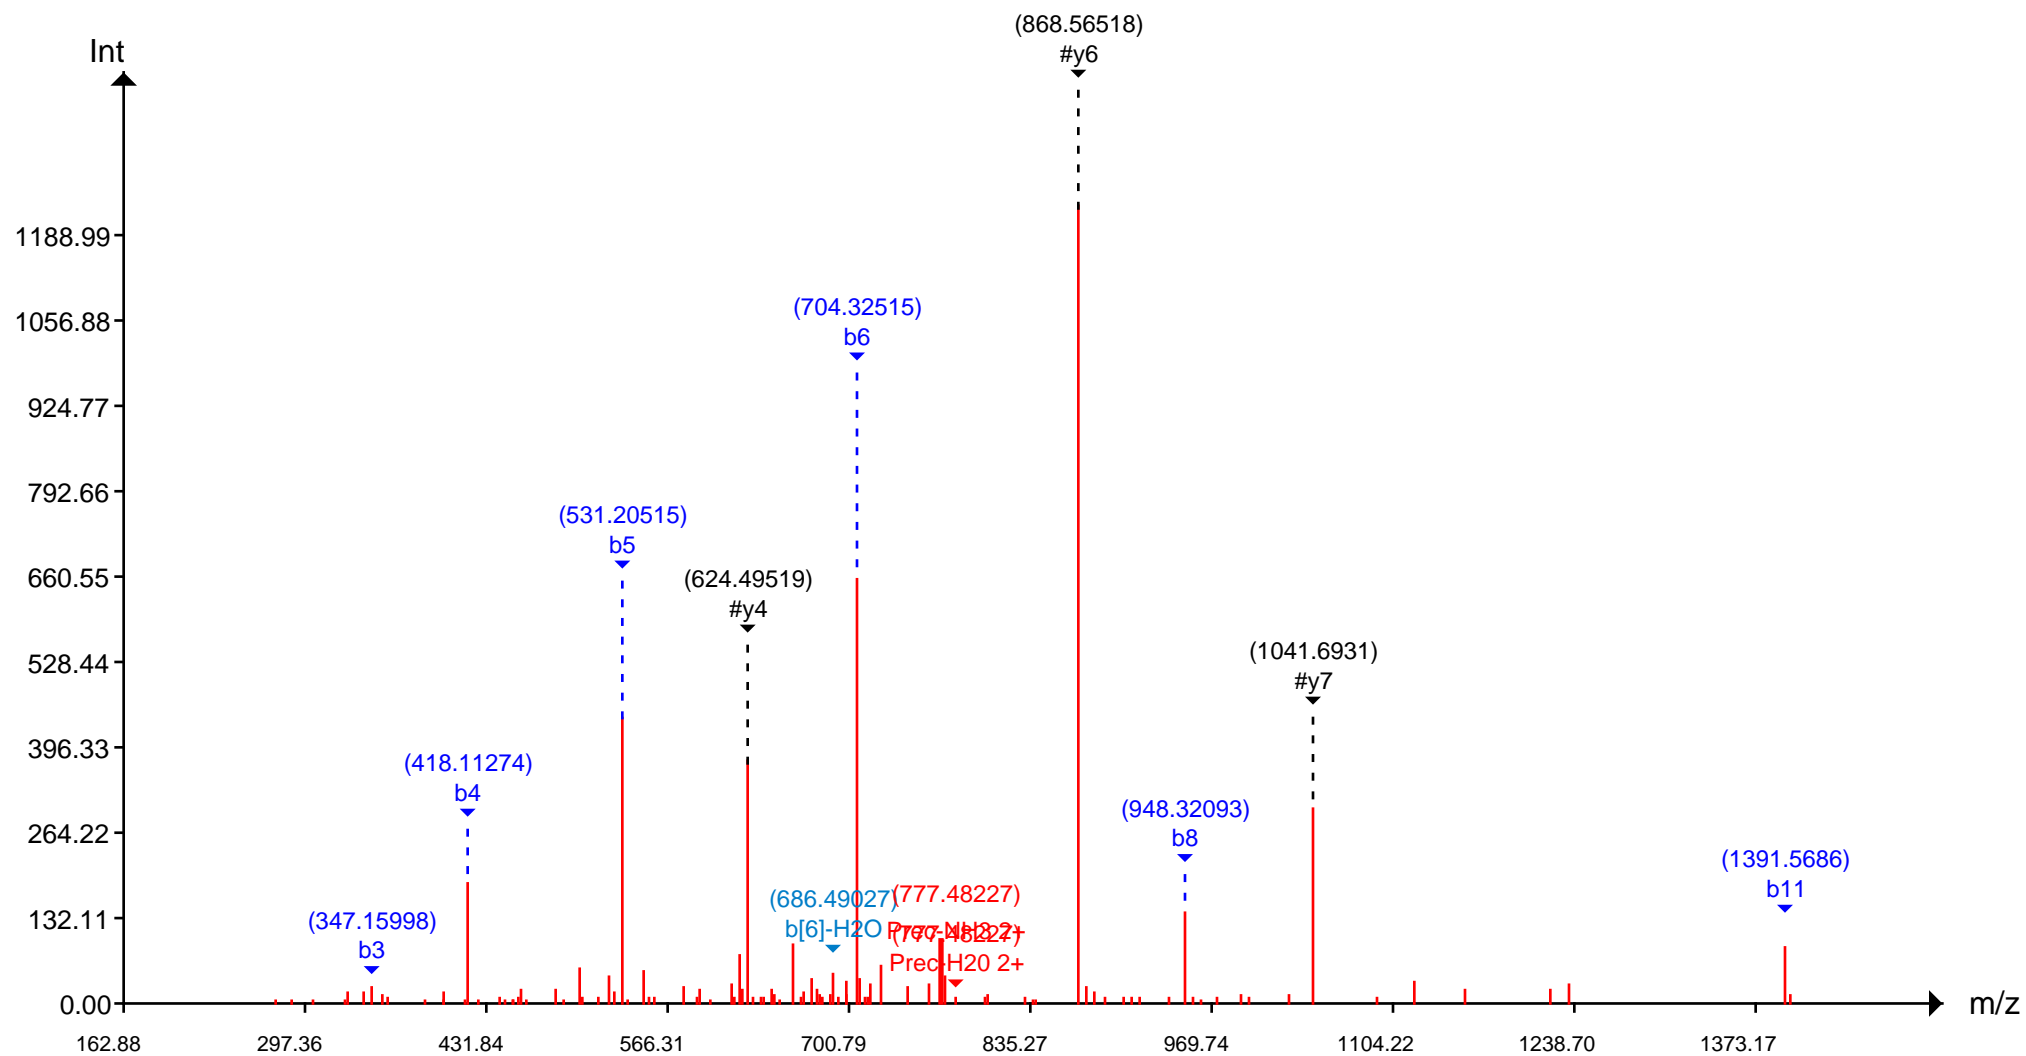

## Info

|                          |                                                      |                           |         |
|--------------------------|------------------------------------------------------|---------------------------|---------|
| <b>Modified Sequence</b> | AcD3-AATEAIK<AcD3K*>PFPK<AcD3K*>K<AcD3K*>R<C13>-COOH | <b>Ion score</b>          | 49.23   |
| <b>Protein</b>           | Q6PGL7                                               | <b>Confidence level</b>   | 99.00%  |
| <b>Precursor m/z</b>     | 786.48588                                            | <b>Identity Threshold</b> | 40.78   |
| <b>Charge</b>            | 2+                                                   | <b>Mass error</b>         | 4.36E-4 |

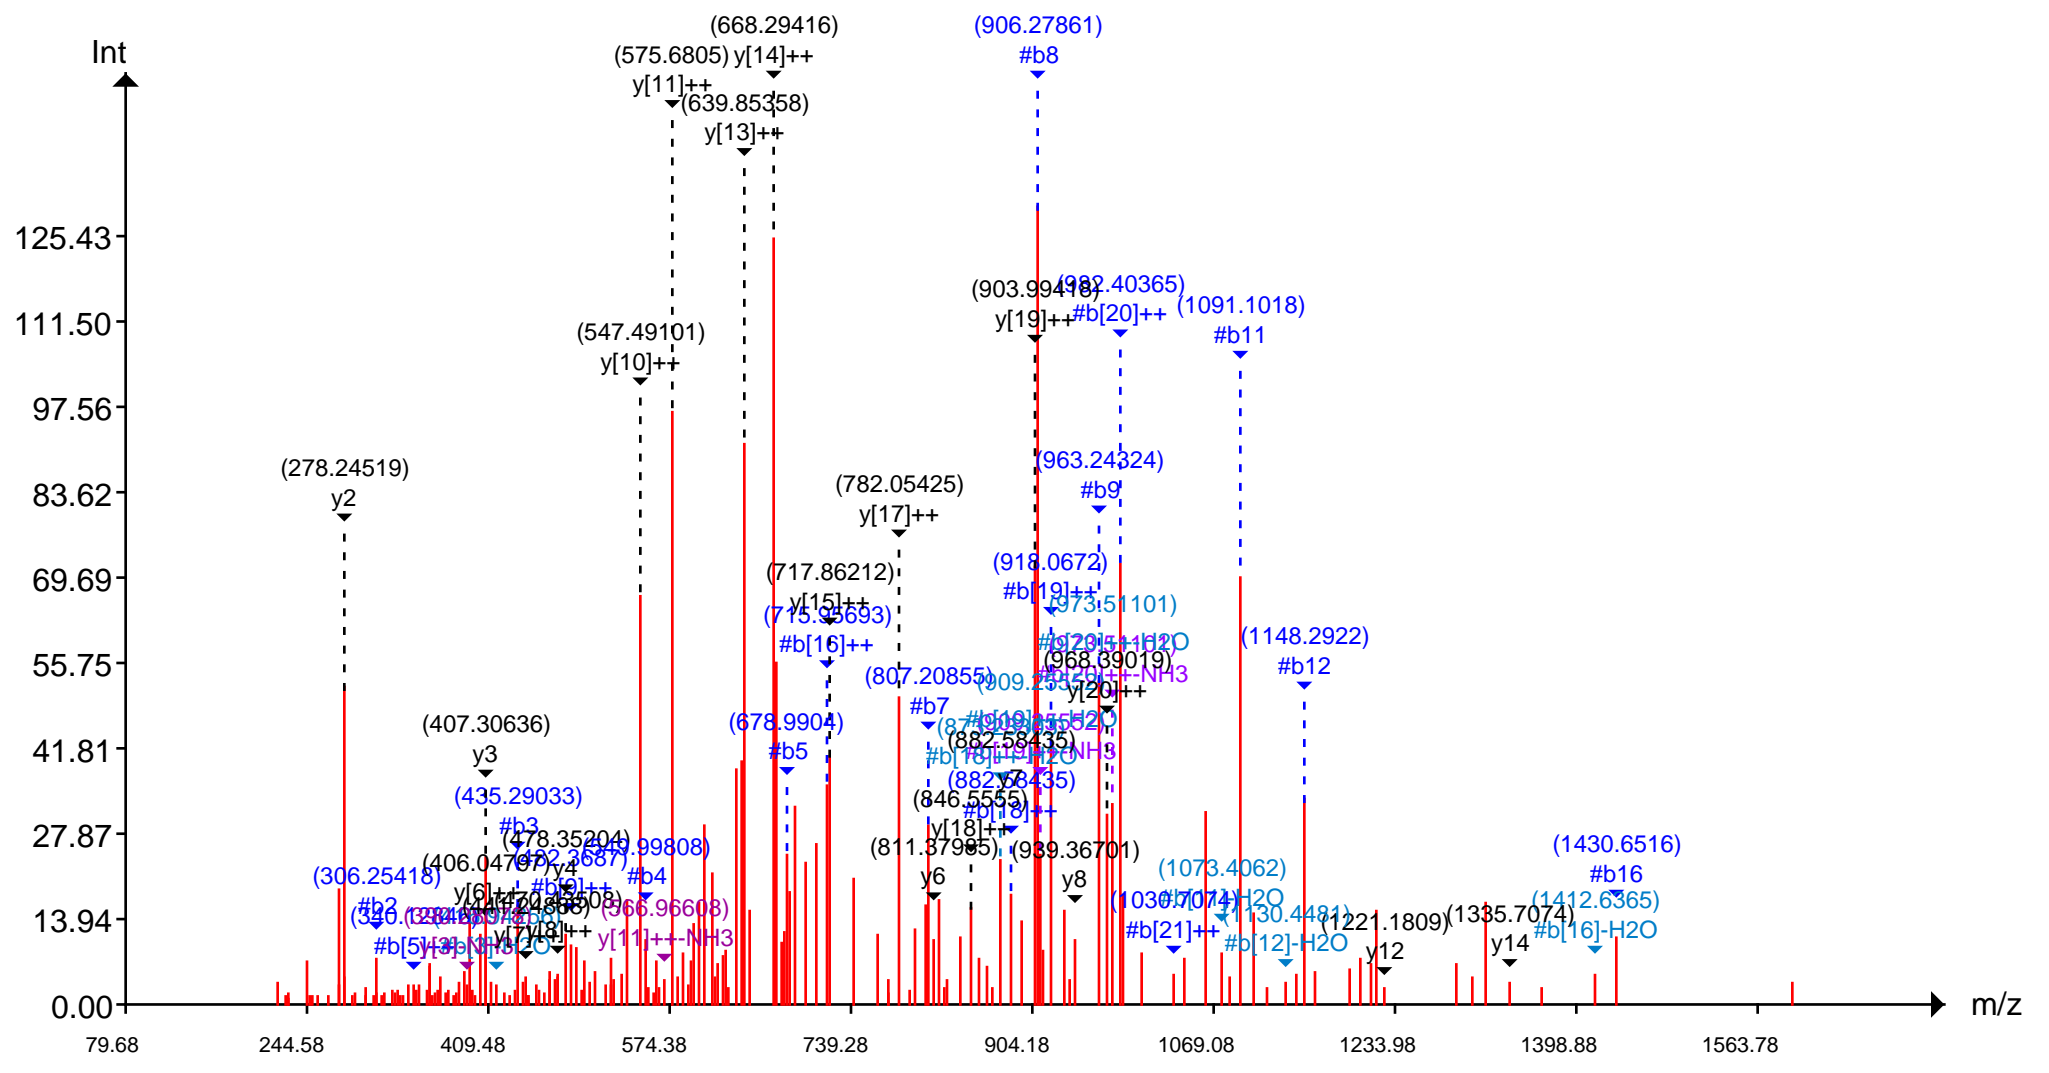

| Info                     |                                                           |                           |         |
|--------------------------|-----------------------------------------------------------|---------------------------|---------|
| <b>Modified Sequence</b> | AcD3-M<Mox*>LEDEAGVGGAGPGGAC<Cmm*>K<AcD3K*>AEPR<C13>-COOH | <b>Ion score</b>          | 49.43   |
| <b>Protein</b>           | Q00PI9                                                    | <b>Confidence level</b>   | 99.00%  |
| <b>Precursor m/z</b>     | 747.68813                                                 | <b>Identity Threshold</b> | 45.85   |
| <b>Charge</b>            | 3+                                                        | <b>Mass error</b>         | 9.82E-4 |

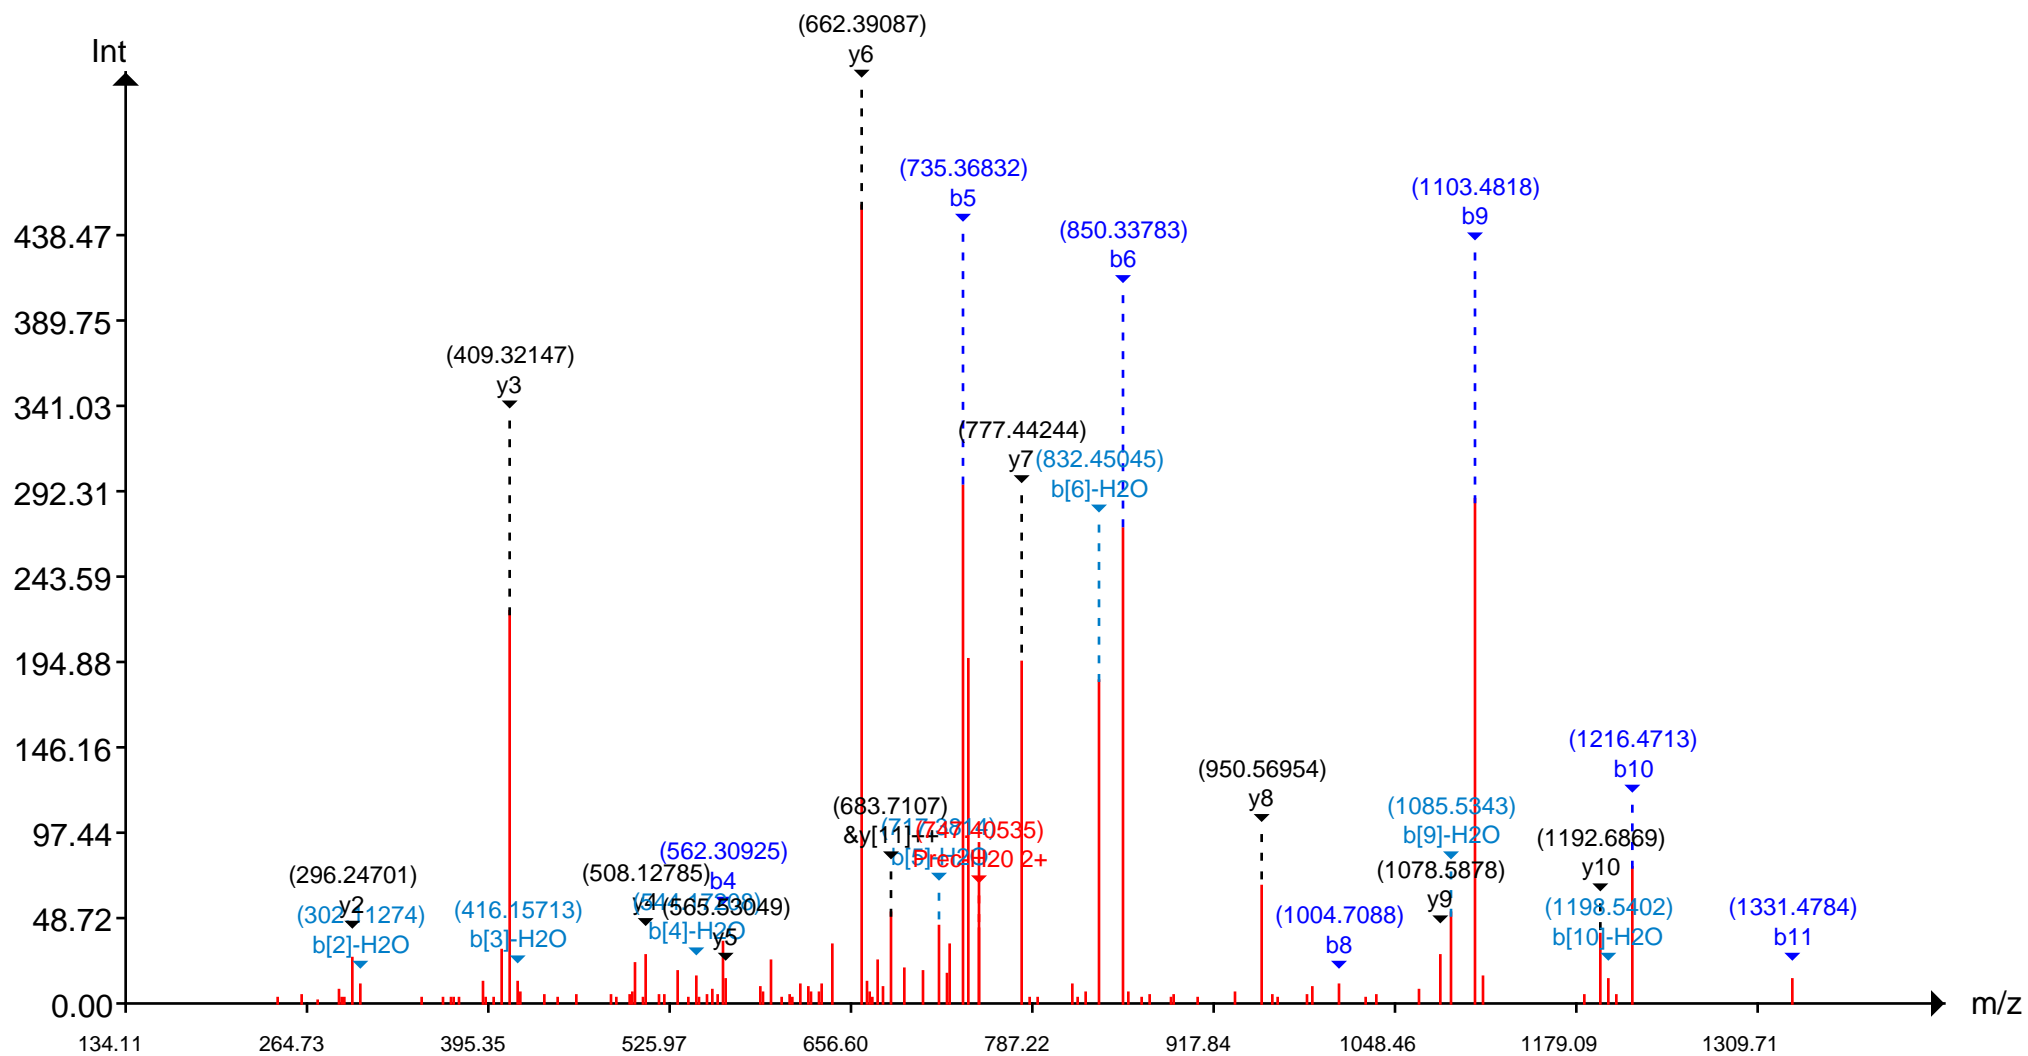

## Info

|                          |                                             |                           |          |
|--------------------------|---------------------------------------------|---------------------------|----------|
| <b>Modified Sequence</b> | AcD3-TK<AcD3K*>NQK<AcD3K*>DPGVLDK<C13>-COOH | <b>Ion score</b>          | 63.64    |
| <b>Protein</b>           | P50543                                      | <b>Confidence level</b>   | 99.00%   |
| <b>Precursor m/z</b>     | 756.42784                                   | <b>Identity Threshold</b> | 46.81    |
| <b>Charge</b>            | 2+                                          | <b>Mass error</b>         | 0.001422 |



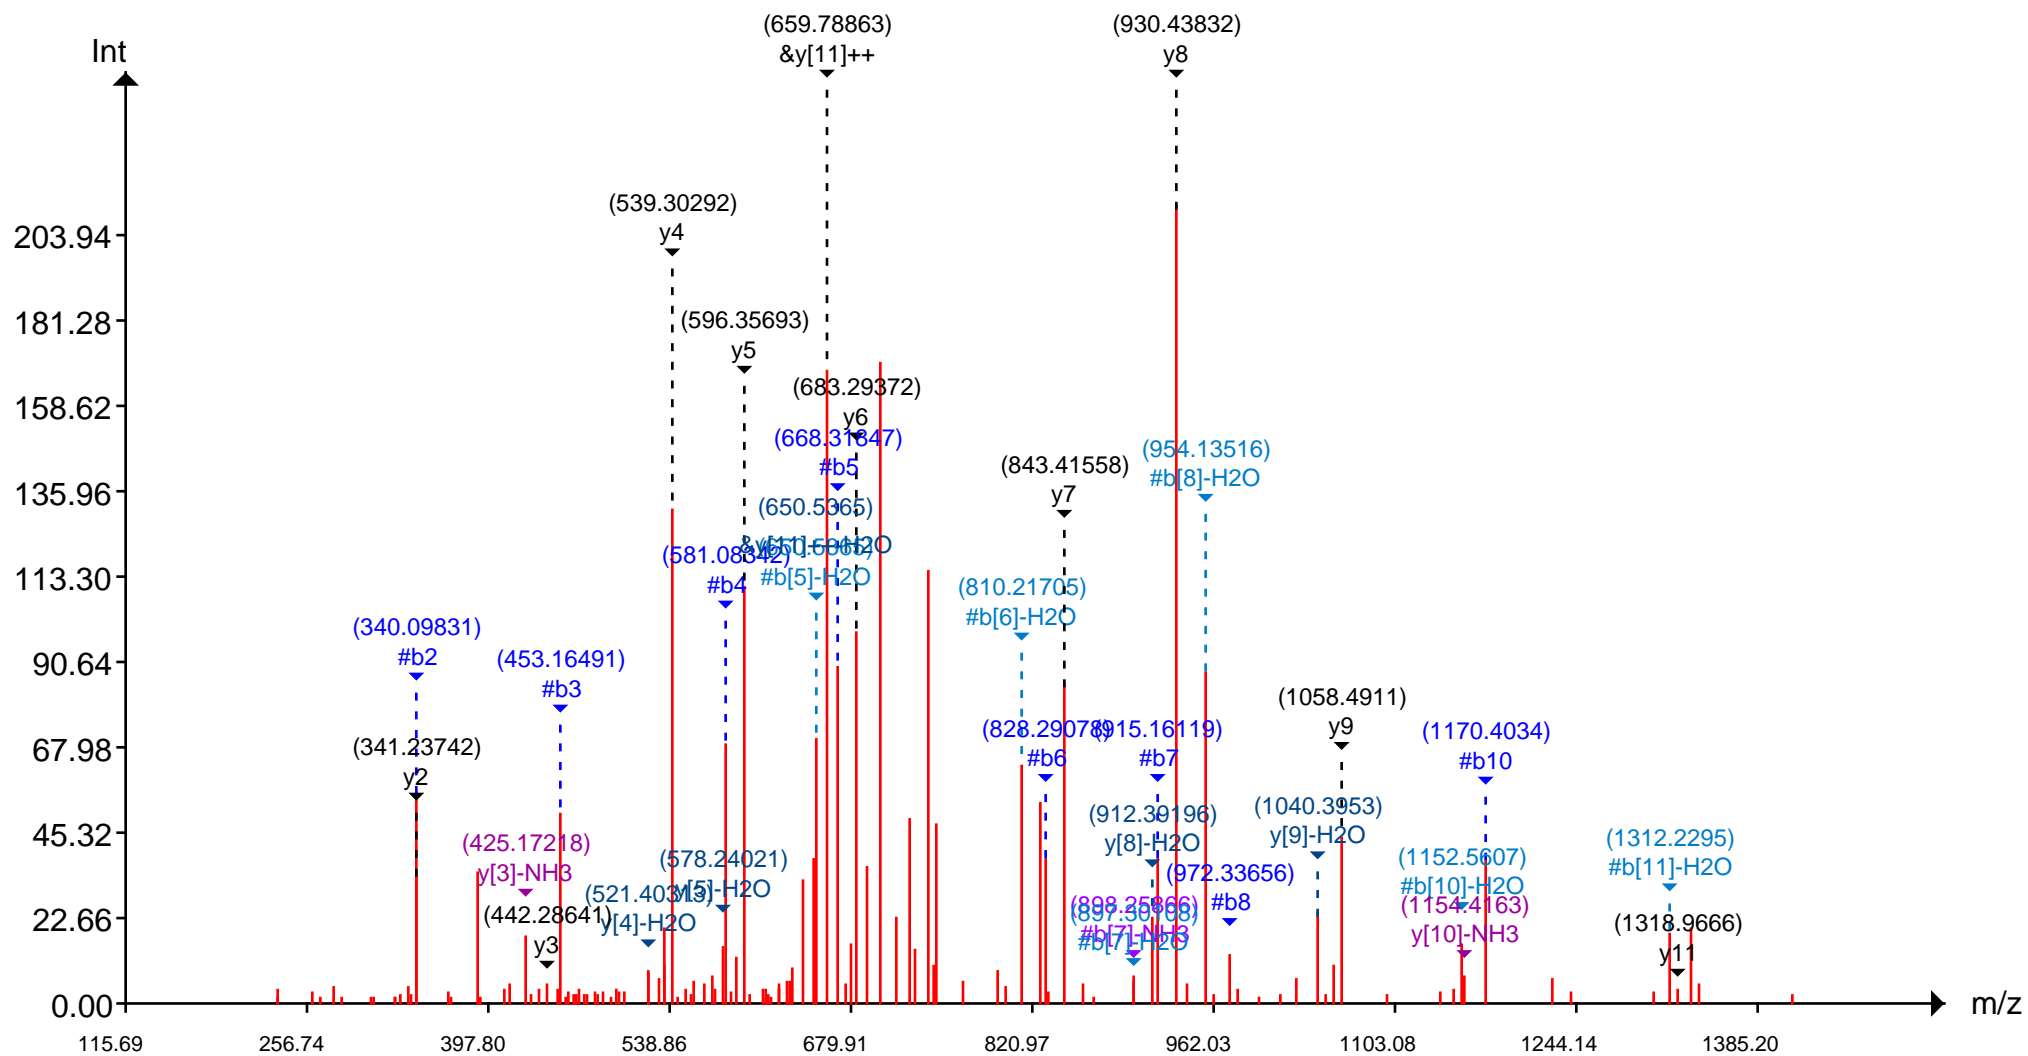

## Info

|                          |                                                     |                           |         |
|--------------------------|-----------------------------------------------------|---------------------------|---------|
| <b>Modified Sequence</b> | AcD3-M<Mox*>M<Mox*>LQSC<Cmm*>SGPTC<Cmm*>R<C13>-COOH | <b>Ion score</b>          | 55.23   |
| <b>Protein</b>           | Q8BFR4                                              | <b>Confidence level</b>   | 99.00%  |
| <b>Precursor m/z</b>     | 755.81897                                           | <b>Identity Threshold</b> | 40.45   |
| <b>Charge</b>            | 2+                                                  | <b>Mass error</b>         | 0.00147 |

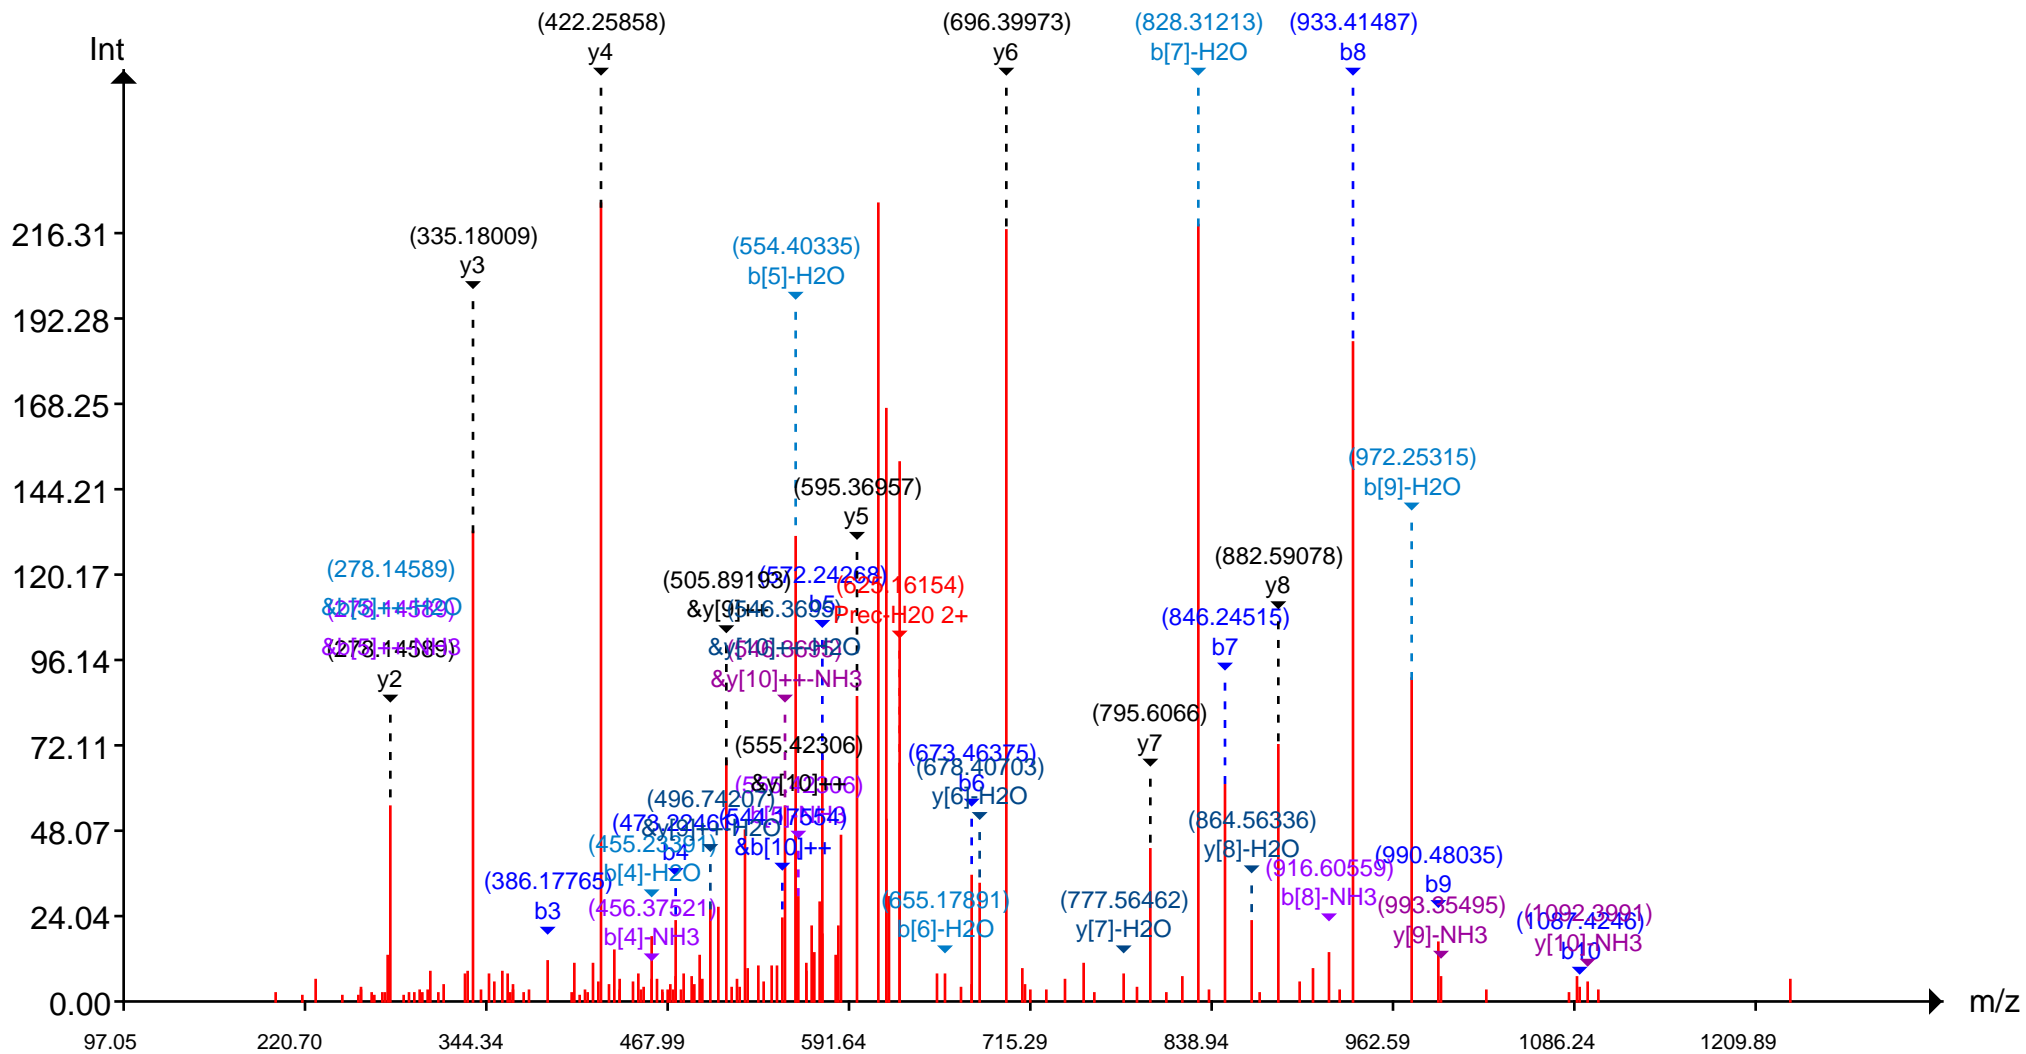

## Info

**Modified Sequence** AcD3-LVQSVTK<AcD3K\*>SGPR<C13>-COOH

**Ion score** 55.62

**Protein** Q6P9Q4

**Confidence level** 99.00%

**Precursor m/z** 634.38314

**Identity Threshold** 44.35

**Charge** 2+

**Mass error** 7.21E-4

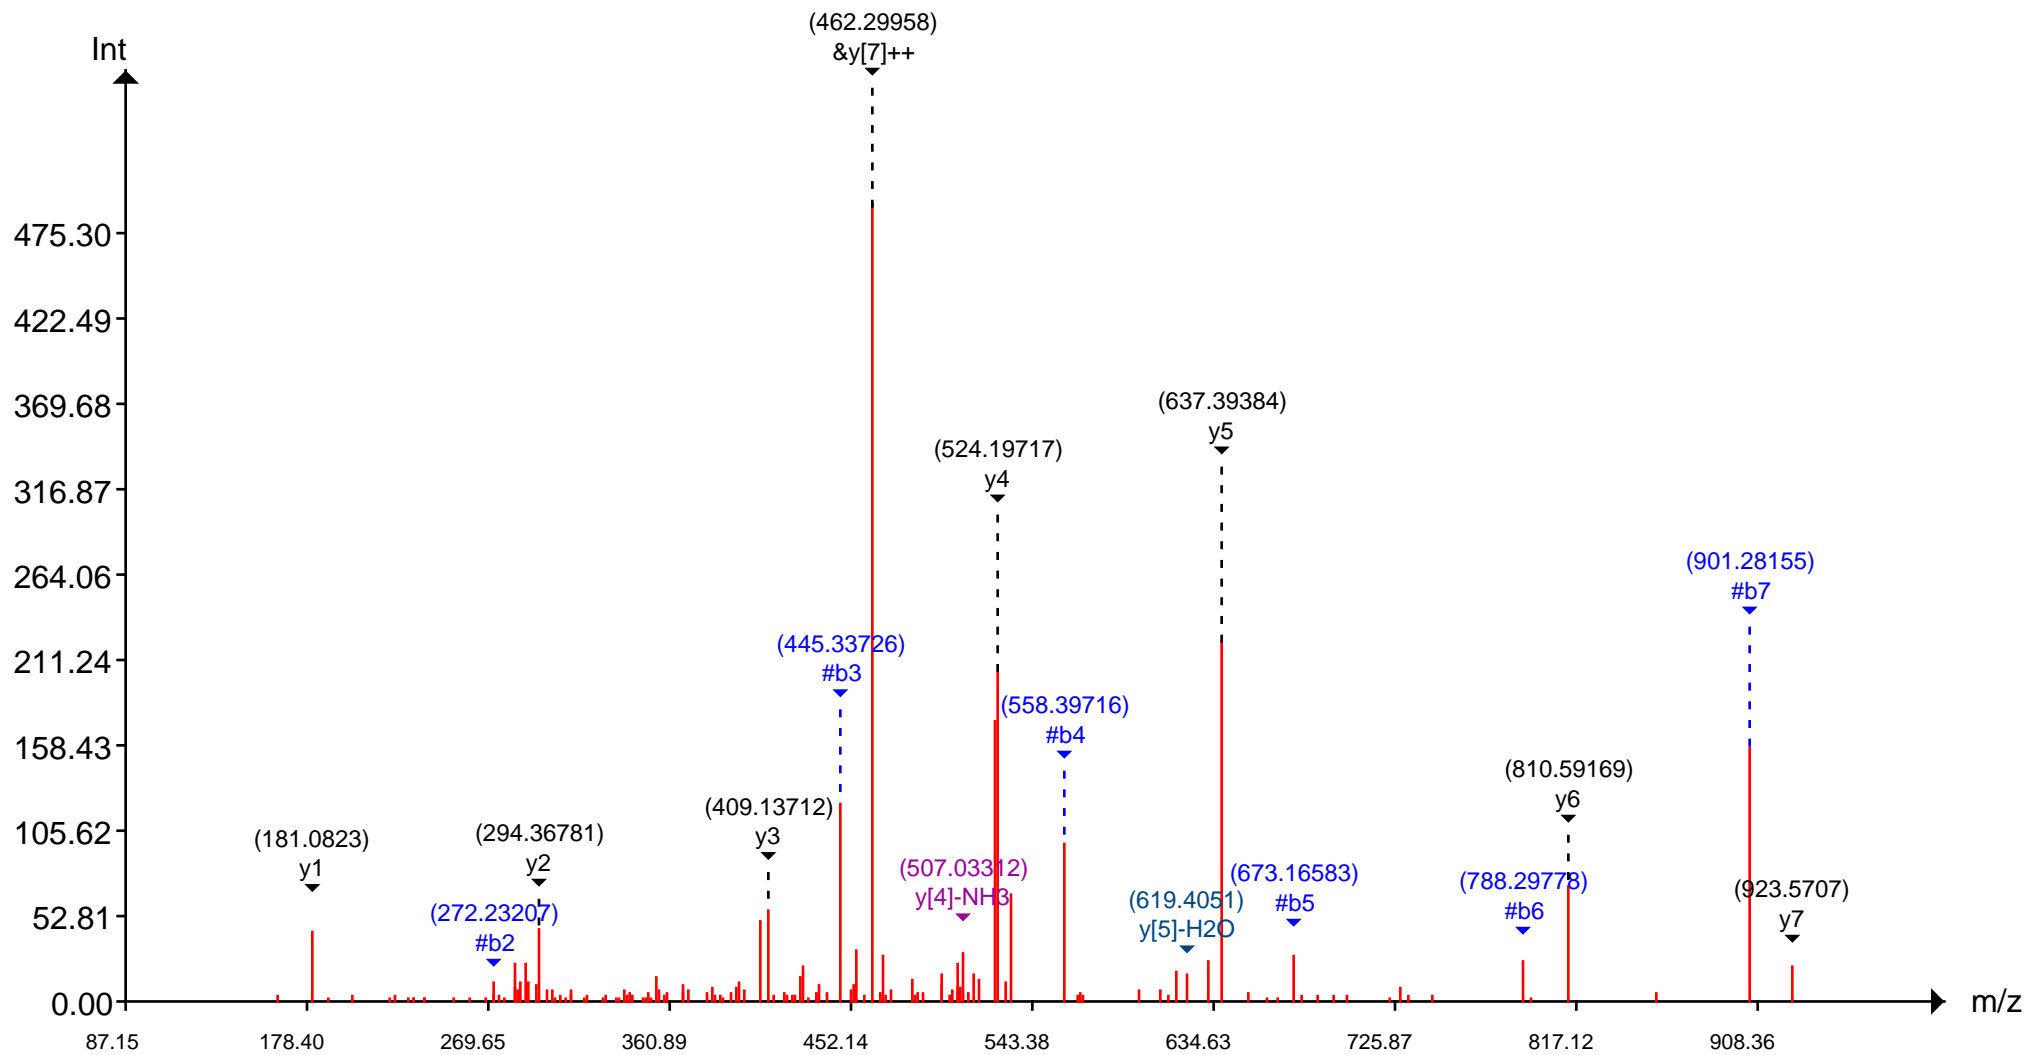

## Info

|                          |                                 |                           |          |
|--------------------------|---------------------------------|---------------------------|----------|
| <b>Modified Sequence</b> | AcD3-ILK<AcD3K*>IDDIR<C13>-COOH | <b>Ion score</b>          | 50.53    |
| <b>Protein</b>           | P80316                          | <b>Confidence level</b>   | 99.00%   |
| <b>Precursor m/z</b>     | 541.34499                       | <b>Identity Threshold</b> | 40.84    |
| <b>Charge</b>            | 2+                              | <b>Mass error</b>         | -2.62E-4 |

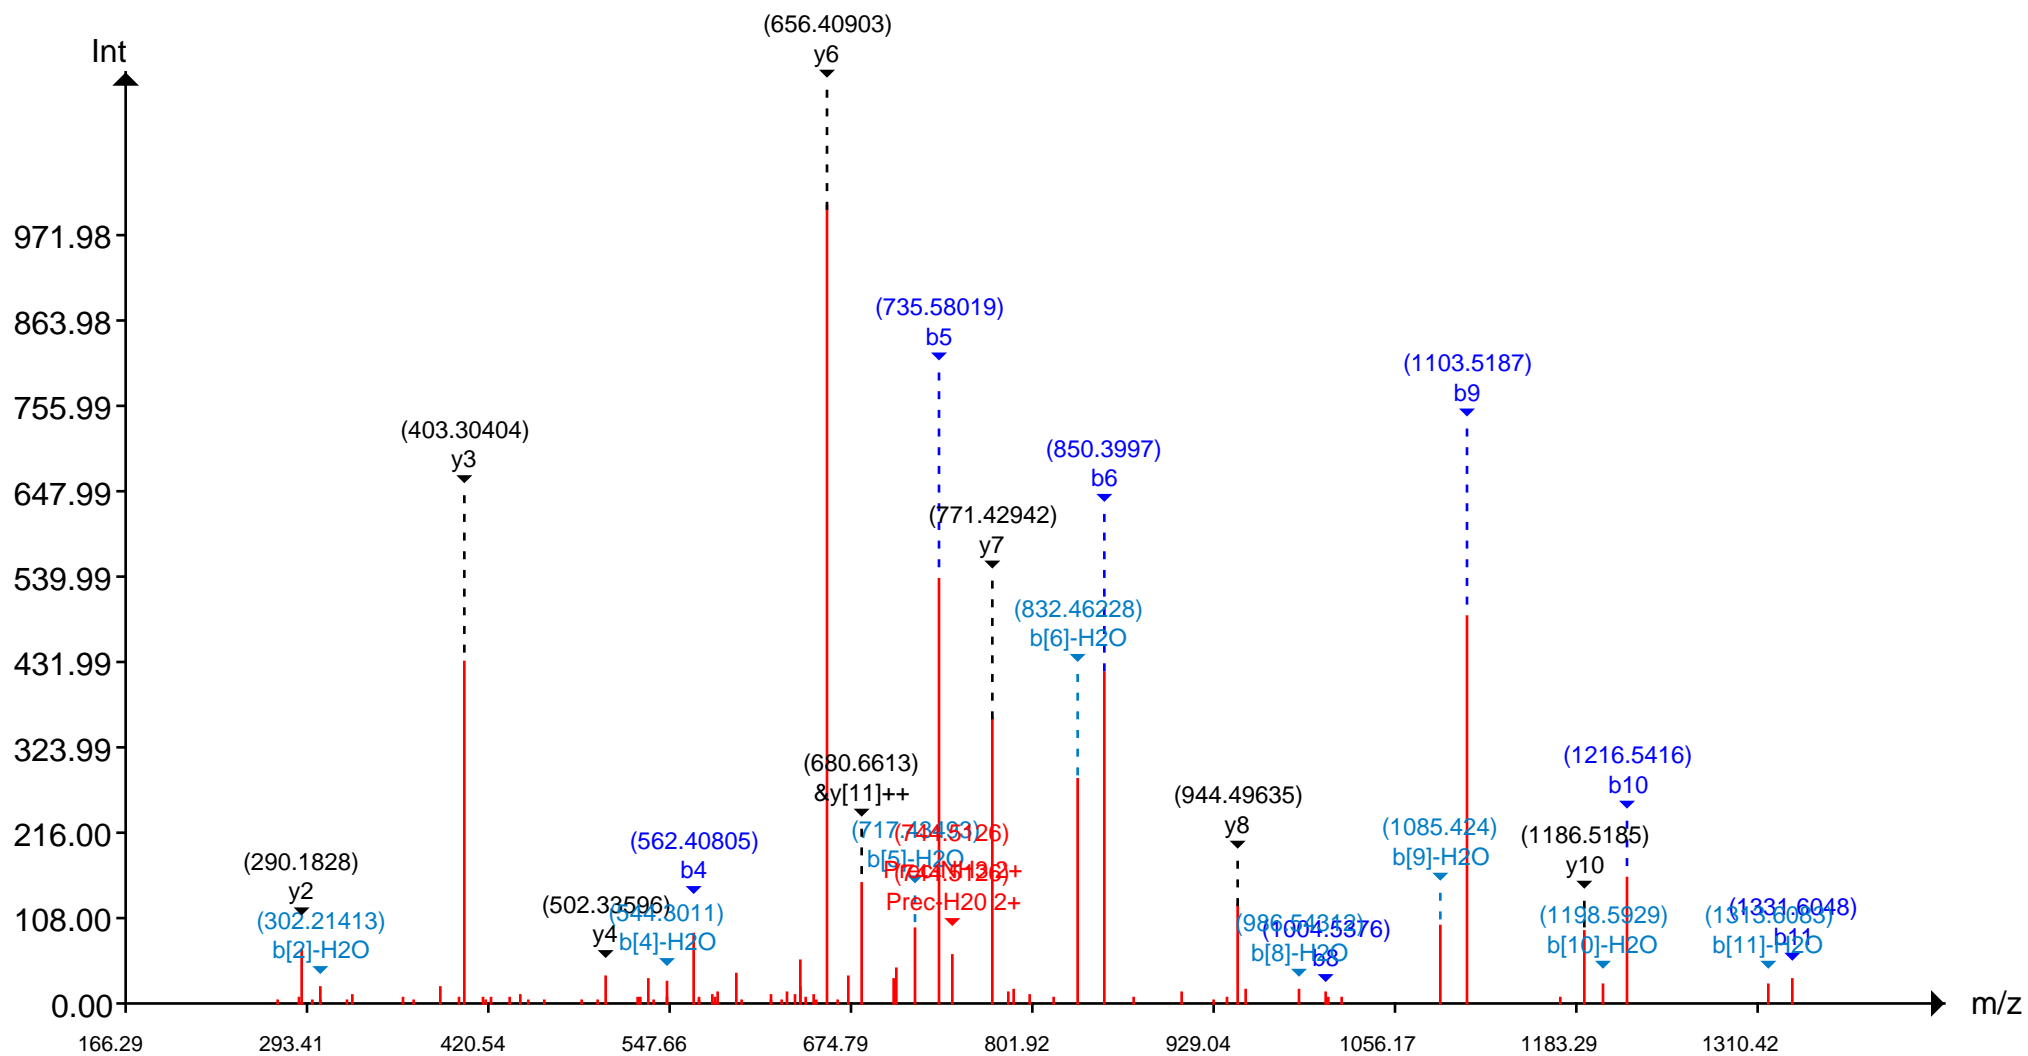

## Info

**Modified Sequence** AcD3-TK<AcD3K\*>NQK<AcD3K\*>DPGVLDLDR-COOH

**Ion score** 76.6

**Protein** P50543

**Confidence level** 99.00%

**Precursor m/z** 753.41761

**Identity Threshold** 47.50

**Charge** 2+

**Mass error** 0.001103

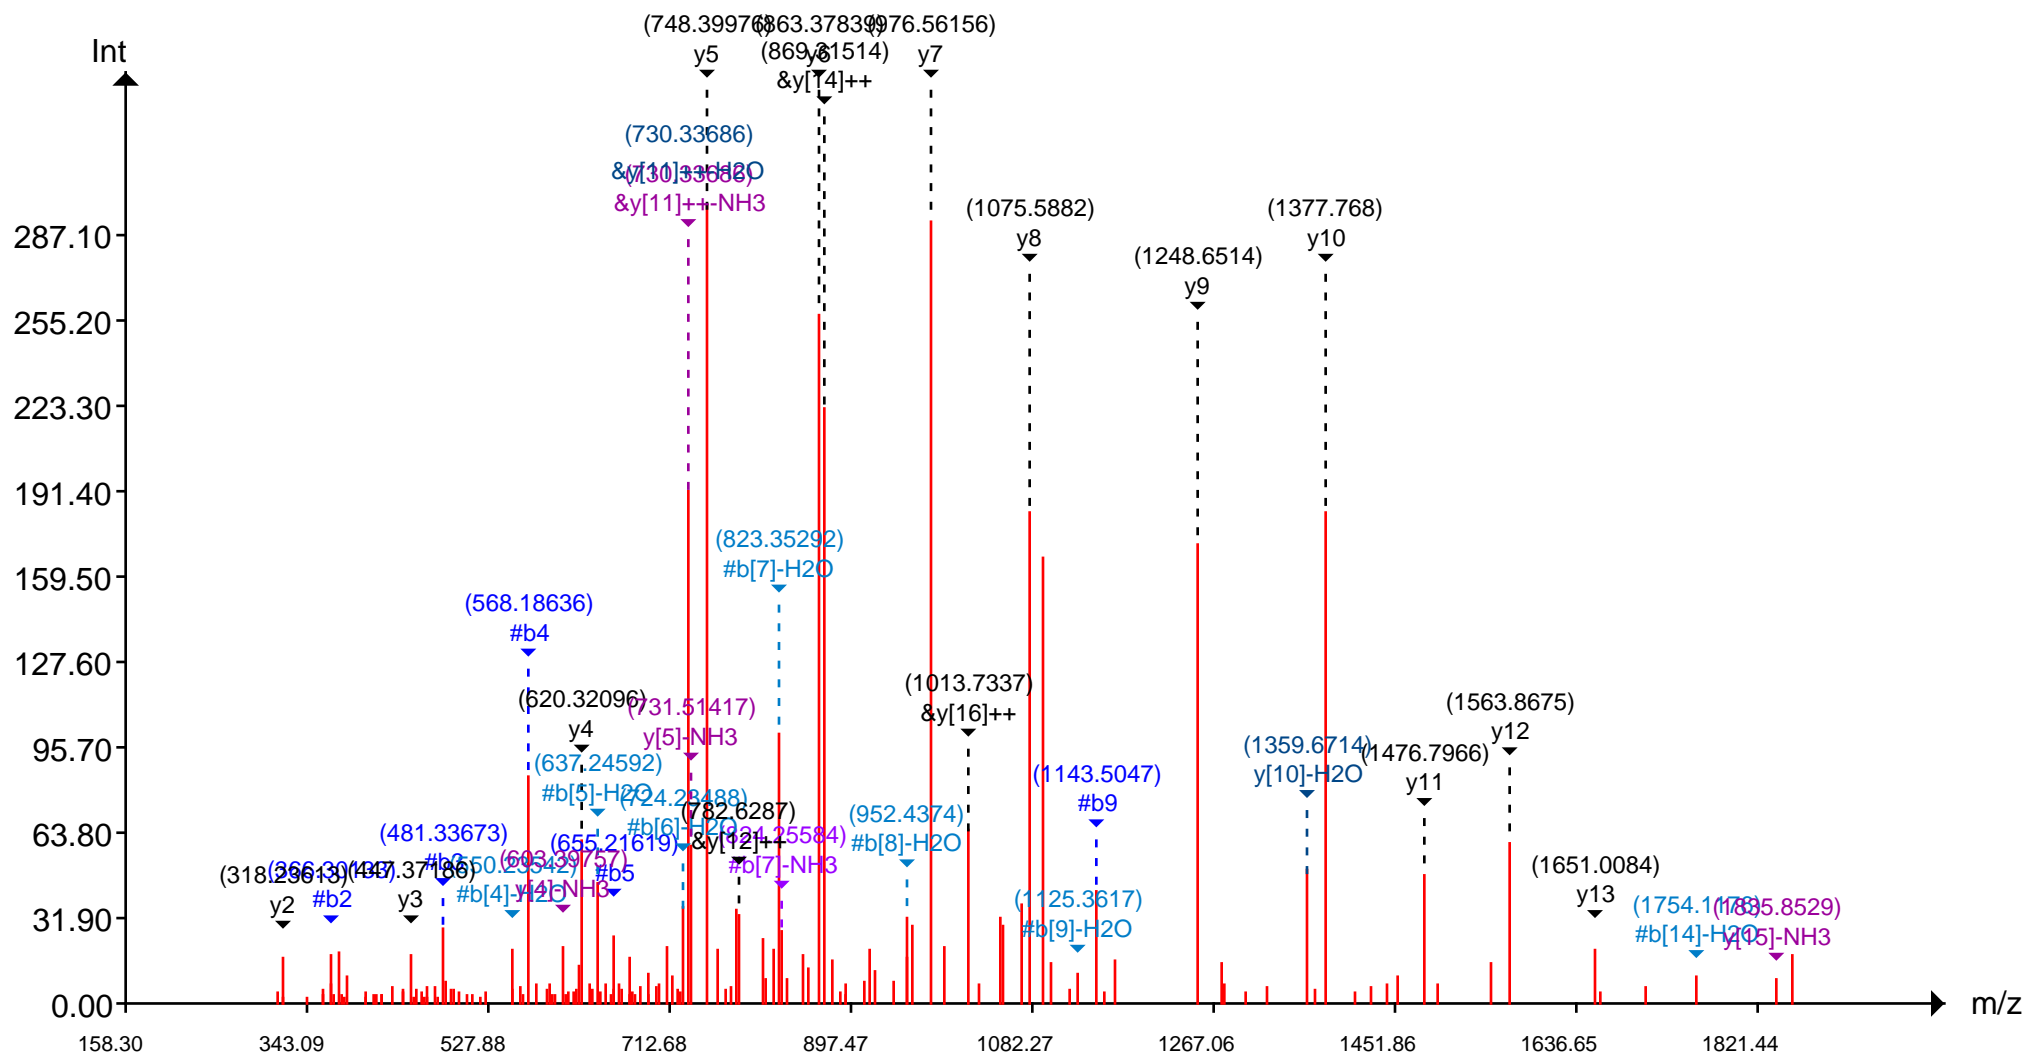

## Info

|                          |                                                          |                           |          |
|--------------------------|----------------------------------------------------------|---------------------------|----------|
| <b>Modified Sequence</b> | AcD3-FK<AcD3K*>DSSSVEK<AcD3K*>VLDQK<AcD3K*>EHR<C13>-COOH | <b>Ion score</b>          | 89.35    |
| <b>Protein</b>           | Q99020                                                   | <b>Confidence level</b>   | 99.00%   |
| <b>Precursor m/z</b>     | 1109.5967                                                | <b>Identity Threshold</b> | 47.54    |
| <b>Charge</b>            | 2+                                                       | <b>Mass error</b>         | 0.002609 |

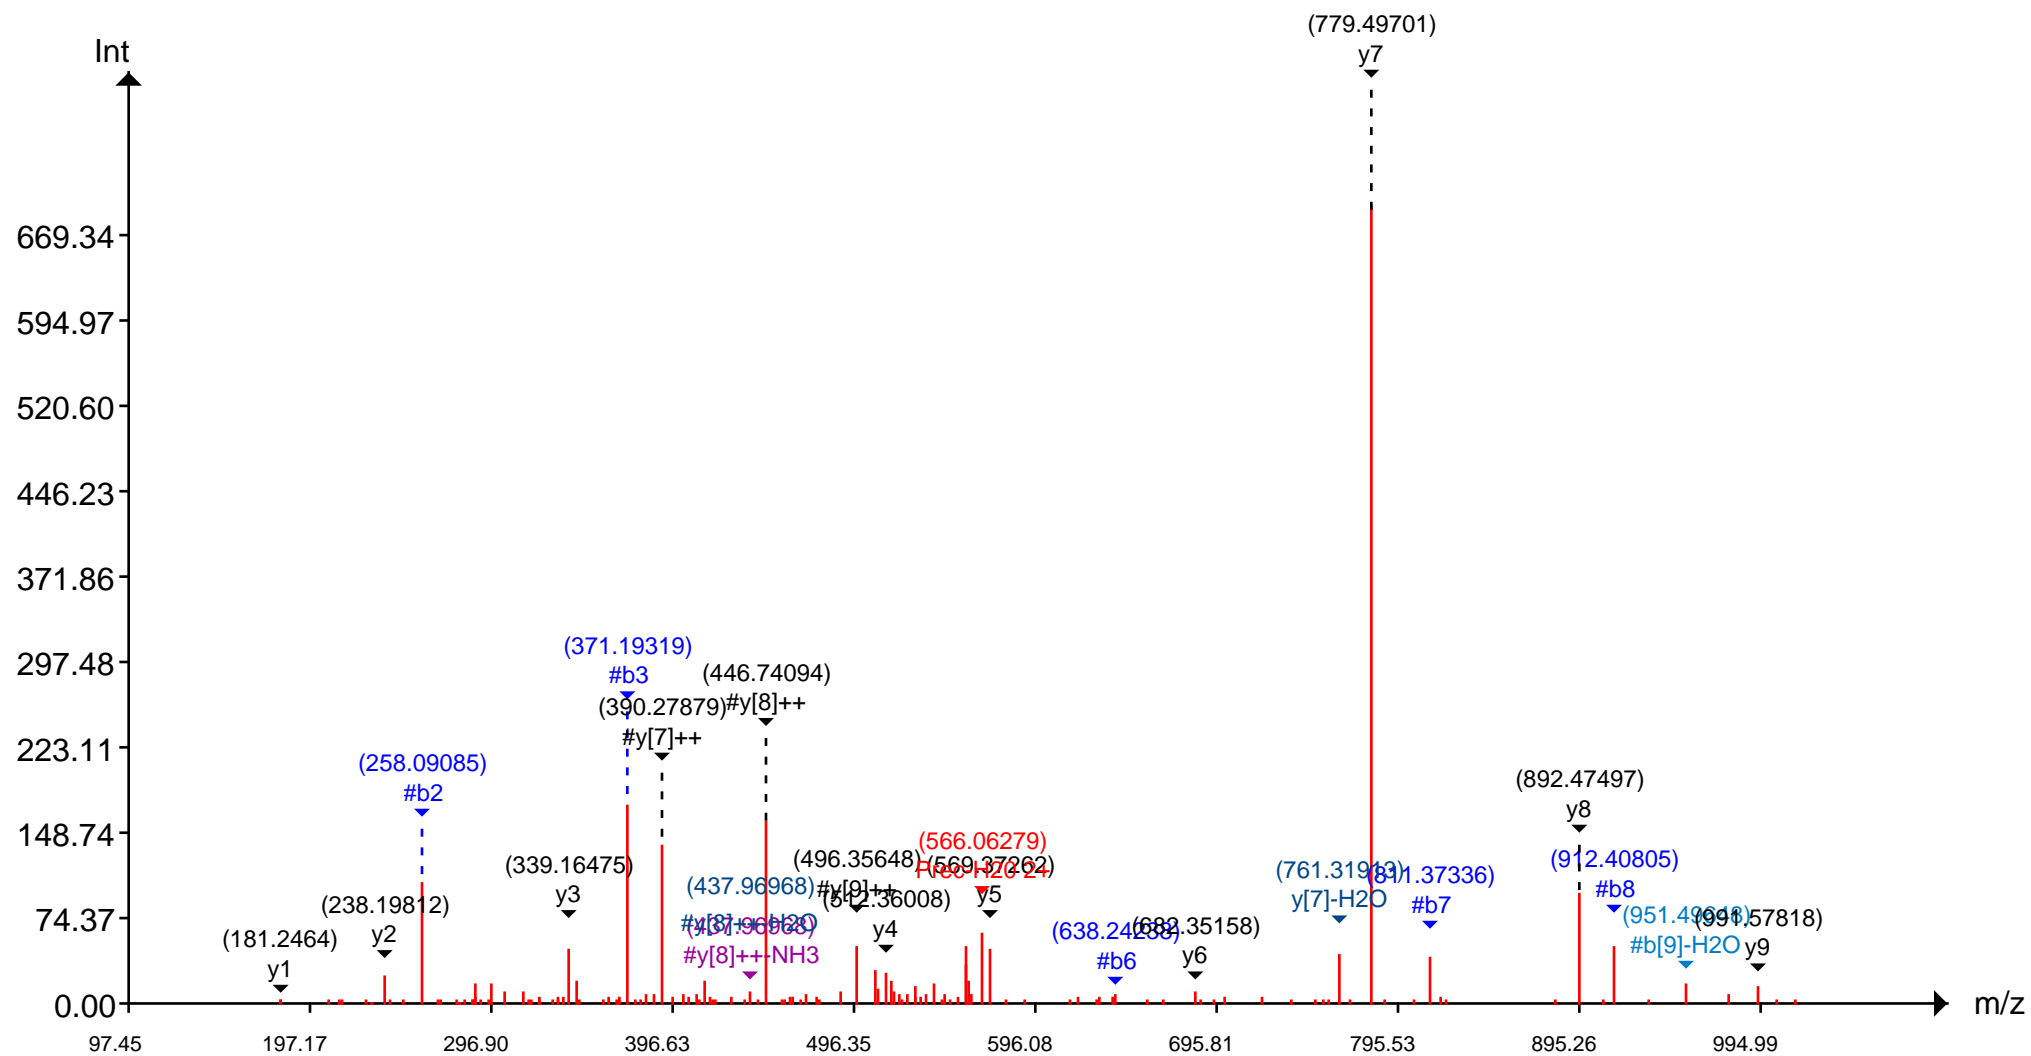

## Info

**Modified Sequence** AcD3-LVLPLGK<AcD3K\*>TGR<C13>-COOH

**Ion score** 54.03

**Protein** O89053

**Confidence level** 99.00%

**Precursor m/z** 575.38206

**Identity Threshold** 36.20

**Charge** 2+

**Mass error** 2.6E-5

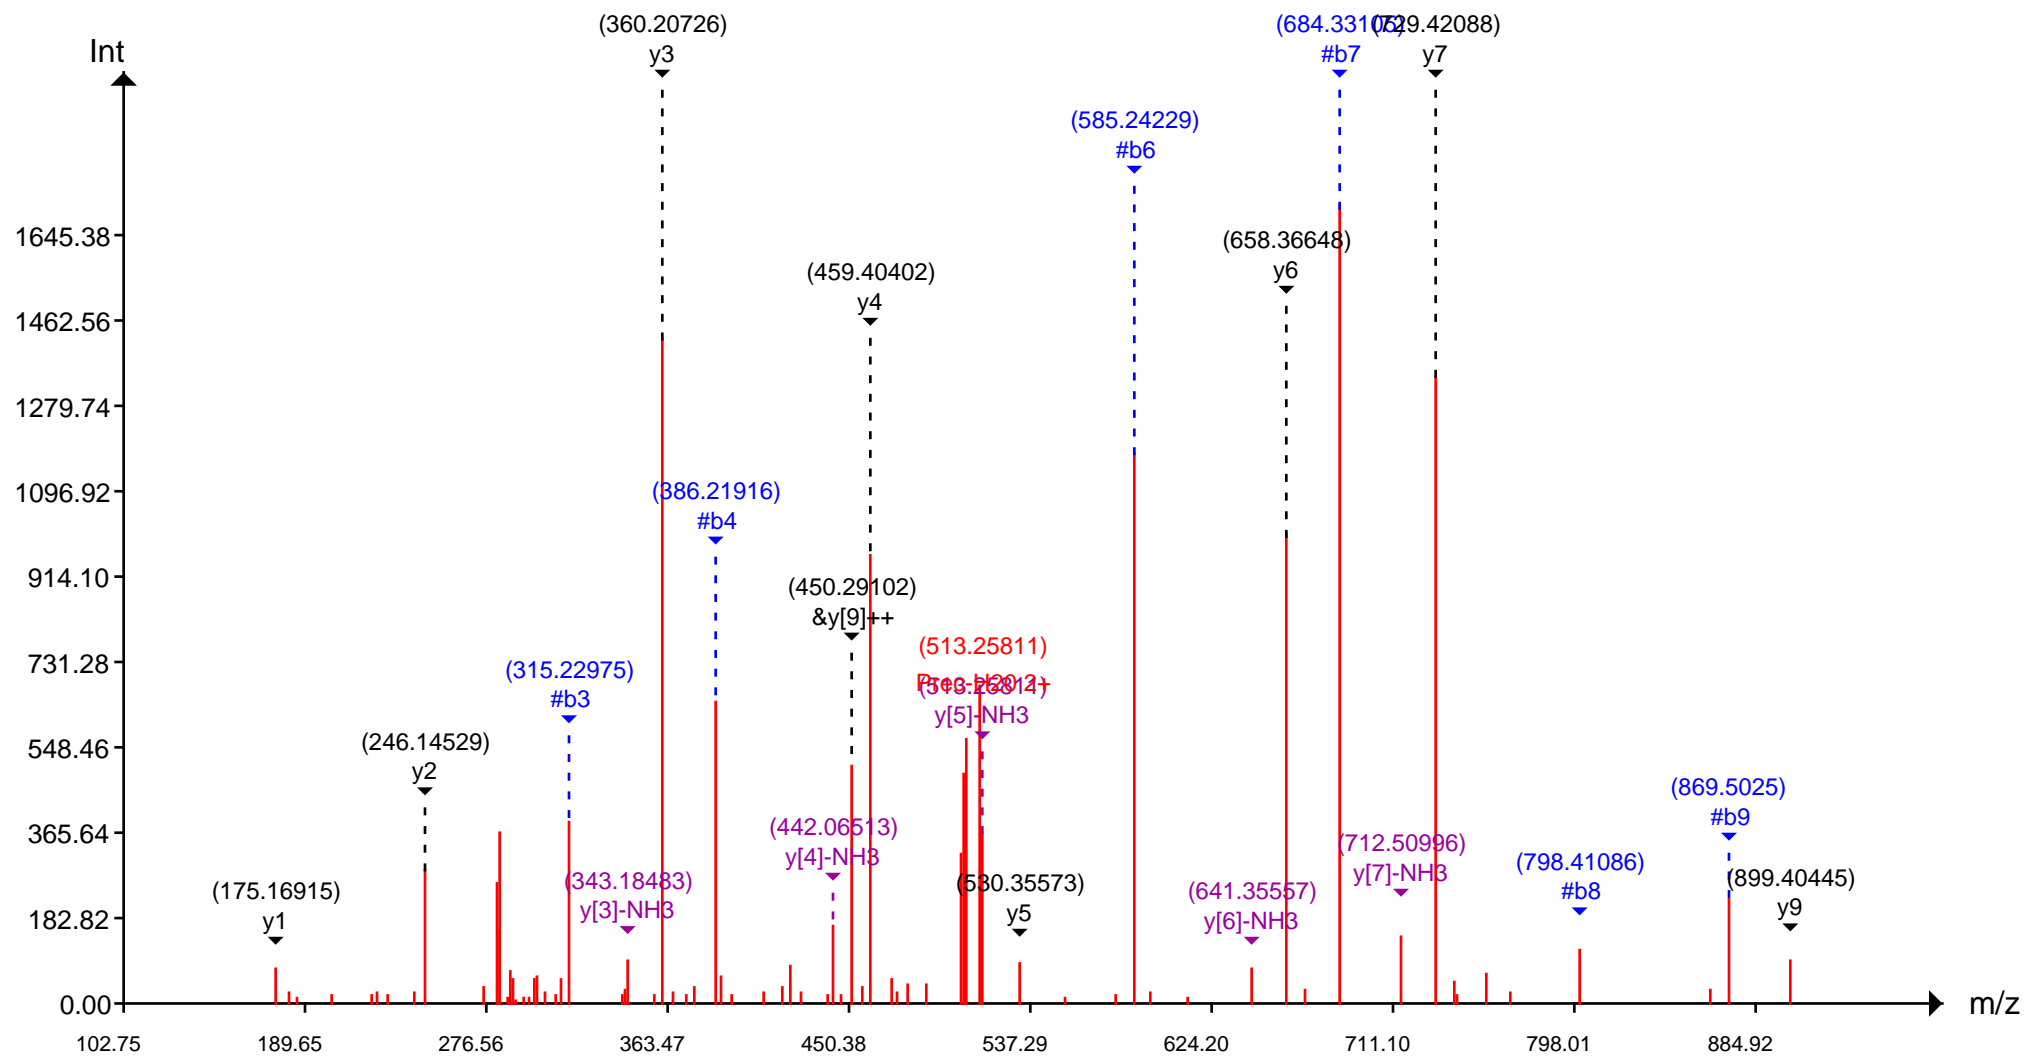

## Info

**Modified Sequence** AcD3-VGLAQAVNAR-COOH

**Ion score** 73.43

**Protein** Q02053

**Confidence level** 99.00%

**Precursor m/z** 522.30538

**Identity Threshold** 46.69

**Charge** 2+

**Mass error** -4.4E-5

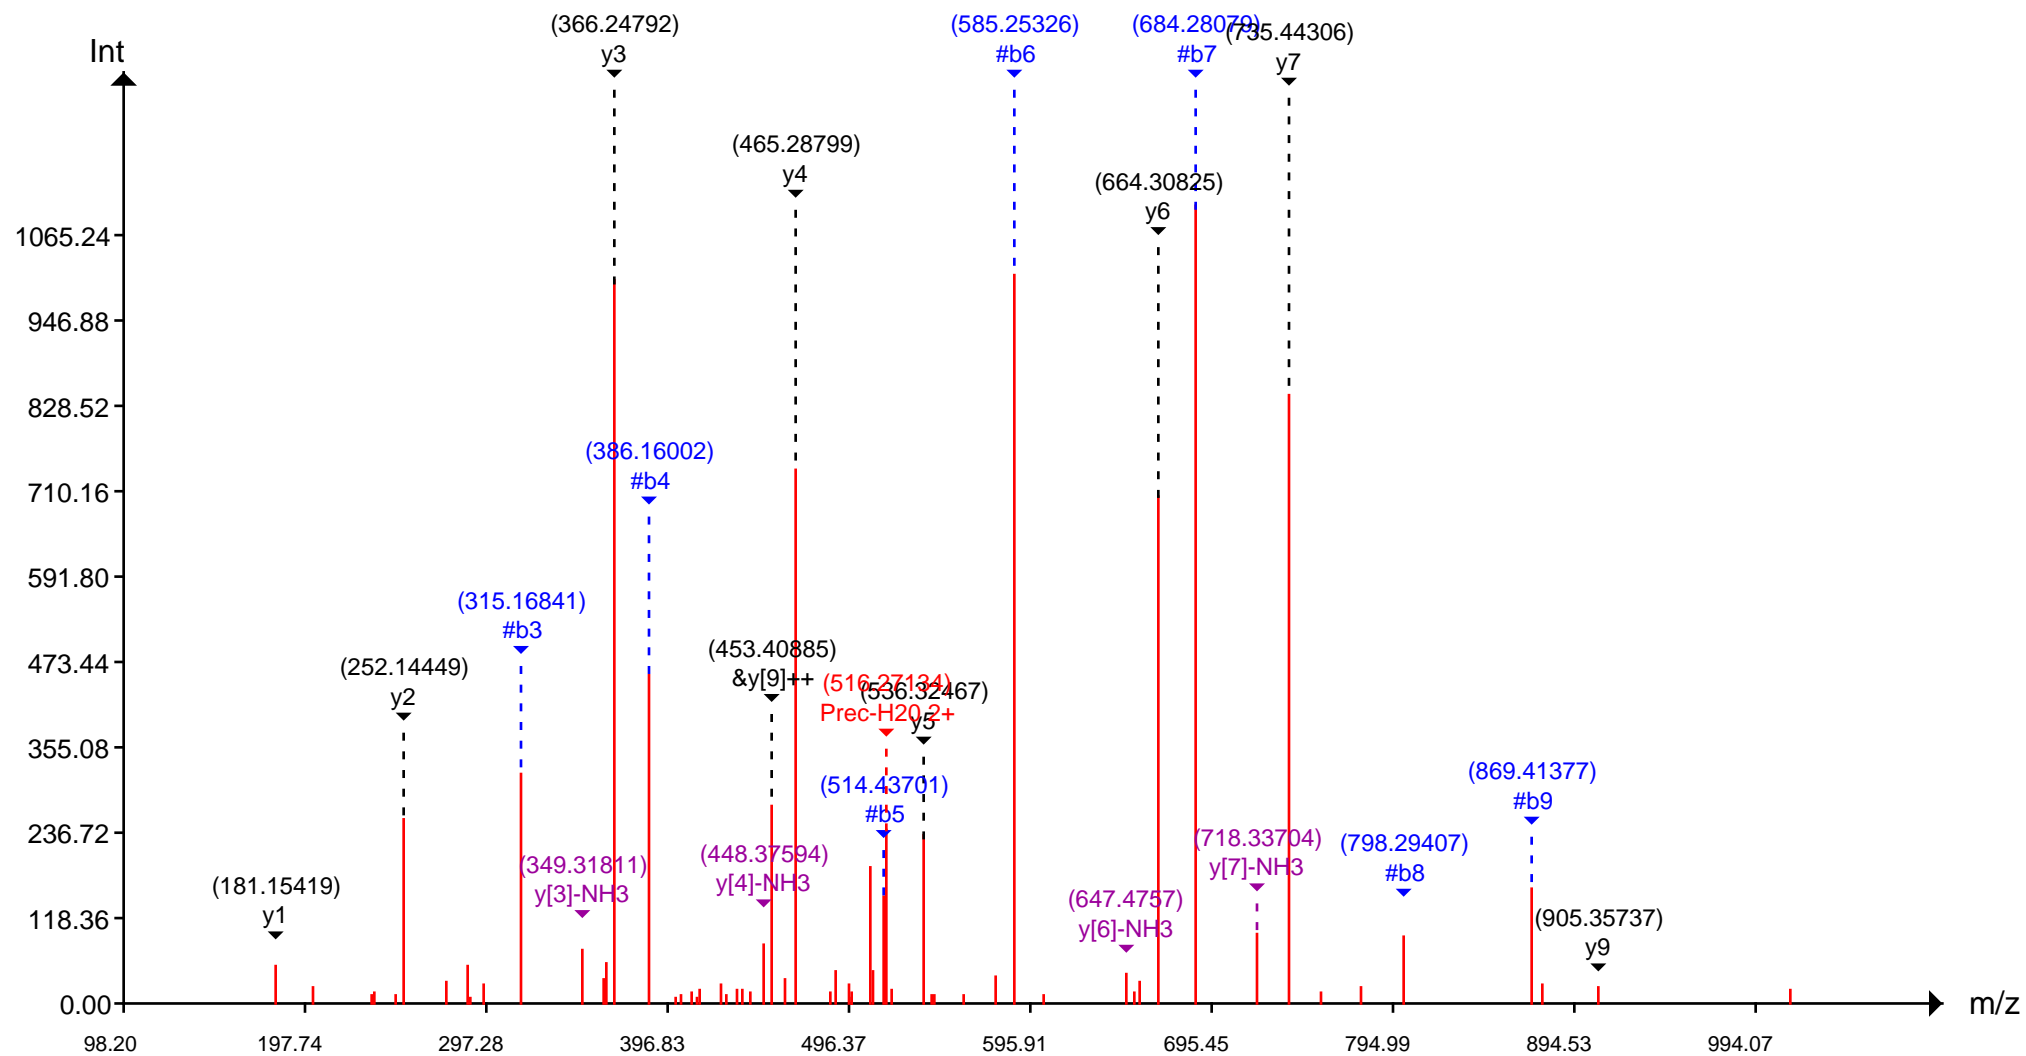

## Info

|                          |                           |                           |          |
|--------------------------|---------------------------|---------------------------|----------|
| <b>Modified Sequence</b> | AcD3-VGLAQAVNAR<C13>-COOH | <b>Ion score</b>          | 84.29    |
| <b>Protein</b>           | Q02053                    | <b>Confidence level</b>   | 99.00%   |
| <b>Precursor m/z</b>     | 525.31539                 | <b>Identity Threshold</b> | 45.47    |
| <b>Charge</b>            | 2+                        | <b>Mass error</b>         | -1.66E-4 |



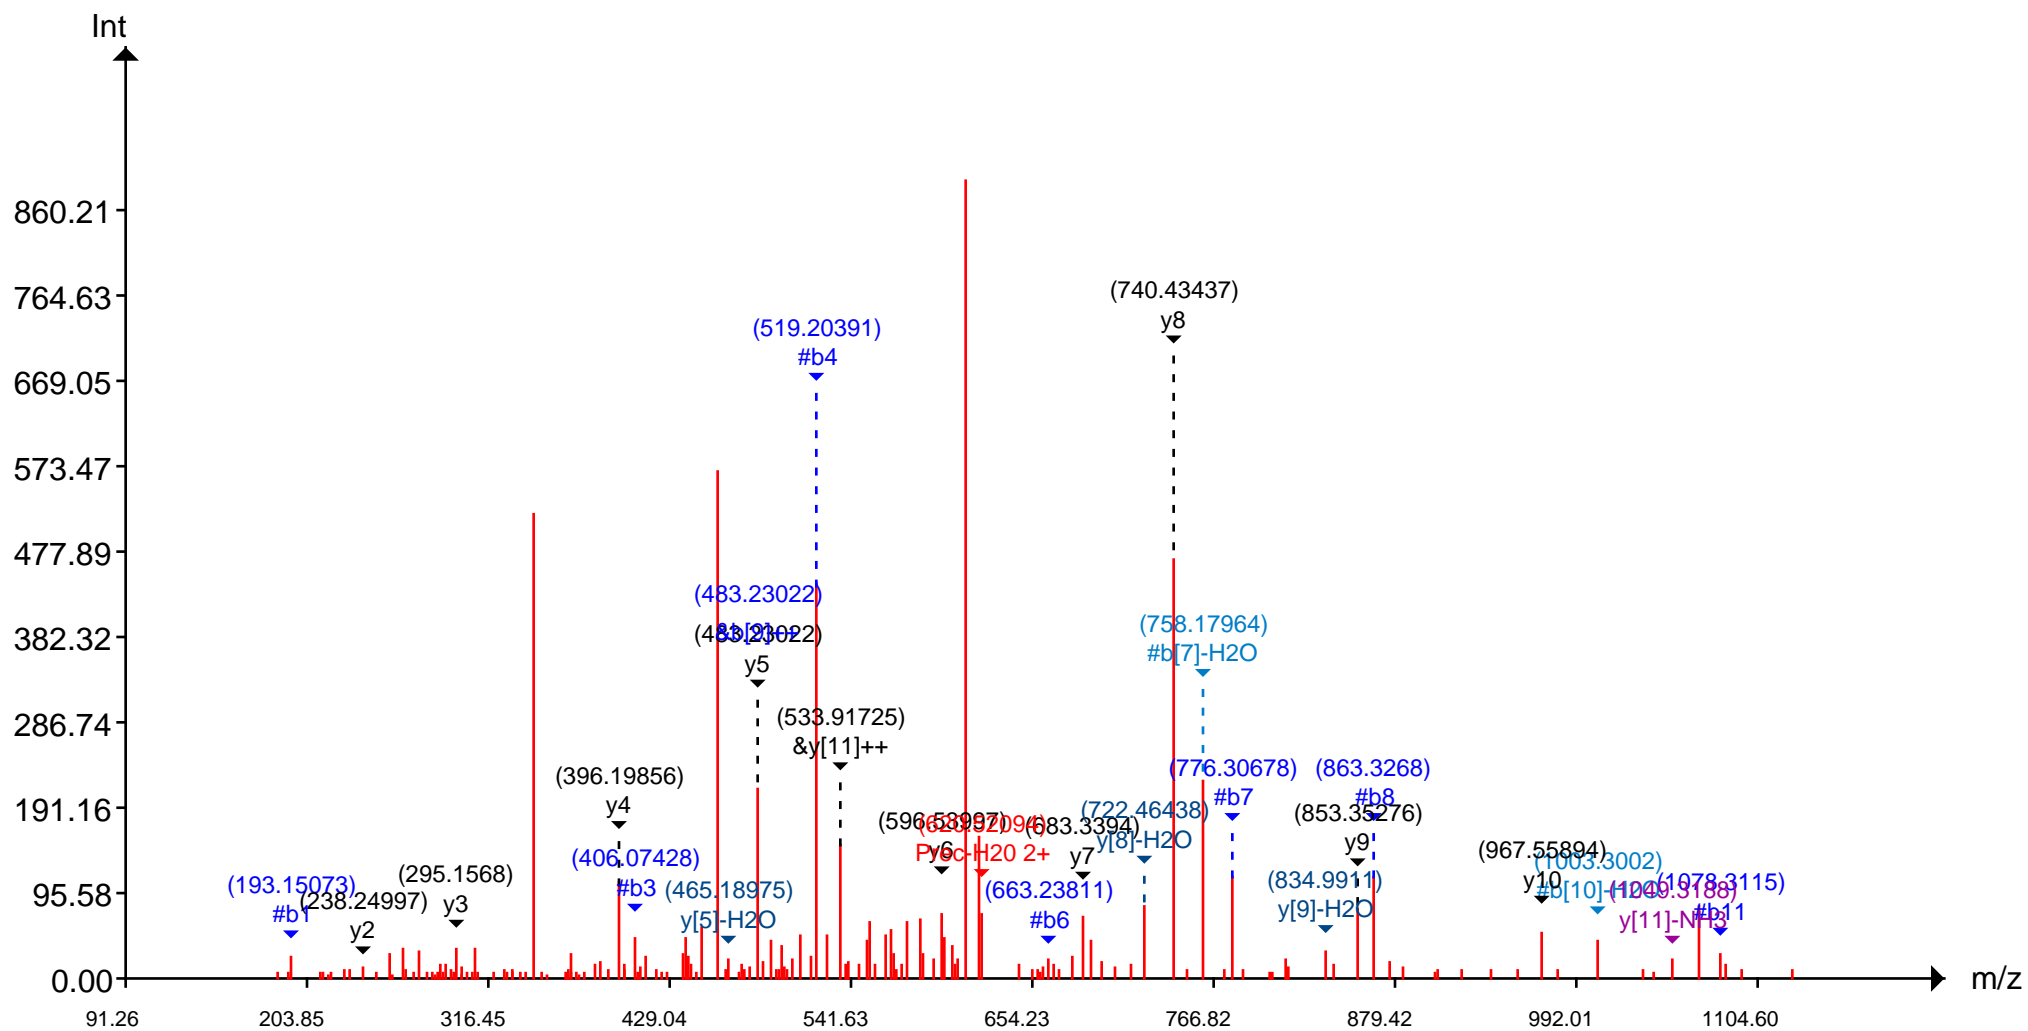

## Info

|                          |                                   |                           |         |
|--------------------------|-----------------------------------|---------------------------|---------|
| <b>Modified Sequence</b> | AcD3-M<Mox*>VNIGSLSTGGR<C13>-COOH | <b>Ion score</b>          | 49.5    |
| <b>Protein</b>           | Q9Z0N1, Q9Z0N2                    | <b>Confidence level</b>   | 99.00%  |
| <b>Precursor m/z</b>     | 629.83377                         | <b>Identity Threshold</b> | 47.91   |
| <b>Charge</b>            | 2+                                | <b>Mass error</b>         | 7.82E-4 |

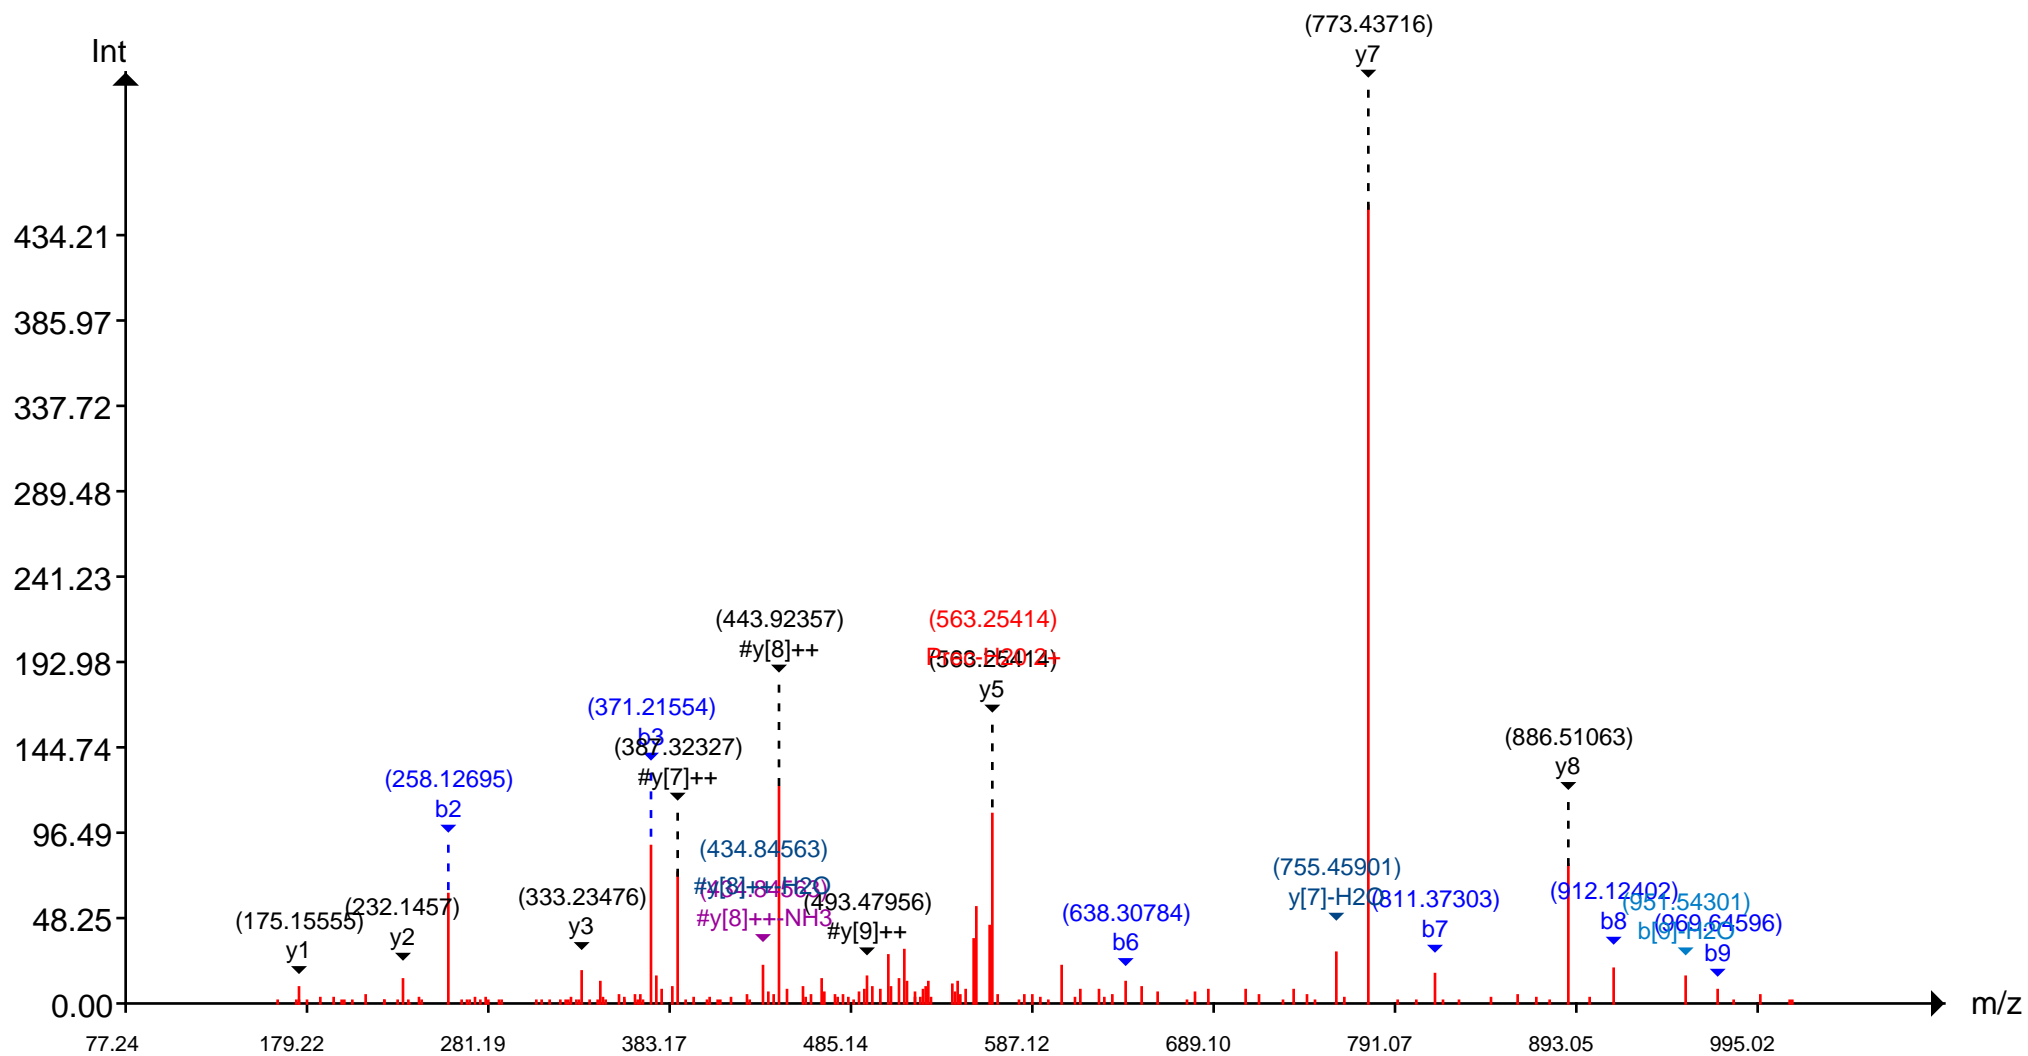

## Info

**Modified Sequence** AcD3-LVLPLGK<AcD3K\*>TGR-COOH

**Ion score** 43.4

**Protein** O89053

**Confidence level** 99.00%

**Precursor m/z** 572.3722

**Identity Threshold** 38.76

**Charge** 2+

**Mass error** 4.47E-4

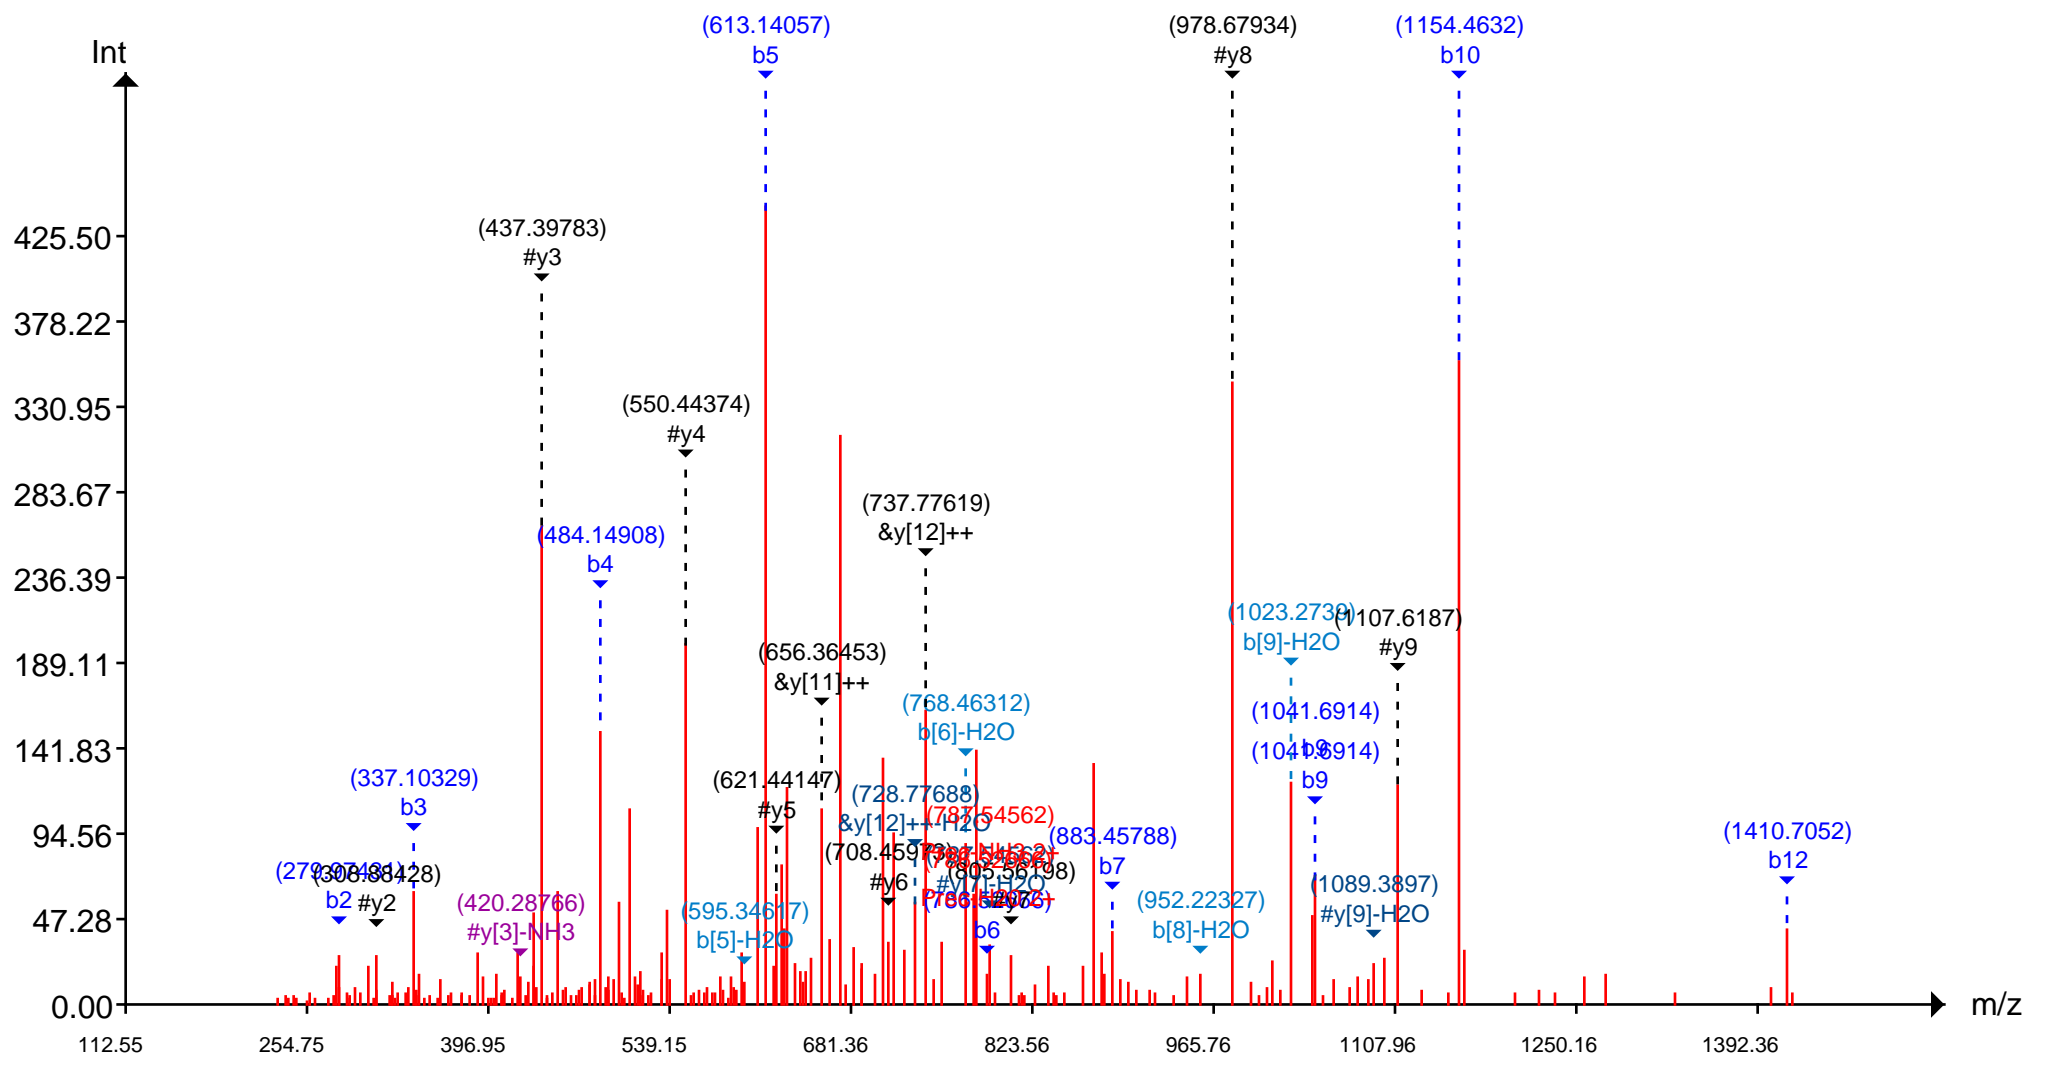

Info

|                          |                                       |                           |         |
|--------------------------|---------------------------------------|---------------------------|---------|
| <b>Modified Sequence</b> | AcD3-AYGF EK<AcD3K*>PSAIQQR<C13>-COOH | <b>Ion score</b>          | 50.95   |
| <b>Protein</b>           | P60843, P10630, Q91VC3                | <b>Confidence level</b>   | 99.00%  |
| <b>Precursor m/z</b>     | 795.92816                             | <b>Identity Threshold</b> | 47.90   |
| <b>Charge</b>            | 2+                                    | <b>Mass error</b>         | 1.85E-4 |

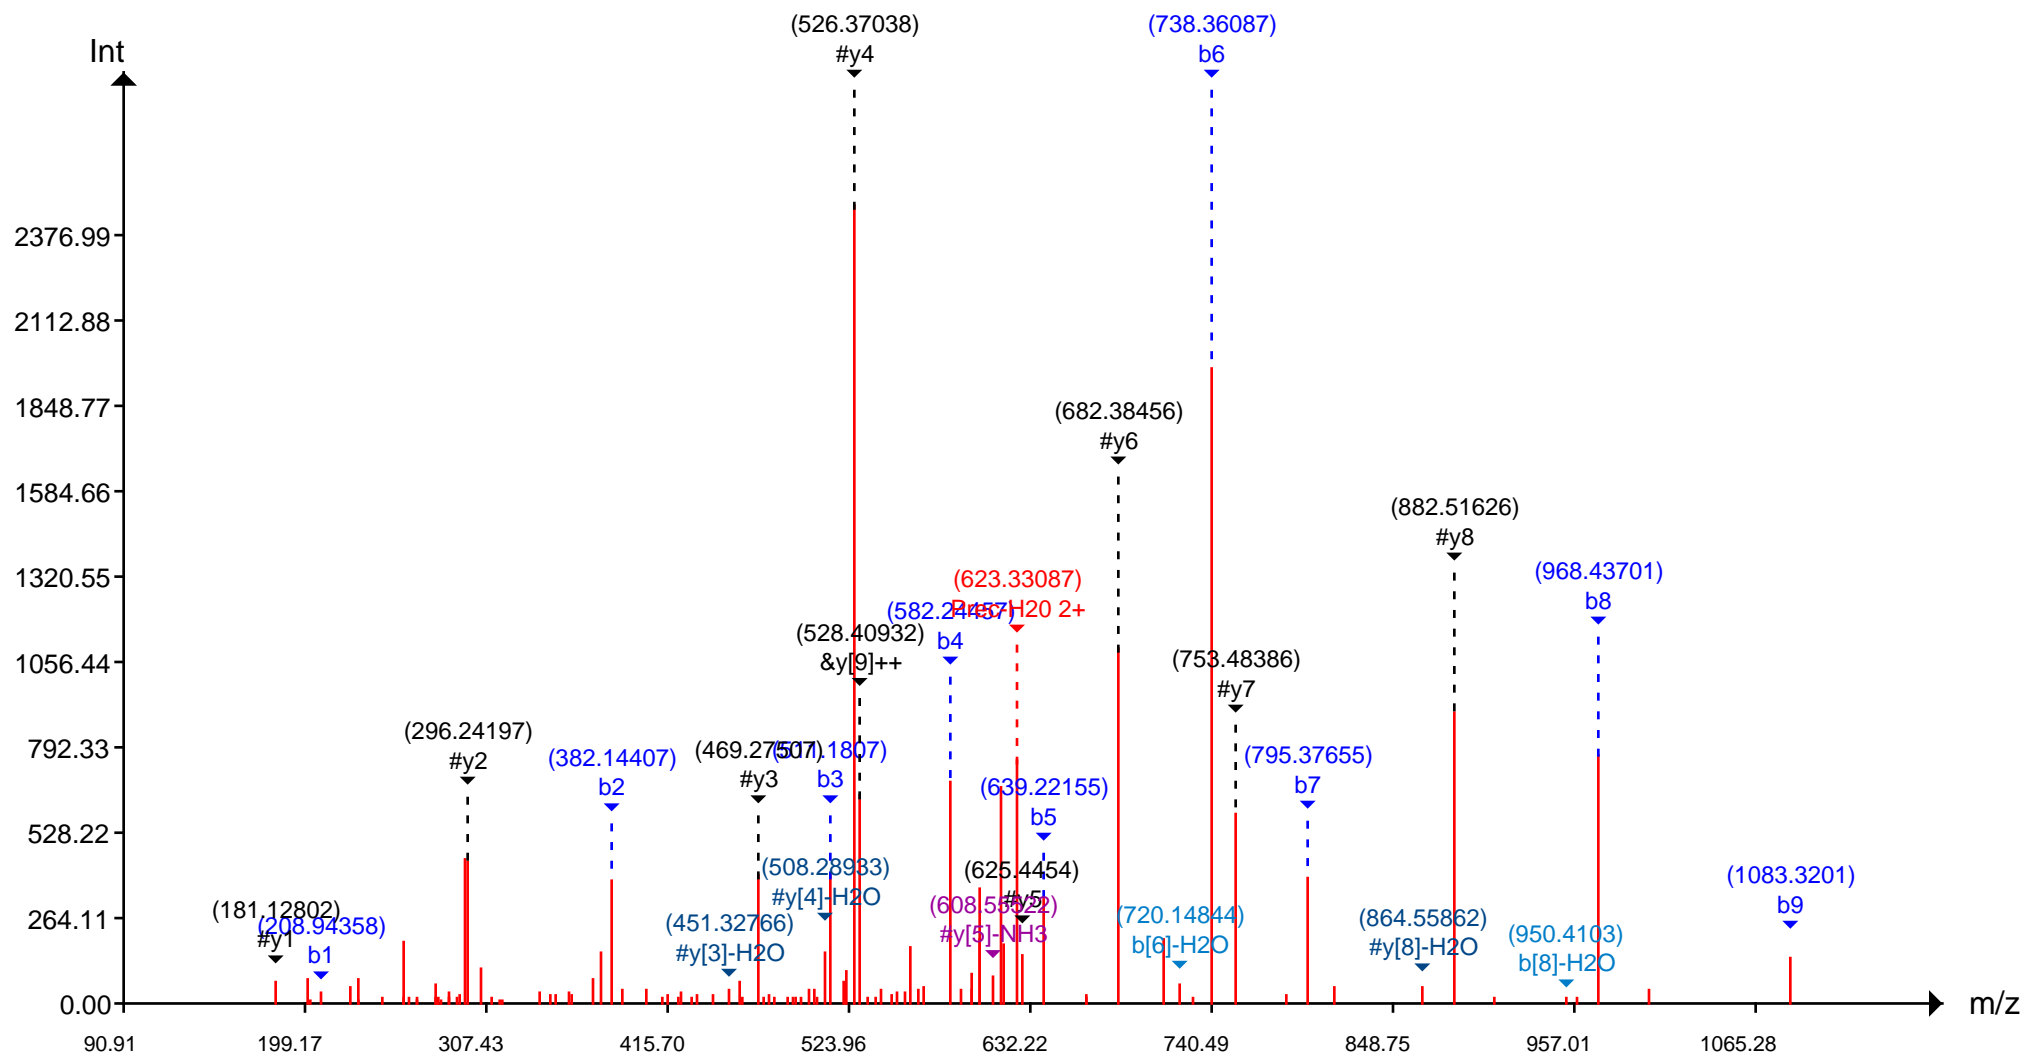

## Info

|                          |                                           |                           |        |
|--------------------------|-------------------------------------------|---------------------------|--------|
| <b>Modified Sequence</b> | AcD3-YK<AcD3K*>EAGVGK<AcD3K*>DR<C13>-COOH | <b>Ion score</b>          | 53.36  |
| <b>Protein</b>           | Q93092                                    | <b>Confidence level</b>   | 99.00% |
| <b>Precursor m/z</b>     | 632.35335                                 | <b>Identity Threshold</b> | 47.66  |
| <b>Charge</b>            | 2+                                        | <b>Mass error</b>         | 9.1E-4 |

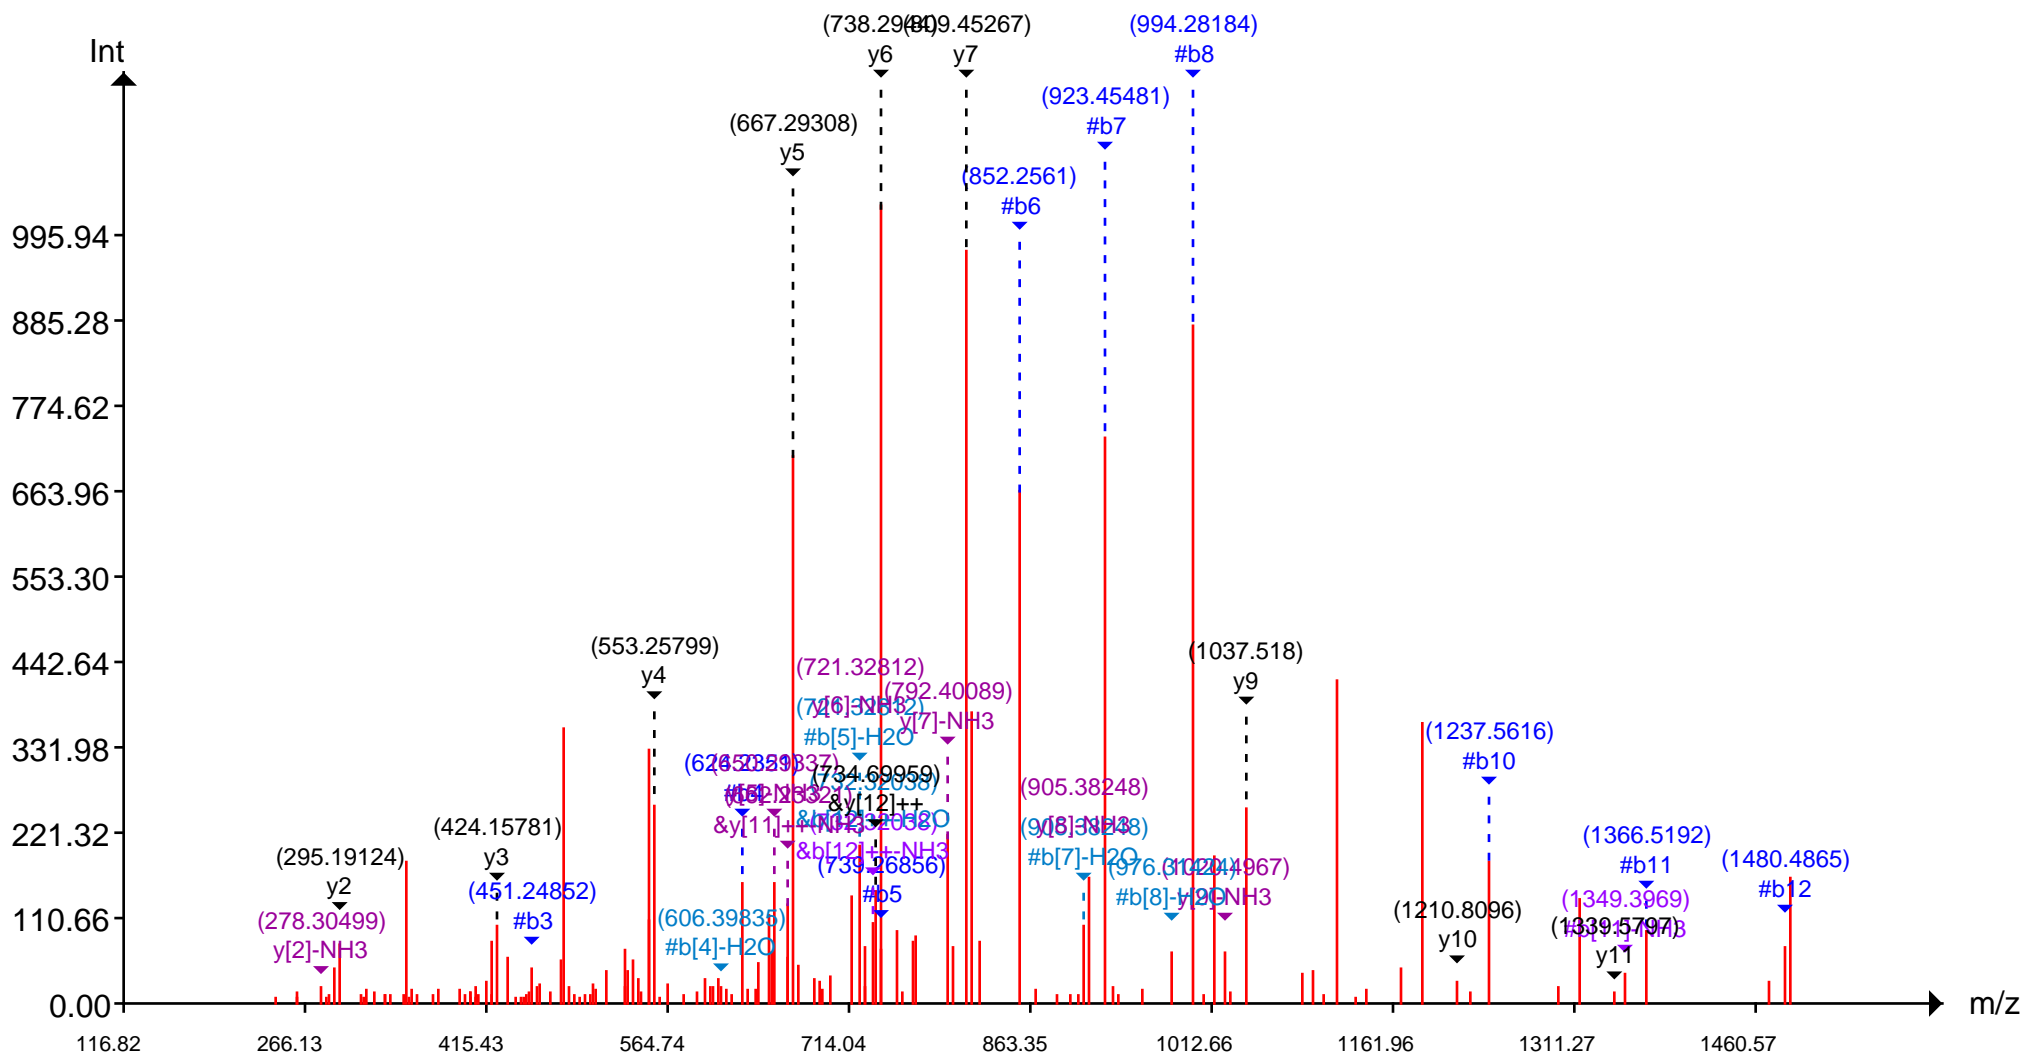

## Info

|                          |                                      |                           |          |
|--------------------------|--------------------------------------|---------------------------|----------|
| <b>Modified Sequence</b> | AcD3-FEEK<AcD3K*>DIAANEENR<C13>-COOH | <b>Ion score</b>          | 51.12    |
| <b>Protein</b>           | Q9JJU8                               | <b>Confidence level</b>   | 99.00%   |
| <b>Precursor m/z</b>     | 830.90588                            | <b>Identity Threshold</b> | 47.13    |
| <b>Charge</b>            | 2+                                   | <b>Mass error</b>         | 0.001813 |

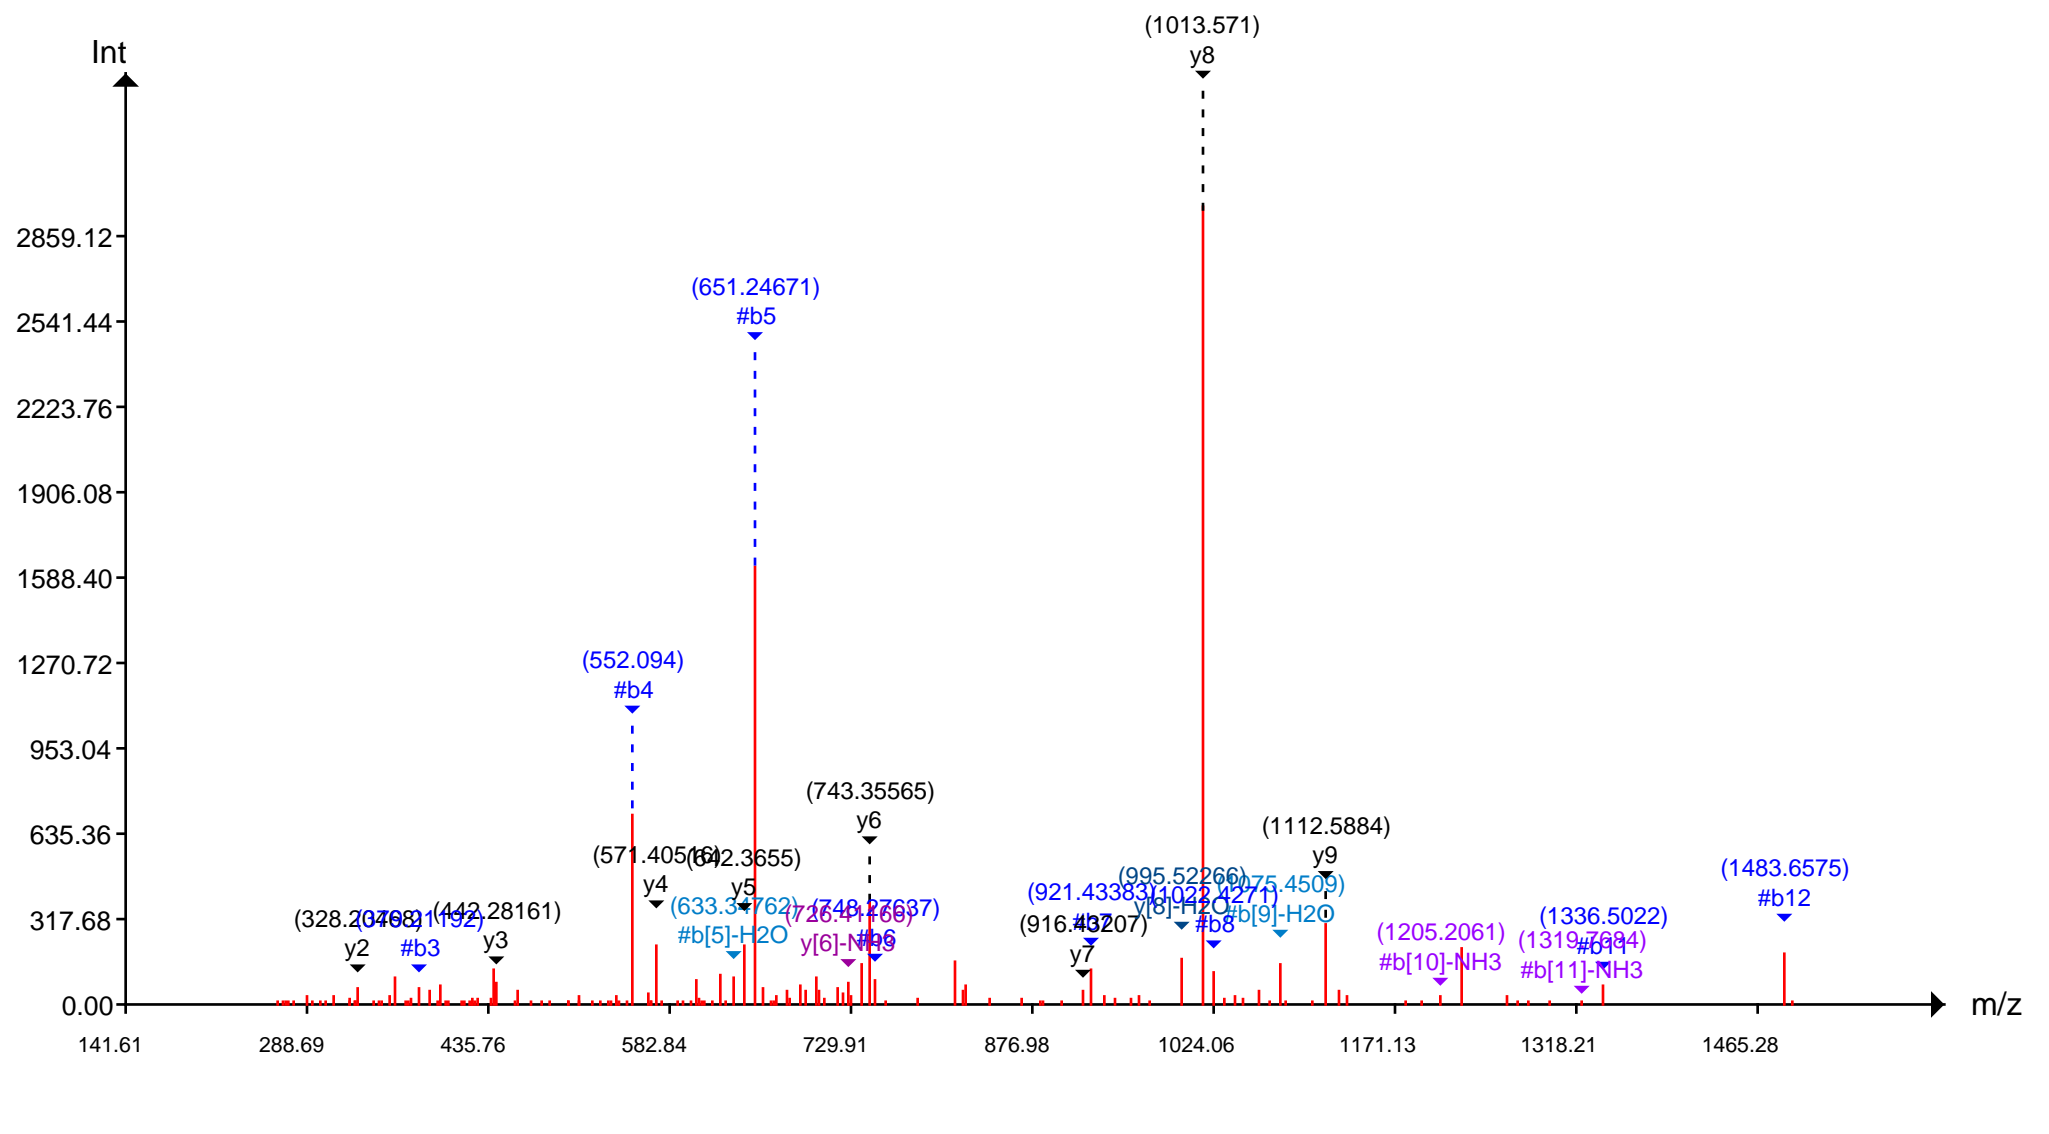

| Info                     |                                              |                           |         |
|--------------------------|----------------------------------------------|---------------------------|---------|
| <b>Modified Sequence</b> | AcD3-FADK<AcD3K*>VPK<AcD3K*>TAENFR<C13>-COOH | <b>Ion score</b>          | 49.09   |
| <b>Protein</b>           | P17742                                       | <b>Confidence level</b>   | 99.00%  |
| <b>Precursor m/z</b>     | 832.4593                                     | <b>Identity Threshold</b> | 47.48   |
| <b>Charge</b>            | 2+                                           | <b>Mass error</b>         | 0.00175 |

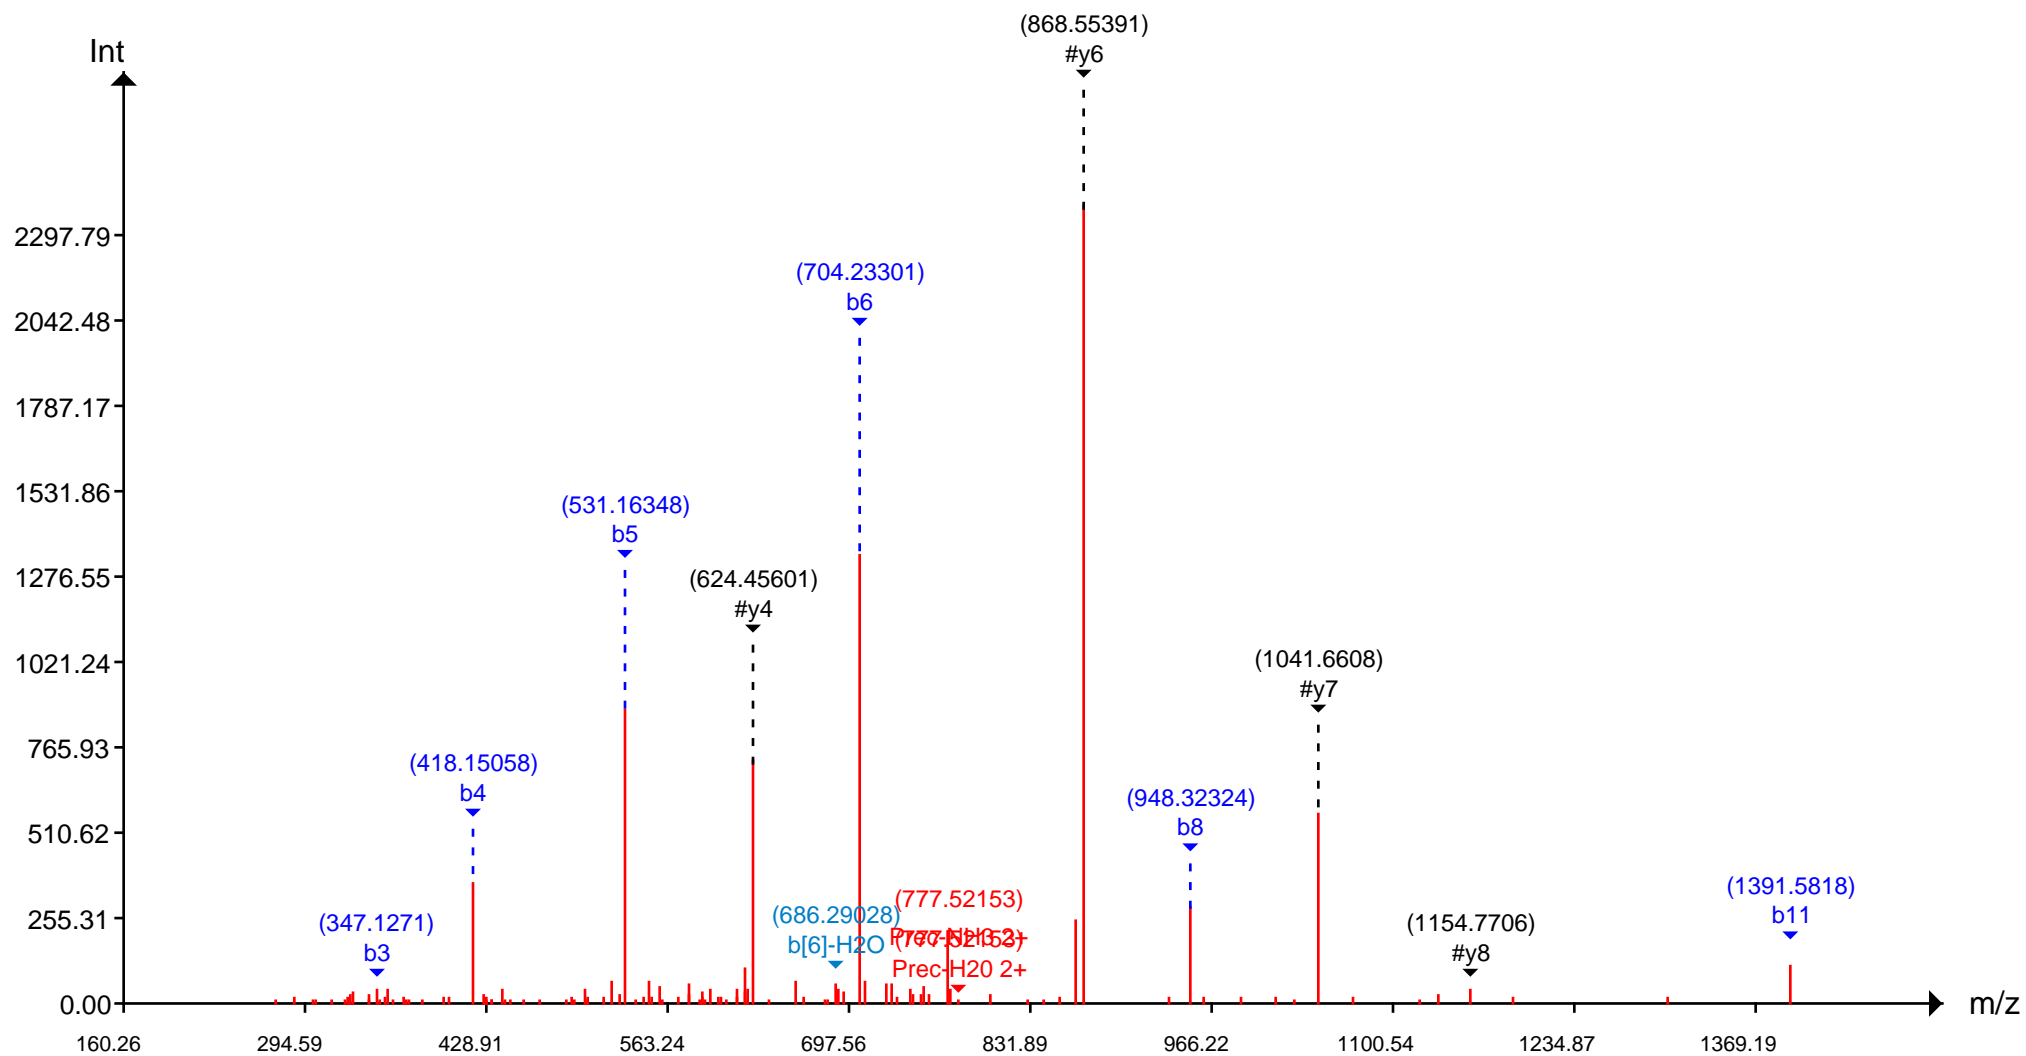

## Info

|                          |                                                      |                           |          |
|--------------------------|------------------------------------------------------|---------------------------|----------|
| <b>Modified Sequence</b> | AcD3-AATEAIK<AcD3K*>PFPK<AcD3K*>K<AcD3K*>R<C13>-COOH | <b>Ion score</b>          | 49.79    |
| <b>Protein</b>           | Q6PGL7                                               | <b>Confidence level</b>   | 99.00%   |
| <b>Precursor m/z</b>     | 786.48652                                            | <b>Identity Threshold</b> | 40.47    |
| <b>Charge</b>            | 2+                                                   | <b>Mass error</b>         | 0.001716 |

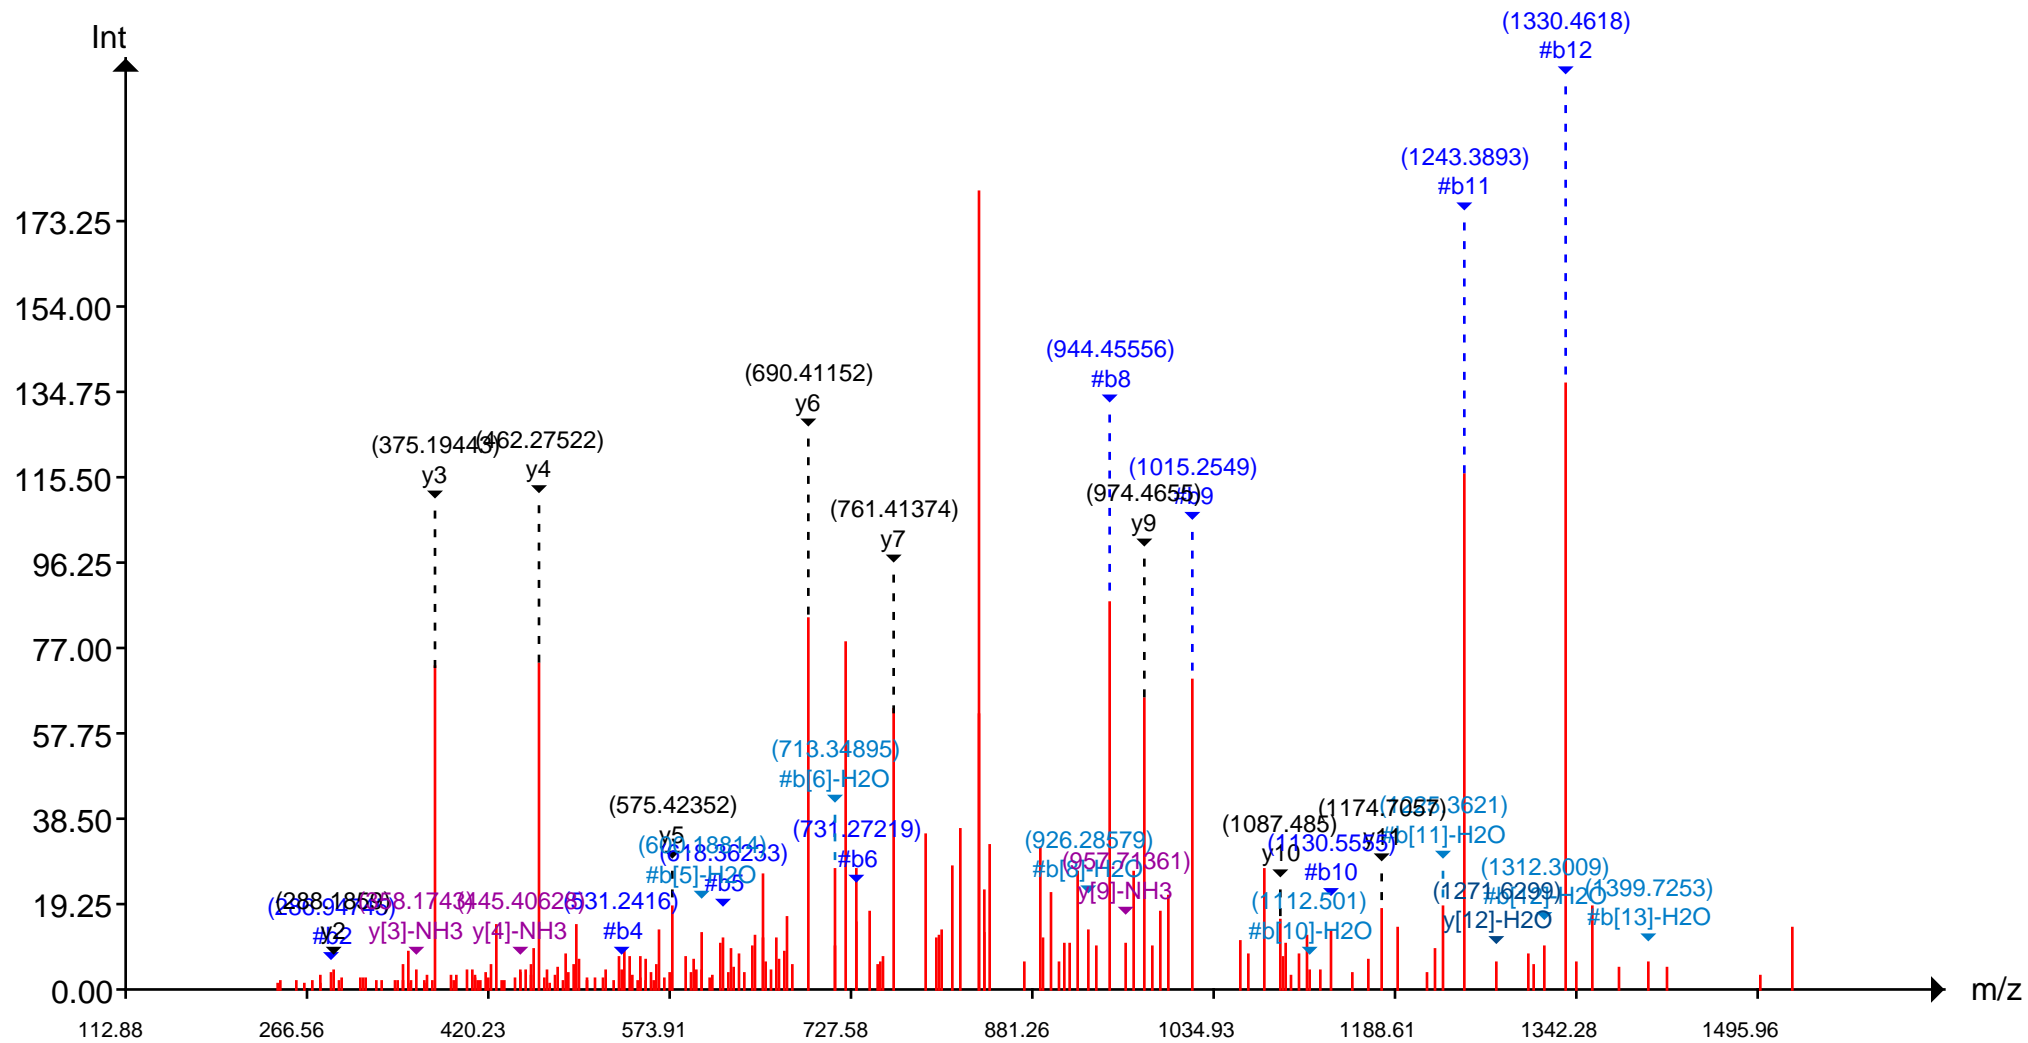

## Info

|                          |                           |                           |          |
|--------------------------|---------------------------|---------------------------|----------|
| <b>Modified Sequence</b> | AcD3-LQEDSLNVADLSSLR-COOH | <b>Ion score</b>          | 52.69    |
| <b>Protein</b>           | P97372                    | <b>Confidence level</b>   | 99.00%   |
| <b>Precursor m/z</b>     | 852.94731                 | <b>Identity Threshold</b> | 48.21    |
| <b>Charge</b>            | 2+                        | <b>Mass error</b>         | 0.003176 |



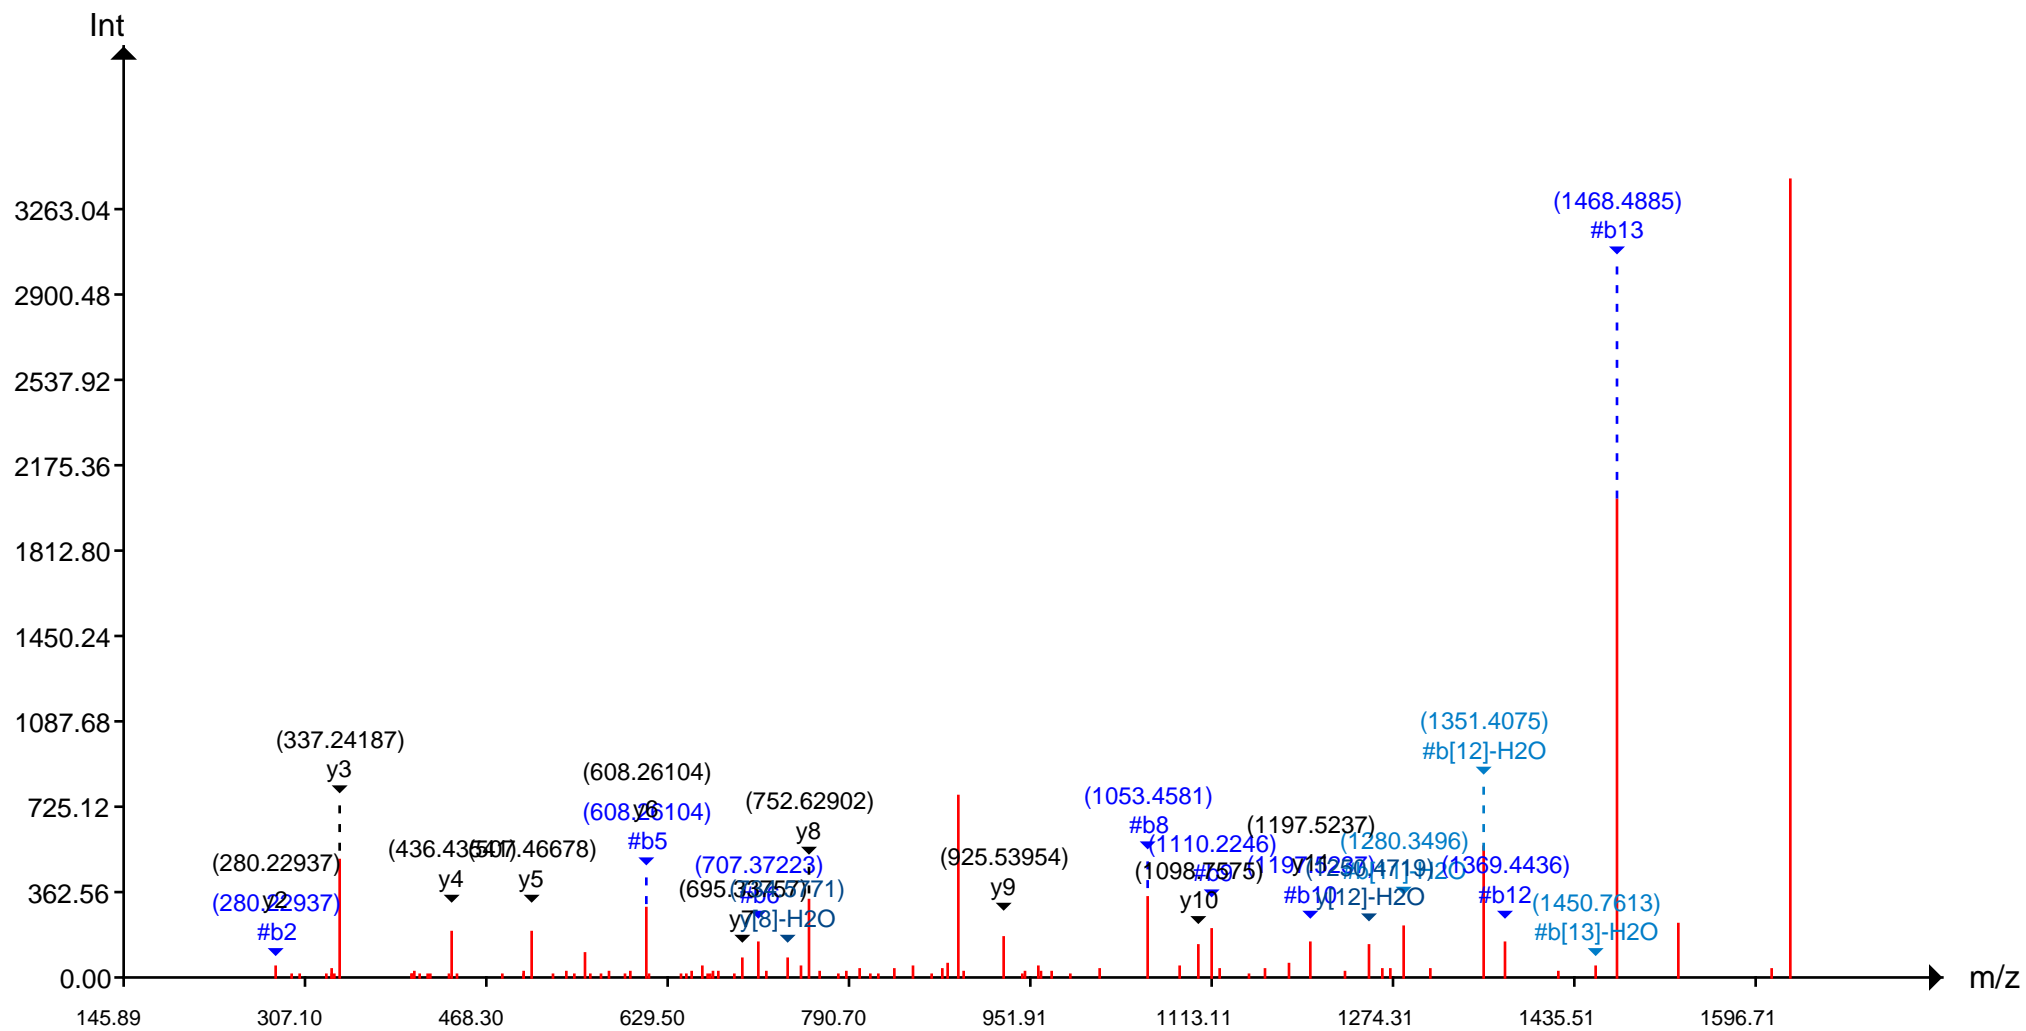

## Info

|                          |                                                 |                           |          |
|--------------------------|-------------------------------------------------|---------------------------|----------|
| <b>Modified Sequence</b> | AcD3-YAQEAVK<AcD3K*>K<AcD3K*>GSTAVGVR<C13>-COOH | <b>Ion score</b>          | 62.93    |
| <b>Protein</b>           | Q9Z2U0                                          | <b>Confidence level</b>   | 99.00%   |
| <b>Precursor m/z</b>     | 903.01508                                       | <b>Identity Threshold</b> | 45.80    |
| <b>Charge</b>            | 2+                                              | <b>Mass error</b>         | 0.001967 |

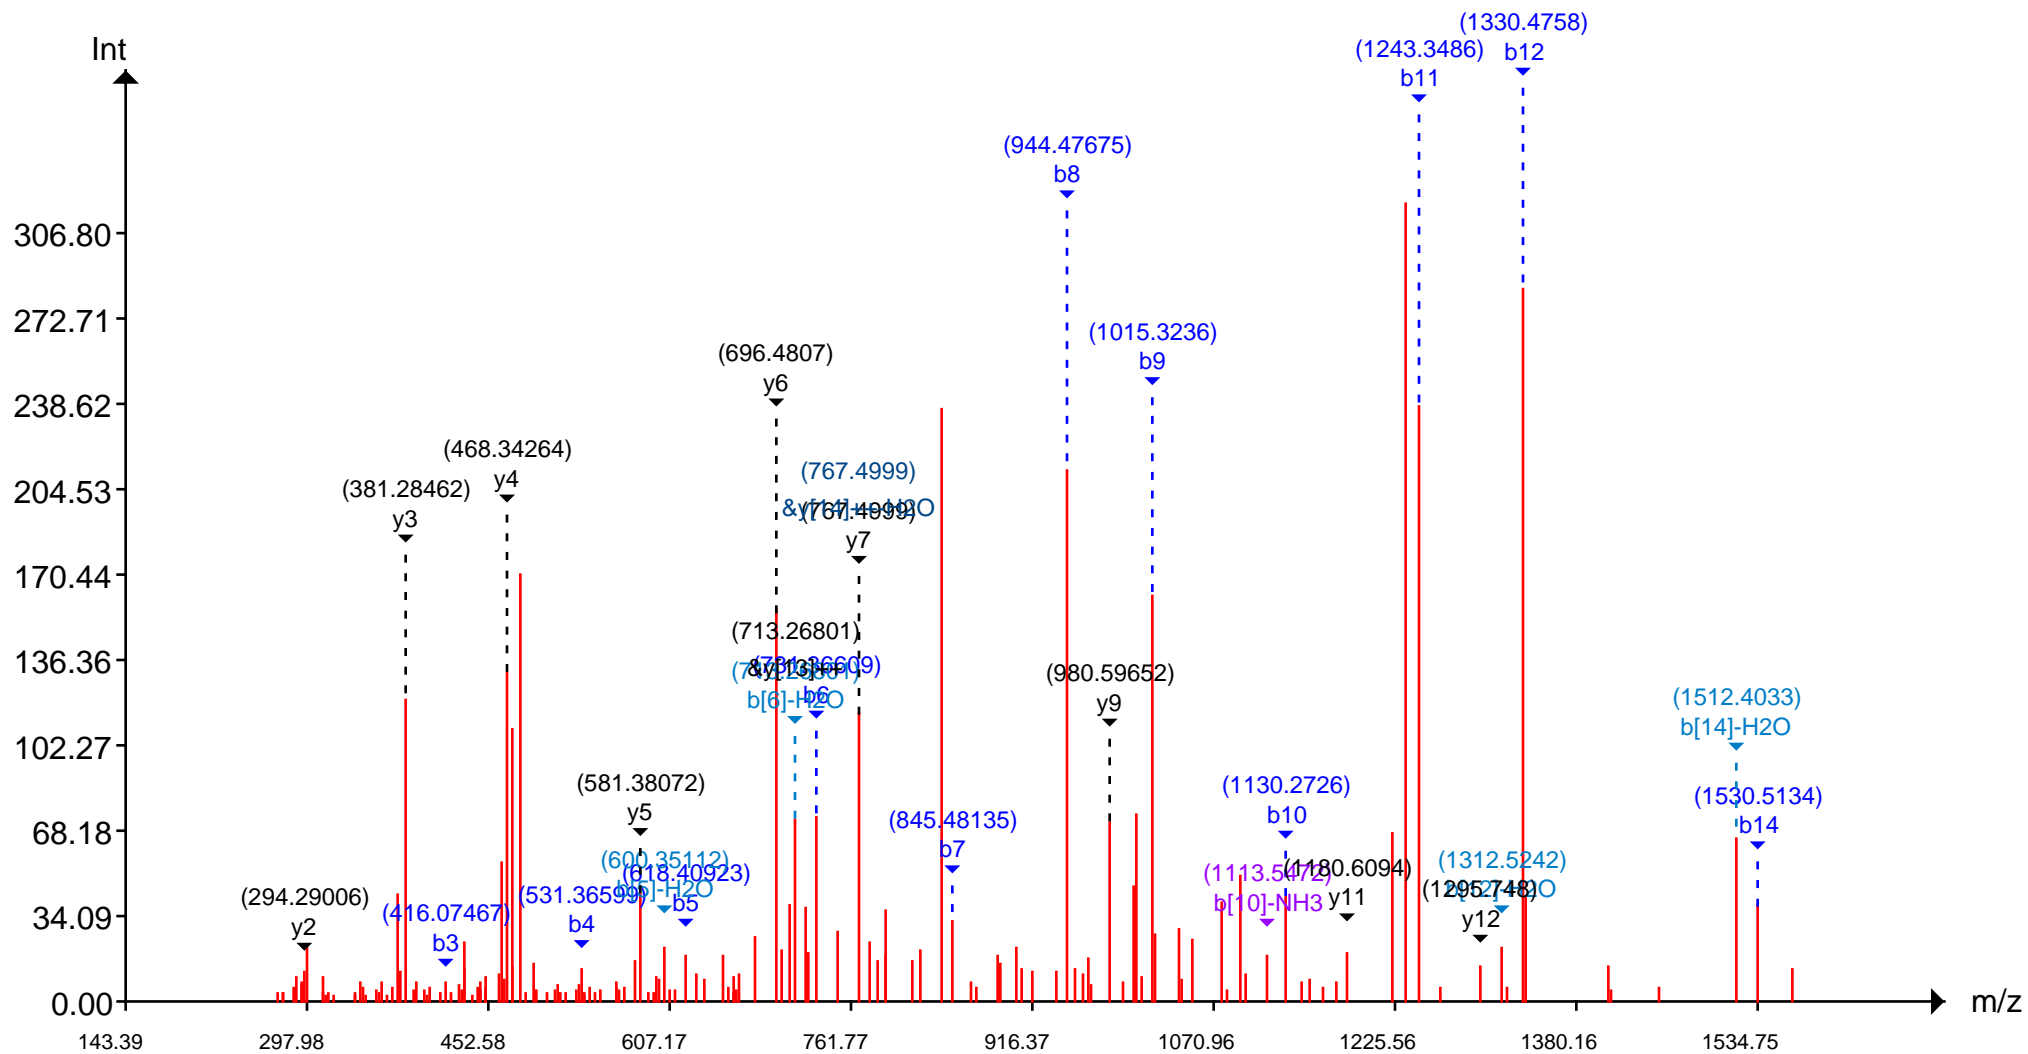

## Info

|                          |                                |                           |          |
|--------------------------|--------------------------------|---------------------------|----------|
| <b>Modified Sequence</b> | AcD3-LQEDSLNVADLSSLR<C13>-COOH | <b>Ion score</b>          | 60.73    |
| <b>Protein</b>           | P97372                         | <b>Confidence level</b>   | 99.00%   |
| <b>Precursor m/z</b>     | 855.95672                      | <b>Identity Threshold</b> | 47.93    |
| <b>Charge</b>            | 2+                             | <b>Mass error</b>         | 0.001854 |

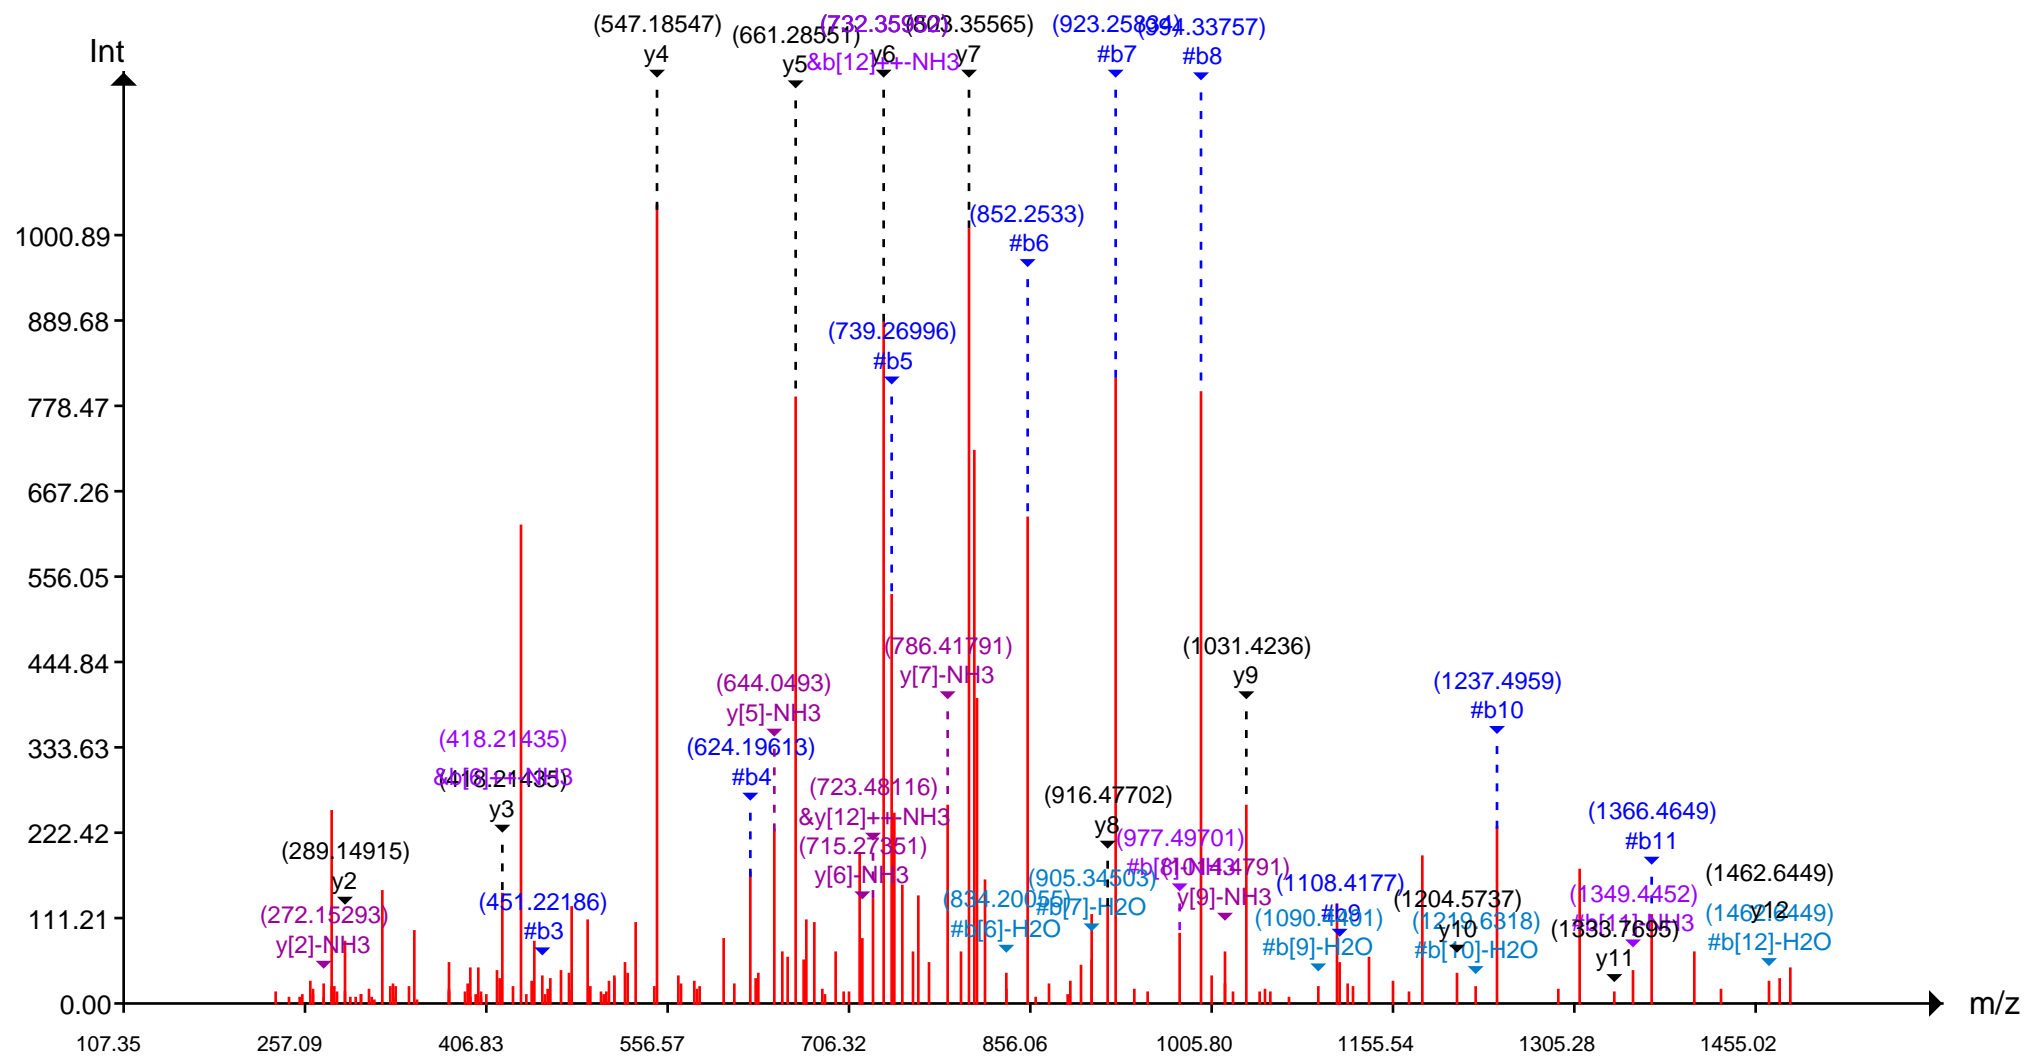

## Info

|                          |                                 |                           |          |
|--------------------------|---------------------------------|---------------------------|----------|
| <b>Modified Sequence</b> | AcD3-FEEK<AcD3K*>DIAANEENR-COOH | <b>Ion score</b>          | 67.83    |
| <b>Protein</b>           | Q9JJU8                          | <b>Confidence level</b>   | 99.00%   |
| <b>Precursor m/z</b>     | 827.89588                       | <b>Identity Threshold</b> | 46.41    |
| <b>Charge</b>            | 2+                              | <b>Mass error</b>         | 0.001955 |

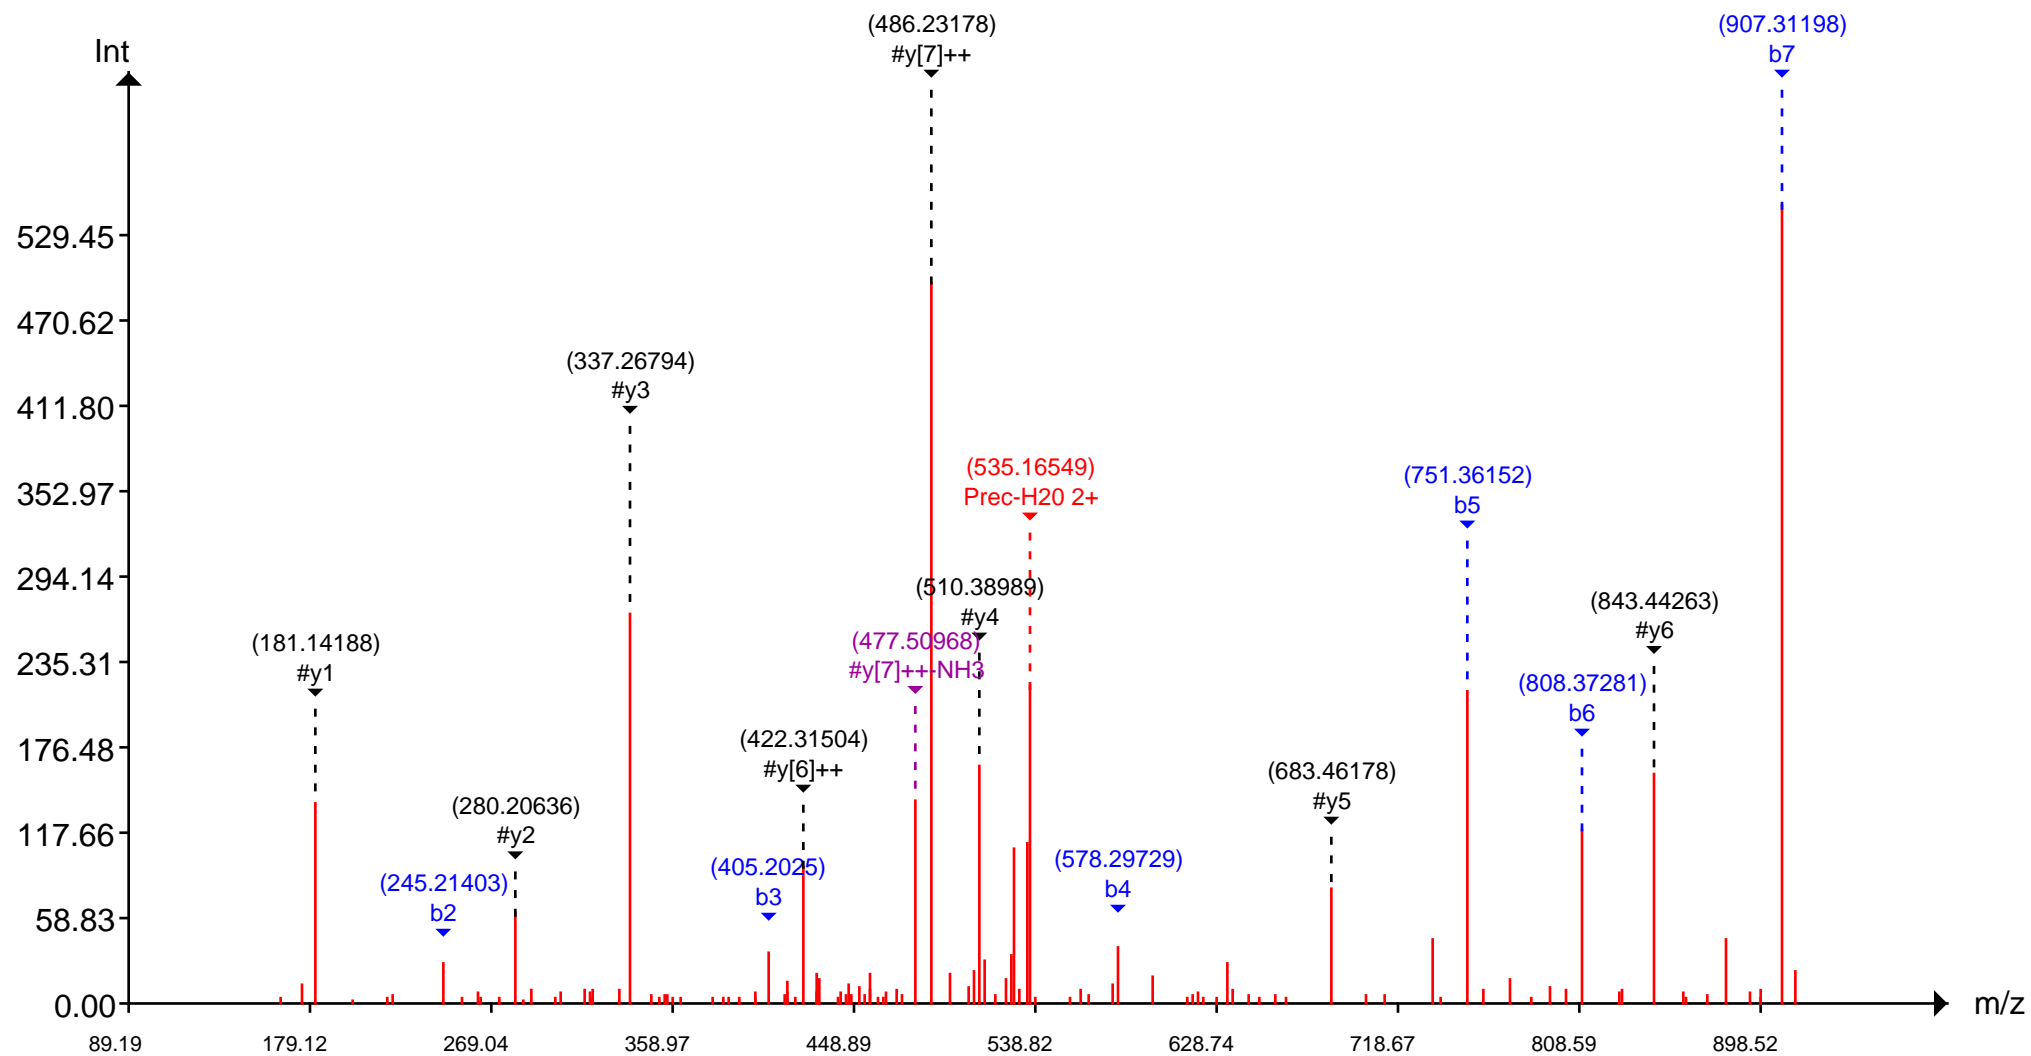

## Info

**Modified Sequence** AcD3-AQC<Cmm\*>K<AcD3K\*>K<AcD3K\*>GVR<C13>-COOH

**Ion score** 52.94

**Protein** Q61753

**Confidence level** 99.00%

**Precursor m/z** 544.32044

**Identity Threshold** 46.24

**Charge** 2+

**Mass error** 1.84E-4

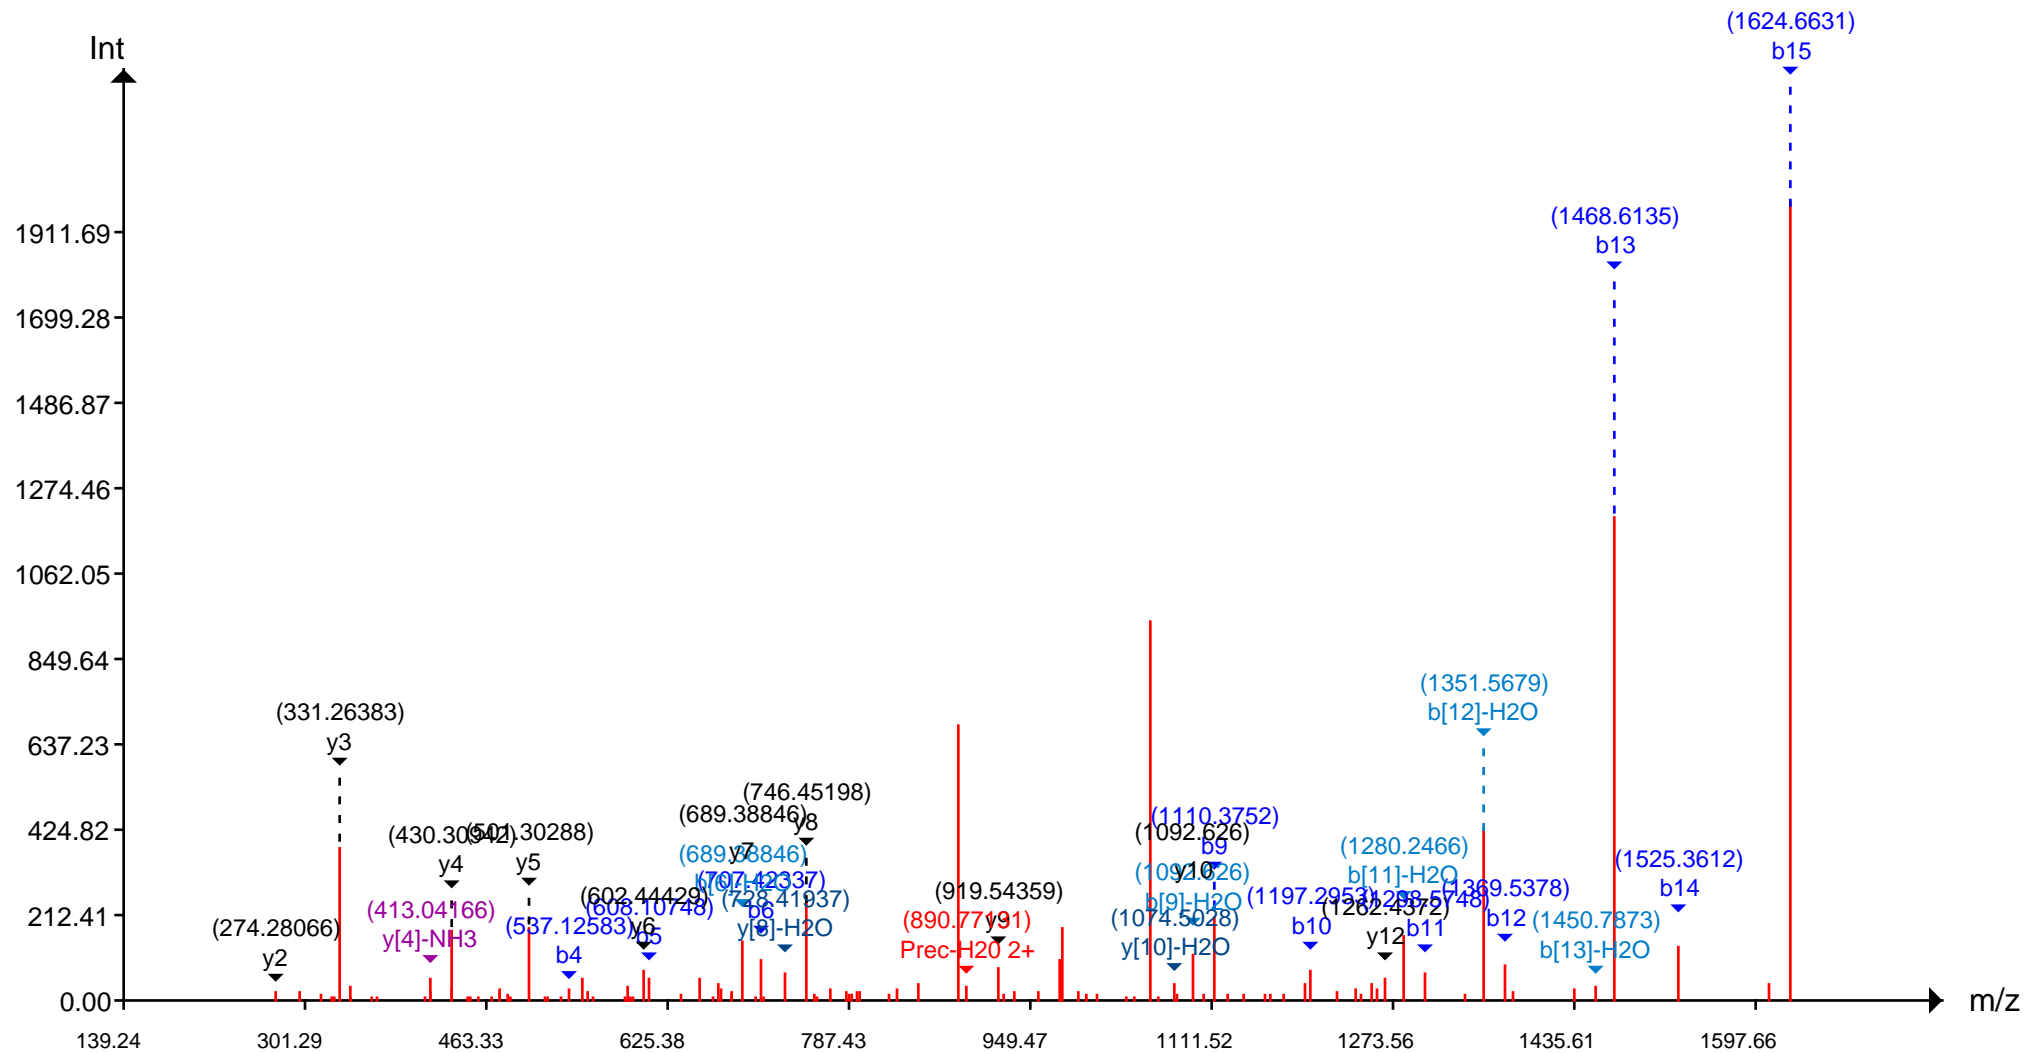

## Info

|                          |                                            |                           |          |
|--------------------------|--------------------------------------------|---------------------------|----------|
| <b>Modified Sequence</b> | AcD3-YAQEAVK<AcD3K*>K<AcD3K*>GSTAVGVR-COOH | <b>Ion score</b>          | 73.94    |
| <b>Protein</b>           | Q9Z2U0                                     | <b>Confidence level</b>   | 99.00%   |
| <b>Precursor m/z</b>     | 900.00512                                  | <b>Identity Threshold</b> | 46.61    |
| <b>Charge</b>            | 2+                                         | <b>Mass error</b>         | 0.002188 |

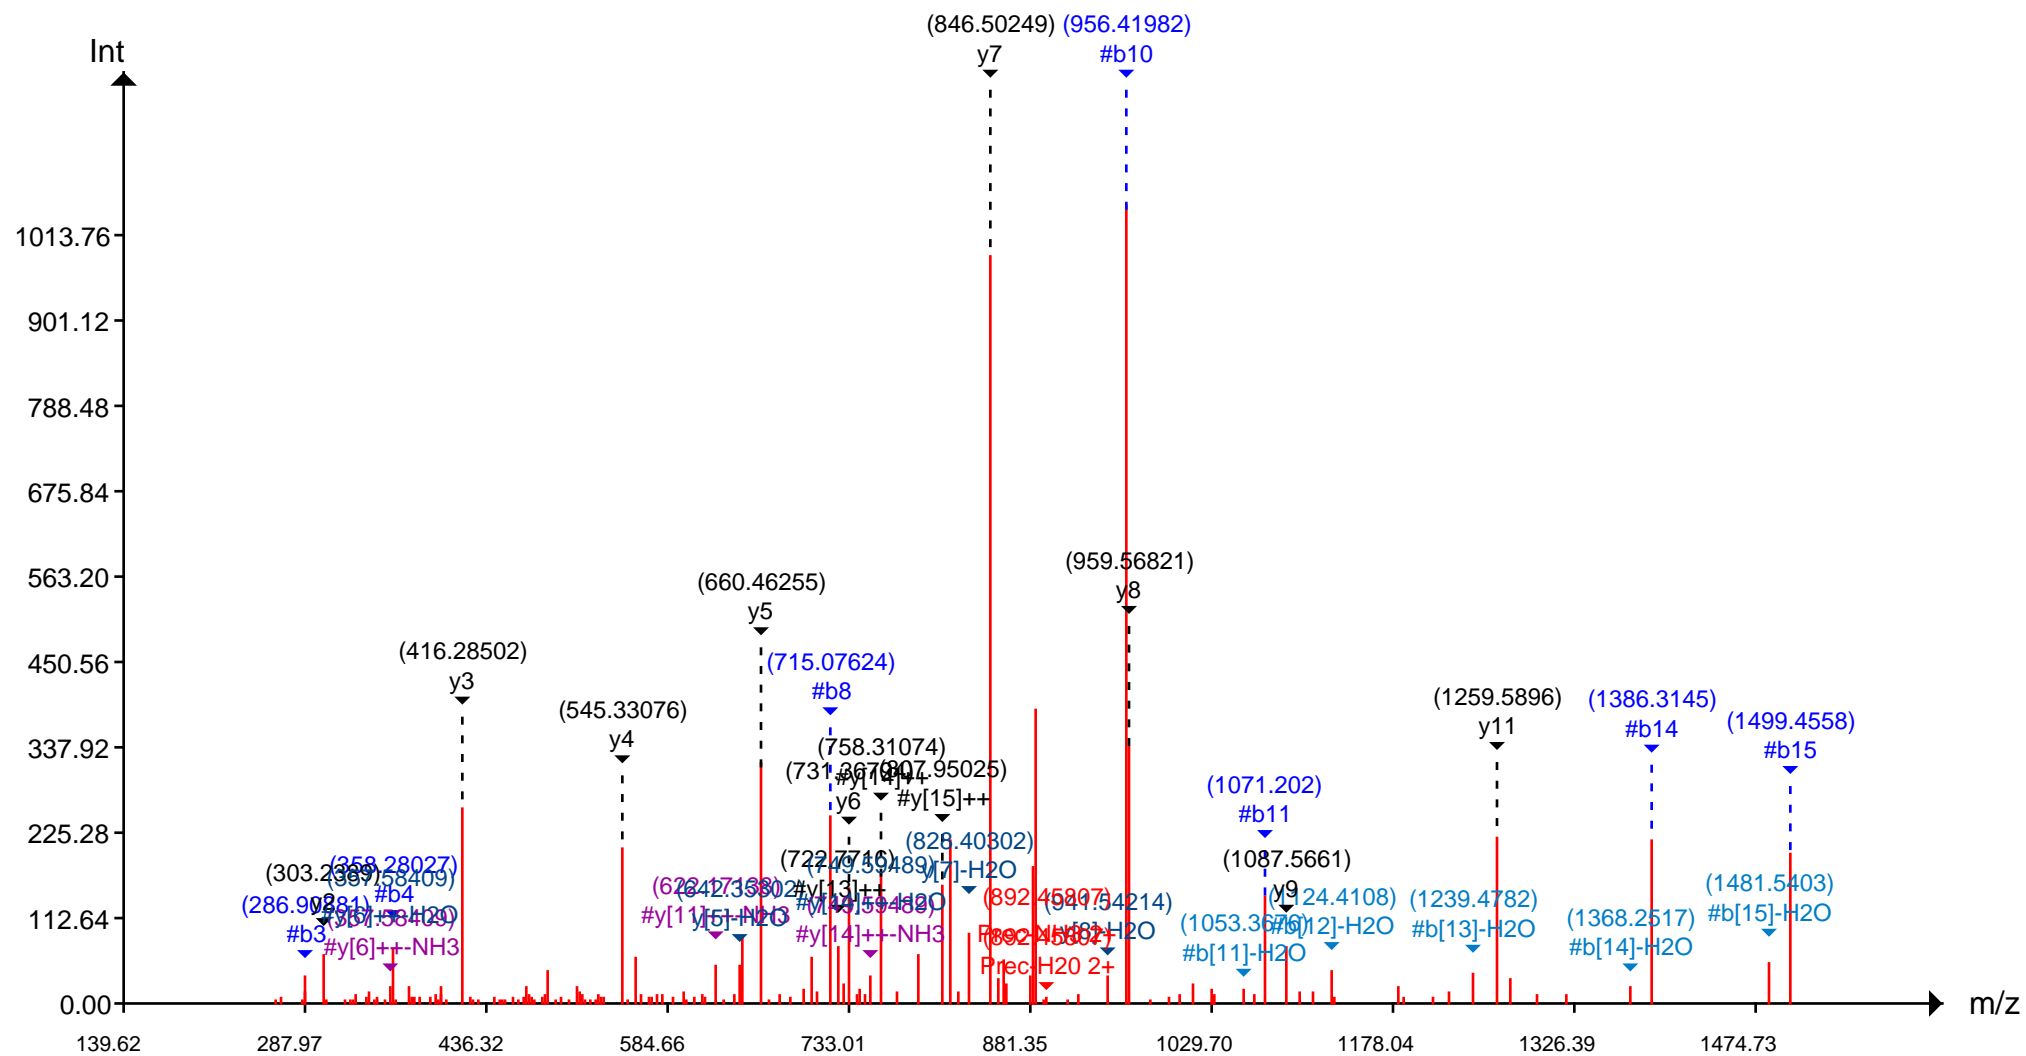

## Info

|                          |                             |                           |          |
|--------------------------|-----------------------------|---------------------------|----------|
| <b>Modified Sequence</b> | AcD3-AAVAGQDGQIDADELQR-COOH | <b>Ion score</b>          | 61.01    |
| <b>Protein</b>           | Q6P069                      | <b>Confidence level</b>   | 99.00%   |
| <b>Precursor m/z</b>     | 901.44238                   | <b>Identity Threshold</b> | 47.25    |
| <b>Charge</b>            | 2+                          | <b>Mass error</b>         | 0.002074 |

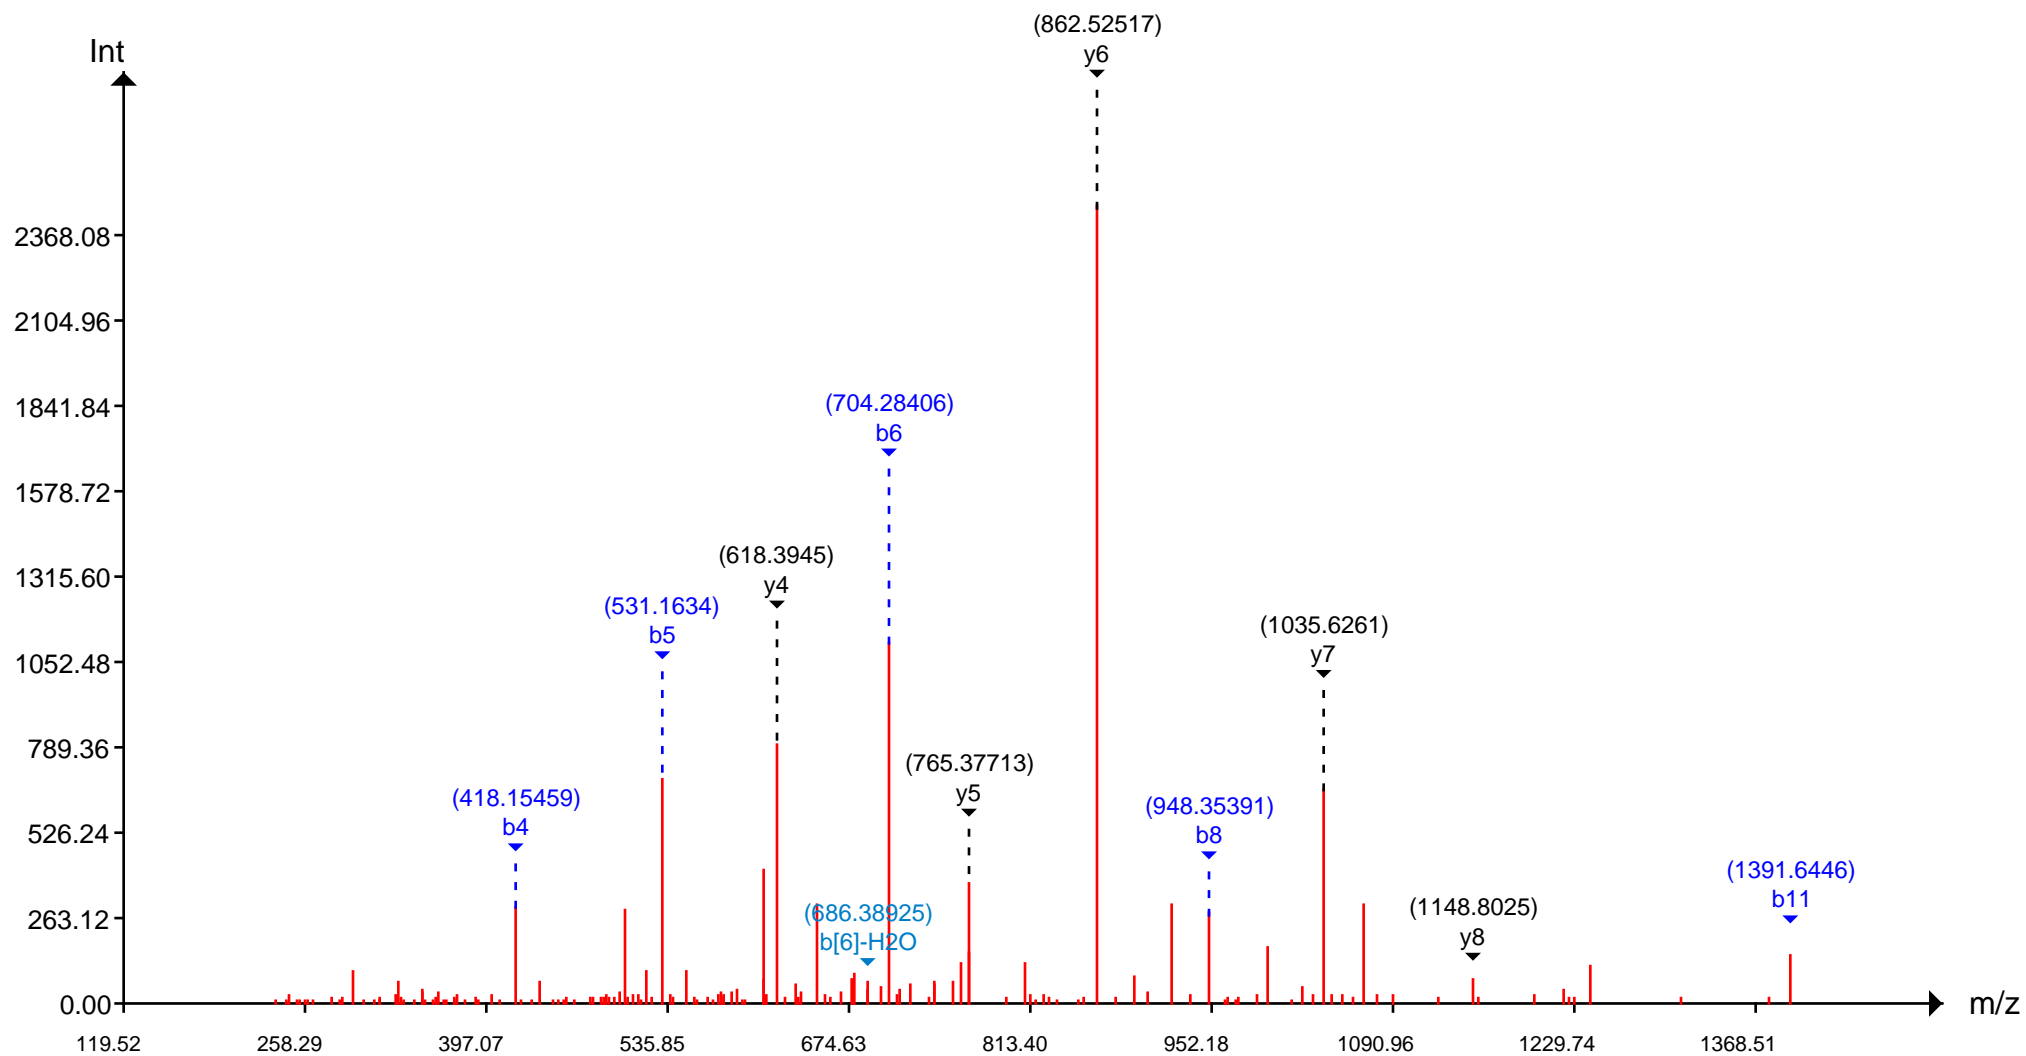

## Info

|                          |                                                 |                           |          |
|--------------------------|-------------------------------------------------|---------------------------|----------|
| <b>Modified Sequence</b> | AcD3-AATEAIK<AcD3K*>PFPK<AcD3K*>K<AcD3K*>R-COOH | <b>Ion score</b>          | 45.11    |
| <b>Protein</b>           | Q6PGL7                                          | <b>Confidence level</b>   | 99.00%   |
| <b>Precursor m/z</b>     | 783.47661                                       | <b>Identity Threshold</b> | 42.21    |
| <b>Charge</b>            | 2+                                              | <b>Mass error</b>         | 0.002038 |

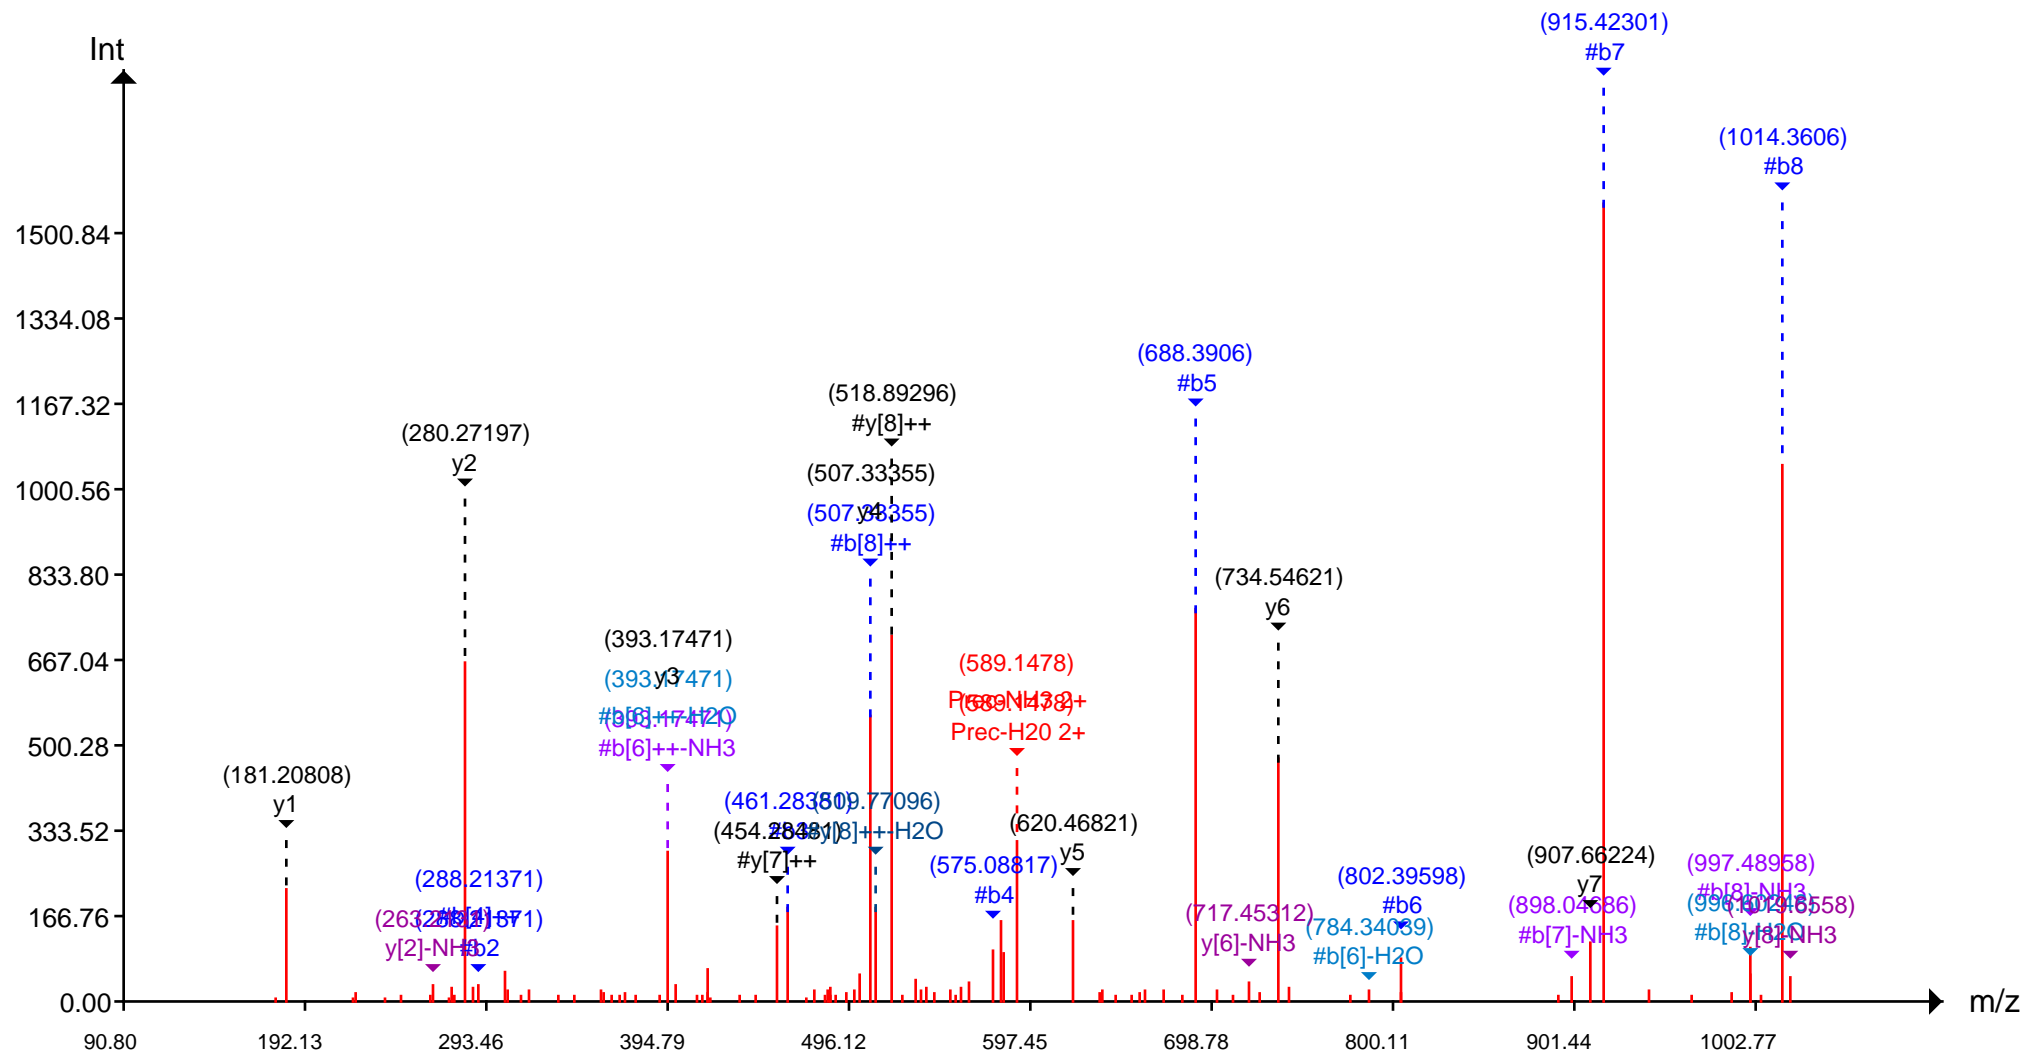

## Info

**Modified Sequence** AcD3-LEK<AcD3K\*>NINIVR<C13>-COOH

**Ion score** 66.06

**Protein** Q99K10

**Confidence level** 99.00%

**Precursor m/z** 597.87466

**Identity Threshold** 41.81

**Charge** 2+

**Mass error** 1.79E-4



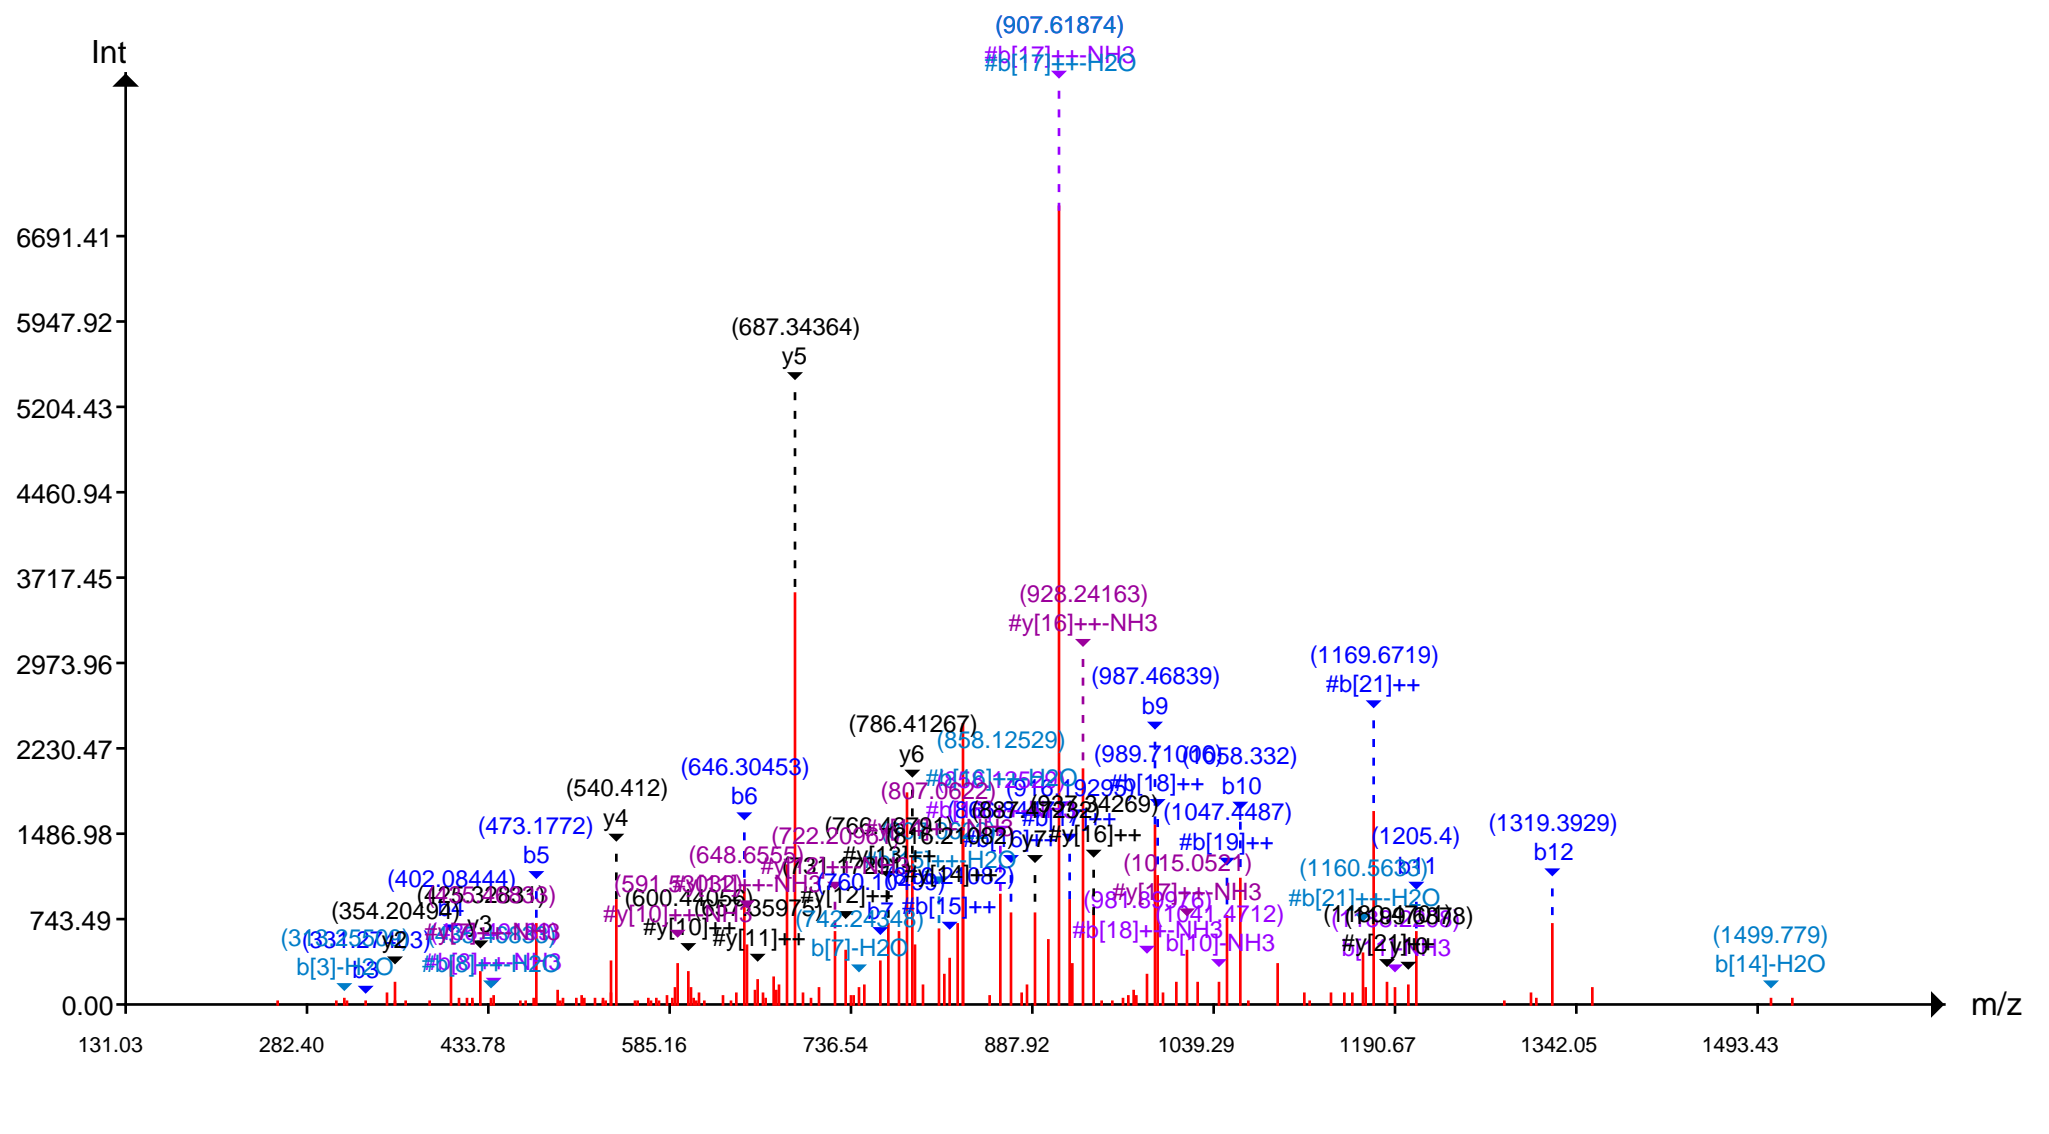

| Info                     |                                                              |                           |          |
|--------------------------|--------------------------------------------------------------|---------------------------|----------|
| <b>Modified Sequence</b> | AcD3-IGDAAK<AcD3K*>NQVAM<Mox*>NPTNTVFDAAK<AcD3K*>R<C13>-COOH | <b>Ion score</b>          | 47.89    |
| <b>Protein</b>           | P63017                                                       | <b>Confidence level</b>   | 99.00%   |
| <b>Precursor m/z</b>     | 840.10585                                                    | <b>Identity Threshold</b> | 47.87    |
| <b>Charge</b>            | 3+                                                           | <b>Mass error</b>         | 0.001807 |

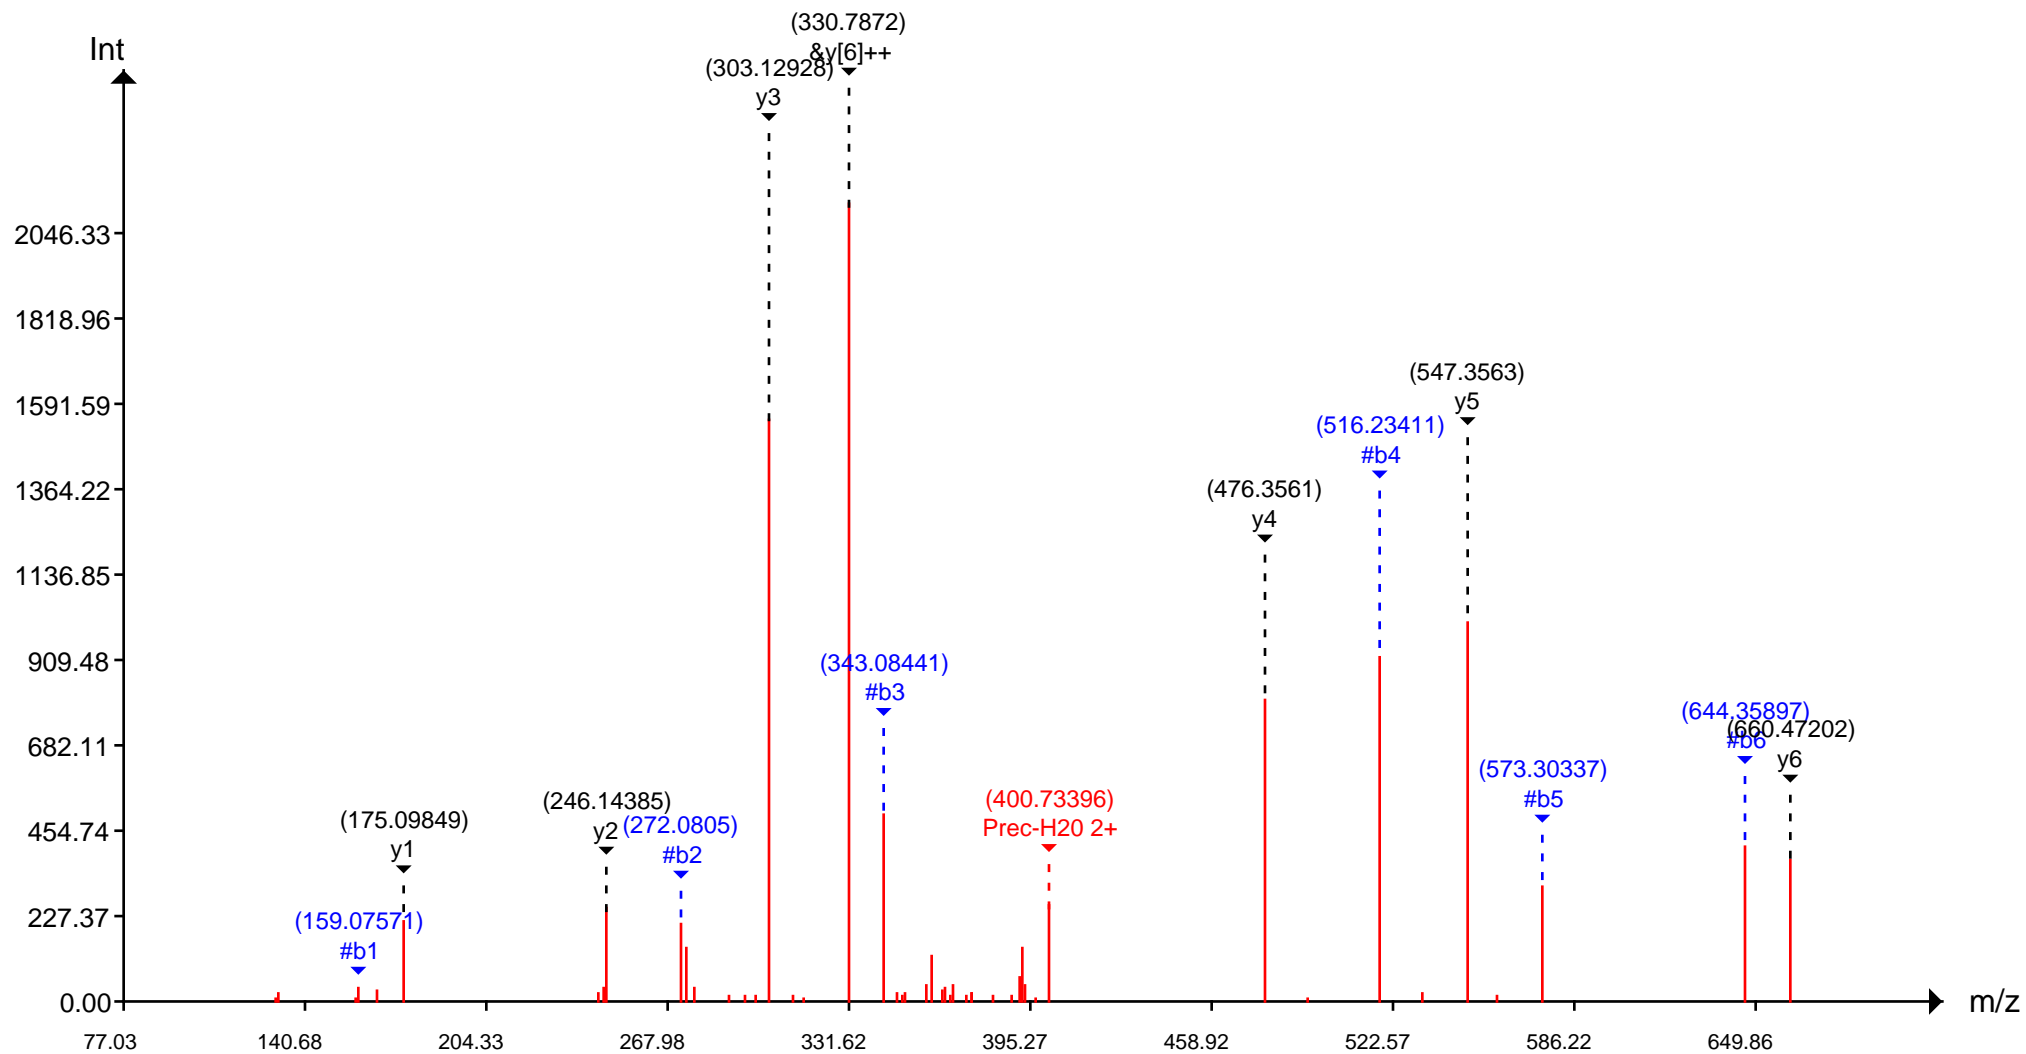

## Info

**Modified Sequence** AcD3-LLAK<AcD3K\*>GAR-COOH

**Ion score** 64.78

**Protein** Q62422

**Confidence level** 99.00%

**Precursor m/z** 409.7719

**Identity Threshold** 39.57

**Charge** 2+

**Mass error** 2.7E-5

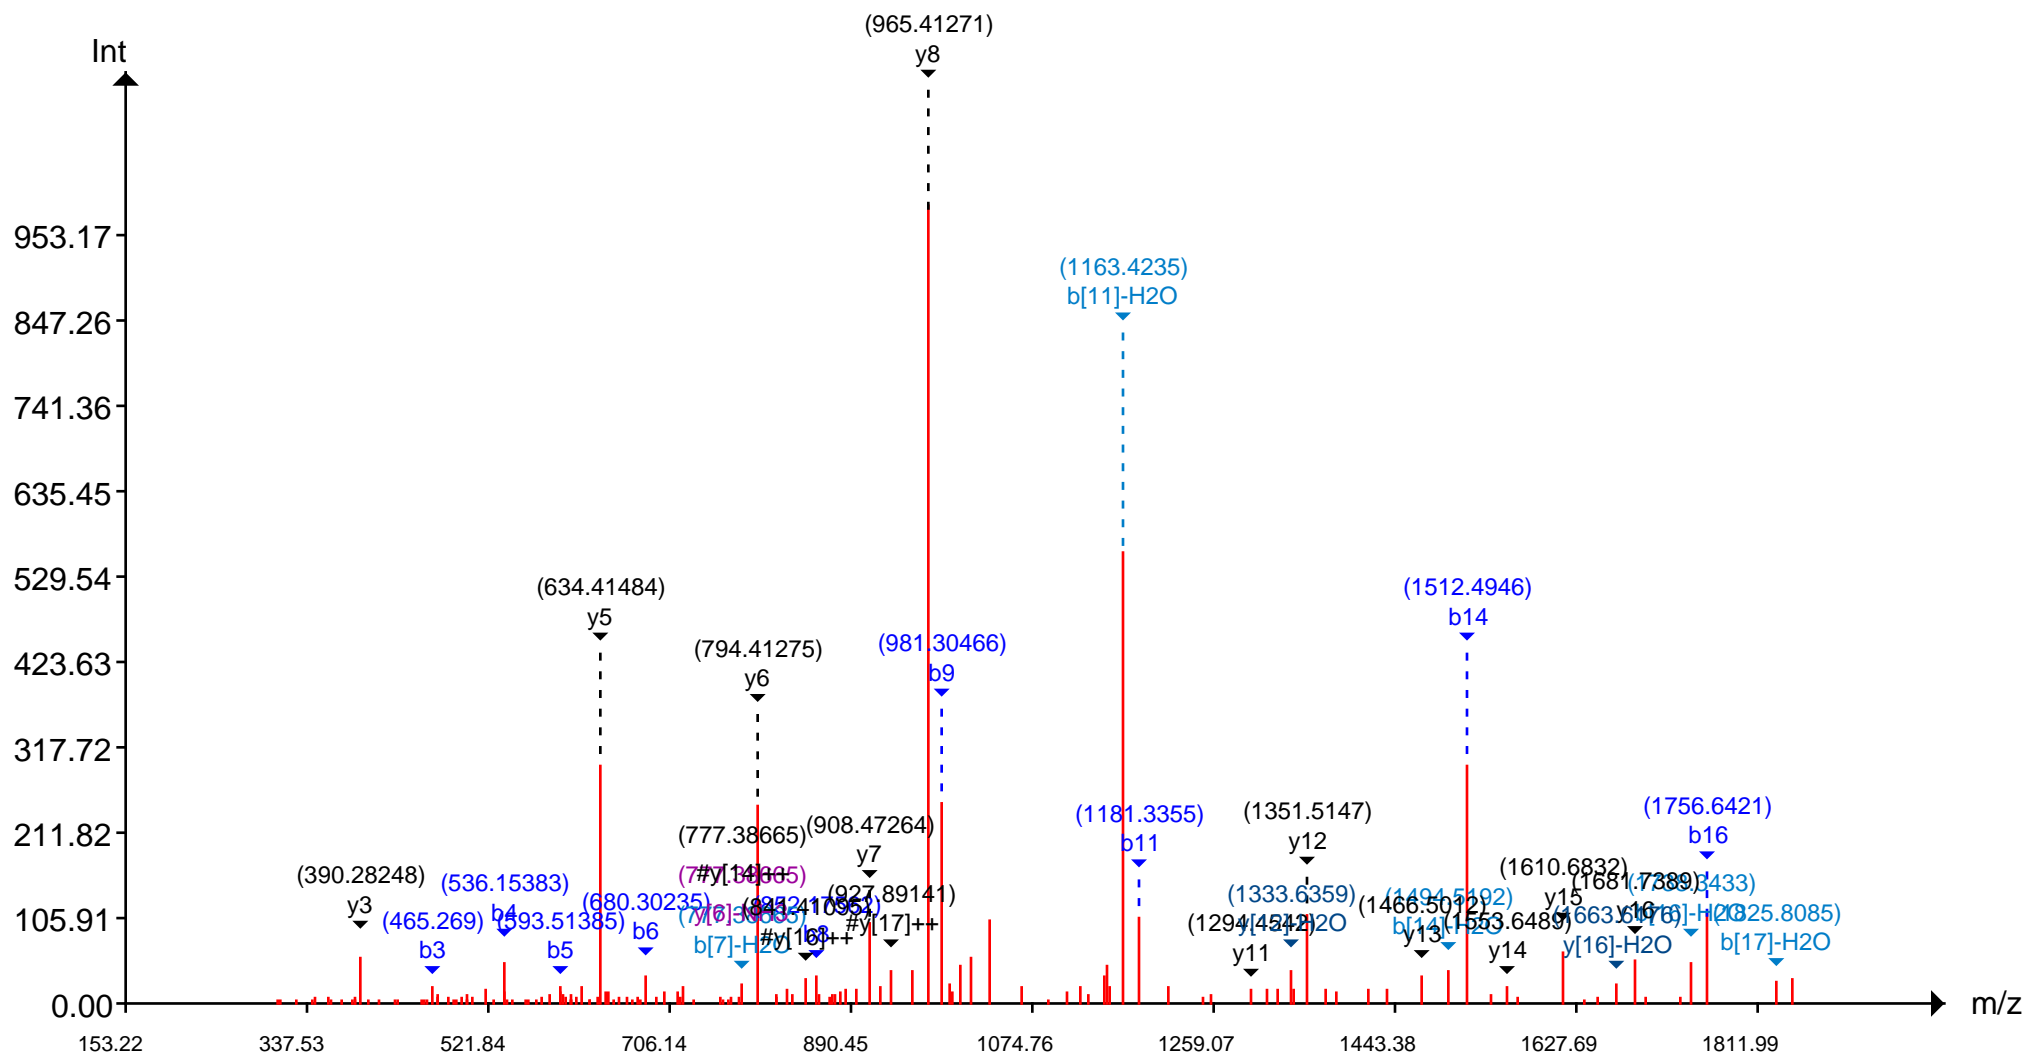

## Info

|                          |                                             |                           |         |
|--------------------------|---------------------------------------------|---------------------------|---------|
| <b>Modified Sequence</b> | AcD3-FVK<AcD3K*>AGSDGESIGNC<Cmm*>PFSQR-COOH | <b>Ion score</b>          | 83.75   |
| <b>Protein</b>           | Q9QYB1                                      | <b>Confidence level</b>   | 99.00%  |
| <b>Precursor m/z</b>     | 1073.511                                    | <b>Identity Threshold</b> | 46.23   |
| <b>Charge</b>            | 2+                                          | <b>Mass error</b>         | 6.58E-4 |

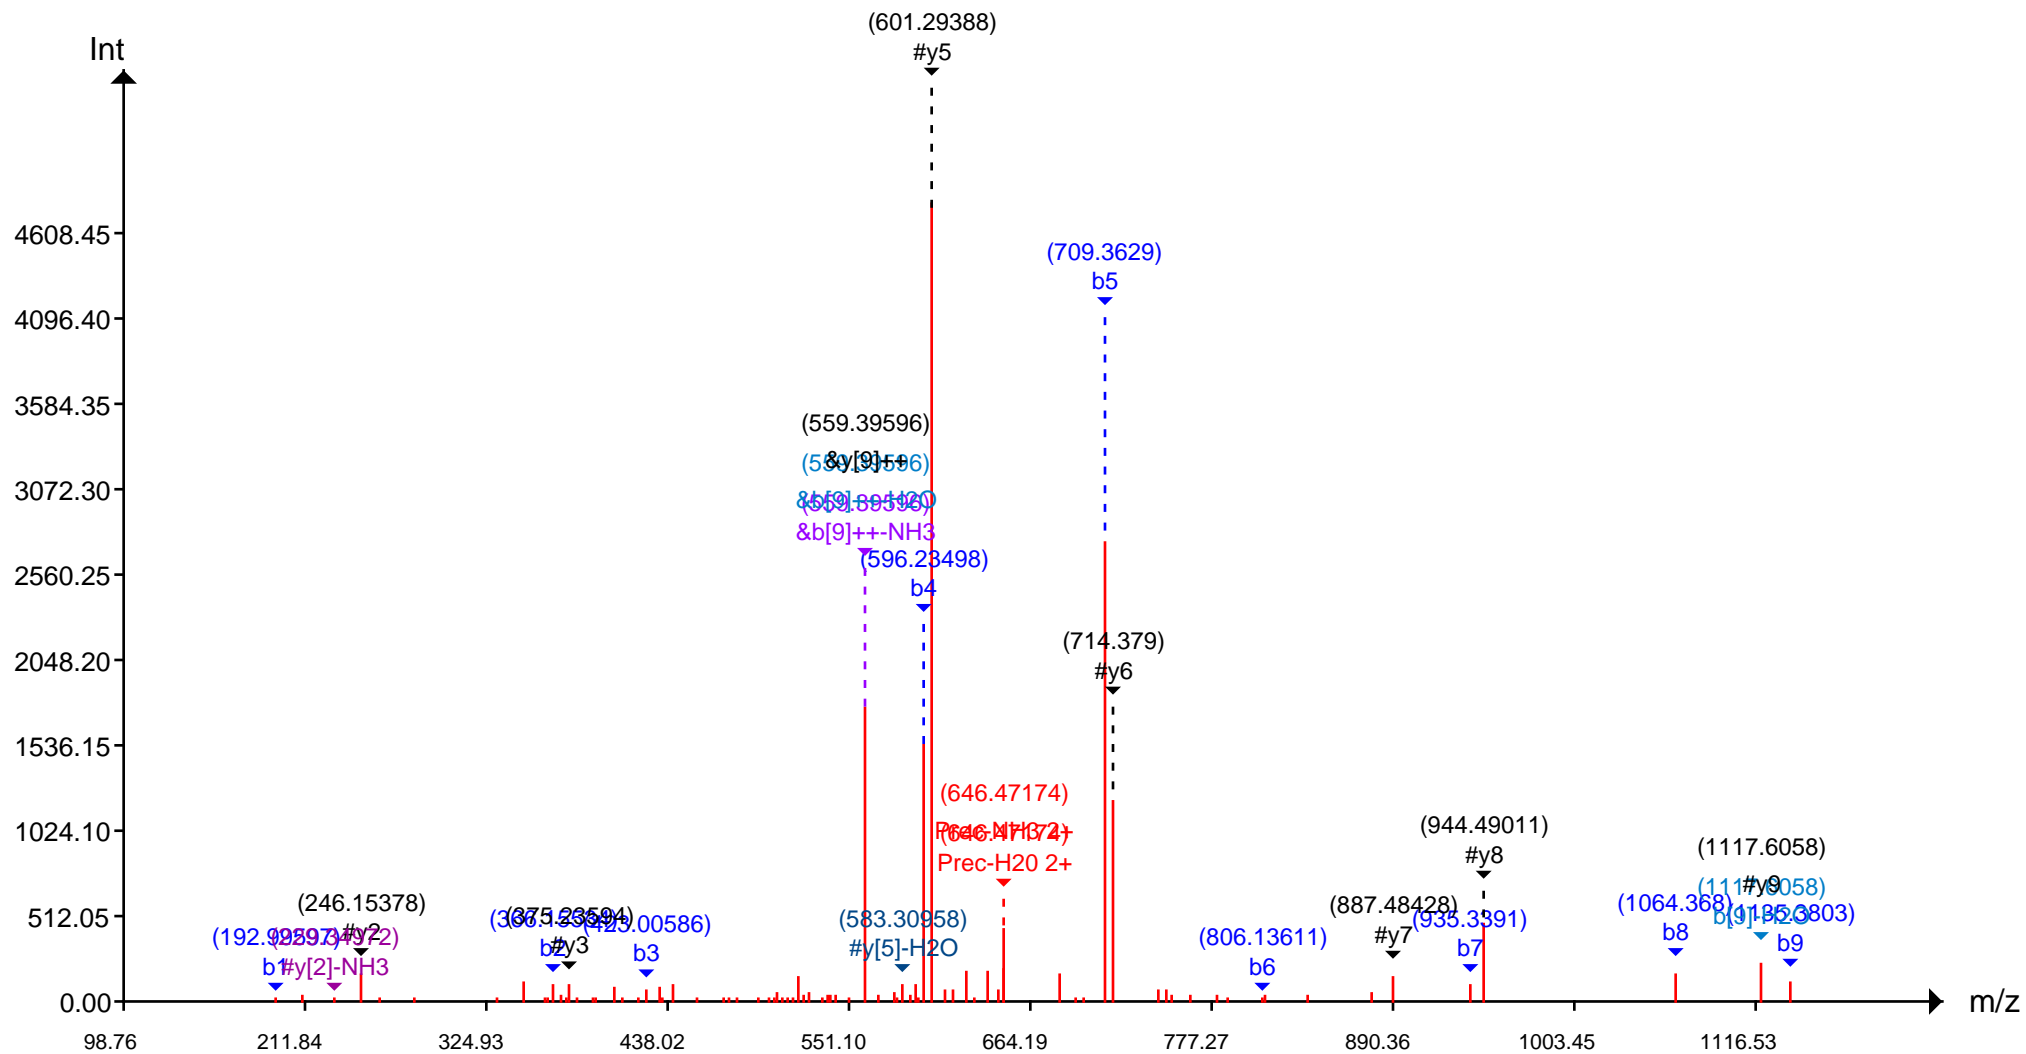

## Info

**Modified Sequence** AcD3-M<Mox\*>K<AcD3K\*>GK<AcD3K\*>LPPEAR-COOH

**Ion score** 60.18

**Protein** P06745

**Confidence level** 99.00%

**Precursor m/z** 655.3608

**Identity Threshold** 47.84

**Charge** 2+

**Mass error** 0.001298

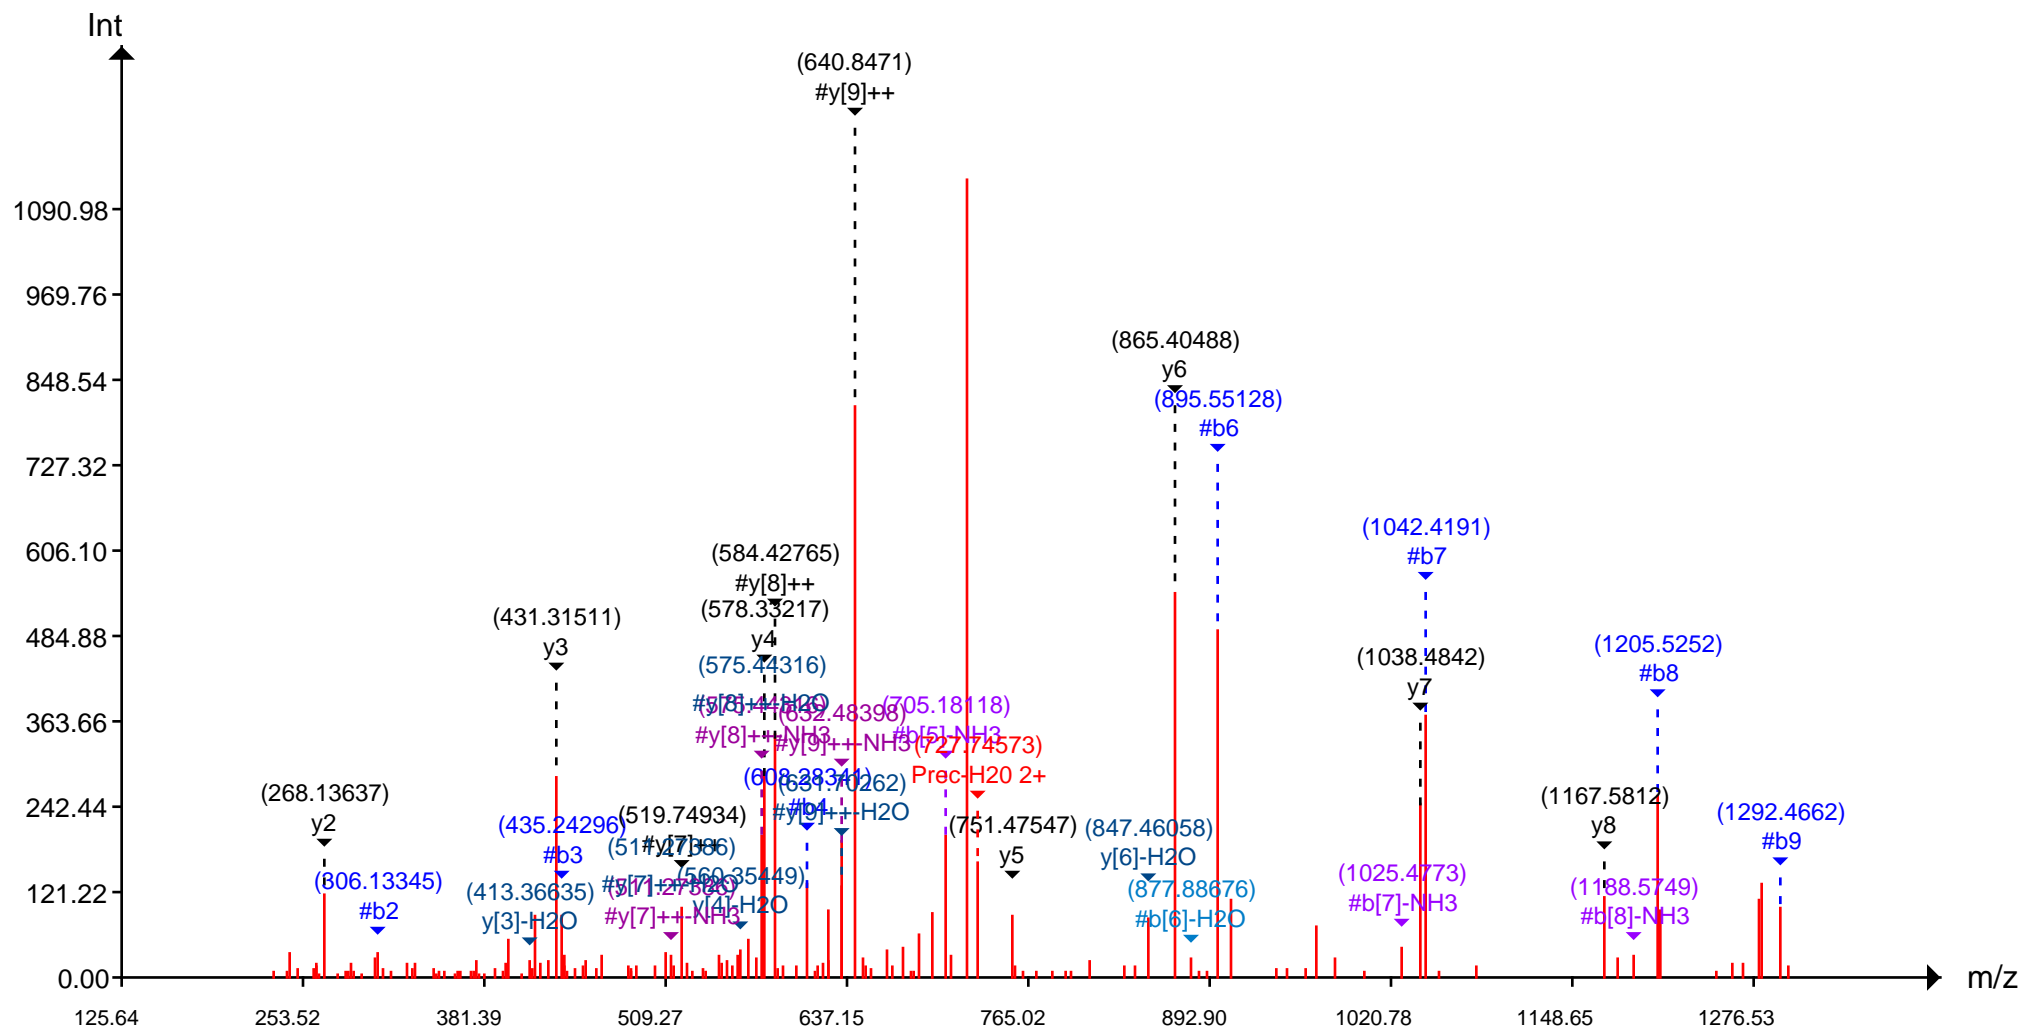

Info

|                          |                                                 |                           |          |
|--------------------------|-------------------------------------------------|---------------------------|----------|
| <b>Modified Sequence</b> | AcD3-FLEK<AcD3K*>NK<AcD3K*>M<Mox*>YSR<C13>-COOH | <b>Ion score</b>          | 51.6     |
| <b>Protein</b>           | Q9D7A6                                          | <b>Confidence level</b>   | 99.00%   |
| <b>Precursor m/z</b>     | 736.89715                                       | <b>Identity Threshold</b> | 48.04    |
| <b>Charge</b>            | 2+                                              | <b>Mass error</b>         | 0.001092 |

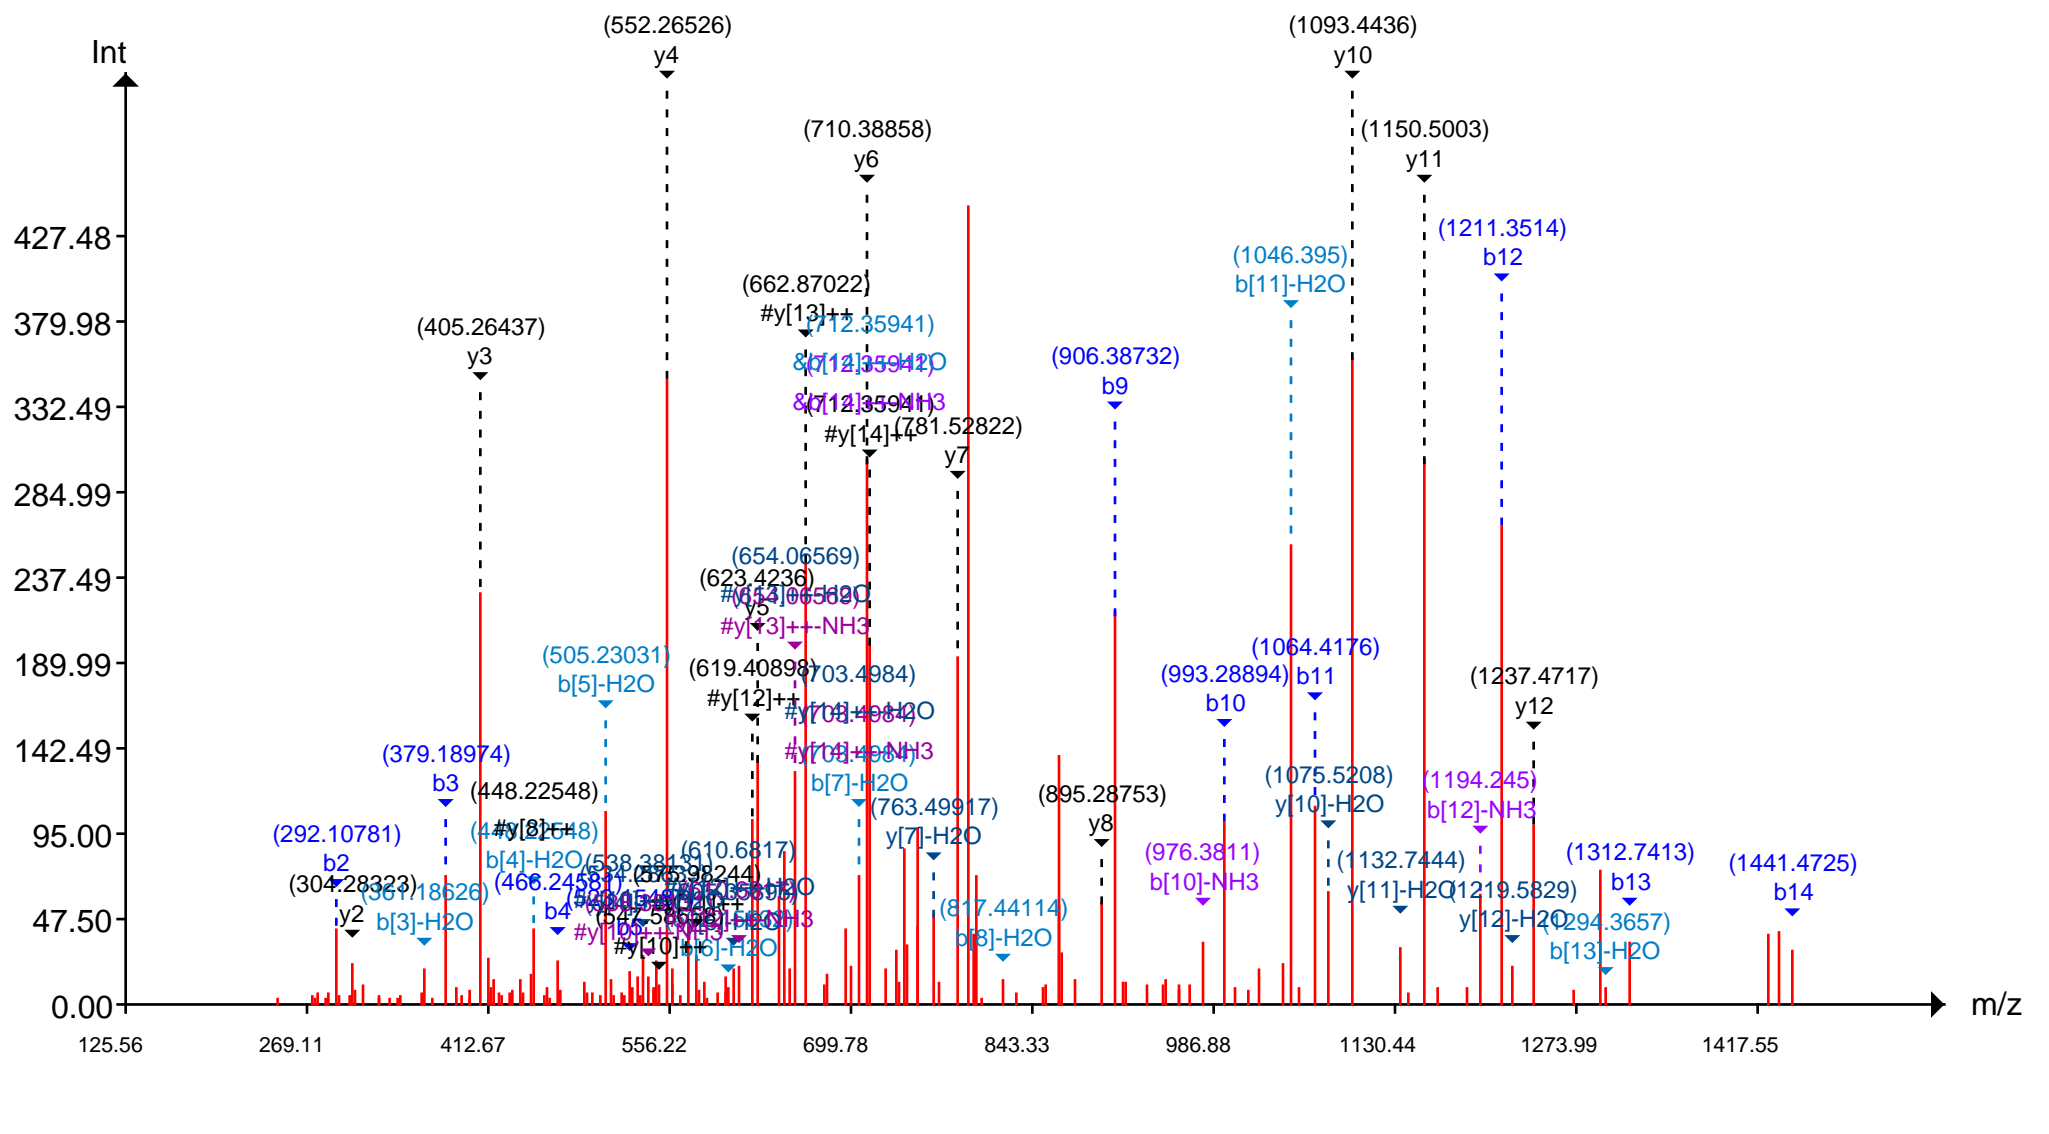

| Info                     |                           |                           |          |
|--------------------------|---------------------------|---------------------------|----------|
| <b>Modified Sequence</b> | AcD3-FVSSGPTNASAFter-COOH | <b>Ion score</b>          | 86.86    |
| <b>Protein</b>           | P27546                    | <b>Confidence level</b>   | 99.00%   |
| <b>Precursor m/z</b>     | 808.3944                  | <b>Identity Threshold</b> | 47.03    |
| <b>Charge</b>            | 2+                        | <b>Mass error</b>         | 0.002519 |

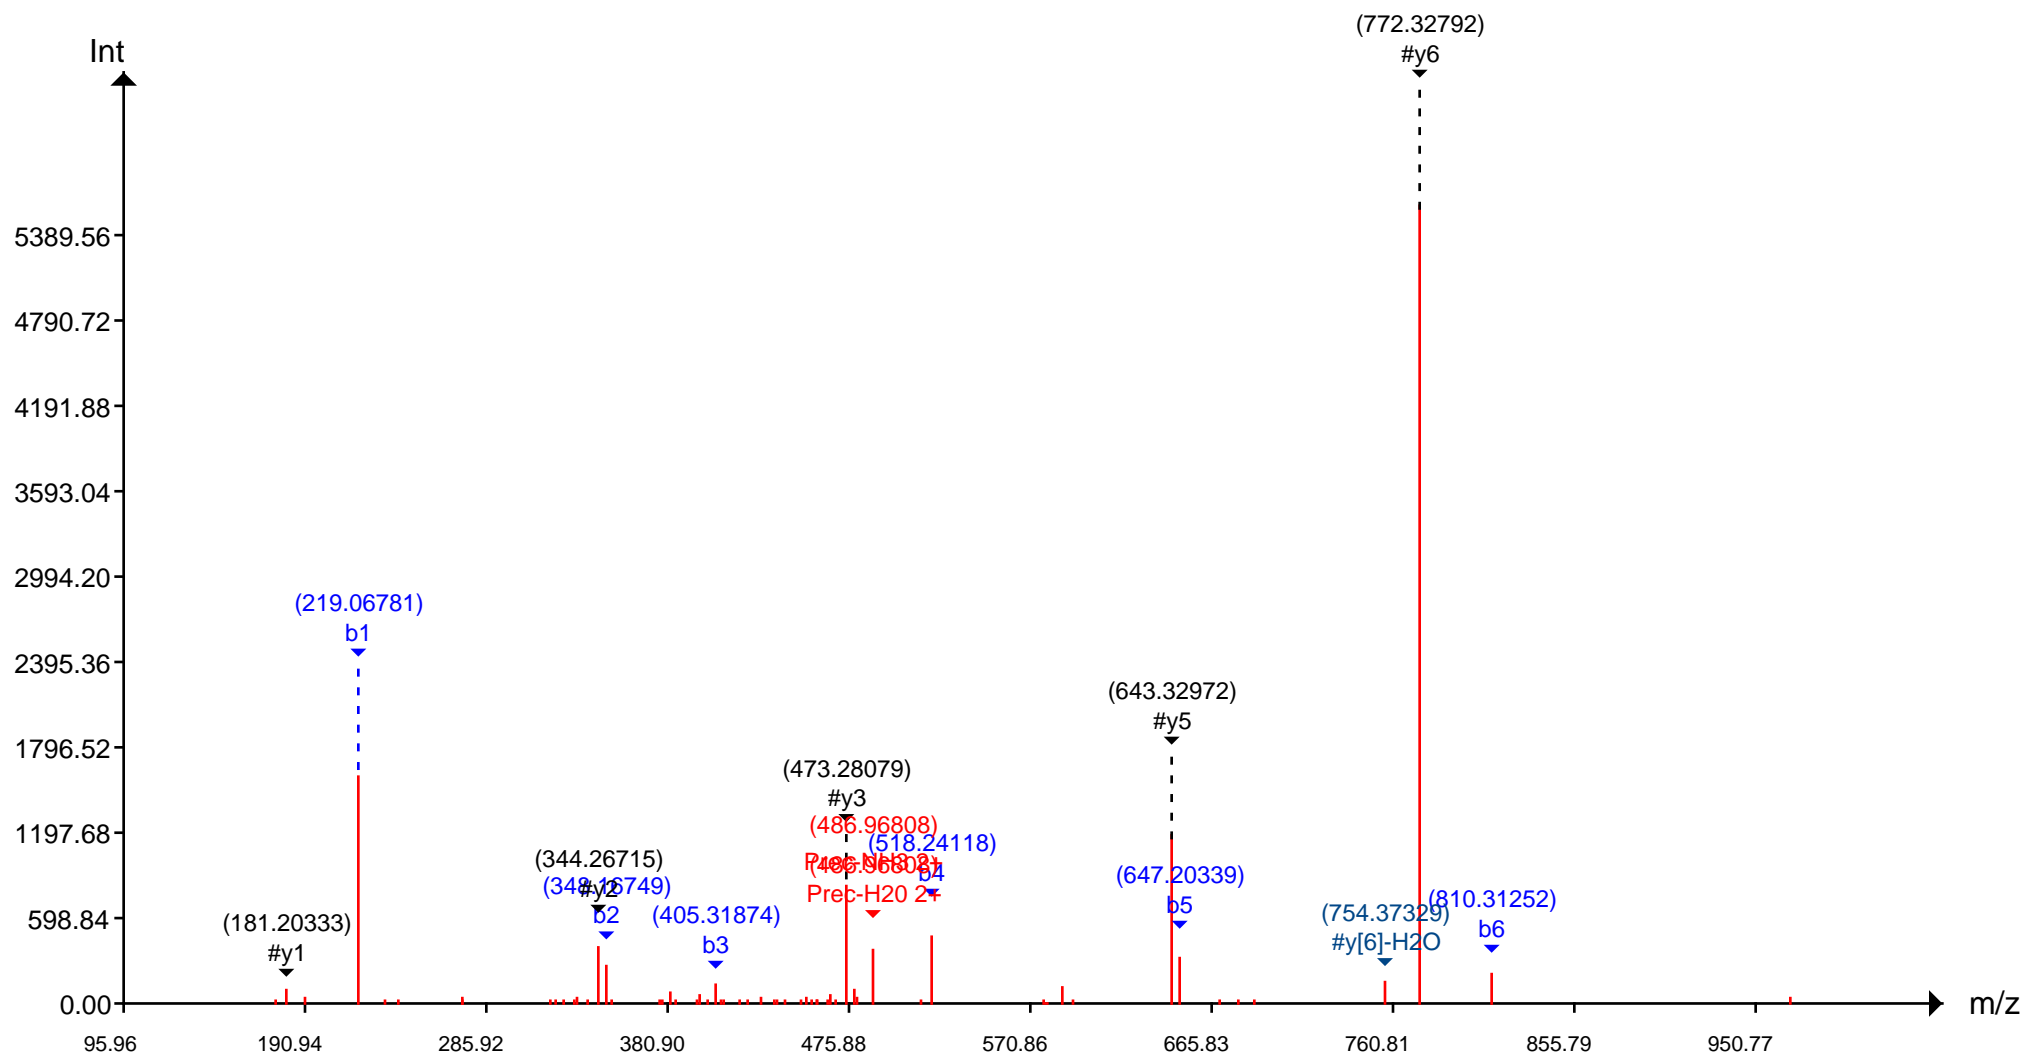

## Info

**Modified Sequence** AcD3-K<AcD3K\*>EGIEYR<C13>-COOH

**Ion score** 59.05

**Protein** Q61599

**Confidence level** 99.00%

**Precursor m/z** 495.77679

**Identity Threshold** 48.30

**Charge** 2+

**Mass error** -5.53E-4

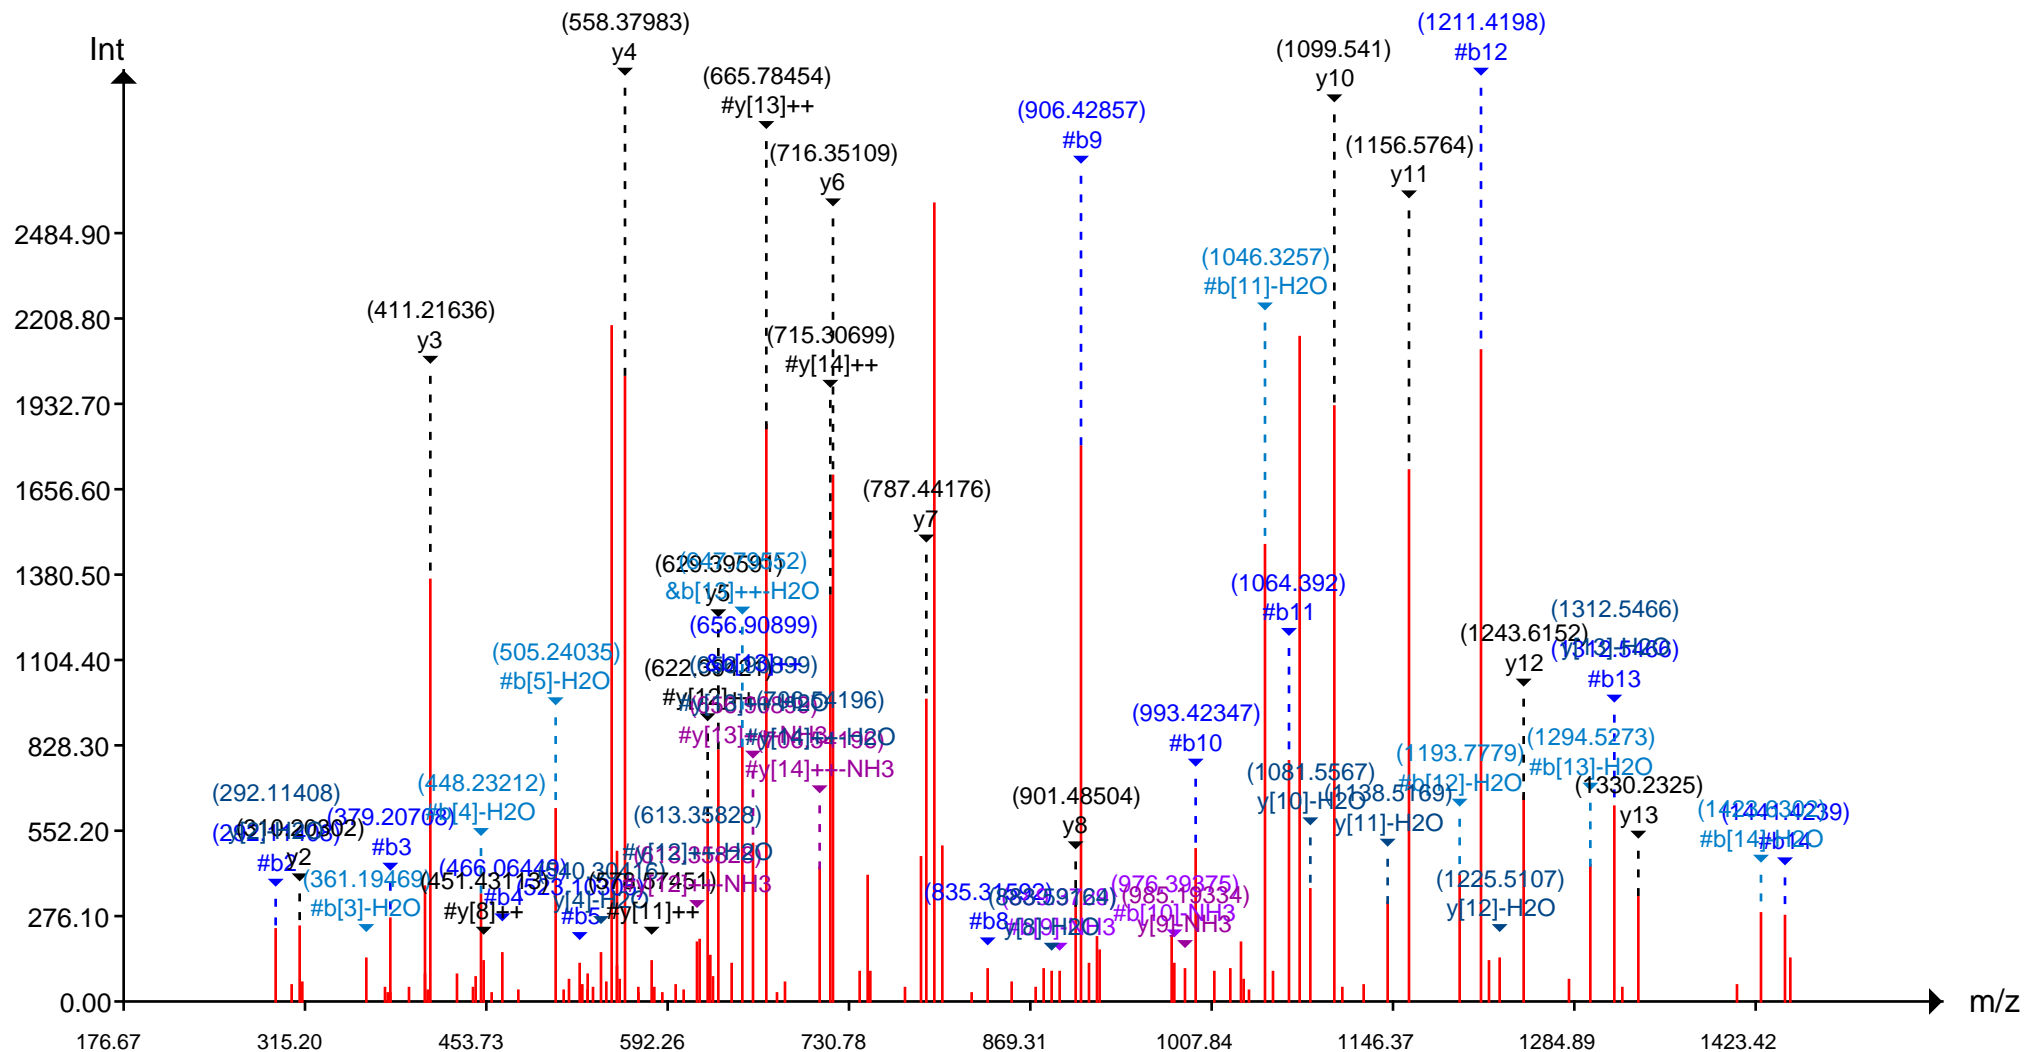

## Info

|                          |                                |                           |          |
|--------------------------|--------------------------------|---------------------------|----------|
| <b>Modified Sequence</b> | AcD3-FVSSGPTNASAFter<C13>-COOH | <b>Ion score</b>          | 101.35   |
| <b>Protein</b>           | P27546                         | <b>Confidence level</b>   | 99.00%   |
| <b>Precursor m/z</b>     | 811.40383                      | <b>Identity Threshold</b> | 47.52    |
| <b>Charge</b>            | 2+                             | <b>Mass error</b>         | 0.001238 |



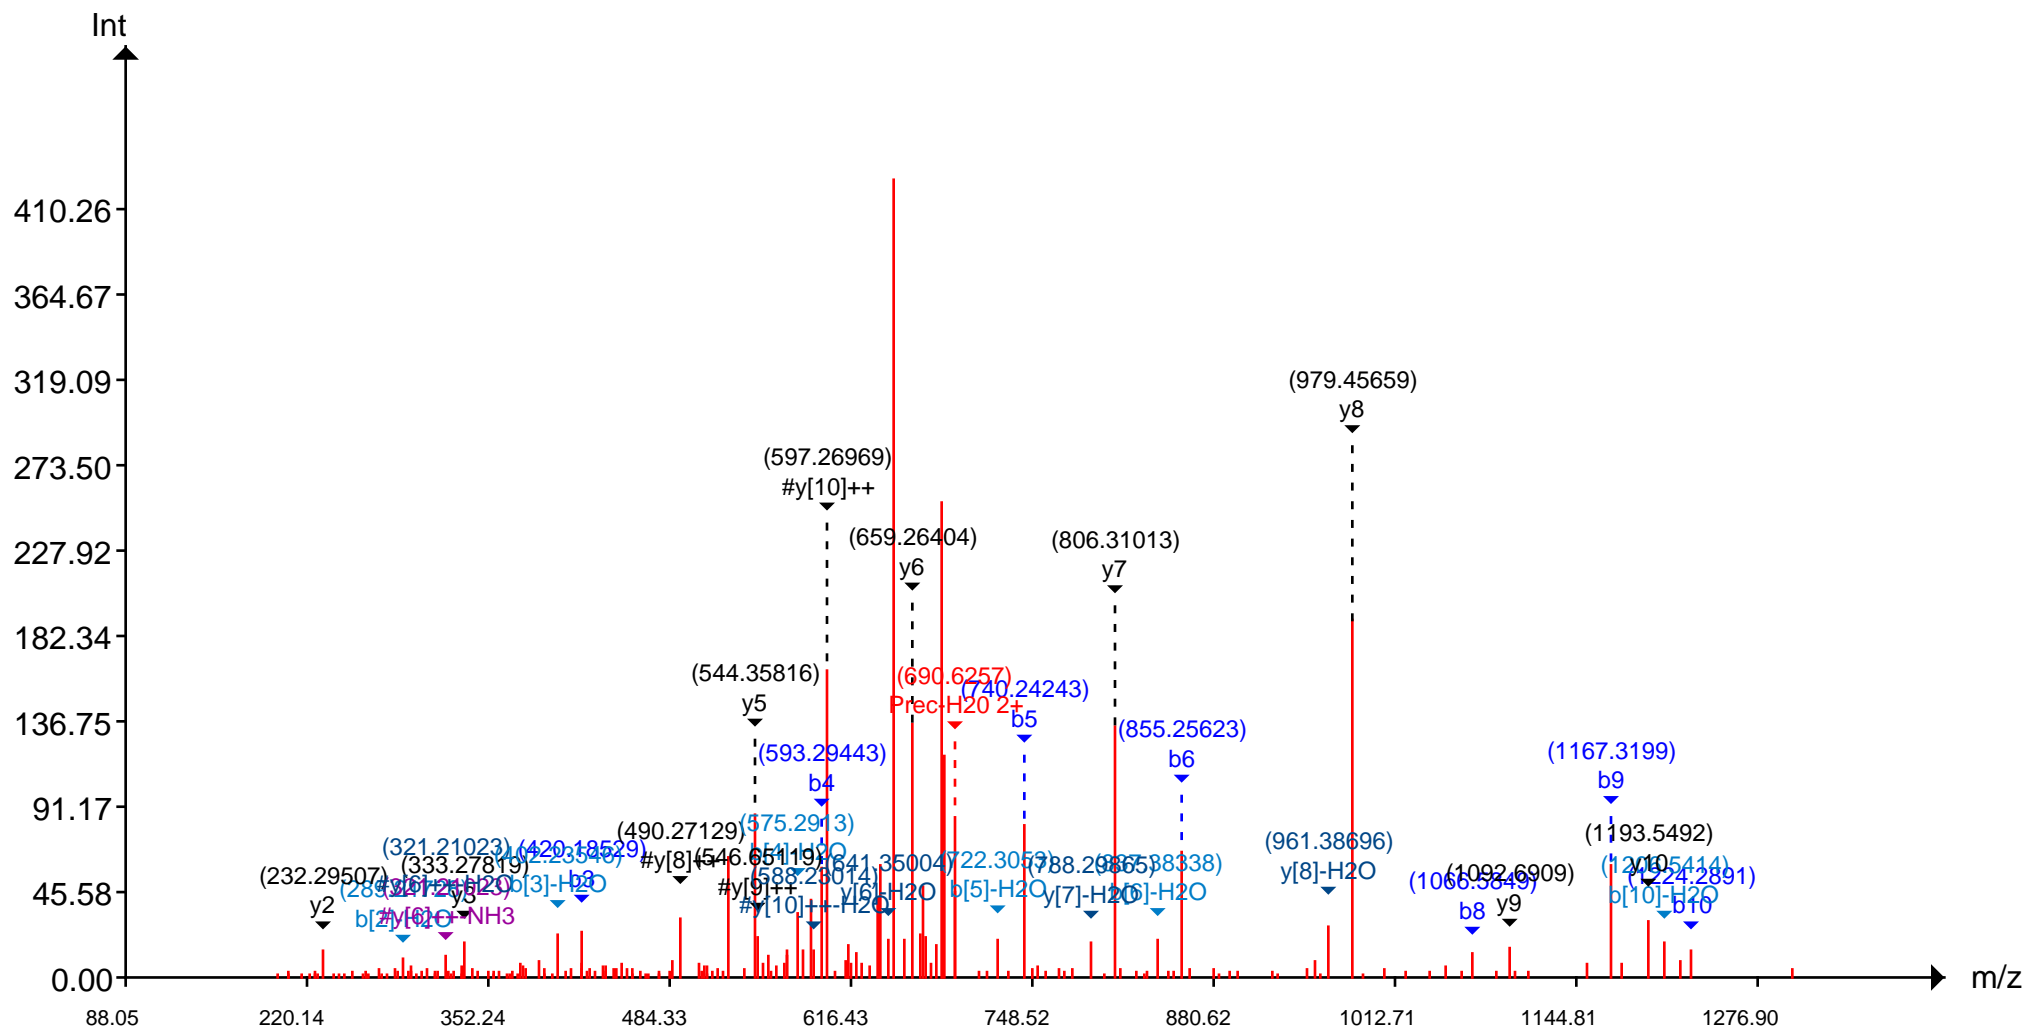

## Info

|                          |                                           |                           |          |
|--------------------------|-------------------------------------------|---------------------------|----------|
| <b>Modified Sequence</b> | AcD3-C<Cmm*>TIK<AcD3K*>M<Mox*>DPNTGR-COOH | <b>Ion score</b>          | 71.38    |
| <b>Protein</b>           | Q99020                                    | <b>Confidence level</b>   | 99.00%   |
| <b>Precursor m/z</b>     | 699.83589                                 | <b>Identity Threshold</b> | 46.44    |
| <b>Charge</b>            | 2+                                        | <b>Mass error</b>         | 0.002229 |

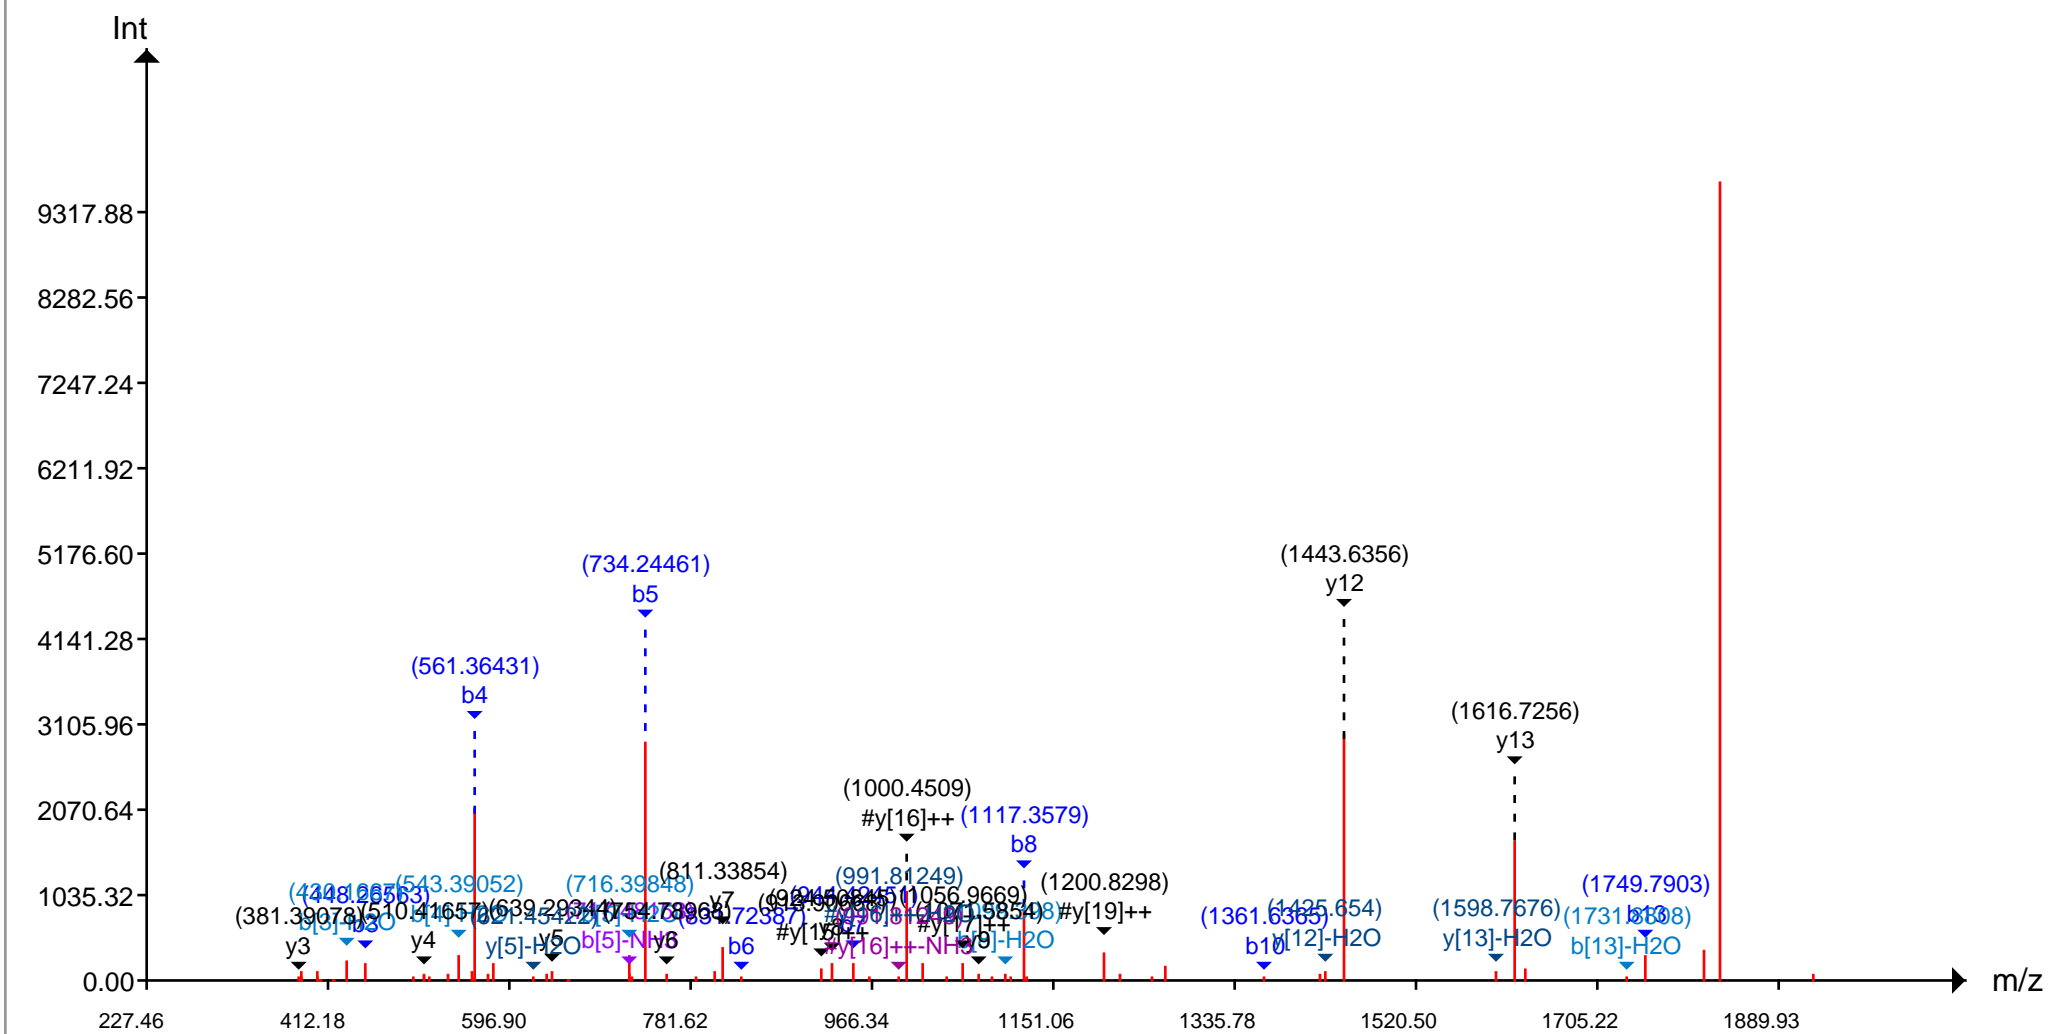

## Info

|                          |                                                                   |                           |          |
|--------------------------|-------------------------------------------------------------------|---------------------------|----------|
| <b>Modified Sequence</b> | AcD3-DK<AcD3K*>NLK<AcD3K*>PIK<AcD3K*>PM<Mox*>QFLGDEETVR<C13>-COOH | <b>Ion score</b>          | 60.02    |
| <b>Protein</b>           | Q9DBJ1                                                            | <b>Confidence level</b>   | 99.00%   |
| <b>Precursor m/z</b>     | 1280.6953                                                         | <b>Identity Threshold</b> | 46.76    |
| <b>Charge</b>            | 2+                                                                | <b>Mass error</b>         | 0.002101 |

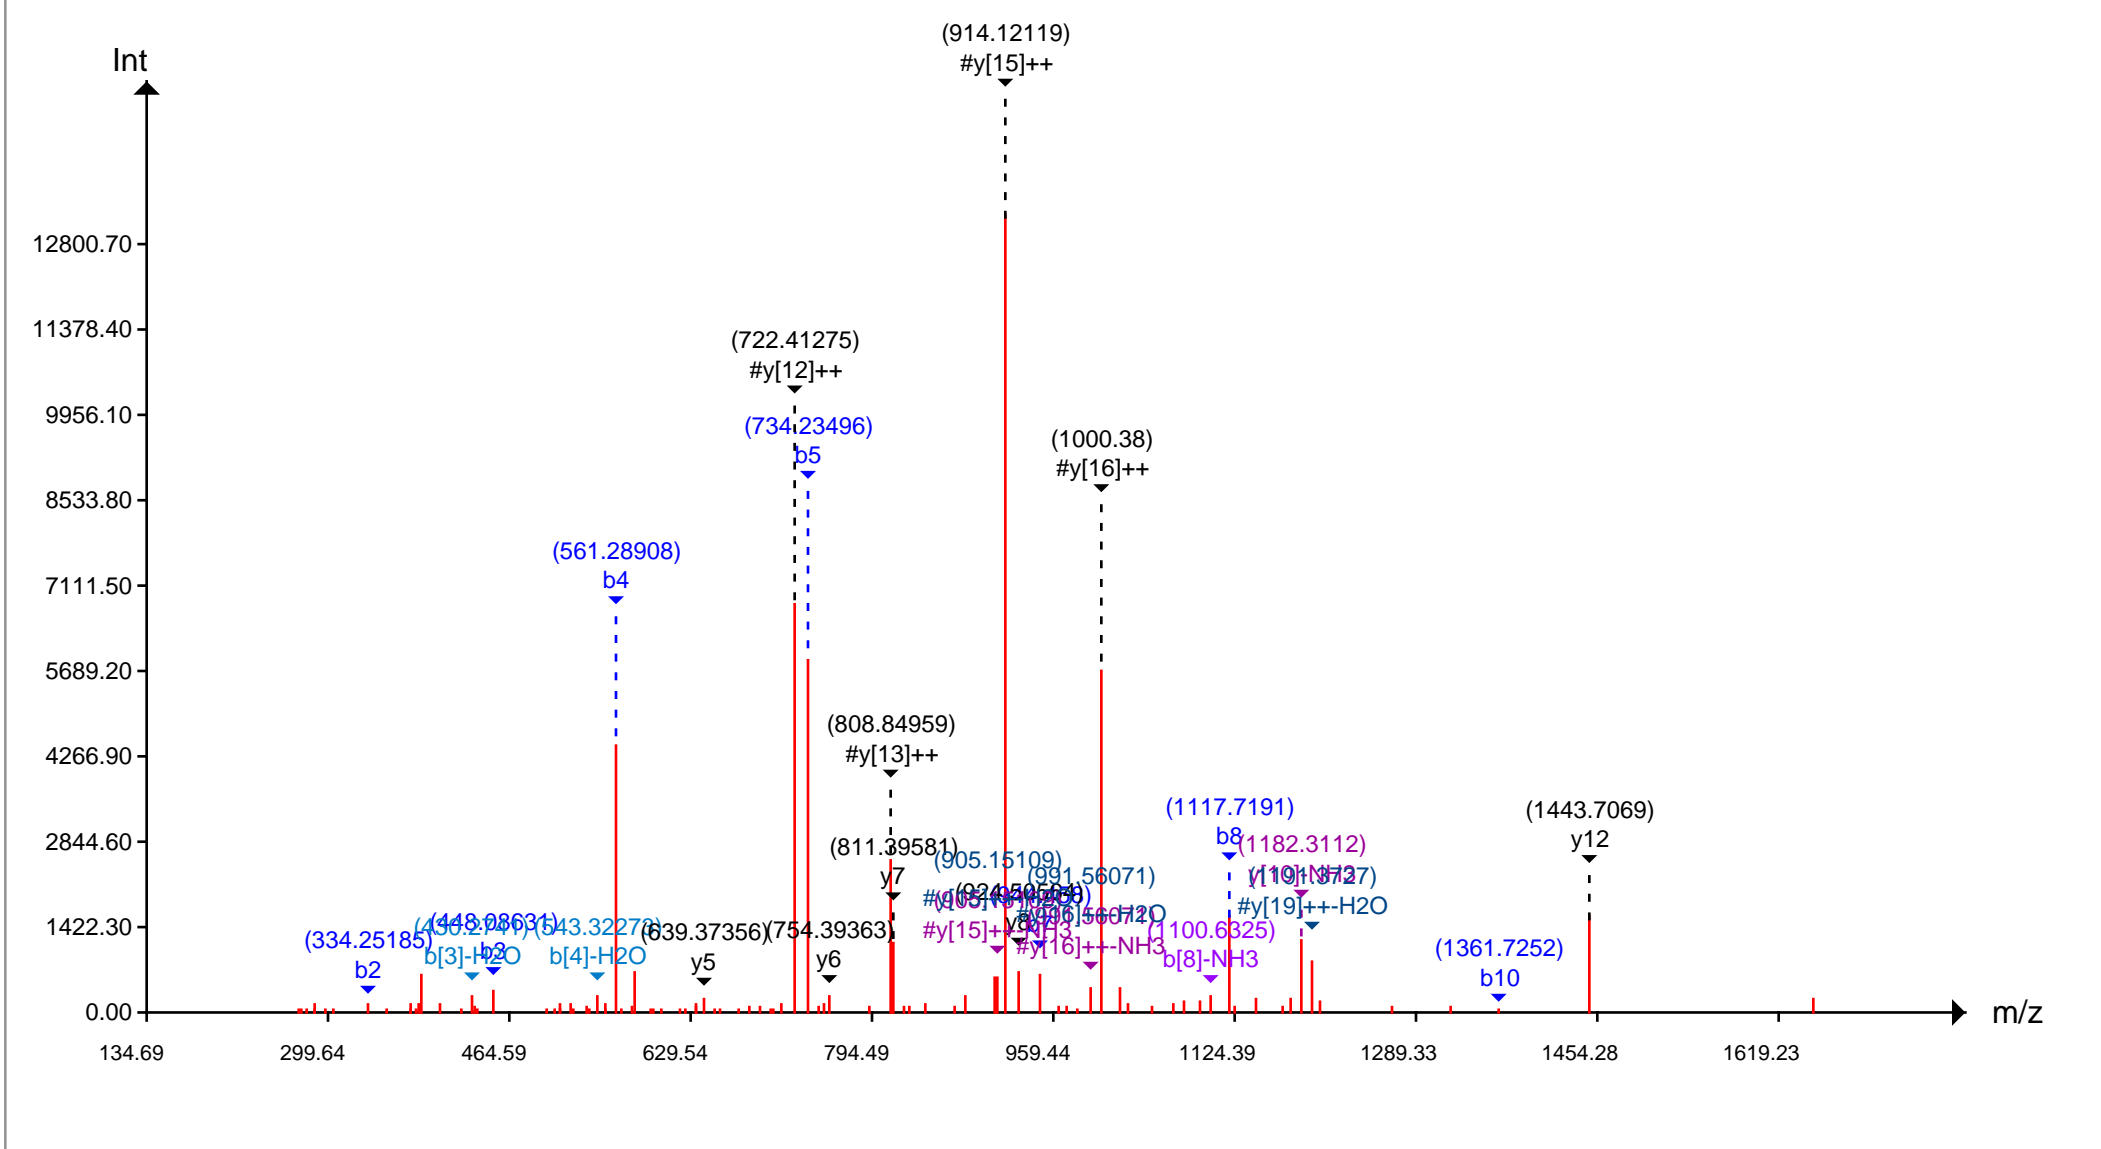

| Info                     |                                                                   |                           |          |
|--------------------------|-------------------------------------------------------------------|---------------------------|----------|
| <b>Modified Sequence</b> | AcD3-DK<AcD3K*>NLK<AcD3K*>PIK<AcD3K*>PM<Mox*>QFLGDEETVR<C13>-COOH | <b>Ion score</b>          | 46.97    |
| <b>Protein</b>           | Q9DBJ1                                                            | <b>Confidence level</b>   | 99.00%   |
| <b>Precursor m/z</b>     | 854.13244                                                         | <b>Identity Threshold</b> | 46.77    |
| <b>Charge</b>            | 3+                                                                | <b>Mass error</b>         | 0.001545 |



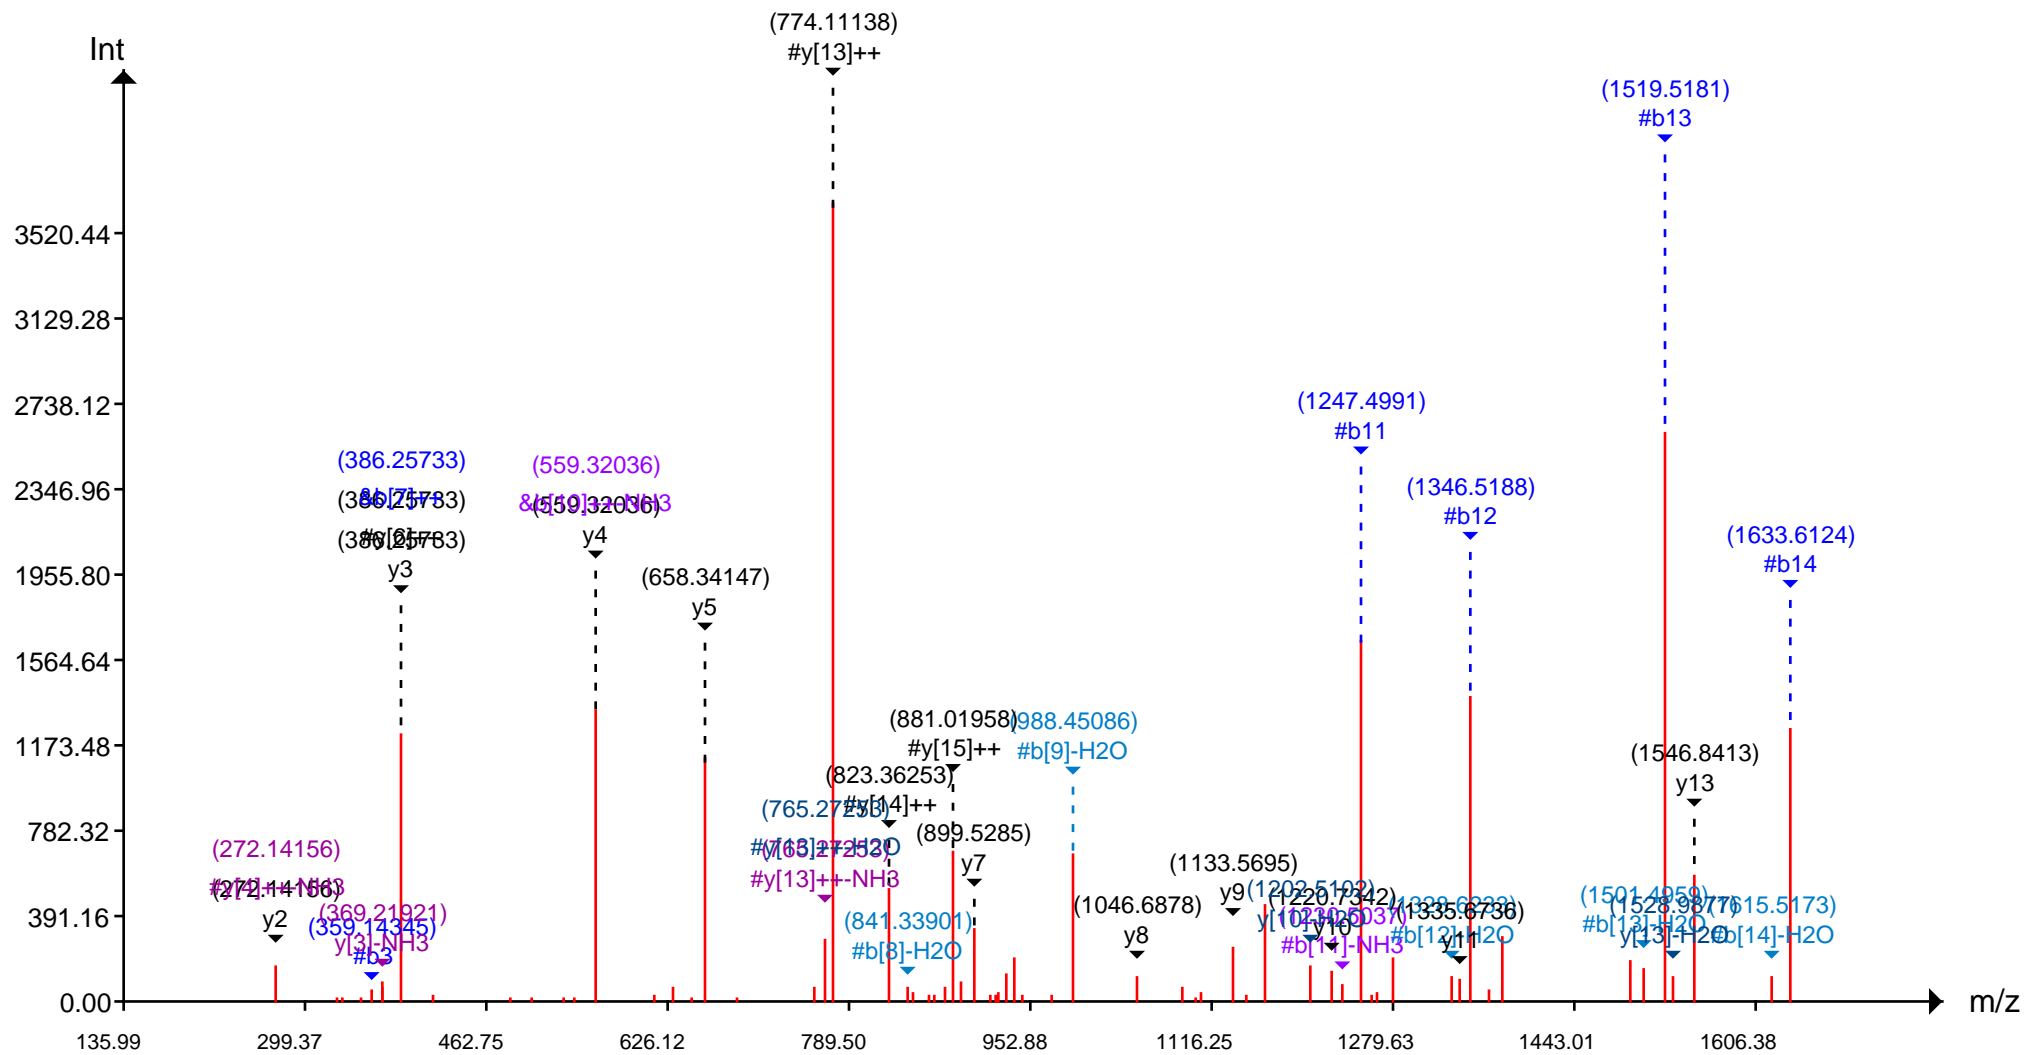

## Info

|                          |                                    |                           |         |
|--------------------------|------------------------------------|---------------------------|---------|
| <b>Modified Sequence</b> | AcD3-VDVPNDSSFQIVK<AcD3K*>NPR-COOH | <b>Ion score</b>          | 62.89   |
| <b>Protein</b>           | Q61176                             | <b>Confidence level</b>   | 99.00%  |
| <b>Precursor m/z</b>     | 953.00335                          | <b>Identity Threshold</b> | 48.17   |
| <b>Charge</b>            | 2+                                 | <b>Mass error</b>         | 0.00109 |

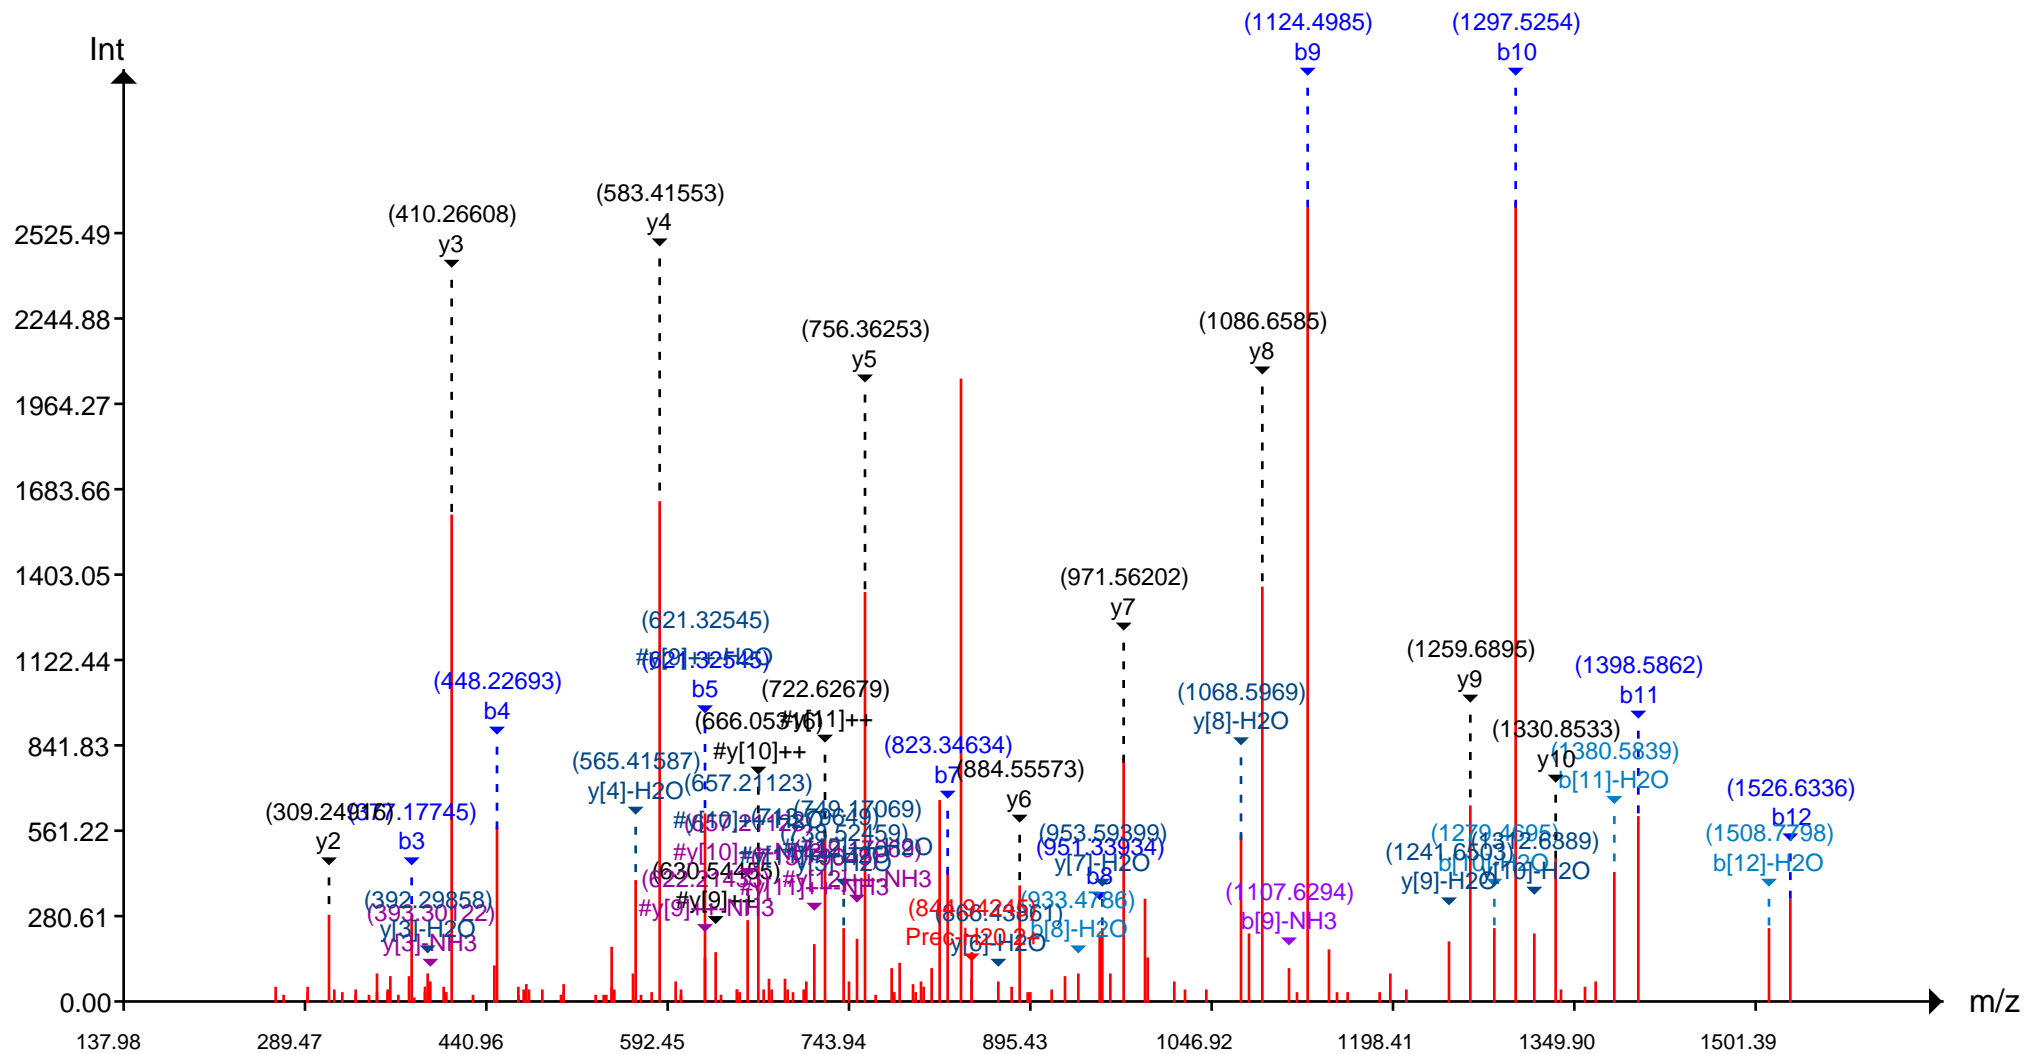

## Info

|                          |                                                      |                           |          |
|--------------------------|------------------------------------------------------|---------------------------|----------|
| <b>Modified Sequence</b> | AcD3-FAIAK<AcD3K*>DSQK<AcD3K*>K<AcD3K*>TQR<C13>-COOH | <b>Ion score</b>          | 75.69    |
| <b>Protein</b>           | Q6PGL7                                               | <b>Confidence level</b>   | 99.00%   |
| <b>Precursor m/z</b>     | 854.00046                                            | <b>Identity Threshold</b> | 44.49    |
| <b>Charge</b>            | 2+                                                   | <b>Mass error</b>         | 0.001581 |

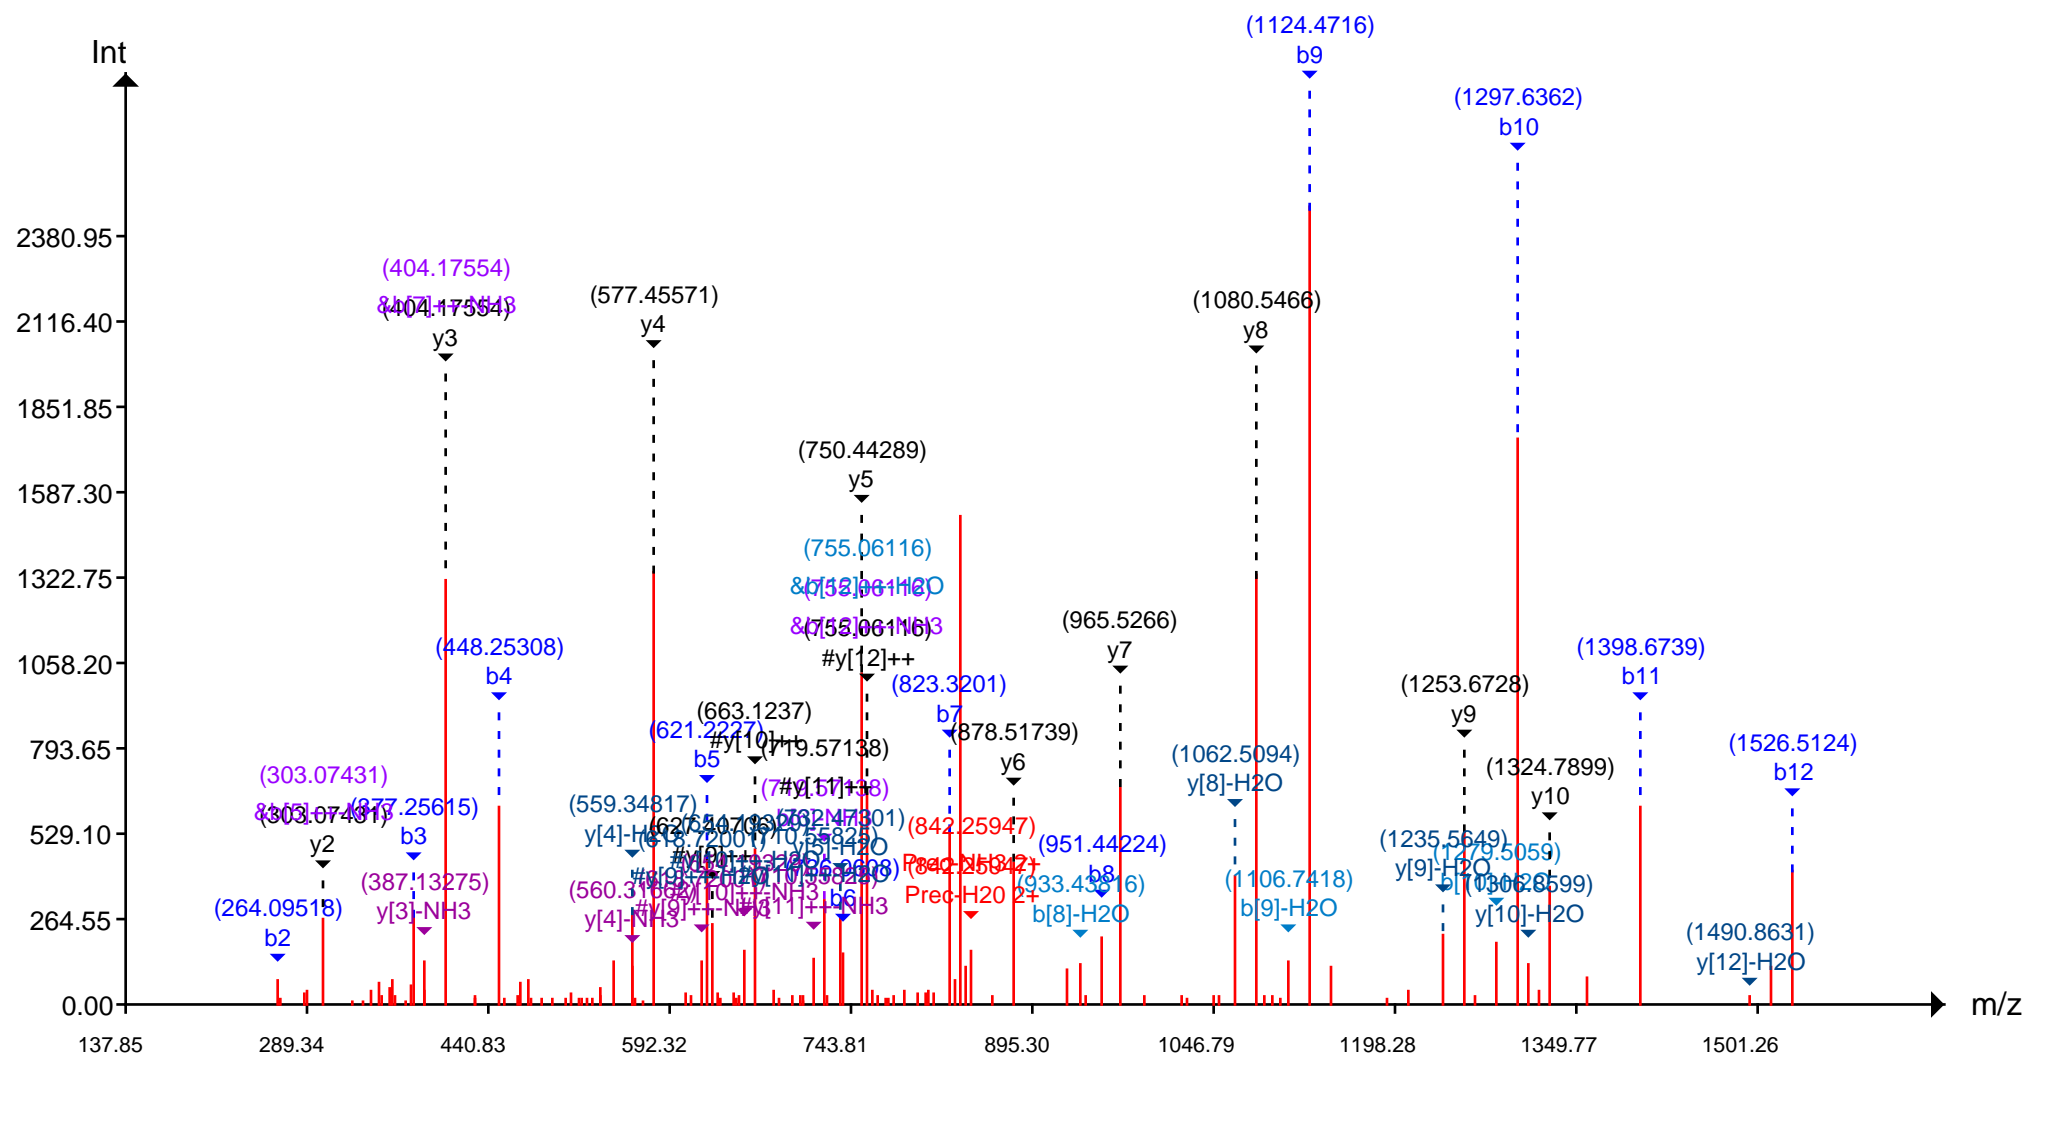

| Info                     |                                                 |                           |          |
|--------------------------|-------------------------------------------------|---------------------------|----------|
| <b>Modified Sequence</b> | AcD3-FAIAK<AcD3K*>DSQK<AcD3K*>K<AcD3K*>TQR-COOH | <b>Ion score</b>          | 92.82    |
| <b>Protein</b>           | Q6PGL7                                          | <b>Confidence level</b>   | 99.00%   |
| <b>Precursor m/z</b>     | 850.99068                                       | <b>Identity Threshold</b> | 45.43    |
| <b>Charge</b>            | 2+                                              | <b>Mass error</b>         | 0.002163 |

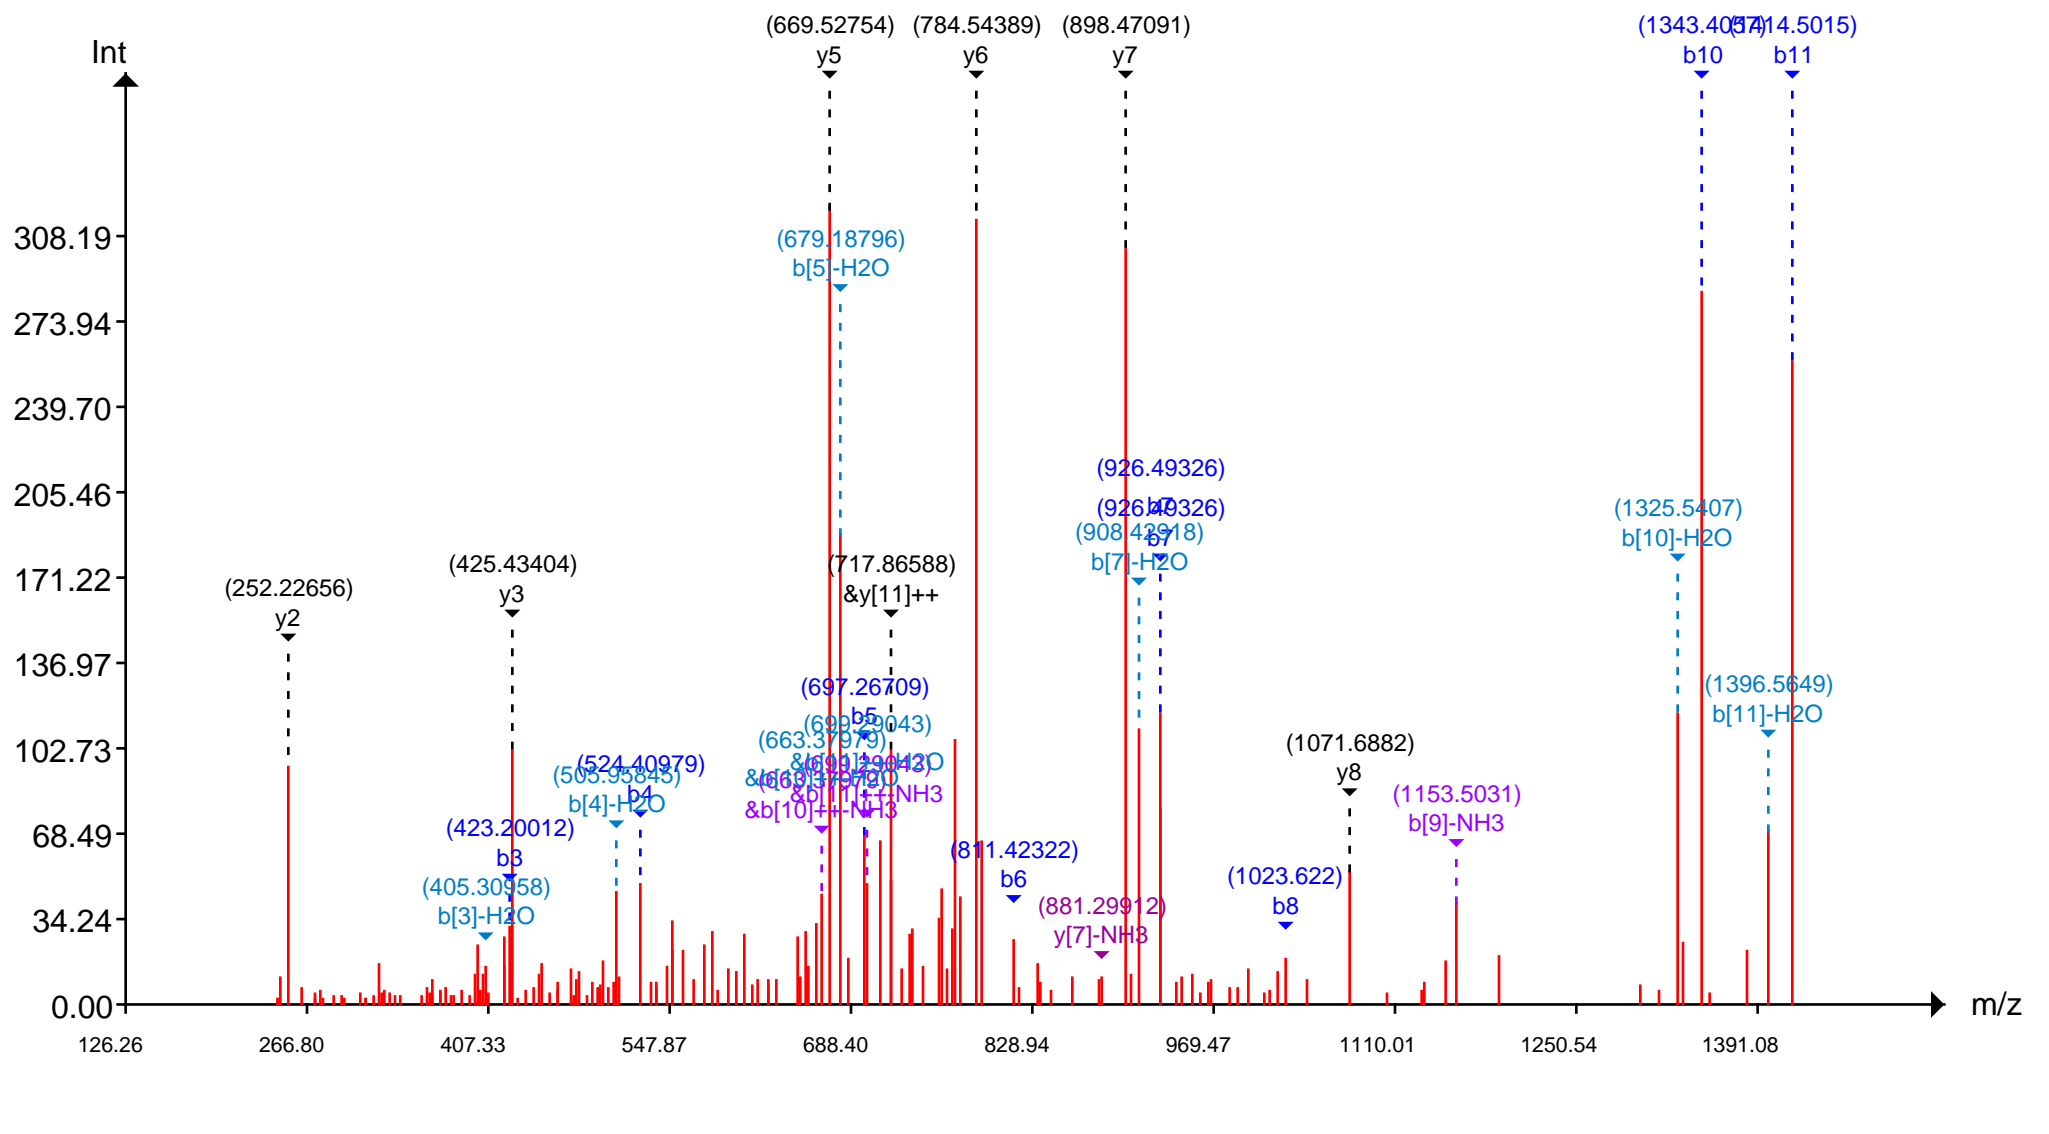

| Info                     |                                                   |                           |          |
|--------------------------|---------------------------------------------------|---------------------------|----------|
| <b>Modified Sequence</b> | AcD3-DDM<Mox*>TK<AcD3K*>NDPFK<AcD3K*>AR<C13>-COOH | <b>Ion score</b>          | 51.58    |
| <b>Protein</b>           | Q62523                                            | <b>Confidence level</b>   | 99.00%   |
| <b>Precursor m/z</b>     | 797.89572                                         | <b>Identity Threshold</b> | 47.50    |
| <b>Charge</b>            | 2+                                                | <b>Mass error</b>         | 0.001833 |



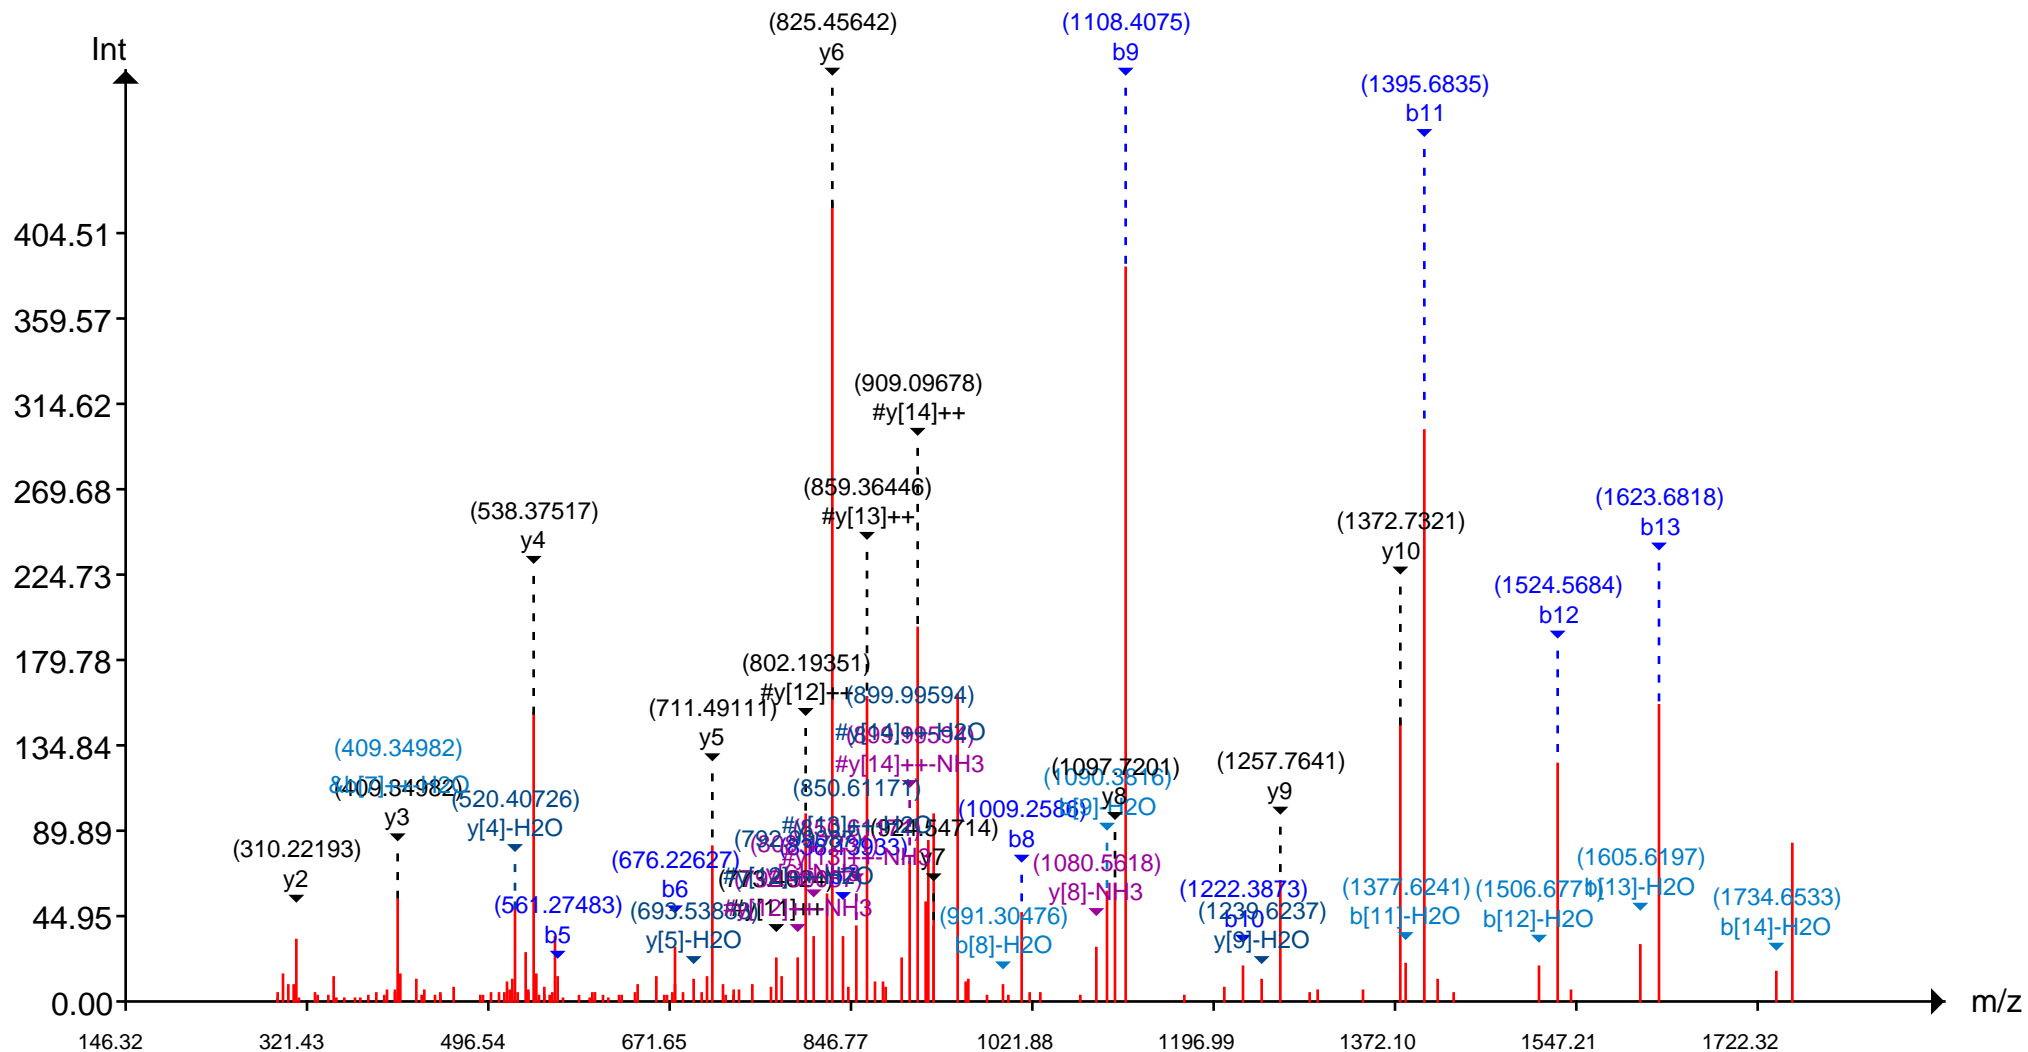

## Info

|                          |                                                              |                           |          |
|--------------------------|--------------------------------------------------------------|---------------------------|----------|
| <b>Modified Sequence</b> | AcD3-AVDGK<AcD3K*>DC<Cmm*>K<AcD3K*>VNK<AcD3K*>EVER<C13>-COOH | <b>Ion score</b>          | 62.53    |
| <b>Protein</b>           | Q9D172                                                       | <b>Confidence level</b>   | 99.00%   |
| <b>Precursor m/z</b>     | 967.01364                                                    | <b>Identity Threshold</b> | 48.02    |
| <b>Charge</b>            | 2+                                                           | <b>Mass error</b>         | 0.001971 |

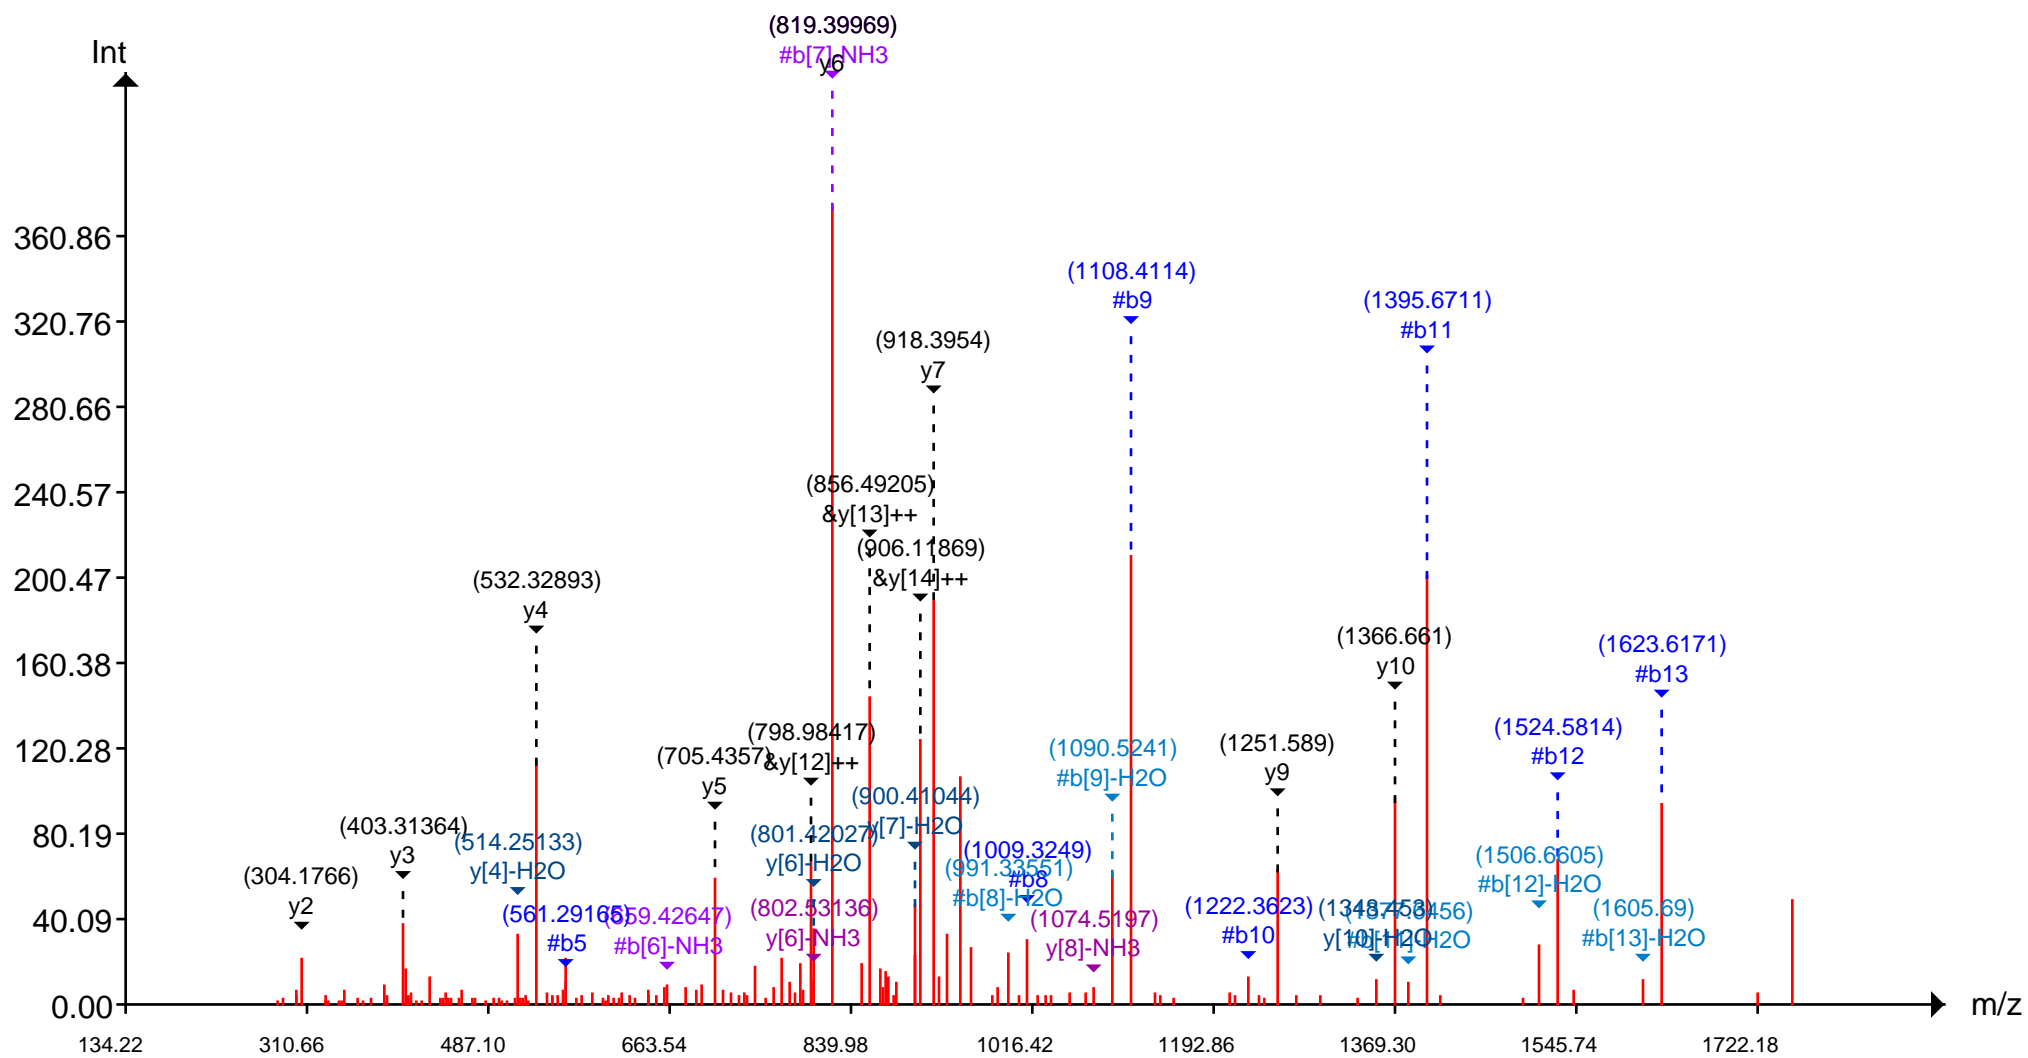

## Info

|                          |                                                         |                           |          |
|--------------------------|---------------------------------------------------------|---------------------------|----------|
| <b>Modified Sequence</b> | AcD3-AVDGK<AcD3K*>DC<Cmm*>K<AcD3K*>VNK<AcD3K*>EVER-COOH | <b>Ion score</b>          | 72.99    |
| <b>Protein</b>           | Q9D172                                                  | <b>Confidence level</b>   | 99.00%   |
| <b>Precursor m/z</b>     | 964.00357                                               | <b>Identity Threshold</b> | 48.13    |
| <b>Charge</b>            | 2+                                                      | <b>Mass error</b>         | 0.001972 |

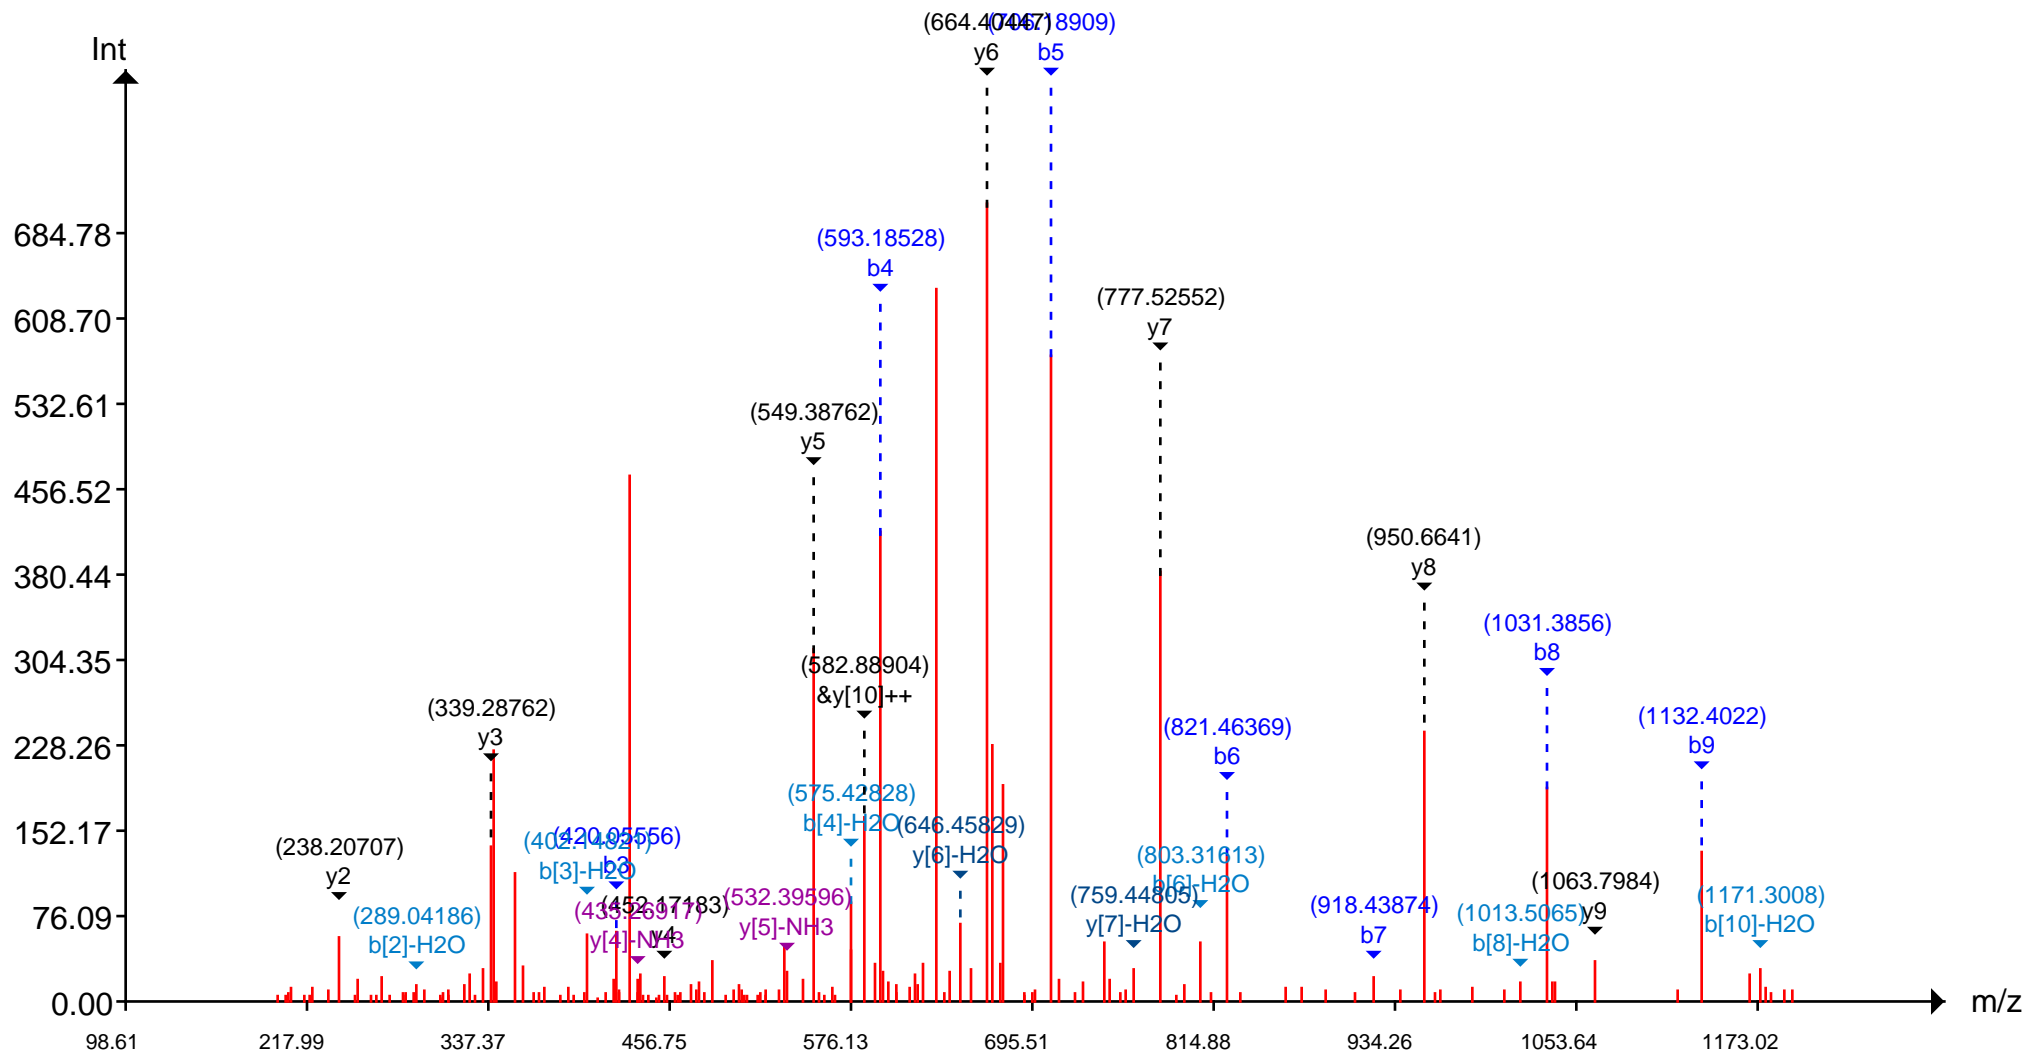

## Info

|                          |                                          |                           |        |
|--------------------------|------------------------------------------|---------------------------|--------|
| <b>Modified Sequence</b> | AcD3-C<Cmm*>TLK<AcD3K*>LDPITGR<C13>-COOH | <b>Ion score</b>          | 66.78  |
| <b>Protein</b>           | Q60668                                   | <b>Confidence level</b>   | 99.00% |
| <b>Precursor m/z</b>     | 685.39015                                | <b>Identity Threshold</b> | 46.81  |
| <b>Charge</b>            | 2+                                       | <b>Mass error</b>         | 8.1E-4 |

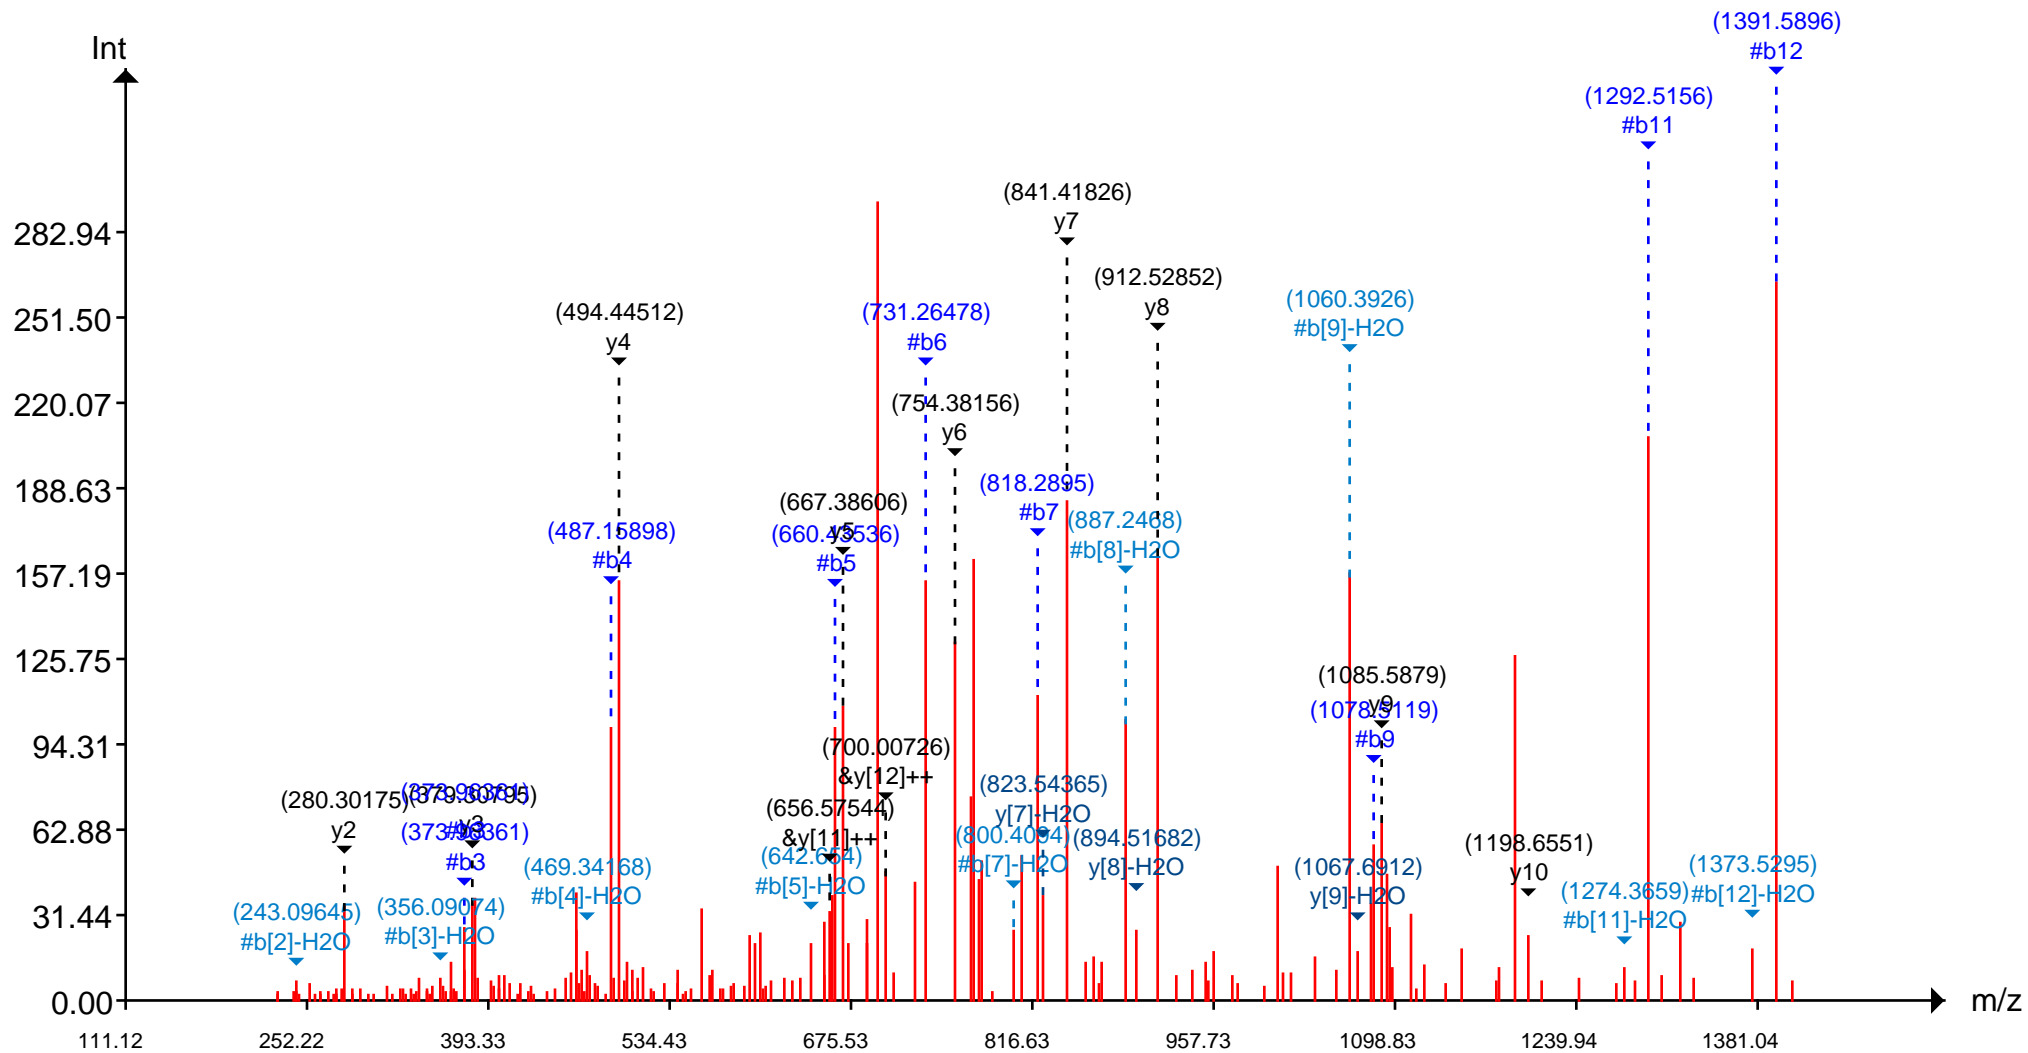

## Info

|                          |                                              |                           |          |
|--------------------------|----------------------------------------------|---------------------------|----------|
| <b>Modified Sequence</b> | AcD3-QSLLK<AcD3K*>ASSK<AcD3K*>DVVR<C13>-COOH | <b>Ion score</b>          | 58.74    |
| <b>Protein</b>           | Q8K2Q0                                       | <b>Confidence level</b>   | 99.00%   |
| <b>Precursor m/z</b>     | 786.47499                                    | <b>Identity Threshold</b> | 42.90    |
| <b>Charge</b>            | 2+                                           | <b>Mass error</b>         | 0.001834 |

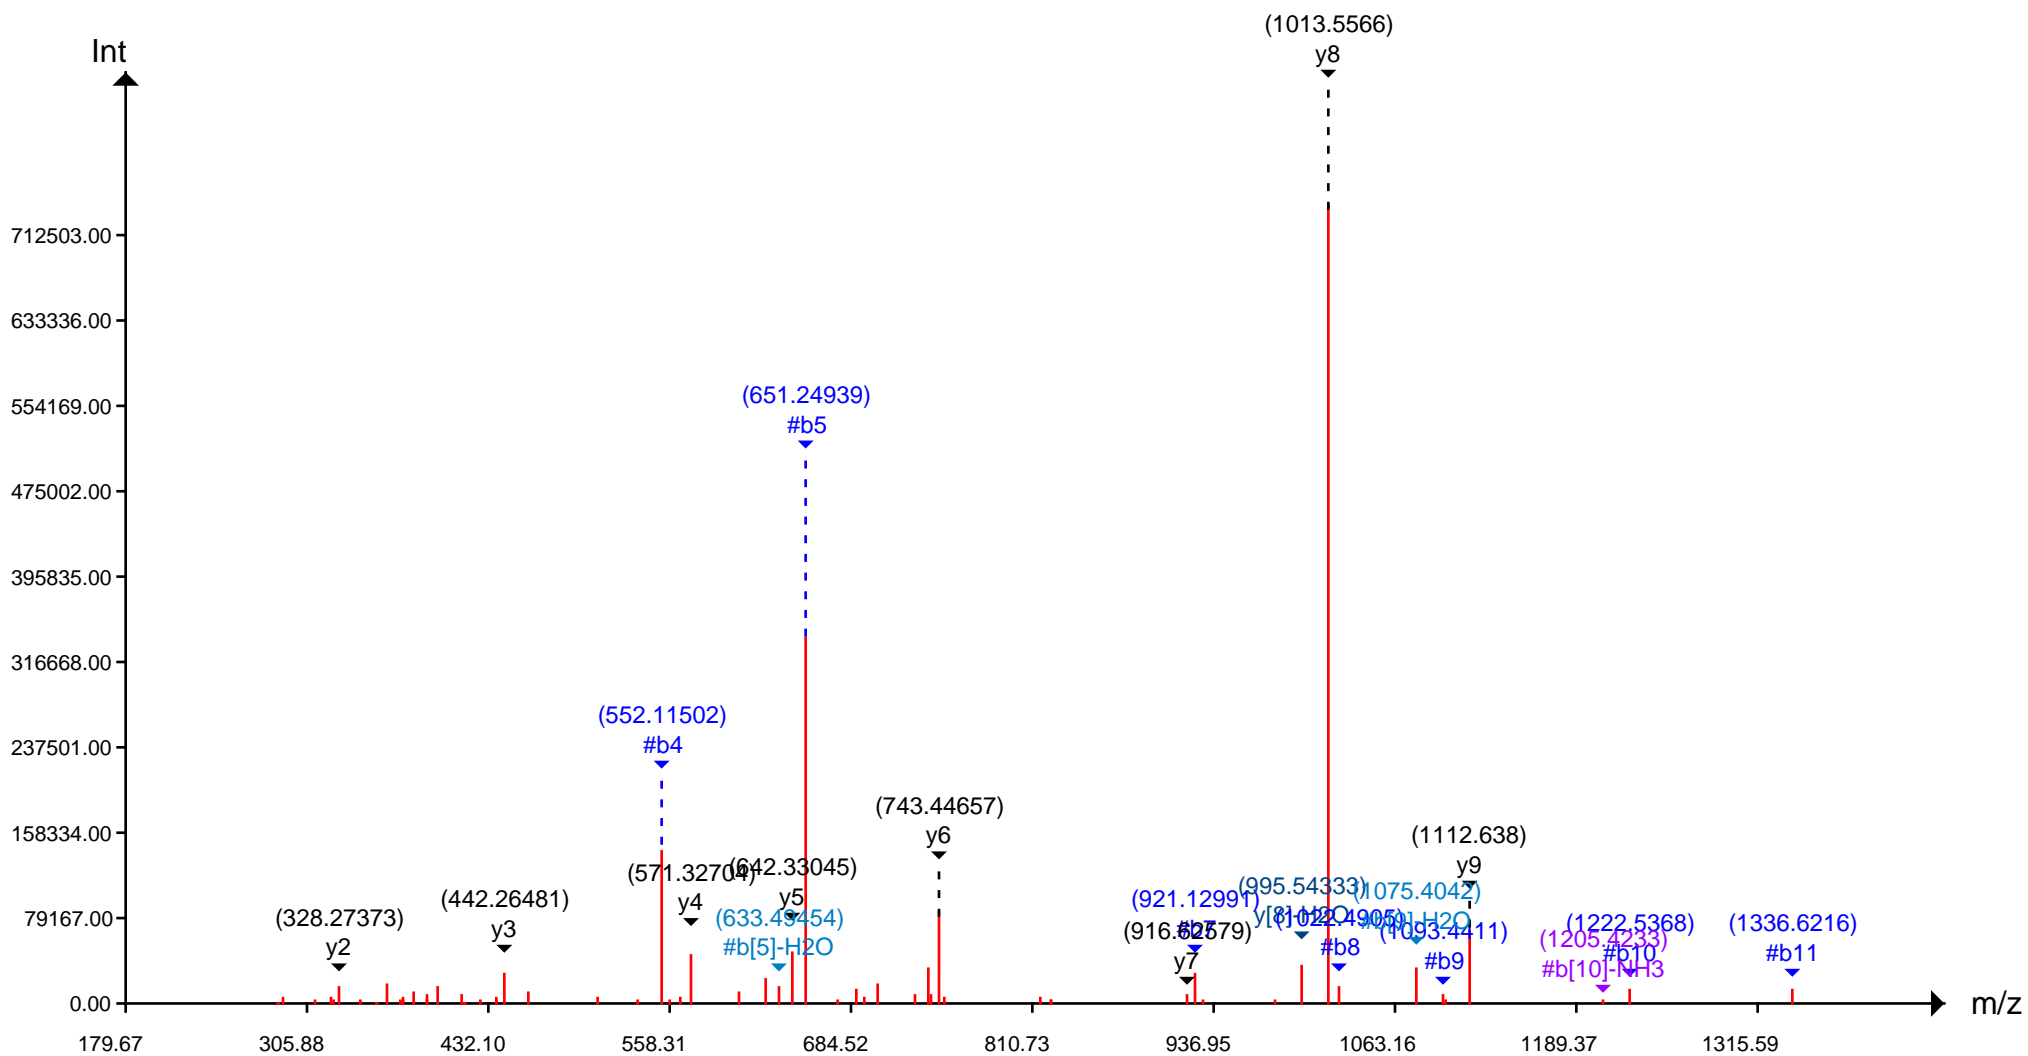

## Info

|                          |                                              |                           |         |
|--------------------------|----------------------------------------------|---------------------------|---------|
| <b>Modified Sequence</b> | AcD3-FADK<AcD3K*>VPK<AcD3K*>TAENFR<C13>-COOH | <b>Ion score</b>          | 68.11   |
| <b>Protein</b>           | P17742                                       | <b>Confidence level</b>   | 99.00%  |
| <b>Precursor m/z</b>     | 832.45809                                    | <b>Identity Threshold</b> | 47.55   |
| <b>Charge</b>            | 2+                                           | <b>Mass error</b>         | -6.7E-4 |

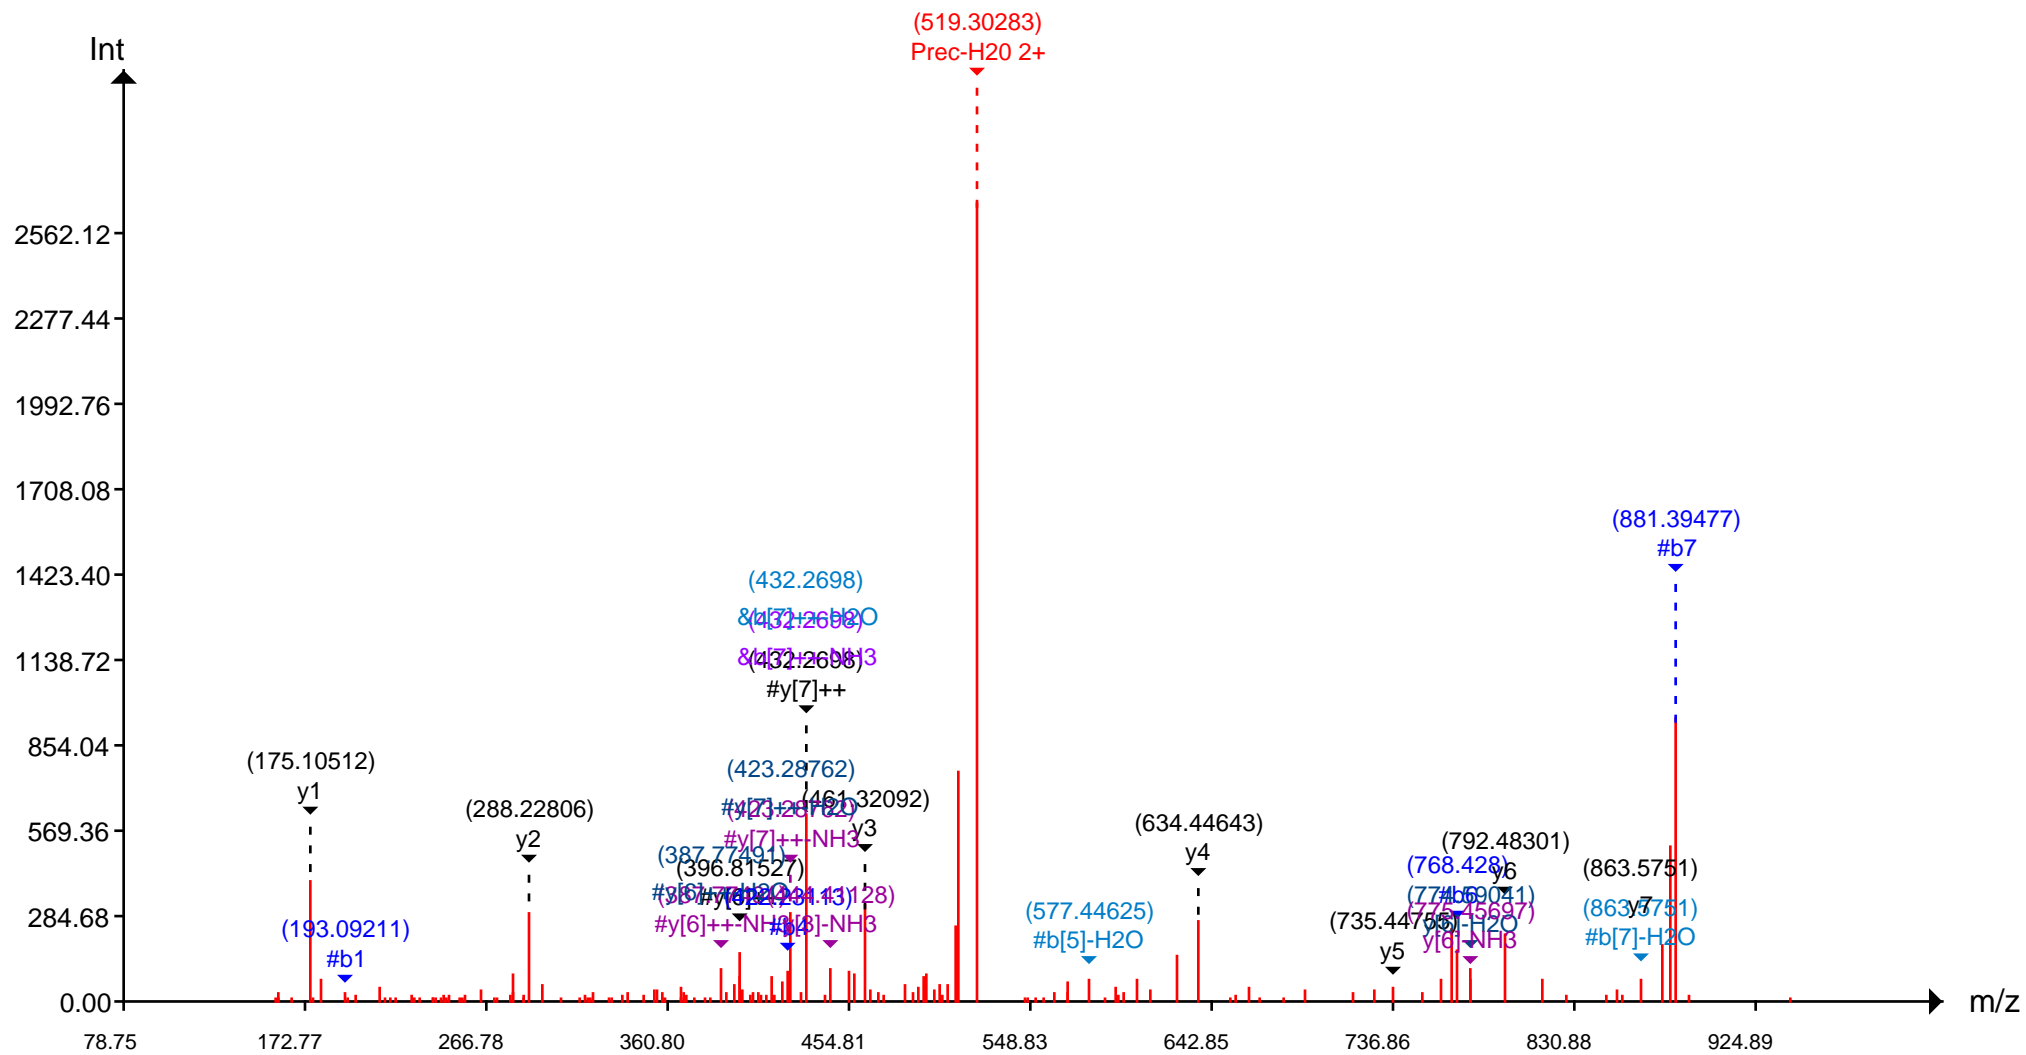

## Info

|                          |                                    |                           |         |
|--------------------------|------------------------------------|---------------------------|---------|
| <b>Modified Sequence</b> | AcD3-FAGTK<AcD3K*>K<AcD3K*>IR-COOH | <b>Ion score</b>          | 45.09   |
| <b>Protein</b>           | Q6PGL7                             | <b>Confidence level</b>   | 99.00%  |
| <b>Precursor m/z</b>     | 528.33186                          | <b>Identity Threshold</b> | 42.64   |
| <b>Charge</b>            | 2+                                 | <b>Mass error</b>         | 6.54E-4 |

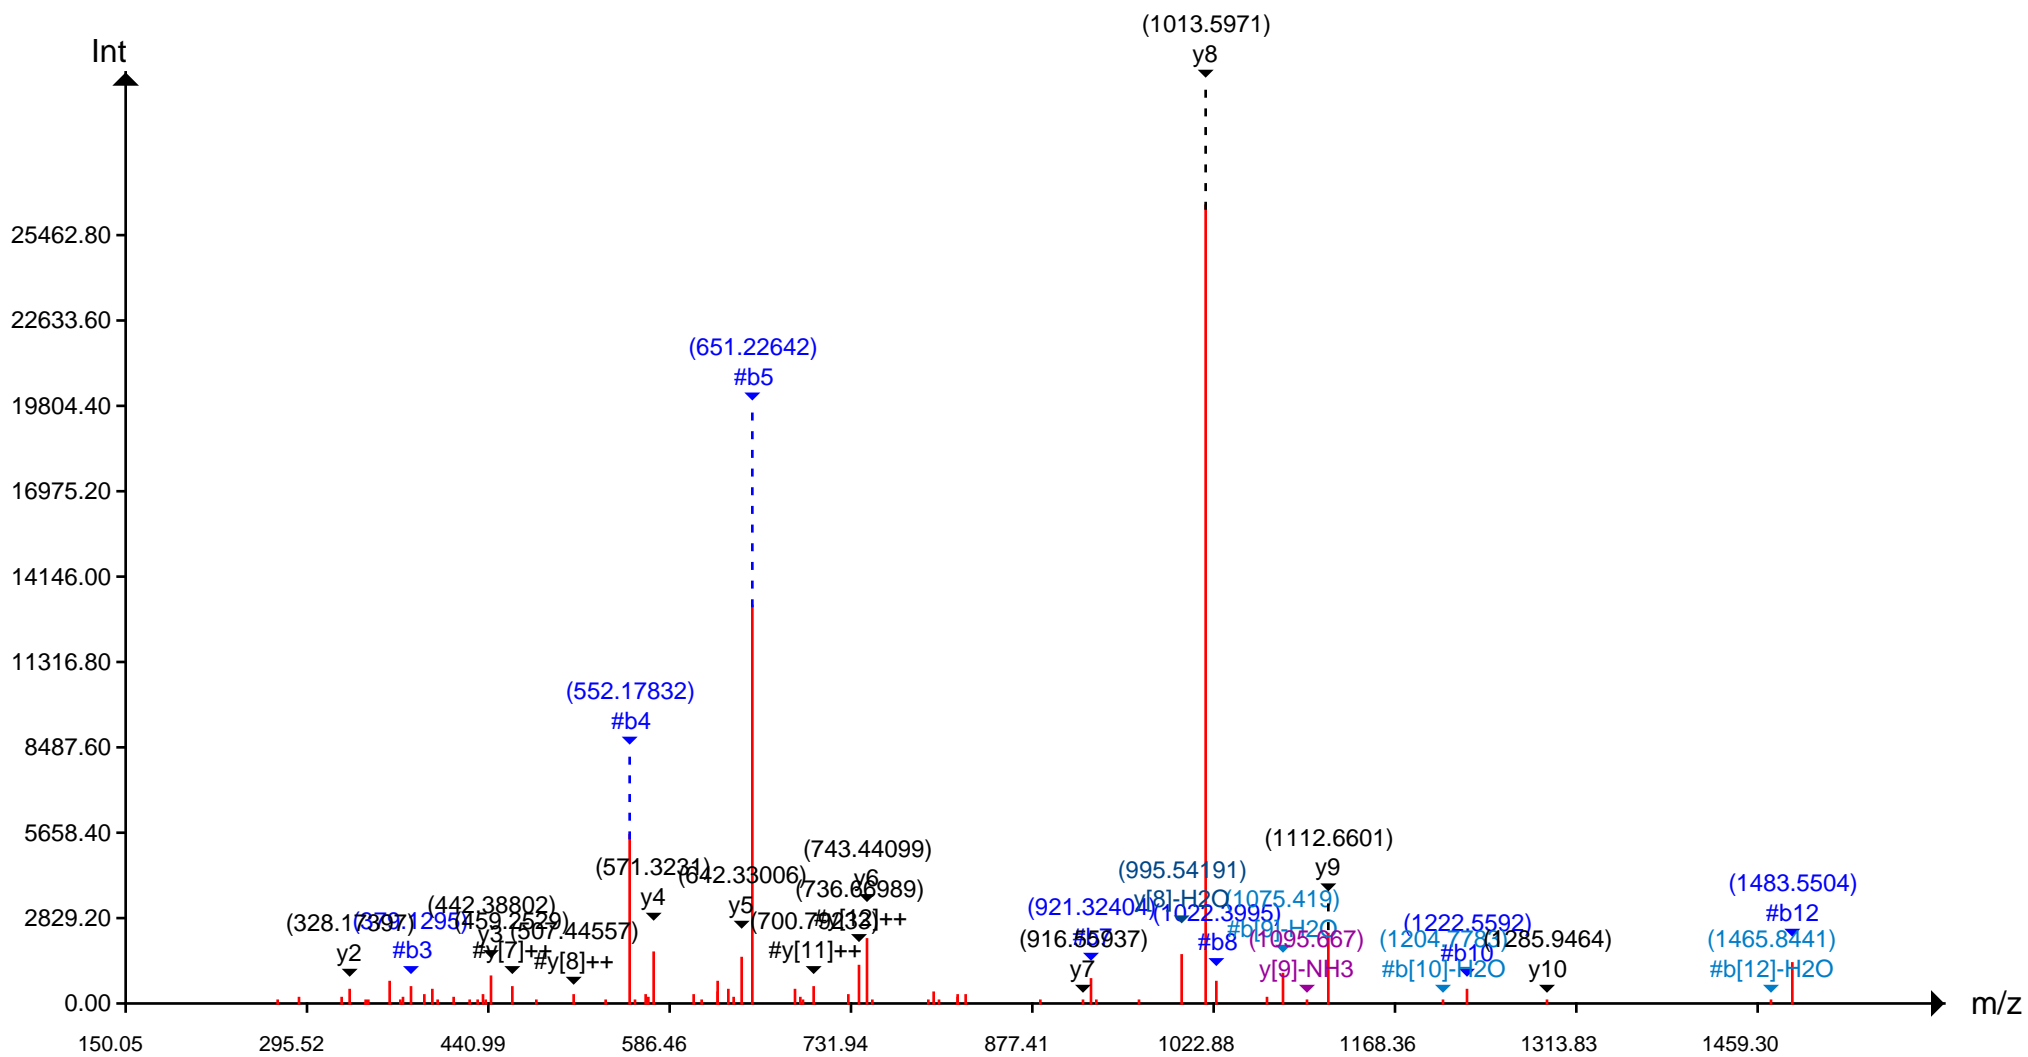

## Info

|                          |                                              |                           |        |
|--------------------------|----------------------------------------------|---------------------------|--------|
| <b>Modified Sequence</b> | AcD3-FADK<AcD3K*>VPK<AcD3K*>TAENFR<C13>-COOH | <b>Ion score</b>          | 76.43  |
| <b>Protein</b>           | P17742                                       | <b>Confidence level</b>   | 99.00% |
| <b>Precursor m/z</b>     | 832.45862                                    | <b>Identity Threshold</b> | 47.56  |
| <b>Charge</b>            | 2+                                           | <b>Mass error</b>         | 3.9E-4 |

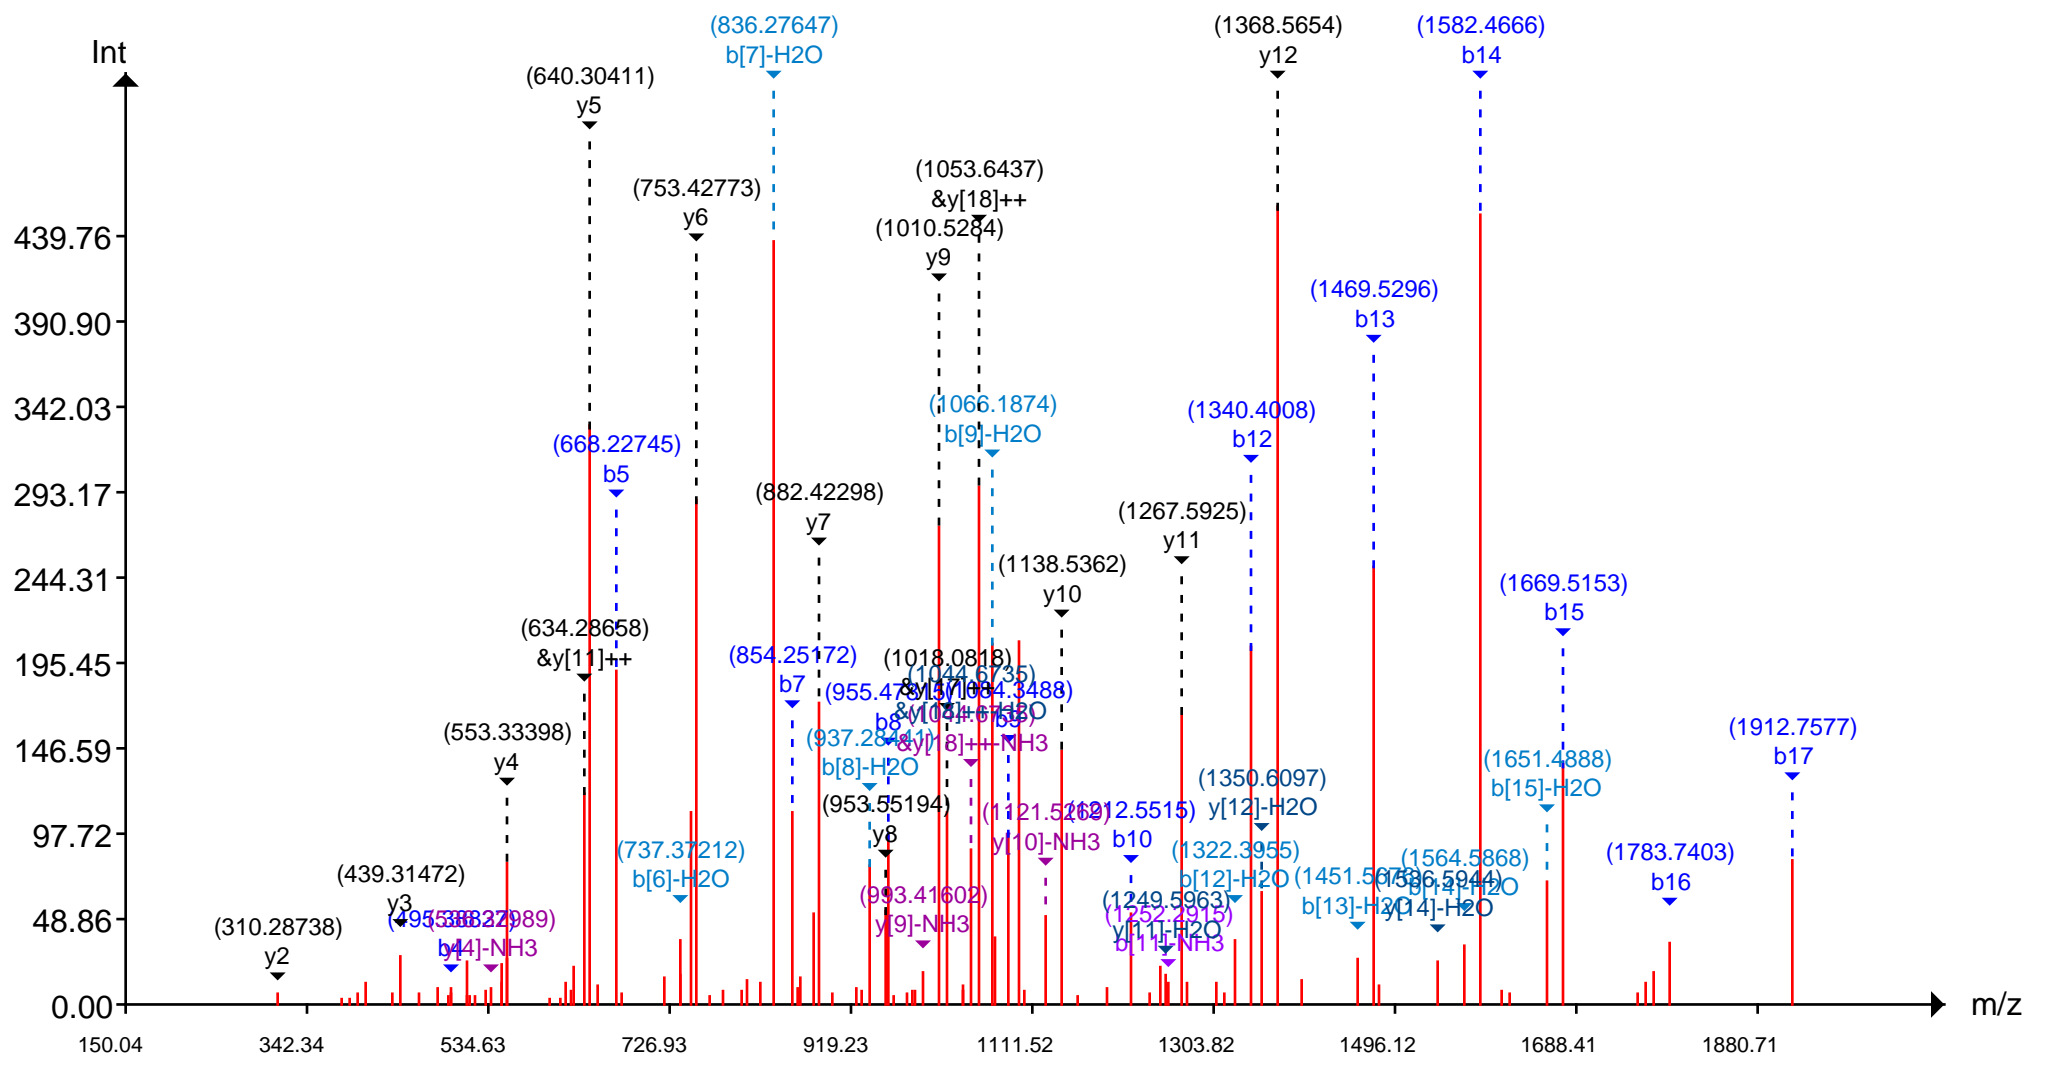

| Info                     |                                                        |                           |          |
|--------------------------|--------------------------------------------------------|---------------------------|----------|
| <b>Modified Sequence</b> | AcD3-AAC<Cmm*>M<Mox*>K<AcD3K*>SVTEQGAELSNEER<C13>-COOH | <b>Ion score</b>          | 84.1     |
| <b>Protein</b>           | P63101                                                 | <b>Confidence level</b>   | 99.00%   |
| <b>Precursor m/z</b>     | 1111.5186                                              | <b>Identity Threshold</b> | 45.40    |
| <b>Charge</b>            | 2+                                                     | <b>Mass error</b>         | 0.002171 |



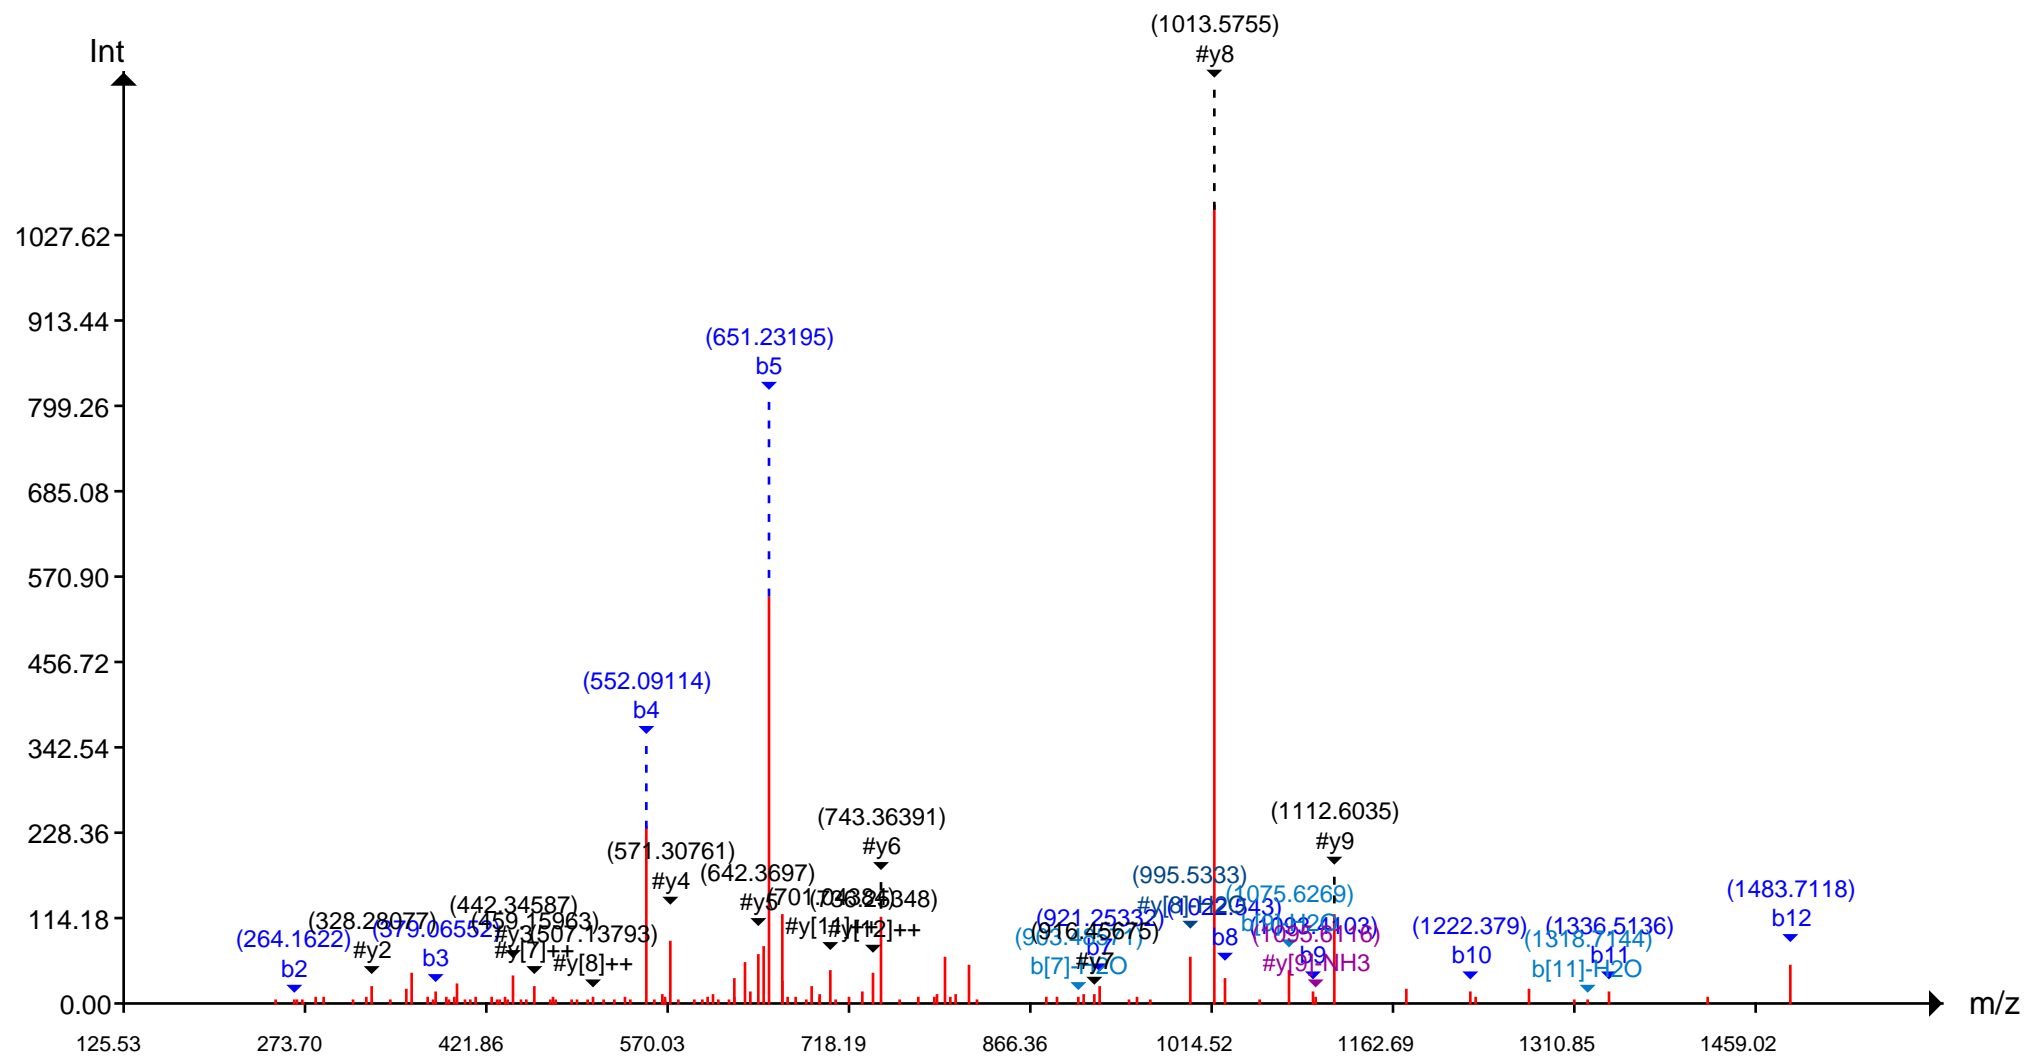

## Info

|                          |                                              |                           |         |
|--------------------------|----------------------------------------------|---------------------------|---------|
| <b>Modified Sequence</b> | AcD3-FADK<AcD3K*>VPK<AcD3K*>TAENFR<C13>-COOH | <b>Ion score</b>          | 54.97   |
| <b>Protein</b>           | P17742                                       | <b>Confidence level</b>   | 99.00%  |
| <b>Precursor m/z</b>     | 832.45899                                    | <b>Identity Threshold</b> | 47.47   |
| <b>Charge</b>            | 2+                                           | <b>Mass error</b>         | 0.00113 |

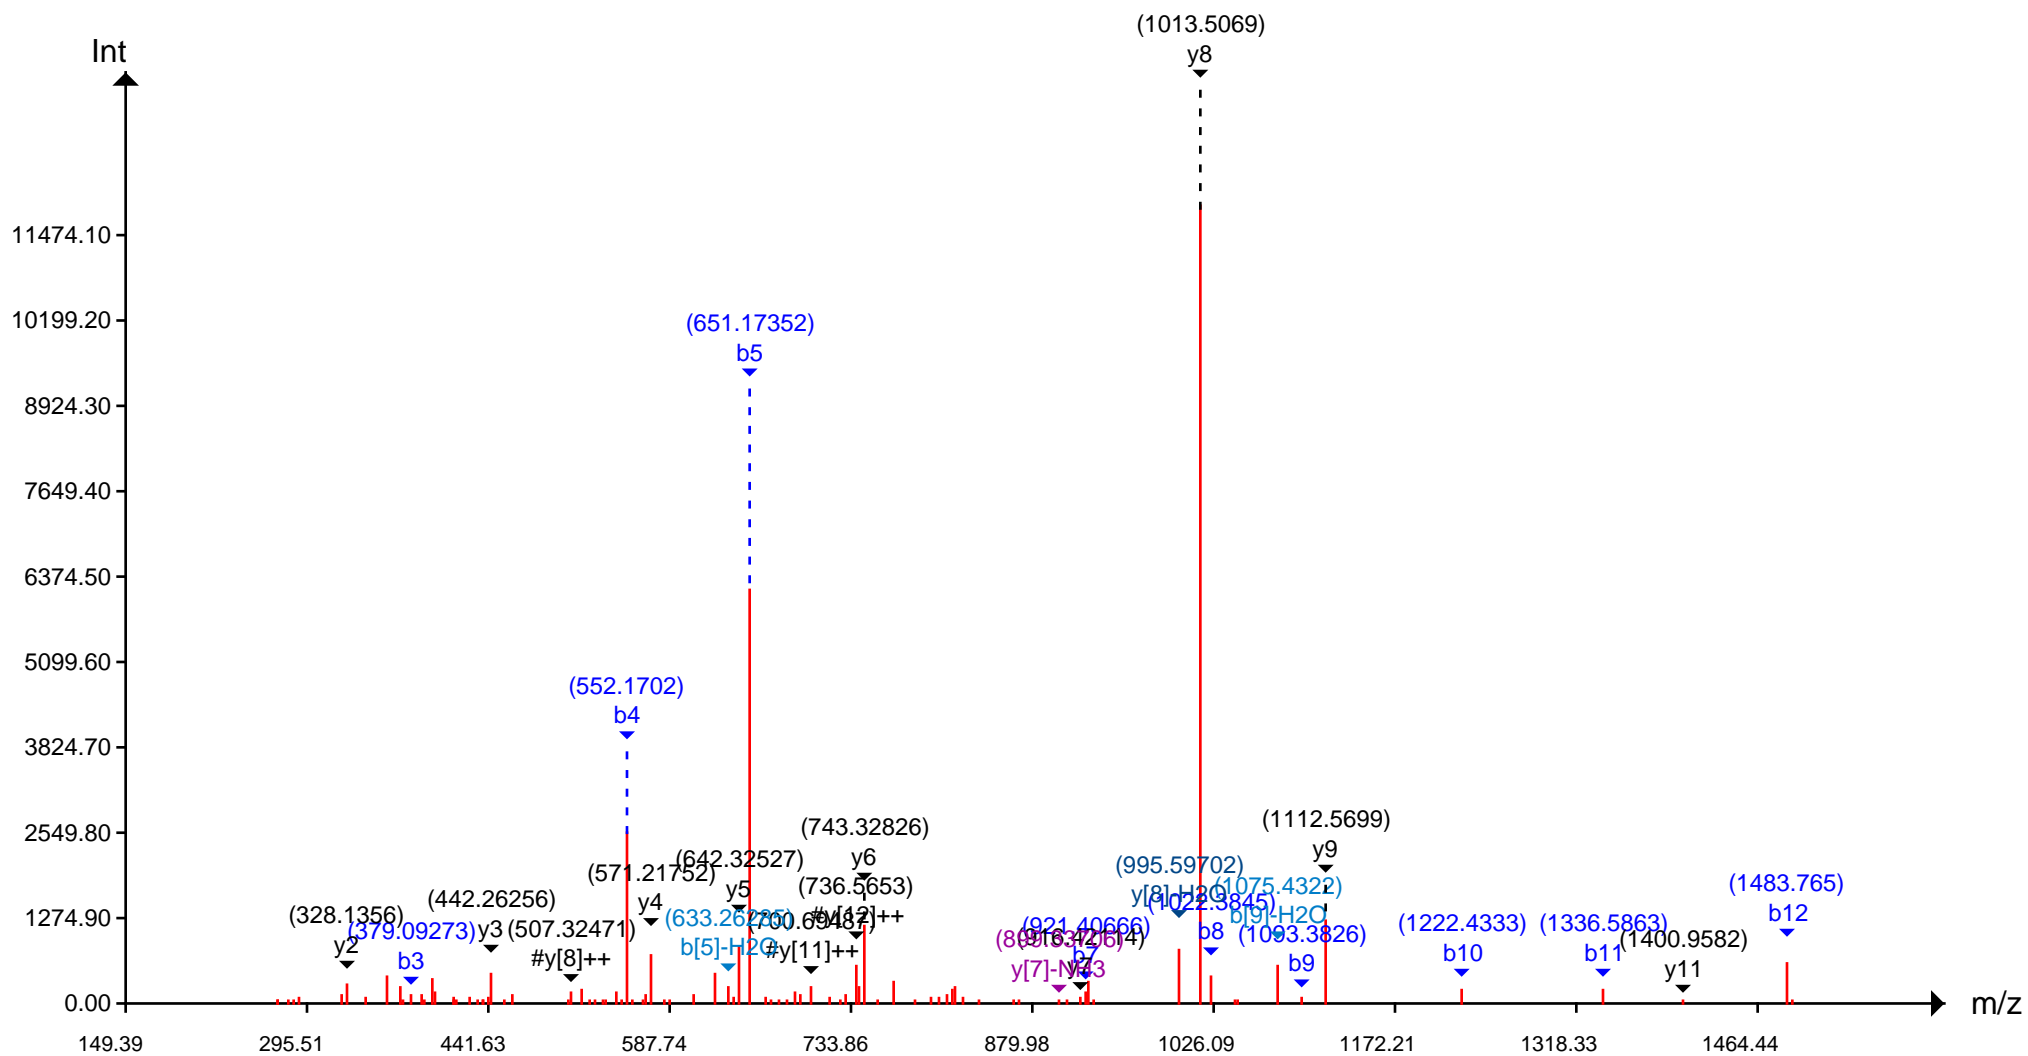

## Info

**Modified Sequence** AcD3-FADK<AcD3K\*>VPK<AcD3K\*>TAENFR<C13>-COOH

**Ion score** 70.17

**Protein** P17742

**Confidence level** 99.00%

**Precursor m/z** 832.45912

**Identity Threshold** 47.45

**Charge** 2+

**Mass error** 0.00139

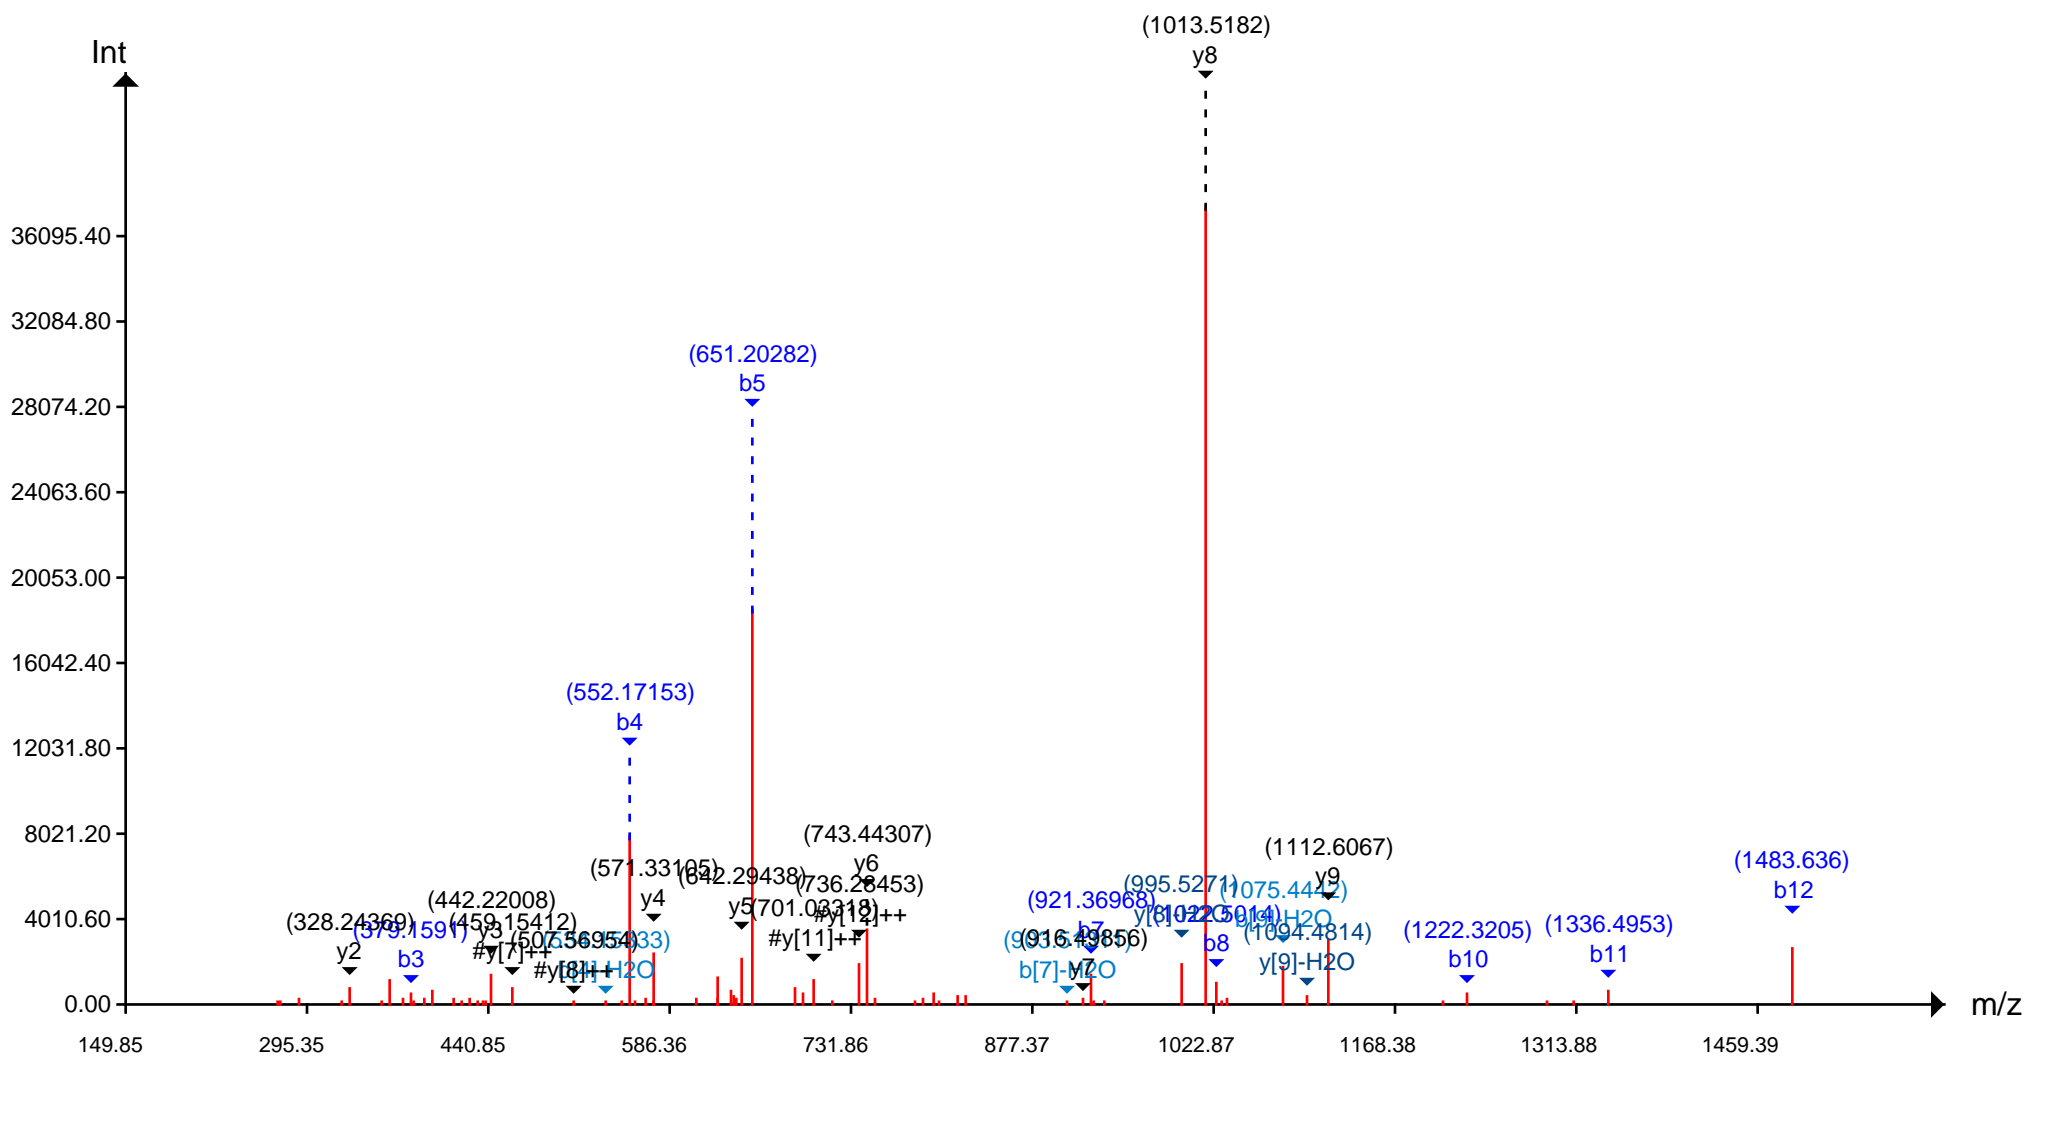

| Info                     |                                              |                           |         |
|--------------------------|----------------------------------------------|---------------------------|---------|
| <b>Modified Sequence</b> | AcD3-FADK<AcD3K*>VPK<AcD3K*>TAENFR<C13>-COOH | <b>Ion score</b>          | 58.4    |
| <b>Protein</b>           | P17742                                       | <b>Confidence level</b>   | 99.00%  |
| <b>Precursor m/z</b>     | 832.45939                                    | <b>Identity Threshold</b> | 47.48   |
| <b>Charge</b>            | 2+                                           | <b>Mass error</b>         | 0.00193 |

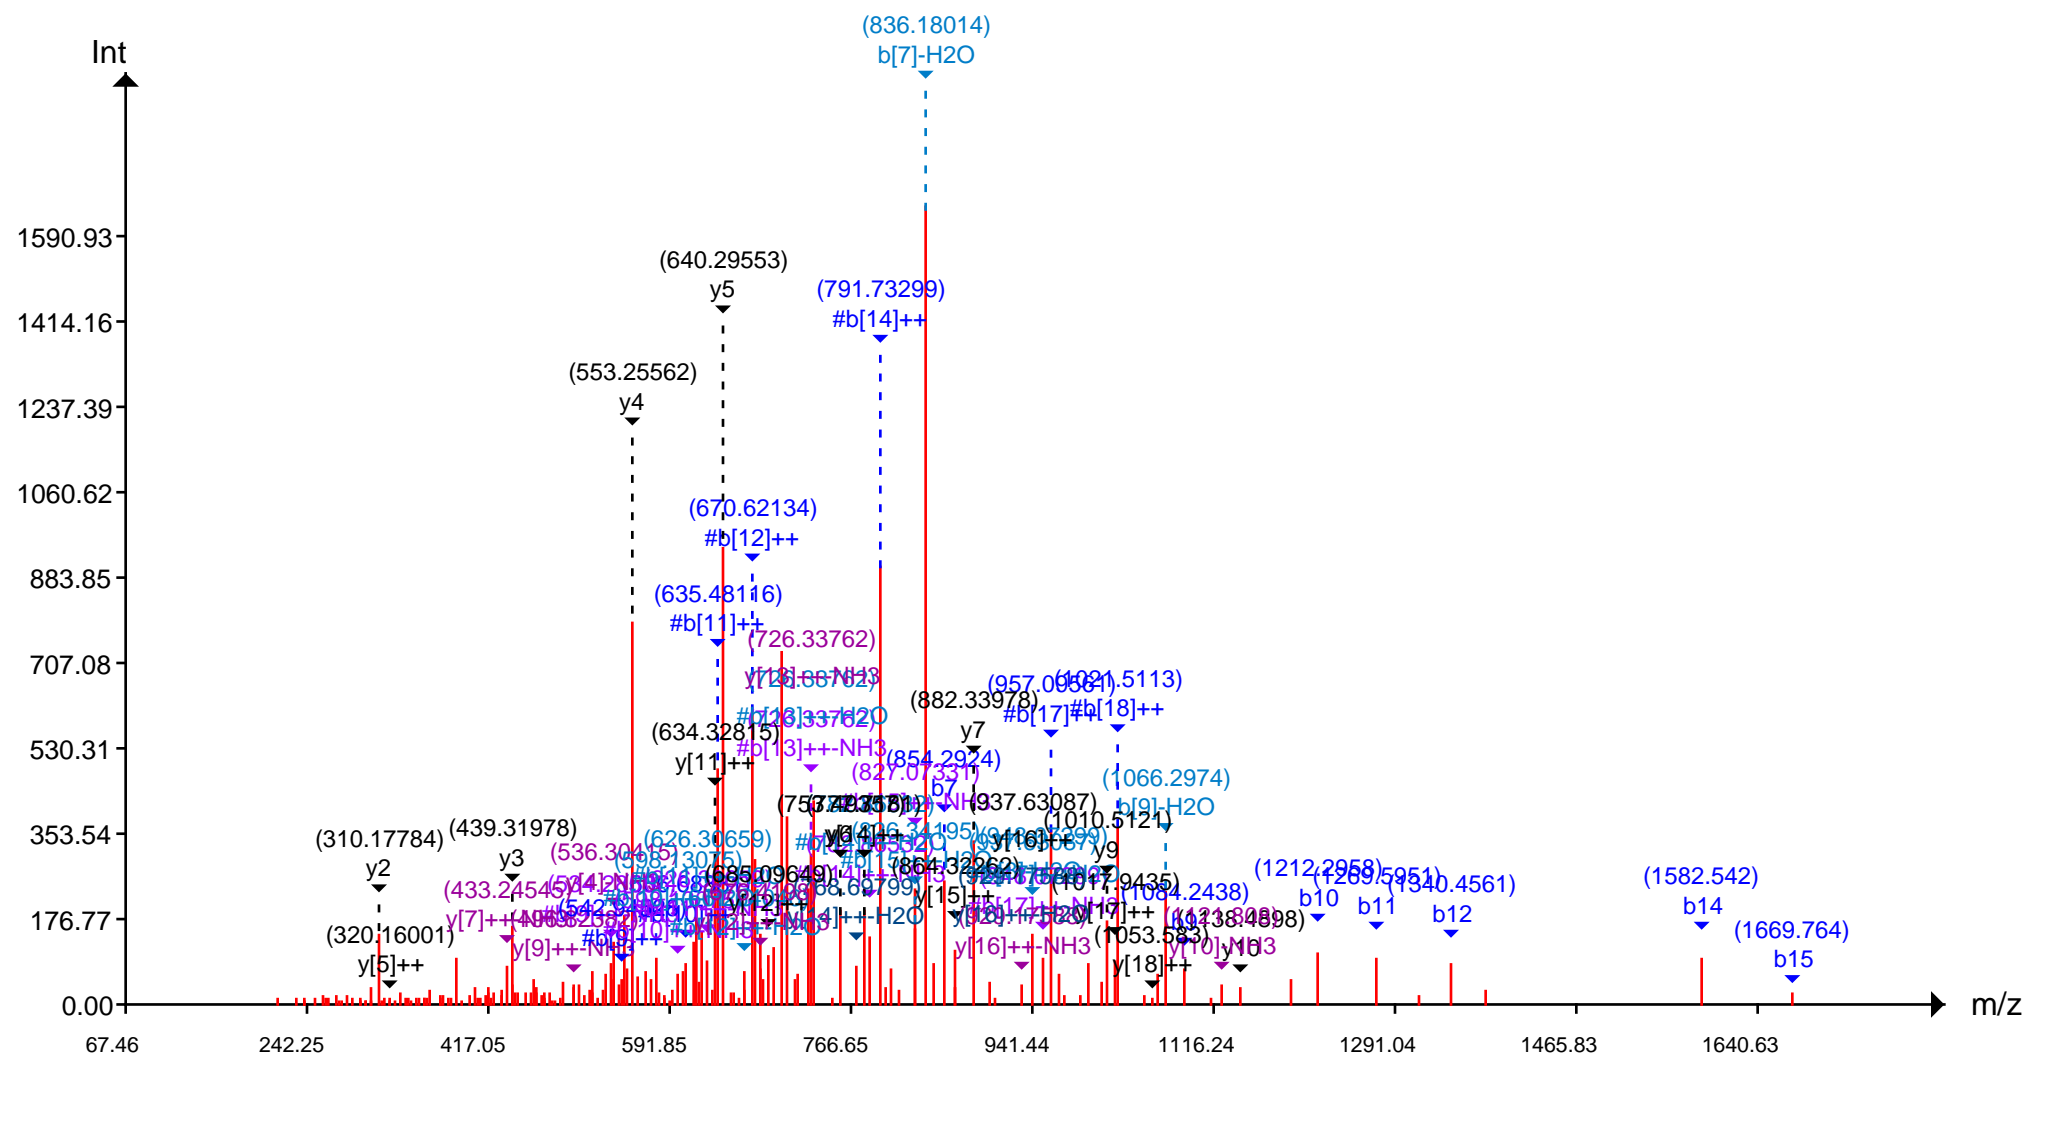

| Info                     |                                                        |                           |         |
|--------------------------|--------------------------------------------------------|---------------------------|---------|
| <b>Modified Sequence</b> | AcD3-AAC<Cmm*>M<Mox*>K<AcD3K*>SVTEQGAELSNEER<C13>-COOH | <b>Ion score</b>          | 47.5    |
| <b>Protein</b>           | P63101                                                 | <b>Confidence level</b>   | 99.00%  |
| <b>Precursor m/z</b>     | 741.34763                                              | <b>Identity Threshold</b> | 45.23   |
| <b>Charge</b>            | 3+                                                     | <b>Mass error</b>         | 5.85E-4 |

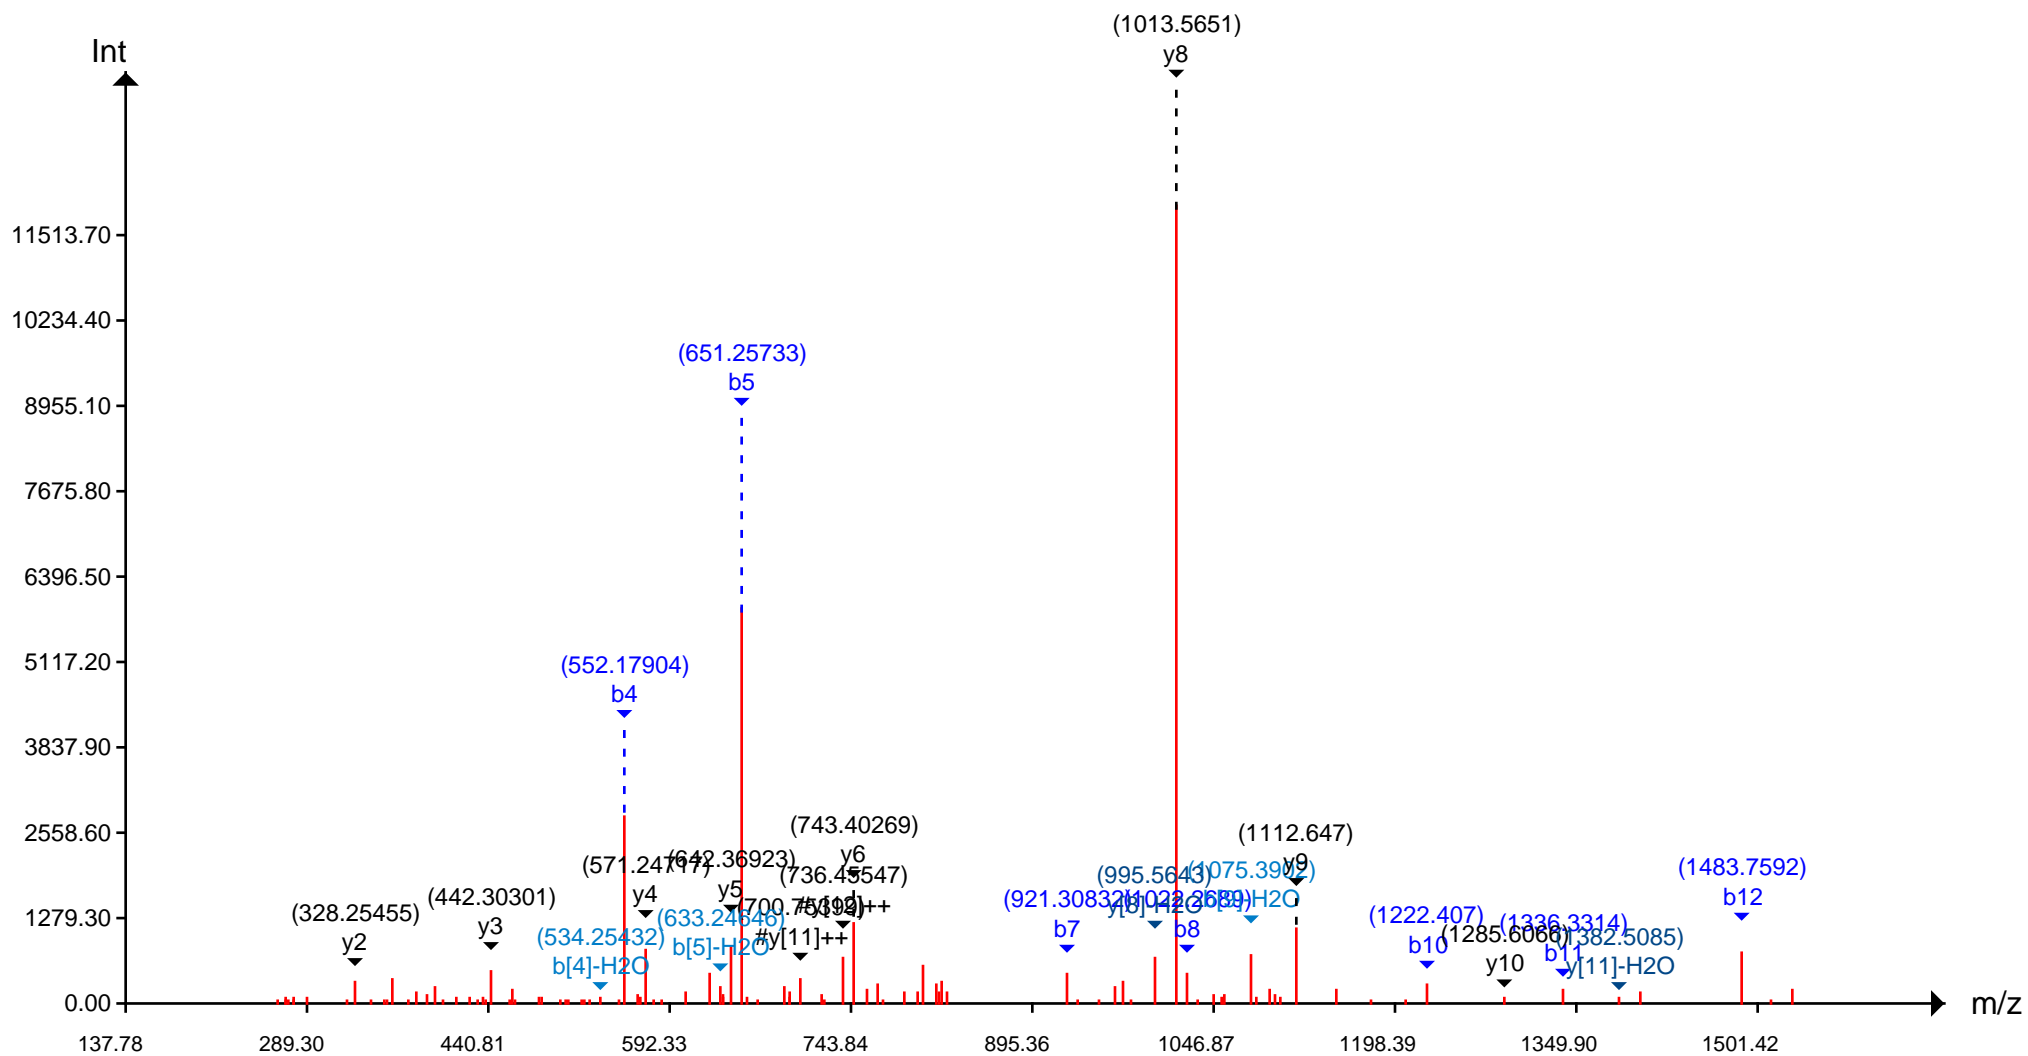

## Info

**Modified Sequence** AcD3-FADK<AcD3K\*>VPK<AcD3K\*>TAENFR<C13>-COOH

**Ion score** 48.42

**Protein** P17742

**Confidence level** 99.00%

**Precursor m/z** 832.4594

**Identity Threshold** 47.48

**Charge** 2+

**Mass error** 0.00195

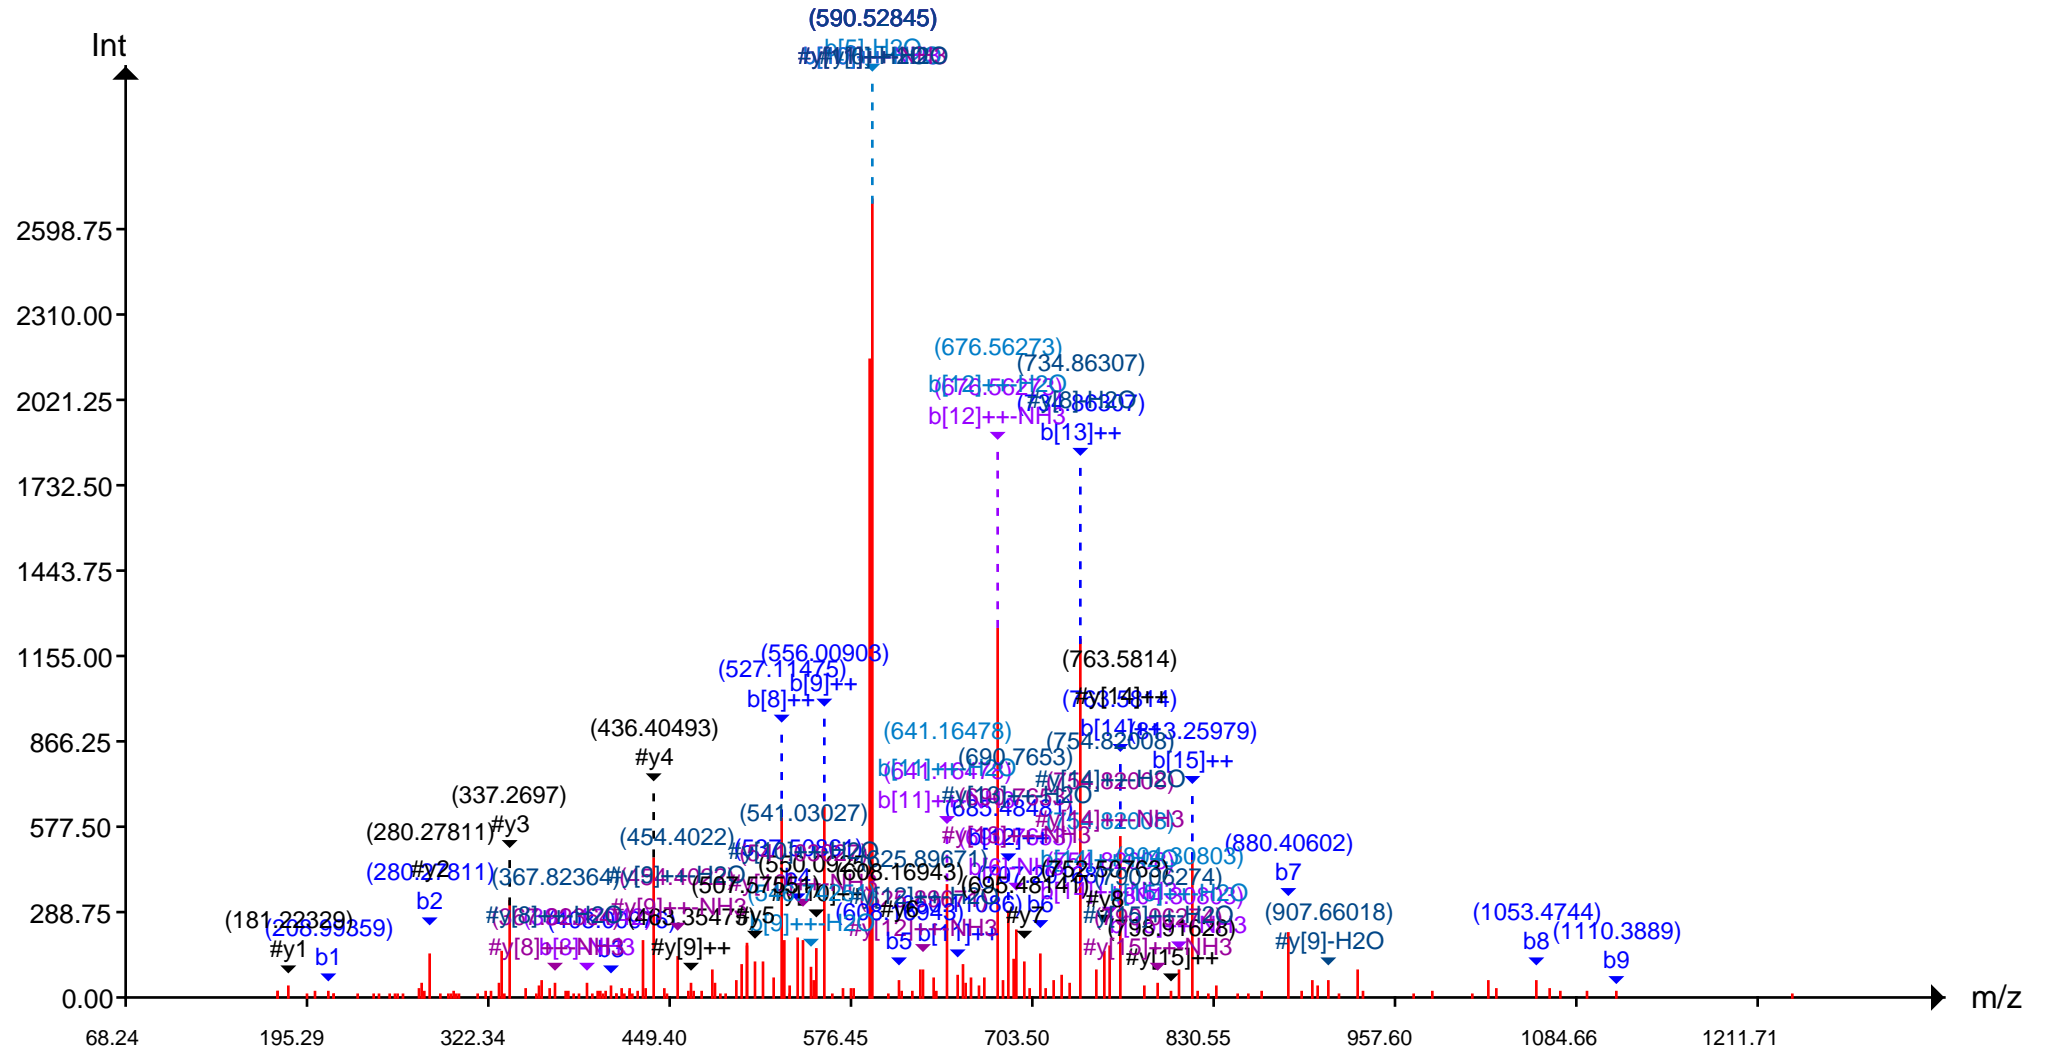

Info

|                          |                                                 |                           |          |
|--------------------------|-------------------------------------------------|---------------------------|----------|
| <b>Modified Sequence</b> | AcD3-YAQEAVK<AcD3K*>K<AcD3K*>GSTAVGVR<C13>-COOH | <b>Ion score</b>          | 46.32    |
| <b>Protein</b>           | Q9Z2U0                                          | <b>Confidence level</b>   | 99.00%   |
| <b>Precursor m/z</b>     | 602.34506                                       | <b>Identity Threshold</b> | 45.95    |
| <b>Charge</b>            | 3+                                              | <b>Mass error</b>         | -2.89E-4 |

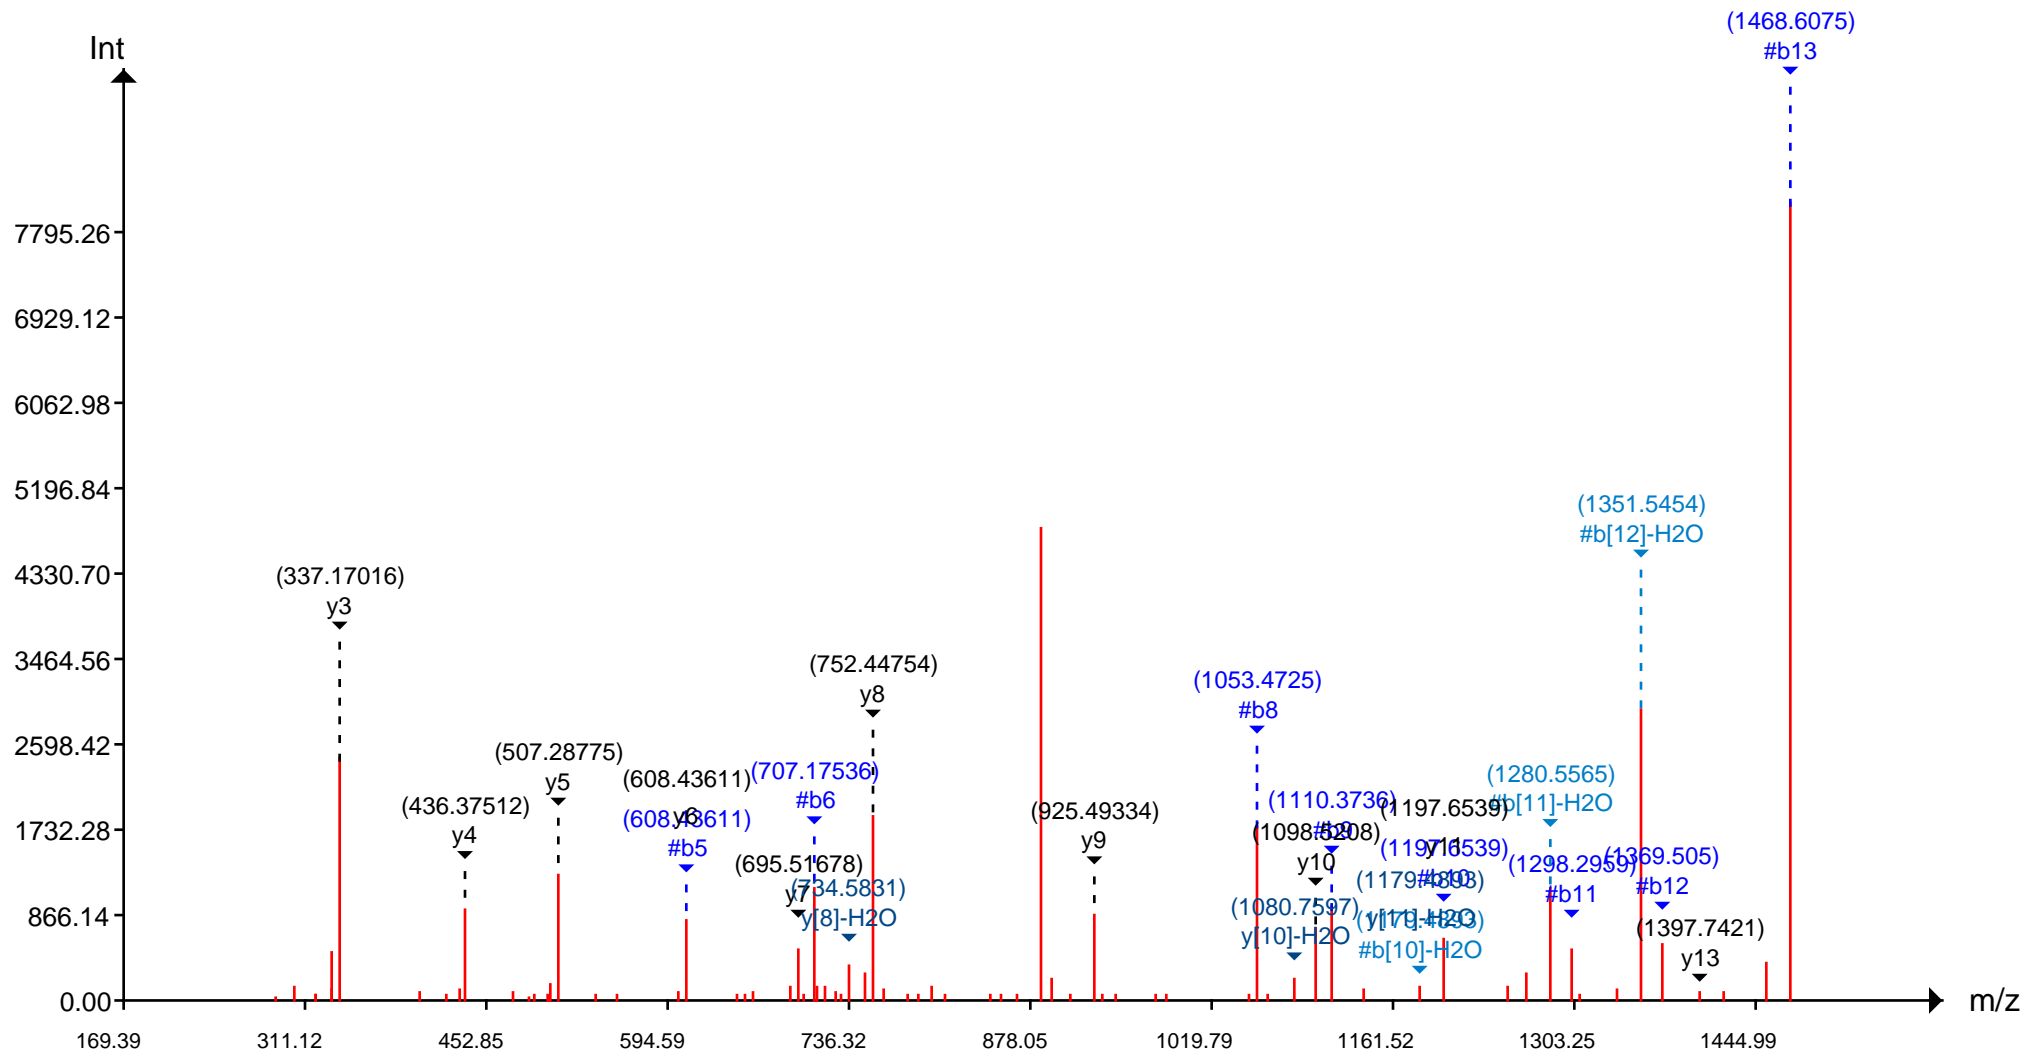

## Info

|                          |                                                 |                           |         |
|--------------------------|-------------------------------------------------|---------------------------|---------|
| <b>Modified Sequence</b> | AcD3-YAQEAVK<AcD3K*>K<AcD3K*>GSTAVGVR<C13>-COOH | <b>Ion score</b>          | 66.14   |
| <b>Protein</b>           | Q9Z2U0                                          | <b>Confidence level</b>   | 99.00%  |
| <b>Precursor m/z</b>     | 903.01433                                       | <b>Identity Threshold</b> | 45.92   |
| <b>Charge</b>            | 2+                                              | <b>Mass error</b>         | 4.67E-4 |

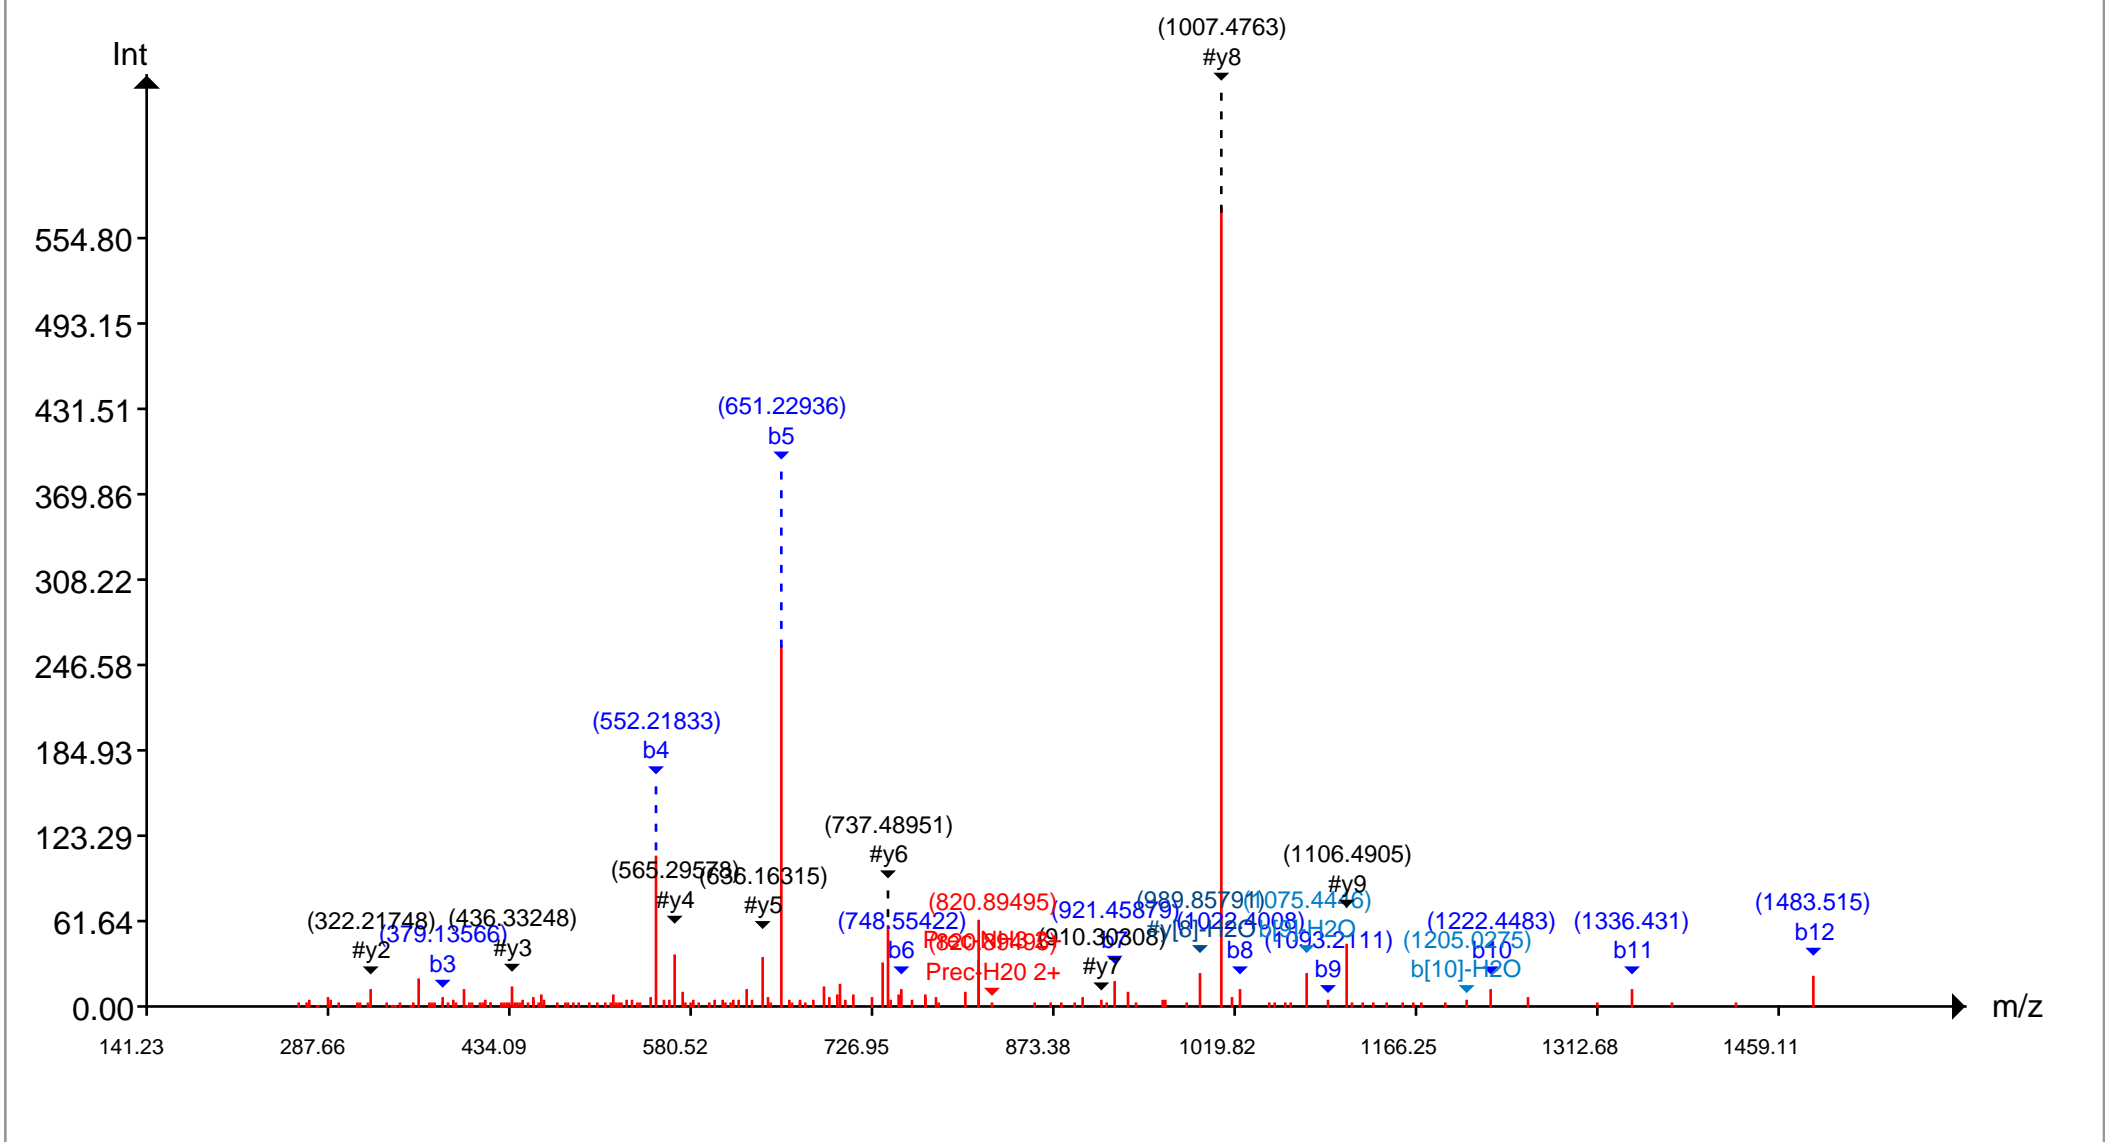

## Info

**Modified Sequence** AcD3-FADK<AcD3K\*>VPK<AcD3K\*>TAENFR-COOH

**Ion score** 54.0

**Protein** P17742

**Confidence level** 99.00%

**Precursor m/z** 829.44962

**Identity Threshold** 47.77

**Charge** 2+

**Mass error** 0.002532



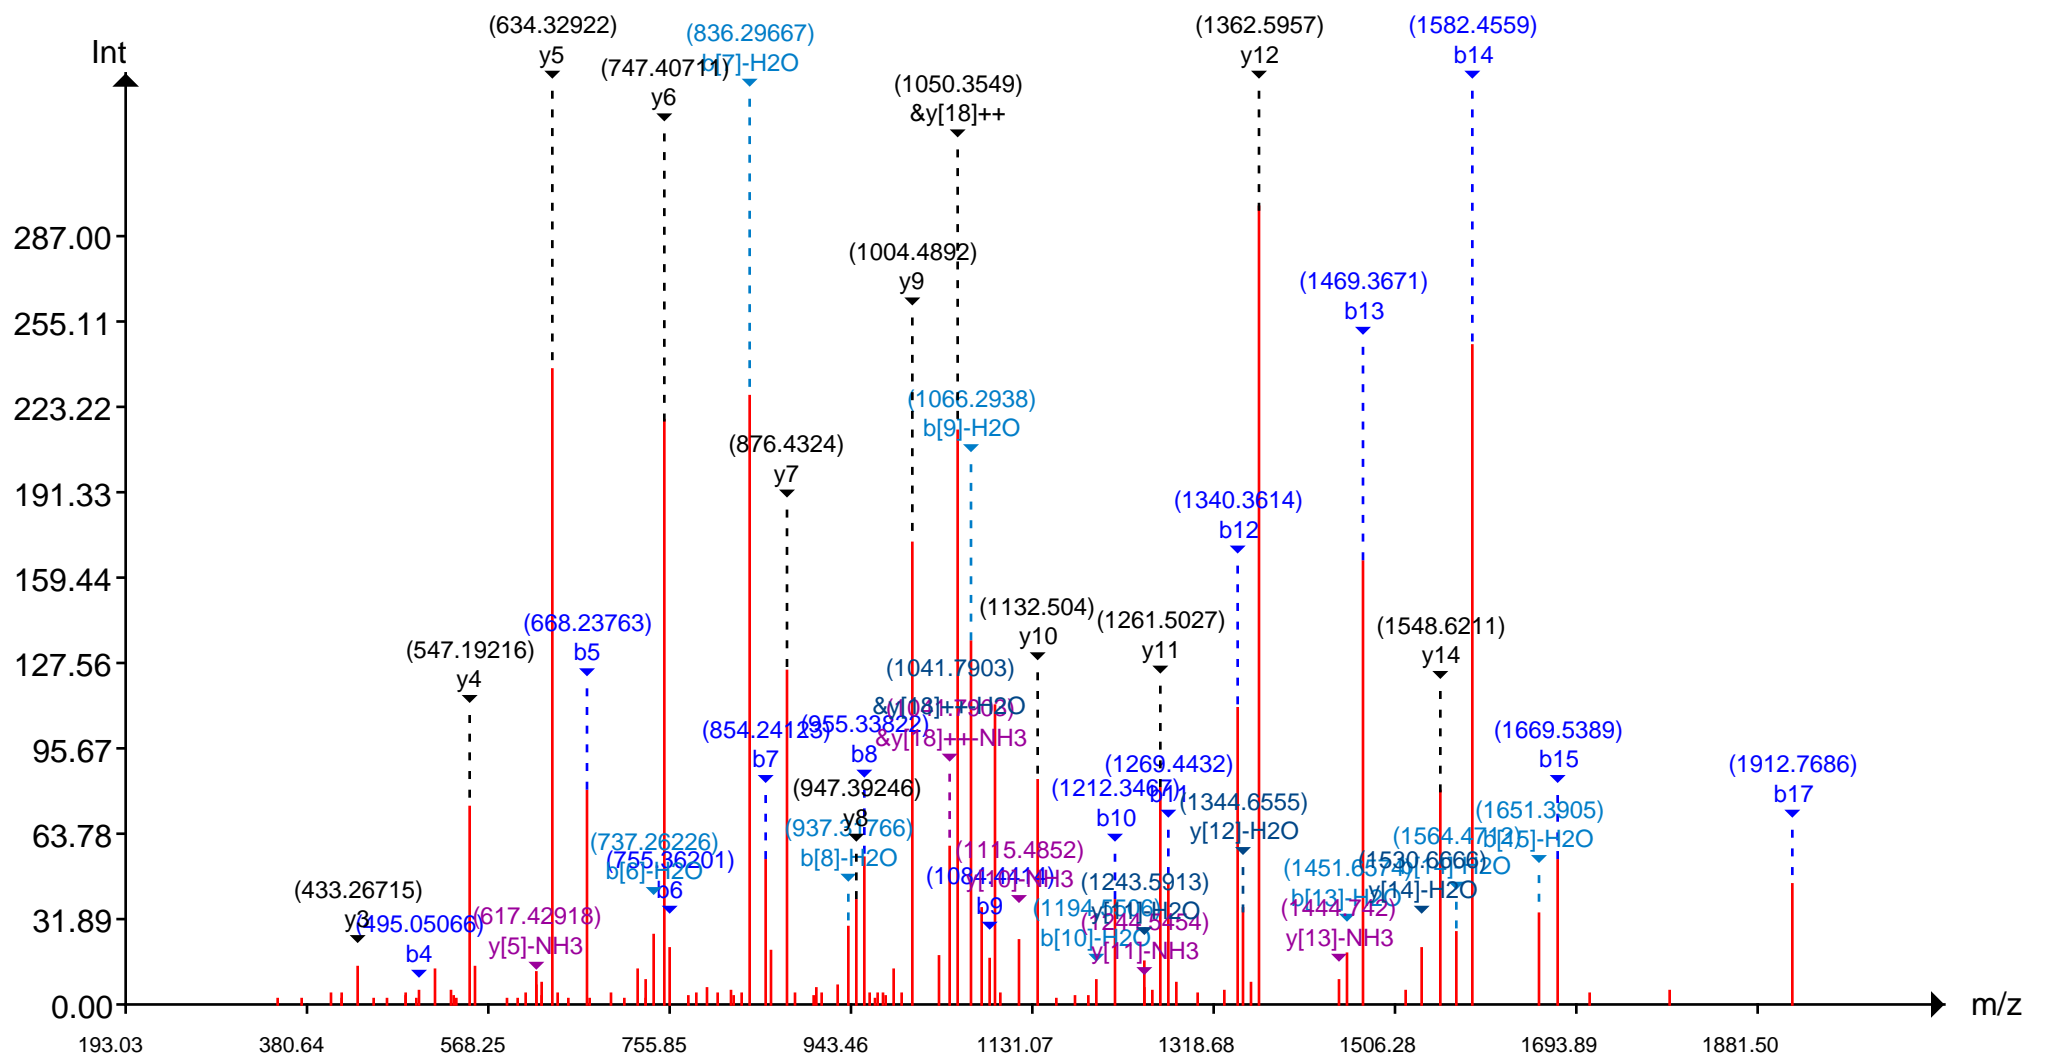

Info

|                          |                                                   |                           |          |
|--------------------------|---------------------------------------------------|---------------------------|----------|
| <b>Modified Sequence</b> | AcD3-AAC<Cmm*>M<Mox*>K<AcD3K*>SVTEQGAELSNEER-COOH | <b>Ion score</b>          | 95.05    |
| <b>Protein</b>           | P63101                                            | <b>Confidence level</b>   | 99.00%   |
| <b>Precursor m/z</b>     | 1108.5089                                         | <b>Identity Threshold</b> | 44.48    |
| <b>Charge</b>            | 2+                                                | <b>Mass error</b>         | 0.002912 |

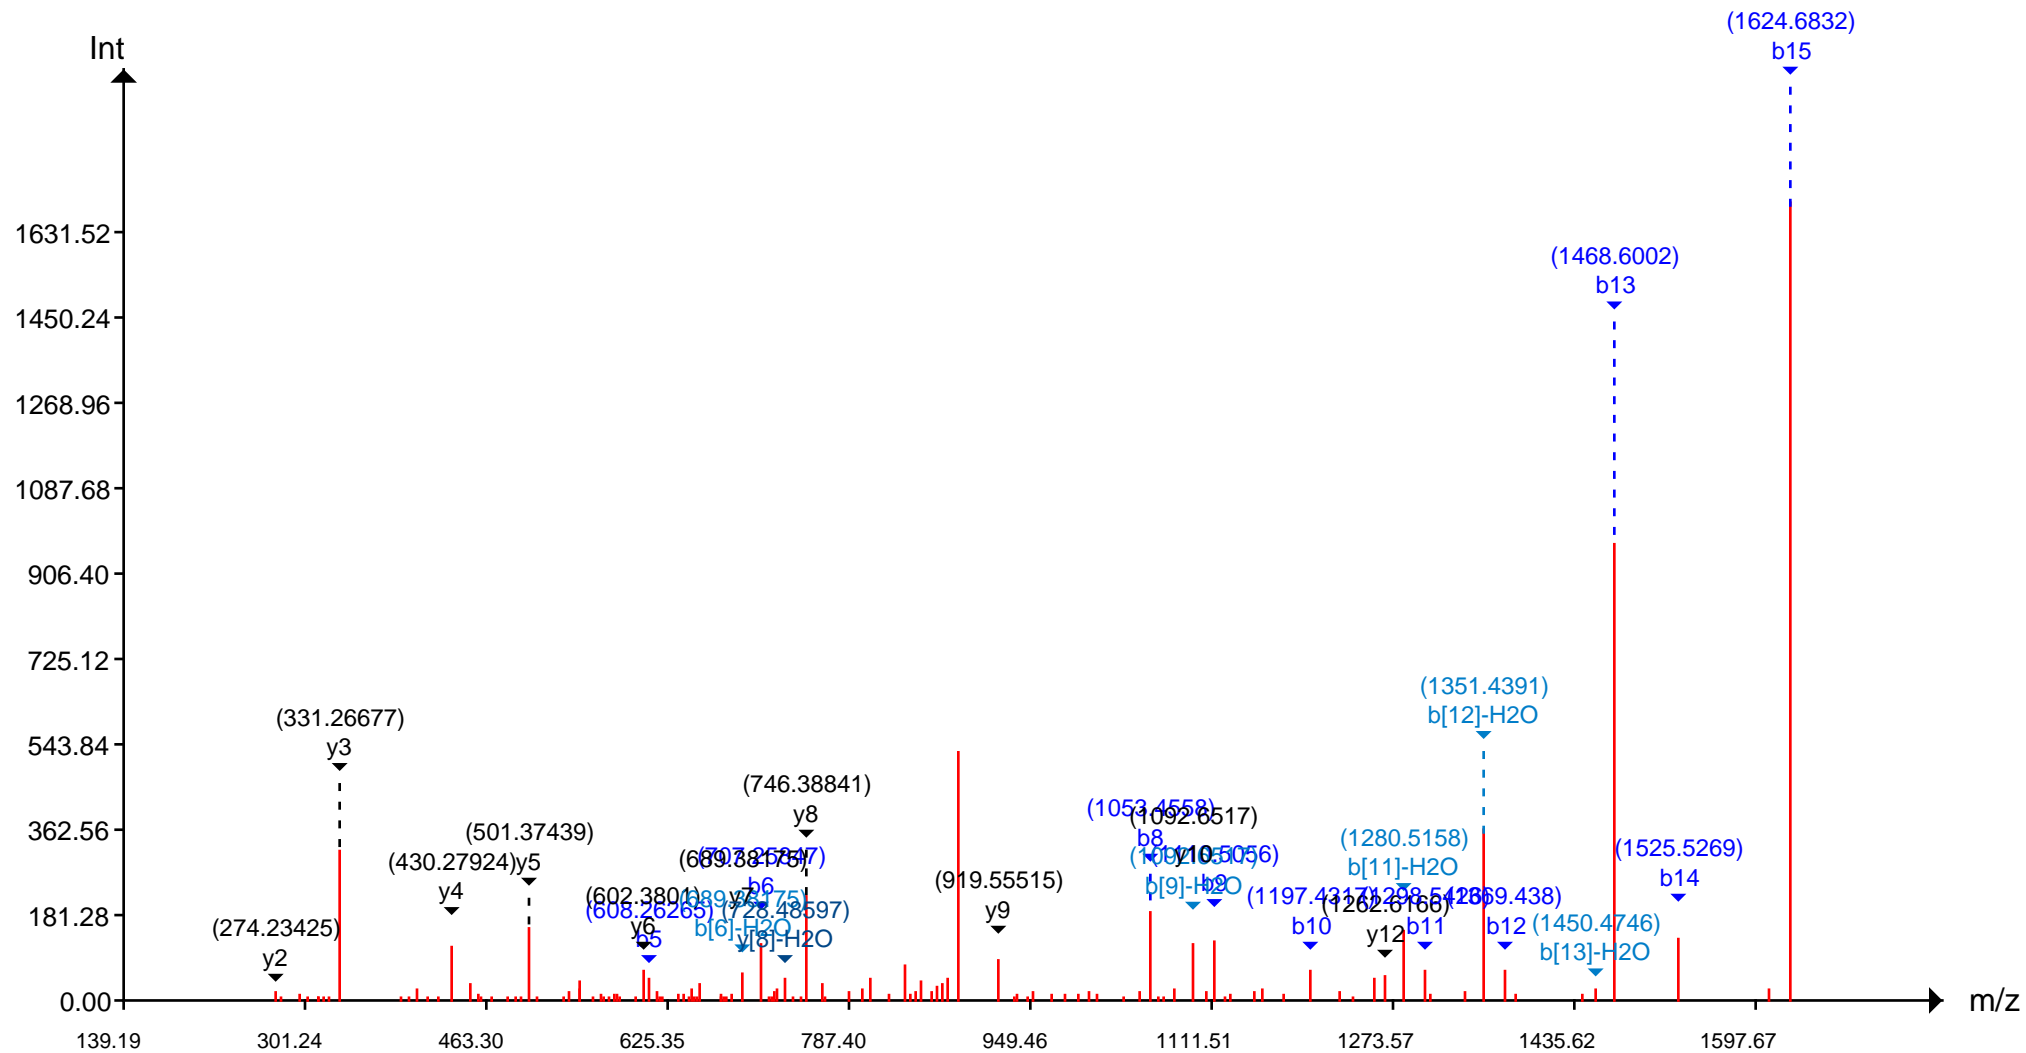

## Info

**Modified Sequence** AcD3-YAQEAVK<AcD3K\*>K<AcD3K\*>GSTAVGVR-COOH

**Ion score** 87.78

**Protein** Q9Z2U0

**Confidence level** 99.00%

**Precursor m/z** 900.00544

**Identity Threshold** 46.61

**Charge** 2+

**Mass error** 0.002828

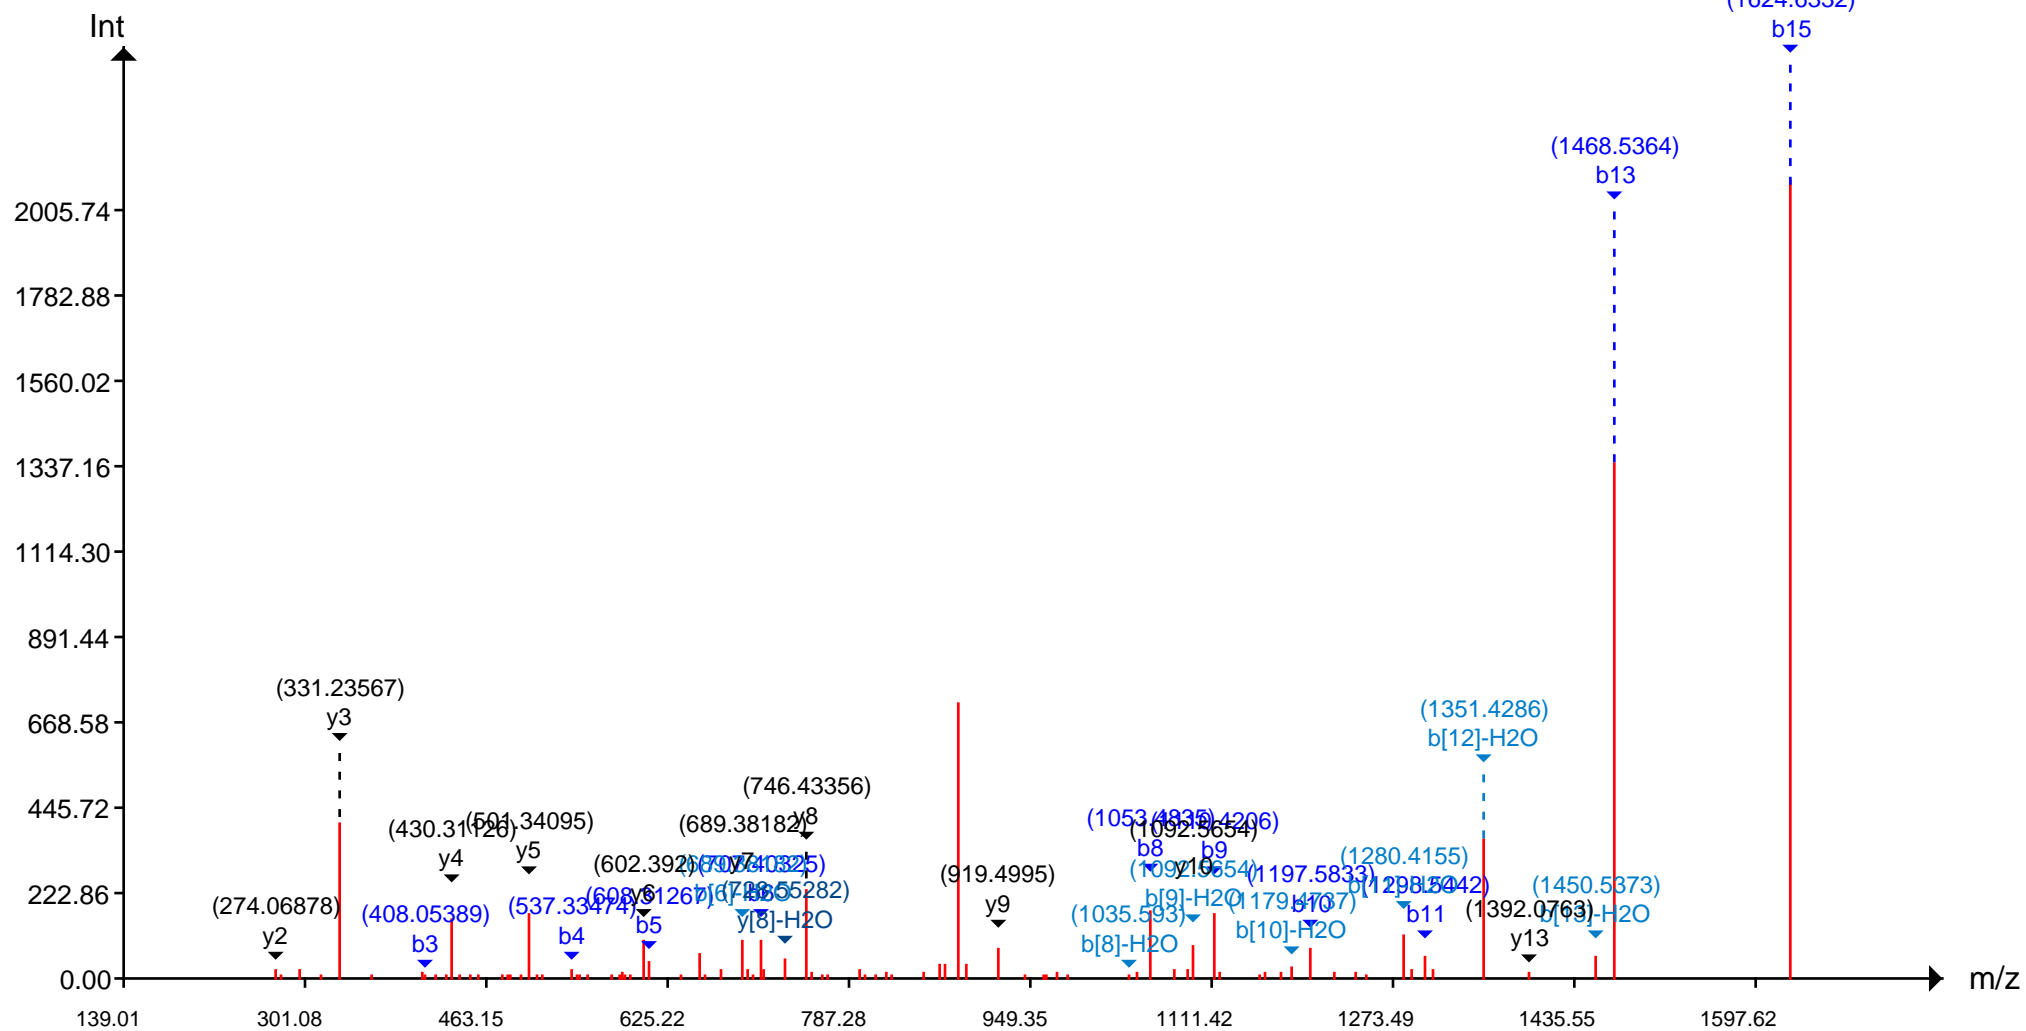

## Info

|                          |                                            |                           |          |
|--------------------------|--------------------------------------------|---------------------------|----------|
| <b>Modified Sequence</b> | AcD3-YAQEAVK<AcD3K*>K<AcD3K*>GSTAVGVR-COOH | <b>Ion score</b>          | 91.52    |
| <b>Protein</b>           | Q9Z2U0                                     | <b>Confidence level</b>   | 99.00%   |
| <b>Precursor m/z</b>     | 900.00544                                  | <b>Identity Threshold</b> | 46.61    |
| <b>Charge</b>            | 2+                                         | <b>Mass error</b>         | 0.002828 |

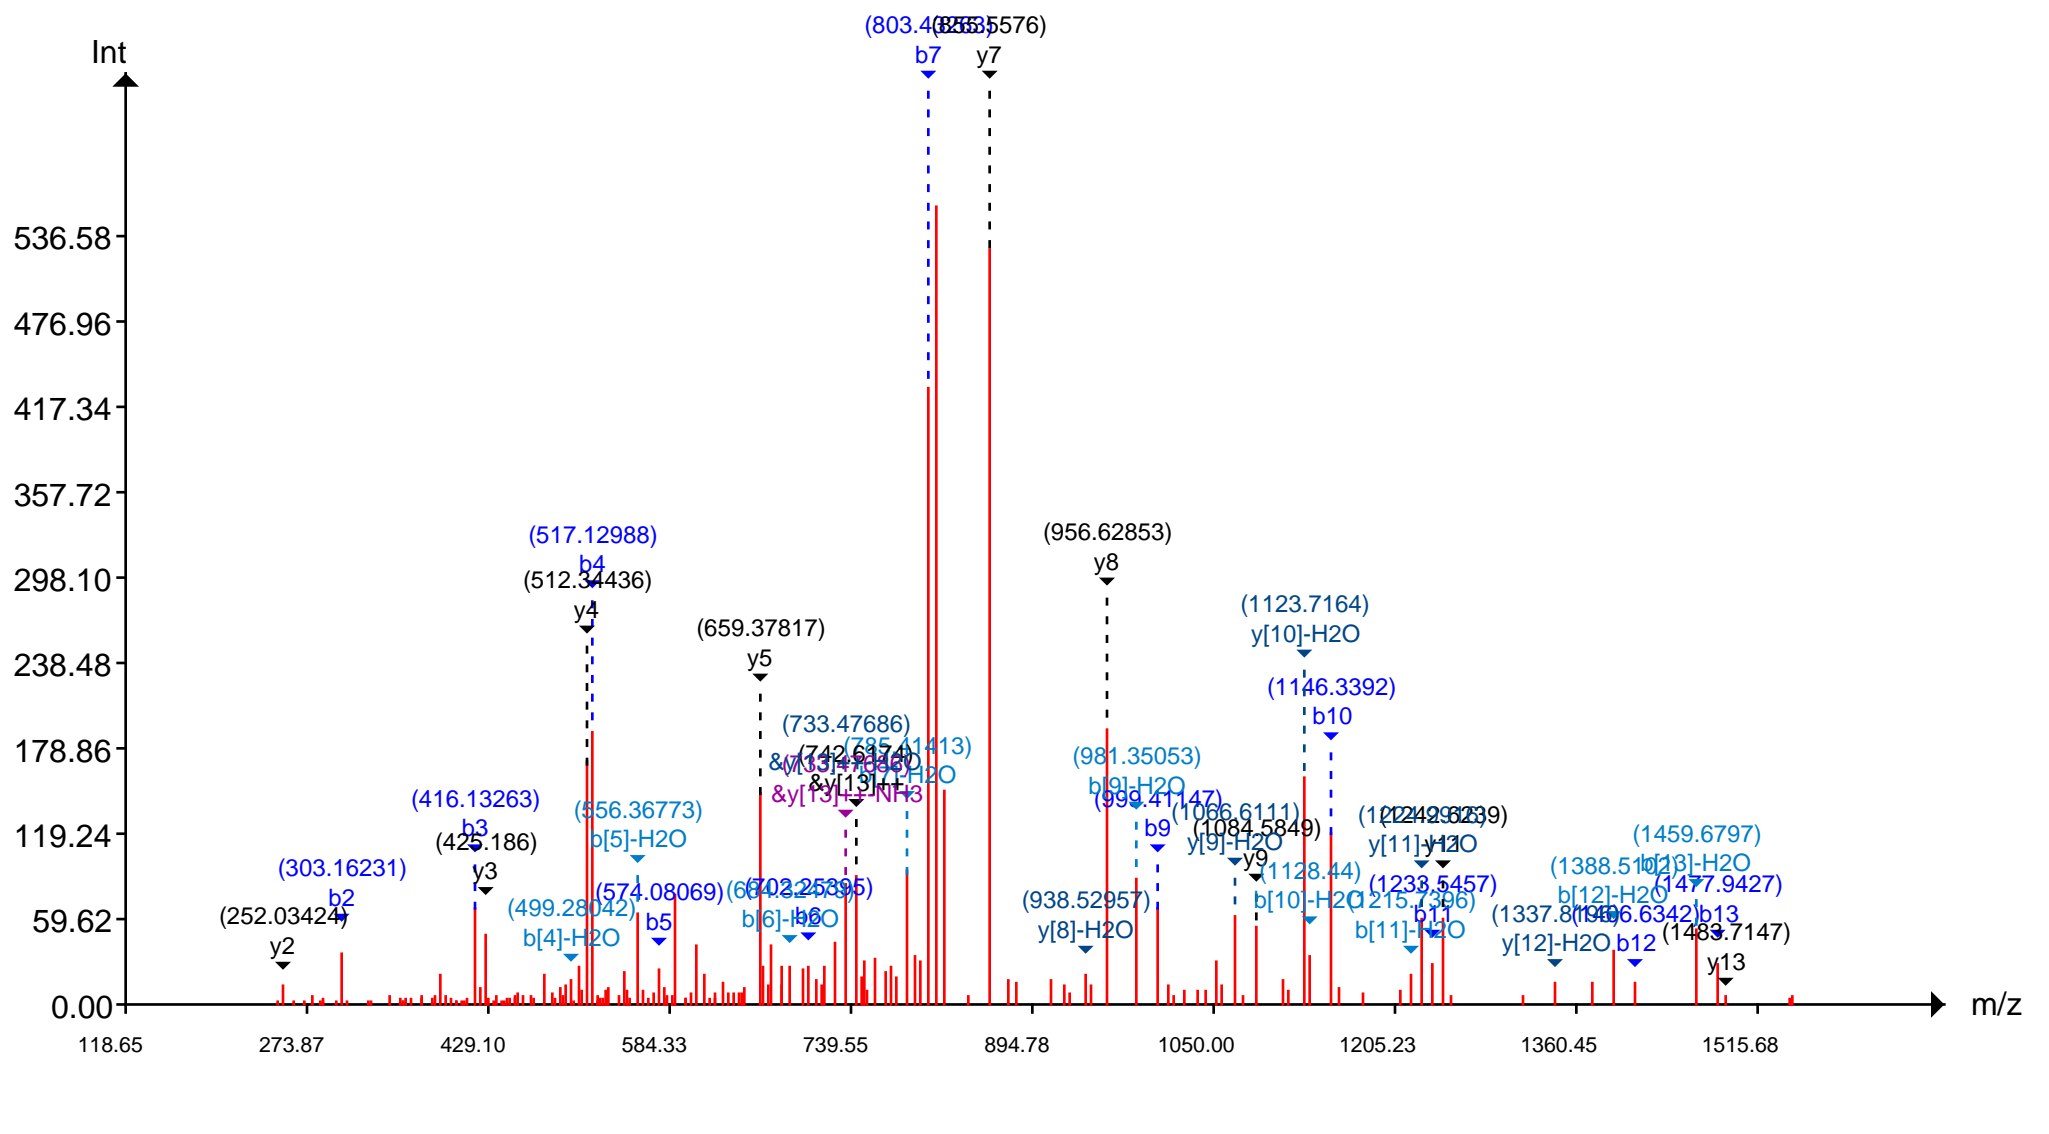

| Info                     |                                       |                           |         |
|--------------------------|---------------------------------------|---------------------------|---------|
| <b>Modified Sequence</b> | AcD3-EQLTGQTPVFSK<AcD3K*>AR<C13>-COOH | <b>Ion score</b>          | 76.19   |
| <b>Protein</b>           | Q9CXW4                                | <b>Confidence level</b>   | 99.00%  |
| <b>Precursor m/z</b>     | 829.46059                             | <b>Identity Threshold</b> | 47.26   |
| <b>Charge</b>            | 2+                                    | <b>Mass error</b>         | 0.00169 |

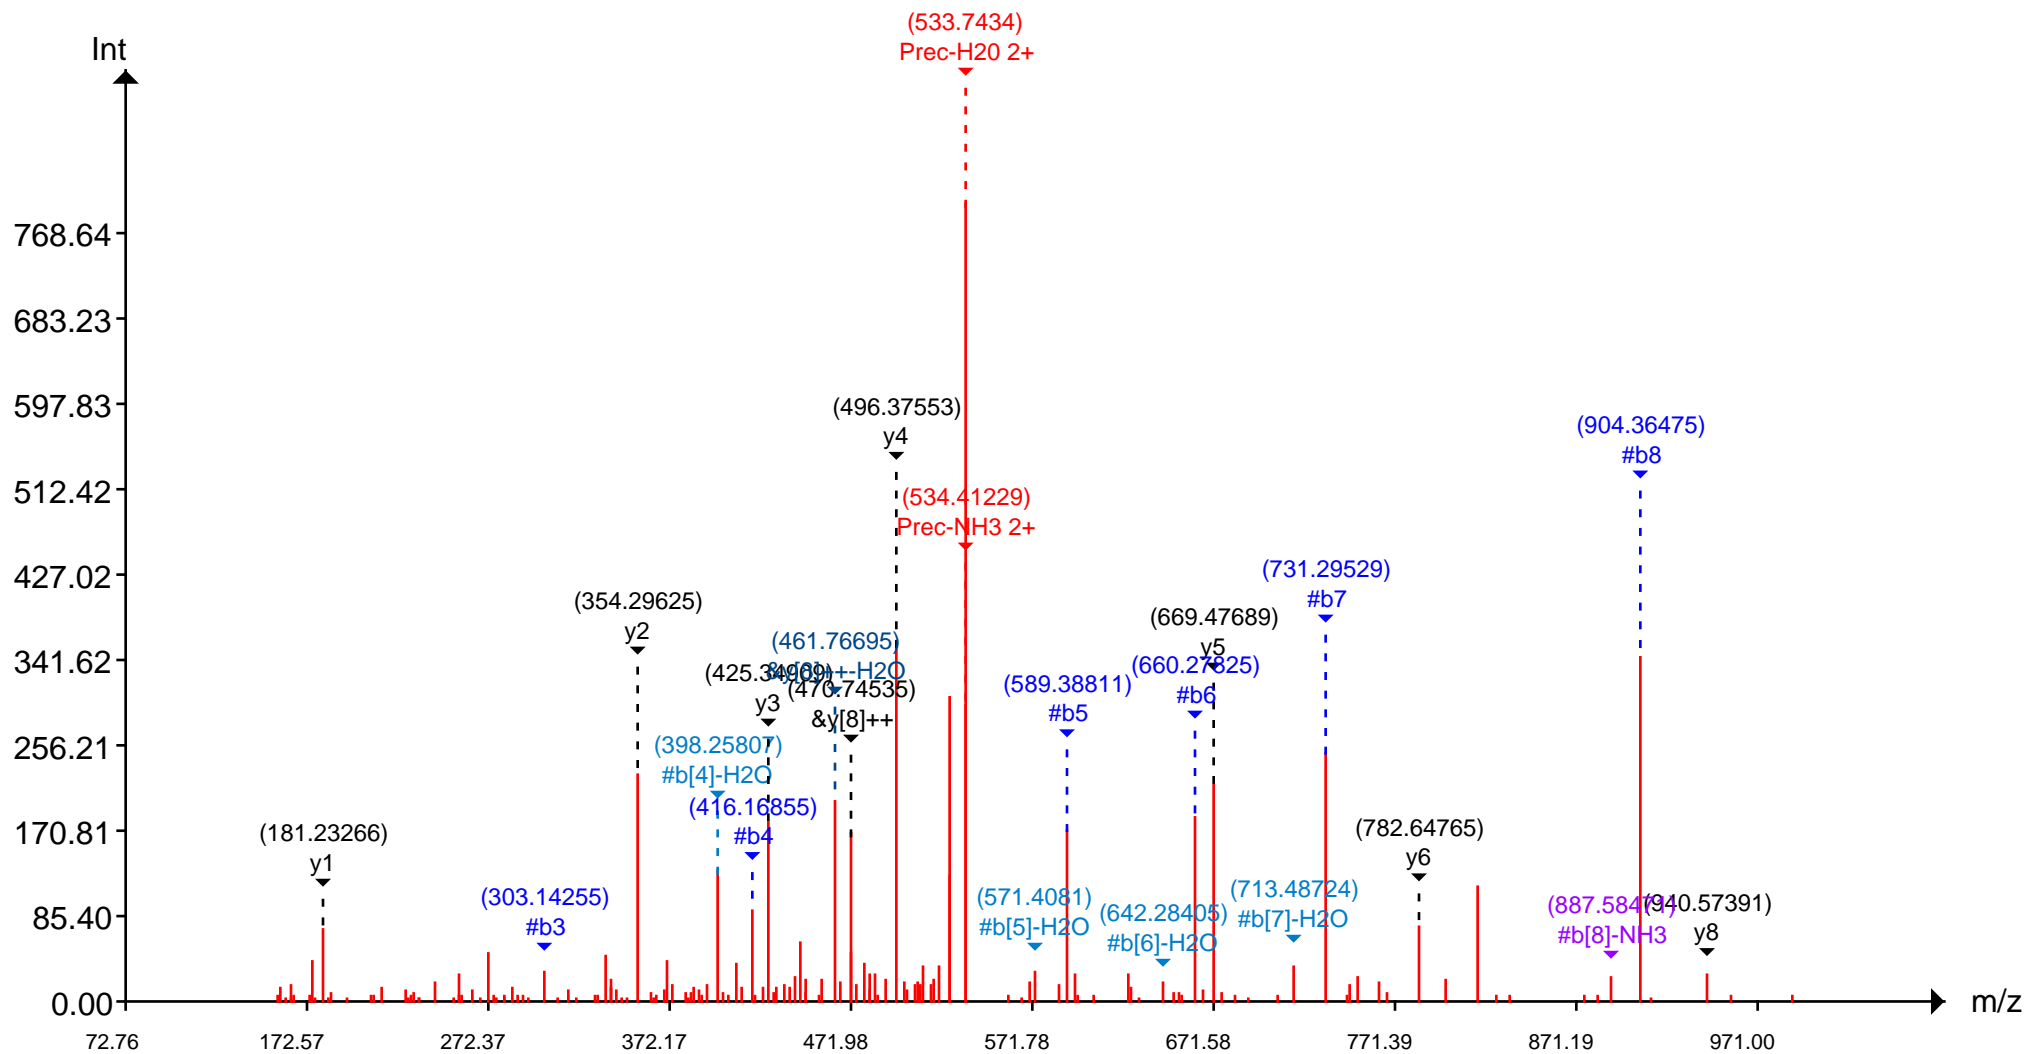

## Info

|                          |                                          |                           |        |
|--------------------------|------------------------------------------|---------------------------|--------|
| <b>Modified Sequence</b> | AcD3-VGTLK<AcD3K*>AAK<AcD3K*>R<C13>-COOH | <b>Ion score</b>          | 58.72  |
| <b>Protein</b>           | Q4KML4                                   | <b>Confidence level</b>   | 99.00% |
| <b>Precursor m/z</b>     | 542.86017                                | <b>Identity Threshold</b> | 38.40  |
| <b>Charge</b>            | 2+                                       | <b>Mass error</b>         | 2.3E-5 |

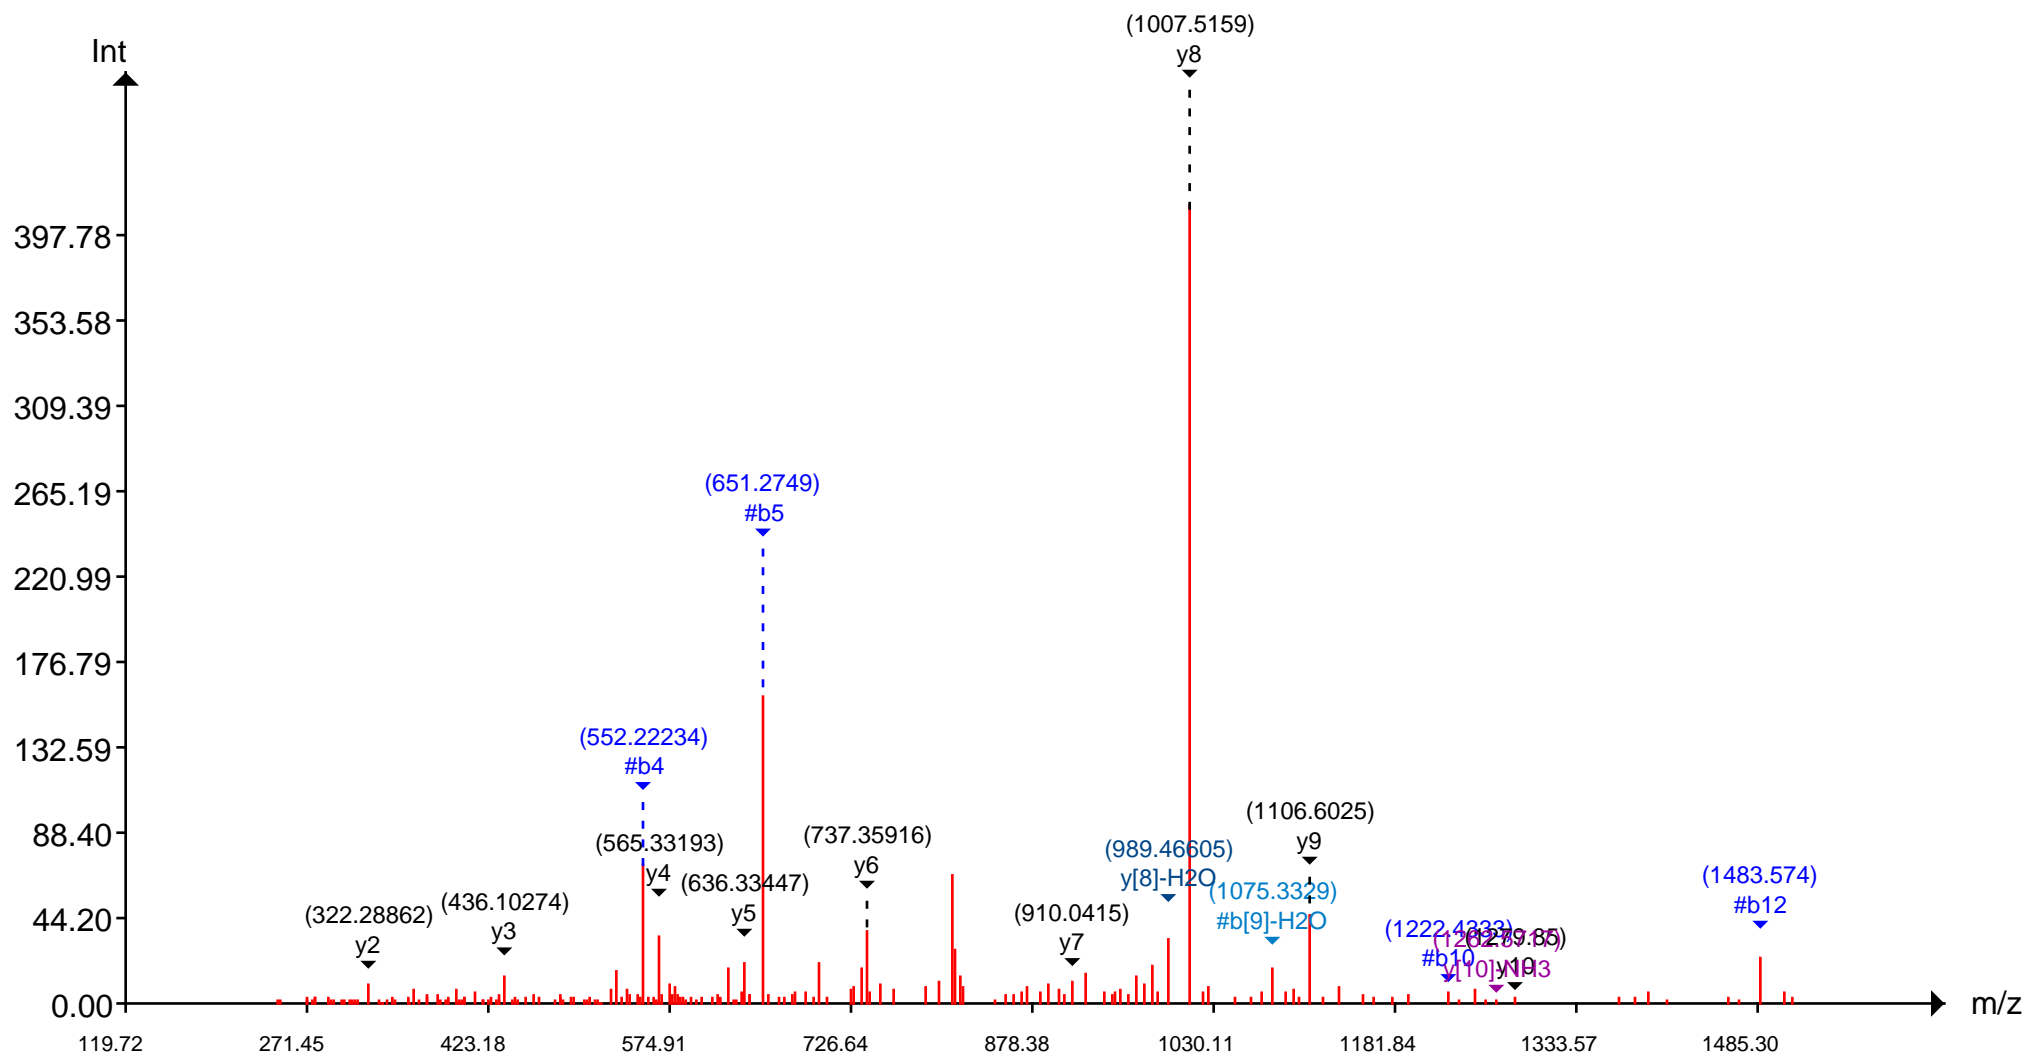

## Info

**Modified Sequence** AcD3-FADK<AcD3K\*>VPK<AcD3K\*>TAENFR-COOH

**Ion score** 55.2

**Protein** P17742

**Confidence level** 99.00%

**Precursor m/z** 829.44906

**Identity Threshold** 47.80

**Charge** 2+

**Mass error** 0.001412

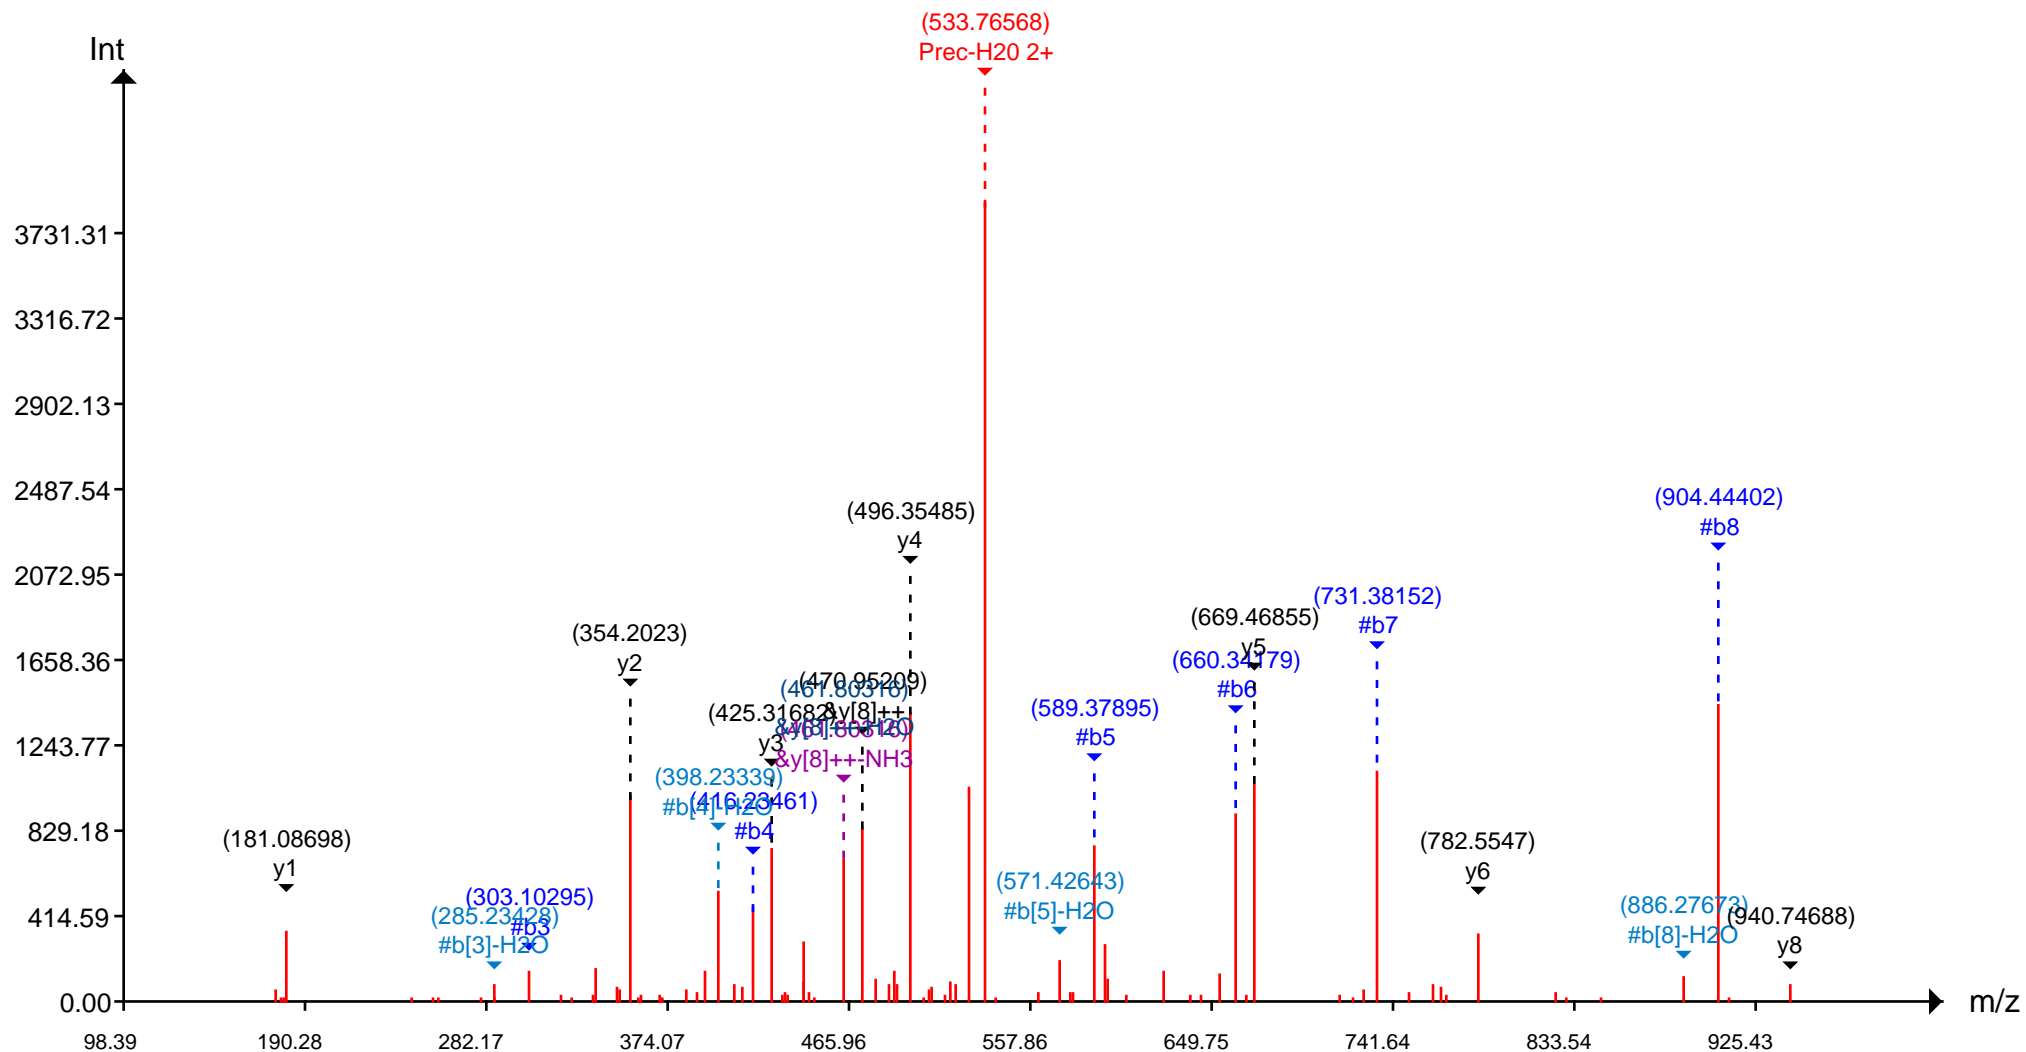

## Info

|                          |                                          |                           |          |
|--------------------------|------------------------------------------|---------------------------|----------|
| <b>Modified Sequence</b> | AcD3-VGTLK<AcD3K*>AAK<AcD3K*>R<C13>-COOH | <b>Ion score</b>          | 53.33    |
| <b>Protein</b>           | Q4KML4                                   | <b>Confidence level</b>   | 99.00%   |
| <b>Precursor m/z</b>     | 542.85991                                | <b>Identity Threshold</b> | 38.40    |
| <b>Charge</b>            | 2+                                       | <b>Mass error</b>         | -4.97E-4 |

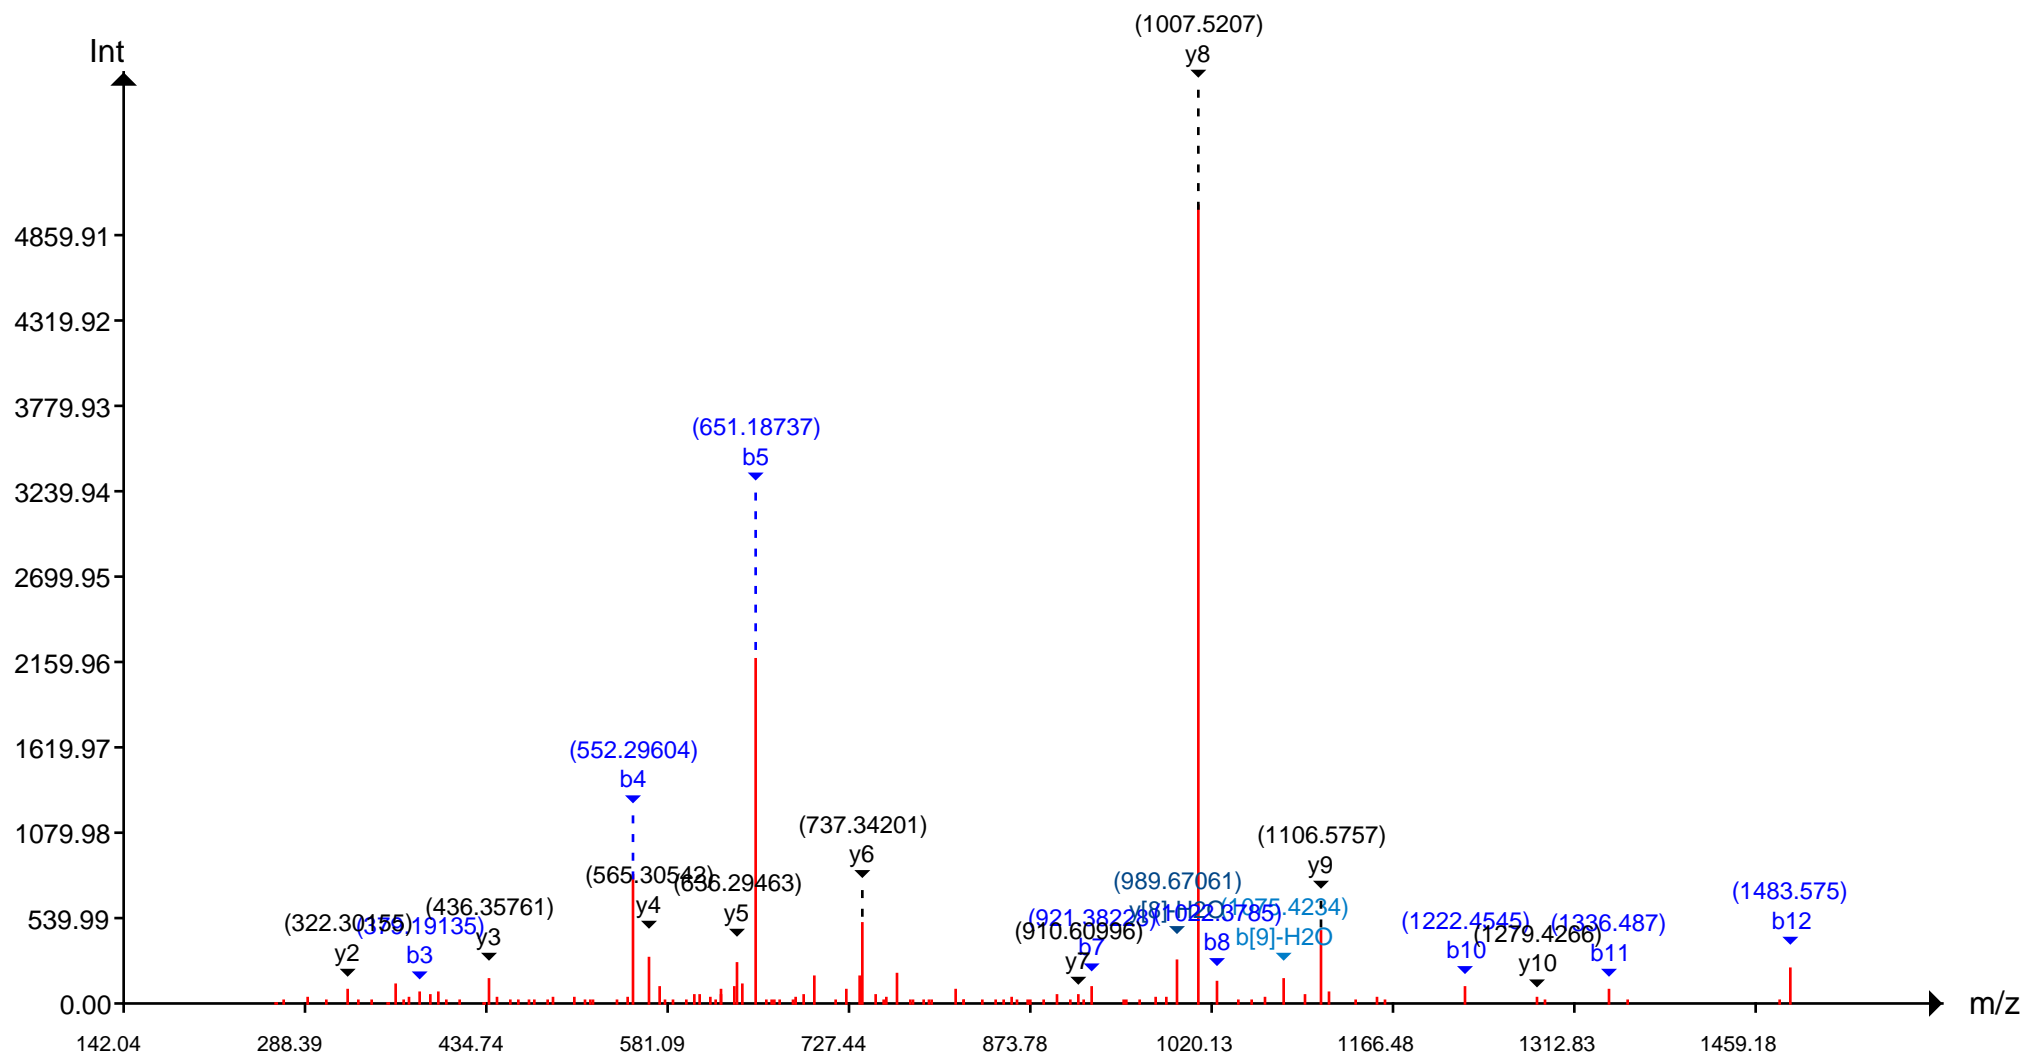

## Info

**Modified Sequence** AcD3-FADK<AcD3K\*>VPK<AcD3K\*>TAENFR-COOH

**Ion score** 71.41

**Protein** P17742

**Confidence level** 99.00%

**Precursor m/z** 829.44927

**Identity Threshold** 47.76

**Charge** 2+

**Mass error** 0.001832



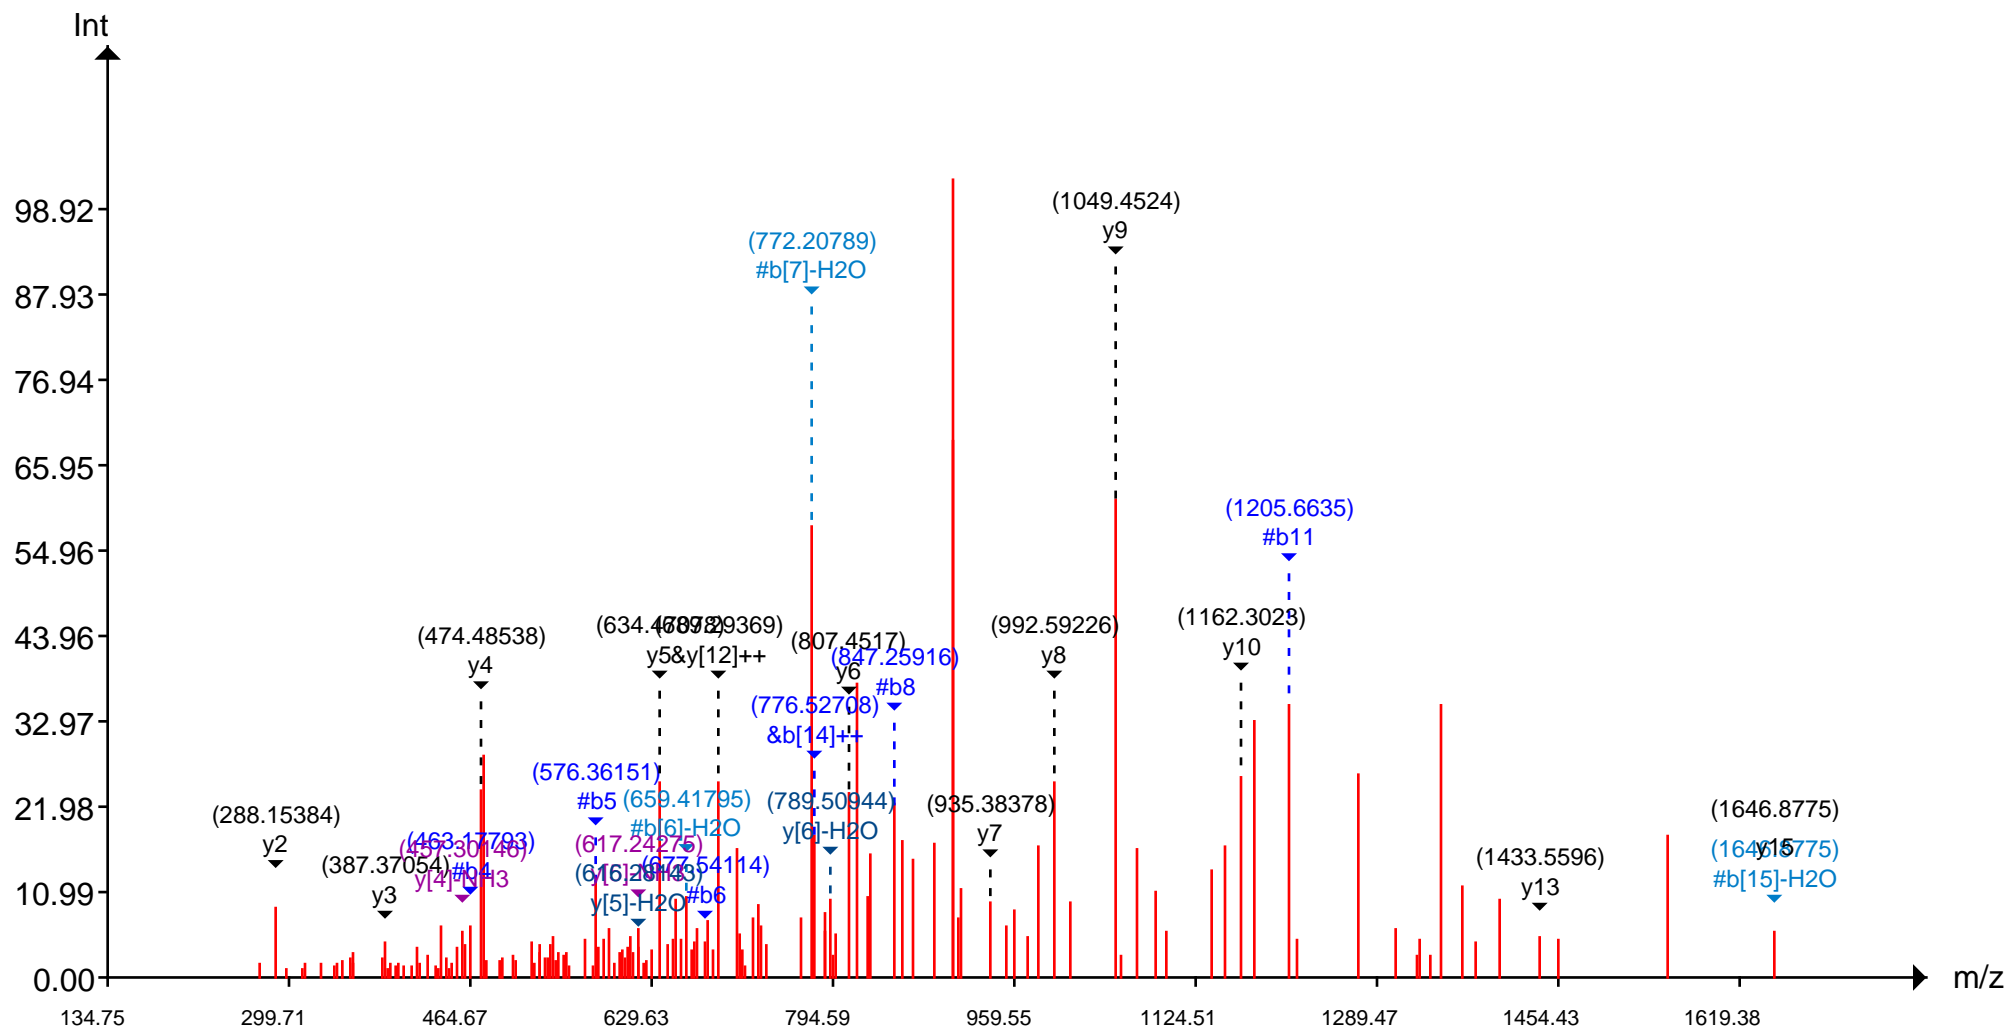

## Info

**Modified Sequence** AcD3-FVNGTLGGQK<AcD3K\*>C<Cmm\*>SVIR-COOH

**Ion score** 53.45

**Protein** P62962

**Confidence level** 99.00%

**Precursor m/z** 920.00711

**Identity Threshold** 47.19

**Charge** 2+

**Mass error** 5.38E-4

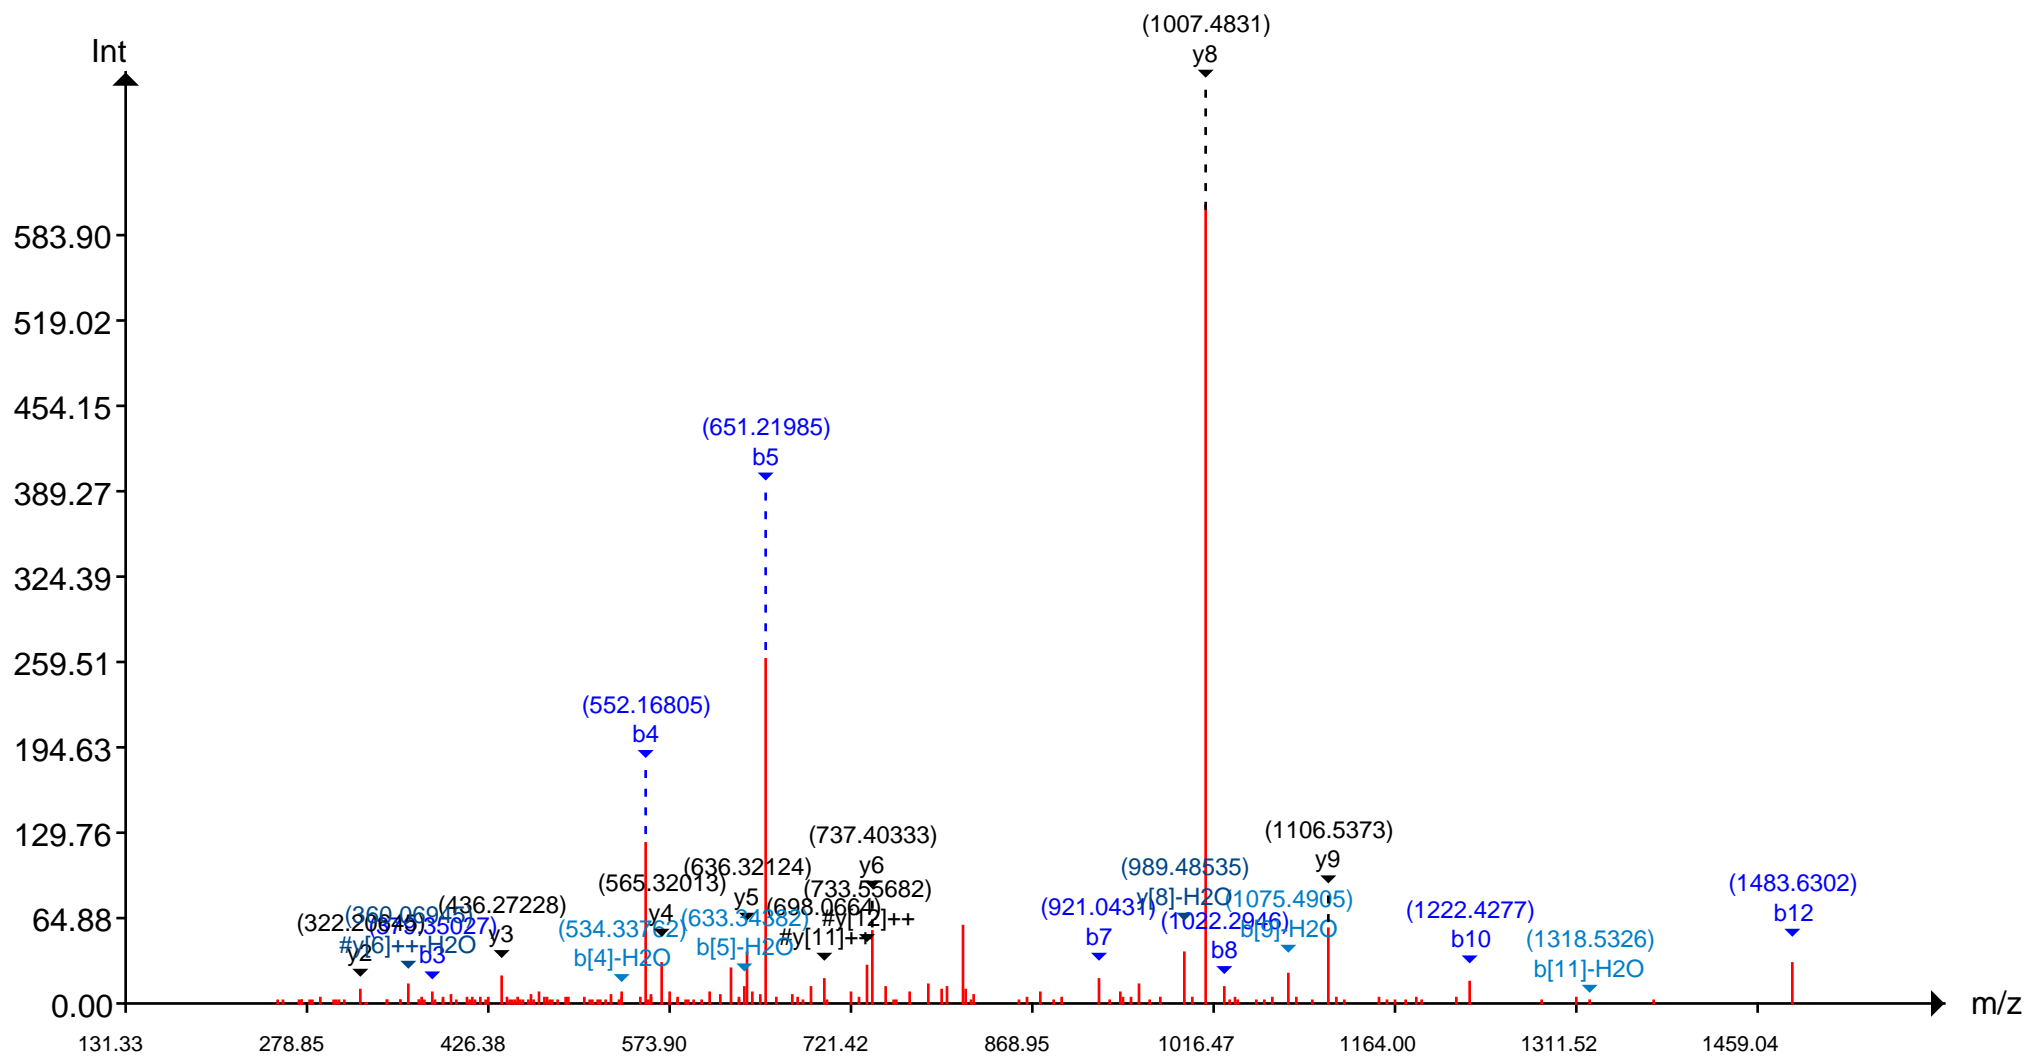

## Info

**Modified Sequence** AcD3-FADK<AcD3K\*>VPK<AcD3K\*>TAENFR-COOH

**Ion score** 49.74

**Protein** P17742

**Confidence level** 99.00%

**Precursor m/z** 829.44925

**Identity Threshold** 47.76

**Charge** 2+

**Mass error** 0.001792

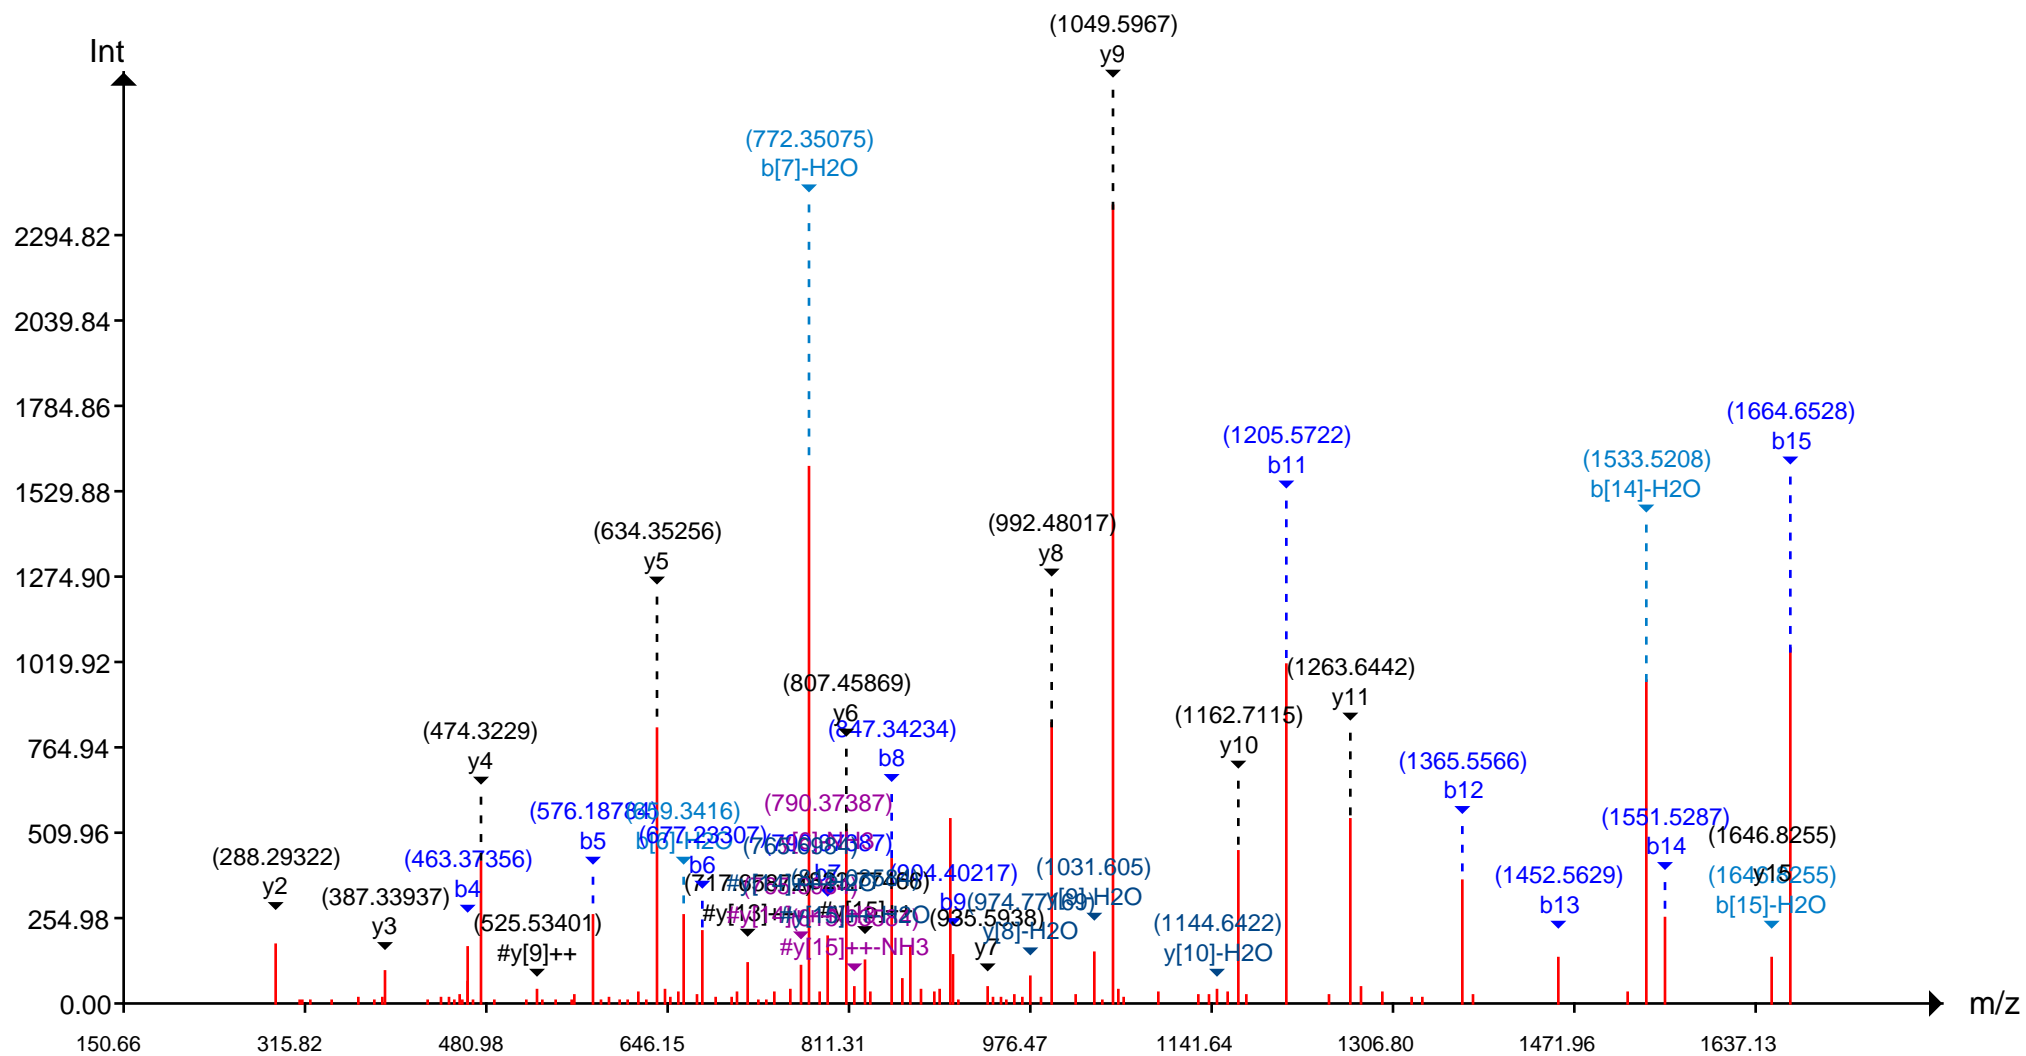

## Info

|                          |                                         |                           |          |
|--------------------------|-----------------------------------------|---------------------------|----------|
| <b>Modified Sequence</b> | AcD3-FVNGTLGGQK<AcD3K*>C<Cmm*>SVIR-COOH | <b>Ion score</b>          | 119.01   |
| <b>Protein</b>           | P62962                                  | <b>Confidence level</b>   | 99.00%   |
| <b>Precursor m/z</b>     | 920.00767                               | <b>Identity Threshold</b> | 47.18    |
| <b>Charge</b>            | 2+                                      | <b>Mass error</b>         | 0.001658 |

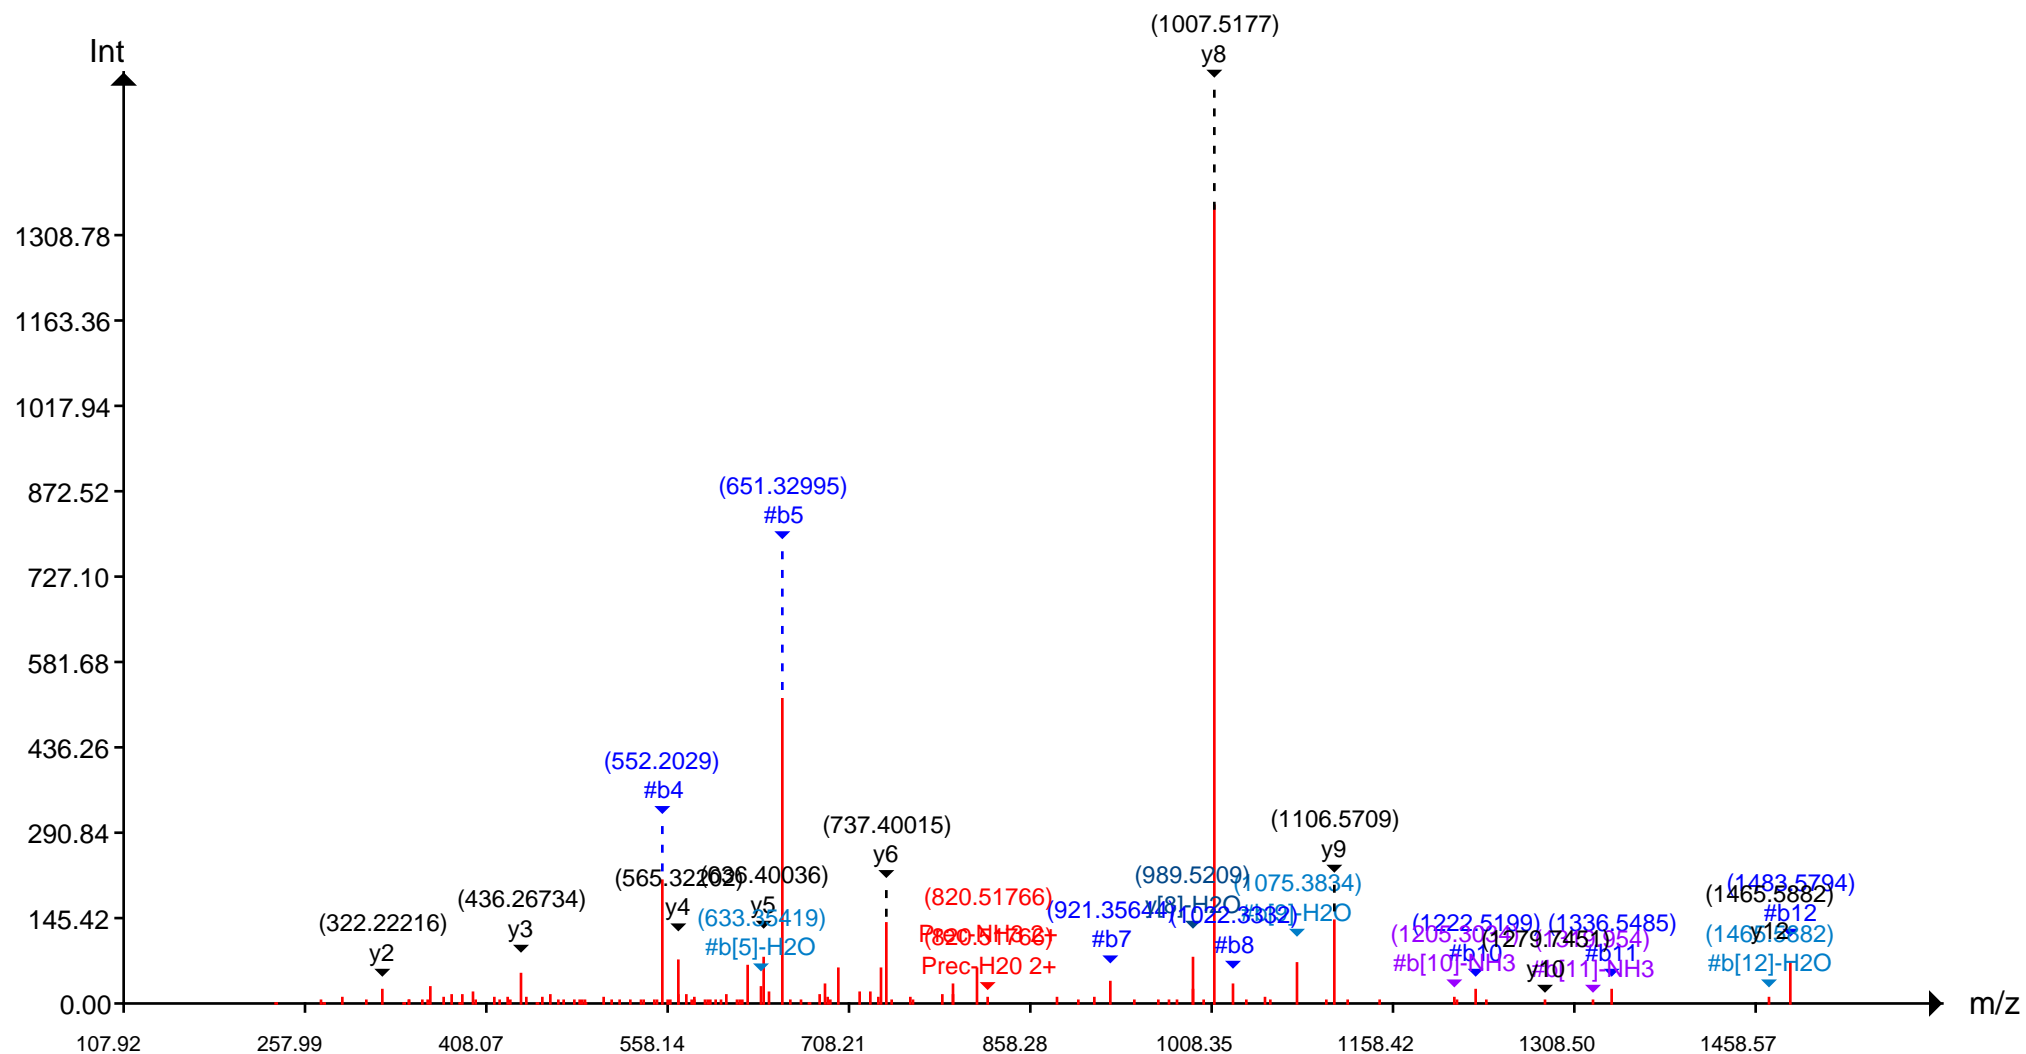

## Info

|                          |                                         |                           |          |
|--------------------------|-----------------------------------------|---------------------------|----------|
| <b>Modified Sequence</b> | AcD3-FADK<AcD3K*>VPK<AcD3K*>TAENFR-COOH | <b>Ion score</b>          | 80.58    |
| <b>Protein</b>           | P17742                                  | <b>Confidence level</b>   | 99.00%   |
| <b>Precursor m/z</b>     | 829.44922                               | <b>Identity Threshold</b> | 47.76    |
| <b>Charge</b>            | 2+                                      | <b>Mass error</b>         | 0.001732 |

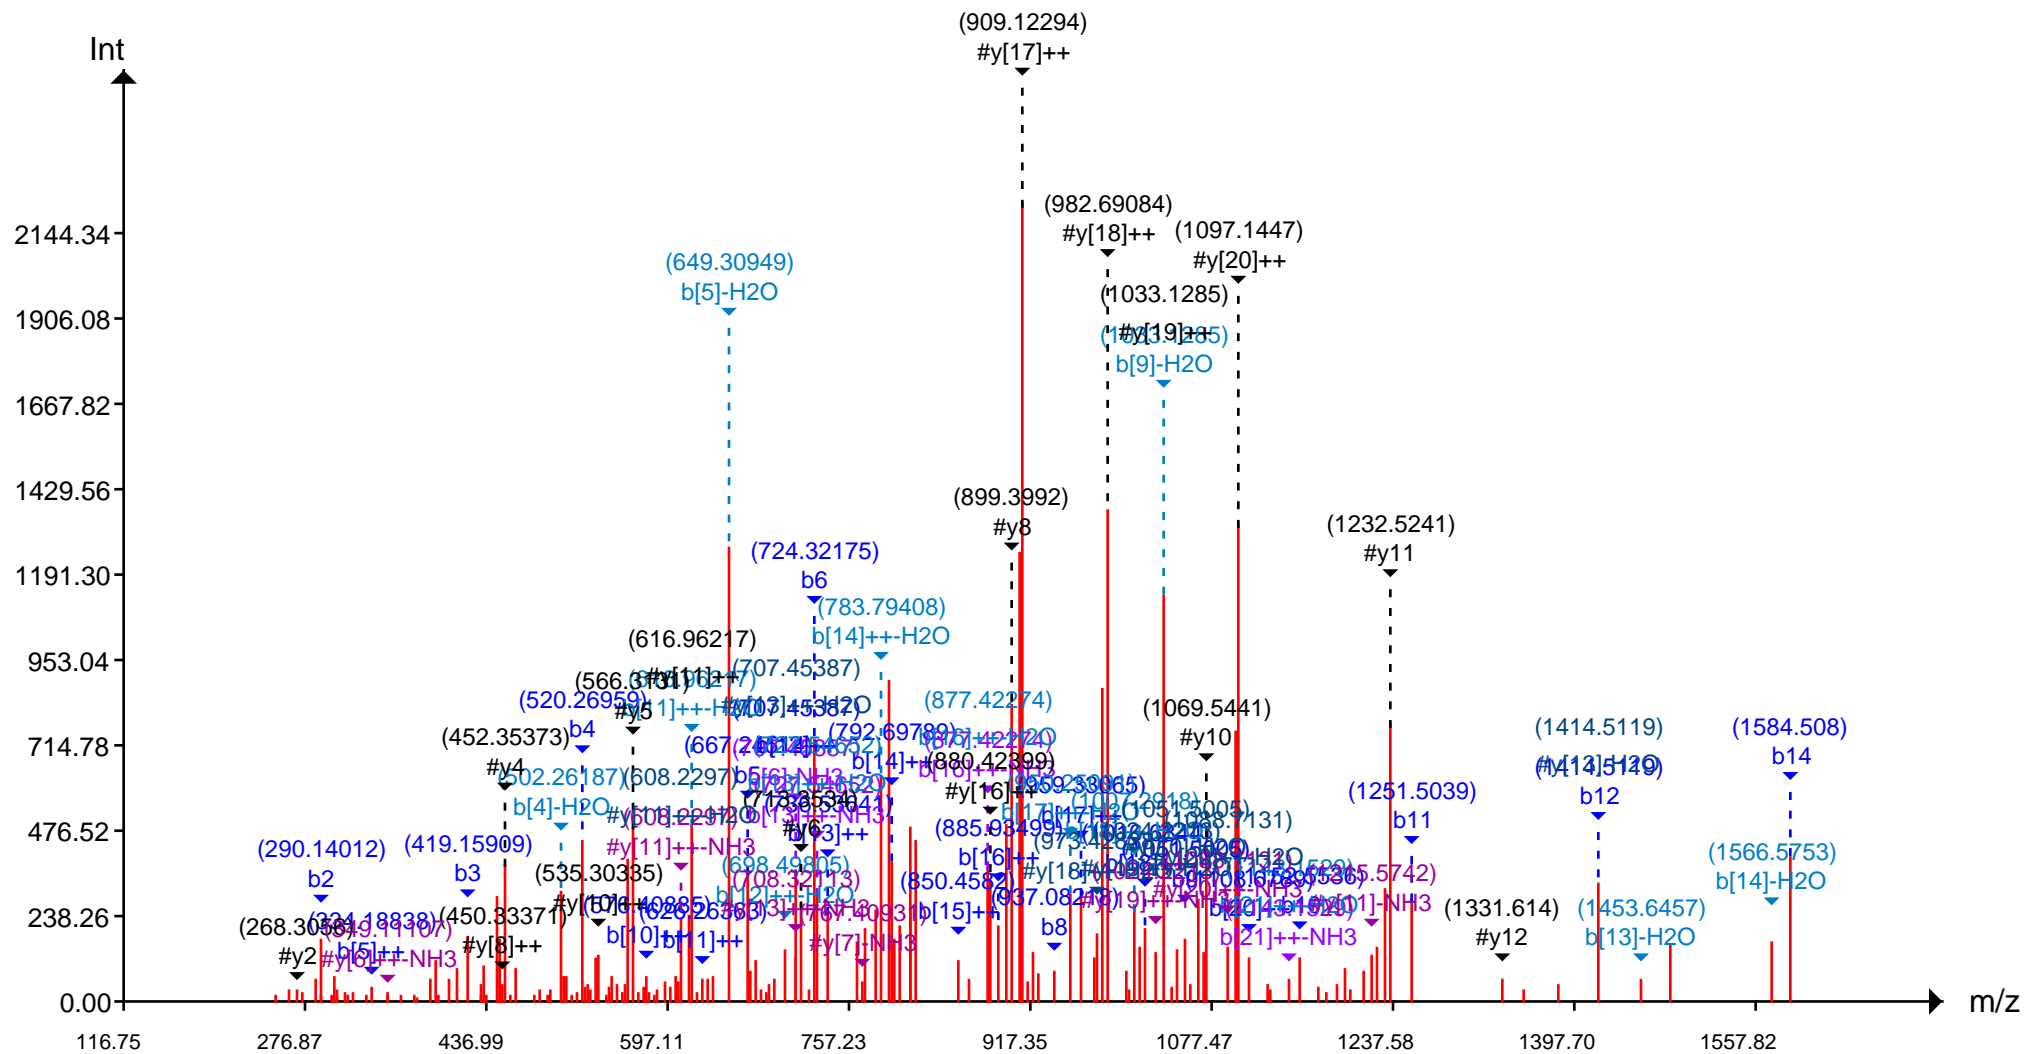

## Info

|                          |                                                       |                           |          |
|--------------------------|-------------------------------------------------------|---------------------------|----------|
| <b>Modified Sequence</b> | AcD3-AK<AcD3K*>ETFGVNN TVY GIDAM<Mox*>NPSSR<C13>-COOH | <b>Ion score</b>          | 62.26    |
| <b>Protein</b>           | Q66JS6                                                | <b>Confidence level</b>   | 99.00%   |
| <b>Precursor m/z</b>     | 828.40842                                             | <b>Identity Threshold</b> | 47.12    |
| <b>Charge</b>            | 3+                                                    | <b>Mass error</b>         | 0.002184 |

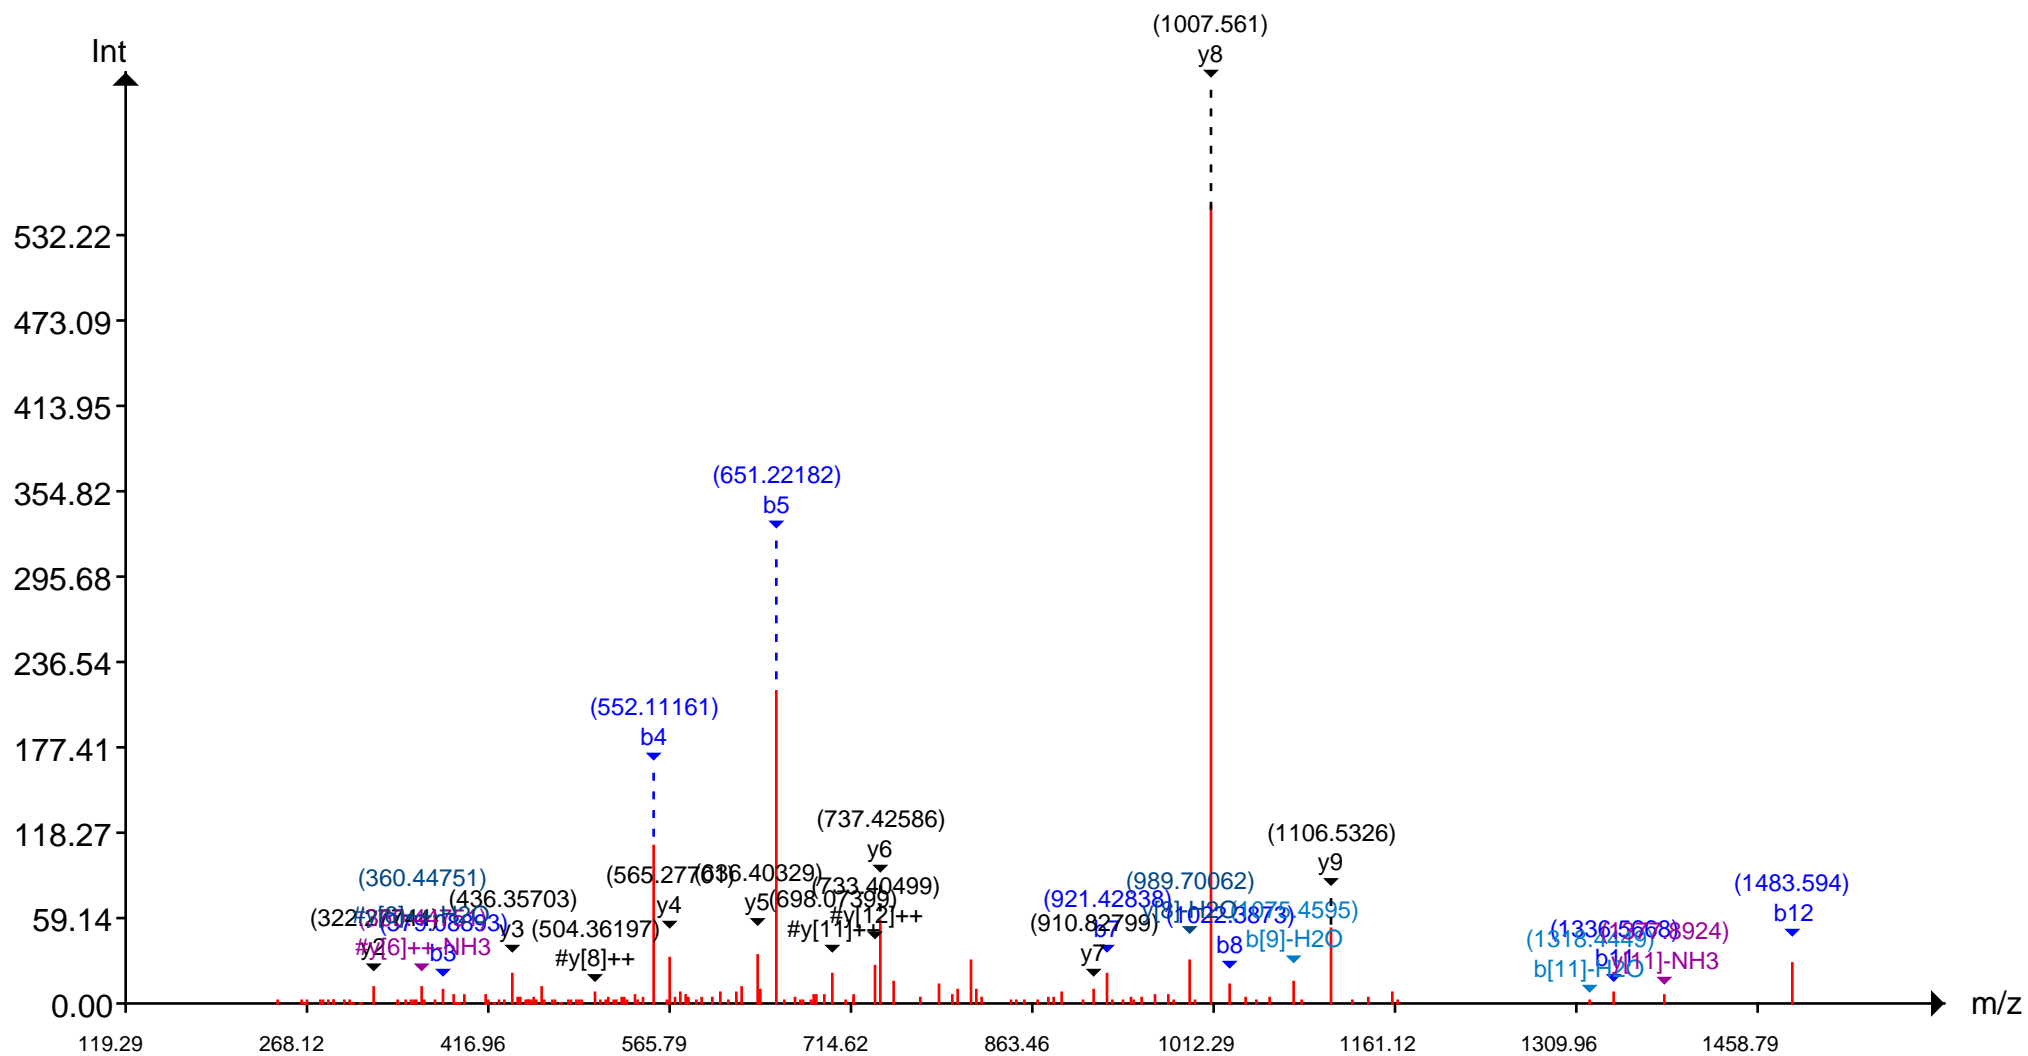

## Info

**Modified Sequence** AcD3-FADK<AcD3K\*>VPK<AcD3K\*>TAENFR-COOH

**Ion score** 62.37

**Protein** P17742

**Confidence level** 99.00%

**Precursor m/z** 829.44941

**Identity Threshold** 47.78

**Charge** 2+

**Mass error** 0.002112

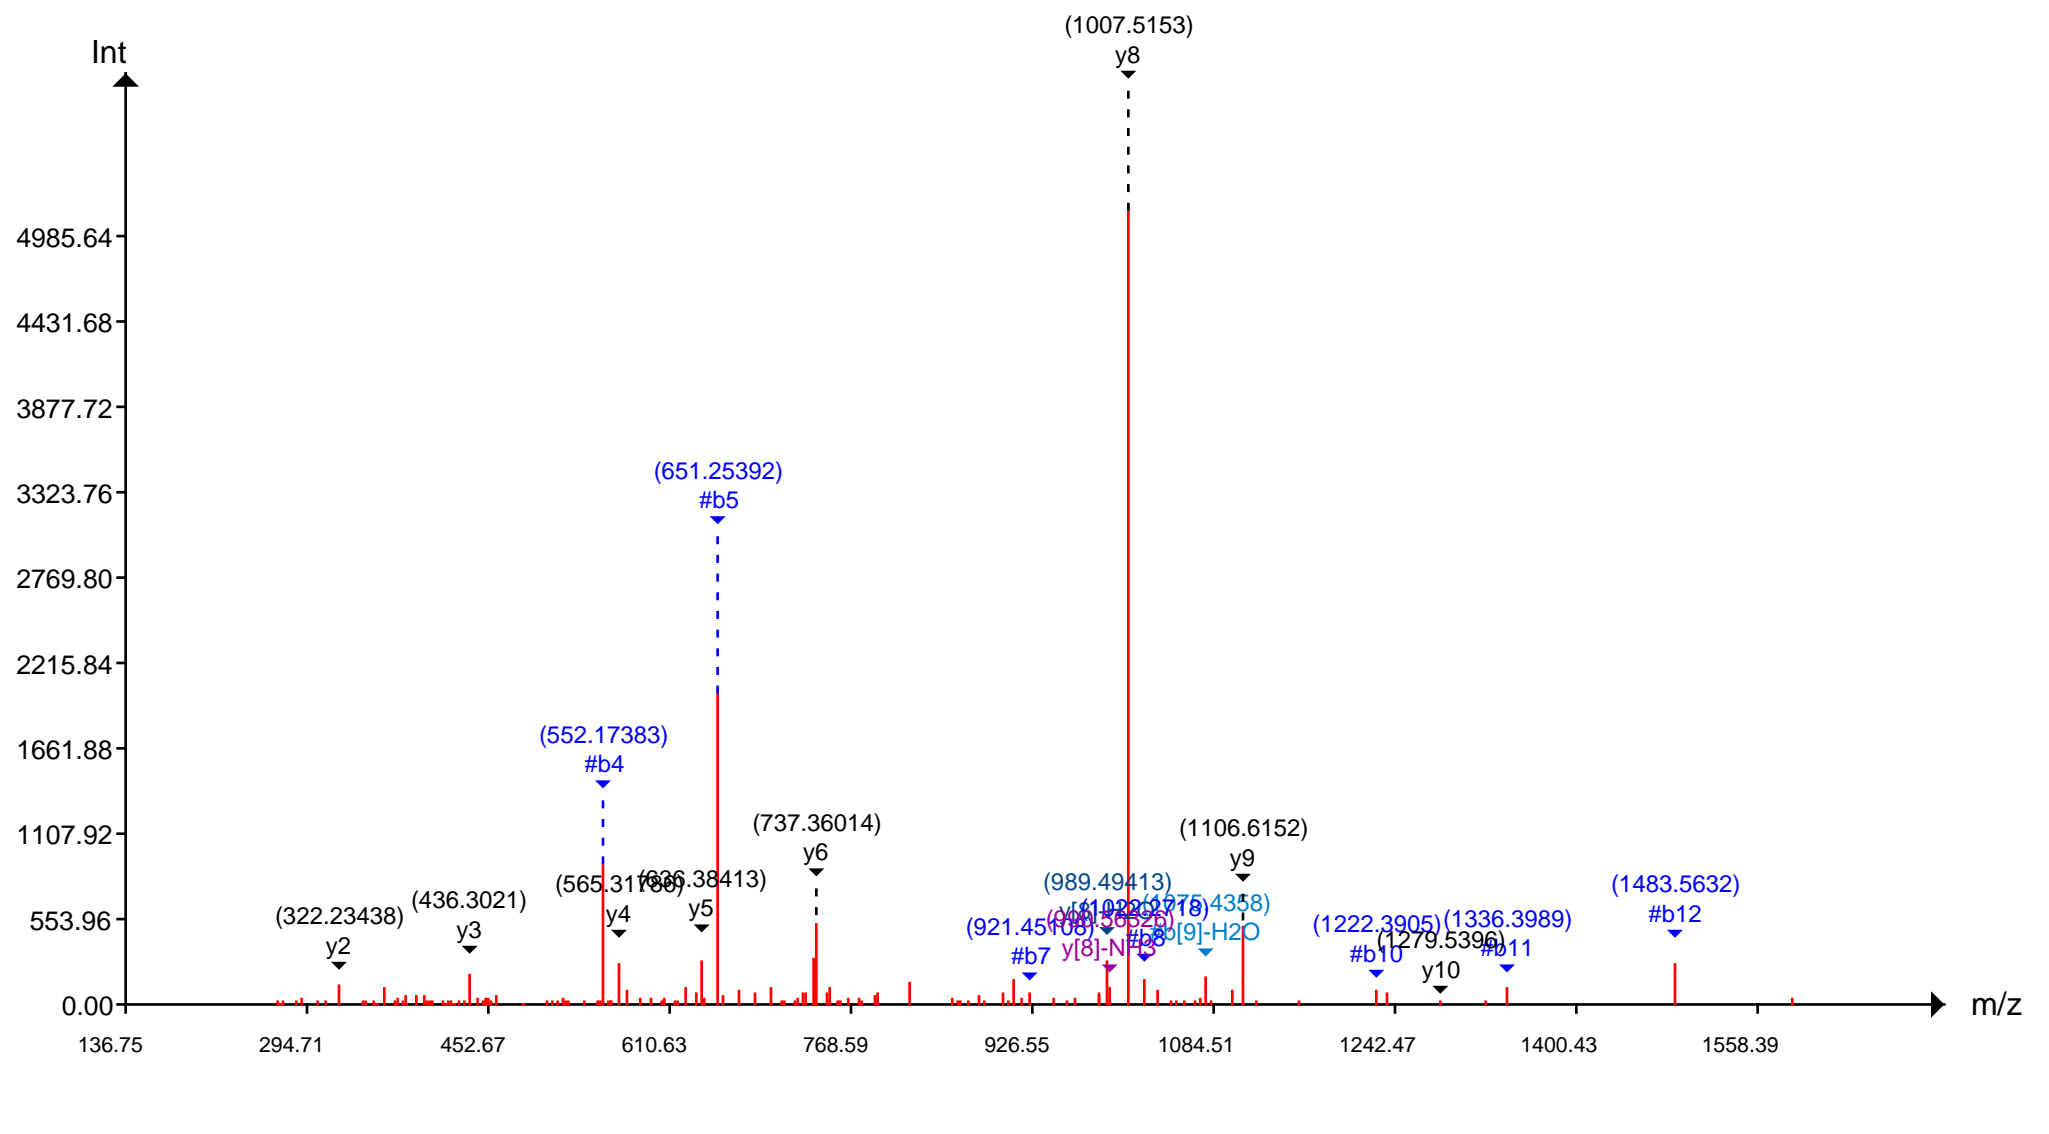

| Info                     |                                         |                           |          |
|--------------------------|-----------------------------------------|---------------------------|----------|
| <b>Modified Sequence</b> | AcD3-FADK<AcD3K*>VPK<AcD3K*>TAENFR-COOH | <b>Ion score</b>          | 62.77    |
| <b>Protein</b>           | P17742                                  | <b>Confidence level</b>   | 99.00%   |
| <b>Precursor m/z</b>     | 829.44961                               | <b>Identity Threshold</b> | 47.77    |
| <b>Charge</b>            | 2+                                      | <b>Mass error</b>         | 0.002512 |

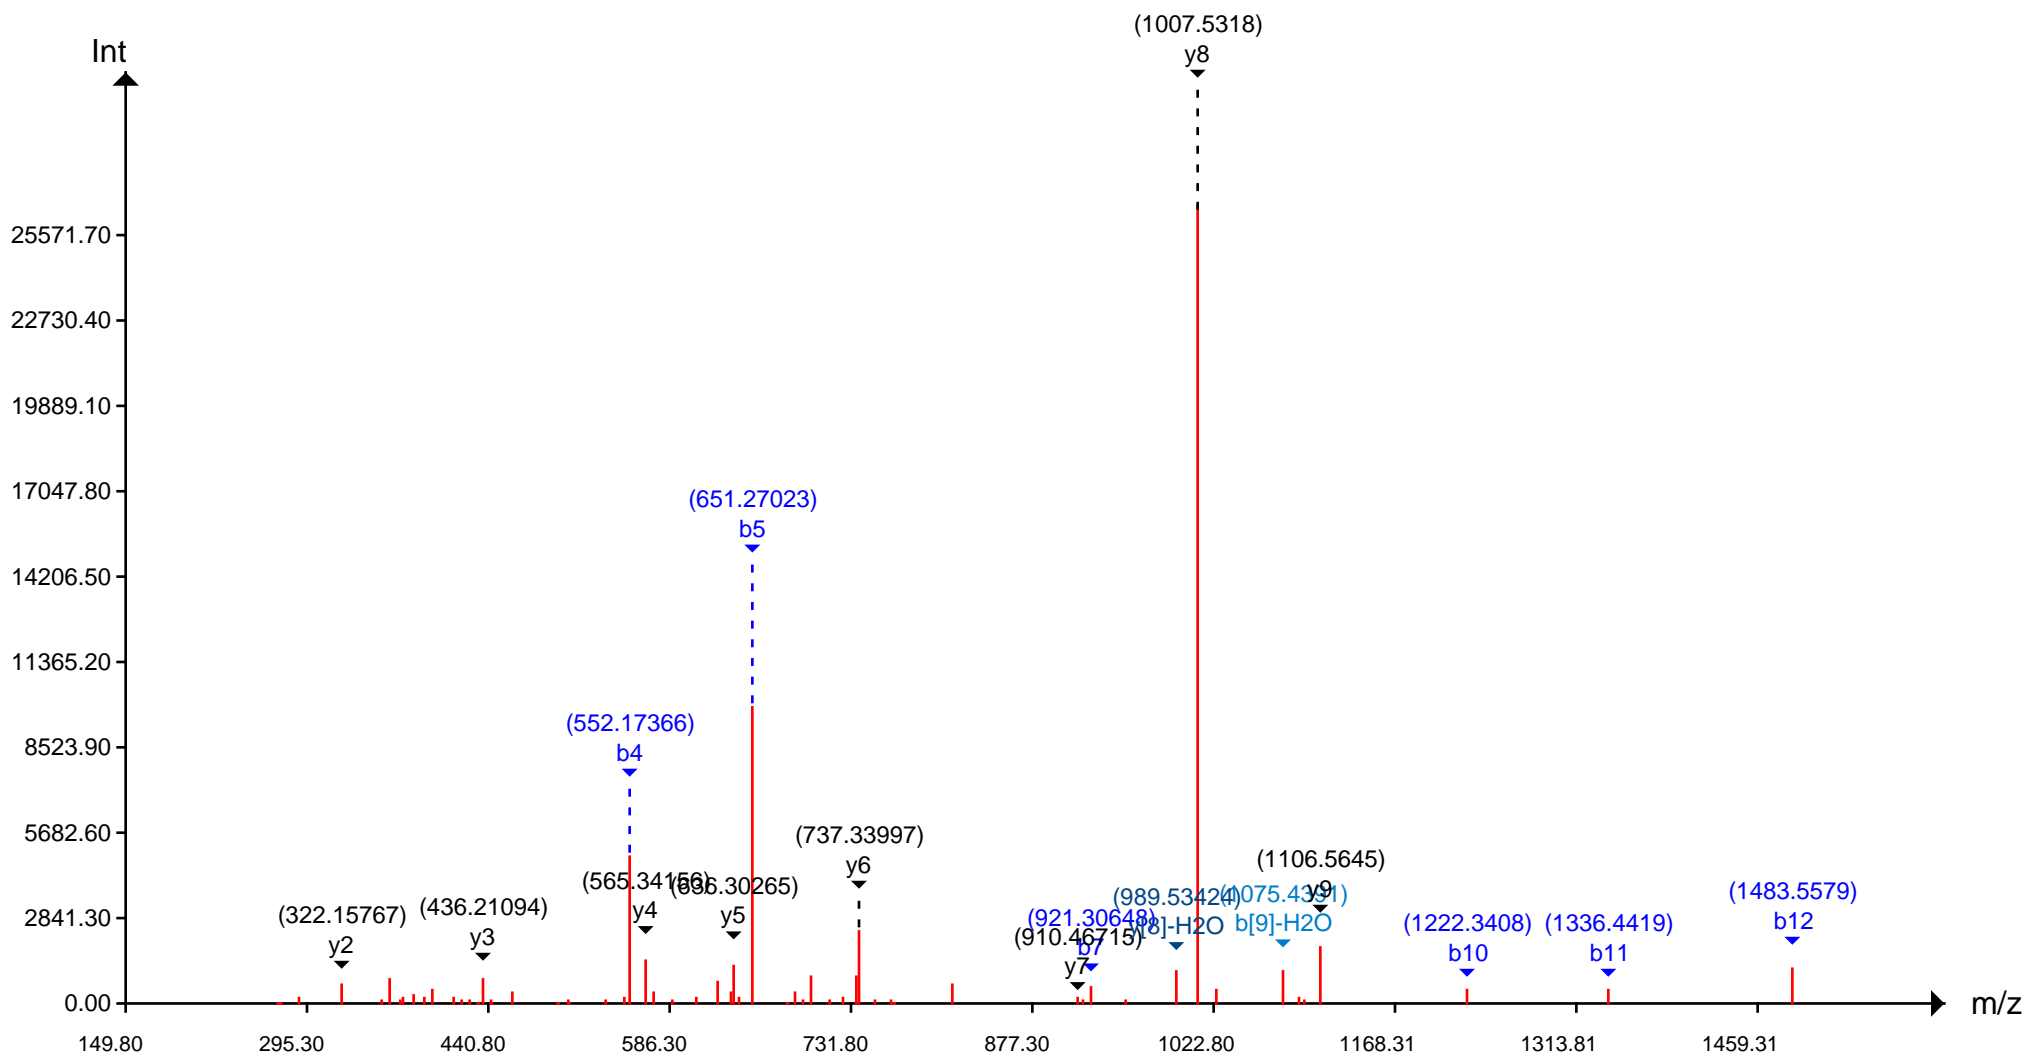

## Info

|                          |                                         |                           |          |
|--------------------------|-----------------------------------------|---------------------------|----------|
| <b>Modified Sequence</b> | AcD3-FADK<AcD3K*>VPK<AcD3K*>TAENFR-COOH | <b>Ion score</b>          | 80.34    |
| <b>Protein</b>           | P17742                                  | <b>Confidence level</b>   | 99.00%   |
| <b>Precursor m/z</b>     | 829.44946                               | <b>Identity Threshold</b> | 47.78    |
| <b>Charge</b>            | 2+                                      | <b>Mass error</b>         | 0.002212 |



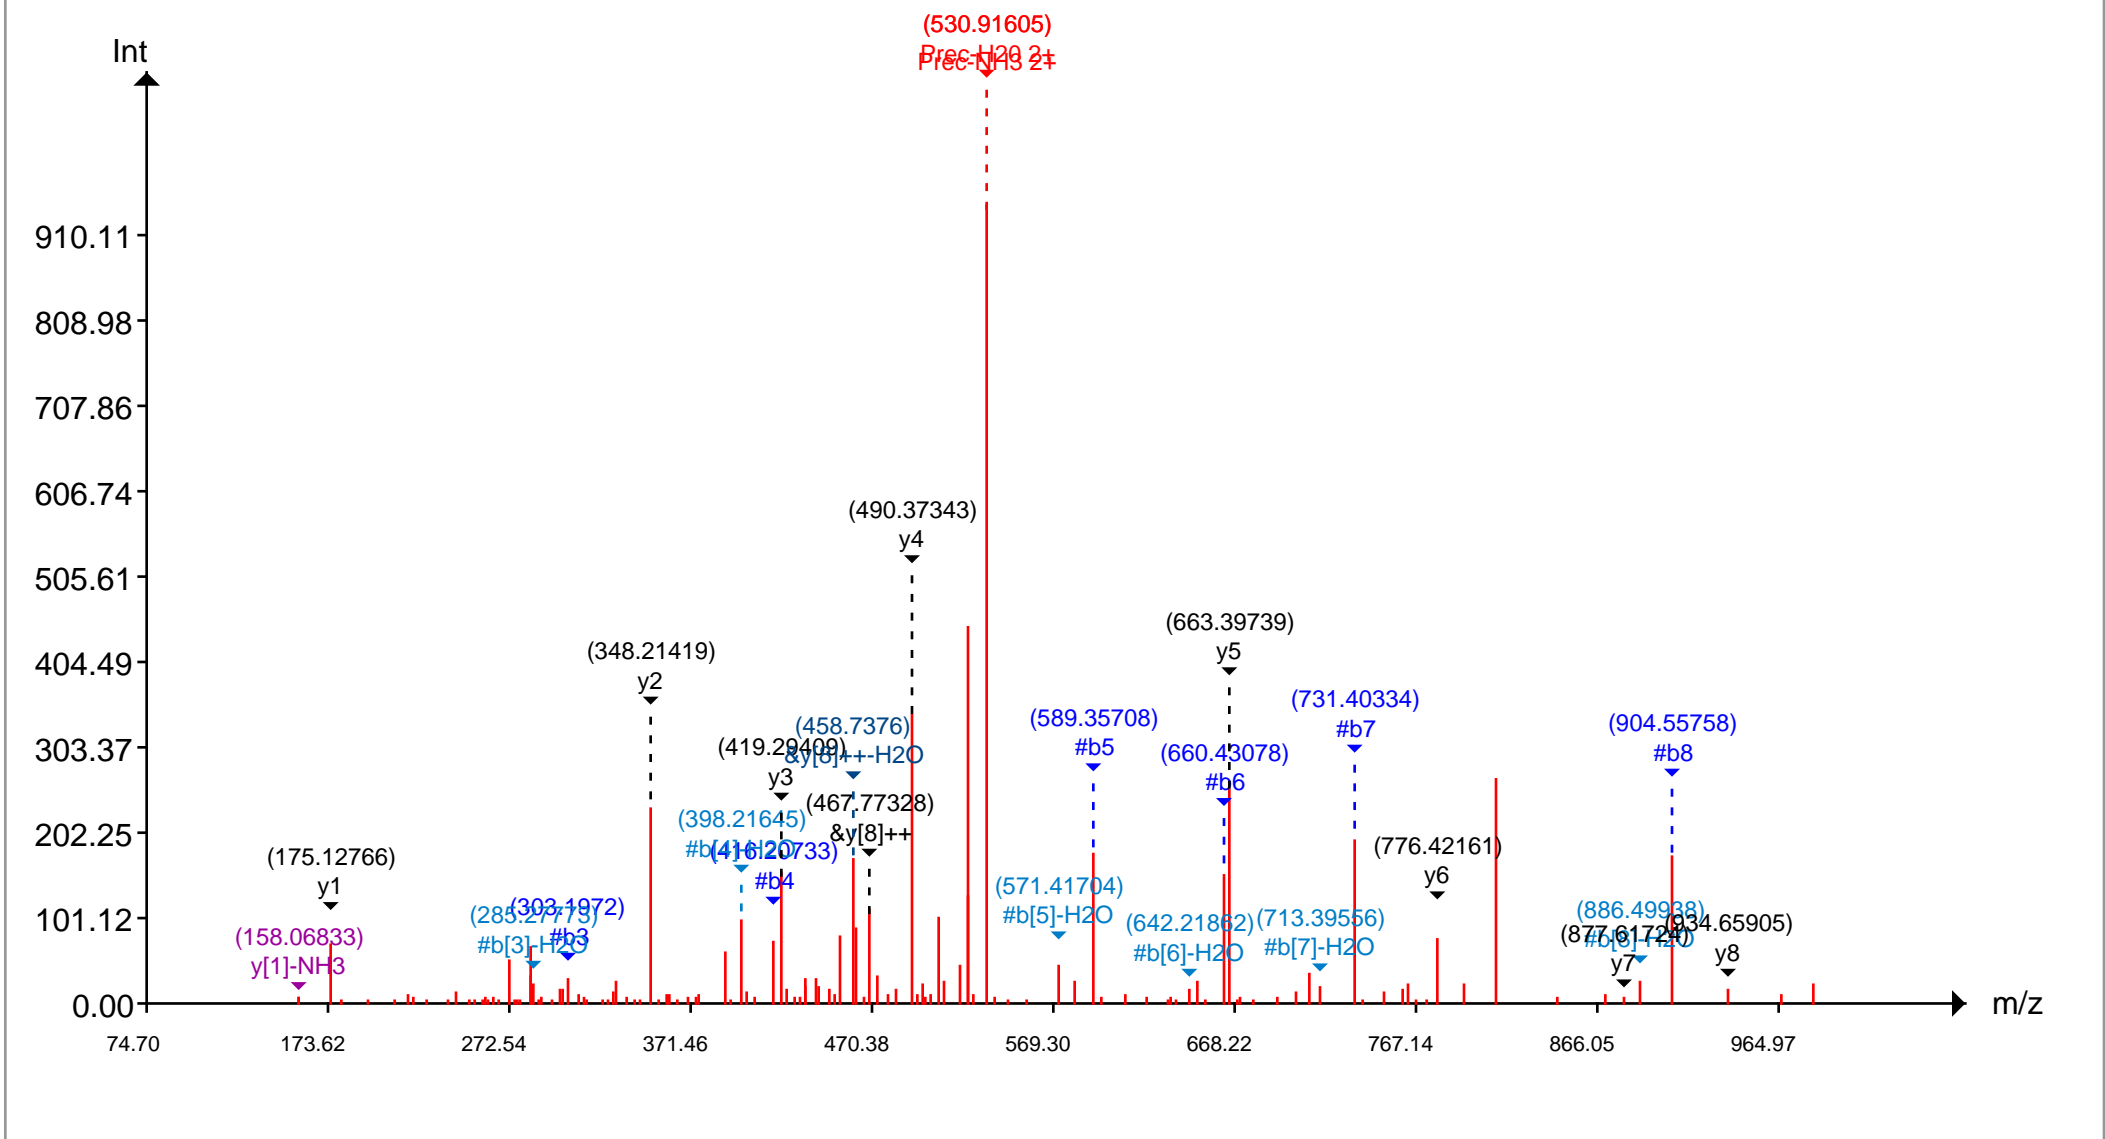

## Info

**Modified Sequence** AcD3-VGTLK<AcD3K\*>AAK<AcD3K\*>R-COOH

**Ion score** 52.82

**Protein** Q4KML4

**Confidence level** 99.00%

**Precursor m/z** 539.8502

**Identity Threshold** 39.67

**Charge** 2+

**Mass error** 2.25E-4

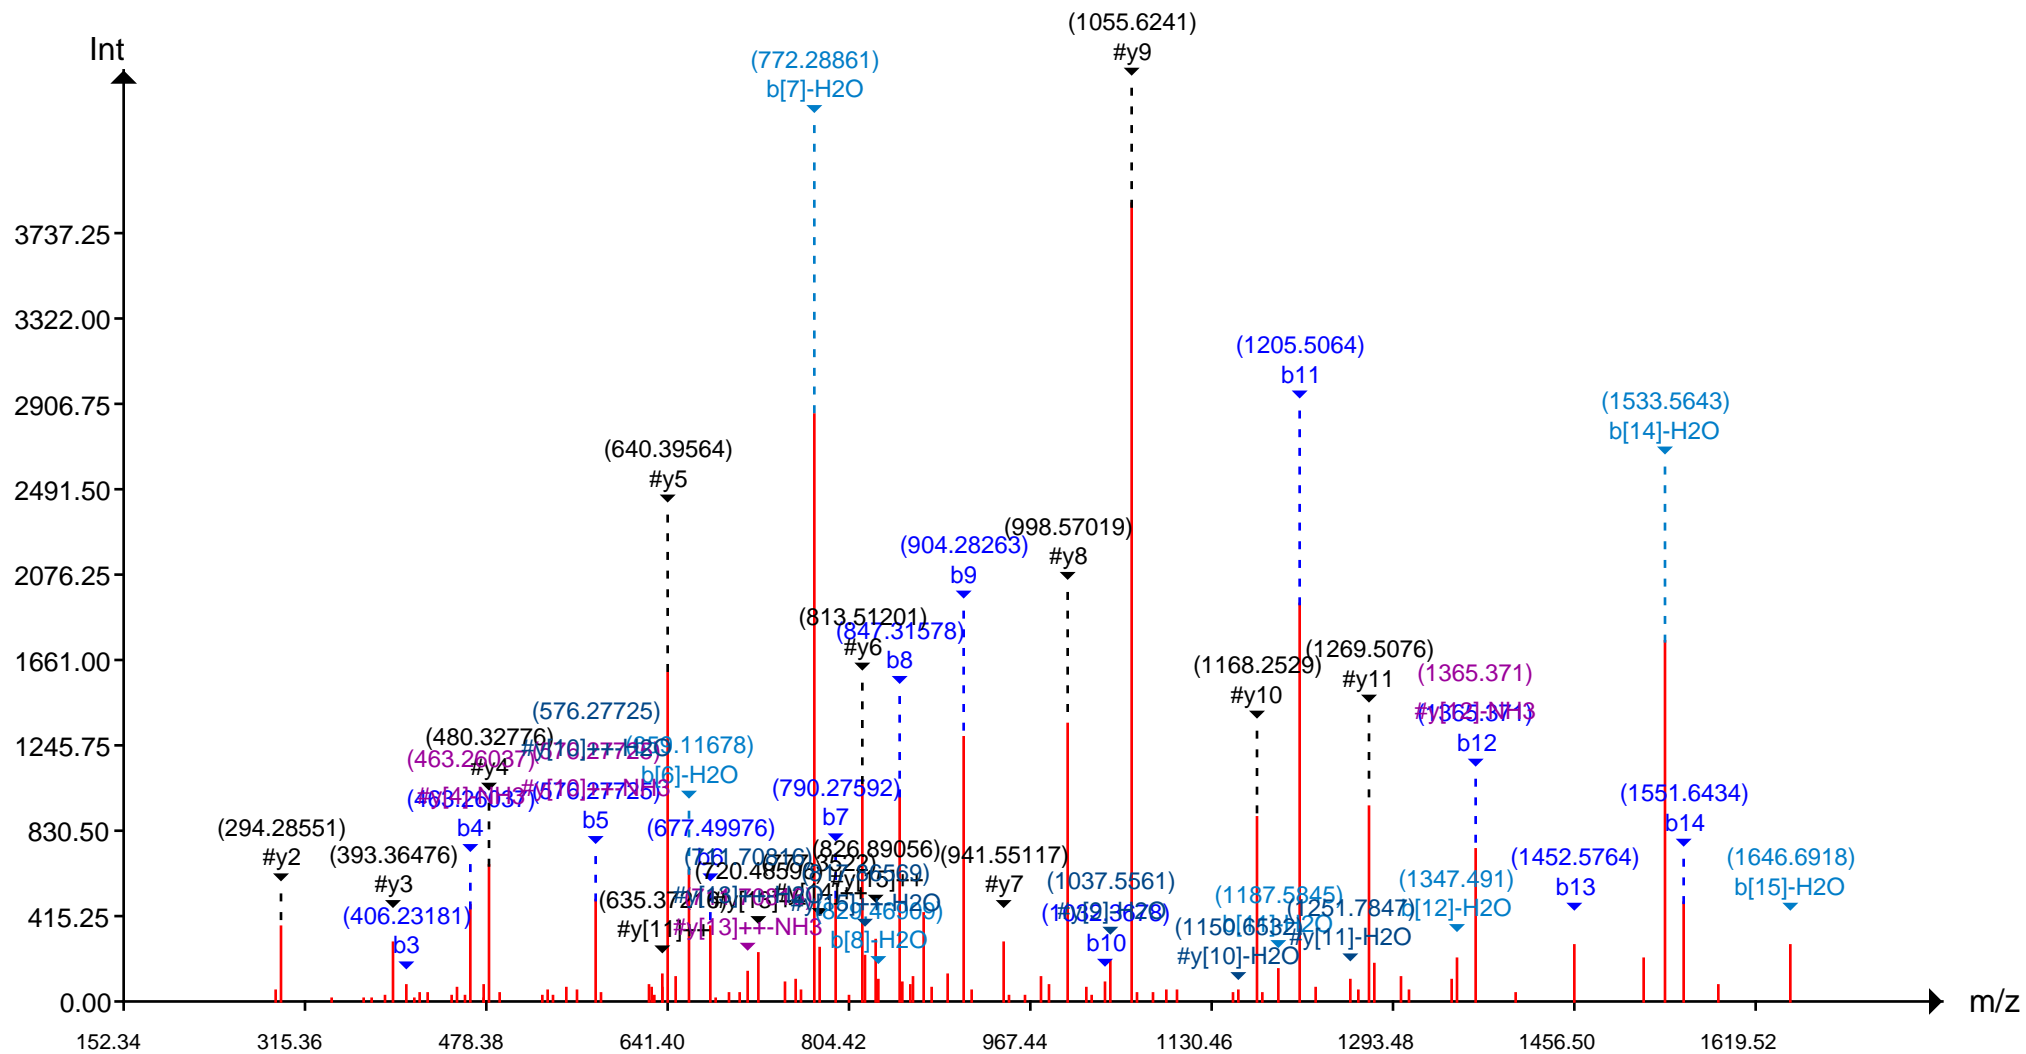

## Info

|                          |                                              |                           |          |
|--------------------------|----------------------------------------------|---------------------------|----------|
| <b>Modified Sequence</b> | AcD3-FVNGTLGGQK<AcD3K*>C<Cmm*>SVIR<C13>-COOH | <b>Ion score</b>          | 92.92    |
| <b>Protein</b>           | P62962                                       | <b>Confidence level</b>   | 99.00%   |
| <b>Precursor m/z</b>     | 923.01772                                    | <b>Identity Threshold</b> | 46.68    |
| <b>Charge</b>            | 2+                                           | <b>Mass error</b>         | 0.001616 |

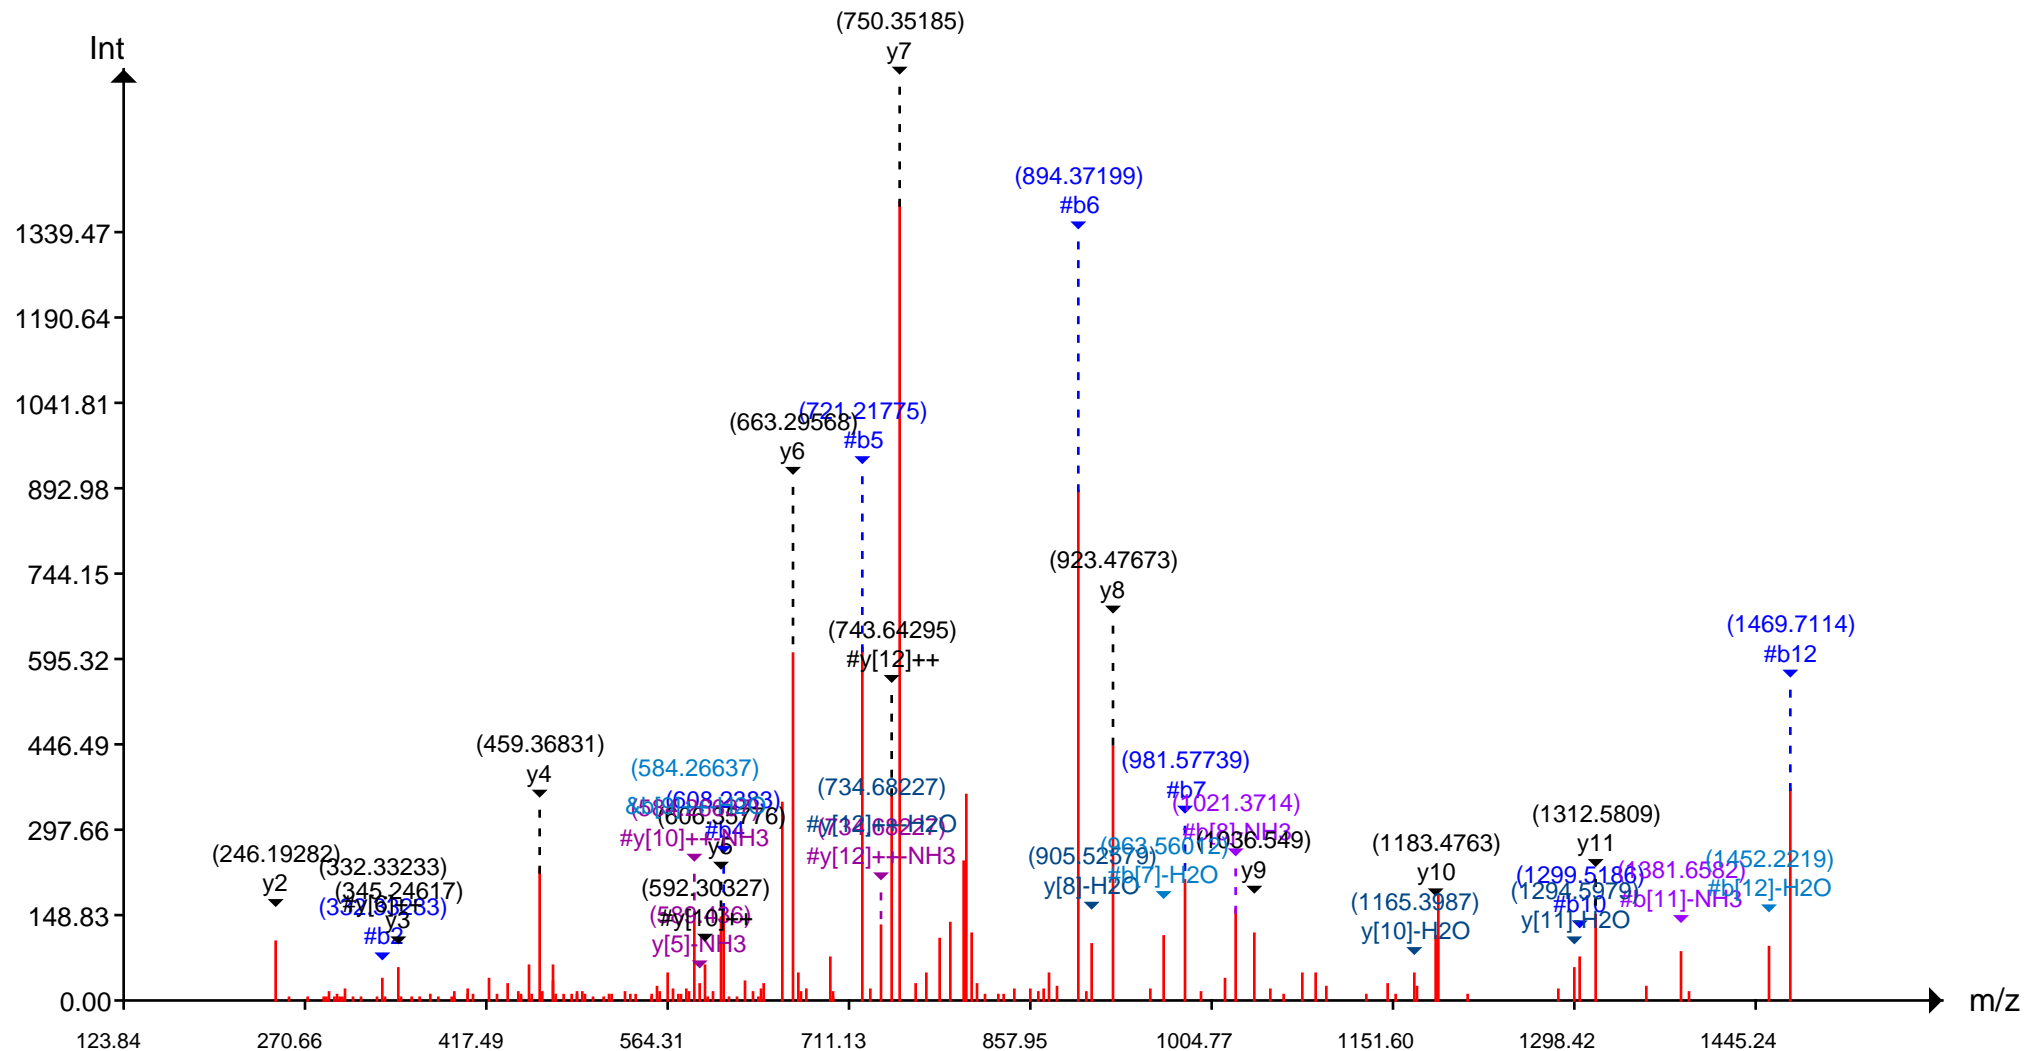

## Info

|                          |                                                     |                           |          |
|--------------------------|-----------------------------------------------------|---------------------------|----------|
| <b>Modified Sequence</b> | AcD3-LK<AcD3K*>EM<Mox*>IK<AcD3K*>SGM<Mox*>NVAR-COOH | <b>Ion score</b>          | 75.48    |
| <b>Protein</b>           | P52480                                              | <b>Confidence level</b>   | 99.00%   |
| <b>Precursor m/z</b>     | 822.44483                                           | <b>Identity Threshold</b> | 47.89    |
| <b>Charge</b>            | 2+                                                  | <b>Mass error</b>         | 0.001878 |

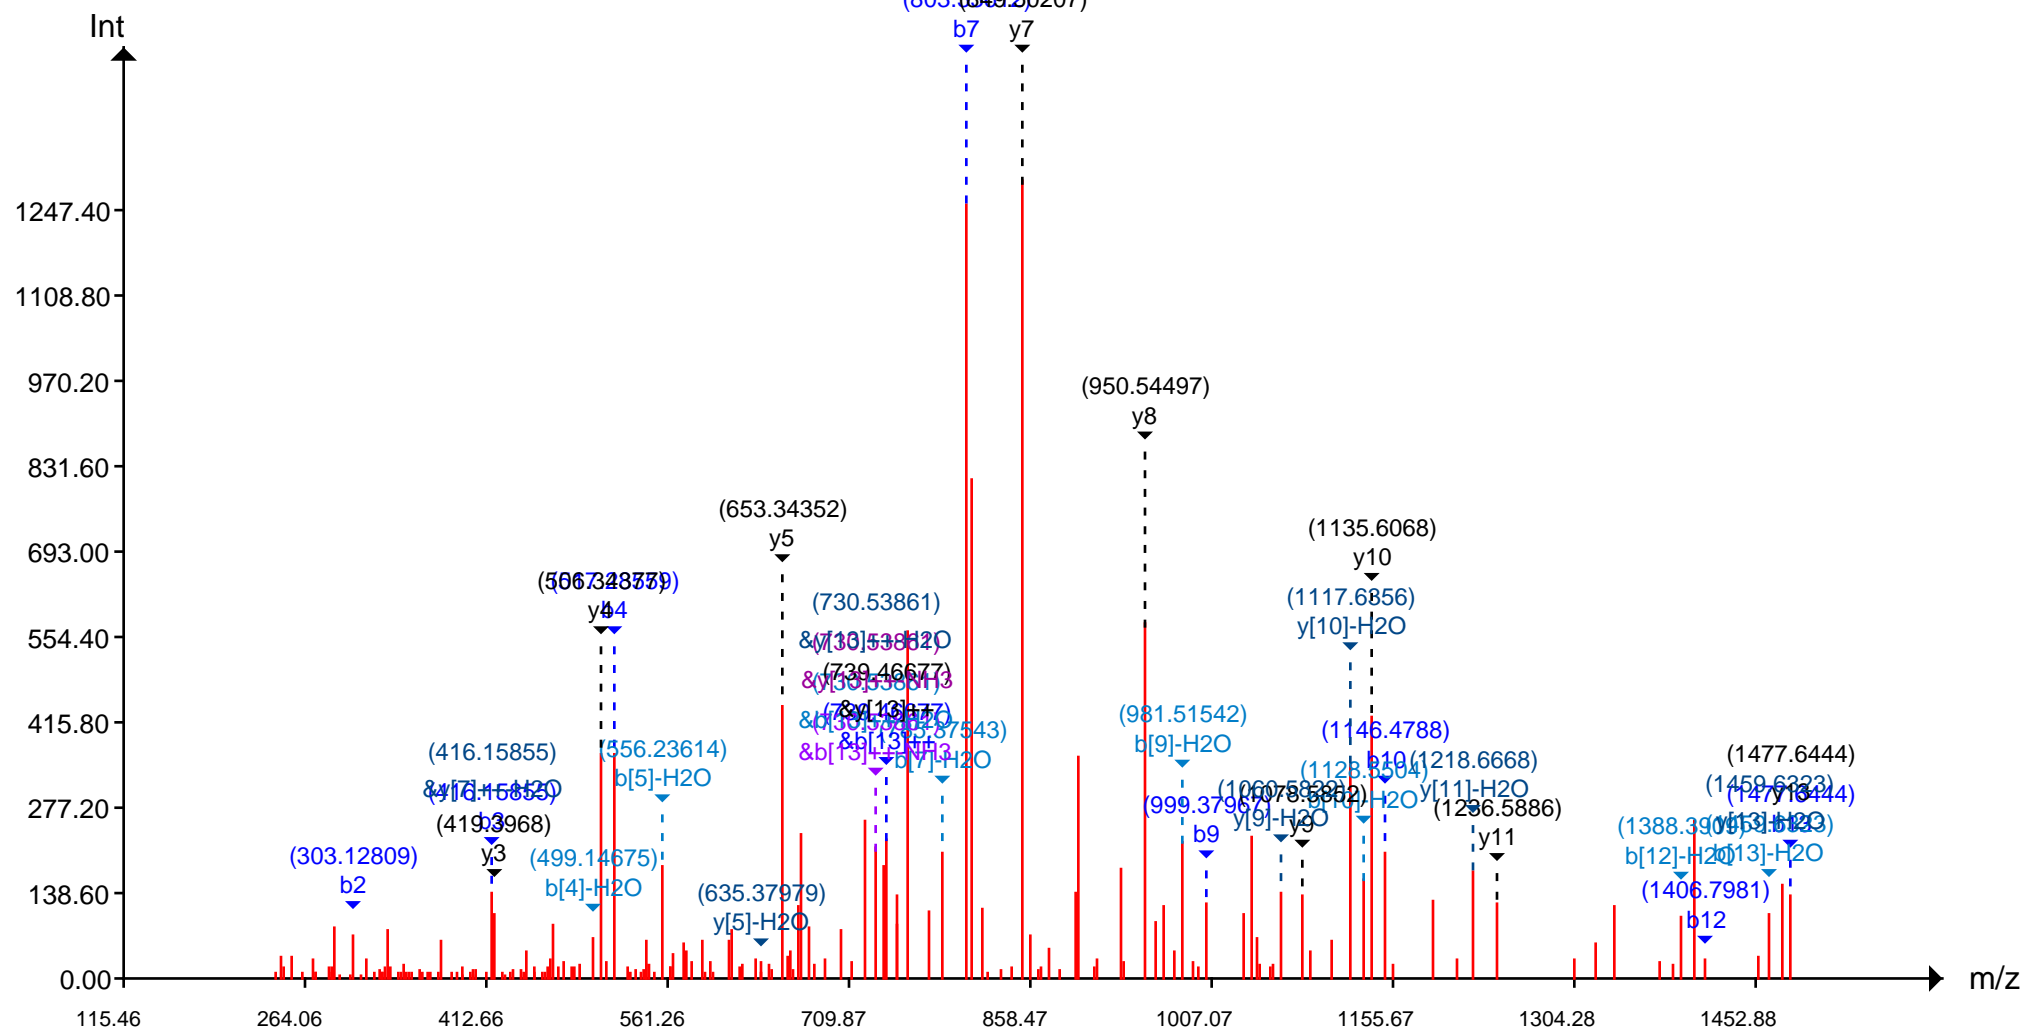

## Info

|                          |                                  |                           |          |
|--------------------------|----------------------------------|---------------------------|----------|
| <b>Modified Sequence</b> | AcD3-EQLTGQTPVFSK<AcD3K*>AR-COOH | <b>Ion score</b>          | 48.33    |
| <b>Protein</b>           | Q9CXW4                           | <b>Confidence level</b>   | 99.00%   |
| <b>Precursor m/z</b>     | 826.4507                         | <b>Identity Threshold</b> | 47.65    |
| <b>Charge</b>            | 2+                               | <b>Mass error</b>         | 0.002052 |

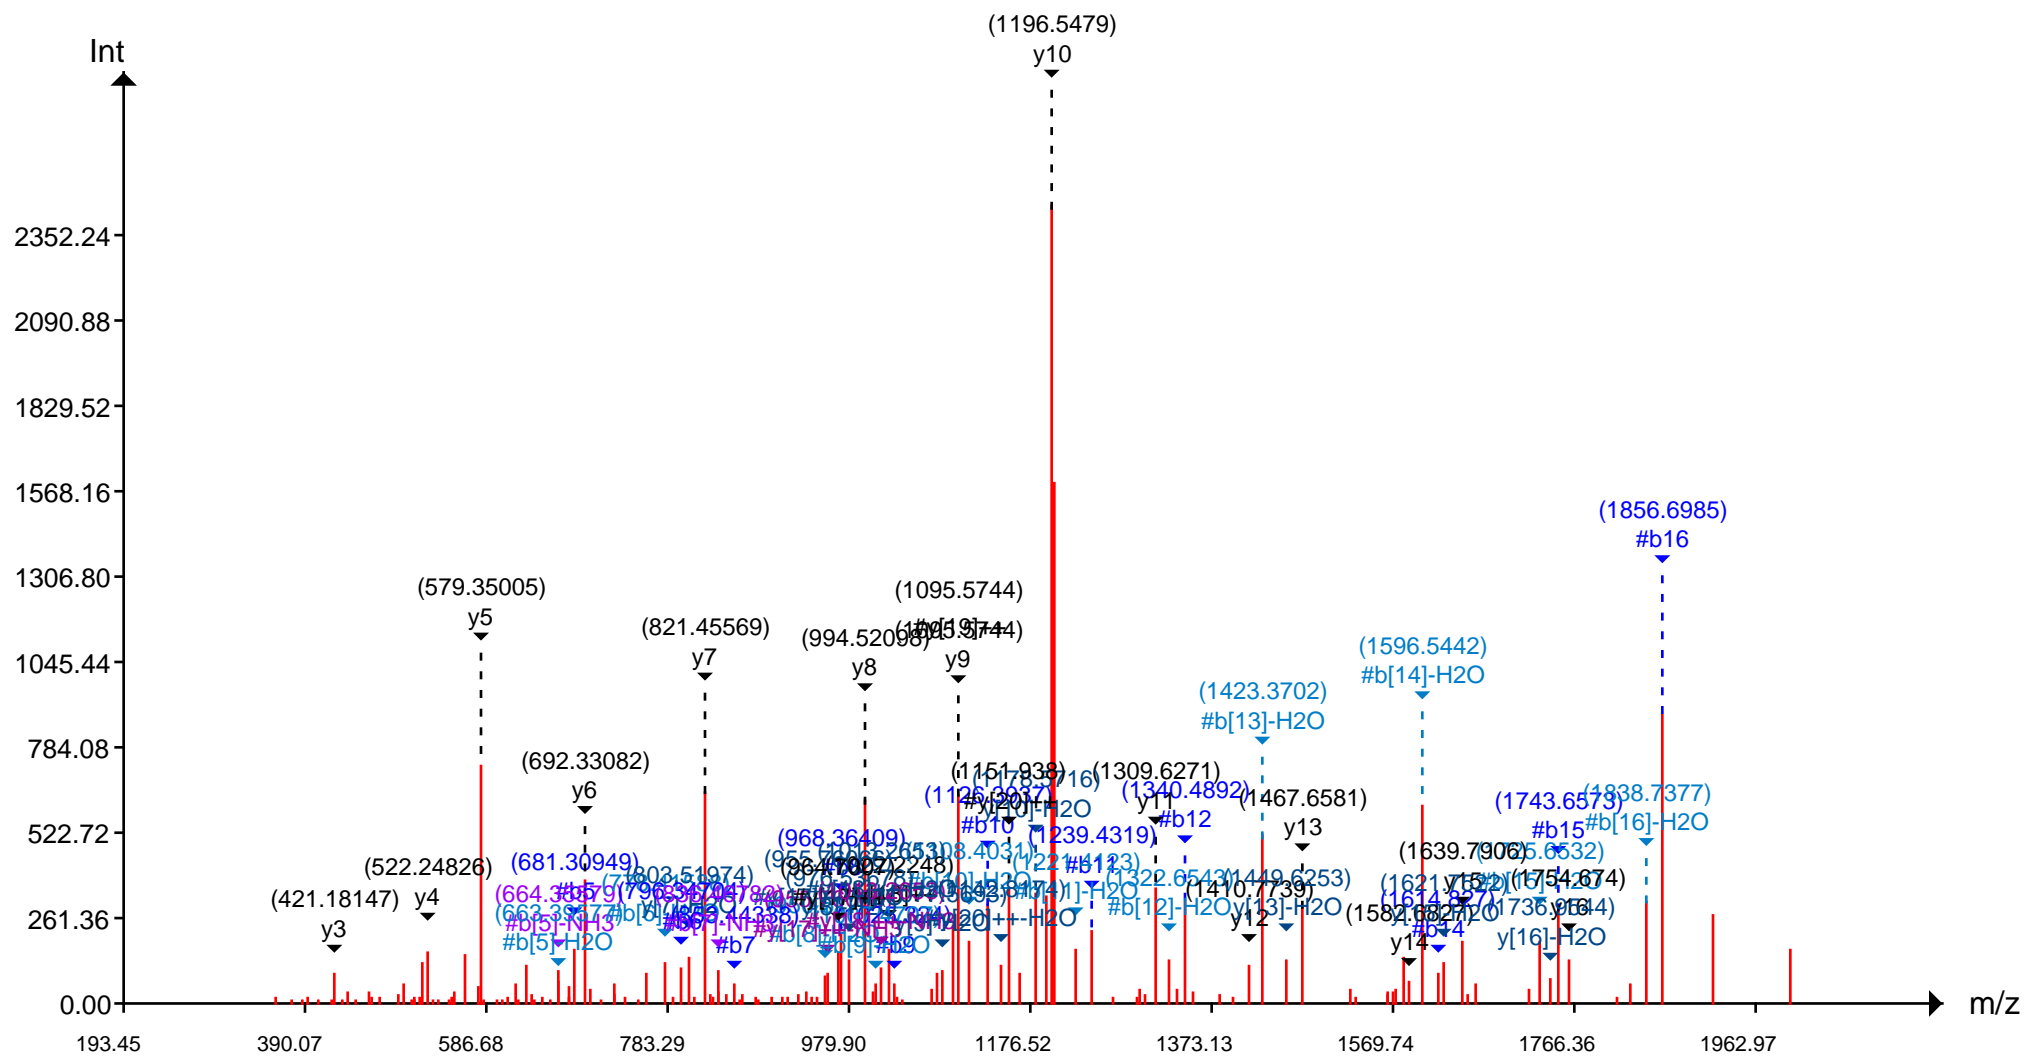

## Info

|                          |                                                       |                           |         |
|--------------------------|-------------------------------------------------------|---------------------------|---------|
| <b>Modified Sequence</b> | AcD3-SLFDK<AcD3K*>DGDGTITTK<AcD3K*>ELGTVM<Mox*>R-COOH | <b>Ion score</b>          | 99.2    |
| <b>Protein</b>           | P62204                                                | <b>Confidence level</b>   | 99.00%  |
| <b>Precursor m/z</b>     | 1218.1198                                             | <b>Identity Threshold</b> | 47.89   |
| <b>Charge</b>            | 2+                                                    | <b>Mass error</b>         | 2.56E-4 |

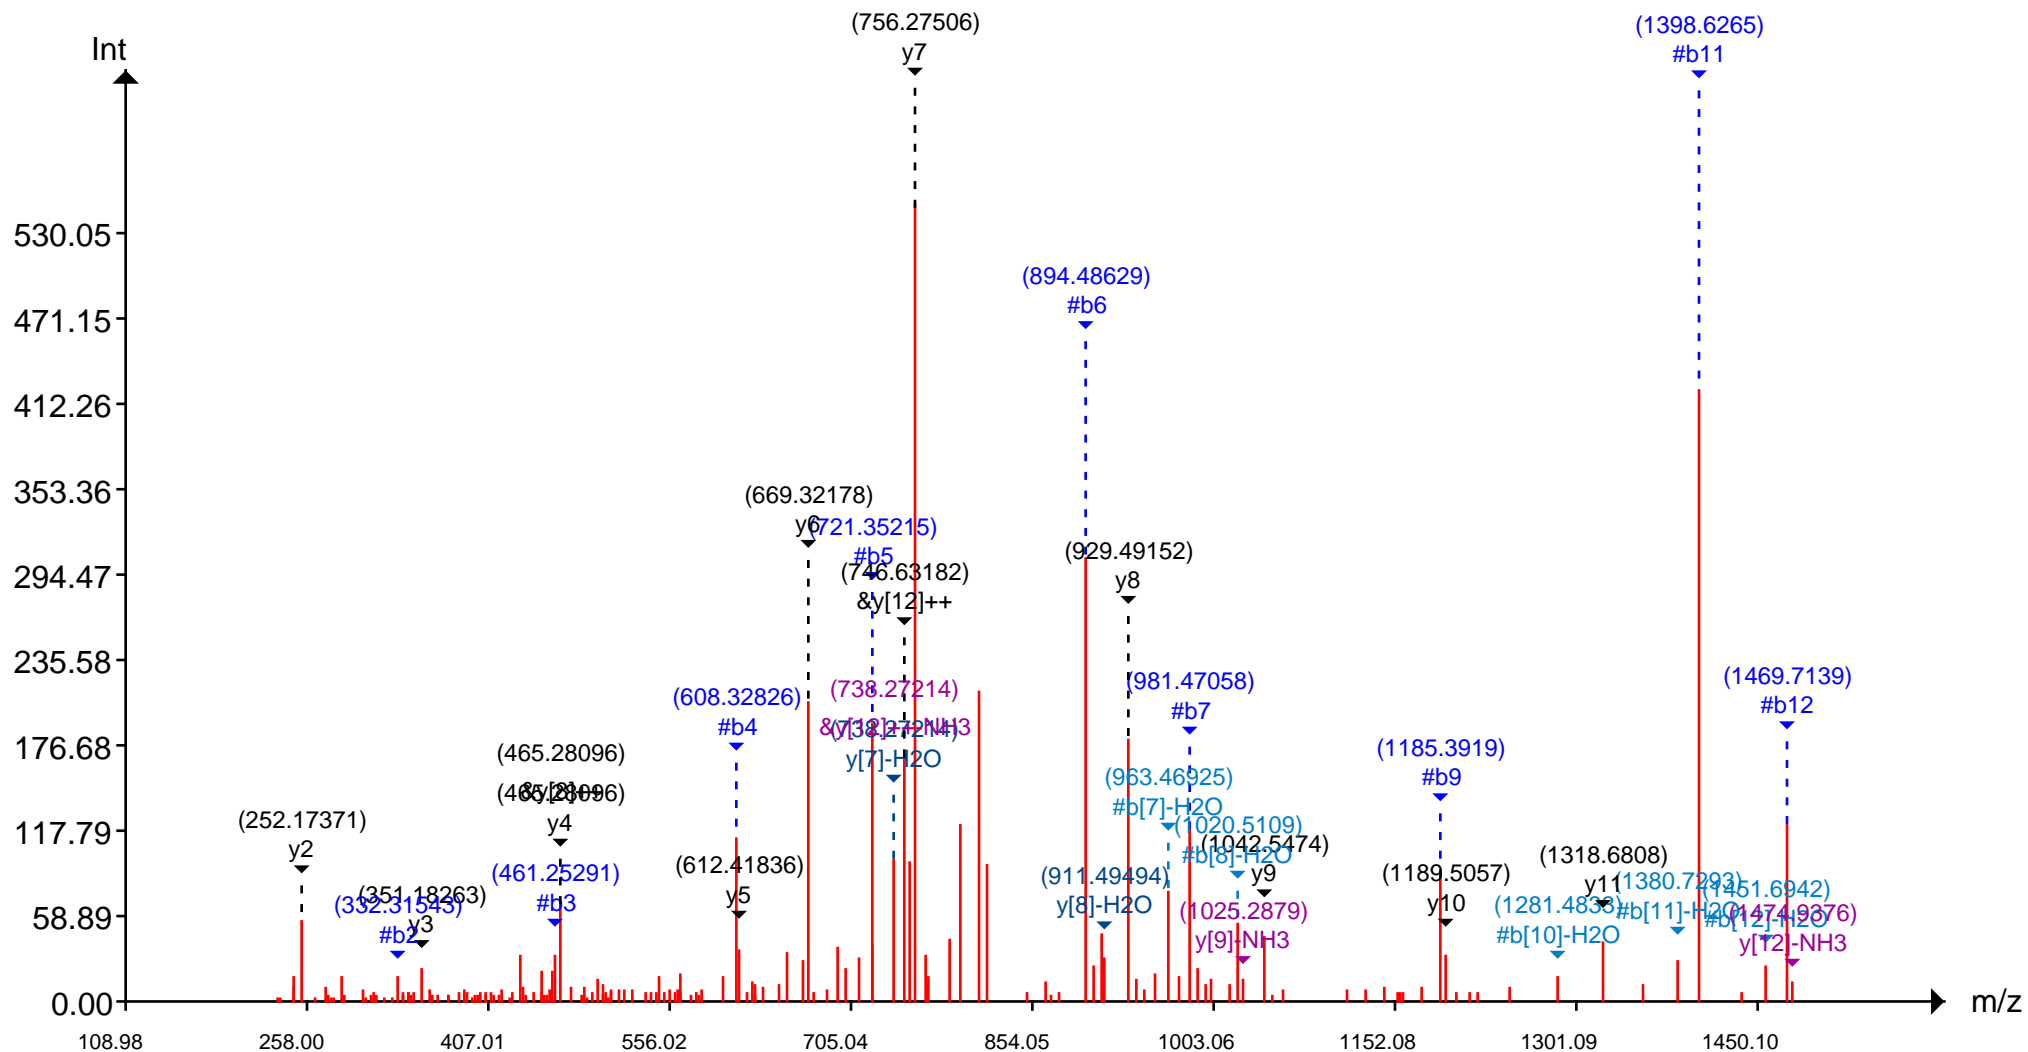

## Info

|                          |                                                          |                           |          |
|--------------------------|----------------------------------------------------------|---------------------------|----------|
| <b>Modified Sequence</b> | AcD3-LK<AcD3K*>EM<Mox*>IK<AcD3K*>SGM<Mox*>NVAR<C13>-COOH | <b>Ion score</b>          | 96.15    |
| <b>Protein</b>           | P52480                                                   | <b>Confidence level</b>   | 99.00%   |
| <b>Precursor m/z</b>     | 825.45459                                                | <b>Identity Threshold</b> | 47.54    |
| <b>Charge</b>            | 2+                                                       | <b>Mass error</b>         | 0.001256 |

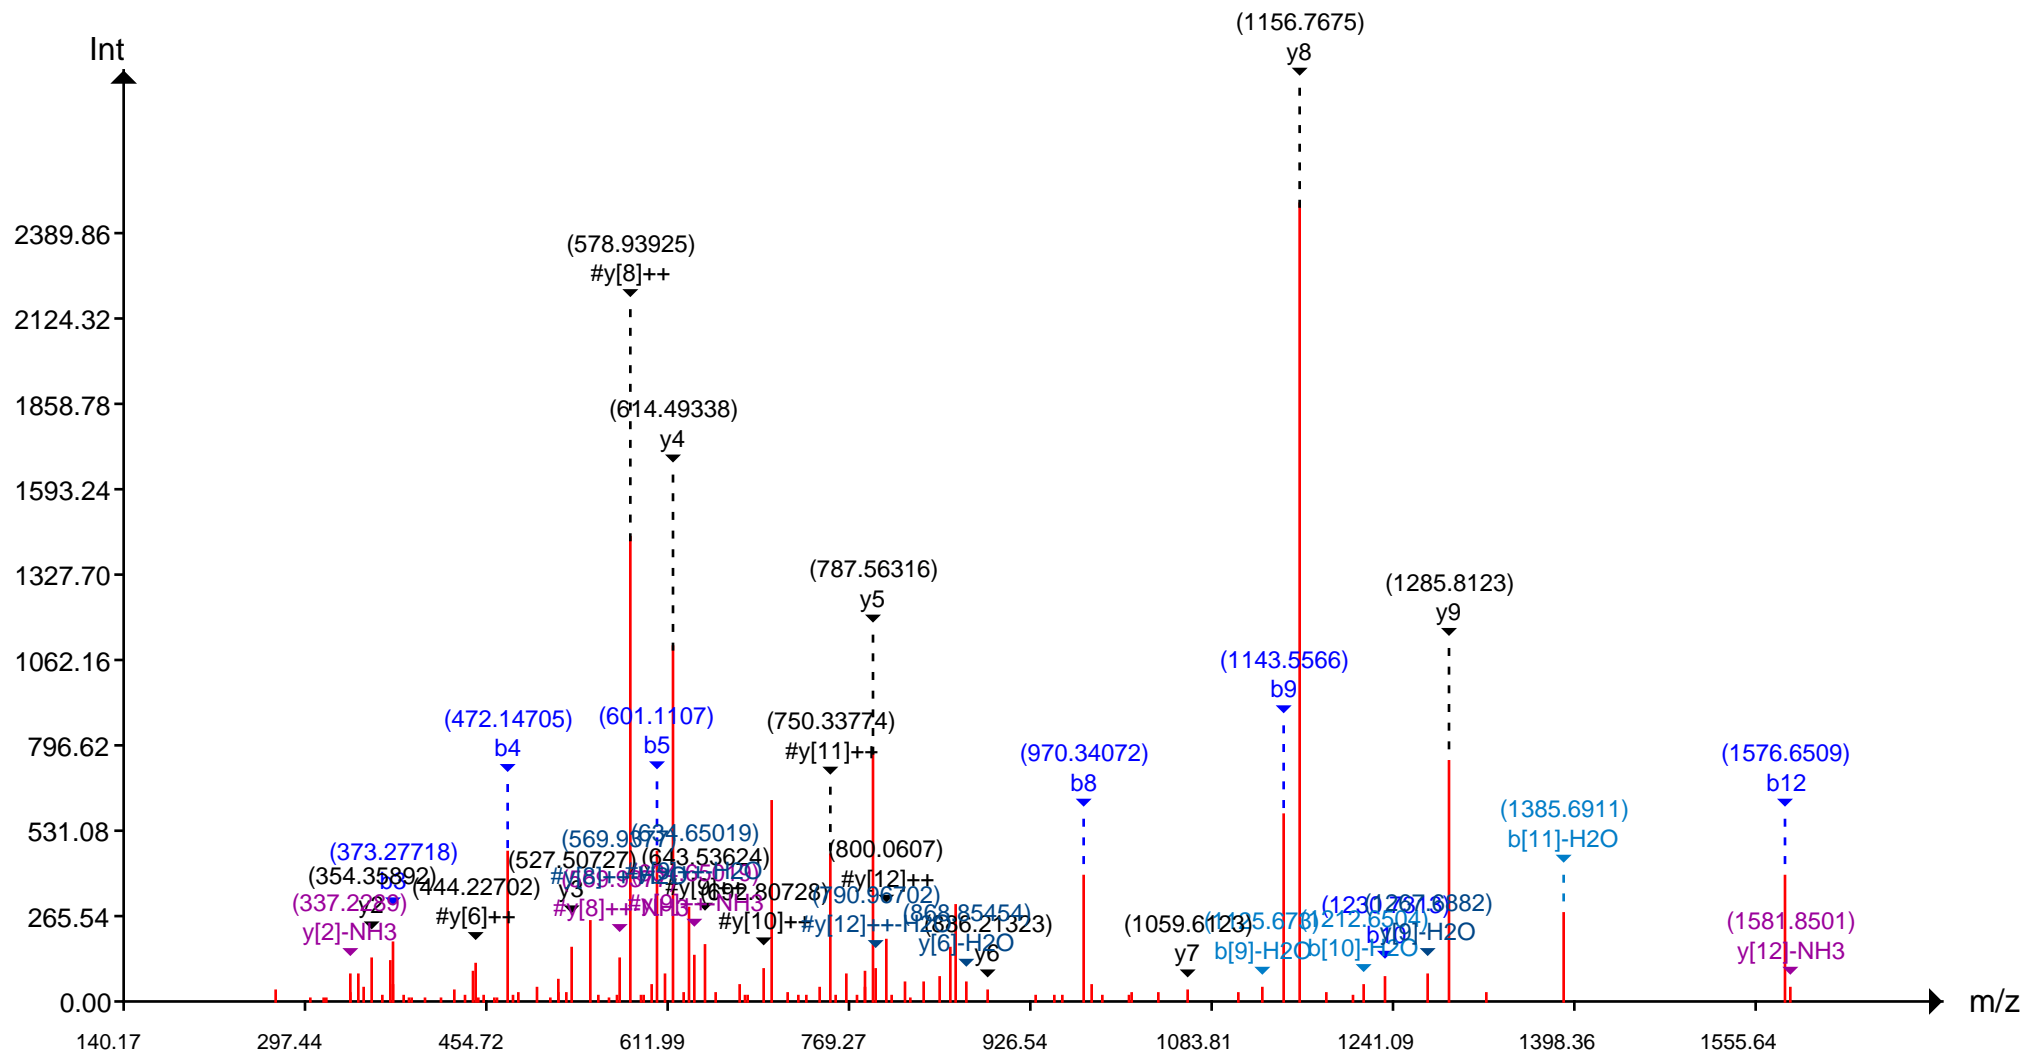

## Info

|                          |                                                              |                           |          |
|--------------------------|--------------------------------------------------------------|---------------------------|----------|
| <b>Modified Sequence</b> | AcD3-LVDVEPK<AcD3K*>VK<AcD3K*>SK<AcD3K*>K<AcD3K*>R<C13>-COOH | <b>Ion score</b>          | 63.01    |
| <b>Protein</b>           | P62315                                                       | <b>Confidence level</b>   | 99.00%   |
| <b>Precursor m/z</b>     | 879.05933                                                    | <b>Identity Threshold</b> | 35.93    |
| <b>Charge</b>            | 2+                                                           | <b>Mass error</b>         | 0.001828 |

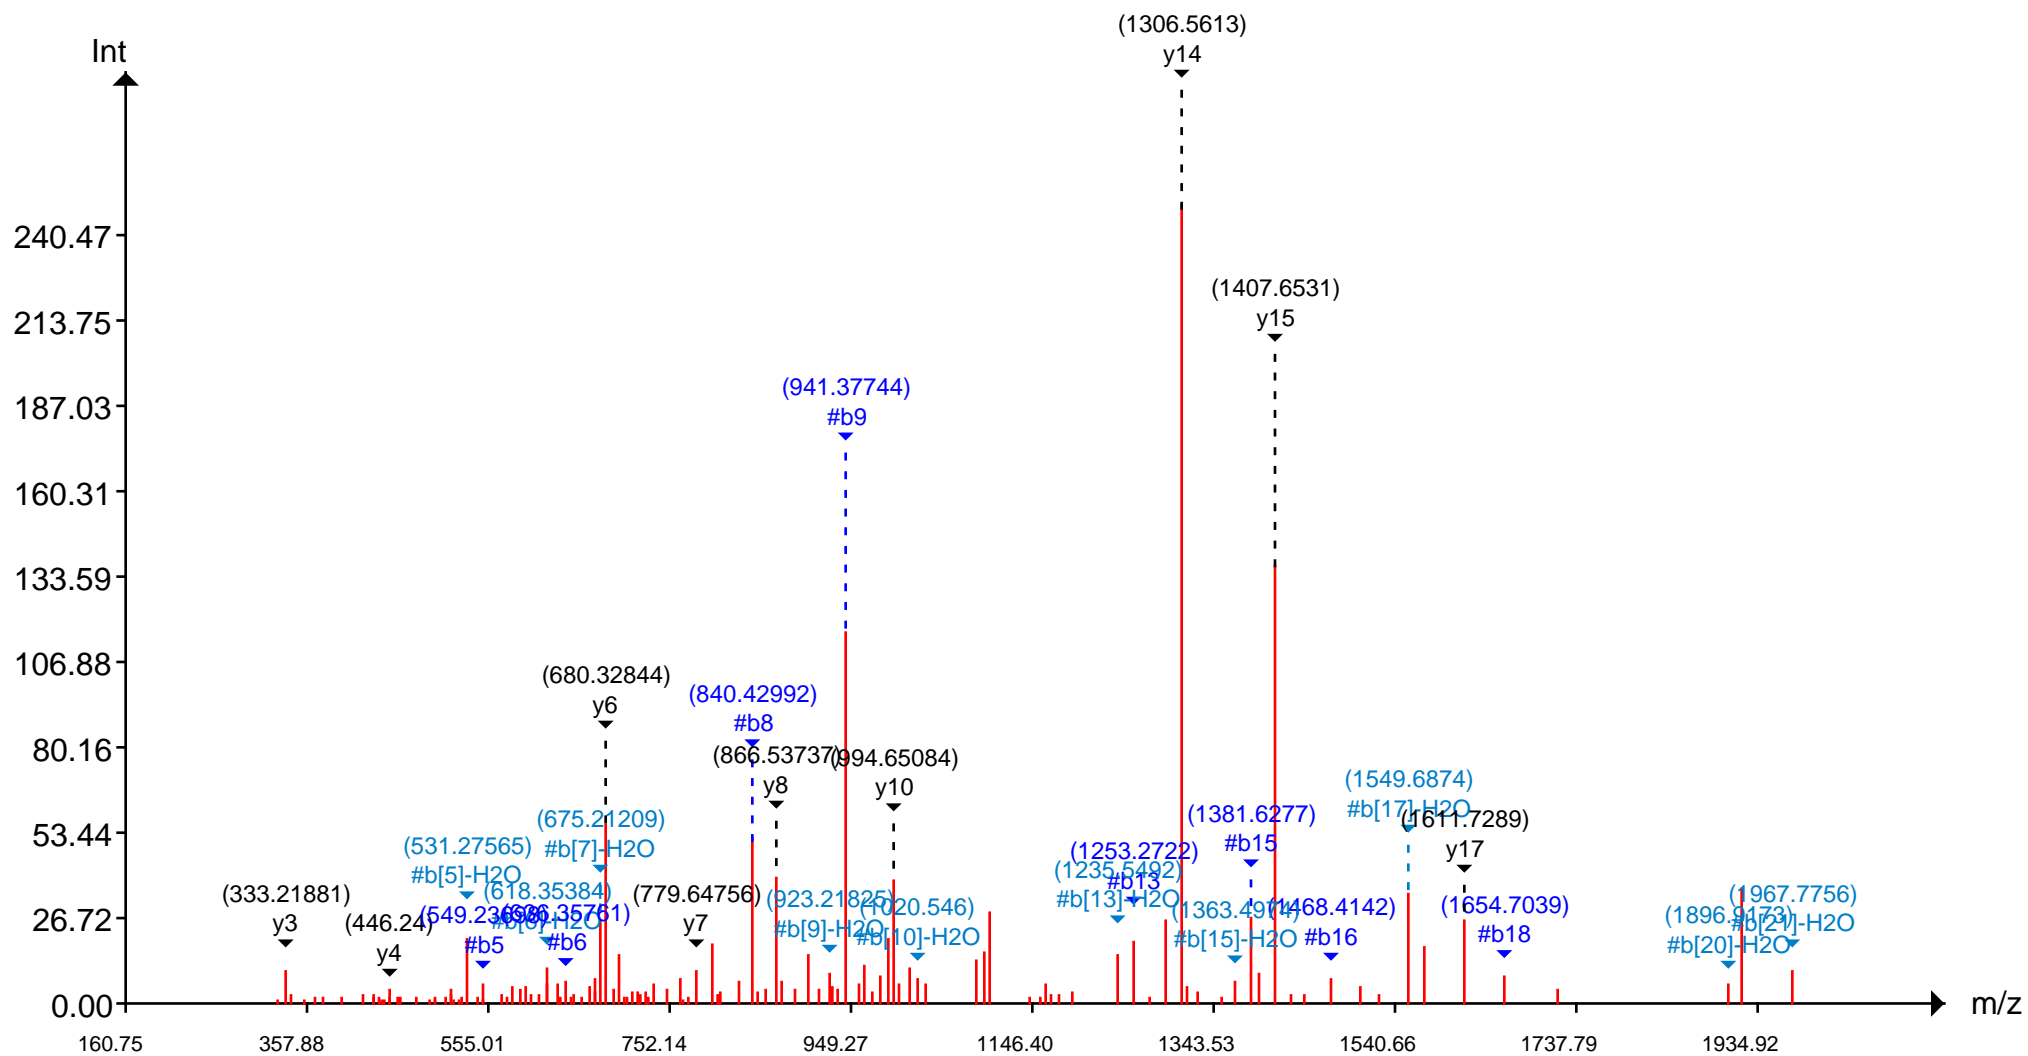

## Info

|                          |                                         |                           |          |
|--------------------------|-----------------------------------------|---------------------------|----------|
| <b>Modified Sequence</b> | AcD3-VESSTSGFTPSGAGASVSM<Mox*>IASR-COOH | <b>Ion score</b>          | 58.24    |
| <b>Protein</b>           | Q99MD9                                  | <b>Confidence level</b>   | 99.00%   |
| <b>Precursor m/z</b>     | 1124.0369                               | <b>Identity Threshold</b> | 46.29    |
| <b>Charge</b>            | 2+                                      | <b>Mass error</b>         | 0.002821 |



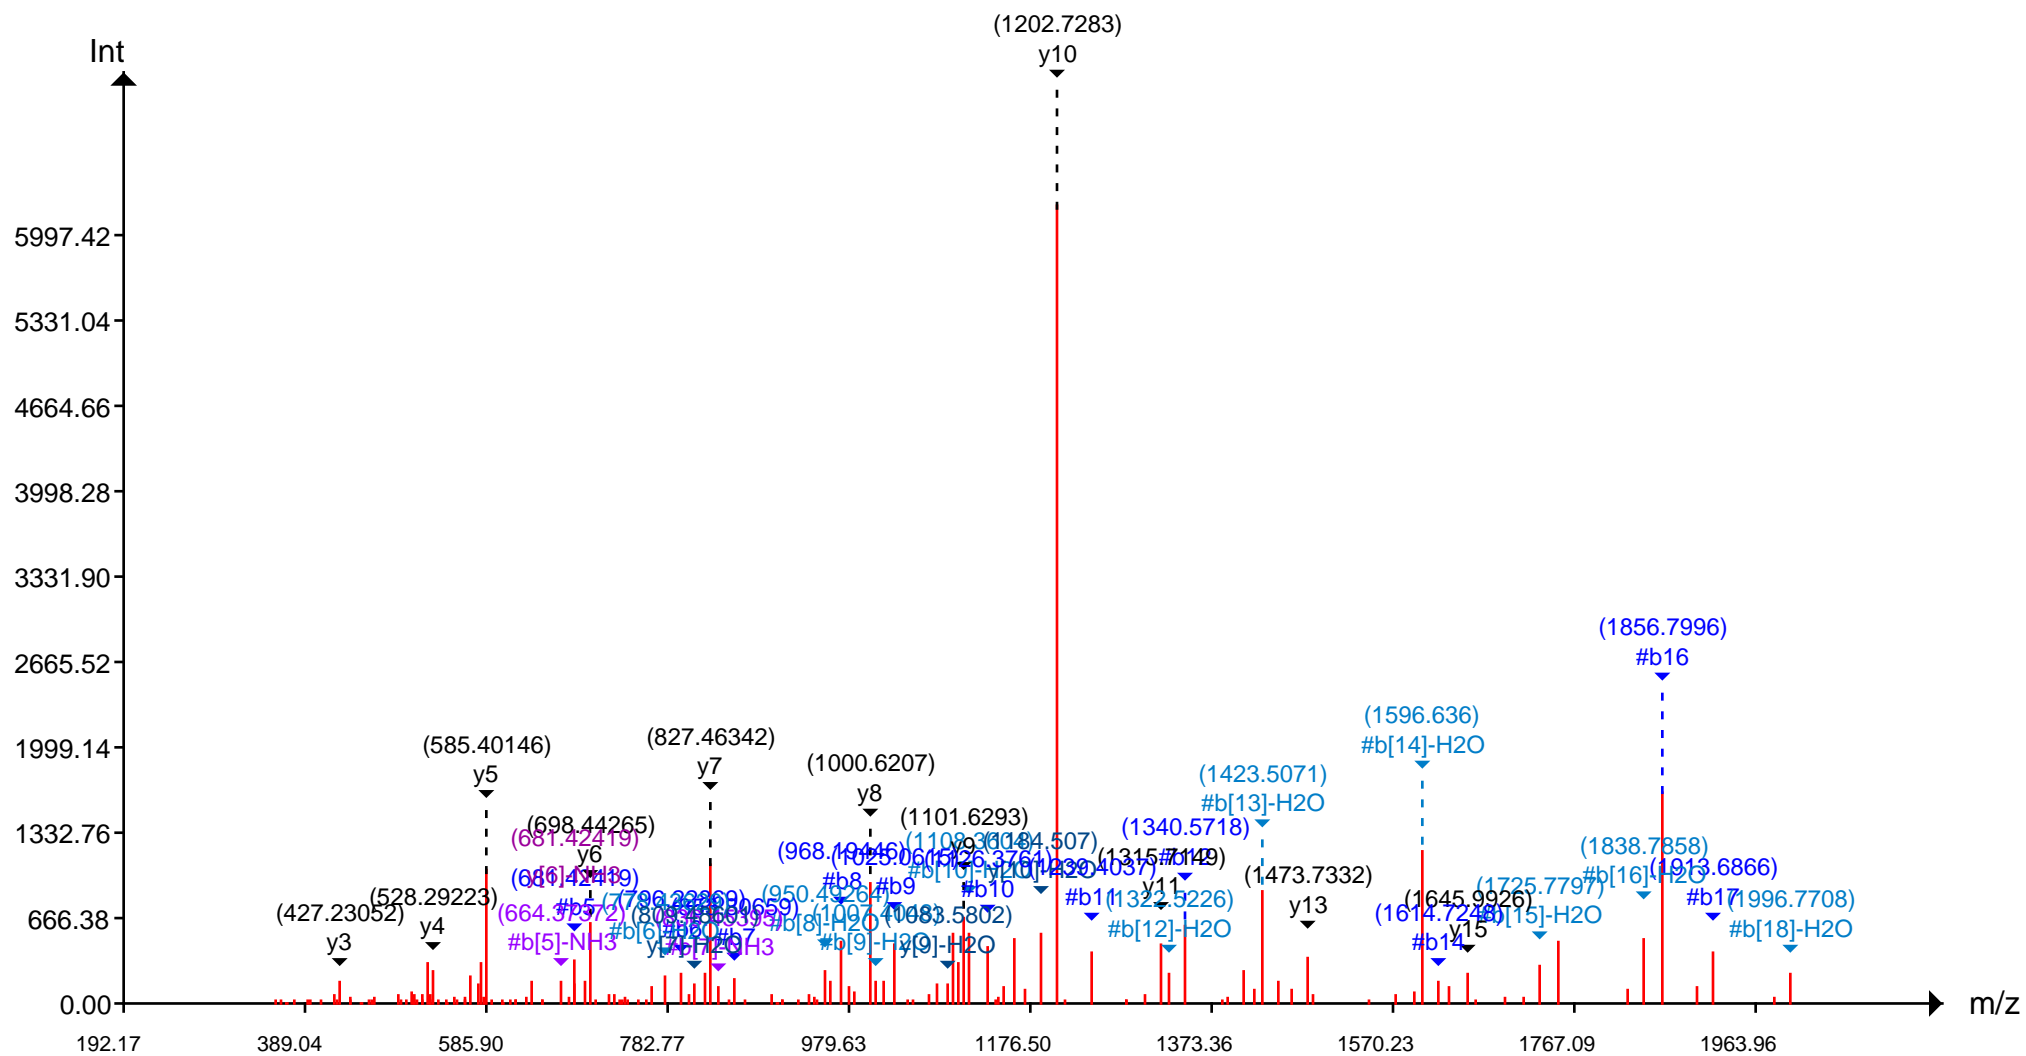

## Info

|                          |                                                            |                           |          |
|--------------------------|------------------------------------------------------------|---------------------------|----------|
| <b>Modified Sequence</b> | AcD3-SLFDK<AcD3K*>DGDGTITTK<AcD3K*>ELGTVM<Mox*>R<C13>-COOH | <b>Ion score</b>          | 80.54    |
| <b>Protein</b>           | P62204                                                     | <b>Confidence level</b>   | 99.00%   |
| <b>Precursor m/z</b>     | 1221.1296                                                  | <b>Identity Threshold</b> | 47.90    |
| <b>Charge</b>            | 2+                                                         | <b>Mass error</b>         | -2.86E-4 |

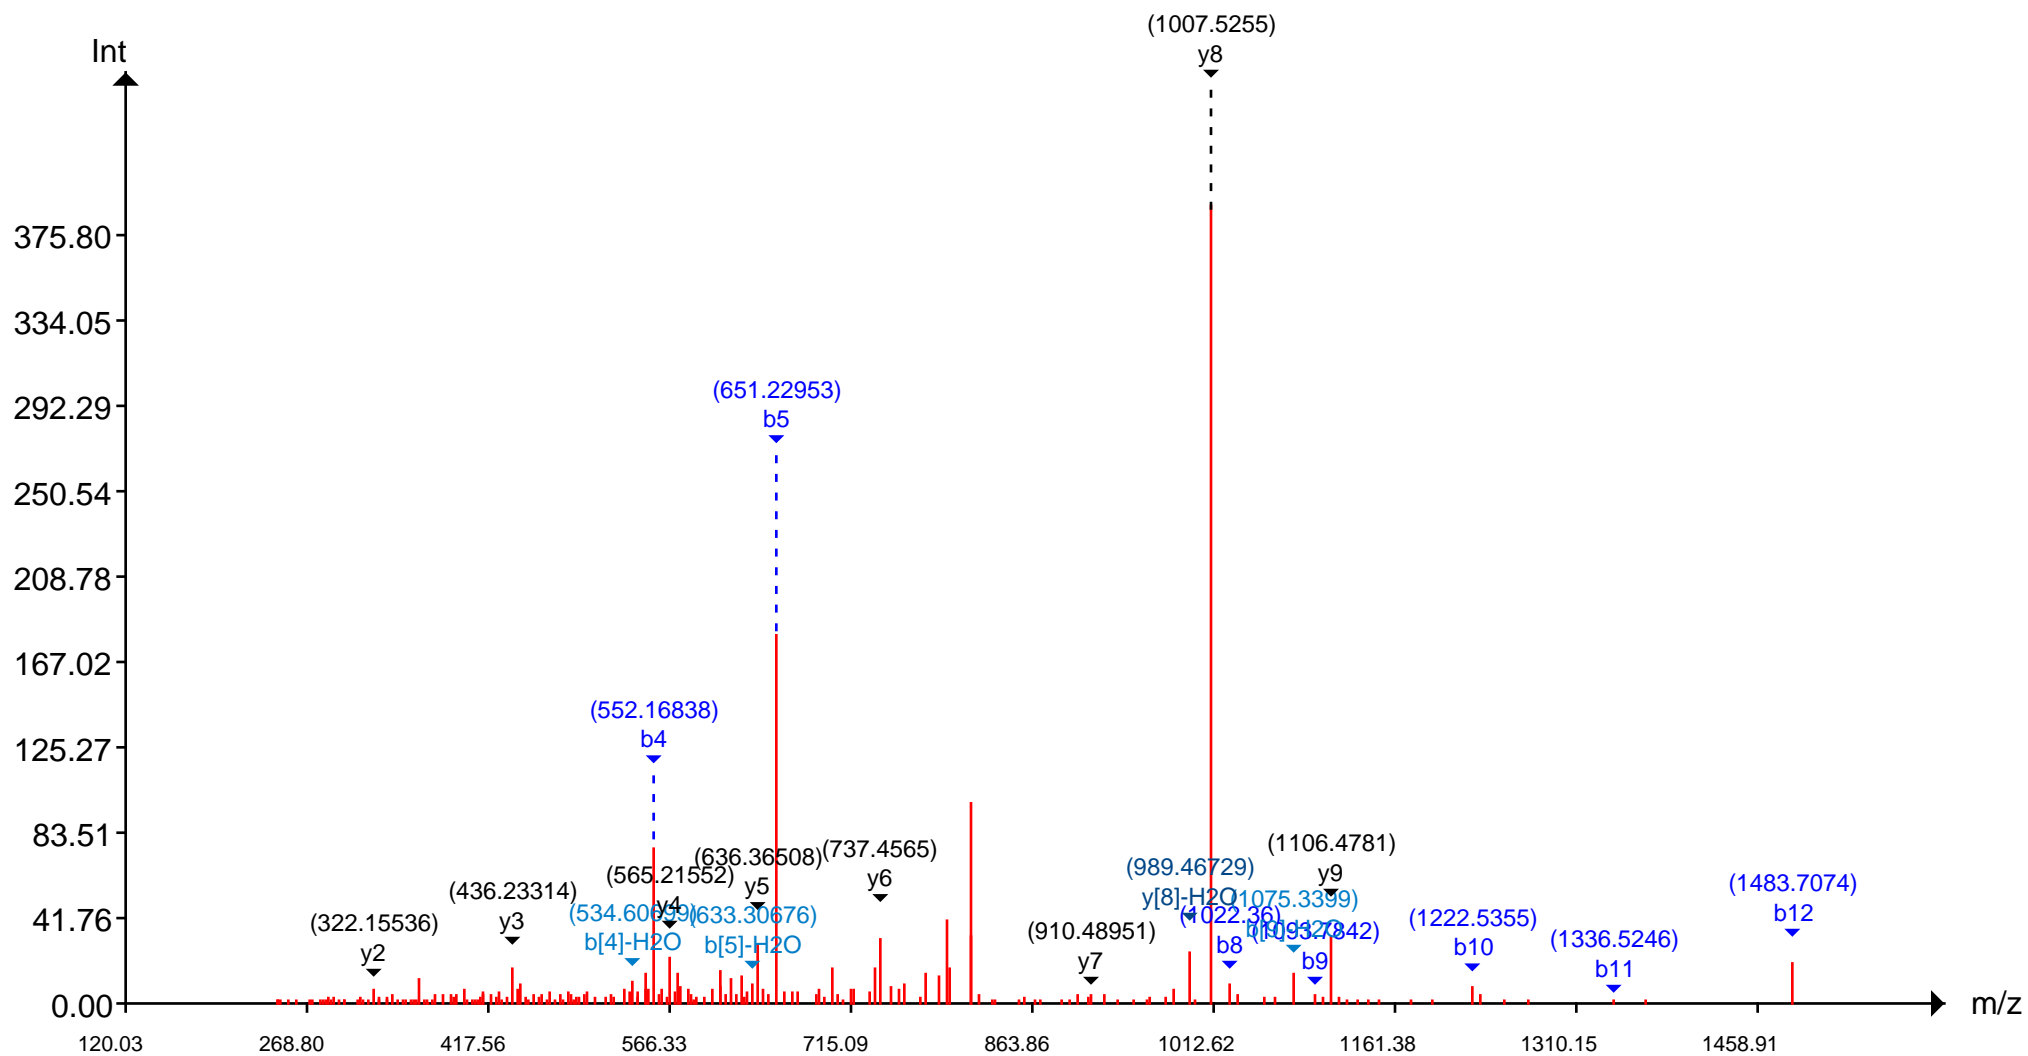

## Info

|                          |                                         |                           |          |
|--------------------------|-----------------------------------------|---------------------------|----------|
| <b>Modified Sequence</b> | AcD3-FADK<AcD3K*>VPK<AcD3K*>TAENFR-COOH | <b>Ion score</b>          | 48.64    |
| <b>Protein</b>           | P17742                                  | <b>Confidence level</b>   | 99.00%   |
| <b>Precursor m/z</b>     | 829.44887                               | <b>Identity Threshold</b> | 47.81    |
| <b>Charge</b>            | 2+                                      | <b>Mass error</b>         | 0.001032 |

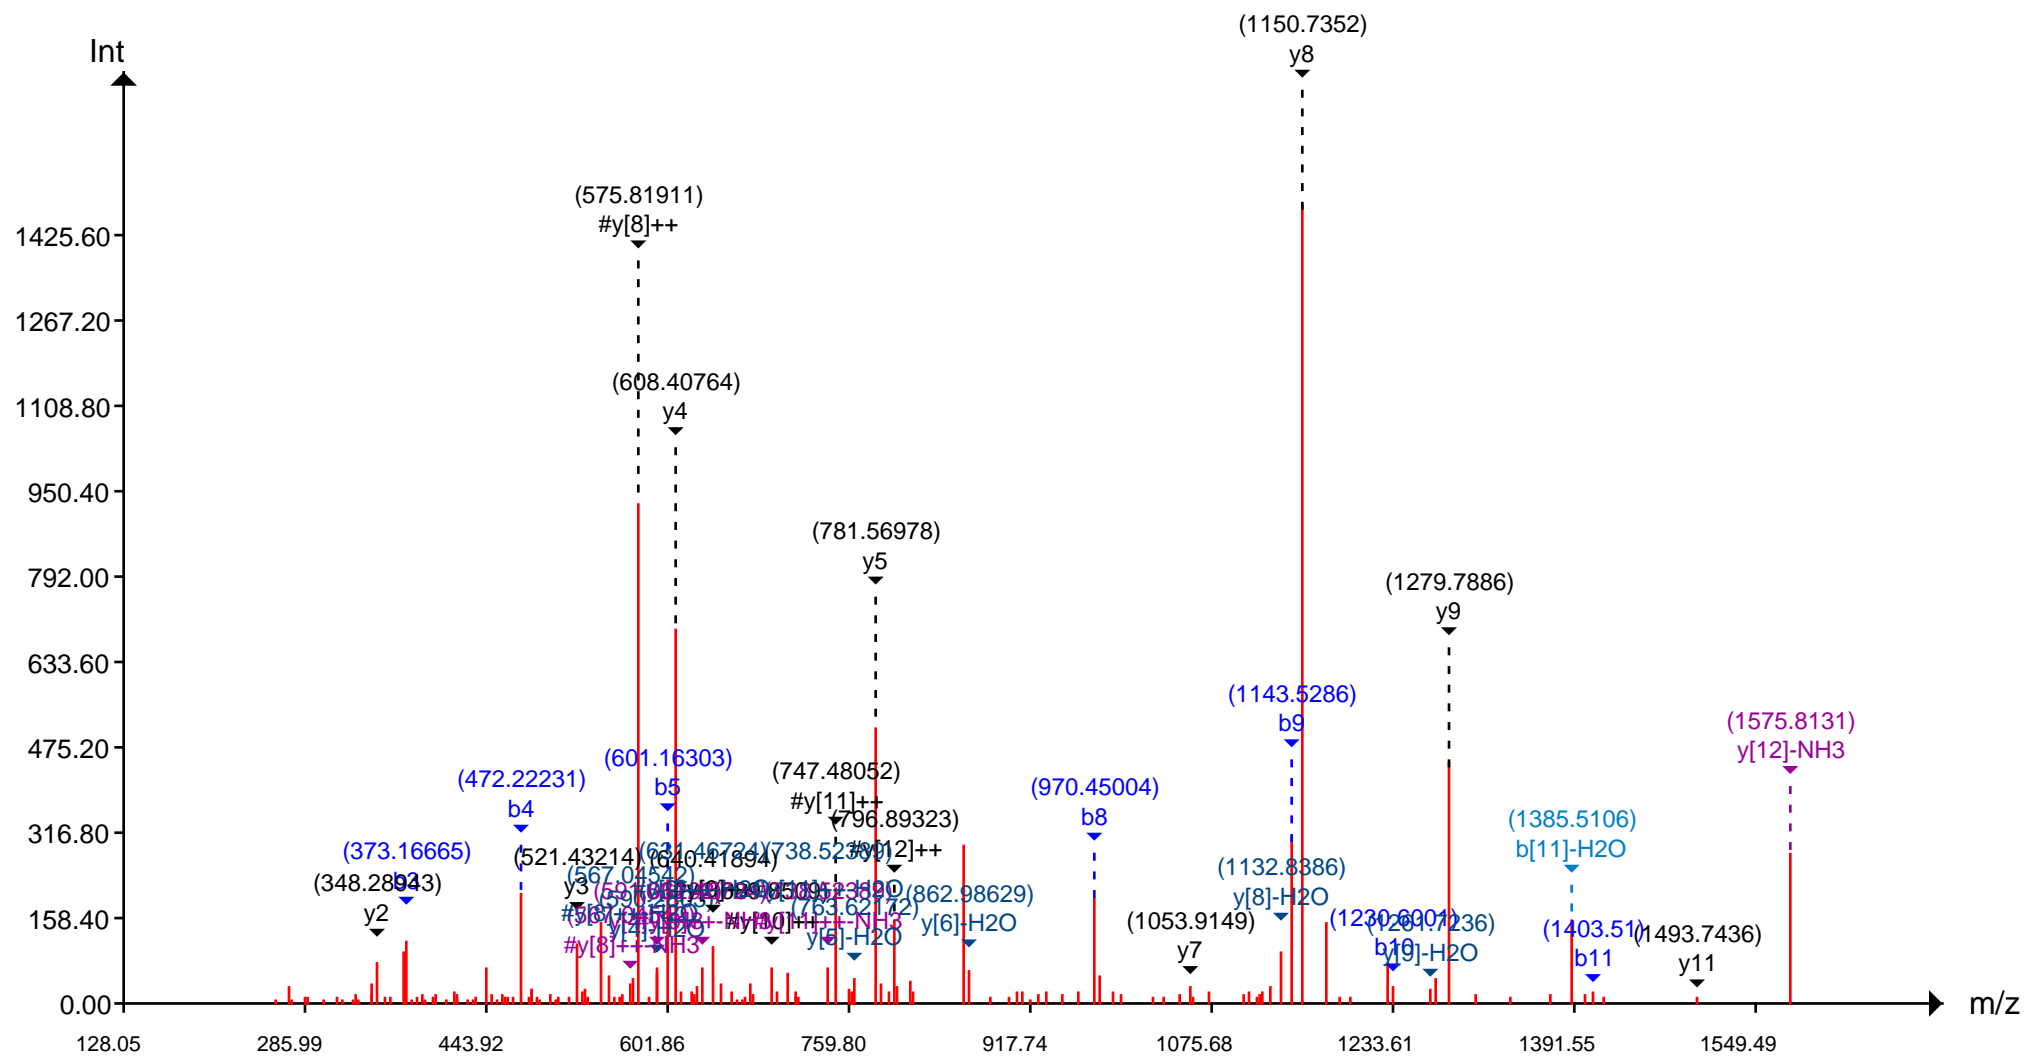

## Info

|                          |                                                         |                           |         |
|--------------------------|---------------------------------------------------------|---------------------------|---------|
| <b>Modified Sequence</b> | AcD3-LVDVEPK<AcD3K*>VK<AcD3K*>SK<AcD3K*>K<AcD3K*>R-COOH | <b>Ion score</b>          | 51.9    |
| <b>Protein</b>           | P62315                                                  | <b>Confidence level</b>   | 99.00%  |
| <b>Precursor m/z</b>     | 876.04945                                               | <b>Identity Threshold</b> | 37.68   |
| <b>Charge</b>            | 2+                                                      | <b>Mass error</b>         | 0.00221 |

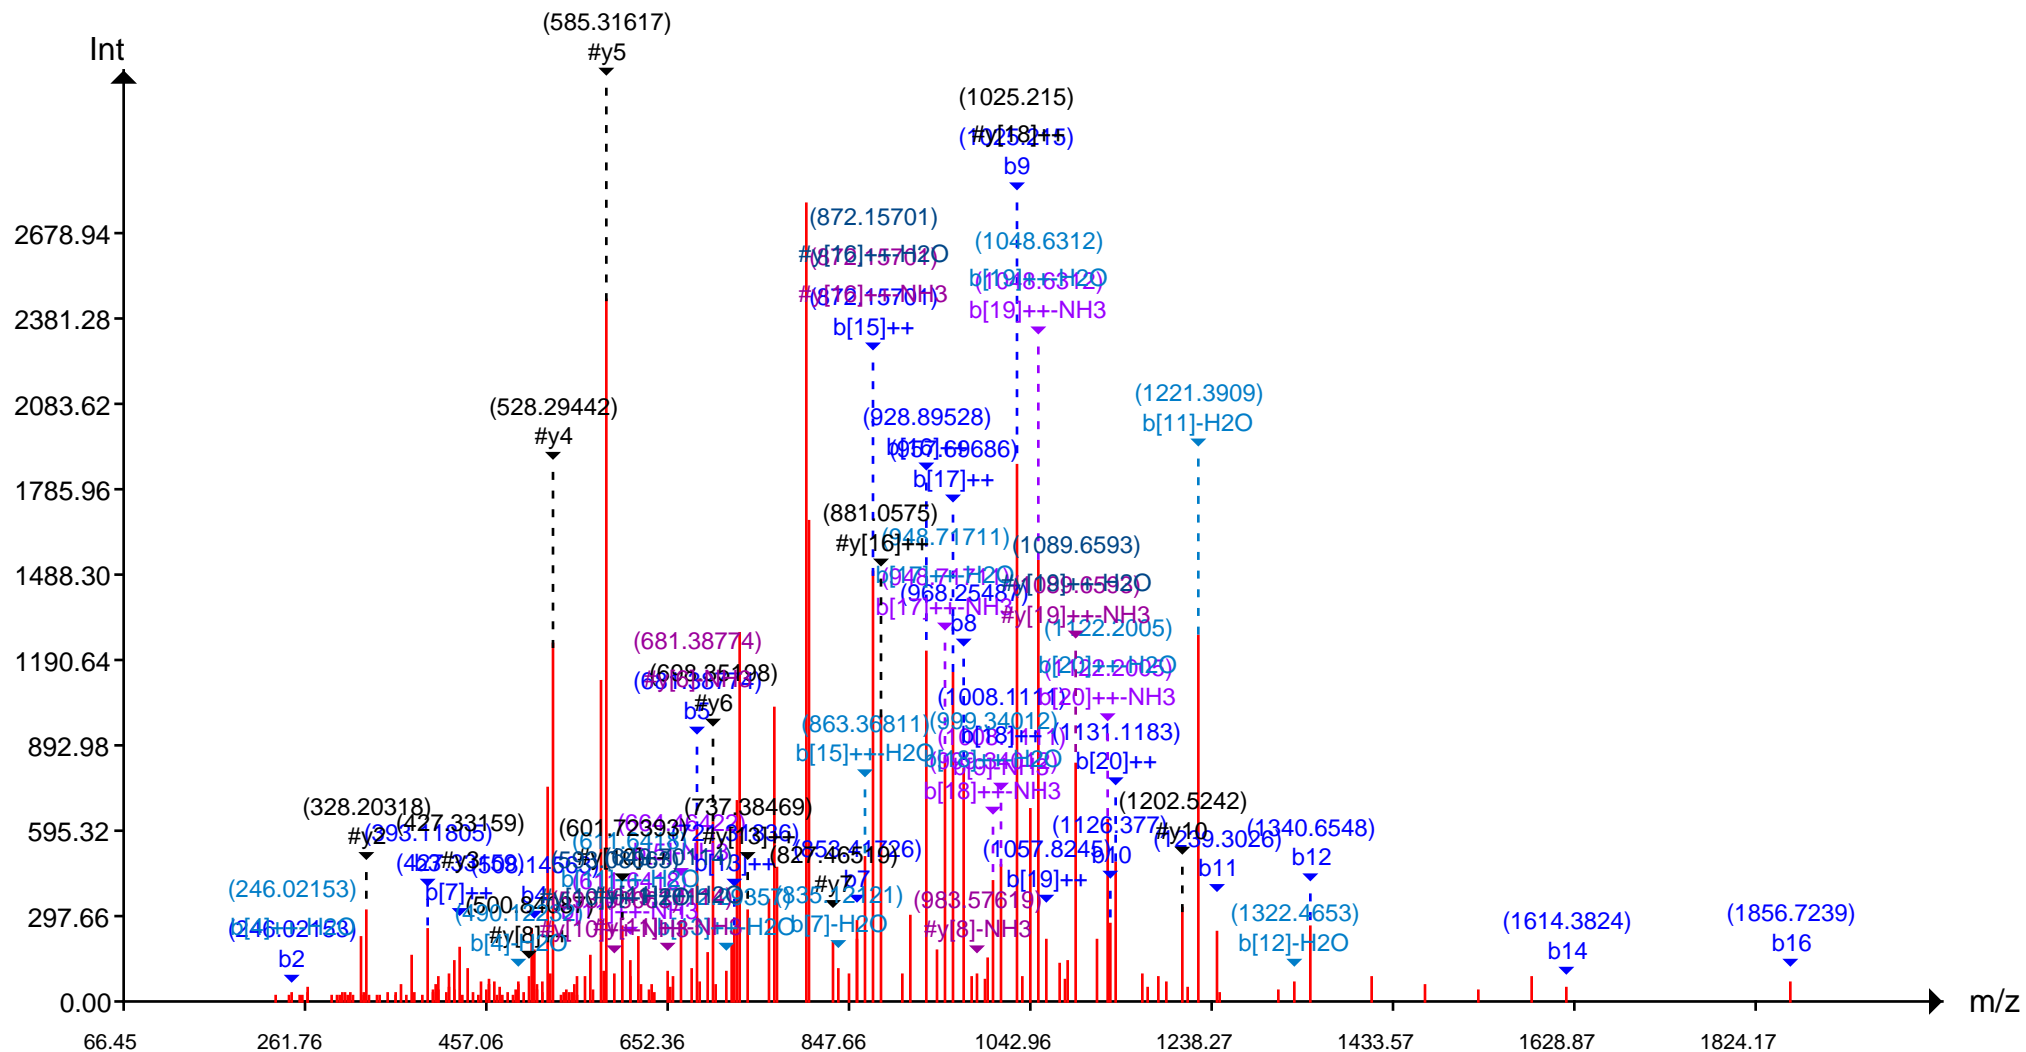

## Info

|                          |                                                            |                           |          |
|--------------------------|------------------------------------------------------------|---------------------------|----------|
| <b>Modified Sequence</b> | AcD3-SLFDK<AcD3K*>DGDGTITTK<AcD3K*>ELGTVM<Mox*>R<C13>-COOH | <b>Ion score</b>          | 66.34    |
| <b>Protein</b>           | P62204                                                     | <b>Confidence level</b>   | 99.00%   |
| <b>Precursor m/z</b>     | 814.42275                                                  | <b>Identity Threshold</b> | 47.91    |
| <b>Charge</b>            | 3+                                                         | <b>Mass error</b>         | 0.001488 |

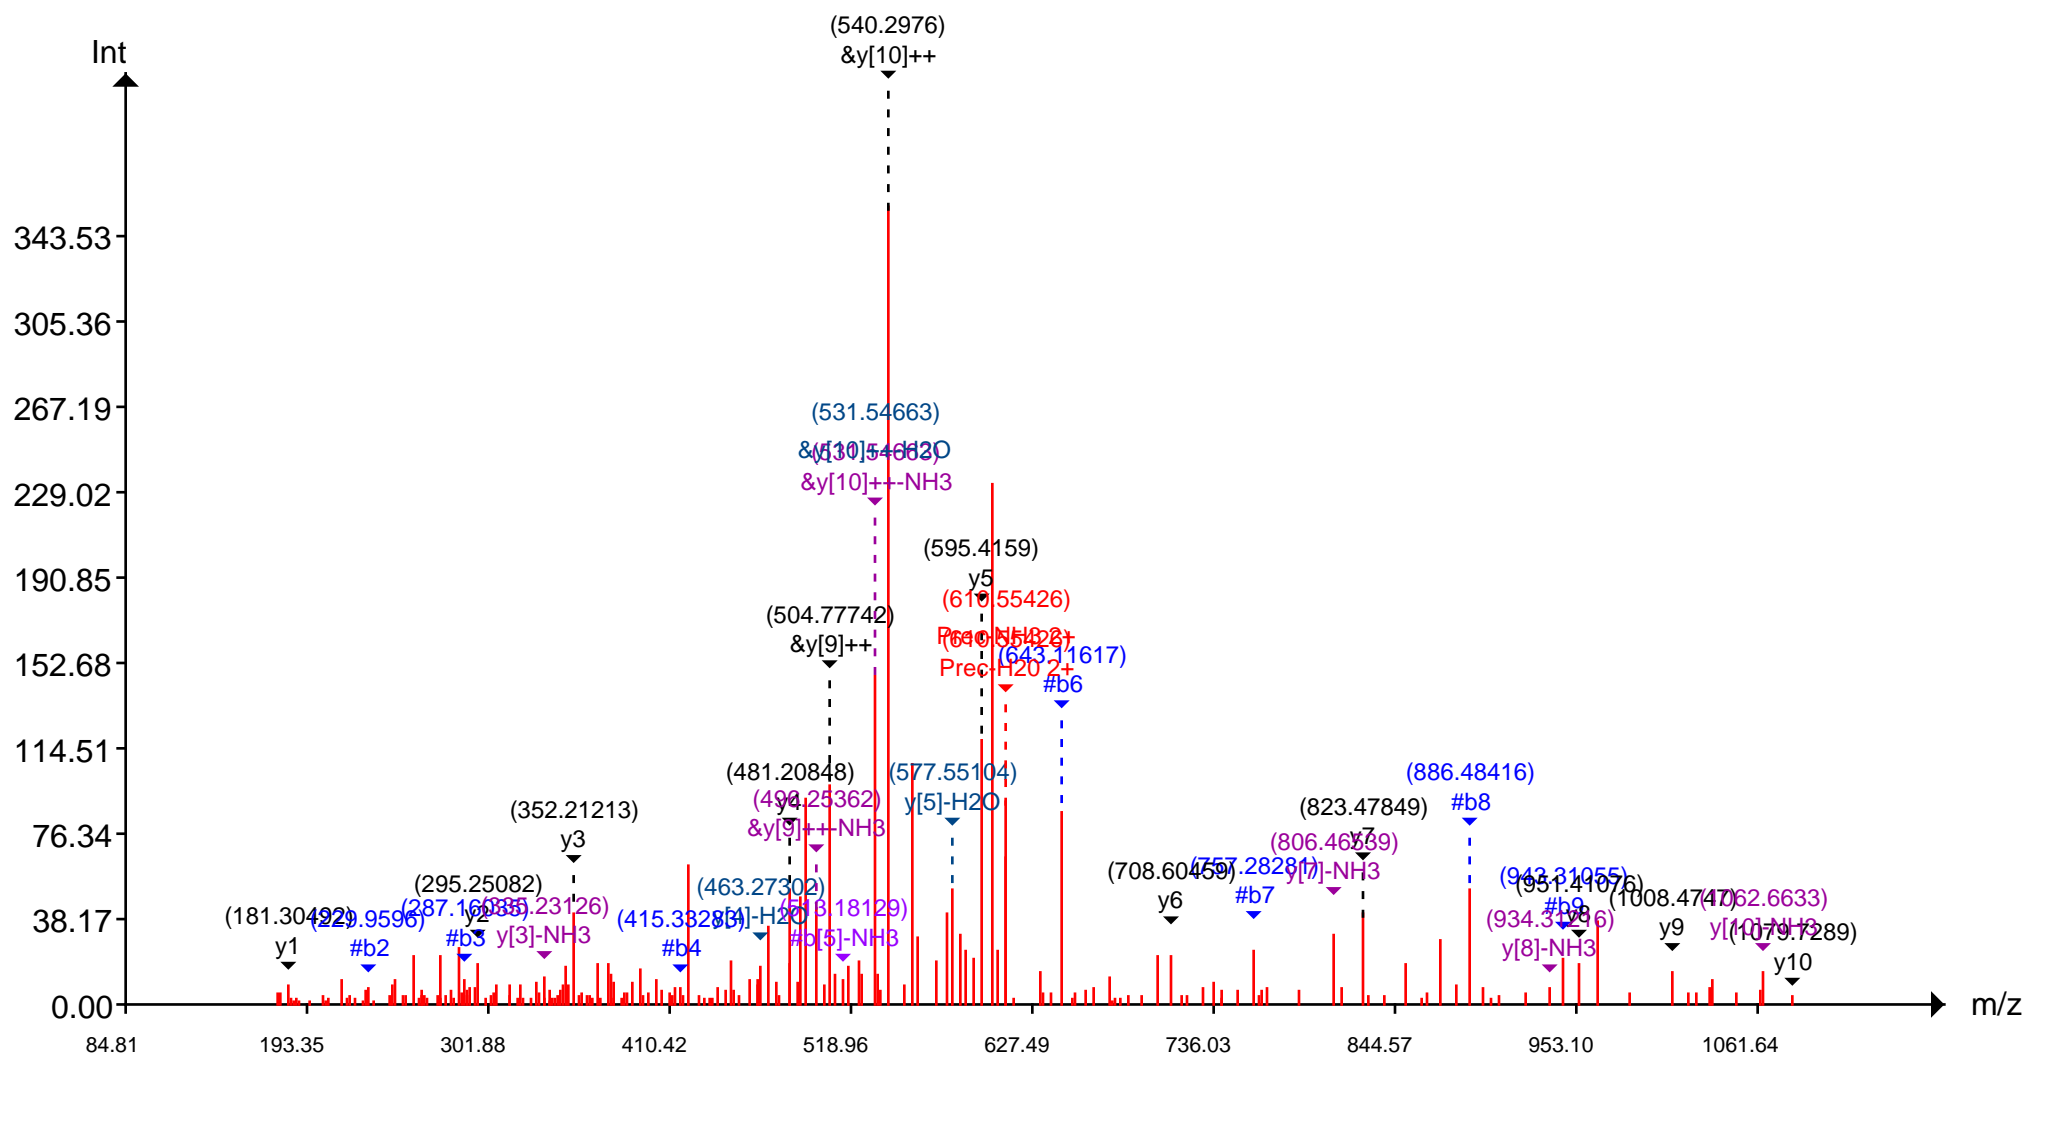

| Info                     |                            |                           |         |
|--------------------------|----------------------------|---------------------------|---------|
| <b>Modified Sequence</b> | AcD3-IAGQDLNEGNR<C13>-COOH | <b>Ion score</b>          | 57.44   |
| <b>Protein</b>           | Q61233                     | <b>Confidence level</b>   | 99.00%  |
| <b>Precursor m/z</b>     | 619.31919                  | <b>Identity Threshold</b> | 47.85   |
| <b>Charge</b>            | 2+                         | <b>Mass error</b>         | 5.06E-4 |

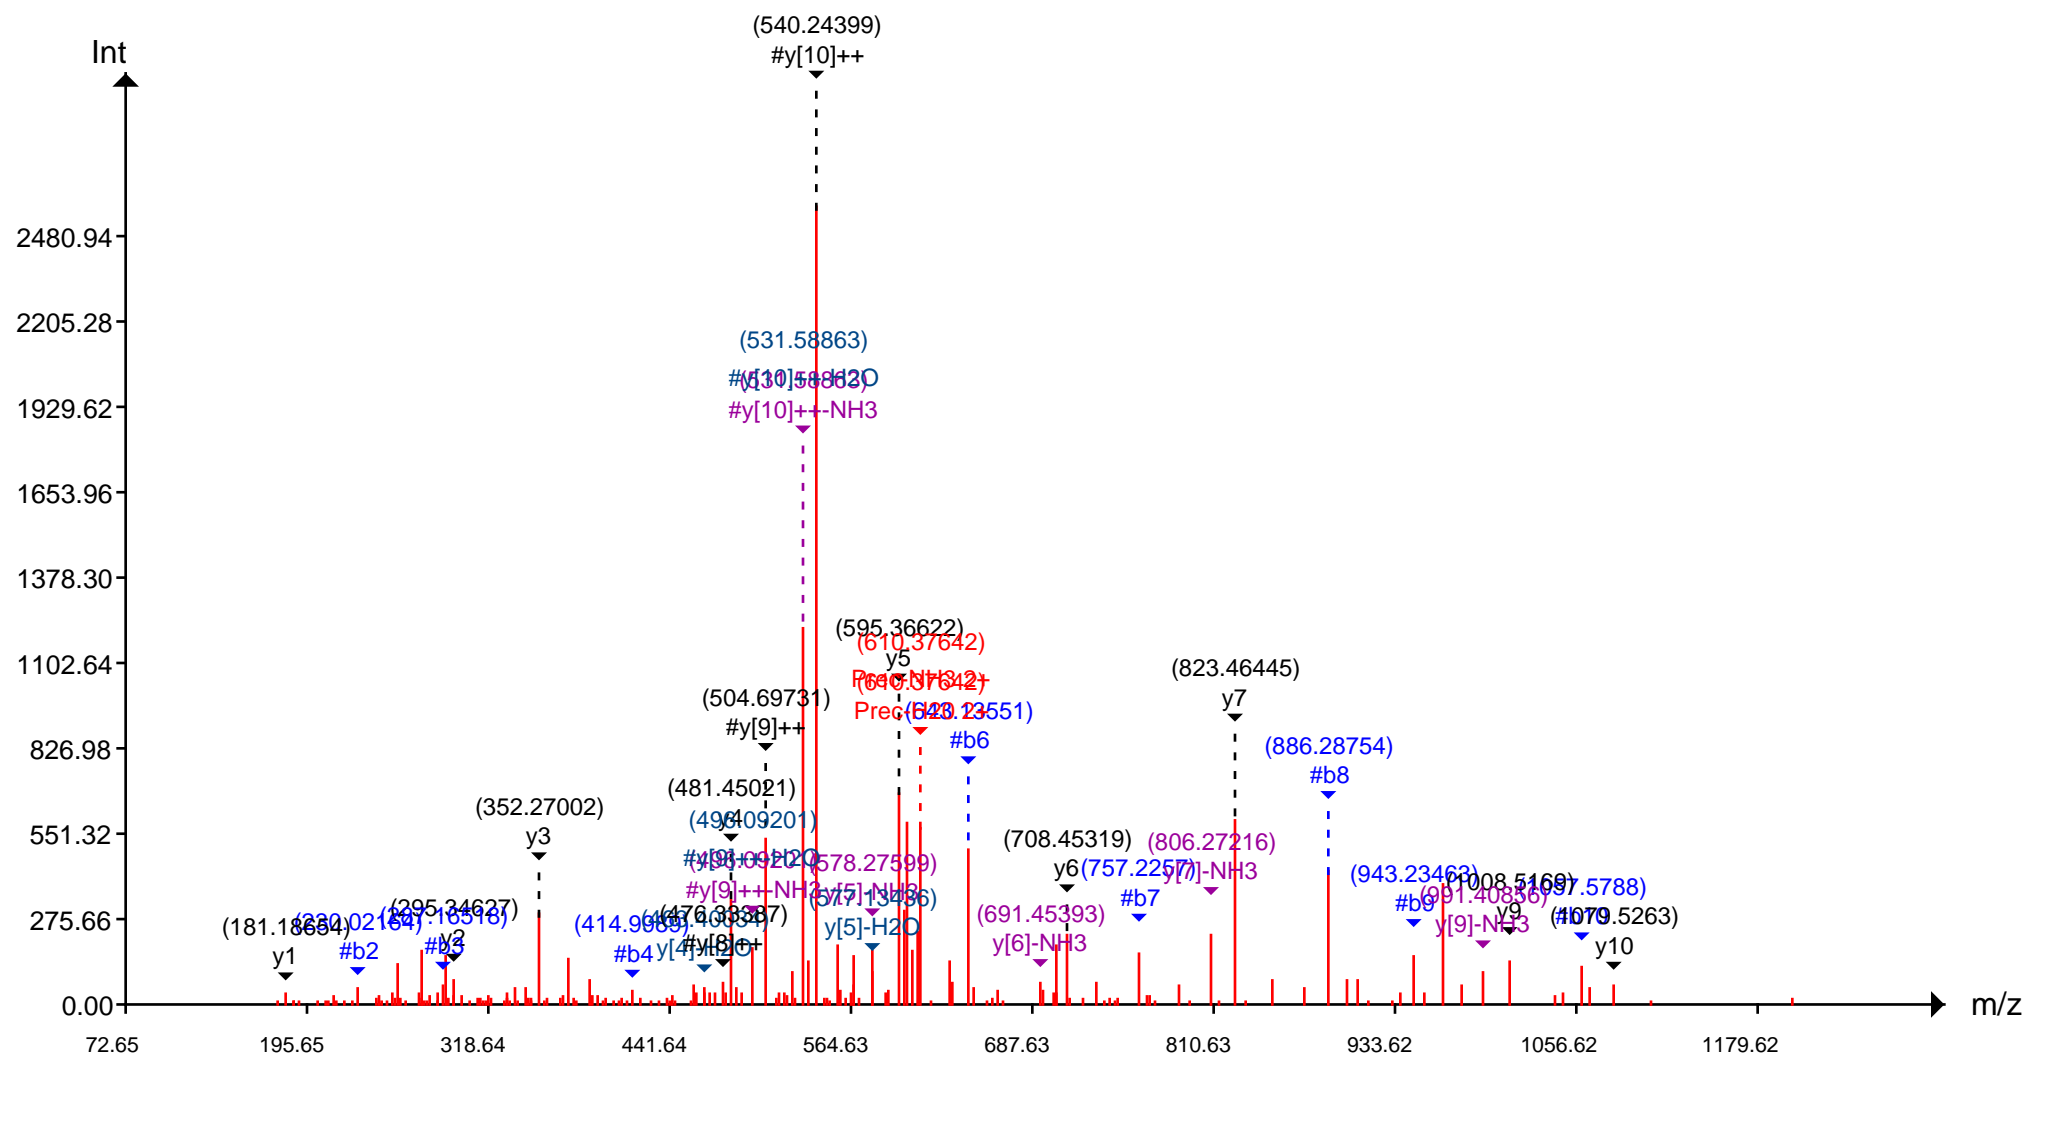

| Info                     |                            |                           |          |
|--------------------------|----------------------------|---------------------------|----------|
| <b>Modified Sequence</b> | AcD3-IAGQDLNEGNR<C13>-COOH | <b>Ion score</b>          | 66.97    |
| <b>Protein</b>           | Q61233                     | <b>Confidence level</b>   | 99.00%   |
| <b>Precursor m/z</b>     | 619.31981                  | <b>Identity Threshold</b> | 47.97    |
| <b>Charge</b>            | 2+                         | <b>Mass error</b>         | 0.001746 |

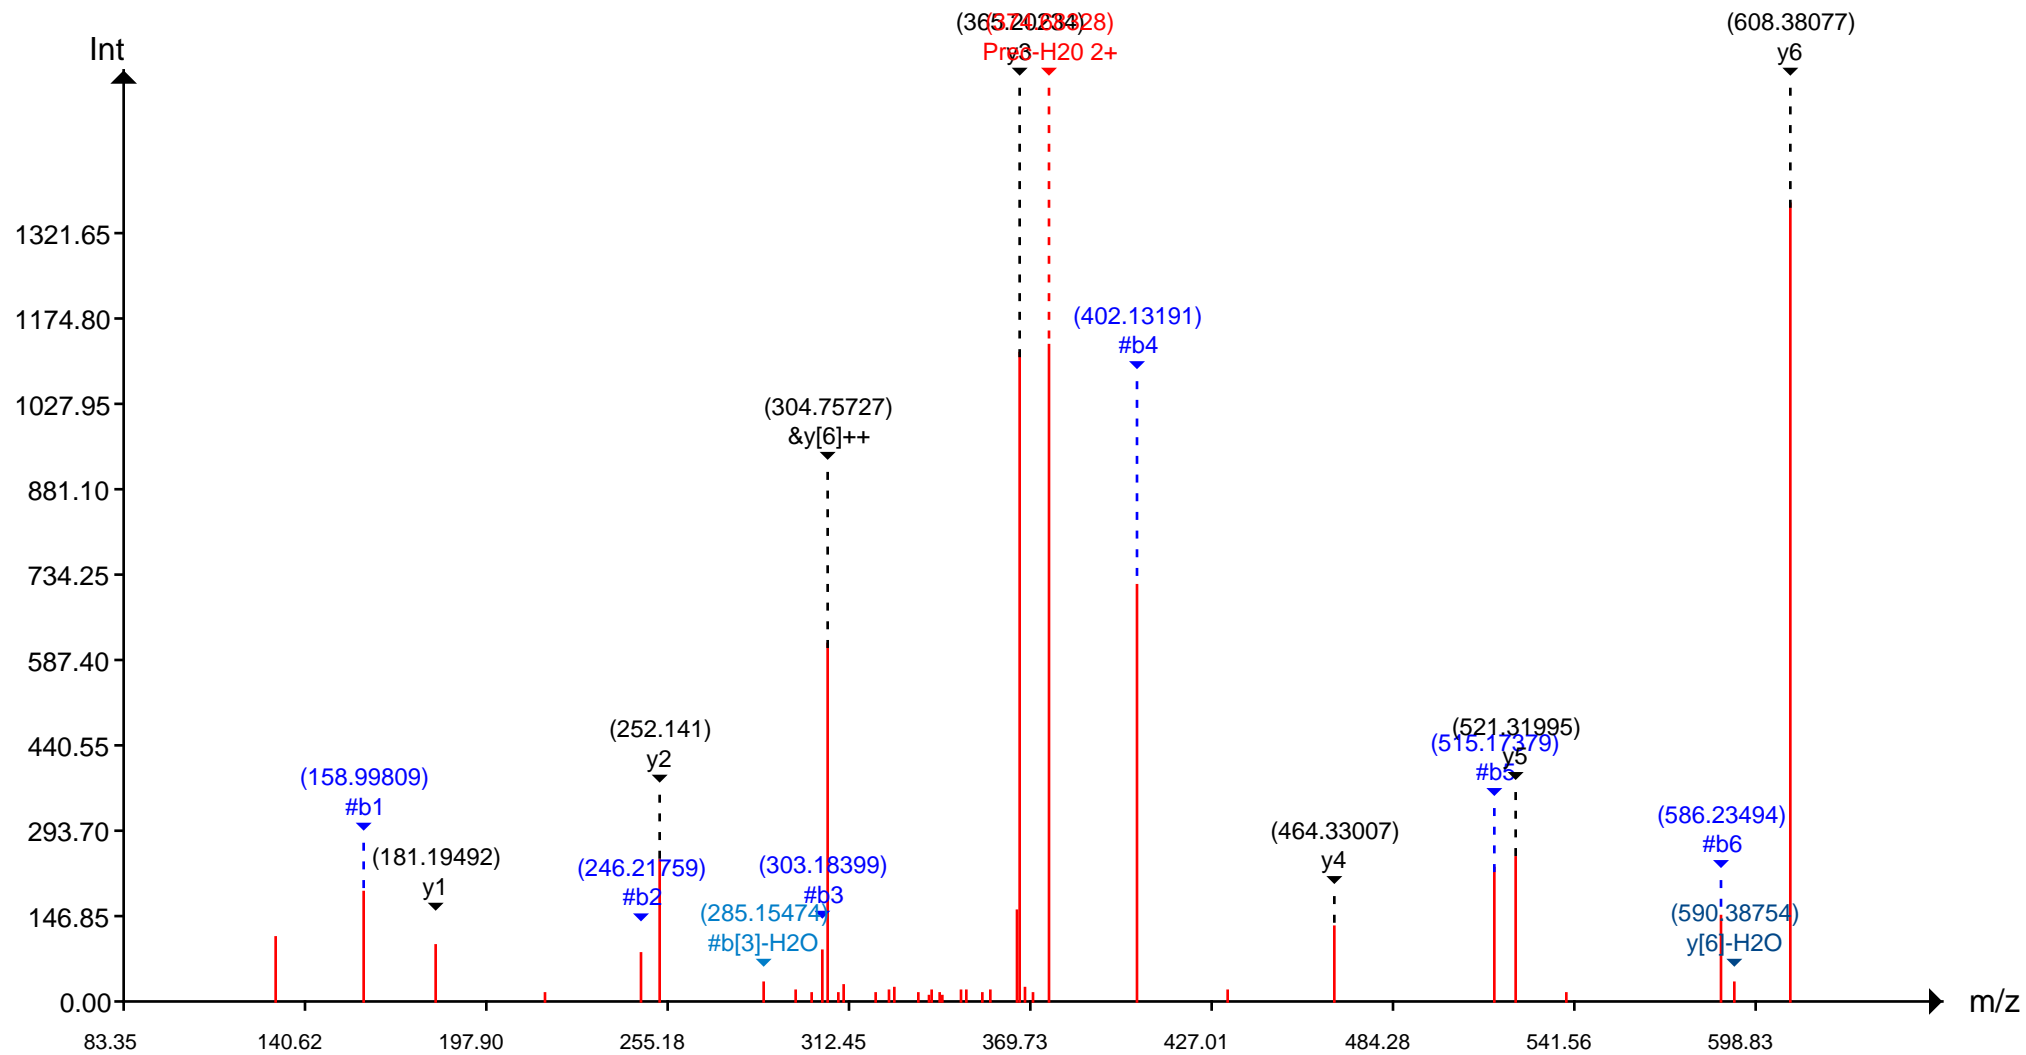

## Info

|                          |                        |                           |        |
|--------------------------|------------------------|---------------------------|--------|
| <b>Modified Sequence</b> | AcD3-ISGVIAR<C13>-COOH | <b>Ion score</b>          | 60.96  |
| <b>Protein</b>           | Q91XC8                 | <b>Confidence level</b>   | 99.00% |
| <b>Precursor m/z</b>     | 383.75148              | <b>Identity Threshold</b> | 43.01  |
| <b>Charge</b>            | 2+                     | <b>Mass error</b>         | 6.6E-5 |

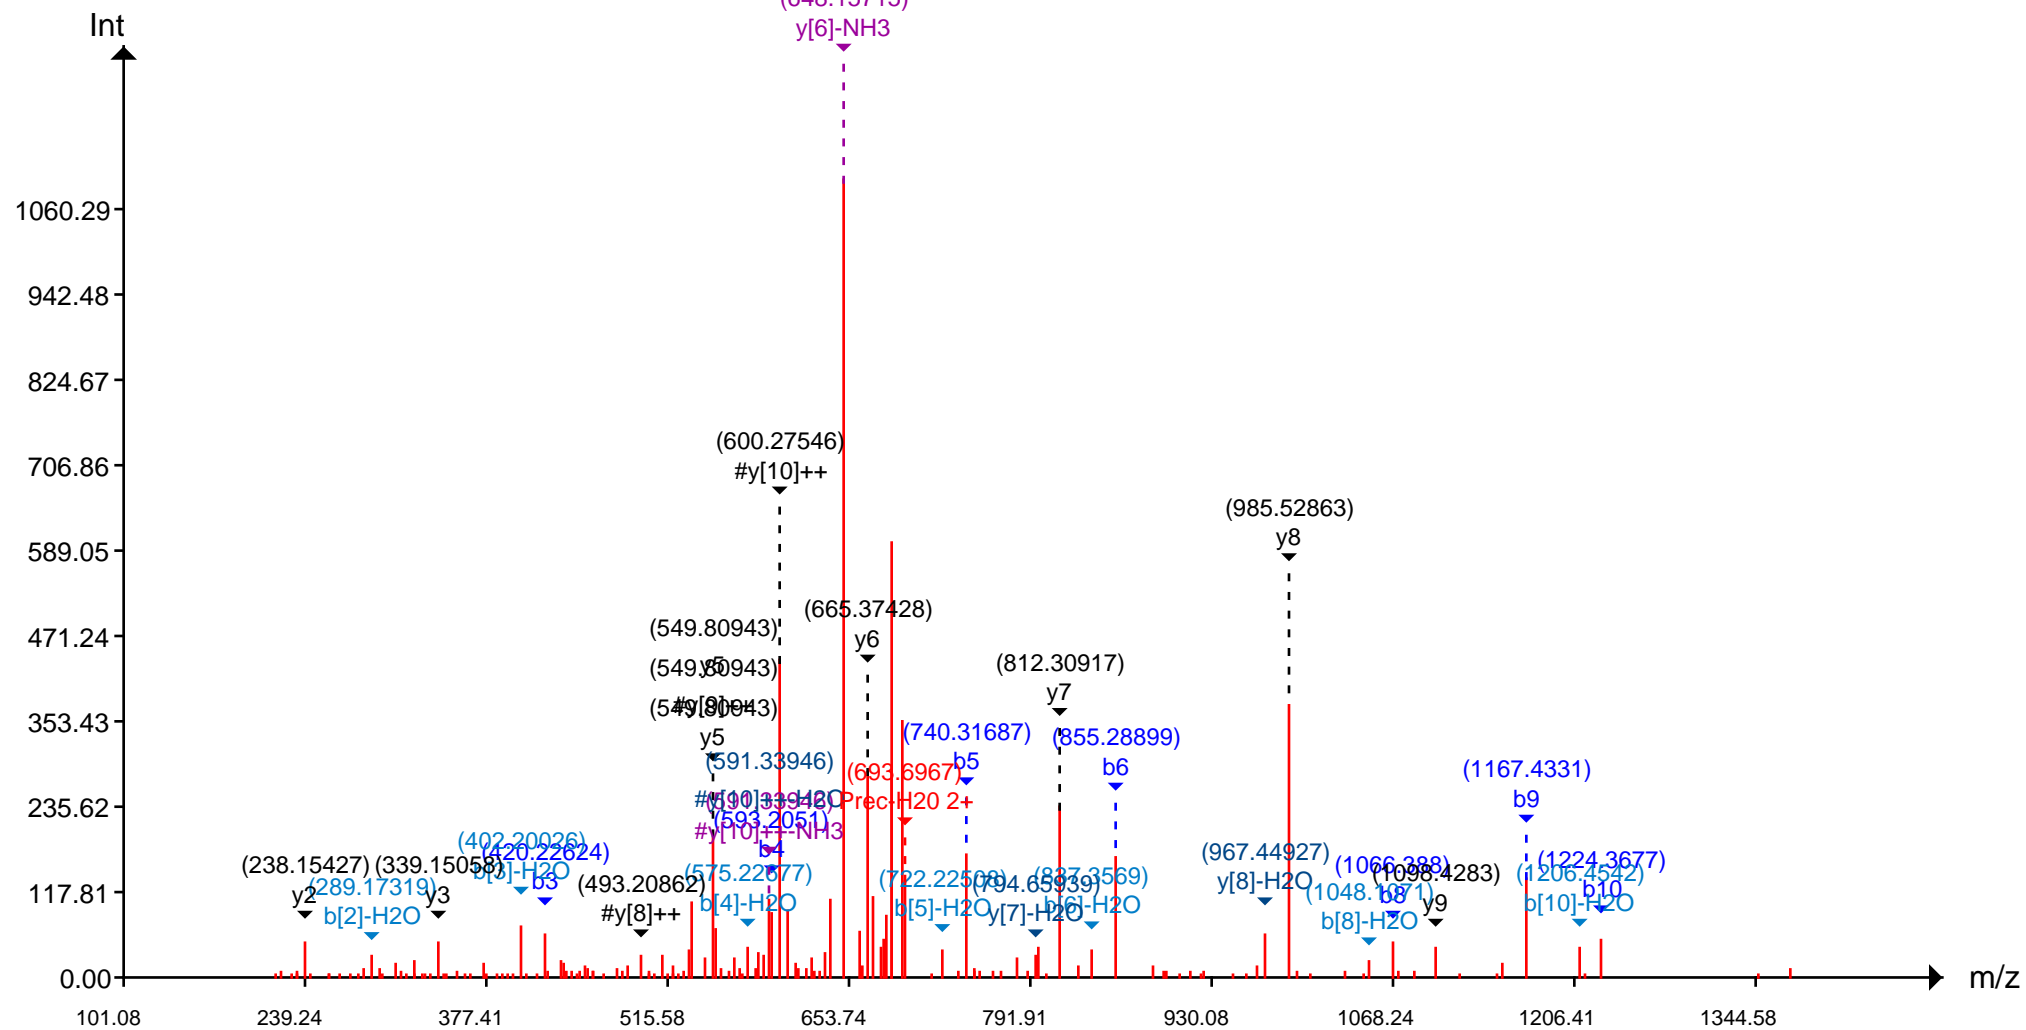

## Info

|                          |                                                |                           |          |
|--------------------------|------------------------------------------------|---------------------------|----------|
| <b>Modified Sequence</b> | AcD3-C<Cmm*>TIK<AcD3K*>M<Mox*>DPNTGR<C13>-COOH | <b>Ion score</b>          | 60.11    |
| <b>Protein</b>           | Q99020                                         | <b>Confidence level</b>   | 99.00%   |
| <b>Precursor m/z</b>     | 702.84469                                      | <b>Identity Threshold</b> | 47.11    |
| <b>Charge</b>            | 2+                                             | <b>Mass error</b>         | -3.12E-4 |



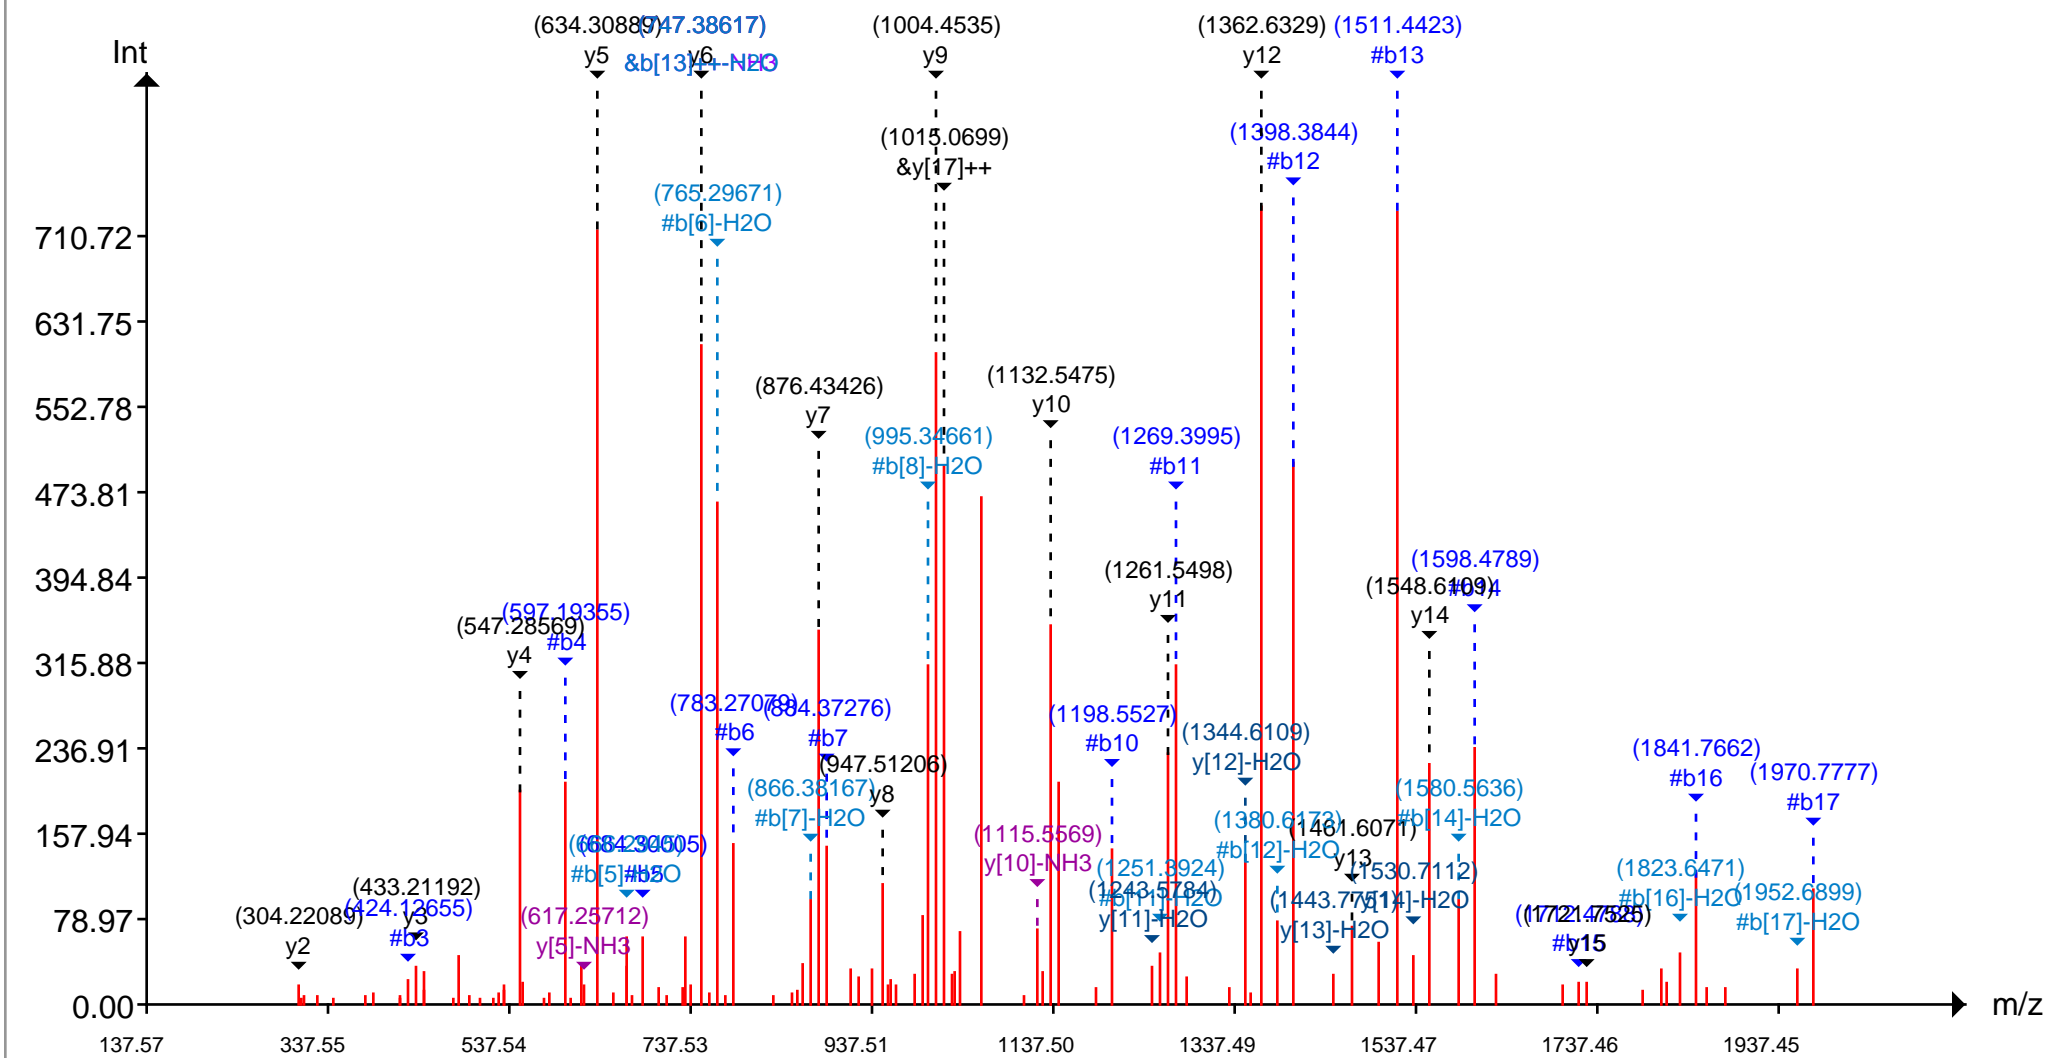

## Info

|                          |                                                  |                           |          |
|--------------------------|--------------------------------------------------|---------------------------|----------|
| <b>Modified Sequence</b> | AcD3-AC<Cmm*>M<Mox*>K<AcD3K*>SVTEQGAELSNEER-COOH | <b>Ion score</b>          | 113.99   |
| <b>Protein</b>           | P63101                                           | <b>Confidence level</b>   | 99.00%   |
| <b>Precursor m/z</b>     | 1072.9902                                        | <b>Identity Threshold</b> | 44.28    |
| <b>Charge</b>            | 2+                                               | <b>Mass error</b>         | 0.002622 |

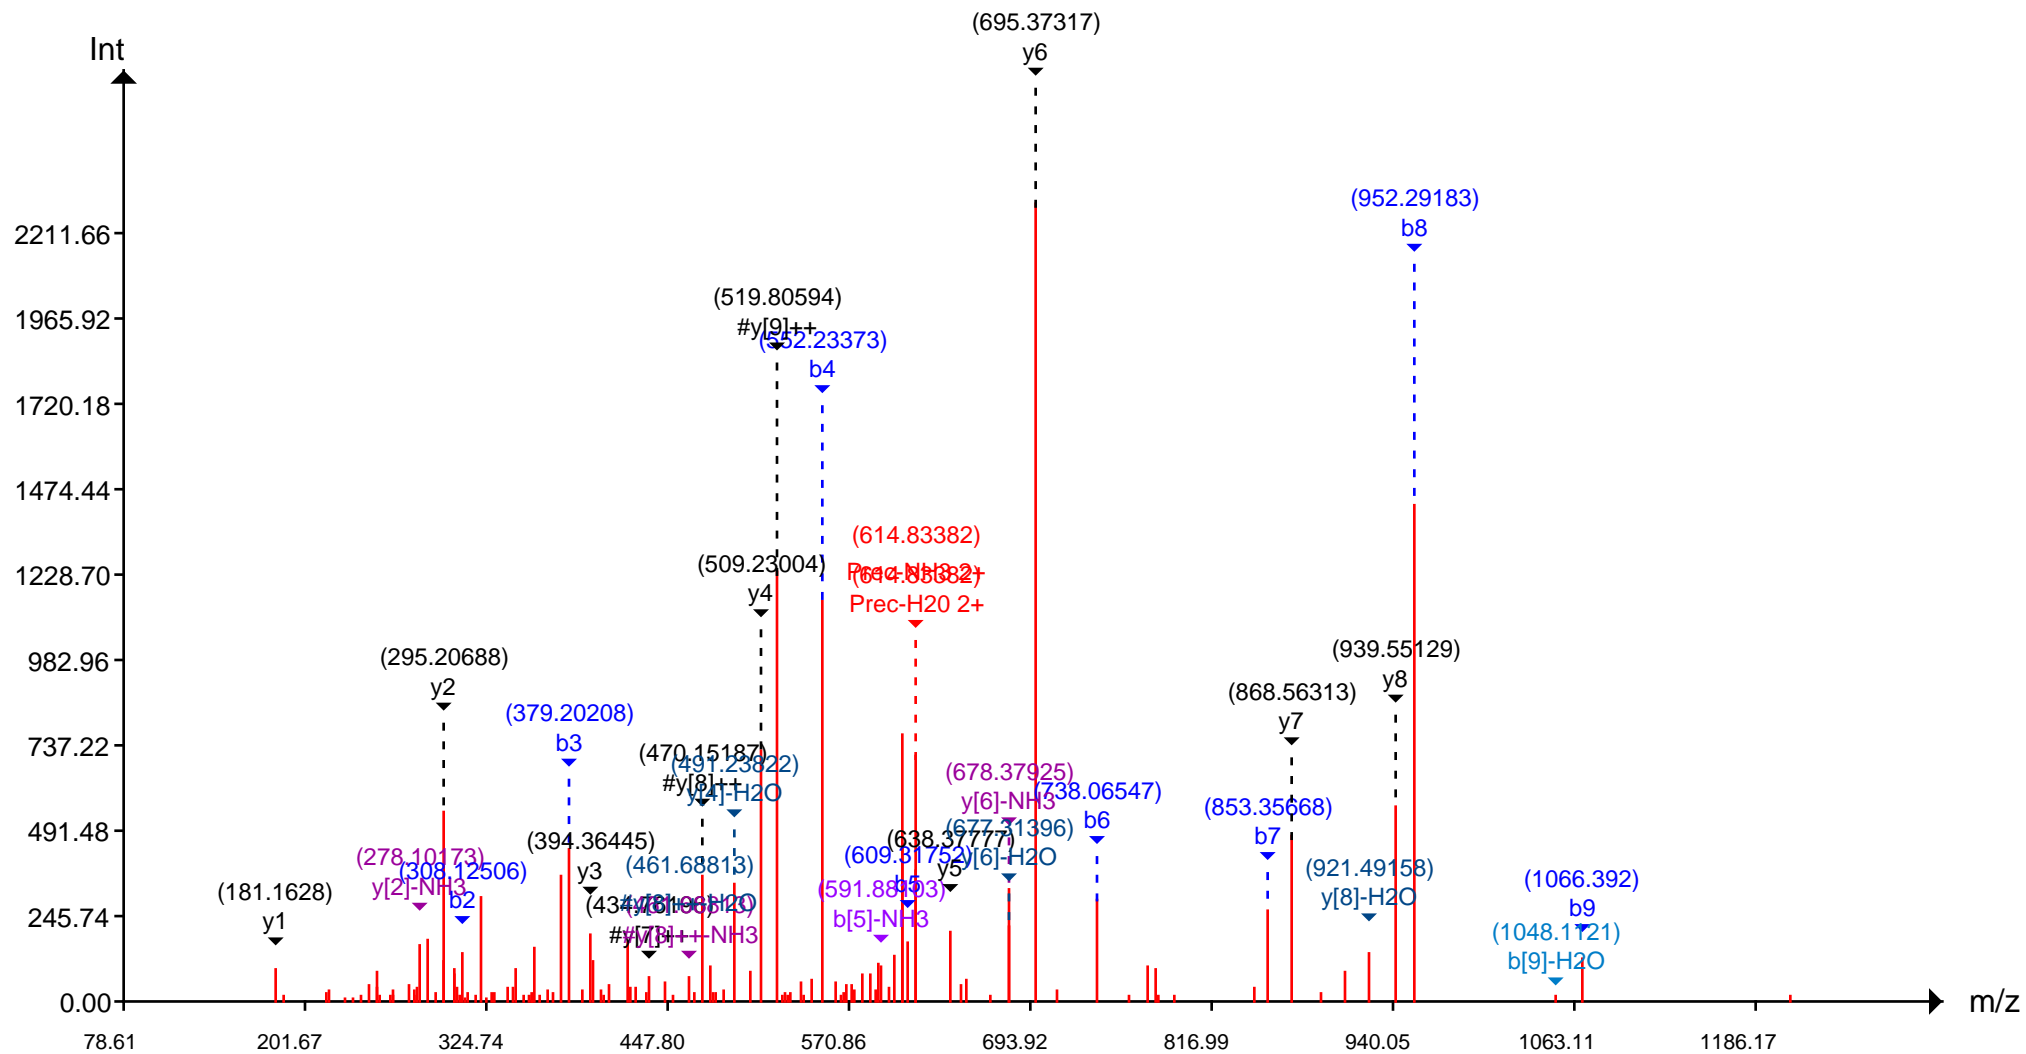

## Info

**Modified Sequence** AcD3-YVAK<AcD3K\*>GEDVNR<C13>-COOH

**Ion score** 60.27

**Protein** P62774

**Confidence level** 99.00%

**Precursor m/z** 623.83619

**Identity Threshold** 48.07

**Charge** 2+

**Mass error** 0.001074

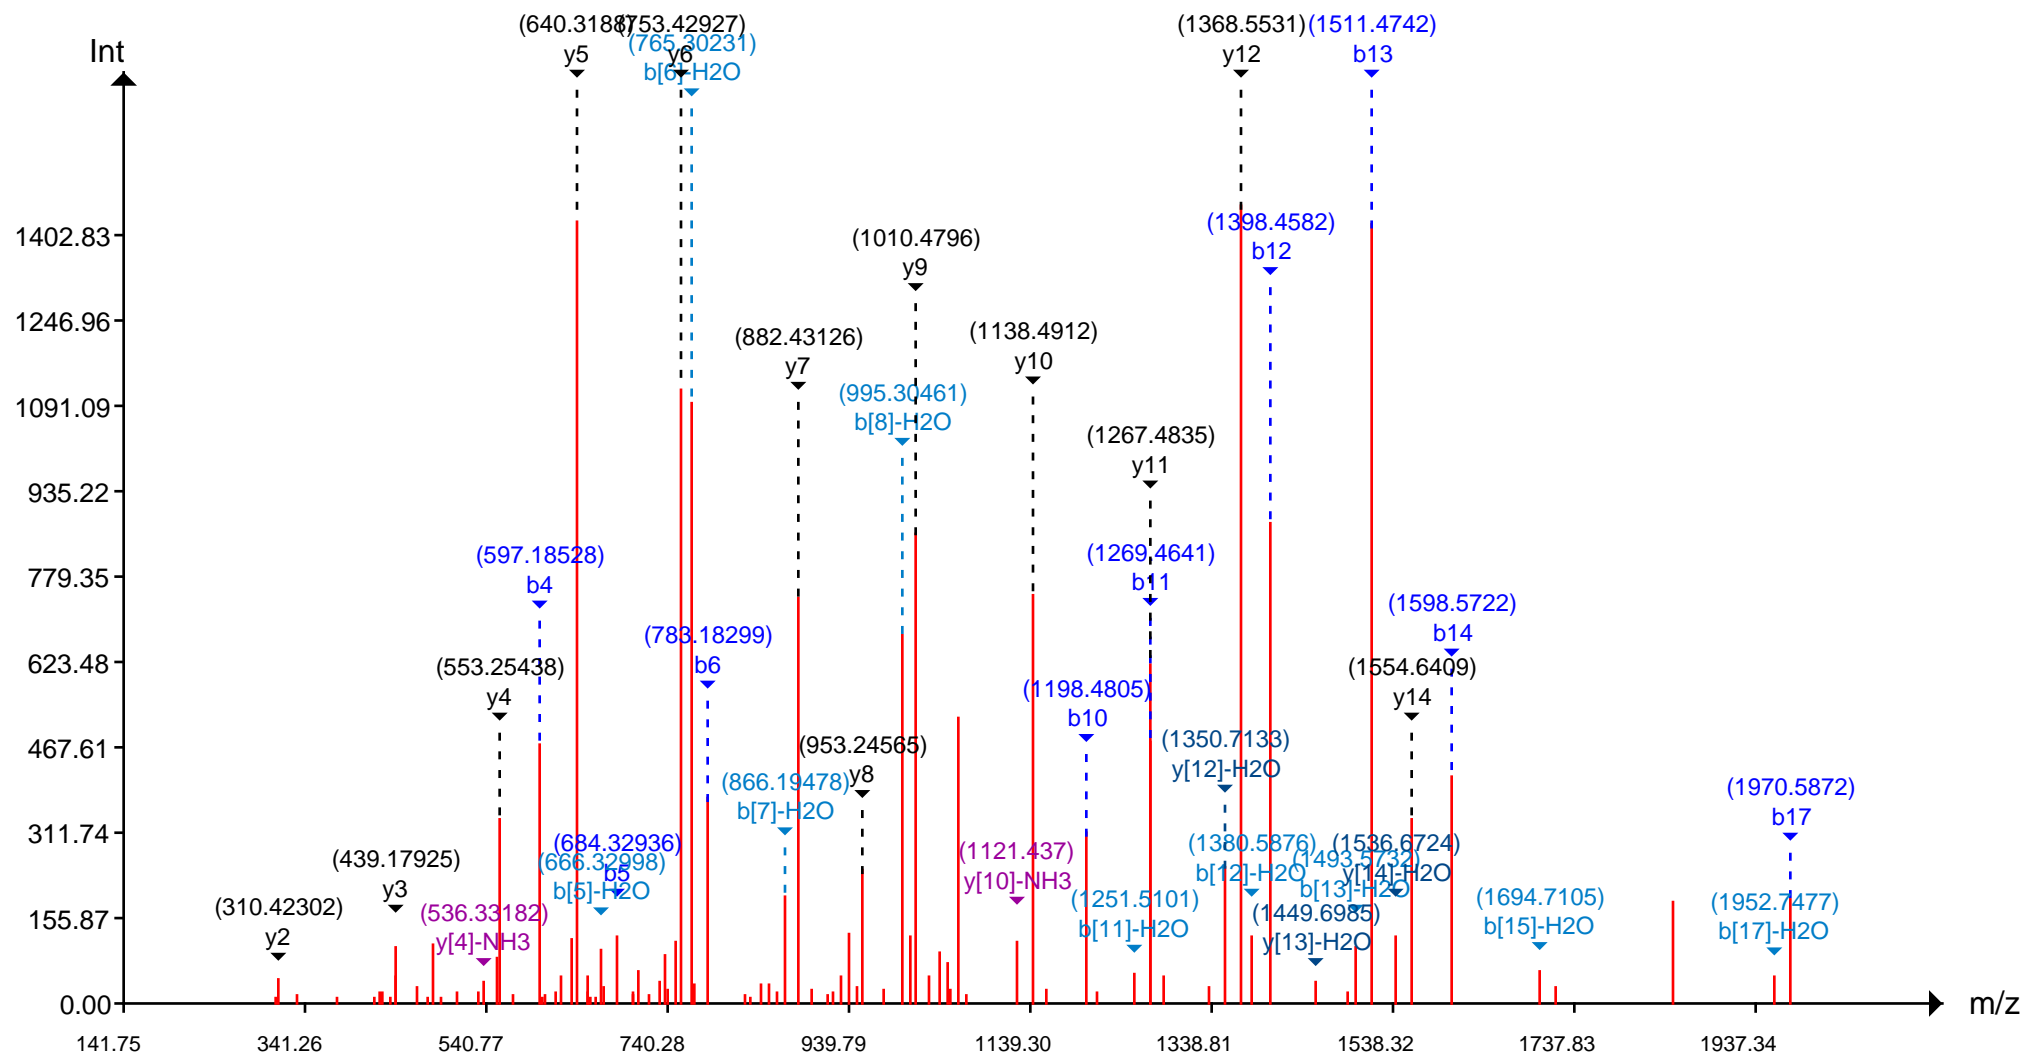

## Info

|                          |                                                       |                           |         |
|--------------------------|-------------------------------------------------------|---------------------------|---------|
| <b>Modified Sequence</b> | AcD3-AC<Cmm*>M<Mox*>K<AcD3K*>SVTEQGAELSNEER<C13>-COOH | <b>Ion score</b>          | 109.04  |
| <b>Protein</b>           | P63101                                                | <b>Confidence level</b>   | 99.00%  |
| <b>Precursor m/z</b>     | 1076.0001                                             | <b>Identity Threshold</b> | 45.24   |
| <b>Charge</b>            | 2+                                                    | <b>Mass error</b>         | 0.00228 |

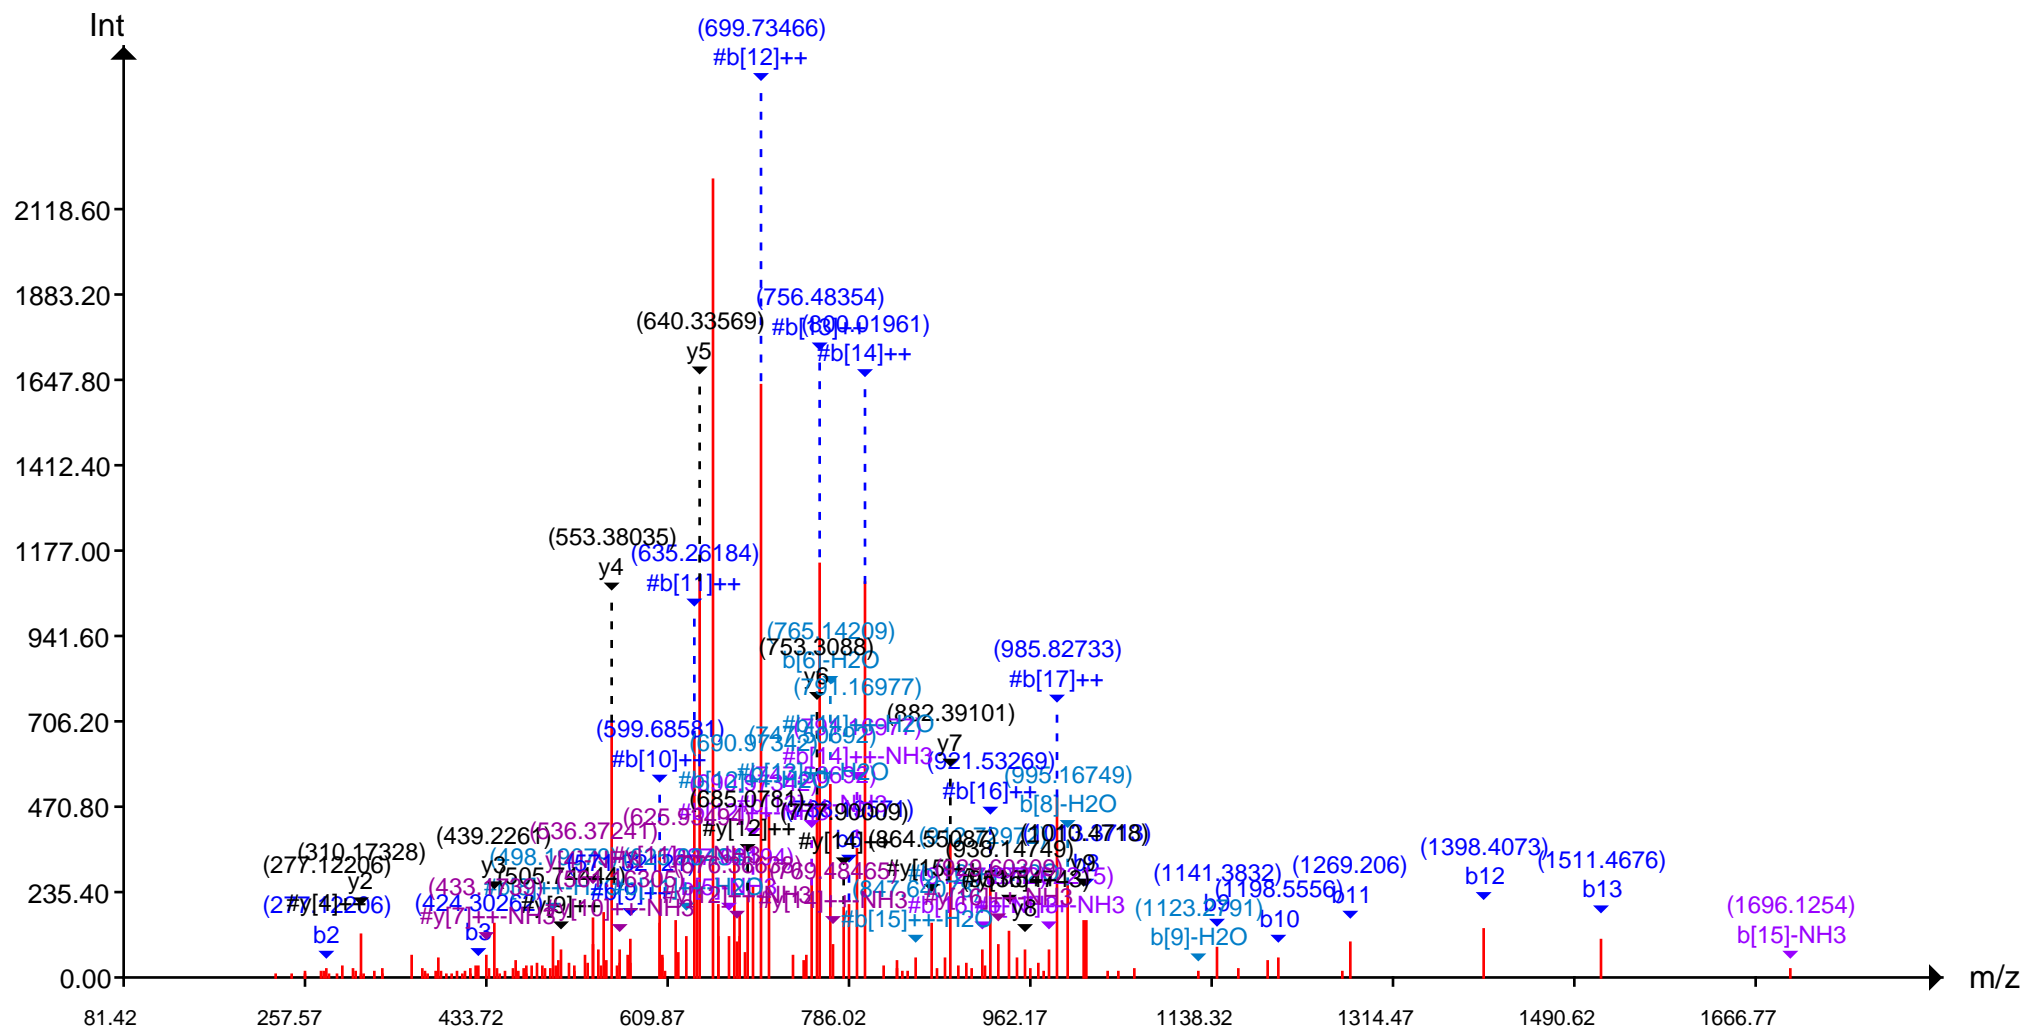

## Info

|                          |                                                       |                           |          |
|--------------------------|-------------------------------------------------------|---------------------------|----------|
| <b>Modified Sequence</b> | AcD3-AC<Cmm*>M<Mox*>K<AcD3K*>SVTEQGAELSNEER<C13>-COOH | <b>Ion score</b>          | 61.14    |
| <b>Protein</b>           | P63101                                                | <b>Confidence level</b>   | 99.00%   |
| <b>Precursor m/z</b>     | 717.66818                                             | <b>Identity Threshold</b> | 45.07    |
| <b>Charge</b>            | 3+                                                    | <b>Mass error</b>         | -6.56E-4 |

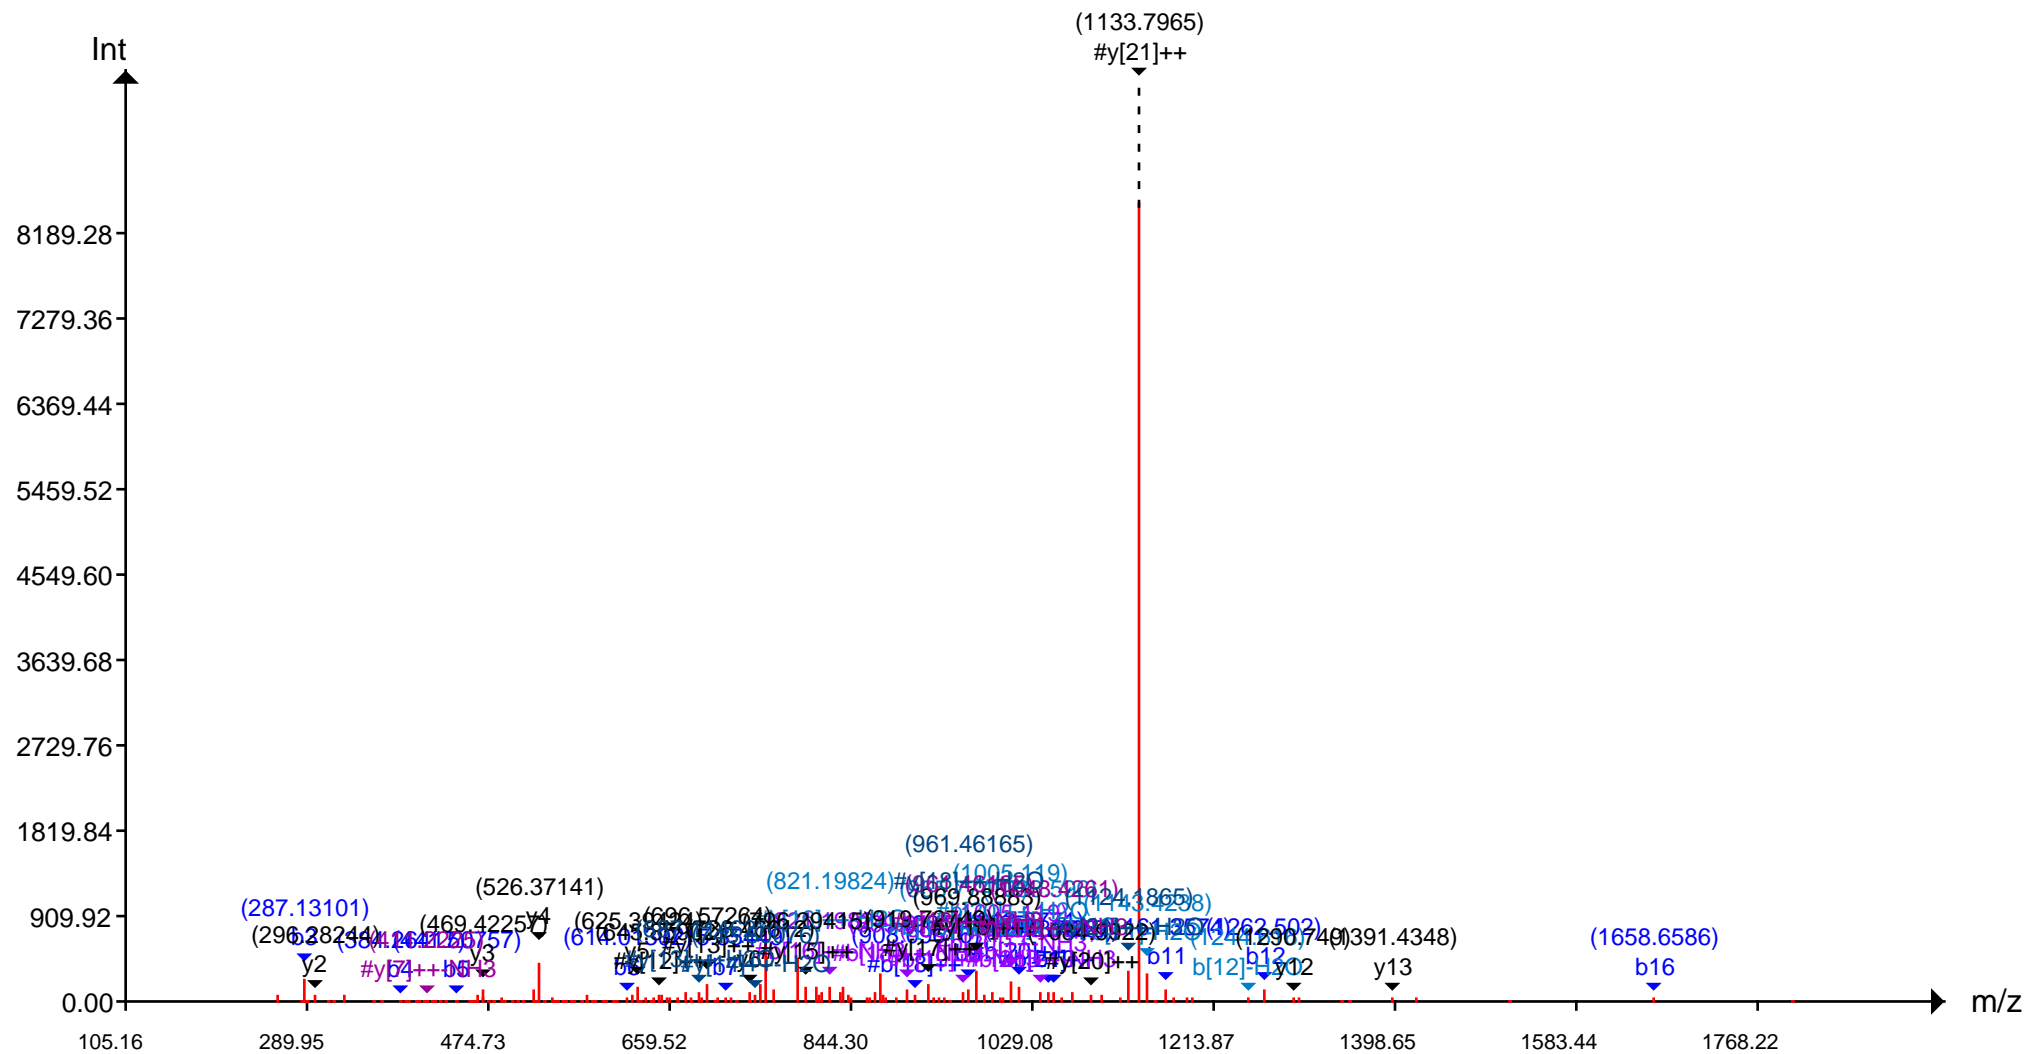

## Info

|                          |                                                         |                           |          |
|--------------------------|---------------------------------------------------------|---------------------------|----------|
| <b>Modified Sequence</b> | AcD3-AAVPGK<AcD3K*>TFVSITPAEVGVLVGK<AcD3K*>DR<C13>-COOH | <b>Ion score</b>          | 44.47    |
| <b>Protein</b>           | P62962                                                  | <b>Confidence level</b>   | 99.00%   |
| <b>Precursor m/z</b>     | 851.49705                                               | <b>Identity Threshold</b> | 42.20    |
| <b>Charge</b>            | 3+                                                      | <b>Mass error</b>         | 0.002571 |

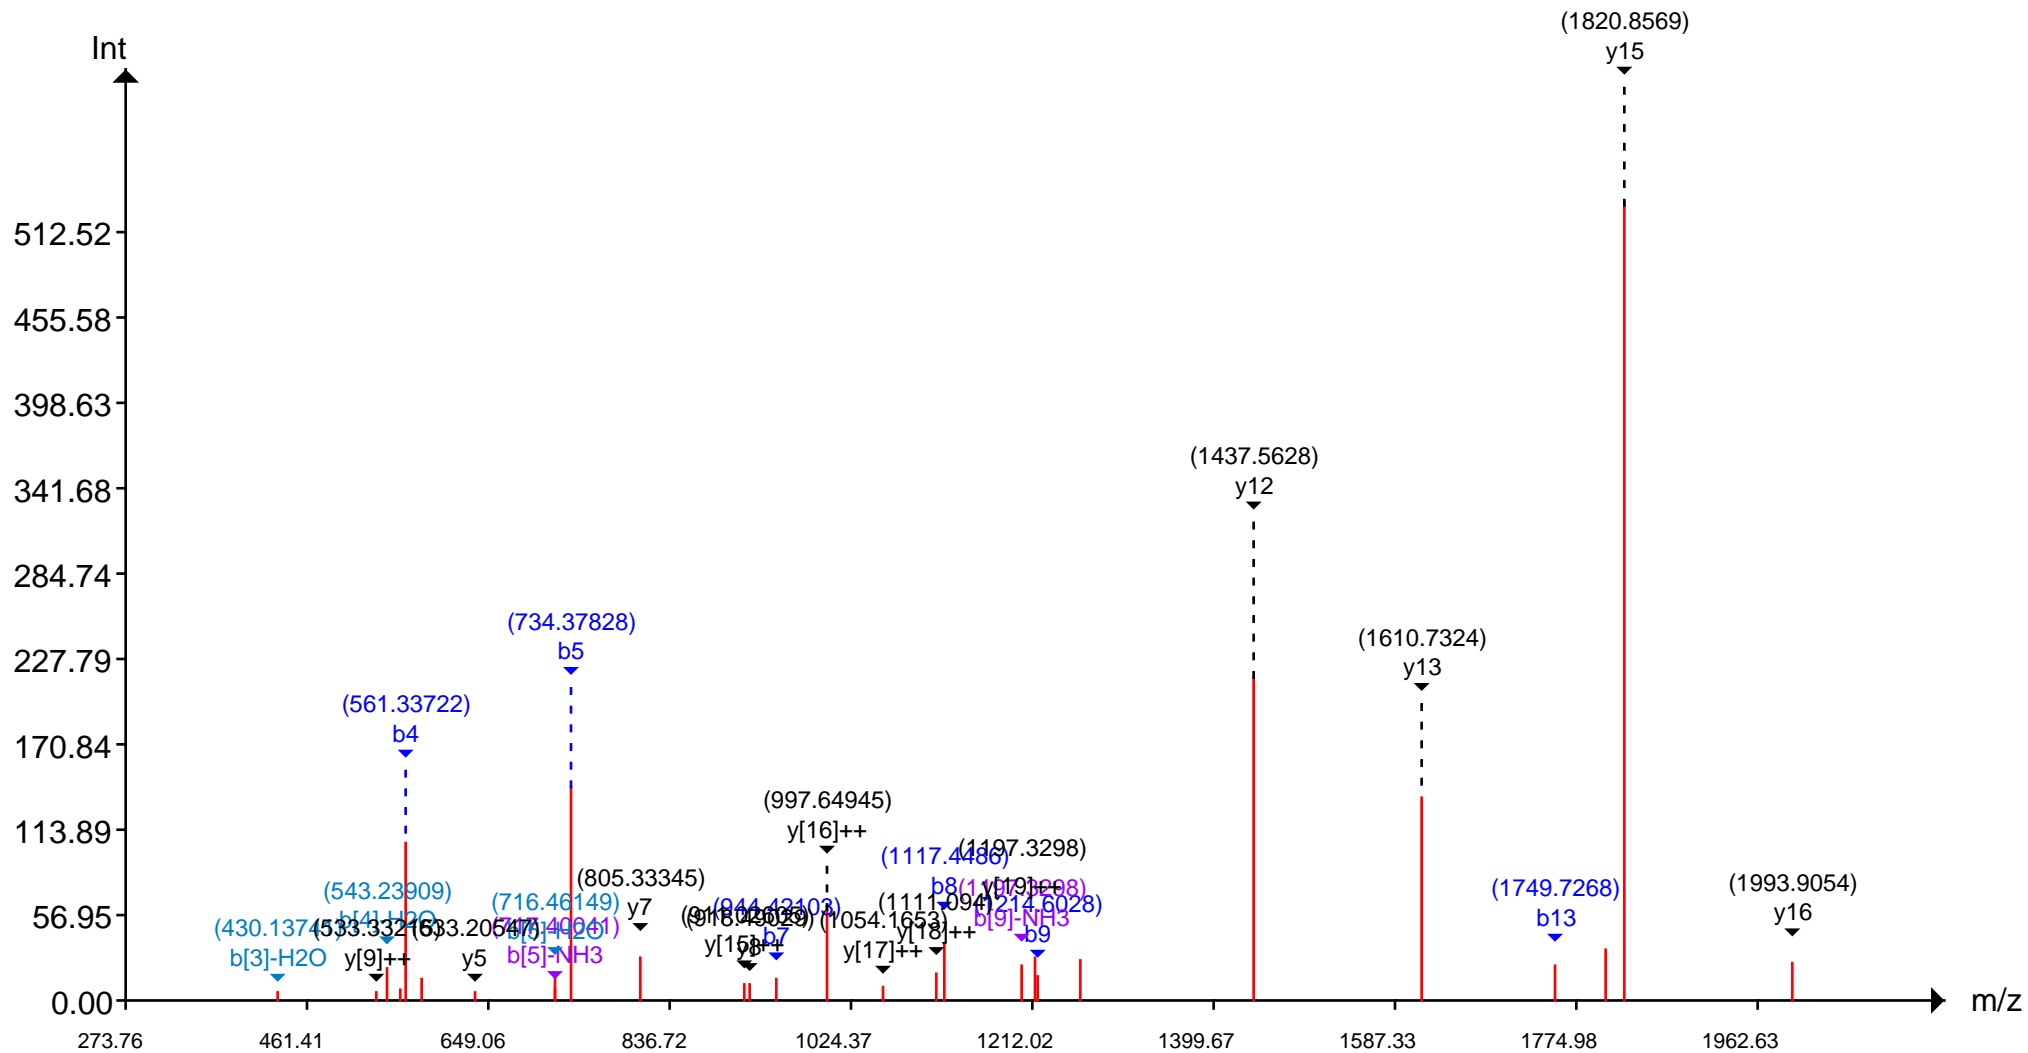

## Info

|                          |                                                              |                           |          |
|--------------------------|--------------------------------------------------------------|---------------------------|----------|
| <b>Modified Sequence</b> | AcD3-DK<AcD3K*>NLK<AcD3K*>PIK<AcD3K*>PM<Mox*>QFLGDEETVR-COOH | <b>Ion score</b>          | 62.45    |
| <b>Protein</b>           | Q9DBJ1                                                       | <b>Confidence level</b>   | 99.00%   |
| <b>Precursor m/z</b>     | 1277.6861                                                    | <b>Identity Threshold</b> | 47.20    |
| <b>Charge</b>            | 2+                                                           | <b>Mass error</b>         | 0.003842 |

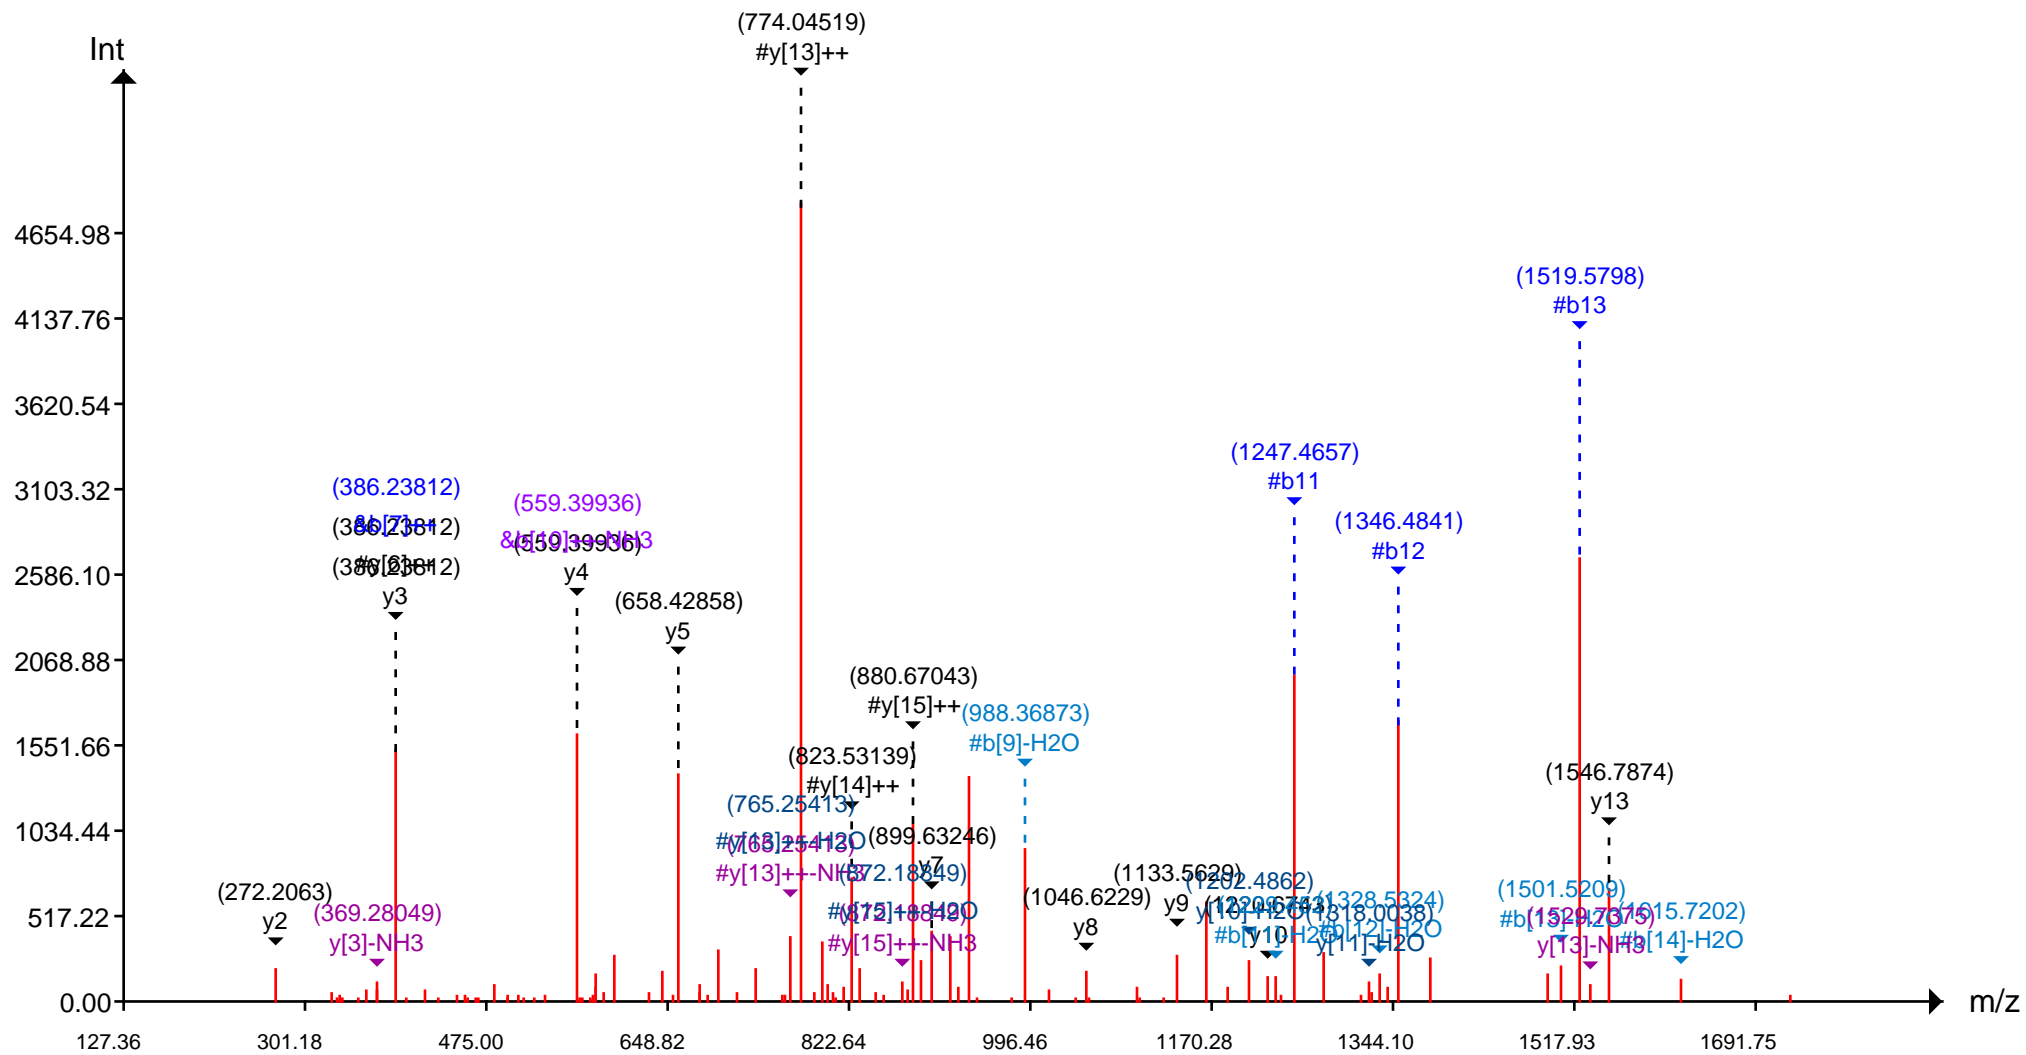

## Info

|                          |                                    |                           |         |
|--------------------------|------------------------------------|---------------------------|---------|
| <b>Modified Sequence</b> | AcD3-VDVPNDSSFQIVK<AcD3K*>NPR-COOH | <b>Ion score</b>          | 53.41   |
| <b>Protein</b>           | Q61176                             | <b>Confidence level</b>   | 99.00%  |
| <b>Precursor m/z</b>     | 953.00435                          | <b>Identity Threshold</b> | 48.16   |
| <b>Charge</b>            | 2+                                 | <b>Mass error</b>         | 0.00309 |

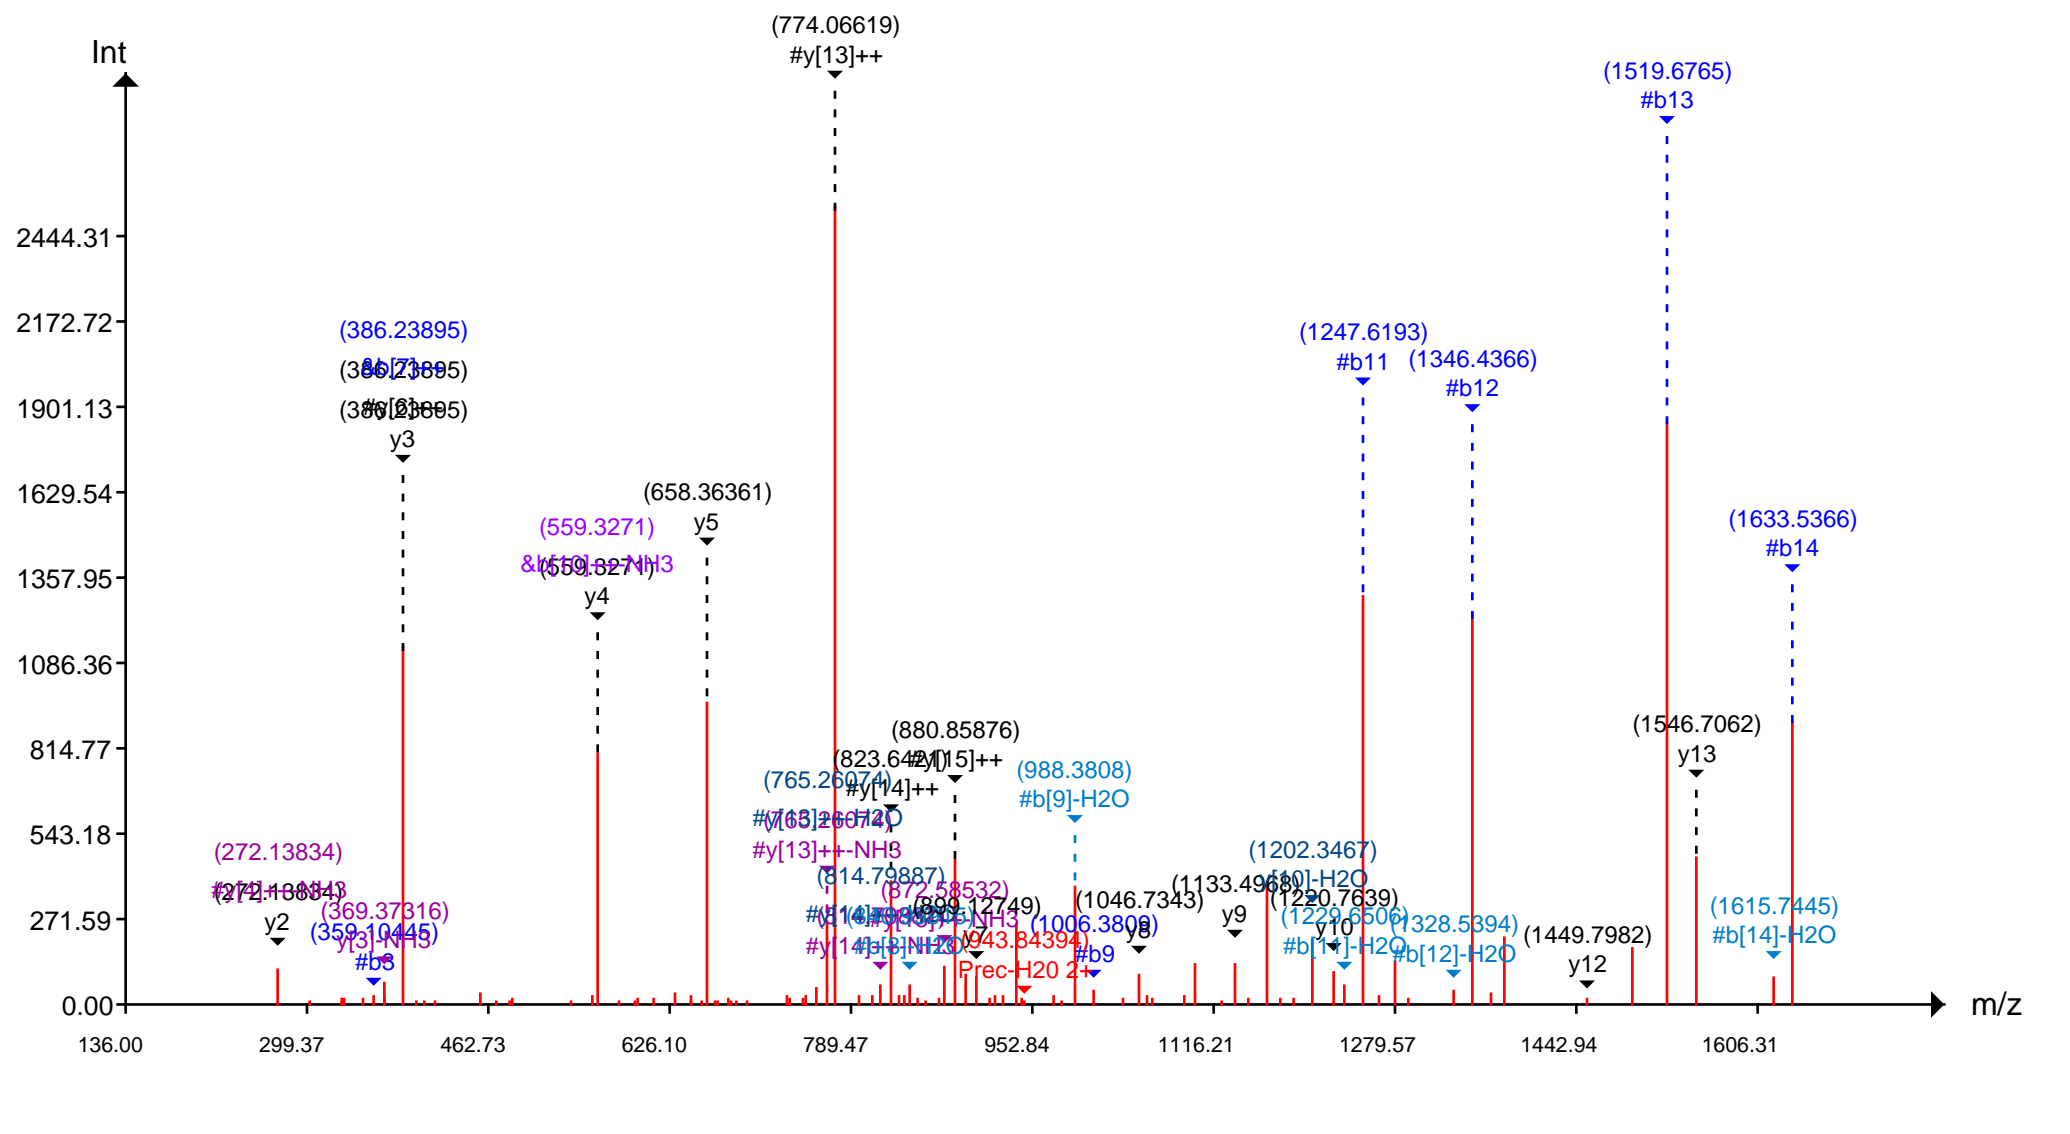

| Info                     |                                    |                           |         |
|--------------------------|------------------------------------|---------------------------|---------|
| <b>Modified Sequence</b> | AcD3-VDVPNDSSFQIVK<AcD3K*>NPR-COOH | <b>Ion score</b>          | 59.2    |
| <b>Protein</b>           | Q61176                             | <b>Confidence level</b>   | 99.00%  |
| <b>Precursor m/z</b>     | 953.00402                          | <b>Identity Threshold</b> | 48.15   |
| <b>Charge</b>            | 2+                                 | <b>Mass error</b>         | 0.00243 |



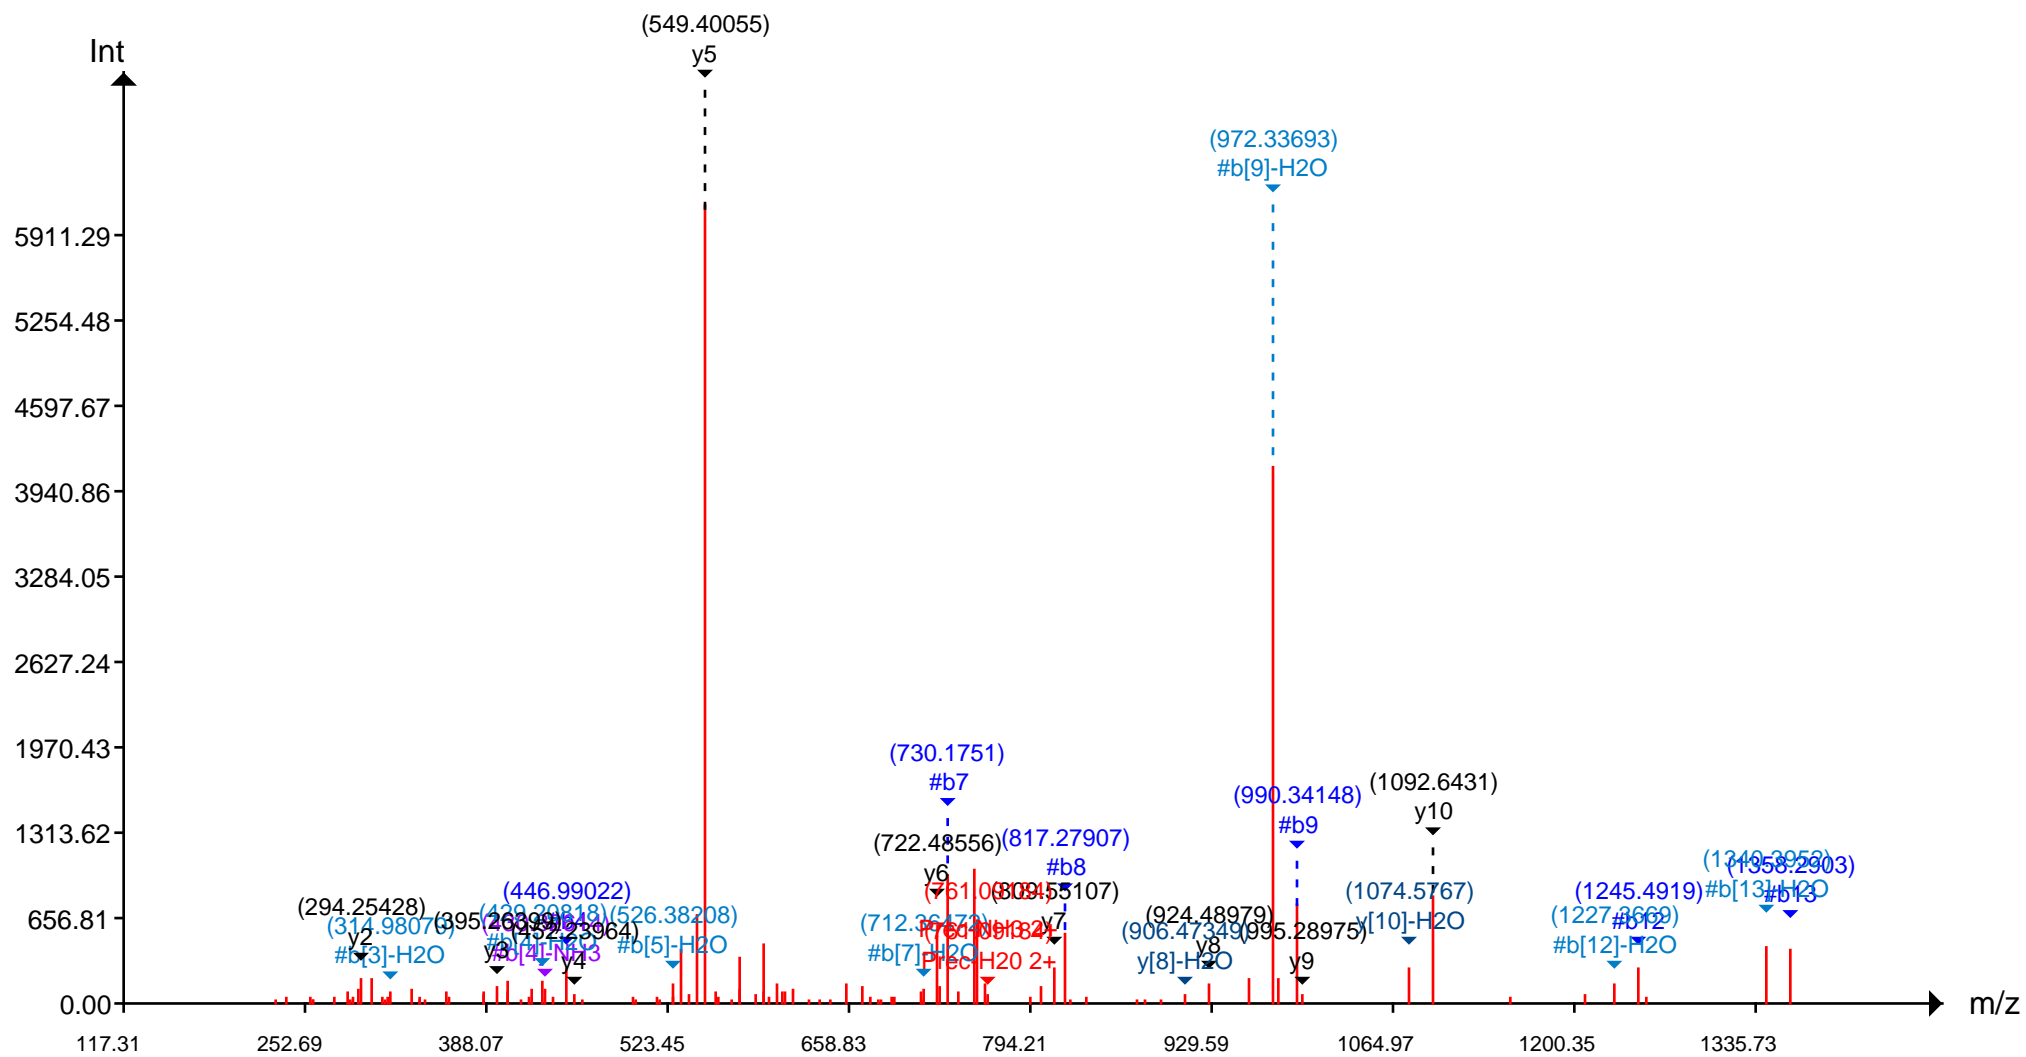

## Info

|                          |                                       |                           |          |
|--------------------------|---------------------------------------|---------------------------|----------|
| <b>Modified Sequence</b> | AcD3-GETNPADSK<AcD3K*>PGTIR<C13>-COOH | <b>Ion score</b>          | 54.09    |
| <b>Protein</b>           | P15532, Q01768                        | <b>Confidence level</b>   | 99.00%   |
| <b>Precursor m/z</b>     | 769.90473                             | <b>Identity Threshold</b> | 48.13    |
| <b>Charge</b>            | 2+                                    | <b>Mass error</b>         | -1.36E-4 |

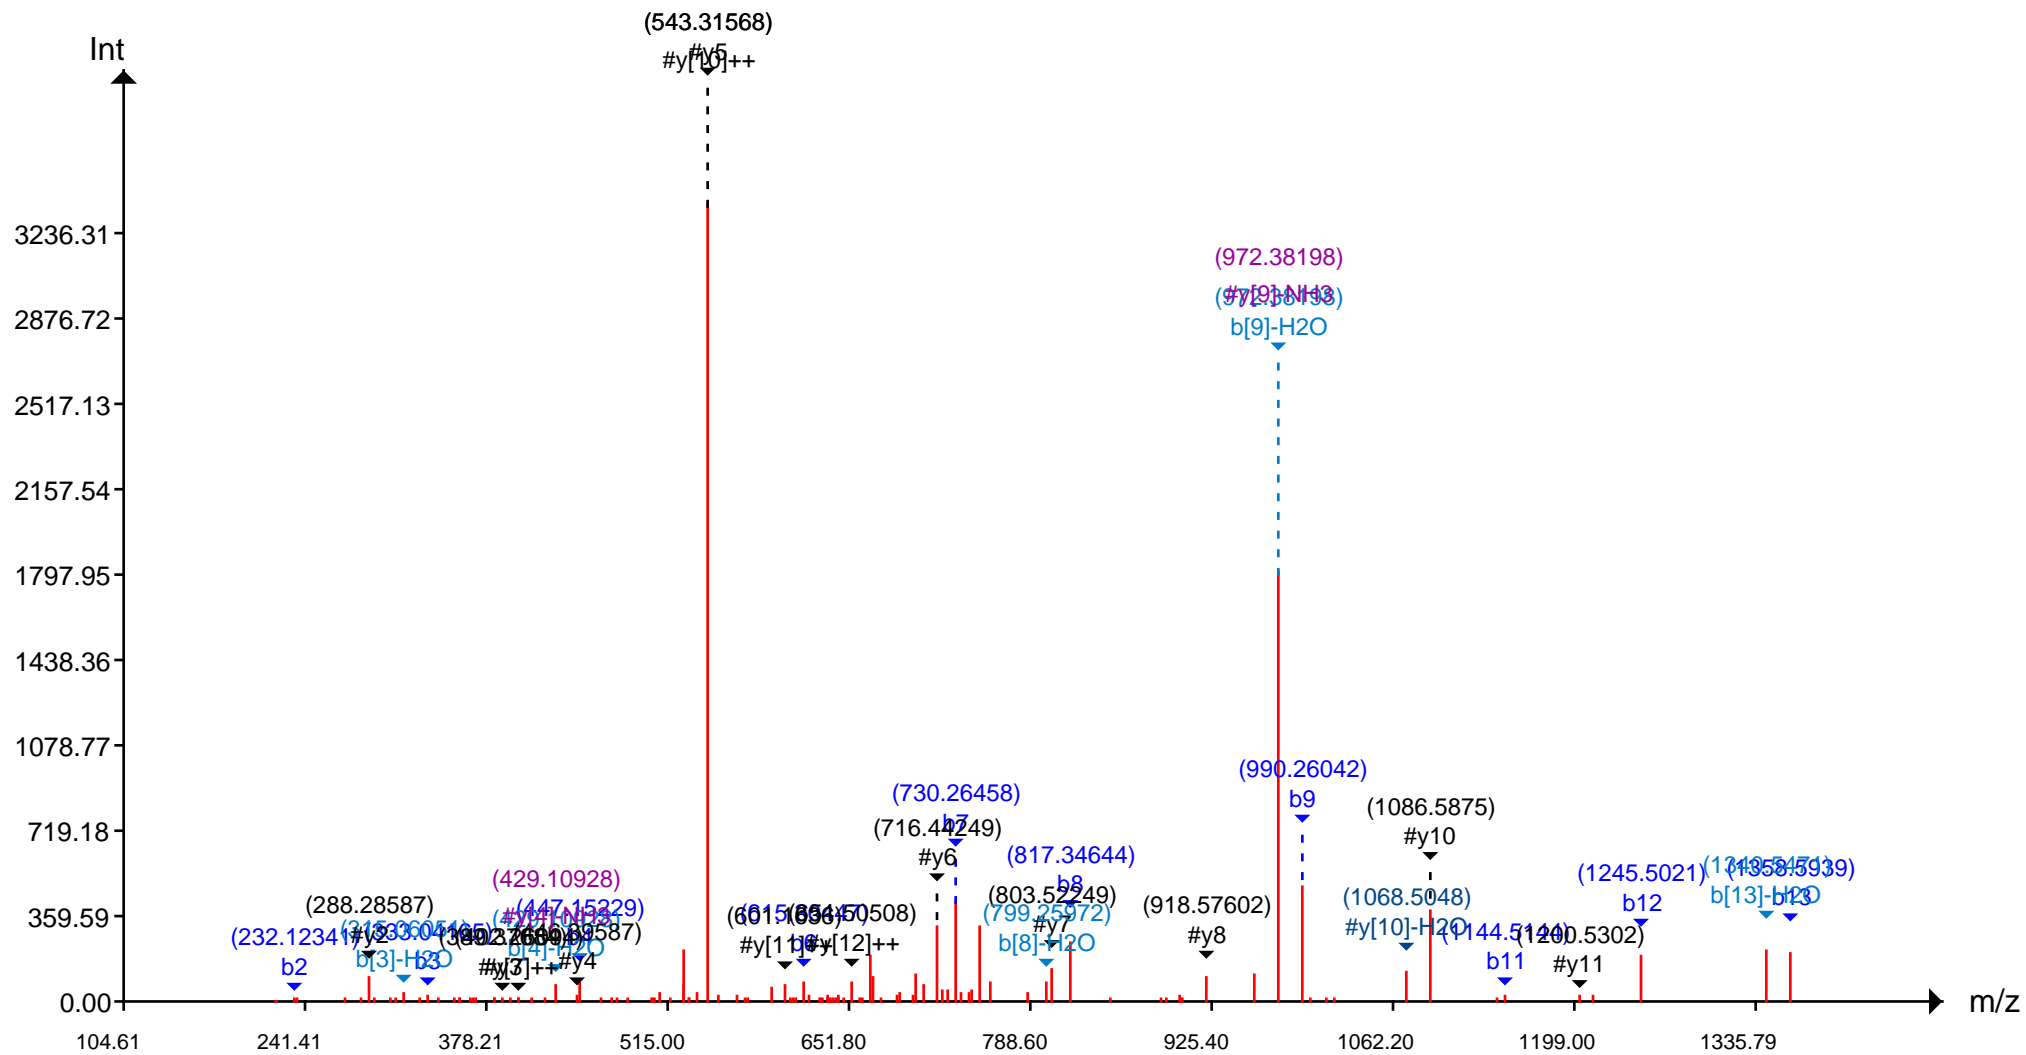

## Info

|                          |                                  |                           |         |
|--------------------------|----------------------------------|---------------------------|---------|
| <b>Modified Sequence</b> | AcD3-GETNPADSK<AcD3K*>PGTIR-COOH | <b>Ion score</b>          | 77.24   |
| <b>Protein</b>           | P15532, Q01768                   | <b>Confidence level</b>   | 99.00%  |
| <b>Precursor m/z</b>     | 766.89491                        | <b>Identity Threshold</b> | 48.07   |
| <b>Charge</b>            | 2+                               | <b>Mass error</b>         | 3.66E-4 |

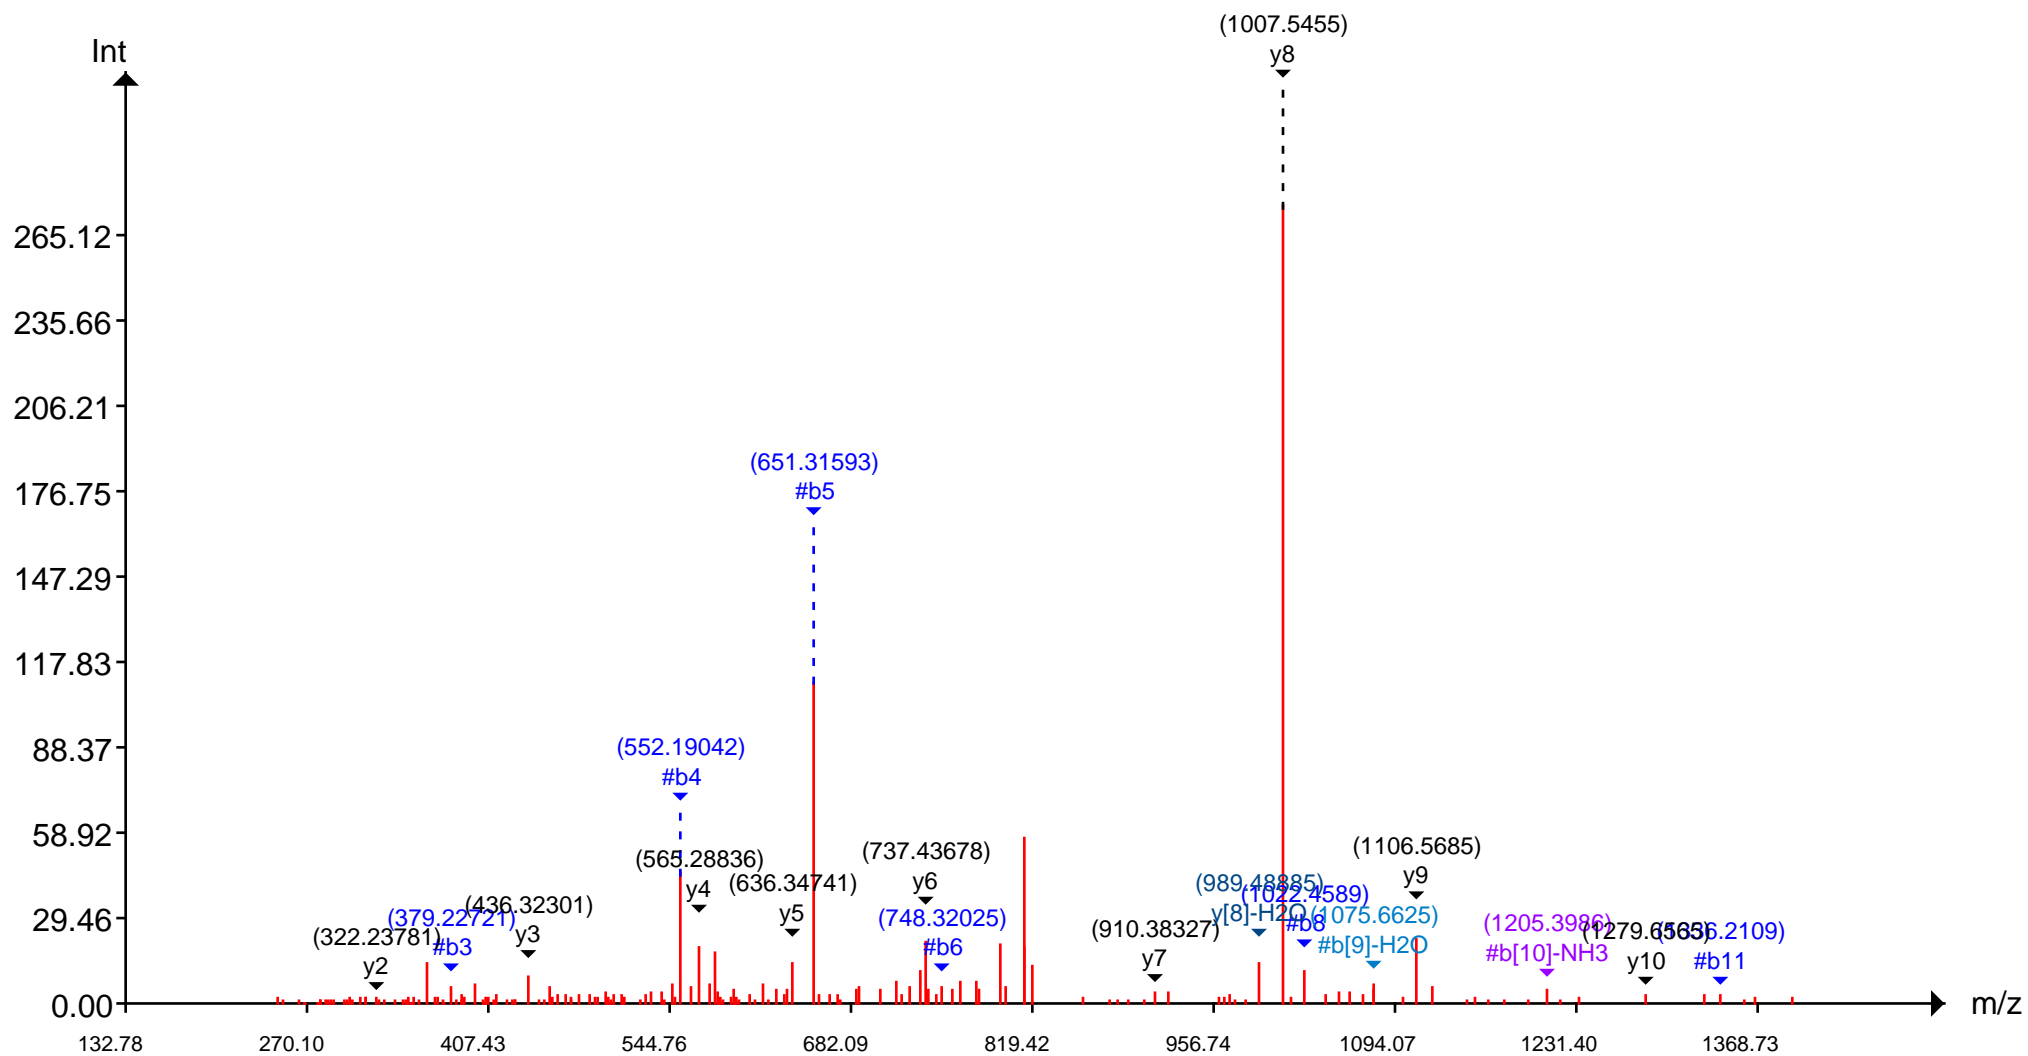

## Info

|                          |                                         |                           |          |
|--------------------------|-----------------------------------------|---------------------------|----------|
| <b>Modified Sequence</b> | AcD3-FADK<AcD3K*>VPK<AcD3K*>TAENFR-COOH | <b>Ion score</b>          | 49.36    |
| <b>Protein</b>           | P17742                                  | <b>Confidence level</b>   | 99.00%   |
| <b>Precursor m/z</b>     | 829.44951                               | <b>Identity Threshold</b> | 47.80    |
| <b>Charge</b>            | 2+                                      | <b>Mass error</b>         | 0.002312 |

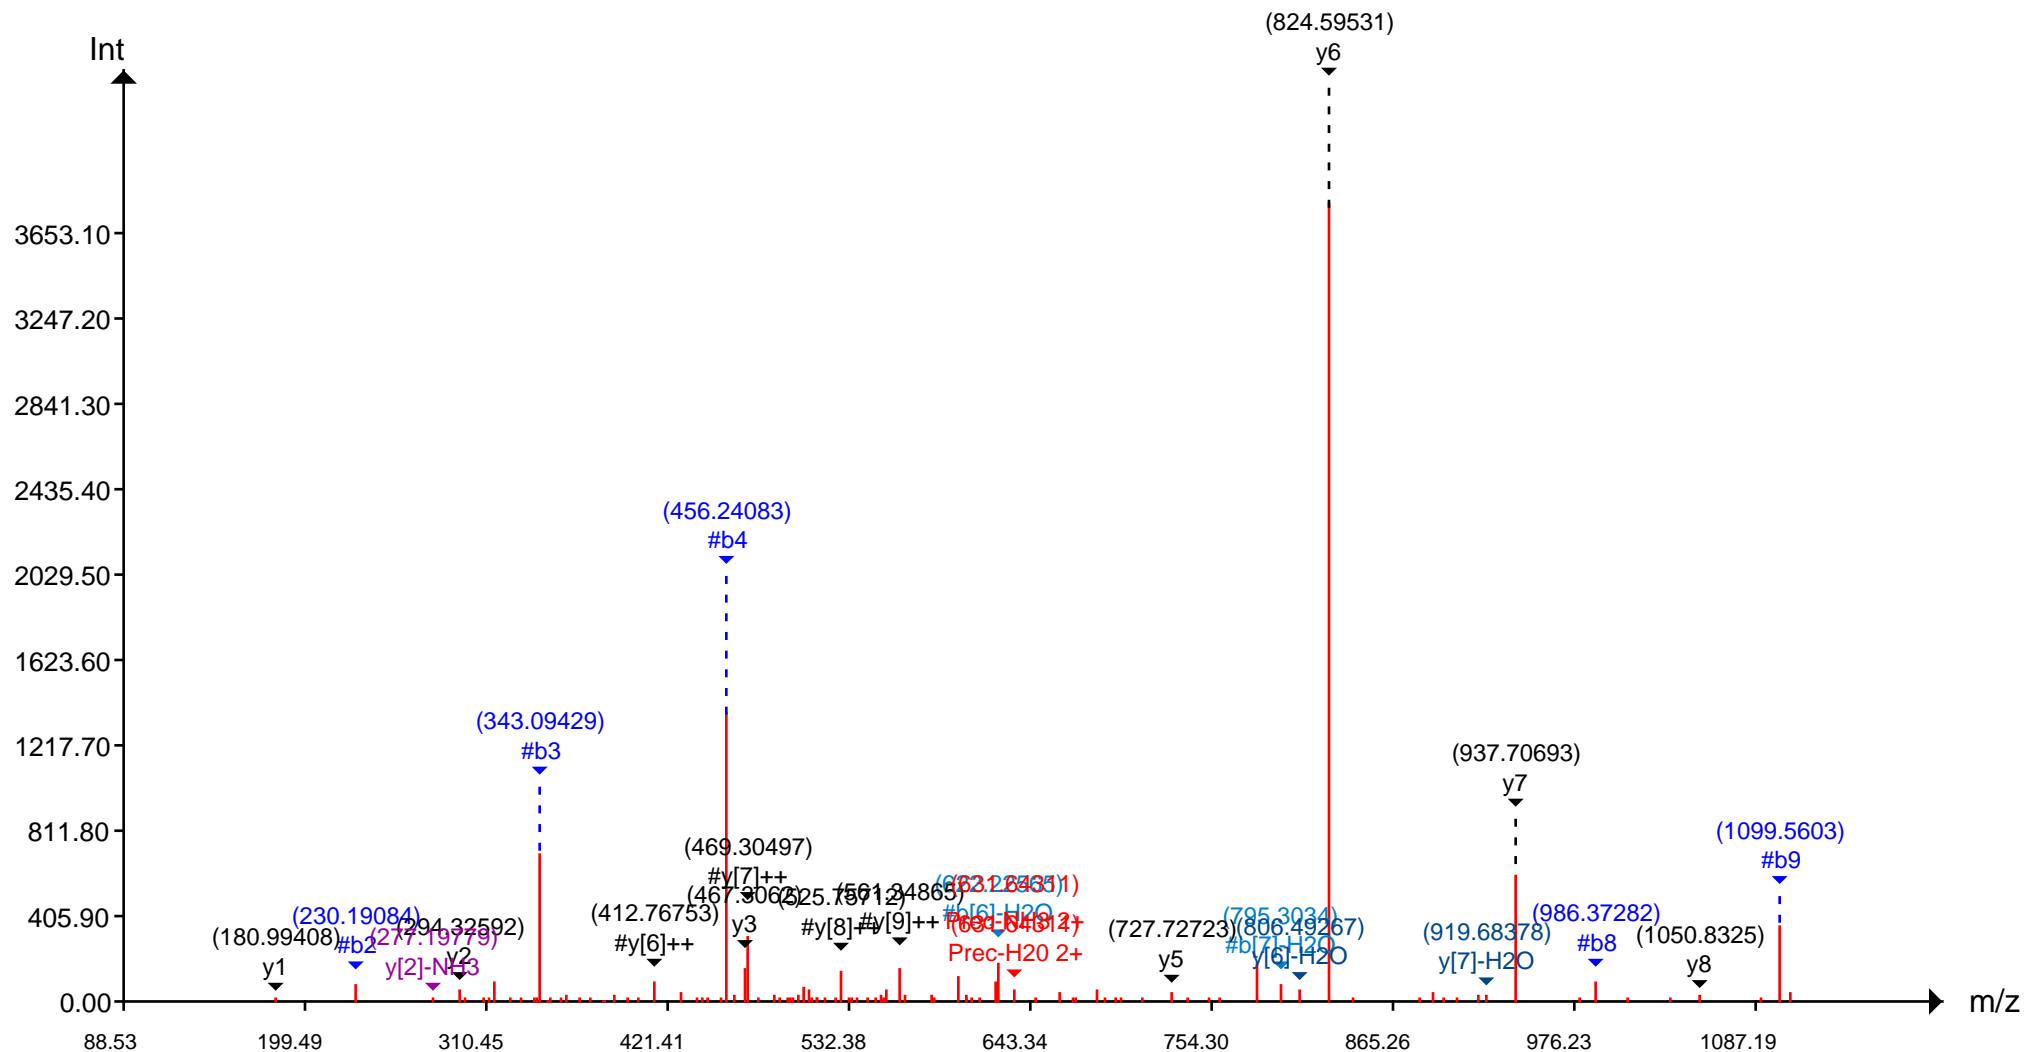

## Info

|                          |                                           |                           |         |
|--------------------------|-------------------------------------------|---------------------------|---------|
| <b>Modified Sequence</b> | AcD3-IAIIPSK<AcD3K*>K<AcD3K*>LR<C13>-COOH | <b>Ion score</b>          | 49.72   |
| <b>Protein</b>           | P63276                                    | <b>Confidence level</b>   | 99.00%  |
| <b>Precursor m/z</b>     | 640.44143                                 | <b>Identity Threshold</b> | 29.55   |
| <b>Charge</b>            | 2+                                        | <b>Mass error</b>         | 2.51E-4 |

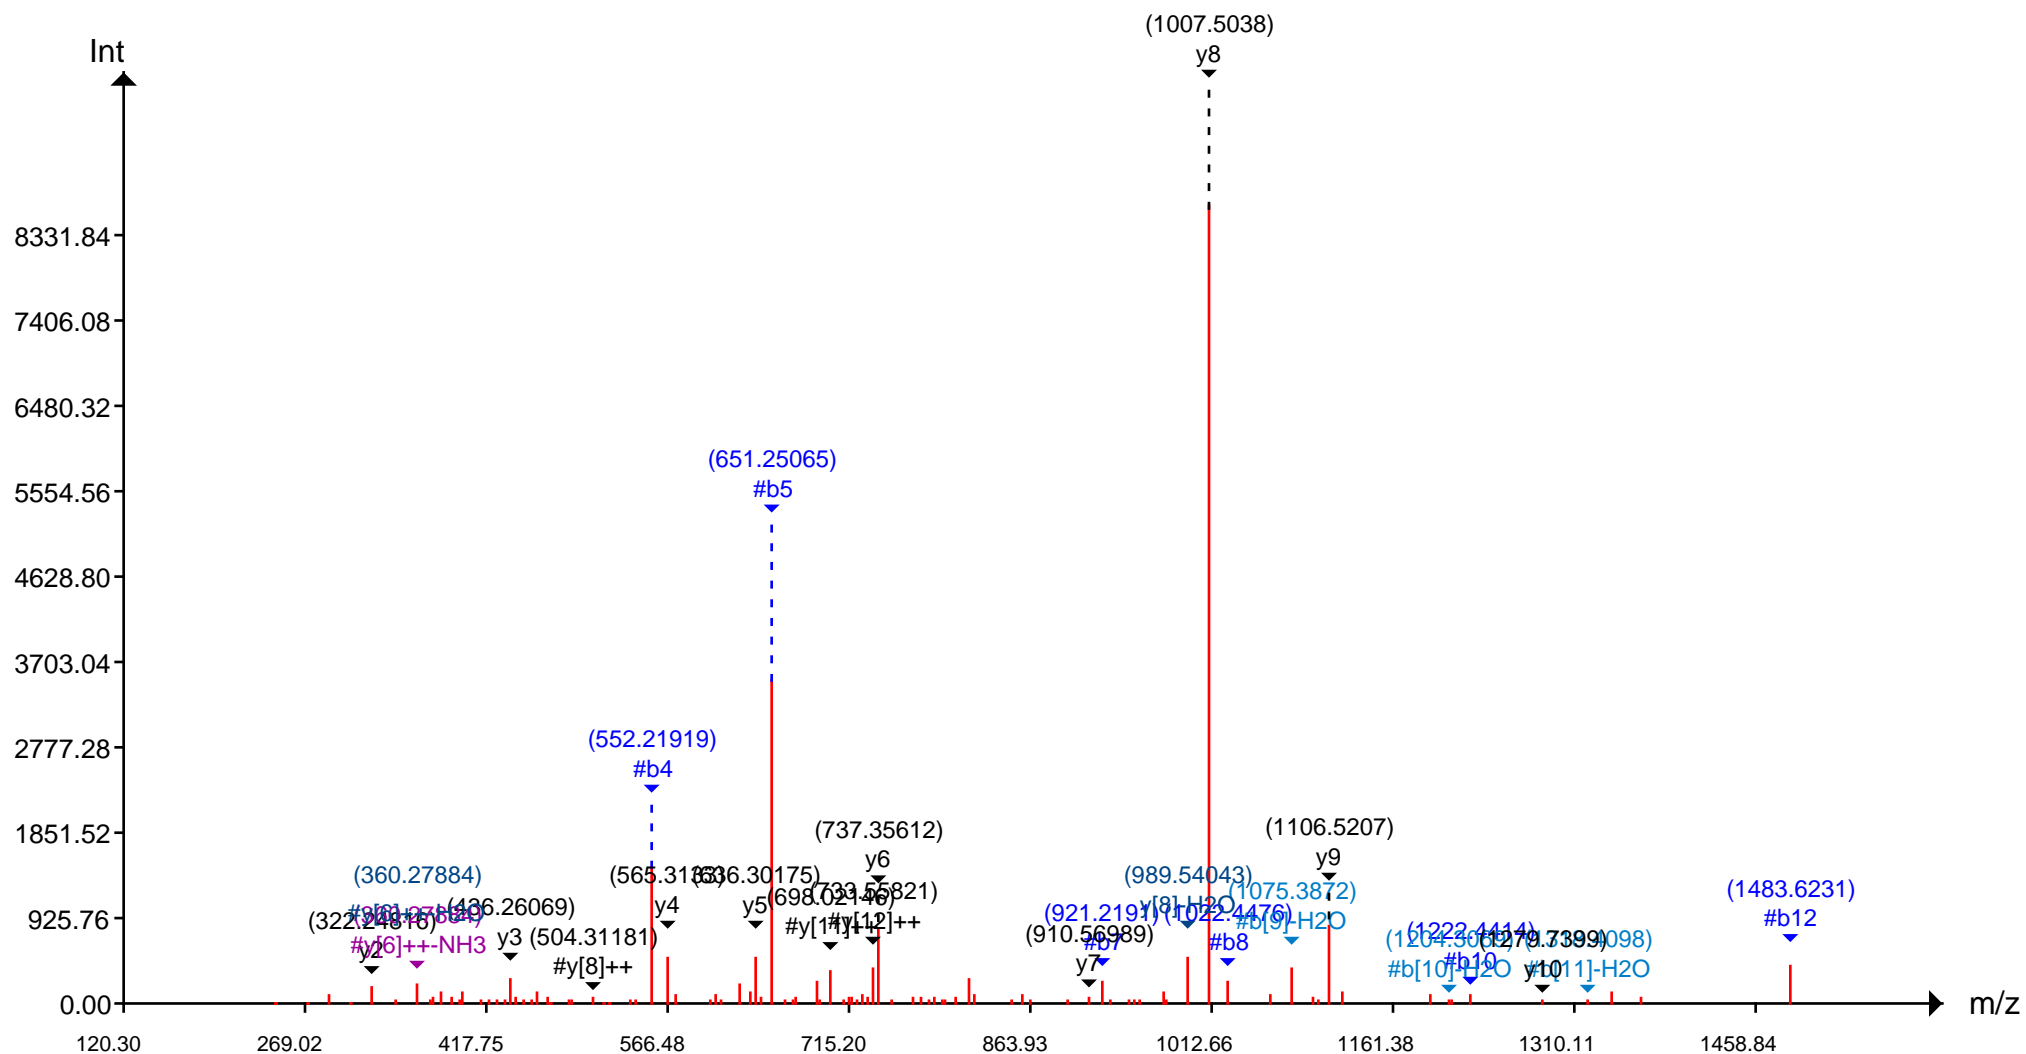

## Info

|                          |                                         |                           |          |
|--------------------------|-----------------------------------------|---------------------------|----------|
| <b>Modified Sequence</b> | AcD3-FADK<AcD3K*>VPK<AcD3K*>TAENFR-COOH | <b>Ion score</b>          | 64.05    |
| <b>Protein</b>           | P17742                                  | <b>Confidence level</b>   | 99.00%   |
| <b>Precursor m/z</b>     | 829.44957                               | <b>Identity Threshold</b> | 47.76    |
| <b>Charge</b>            | 2+                                      | <b>Mass error</b>         | 0.002432 |

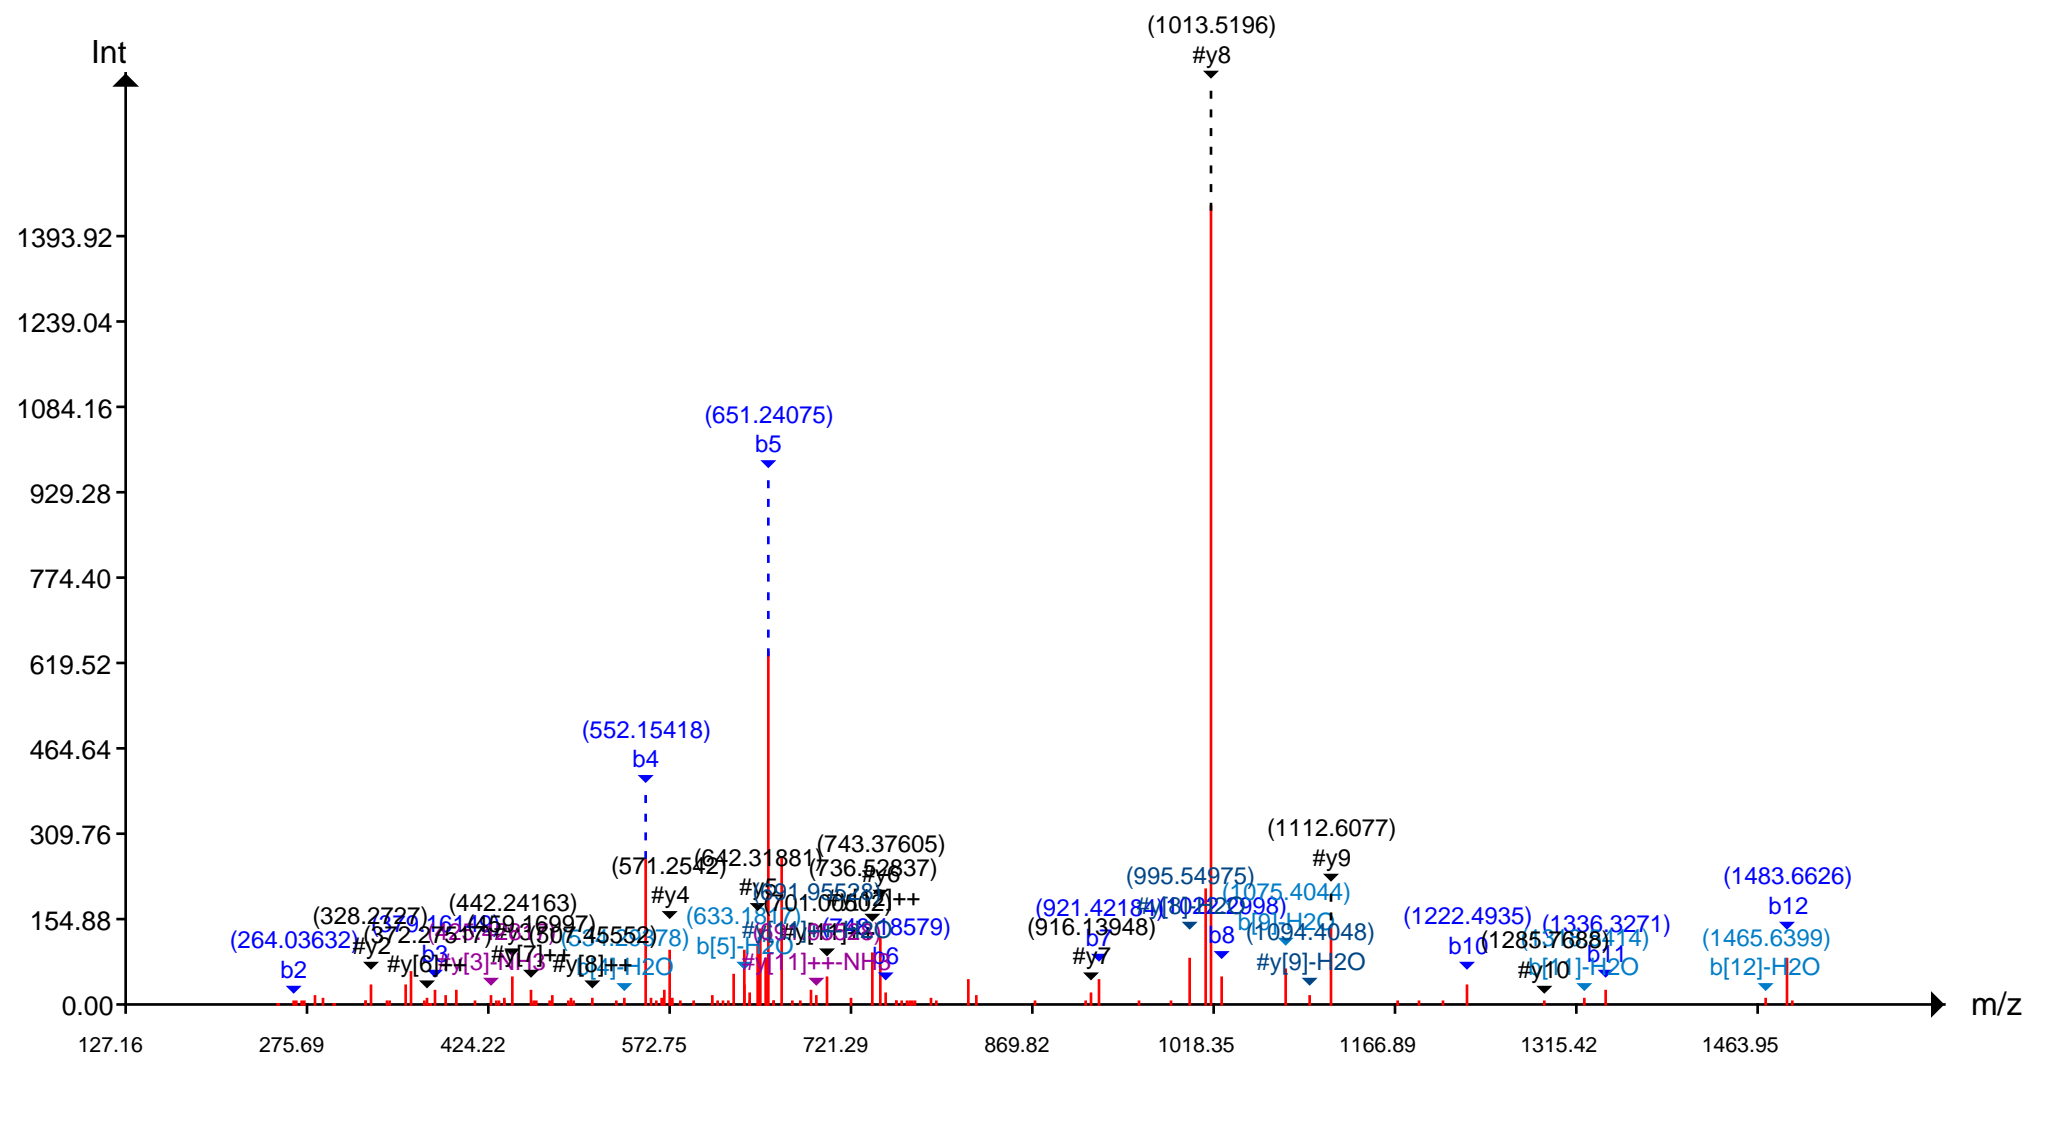

| Info                     |                                              |                           |         |
|--------------------------|----------------------------------------------|---------------------------|---------|
| <b>Modified Sequence</b> | AcD3-FADK<AcD3K*>VPK<AcD3K*>TAENFR<C13>-COOH | <b>Ion score</b>          | 51.59   |
| <b>Protein</b>           | P17742                                       | <b>Confidence level</b>   | 99.00%  |
| <b>Precursor m/z</b>     | 832.45906                                    | <b>Identity Threshold</b> | 47.46   |
| <b>Charge</b>            | 2+                                           | <b>Mass error</b>         | 0.00127 |

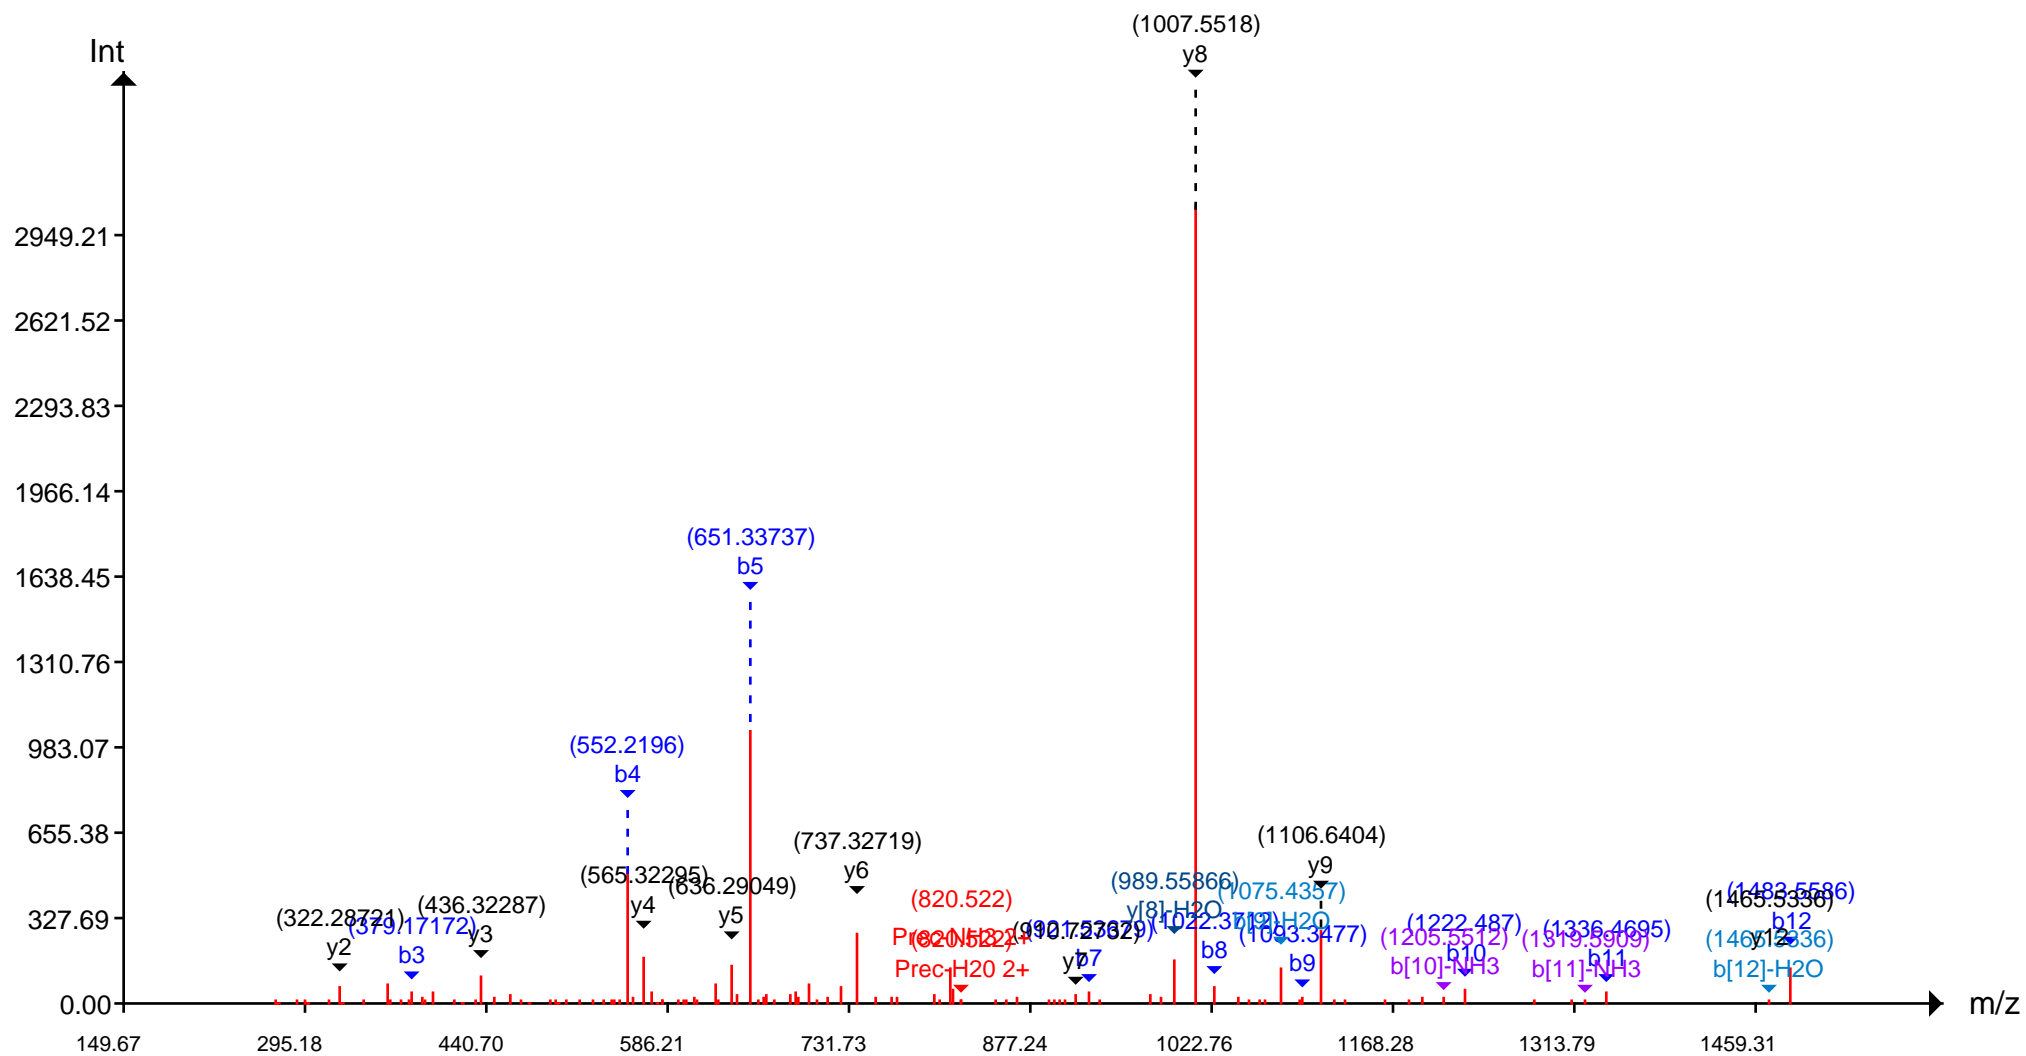

## Info

**Modified Sequence** AcD3-FADK<AcD3K\*>VPK<AcD3K\*>TAENFR-COOH

**Ion score** 79.8

**Protein** P17742

**Confidence level** 99.00%

**Precursor m/z** 829.4496

**Identity Threshold** 47.77

**Charge** 2+

**Mass error** 0.002492

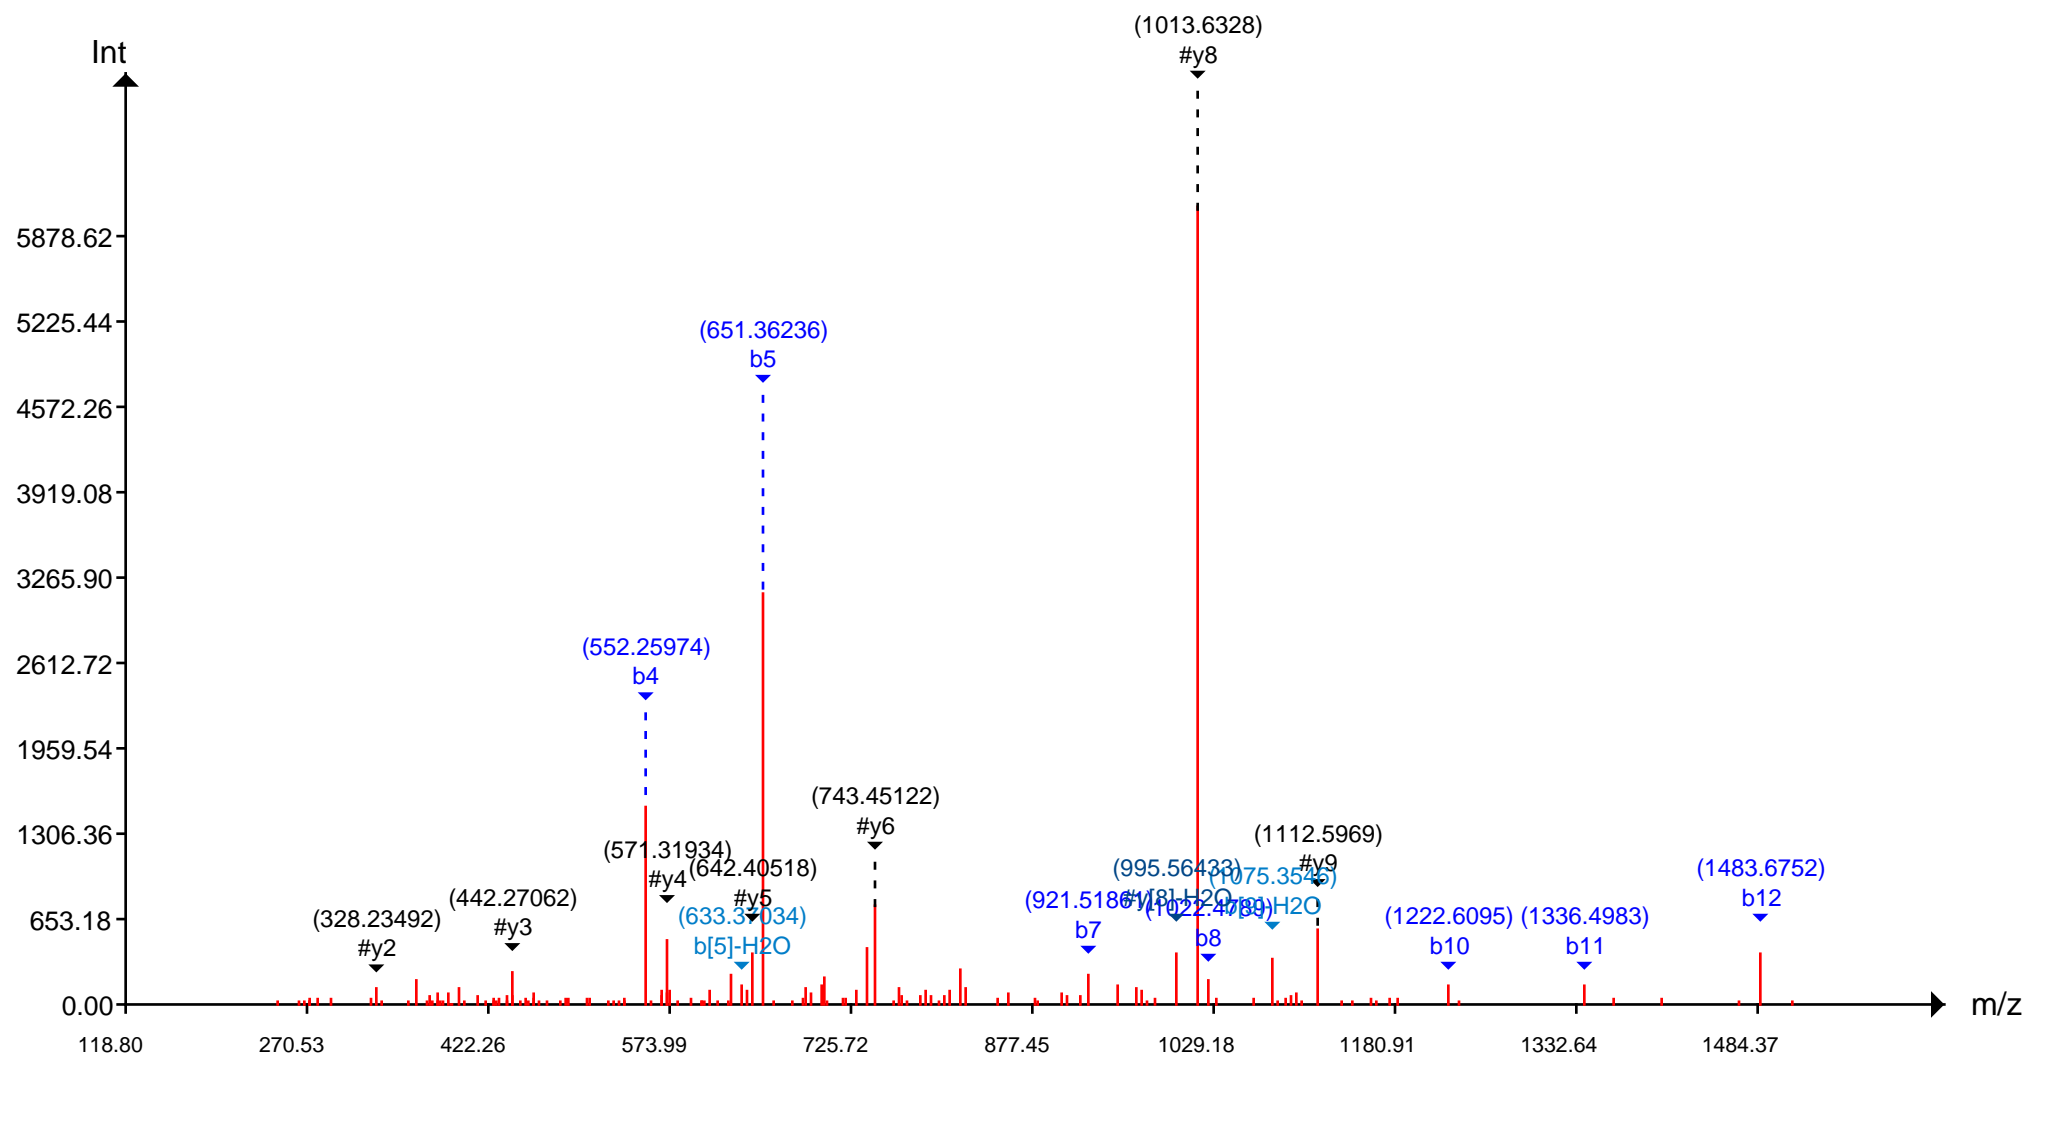

| Info                     |                                              |                           |         |
|--------------------------|----------------------------------------------|---------------------------|---------|
| <b>Modified Sequence</b> | AcD3-FADK<AcD3K*>VPK<AcD3K*>TAENFR<C13>-COOH | <b>Ion score</b>          | 49.07   |
| <b>Protein</b>           | P17742                                       | <b>Confidence level</b>   | 99.00%  |
| <b>Precursor m/z</b>     | 832.45911                                    | <b>Identity Threshold</b> | 47.45   |
| <b>Charge</b>            | 2+                                           | <b>Mass error</b>         | 0.00137 |



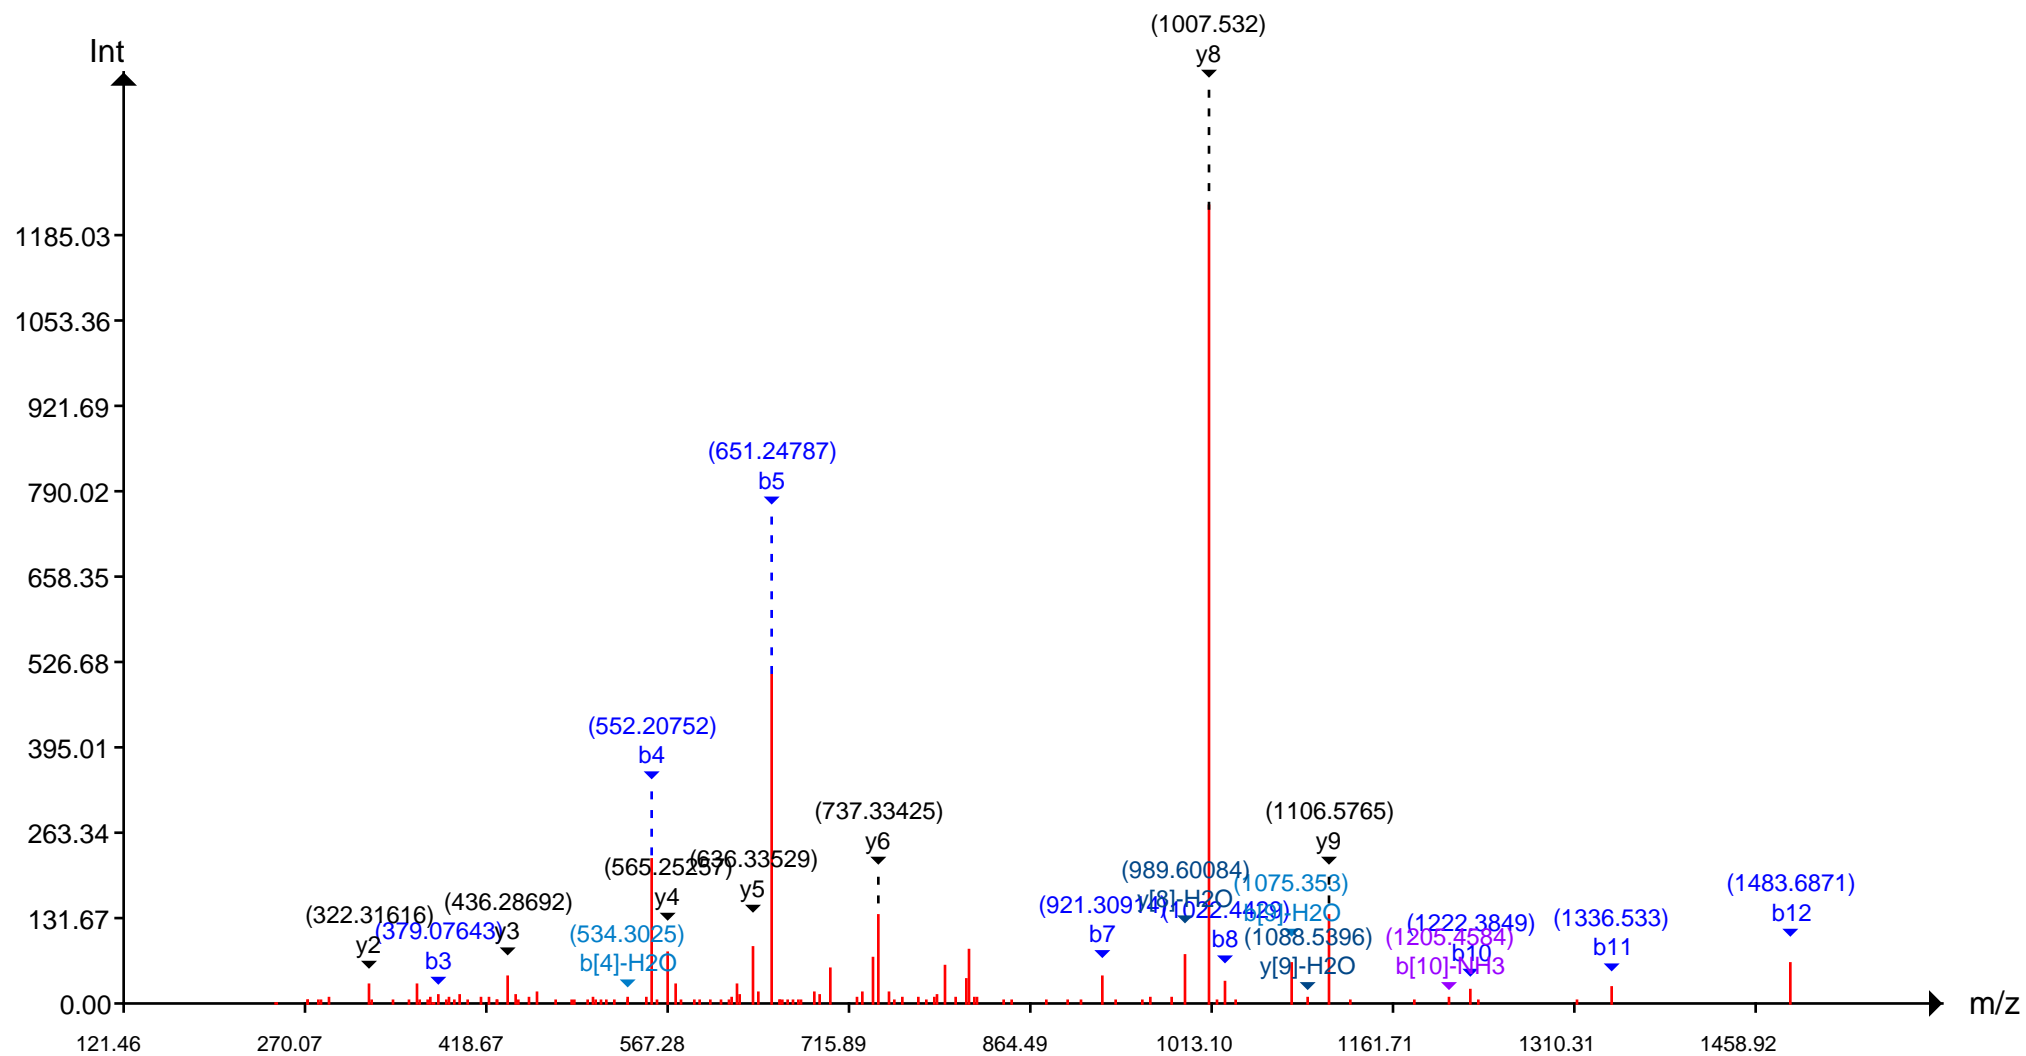

## Info

**Modified Sequence** AcD3-FADK<AcD3K\*>VPK<AcD3K\*>TAENFR-COOH

**Ion score** 58.11

**Protein** P17742

**Confidence level** 99.00%

**Precursor m/z** 829.44932

**Identity Threshold** 47.76

**Charge** 2+

**Mass error** 0.001932

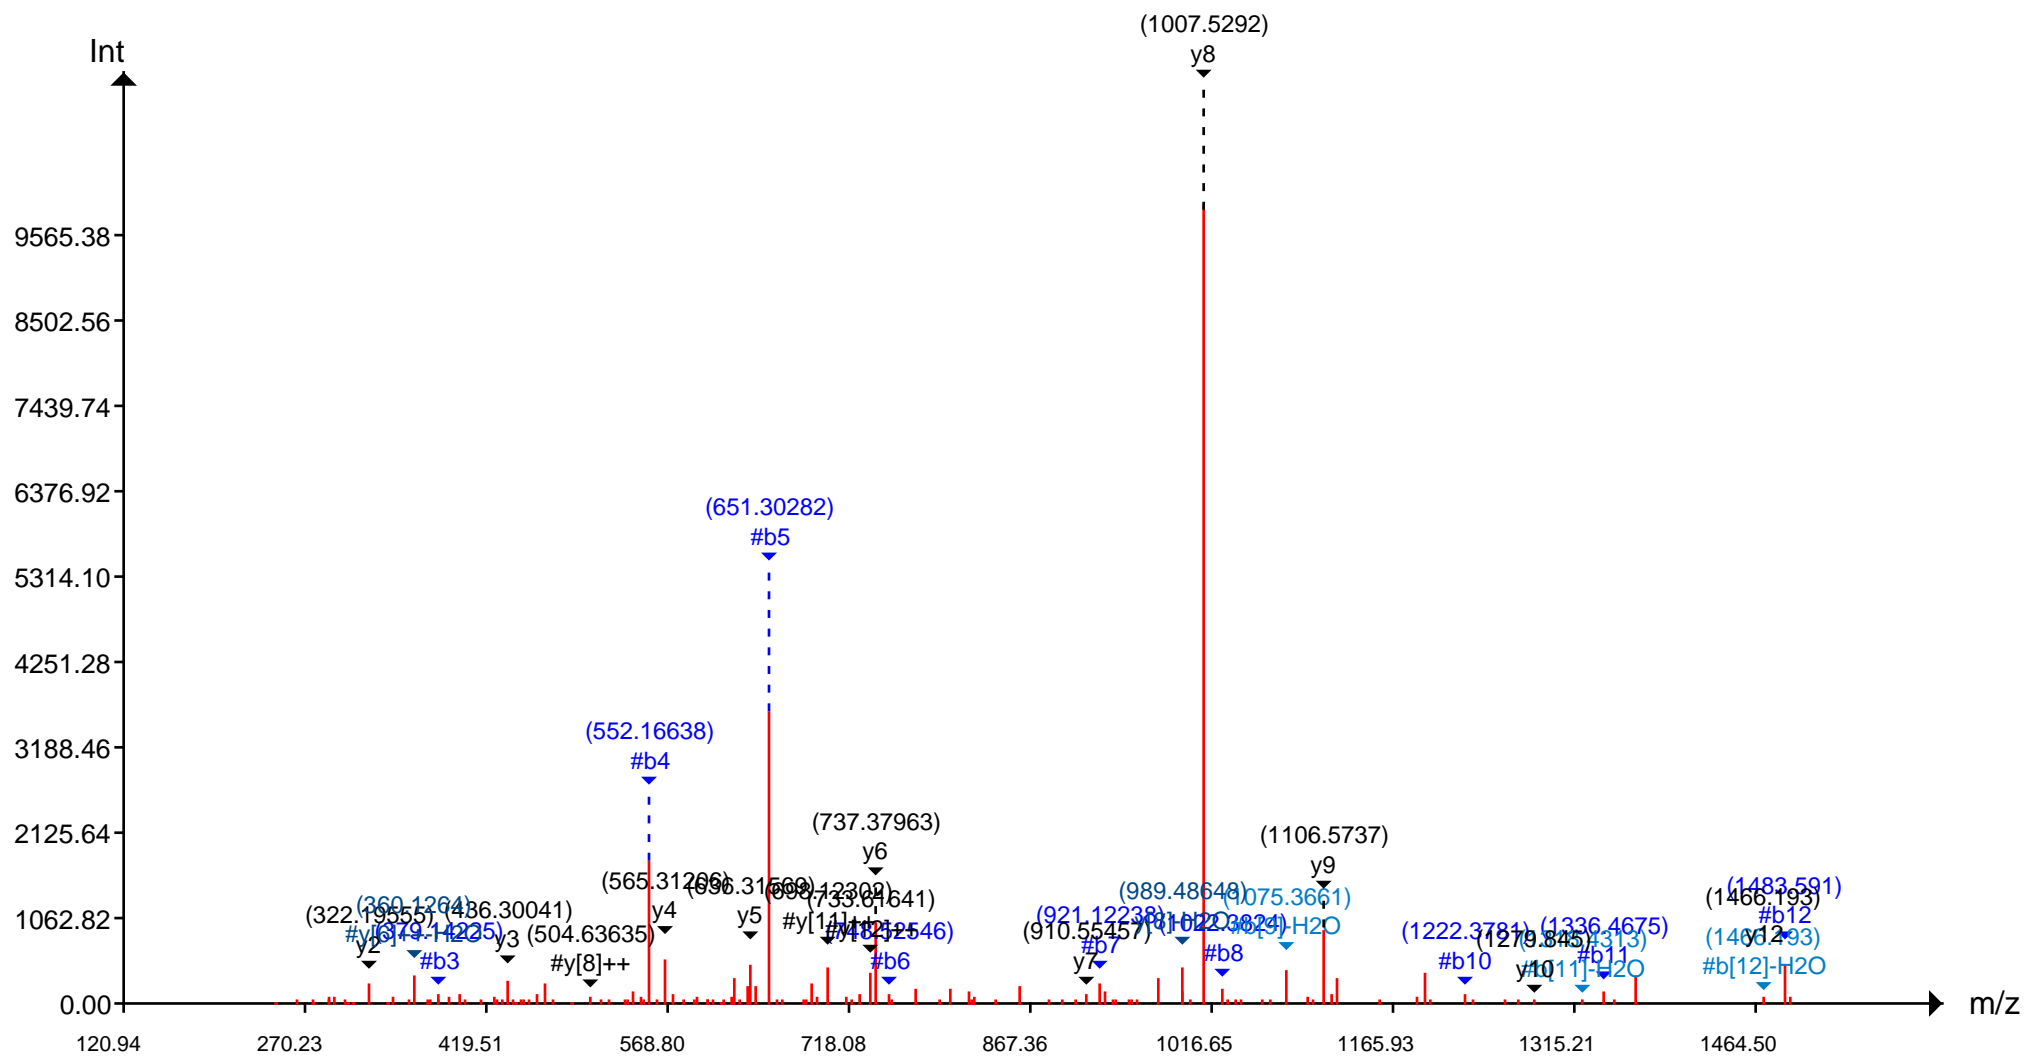

## Info

|                          |                                         |                           |          |
|--------------------------|-----------------------------------------|---------------------------|----------|
| <b>Modified Sequence</b> | AcD3-FADK<AcD3K*>VPK<AcD3K*>TAENFR-COOH | <b>Ion score</b>          | 63.65    |
| <b>Protein</b>           | P17742                                  | <b>Confidence level</b>   | 99.00%   |
| <b>Precursor m/z</b>     | 829.44968                               | <b>Identity Threshold</b> | 47.78    |
| <b>Charge</b>            | 2+                                      | <b>Mass error</b>         | 0.002652 |

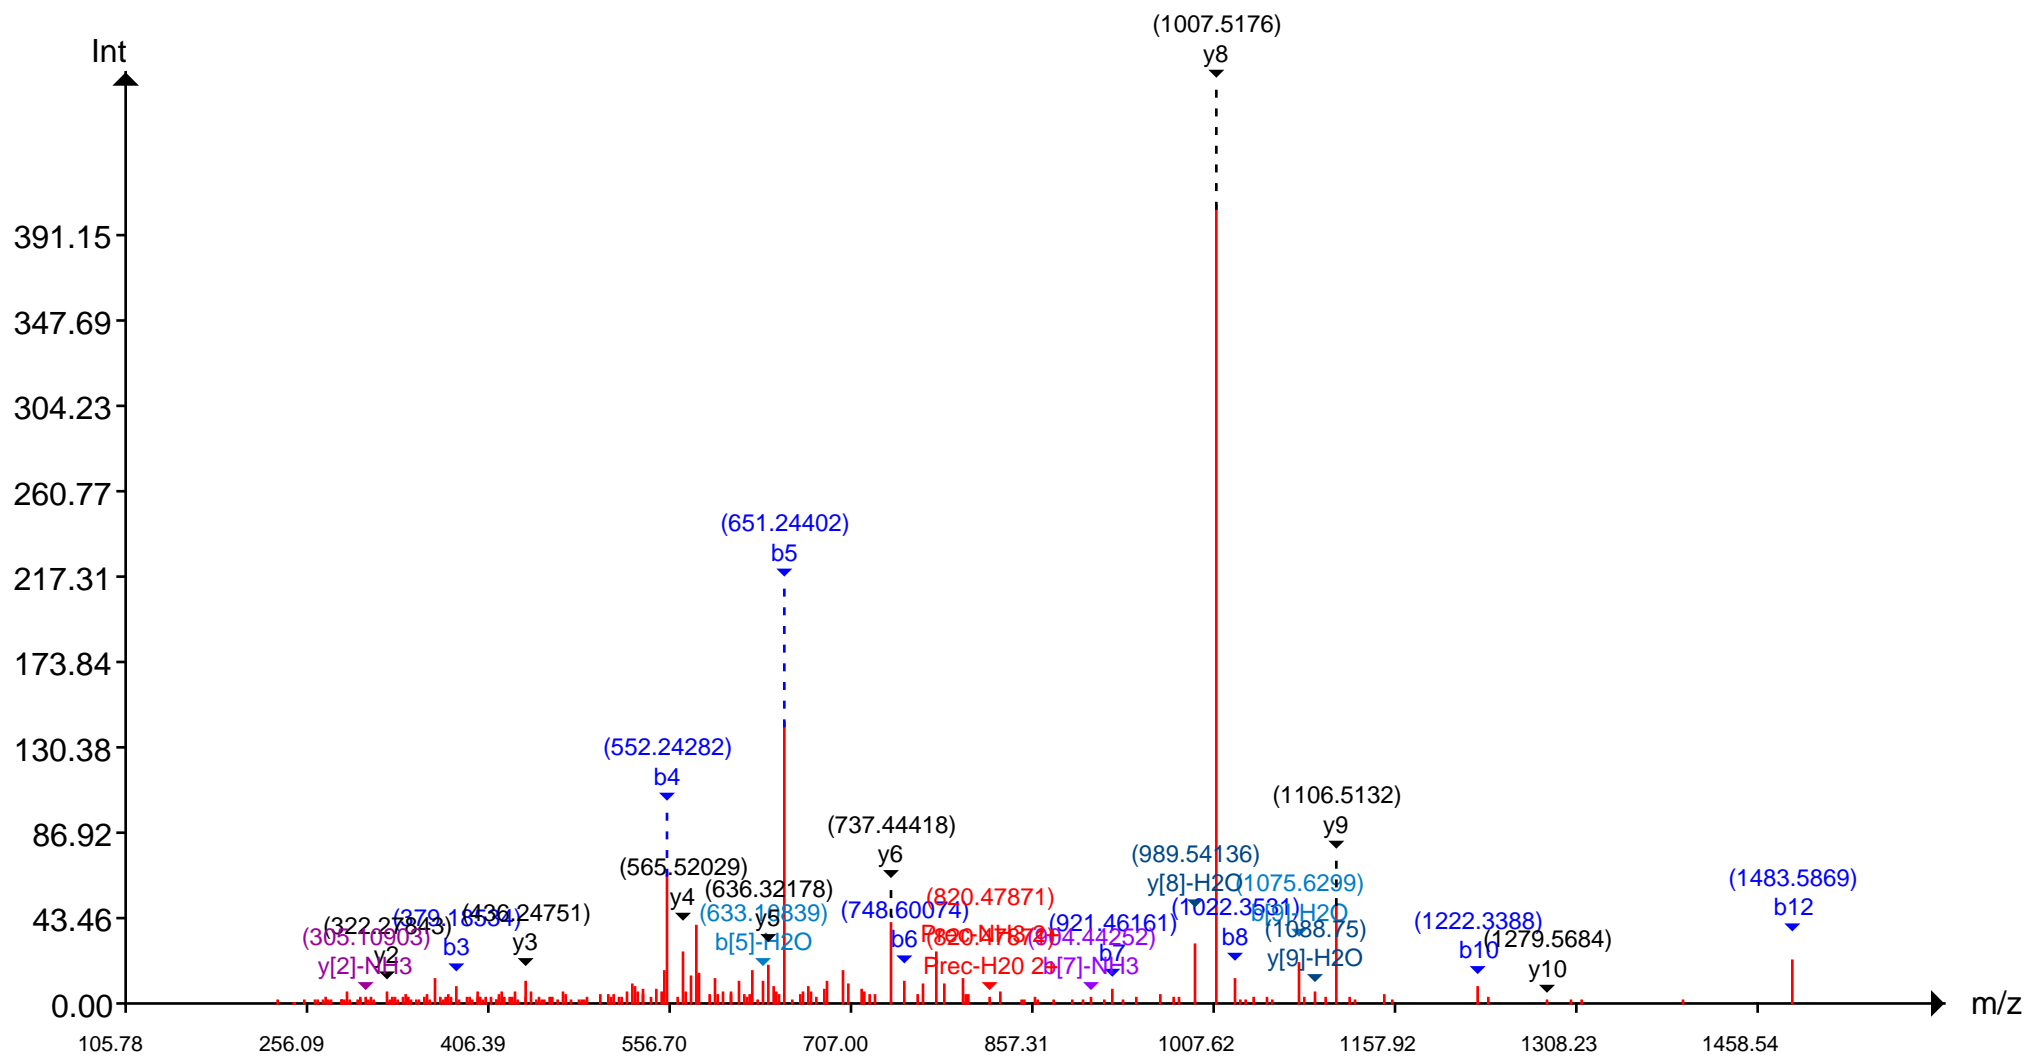

## Info

|                          |                                         |                           |          |
|--------------------------|-----------------------------------------|---------------------------|----------|
| <b>Modified Sequence</b> | AcD3-FADK<AcD3K*>VPK<AcD3K*>TAENFR-COOH | <b>Ion score</b>          | 49.57    |
| <b>Protein</b>           | P17742                                  | <b>Confidence level</b>   | 99.00%   |
| <b>Precursor m/z</b>     | 829.44981                               | <b>Identity Threshold</b> | 47.76    |
| <b>Charge</b>            | 2+                                      | <b>Mass error</b>         | 0.002912 |

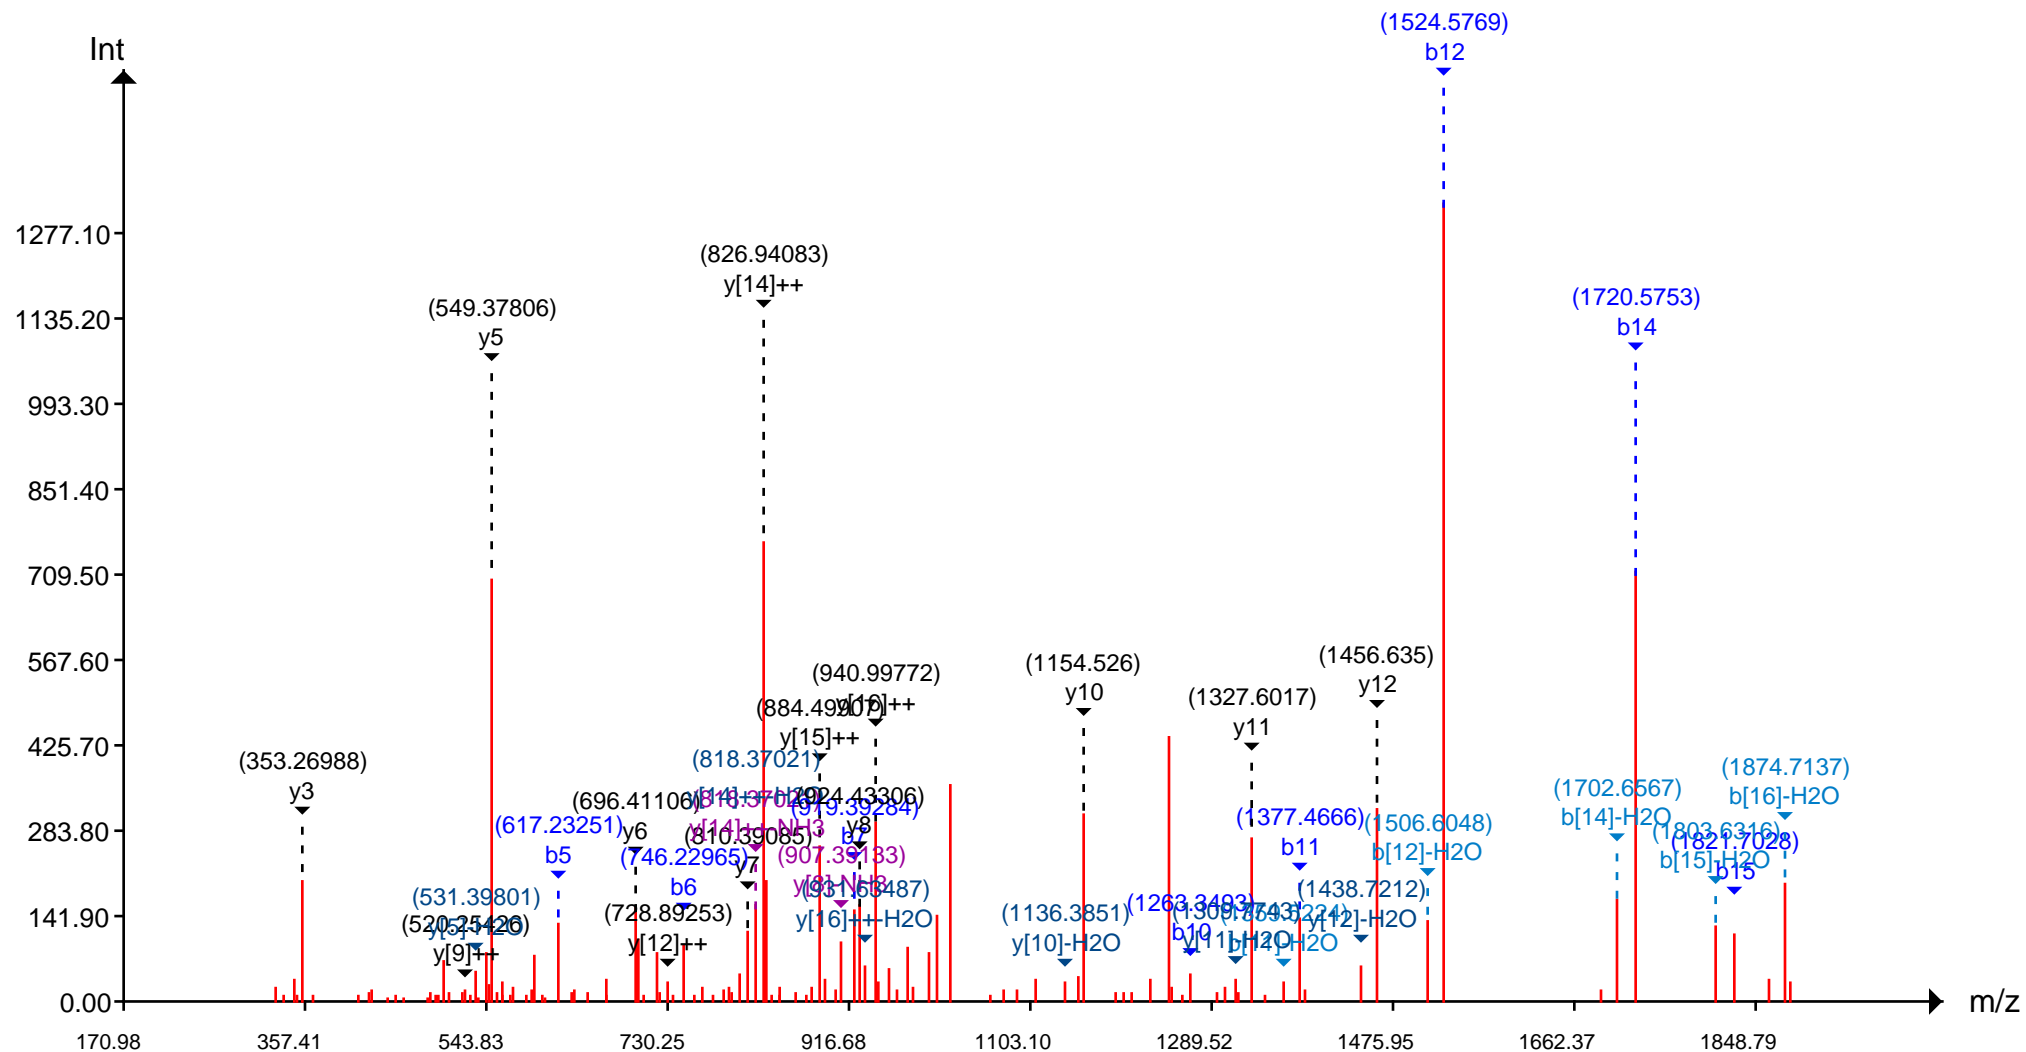

## Info

|                          |                                                      |                           |         |
|--------------------------|------------------------------------------------------|---------------------------|---------|
| <b>Modified Sequence</b> | AcD3-M<Mox*>LDPVEK<AcD3K*>DDNNM<Mox*>PVTAR<C13>-COOH | <b>Ion score</b>          | 53.22   |
| <b>Protein</b>           | O08709                                               | <b>Confidence level</b>   | 99.00%  |
| <b>Precursor m/z</b>     | 1036.9961                                            | <b>Identity Threshold</b> | 46.44   |
| <b>Charge</b>            | 2+                                                   | <b>Mass error</b>         | 7.96E-4 |

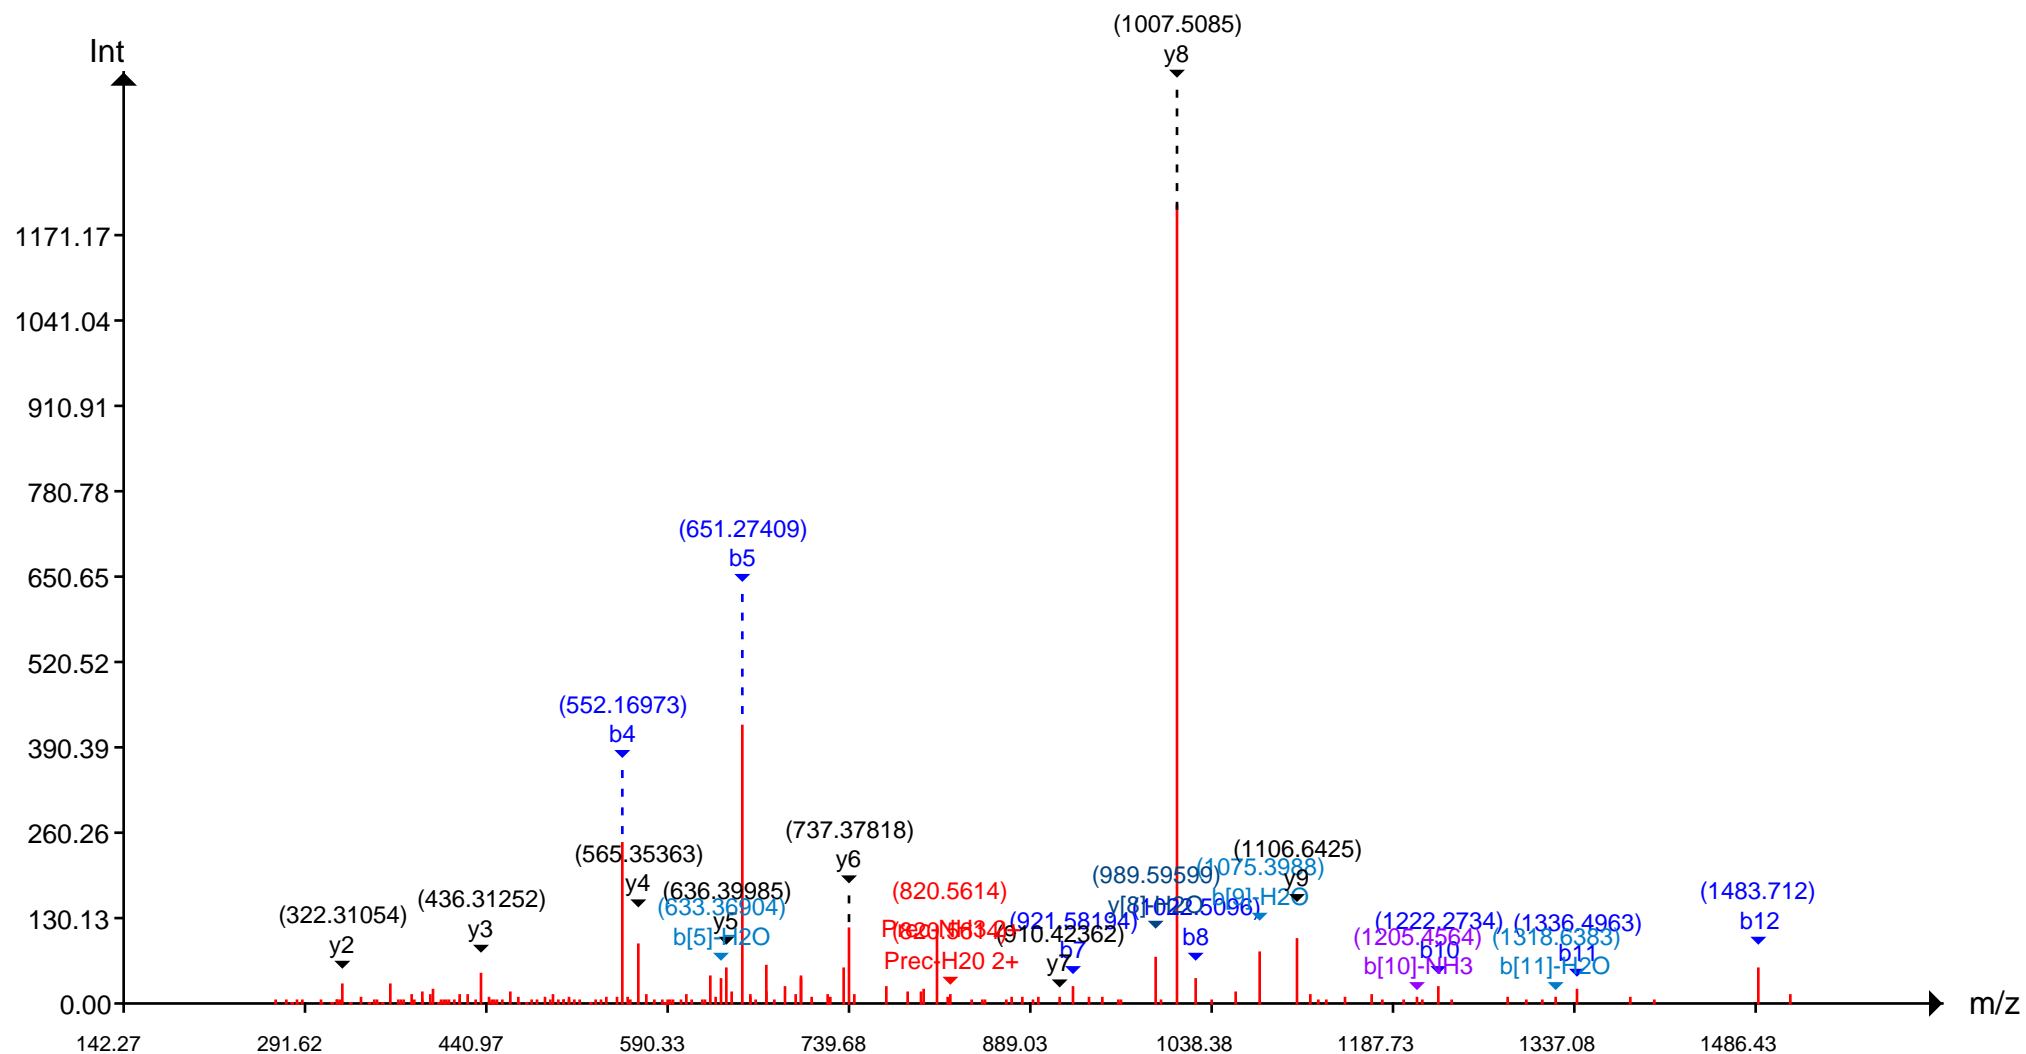

## Info

**Modified Sequence** AcD3-FADK<AcD3K\*>VPK<AcD3K\*>TAENFR-COOH

**Ion score** 49.74

**Protein** P17742

**Confidence level** 99.00%

**Precursor m/z** 829.4499

**Identity Threshold** 47.74

**Charge** 2+

**Mass error** 0.003092

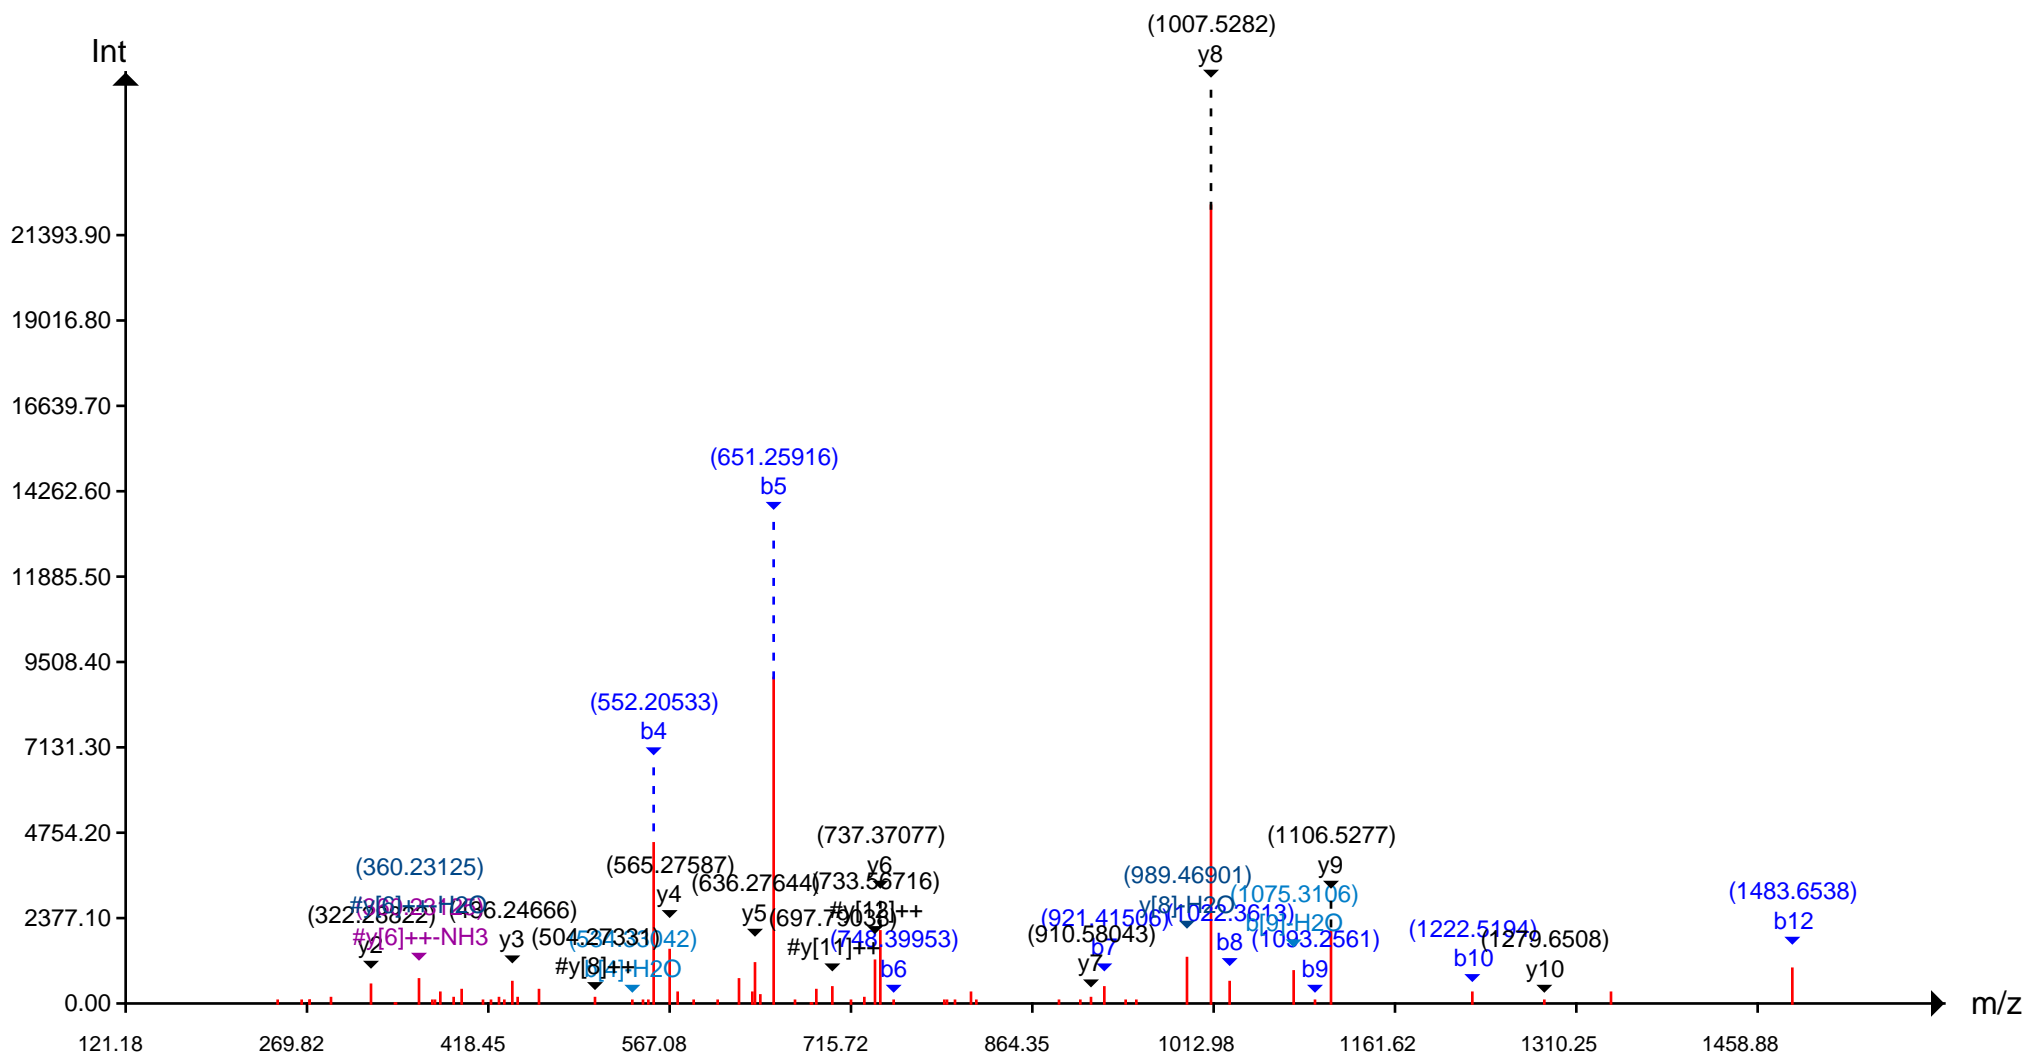

## Info

**Modified Sequence** AcD3-FADK<AcD3K\*>VPK<AcD3K\*>TAENFR-COOH

**Ion score** 76.03

**Protein** P17742

**Confidence level** 99.00%

**Precursor m/z** 829.45032

**Identity Threshold** 47.76

**Charge** 2+

**Mass error** 0.003932

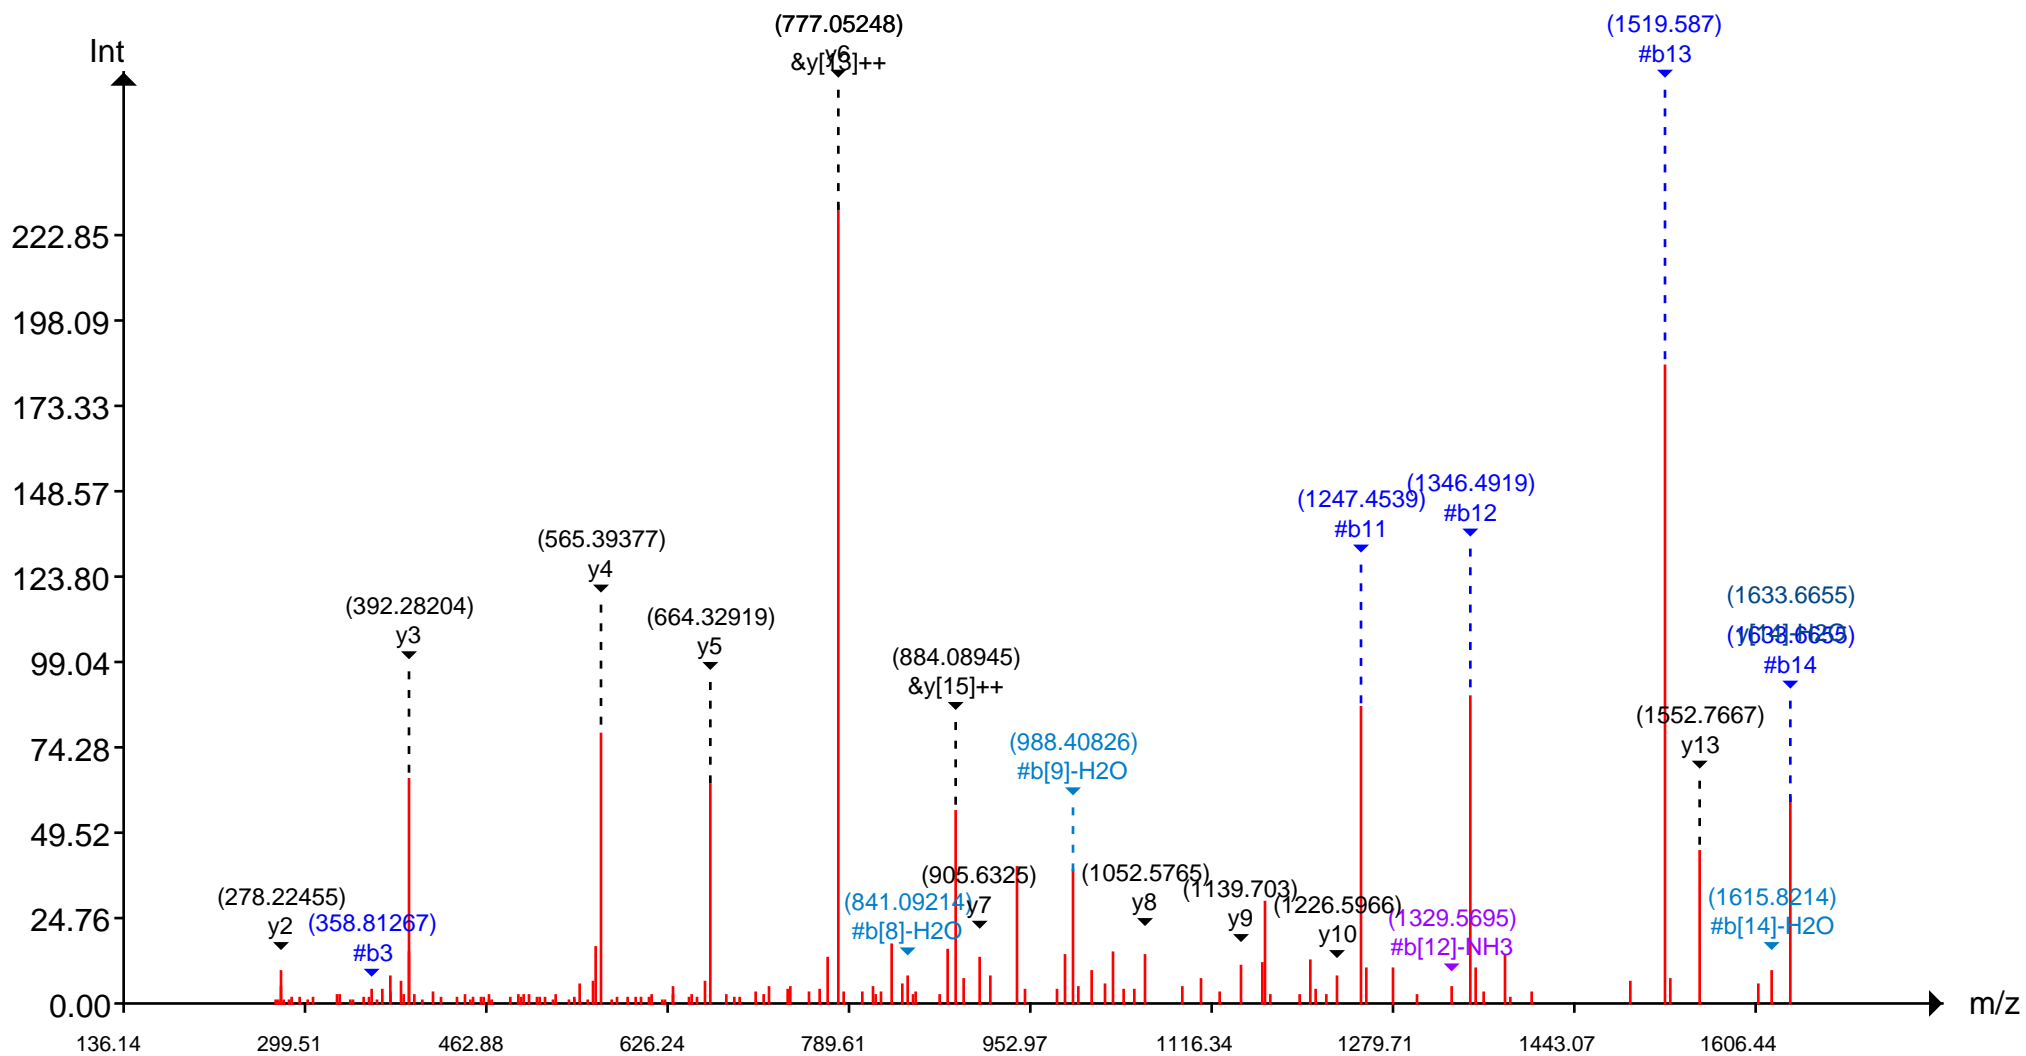

## Info

**Modified Sequence** AcD3-VDVPNDSSFQIVK<AcD3K\*>NPR<C13>-COOH

**Ion score** 49.5

**Protein** Q61176

**Confidence level** 99.00%

**Precursor m/z** 956.01561

**Identity Threshold** 47.74

**Charge** 2+

**Mass error** 0.005468

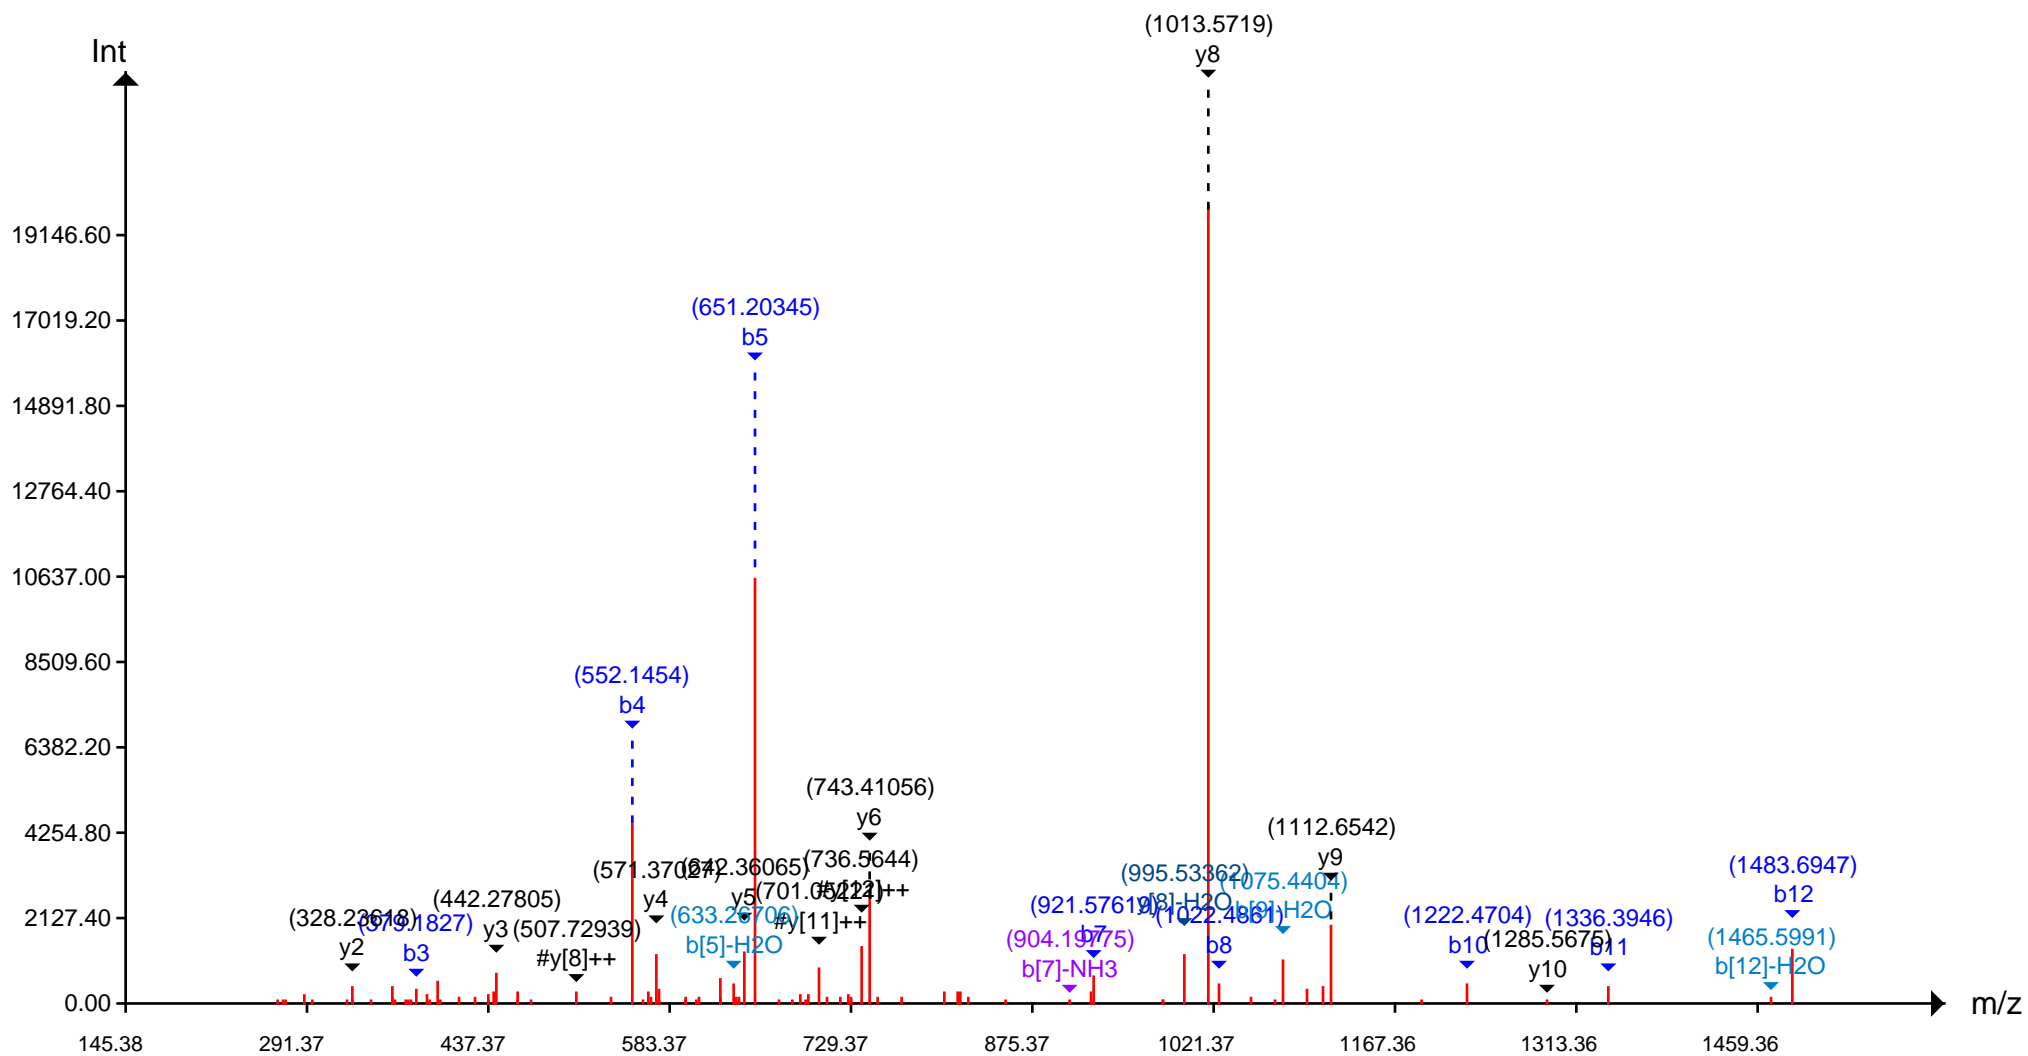

## Info

**Modified Sequence** AcD3-FADK<AcD3K\*>VPK<AcD3K\*>TAENFR<C13>-COOH

**Ion score** 63.43

**Protein** P17742

**Confidence level** 99.00%

**Precursor m/z** 832.45928

**Identity Threshold** 47.47

**Charge** 2+

**Mass error** 0.00171



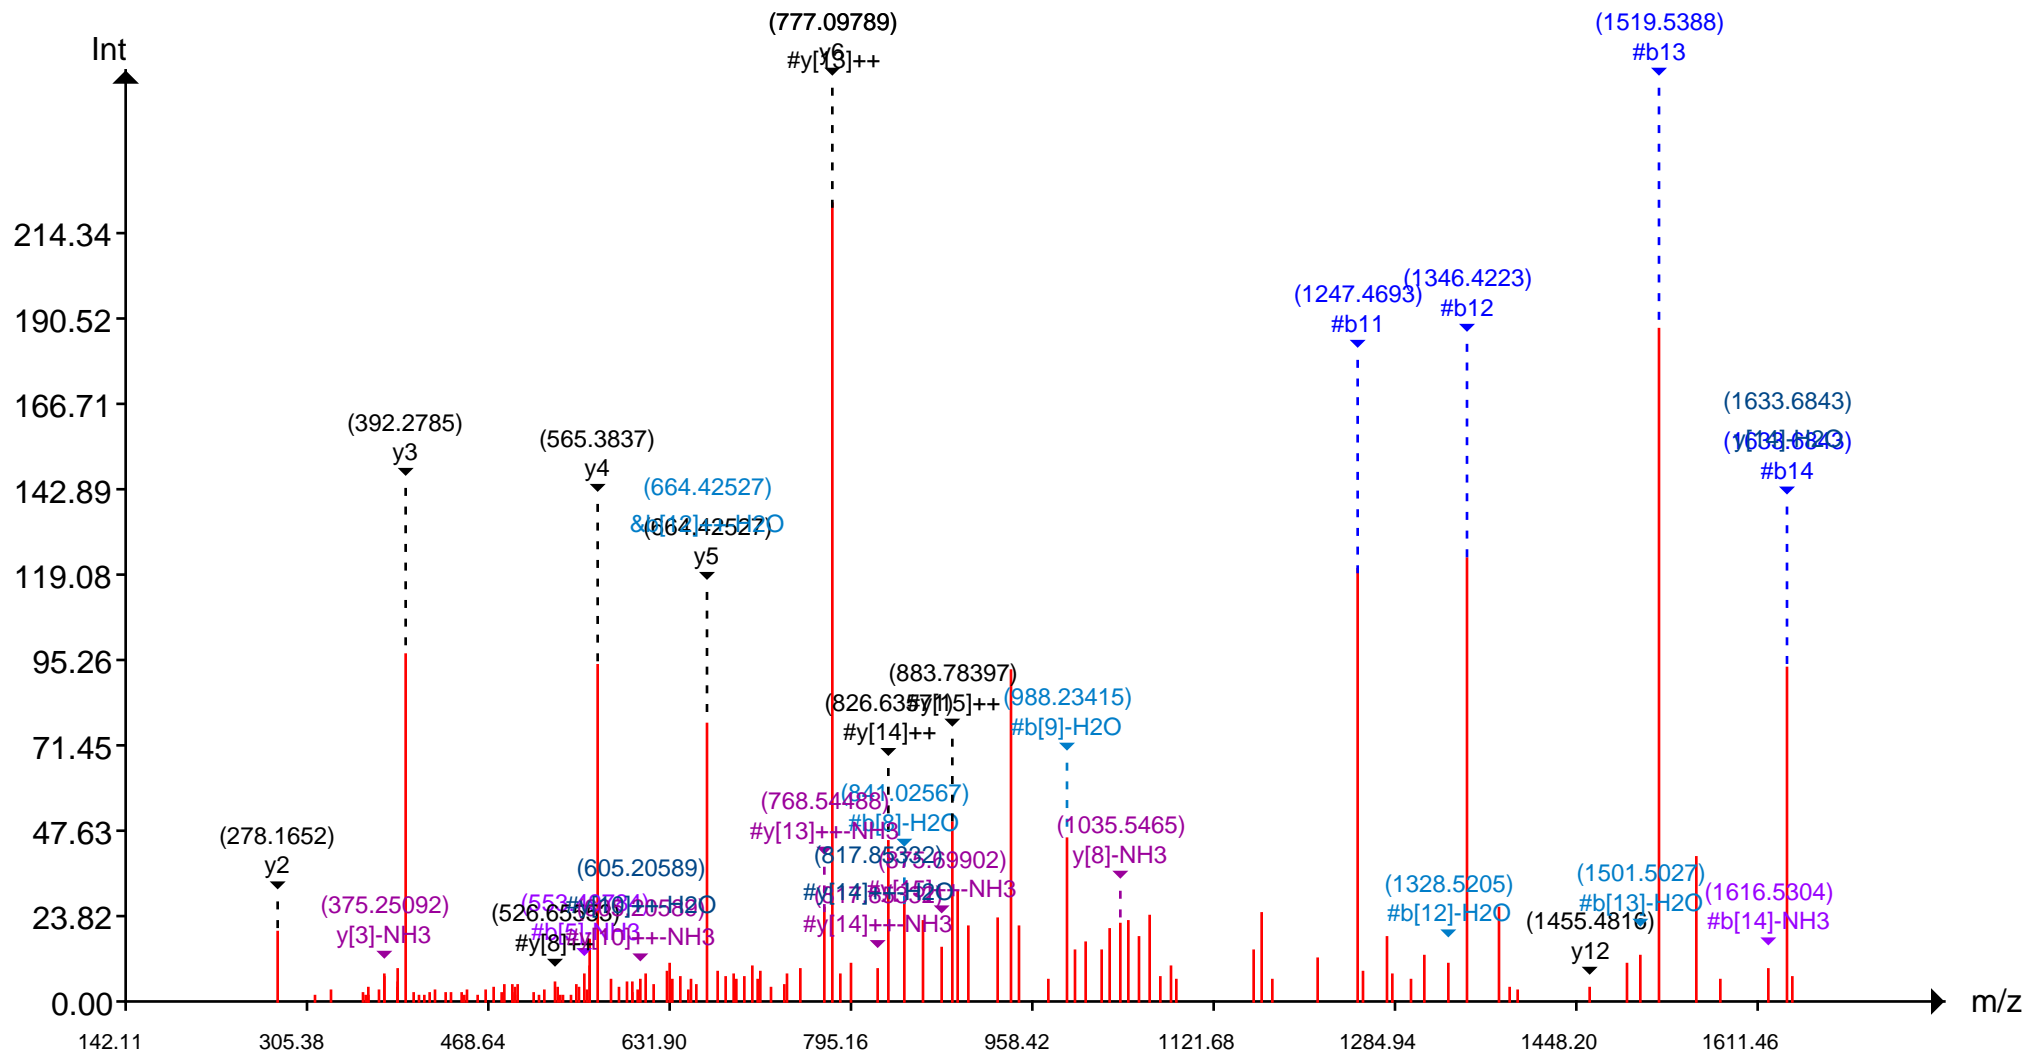

## Info

|                          |                                         |                           |          |
|--------------------------|-----------------------------------------|---------------------------|----------|
| <b>Modified Sequence</b> | AcD3-VDVPNDSSFQIVK<AcD3K*>NPR<C13>-COOH | <b>Ion score</b>          | 50.23    |
| <b>Protein</b>           | Q61176                                  | <b>Confidence level</b>   | 99.00%   |
| <b>Precursor m/z</b>     | 956.01433                               | <b>Identity Threshold</b> | 47.81    |
| <b>Charge</b>            | 2+                                      | <b>Mass error</b>         | 0.002908 |

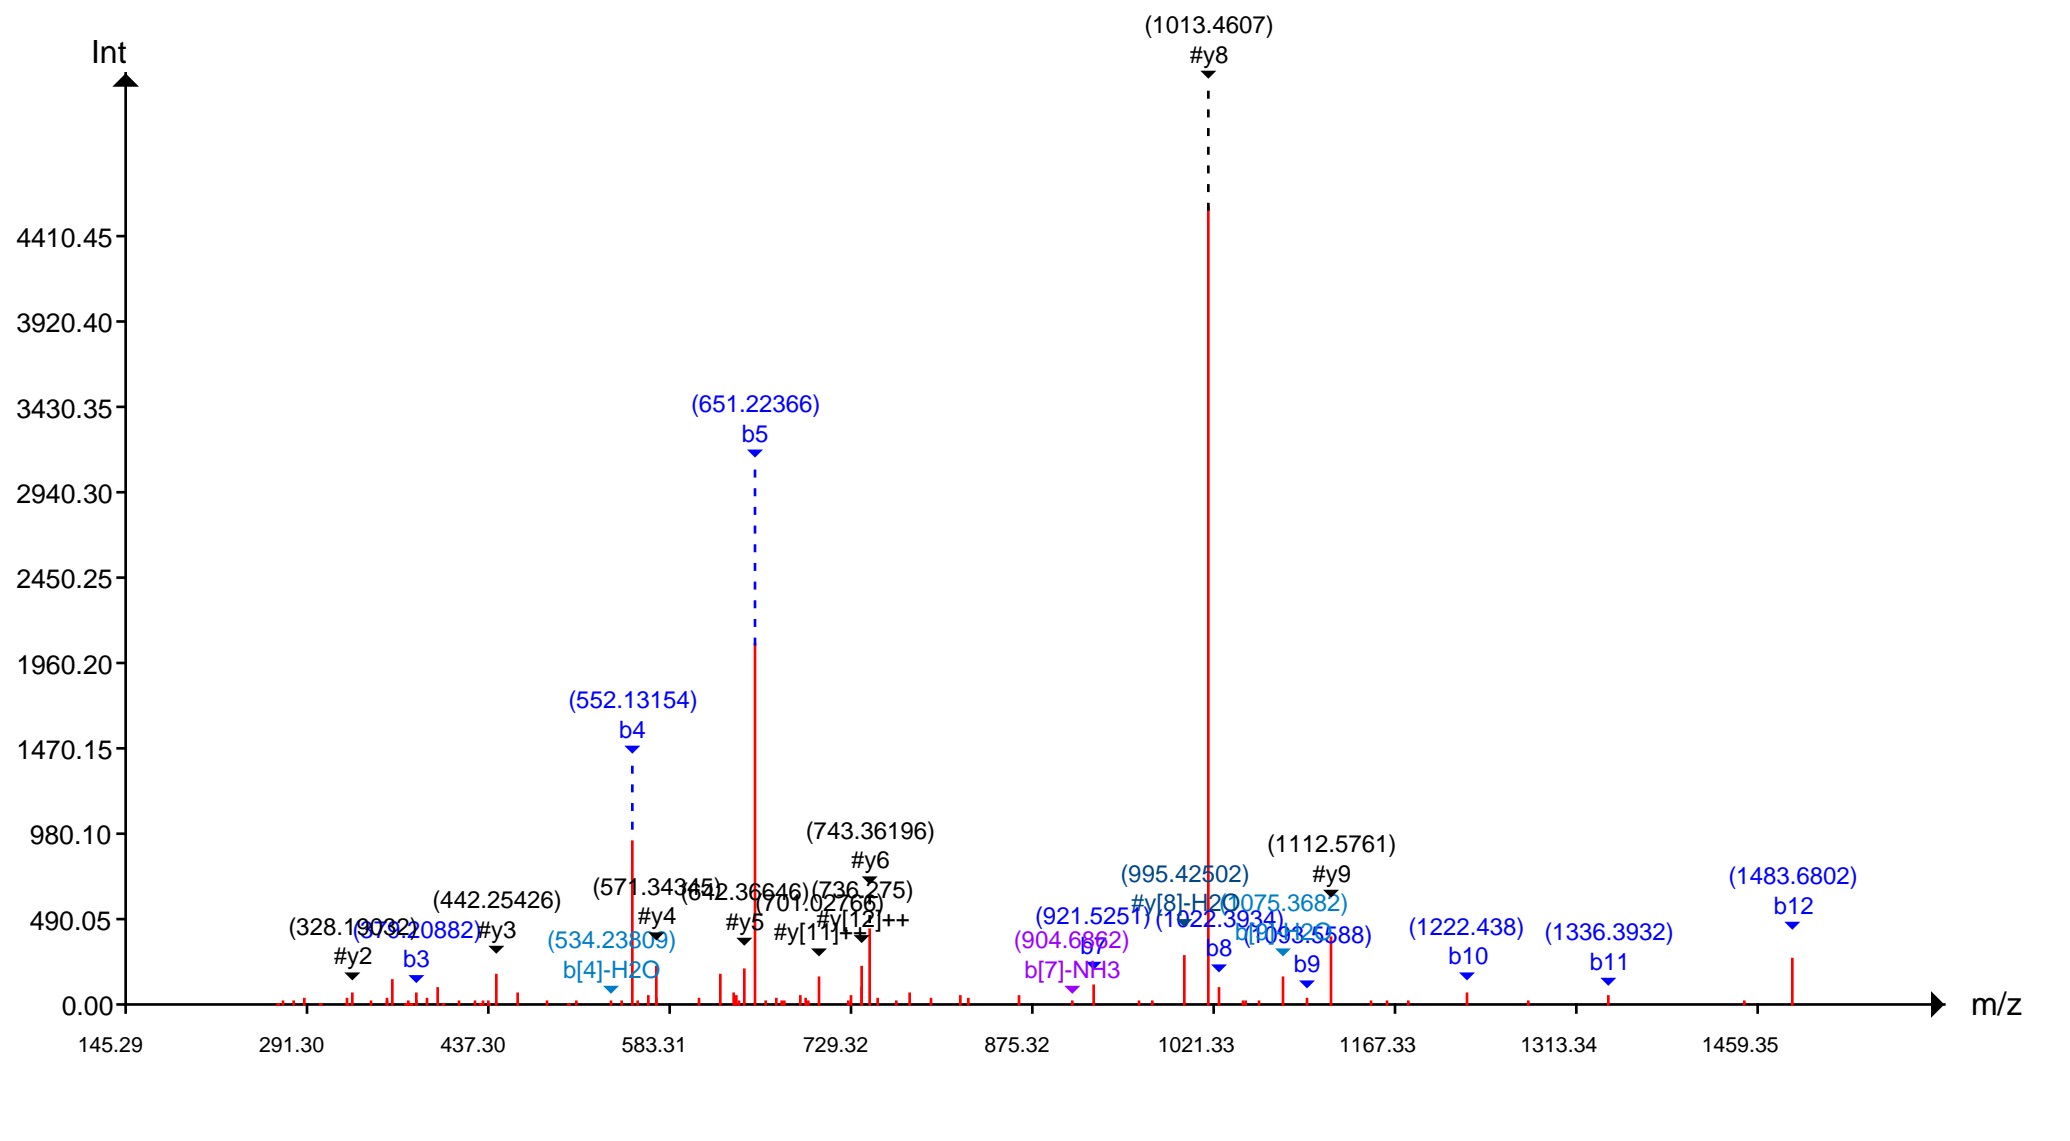

Info

|                          |                                              |                           |         |
|--------------------------|----------------------------------------------|---------------------------|---------|
| <b>Modified Sequence</b> | AcD3-FADK<AcD3K*>VPK<AcD3K*>TAENFR<C13>-COOH | <b>Ion score</b>          | 67.58   |
| <b>Protein</b>           | P17742                                       | <b>Confidence level</b>   | 99.00%  |
| <b>Precursor m/z</b>     | 832.45933                                    | <b>Identity Threshold</b> | 47.48   |
| <b>Charge</b>            | 2+                                           | <b>Mass error</b>         | 0.00181 |

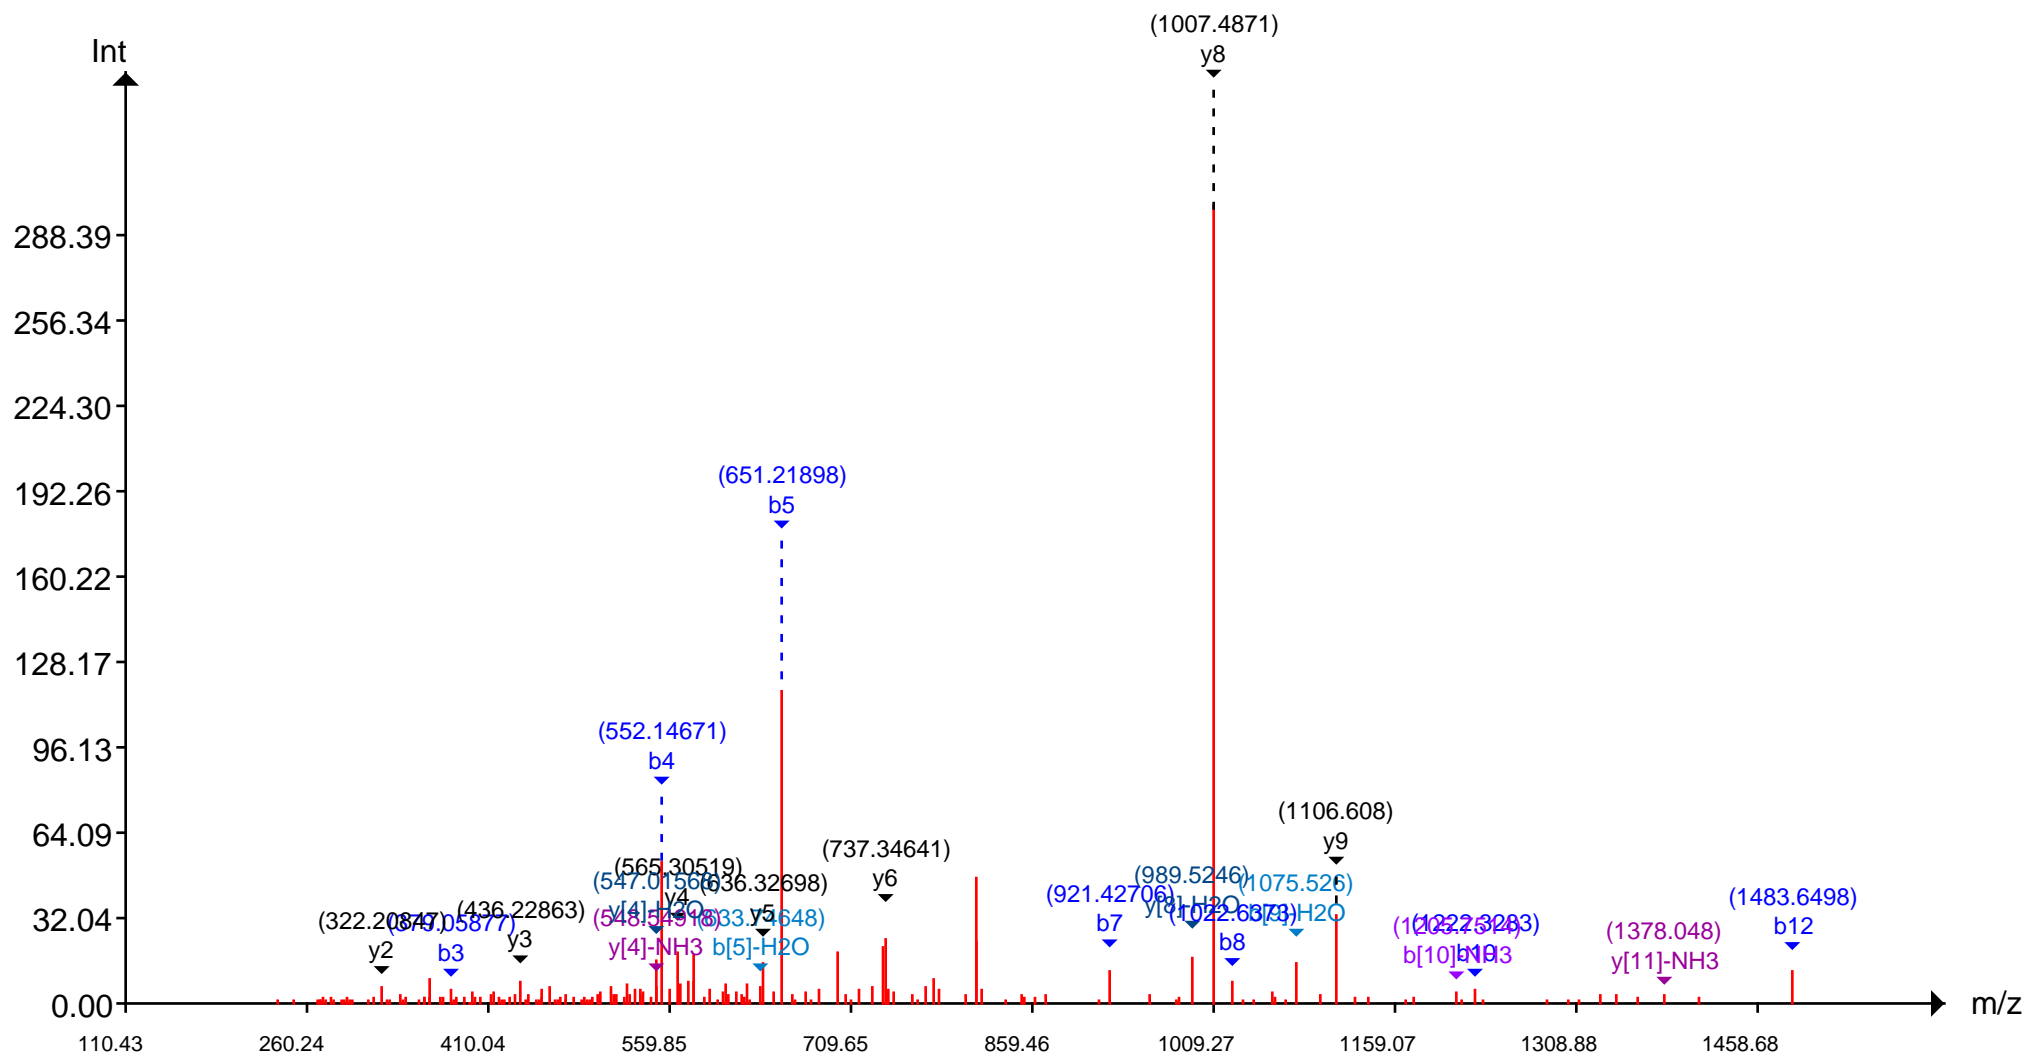

## Info

**Modified Sequence** AcD3-FADK<AcD3K\*>VPK<AcD3K\*>TAENFR-COOH

**Ion score** 50.55

**Protein** P17742

**Confidence level** 99.00%

**Precursor m/z** 829.44901

**Identity Threshold** 47.80

**Charge** 2+

**Mass error** 0.001312

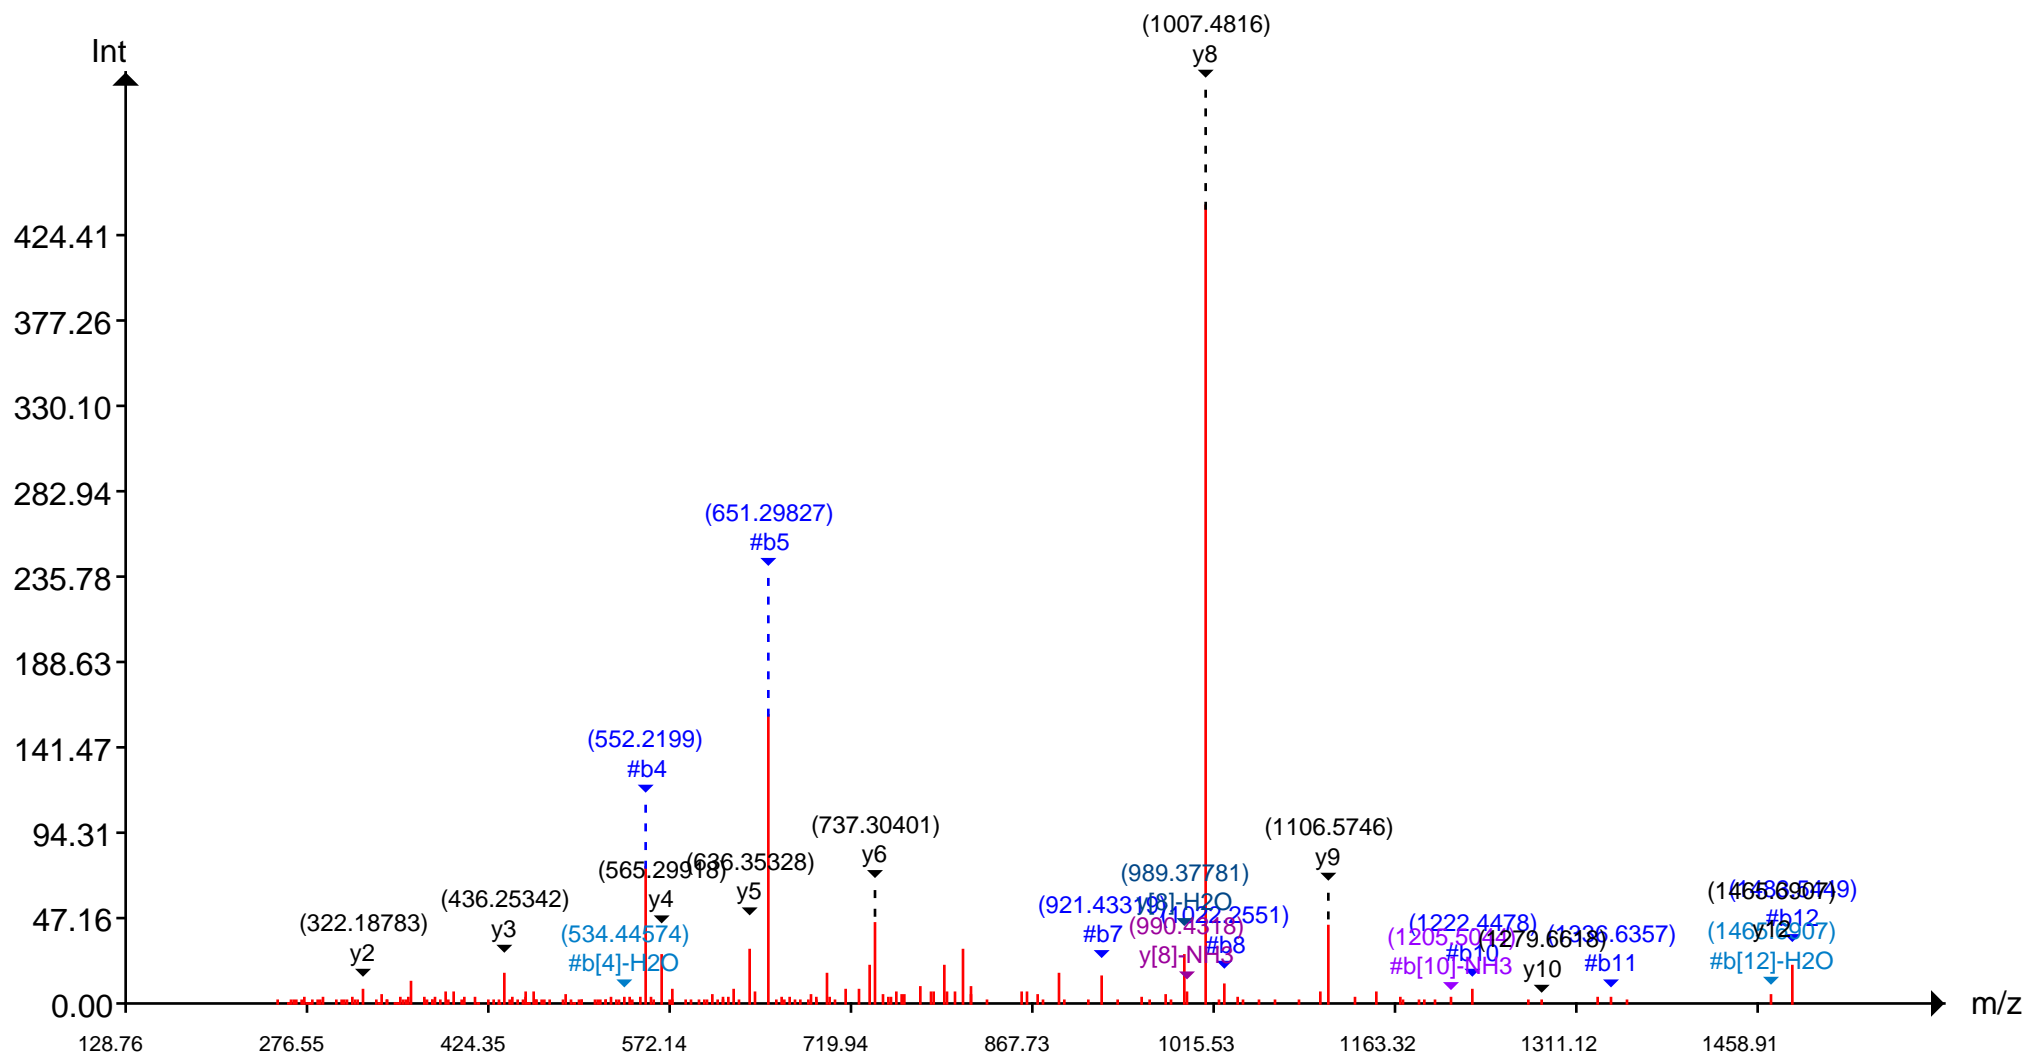

## Info

**Modified Sequence** AcD3-FADK<AcD3K\*>VPK<AcD3K\*>TAENFR-COOH

**Ion score** 49.94

**Protein** P17742

**Confidence level** 99.00%

**Precursor m/z** 829.44932

**Identity Threshold** 47.76

**Charge** 2+

**Mass error** 0.001932

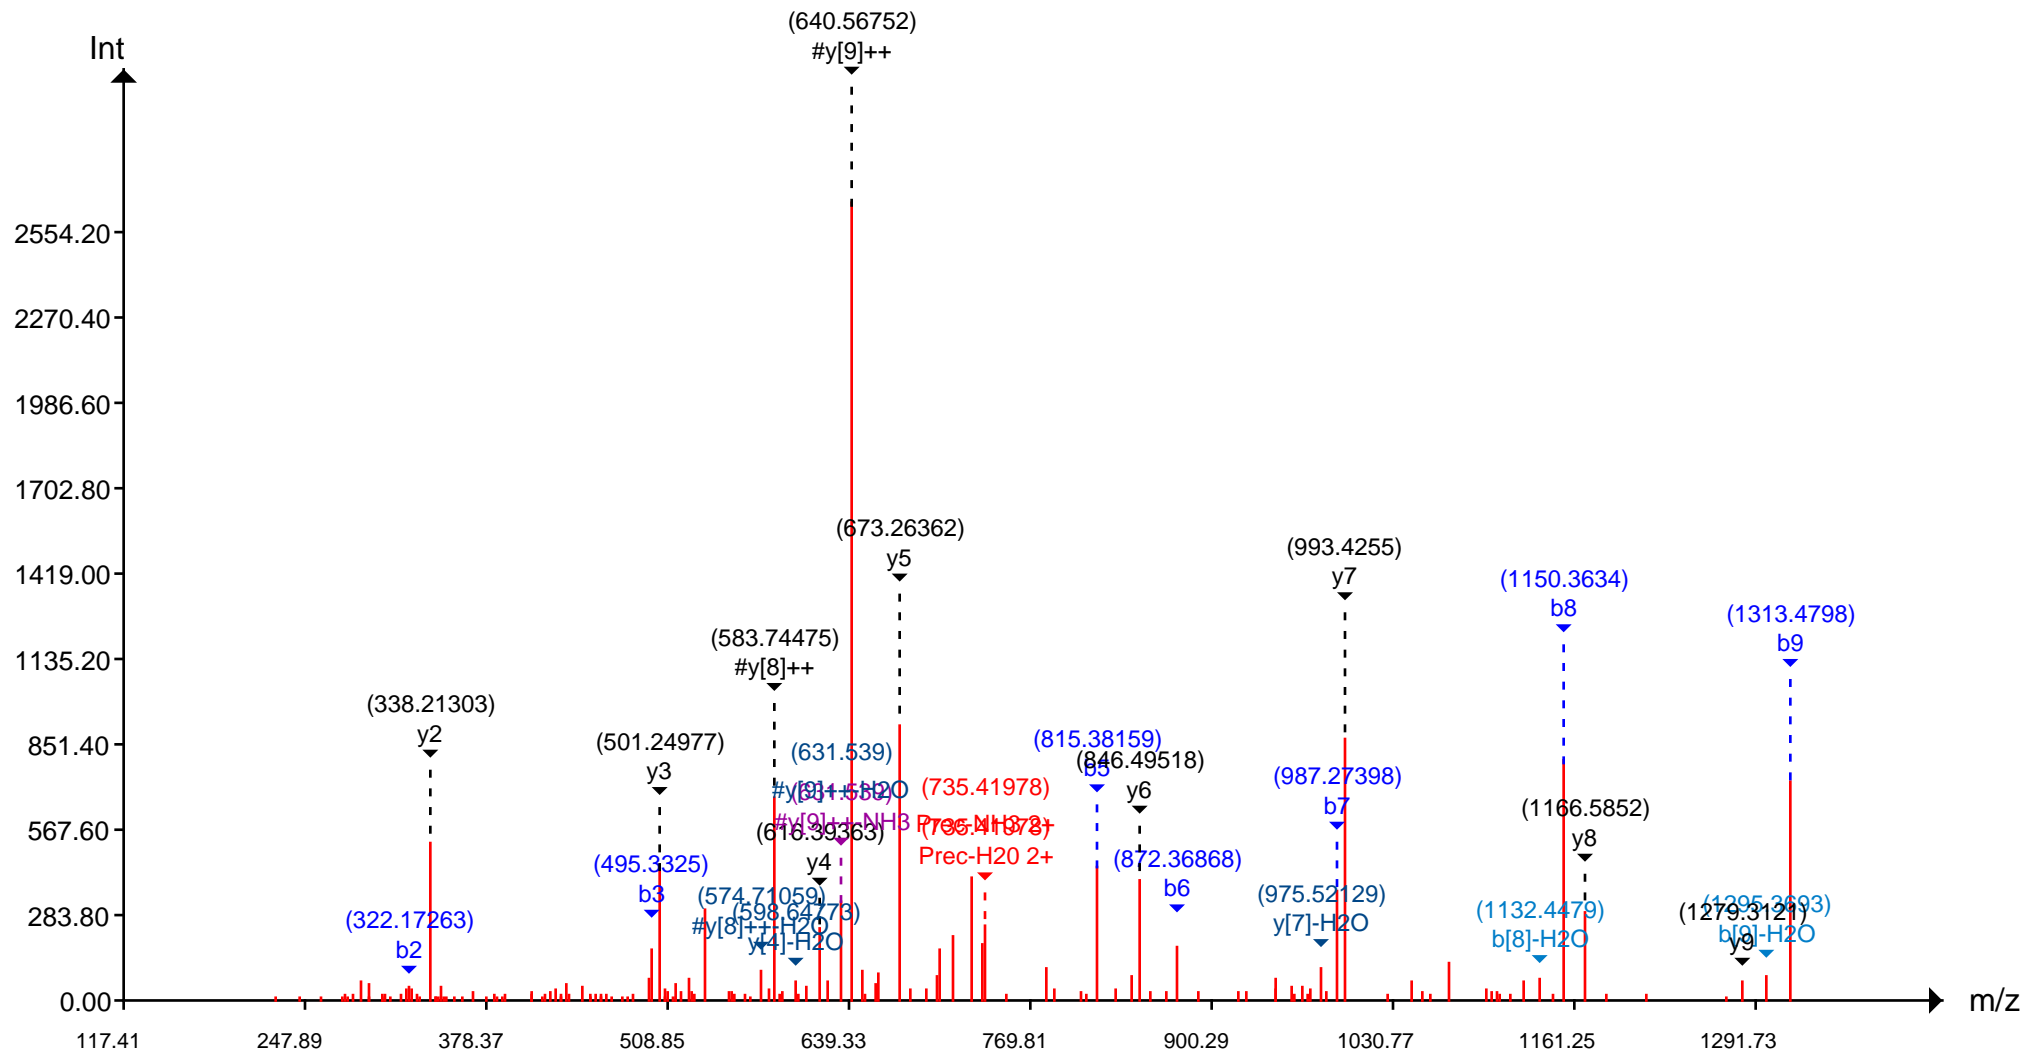

## Info

**Modified Sequence** AcD3-YLK<AcD3K\*>M<Mox\*>K<AcD3K\*>GDYYR-COOH

**Ion score** 55.01

**Protein** P68510, P61982, O70456, P63101

**Confidence level** 99.00%

**Precursor m/z** 744.38145

**Identity Threshold** 47.99

**Charge** 2+

**Mass error** 7.28E-4

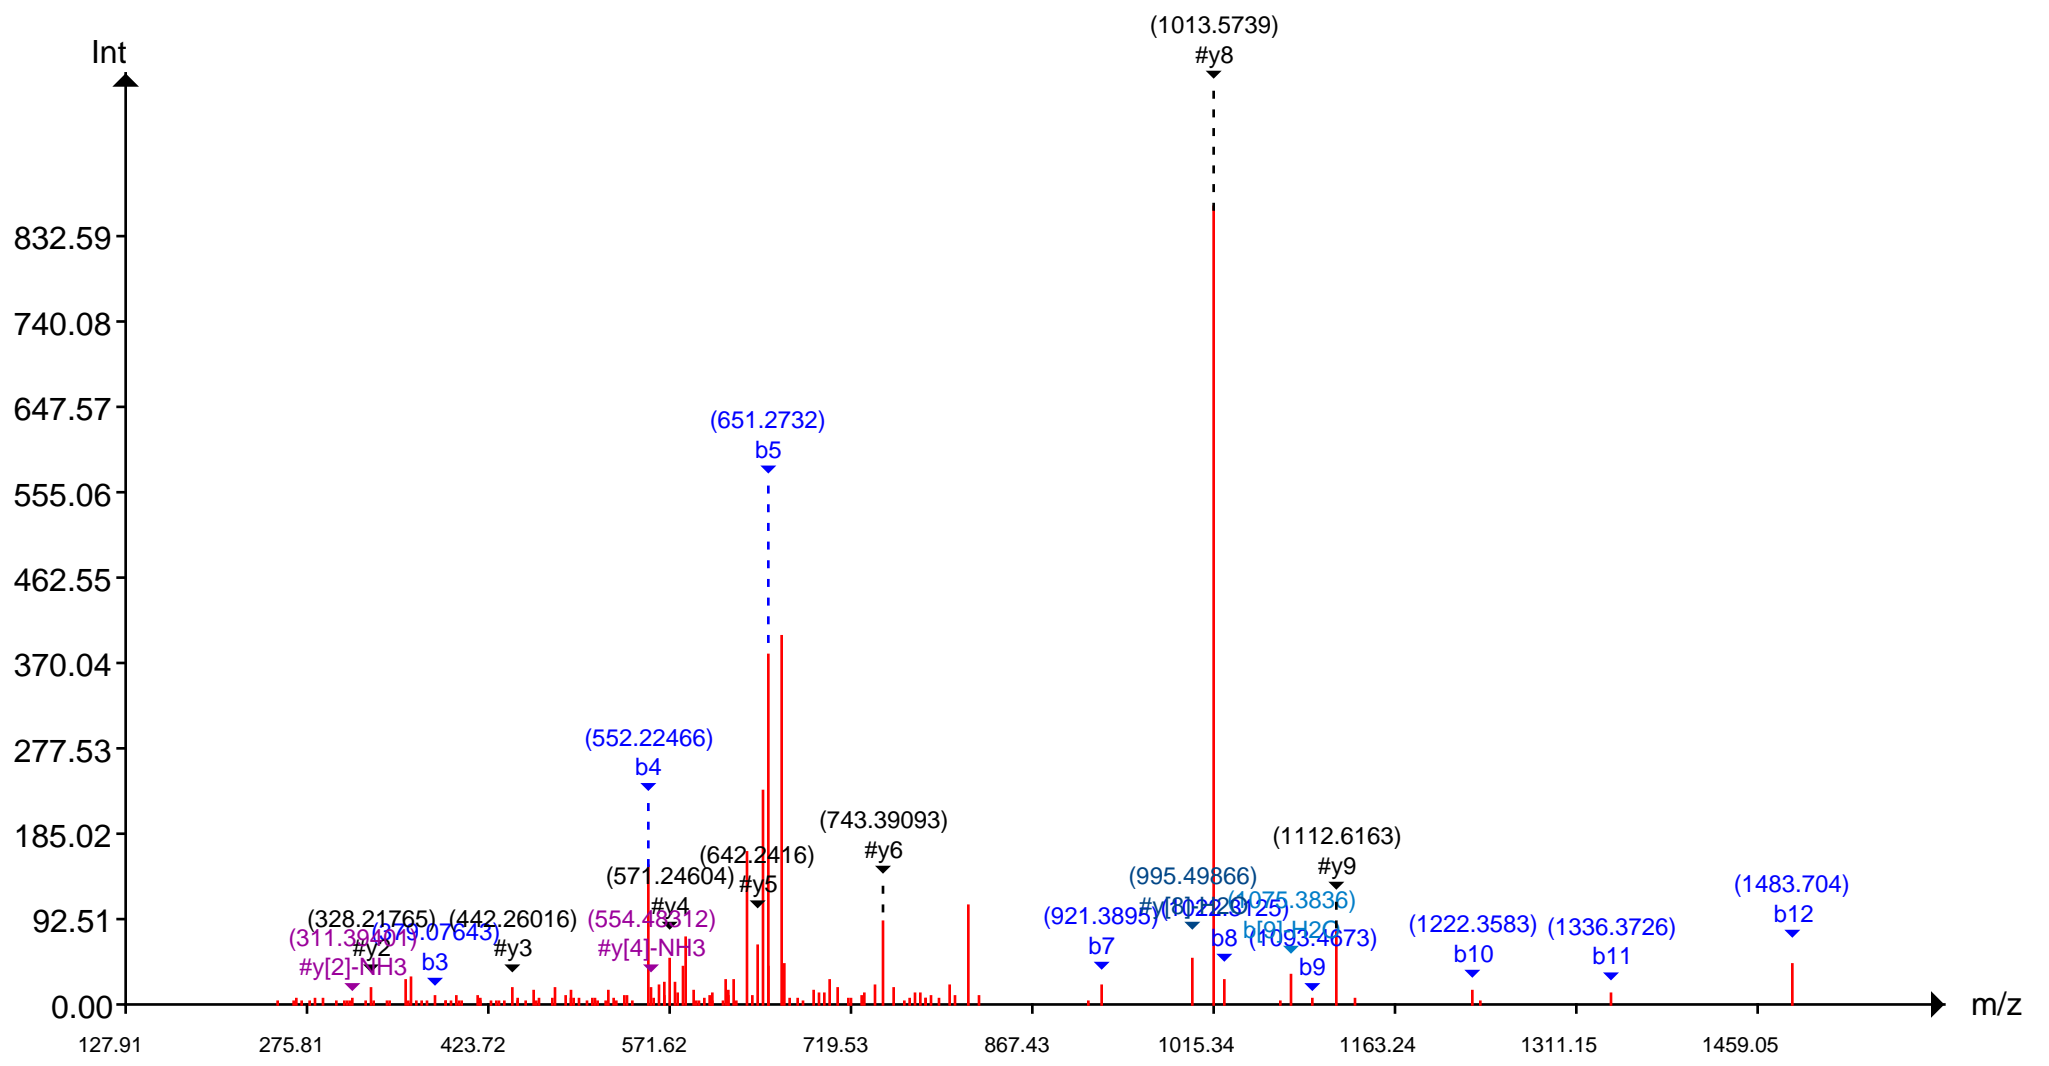

Info

|                          |                                              |                           |         |
|--------------------------|----------------------------------------------|---------------------------|---------|
| <b>Modified Sequence</b> | AcD3-FADK<AcD3K*>VPK<AcD3K*>TAENFR<C13>-COOH | <b>Ion score</b>          | 50.64   |
| <b>Protein</b>           | P17742                                       | <b>Confidence level</b>   | 99.00%  |
| <b>Precursor m/z</b>     | 832.45936                                    | <b>Identity Threshold</b> | 47.48   |
| <b>Charge</b>            | 2+                                           | <b>Mass error</b>         | 0.00187 |

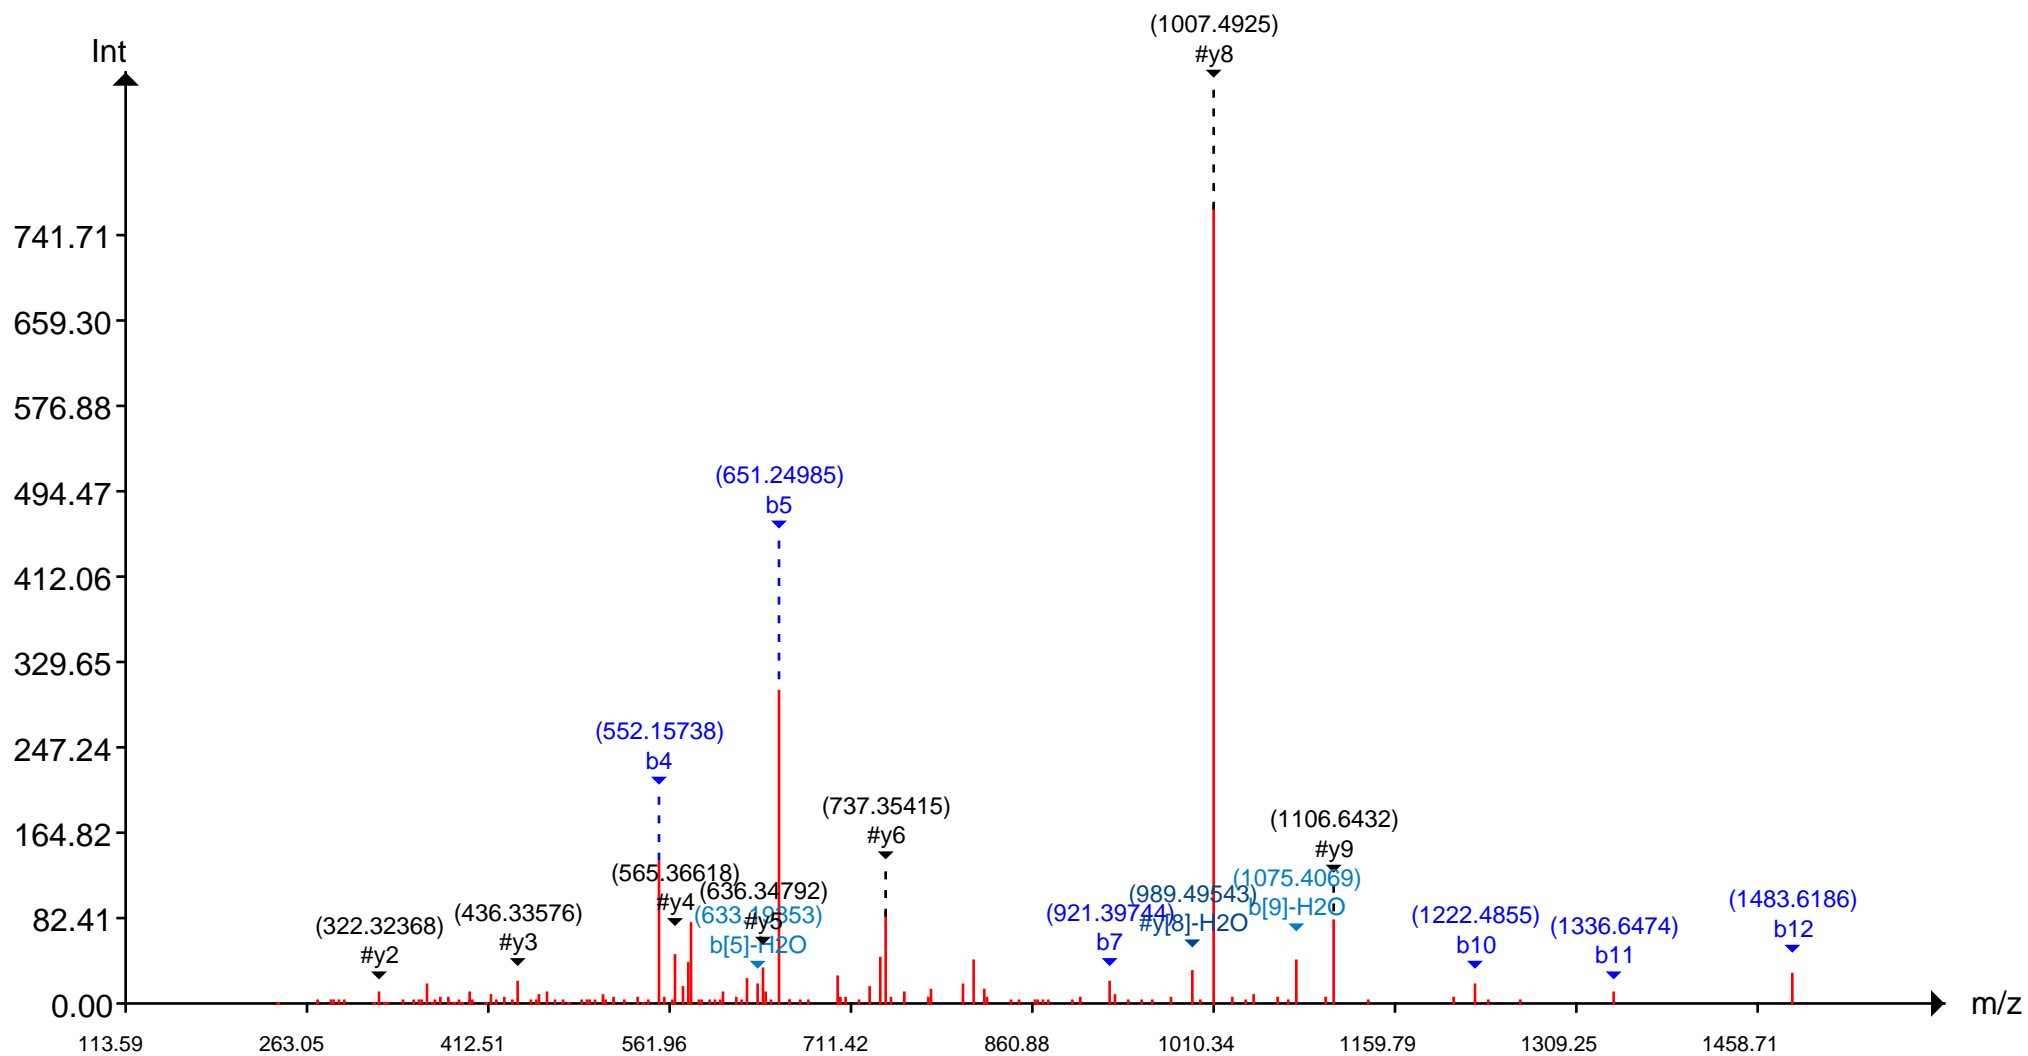

## Info

**Modified Sequence** AcD3-FADK<AcD3K\*>VPK<AcD3K\*>TAENFR-COOH

**Ion score** 53.06

**Protein** P17742

**Confidence level** 99.00%

**Precursor m/z** 829.44931

**Identity Threshold** 47.76

**Charge** 2+

**Mass error** 0.001912

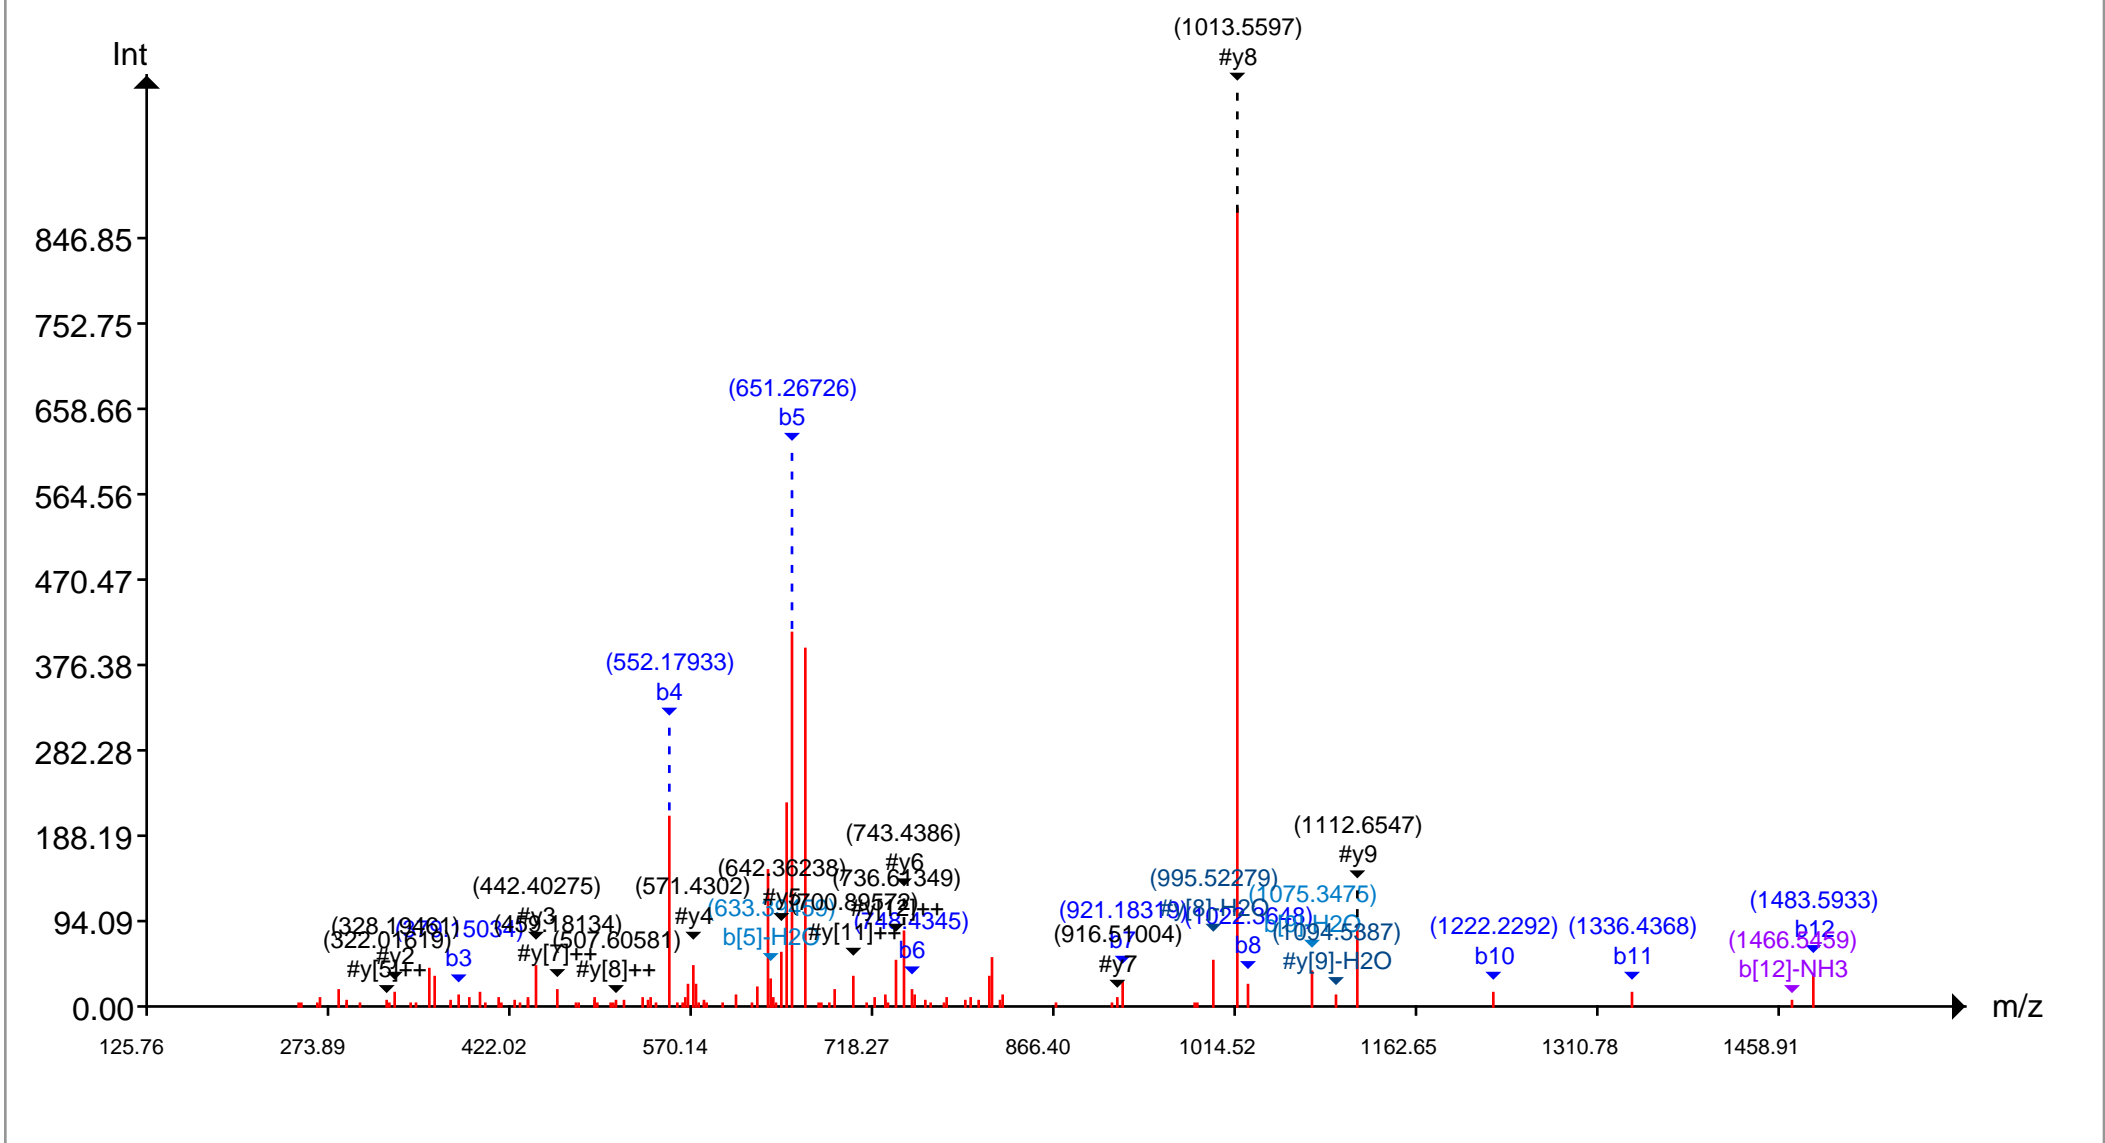

## Info

**Modified Sequence** AcD3-FADK<AcD3K\*>VPK<AcD3K\*>TAENFR<C13>-COOH

**Ion score** 50.09

**Protein** P17742

**Confidence level** 99.00%

**Precursor m/z** 832.45916

**Identity Threshold** 47.45

**Charge** 2+

**Mass error** 0.00147



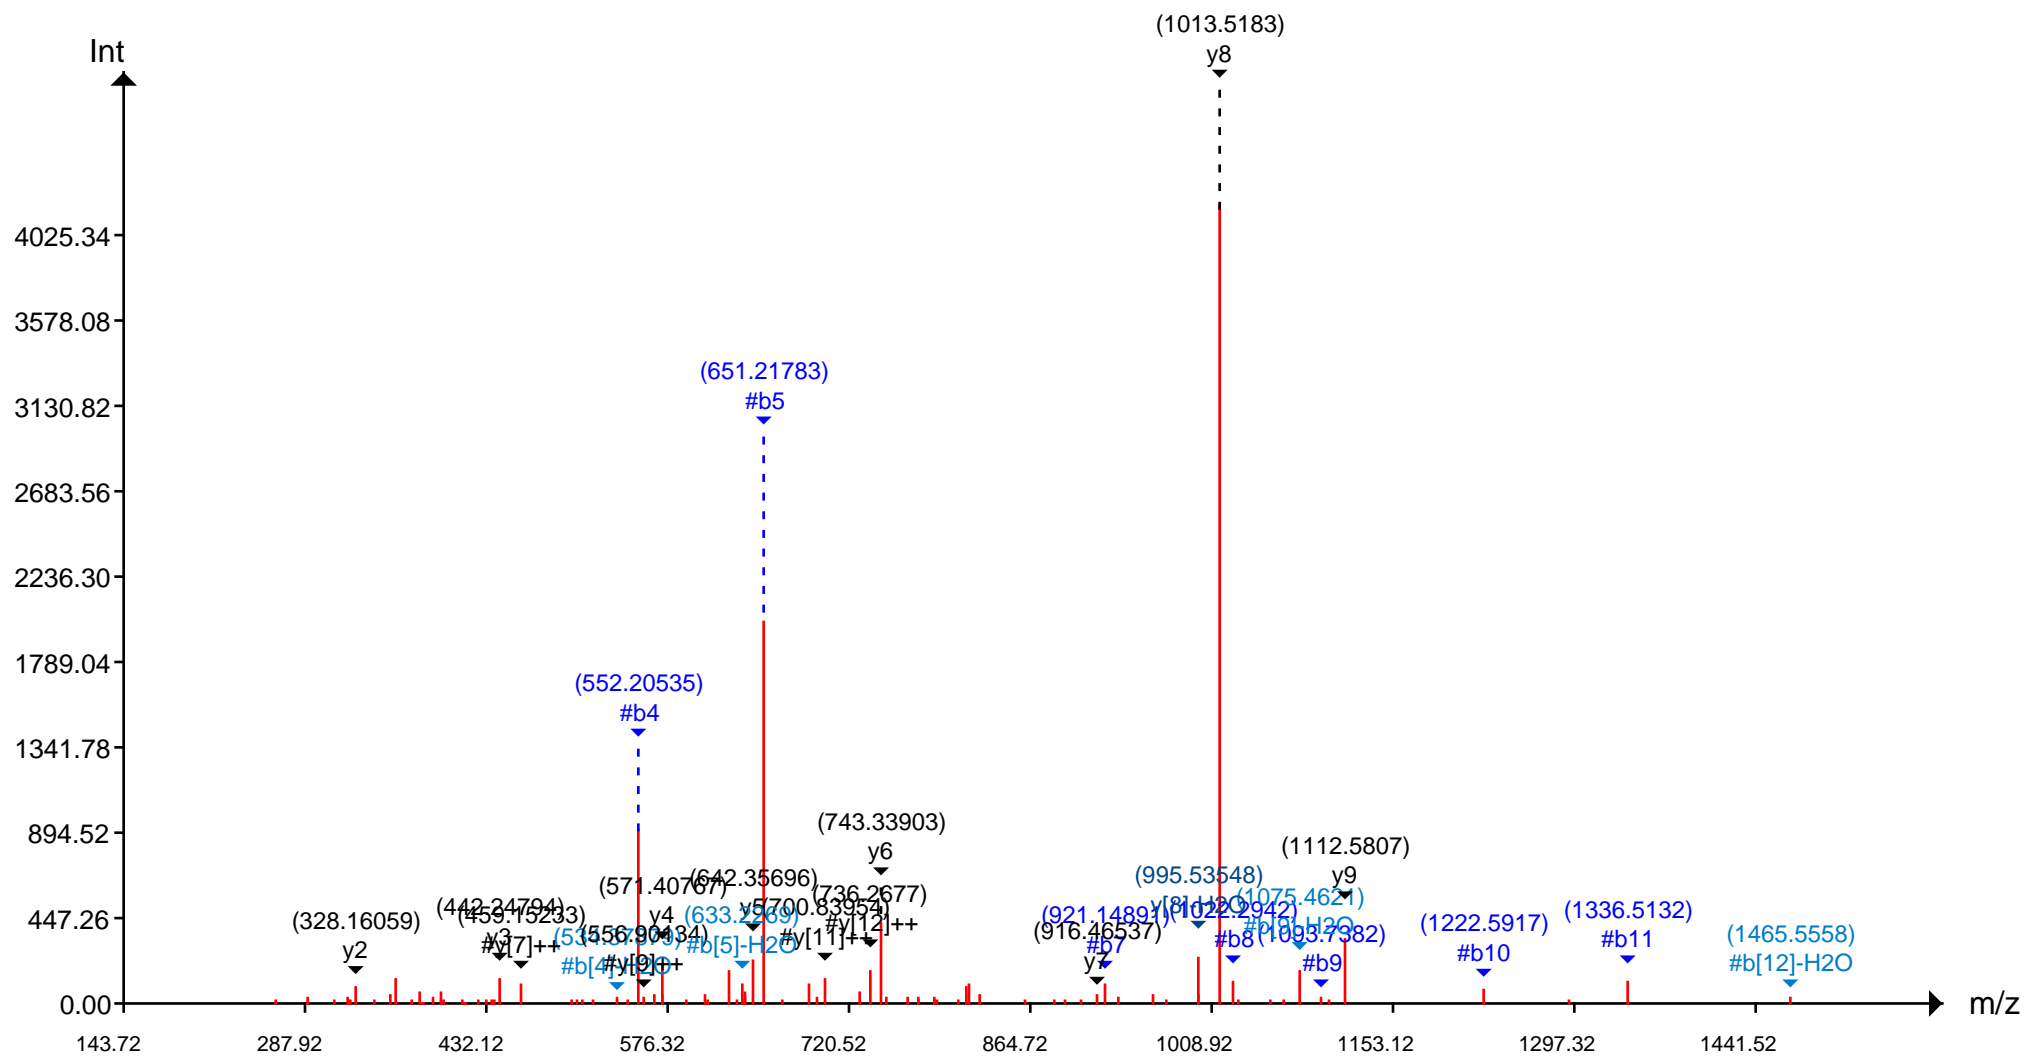

## Info

**Modified Sequence** AcD3-FADK<AcD3K\*>VPK<AcD3K\*>TAENFR<C13>-COOH

**Ion score** 62.13

**Protein** P17742

**Confidence level** 99.00%

**Precursor m/z** 832.45916

**Identity Threshold** 47.45

**Charge** 2+

**Mass error** 0.00147

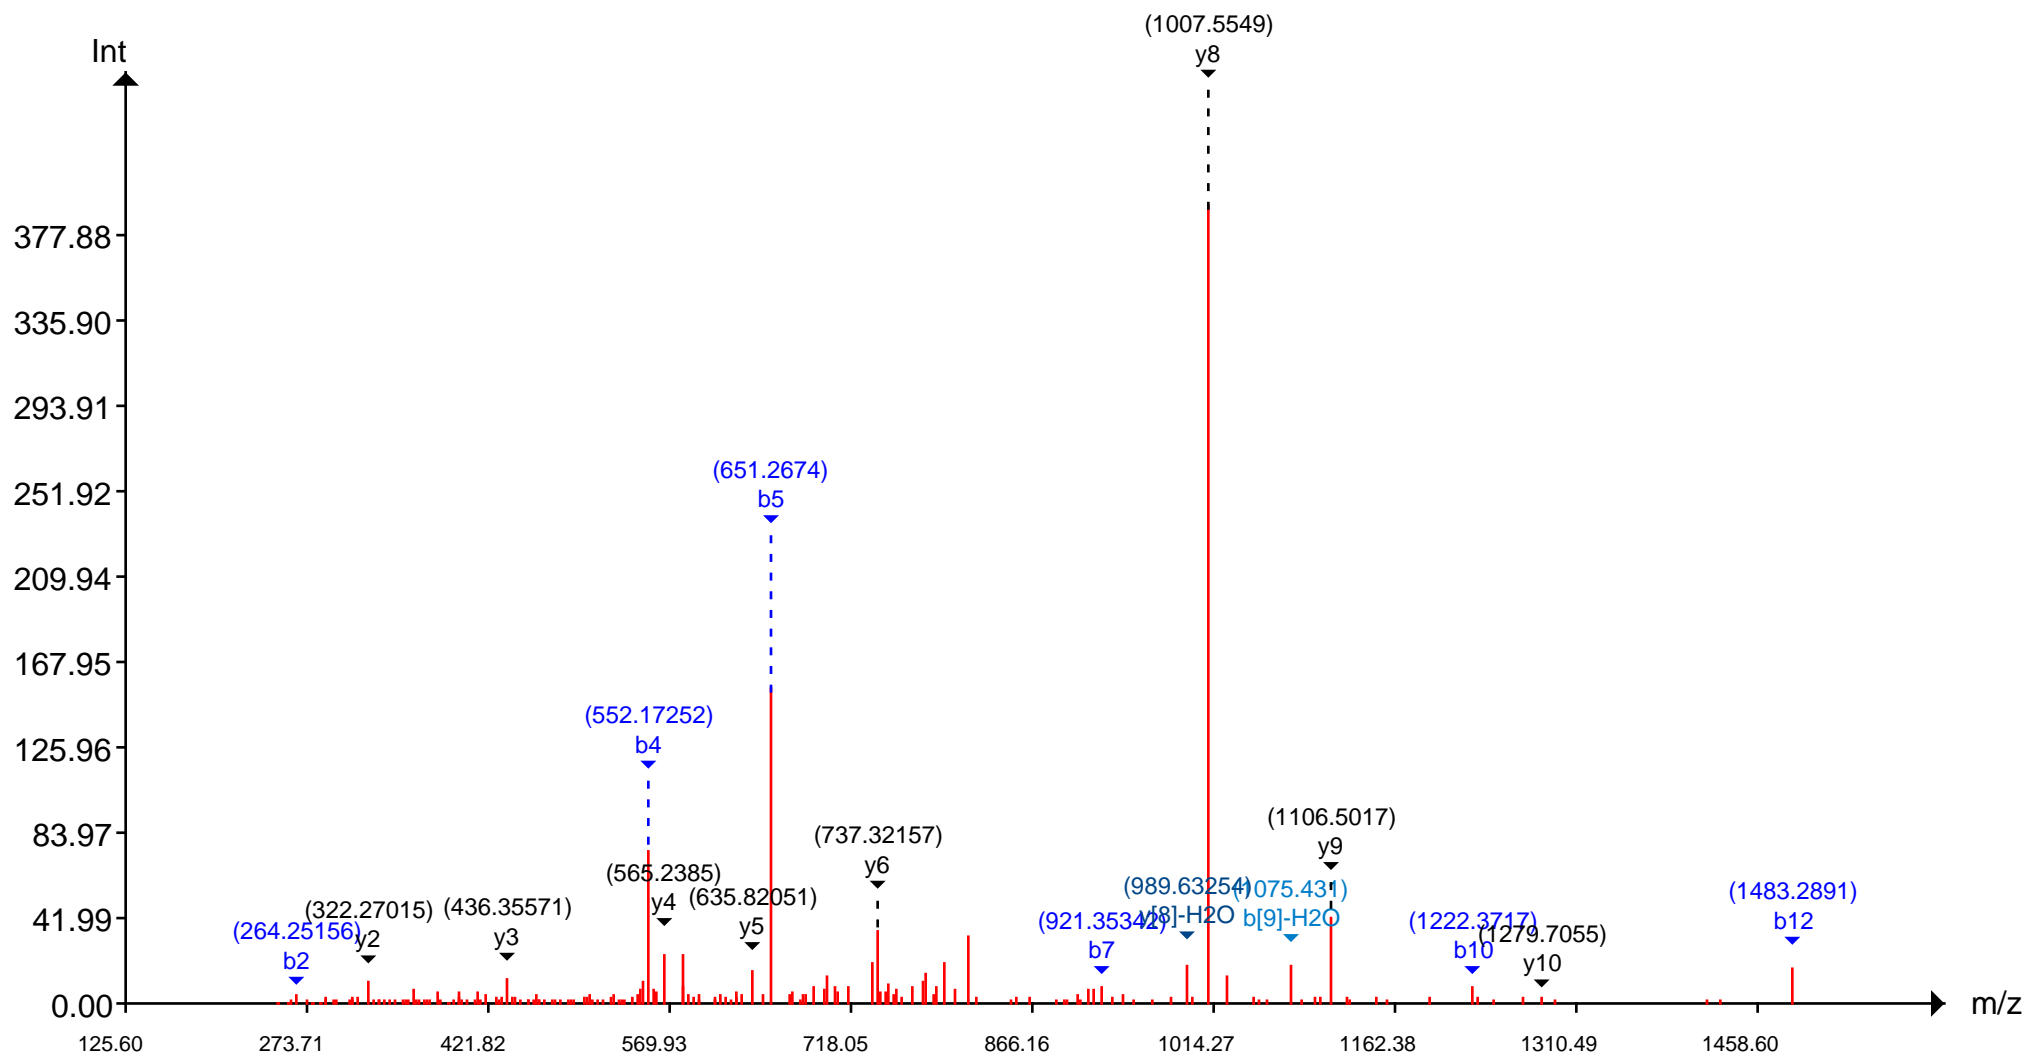

## Info

**Modified Sequence** AcD3-FADK<AcD3K\*>VPK<AcD3K\*>TAENFR-COOH

**Ion score** 55.8

**Protein** P17742

**Confidence level** 99.00%

**Precursor m/z** 829.44854

**Identity Threshold** 47.89

**Charge** 2+

**Mass error** 3.72E-4

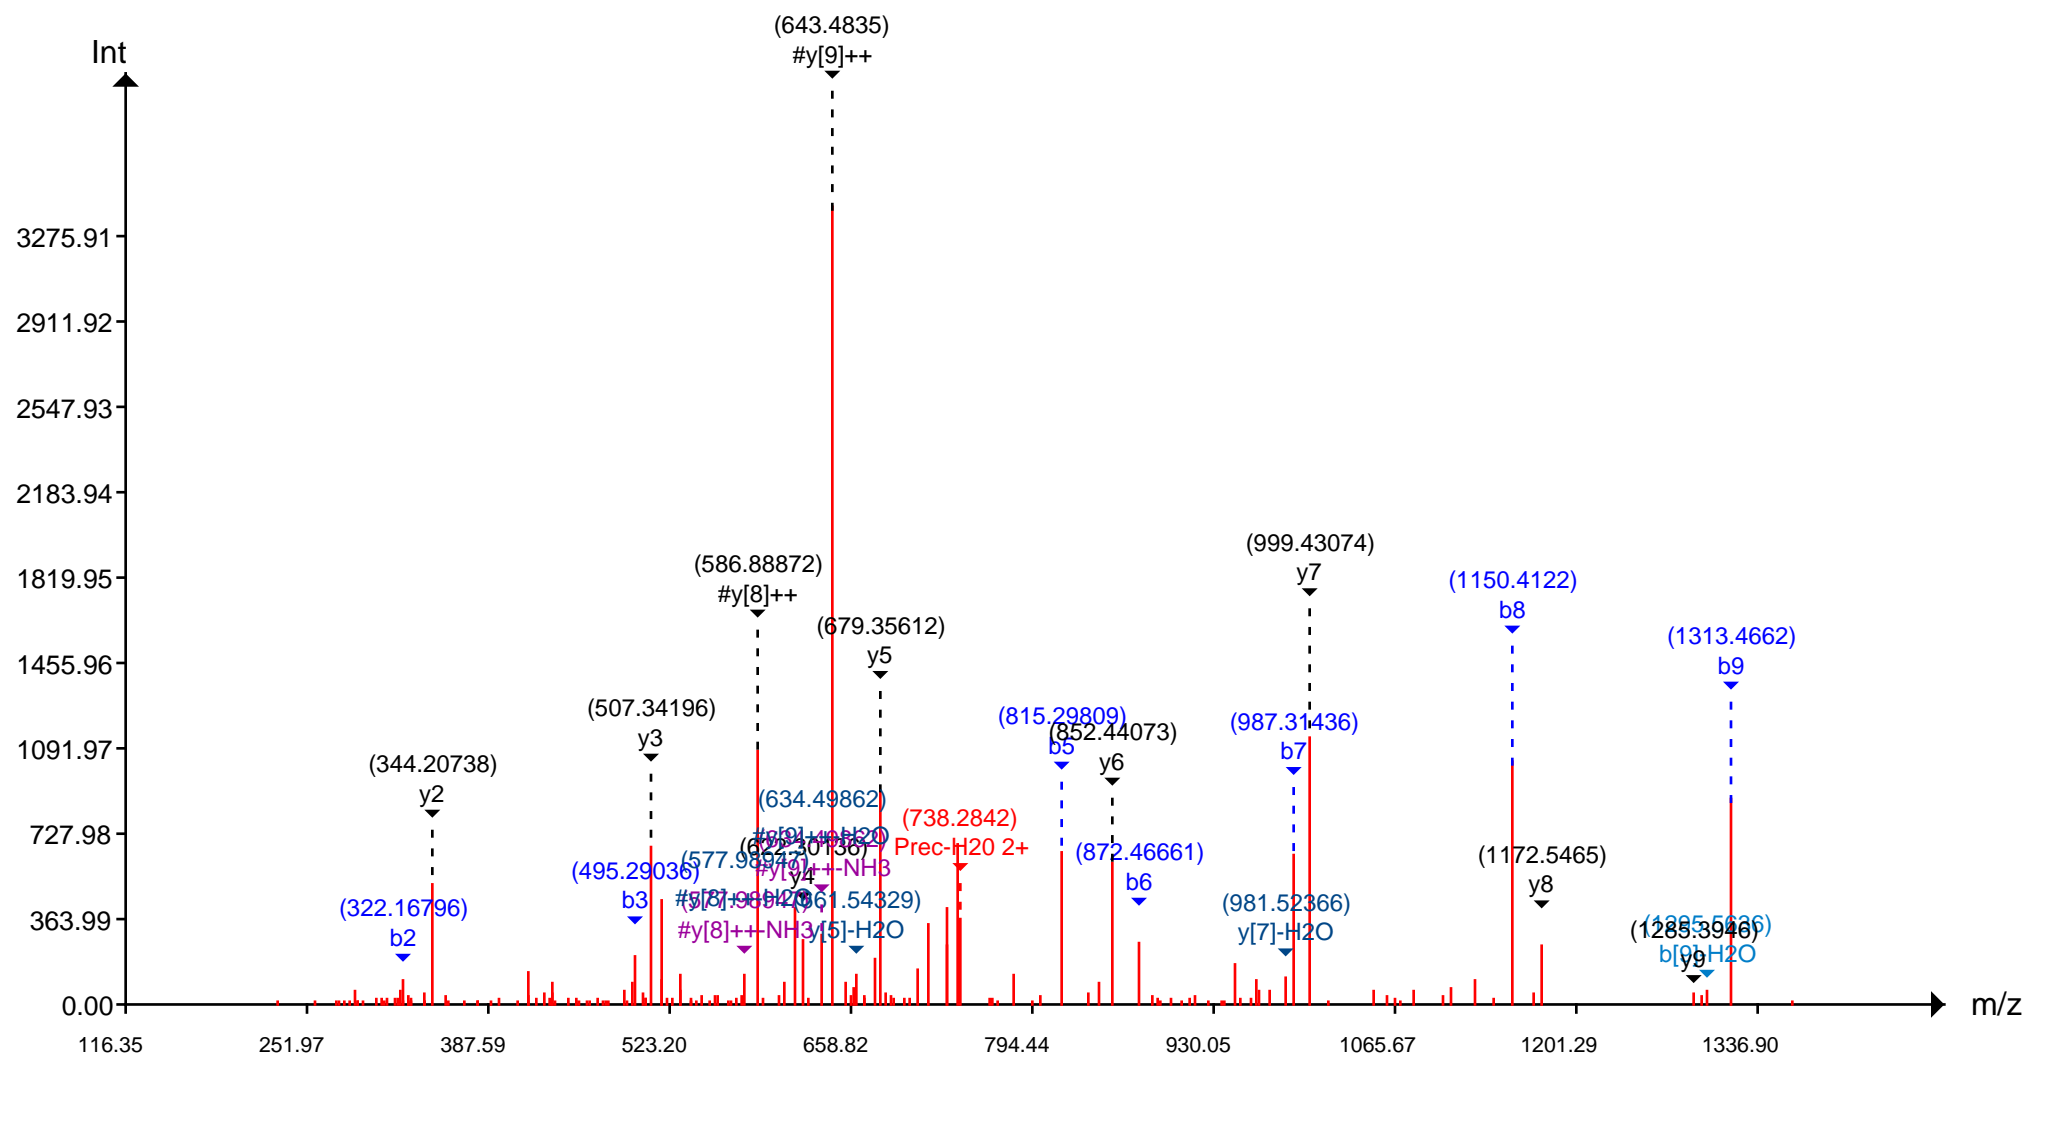

| Info                     |                                                 |                           |          |
|--------------------------|-------------------------------------------------|---------------------------|----------|
| <b>Modified Sequence</b> | AcD3-YLK<AcD3K*>M<Mox*>K<AcD3K*>GDYYR<C13>-COOH | <b>Ion score</b>          | 53.19    |
| <b>Protein</b>           | P68510, P61982, O70456, P63101                  | <b>Confidence level</b>   | 99.00%   |
| <b>Precursor m/z</b>     | 747.3917                                        | <b>Identity Threshold</b> | 48.22    |
| <b>Charge</b>            | 2+                                              | <b>Mass error</b>         | 0.001087 |

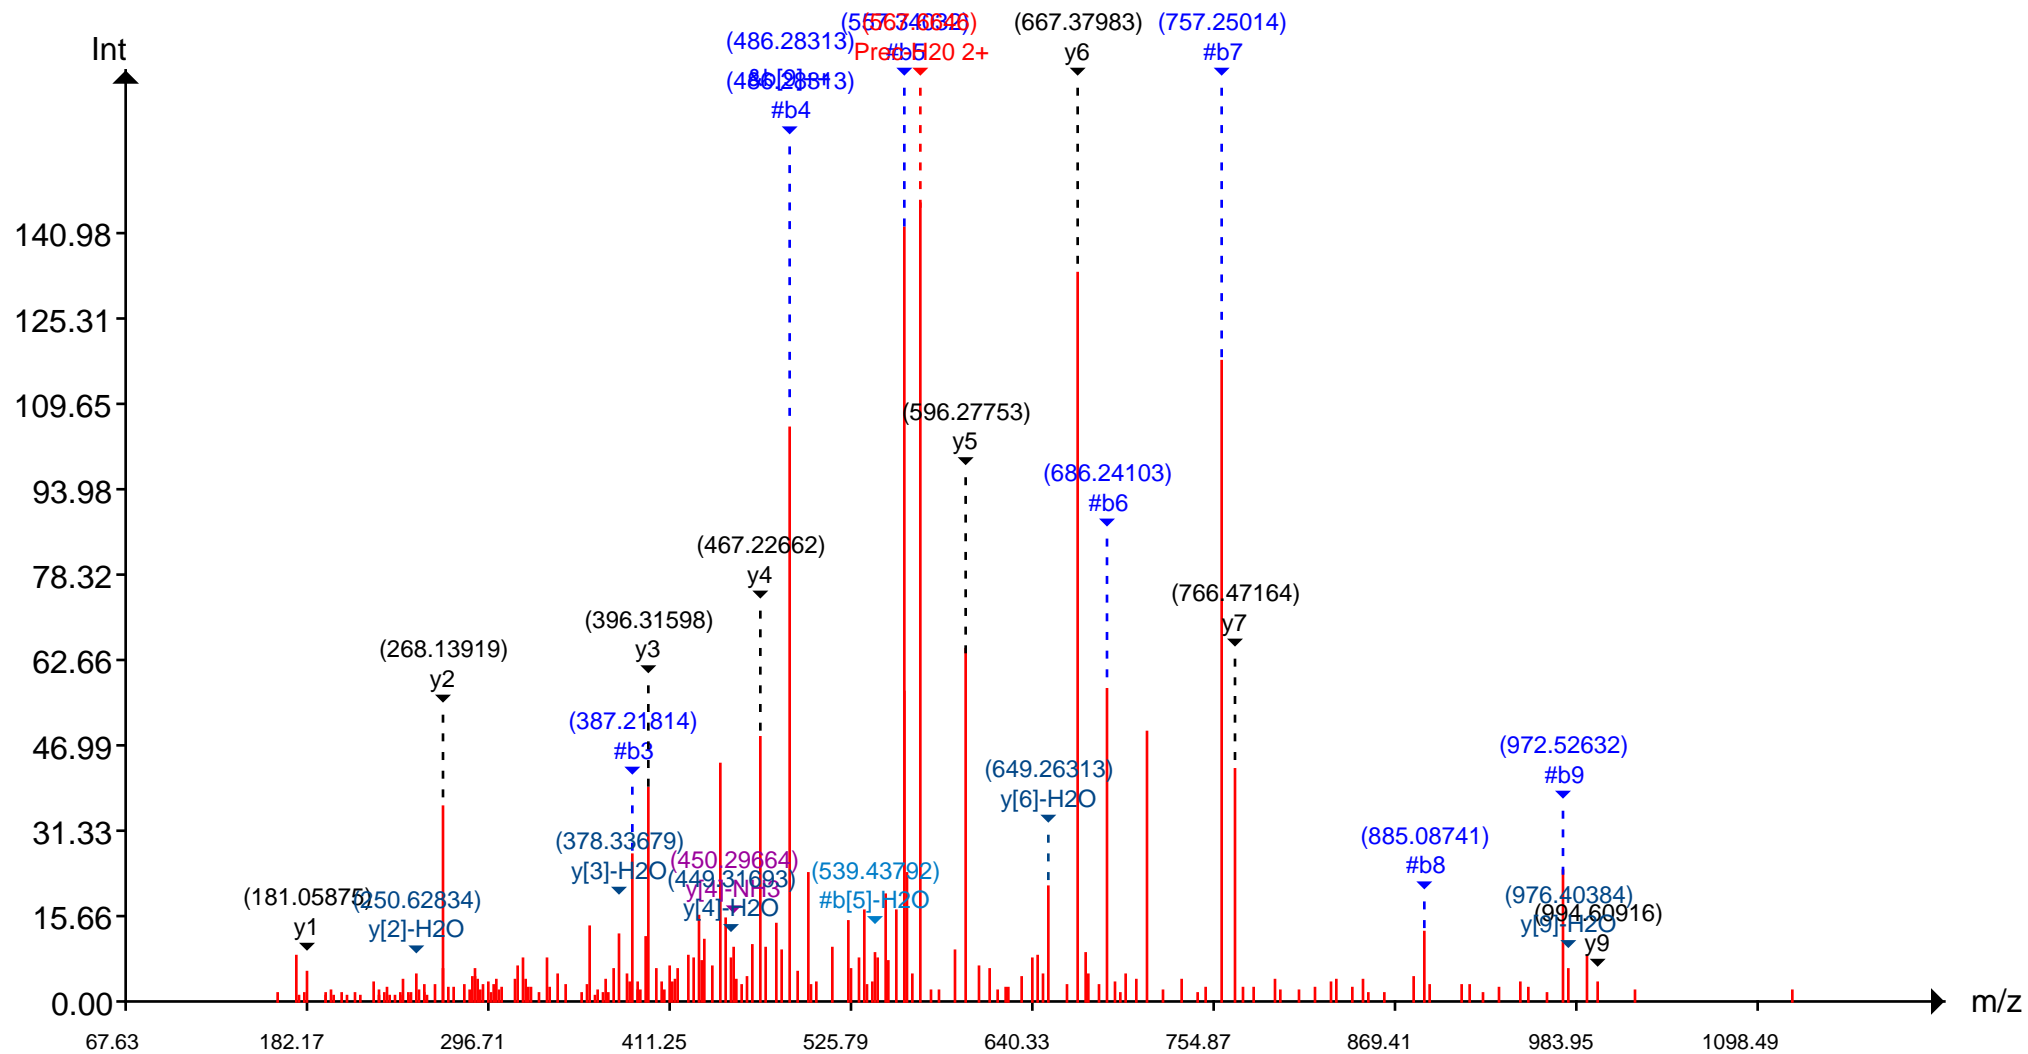

## Info

|                          |                           |                           |          |
|--------------------------|---------------------------|---------------------------|----------|
| <b>Modified Sequence</b> | AcD3-LDLVAEAQSR<C13>-COOH | <b>Ion score</b>          | 52.46    |
| <b>Protein</b>           | Q3U1Z5                    | <b>Confidence level</b>   | 99.00%   |
| <b>Precursor m/z</b>     | 576.82302                 | <b>Identity Threshold</b> | 47.35    |
| <b>Charge</b>            | 2+                        | <b>Mass error</b>         | -6.07E-4 |

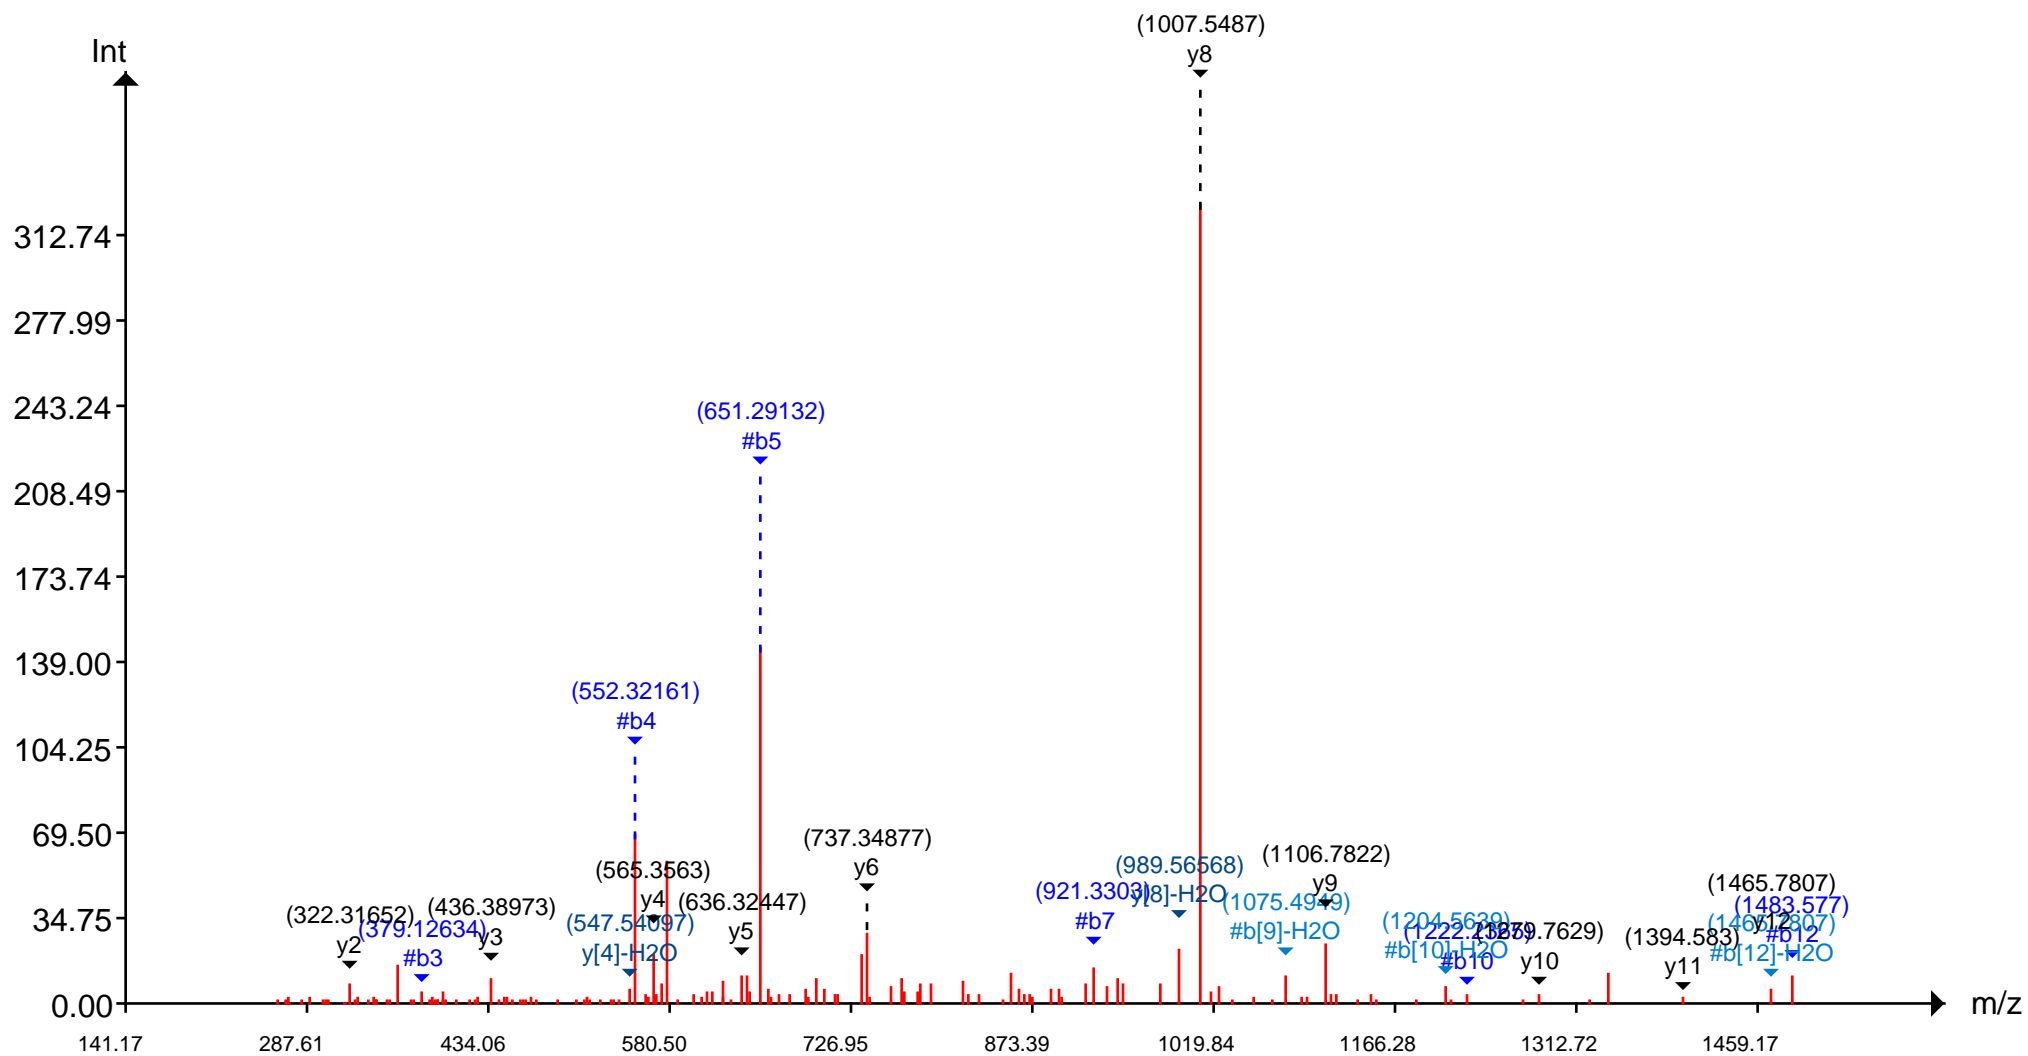

## Info

**Modified Sequence** AcD3-FADK<AcD3K\*>VPK<AcD3K\*>TAENFR-COOH

**Ion score** 62.09

**Protein** P17742

**Confidence level** 99.00%

**Precursor m/z** 829.44866

**Identity Threshold** 47.89

**Charge** 2+

**Mass error** 6.12E-4

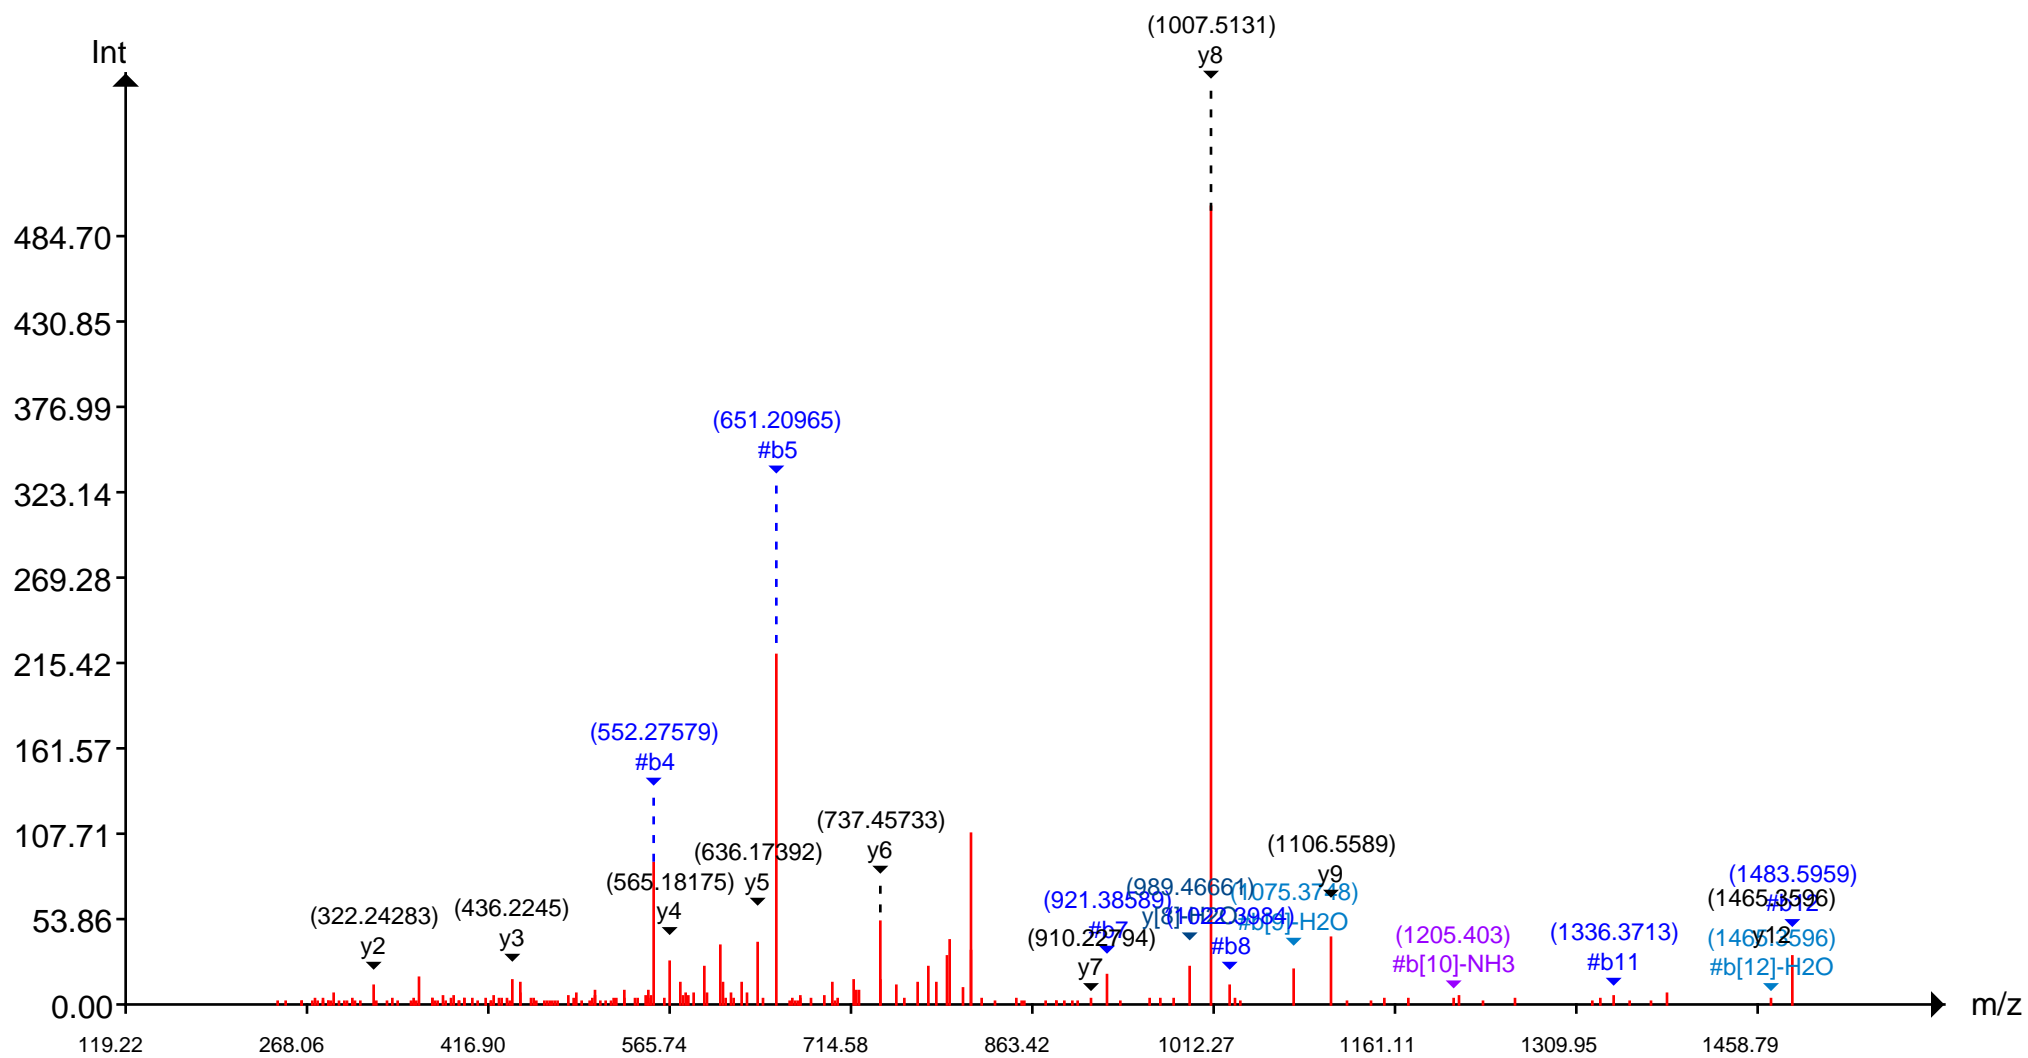

## Info

|                          |                                         |                           |         |
|--------------------------|-----------------------------------------|---------------------------|---------|
| <b>Modified Sequence</b> | AcD3-FADK<AcD3K*>VPK<AcD3K*>TAENFR-COOH | <b>Ion score</b>          | 55.31   |
| <b>Protein</b>           | P17742                                  | <b>Confidence level</b>   | 99.00%  |
| <b>Precursor m/z</b>     | 829.44864                               | <b>Identity Threshold</b> | 47.89   |
| <b>Charge</b>            | 2+                                      | <b>Mass error</b>         | 5.72E-4 |

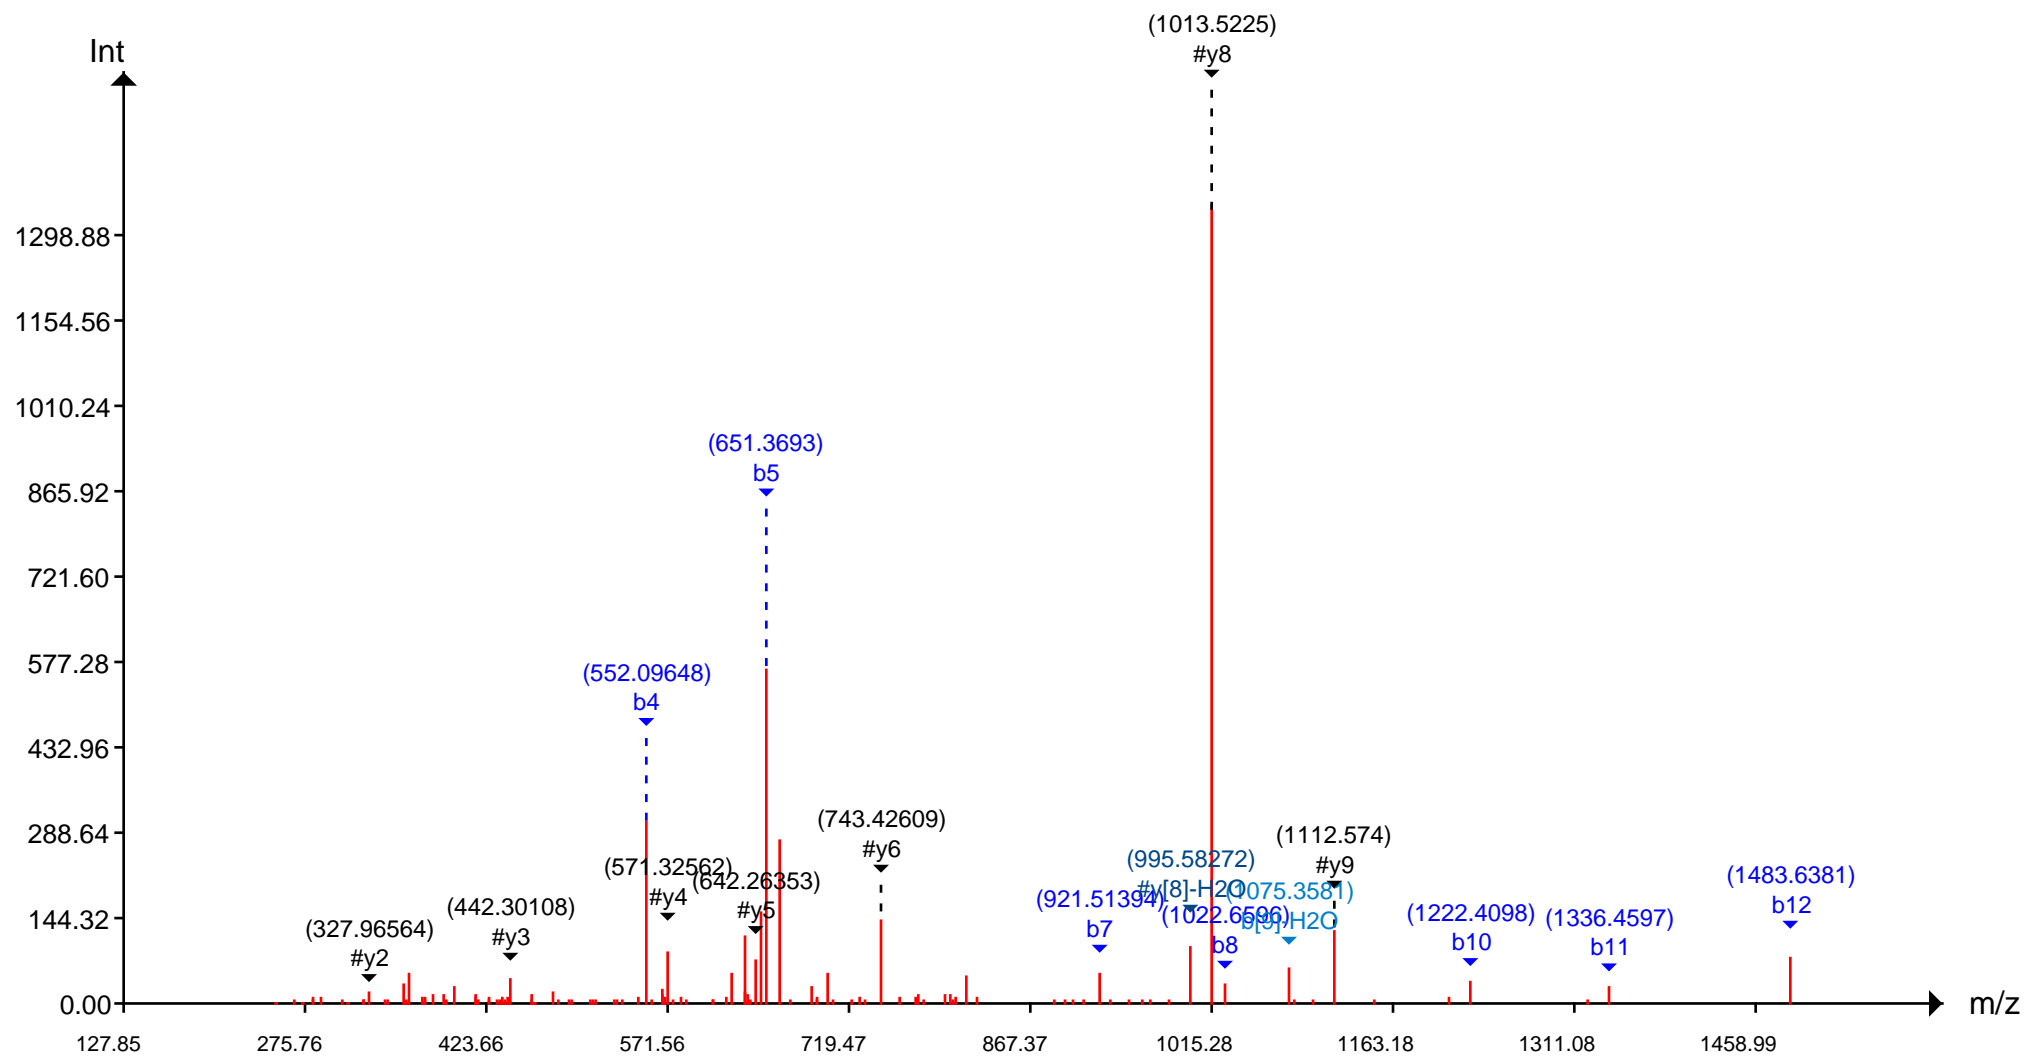

## Info

**Modified Sequence** AcD3-FADK<AcD3K\*>VPK<AcD3K\*>TAENFR<C13>-COOH

**Ion score** 48.78

**Protein** P17742

**Confidence level** 99.00%

**Precursor m/z** 832.45919

**Identity Threshold** 47.46

**Charge** 2+

**Mass error** 0.00153

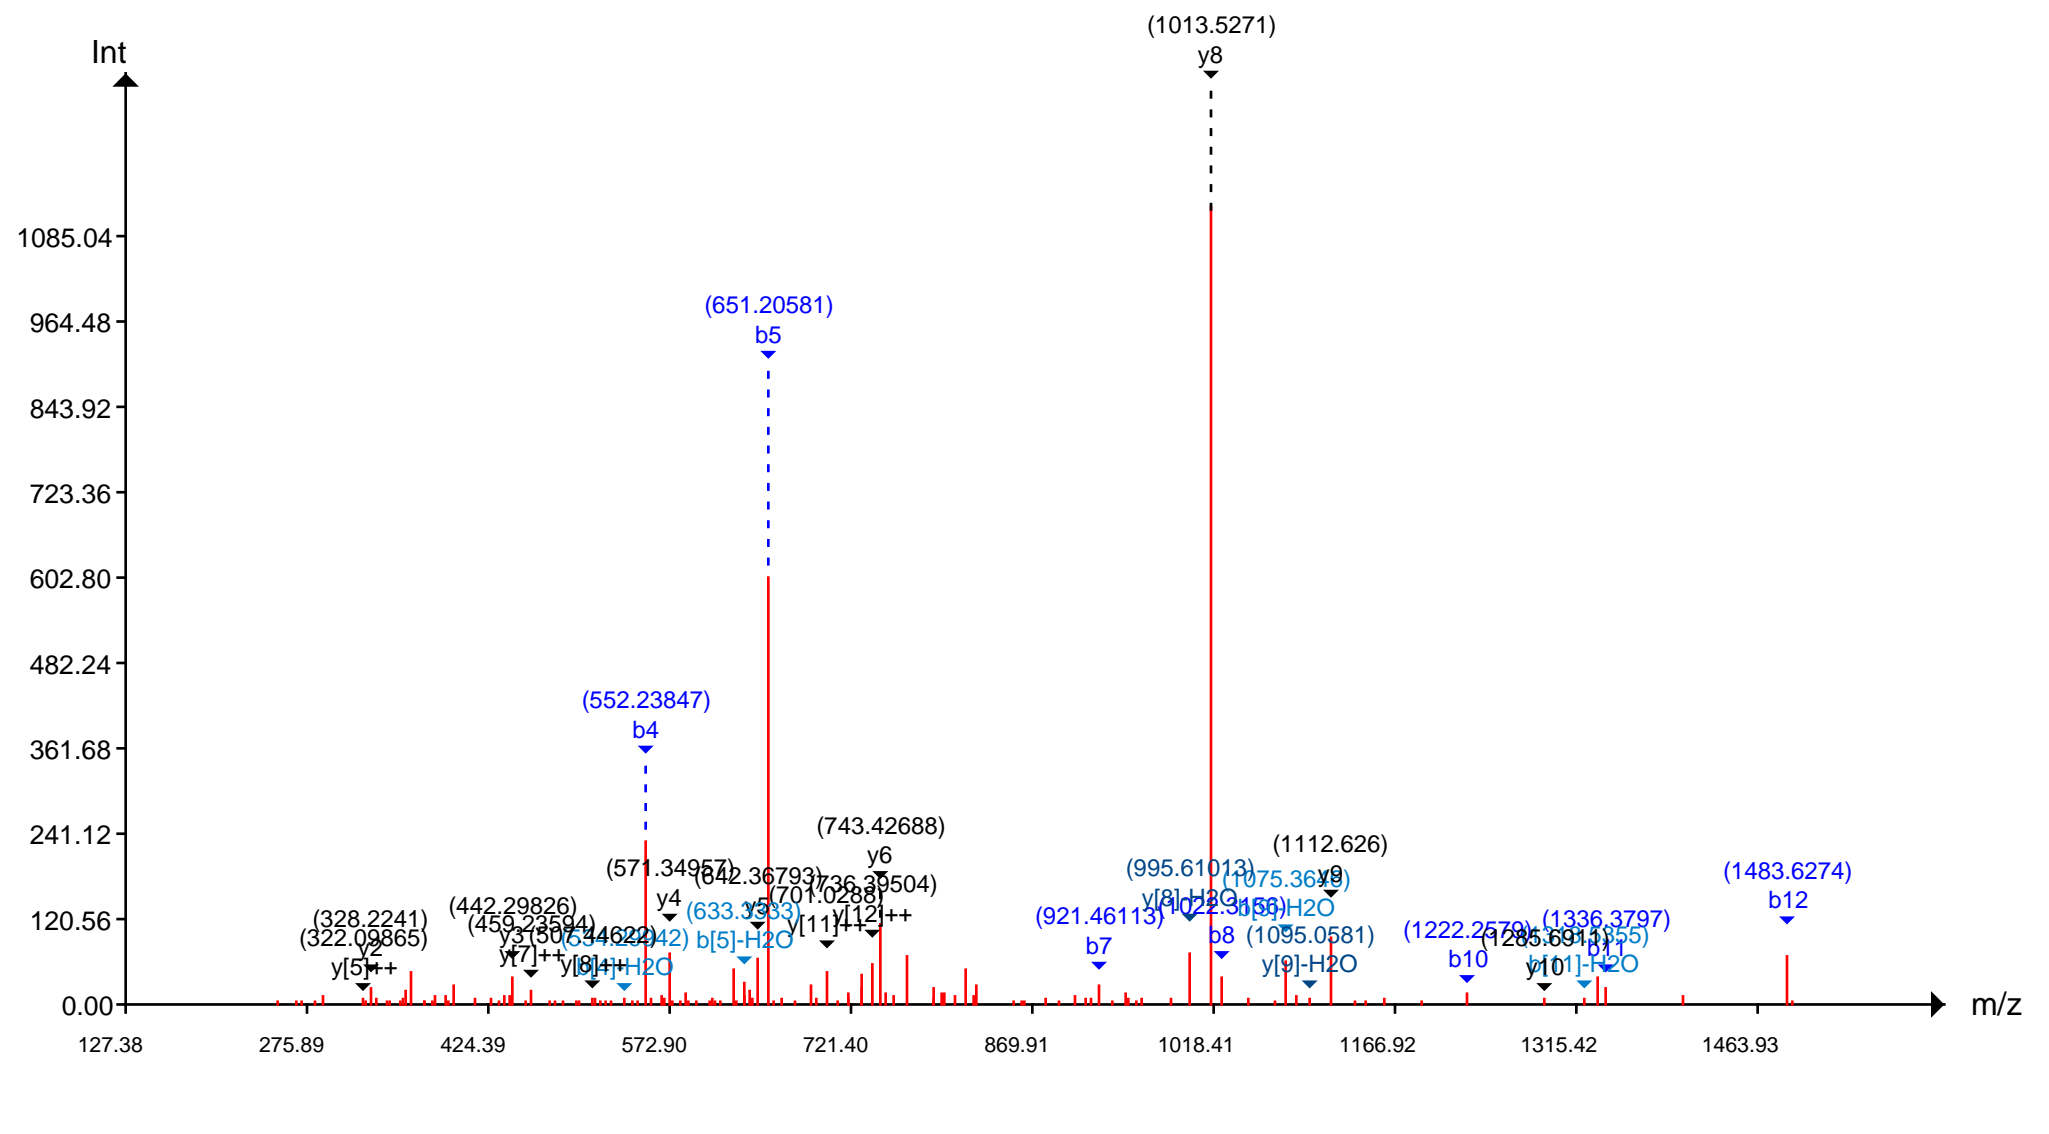

| Info                     |                                              |                           |         |
|--------------------------|----------------------------------------------|---------------------------|---------|
| <b>Modified Sequence</b> | AcD3-FADK<AcD3K*>VPK<AcD3K*>TAENFR<C13>-COOH | <b>Ion score</b>          | 49.11   |
| <b>Protein</b>           | P17742                                       | <b>Confidence level</b>   | 99.00%  |
| <b>Precursor m/z</b>     | 832.45927                                    | <b>Identity Threshold</b> | 47.47   |
| <b>Charge</b>            | 2+                                           | <b>Mass error</b>         | 0.00169 |





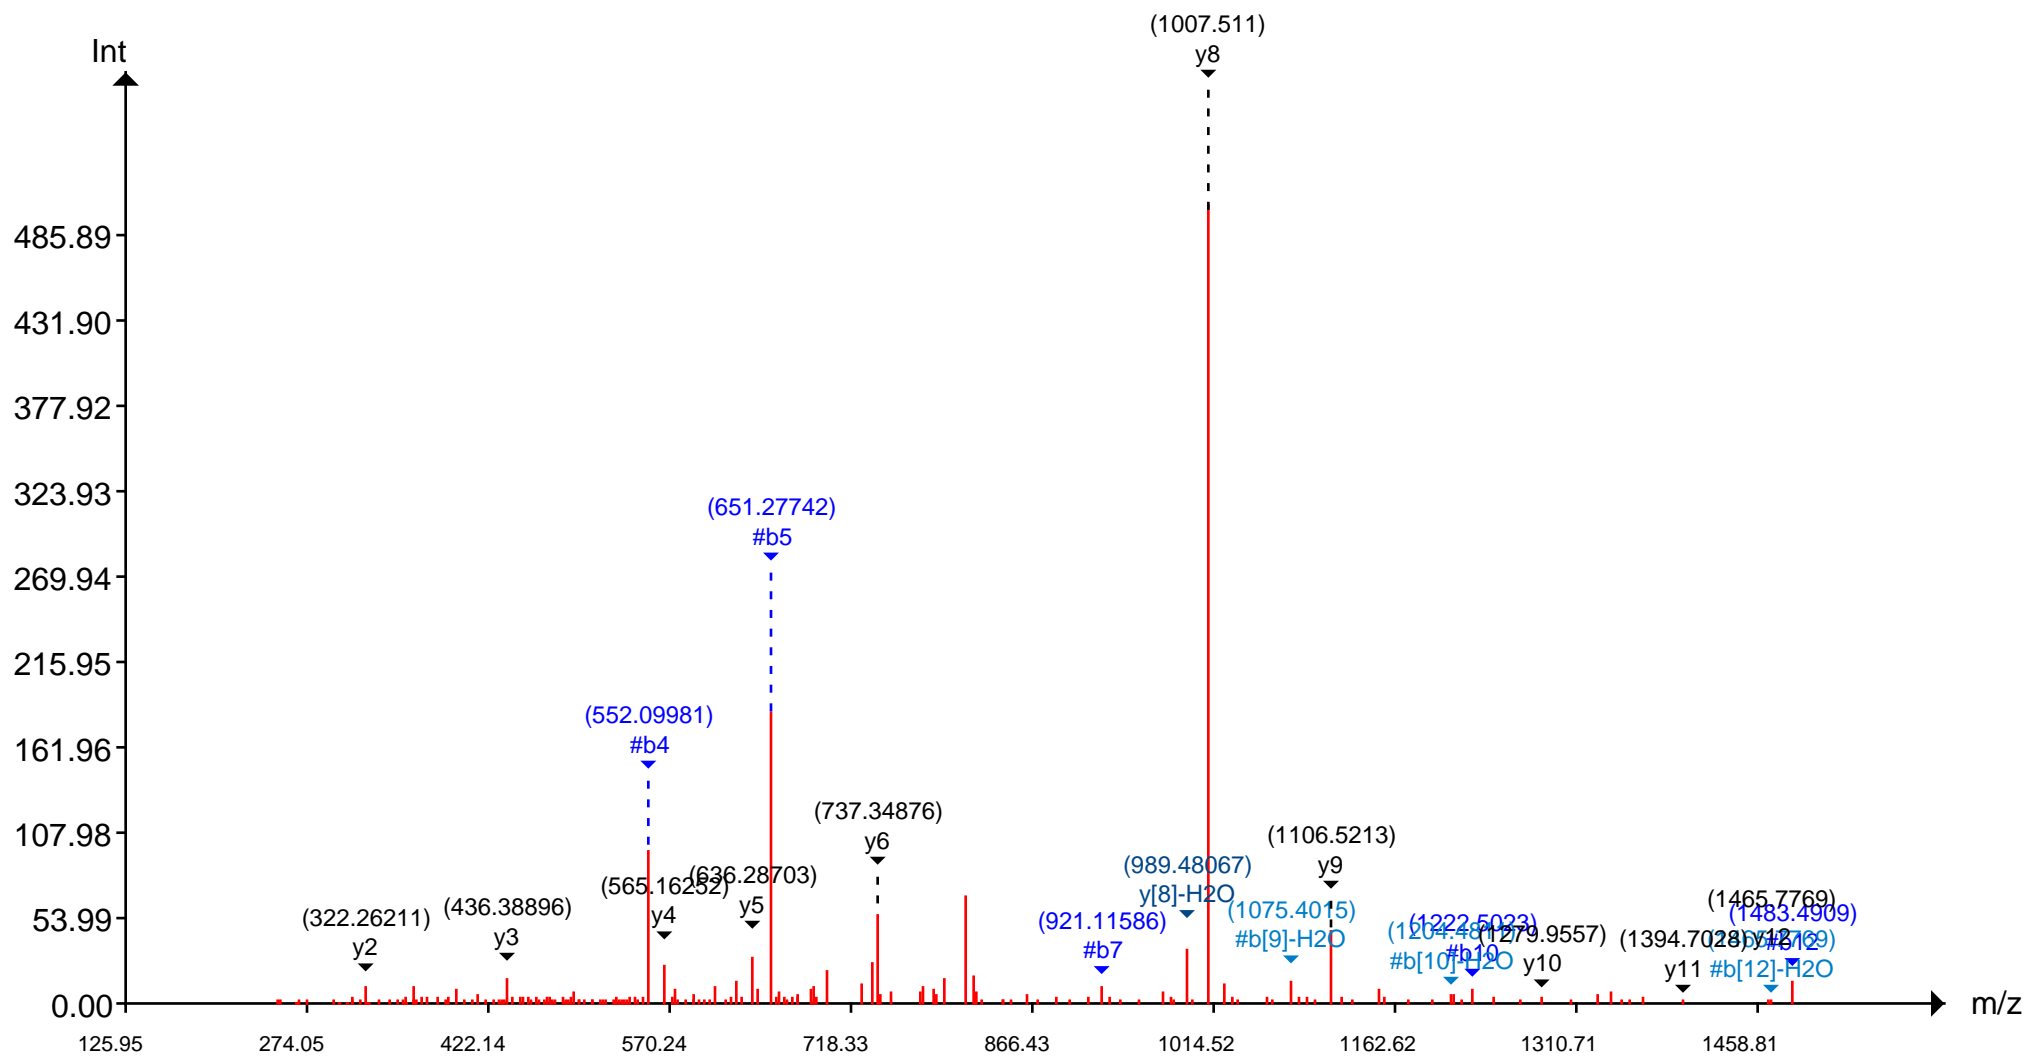

## Info

**Modified Sequence** AcD3-FADK<AcD3K\*>VPK<AcD3K\*>TAENFR-COOH

**Ion score** 66.38

**Protein** P17742

**Confidence level** 99.00%

**Precursor m/z** 829.44883

**Identity Threshold** 47.83

**Charge** 2+

**Mass error** 9.52E-4

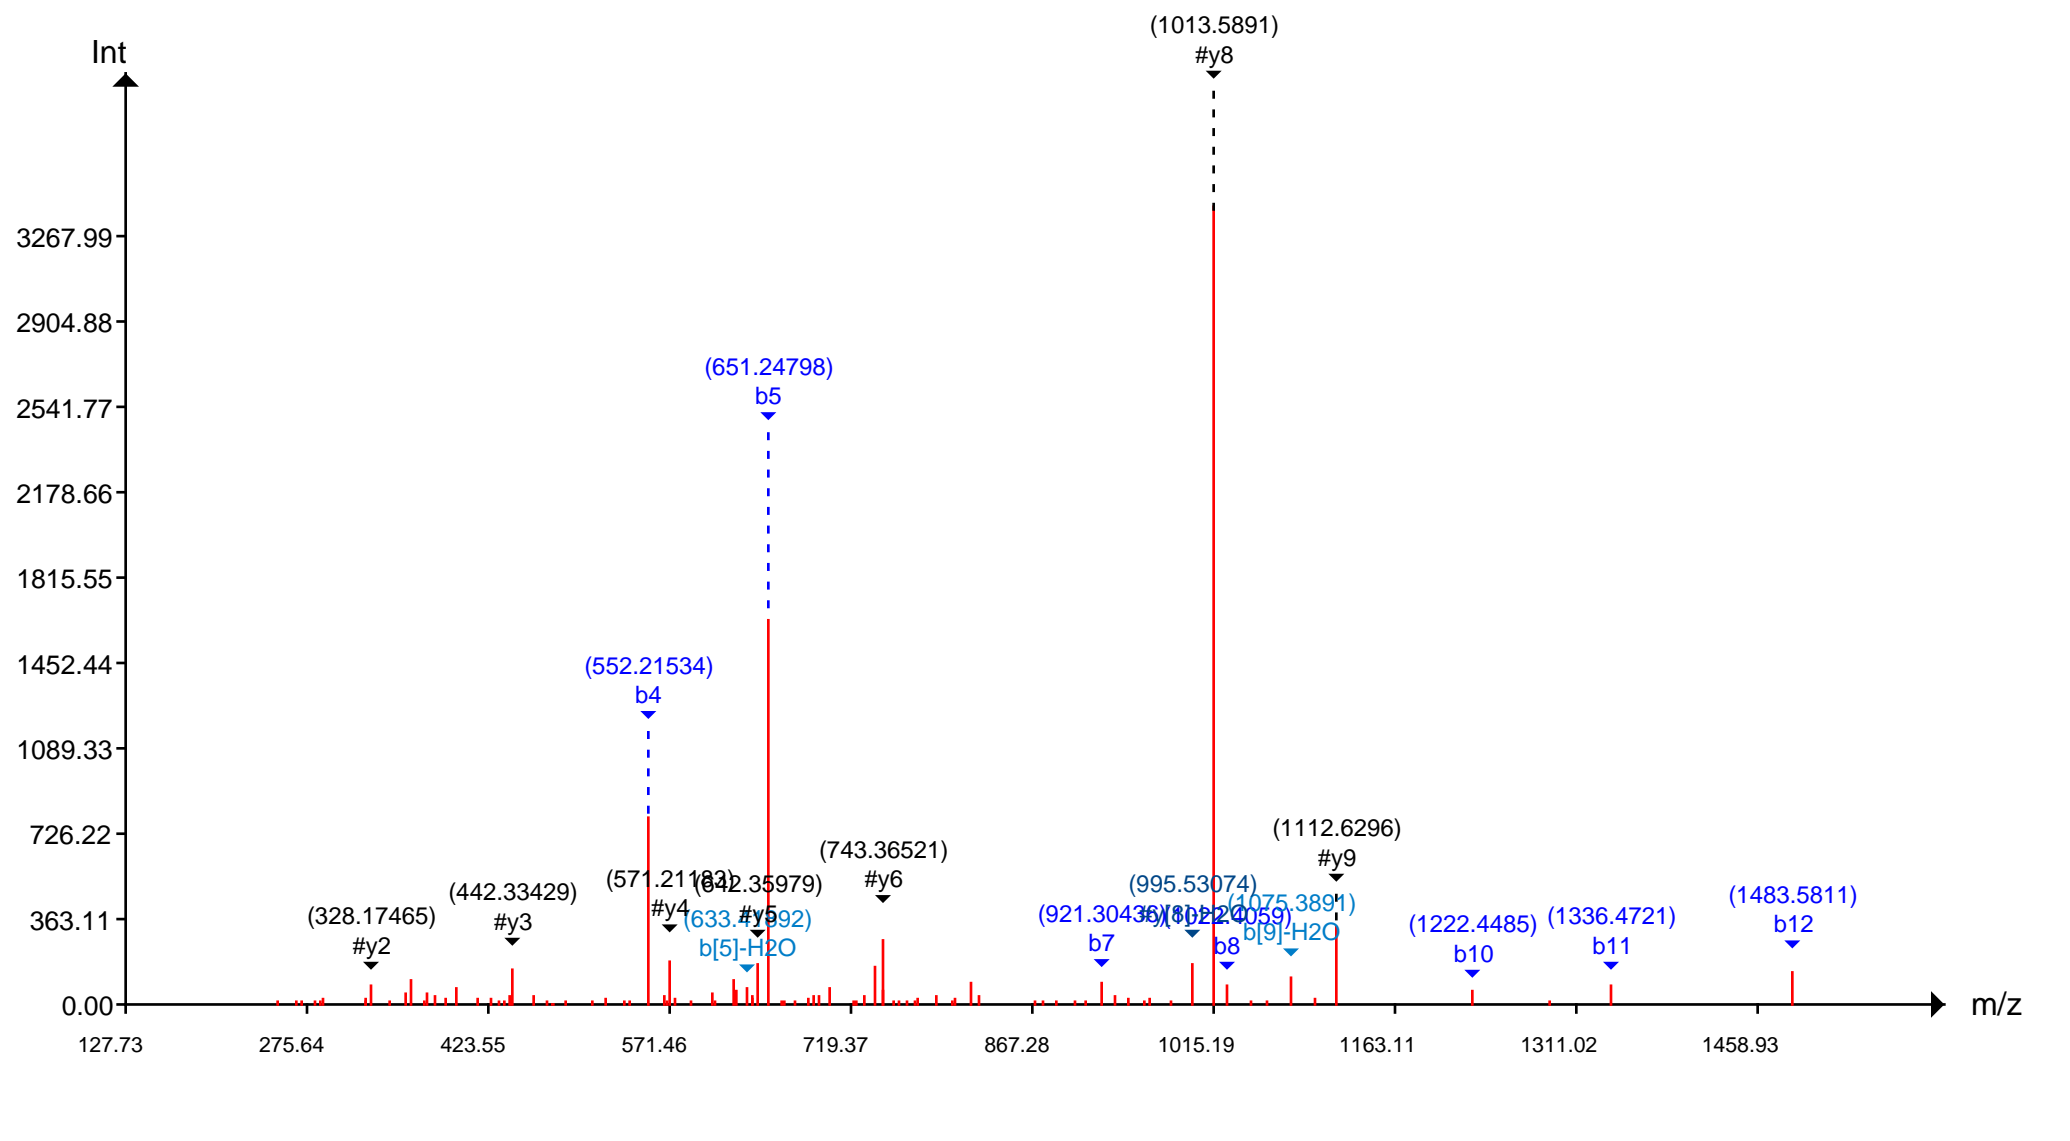

| Info                     |                                              |                           |         |
|--------------------------|----------------------------------------------|---------------------------|---------|
| <b>Modified Sequence</b> | AcD3-FADK<AcD3K*>VPK<AcD3K*>TAENFR<C13>-COOH | <b>Ion score</b>          | 53.54   |
| <b>Protein</b>           | P17742                                       | <b>Confidence level</b>   | 99.00%  |
| <b>Precursor m/z</b>     | 832.45924                                    | <b>Identity Threshold</b> | 47.46   |
| <b>Charge</b>            | 2+                                           | <b>Mass error</b>         | 0.00163 |

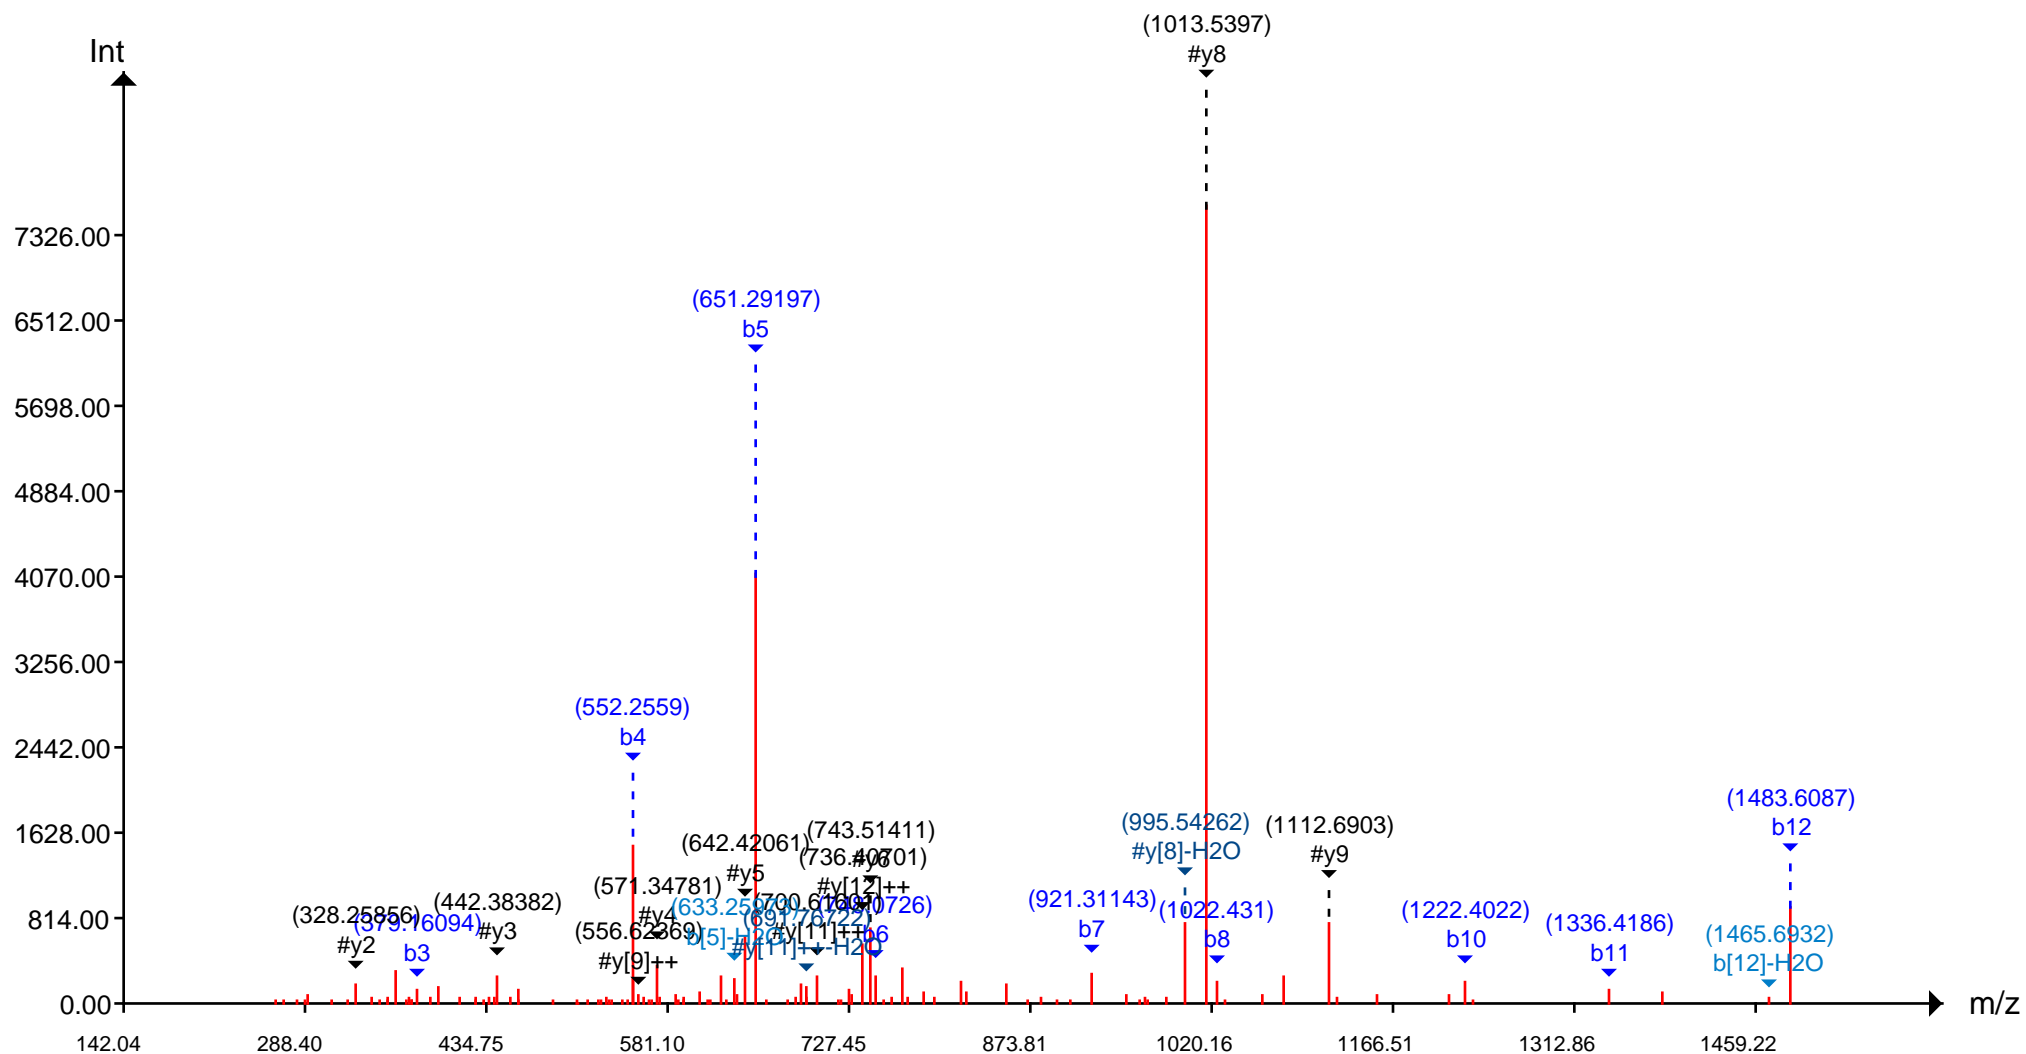

## Info

|                          |                                              |                           |         |
|--------------------------|----------------------------------------------|---------------------------|---------|
| <b>Modified Sequence</b> | AcD3-FADK<AcD3K*>VPK<AcD3K*>TAENFR<C13>-COOH | <b>Ion score</b>          | 51.88   |
| <b>Protein</b>           | P17742                                       | <b>Confidence level</b>   | 99.00%  |
| <b>Precursor m/z</b>     | 832.45982                                    | <b>Identity Threshold</b> | 47.49   |
| <b>Charge</b>            | 2+                                           | <b>Mass error</b>         | 0.00279 |

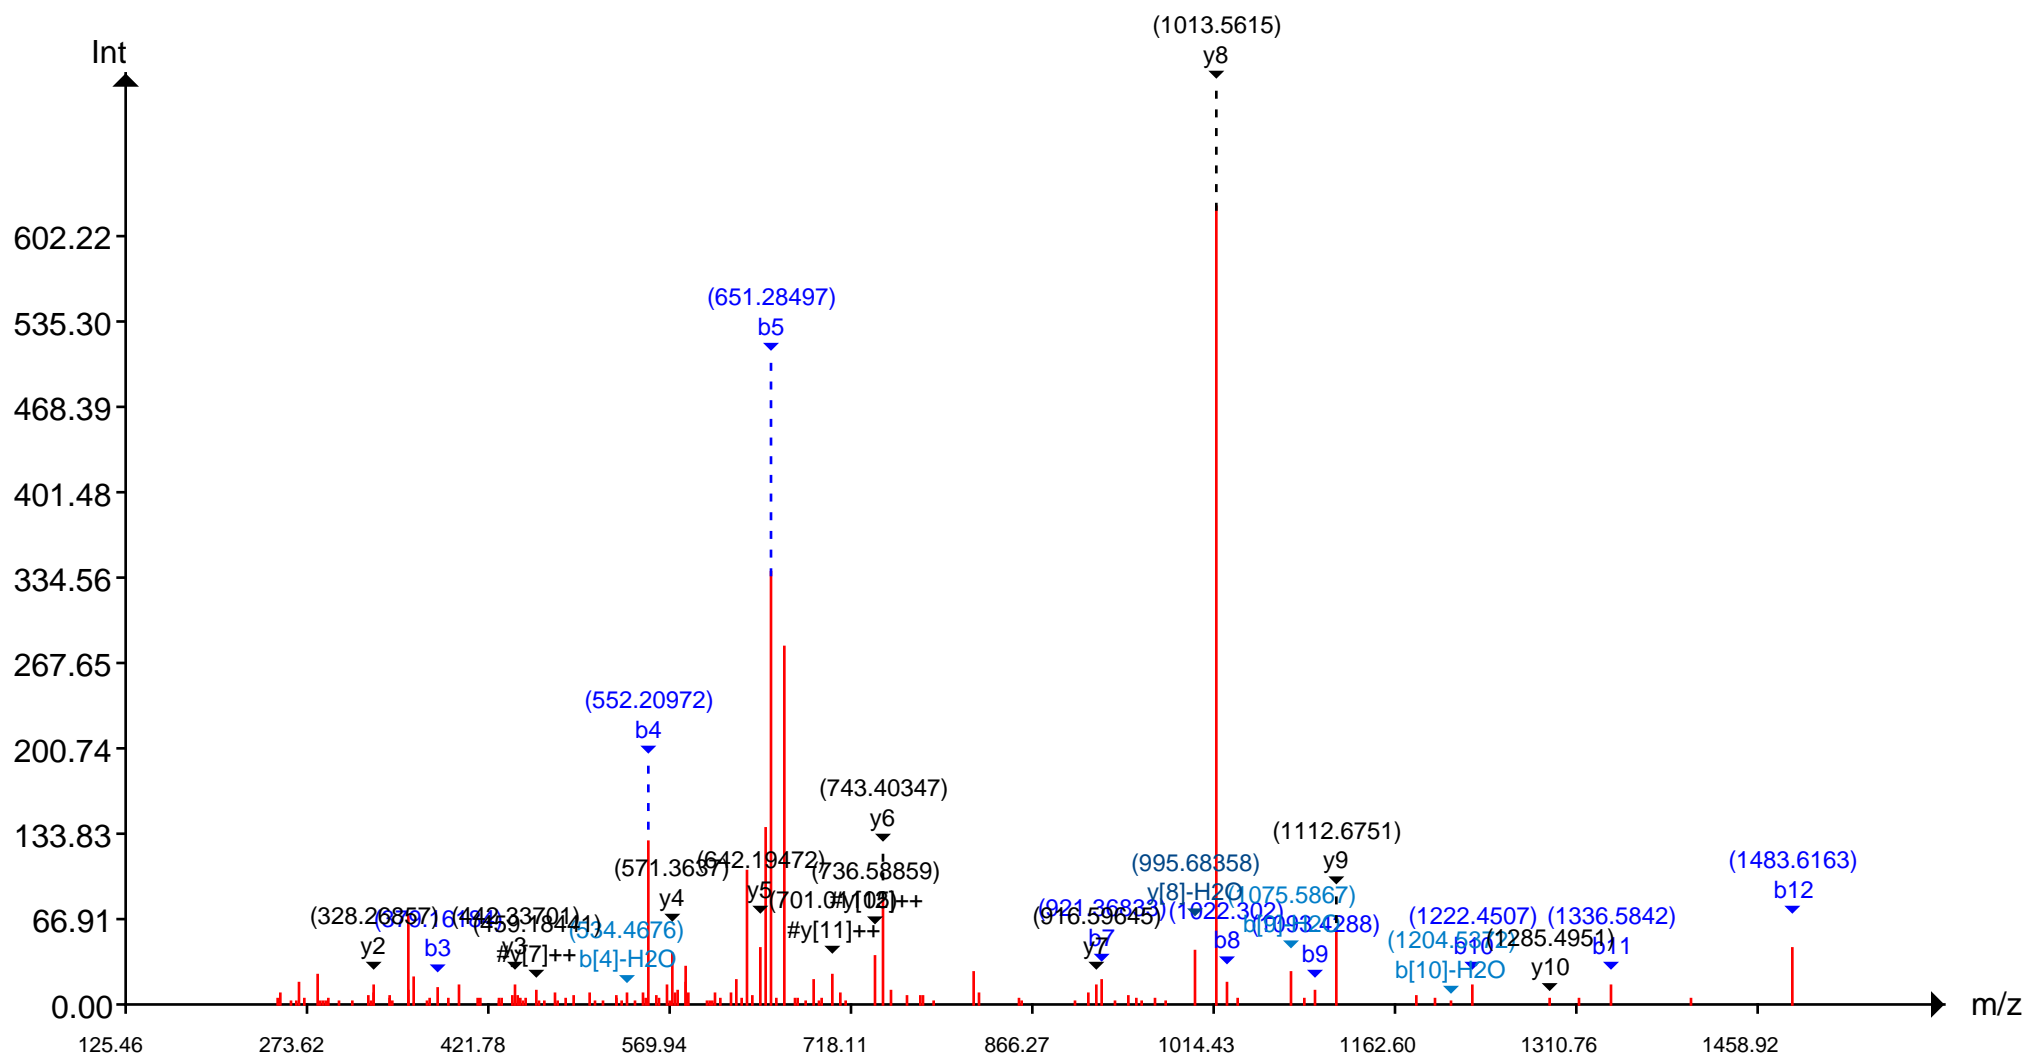

## Info

|                          |                                              |                           |         |
|--------------------------|----------------------------------------------|---------------------------|---------|
| <b>Modified Sequence</b> | AcD3-FADK<AcD3K*>VPK<AcD3K*>TAENFR<C13>-COOH | <b>Ion score</b>          | 49.73   |
| <b>Protein</b>           | P17742                                       | <b>Confidence level</b>   | 99.00%  |
| <b>Precursor m/z</b>     | 832.4599                                     | <b>Identity Threshold</b> | 47.48   |
| <b>Charge</b>            | 2+                                           | <b>Mass error</b>         | 0.00295 |



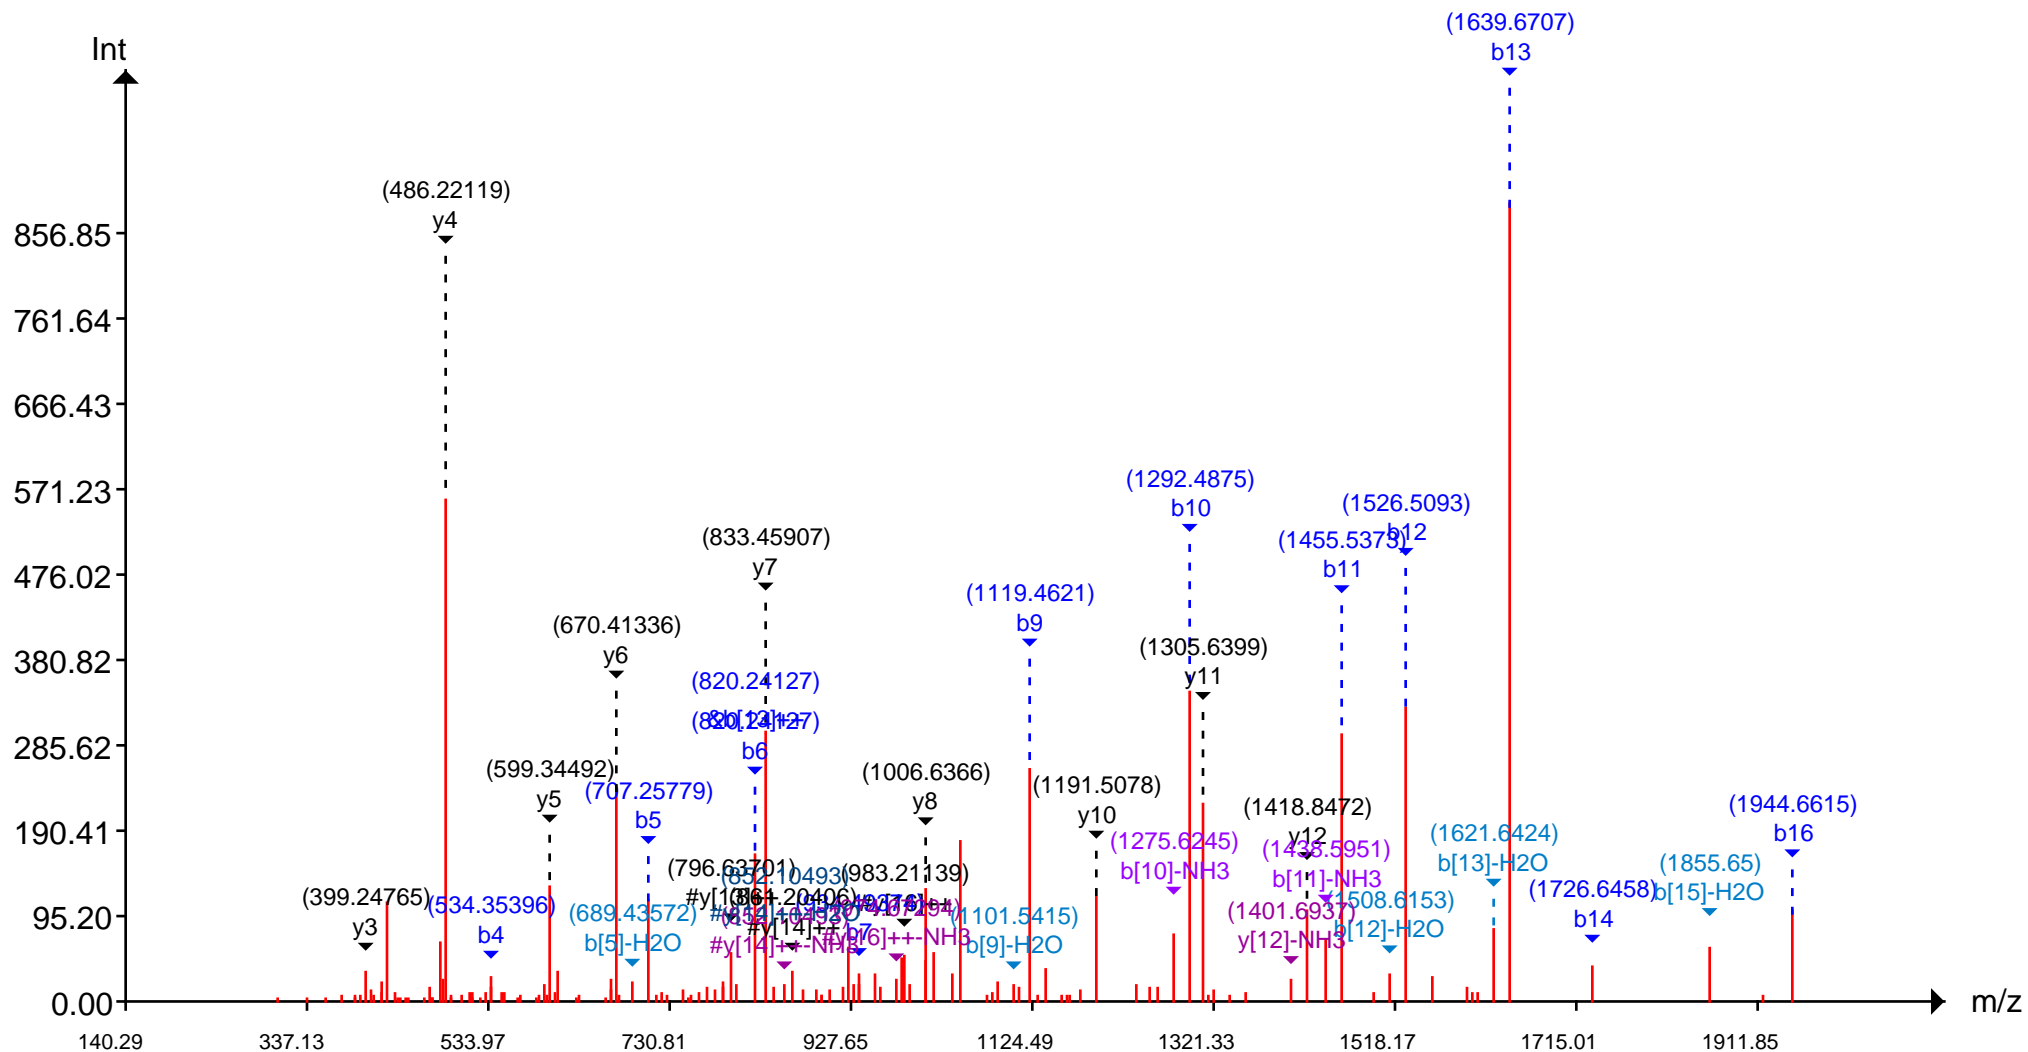

## Info

|                          |                                                        |                           |          |
|--------------------------|--------------------------------------------------------|---------------------------|----------|
| <b>Modified Sequence</b> | AcD3-DDEEK<AcD3K*>LNNAK<AcD3K*>YAISM<Mox*>AR<C13>-COOH | <b>Ion score</b>          | 83.8     |
| <b>Protein</b>           | Q61233                                                 | <b>Confidence level</b>   | 99.00%   |
| <b>Precursor m/z</b>     | 1063.0315                                              | <b>Identity Threshold</b> | 47.73    |
| <b>Charge</b>            | 2+                                                     | <b>Mass error</b>         | 0.003419 |

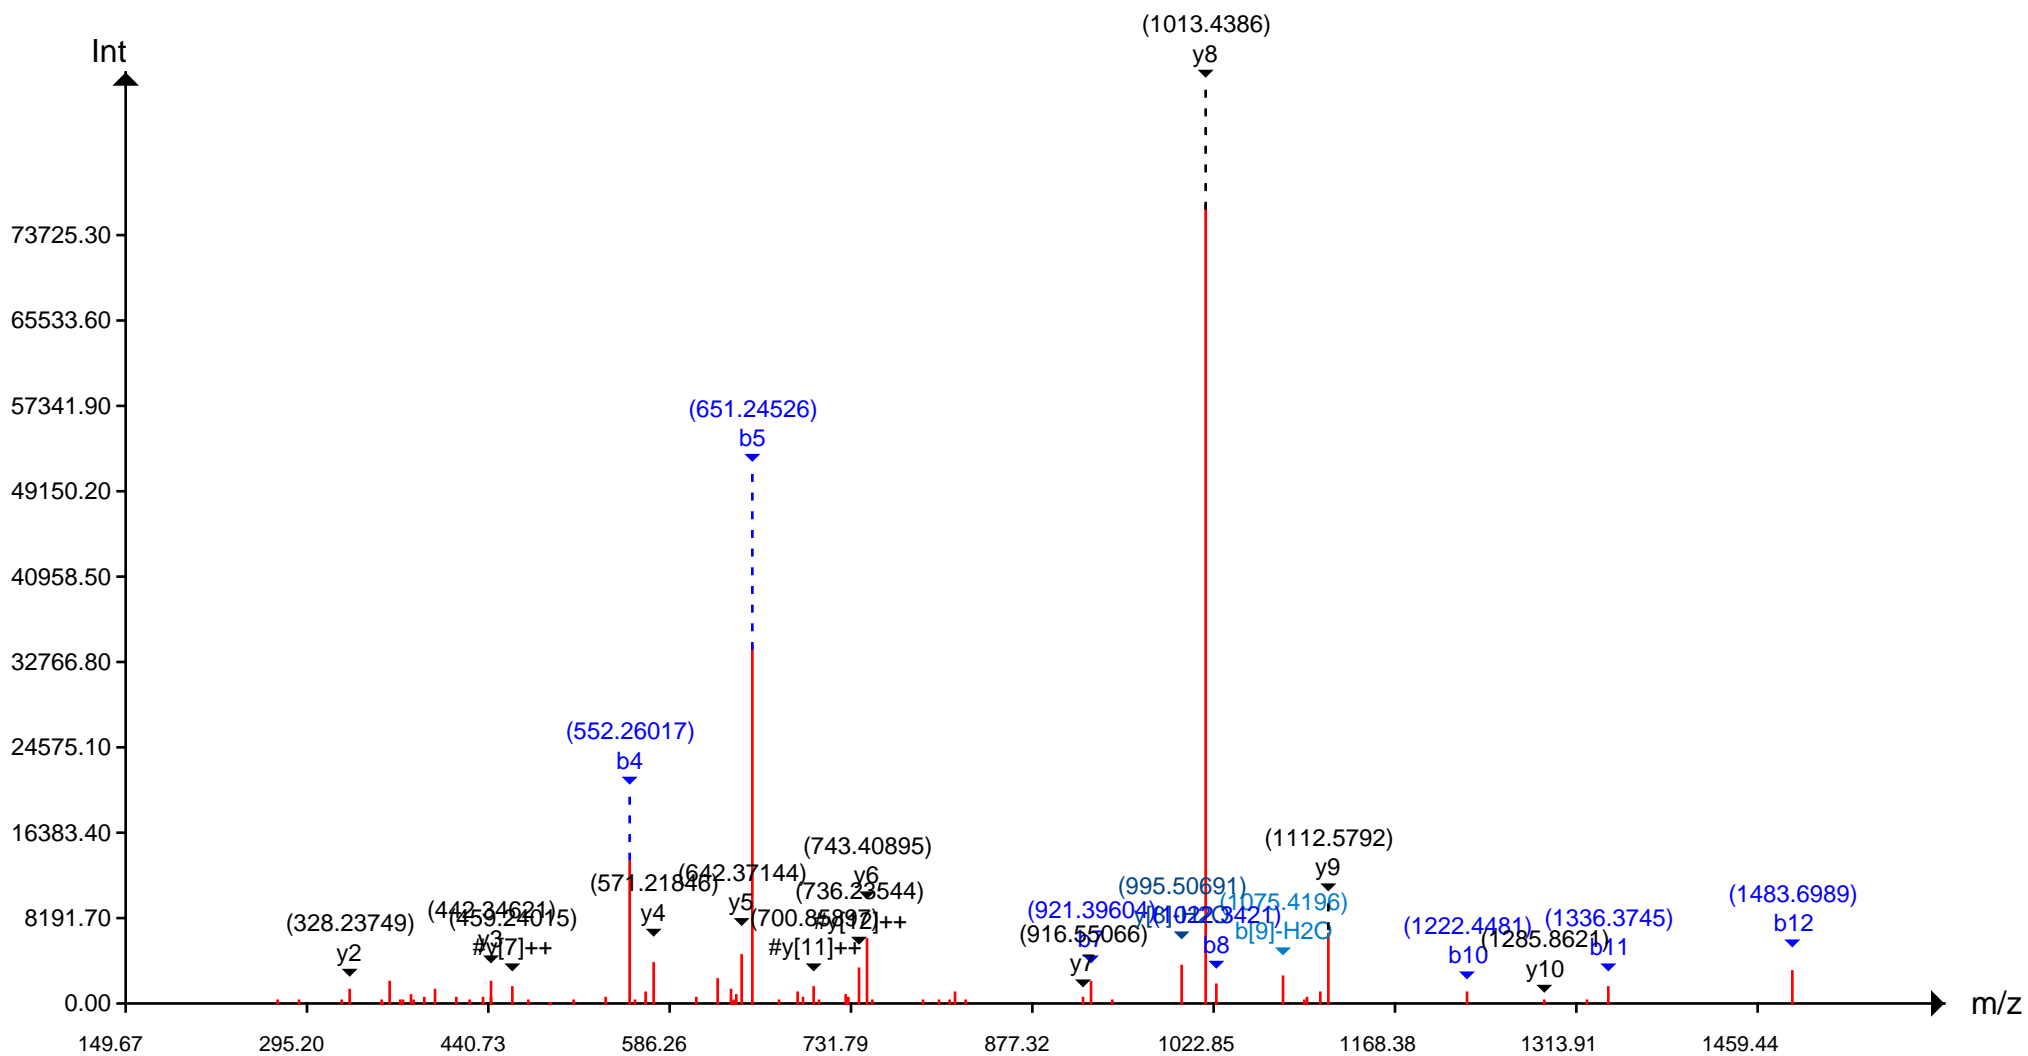

## Info

**Modified Sequence** AcD3-FADK<AcD3K\*>VPK<AcD3K\*>TAENFR<C13>-COOH

**Ion score** 75.42

**Protein** P17742

**Confidence level** 99.00%

**Precursor m/z** 832.45977

**Identity Threshold** 47.51

**Charge** 2+

**Mass error** 0.00269



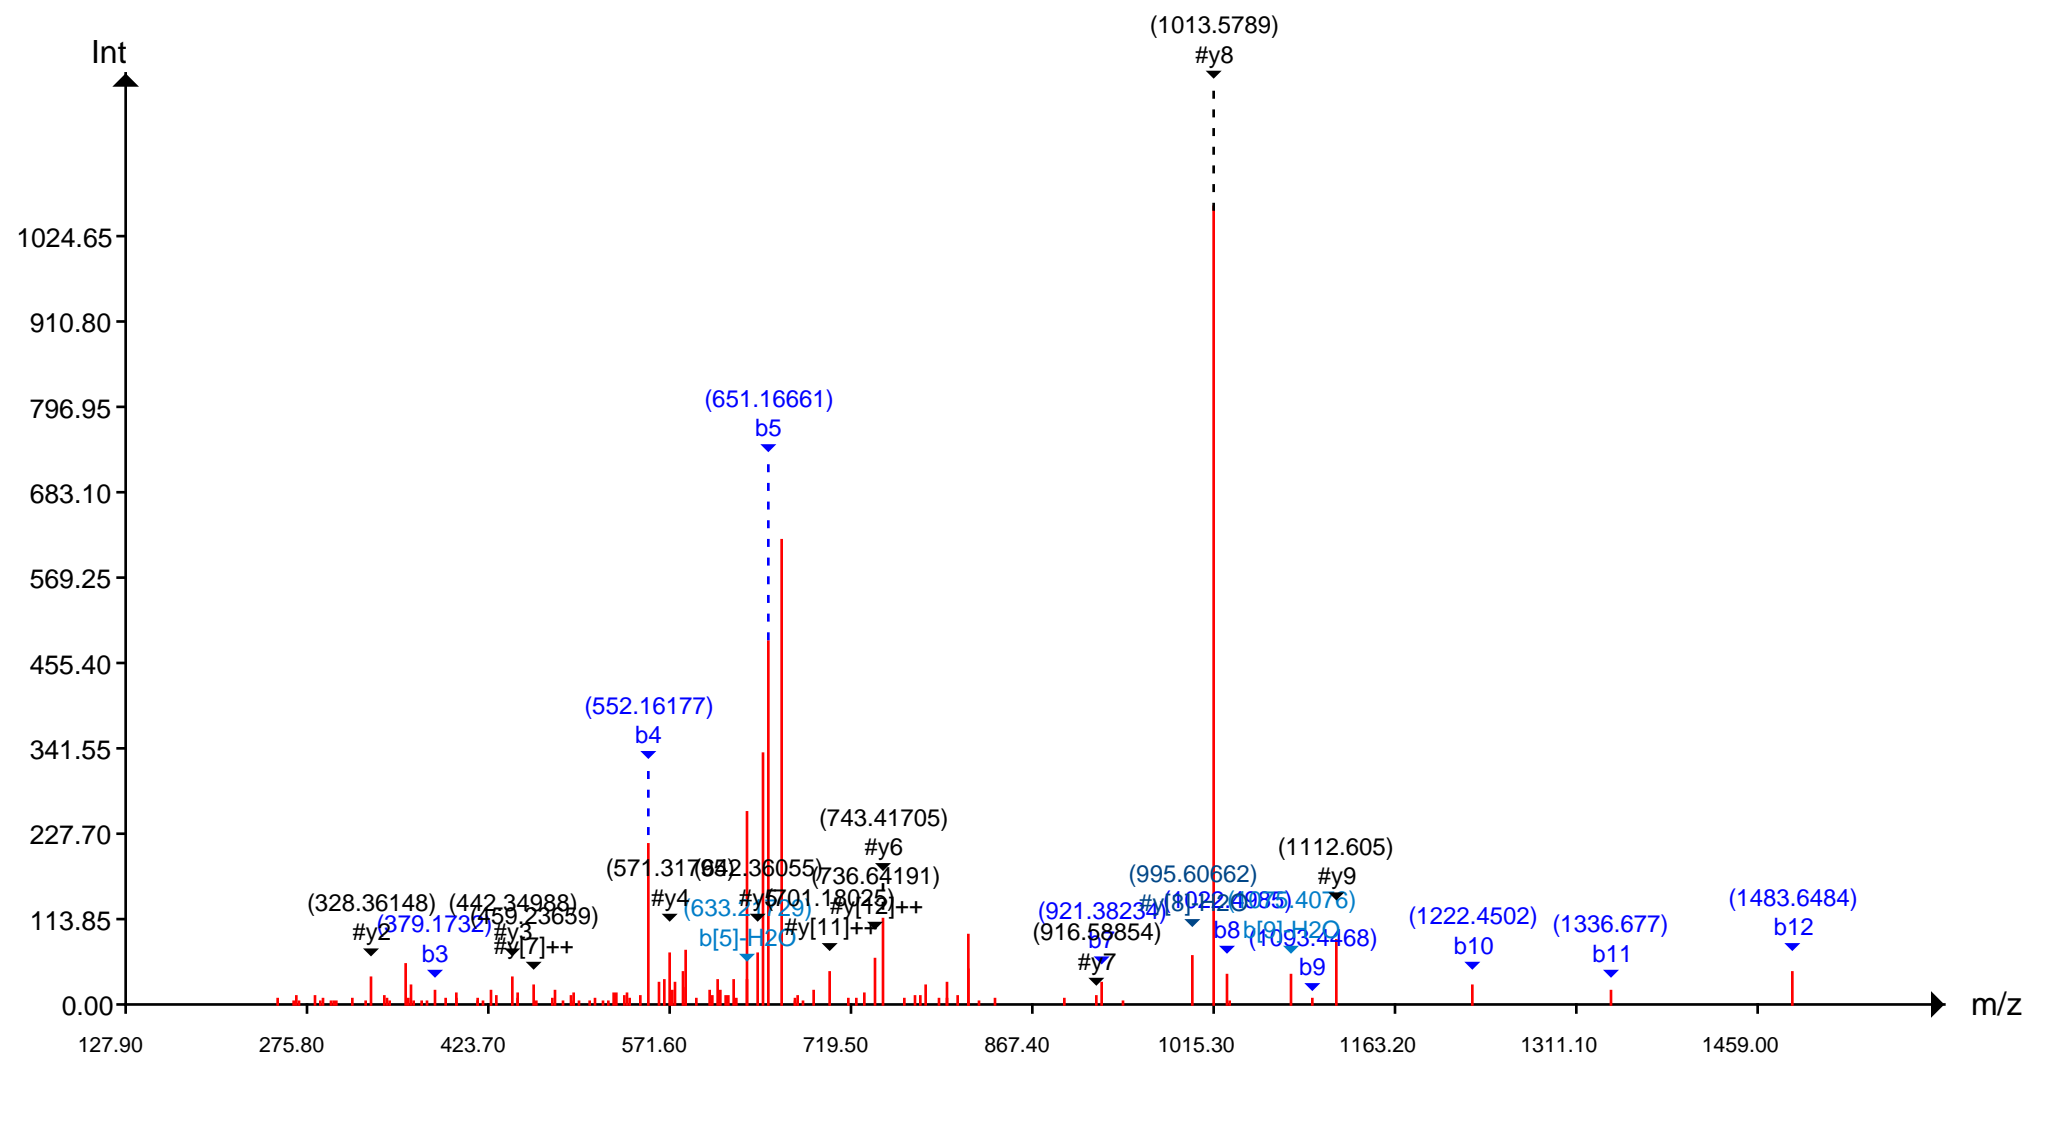

| Info                     |                                              |                           |         |
|--------------------------|----------------------------------------------|---------------------------|---------|
| <b>Modified Sequence</b> | AcD3-FADK<AcD3K*>VPK<AcD3K*>TAENFR<C13>-COOH | <b>Ion score</b>          | 54.32   |
| <b>Protein</b>           | P17742                                       | <b>Confidence level</b>   | 99.00%  |
| <b>Precursor m/z</b>     | 832.45991                                    | <b>Identity Threshold</b> | 47.48   |
| <b>Charge</b>            | 2+                                           | <b>Mass error</b>         | 0.00297 |

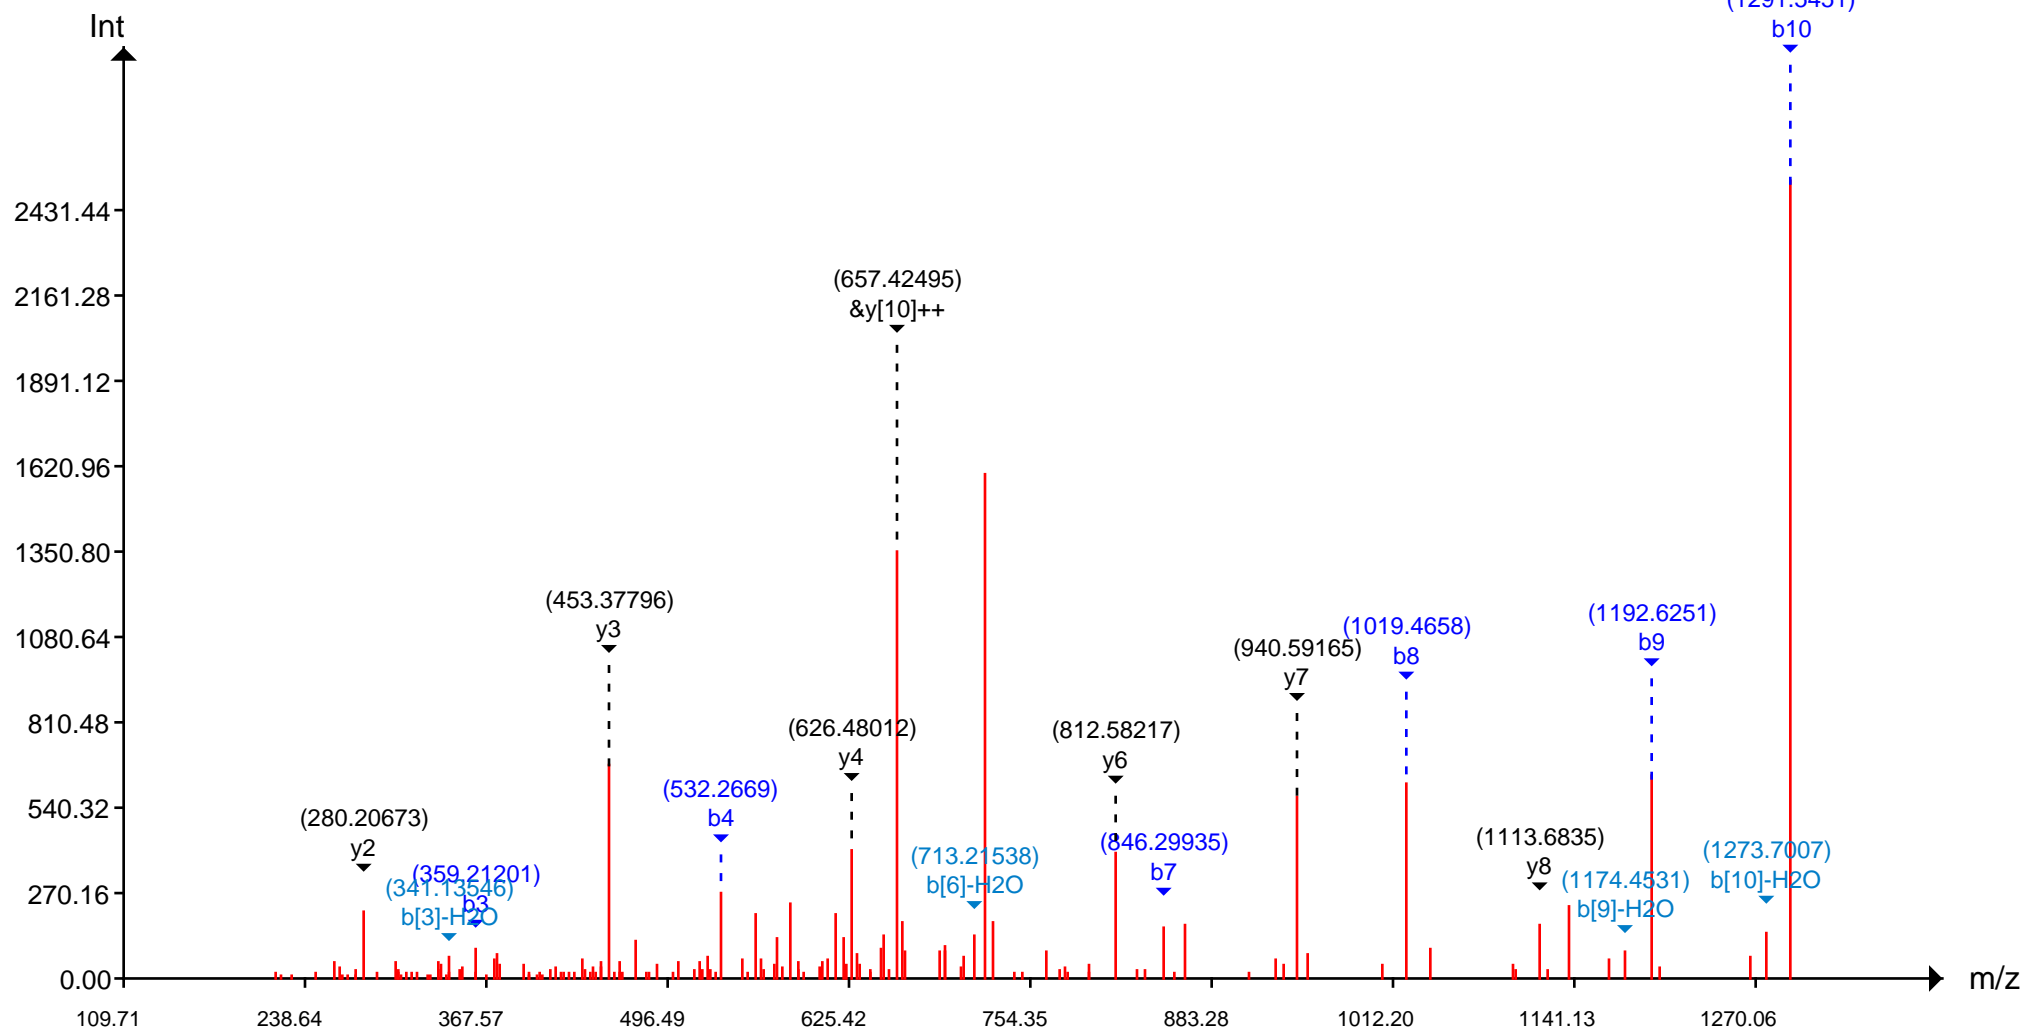

## Info

|                          |                                                    |                           |         |
|--------------------------|----------------------------------------------------|---------------------------|---------|
| <b>Modified Sequence</b> | AcD3-ISLK<AcD3K*>QADK<AcD3K*>K<AcD3K*>VR<C13>-COOH | <b>Ion score</b>          | 42.77   |
| <b>Protein</b>           | Q9DCL9                                             | <b>Confidence level</b>   | 99.00%  |
| <b>Precursor m/z</b>     | 736.47049                                          | <b>Identity Threshold</b> | 38.20   |
| <b>Charge</b>            | 2+                                                 | <b>Mass error</b>         | 9.52E-4 |

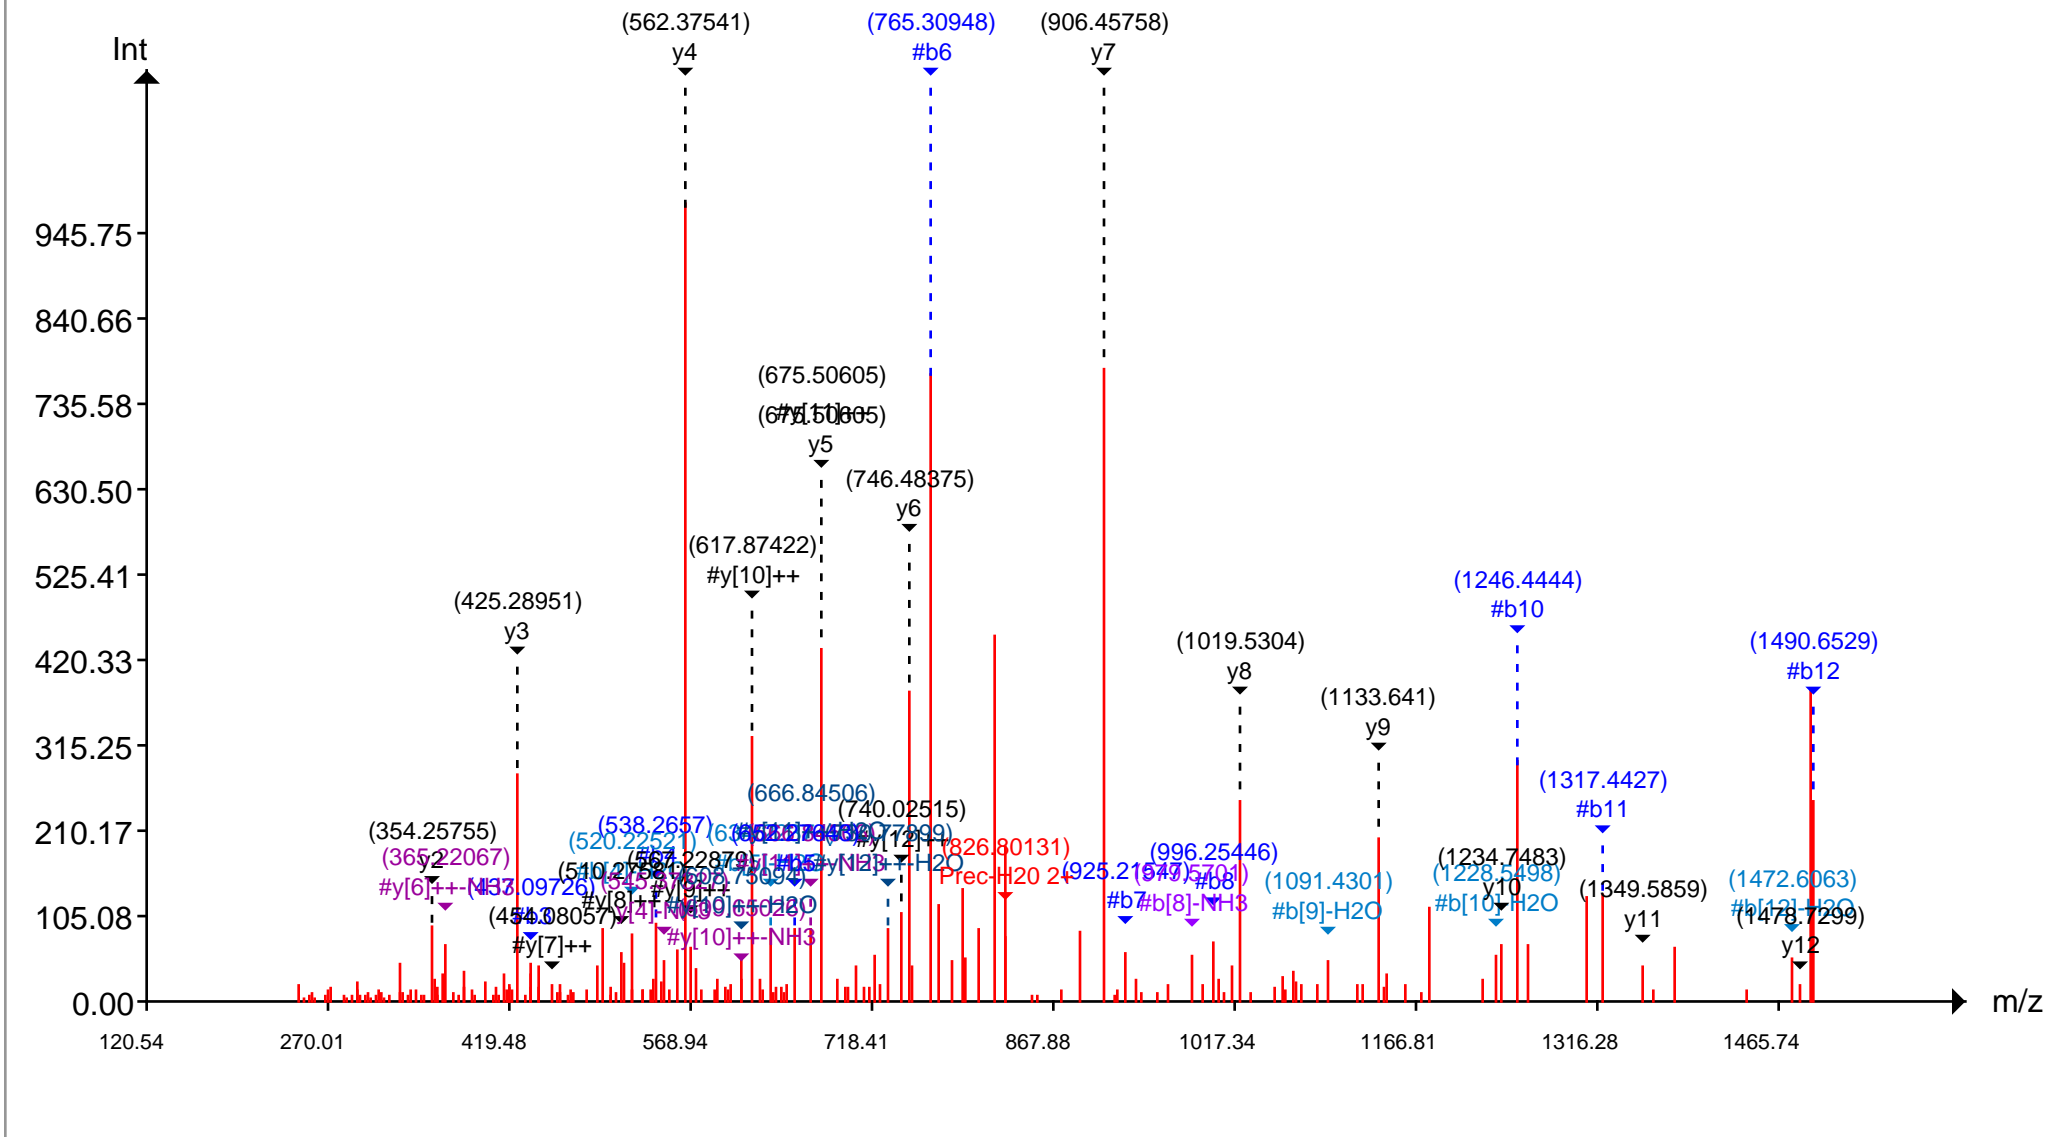

## Info

**Modified Sequence** AcD3-FEDTNLC<Cmm\*>AIHAK<AcD3K\*>R<C13>-COOH

**Ion score** 75.98

**Protein** P68433, P84228, P84244

**Confidence level** 99.00%

**Precursor m/z** 835.93109

**Identity Threshold** 48.14

**Charge** 2+

**Mass error** 0.001604



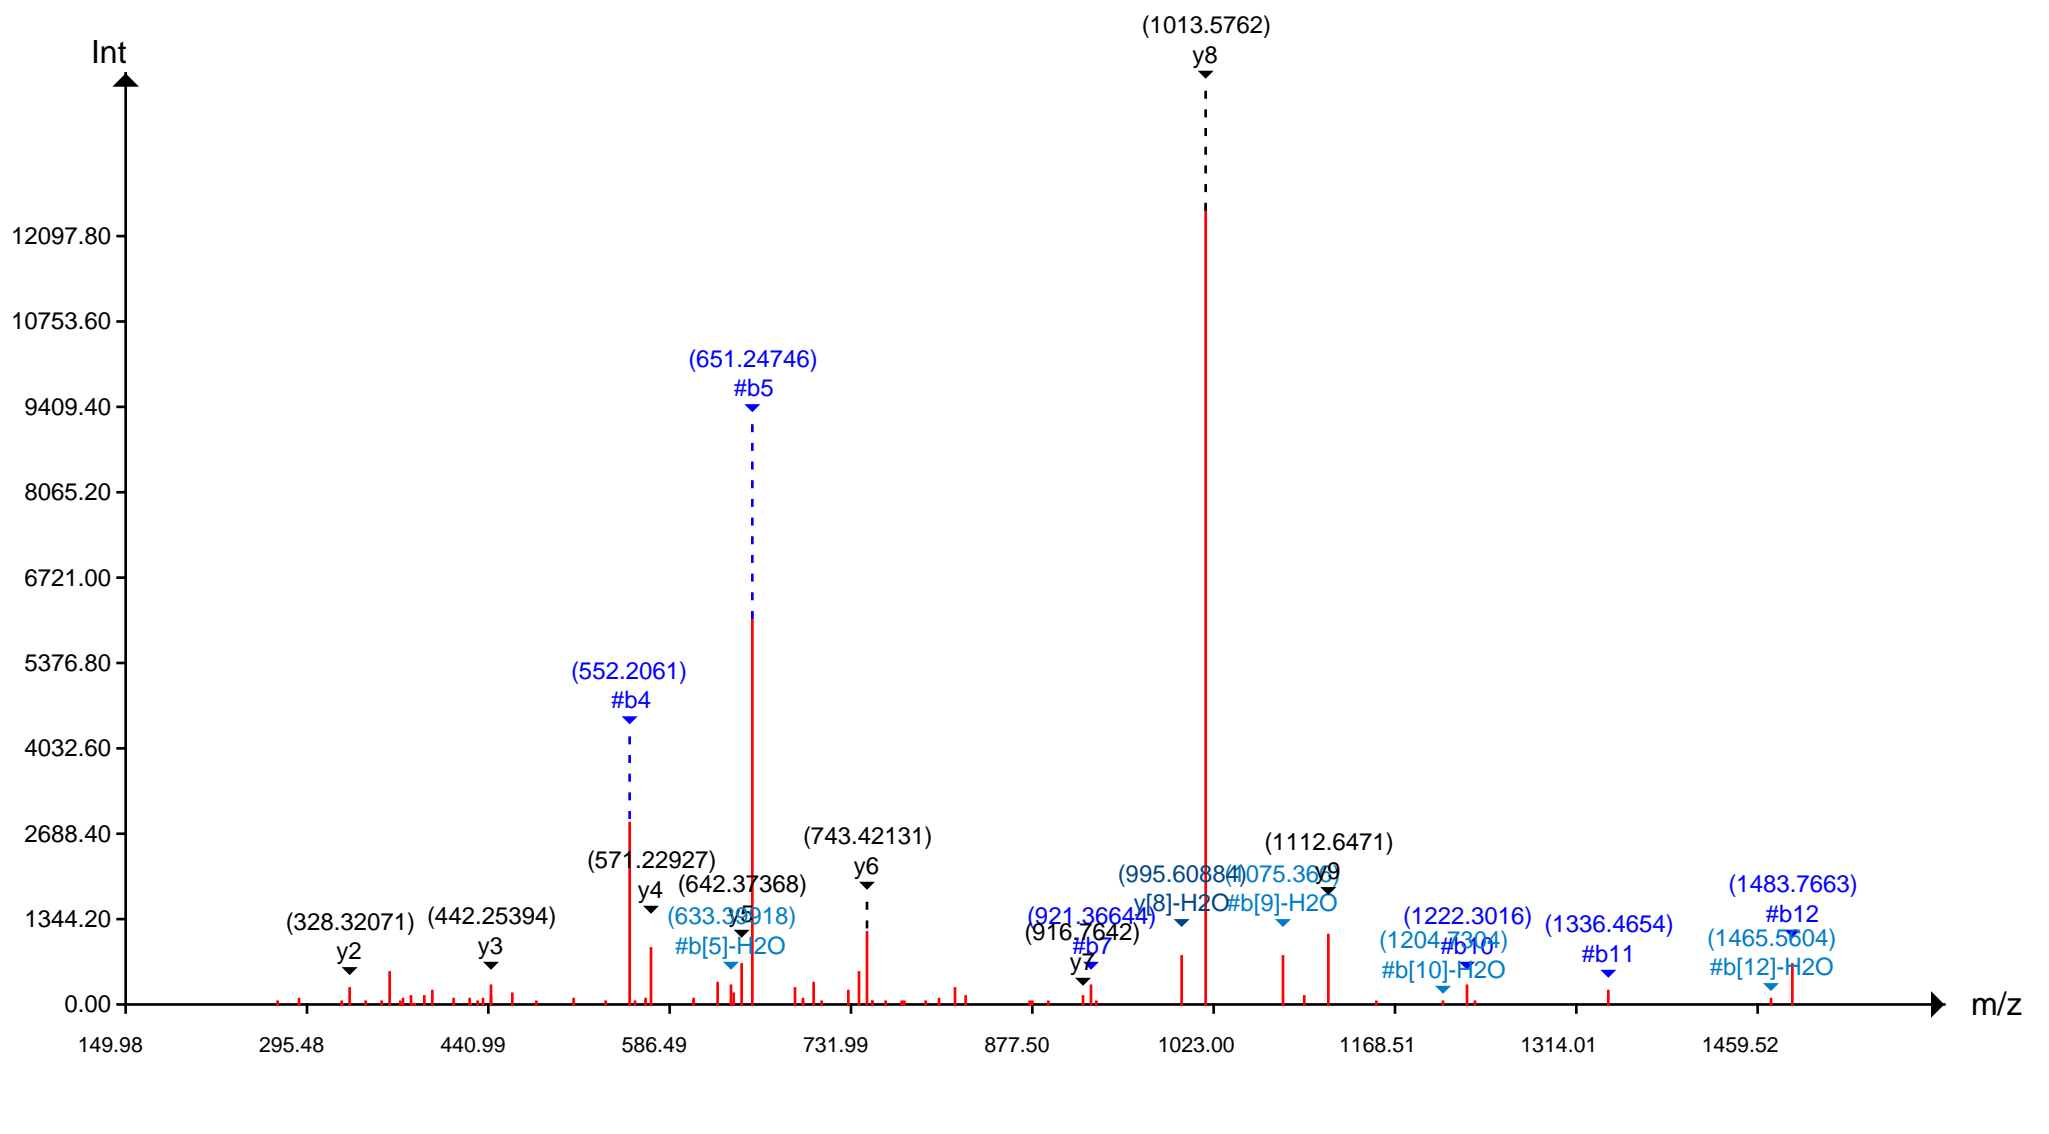

| Info                     |                                              |                           |         |
|--------------------------|----------------------------------------------|---------------------------|---------|
| <b>Modified Sequence</b> | AcD3-FADK<AcD3K*>VPK<AcD3K*>TAENFR<C13>-COOH | <b>Ion score</b>          | 68.46   |
| <b>Protein</b>           | P17742                                       | <b>Confidence level</b>   | 99.00%  |
| <b>Precursor m/z</b>     | 832.45946                                    | <b>Identity Threshold</b> | 47.48   |
| <b>Charge</b>            | 2+                                           | <b>Mass error</b>         | 0.00207 |



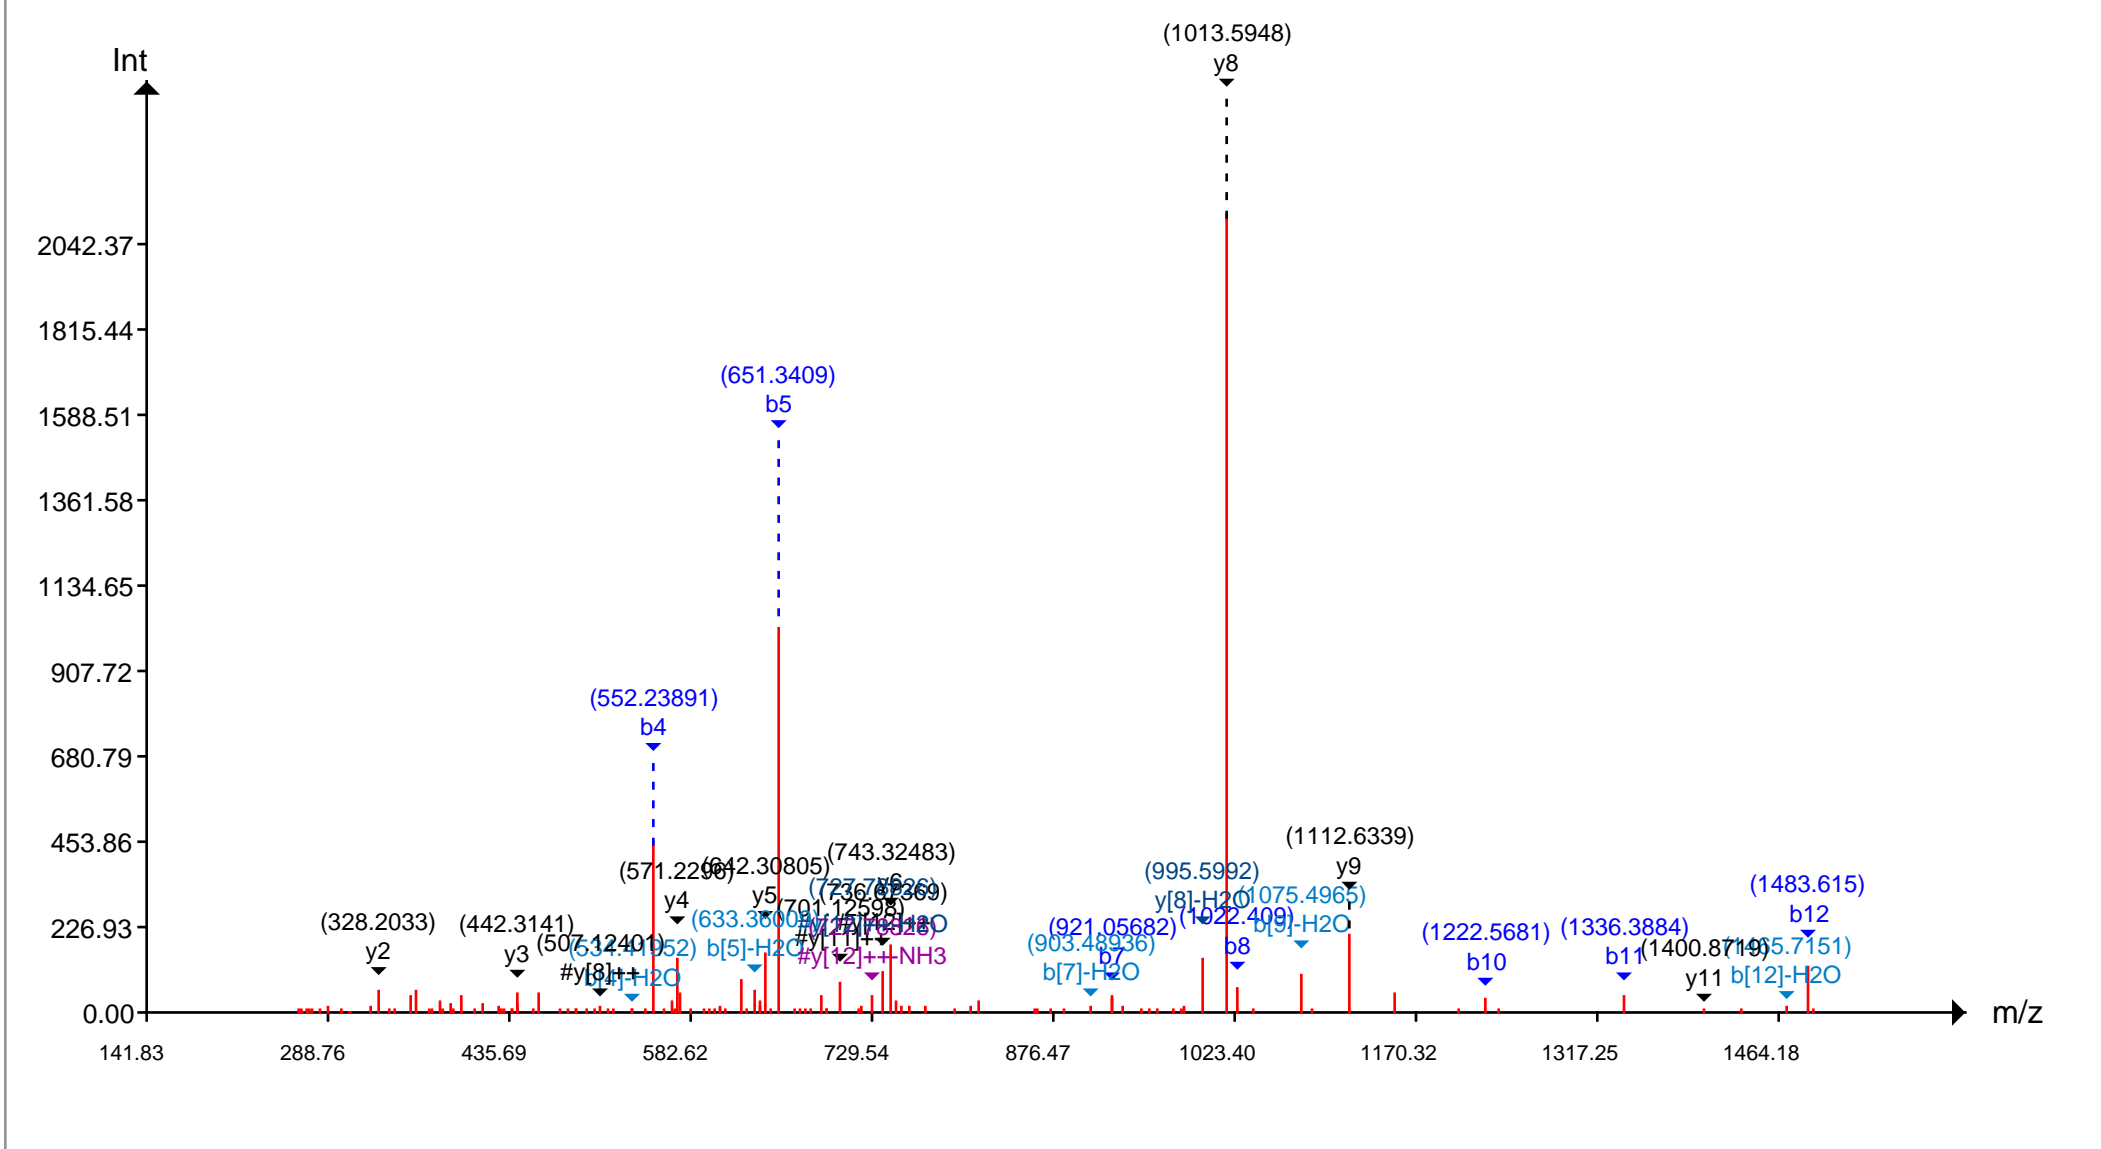

| Info                     |                                              |                           |         |
|--------------------------|----------------------------------------------|---------------------------|---------|
| <b>Modified Sequence</b> | AcD3-FADK<AcD3K*>VPK<AcD3K*>TAENFR<C13>-COOH | <b>Ion score</b>          | 54.89   |
| <b>Protein</b>           | P17742                                       | <b>Confidence level</b>   | 99.00%  |
| <b>Precursor m/z</b>     | 832.4595                                     | <b>Identity Threshold</b> | 47.49   |
| <b>Charge</b>            | 2+                                           | <b>Mass error</b>         | 0.00215 |

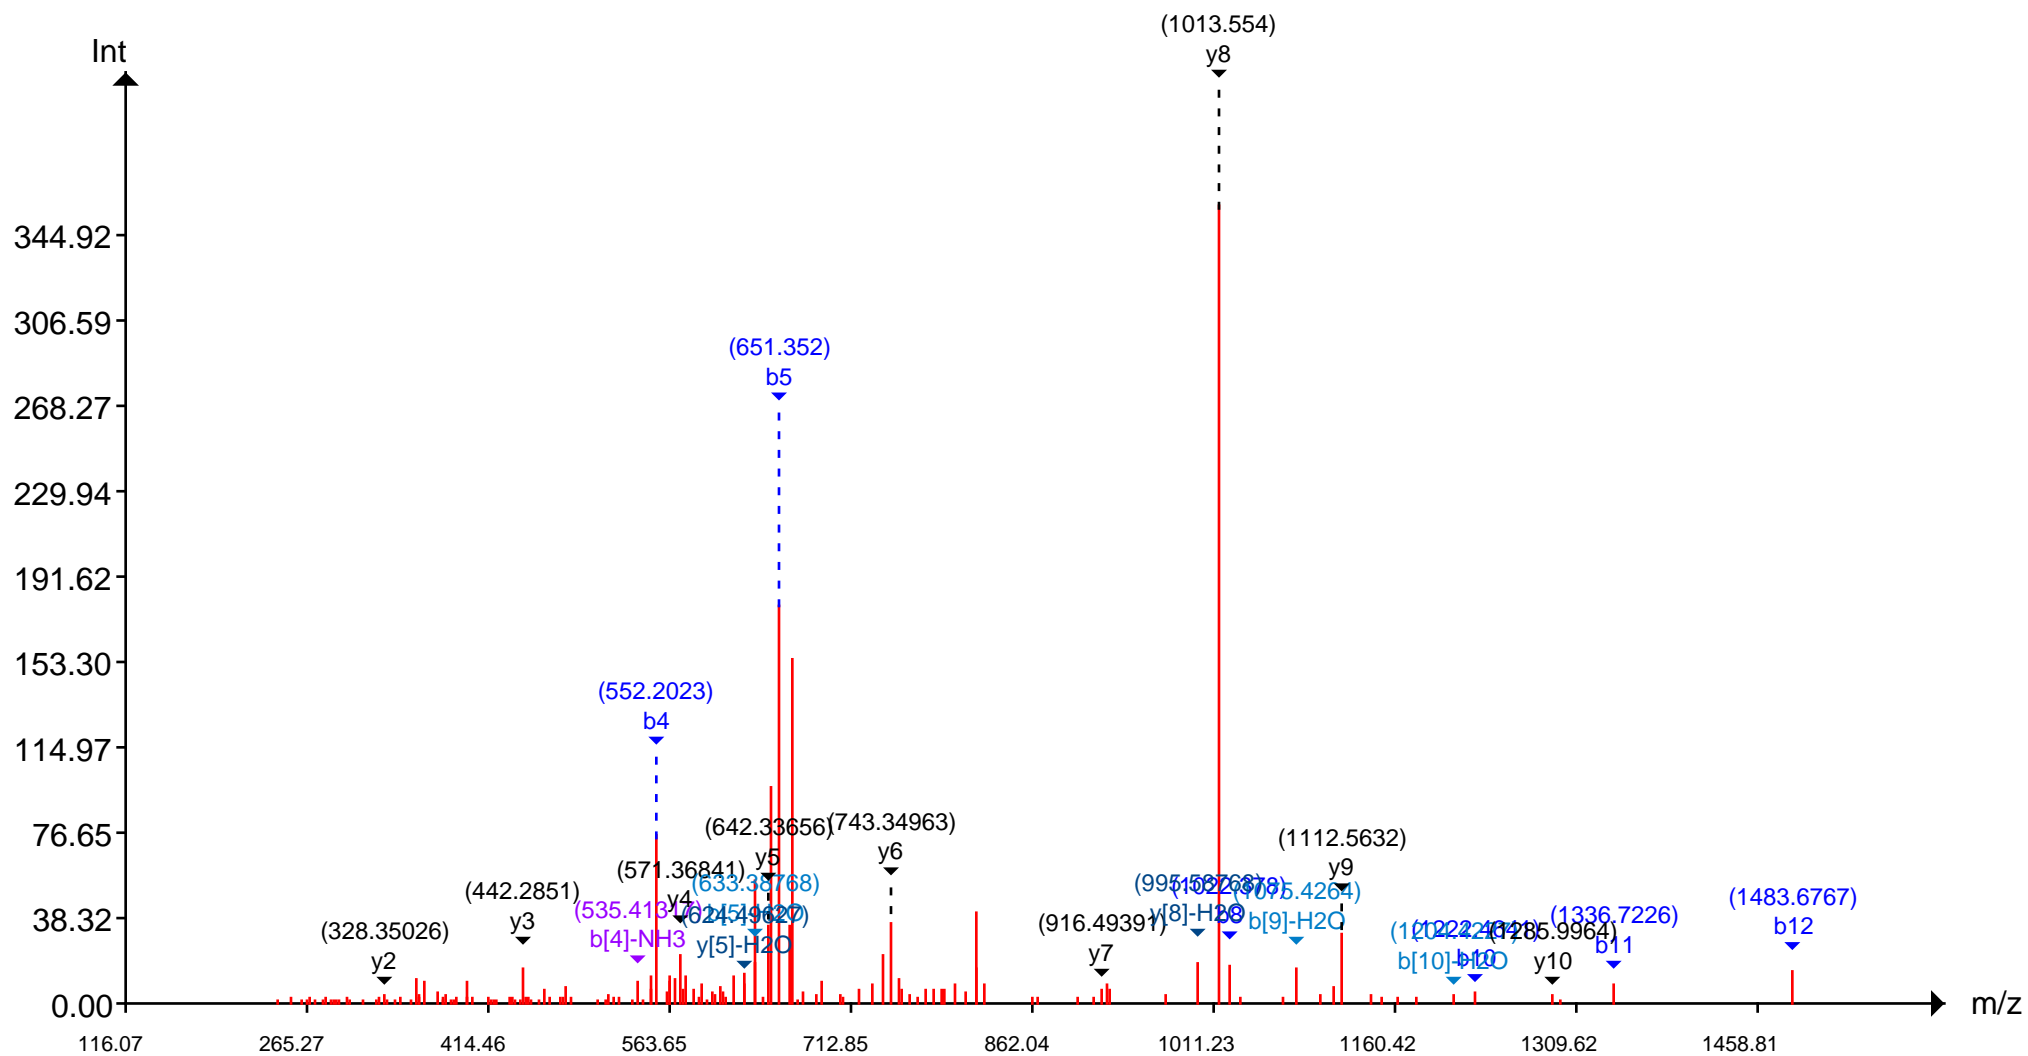

## Info

|                          |                                              |                           |         |
|--------------------------|----------------------------------------------|---------------------------|---------|
| <b>Modified Sequence</b> | AcD3-FADK<AcD3K*>VPK<AcD3K*>TAENFR<C13>-COOH | <b>Ion score</b>          | 50.59   |
| <b>Protein</b>           | P17742                                       | <b>Confidence level</b>   | 99.00%  |
| <b>Precursor m/z</b>     | 832.4594                                     | <b>Identity Threshold</b> | 47.48   |
| <b>Charge</b>            | 2+                                           | <b>Mass error</b>         | 0.00195 |



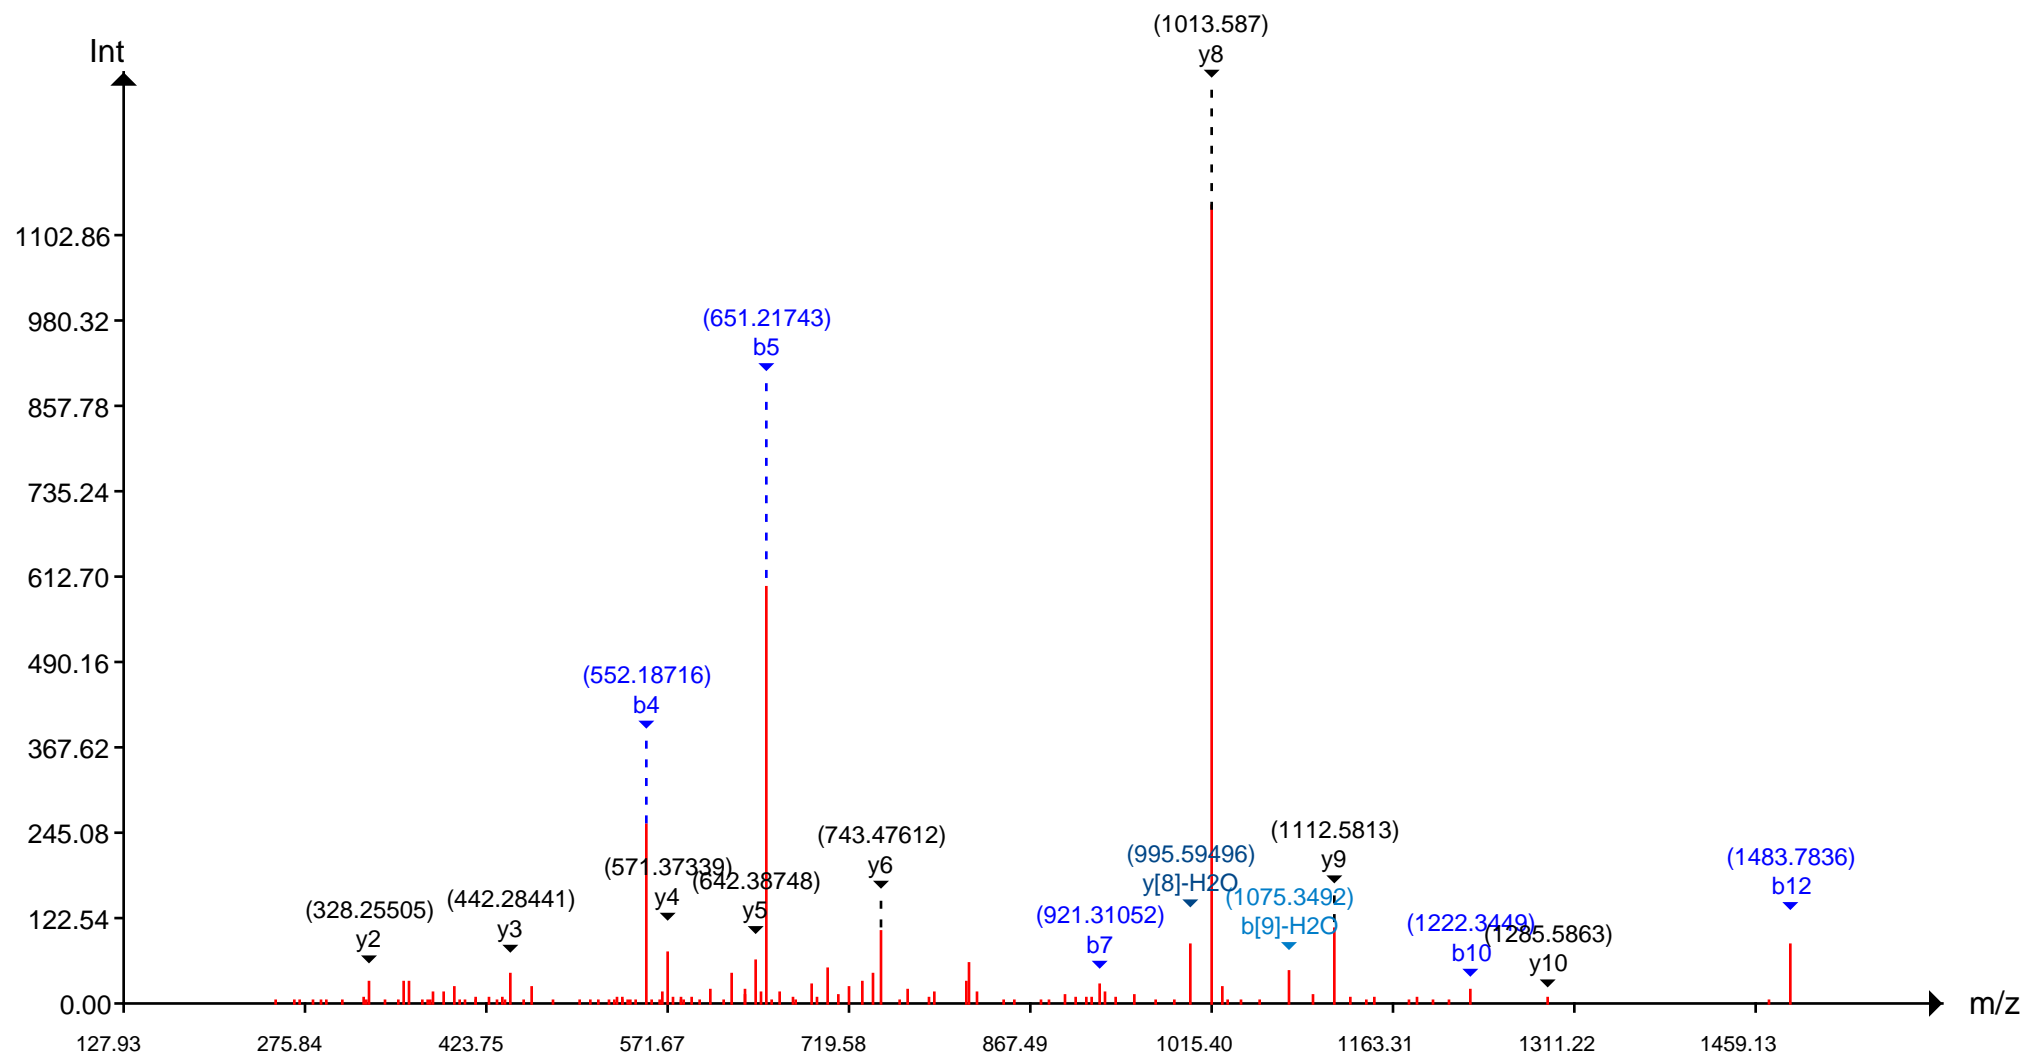

## Info

**Modified Sequence** AcD3-FADK<AcD3K\*>VPK<AcD3K\*>TAENFR<C13>-COOH

**Ion score** 53.58

**Protein** P17742

**Confidence level** 99.00%

**Precursor m/z** 832.45965

**Identity Threshold** 47.56

**Charge** 2+

**Mass error** 0.00245

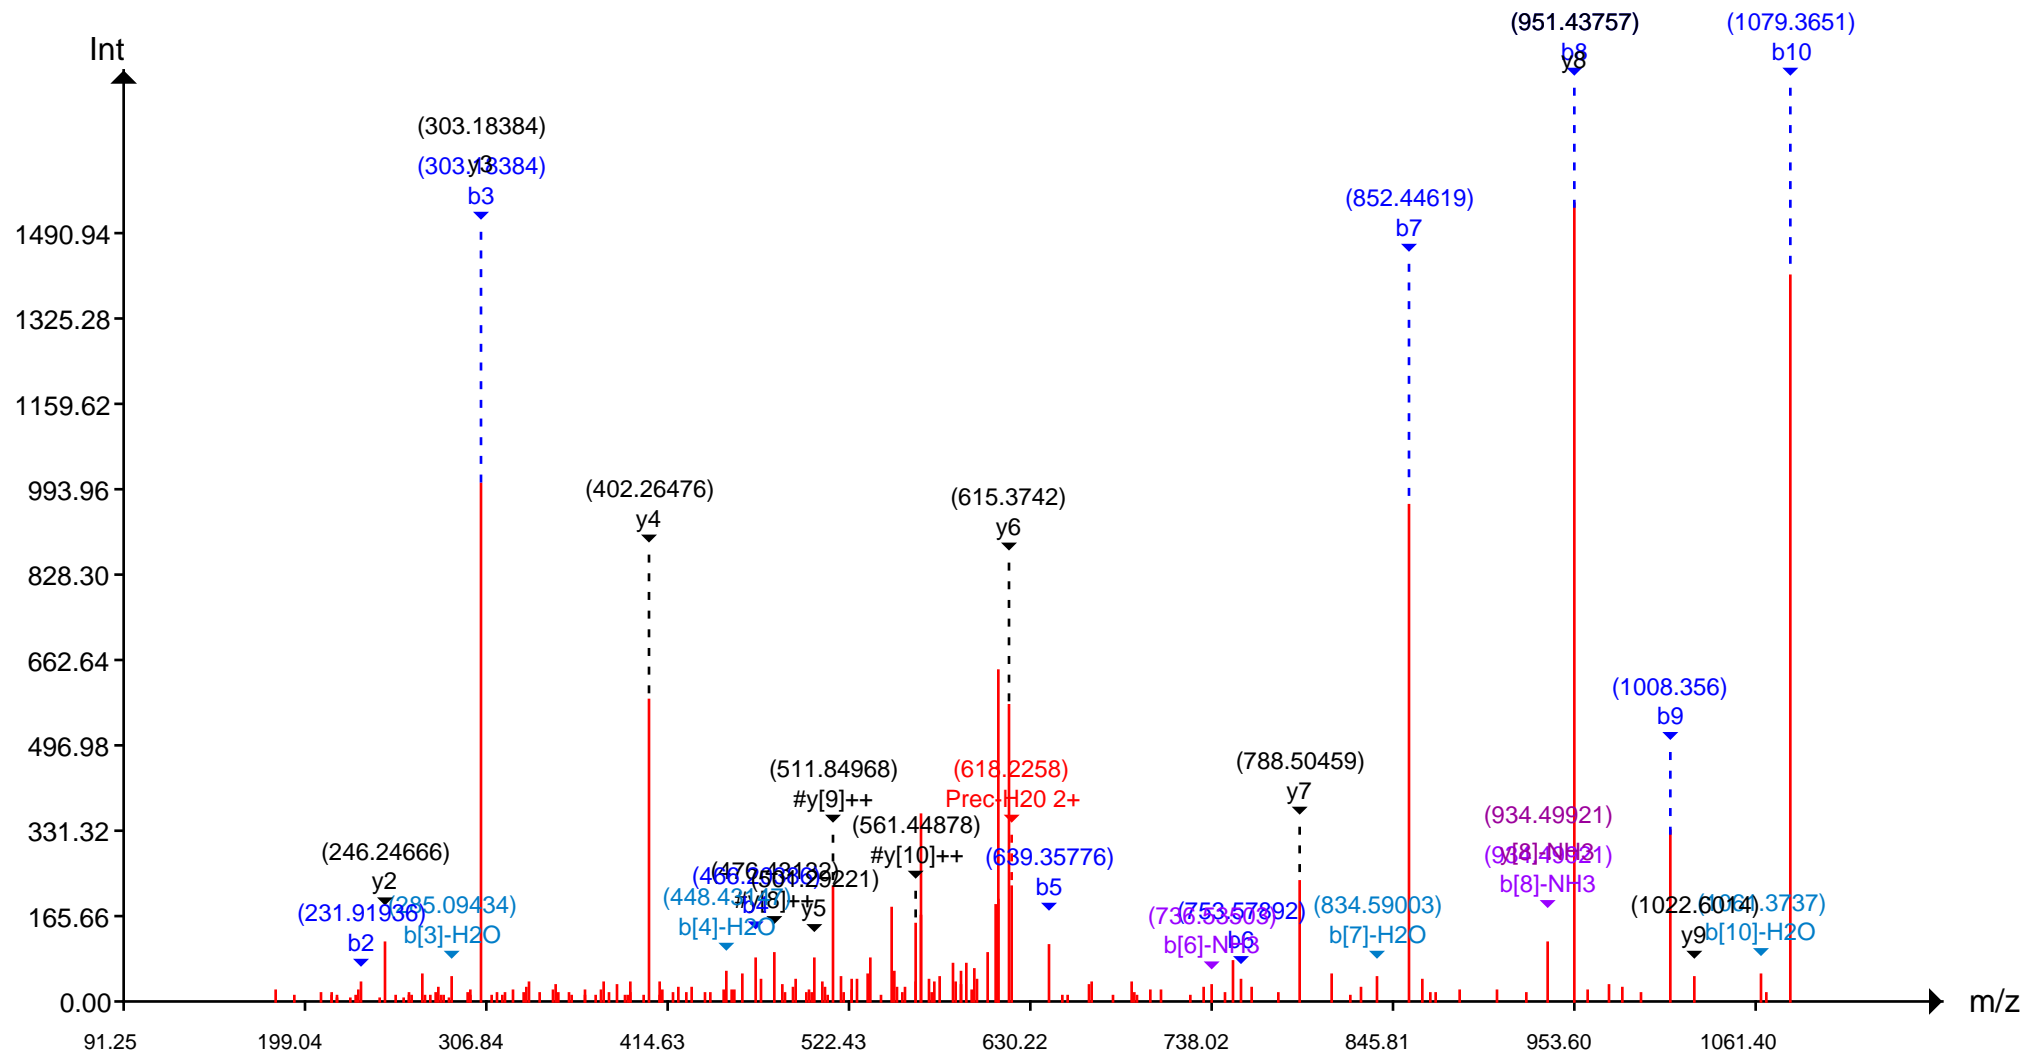

## Info

|                          |                                |                           |         |
|--------------------------|--------------------------------|---------------------------|---------|
| <b>Modified Sequence</b> | AcD3-SVAYK<AcD3K*>NVVGAR-COOH  | <b>Ion score</b>          | 61.49   |
| <b>Protein</b>           | Q9CQV8, P68510, P61982, P63101 | <b>Confidence level</b>   | 99.00%  |
| <b>Precursor m/z</b>     | 627.35983                      | <b>Identity Threshold</b> | 47.06   |
| <b>Charge</b>            | 2+                             | <b>Mass error</b>         | 4.72E-4 |

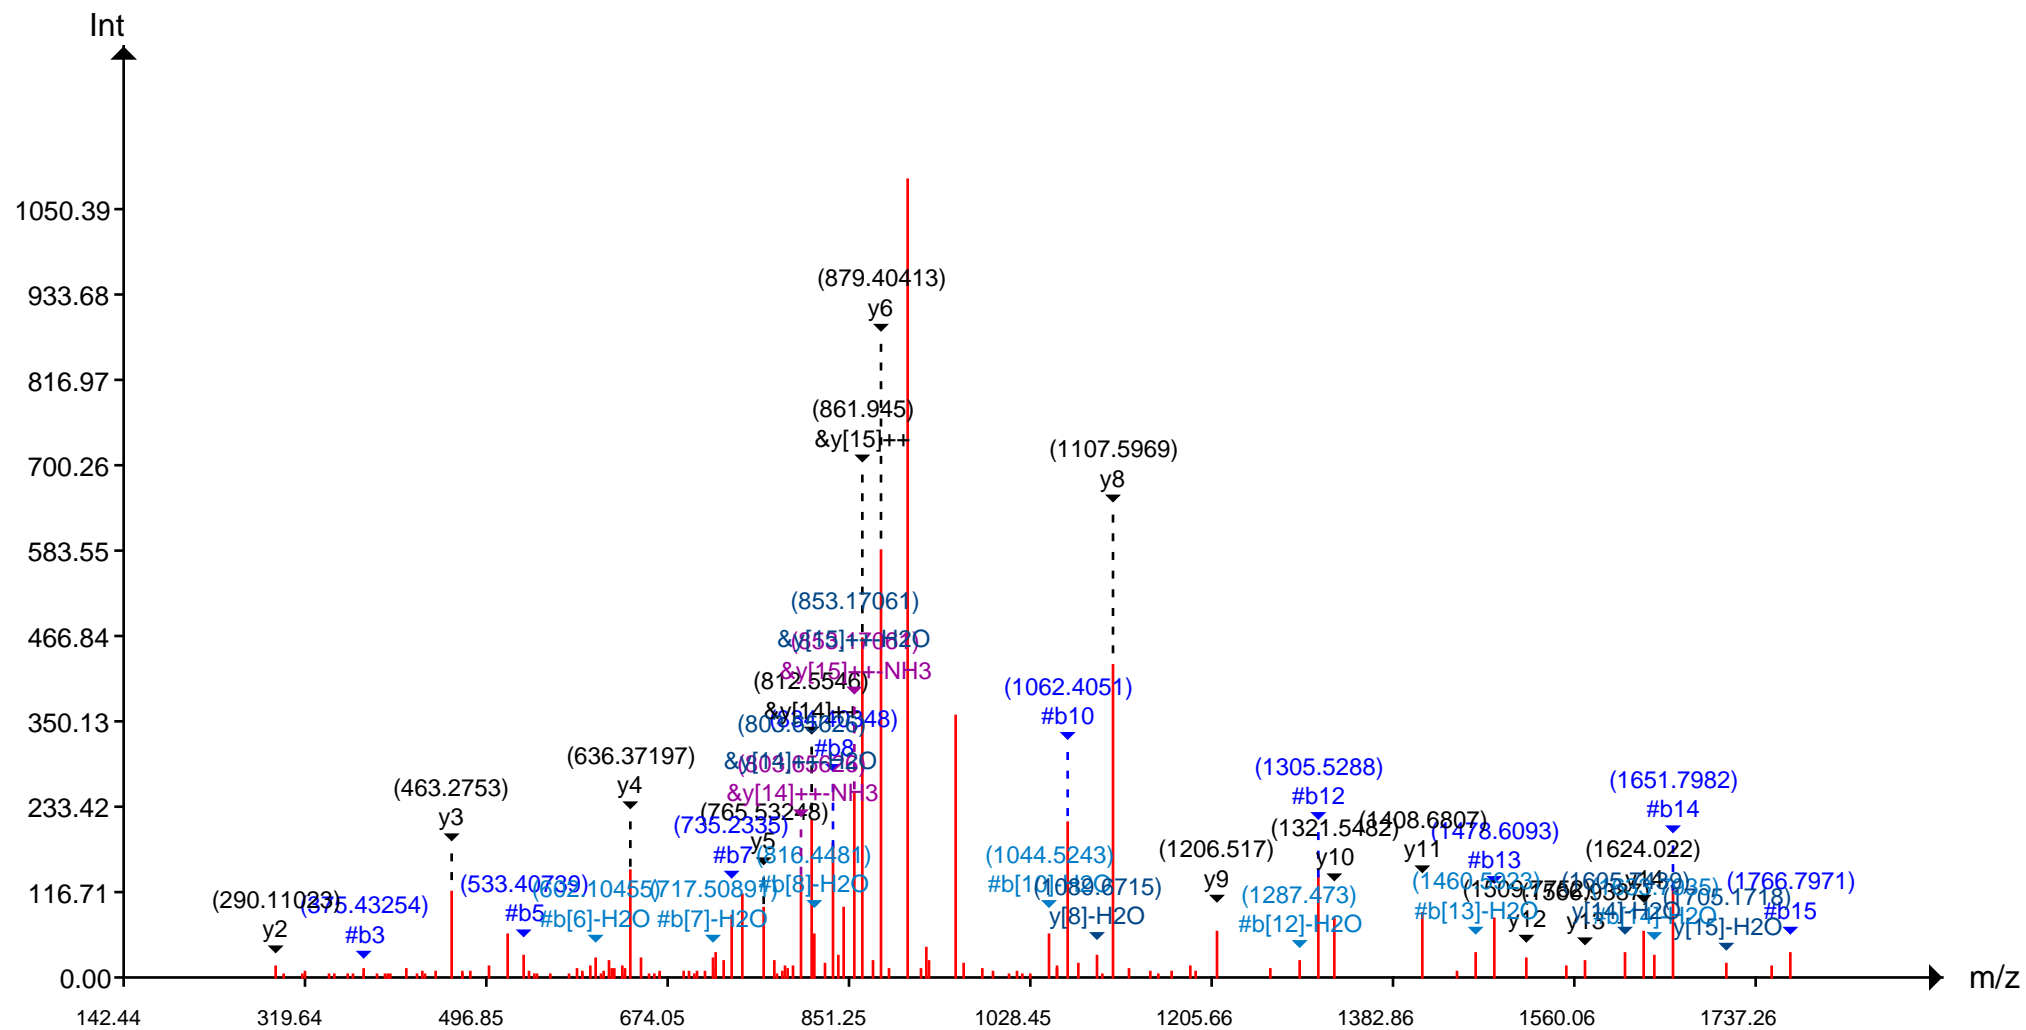

## Info

|                          |                                                    |                           |          |
|--------------------------|----------------------------------------------------|---------------------------|----------|
| <b>Modified Sequence</b> | AcD3-K<AcD3K*>VGGTSDVEVNEK<AcD3K*>K<AcD3K*>DR-COOH | <b>Ion score</b>          | 108.74   |
| <b>Protein</b>           | P63038                                             | <b>Confidence level</b>   | 99.00%   |
| <b>Precursor m/z</b>     | 971.02023                                          | <b>Identity Threshold</b> | 47.69    |
| <b>Charge</b>            | 2+                                                 | <b>Mass error</b>         | 0.001875 |

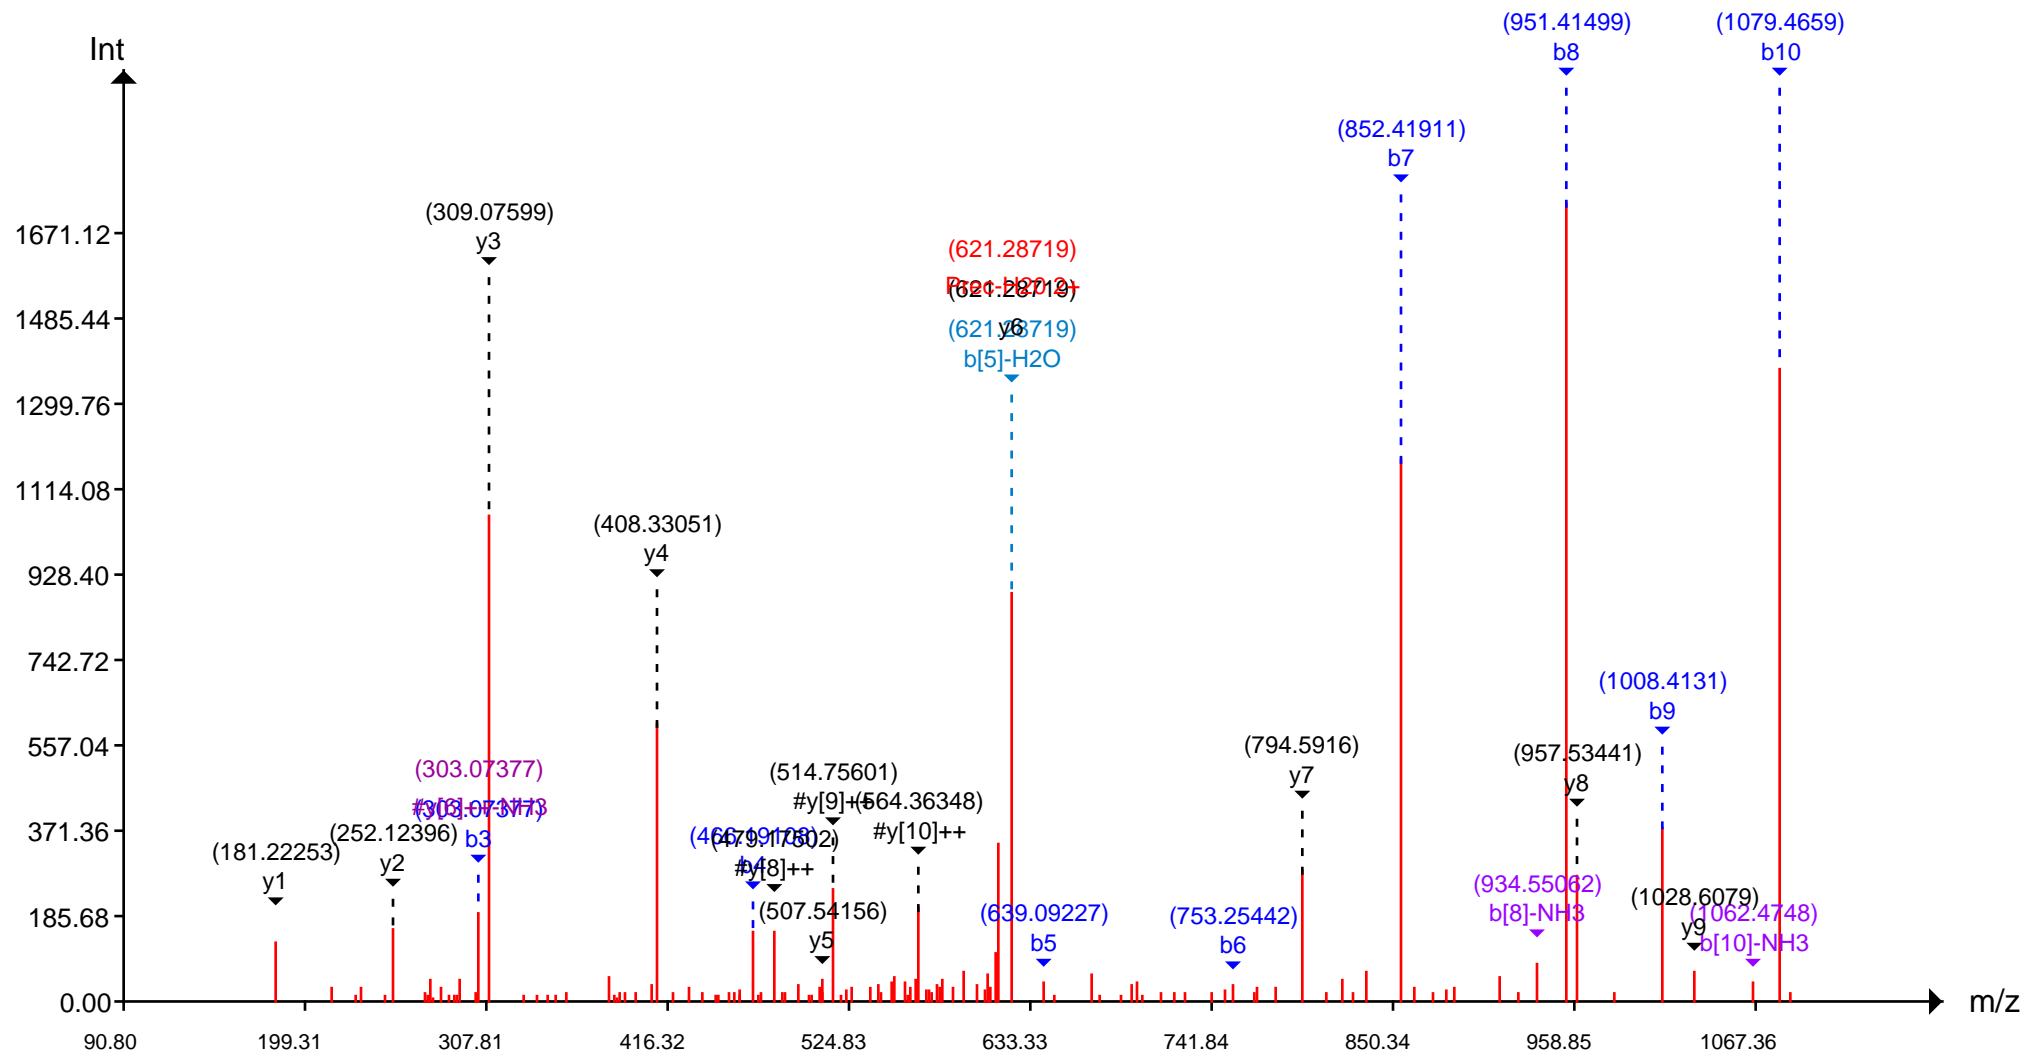

## Info

**Modified Sequence** AcD3-SVAYK<AcD3K\*>NVVGAR<C13>-COOH

**Ion score** 69.22

**Protein** Q9CQV8, P68510, P61982, P63101

**Confidence level** 99.00%

**Precursor m/z** 630.36973

**Identity Threshold** 46.17

**Charge** 2+

**Mass error** 1.31E-4

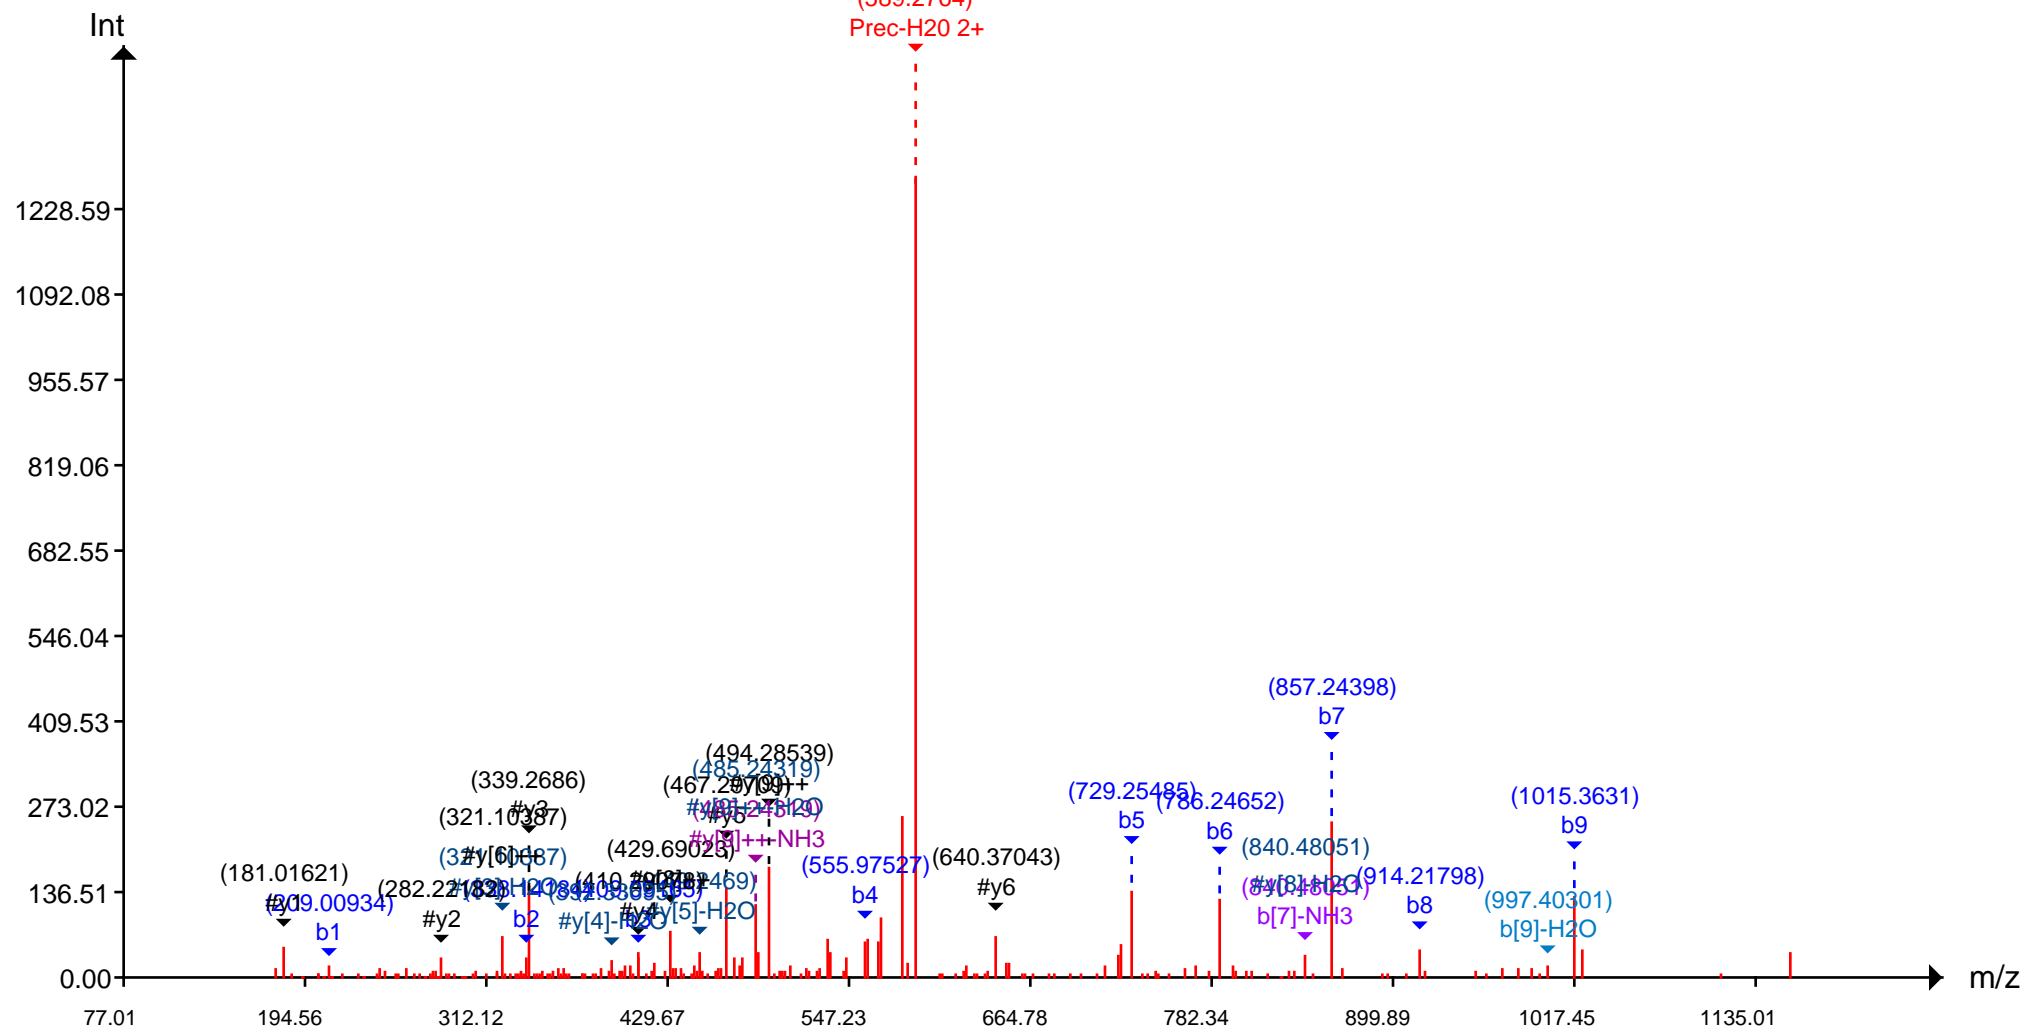

## Info

|                          |                                         |                           |         |
|--------------------------|-----------------------------------------|---------------------------|---------|
| <b>Modified Sequence</b> | AcD3-YEAM<Mox*>K<AcD3K*>GAGTR<C13>-COOH | <b>Ion score</b>          | 52.41   |
| <b>Protein</b>           | P10107                                  | <b>Confidence level</b>   | 99.00%  |
| <b>Precursor m/z</b>     | 598.30319                               | <b>Identity Threshold</b> | 47.79   |
| <b>Charge</b>            | 2+                                      | <b>Mass error</b>         | 1.23E-4 |

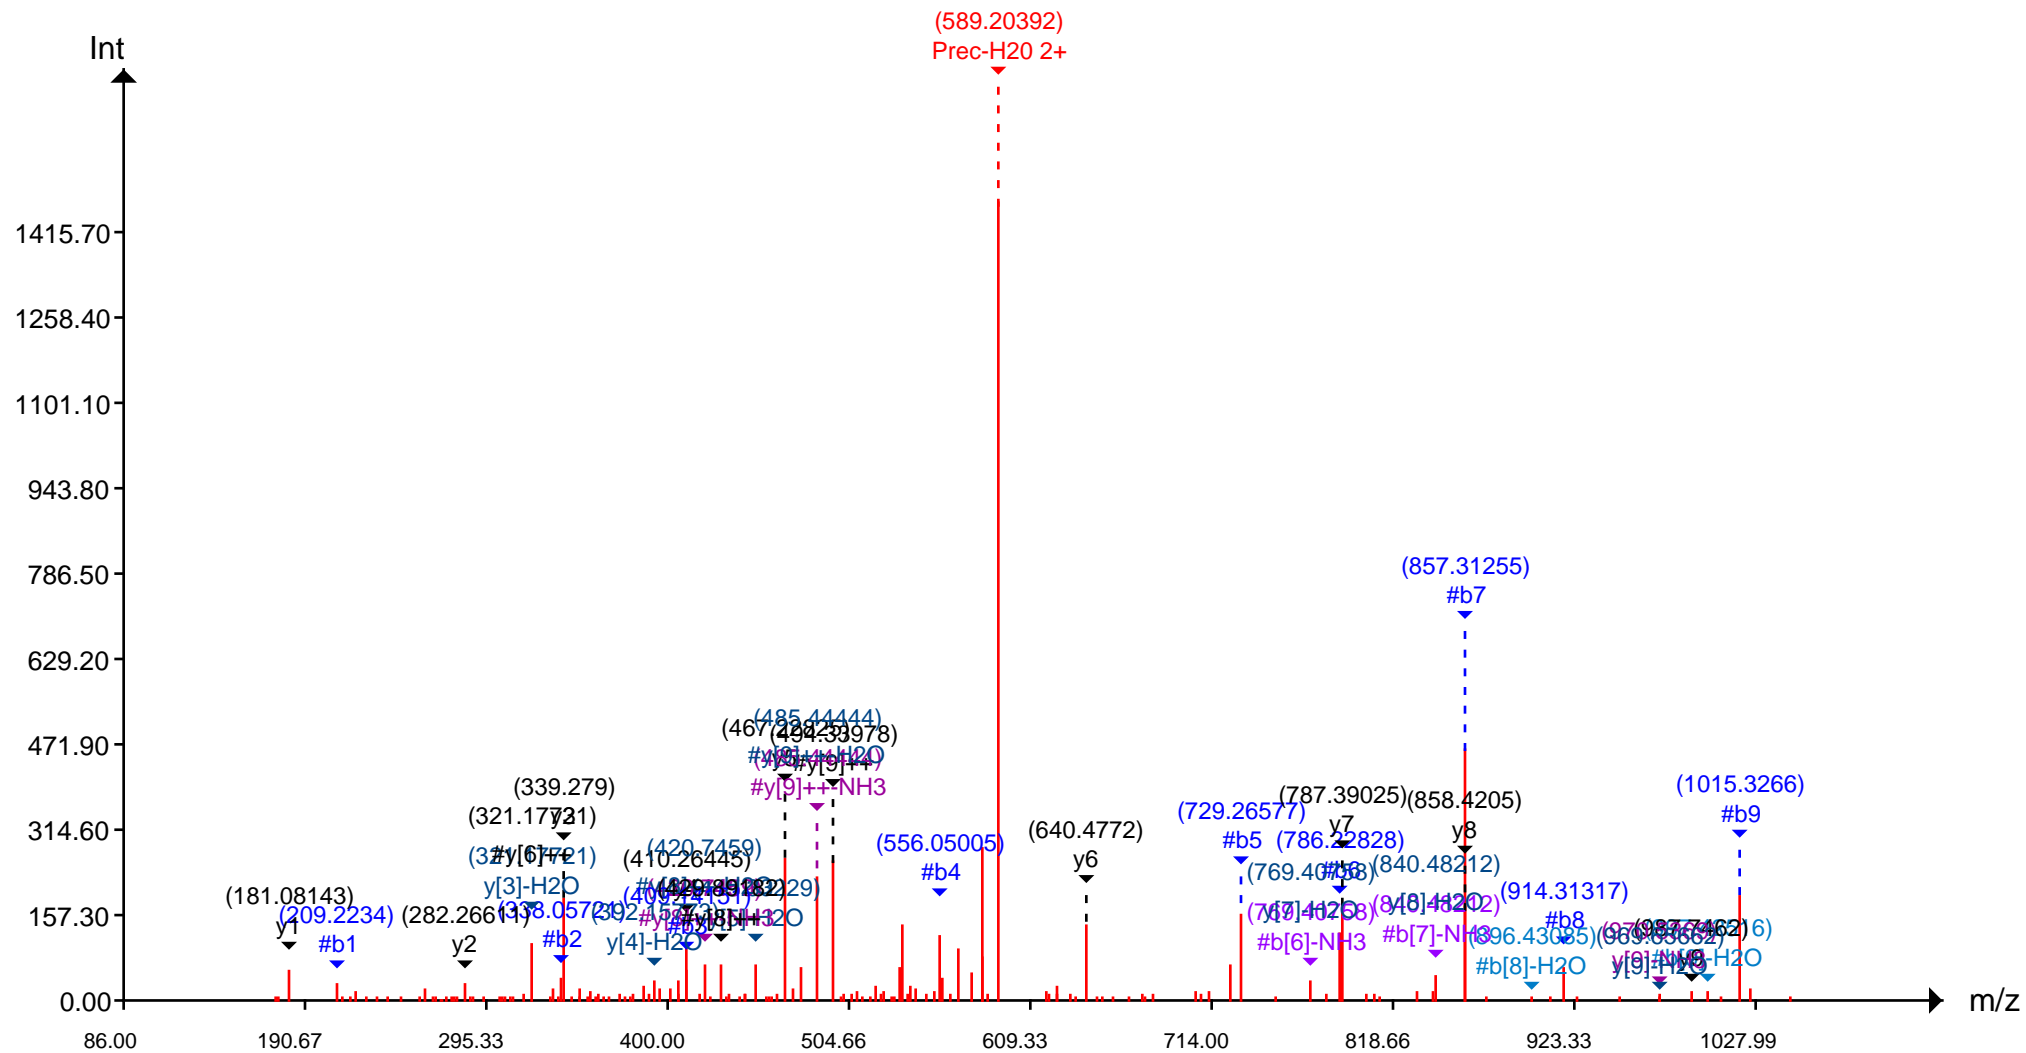

## Info

**Modified Sequence** AcD3-YEAM<Mox\*>K<AcD3K\*>GAGTR<C13>-COOH

**Ion score** 81.11

**Protein** P10107

**Confidence level** 99.00%

**Precursor m/z** 598.30255

**Identity Threshold** 47.72

**Charge** 2+

**Mass error** -0.001157

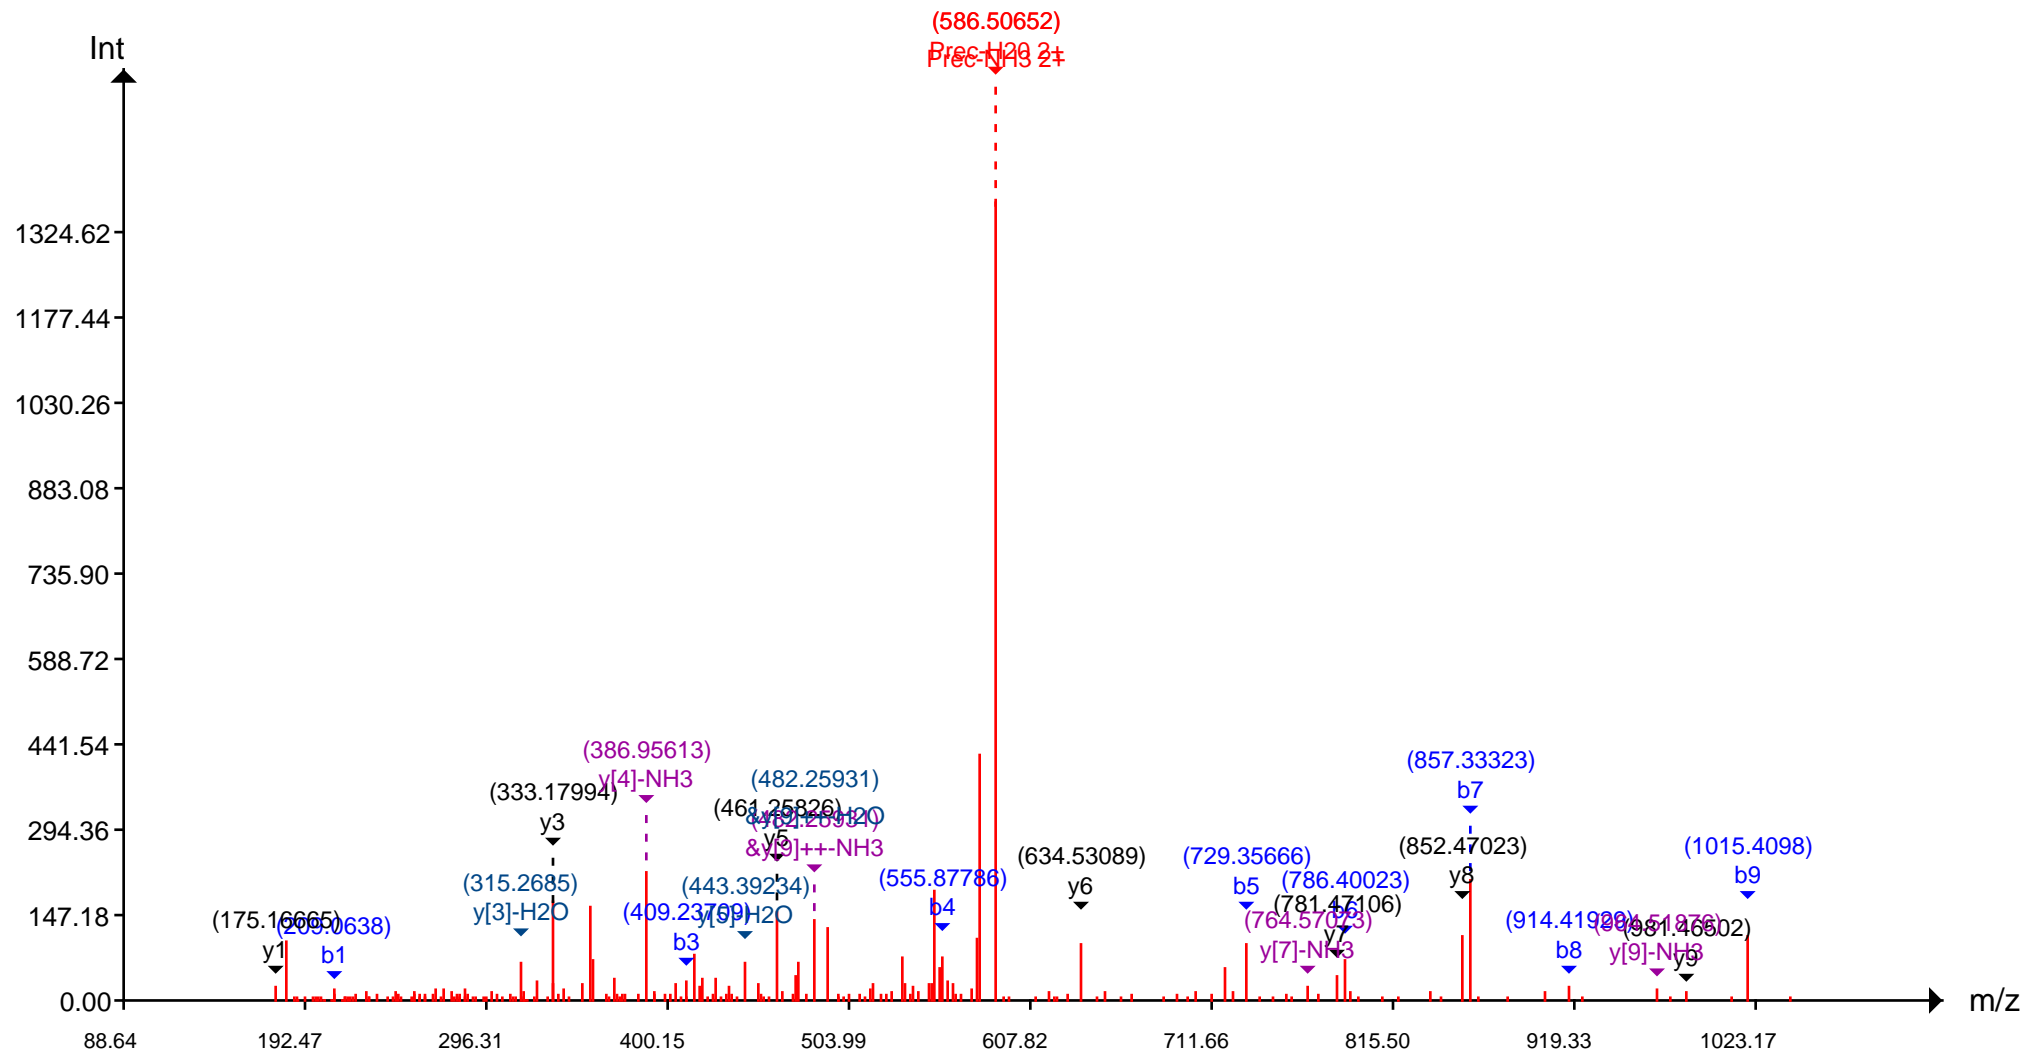

## Info

|                          |                                    |                           |         |
|--------------------------|------------------------------------|---------------------------|---------|
| <b>Modified Sequence</b> | AcD3-YEAM<Mox*>K<AcD3K*>GAGTR-COOH | <b>Ion score</b>          | 48.17   |
| <b>Protein</b>           | P10107                             | <b>Confidence level</b>   | 99.00%  |
| <b>Precursor m/z</b>     | 595.29334                          | <b>Identity Threshold</b> | 47.05   |
| <b>Charge</b>            | 2+                                 | <b>Mass error</b>         | 5.64E-4 |

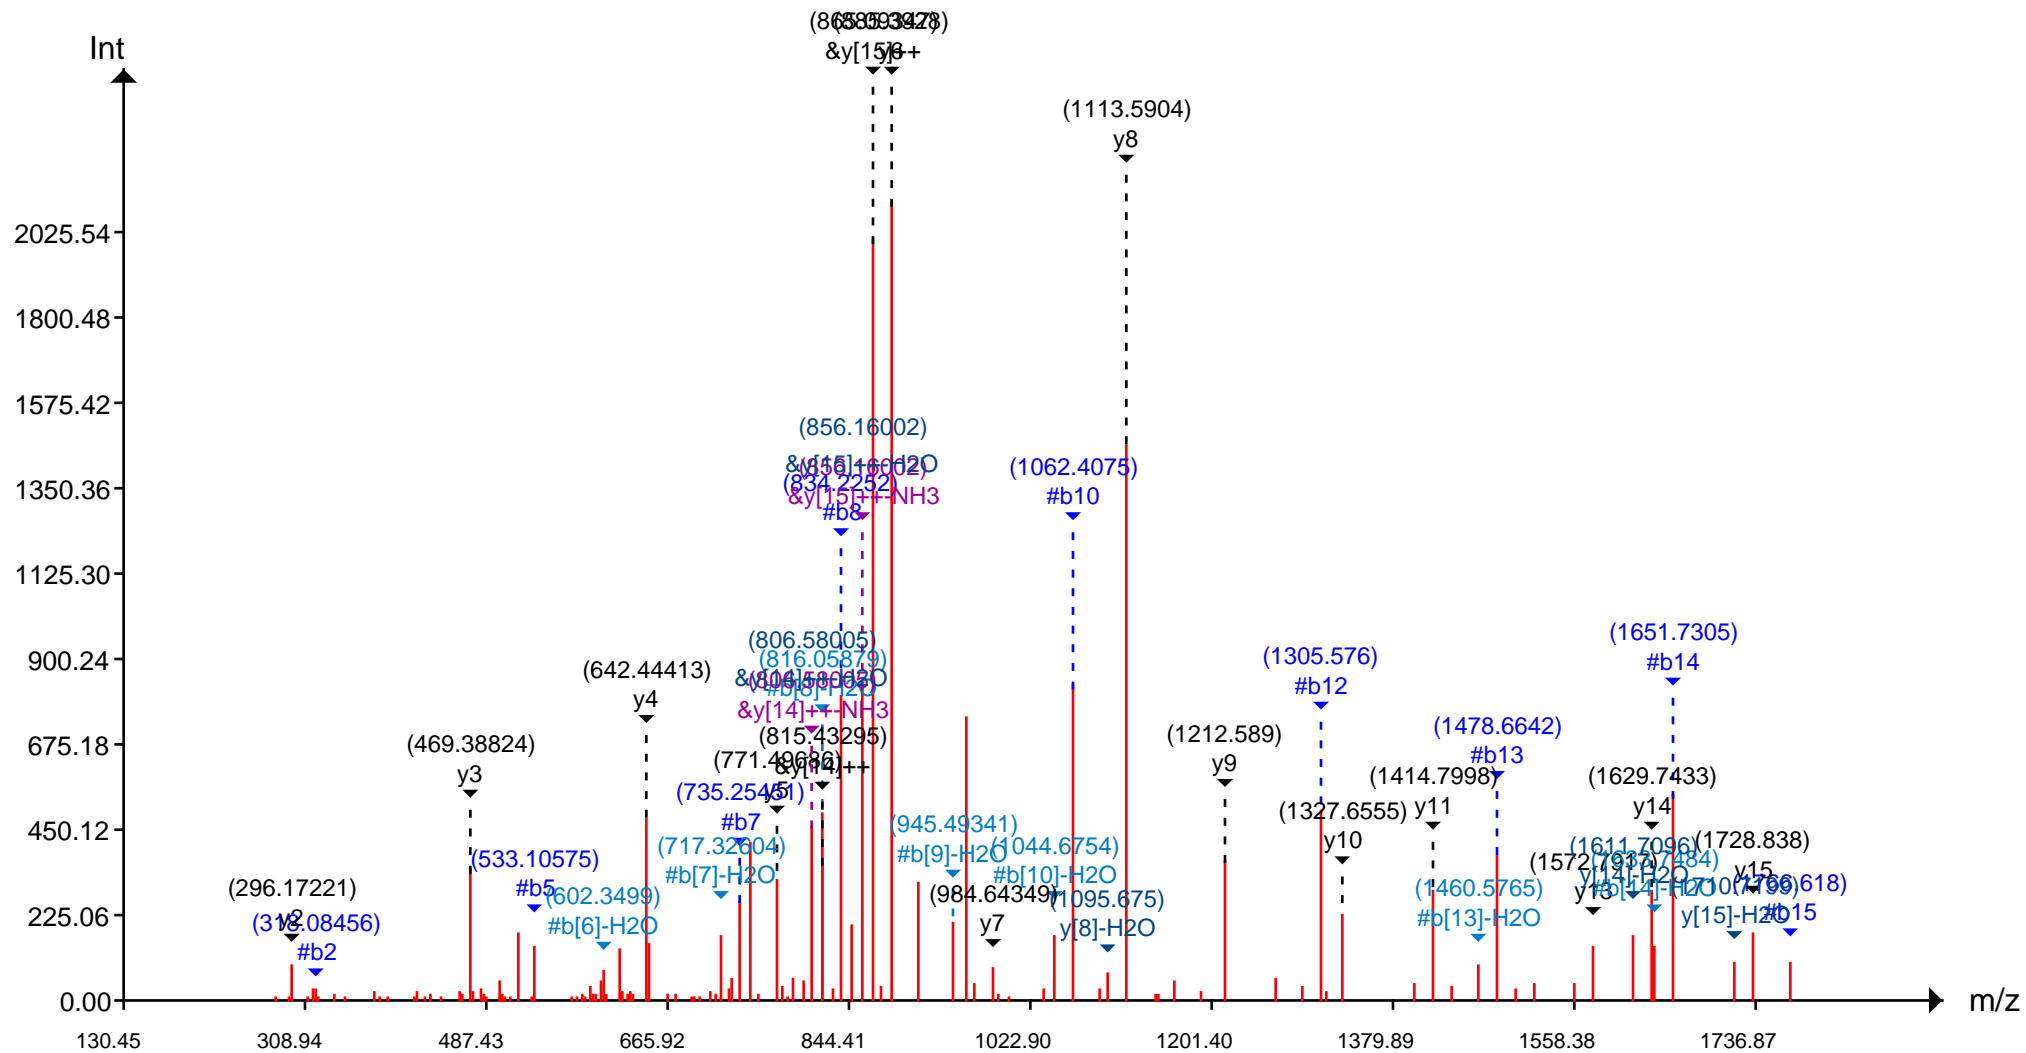

## Info

|                          |                                                         |                           |          |
|--------------------------|---------------------------------------------------------|---------------------------|----------|
| <b>Modified Sequence</b> | AcD3-K<AcD3K*>VGGTSDVEVNEK<AcD3K*>K<AcD3K*>DR<C13>-COOH | <b>Ion score</b>          | 103.48   |
| <b>Protein</b>           | P63038                                                  | <b>Confidence level</b>   | 99.00%   |
| <b>Precursor m/z</b>     | 974.02999                                               | <b>Identity Threshold</b> | 47.55    |
| <b>Charge</b>            | 2+                                                      | <b>Mass error</b>         | 0.001254 |



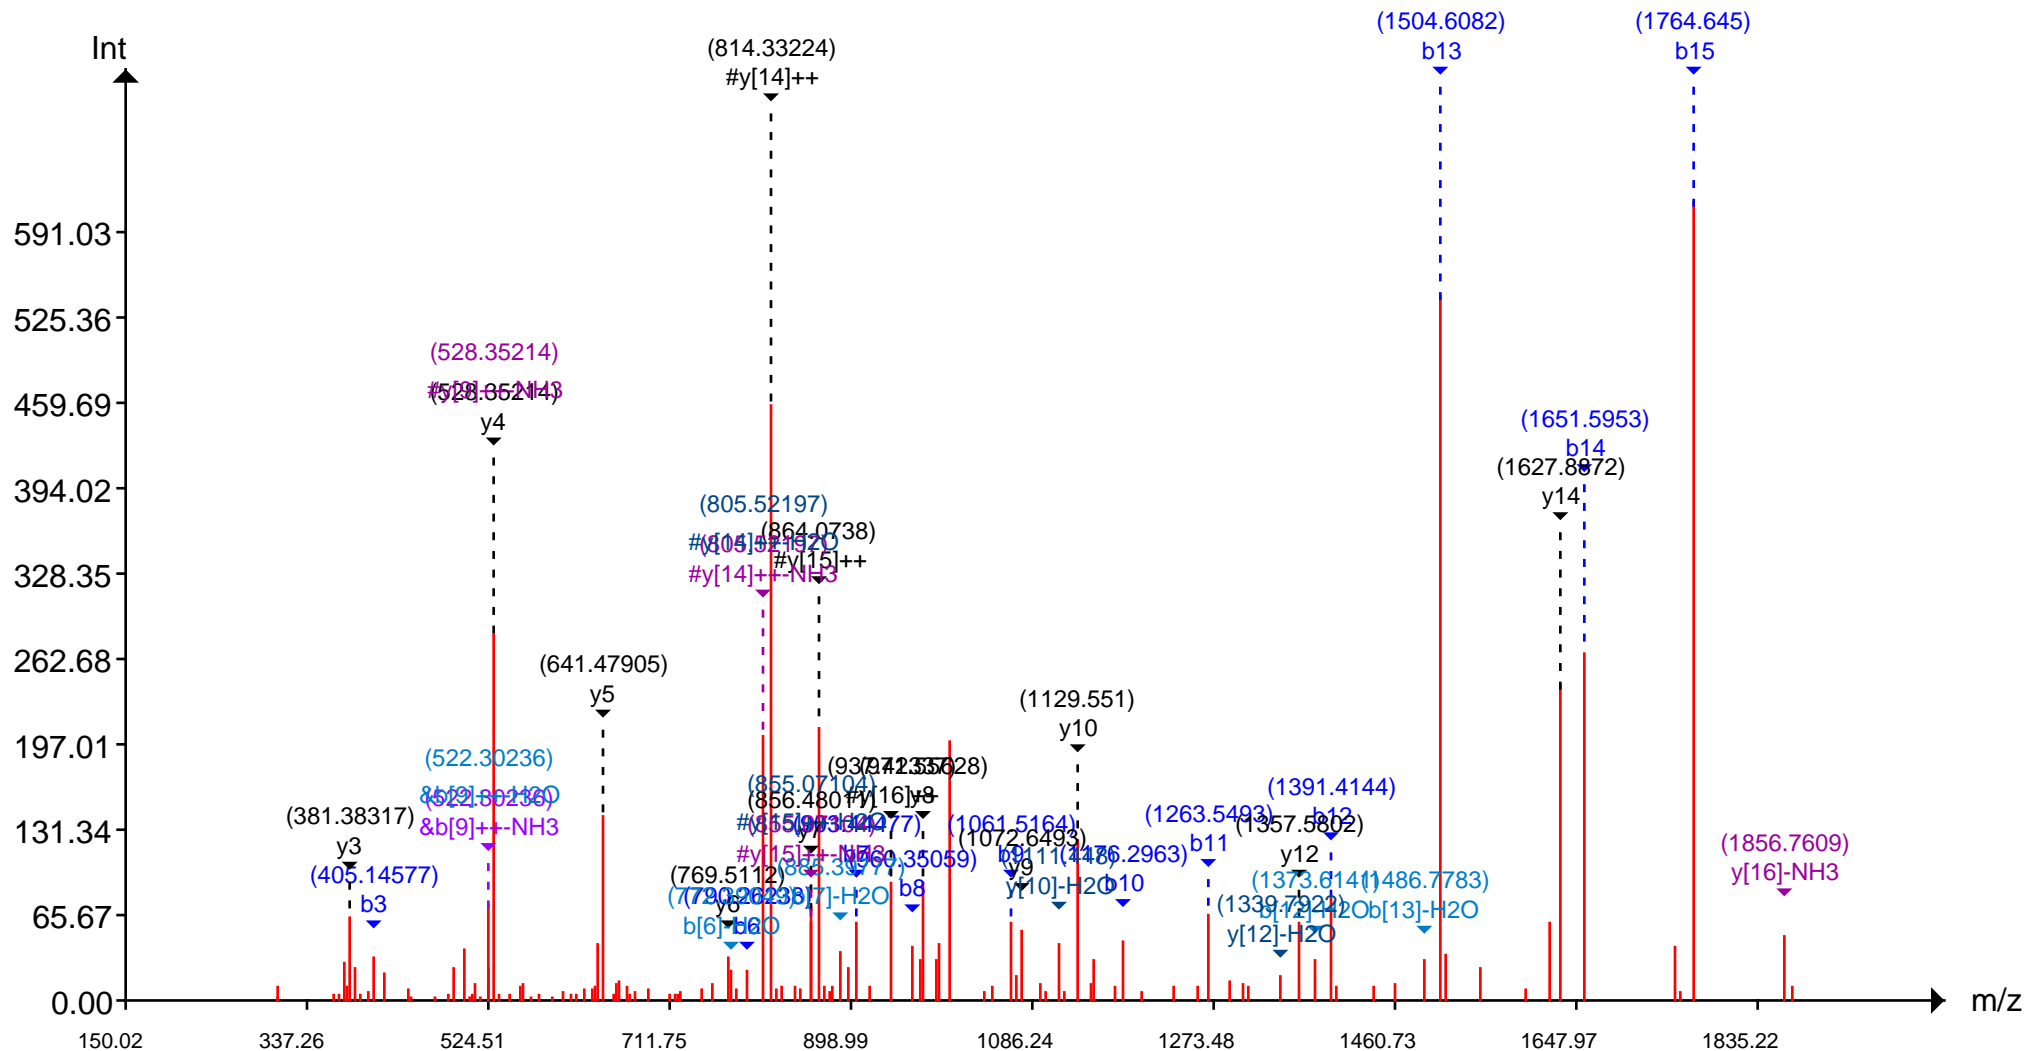

## Info

|                          |                                          |                           |          |
|--------------------------|------------------------------------------|---------------------------|----------|
| <b>Modified Sequence</b> | AcD3-LFVPK<AcD3K*>DLGTDSQIFISR<C13>-COOH | <b>Ion score</b>          | 69.63    |
| <b>Protein</b>           | Q61598                                   | <b>Confidence level</b>   | 99.00%   |
| <b>Precursor m/z</b>     | 1016.5717                                | <b>Identity Threshold</b> | 46.08    |
| <b>Charge</b>            | 2+                                       | <b>Mass error</b>         | 0.003344 |

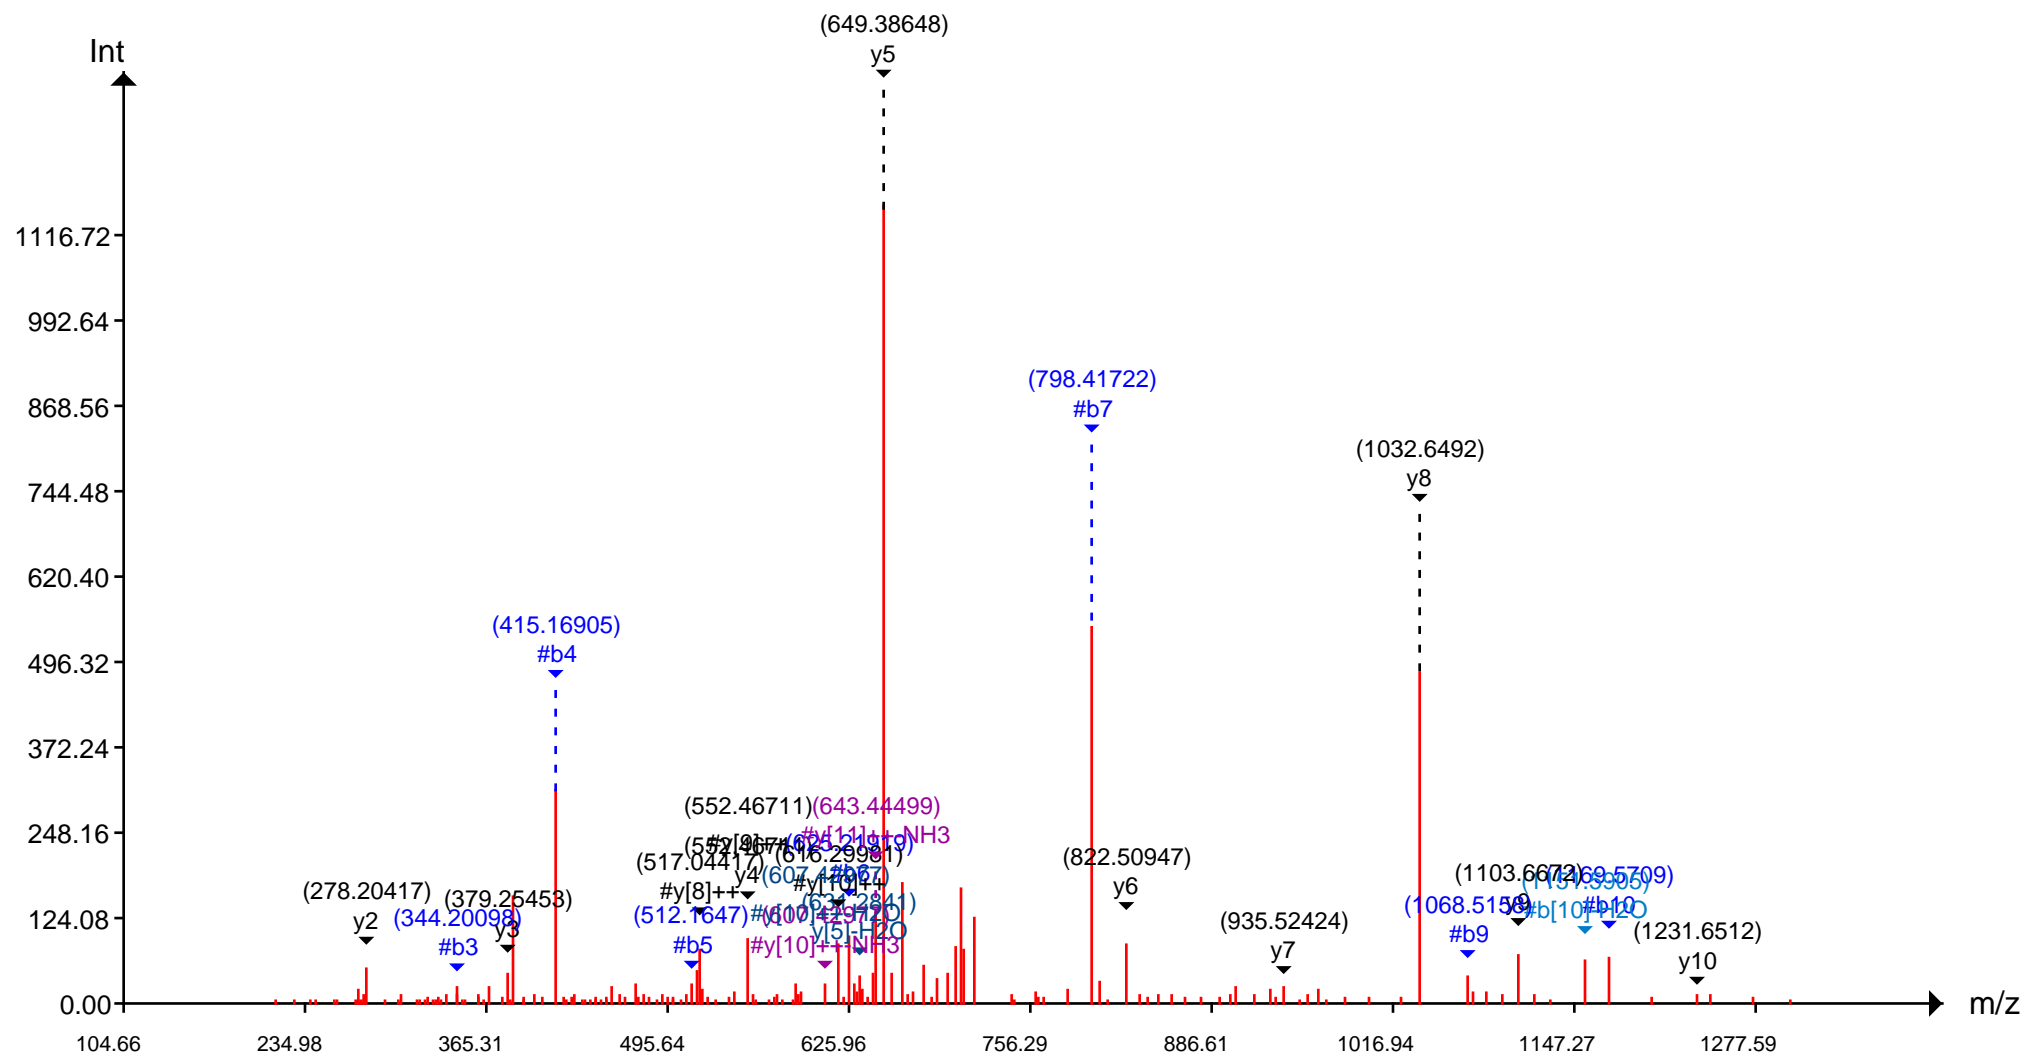

## Info

|                          |                                             |                           |         |
|--------------------------|---------------------------------------------|---------------------------|---------|
| <b>Modified Sequence</b> | AcD3-VAQAPLK<AcD3K*>PK<AcD3K*>TPR<C13>-COOH | <b>Ion score</b>          | 68.74   |
| <b>Protein</b>           | Q9R190                                      | <b>Confidence level</b>   | 99.00%  |
| <b>Precursor m/z</b>     | 723.95835                                   | <b>Identity Threshold</b> | 39.22   |
| <b>Charge</b>            | 2+                                          | <b>Mass error</b>         | 9.79E-4 |

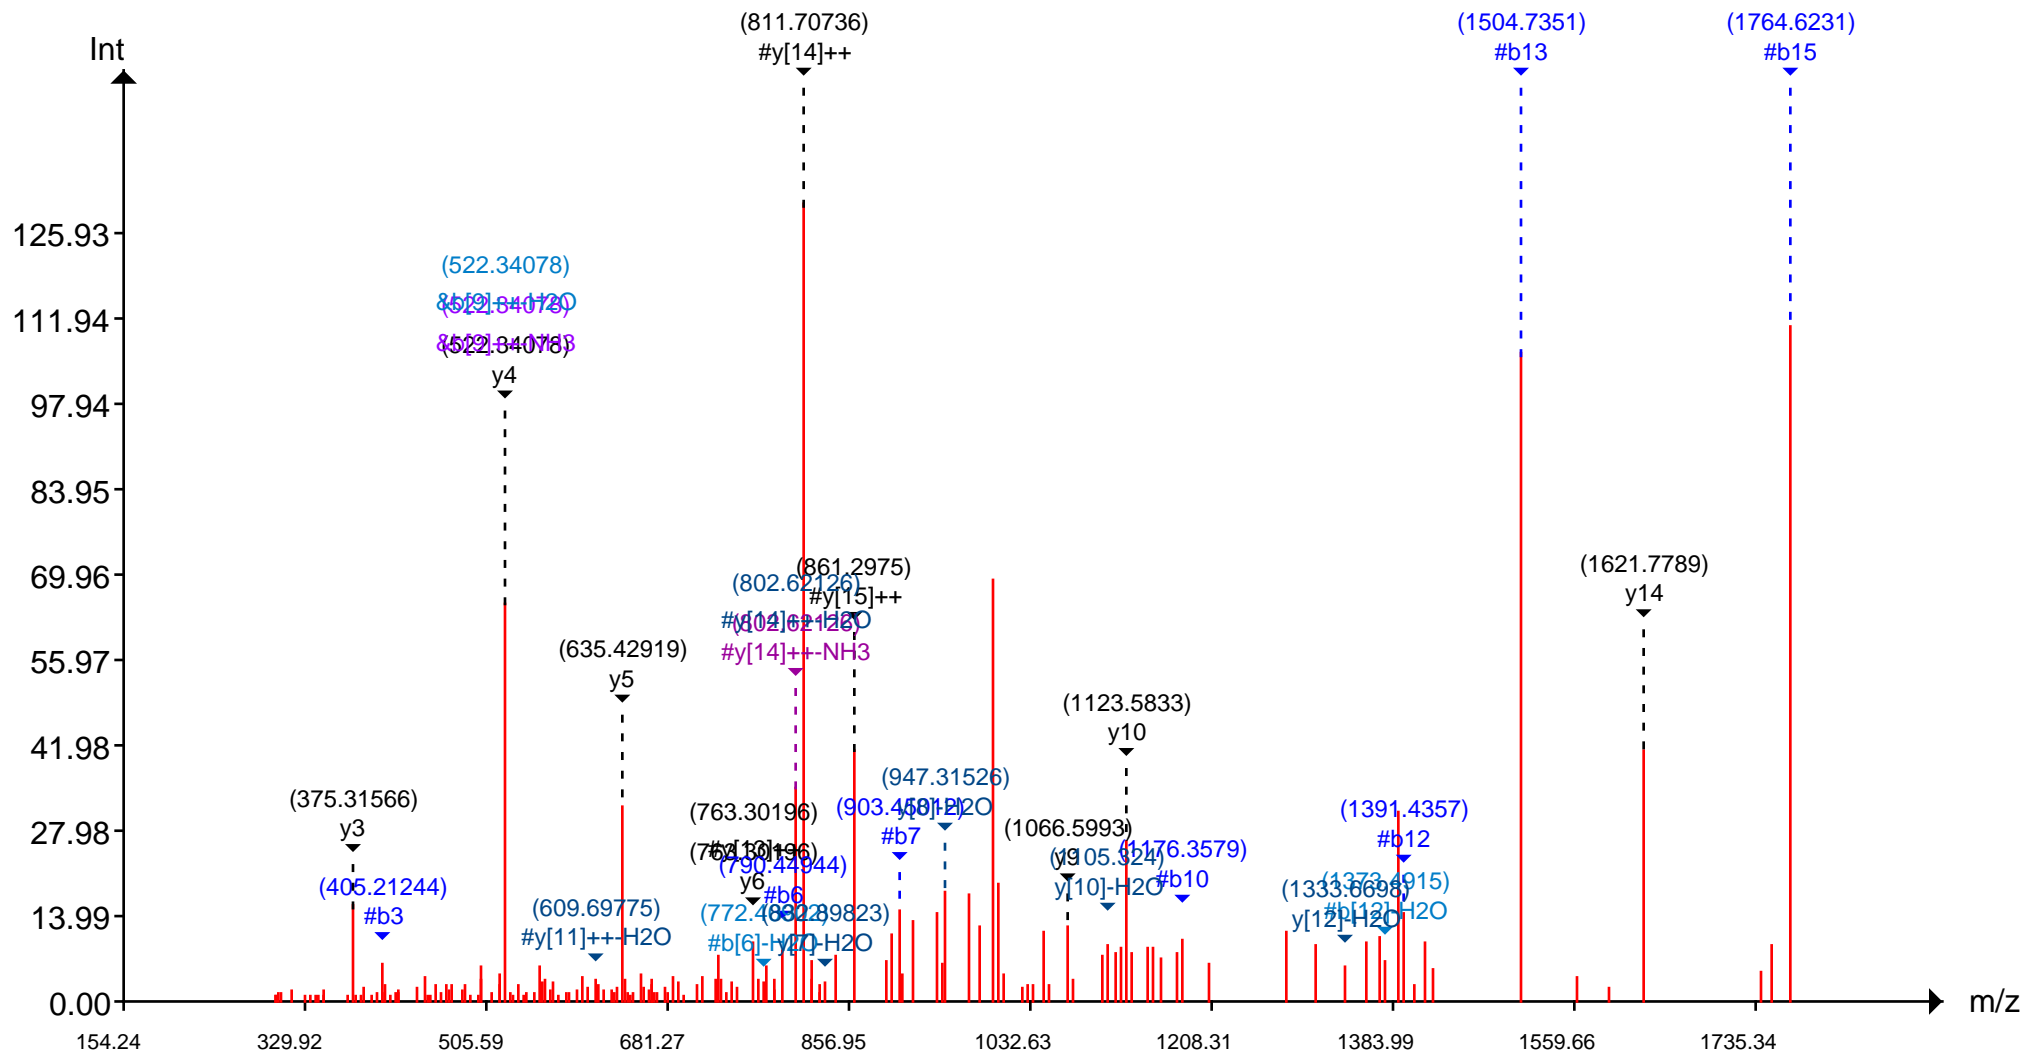

## Info

|                          |                                     |                           |          |
|--------------------------|-------------------------------------|---------------------------|----------|
| <b>Modified Sequence</b> | AcD3-LFVPK<AcD3K*>DLGTDSQIFISR-COOH | <b>Ion score</b>          | 48.54    |
| <b>Protein</b>           | Q61598                              | <b>Confidence level</b>   | 99.00%   |
| <b>Precursor m/z</b>     | 1014.0574                           | <b>Identity Threshold</b> | 47.06    |
| <b>Charge</b>            | 2+                                  | <b>Mass error</b>         | 0.994886 |

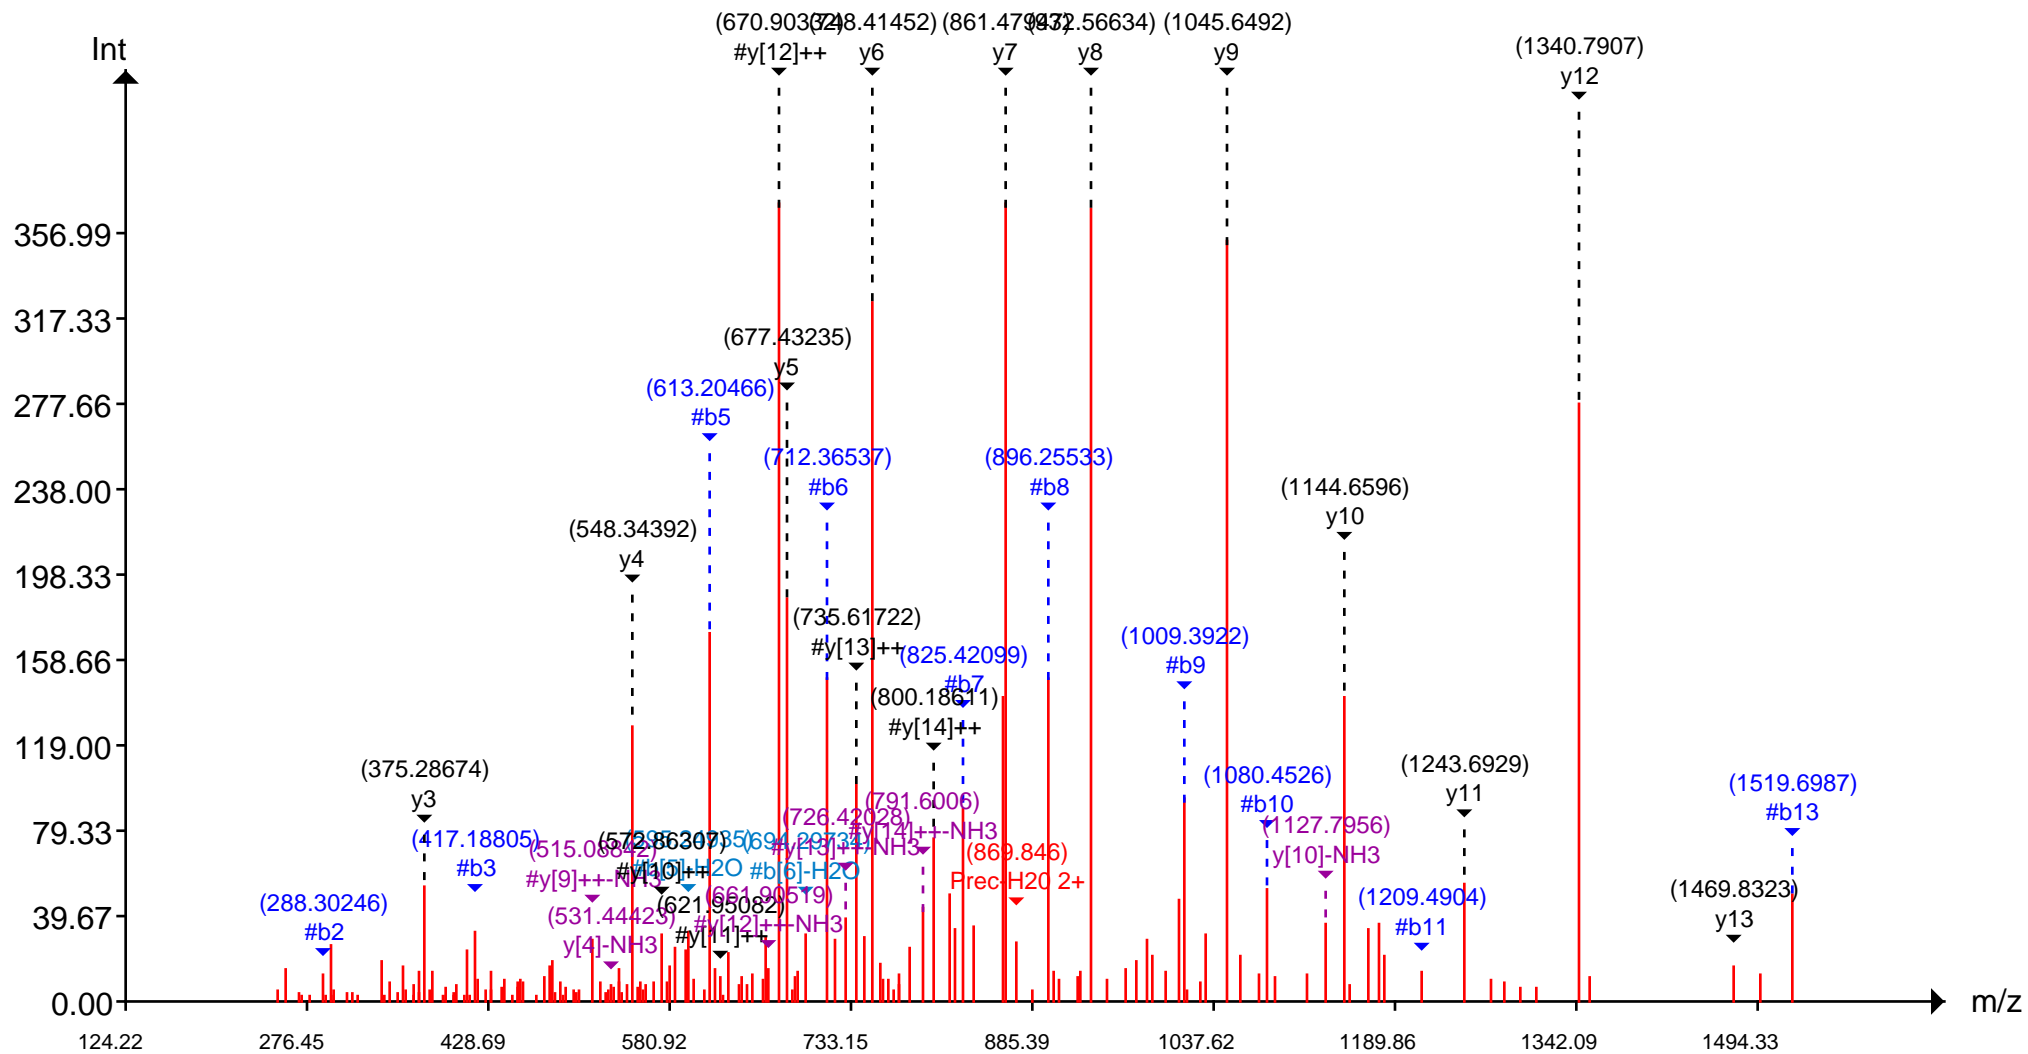

## Info

|                          |                                        |                           |          |
|--------------------------|----------------------------------------|---------------------------|----------|
| <b>Modified Sequence</b> | AcD3-LEEPVVLALAEK<AcD3K*>HGR<C13>-COOH | <b>Ion score</b>          | 89.94    |
| <b>Protein</b>           | Q9JII6                                 | <b>Confidence level</b>   | 99.00%   |
| <b>Precursor m/z</b>     | 879.01351                              | <b>Identity Threshold</b> | 44.49    |
| <b>Charge</b>            | 2+                                     | <b>Mass error</b>         | 0.002763 |

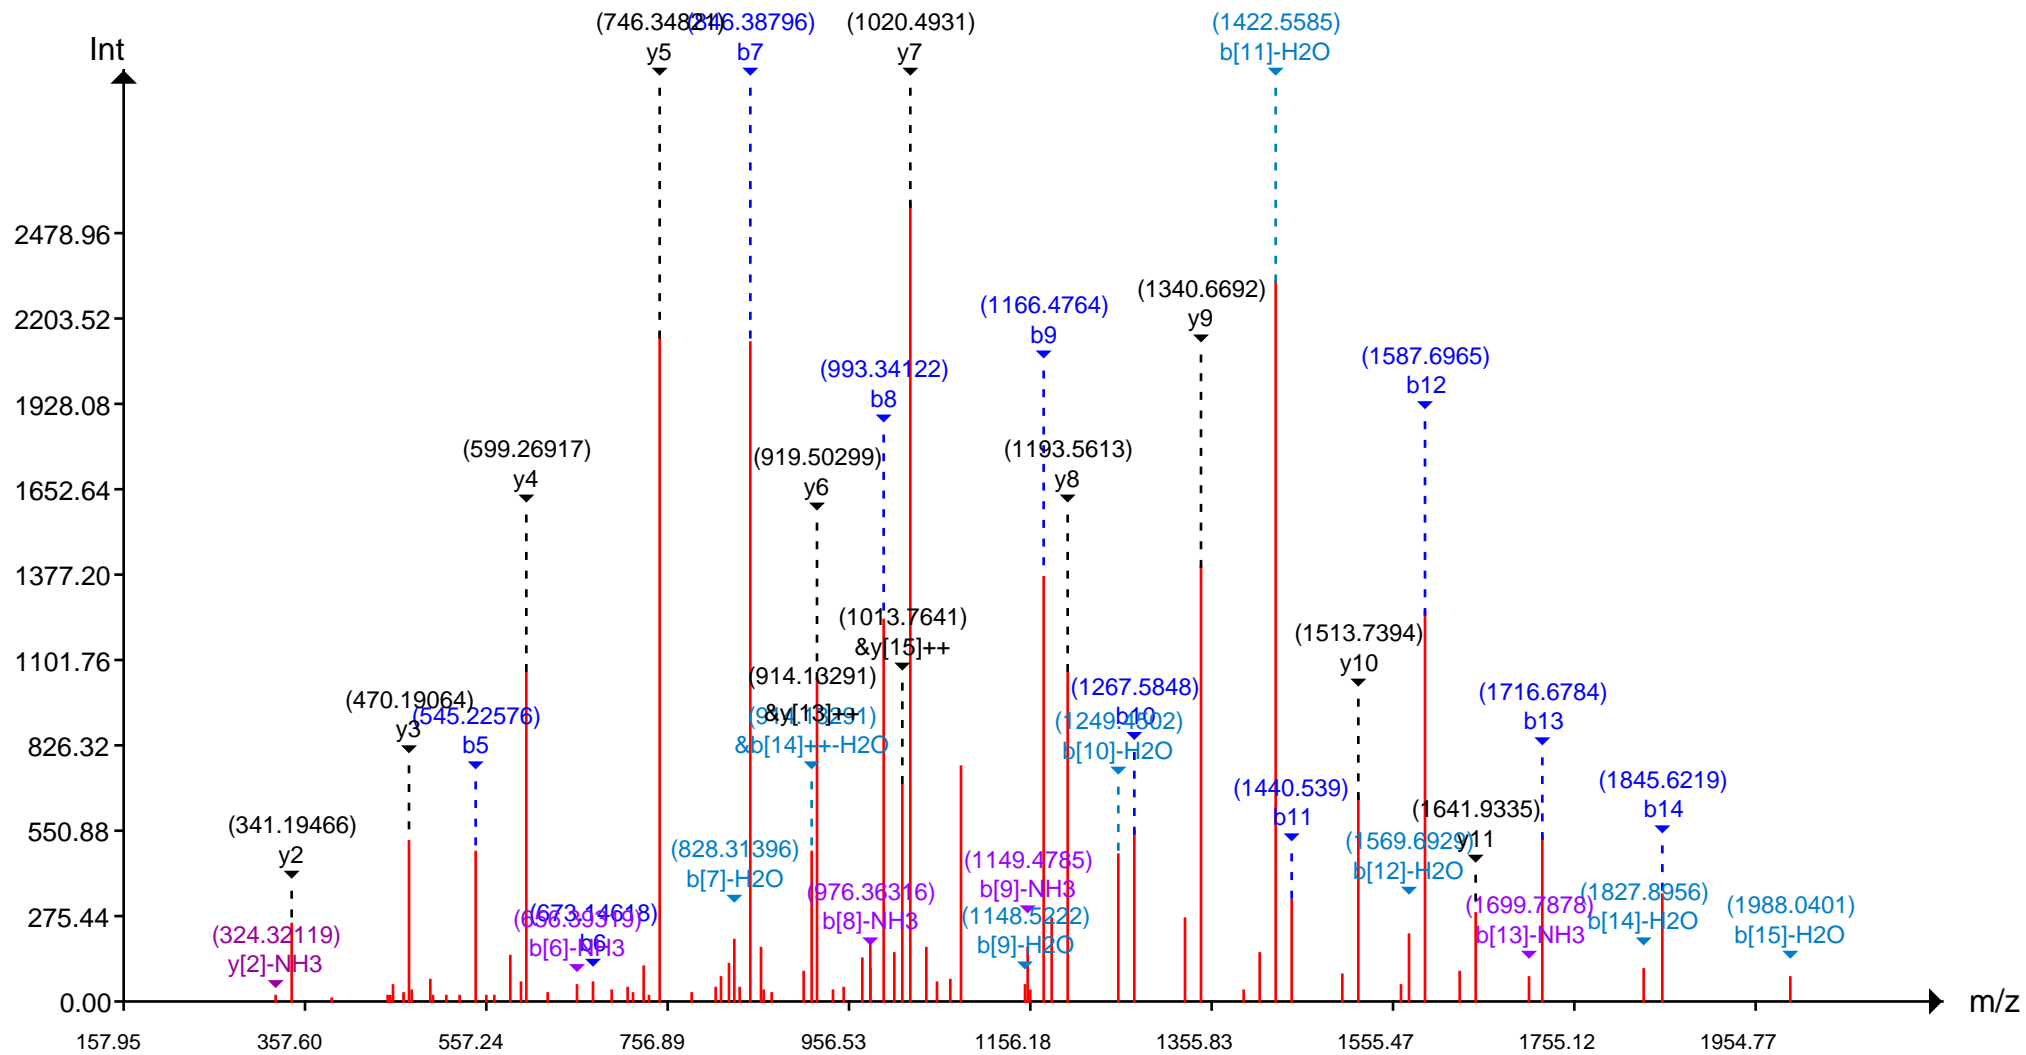

## Info

|                          |                                                               |                           |          |
|--------------------------|---------------------------------------------------------------|---------------------------|----------|
| <b>Modified Sequence</b> | AcD3-NAENAQK<AcD3K*>FK<AcD3K*>TK<AcD3K*>FEEC<Cmm*>R<C13>-COOH | <b>Ion score</b>          | 94.47    |
| <b>Protein</b>           | P34022                                                        | <b>Confidence level</b>   | 99.00%   |
| <b>Precursor m/z</b>     | 1093.5566                                                     | <b>Identity Threshold</b> | 47.93    |
| <b>Charge</b>            | 2+                                                            | <b>Mass error</b>         | 0.002792 |

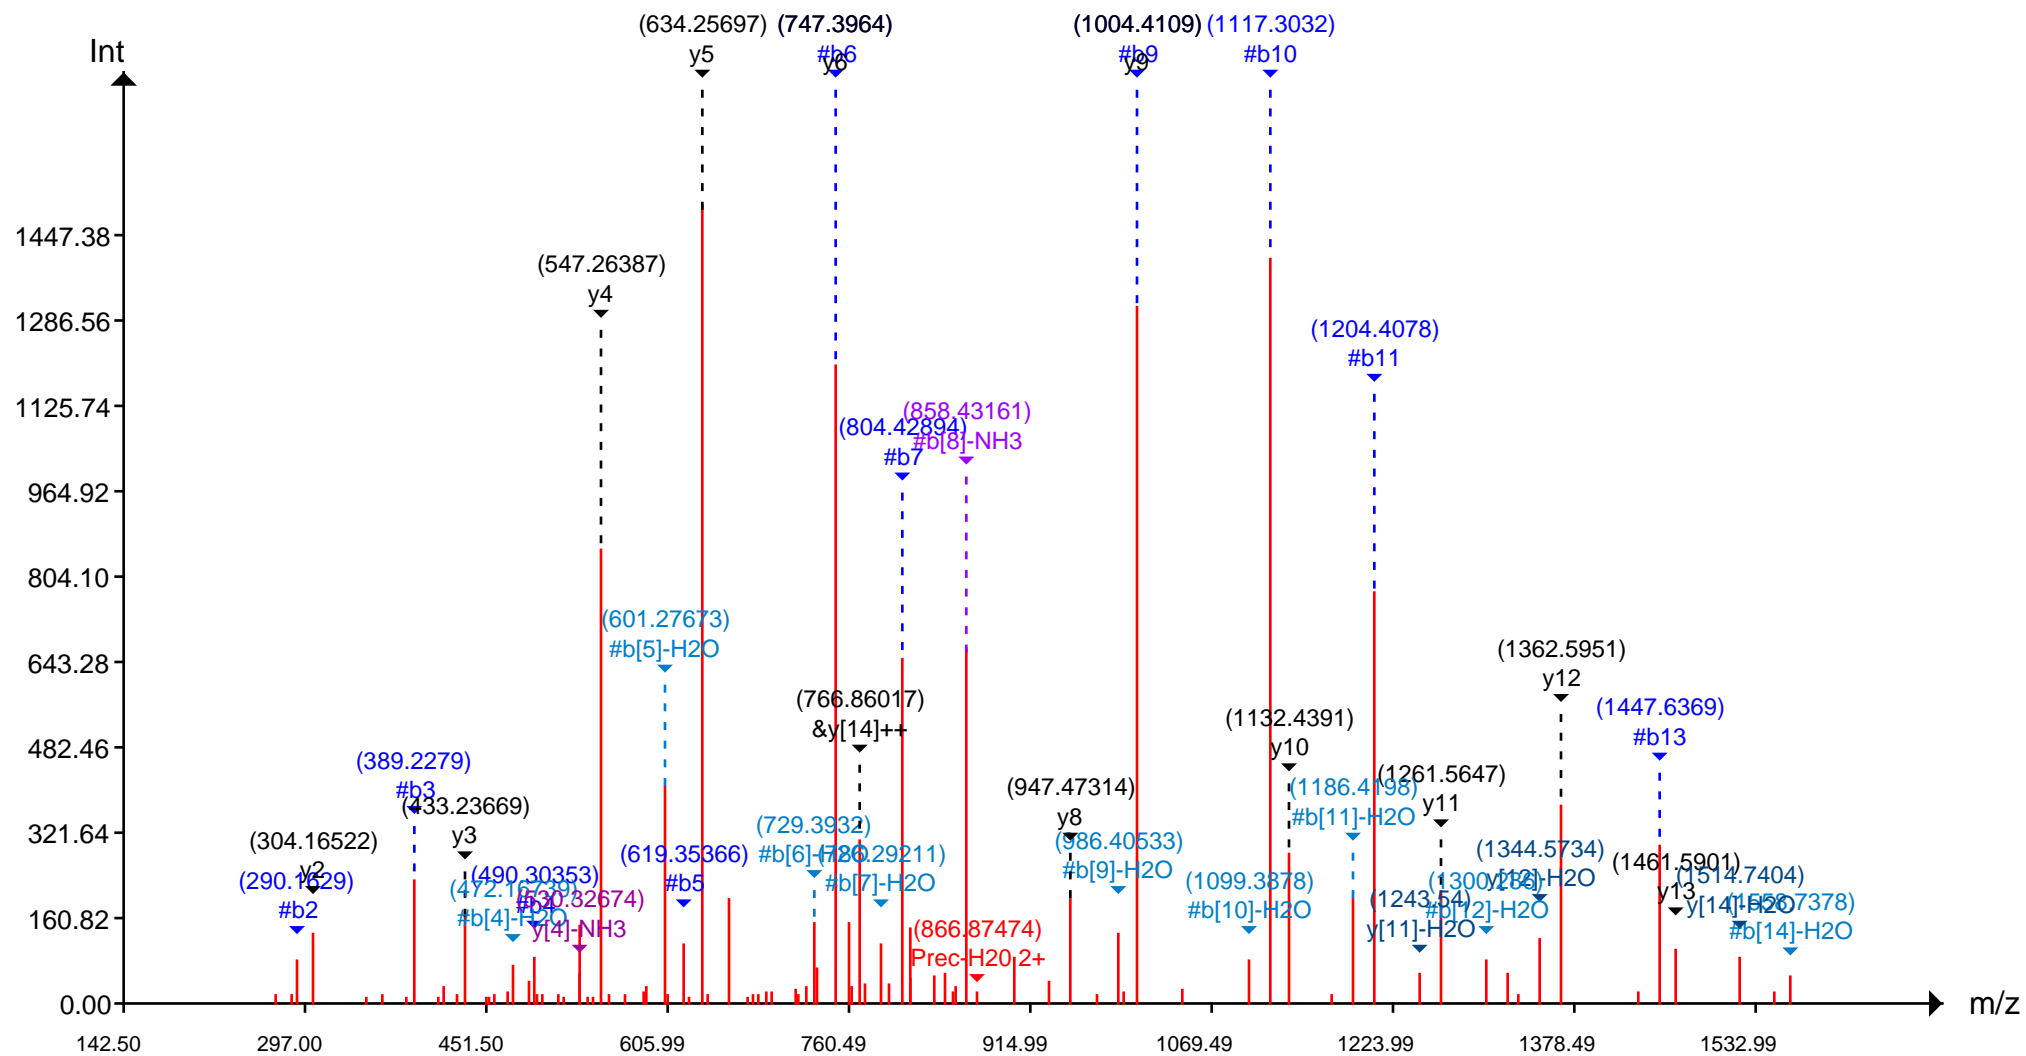

## Info

**Modified Sequence** AcD3-K<AcD3K\*>AVTEQGAELSNEER-COOH

**Ion score** 112.74

**Protein** P68254

**Confidence level** 99.00%

**Precursor m/z** 875.94098

**Identity Threshold** 47.90

**Charge** 2+

**Mass error** 0.002265

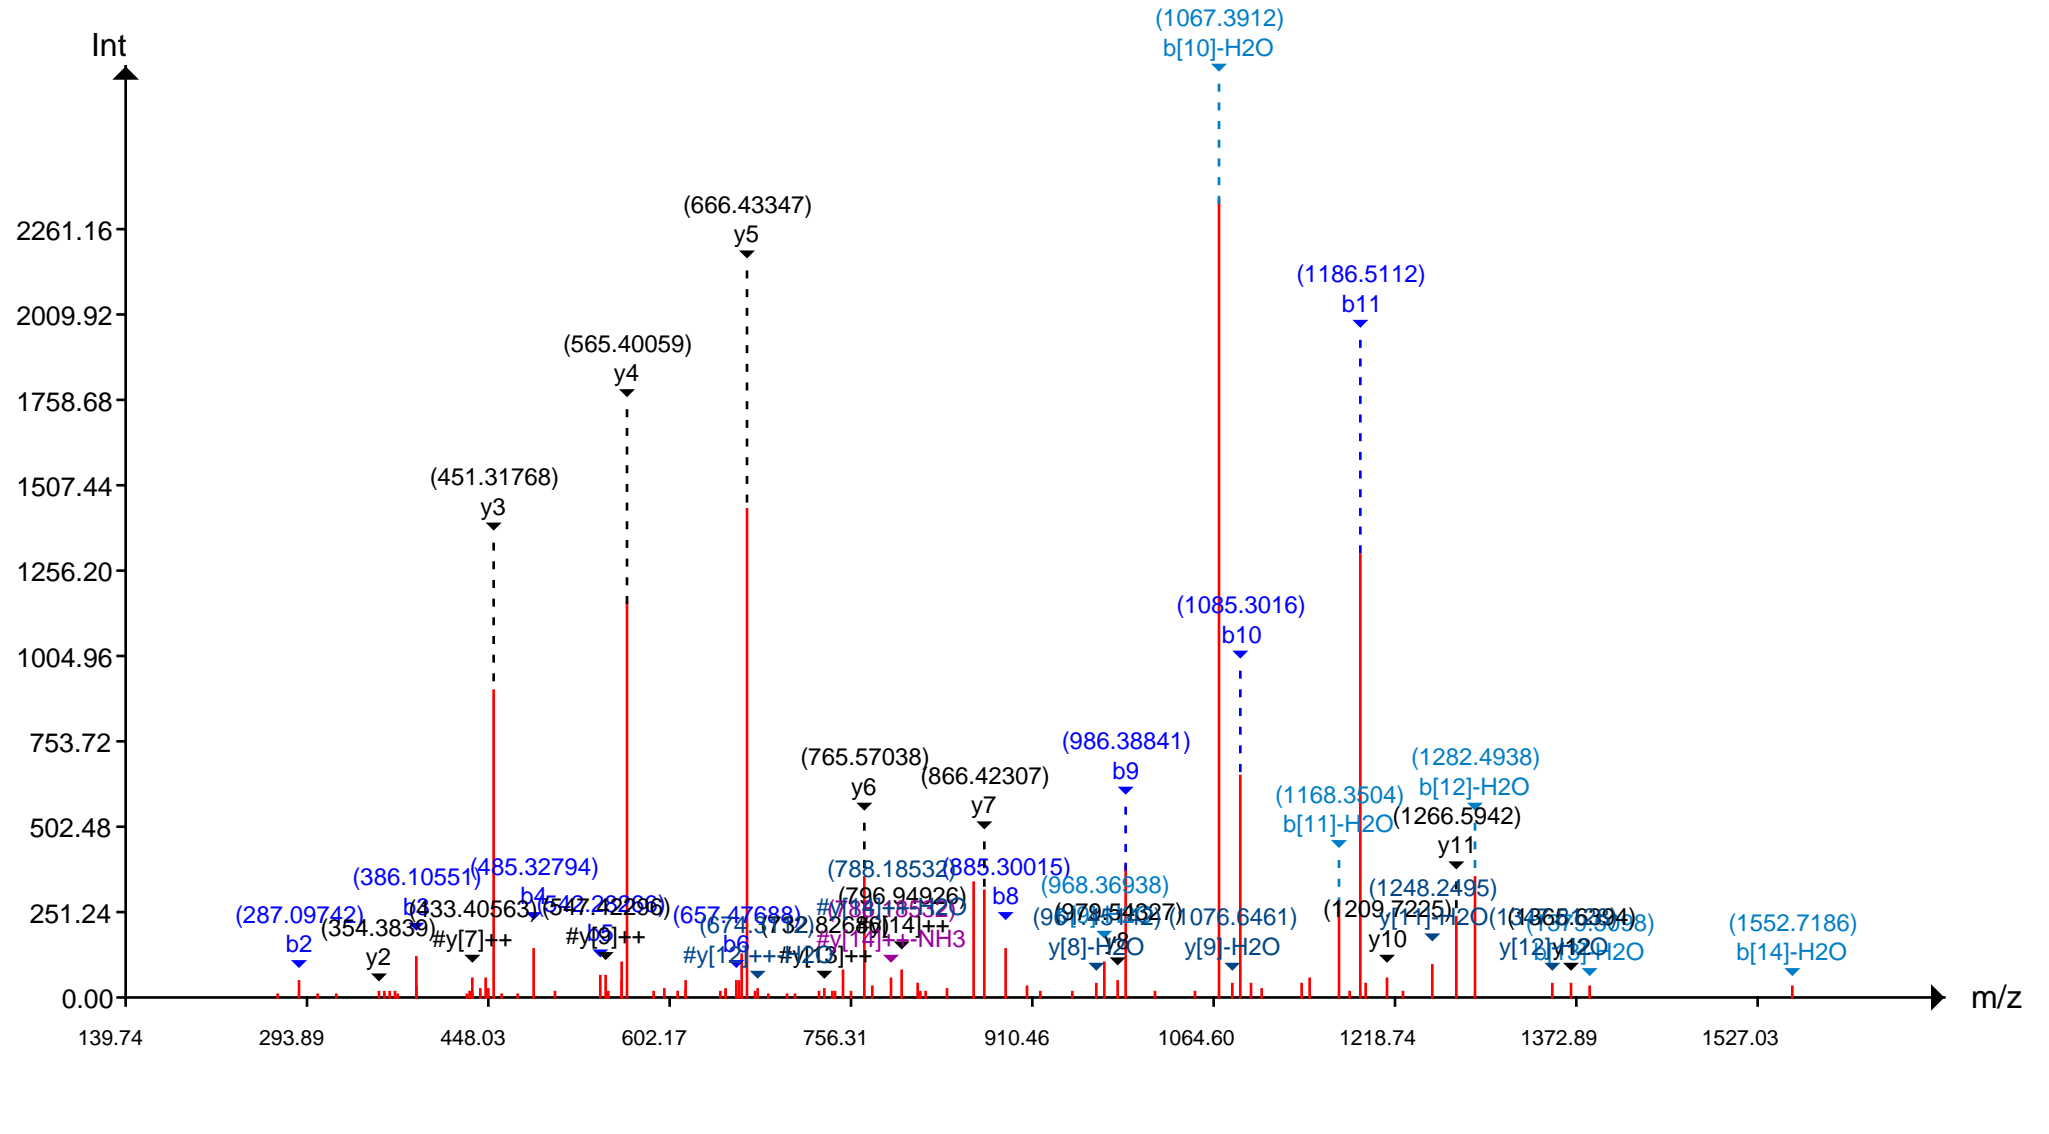

| Info                     |                                        |                           |          |
|--------------------------|----------------------------------------|---------------------------|----------|
| <b>Modified Sequence</b> | AcD3-IQVVGDDLTVTNPK<AcD3K*>R<C13>-COOH | <b>Ion score</b>          | 72.73    |
| <b>Protein</b>           | P17182                                 | <b>Confidence level</b>   | 99.00%   |
| <b>Precursor m/z</b>     | 876.00048                              | <b>Identity Threshold</b> | 45.78    |
| <b>Charge</b>            | 2+                                     | <b>Mass error</b>         | 0.002476 |

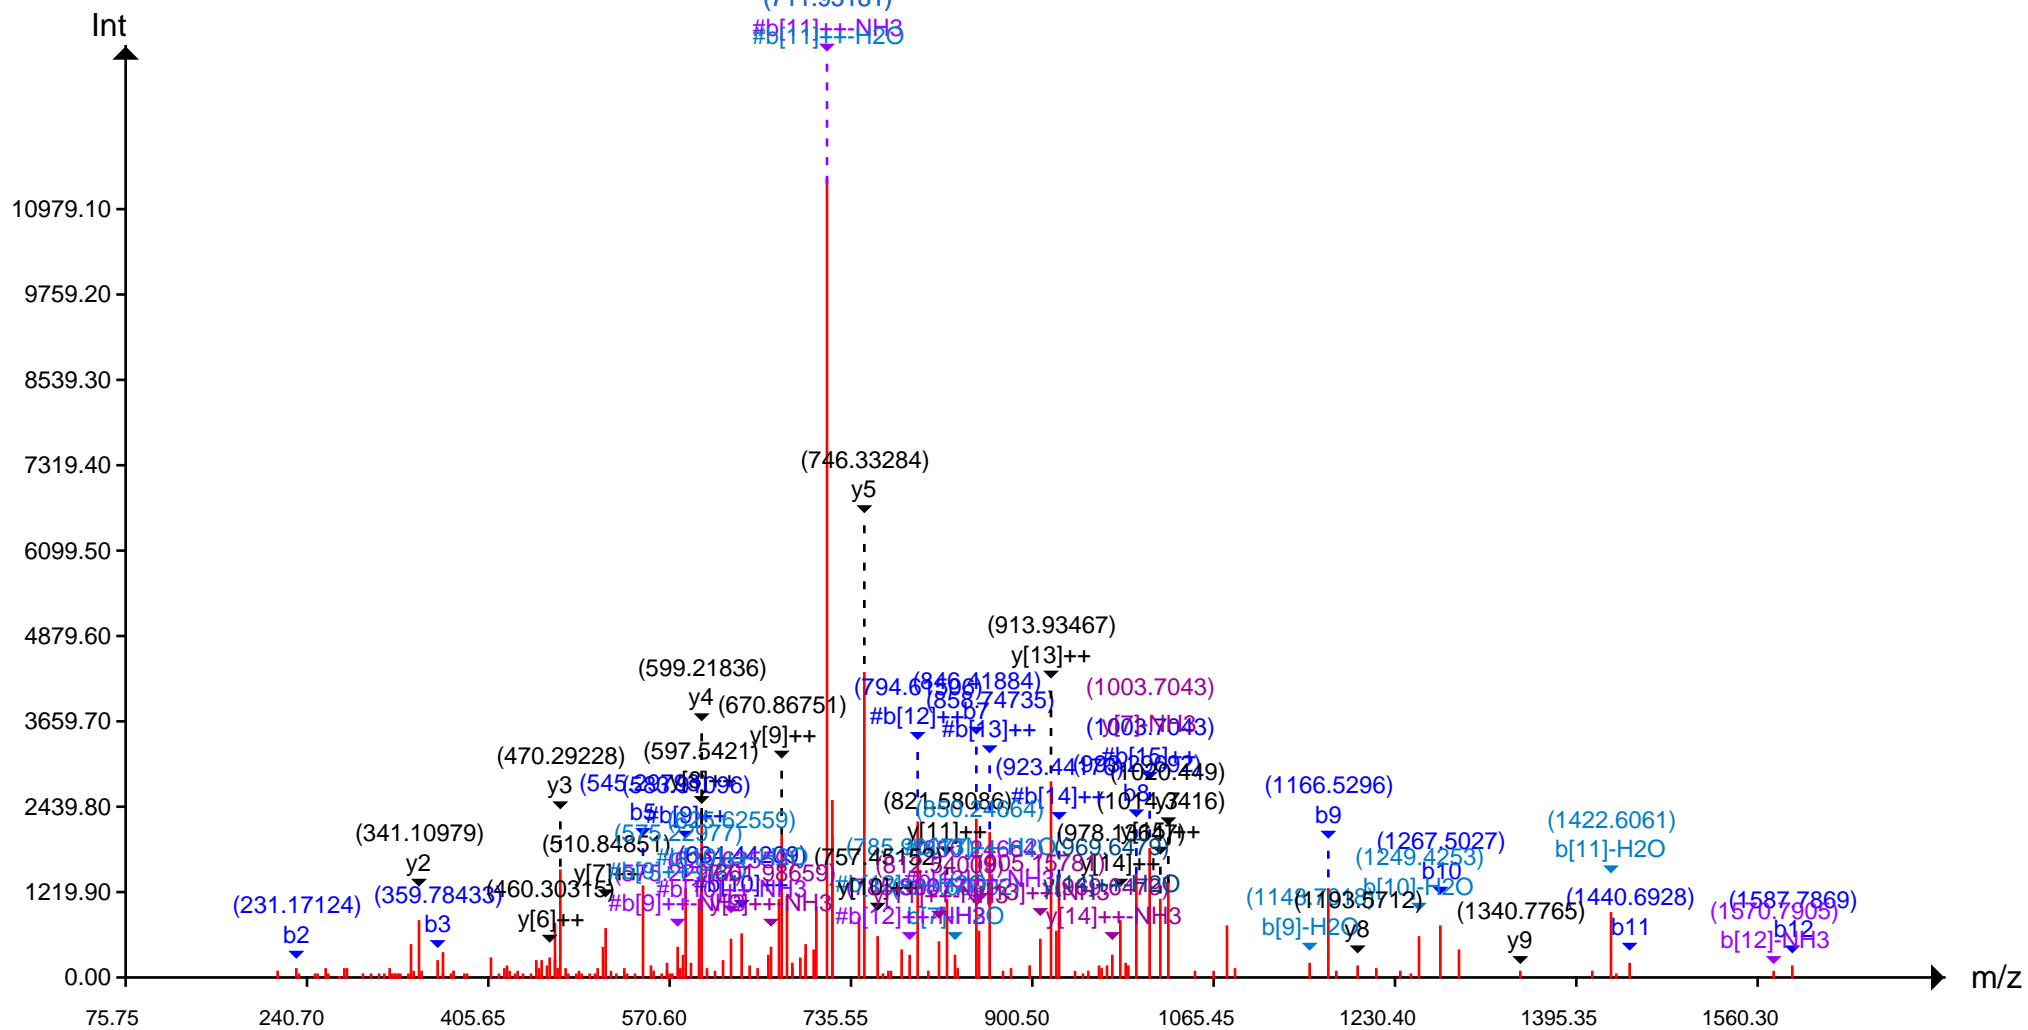

## Info

|                          |                                                               |                           |          |
|--------------------------|---------------------------------------------------------------|---------------------------|----------|
| <b>Modified Sequence</b> | AcD3-NAENAQK<AcD3K*>FK<AcD3K*>TK<AcD3K*>FEEC<Cmm*>R<C13>-COOH | <b>Ion score</b>          | 58.45    |
| <b>Protein</b>           | P34022                                                        | <b>Confidence level</b>   | 99.00%   |
| <b>Precursor m/z</b>     | 729.37309                                                     | <b>Identity Threshold</b> | 47.94    |
| <b>Charge</b>            | 3+                                                            | <b>Mass error</b>         | 0.001586 |



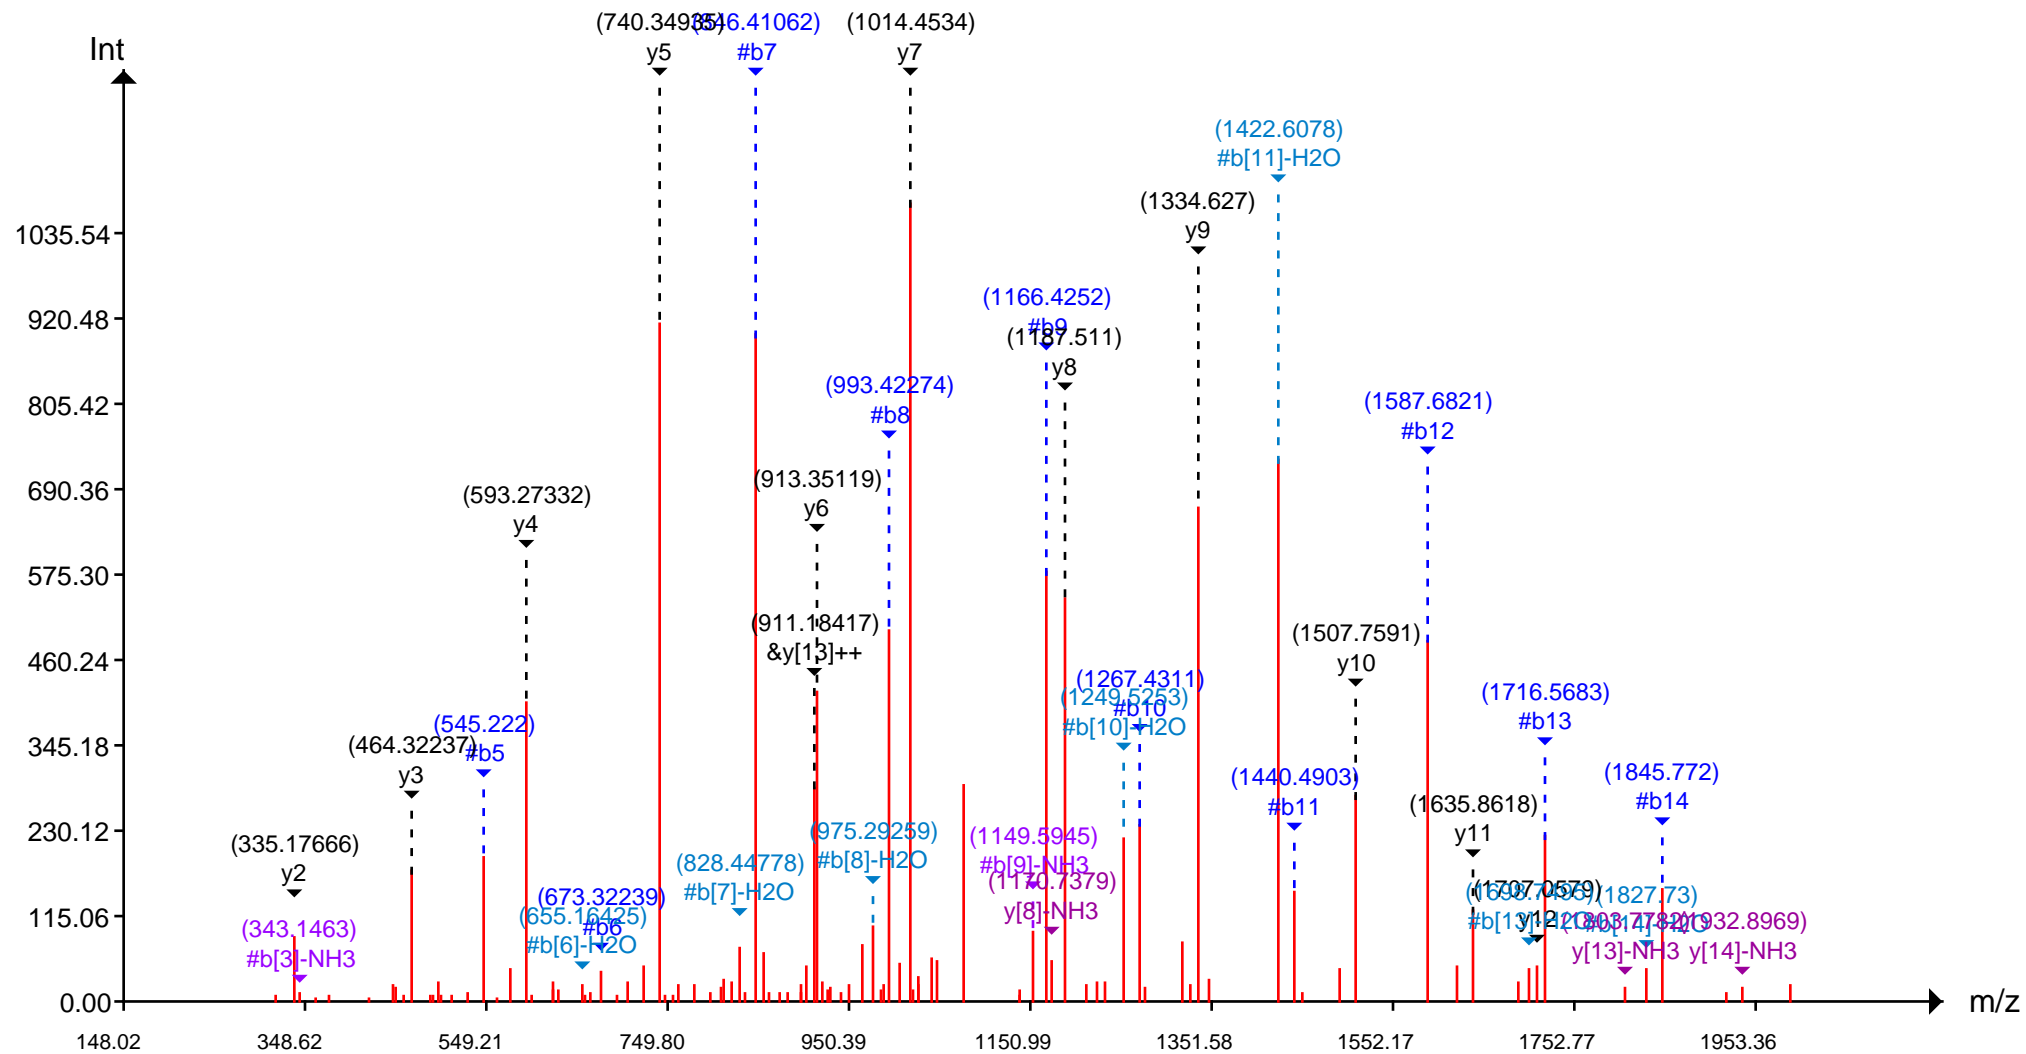

## Info

|                          |                                                          |                           |          |
|--------------------------|----------------------------------------------------------|---------------------------|----------|
| <b>Modified Sequence</b> | AcD3-NAENAQK<AcD3K*>FK<AcD3K*>TK<AcD3K*>FEEC<Cmm*>R-COOH | <b>Ion score</b>          | 98.2     |
| <b>Protein</b>           | P34022                                                   | <b>Confidence level</b>   | 99.00%   |
| <b>Precursor m/z</b>     | 1090.5467                                                | <b>Identity Threshold</b> | 47.74    |
| <b>Charge</b>            | 2+                                                       | <b>Mass error</b>         | 0.003134 |

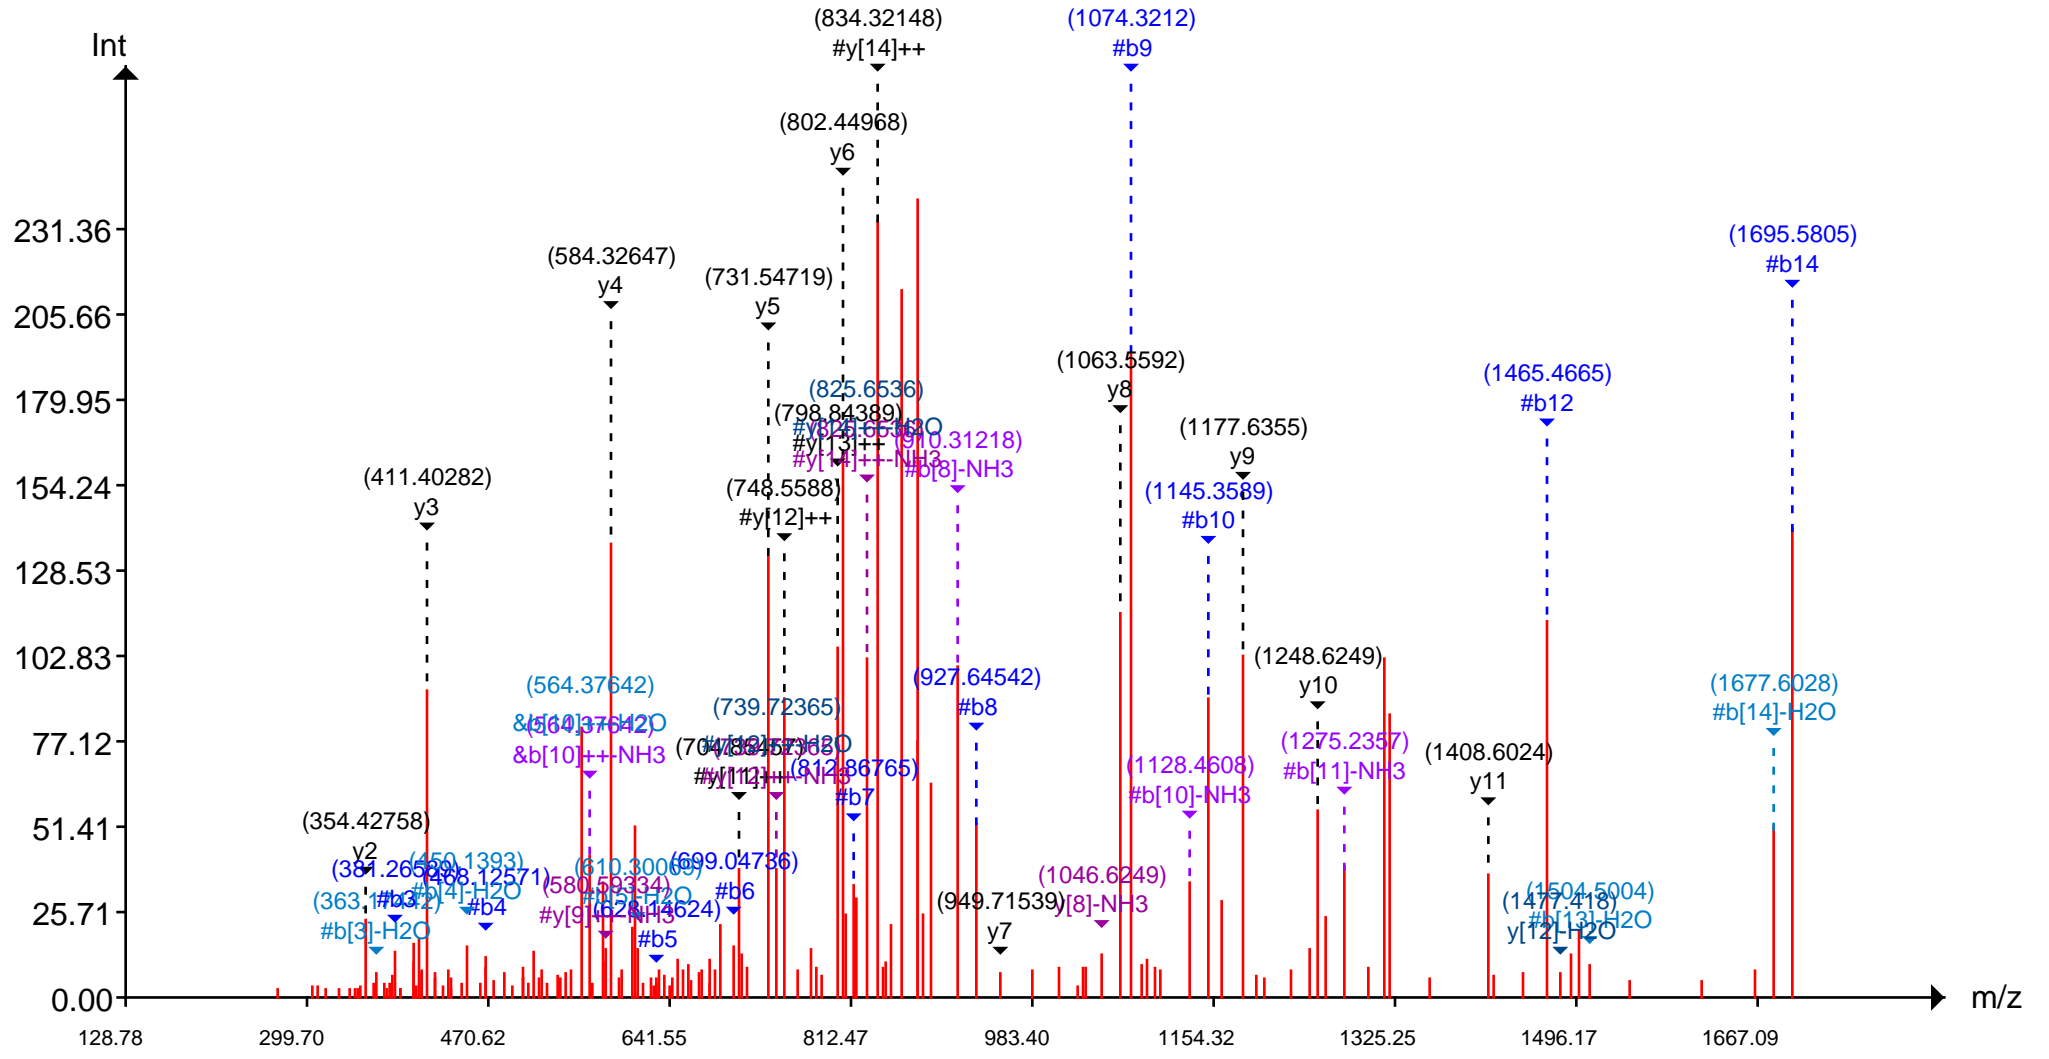

Info

|                          |                                                            |                           |          |
|--------------------------|------------------------------------------------------------|---------------------------|----------|
| <b>Modified Sequence</b> | AcD3-YATSC<Cmm*>ANNFAM<Mox*>K<AcD3K*>GK<AcD3K*>R<C13>-COOH | <b>Ion score</b>          | 48.54    |
| <b>Protein</b>           | Q9JKP7                                                     | <b>Confidence level</b>   | 99.00%   |
| <b>Precursor m/z</b>     | 938.46143                                                  | <b>Identity Threshold</b> | 47.23    |
| <b>Charge</b>            | 2+                                                         | <b>Mass error</b>         | 0.002241 |

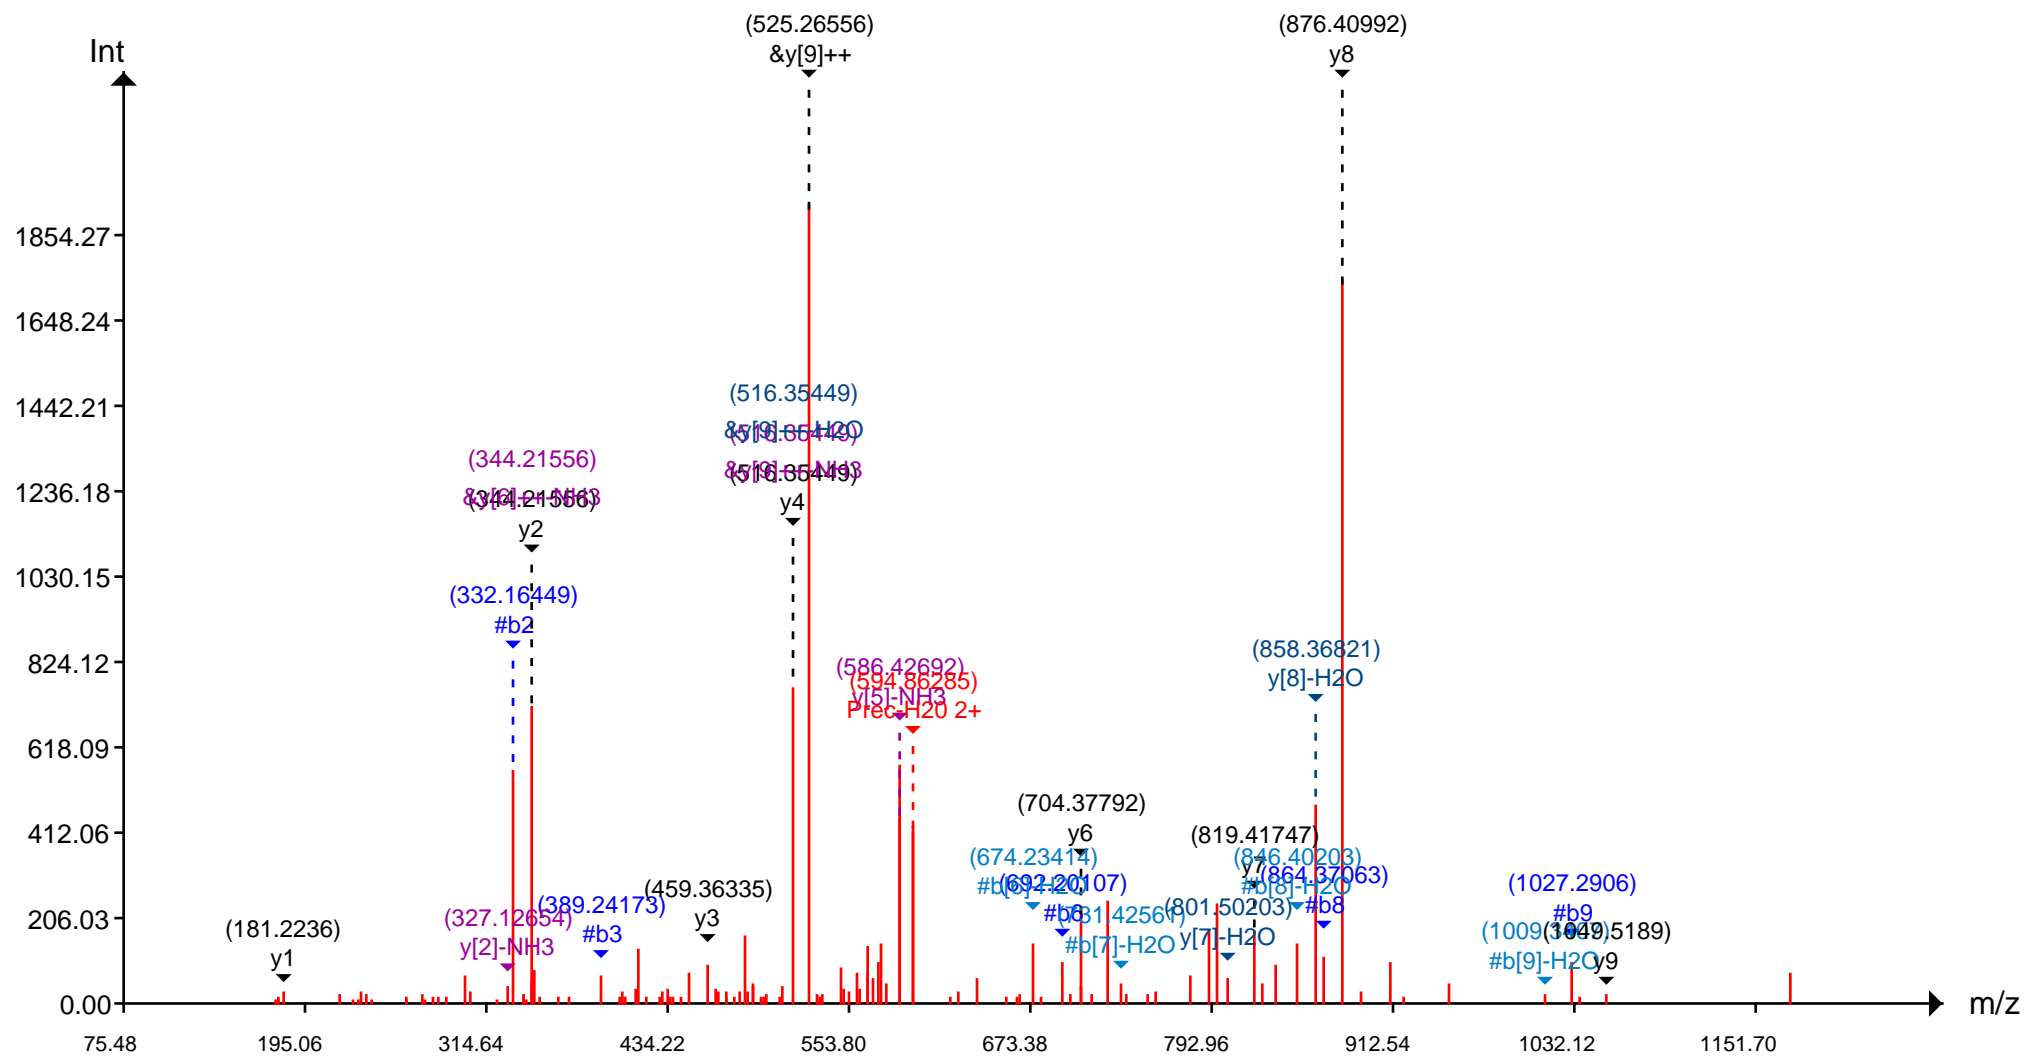

## Info

|                          |                                   |                           |         |
|--------------------------|-----------------------------------|---------------------------|---------|
| <b>Modified Sequence</b> | AcD3-IK<AcD3K*>GDTSGDYR<C13>-COOH | <b>Ion score</b>          | 57.54   |
| <b>Protein</b>           | P97429                            | <b>Confidence level</b>   | 99.00%  |
| <b>Precursor m/z</b>     | 604.31199                         | <b>Identity Threshold</b> | 47.92   |
| <b>Charge</b>            | 2+                                | <b>Mass error</b>         | -5.4E-5 |

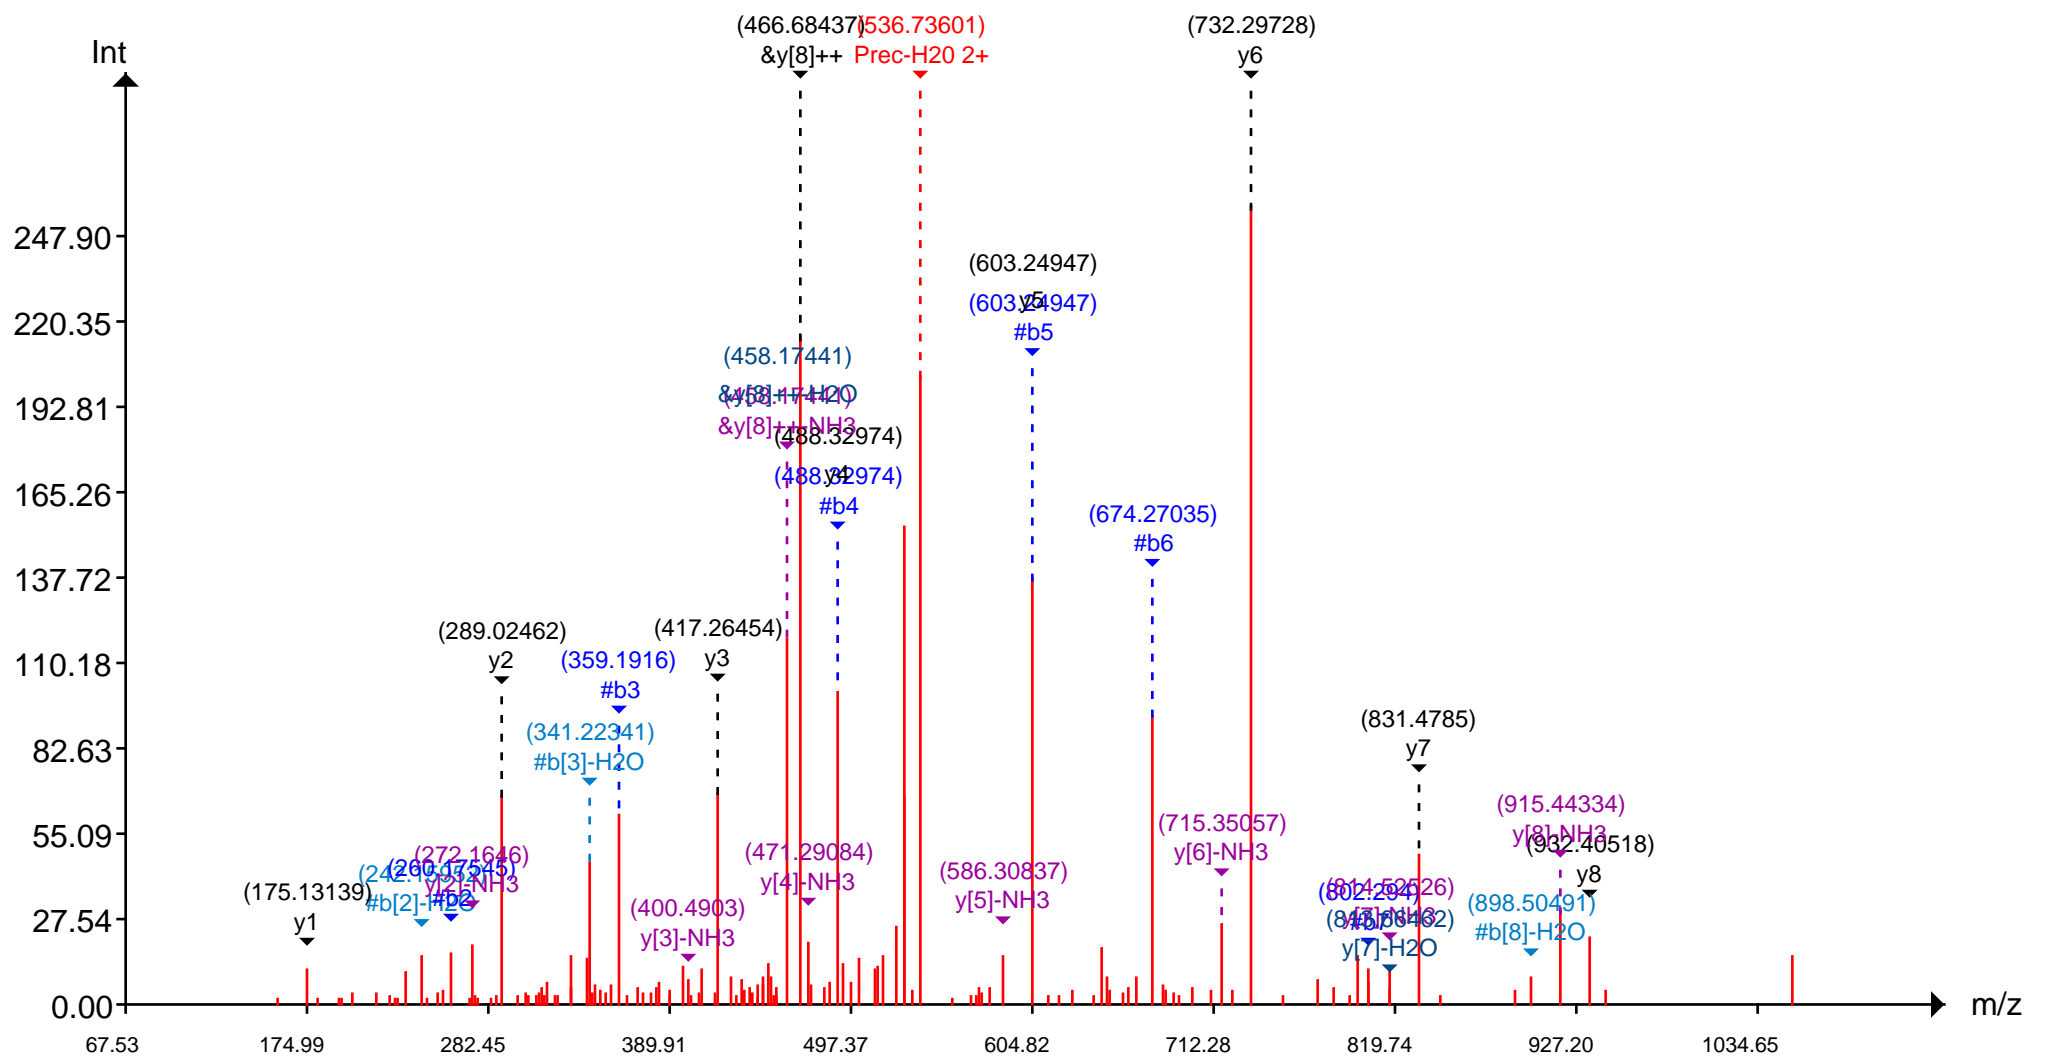

Info

|                          |                     |                           |         |
|--------------------------|---------------------|---------------------------|---------|
| <b>Modified Sequence</b> | AcD3-ITVEDAQNR-COOH | <b>Ion score</b>          | 59.04   |
| <b>Protein</b>           | Q9QYS9              | <b>Confidence level</b>   | 99.00%  |
| <b>Precursor m/z</b>     | 545.78202           | <b>Identity Threshold</b> | 47.56   |
| <b>Charge</b>            | 2+                  | <b>Mass error</b>         | 1.26E-4 |

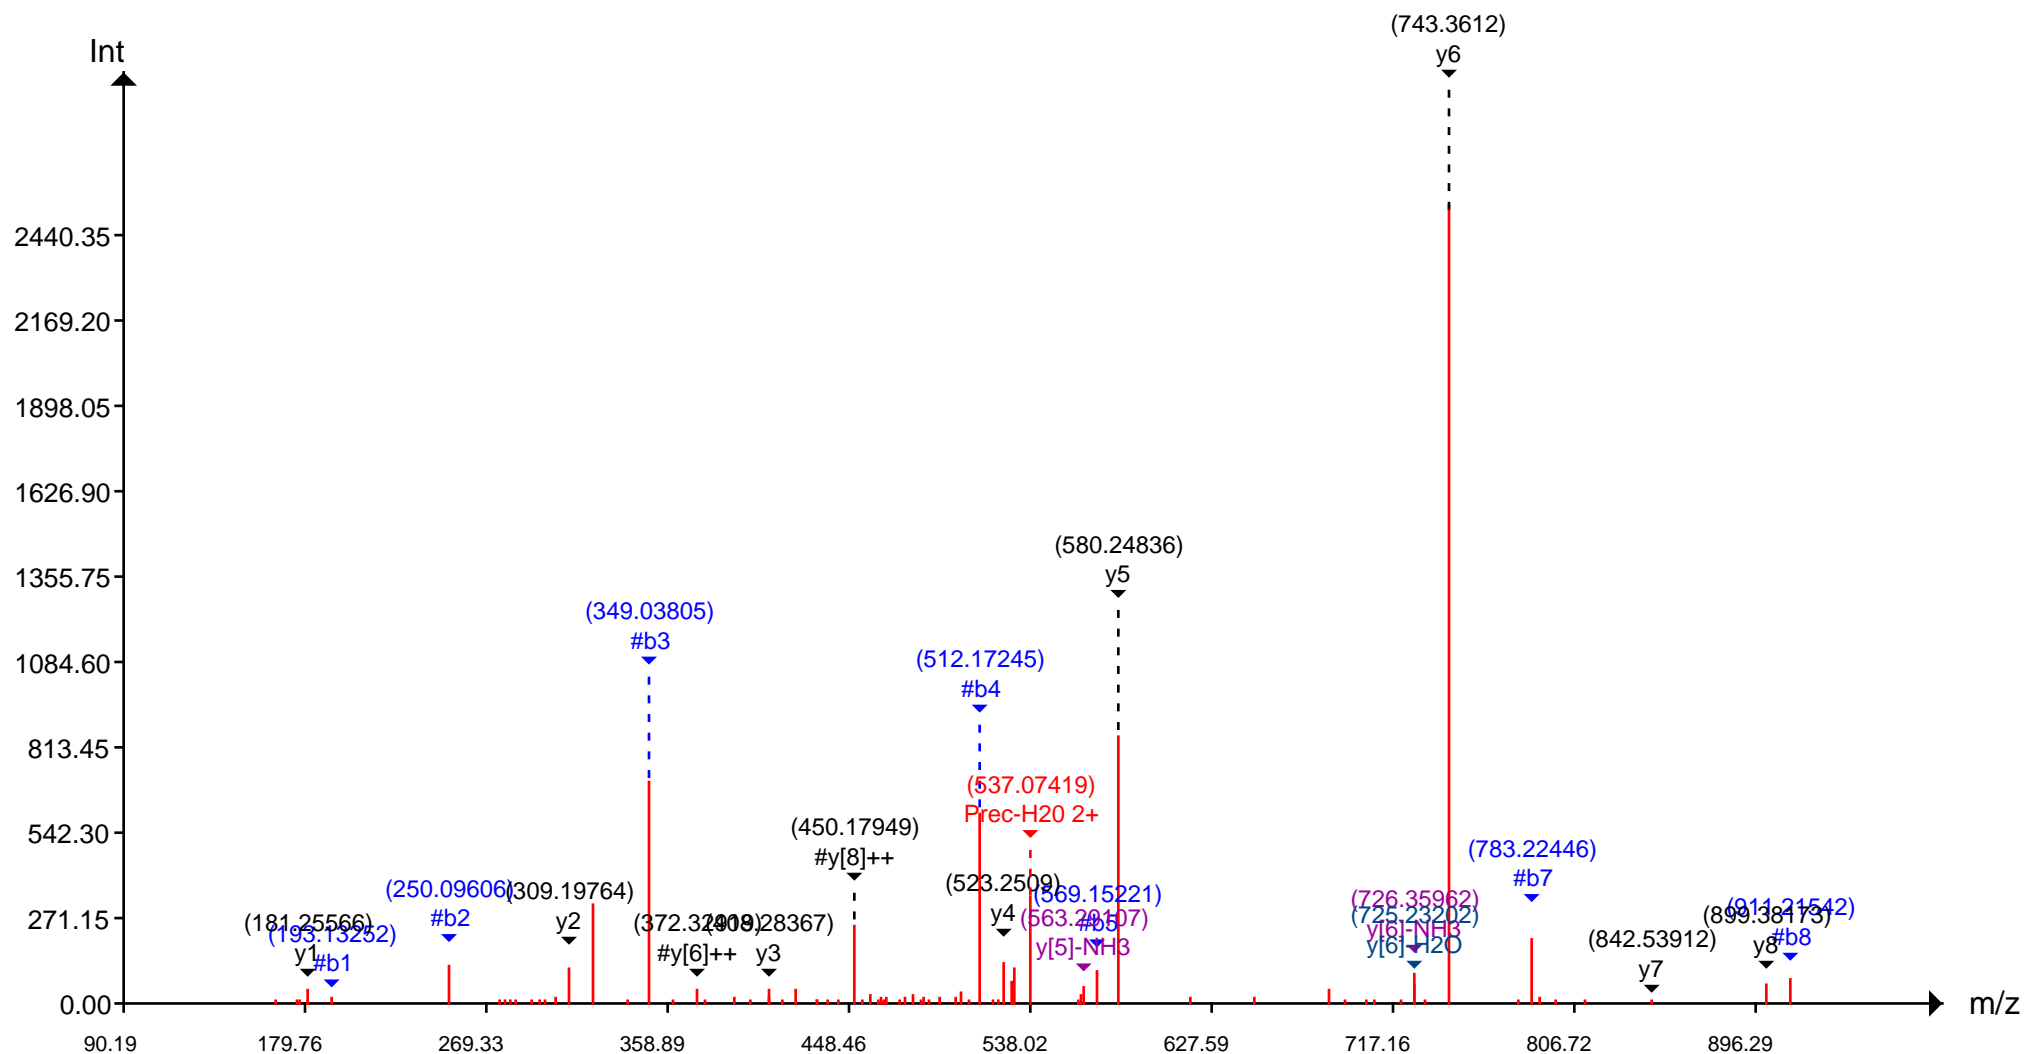

## Info

**Modified Sequence** AcD3-FGVYGDVQR<C13>-COOH

**Ion score** 78.54

**Protein** P17225, Q91Z31

**Confidence level** 99.00%

**Precursor m/z** 546.28668

**Identity Threshold** 47.94

**Charge** 2+

**Mass error** 5.65E-4

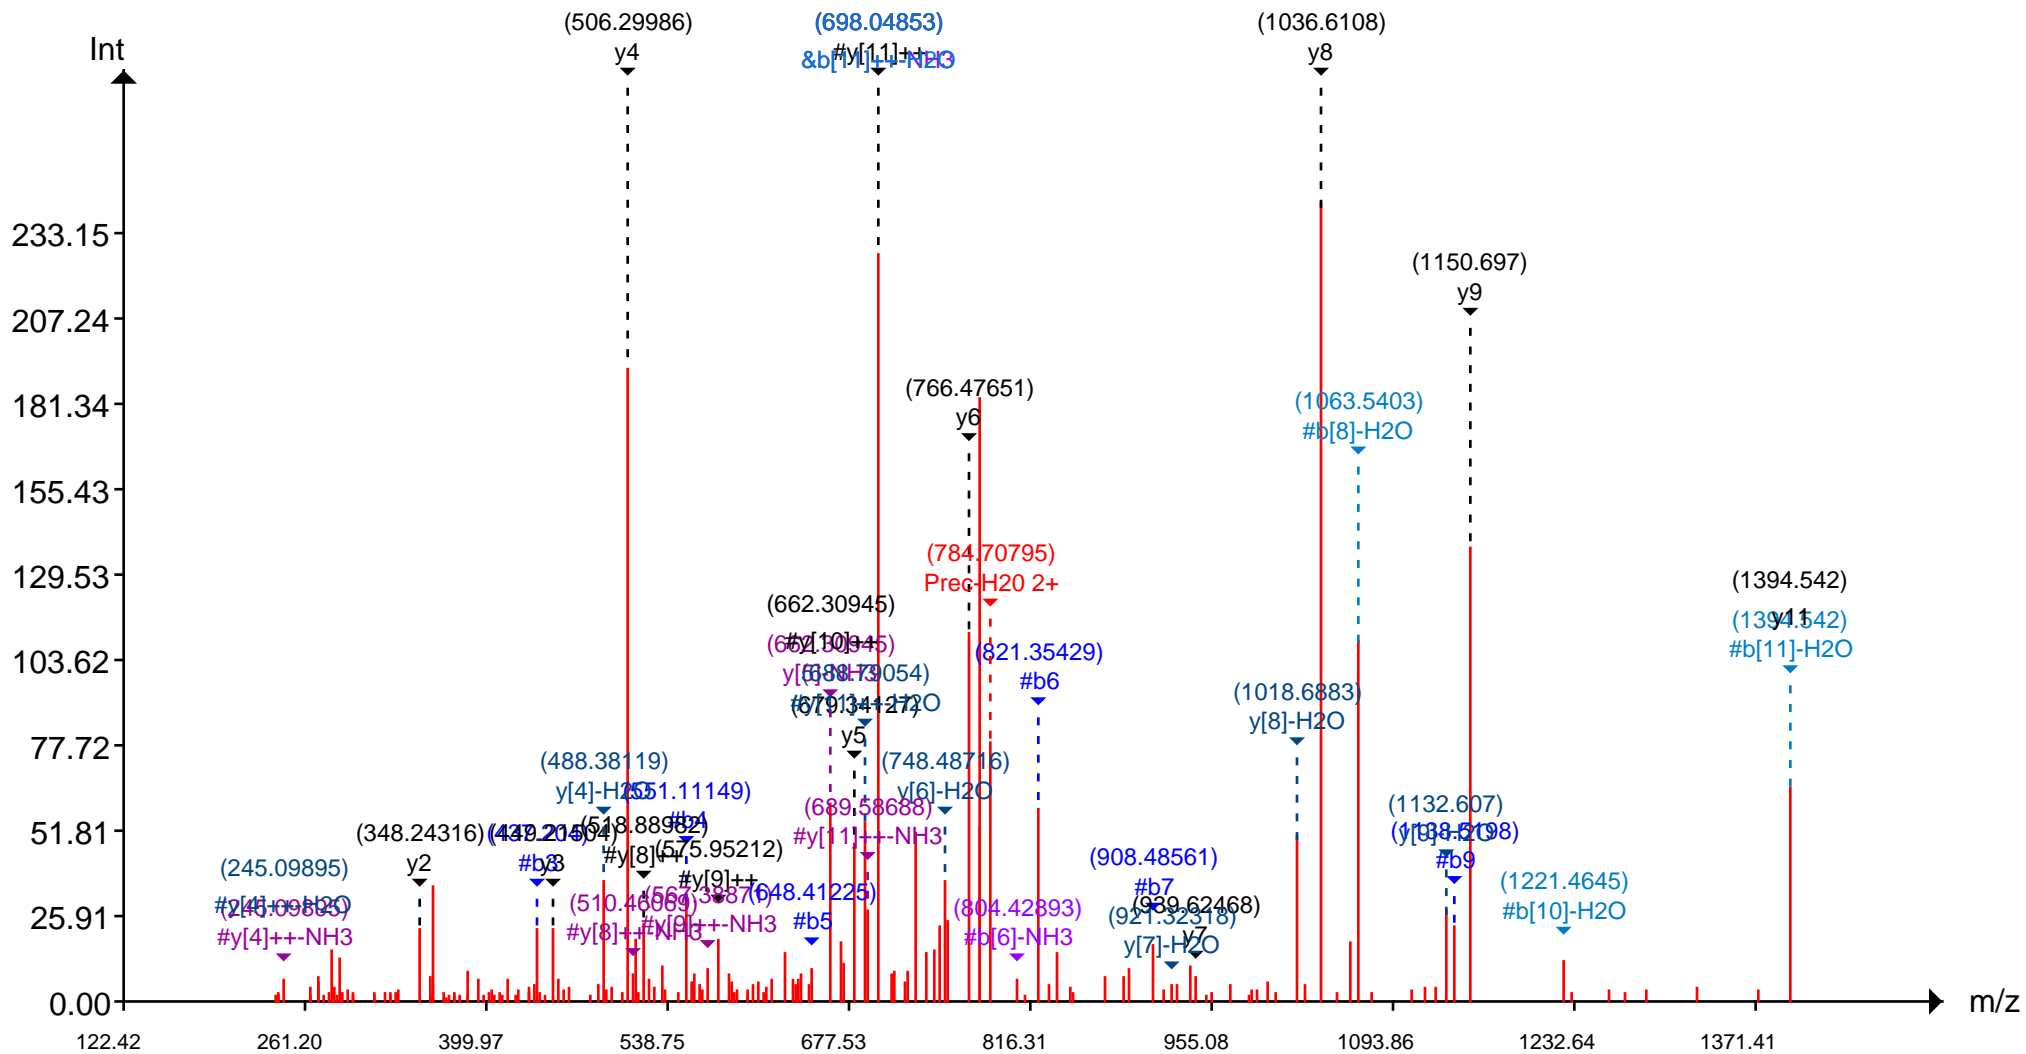

## Info

|                          |                                                        |                           |          |
|--------------------------|--------------------------------------------------------|---------------------------|----------|
| <b>Modified Sequence</b> | AcD3-FAK<AcD3K*>NPK<AcD3K*>SK<AcD3K*>GTK<AcD3K*>R-COOH | <b>Ion score</b>          | 48.13    |
| <b>Protein</b>           | Q9D554                                                 | <b>Confidence level</b>   | 99.00%   |
| <b>Precursor m/z</b>     | 793.9786                                               | <b>Identity Threshold</b> | 42.99    |
| <b>Charge</b>            | 2+                                                     | <b>Mass error</b>         | 0.001761 |

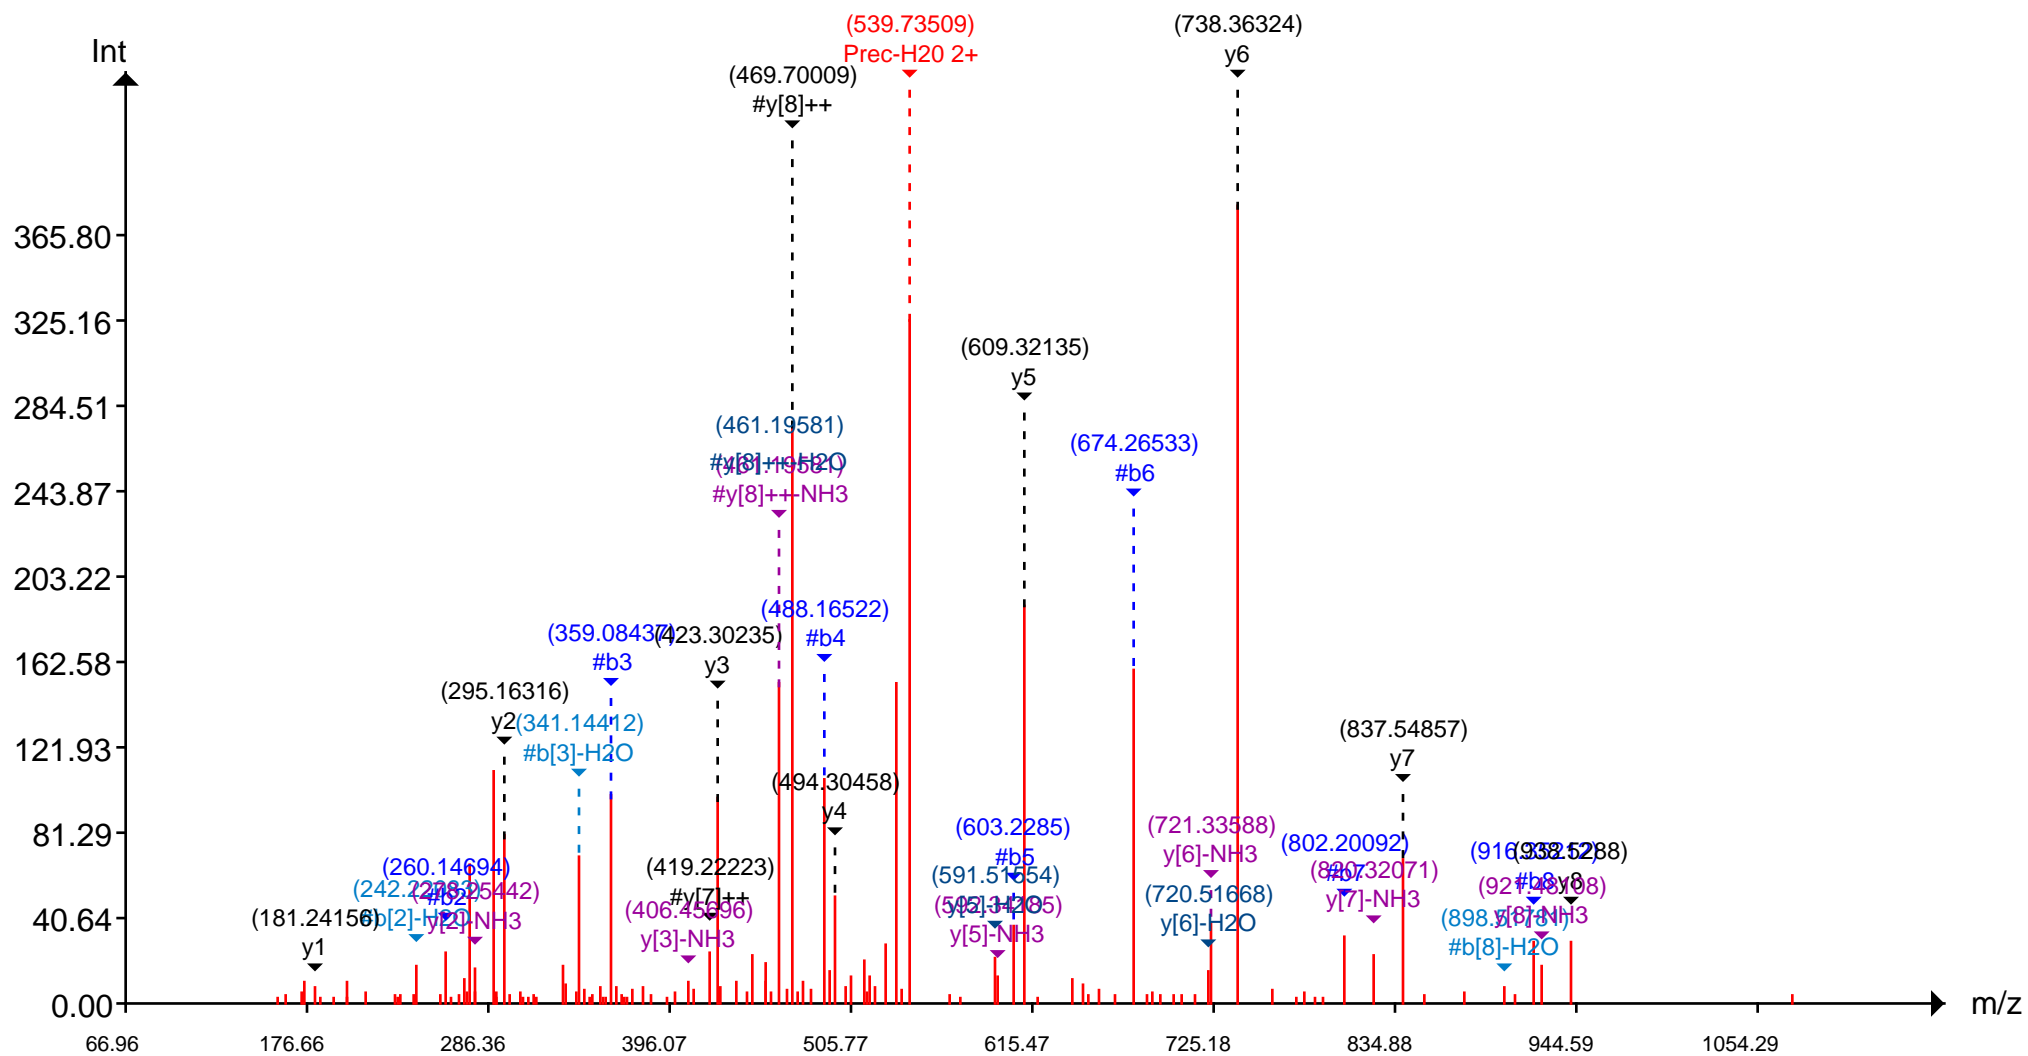

## Info

**Modified Sequence** AcD3-ITVEDAQNR<C13>-COOH

**Ion score** 57.11

**Protein** Q9QYS9

**Confidence level** 99.00%

**Precursor m/z** 548.79211

**Identity Threshold** 47.54

**Charge** 2+

**Mass error** 1.64E-4

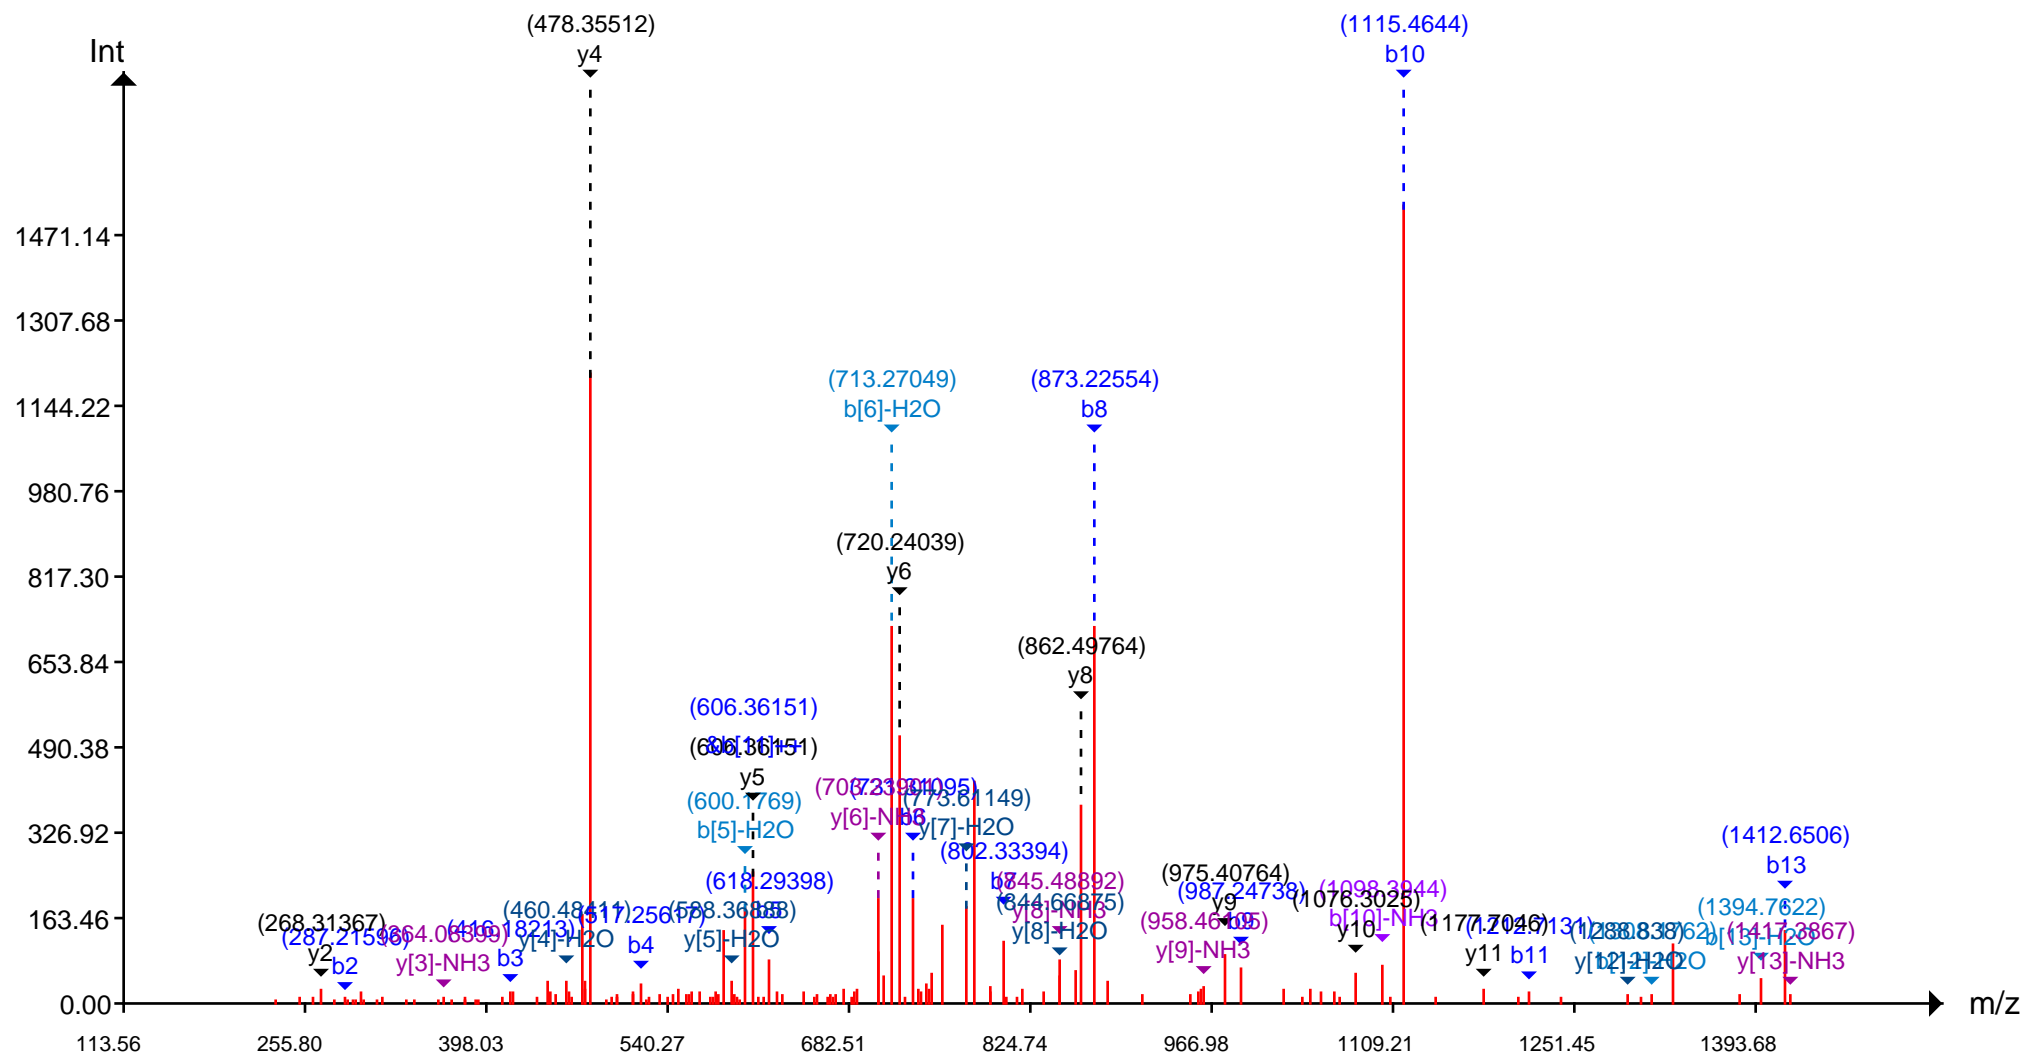

## Info

**Modified Sequence** AcD3-LQETTLAANQPLSR<C13>-COOH

**Ion score** 73.29

**Protein** O09159

**Confidence level** 99.00%

**Precursor m/z** 796.94356

**Identity Threshold** 47.35

**Charge** 2+

**Mass error** 0.002146



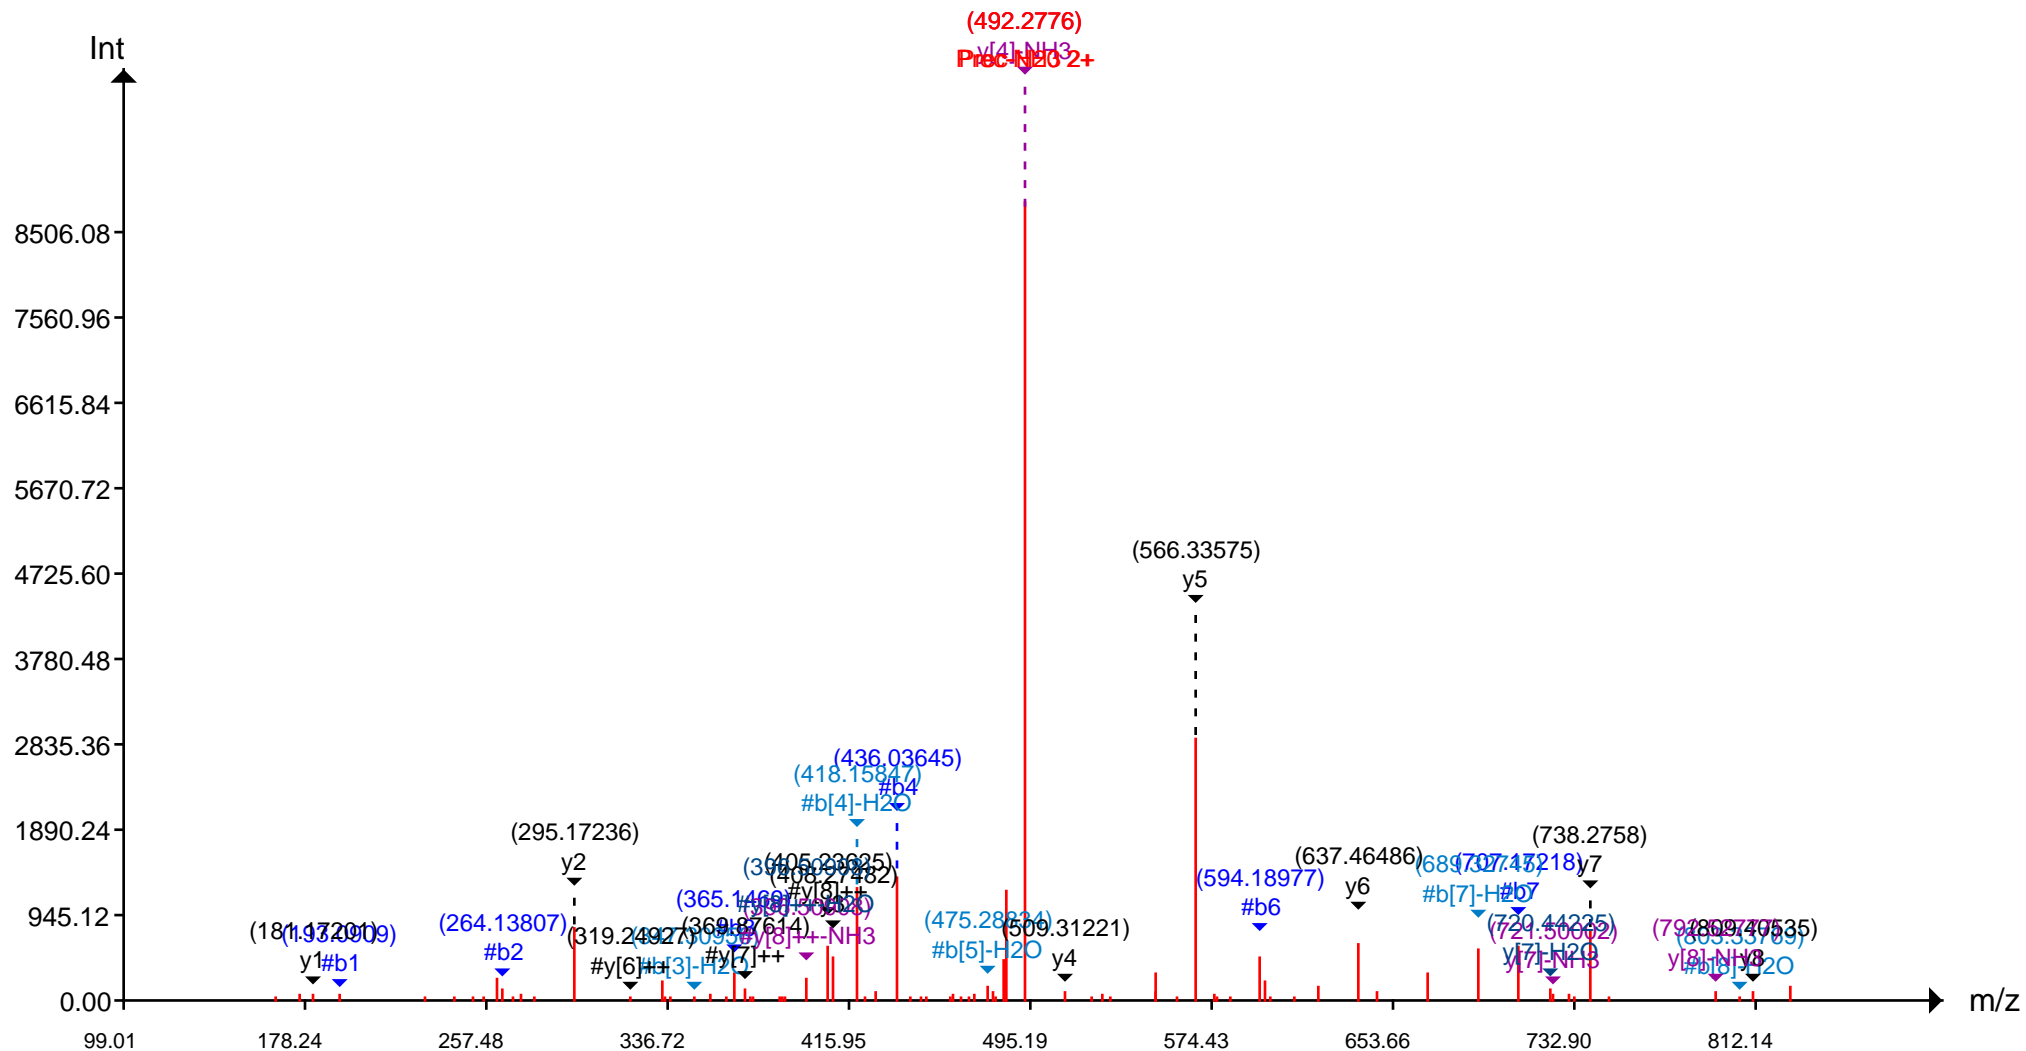

## Info

|                          |                          |                           |         |
|--------------------------|--------------------------|---------------------------|---------|
| <b>Modified Sequence</b> | AcD3-FATAGTLNR<C13>-COOH | <b>Ion score</b>          | 60.16   |
| <b>Protein</b>           | P26039                   | <b>Confidence level</b>   | 99.00%  |
| <b>Precursor m/z</b>     | 501.28124                | <b>Identity Threshold</b> | 47.99   |
| <b>Charge</b>            | 2+                       | <b>Mass error</b>         | 2.75E-4 |

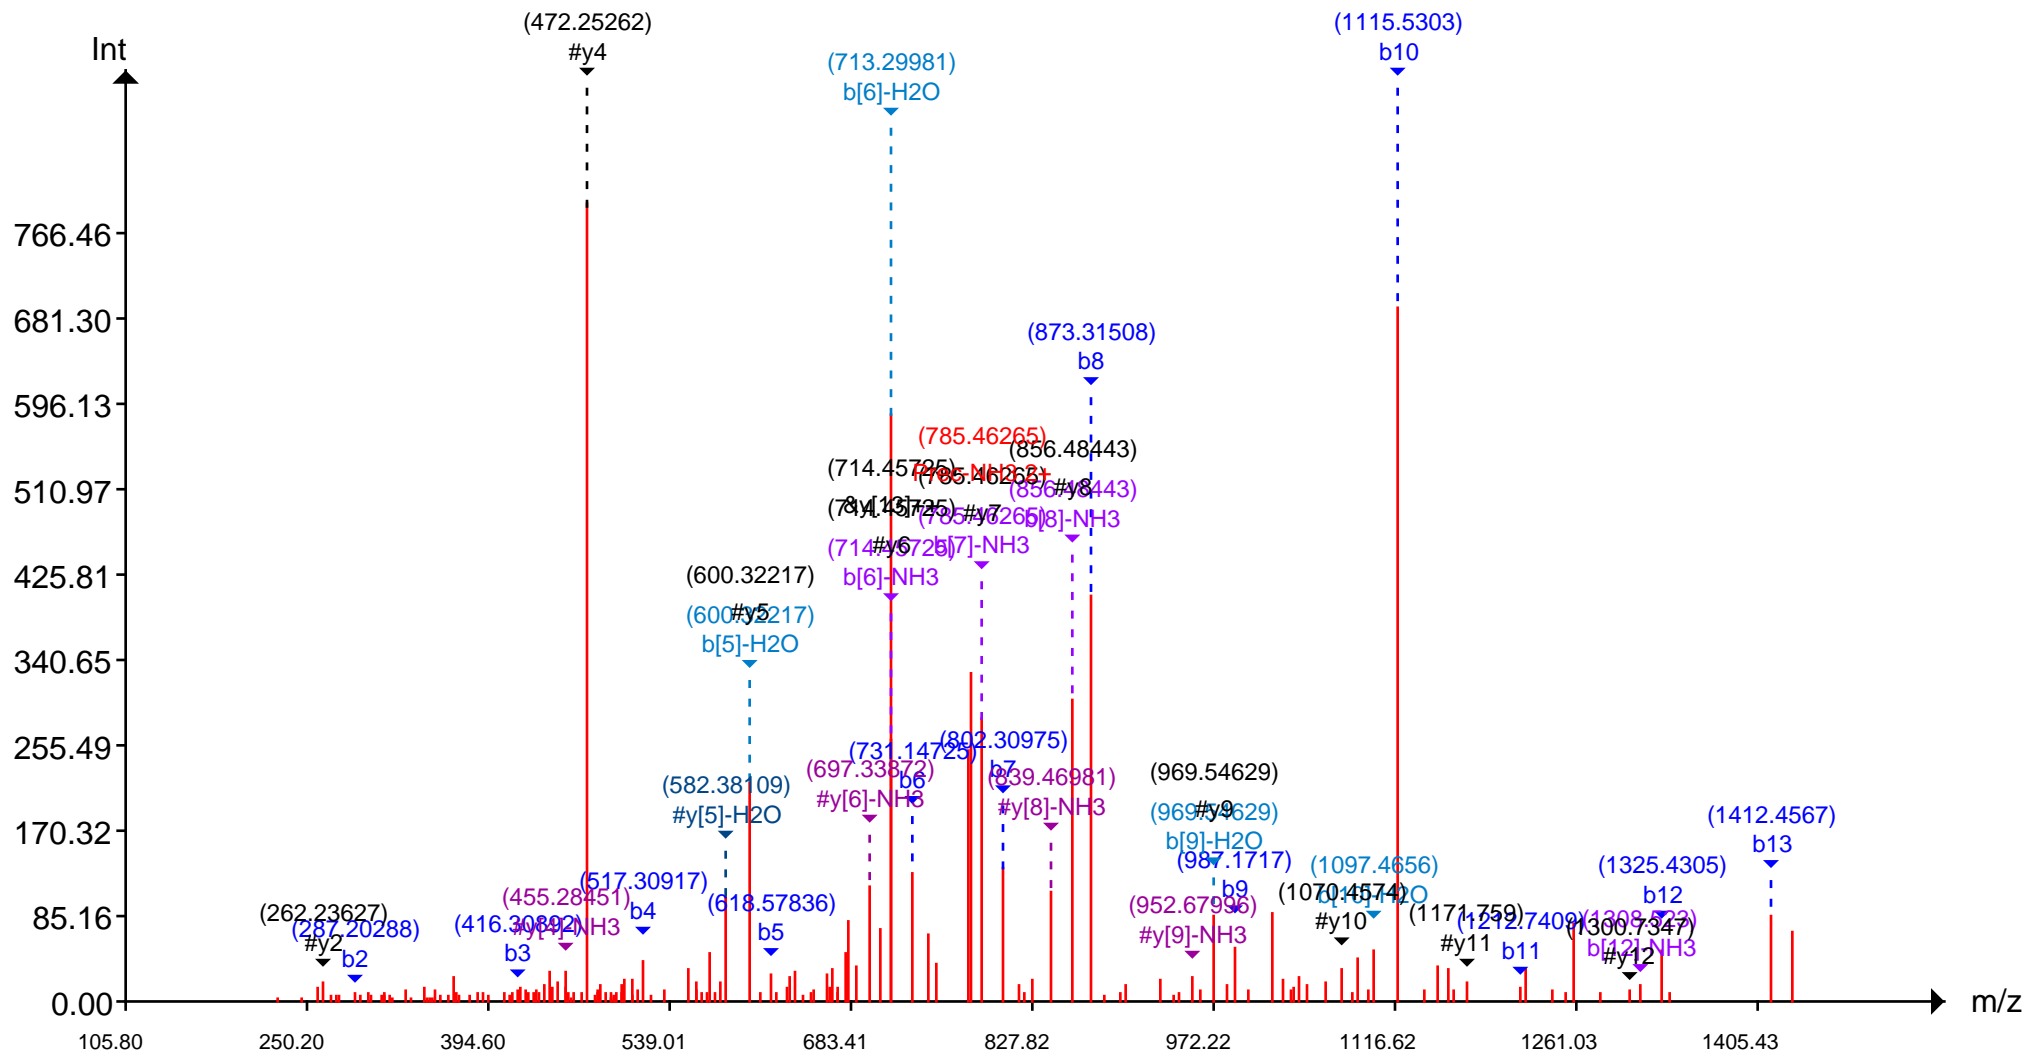

## Info

|                          |                          |                           |          |
|--------------------------|--------------------------|---------------------------|----------|
| <b>Modified Sequence</b> | AcD3-LQETTLAANQPLSR-COOH | <b>Ion score</b>          | 81.66    |
| <b>Protein</b>           | O09159                   | <b>Confidence level</b>   | 99.00%   |
| <b>Precursor m/z</b>     | 793.93339                | <b>Identity Threshold</b> | 47.81    |
| <b>Charge</b>            | 2+                       | <b>Mass error</b>         | 0.001947 |

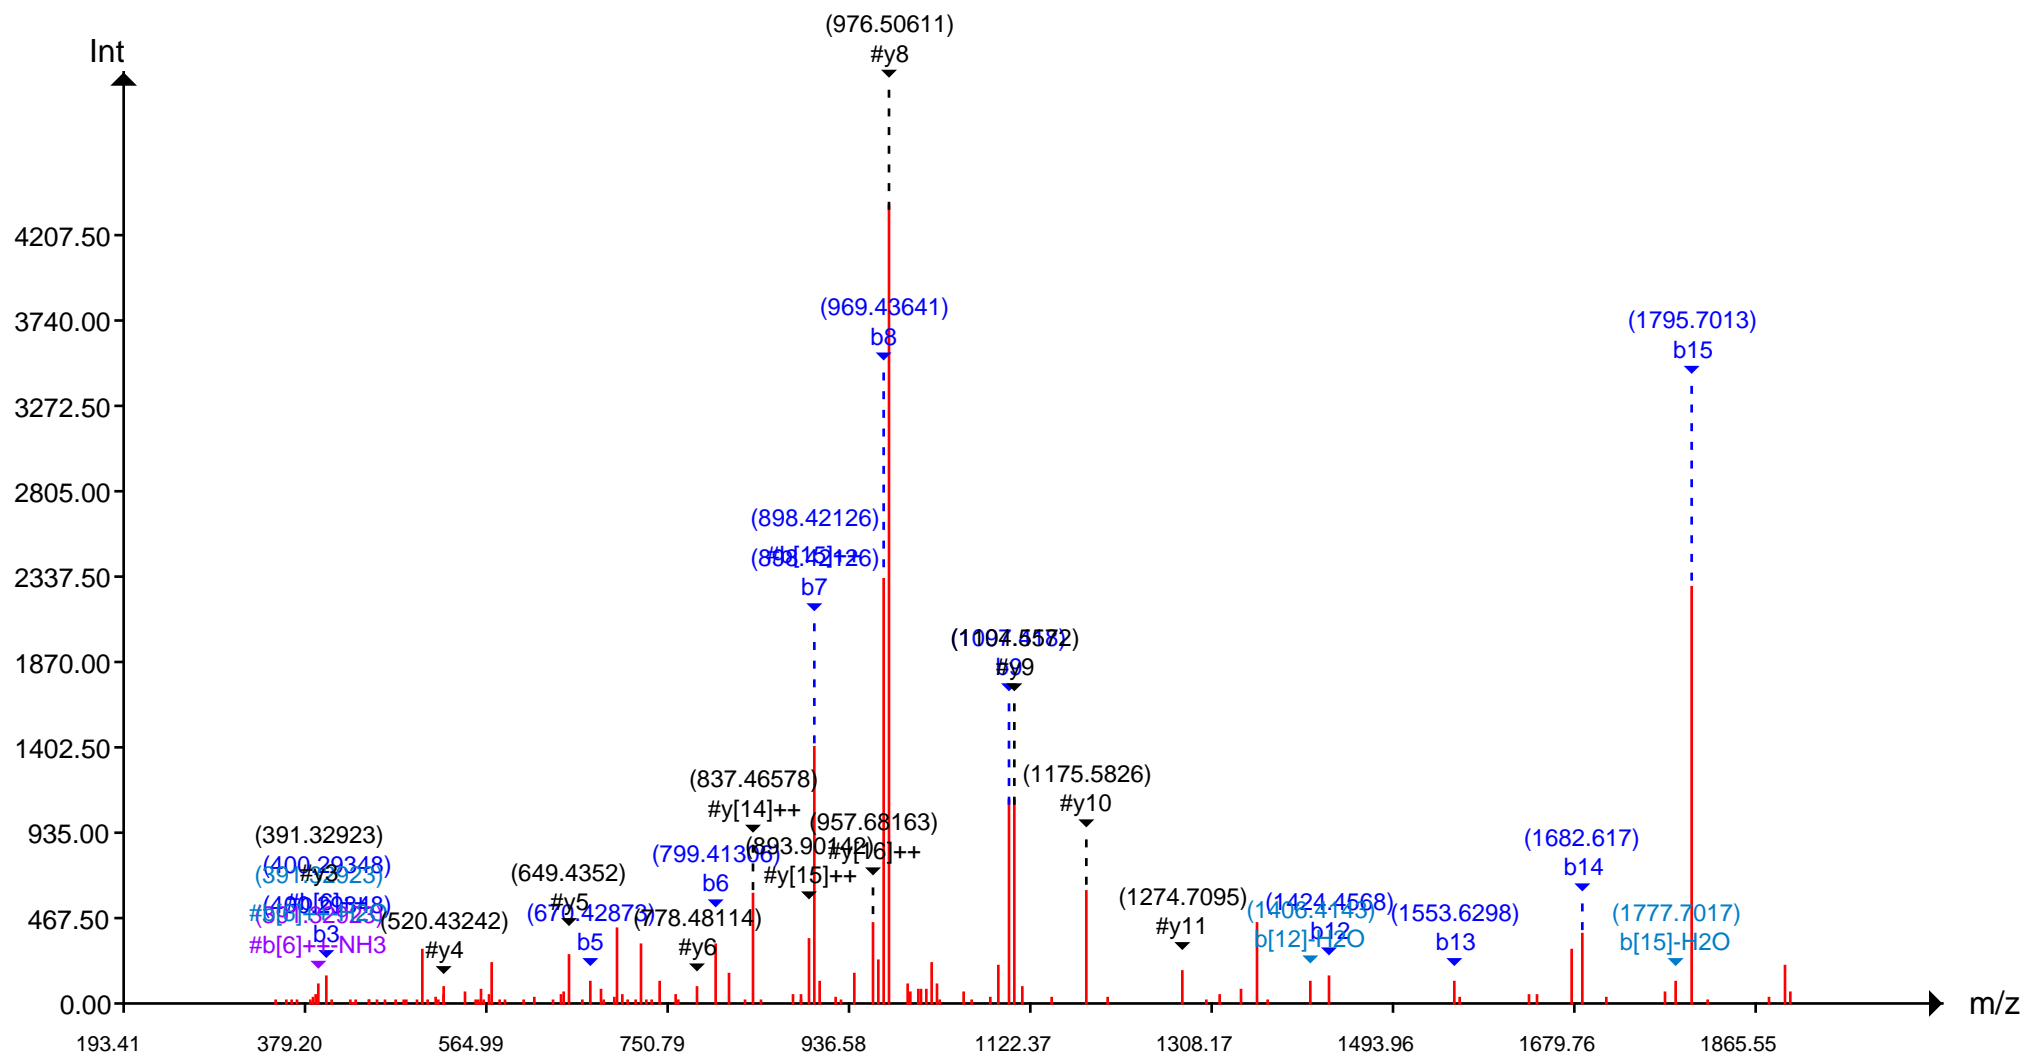

## Info

|                          |                                          |                           |          |
|--------------------------|------------------------------------------|---------------------------|----------|
| <b>Modified Sequence</b> | AcD3-LQLPK<AcD3K*>EVAQPTEEELPR<C13>-COOH | <b>Ion score</b>          | 56.07    |
| <b>Protein</b>           | Q9ERD8                                   | <b>Confidence level</b>   | 99.00%   |
| <b>Precursor m/z</b>     | 1037.0769                                | <b>Identity Threshold</b> | 46.54    |
| <b>Charge</b>            | 2+                                       | <b>Mass error</b>         | 0.002499 |

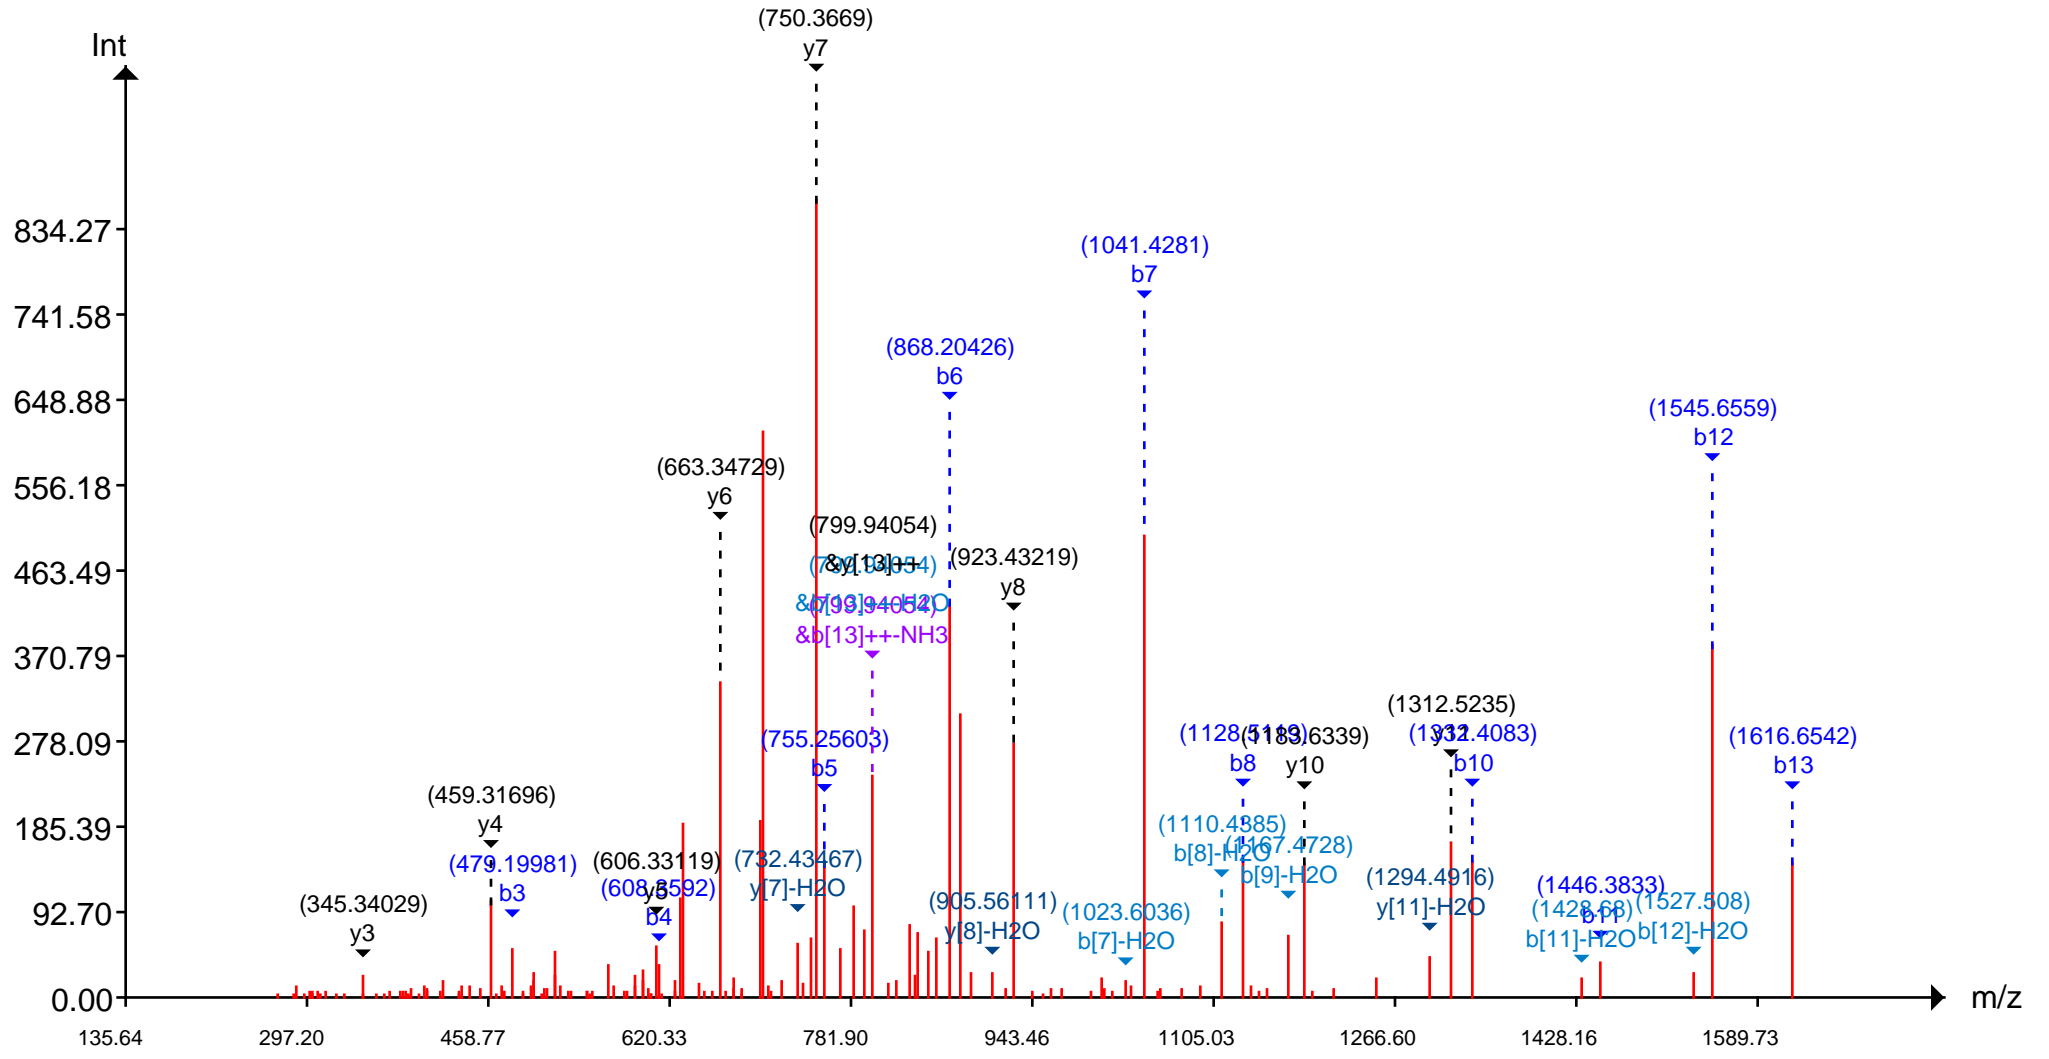

Info

|                          |                                                            |                           |          |
|--------------------------|------------------------------------------------------------|---------------------------|----------|
| <b>Modified Sequence</b> | AcD3-M<Mox*>LK<AcD3K*>EM<Mox*>IK<AcD3K*>SGM<Mox*>NVAR-COOH | <b>Ion score</b>          | 77.89    |
| <b>Protein</b>           | P52480                                                     | <b>Confidence level</b>   | 99.00%   |
| <b>Precursor m/z</b>     | 895.96239                                                  | <b>Identity Threshold</b> | 48.14    |
| <b>Charge</b>            | 2+                                                         | <b>Mass error</b>         | 0.001598 |

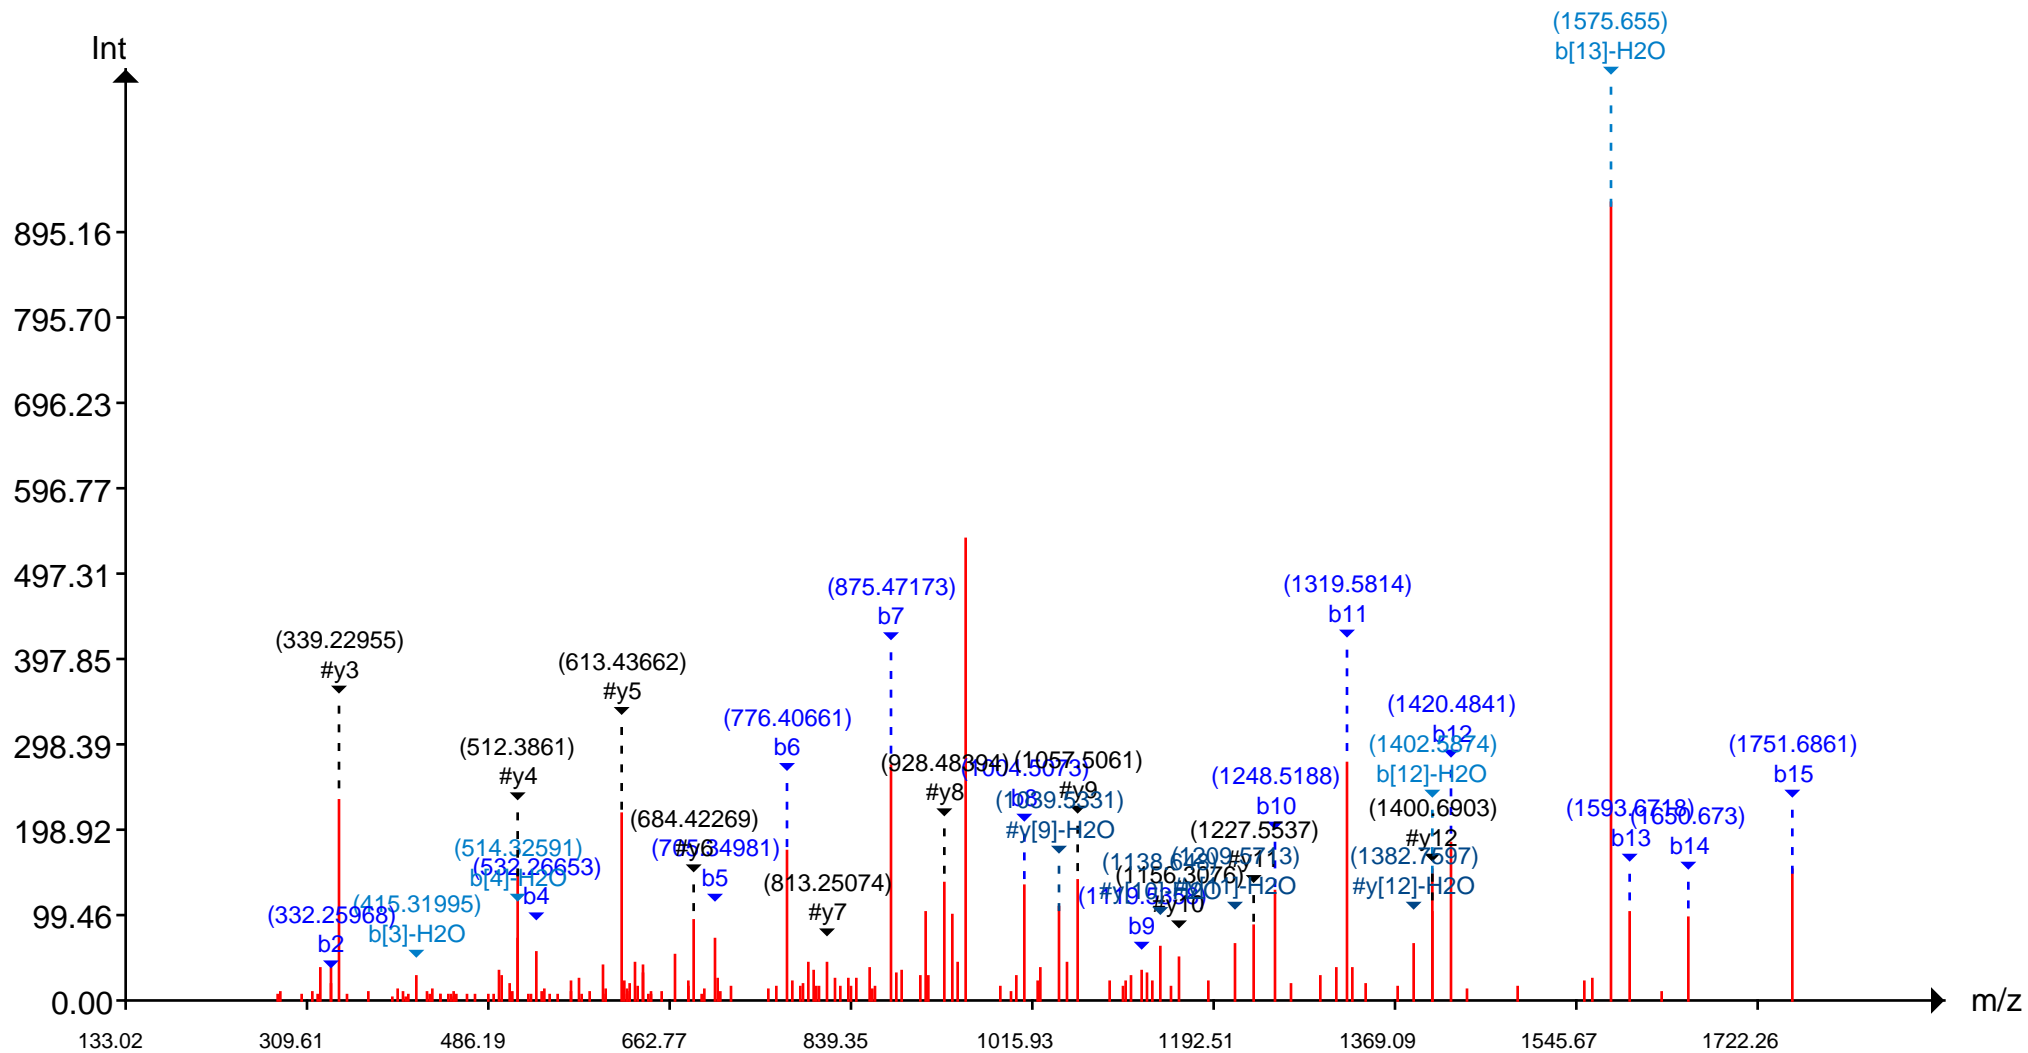

## Info

|                          |                                                         |                           |          |
|--------------------------|---------------------------------------------------------|---------------------------|----------|
| <b>Modified Sequence</b> | AcD3-LK<AcD3K*>TVK<AcD3K*>AVEDEATK<AcD3K*>GTR<C13>-COOH | <b>Ion score</b>          | 106.18   |
| <b>Protein</b>           | P26039                                                  | <b>Confidence level</b>   | 99.00%   |
| <b>Precursor m/z</b>     | 966.56146                                               | <b>Identity Threshold</b> | 44.42    |
| <b>Charge</b>            | 2+                                                      | <b>Mass error</b>         | 0.002335 |

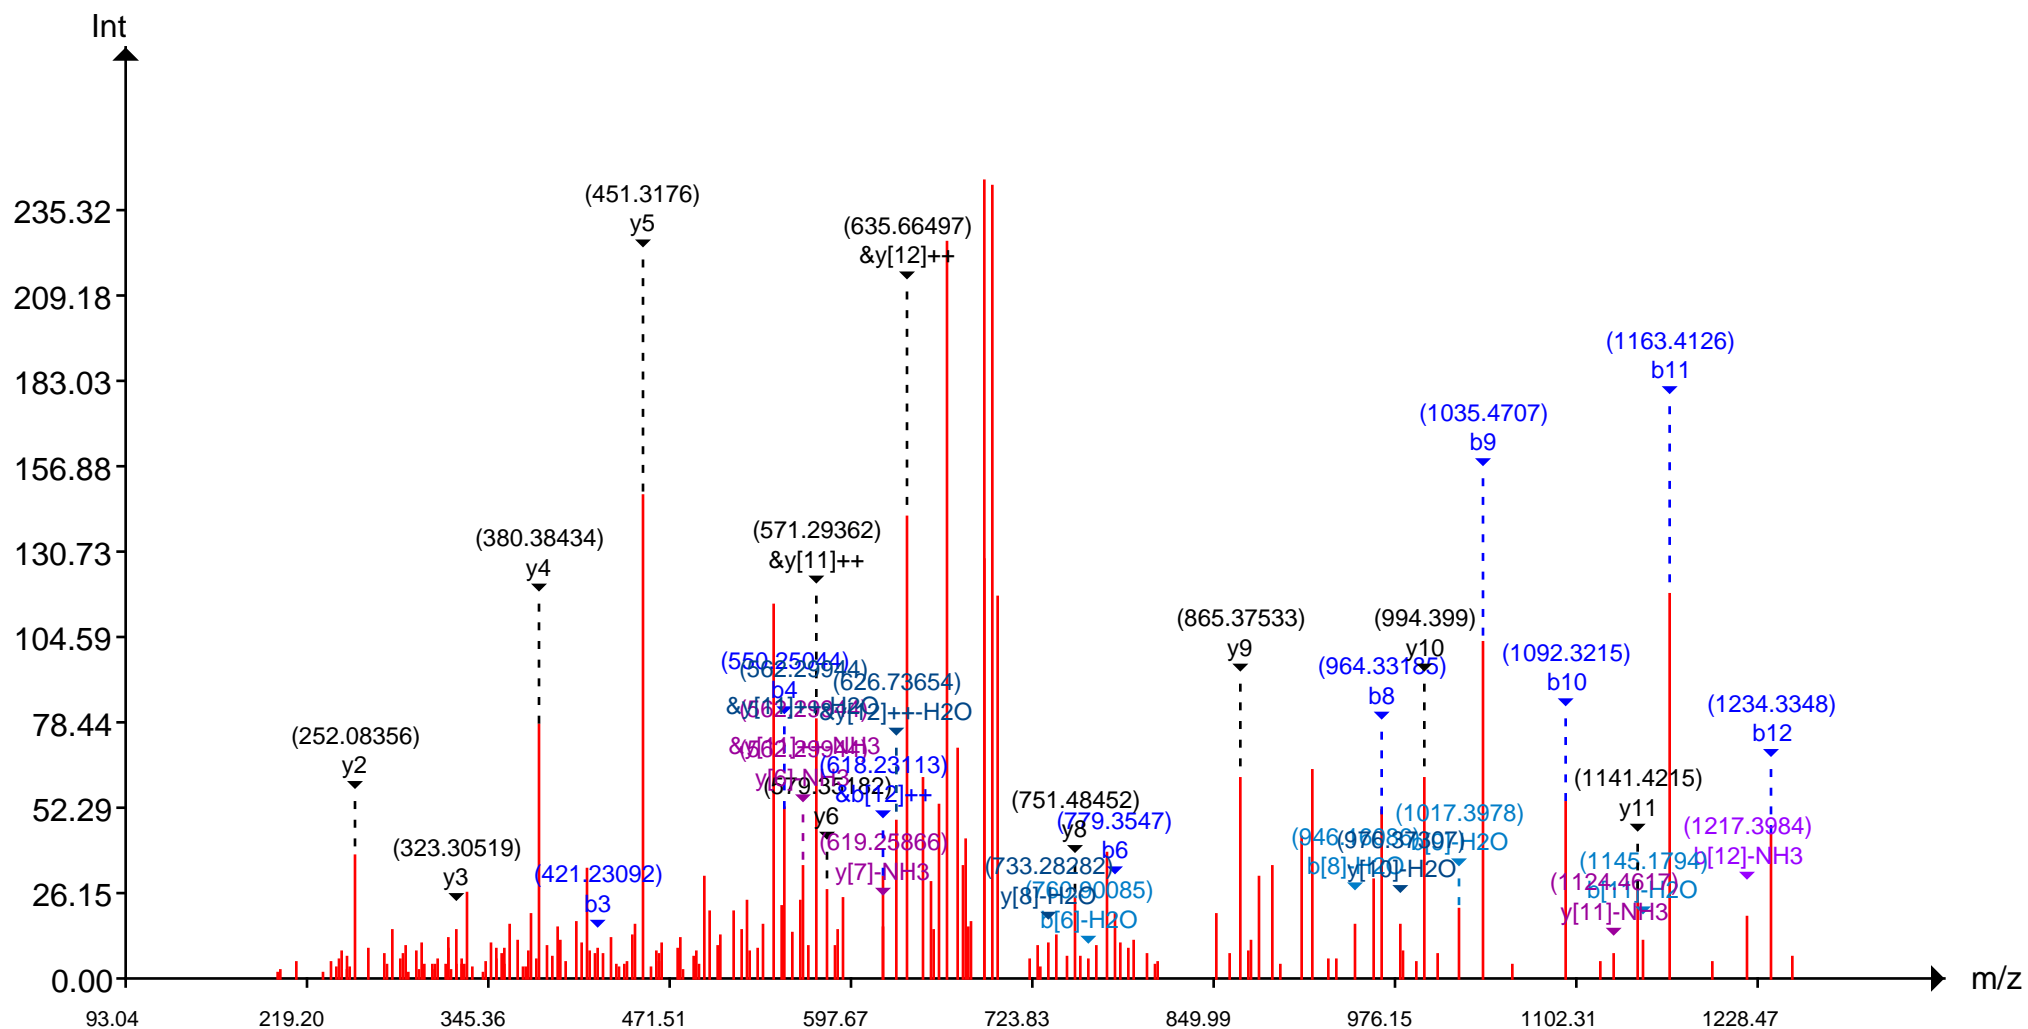

## Info

|                          |                              |                           |         |
|--------------------------|------------------------------|---------------------------|---------|
| <b>Modified Sequence</b> | AcD3-VEFENDGQAGAAR<C13>-COOH | <b>Ion score</b>          | 47.3    |
| <b>Protein</b>           | Q9CQI7                       | <b>Confidence level</b>   | 99.00%  |
| <b>Precursor m/z</b>     | 707.84073                    | <b>Identity Threshold</b> | 46.29   |
| <b>Charge</b>            | 2+                           | <b>Mass error</b>         | 9.84E-4 |

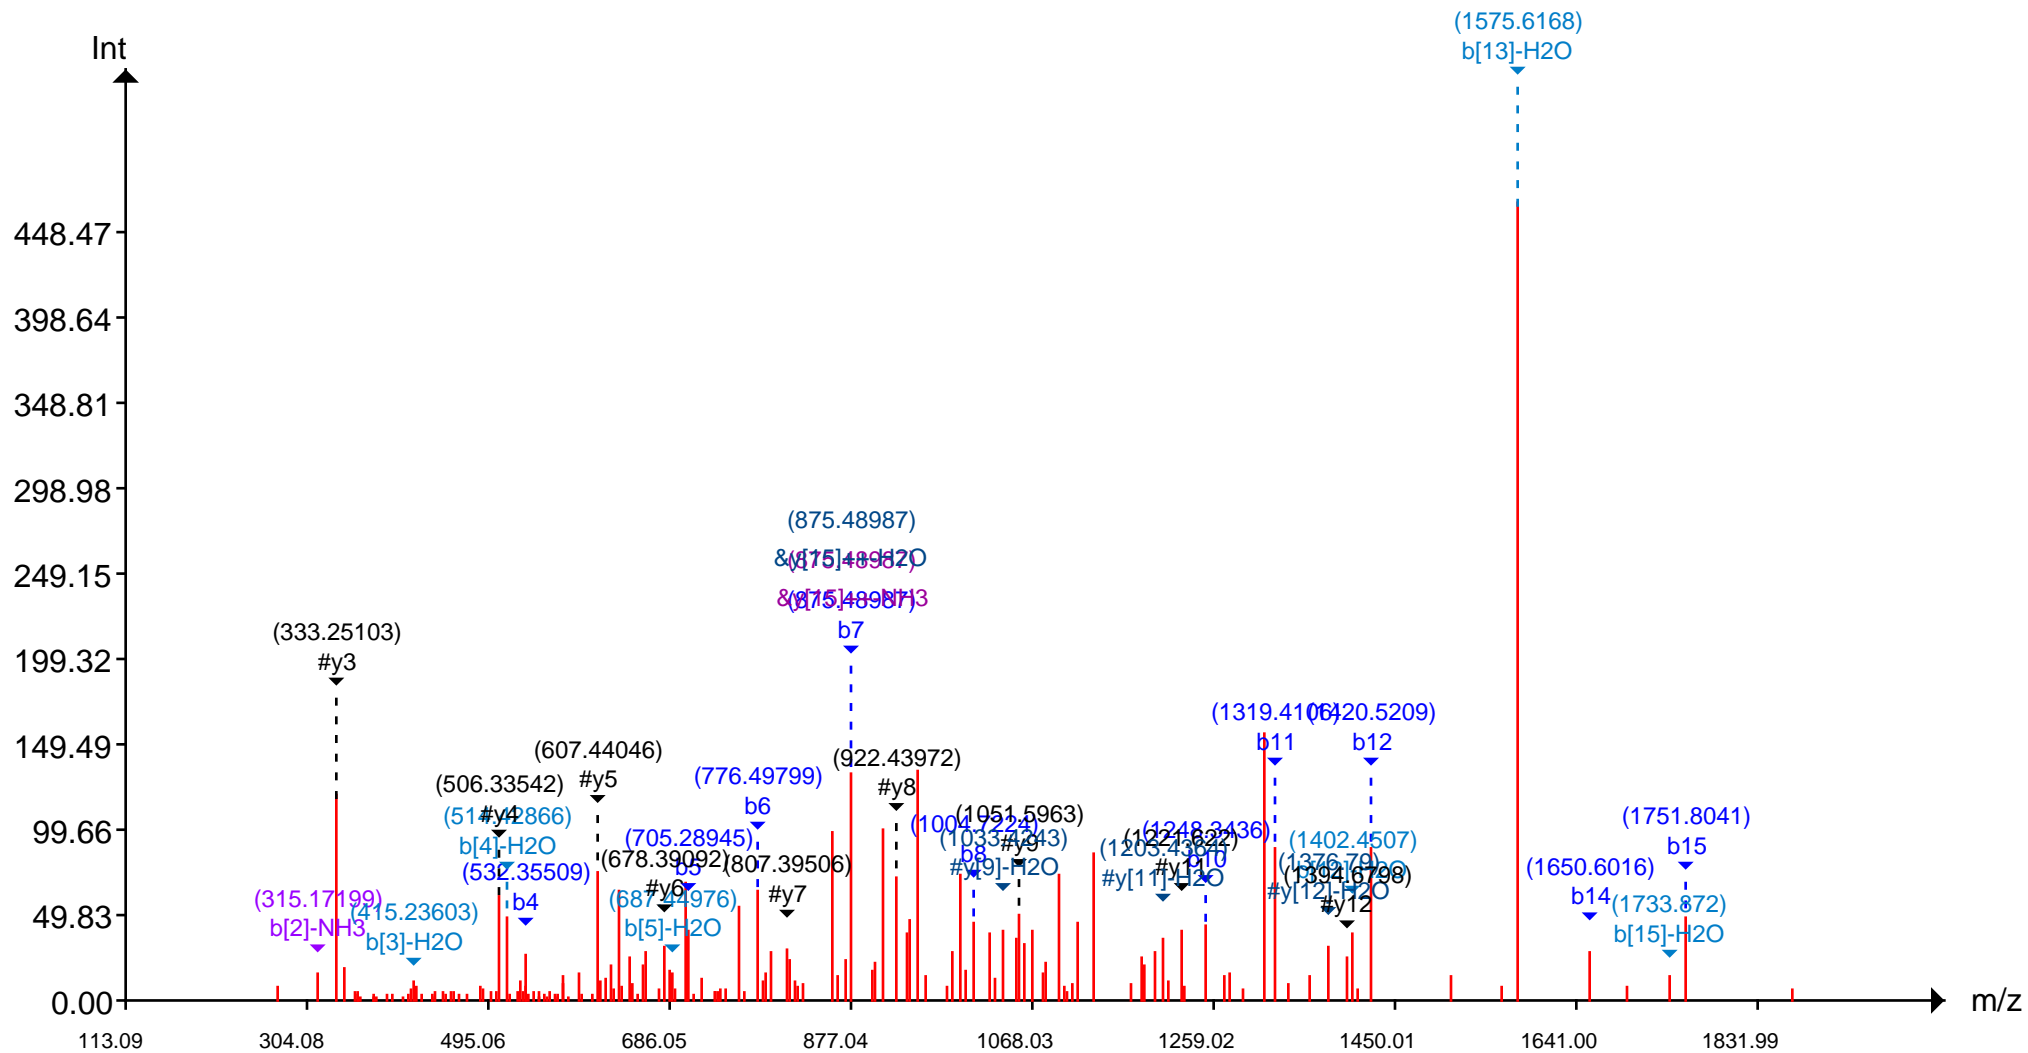

## Info

|                          |                                                    |                           |          |
|--------------------------|----------------------------------------------------|---------------------------|----------|
| <b>Modified Sequence</b> | AcD3-LK<AcD3K*>TVK<AcD3K*>AVEDEATK<AcD3K*>GTR-COOH | <b>Ion score</b>          | 61.13    |
| <b>Protein</b>           | P26039                                             | <b>Confidence level</b>   | 99.00%   |
| <b>Precursor m/z</b>     | 963.55097                                          | <b>Identity Threshold</b> | 45.40    |
| <b>Charge</b>            | 2+                                                 | <b>Mass error</b>         | 0.001496 |

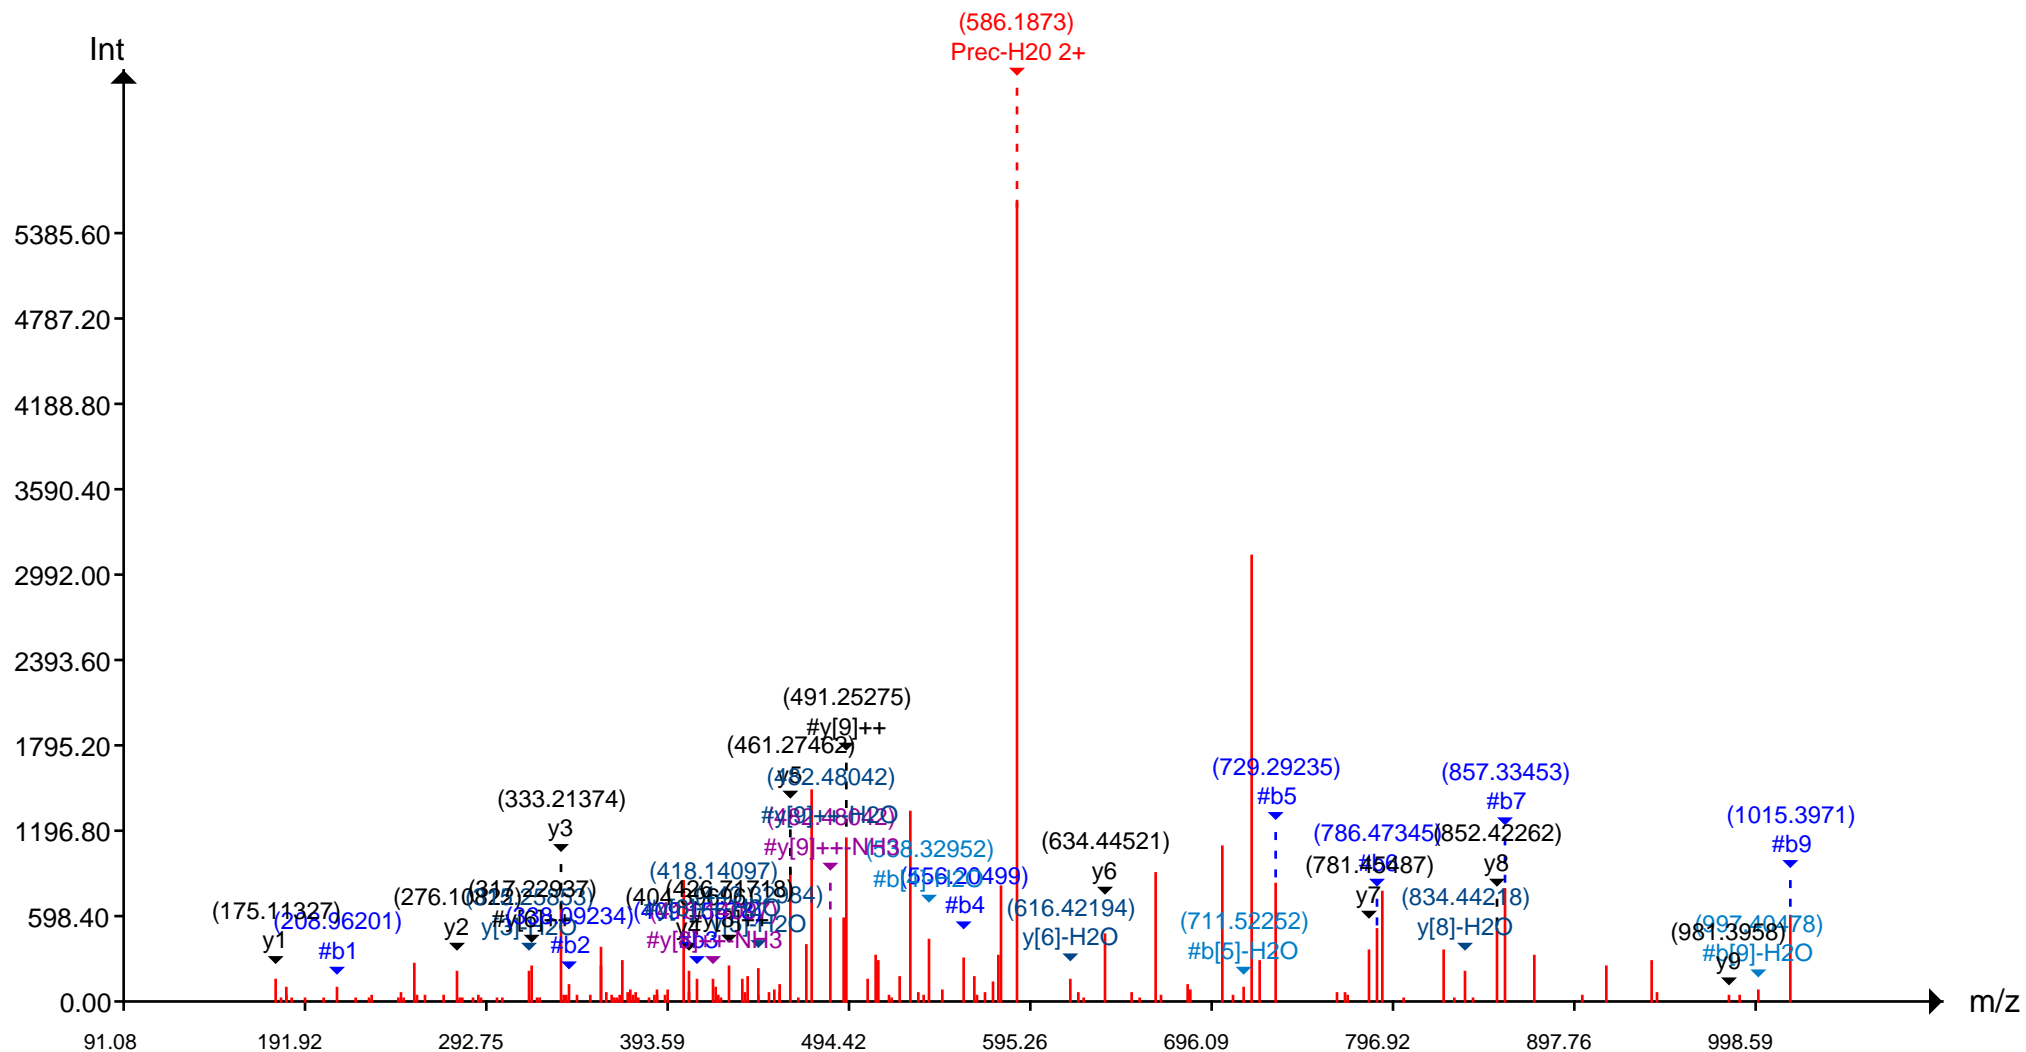

## Info

|                          |                                    |                           |          |
|--------------------------|------------------------------------|---------------------------|----------|
| <b>Modified Sequence</b> | AcD3-YEAM<Mox*>K<AcD3K*>GAGTR-COOH | <b>Ion score</b>          | 52.52    |
| <b>Protein</b>           | P10107                             | <b>Confidence level</b>   | 99.00%   |
| <b>Precursor m/z</b>     | 595.29583                          | <b>Identity Threshold</b> | 47.19    |
| <b>Charge</b>            | 2+                                 | <b>Mass error</b>         | 0.005544 |



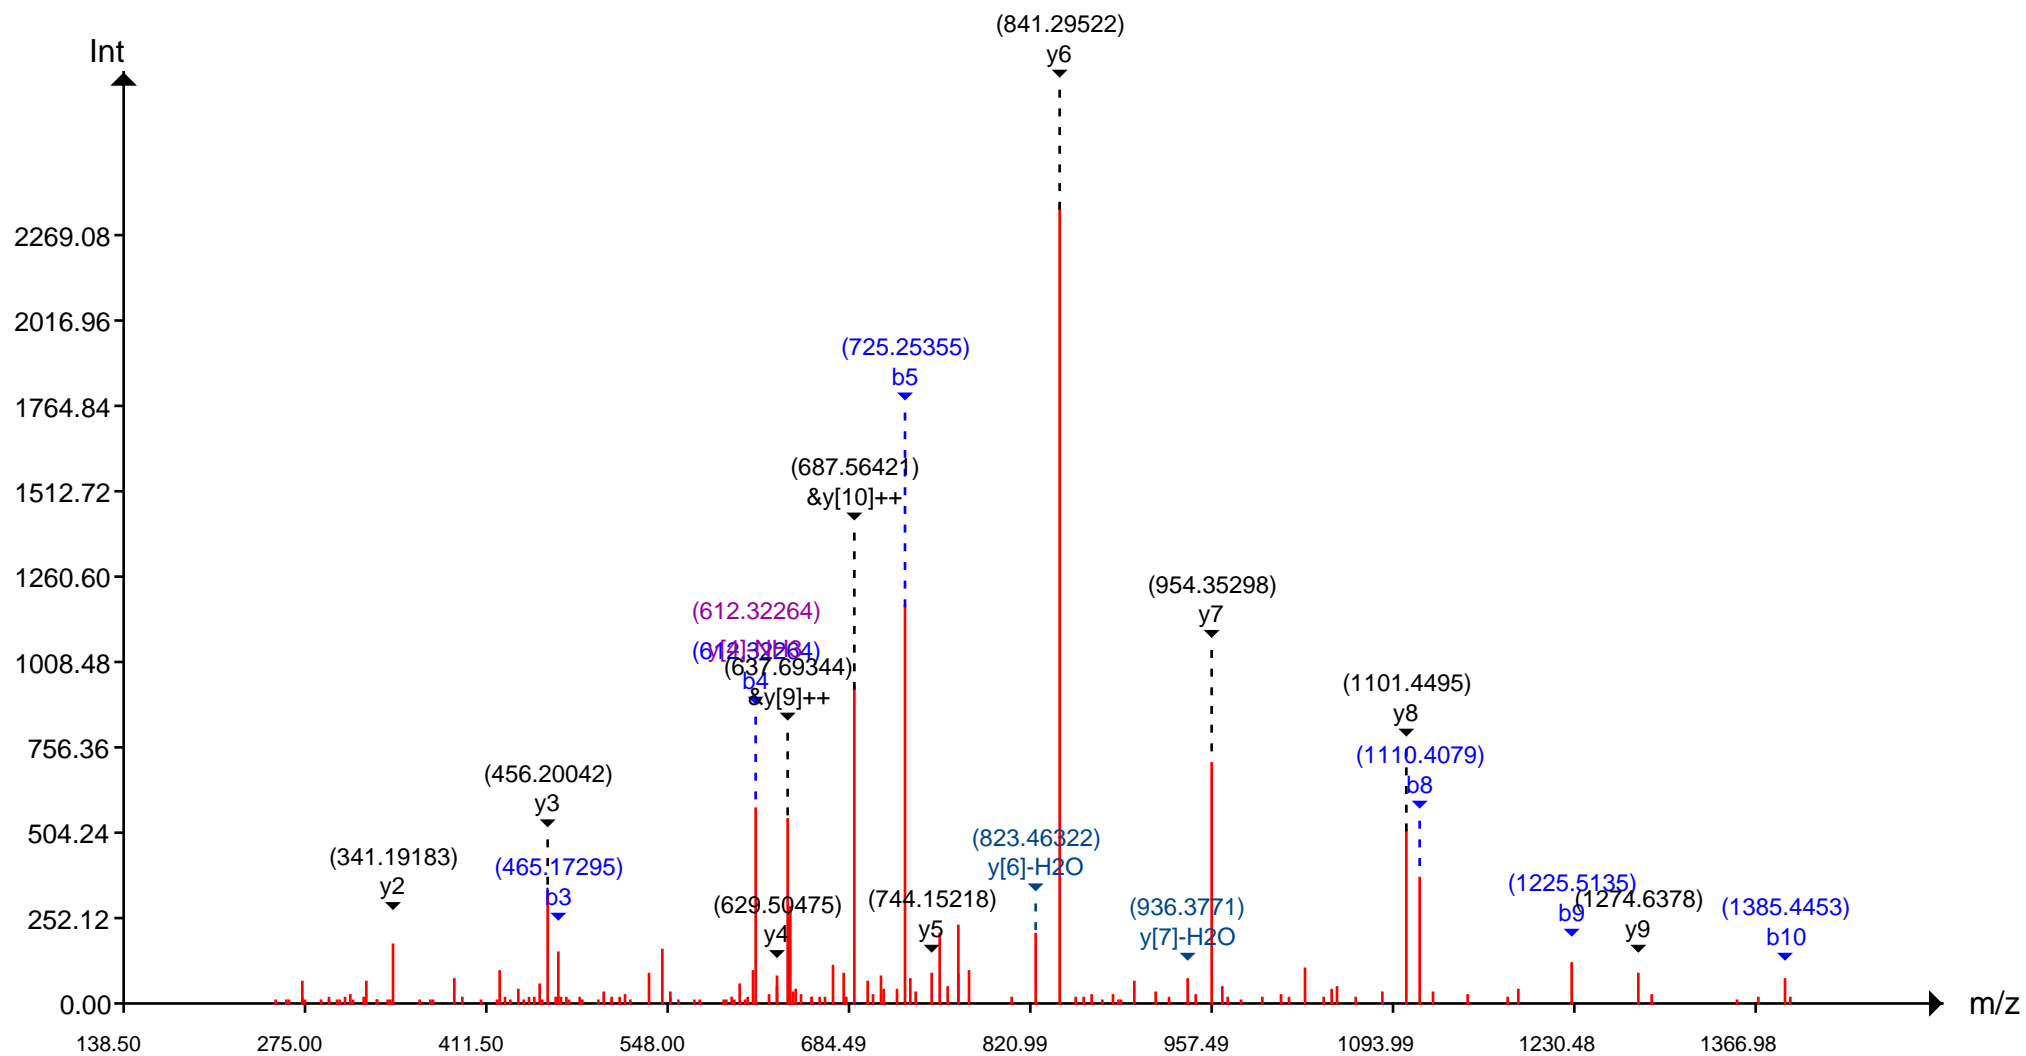

## Info

|                          |                                                        |                           |         |
|--------------------------|--------------------------------------------------------|---------------------------|---------|
| <b>Modified Sequence</b> | AcD3-FVK<AcD3K*>M<Mox*>LPDK<AcD3K*>DC<Cmm*>R<C13>-COOH | <b>Ion score</b>          | 52.54   |
| <b>Protein</b>           | P18760                                                 | <b>Confidence level</b>   | 99.00%  |
| <b>Precursor m/z</b>     | 783.41005                                              | <b>Identity Threshold</b> | 48.04   |
| <b>Charge</b>            | 2+                                                     | <b>Mass error</b>         | 0.00202 |

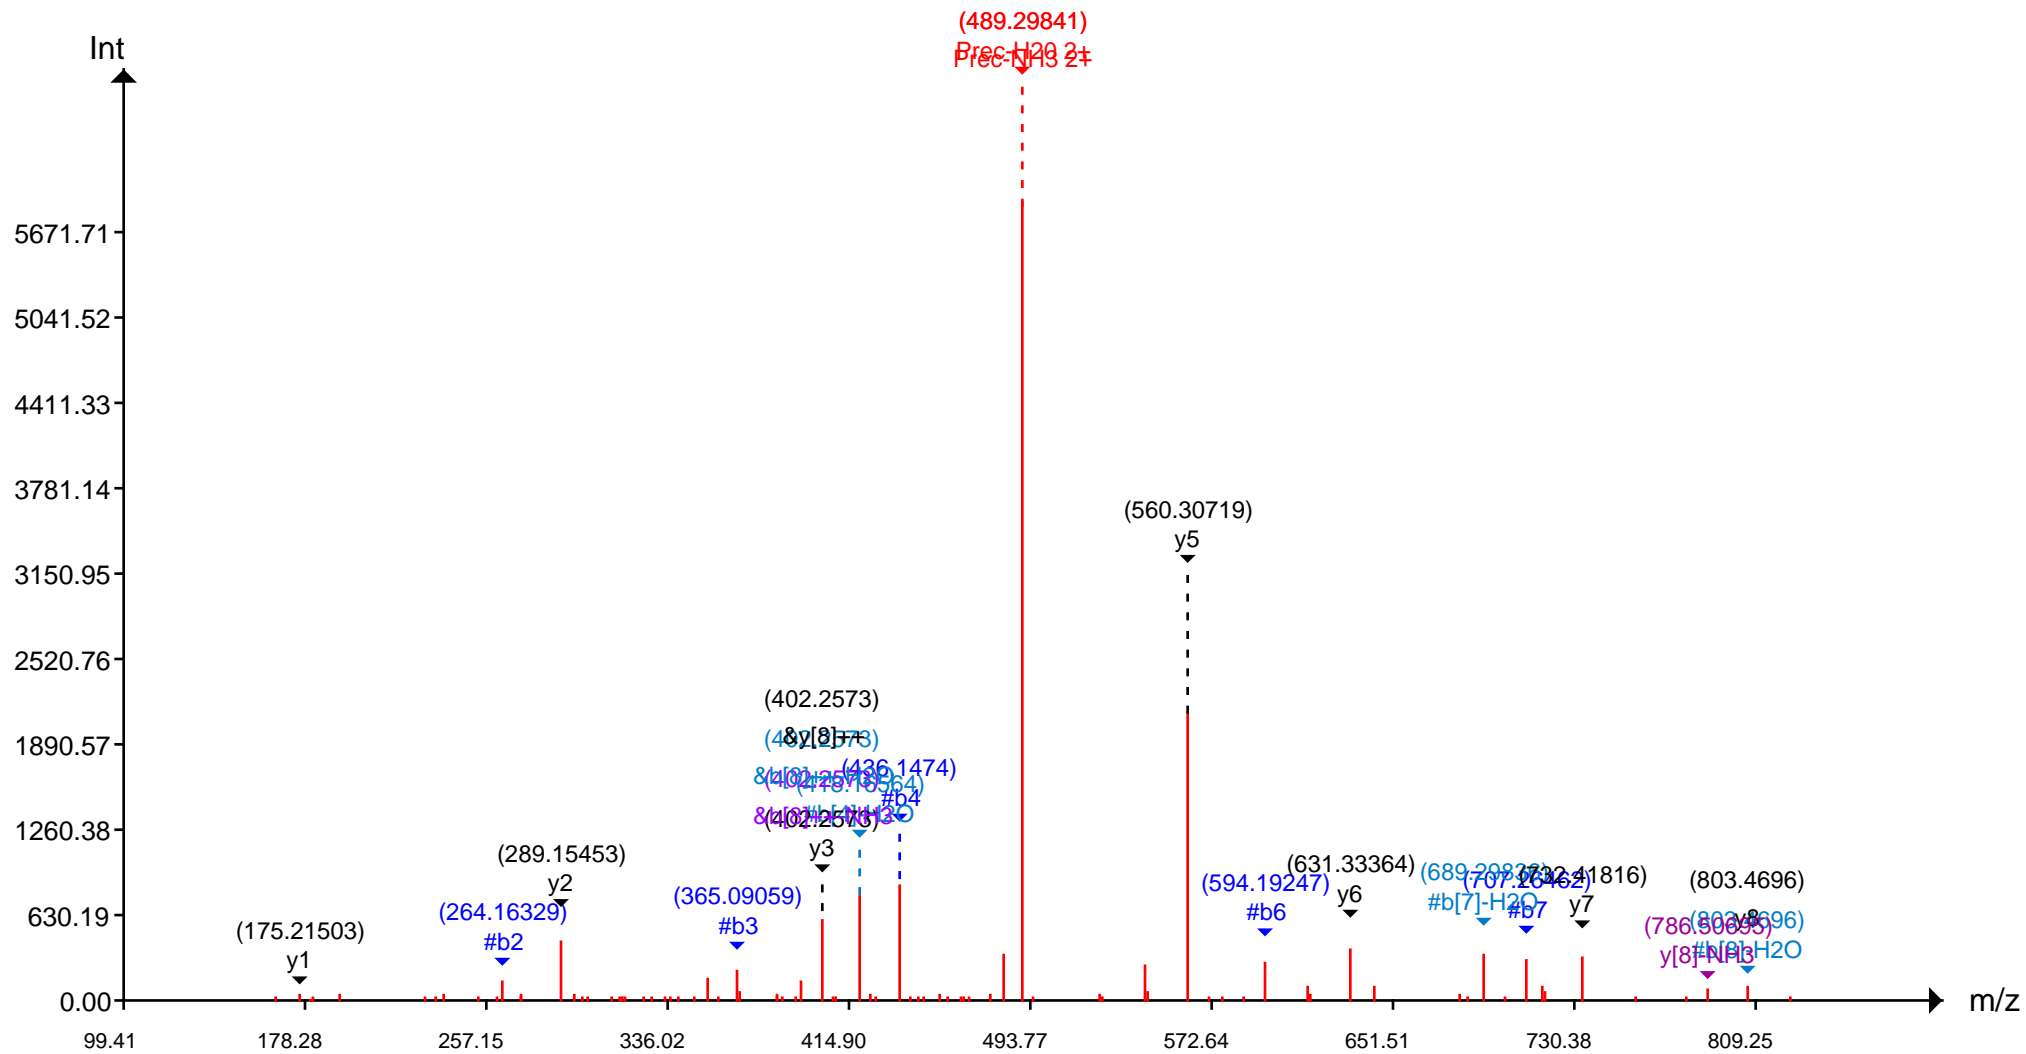

## Info

|                          |                     |                           |         |
|--------------------------|---------------------|---------------------------|---------|
| <b>Modified Sequence</b> | AcD3-FATAGTLNR-COOH | <b>Ion score</b>          | 67.16   |
| <b>Protein</b>           | P26039              | <b>Confidence level</b>   | 99.00%  |
| <b>Precursor m/z</b>     | 498.27128           | <b>Identity Threshold</b> | 47.68   |
| <b>Charge</b>            | 2+                  | <b>Mass error</b>         | 4.96E-4 |

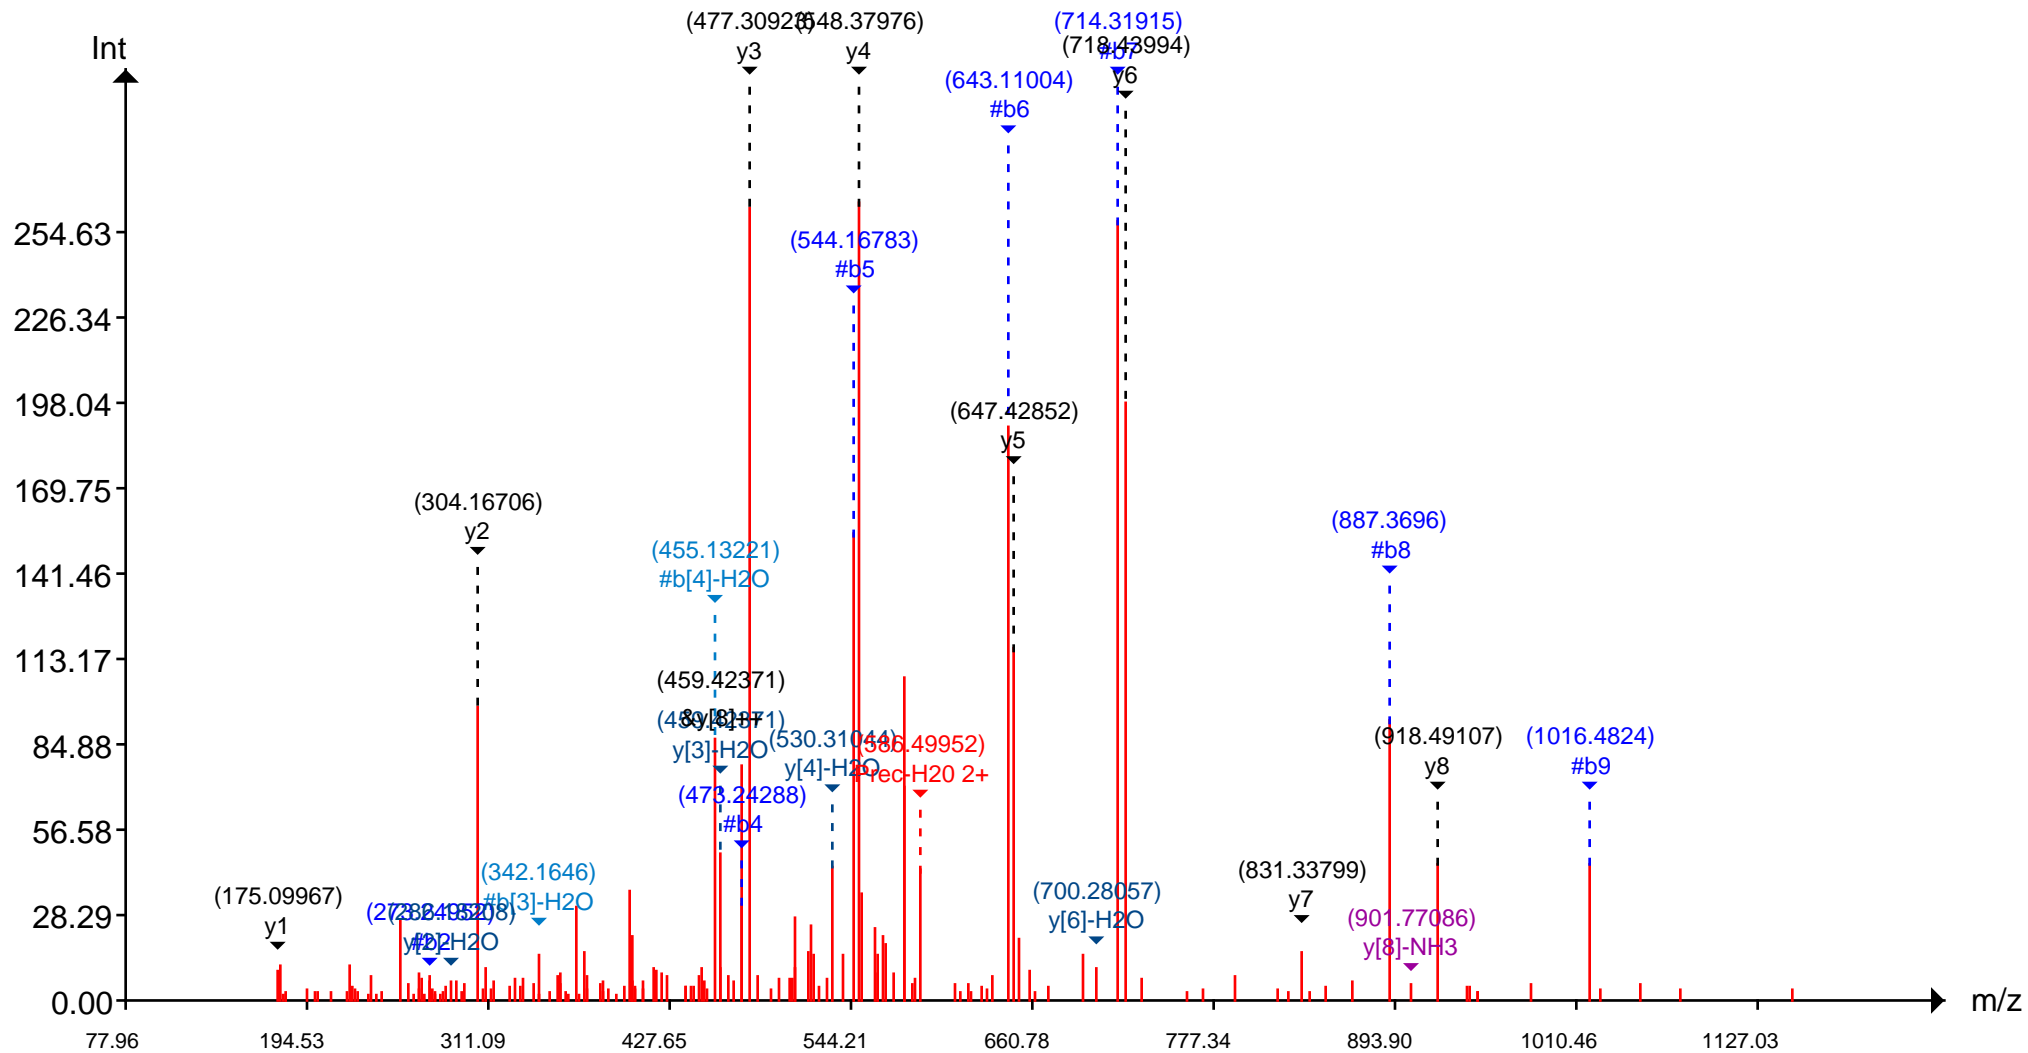

## Info

|                          |                              |                           |         |
|--------------------------|------------------------------|---------------------------|---------|
| <b>Modified Sequence</b> | AcD3-NISLAVAK<AcD3K*>ER-COOH | <b>Ion score</b>          | 52.72   |
| <b>Protein</b>           | P70441                       | <b>Confidence level</b>   | 99.00%  |
| <b>Precursor m/z</b>     | 595.85444                    | <b>Identity Threshold</b> | 45.80   |
| <b>Charge</b>            | 2+                           | <b>Mass error</b>         | 6.18E-4 |

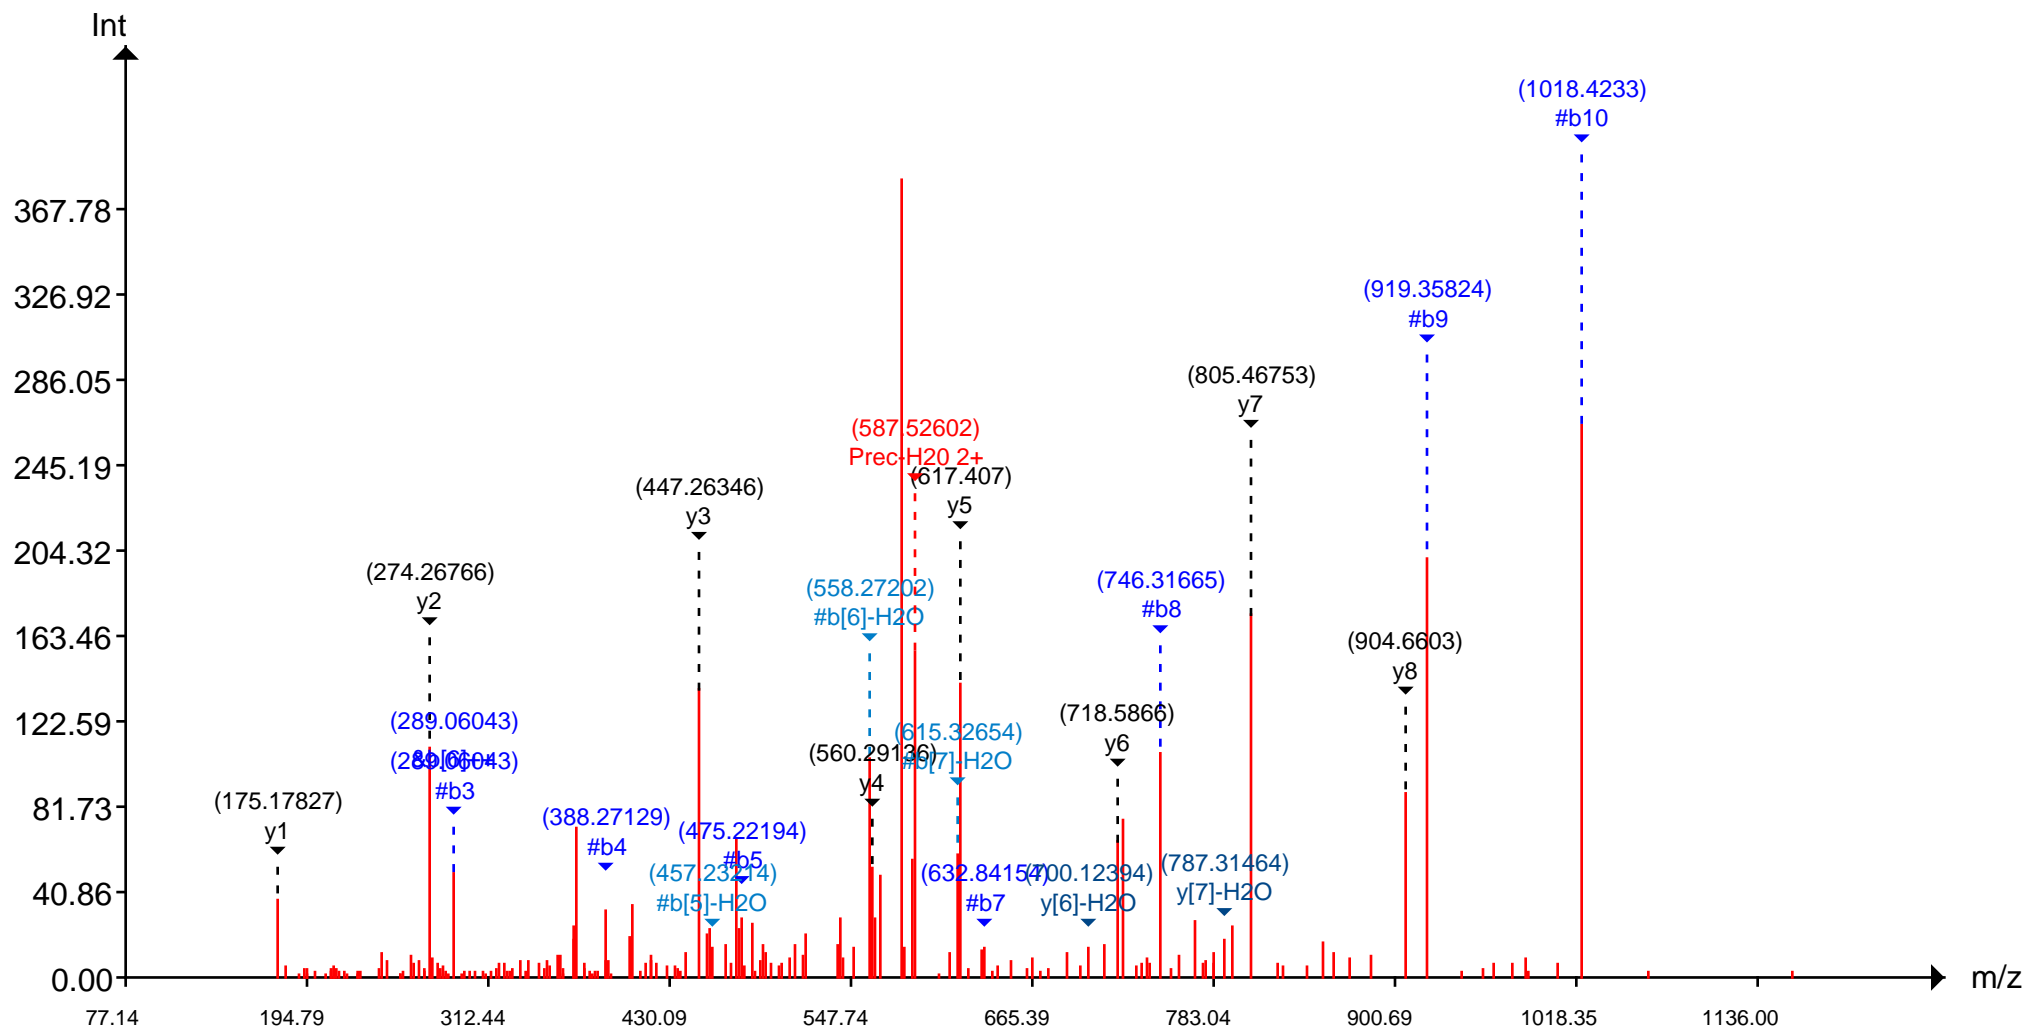

## Info

**Modified Sequence** AcD3-SGVVSTGLK<AcD3K\*>VR-COOH

**Ion score** 57.36

**Protein** P58252

**Confidence level** 99.00%

**Precursor m/z** 596.86166

**Identity Threshold** 44.68

**Charge** 2+

**Mass error** -6.44E-4

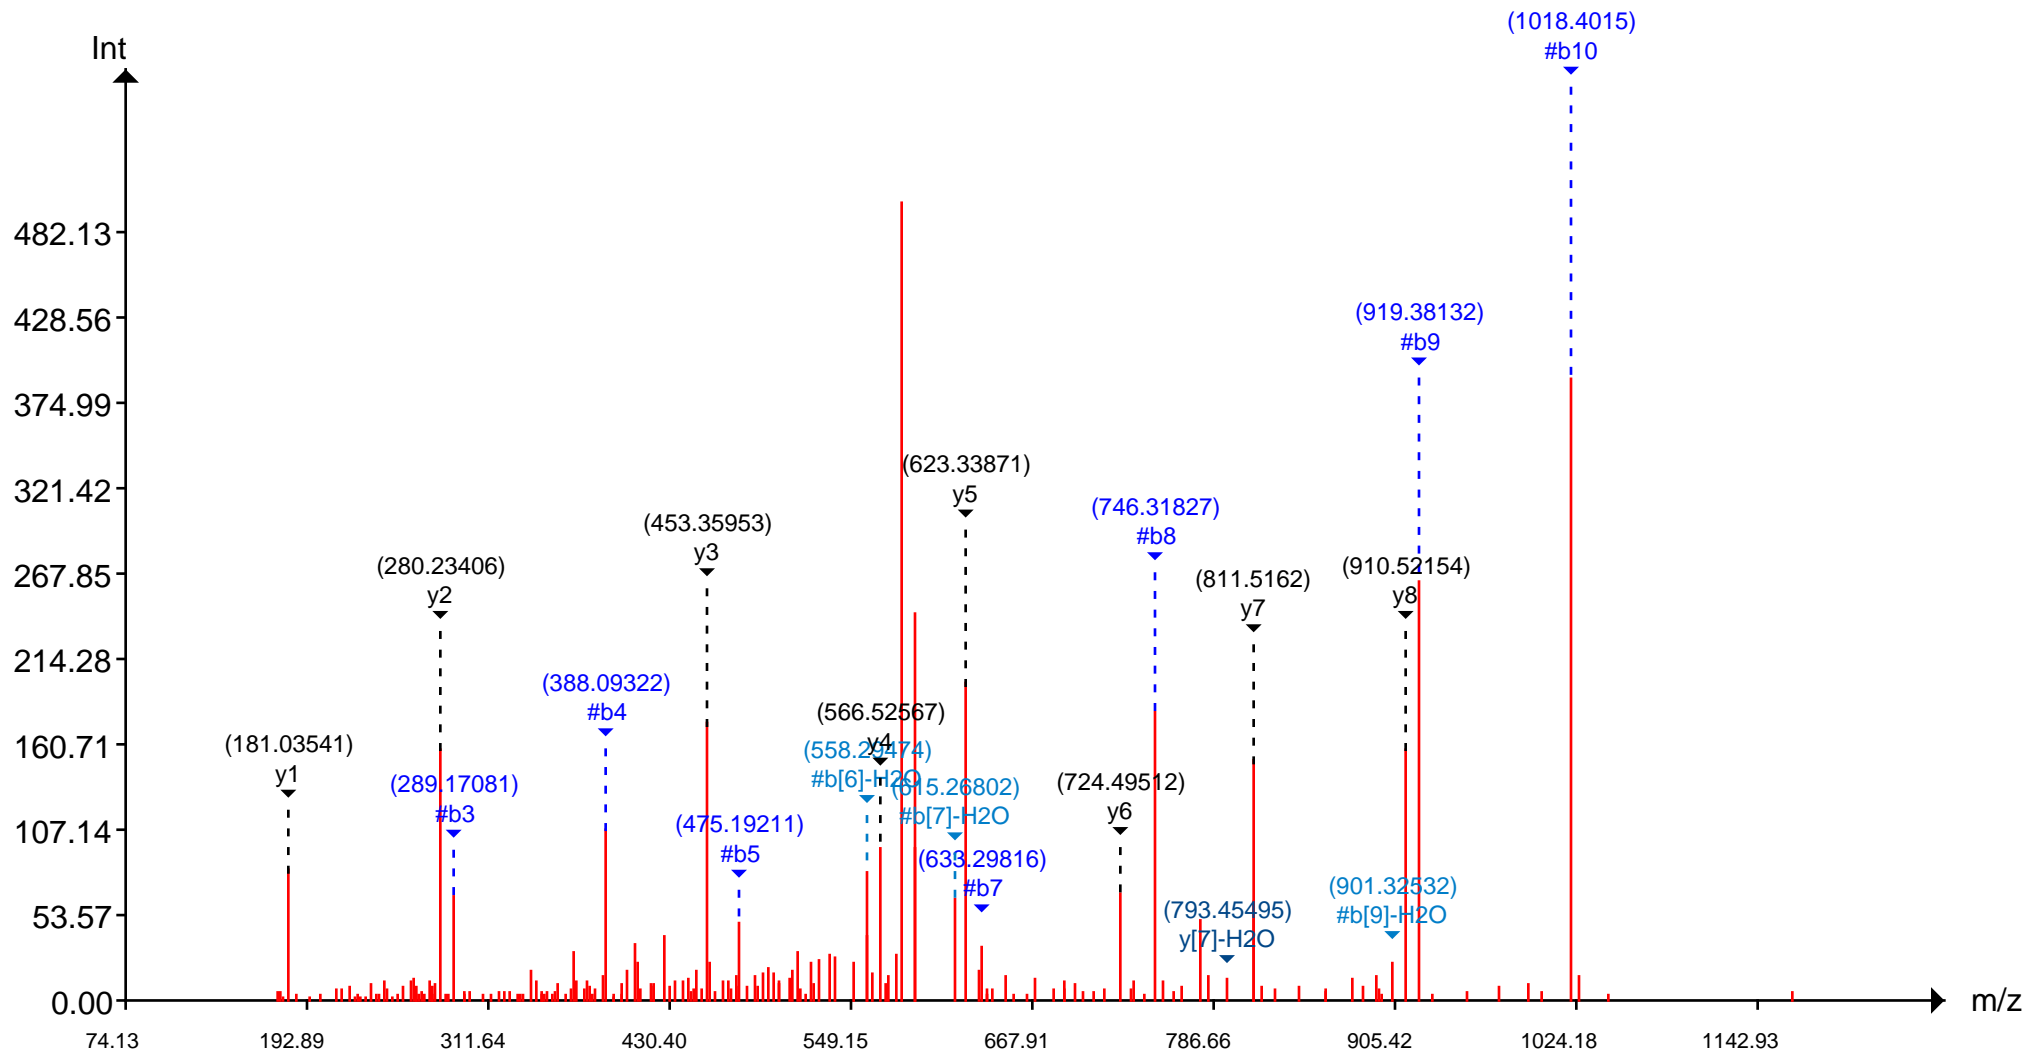

## Info

|                          |                                    |                           |          |
|--------------------------|------------------------------------|---------------------------|----------|
| <b>Modified Sequence</b> | AcD3-SGVVSTGLK<AcD3K*>VR<C13>-COOH | <b>Ion score</b>          | 61.39    |
| <b>Protein</b>           | P58252                             | <b>Confidence level</b>   | 99.00%   |
| <b>Precursor m/z</b>     | 599.87195                          | <b>Identity Threshold</b> | 42.67    |
| <b>Charge</b>            | 2+                                 | <b>Mass error</b>         | -2.05E-4 |

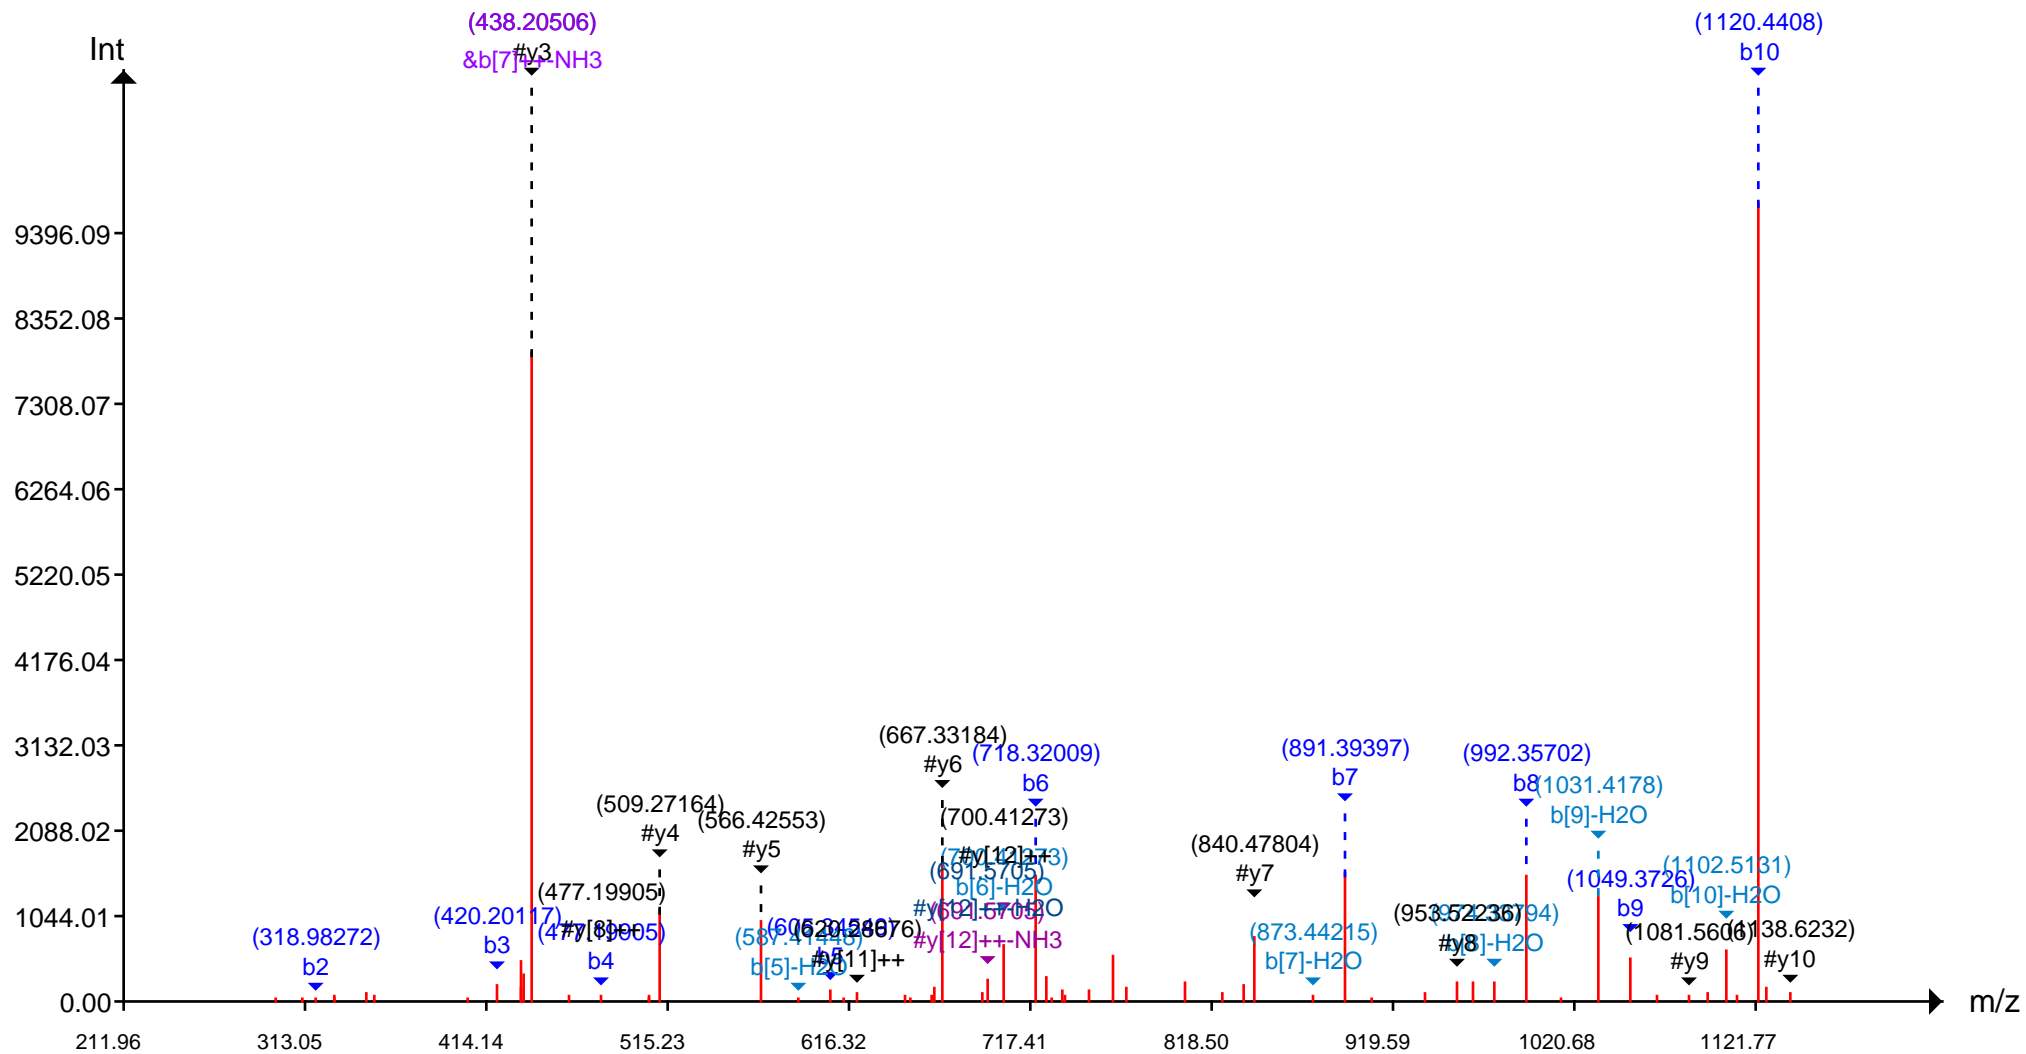

## Info

|                          |                                                  |                           |         |
|--------------------------|--------------------------------------------------|---------------------------|---------|
| <b>Modified Sequence</b> | AcD3-LC<Cmm*>TGQIK<AcD3K*>TGAPC<Cmm*>R<C13>-COOH | <b>Ion score</b>          | 55.18   |
| <b>Protein</b>           | P17182, P21550, P17183                           | <b>Confidence level</b>   | 99.00%  |
| <b>Precursor m/z</b>     | 779.40842                                        | <b>Identity Threshold</b> | 48.08   |
| <b>Charge</b>            | 2+                                               | <b>Mass error</b>         | 5.45E-4 |

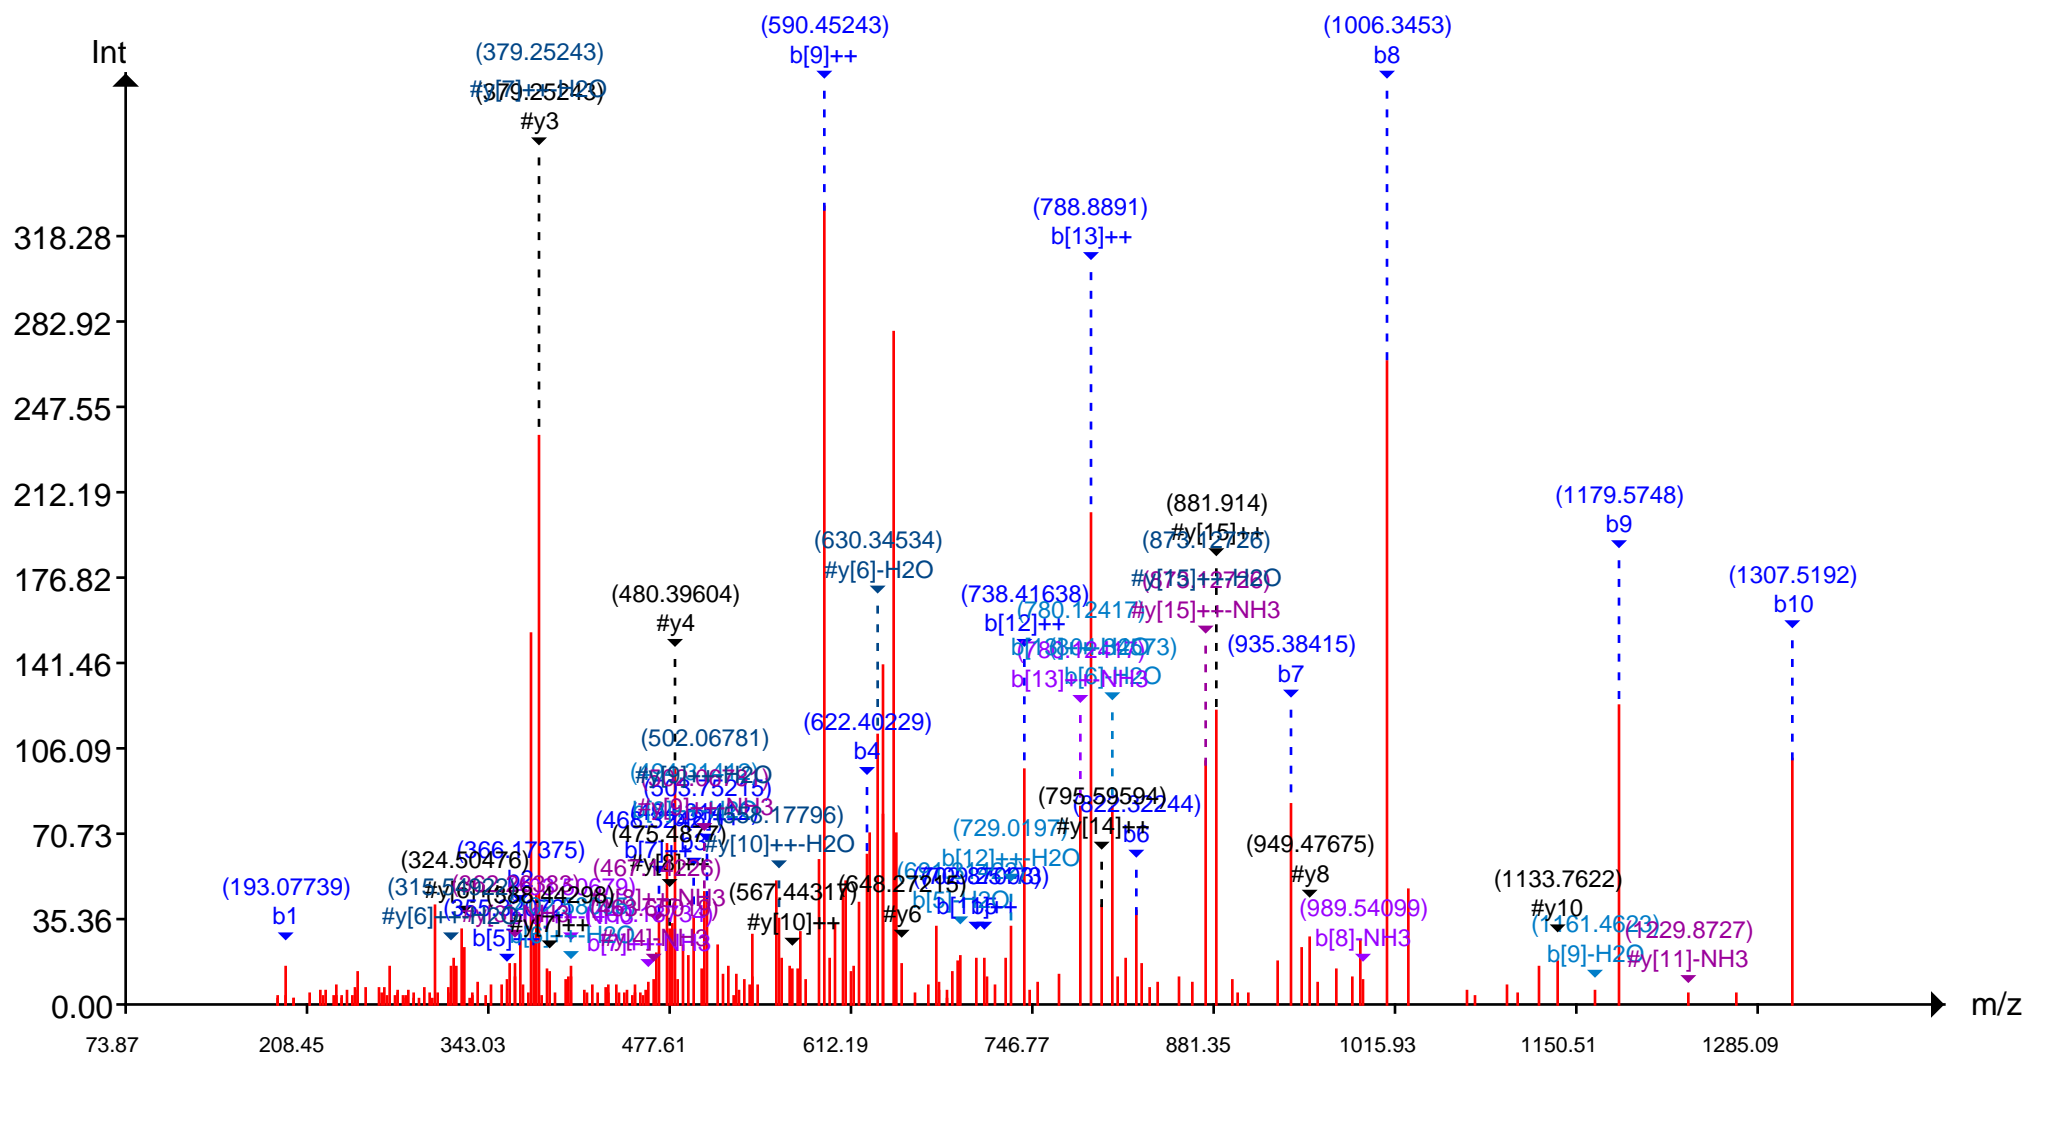

| Info                     |                                                       |                           |          |
|--------------------------|-------------------------------------------------------|---------------------------|----------|
| <b>Modified Sequence</b> | AcD3-M<Mox*>K<AcD3K*>QQSLLAK<AcD3K*>QPATPTR<C13>-COOH | <b>Ion score</b>          | 46.7     |
| <b>Protein</b>           | Q6PDL0                                                | <b>Confidence level</b>   | 99.00%   |
| <b>Precursor m/z</b>     | 652.37365                                             | <b>Identity Threshold</b> | 45.57    |
| <b>Charge</b>            | 3+                                                    | <b>Mass error</b>         | 0.002809 |

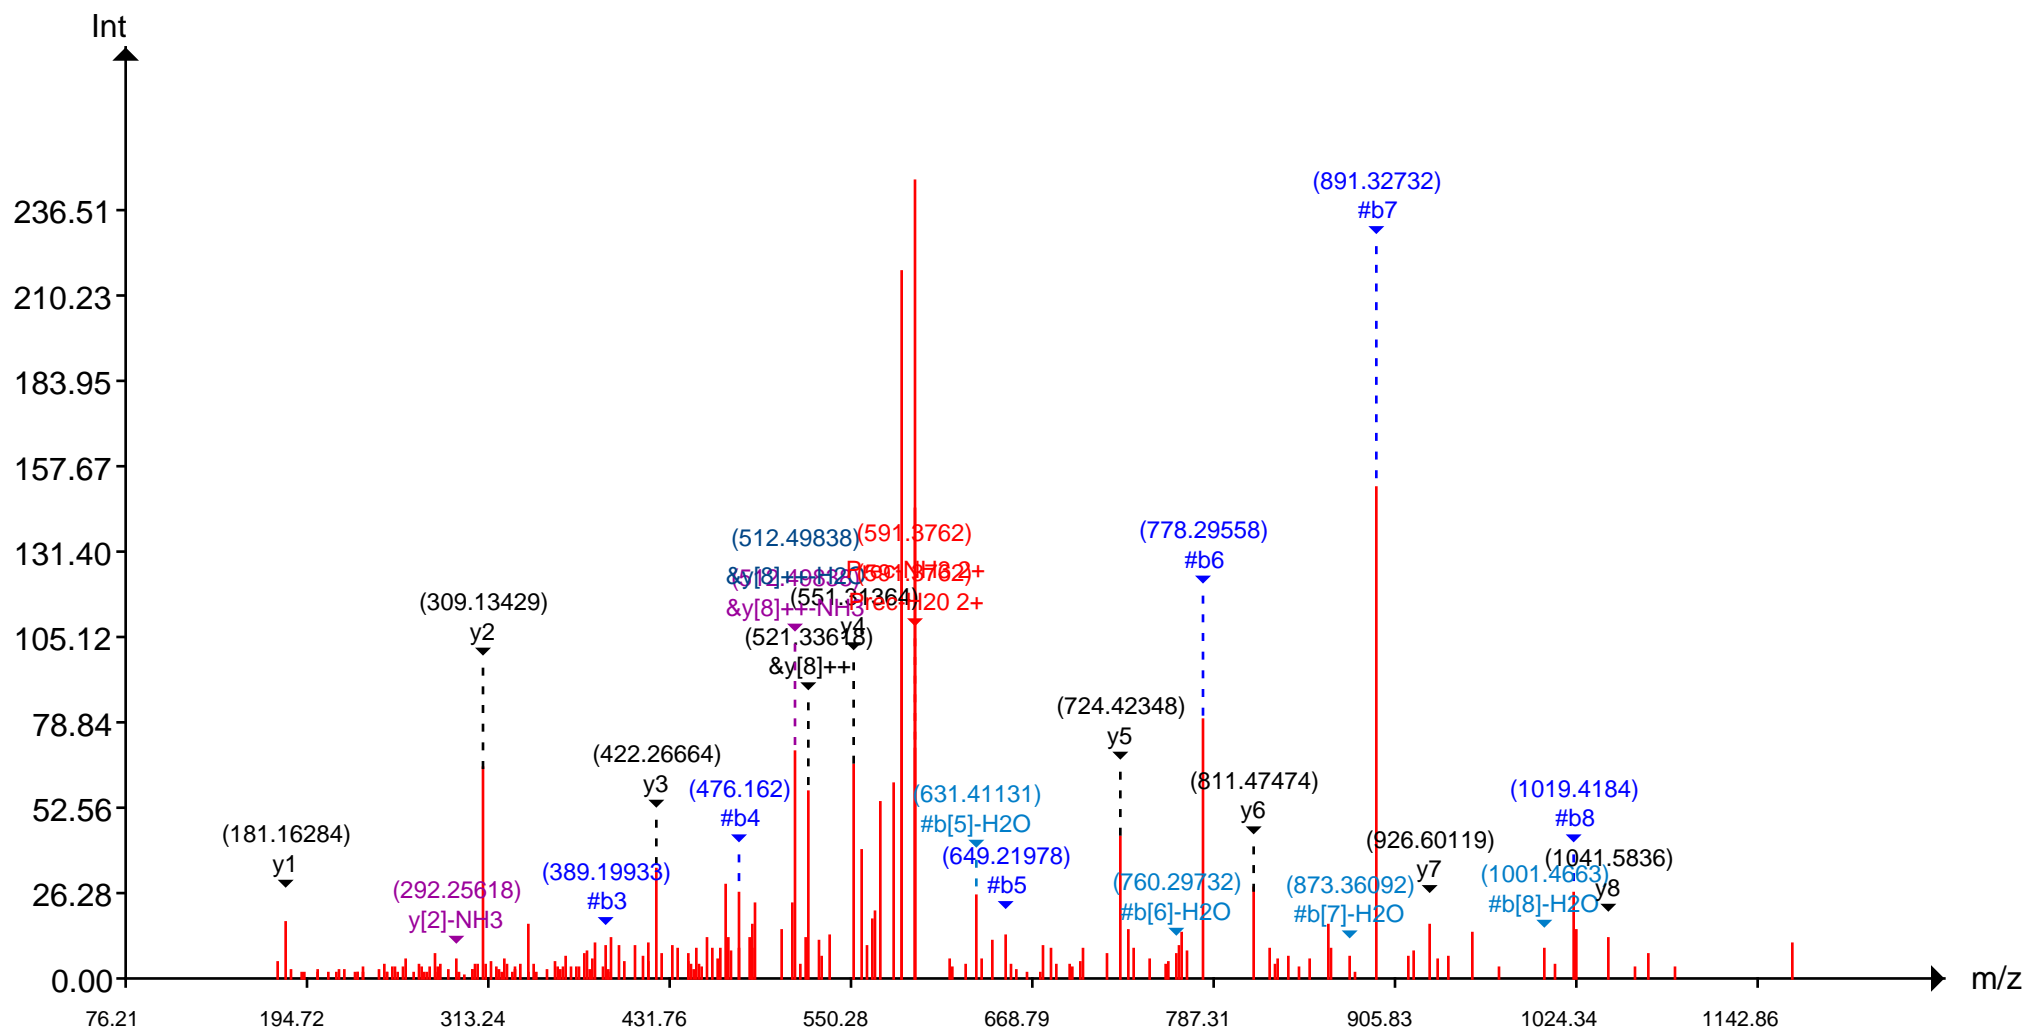

## Info

|                          |                                  |                           |         |
|--------------------------|----------------------------------|---------------------------|---------|
| <b>Modified Sequence</b> | AcD3-LDDSK<AcD3K*>ELQR<C13>-COOH | <b>Ion score</b>          | 48.42   |
| <b>Protein</b>           | Q7TQI3                           | <b>Confidence level</b>   | 99.00%  |
| <b>Precursor m/z</b>     | 600.32786                        | <b>Identity Threshold</b> | 47.67   |
| <b>Charge</b>            | 2+                               | <b>Mass error</b>         | 4.06E-4 |



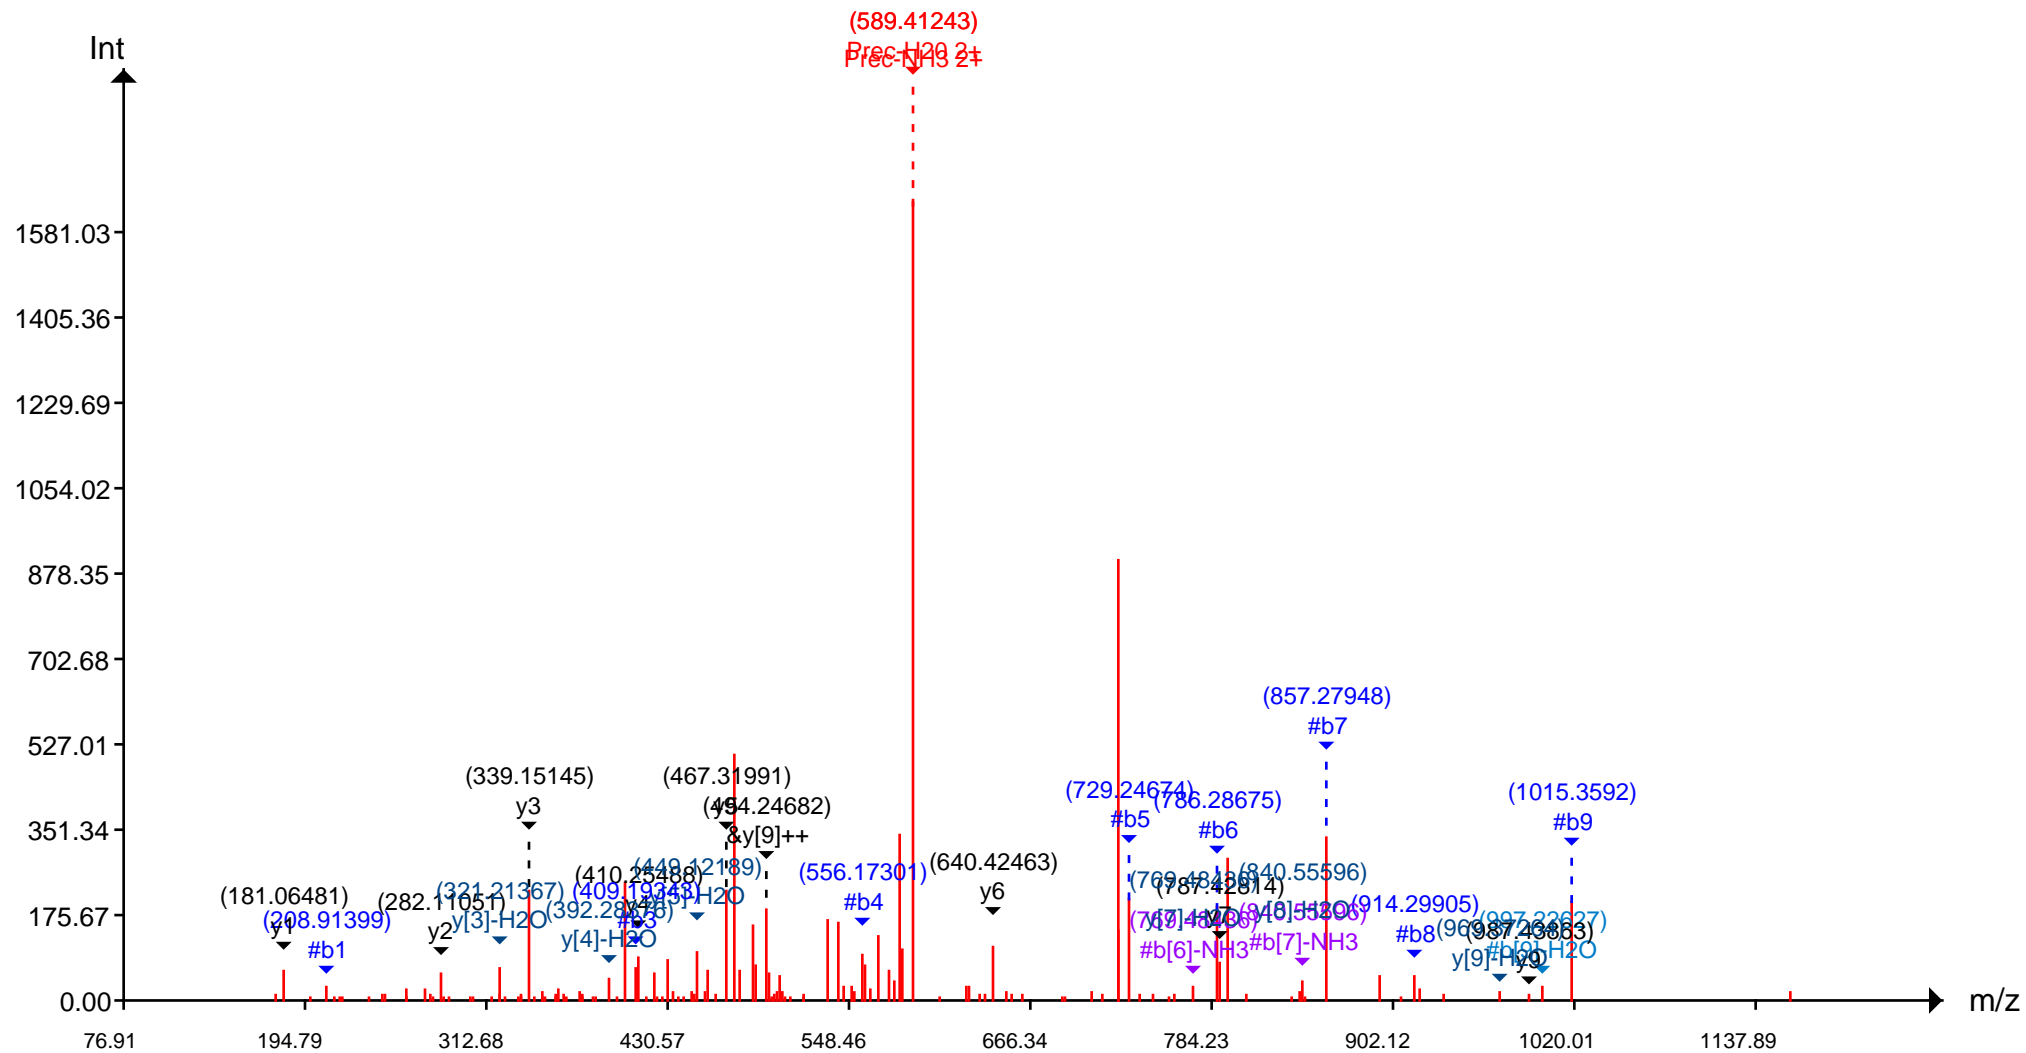

## Info

|                          |                                         |                           |           |
|--------------------------|-----------------------------------------|---------------------------|-----------|
| <b>Modified Sequence</b> | AcD3-YEAM<Mox*>K<AcD3K*>GAGTR<C13>-COOH | <b>Ion score</b>          | 48.46     |
| <b>Protein</b>           | P10107                                  | <b>Confidence level</b>   | 99.00%    |
| <b>Precursor m/z</b>     | 598.30251                               | <b>Identity Threshold</b> | 47.72     |
| <b>Charge</b>            | 2+                                      | <b>Mass error</b>         | -0.001237 |

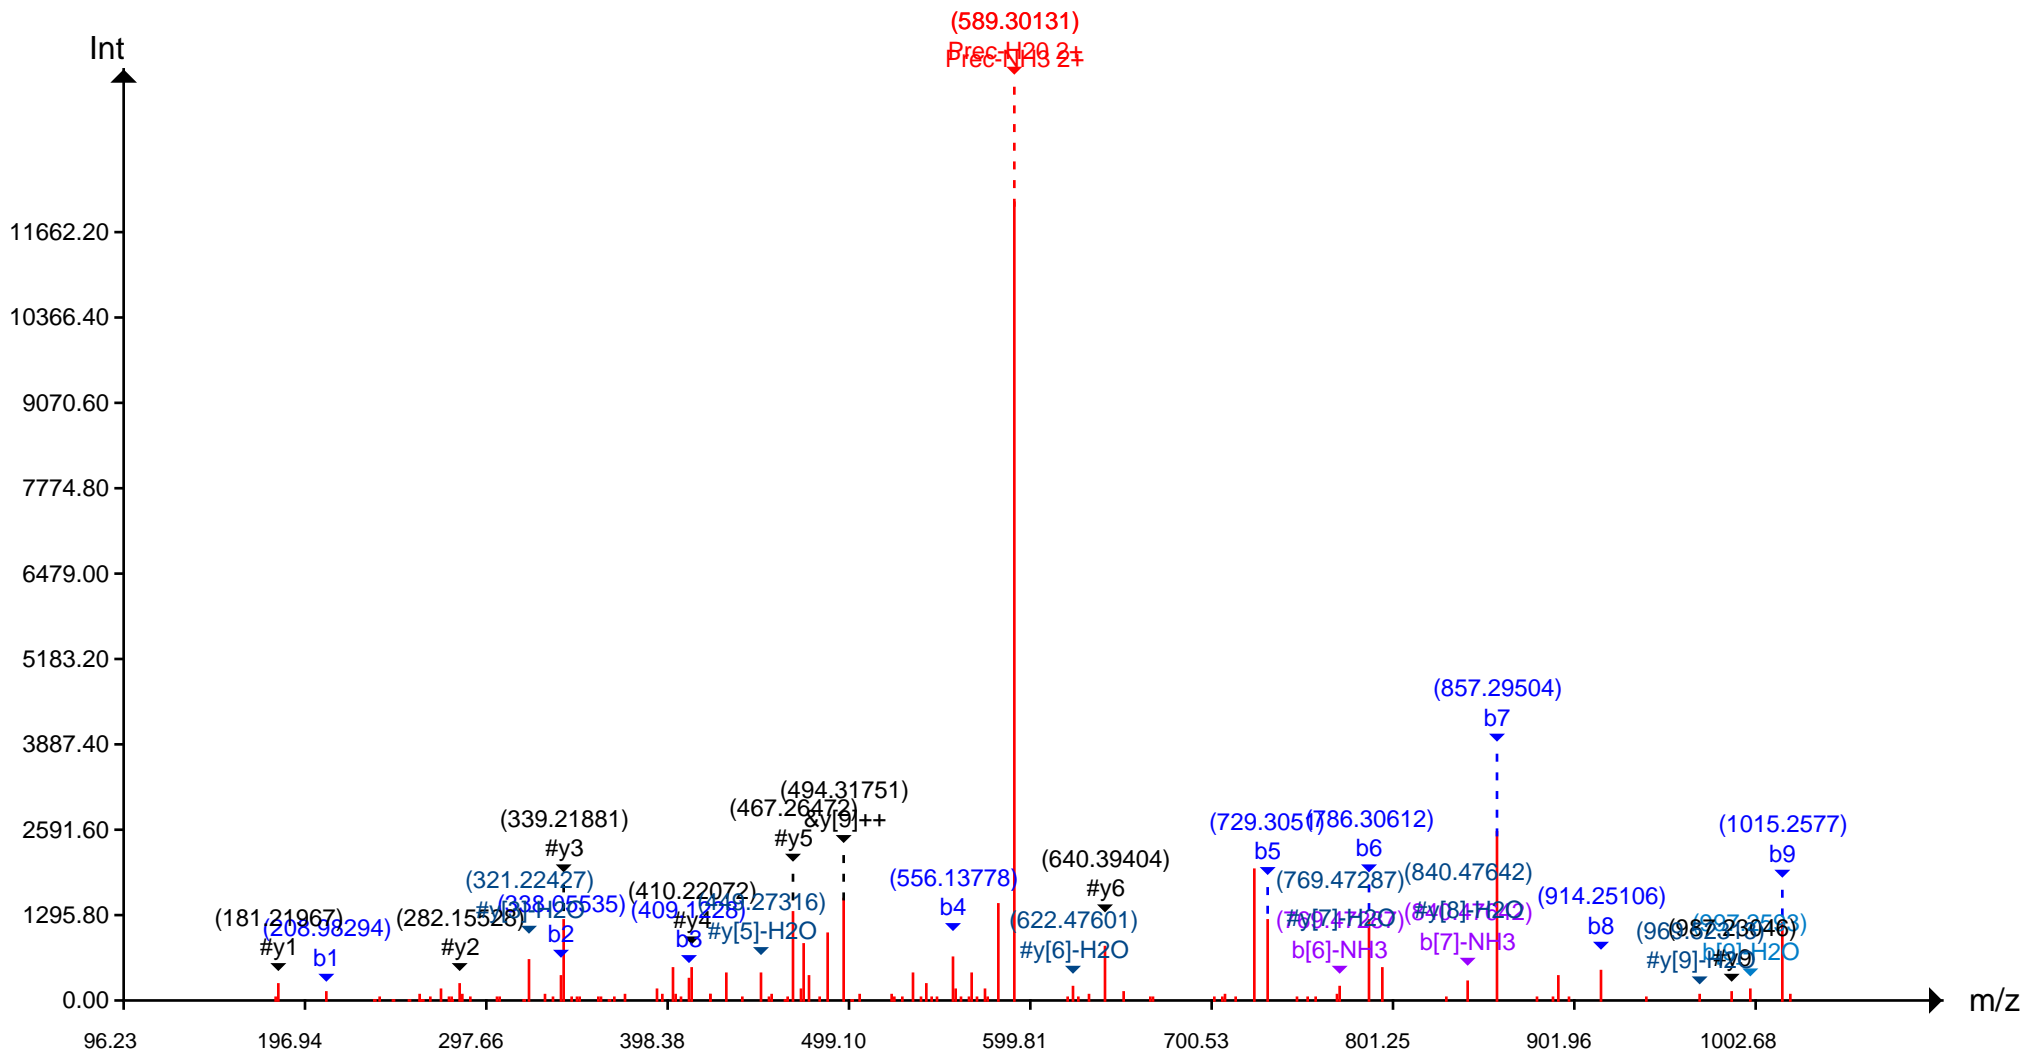

## Info

**Modified Sequence** AcD3-YEAM<Mox\*>K<AcD3K\*>GAGTR<C13>-COOH

**Ion score** 58.97

**Protein** P10107

**Confidence level** 99.00%

**Precursor m/z** 598.30222

**Identity Threshold** 47.90

**Charge** 2+

**Mass error** -0.001817

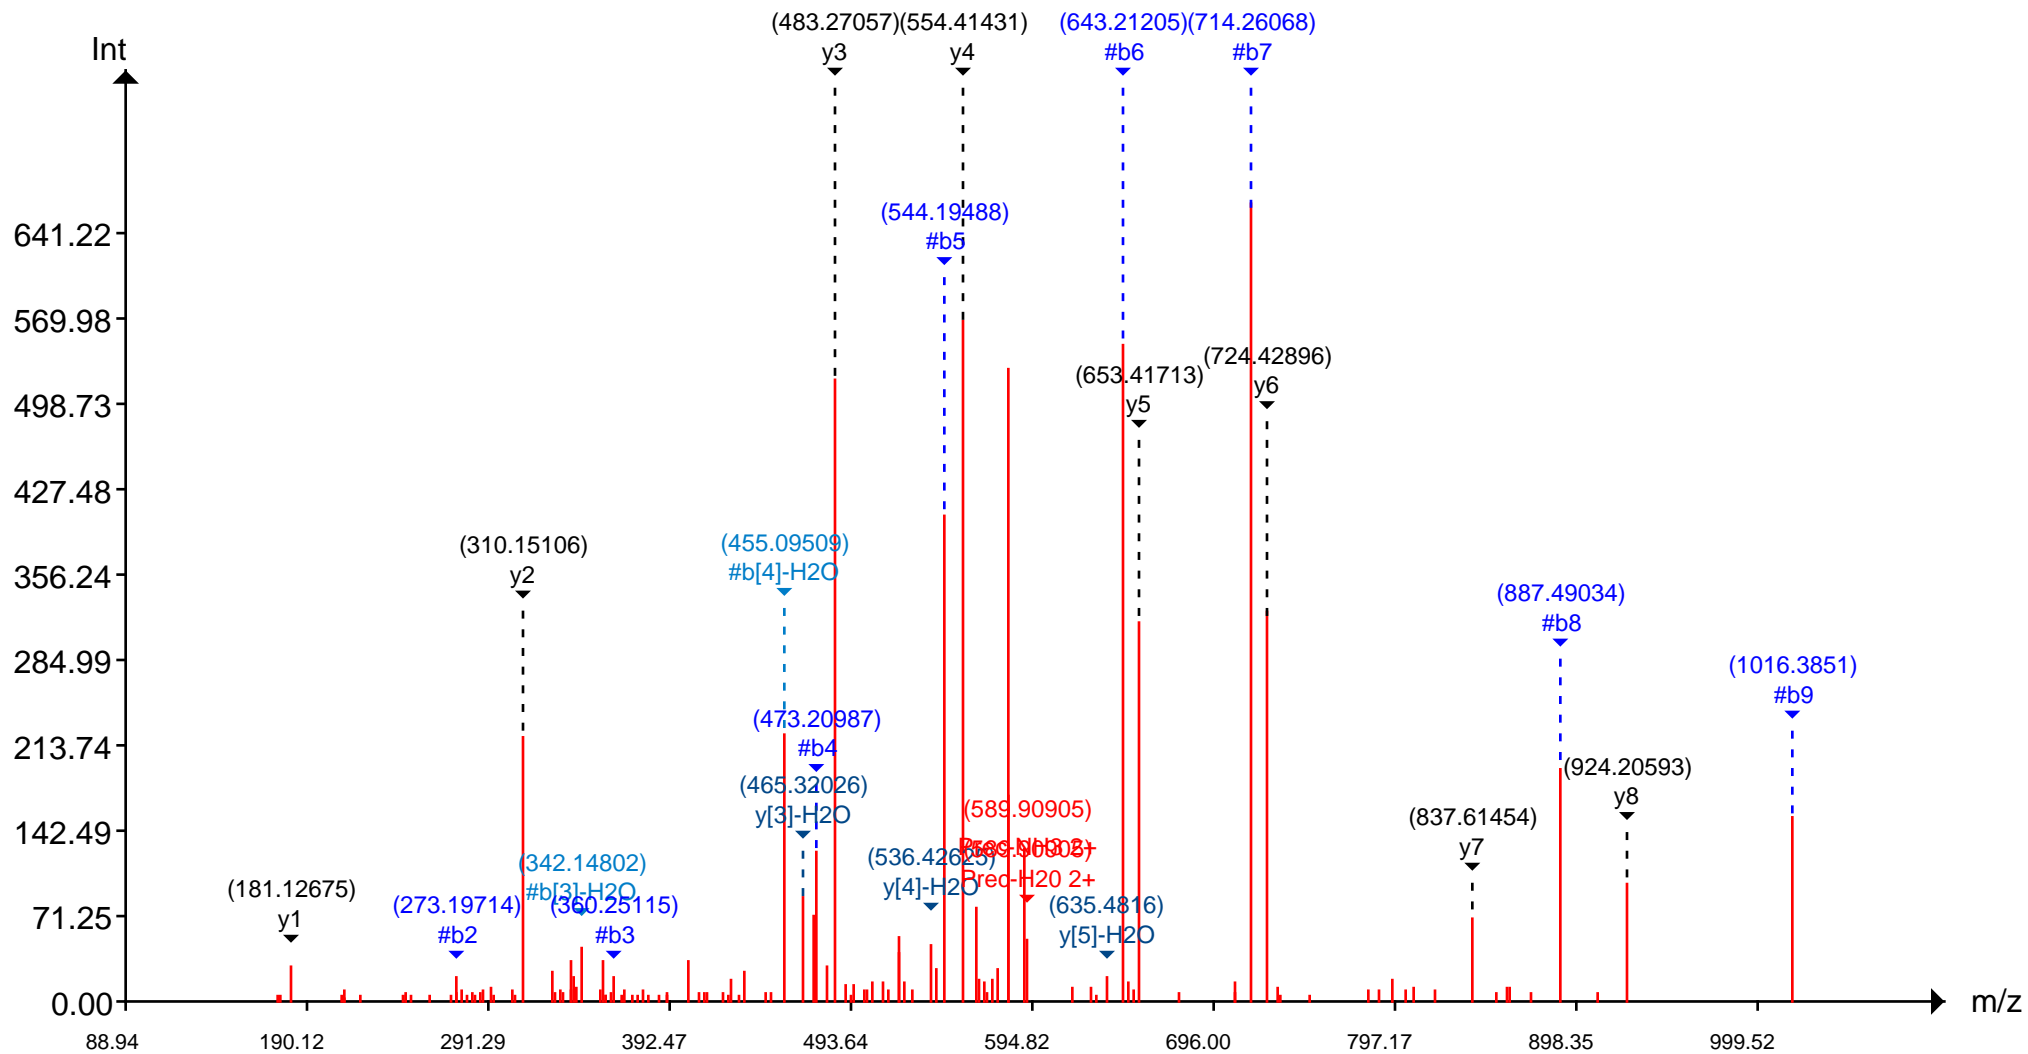

## Info

|                          |                                   |                           |         |
|--------------------------|-----------------------------------|---------------------------|---------|
| <b>Modified Sequence</b> | AcD3-NISLAVAK<AcD3K*>ER<C13>-COOH | <b>Ion score</b>          | 71.47   |
| <b>Protein</b>           | P70441                            | <b>Confidence level</b>   | 99.00%  |
| <b>Precursor m/z</b>     | 598.86464                         | <b>Identity Threshold</b> | 43.77   |
| <b>Charge</b>            | 2+                                | <b>Mass error</b>         | 8.76E-4 |

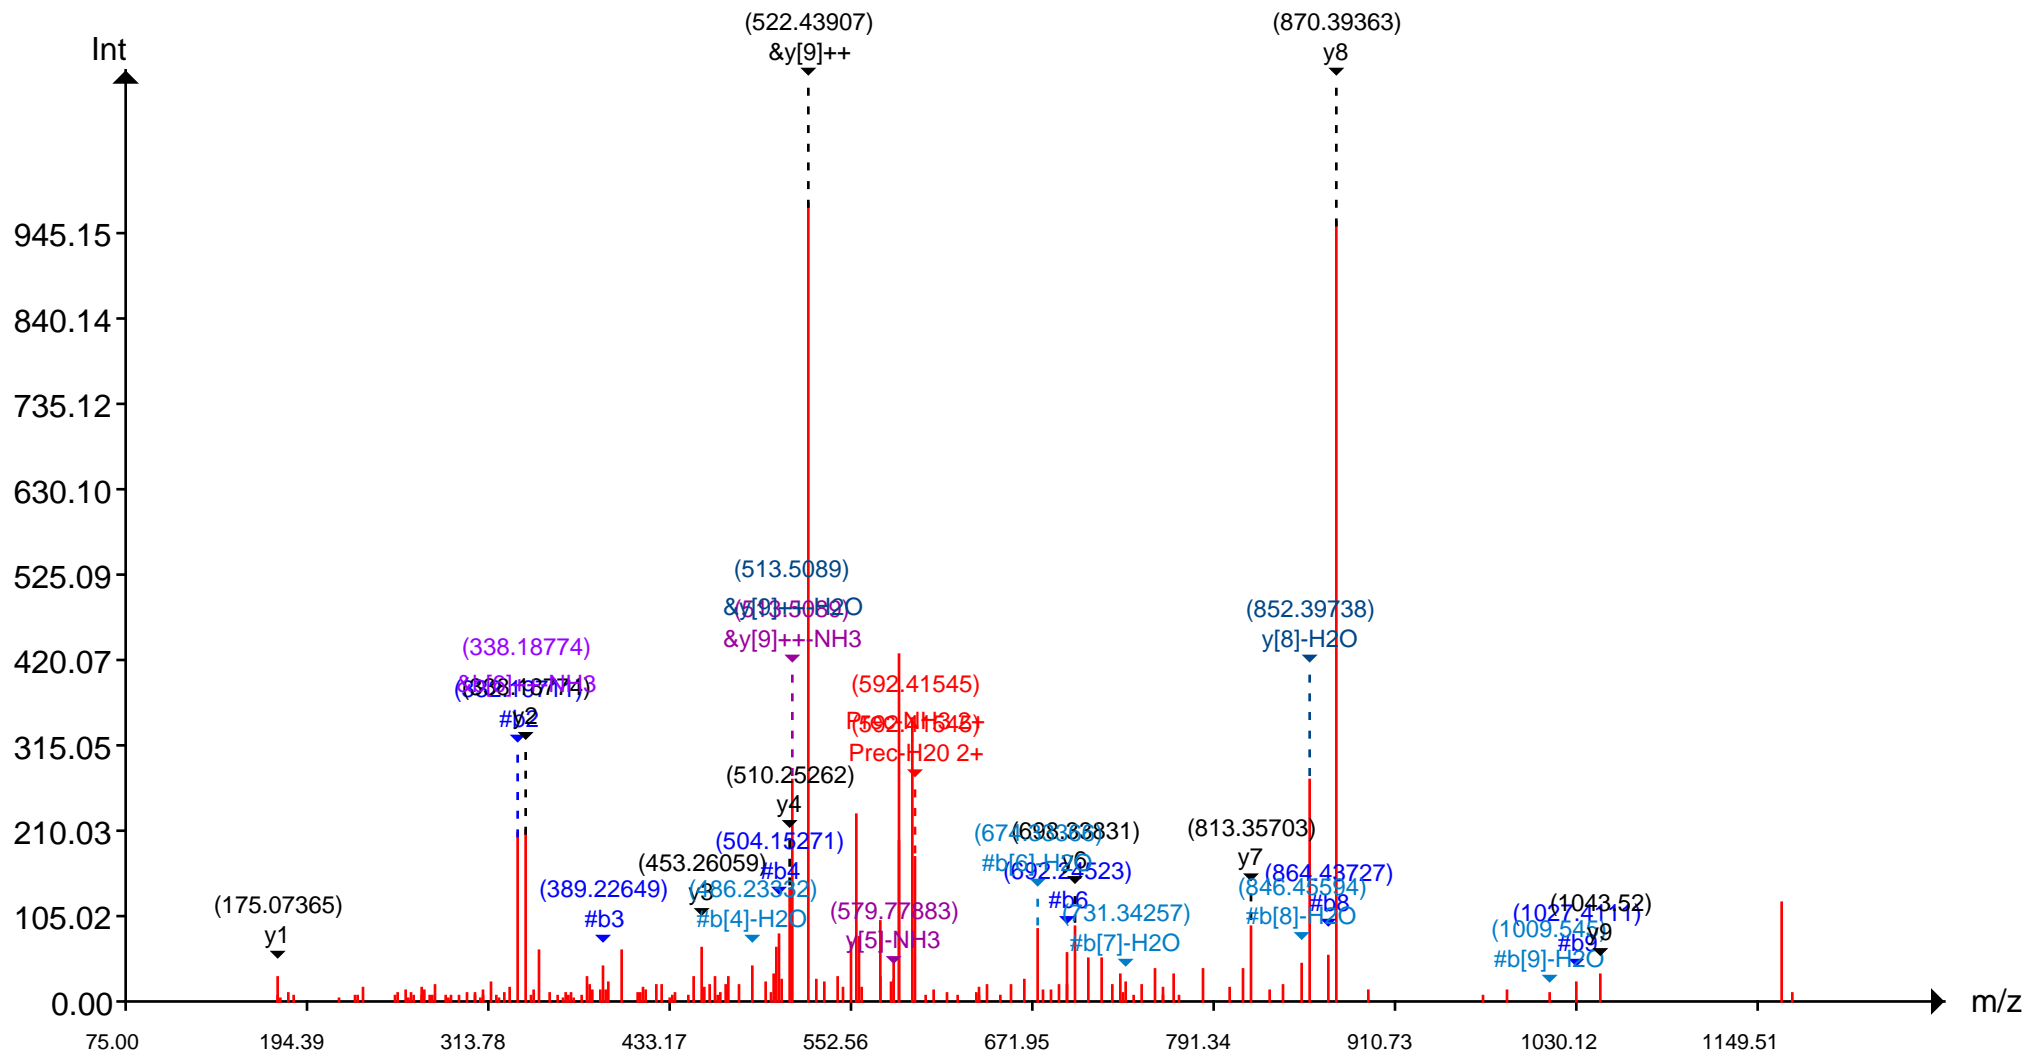

## Info

**Modified Sequence** AcD3-IK<AcD3K\*>GDTSGDYR-COOH

**Protein** P97429

**Precursor m/z** 601.30221

**Charge** 2+

**Ion score** 48.47

**Confidence level** 99.00%

**Identity Threshold** 47.20

**Mass error** 5.28E-4

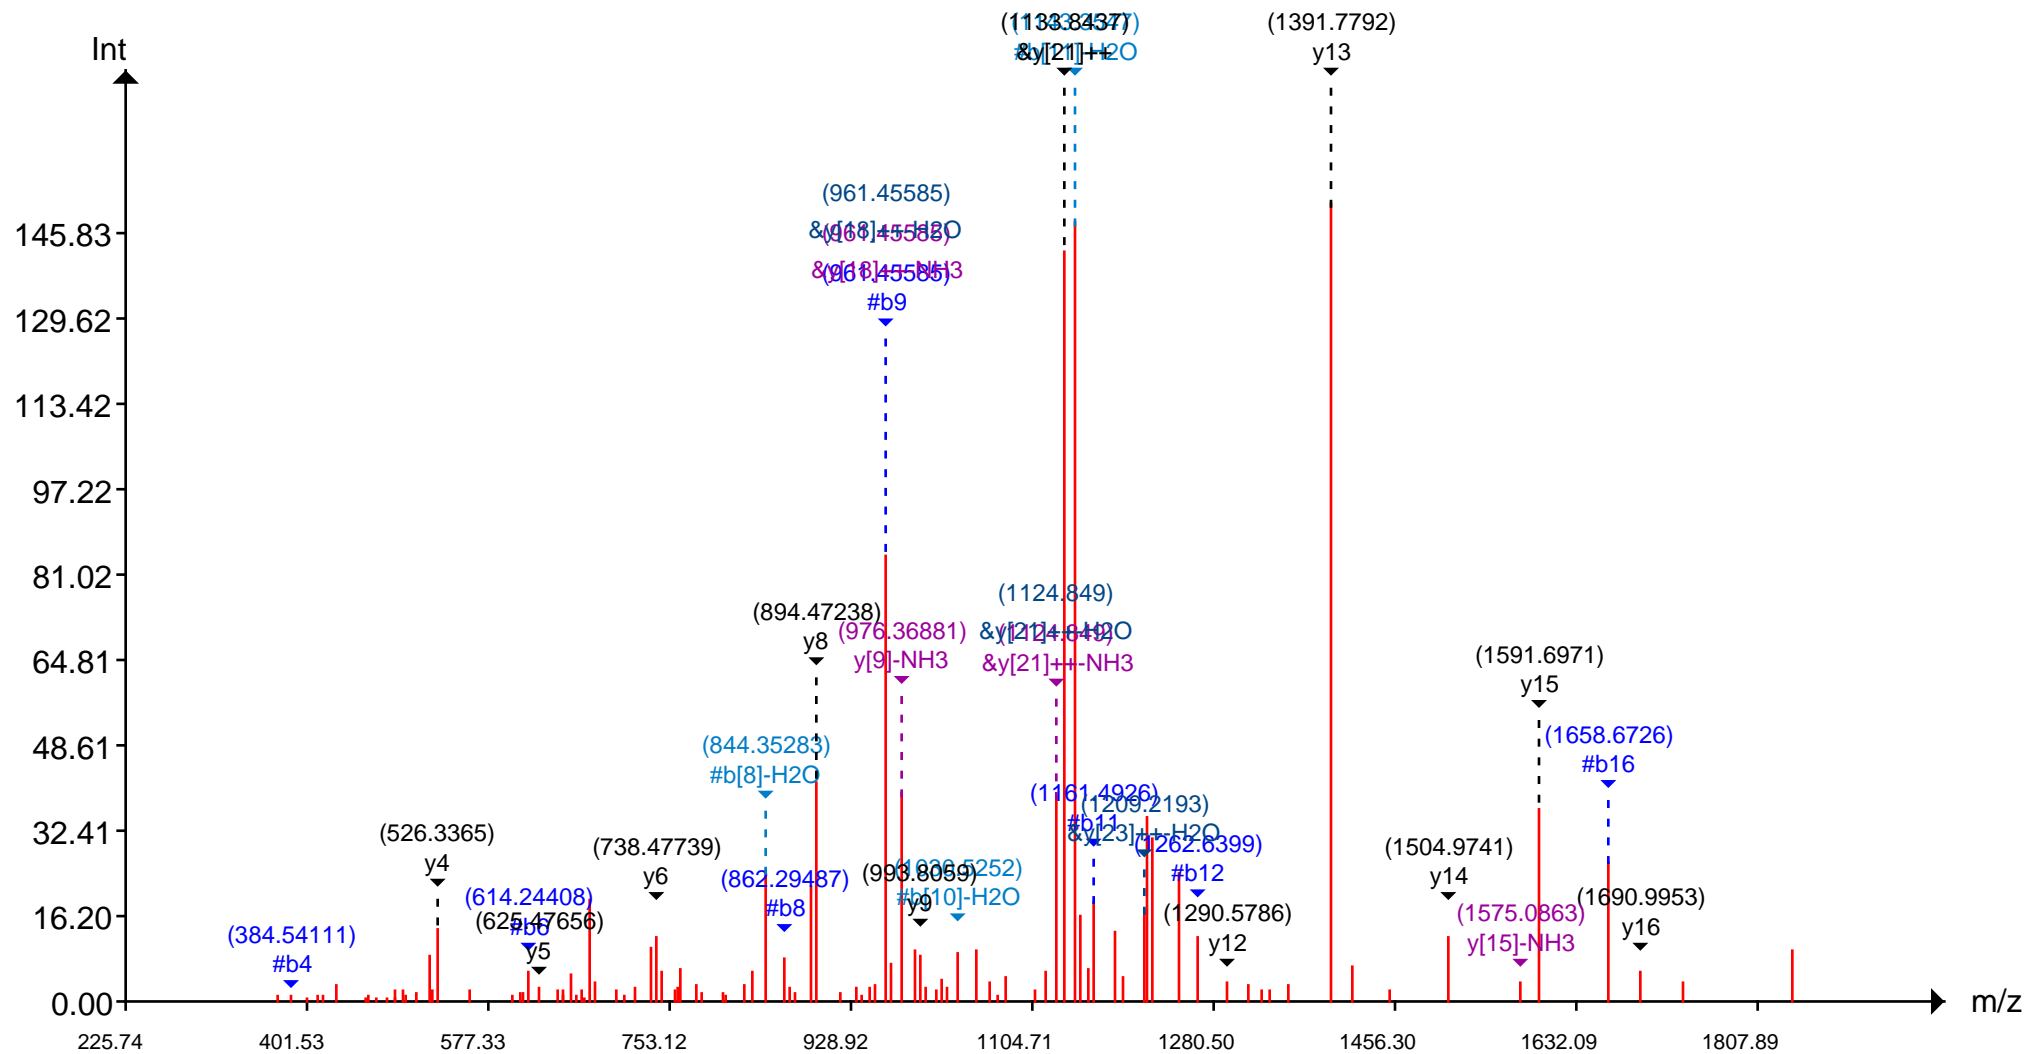

## Info

|                          |                                                         |                           |          |
|--------------------------|---------------------------------------------------------|---------------------------|----------|
| <b>Modified Sequence</b> | AcD3-AAVPGK<AcD3K*>TFVSITPAEVGVLVGK<AcD3K*>DR<C13>-COOH | <b>Ion score</b>          | 42.78    |
| <b>Protein</b>           | P62962                                                  | <b>Confidence level</b>   | 99.00%   |
| <b>Precursor m/z</b>     | 1276.7423                                               | <b>Identity Threshold</b> | 42.20    |
| <b>Charge</b>            | 2+                                                      | <b>Mass error</b>         | 0.003297 |

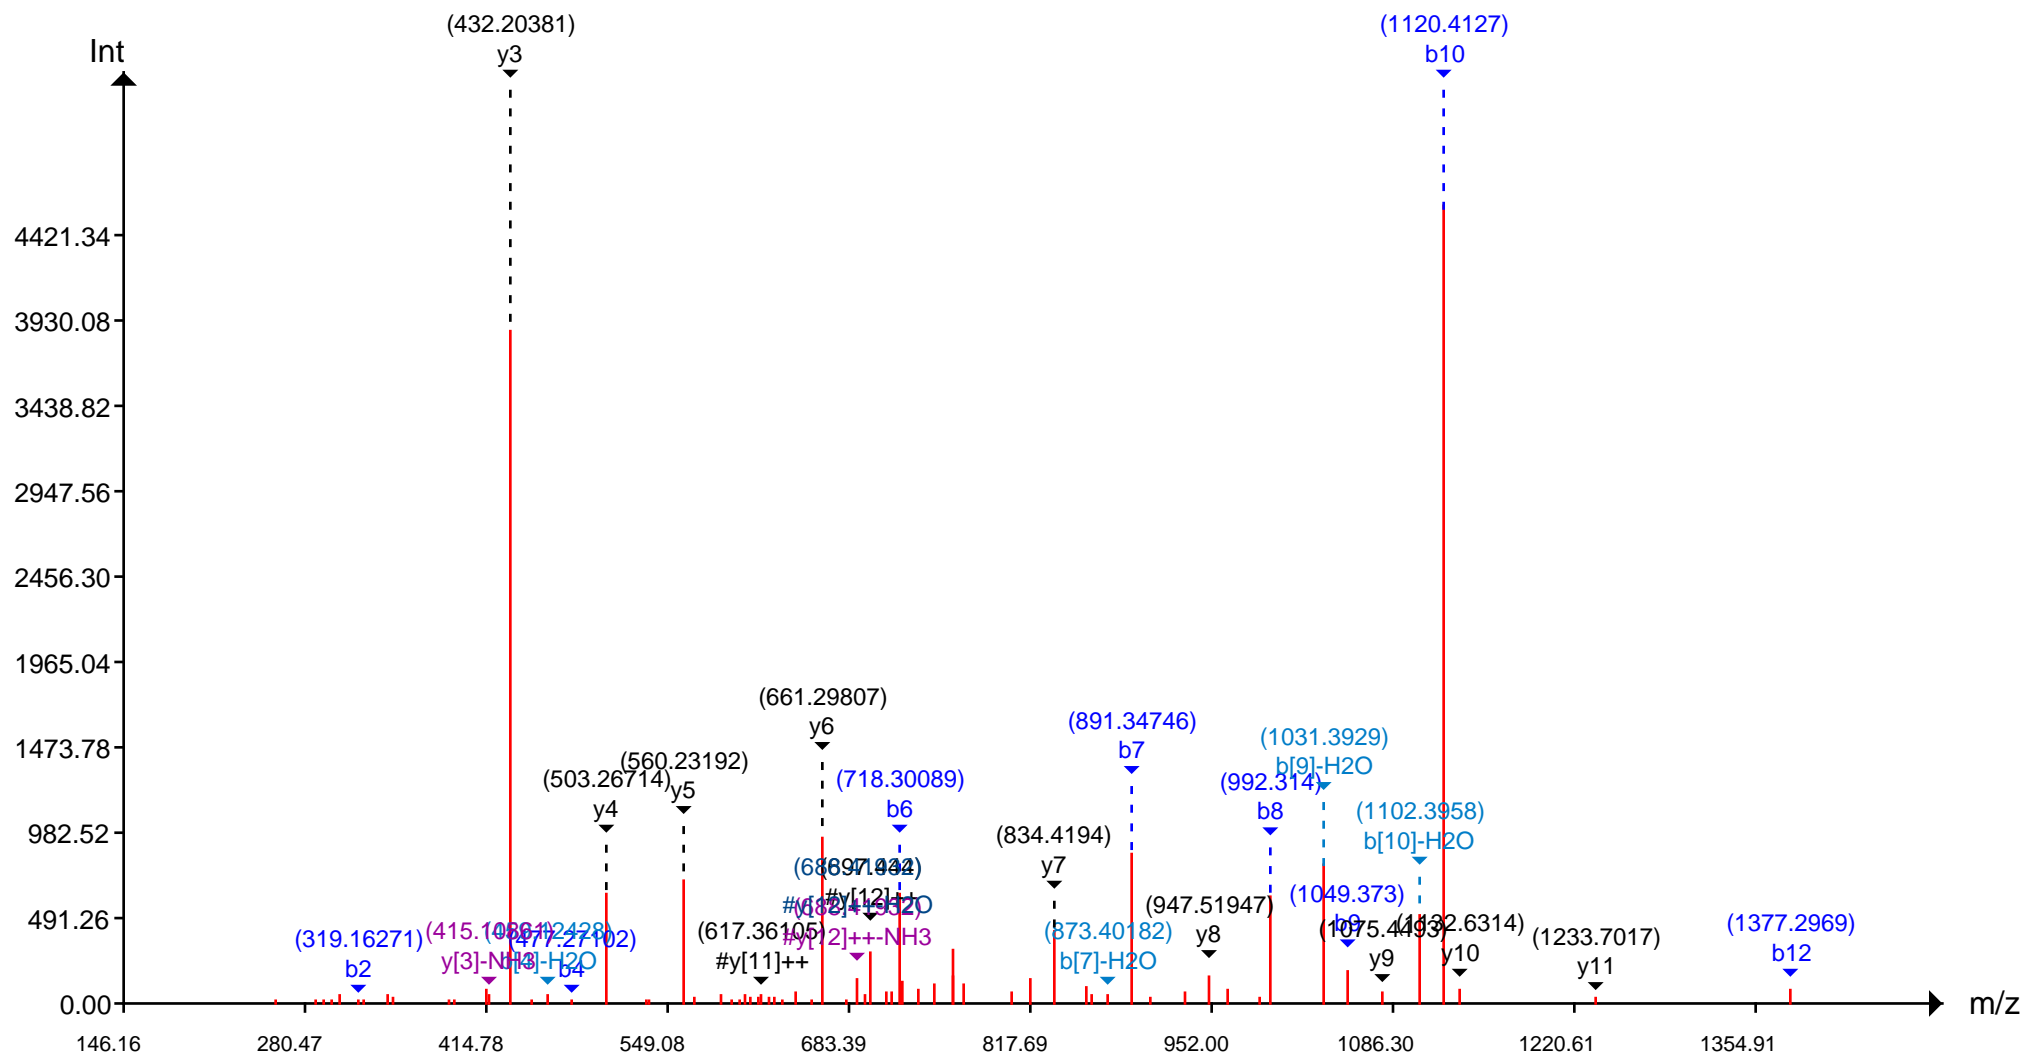

## Info

**Modified Sequence** AcD3-LC<Cmm\*>TGQIK<AcD3K\*>TGAPC<Cmm\*>R-COOH

**Ion score** 75.94

**Protein** P17182, P21550, P17183

**Confidence level** 99.00%

**Precursor m/z** 776.39876

**Identity Threshold** 47.95

**Charge** 2+

**Mass error** 0.001367

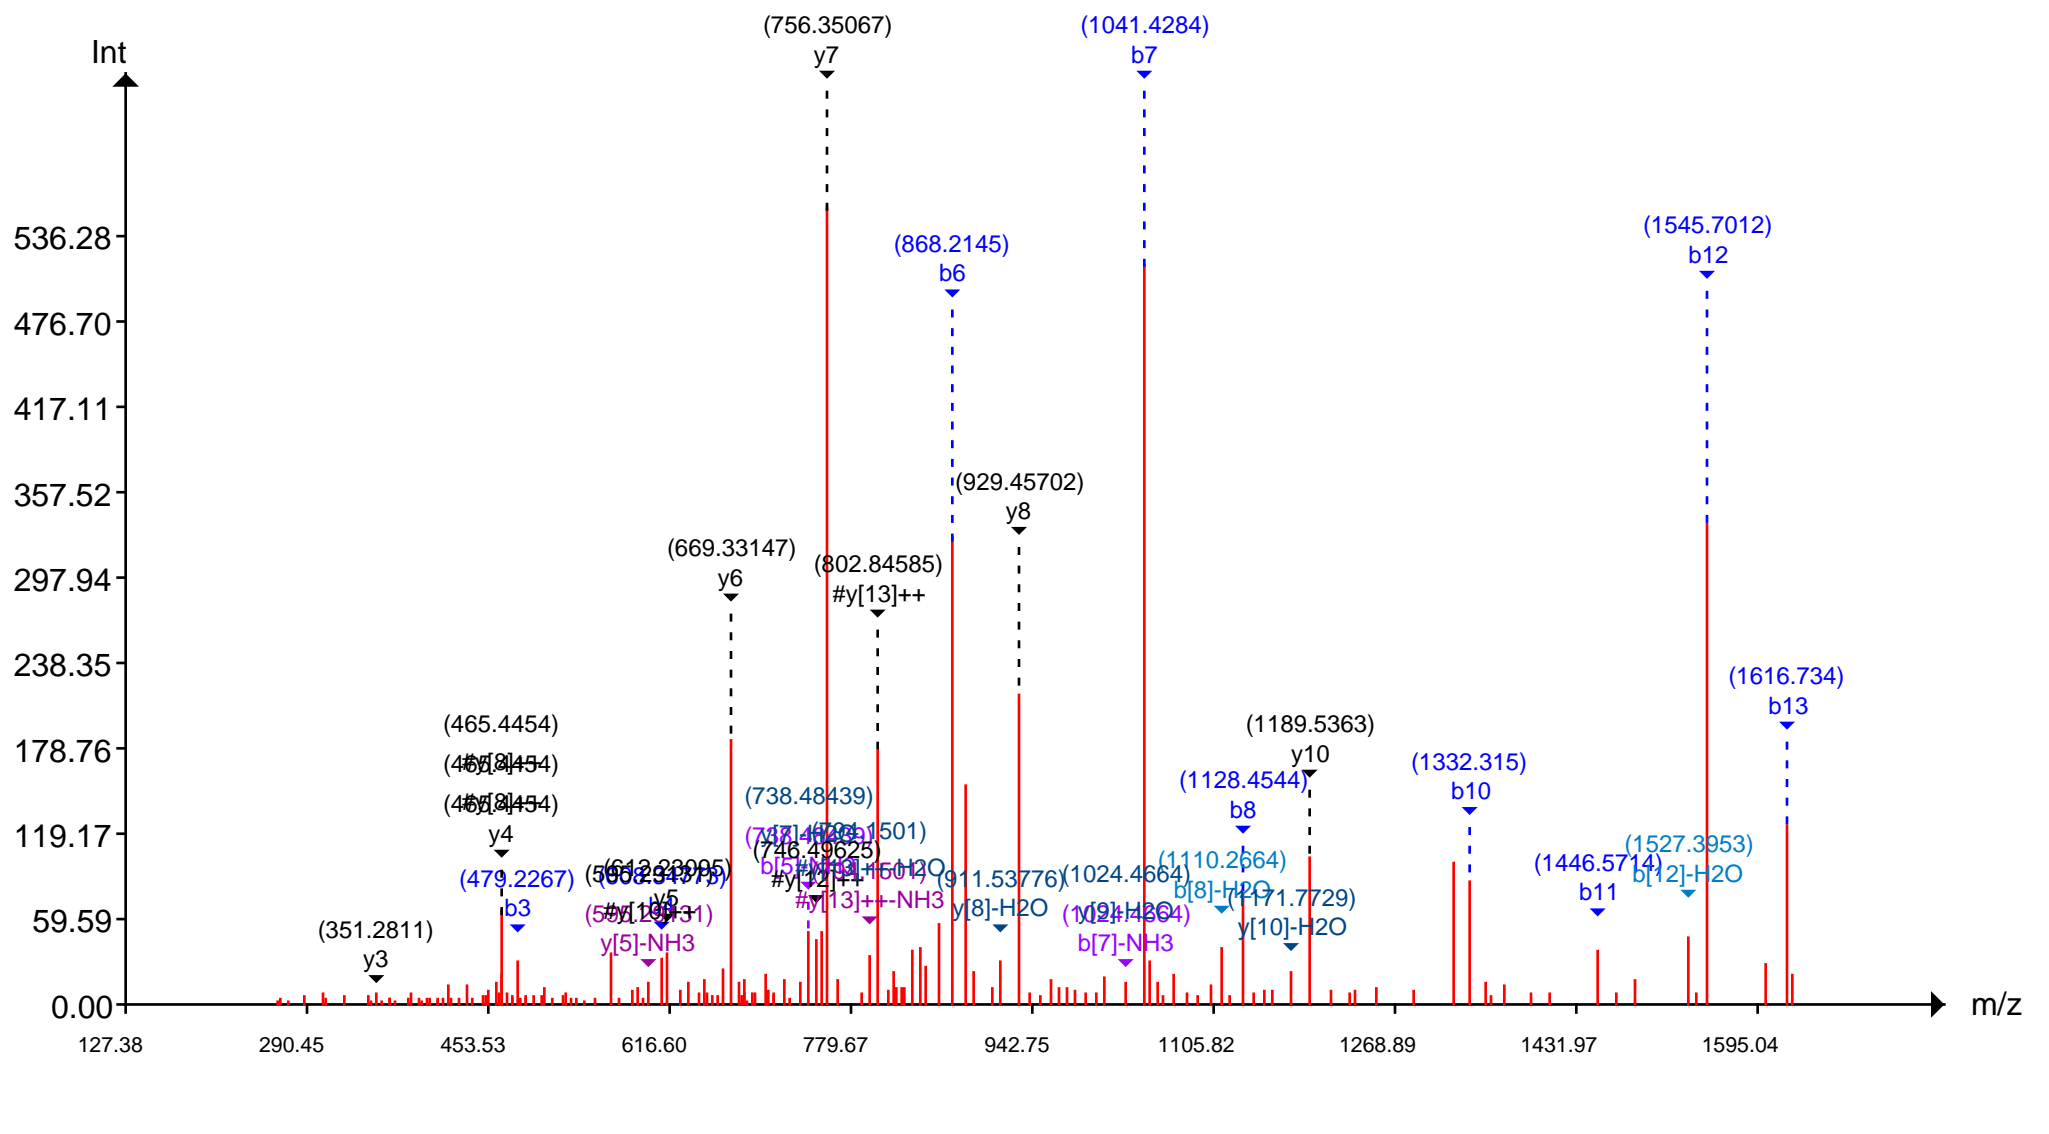

| Info                     |                                                                 |                           |          |
|--------------------------|-----------------------------------------------------------------|---------------------------|----------|
| <b>Modified Sequence</b> | AcD3-M<Mox*>LK<AcD3K*>EM<Mox*>IK<AcD3K*>SGM<Mox*>NVAR<C13>-COOH | <b>Ion score</b>          | 60.1     |
| <b>Protein</b>           | P52480                                                          | <b>Confidence level</b>   | 99.00%   |
| <b>Precursor m/z</b>     | 898.97238                                                       | <b>Identity Threshold</b> | 48.03    |
| <b>Charge</b>            | 2+                                                              | <b>Mass error</b>         | 0.001436 |

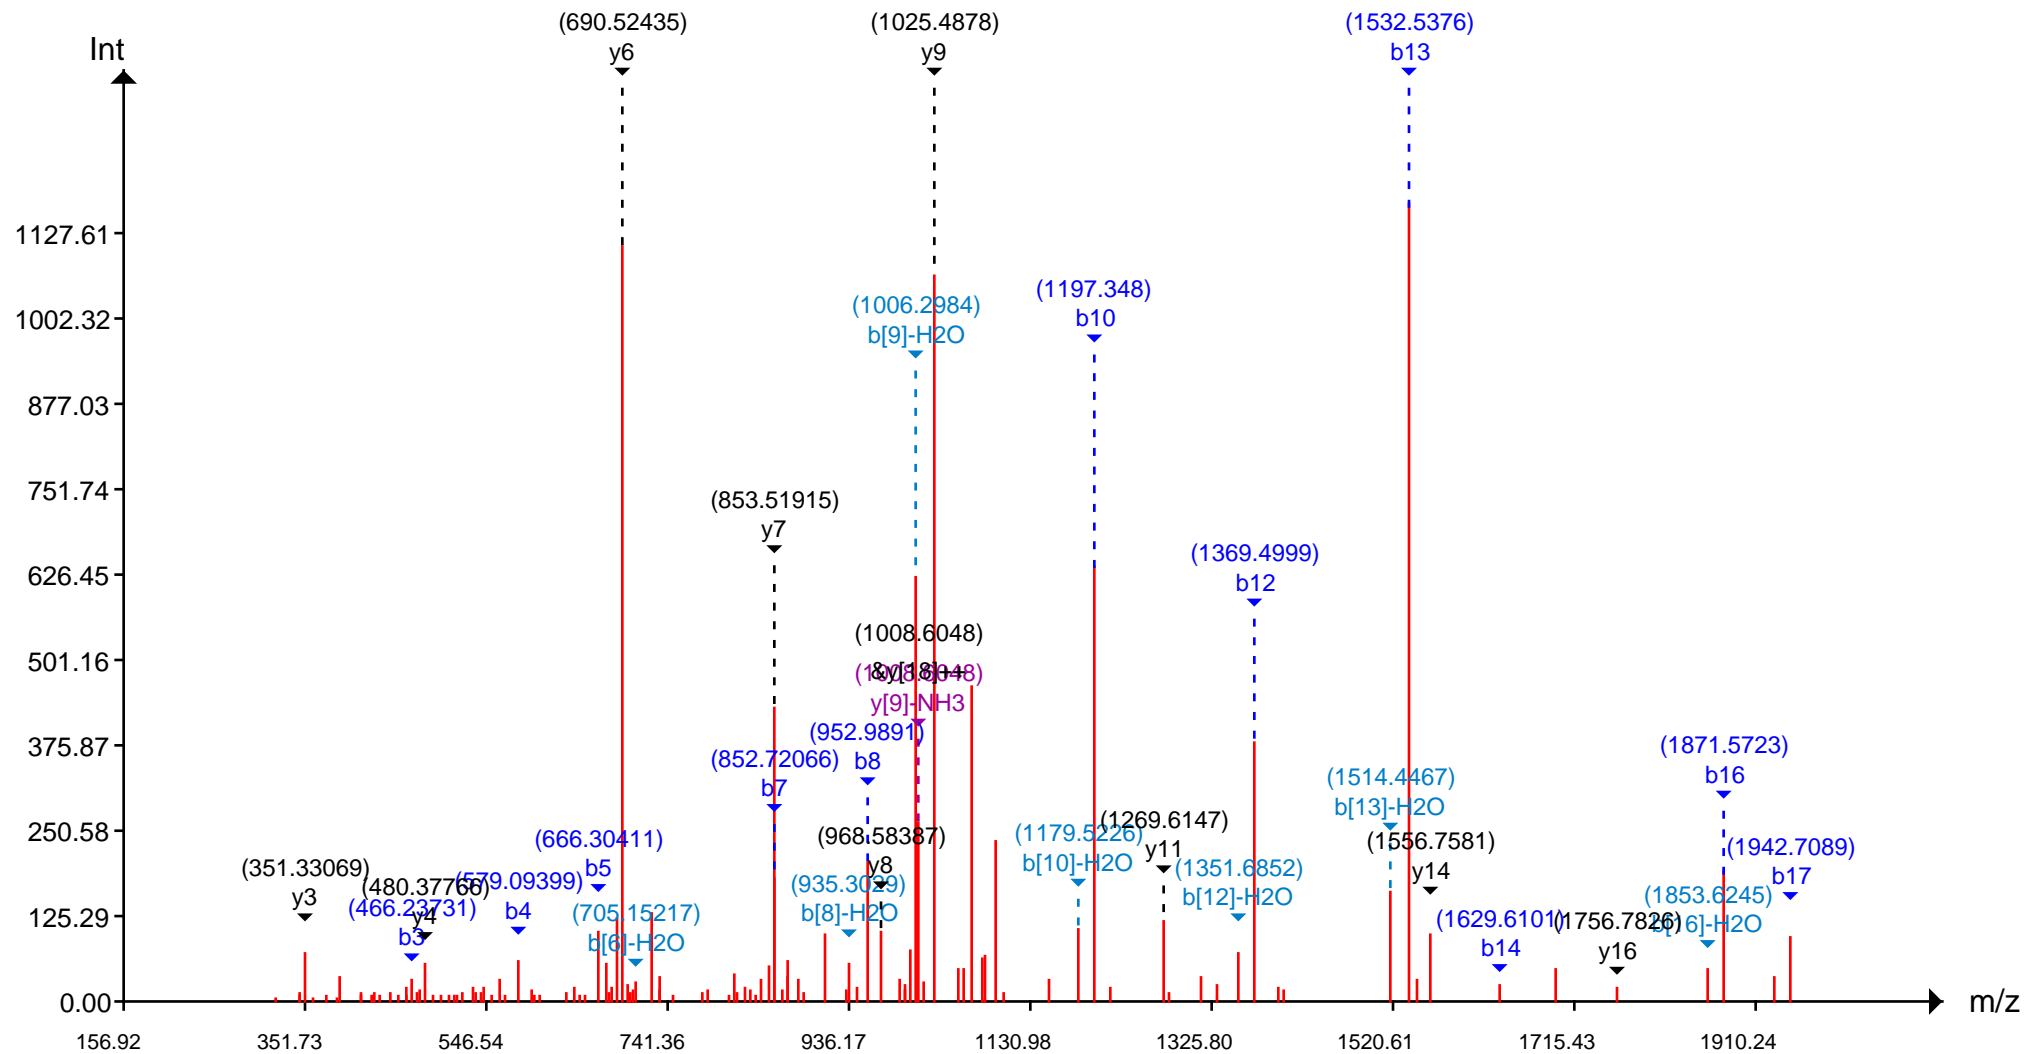

## Info

|                          |                                                        |                           |          |
|--------------------------|--------------------------------------------------------|---------------------------|----------|
| <b>Modified Sequence</b> | AcD3-C<Cmm*>IM<Mox*>LSGETAK<AcD3K*>GDYPLEAVR<C13>-COOH | <b>Ion score</b>          | 71.61    |
| <b>Protein</b>           | P52480                                                 | <b>Confidence level</b>   | 99.00%   |
| <b>Precursor m/z</b>     | 1111.5577                                              | <b>Identity Threshold</b> | 47.73    |
| <b>Charge</b>            | 2+                                                     | <b>Mass error</b>         | 0.003558 |







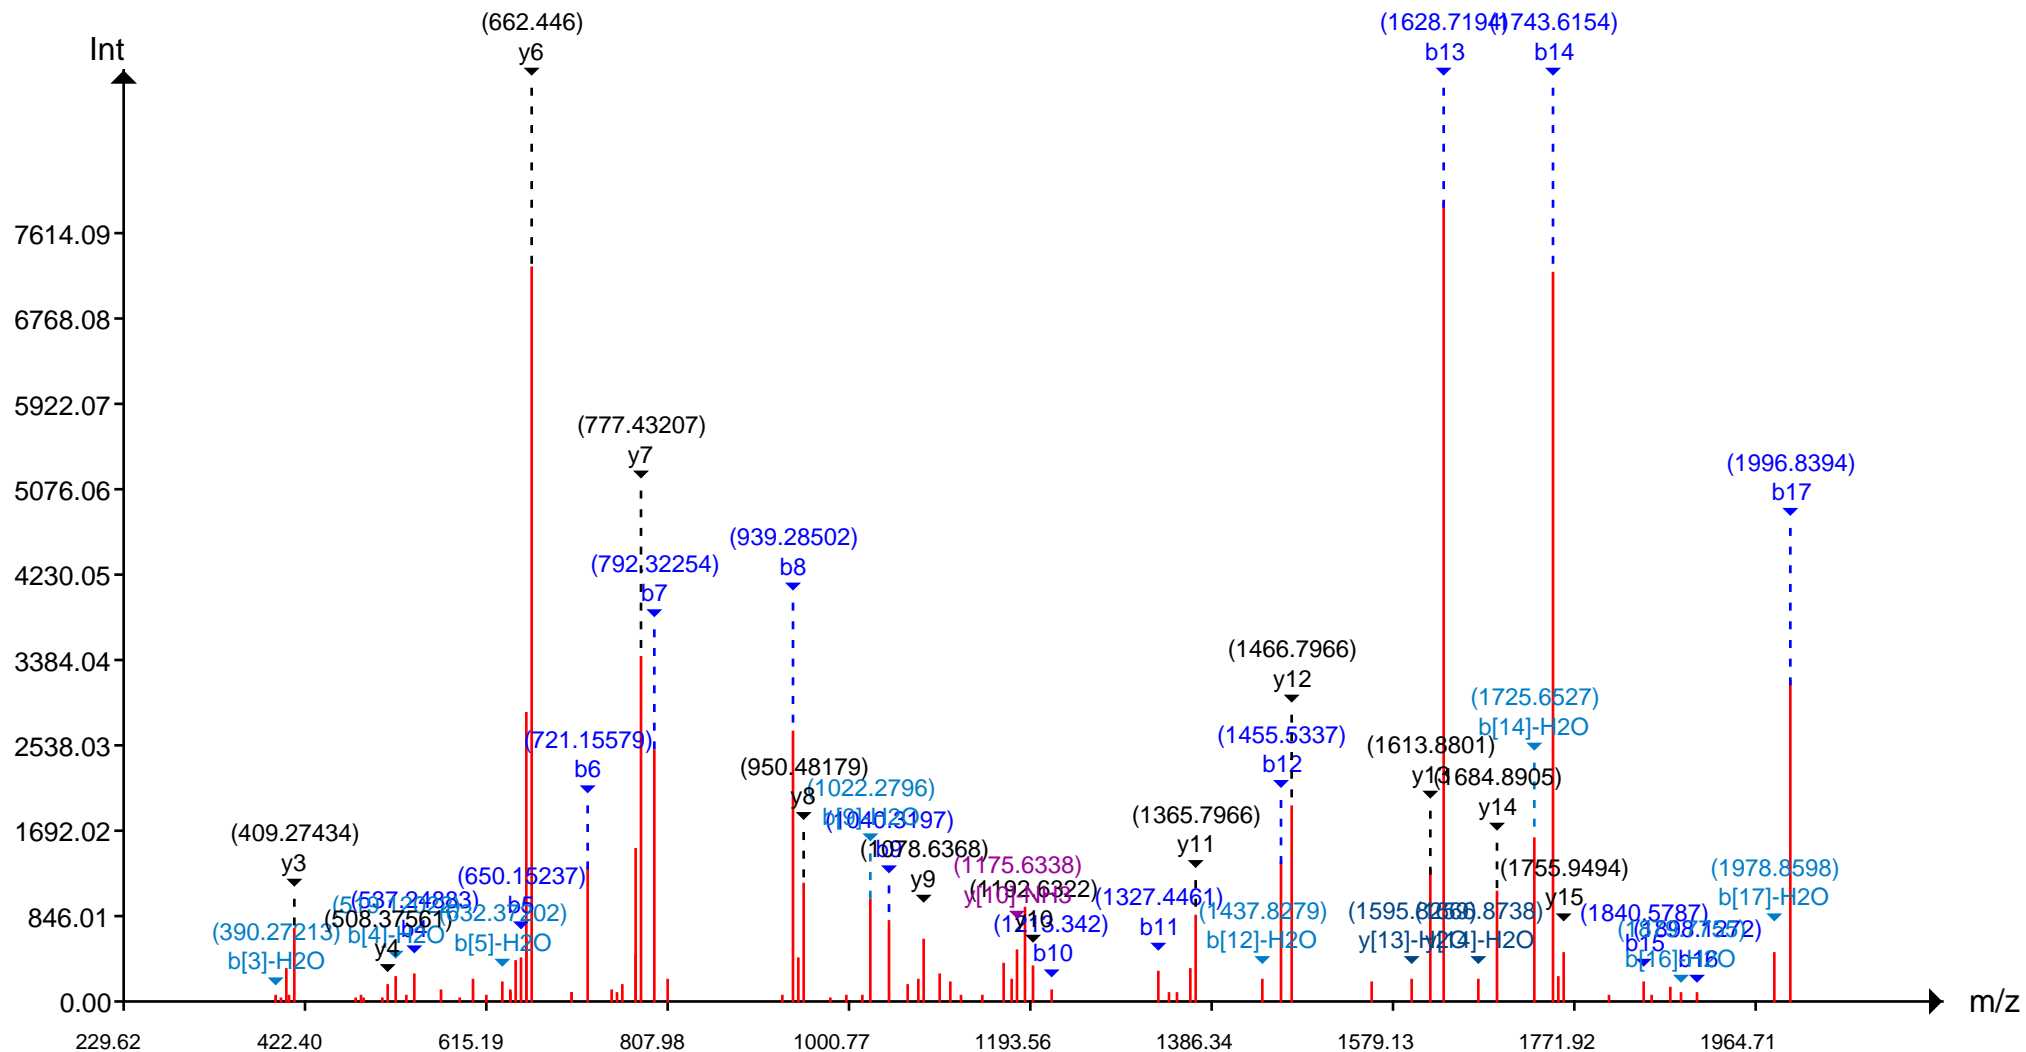

## Info

|                          |                                                          |                           |          |
|--------------------------|----------------------------------------------------------|---------------------------|----------|
| <b>Modified Sequence</b> | AcD3-M<Mox*>NTELAFTK<AcD3K*>NQK<AcD3K*>DPGVLDR<C13>-COOH | <b>Ion score</b>          | 109.27   |
| <b>Protein</b>           | P50543                                                   | <b>Confidence level</b>   | 99.00%   |
| <b>Precursor m/z</b>     | 1203.1261                                                | <b>Identity Threshold</b> | 47.86    |
| <b>Charge</b>            | 2+                                                       | <b>Mass error</b>         | 0.002647 |

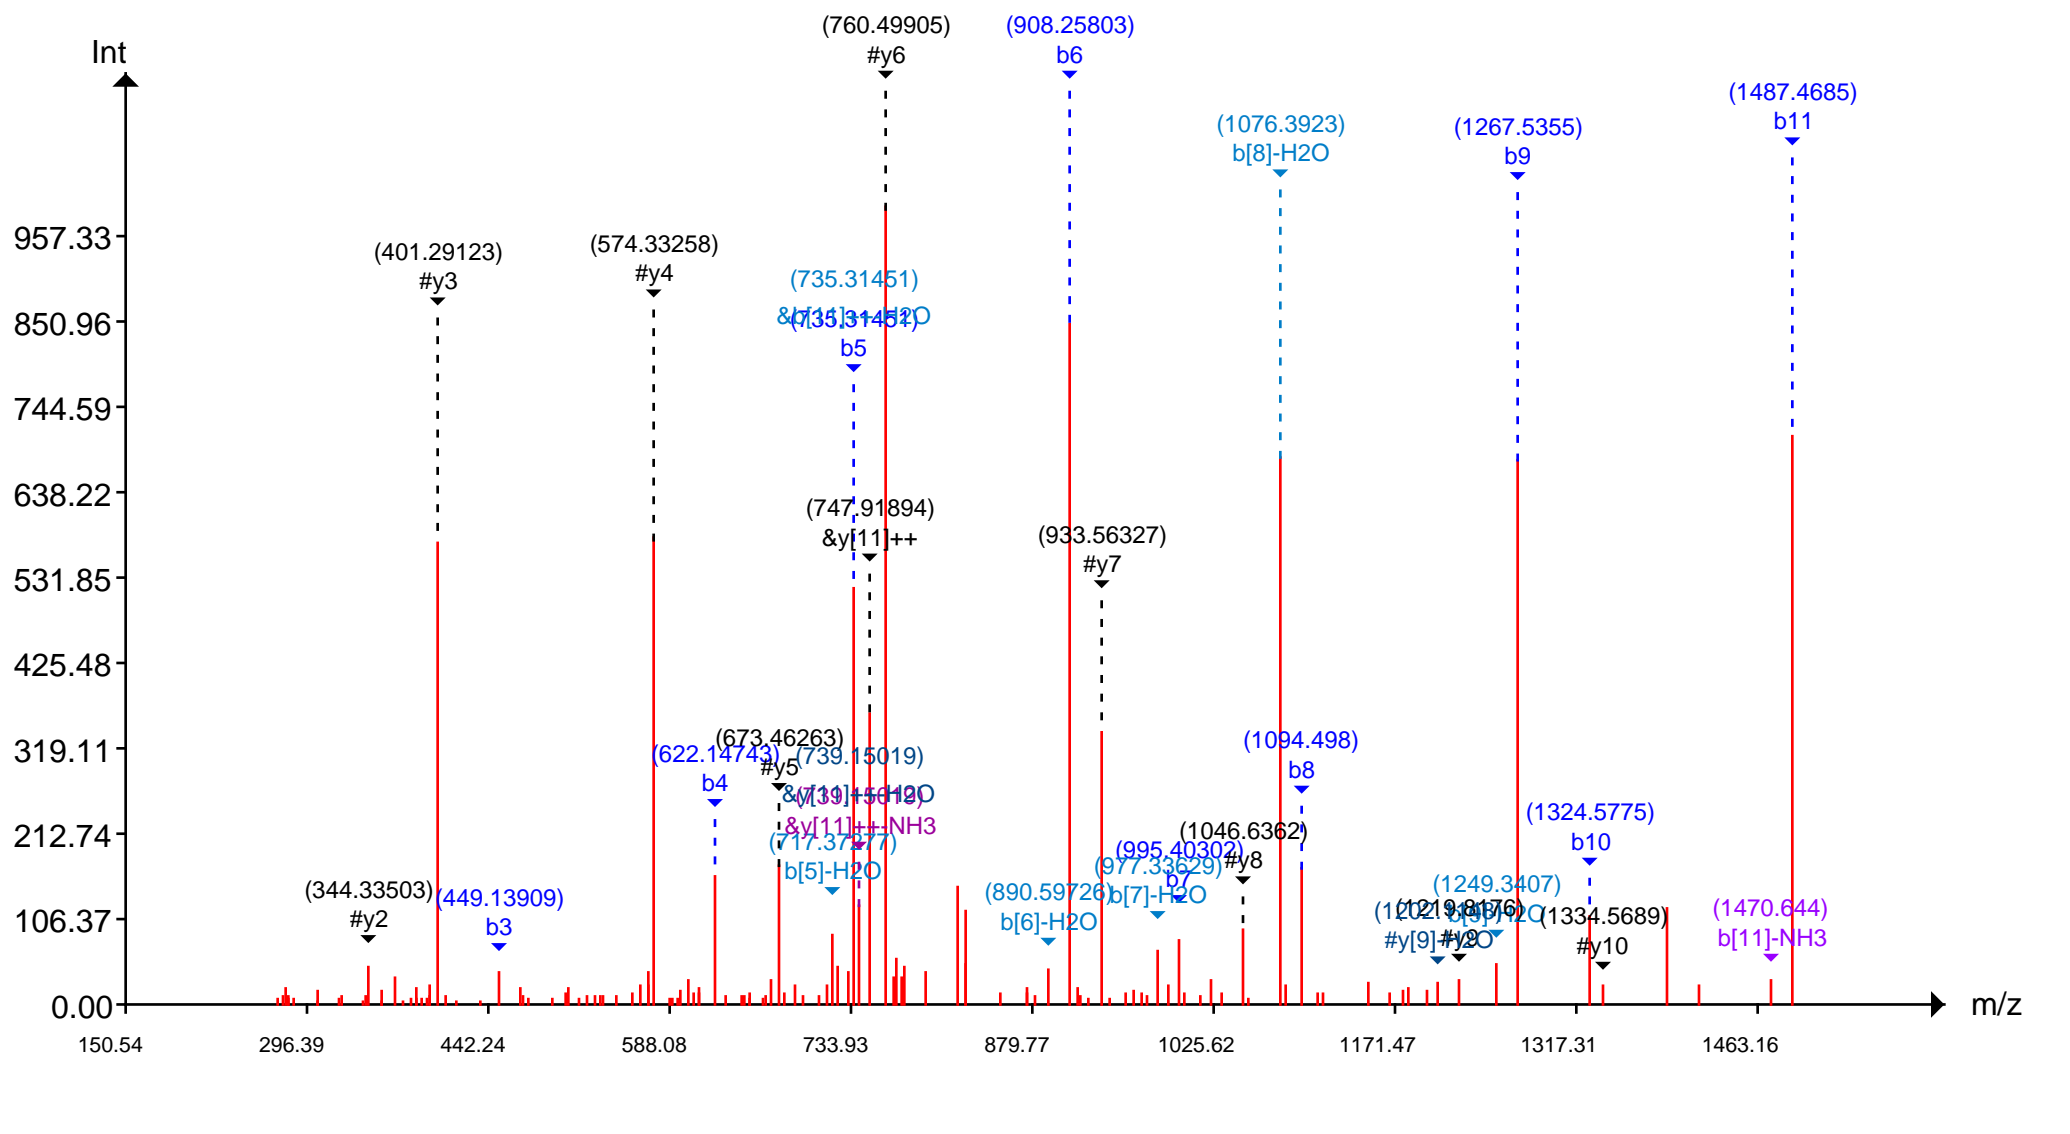

| Info                     |                                                           |                           |          |
|--------------------------|-----------------------------------------------------------|---------------------------|----------|
| <b>Modified Sequence</b> | AcD3-QC<Cmm*>DK<AcD3K*>LK<AcD3K*>SVK<AcD3K*>GYR<C13>-COOH | <b>Ion score</b>          | 72.65    |
| <b>Protein</b>           | P21981                                                    | <b>Confidence level</b>   | 99.00%   |
| <b>Precursor m/z</b>     | 834.4691                                                  | <b>Identity Threshold</b> | 46.65    |
| <b>Charge</b>            | 2+                                                        | <b>Mass error</b>         | 0.003894 |

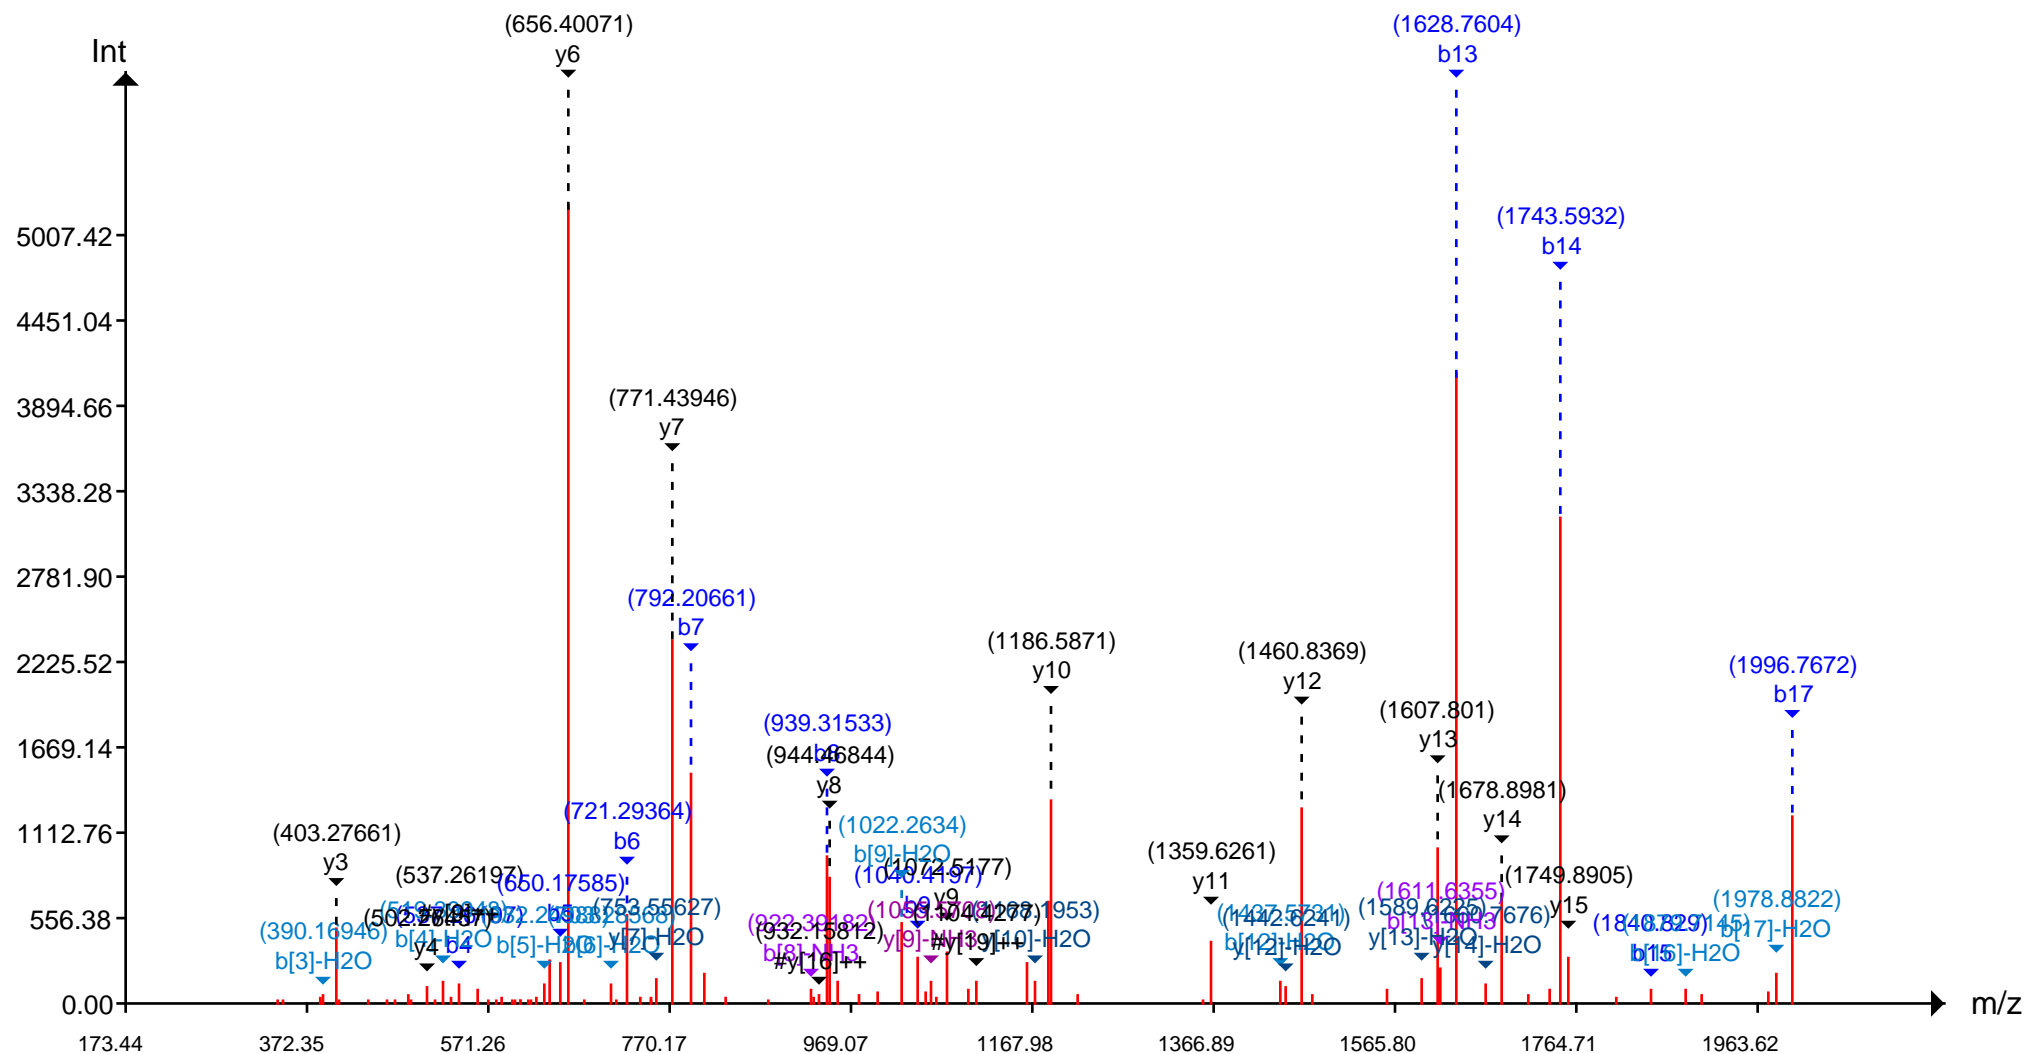

## Info

|                          |                                                       |                           |          |
|--------------------------|-------------------------------------------------------|---------------------------|----------|
| <b>Modified Sequence</b> | AcD3-M<Mox*>NTELAAF TK<AcD3K*>NQK<AcD3K*>DPGVLDR-COOH | <b>Ion score</b>          | 118.83   |
| <b>Protein</b>           | P50543                                                | <b>Confidence level</b>   | 99.00%   |
| <b>Precursor m/z</b>     | 1200.1159                                             | <b>Identity Threshold</b> | 47.90    |
| <b>Charge</b>            | 2+                                                    | <b>Mass error</b>         | 0.002389 |

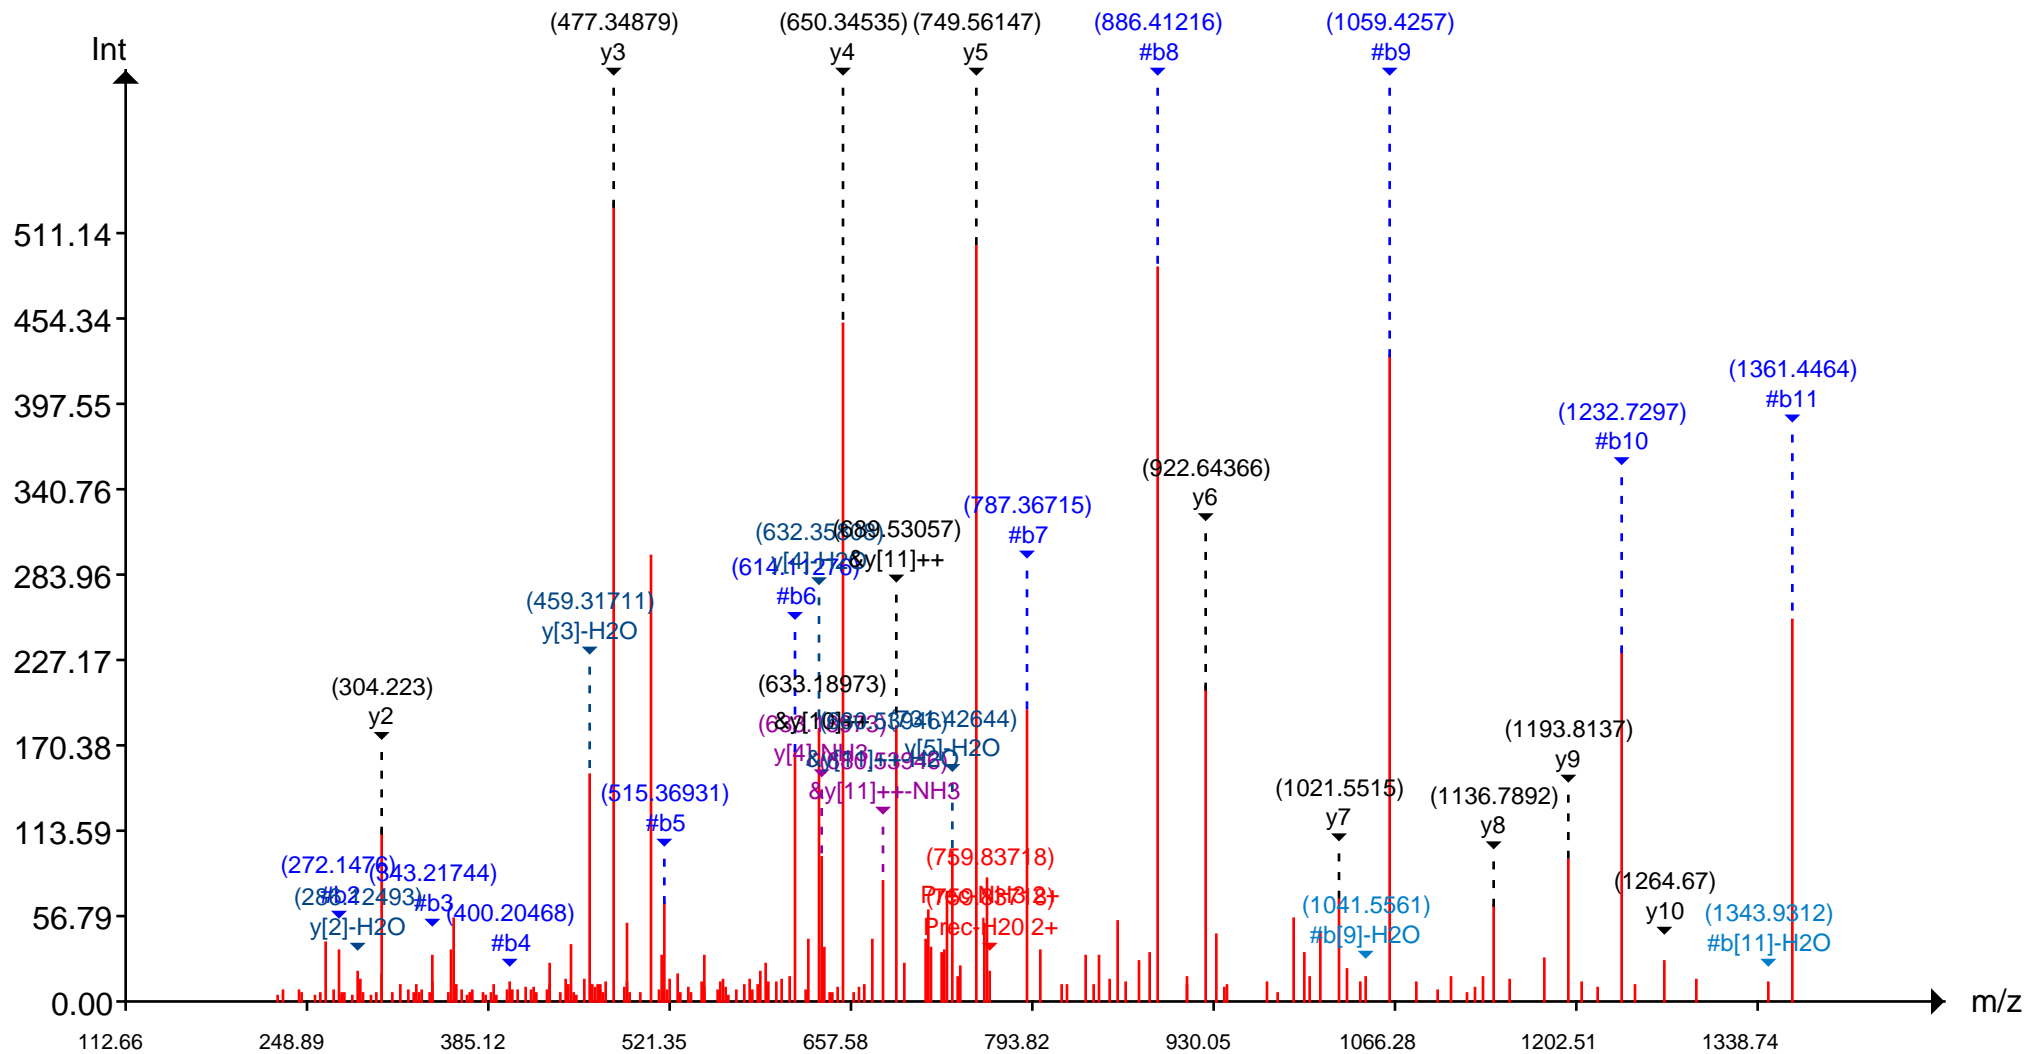

## Info

**Modified Sequence** AcD3-ILAGDVK<AcD3K\*>VK<AcD3K\*>K<AcD3K\*>ER-COOH

**Ion score** 72.26

**Protein** Q8K3X4

**Confidence level** 99.00%

**Precursor m/z** 768.48159

**Identity Threshold** 39.38

**Charge** 2+

**Mass error** 0.001423

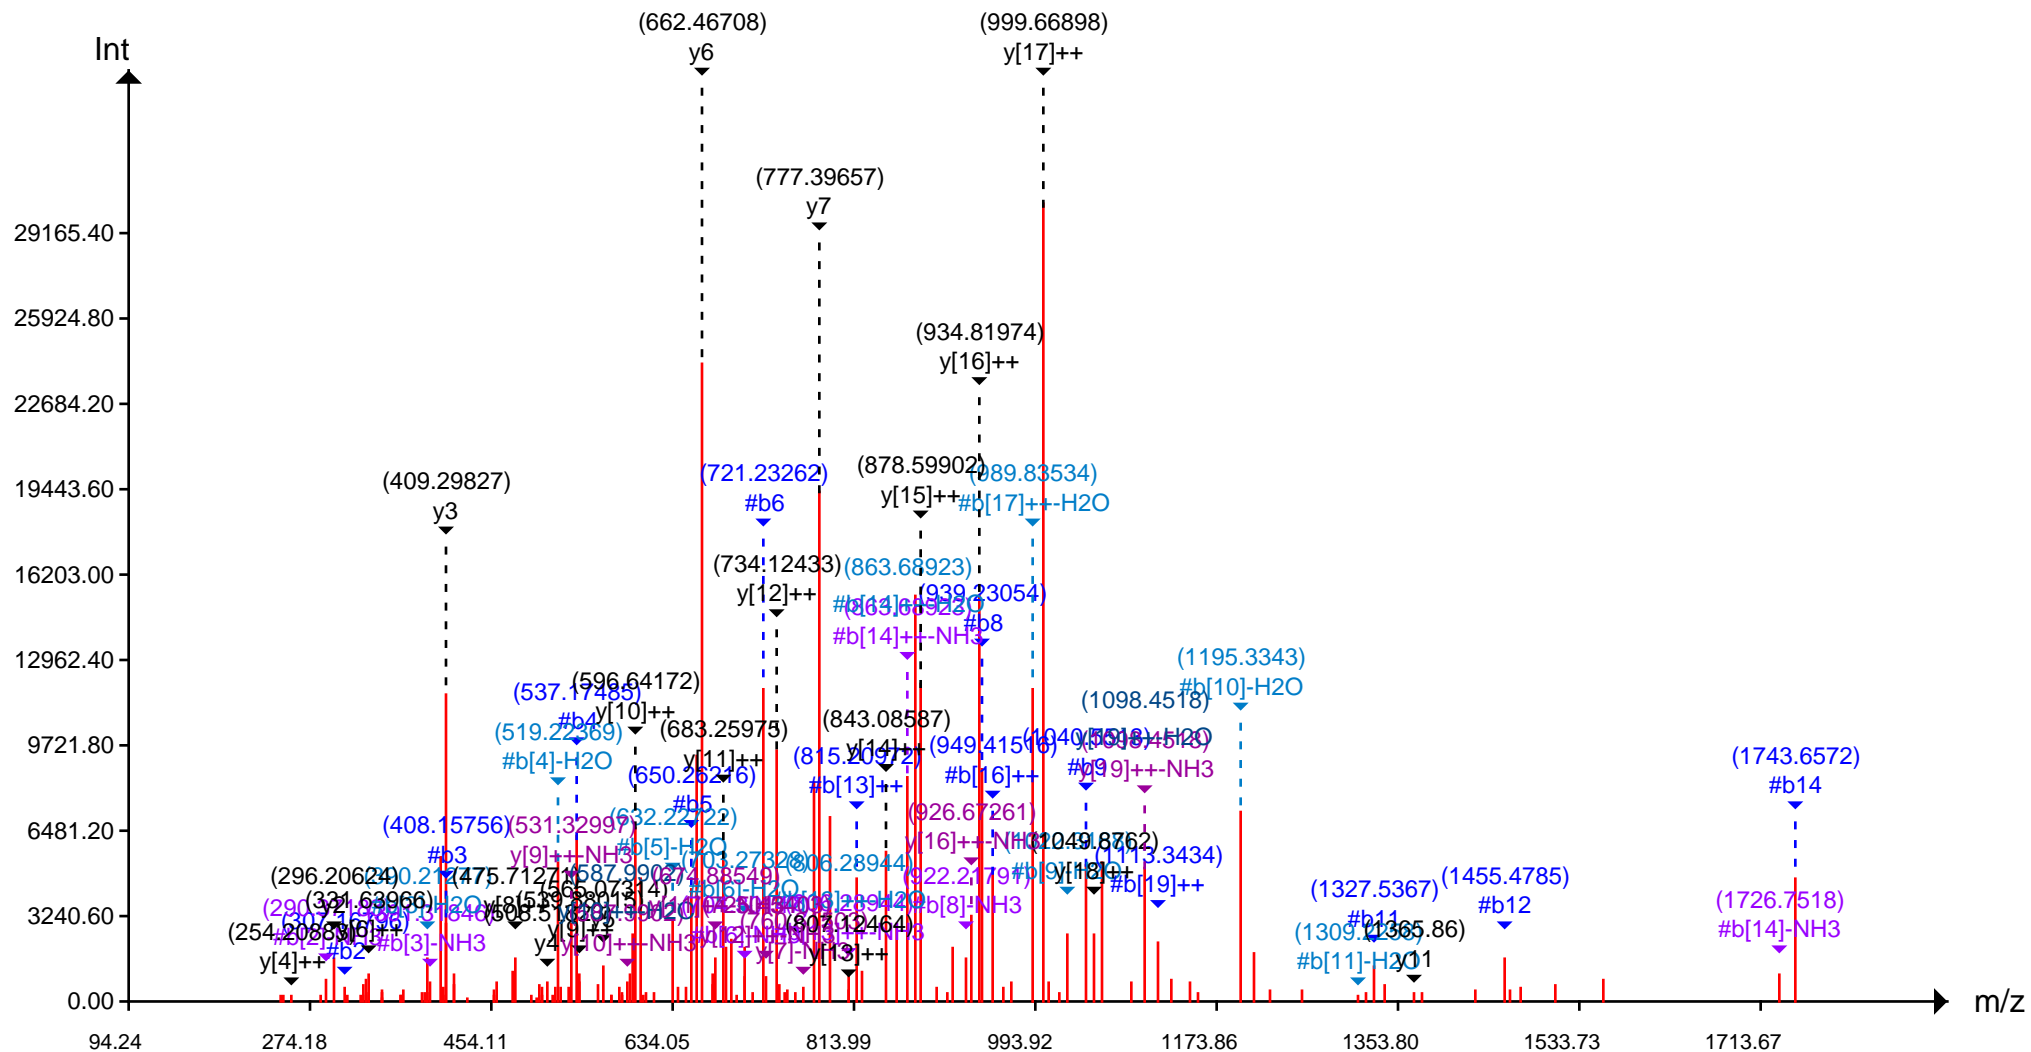

## Info

|                          |                                                          |                           |          |
|--------------------------|----------------------------------------------------------|---------------------------|----------|
| <b>Modified Sequence</b> | AcD3-M<Mox*>NTELAFTK<AcD3K*>NQK<AcD3K*>DPGVLDK<C13>-COOH | <b>Ion score</b>          | 66.35    |
| <b>Protein</b>           | P50543                                                   | <b>Confidence level</b>   | 99.00%   |
| <b>Precursor m/z</b>     | 802.41931                                                | <b>Identity Threshold</b> | 47.88    |
| <b>Charge</b>            | 3+                                                       | <b>Mass error</b>         | 0.001101 |

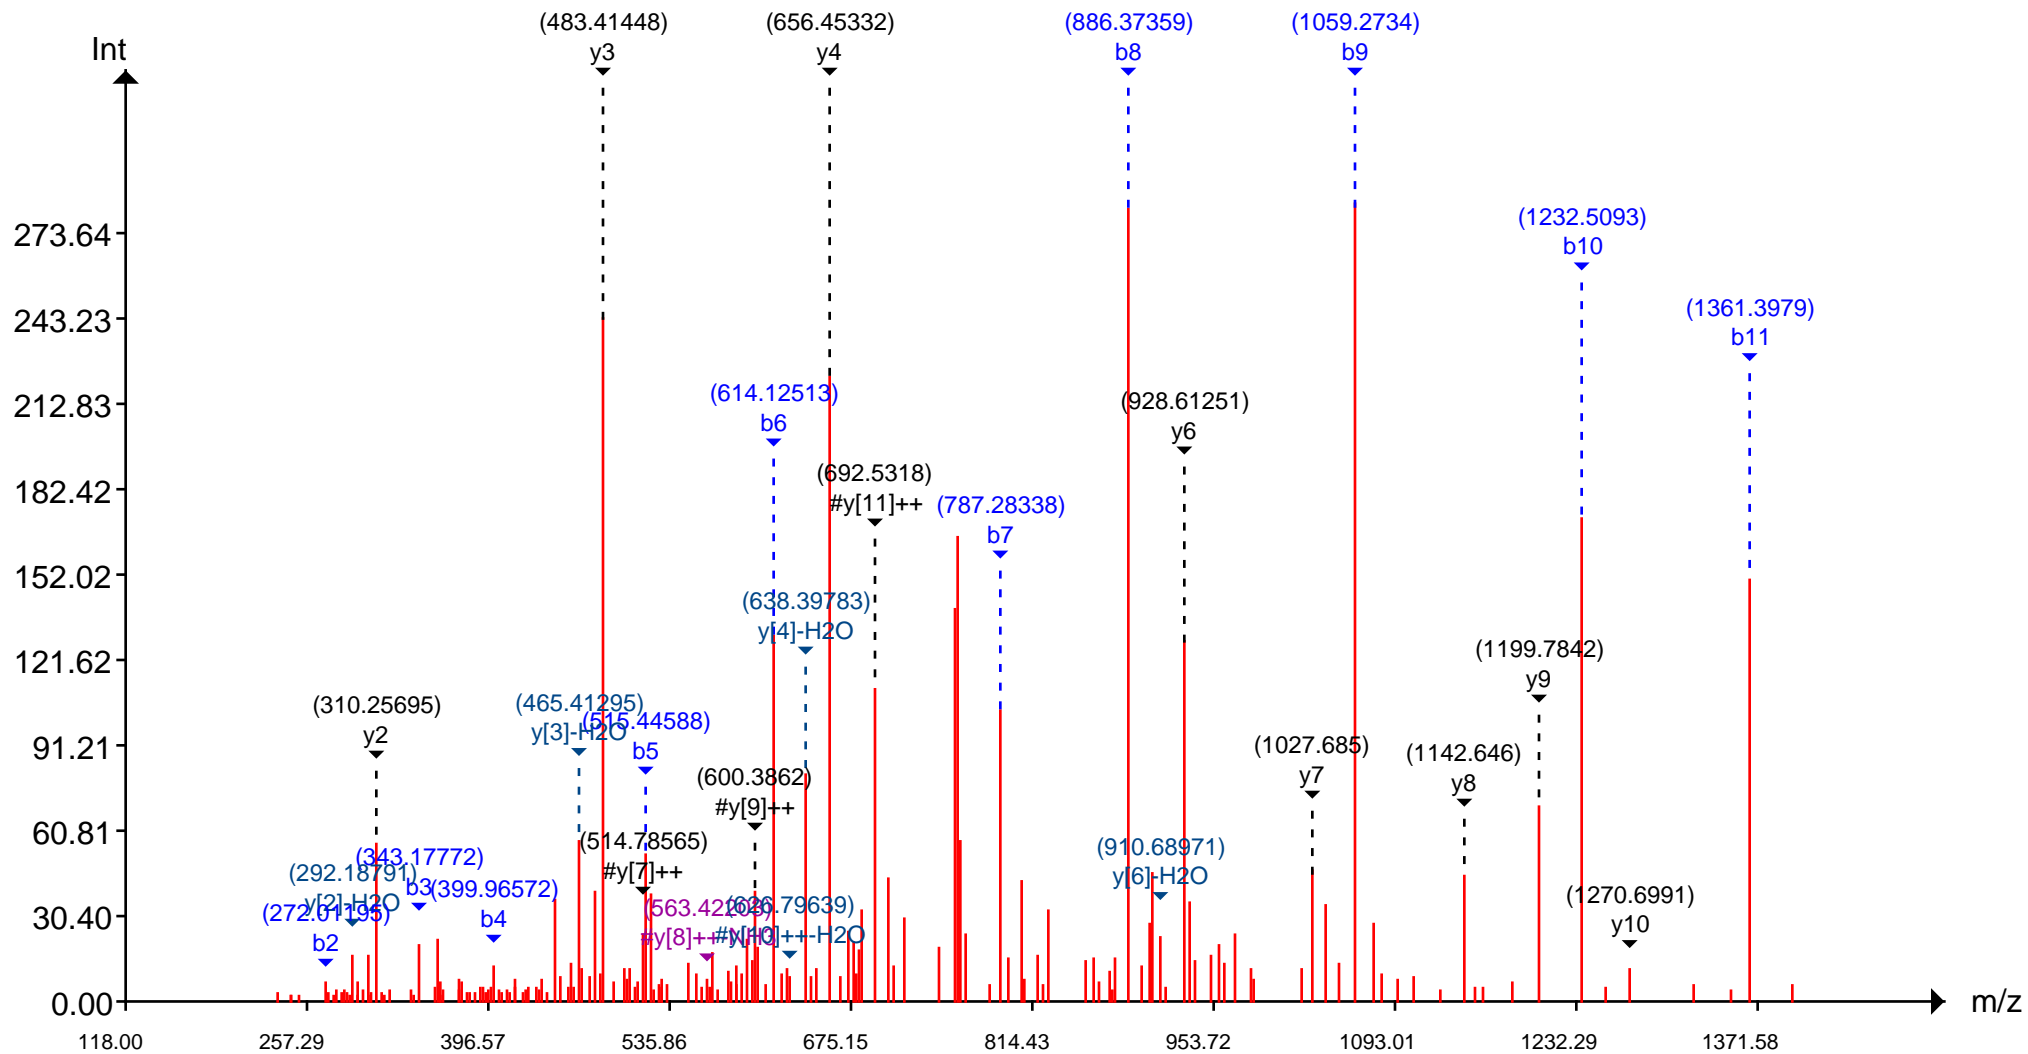

## Info

**Modified Sequence** AcD3-ILAGDVK<AcD3K\*>VK<AcD3K\*>K<AcD3K\*>ER<C13>-COOH

**Ion score** 61.69

**Protein** Q8K3X4

**Confidence level** 99.00%

**Precursor m/z** 771.49185

**Identity Threshold** 37.68

**Charge** 2+

**Mass error** 0.001802



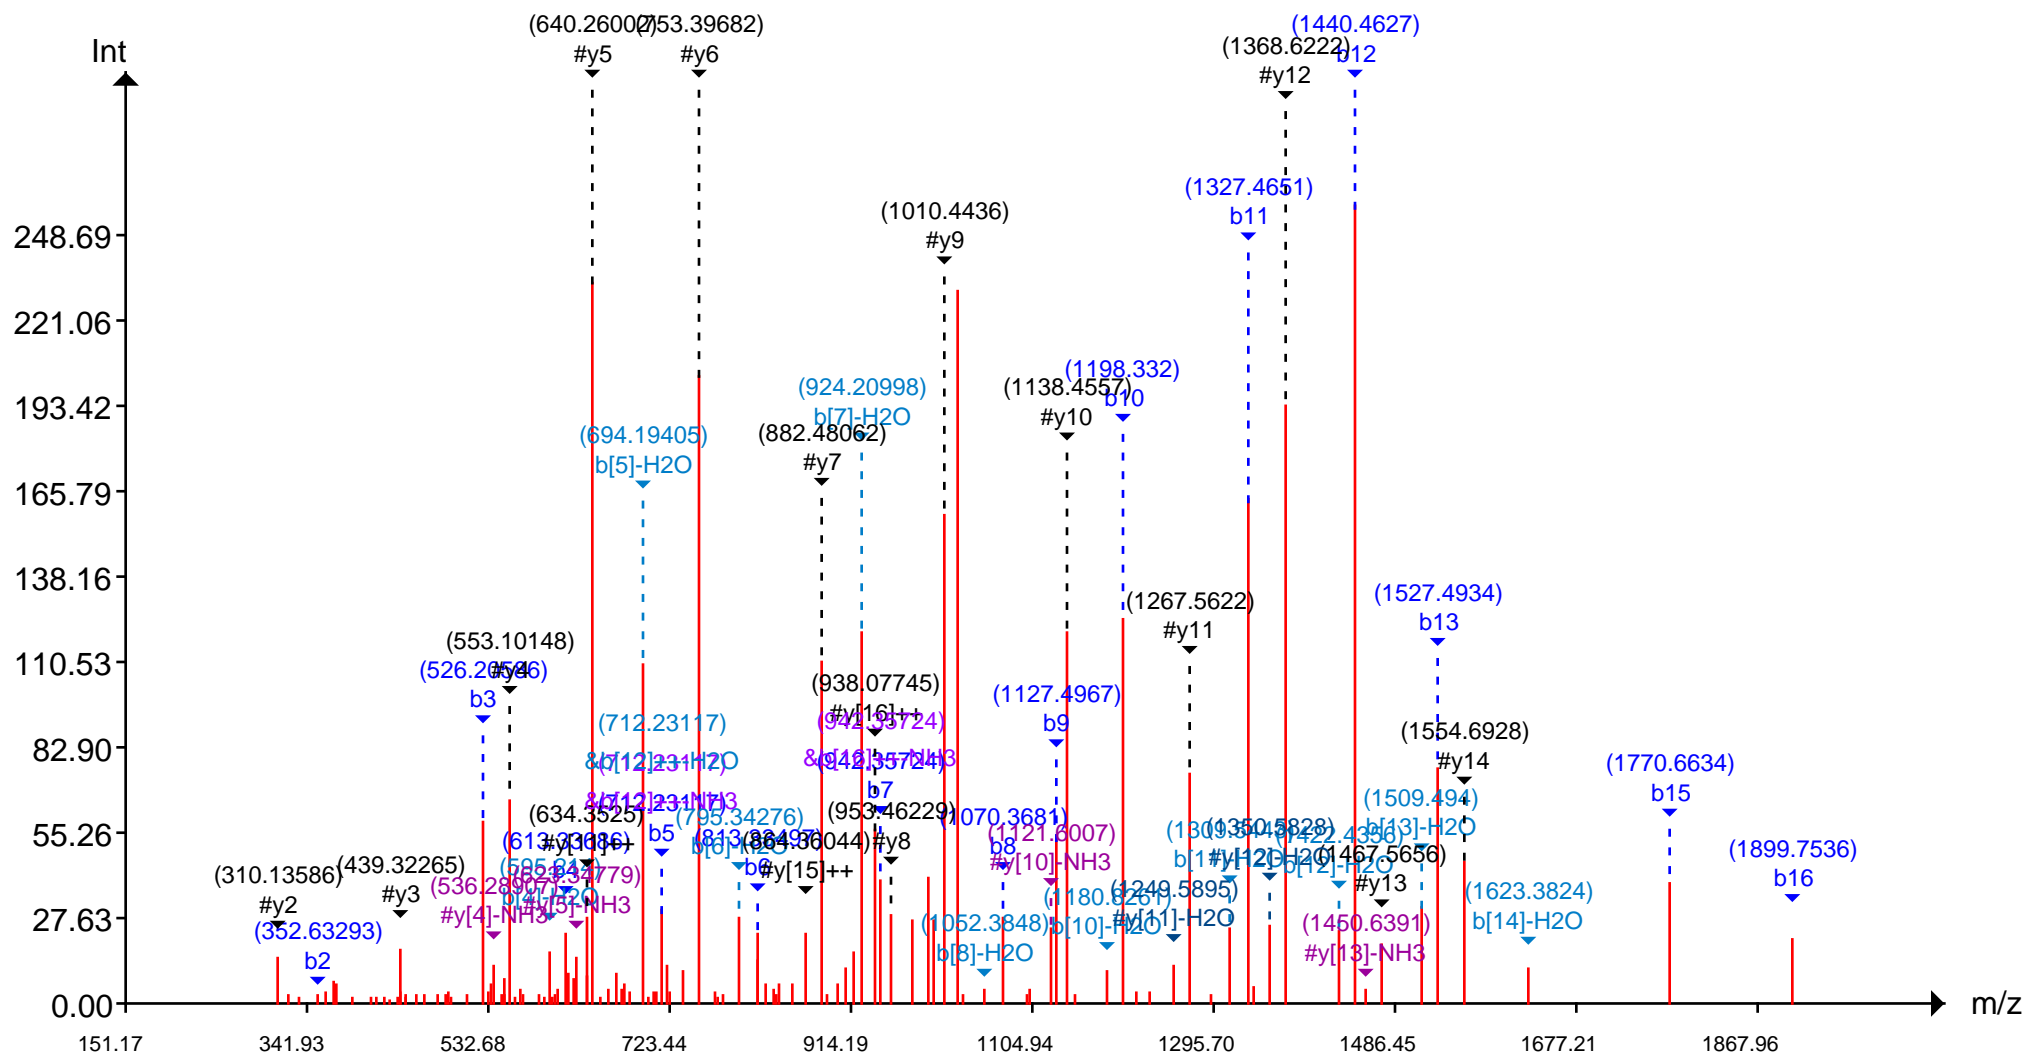

## Info

|                          |                                                      |                           |          |
|--------------------------|------------------------------------------------------|---------------------------|----------|
| <b>Modified Sequence</b> | AcD3-C<Cmm*>M<Mox*>K<AcD3K*>SVTEQGAELSNEER<C13>-COOH | <b>Ion score</b>          | 115.29   |
| <b>Protein</b>           | P63101                                               | <b>Confidence level</b>   | 99.00%   |
| <b>Precursor m/z</b>     | 1040.4812                                            | <b>Identity Threshold</b> | 44.94    |
| <b>Charge</b>            | 2+                                                   | <b>Mass error</b>         | 0.001589 |

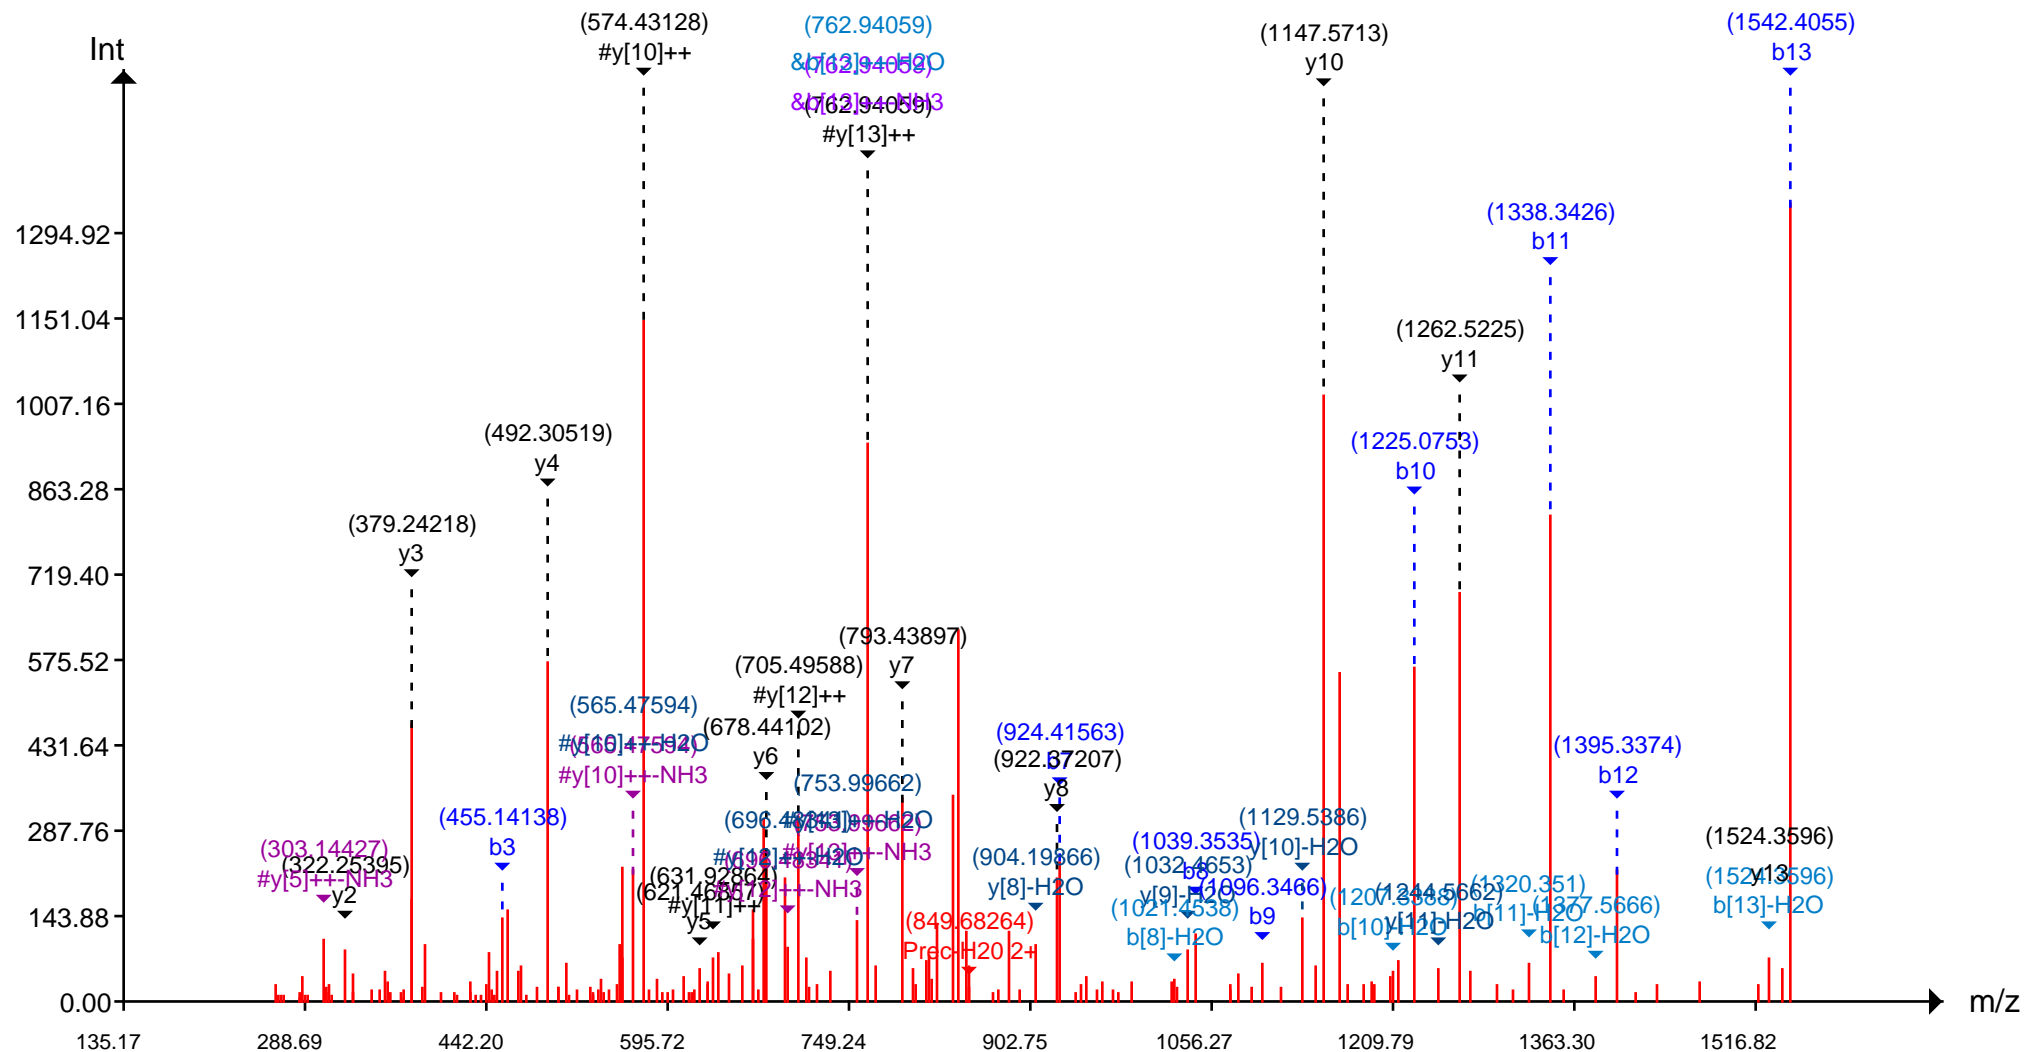

## Info

|                          |                          |                           |          |
|--------------------------|--------------------------|---------------------------|----------|
| <b>Modified Sequence</b> | AcD3-FDFDPQEDGELGFR-COOH | <b>Ion score</b>          | 66.55    |
| <b>Protein</b>           | Q60631                   | <b>Confidence level</b>   | 99.00%   |
| <b>Precursor m/z</b>     | 858.88407                | <b>Identity Threshold</b> | 43.28    |
| <b>Charge</b>            | 2+                       | <b>Mass error</b>         | 0.002917 |

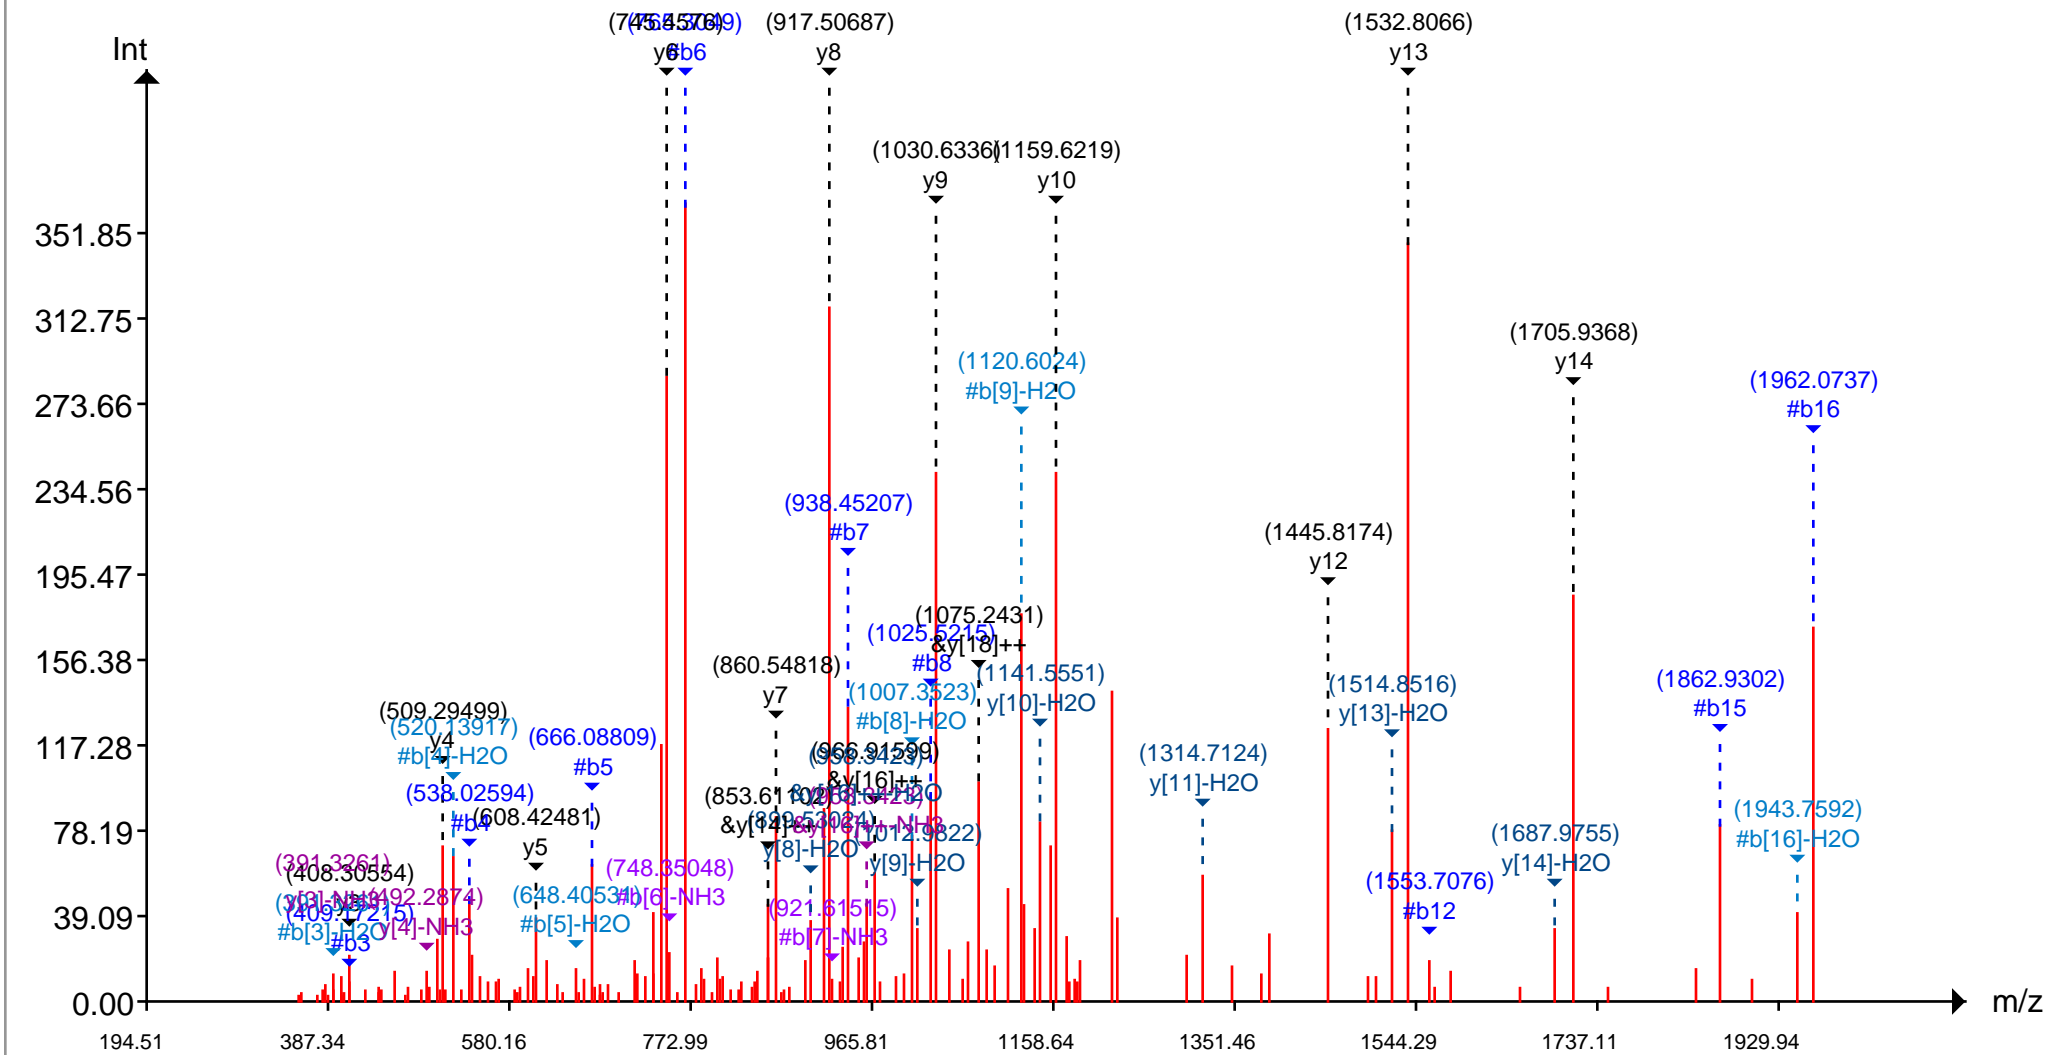

## Info

|                          |                                                     |                           |          |
|--------------------------|-----------------------------------------------------|---------------------------|----------|
| <b>Modified Sequence</b> | AcD3-YLSEQVK<AcD3K*>SIK<AcD3K*>ELGDHVTNLR<C13>-COOH | <b>Ion score</b>          | 86.24    |
| <b>Protein</b>           | P09528                                              | <b>Confidence level</b>   | 99.00%   |
| <b>Precursor m/z</b>     | 1235.685                                            | <b>Identity Threshold</b> | 45.99    |
| <b>Charge</b>            | 2+                                                  | <b>Mass error</b>         | 0.003382 |

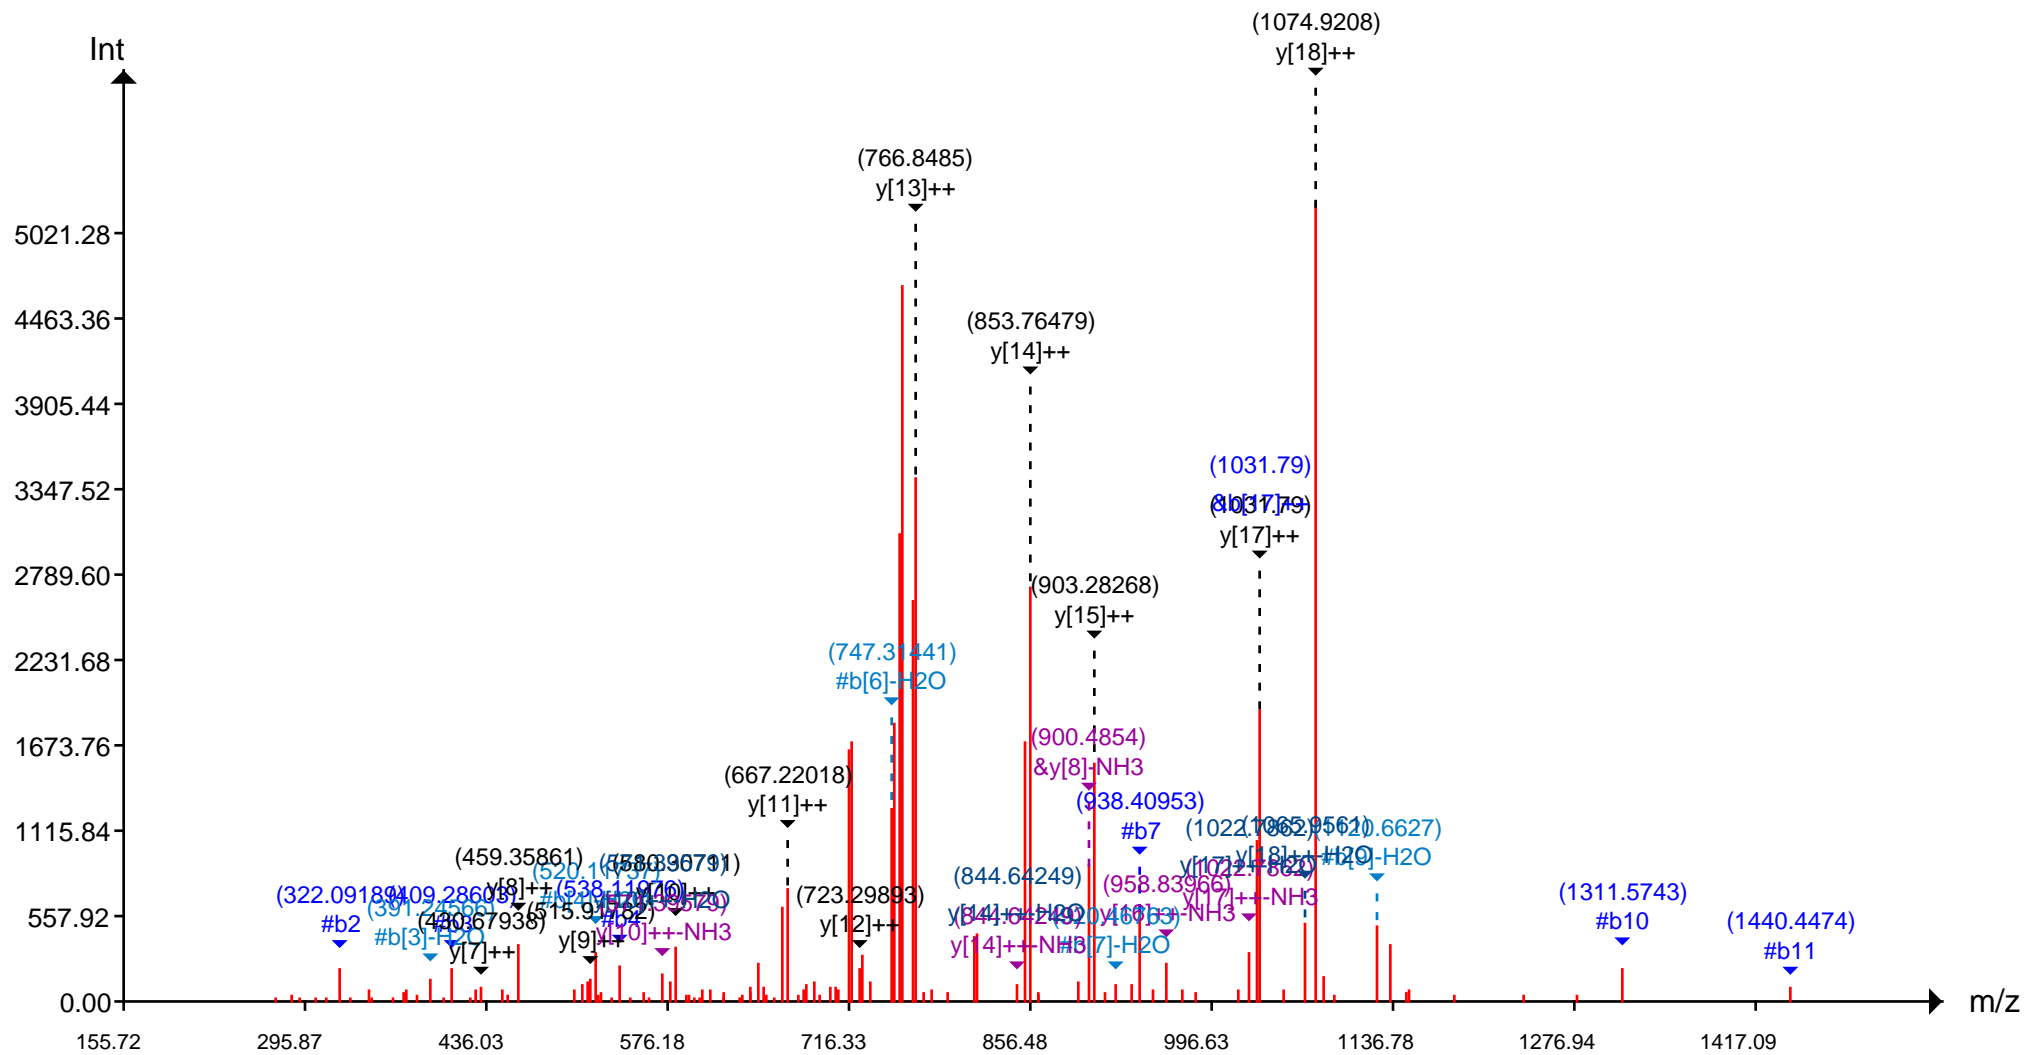

## Info

|                          |                                                     |                           |          |
|--------------------------|-----------------------------------------------------|---------------------------|----------|
| <b>Modified Sequence</b> | AcD3-YLSEQVK<AcD3K*>SIK<AcD3K*>ELGDHVTNLR<C13>-COOH | <b>Ion score</b>          | 49.05    |
| <b>Protein</b>           | P09528                                              | <b>Confidence level</b>   | 99.00%   |
| <b>Precursor m/z</b>     | 824.12568                                           | <b>Identity Threshold</b> | 46.02    |
| <b>Charge</b>            | 3+                                                  | <b>Mass error</b>         | 0.003146 |

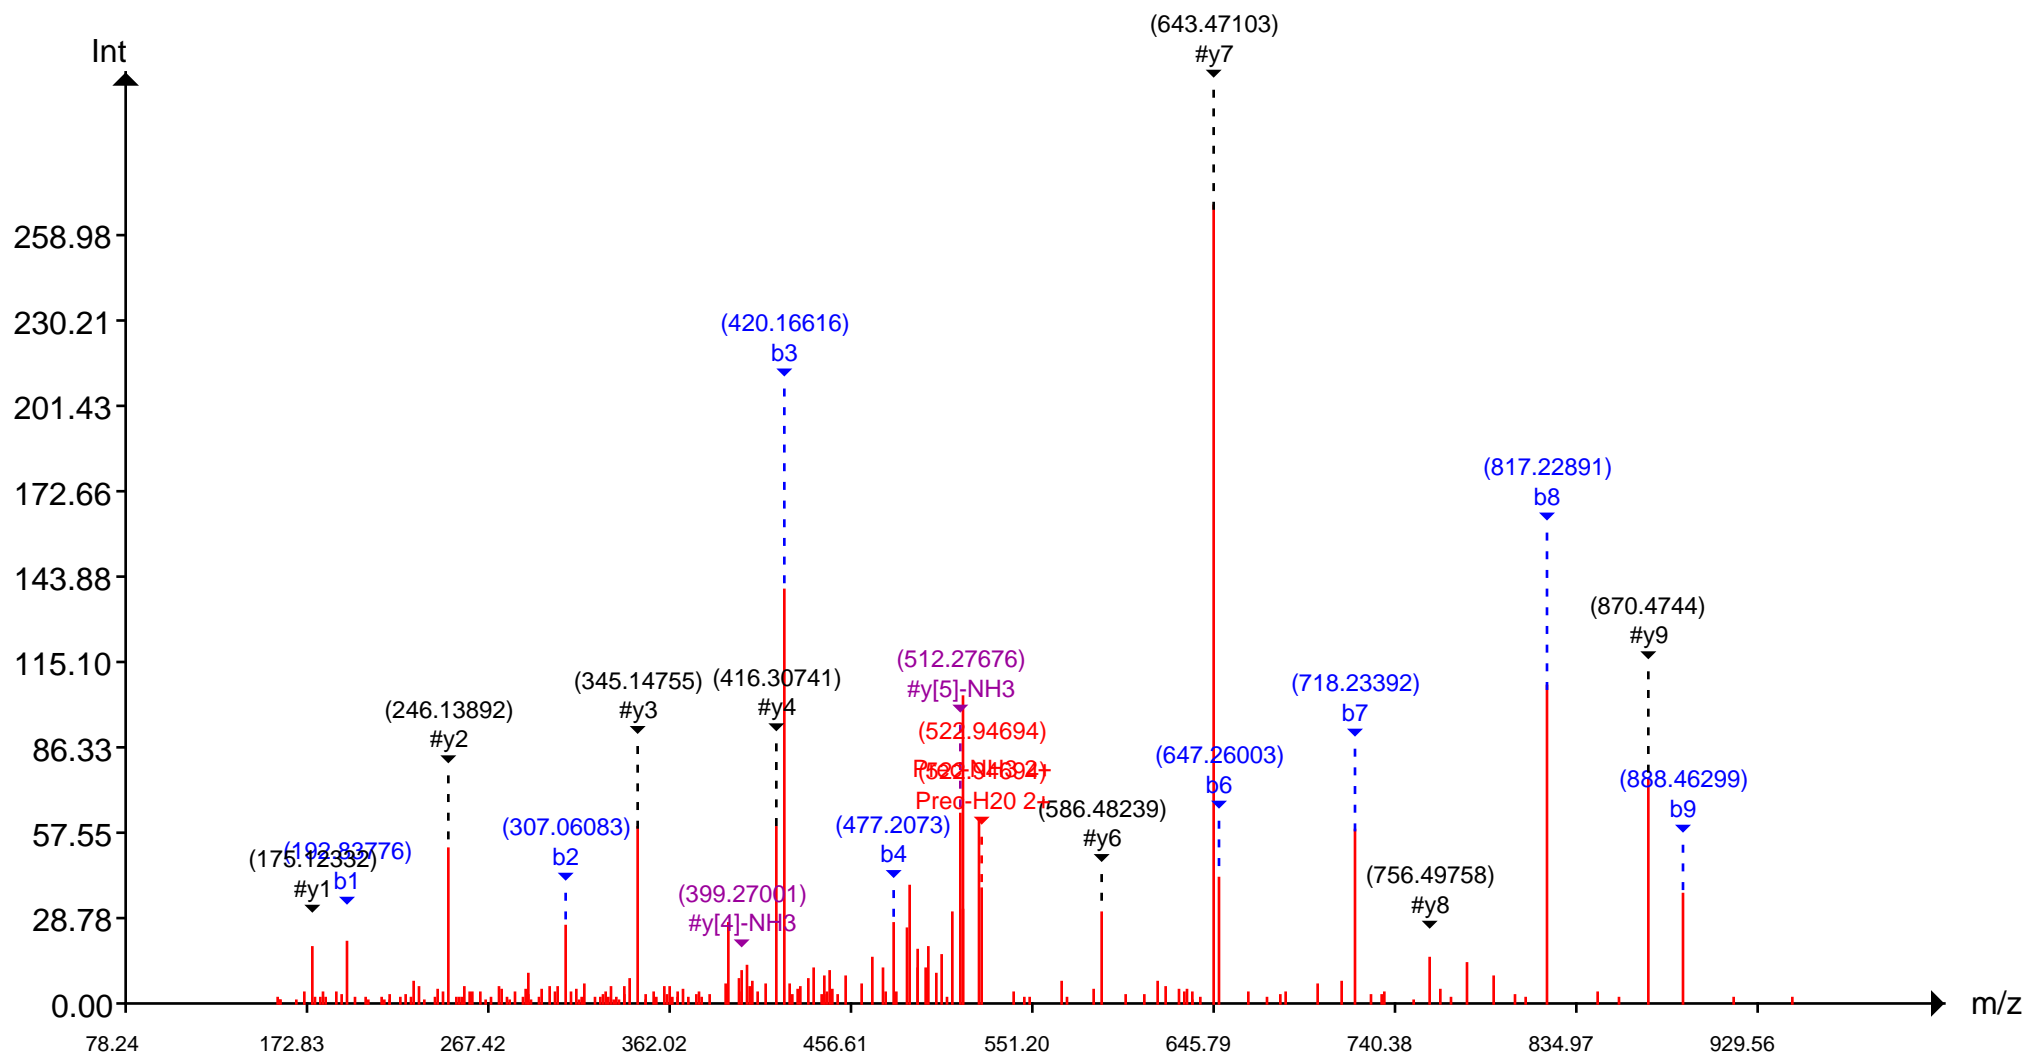

## Info

|                          |                            |                           |          |
|--------------------------|----------------------------|---------------------------|----------|
| <b>Modified Sequence</b> | AcD3-M<Mox*>NLGGLAVAR-COOH | <b>Ion score</b>          | 68.68    |
| <b>Protein</b>           | Q9WVA4                     | <b>Confidence level</b>   | 99.00%   |
| <b>Precursor m/z</b>     | 531.79373                  | <b>Identity Threshold</b> | 48.03    |
| <b>Charge</b>            | 2+                         | <b>Mass error</b>         | -1.66E-4 |

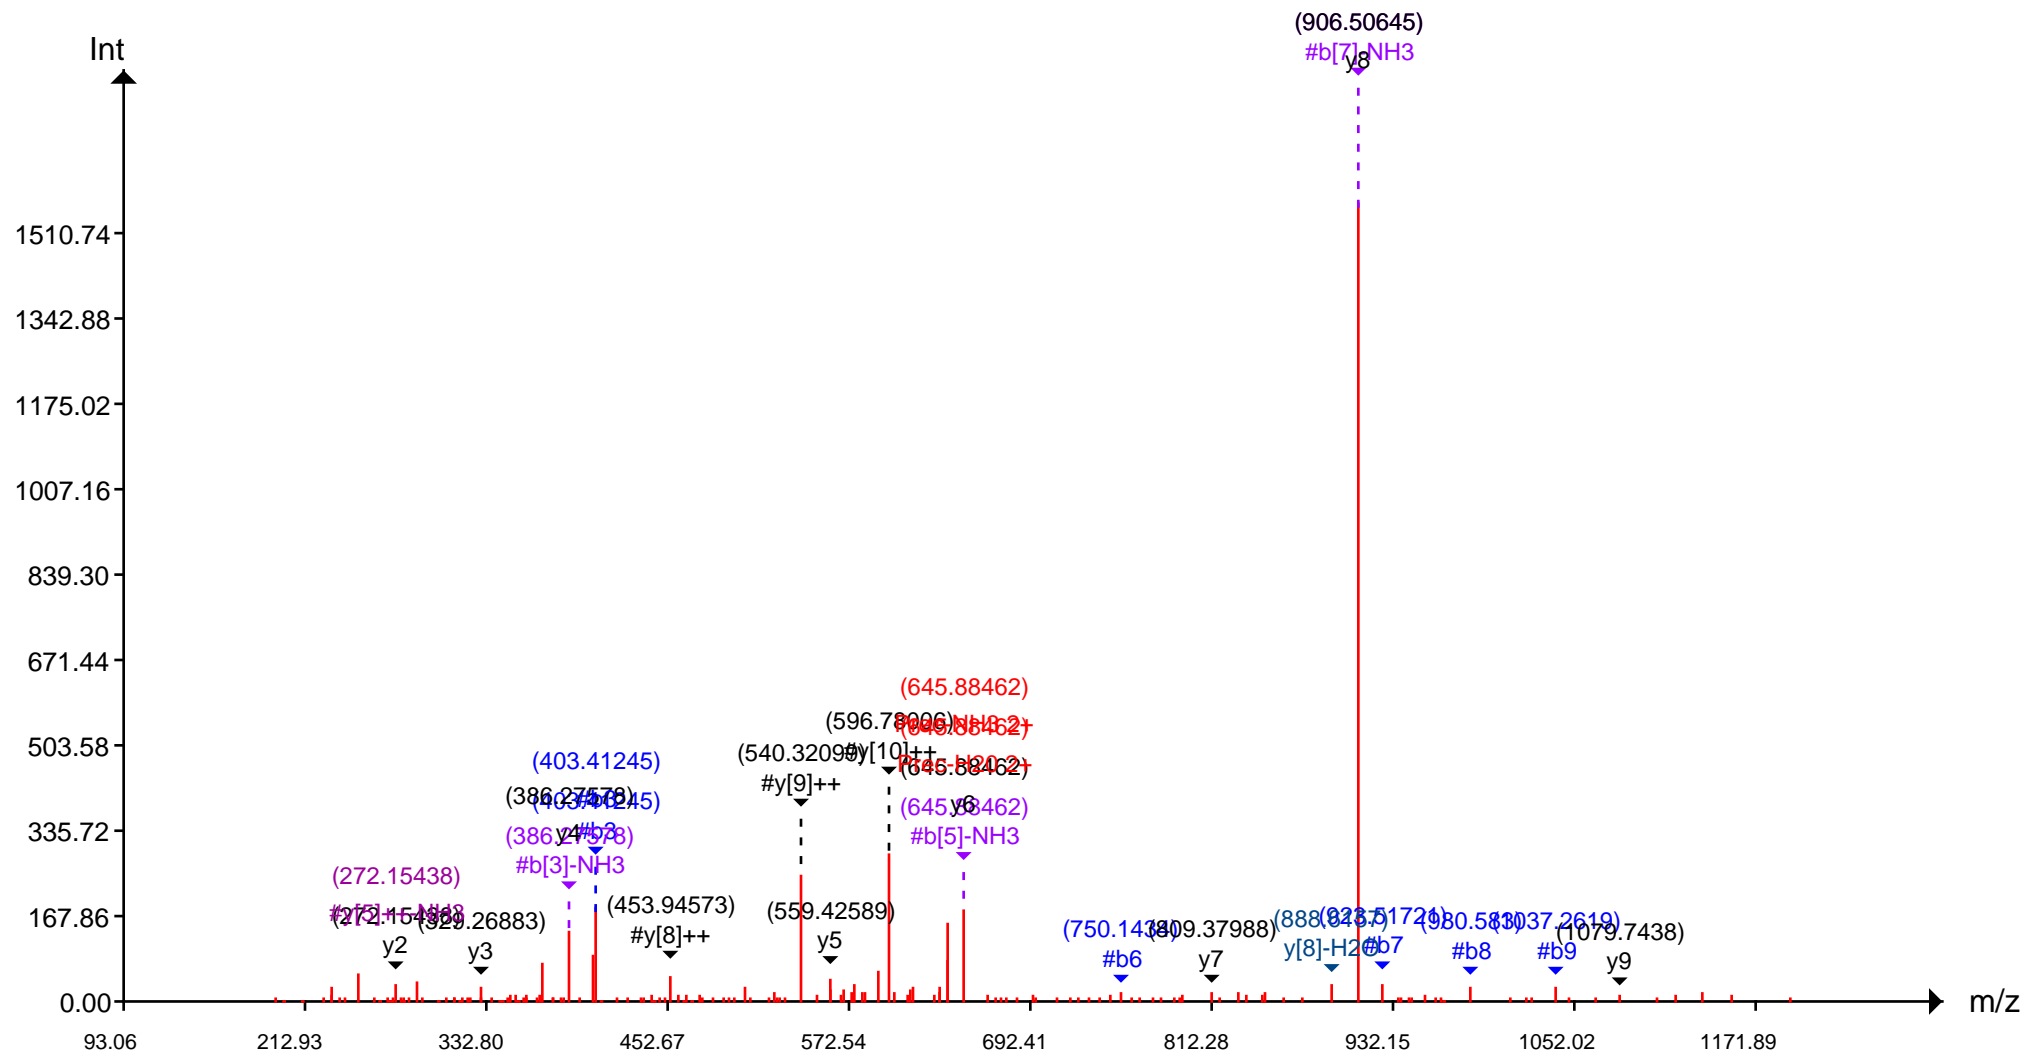

## Info

|                          |                                       |                           |          |
|--------------------------|---------------------------------------|---------------------------|----------|
| <b>Modified Sequence</b> | AcD3-ALK<AcD3K*>PYSK<AcD3K*>GGPR-COOH | <b>Ion score</b>          | 56.41    |
| <b>Protein</b>           | P06745                                | <b>Confidence level</b>   | 99.00%   |
| <b>Precursor m/z</b>     | 654.88531                             | <b>Identity Threshold</b> | 45.32    |
| <b>Charge</b>            | 2+                                    | <b>Mass error</b>         | 0.001307 |

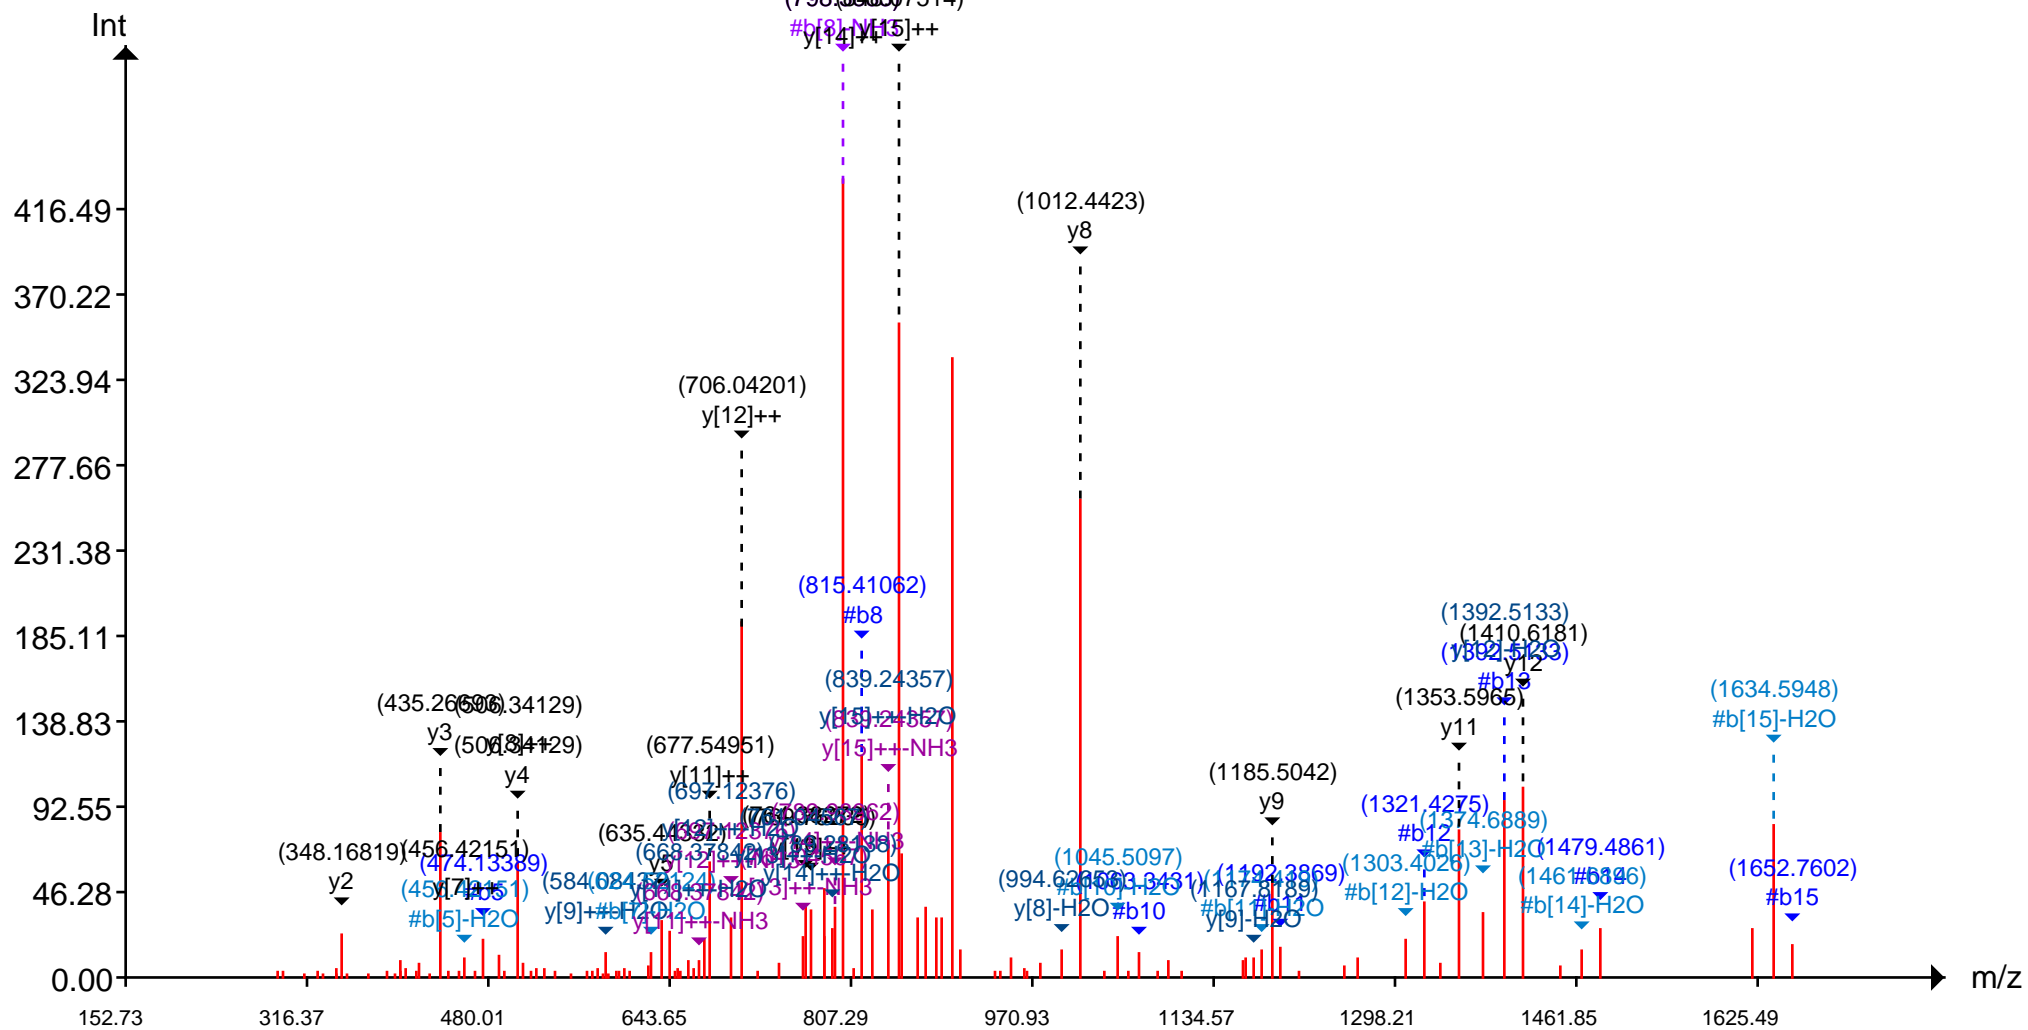

## Info

|                          |                                                  |                           |          |
|--------------------------|--------------------------------------------------|---------------------------|----------|
| <b>Modified Sequence</b> | AcD3-SVGQGPAK<AcD3K*>TM<Mox*>EEASK<AcD3K*>R-COOH | <b>Ion score</b>          | 71.21    |
| <b>Protein</b>           | O70310                                           | <b>Confidence level</b>   | 99.00%   |
| <b>Precursor m/z</b>     | 913.96755                                        | <b>Identity Threshold</b> | 48.03    |
| <b>Charge</b>            | 2+                                               | <b>Mass error</b>         | 0.001542 |

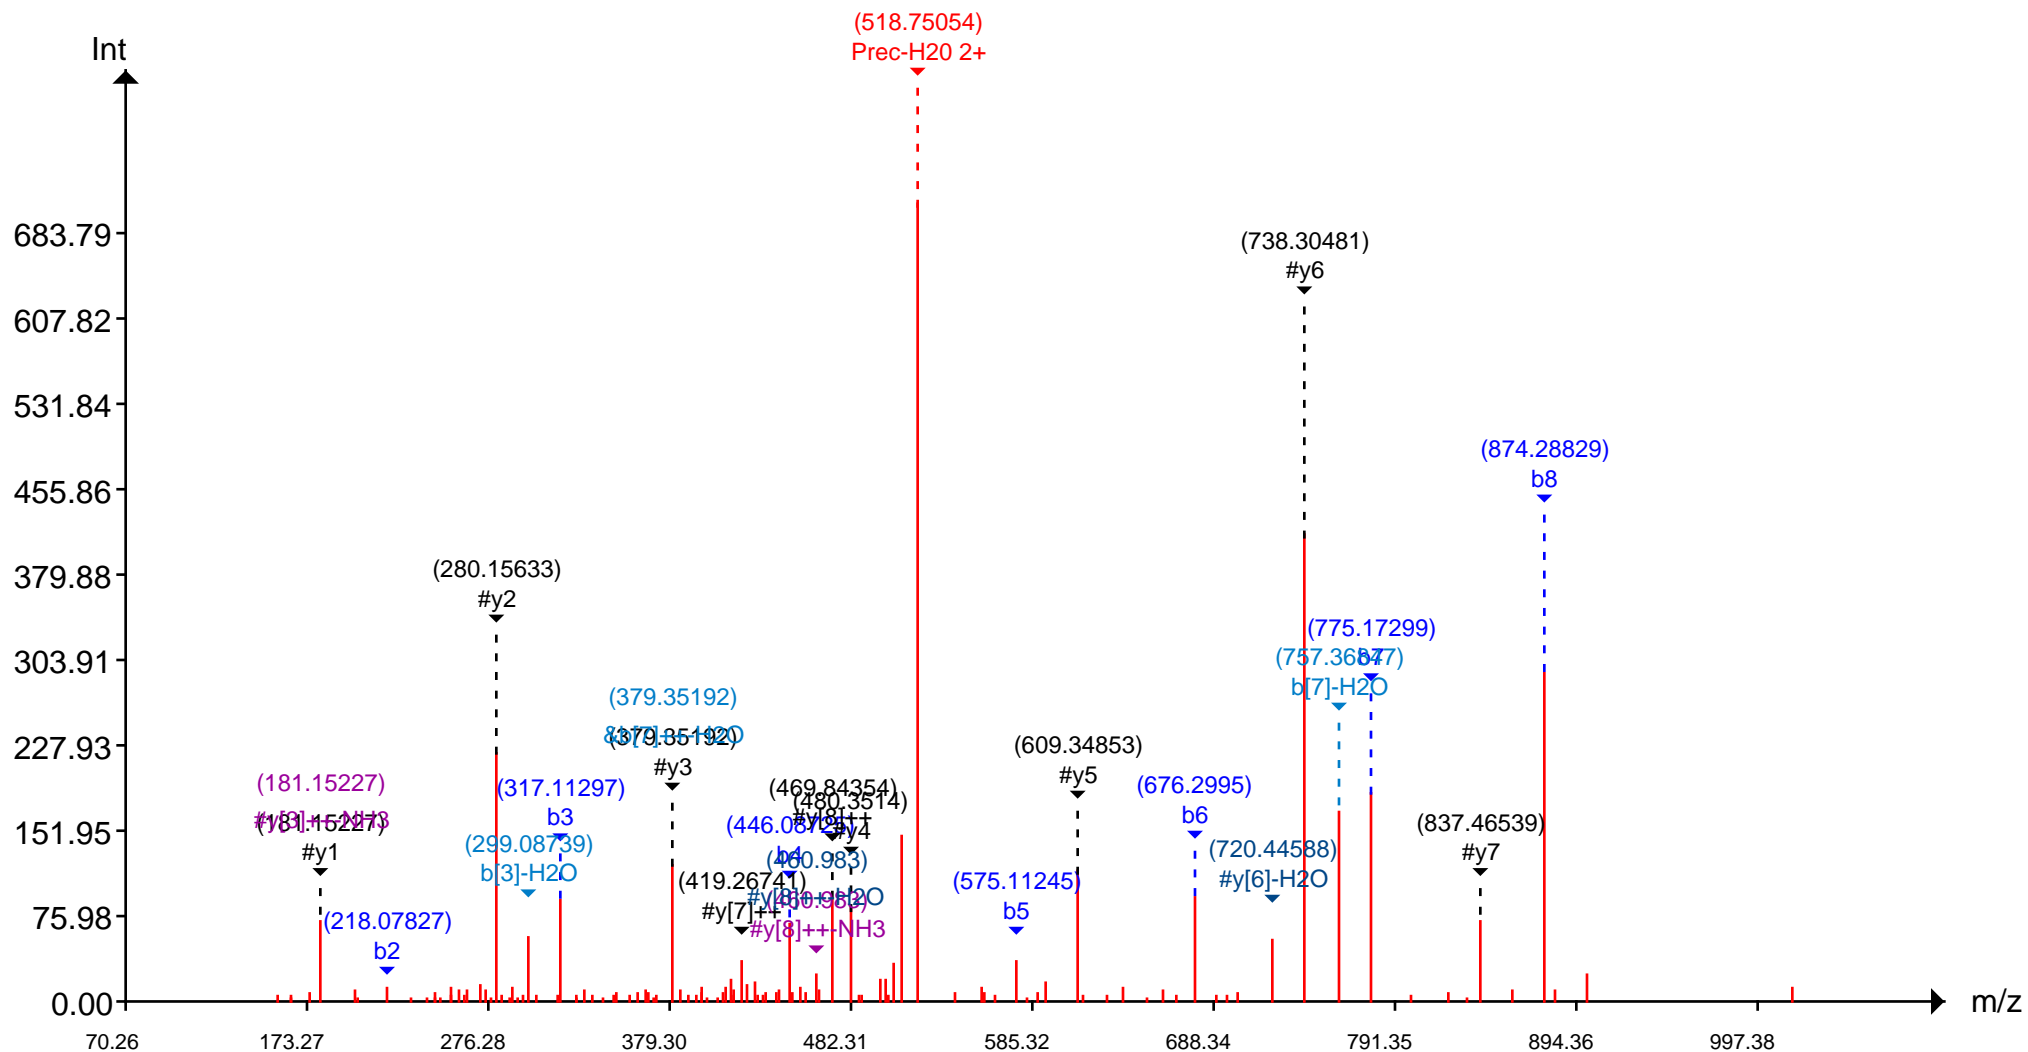

## Info

|                          |                          |                           |          |
|--------------------------|--------------------------|---------------------------|----------|
| <b>Modified Sequence</b> | AcD3-ATVEETVVR<C13>-COOH | <b>Ion score</b>          | 62.58    |
| <b>Protein</b>           | Q76MZ3, Q7TNP2           | <b>Confidence level</b>   | 99.00%   |
| <b>Precursor m/z</b>     | 527.79916                | <b>Identity Threshold</b> | 46.78    |
| <b>Charge</b>            | 2+                       | <b>Mass error</b>         | -3.38E-4 |



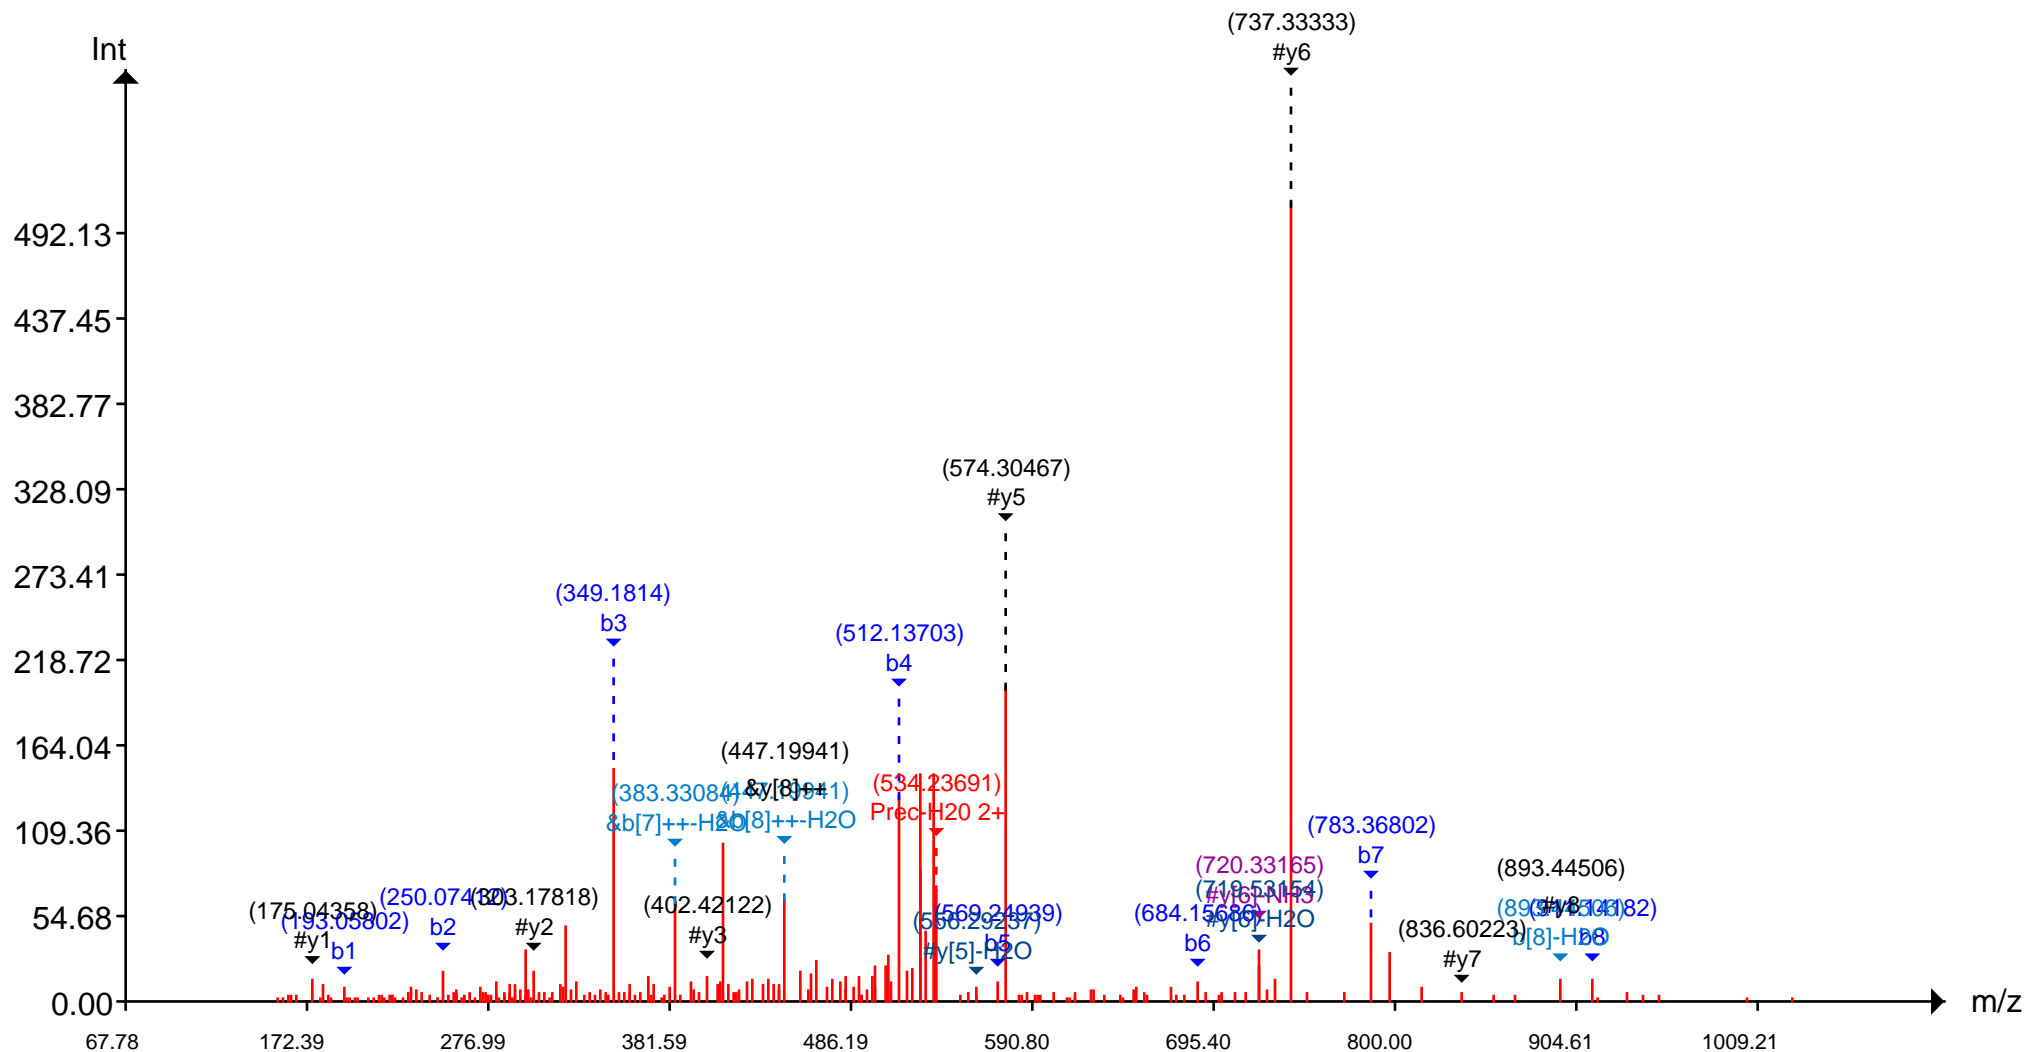

## Info

|                          |                     |                           |         |
|--------------------------|---------------------|---------------------------|---------|
| <b>Modified Sequence</b> | AcD3-FGVYGDVQR-COOH | <b>Ion score</b>          | 50.77   |
| <b>Protein</b>           | P17225, Q91Z31      | <b>Confidence level</b>   | 99.00%  |
| <b>Precursor m/z</b>     | 543.27675           | <b>Identity Threshold</b> | 47.43   |
| <b>Charge</b>            | 2+                  | <b>Mass error</b>         | 8.47E-4 |

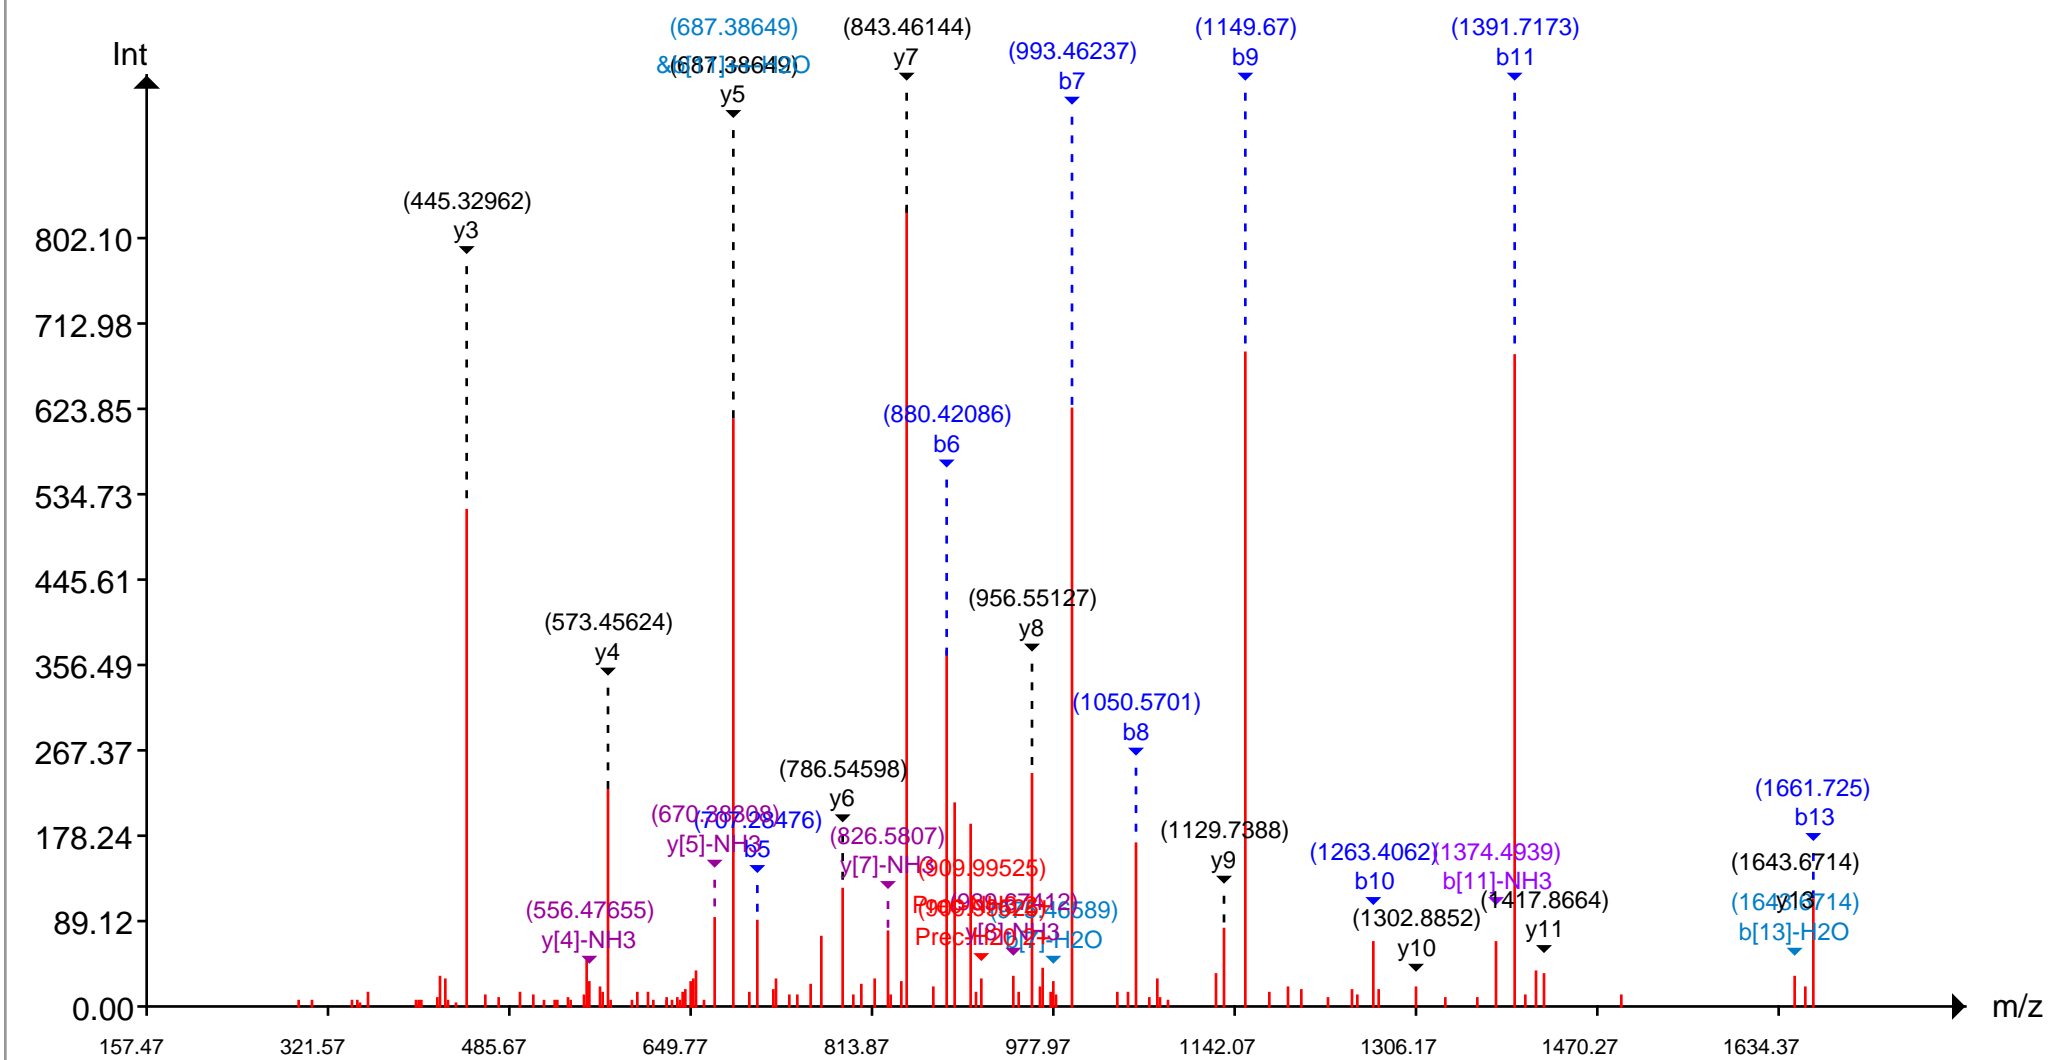

## Info

|                          |                                                  |                           |          |
|--------------------------|--------------------------------------------------|---------------------------|----------|
| <b>Modified Sequence</b> | AcD3-FLLDK<AcD3K*>K<AcD3K*>IGVNQPK<AcD3K*>R-COOH | <b>Ion score</b>          | 72.03    |
| <b>Protein</b>           | P80314                                           | <b>Confidence level</b>   | 99.00%   |
| <b>Precursor m/z</b>     | 918.56105                                        | <b>Identity Threshold</b> | 40.24    |
| <b>Charge</b>            | 2+                                               | <b>Mass error</b>         | 0.001713 |

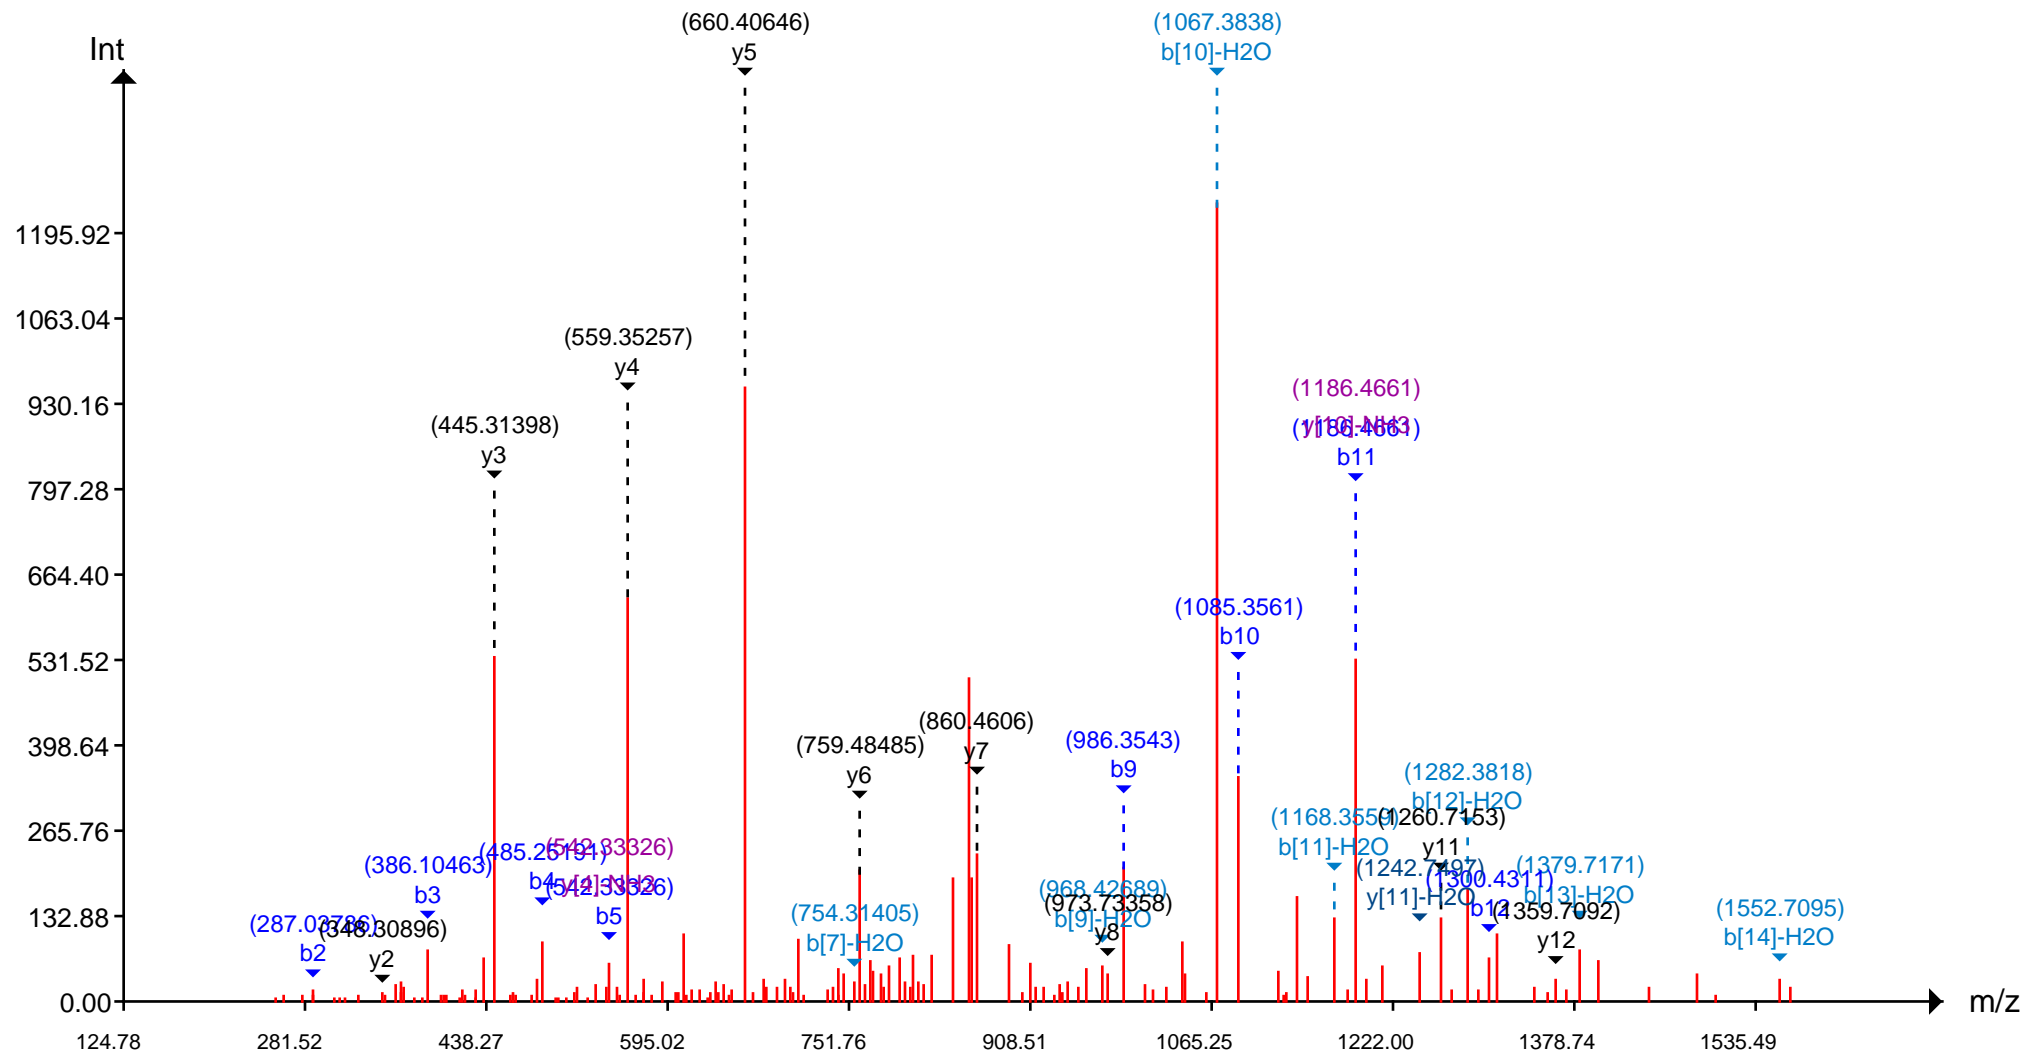

## Info

|                          |                                   |                           |          |
|--------------------------|-----------------------------------|---------------------------|----------|
| <b>Modified Sequence</b> | AcD3-IQVVGDDLTVTNPK<AcD3K*>R-COOH | <b>Ion score</b>          | 59.68    |
| <b>Protein</b>           | P17182                            | <b>Confidence level</b>   | 99.00%   |
| <b>Precursor m/z</b>     | 872.99031                         | <b>Identity Threshold</b> | 46.76    |
| <b>Charge</b>            | 2+                                | <b>Mass error</b>         | 0.002277 |

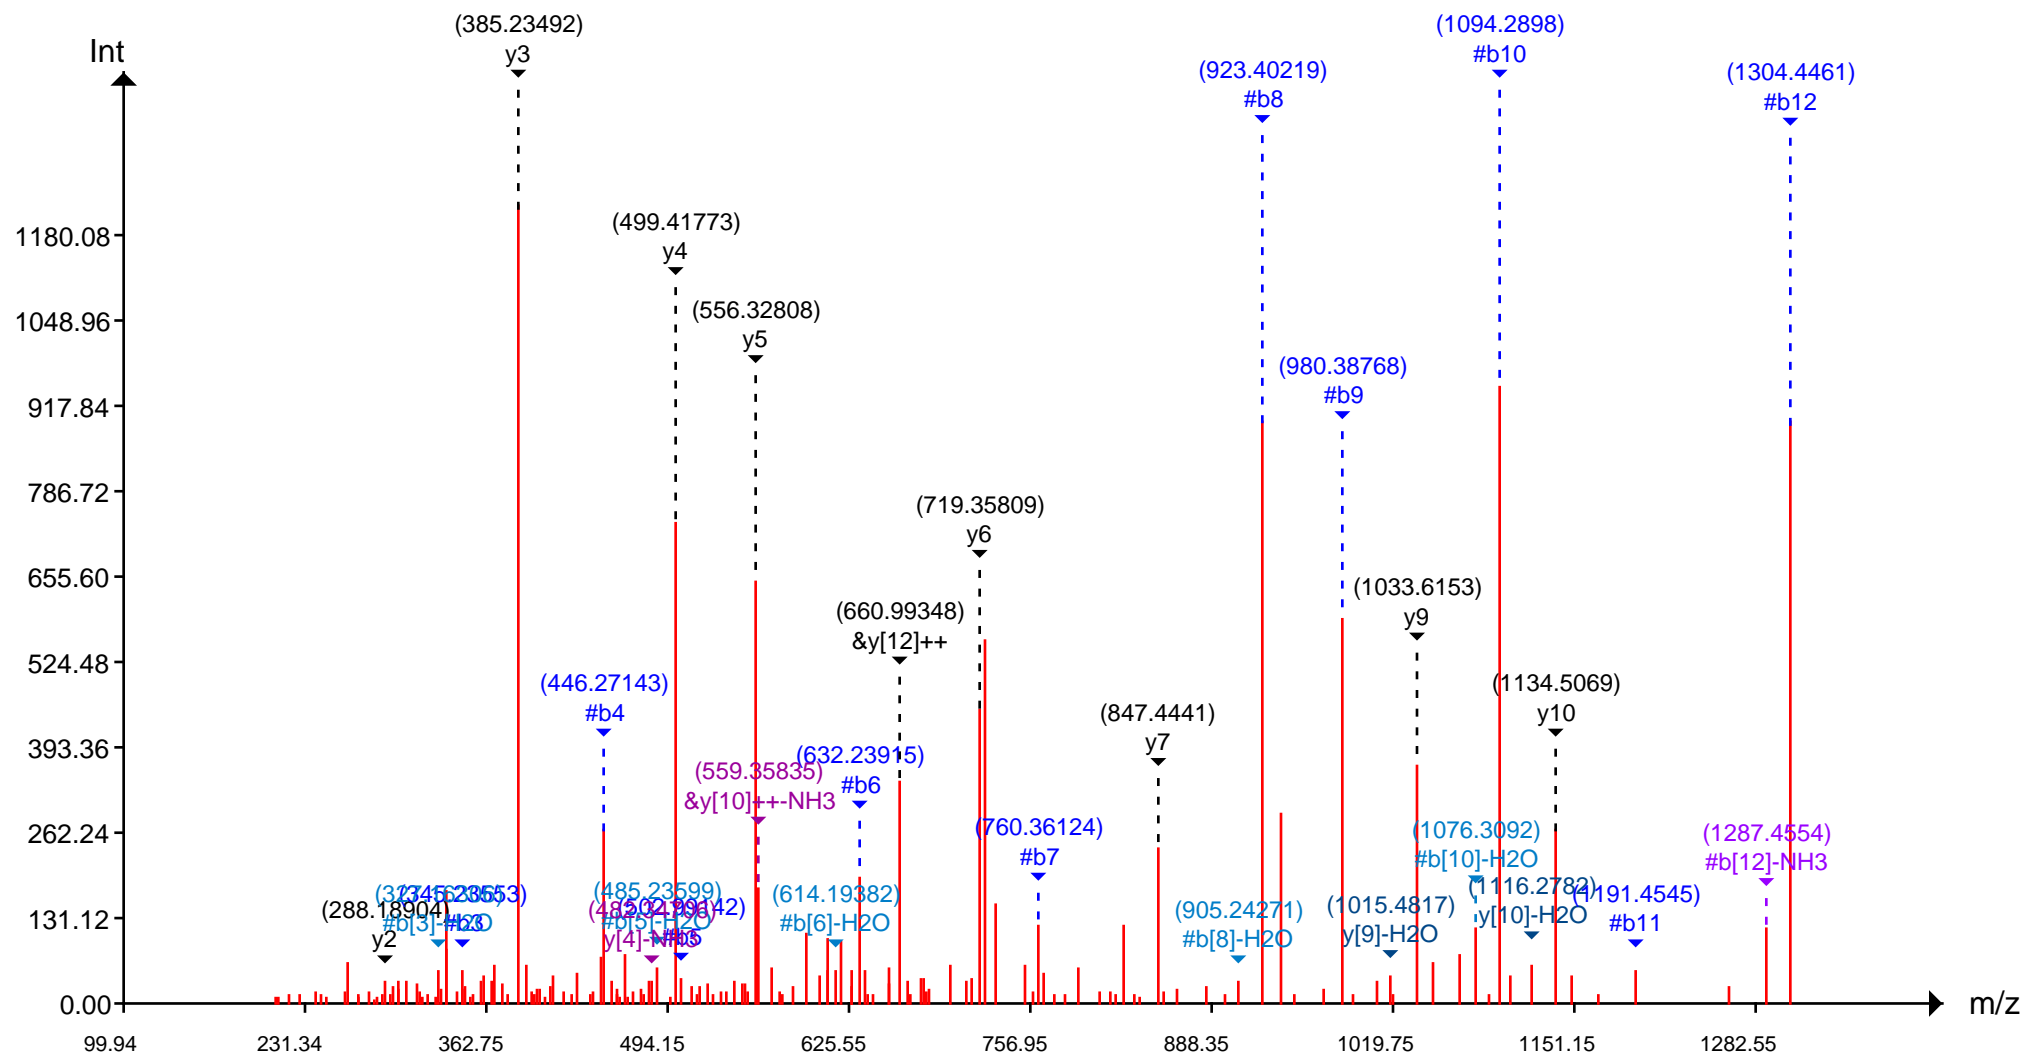

## Info

|                          |                         |                           |          |
|--------------------------|-------------------------|---------------------------|----------|
| <b>Modified Sequence</b> | AcD3-LSVTGEQYGNPIR-COOH | <b>Ion score</b>          | 65.8     |
| <b>Protein</b>           | Q9ESP1                  | <b>Confidence level</b>   | 99.00%   |
| <b>Precursor m/z</b>     | 739.88854               | <b>Identity Threshold</b> | 48.06    |
| <b>Charge</b>            | 2+                      | <b>Mass error</b>         | 0.002106 |

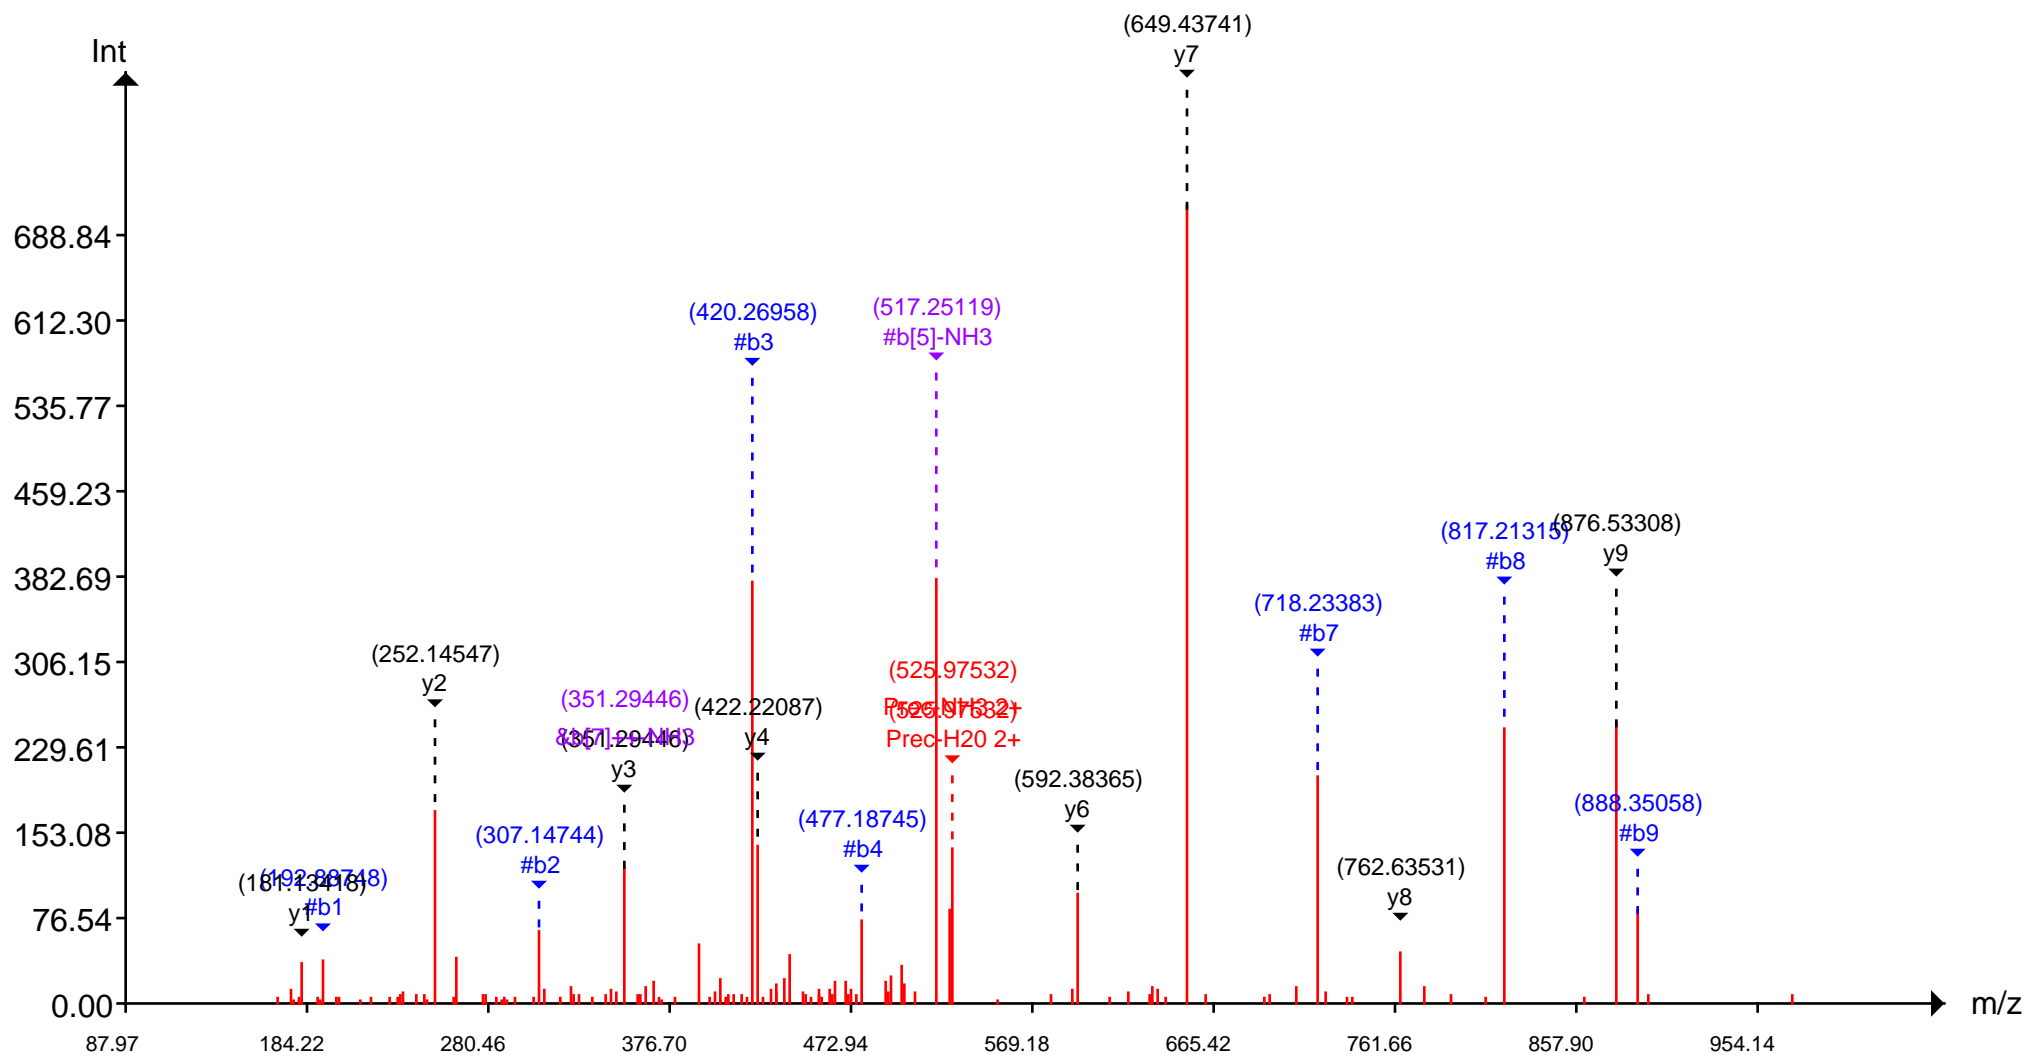

## Info

**Modified Sequence** AcD3-M<Mox\*>NLGGLAVAR<C13>-COOH

**Ion score** 63.29

**Protein** Q9WVA4

**Confidence level** 99.00%

**Precursor m/z** 534.80378

**Identity Threshold** 47.18

**Charge** 2+

**Mass error** -2.08E-4

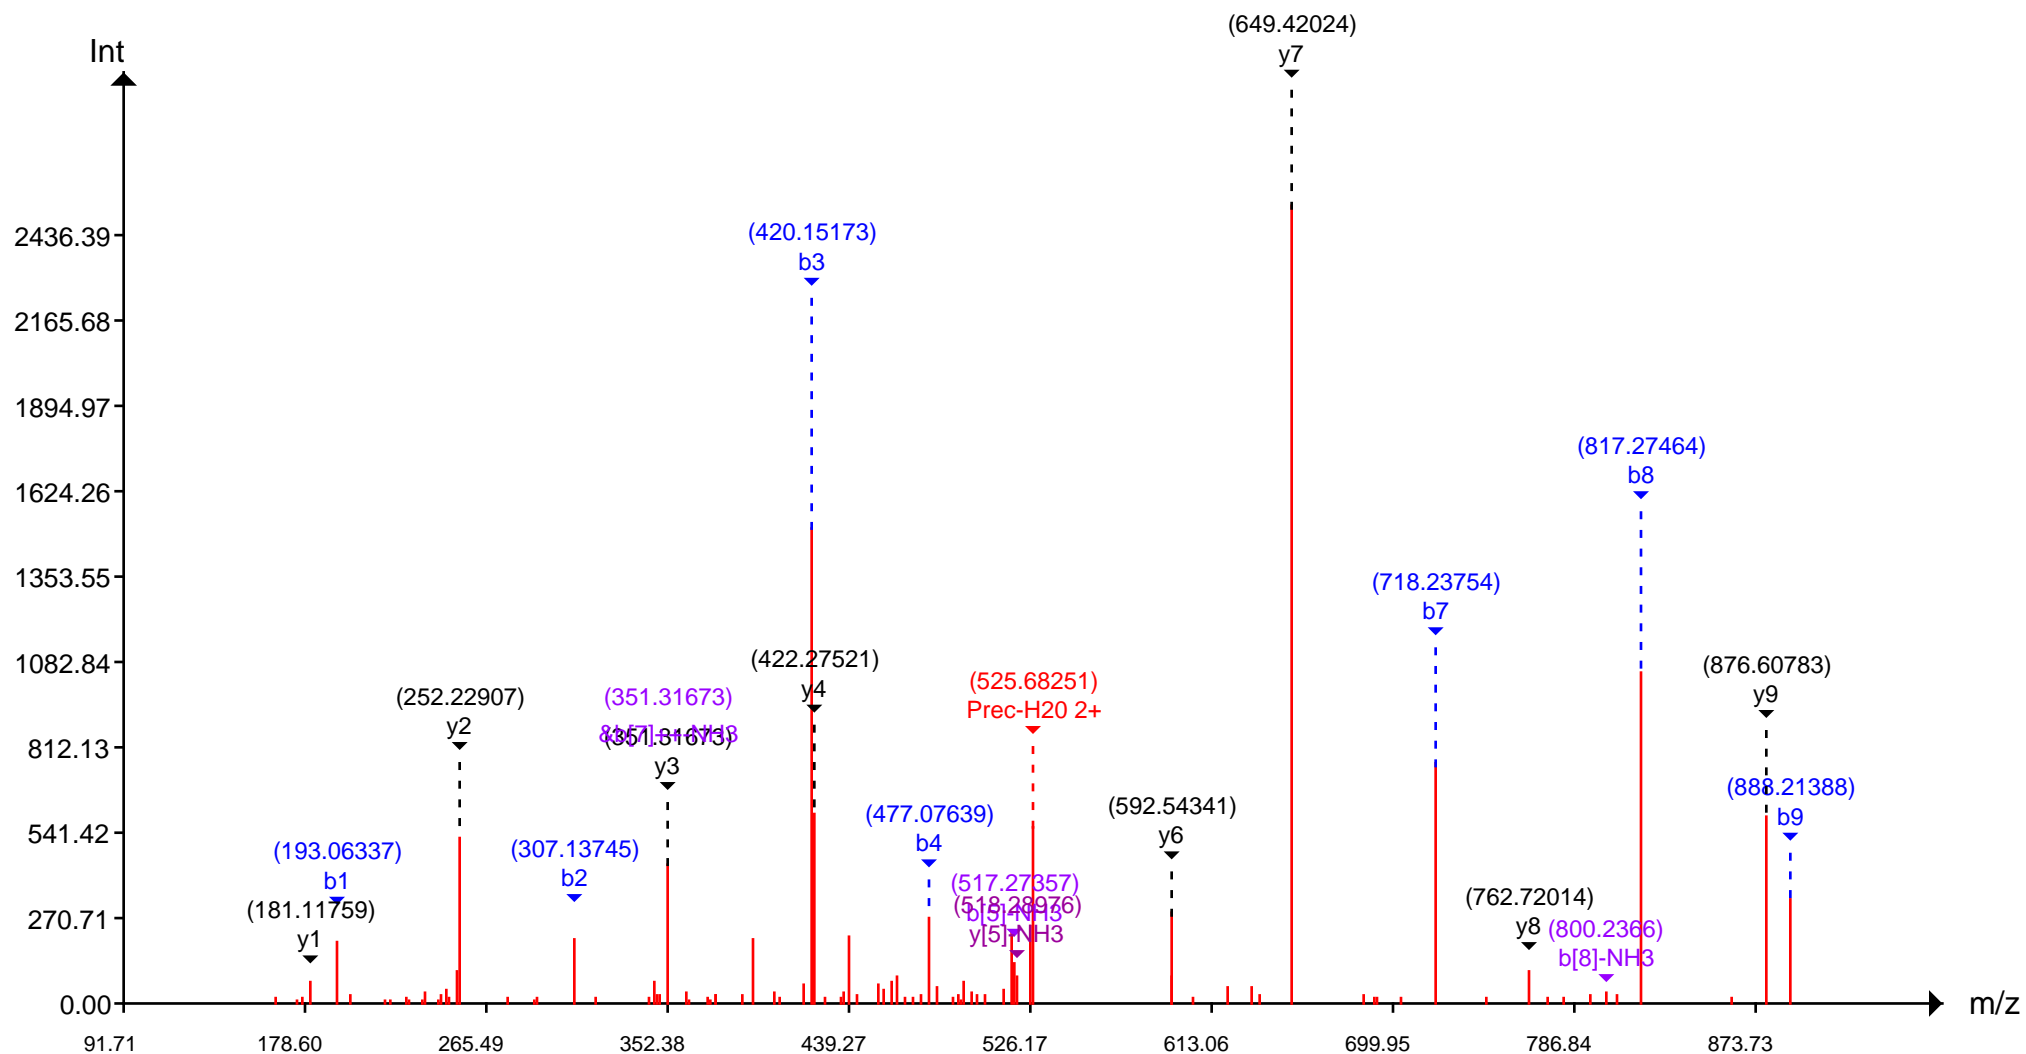

## Info

|                          |                                 |                           |         |
|--------------------------|---------------------------------|---------------------------|---------|
| <b>Modified Sequence</b> | AcD3-M<Mox*>NLGGLAVAR<C13>-COOH | <b>Ion score</b>          | 81.94   |
| <b>Protein</b>           | Q9WVA4                          | <b>Confidence level</b>   | 99.00%  |
| <b>Precursor m/z</b>     | 534.80419                       | <b>Identity Threshold</b> | 46.81   |
| <b>Charge</b>            | 2+                              | <b>Mass error</b>         | 6.12E-4 |

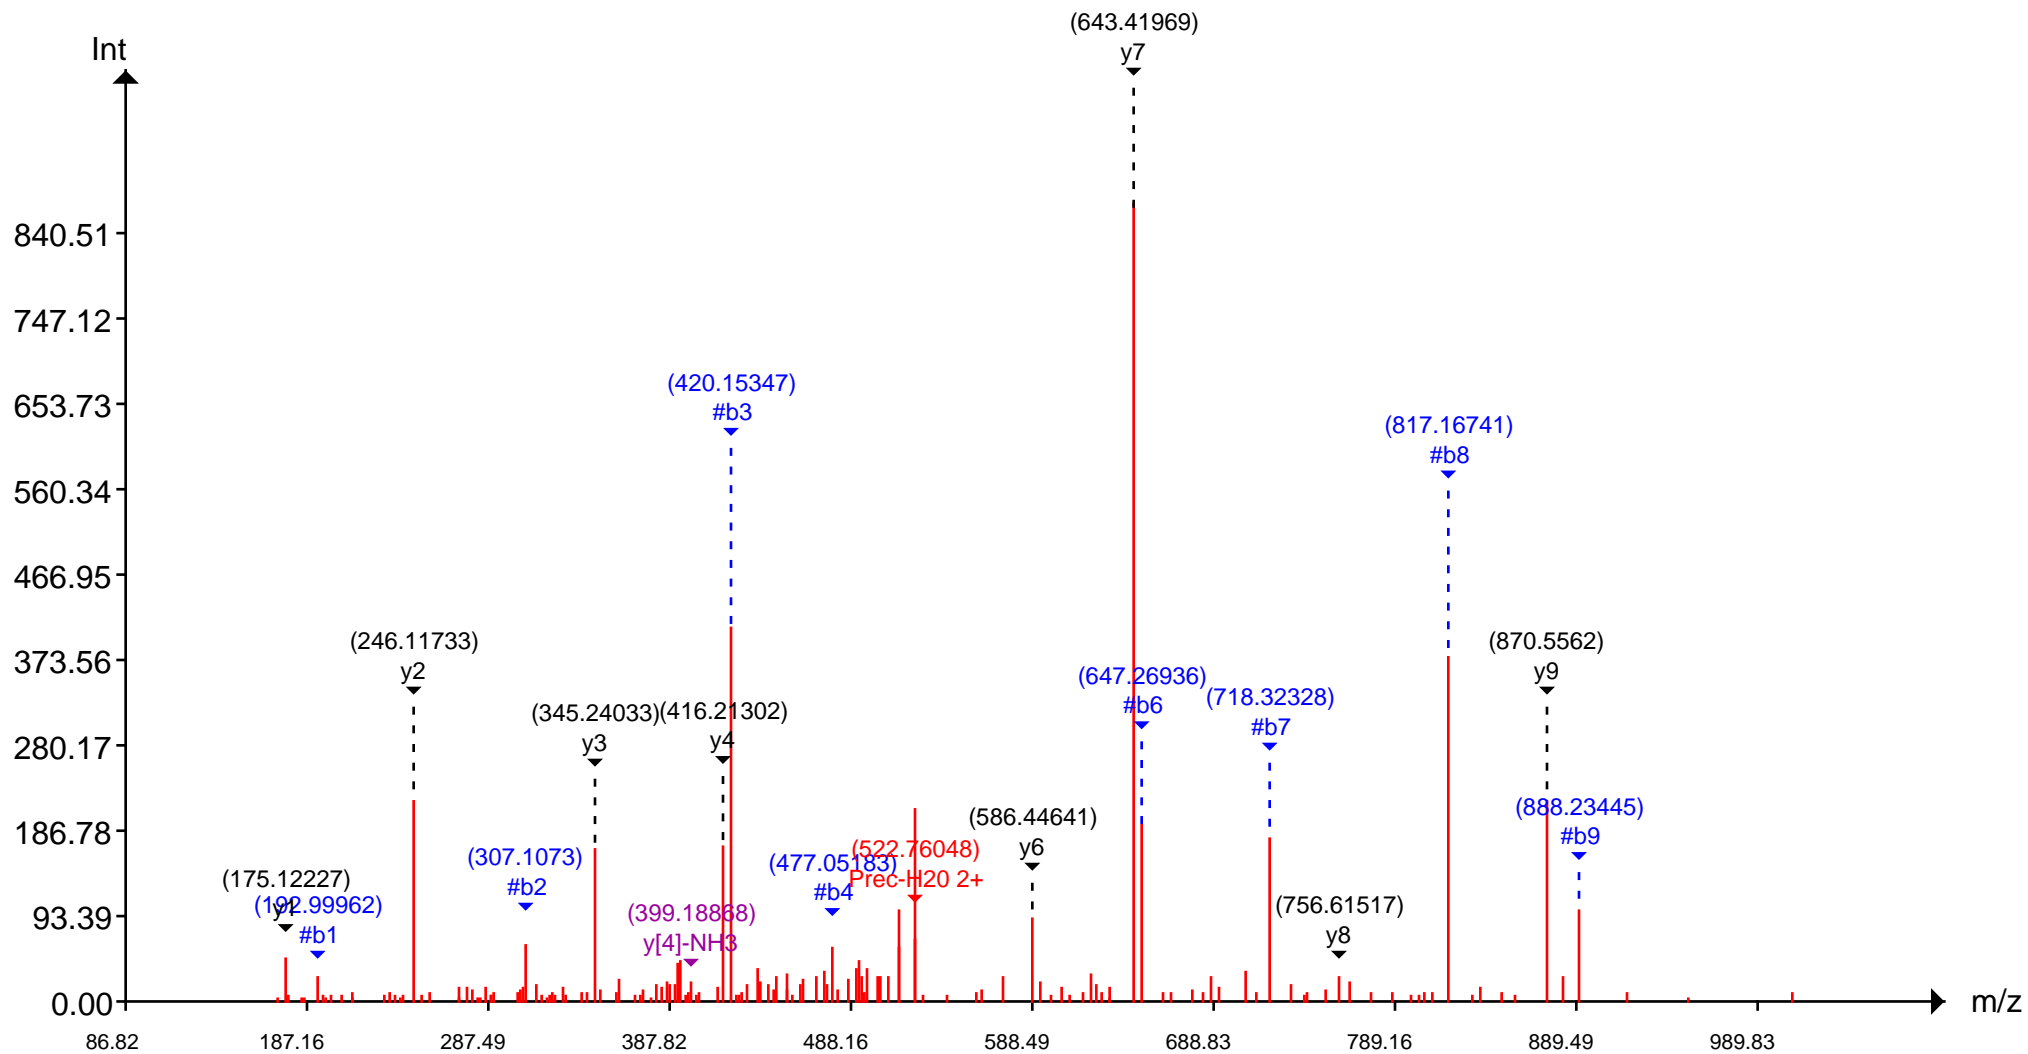

## Info

**Modified Sequence** AcD3-M<Mox\*>NLGGLAVAR-COOH

**Ion score** 65.49

**Protein** Q9WVA4

**Confidence level** 99.00%

**Precursor m/z** 531.79395

**Identity Threshold** 47.77

**Charge** 2+

**Mass error** 2.74E-4

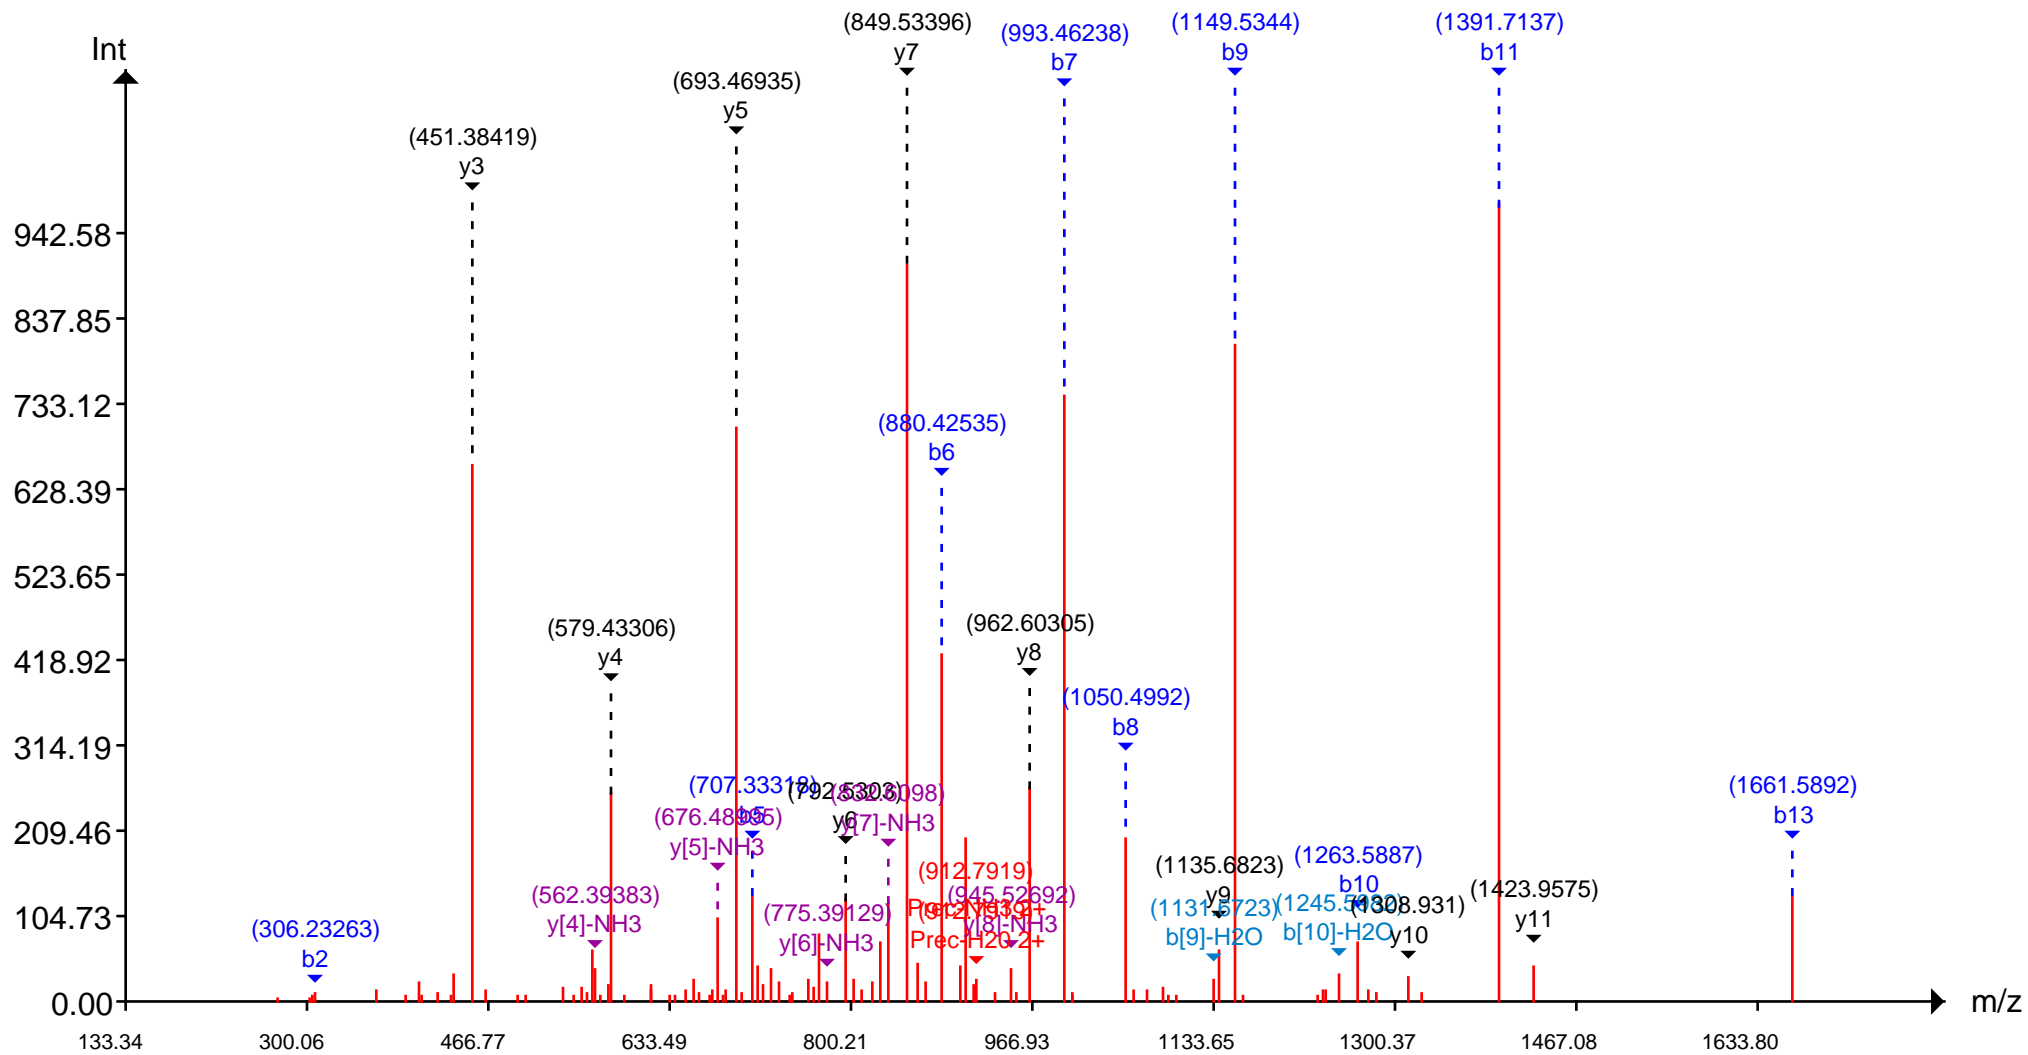

## Info

|                          |                                                       |                           |          |
|--------------------------|-------------------------------------------------------|---------------------------|----------|
| <b>Modified Sequence</b> | AcD3-FLLDK<AcD3K*>K<AcD3K*>IGVNQPK<AcD3K*>R<C13>-COOH | <b>Ion score</b>          | 86.29    |
| <b>Protein</b>           | P80314                                                | <b>Confidence level</b>   | 99.00%   |
| <b>Precursor m/z</b>     | 921.57105                                             | <b>Identity Threshold</b> | 38.37    |
| <b>Charge</b>            | 2+                                                    | <b>Mass error</b>         | 0.001571 |



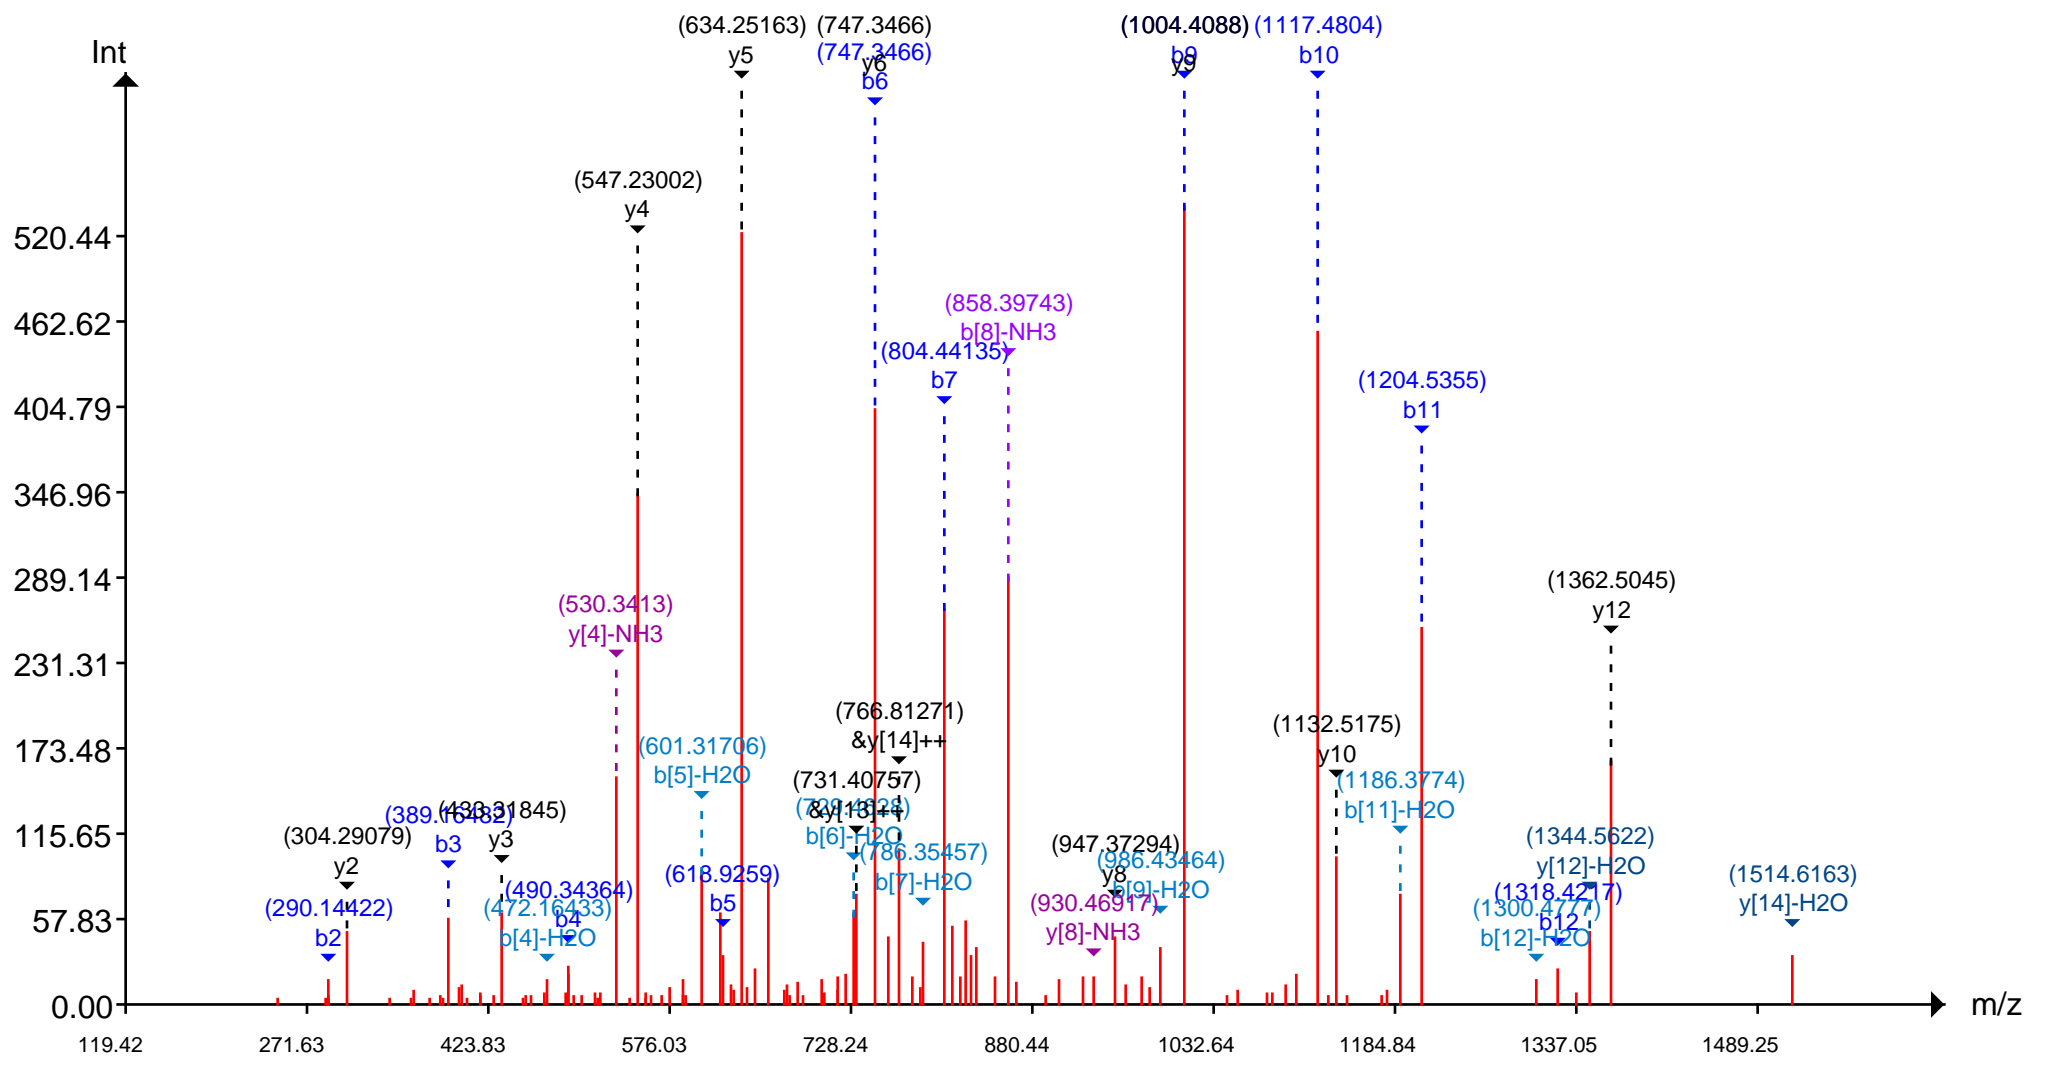

Info

|                          |                                   |                           |          |
|--------------------------|-----------------------------------|---------------------------|----------|
| <b>Modified Sequence</b> | AcD3-K<AcD3K*>AVTEQGAELSNEER-COOH | <b>Ion score</b>          | 94.86    |
| <b>Protein</b>           | P68254                            | <b>Confidence level</b>   | 99.00%   |
| <b>Precursor m/z</b>     | 875.94086                         | <b>Identity Threshold</b> | 47.93    |
| <b>Charge</b>            | 2+                                | <b>Mass error</b>         | 0.002025 |

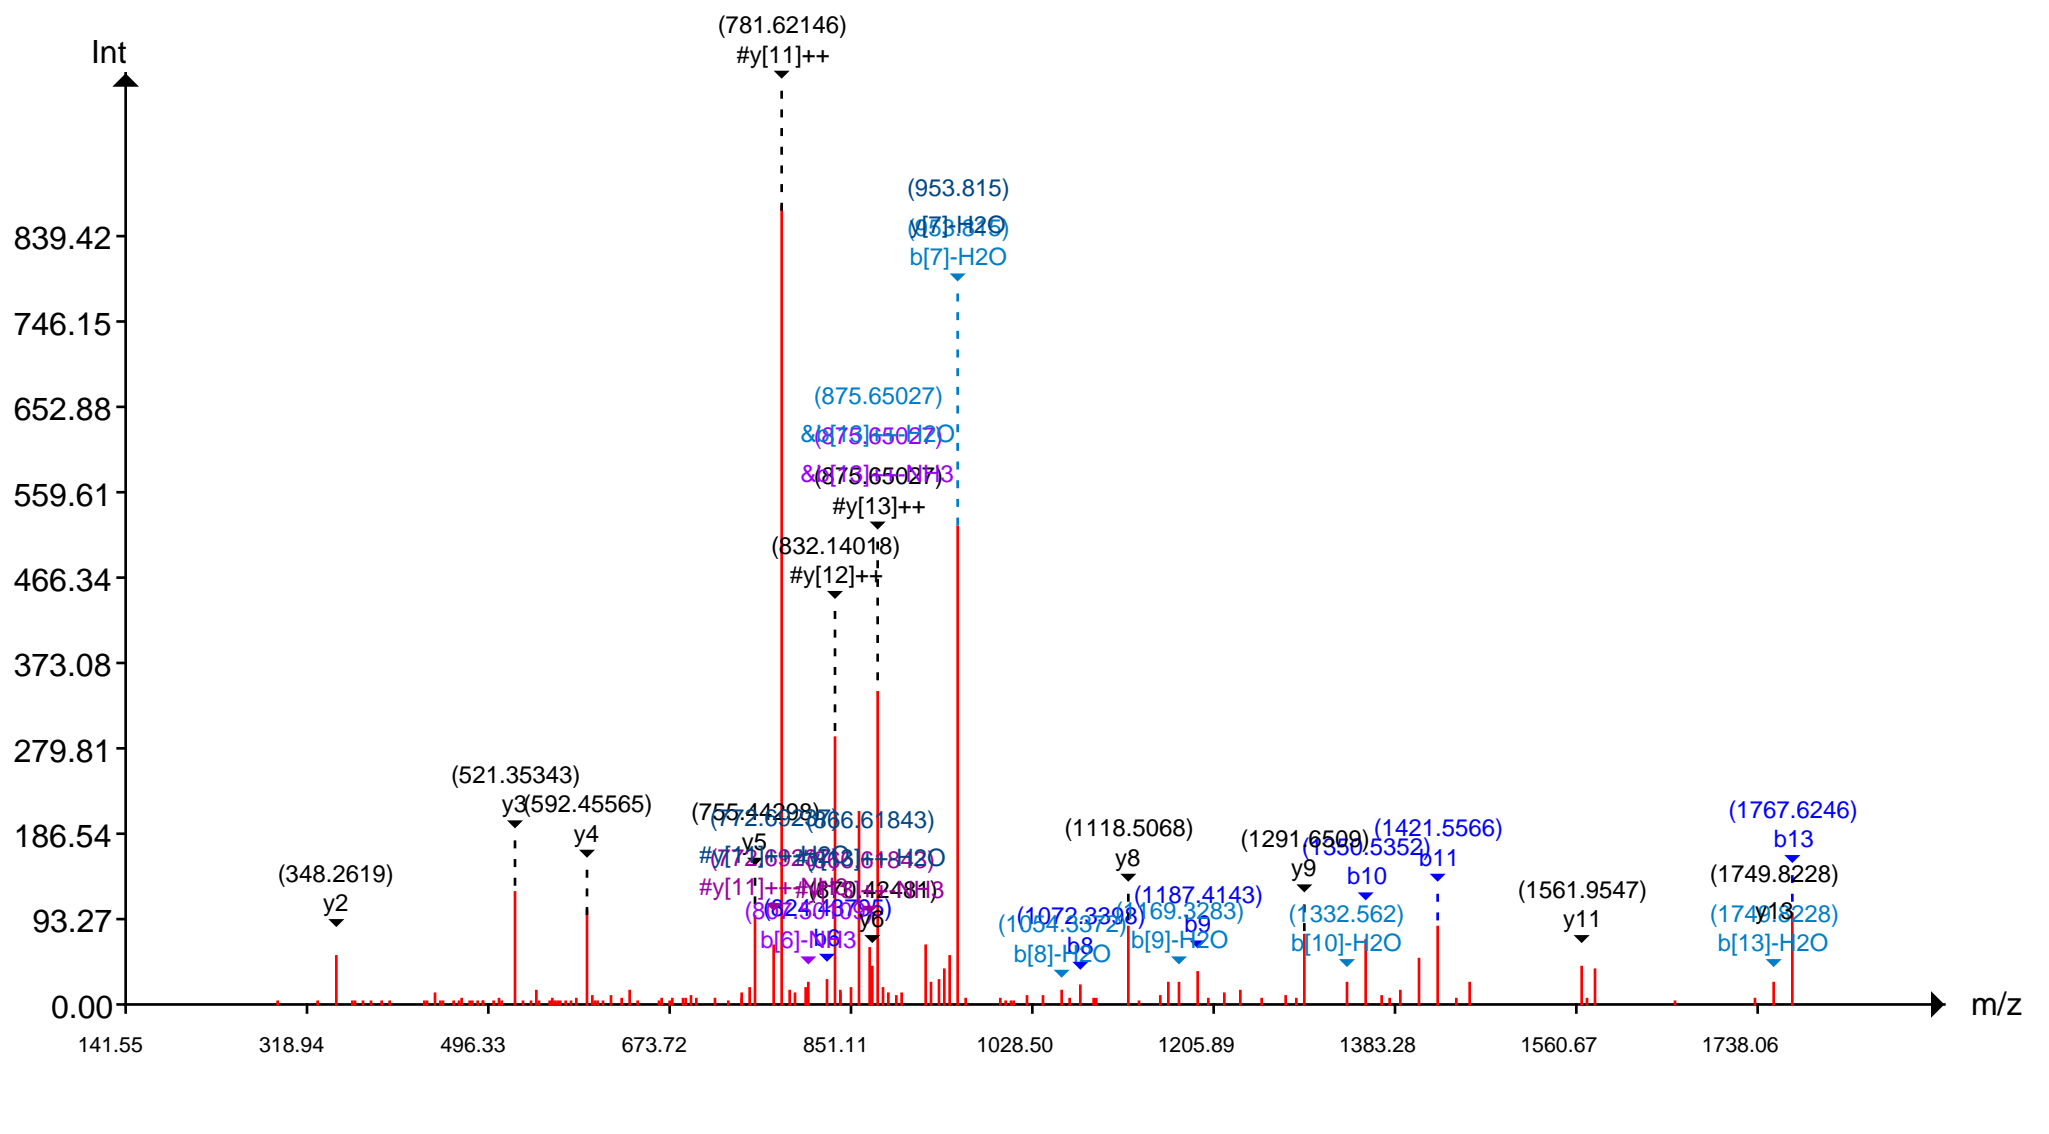

| Info                     |                                                                |                           |          |
|--------------------------|----------------------------------------------------------------|---------------------------|----------|
| <b>Modified Sequence</b> | AcD3-FSTPK<AcD3K*>K<AcD3K*>M<Mox*>TDYAK<AcD3K*>K<AcD3K*>R-COOH | <b>Ion score</b>          | 49.52    |
| <b>Protein</b>           | Q9CX56                                                         | <b>Confidence level</b>   | 99.00%   |
| <b>Precursor m/z</b>     | 971.53319                                                      | <b>Identity Threshold</b> | 47.27    |
| <b>Charge</b>            | 2+                                                             | <b>Mass error</b>         | 0.001978 |

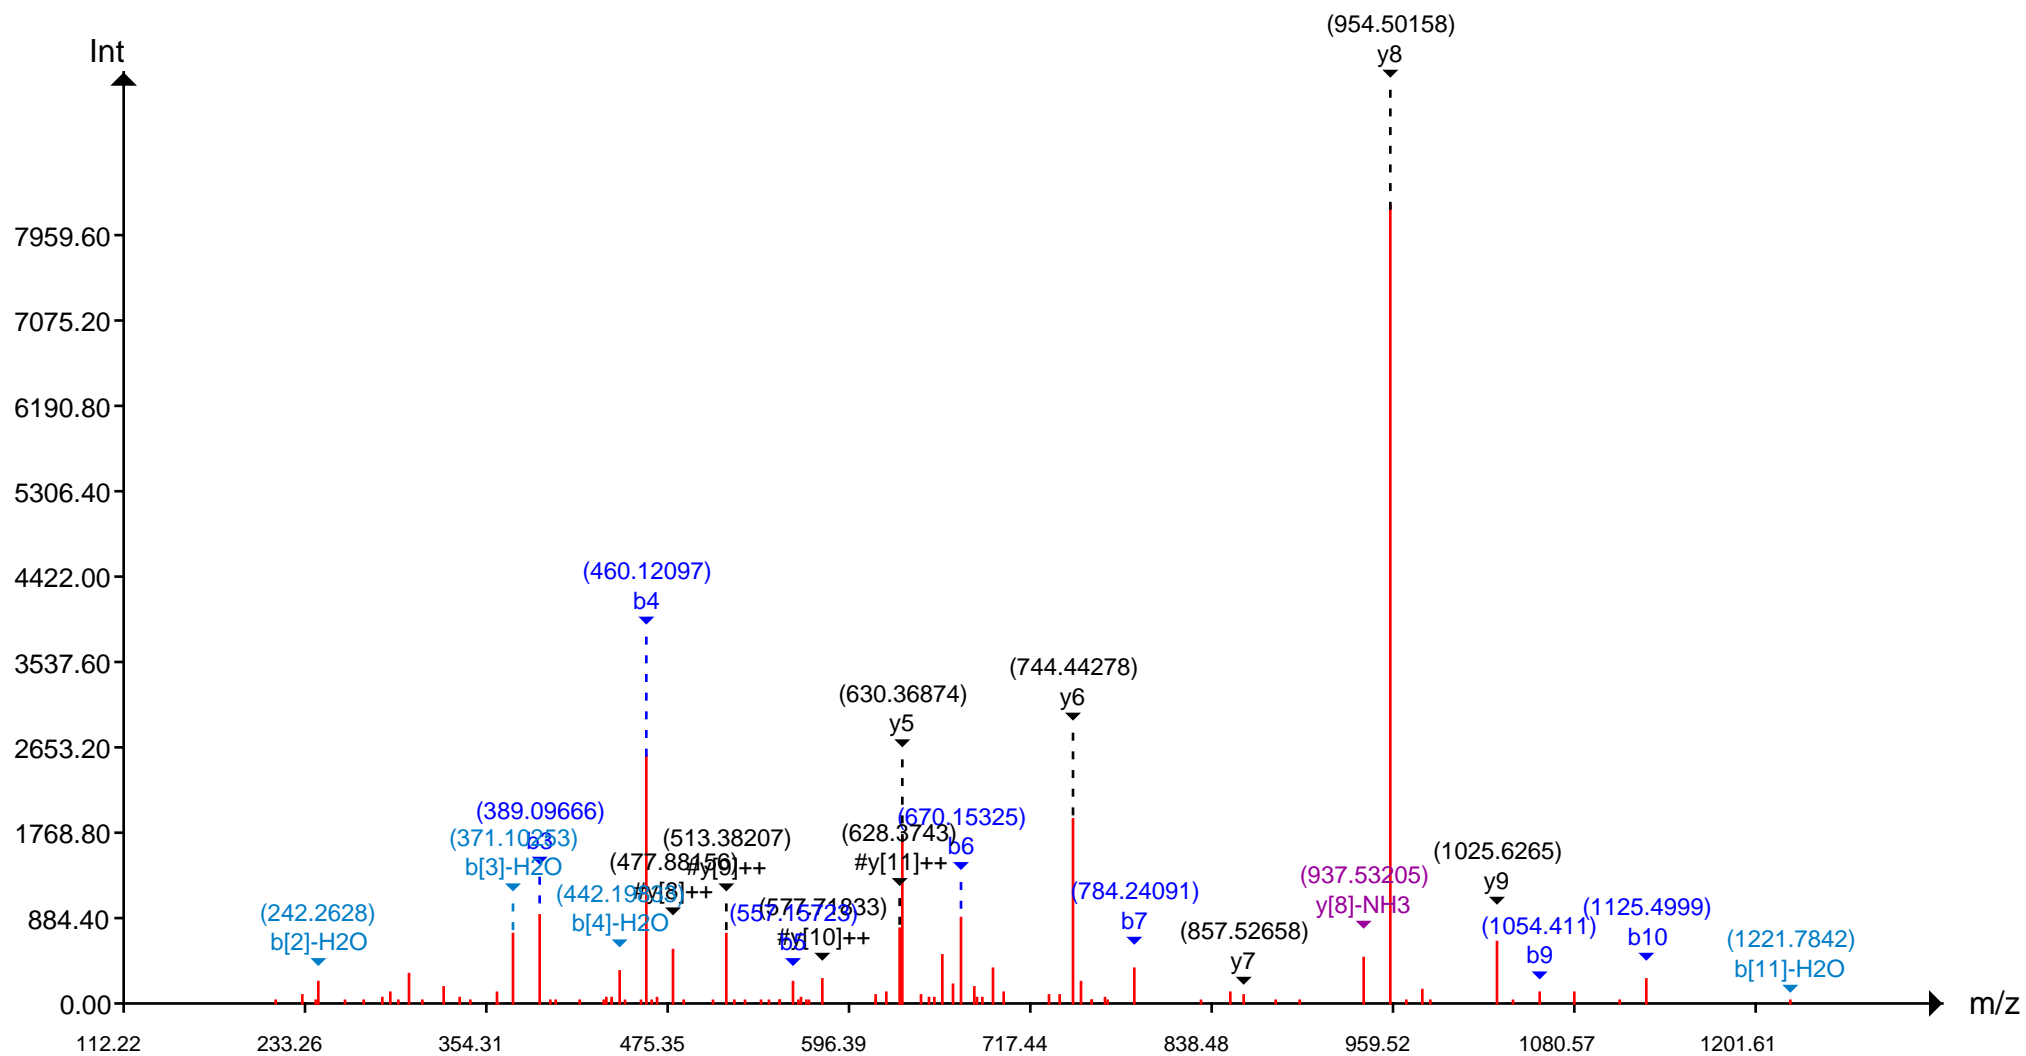

## Info

|                          |                                                |                           |         |
|--------------------------|------------------------------------------------|---------------------------|---------|
| <b>Modified Sequence</b> | AcD3-LTEAPLNPK<AcD3K*>ANR-COOH                 | <b>Ion score</b>          | 56.33   |
| <b>Protein</b>           | P62737, P60710, P68033, P63260, P63268, P68134 | <b>Confidence level</b>   | 99.00%  |
| <b>Precursor m/z</b>     | 707.40276                                      | <b>Identity Threshold</b> | 46.89   |
| <b>Charge</b>            | 2+                                             | <b>Mass error</b>         | 0.00157 |

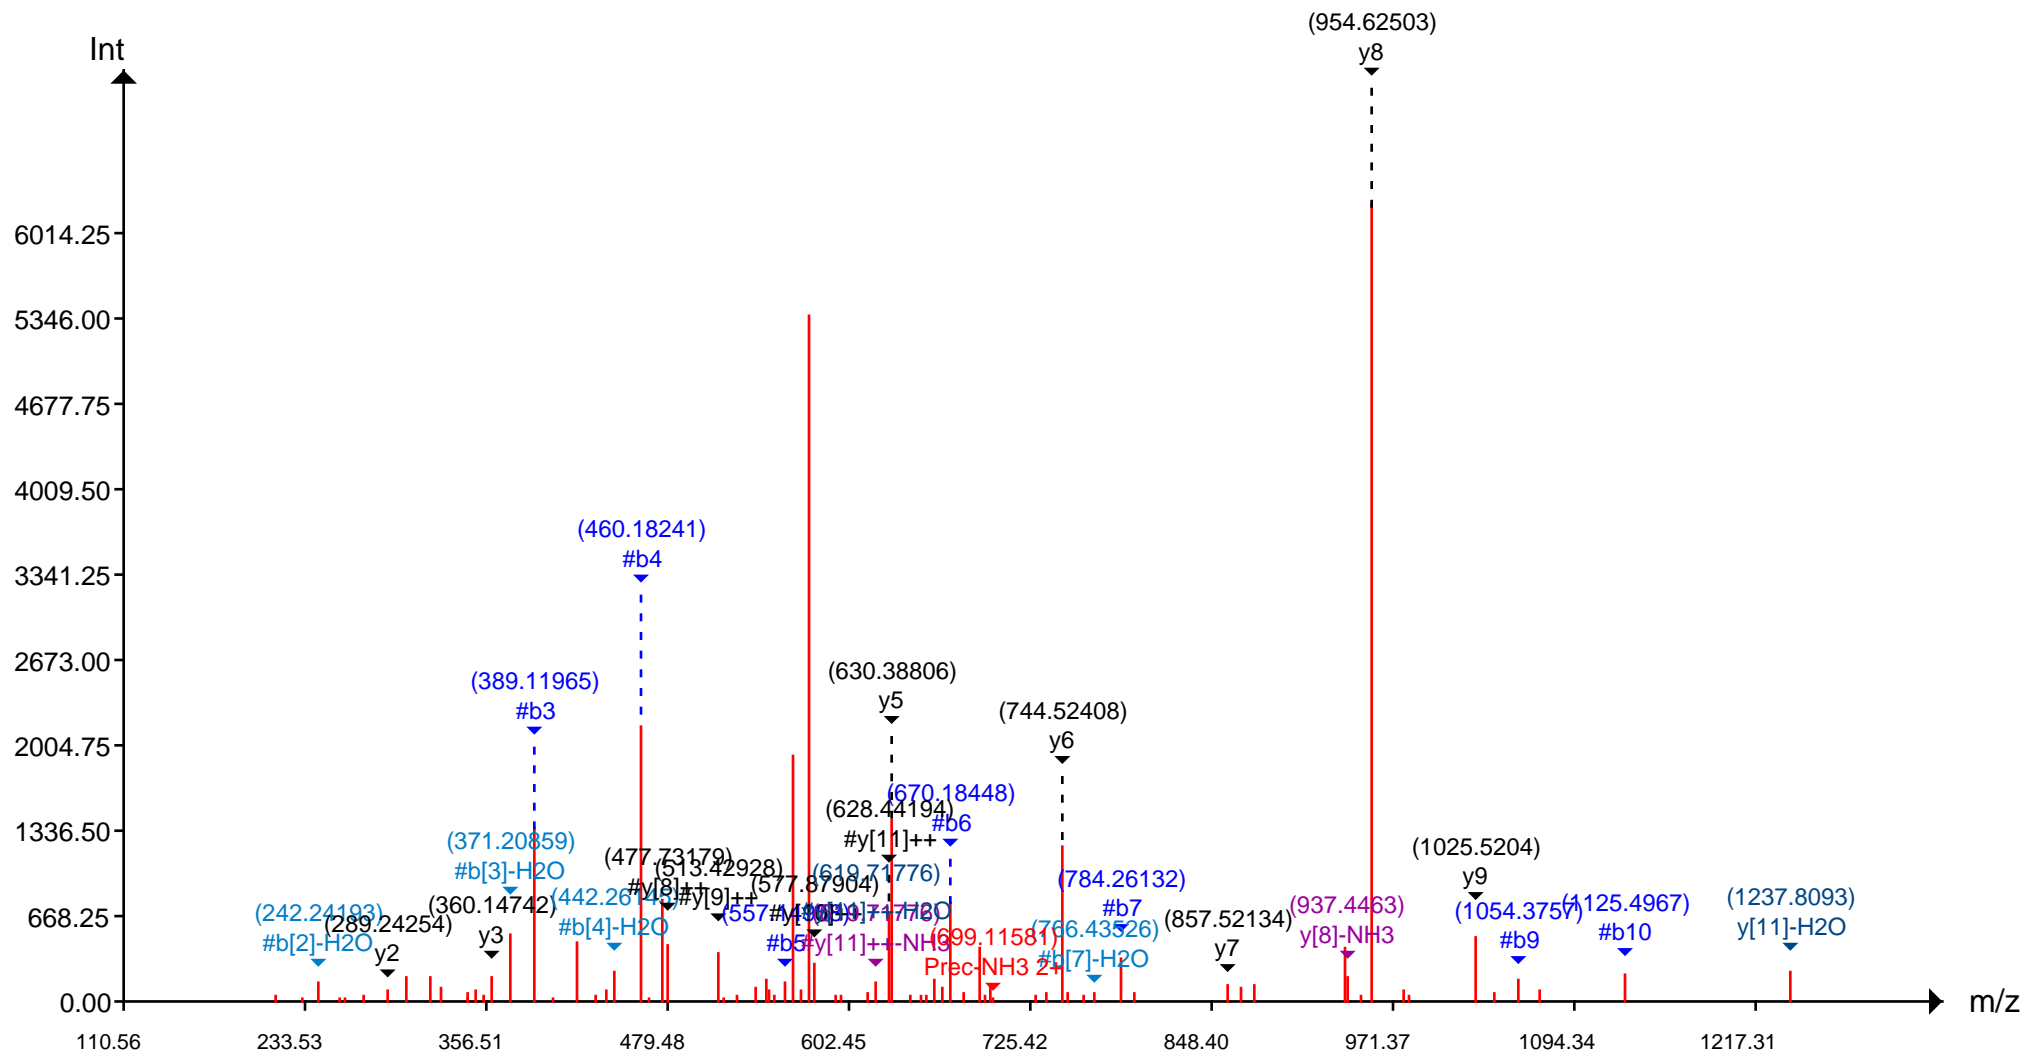

## Info

|                          |                                                |                           |         |
|--------------------------|------------------------------------------------|---------------------------|---------|
| <b>Modified Sequence</b> | AcD3-LTEAPLNPK<AcD3K*>ANR-COOH                 | <b>Ion score</b>          | 47.96   |
| <b>Protein</b>           | P62737, P60710, P68033, P63260, P63268, P68134 | <b>Confidence level</b>   | 99.00%  |
| <b>Precursor m/z</b>     | 707.40254                                      | <b>Identity Threshold</b> | 46.72   |
| <b>Charge</b>            | 2+                                             | <b>Mass error</b>         | 0.00113 |

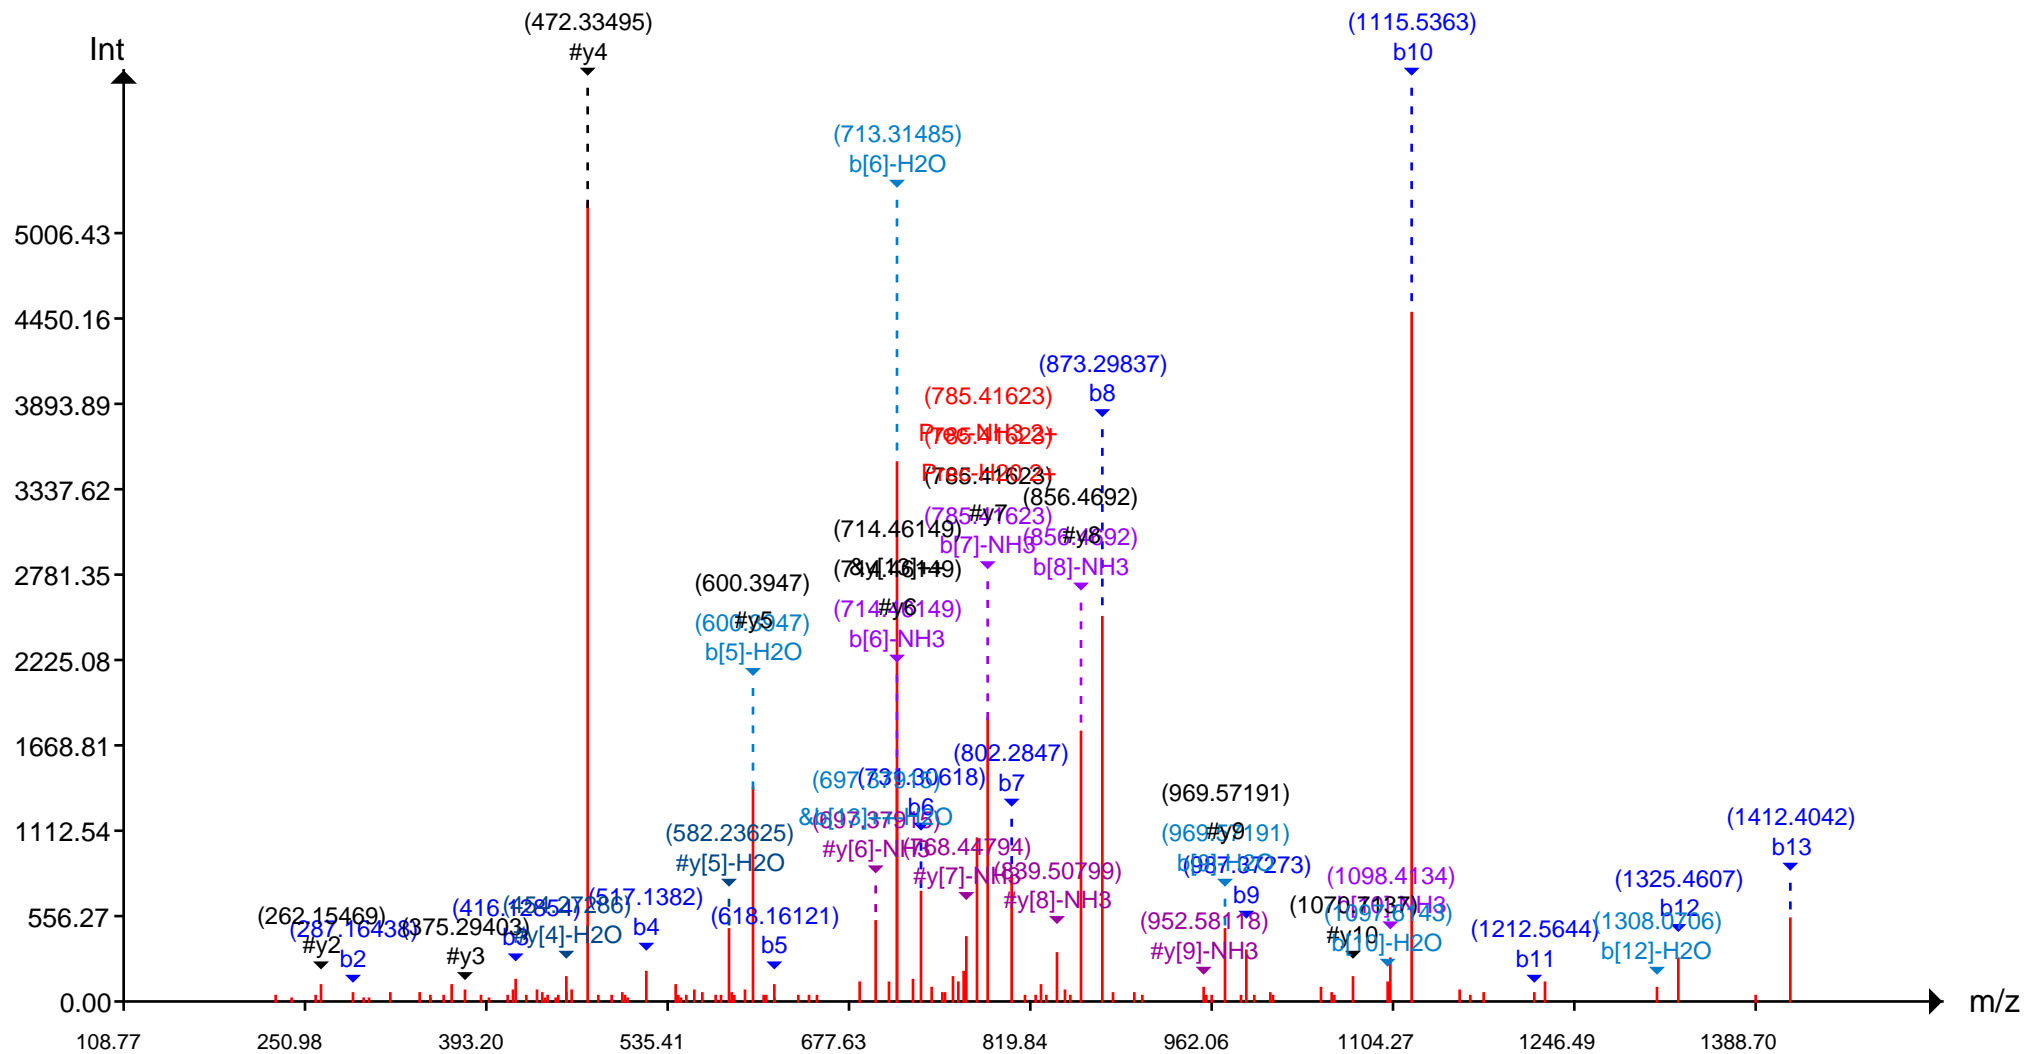

## Info

|                          |                          |                           |         |
|--------------------------|--------------------------|---------------------------|---------|
| <b>Modified Sequence</b> | AcD3-LQETTLAANQPLSR-COOH | <b>Ion score</b>          | 105.13  |
| <b>Protein</b>           | O09159                   | <b>Confidence level</b>   | 99.00%  |
| <b>Precursor m/z</b>     | 793.93269                | <b>Identity Threshold</b> | 47.74   |
| <b>Charge</b>            | 2+                       | <b>Mass error</b>         | 5.47E-4 |

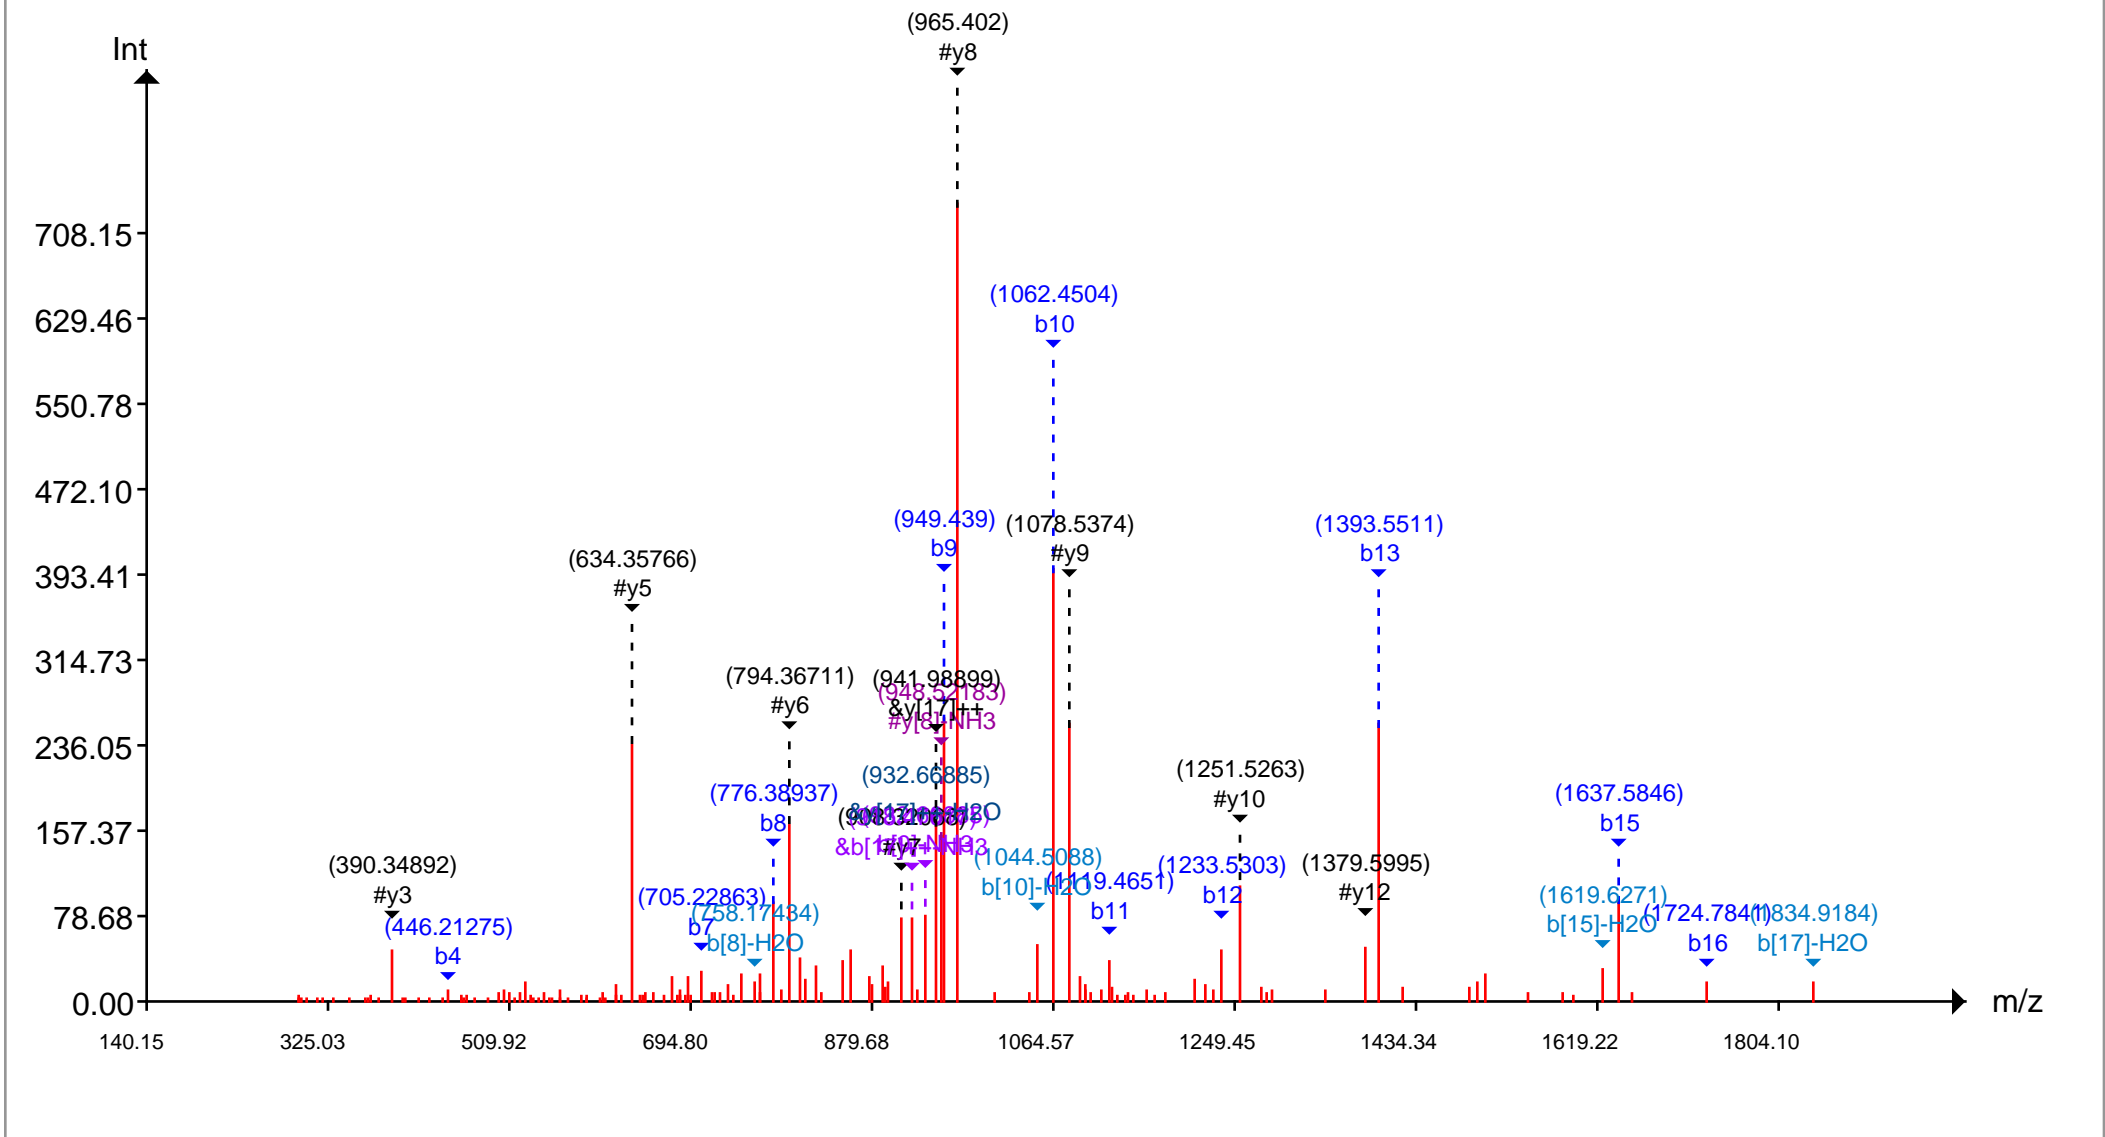

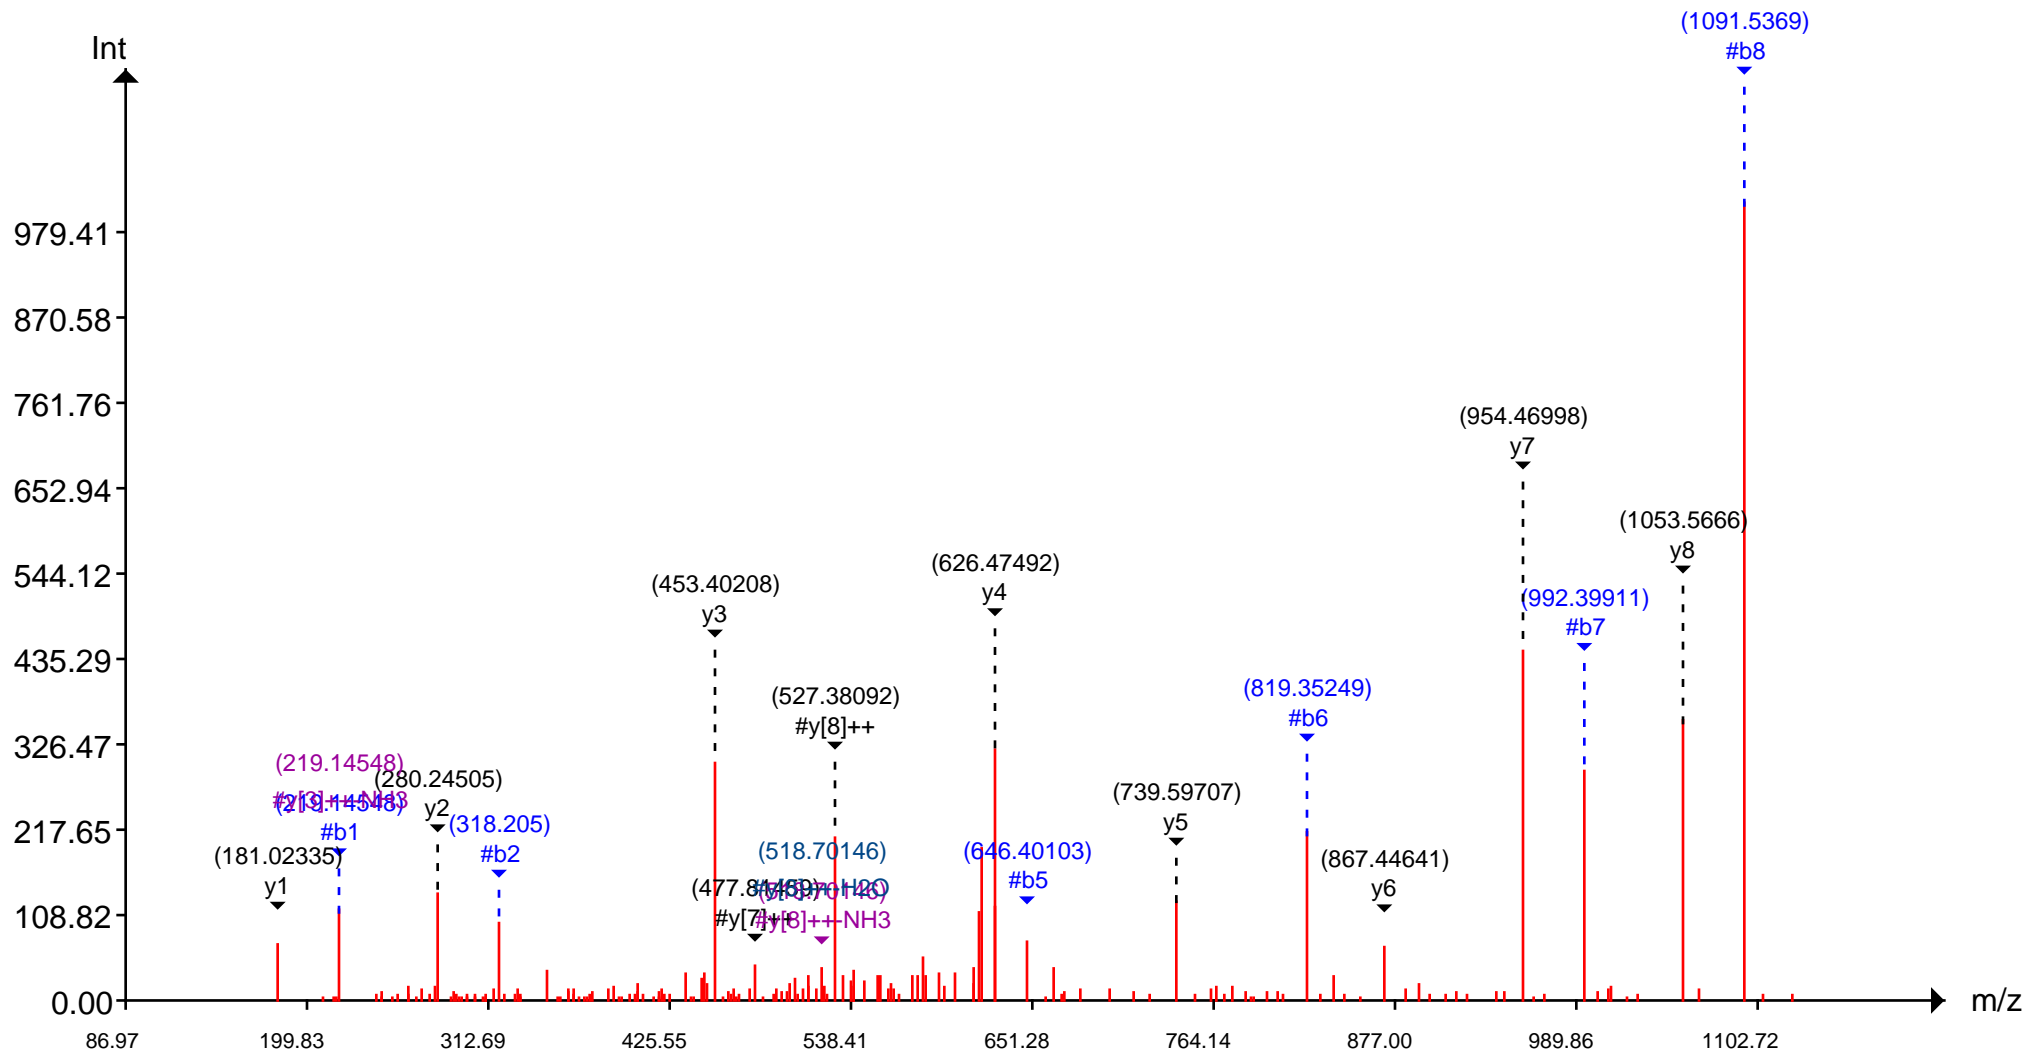

## Info

|                          |                                                  |                           |         |
|--------------------------|--------------------------------------------------|---------------------------|---------|
| <b>Modified Sequence</b> | AcD3-K<AcD3K*>VSQIK<AcD3K*>K<AcD3K*>VR<C13>-COOH | <b>Ion score</b>          | 59.83   |
| <b>Protein</b>           | P26638                                           | <b>Confidence level</b>   | 99.00%  |
| <b>Precursor m/z</b>     | 636.43025                                        | <b>Identity Threshold</b> | 33.36   |
| <b>Charge</b>            | 2+                                               | <b>Mass error</b>         | 1.69E-4 |

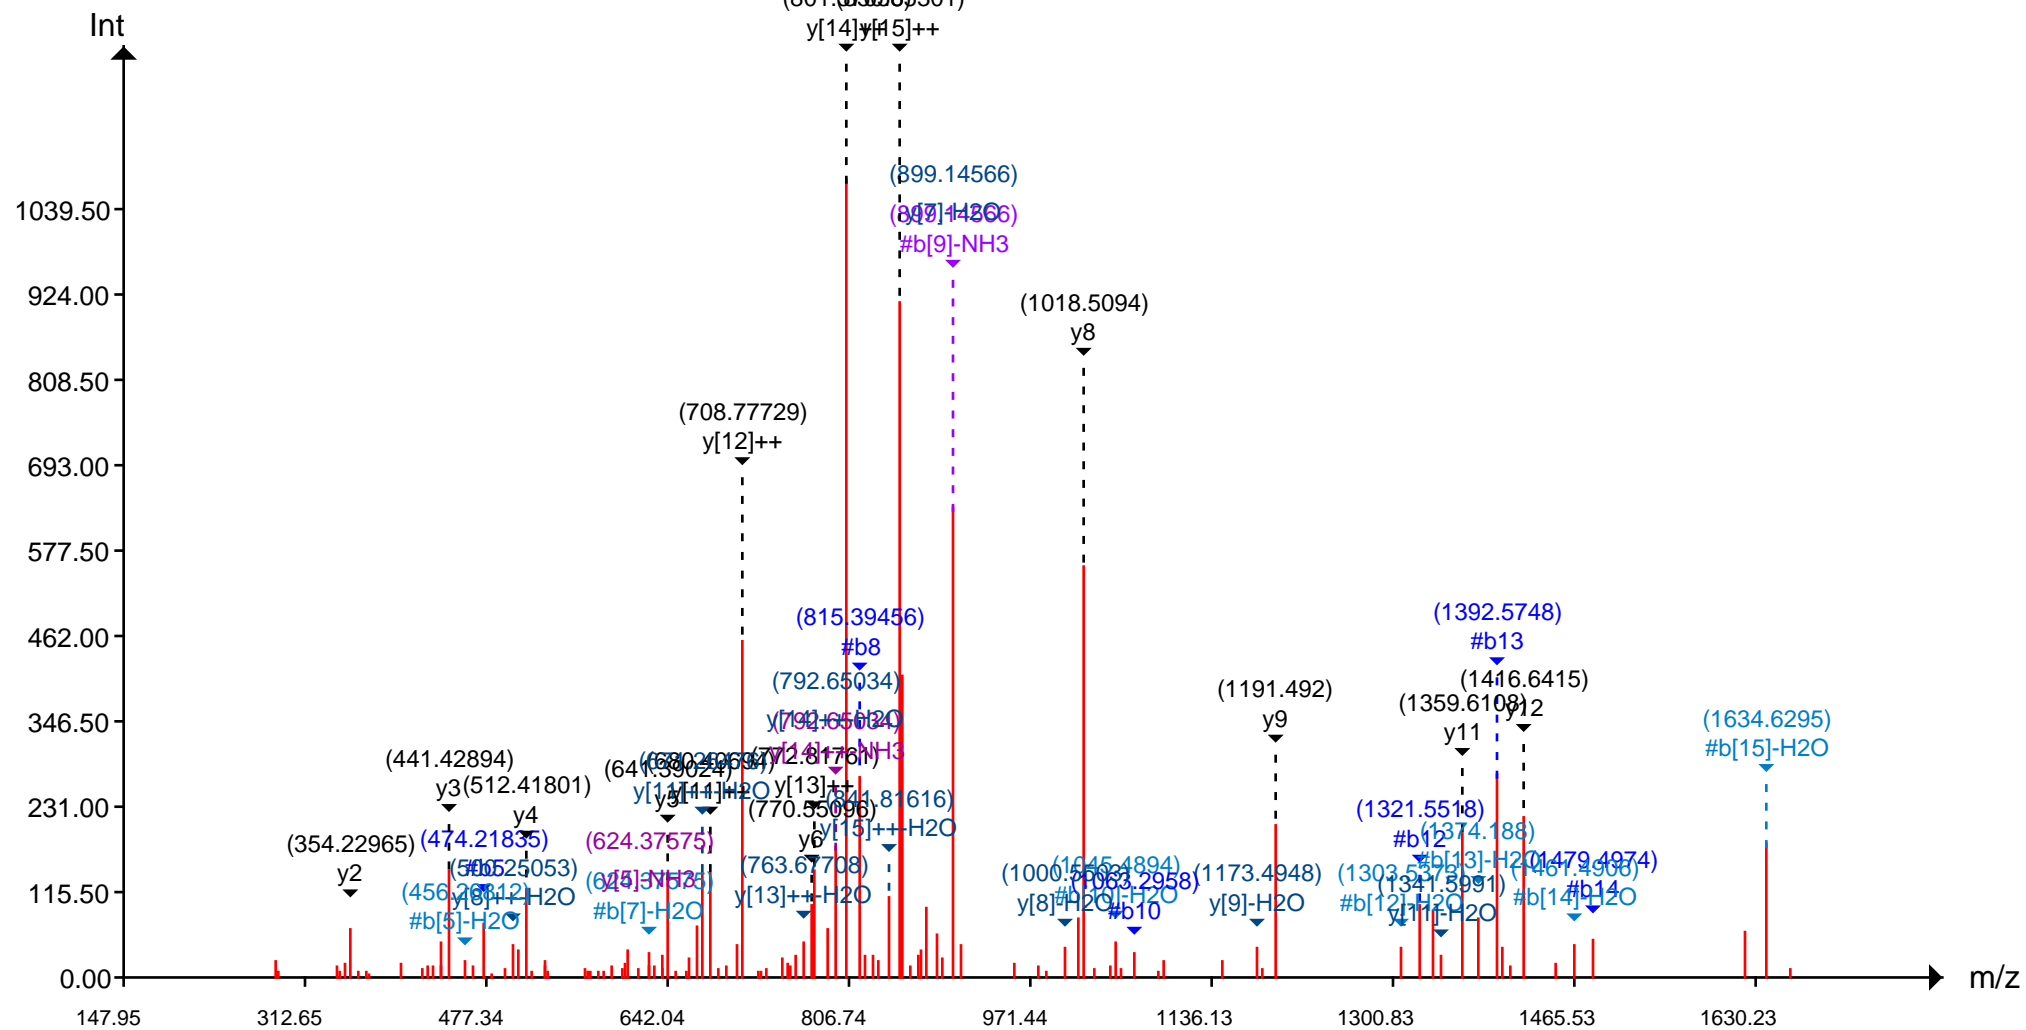

## Info

|                          |                                                       |                           |         |
|--------------------------|-------------------------------------------------------|---------------------------|---------|
| <b>Modified Sequence</b> | AcD3-SVGQGPAK<AcD3K*>TM<Mox*>EEASK<AcD3K*>R<C13>-COOH | <b>Ion score</b>          | 62.6    |
| <b>Protein</b>           | O70310                                                | <b>Confidence level</b>   | 99.00%  |
| <b>Precursor m/z</b>     | 916.97767                                             | <b>Identity Threshold</b> | 48.17   |
| <b>Charge</b>            | 2+                                                    | <b>Mass error</b>         | 0.00164 |



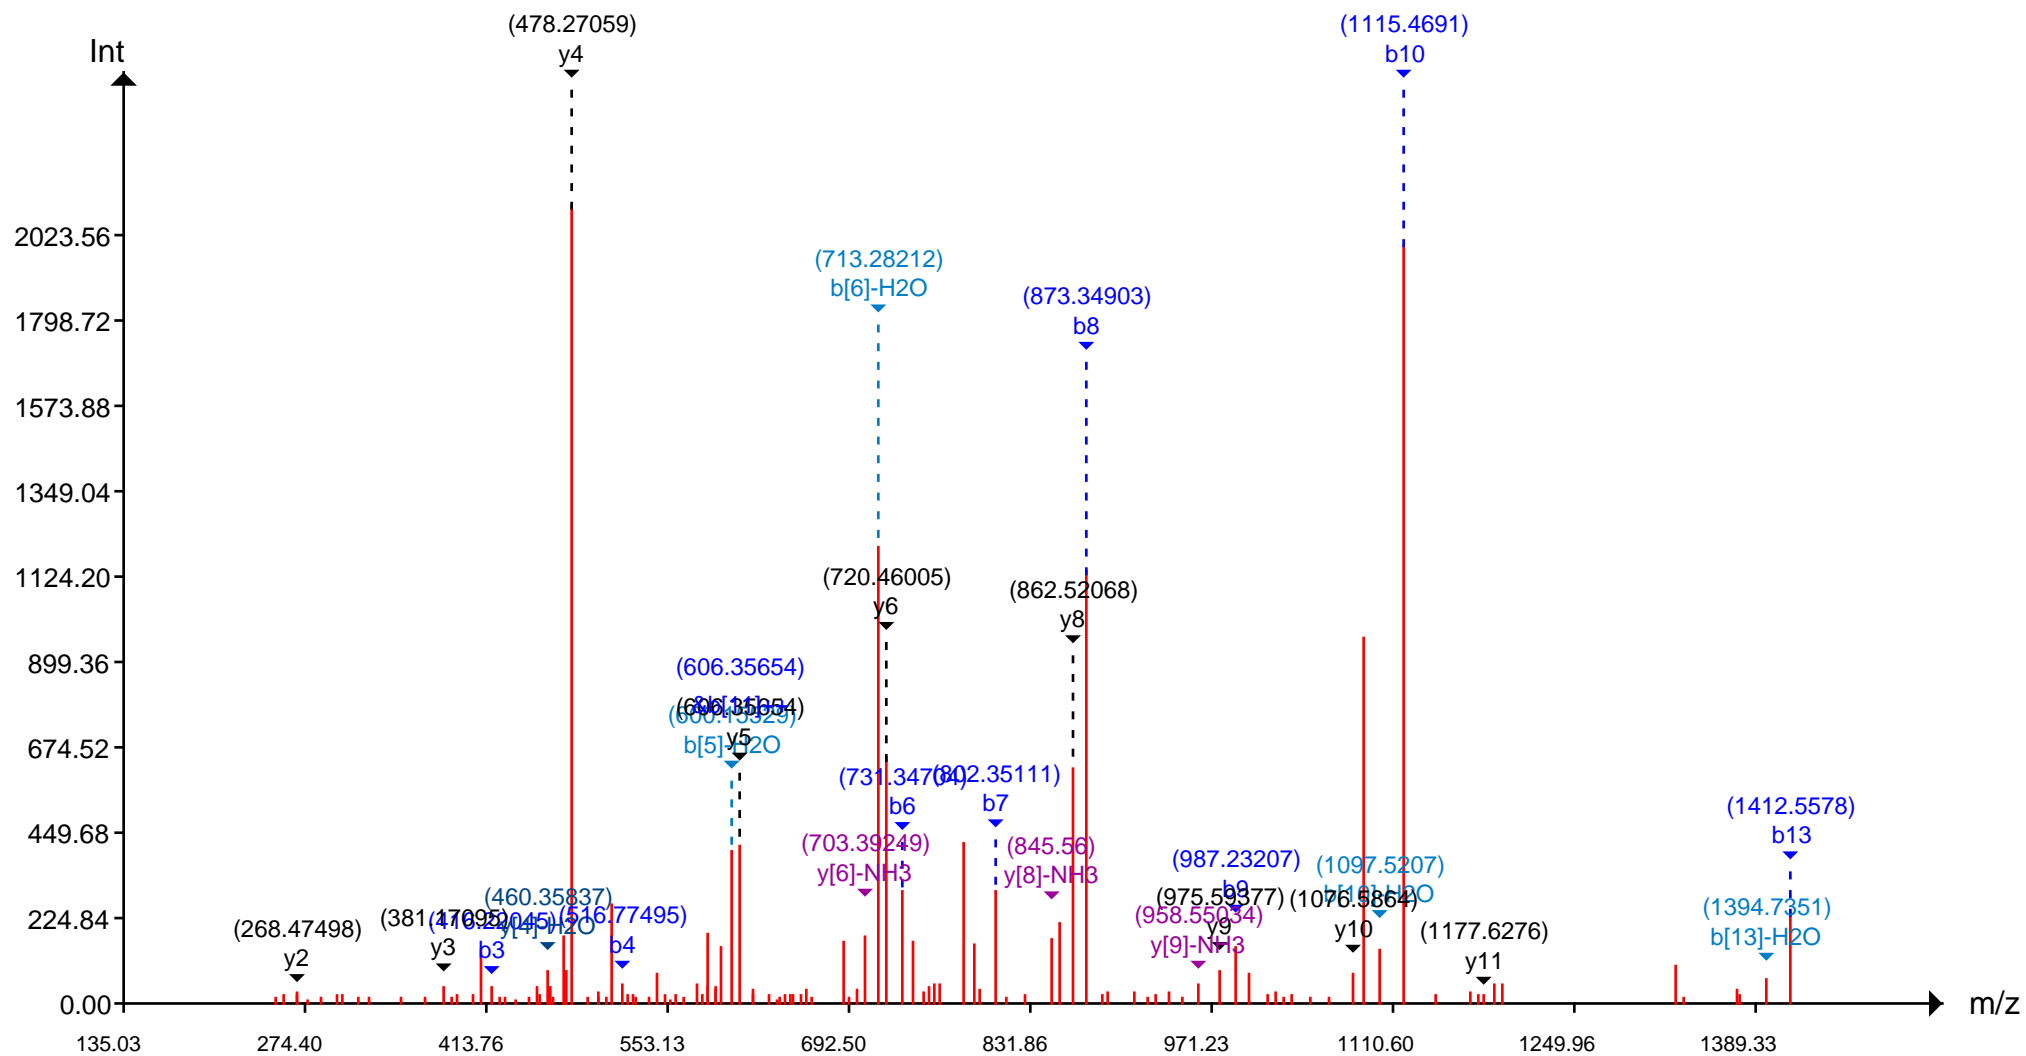

## Info

**Modified Sequence** AcD3-LQETTLAANQPLSR<C13>-COOH

**Ion score** 55.88

**Protein** O09159

**Confidence level** 99.00%

**Precursor m/z** 796.94379

**Identity Threshold** 47.28

**Charge** 2+

**Mass error** 0.002606

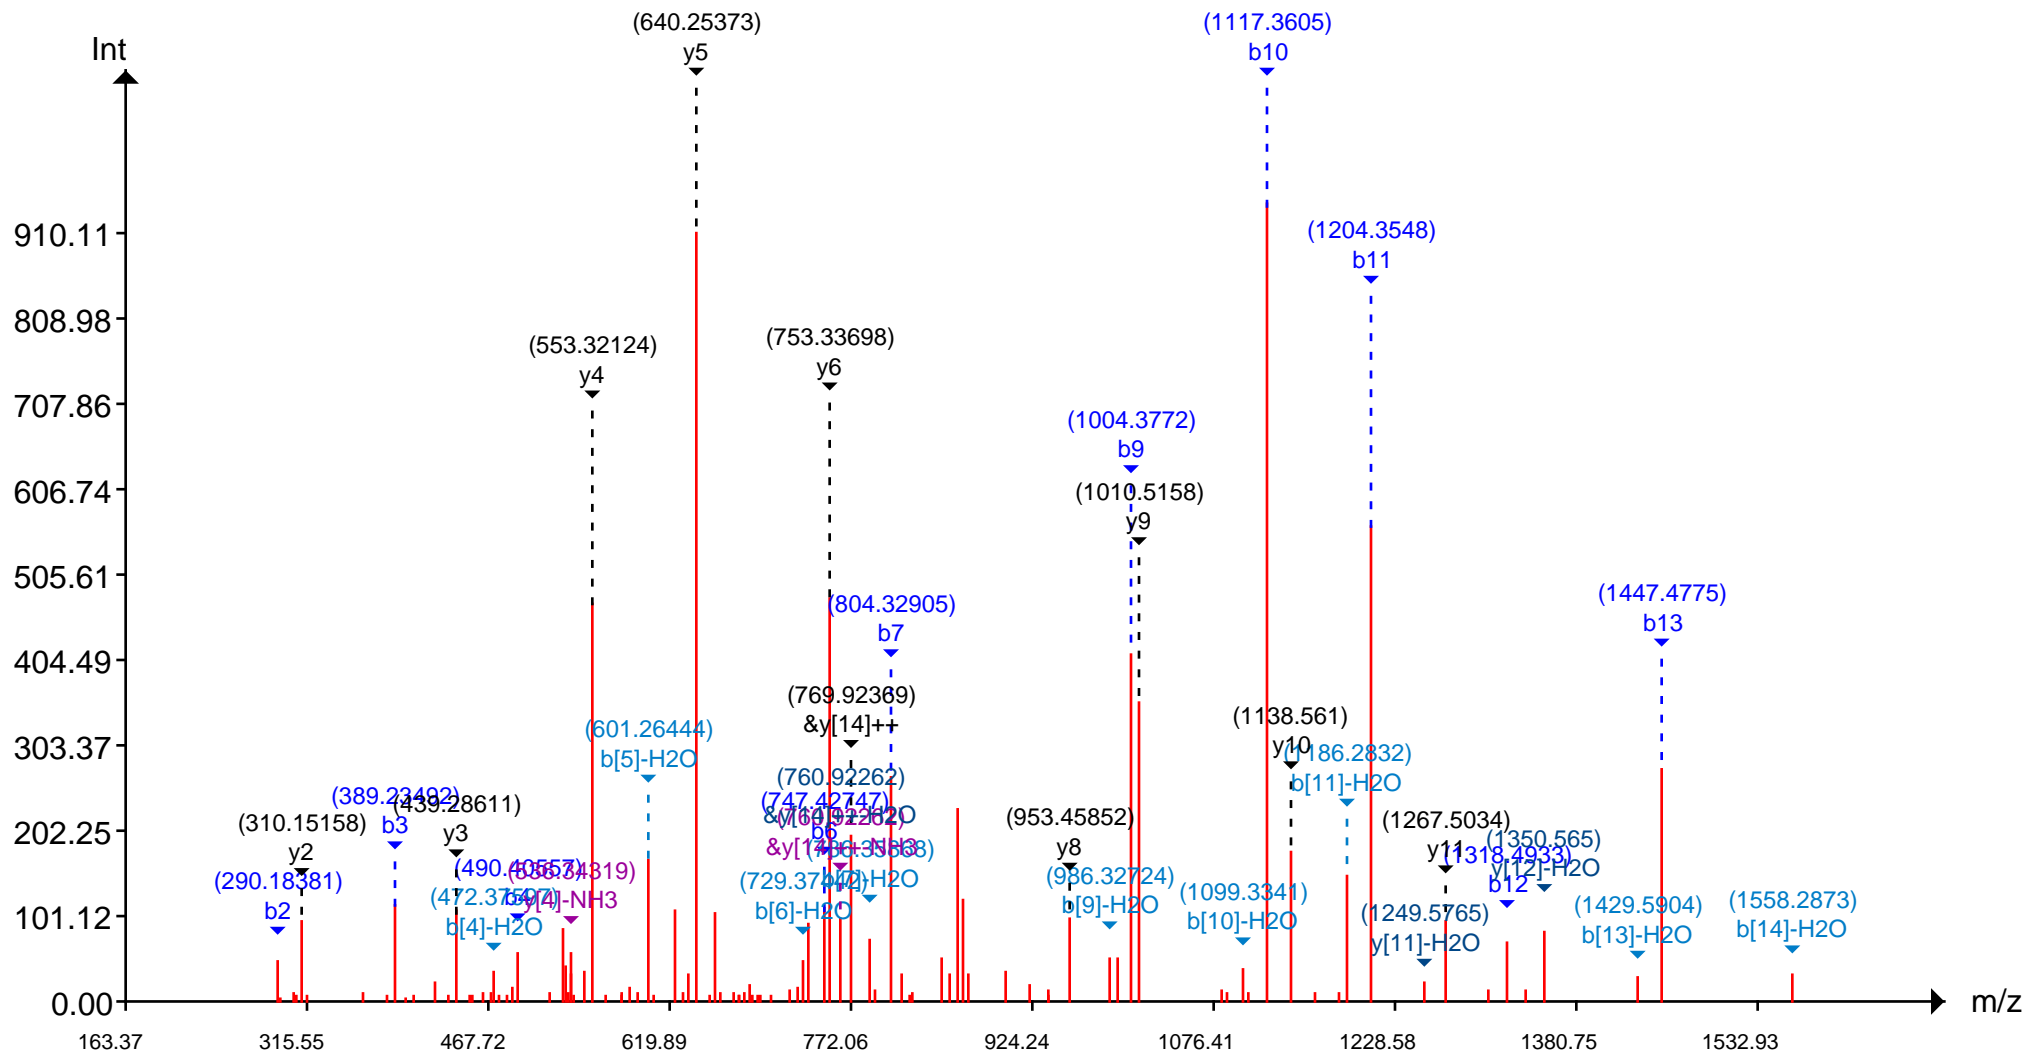

## Info

**Modified Sequence** AcD3-K<AcD3K\*>AVTEQGAELSNEER<C13>-COOH

**Ion score** 92.61

**Protein** P68254

**Confidence level** 99.00%

**Precursor m/z** 878.95074

**Identity Threshold** 48.09

**Charge** 2+

**Mass error** 0.001644

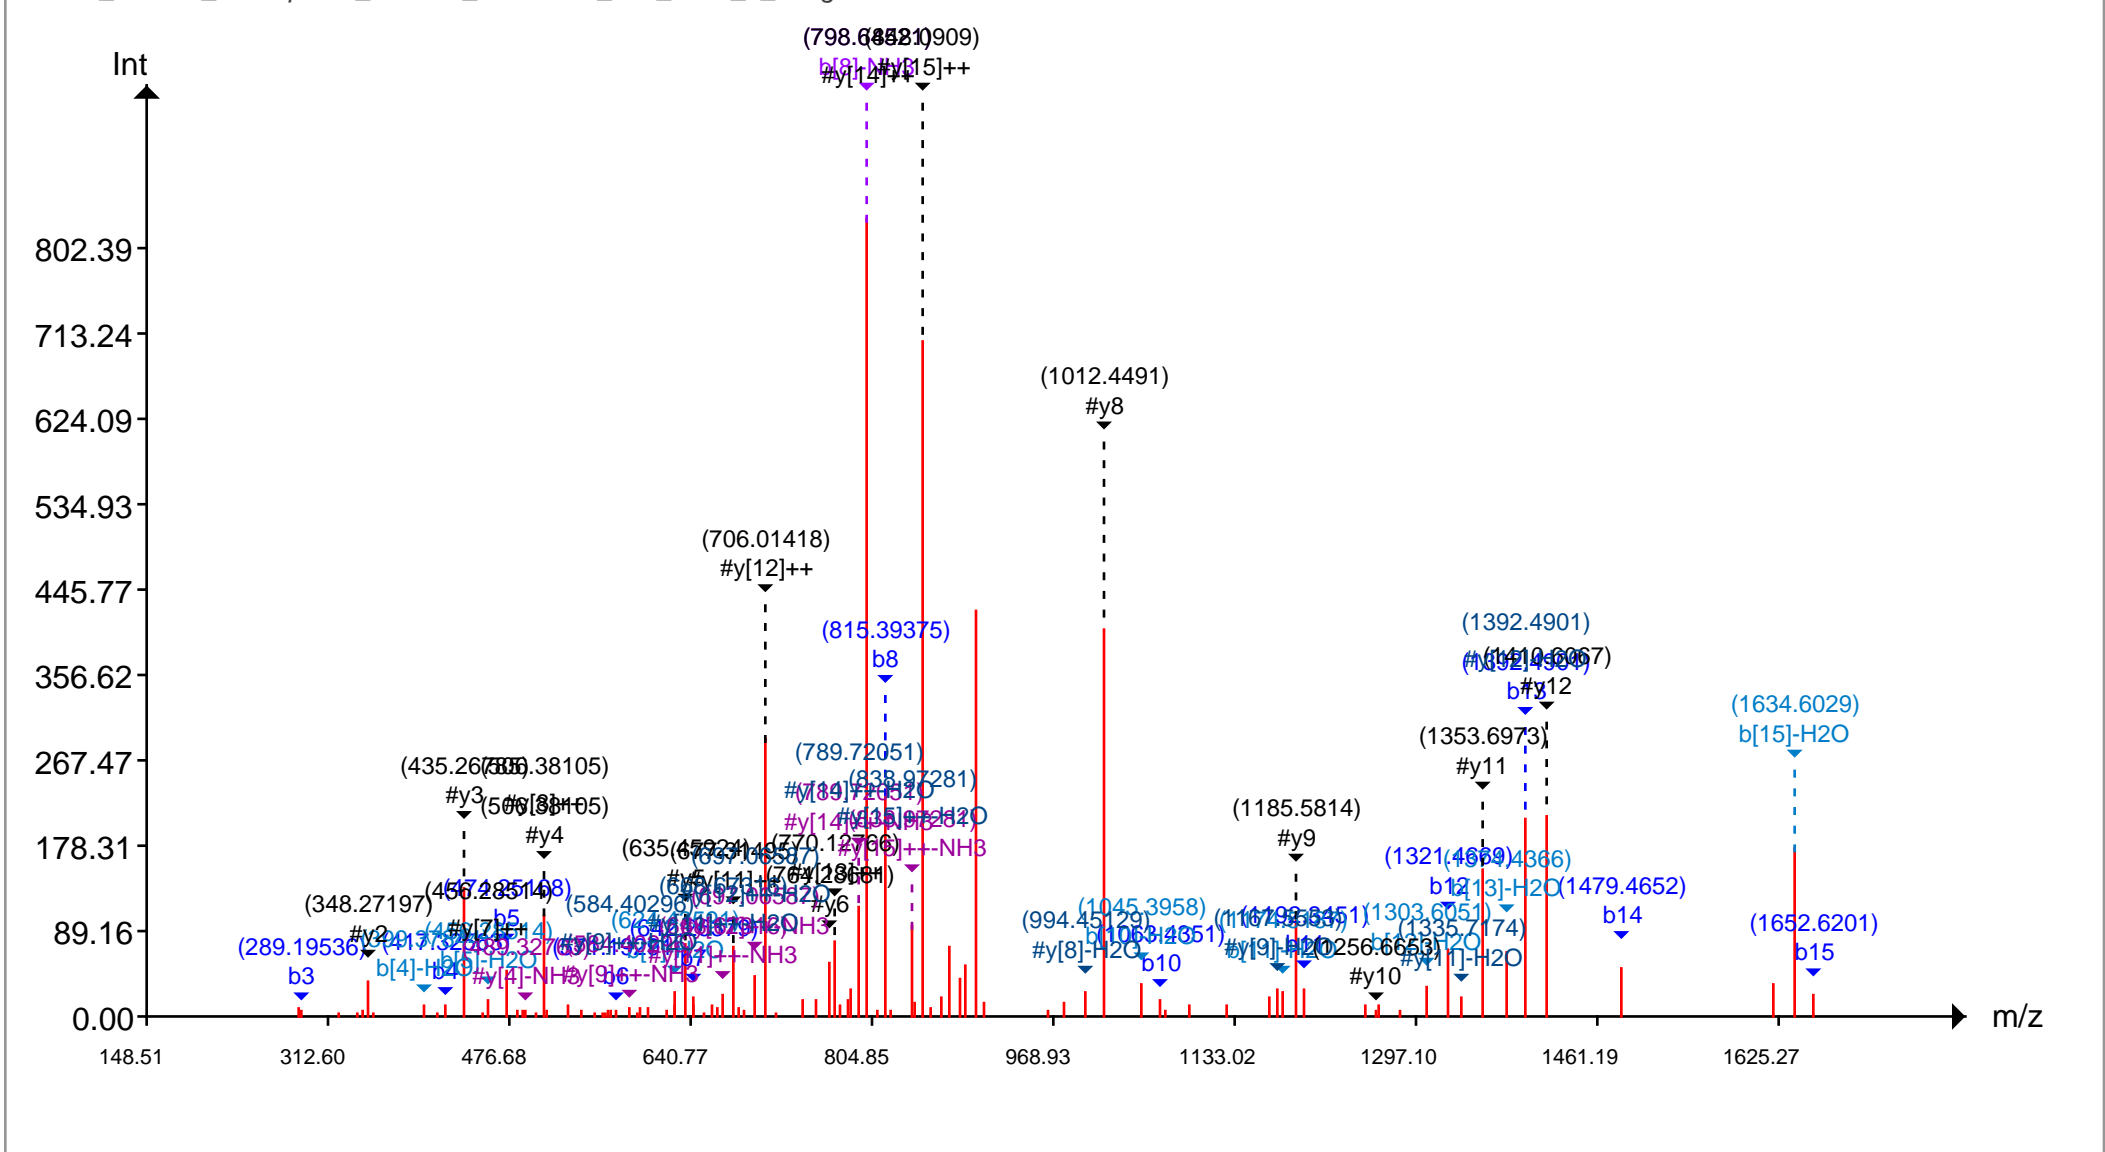

## Info

|                          |                                                  |                           |          |
|--------------------------|--------------------------------------------------|---------------------------|----------|
| <b>Modified Sequence</b> | AcD3-SVGQGPAK<AcD3K*>TM<Mox*>EEASK<AcD3K*>R-COOH | <b>Ion score</b>          | 93.13    |
| <b>Protein</b>           | O70310                                           | <b>Confidence level</b>   | 99.00%   |
| <b>Precursor m/z</b>     | 913.96799                                        | <b>Identity Threshold</b> | 48.03    |
| <b>Charge</b>            | 2+                                               | <b>Mass error</b>         | 0.002422 |

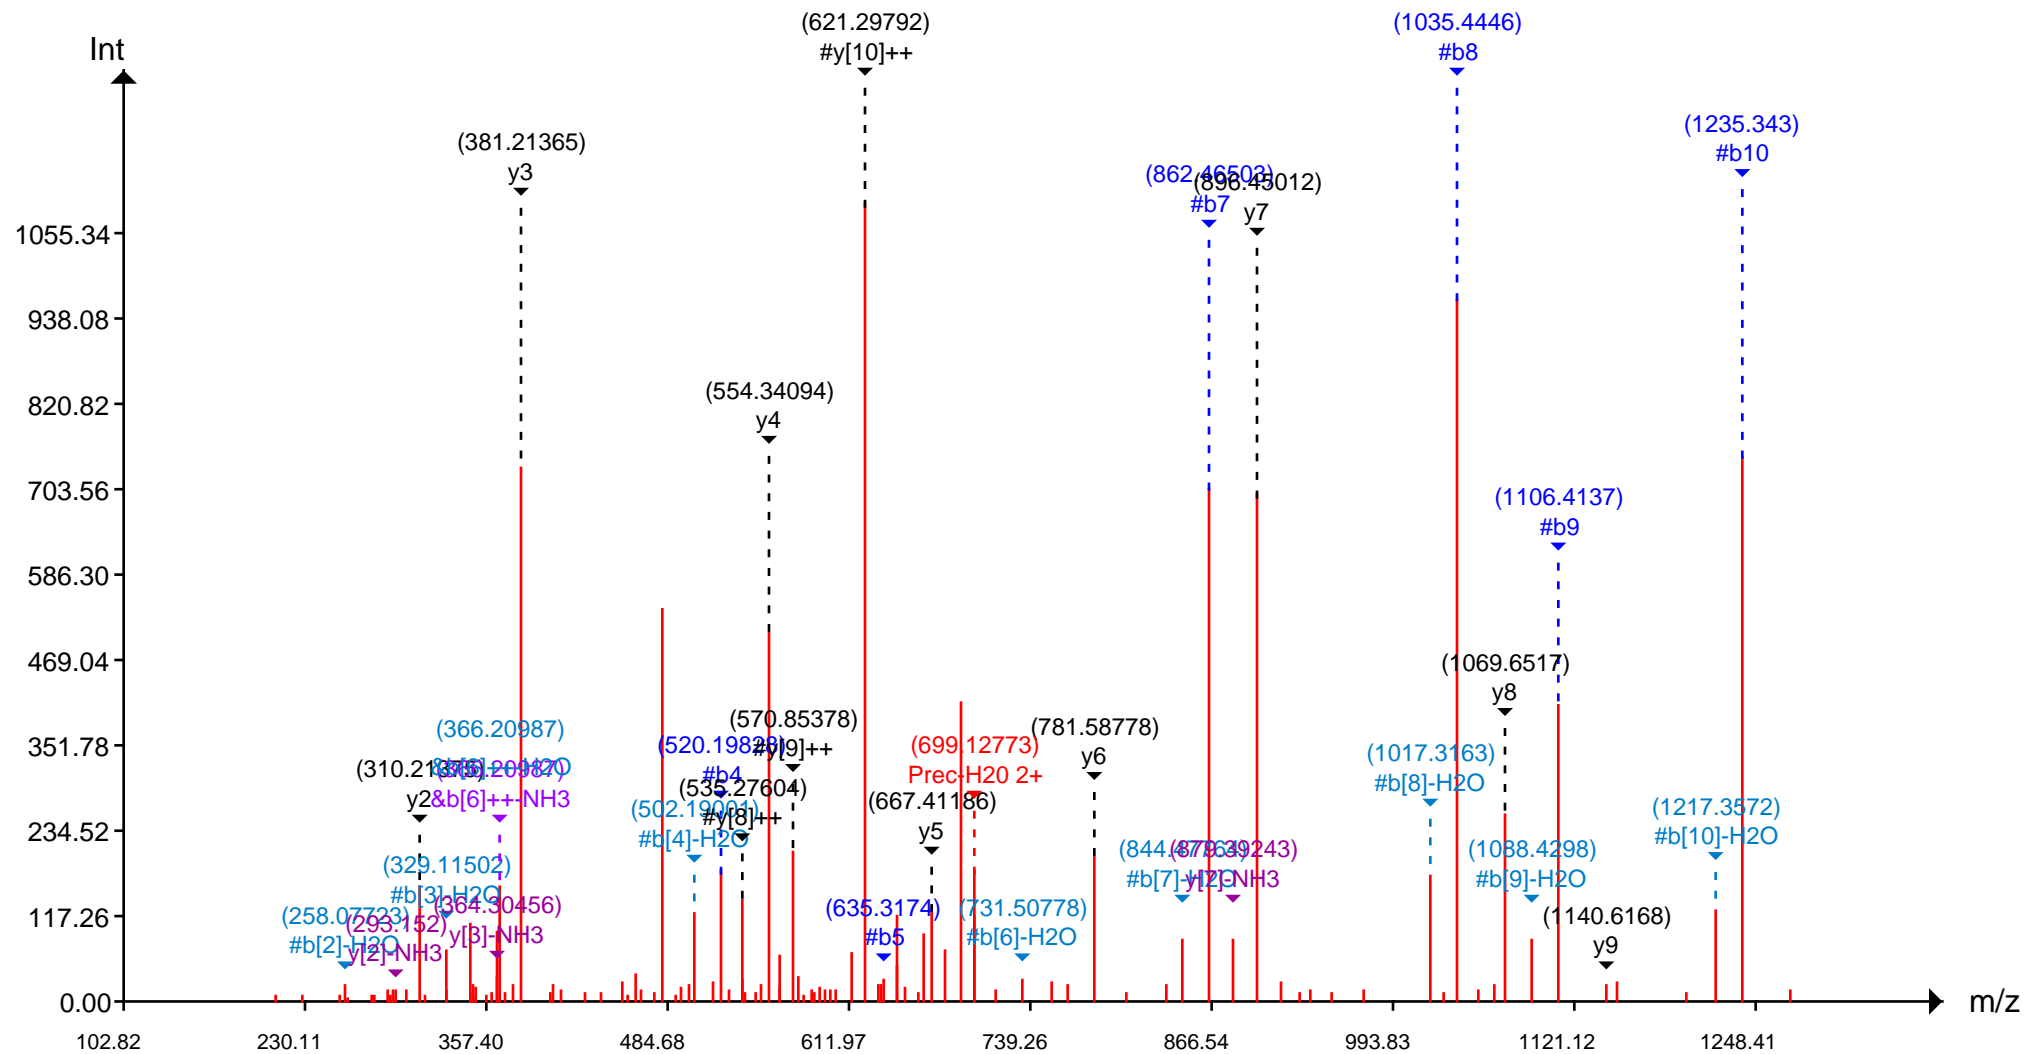

## Info

**Modified Sequence** AcD3-ETAK<AcD3K\*>DNLK<AcD3K\*>AER<C13>-COOH

**Ion score** 53.25

**Protein** Q9CVD2

**Confidence level** 99.00%

**Precursor m/z** 708.39342

**Identity Threshold** 47.67

**Charge** 2+

**Mass error** 0.001368

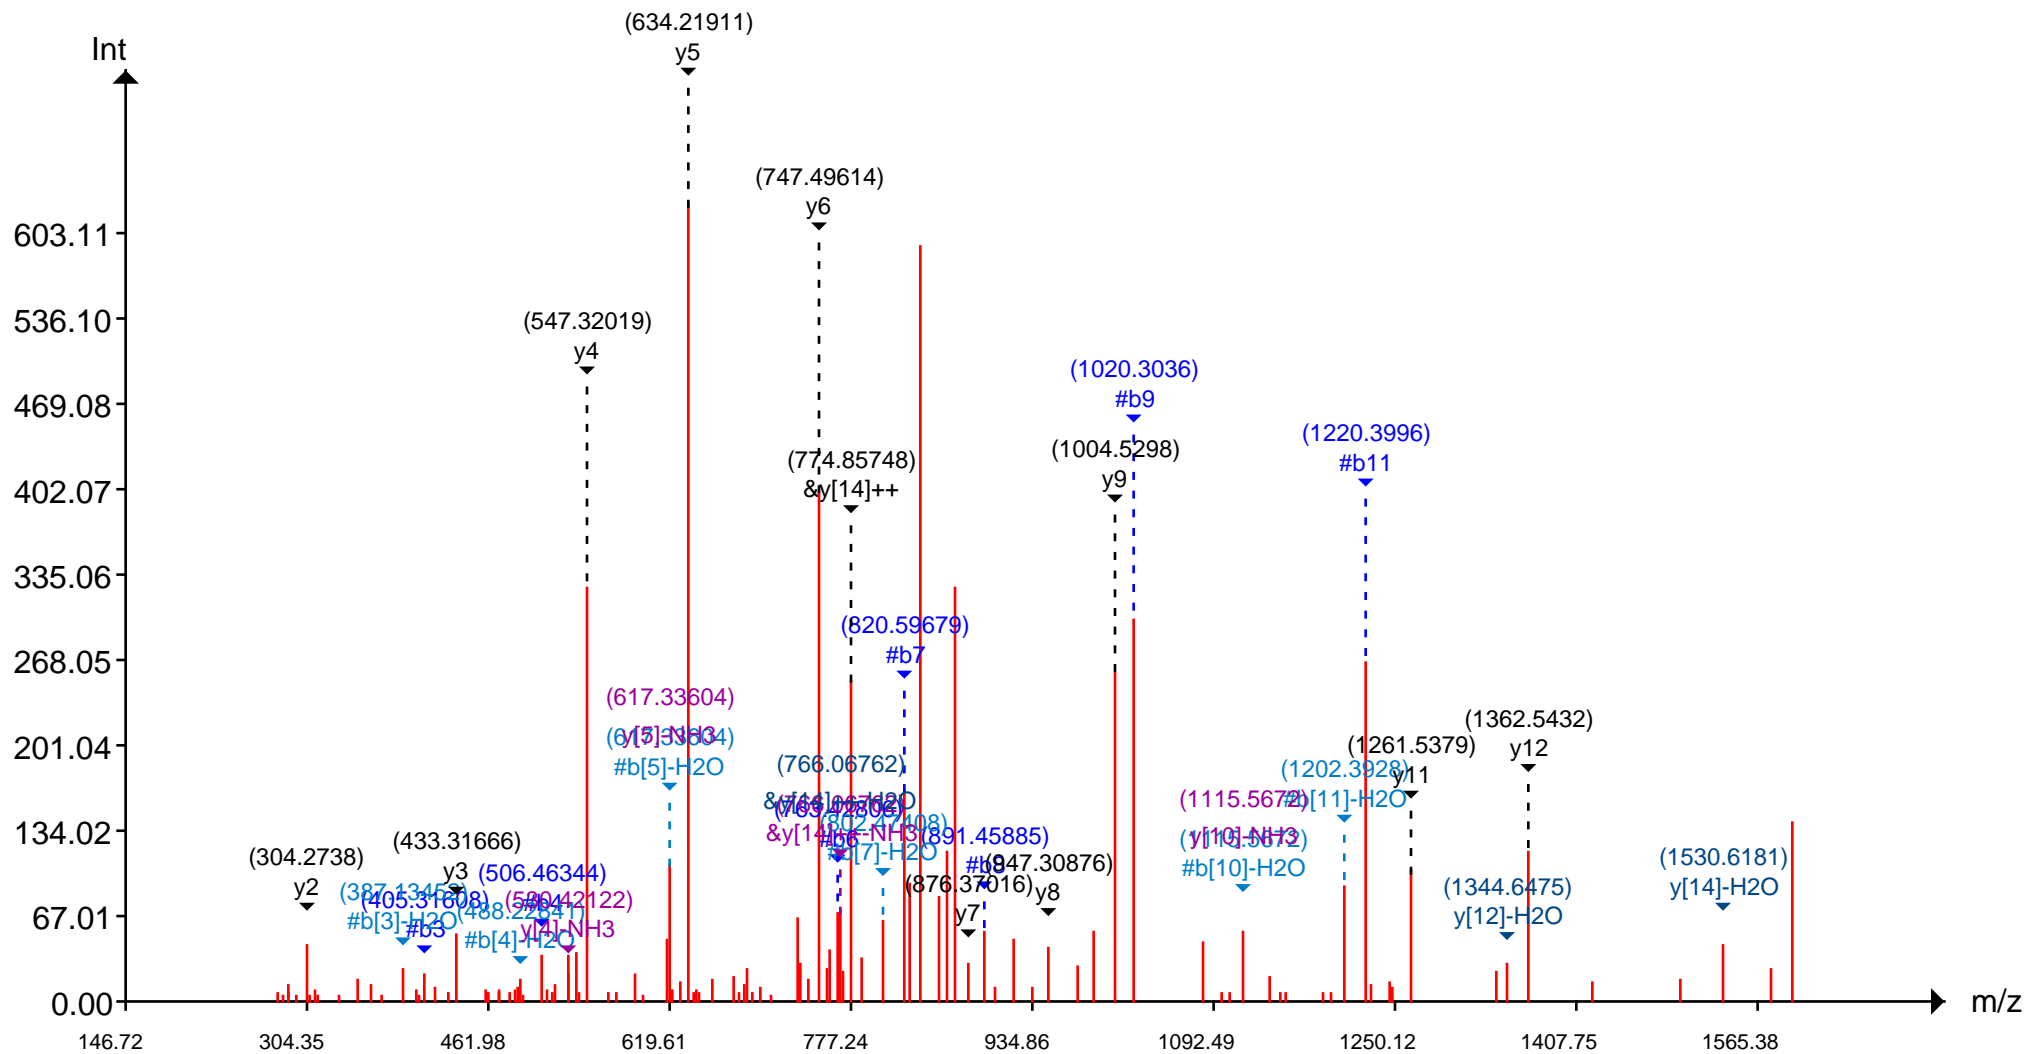

## Info

|                          |                                   |                           |          |
|--------------------------|-----------------------------------|---------------------------|----------|
| <b>Modified Sequence</b> | AcD3-K<AcD3K*>SVTEQGAELSNEER-COOH | <b>Ion score</b>          | 60.33    |
| <b>Protein</b>           | P63101                            | <b>Confidence level</b>   | 99.00%   |
| <b>Precursor m/z</b>     | 883.93833                         | <b>Identity Threshold</b> | 47.65    |
| <b>Charge</b>            | 2+                                | <b>Mass error</b>         | 0.002046 |

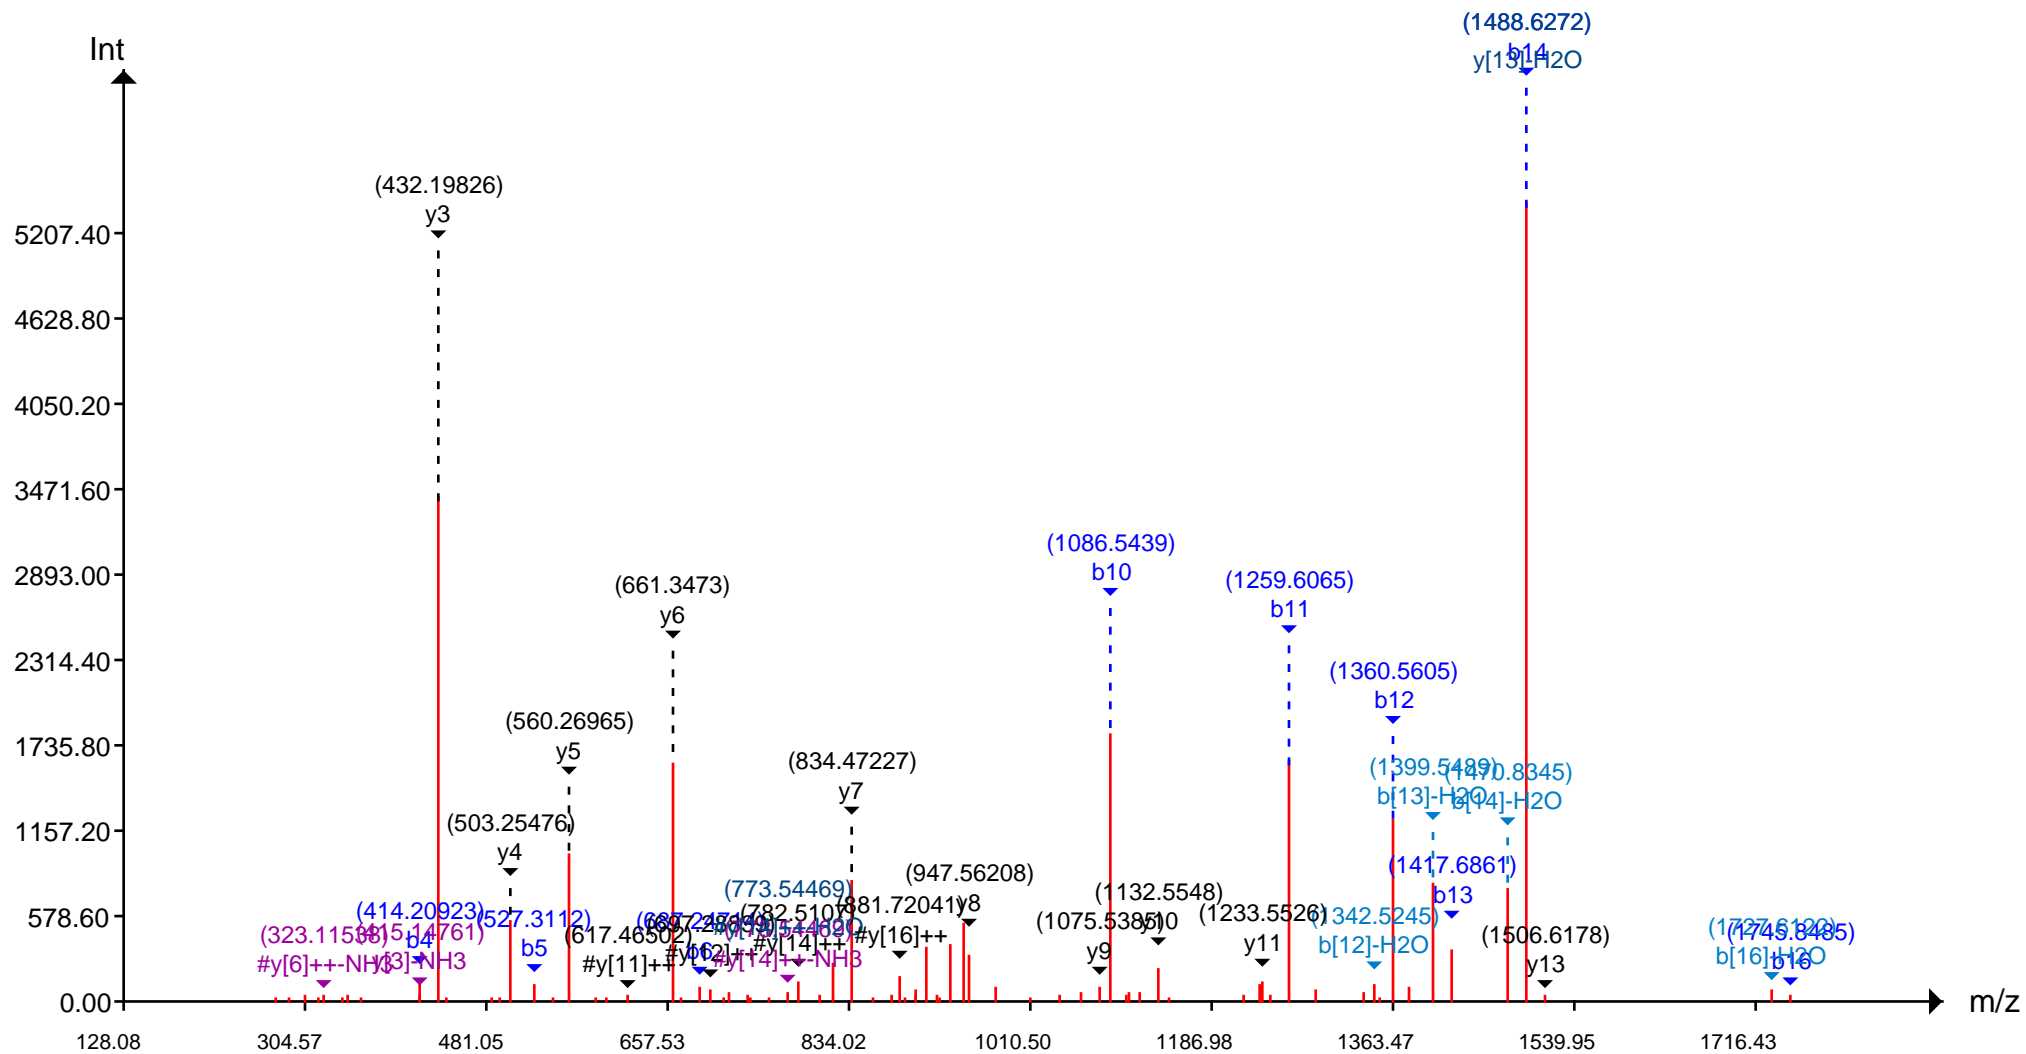

## Info

|                          |                                                 |                           |          |
|--------------------------|-------------------------------------------------|---------------------------|----------|
| <b>Modified Sequence</b> | AcD3-LVVGLC<Cmm*>TGQIK<AcD3K*>TGAPC<Cmm*>R-COOH | <b>Ion score</b>          | 78.75    |
| <b>Protein</b>           | P17182, P21550, P17183                          | <b>Confidence level</b>   | 99.00%   |
| <b>Precursor m/z</b>     | 960.5204                                        | <b>Identity Threshold</b> | 47.57    |
| <b>Charge</b>            | 2+                                              | <b>Mass error</b>         | 0.002276 |

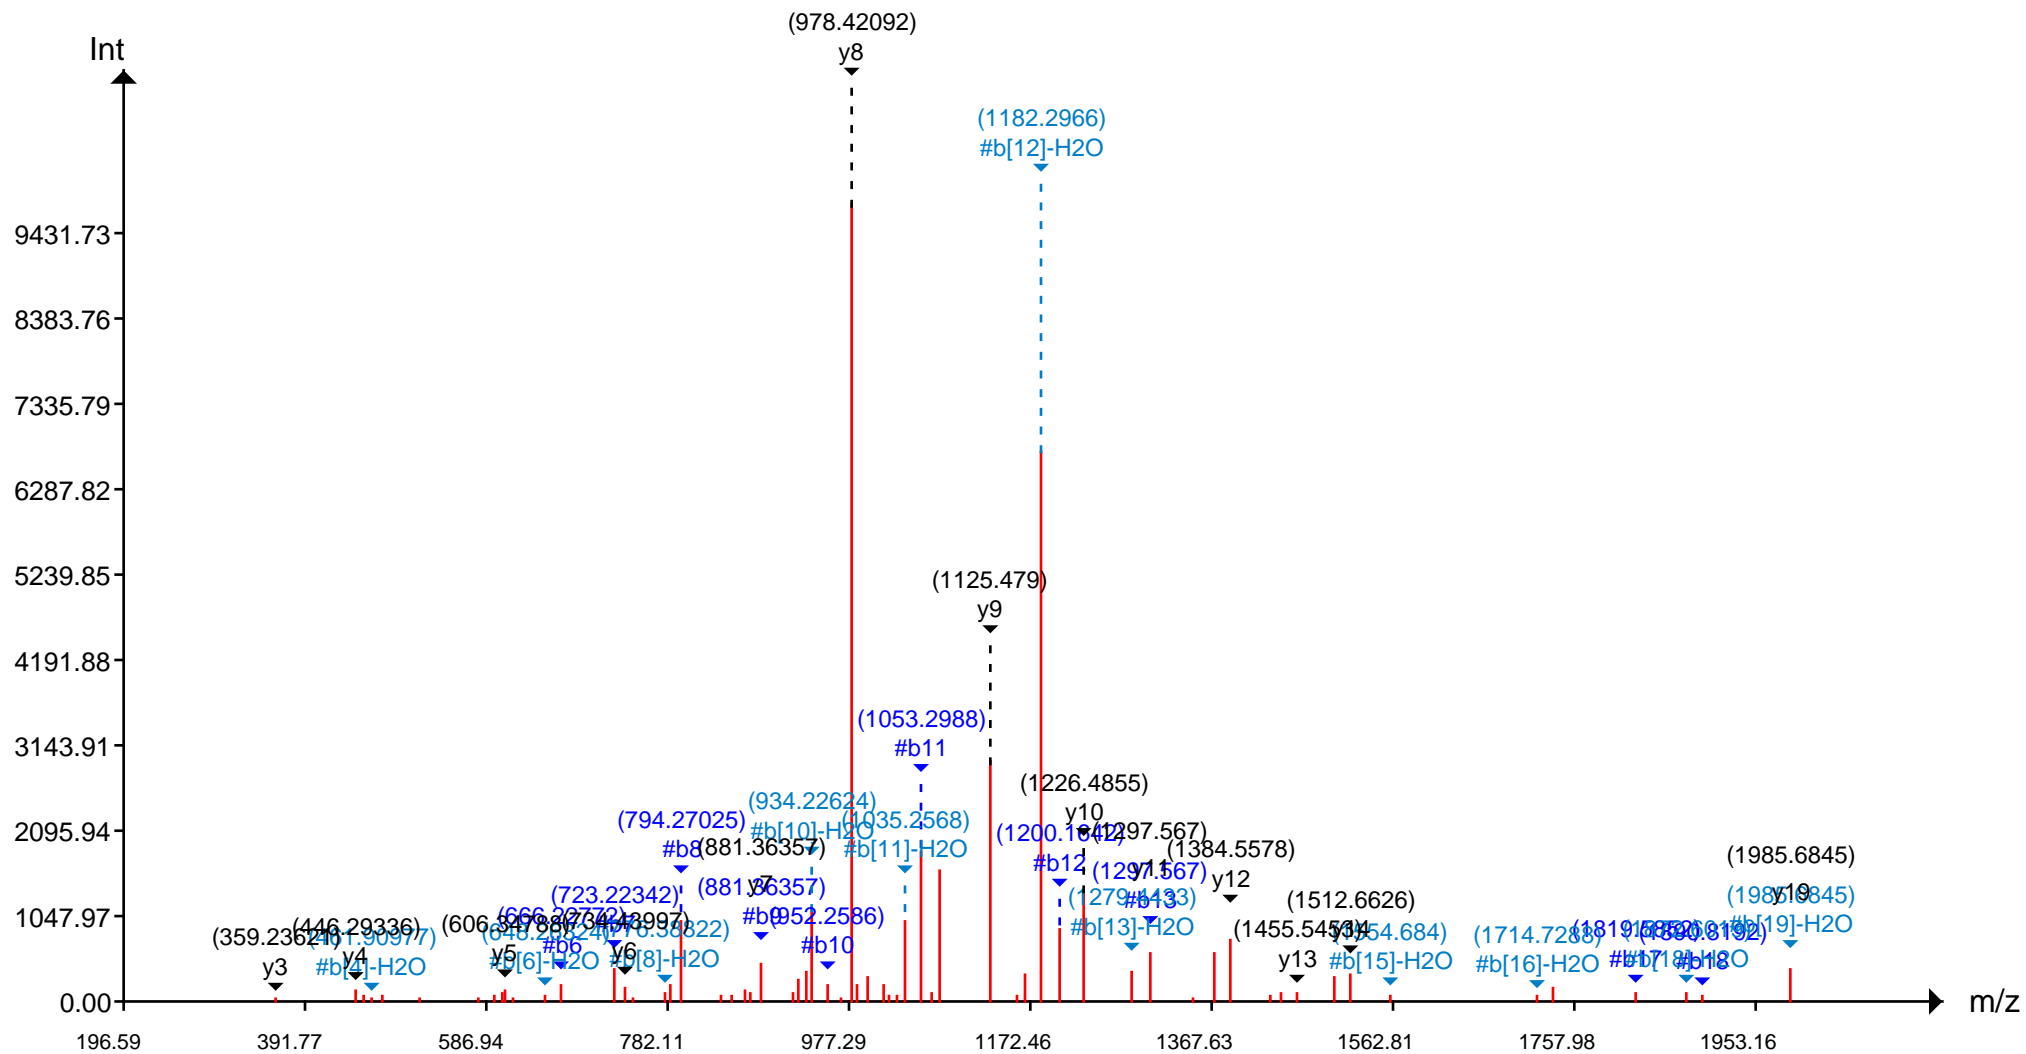

## Info

**Modified Sequence** AcD3-FETGDAGASATFPM<Mox\*>QC<Cmm\*>SALR-COOH

**Ion score** 112.8

**Protein** P63242

**Confidence level** 99.00%

**Precursor m/z** 1089.4891

**Identity Threshold** 43.25

**Charge** 2+

**Mass error** 0.003962

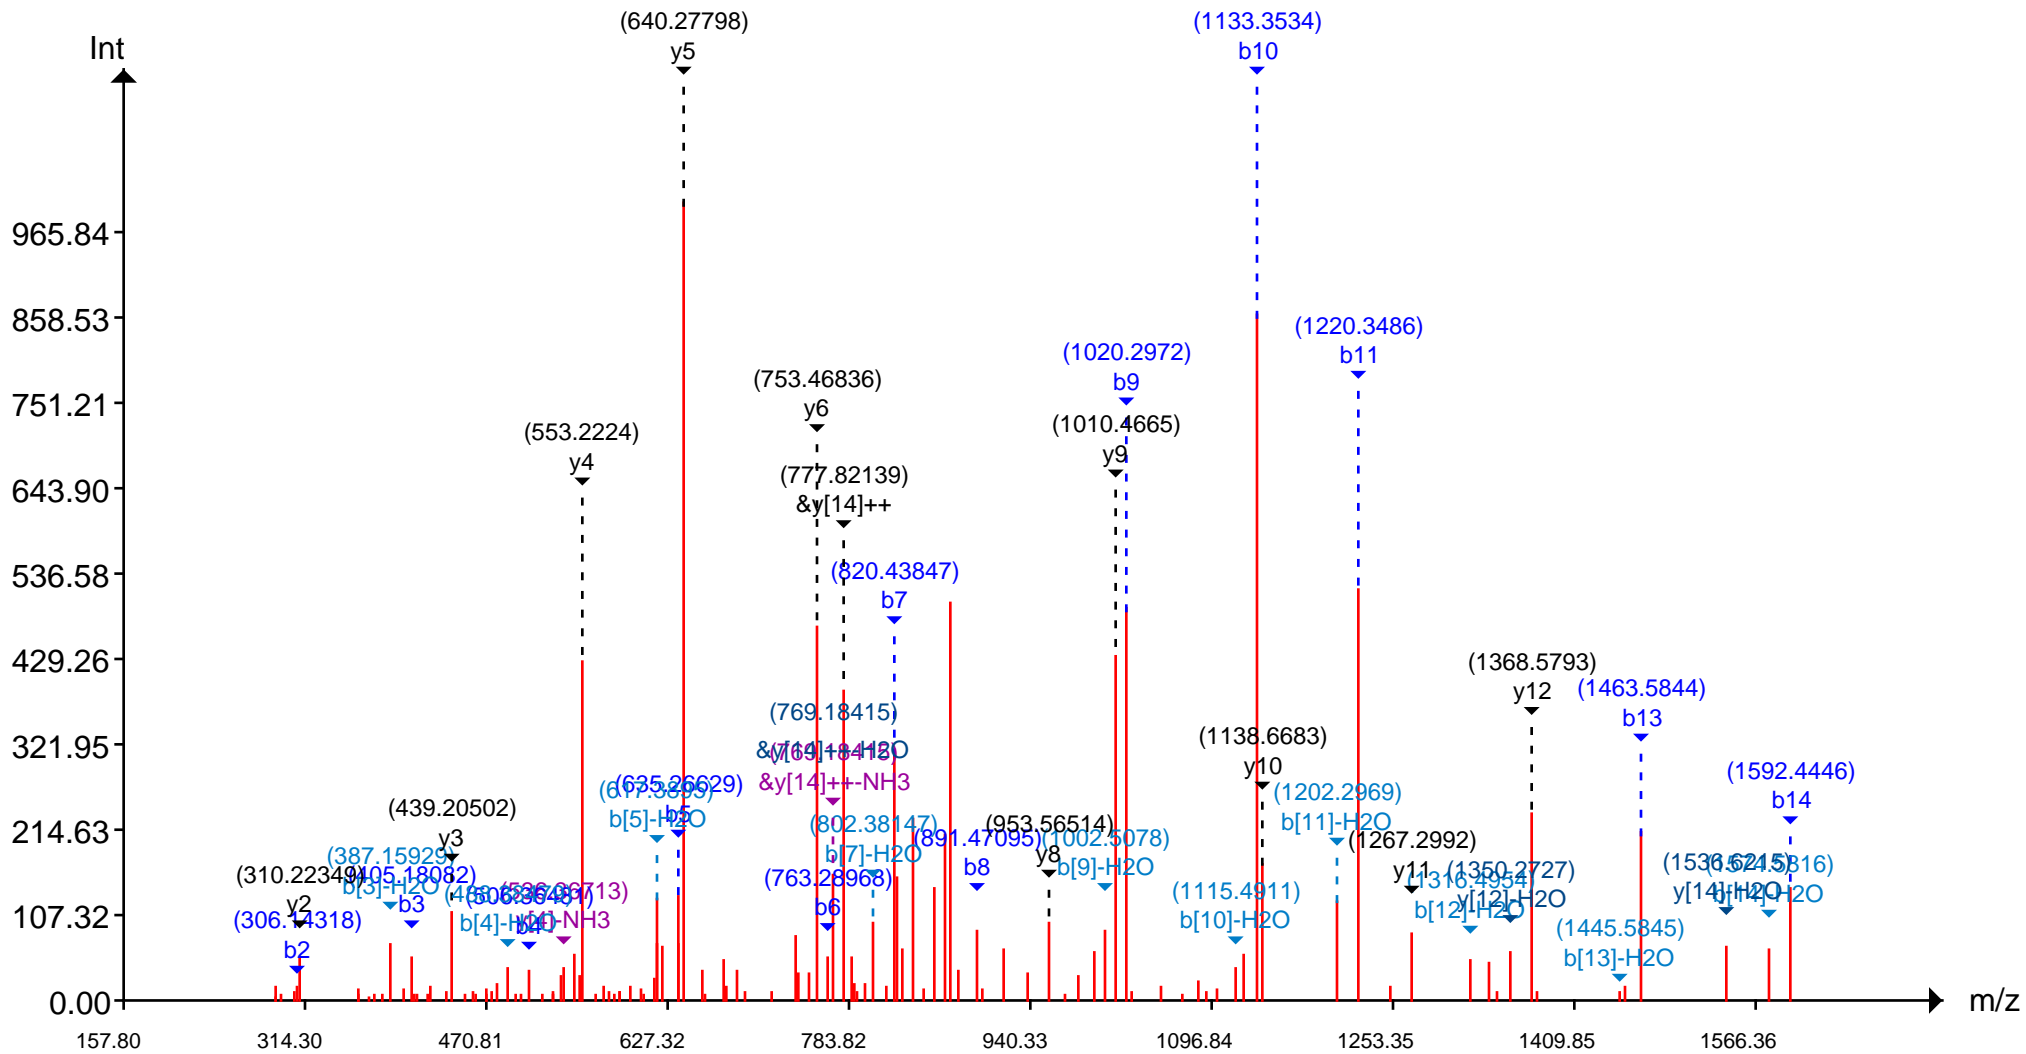

## Info

**Modified Sequence** AcD3-K<AcD3K\*>SVTEQGAELSNEER<C13>-COOH

**Ion score** 104.01

**Protein** P63101

**Confidence level** 99.00%

**Precursor m/z** 886.94826

**Identity Threshold** 47.94

**Charge** 2+

**Mass error** 0.001765



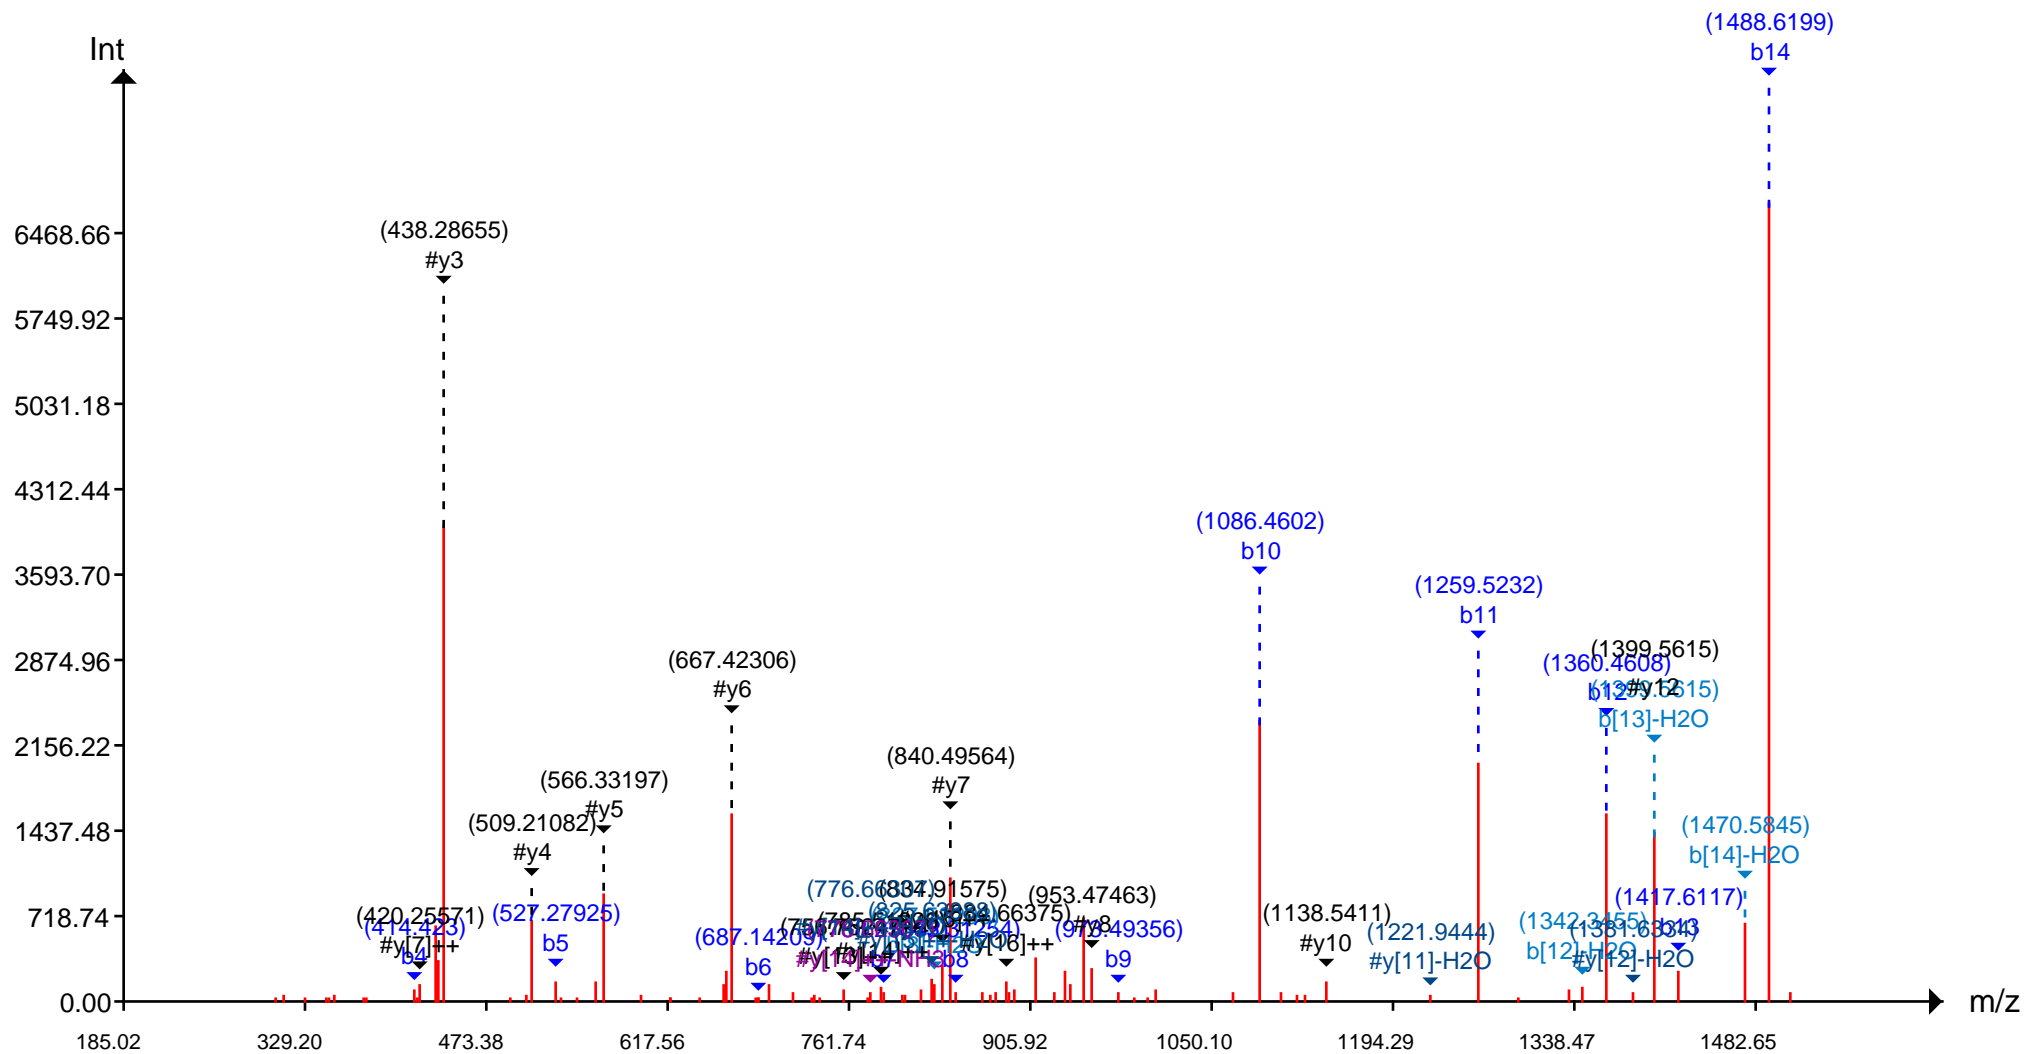

## Info

|                          |                                                      |                           |          |
|--------------------------|------------------------------------------------------|---------------------------|----------|
| <b>Modified Sequence</b> | AcD3-LVVGLC<Cmm*>TGQIK<AcD3K*>TGAPC<Cmm*>R<C13>-COOH | <b>Ion score</b>          | 56.47    |
| <b>Protein</b>           | P17182, P21550, P17183                               | <b>Confidence level</b>   | 99.00%   |
| <b>Precursor m/z</b>     | 963.53016                                            | <b>Identity Threshold</b> | 47.17    |
| <b>Charge</b>            | 2+                                                   | <b>Mass error</b>         | 0.001655 |

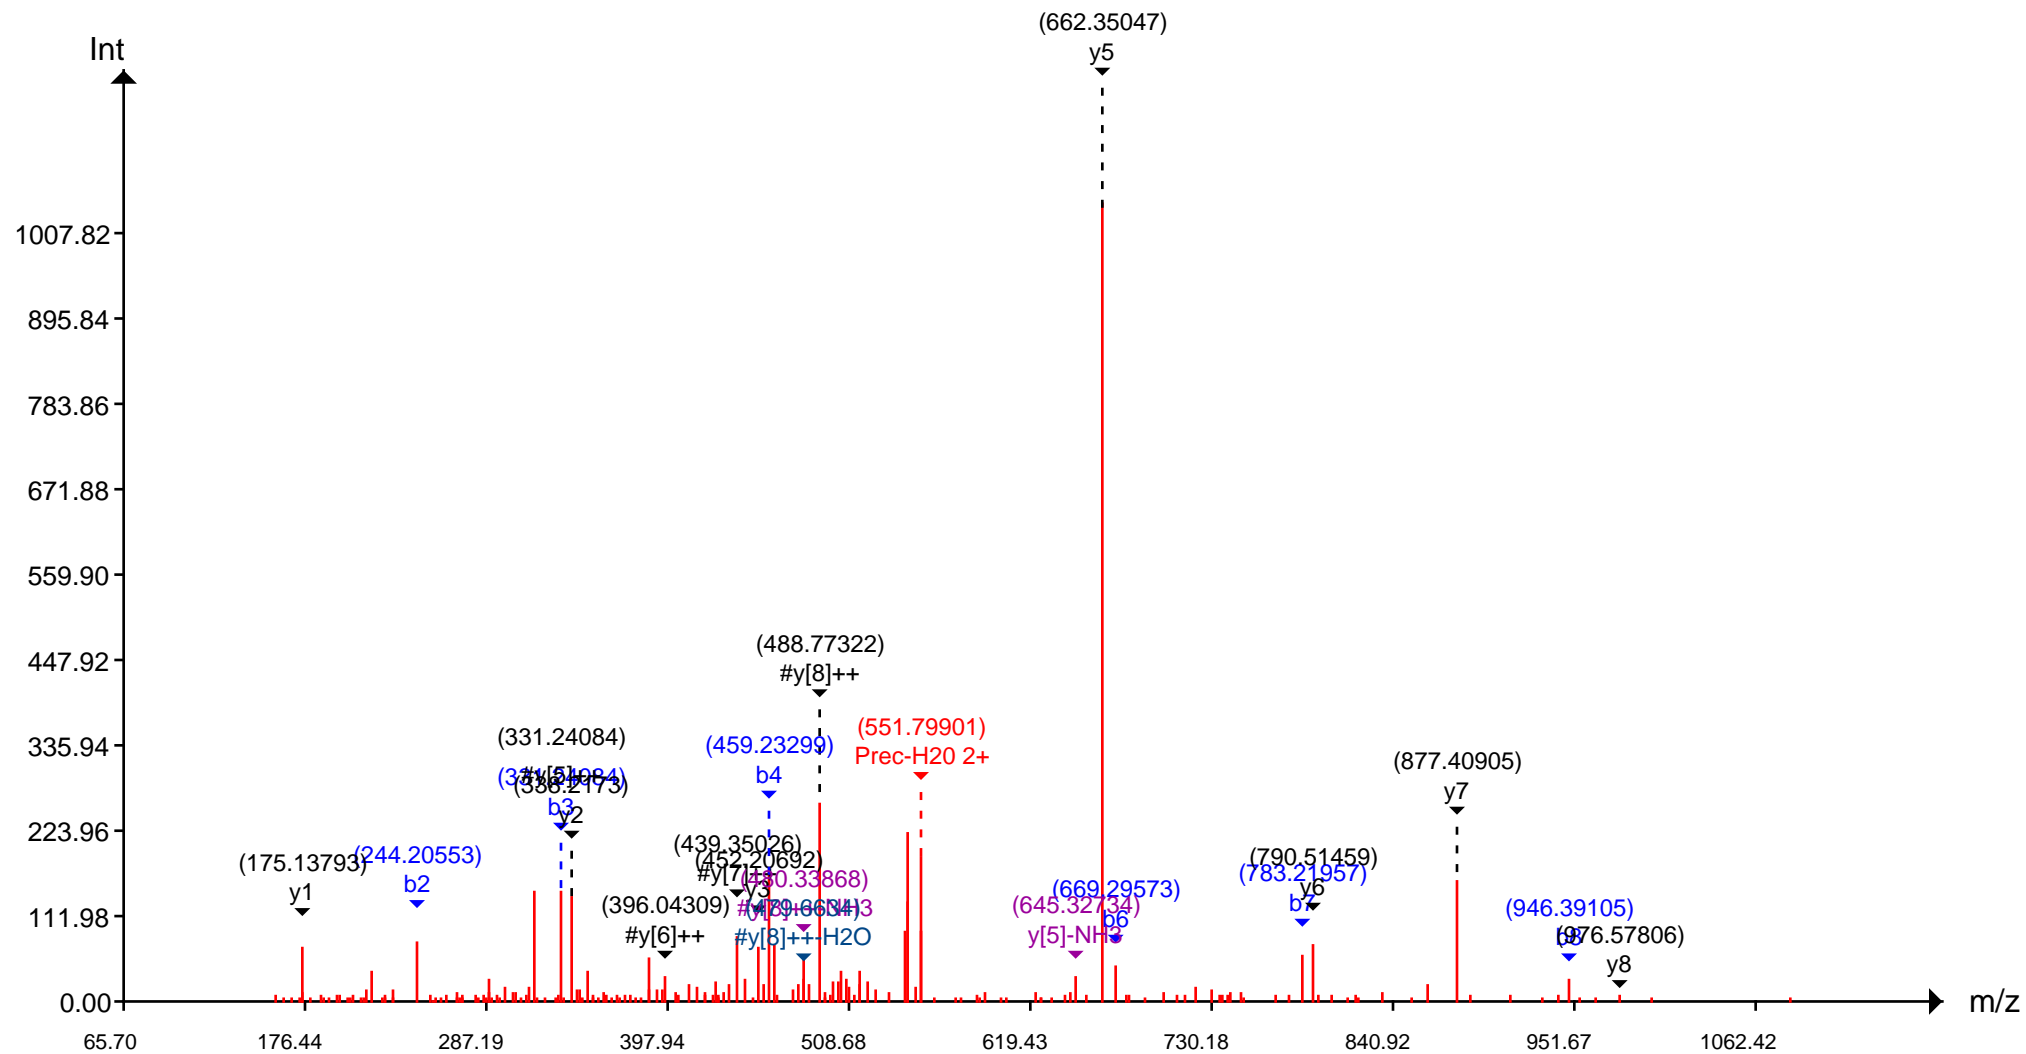

## Info

|                          |                     |                           |        |
|--------------------------|---------------------|---------------------------|--------|
| <b>Modified Sequence</b> | AcD3-VVSQPLNYR-COOH | <b>Ion score</b>          | 50.61  |
| <b>Protein</b>           | Q9JLJ2              | <b>Confidence level</b>   | 99.00% |
| <b>Precursor m/z</b>     | 560.81308           | <b>Identity Threshold</b> | 47.33  |
| <b>Charge</b>            | 2+                  | <b>Mass error</b>         | 3.6E-5 |

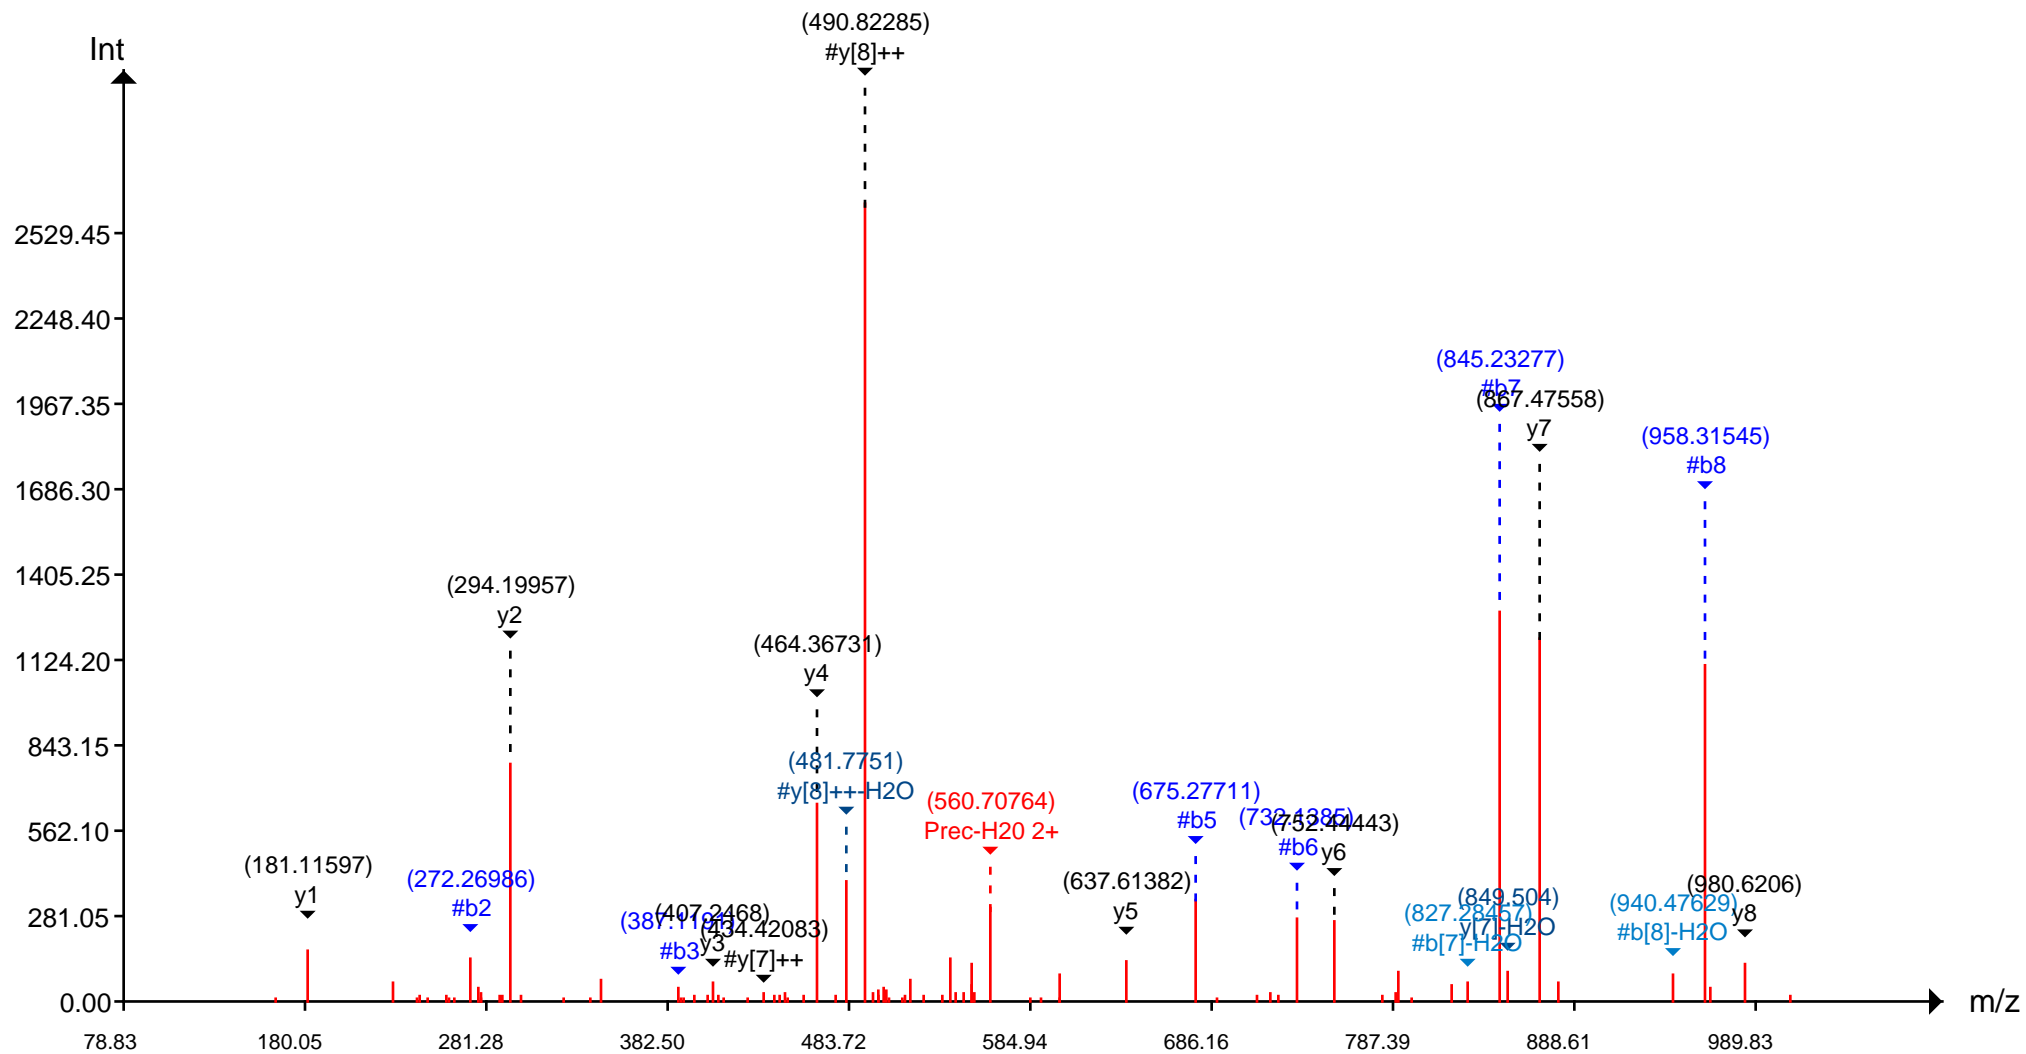

## Info

**Modified Sequence** AcD3-IIDDK<AcD3K\*>GILR<C13>-COOH

**Protein** P35700

**Precursor m/z** 569.85547

**Charge** 2+

**Ion score** 68.47

**Confidence level** 99.00%

**Identity Threshold** 42.64

**Mass error** -7.71E-4

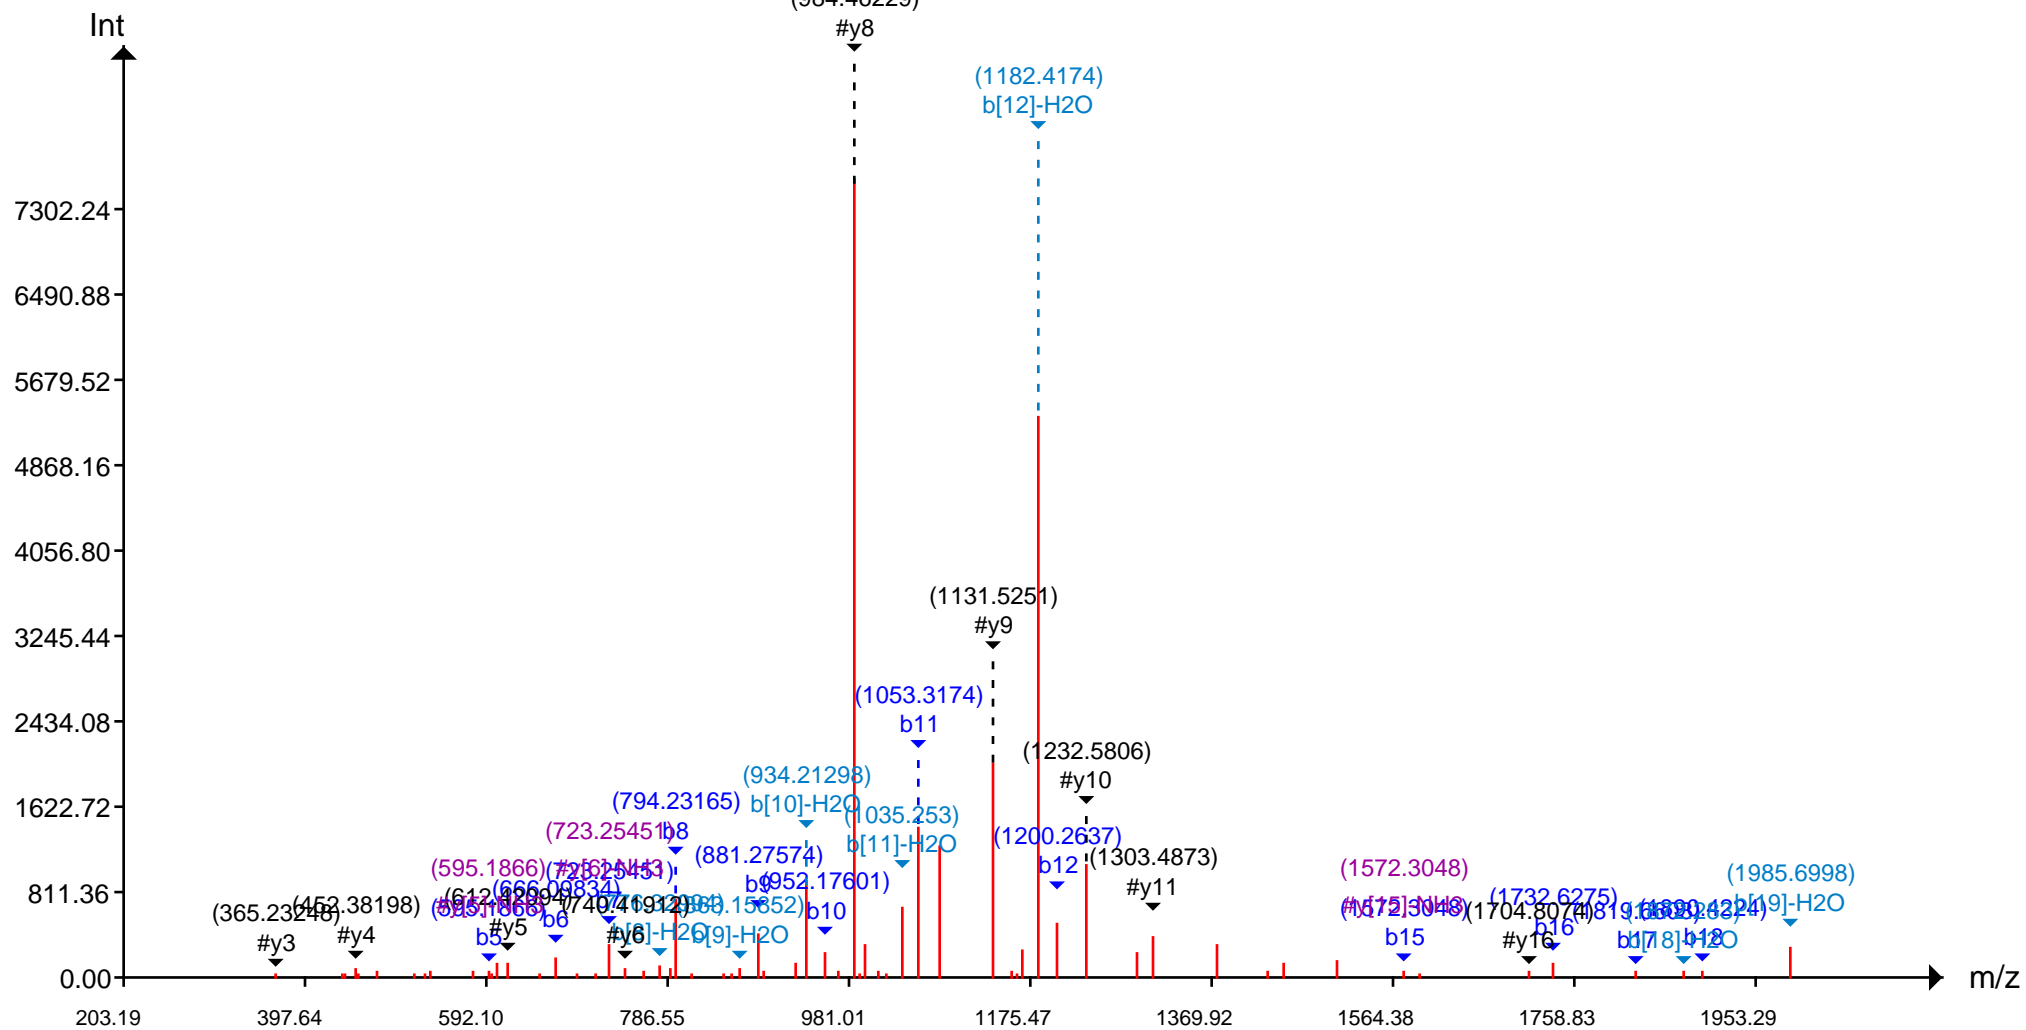

## Info

|                          |                                                 |                           |         |
|--------------------------|-------------------------------------------------|---------------------------|---------|
| <b>Modified Sequence</b> | AcD3-FETGDAGASATFPM<Mox*>QC<Cmm*>SALR<C13>-COOH | <b>Ion score</b>          | 100.39  |
| <b>Protein</b>           | P63242                                          | <b>Confidence level</b>   | 99.00%  |
| <b>Precursor m/z</b>     | 1092.4986                                       | <b>Identity Threshold</b> | 44.22   |
| <b>Charge</b>            | 2+                                              | <b>Mass error</b>         | 0.00282 |

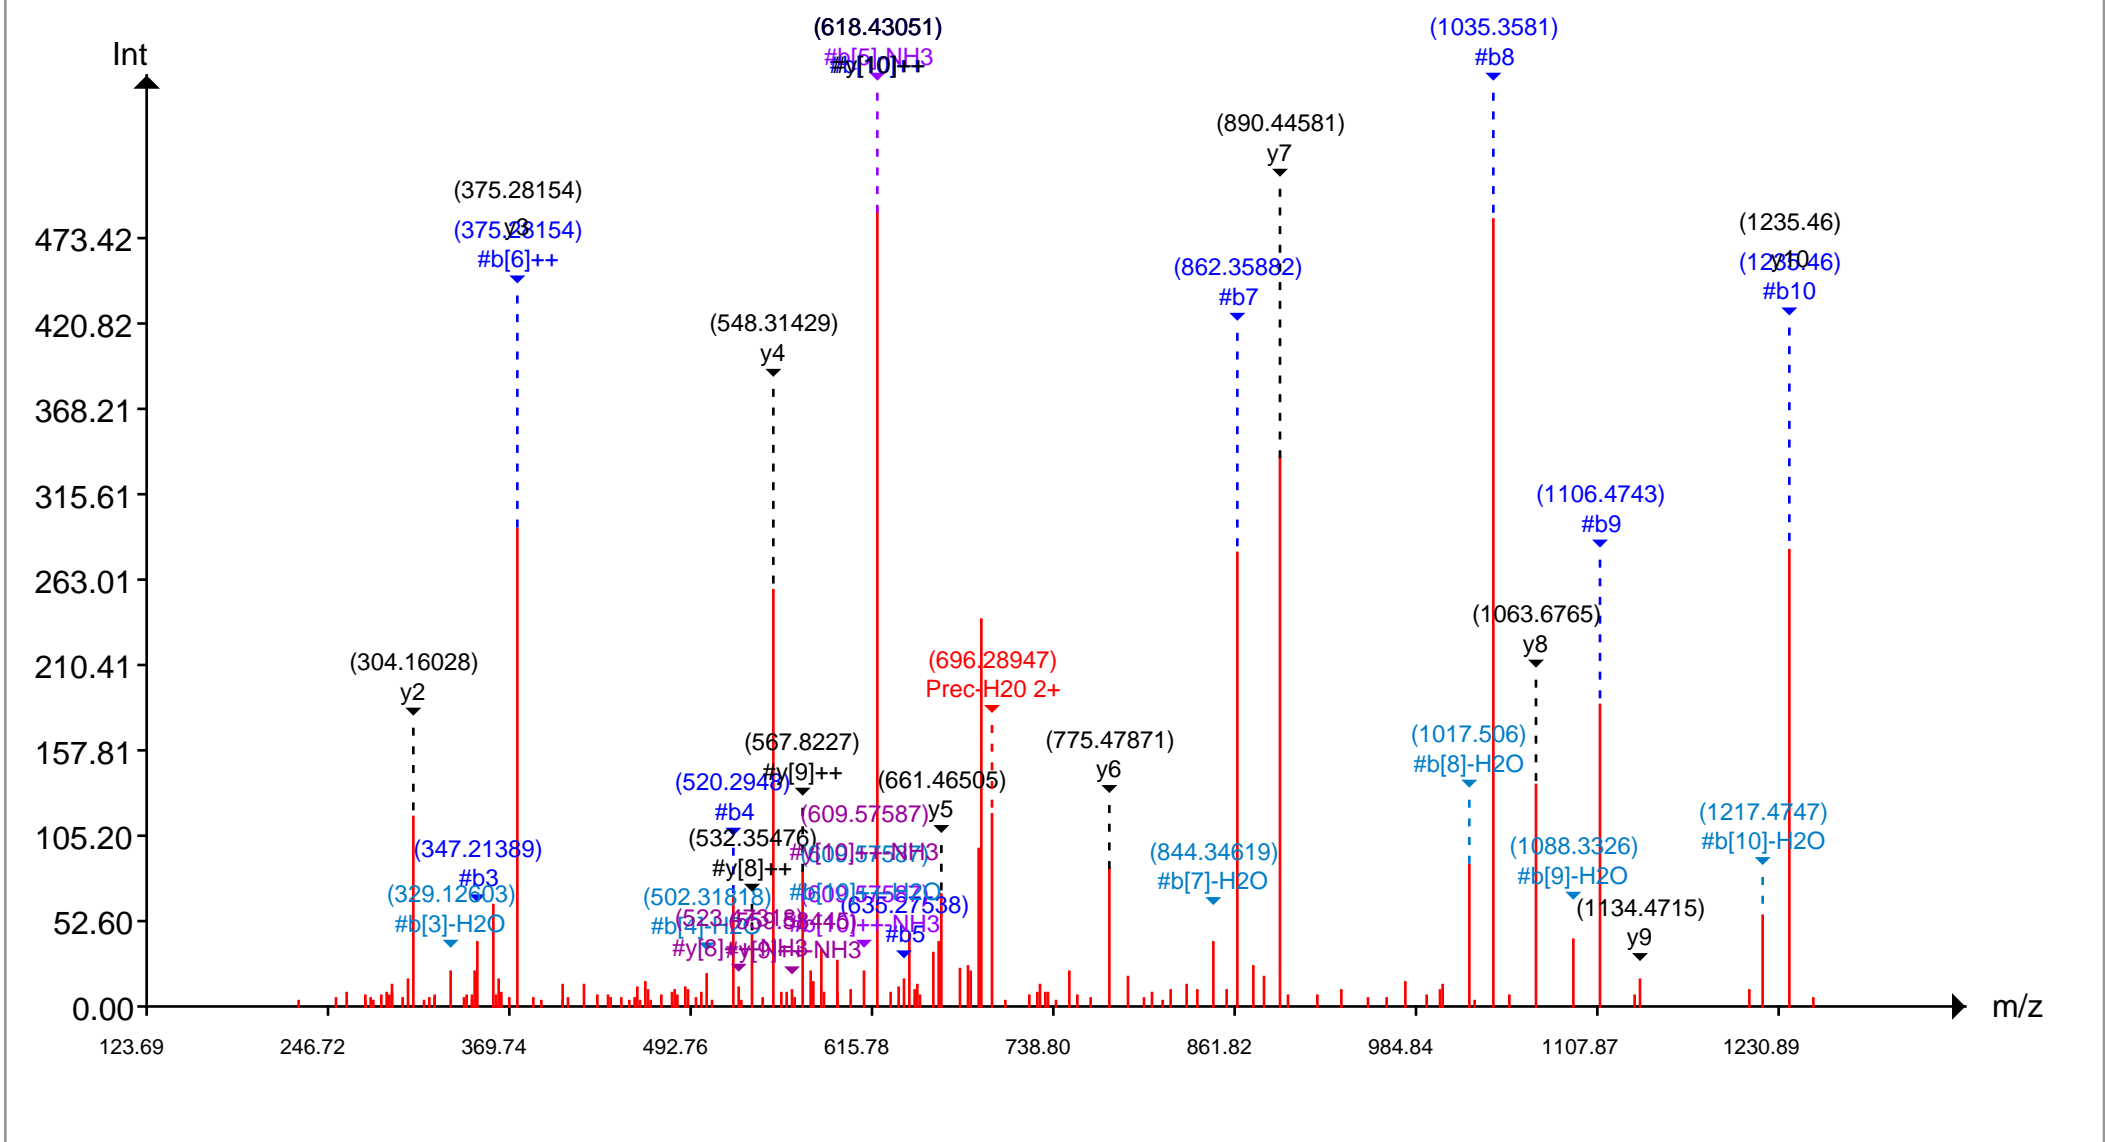

## Info

**Modified Sequence** AcD3-ETAK<AcD3K\*>DNLK<AcD3K\*>AER-COOH

**Ion score** 62.91

**Protein** Q9CVD2

**Confidence level** 99.00%

**Precursor m/z** 705.38325

**Identity Threshold** 47.90

**Charge** 2+

**Mass error** 0.00117

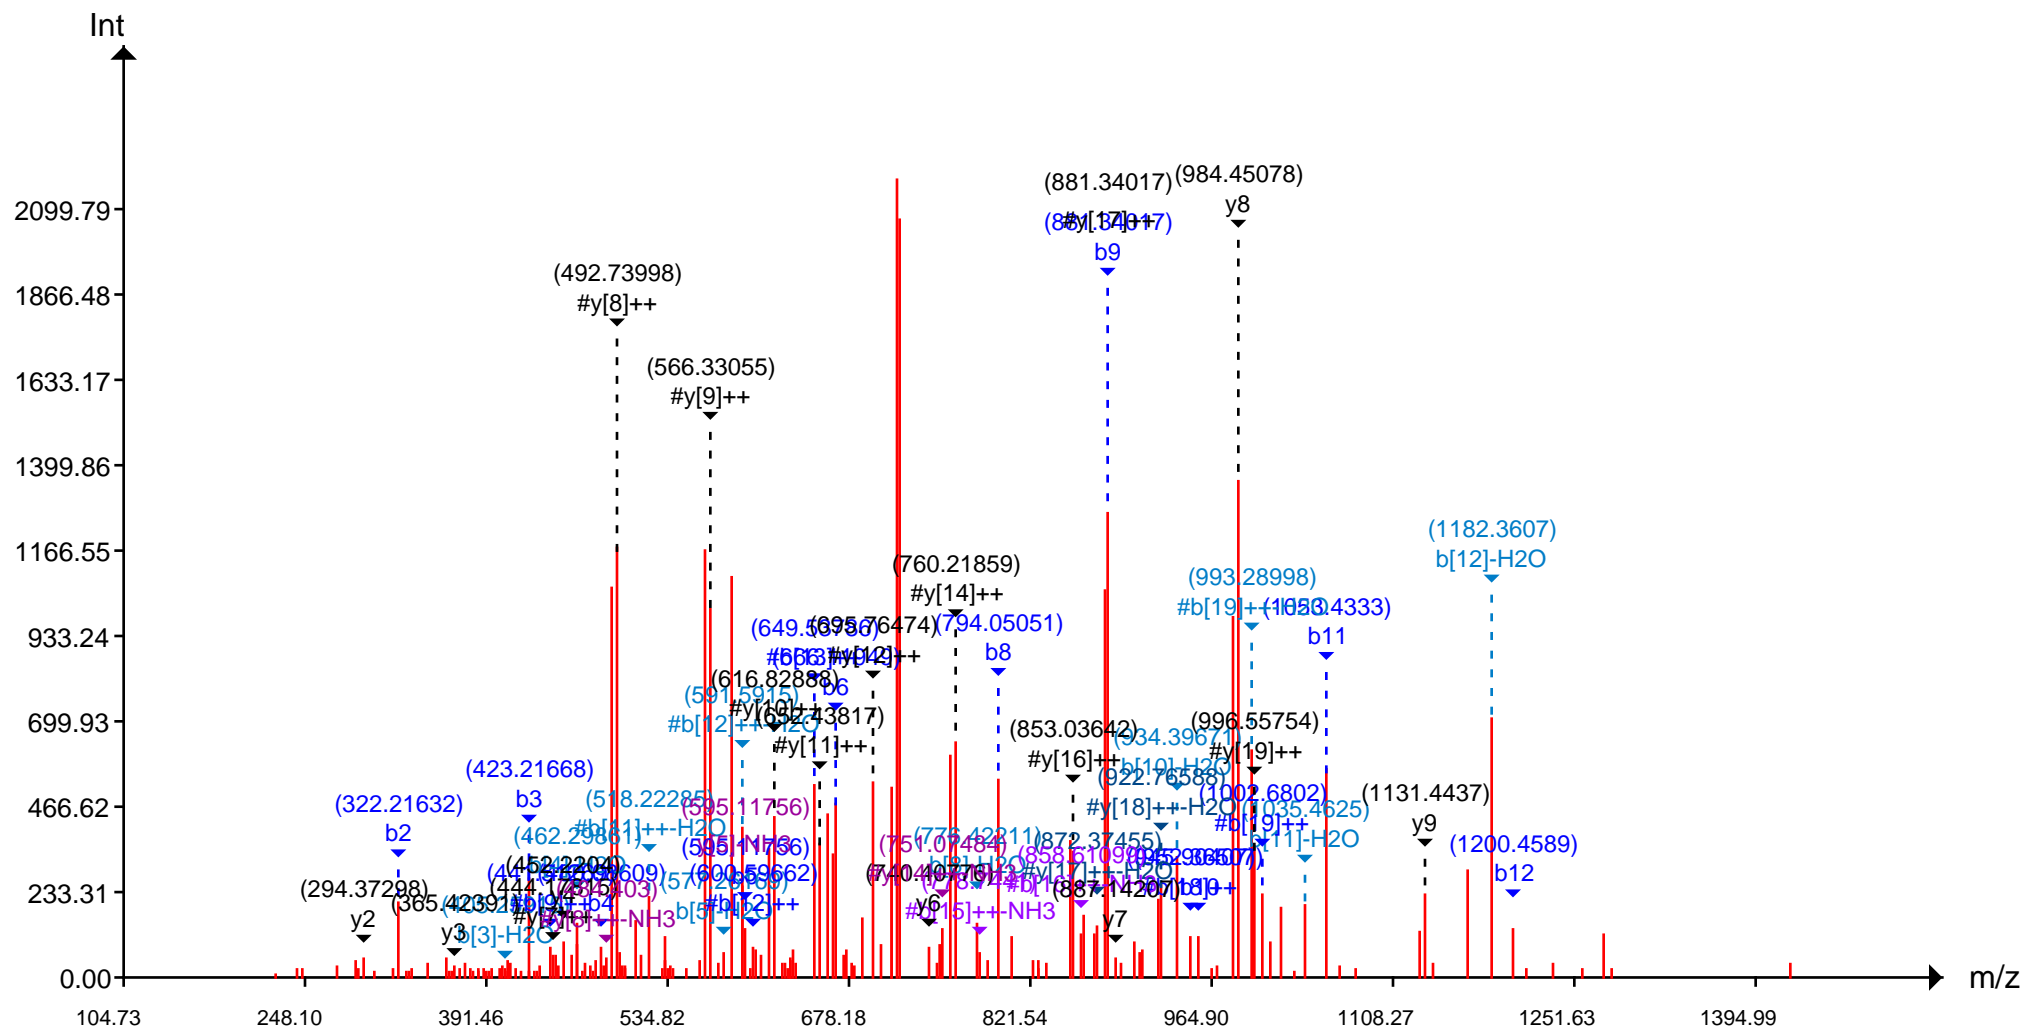

## Info

|                          |                                                 |                           |          |
|--------------------------|-------------------------------------------------|---------------------------|----------|
| <b>Modified Sequence</b> | AcD3-FETGDAGASATFPM<Mox*>QC<Cmm*>SALR<C13>-COOH | <b>Ion score</b>          | 44.64    |
| <b>Protein</b>           | P63242                                          | <b>Confidence level</b>   | 99.00%   |
| <b>Precursor m/z</b>     | 728.6671                                        | <b>Identity Threshold</b> | 43.99    |
| <b>Charge</b>            | 3+                                              | <b>Mass error</b>         | -3.56E-4 |

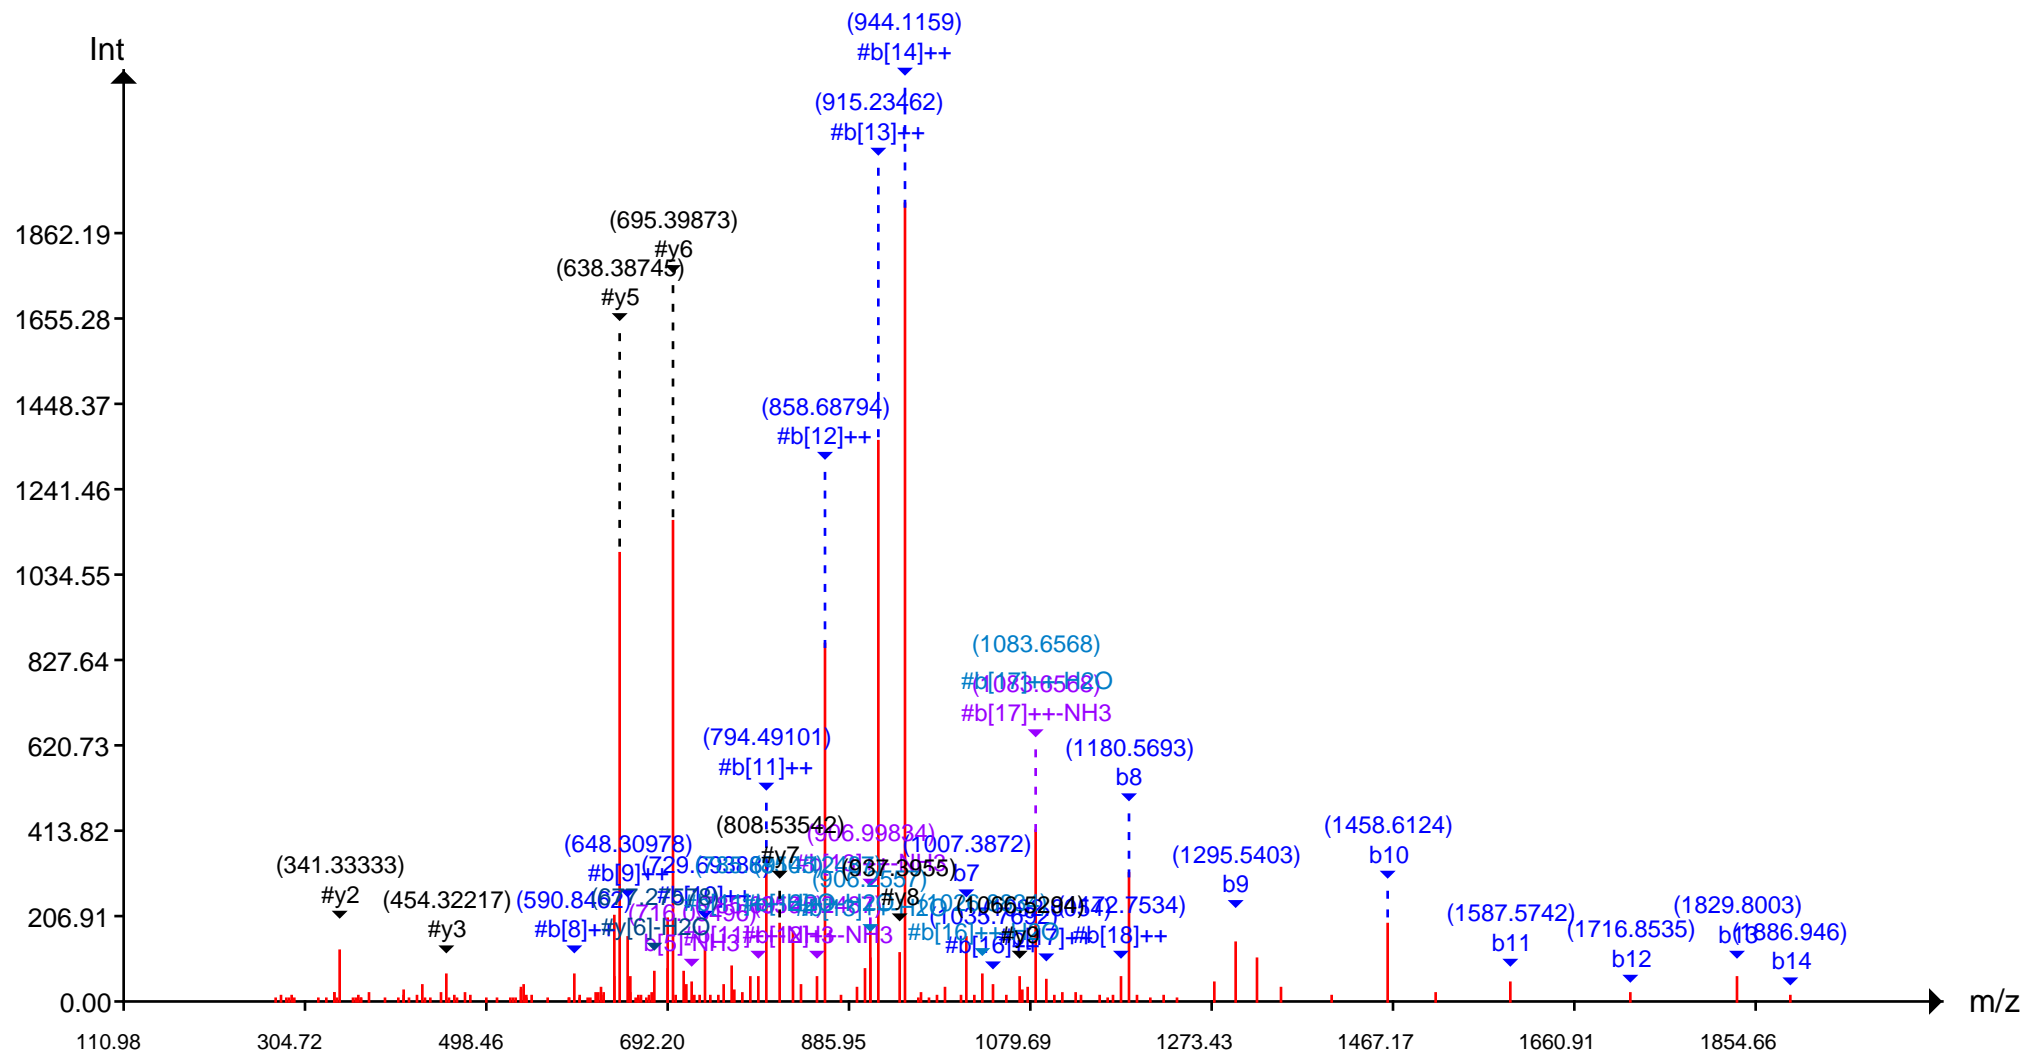

## Info

|                          |                                                                |                           |         |
|--------------------------|----------------------------------------------------------------|---------------------------|---------|
| <b>Modified Sequence</b> | AcD3-YQVC<Cmm*>HTK<AcD3K*>K<AcD3K*>DYEEIGPSIC<Cmm*>R<C13>-COOH | <b>Ion score</b>          | 64.19   |
| <b>Protein</b>           | Q99JY9                                                         | <b>Confidence level</b>   | 99.00%  |
| <b>Precursor m/z</b>     | 842.08116                                                      | <b>Identity Threshold</b> | 47.09   |
| <b>Charge</b>            | 3+                                                             | <b>Mass error</b>         | 0.00368 |

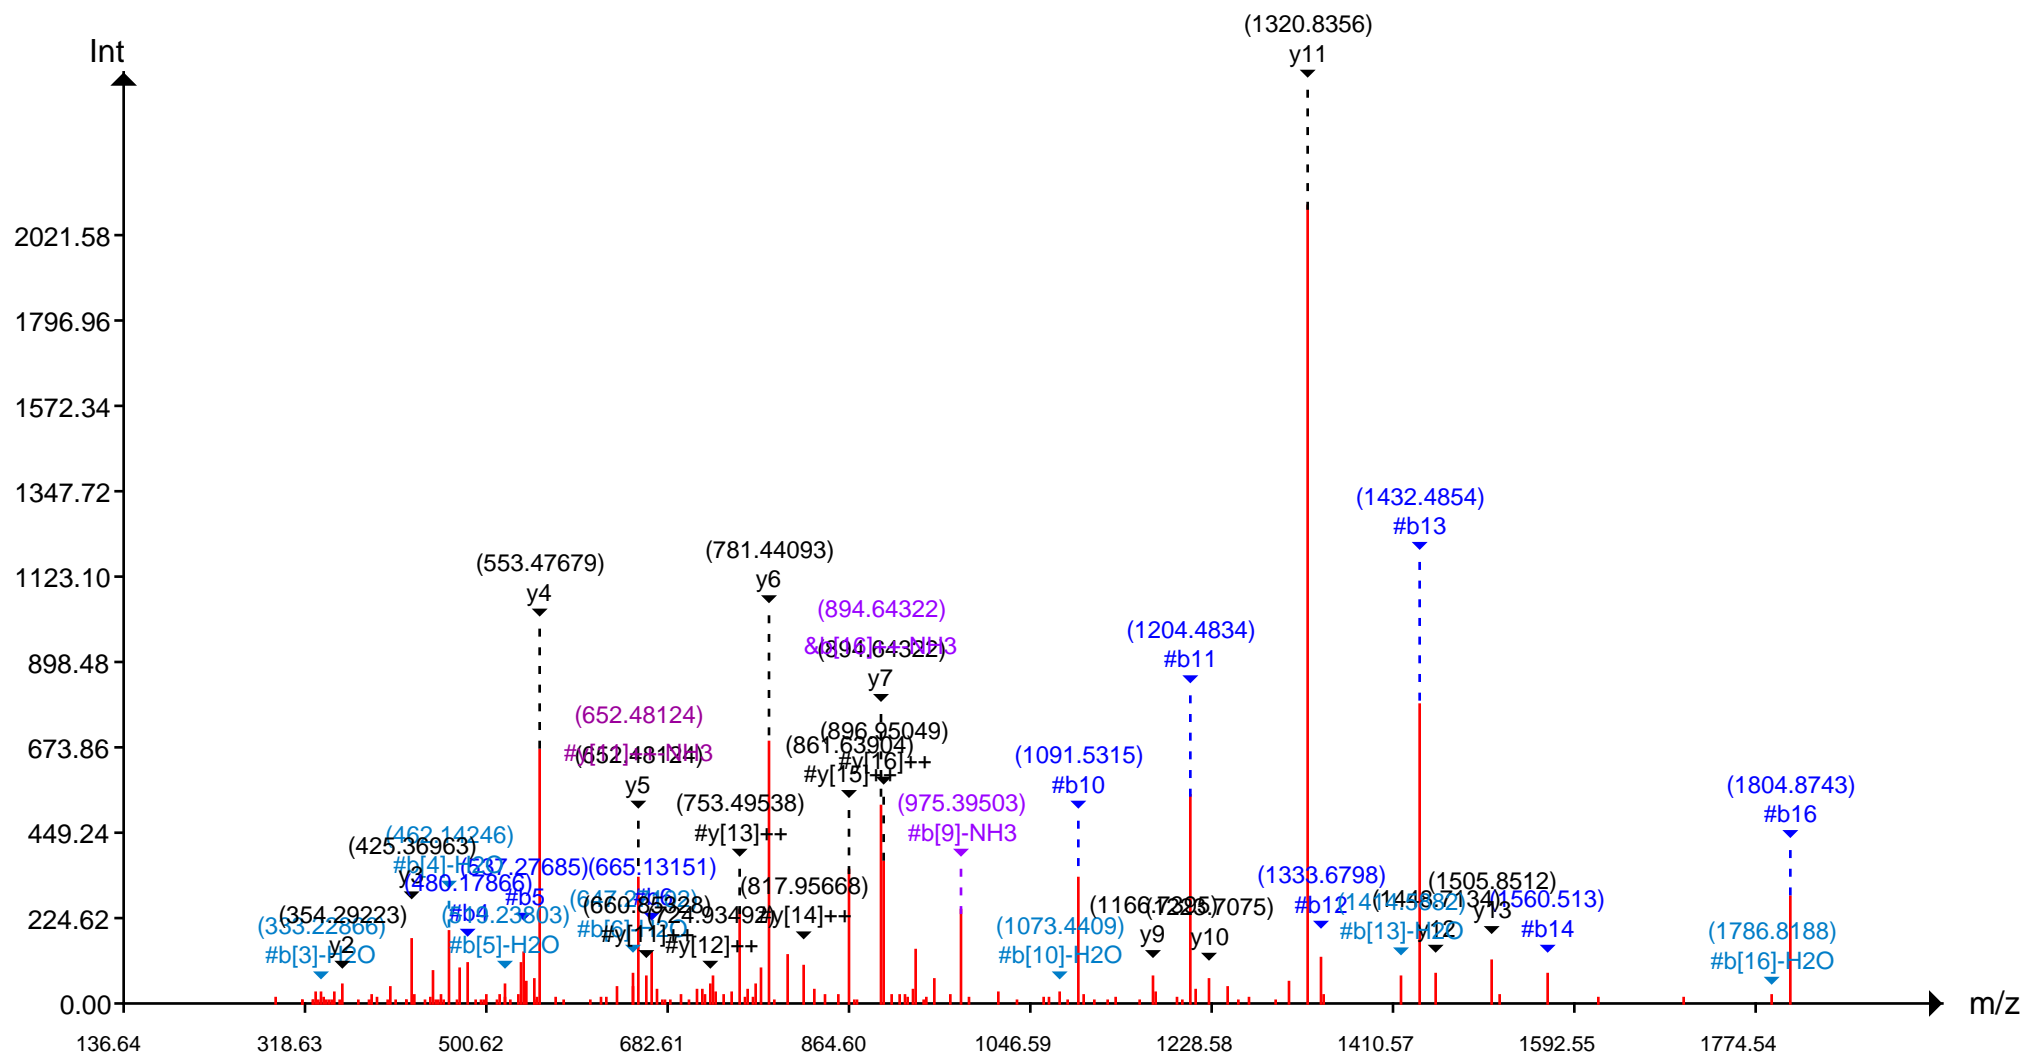



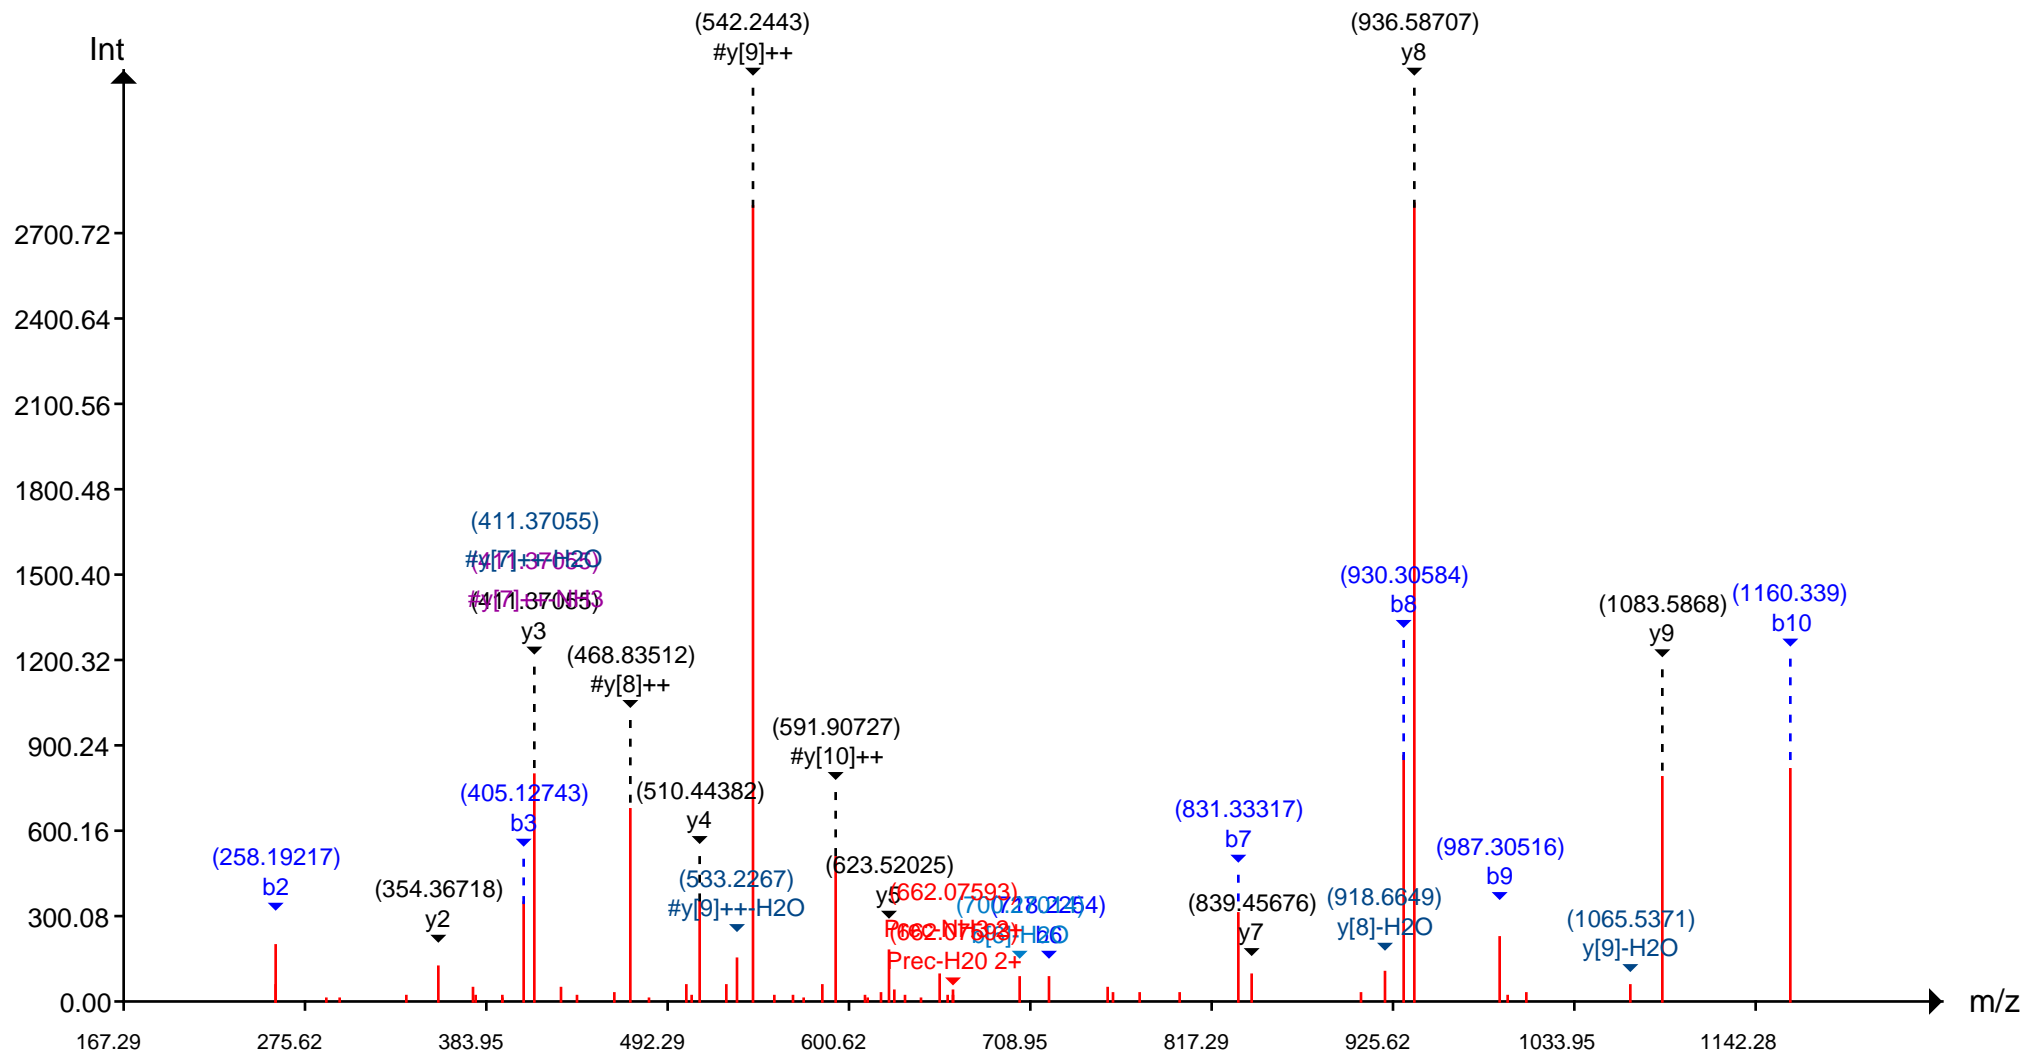

## Info

|                          |                                    |                           |          |
|--------------------------|------------------------------------|---------------------------|----------|
| <b>Modified Sequence</b> | AcD3-LVFPSEIVGK<AcD3K*>R<C13>-COOH | <b>Ion score</b>          | 73.75    |
| <b>Protein</b>           | P62082                             | <b>Confidence level</b>   | 99.00%   |
| <b>Precursor m/z</b>     | 670.91184                          | <b>Identity Threshold</b> | 42.50    |
| <b>Charge</b>            | 2+                                 | <b>Mass error</b>         | 0.001343 |

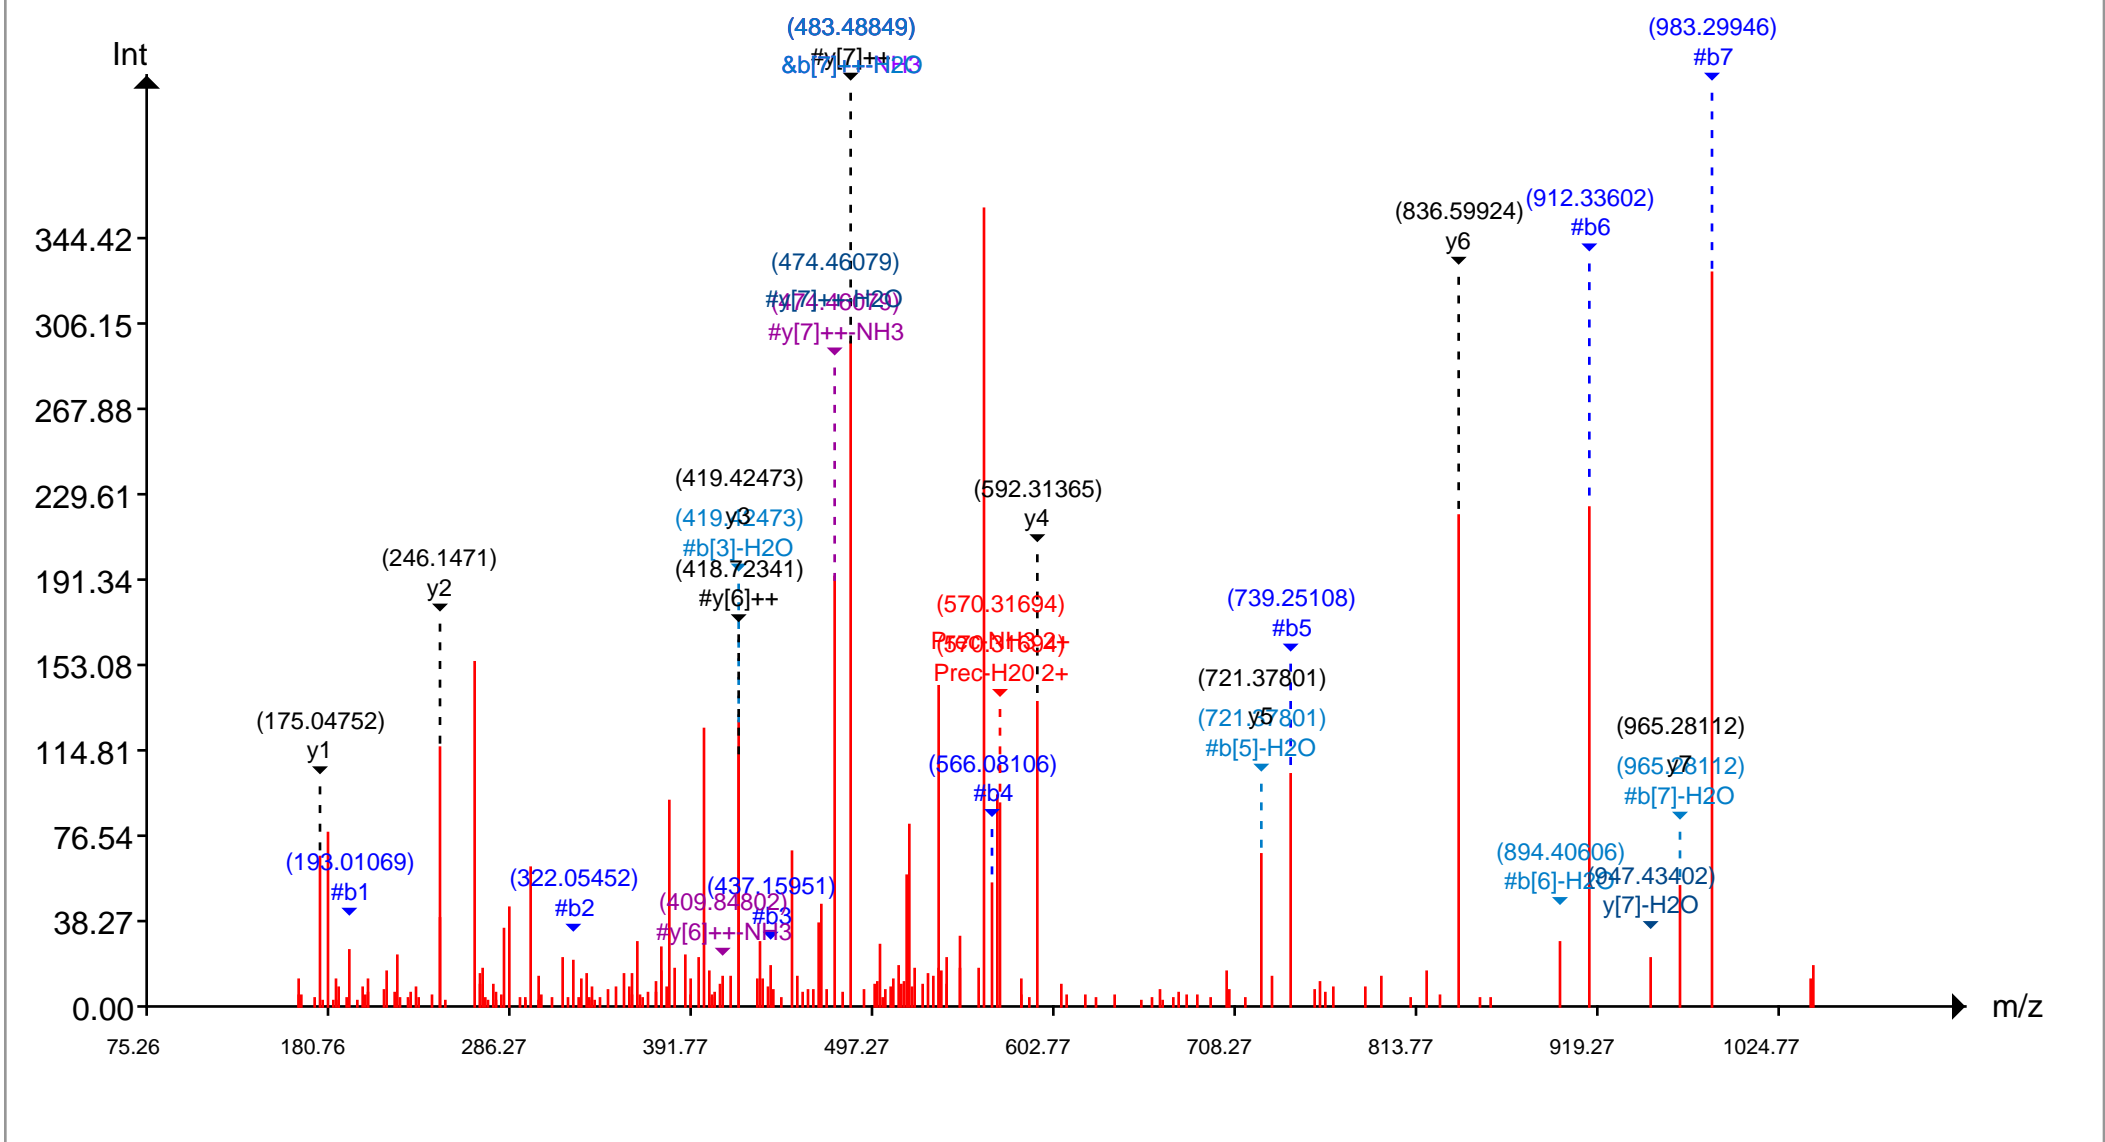

## Info

**Modified Sequence** AcD3-FEDEK<AcD3K\*>K<AcD3K\*>AR-COOH

**Ion score** 49.08

**Protein** P50580

**Confidence level** 99.00%

**Precursor m/z** 579.3114

**Identity Threshold** 47.86

**Charge** 2+

**Mass error** 8.26E-4

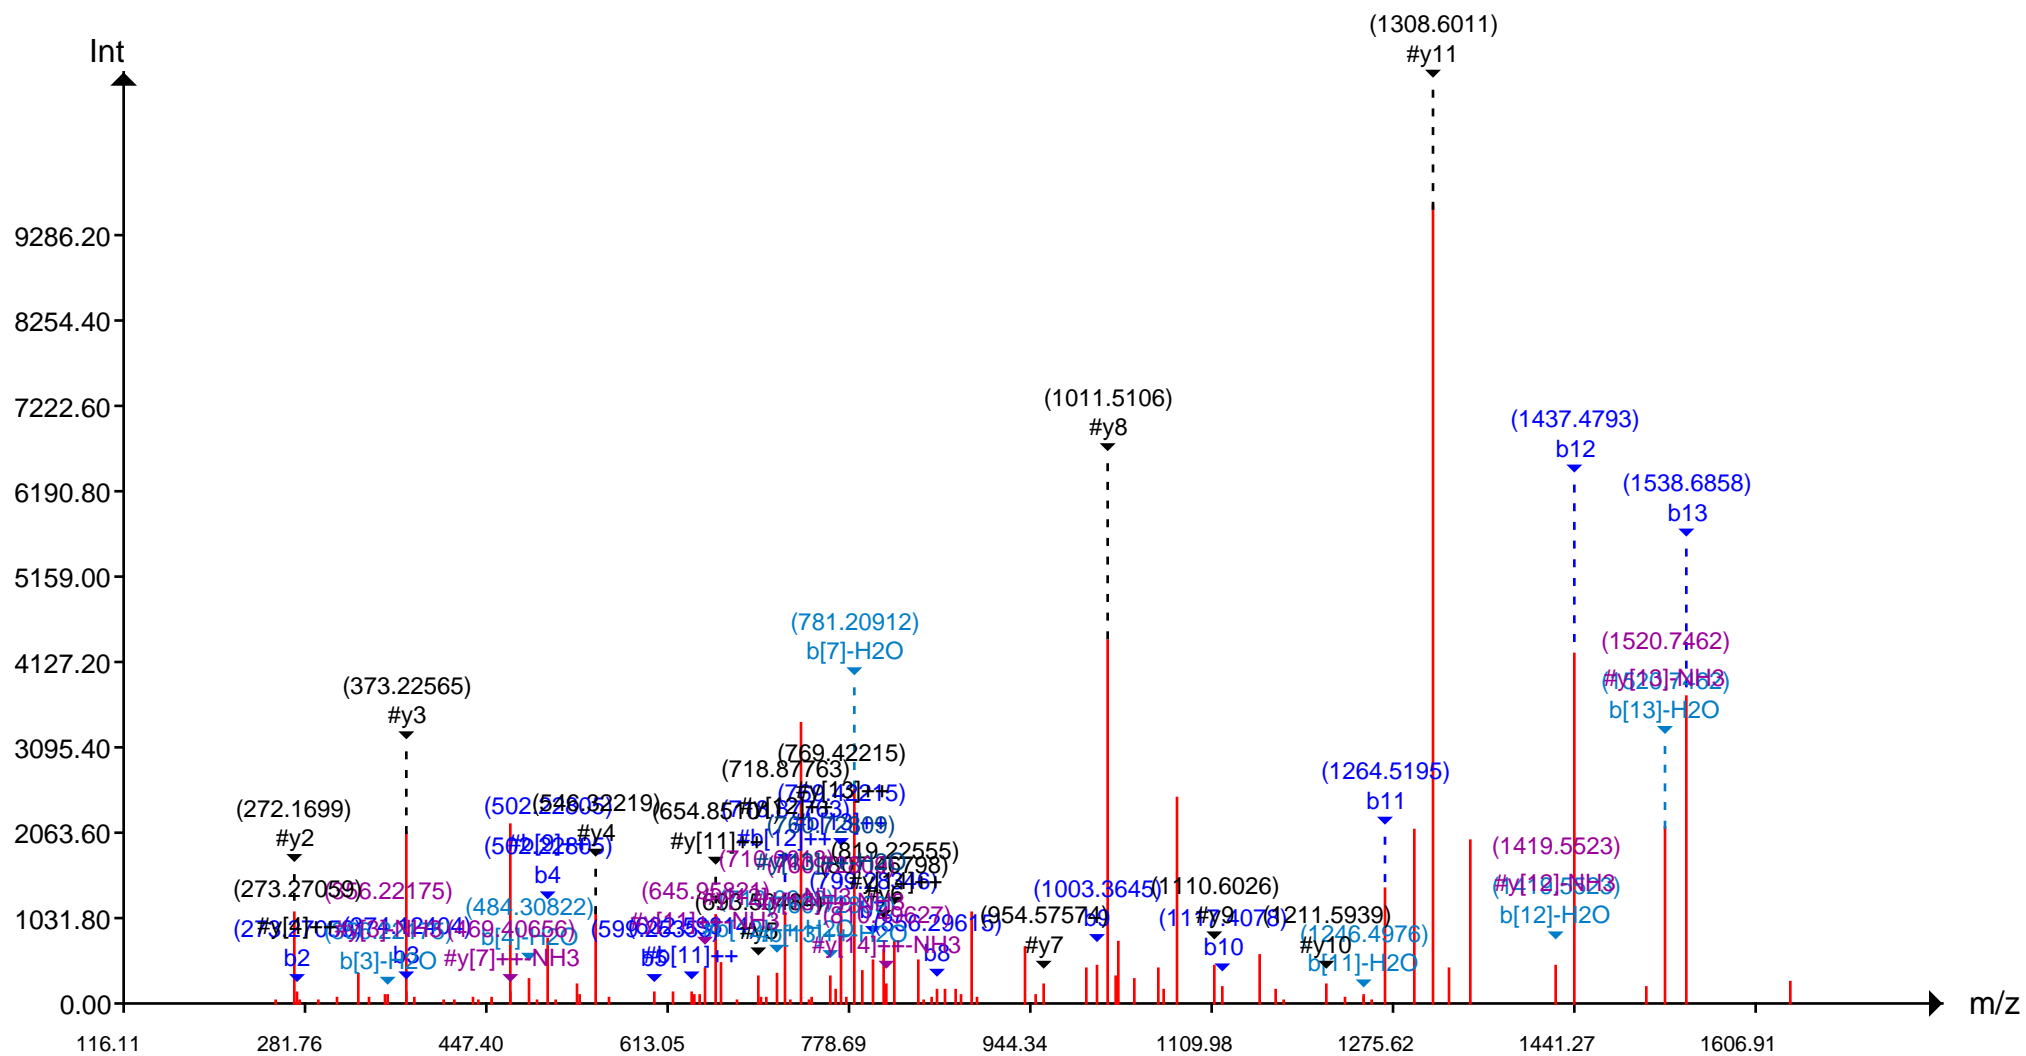

## Info

|                          |                                         |                           |          |
|--------------------------|-----------------------------------------|---------------------------|----------|
| <b>Modified Sequence</b> | AcD3-QVTQPTVGM<Mox*>NFK<AcD3K*>TPR-COOH | <b>Ion score</b>          | 64.64    |
| <b>Protein</b>           | P63276                                  | <b>Confidence level</b>   | 99.00%   |
| <b>Precursor m/z</b>     | 905.47666                               | <b>Identity Threshold</b> | 48.05    |
| <b>Charge</b>            | 2+                                      | <b>Mass error</b>         | 0.002565 |



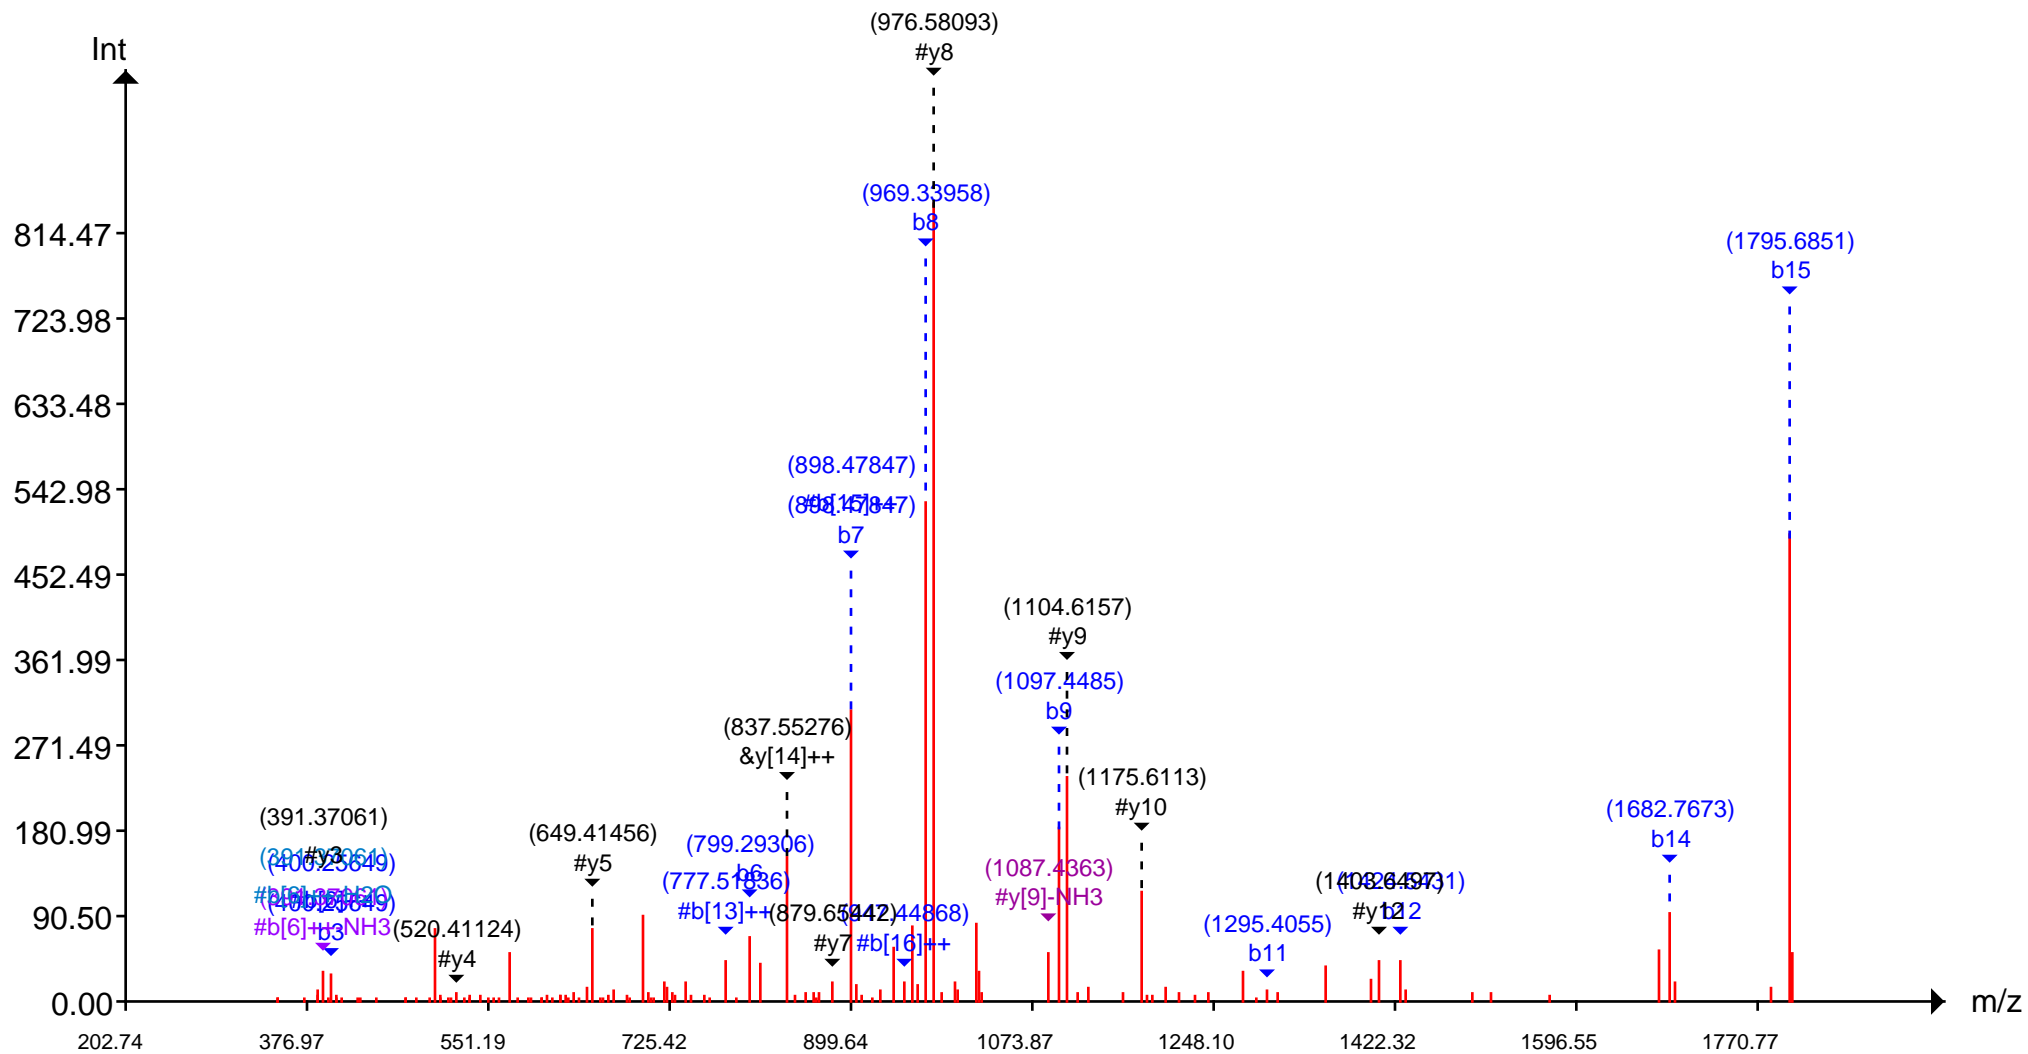

## Info

|                          |                                          |                           |          |
|--------------------------|------------------------------------------|---------------------------|----------|
| <b>Modified Sequence</b> | AcD3-LQLPK<AcD3K*>EVAQPTEEELPR<C13>-COOH | <b>Ion score</b>          | 53.61    |
| <b>Protein</b>           | Q9ERD8                                   | <b>Confidence level</b>   | 99.00%   |
| <b>Precursor m/z</b>     | 1037.0766                                | <b>Identity Threshold</b> | 46.53    |
| <b>Charge</b>            | 2+                                       | <b>Mass error</b>         | 0.001899 |

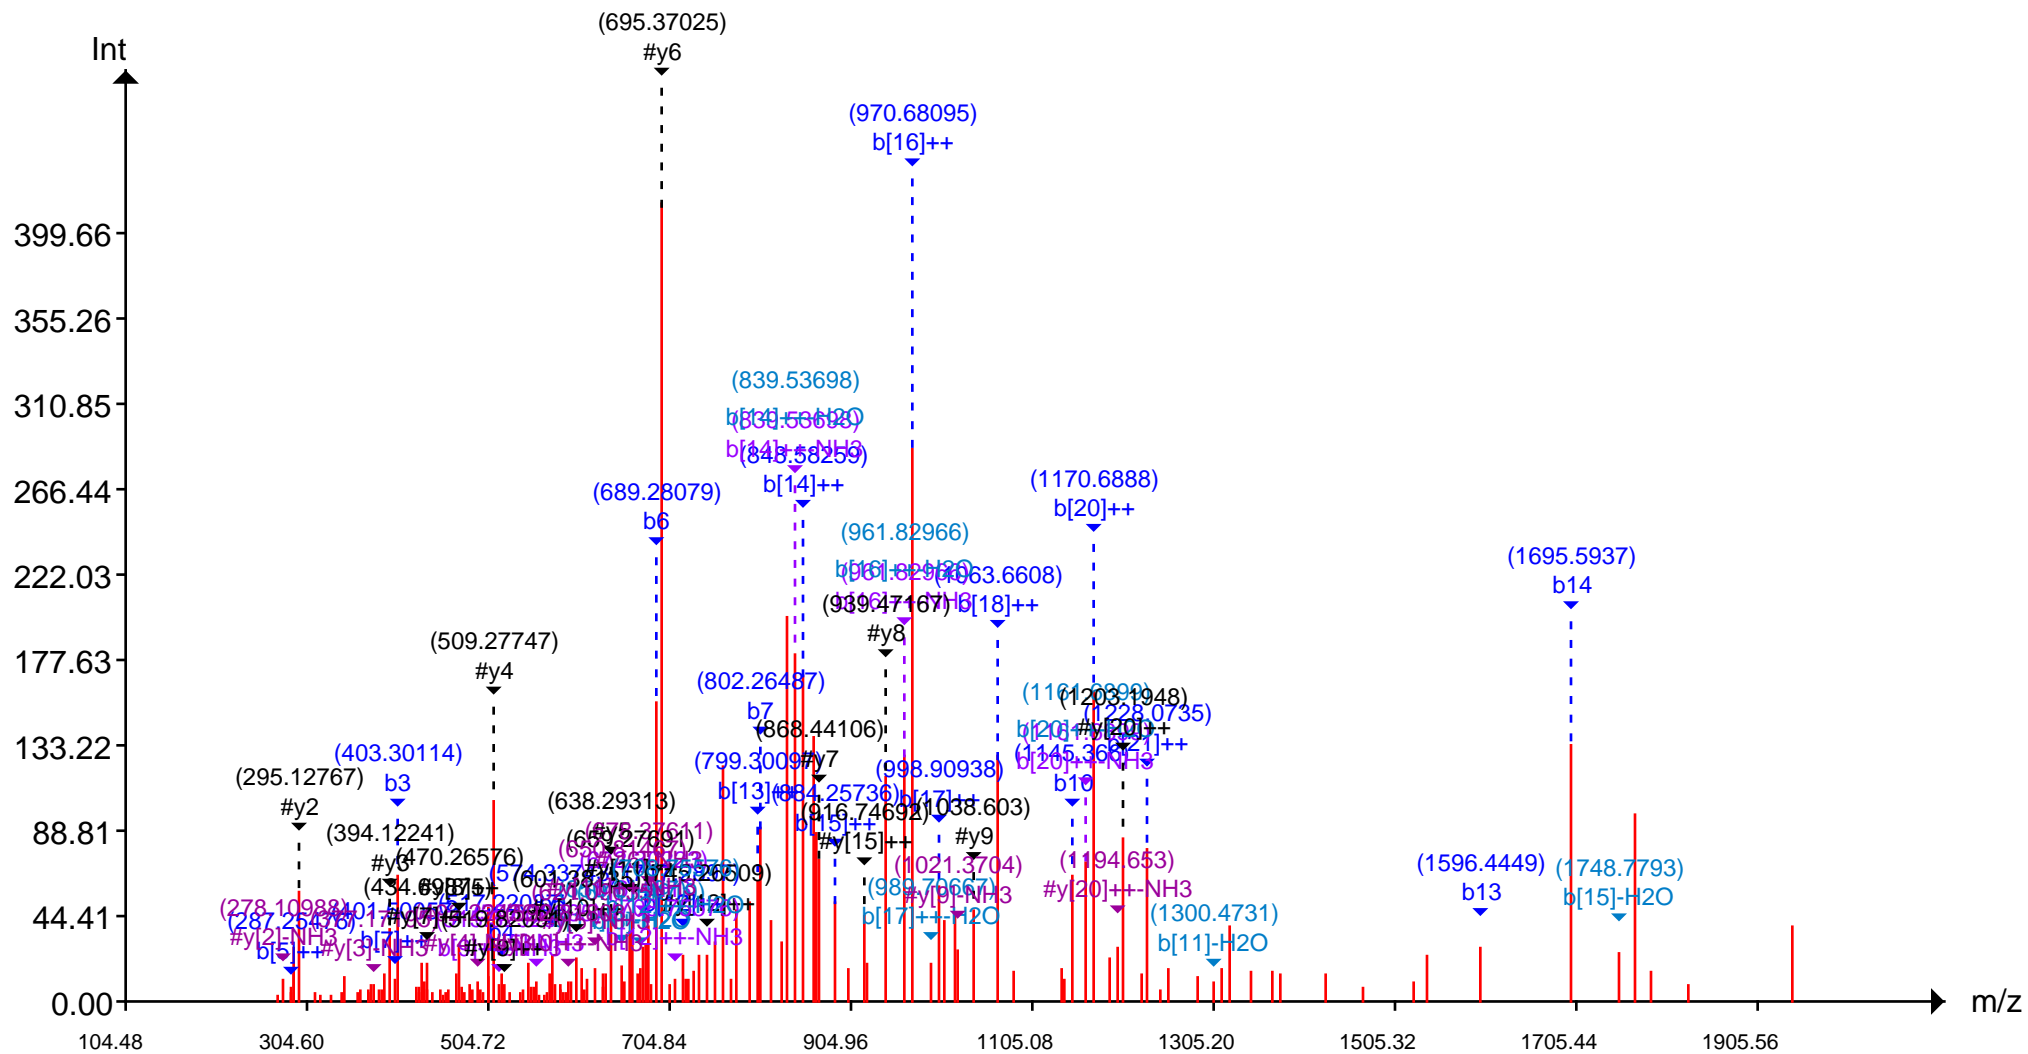

## Info

|                          |                                                               |                           |          |
|--------------------------|---------------------------------------------------------------|---------------------------|----------|
| <b>Modified Sequence</b> | AcD3-ALK<AcD3K*>NGDLDEVK<AcD3K*>DYVAK<AcD3K*>GEDVNR<C13>-COOH | <b>Ion score</b>          | 49.86    |
| <b>Protein</b>           | P62774                                                        | <b>Confidence level</b>   | 99.00%   |
| <b>Precursor m/z</b>     | 878.79718                                                     | <b>Identity Threshold</b> | 47.70    |
| <b>Charge</b>            | 3+                                                            | <b>Mass error</b>         | 0.002769 |

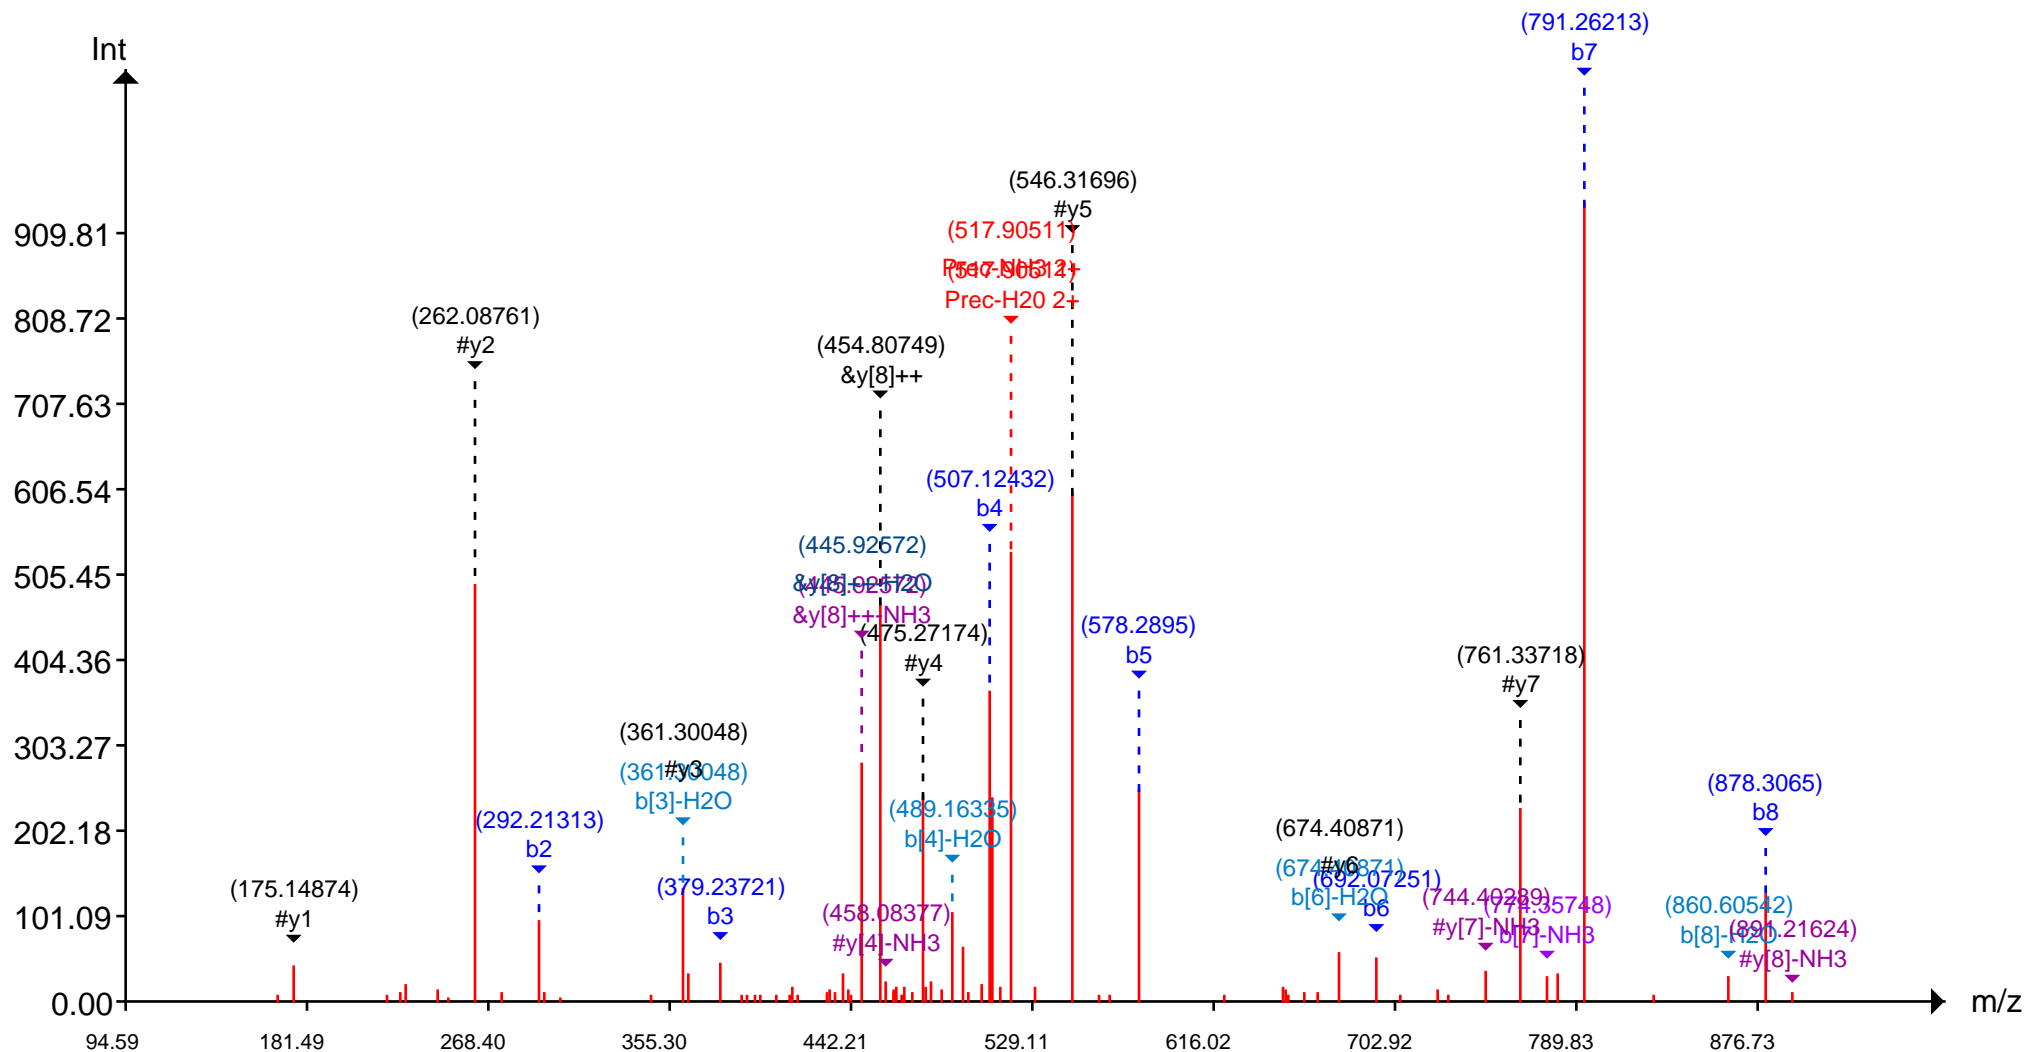

## Info

|                          |                           |                           |         |
|--------------------------|---------------------------|---------------------------|---------|
| <b>Modified Sequence</b> | AcD3-VM<Mox*>SQANVSR-COOH | <b>Ion score</b>          | 57.35   |
| <b>Protein</b>           | P70670, Q60817            | <b>Confidence level</b>   | 99.00%  |
| <b>Precursor m/z</b>     | 526.76547                 | <b>Identity Threshold</b> | 47.53   |
| <b>Charge</b>            | 2+                        | <b>Mass error</b>         | 4.27E-4 |

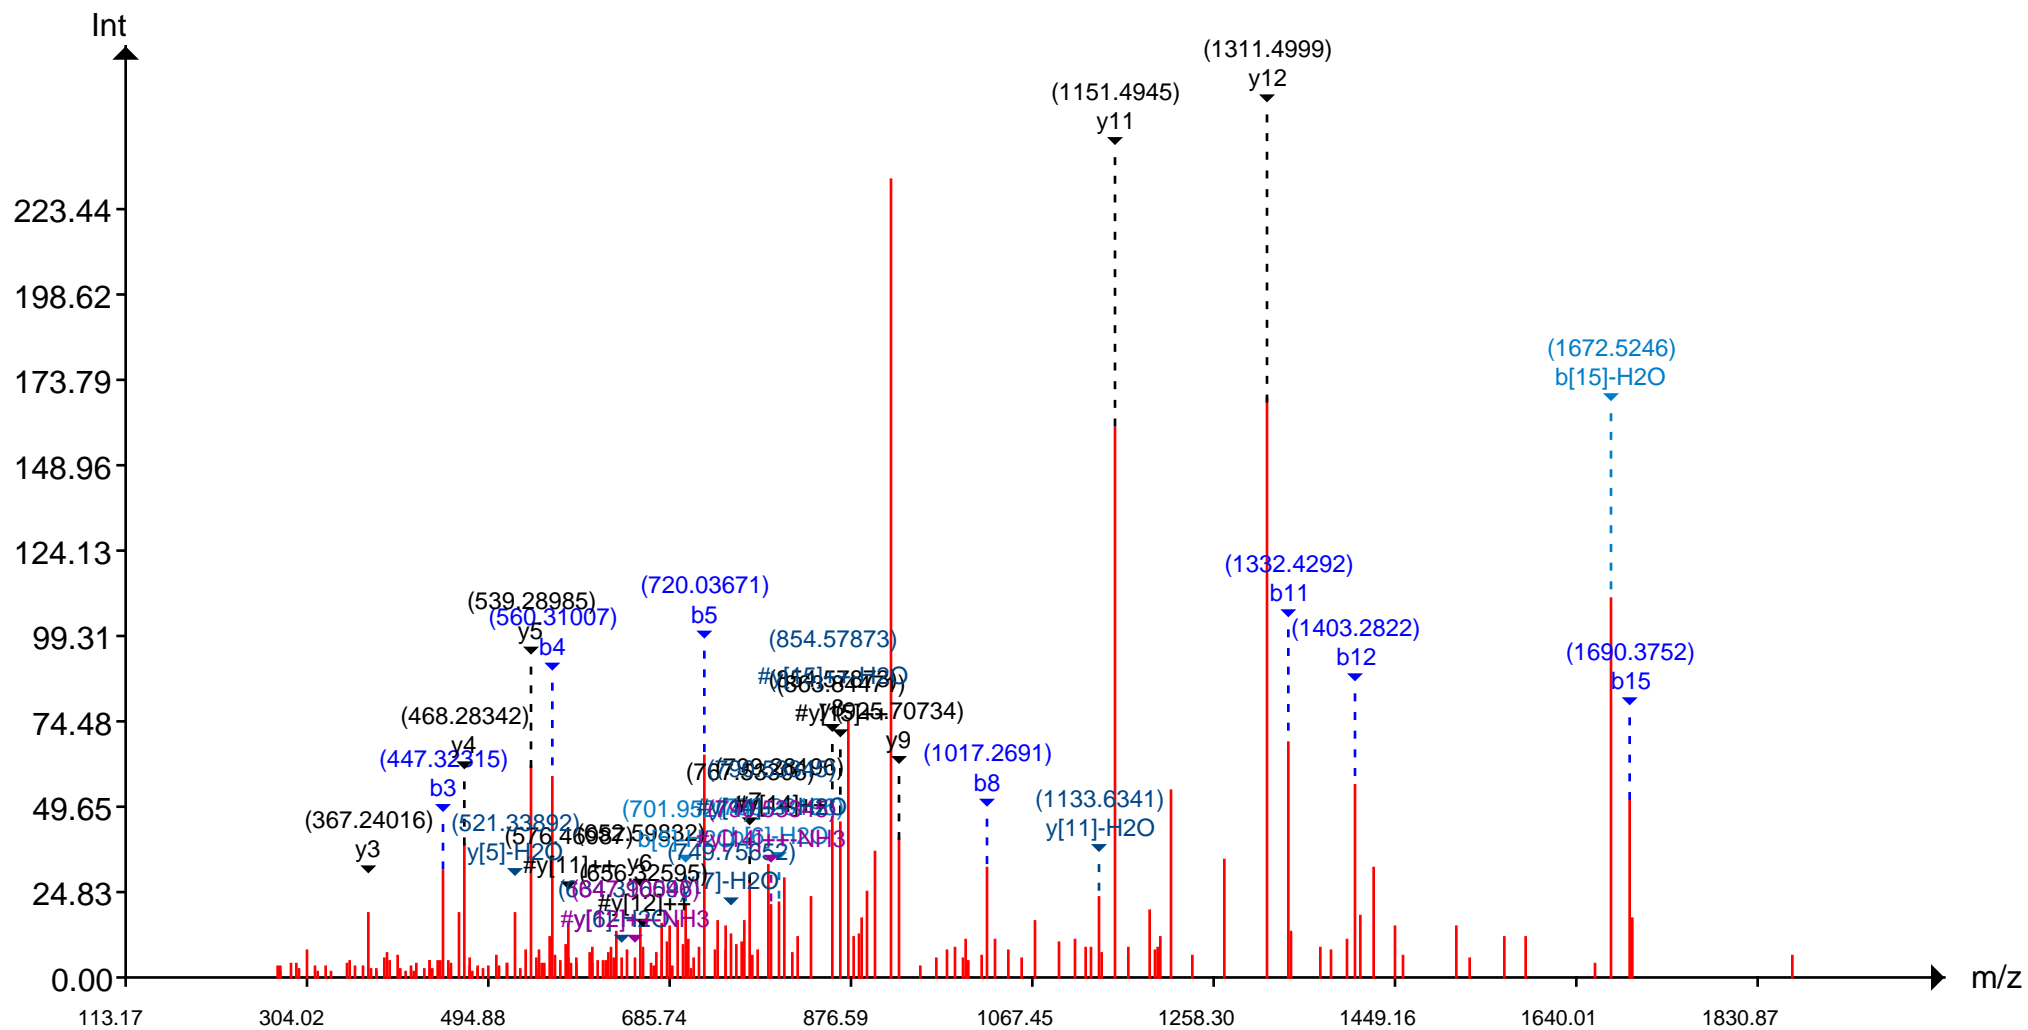

## Info

|                          |                                               |                           |          |
|--------------------------|-----------------------------------------------|---------------------------|----------|
| <b>Modified Sequence</b> | AcD3-VEK<AcD3K*>LC<Cmm*>PEASDIATSVR<C13>-COOH | <b>Ion score</b>          | 52.85    |
| <b>Protein</b>           | Q8BIJ7                                        | <b>Confidence level</b>   | 99.00%   |
| <b>Precursor m/z</b>     | 935.99513                                     | <b>Identity Threshold</b> | 48.00    |
| <b>Charge</b>            | 2+                                            | <b>Mass error</b>         | 0.003693 |





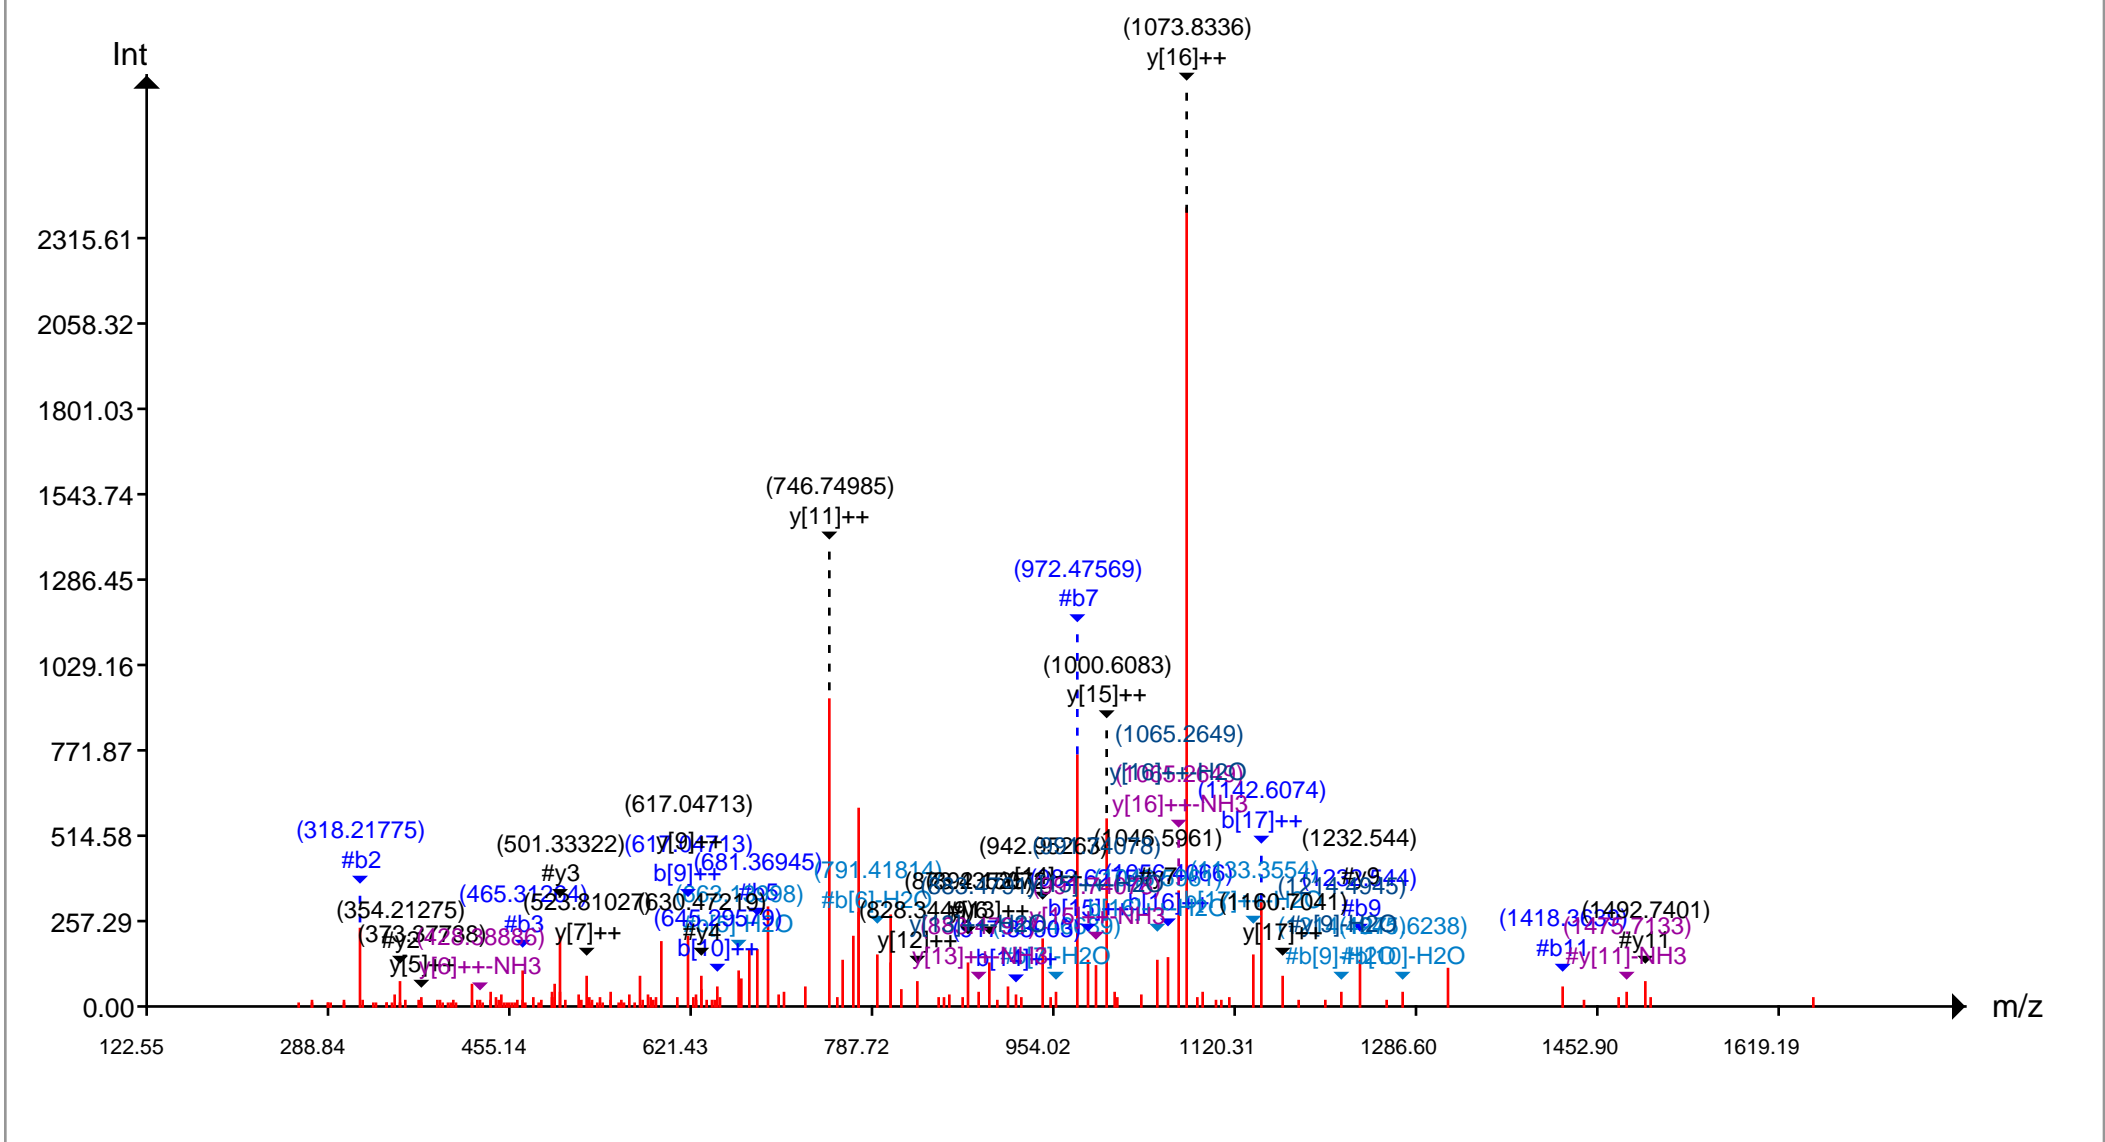

## Info

|                          |                                                           |                           |          |
|--------------------------|-----------------------------------------------------------|---------------------------|----------|
| <b>Modified Sequence</b> | AcD3-VK<AcD3K*>FDTQYPYGEK<AcD3K*>QDEFK<AcD3K*>R<C13>-COOH | <b>Ion score</b>          | 49.74    |
| <b>Protein</b>           | P57759                                                    | <b>Confidence level</b>   | 99.00%   |
| <b>Precursor m/z</b>     | 822.42362                                                 | <b>Identity Threshold</b> | 47.97    |
| <b>Charge</b>            | 3+                                                        | <b>Mass error</b>         | 1.004708 |

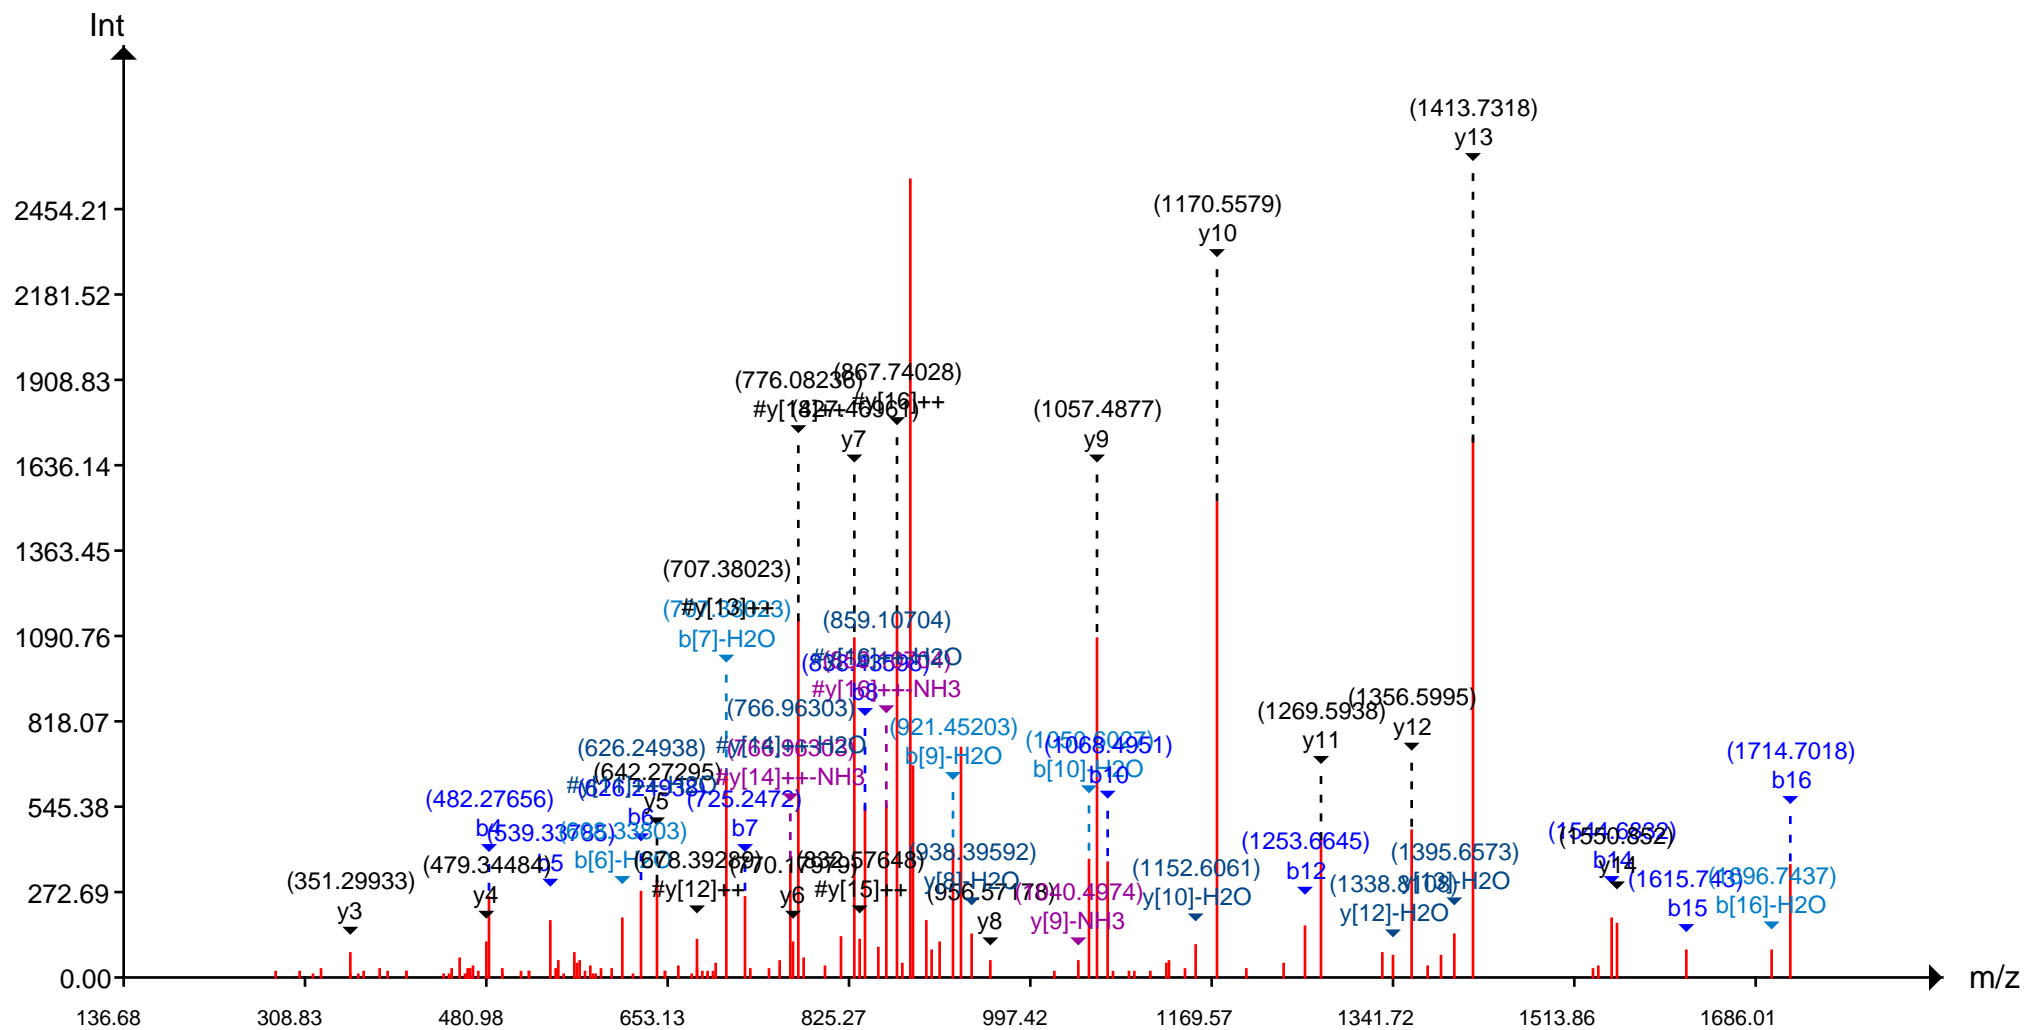

## Info

|                          |                                  |                           |          |
|--------------------------|----------------------------------|---------------------------|----------|
| <b>Modified Sequence</b> | AcD3-DALHGSLVLTGQYQAVR<C13>-COOH | <b>Ion score</b>          | 88.77    |
| <b>Protein</b>           | Q9EPB4                           | <b>Confidence level</b>   | 99.00%   |
| <b>Precursor m/z</b>     | 947.99414                        | <b>Identity Threshold</b> | 48.02    |
| <b>Charge</b>            | 2+                               | <b>Mass error</b>         | 0.001774 |

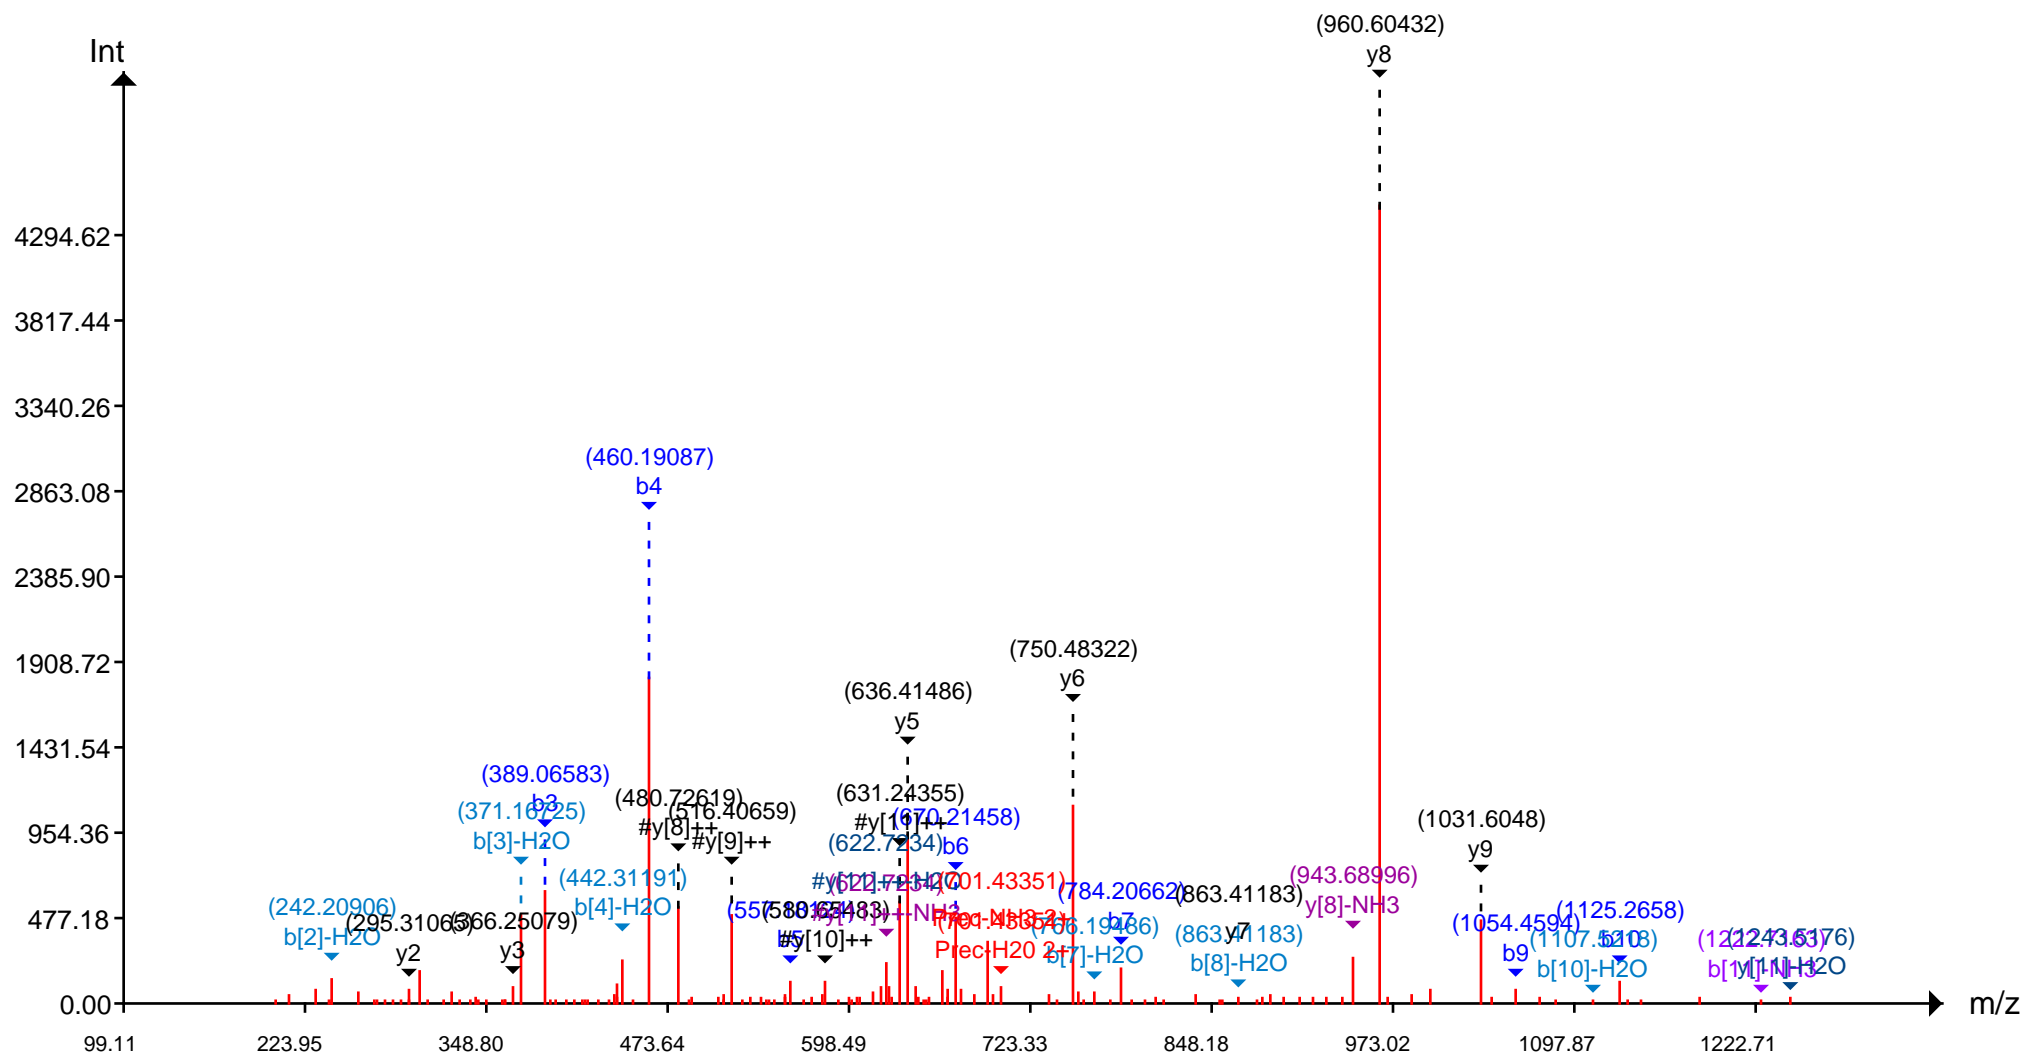

## Info

|                          |                                                |                           |          |
|--------------------------|------------------------------------------------|---------------------------|----------|
| <b>Modified Sequence</b> | AcD3-LTEAPLNPK<AcD3K*>ANR<C13>-COOH            | <b>Ion score</b>          | 56.73    |
| <b>Protein</b>           | P62737, P60710, P68033, P63260, P63268, P68134 | <b>Confidence level</b>   | 99.00%   |
| <b>Precursor m/z</b>     | 710.4127                                       | <b>Identity Threshold</b> | 45.92    |
| <b>Charge</b>            | 2+                                             | <b>Mass error</b>         | 0.001308 |

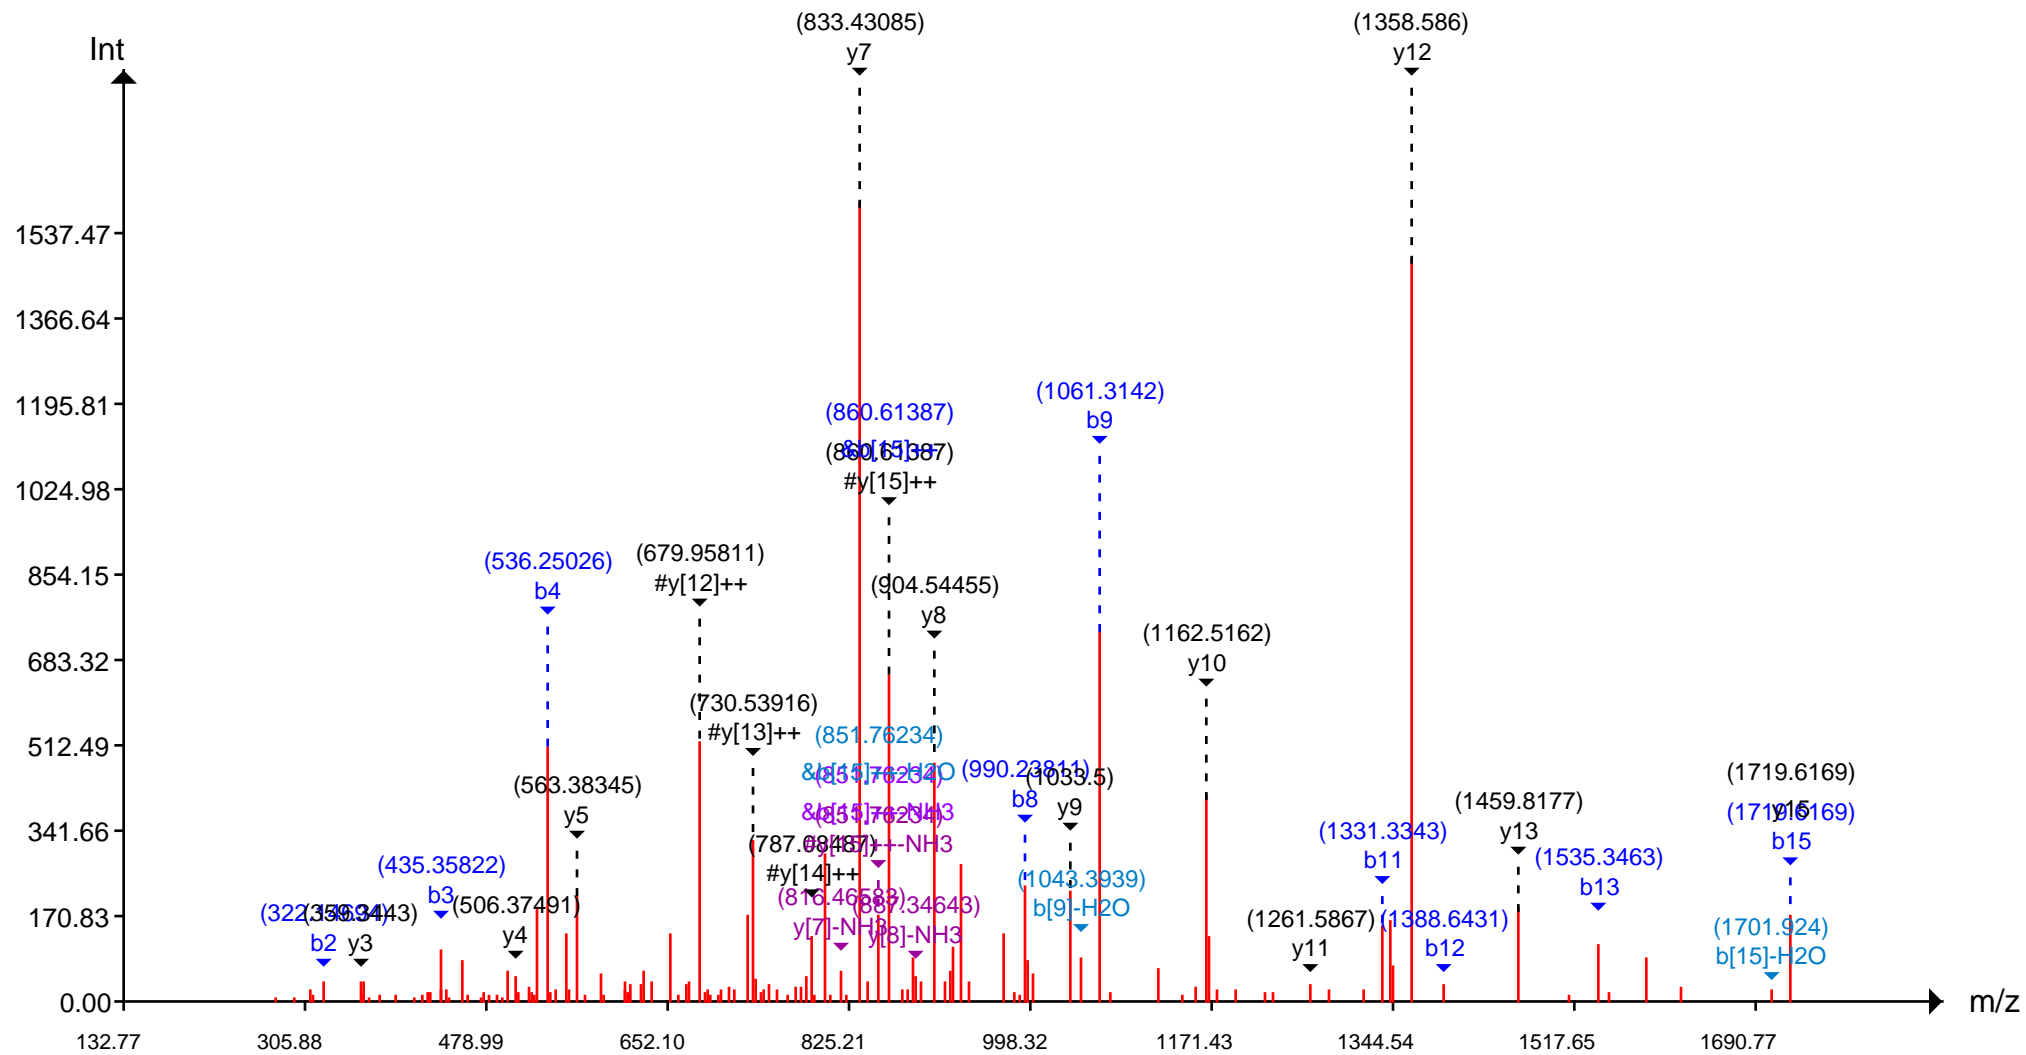

## Info

|                          |                                          |                           |          |
|--------------------------|------------------------------------------|---------------------------|----------|
| <b>Modified Sequence</b> | AcD3-EFLTPVEEAPK<AcD3K*>GM<Mox*>LAR-COOH | <b>Ion score</b>          | 63.94    |
| <b>Protein</b>           | Q61599                                   | <b>Confidence level</b>   | 99.00%   |
| <b>Precursor m/z</b>     | 947.50038                                | <b>Identity Threshold</b> | 48.03    |
| <b>Charge</b>            | 2+                                       | <b>Mass error</b>         | 0.003771 |

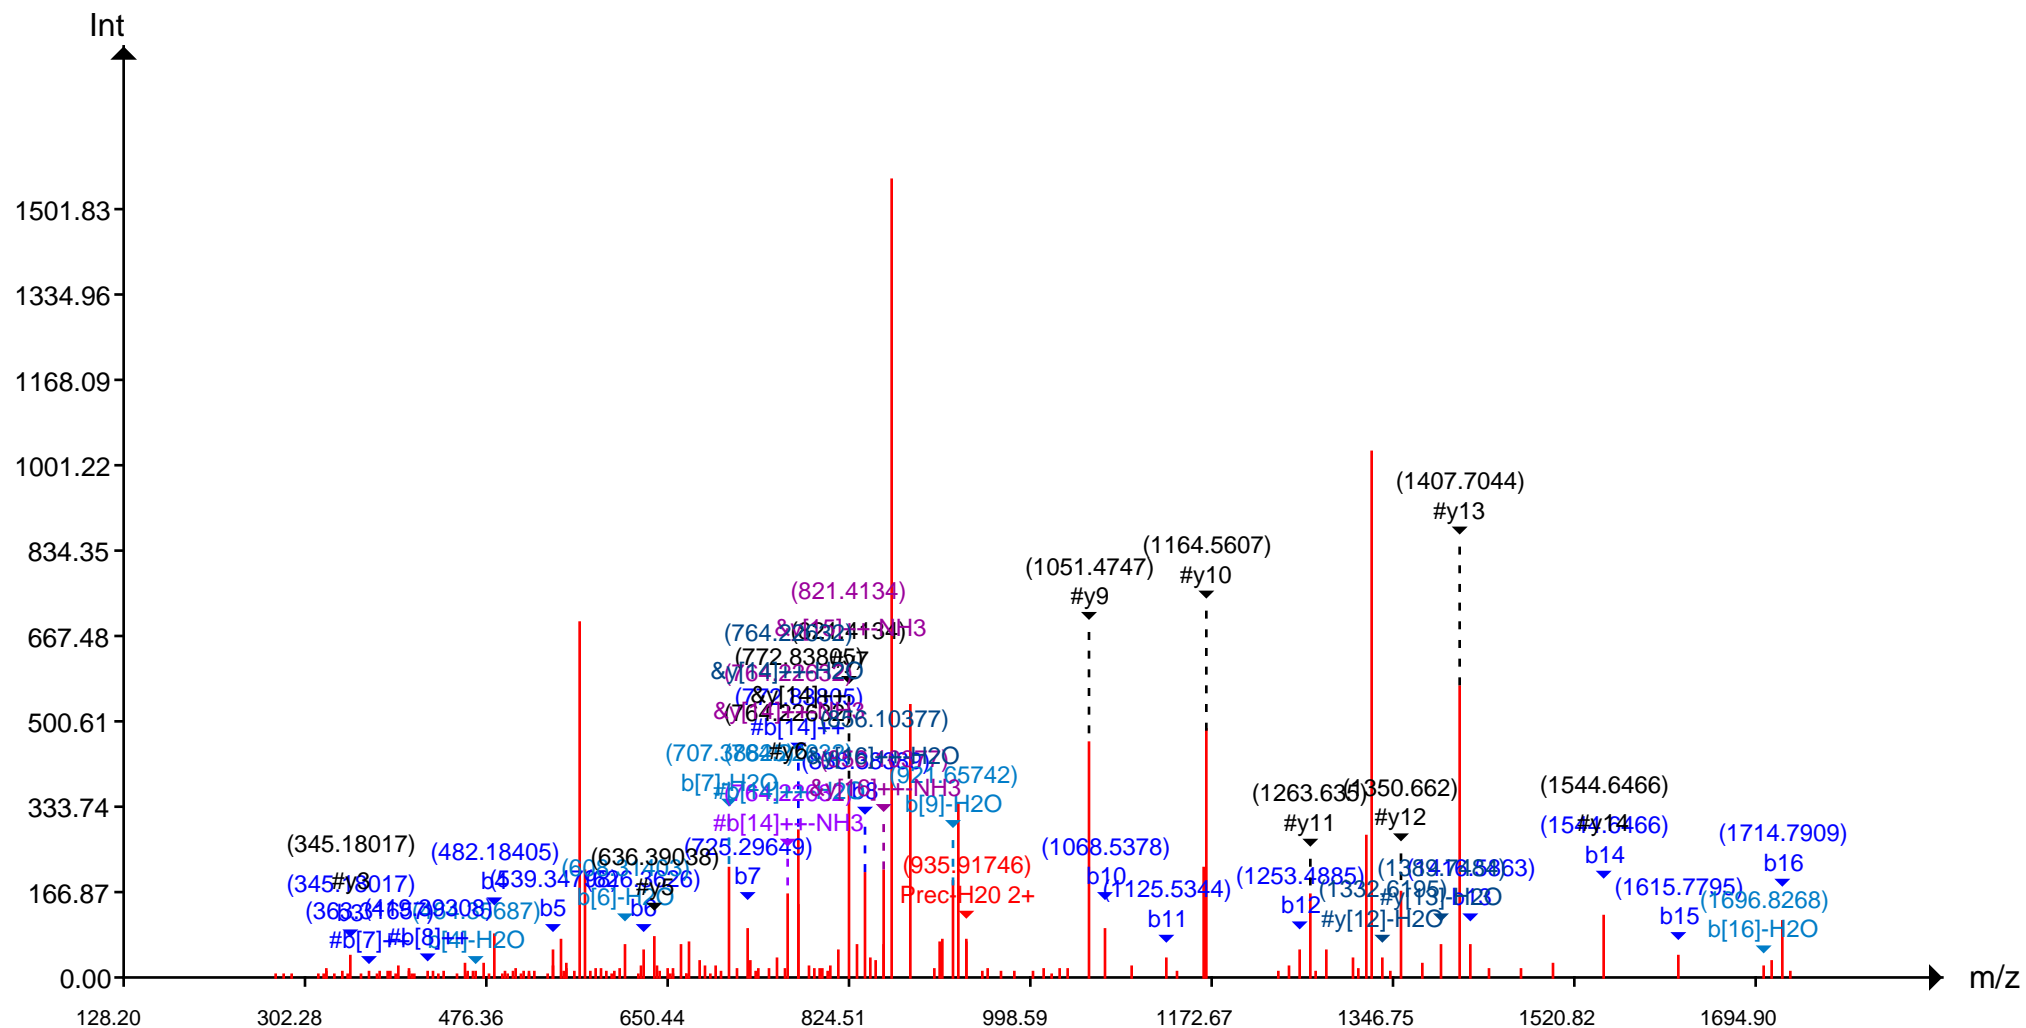

## Info

|                          |                             |                           |          |
|--------------------------|-----------------------------|---------------------------|----------|
| <b>Modified Sequence</b> | AcD3-DALHGSLVTEGQYQAVR-COOH | <b>Ion score</b>          | 71.13    |
| <b>Protein</b>           | Q9EPB4                      | <b>Confidence level</b>   | 99.00%   |
| <b>Precursor m/z</b>     | 944.98412                   | <b>Identity Threshold</b> | 48.00    |
| <b>Charge</b>            | 2+                          | <b>Mass error</b>         | 0.001875 |

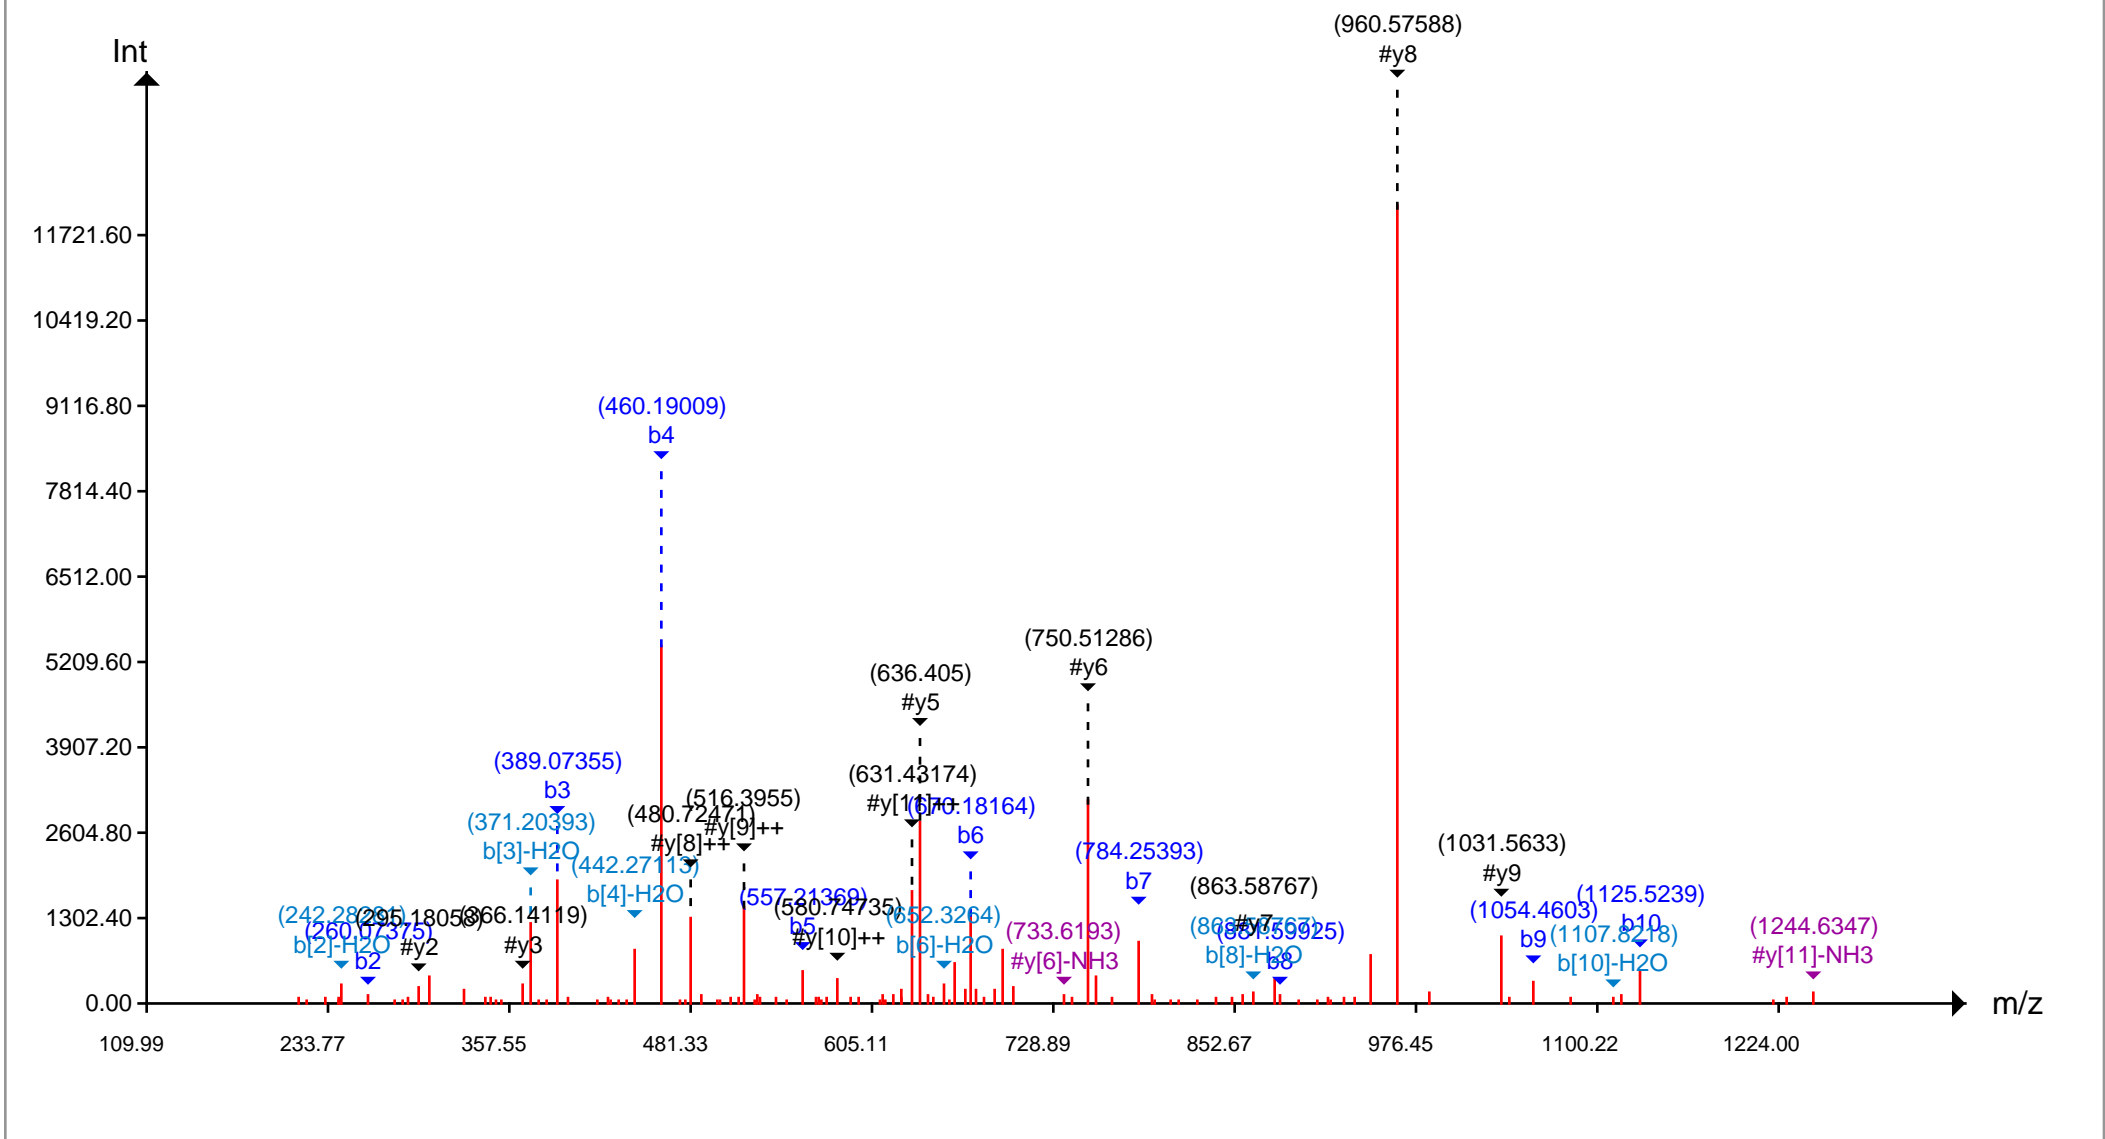

## Info

**Modified Sequence** AcD3-LTEAPLNPK<AcD3K\*>ANR<C13>-COOH

**Ion score** 66.0

**Protein** P62737, P60710, P68033, P63260, P63268, P68134

**Confidence level** 99.00%

**Precursor m/z** 710.41256

**Identity Threshold** 45.88

**Charge** 2+

**Mass error** 0.001028

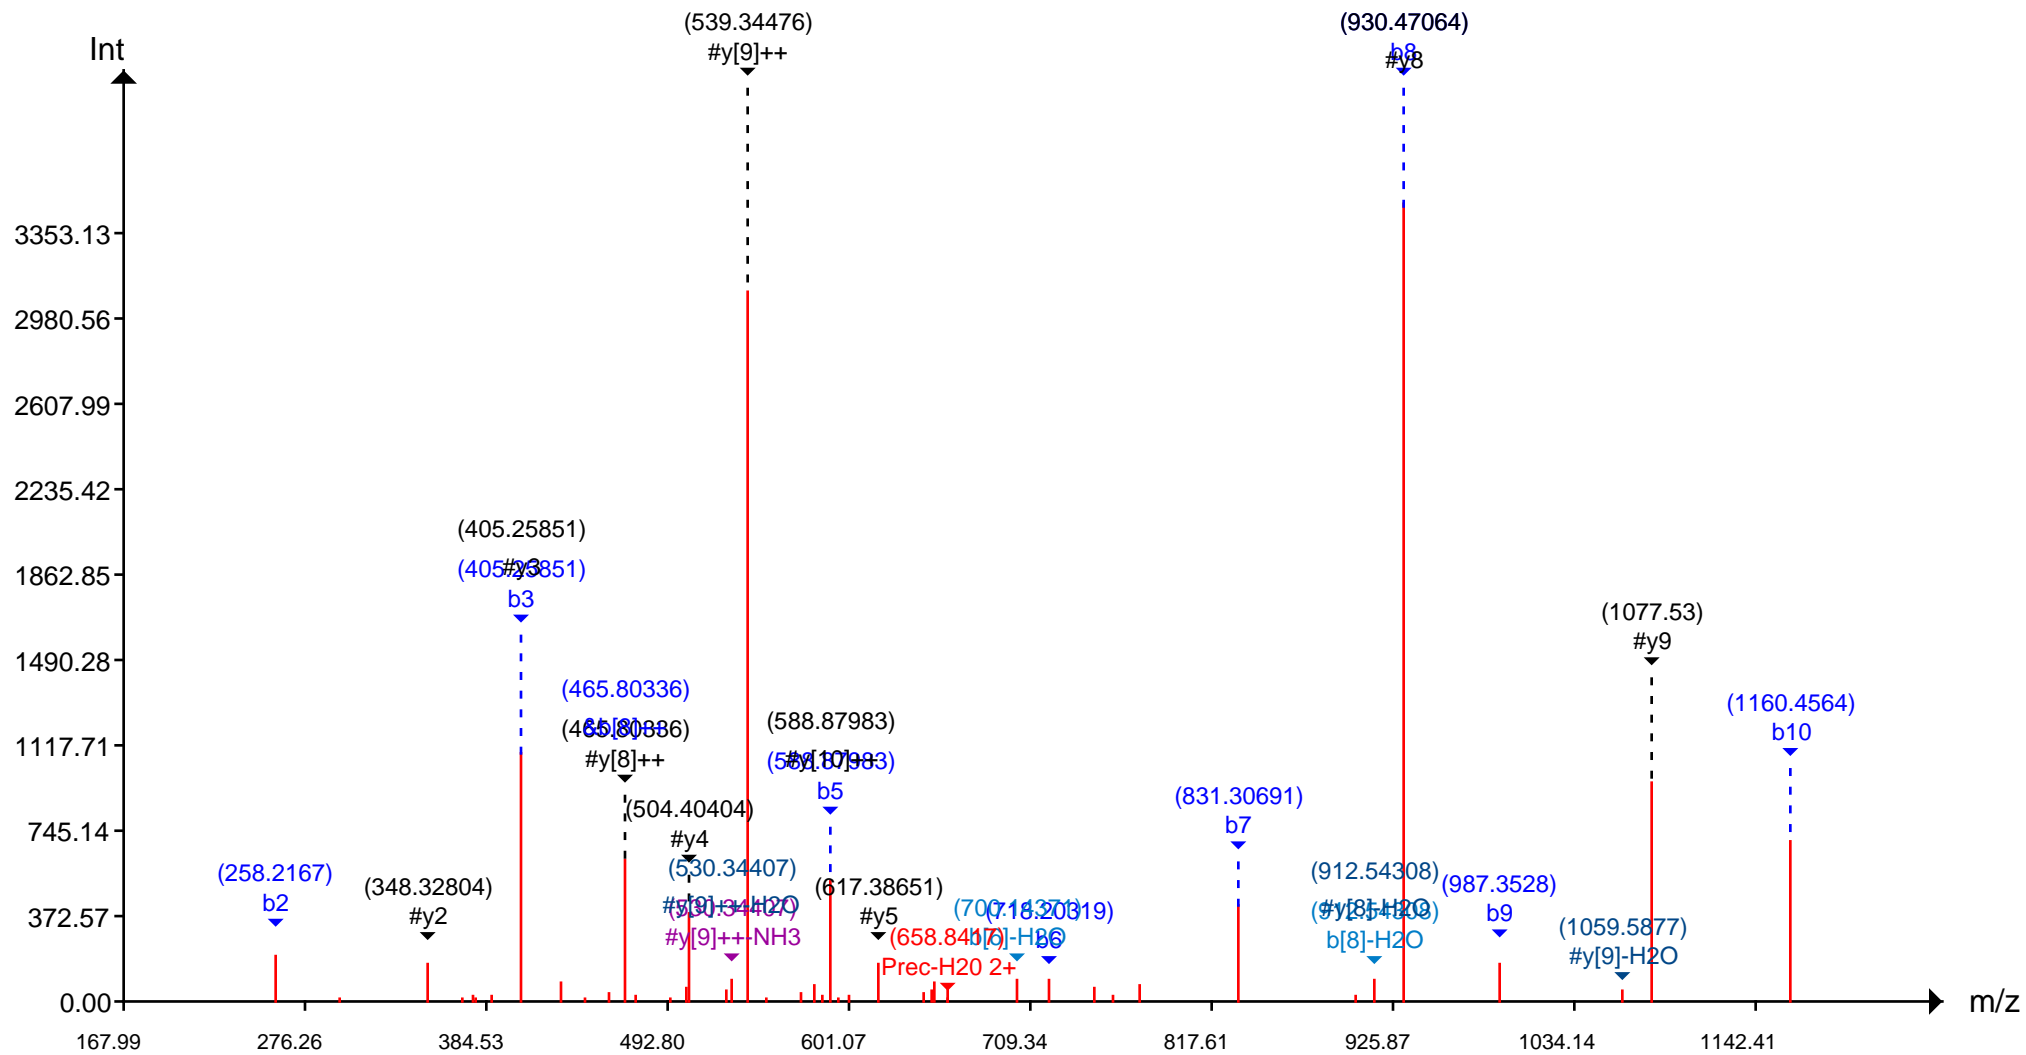

## Info

**Modified Sequence** AcD3-LVFPSEIVGK<AcD3K\*>R-COOH

**Ion score** 78.05

**Protein** P62082

**Confidence level** 99.00%

**Precursor m/z** 667.90185

**Identity Threshold** 44.08

**Charge** 2+

**Mass error** 0.001505



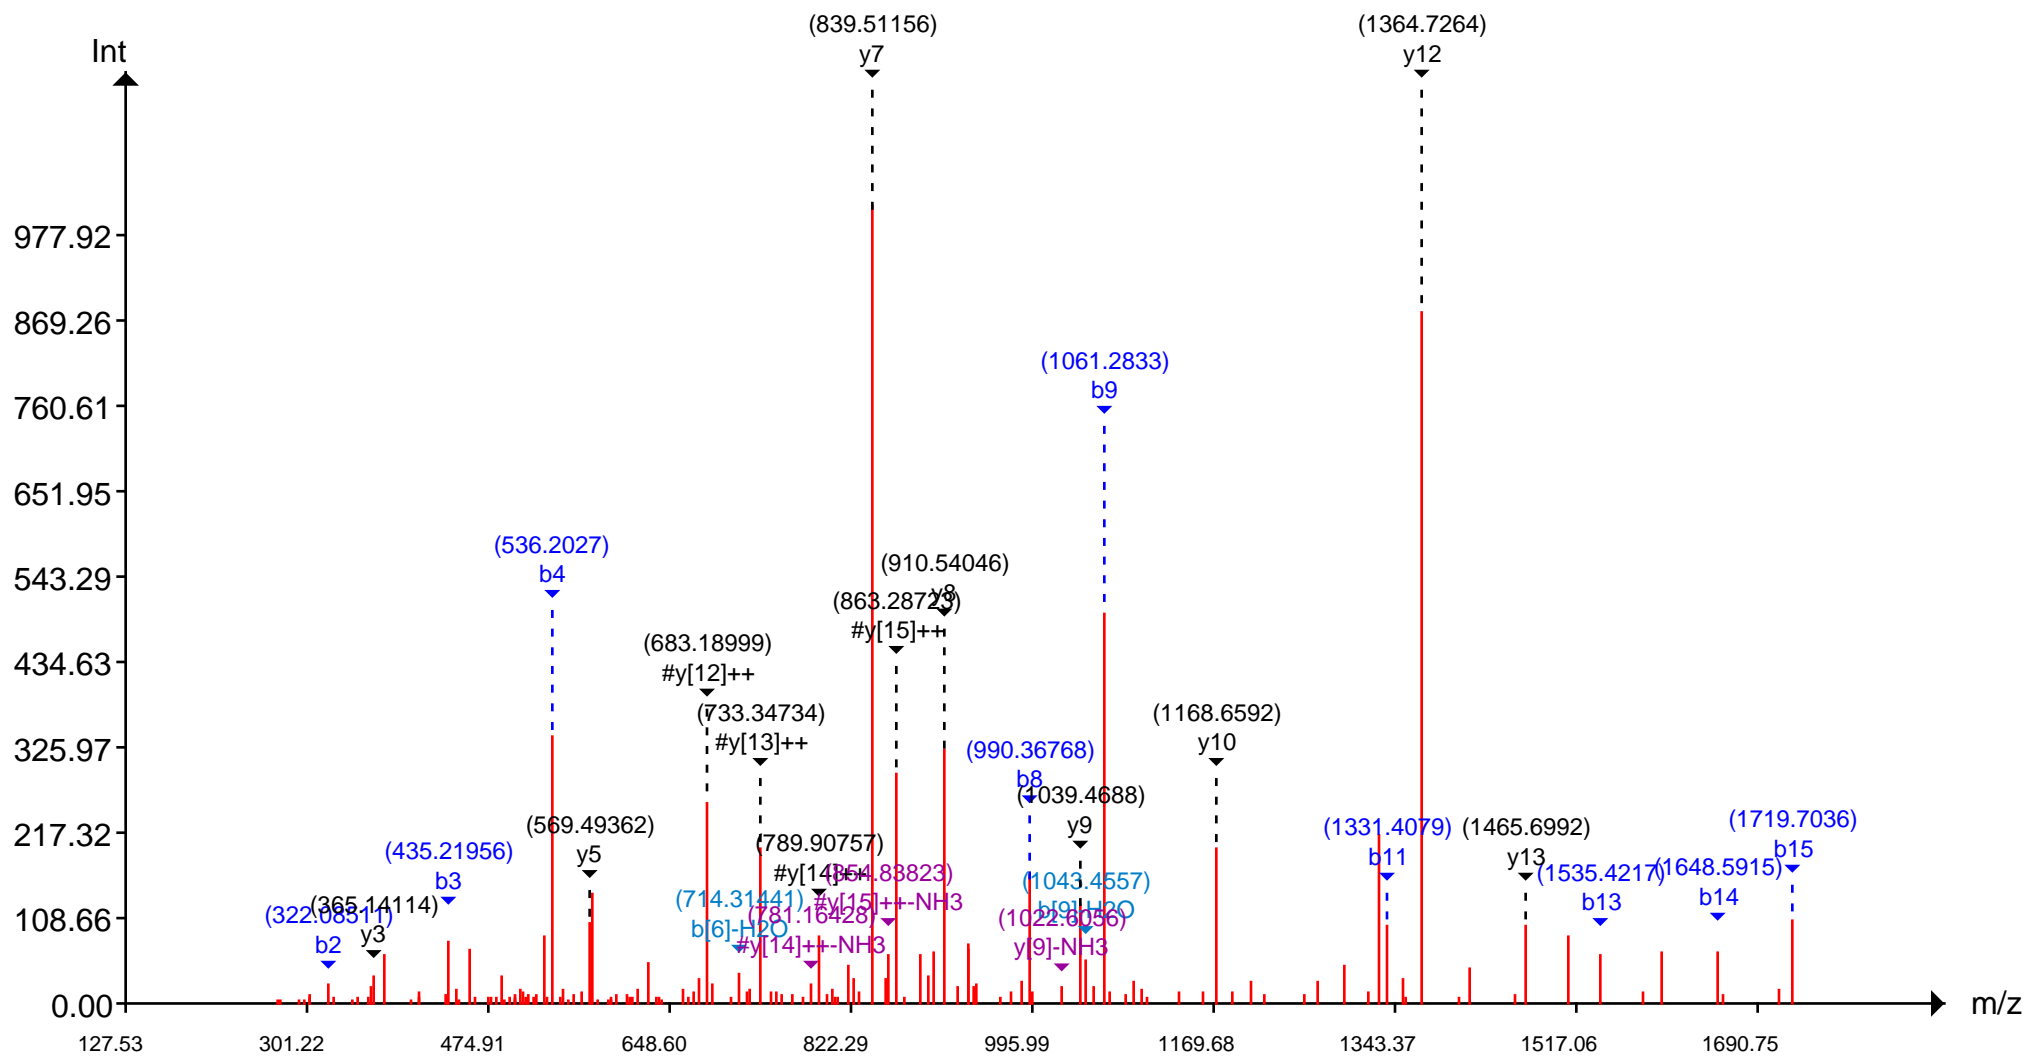

## Info

|                          |                                               |                           |          |
|--------------------------|-----------------------------------------------|---------------------------|----------|
| <b>Modified Sequence</b> | AcD3-EFLTPVEEAPK<AcD3K*>GM<Mox*>LAR<C13>-COOH | <b>Ion score</b>          | 55.22    |
| <b>Protein</b>           | Q61599                                        | <b>Confidence level</b>   | 99.00%   |
| <b>Precursor m/z</b>     | 950.50927                                     | <b>Identity Threshold</b> | 47.86    |
| <b>Charge</b>            | 2+                                            | <b>Mass error</b>         | 0.001409 |

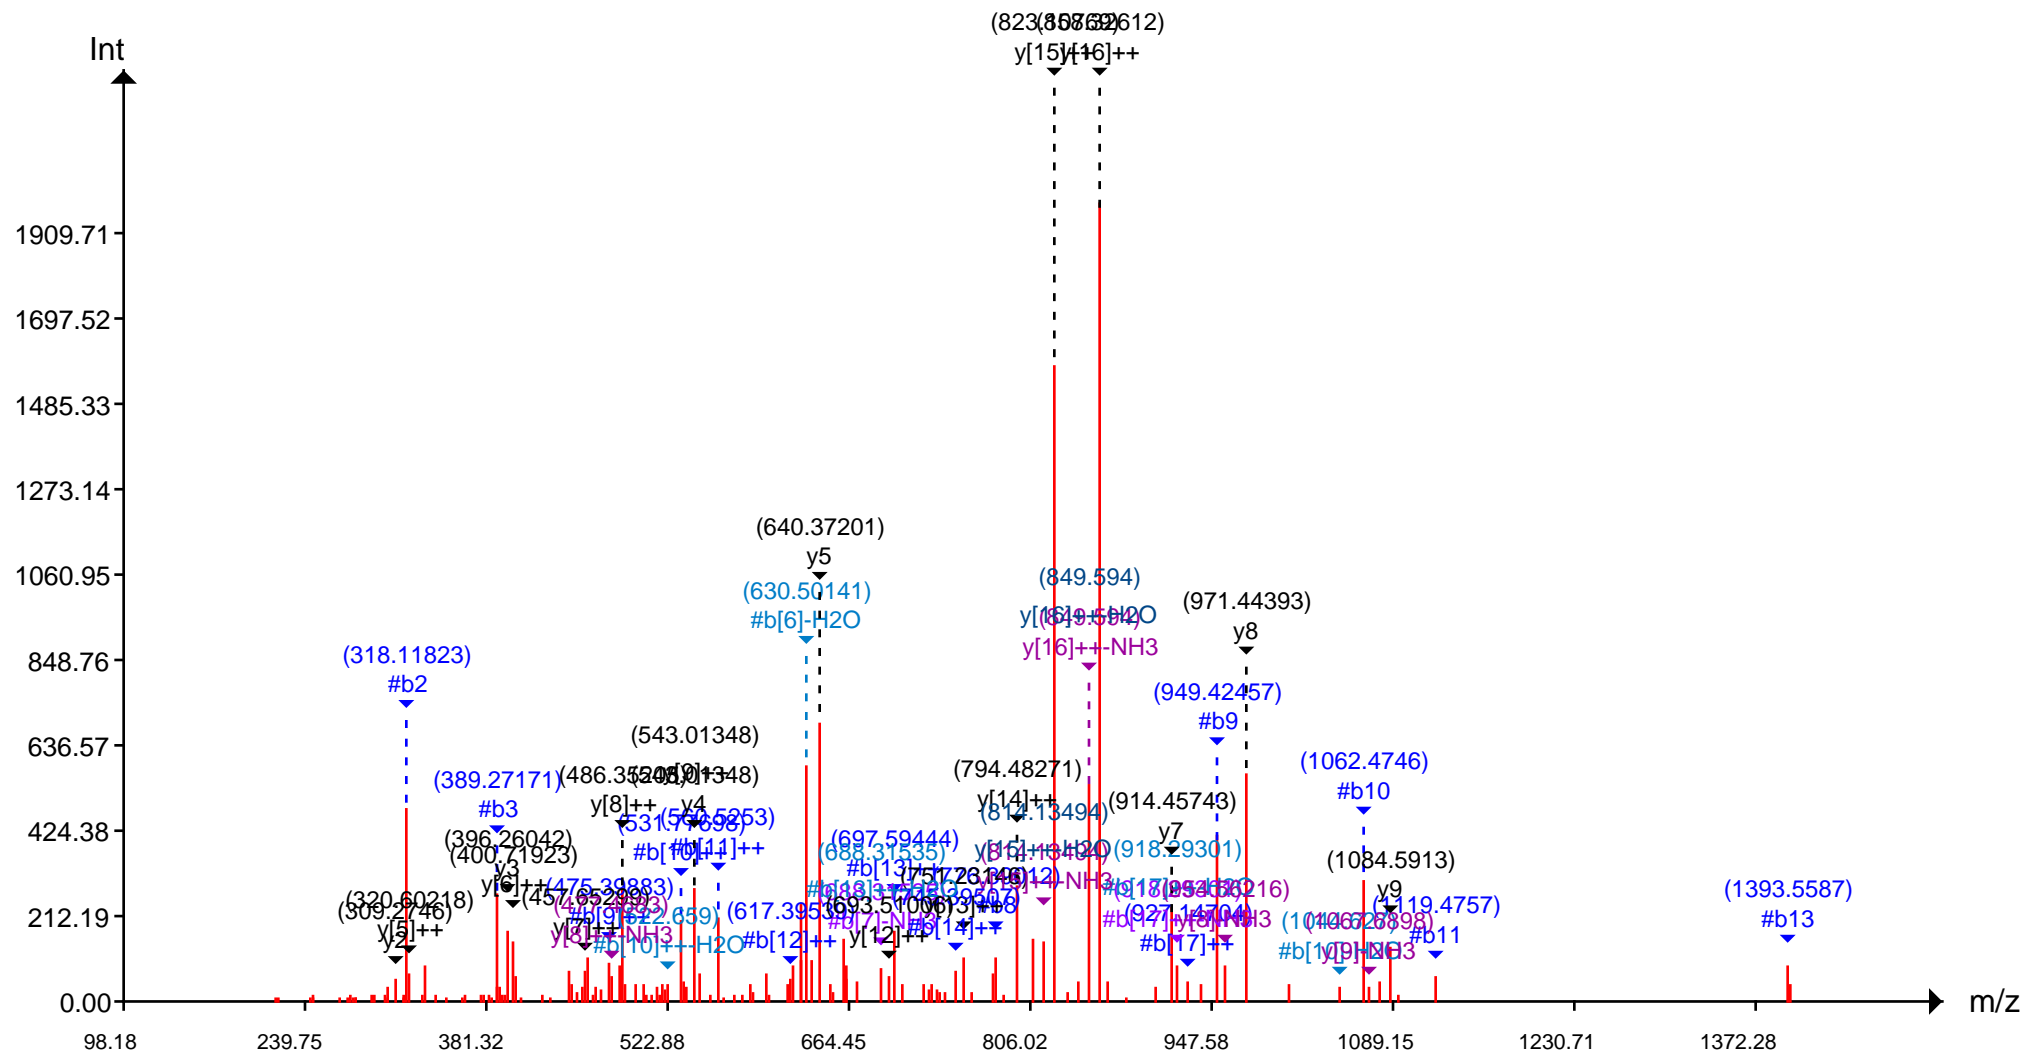

## Info

|                          |                                                         |                           |          |
|--------------------------|---------------------------------------------------------|---------------------------|----------|
| <b>Modified Sequence</b> | AcD3-VK<AcD3K*>AGSDGAK<AcD3K*>IGNC<Cmm*>PFSQR<C13>-COOH | <b>Ion score</b>          | 55.66    |
| <b>Protein</b>           | Q9Z1Q5                                                  | <b>Confidence level</b>   | 99.00%   |
| <b>Precursor m/z</b>     | 678.35628                                               | <b>Identity Threshold</b> | 48.12    |
| <b>Charge</b>            | 3+                                                      | <b>Mass error</b>         | 0.001648 |

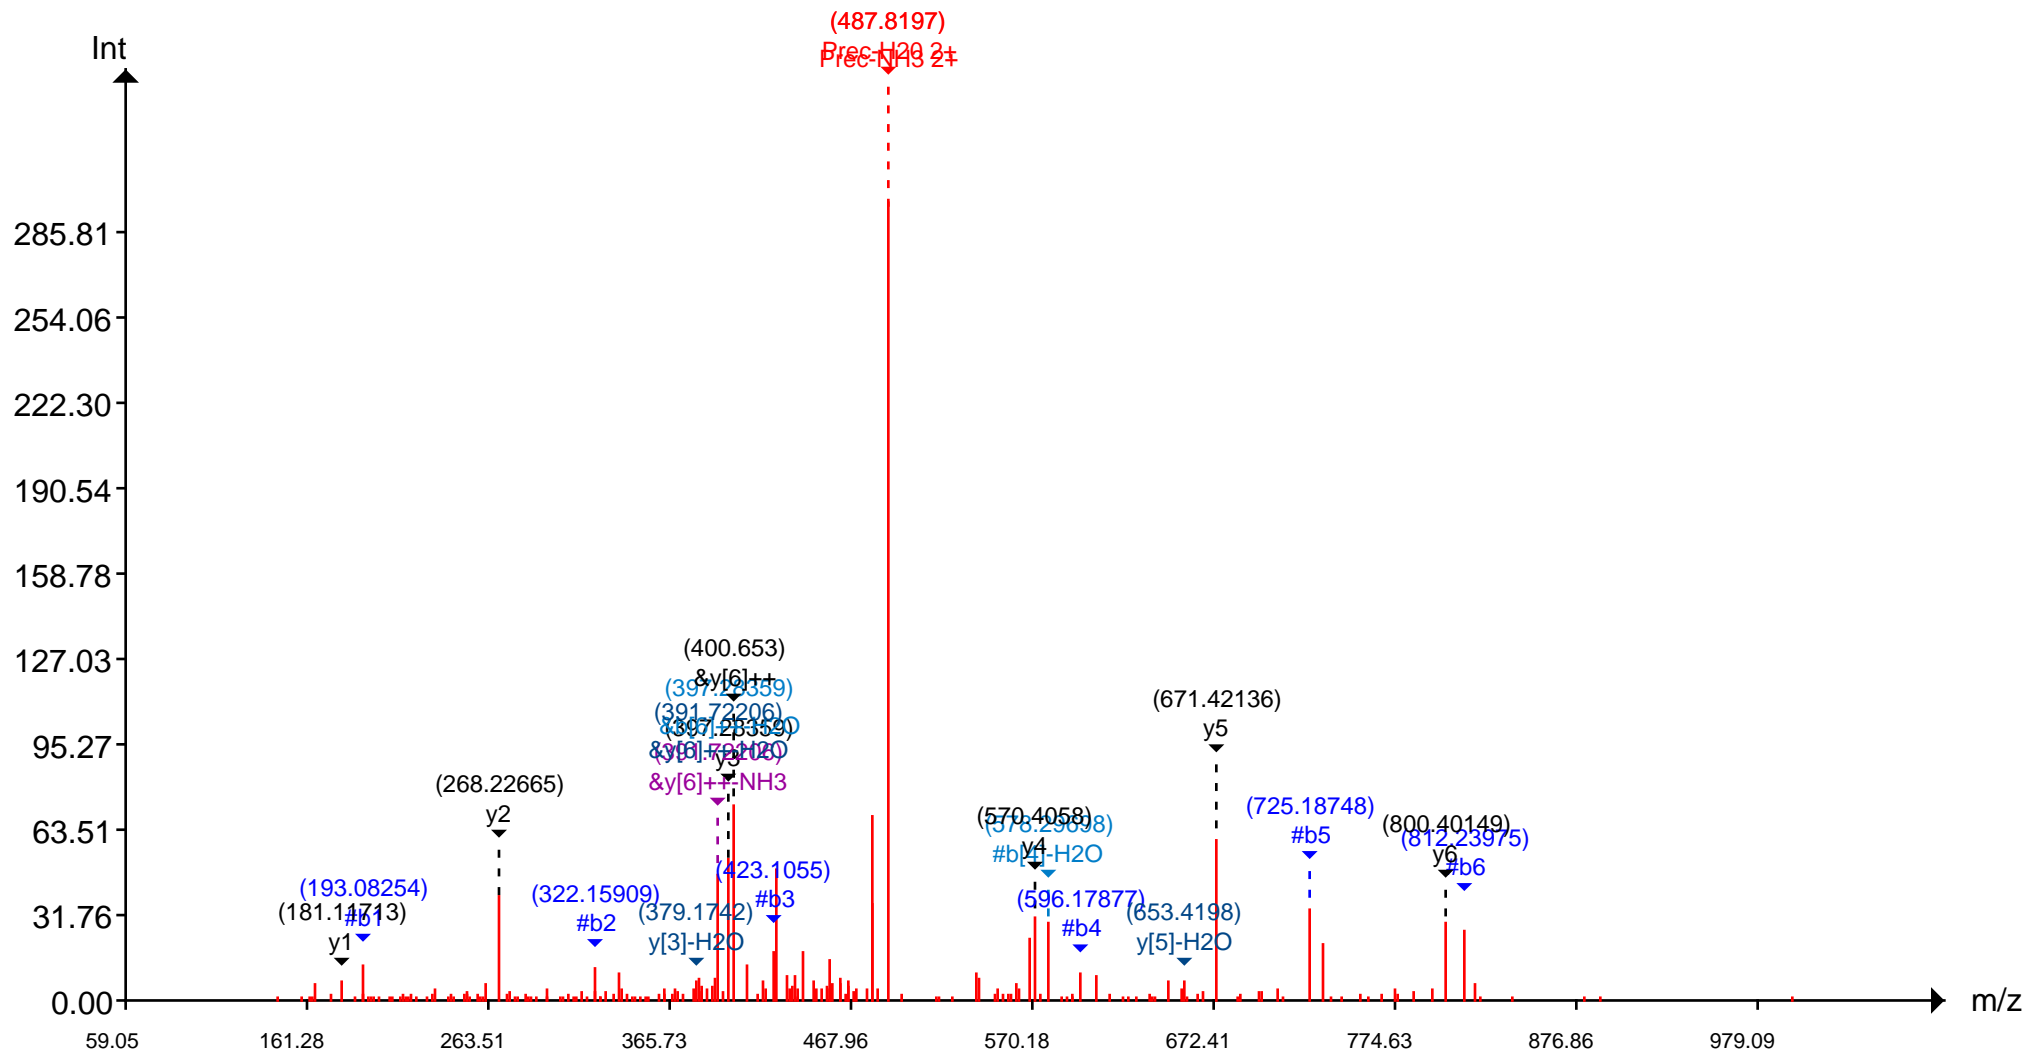

## Info

**Modified Sequence** AcD3-FETK<AcD3K\*>ESR<C13>-COOH

**Ion score** 51.52

**Protein** Q9R0P5

**Confidence level** 99.00%

**Precursor m/z** 496.76672

**Identity Threshold** 48.05

**Charge** 2+

**Mass error** 2.8E-5

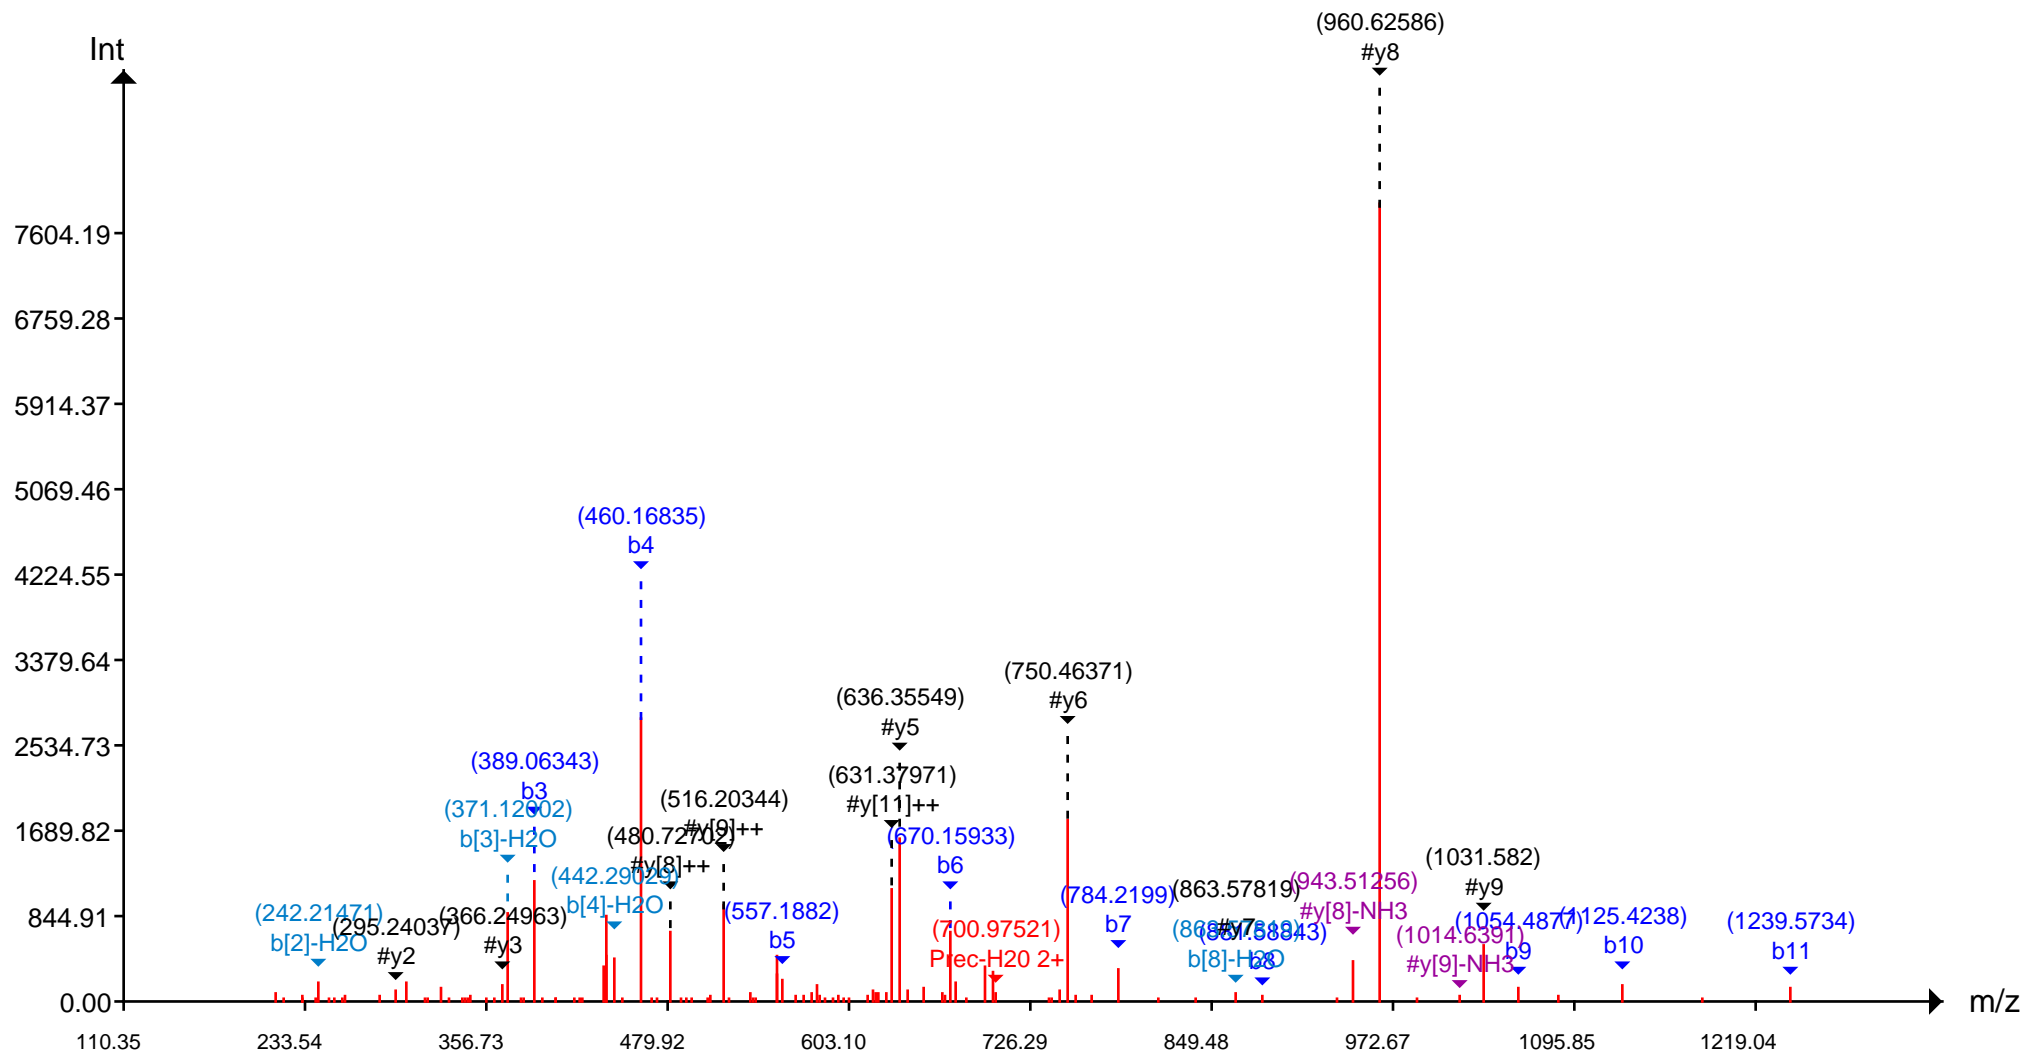

## Info

|                          |                                                |                           |          |
|--------------------------|------------------------------------------------|---------------------------|----------|
| <b>Modified Sequence</b> | AcD3-LTEAPLNPK<AcD3K*>ANR<C13>-COOH            | <b>Ion score</b>          | 65.01    |
| <b>Protein</b>           | P62737, P60710, P68033, P63260, P63268, P68134 | <b>Confidence level</b>   | 99.00%   |
| <b>Precursor m/z</b>     | 710.41166                                      | <b>Identity Threshold</b> | 46.01    |
| <b>Charge</b>            | 2+                                             | <b>Mass error</b>         | -7.72E-4 |

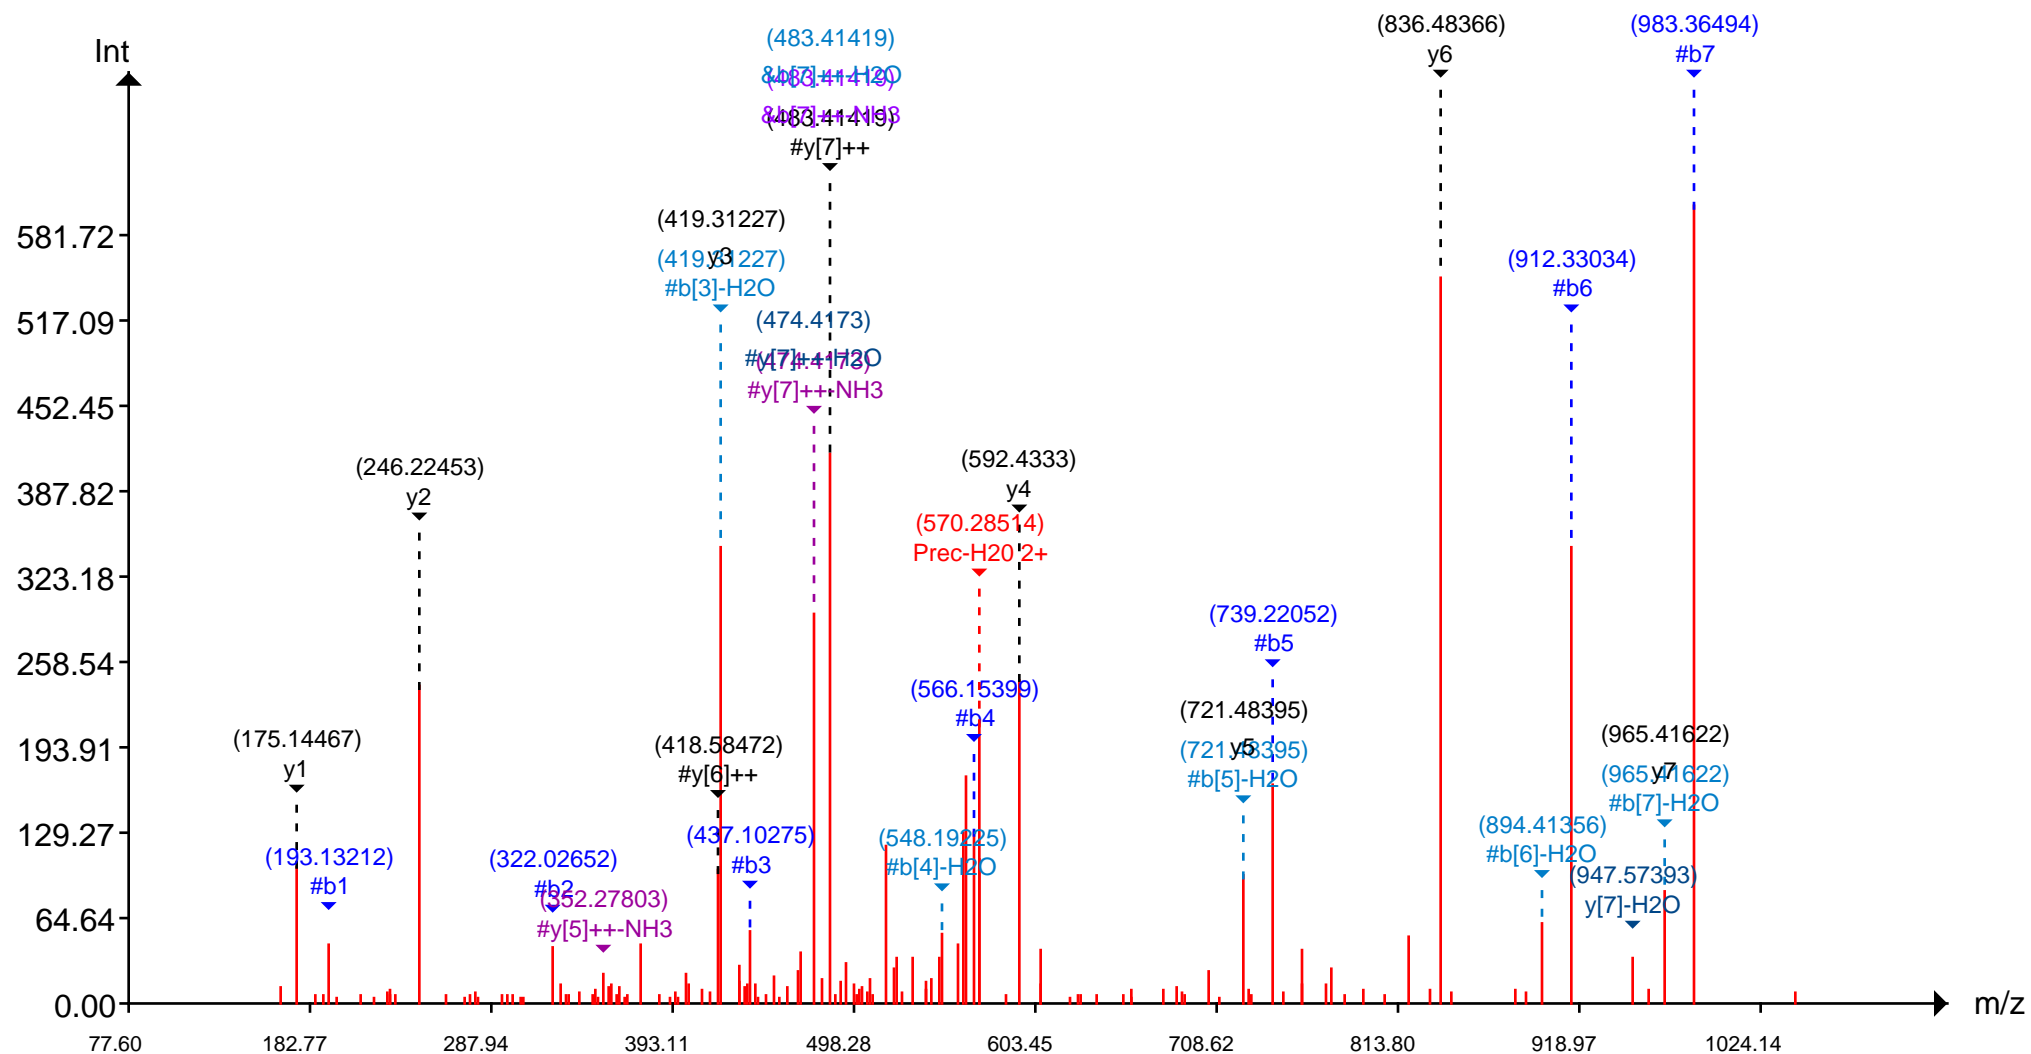

## Info

**Modified Sequence** AcD3-FEDEK<AcD3K\*>K<AcD3K\*>AR-COOH

**Ion score** 71.71

**Protein** P50580

**Confidence level** 99.00%

**Precursor m/z** 579.3113

**Identity Threshold** 47.84

**Charge** 2+

**Mass error** 6.26E-4

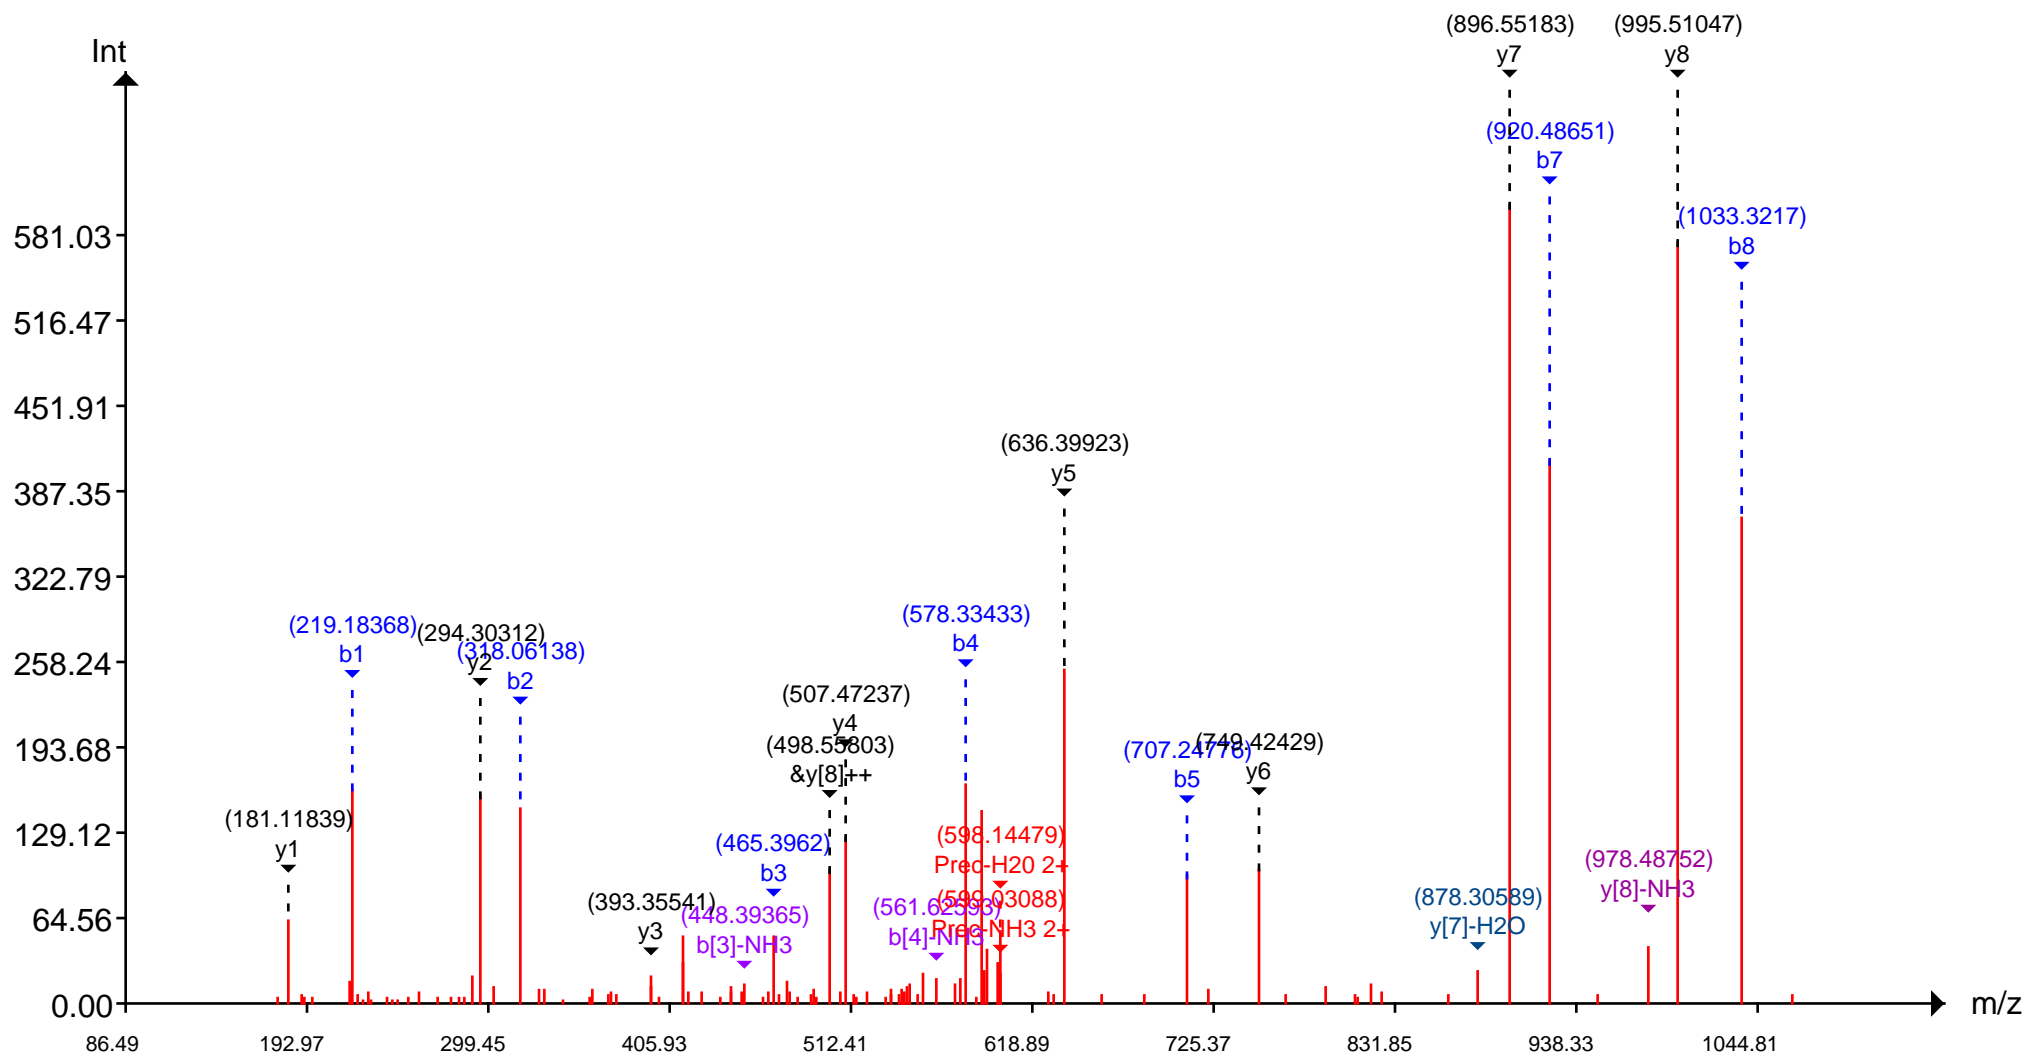

## Info

**Modified Sequence** AcD3-K<AcD3K\*>VFLENVIR<C13>-COOH

**Ion score** 62.81

**Protein** P62806

**Confidence level** 99.00%

**Precursor m/z** 607.37973

**Identity Threshold** 42.00

**Charge** 2+

**Mass error** 4.62E-4

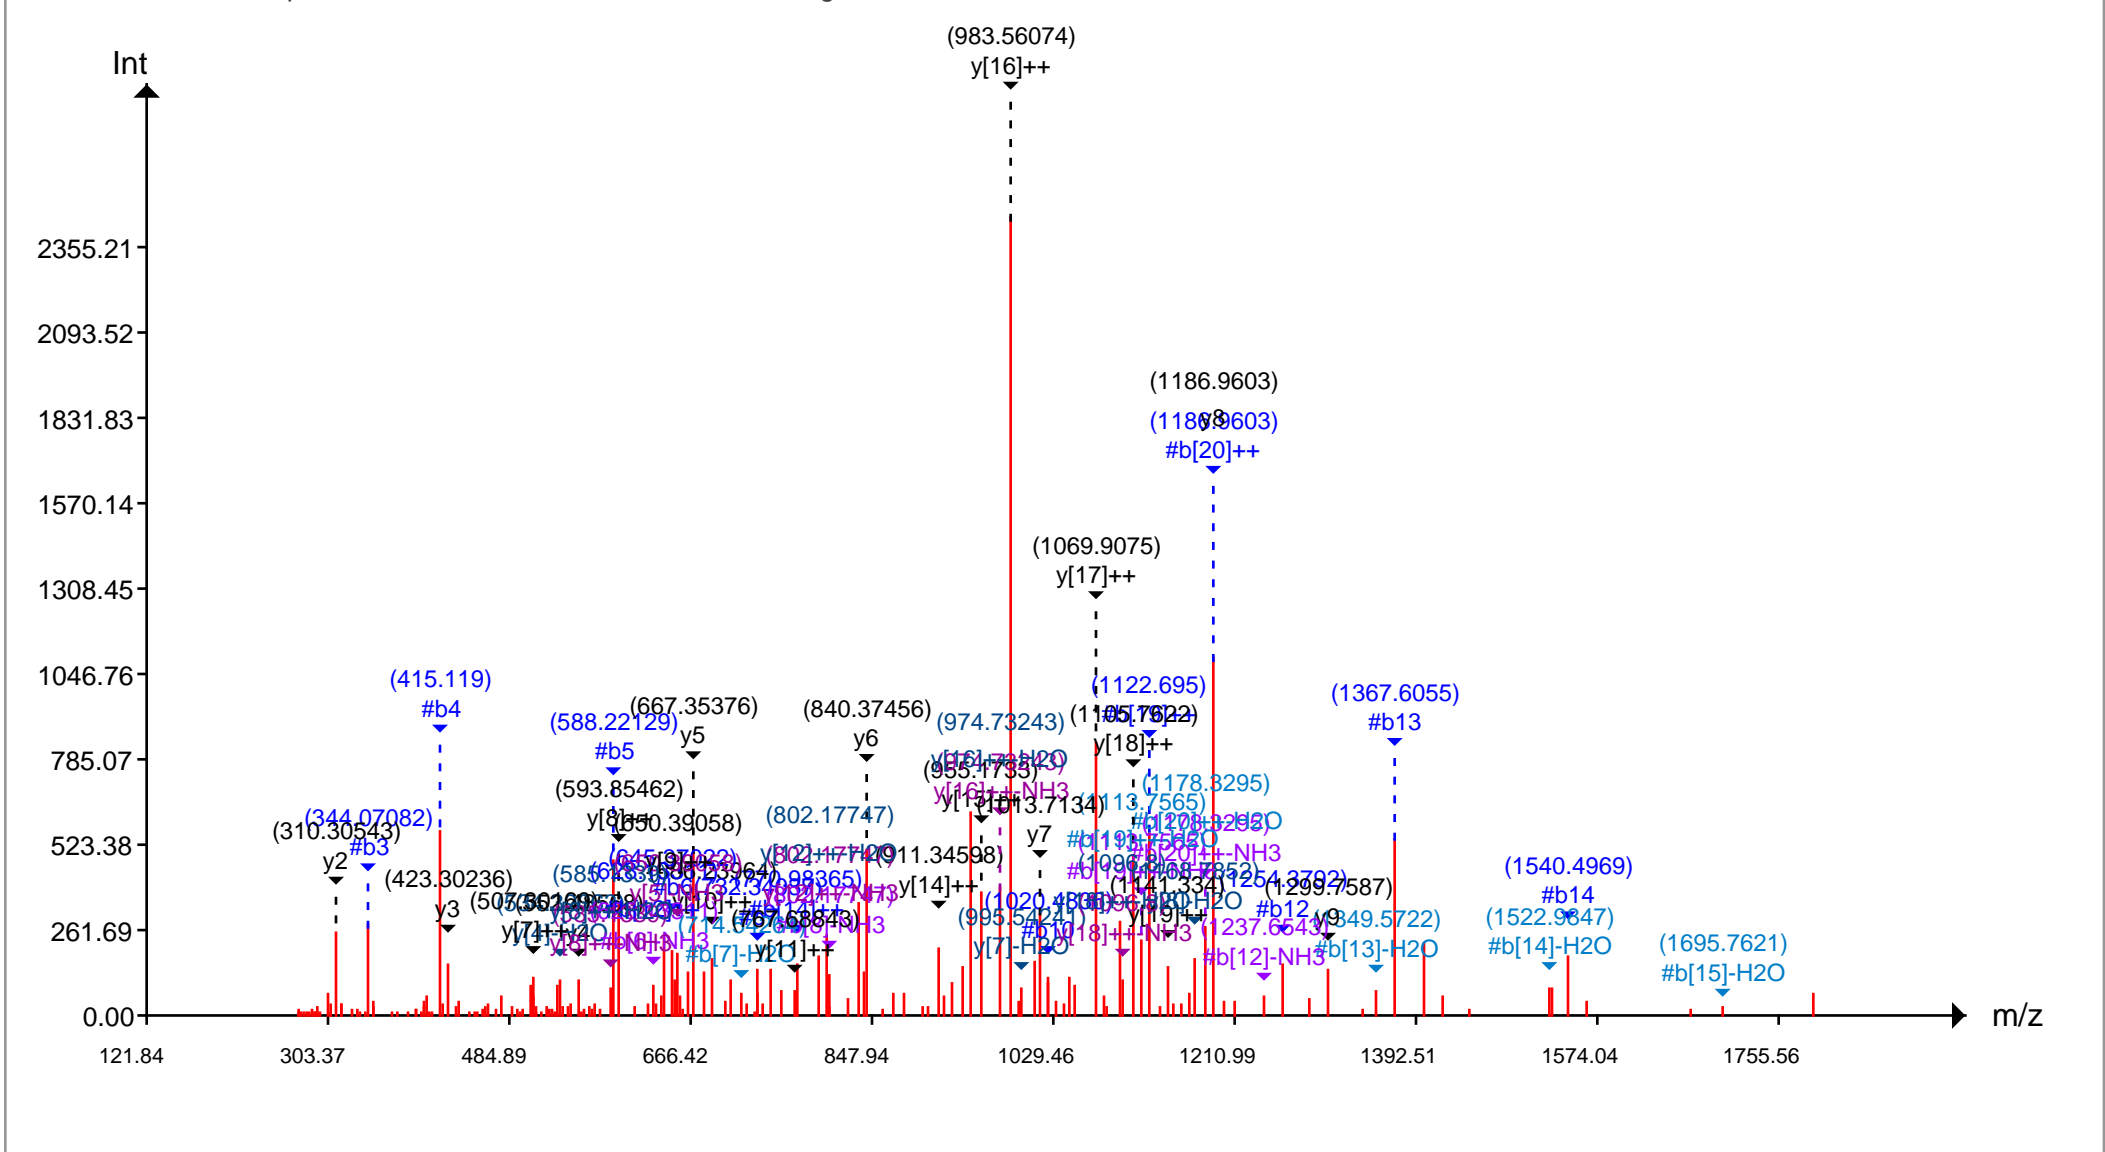

## Info

|                    |                                                                      |                    |          |
|--------------------|----------------------------------------------------------------------|--------------------|----------|
| Modified Sequen... | AcD3-INAAK<AcD3K*>GSSNSYAIK<AcD3K*>K<AcD3K*>K<AcD3K*>DELER<C13>-COOH | Ion score          | 64.63    |
| Prote...           | P97461                                                               | Confidence level   | 99.00%   |
| Precursor m...     | 851.80833                                                            | Identity Threshold | 45.80    |
| Char...            | 3+                                                                   | Mass error         | 0.002176 |

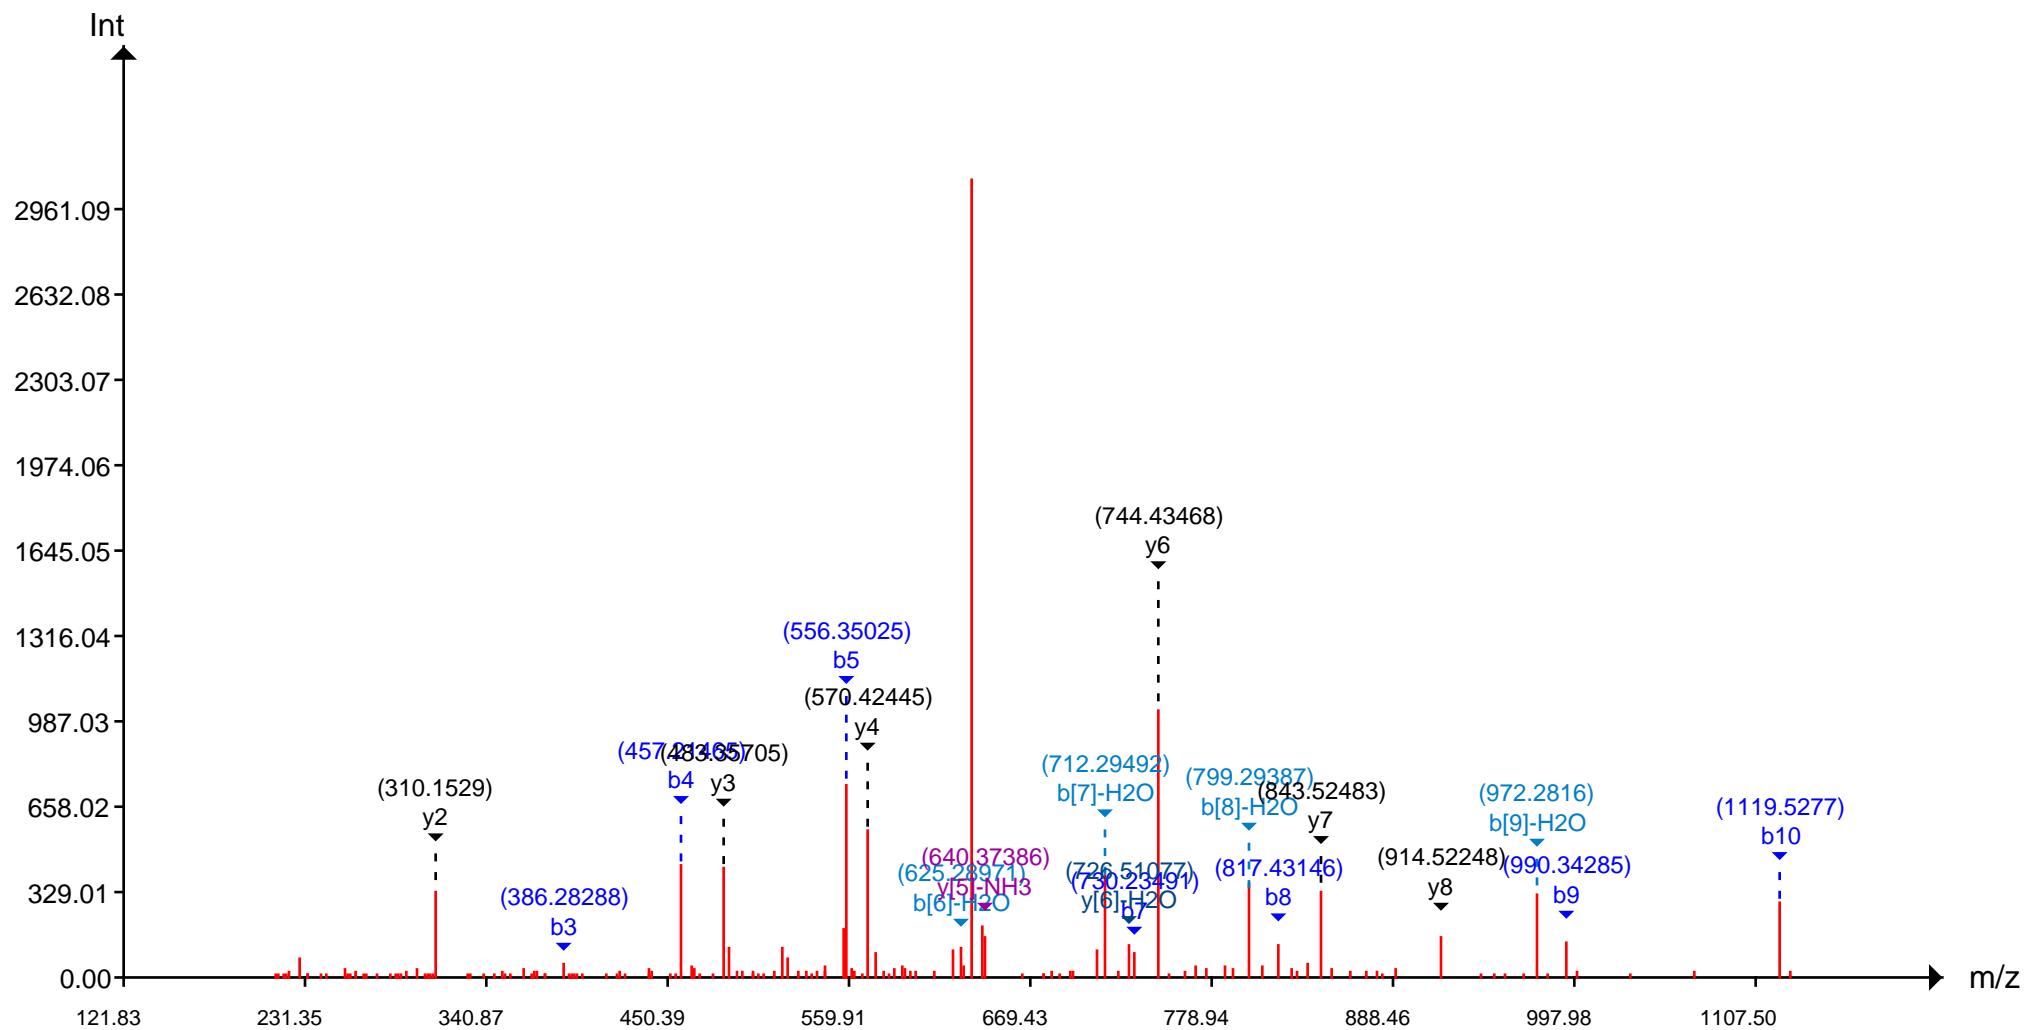

## Info

|                          |                                    |                           |          |
|--------------------------|------------------------------------|---------------------------|----------|
| <b>Modified Sequence</b> | AcD3-IVQAVSSSK<AcD3K*>ER<C13>-COOH | <b>Ion score</b>          | 48.16    |
| <b>Protein</b>           | P43275                             | <b>Confidence level</b>   | 99.00%   |
| <b>Precursor m/z</b>     | 650.37829                          | <b>Identity Threshold</b> | 46.23    |
| <b>Charge</b>            | 2+                                 | <b>Mass error</b>         | 0.001214 |



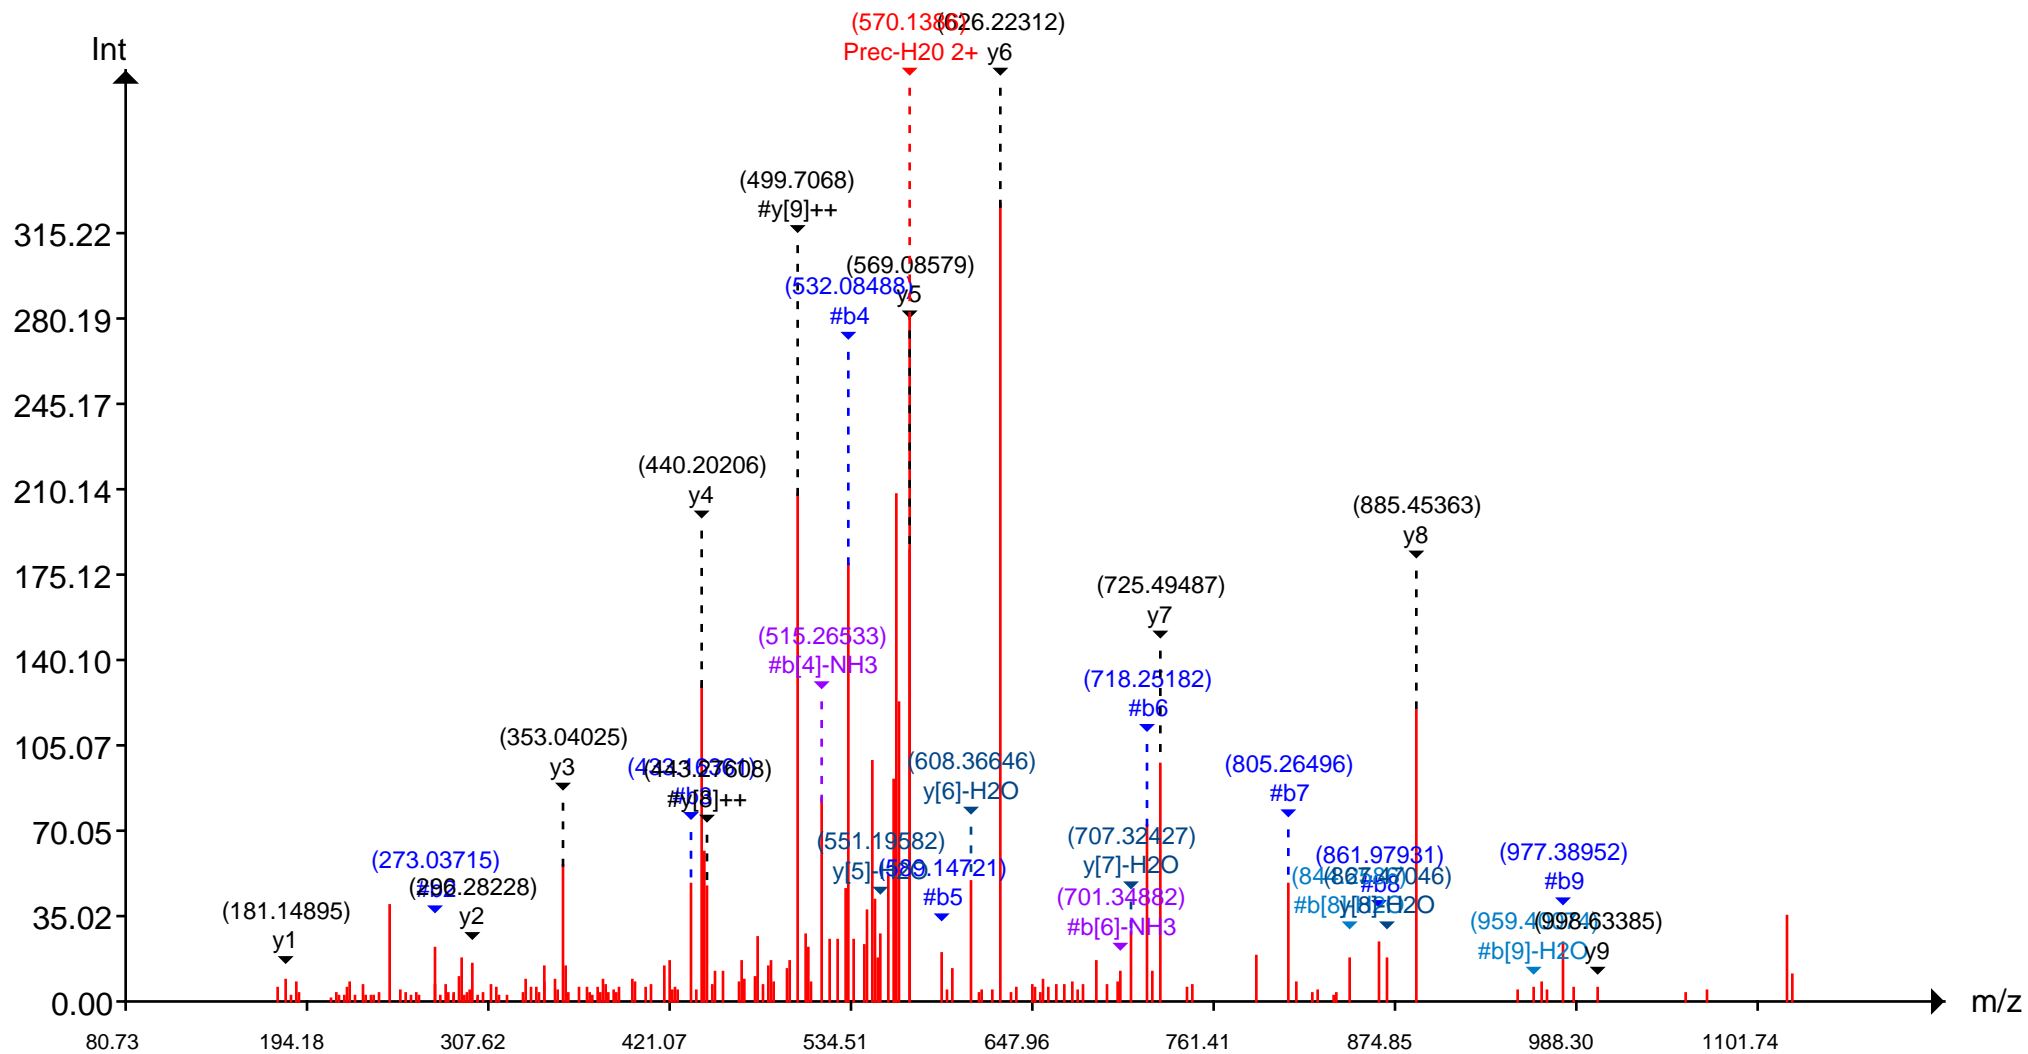

## Info

|                          |                                 |                           |         |
|--------------------------|---------------------------------|---------------------------|---------|
| <b>Modified Sequence</b> | AcD3-NIC<Cmm*>VGESGDR<C13>-COOH | <b>Ion score</b>          | 67.43   |
| <b>Protein</b>           | Q9CXW4                          | <b>Confidence level</b>   | 99.00%  |
| <b>Precursor m/z</b>     | 579.27322                       | <b>Identity Threshold</b> | 45.46   |
| <b>Charge</b>            | 2+                              | <b>Mass error</b>         | 1.34E-4 |

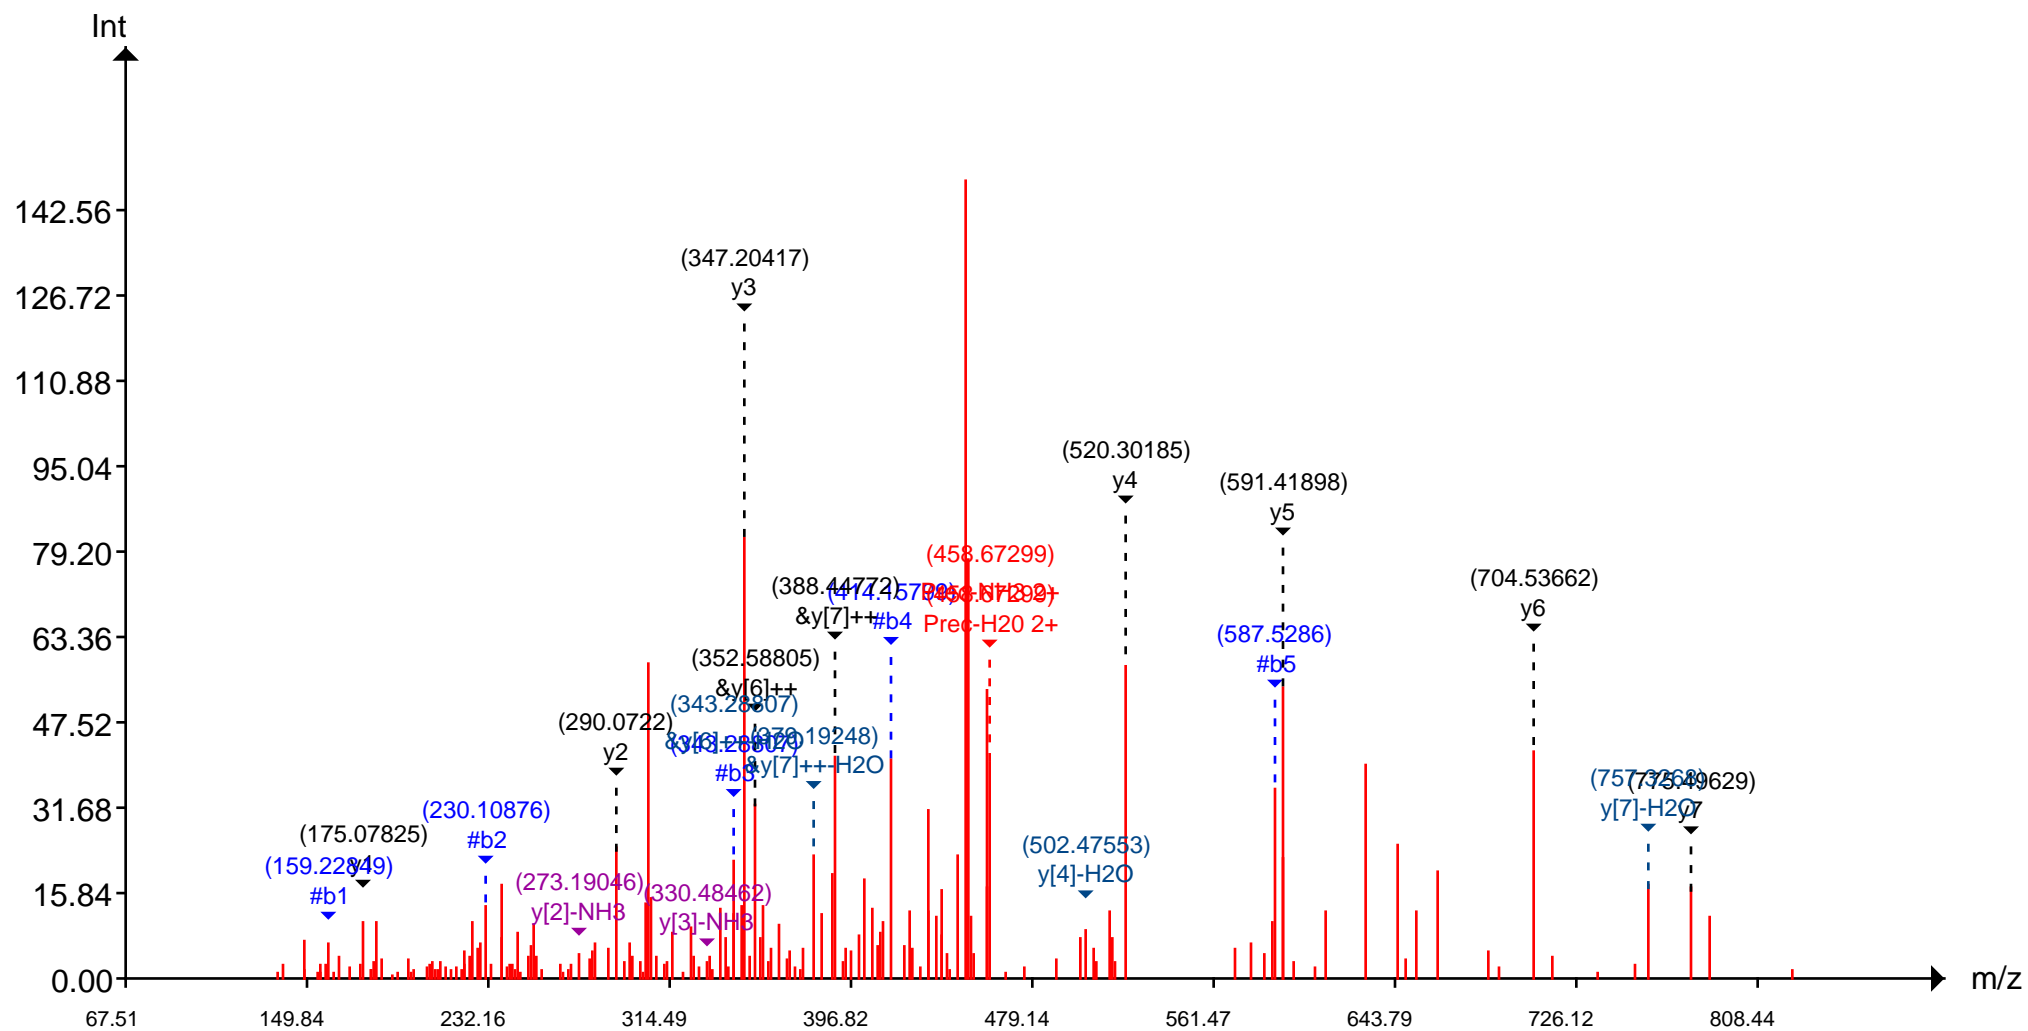

## Info

|                          |                            |                           |         |
|--------------------------|----------------------------|---------------------------|---------|
| <b>Modified Sequence</b> | AcD3-LALAK<AcD3K*>GDR-COOH | <b>Ion score</b>          | 51.1    |
| <b>Protein</b>           | P10107                     | <b>Confidence level</b>   | 99.00%  |
| <b>Precursor m/z</b>     | 467.28533                  | <b>Identity Threshold</b> | 44.87   |
| <b>Charge</b>            | 2+                         | <b>Mass error</b>         | -6.0E-5 |

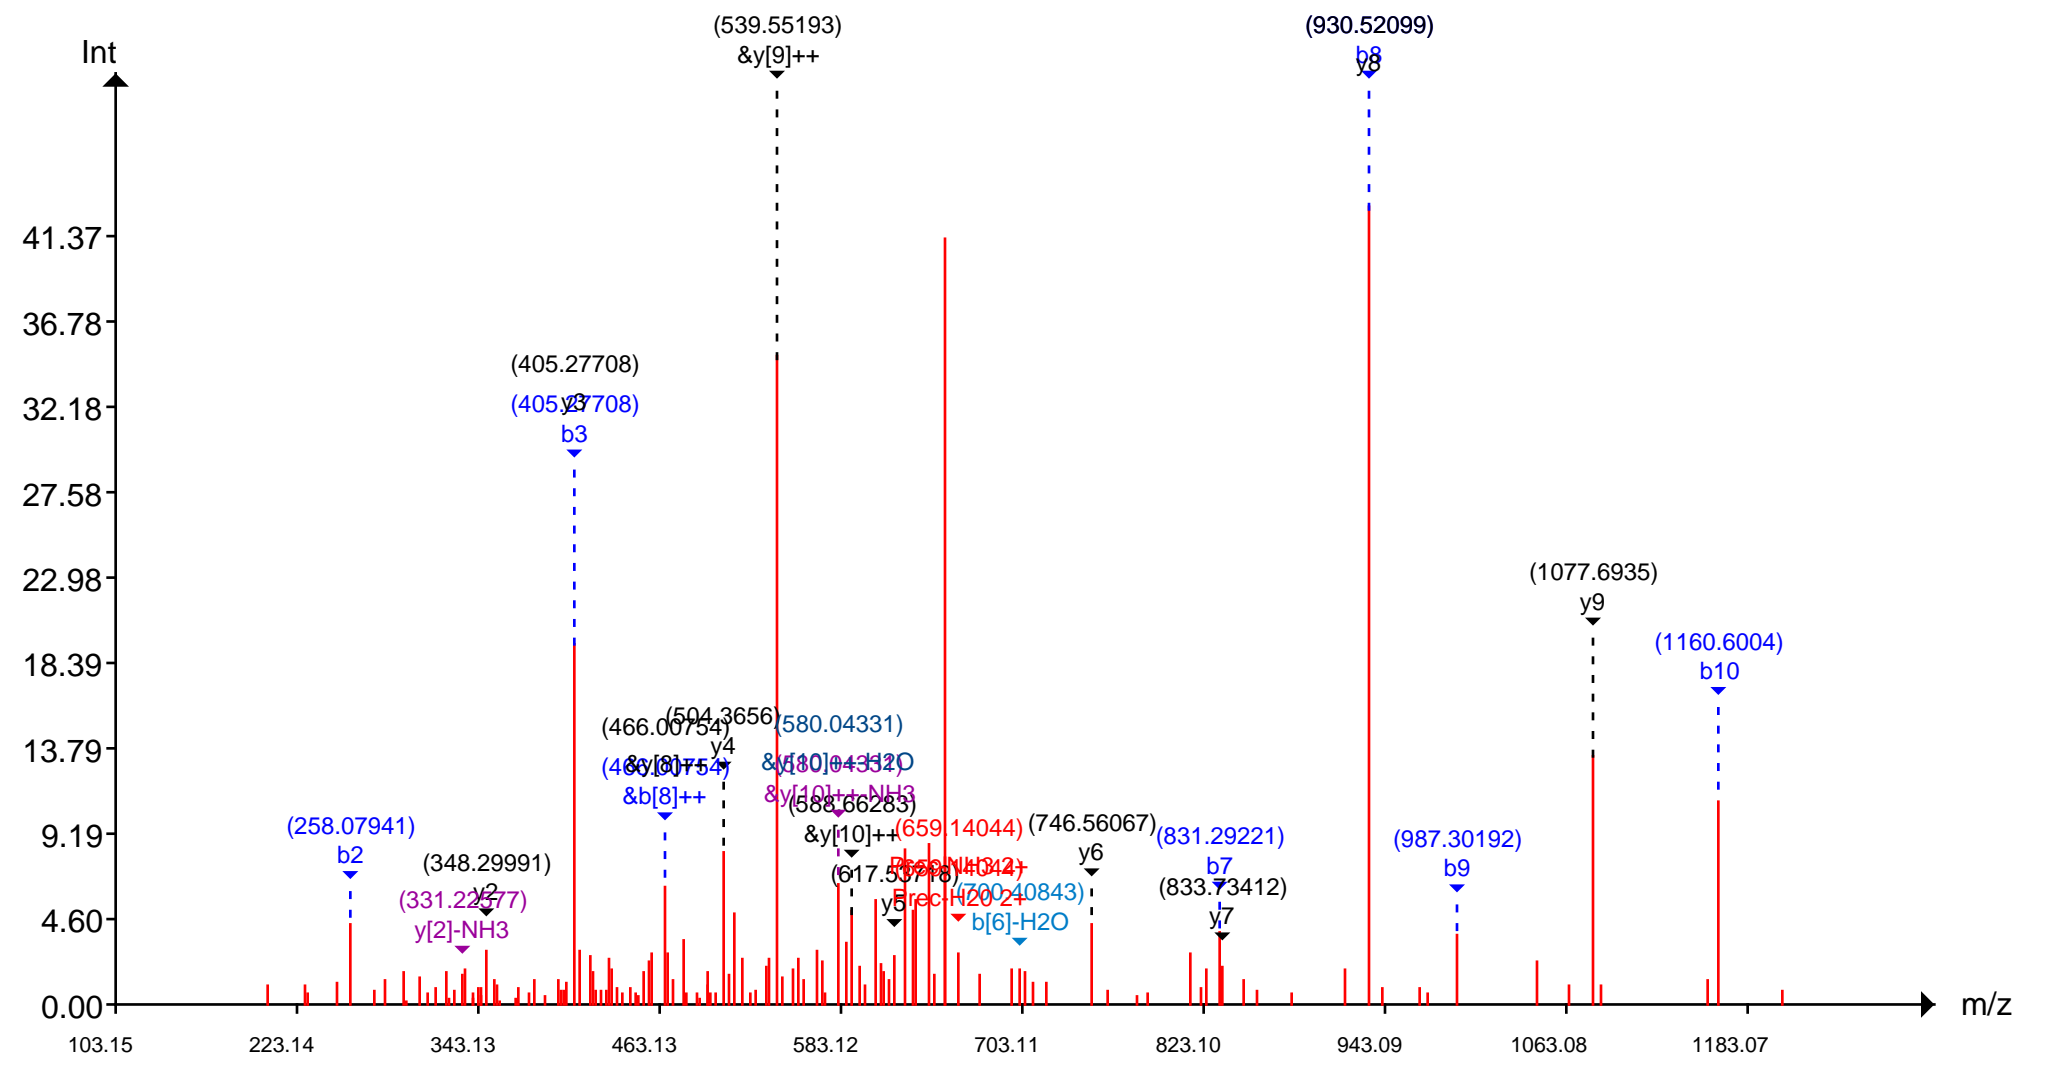

| Info                     |                               |                           |          |
|--------------------------|-------------------------------|---------------------------|----------|
| <b>Modified Sequence</b> | AcD3-LVFPSEIVGK<AcD3K*>R-COOH | <b>Ion score</b>          | 54.11    |
| <b>Protein</b>           | P62082                        | <b>Confidence level</b>   | 99.00%   |
| <b>Precursor m/z</b>     | 667.9016                      | <b>Identity Threshold</b> | 44.10    |
| <b>Charge</b>            | 2+                            | <b>Mass error</b>         | 0.001005 |

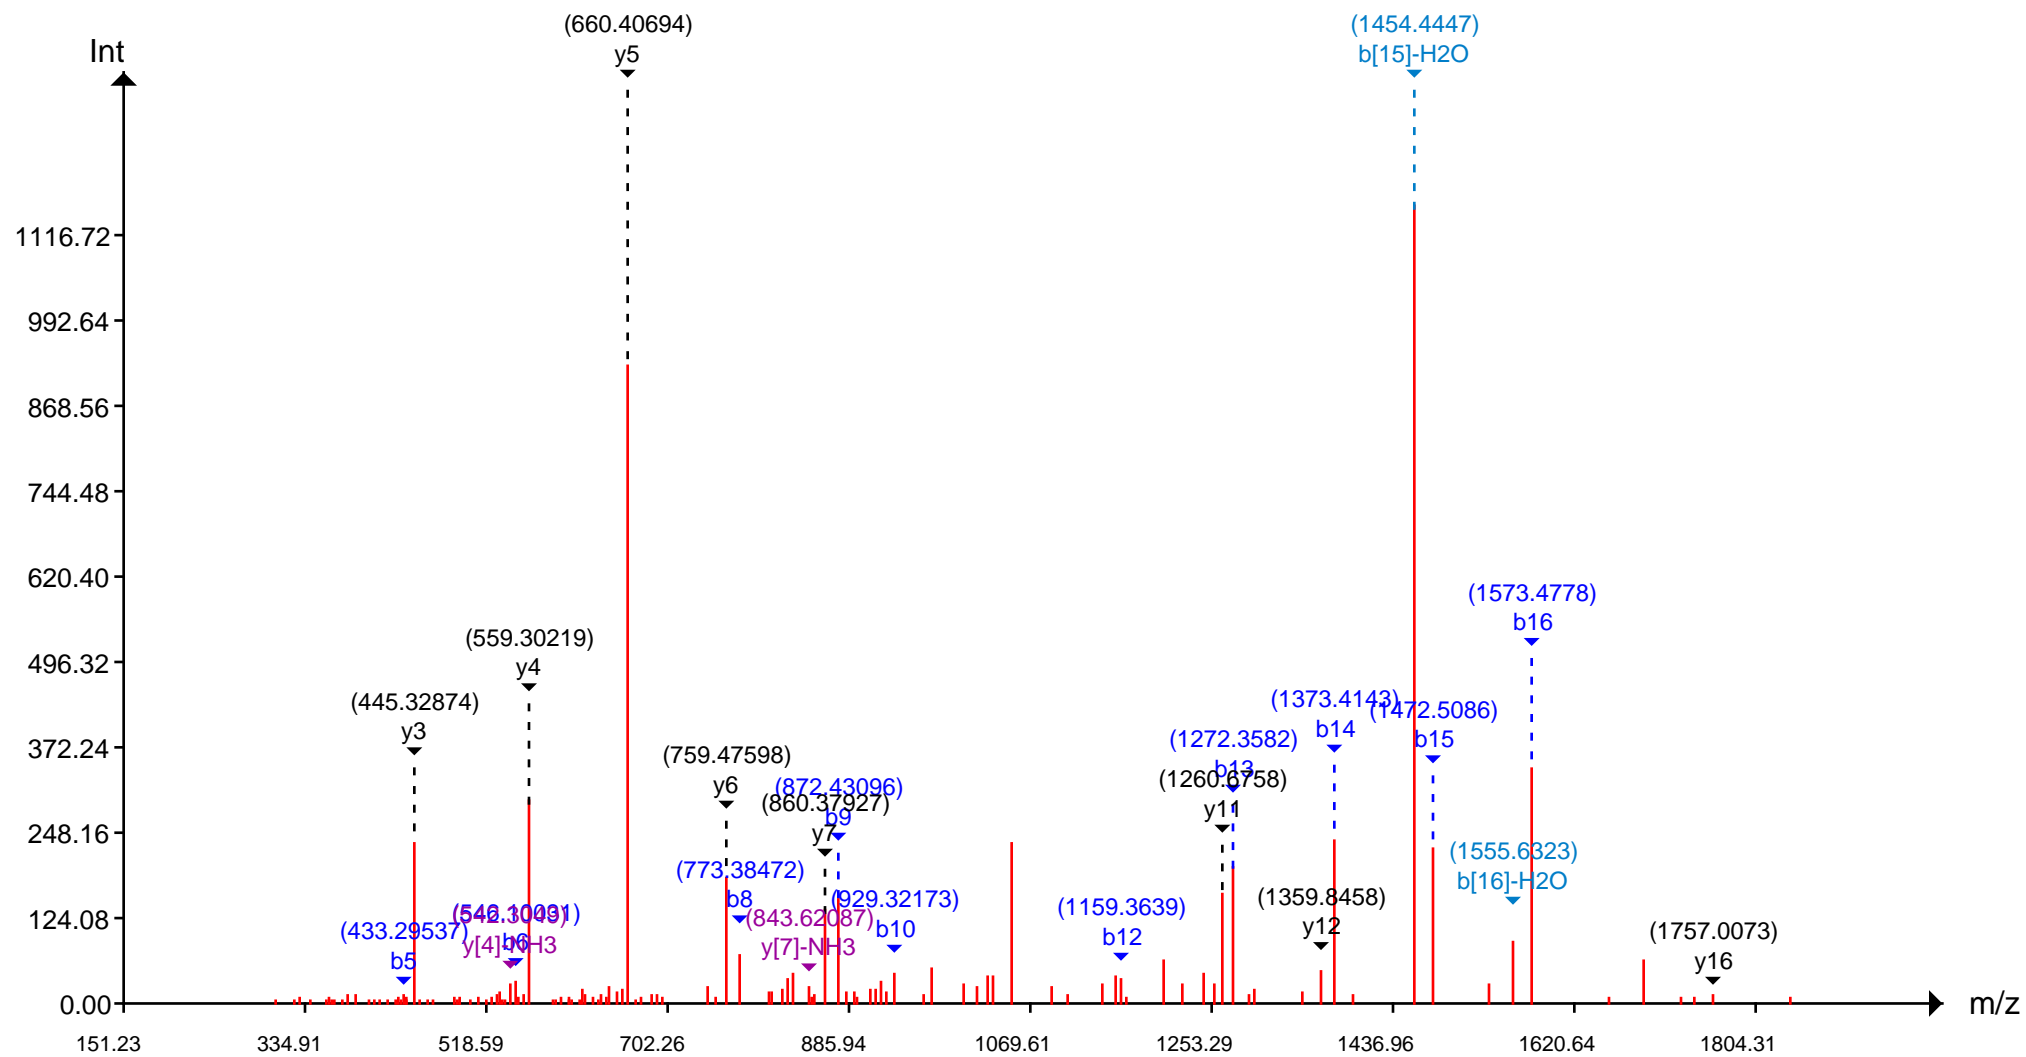

## Info

|                          |                                        |                           |          |
|--------------------------|----------------------------------------|---------------------------|----------|
| <b>Modified Sequence</b> | AcD3-TASAGIQVVGDDTLVTNPK<AcD3K*>R-COOH | <b>Ion score</b>          | 66.63    |
| <b>Protein</b>           | P17182                                 | <b>Confidence level</b>   | 99.00%   |
| <b>Precursor m/z</b>     | 1066.578                               | <b>Identity Threshold</b> | 47.45    |
| <b>Charge</b>            | 2+                                     | <b>Mass error</b>         | 0.002257 |

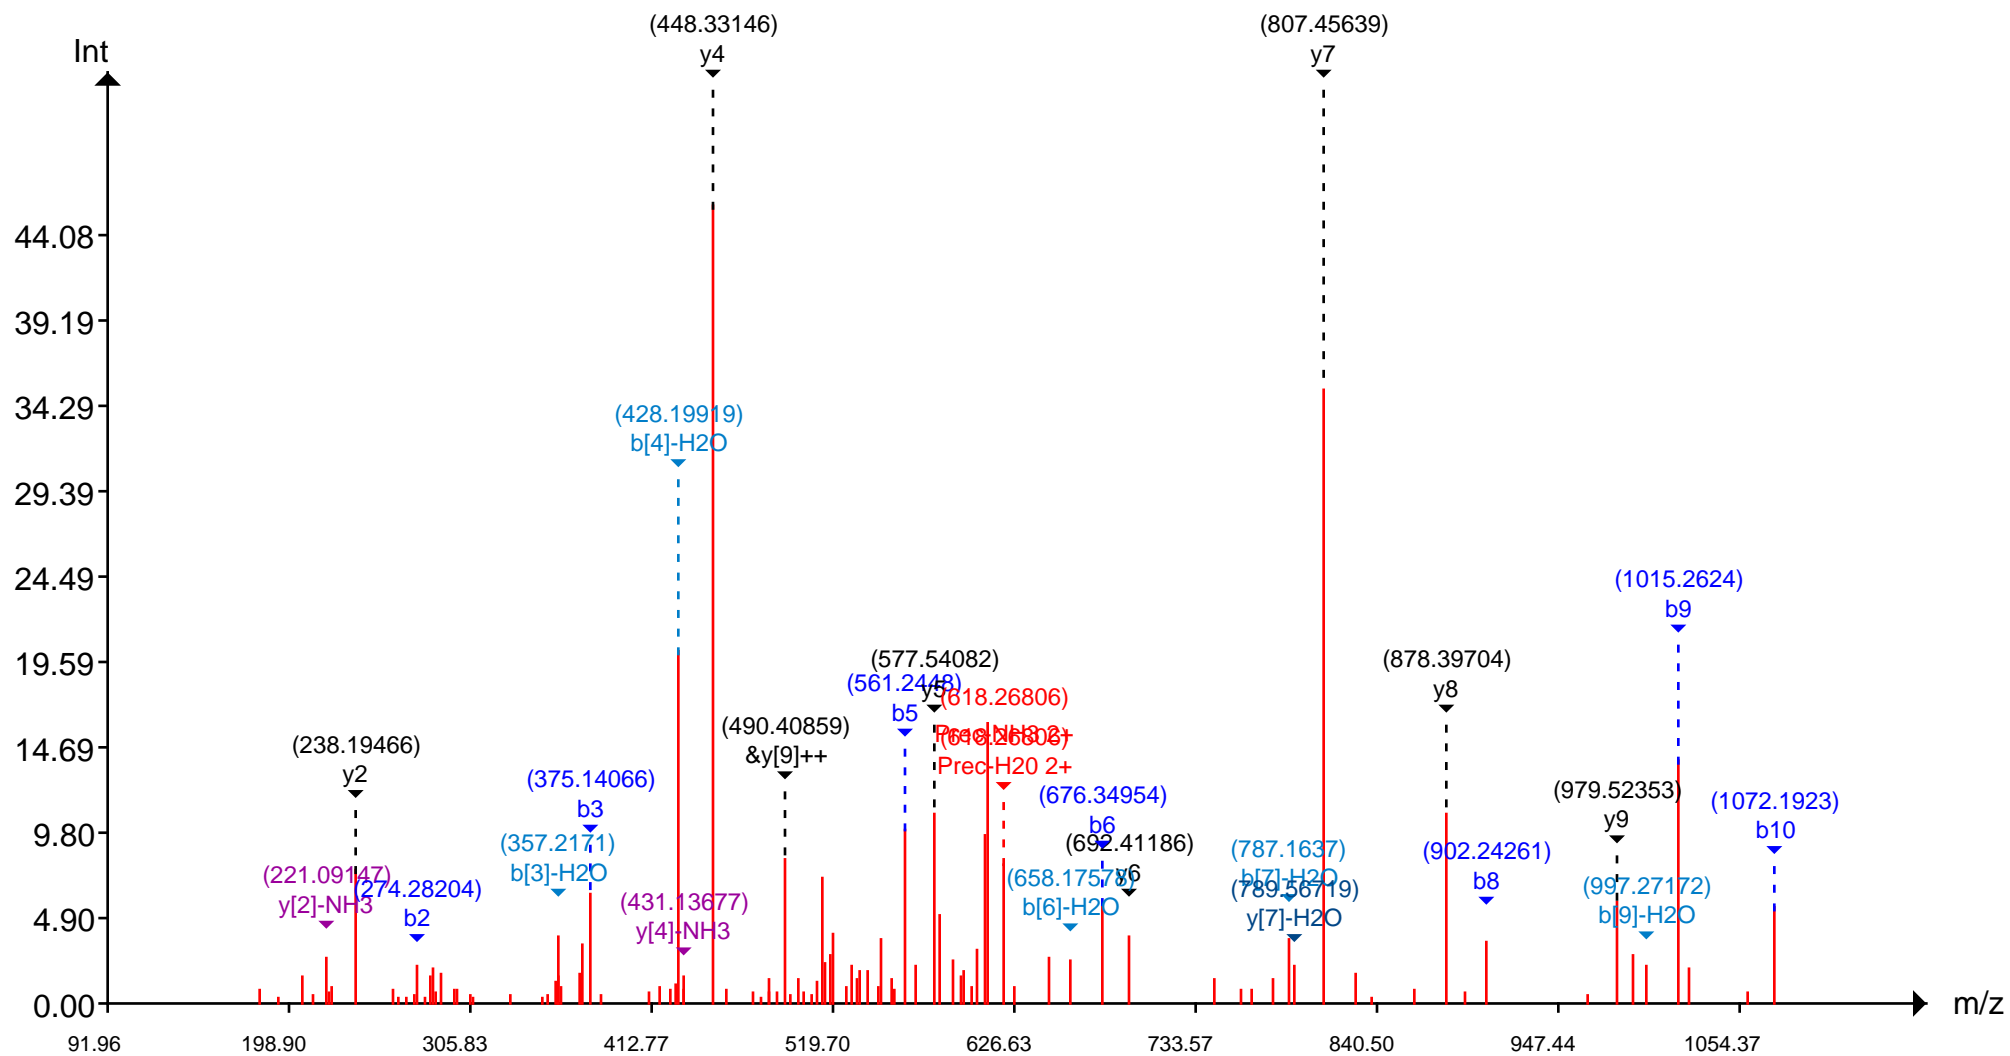

## Info

**Modified Sequence** AcD3-DITADDEPLGR<C13>-COOH

**Protein** P17742

**Precursor m/z** 626.8127

**Charge** 2+

**Ion score** 70.12

**Confidence level** 99.00%

**Identity Threshold** 47.47

**Mass error** -9.23E-4

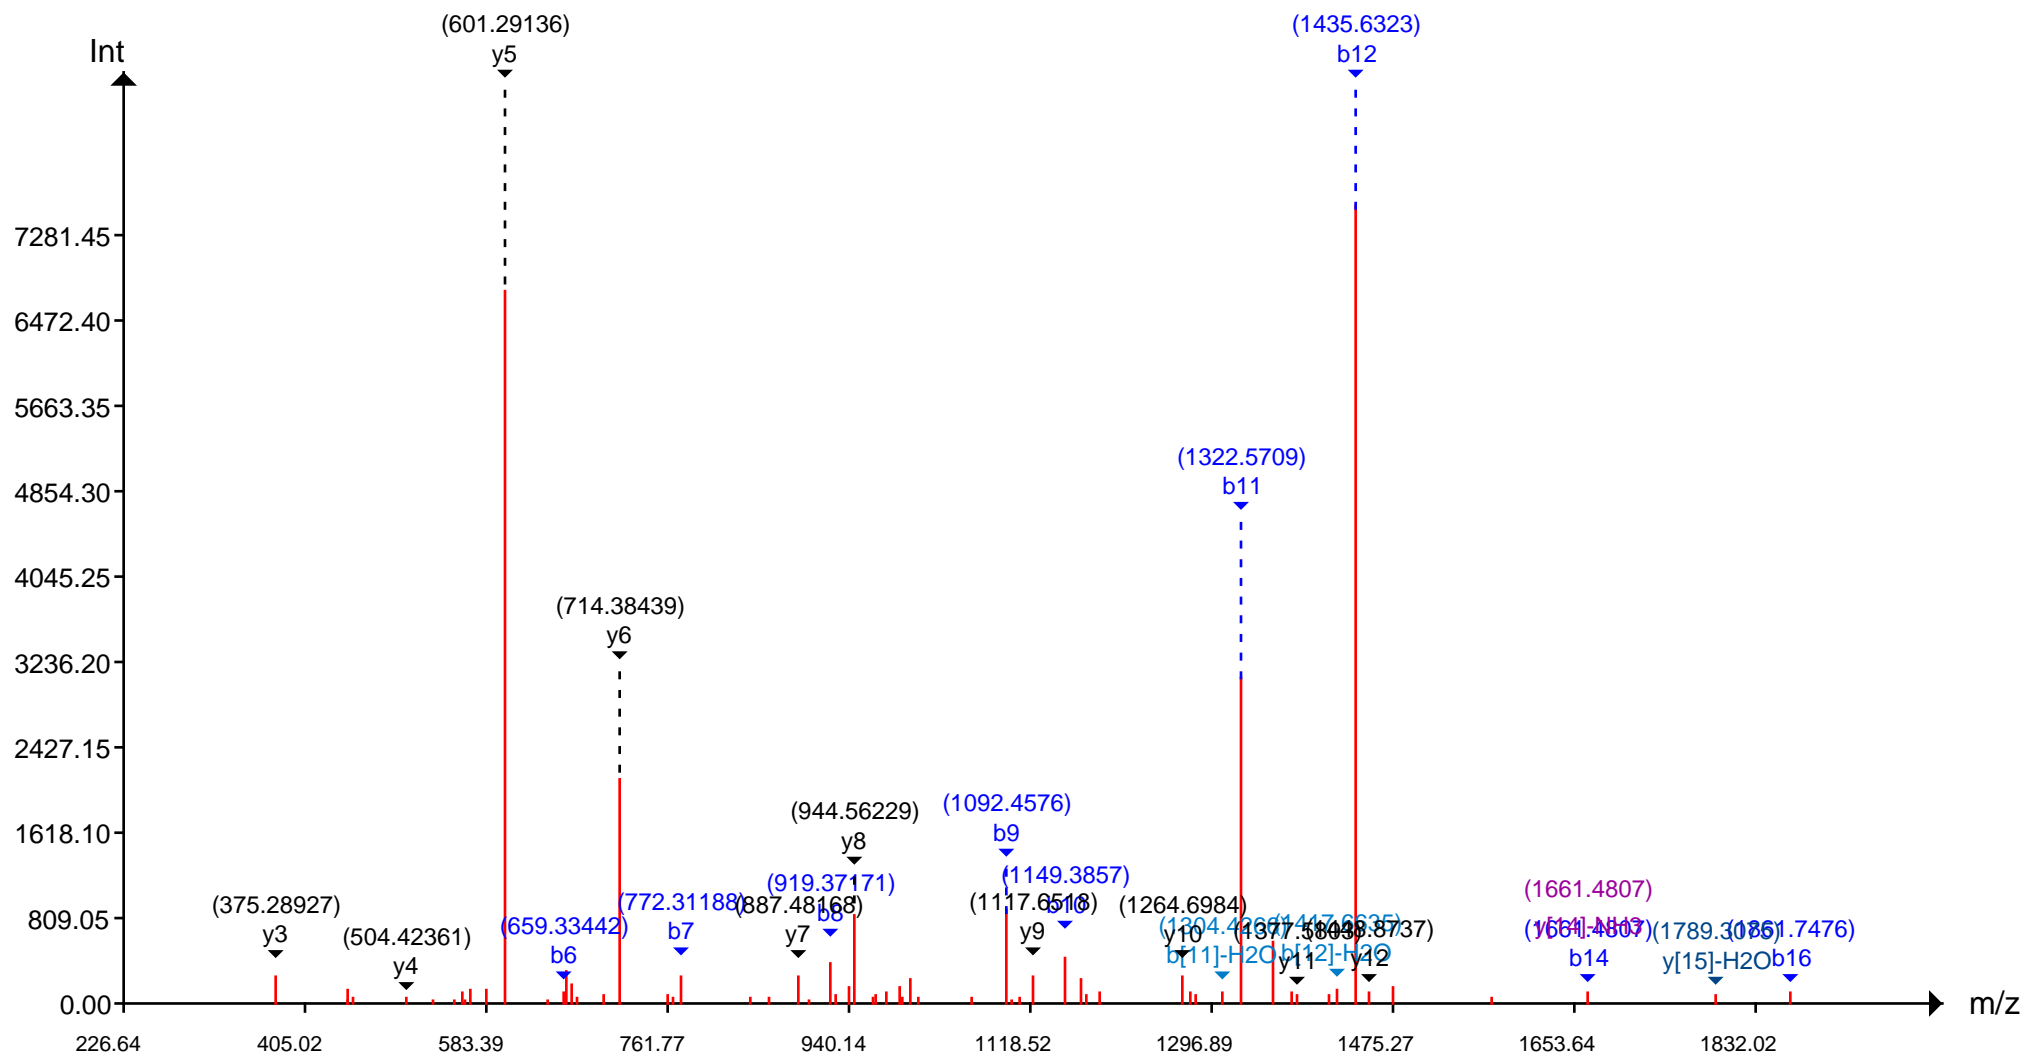

## Info

|                          |                                                   |                           |          |
|--------------------------|---------------------------------------------------|---------------------------|----------|
| <b>Modified Sequence</b> | AcD3-LAQTEALM<Mox*>K<AcD3K*>GK<AcD3K*>LPPEAR-COOH | <b>Ion score</b>          | 50.22    |
| <b>Protein</b>           | P06745                                            | <b>Confidence level</b>   | 99.00%   |
| <b>Precursor m/z</b>     | 1018.557                                          | <b>Identity Threshold</b> | 47.30    |
| <b>Charge</b>            | 2+                                                | <b>Mass error</b>         | 0.002509 |

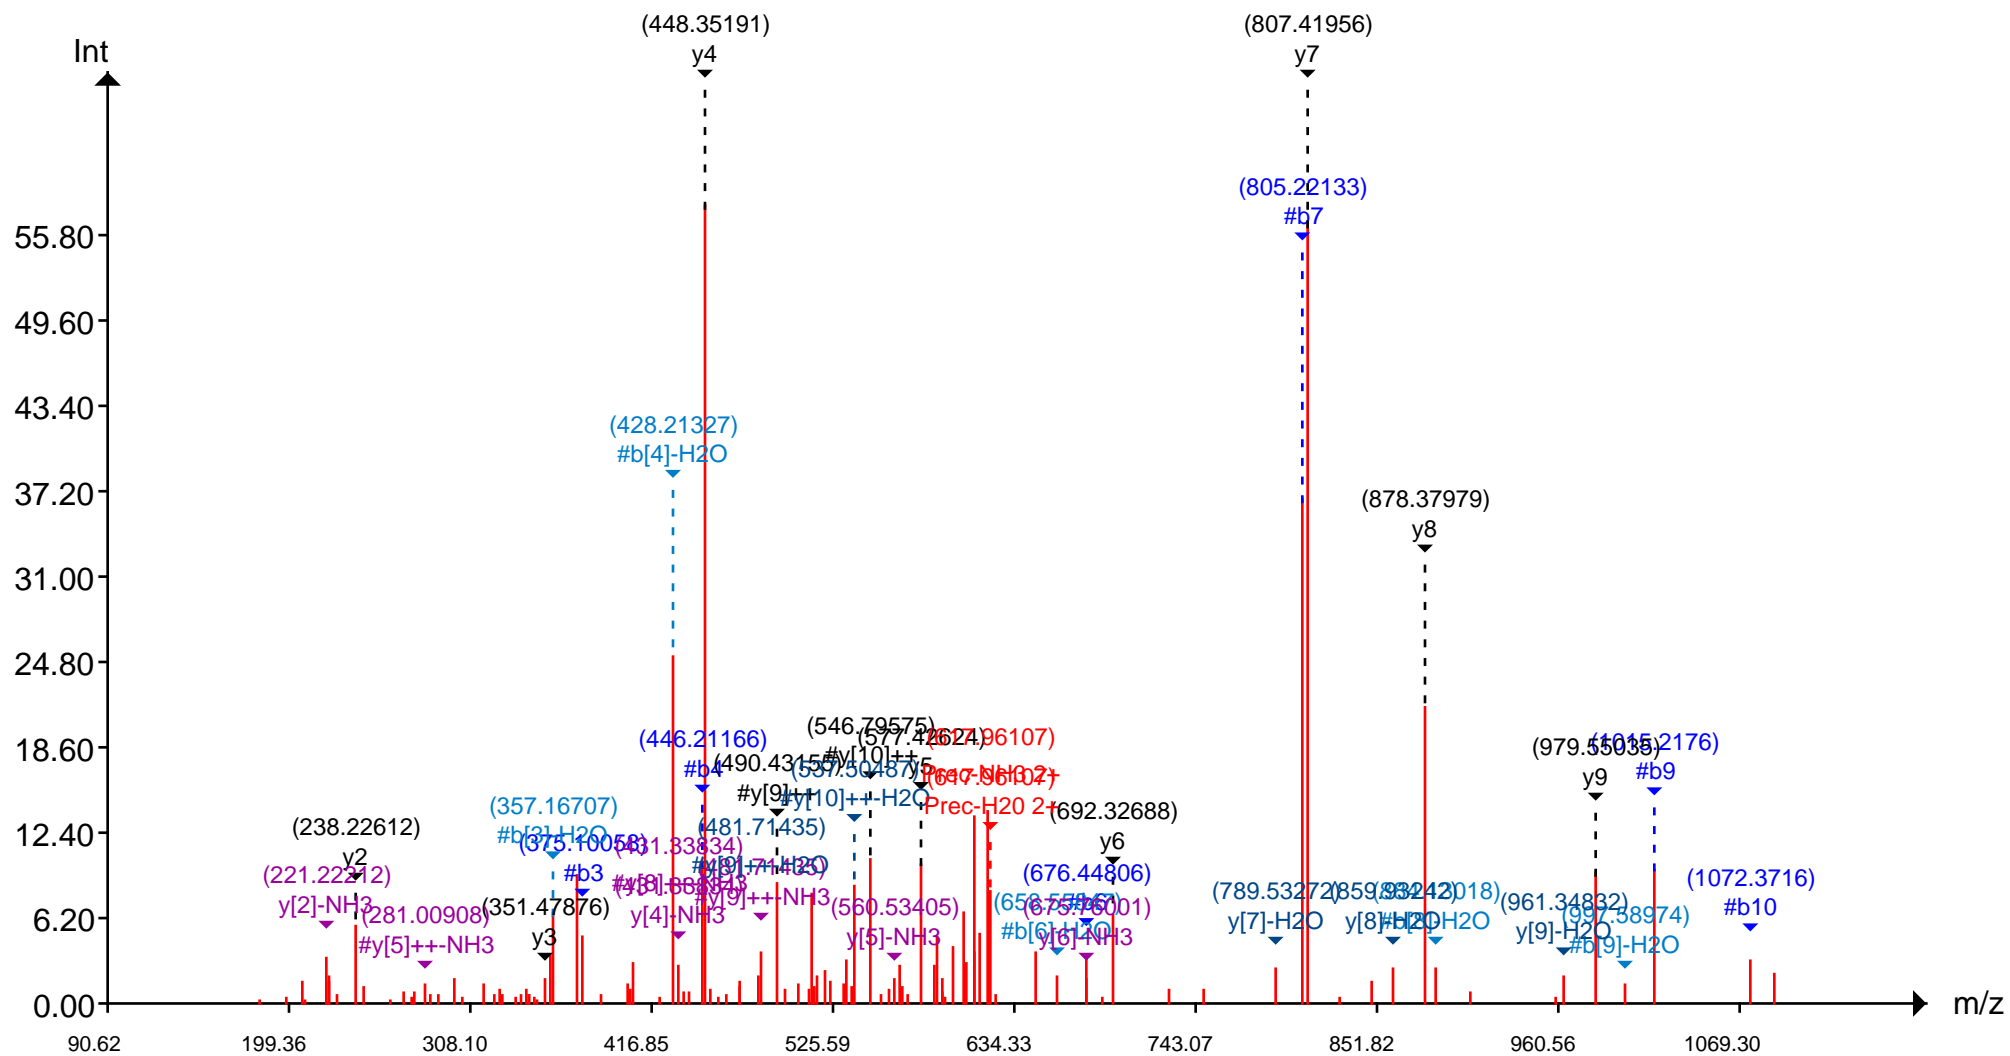

## Info

|                          |                            |                           |         |
|--------------------------|----------------------------|---------------------------|---------|
| <b>Modified Sequence</b> | AcD3-DITADDEPLGR<C13>-COOH | <b>Ion score</b>          | 51.94   |
| <b>Protein</b>           | P17742                     | <b>Confidence level</b>   | 99.00%  |
| <b>Precursor m/z</b>     | 626.81366                  | <b>Identity Threshold</b> | 47.50   |
| <b>Charge</b>            | 2+                         | <b>Mass error</b>         | 9.97E-4 |

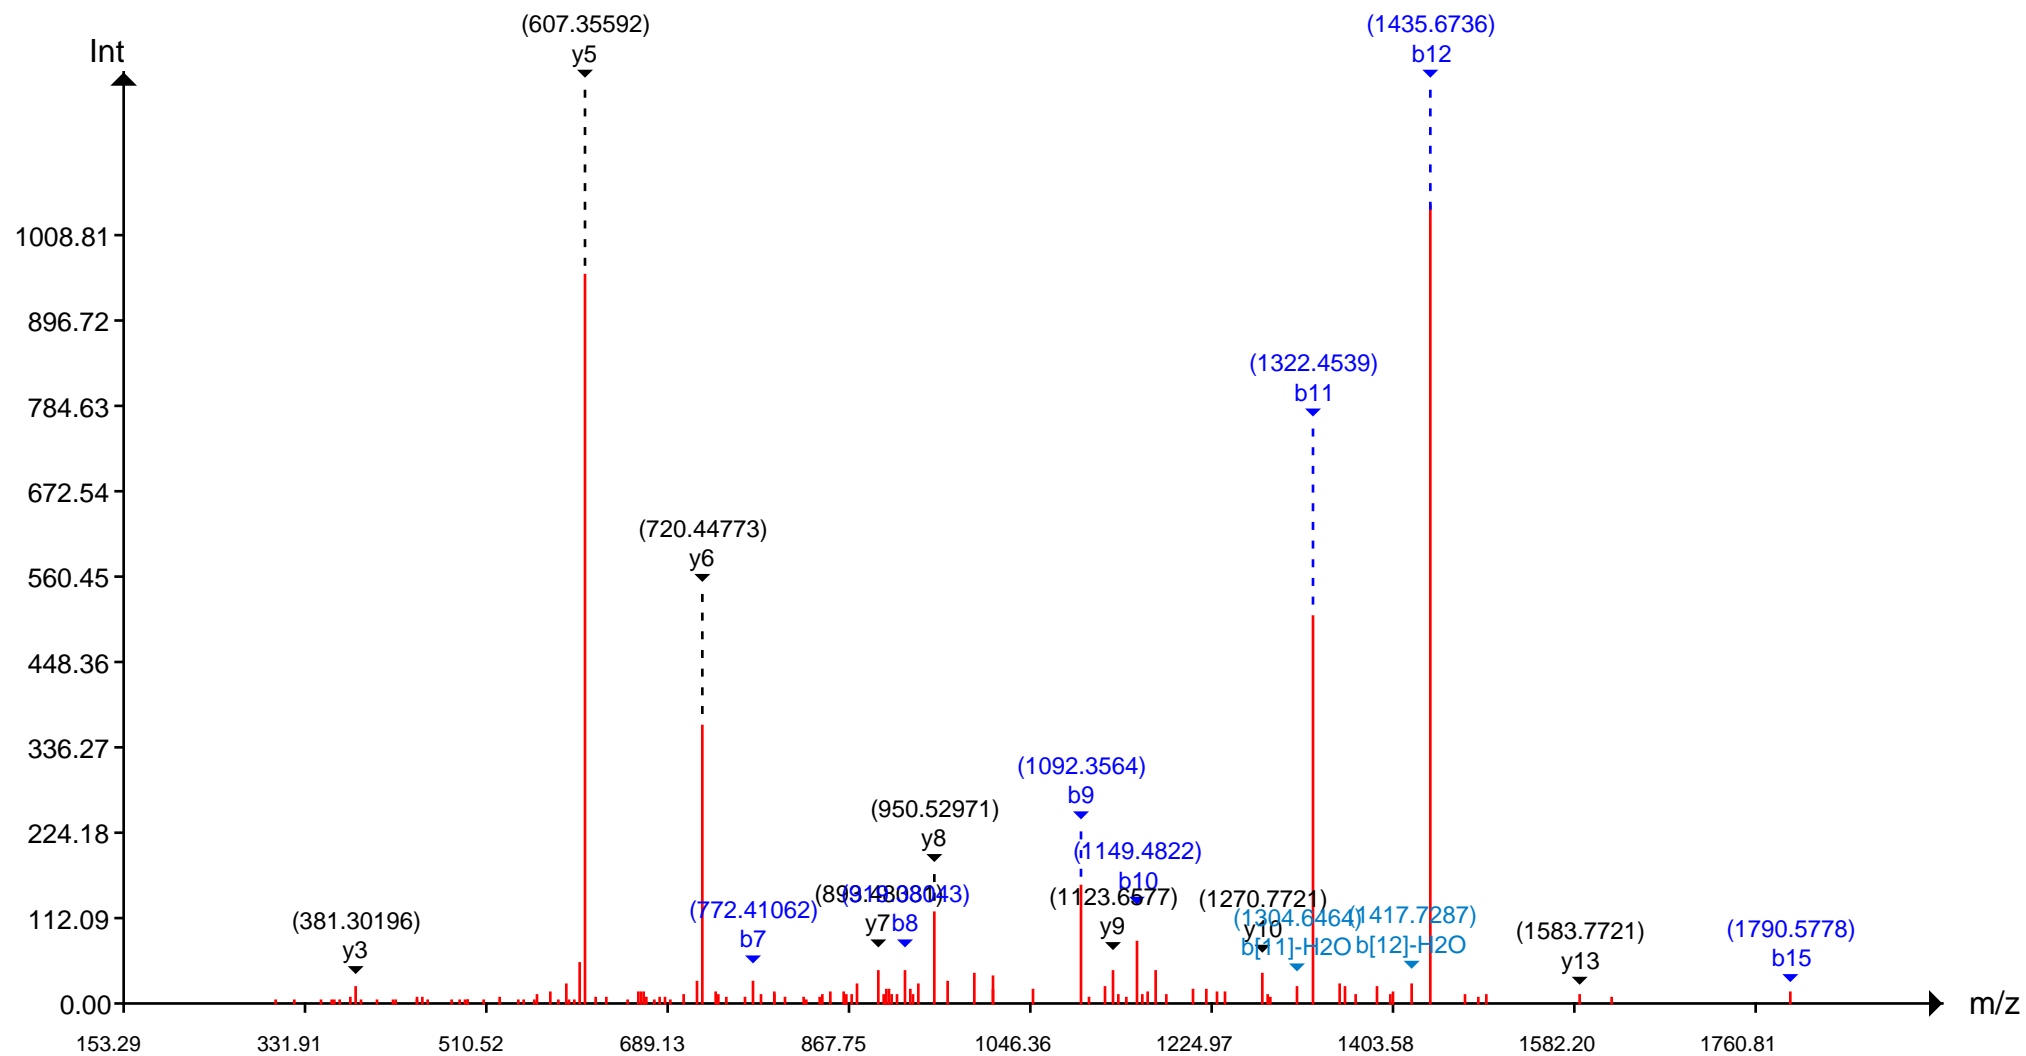

## Info

|                          |                                                        |                           |          |
|--------------------------|--------------------------------------------------------|---------------------------|----------|
| <b>Modified Sequence</b> | AcD3-LAQTEALM<Mox*>K<AcD3K*>GK<AcD3K*>LPPEAR<C13>-COOH | <b>Ion score</b>          | 54.8     |
| <b>Protein</b>           | P06745                                                 | <b>Confidence level</b>   | 99.00%   |
| <b>Precursor m/z</b>     | 1021.5673                                              | <b>Identity Threshold</b> | 46.73    |
| <b>Charge</b>            | 2+                                                     | <b>Mass error</b>         | 0.002967 |





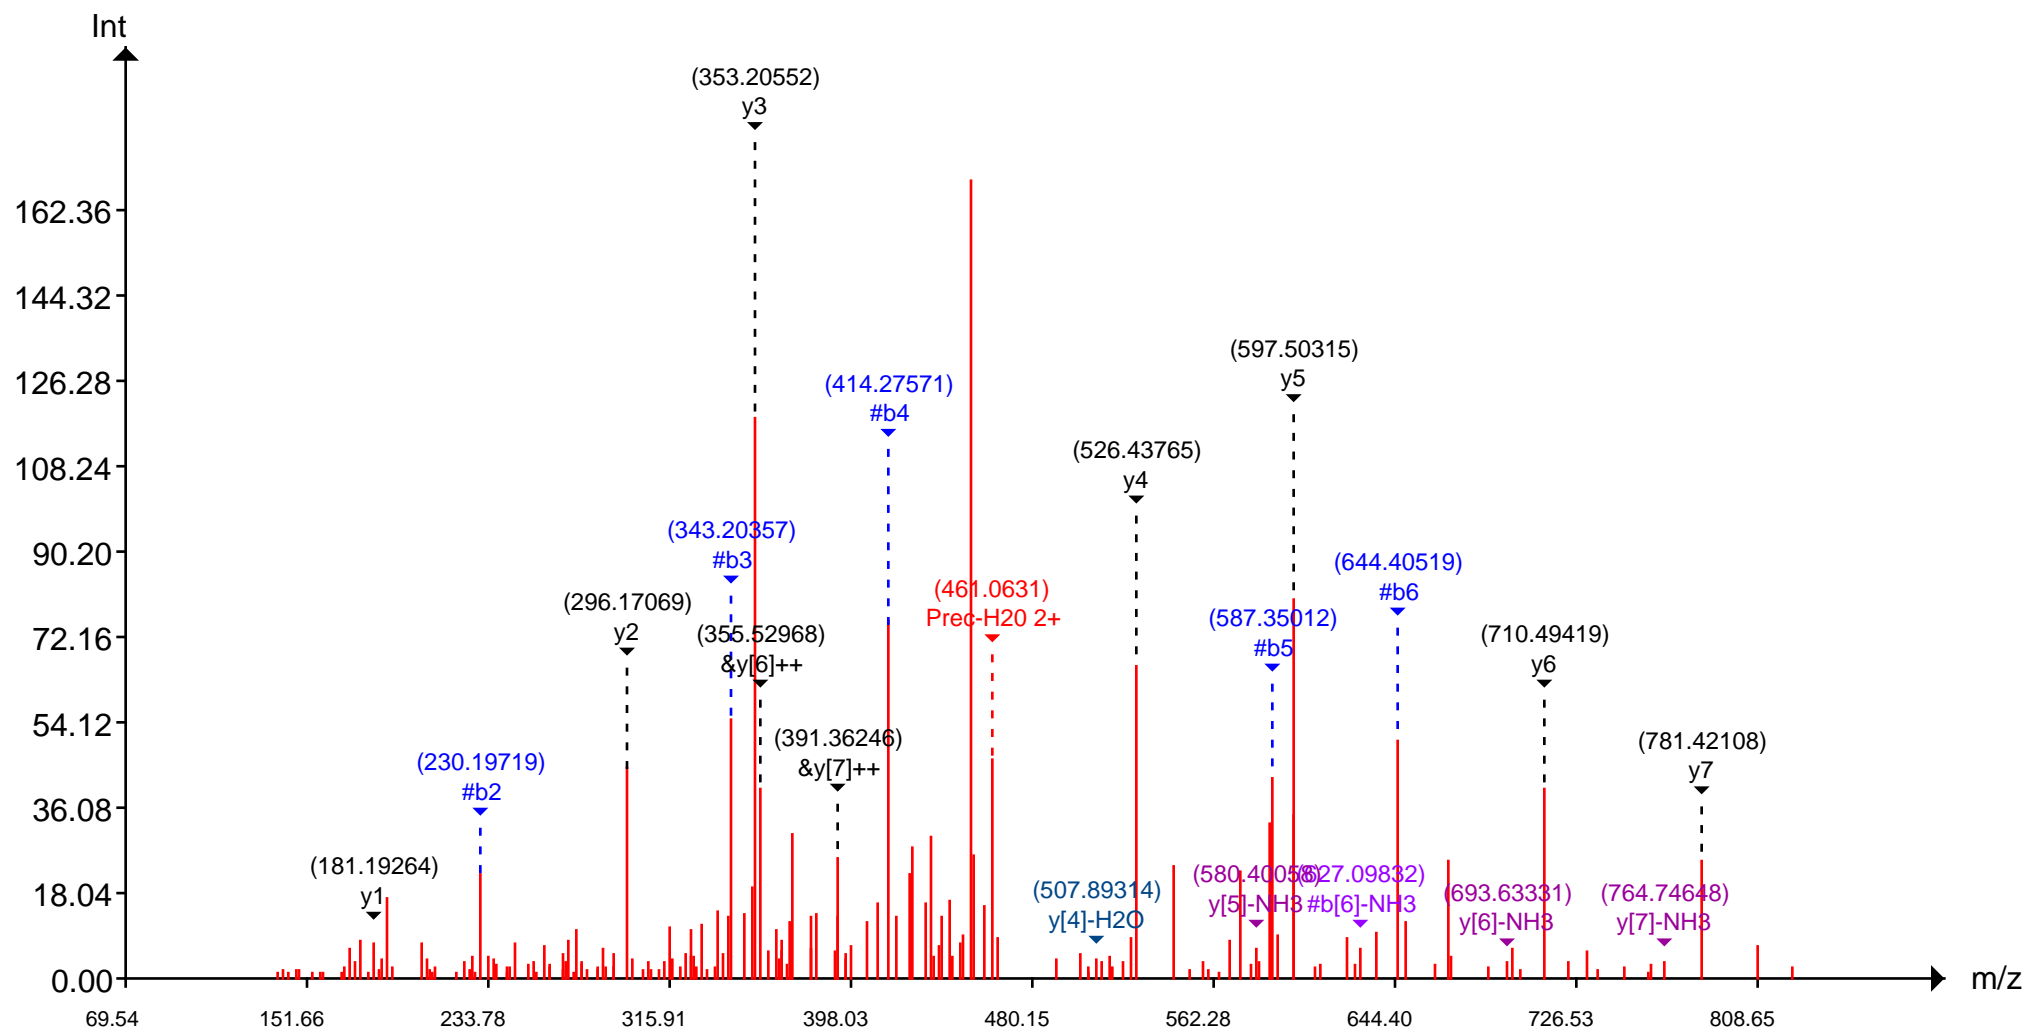

## Info

**Modified Sequence** AcD3-LALAK<AcD3K\*>GDR<C13>-COOH

**Ion score** 48.71

**Protein** P10107

**Confidence level** 99.00%

**Precursor m/z** 470.2955

**Identity Threshold** 44.11

**Charge** 2+

**Mass error** 1.39E-4

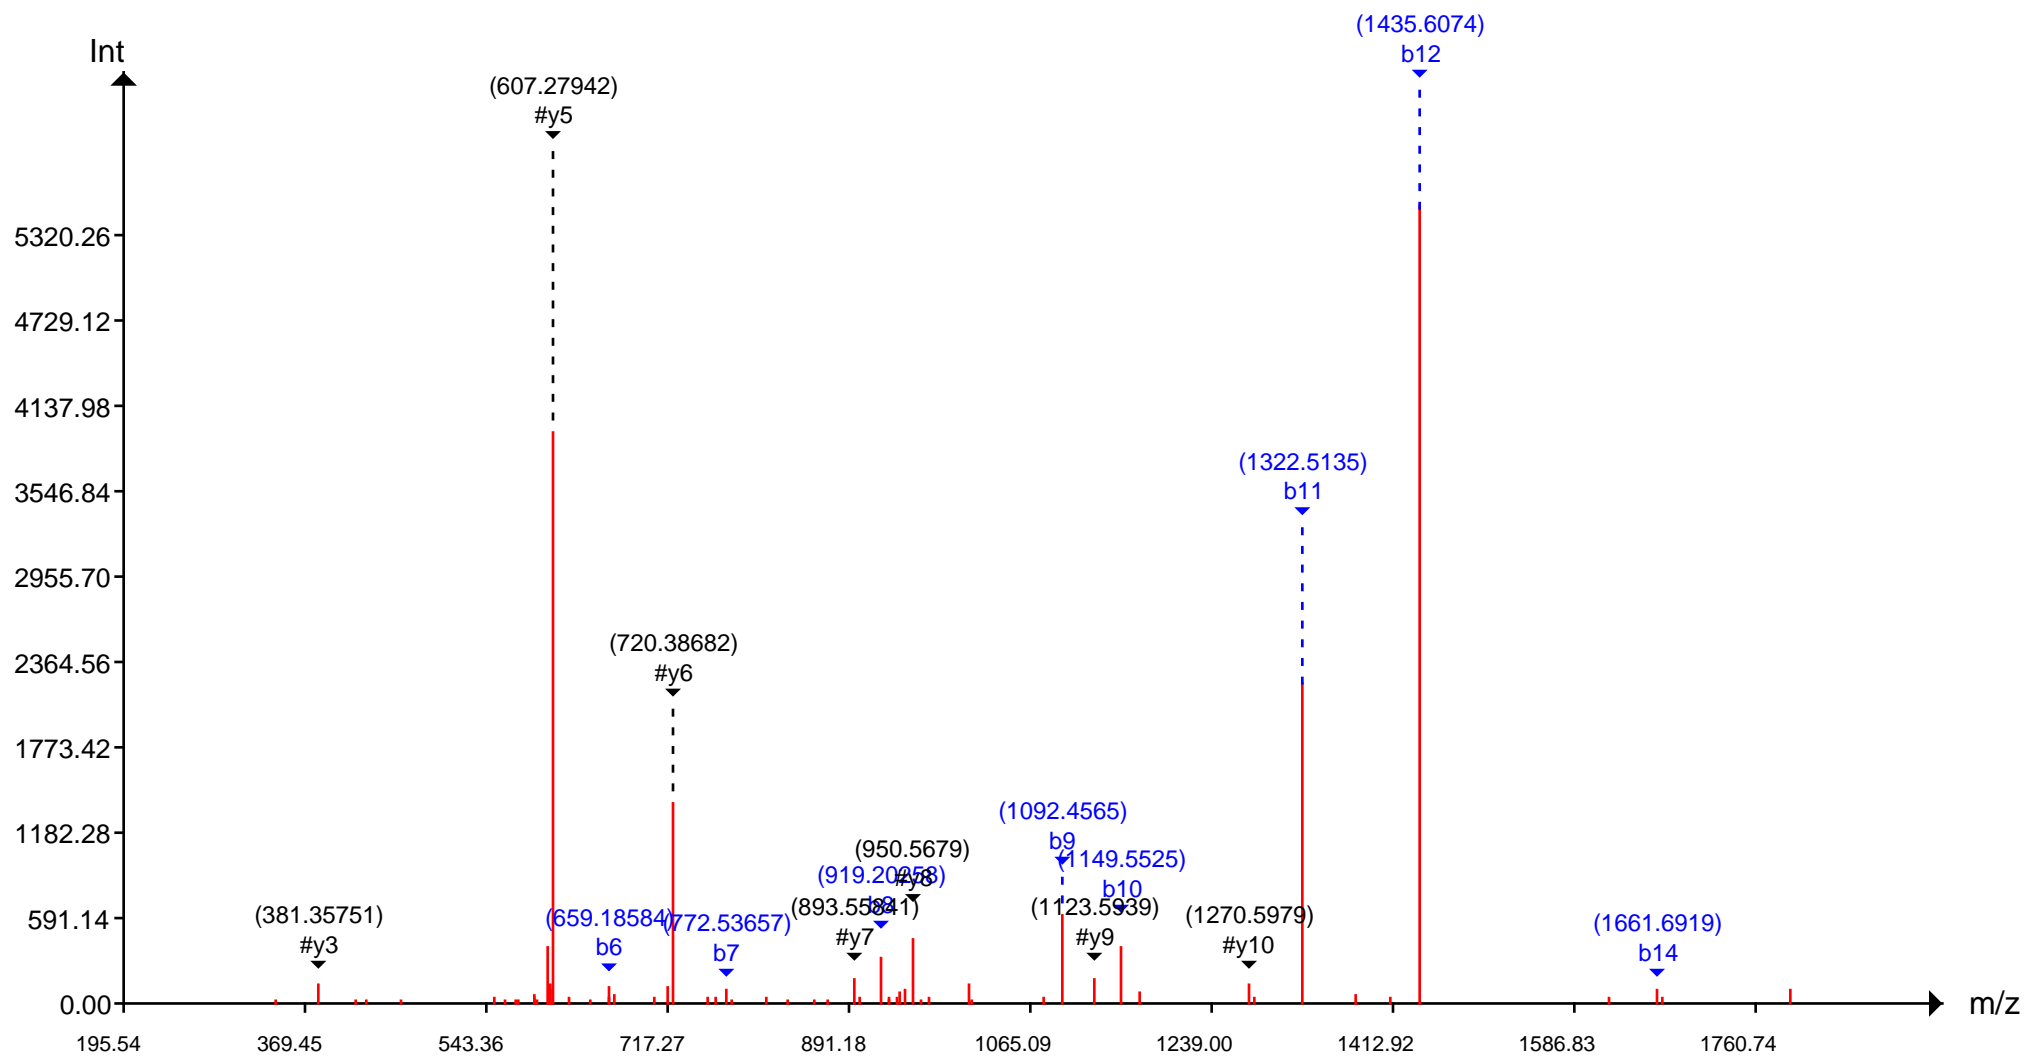

## Info

|                          |                                                        |                           |          |
|--------------------------|--------------------------------------------------------|---------------------------|----------|
| <b>Modified Sequence</b> | AcD3-LAQTEALM<Mox*>K<AcD3K*>GK<AcD3K*>LPPEAR<C13>-COOH | <b>Ion score</b>          | 54.35    |
| <b>Protein</b>           | P06745                                                 | <b>Confidence level</b>   | 99.00%   |
| <b>Precursor m/z</b>     | 1021.5666                                              | <b>Identity Threshold</b> | 46.74    |
| <b>Charge</b>            | 2+                                                     | <b>Mass error</b>         | 0.001567 |

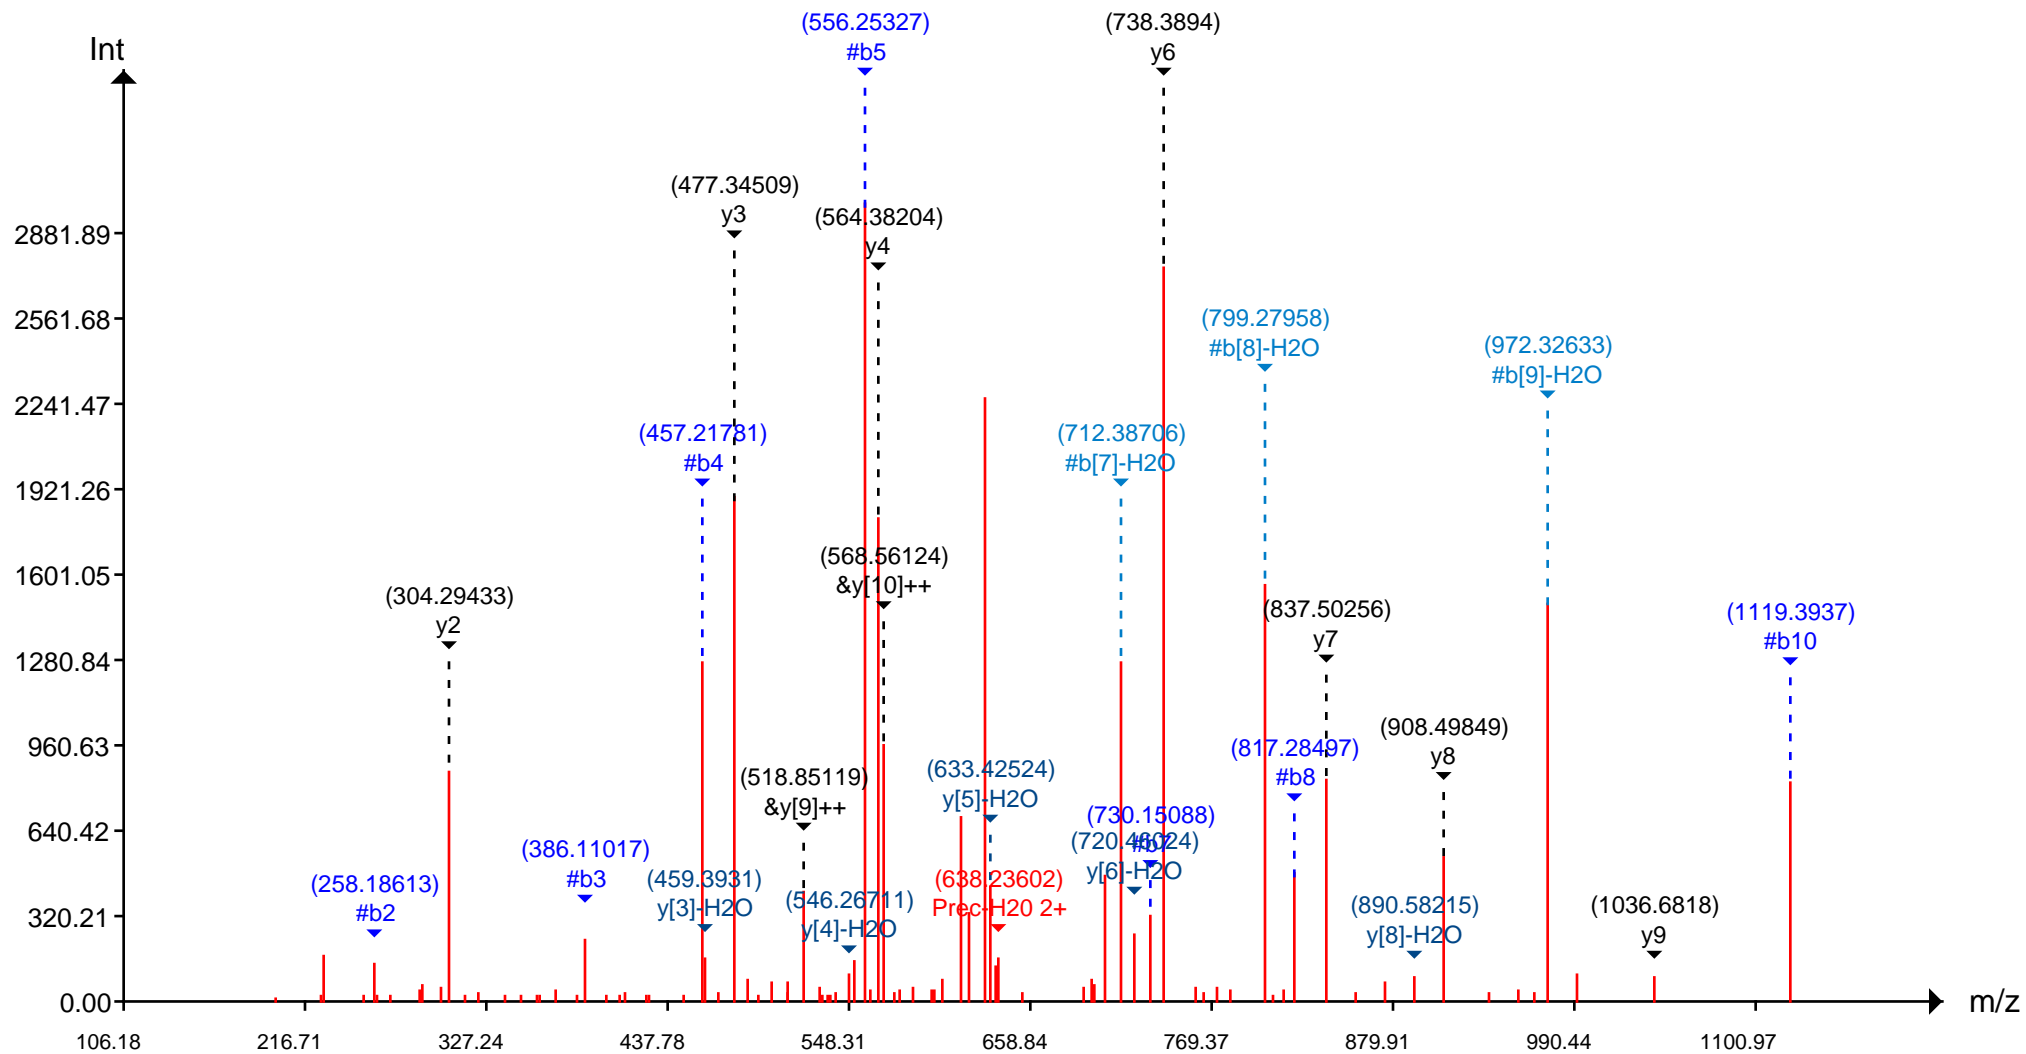

## Info

**Modified Sequence** AcD3-IVQAVSSSK<AcD3K\*>ER-COOH

**Ion score** 66.13

**Protein** P43275

**Confidence level** 99.00%

**Precursor m/z** 647.36898

**Identity Threshold** 47.02

**Charge** 2+

**Mass error** 0.002735

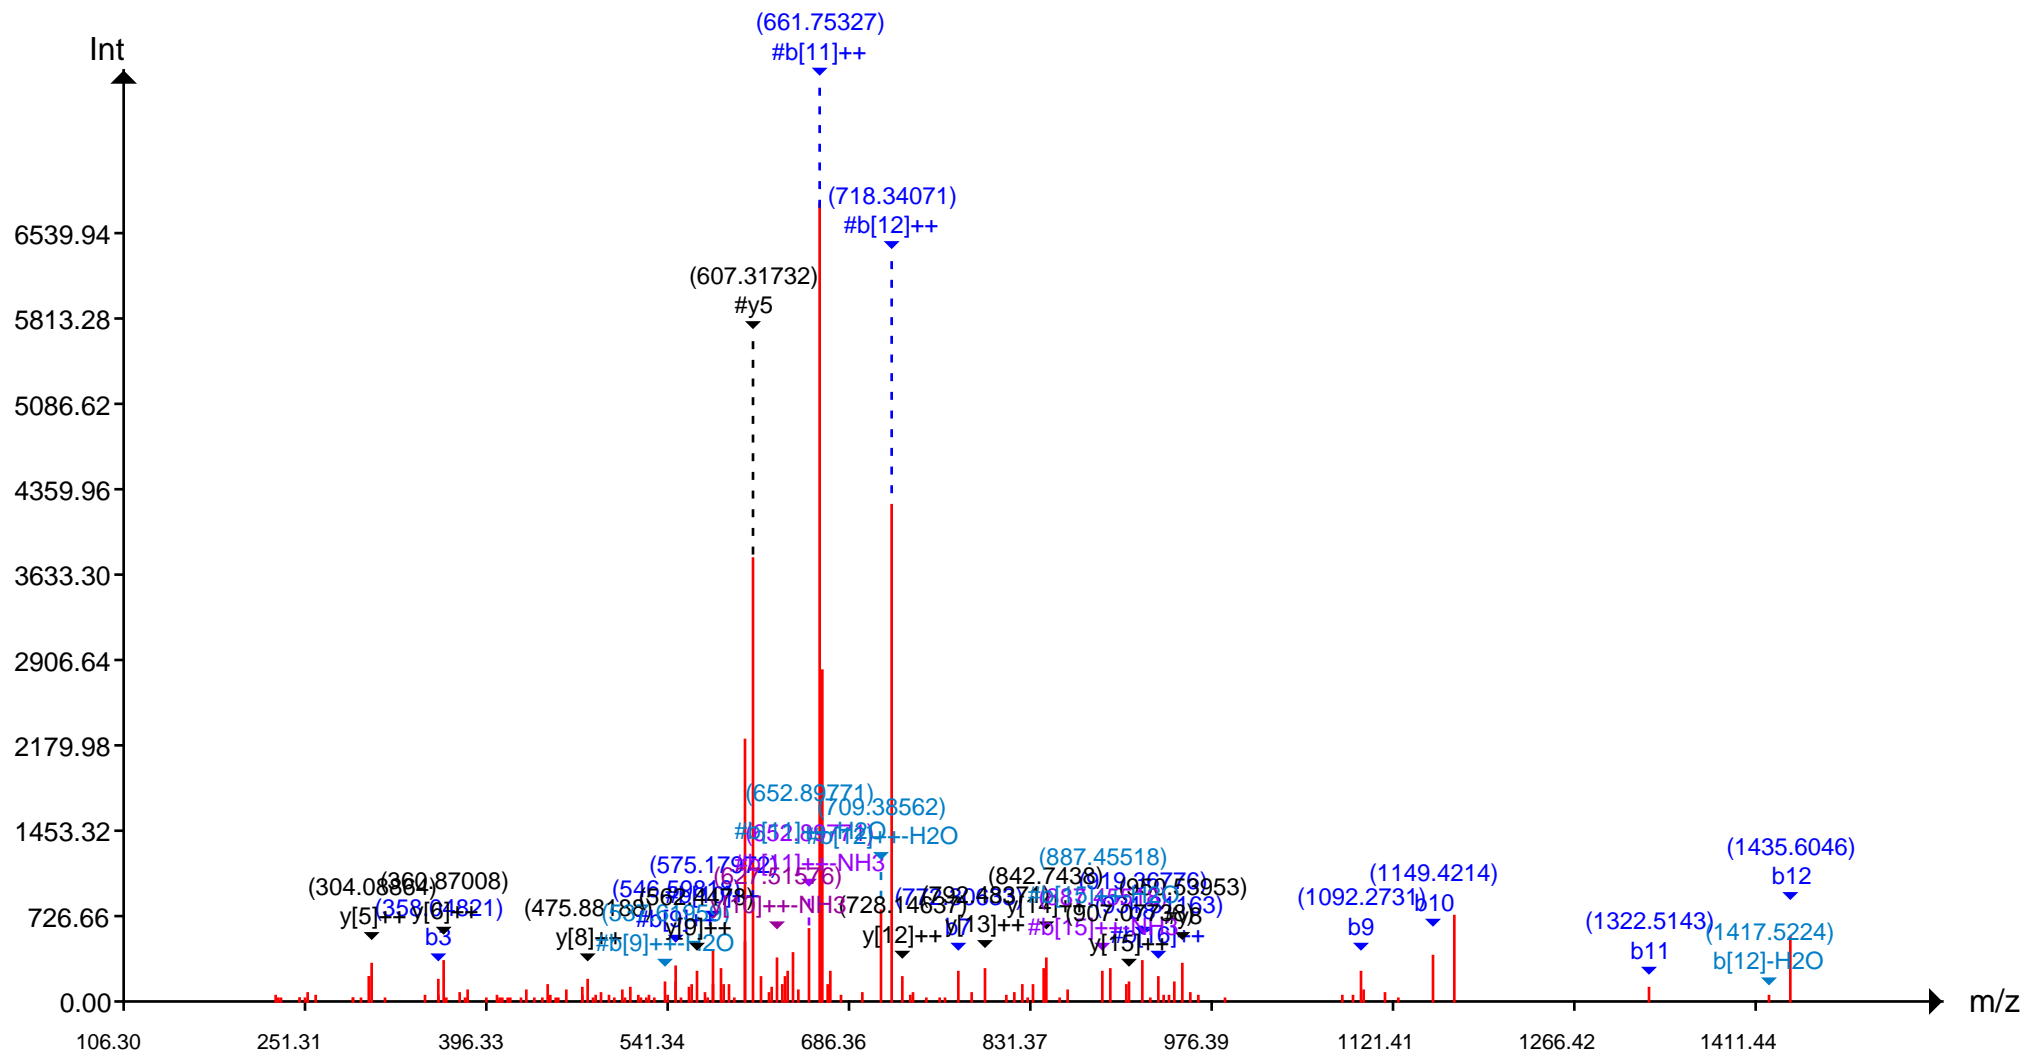

## Info

|                          |                                                        |                           |         |
|--------------------------|--------------------------------------------------------|---------------------------|---------|
| <b>Modified Sequence</b> | AcD3-LAQTEALM<Mox*>K<AcD3K*>GK<AcD3K*>LPEEAR<C13>-COOH | <b>Ion score</b>          | 48.74   |
| <b>Protein</b>           | P06745                                                 | <b>Confidence level</b>   | 99.00%  |
| <b>Precursor m/z</b>     | 681.37971                                              | <b>Identity Threshold</b> | 46.79   |
| <b>Charge</b>            | 3+                                                     | <b>Mass error</b>         | 2.21E-4 |

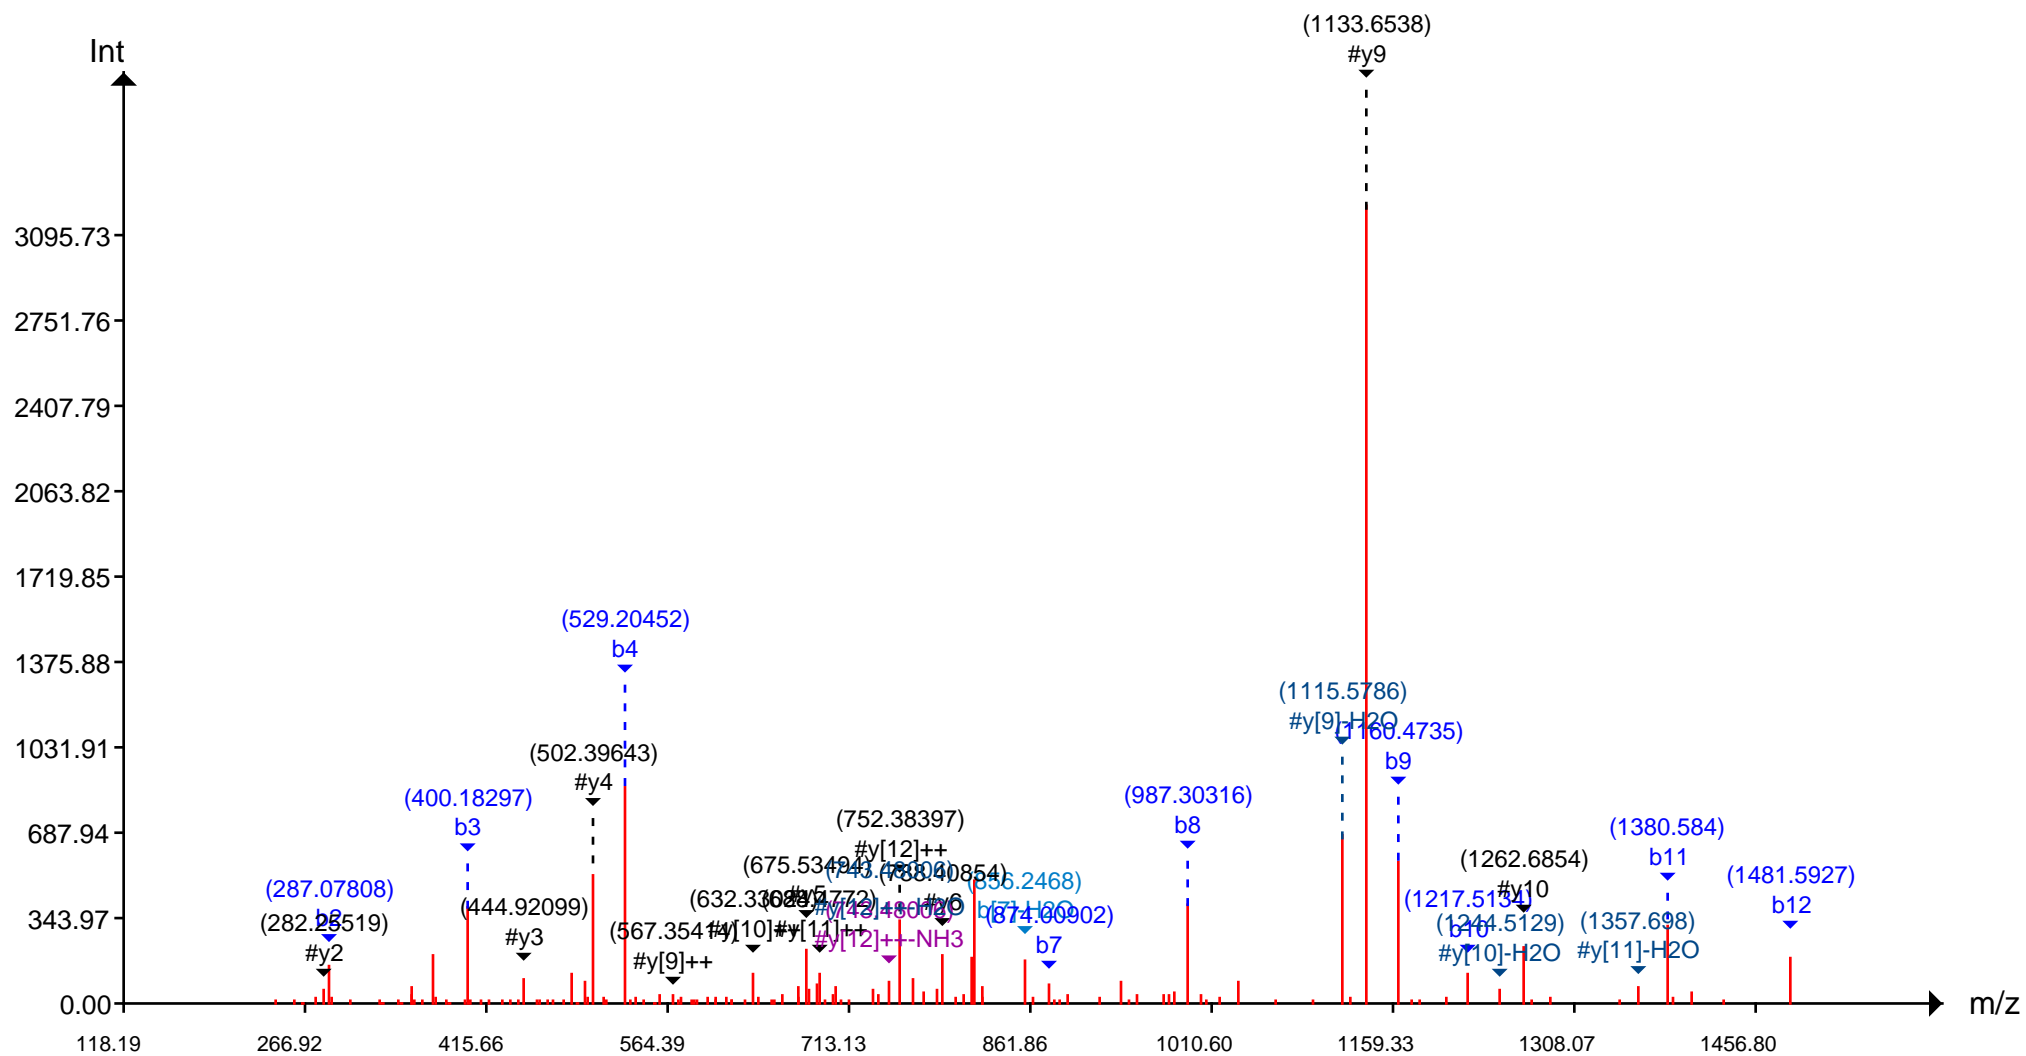

## Info

|                          |                                      |                           |          |
|--------------------------|--------------------------------------|---------------------------|----------|
| <b>Modified Sequence</b> | AcD3-IQLEPTFIK<AcD3K*>GYTR<C13>-COOH | <b>Ion score</b>          | 71.22    |
| <b>Protein</b>           | Q60864                               | <b>Confidence level</b>   | 99.00%   |
| <b>Precursor m/z</b>     | 831.47902                            | <b>Identity Threshold</b> | 45.59    |
| <b>Charge</b>            | 2+                                   | <b>Mass error</b>         | 0.003241 |

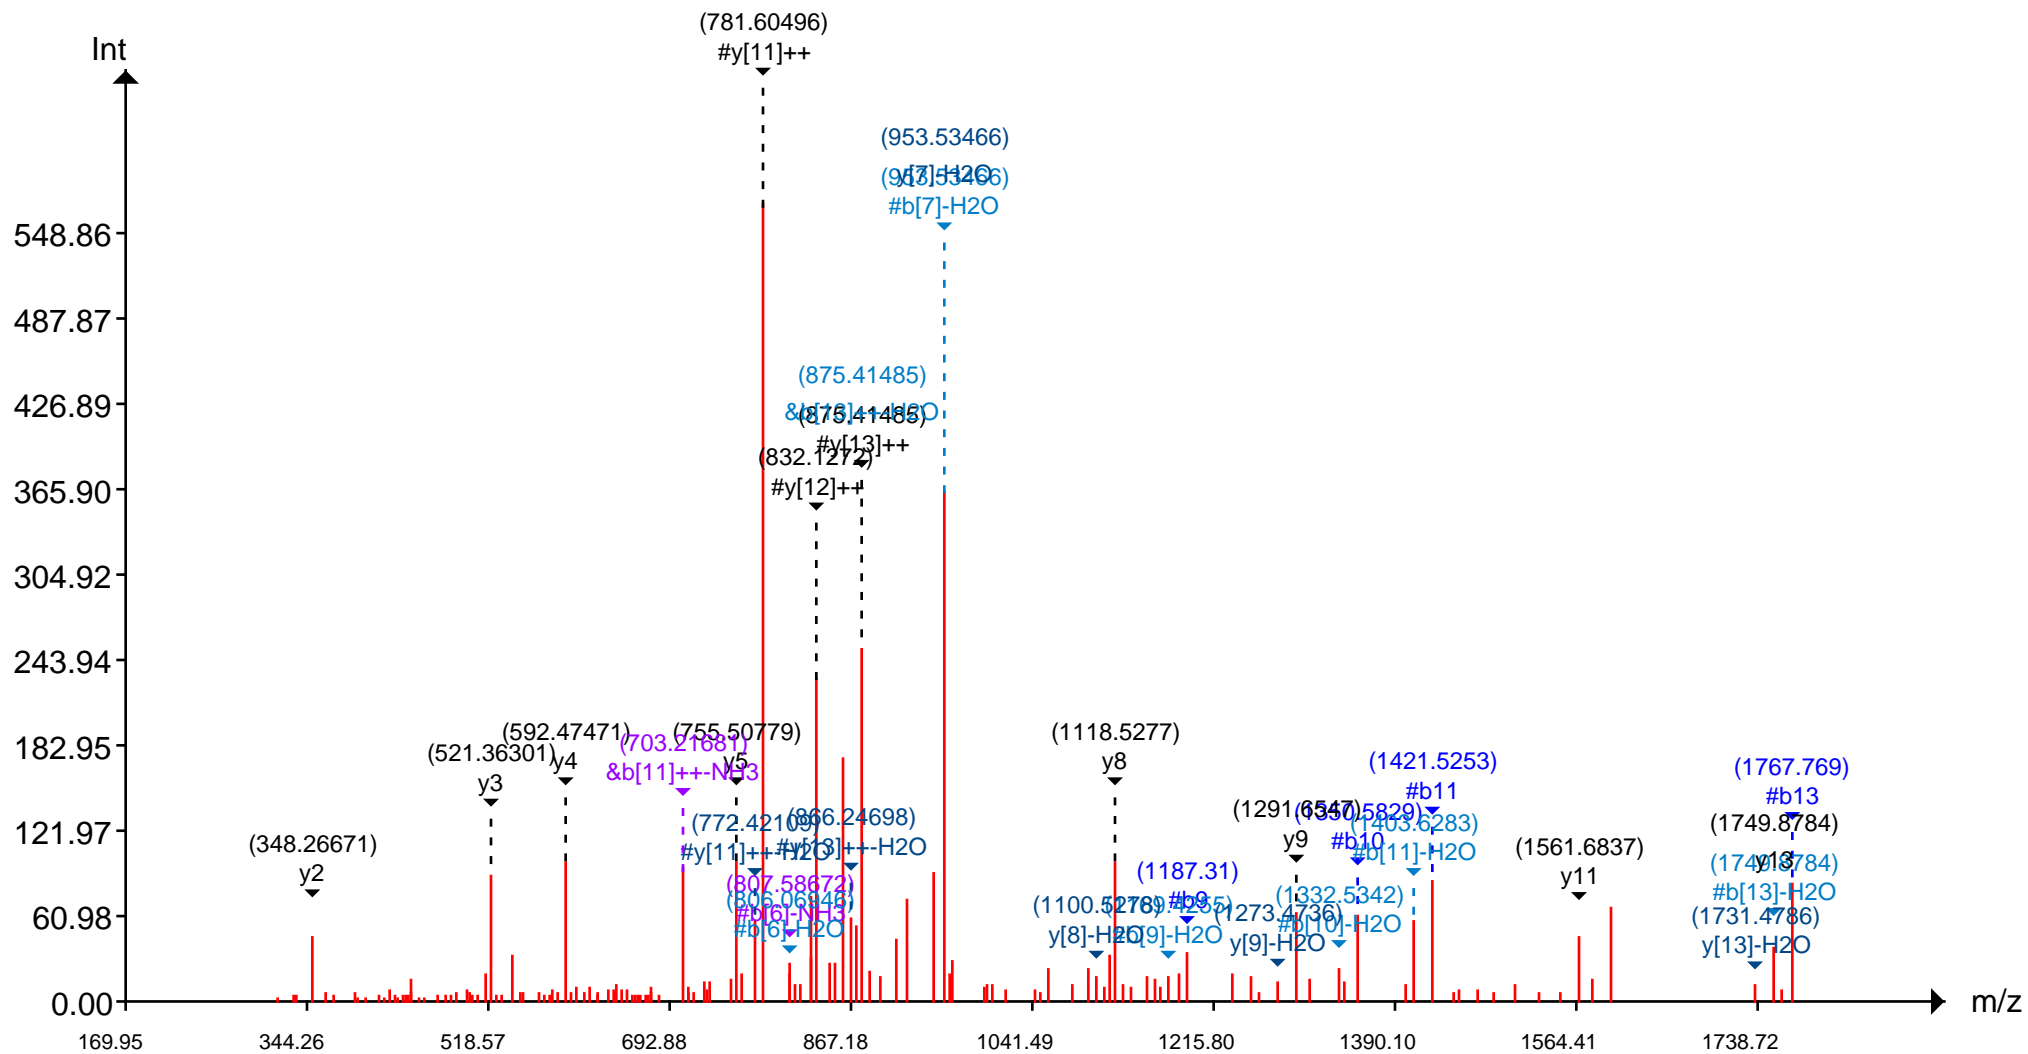

## Info

|                          |                                                                |                           |          |
|--------------------------|----------------------------------------------------------------|---------------------------|----------|
| <b>Modified Sequence</b> | AcD3-FSTPK<AcD3K*>K<AcD3K*>M<Mox*>TDYAK<AcD3K*>K<AcD3K*>R-COOH | <b>Ion score</b>          | 50.07    |
| <b>Protein</b>           | Q9CX56                                                         | <b>Confidence level</b>   | 99.00%   |
| <b>Precursor m/z</b>     | 971.53354                                                      | <b>Identity Threshold</b> | 47.20    |
| <b>Charge</b>            | 2+                                                             | <b>Mass error</b>         | 0.002678 |

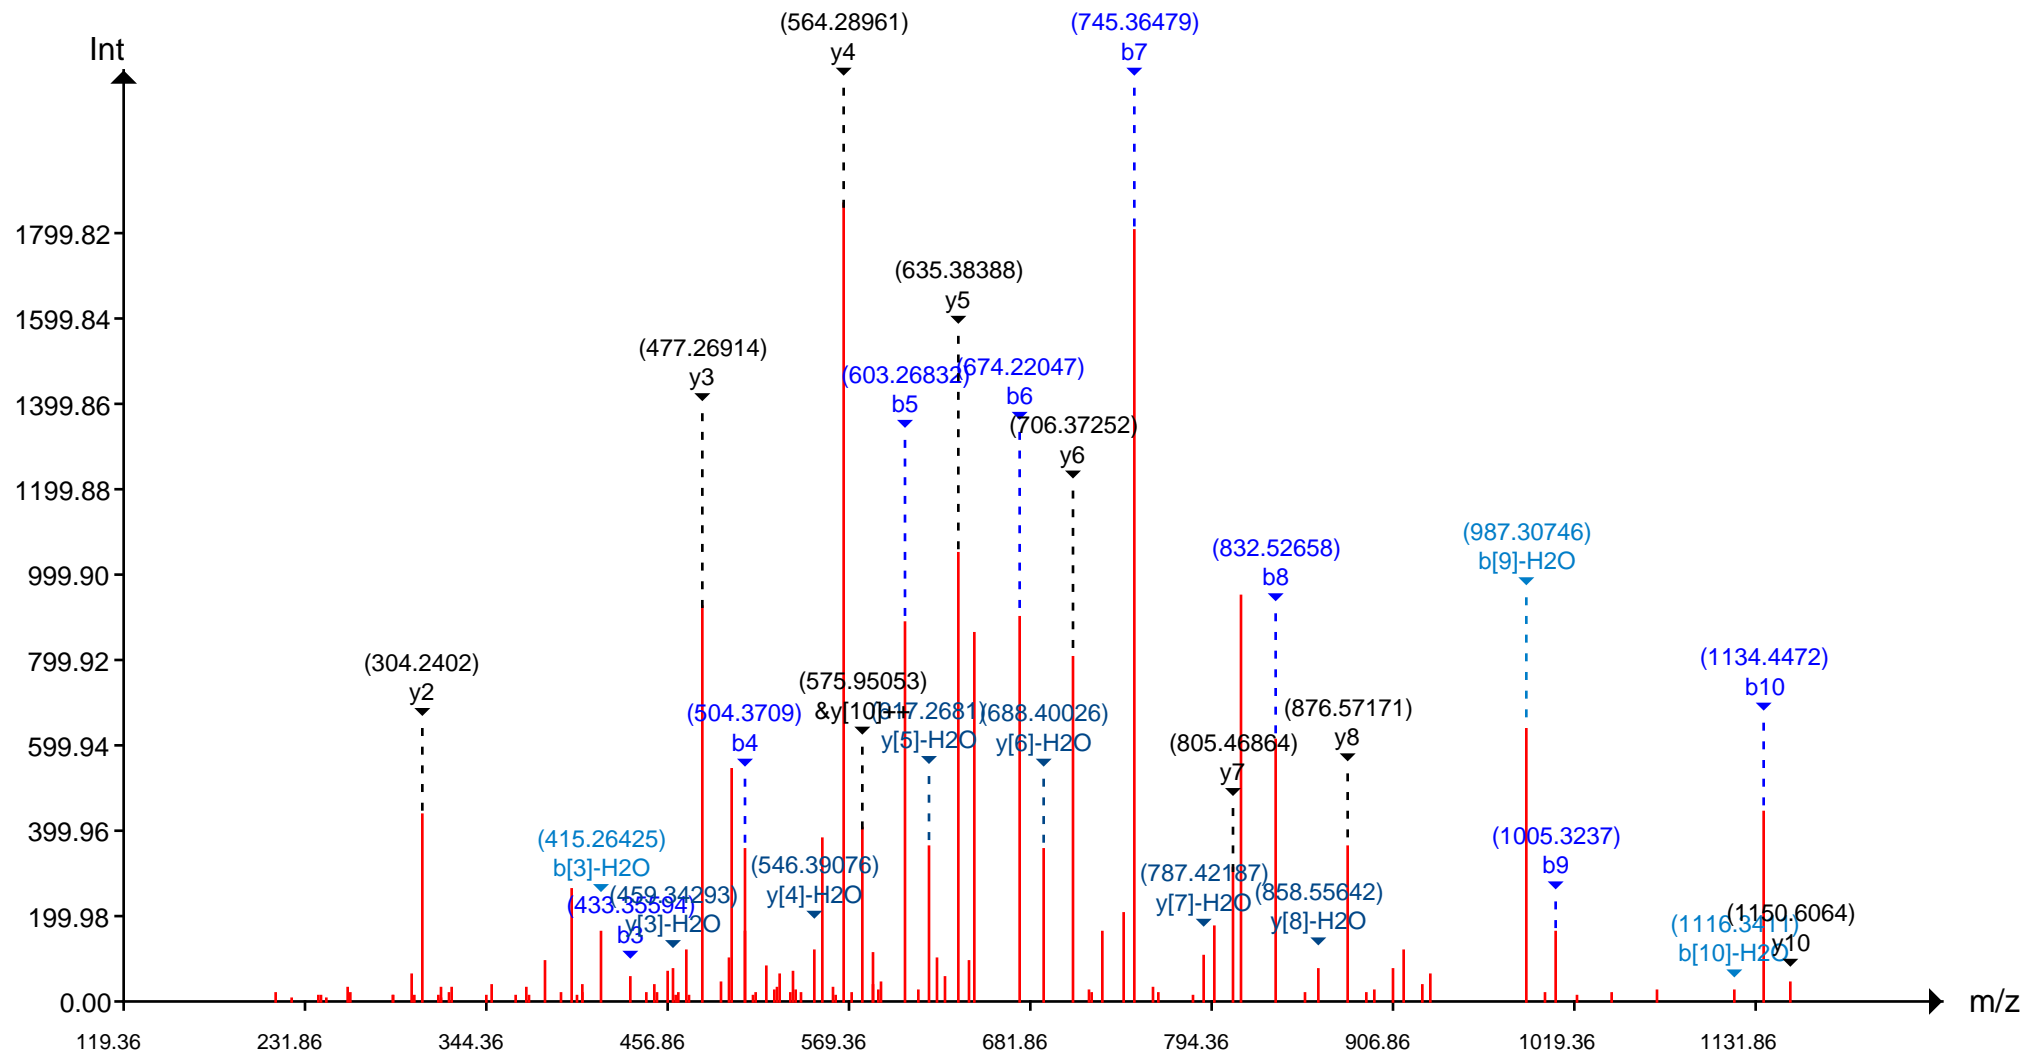

## Info

**Modified Sequence** AcD3-ITK<AcD3K\*>AVAASK<AcD3K\*>ER-COOH

**Ion score** 49.72

**Protein** P15864, P43277, P43274

**Confidence level** 99.00%

**Precursor m/z** 654.89575

**Identity Threshold** 44.08

**Charge** 2+

**Mass error** 0.001069



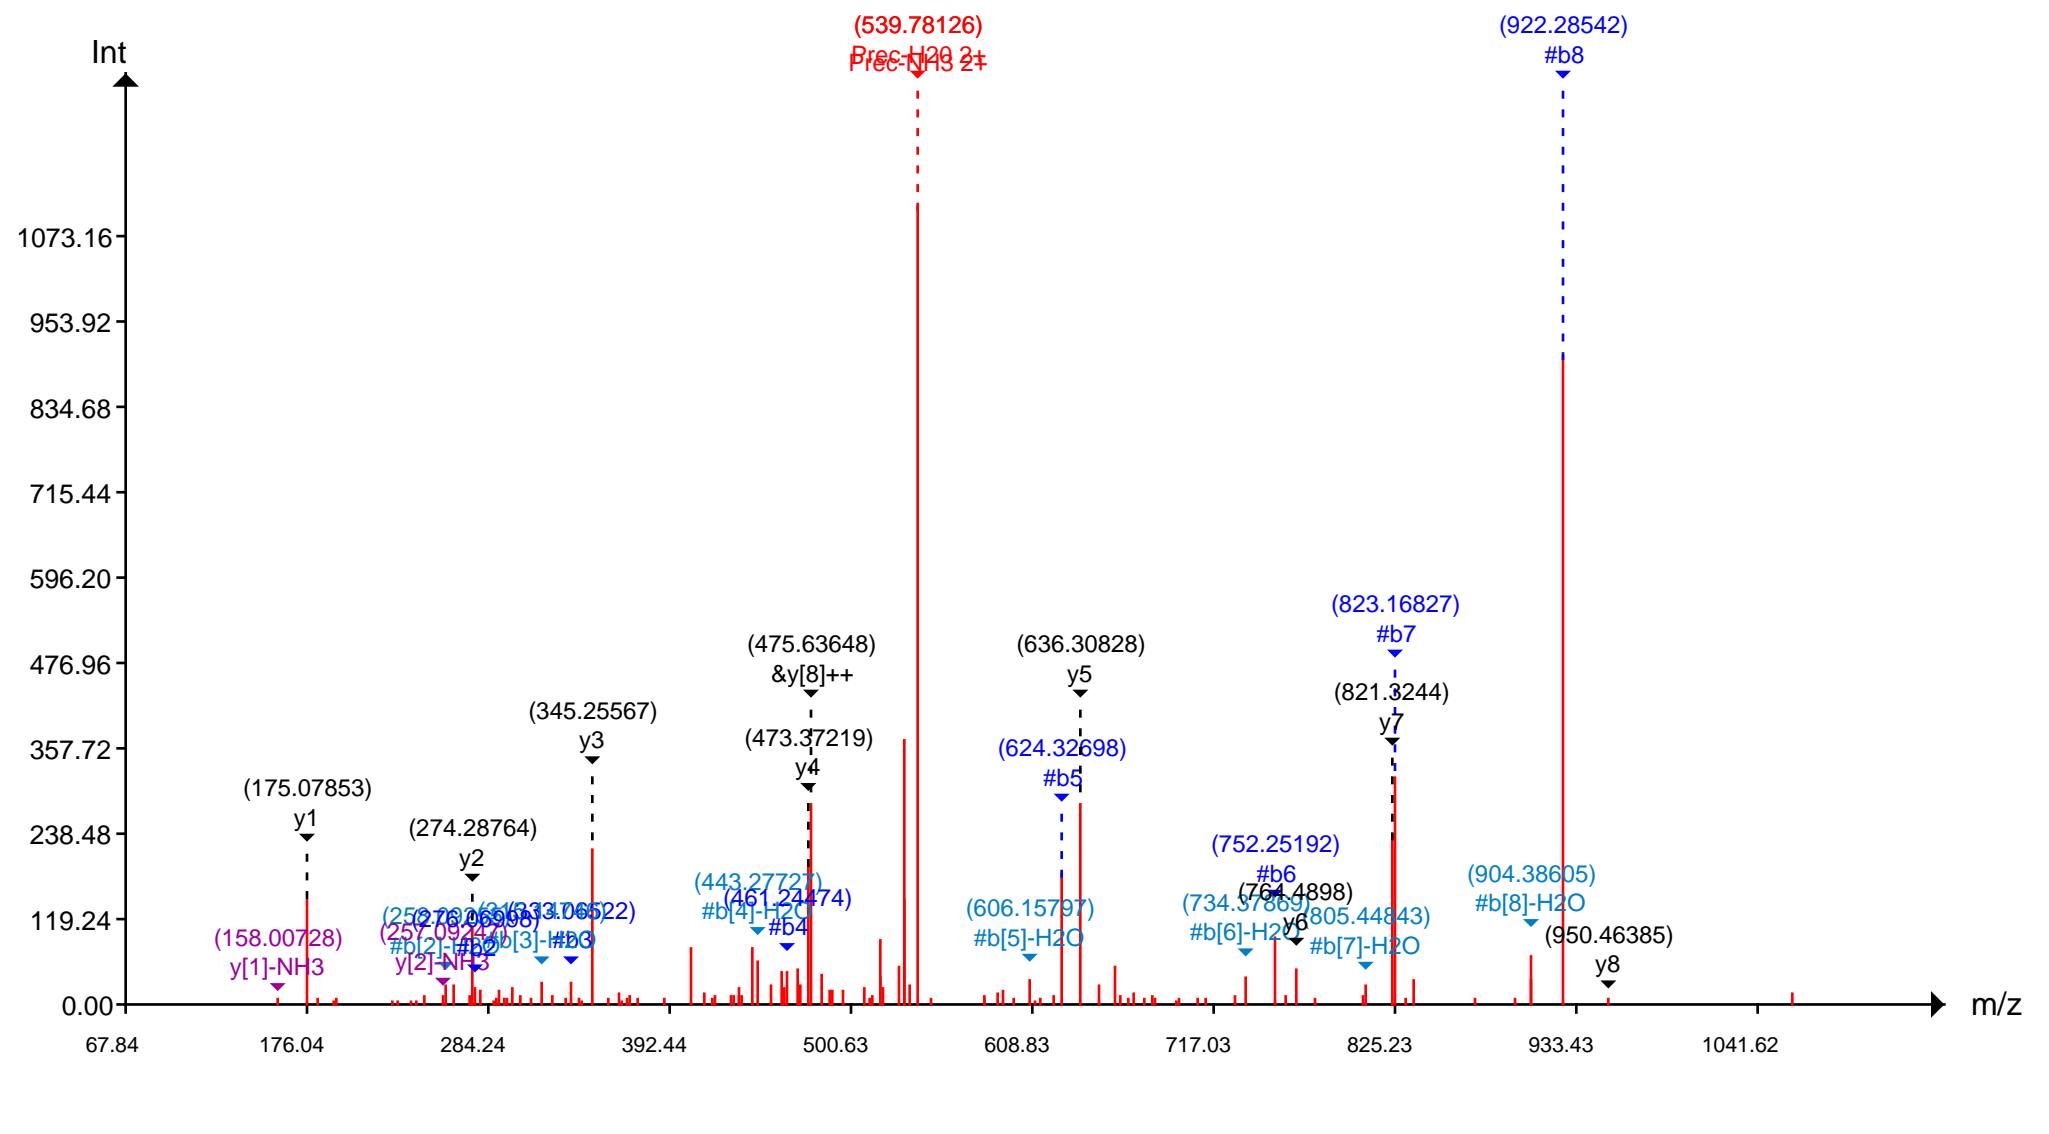

| Info                     |                     |                           |        |
|--------------------------|---------------------|---------------------------|--------|
| <b>Modified Sequence</b> | AcD3-TEGQYQAVR-COOH | <b>Ion score</b>          | 58.72  |
| <b>Protein</b>           | Q9EPB4              | <b>Confidence level</b>   | 99.00% |
| <b>Precursor m/z</b>     | 548.77672           | <b>Identity Threshold</b> | 47.13  |
| <b>Charge</b>            | 2+                  | <b>Mass error</b>         | 8.5E-5 |

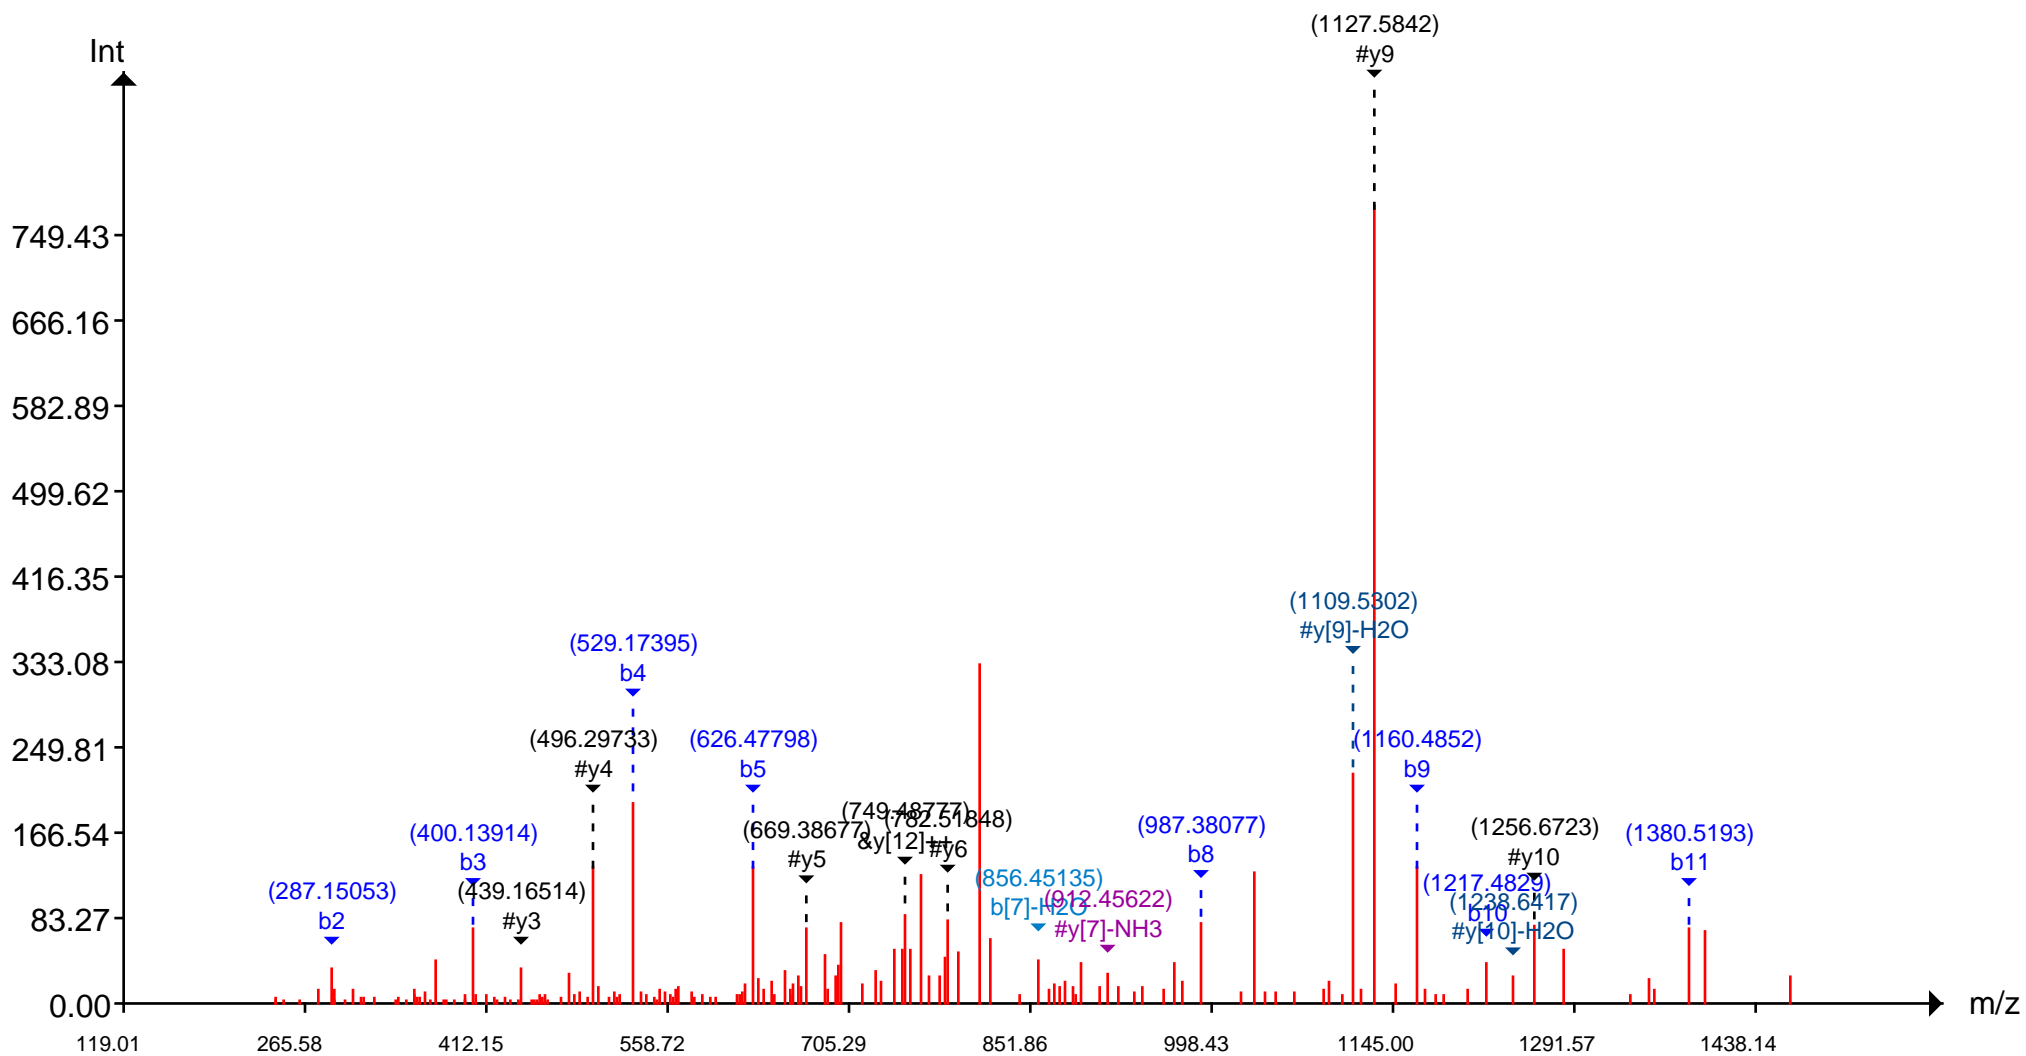

## Info

**Modified Sequence** AcD3-IQLEPTFIK<AcD3K\*>GYTR-COOH

**Ion score** 49.33

**Protein** Q60864

**Confidence level** 99.00%

**Precursor m/z** 828.46879

**Identity Threshold** 46.59

**Charge** 2+

**Mass error** 0.002923

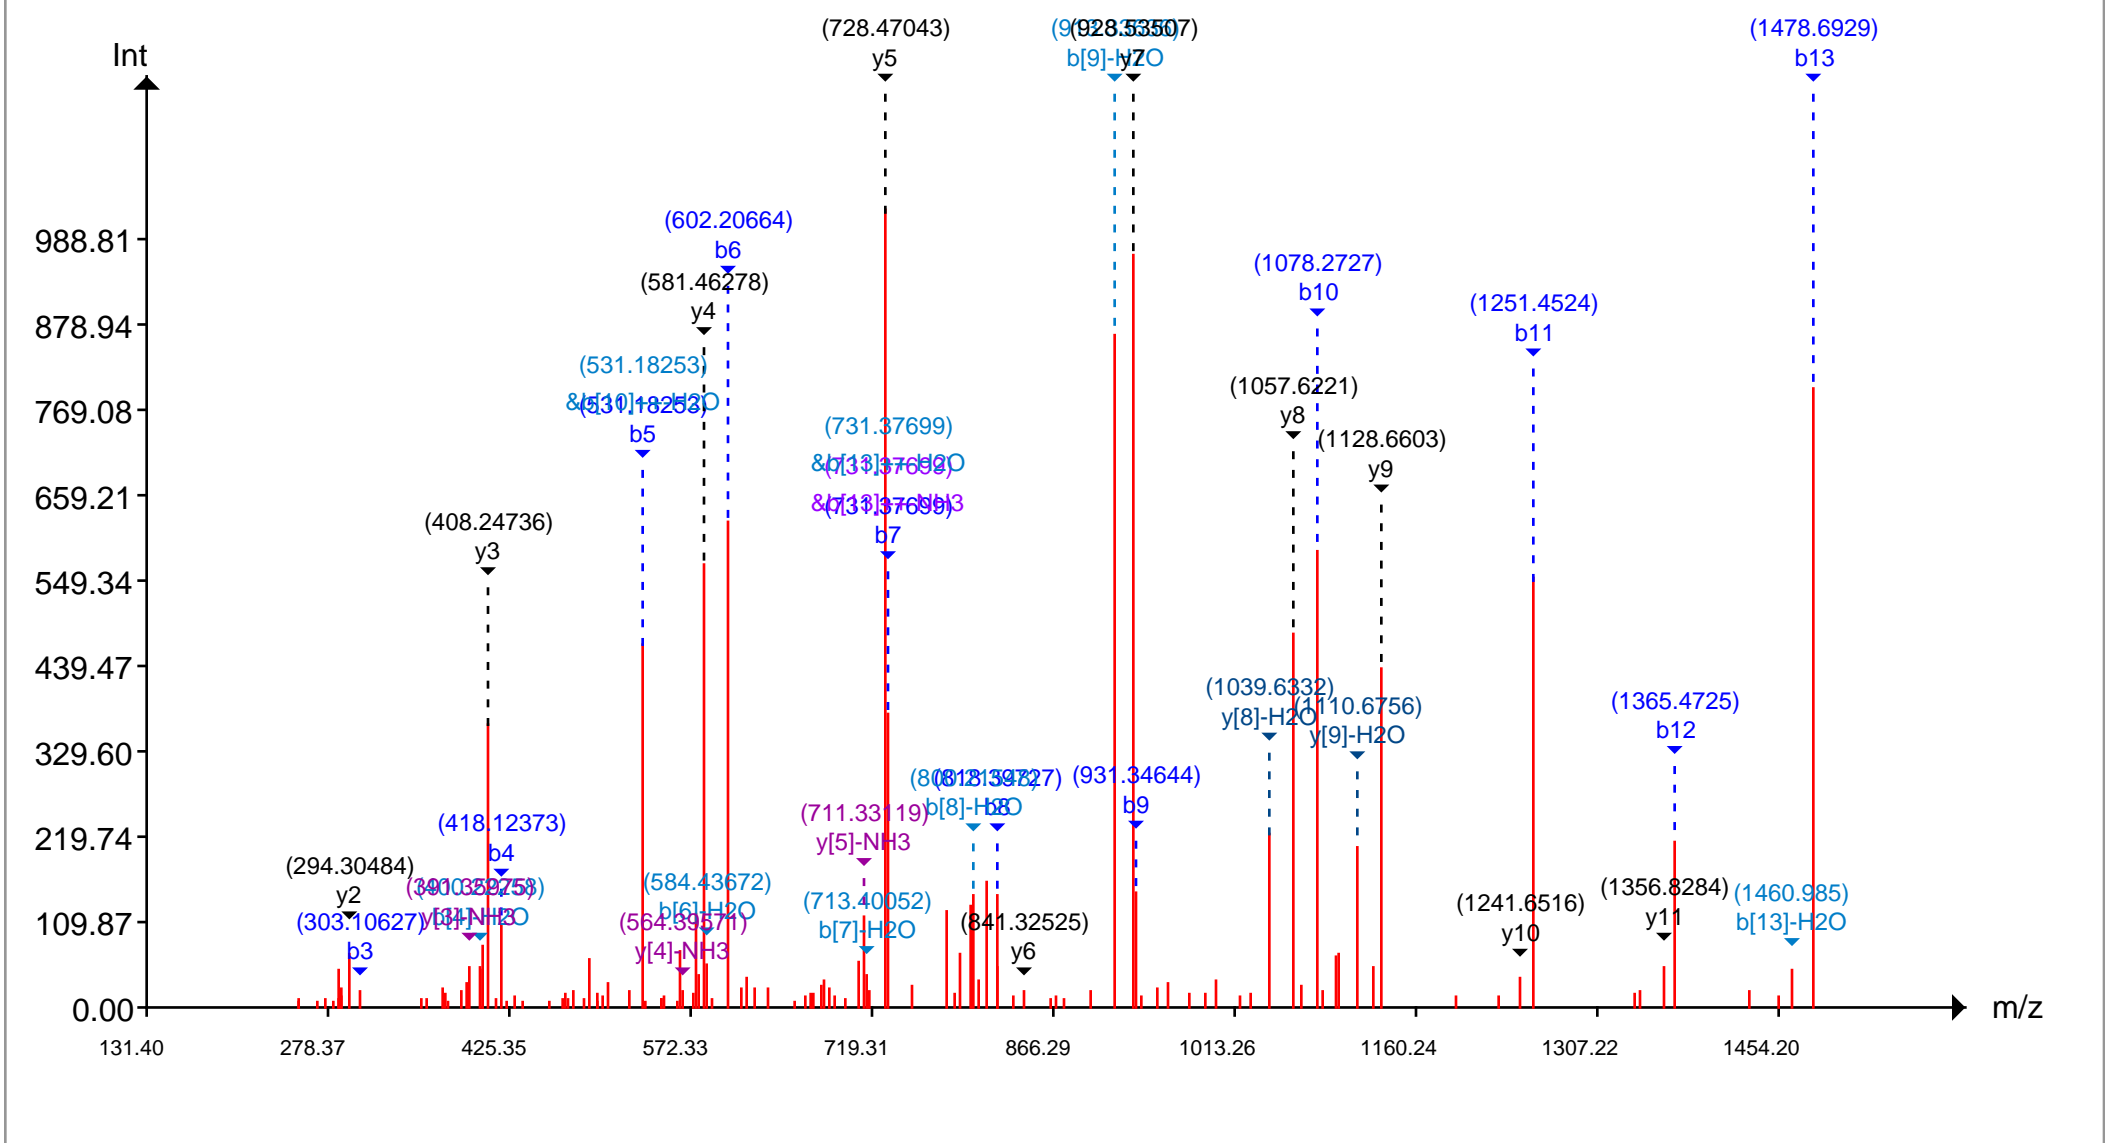

## Info

**Modified Sequence** AcD3-SVADLAESIM<Mox\*>K<AcD3K\*>NLR<C13>-COOH

**Ion score** 82.04

**Protein** P06151

**Confidence level** 99.00%

**Precursor m/z** 829.95423

**Identity Threshold** 47.69

**Charge** 2+

**Mass error** 0.00162

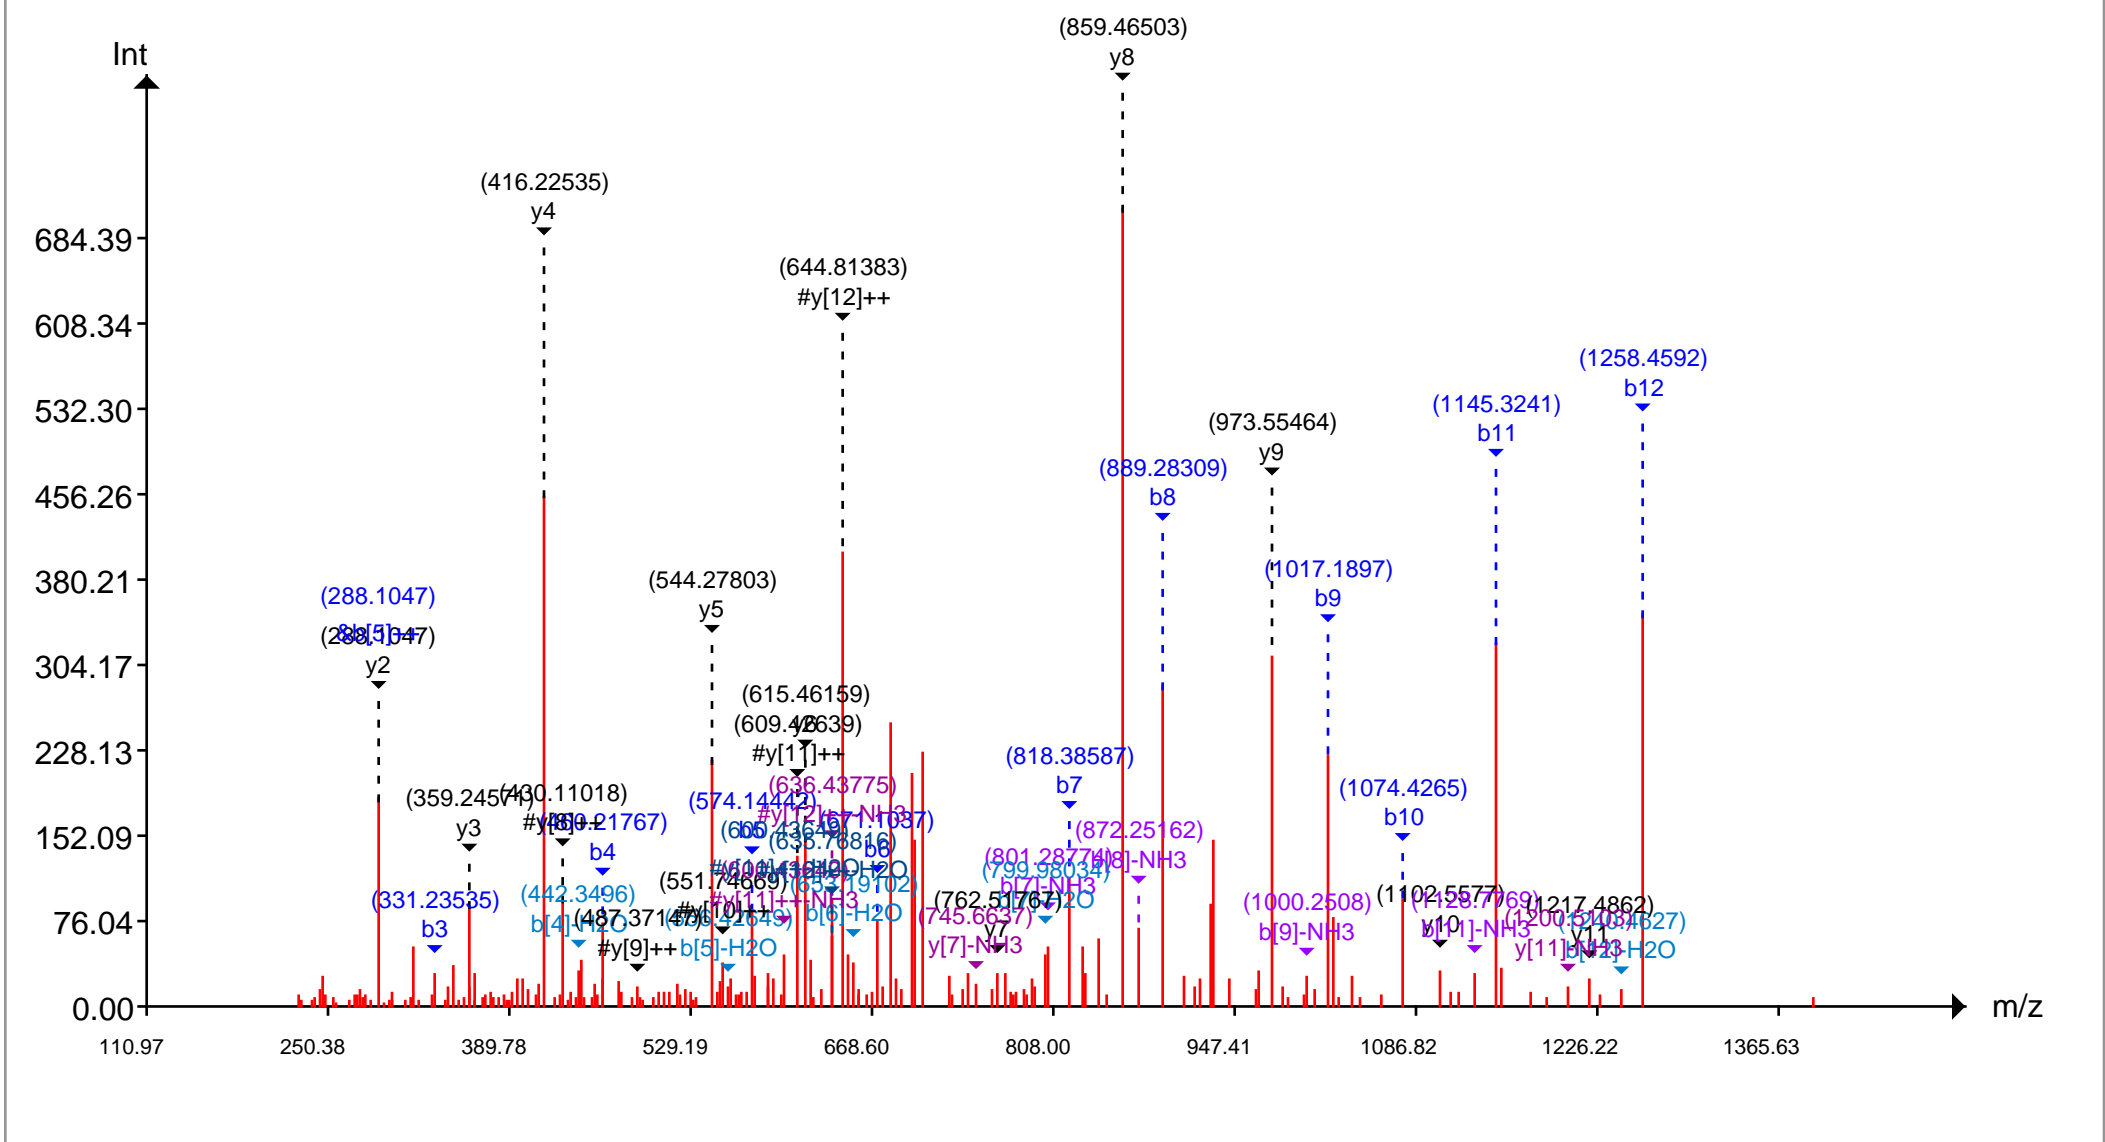

## Info

**Modified Sequence** AcD3-VADENPFAQGALR-COOH

**Ion score** 72.63

**Protein** P13020

**Confidence level** 99.00%

**Precursor m/z** 716.86736

**Identity Threshold** 47.91

**Charge** 2+

**Mass error** 0.001616

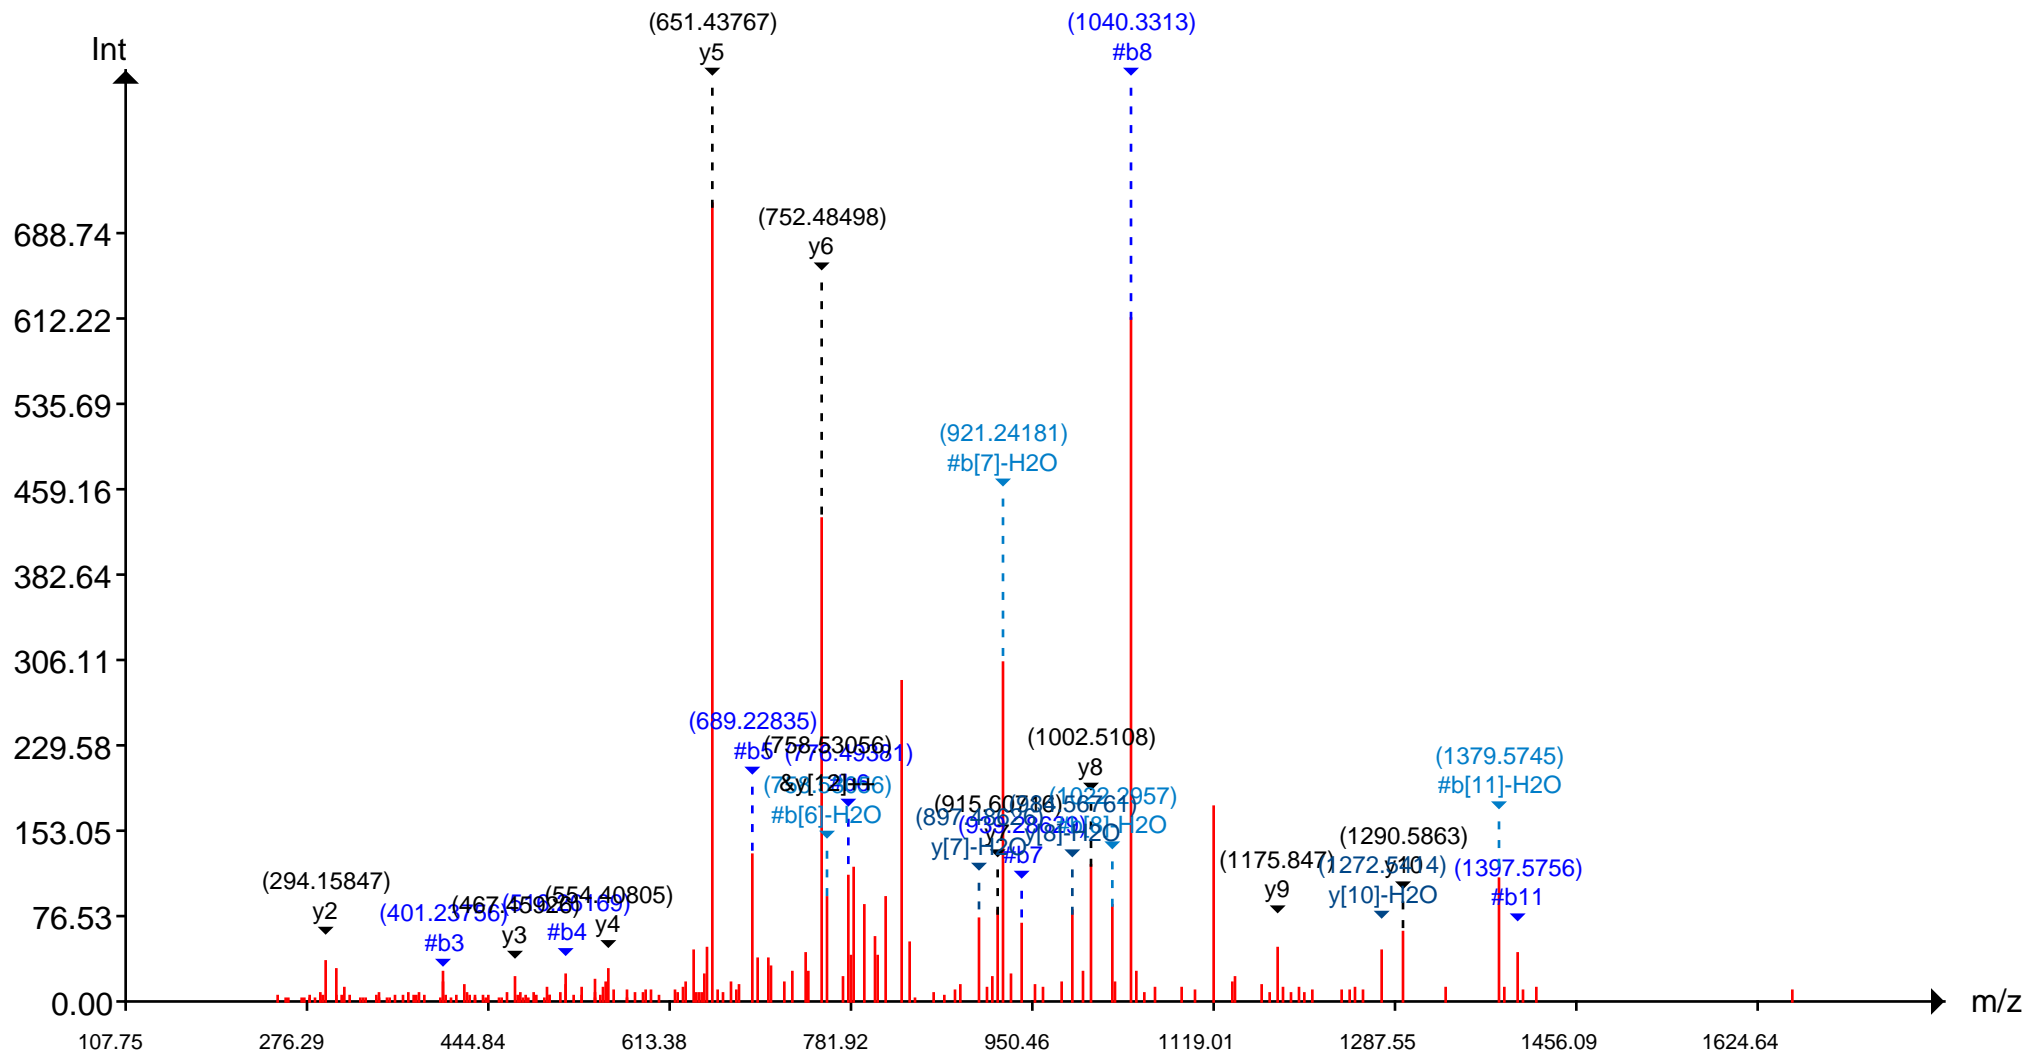

## Info

**Modified Sequence** AcD3-EIIDK<AcD3K\*>SYTPSK<AcD3K\*>IR<C13>-COOH

**Ion score** 58.01

**Protein** O70492

**Confidence level** 99.00%

**Precursor m/z** 845.98758

**Identity Threshold** 45.48

**Charge** 2+

**Mass error** 0.001151

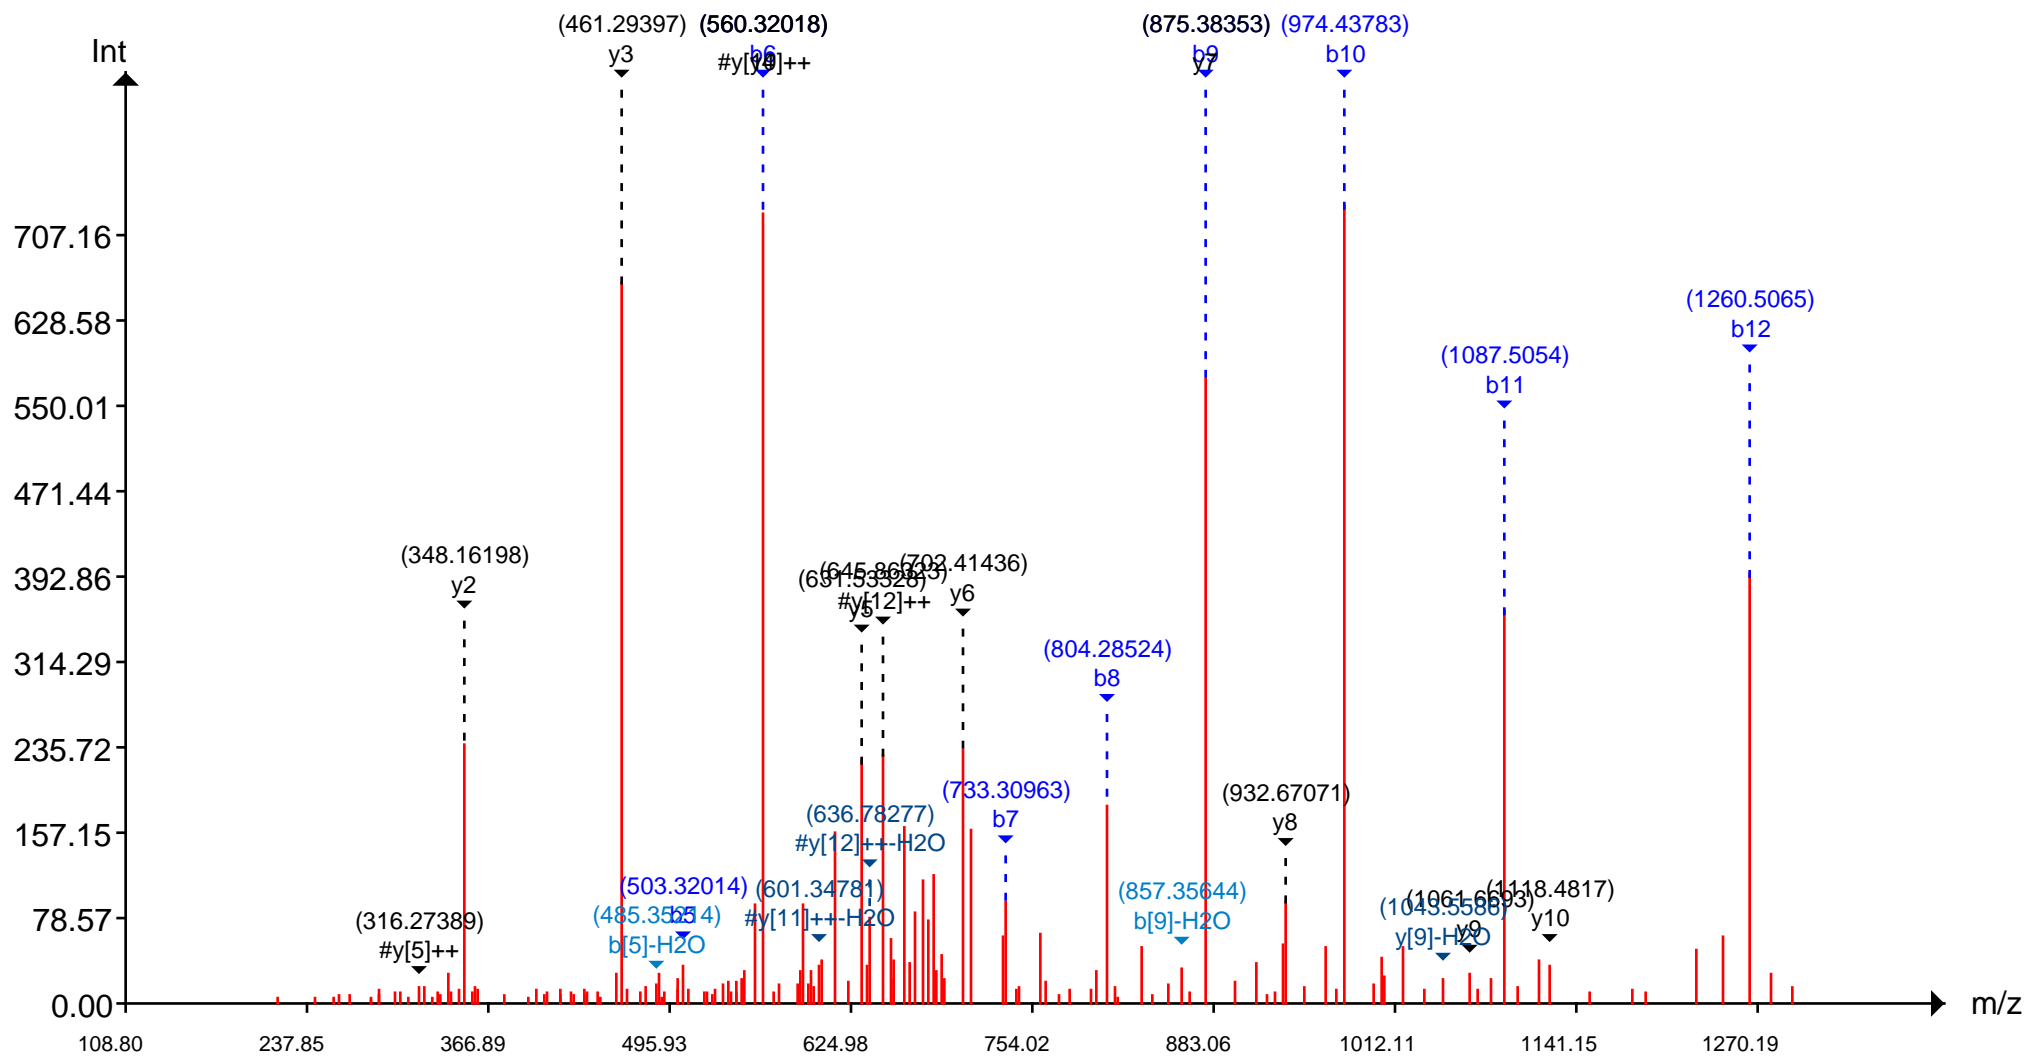

## Info

**Modified Sequence** AcD3-VATGEGK<AcD3K\*>AAVLK<AcD3K\*>R-COOH

**Ion score** 69.07

**Protein** Q9CQ60

**Confidence level** 99.00%

**Precursor m/z** 717.93532

**Identity Threshold** 43.04

**Charge** 2+

**Mass error** 8.79E-4

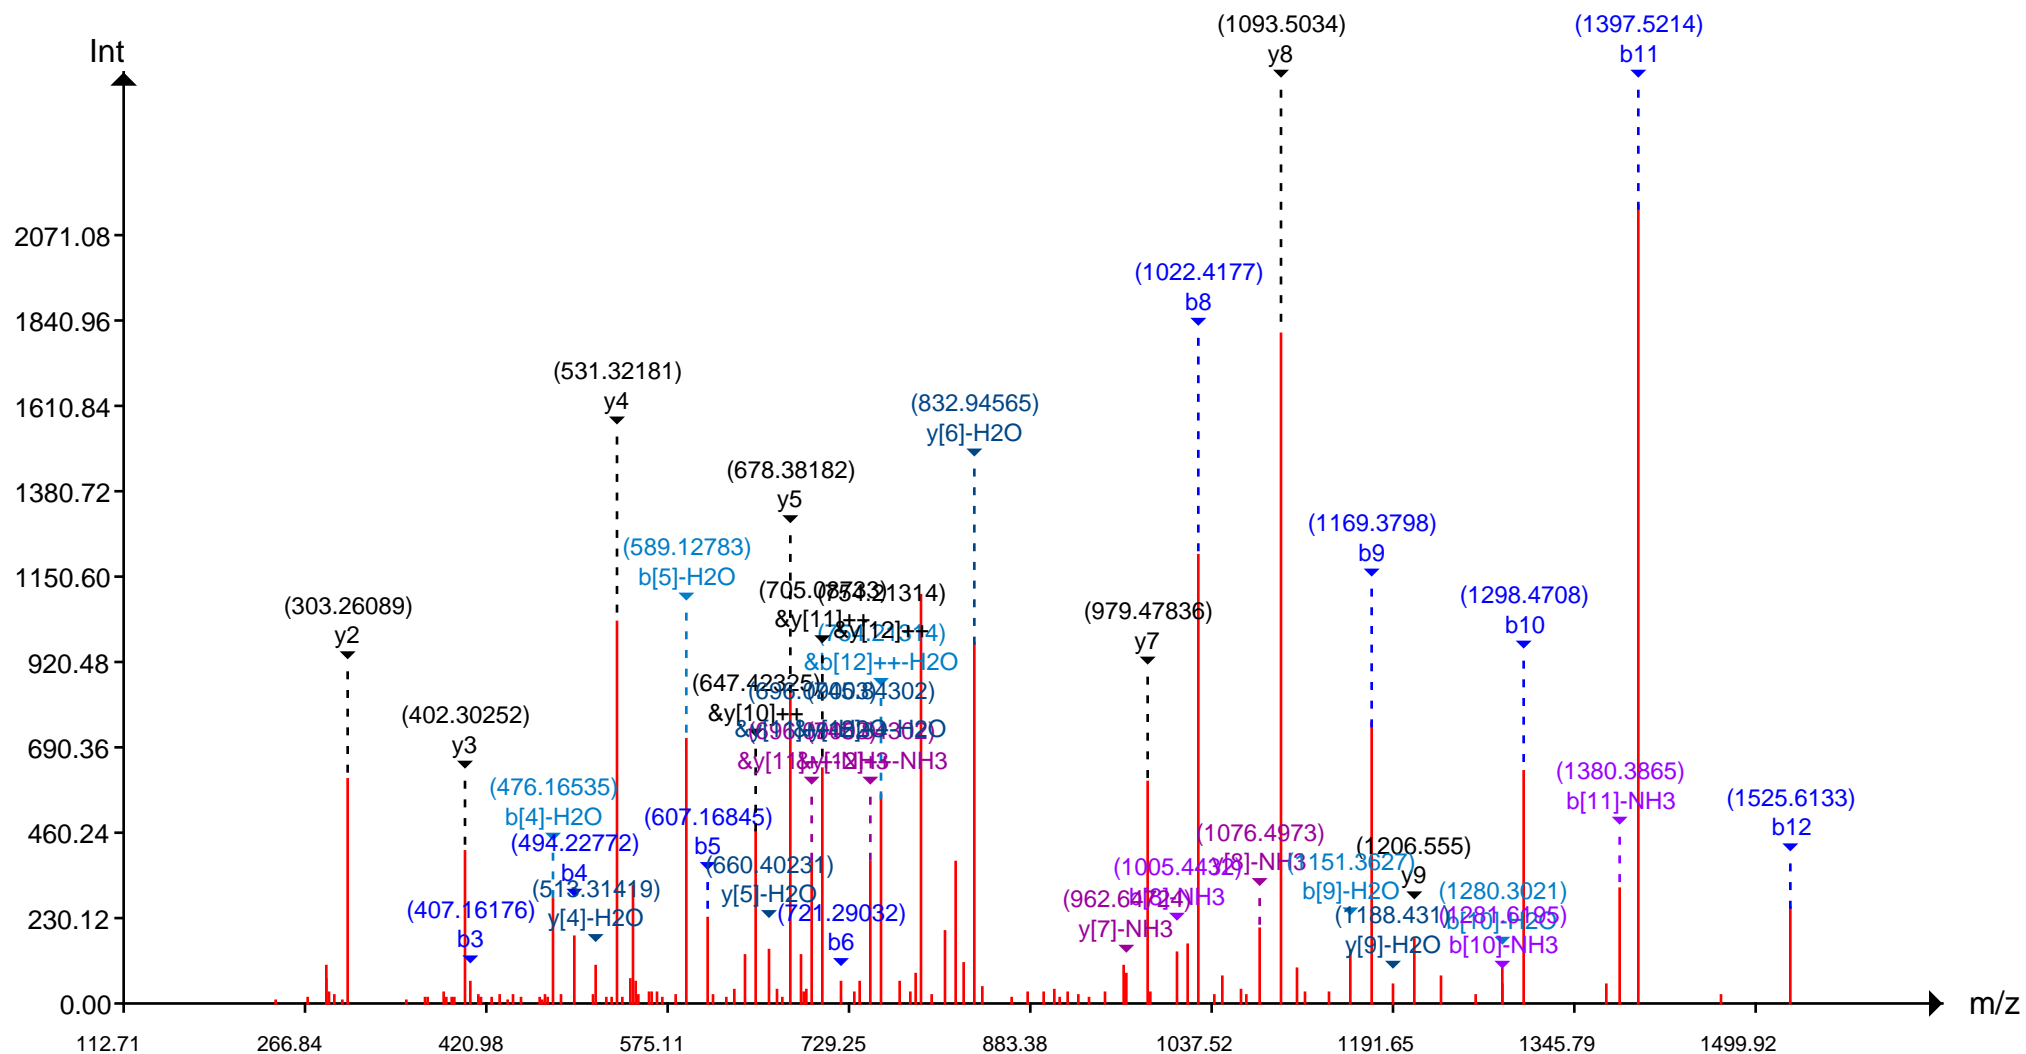

## Info

**Modified Sequence** AcD3-FVDSL NQK<AcD3K\*>M<Mox\*>EVQR-COOH

**Ion score** 54.65

**Protein** P16675

**Confidence level** 99.00%

**Precursor m/z** 850.4336

**Identity Threshold** 47.88

**Charge** 2+

**Mass error** 8.72E-4

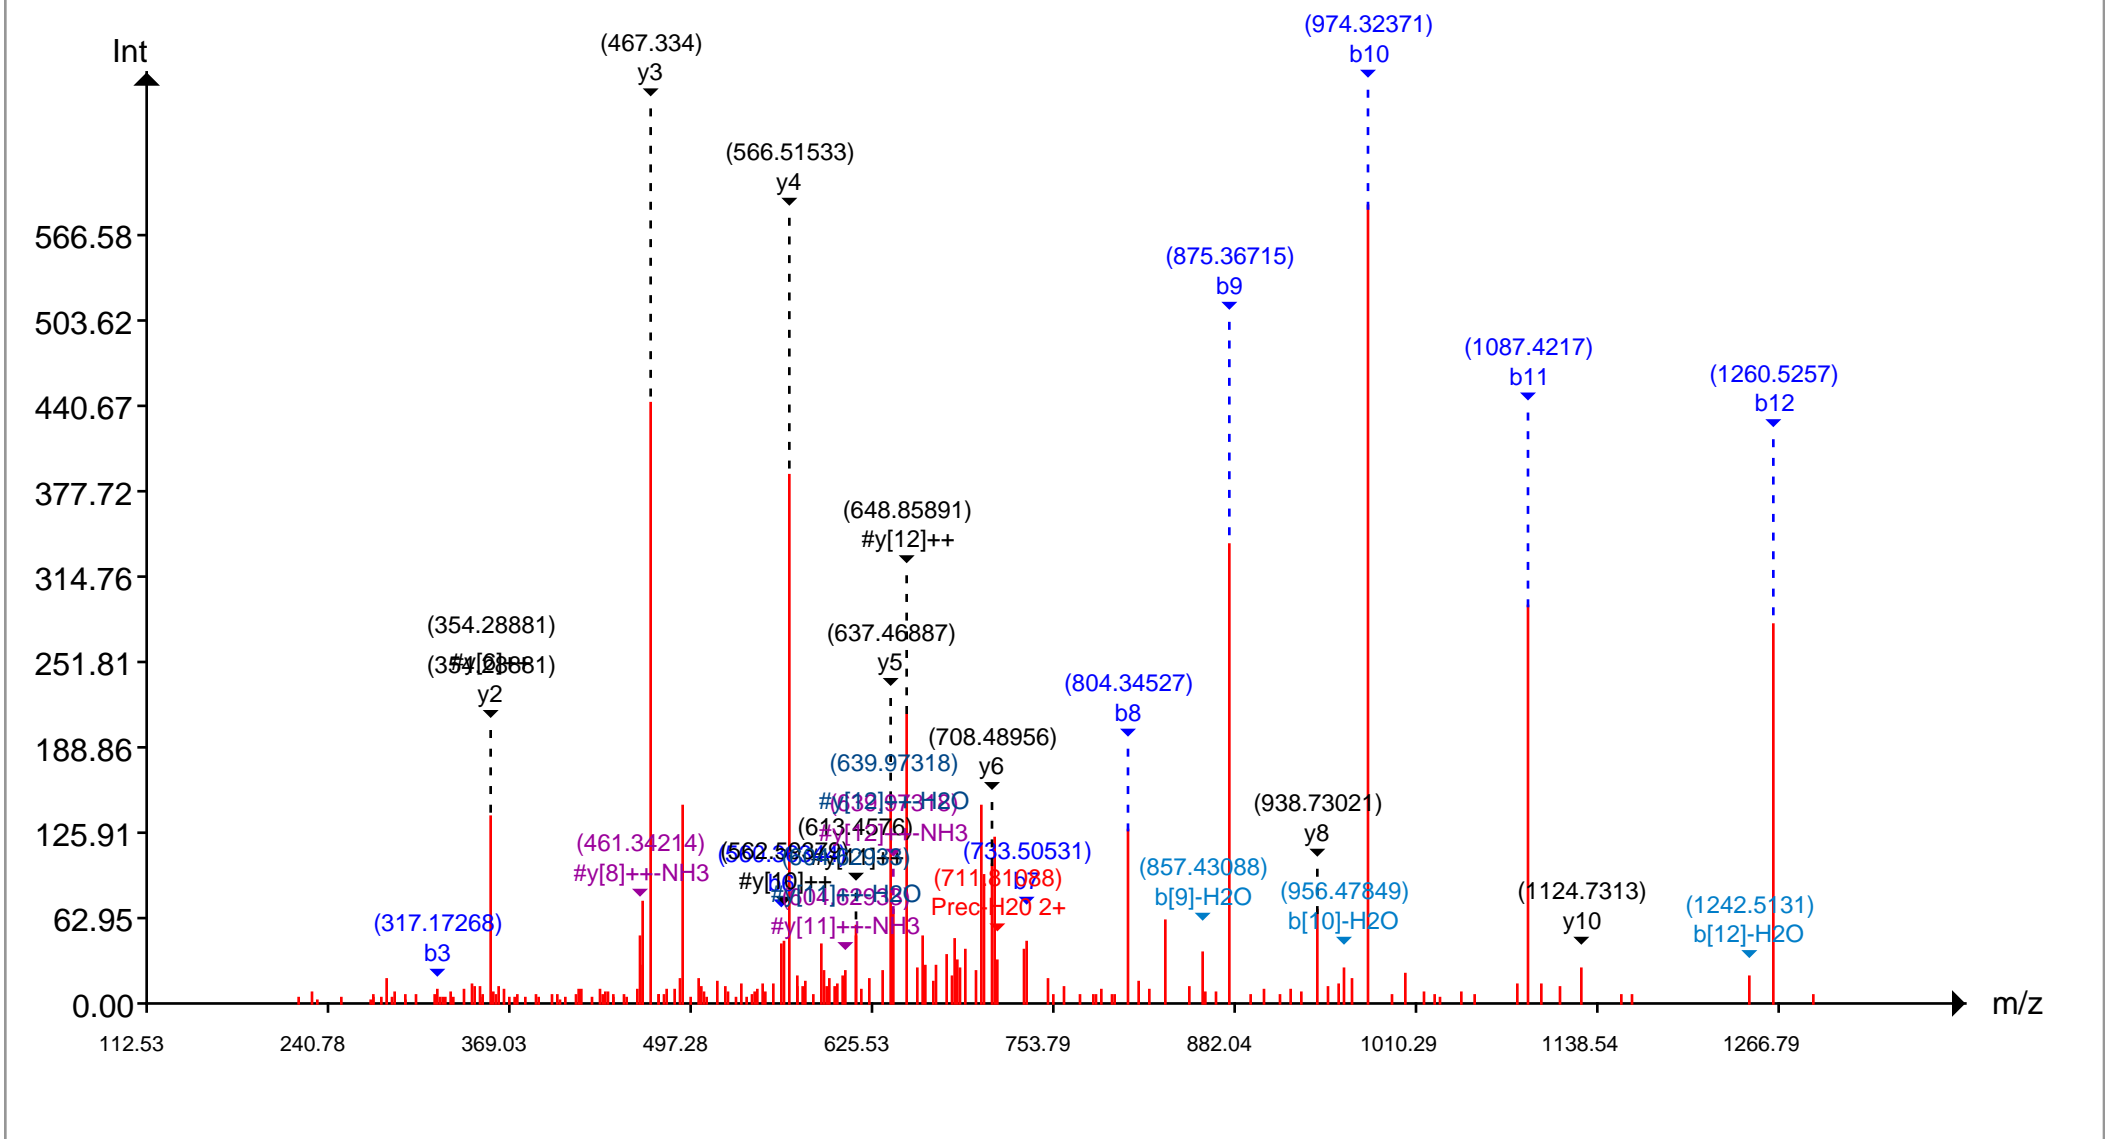

## Info

**Modified Sequence** AcD3-VATGEGK<AcD3K\*>AAVLK<AcD3K\*>R<C13>-COOH

**Ion score** 55.27

**Protein** Q9CQ60

**Confidence level** 99.00%

**Precursor m/z** 720.9454

**Identity Threshold** 41.96

**Charge** 2+

**Mass error** 8.97E-4



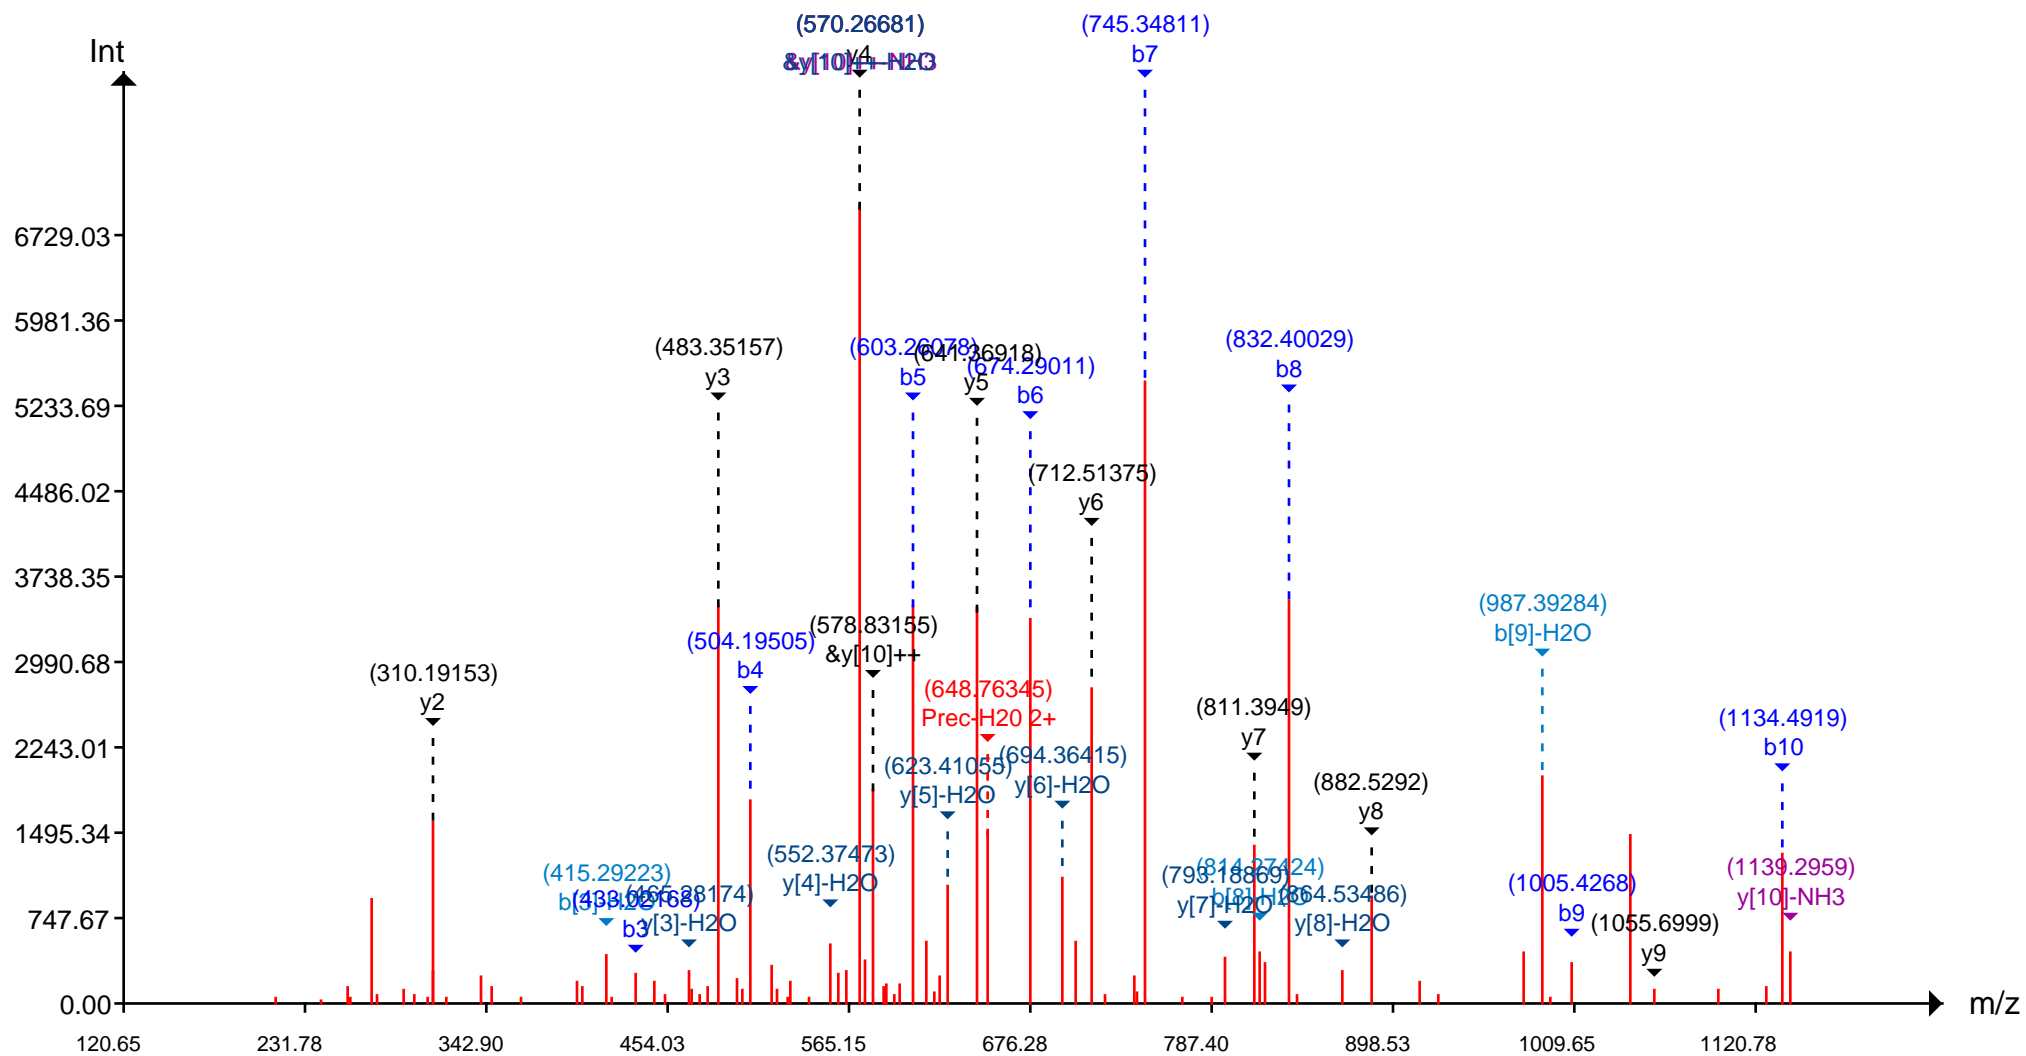

## Info

|                          |                                            |                           |         |
|--------------------------|--------------------------------------------|---------------------------|---------|
| <b>Modified Sequence</b> | AcD3-ITK<AcD3K*>AVAASK<AcD3K*>ER<C13>-COOH | <b>Ion score</b>          | 63.43   |
| <b>Protein</b>           | P15864, P43277, P43274                     | <b>Confidence level</b>   | 99.00%  |
| <b>Precursor m/z</b>     | 657.90526                                  | <b>Identity Threshold</b> | 42.82   |
| <b>Charge</b>            | 2+                                         | <b>Mass error</b>         | -5.3E-5 |



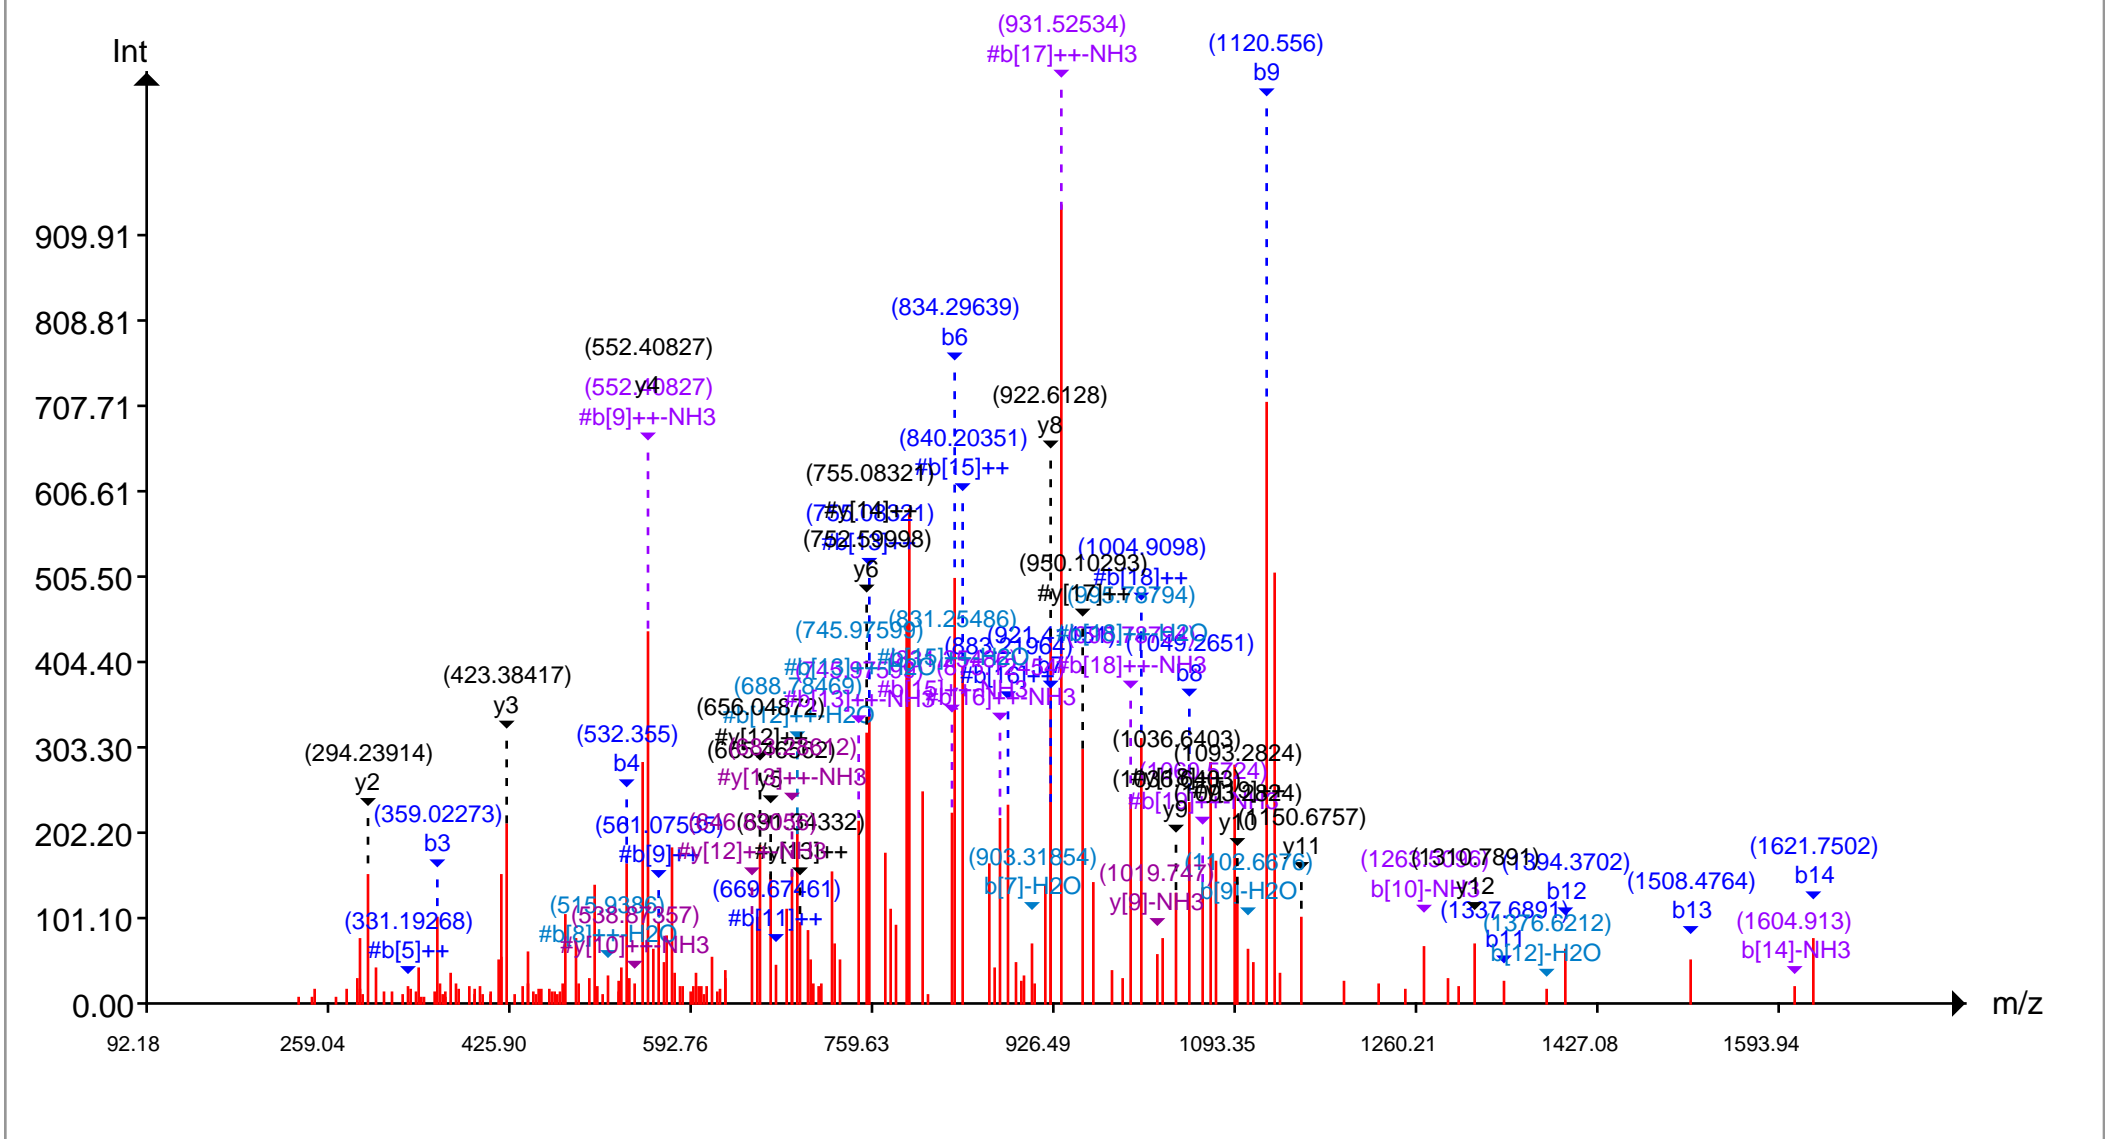

## Info

|                          |                                                            |                           |          |
|--------------------------|------------------------------------------------------------|---------------------------|----------|
| <b>Modified Sequence</b> | AcD3-AELK<AcD3K*>EK<AcD3K*>SQAC<Cmm*>GGNLGSIEELR<C13>-COOH | <b>Ion score</b>          | 63.92    |
| <b>Protein</b>           | Q99KH8                                                     | <b>Confidence level</b>   | 99.00%   |
| <b>Precursor m/z</b>     | 810.7584                                                   | <b>Identity Threshold</b> | 47.89    |
| <b>Charge</b>            | 3+                                                         | <b>Mass error</b>         | 0.002029 |

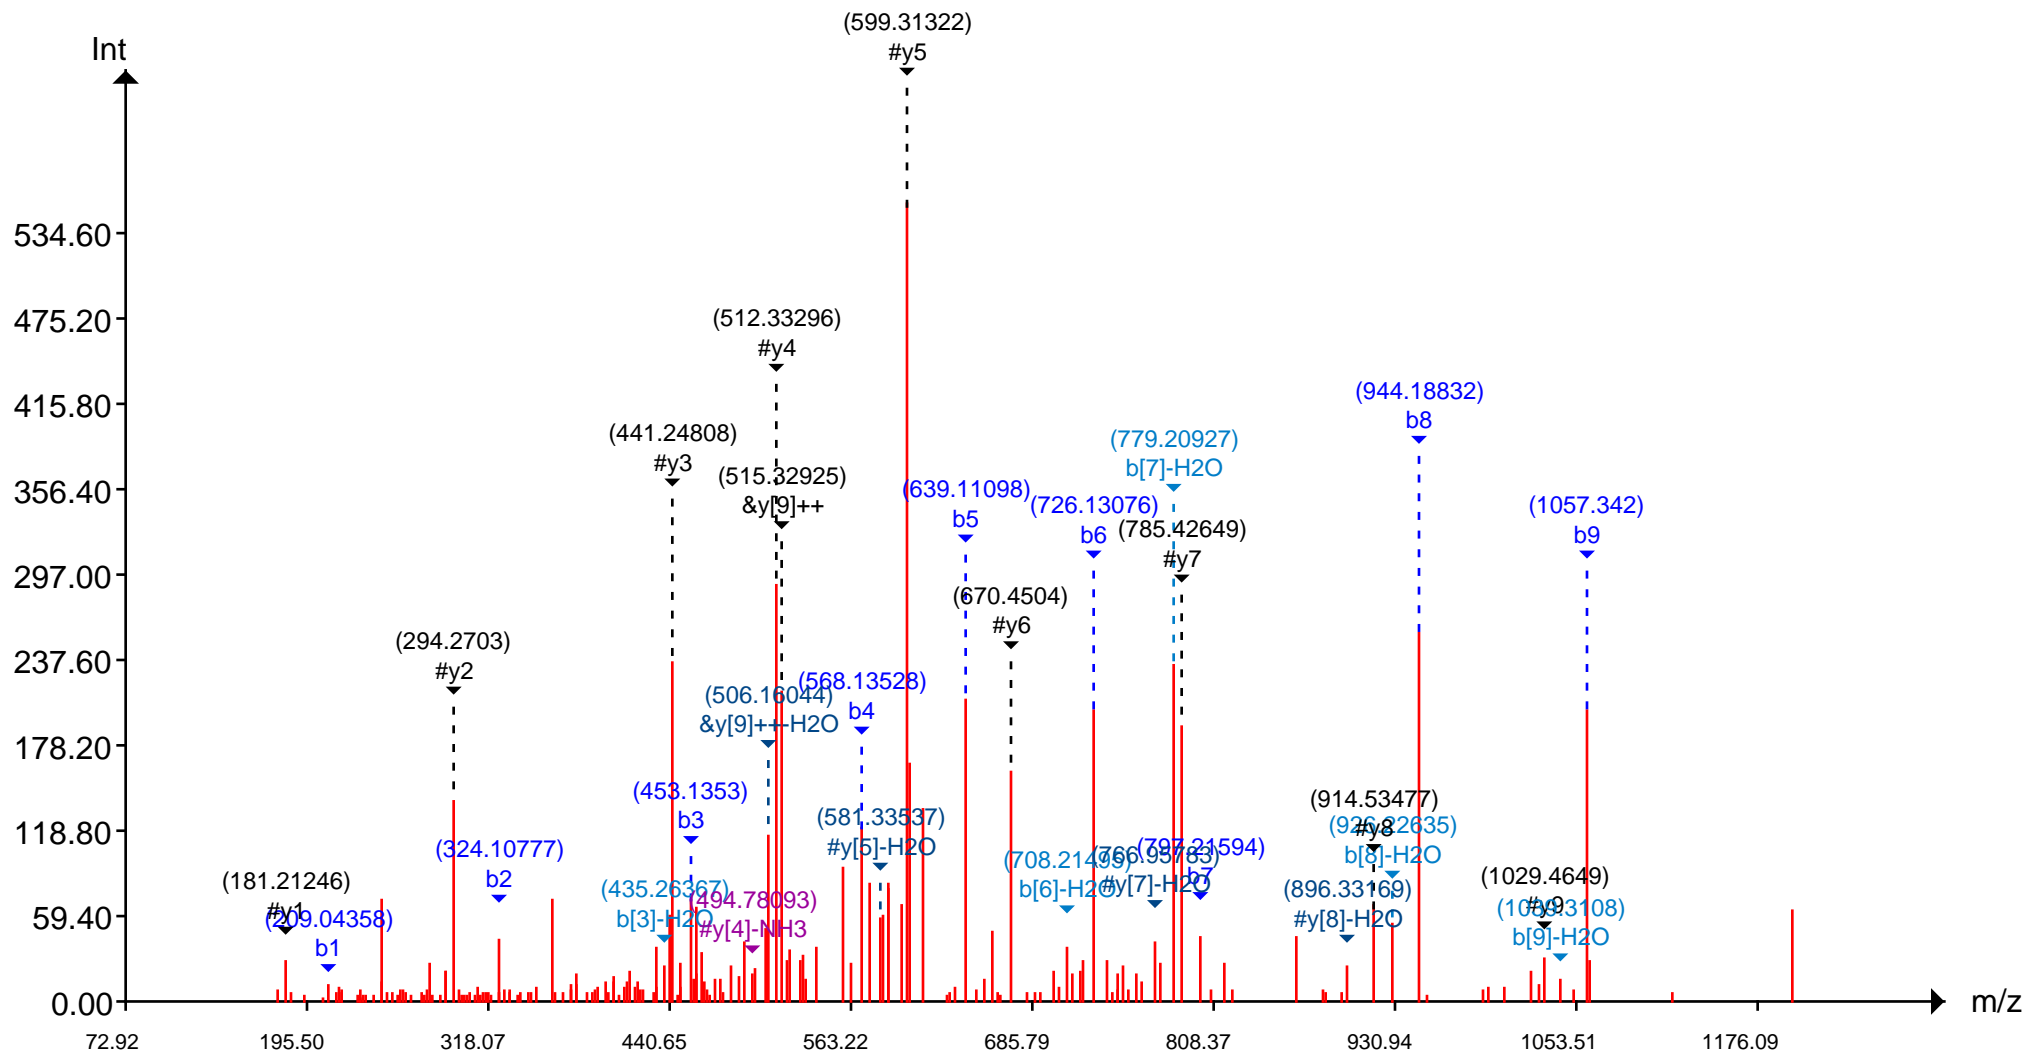

## Info

**Modified Sequence** AcD3-YDEDASAM<Mox\*>LR<C13>-COOH

**Ion score** 68.34

**Protein** Q99L47

**Confidence level** 99.00%

**Precursor m/z** 619.28105

**Identity Threshold** 44.46

**Charge** 2+

**Mass error** 8.41E-4

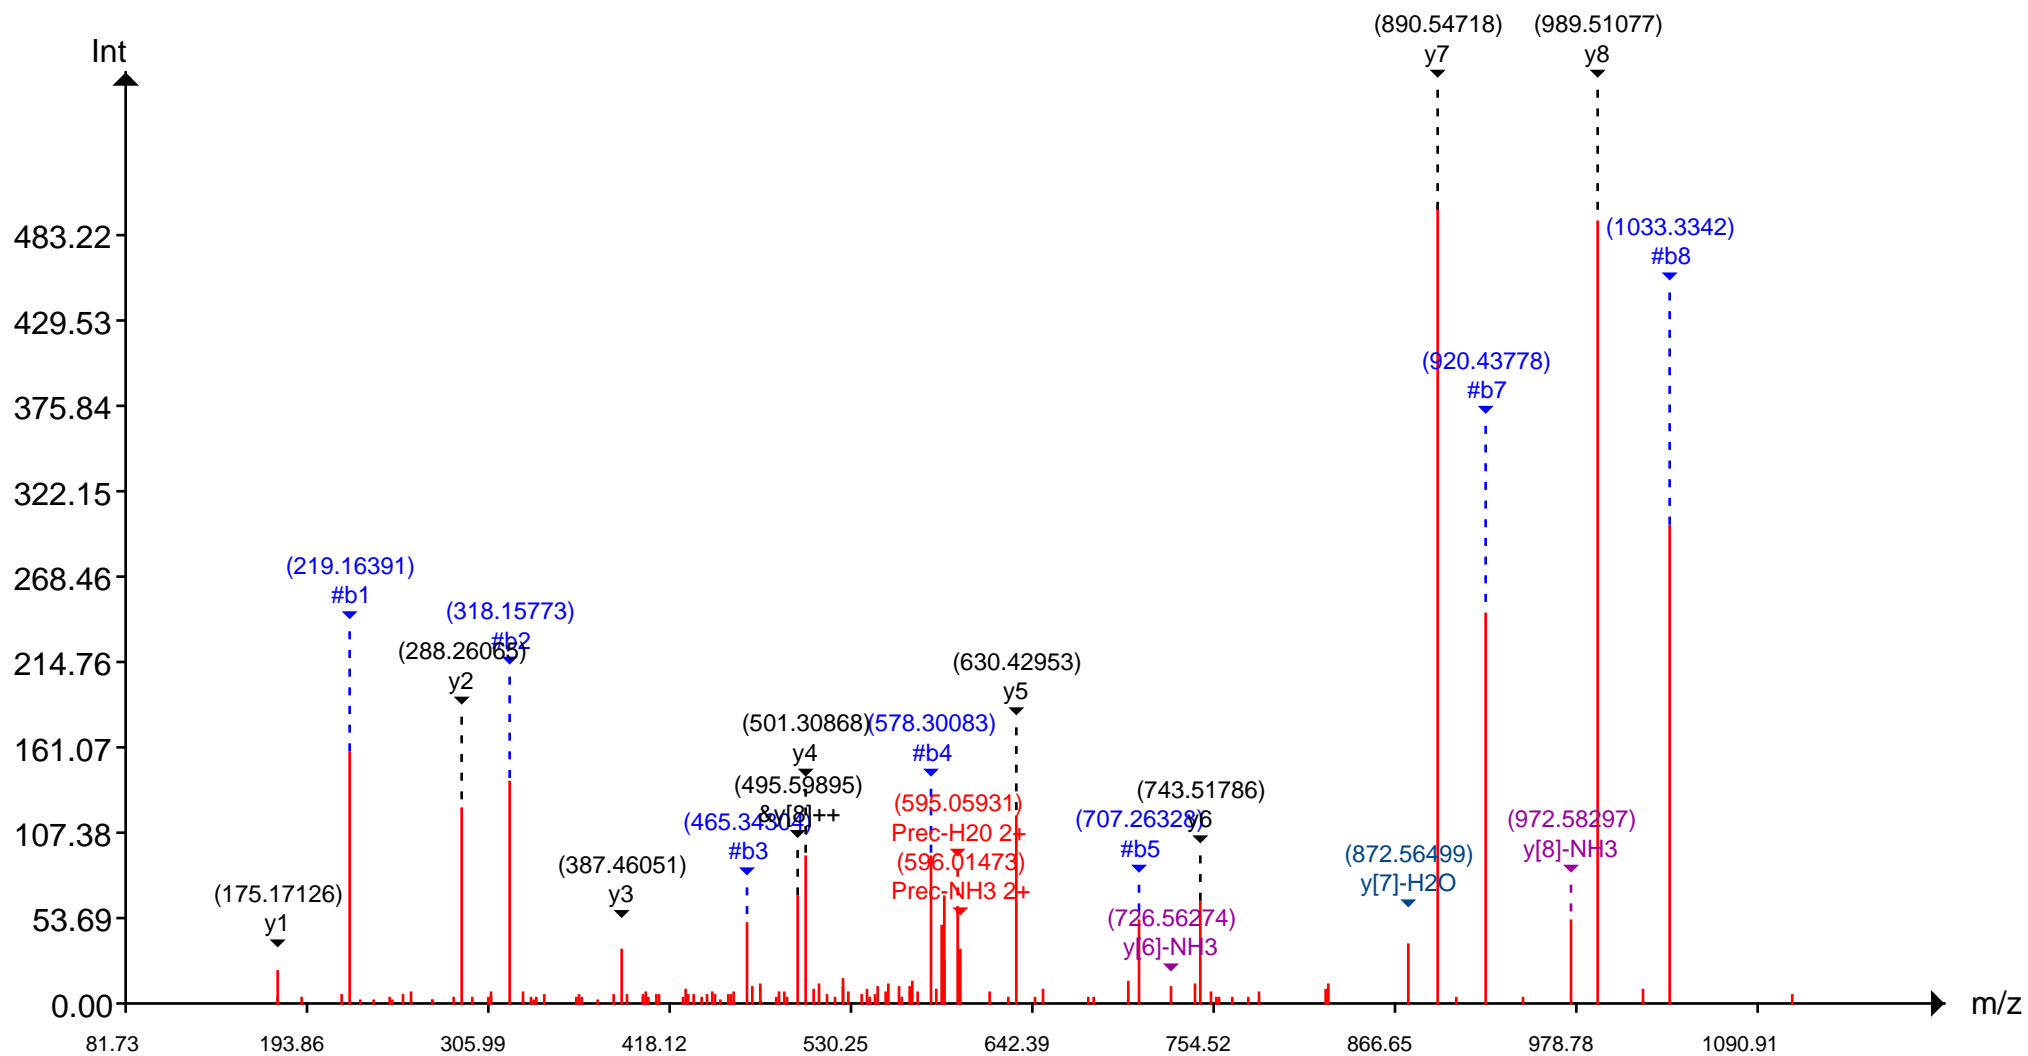

## Info

**Modified Sequence** AcD3-K<AcD3K\*>VFLENVIR-COOH

**Ion score** 78.16

**Protein** P62806

**Confidence level** 99.00%

**Precursor m/z** 604.36969

**Identity Threshold** 43.65

**Charge** 2+

**Mass error** 5.24E-4

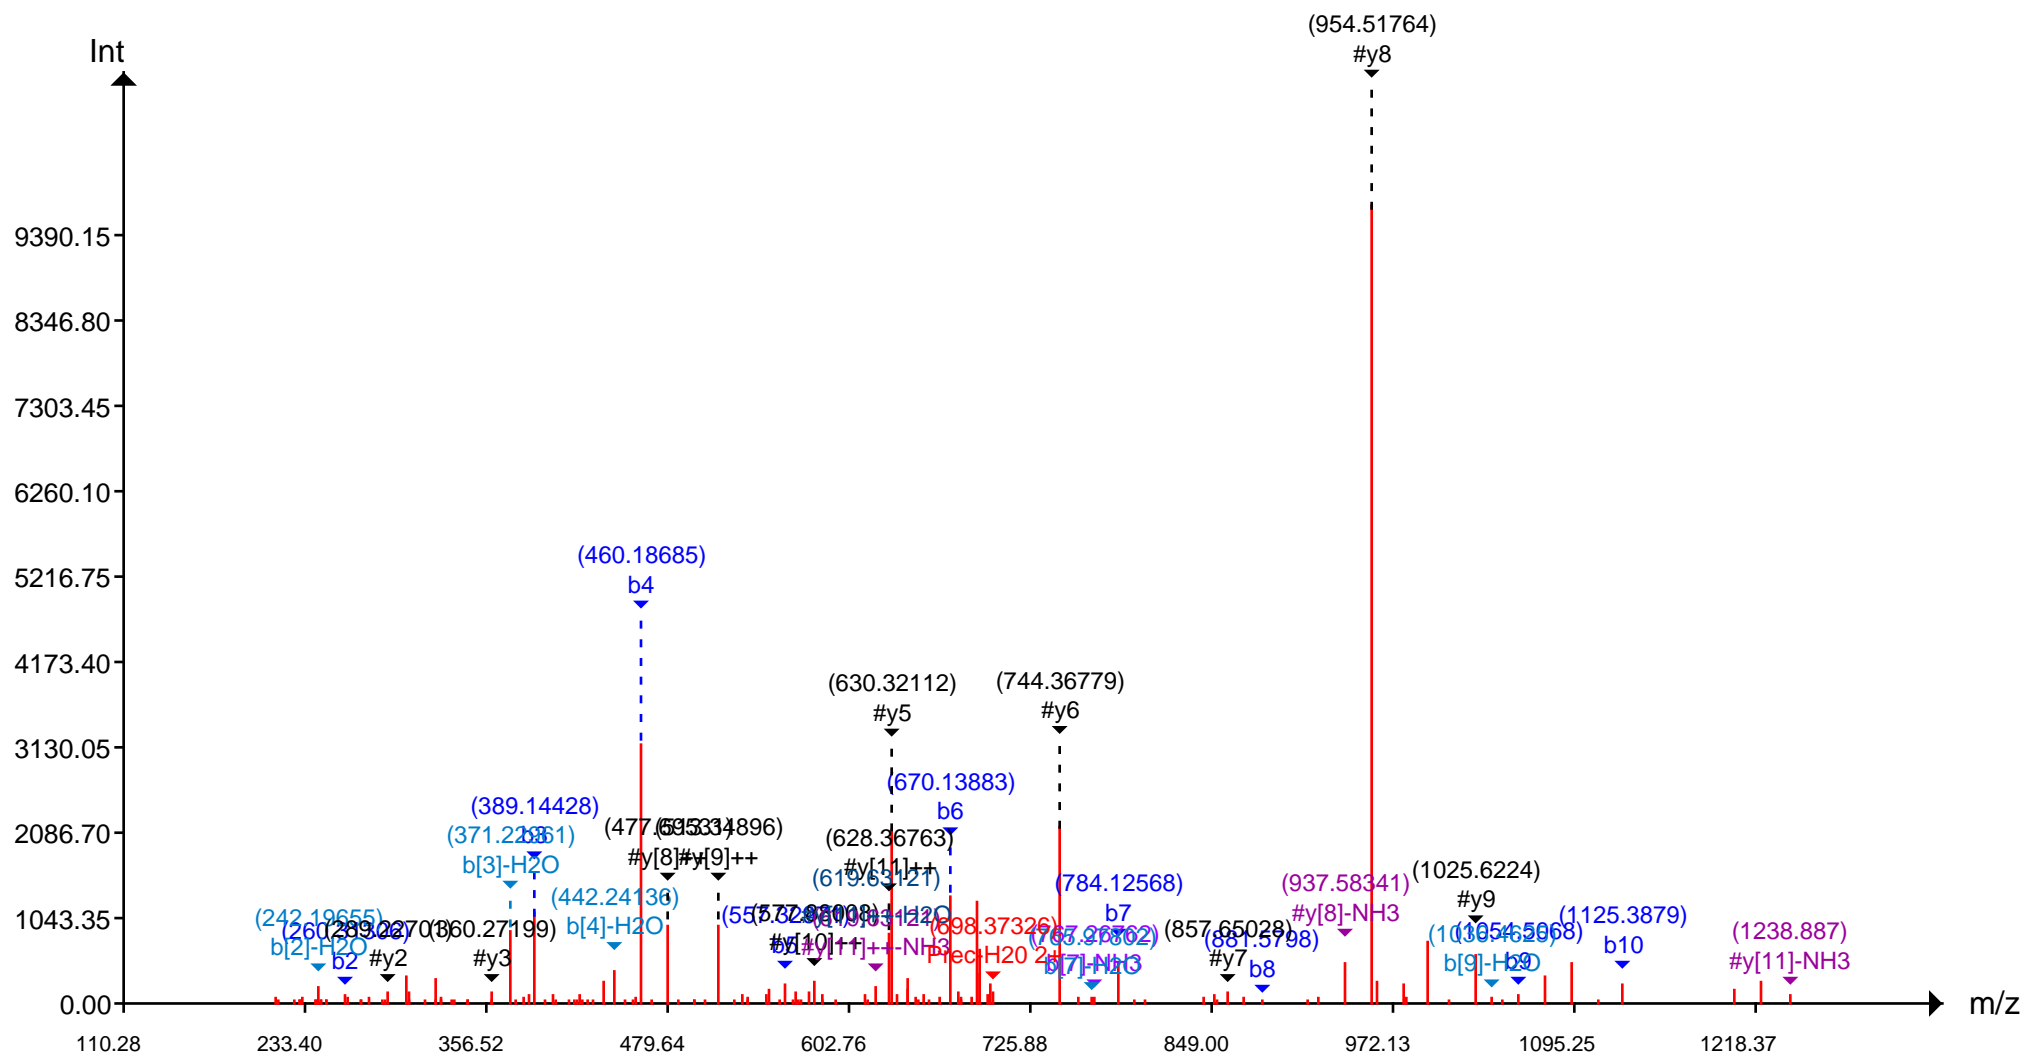

## Info

|                          |                                                |                           |         |
|--------------------------|------------------------------------------------|---------------------------|---------|
| <b>Modified Sequence</b> | AcD3-LTEAPLNPK<AcD3K*>ANR-COOH                 | <b>Ion score</b>          | 58.82   |
| <b>Protein</b>           | P62737, P60710, P68033, P63260, P63268, P68134 | <b>Confidence level</b>   | 99.00%  |
| <b>Precursor m/z</b>     | 707.40359                                      | <b>Identity Threshold</b> | 46.76   |
| <b>Charge</b>            | 2+                                             | <b>Mass error</b>         | 0.00323 |

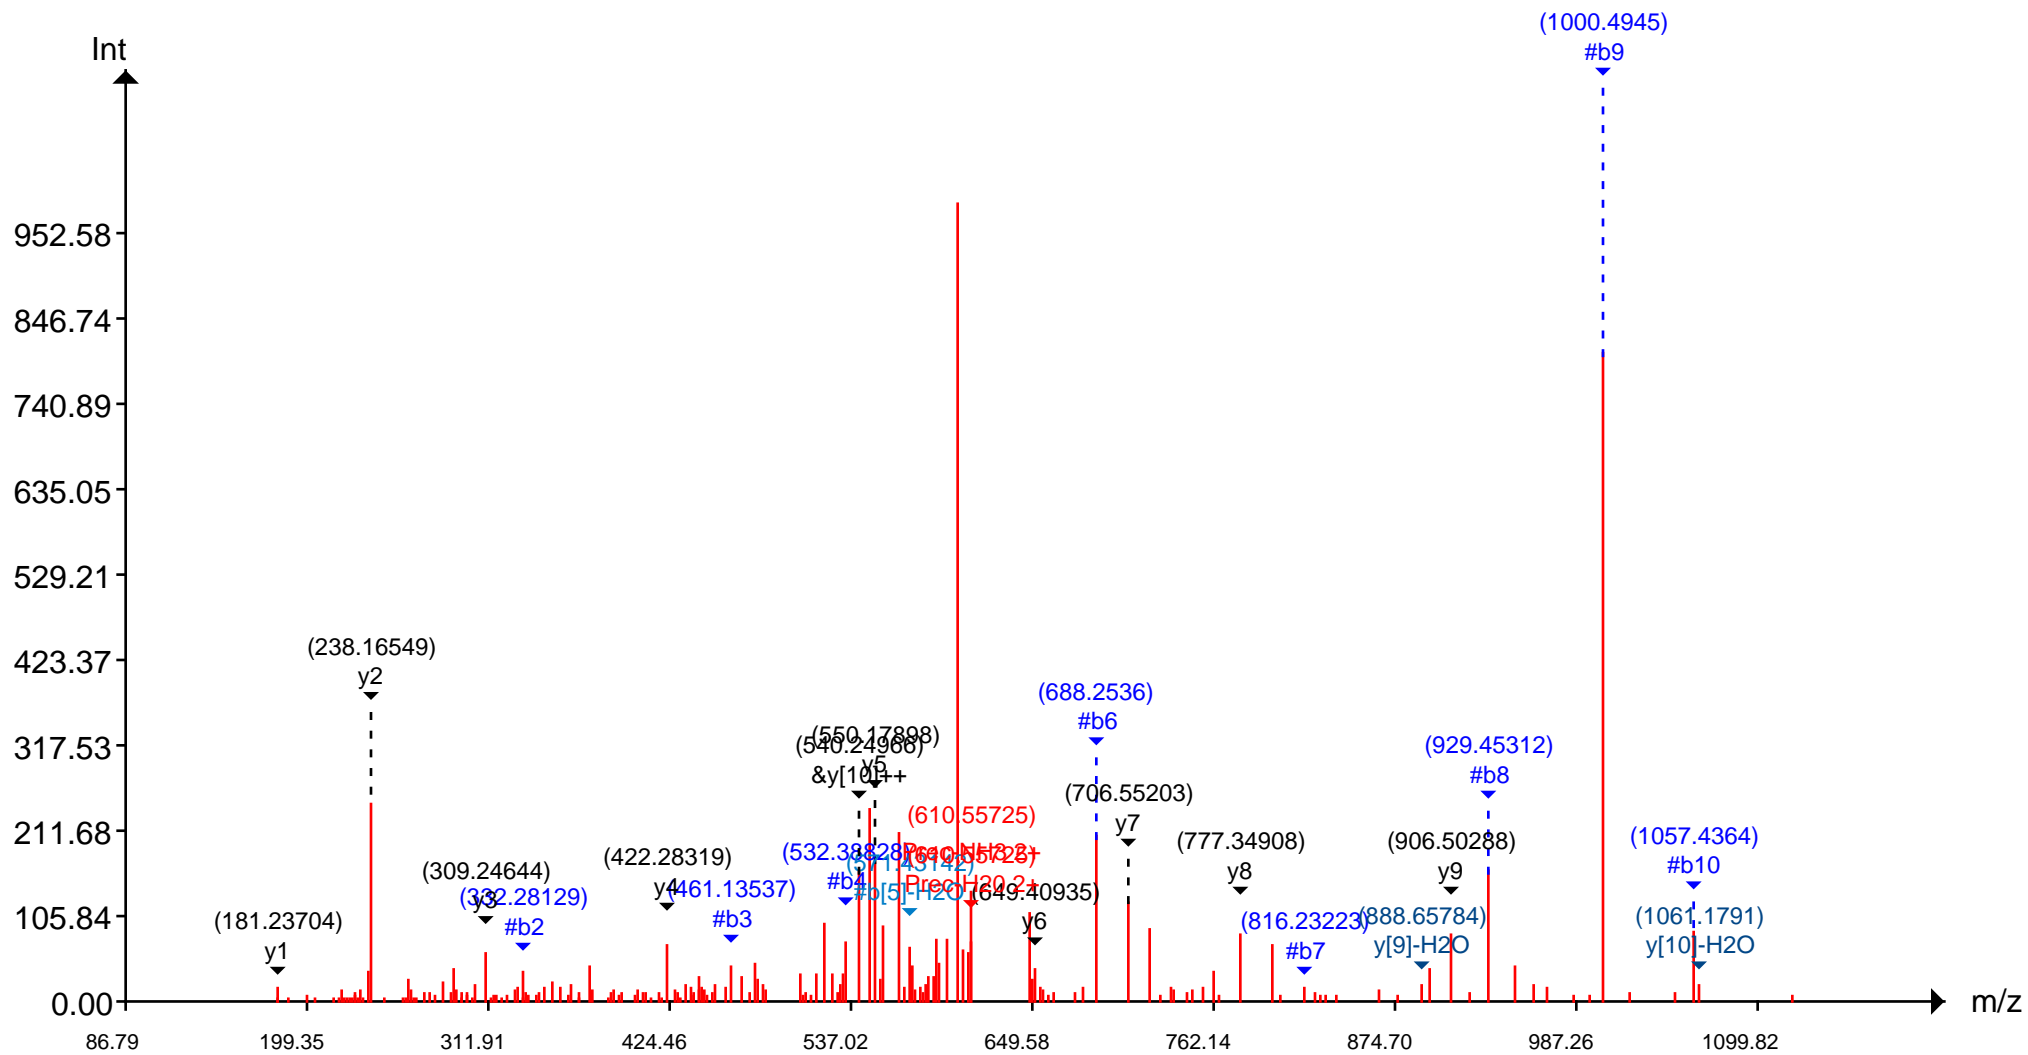

## Info

**Modified Sequence** AcD3-IK<AcD3K\*>EAGVQIAGR<C13>-COOH

**Ion score** 46.55

**Protein** Q922D8

**Confidence level** 99.00%

**Precursor m/z** 619.37819

**Identity Threshold** 43.50

**Charge** 2+

**Mass error** 0.001411

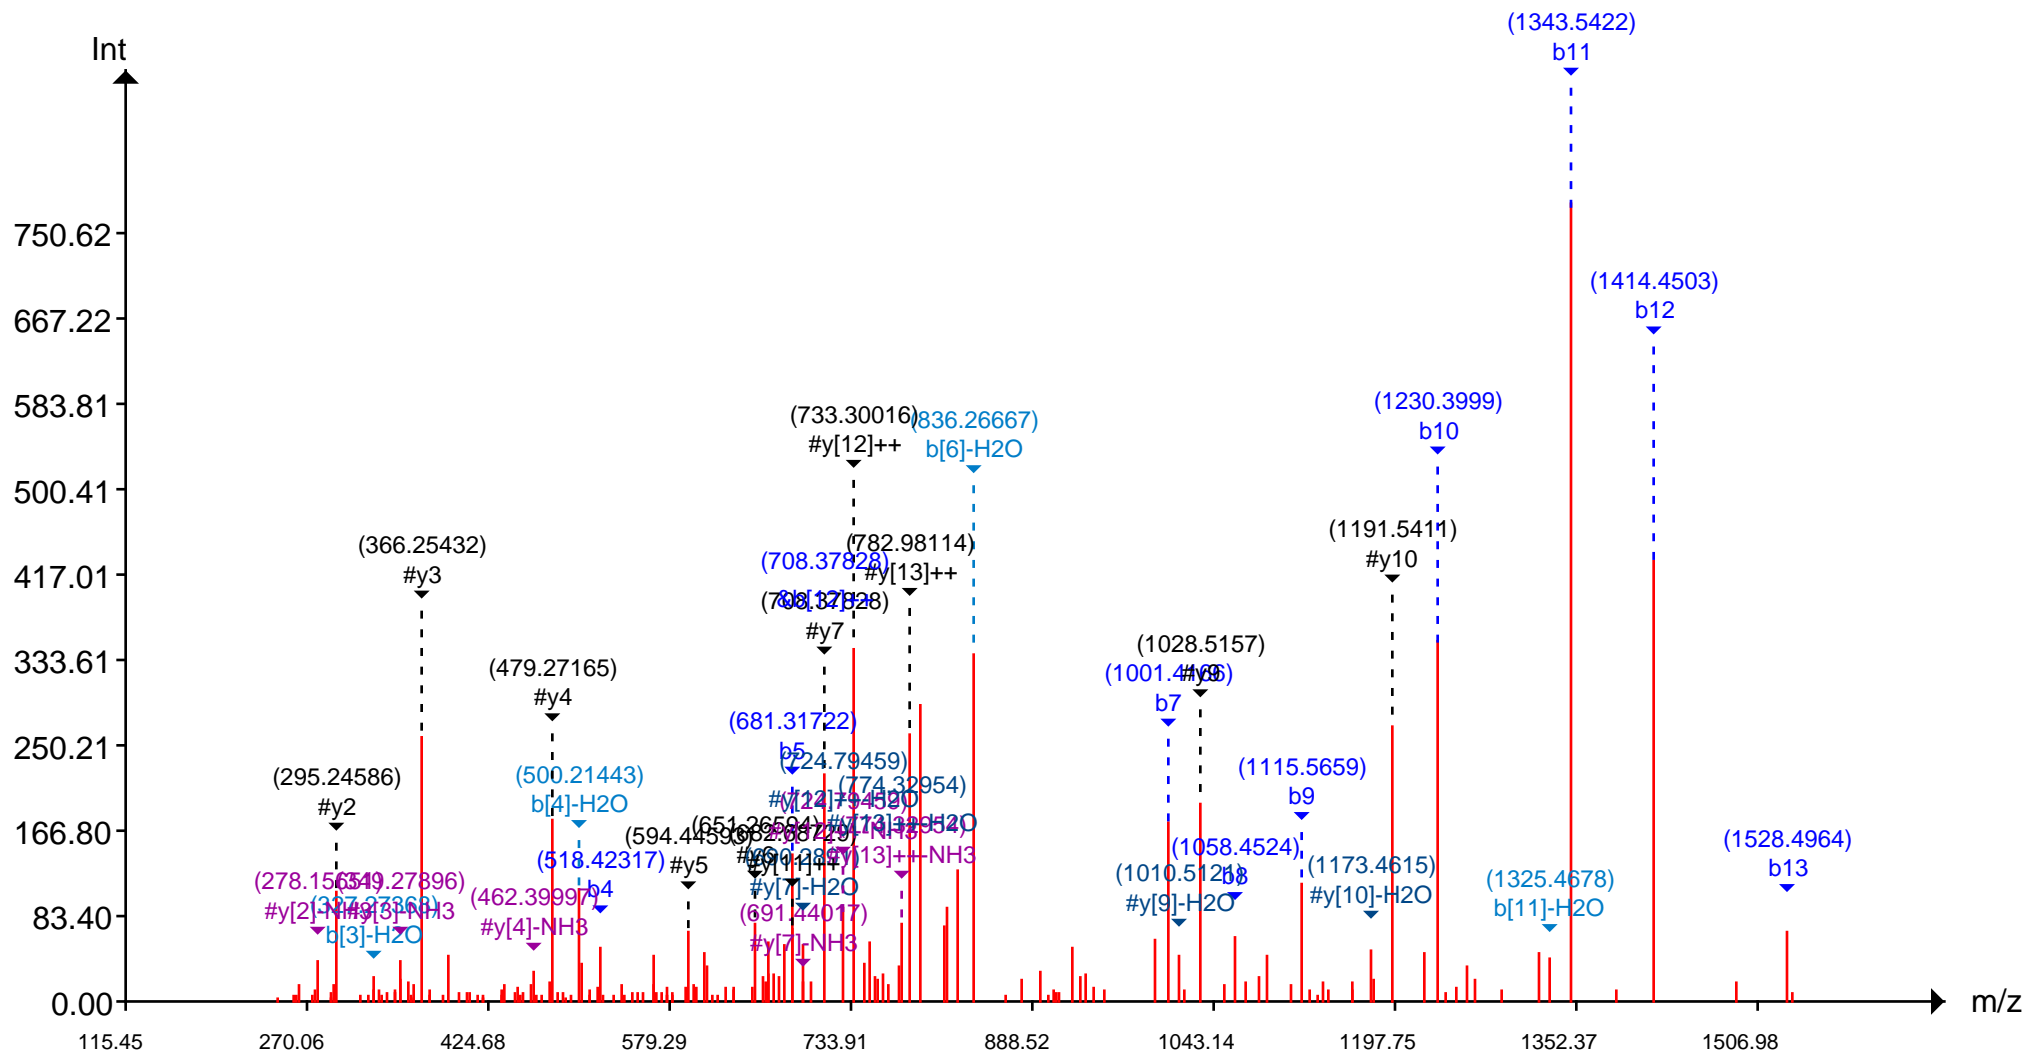

## Info

|                          |                                                     |                           |          |
|--------------------------|-----------------------------------------------------|---------------------------|----------|
| <b>Modified Sequence</b> | AcD3-VVTK<AcD3K*>YK<AcD3K*>M<Mox*>GGDIANR<C13>-COOH | <b>Ion score</b>          | 62.12    |
| <b>Protein</b>           | P50580                                              | <b>Confidence level</b>   | 99.00%   |
| <b>Precursor m/z</b>     | 854.9722                                            | <b>Identity Threshold</b> | 47.44    |
| <b>Charge</b>            | 2+                                                  | <b>Mass error</b>         | 0.002709 |



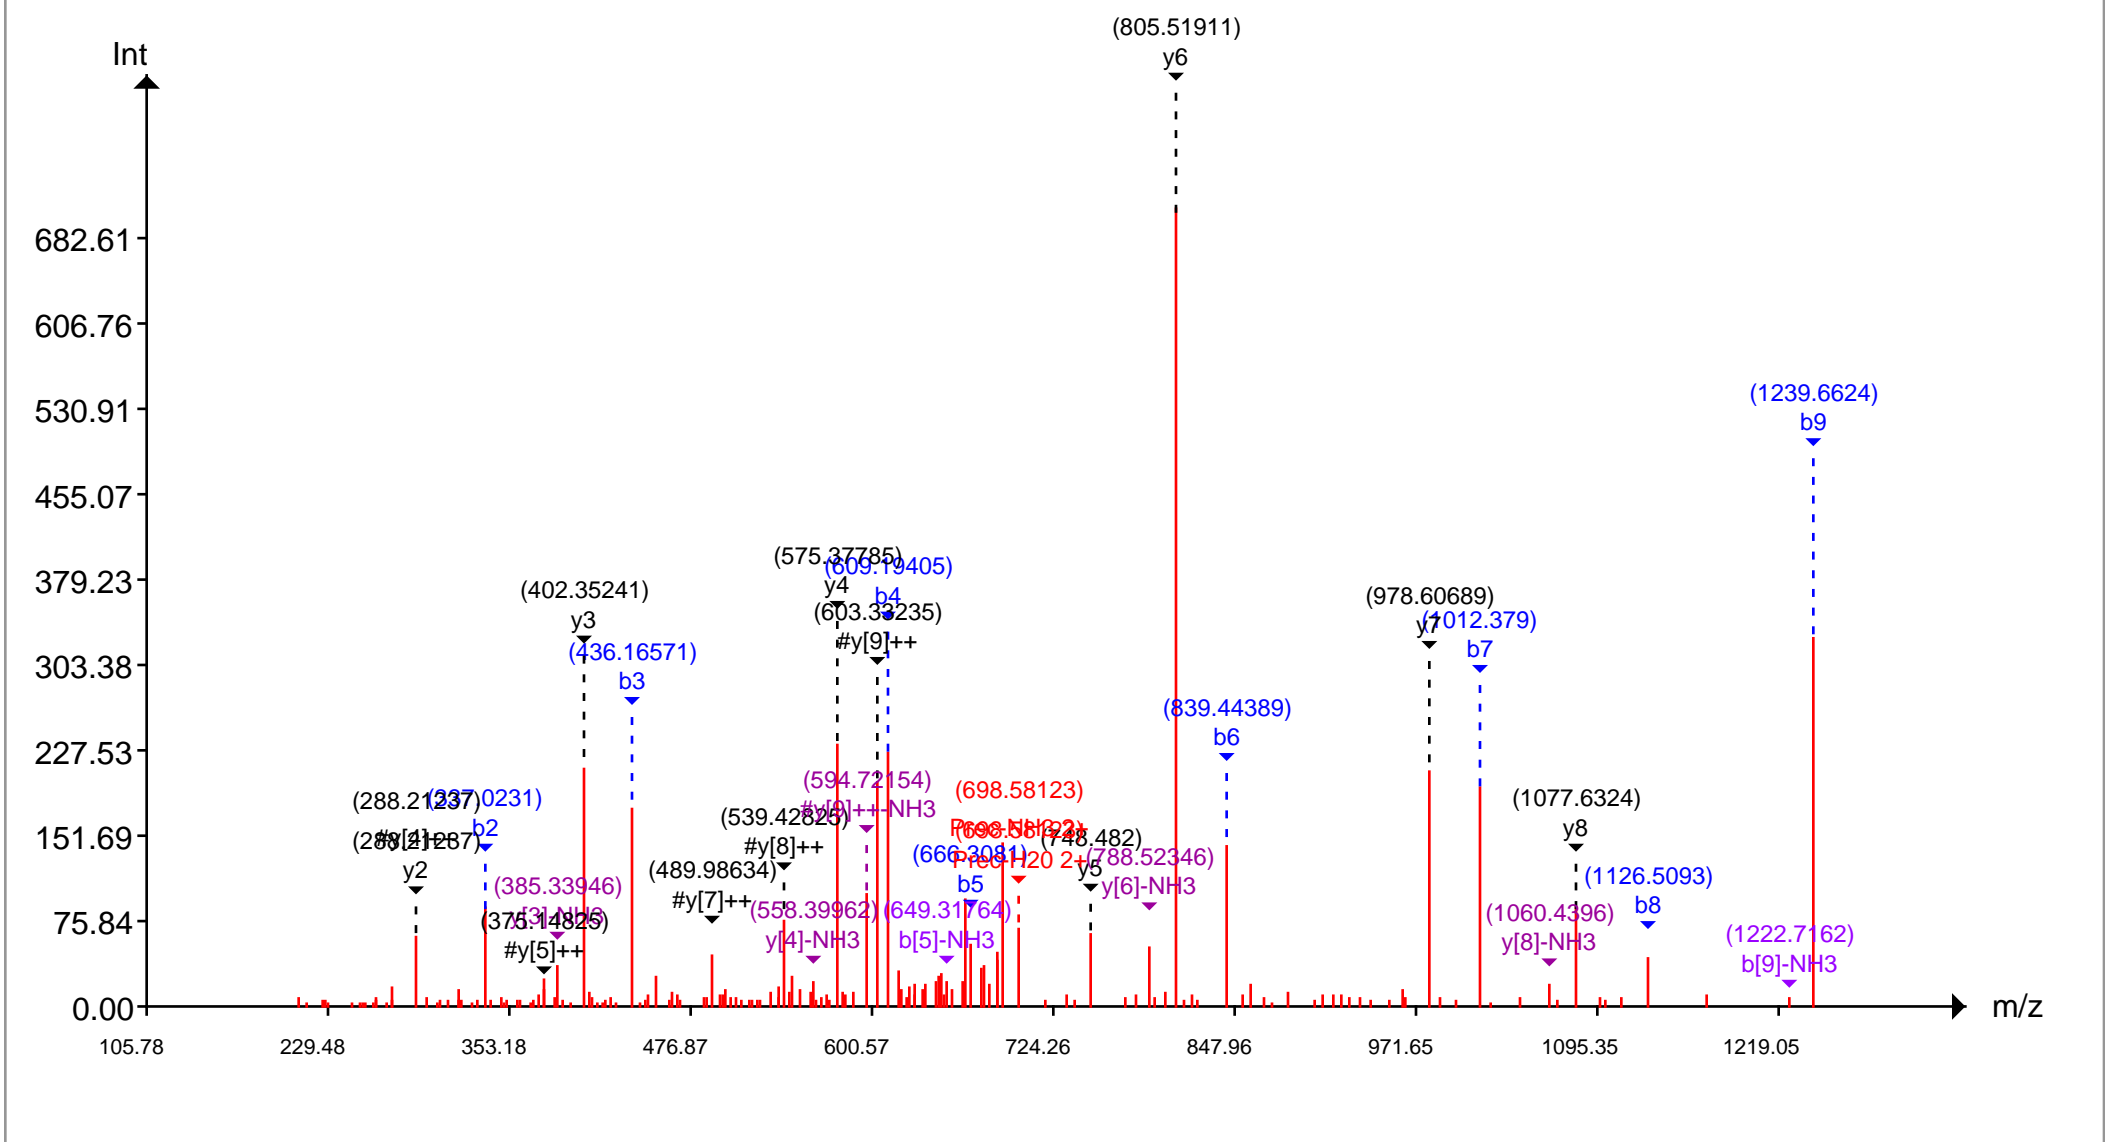

## Info

**Modified Sequence** AcD3-YQVK<AcD3K\*>GK<AcD3K\*>K<AcD3K\*>NIR-COOH

**Ion score** 61.79

**Protein** P24452

**Confidence level** 99.00%

**Precursor m/z** 707.43405

**Identity Threshold** 42.44

**Charge** 2+

**Mass error** 6.43E-4

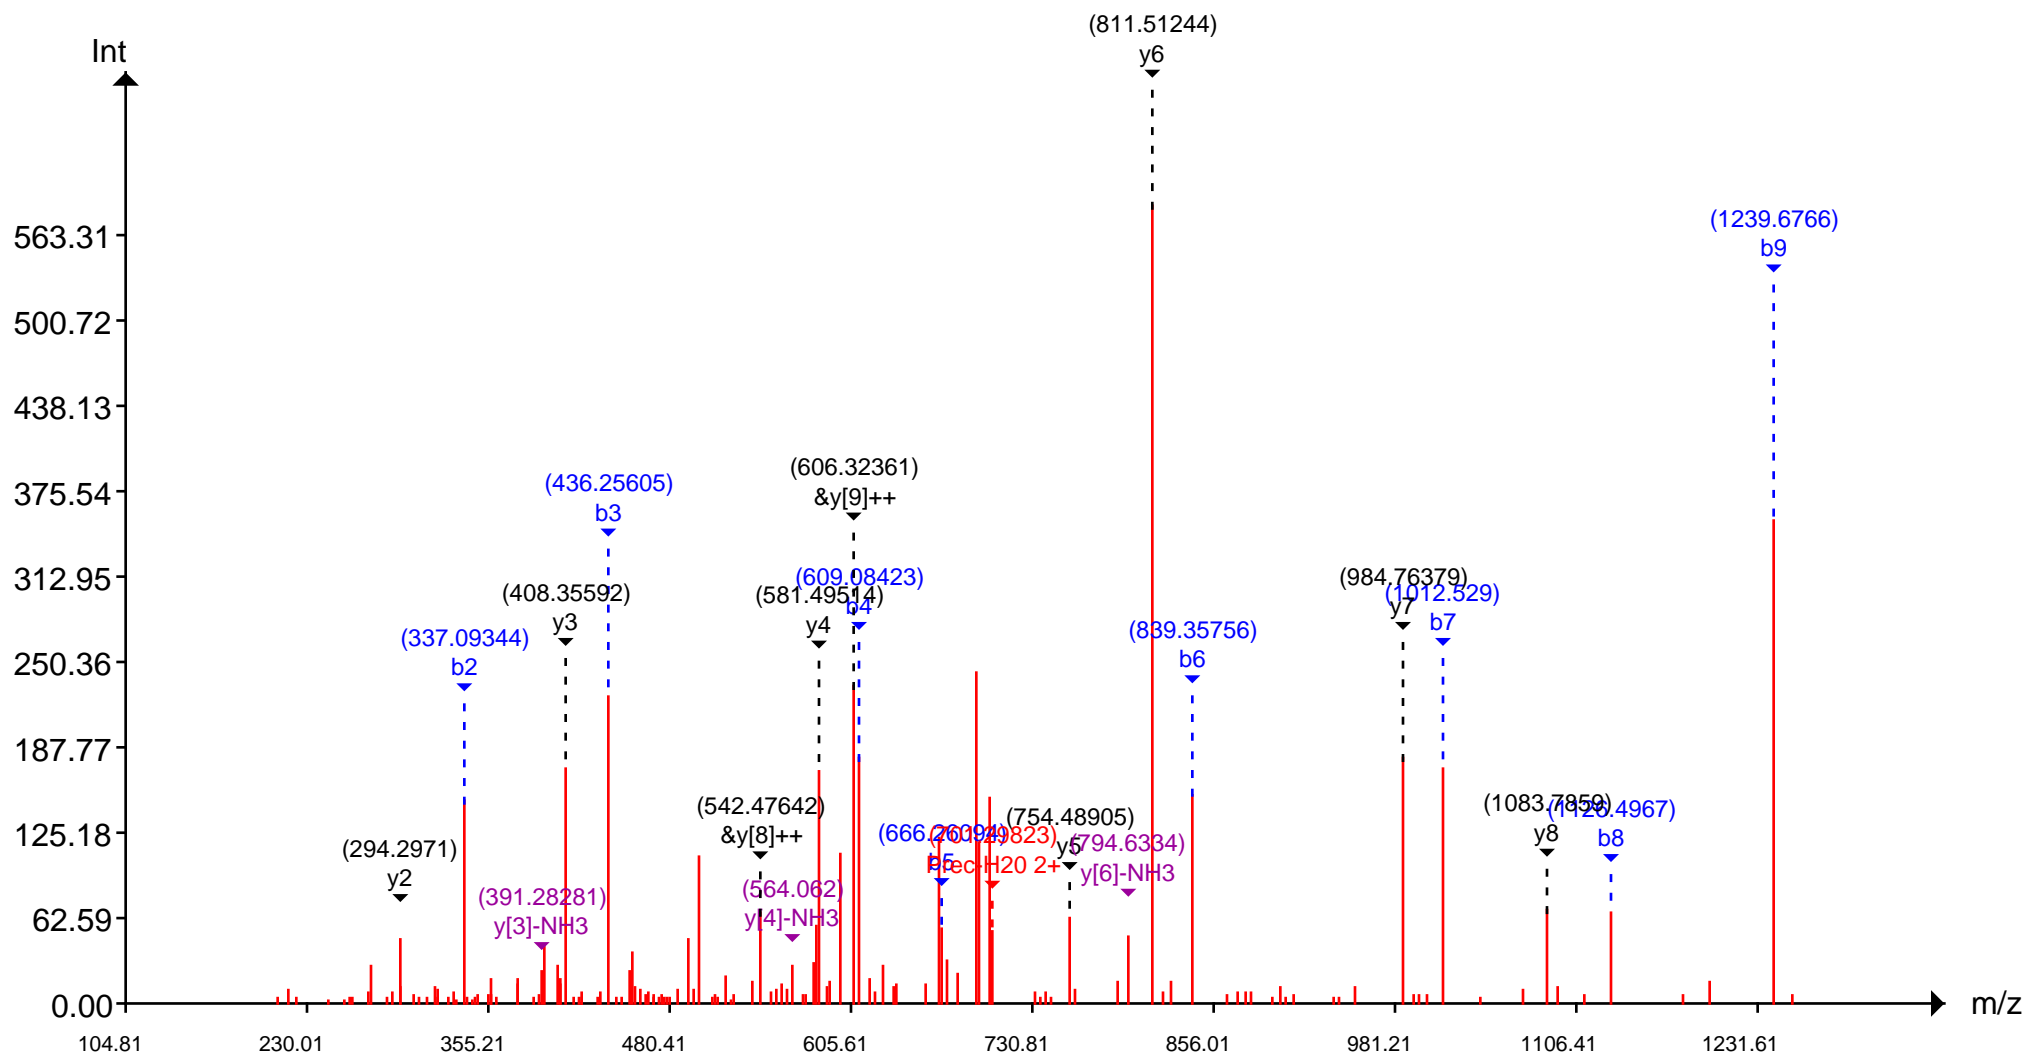

## Info

|                          |                                                   |                           |          |
|--------------------------|---------------------------------------------------|---------------------------|----------|
| <b>Modified Sequence</b> | AcD3-YQVK<AcD3K*>GK<AcD3K*>K<AcD3K*>NIR<C13>-COOH | <b>Ion score</b>          | 50.03    |
| <b>Protein</b>           | P24452                                            | <b>Confidence level</b>   | 99.00%   |
| <b>Precursor m/z</b>     | 710.44437                                         | <b>Identity Threshold</b> | 40.64    |
| <b>Charge</b>            | 2+                                                | <b>Mass error</b>         | 0.001141 |

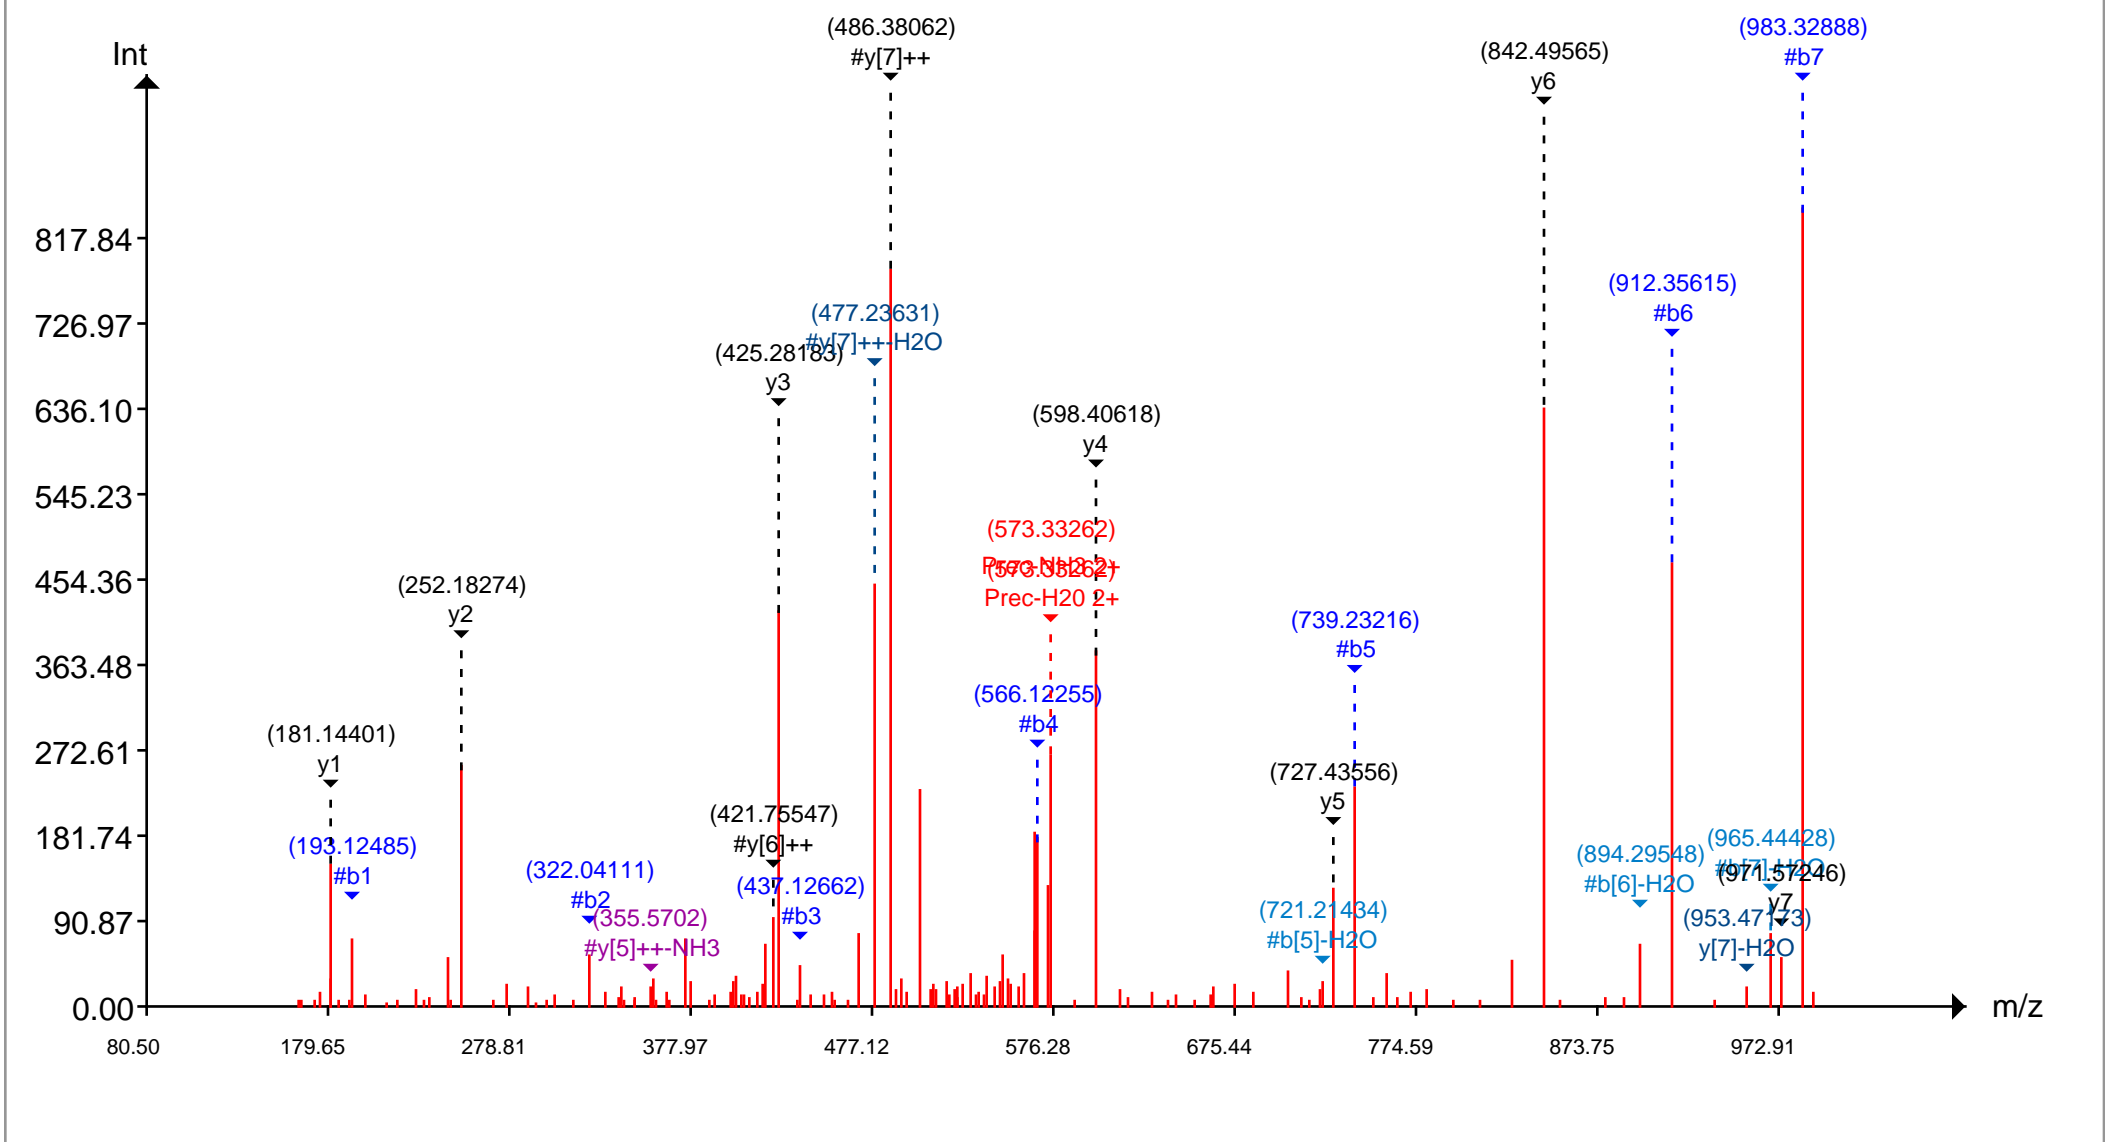

## Info

**Modified Sequence** AcD3-FEDEK<AcD3K\*>K<AcD3K\*>AR<C13>-COOH

**Ion score** 55.96

**Protein** P50580

**Confidence level** 99.00%

**Precursor m/z** 582.3211

**Identity Threshold** 47.87

**Charge** 2+

**Mass error** 8.5E-5

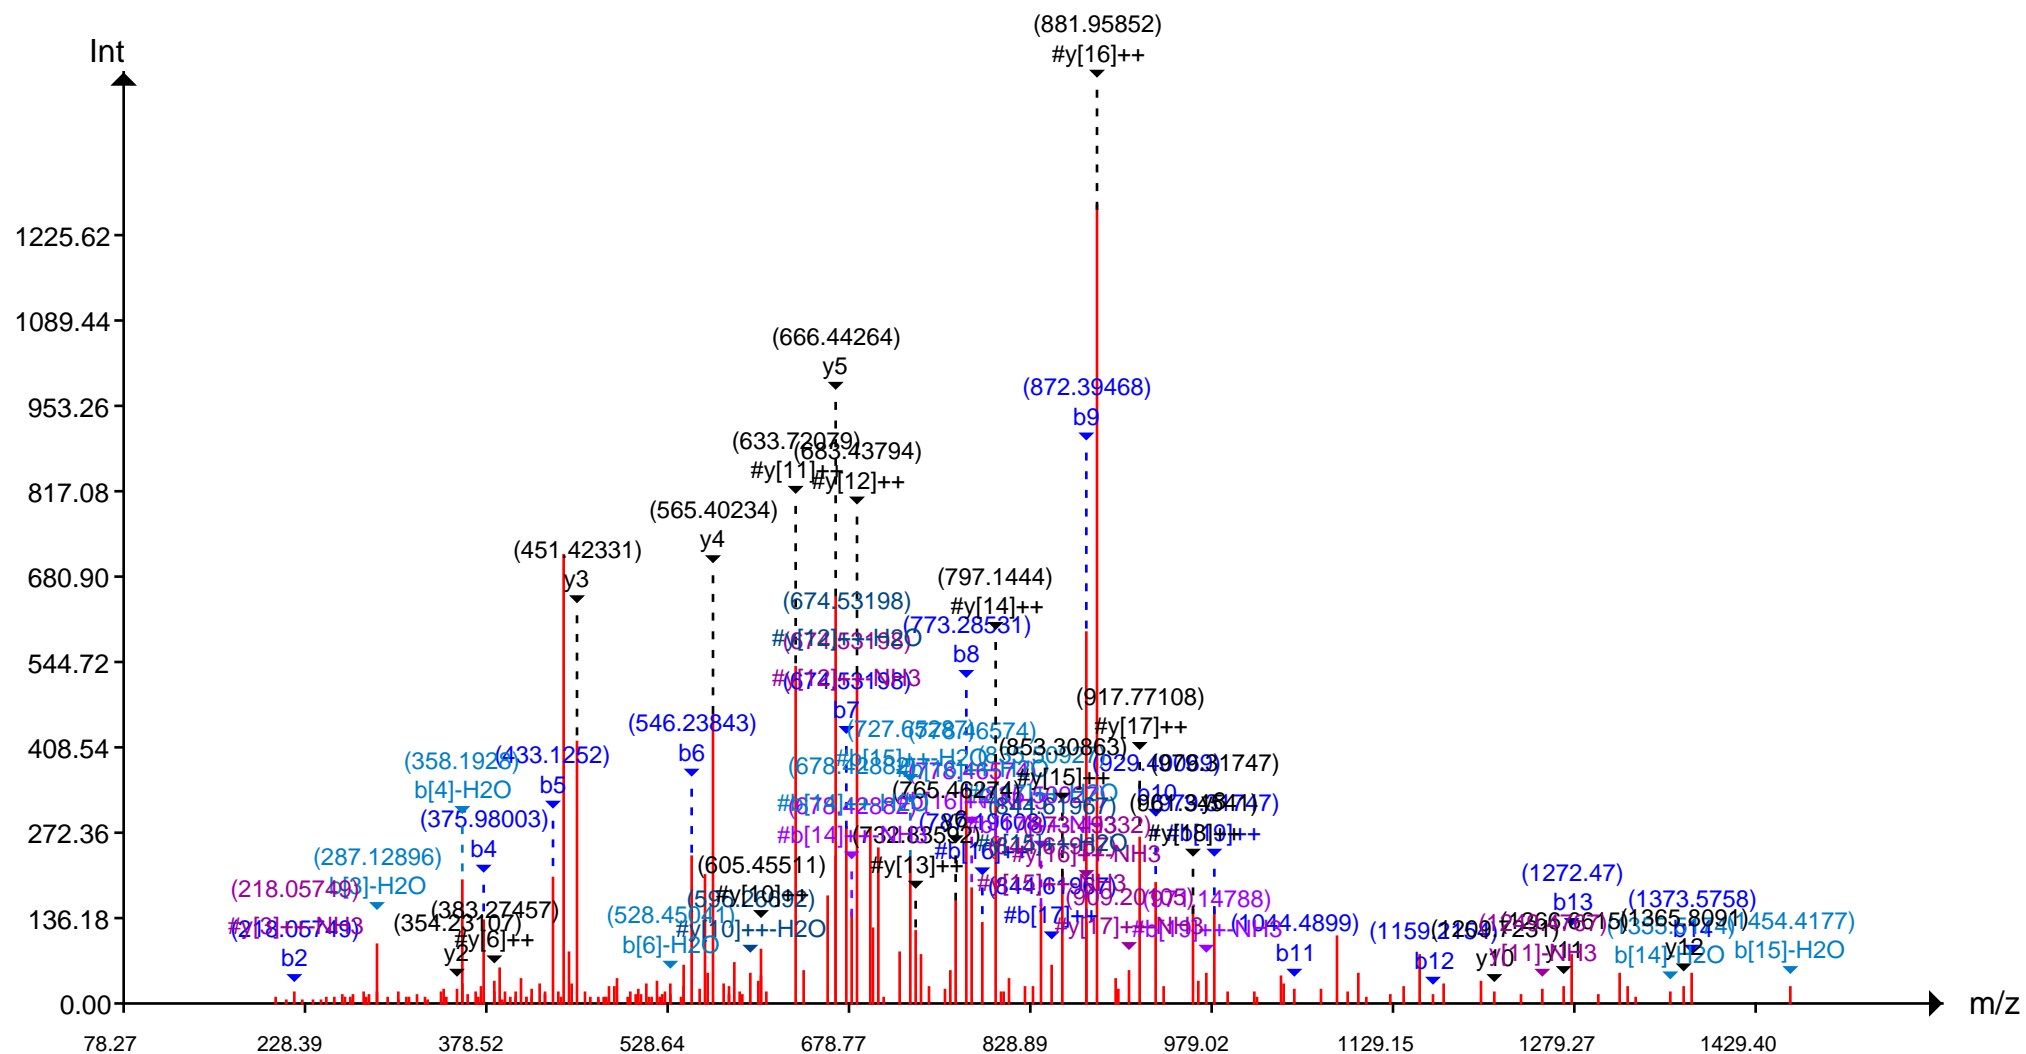

## Info

|                          |                                             |                           |         |
|--------------------------|---------------------------------------------|---------------------------|---------|
| <b>Modified Sequence</b> | AcD3-TASAGIQVVGDDLTVTNPK<AcD3K*>R<C13>-COOH | <b>Ion score</b>          | 71.32   |
| <b>Protein</b>           | P17182                                      | <b>Confidence level</b>   | 99.00%  |
| <b>Precursor m/z</b>     | 713.39419                                   | <b>Identity Threshold</b> | 46.96   |
| <b>Charge</b>            | 3+                                          | <b>Mass error</b>         | 0.00141 |

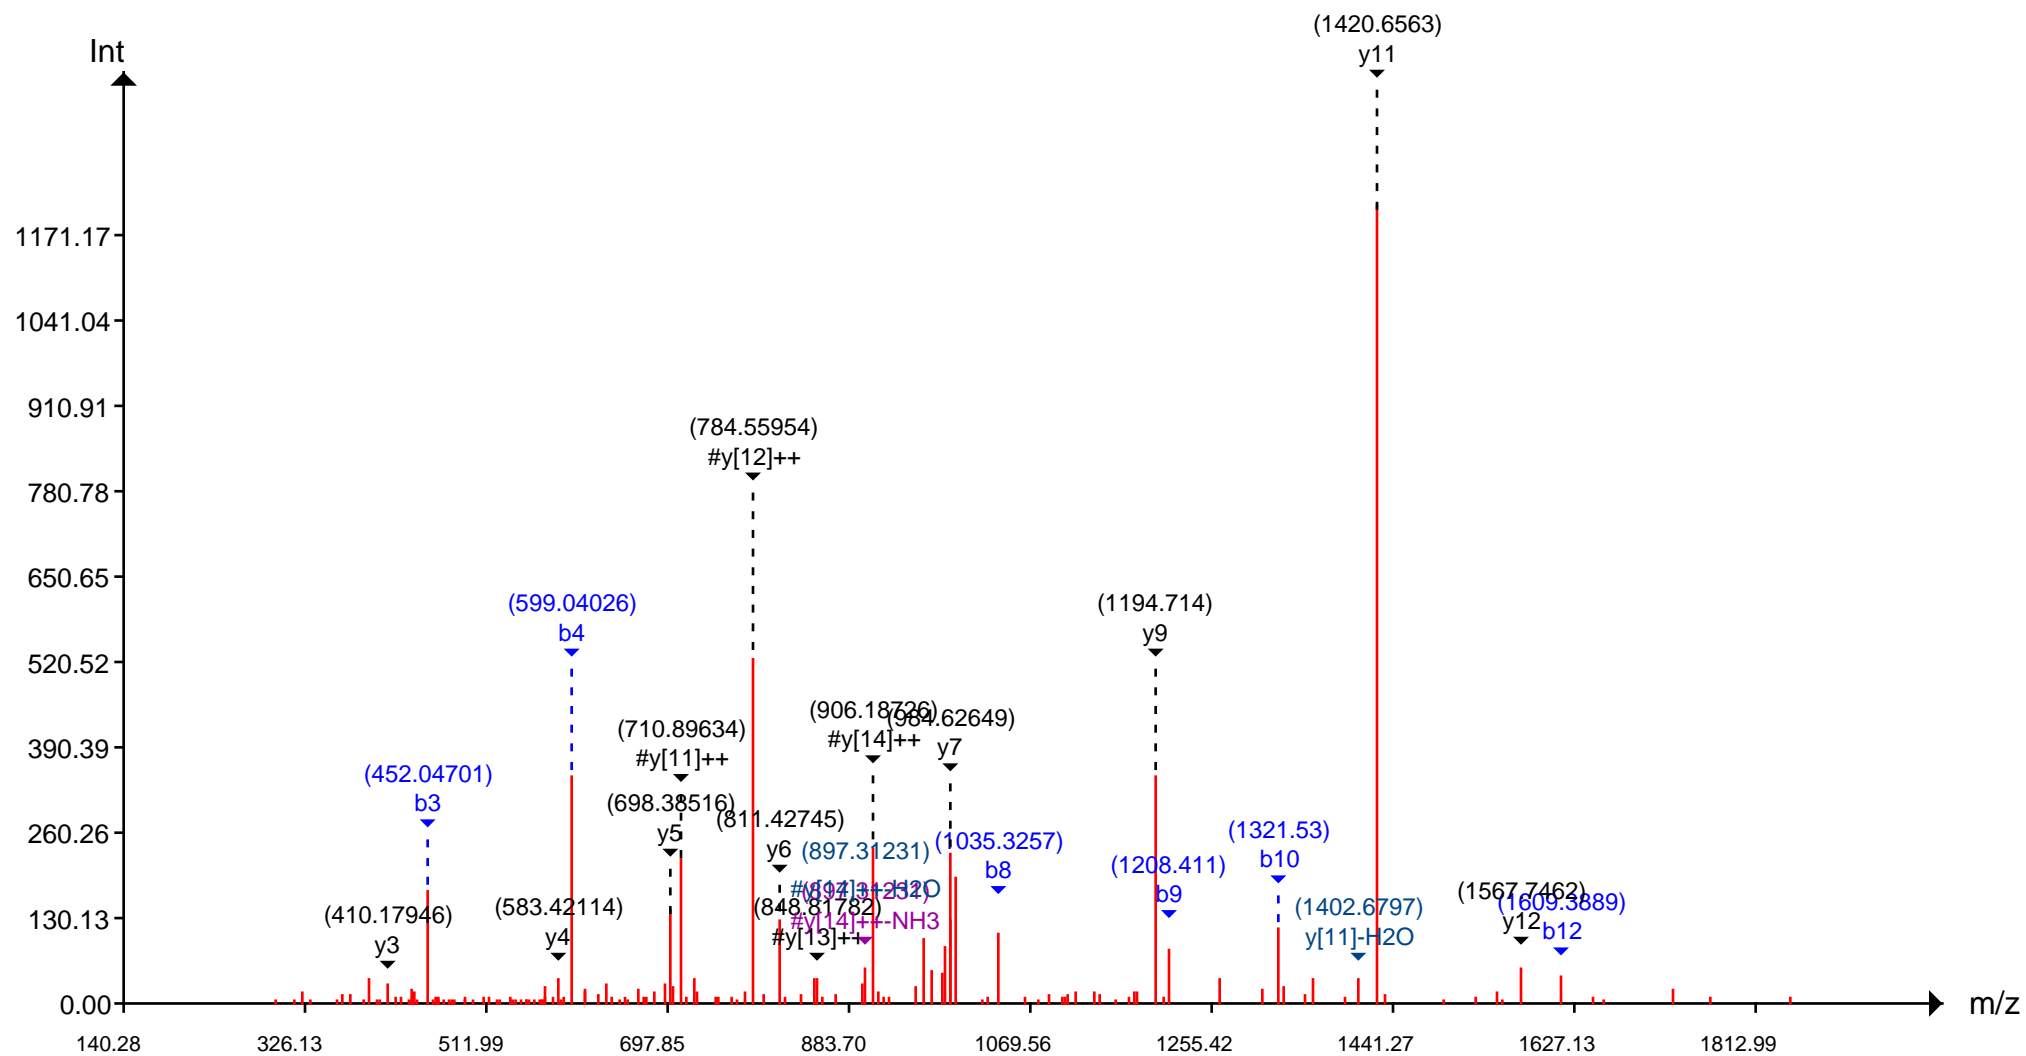

## Info

|                          |                                                |                           |          |
|--------------------------|------------------------------------------------|---------------------------|----------|
| <b>Modified Sequence</b> | AcD3-YNEFPEPIK<AcD3K*>LDK<AcD3K*>NDR<C13>-COOH | <b>Ion score</b>          | 50.24    |
| <b>Protein</b>           | P51150                                         | <b>Confidence level</b>   | 99.00%   |
| <b>Precursor m/z</b>     | 1010.0283                                      | <b>Identity Threshold</b> | 48.07    |
| <b>Charge</b>            | 2+                                             | <b>Mass error</b>         | 0.001826 |

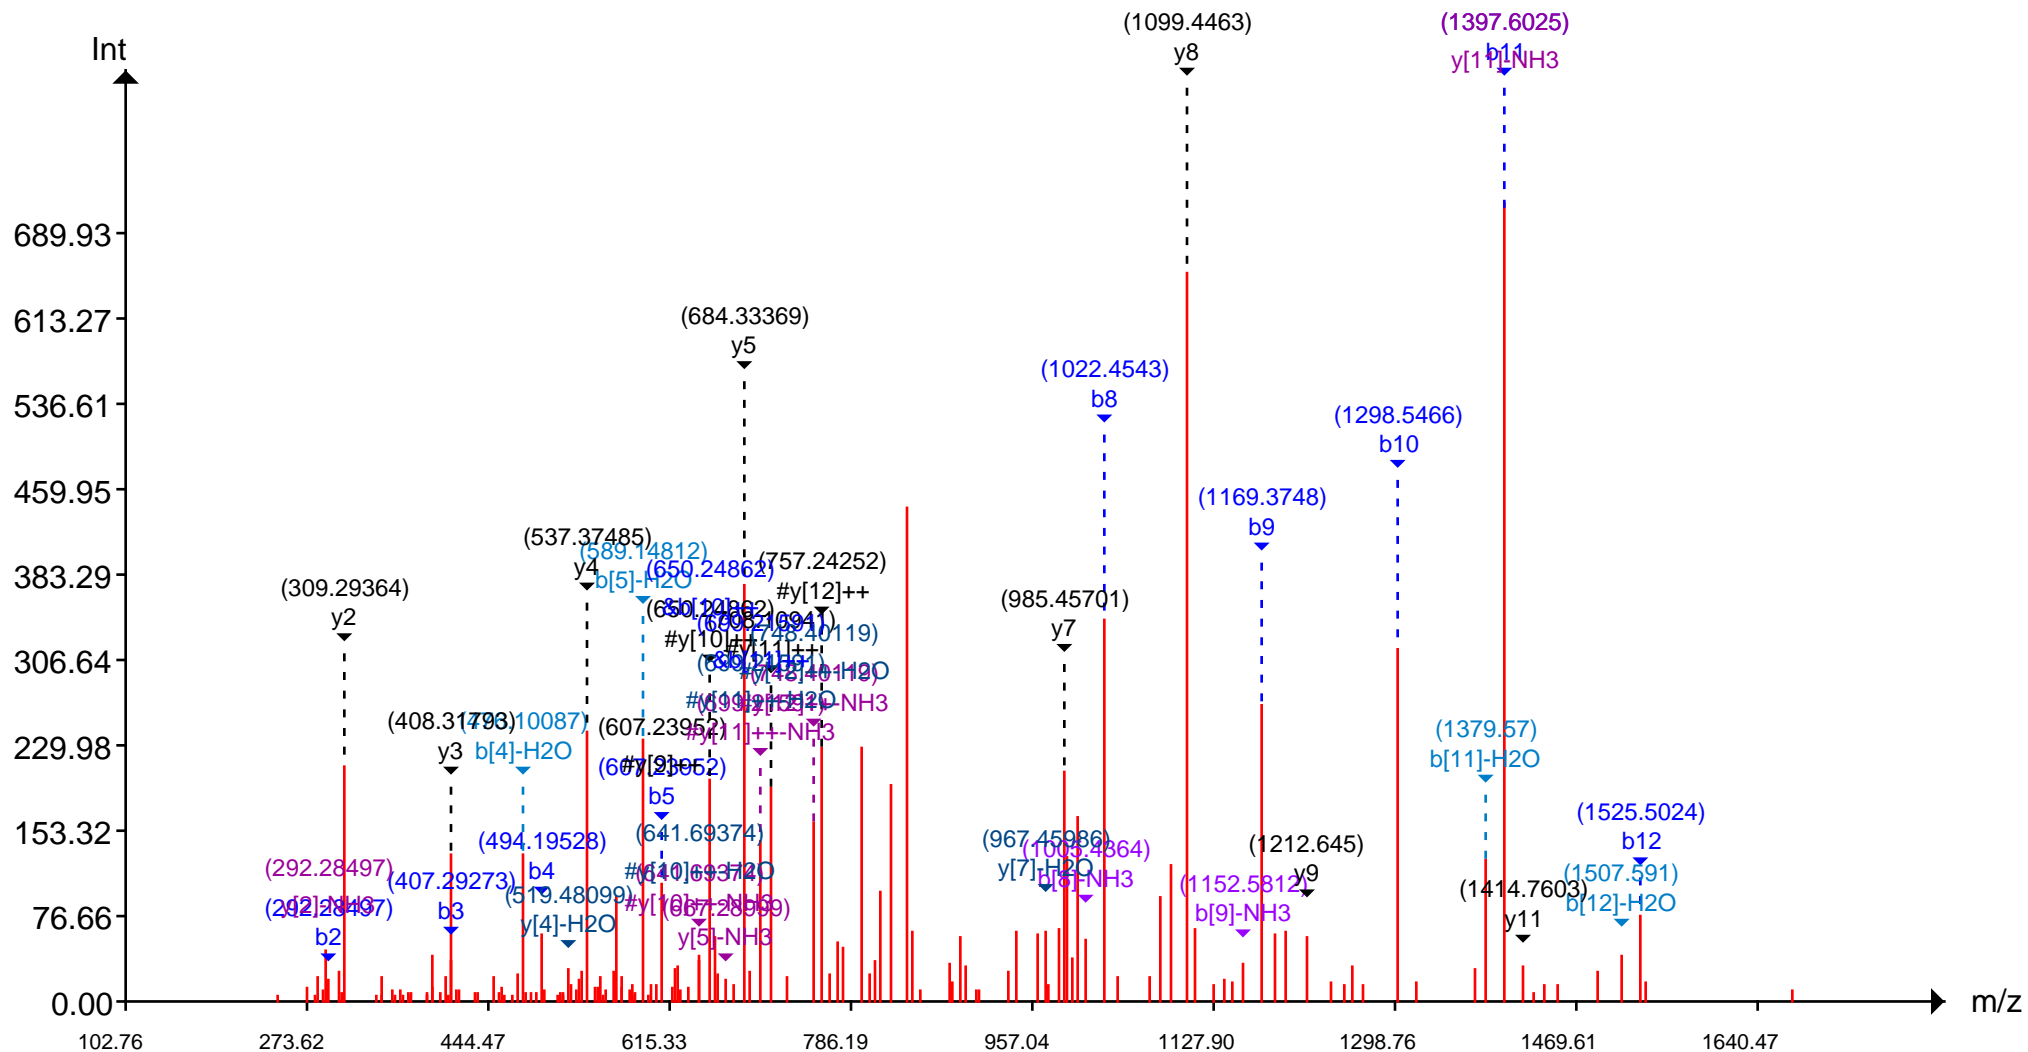

## Info

**Modified Sequence** AcD3-FVDSL NQK<AcD3K\*>M<Mox\*>EVQR<C13>-COOH

**Ion score** 49.41

**Protein** P16675

**Confidence level** 99.00%

**Precursor m/z** 853.44445

**Identity Threshold** 48.09

**Charge** 2+

**Mass error** 0.00243

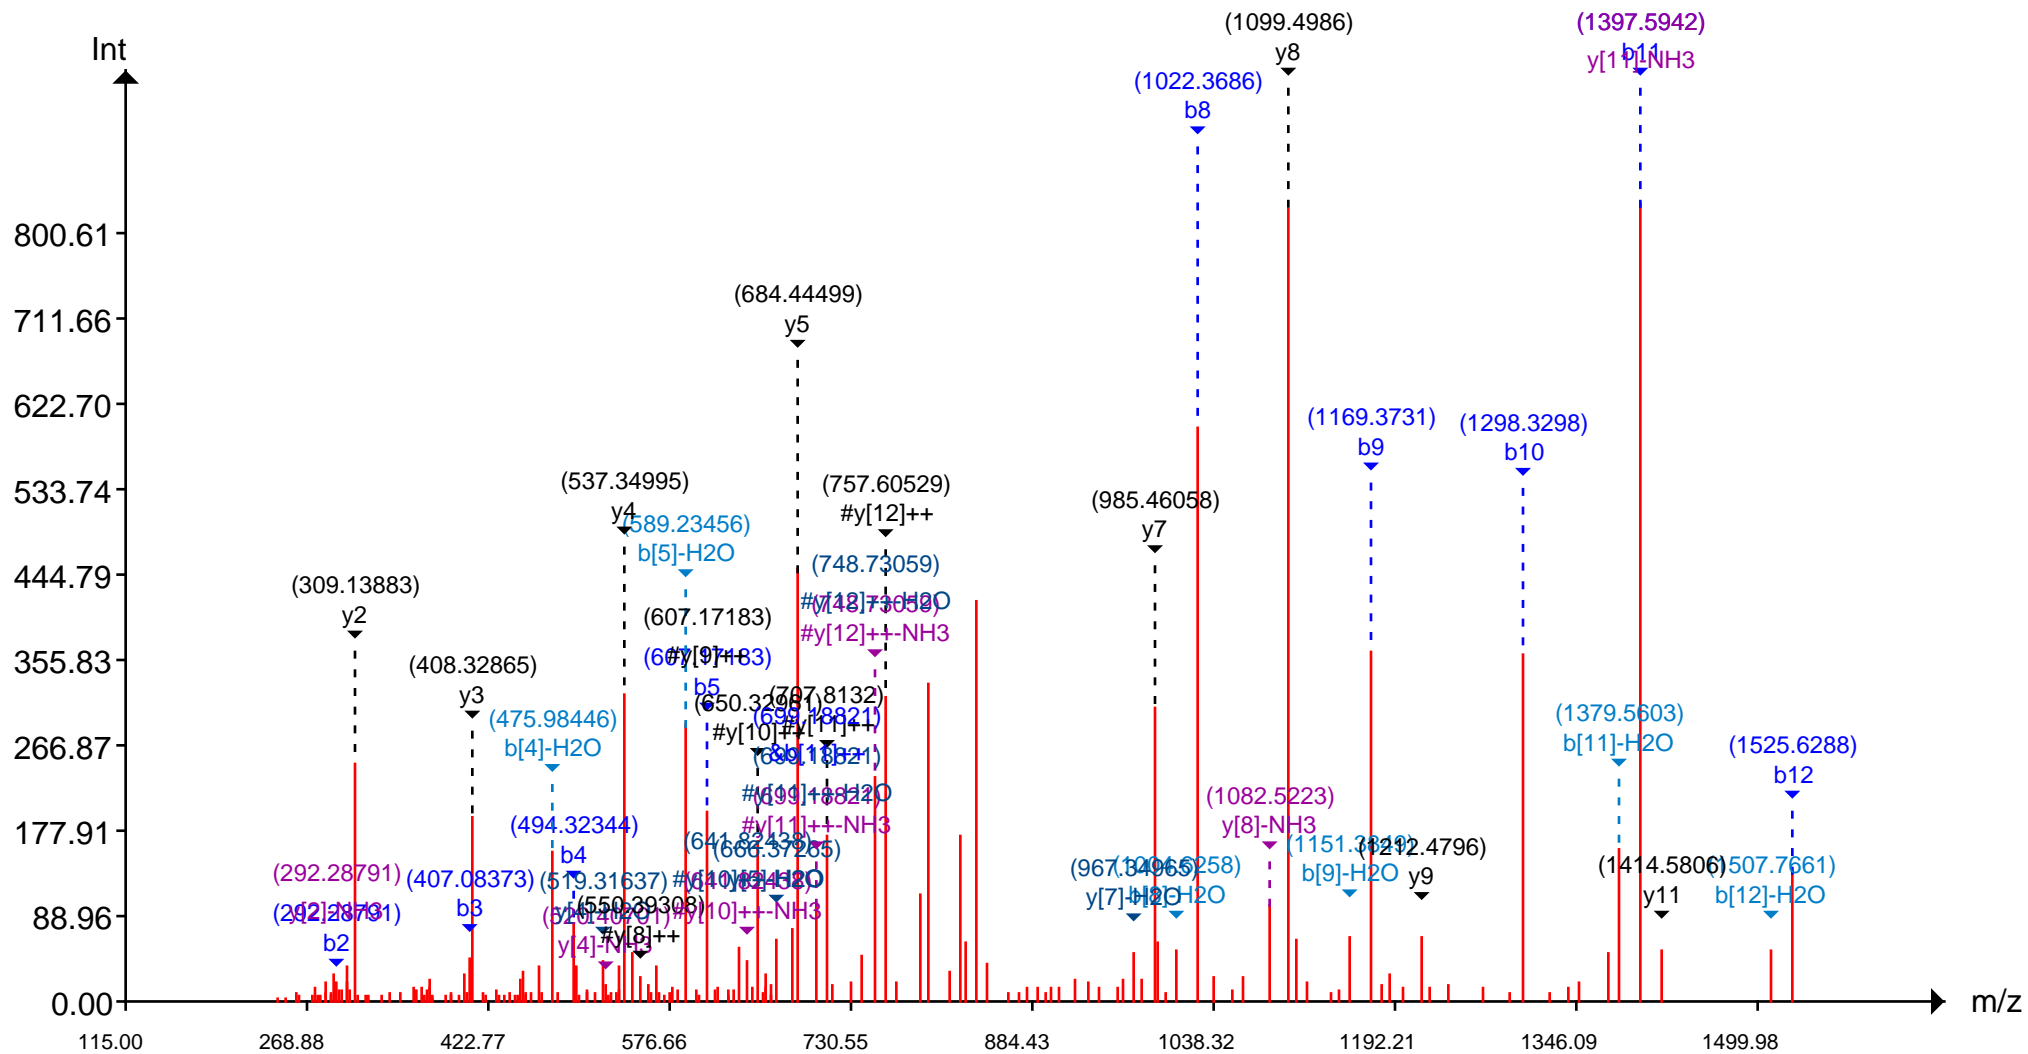

## Info

|                          |                                             |                           |         |
|--------------------------|---------------------------------------------|---------------------------|---------|
| <b>Modified Sequence</b> | AcD3-FVDSL NQK<AcD3K*>M<Mox*>EVQR<C13>-COOH | <b>Ion score</b>          | 60.64   |
| <b>Protein</b>           | P16675                                      | <b>Confidence level</b>   | 99.00%  |
| <b>Precursor m/z</b>     | 853.44429                                   | <b>Identity Threshold</b> | 48.06   |
| <b>Charge</b>            | 2+                                          | <b>Mass error</b>         | 0.00211 |

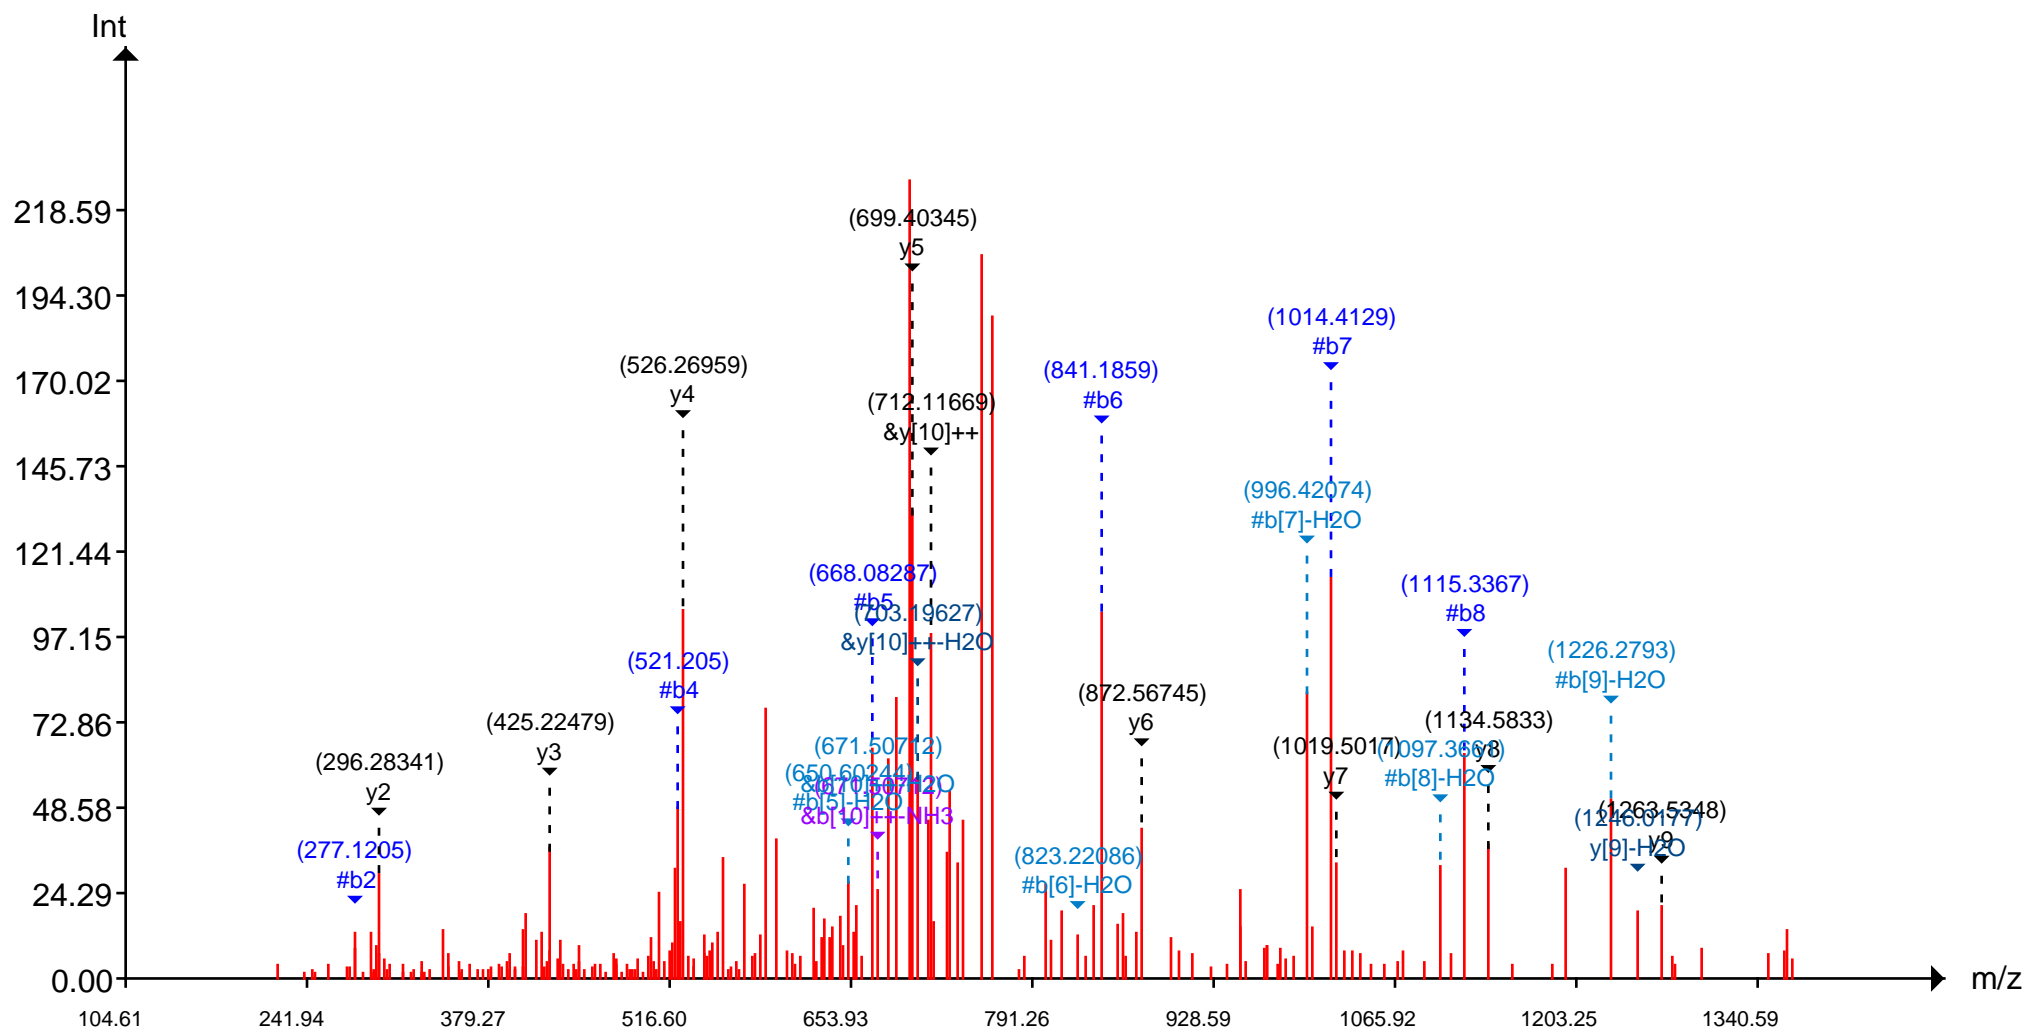

## Info

|                          |                                                  |                           |         |
|--------------------------|--------------------------------------------------|---------------------------|---------|
| <b>Modified Sequence</b> | AcD3-AC<Cmm*>EDFK<AcD3K*>K<AcD3K*>TEDR<C13>-COOH | <b>Ion score</b>          | 55.16   |
| <b>Protein</b>           | Q9CQE5                                           | <b>Confidence level</b>   | 99.00%  |
| <b>Precursor m/z</b>     | 770.37413                                        | <b>Identity Threshold</b> | 46.90   |
| <b>Charge</b>            | 2+                                               | <b>Mass error</b>         | 8.59E-4 |



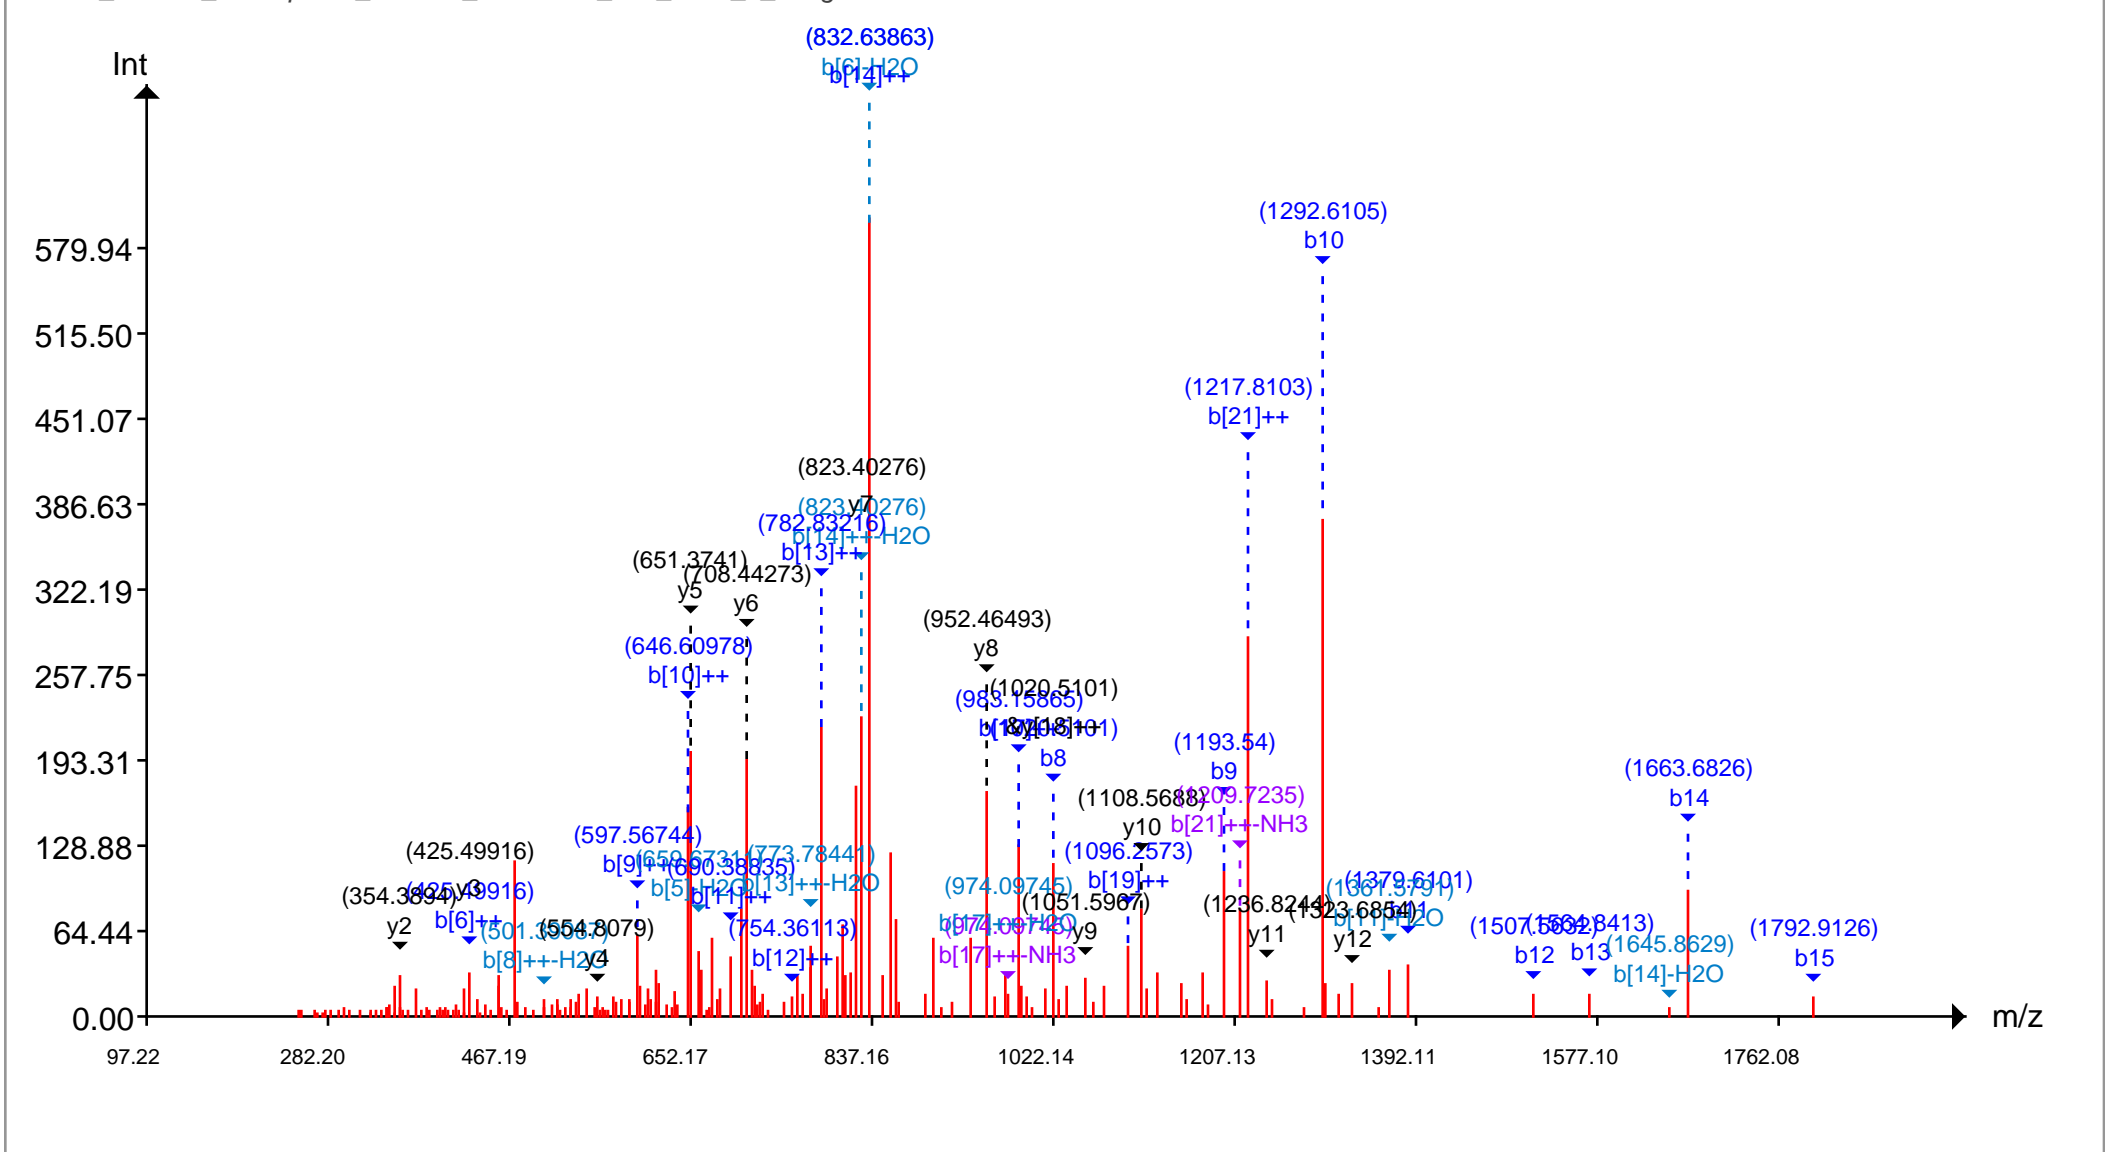

## Info

|                   |                                                                       |                    |         |
|-------------------|-----------------------------------------------------------------------|--------------------|---------|
| Modified Sequence | AcD3-VEEK<AcD3K*>TK<AcD3K*>VAK<AcD3K*>VSQGVEDGPEAK<AcD3K*>R<C13>-COOH | Ion score          | 65.22   |
| Protein           | Q9R1T2                                                                | Confidence level   | 99.00%  |
| Precursor         | 872.48787                                                             | Identity Threshold | 45.56   |
| Charge            | 3+                                                                    | Mass error         | 0.00396 |

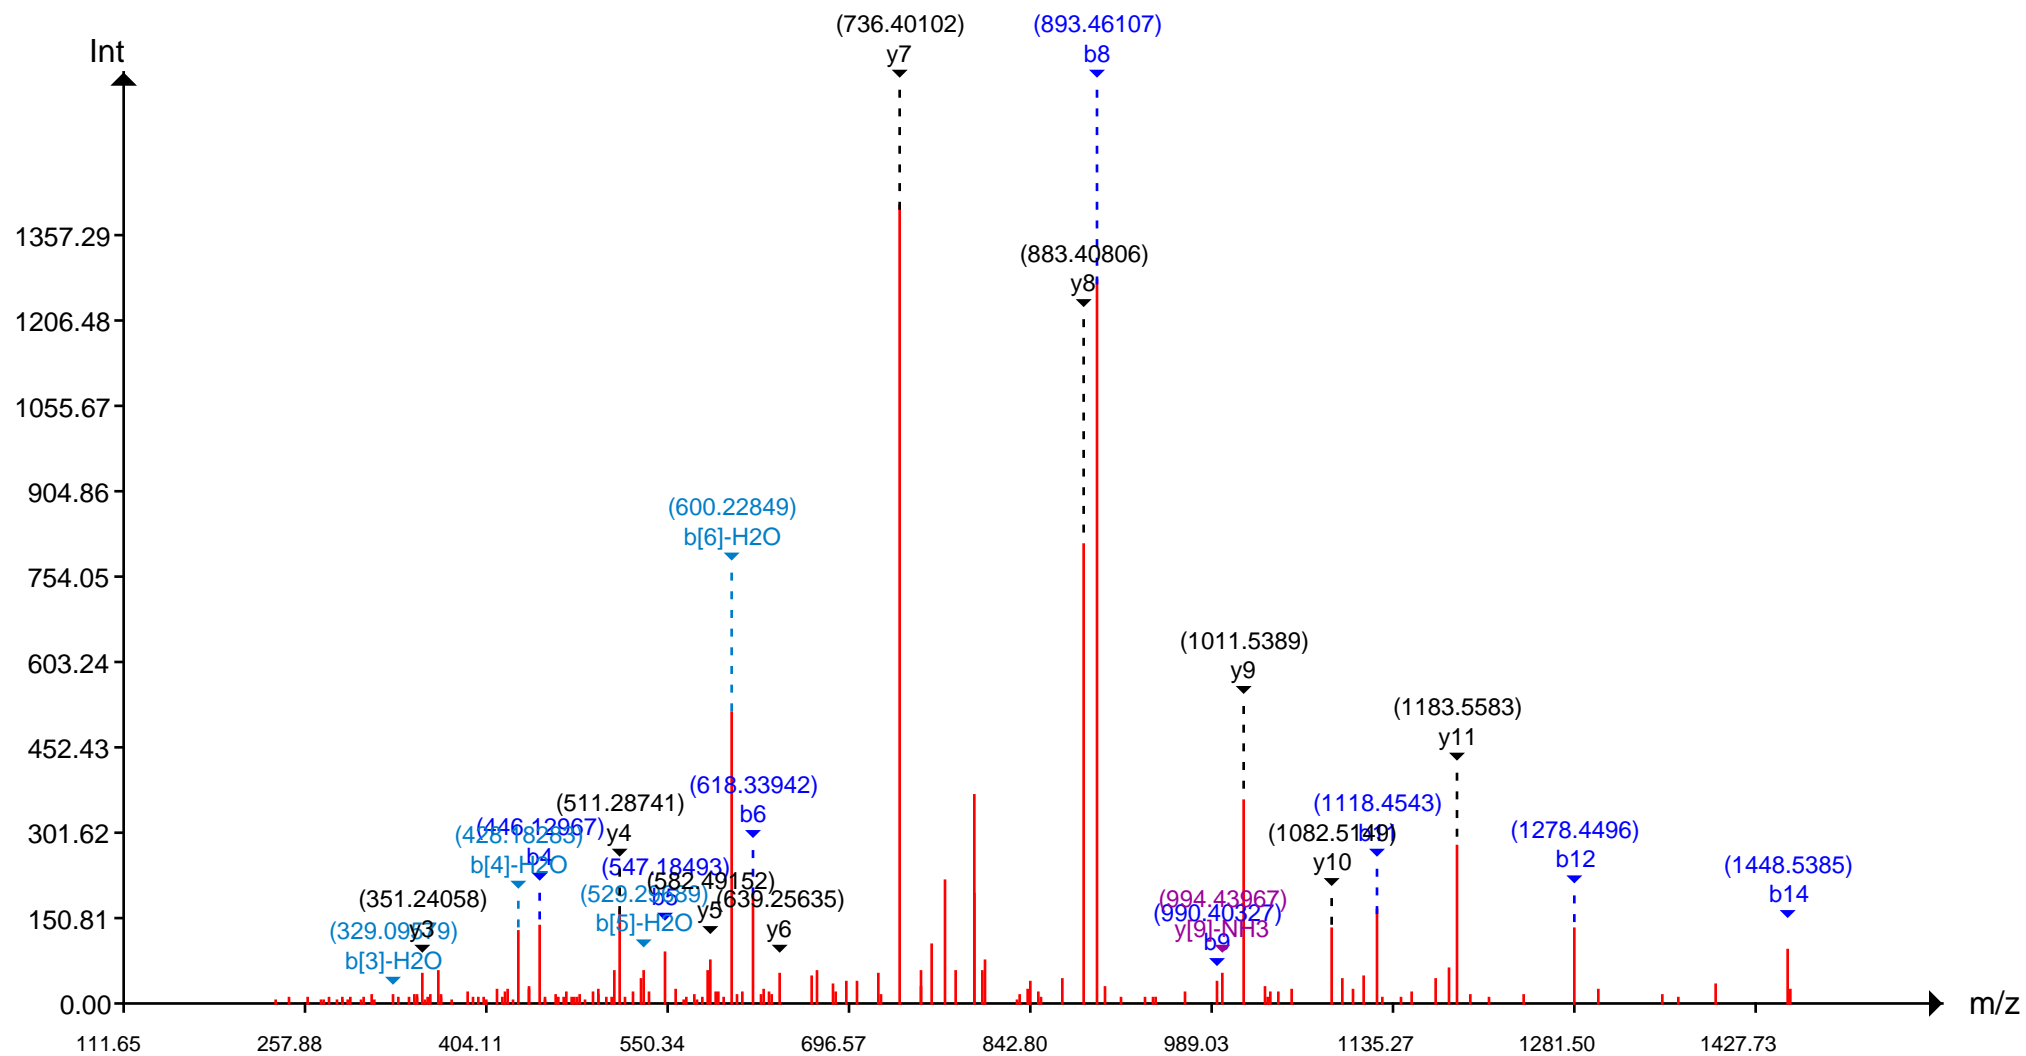

## Info

|                          |                                      |                           |          |
|--------------------------|--------------------------------------|---------------------------|----------|
| <b>Modified Sequence</b> | AcD3-LSTVTAQFPGAC<Cmm*>GLR<C13>-COOH | <b>Ion score</b>          | 54.32    |
| <b>Protein</b>           | Q921F2                               | <b>Confidence level</b>   | 99.00%   |
| <b>Precursor m/z</b>     | 814.93485                            | <b>Identity Threshold</b> | 48.11    |
| <b>Charge</b>            | 2+                                   | <b>Mass error</b>         | 0.002441 |

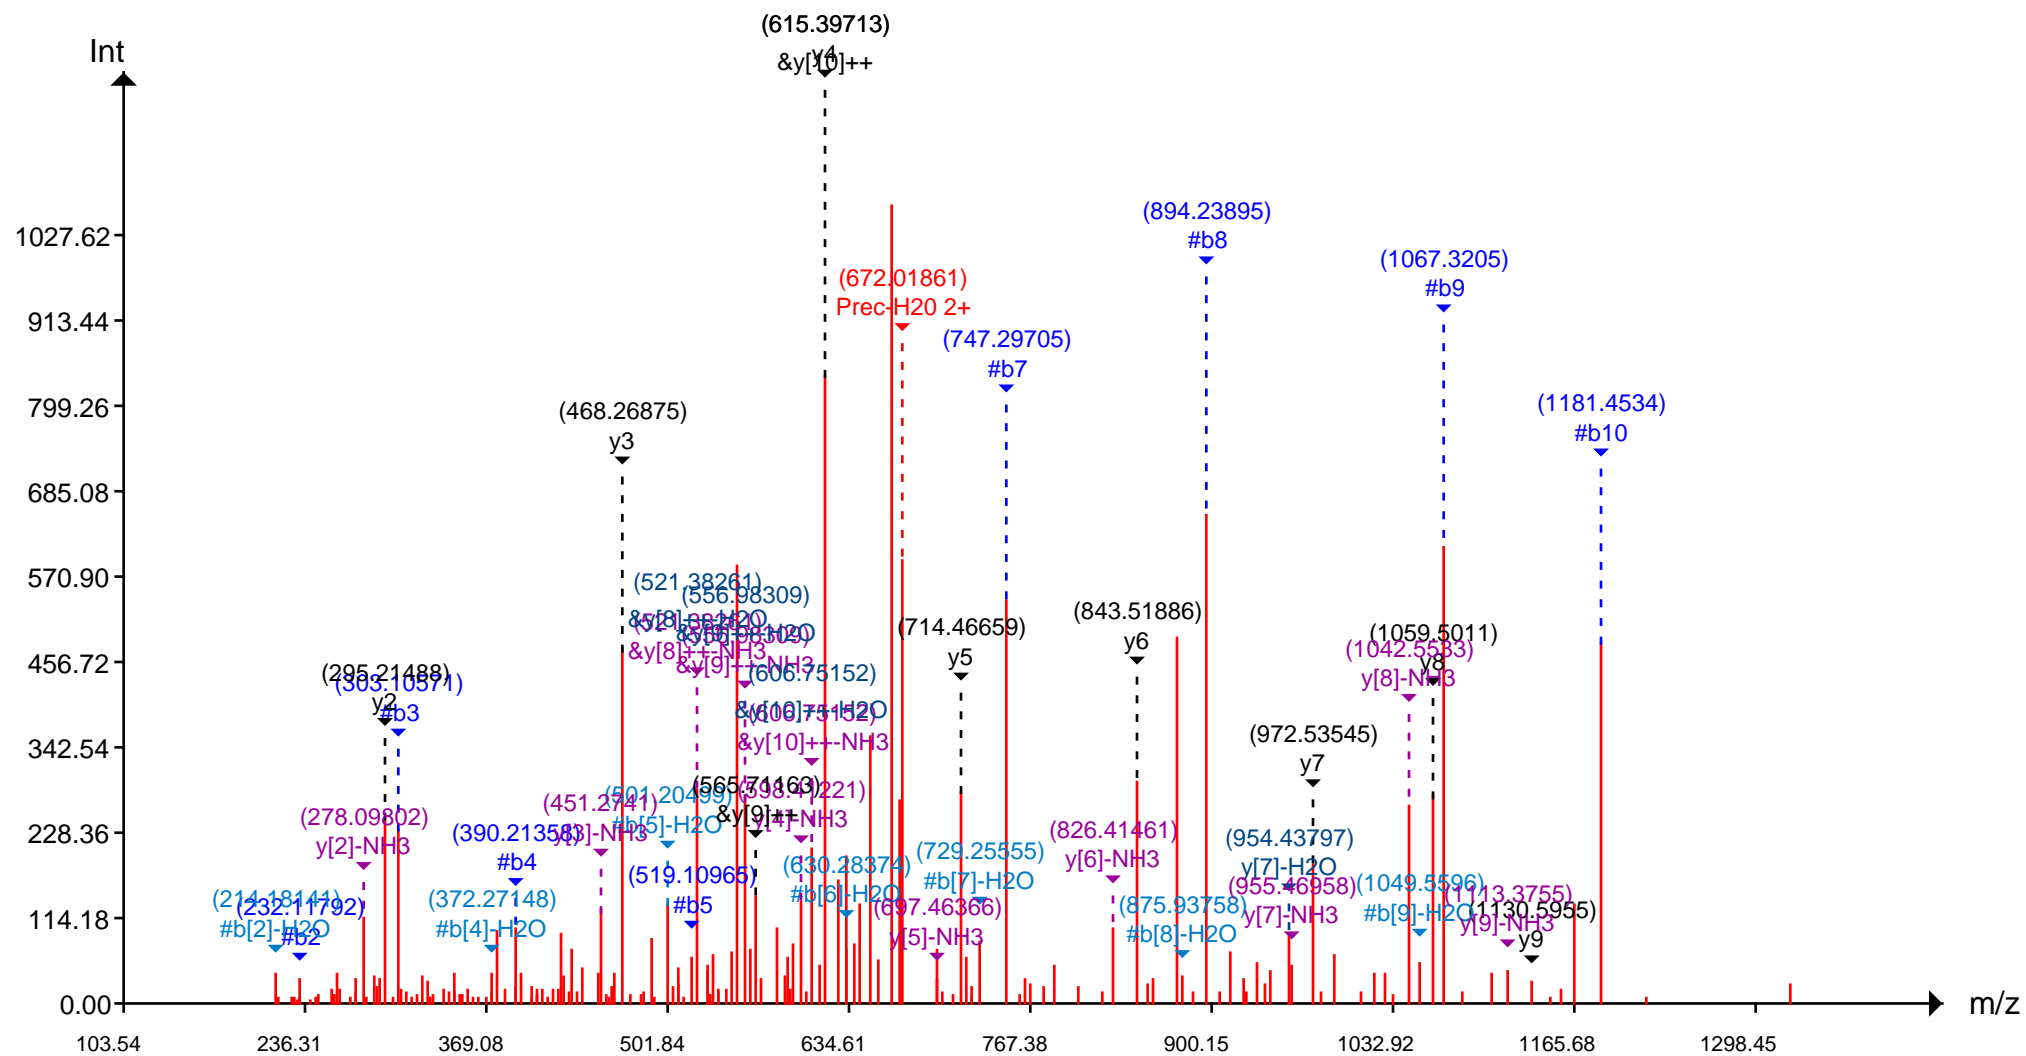

## Info

|                          |                                          |                           |          |
|--------------------------|------------------------------------------|---------------------------|----------|
| <b>Modified Sequence</b> | AcD3-SVASEEVM<Mox*>K<AcD3K*>NR<C13>-COOH | <b>Ion score</b>          | 59.95    |
| <b>Protein</b>           | Q9JIH2                                   | <b>Confidence level</b>   | 99.00%   |
| <b>Precursor m/z</b>     | 681.35046                                | <b>Identity Threshold</b> | 47.99    |
| <b>Charge</b>            | 2+                                       | <b>Mass error</b>         | -6.89E-4 |

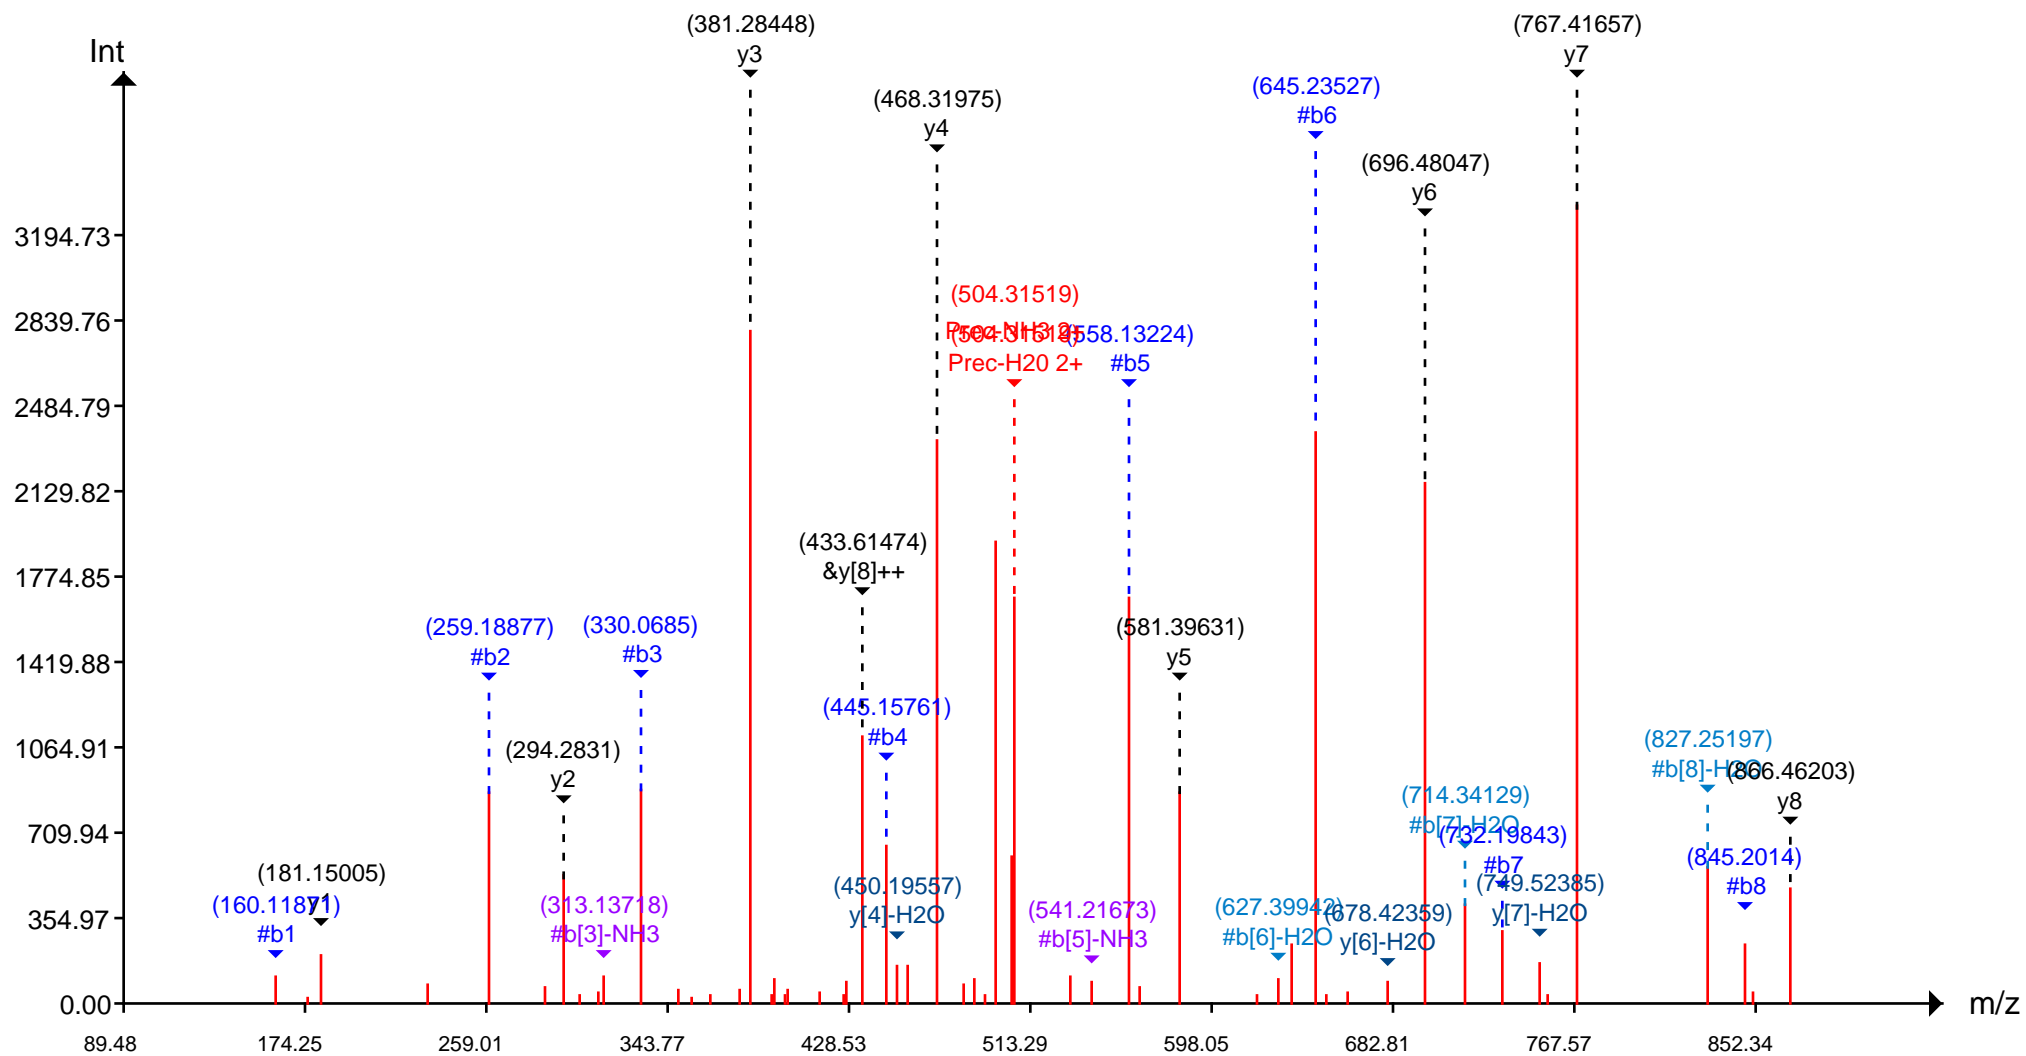

## Info

**Modified Sequence** AcD3-NVADLSSLR<C13>-COOH

**Ion score** 88.29

**Protein** P97372

**Confidence level** 99.00%

**Precursor m/z** 513.29156

**Identity Threshold** 46.94

**Charge** 2+

**Mass error** -2.03E-4

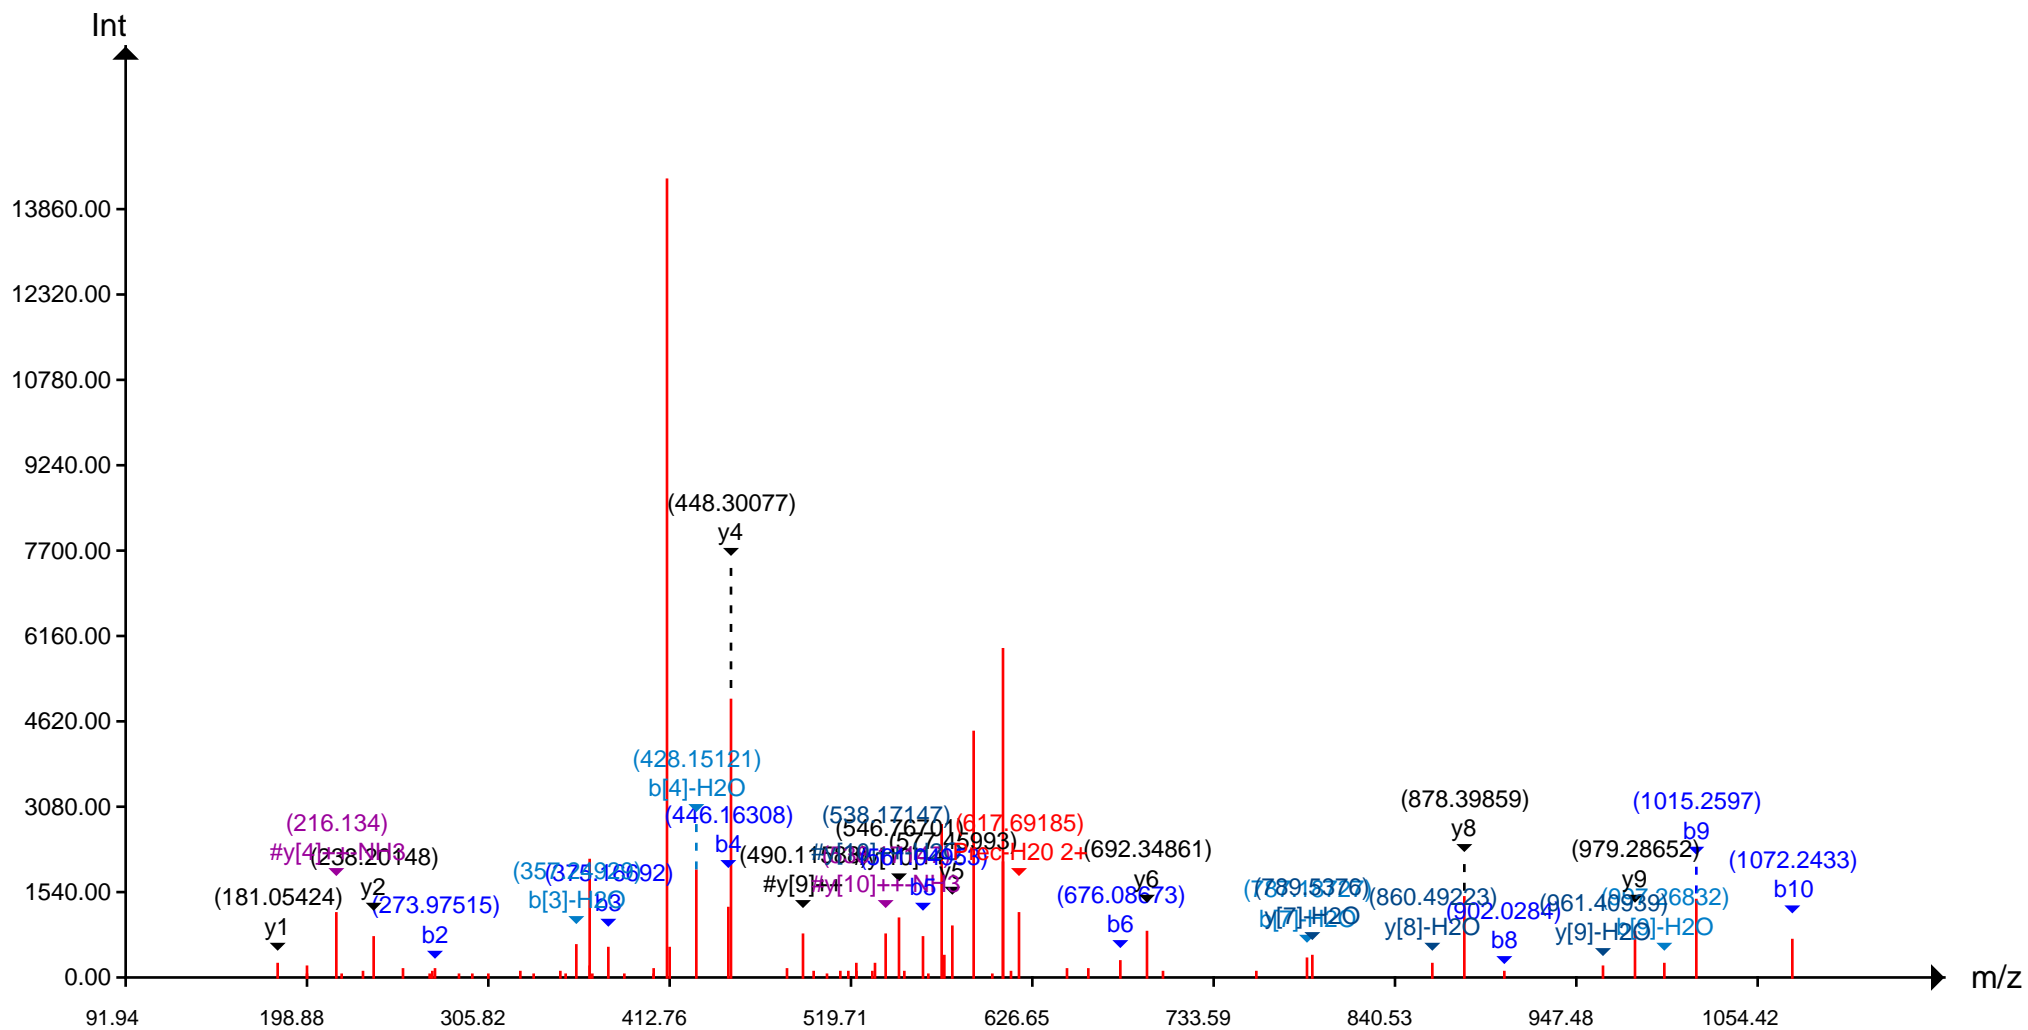

## Info

**Modified Sequence** AcD3-DITADDEPLGR<C13>-COOH

**Ion score** 51.58

**Protein** P17742

**Confidence level** 99.00%

**Precursor m/z** 626.81228

**Identity Threshold** 47.40

**Charge** 2+

**Mass error** -0.001763

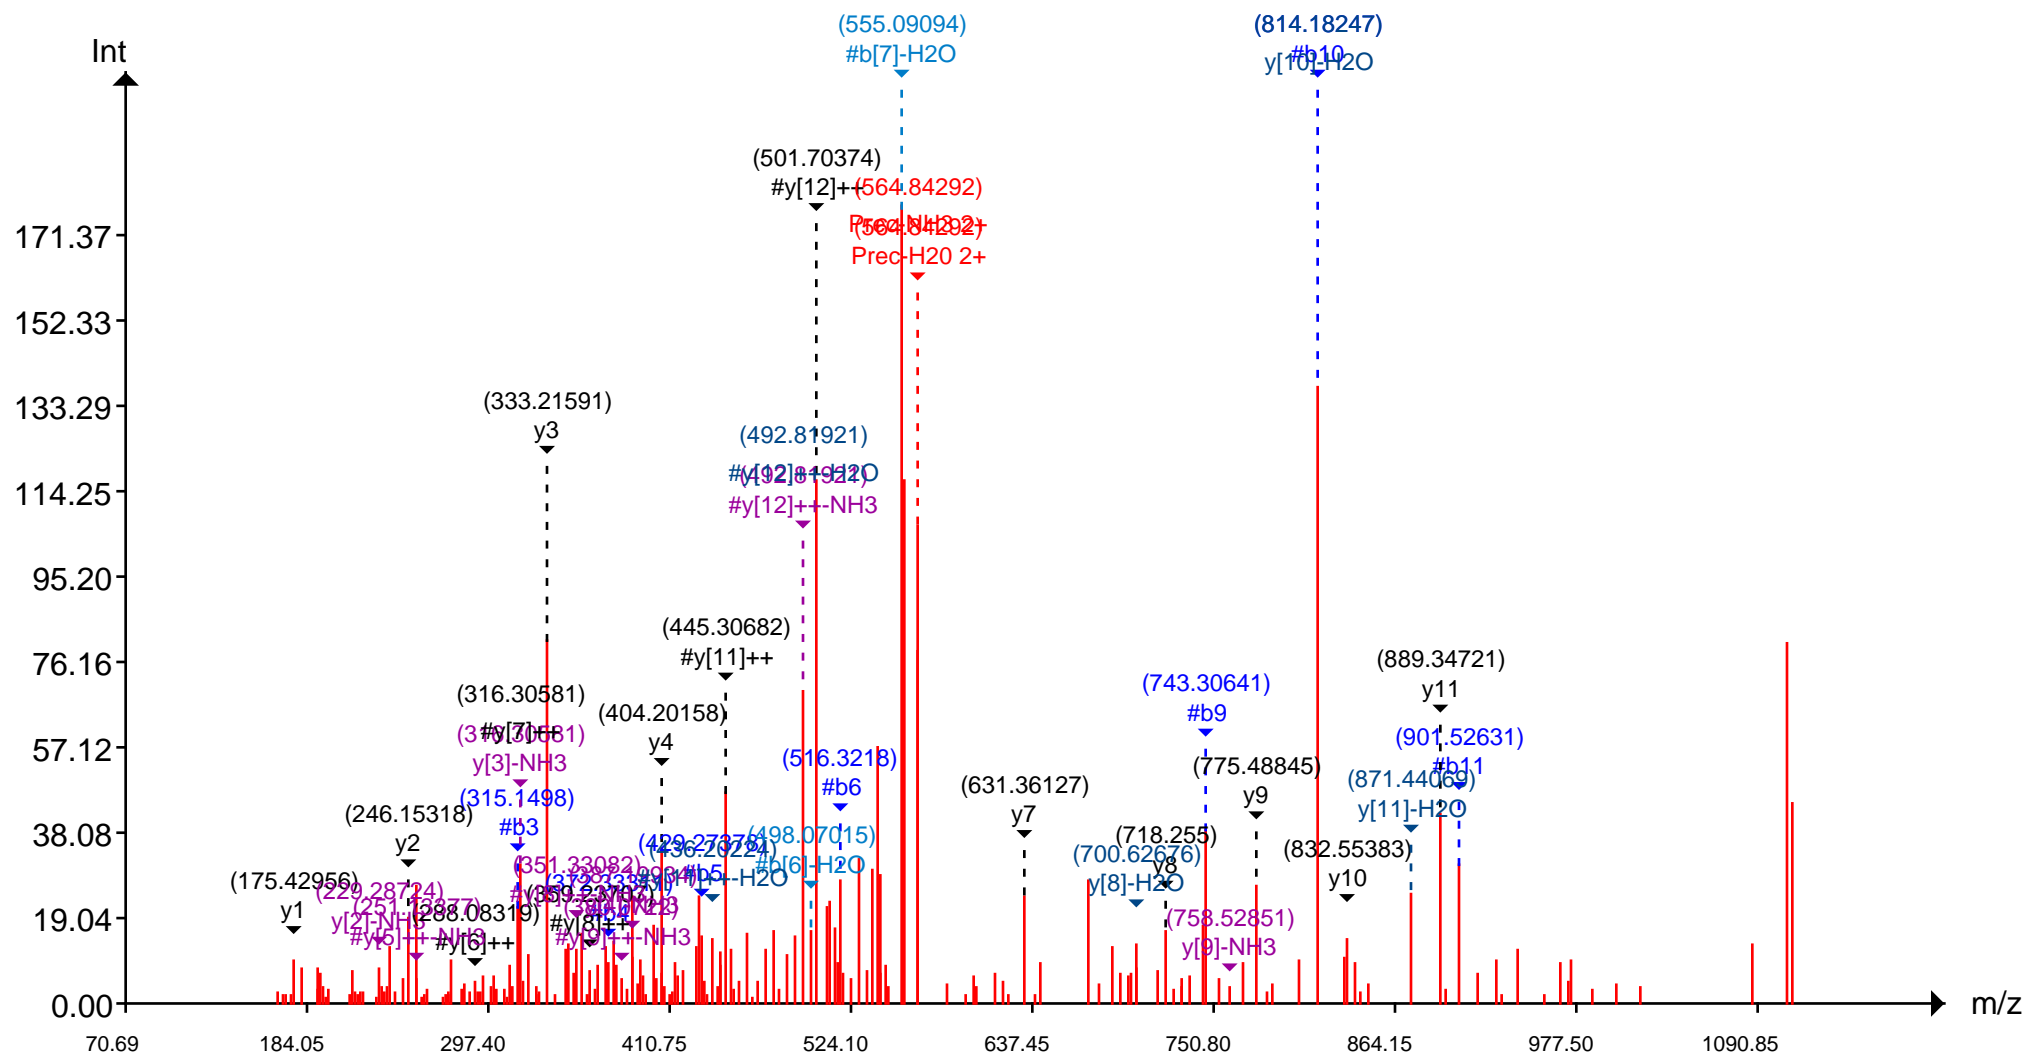

## Info

**Modified Sequence** AcD3-VIGGGSGGLASAR-COOH

**Ion score** 58.69

**Protein** P47791

**Confidence level** 99.00%

**Precursor m/z** 573.81772

**Identity Threshold** 47.95

**Charge** 2+

**Mass error** -0.002327

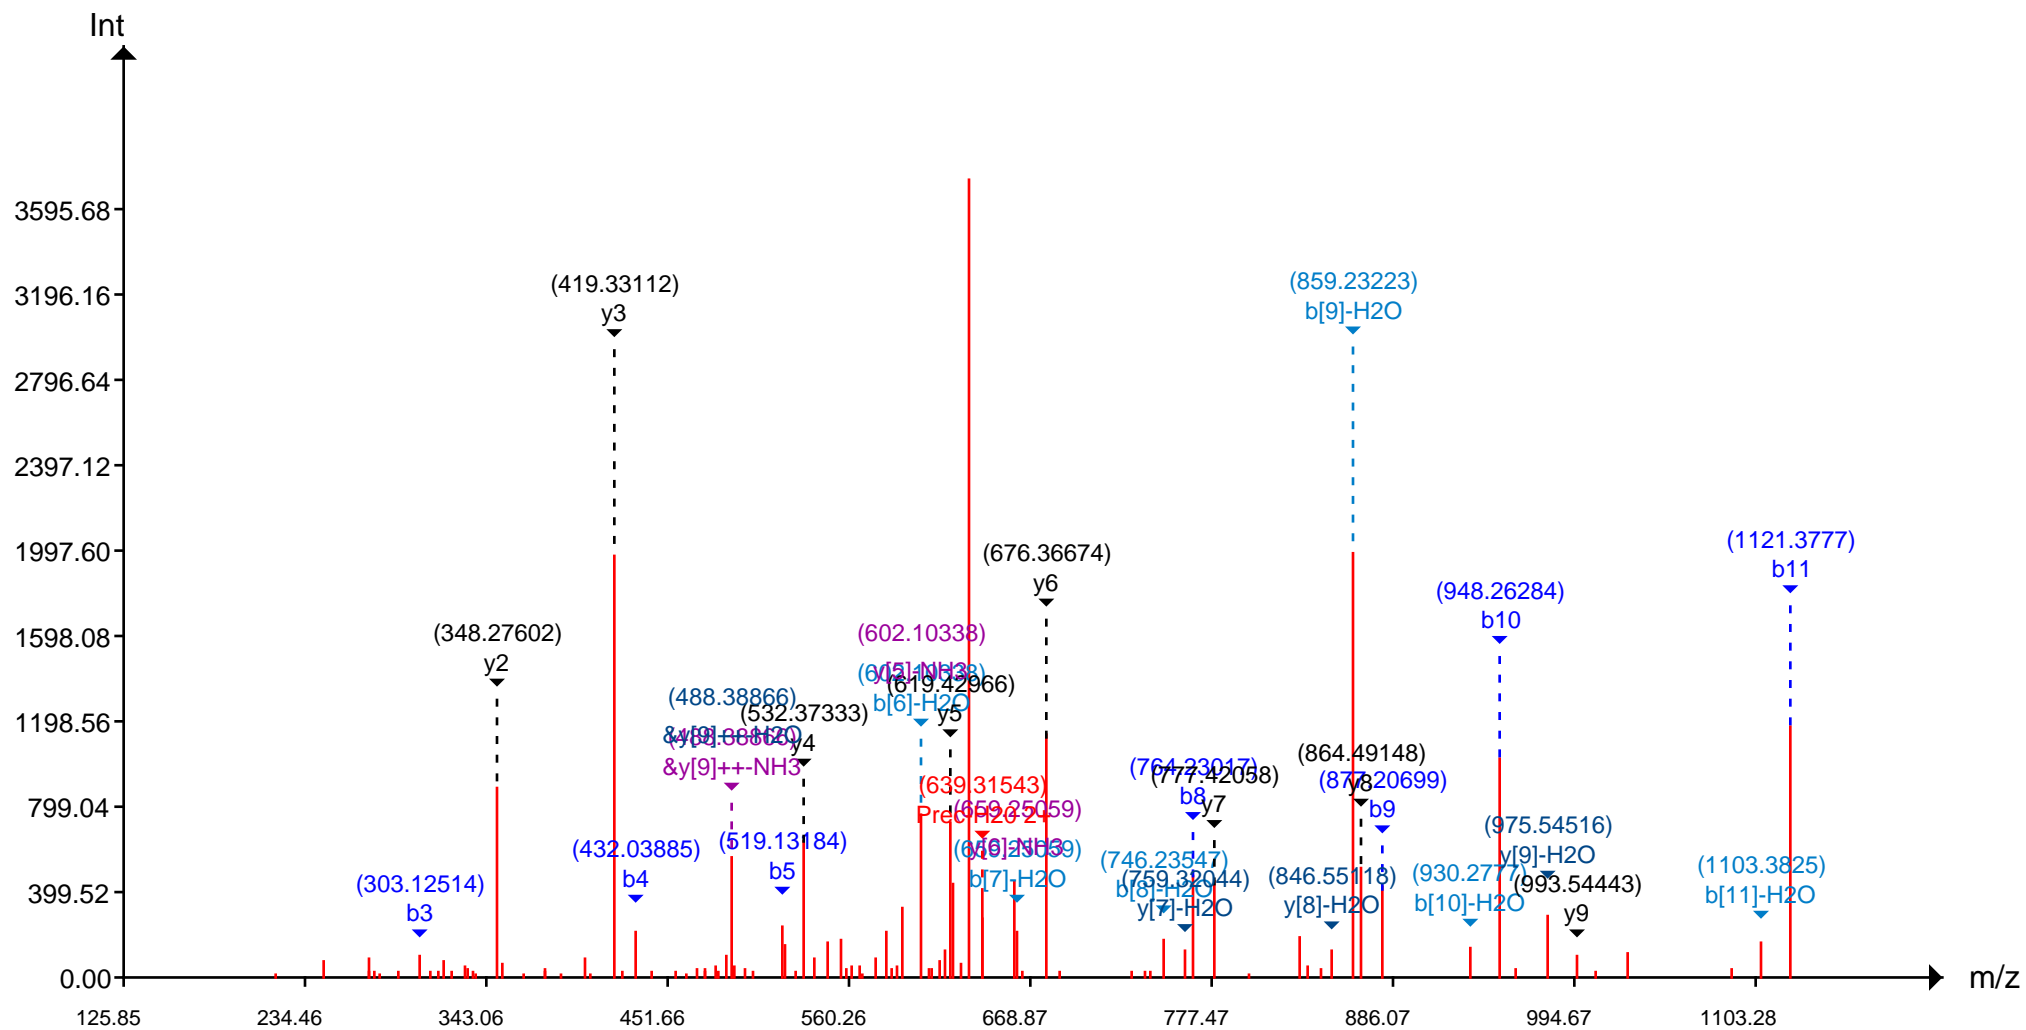

## Info

**Modified Sequence** AcD3-AADESTGSIK<AcD3K\*>R-COOH

**Ion score** 62.69

**Protein** P05064

**Confidence level** 99.00%

**Precursor m/z** 648.34008

**Identity Threshold** 47.94

**Charge** 2+

**Mass error** 0.002064

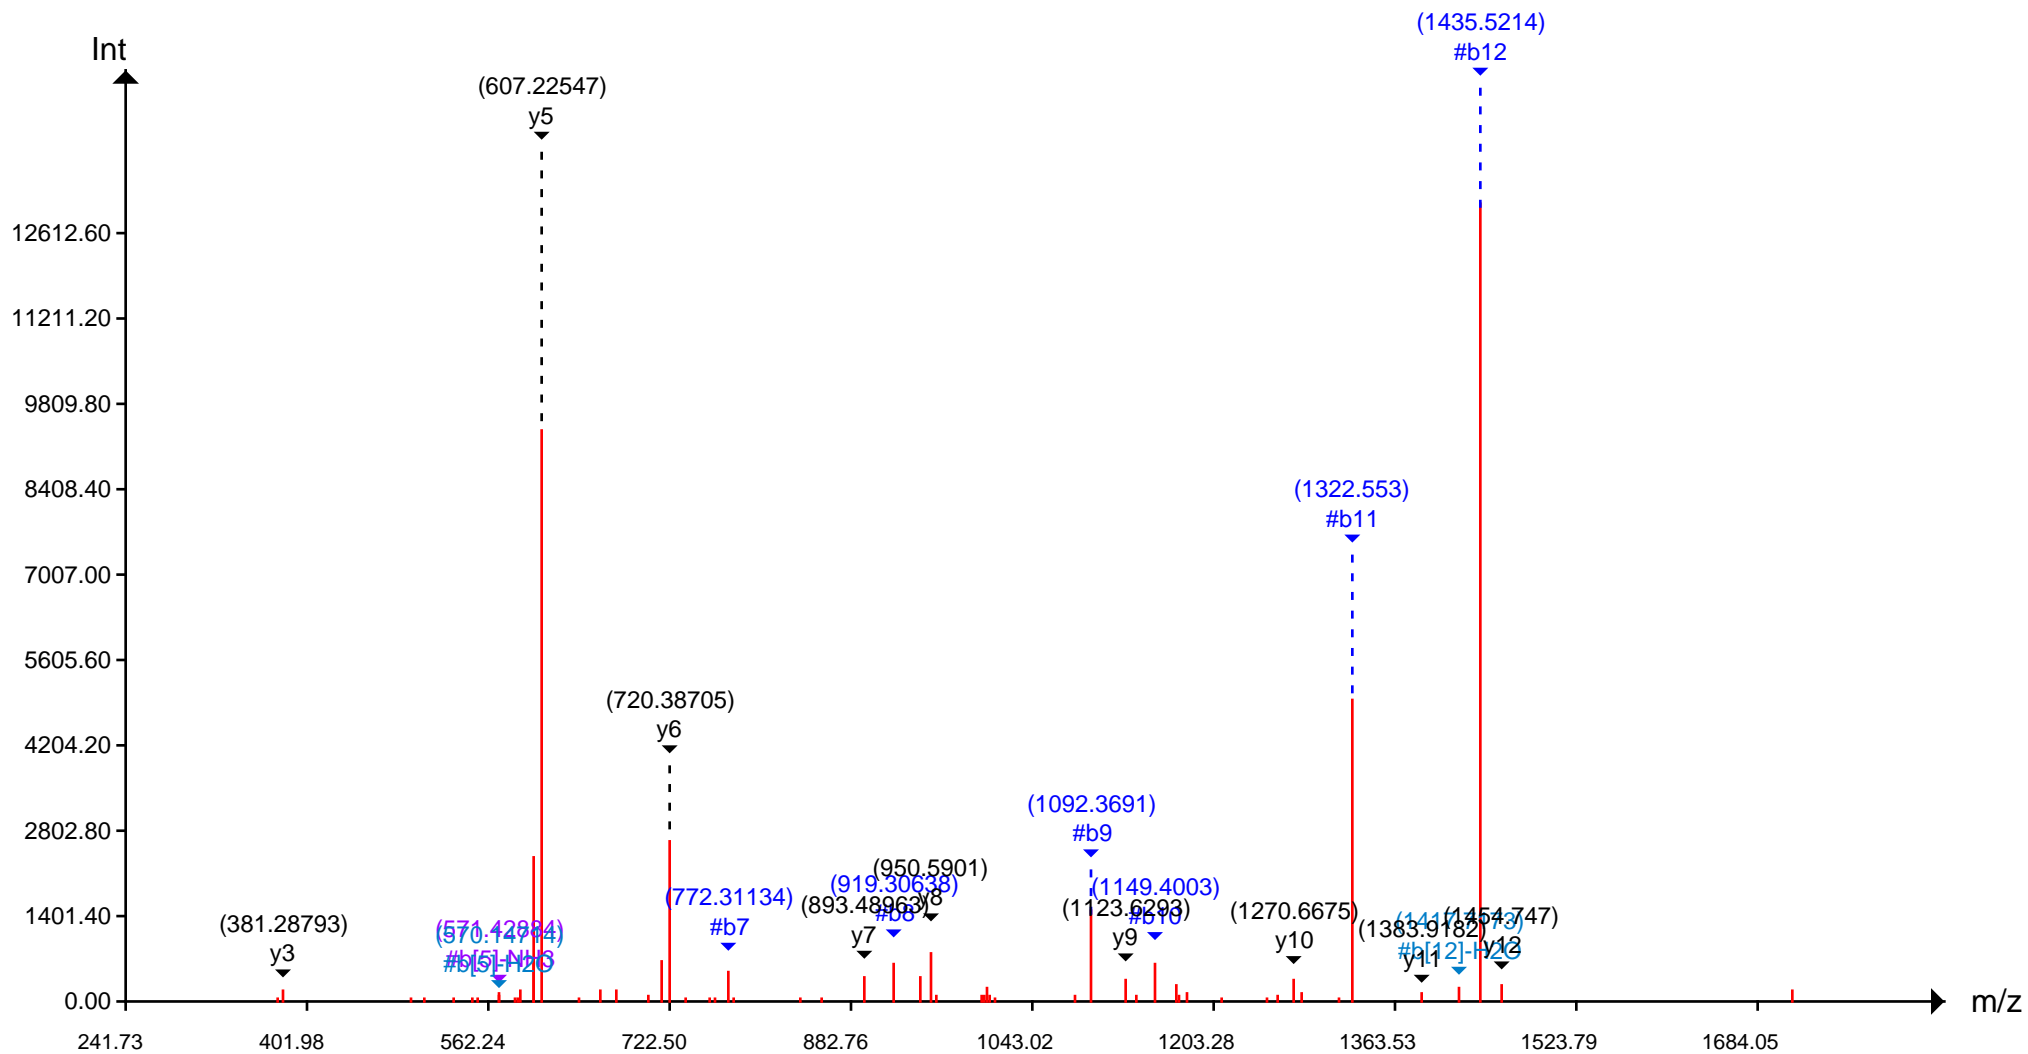

## Info

|                          |                                                        |                           |          |
|--------------------------|--------------------------------------------------------|---------------------------|----------|
| <b>Modified Sequence</b> | AcD3-LAQTEALM<Mox*>K<AcD3K*>GK<AcD3K*>LPPEAR<C13>-COOH | <b>Ion score</b>          | 47.39    |
| <b>Protein</b>           | P06745                                                 | <b>Confidence level</b>   | 99.00%   |
| <b>Precursor m/z</b>     | 1021.567                                               | <b>Identity Threshold</b> | 46.70    |
| <b>Charge</b>            | 2+                                                     | <b>Mass error</b>         | 0.002367 |



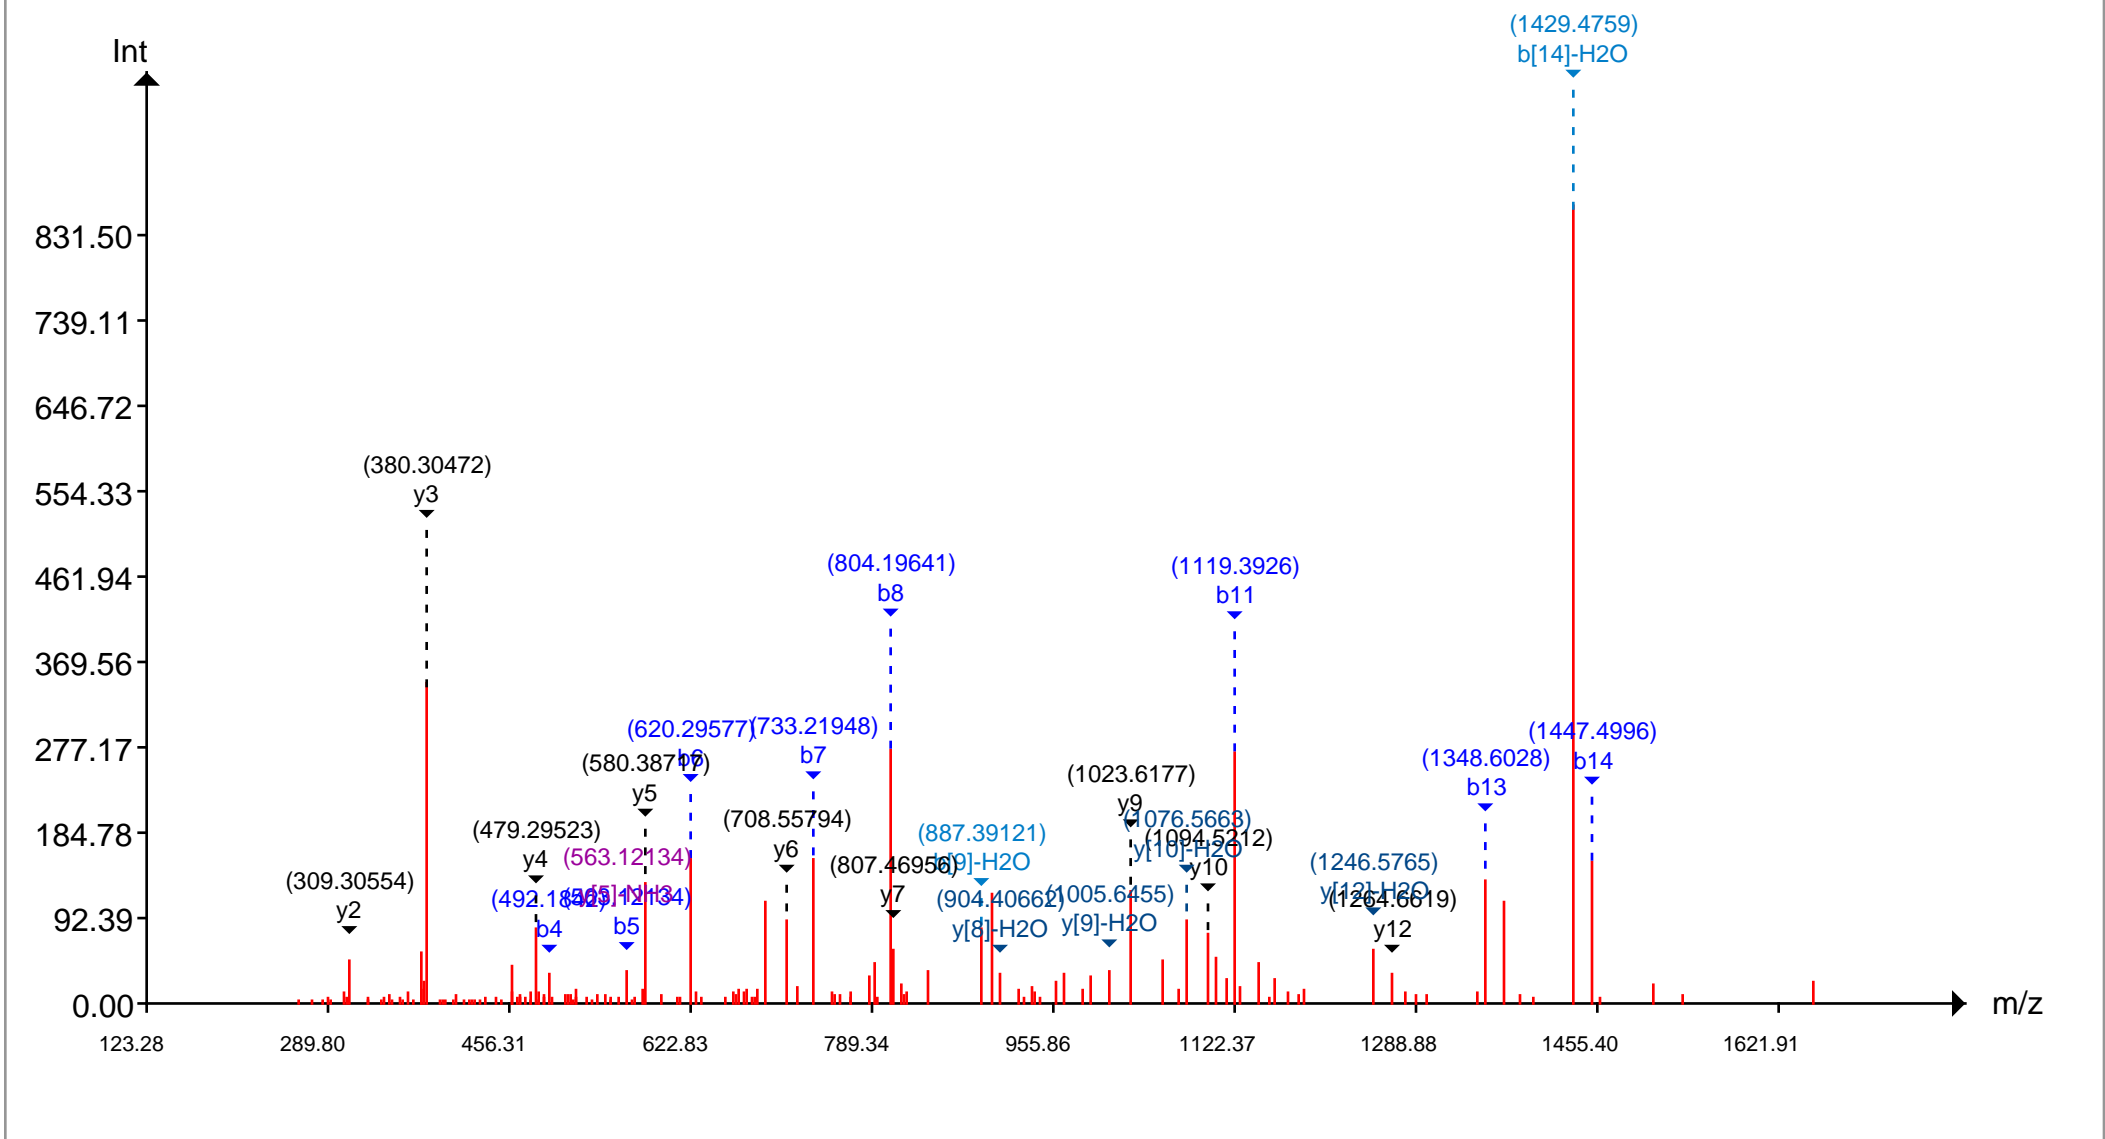

## Info

**Modified Sequence** AcD3-YIGLAGLATDVQTVAR<C13>-COOH

**Ion score** 67.26

**Protein** Q9R1P1

**Confidence level** 99.00%

**Precursor m/z** 914.01249

**Identity Threshold** 46.65

**Charge** 2+

**Mass error** 0.00315

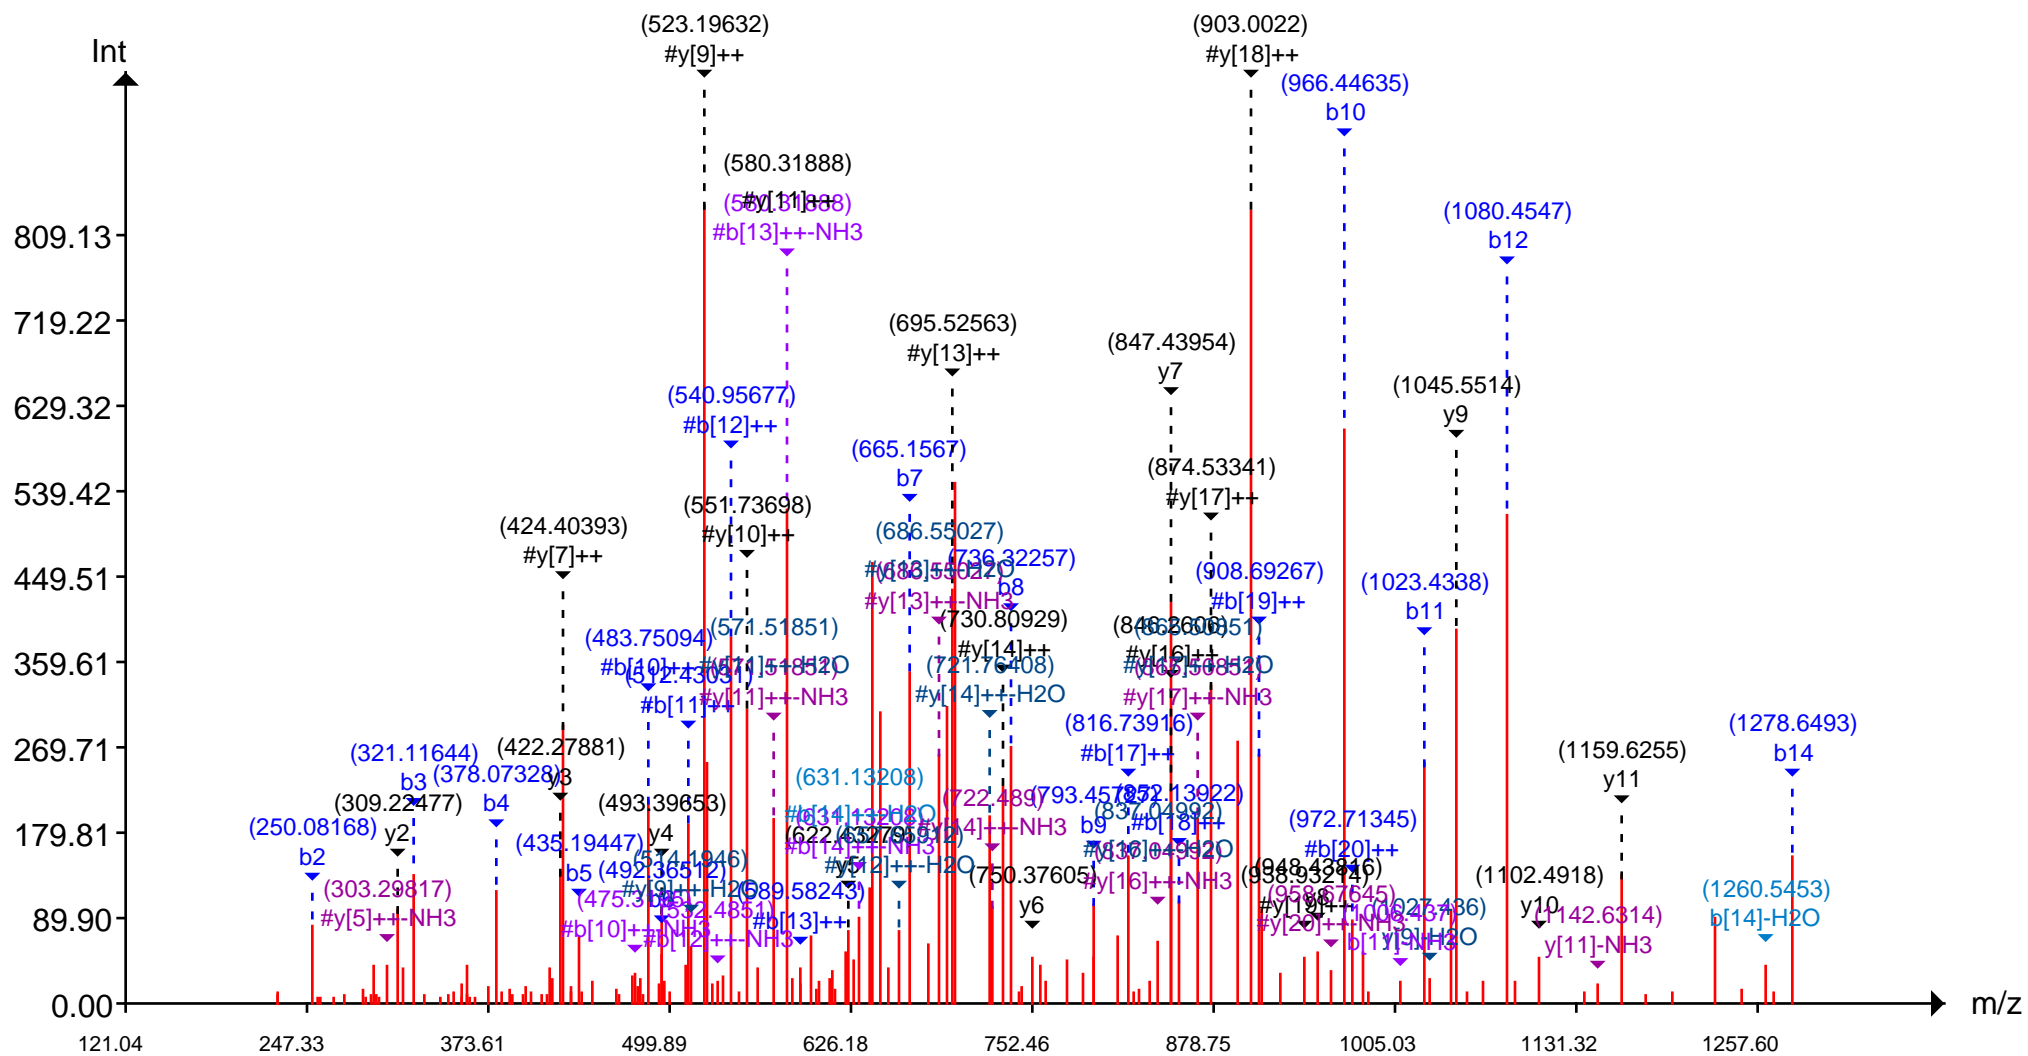

## Info

|                          |                                                      |                           |          |
|--------------------------|------------------------------------------------------|---------------------------|----------|
| <b>Modified Sequence</b> | AcD3-FGAGGGK<AcD3K*>AGK<AcD3K*>GGPTPQEAIQR<C13>-COOH | <b>Ion score</b>          | 91.0     |
| <b>Protein</b>           | Q9D8B3                                               | <b>Confidence level</b>   | 99.00%   |
| <b>Precursor m/z</b>     | 709.05333                                            | <b>Identity Threshold</b> | 47.36    |
| <b>Charge</b>            | 3+                                                   | <b>Mass error</b>         | 0.001199 |

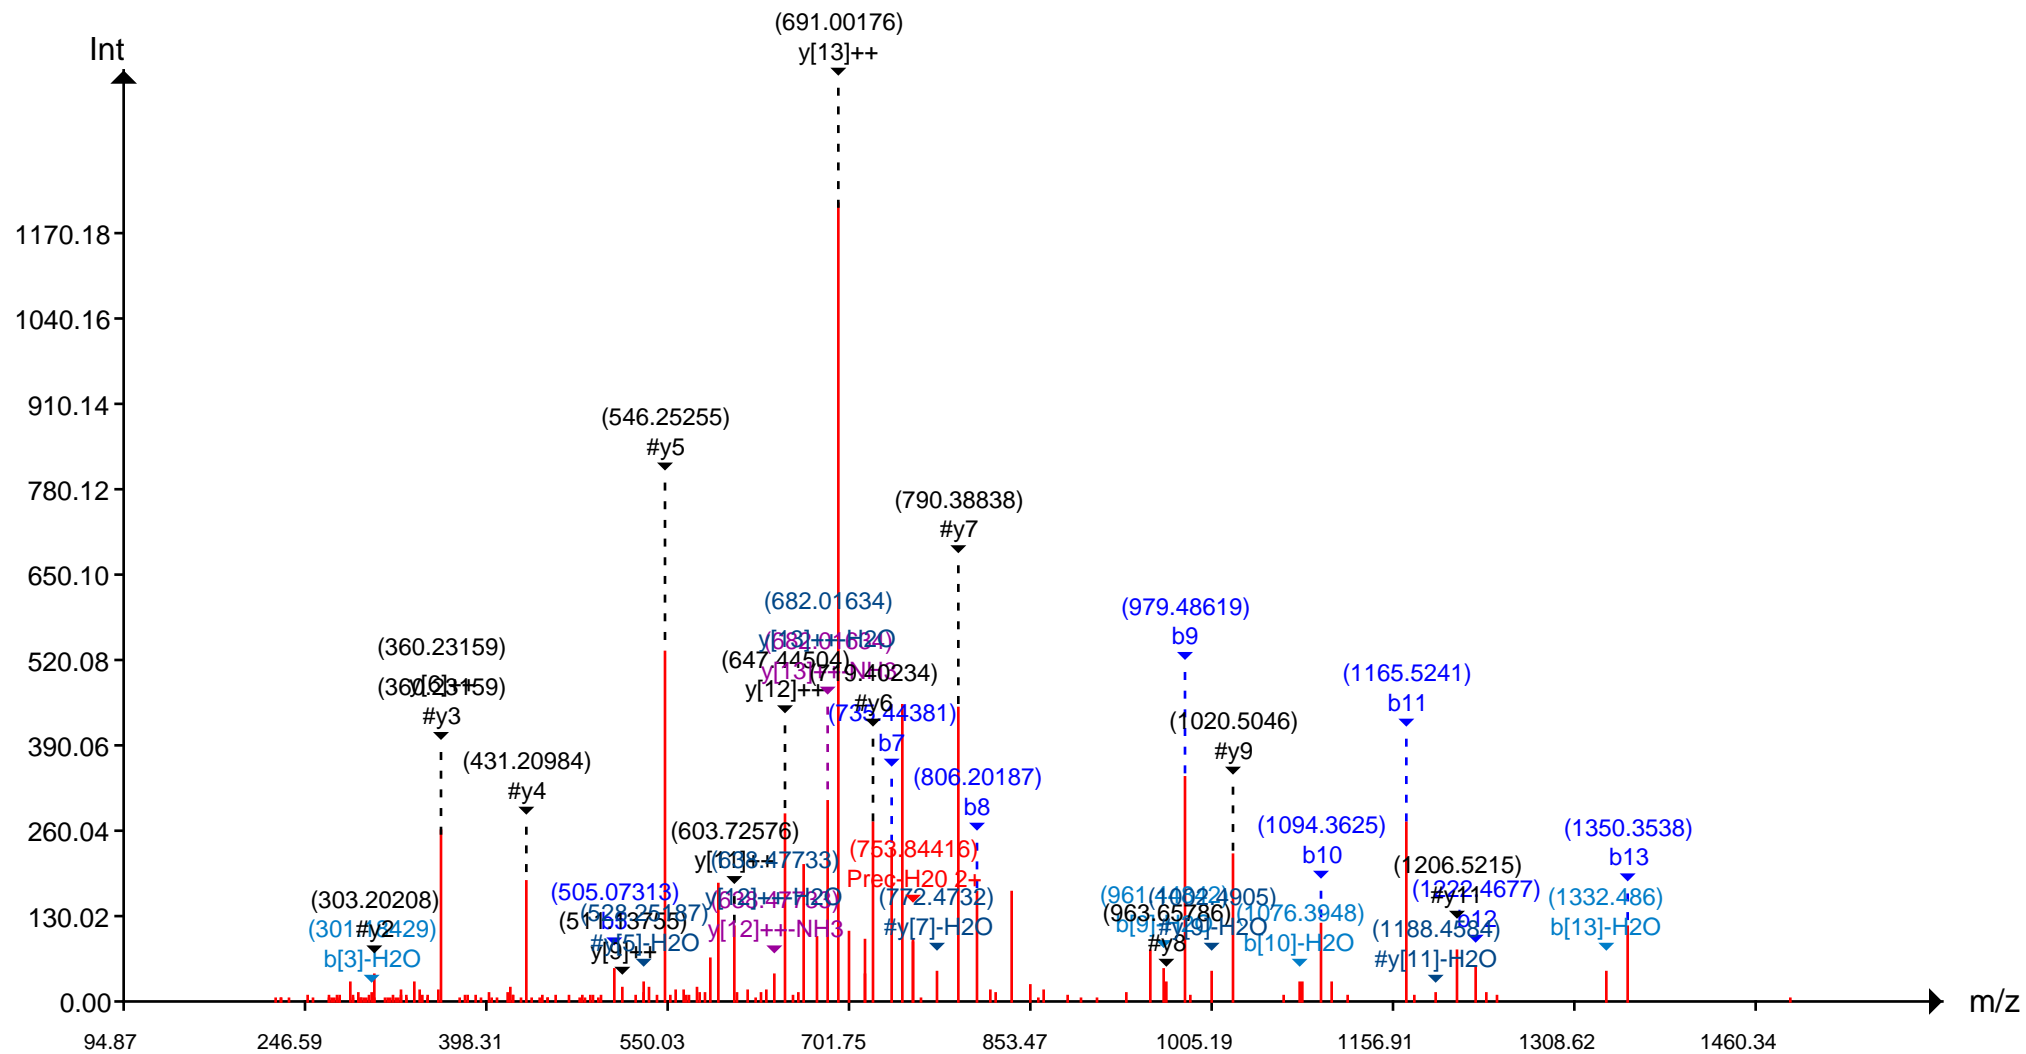

## Info

|                          |                                          |                           |          |
|--------------------------|------------------------------------------|---------------------------|----------|
| <b>Modified Sequence</b> | AcD3-VSSGEGK<AcD3K*>AK<AcD3K*>DAGQR-COOH | <b>Ion score</b>          | 56.44    |
| <b>Protein</b>           | P50580                                   | <b>Confidence level</b>   | 99.00%   |
| <b>Precursor m/z</b>     | 762.90241                                | <b>Identity Threshold</b> | 48.06    |
| <b>Charge</b>            | 2+                                       | <b>Mass error</b>         | 0.001282 |

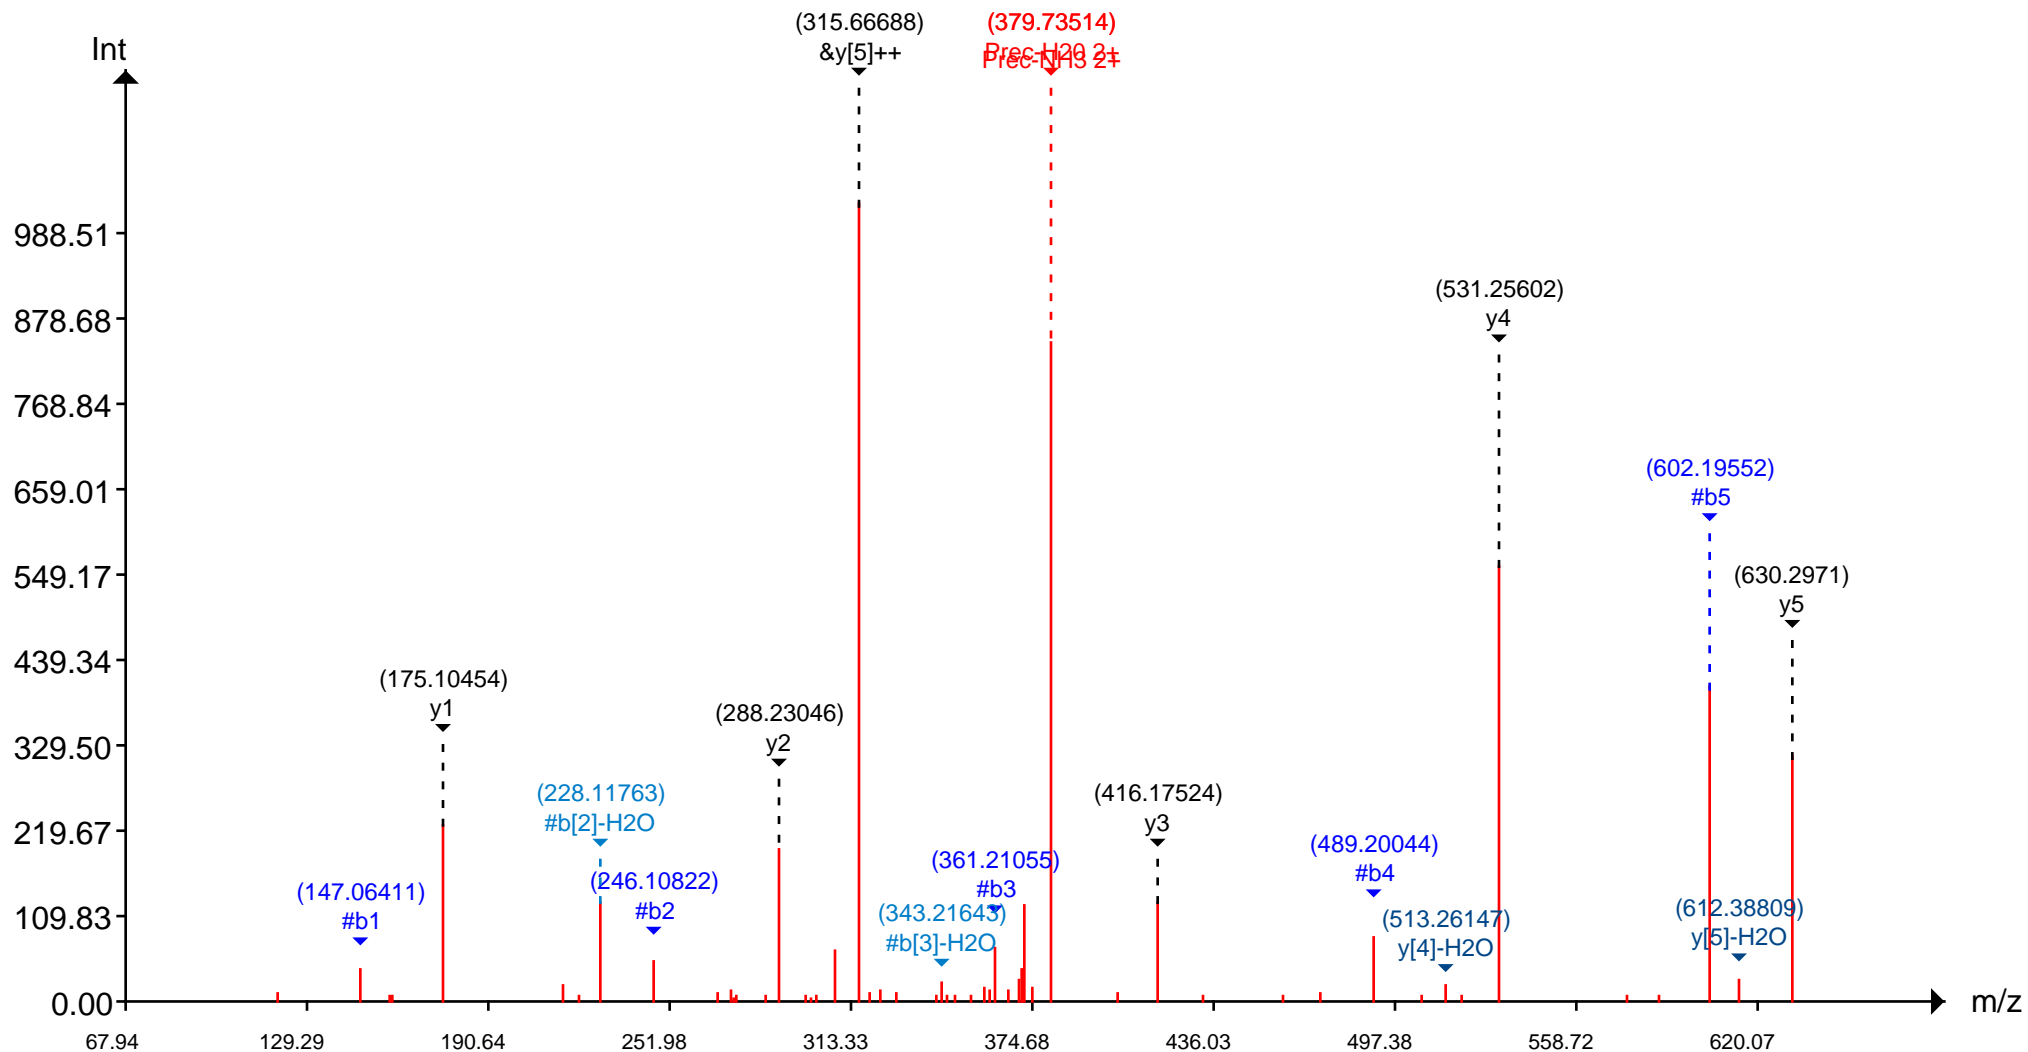

## Info

**Modified Sequence** AcD3-TVDQIR-COOH

**Protein** P58252

**Precursor m/z** 388.72103

**Charge** 2+

**Ion score** 49.04

**Confidence level** 99.00%

**Identity Threshold** 47.88

**Mass error** 7.65E-4

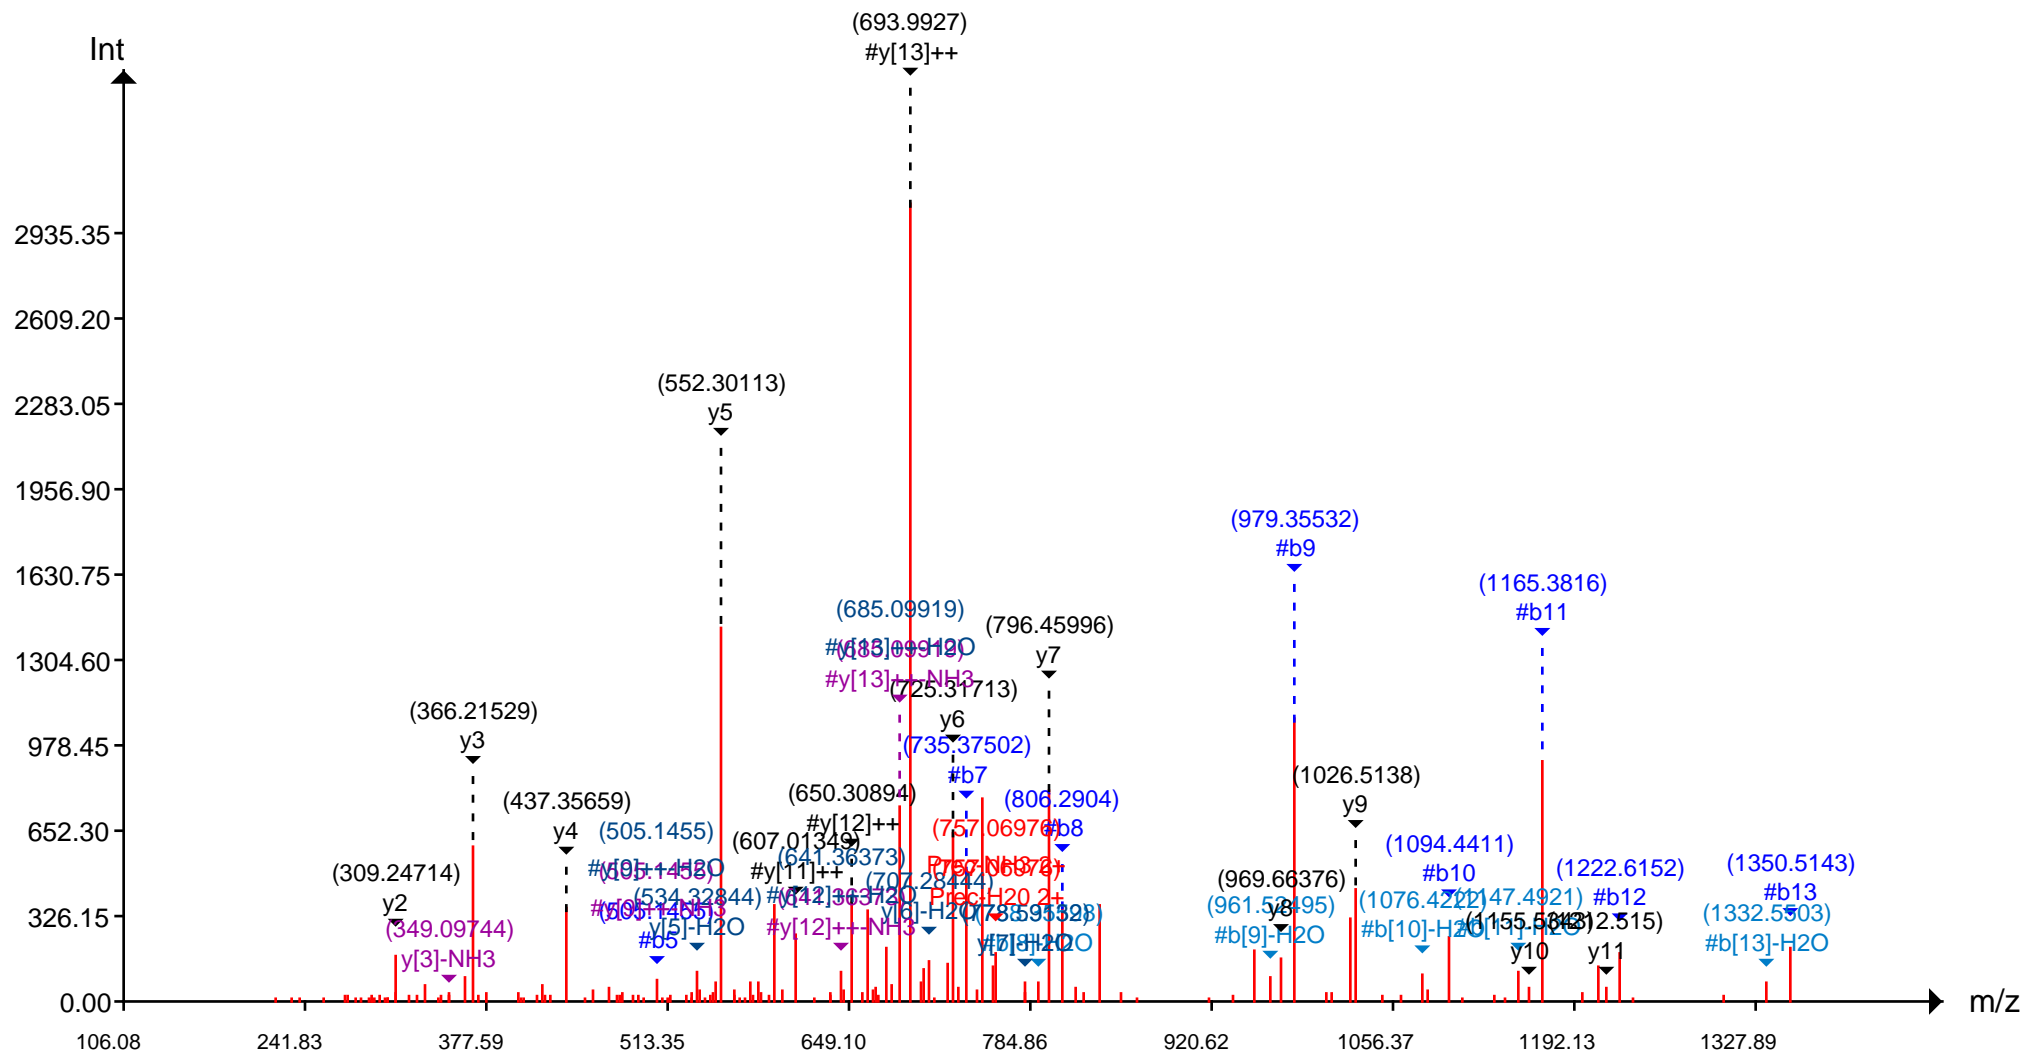

## Info

|                          |                                               |                           |         |
|--------------------------|-----------------------------------------------|---------------------------|---------|
| <b>Modified Sequence</b> | AcD3-VSSGEGK<AcD3K*>AK<AcD3K*>DAGQR<C13>-COOH | <b>Ion score</b>          | 61.2    |
| <b>Protein</b>           | P50580                                        | <b>Confidence level</b>   | 99.00%  |
| <b>Precursor m/z</b>     | 765.91251                                     | <b>Identity Threshold</b> | 48.06   |
| <b>Charge</b>            | 2+                                            | <b>Mass error</b>         | 0.00134 |

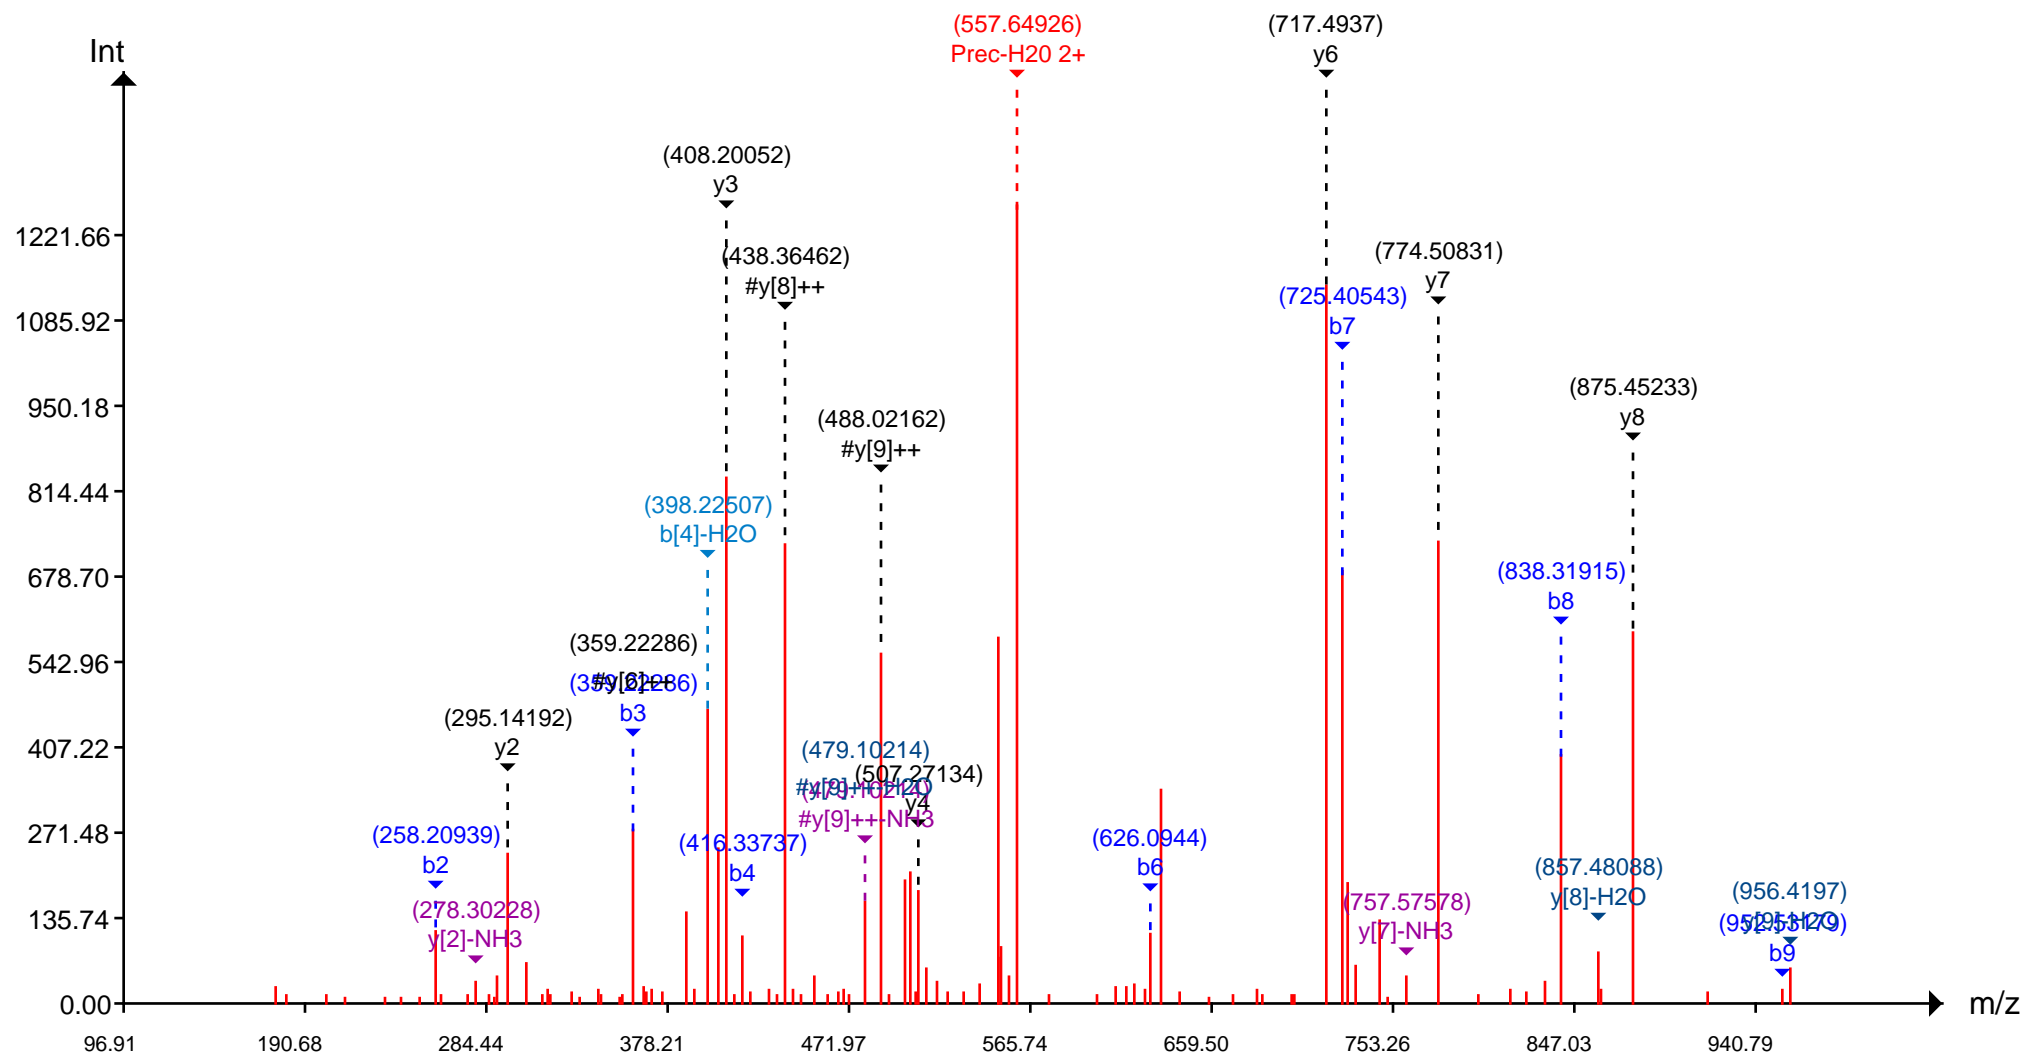

## Info

|                          |                           |                           |         |
|--------------------------|---------------------------|---------------------------|---------|
| <b>Modified Sequence</b> | AcD3-LVTGPLVINR<C13>-COOH | <b>Ion score</b>          | 43.29   |
| <b>Protein</b>           | P47911                    | <b>Confidence level</b>   | 99.00%  |
| <b>Precursor m/z</b>     | 566.86492                 | <b>Identity Threshold</b> | 40.27   |
| <b>Charge</b>            | 2+                        | <b>Mass error</b>         | 2.31E-4 |

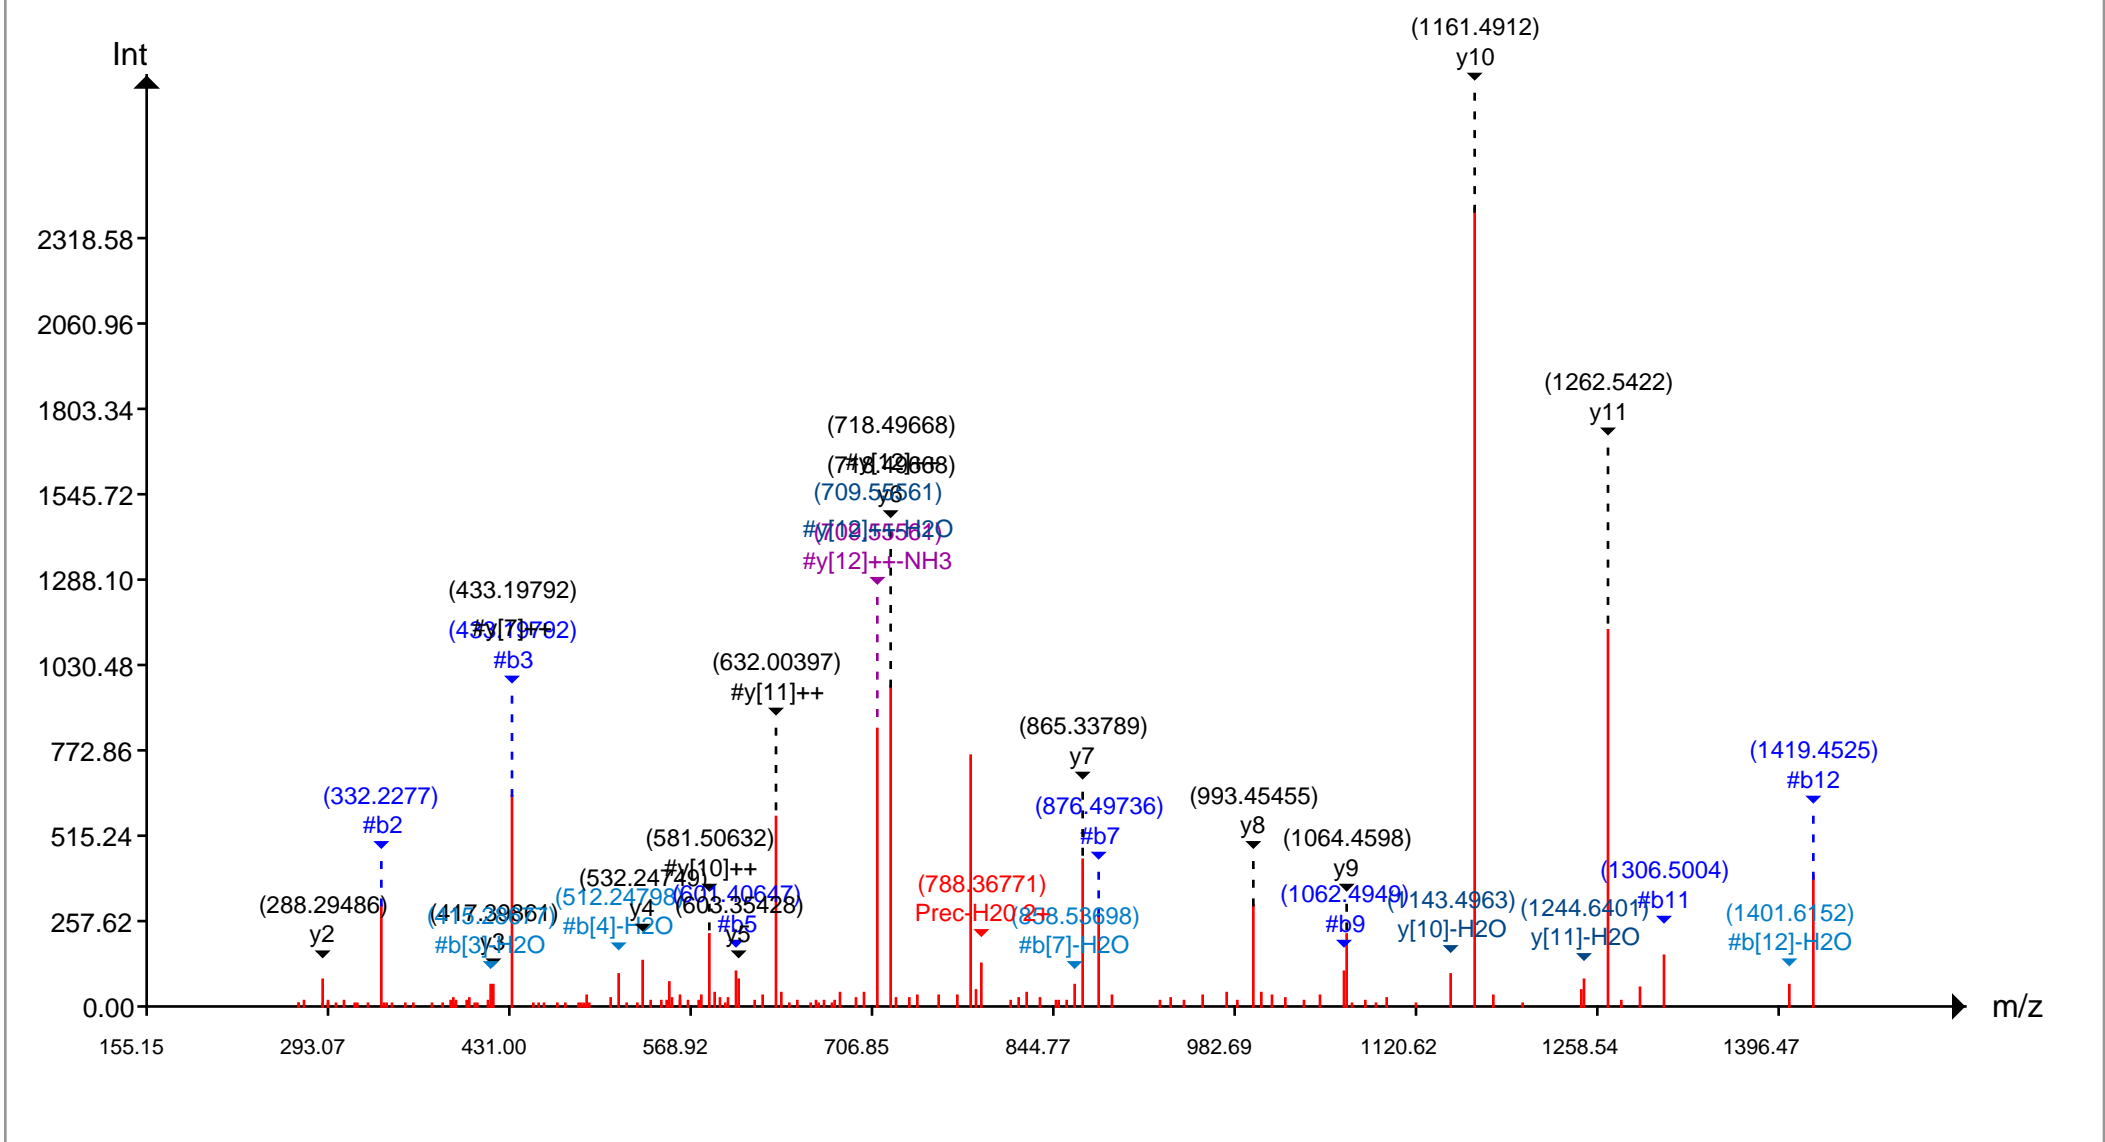

## Info

**Modified Sequence** AcD3-LK<AcD3K\*>TPAQFDADELK-COOH

**Ion score** 87.7

**Protein** P10107

**Confidence level** 99.00%

**Precursor m/z** 797.4239

**Identity Threshold** 48.09

**Charge** 2+

**Mass error** 0.001568

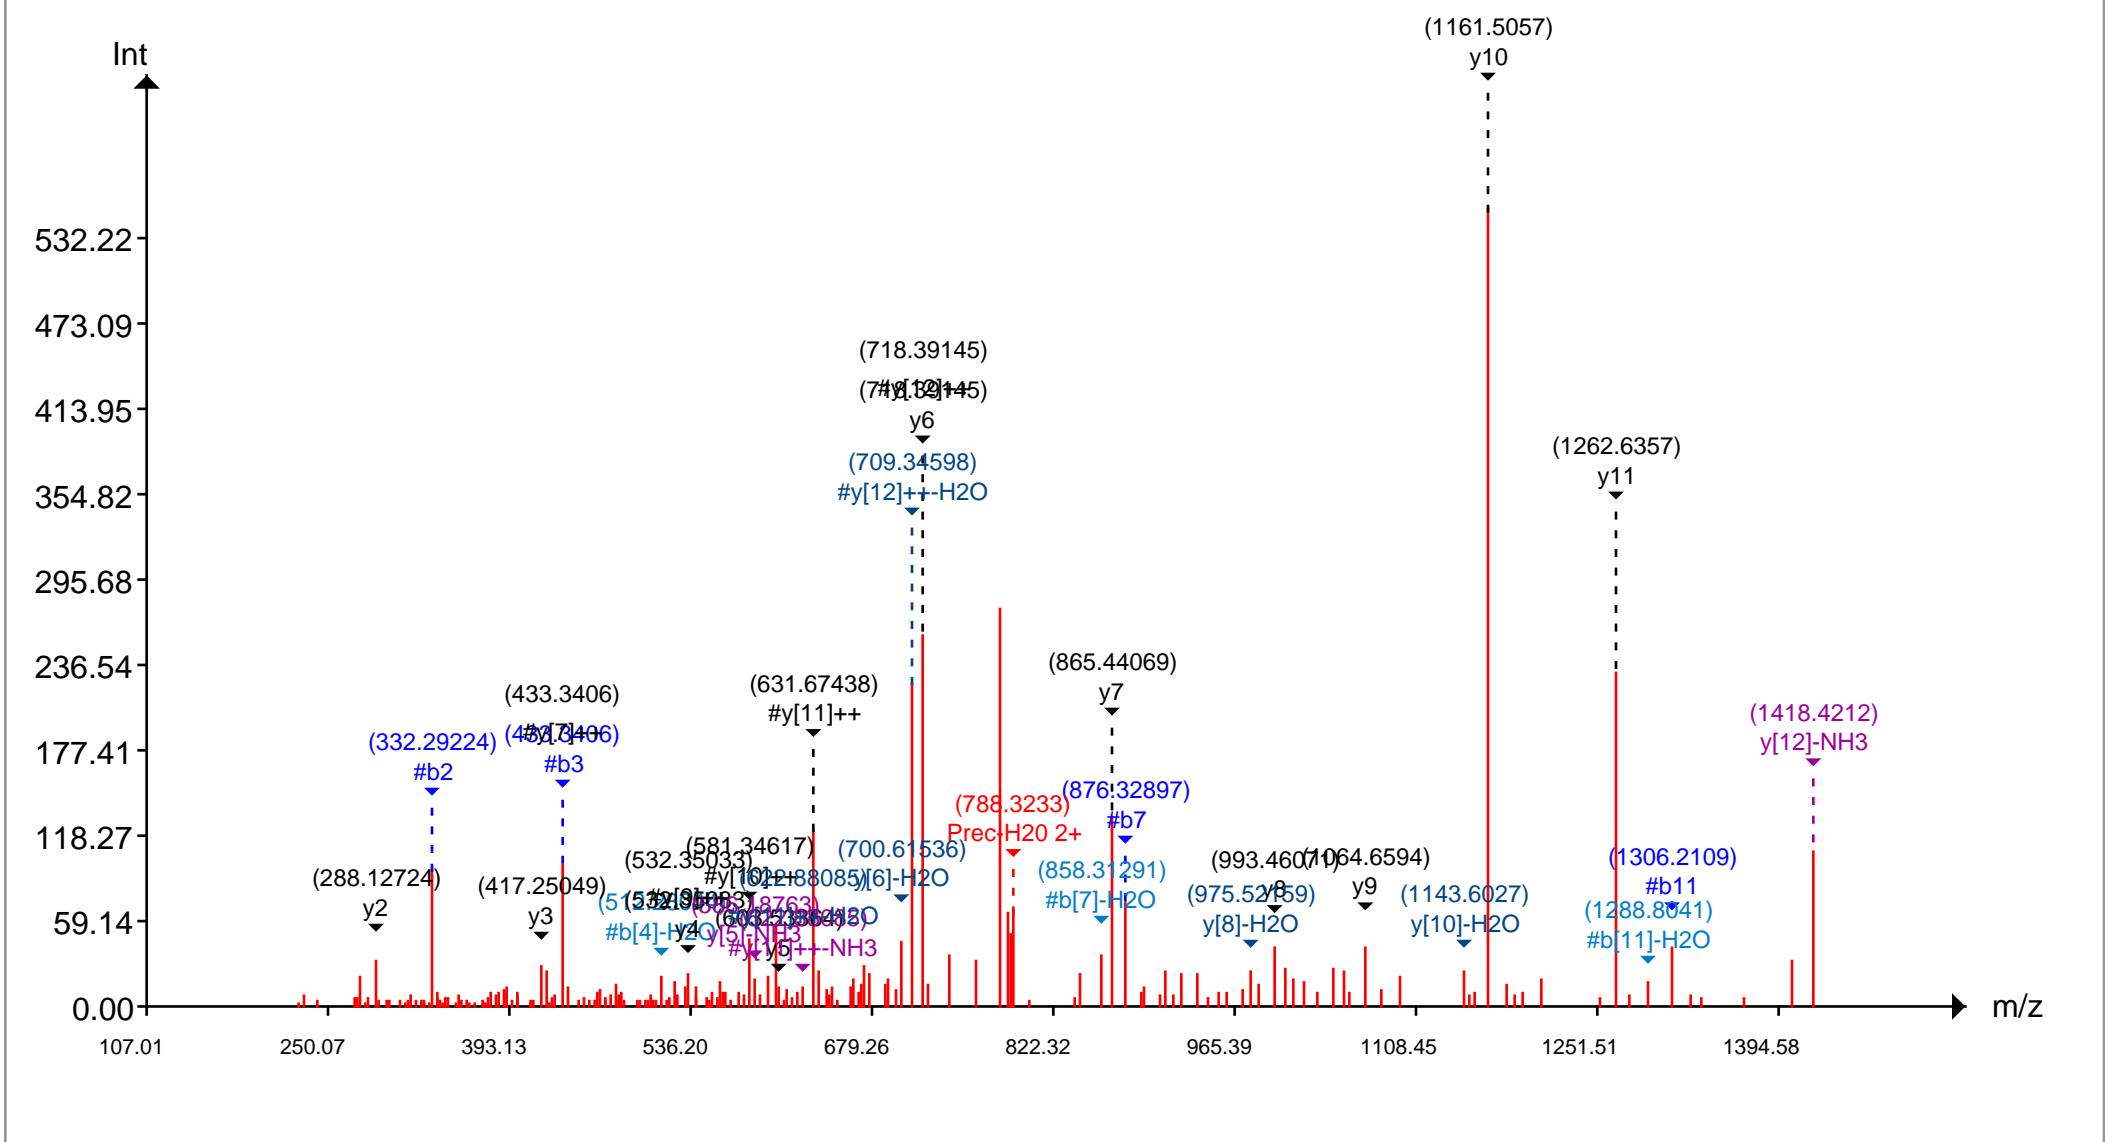

## Info

**Modified Sequence** AcD3-LK<AcD3K\*>TPAQFDADELK-COOH

**Ion score** 63.68

**Protein** P10107

**Confidence level** 99.00%

**Precursor m/z** 797.42377

**Identity Threshold** 48.11

**Charge** 2+

**Mass error** 0.001308



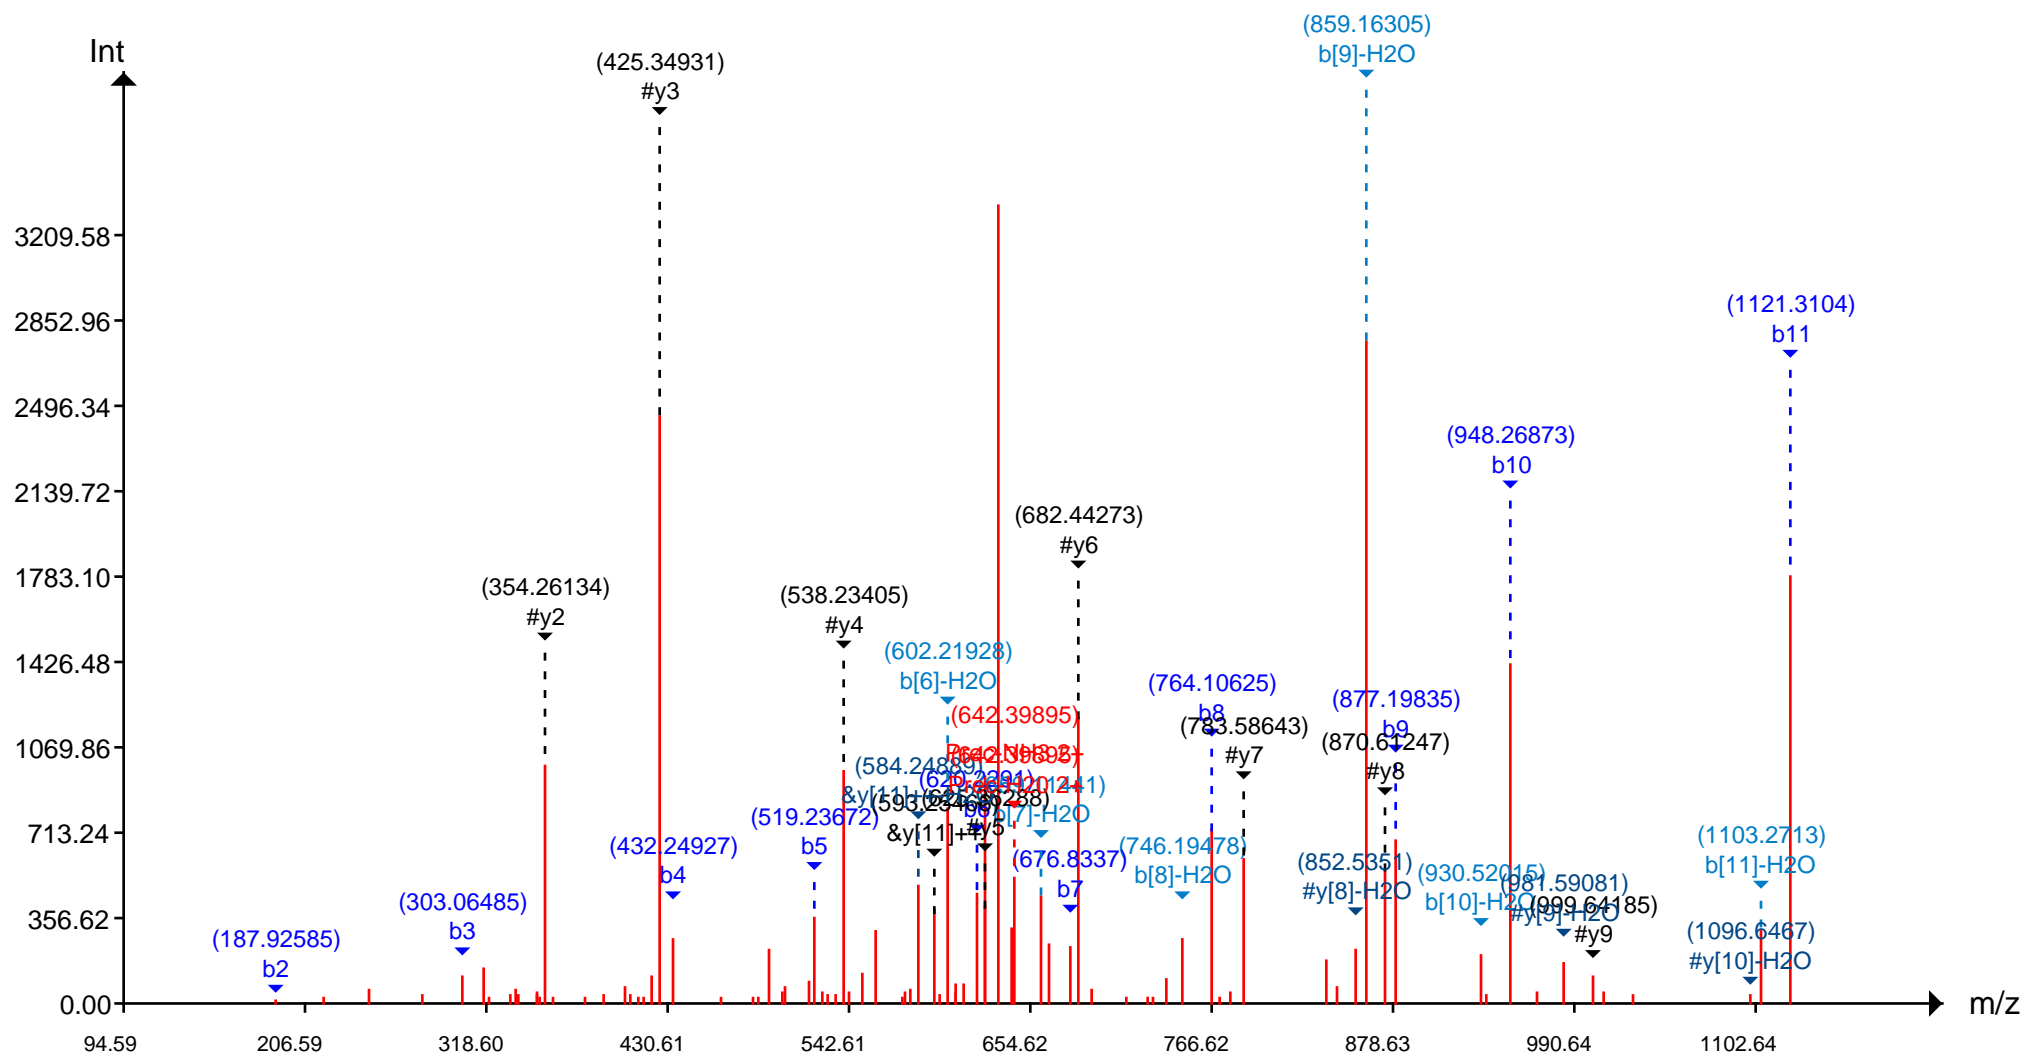

## Info

|                          |                                    |                           |          |
|--------------------------|------------------------------------|---------------------------|----------|
| <b>Modified Sequence</b> | AcD3-AADESTGSIK<AcD3K*>R<C13>-COOH | <b>Ion score</b>          | 59.55    |
| <b>Protein</b>           | P05064                             | <b>Confidence level</b>   | 99.00%   |
| <b>Precursor m/z</b>     | 651.35002                          | <b>Identity Threshold</b> | 47.89    |
| <b>Charge</b>            | 2+                                 | <b>Mass error</b>         | 0.001803 |

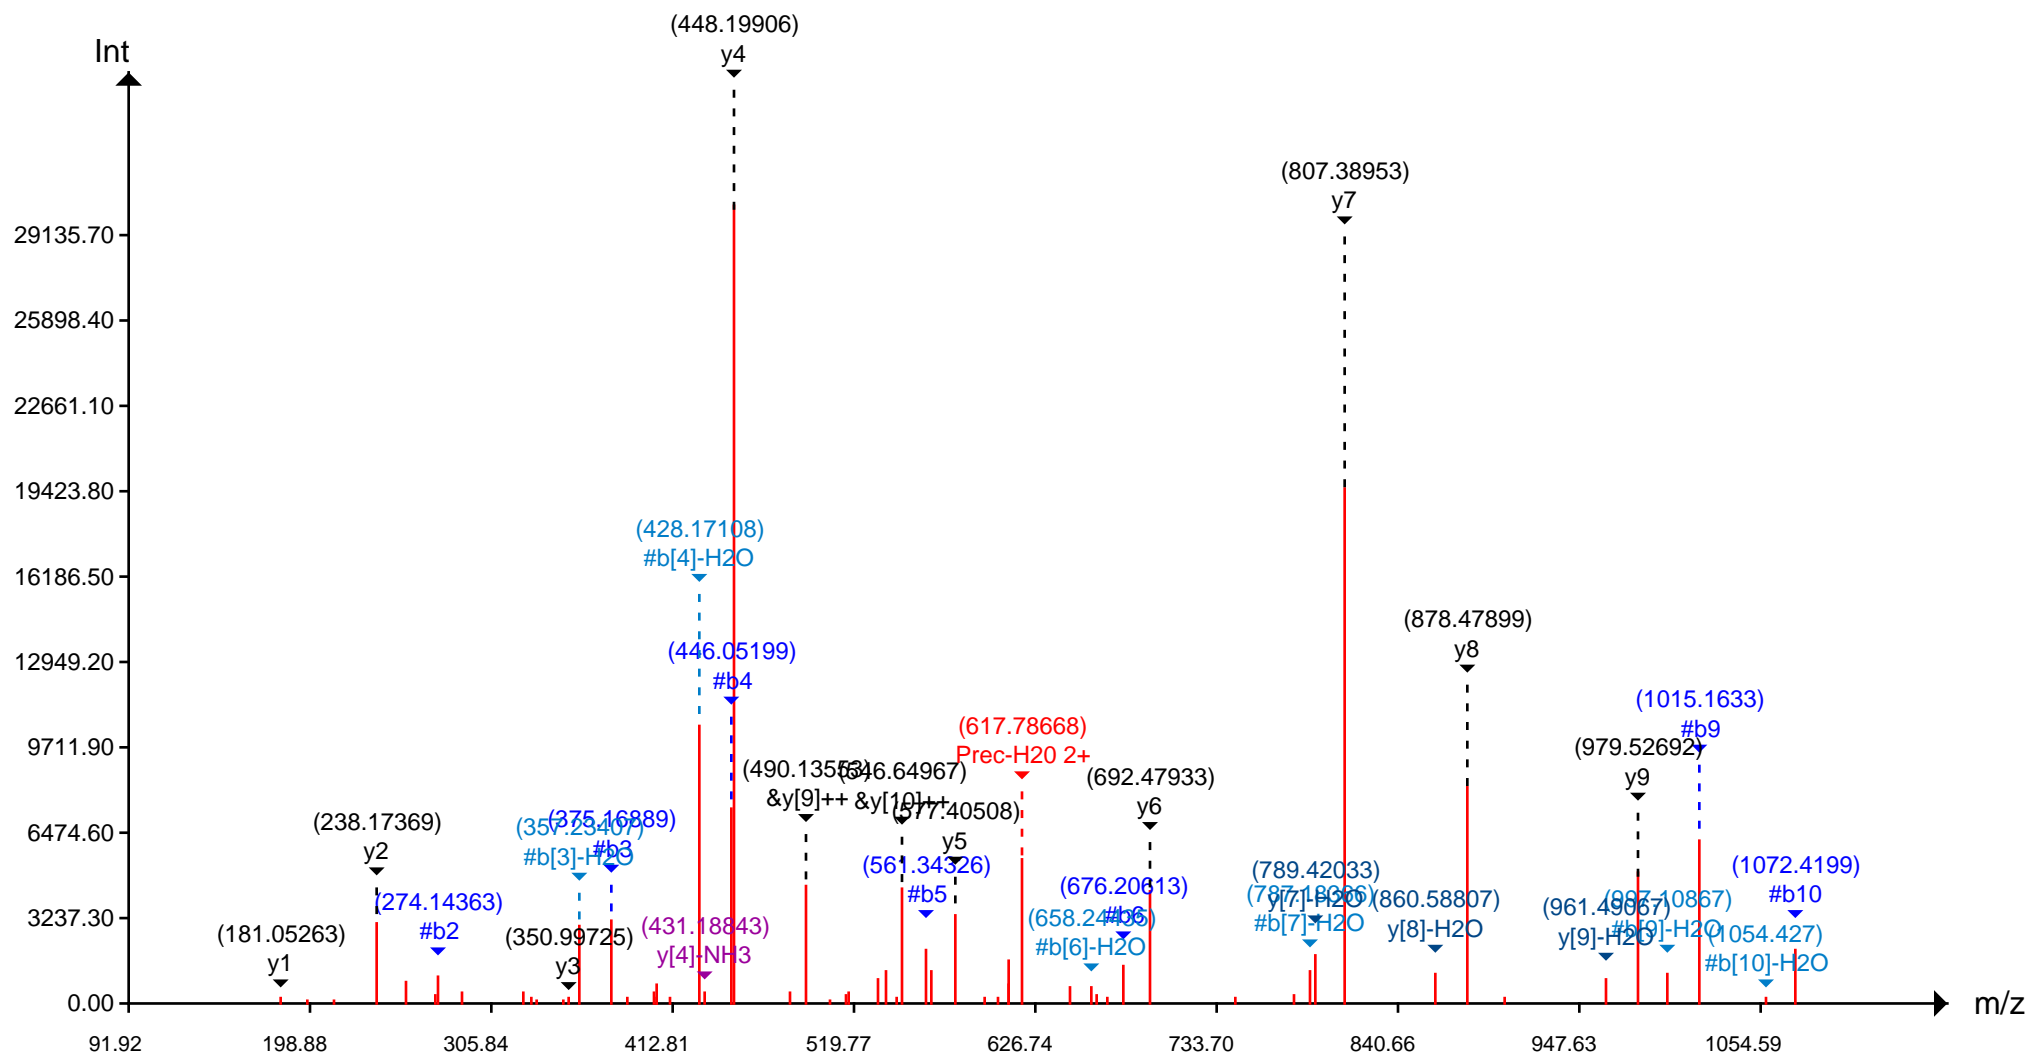

## Info

**Modified Sequence** AcD3-DITADDEPLGR<C13>-COOH

**Ion score** 69.74

**Protein** P17742

**Confidence level** 99.00%

**Precursor m/z** 626.8136

**Identity Threshold** 47.49

**Charge** 2+

**Mass error** 8.77E-4

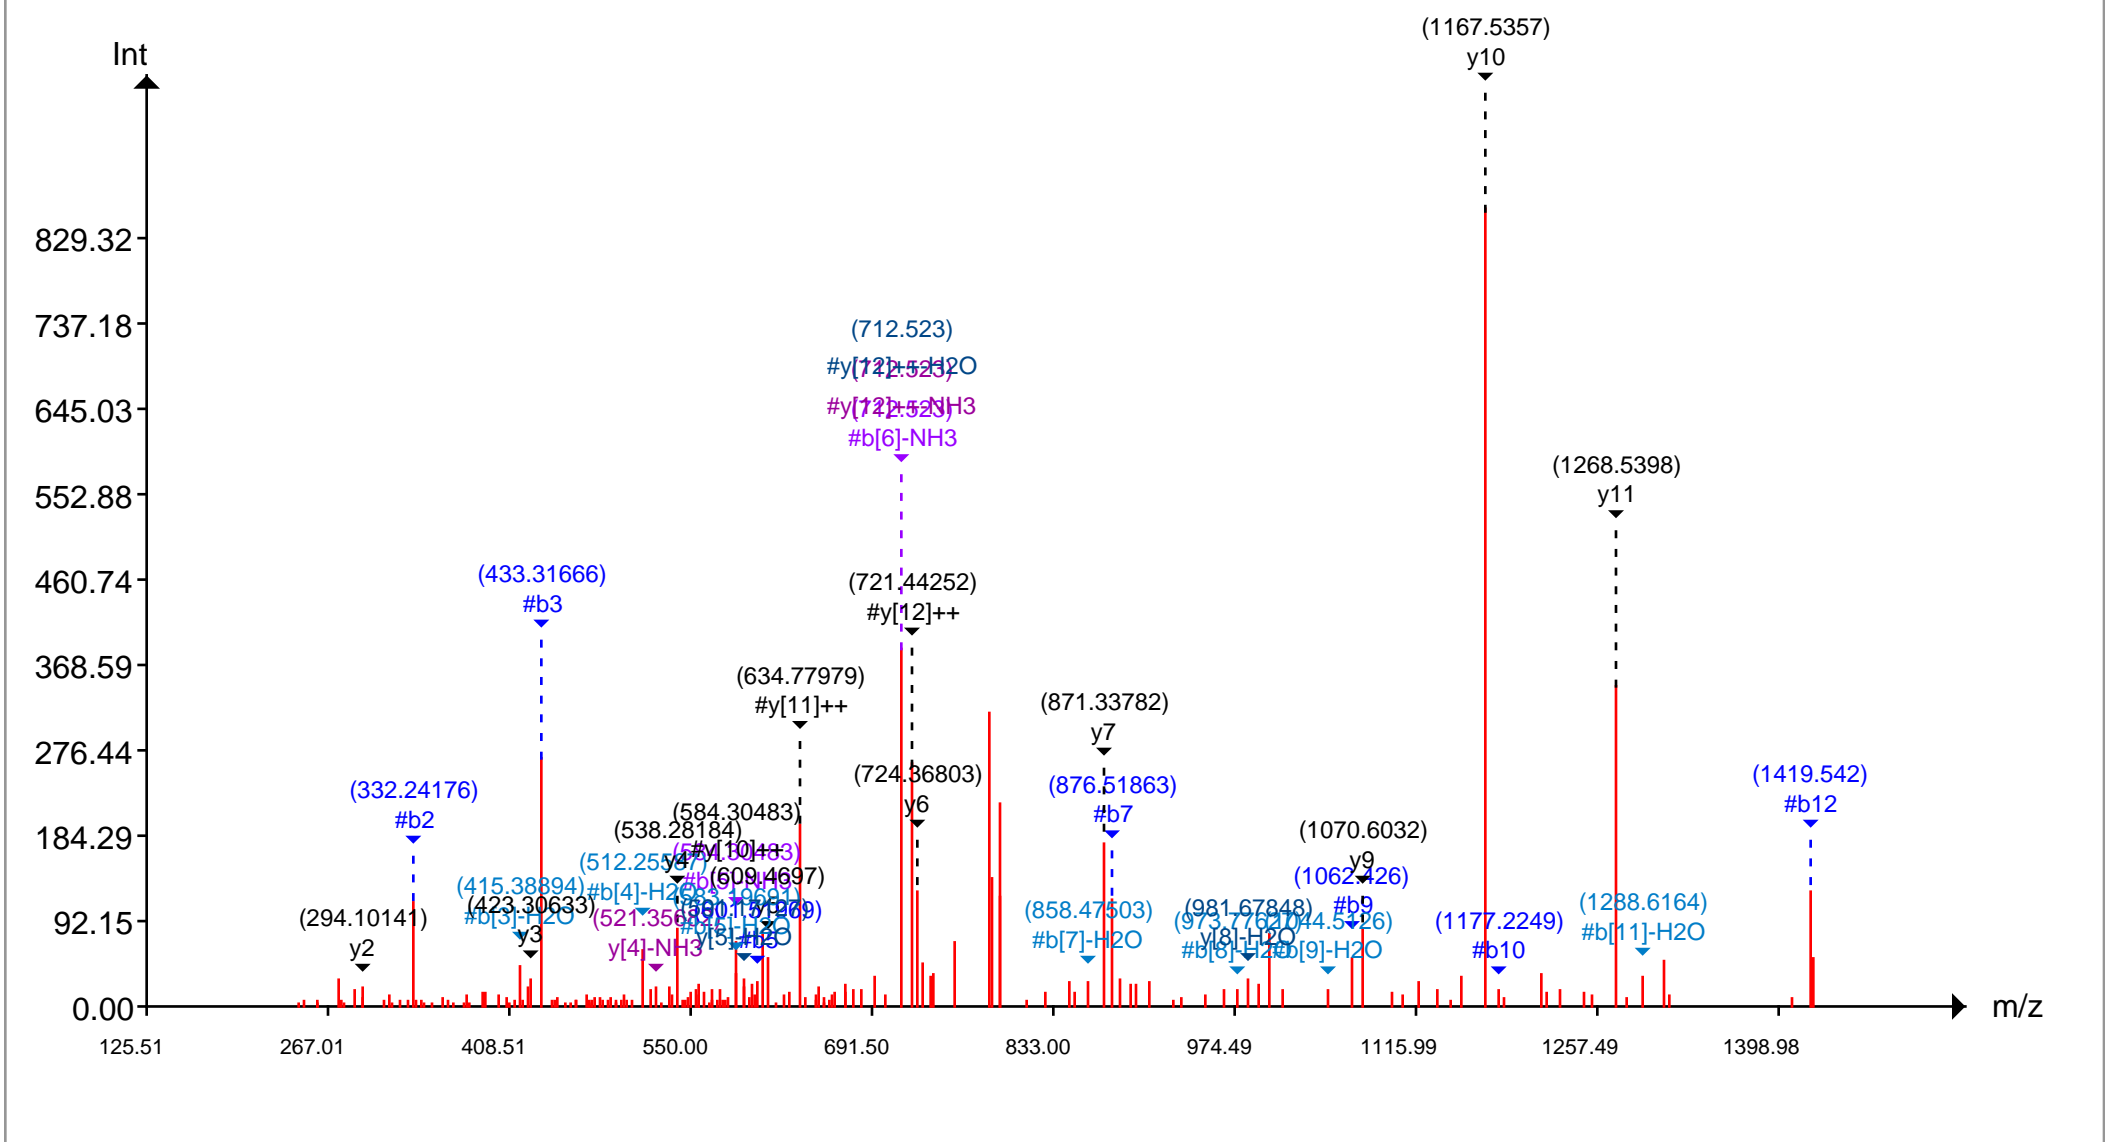

## Info

**Modified Sequence** AcD3-LK<AcD3K\*>TPAQFDADELRL<C13>-COOH

**Ion score** 52.31

**Protein** P10107

**Confidence level** 99.00%

**Precursor m/z** 800.43418

**Identity Threshold** 47.86

**Charge** 2+

**Mass error** 0.001986

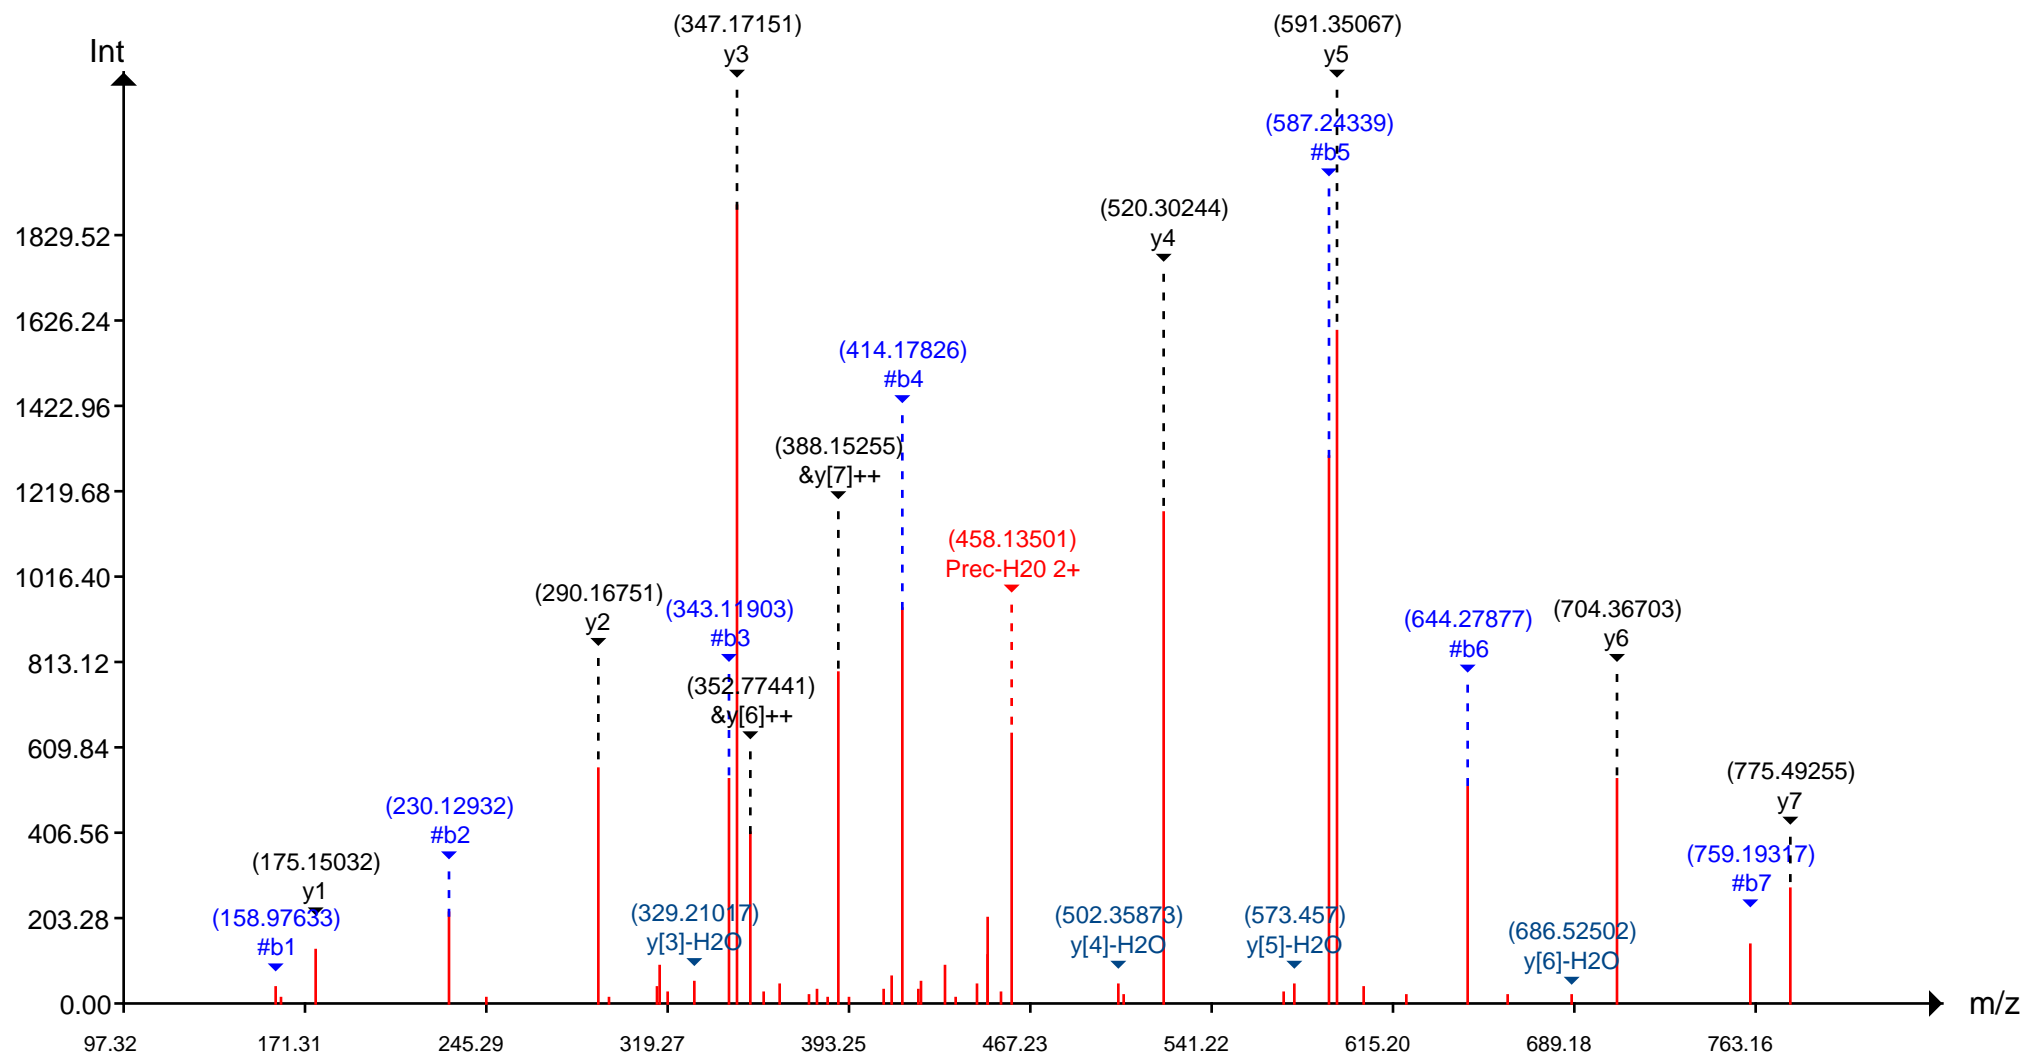

## Info

|                          |                            |                           |         |
|--------------------------|----------------------------|---------------------------|---------|
| <b>Modified Sequence</b> | AcD3-LALAK<AcD3K*>GDR-COOH | <b>Ion score</b>          | 76.28   |
| <b>Protein</b>           | P10107                     | <b>Confidence level</b>   | 99.00%  |
| <b>Precursor m/z</b>     | 467.28535                  | <b>Identity Threshold</b> | 44.85   |
| <b>Charge</b>            | 2+                         | <b>Mass error</b>         | -2.0E-5 |

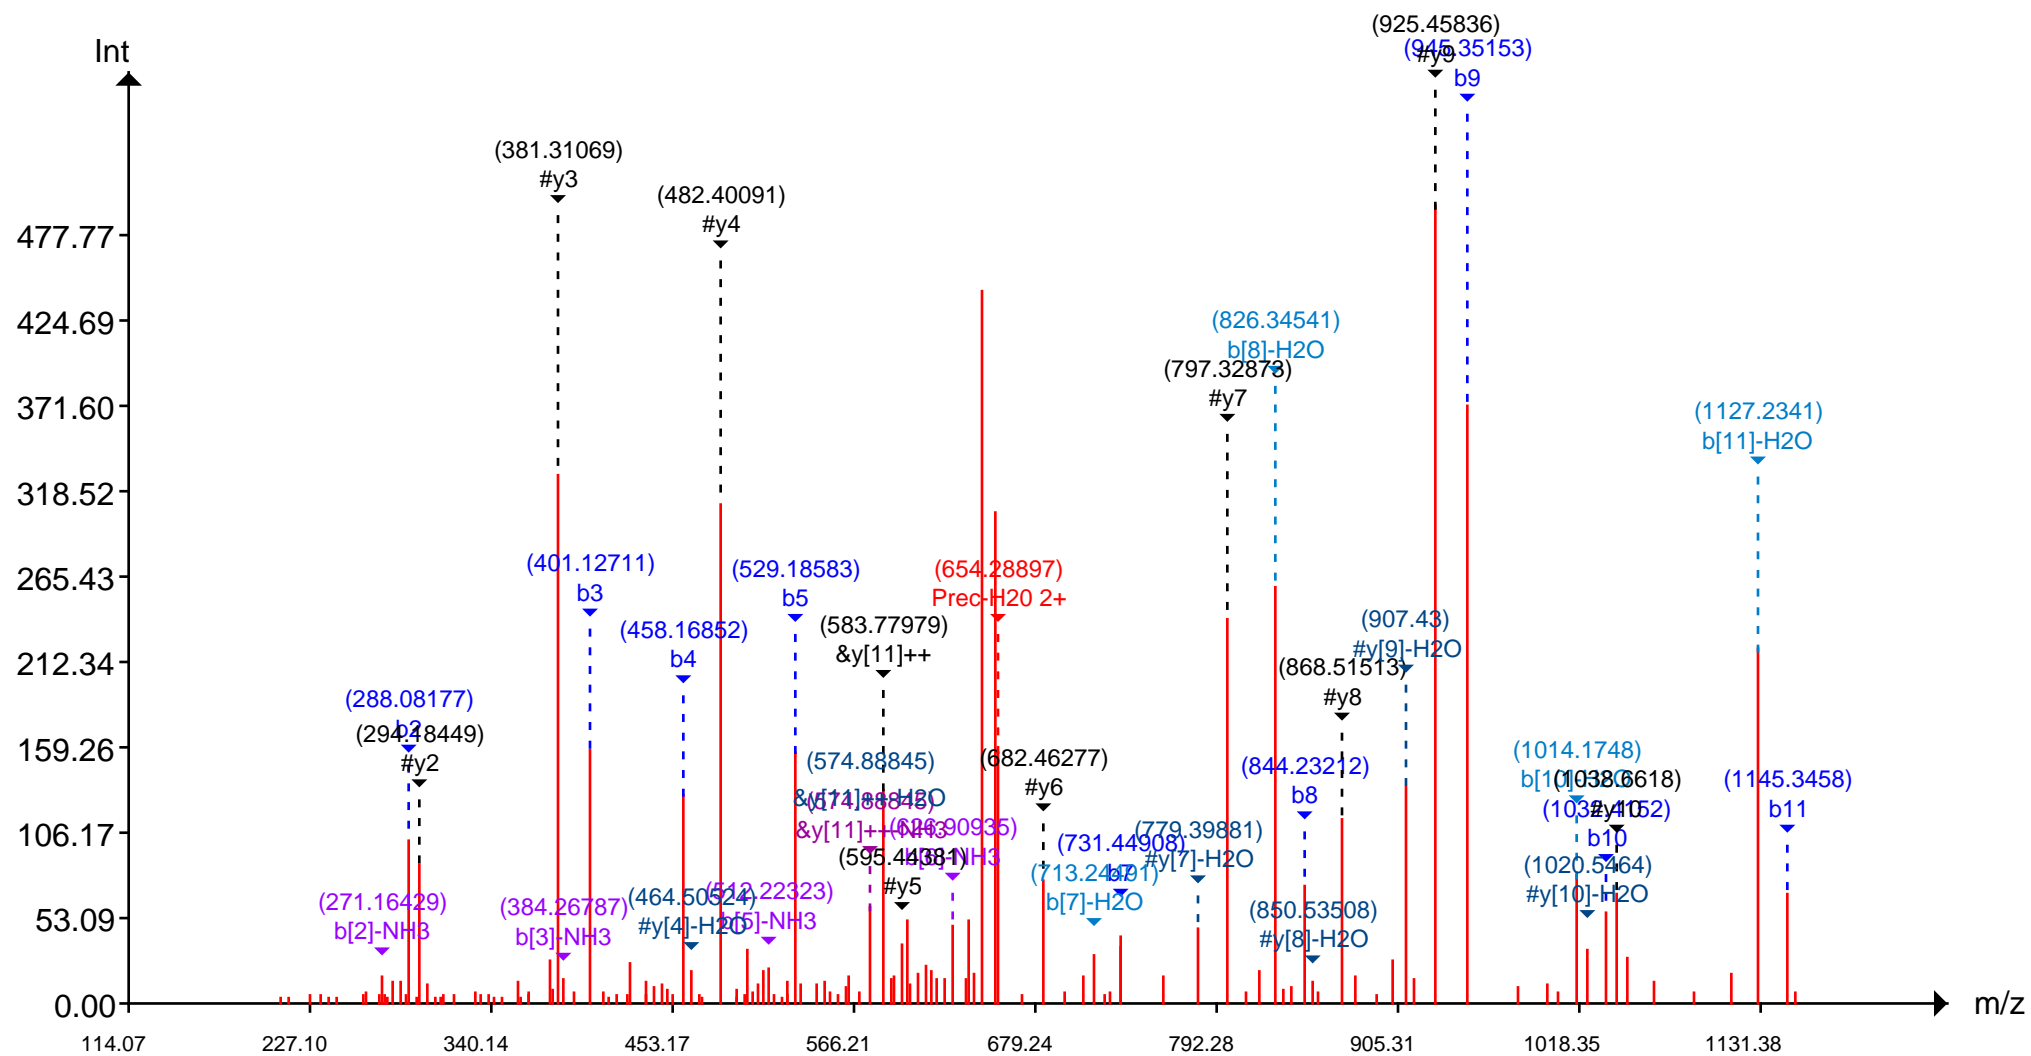

## Info

**Modified Sequence** AcD3-NQLGADSLTSLR<C13>-COOH

**Ion score** 71.26

**Protein** Q64152

**Confidence level** 99.00%

**Precursor m/z** 663.36355

**Identity Threshold** 47.70

**Charge** 2+

**Mass error** 4.05E-4

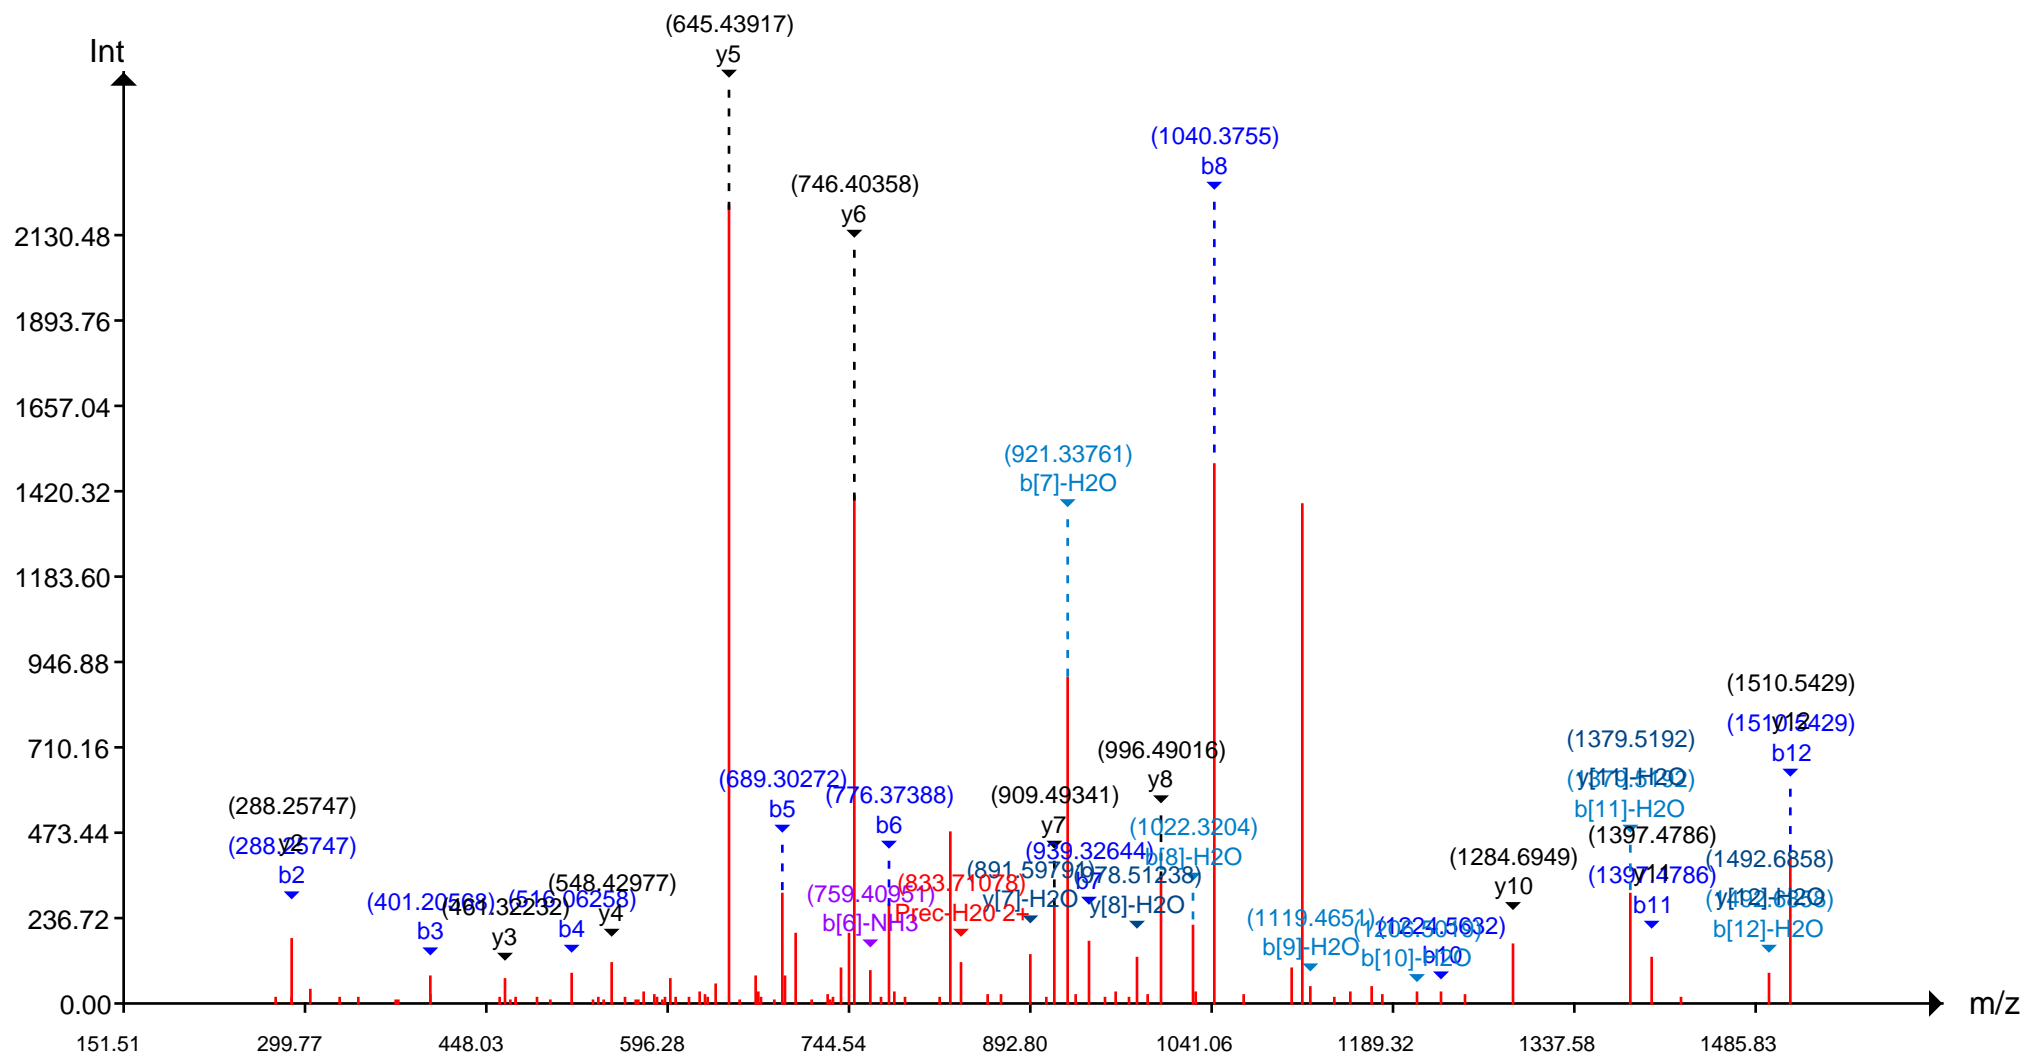

## Info

|                          |                                         |                           |          |
|--------------------------|-----------------------------------------|---------------------------|----------|
| <b>Modified Sequence</b> | AcD3-EIIDK<AcD3K*>SYTPSK<AcD3K*>IR-COOH | <b>Ion score</b>          | 94.49    |
| <b>Protein</b>           | O70492                                  | <b>Confidence level</b>   | 99.00%   |
| <b>Precursor m/z</b>     | 842.97836                               | <b>Identity Threshold</b> | 46.34    |
| <b>Charge</b>            | 2+                                      | <b>Mass error</b>         | 0.002852 |

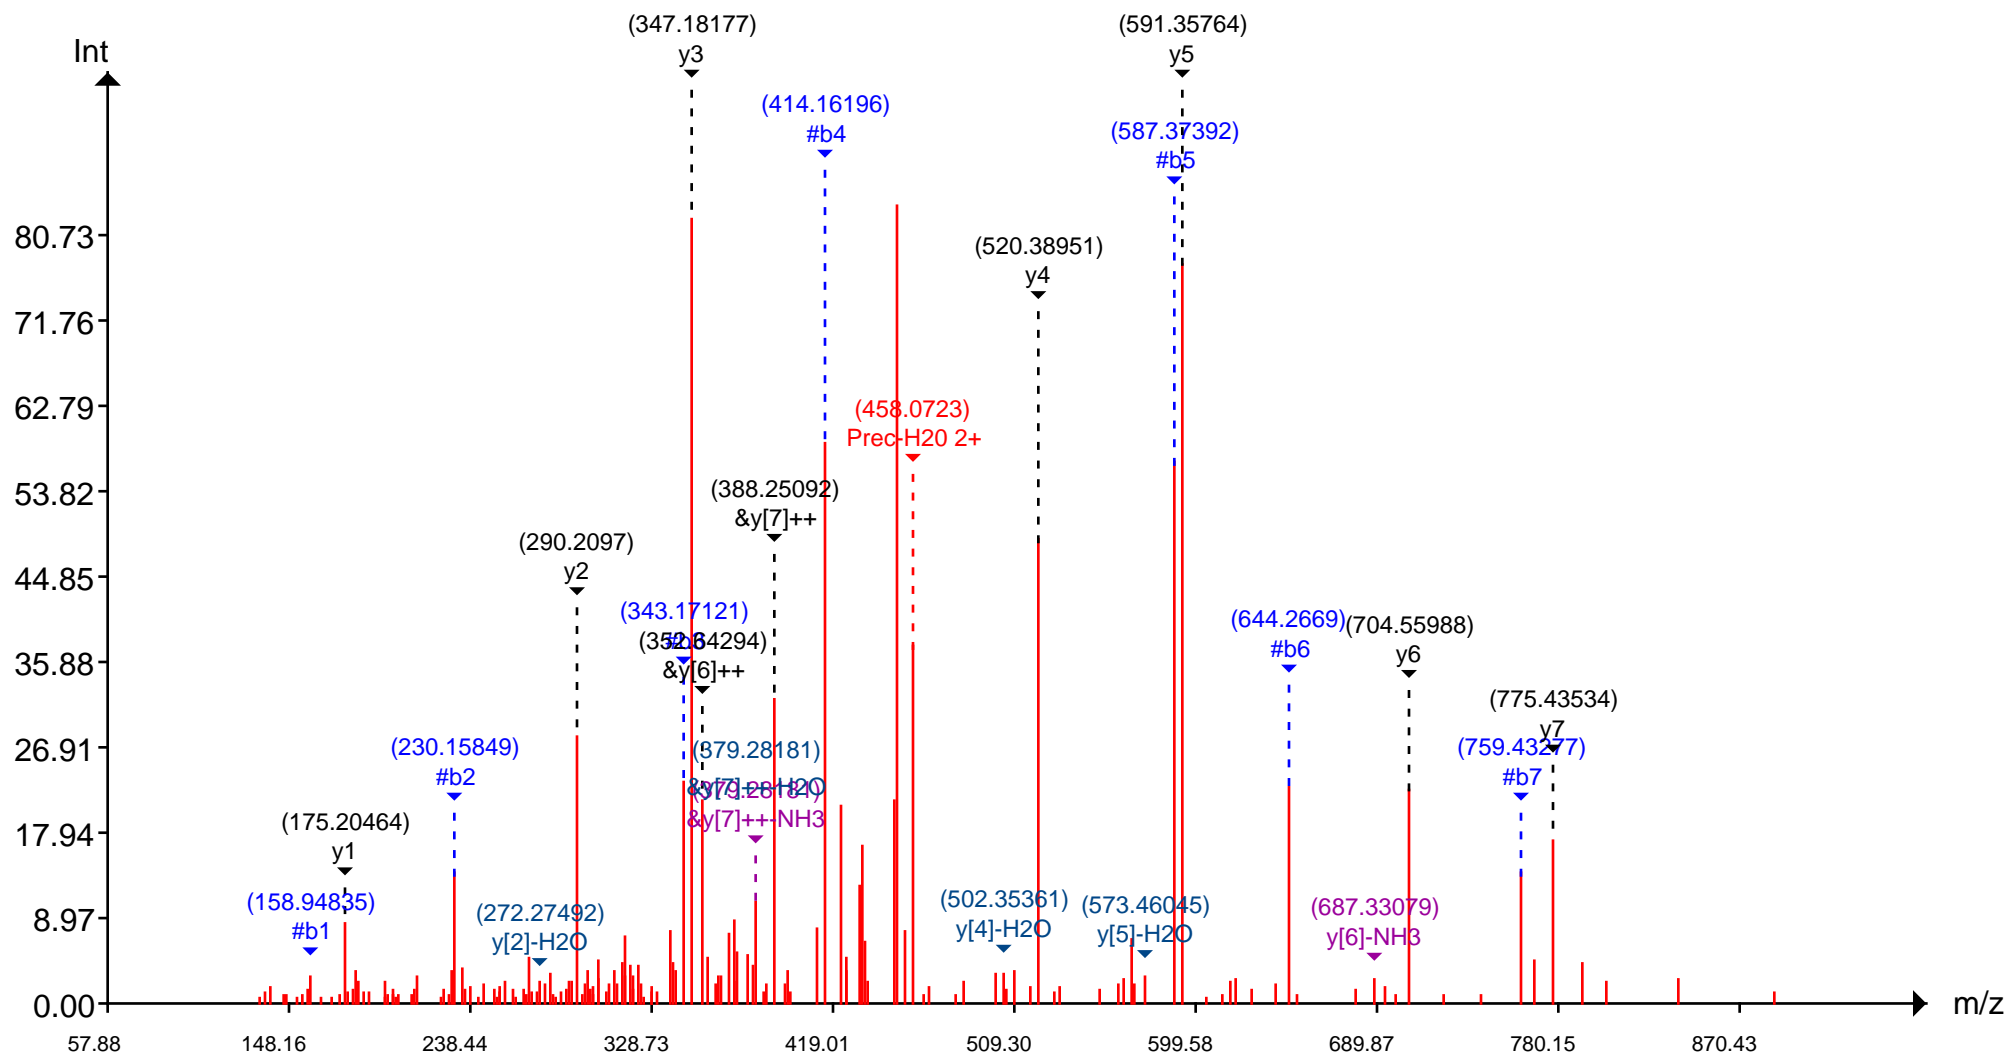

## Info

**Modified Sequence** AcD3-LALAK<AcD3K\*>GDR-COOH

**Ion score** 67.76

**Protein** P10107

**Confidence level** 99.00%

**Precursor m/z** 467.28526

**Identity Threshold** 45.01

**Charge** 2+

**Mass error** -2.0E-4

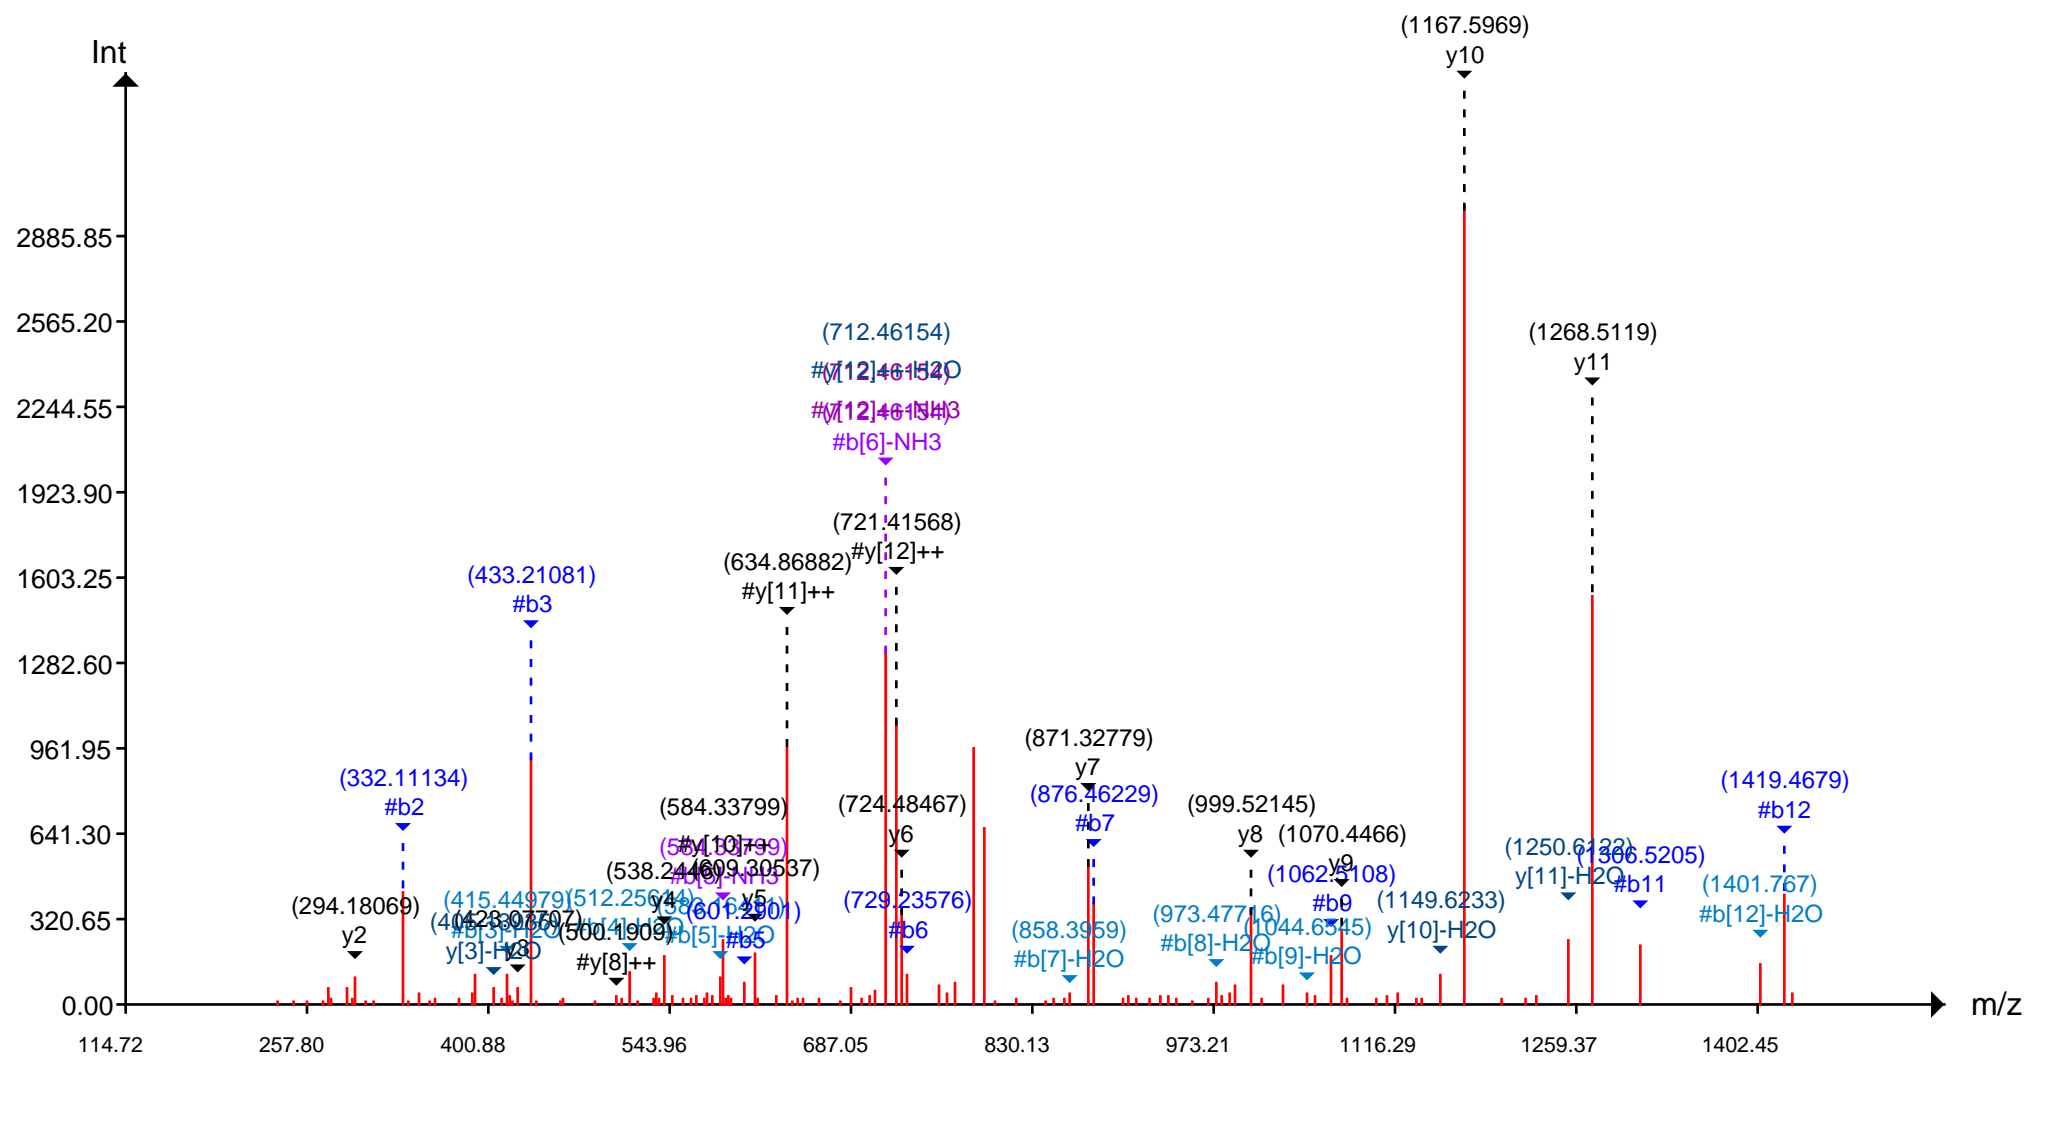

| Info                     |                                     |                           |          |
|--------------------------|-------------------------------------|---------------------------|----------|
| <b>Modified Sequence</b> | AcD3-LK<AcD3K*>TPAQFDAELR<C13>-COOH | <b>Ion score</b>          | 72.66    |
| <b>Protein</b>           | P10107                              | <b>Confidence level</b>   | 99.00%   |
| <b>Precursor m/z</b>     | 800.43389                           | <b>Identity Threshold</b> | 47.90    |
| <b>Charge</b>            | 2+                                  | <b>Mass error</b>         | 0.001406 |



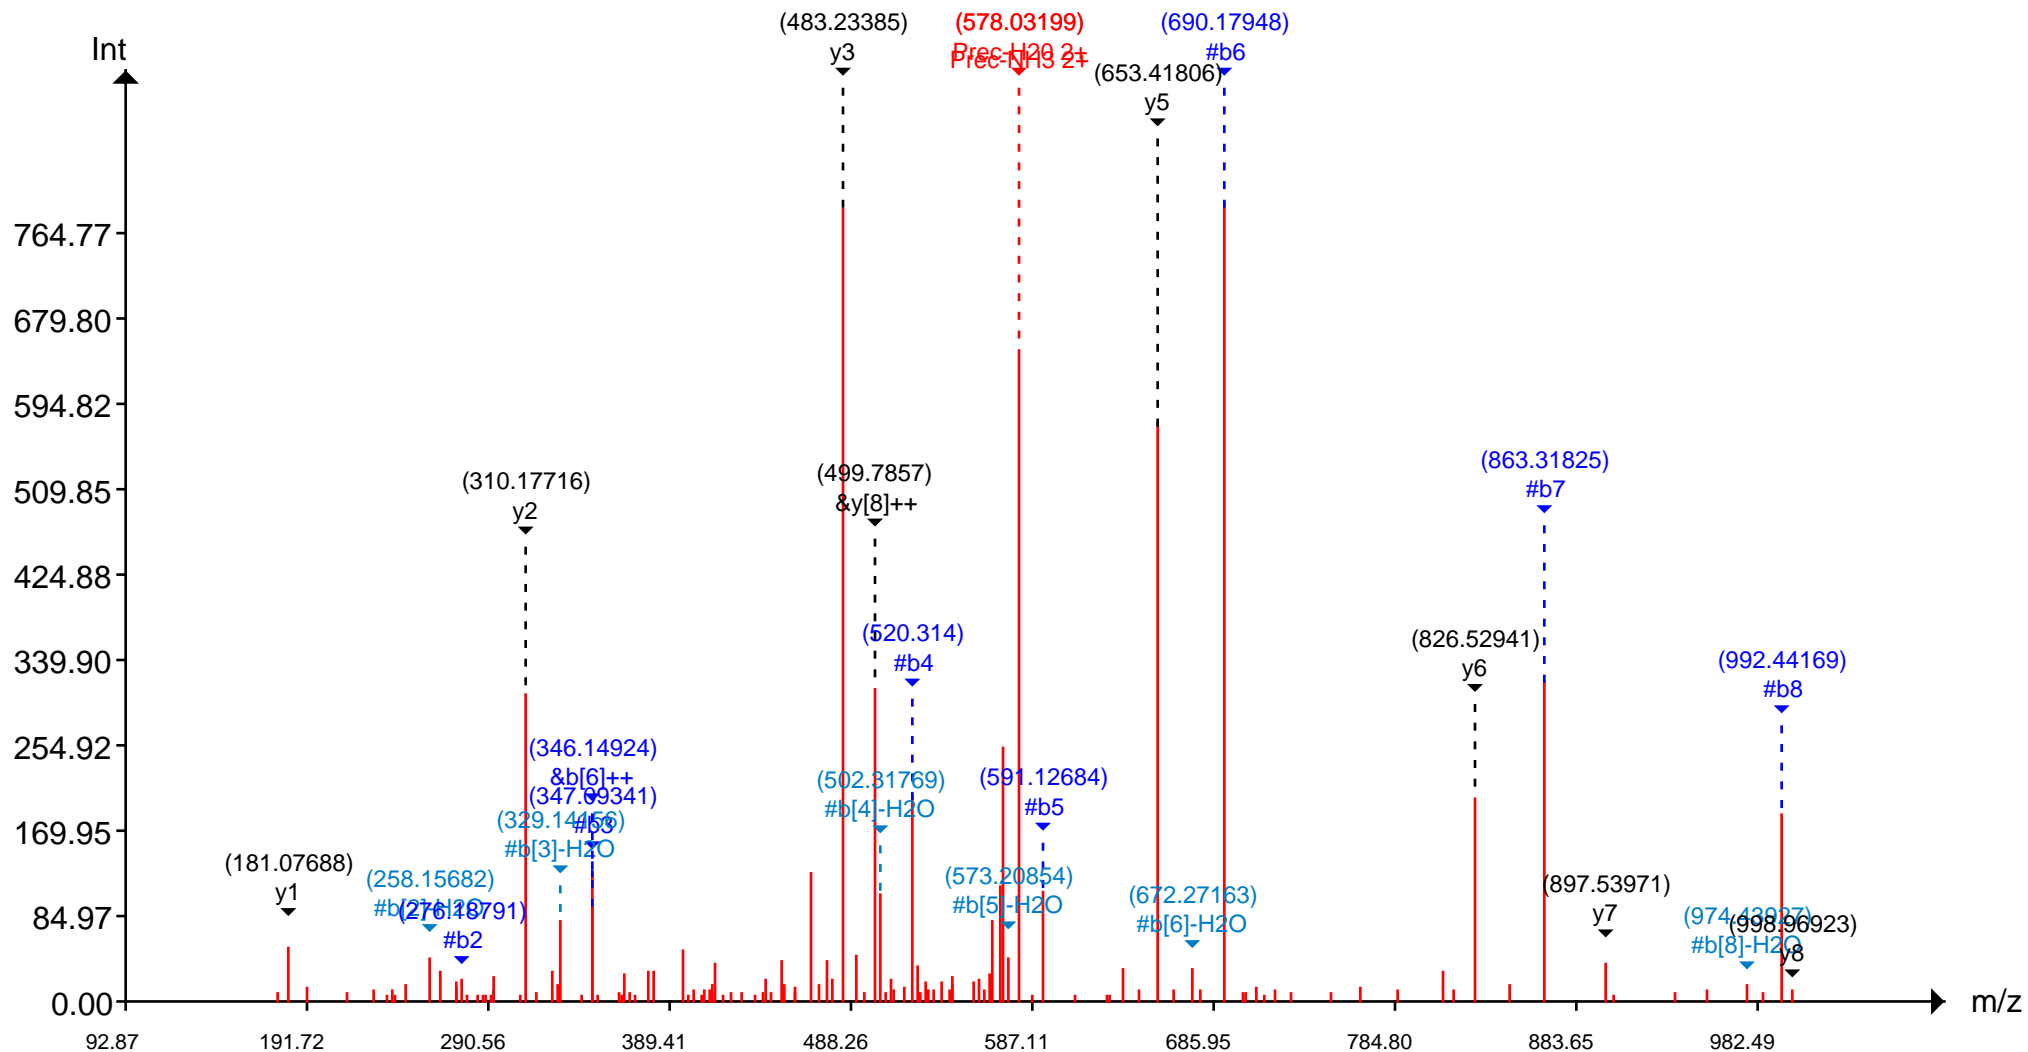

## Info

**Modified Sequence** AcD3-ETAK<AcD3K\*>AVK<AcD3K\*>ER<C13>-COOH

**Ion score** 58.19

**Protein** Q99JY9

**Confidence level** 99.00%

**Precursor m/z** 586.85053

**Identity Threshold** 45.36

**Charge** 2+

**Mass error** 0.001098

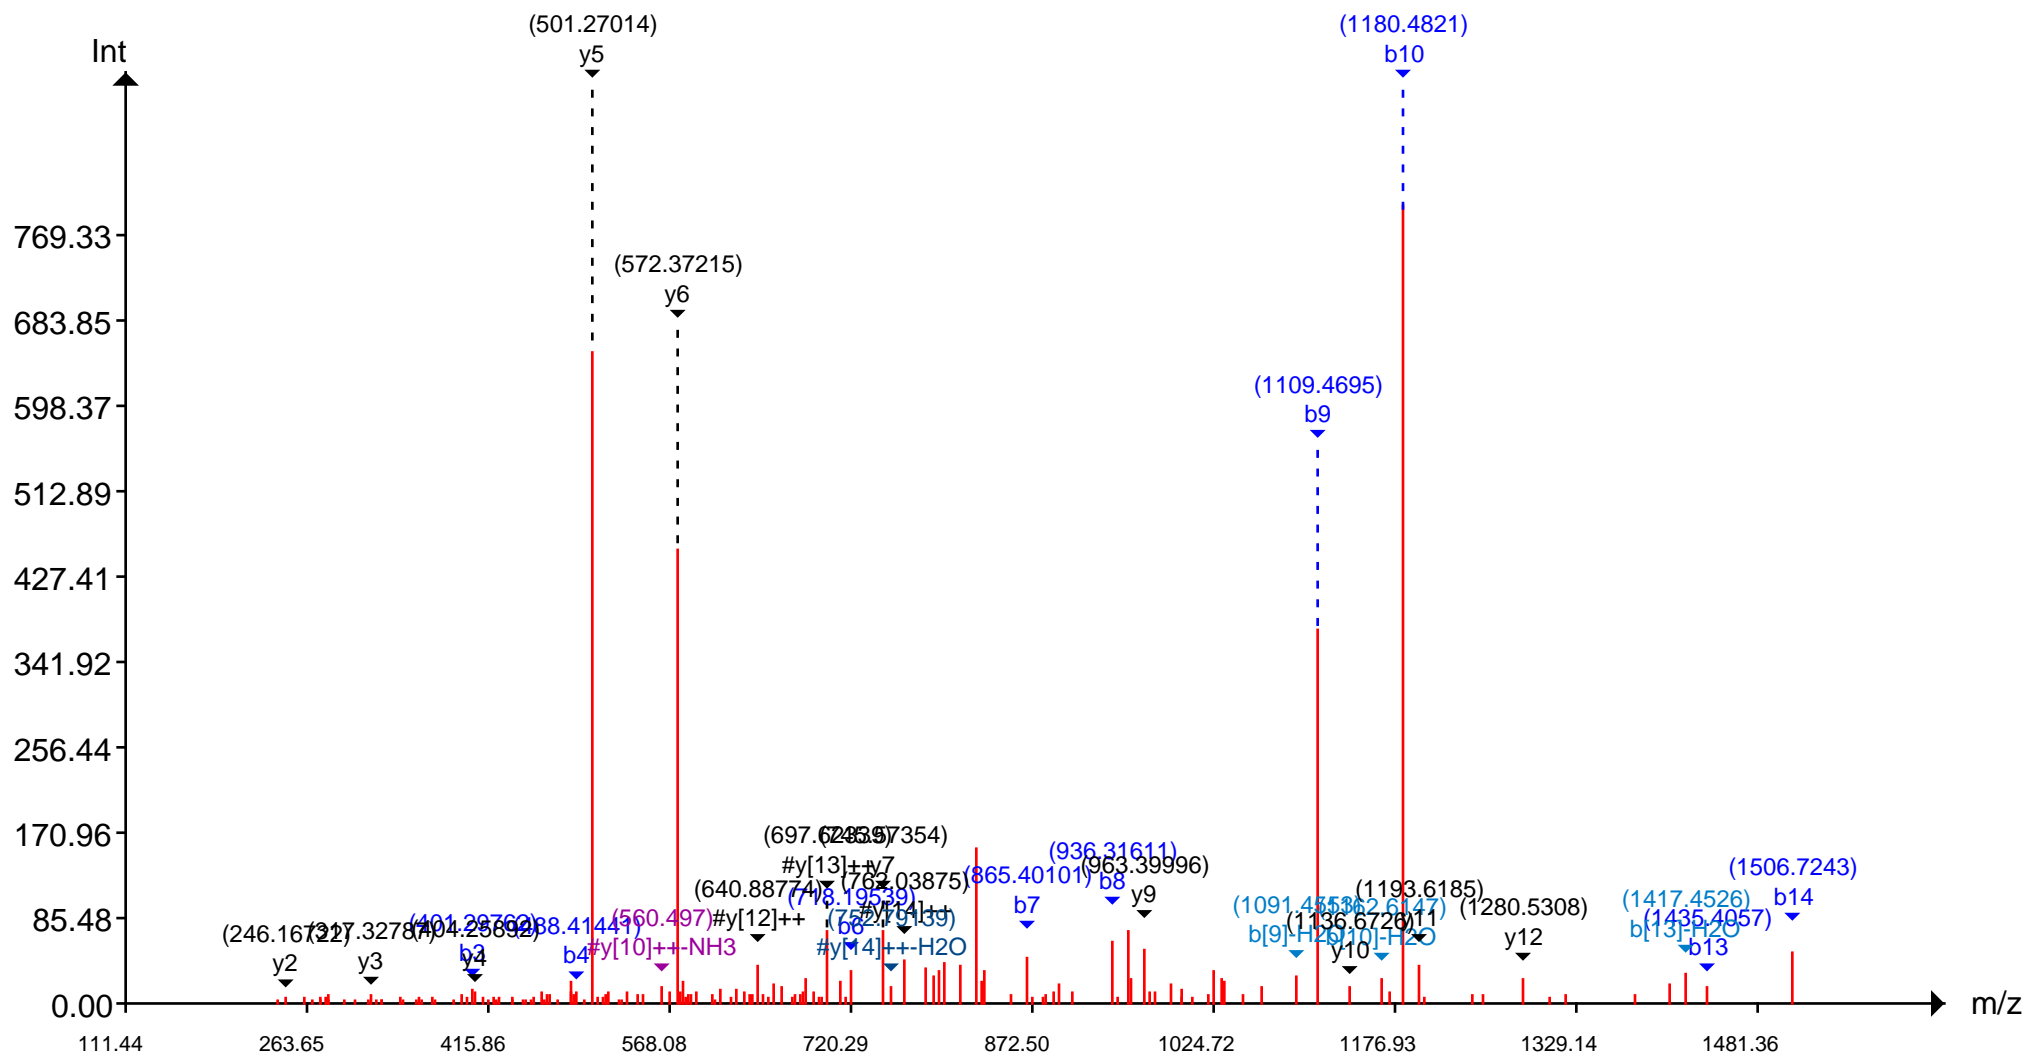

## Info

|                          |                                                 |                           |          |
|--------------------------|-------------------------------------------------|---------------------------|----------|
| <b>Modified Sequence</b> | AcD3-IEISGK<AcD3K*>M<Mox*>AK<AcD3K*>APSAAR-COOH | <b>Ion score</b>          | 83.83    |
| <b>Protein</b>           | Q8BJF9                                          | <b>Confidence level</b>   | 99.00%   |
| <b>Precursor m/z</b>     | 840.96988                                       | <b>Identity Threshold</b> | 46.90    |
| <b>Charge</b>            | 2+                                              | <b>Mass error</b>         | 0.002601 |

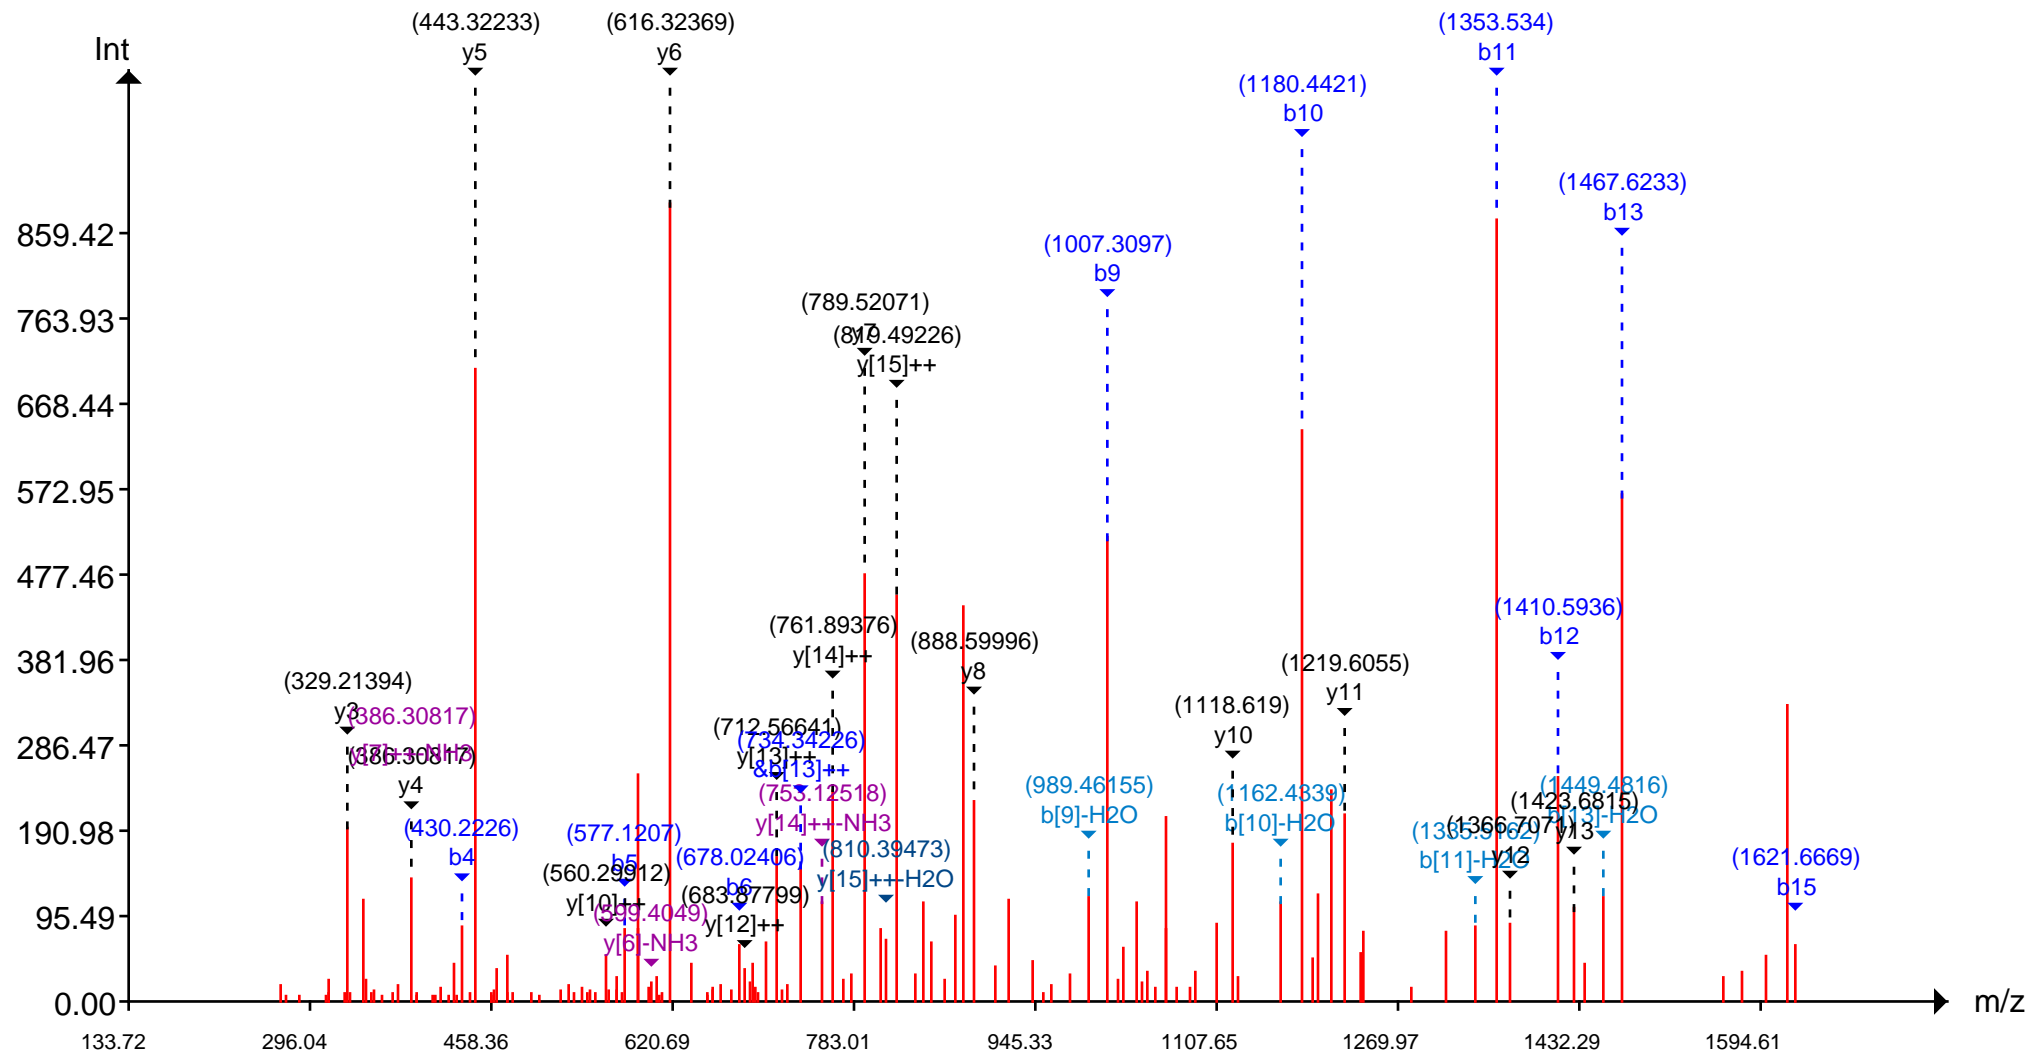

## Info

**Modified Sequence** AcD3-IDVGFTDDVK<AcD3K\*>K<AcD3K\*>GGPGR-COOH

**Ion score** 57.35

**Protein** Q9CX00

**Confidence level** 99.00%

**Precursor m/z** 898.48158

**Identity Threshold** 47.82

**Charge** 2+

**Mass error** 0.002349

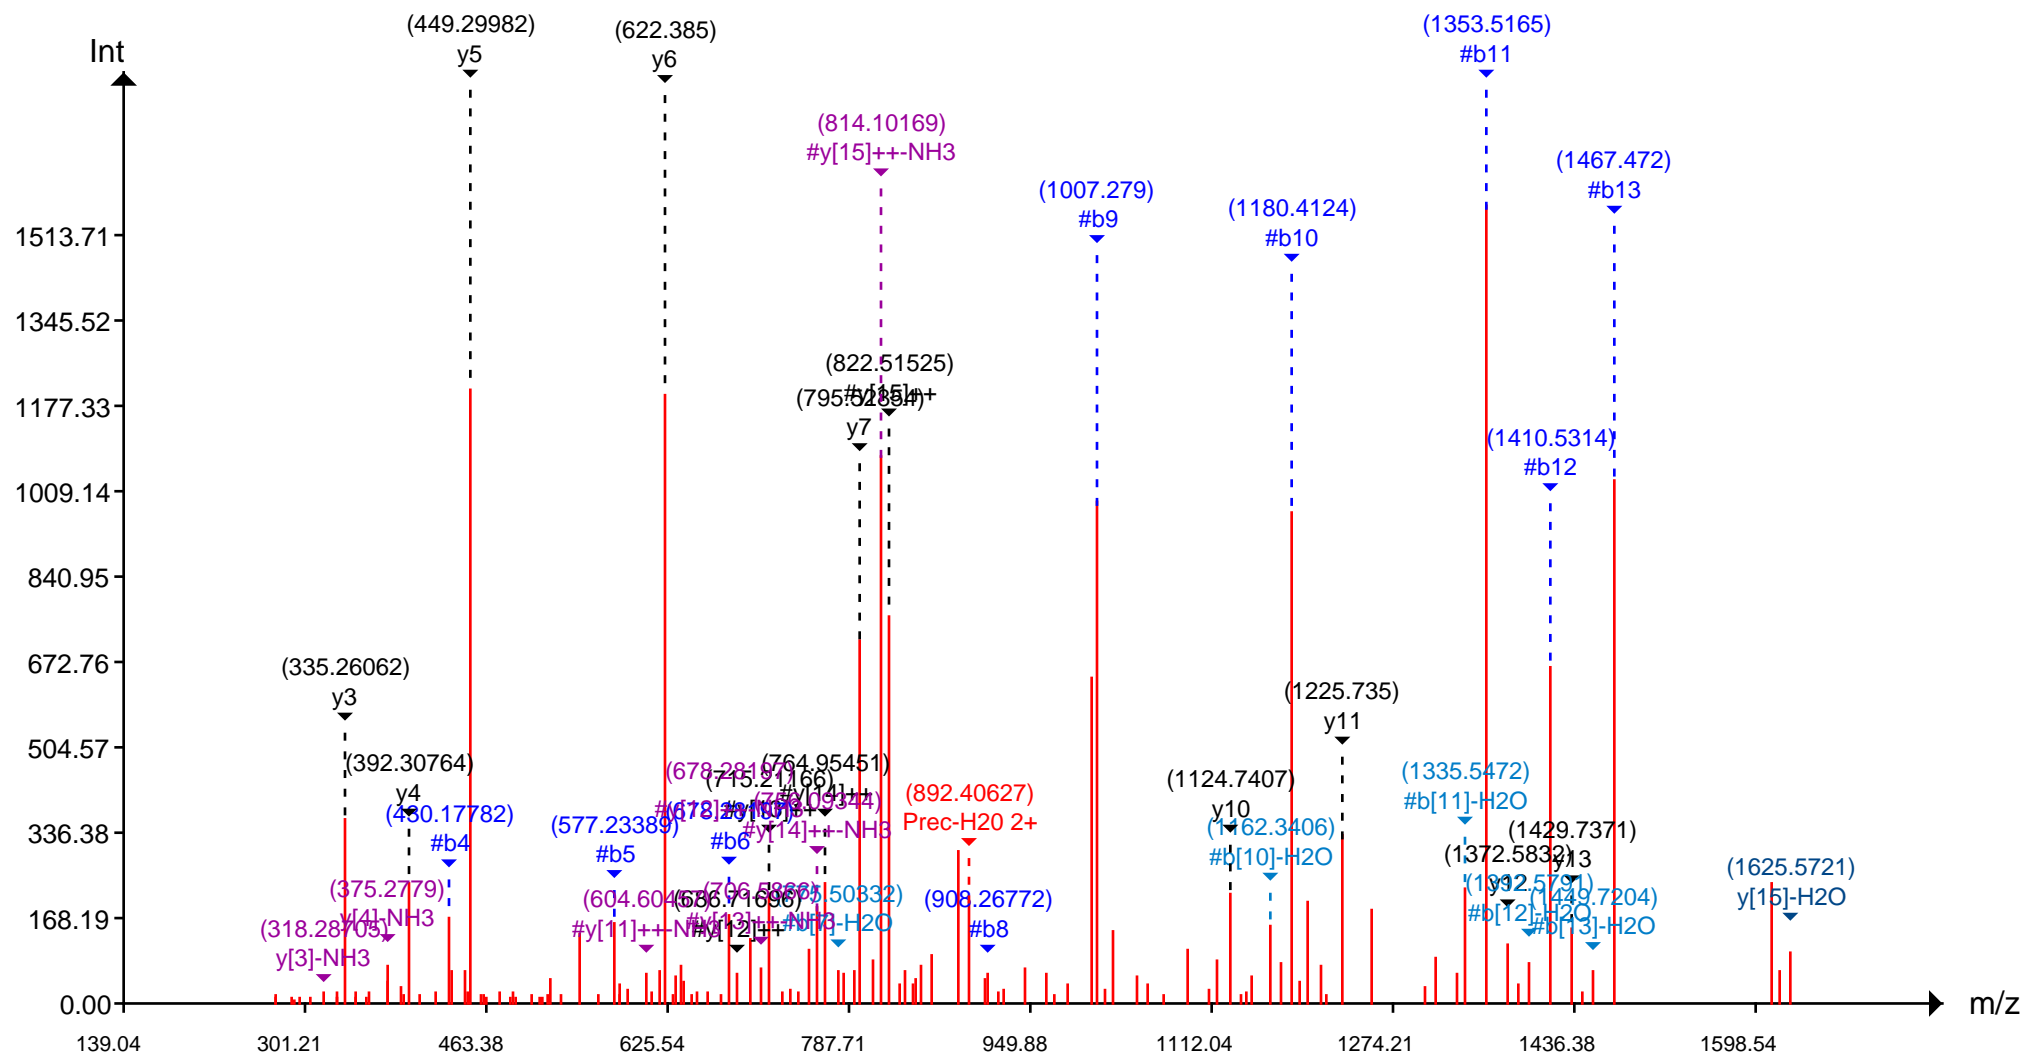

## Info

|                          |                                                 |                           |          |
|--------------------------|-------------------------------------------------|---------------------------|----------|
| <b>Modified Sequence</b> | AcD3-IDVGFTDDVK<AcD3K*>K<AcD3K*>GGPGR<C13>-COOH | <b>Ion score</b>          | 59.61    |
| <b>Protein</b>           | Q9CX00                                          | <b>Confidence level</b>   | 99.00%   |
| <b>Precursor m/z</b>     | 901.4912                                        | <b>Identity Threshold</b> | 47.61    |
| <b>Charge</b>            | 2+                                              | <b>Mass error</b>         | 0.001448 |

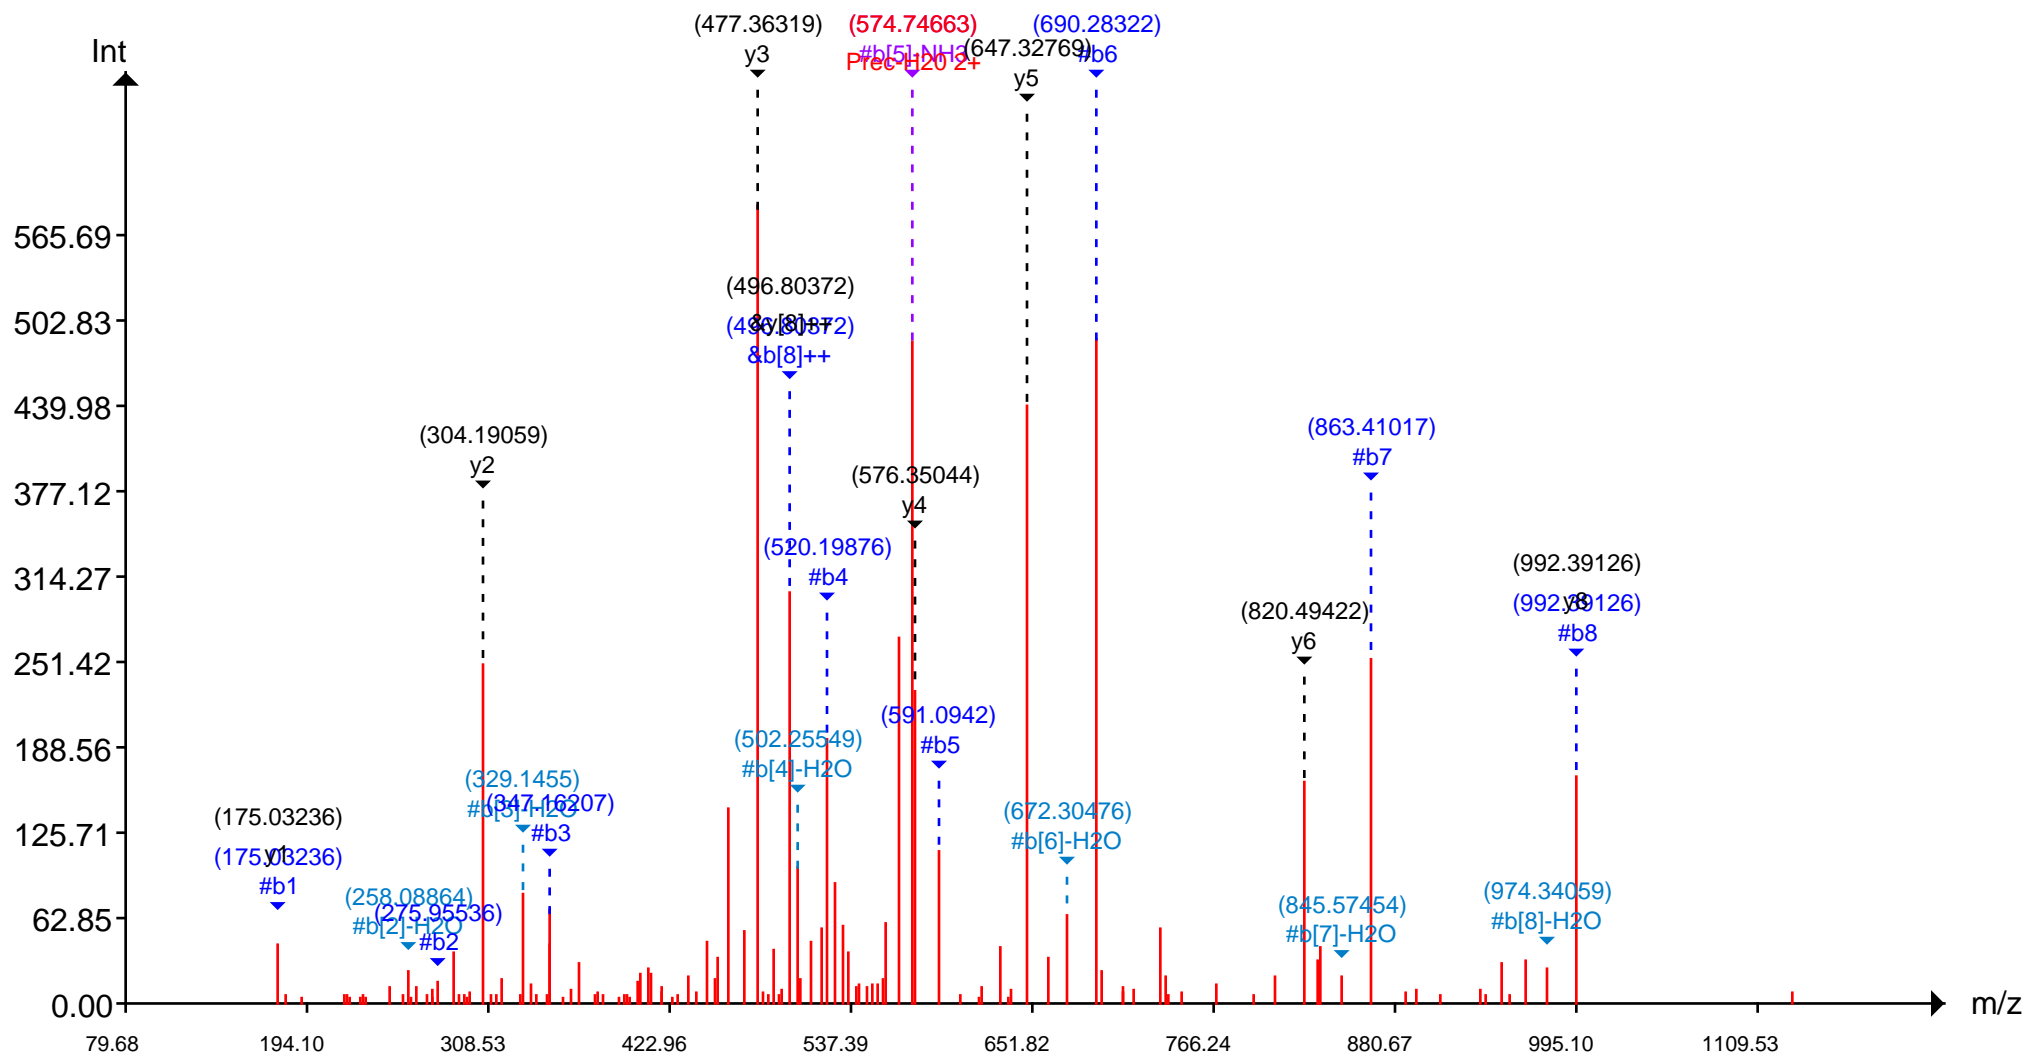

## Info

|                          |                                     |                           |        |
|--------------------------|-------------------------------------|---------------------------|--------|
| <b>Modified Sequence</b> | AcD3-ETAK<AcD3K*>AVK<AcD3K*>ER-COOH | <b>Ion score</b>          | 57.43  |
| <b>Protein</b>           | Q99JY9                              | <b>Confidence level</b>   | 99.00% |
| <b>Precursor m/z</b>     | 583.8401                            | <b>Identity Threshold</b> | 46.18  |
| <b>Charge</b>            | 2+                                  | <b>Mass error</b>         | 3.8E-4 |

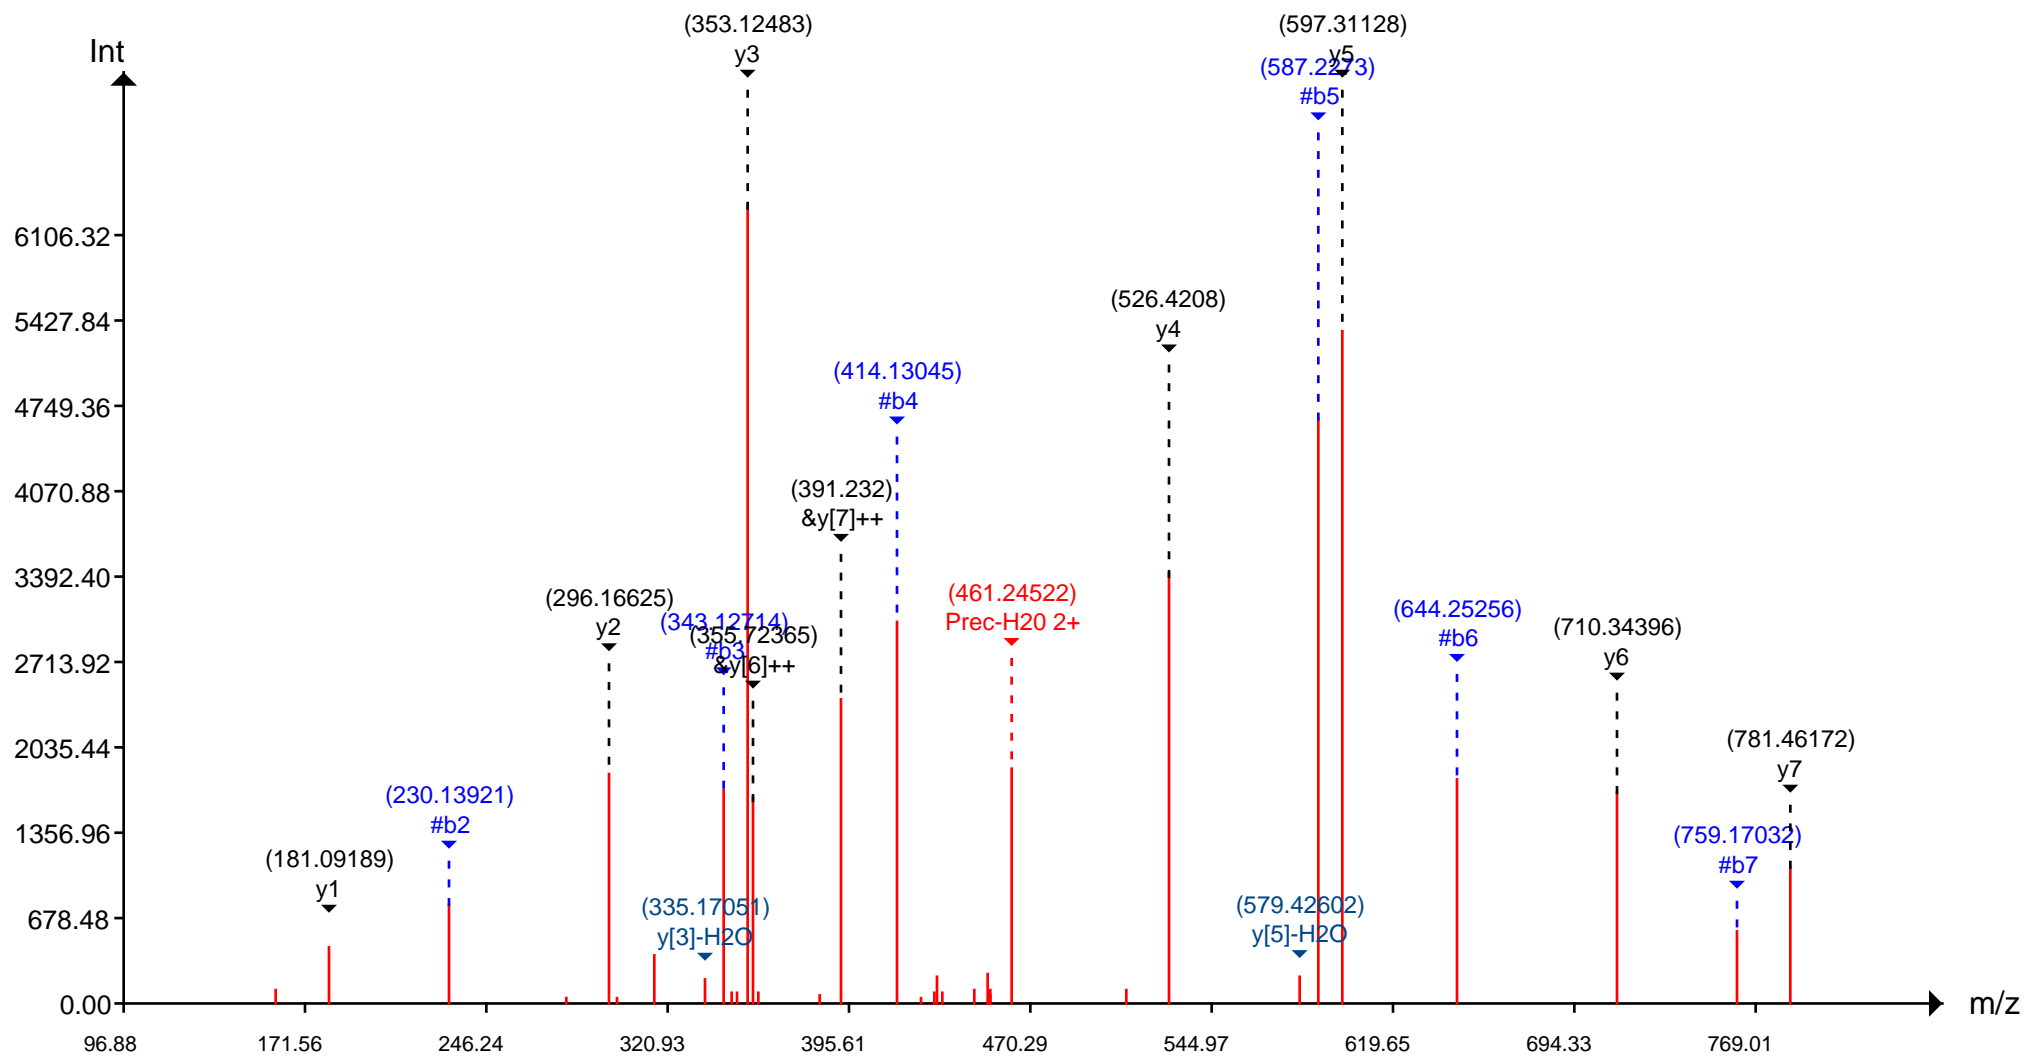

## Info

**Modified Sequence** AcD3-LALAK<AcD3K\*>GDR<C13>-COOH

**Ion score** 72.12

**Protein** P10107

**Confidence level** 99.00%

**Precursor m/z** 470.29514

**Identity Threshold** 43.99

**Charge** 2+

**Mass error** -5.81E-4

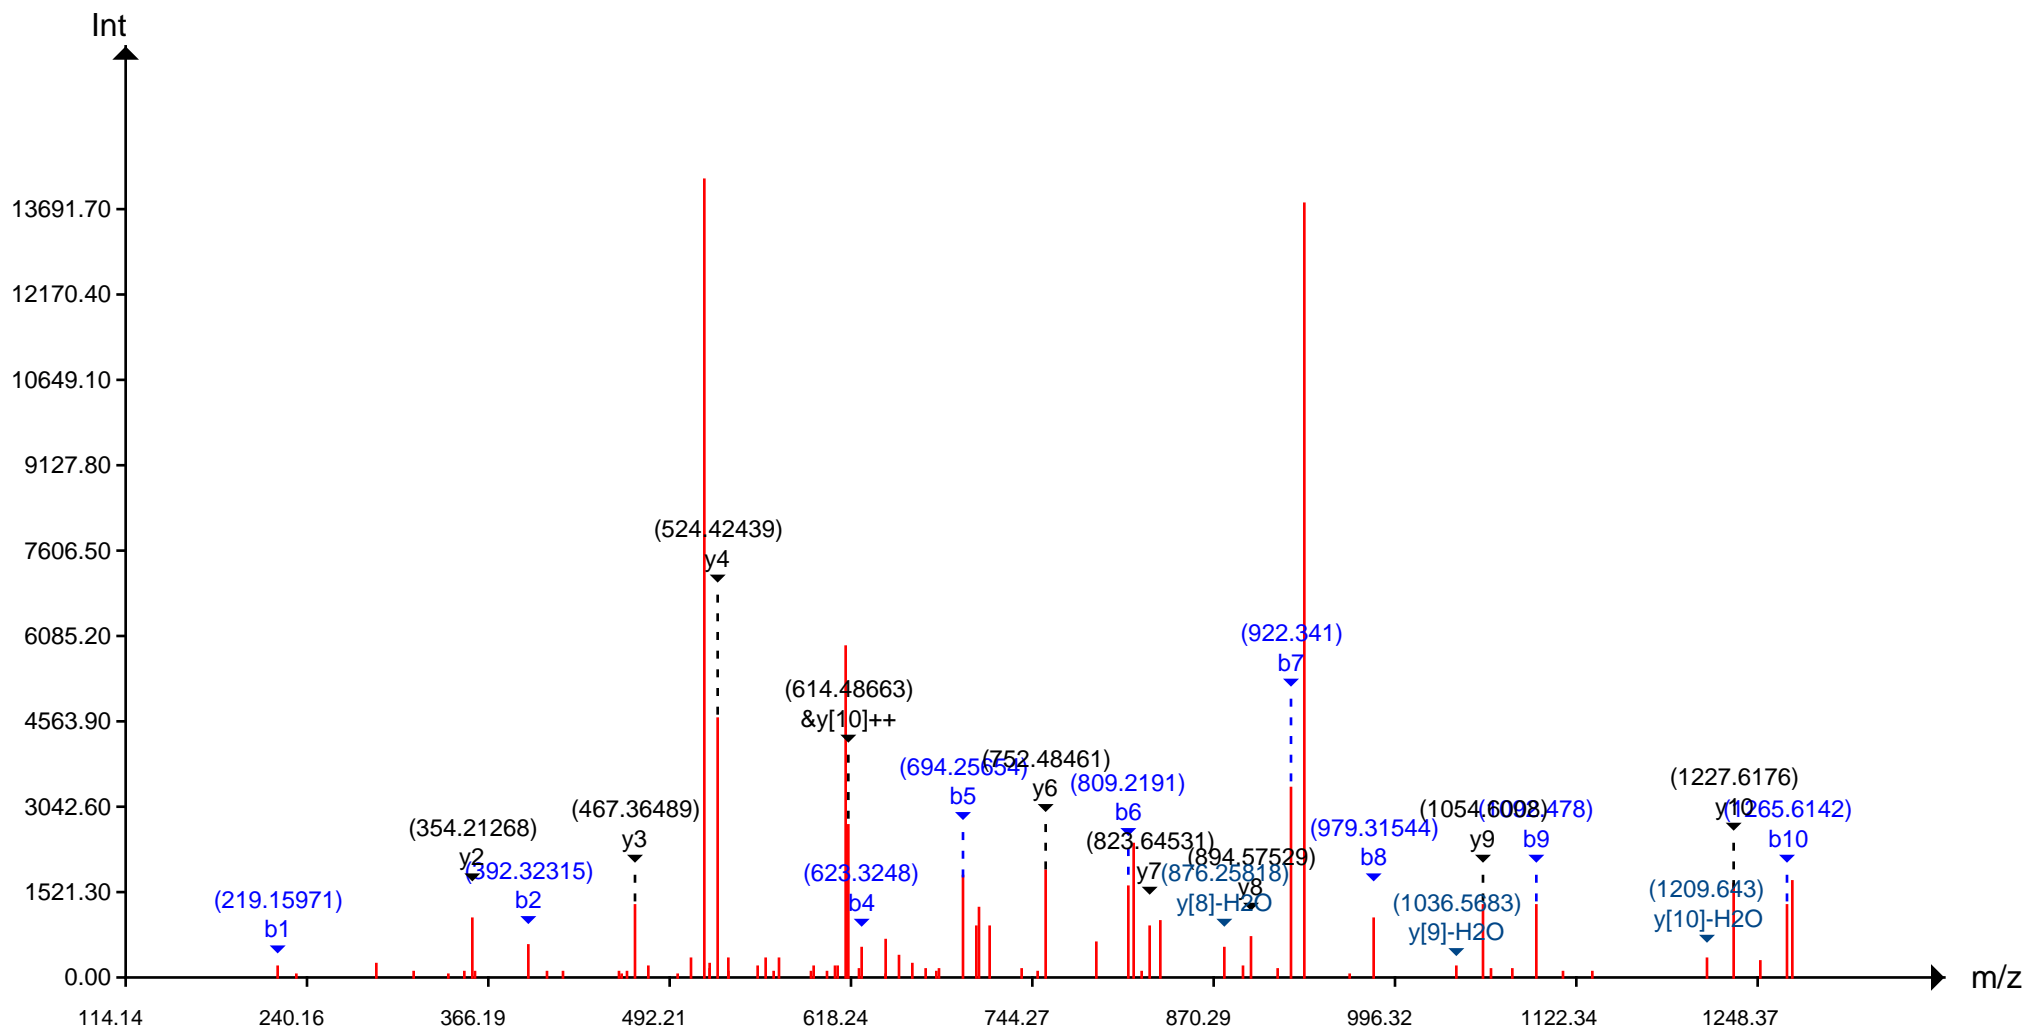

## Info

|                          |                                                          |                           |           |
|--------------------------|----------------------------------------------------------|---------------------------|-----------|
| <b>Modified Sequence</b> | AcD3-K<AcD3K*>K<AcD3K*>C<Cmm*>AADLGLK<AcD3K*>R<C13>-COOH | <b>Ion score</b>          | 57.39     |
| <b>Protein</b>           | P70349                                                   | <b>Confidence level</b>   | 99.00%    |
| <b>Precursor m/z</b>     | 723.4345                                                 | <b>Identity Threshold</b> | 43.91     |
| <b>Charge</b>            | 2+                                                       | <b>Mass error</b>         | -0.001234 |

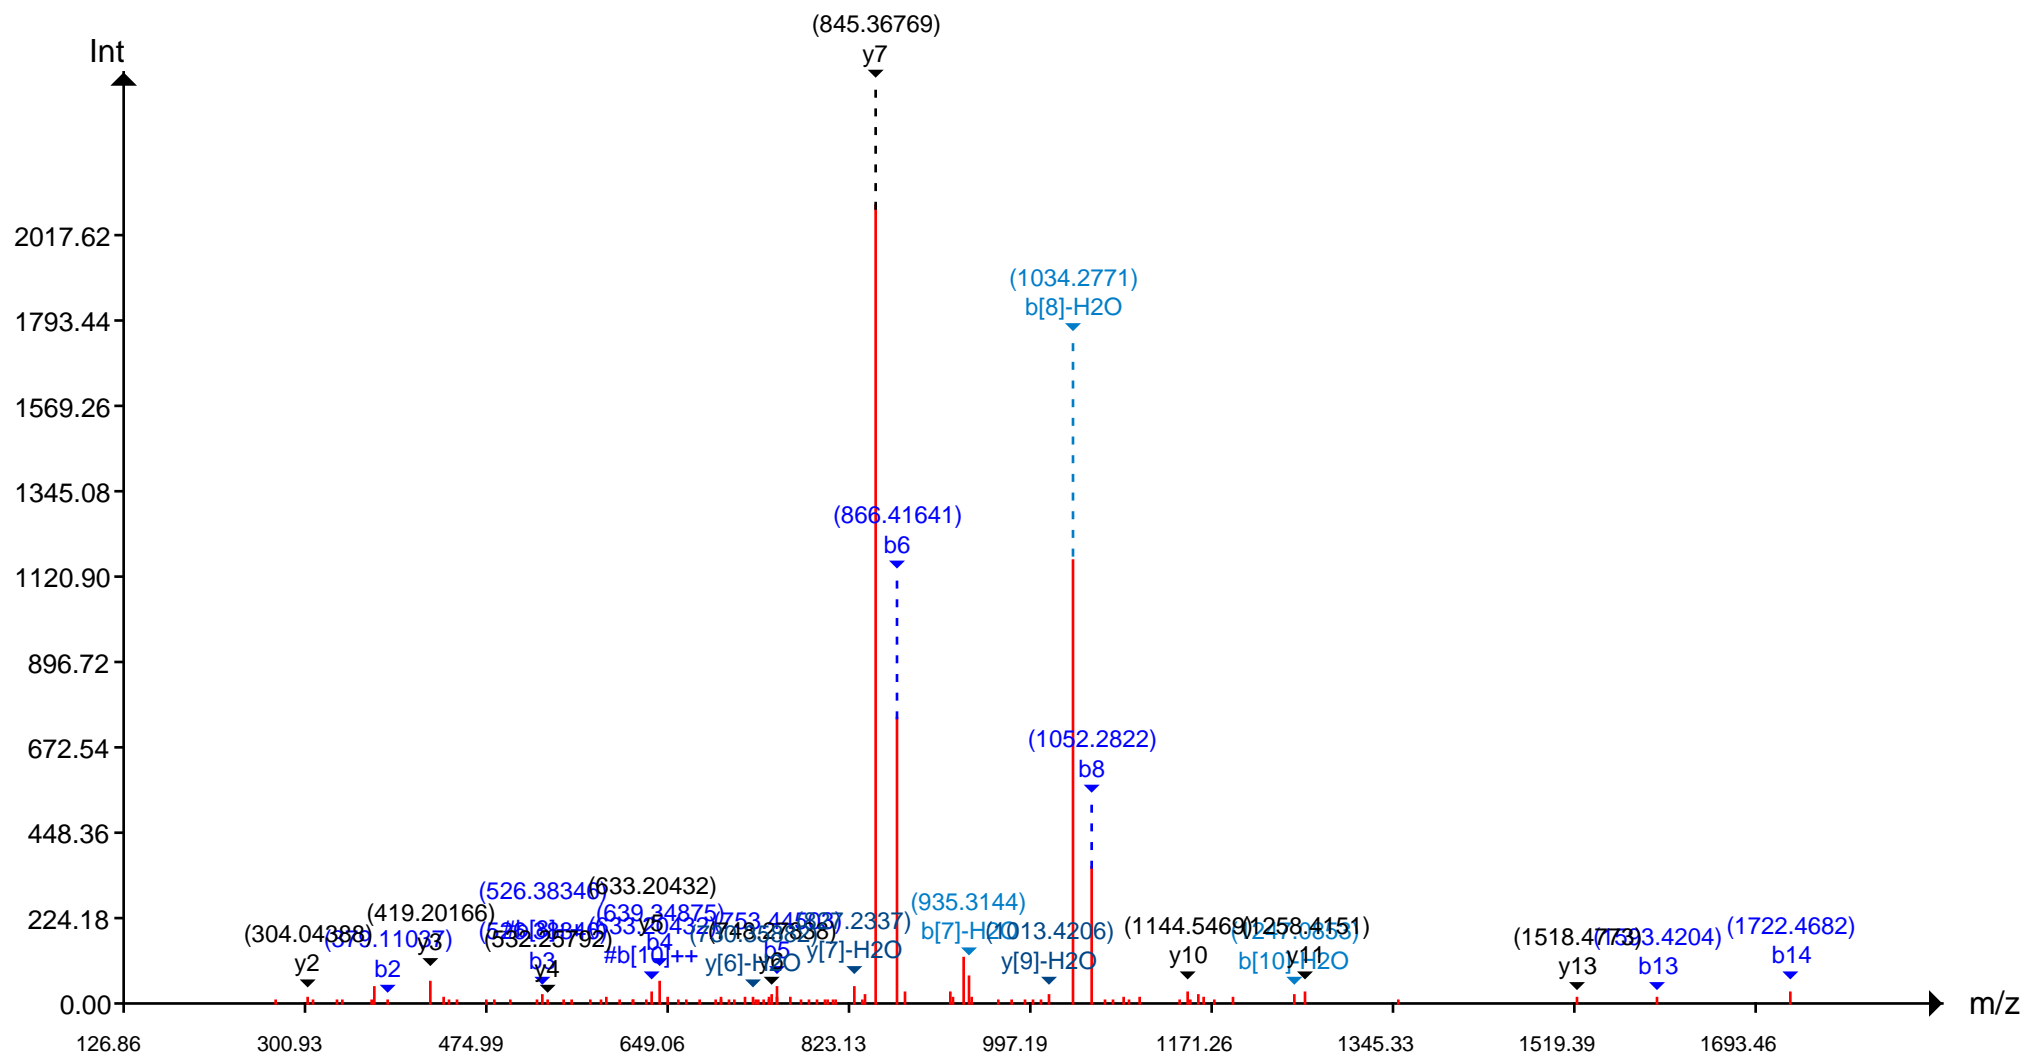

## Info

|                          |                                               |                           |          |
|--------------------------|-----------------------------------------------|---------------------------|----------|
| <b>Modified Sequence</b> | AcD3-C<Cmm*>K<AcD3K*>M<Mox*>INLSVPDTIDER-COOH | <b>Ion score</b>          | 72.18    |
| <b>Protein</b>           | Q61233, Q99K51                                | <b>Confidence level</b>   | 99.00%   |
| <b>Precursor m/z</b>     | 948.97058                                     | <b>Identity Threshold</b> | 47.50    |
| <b>Charge</b>            | 2+                                            | <b>Mass error</b>         | 0.002658 |



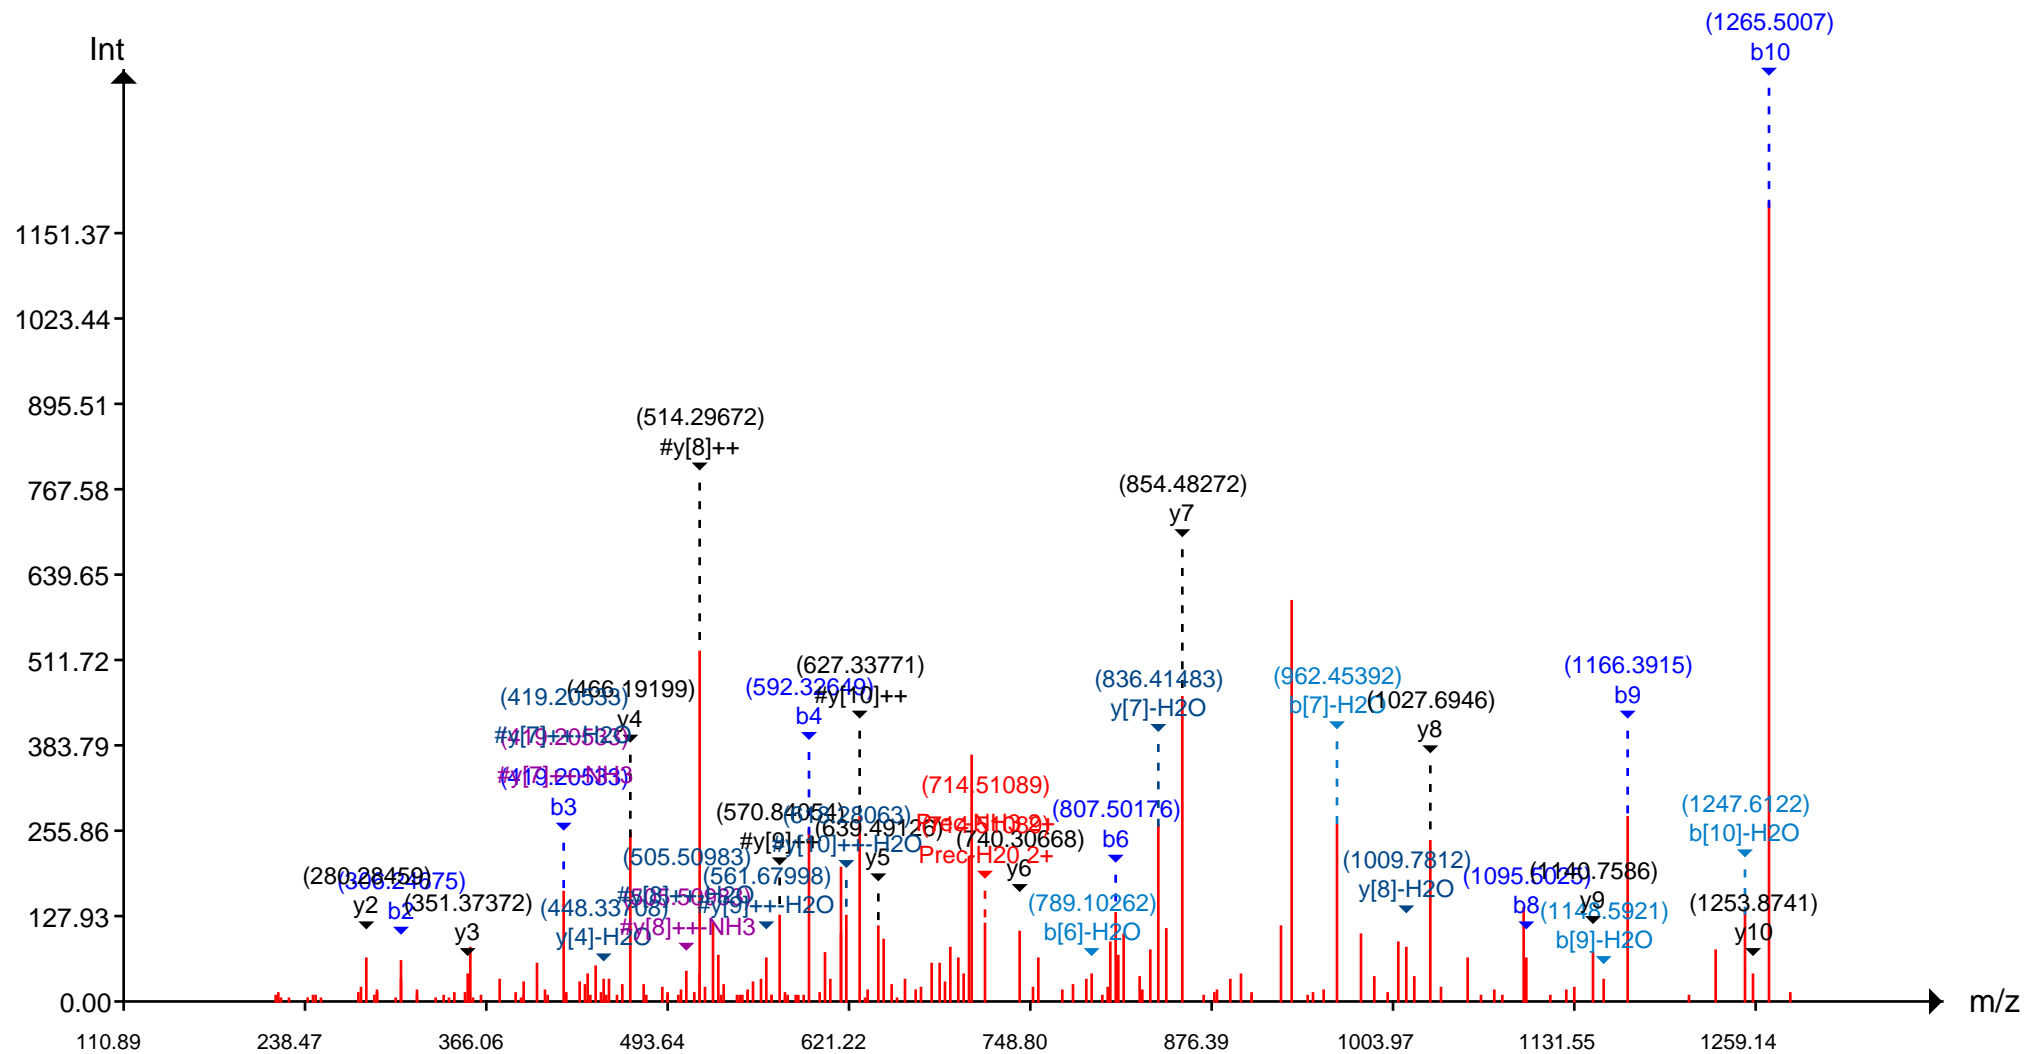

## Info

|                          |                                                  |                           |          |
|--------------------------|--------------------------------------------------|---------------------------|----------|
| <b>Modified Sequence</b> | AcD3-M<Mox*>ILK<AcD3K*>NTK<AcD3K*>DAVR<C13>-COOH | <b>Ion score</b>          | 52.58    |
| <b>Protein</b>           | Q3TXS7                                           | <b>Confidence level</b>   | 99.00%   |
| <b>Precursor m/z</b>     | 723.42539                                        | <b>Identity Threshold</b> | 45.23    |
| <b>Charge</b>            | 2+                                               | <b>Mass error</b>         | -2.89E-4 |

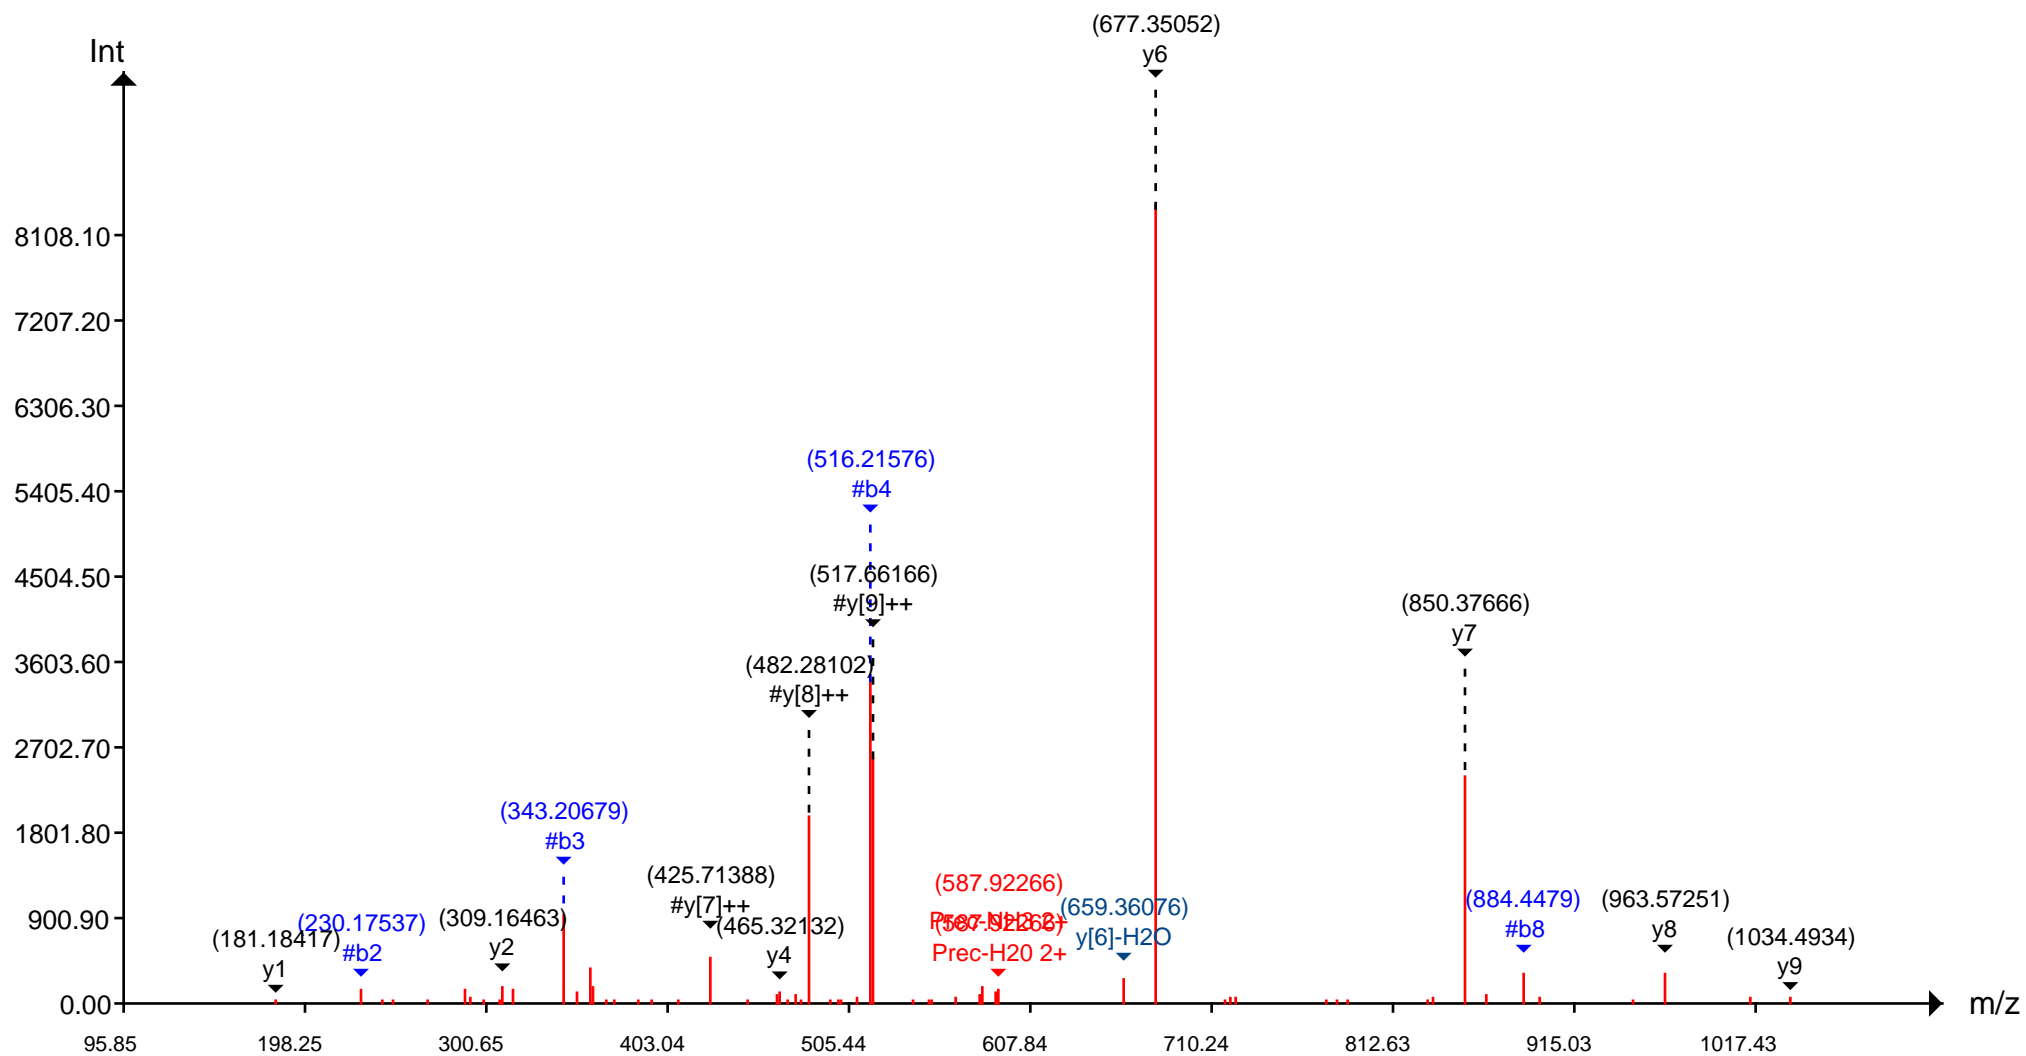

## Info

|                          |                                   |                           |          |
|--------------------------|-----------------------------------|---------------------------|----------|
| <b>Modified Sequence</b> | AcD3-IAIK<AcD3K*>PDGVQR<C13>-COOH | <b>Ion score</b>          | 47.15    |
| <b>Protein</b>           | P15532, Q01768                    | <b>Confidence level</b>   | 99.00%   |
| <b>Precursor m/z</b>     | 596.86754                         | <b>Identity Threshold</b> | 43.11    |
| <b>Charge</b>            | 2+                                | <b>Mass error</b>         | 0.001564 |

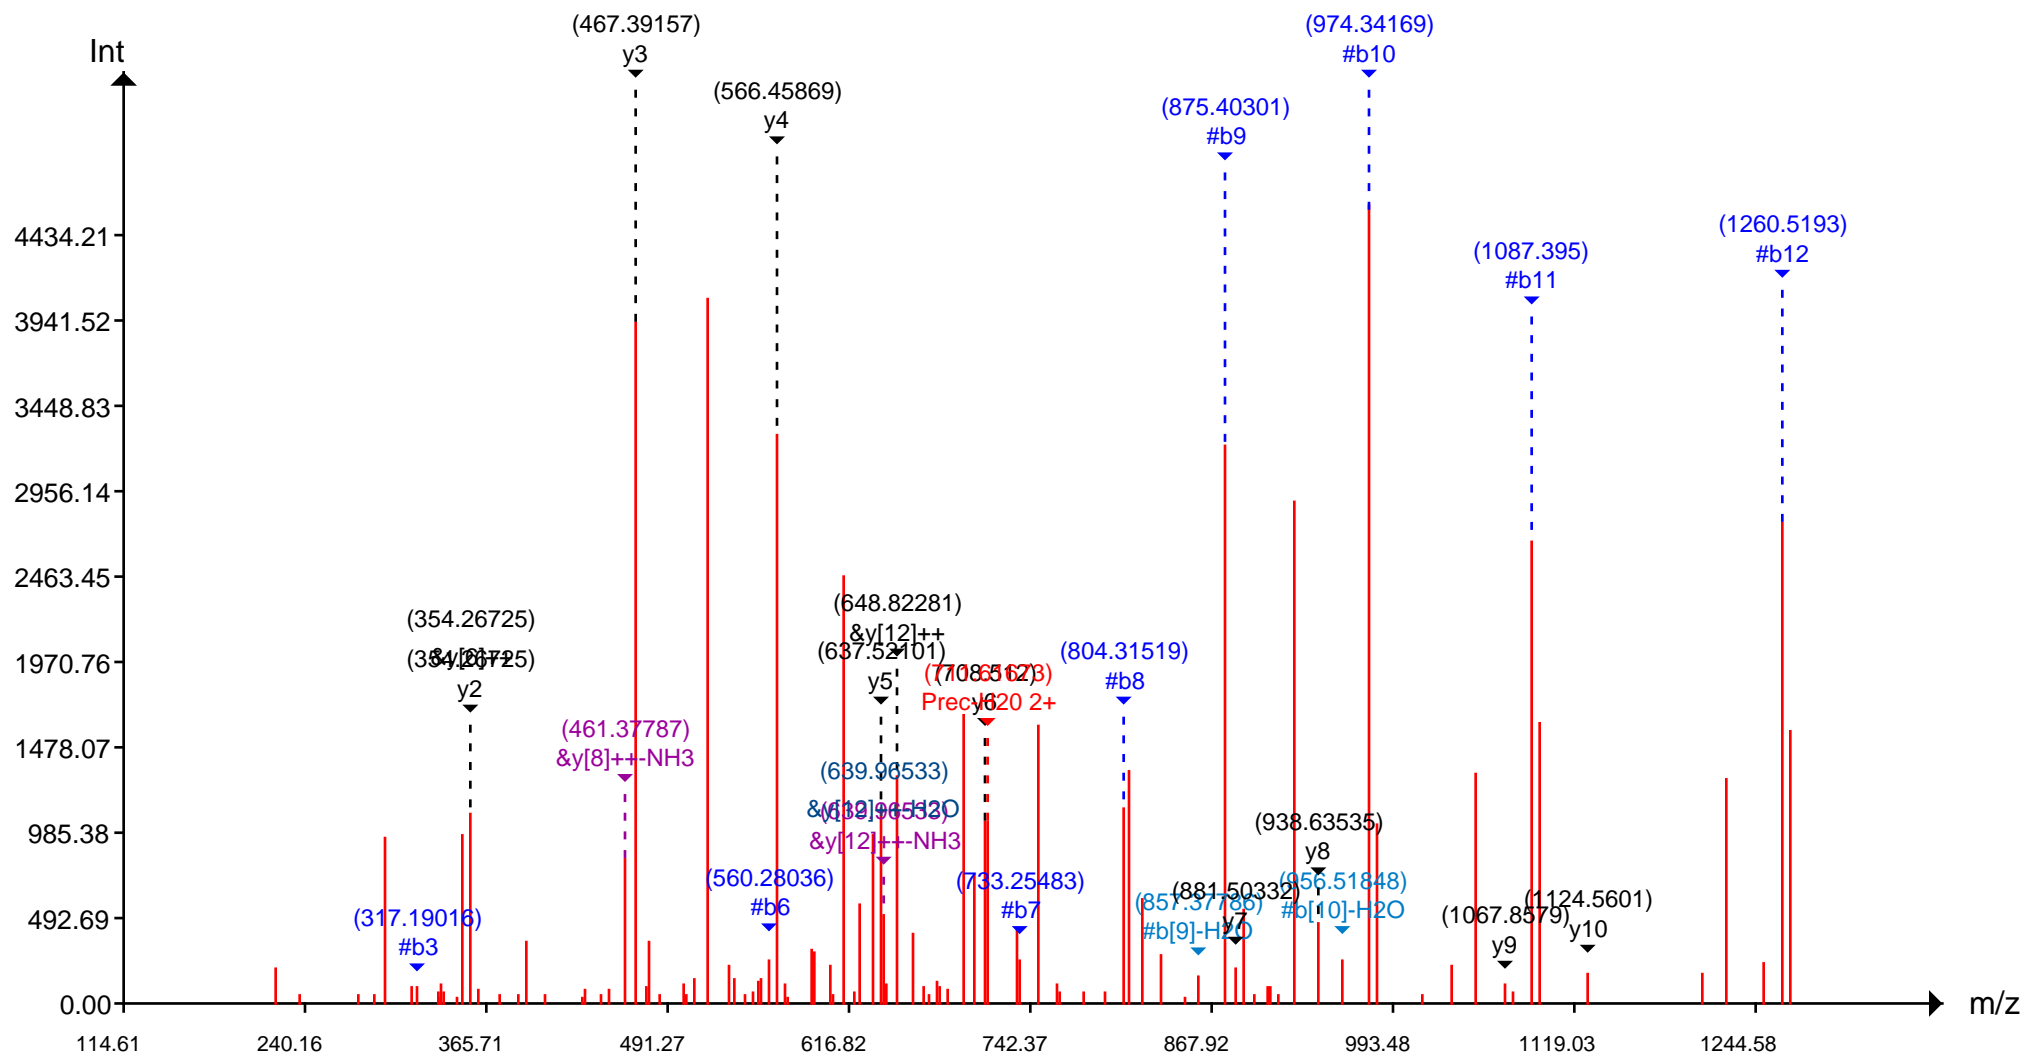

## Info

|                          |                                              |                           |          |
|--------------------------|----------------------------------------------|---------------------------|----------|
| <b>Modified Sequence</b> | AcD3-VATGEGK<AcD3K*>AAVLK<AcD3K*>R<C13>-COOH | <b>Ion score</b>          | 43.2     |
| <b>Protein</b>           | Q9CQ60                                       | <b>Confidence level</b>   | 99.00%   |
| <b>Precursor m/z</b>     | 720.94708                                    | <b>Identity Threshold</b> | 41.37    |
| <b>Charge</b>            | 2+                                           | <b>Mass error</b>         | 0.004257 |

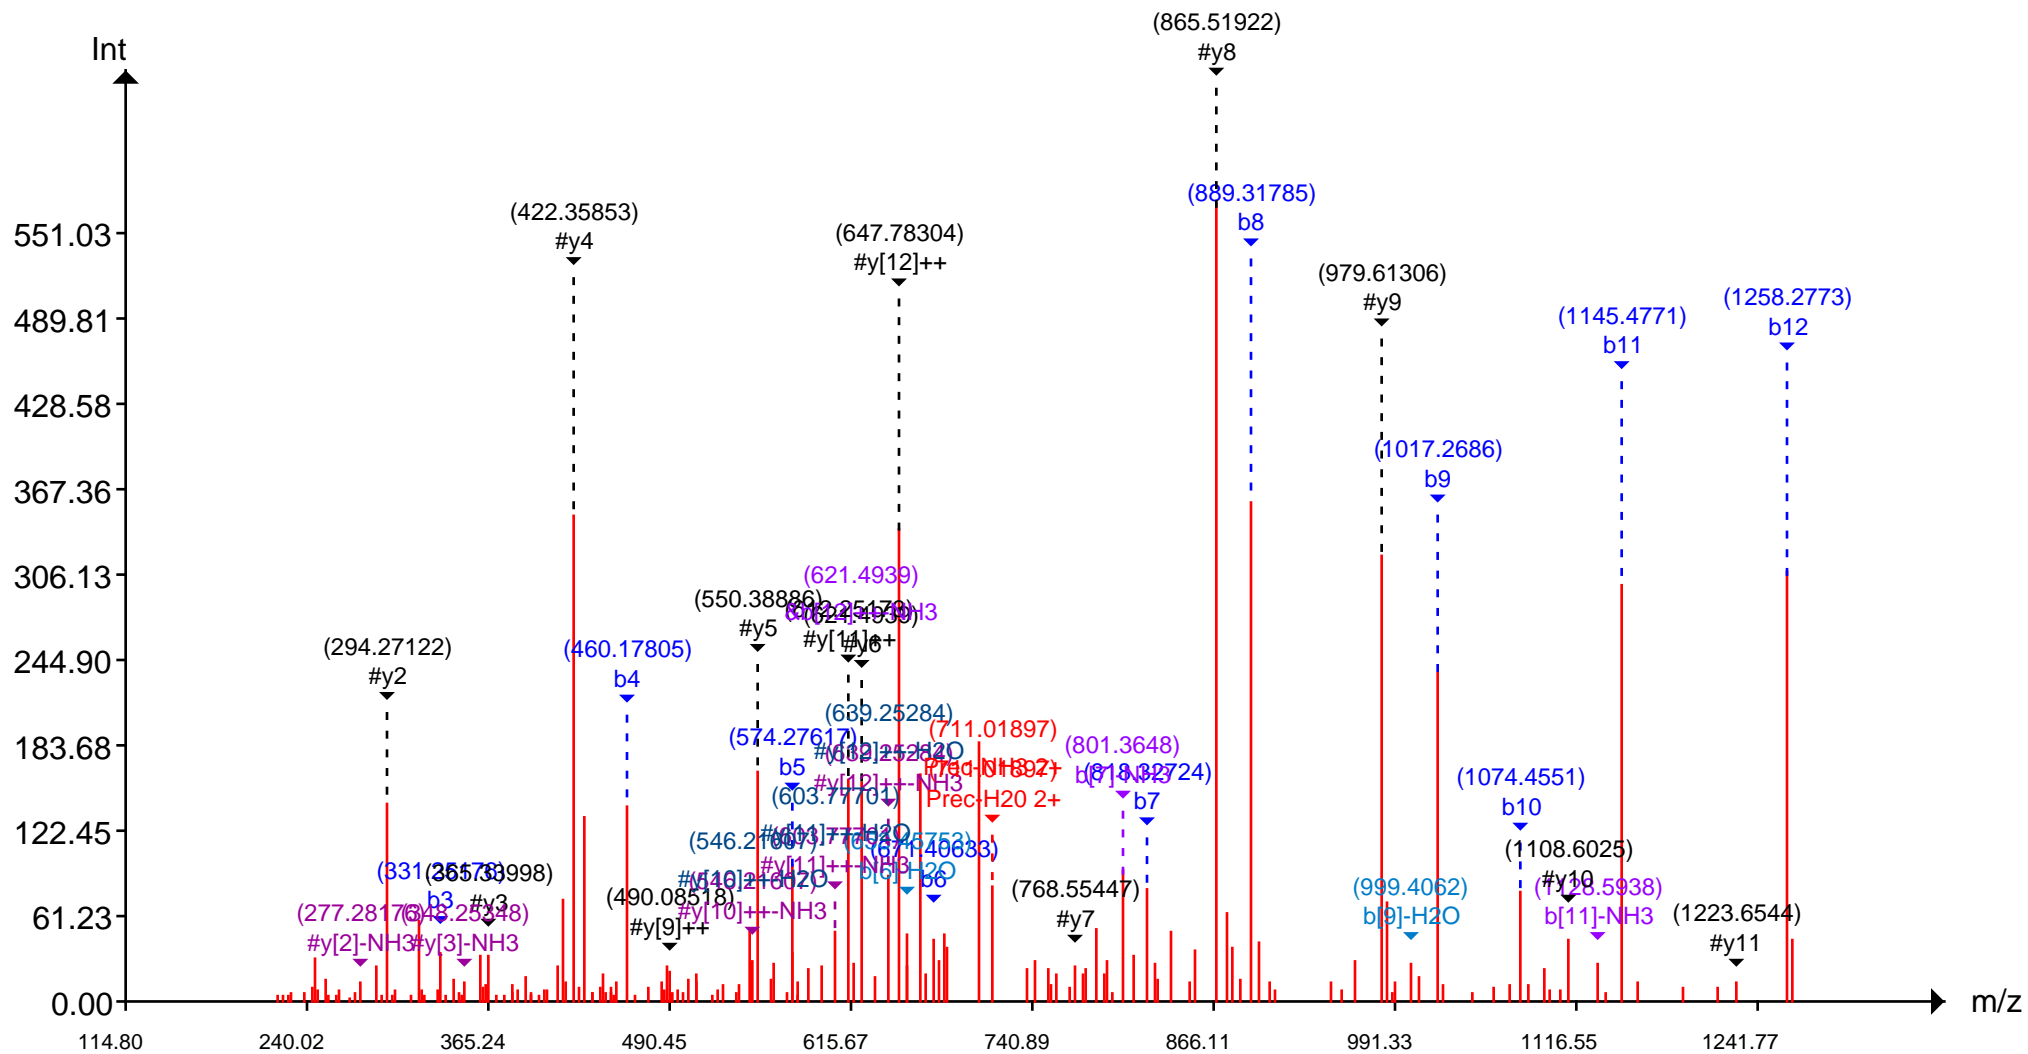

## Info

|                          |                              |                           |          |
|--------------------------|------------------------------|---------------------------|----------|
| <b>Modified Sequence</b> | AcD3-VADENPFAQGALR<C13>-COOH | <b>Ion score</b>          | 73.16    |
| <b>Protein</b>           | P13020                       | <b>Confidence level</b>   | 99.00%   |
| <b>Precursor m/z</b>     | 719.87748                    | <b>Identity Threshold</b> | 48.02    |
| <b>Charge</b>            | 2+                           | <b>Mass error</b>         | 0.001715 |

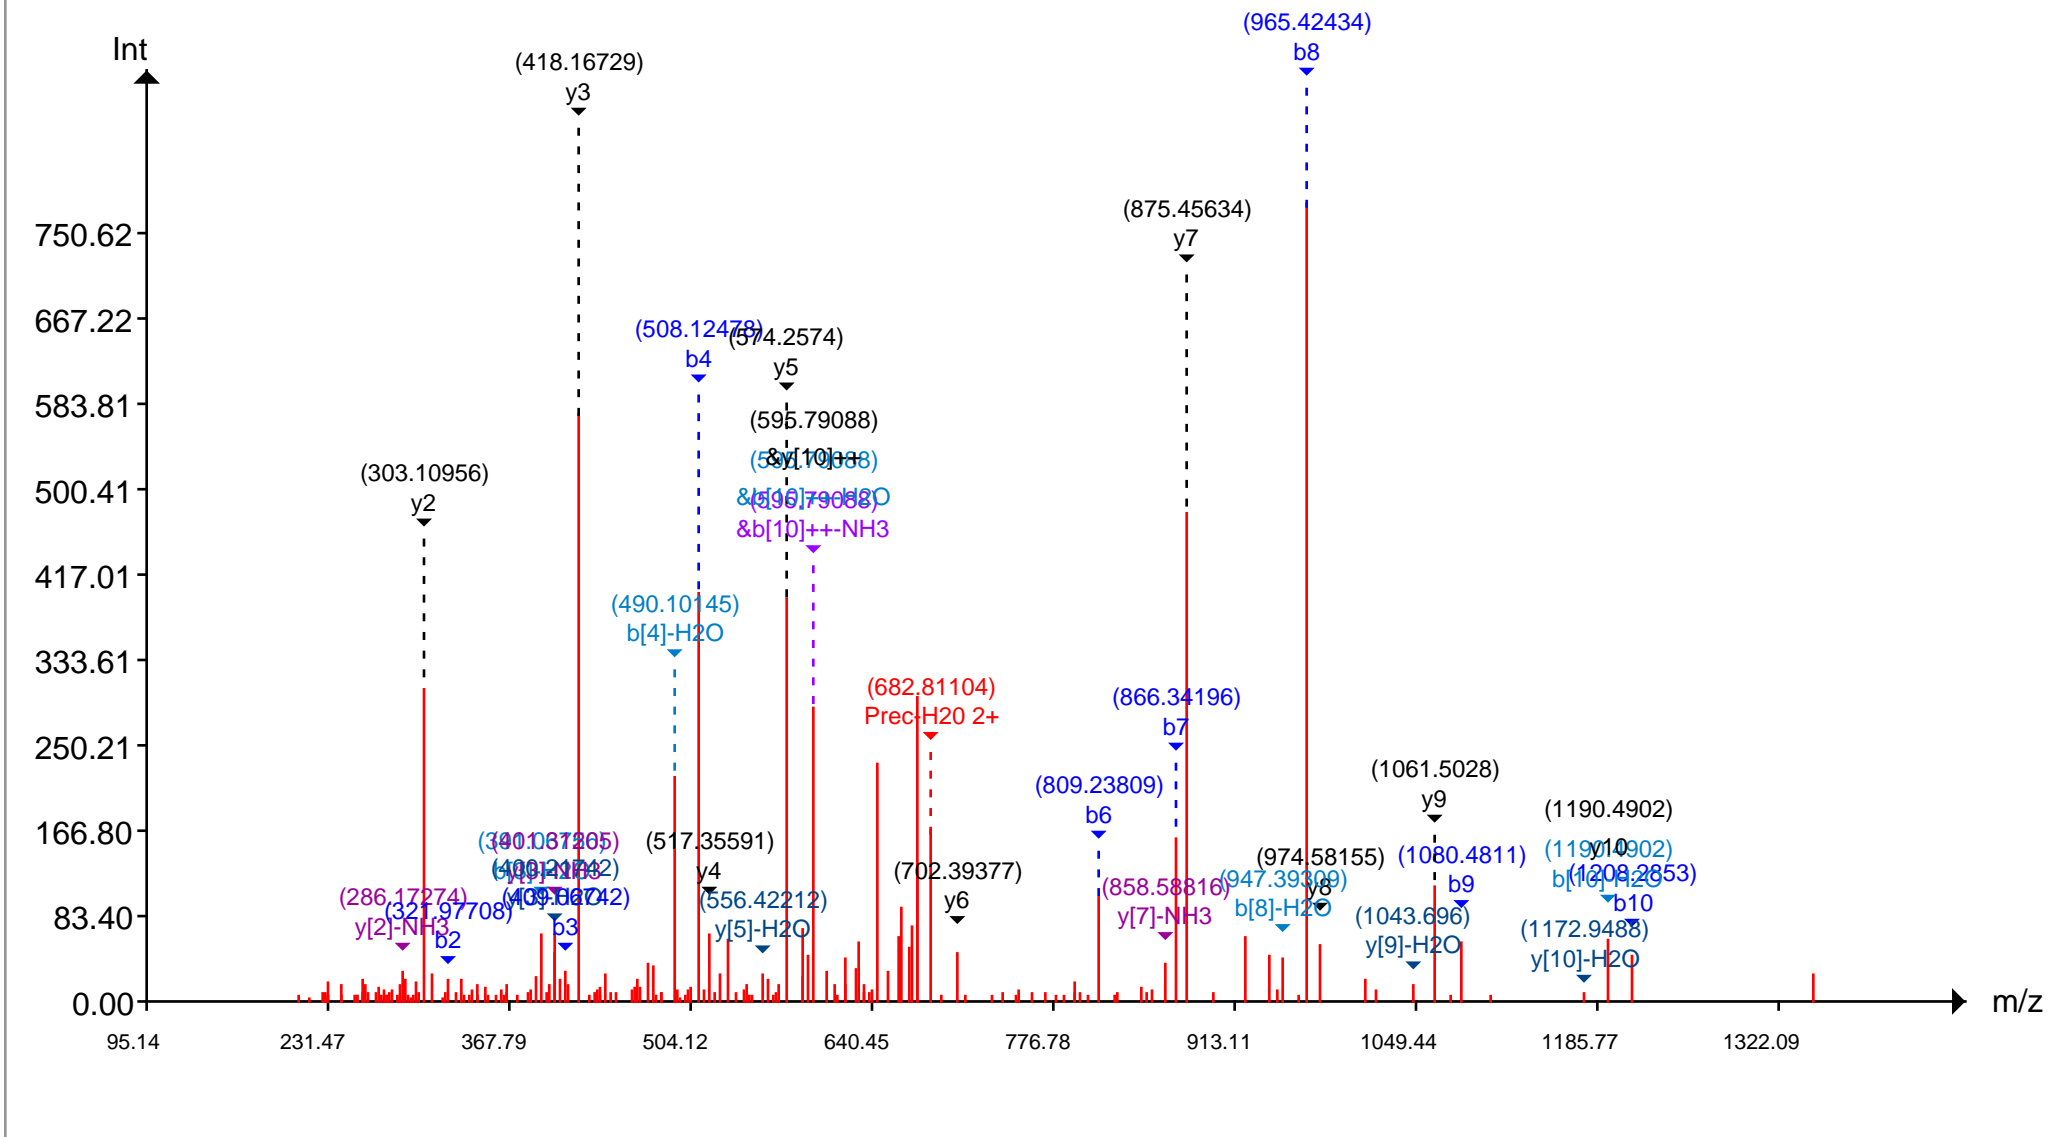

## Info

|                          |                                     |                           |         |
|--------------------------|-------------------------------------|---------------------------|---------|
| <b>Modified Sequence</b> | AcD3-M<Mox*>ESVK<AcD3K*>QGVDQR-COOH | <b>Ion score</b>          | 55.39   |
| <b>Protein</b>           | Q9DBG5                              | <b>Confidence level</b>   | 99.00%  |
| <b>Precursor m/z</b>     | 691.84663                           | <b>Identity Threshold</b> | 47.56   |
| <b>Charge</b>            | 2+                                  | <b>Mass error</b>         | 8.67E-4 |

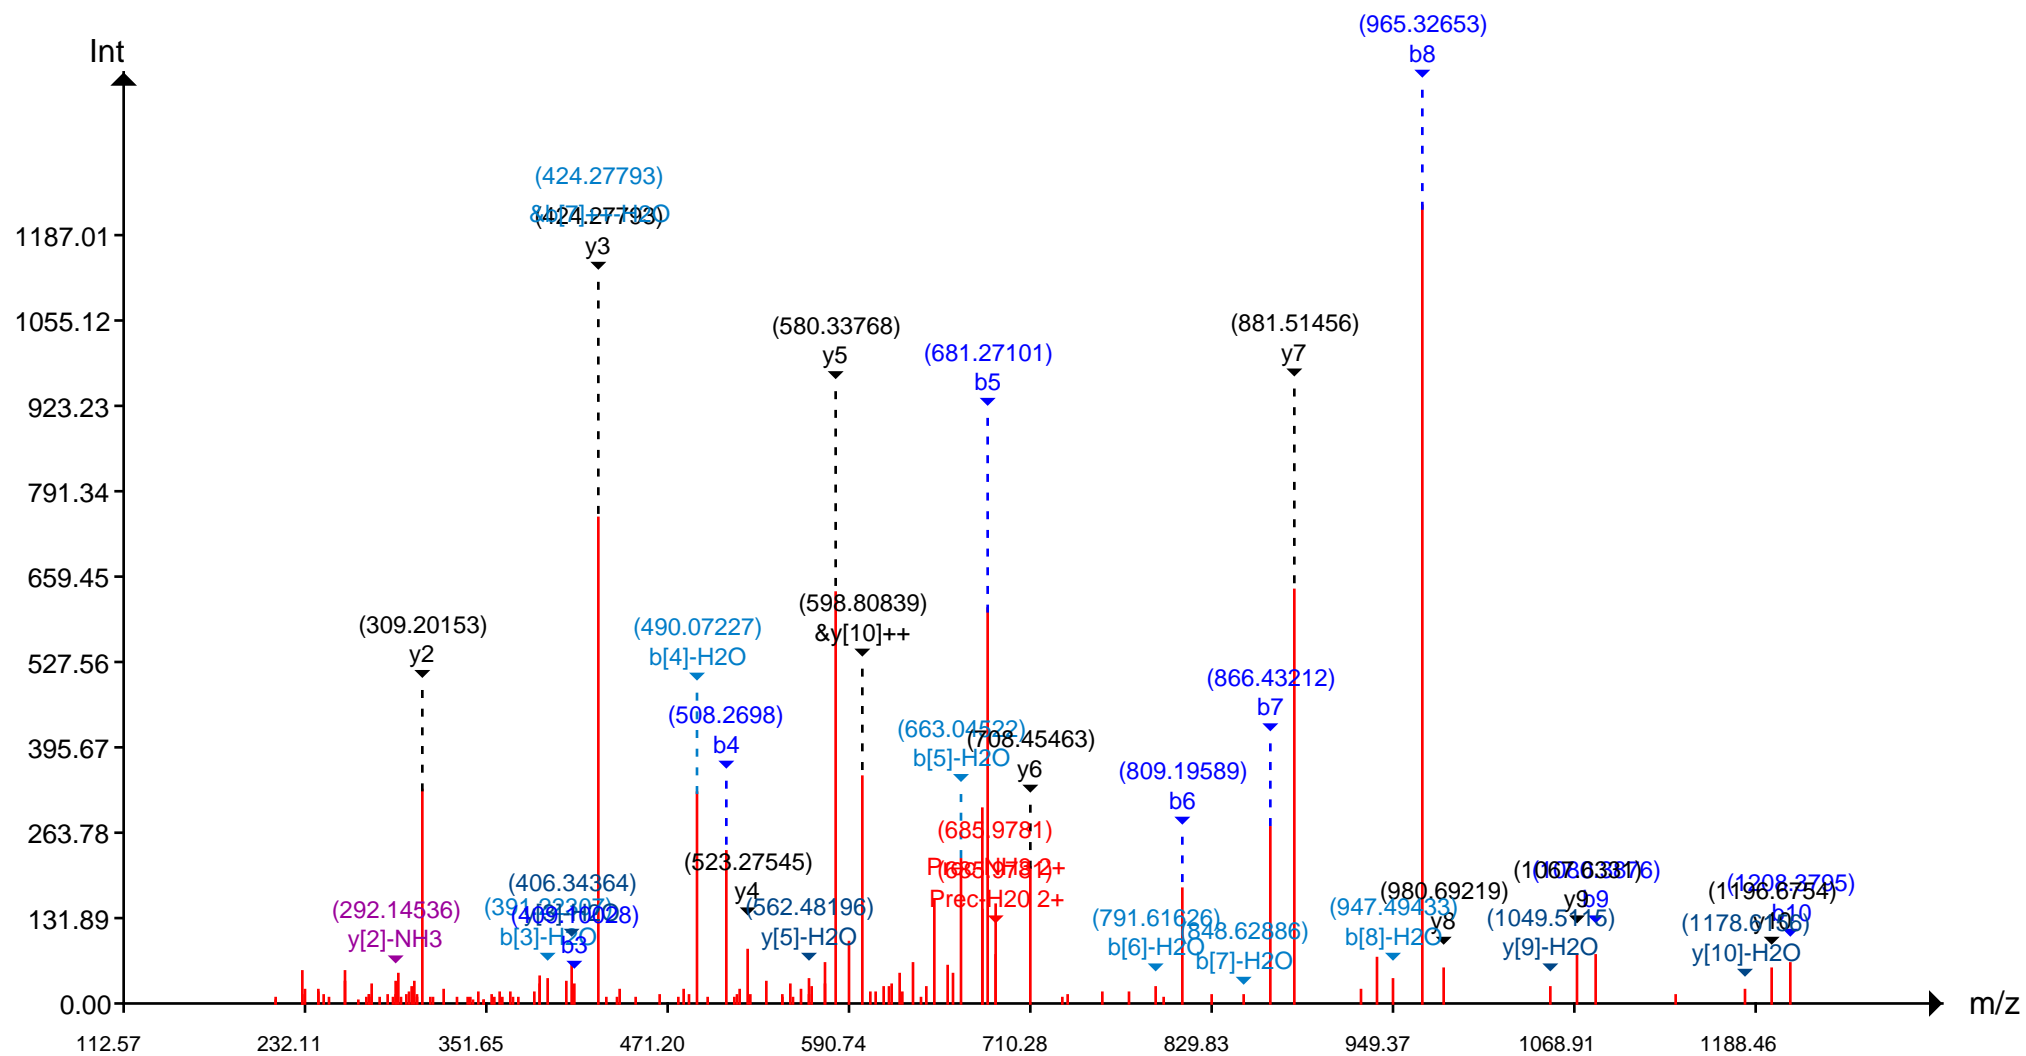

## Info

**Modified Sequence** AcD3-M<Mox\*>ESVK<AcD3K\*>QGVDQR<C13>-COOH

**Ion score** 70.6

**Protein** Q9DBG5

**Confidence level** 99.00%

**Precursor m/z** 694.85663

**Identity Threshold** 47.88

**Charge** 2+

**Mass error** 7.25E-4

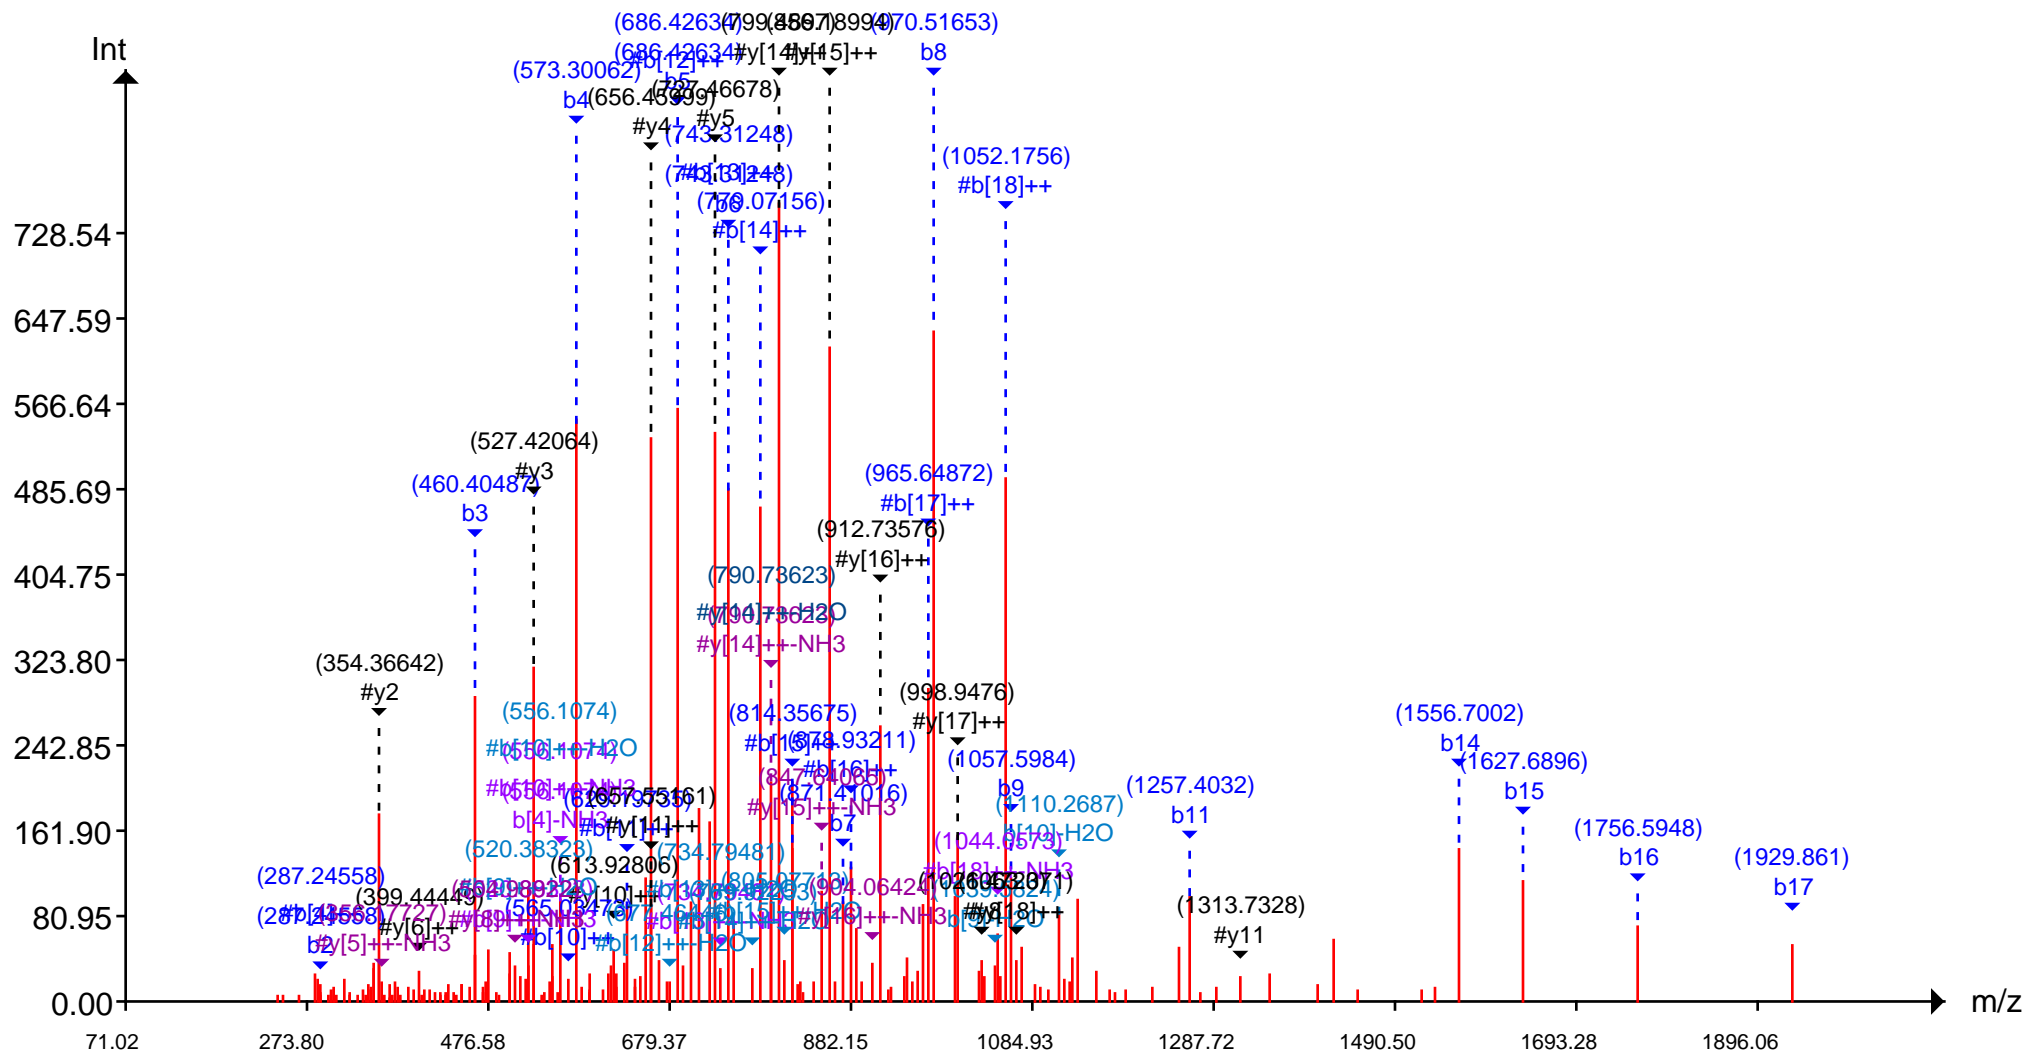

## Info

|                          |                                                            |                           |          |
|--------------------------|------------------------------------------------------------|---------------------------|----------|
| <b>Modified Sequence</b> | AcD3-IQK<AcD3K*>LLGQVSAEDLAAEK<AcD3K*>K<AcD3K*>R<C13>-COOH | <b>Ion score</b>          | 78.15    |
| <b>Protein</b>           | Q9CY64                                                     | <b>Confidence level</b>   | 99.00%   |
| <b>Precursor m/z</b>     | 761.78557                                                  | <b>Identity Threshold</b> | 41.58    |
| <b>Charge</b>            | 3+                                                         | <b>Mass error</b>         | 0.001844 |

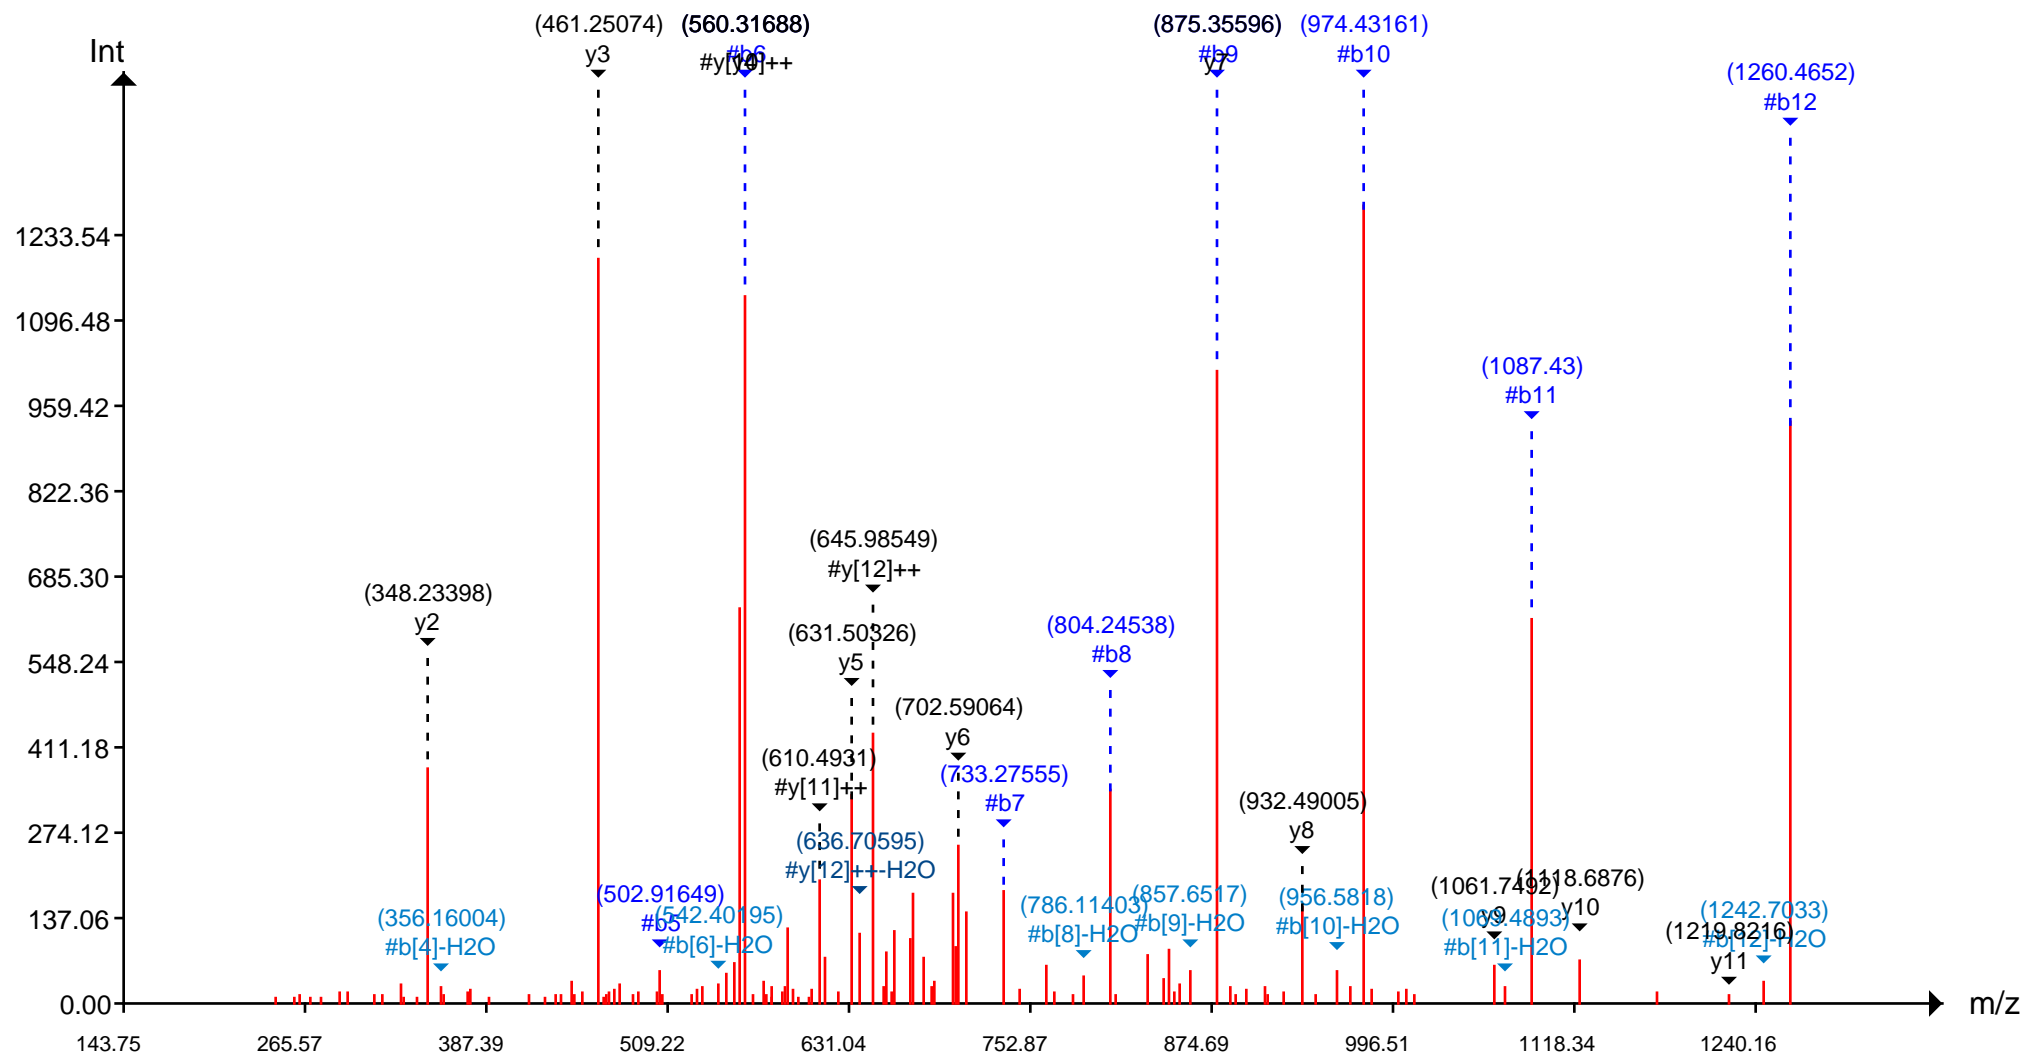

## Info

**Modified Sequence** AcD3-VATGEGK<AcD3K\*>AAVLK<AcD3K\*>R-COOH

**Ion score** 82.59

**Protein** Q9CQ60

**Confidence level** 99.00%

**Precursor m/z** 717.93524

**Identity Threshold** 43.06

**Charge** 2+

**Mass error** 7.19E-4



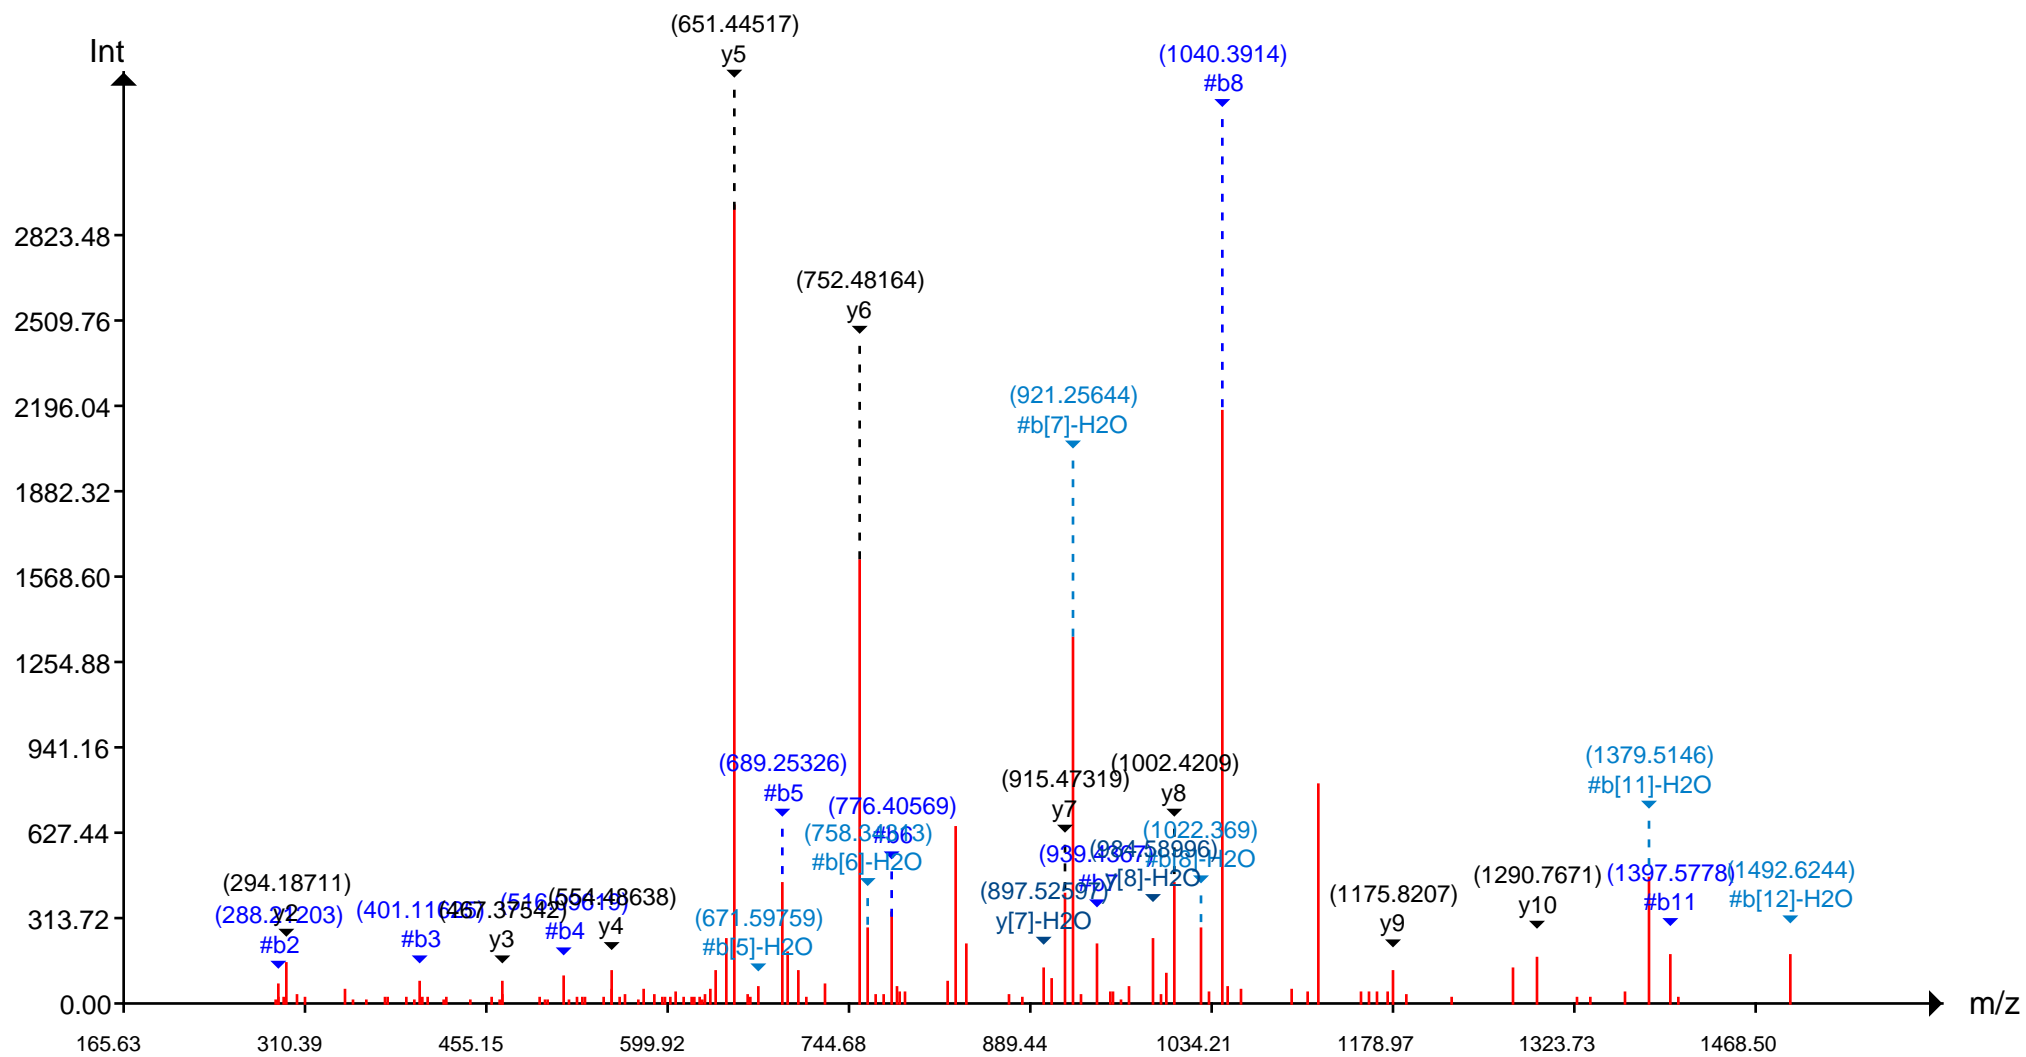

## Info

|                          |                                              |                           |          |
|--------------------------|----------------------------------------------|---------------------------|----------|
| <b>Modified Sequence</b> | AcD3-EIIDK<AcD3K*>SYTPSK<AcD3K*>IR<C13>-COOH | <b>Ion score</b>          | 72.48    |
| <b>Protein</b>           | O70492                                       | <b>Confidence level</b>   | 99.00%   |
| <b>Precursor m/z</b>     | 845.98808                                    | <b>Identity Threshold</b> | 45.51    |
| <b>Charge</b>            | 2+                                           | <b>Mass error</b>         | 0.002151 |

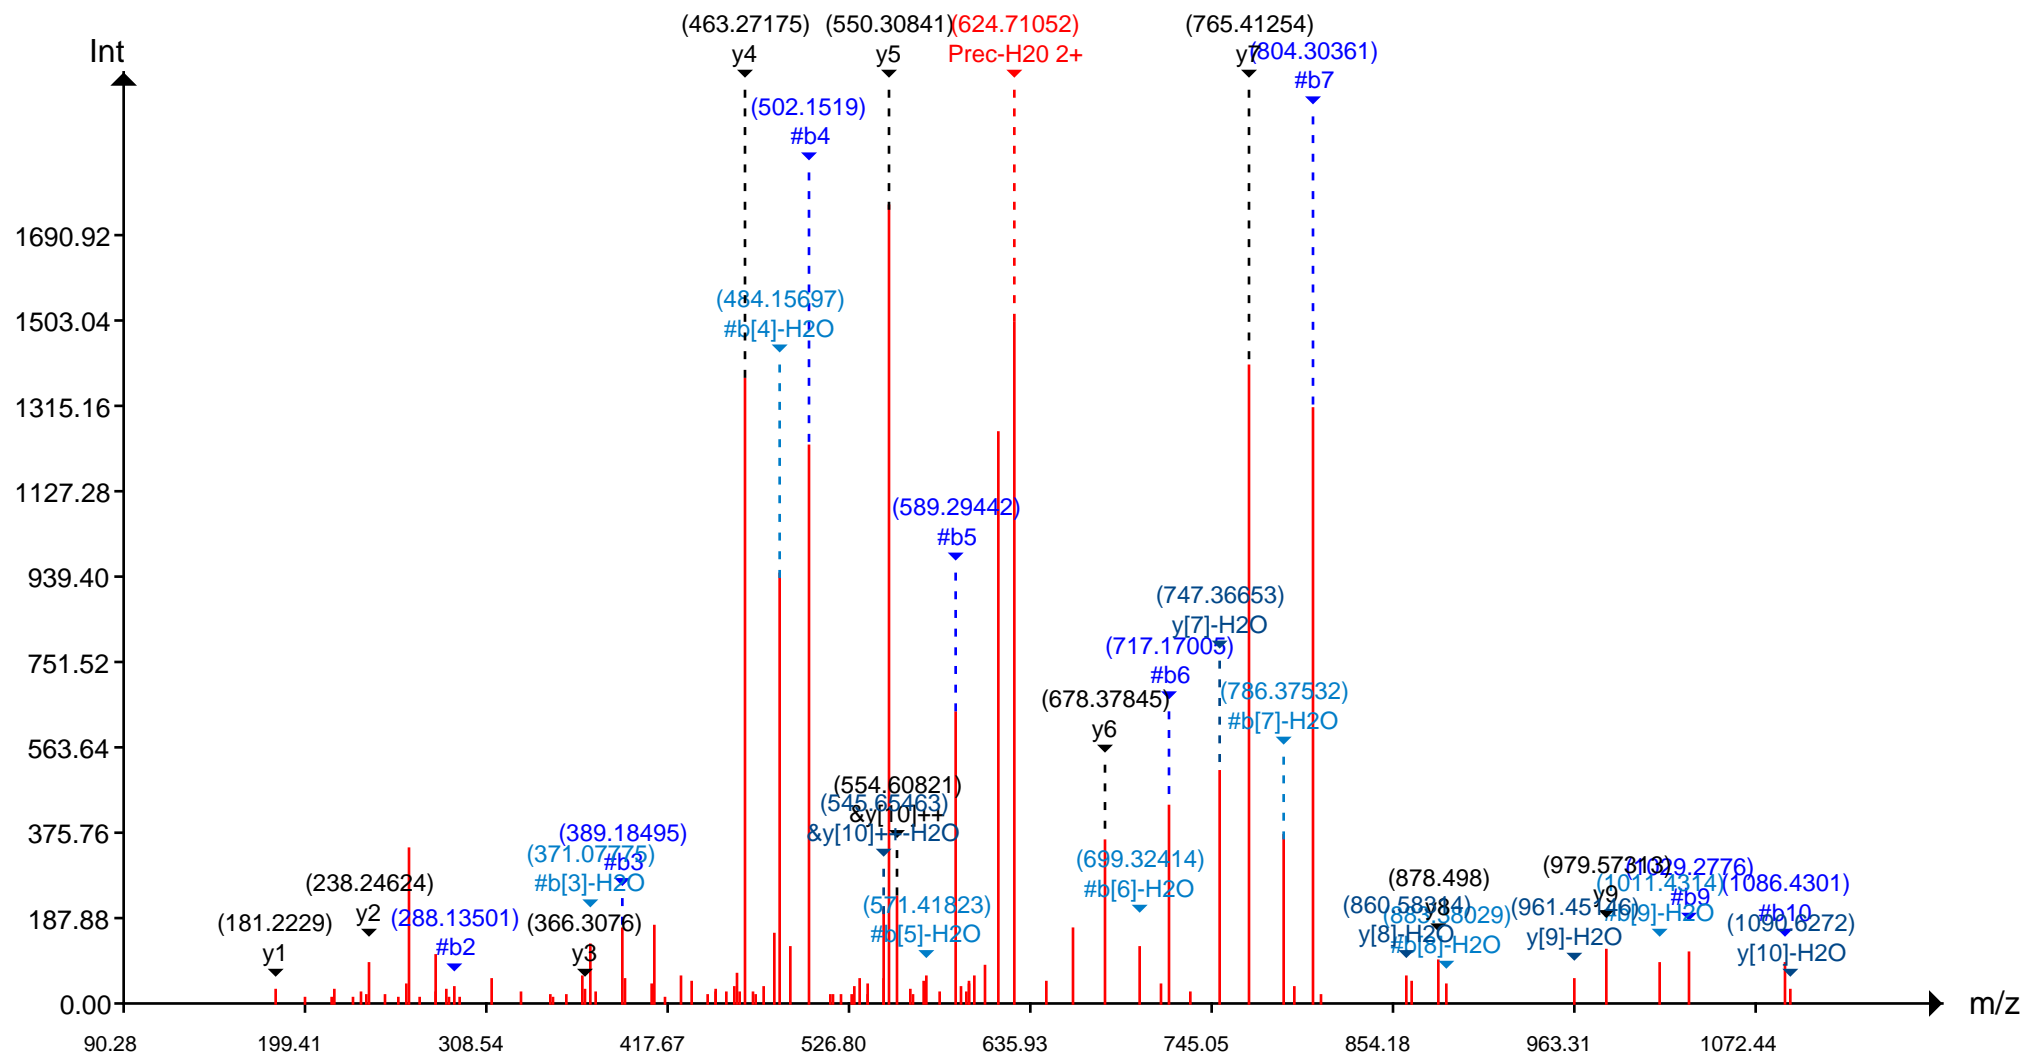

## Info

|                          |                            |                           |         |
|--------------------------|----------------------------|---------------------------|---------|
| <b>Modified Sequence</b> | AcD3-LETLSQSPQGR<C13>-COOH | <b>Ion score</b>          | 64.48   |
| <b>Protein</b>           | P60335                     | <b>Confidence level</b>   | 99.00%  |
| <b>Precursor m/z</b>     | 633.84508                  | <b>Identity Threshold</b> | 47.81   |
| <b>Charge</b>            | 2+                         | <b>Mass error</b>         | 5.74E-4 |

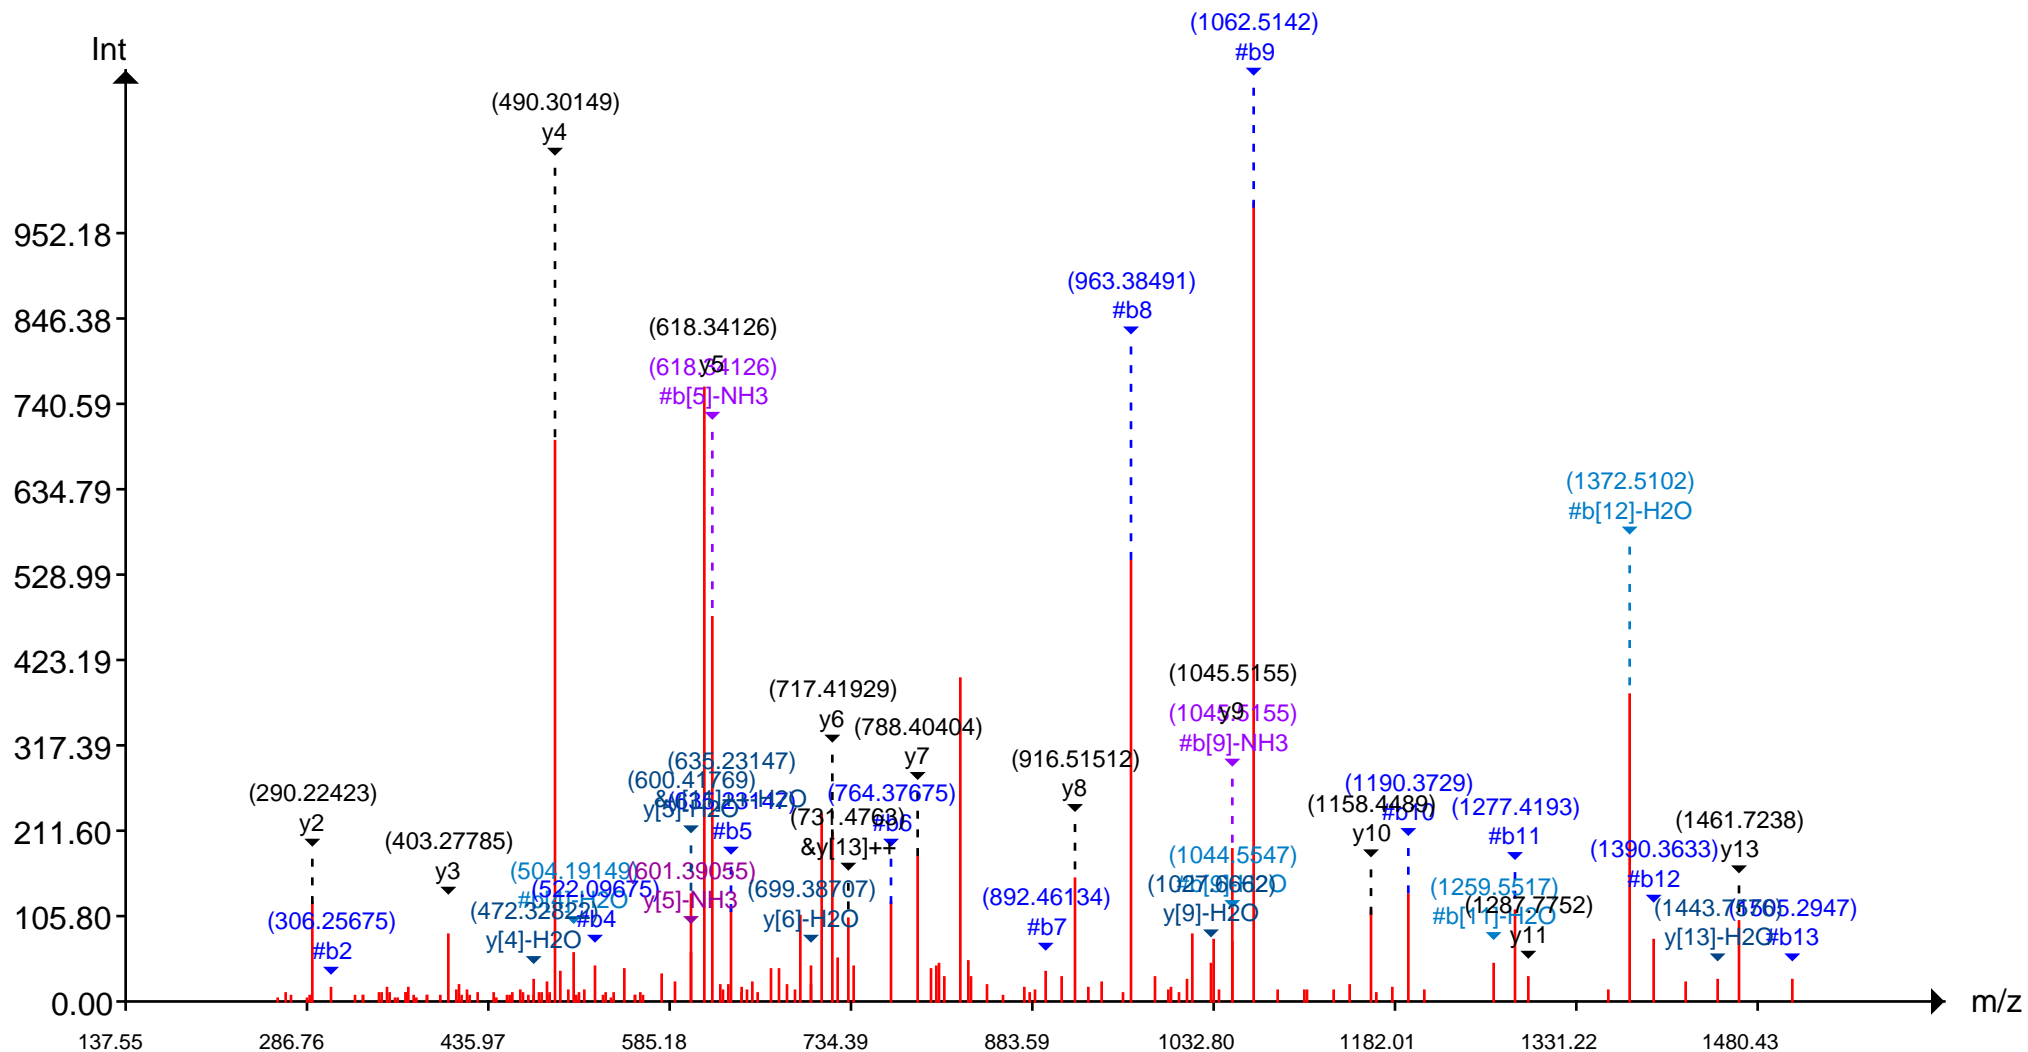

## Info

|                          |                                  |                           |          |
|--------------------------|----------------------------------|---------------------------|----------|
| <b>Modified Sequence</b> | AcD3-K<AcD3K*>SSEIEQAVQSLDR-COOH | <b>Ion score</b>          | 107.07   |
| <b>Protein</b>           | Q9D898                           | <b>Confidence level</b>   | 99.00%   |
| <b>Precursor m/z</b>     | 840.44067                        | <b>Identity Threshold</b> | 48.12    |
| <b>Charge</b>            | 2+                               | <b>Mass error</b>         | 0.002362 |

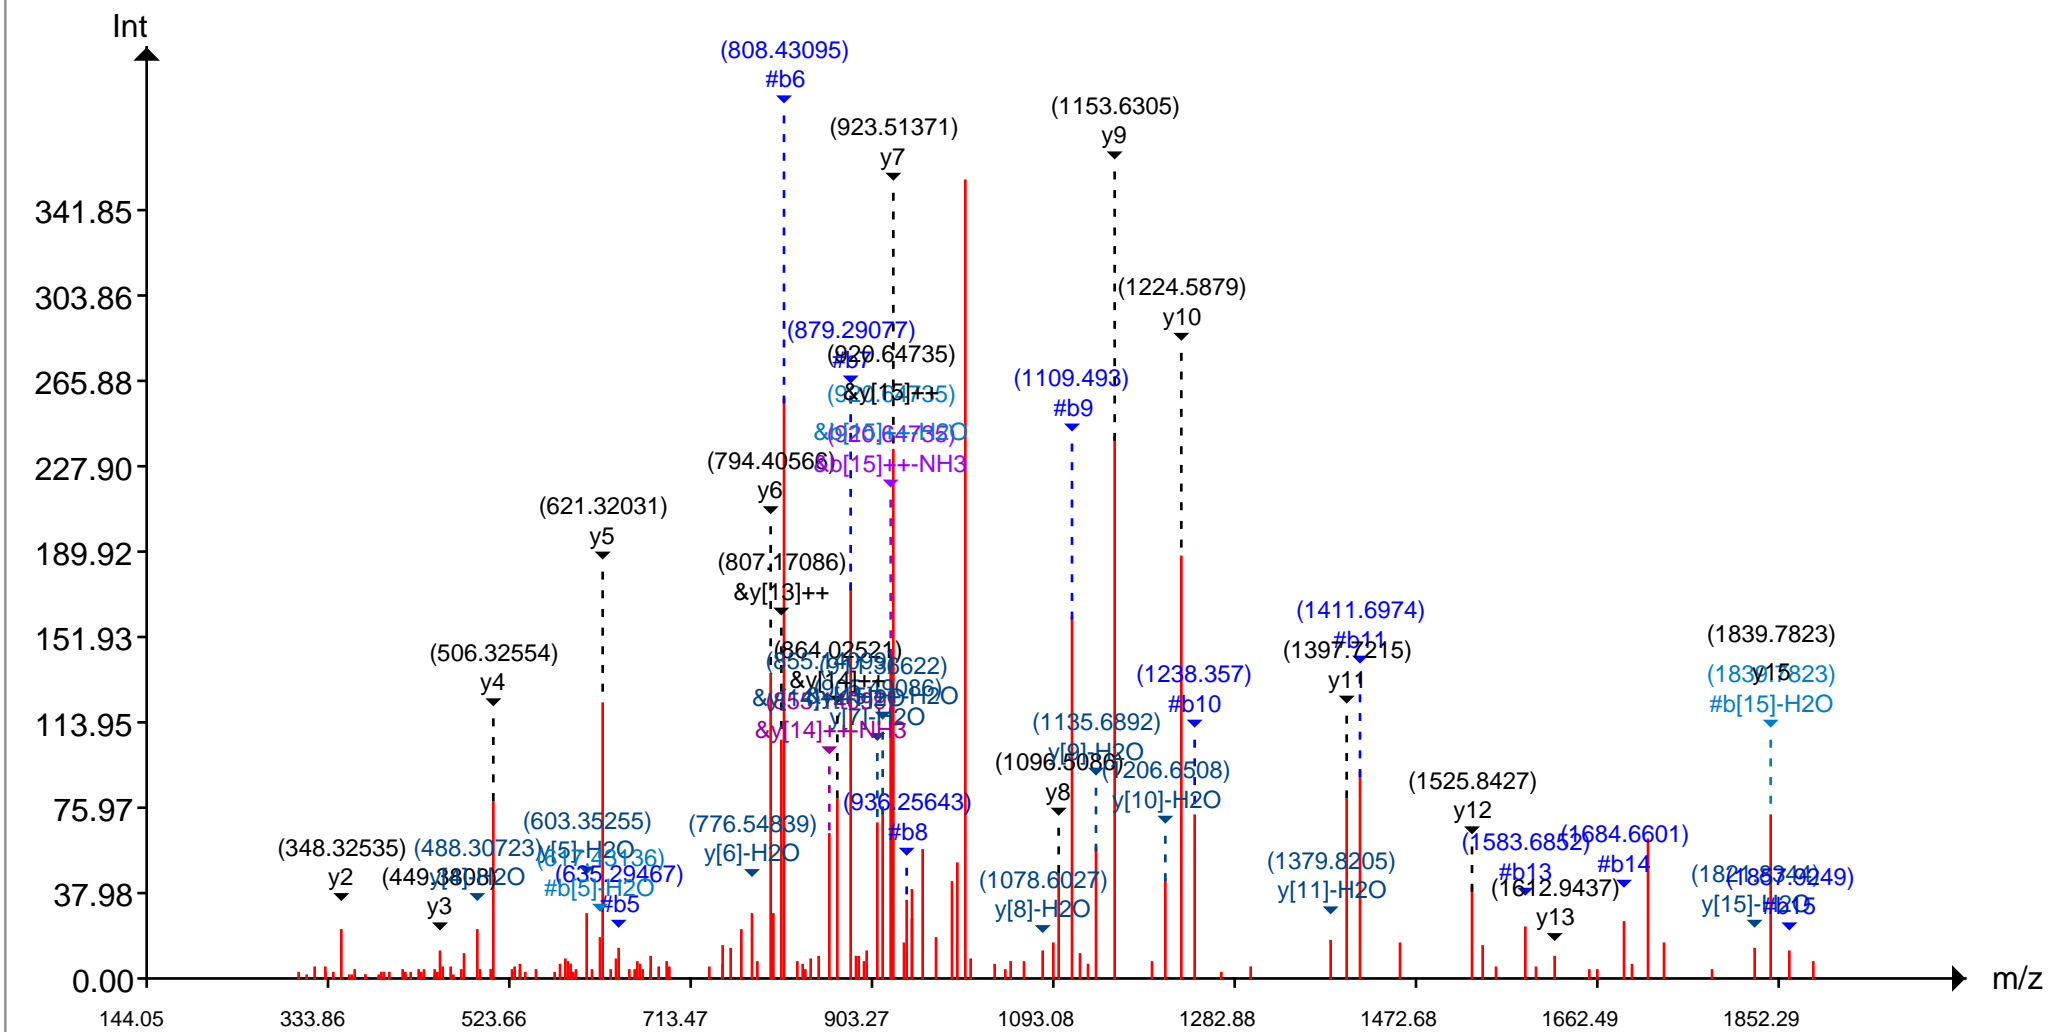

## Info

|                          |                                                           |                           |          |
|--------------------------|-----------------------------------------------------------|---------------------------|----------|
| <b>Modified Sequence</b> | AcD3-FLNSQ<AcD3K*>AGK<AcD3K*>EK<AcD3K*>DGTK<AcD3K*>R-COOH | <b>Ion score</b>          | 117.61   |
| <b>Protein</b>           | P23198                                                    | <b>Confidence level</b>   | 99.00%   |
| <b>Precursor m/z</b>     | 1016.5693                                                 | <b>Identity Threshold</b> | 46.30    |
| <b>Charge</b>            | 2+                                                        | <b>Mass error</b>         | 0.002283 |



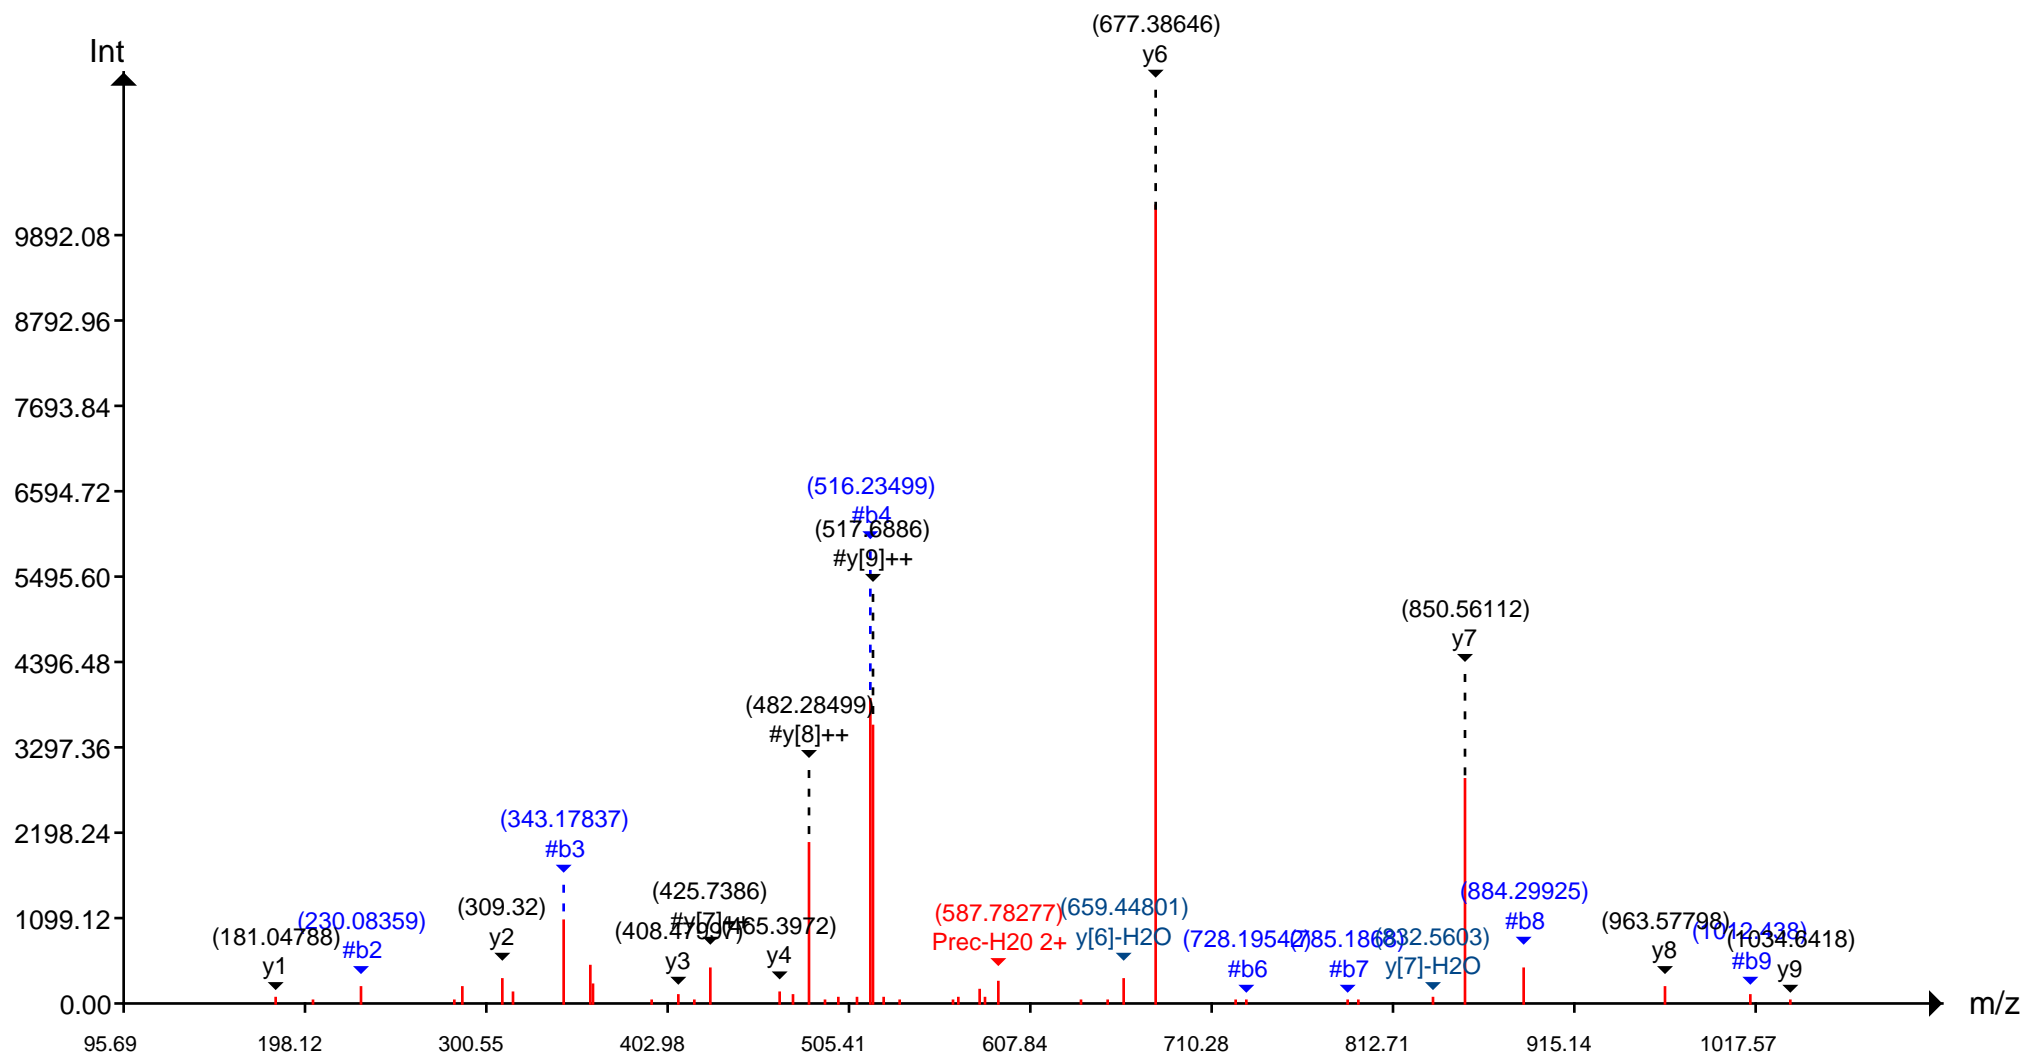

## Info

**Modified Sequence** AcD3-IAIK<AcD3K\*>PDGVQR<C13>-COOH

**Ion score** 76.37

**Protein** P15532, Q01768

**Confidence level** 99.00%

**Precursor m/z** 596.86709

**Identity Threshold** 42.91

**Charge** 2+

**Mass error** 6.64E-4

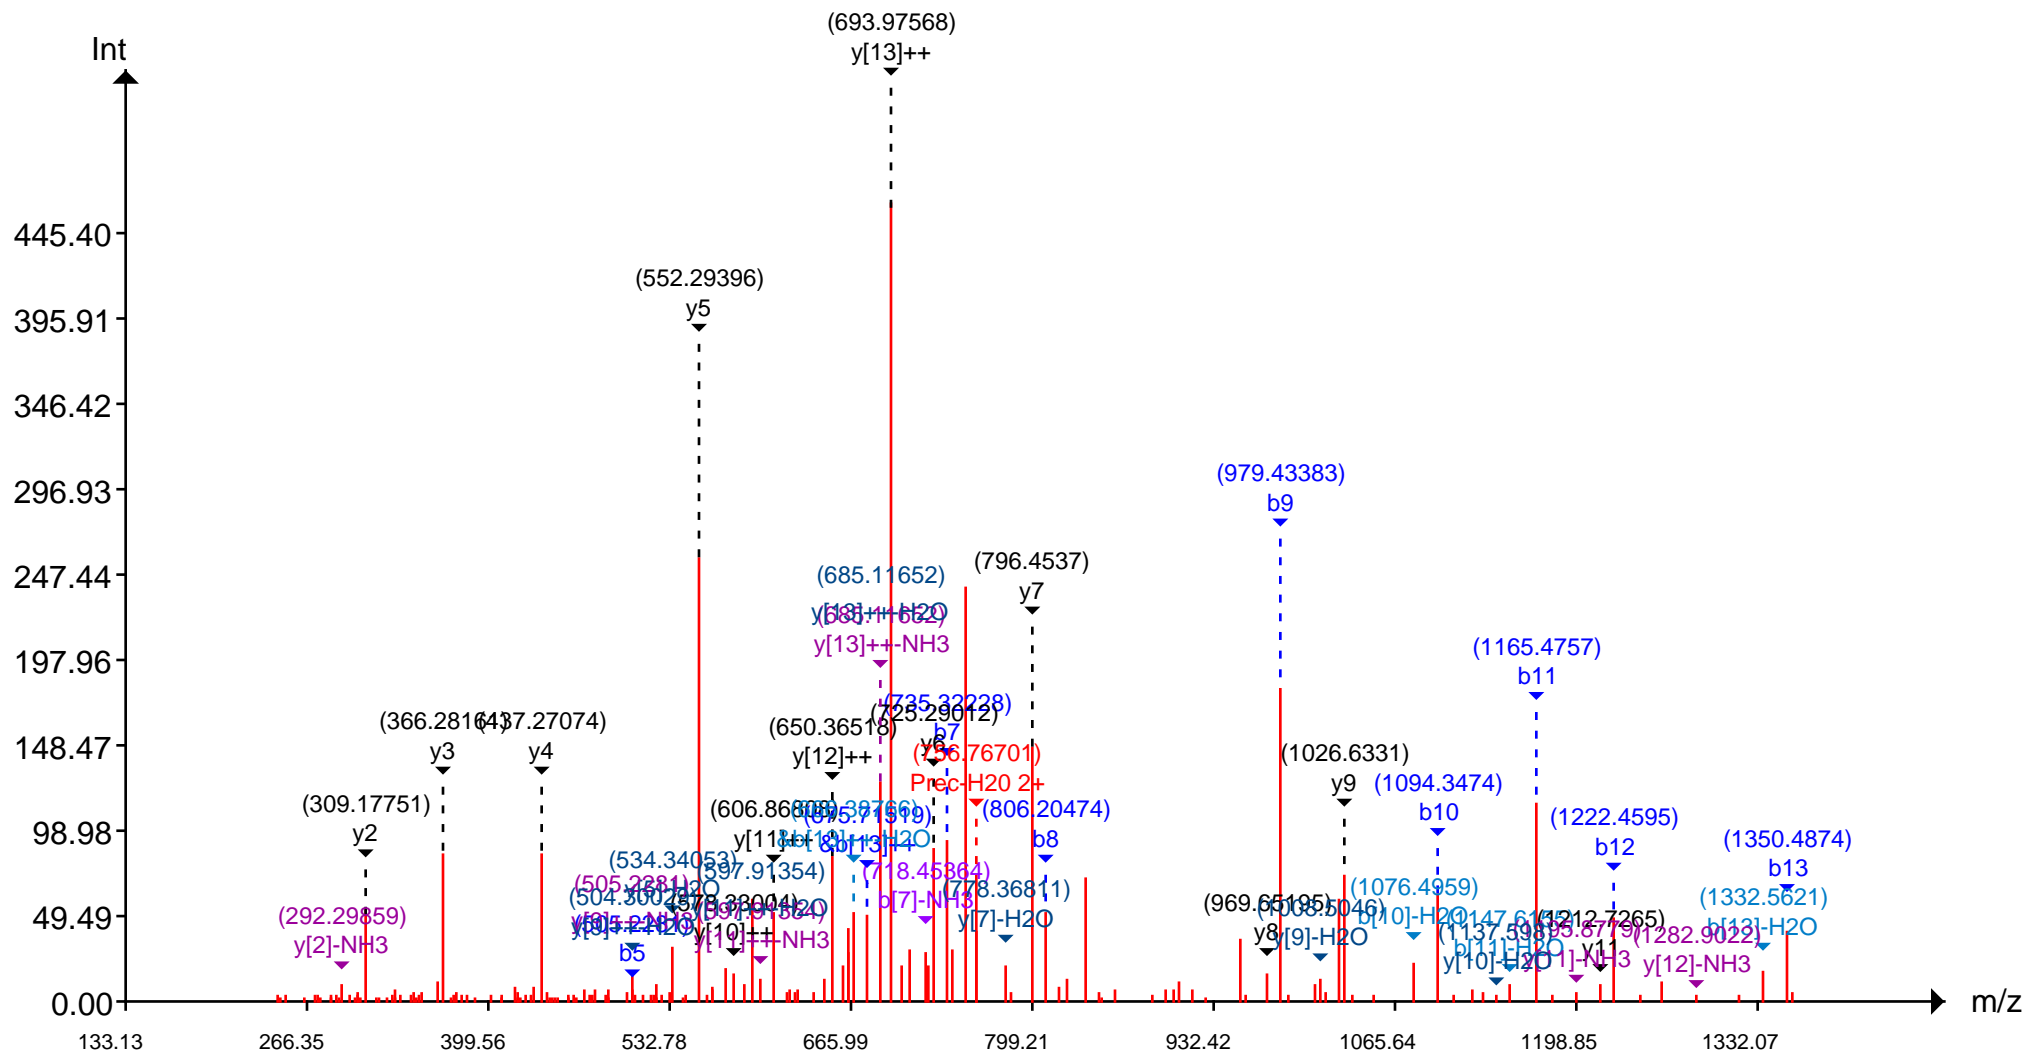

## Info

|                          |                                               |                           |        |
|--------------------------|-----------------------------------------------|---------------------------|--------|
| <b>Modified Sequence</b> | AcD3-VSSGEGK<AcD3K*>AK<AcD3K*>DAGQR<C13>-COOH | <b>Ion score</b>          | 54.93  |
| <b>Protein</b>           | P50580                                        | <b>Confidence level</b>   | 99.00% |
| <b>Precursor m/z</b>     | 765.91202                                     | <b>Identity Threshold</b> | 48.04  |
| <b>Charge</b>            | 2+                                            | <b>Mass error</b>         | 3.6E-4 |

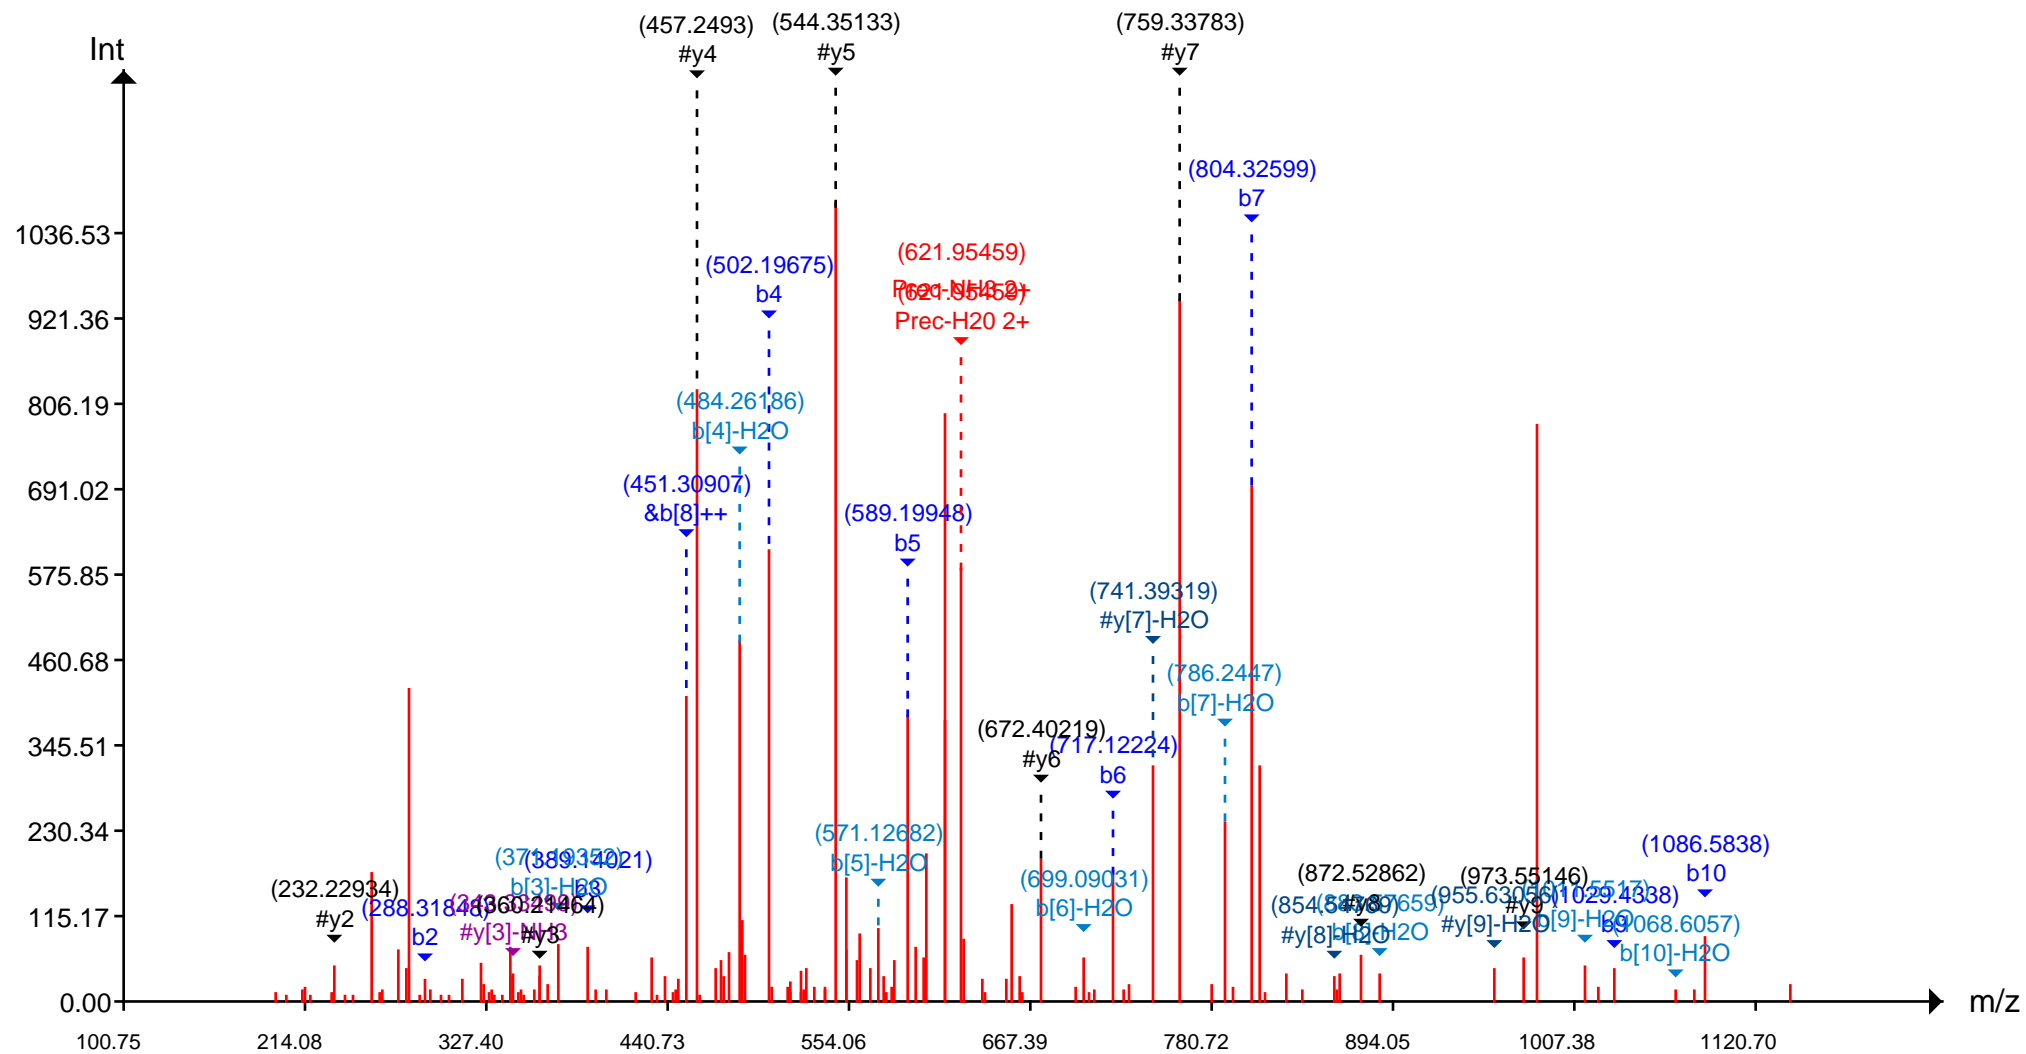

## Info

|                          |                       |                           |          |
|--------------------------|-----------------------|---------------------------|----------|
| <b>Modified Sequence</b> | AcD3-LETLSQSPQGR-COOH | <b>Ion score</b>          | 48.56    |
| <b>Protein</b>           | P60335                | <b>Confidence level</b>   | 99.00%   |
| <b>Precursor m/z</b>     | 630.83531             | <b>Identity Threshold</b> | 48.05    |
| <b>Charge</b>            | 2+                    | <b>Mass error</b>         | 0.001176 |



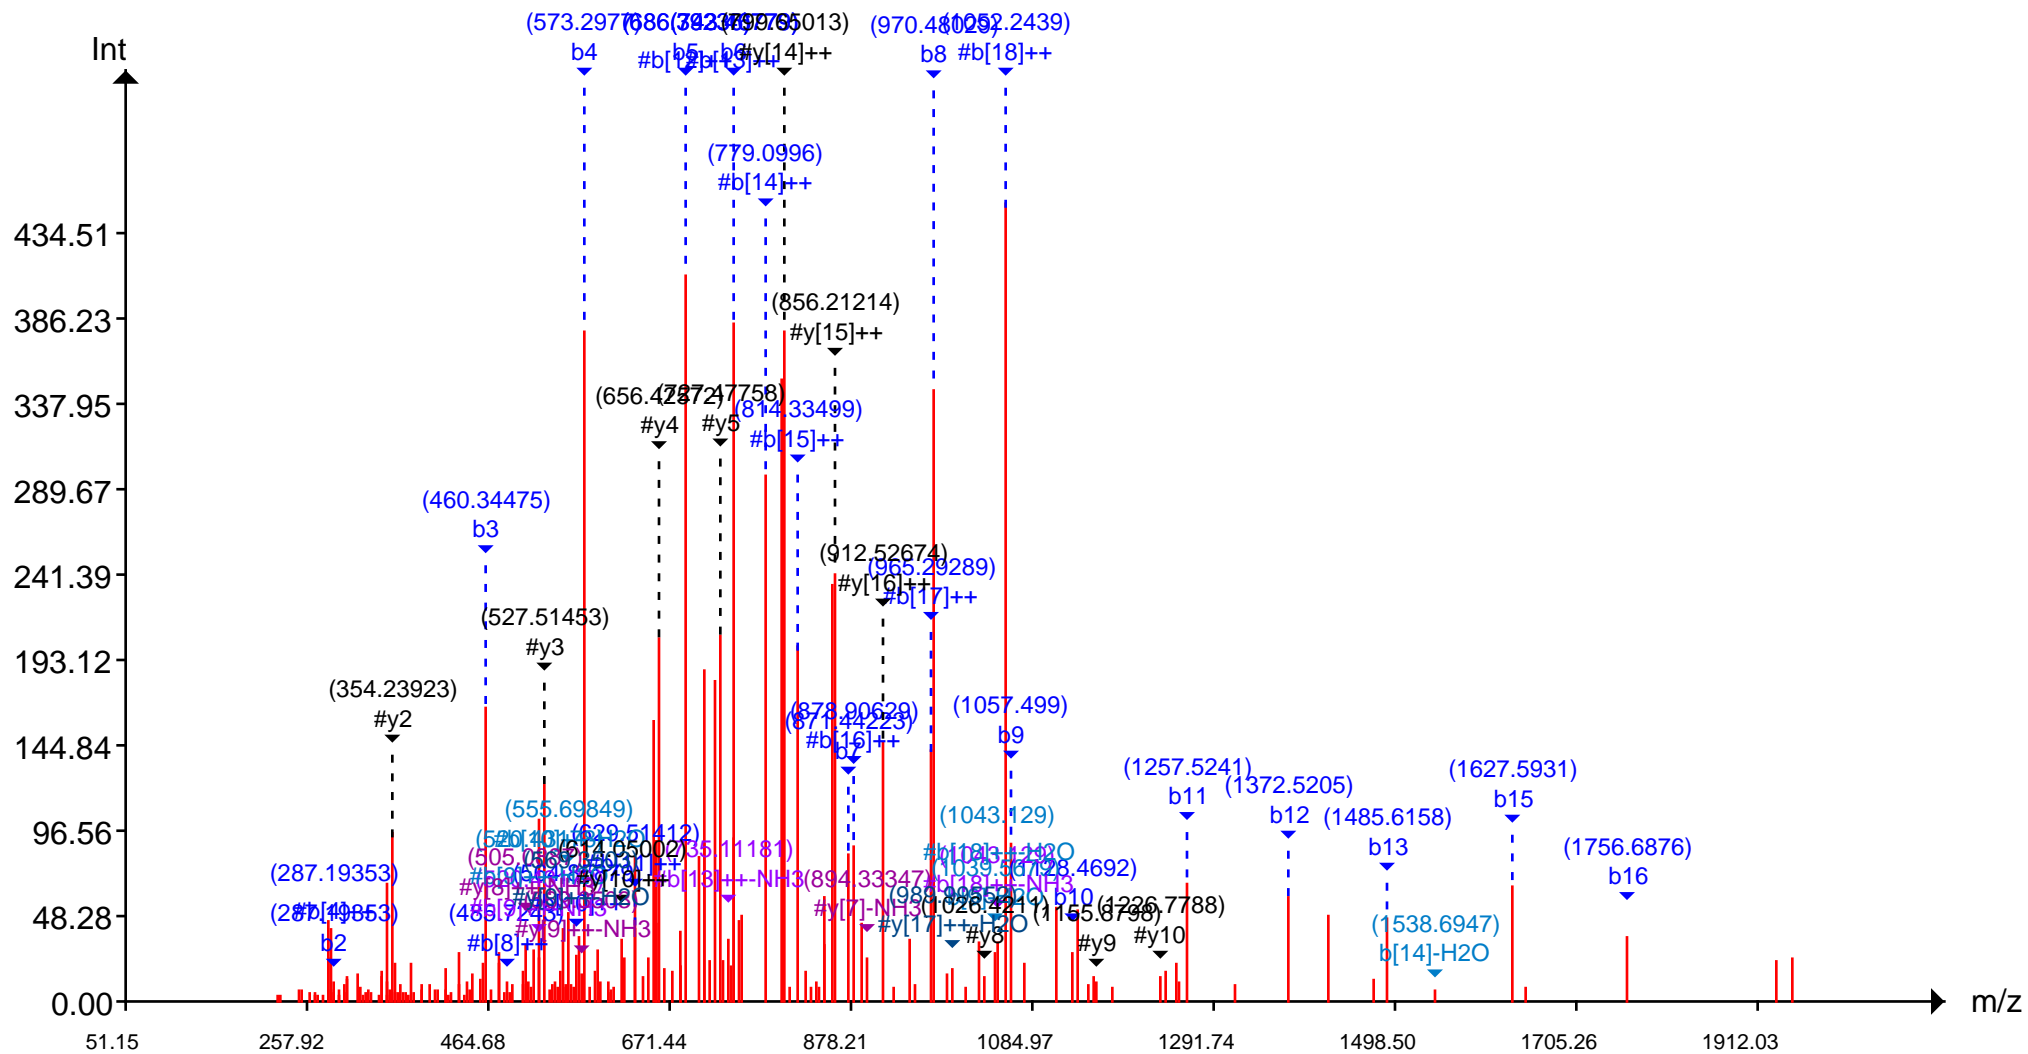

## Info

|                          |                                                            |                           |          |
|--------------------------|------------------------------------------------------------|---------------------------|----------|
| <b>Modified Sequence</b> | AcD3-IQK<AcD3K*>LLGQVSAEDLAAEK<AcD3K*>K<AcD3K*>R<C13>-COOH | <b>Ion score</b>          | 85.82    |
| <b>Protein</b>           | Q9CY64                                                     | <b>Confidence level</b>   | 99.00%   |
| <b>Precursor m/z</b>     | 761.78572                                                  | <b>Identity Threshold</b> | 41.59    |
| <b>Charge</b>            | 3+                                                         | <b>Mass error</b>         | 0.002294 |

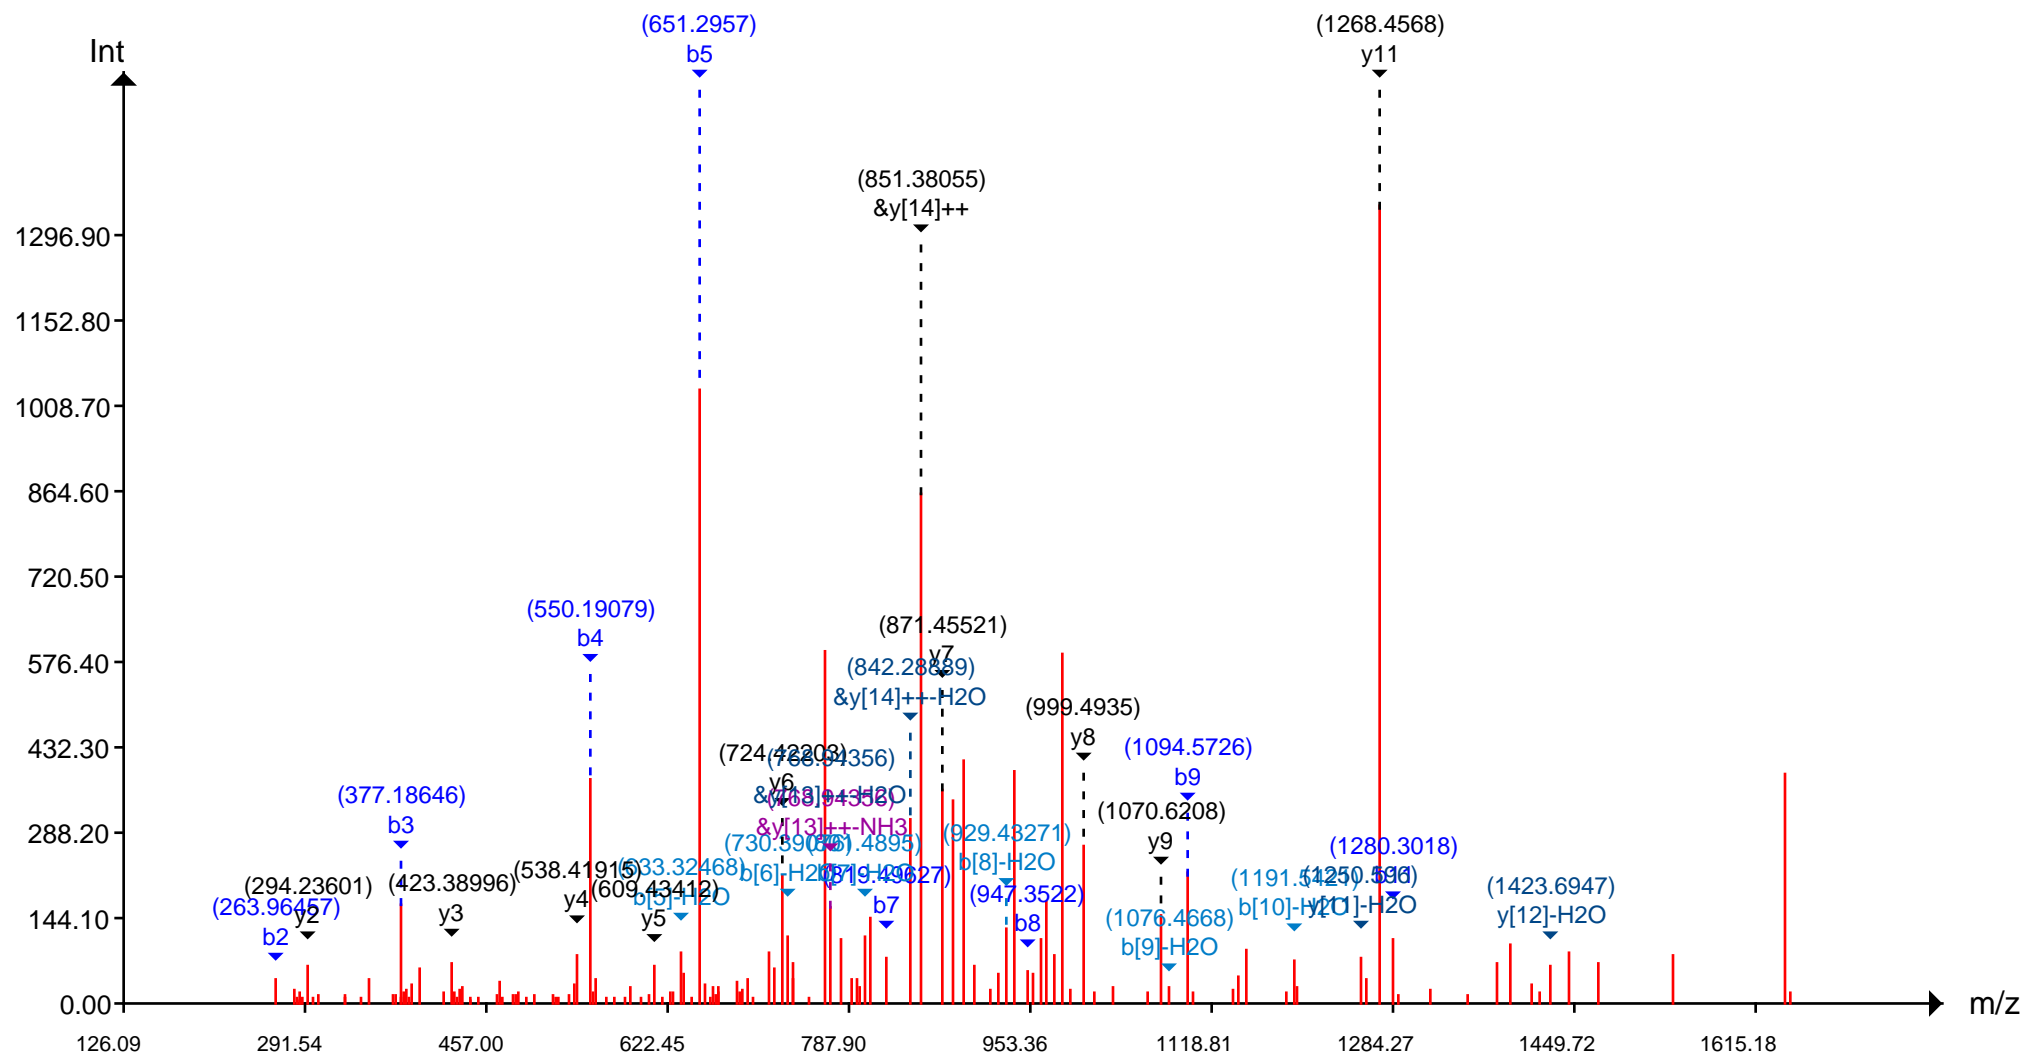

## Info

**Modified Sequence** AcD3-AM<Mox\*>LK<AcD3K\*>TPAQFDADELRL<C13>-COOH

**Ion score** 54.83

**Protein** P10107

**Confidence level** 99.00%

**Precursor m/z** 909.46965

**Identity Threshold** 48.10

**Charge** 2+

**Mass error** 4.16E-4

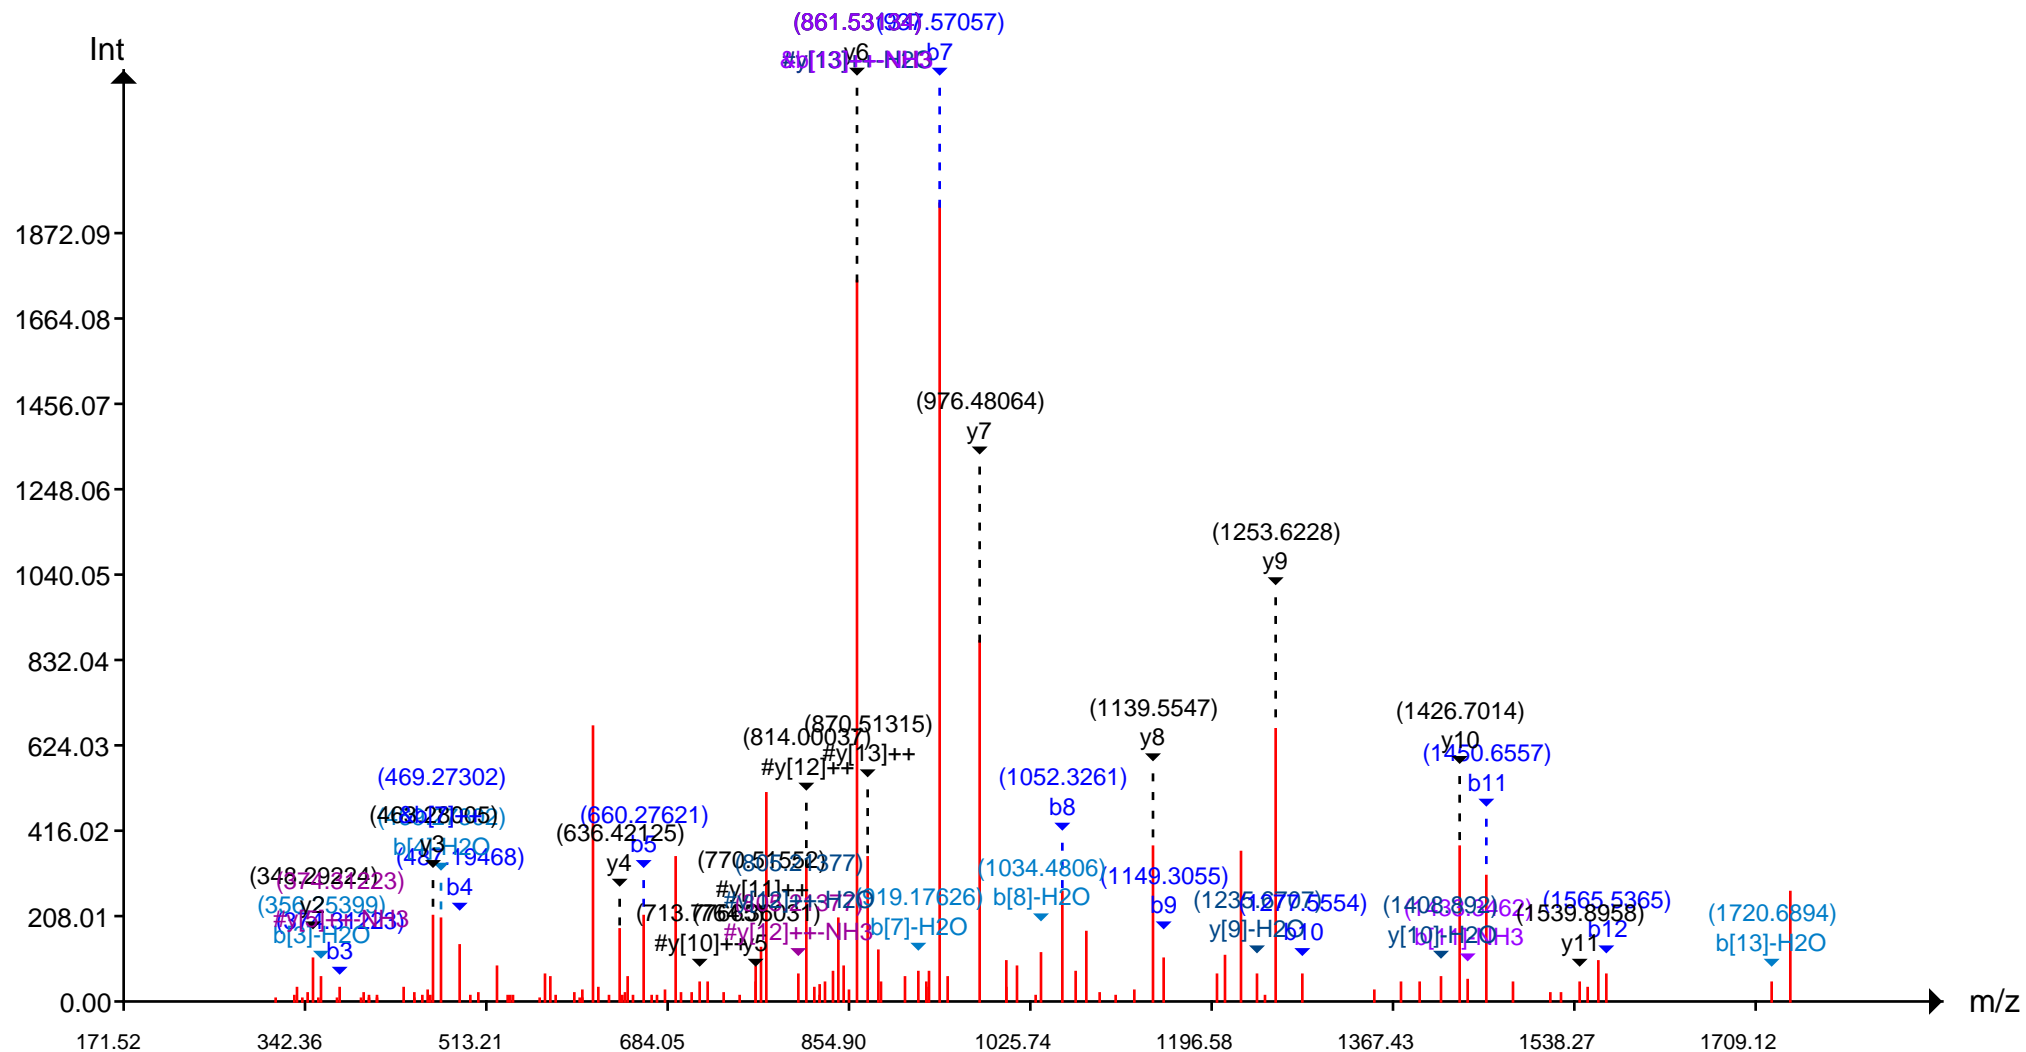

## Info

|                          |                                                  |                           |          |
|--------------------------|--------------------------------------------------|---------------------------|----------|
| <b>Modified Sequence</b> | AcD3-QISLK<AcD3K*>NYDPQK<AcD3K*>DK<AcD3K*>R-COOH | <b>Ion score</b>          | 59.72    |
| <b>Protein</b>           | P53026                                           | <b>Confidence level</b>   | 99.00%   |
| <b>Precursor m/z</b>     | 957.03027                                        | <b>Identity Threshold</b> | 46.88    |
| <b>Charge</b>            | 2+                                               | <b>Mass error</b>         | 0.001646 |

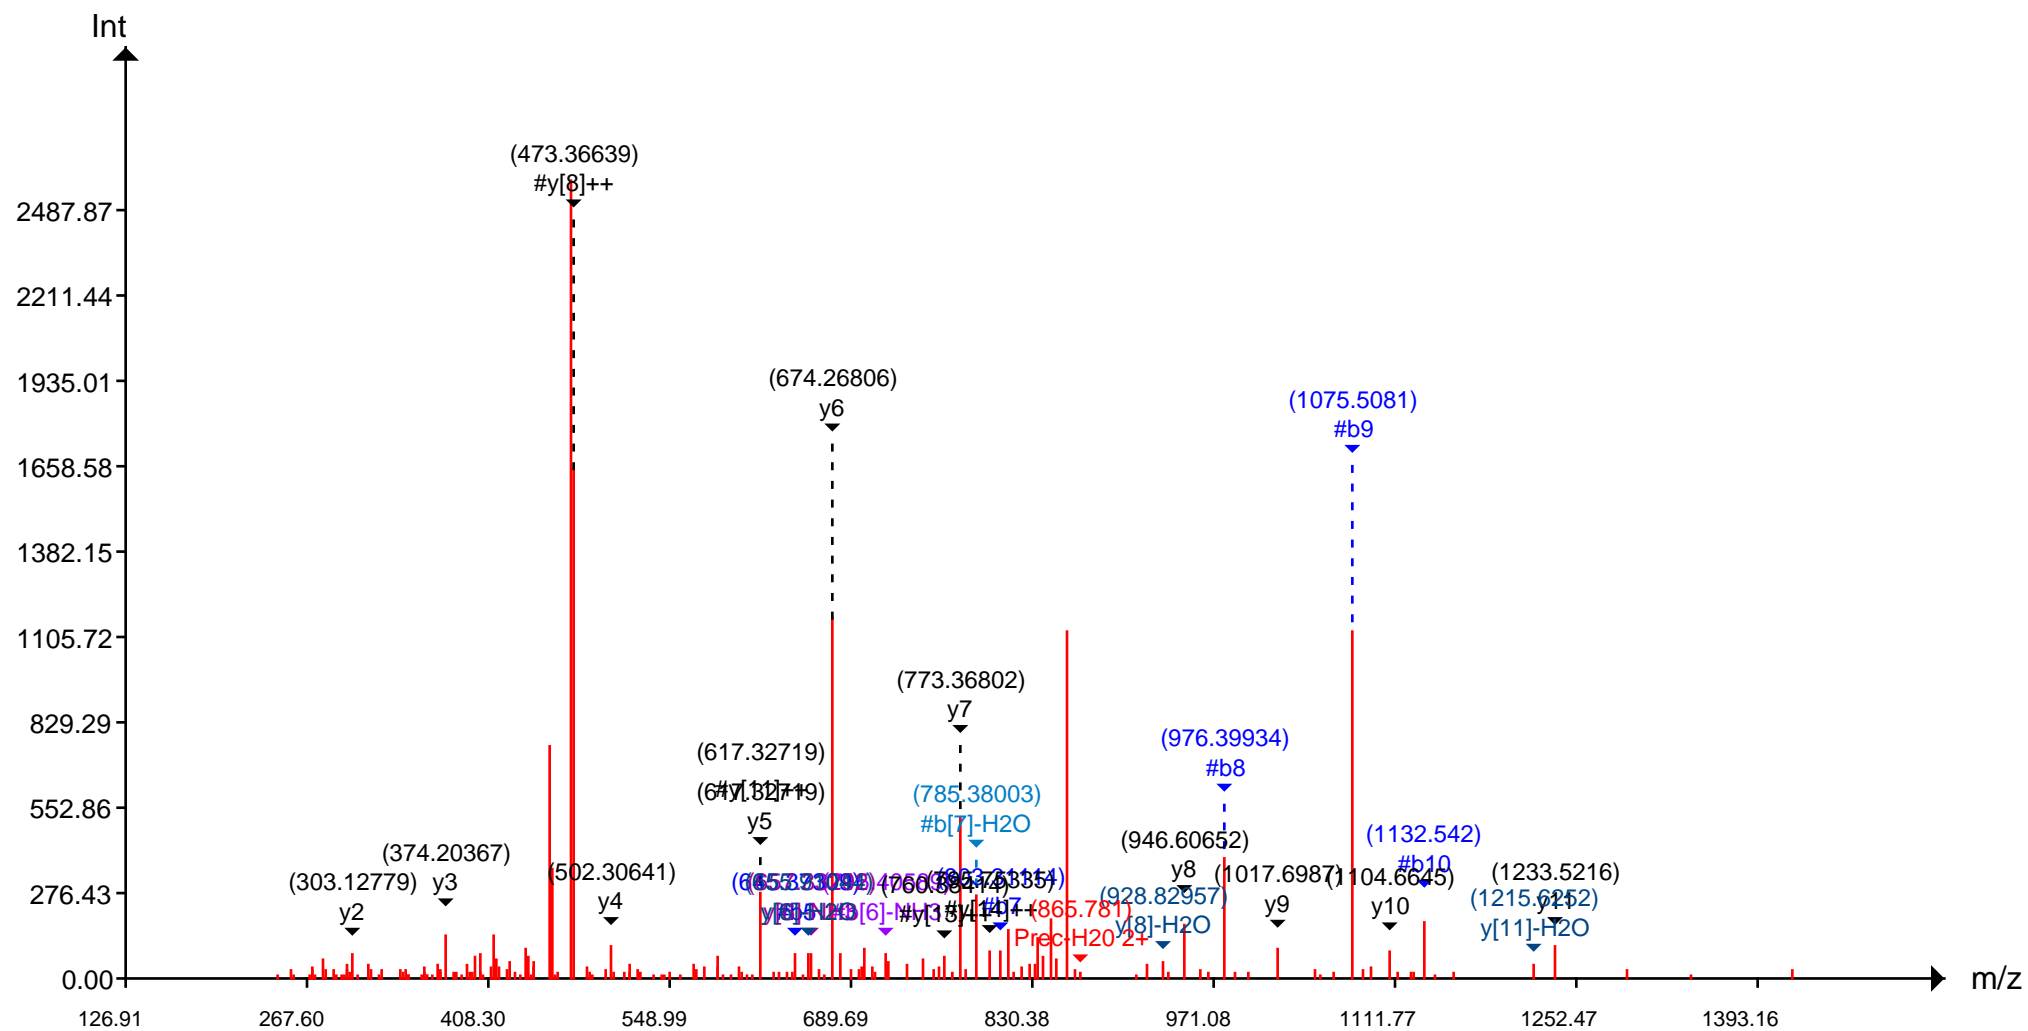

## Info

|                          |                                           |                           |          |
|--------------------------|-------------------------------------------|---------------------------|----------|
| <b>Modified Sequence</b> | AcD3-IAIK<AcD3K*>ESAK<AcD3K*>VGDQAQR-COOH | <b>Ion score</b>          | 53.52    |
| <b>Protein</b>           | Q99JY9                                    | <b>Confidence level</b>   | 99.00%   |
| <b>Precursor m/z</b>     | 874.99721                                 | <b>Identity Threshold</b> | 46.22    |
| <b>Charge</b>            | 2+                                        | <b>Mass error</b>         | 0.002039 |

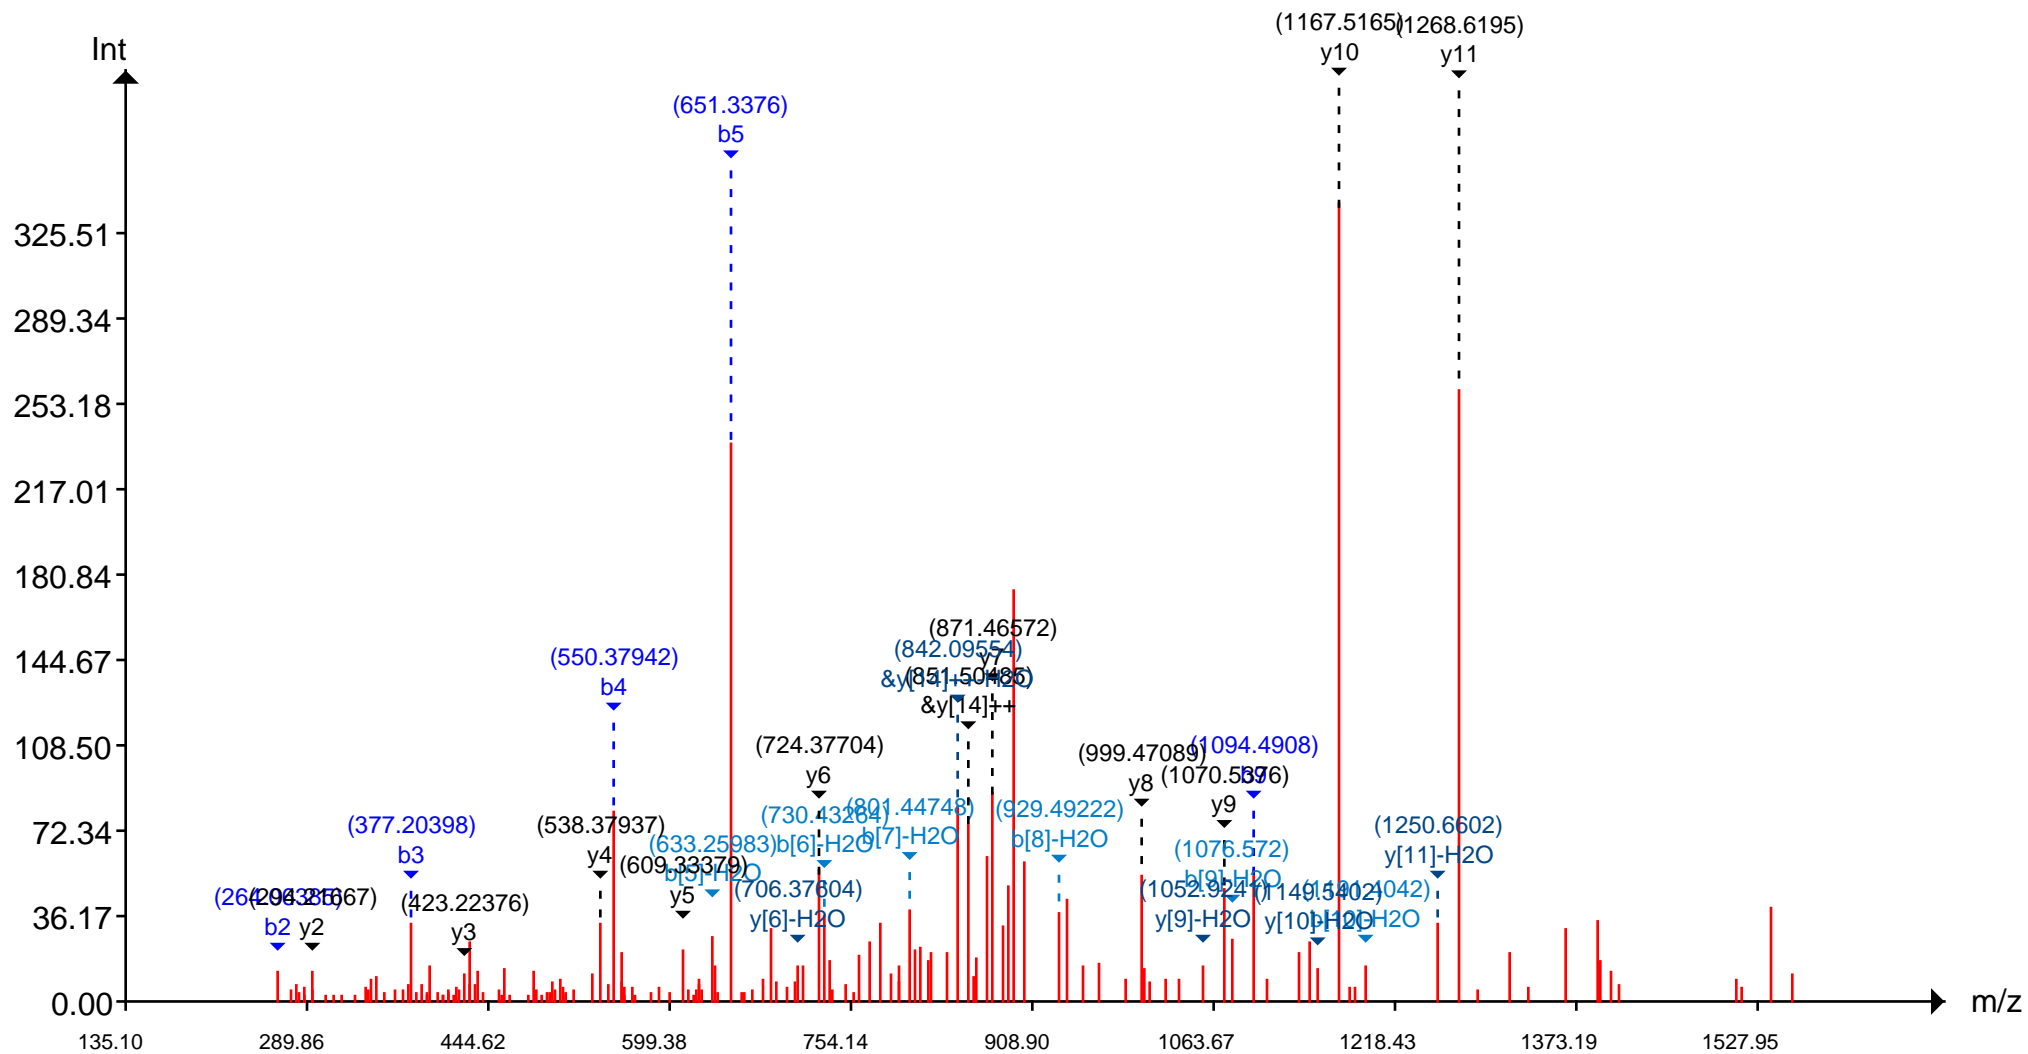

## Info

|                          |                                             |                           |          |
|--------------------------|---------------------------------------------|---------------------------|----------|
| <b>Modified Sequence</b> | AcD3-AM<Mox*>LK<AcD3K*>TPAQFDAELR<C13>-COOH | <b>Ion score</b>          | 57.4     |
| <b>Protein</b>           | P10107                                      | <b>Confidence level</b>   | 99.00%   |
| <b>Precursor m/z</b>     | 909.47056                                   | <b>Identity Threshold</b> | 48.09    |
| <b>Charge</b>            | 2+                                          | <b>Mass error</b>         | 0.002236 |

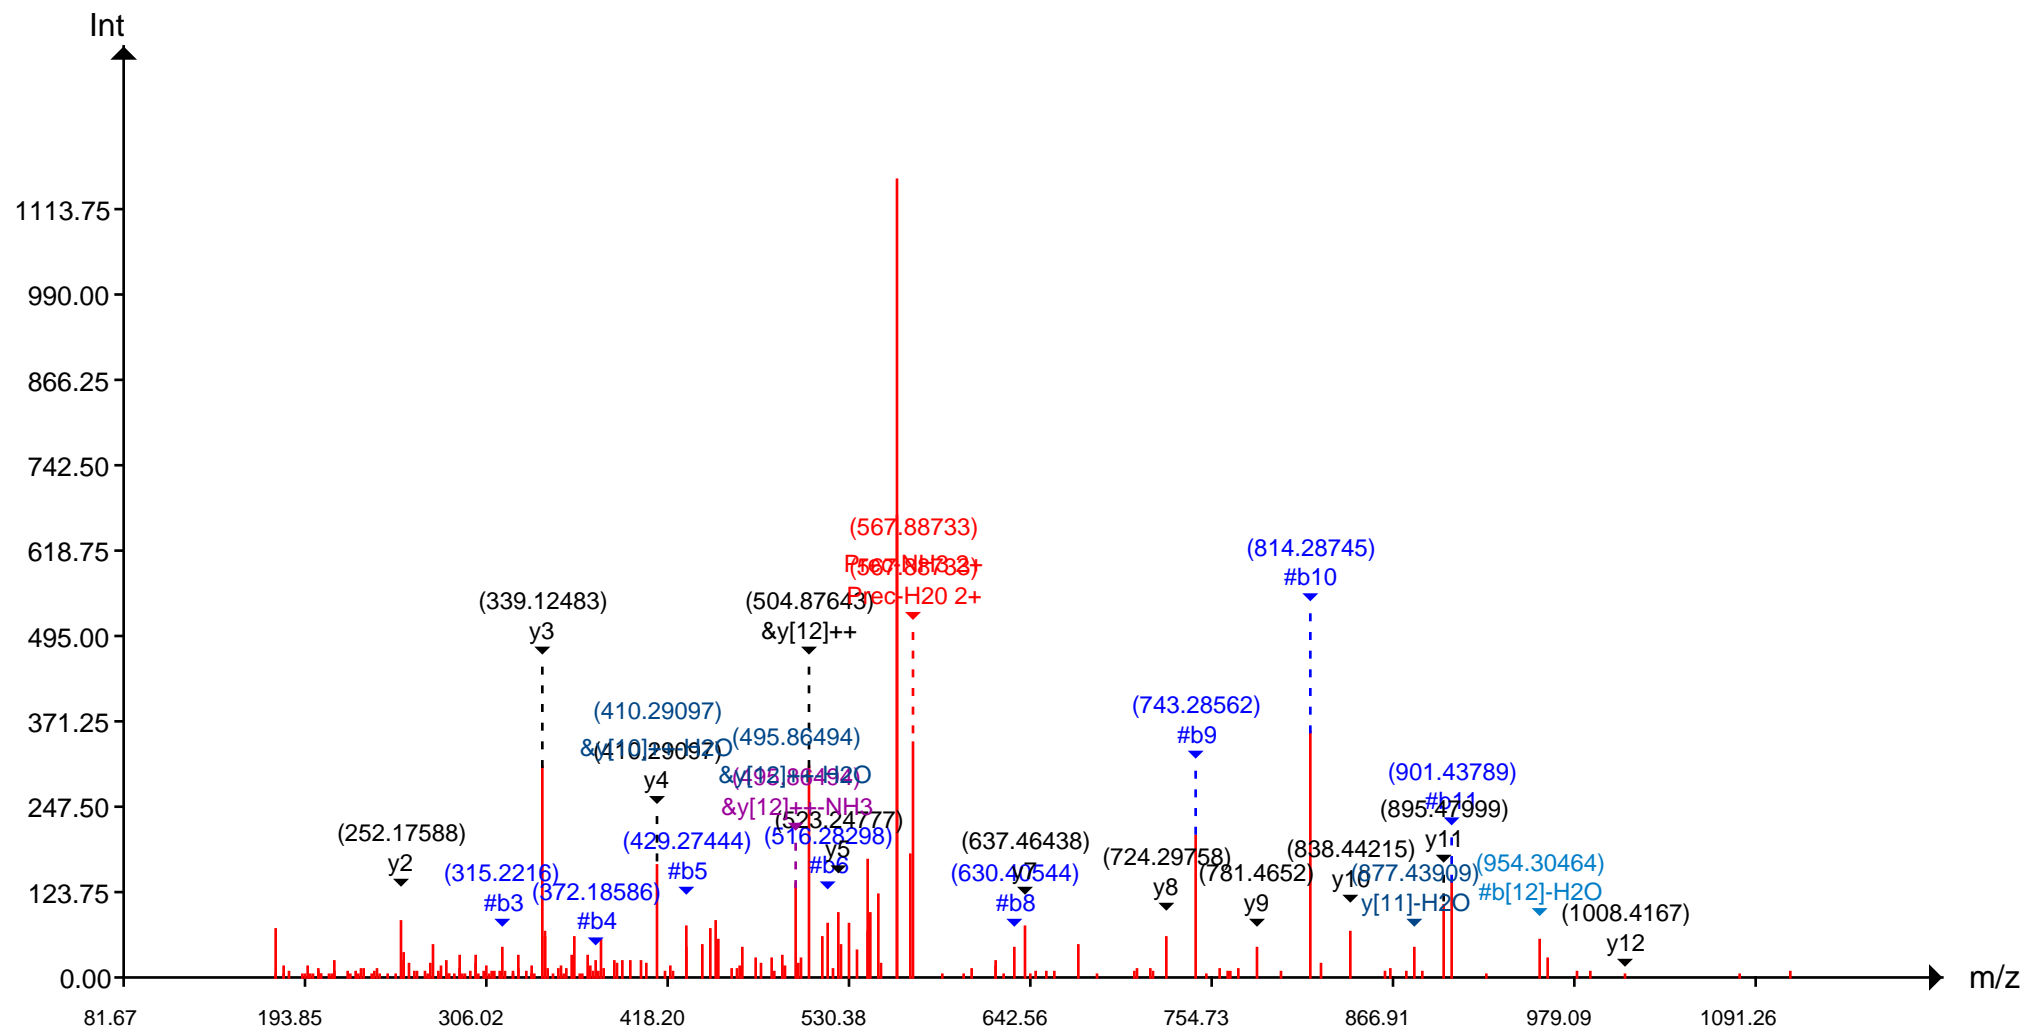

## Info

|                          |                              |                           |          |
|--------------------------|------------------------------|---------------------------|----------|
| <b>Modified Sequence</b> | AcD3-VIGGGSGGLASAR<C13>-COOH | <b>Ion score</b>          | 60.73    |
| <b>Protein</b>           | P47791                       | <b>Confidence level</b>   | 99.00%   |
| <b>Precursor m/z</b>     | 576.82884                    | <b>Identity Threshold</b> | 47.38    |
| <b>Charge</b>            | 2+                           | <b>Mass error</b>         | -2.28E-4 |

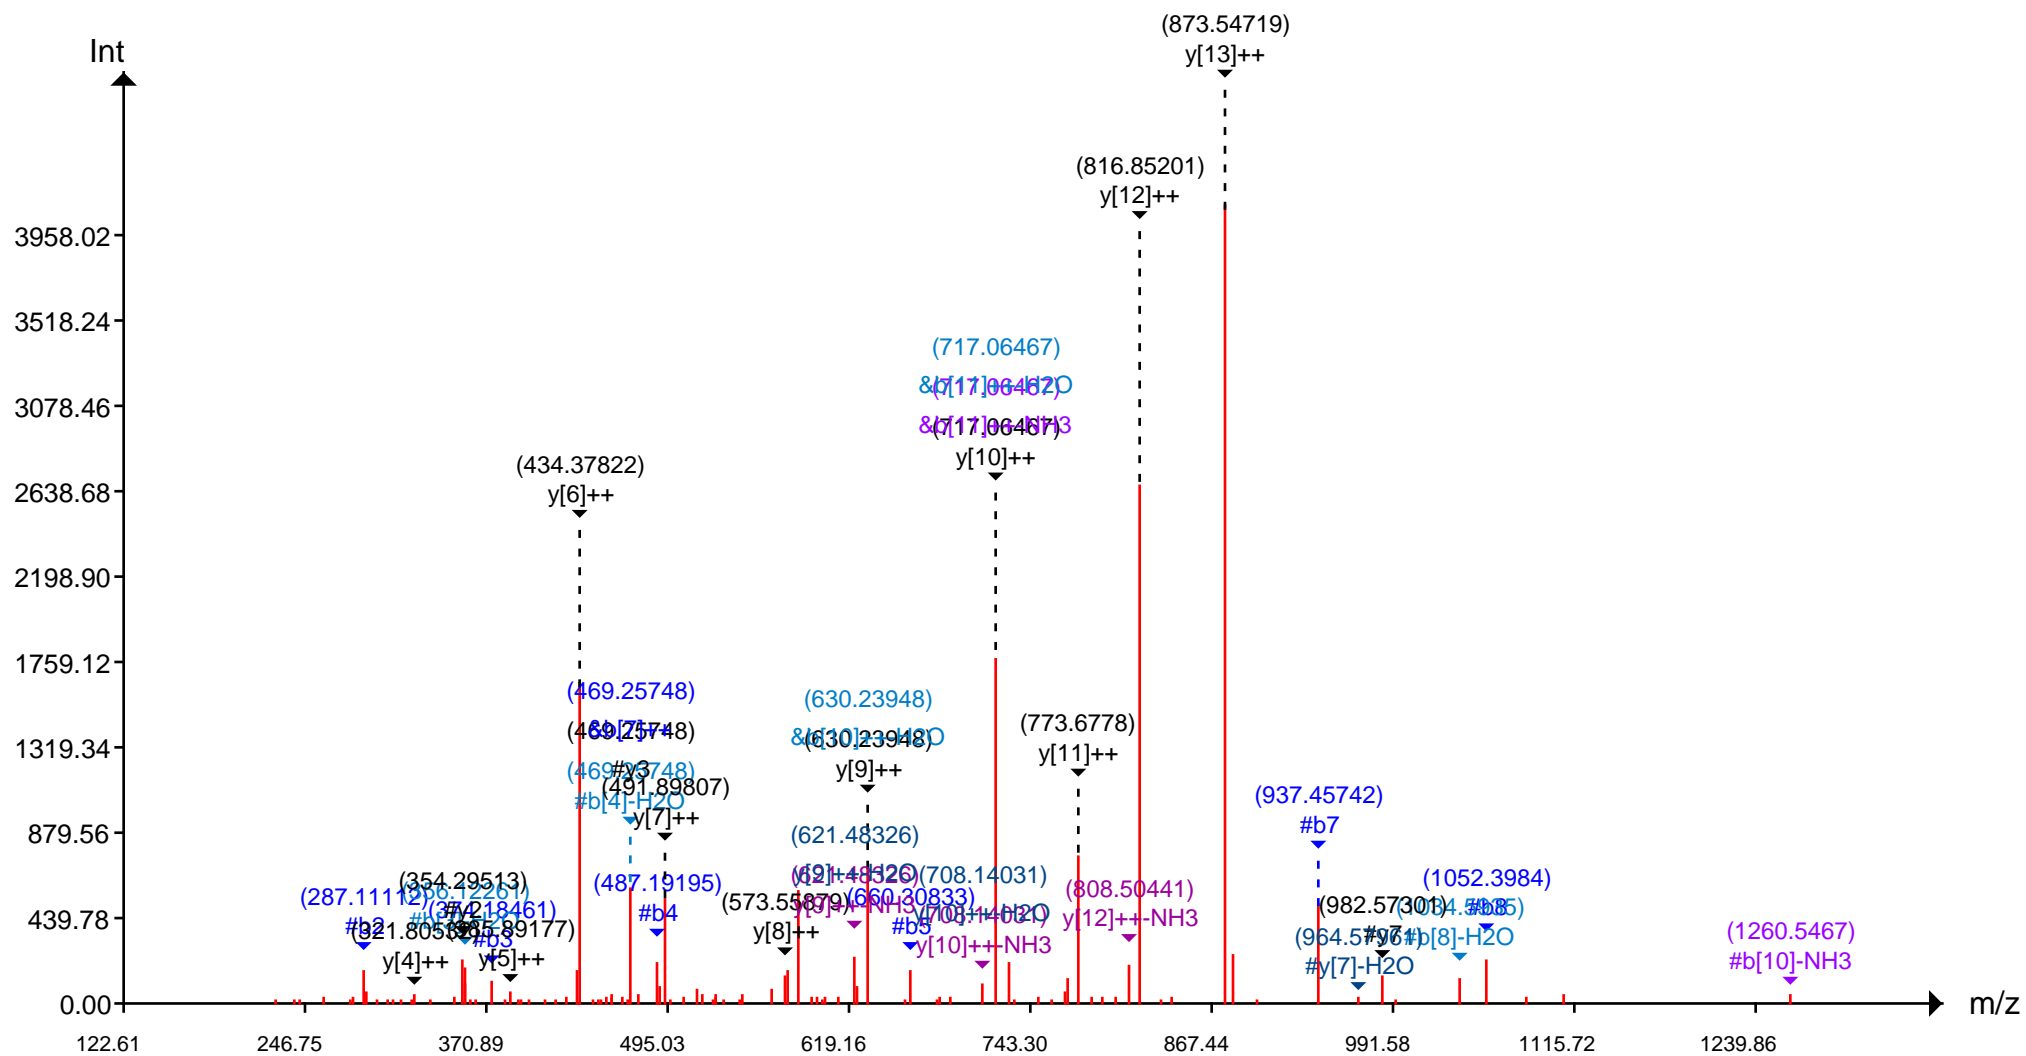

## Info

|                          |                                                       |                           |          |
|--------------------------|-------------------------------------------------------|---------------------------|----------|
| <b>Modified Sequence</b> | AcD3-QISLK<AcD3K*>NYDPQK<AcD3K*>DK<AcD3K*>R<C13>-COOH | <b>Ion score</b>          | 62.11    |
| <b>Protein</b>           | P53026                                                | <b>Confidence level</b>   | 99.00%   |
| <b>Precursor m/z</b>     | 640.36203                                             | <b>Identity Threshold</b> | 46.36    |
| <b>Charge</b>            | 3+                                                    | <b>Mass error</b>         | -2.22E-4 |

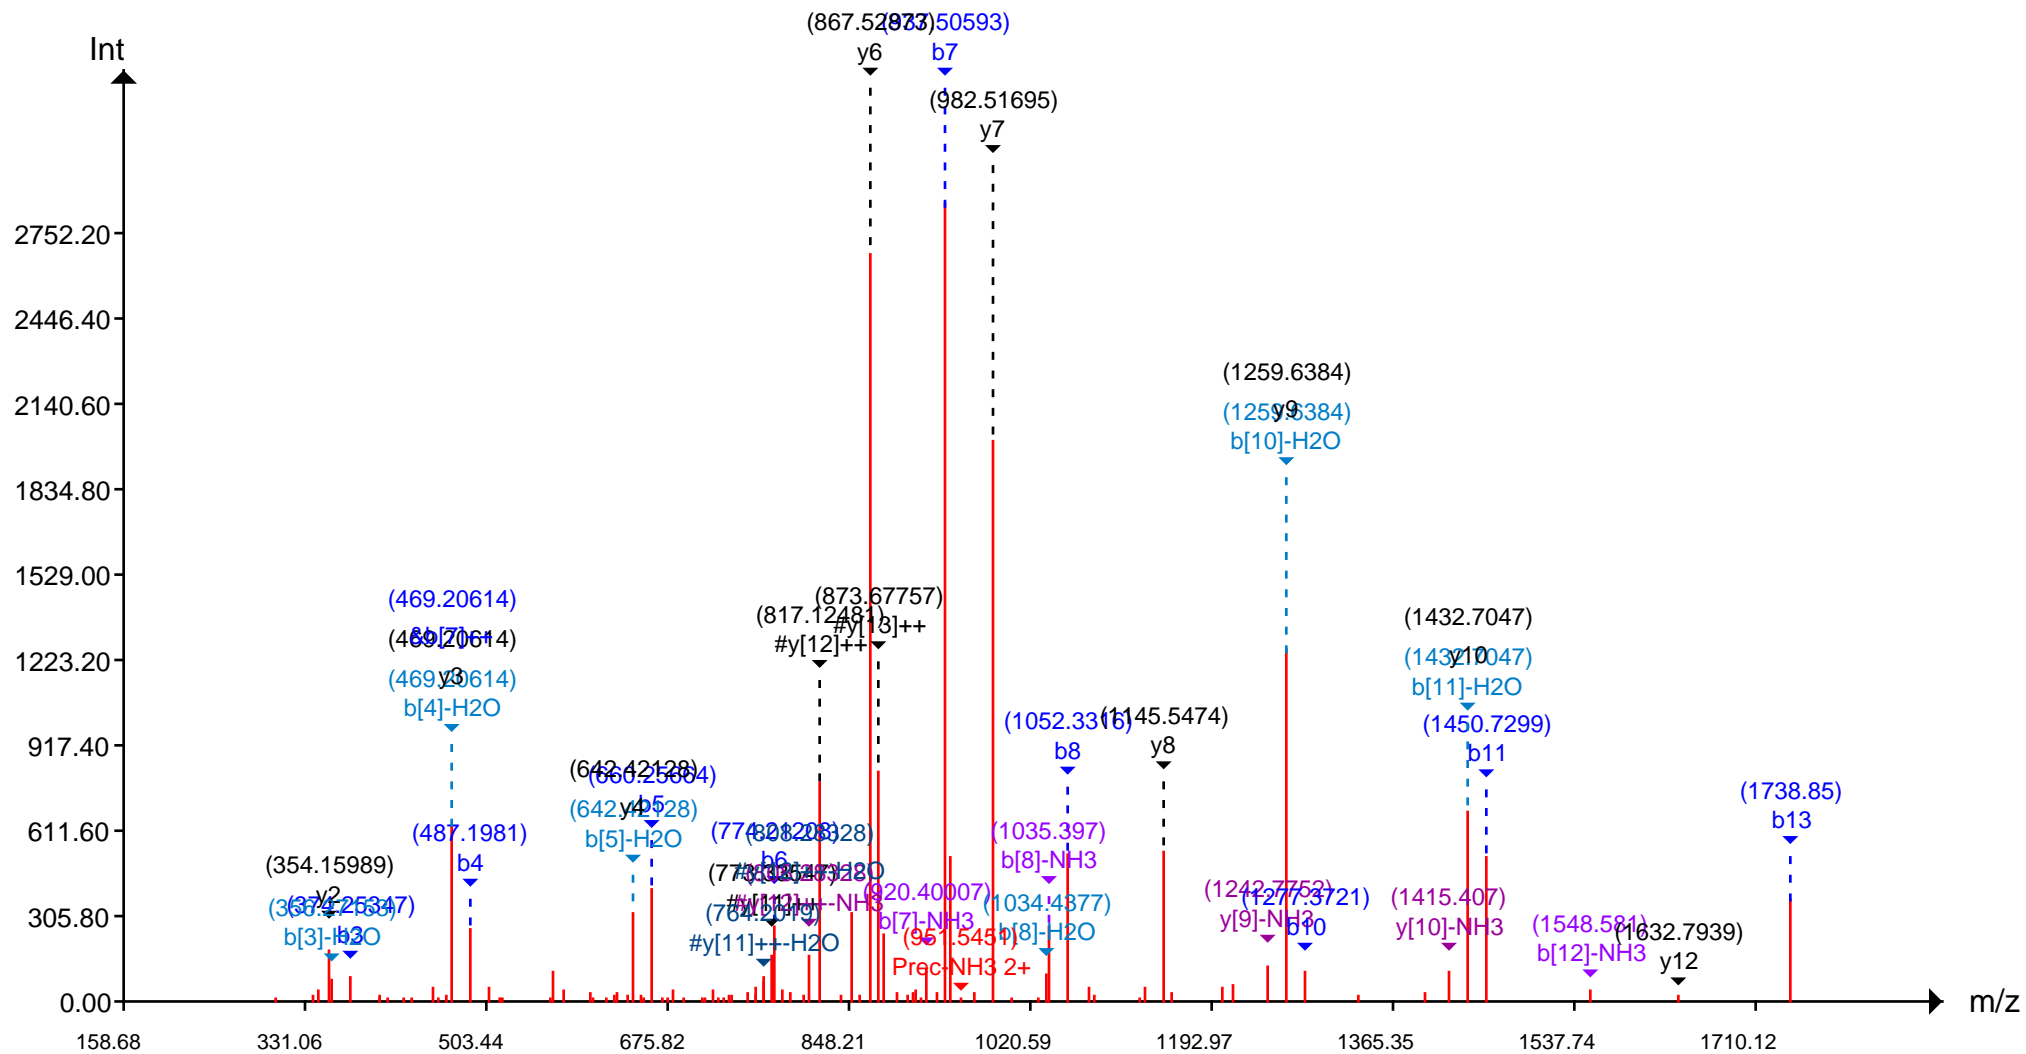

## Info

|                          |                                                       |                           |          |
|--------------------------|-------------------------------------------------------|---------------------------|----------|
| <b>Modified Sequence</b> | AcD3-QISLK<AcD3K*>NYDPQK<AcD3K*>DK<AcD3K*>R<C13>-COOH | <b>Ion score</b>          | 84.96    |
| <b>Protein</b>           | P53026                                                | <b>Confidence level</b>   | 99.00%   |
| <b>Precursor m/z</b>     | 960.04011                                             | <b>Identity Threshold</b> | 46.32    |
| <b>Charge</b>            | 2+                                                    | <b>Mass error</b>         | 0.001184 |



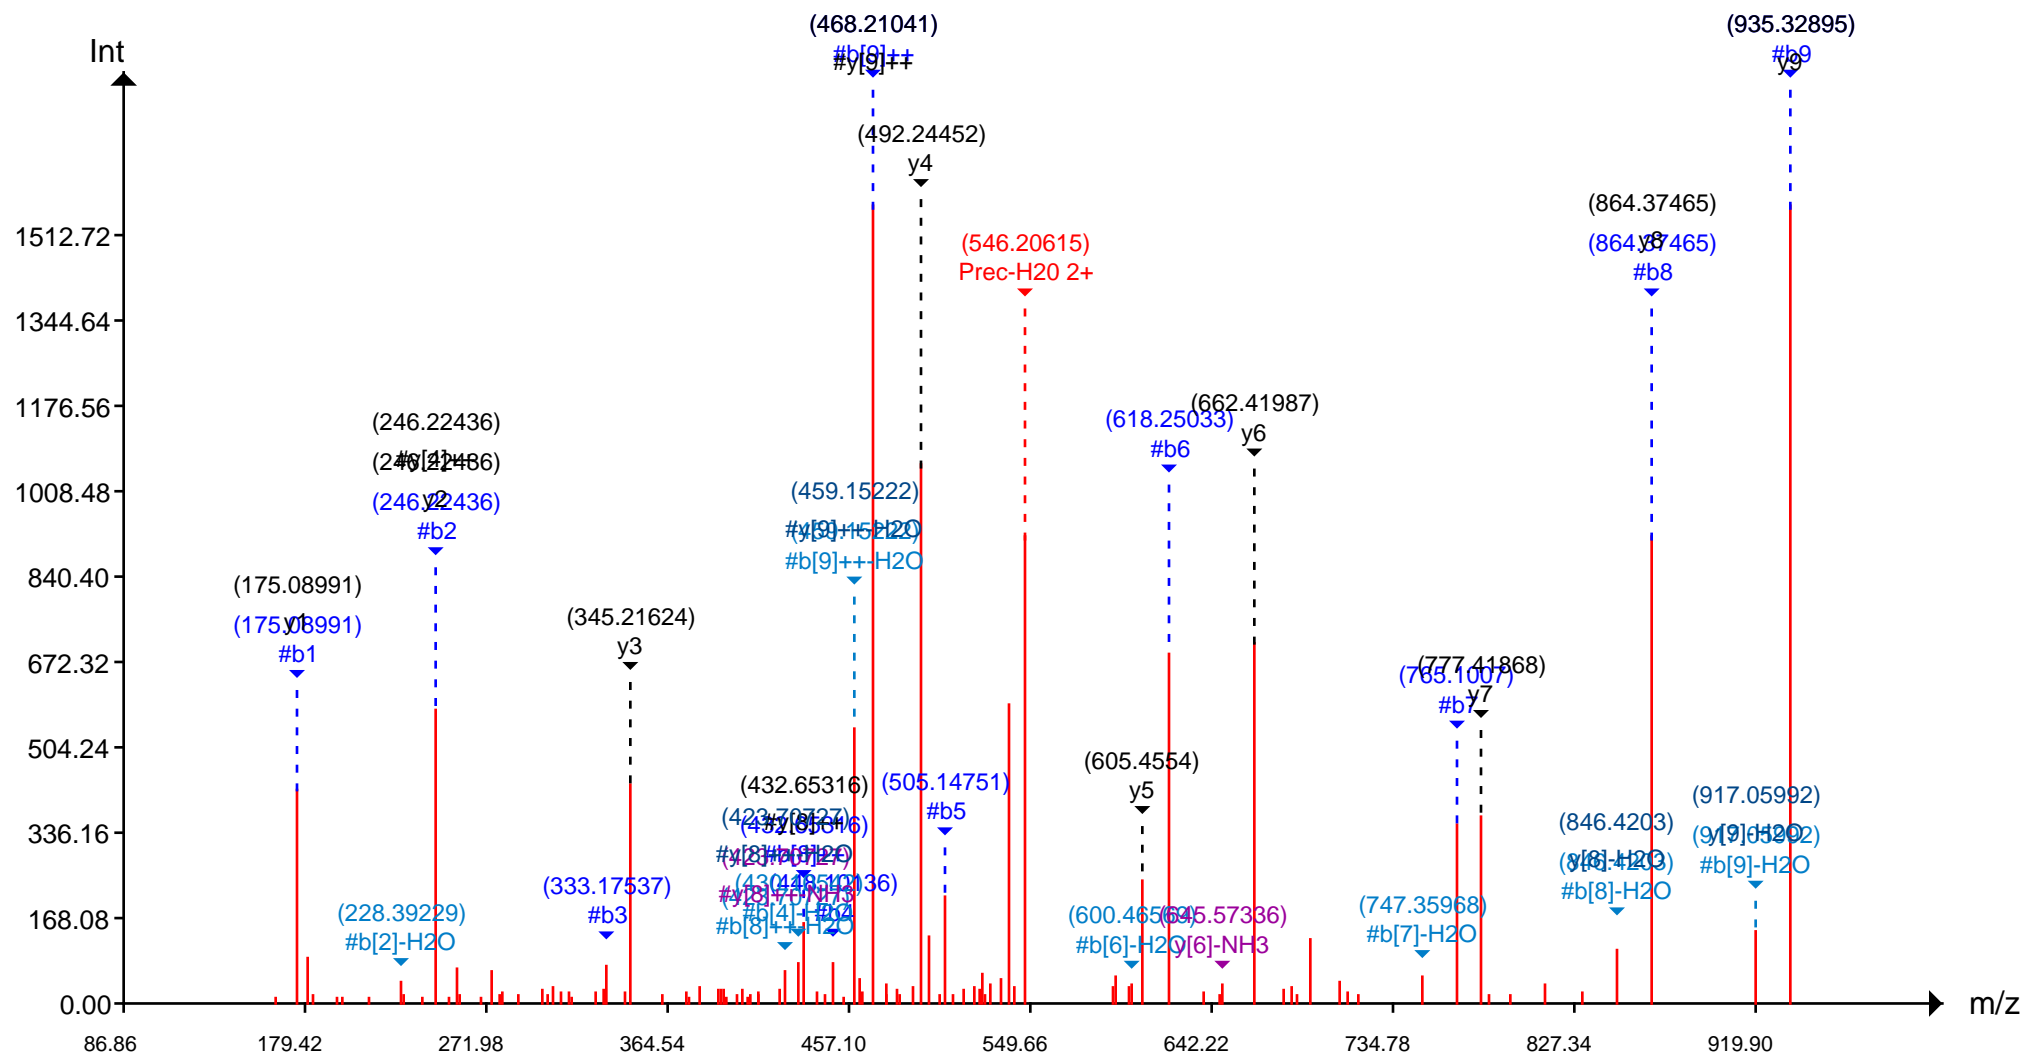

## Info

|                          |                            |                           |          |
|--------------------------|----------------------------|---------------------------|----------|
| <b>Modified Sequence</b> | AcD3-EASDGIM<Mox*>VAR-COOH | <b>Ion score</b>          | 93.33    |
| <b>Protein</b>           | P52480                     | <b>Confidence level</b>   | 99.00%   |
| <b>Precursor m/z</b>     | 555.27135                  | <b>Identity Threshold</b> | 46.64    |
| <b>Charge</b>            | 2+                         | <b>Mass error</b>         | 0.001964 |

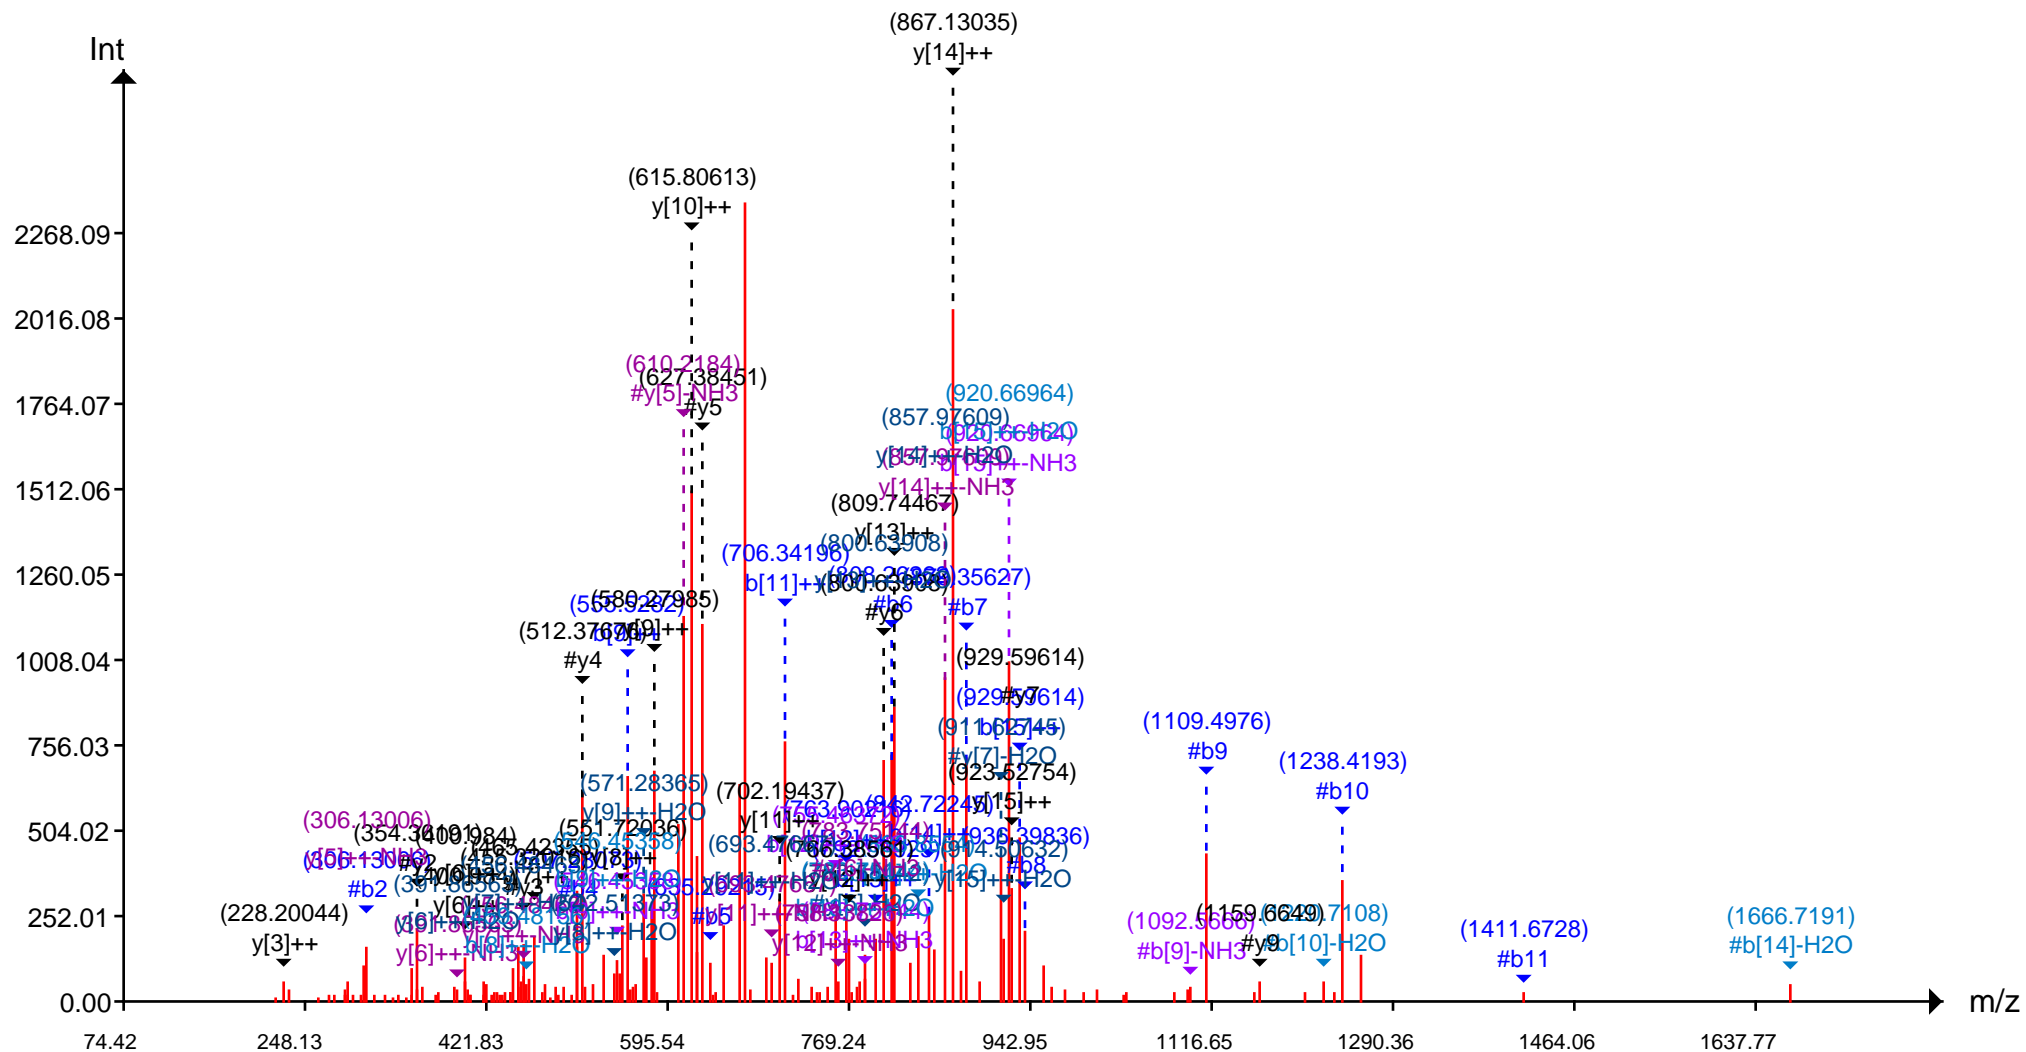

## Info

|                          |                                                                |                           |          |
|--------------------------|----------------------------------------------------------------|---------------------------|----------|
| <b>Modified Sequence</b> | AcD3-FLNSQ<AcD3K*>AGK<AcD3K*>EK<AcD3K*>DGTK<AcD3K*>R<C13>-COOH | <b>Ion score</b>          | 63.81    |
| <b>Protein</b>           | P23198                                                         | <b>Confidence level</b>   | 99.00%   |
| <b>Precursor m/z</b>     | 680.05437                                                      | <b>Identity Threshold</b> | 45.55    |
| <b>Charge</b>            | 3+                                                             | <b>Mass error</b>         | -6.25E-4 |



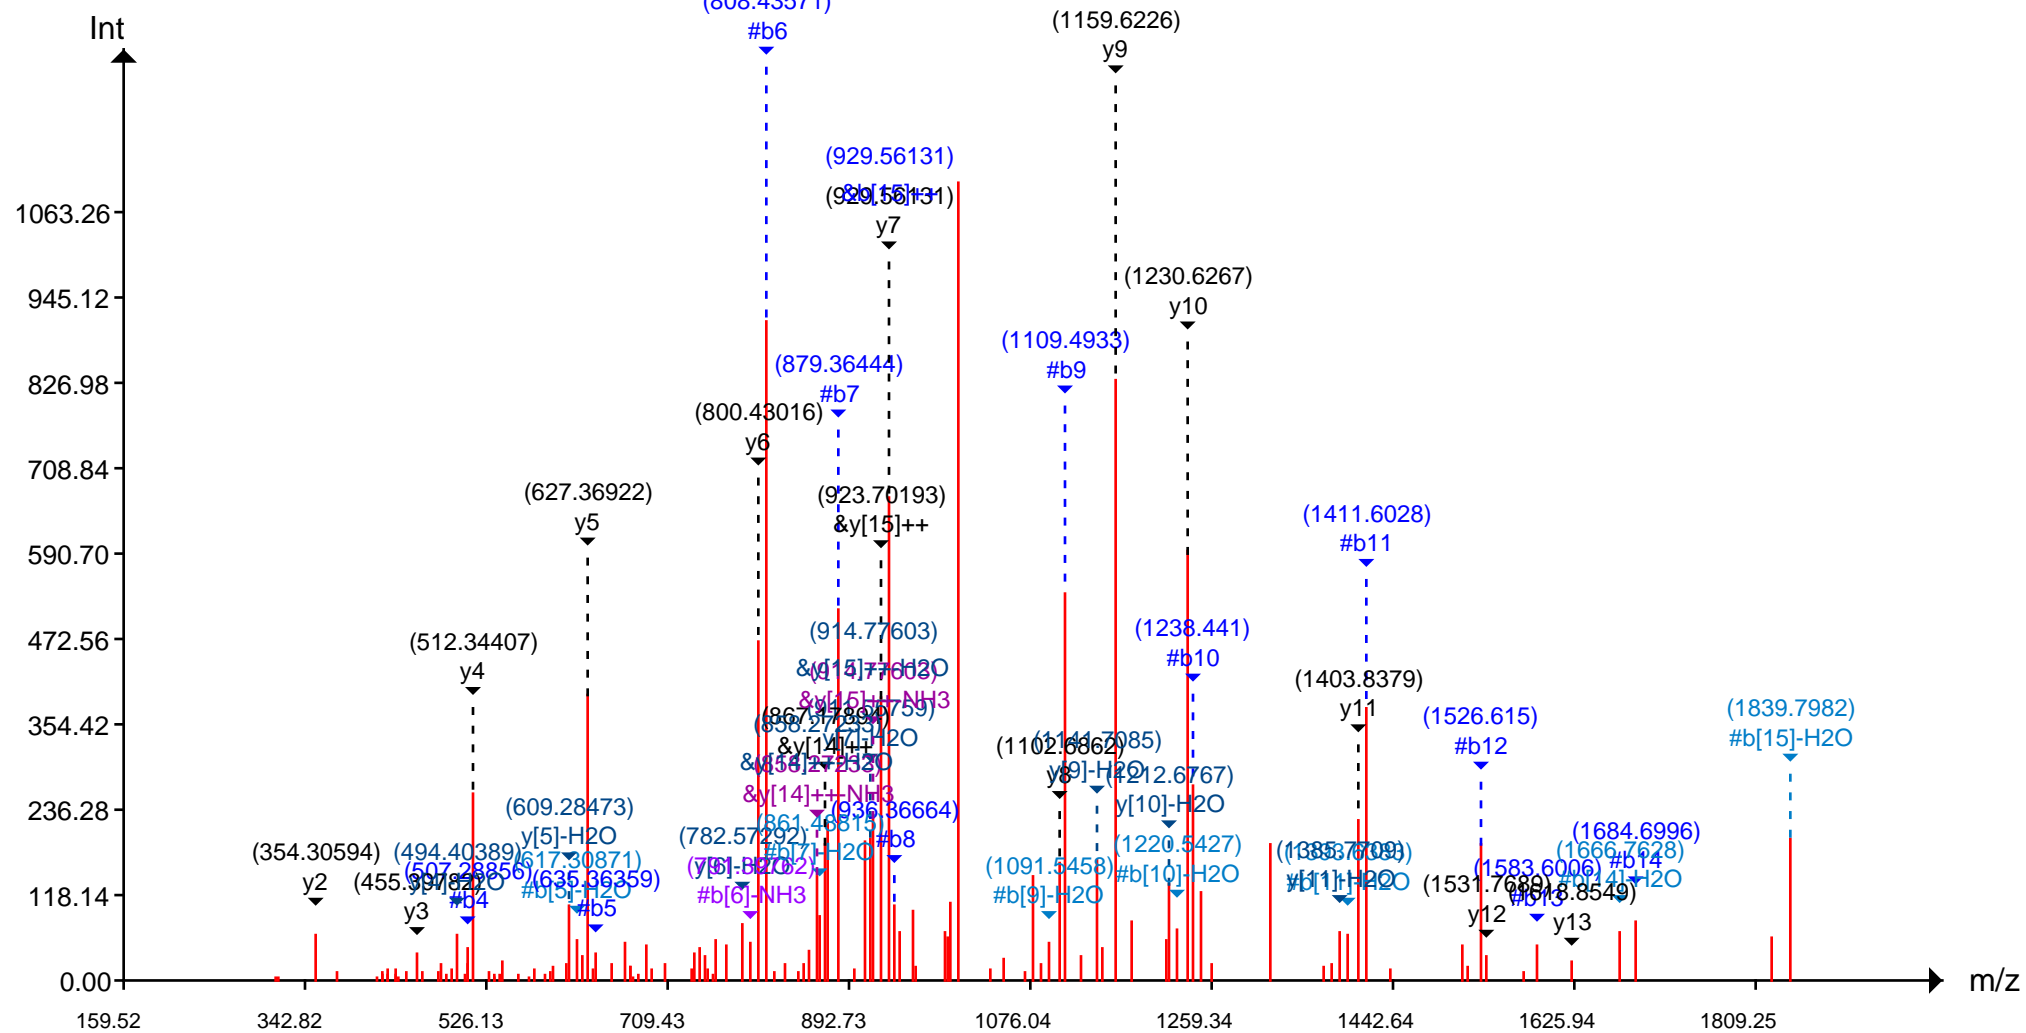

## Info

|                          |                                                                 |                           |          |
|--------------------------|-----------------------------------------------------------------|---------------------------|----------|
| <b>Modified Sequence</b> | AcD3-FLNSQK<AcD3K*>AGK<AcD3K*>EK<AcD3K*>DGTK<AcD3K*>R<C13>-COOH | <b>Ion score</b>          | 92.12    |
| <b>Protein</b>           | P23198                                                          | <b>Confidence level</b>   | 99.00%   |
| <b>Precursor m/z</b>     | 1019.5795                                                       | <b>Identity Threshold</b> | 45.45    |
| <b>Charge</b>            | 2+                                                              | <b>Mass error</b>         | 0.002541 |

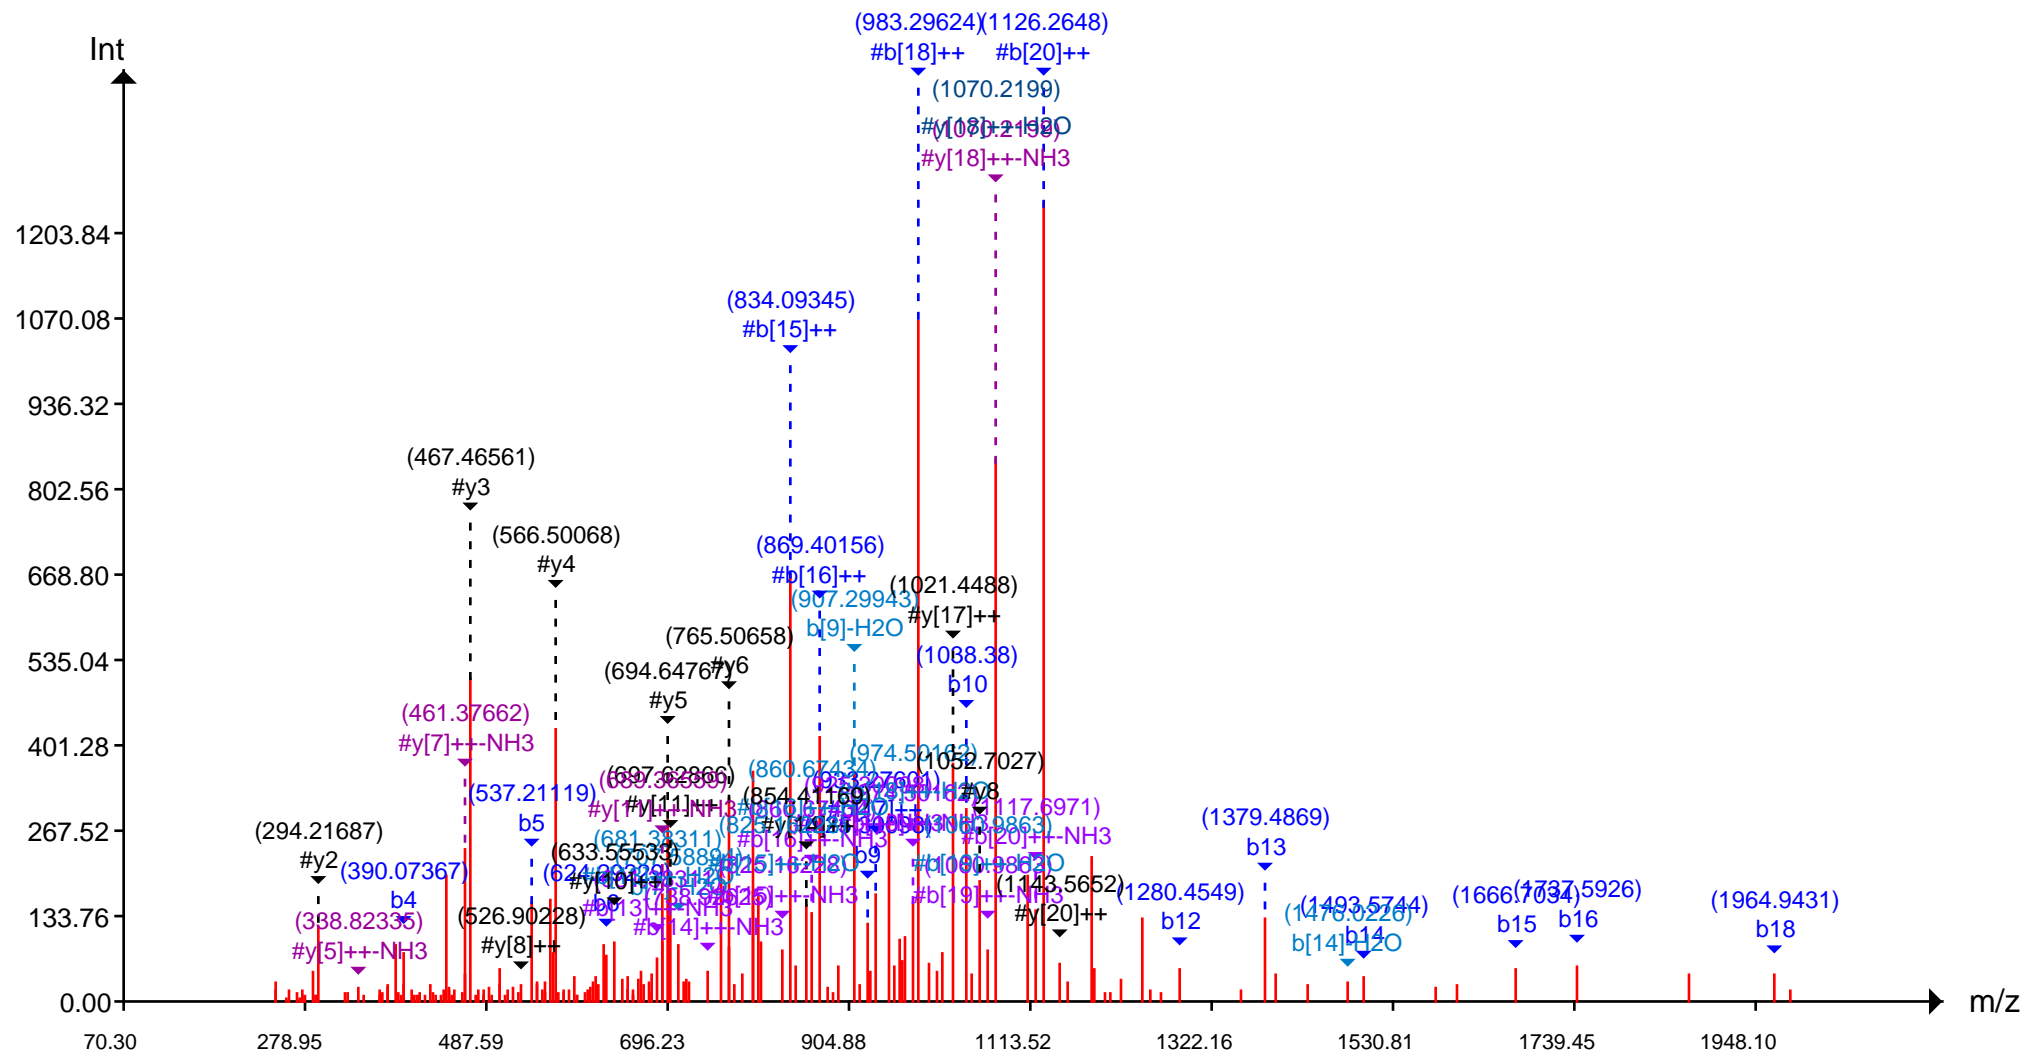

## Info

|                          |                                                      |                           |         |
|--------------------------|------------------------------------------------------|---------------------------|---------|
| <b>Modified Sequence</b> | AcD3-TAGDFSTTVIQNVNK<AcD3K*>AQVK<AcD3K*>IR<C13>-COOH | <b>Ion score</b>          | 49.4    |
| <b>Protein</b>           | P57746                                               | <b>Confidence level</b>   | 99.00%  |
| <b>Precursor m/z</b>     | 811.45983                                            | <b>Identity Threshold</b> | 45.14   |
| <b>Charge</b>            | 3+                                                   | <b>Mass error</b>         | 1.00523 |

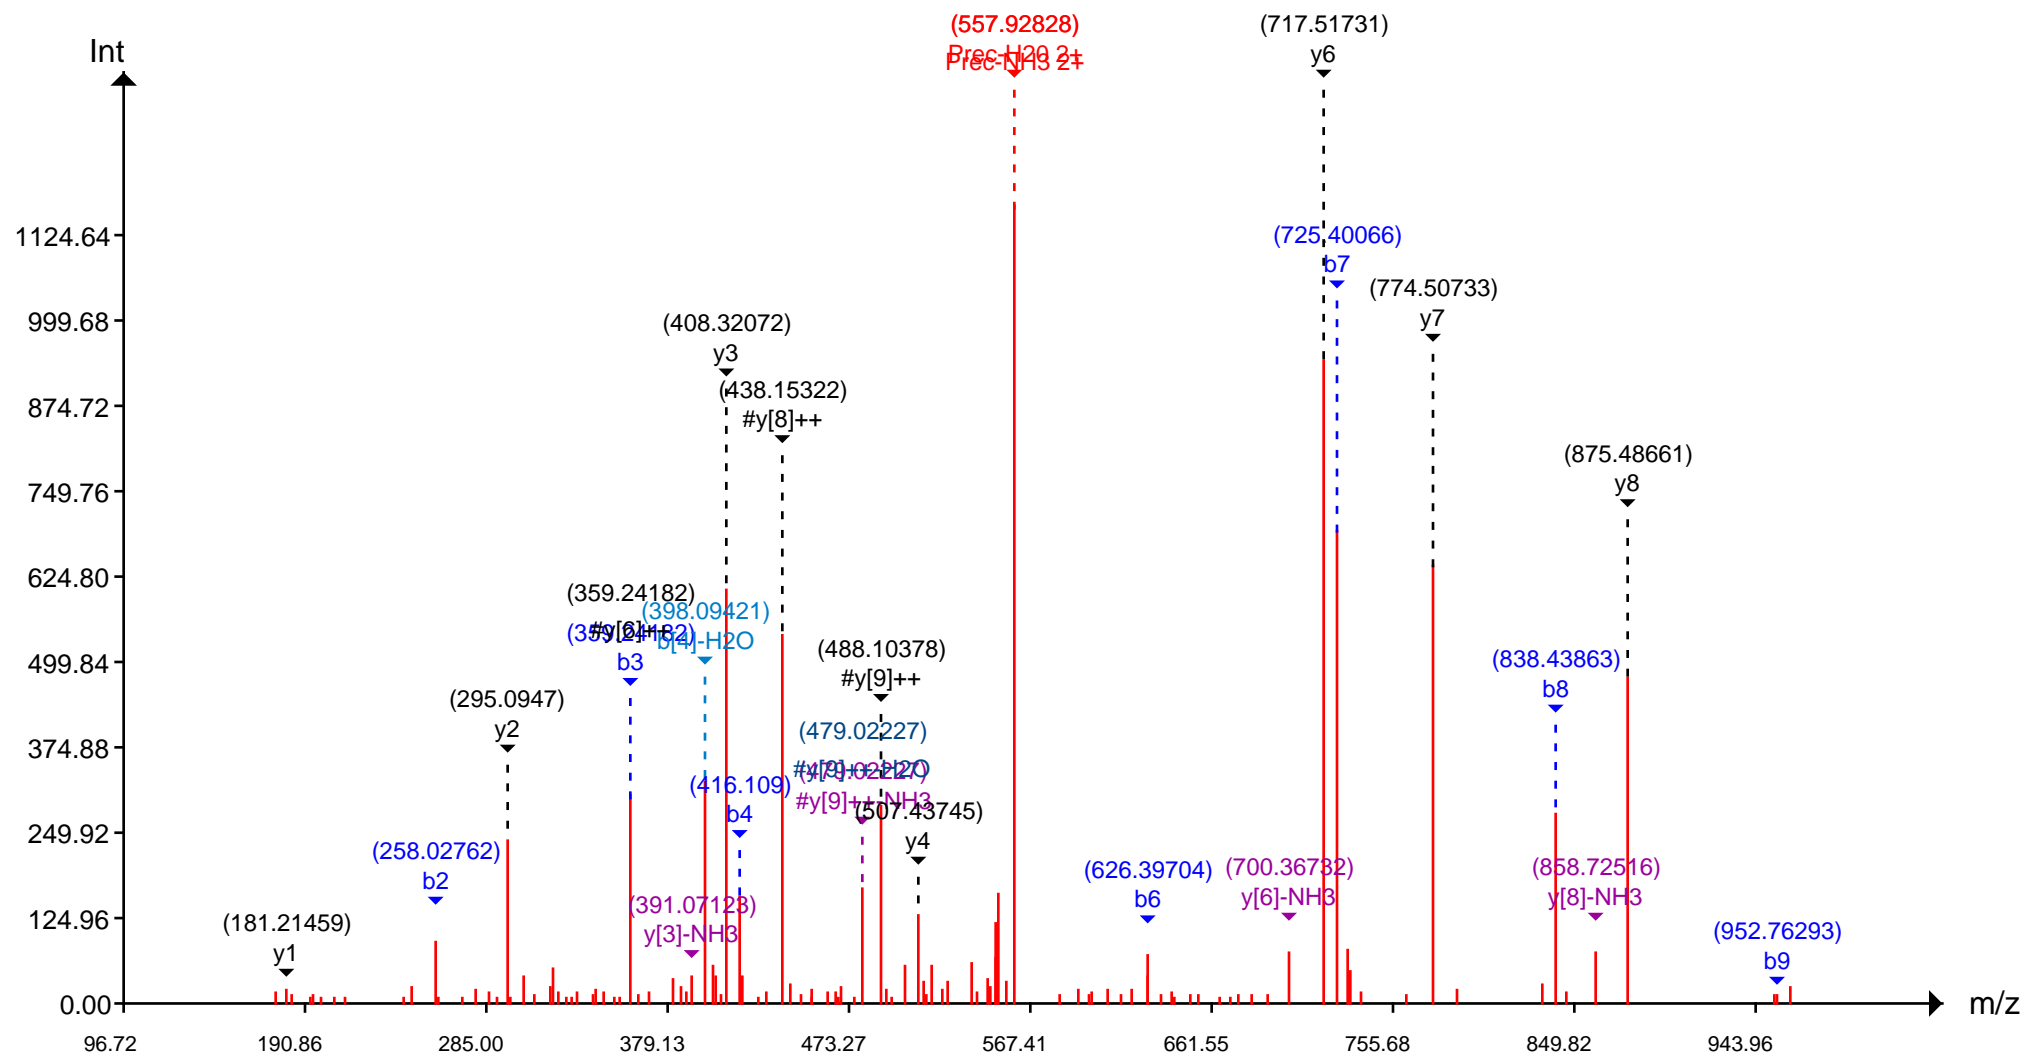

## Info

|                          |                           |                           |         |
|--------------------------|---------------------------|---------------------------|---------|
| <b>Modified Sequence</b> | AcD3-LVTGPLVINR<C13>-COOH | <b>Ion score</b>          | 48.97   |
| <b>Protein</b>           | P47911                    | <b>Confidence level</b>   | 99.00%  |
| <b>Precursor m/z</b>     | 566.86478                 | <b>Identity Threshold</b> | 40.30   |
| <b>Charge</b>            | 2+                        | <b>Mass error</b>         | -4.9E-5 |

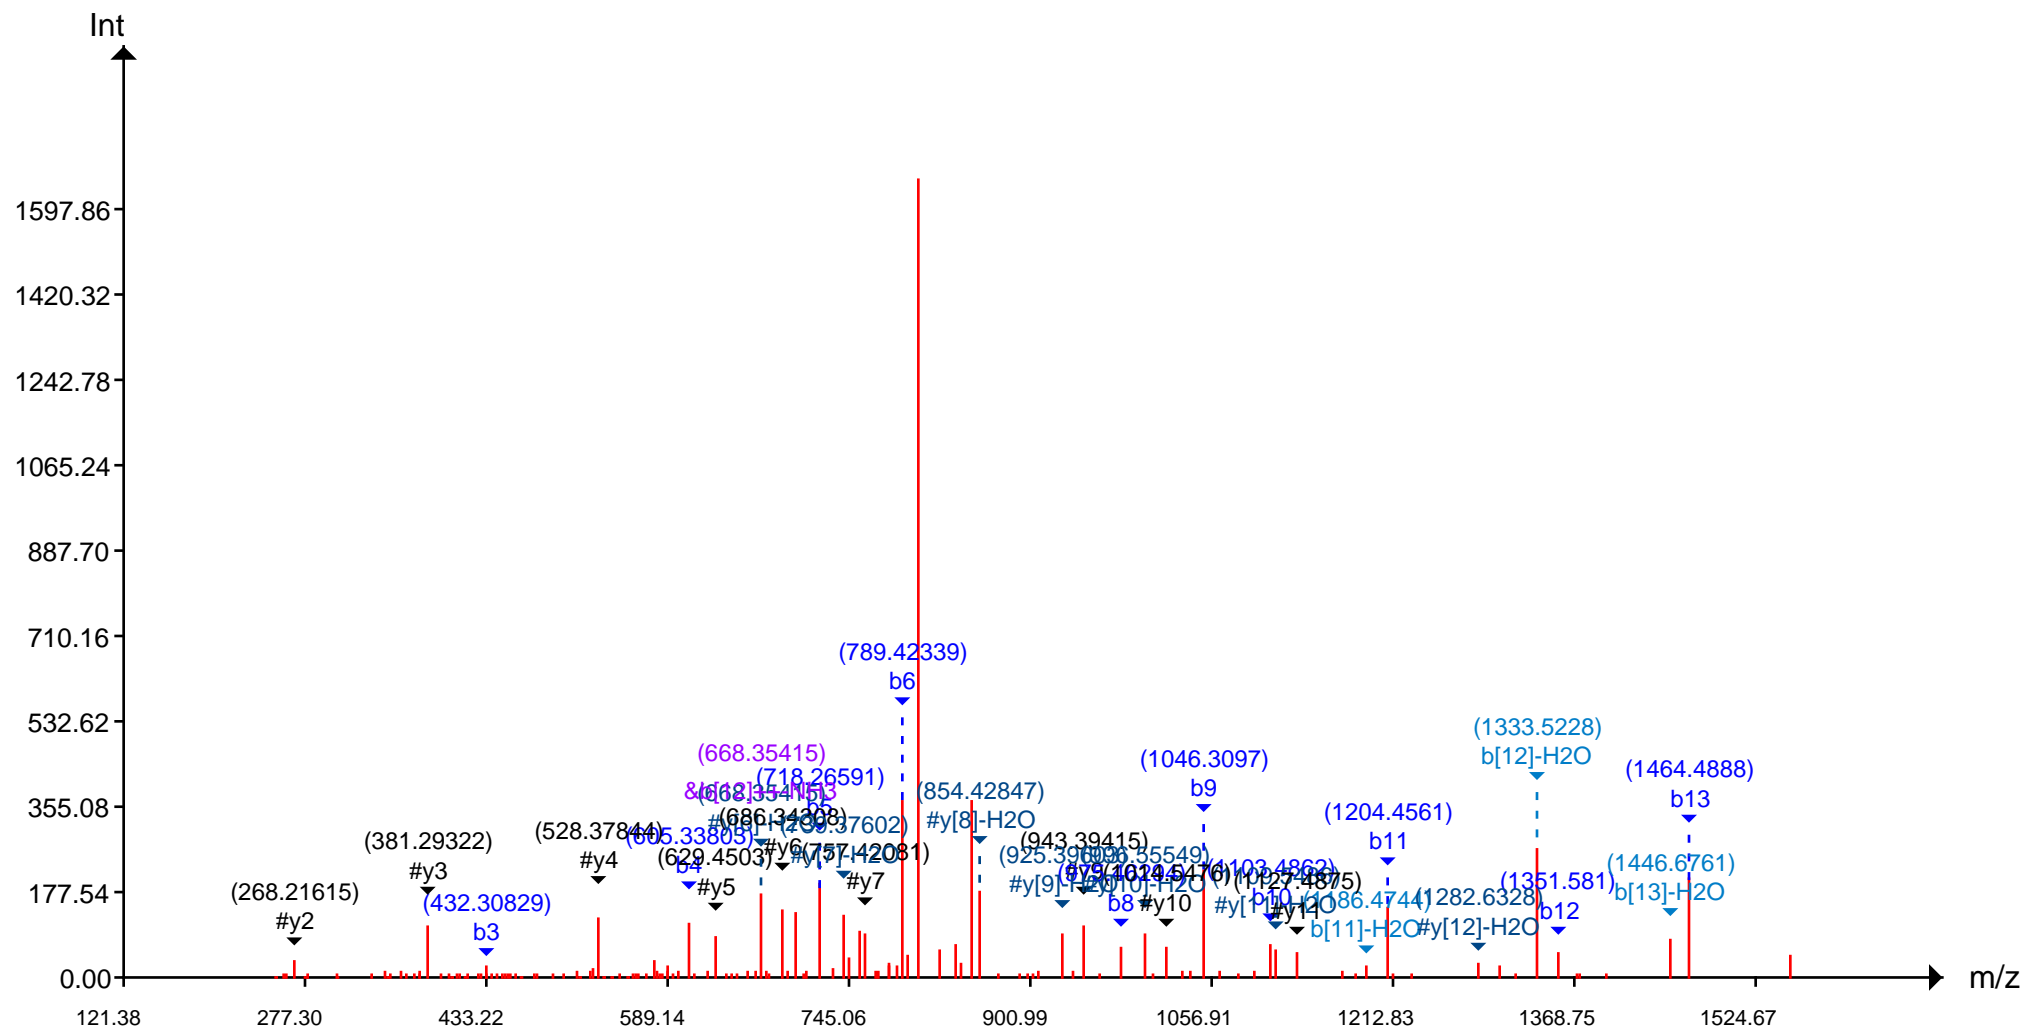

## Info

|                          |                                                |                           |          |
|--------------------------|------------------------------------------------|---------------------------|----------|
| <b>Modified Sequence</b> | AcD3-NVK<AcD3K*>K<AcD3K*>LAADAGTFLSR<C13>-COOH | <b>Ion score</b>          | 76.35    |
| <b>Protein</b>           | Q9JK48                                         | <b>Confidence level</b>   | 99.00%   |
| <b>Precursor m/z</b>     | 866.50706                                      | <b>Identity Threshold</b> | 44.54    |
| <b>Charge</b>            | 2+                                             | <b>Mass error</b>         | 0.002315 |

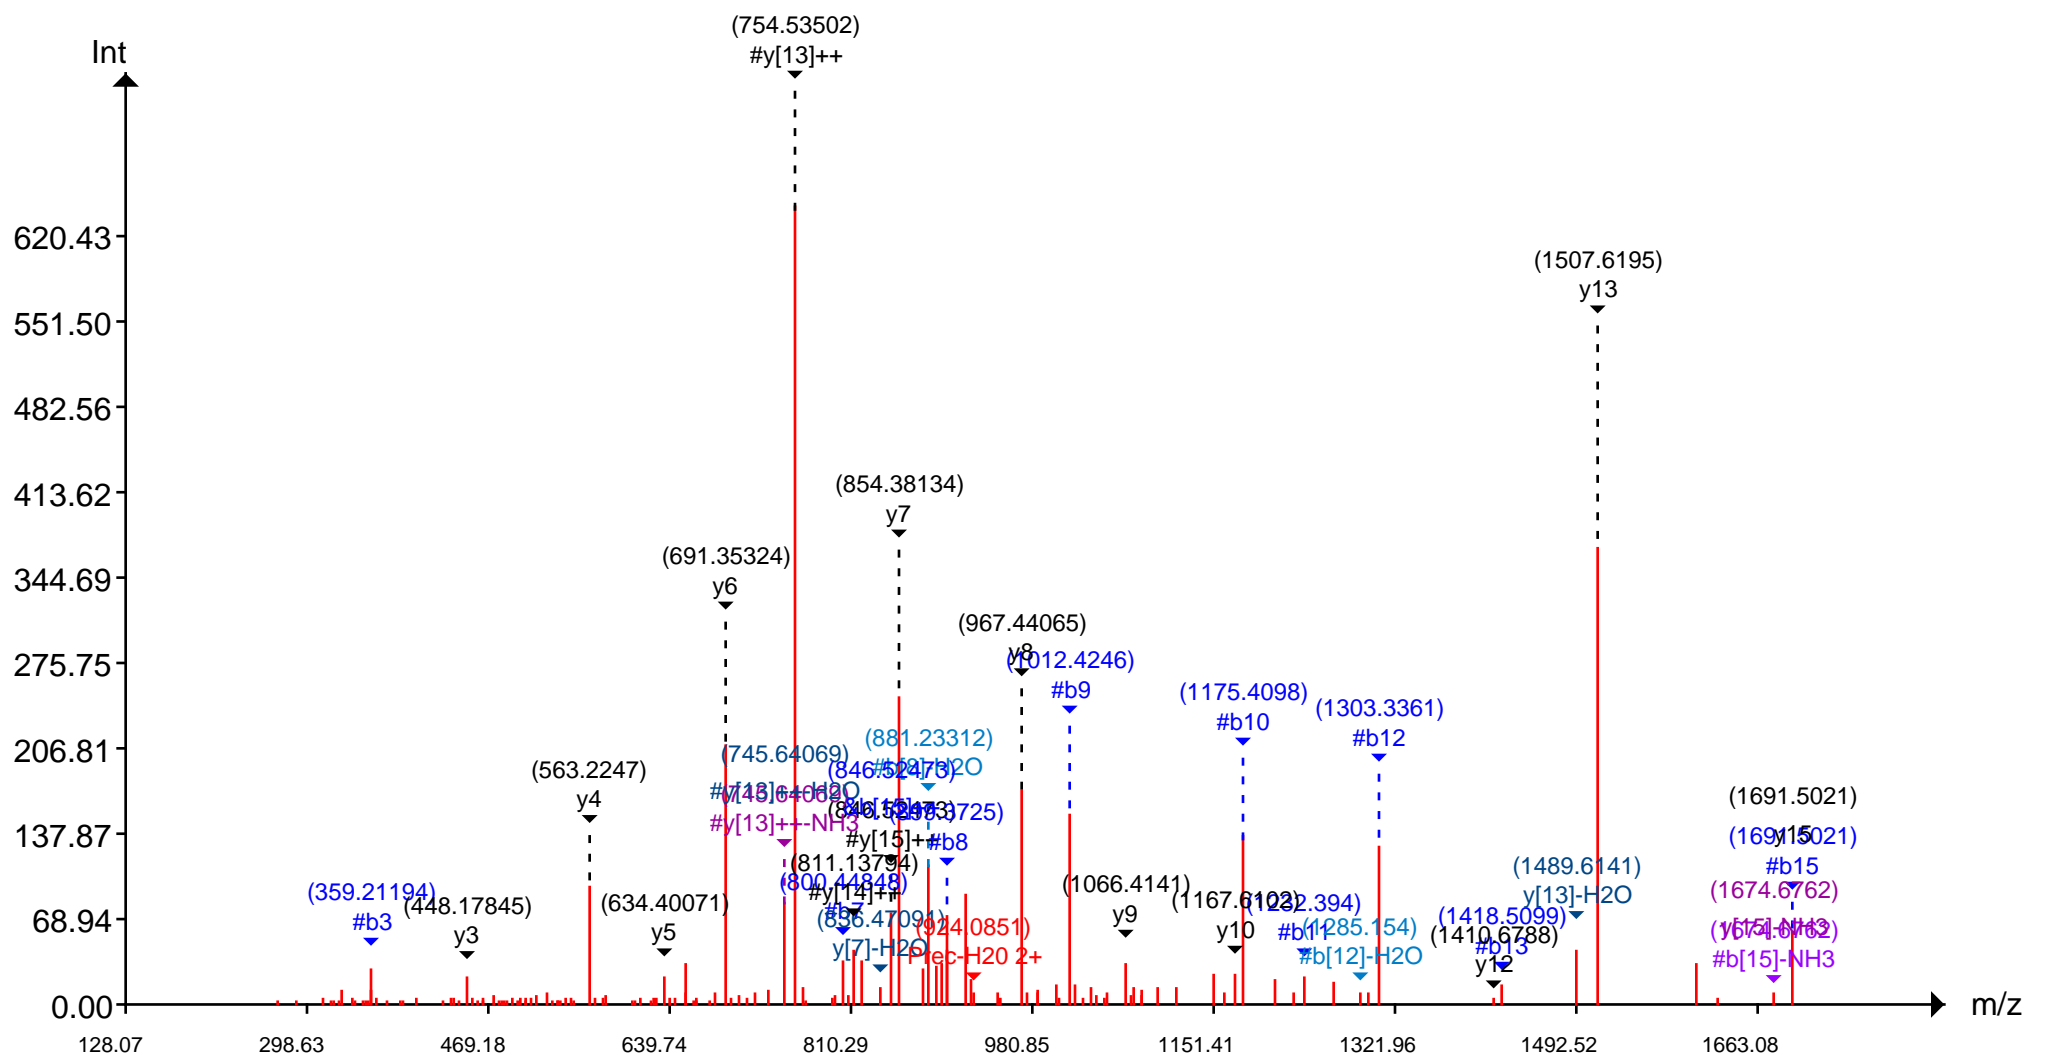

| Info                     |                                  |                           |          |
|--------------------------|----------------------------------|---------------------------|----------|
| <b>Modified Sequence</b> | AcD3-EAIPENTVIYGADC<Cmm*>LR-COOH | <b>Ion score</b>          | 93.24    |
| <b>Protein</b>           | Q9WUB4                           | <b>Confidence level</b>   | 99.00%   |
| <b>Precursor m/z</b>     | 933.46268                        | <b>Identity Threshold</b> | 47.50    |
| <b>Charge</b>            | 2+                               | <b>Mass error</b>         | 0.003993 |



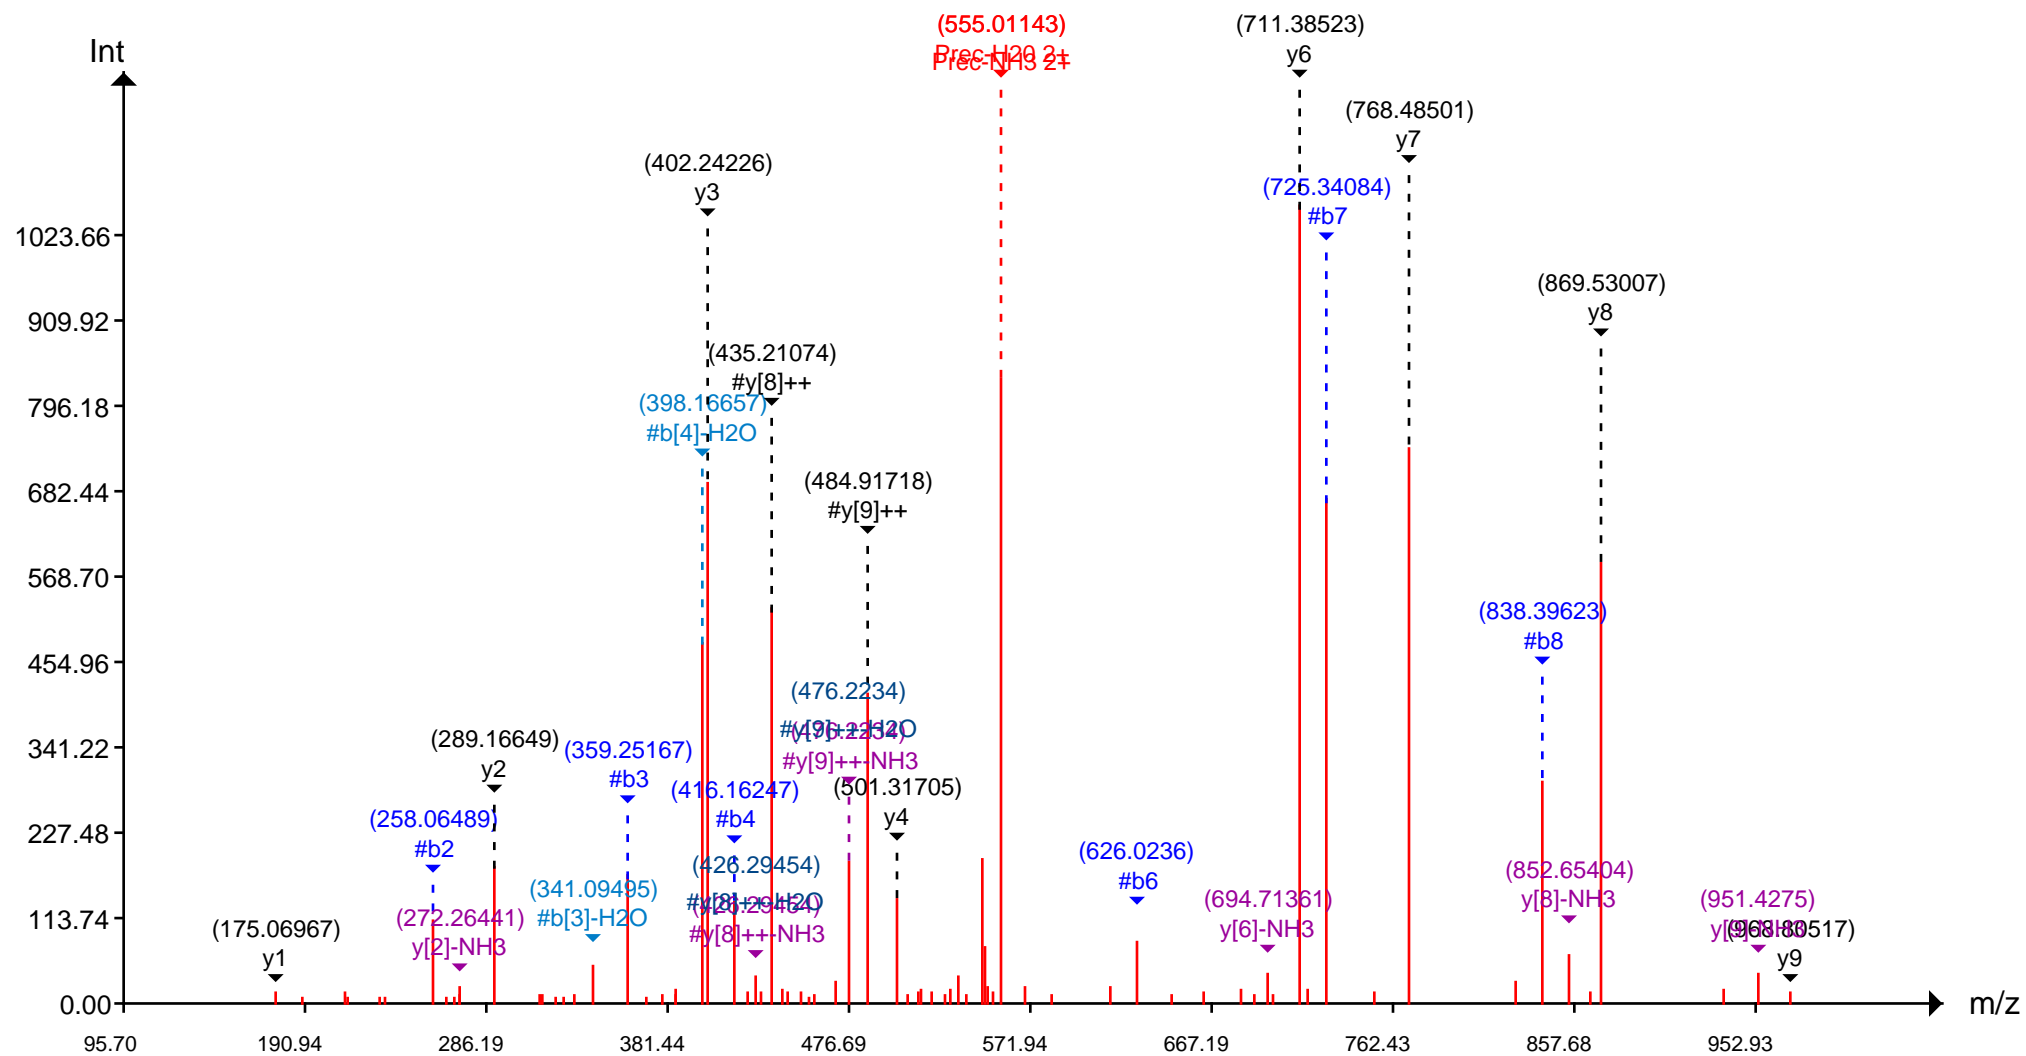

## Info

|                          |                      |                           |         |
|--------------------------|----------------------|---------------------------|---------|
| <b>Modified Sequence</b> | AcD3-LVTGPLVINR-COOH | <b>Ion score</b>          | 58.66   |
| <b>Protein</b>           | P47911               | <b>Confidence level</b>   | 99.00%  |
| <b>Precursor m/z</b>     | 563.8548             | <b>Identity Threshold</b> | 41.60   |
| <b>Charge</b>            | 2+                   | <b>Mass error</b>         | 1.32E-4 |

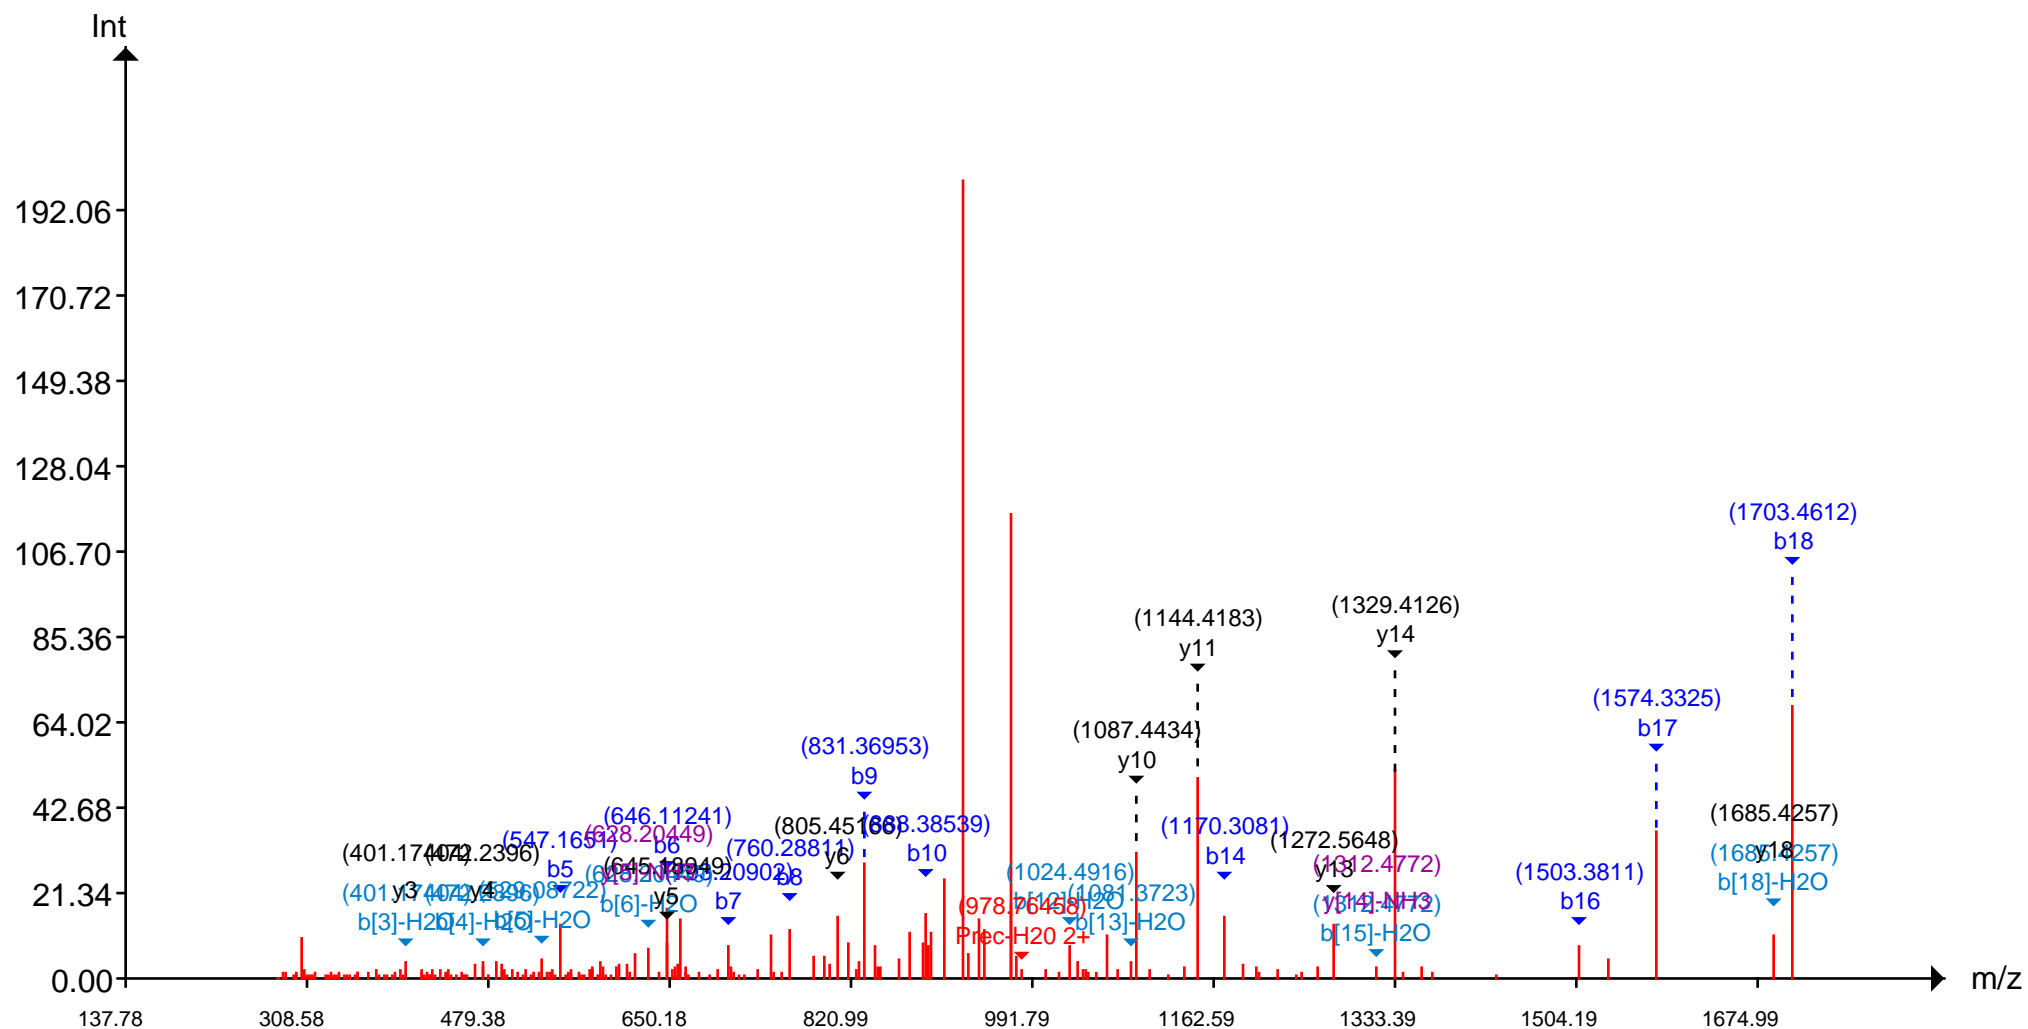

## Info

|                          |                                              |                           |         |
|--------------------------|----------------------------------------------|---------------------------|---------|
| <b>Modified Sequence</b> | AcD3-EDEAGVGGAGPGGAC<Cmm*>K<AcD3K*>AEPR-COOH | <b>Ion score</b>          | 60.52   |
| <b>Protein</b>           | Q00P19                                       | <b>Confidence level</b>   | 99.00%  |
| <b>Precursor m/z</b>     | 987.95948                                    | <b>Identity Threshold</b> | 45.27   |
| <b>Charge</b>            | 2+                                           | <b>Mass error</b>         | 0.00243 |

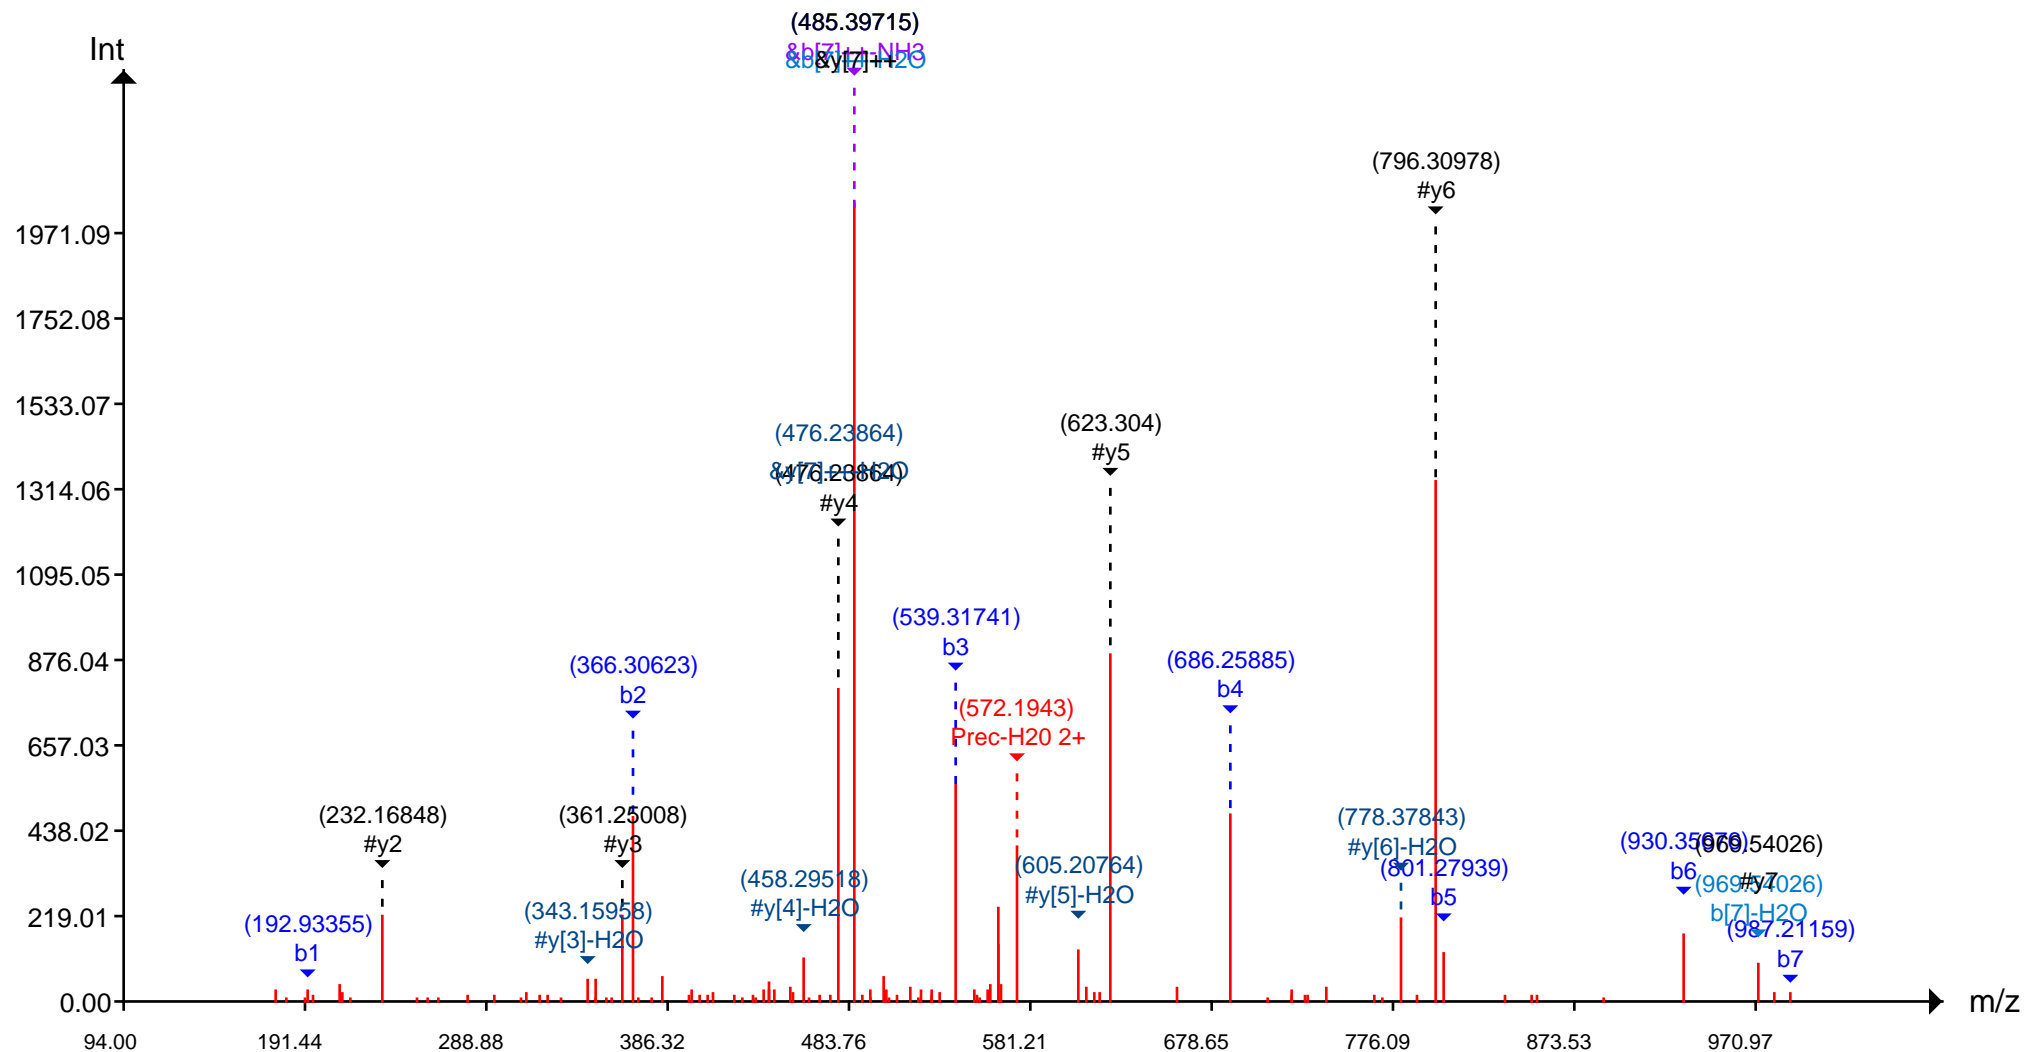

## Info

|                          |                                    |                           |          |
|--------------------------|------------------------------------|---------------------------|----------|
| <b>Modified Sequence</b> | AcD3-FK<AcD3K*>K<AcD3K*>FDEGR-COOH | <b>Ion score</b>          | 52.03    |
| <b>Protein</b>           | P09103                             | <b>Confidence level</b>   | 99.00%   |
| <b>Precursor m/z</b>     | 581.31601                          | <b>Identity Threshold</b> | 47.73    |
| <b>Charge</b>            | 2+                                 | <b>Mass error</b>         | -1.47E-4 |

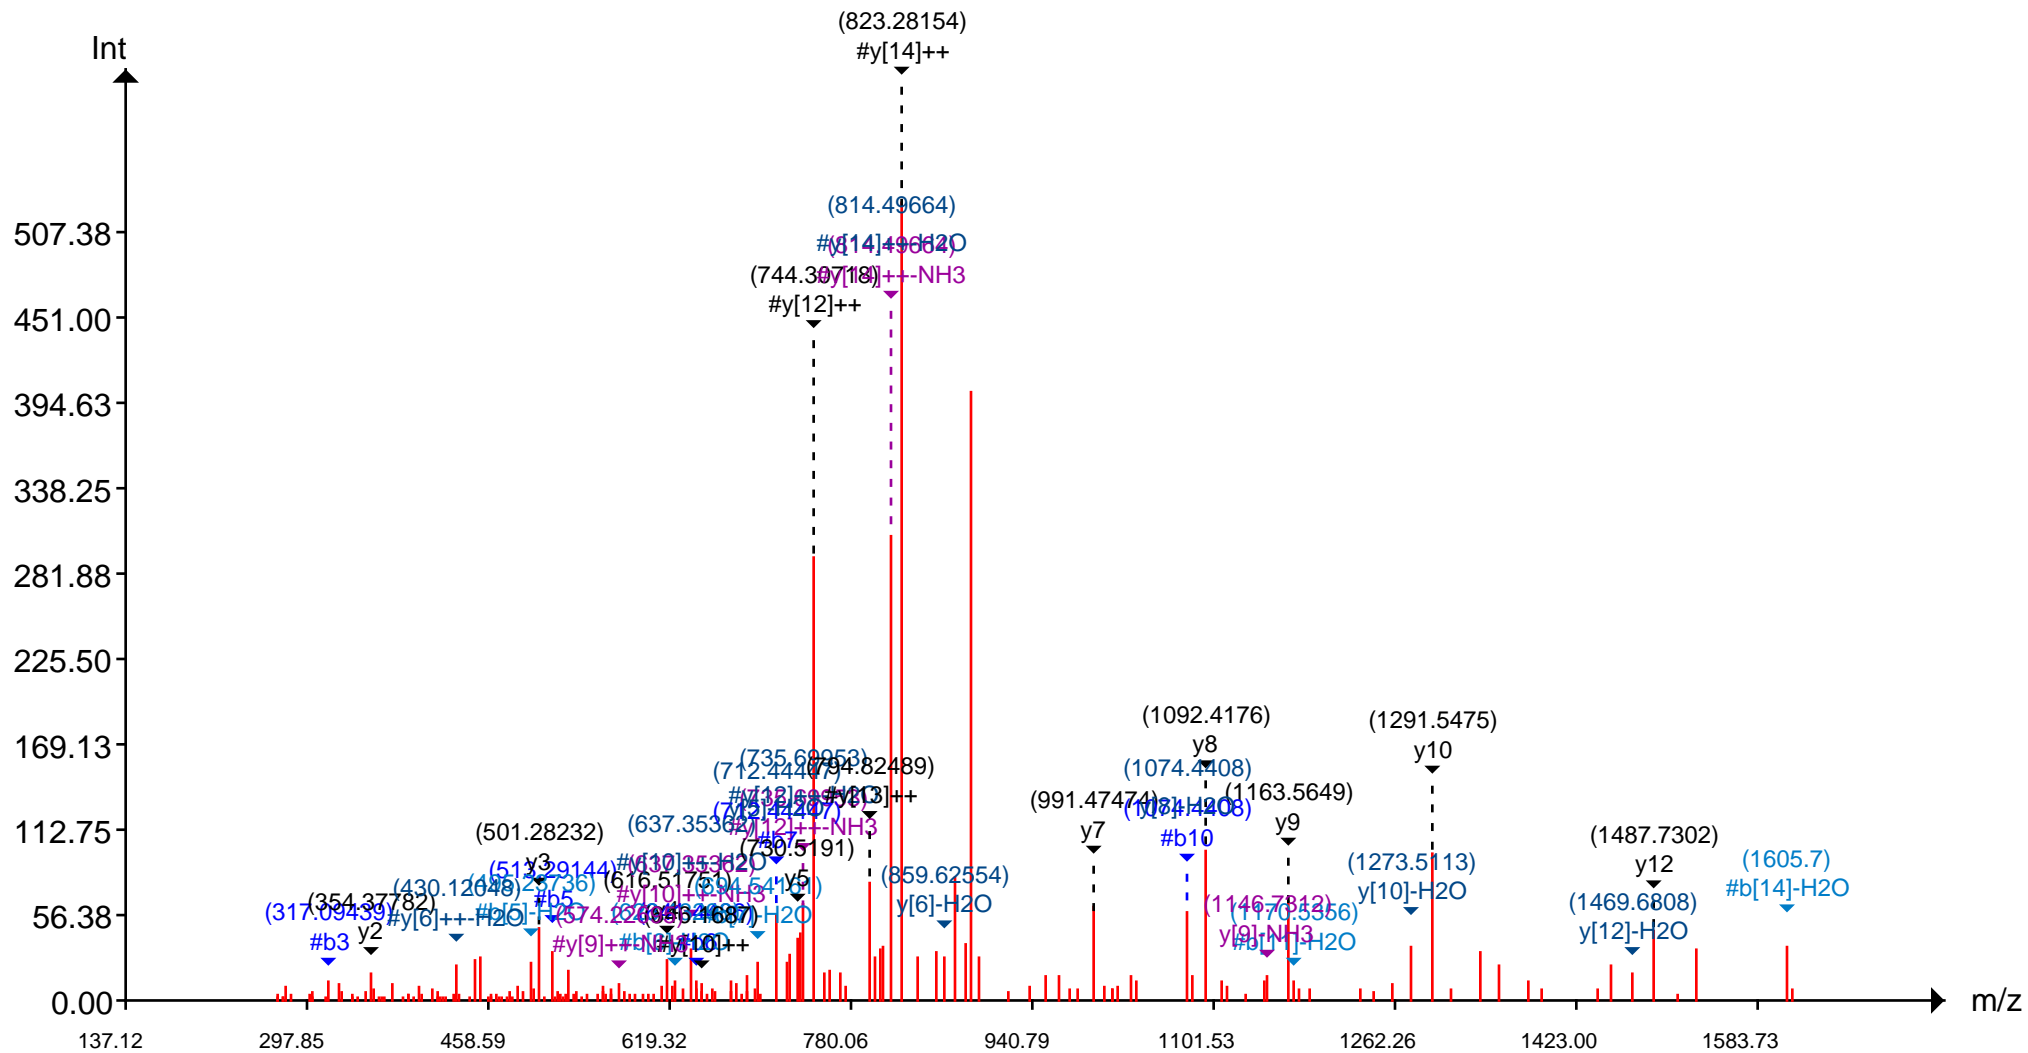

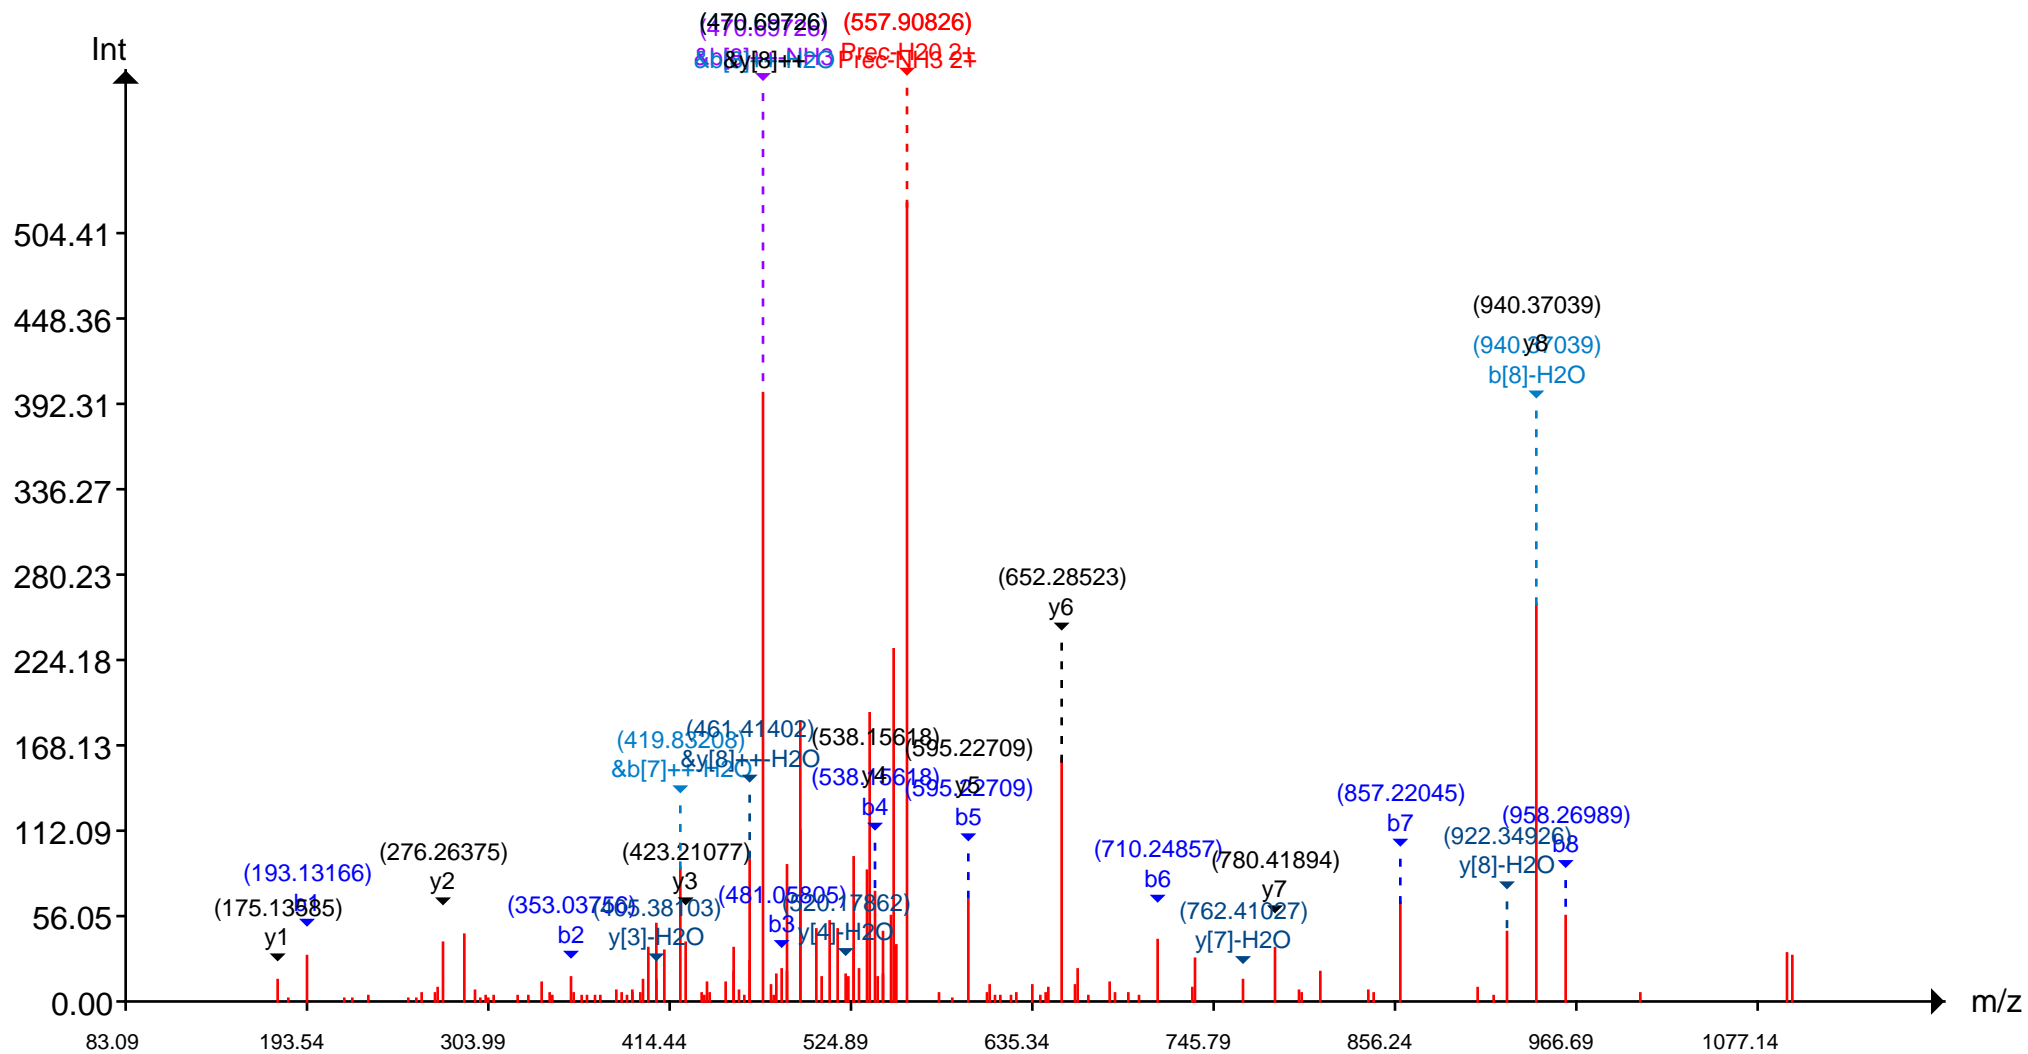

## Info

**Modified Sequence** AcD3-M<Mox\*>C<Cmm\*>QGGDFTR-COOH

**Ion score** 47.91

**Protein** P17742

**Confidence level** 99.00%

**Precursor m/z** 566.73294

**Identity Threshold** 39.19

**Charge** 2+

**Mass error** -3.47E-4

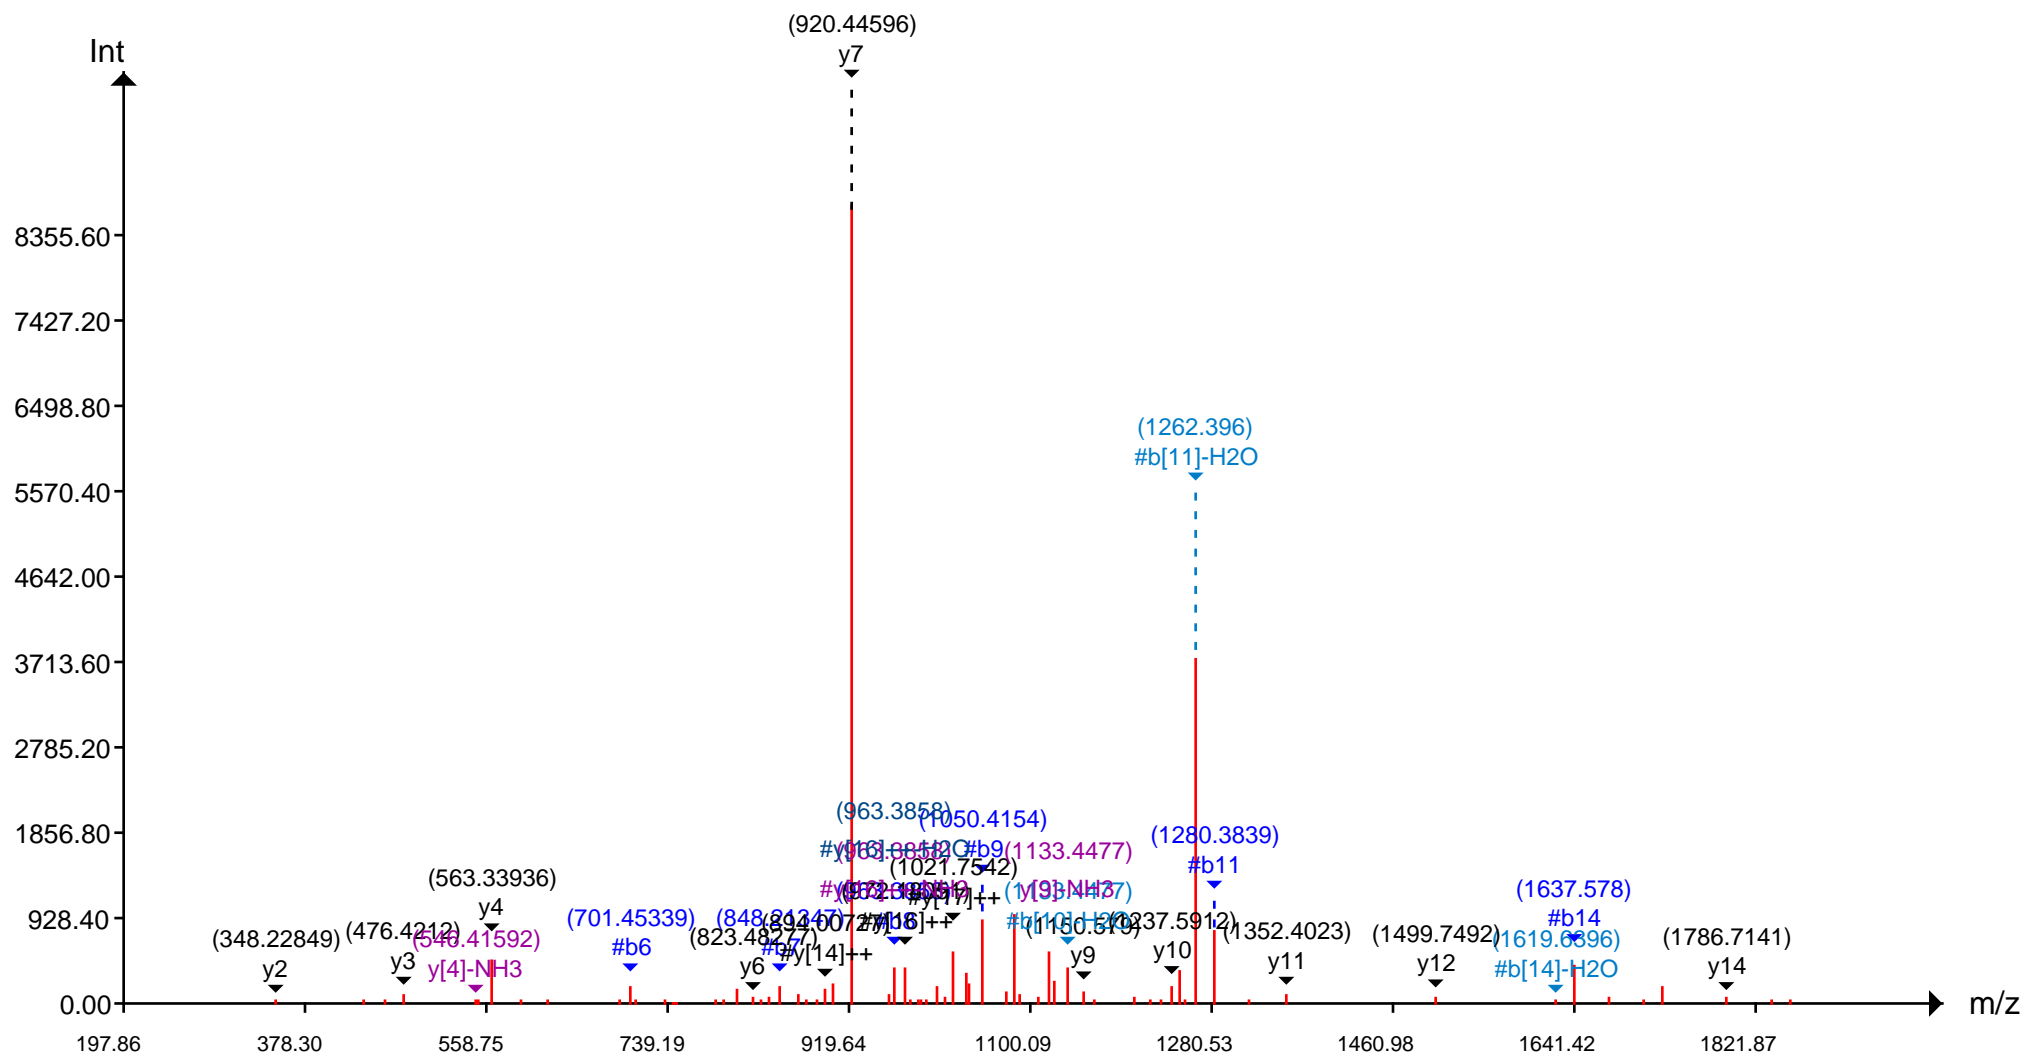

## Info

|                          |                                                    |                           |          |
|--------------------------|----------------------------------------------------|---------------------------|----------|
| <b>Modified Sequence</b> | AcD3-IVGVNK<AcD3K*>M<Mox*>DSTEPPYSQK<AcD3K*>R-COOH | <b>Ion score</b>          | 64.56    |
| <b>Protein</b>           | P10126                                             | <b>Confidence level</b>   | 99.00%   |
| <b>Precursor m/z</b>     | 1100.5681                                          | <b>Identity Threshold</b> | 47.95    |
| <b>Charge</b>            | 2+                                                 | <b>Mass error</b>         | 0.002477 |

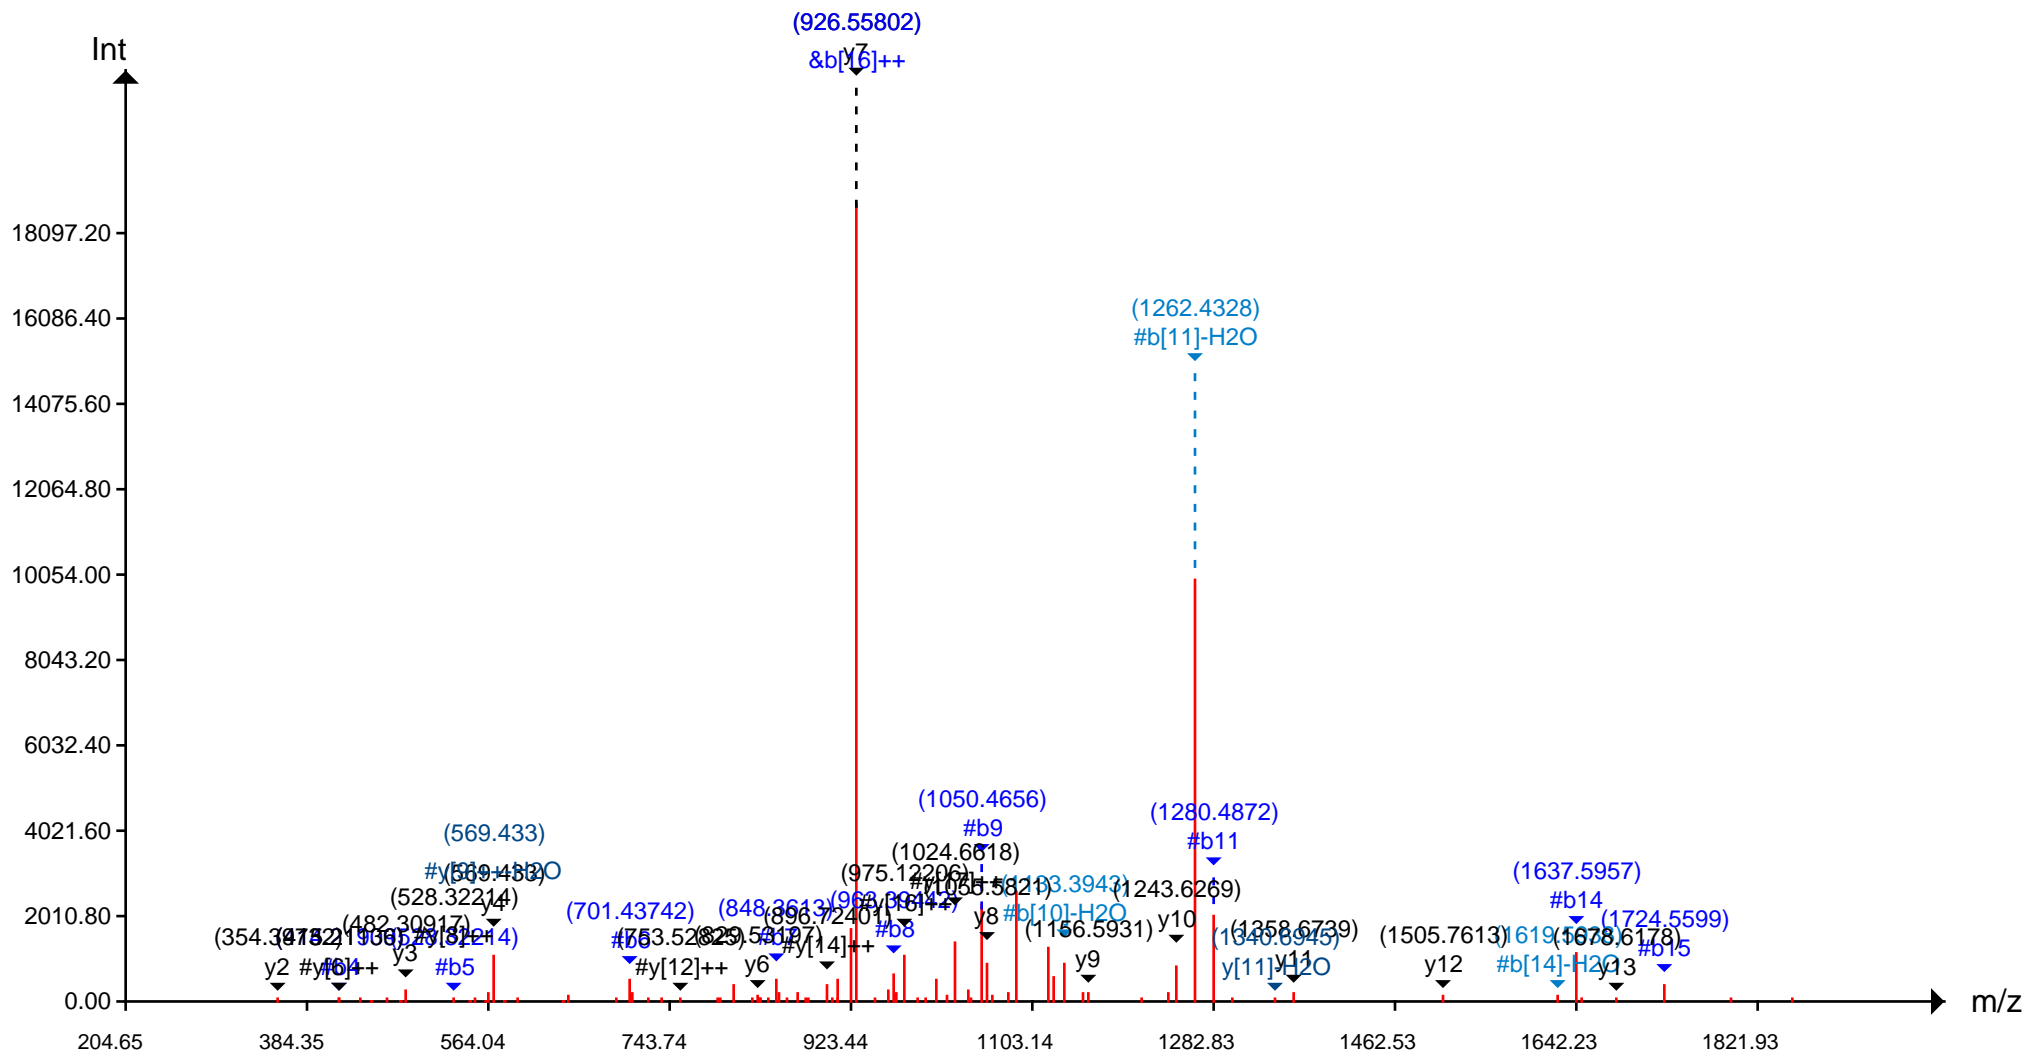

## Info

|                          |                                                         |                           |          |
|--------------------------|---------------------------------------------------------|---------------------------|----------|
| <b>Modified Sequence</b> | AcD3-IVGVNK<AcD3K*>M<Mox*>DSTEPPYSQK<AcD3K*>R<C13>-COOH | <b>Ion score</b>          | 70.55    |
| <b>Protein</b>           | P10126                                                  | <b>Confidence level</b>   | 99.00%   |
| <b>Precursor m/z</b>     | 1103.578                                                | <b>Identity Threshold</b> | 47.98    |
| <b>Charge</b>            | 2+                                                      | <b>Mass error</b>         | 0.002135 |





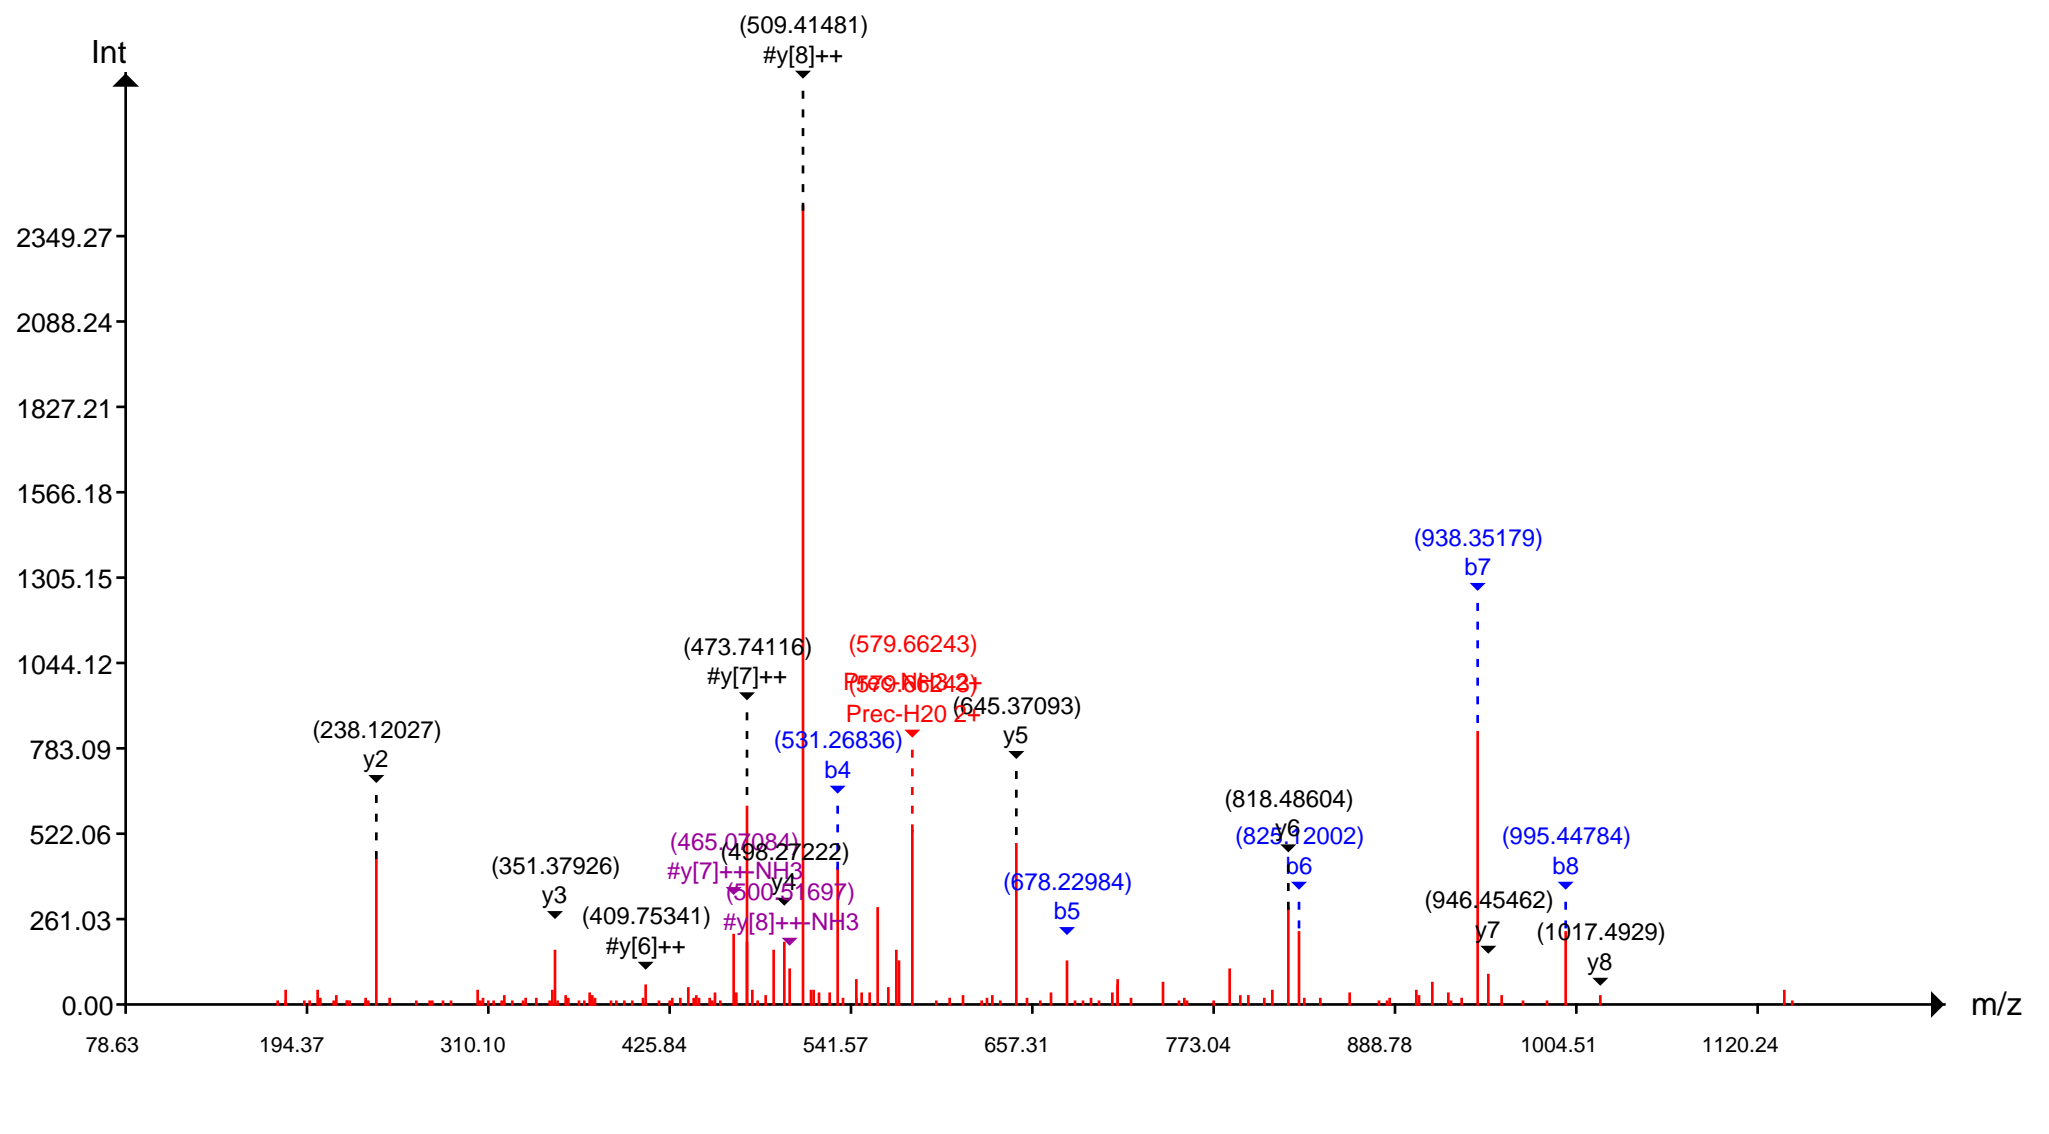

| Info                     |                                              |                           |         |
|--------------------------|----------------------------------------------|---------------------------|---------|
| <b>Modified Sequence</b> | AcD3-LAQK<AcD3K*>M<Mox*>M<Mox*>IGR<C13>-COOH | <b>Ion score</b>          | 51.37   |
| <b>Protein</b>           | P52480, P53657                               | <b>Confidence level</b>   | 99.00%  |
| <b>Precursor m/z</b>     | 588.32818                                    | <b>Identity Threshold</b> | 47.61   |
| <b>Charge</b>            | 2+                                           | <b>Mass error</b>         | 1.76E-4 |



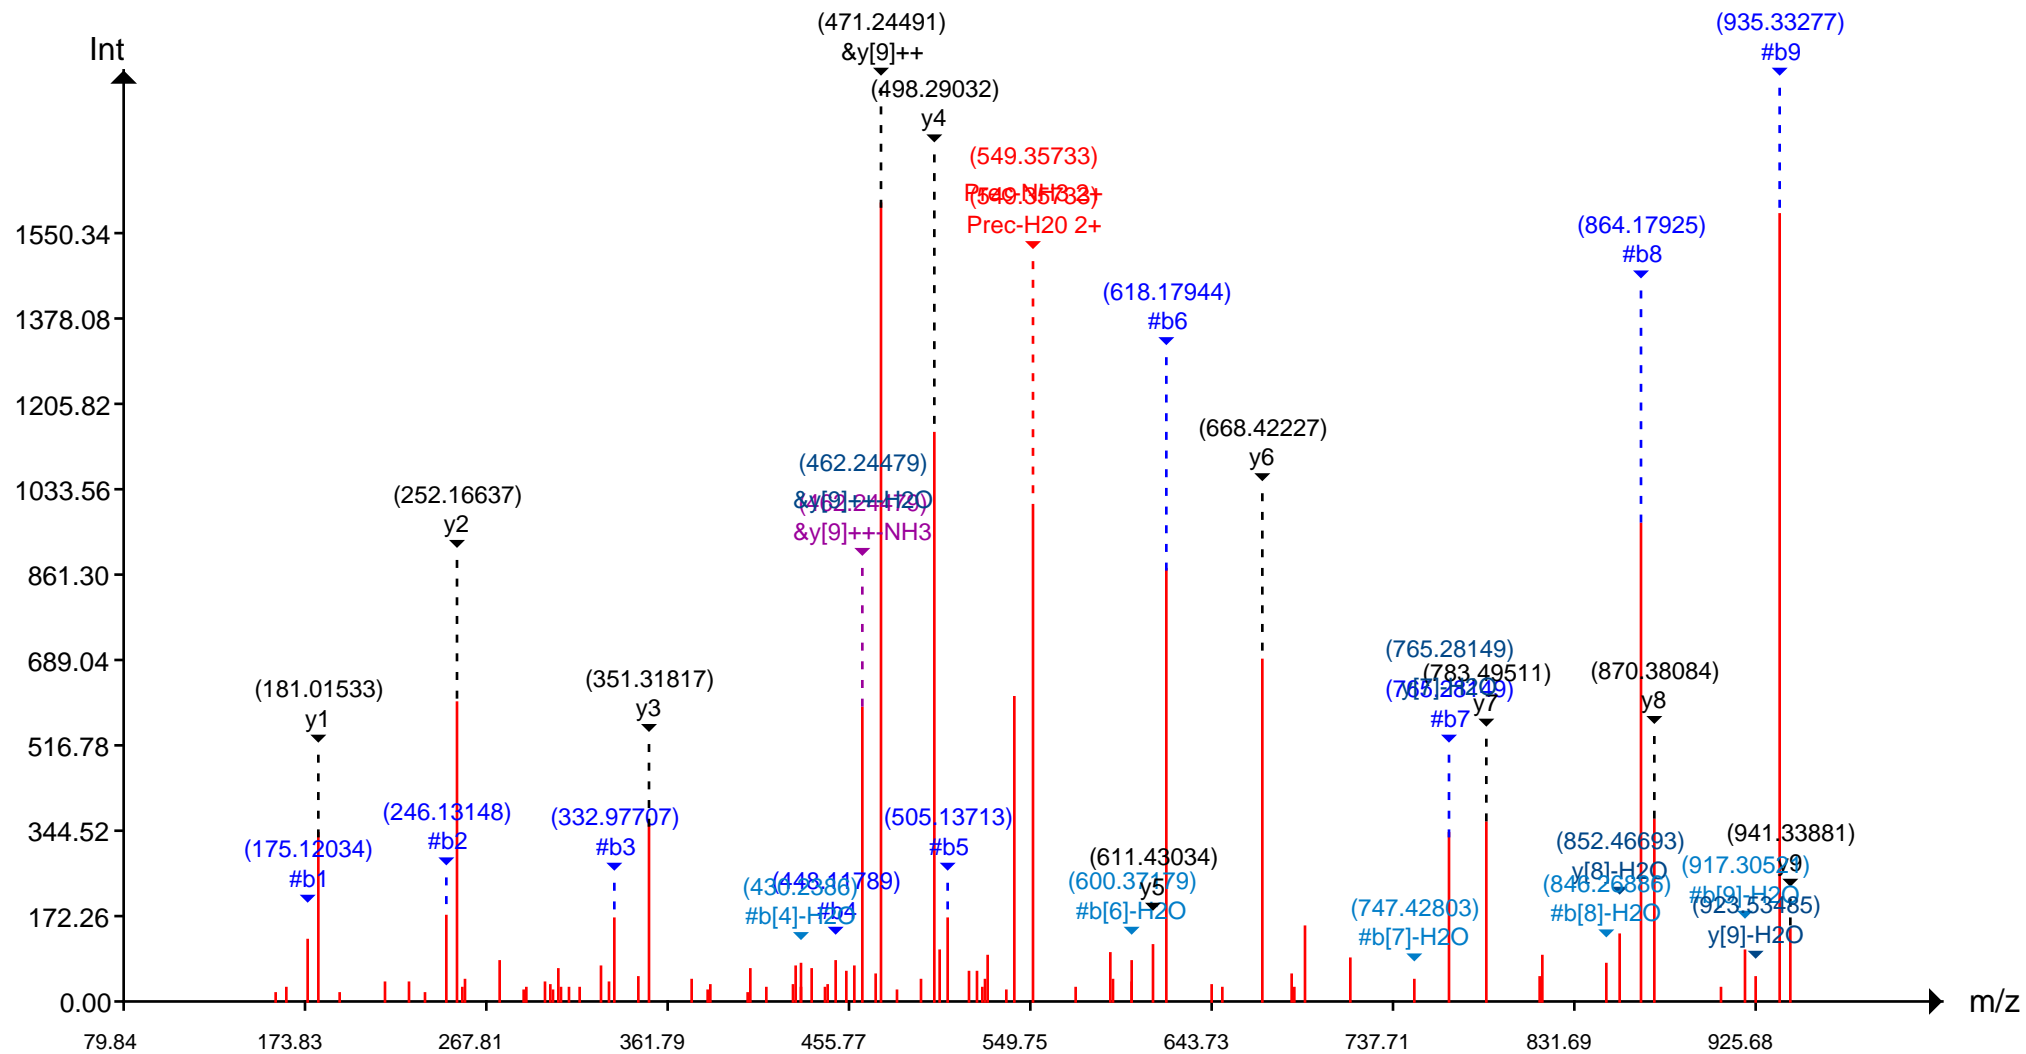

## Info

|                          |                                 |                           |          |
|--------------------------|---------------------------------|---------------------------|----------|
| <b>Modified Sequence</b> | AcD3-EASDGIM<Mox*>VAR<C13>-COOH | <b>Ion score</b>          | 78.26    |
| <b>Protein</b>           | P52480                          | <b>Confidence level</b>   | 99.00%   |
| <b>Precursor m/z</b>     | 558.2813                        | <b>Identity Threshold</b> | 47.14    |
| <b>Charge</b>            | 2+                              | <b>Mass error</b>         | 0.001722 |



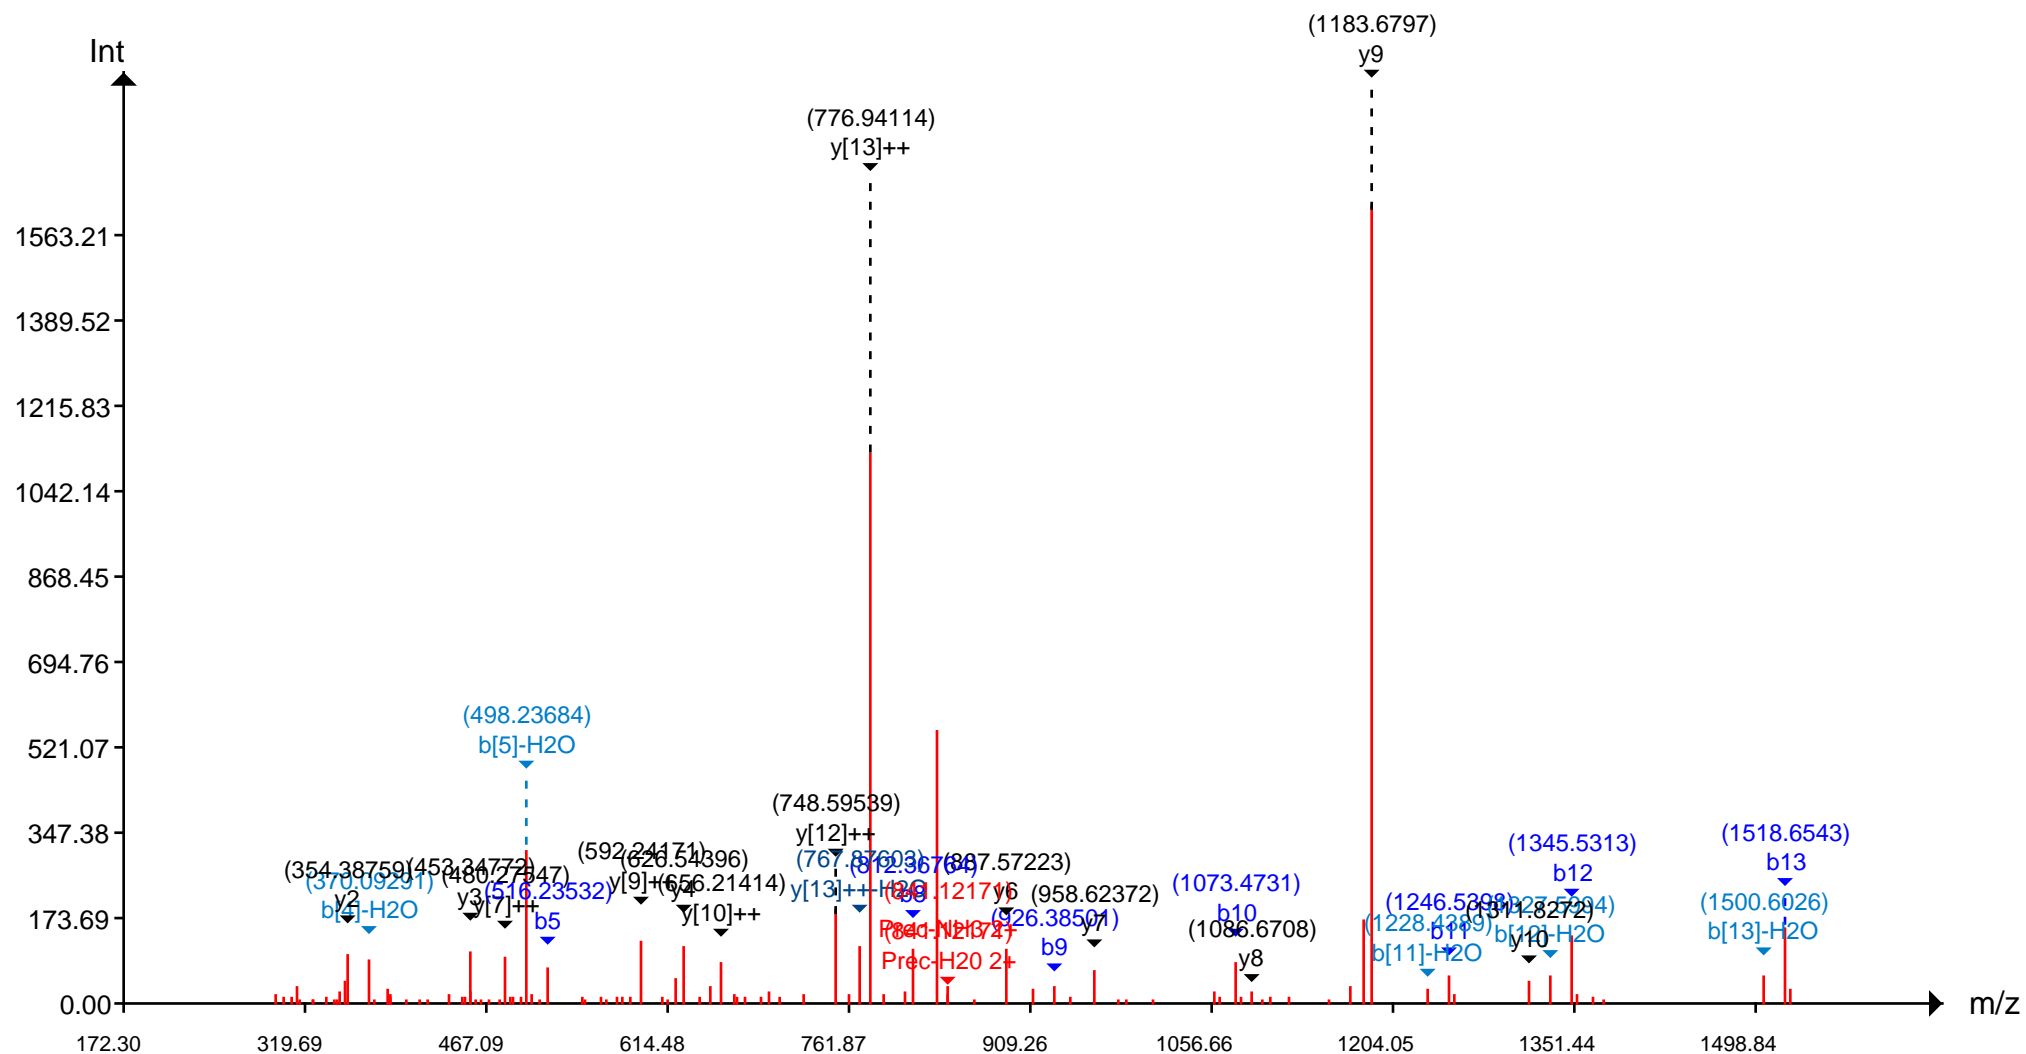

## Info

|                          |                                               |                           |          |
|--------------------------|-----------------------------------------------|---------------------------|----------|
| <b>Modified Sequence</b> | AcD3-TGPSQPQANFK<AcD3K*>VK<AcD3K*>R<C13>-COOH | <b>Ion score</b>          | 78.35    |
| <b>Protein</b>           | Q9JHS9                                        | <b>Confidence level</b>   | 99.00%   |
| <b>Precursor m/z</b>     | 849.98346                                     | <b>Identity Threshold</b> | 46.25    |
| <b>Charge</b>            | 2+                                            | <b>Mass error</b>         | 0.001715 |

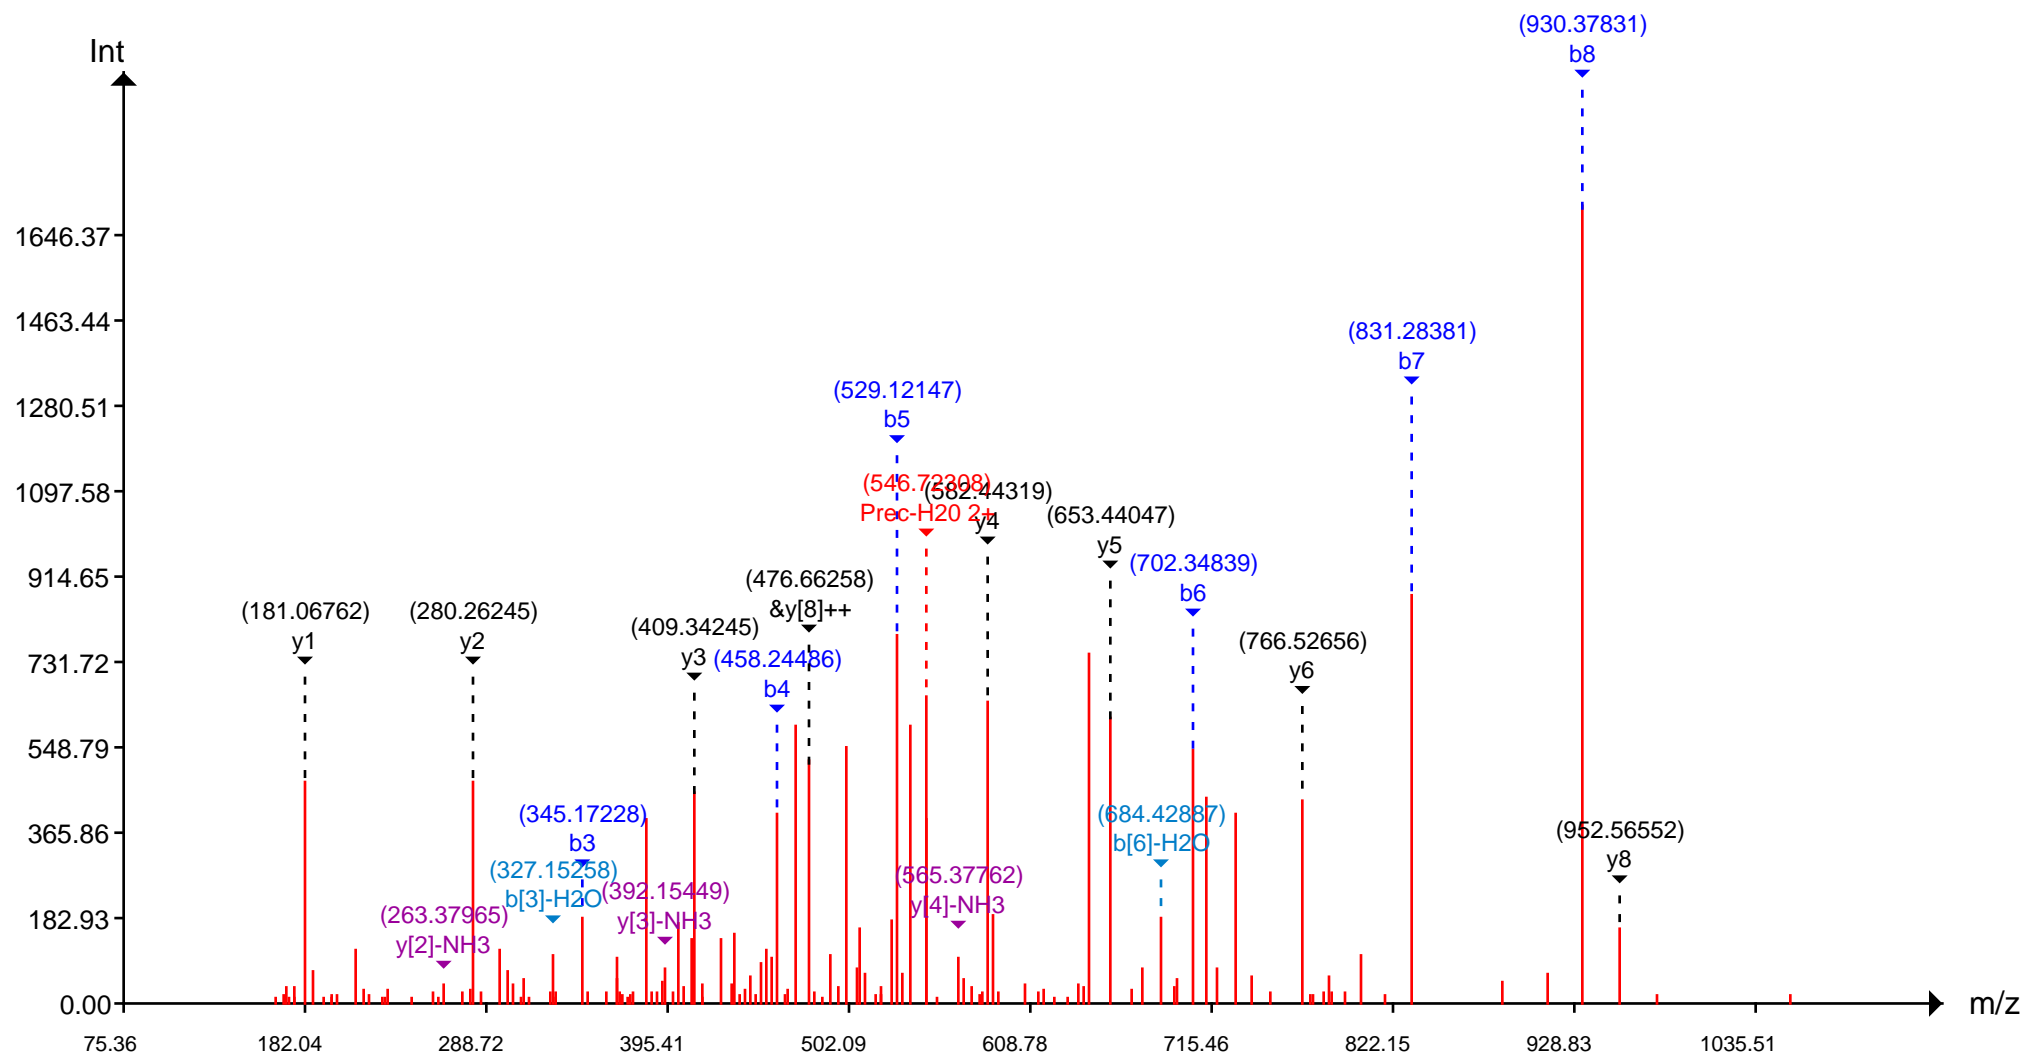

## Info

**Modified Sequence** AcD3-IGELAK<AcD3K\*>EVR<C13>-COOH

**Ion score** 49.09

**Protein** P97352

**Confidence level** 99.00%

**Precursor m/z** 555.83992

**Identity Threshold** 44.15

**Charge** 2+

**Mass error** -5.6E-4

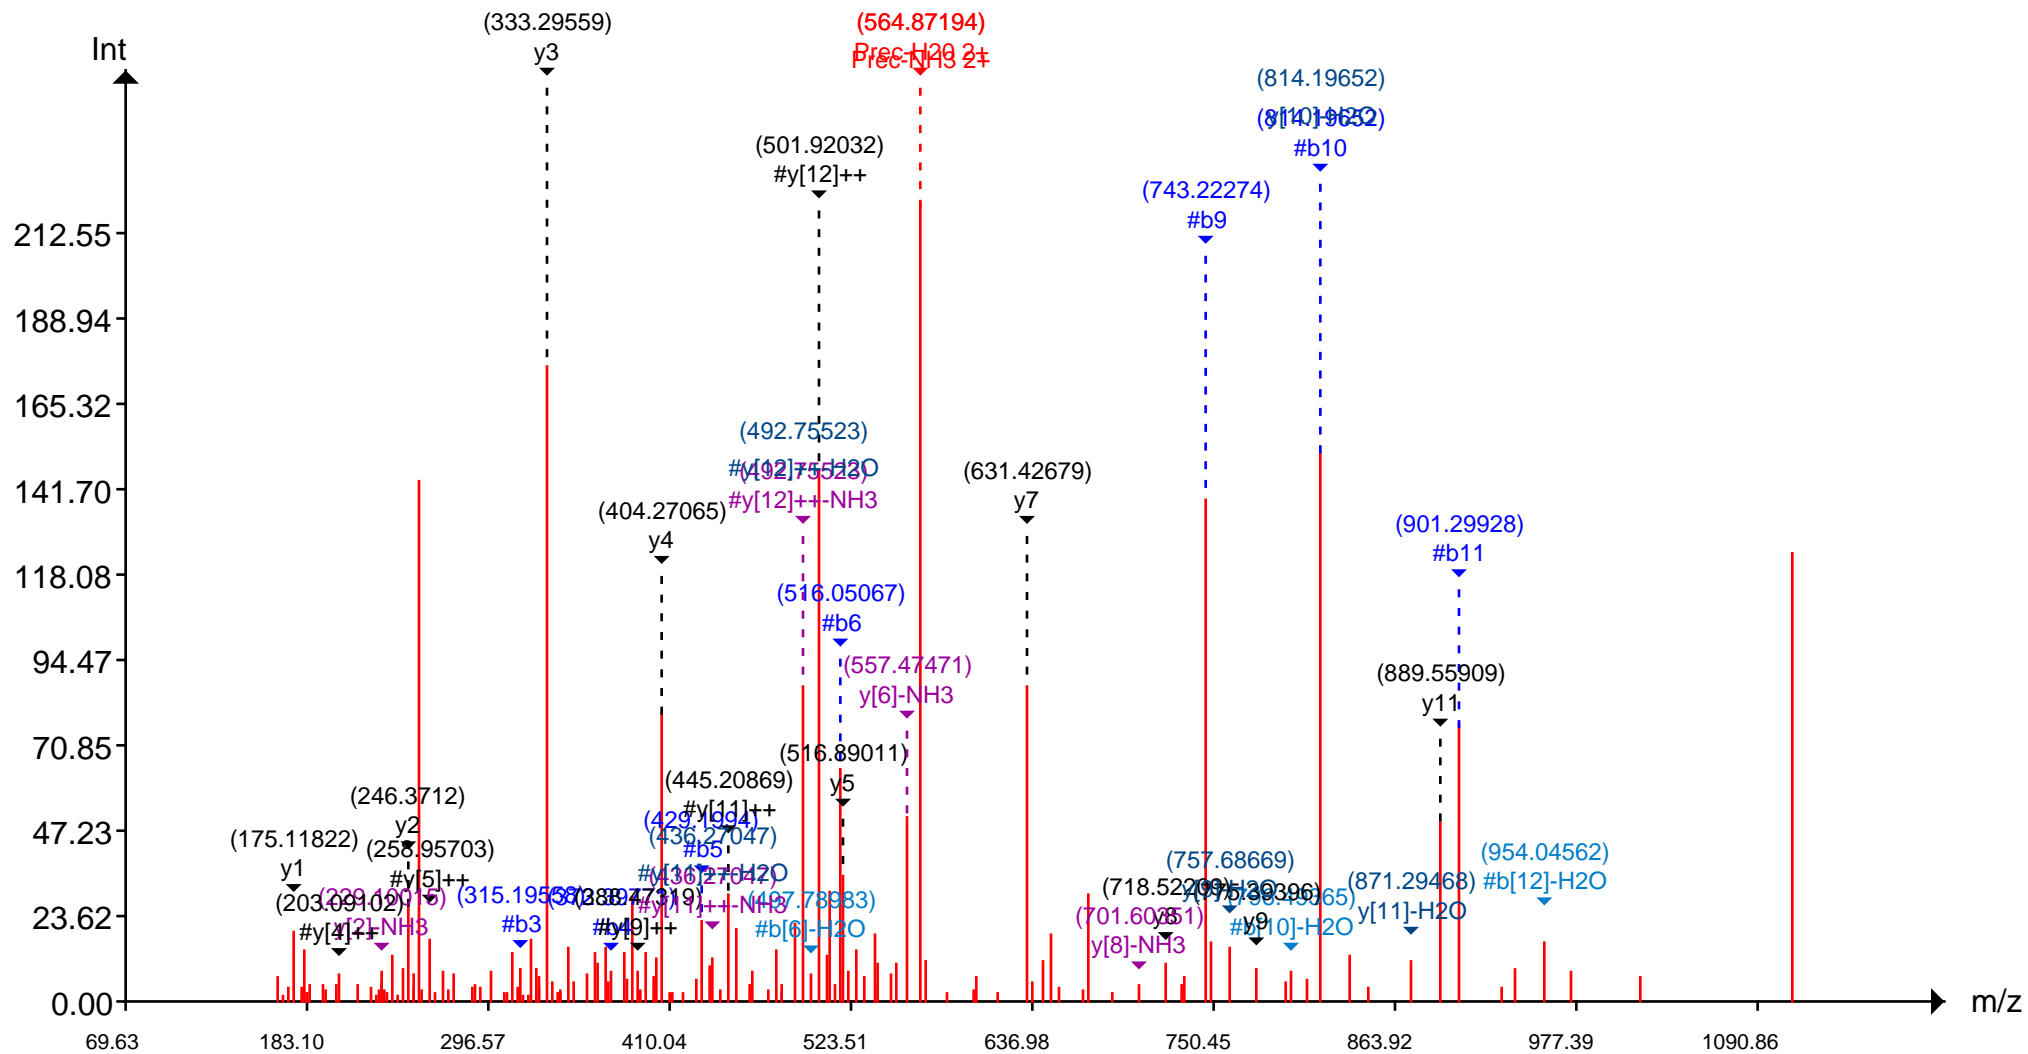

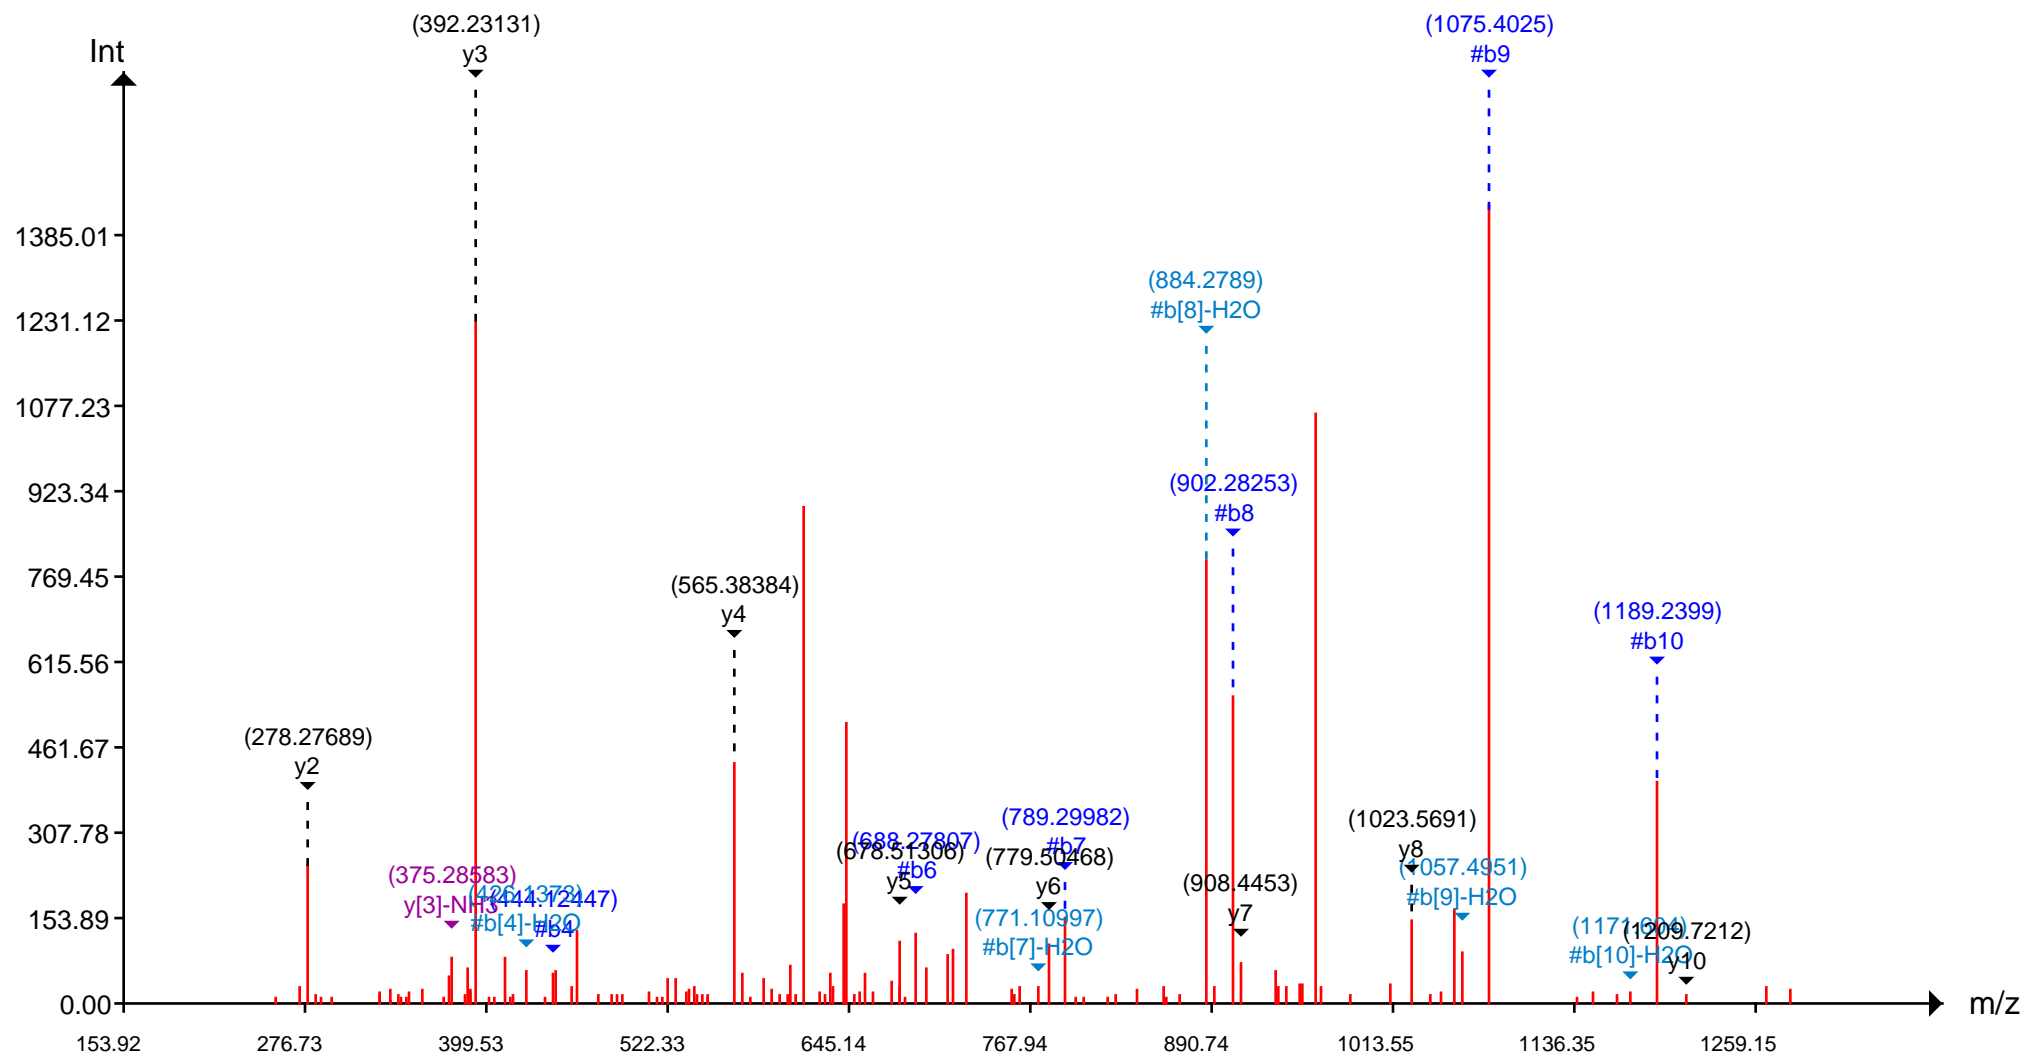

## Info

|                          |                                     |                           |          |
|--------------------------|-------------------------------------|---------------------------|----------|
| <b>Modified Sequence</b> | AcD3-IVSVDETIK<AcD3K*>NPR<C13>-COOH | <b>Ion score</b>          | 48.76    |
| <b>Protein</b>           | P80313                              | <b>Confidence level</b>   | 99.00%   |
| <b>Precursor m/z</b>     | 733.92568                           | <b>Identity Threshold</b> | 45.78    |
| <b>Charge</b>            | 2+                                  | <b>Mass error</b>         | 0.001359 |



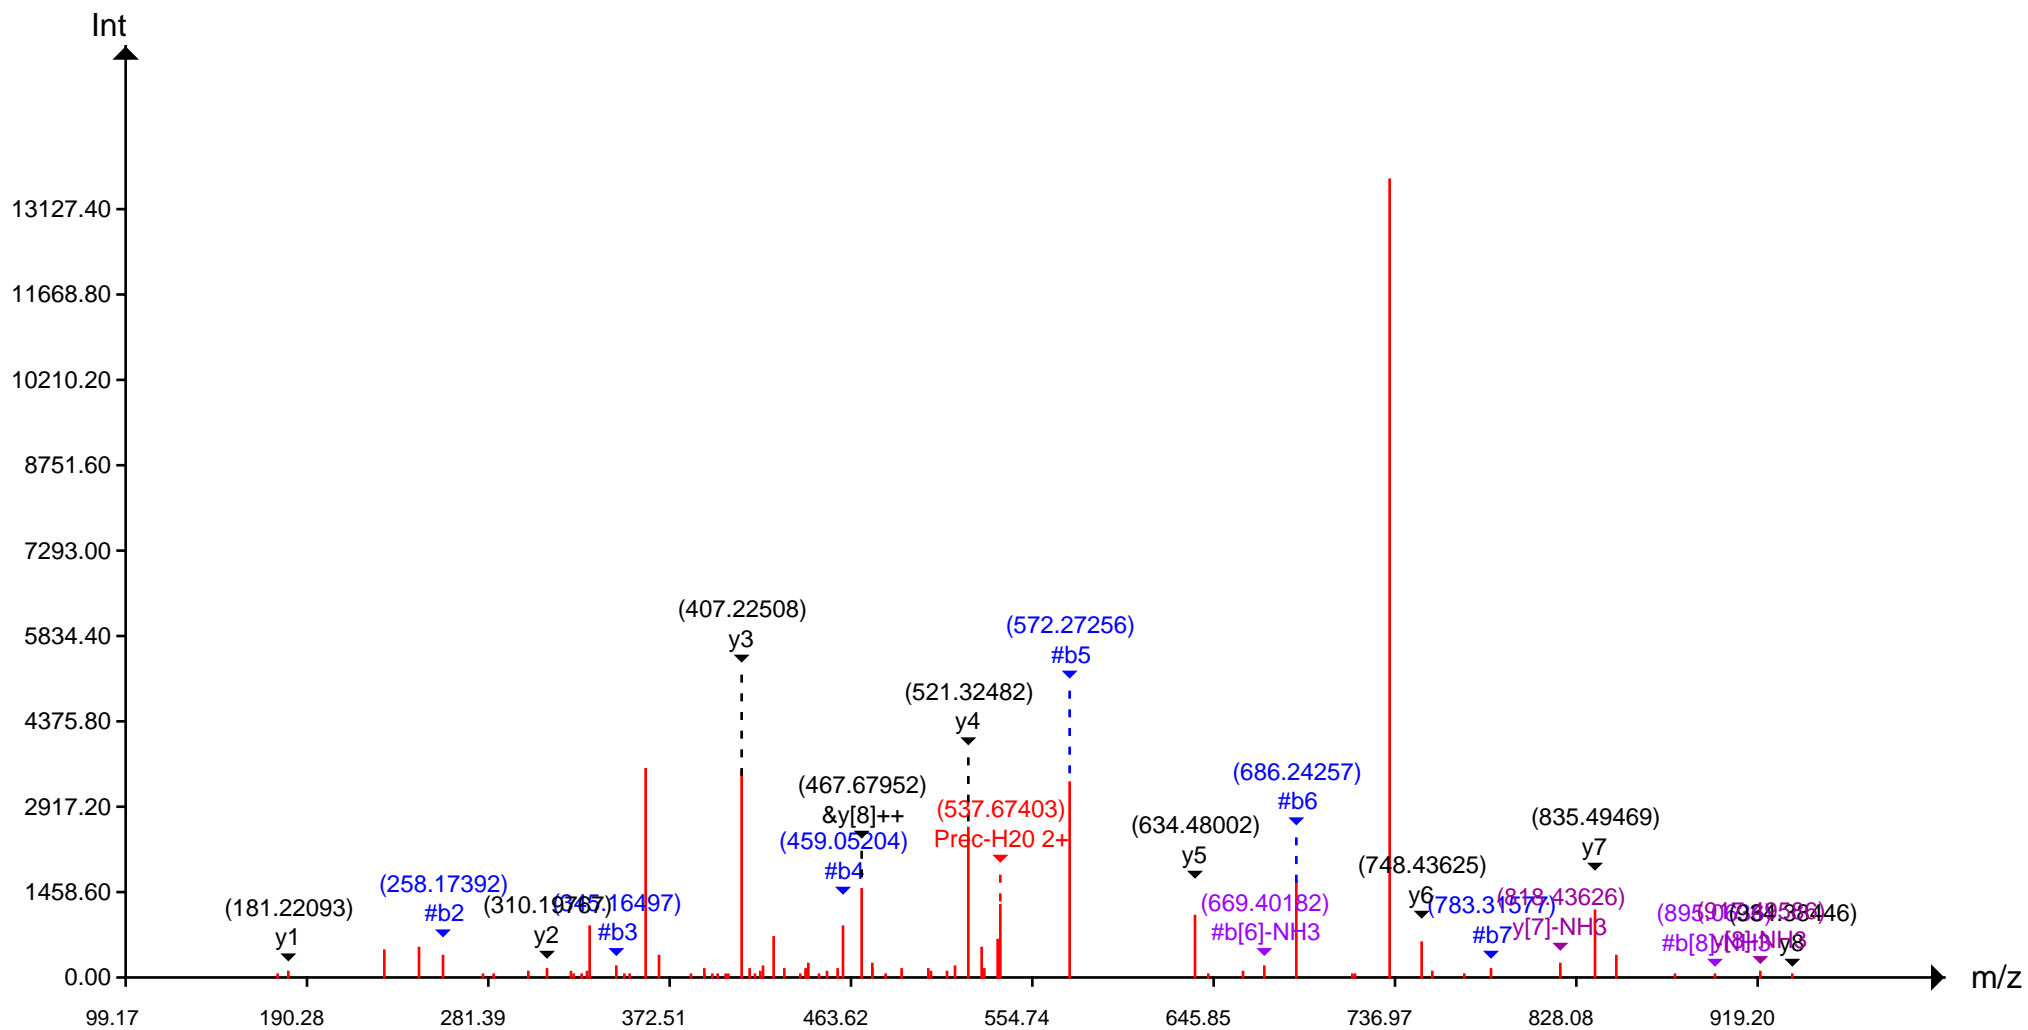

## Info

|                          |                          |                           |          |
|--------------------------|--------------------------|---------------------------|----------|
| <b>Modified Sequence</b> | AcD3-LVSNLNPER<C13>-COOH | <b>Ion score</b>          | 50.07    |
| <b>Protein</b>           | P17225                   | <b>Confidence level</b>   | 99.00%   |
| <b>Precursor m/z</b>     | 546.81263                | <b>Identity Threshold</b> | 46.96    |
| <b>Charge</b>            | 2+                       | <b>Mass error</b>         | -2.54E-4 |

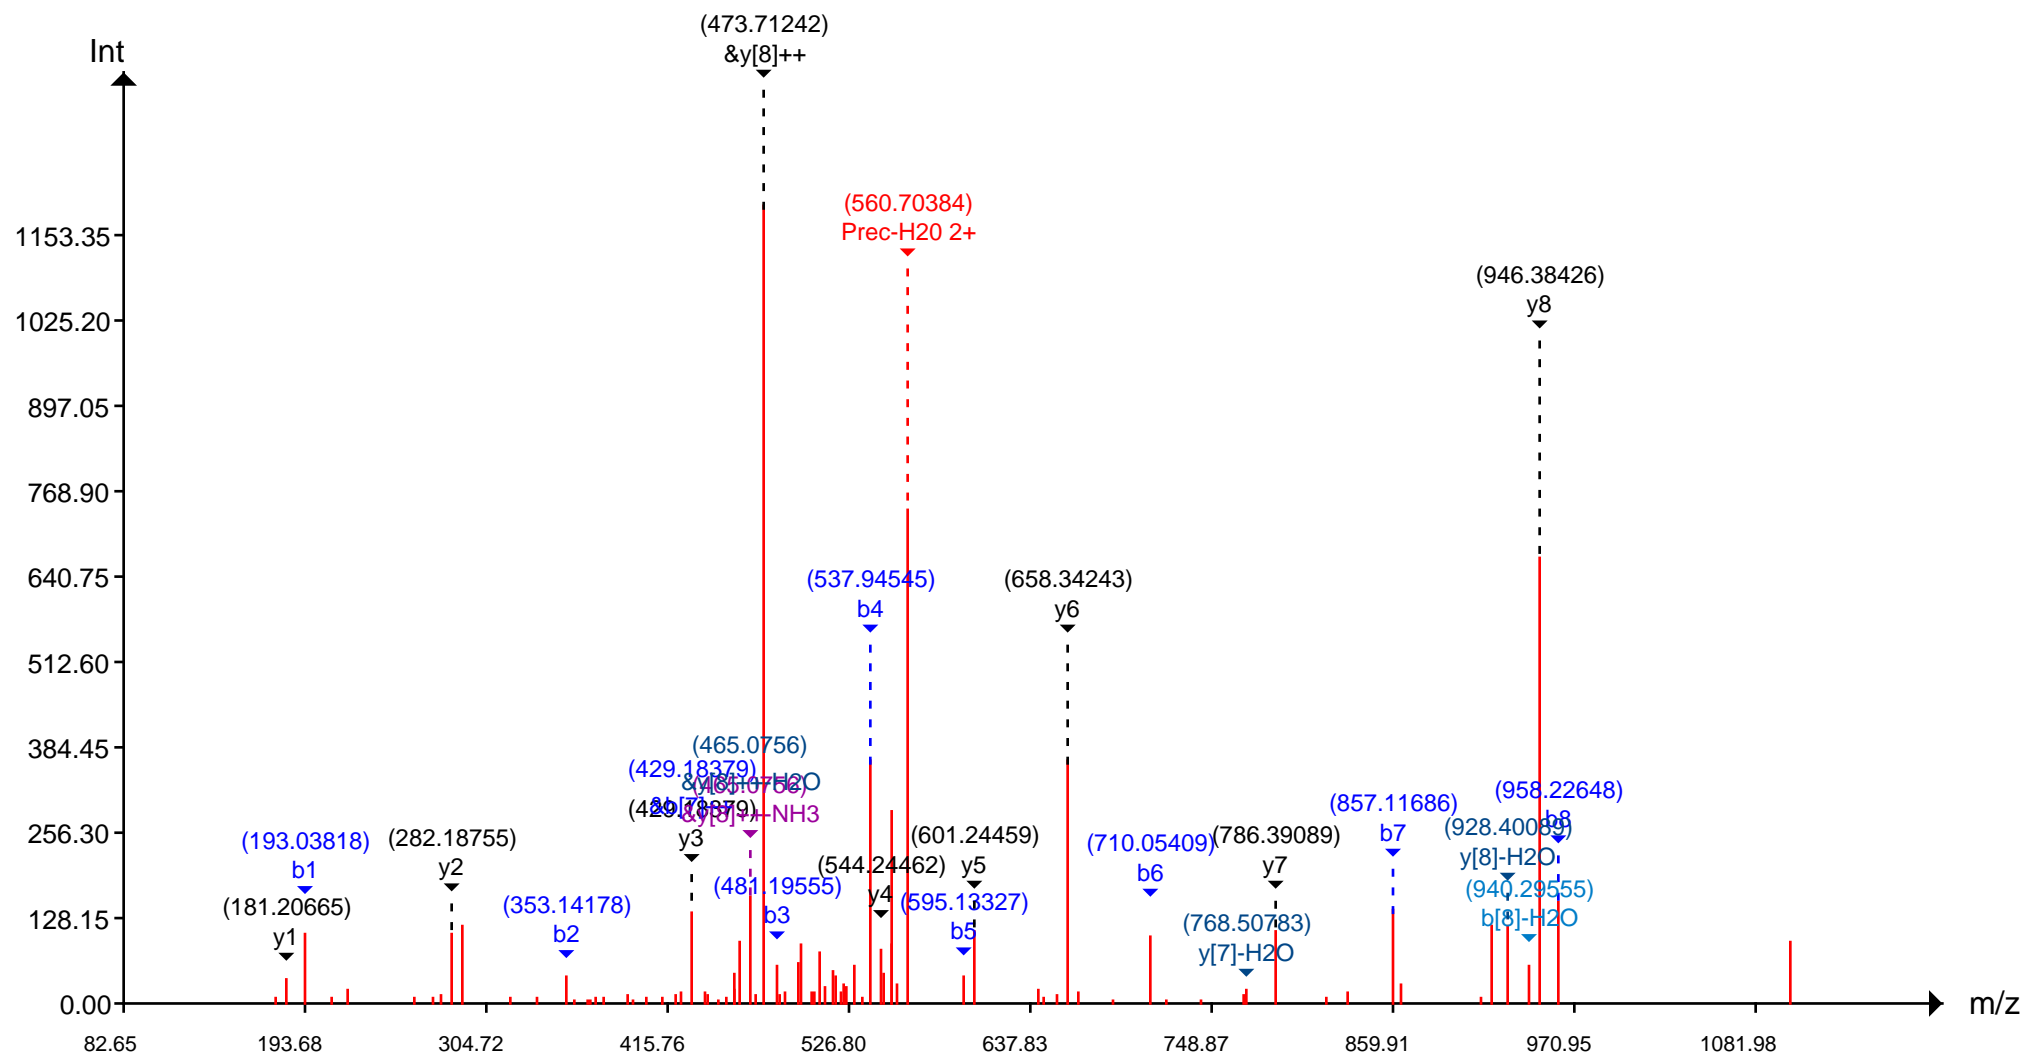

## Info

|                          |                                      |                           |          |
|--------------------------|--------------------------------------|---------------------------|----------|
| <b>Modified Sequence</b> | AcD3-M<Mox*>C<Cmm*>QGGDFTR<C13>-COOH | <b>Ion score</b>          | 58.06    |
| <b>Protein</b>           | P17742                               | <b>Confidence level</b>   | 99.00%   |
| <b>Precursor m/z</b>     | 569.74278                            | <b>Identity Threshold</b> | 41.37    |
| <b>Charge</b>            | 2+                                   | <b>Mass error</b>         | -8.09E-4 |

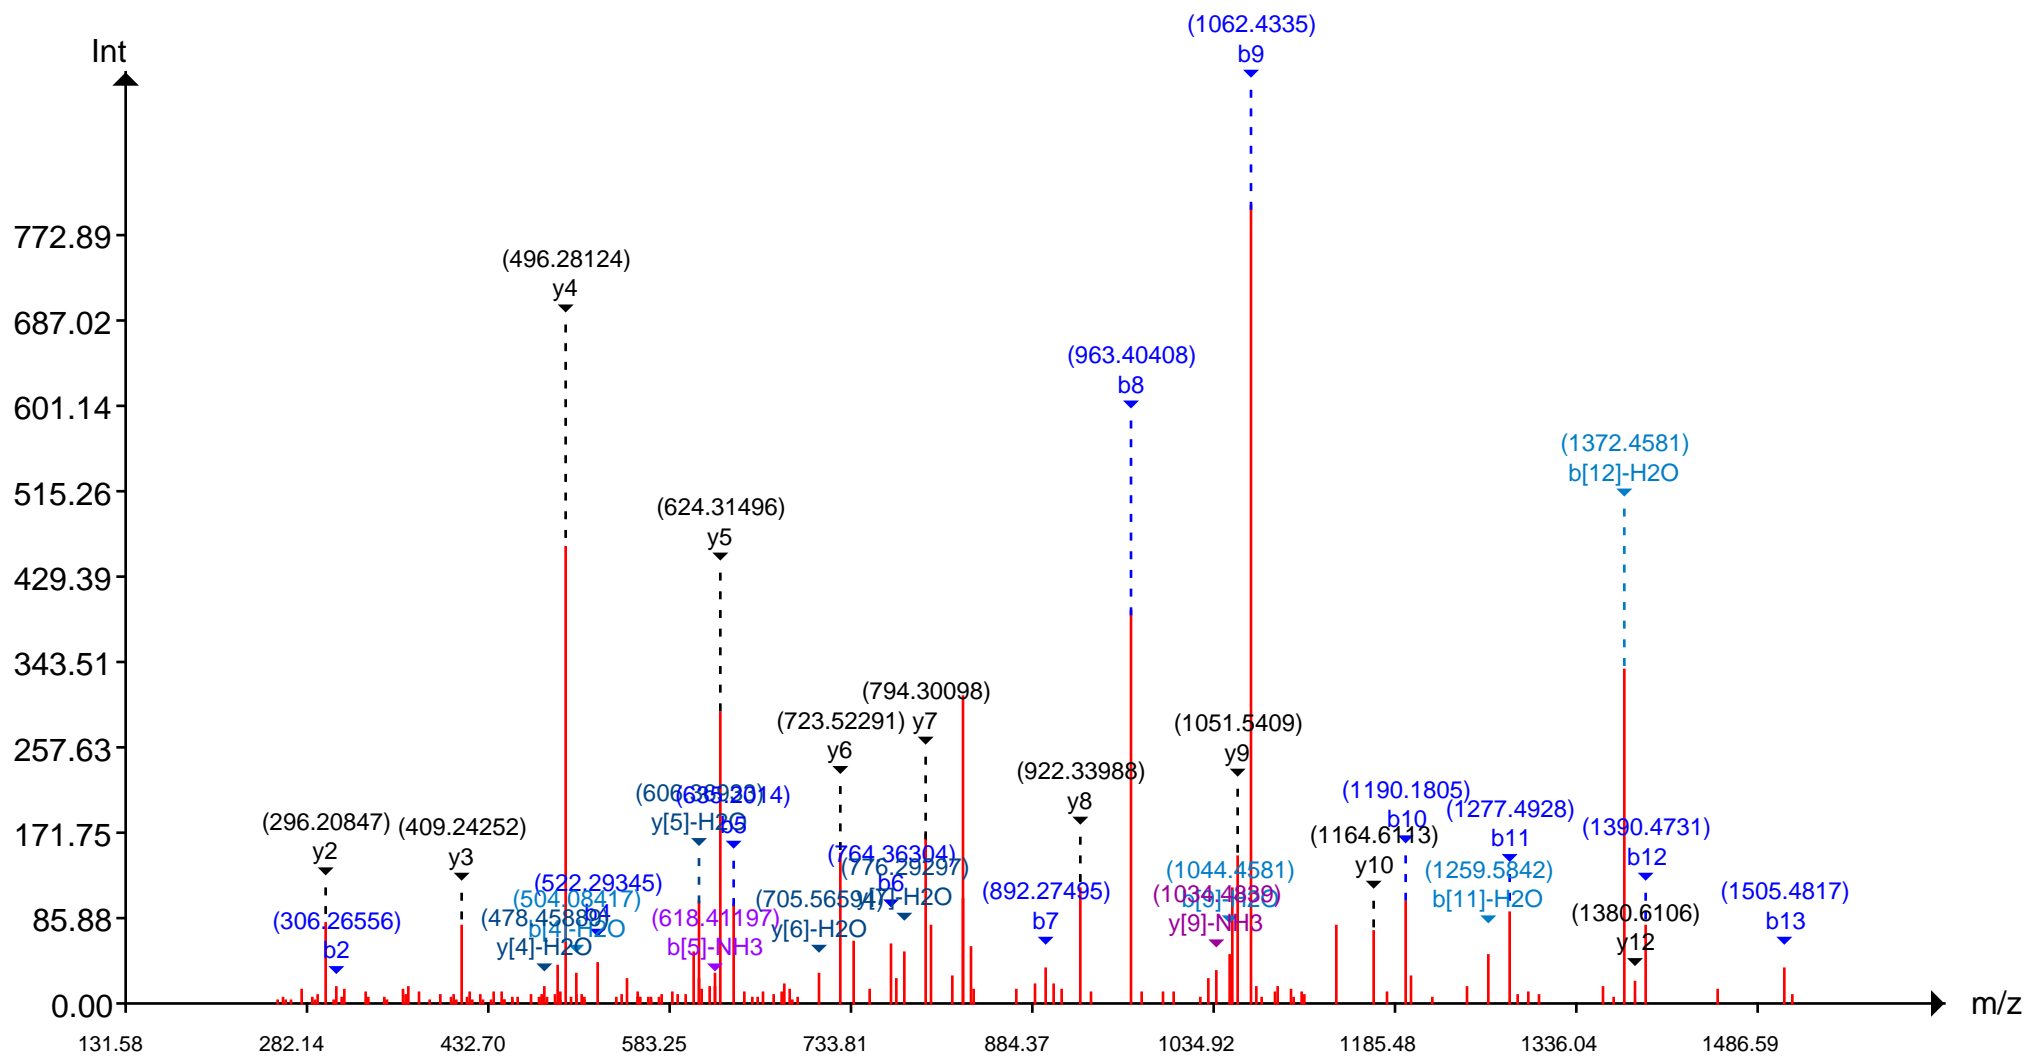

## Info

|                          |                                       |                           |          |
|--------------------------|---------------------------------------|---------------------------|----------|
| <b>Modified Sequence</b> | AcD3-K<AcD3K*>SSEIEQAVQSLDR<C13>-COOH | <b>Ion score</b>          | 90.76    |
| <b>Protein</b>           | Q9D898                                | <b>Confidence level</b>   | 99.00%   |
| <b>Precursor m/z</b>     | 843.45042                             | <b>Identity Threshold</b> | 47.85    |
| <b>Charge</b>            | 2+                                    | <b>Mass error</b>         | 0.001721 |

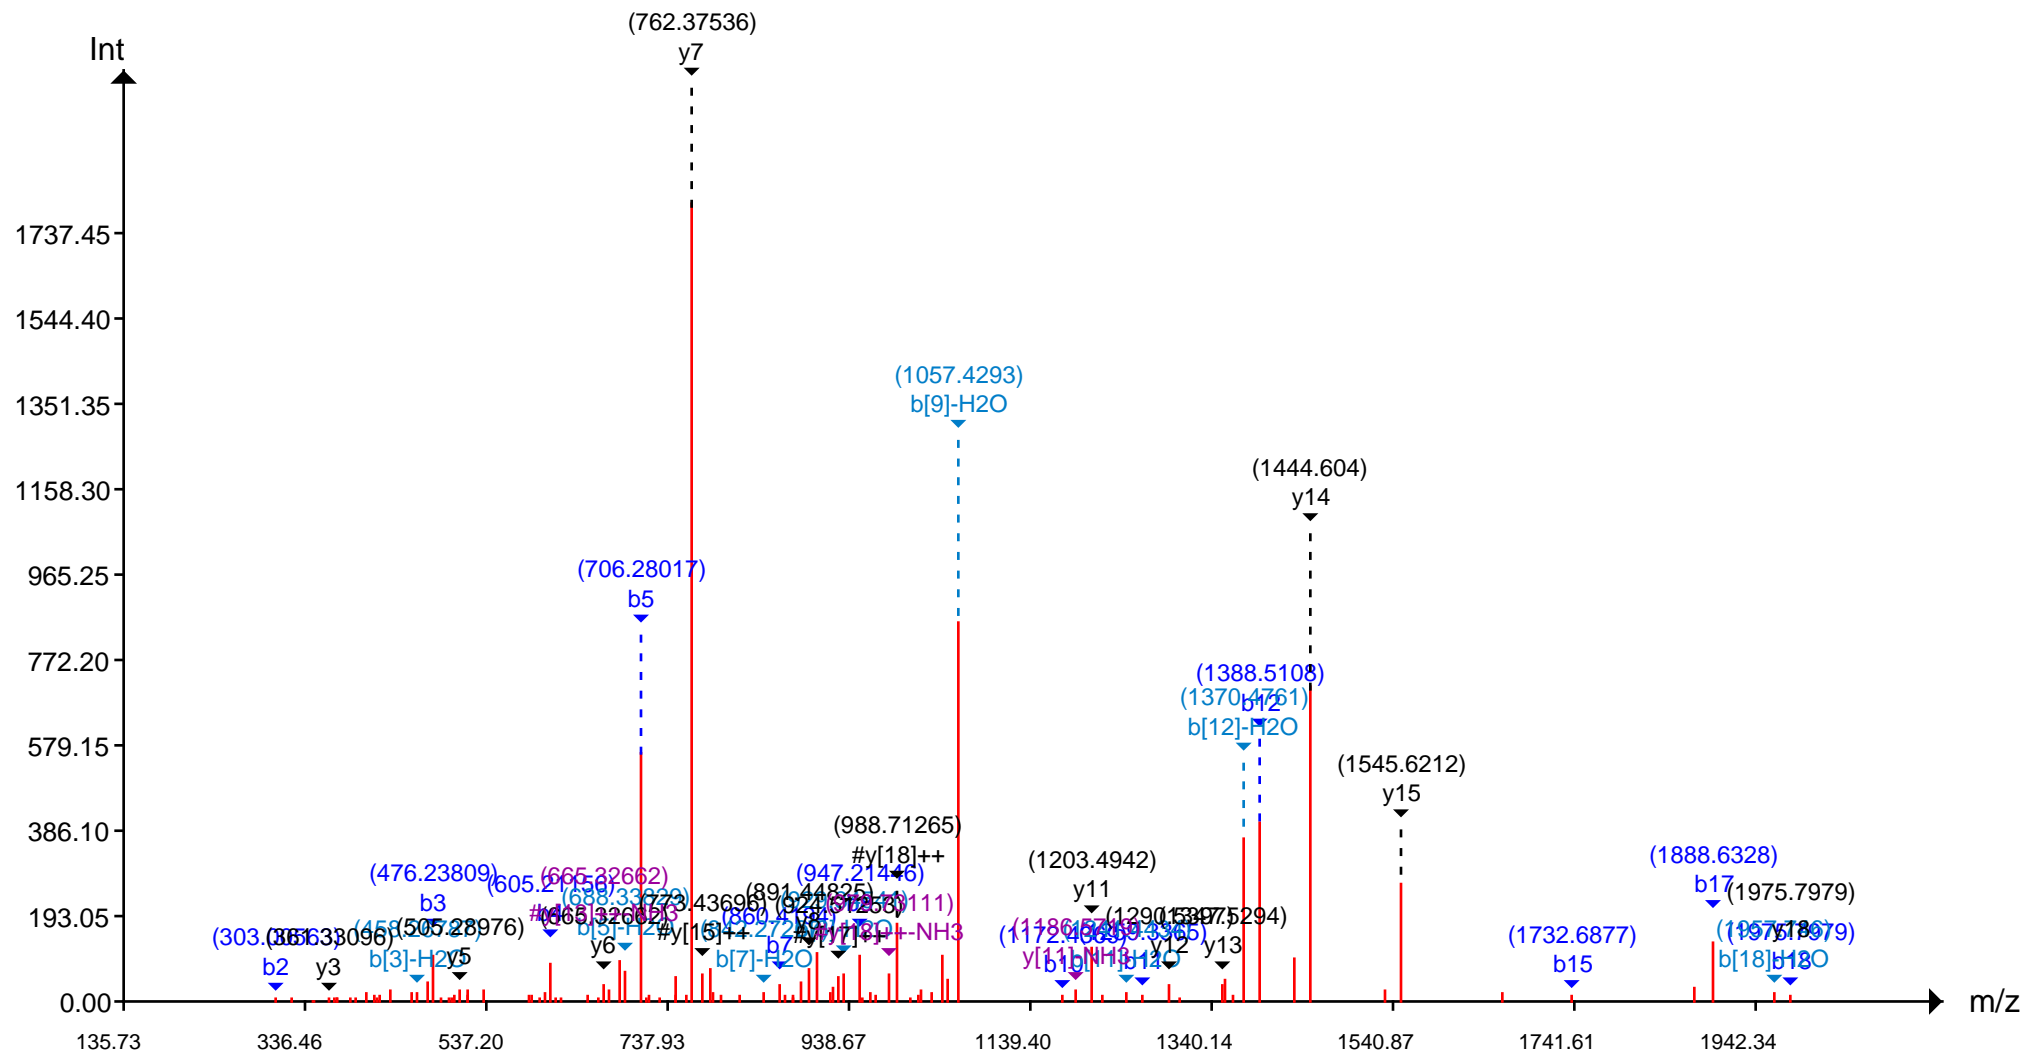

## Info

|                          |                                             |                           |          |
|--------------------------|---------------------------------------------|---------------------------|----------|
| <b>Modified Sequence</b> | AcD3-EQK<AcD3K*>ETPGSQPSEPC<Cmm*>SGVSR-COOH | <b>Ion score</b>          | 90.55    |
| <b>Protein</b>           | P27546                                      | <b>Confidence level</b>   | 99.00%   |
| <b>Precursor m/z</b>     | 1075.502                                    | <b>Identity Threshold</b> | 45.42    |
| <b>Charge</b>            | 2+                                          | <b>Mass error</b>         | 0.003013 |

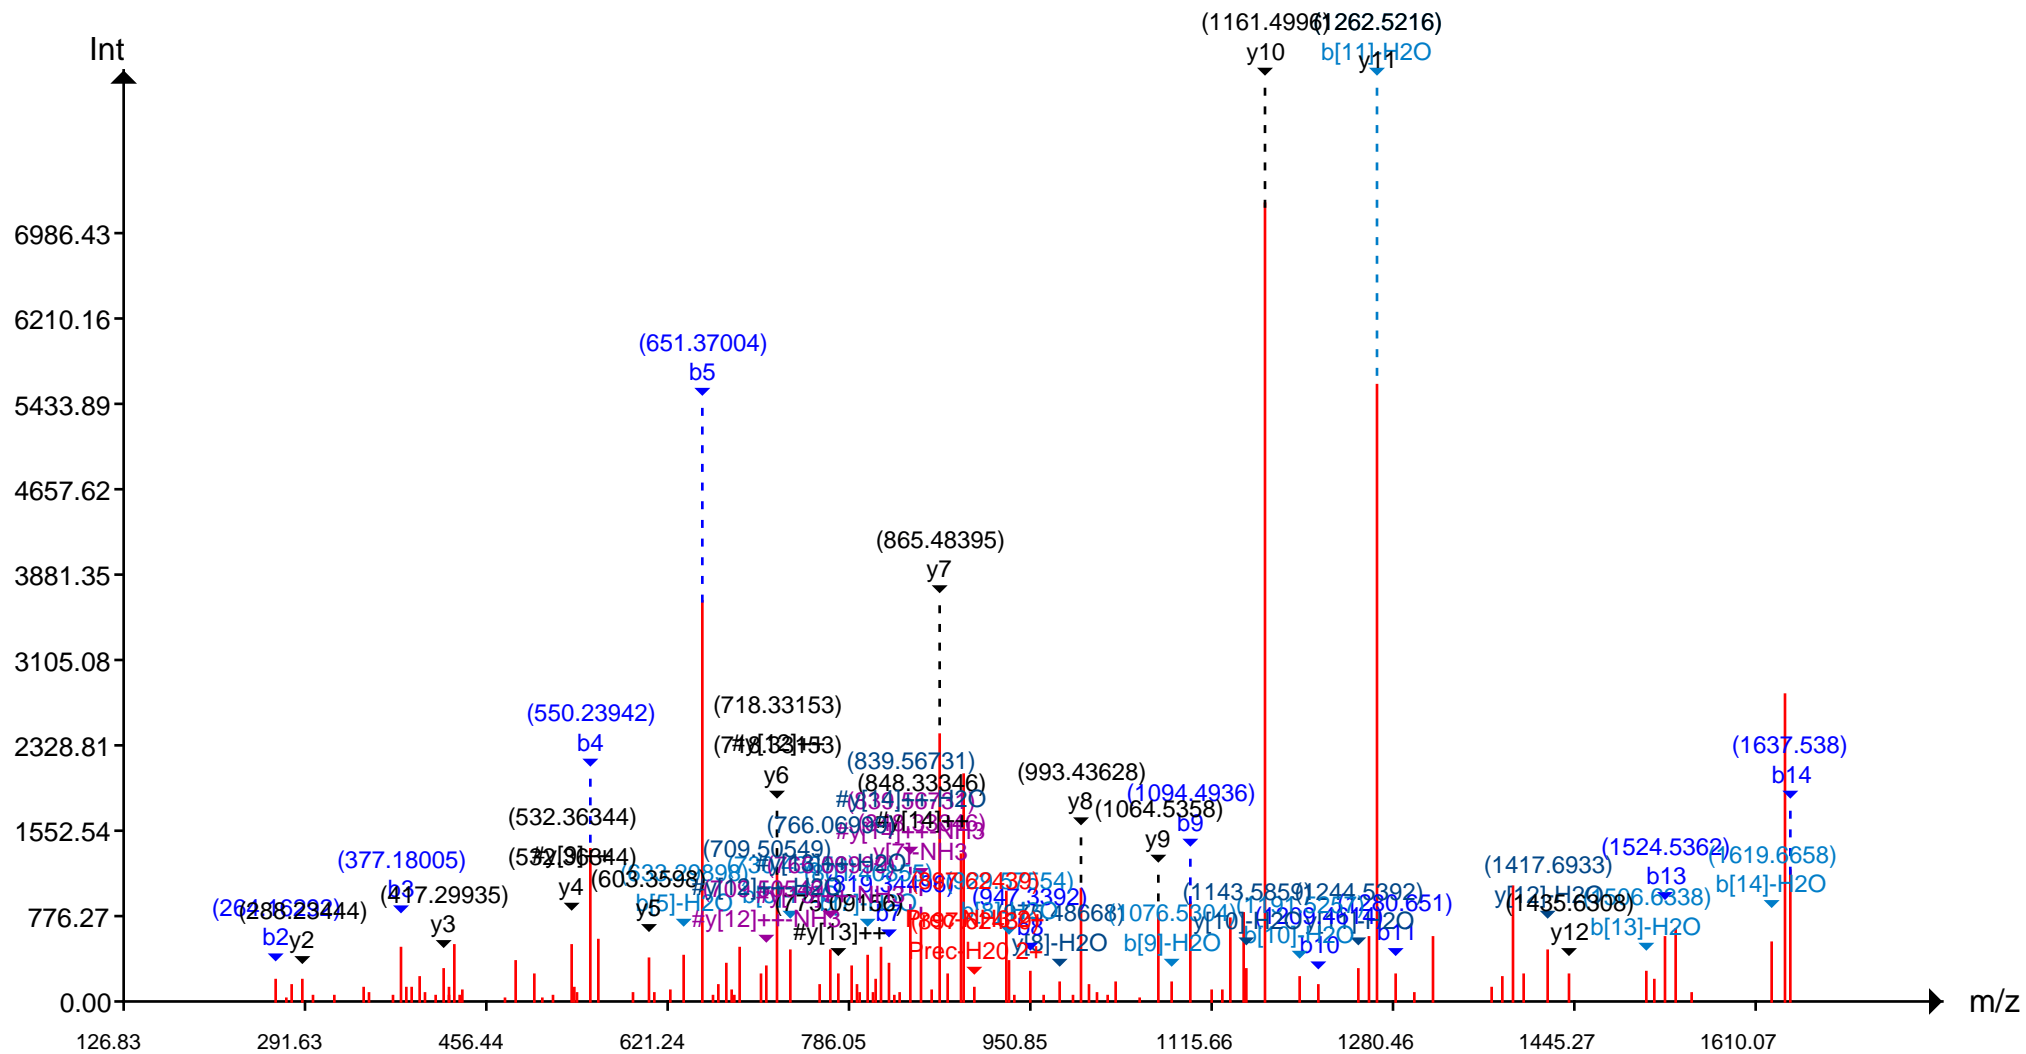

## Info

|                          |                                        |                           |          |
|--------------------------|----------------------------------------|---------------------------|----------|
| <b>Modified Sequence</b> | AcD3-AM<Mox*>LK<AcD3K*>TPAQFDAELR-COOH | <b>Ion score</b>          | 76.0     |
| <b>Protein</b>           | P10107                                 | <b>Confidence level</b>   | 99.00%   |
| <b>Precursor m/z</b>     | 906.46075                              | <b>Identity Threshold</b> | 47.94    |
| <b>Charge</b>            | 2+                                     | <b>Mass error</b>         | 0.002758 |

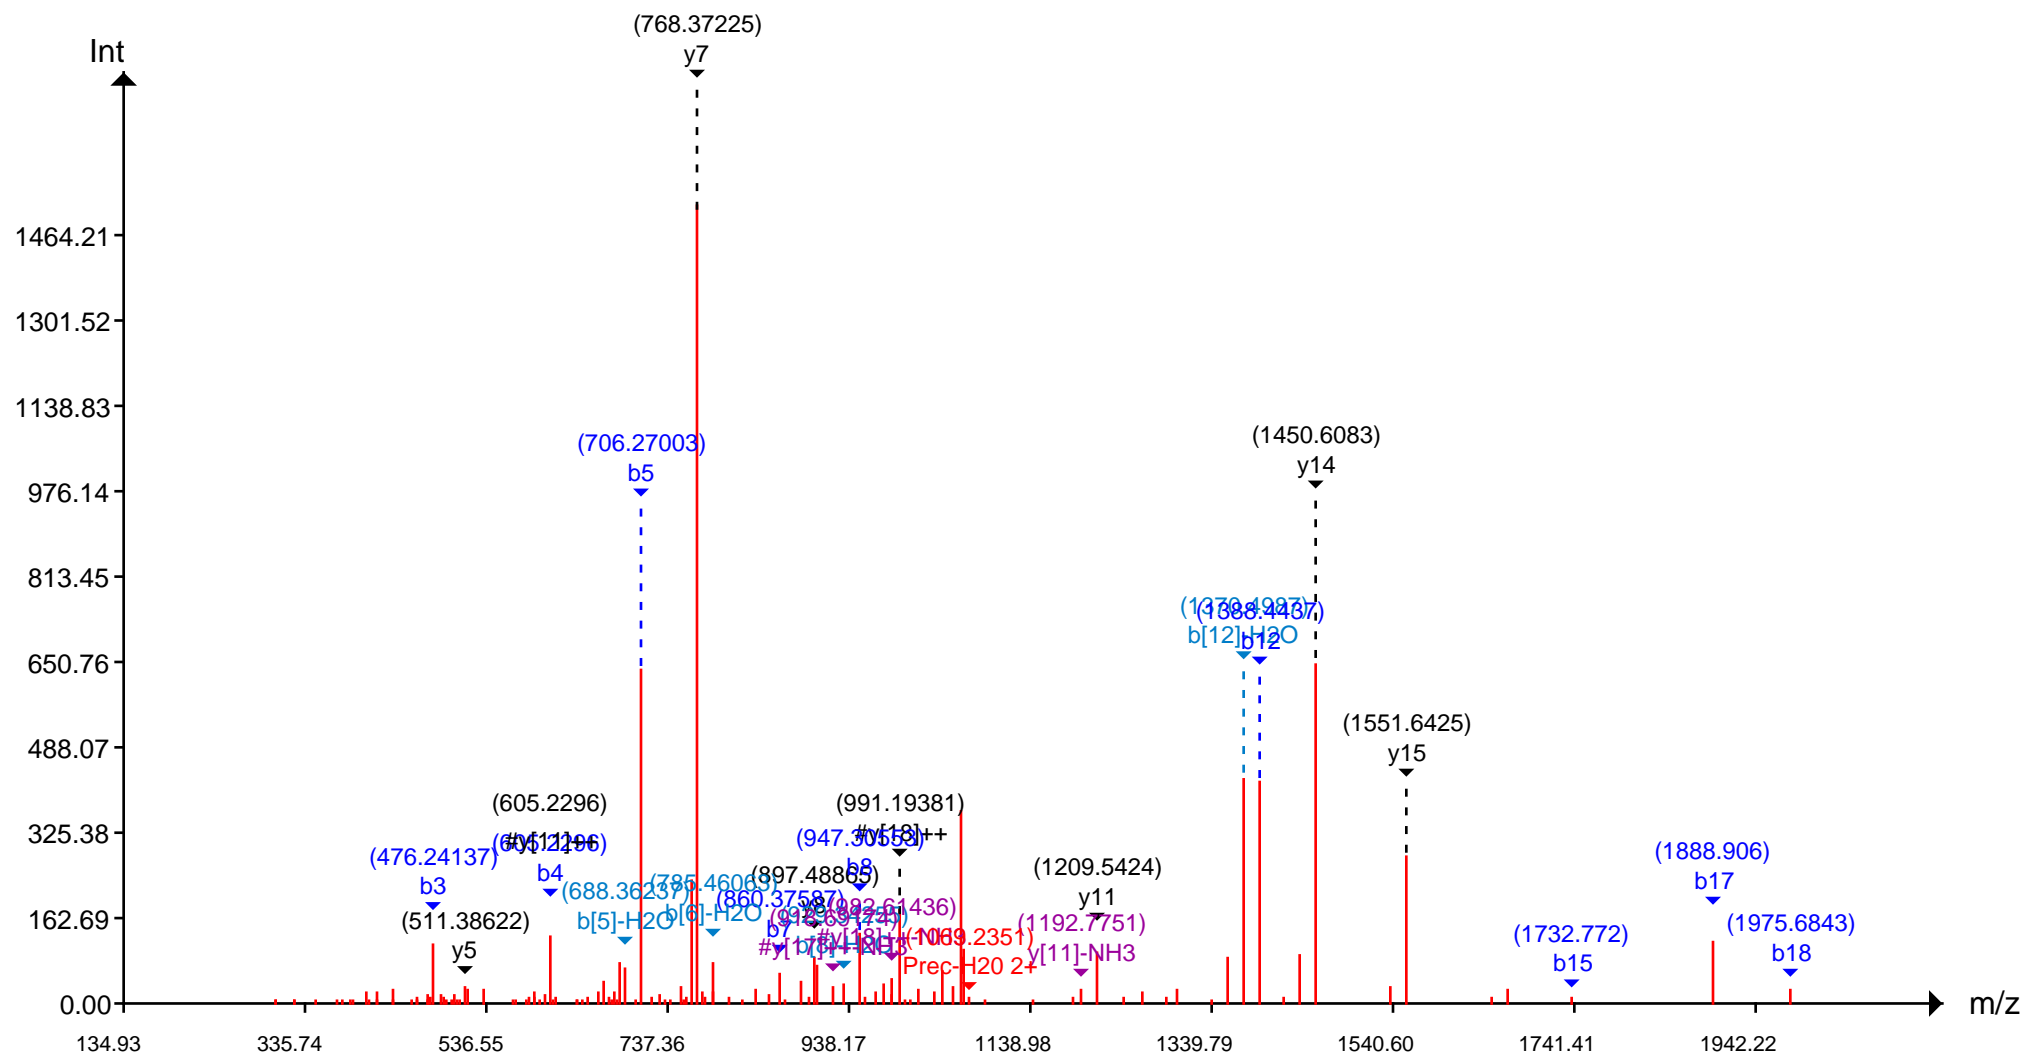

## Info

|                          |                                                  |                           |          |
|--------------------------|--------------------------------------------------|---------------------------|----------|
| <b>Modified Sequence</b> | AcD3-EQK<AcD3K*>ETPGSQPSEPC<Cmm*>SGVSR<C13>-COOH | <b>Ion score</b>          | 65.18    |
| <b>Protein</b>           | P27546                                           | <b>Confidence level</b>   | 99.00%   |
| <b>Precursor m/z</b>     | 1078.5115                                        | <b>Identity Threshold</b> | 46.07    |
| <b>Charge</b>            | 2+                                               | <b>Mass error</b>         | 0.001871 |

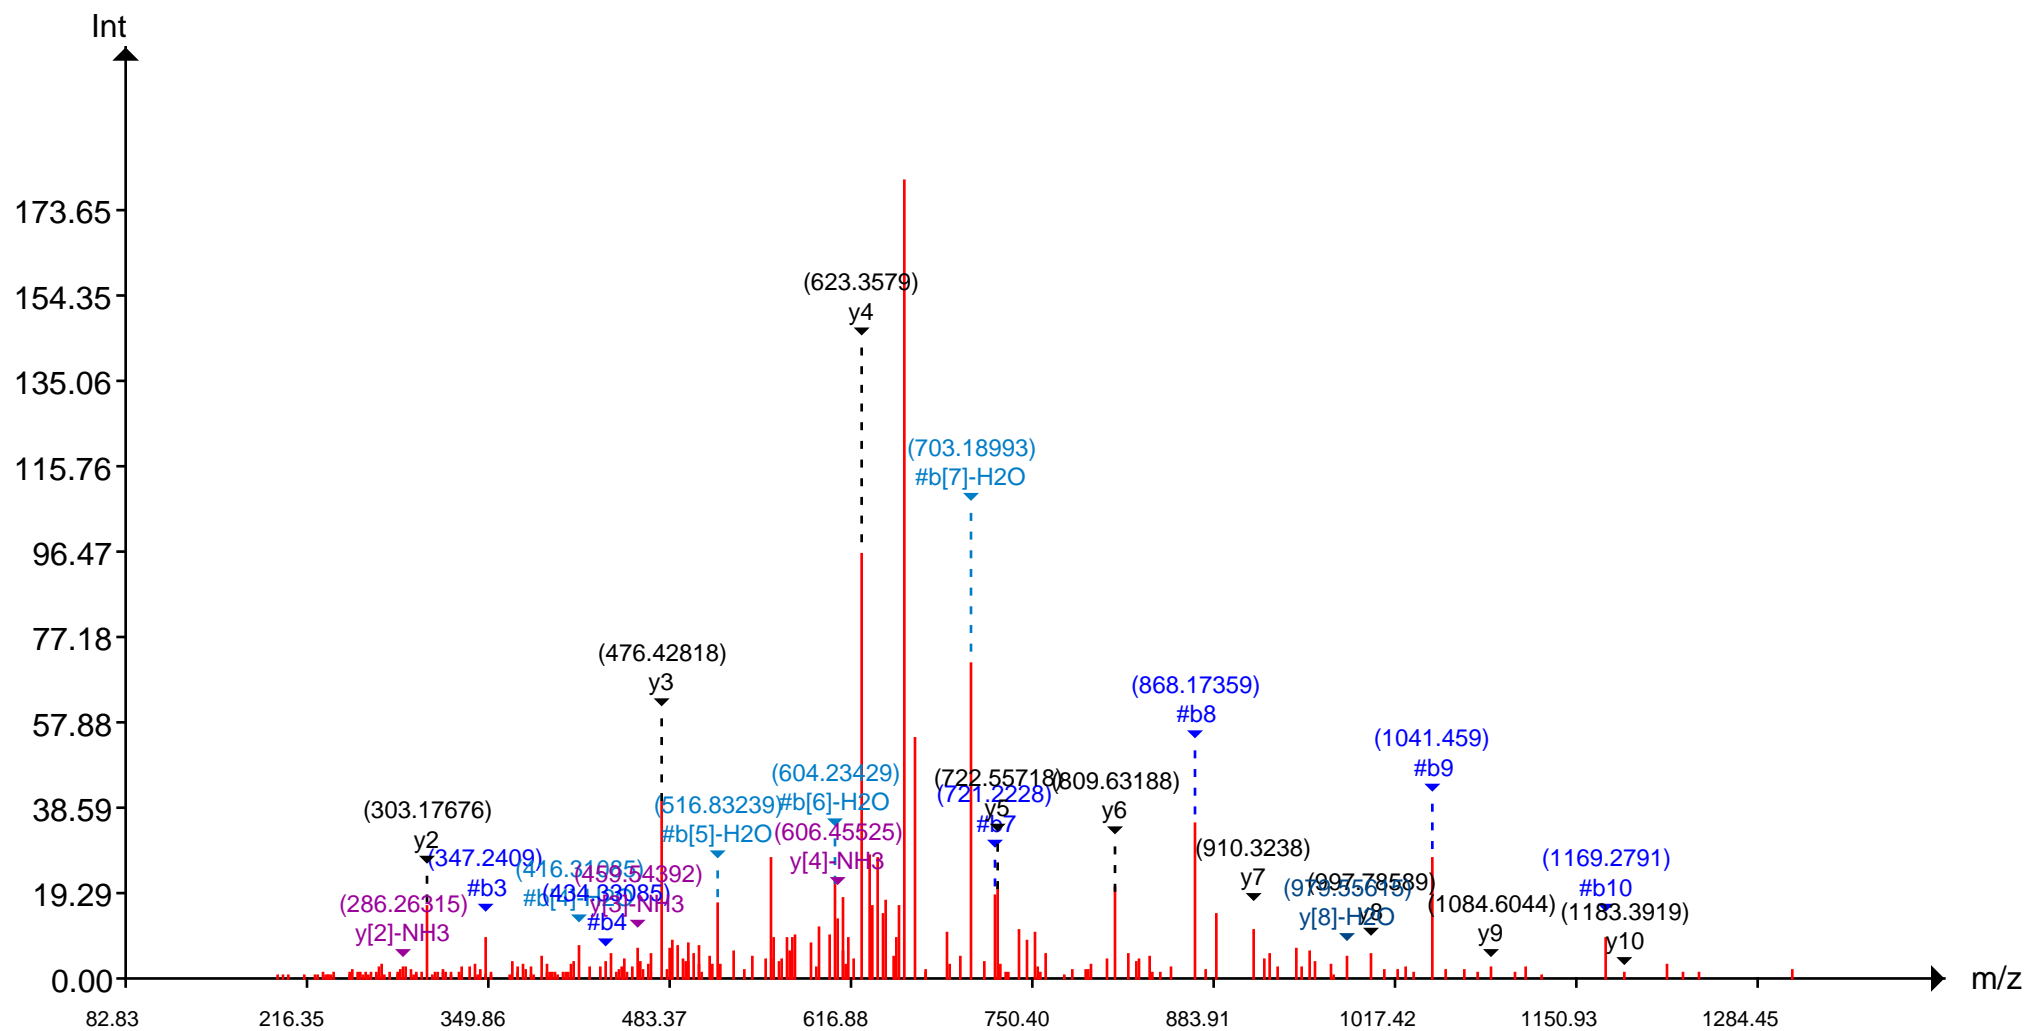

## Info

|                          |                               |                           |          |
|--------------------------|-------------------------------|---------------------------|----------|
| <b>Modified Sequence</b> | AcD3-DVSSTSVFK<AcD3K*>QR-COOH | <b>Ion score</b>          | 48.41    |
| <b>Protein</b>           | Q8R1F1                        | <b>Confidence level</b>   | 99.00%   |
| <b>Precursor m/z</b>     | 672.35818                     | <b>Identity Threshold</b> | 48.00    |
| <b>Charge</b>            | 2+                            | <b>Mass error</b>         | 0.001842 |

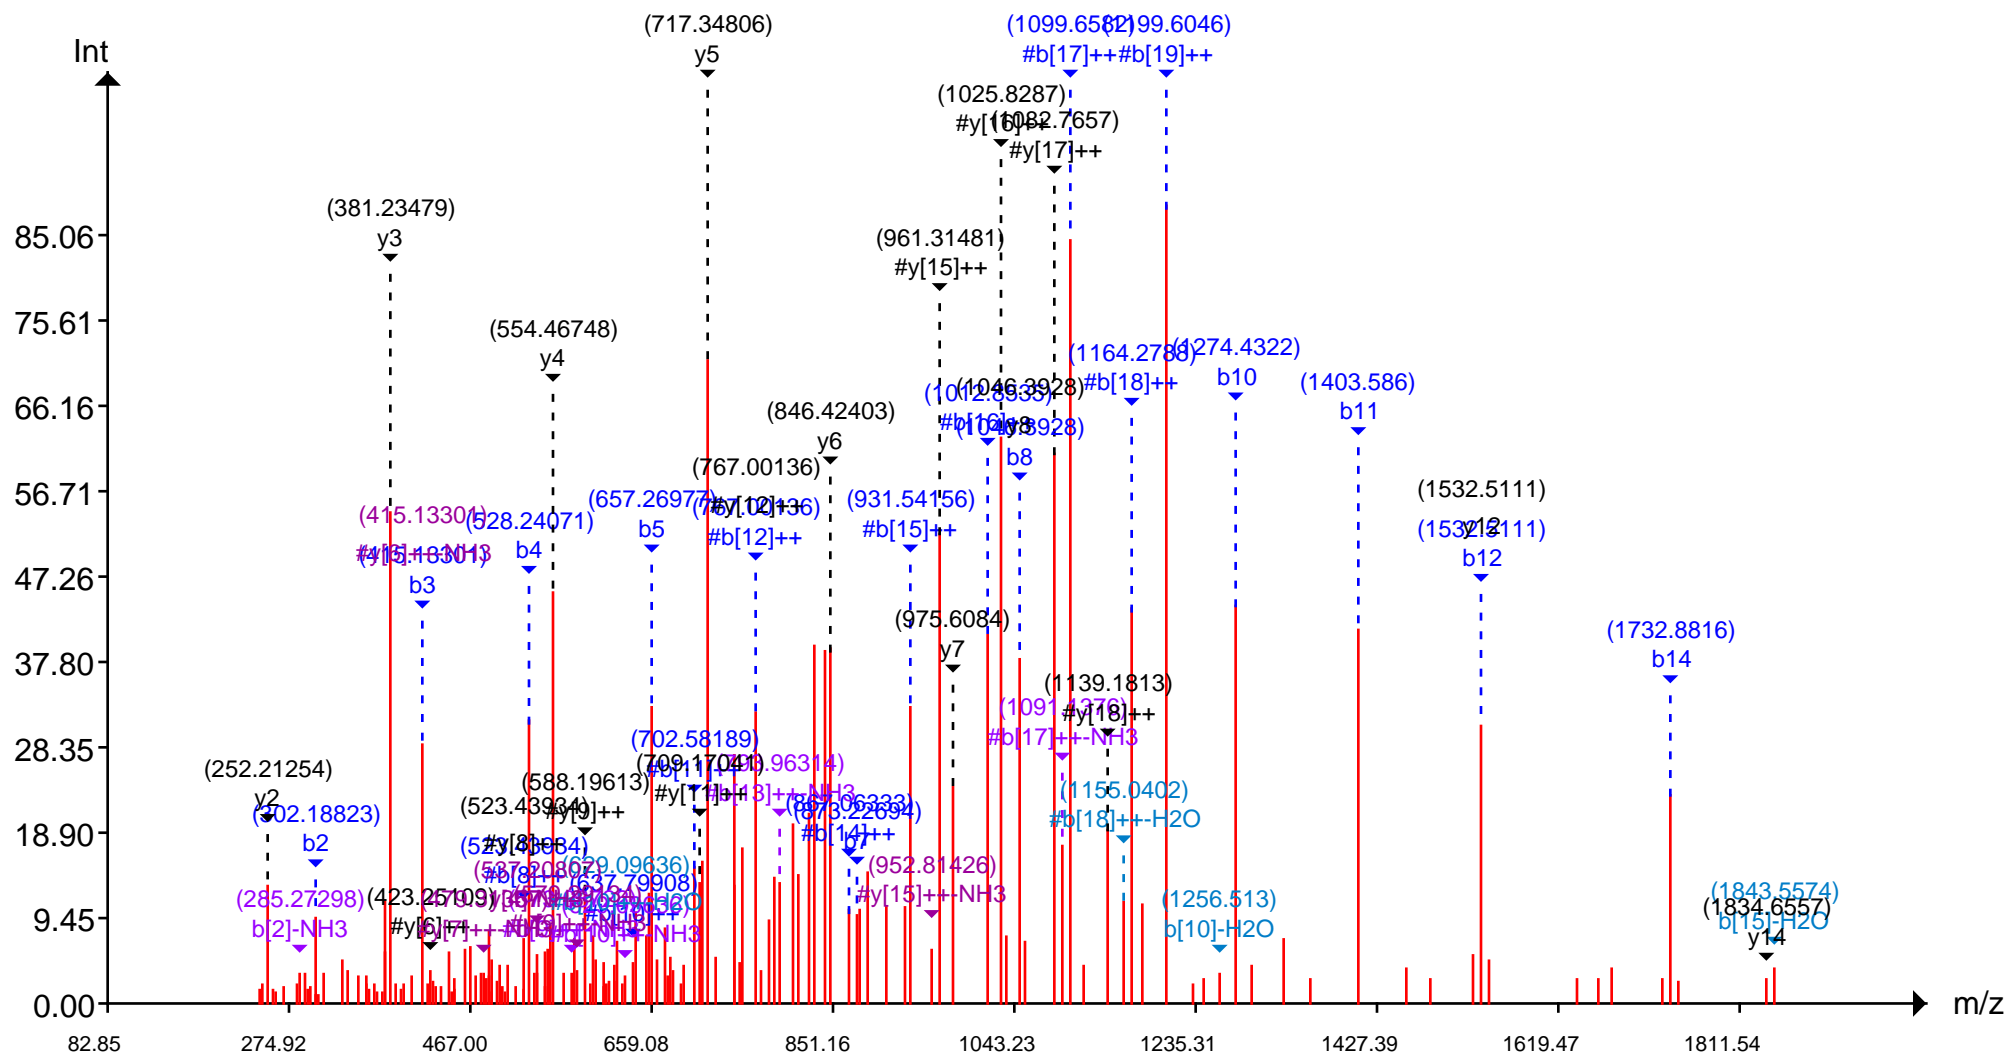

## Info

|                          |                                                    |                           |          |
|--------------------------|----------------------------------------------------|---------------------------|----------|
| <b>Modified Sequence</b> | AcD3-QQILESEK<AcD3K*>DLEEAEYK<AcD3K*>EAR<C13>-COOH | <b>Ion score</b>          | 65.8     |
| <b>Protein</b>           | P48428                                             | <b>Confidence level</b>   | 99.00%   |
| <b>Precursor m/z</b>     | 860.09976                                          | <b>Identity Threshold</b> | 47.56    |
| <b>Charge</b>            | 3+                                                 | <b>Mass error</b>         | 0.003572 |



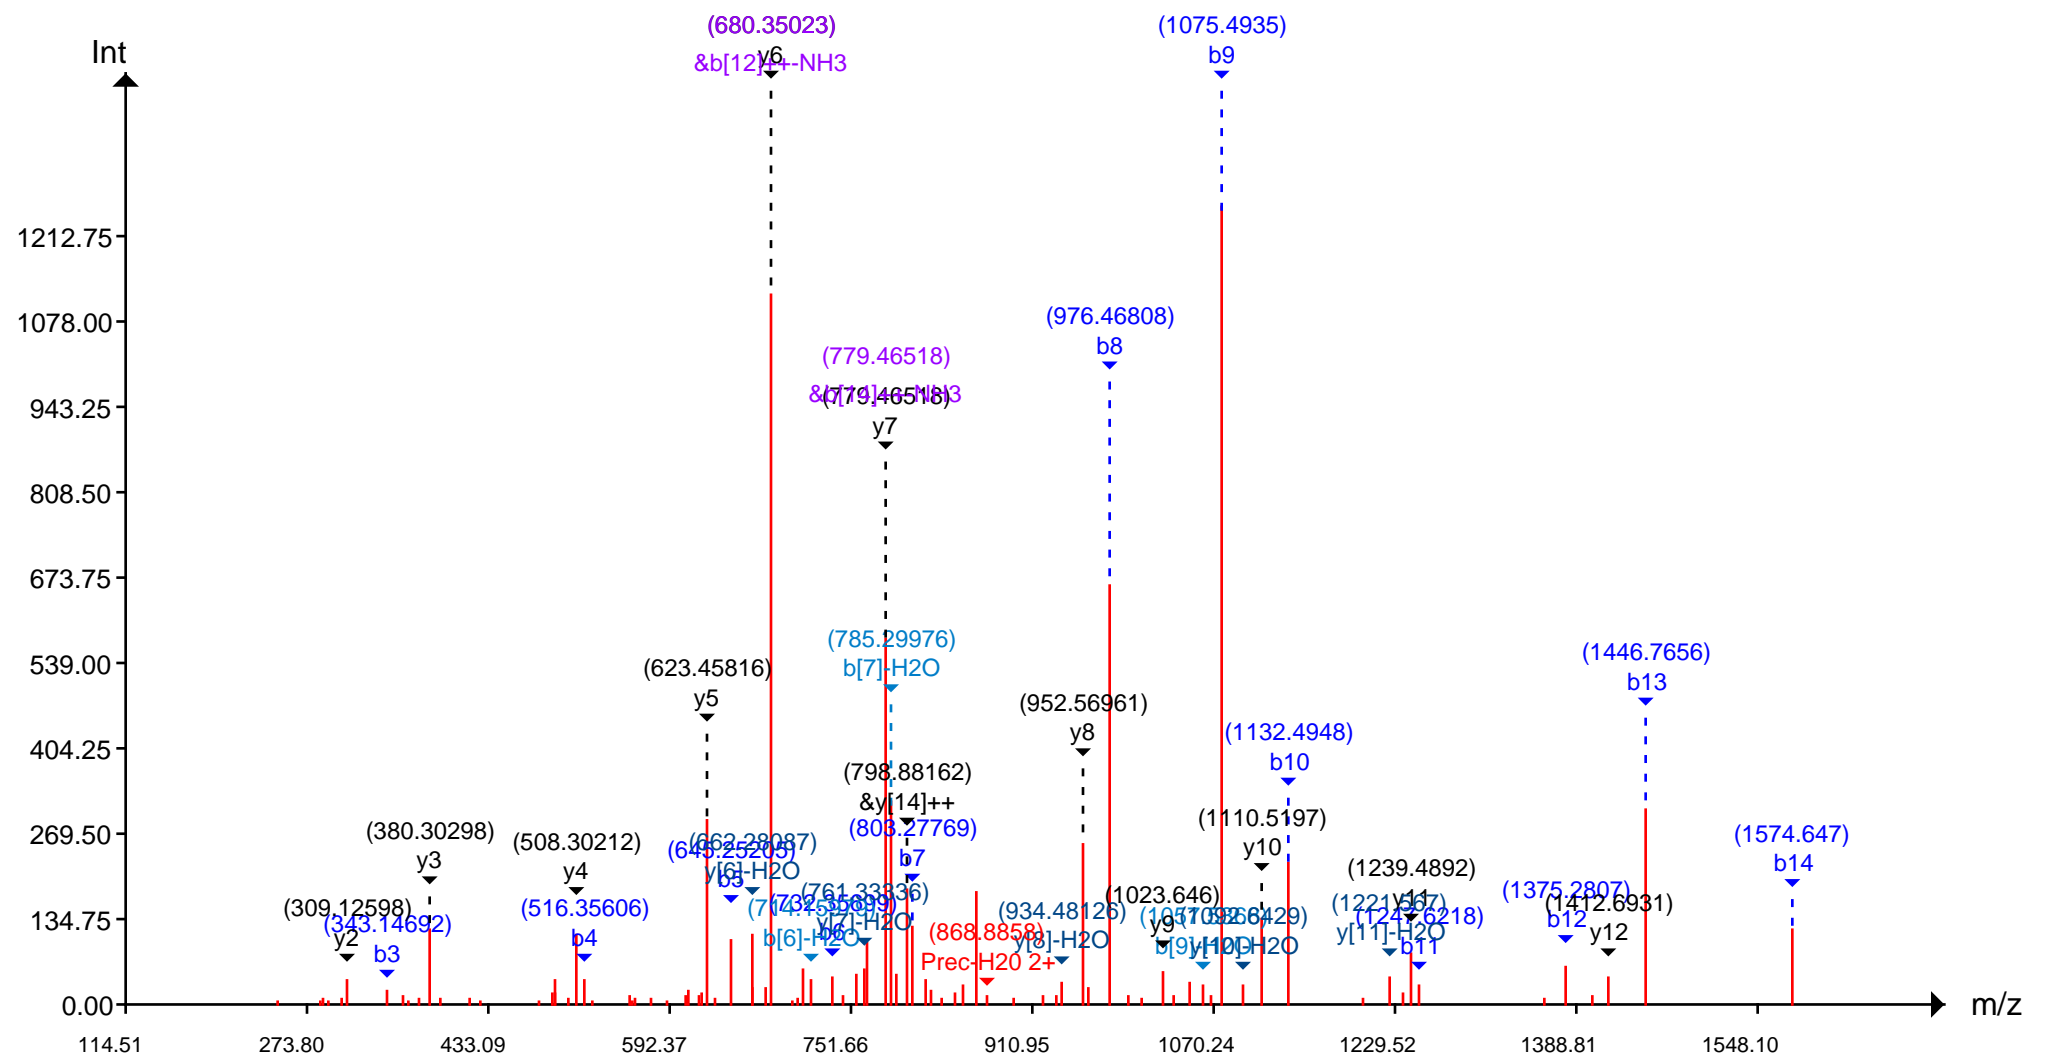

Info

|                          |                                                |                           |          |
|--------------------------|------------------------------------------------|---------------------------|----------|
| <b>Modified Sequence</b> | AcD3-IAIK<AcD3K*>ESAK<AcD3K*>VGDQAQR<C13>-COOH | <b>Ion score</b>          | 112.34   |
| <b>Protein</b>           | Q99JY9                                         | <b>Confidence level</b>   | 99.00%   |
| <b>Precursor m/z</b>     | 878.00739                                      | <b>Identity Threshold</b> | 45.18    |
| <b>Charge</b>            | 2+                                             | <b>Mass error</b>         | 0.002257 |

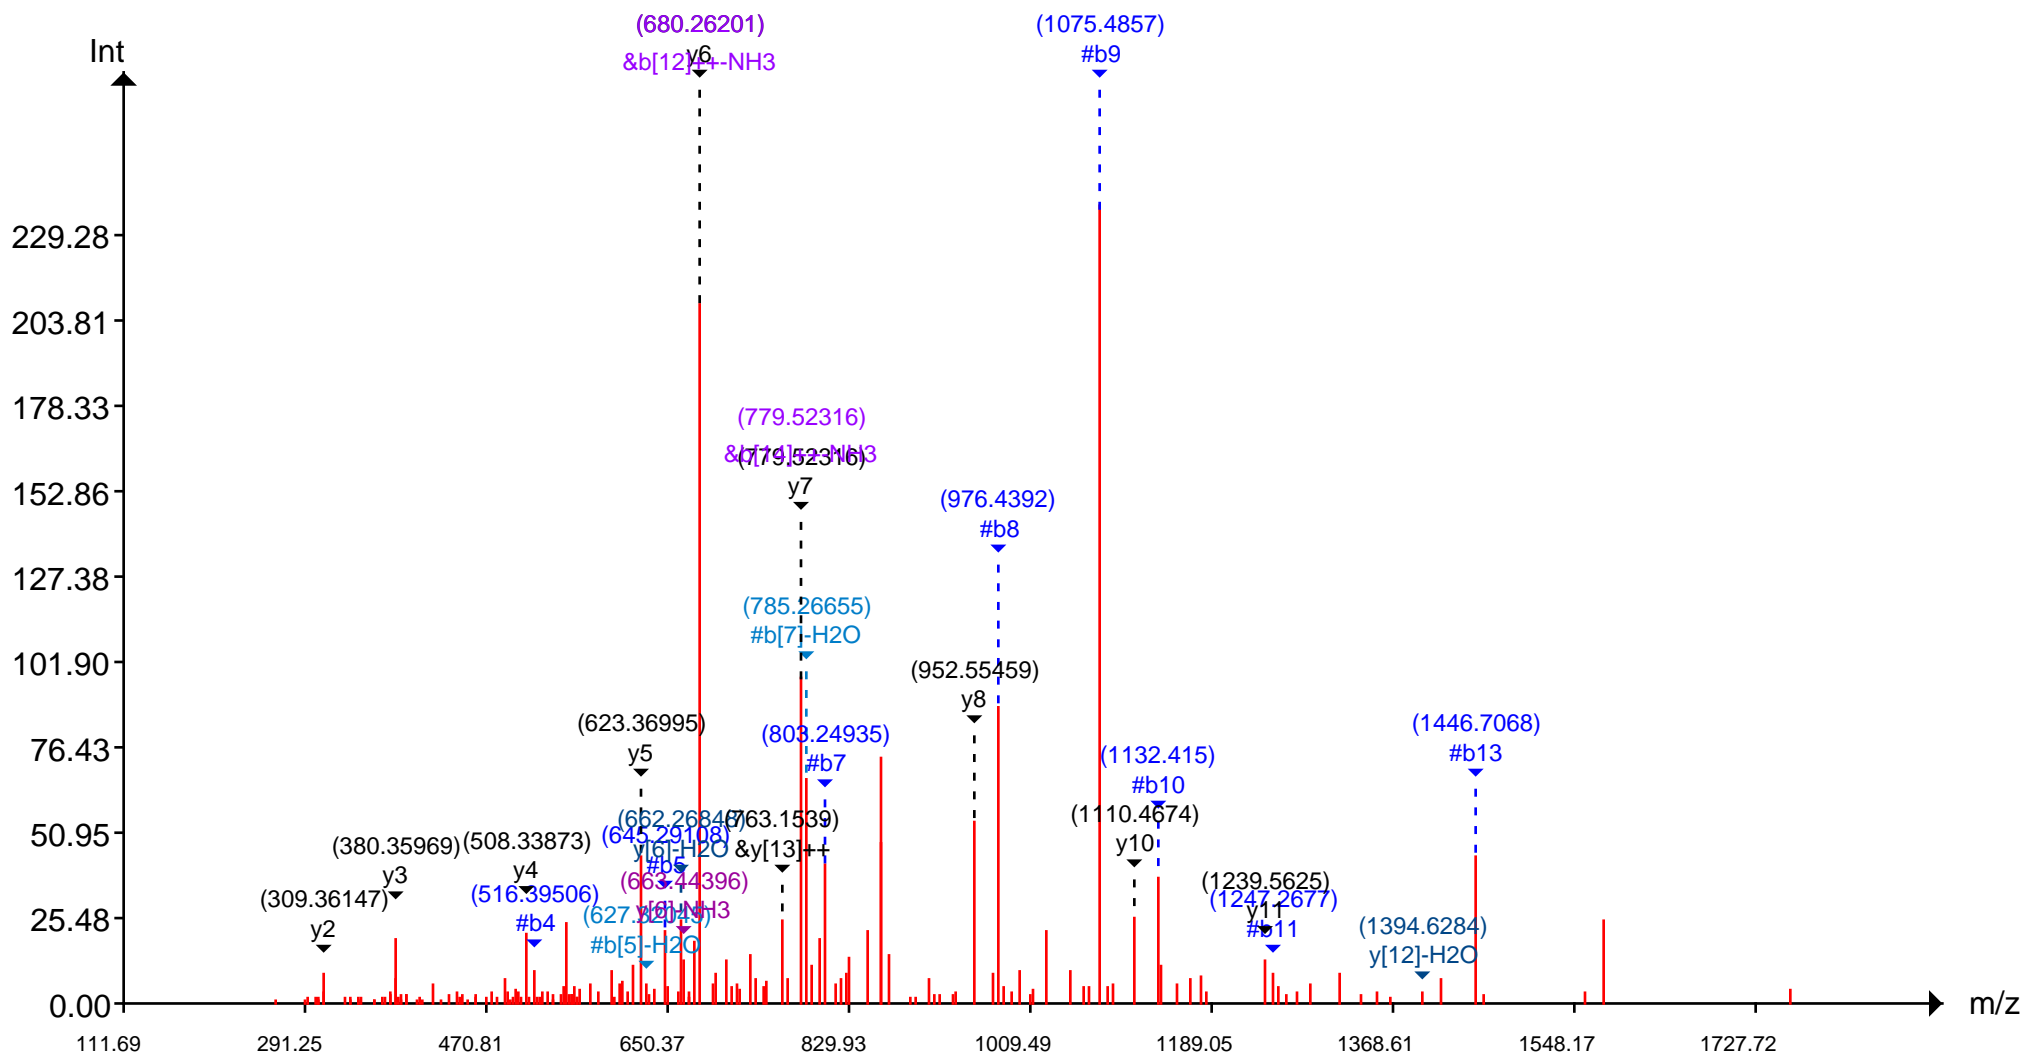

## Info

|                          |                                                |                           |          |
|--------------------------|------------------------------------------------|---------------------------|----------|
| <b>Modified Sequence</b> | AcD3-IAIK<AcD3K*>ESAK<AcD3K*>VGDQAQR<C13>-COOH | <b>Ion score</b>          | 53.57    |
| <b>Protein</b>           | Q99JY9                                         | <b>Confidence level</b>   | 99.00%   |
| <b>Precursor m/z</b>     | 878.0073                                       | <b>Identity Threshold</b> | 45.21    |
| <b>Charge</b>            | 2+                                             | <b>Mass error</b>         | 0.002077 |

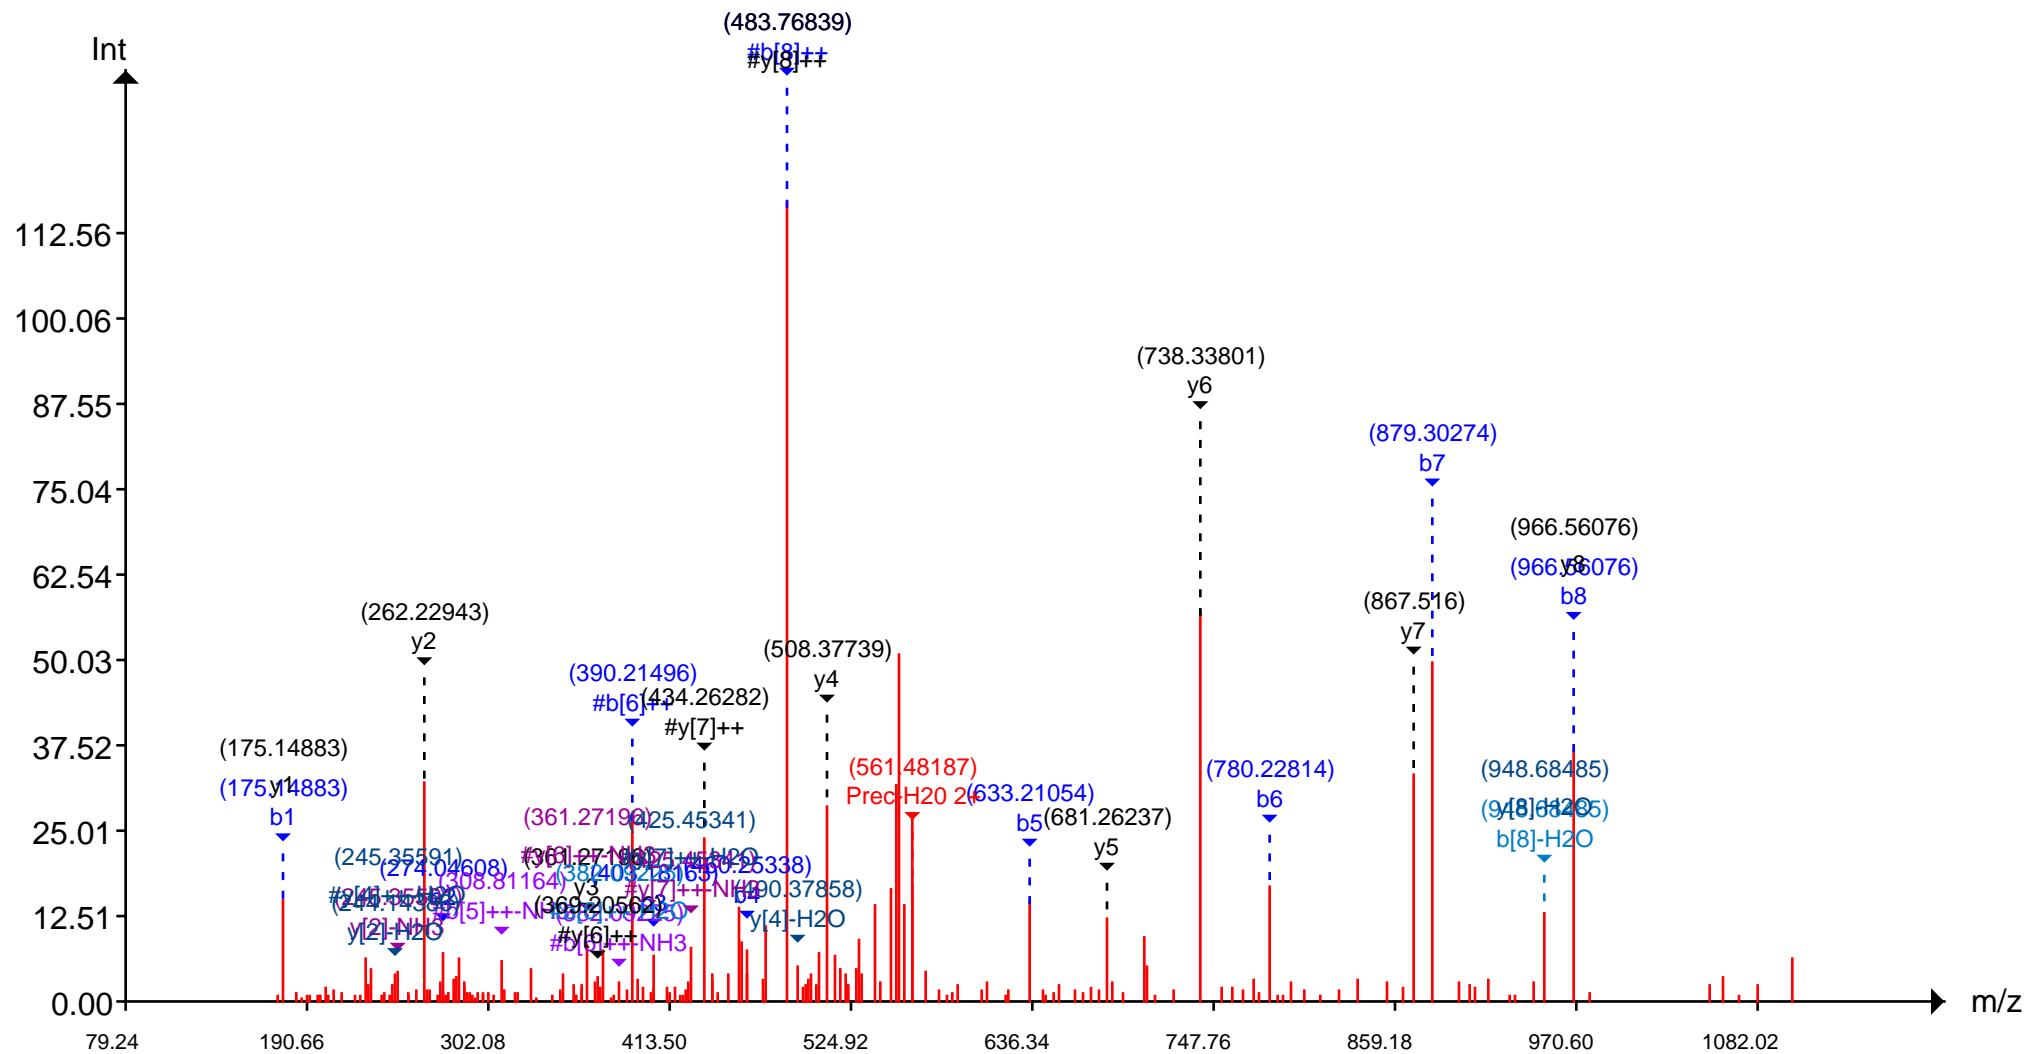

## Info

**Modified Sequence** AcD3-EVEGK<AcD3K\*>M<Mox\*>VSR-COOH

**Ion score** 62.9

**Protein** P63028

**Confidence level** 99.00%

**Precursor m/z** 570.79563

**Identity Threshold** 47.46

**Charge** 2+

**Mass error** 3.84E-4

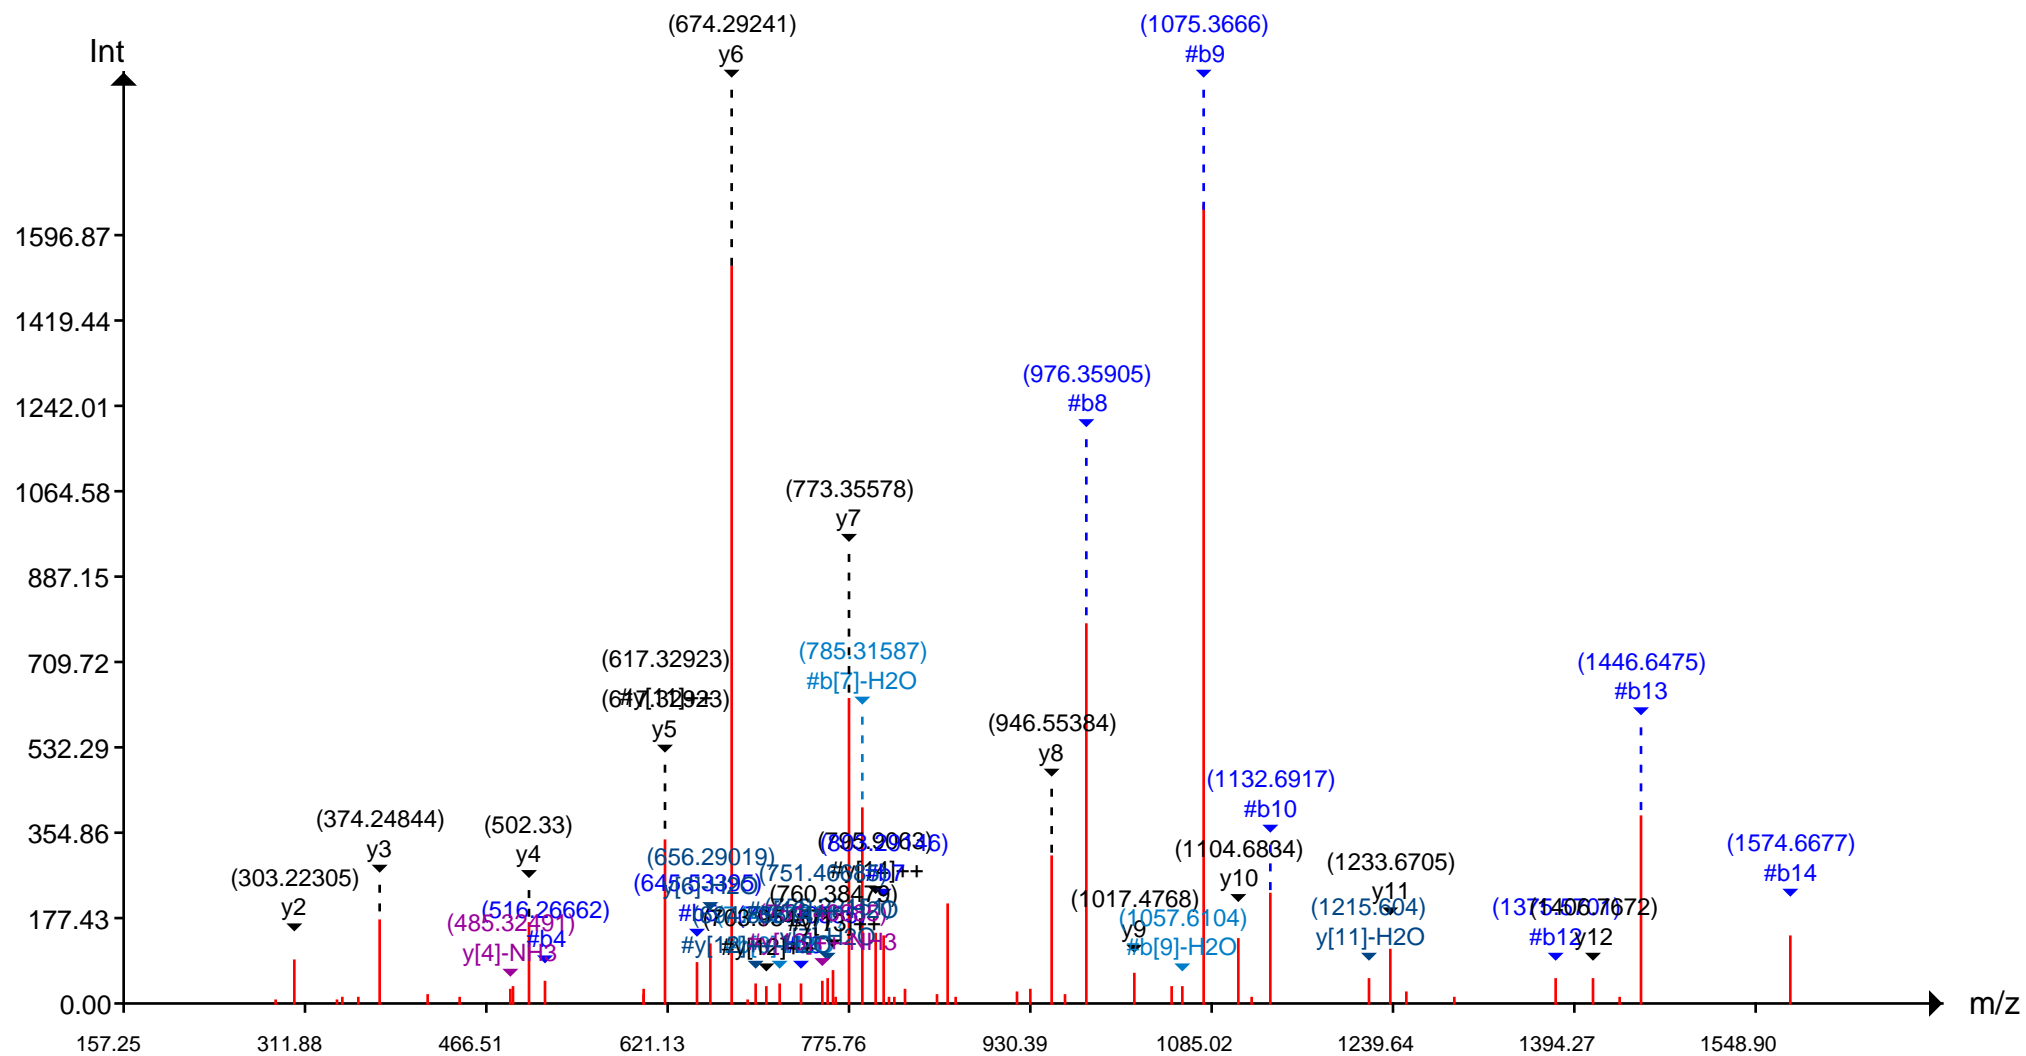

## Info

|                          |                                           |                           |          |
|--------------------------|-------------------------------------------|---------------------------|----------|
| <b>Modified Sequence</b> | AcD3-IAIK<AcD3K*>ESAK<AcD3K*>VGDQAQR-COOH | <b>Ion score</b>          | 112.97   |
| <b>Protein</b>           | Q99JY9                                    | <b>Confidence level</b>   | 99.00%   |
| <b>Precursor m/z</b>     | 874.99762                                 | <b>Identity Threshold</b> | 46.08    |
| <b>Charge</b>            | 2+                                        | <b>Mass error</b>         | 0.002859 |

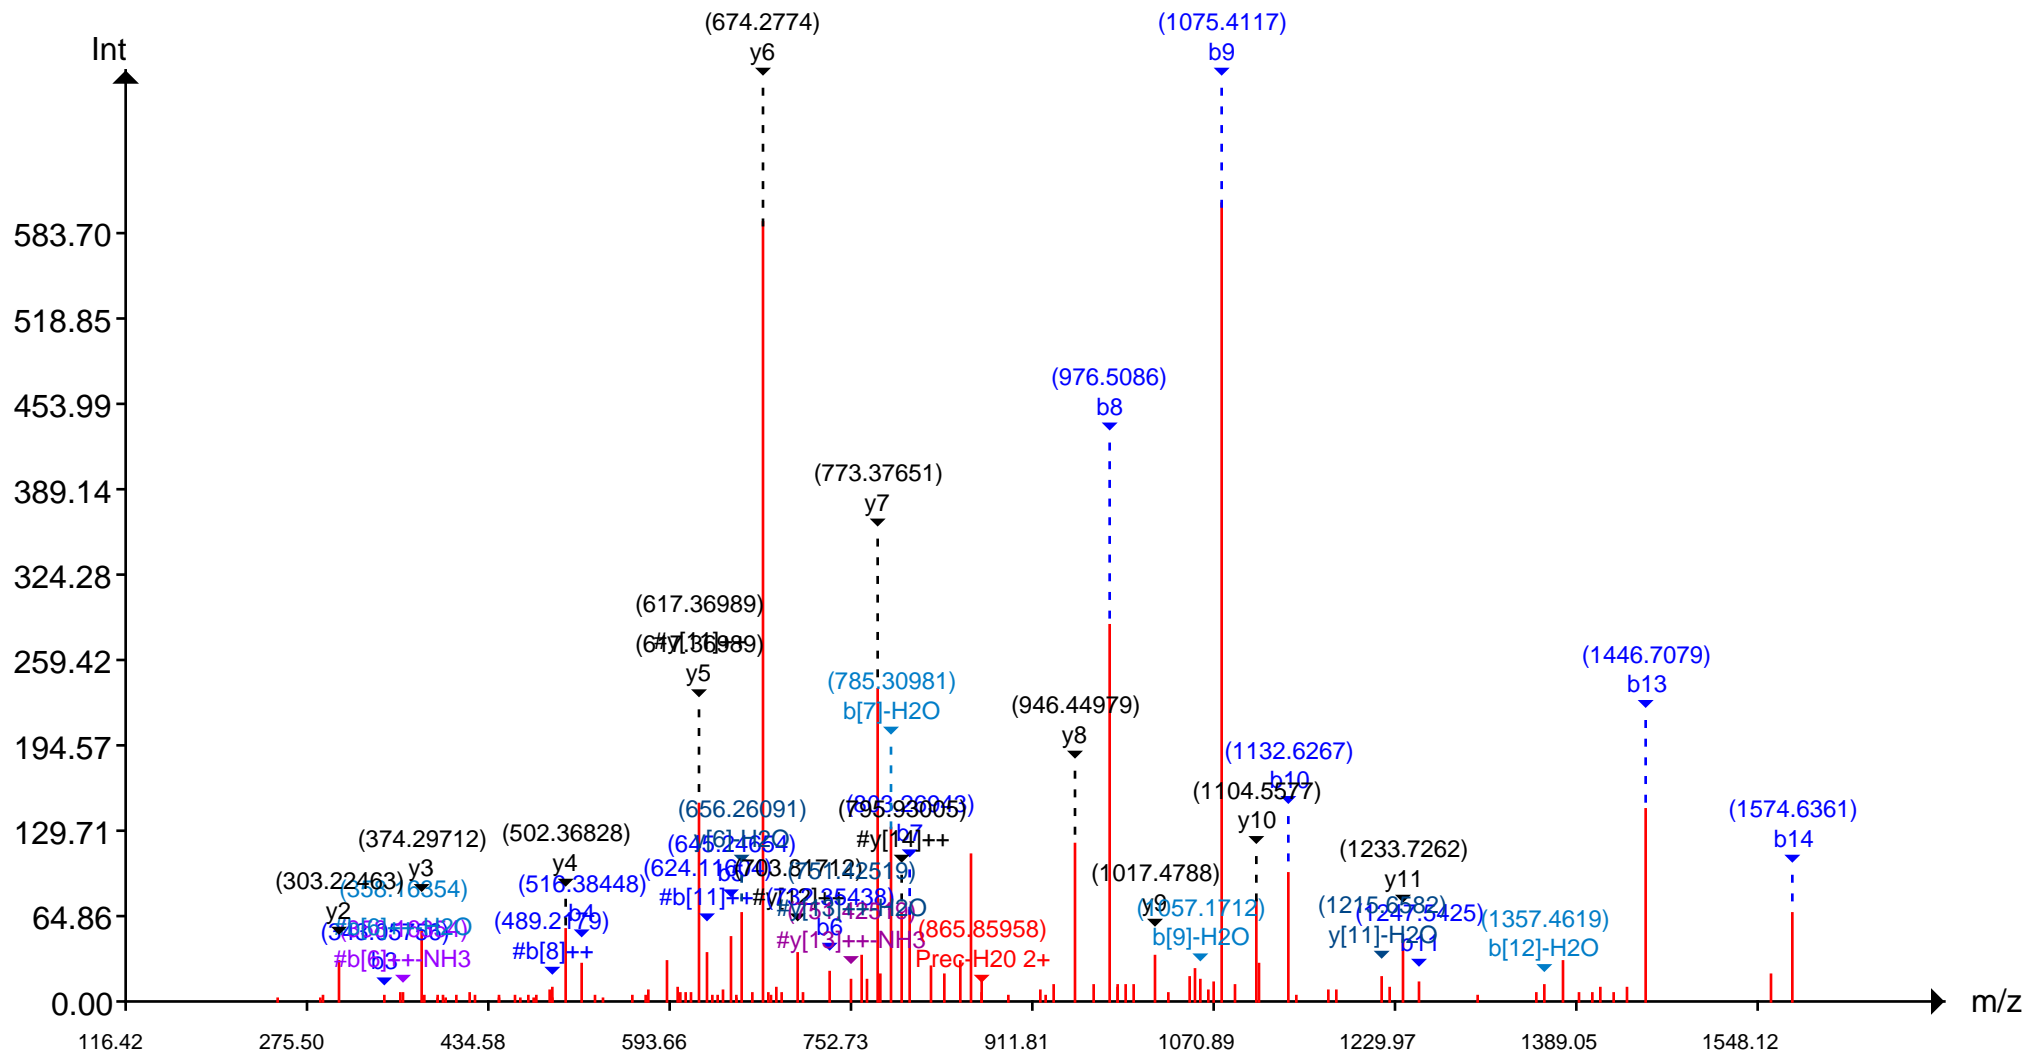

## Info

**Modified Sequence** AcD3-IAIK<AcD3K\*>ESAK<AcD3K\*>VGDQAQR-COOH

**Ion score** 92.34

**Protein** Q99JY9

**Confidence level** 99.00%

**Precursor m/z** 874.99731

**Identity Threshold** 46.19

**Charge** 2+

**Mass error** 0.002239

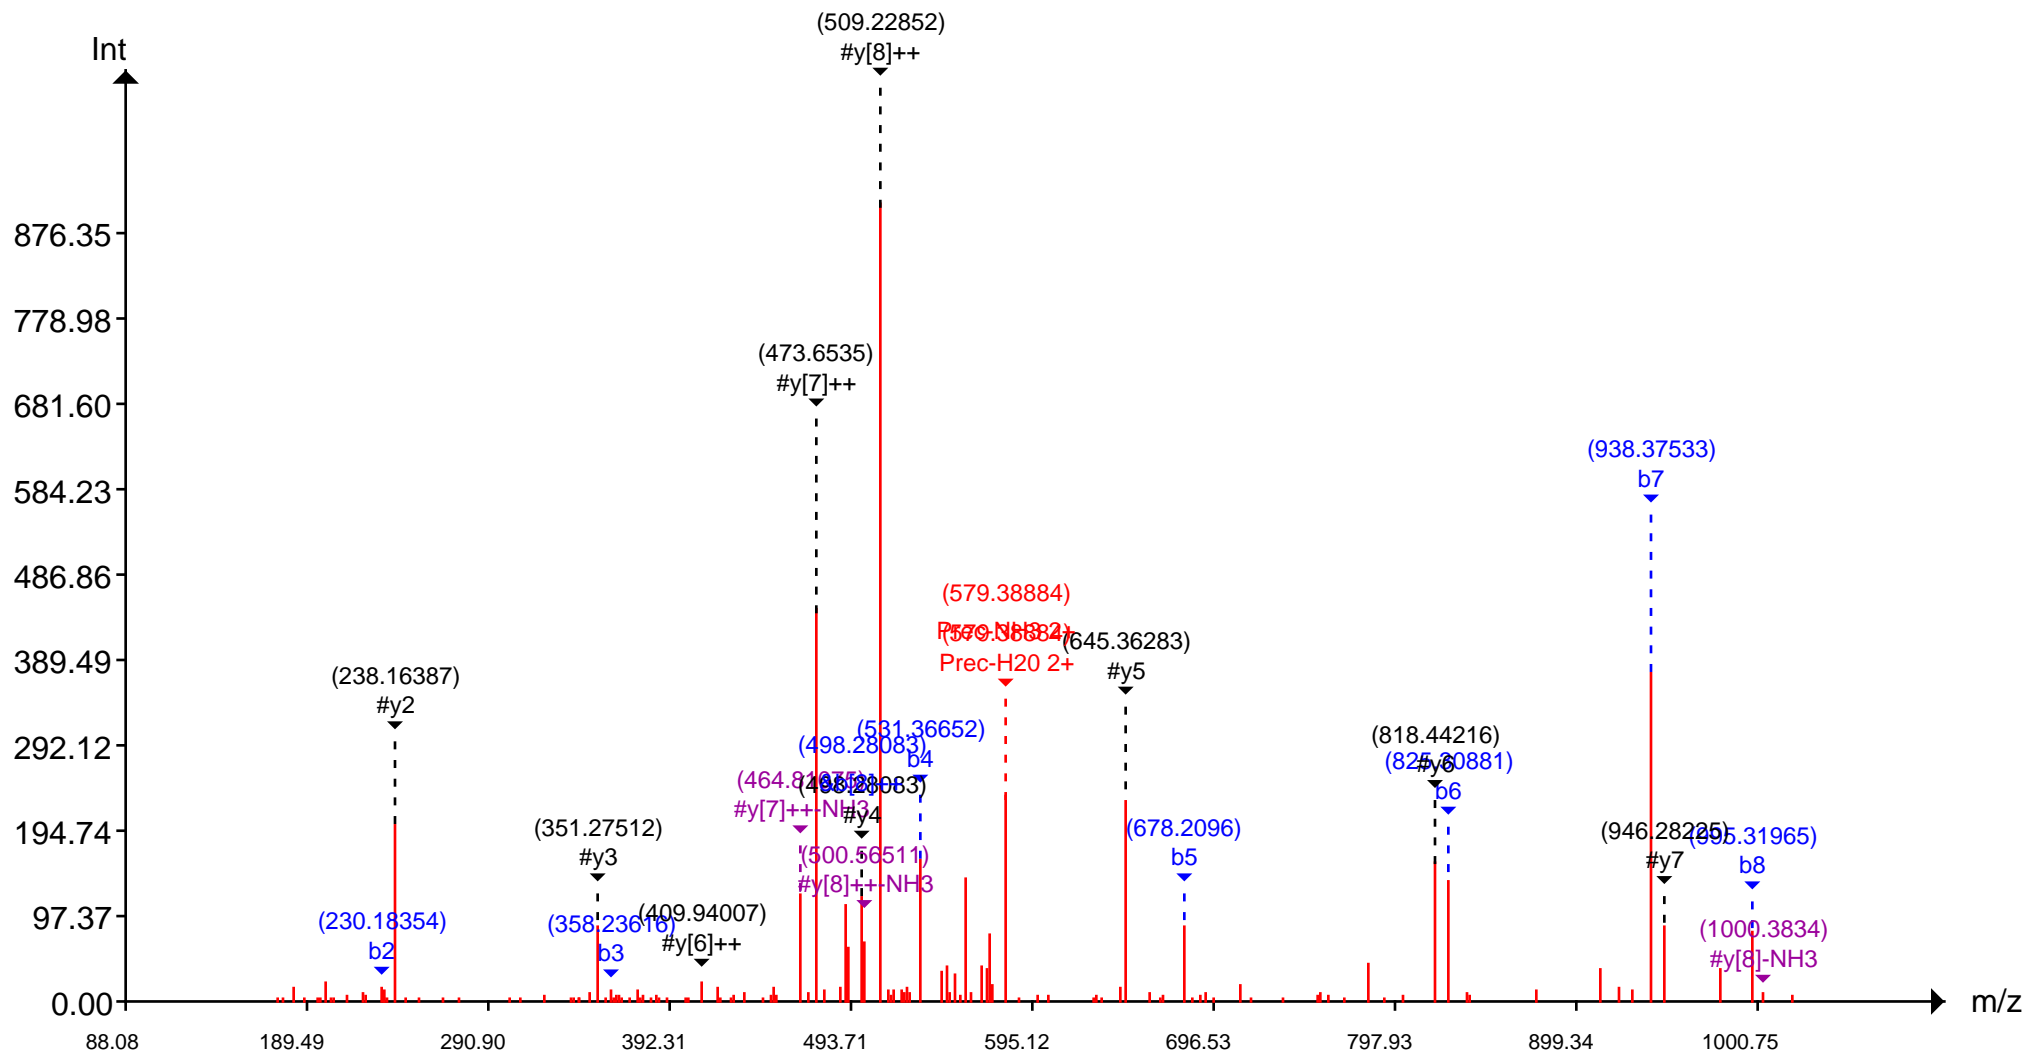

## Info

|                          |                                              |                           |          |
|--------------------------|----------------------------------------------|---------------------------|----------|
| <b>Modified Sequence</b> | AcD3-LAQK<AcD3K*>M<Mox*>M<Mox*>IGR<C13>-COOH | <b>Ion score</b>          | 50.14    |
| <b>Protein</b>           | P52480, P53657                               | <b>Confidence level</b>   | 99.00%   |
| <b>Precursor m/z</b>     | 588.32796                                    | <b>Identity Threshold</b> | 47.60    |
| <b>Charge</b>            | 2+                                           | <b>Mass error</b>         | -2.64E-4 |

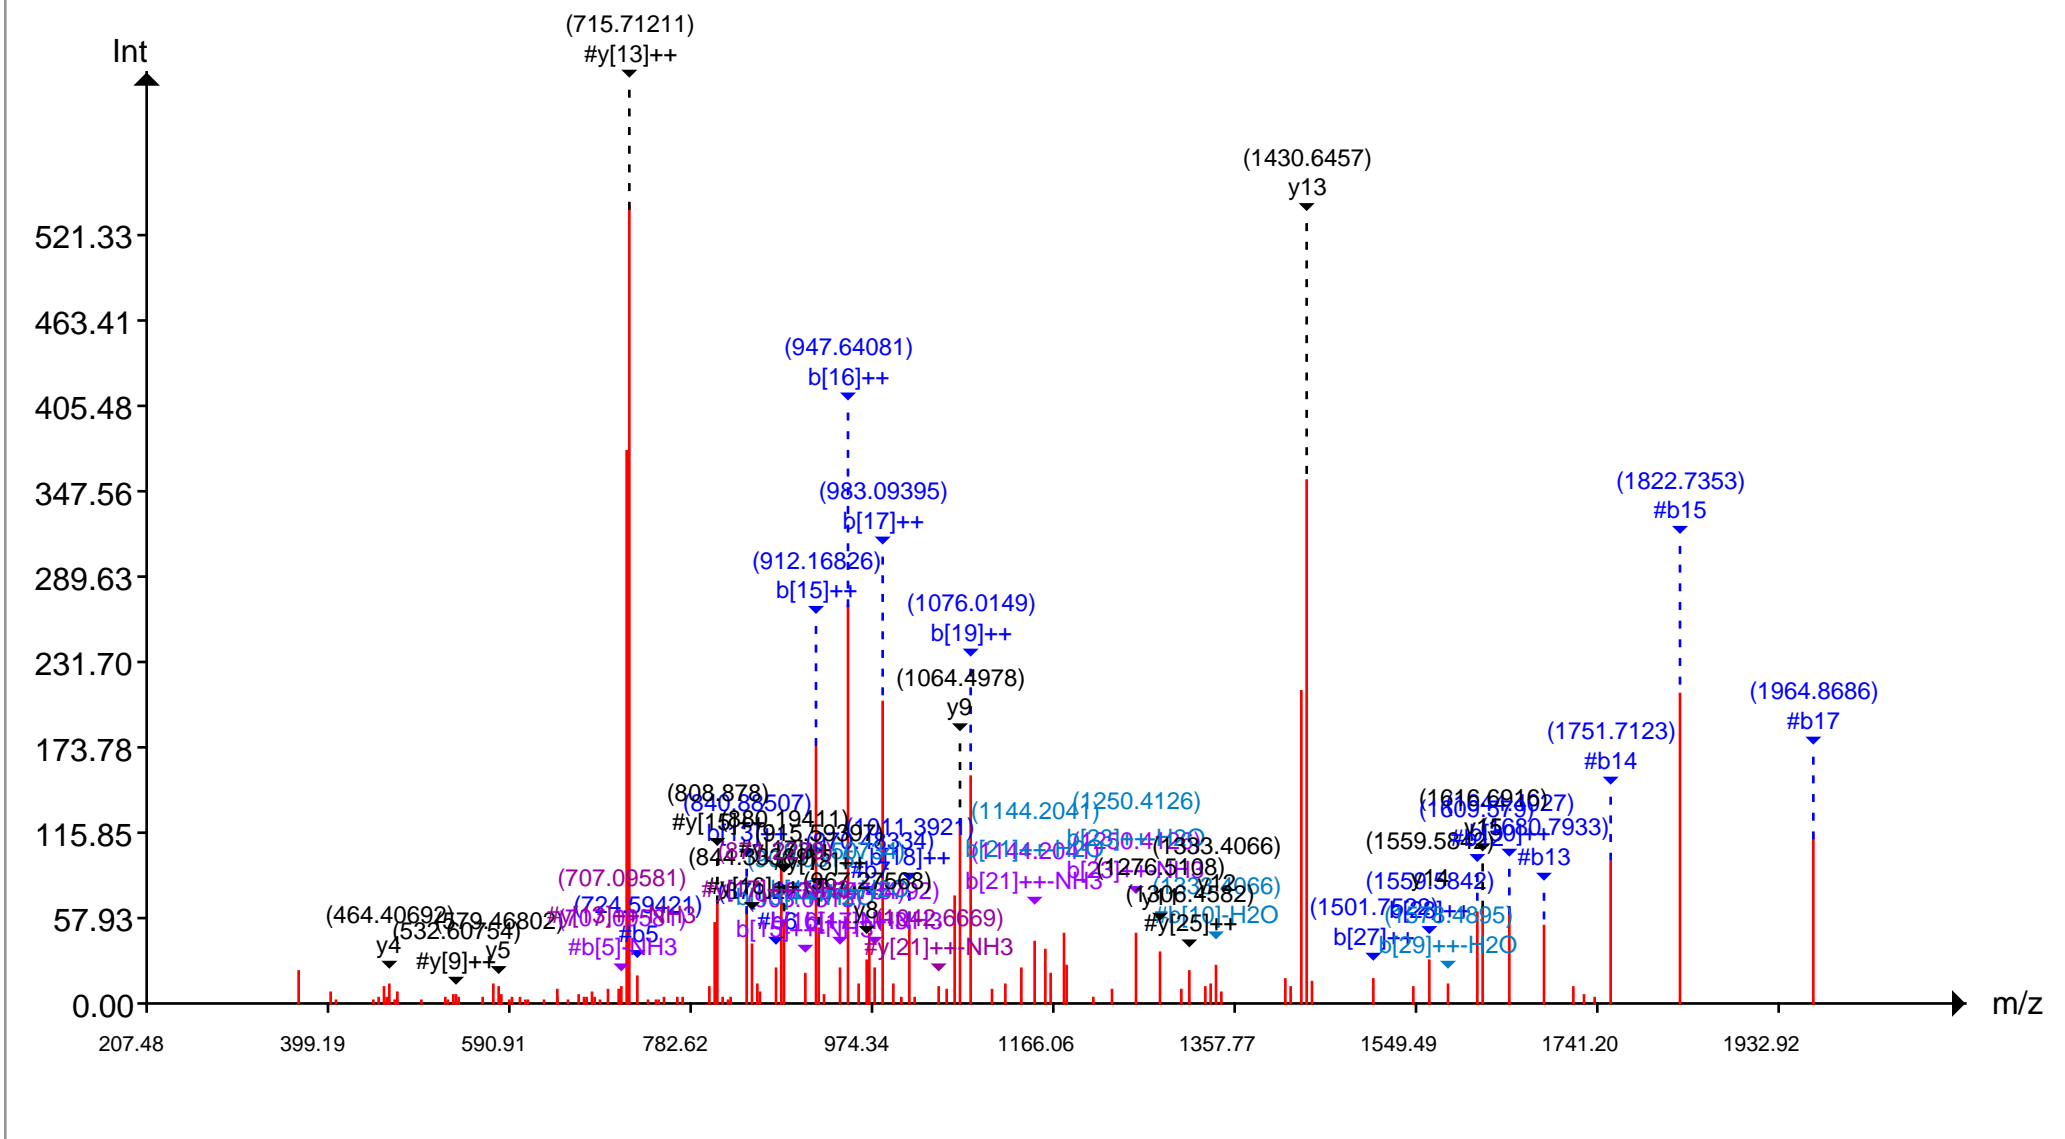

## Info

|                          |                                                               |                           |          |
|--------------------------|---------------------------------------------------------------|---------------------------|----------|
| <b>Modified Sequence</b> | AcD3-FDENK<AcD3K*>FVDEHEEAAAAAGEPGPDPC<Cmm*>EVDGLLR<C13>-COOH | <b>Ion score</b>          | 62.88    |
| <b>Protein</b>           | Q9D898                                                        | <b>Confidence level</b>   | 99.00%   |
| <b>Precursor m/z</b>     | 1194.2189                                                     | <b>Identity Threshold</b> | 43.26    |
| <b>Charge</b>            | 3+                                                            | <b>Mass error</b>         | 0.003463 |

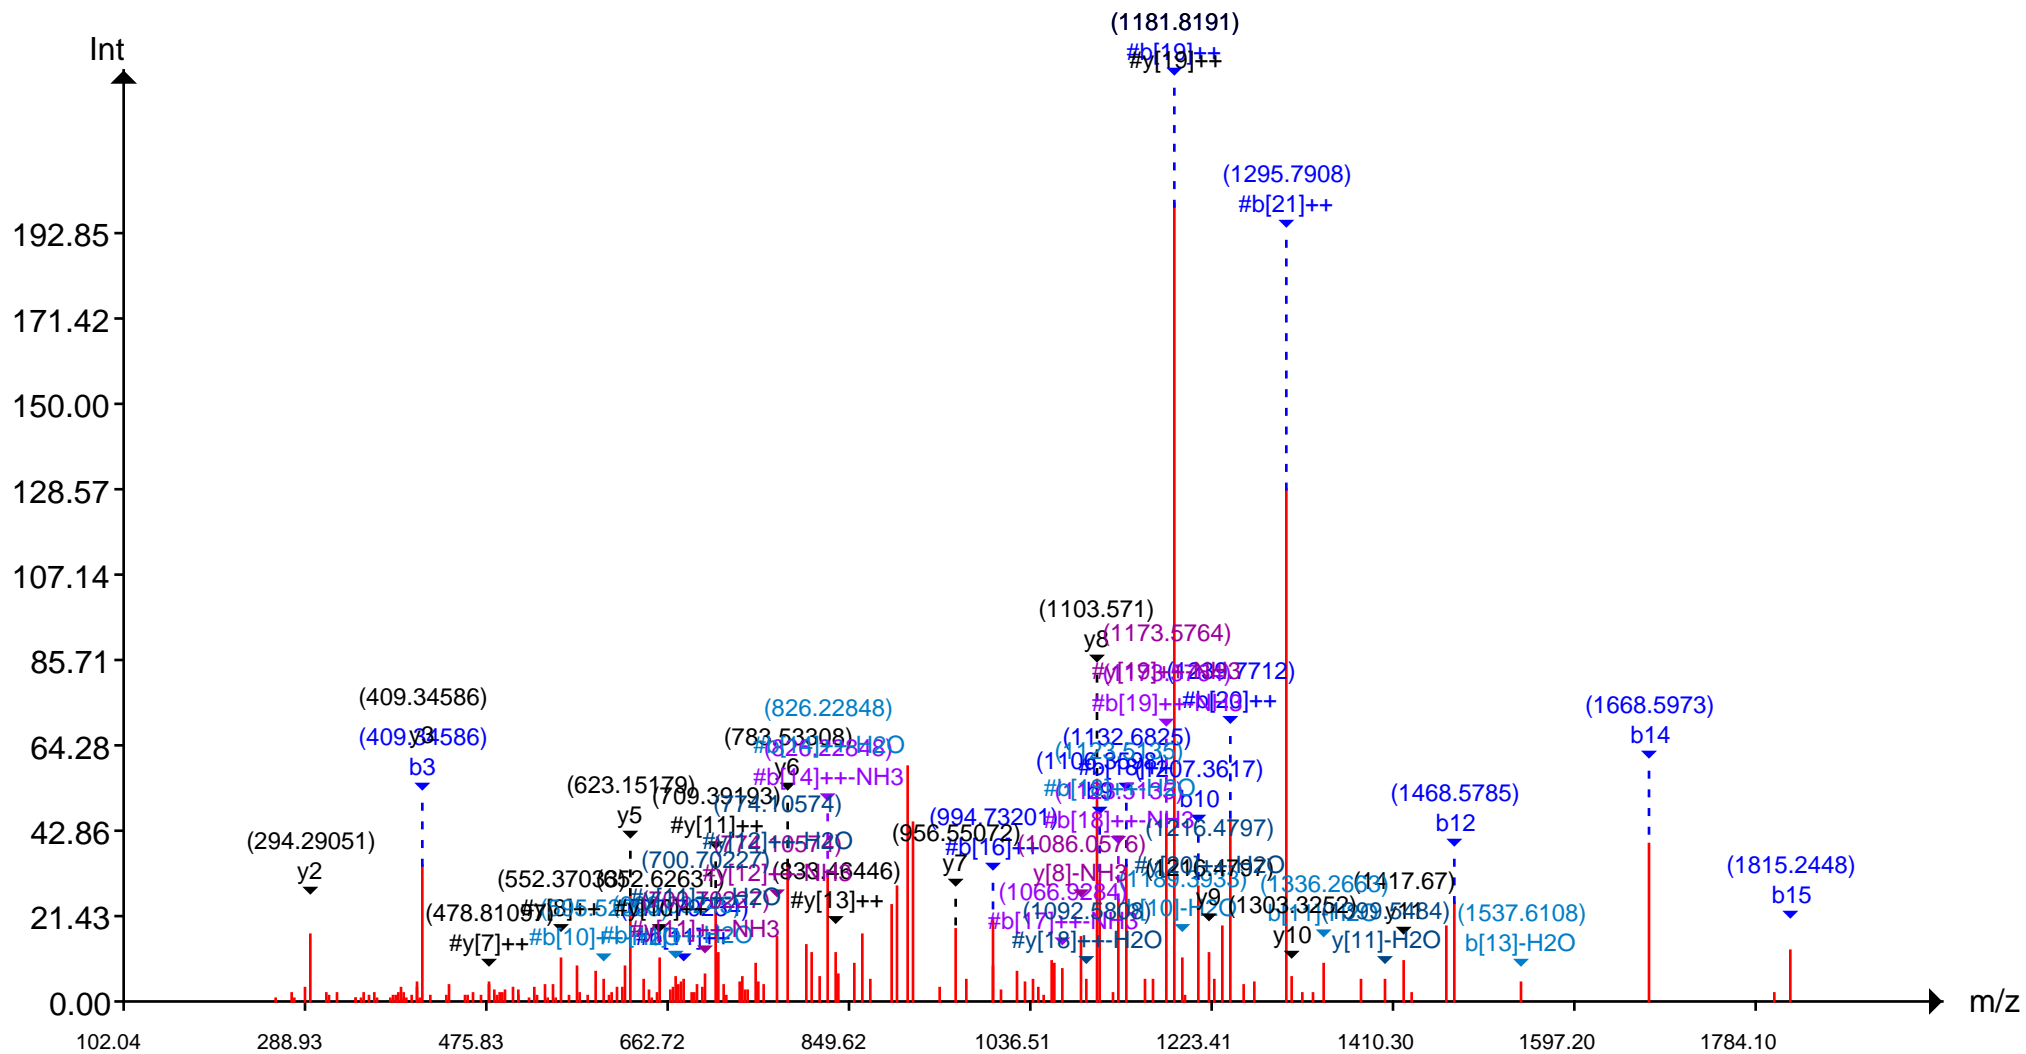

## Info

|                  |                                                                        |                    |         |
|------------------|------------------------------------------------------------------------|--------------------|---------|
| Modified Sequ... | AcD3-M<Mox*>ESC<Cmm*>GIHETTFNSIM<Mox*>K<AcD3K*>C<Cmm*>DVIDIR<C13>-COOH | Ion score          | 49.23   |
| Pro...           | P60710, P63260                                                         | Confidence level   | 99.00%  |
| Precursor ...    | 924.41751                                                              | Identity Threshold | 42.58   |
| Ch...            | 3+                                                                     | Mass error         | 0.00221 |



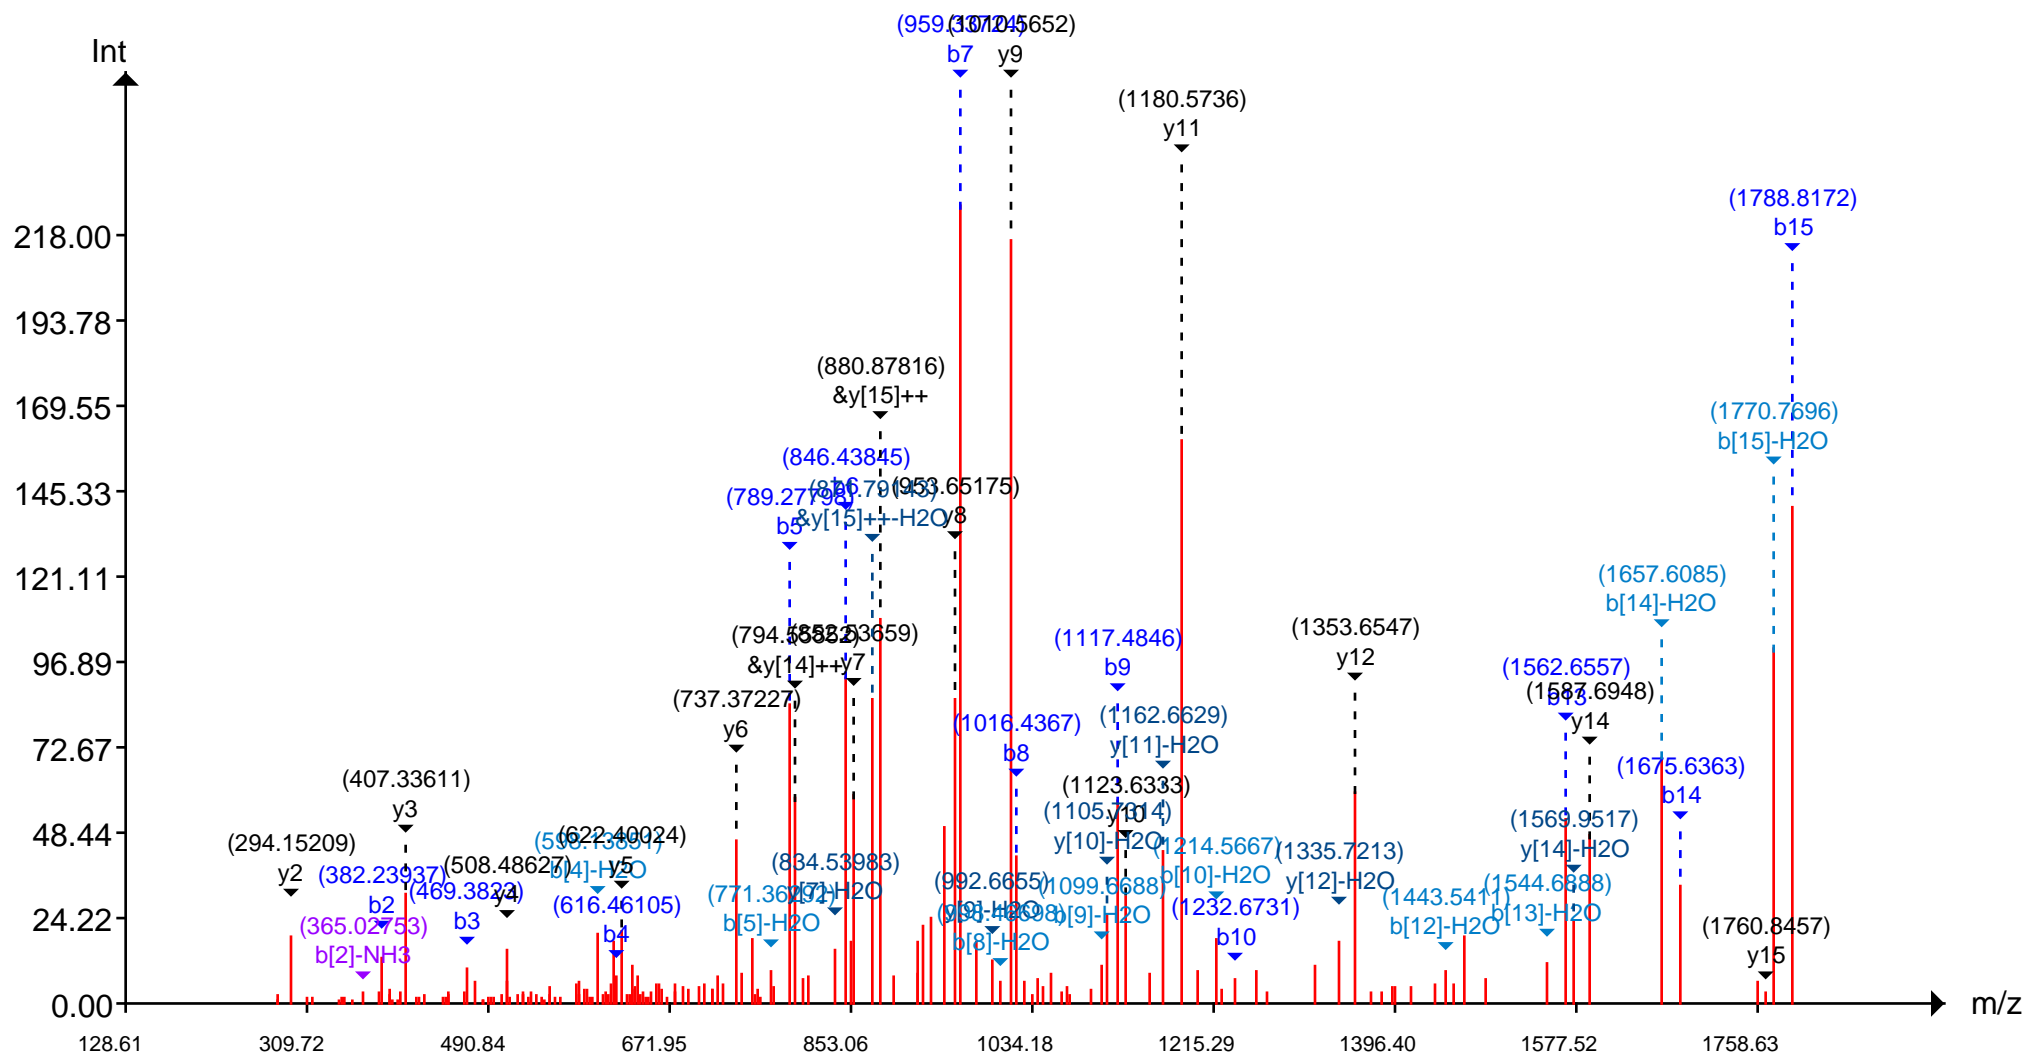

## Info

|                          |                                                       |                           |          |
|--------------------------|-------------------------------------------------------|---------------------------|----------|
| <b>Modified Sequence</b> | AcD3-YK<AcD3K*>SM<Mox*>K<AcD3K*>GLGTDDNTLIR<C13>-COOH | <b>Ion score</b>          | 105.72   |
| <b>Protein</b>           | P97429                                                | <b>Confidence level</b>   | 99.00%   |
| <b>Precursor m/z</b>     | 985.02264                                             | <b>Identity Threshold</b> | 47.82    |
| <b>Charge</b>            | 2+                                                    | <b>Mass error</b>         | 0.002759 |

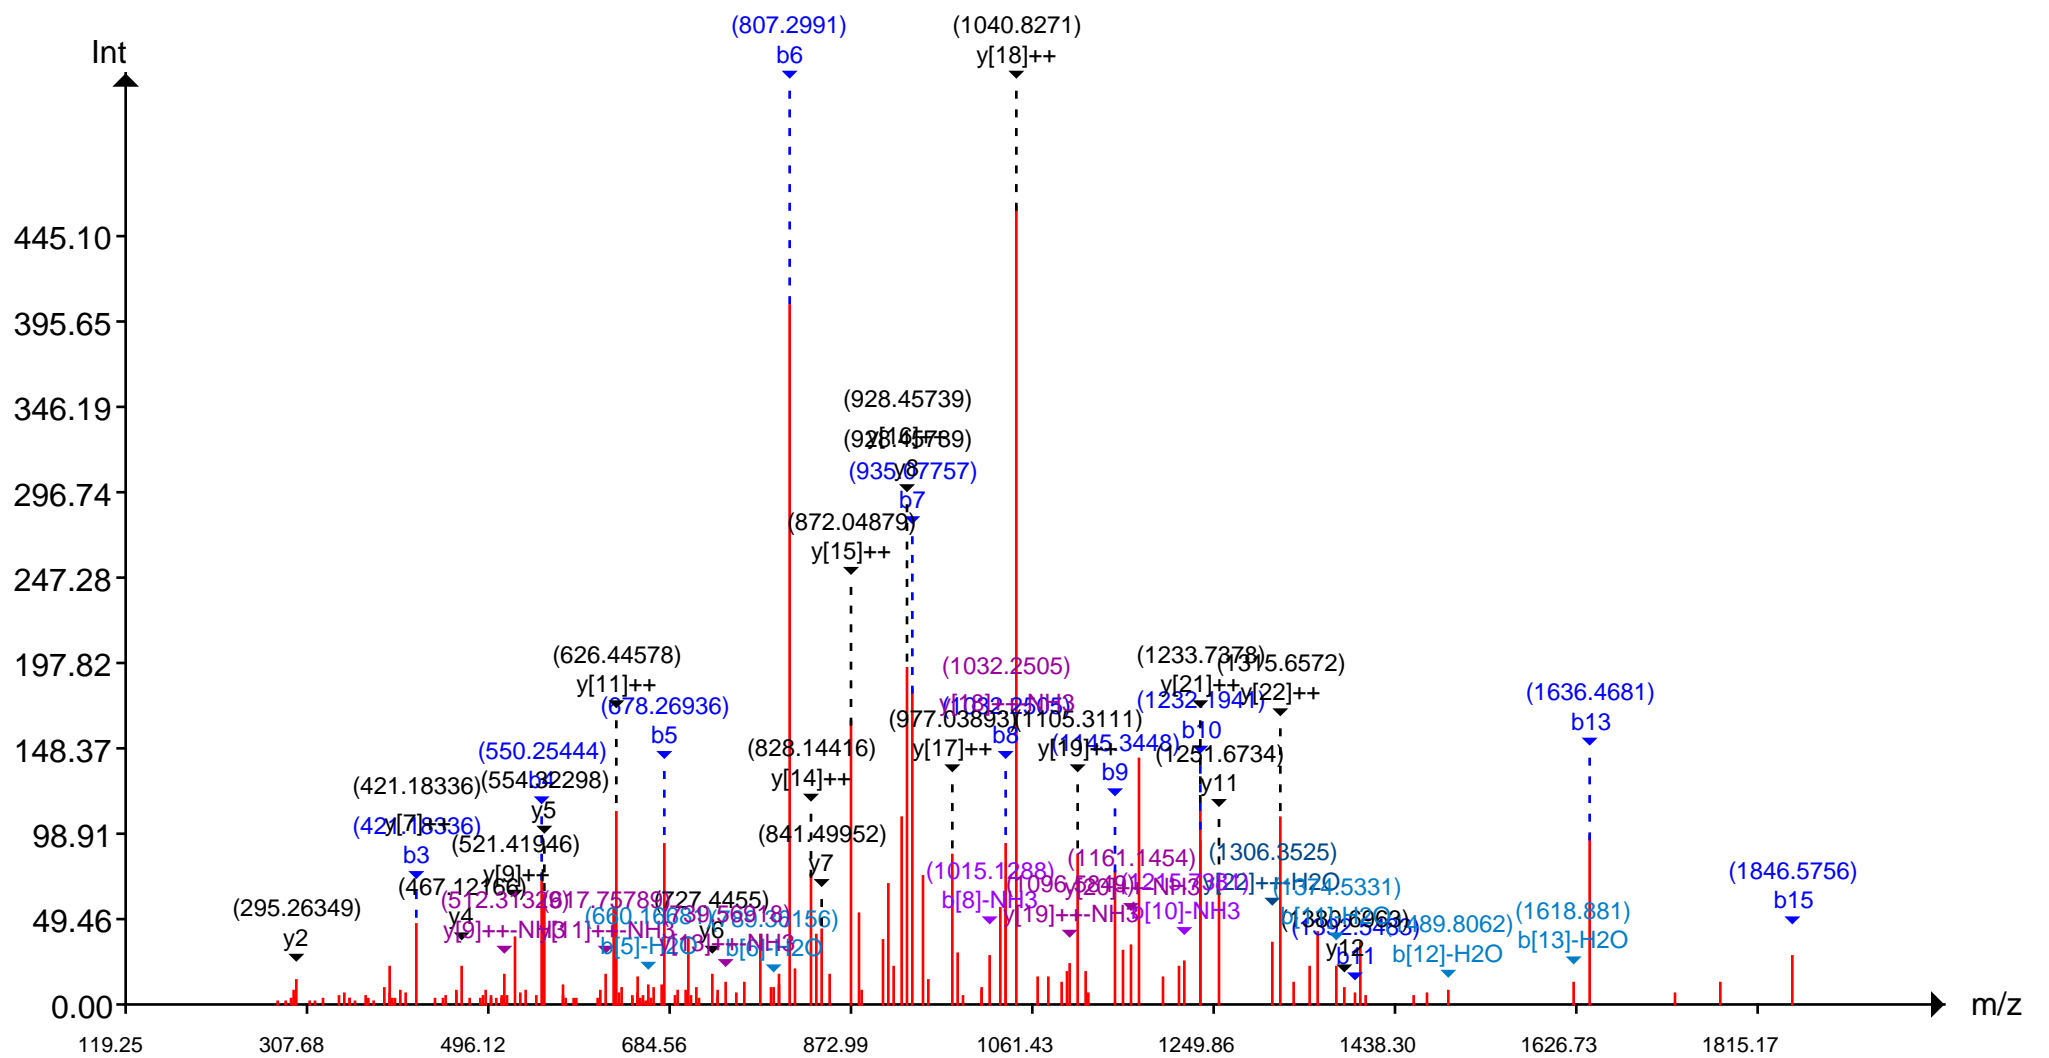

| Info                     |                                                       |                           |          |
|--------------------------|-------------------------------------------------------|---------------------------|----------|
| <b>Modified Sequence</b> | AcD3-LVYEQEQPLSC<Cmm*>DEPILSNK<AcD3K*>SGDNR<C13>-COOH | <b>Ion score</b>          | 92.08    |
| <b>Protein</b>           | P70296                                                | <b>Confidence level</b>   | 99.00%   |
| <b>Precursor m/z</b>     | 963.13925                                             | <b>Identity Threshold</b> | 46.92    |
| <b>Charge</b>            | 3+                                                    | <b>Mass error</b>         | 0.003985 |

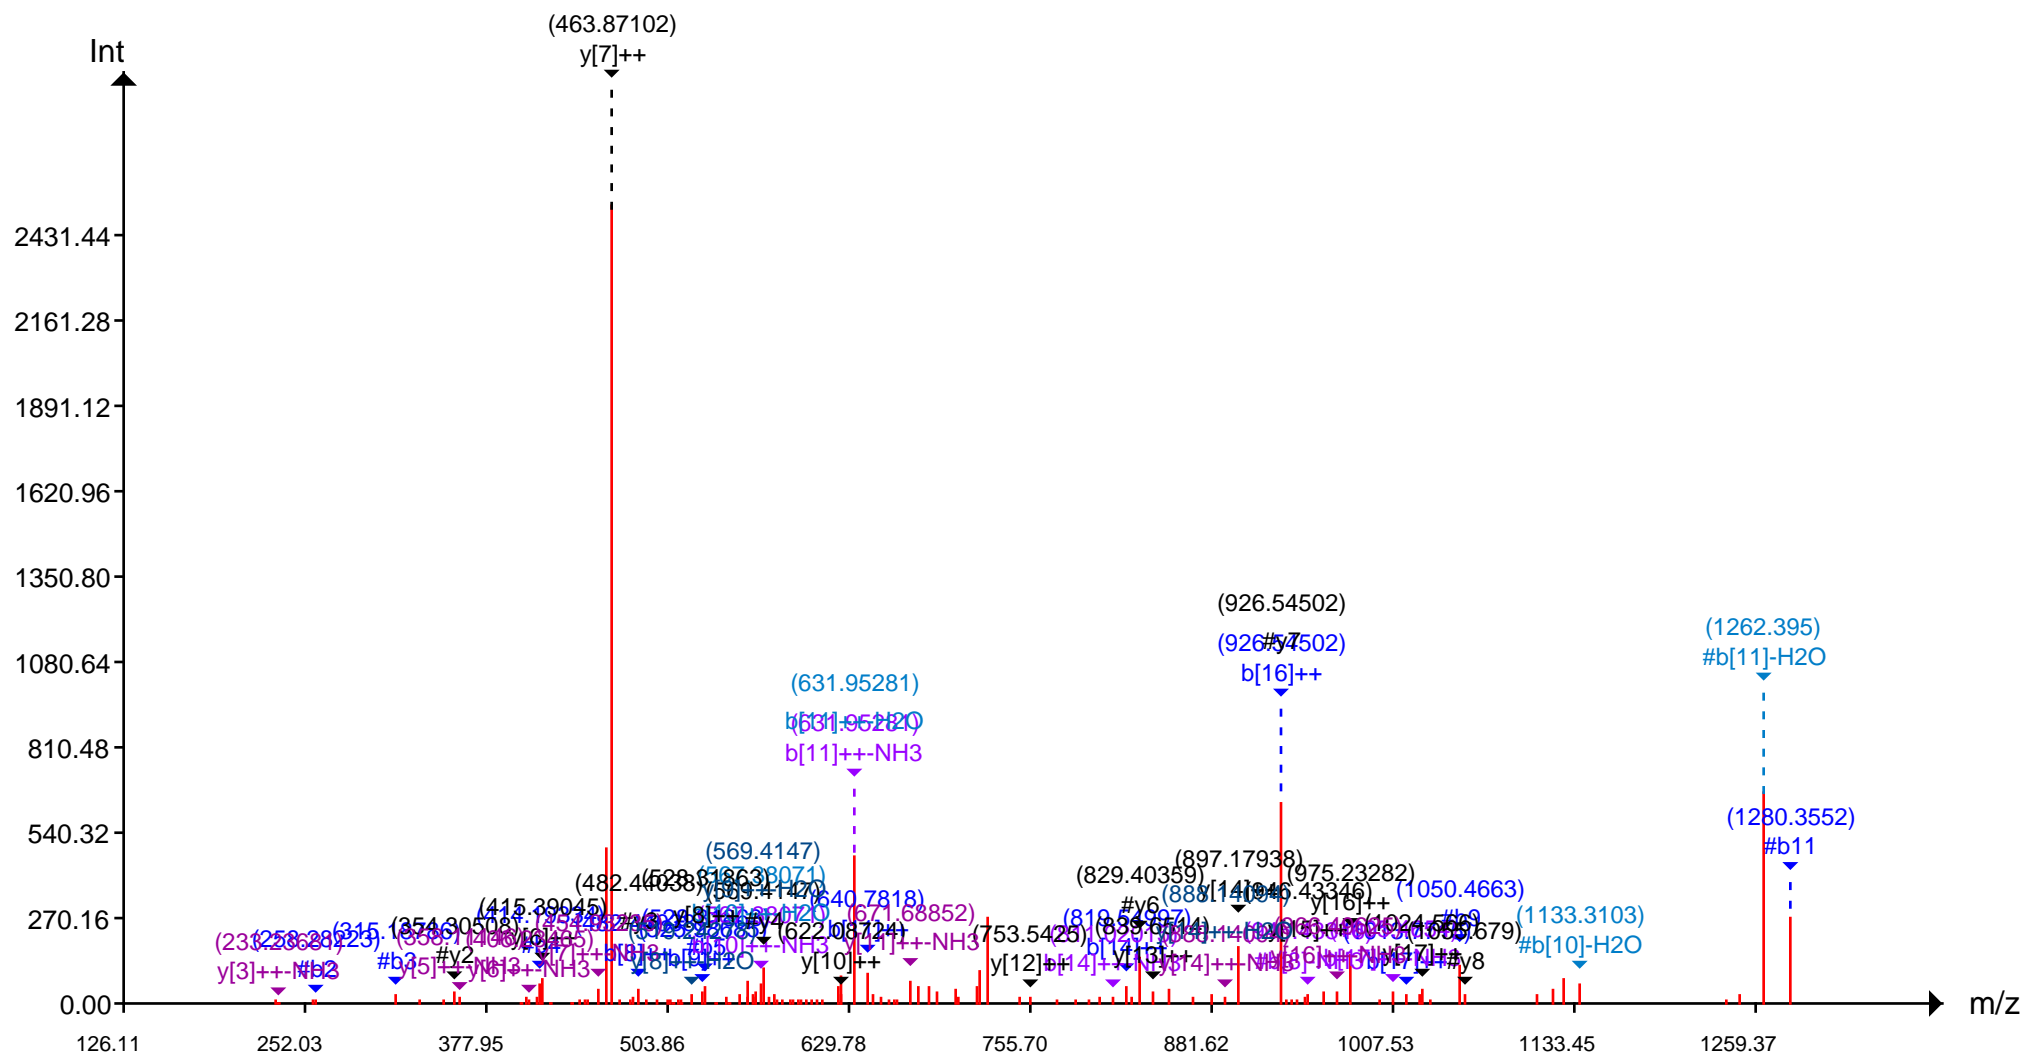

## Info

|                          |                                                         |                           |          |
|--------------------------|---------------------------------------------------------|---------------------------|----------|
| <b>Modified Sequence</b> | AcD3-IVGVNK<AcD3K*>M<Mox*>DSTEPPYSQK<AcD3K*>R<C13>-COOH | <b>Ion score</b>          | 54.11    |
| <b>Protein</b>           | P10126                                                  | <b>Confidence level</b>   | 99.00%   |
| <b>Precursor m/z</b>     | 736.05443                                               | <b>Identity Threshold</b> | 47.98    |
| <b>Charge</b>            | 3+                                                      | <b>Mass error</b>         | 0.002149 |

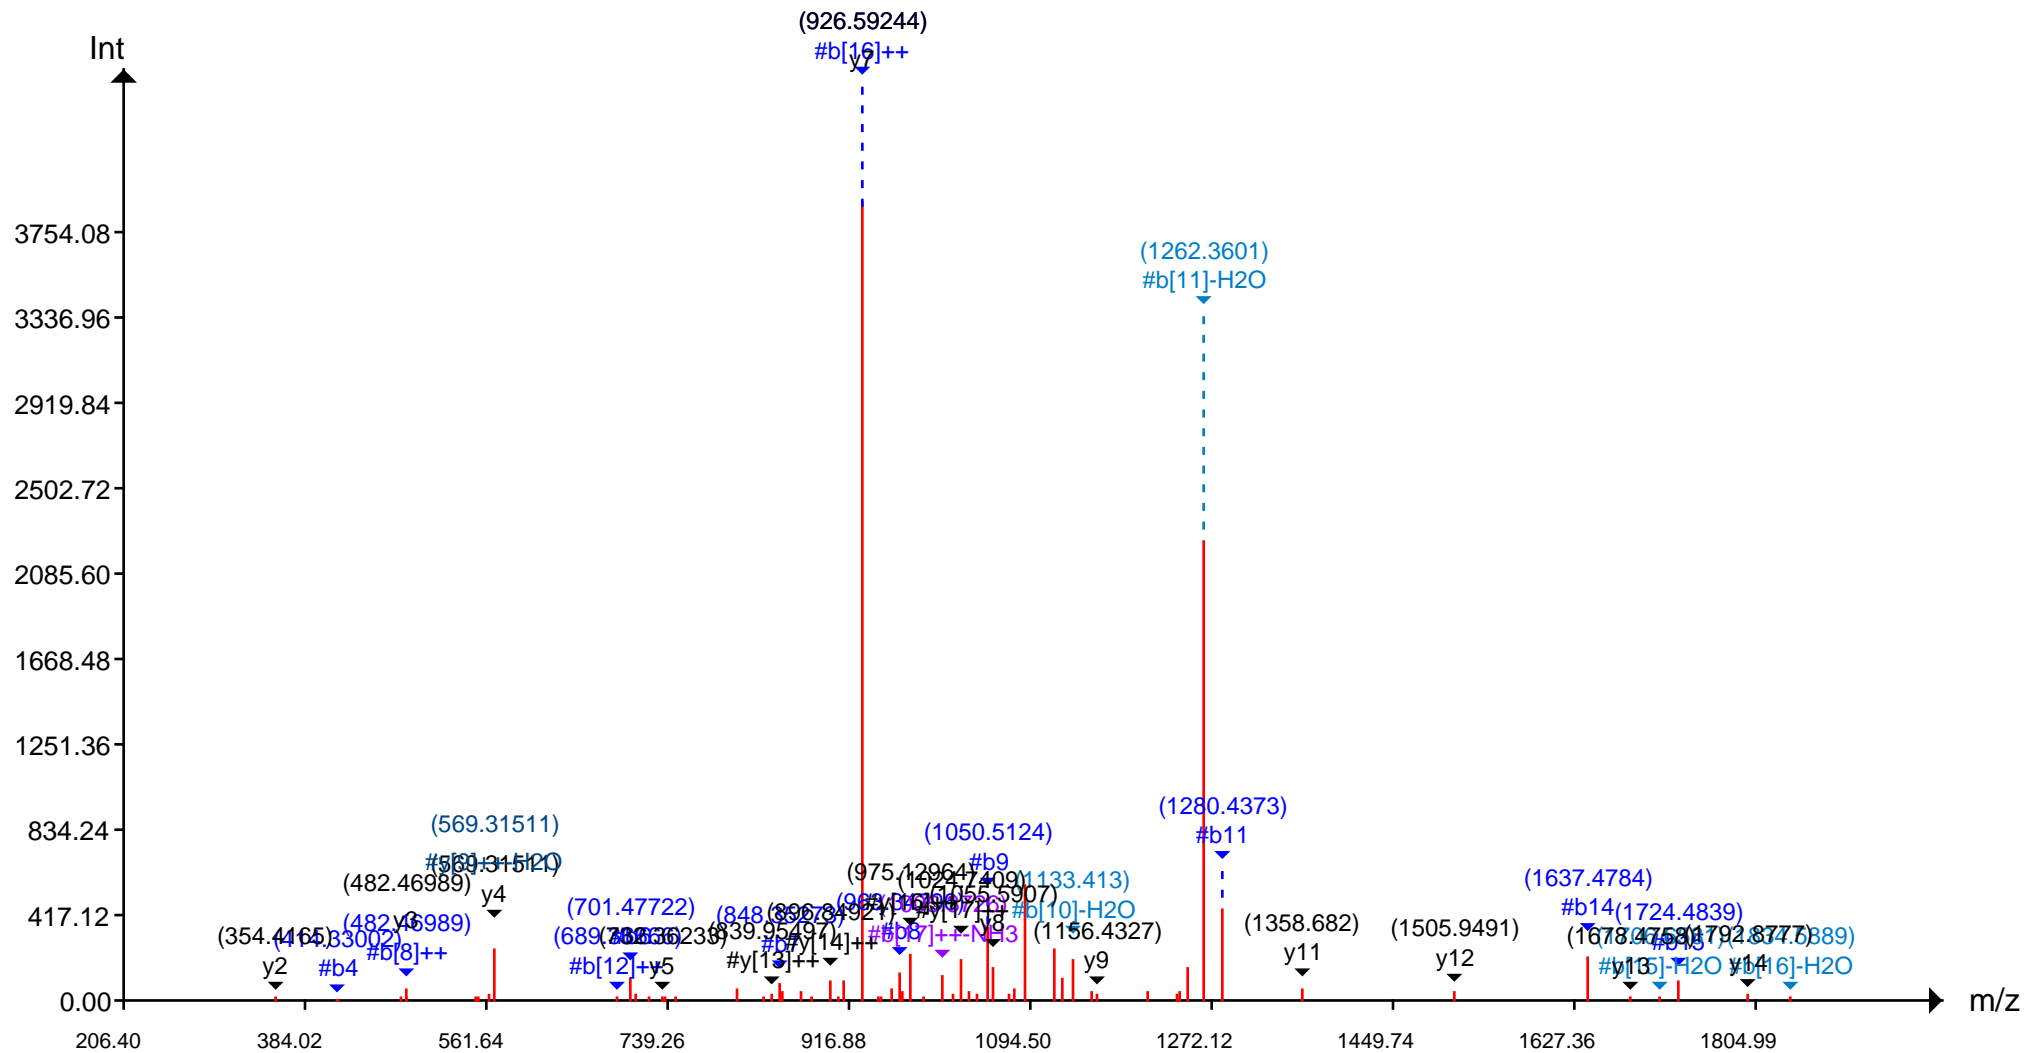

## Info

|                          |                                                         |                           |          |
|--------------------------|---------------------------------------------------------|---------------------------|----------|
| <b>Modified Sequence</b> | AcD3-IVGVNK<AcD3K*>M<Mox*>DSTEPPYSQK<AcD3K*>R<C13>-COOH | <b>Ion score</b>          | 72.39    |
| <b>Protein</b>           | P10126                                                  | <b>Confidence level</b>   | 99.00%   |
| <b>Precursor m/z</b>     | 1103.578                                                | <b>Identity Threshold</b> | 47.98    |
| <b>Charge</b>            | 2+                                                      | <b>Mass error</b>         | 0.002135 |

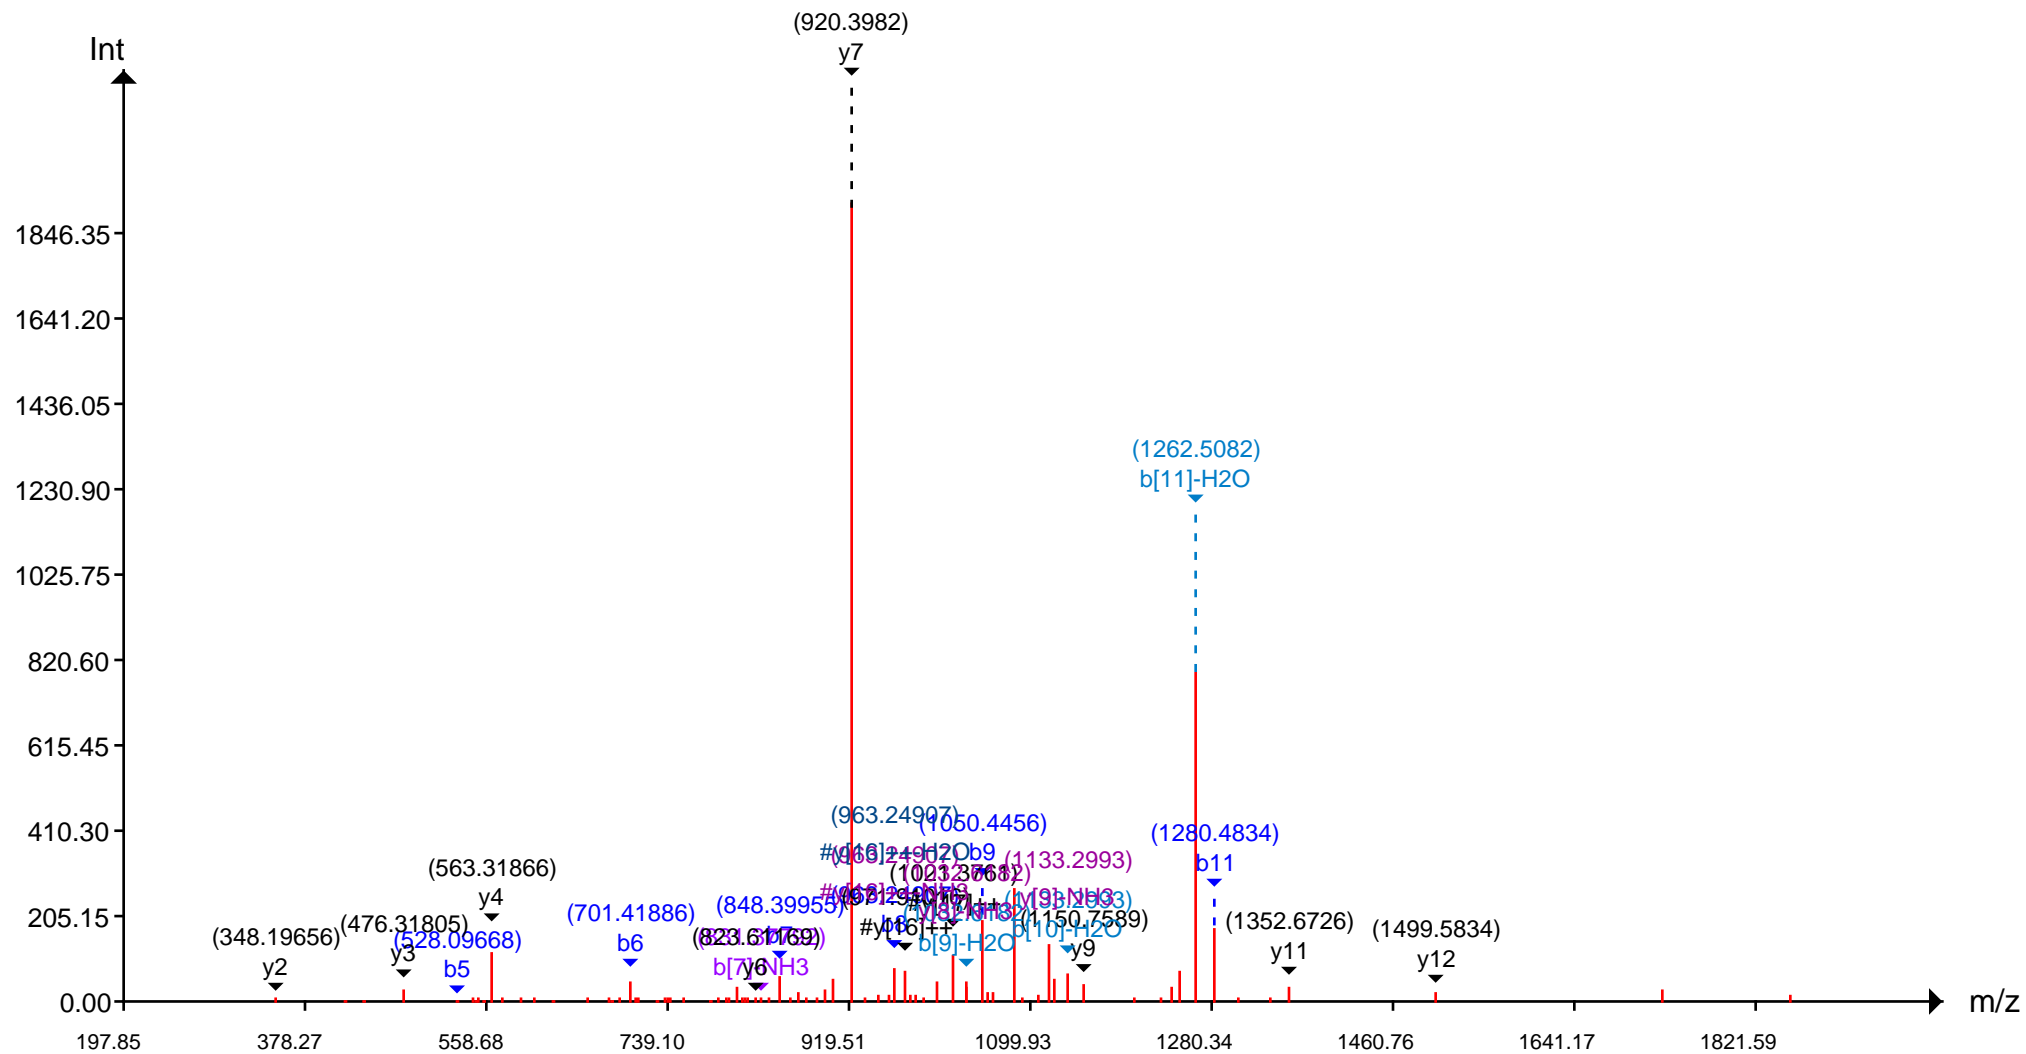

## Info

|                          |                                                     |                           |          |
|--------------------------|-----------------------------------------------------|---------------------------|----------|
| <b>Modified Sequence</b> | AcD3-IVGVNK<AcD3K*>M<Mox*>DSTEPPEYSQK<AcD3K*>R-COOH | <b>Ion score</b>          | 48.89    |
| <b>Protein</b>           | P10126                                              | <b>Confidence level</b>   | 99.00%   |
| <b>Precursor m/z</b>     | 1100.5683                                           | <b>Identity Threshold</b> | 47.93    |
| <b>Charge</b>            | 2+                                                  | <b>Mass error</b>         | 0.002877 |

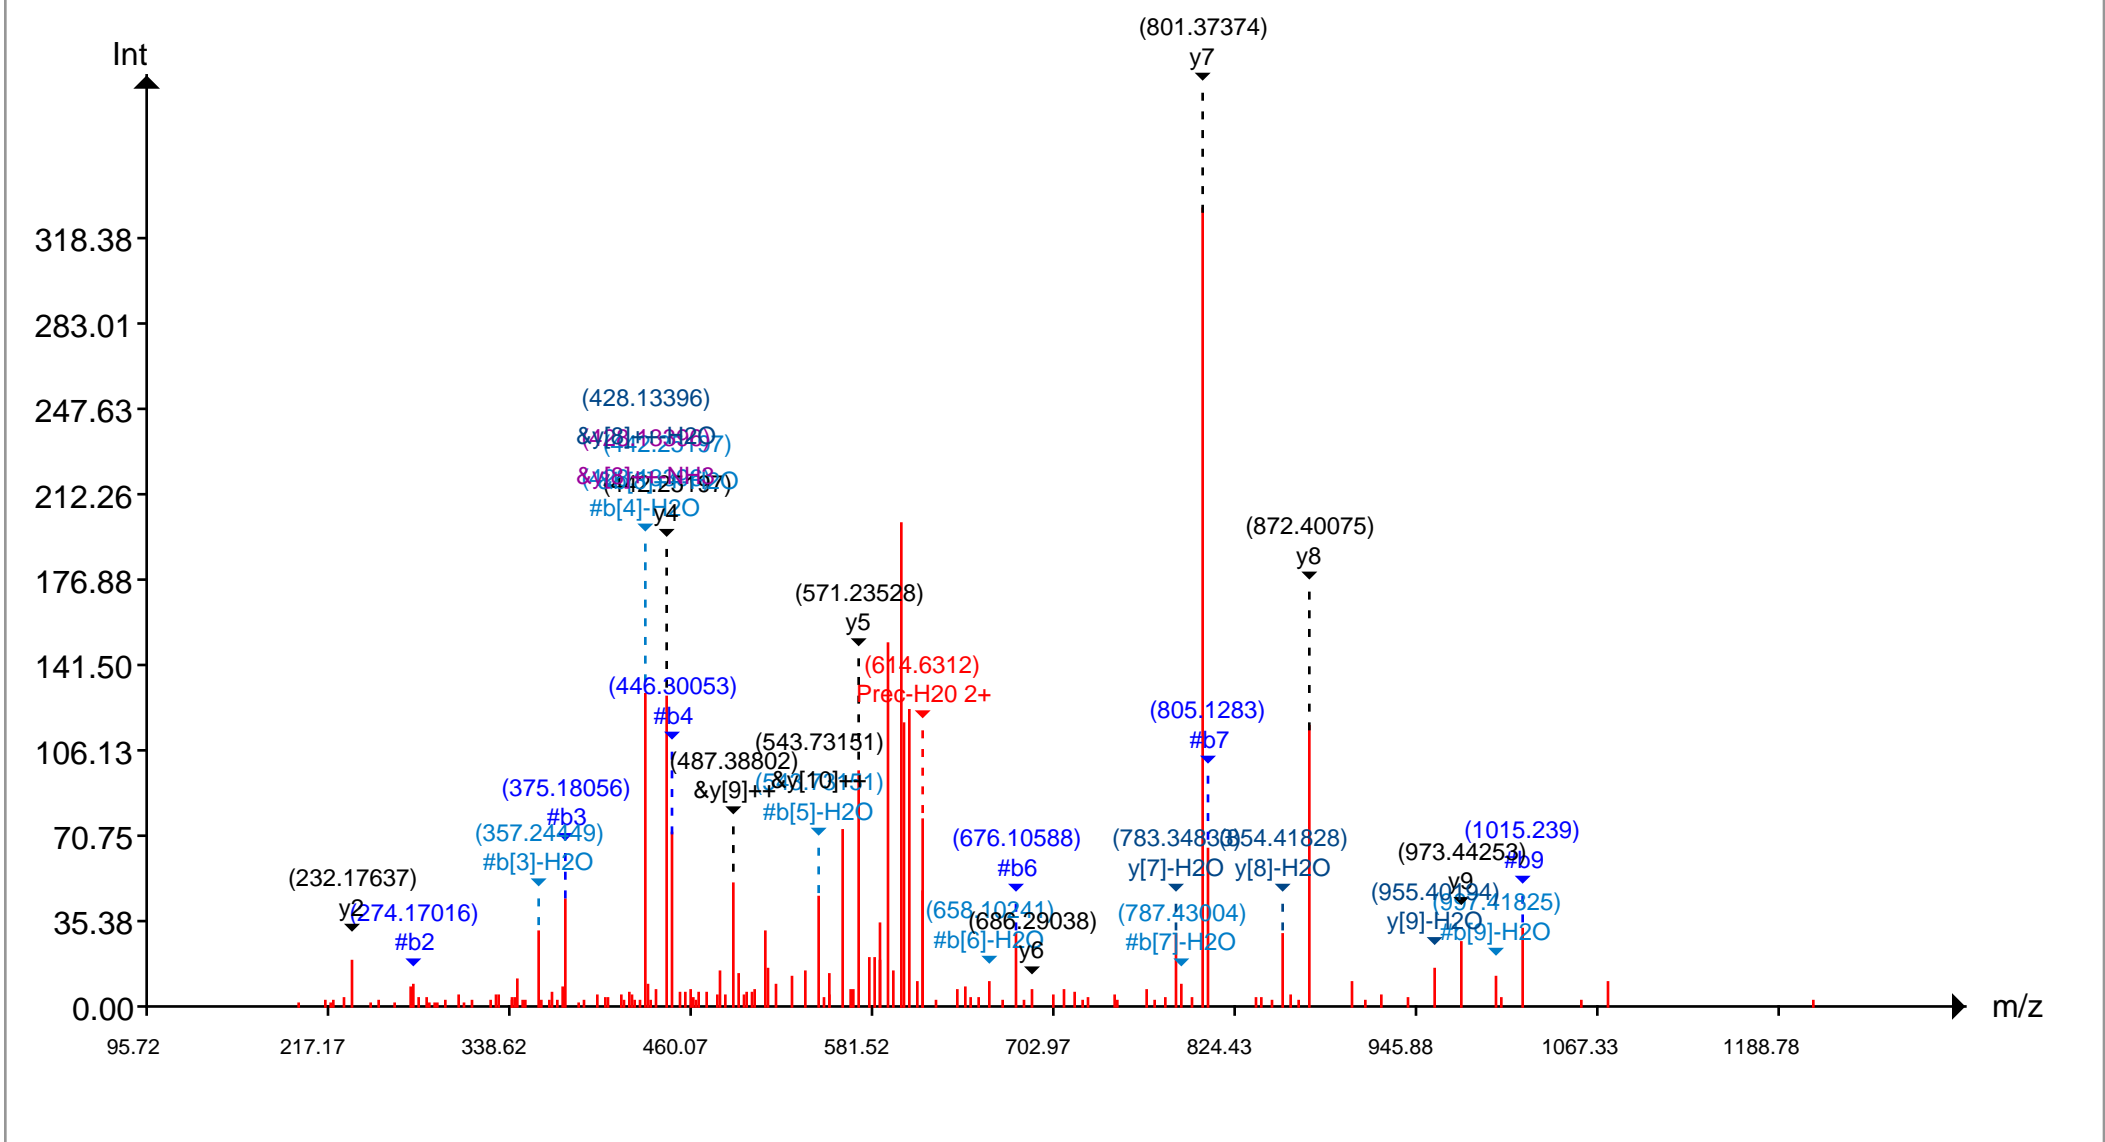

## Info

**Modified Sequence** AcD3-DITADDEPLGR-COOH

**Protein** P17742

**Precursor m/z** 623.80361

**Charge** 2+

**Ion score** 48.75

**Confidence level** 99.00%

**Identity Threshold** 46.88

**Mass error** 0.001039

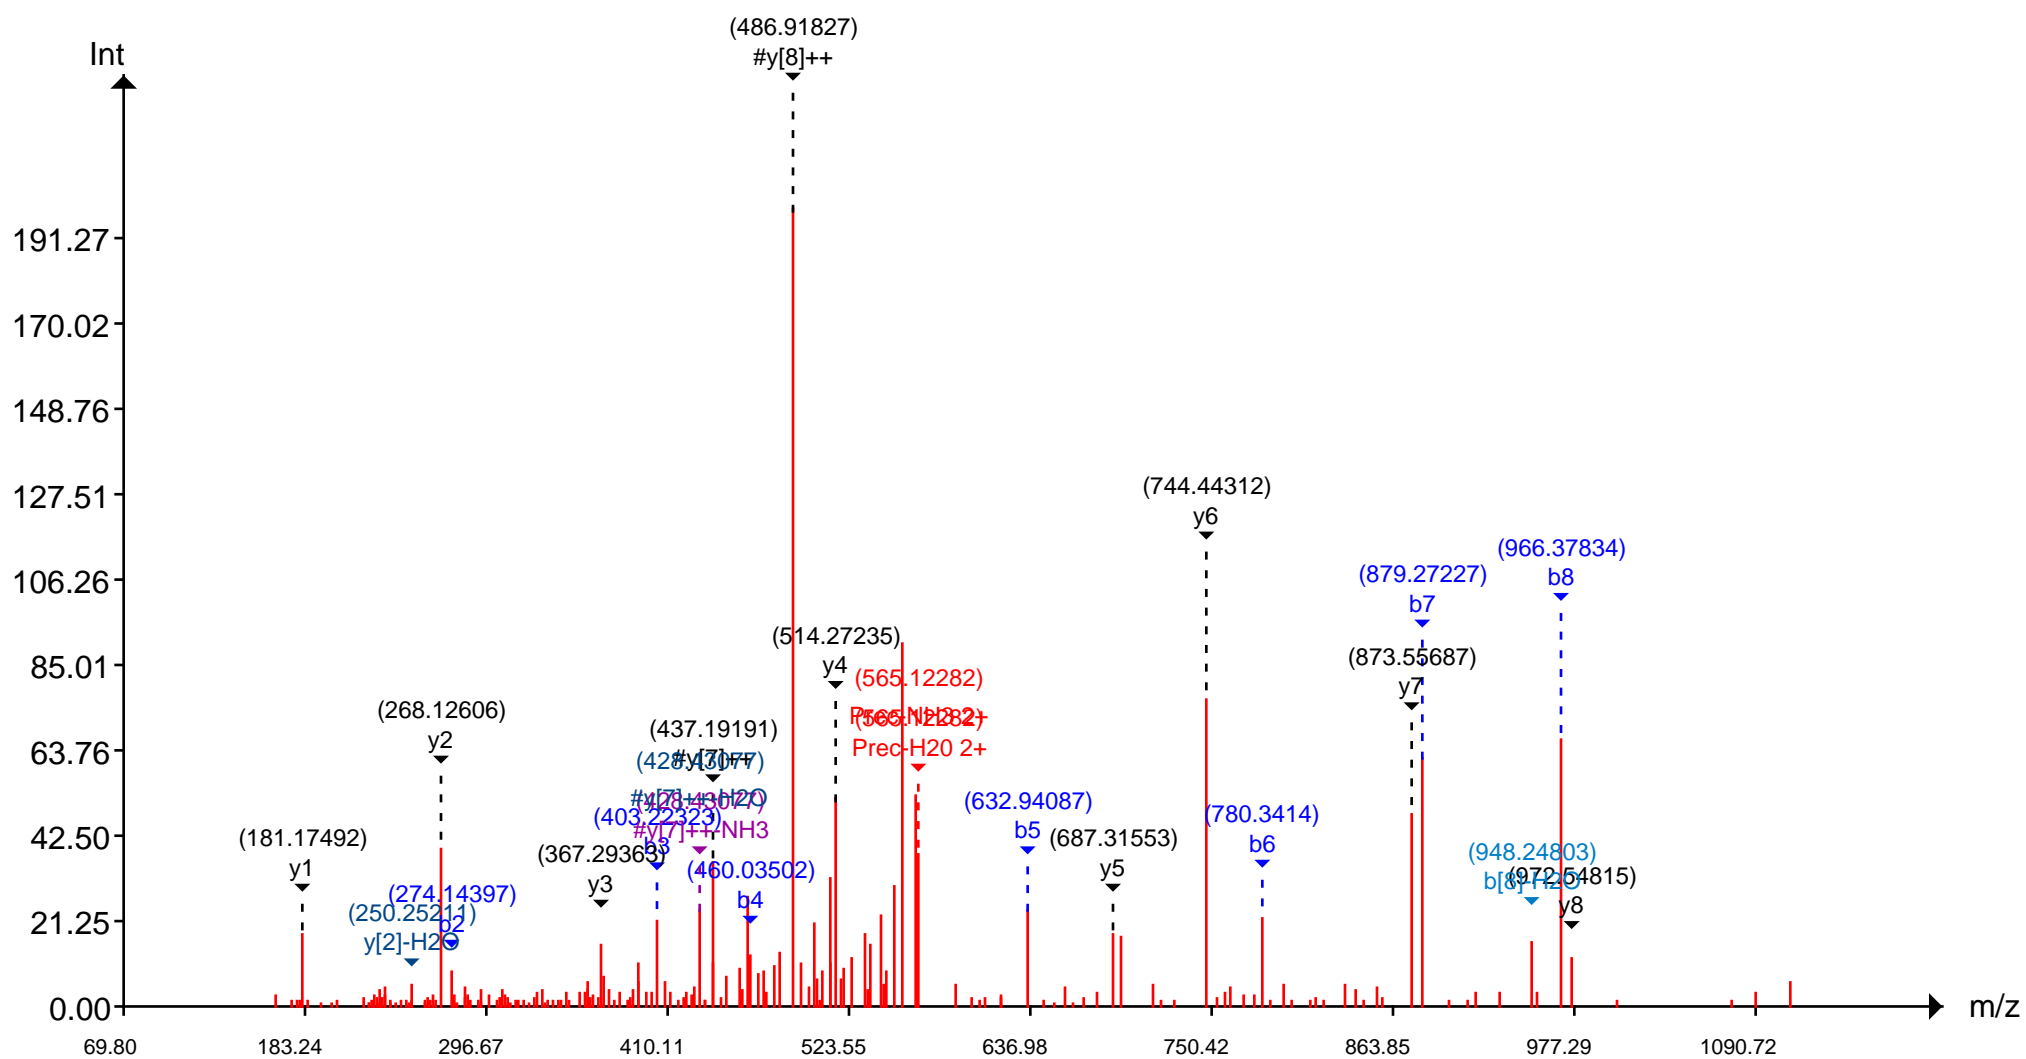

## Info

|                          |                                        |                           |         |
|--------------------------|----------------------------------------|---------------------------|---------|
| <b>Modified Sequence</b> | AcD3-EVEGK<AcD3K*>M<Mox*>VSR<C13>-COOH | <b>Ion score</b>          | 52.99   |
| <b>Protein</b>           | P63028                                 | <b>Confidence level</b>   | 99.00%  |
| <b>Precursor m/z</b>     | 573.80566                              | <b>Identity Threshold</b> | 47.94   |
| <b>Charge</b>            | 2+                                     | <b>Mass error</b>         | 3.02E-4 |

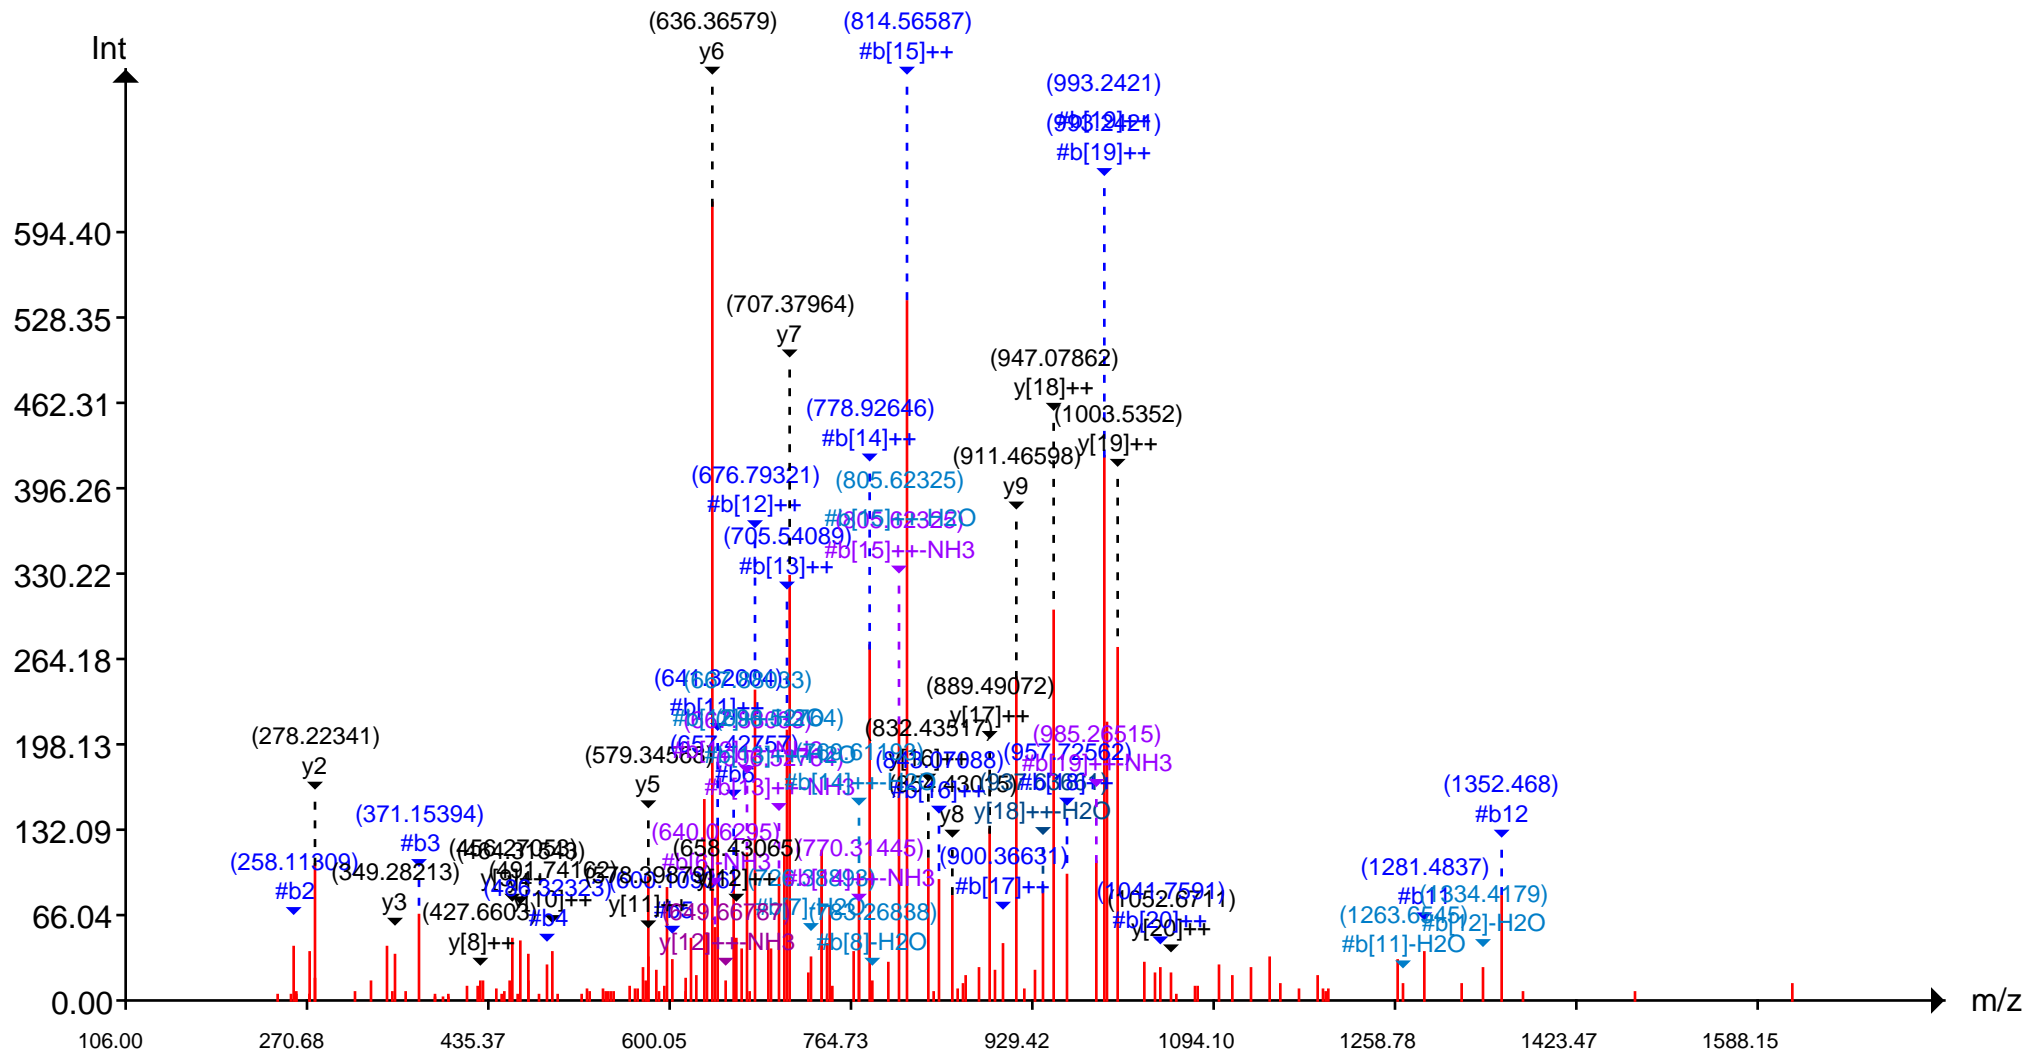

## Info

|                          |                                                          |                           |        |
|--------------------------|----------------------------------------------------------|---------------------------|--------|
| <b>Modified Sequence</b> | AcD3-LVIDNGSGM<Mox*>C<Cmm*>K<AcD3K*>AGFAGDDAPR<C13>-COOH | <b>Ion score</b>          | 65.12  |
| <b>Protein</b>           | P63260                                                   | <b>Confidence level</b>   | 99.00% |
| <b>Precursor m/z</b>     | 755.02815                                                | <b>Identity Threshold</b> | 46.30  |
| <b>Charge</b>            | 3+                                                       | <b>Mass error</b>         | 2.9E-4 |



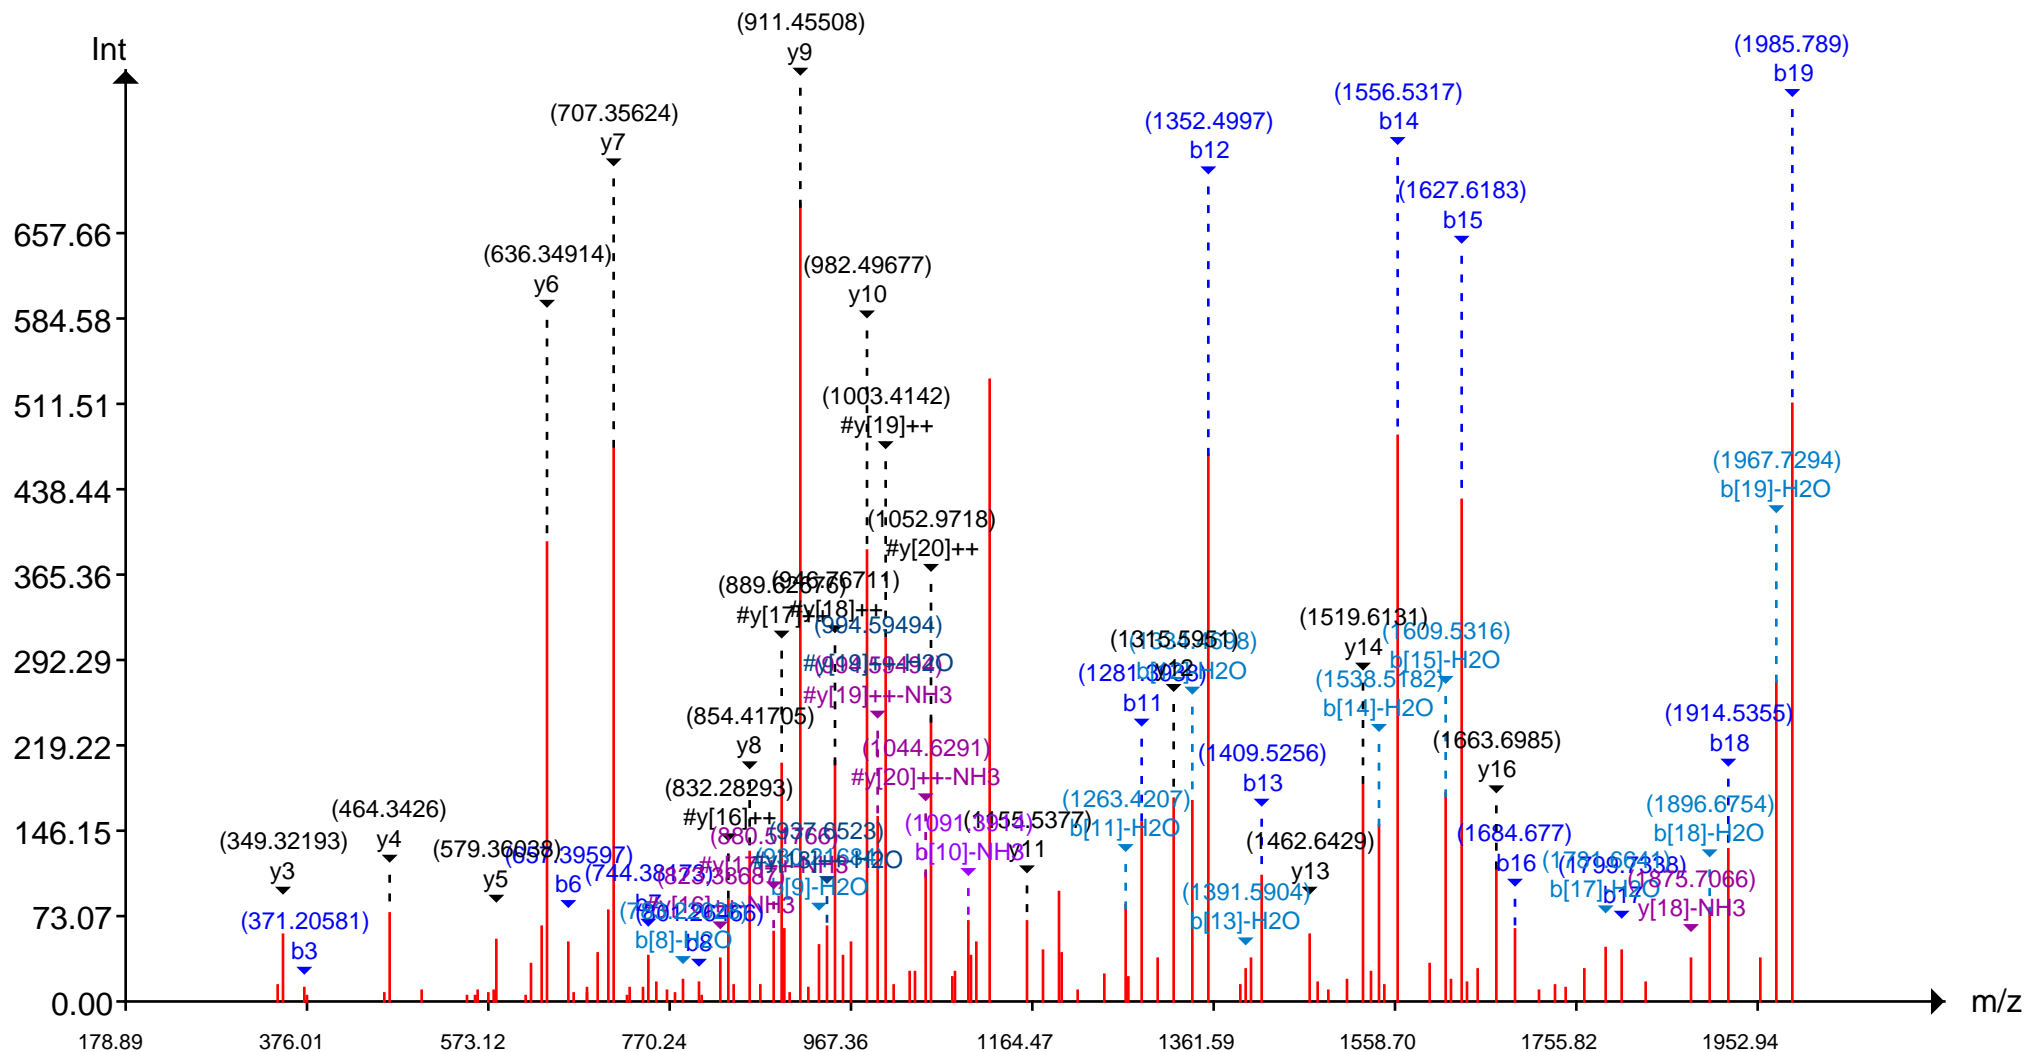

## Info

|                          |                                                          |                           |          |
|--------------------------|----------------------------------------------------------|---------------------------|----------|
| <b>Modified Sequence</b> | AcD3-LVIDNGSGM<Mox*>C<Cmm*>K<AcD3K*>AGFAGDDAPR<C13>-COOH | <b>Ion score</b>          | 118.94   |
| <b>Protein</b>           | P63260                                                   | <b>Confidence level</b>   | 99.00%   |
| <b>Precursor m/z</b>     | 1132.0392                                                | <b>Identity Threshold</b> | 46.37    |
| <b>Charge</b>            | 2+                                                       | <b>Mass error</b>         | 0.001516 |

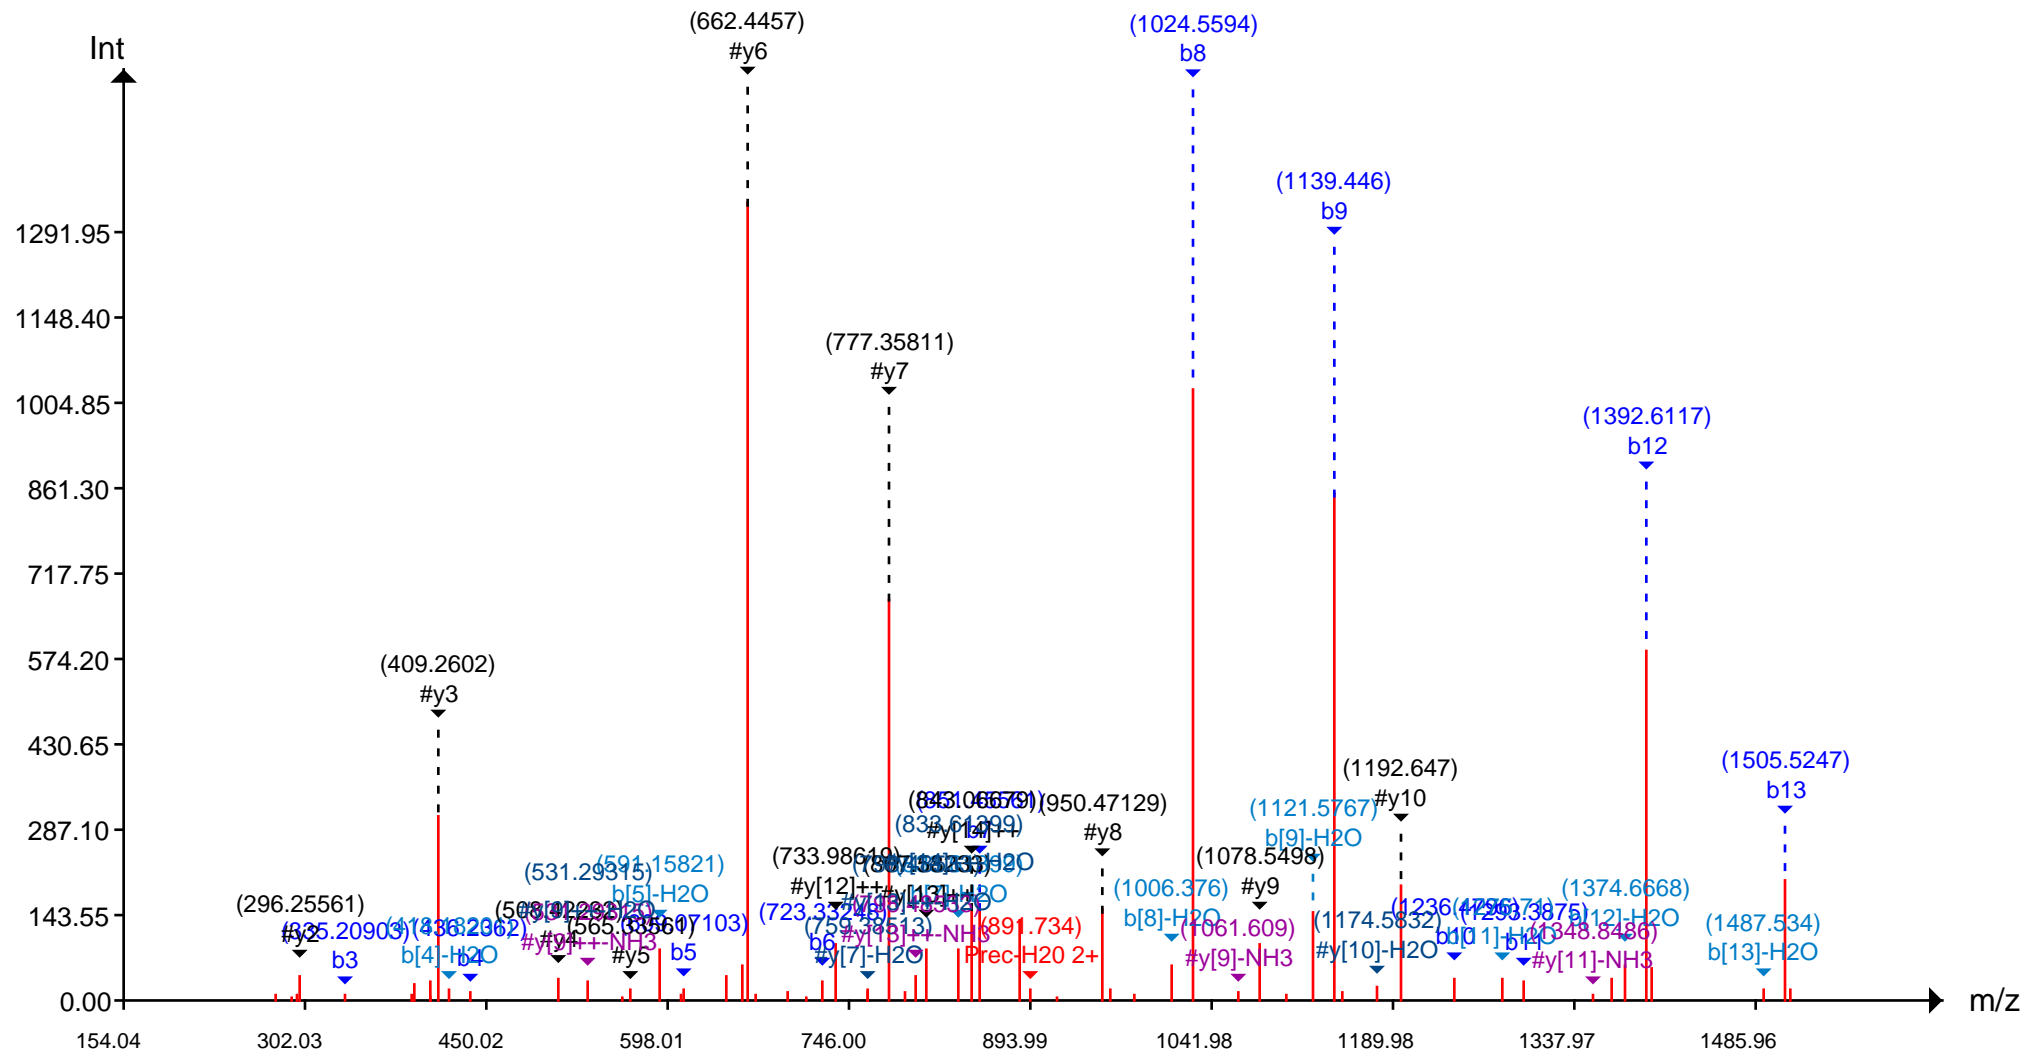

## Info

|                          |                                                |                           |          |
|--------------------------|------------------------------------------------|---------------------------|----------|
| <b>Modified Sequence</b> | AcD3-AAFTK<AcD3K*>NQK<AcD3K*>DPGVLDK<C13>-COOH | <b>Ion score</b>          | 83.77    |
| <b>Protein</b>           | P50543                                         | <b>Confidence level</b>   | 99.00%   |
| <b>Precursor m/z</b>     | 900.99923                                      | <b>Identity Threshold</b> | 47.12    |
| <b>Charge</b>            | 2+                                             | <b>Mass error</b>         | 0.001562 |

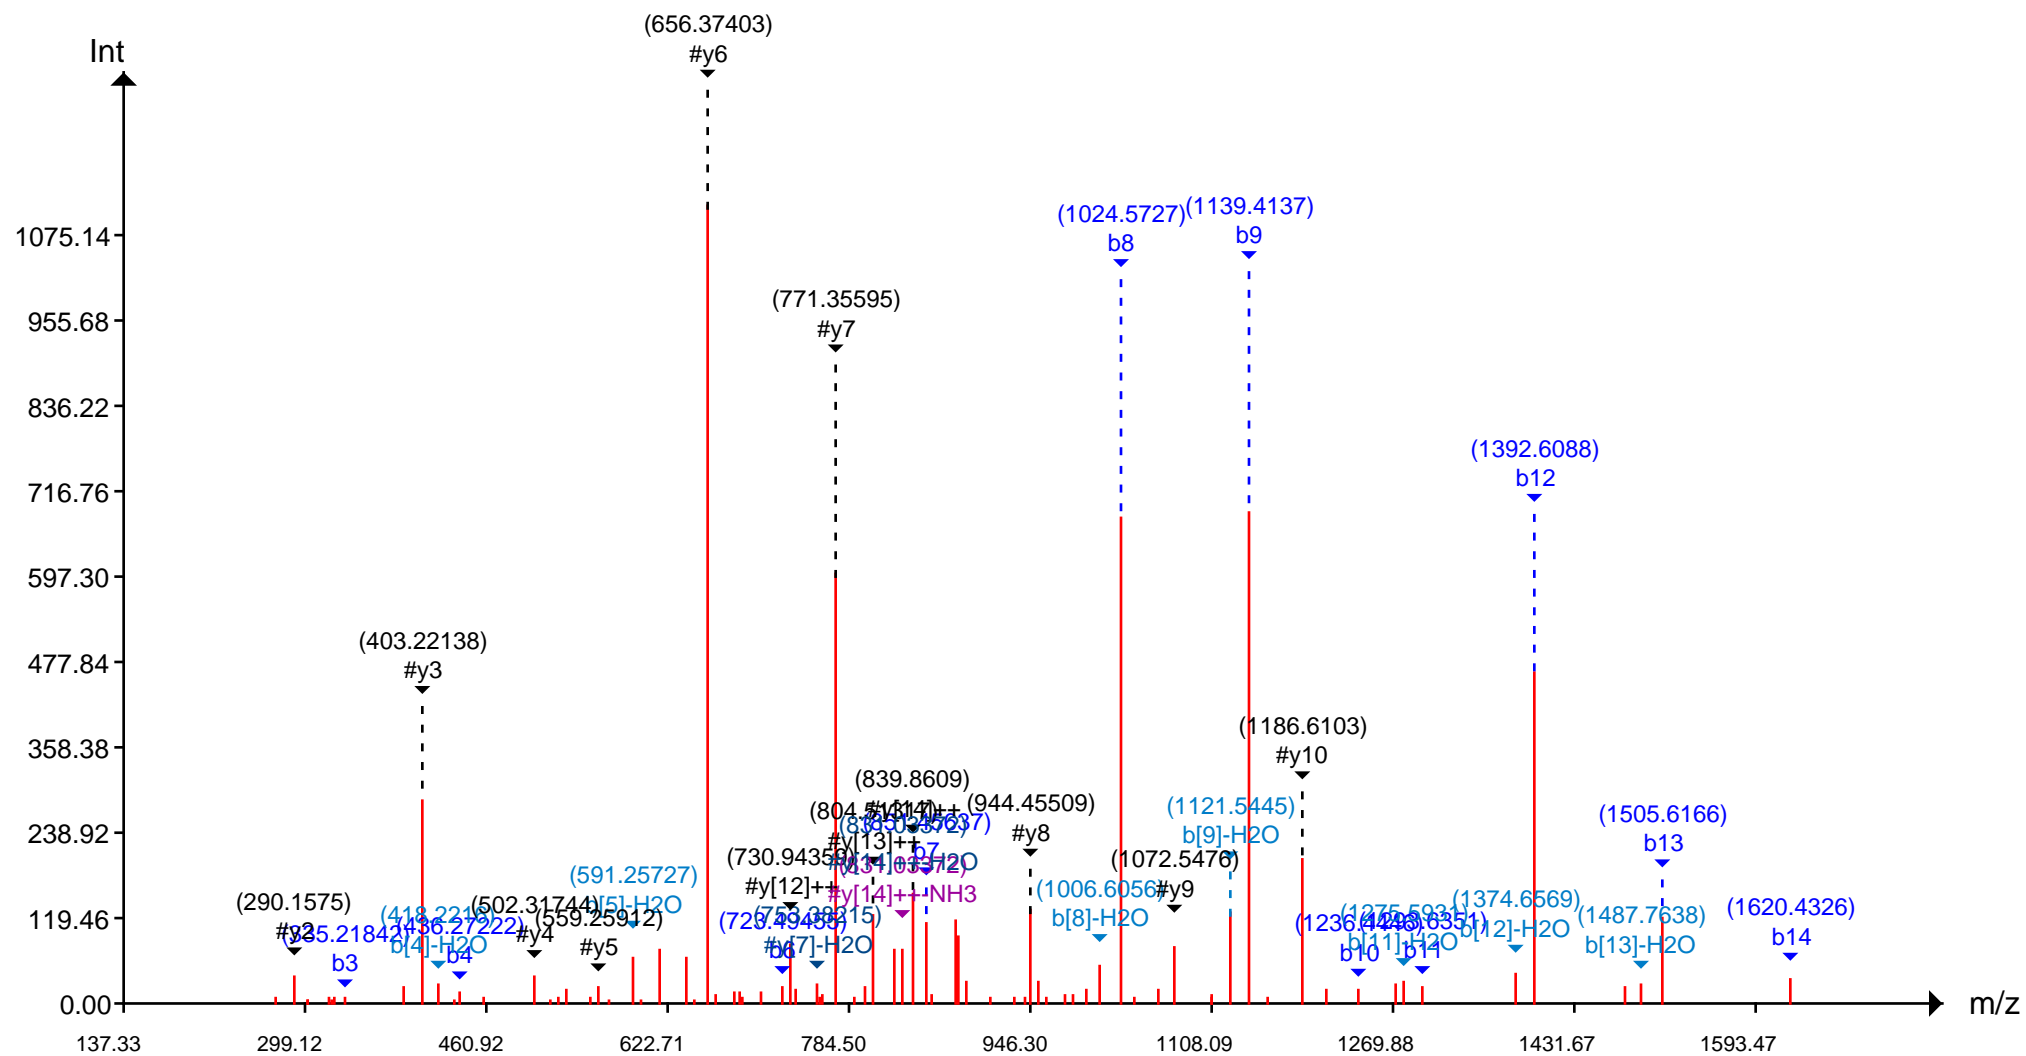

## Info

|                          |                                             |                           |          |
|--------------------------|---------------------------------------------|---------------------------|----------|
| <b>Modified Sequence</b> | AcD3-AAFTK<AcD3K*>NQK<AcD3K*>DPGVLDLDR-COOH | <b>Ion score</b>          | 84.19    |
| <b>Protein</b>           | P50543                                      | <b>Confidence level</b>   | 99.00%   |
| <b>Precursor m/z</b>     | 897.98939                                   | <b>Identity Threshold</b> | 47.70    |
| <b>Charge</b>            | 2+                                          | <b>Mass error</b>         | 0.002024 |

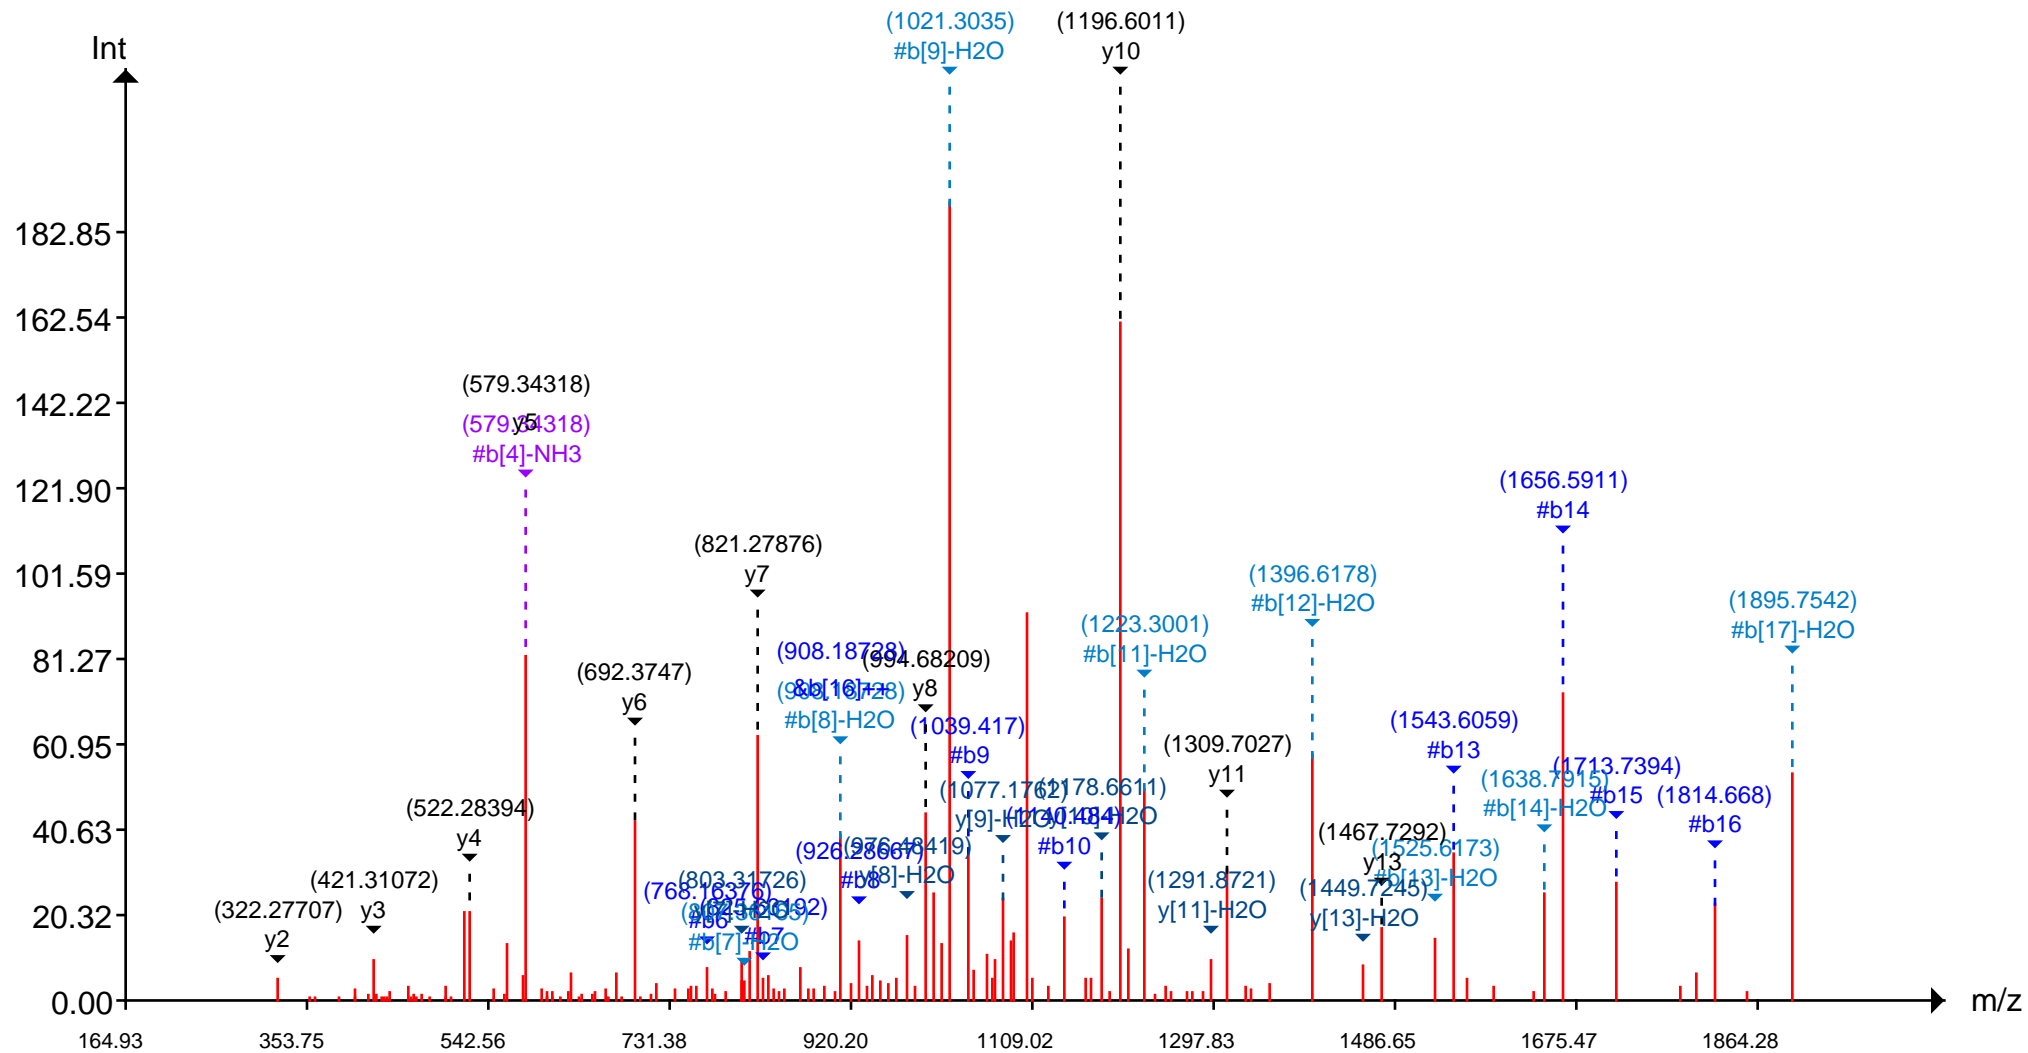

## Info

|                          |                                                     |                           |          |
|--------------------------|-----------------------------------------------------|---------------------------|----------|
| <b>Modified Sequence</b> | AcD3-FDK<AcD3K*>DGDGTITTK<AcD3K*>ELGTVM<MoX*>R-COOH | <b>Ion score</b>          | 73.04    |
| <b>Protein</b>           | P62204                                              | <b>Confidence level</b>   | 99.00%   |
| <b>Precursor m/z</b>     | 1118.0628                                           | <b>Identity Threshold</b> | 47.78    |
| <b>Charge</b>            | 2+                                                  | <b>Mass error</b>         | 0.002344 |

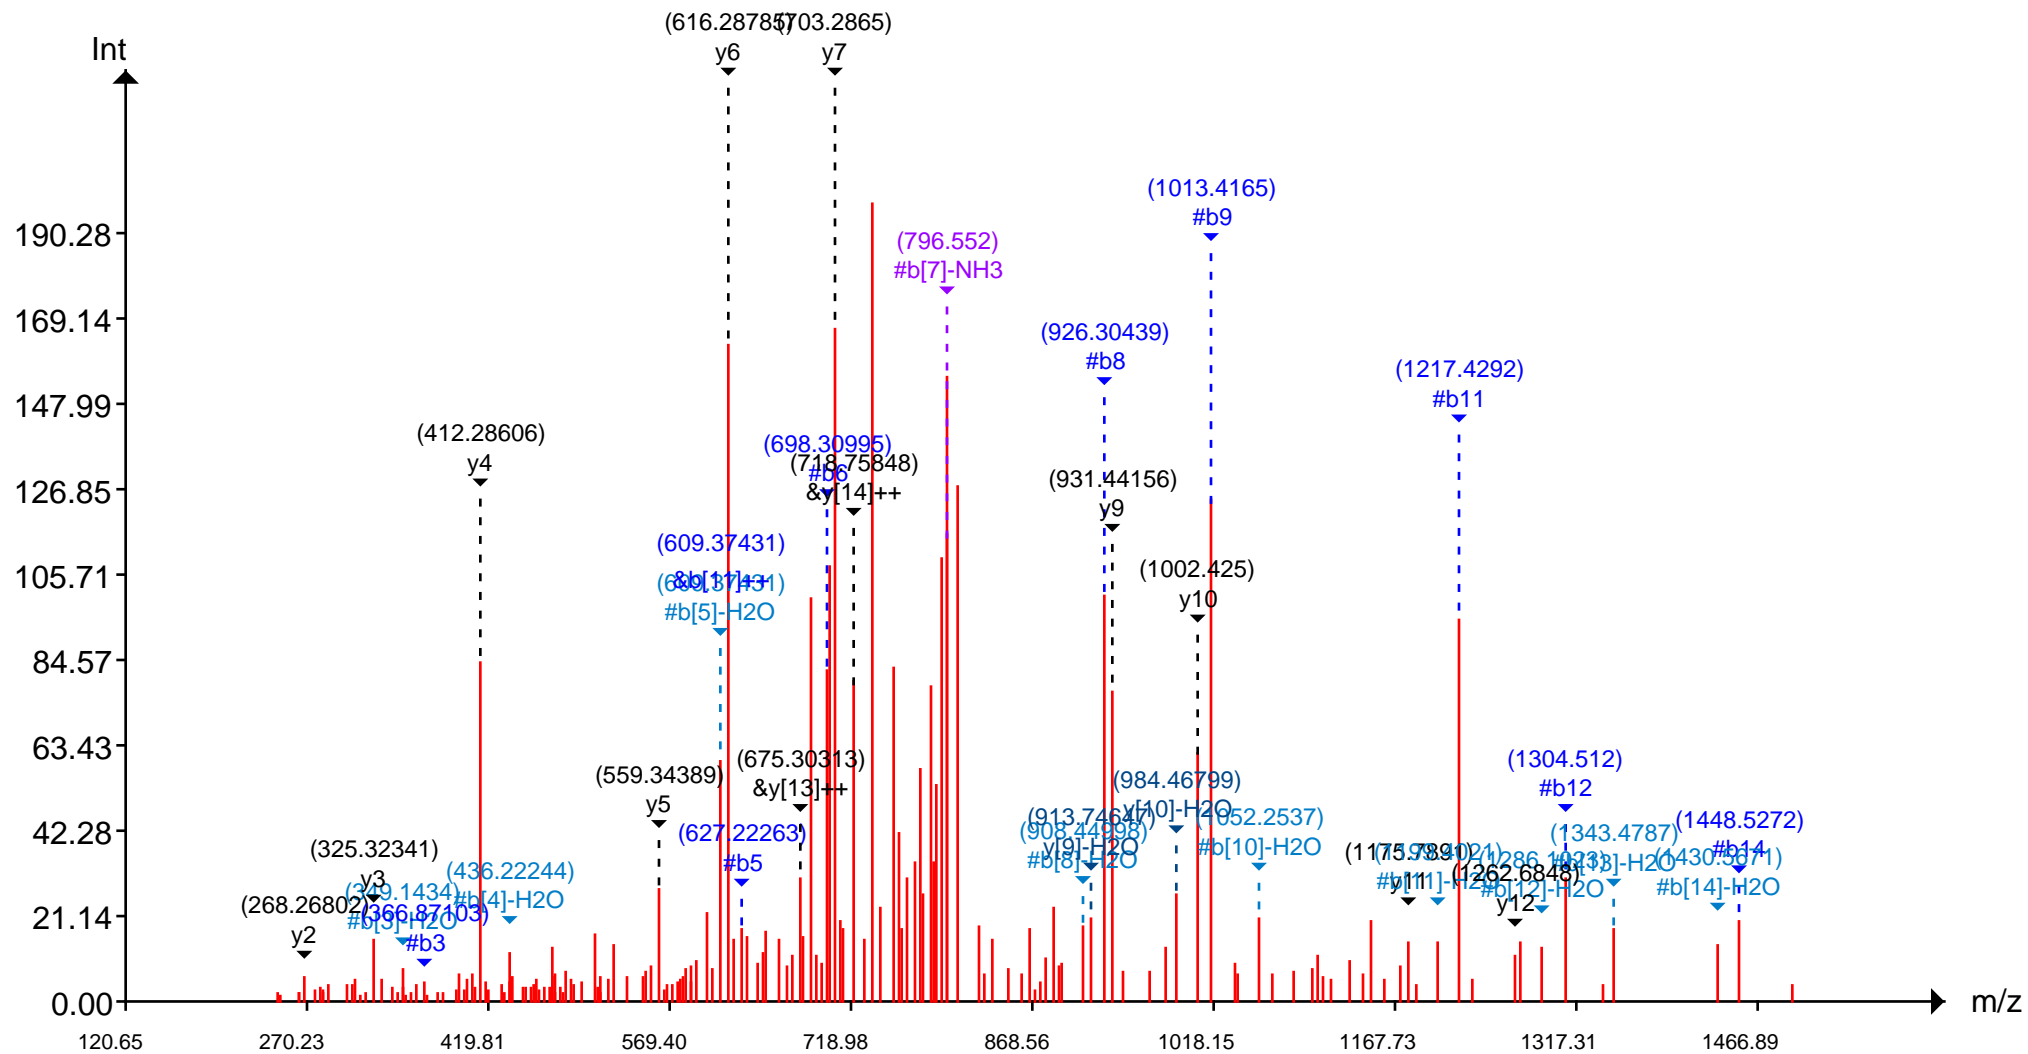

## Info

|                          |                                              |                           |         |
|--------------------------|----------------------------------------------|---------------------------|---------|
| <b>Modified Sequence</b> | AcD3-FSSSK<AcD3K*>ADLSGM<Mox*>SGSR<C13>-COOH | <b>Ion score</b>          | 59.69   |
| <b>Protein</b>           | Q9D154, Q5SV42                               | <b>Confidence level</b>   | 99.00%  |
| <b>Precursor m/z</b>     | 814.89419                                    | <b>Identity Threshold</b> | 46.74   |
| <b>Charge</b>            | 2+                                           | <b>Mass error</b>         | 0.00123 |

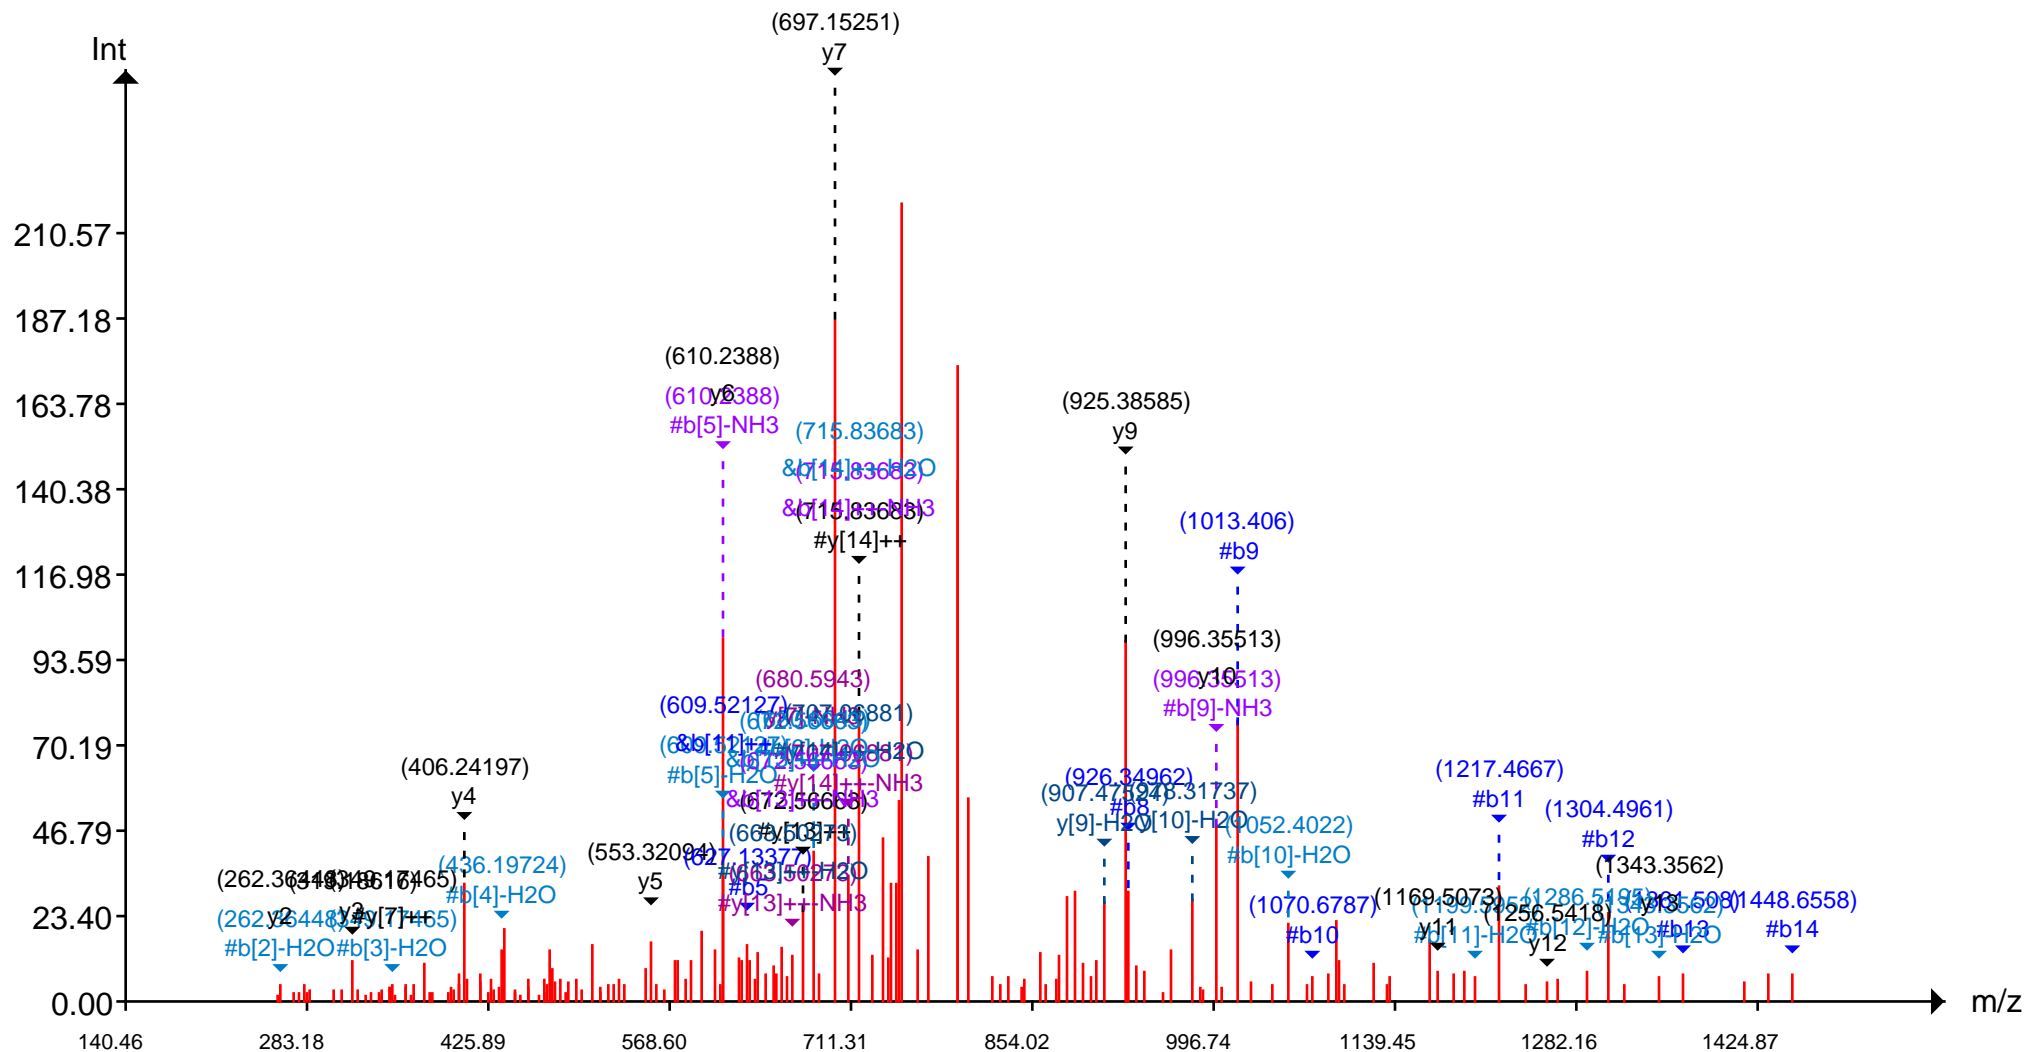

## Info

|                          |                                         |                           |          |
|--------------------------|-----------------------------------------|---------------------------|----------|
| <b>Modified Sequence</b> | AcD3-FSSSK<AcD3K*>ADLSGM<Mox*>SGSR-COOH | <b>Ion score</b>          | 62.0     |
| <b>Protein</b>           | Q9D154, Q5SV42                          | <b>Confidence level</b>   | 99.00%   |
| <b>Precursor m/z</b>     | 811.88599                               | <b>Identity Threshold</b> | 46.28    |
| <b>Charge</b>            | 2+                                      | <b>Mass error</b>         | 0.004971 |

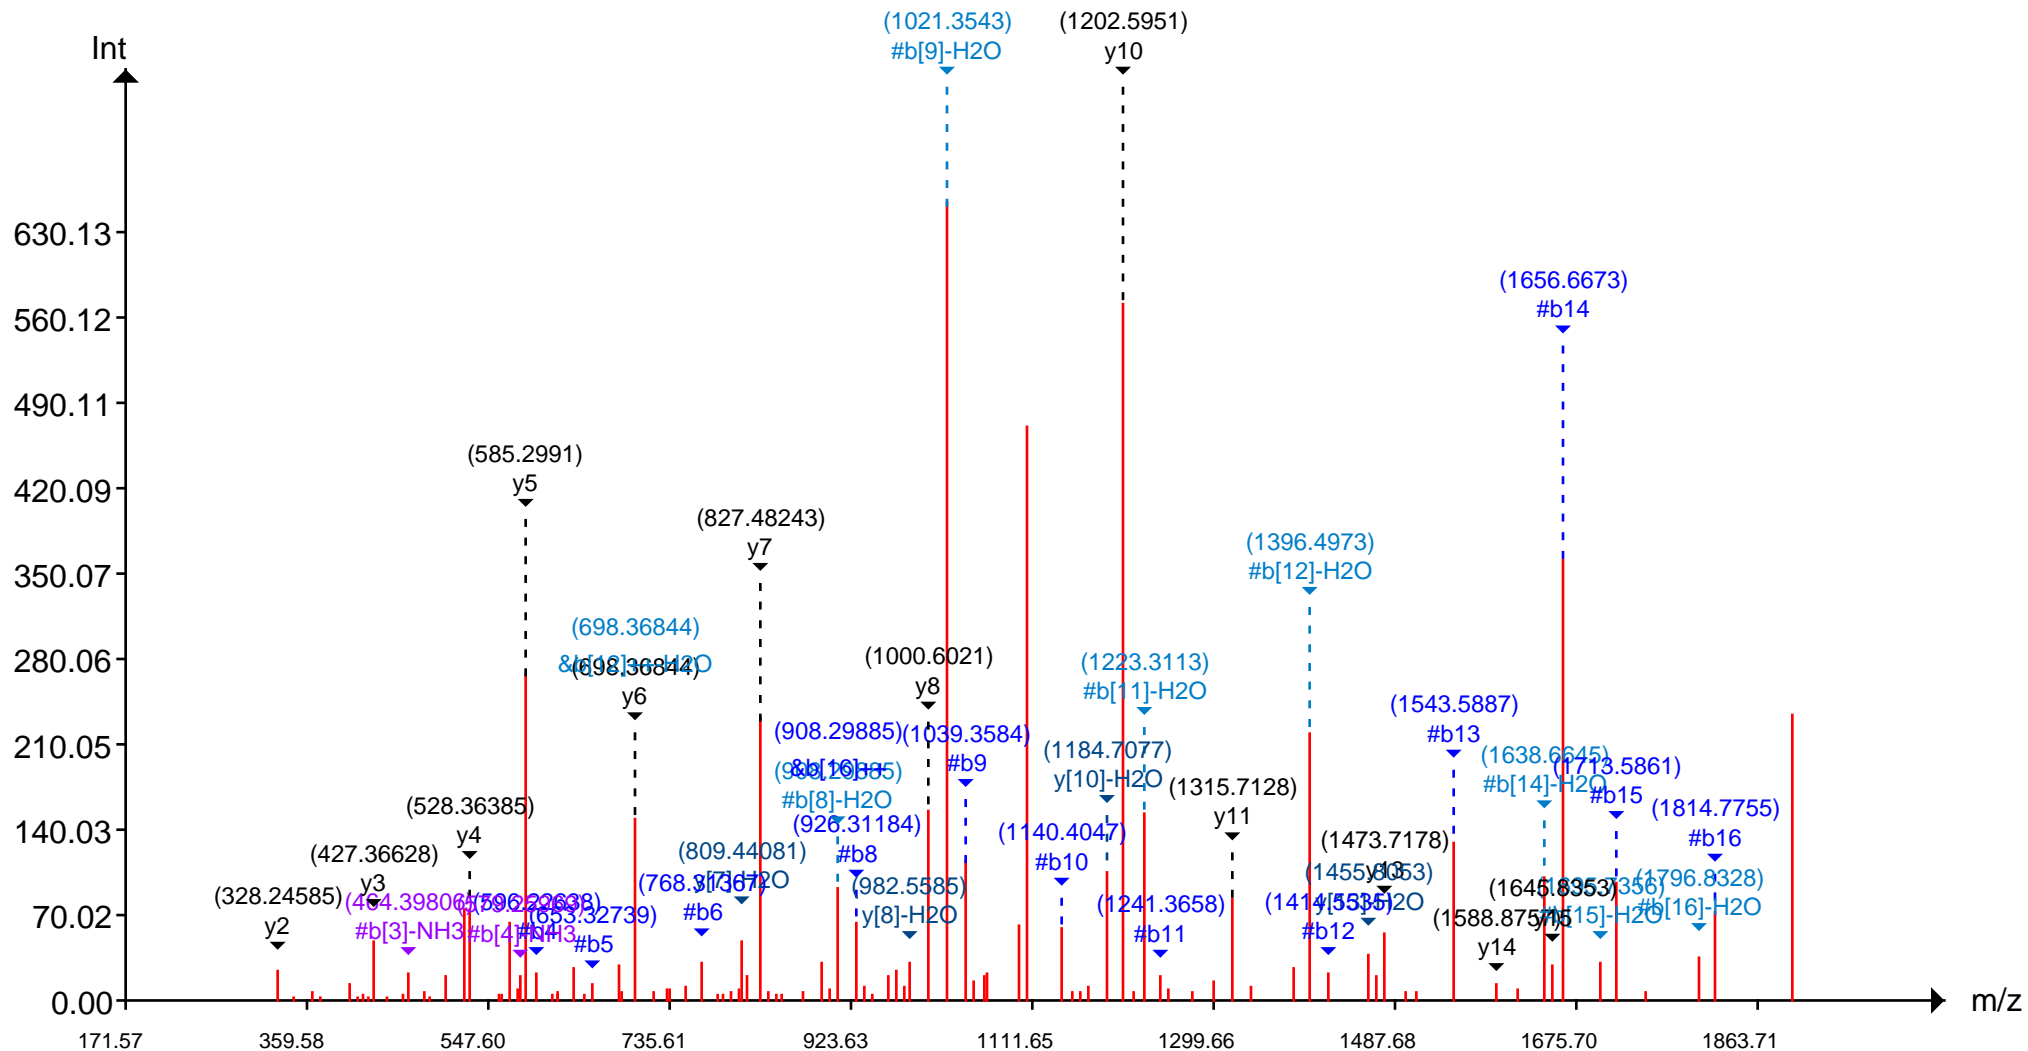

## Info

|                          |                                                          |                           |          |
|--------------------------|----------------------------------------------------------|---------------------------|----------|
| <b>Modified Sequence</b> | AcD3-FDK<AcD3K*>DGDGTITTK<AcD3K*>ELGTVM<Mox*>R<C13>-COOH | <b>Ion score</b>          | 99.72    |
| <b>Protein</b>           | P62204                                                   | <b>Confidence level</b>   | 99.00%   |
| <b>Precursor m/z</b>     | 1121.073                                                 | <b>Identity Threshold</b> | 47.94    |
| <b>Charge</b>            | 2+                                                       | <b>Mass error</b>         | 0.002603 |

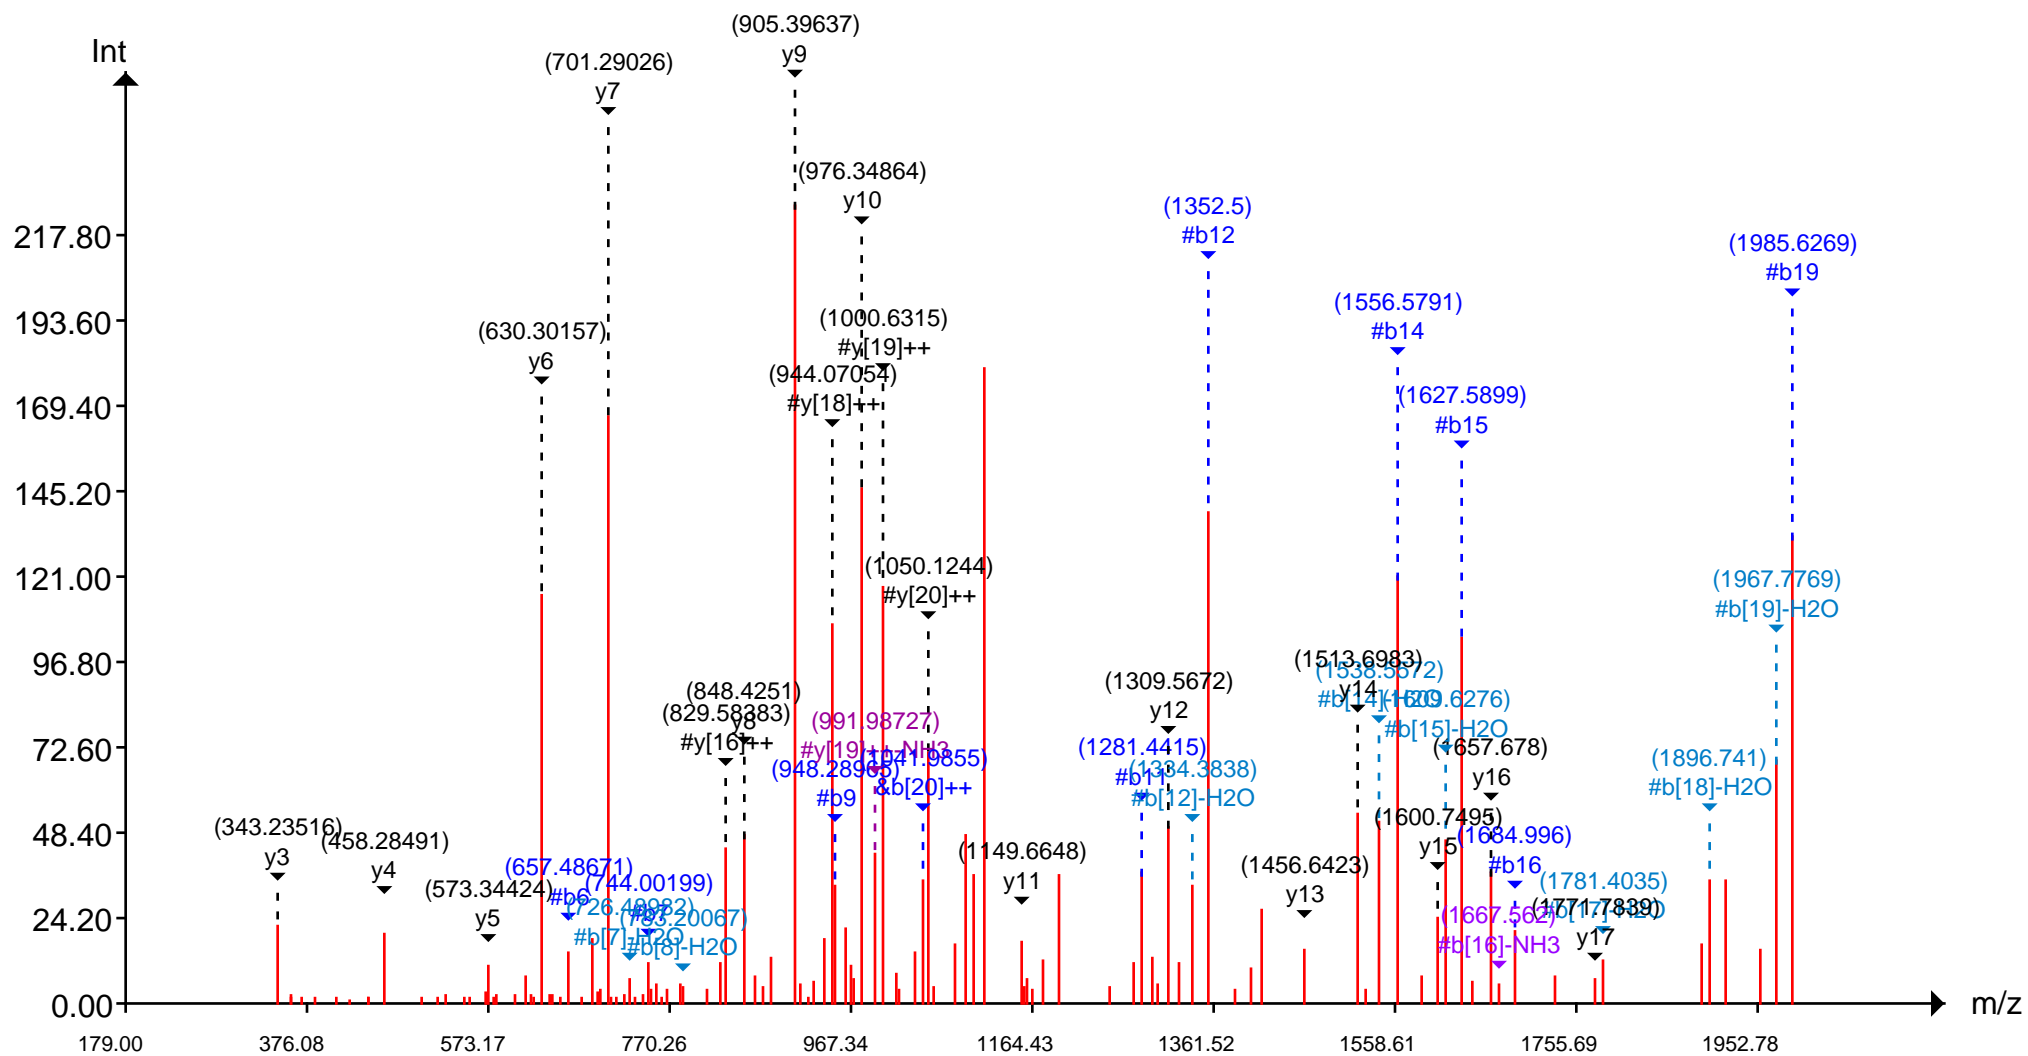

## Info

|                          |                                                     |                           |          |
|--------------------------|-----------------------------------------------------|---------------------------|----------|
| <b>Modified Sequence</b> | AcD3-LVIDNGSGM<Mox*>C<Cmm*>K<AcD3K*>AGFAGDDAPR-COOH | <b>Ion score</b>          | 114.22   |
| <b>Protein</b>           | P63260                                              | <b>Confidence level</b>   | 99.00%   |
| <b>Precursor m/z</b>     | 1129.0304                                           | <b>Identity Threshold</b> | 45.62    |
| <b>Charge</b>            | 2+                                                  | <b>Mass error</b>         | 0.004057 |



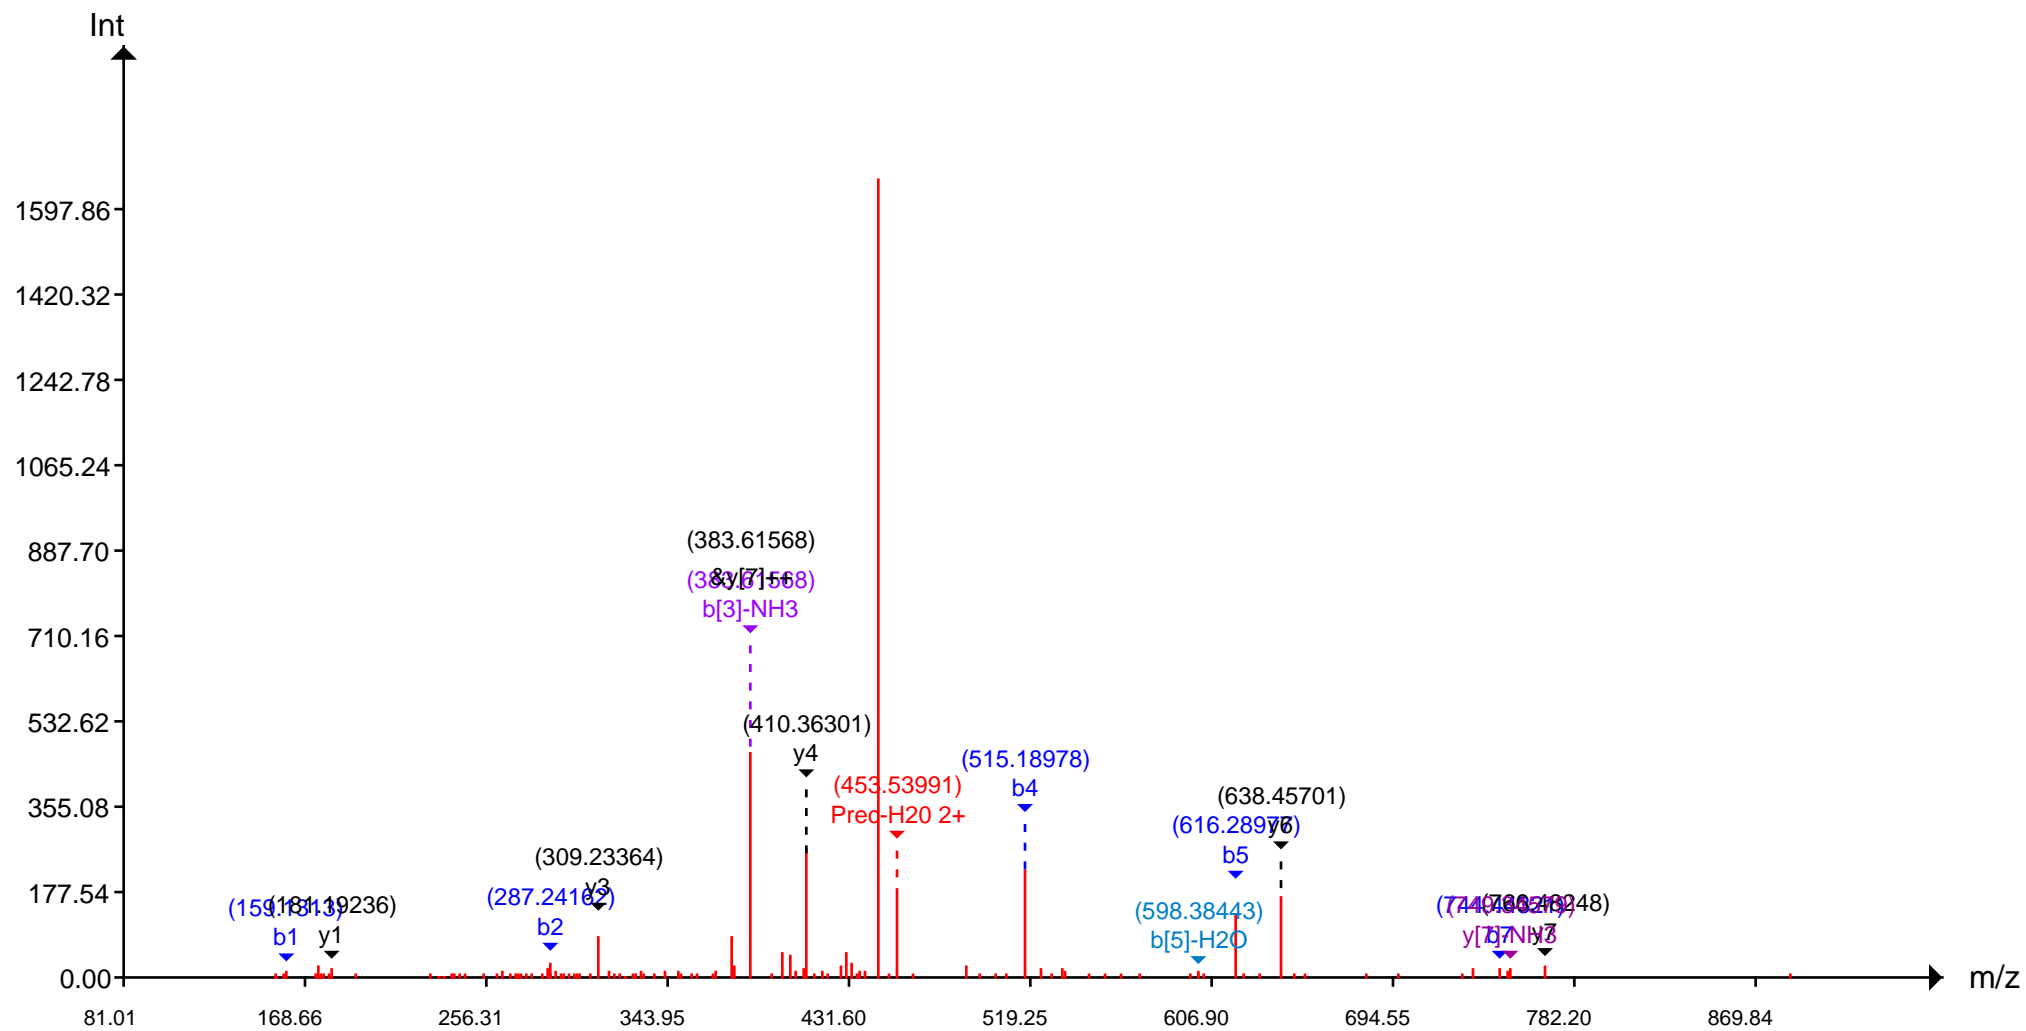

## Info

|                          |                         |                           |          |
|--------------------------|-------------------------|---------------------------|----------|
| <b>Modified Sequence</b> | AcD3-LQLDTAGR<C13>-COOH | <b>Ion score</b>          | 37.74    |
| <b>Protein</b>           | Q8C7B8                  | <b>Confidence level</b>   | 99.00%   |
| <b>Precursor m/z</b>     | 462.76765               | <b>Identity Threshold</b> | 32.56    |
| <b>Charge</b>            | 2+                      | <b>Mass error</b>         | -3.55E-4 |

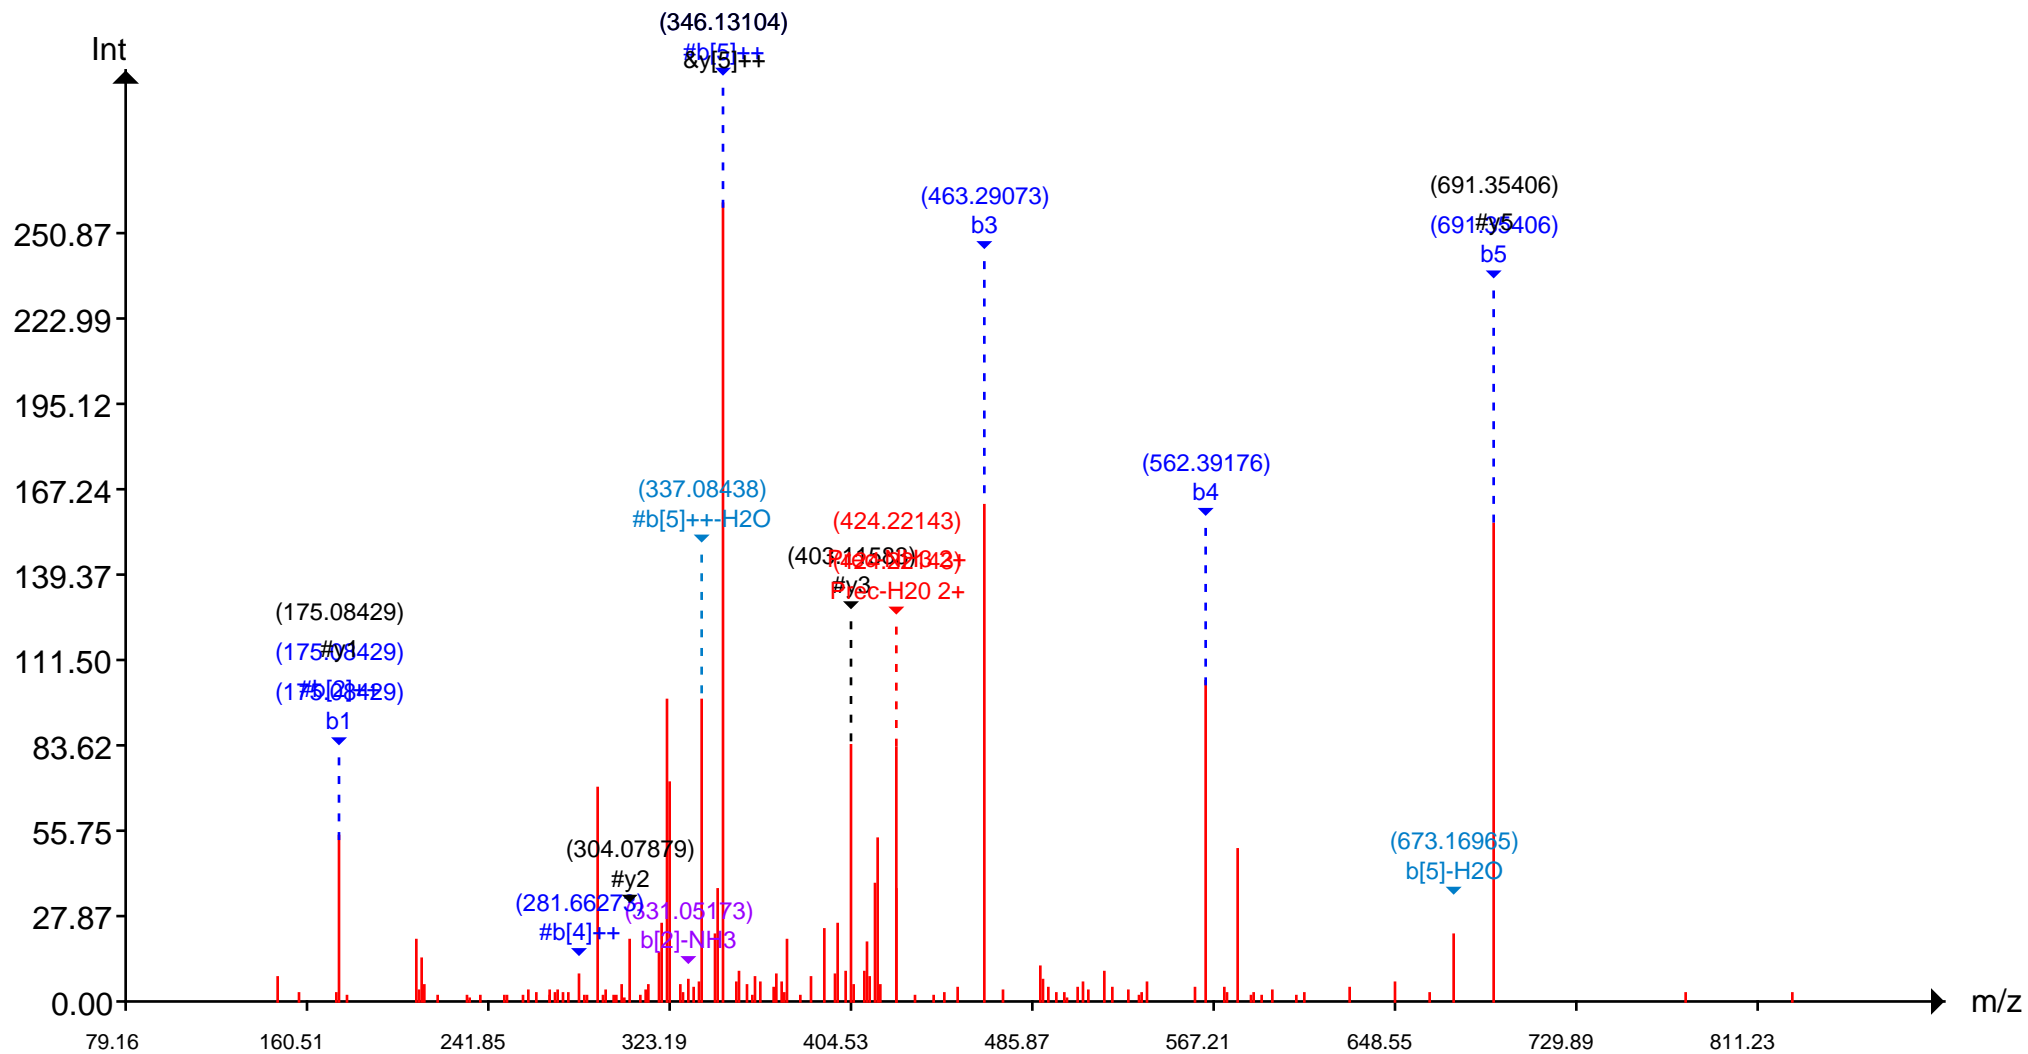

## Info

**Modified Sequence** AcD3-EK<AcD3K\*>DVER-COOH

**Protein** O35326

**Precursor m/z** 433.23045

**Charge** 2+

**Ion score** 34.91

**Confidence level** 99.00%

**Identity Threshold** 33.69

**Mass error** 3.95E-4

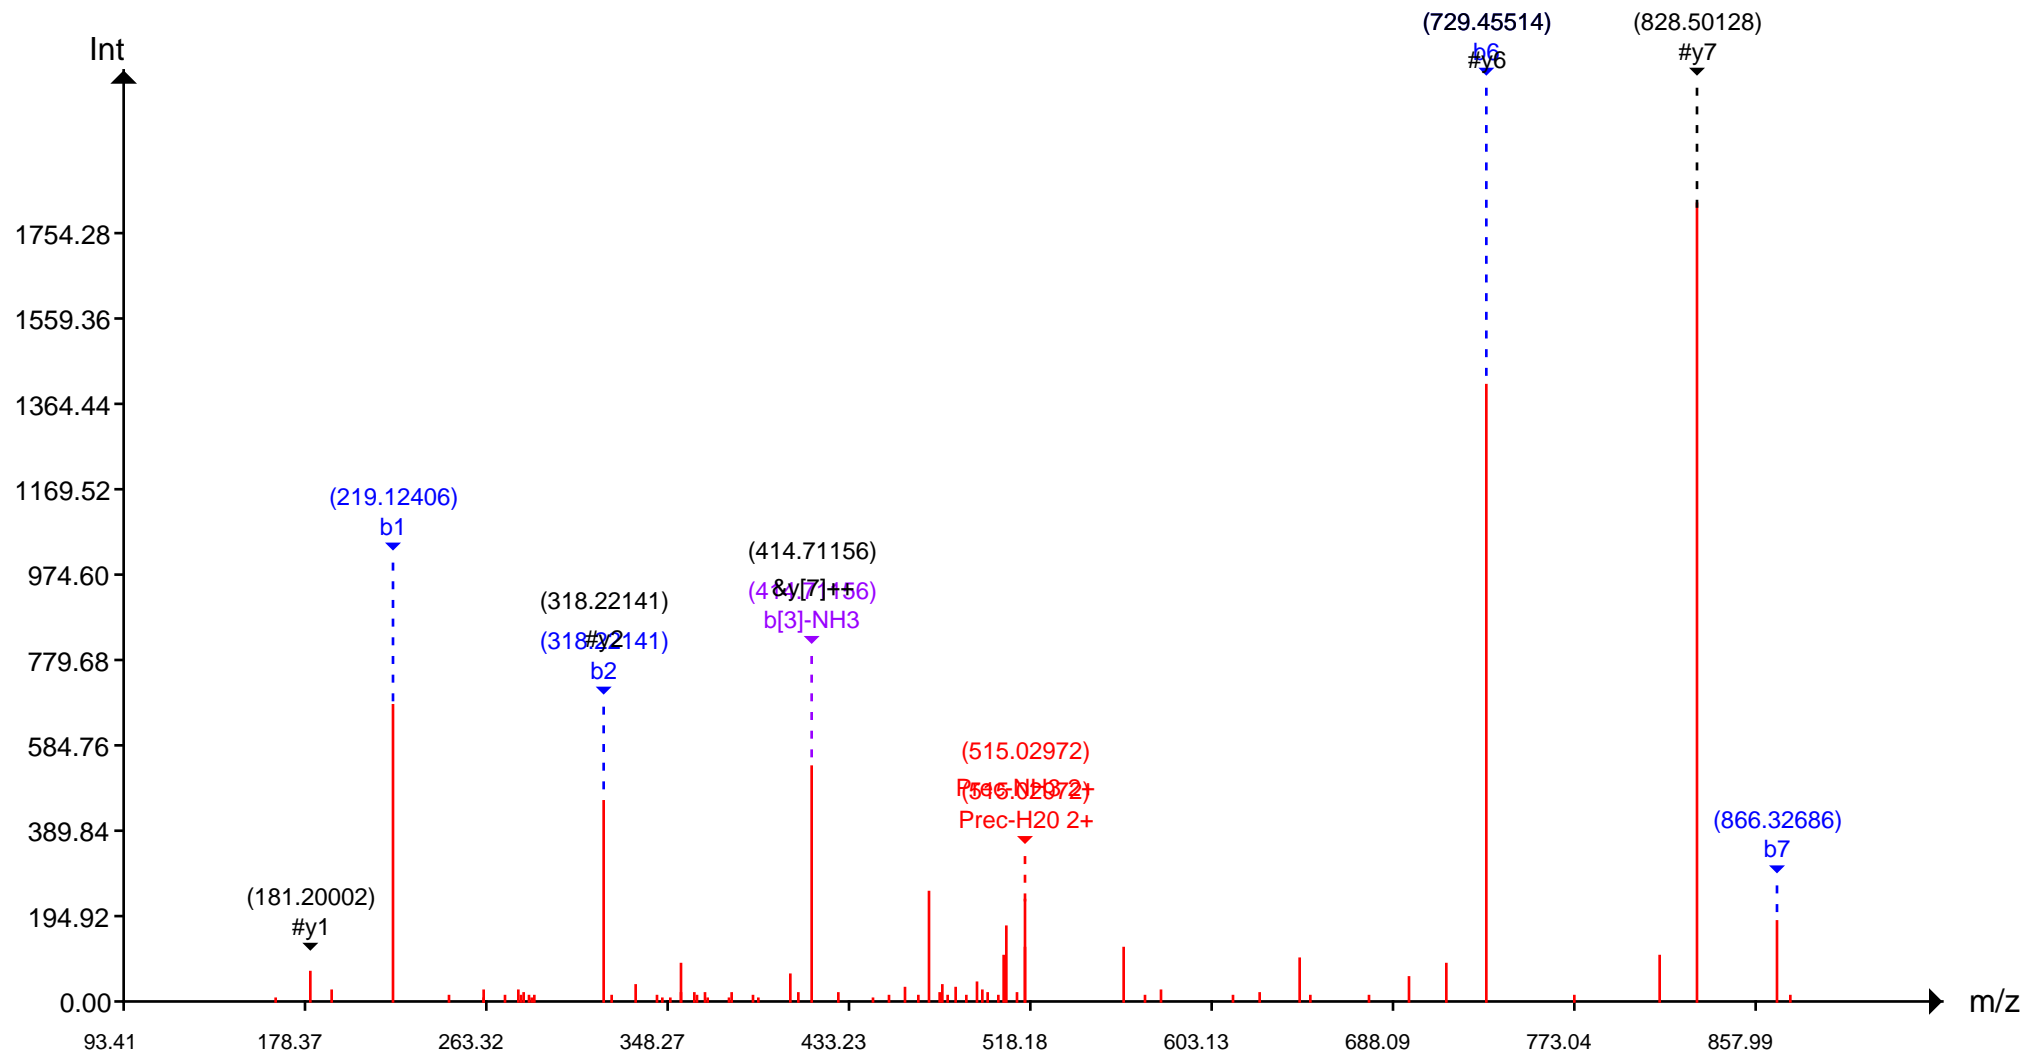

## Info

**Modified Sequence** AcD3-K<AcD3K\*>VLQAVHR<C13>-COOH

**Ion score** 31.37

**Protein** O70622

**Confidence level** 99.00%

**Precursor m/z** 523.83756

**Identity Threshold** 29.12

**Charge** 2+

**Mass error** -4.89E-4
